# Supplementary material
Source: PubMed Central journal article supplement (PMC7790864)
Supplement: NIHMS1629627-supplement-1.pdf [file NIHMS1629627-supplement-1.pdf]

## Supporting information

For article:

### Consistency and variation of protein subcellular location annotations

*Ying-Ying Xu*<sup>1,2,3</sup>, *Hang Zhou*<sup>2</sup>, *Robert F. Murphy*<sup>3</sup>, and *Hong-Bin Shen*<sup>\*,2</sup>

<sup>1</sup> School of Biomedical Engineering, Southern Medical University, Guangzhou 510515, China

<sup>2</sup> Institute of Image Processing and Pattern Recognition, Shanghai Jiao Tong University, Shanghai 200240, China

<sup>3</sup> Computational Biology Department, Carnegie Mellon University, Pittsburgh, PA 15213, USA

\* E-mail: [hbshen@sjtu.edu.cn](mailto:hbshen@sjtu.edu.cn)

#### Table of Contents

| Figure/Table | Description                                                                                                           | Page           |
|--------------|-----------------------------------------------------------------------------------------------------------------------|----------------|
| Figure S-1   | Consistency of subcellular location annotations of 26 cell lines between the HPA and Swiss-Prot                       | 2              |
| Figure S-2   | Consistency of subcellular location annotations of 44 tissues between the HPA and Swiss-Prot                          | 3              |
| Figure S-3   | Protein location consistency across tissues and location marker <i>P</i> values of proteins in Kumar <i>et al.</i>    | 4              |
| Table S-1    | Subcellular location annotations of Immunofluorescence images                                                         | Table S-1.xlsx |
| Table S-2    | Subcellular location annotations of Immunohistochemistry images                                                       | Table S-2.xlsx |
| Table S-3    | Subcellular locations of immunofluorescence cell line in the HPA                                                      | Table S-3.xlsx |
| Table S-4    | Subcellular locations of immunohistochemistry tissue in the HPA                                                       | Table S-4.xlsx |
| Table S-5    | Mapping subcellular locations of immunofluorescence images in the human protein atlas to common subcellular locations | Table S-5.xlsx |
| Table S-6    | Mapping subcellular locations in the UniProtKB/Swiss-Prot to common subcellular locations                             | Table S-6.xlsx |
| Table S-7    | Ranking of low-consistency proteins (across cell lines and tissues)                                                   | Table S-7.xlsx |

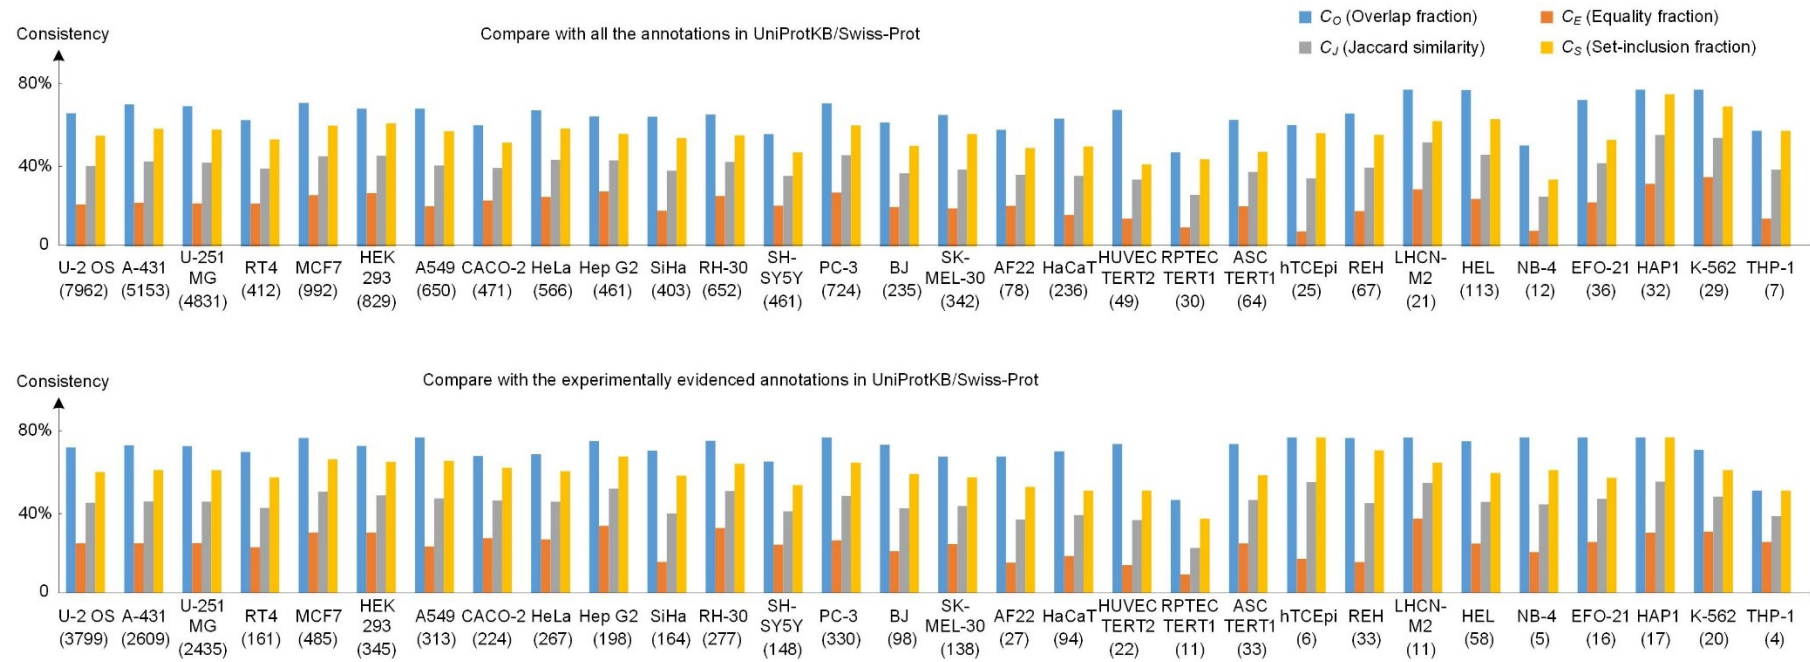

**Figure S-1.** Consistency of subcellular location annotations of different cell lines between the HPA (version 19) and UniProtKB/Swiss-Prot database (version 2019\_07). The numbers below cell lines are the numbers of proteins that were used in statistics.

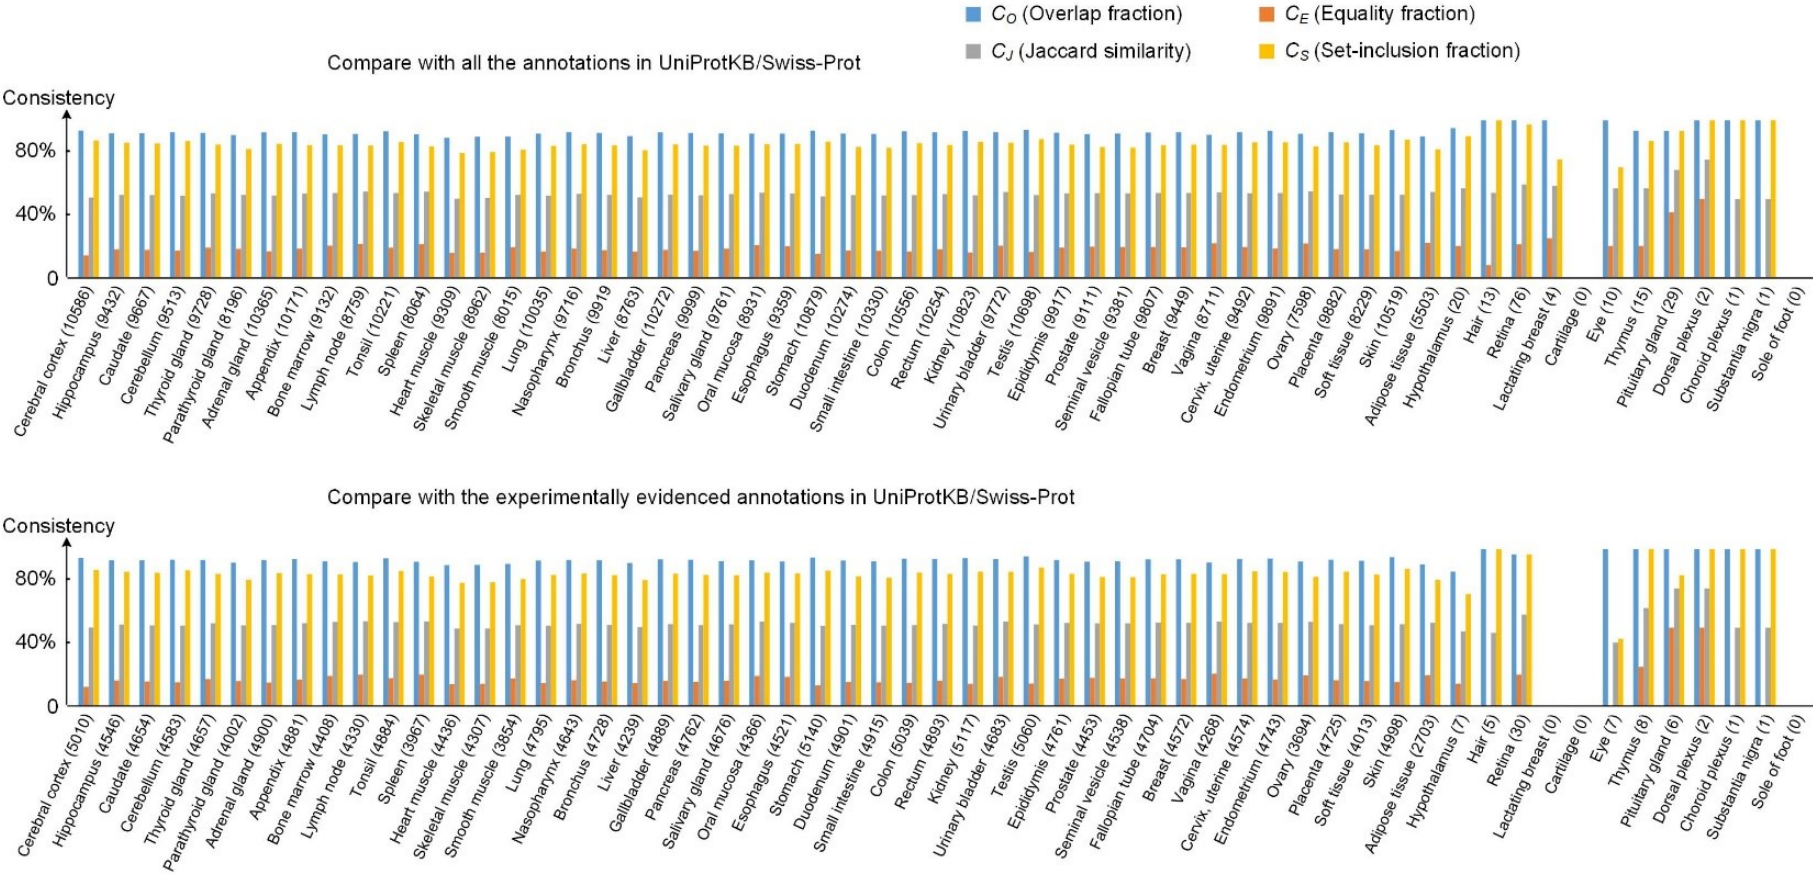

**Figure S-2.** Consistency of subcellular location annotations of 57 tissues between the HPA (version 19) and UniProtKB/Swiss-Prot database (version 2019\_07). The numbers after tissues are the numbers of proteins that were used in statistics.

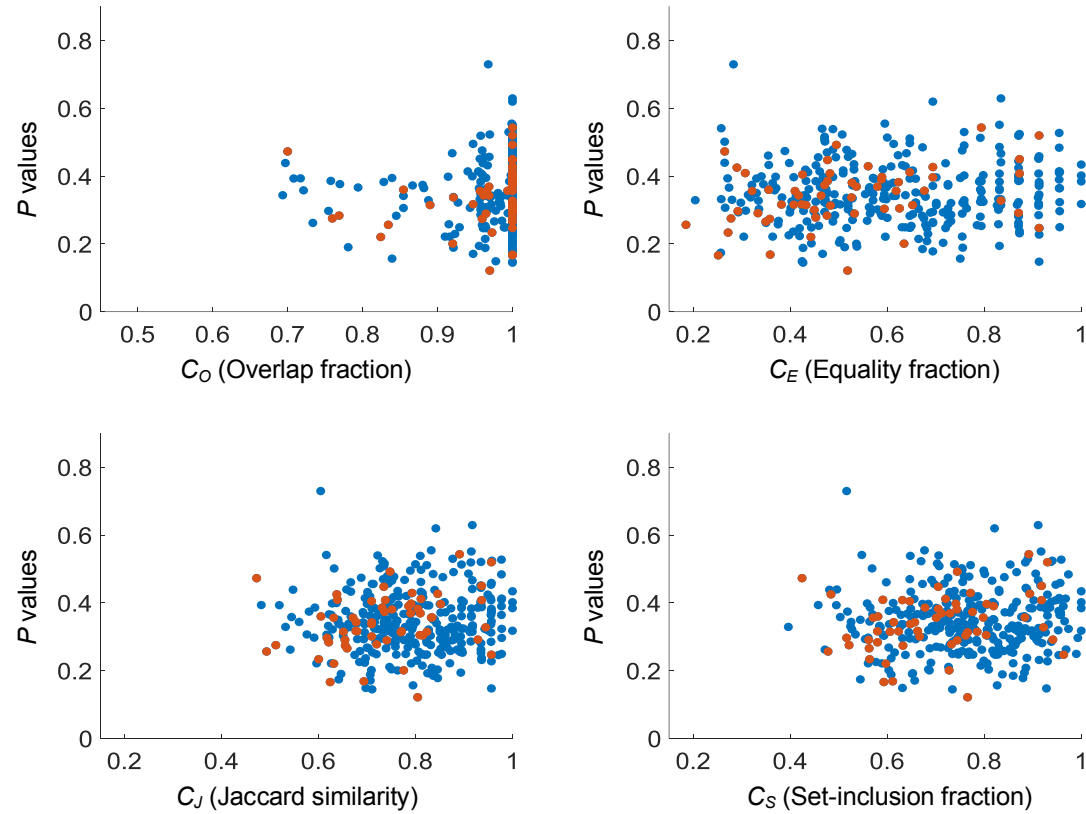

**Figure S-3.** Protein location consistency across tissues and location marker  $P$  values of proteins in Kumar *et al* (reference 1). Each dot represents one protein, and the red ones represent the proteins that are marked as cancer-related in HPA.



Table S-1. Subcellular location annotations of Immunofluorescence images

| NO. | Gene            | Gene name | Reliability | Enhanced                   | Supported | Approved                    | Uncertain               |
|-----|-----------------|-----------|-------------|----------------------------|-----------|-----------------------------|-------------------------|
| 1   | ENSG00000000003 | TSPAN6    | Approved    |                            |           |                             | Cell Junctions;Cyt      |
| 2   | ENSG00000000457 | SCYL3     | Uncertain   |                            |           |                             | Microtubule             |
| 3   | ENSG00000000460 | Clorf112  | Approved    |                            |           |                             | Mitochondria            |
| 4   | ENSG00000000938 | FGR       | Approved    |                            |           |                             | Aggresome;Plasma m      |
| 5   | ENSG00000000971 | CFH       | Approved    |                            |           |                             | Vesicles                |
| 6   | ENSG00000001084 | GCLC      | Approved    |                            |           |                             | Cytosol;Nucleoli;N      |
| 7   | ENSG00000001167 | NFYA      | Supported   |                            |           | Nucleoplasm                 |                         |
| 8   | ENSG00000001460 | STPG1     | Approved    |                            |           |                             | Nucleoplasm             |
| 9   | ENSG00000001461 | NIPAL3    | Approved    |                            |           |                             | Nucleoplasm             |
| 10  | ENSG00000001497 | LAS1L     | Approved    |                            |           | Nucleopla                   | Centriolar satelli      |
| 11  | ENSG00000001629 | ANKIB1    | Supported   |                            |           |                             | Cytosol;Plasma membrane |
| 12  | ENSG00000001630 | CYP51A1   | Enhanced    | Endoplasmic reticulum      |           |                             |                         |
| 13  | ENSG00000001631 | KRIT1     | Uncertain   |                            |           |                             | Vesicles                |
| 14  | ENSG00000002016 | RAD52     | Approved    |                            |           |                             | Nuclear speckles;P      |
| 15  | ENSG00000002330 | BAD       | Enhanced    | Mitochondria               |           |                             |                         |
| 16  | ENSG00000002549 | LAP3      | Supported   |                            | Cytosol   |                             | Midbody;Nucleoplas      |
| 17  | ENSG00000002586 | CD99      | Approved    |                            |           |                             | Golgi apparatus         |
| 18  | ENSG00000002587 | HS3ST1    | Approved    |                            |           |                             | Vesicles                |
| 19  | ENSG00000002746 | HECW1     | Supported   |                            | Cytosol   |                             |                         |
| 20  | ENSG00000002822 | MAD1L1    | Supported   |                            |           | Nuclear membrane;Nucleoplas |                         |
| 21  | ENSG00000002834 | LASP1     | Supported   |                            |           | Cytosol;P                   | Focal adhesion sit      |
| 22  | ENSG00000002919 | SNX11     | Approved    |                            |           |                             | Cytosol                 |
| 23  | ENSG00000002933 | TMEM176A  | Approved    |                            |           |                             | Mitochondria            |
| 24  | ENSG00000003096 | KLHL13    | Approved    |                            |           |                             | Cytosol                 |
| 25  | ENSG00000003137 | CYP26B1   | Approved    |                            |           |                             | Cytosol                 |
| 26  | ENSG00000003147 | ICA1      | Supported   |                            |           | Cytosol;Vesicles            |                         |
| 27  | ENSG00000003249 | DBNDD1    | Approved    |                            |           |                             | Cytosol;Nuclear sp      |
| 28  | ENSG00000003393 | ALS2      | Approved    |                            |           |                             | Cytosol;Intermedia      |
| 29  | ENSG00000003400 | CASP10    | Approved    |                            |           |                             | Golgi apparatus;Ve      |
| 30  | ENSG00000003402 | CFLAR     | Supported   |                            |           | Cytosol;N                   | Nuclear bodies          |
| 31  | ENSG00000003436 | TFPI      | Approved    |                            |           |                             | Cytosol;Intermedia      |
| 32  | ENSG00000003756 | RBM5      | Enhanced    | Nucleoplasm                |           |                             |                         |
| 33  | ENSG00000003987 | MTMR7     | Approved    |                            | Cytosol   |                             | Nucleopla               |
| 34  | ENSG00000003989 | SLC7A2    | Supported   |                            |           | Cell Junctions;Plasma membr |                         |
| 35  | ENSG00000004139 | SARM1     | Approved    |                            |           |                             | Vesicles                |
| 36  | ENSG00000004142 | POLDIP2   | Approved    |                            |           |                             | Mitochondria            |
| 37  | ENSG00000004468 | CD38      | Supported   |                            |           | Plasma membrane             |                         |
| 38  | ENSG00000004478 | FKBP4     | Enhanced    | Cytosol;Nucleoplasm        |           |                             |                         |
| 39  | ENSG00000004487 | KDM1A     | Supported   | Nucleoplasm                |           | Cytosol                     |                         |
| 40  | ENSG00000004534 | RBM6      | Approved    |                            |           |                             | Cytoplasmic bodies      |
| 41  | ENSG00000004660 | CAMKK1    | Supported   |                            | Cytosol   |                             |                         |
| 42  | ENSG00000004700 | RECQL     | Enhanced    | Nucleoplasm                |           |                             |                         |
| 43  | ENSG00000004766 | VPS50     | Uncertain   |                            |           |                             | Cytosol;P               |
| 44  | ENSG00000004776 | HSPB6     | Supported   |                            | Cytosol   |                             | Golgi app               |
| 45  | ENSG00000004777 | ARHGAP33  | Approved    |                            |           |                             | Actin filaments;Cy      |
| 46  | ENSG00000004779 | NDUFAB1   | Supported   |                            | Mitochond | Nucleoplasm                 |                         |
| 47  | ENSG00000004838 | ZMYND10   | Approved    |                            |           |                             | Cytosol;Plasma mem      |
| 48  | ENSG00000004864 | SLC25A13  | Supported   |                            |           | Mitochondria                |                         |
| 49  | ENSG00000004866 | ST7       | Supported   |                            |           | Nucleopla                   | Cytosol                 |
| 50  | ENSG00000004897 | CDC27     | Enhanced    | Nucleoplasm                |           |                             |                         |
| 51  | ENSG00000004961 | HCCS      | Enhanced    | Mitochondria               |           |                             |                         |
| 52  | ENSG00000004975 | DVL2      | Enhanced    | Nuclear bodies;Nucleoplasm |           |                             |                         |
| 53  | ENSG00000005001 | PRSS22    | Approved    |                            |           |                             | Nucleoplasm             |

|     |                 |           |           |                                                      |
|-----|-----------------|-----------|-----------|------------------------------------------------------|
| 54  | ENSG00000005007 | UPF1      | Supported | Nucleoplasm                                          |
| 55  | ENSG00000005020 | SKAP2     | Supported | Nucleoplasm;Cytosol                                  |
| 56  | ENSG00000005022 | SLC25A5   | Supported | Mitochondria                                         |
| 57  | ENSG00000005059 | MCUB      | Approved  | Mitochondria;Nucleoplasm                             |
| 58  | ENSG00000005073 | HOXA11    | Supported | Nucleoplasm                                          |
| 59  | ENSG00000005075 | POLR2J    | Approved  | Nucleoplasm                                          |
| 60  | ENSG00000005100 | DHX33     | Supported | Nucleoli                                             |
| 61  | ENSG00000005102 | MEOX1     | Approved  | Cytokinetic bridge                                   |
| 62  | ENSG00000005156 | LIG3      | Supported | Nucleoplasm                                          |
| 63  | ENSG00000005175 | RPAP3     | Enhanced  | Cytosol                                              |
| 64  | ENSG00000005189 | REX05     | Approved  | Endoplasmic reticulum                                |
| 65  | ENSG00000005194 | CIAPIN1   | Supported | Mitochondria                                         |
| 66  | ENSG00000005206 | SPPL2B    | Approved  | Plasma membrane;Centrosome                           |
| 67  | ENSG00000005238 | FAM214B   | Approved  | Nucleoli;fibrillar                                   |
| 68  | ENSG00000005249 | PRKAR2B   | Uncertain | Mitochondria                                         |
| 69  | ENSG00000005302 | MSL3      | Approved  | Nucleoplasm                                          |
| 70  | ENSG00000005339 | CREBBP    | Enhanced  | Nuclear bodies;Nucleoplasm                           |
| 71  | ENSG00000005381 | MPO       | Supported | Vesicles;Nucleoplasm                                 |
| 72  | ENSG00000005436 | GCFC2     | Supported | Nucleoplasm                                          |
| 73  | ENSG00000005448 | WDR54     | Approved  | Cytosol;Vesicles                                     |
| 74  | ENSG00000005469 | CROT      | Approved  | Vesicles                                             |
| 75  | ENSG00000005471 | ABCB4     | Approved  | Plasma membrane;Actin filaments;Focal adhesion sites |
| 76  | ENSG00000005483 | KMT2E     | Approved  | Nucleoplasm;Nuclear bodies;Vesicles                  |
| 77  | ENSG00000005486 | RHBDD2    | Enhanced  | Golgi apparatus                                      |
| 78  | ENSG00000005513 | SOX8      | Enhanced  | Nucleoplasm                                          |
| 79  | ENSG00000005700 | IBTK      | Supported | Nucleoplasm                                          |
| 80  | ENSG00000005801 | ZNF195    | Approved  | Cytosol;Nucleoplasm                                  |
| 81  | ENSG00000005810 | MYCBP2    | Supported | Nucleoplasm;Vesicles                                 |
| 82  | ENSG00000005812 | FBXL3     | Enhanced  | Nuclear bodies                                       |
| 83  | ENSG00000005882 | PDK2      | Supported | Mitochondria;Nucleoplasm                             |
| 84  | ENSG00000005884 | ITGA3     | Supported | Plasma membrane                                      |
| 85  | ENSG00000005889 | ZFX       | Approved  | Nucleoli;Nucleoplasm                                 |
| 86  | ENSG00000005893 | LAMP2     | Approved  | Plasma membrane;Vesicles                             |
| 87  | ENSG00000005961 | ITGA2B    | Approved  | Plasma membrane                                      |
| 88  | ENSG00000006007 | GDE1      | Approved  | Nucleoli;Nucleoplasm                                 |
| 89  | ENSG00000006015 | REX1BD    | Approved  | Vesicles                                             |
| 90  | ENSG00000006025 | OSBPL7    | Approved  | Cytosol;Nucleoplasm                                  |
| 91  | ENSG00000006042 | TMEM98    | Supported | Nucleoplasm                                          |
| 92  | ENSG00000006062 | MAP3K14   | Supported | Cytosol;Vesicles;Nucleoli                            |
| 93  | ENSG00000006071 | ABCC8     | Approved  | Cytosol;Golgi apparatus                              |
| 94  | ENSG00000006118 | TMEM132A  | Approved  | Mitochondria                                         |
| 95  | ENSG00000006125 | AP2B1     | Supported | Vesicles                                             |
| 96  | ENSG00000006194 | ZNF263    | Supported | Cytosol;Mitotic spindle;Nucleoplasm                  |
| 97  | ENSG00000006210 | CX3CL1    | Supported | Plasma membrane                                      |
| 98  | ENSG00000006282 | SPATA20   | Approved  | Nucleoplasm                                          |
| 99  | ENSG00000006327 | TNFRSF12A | Approved  | Cytosol;Plasma membrane                              |
| 100 | ENSG00000006377 | DLX6      | Approved  | Nuclear bodies                                       |
| 101 | ENSG00000006432 | MAP3K9    | Approved  | Nucleoli;Nucleoplasm                                 |
| 102 | ENSG00000006451 | RALA      | Supported | Focal adhesion sites;Plasma membrane                 |
| 103 | ENSG00000006453 | BAIAP2L1  | Enhanced  | Cytosol;Plasma membrane                              |
| 104 | ENSG00000006459 | KDM7A     | Approved  | Nucleoli;Nucleoplasm                                 |
| 105 | ENSG00000006468 | ETV1      | Approved  | Nucleoplasm                                          |
| 106 | ENSG00000006530 | AGK       | Supported | Mitochondria;Vesicles                                |
| 107 | ENSG00000006576 | PHTF2     | Approved  | Cytosol;Nucleoplasm                                  |
| 108 | ENSG00000006607 | FARP2     | Approved  | Cytosol                                              |

|     |                 |          |           |                         |                              |
|-----|-----------------|----------|-----------|-------------------------|------------------------------|
| 109 | ENSG00000006611 | USH1C    | Enhanced  | Cytosol                 |                              |
| 110 | ENSG00000006634 | DBF4     | Supported |                         | Nuclear bodies;Nucleoplasm   |
| 111 | ENSG00000006638 | TBXA2R   | Supported |                         | Plasma meNuclear speckles    |
| 112 | ENSG00000006652 | IFRD1    | Approved  |                         | Cytosol;Plasma mem           |
| 113 | ENSG00000006659 | LGALS14  | Supported |                         | Nucleoplasm                  |
| 114 | ENSG00000006695 | COX10    | Supported |                         | Mitochondria Cytosol;N       |
| 115 | ENSG00000006704 | GTF2IRD1 | Supported |                         | NucleoplaCytosol             |
| 116 | ENSG00000006712 | PAF1     | Supported |                         | Nucleoplasm                  |
| 117 | ENSG00000006744 | ELAC2    | Enhanced  | Nucleoplasm             |                              |
| 118 | ENSG00000006747 | SCIN     | Enhanced  | Plasma membrane         |                              |
| 119 | ENSG00000006756 | ARSD     | Approved  |                         | Lipid droplets;Ves           |
| 120 | ENSG00000006837 | CDKL3    | Uncertain |                         | Nucleopla                    |
| 121 | ENSG00000007001 | UPP2     | Approved  |                         | Mitochondria;Nucle           |
| 122 | ENSG00000007038 | PRSS21   | Approved  |                         | Cytosol                      |
| 123 | ENSG00000007047 | MARK4    | Supported |                         | Cytosol                      |
| 124 | ENSG00000007080 | CCDC124  | Enhanced  | Cytosol;Plasma membrane |                              |
| 125 | ENSG00000007168 | PAFAH1B1 | Supported |                         | Centrosome                   |
| 126 | ENSG00000007202 | KIAA0100 | Approved  |                         | Cytosol;Nuclear sp           |
| 127 | ENSG00000007237 | GAS7     | Approved  |                         | Actin filaments;Fo           |
| 128 | ENSG00000007264 | MATK     | Approved  | Cytosol                 | Centriolar satelli           |
| 129 | ENSG00000007314 | SCN4A    | Approved  |                         | Centriolar satelli           |
| 130 | ENSG00000007341 | ST7L     | Approved  |                         | Centrosome                   |
| 131 | ENSG00000007350 | TKTL1    | Supported |                         | Cytosol                      |
| 132 | ENSG00000007372 | PAX6     | Enhanced  | Nucleoplasm             |                              |
| 133 | ENSG00000007376 | RPUSD1   | Approved  |                         | Cell Junctions;Cyt           |
| 134 | ENSG00000007384 | RHBDF1   | Uncertain |                         | Vesicles                     |
| 135 | ENSG00000007392 | LUC7L    | Approved  |                         | Mitochondria;Nucle           |
| 136 | ENSG00000007402 | CACNA2D2 | Approved  |                         | Vesicles                     |
| 137 | ENSG00000007520 | TSR3     | Approved  |                         | Cytosol;Golgi appa           |
| 138 | ENSG00000007541 | PIGQ     | Approved  |                         | Golgi apparatus;Nu           |
| 139 | ENSG00000007545 | CRAMP1   | Approved  |                         | Cytosol;Nucleoli;N           |
| 140 | ENSG00000007923 | DNAJC11  | Approved  |                         | Cytosol                      |
| 141 | ENSG00000008018 | PSMB1    | Supported |                         | Nucleoplasm                  |
| 142 | ENSG00000008083 | JARID2   | Supported |                         | NucleoplaMitochondria        |
| 143 | ENSG00000008086 | CDKL5    | Supported |                         | Nucleoplasm                  |
| 144 | ENSG00000008128 | CDK11A   | Supported |                         | Cytosol;Nuclear speckles     |
| 145 | ENSG00000008130 | NADK     | Approved  |                         | Nucleoplasm;Vesicl           |
| 146 | ENSG00000008196 | TFAP2B   | Approved  |                         | Nucleoplasm                  |
| 147 | ENSG00000008226 | DLEC1    | Supported |                         | Cytosol                      |
| 148 | ENSG00000008256 | CYTH3    | Supported |                         | Cytosol Nucleopla            |
| 149 | ENSG00000008277 | ADAM22   | Approved  |                         | Cell Junctions               |
| 150 | ENSG00000008294 | SPAG9    | Enhanced  |                         | Centriolar satellite;Cytosol |
| 151 | ENSG00000008311 | AASS     | Enhanced  |                         | Mitochondria;Vesicles        |
| 152 | ENSG00000008323 | PLEKHG6  | Supported |                         | Cell JuncCentrosome          |
| 153 | ENSG00000008324 | SS18L2   | Approved  |                         | Mitochondria;Nucle           |
| 154 | ENSG00000008382 | MPND     | Approved  |                         | Nucleoli;Nucleopla           |
| 155 | ENSG00000008394 | MGST1    | Approved  |                         | Endoplasmic reticu           |
| 156 | ENSG00000008405 | CRY1     | Supported |                         | NucleoplaMicrotubules;Nucle  |
| 157 | ENSG00000008441 | NFIX     | Supported |                         | Nucleoplasm                  |
| 158 | ENSG00000008853 | RHOBTB2  | Approved  |                         | Plasma membrane              |
| 159 | ENSG00000008869 | HEATR5B  | Approved  |                         | Cytosol;Nucleoli;N           |
| 160 | ENSG00000008952 | SEC62    | Approved  |                         | Endoplasmic reticu           |
| 161 | ENSG00000008988 | RPS20    | Supported |                         | Cytosol;Endoplasmic reticul  |
| 162 | ENSG00000009307 | CSDE1    | Enhanced  |                         | Cytosol;Plasma membrane      |
| 163 | ENSG00000009335 | UBE3C    | Approved  |                         | Mitochondria;Nucle           |

|     |                 |           |           |                             |
|-----|-----------------|-----------|-----------|-----------------------------|
| 164 | ENSG00000009413 | REV3L     | Approved  | Nucleoplasm                 |
| 165 | ENSG00000009724 | MASP2     | Supported | Golgi apparatus             |
| 166 | ENSG00000009765 | IYD       | Supported | Plasma membrane             |
| 167 | ENSG00000009780 | FAM76A    | Approved  | Cytosol;Nucleoplas          |
| 168 | ENSG00000009790 | TRAF3IP3  | Approved  | Vesicles                    |
| 169 | ENSG00000009844 | VTA1      | Supported | Cytosol;VNucleoplasm        |
| 170 | ENSG00000009950 | MLXIPL    | Supported | Nucleoplasm                 |
| 171 | ENSG00000009954 | BAZ1B     | Supported | Nuclear bodies              |
| 172 | ENSG00000010017 | RANBP9    | Supported | Cytosol;Nucleoplasm         |
| 173 | ENSG00000010030 | ETV7      | Enhanced  | Nucleoplasm                 |
| 174 | ENSG00000010072 | SPRTN     | Supported | Nucleoplasm                 |
| 175 | ENSG00000010165 | METTL13   | Approved  | Cytosol                     |
| 176 | ENSG00000010219 | DYRK4     | Enhanced  | Vesicles                    |
| 177 | ENSG00000010244 | ZNF207    | Enhanced  | Nucleoplasm                 |
| 178 | ENSG00000010256 | UQCRC1    | Supported | MitochondCytosol            |
| 179 | ENSG00000010270 | STARD3NL  | Supported | Vesicles                    |
| 180 | ENSG00000010278 | CD9       | Supported | Plasma membrane             |
| 181 | ENSG00000010292 | NCAPD2    | Supported | Cytosol;Nucleoli;Nucleoplas |
| 182 | ENSG00000010318 | PHF7      | Supported | NucleoplaGolgi apparatus    |
| 183 | ENSG00000010327 | STAB1     | Approved  | Cytosol;Nucleoplas          |
| 184 | ENSG00000010361 | FUZ       | Approved  | Cytosol                     |
| 185 | ENSG00000010379 | SLC6A13   | Supported | Mitochondria Cytosol;N      |
| 186 | ENSG00000010438 | PRSS3     | Approved  | Endoplasmic reticu          |
| 187 | ENSG00000010539 | ZNF200    | Approved  | Mitochondria                |
| 188 | ENSG00000010610 | CD4       | Supported | Plasma membrane             |
| 189 | ENSG00000010626 | LRRC23    | Supported | Nucleoli                    |
| 190 | ENSG00000010671 | BTK       | Supported | Cytosol;Plasma membrane     |
| 191 | ENSG00000010704 | HFE       | Supported | Plasma meNucleoplasm        |
| 192 | ENSG00000010803 | SCMH1     | Supported | NucleoplaCytosol;Nuclear bo |
| 193 | ENSG00000010810 | FYN       | Enhanced  | Cytosol;Plasma membrane     |
| 194 | ENSG00000010818 | HIVEP2    | Supported | Nucleoplasm                 |
| 195 | ENSG00000011007 | ELOA      | Approved  | Nuclear speckles Cytosol    |
| 196 | ENSG00000011009 | LYPLA2    | Uncertain | Cytosol;N                   |
| 197 | ENSG00000011021 | CLCN6     | Approved  | Cytosol;Plasma mem          |
| 198 | ENSG00000011052 | NME1-NME2 | Approved  | Cytosol                     |
| 199 | ENSG00000011105 | TSPAN9    | Approved  | Cytosol;Golgi appa          |
| 200 | ENSG00000011114 | BTBD7     | Approved  | Focal adhesion sit          |
| 201 | ENSG00000011132 | APBA3     | Approved  | Vesicles                    |
| 202 | ENSG00000011198 | ABHD5     | Approved  | Vesicles                    |
| 203 | ENSG00000011243 | AKAP8L    | Supported | Nuclear speckles            |
| 204 | ENSG00000011258 | MBTD1     | Approved  | Cytosol;Nucleoplas          |
| 205 | ENSG00000011260 | UTP18     | Supported | Nucleoli Nuclear m          |
| 206 | ENSG00000011275 | RNF216    | Supported | Cytosol Nucleoplasm         |
| 207 | ENSG00000011295 | TTC19     | Enhanced  | Mitochondria                |
| 208 | ENSG00000011304 | PTBP1     | Supported | Nucleoplasm                 |
| 209 | ENSG00000011332 | DPF1      | Approved  | Cytosol;Mitochondr          |
| 210 | ENSG00000011376 | LARS2     | Supported | MitochondNucleoplasm        |
| 211 | ENSG00000011405 | PIK3C2A   | Supported | Nucleoplasm                 |
| 212 | ENSG00000011422 | PLAUR     | Supported | Plasma membrane             |
| 213 | ENSG00000011426 | ANLN      | Enhanced  | NucleoplaMidbody            |
| 214 | ENSG00000011451 | WIZ       | Enhanced  | Nucleoplasm Midbody         |
| 215 | ENSG00000011454 | RABGAP1   | Enhanced  | Cytosol                     |
| 216 | ENSG00000011478 | QPCTL     | Supported | Golgi apparatus             |
| 217 | ENSG00000011485 | PPP5C     | Supported | Cytosol;Vesicles            |
| 218 | ENSG00000011523 | CEP68     | Supported | CentriolaNucleoplasm        |

|     |                 |          |           |                          |                             |
|-----|-----------------|----------|-----------|--------------------------|-----------------------------|
| 219 | ENSG00000011566 | MAP4K3   | Approved  |                          | Centriolar satelli          |
| 220 | ENSG00000011638 | TMEM159  | Approved  |                          | Vesicles                    |
| 221 | ENSG00000012048 | BRCA1    | Supported |                          | Nuclear bodies;Nucleoplasm  |
| 222 | ENSG00000012061 | ERCC1    | Enhanced  | Nucleoplasm              |                             |
| 223 | ENSG00000012174 | MBTPS2   | Approved  |                          | Cytosol;Mitochondr          |
| 224 | ENSG00000012504 | NR1H4    | Approved  |                          | Nucleoplasm                 |
| 225 | ENSG00000012660 | ELOVL5   | Enhanced  | Endoplasmic reticulum    |                             |
| 226 | ENSG00000012779 | ALOX5    | Supported |                          | Nucleoplasm                 |
| 227 | ENSG00000012817 | KDM5D    | Approved  |                          | Nucleoli fibrillar          |
| 228 | ENSG00000012822 | CALCOCO1 | Enhanced  | Cytosol                  | Vesicles                    |
| 229 | ENSG00000012963 | UBR7     | Approved  |                          | Nucleoplasm                 |
| 230 | ENSG00000012983 | MAP4K5   | Approved  |                          | Cytosol;Plasma mem          |
| 231 | ENSG00000013016 | EHD3     | Approved  |                          | Plasma membrane             |
| 232 | ENSG00000013275 | PSMC4    | Supported |                          | Cytosol;Nucleoplasm         |
| 233 | ENSG00000013293 | SLC7A14  | Approved  |                          | Vesicles Cytosol Nucleopla  |
| 234 | ENSG00000013297 | CLDN11   | Supported |                          | Cell JuncLipid droplets     |
| 235 | ENSG00000013364 | MVP      | Supported |                          | Cytosol                     |
| 236 | ENSG00000013374 | NUB1     | Enhanced  | Nucleoli;Nucleoplasm     |                             |
| 237 | ENSG00000013375 | PGM3     | Approved  |                          | Cytosol;Nucleoplas          |
| 238 | ENSG00000013392 | RWDD2A   | Approved  |                          | Vesicles                    |
| 239 | ENSG00000013441 | CLK1     | Supported |                          | Nuclear membrane;Nucleoplas |
| 240 | ENSG00000013503 | POLR3B   | Approved  |                          | Nuclear speckles            |
| 241 | ENSG00000013523 | ANGEL1   | Approved  |                          | Nucleoplasm                 |
| 242 | ENSG00000013561 | RNF14    | Supported |                          | Cytosol                     |
| 243 | ENSG00000013573 | DDX11    | Supported |                          | Centrosome;Nucleoli fibrill |
| 244 | ENSG00000013583 | HEBP1    | Approved  |                          | Vesicles Nucleopla          |
| 245 | ENSG00000013588 | GPRC5A   | Enhanced  | Plasma membrane;Vesicles |                             |
| 246 | ENSG00000013619 | MAMLD1   | Supported |                          | Nucleoplasm                 |
| 247 | ENSG00000013810 | TACC3    | Enhanced  | Cytosol;M                | Centriolar satelliVesicles  |
| 248 | ENSG00000014123 | UFL1     | Supported |                          | Endoplasmic reticulum       |
| 249 | ENSG00000014138 | POLA2    | Supported |                          | Nucleoplasm                 |
| 250 | ENSG00000014164 | ZC3H3    | Approved  |                          | Nucleoplasm                 |
| 251 | ENSG00000014216 | CAPN1    | Supported |                          | Cytosol                     |
| 252 | ENSG00000014641 | MDH1     | Supported |                          | Cytosol Centrosome          |
| 253 | ENSG00000014914 | MTMR11   | Approved  |                          | Centrosome                  |
| 254 | ENSG00000014919 | COX15    | Supported |                          | Mitochondria                |
| 255 | ENSG00000015133 | CCDC88C  | Approved  |                          | Nucleoli fibrillar          |
| 256 | ENSG00000015153 | YAF2     | Supported |                          | Nucleoplasm                 |
| 257 | ENSG00000015171 | ZMYND11  | Supported |                          | Nucleoplasm                 |
| 258 | ENSG00000015285 | WAS      | Approved  |                          | Cytosol;Plasma mem          |
| 259 | ENSG00000015413 | DPEP1    | Approved  |                          | Cell Junctions Nucleopla    |
| 260 | ENSG00000015475 | BID      | Supported |                          | Cytosol                     |
| 261 | ENSG00000015479 | MATR3    | Approved  |                          | Nucleoplasm                 |
| 262 | ENSG00000015532 | XYLT2    | Approved  |                          | Cytosol;Nuclear bo          |
| 263 | ENSG00000015568 | RGPD5    | Uncertain |                          | Nuclear m                   |
| 264 | ENSG00000015592 | STMN4    | Uncertain |                          | Golgi app                   |
| 265 | ENSG00000015676 | NUDCD3   | Approved  |                          | Cytosol;Nucleoplas          |
| 266 | ENSG00000016082 | ISL1     | Approved  |                          | Nucleoplasm                 |
| 267 | ENSG00000016402 | IL20RA   | Approved  |                          | Cytosol                     |
| 268 | ENSG00000016602 | CLCA4    | Approved  |                          | Aggresome;Nucleopl          |
| 269 | ENSG00000016864 | GLT8D1   | Approved  |                          | Mitochondria                |
| 270 | ENSG00000017260 | ATP2C1   | Supported |                          | Golgi apparatus             |
| 271 | ENSG00000017483 | SLC38A5  | Approved  |                          | Cytosol;Plasma mem          |
| 272 | ENSG00000017797 | RALBP1   | Approved  |                          | Cytosol;Nuclear me          |
| 273 | ENSG00000018189 | RUFY3    | Supported |                          | Cytosol                     |

|     |                 |          |           |                                   |
|-----|-----------------|----------|-----------|-----------------------------------|
| 274 | ENSG00000018408 | WWTR1    | Supported | Cytosol;Nuclear bodies;Nucl       |
| 275 | ENSG00000018510 | AGPS     | Enhanced  | Peroxisomes                       |
| 276 | ENSG00000018610 | CXorf56  | Approved  | Centrosome;Nucleop                |
| 277 | ENSG00000018699 | TTC27    | Approved  | Mitochondria;Nucle                |
| 278 | ENSG00000018869 | ZNF582   | Approved  | Cytosol;Nucleoplas                |
| 279 | ENSG00000019102 | VSIG2    | Approved  | Nucleoplasm                       |
| 280 | ENSG00000019144 | PHLDB1   | Approved  | Mitotic spindle;Nu                |
| 281 | ENSG00000019169 | MARCO    | Approved  | Golgi apparatus;Ve                |
| 282 | ENSG00000019186 | CYP24A1  | Supported | Mitochondria NucleoplaPlasma me   |
| 283 | ENSG00000019505 | SYT13    | Supported | Vesicles                          |
| 284 | ENSG00000019549 | SNAI2    | Approved  | Nucleoplasm                       |
| 285 | ENSG00000019582 | CD74     | Supported | Golgi apparatus                   |
| 286 | ENSG00000019991 | HGF      | Approved  | Centrosome;Cytosol                |
| 287 | ENSG00000019995 | ZRANB1   | Supported | Cytosol;Nucleoplasm               |
| 288 | ENSG00000020129 | NCDN     | Supported | Cytosol                           |
| 289 | ENSG00000020256 | ZFP64    | Approved  | Nucleoplasm                       |
| 290 | ENSG00000020426 | MNAT1    | Enhanced  | Nucleoplasm                       |
| 291 | ENSG00000020577 | SAMD4A   | Approved  | Cytosol Cell Junctions            |
| 292 | ENSG00000020633 | RUNX3    | Supported | Cytosol;Nucleoplasm;Vesicle       |
| 293 | ENSG00000020922 | MRE11    | Enhanced  | Nucleoplasm                       |
| 294 | ENSG00000021355 | SERPINB1 | Supported | Cytoplasmic bodies                |
| 295 | ENSG00000021461 | CYP3A43  | Uncertain | Cytosol                           |
| 296 | ENSG00000021574 | SPAST    | Approved  | Cytosol;Nucleoplas                |
| 297 | ENSG00000021762 | OSBPL5   | Enhanced  | Vesicles                          |
| 298 | ENSG00000021776 | AQR      | Enhanced  | Nucleoplasm                       |
| 299 | ENSG00000021826 | CPS1     | Supported | Nucleoli                          |
| 300 | ENSG00000022267 | FHL1     | Supported | Cytosol Plasma membrane           |
| 301 | ENSG00000022277 | RTF2     | Approved  | Nucleoli;Nucleopla                |
| 302 | ENSG00000022556 | NLRP2    | Supported | Cytosol Golgi apparatus;Ve        |
| 303 | ENSG00000022567 | SLC45A4  | Approved  | Plasma membrane                   |
| 304 | ENSG00000022840 | RNF10    | Approved  | Mitochondria;Nucle                |
| 305 | ENSG00000022976 | ZNF839   | Approved  | Nucleoplasm;Plasma                |
| 306 | ENSG00000023171 | GRAMD1B  | Approved  | Intermediate filam                |
| 307 | ENSG00000023191 | RNH1     | Enhanced  | Cytosol Nucleoplasm               |
| 308 | ENSG00000023228 | NDUFS1   | Supported | Mitochondria                      |
| 309 | ENSG00000023287 | RB1CC1   | Supported | Cytosol Nuclear membrane          |
| 310 | ENSG00000023330 | ALAS1    | Enhanced  | Mitochondria;Nucleoplasm          |
| 311 | ENSG00000023445 | BIRC3    | Supported | Cytosol;Nucleoplasm               |
| 312 | ENSG00000023516 | AKAP11   | Approved  | Cytosol Nucleoli;                 |
| 313 | ENSG00000023572 | GLRX2    | Supported | Nucleoplasm Vesicles              |
| 314 | ENSG00000023608 | SNAPC1   | Enhanced  | Nucleoli;Nucleoplasm              |
| 315 | ENSG00000023697 | DERA     | Supported | Nucleoplasm                       |
| 316 | ENSG00000023734 | STRAP    | Enhanced  | Cytosol                           |
| 317 | ENSG00000023892 | DEF6     | Enhanced  | Nucleoplasm                       |
| 318 | ENSG00000023902 | PLEKH01  | Supported | Mitochondria                      |
| 319 | ENSG00000023909 | GCLM     | Approved  | Cytosol;Nucleoplas                |
| 320 | ENSG00000024048 | UBR2     | Approved  | Nucleoplasm;Plasma                |
| 321 | ENSG00000024422 | EHD2     | Supported | Plasma membrane                   |
| 322 | ENSG00000024526 | DEPDC1   | Supported | Nucleoli fibrillar center;N       |
| 323 | ENSG00000024862 | CCDC28A  | Approved  | Nucleoplasm;Plasma                |
| 324 | ENSG00000025039 | RRAGD    | Approved  | Centrosome;Nucleop                |
| 325 | ENSG00000025156 | HSF2     | Supported | Nucleoplasm                       |
| 326 | ENSG00000025293 | PHF20    | Supported | NucleoplaNuclear membrane Cytosol |
| 327 | ENSG00000025423 | HSD17B6  | Approved  | Vesicles Nucleopla                |
| 328 | ENSG00000025708 | TYMP     | Approved  | Golgi apparatus;Nu                |

|     |                 |           |           |                                      |
|-----|-----------------|-----------|-----------|--------------------------------------|
| 329 | ENSG00000025770 | NCAPH2    | Enhanced  | Nucleoplasm;Cytokinetic bridge       |
| 330 | ENSG00000025796 | SEC63     | Supported | Endoplasmic reticulum                |
| 331 | ENSG00000025800 | KPNA6     | Approved  | Cytosol;Nucleoplasm                  |
| 332 | ENSG00000026025 | VIM       | Supported | Intermediate filaments               |
| 333 | ENSG00000026103 | FAS       | Supported | Plasma membrane;Cytosol;Nuclear b    |
| 334 | ENSG00000026508 | CD44      | Enhanced  | Plasma membrane;Golgi apparatus      |
| 335 | ENSG00000026559 | KCNG1     | Approved  | Vesicles                             |
| 336 | ENSG00000026652 | AGPAT4    | Approved  | Golgi apparatus;Nu                   |
| 337 | ENSG00000026751 | SLAMF7    | Approved  | Vesicles                             |
| 338 | ENSG00000026950 | BTN3A1    | Uncertain | Vesicles                             |
| 339 | ENSG00000027001 | MIPEP     | Enhanced  | Mitochondria                         |
| 340 | ENSG00000027075 | PRKCH     | Approved  | Cytosol;Plasma mem                   |
| 341 | ENSG00000027697 | IFNGR1    | Approved  | Plasma membrane                      |
| 342 | ENSG00000028116 | VRK2      | Supported | Endoplasmic reticulum                |
| 343 | ENSG00000028203 | VEZT      | Supported | Nucleoplasm;Cytosol                  |
| 344 | ENSG00000028277 | POU2F2    | Enhanced  | Nucleoplasm;Vesicles                 |
| 345 | ENSG00000028310 | BRD9      | Approved  | Nucleoplasm                          |
| 346 | ENSG00000028528 | SNX1      | Enhanced  | Endosomes;Lysosomes                  |
| 347 | ENSG00000028839 | TBPL1     | Supported | Nucleoplasm;Nucleoli                 |
| 348 | ENSG00000029153 | ARNTL2    | Supported | Nucleoli;Nucleoplasm                 |
| 349 | ENSG00000029363 | BCLAF1    | Enhanced  | Nuclear speckles                     |
| 350 | ENSG00000029364 | SLC39A9   | Approved  | Endoplasmic reticu                   |
| 351 | ENSG00000029725 | RABEP1    | Supported | Vesicles                             |
| 352 | ENSG00000029993 | HMGB3     | Approved  | Nucleoli;Nucleoplasm                 |
| 353 | ENSG00000030419 | IKZF2     | Approved  | Cytosol;Nuclear bo                   |
| 354 | ENSG00000030582 | GRN       | Enhanced  | Endoplasmic reticulum;Endosomes;Lyso |
| 355 | ENSG00000031003 | FAM13B    | Approved  | Nucleoplasm                          |
| 356 | ENSG00000031691 | CENPQ     | Supported | Nucleoplasm                          |
| 357 | ENSG00000031698 | SARS      | Enhanced  | Cytosol                              |
| 358 | ENSG00000031823 | RANBP3    | Enhanced  | Nucleoplasm                          |
| 359 | ENSG00000032219 | ARID4A    | Supported | Nucleoplasm;Cytosol;Plasma mem       |
| 360 | ENSG00000032389 | EIPR1     | Supported | Nucleoli;Intermediate filam          |
| 361 | ENSG00000033011 | ALG1      | Approved  | Endoplasmic reticu                   |
| 362 | ENSG00000033030 | ZCCHC8    | Enhanced  | Nucleoplasm                          |
| 363 | ENSG00000033050 | ABCF2     | Enhanced  | Cytosol                              |
| 364 | ENSG00000033100 | CHPF2     | Approved  | Cytosol;Nucleoplasm                  |
| 365 | ENSG00000033122 | LRRC7     | Supported | Cytosol;Plasma mem;Centrosom         |
| 366 | ENSG00000033170 | FUT8      | Supported | Golgi apparatus;Cytosol;Nucleoplasm  |
| 367 | ENSG00000033178 | UBA6      | Enhanced  | Cytosol;Nucleoplasm                  |
| 368 | ENSG00000033327 | GAB2      | Supported | Plasma membrane                      |
| 369 | ENSG00000033627 | ATP6V0A1  | Approved  | Vesicles;Golgi app;Cytosol;N         |
| 370 | ENSG00000033800 | PIAS1     | Approved  | Microtubules                         |
| 371 | ENSG00000033867 | SLC4A7    | Supported | Focal adh;Cytosol                    |
| 372 | ENSG00000034053 | APBA2     | Enhanced  | Golgi apparatus                      |
| 373 | ENSG00000034152 | MAP2K3    | Supported | Cytosol;Nucleoplasm                  |
| 374 | ENSG00000034239 | EFCAB1    | Approved  | Nucleoplasm;Plasma                   |
| 375 | ENSG00000034533 | ASTE1     | Approved  | Endoplasmic reticu                   |
| 376 | ENSG00000034693 | PEX3      | Supported | Peroxisome;Nucleoplasm               |
| 377 | ENSG00000034713 | GABARAPL2 | Uncertain | Cytosol;N                            |
| 378 | ENSG00000035115 | SH3YL1    | Approved  | Nucleoplasm                          |
| 379 | ENSG00000035141 | FAM136A   | Approved  | Mitochondria                         |
| 380 | ENSG00000035403 | VCL       | Enhanced  | Focal adhesion sites                 |
| 381 | ENSG00000035499 | DEPDC1B   | Approved  | Cytosol;Golgi appa                   |
| 382 | ENSG00000035664 | DAPK2     | Supported | Vesicles;Golgi apparatus             |
| 383 | ENSG00000035681 | NSMAF     | Approved  | Nucleoli                             |



|     |                 |           |           |                             |                      |
|-----|-----------------|-----------|-----------|-----------------------------|----------------------|
| 384 | ENSG00000035687 | ADSS      | Supported | Cytosol                     | Plasma membrane      |
| 385 | ENSG00000035720 | STAP1     | Uncertain |                             | Nucleopla            |
| 386 | ENSG00000035928 | RFC1      | Enhanced  | Nucleoplasm                 |                      |
| 387 | ENSG00000036054 | TBC1D23   | Enhanced  | Golgi apparatus             |                      |
| 388 | ENSG00000036448 | MYOM2     | Approved  |                             | Mitochondria         |
| 389 | ENSG00000036473 | OTC       | Supported |                             | Mitochondria         |
| 390 | ENSG00000036549 | AC118549. | Enhanced  | Nucleoli;Nucleoplasm        |                      |
| 391 | ENSG00000036672 | USP2      | Supported | Cytosol                     | Plasma membrane      |
| 392 | ENSG00000037042 | TUBG2     | Supported |                             | Centriolar satellite |
| 393 | ENSG00000037241 | RPL26L1   | Supported | Cytosol;Endoplasmic reticul |                      |
| 394 | ENSG00000037280 | FLT4      | Approved  |                             | Cell Junctions;Nuc   |
| 395 | ENSG00000037474 | NSUN2     | Approved  |                             | Nucleoplasm          |
| 396 | ENSG00000037637 | FBX042    | Approved  |                             | Nucleoplasm          |
| 397 | ENSG00000037749 | MFAP3     | Approved  |                             | Golgi apparatus;Nu   |
| 398 | ENSG00000037757 | MRI1      | Supported | Nucleopla                   | Cytosol;Nucleoli f   |
| 399 | ENSG00000037897 | METTL1    | Supported | Nucleoplasm                 |                      |
| 400 | ENSG00000037965 | HOXC8     | Supported | Nucleoplasm                 | Microtubu            |
| 401 | ENSG00000038210 | PI4K2B    | Supported | Cytosol                     |                      |
| 402 | ENSG00000038219 | BOD1L1    | Enhanced  | Nucleoplasm                 |                      |
| 403 | ENSG00000038274 | MAT2B     | Approved  |                             | Plasma membrane      |
| 404 | ENSG00000038295 | TLL1      | Approved  |                             | Vesicles             |
| 405 | ENSG00000038358 | EDC4      | Enhanced  | Cytoplasm                   | Nucleoplasm          |
| 406 | ENSG00000038382 | TRIO      | Approved  |                             | Cytosol;Vesicles     |
| 407 | ENSG00000038427 | VCAN      | Supported | Vesicles                    |                      |
| 408 | ENSG00000038532 | CLEC16A   | Approved  |                             | Nucleoplasm;Vesicl   |
| 409 | ENSG00000039068 | CDH1      | Supported | Cell Junctions;Golgi appara |                      |
| 410 | ENSG00000039123 | MTREX     | Supported | Nucleoplasm                 |                      |
| 411 | ENSG00000039319 | ZFYVE16   | Enhanced  | Cytosol;Vesicles            |                      |
| 412 | ENSG00000039523 | RIPOR1    | Approved  |                             | Cytosol;Golgi appa   |
| 413 | ENSG00000039560 | RAI14     | Supported | Nucleopla                   | Actin filCytosol     |
| 414 | ENSG00000039650 | PNKP      | Supported | Nucleoli;Nucleoplasm        |                      |
| 415 | ENSG00000040199 | PHLPP2    | Approved  |                             | Vesicles             |
| 416 | ENSG00000040275 | SPDL1     | Approved  |                             | Cytosol              |
| 417 | ENSG00000040341 | STAU2     | Supported | Cytosol;Nucleoplasm         |                      |
| 418 | ENSG00000040487 | PQLC2     | Supported | Vesicles                    |                      |
| 419 | ENSG00000040531 | CTNS      | Supported | Vesicles                    | Intermediate filam   |
| 420 | ENSG00000040608 | RTN4R     | Supported | Focal adh                   | Actin filaments      |
| 421 | ENSG00000040633 | PHF23     | Enhanced  | Nucleoplasm                 |                      |
| 422 | ENSG00000040933 | INPP4A    | Approved  |                             | Nuclear membrane;N   |
| 423 | ENSG00000041353 | RAB27B    | Approved  | Golgi app                   | Cytosol;Plasma mem   |
| 424 | ENSG00000041357 | PSMA4     | Supported | Cytosol;Nucleoplasm;Vesicle |                      |
| 425 | ENSG00000041515 | MYO16     | Approved  |                             | Vesicles             |
| 426 | ENSG00000041802 | LSG1      | Supported | Cytosol;Nuclear bodies;Nucl |                      |
| 427 | ENSG00000041880 | PARP3     | Supported | Nuclear bodies;Nucleoplasm  |                      |
| 428 | ENSG00000041988 | THAP3     | Approved  |                             | NucleoplaMitochond   |
| 429 | ENSG00000042062 | RIPOR3    | Approved  |                             | Nucleoplasm          |
| 430 | ENSG00000042088 | TDP1      | Supported | Nucleopla                   | Plasma membrane      |
| 431 | ENSG00000042286 | AIFM2     | Supported | Cytosol;V                   | Plasma membrane      |
| 432 | ENSG00000042317 | SPATA7    | Approved  |                             | Cytosol;Mitochondr   |
| 433 | ENSG00000042429 | MED17     | Approved  |                             | Cytosol;Nuclear sp   |
| 434 | ENSG00000042445 | RETSAT    | Uncertain |                             | Nucleoli             |
| 435 | ENSG00000042493 | CAPG      | Enhanced  | Nucleoplasm                 |                      |
| 436 | ENSG00000042980 | ADAM28    | Approved  | Plasma me                   | Mitochondria         |
| 437 | ENSG00000043039 | BARX2     | Supported | Nucleopla                   | Cytosol              |
| 438 | ENSG00000043093 | DCUN1D1   | Approved  |                             | Cytosol;Nucleoplas   |

|     |                 |          |           |                                      |
|-----|-----------------|----------|-----------|--------------------------------------|
| 439 | ENSG00000043143 | JADE2    | Enhanced  | Nucleoplasm                          |
| 440 | ENSG00000043355 | ZIC2     | Supported | Nuclear bodies                       |
| 441 | ENSG00000043514 | TRIT1    | Approved  | Cytosol;Nucleoplas                   |
| 442 | ENSG00000044115 | CTNNA1   | Enhanced  | Cell Junctions;Plasma membrane       |
| 443 | ENSG00000044446 | PHKA2    | Approved  | Nucleoplasm                          |
| 444 | ENSG00000044459 | CNTLN    | Approved  | Centrosome Cytosol;N                 |
| 445 | ENSG00000044524 | EPHA3    | Supported | Plasma meActin filaments;Cy          |
| 446 | ENSG00000044574 | HSPA5    | Approved  | Cytosol                              |
| 447 | ENSG00000046604 | DSG2     | Supported | Cell Junctions                       |
| 448 | ENSG00000046647 | GEMIN8   | Supported | Cytosol Nucleoplasm                  |
| 449 | ENSG00000046651 | OFD1     | Supported | Microtubules                         |
| 450 | ENSG00000046774 | MAGEC2   | Supported | Cytosol;Nucleoplasm                  |
| 451 | ENSG00000046889 | PREX2    | Approved  | Endoplasmic reticu                   |
| 452 | ENSG00000047056 | WDR37    | Approved  | Intermediate filam                   |
| 453 | ENSG00000047188 | YTHDC2   | Approved  | Cytoplasmic bodies                   |
| 454 | ENSG00000047230 | CTPS2    | Approved  | Cytosol;Nucleoplas                   |
| 455 | ENSG00000047249 | ATP6V1H  | Approved  | Actin filaments;Cy                   |
| 456 | ENSG00000047315 | POLR2B   | Supported | Nucleoplasm                          |
| 457 | ENSG00000047346 | FAM214A  | Approved  | Nucleoplasm                          |
| 458 | ENSG00000047365 | ARAP2    | Approved  | Actin filaments;Fo                   |
| 459 | ENSG00000047410 | TPR      | Enhanced  | Nuclear membrane                     |
| 460 | ENSG00000047578 | KIAA0556 | Approved  | Nuclear speckles;P                   |
| 461 | ENSG00000047579 | DTNBP1   | Enhanced  | Microtubules Midbody                 |
| 462 | ENSG00000047597 | XK       | Approved  | Mitochondria;Nucle                   |
| 463 | ENSG00000047617 | ANO2     | Supported | Plasma meNucleoplasm                 |
| 464 | ENSG00000047621 | C12orf4  | Approved  | Nuclear bodies                       |
| 465 | ENSG00000047634 | SCML1    | Approved  | Nucleoplasm                          |
| 466 | ENSG00000047644 | WWC3     | Approved  | Actin filaments;Cy                   |
| 467 | ENSG00000047648 | ARHGAP6  | Supported | Cytosol                              |
| 468 | ENSG00000047849 | MAP4     | Enhanced  | Cytosol;Microtubules;Plasma membrane |
| 469 | ENSG00000047932 | GOPC     | Enhanced  | Golgi apparatus                      |
| 470 | ENSG00000047936 | ROS1     | Approved  | Vesicles                             |
| 471 | ENSG00000048028 | USP28    | Supported | Nuclear bodies;Nucleoplasm           |
| 472 | ENSG00000048052 | HDAC9    | Approved  | Nucleoplasm                          |
| 473 | ENSG00000048140 | TSPAN17  | Approved  | Nucleoplasm                          |
| 474 | ENSG00000048162 | NOP16    | Enhanced  | Nucleoli                             |
| 475 | ENSG00000048392 | RRM2B    | Supported | Cytosol;Nucleoplasm                  |
| 476 | ENSG00000048405 | ZNF800   | Supported | Nucleoli Cytosol                     |
| 477 | ENSG00000048544 | MRPS10   | Approved  | Actin filaments;Mi                   |
| 478 | ENSG00000048545 | GUCA1A   | Approved  | Plasma membrane                      |
| 479 | ENSG00000048649 | RSF1     | Enhanced  | Nucleoplasm                          |
| 480 | ENSG00000048707 | VPS13D   | Approved  | Cytosol;Nucleoplas                   |
| 481 | ENSG00000048740 | CELF2    | Uncertain | Cytokinet                            |
| 482 | ENSG00000048828 | FAM120A  | Enhanced  | Cytosol                              |
| 483 | ENSG00000048991 | R3HDM1   | Approved  | Cytosol;Nucleoplas                   |
| 484 | ENSG00000049089 | COL9A2   | Approved  | Nucleoplasm;Vesicl                   |
| 485 | ENSG00000049130 | KITLG    | Approved  | Vesicles                             |
| 486 | ENSG00000049167 | ERCC8    | Approved  | Nuclear speckles                     |
| 487 | ENSG00000049239 | H6PD     | Uncertain | Cytosol                              |
| 488 | ENSG00000049246 | PER3     | Supported | Cytosol                              |
| 489 | ENSG00000049249 | TNFRSF9  | Approved  | Nucleoli;Plasma me                   |
| 490 | ENSG00000049283 | EPN3     | Supported | Vesicles Nucleoplasm                 |
| 491 | ENSG00000049323 | LTBP1    | Approved  | Cytosol                              |
| 492 | ENSG00000049449 | RCN1     | Supported | Endoplasmic reticulum                |
| 493 | ENSG00000049540 | ELN      | Approved  | Plasma membrane                      |

|     |                 |          |           |                                          |                                    |
|-----|-----------------|----------|-----------|------------------------------------------|------------------------------------|
| 494 | ENSG00000049541 | RFC2     | Supported | Nucleoplasm                              | Golgi apparatus                    |
| 495 | ENSG00000049618 | ARID1B   | Supported | Nucleoplasm                              |                                    |
| 496 | ENSG00000049656 | CLPTM1L  | Approved  |                                          | Endoplasmic reticulum              |
| 497 | ENSG00000049768 | FOXP3    | Supported | Nucleoplasm                              |                                    |
| 498 | ENSG00000049769 | PPP1R3F  | Approved  |                                          | Nucleoplasm; Vesicles              |
| 499 | ENSG00000050030 | NEXMIF   | Supported | Nucleoplasm                              | Cytosol; Mitochondria              |
| 500 | ENSG00000050130 | JKAMP    | Approved  |                                          | Nucleoplasm; Vesicles              |
| 501 | ENSG00000050165 | DKK3     | Supported | Vesicles                                 | Cytosol; Nucleoplasm               |
| 502 | ENSG00000050327 | ARHGEF5  | Supported | Cytosol; Nucleoplasm; Plasma membrane    |                                    |
| 503 | ENSG00000050344 | NFE2L3   | Approved  |                                          | Nucleoplasm; Vesicles              |
| 504 | ENSG00000050405 | LIMA1    | Enhanced  | Actin filaments; Cytosol; Focal adhesion |                                    |
| 505 | ENSG00000050426 | LETMD1   | Supported | Mitochondria                             | Nucleoli; Plasma membrane          |
| 506 | ENSG00000050438 | SLC4A8   | Approved  |                                          | Plasma membrane                    |
| 507 | ENSG00000050820 | BCAR1    | Approved  |                                          | Cytosol; Plasma membrane           |
| 508 | ENSG00000051009 | FAM160A2 | Approved  |                                          | Mitochondria                       |
| 509 | ENSG00000051108 | HERPUD1  | Uncertain |                                          | Cytosol; Plasma membrane           |
| 510 | ENSG00000051128 | HOMER3   | Supported | Cytosol; Plasma membrane                 | Cytoplasmic bodies                 |
| 511 | ENSG00000051180 | RAD51    | Supported | Cytosol; Nucleoli                        |                                    |
| 512 | ENSG00000051341 | POLQ     | Uncertain |                                          | Cytosol; Golgi apparatus           |
| 513 | ENSG00000051382 | PIK3CB   | Supported | Nucleoplasm                              | Midbody; Nucleoli; Vesicles        |
| 514 | ENSG00000051596 | THOC3    | Approved  |                                          | Nucleoplasm; Vesicles              |
| 515 | ENSG00000051825 | MPHOSPH9 | Uncertain |                                          | Cytosol; Nucleoplasm               |
| 516 | ENSG00000052126 | PLEKHA5  | Approved  | Cytosol                                  | Nucleoplasm                        |
| 517 | ENSG00000052723 | SIKE1    | Approved  |                                          | Focal adhesion site                |
| 518 | ENSG00000052749 | RRP12    | Supported | Nucleoli                                 | Plasma membrane; Cytosol; Vesicles |
| 519 | ENSG00000052795 | FNIP2    | Supported |                                          | Centriolar satellite; Cytosol      |
| 520 | ENSG00000052841 | TTC17    | Supported |                                          | Cytosol; Plasma membrane           |
| 521 | ENSG00000052850 | ALX4     | Supported | Nucleoplasm                              |                                    |
| 522 | ENSG00000053108 | FSTL4    | Approved  |                                          | Mitochondria; Nucleoplasm          |
| 523 | ENSG00000053254 | FOXN3    | Approved  |                                          | Nucleoplasm; Plasma membrane       |
| 524 | ENSG00000053371 | AKR7A2   | Supported | Cytosol                                  |                                    |
| 525 | ENSG00000053372 | MRT04    | Approved  | Nucleoli                                 | Nuclear membrane; Nucleoplasm      |
| 526 | ENSG00000053524 | MCF2L2   | Approved  |                                          | Cytosol; Plasma membrane           |
| 527 | ENSG00000053702 | NRIP2    | Approved  |                                          | Cytosol; Nuclear membrane          |
| 528 | ENSG00000053747 | LAMA3    | Supported |                                          | Endoplasmic reticulum              |
| 529 | ENSG00000053900 | ANAPC4   | Approved  |                                          | Intermediate filament              |
| 530 | ENSG00000054116 | TRAPPC3  | Approved  |                                          | Golgi apparatus; Cytosol           |
| 531 | ENSG00000054118 | THRAP3   | Enhanced  | Nuclear speckles                         |                                    |
| 532 | ENSG00000054148 | PHPT1    | Approved  |                                          | Cytosol; Nuclear membrane          |
| 533 | ENSG00000054219 | LY75     | Approved  |                                          | Golgi apparatus                    |
| 534 | ENSG00000054267 | ARID4B   | Approved  |                                          | Nucleoplasm; Vesicles              |
| 535 | ENSG00000054277 | OPN3     | Approved  |                                          | Nucleoplasm                        |
| 536 | ENSG00000054282 | SDCCAG8  | Enhanced  | Centrosome                               |                                    |
| 537 | ENSG00000054356 | PTPRN    | Approved  |                                          | Endoplasmic reticulum              |
| 538 | ENSG00000054392 | HHAT     | Approved  |                                          | Golgi apparatus                    |
| 539 | ENSG00000054598 | FOXC1    | Supported | Nucleoplasm                              | Cytosol                            |
| 540 | ENSG00000054611 | TBC1D22A | Approved  |                                          | Golgi apparatus; Nucleoplasm       |
| 541 | ENSG00000054654 | SYNE2    | Supported | Nuclear membrane                         | Intermediate filament              |
| 542 | ENSG00000054690 | PLEKHH1  | Approved  |                                          | Centrosome                         |
| 543 | ENSG00000054965 | FAM168A  | Approved  |                                          | Nucleoplasm                        |
| 544 | ENSG00000054967 | RELT     | Supported | Nucleoplasm                              |                                    |
| 545 | ENSG00000055044 | NOP58    | Enhanced  | Nucleoli                                 | fibrillar center; Nucleoplasm      |
| 546 | ENSG00000055070 | SZRD1    | Approved  |                                          | Cytosol; Nucleoplasm               |
| 547 | ENSG00000055130 | CUL1     | Supported | Nucleoplasm                              | Nucleoli                           |
| 548 | ENSG00000055147 | FAM114A2 | Approved  |                                          | Vesicles                           |

|     |                 |          |           |                       |                         |                    |
|-----|-----------------|----------|-----------|-----------------------|-------------------------|--------------------|
| 549 | ENSG00000055163 | CYFIP2   | Approved  |                       | Cytosol;P               | Endoplasmic reticu |
| 550 | ENSG00000055211 | GINM1    | Approved  |                       |                         | Nucleoli fibrillar |
| 551 | ENSG00000055332 | EIF2AK2  | Enhanced  | Cytosol               |                         |                    |
| 552 | ENSG00000055483 | USP36    | Enhanced  | Nucleoli              | Nuclear                 | speckles           |
| 553 | ENSG00000055609 | KMT2C    | Approved  |                       |                         | Nucleoplasm        |
| 554 | ENSG00000055732 | MCOLN3   | Approved  |                       |                         | Cytosol;Nucleoli   |
| 555 | ENSG00000055917 | PUM2     | Enhanced  | Cytosol               |                         |                    |
| 556 | ENSG00000055950 | MRPL43   | Approved  |                       | Mitochondria            | Nucleopla          |
| 557 | ENSG00000055955 | ITIH4    | Approved  |                       |                         | Vesicles           |
| 558 | ENSG00000055957 | ITIH1    | Approved  |                       |                         | Vesicles           |
| 559 | ENSG00000056050 | HPF1     | Approved  |                       |                         | Cytokinetic bridge |
| 560 | ENSG00000056097 | ZFR      | Approved  |                       |                         | Nucleoplasm        |
| 561 | ENSG00000056277 | ZNF280C  | Approved  |                       |                         | Nucleoli fibrillar |
| 562 | ENSG00000056291 | NPFPR2   | Approved  |                       | Plasma me               | Actin filaments    |
| 563 | ENSG00000056487 | PHF21B   | Uncertain |                       |                         | Nucleoli           |
| 564 | ENSG00000056558 | TRAF1    | Approved  |                       |                         | Nucleoplasm        |
| 565 | ENSG00000056586 | RC3H2    | Enhanced  | Vesicles              |                         |                    |
| 566 | ENSG00000056972 | TRAF3IP2 | Approved  |                       |                         | Golgi apparatus;Ve |
| 567 | ENSG00000056998 | GYG2     | Approved  |                       |                         | Cytosol;Nucleoli;N |
| 568 | ENSG00000057019 | DCBLD2   | Approved  |                       |                         | Cytosol;Golgi appa |
| 569 | ENSG00000057149 | SERPINB3 | Approved  |                       | Cytosol                 | Plasma membrane    |
| 570 | ENSG00000057252 | SOAT1    | Enhanced  | Endoplasmic reticulum |                         |                    |
| 571 | ENSG00000057294 | PKP2     | Enhanced  | Cell Junc             | Nucleoplasm             |                    |
| 572 | ENSG00000057593 | F7       | Approved  |                       |                         | Mitochondria       |
| 573 | ENSG00000057657 | PRDM1    | Approved  |                       |                         | Nucleoli;Nucleopla |
| 574 | ENSG00000057663 | ATG5     | Approved  |                       |                         | Centrosome         |
| 575 | ENSG00000057704 | TMCC3    | Approved  |                       |                         | Endoplasmic reticu |
| 576 | ENSG00000057935 | MTA3     | Supported |                       | Nucleopla               | Vesicles           |
| 577 | ENSG00000058056 | USP13    | Approved  |                       |                         | Cytosol;Nucleoplas |
| 578 | ENSG00000058063 | ATP11B   | Approved  |                       |                         | Centriolar satelli |
| 579 | ENSG00000058085 | LAMC2    | Approved  |                       |                         | Cytosol            |
| 580 | ENSG00000058091 | CDK14    | Supported |                       | Cytosol;Nucleoplasm     |                    |
| 581 | ENSG00000058262 | SEC61A1  | Supported |                       | Endoplasmic reticulum   |                    |
| 582 | ENSG00000058272 | PPP1R12A | Supported |                       | Actin filaments;Cytosol |                    |
| 583 | ENSG00000058335 | RASGRF1  | Supported |                       | Golgi apparatus         |                    |
| 584 | ENSG00000058404 | CAMK2B   | Supported |                       | Plasma me               | Cell JuncCytosol   |
| 585 | ENSG00000058453 | CROCC    | Supported |                       | Centrosom               | Plasma membrane    |
| 586 | ENSG00000058600 | POLR3E   | Enhanced  | Nucleoplasm           |                         |                    |
| 587 | ENSG00000058668 | ATP2B4   | Supported |                       | Plasma membrane         |                    |
| 588 | ENSG00000058673 | ZC3H11A  | Approved  |                       |                         | Nuclear speckles   |
| 589 | ENSG00000058729 | RIOK2    | Approved  |                       |                         | Cytosol;Plasma mem |
| 590 | ENSG00000058799 | YIPF1    | Approved  |                       |                         | Nucleoplasm        |
| 591 | ENSG00000058804 | NDC1     | Supported |                       | Nuclear m               | Plasma meActin fil |
| 592 | ENSG00000058866 | DGKG     | Approved  |                       |                         | Plasma membrane;Ve |
| 593 | ENSG00000059122 | FLYWCH1  | Enhanced  | Nuclear bodies        |                         | Cytosol;Nucleoplas |
| 594 | ENSG00000059145 | UNKL     | Supported |                       | Cytosol                 |                    |
| 595 | ENSG00000059378 | PARP12   | Approved  |                       |                         | Nucleoplasm        |
| 596 | ENSG00000059573 | ALDH18A1 | Supported |                       | Mitochondria            |                    |
| 597 | ENSG00000059588 | TARBP1   | Approved  |                       |                         | Nuclear speckles   |
| 598 | ENSG00000059691 | GATB     | Supported |                       | Mitochondria            |                    |
| 599 | ENSG00000059728 | MXD1     | Uncertain |                       |                         | Cytosol;M          |
| 600 | ENSG00000059758 | CDK17    | Approved  |                       | Cytosol;Nucleoplas      |                    |
| 601 | ENSG00000059769 | DNAJC25  | Approved  |                       | Cytosol;Nucleoplas      |                    |
| 602 | ENSG00000059804 | SLC2A3   | Approved  |                       | Plasma membrane         |                    |
| 603 | ENSG00000059915 | PSD      | Approved  |                       | Cytosol;Nucleoplas      |                    |

|     |                 |         |           |                                       |
|-----|-----------------|---------|-----------|---------------------------------------|
| 604 | ENSG00000060069 | CTDP1   | Approved  | Nucleoplasm; Vesicles                 |
| 605 | ENSG00000060138 | YBX3    | Supported | Cytosol                               |
| 606 | ENSG00000060140 | STYK1   | Approved  | Nucleoplasm; Plasma                   |
| 607 | ENSG00000060237 | WNK1    | Supported | Cytosol                               |
| 608 | ENSG00000060339 | CCAR1   | Supported | Golgi apparatus; Nucleoplasm          |
| 609 | ENSG00000060491 | OGFR    | Approved  | Nucleoplasm                           |
| 610 | ENSG00000060642 | PIGV    | Approved  | Endoplasm; Cytosol                    |
| 611 | ENSG00000060688 | SNRNP40 | Supported | Nuclear speckles                      |
| 612 | ENSG00000060709 | RIMBP2  | Approved  | Cytosol; Golgi apparatus              |
| 613 | ENSG00000060718 | COL11A1 | Approved  | Endoplasmic reticulum                 |
| 614 | ENSG00000060749 | QSER1   | Approved  | Cytosol; Nucleoplasm                  |
| 615 | ENSG00000060762 | MPC1    | Enhanced  | Mitochondria                          |
| 616 | ENSG00000060971 | ACAA1   | Enhanced  | Peroxisomes                           |
| 617 | ENSG00000061273 | HDAC7   | Supported | Cytosol                               |
| 618 | ENSG00000061337 | LZTS1   | Approved  | Nucleoli; Plasma membrane             |
| 619 | ENSG00000061455 | PRDM6   | Approved  | Nucleoplasm                           |
| 620 | ENSG00000061676 | NCKAP1  | Approved  | Cytosol                               |
| 621 | ENSG00000061794 | MRPS35  | Approved  | Cytosol; Mitochondria                 |
| 622 | ENSG00000061918 | GUCY1B1 | Approved  | Cytosol                               |
| 623 | ENSG00000061936 | SFSWAP  | Approved  | Cytosol; Nucleoplasm                  |
| 624 | ENSG00000061938 | TNK2    | Approved  | Cytosol                               |
| 625 | ENSG00000061987 | MON2    | Approved  | Nucleoli fibrillar                    |
| 626 | ENSG00000062038 | CDH3    | Supported | Plasma membrane; Cell Junctions       |
| 627 | ENSG00000062096 | ARSF    | Uncertain | Cytosol                               |
| 628 | ENSG00000062194 | GPBP1   | Approved  | Cytosol; Plasma membrane; Vesicles    |
| 629 | ENSG00000062370 | ZNF112  | Approved  | Centrosome                            |
| 630 | ENSG00000062485 | CS      | Enhanced  | Mitochondria                          |
| 631 | ENSG00000062524 | LTK     | Approved  | Vesicles                              |
| 632 | ENSG00000062598 | ELMO2   | Supported | Cytosol                               |
| 633 | ENSG00000062716 | VMP1    | Approved  | Endoplasm; Nucleoli                   |
| 634 | ENSG00000062725 | APPBP2  | Uncertain | Centriole                             |
| 635 | ENSG00000062822 | POLD1   | Supported | Nucleoplasm                           |
| 636 | ENSG00000063046 | EIF4B   | Enhanced  | Cytosol                               |
| 637 | ENSG00000063127 | SLC6A16 | Supported | Golgi apparatus                       |
| 638 | ENSG00000063169 | BICRA   | Approved  | Nucleoplasm                           |
| 639 | ENSG00000063176 | SPHK2   | Supported | Vesicles                              |
| 640 | ENSG00000063177 | RPL18   | Supported | Cytosol; Endoplasm; Nucleoli          |
| 641 | ENSG00000063180 | CA11    | Approved  | Microtubules; Vesicles                |
| 642 | ENSG00000063241 | ISOC2   | Approved  | Cytosol; Mitochondria                 |
| 643 | ENSG00000063244 | U2AF2   | Enhanced  | Nuclear speckles; Nucleoplasm         |
| 644 | ENSG00000063245 | EPN1    | Supported | Cytosol; Plasma membrane              |
| 645 | ENSG00000063322 | MED29   | Supported | Nucleoplasm                           |
| 646 | ENSG00000063438 | AHRR    | Supported | Cytosol; Nucleoplasm                  |
| 647 | ENSG00000063587 | ZNF275  | Approved  | Nucleoli                              |
| 648 | ENSG00000063601 | MTMR1   | Approved  | Centrosome                            |
| 649 | ENSG00000063660 | GPC1    | Supported | Plasma membrane; Cytosol              |
| 650 | ENSG00000063761 | ADCK1   | Approved  | Nucleoplasm                           |
| 651 | ENSG00000063978 | RNF4    | Supported | Nuclear bodies; Nuclear Microtubules  |
| 652 | ENSG00000064012 | CASP8   | Supported | Cytosol; Nucleoplasm                  |
| 653 | ENSG00000064042 | LIMCH1  | Approved  | Actin filaments                       |
| 654 | ENSG00000064102 | INTS13  | Enhanced  | Nucleoplasm; Nuclear bodies; Vesicles |
| 655 | ENSG00000064115 | TM7SF3  | Supported | Cytosol; Nucleoplasm                  |
| 656 | ENSG00000064199 | SPA17   | Approved  | Vesicles                              |
| 657 | ENSG00000064201 | TSPAN32 | Approved  | Nucleoplasm                           |
| 658 | ENSG00000064270 | ATP2C2  | Approved  | Focal adhesion sites                  |

|     |                 |           |           |                                      |                             |
|-----|-----------------|-----------|-----------|--------------------------------------|-----------------------------|
| 659 | ENSG00000064300 | NGFR      | Approved  |                                      | Nucleoplasm;Plasma          |
| 660 | ENSG00000064393 | HIPK2     | Supported |                                      | Nucleoplasm                 |
| 661 | ENSG00000064419 | TNP03     | Enhanced  | Vesicles                             |                             |
| 662 | ENSG00000064489 | BORCS8-ME | Approved  |                                      | Cell Junctions;Cyt          |
| 663 | ENSG00000064490 | RFXANK    | Enhanced  | Nucleoplasm                          |                             |
| 664 | ENSG00000064545 | TMEM161A  | Approved  |                                      | Cytosol                     |
| 665 | ENSG00000064601 | CTSA      | Enhanced  | Vesicles                             |                             |
| 666 | ENSG00000064607 | SUGP2     | Enhanced  | Nuclear bodies;Nucleoplasm           |                             |
| 667 | ENSG00000064651 | SLC12A2   | Approved  |                                      | Plasma membrane;Ve          |
| 668 | ENSG00000064652 | SNX24     | Approved  |                                      | Vesicles                    |
| 669 | ENSG00000064655 | EYA2      | Supported | Cytosol                              |                             |
| 670 | ENSG00000064666 | CNN2      | Approved  |                                      | Actin filaments;Cy          |
| 671 | ENSG00000064687 | ABCA7     | Supported | Cell Junctions;Golgi appara          |                             |
| 672 | ENSG00000064692 | SNCAIP    | Supported | Cytoplasmic bodiesNucleopla          |                             |
| 673 | ENSG00000064703 | DDX20     | Supported | Cytosol;Nuclear bodies;Nucl          |                             |
| 674 | ENSG00000064726 | BTBD1     | Uncertain | Cytoplasmic bodiesNucleopla          |                             |
| 675 | ENSG00000064763 | FAR2      | Approved  |                                      | Golgi apparatus;Nu          |
| 676 | ENSG00000064787 | BCAS1     | Approved  |                                      | Vesicles                    |
| 677 | ENSG00000064933 | PMS1      | Supported |                                      | Nuclear bodies;Nucleoplasm  |
| 678 | ENSG00000064961 | HMG20B    | Enhanced  | Nucleoplasm                          |                             |
| 679 | ENSG00000064989 | CALCRL    | Supported |                                      | Plasma membrane             |
| 680 | ENSG00000064995 | TAF11     | Supported | Nucleoplasm                          | Golgi app                   |
| 681 | ENSG00000064999 | ANKS1A    | Approved  |                                      | Cytosol;Nucleoplas          |
| 682 | ENSG00000065000 | AP3D1     | Approved  |                                      | Cytosol                     |
| 683 | ENSG00000065029 | ZNF76     | Approved  |                                      | Cytosol;Nucleoplas          |
| 684 | ENSG00000065054 | SLC9A3R2  | Supported |                                      | Plasma membrane             |
| 685 | ENSG00000065060 | UHRF1BP1  | Approved  |                                      | Cytosol;Nuclear me          |
| 686 | ENSG00000065135 | GNAI3     | Approved  |                                      | Centrosome;Nucleol          |
| 687 | ENSG00000065150 | IPO5      | Supported |                                      | Cytosol;Nucleoplasm         |
| 688 | ENSG00000065154 | OAT       | Supported |                                      | MitochondNucleoplasm        |
| 689 | ENSG00000065183 | WDR3      | Enhanced  | Nucleoli;Nucleoplasm                 |                             |
| 690 | ENSG00000065243 | PKN2      | Supported | Intermediate filamCentrosome;Cytosol |                             |
| 691 | ENSG00000065268 | WDR18     | Supported |                                      | Nucleoplasm                 |
| 692 | ENSG00000065308 | TRAM2     | Approved  |                                      | Cytosol                     |
| 693 | ENSG00000065325 | GLP2R     | Supported |                                      | Plasma membrane             |
| 694 | ENSG00000065328 | MCM10     | Supported |                                      | Nucleoli;Nucleoplasm        |
| 695 | ENSG00000065357 | DGKA      | Approved  |                                      | Mitochondria;Nucle          |
| 696 | ENSG00000065361 | ERBB3     | Approved  | Plasma meActin filaments             |                             |
| 697 | ENSG00000065413 | ANKRD44   | Approved  |                                      | Mitochondria;Nucle          |
| 698 | ENSG00000065427 | KARS      | Supported |                                      | Cytosol                     |
| 699 | ENSG00000065457 | ADAT1     | Supported |                                      | Nucleoplasm                 |
| 700 | ENSG00000065485 | PDIA5     | Supported |                                      | Golgi apparatus;Nucleoli fi |
| 701 | ENSG00000065491 | TBC1D22B  | Uncertain |                                      | Cytosol;N                   |
| 702 | ENSG00000065518 | NDUFB4    | Supported |                                      | MitochondNuclear membrane   |
| 703 | ENSG00000065526 | SPEN      | Enhanced  | Nucleoplasm                          |                             |
| 704 | ENSG00000065534 | MYLK      | Enhanced  | Actin filPlasma membrane             |                             |
| 705 | ENSG00000065548 | ZC3H15    | Enhanced  | Cytosol                              |                             |
| 706 | ENSG00000065559 | MAP2K4    | Approved  |                                      | Cell Junctions;Nuc          |
| 707 | ENSG00000065609 | SNAP91    | Uncertain |                                      | Centrosom                   |
| 708 | ENSG00000065613 | SLK       | Approved  |                                      | Cytosol;Plasma mem          |
| 709 | ENSG00000065618 | COL17A1   | Supported |                                      | Plasma meGolgi apparatus    |
| 710 | ENSG00000065675 | PRKCQ     | Enhanced  | Centriolar satellite                 |                             |
| 711 | ENSG00000065717 | TLE2      | Supported |                                      | Nuclear bFocal adhesion sit |
| 712 | ENSG00000065802 | ASB1      | Approved  |                                      | Nucleoplasm                 |
| 713 | ENSG00000065809 | FAM107B   | Supported |                                      | NucleoplaGolgi apparatus    |

|     |                 |         |           |                                     |                             |           |
|-----|-----------------|---------|-----------|-------------------------------------|-----------------------------|-----------|
| 714 | ENSG00000065833 | ME1     | Uncertain |                                     | Cytosol                     | Nucleopla |
| 715 | ENSG00000065882 | TBC1D1  | Approved  |                                     |                             | Nucleoli  |
| 716 | ENSG00000065883 | CDK13   | Supported |                                     | Nuclear speckles            |           |
| 717 | ENSG00000065923 | SLC9A7  | Supported |                                     | Vesicles                    |           |
| 718 | ENSG00000065970 | FOXJ2   | Supported |                                     | Nucleoli fibrillar center;N |           |
| 719 | ENSG00000065978 | YBX1    | Enhanced  | Cytosol                             | Vesicles                    |           |
| 720 | ENSG00000065989 | PDE4A   | Supported |                                     | Plasma membrane             |           |
| 721 | ENSG00000066027 | PPP2R5A | Supported |                                     | Cytosol                     |           |
| 722 | ENSG00000066044 | ELAVL1  | Supported |                                     | Cytosol;Nucleoli;Nucleoplas |           |
| 723 | ENSG00000066084 | DIP2B   | Approved  |                                     | Endoplasmic reticu          |           |
| 724 | ENSG00000066117 | SMARCD1 | Supported |                                     | NucleoplaVesicles           |           |
| 725 | ENSG00000066135 | KDM4A   | Approved  |                                     | Nucleoli fibrillar          |           |
| 726 | ENSG00000066136 | NFYC    | Supported |                                     | Nucleoplasm                 |           |
| 727 | ENSG00000066230 | SLC9A3  | Supported |                                     | Plasma membrane             |           |
| 728 | ENSG00000066248 | NGEF    | Uncertain |                                     |                             | Cytosol;P |
| 729 | ENSG00000066279 | ASPM    | Approved  |                                     | Cytosol;Plasma mem          |           |
| 730 | ENSG00000066294 | CD84    | Enhanced  | Plasma membrane                     | Vesicles                    |           |
| 731 | ENSG00000066322 | ELOVL1  | Approved  |                                     | Endoplasmic reticu          |           |
| 732 | ENSG00000066336 | SPI1    | Supported |                                     | Nucleoplasm                 |           |
| 733 | ENSG00000066379 | ZNRD1   | Supported |                                     | Nucleoli fibrillar center   |           |
| 734 | ENSG00000066382 | MPPED2  | Approved  |                                     | Mitochondria;Nucle          |           |
| 735 | ENSG00000066422 | ZBTB11  | Enhanced  | Nucleoplasm                         |                             |           |
| 736 | ENSG00000066427 | ATXN3   | Approved  |                                     | Nucleoli;Nucleopla          |           |
| 737 | ENSG00000066455 | GOLGA5  | Supported |                                     | Golgi apparatus             |           |
| 738 | ENSG00000066468 | FGFR2   | Supported |                                     | Cell JuncNucleoplasm        |           |
| 739 | ENSG00000066557 | LRRC40  | Approved  |                                     | Nucleoli                    |           |
| 740 | ENSG00000066583 | ISOC1   | Approved  |                                     | Endoplasmic reticu          |           |
| 741 | ENSG00000066651 | TRMT11  | Approved  |                                     | Nuclear bodies              |           |
| 742 | ENSG00000066654 | THUMPD1 | Approved  |                                     | Cytosol                     |           |
| 743 | ENSG00000066697 | MSANTD3 | Approved  |                                     | Nucleoplasm                 |           |
| 744 | ENSG00000066735 | KIF26A  | Approved  |                                     | Cytosol;Nucleoplas          |           |
| 745 | ENSG00000066739 | ATG2B   | Enhanced  | Nucleoplasm                         |                             |           |
| 746 | ENSG00000066777 | ARFGEF1 | Enhanced  | Cytosol;Golgi apparatus;Nucleoplasm |                             |           |
| 747 | ENSG00000066827 | ZFAT    | Approved  |                                     | Nuclear bodies;Nuc          |           |
| 748 | ENSG00000066855 | MTFR1   | Supported | Mitochond                           | Cytosol                     |           |
| 749 | ENSG00000066933 | MYO9A   | Approved  |                                     | Plasma membrane             |           |
| 750 | ENSG00000067048 | DDX3Y   | Supported |                                     | Cytosol;Nucleoplasm         |           |
| 751 | ENSG00000067057 | PFKP    | Supported |                                     | Cytosol                     |           |
| 752 | ENSG00000067066 | SP100   | Supported |                                     | Nuclear bodies;Nucleoplasm  |           |
| 753 | ENSG00000067082 | KLF6    | Approved  |                                     | Cytosol;Nucleoli f          |           |
| 754 | ENSG00000067113 | PLPP1   | Supported |                                     | Plasma membrane             |           |
| 755 | ENSG00000067141 | NEO1    | Approved  |                                     | Plasma membrane             | Golgi app |
| 756 | ENSG00000067177 | PHKA1   | Approved  |                                     | Vesicles                    |           |
| 757 | ENSG00000067221 | STOML1  | Approved  |                                     | Cytosol                     |           |
| 758 | ENSG00000067225 | PKM     | Enhanced  | Cytosol                             |                             |           |
| 759 | ENSG00000067248 | DHX29   | Approved  |                                     | Cytosol                     |           |
| 760 | ENSG00000067334 | DNTTIP2 | Enhanced  | Nucleoli                            |                             |           |
| 761 | ENSG00000067365 | METTL2  | Supported |                                     | Nucleoli;Nucleoplasm        |           |
| 762 | ENSG00000067369 | TP53BP1 | Enhanced  | Nuclear bodies                      |                             |           |
| 763 | ENSG00000067445 | TRO     | Approved  |                                     | Nucleoli fibrillar          |           |
| 764 | ENSG00000067533 | RRP15   | Approved  |                                     | Mitochondria;Nucle          |           |
| 765 | ENSG00000067560 | RHOA    | Supported |                                     | Cytosol;Plasma membrane     |           |
| 766 | ENSG00000067596 | DHX8    | Supported |                                     | Nuclear bodies;Nucleoplasm  |           |
| 767 | ENSG00000067606 | PRKCZ   | Supported |                                     | Cytosol;Plasma membrane     |           |
| 768 | ENSG00000067646 | ZFY     | Approved  |                                     | Nucleoli;Nucleopla          |           |



|     |                 |         |           |              |                                 |
|-----|-----------------|---------|-----------|--------------|---------------------------------|
| 769 | ENSG00000067704 | IARS2   | Enhanced  | Mitochondria |                                 |
| 770 | ENSG00000067798 | NAV3    | Approved  |              | Cytosol;Nuclear me              |
| 771 | ENSG00000067829 | IDH3G   | Approved  | Mitochondria | Nucleoli                        |
| 772 | ENSG00000067955 | CBFB    | Approved  |              | Cytosol;Nucleoplas              |
| 773 | ENSG00000067992 | PDK3    | Supported | Mitochondria | Nucleoli                        |
| 774 | ENSG00000068024 | HDAC4   | Supported |              | Cytosol;Nuclear speckles;Nu     |
| 775 | ENSG00000068078 | FGFR3   | Supported |              | Endoplasmic reticulum           |
| 776 | ENSG00000068079 | IFI35   | Approved  |              | Cytosol;Nucleoplas              |
| 777 | ENSG00000068097 | HEATR6  | Approved  |              | Mitochondria                    |
| 778 | ENSG00000068137 | PLEKHH3 | Approved  |              | Golgi apparatus                 |
| 779 | ENSG00000068305 | MEF2A   | Supported |              | Nucleoplasm                     |
| 780 | ENSG00000068308 | OTUD5   | Approved  |              | Cytosol;Nucleoli f              |
| 781 | ENSG00000068323 | TFE3    | Supported |              | NucleoplaCytosol                |
| 782 | ENSG00000068366 | ACSL4   | Approved  |              | Golgi apparatus;Mi              |
| 783 | ENSG00000068383 | INPP5A  | Approved  |              | Endoplasmic reticu              |
| 784 | ENSG00000068394 | GPKOW   | Enhanced  |              | Nucleoplasm                     |
| 785 | ENSG00000068400 | GRIPAP1 | Approved  |              | Cytosol;Vesicles                |
| 786 | ENSG00000068438 | FTSJ1   | Approved  |              | Cytosol                         |
| 787 | ENSG00000068489 | PRR11   | Approved  |              | Endoplasmic reticu              |
| 788 | ENSG00000068650 | ATP11A  | Enhanced  |              | Vesicles                        |
| 789 | ENSG00000068654 | POLR1A  | Supported |              | Nucleoli NucleoplaIntermedi     |
| 790 | ENSG00000068697 | LAPTM4A | Approved  |              | Golgi apparatus;Pl              |
| 791 | ENSG00000068745 | IP6K2   | Approved  |              | Cell Junctions;Nuc              |
| 792 | ENSG00000068784 | SRBD1   | Approved  |              | Cytosol;Mitochondr              |
| 793 | ENSG00000068796 | KIF2A   | Enhanced  |              | Centrosome;Nucleoli;Nucleoplasm |
| 794 | ENSG00000068878 | PSME4   | Supported |              | Nucleoplasm                     |
| 795 | ENSG00000068903 | SIRT2   | Approved  |              | Cytosol;Nucleoli;N              |
| 796 | ENSG00000068985 | PAGE1   | Approved  |              | Mitochondria;Nucle              |
| 797 | ENSG00000069011 | PITX1   | Approved  |              | Nucleoli                        |
| 798 | ENSG00000069018 | TRPC7   | Uncertain |              | Actin fil                       |
| 799 | ENSG00000069020 | MAST4   | Approved  |              | Cytosol;Nucleoplas              |
| 800 | ENSG00000069188 | SDK2    | Approved  |              | Nucleoplasm                     |
| 801 | ENSG00000069248 | NUP133  | Supported |              | Nuclear membrane                |
| 802 | ENSG00000069275 | NUCKS1  | Supported |              | NucleoplaNucleoli               |
| 803 | ENSG00000069329 | VPS35   | Supported |              | Endosomes;Lysosomes             |
| 804 | ENSG00000069345 | DNAJA2  | Approved  |              | Cytosol;Intermedia              |
| 805 | ENSG00000069399 | BCL3    | Supported |              | NucleoplaMidbody;Vesicles       |
| 806 | ENSG00000069431 | ABCC9   | Approved  |              | Cytosol;Nucleoplas              |
| 807 | ENSG00000069482 | GAL     | Supported |              | Golgi apparatus;Vesicles        |
| 808 | ENSG00000069493 | CLEC2D  | Uncertain |              | Golgi app                       |
| 809 | ENSG00000069702 | TGFBR3  | Approved  |              | Cytosol                         |
| 810 | ENSG00000069849 | ATP1B3  | Supported |              | Plasma membrane                 |
| 811 | ENSG00000069869 | NEDD4   | Approved  |              | Cytosol                         |
| 812 | ENSG00000069943 | PIGB    | Uncertain |              | Cytosol;P                       |
| 813 | ENSG00000069956 | MAPK6   | Enhanced  |              | Cytosol                         |
| 814 | ENSG00000069966 | GNB5    | Approved  |              | Centrosome;Nuclear              |
| 815 | ENSG00000069998 | HDHD5   | Approved  |              | Mitochondria                    |
| 816 | ENSG00000070010 | UFD1    | Approved  |              | Cytosol;Nucleoli;N              |
| 817 | ENSG00000070019 | GUCY2C  | Uncertain |              | Vesicles                        |
| 818 | ENSG00000070061 | ELP1    | Supported |              | Cytosol;Nucleoplasm             |
| 819 | ENSG00000070081 | NUCB2   | Enhanced  |              | Golgi apparatus                 |
| 820 | ENSG00000070182 | SPTB    | Approved  |              | Cytosol                         |
| 821 | ENSG00000070214 | SLC44A1 | Supported |              | MitochondNucleoplasm            |
| 822 | ENSG00000070269 | TMEM260 | Approved  |              | Cytosol;Focal adhe              |
| 823 | ENSG00000070366 | SMG6    | Supported |              | Cytosol;Nucleoli                |

|     |                 |           |           |                            |                                     |
|-----|-----------------|-----------|-----------|----------------------------|-------------------------------------|
| 824 | ENSG00000070371 | CLTCL1    | Approved  |                            | Vesicles                            |
| 825 | ENSG00000070404 | FSTL3     | Approved  |                            | Nucleoplasm                         |
| 826 | ENSG00000070423 | RNF126    | Approved  |                            | Cytosol;Nucleoplas                  |
| 827 | ENSG00000070444 | MNT       | Enhanced  | Nucleoplasm                |                                     |
| 828 | ENSG00000070476 | ZXDC      | Approved  |                            | Nucleoli                            |
| 829 | ENSG00000070495 | JMJD6     | Supported | Nucleoplasm                |                                     |
| 830 | ENSG00000070501 | POLB      | Uncertain |                            | Vesicles                            |
| 831 | ENSG00000070526 | ST6GALNAC | Approved  |                            | Golgi apparatus;Nu                  |
| 832 | ENSG00000070540 | WIPI1     | Supported | Golgi app                  | Cytosol;Nucleoplas                  |
| 833 | ENSG00000070610 | GBA2      | Approved  |                            | Cytosol;Golgi appa                  |
| 834 | ENSG00000070669 | ASNS      | Enhanced  | Cytosol                    |                                     |
| 835 | ENSG00000070729 | CNGB1     | Approved  |                            | Vesicles Cytosol                    |
| 836 | ENSG00000070756 | PABPC1    | Supported |                            | Cytosol                             |
| 837 | ENSG00000070759 | TESK2     | Enhanced  | Nucleoplasm                |                                     |
| 838 | ENSG00000070761 | CFAP20    | Supported |                            | Nucleoplasm                         |
| 839 | ENSG00000070778 | PTPN21    | Approved  |                            | Centriolar satelli                  |
| 840 | ENSG00000070785 | EIF2B3    | Supported |                            | Cytosol;Vesicles                    |
| 841 | ENSG00000070808 | CAMK2A    | Approved  |                            | Cell Junctions;Cyt                  |
| 842 | ENSG00000070814 | TCOF1     | Enhanced  | Nucleoli fibrillar center  |                                     |
| 843 | ENSG00000070831 | CDC42     | Supported |                            | Cytokinetic bridge;Microtub         |
| 844 | ENSG00000070882 | OSBPL3    | Supported |                            | Cytosol;Nucleoli                    |
| 845 | ENSG00000070950 | RAD18     | Enhanced  | Nuclear bodies;Nucleoplasm |                                     |
| 846 | ENSG00000070961 | ATP2B1    | Supported |                            | Plasma membrane                     |
| 847 | ENSG00000071073 | MGAT4A    | Approved  |                            | Golgi apparatus                     |
| 848 | ENSG00000071127 | WDR1      | Supported |                            | Cell Junctions;Plasma membr         |
| 849 | ENSG00000071203 | MS4A12    | Approved  |                            | Cytosol;Endoplasmic                 |
| 850 | ENSG00000071205 | ARHGAP10  | Approved  |                            | Cytosol;Nuclear me                  |
| 851 | ENSG00000071242 | RPS6KA2   | Supported |                            | Nucleoplasm                         |
| 852 | ENSG00000071243 | ING3      | Enhanced  | Nucleoplasm                |                                     |
| 853 | ENSG00000071282 | LMCD1     | Supported |                            | Cytosol;Nucleoli;Cell Junctions;Pla |
| 854 | ENSG00000071462 | BUD23     | Supported |                            | Nucleoli;Nucleoplasm                |
| 855 | ENSG00000071539 | TRIP13    | Approved  |                            | Nucleoplasm                         |
| 856 | ENSG00000071553 | ATP6AP1   | Approved  |                            | Cytosol;Microtubul                  |
| 857 | ENSG00000071564 | TCF3      | Enhanced  | Nucleoplasm                |                                     |
| 858 | ENSG00000071575 | TRIB2     | Approved  |                            | Cytosol;Nucleoplas                  |
| 859 | ENSG00000071626 | DAZAP1    | Enhanced  | Cytosol;Nucleoplasm        |                                     |
| 860 | ENSG00000071655 | MBD3      | Supported |                            | Nucleoplasm                         |
| 861 | ENSG00000071794 | HLTF      | Supported |                            | Nucleoplasm                         |
| 862 | ENSG00000071859 | FAM50A    | Enhanced  | Nucleoplasm                |                                     |
| 863 | ENSG00000071889 | FAM3A     | Approved  |                            | Nucleoli;Nucleopla                  |
| 864 | ENSG00000071894 | CPSF1     | Enhanced  | Nucleoplasm                |                                     |
| 865 | ENSG00000071967 | CYBRD1    | Approved  |                            | Cytosol;Golgi appa                  |
| 866 | ENSG00000071994 | PDCD2     | Approved  |                            | Cytokinetic bridge                  |
| 867 | ENSG00000072041 | SLC6A15   | Approved  |                            | Nucleoli;Vesicles                   |
| 868 | ENSG00000072062 | PRKACA    | Approved  |                            | Cytosol                             |
| 869 | ENSG00000072110 | ACTN1     | Approved  |                            | Actin filaments;Fo                  |
| 870 | ENSG00000072133 | RPS6KA6   | Supported | Nucleopla                  | Mitochondria;Nucle                  |
| 871 | ENSG00000072134 | EPN2      | Supported |                            | Vesicles                            |
| 872 | ENSG00000072135 | PTPN18    | Approved  |                            | Intermediate filam                  |
| 873 | ENSG00000072163 | LIMS2     | Supported |                            | Focal adhesion sites                |
| 874 | ENSG00000072182 | ASIC4     | Approved  |                            | Centriolar satelli                  |
| 875 | ENSG00000072195 | SPEG      | Approved  |                            | Vesicles                            |
| 876 | ENSG00000072201 | LNX1      | Supported |                            | Cell Junctions;Cytosol              |
| 877 | ENSG00000072274 | TFRC      | Supported |                            | Endosomes;Lysosomes                 |
| 878 | ENSG00000072310 | SREBF1    | Supported |                            | Cytosol;Golgi apparatus             |

|     |                 |         |           |                                 |
|-----|-----------------|---------|-----------|---------------------------------|
| 879 | ENSG00000072364 | AFF4    | Supported | Nucleoli fibrillar center;N     |
| 880 | ENSG00000072401 | UBE2D1  | Approved  | Cytosol Plasma me               |
| 881 | ENSG00000072415 | MPP5    | Uncertain | Cytosol;PNucleopla              |
| 882 | ENSG00000072422 | RHOBTB1 | Approved  | Cytosol;Nucleoplas              |
| 883 | ENSG00000072501 | SMC1A   | Enhanced  | Nucleoplasm                     |
| 884 | ENSG00000072518 | MARK2   | Supported | Plasma meNucleoplasm            |
| 885 | ENSG00000072571 | HMMR    | Enhanced  | Centrosome;Cytosol;Microtubules |
| 886 | ENSG00000072609 | CHFR    | Uncertain | Microtubu                       |
| 887 | ENSG00000072682 | P4HA2   | Enhanced  | Endoplasmic reticulum;Vesicles  |
| 888 | ENSG00000072736 | NFATC3  | Supported | Cytosol;Nucleoplasm             |
| 889 | ENSG00000072756 | TRNT1   | Supported | Mitochondria                    |
| 890 | ENSG00000072778 | ACADVL  | Supported | MitochondCytosol;Nucleoli;N     |
| 891 | ENSG00000072786 | STK10   | Approved  | Nucleoplasm;Plasma              |
| 892 | ENSG00000072803 | FBXW11  | Approved  | Nucleoli;Vesicles               |
| 893 | ENSG00000072818 | ACAP1   | Approved  | Golgi apparatus                 |
| 894 | ENSG00000072832 | CRMP1   | Supported | Centrosome;Cytosol              |
| 895 | ENSG00000072840 | EVC     | Approved  | Cytosol;Nucleoplas              |
| 896 | ENSG00000072849 | DERL2   | Supported | Endoplasmic reticulum           |
| 897 | ENSG00000072952 | MRVI1   | Approved  | Cytosol;Nuclear bo              |
| 898 | ENSG00000072954 | TMEM38A | Approved  | Nucleoplasm                     |
| 899 | ENSG00000073008 | PVR     | Supported | Plasma meNucleoplasm;Vesicl     |
| 900 | ENSG00000073050 | XRCC1   | Enhanced  | Nucleoplasm                     |
| 901 | ENSG00000073060 | SCARB1  | Approved  | Vesicles                        |
| 902 | ENSG00000073111 | MCM2    | Enhanced  | Nucleoplasm                     |
| 903 | ENSG00000073150 | PANX2   | Supported | Plasma membrane                 |
| 904 | ENSG00000073282 | TP63    | Enhanced  | Nucleoplasm                     |
| 905 | ENSG00000073331 | ALPK1   | Approved  | Centrosome                      |
| 906 | ENSG00000073350 | LLGL2   | Supported | Cytosol Vesicles                |
| 907 | ENSG00000073417 | PDE8A   | Approved  | Golgi apparatus                 |
| 908 | ENSG00000073464 | CLCN4   | Approved  | Vesicles                        |
| 909 | ENSG00000073536 | NLE1    | Supported | Nucleoli Nucleoplasm            |
| 910 | ENSG00000073578 | SDHA    | Supported | Mitochondria Nucleoli           |
| 911 | ENSG00000073584 | SMARCE1 | Supported | Nucleoplasm                     |
| 912 | ENSG00000073605 | GSDMB   | Approved  | Cytosol Nucleoplasm             |
| 913 | ENSG00000073614 | KDM5A   | Supported | Nuclear bCytosol                |
| 914 | ENSG00000073711 | PPP2R3A | Approved  | Golgi apparatus                 |
| 915 | ENSG00000073712 | FERMT2  | Supported | Focal adhesion sites;Nucleo     |
| 916 | ENSG00000073734 | ABCB11  | Uncertain | Cytosol;N                       |
| 917 | ENSG00000073756 | PTGS2   | Supported | Endoplasmic reticulum           |
| 918 | ENSG00000073792 | IGF2BP2 | Enhanced  | Cytosol                         |
| 919 | ENSG00000073803 | MAP3K13 | Approved  | Centriolar satelli              |
| 920 | ENSG00000073921 | PICALM  | Enhanced  | Vesicles                        |
| 921 | ENSG00000073969 | NSF     | Enhanced  | Cytosol                         |
| 922 | ENSG00000074047 | GLI2    | Supported | Nucleoli;Nucleoplasm            |
| 923 | ENSG00000074071 | MRPS34  | Supported | Mitochondria                    |
| 924 | ENSG00000074181 | NOTCH3  | Supported | Actin filaments;Cytosol;Nuc     |
| 925 | ENSG00000074201 | CLNS1A  | Supported | Cytosol;NMicrotubules           |
| 926 | ENSG00000074211 | PPP2R2C | Enhanced  | Cytosol                         |
| 927 | ENSG00000074219 | TEAD2   | Supported | Nucleoplasm                     |
| 928 | ENSG00000074266 | EED     | Supported | Nucleoplasm                     |
| 929 | ENSG00000074319 | TSG101  | Supported | Cytosol Nucleoli;Plasma me      |
| 930 | ENSG00000074356 | NCBP3   | Approved  | Nuclear speckles                |
| 931 | ENSG00000074410 | CA12    | Approved  | Nucleoplasm;Vesicl              |
| 932 | ENSG00000074416 | MGLL    | Enhanced  | Nucleoplasm                     |
| 933 | ENSG00000074590 | NUAK1   | Approved  | NucleoplaMicrotubules;Nucle     |

|     |                 |           |           |                             |
|-----|-----------------|-----------|-----------|-----------------------------|
| 934 | ENSG00000074603 | DPP8      | Supported | Cytosol                     |
| 935 | ENSG00000074621 | SLC24A1   | Approved  | Microtubules                |
| 936 | ENSG00000074657 | ZNF532    | Approved  | Golgi apparatus;Nu          |
| 937 | ENSG00000074695 | LMAN1     | Uncertain | Cytosol                     |
| 938 | ENSG00000074696 | HACD3     | Enhanced  | Endoplasmic reticulum       |
| 939 | ENSG00000074706 | IPCEF1    | Approved  | Cytoplasmic bodies          |
| 940 | ENSG00000074755 | ZZEF1     | Approved  | Mitochondria;Nucle          |
| 941 | ENSG00000074771 | NOX3      | Uncertain | Vesicles                    |
| 942 | ENSG00000074800 | ENO1      | Enhanced  | Cytosol;Plasma membrane     |
| 943 | ENSG00000074803 | SLC12A1   | Approved  | Vesicles Nucleopla          |
| 944 | ENSG00000074855 | AN08      | Uncertain | Nucleoli                    |
| 945 | ENSG00000074964 | ARHGEF10L | Approved  | Cytosol;Golgi appa          |
| 946 | ENSG00000074966 | TXK       | Approved  | Vesicles                    |
| 947 | ENSG00000075035 | WSCD2     | Uncertain | Nucleopla                   |
| 948 | ENSG00000075043 | KCNQ2     | Approved  | Endoplasmic reticu          |
| 949 | ENSG00000075073 | TACR2     | Approved  | Plasma membrane             |
| 950 | ENSG00000075089 | ACTR6     | Approved  | Cytosol;Plasma mem          |
| 951 | ENSG00000075142 | SRI       | Supported | Cytosol;Nucleoplasm         |
| 952 | ENSG00000075151 | EIF4G3    | Approved  | Cytosol                     |
| 953 | ENSG00000075188 | NUP37     | Approved  | Nucleoplasm                 |
| 954 | ENSG00000075213 | SEMA3A    | Approved  | Nucleoplasm;Vesicl          |
| 955 | ENSG00000075218 | GTSE1     | Approved  | Centrosome;Plasma           |
| 956 | ENSG00000075223 | SEMA3C    | Approved  | Cytosol;Golgi appa          |
| 957 | ENSG00000075234 | TTC38     | Approved  | Cytosol                     |
| 958 | ENSG00000075239 | ACAT1     | Enhanced  | Mitochondria                |
| 959 | ENSG00000075275 | CELSR1    | Supported | Plasma membrane             |
| 960 | ENSG00000075292 | ZNF638    | Enhanced  | NucleoplaVesicles           |
| 961 | ENSG00000075340 | ADD2      | Approved  | Plasma meCytosol Nucleopla  |
| 962 | ENSG00000075391 | RASAL2    | Approved  | Focal adhesion sit          |
| 963 | ENSG00000075399 | VPS9D1    | Approved  | Cytosol;Nucleoplas          |
| 964 | ENSG00000075407 | ZNF37A    | Approved  | Vesicles                    |
| 965 | ENSG00000075415 | SLC25A3   | Supported | Mitochondria                |
| 966 | ENSG00000075420 | FNDC3B    | Approved  | Endoplasmic reticu          |
| 967 | ENSG00000075426 | FOSL2     | Enhanced  | Nucleoplasm                 |
| 968 | ENSG00000075461 | CACNG4    | Approved  | Cytosol                     |
| 969 | ENSG00000075539 | FRYL      | Approved  | Cytokinetic bridge          |
| 970 | ENSG00000075568 | TMEM131   | Uncertain | Intermedi                   |
| 971 | ENSG00000075618 | FSCN1     | Supported | Cytosol;Plasma membrane     |
| 972 | ENSG00000075643 | MOCOS     | Supported | Cytosol;Mitochondr          |
| 973 | ENSG00000075702 | WDR62     | Enhanced  | CentriolaCytosol            |
| 974 | ENSG00000075711 | DLG1      | Uncertain | Plasma me                   |
| 975 | ENSG00000075785 | RAB7A     | Supported | Lysosomes                   |
| 976 | ENSG00000075790 | BCAP29    | Approved  | Cytosol                     |
| 977 | ENSG00000075826 | SEC31B    | Supported | Cytosol;Vesicles Nucleopla  |
| 978 | ENSG00000075856 | SART3     | Supported | Nucleoplasm                 |
| 979 | ENSG00000075884 | ARHGAP15  | Uncertain | Golgi app                   |
| 980 | ENSG00000075886 | TUBA3D    | Supported | Microtubules                |
| 981 | ENSG00000075891 | PAX2      | Supported | Nucleoli Golgi app          |
| 982 | ENSG00000075914 | EXOSC7    | Supported | Nuclear speckles            |
| 983 | ENSG00000075975 | MKRN2     | Approved  | Cytosol;Nucleoplas          |
| 984 | ENSG00000076003 | MCM6      | Enhanced  | Nucleoplasm                 |
| 985 | ENSG00000076043 | REXO2     | Supported | MitochondFocal adhesion sit |
| 986 | ENSG00000076053 | RBM7      | Enhanced  | Nucleoplasm                 |
| 987 | ENSG00000076067 | RBMS2     | Approved  | Cytosol;Nucleoli f          |
| 988 | ENSG00000076108 | BAZ2A     | Enhanced  | Nuclear speckles            |

|      |                 |          |           |                             |
|------|-----------------|----------|-----------|-----------------------------|
| 989  | ENSG00000076201 | PTPN23   | Supported | Nuclear bodies;Nucleoplasm  |
| 990  | ENSG00000076242 | MLH1     | Enhanced  | Nucleoplasm                 |
| 991  | ENSG00000076248 | UNG      | Approved  | Cytosol                     |
| 992  | ENSG00000076258 | FM04     | Approved  | Cytosol;Vesicles            |
| 993  | ENSG00000076321 | KLHL20   | Supported | Cytosol;Golgi apparatus     |
| 994  | ENSG00000076351 | SLC46A1  | Supported | Plasma meCytosol            |
| 995  | ENSG00000076513 | ANKRD13A | Supported | Plasma membrane             |
| 996  | ENSG00000076554 | TPD52    | Approved  | Cytosol;Golgi appa          |
| 997  | ENSG00000076641 | PAG1     | Supported | Plasma membrane Vesicles    |
| 998  | ENSG00000076650 | GPATCH1  | Uncertain | Cell Junc                   |
| 999  | ENSG00000076662 | ICAM3    | Approved  | Mitochondria;Nucle          |
| 1000 | ENSG00000076706 | MCAM     | Approved  | Plasma membrane             |
| 1001 | ENSG00000076716 | GPC4     | Approved  | Nucleoplasm;Plasma          |
| 1002 | ENSG00000076770 | MBNL3    | Approved  | Golgi apparatus;Ve          |
| 1003 | ENSG00000076826 | CAMSAP3  | Approved  | Centrosome Nucleopla        |
| 1004 | ENSG00000076864 | RAP1GAP  | Approved  | Cytosol                     |
| 1005 | ENSG00000076924 | XAB2     | Supported | NucleoplaVesicles           |
| 1006 | ENSG00000076928 | ARHGEF1  | Enhanced  | Cytosol Plasma membrane     |
| 1007 | ENSG00000076944 | STXBP2   | Enhanced  | Cytosol                     |
| 1008 | ENSG00000076984 | MAP2K7   | Approved  | Cytosol;Golgi appa          |
| 1009 | ENSG00000077009 | NMRK2    | Enhanced  | Nucleoplasm;Vesicles        |
| 1010 | ENSG00000077044 | DGKD     | Supported | Cytosol                     |
| 1011 | ENSG00000077063 | CTTNBP2  | Approved  | Cytosol;Midbody ri          |
| 1012 | ENSG00000077080 | ACTL6B   | Approved  | Nucleoli                    |
| 1013 | ENSG00000077092 | RARB     | Enhanced  | Nucleoplasm                 |
| 1014 | ENSG00000077097 | TOP2B    | Enhanced  | Nucleoplasm                 |
| 1015 | ENSG00000077147 | TM9SF3   | Approved  | Golgi apparatus;Ve          |
| 1016 | ENSG00000077150 | NFKB2    | Approved  | Cytosol;Nucleoplas          |
| 1017 | ENSG00000077152 | UBE2T    | Approved  | Nucleoli;Nucleopla          |
| 1018 | ENSG00000077157 | PPP1R12B | Approved  | Actin filaments;Pl          |
| 1019 | ENSG00000077235 | GTF3C1   | Supported | Nucleoli;Nucleoplasm        |
| 1020 | ENSG00000077238 | IL4R     | Supported | Plasma meCentriolar satelli |
| 1021 | ENSG00000077254 | USP33    | Supported | Golgi appNucleoplasm        |
| 1022 | ENSG00000077264 | PAK3     | Approved  | Cytosol                     |
| 1023 | ENSG00000077274 | CAPN6    | Approved  | Vesicles                    |
| 1024 | ENSG00000077279 | DCX      | Approved  | Cytosol                     |
| 1025 | ENSG00000077312 | SNRPA    | Supported | Nucleoplasm                 |
| 1026 | ENSG00000077348 | EXOSC5   | Enhanced  | Nucleoli Nucleoplasm        |
| 1027 | ENSG00000077380 | DYNC1I2  | Supported | Cytosol;EMicrotubules       |
| 1028 | ENSG00000077420 | APBB1IP  | Enhanced  | Cytosol;Plasma membrane     |
| 1029 | ENSG00000077454 | LRCH4    | Approved  | Cytosol;Focal adhe          |
| 1030 | ENSG00000077458 | FAM76B   | Approved  | Nucleoli fibrillar          |
| 1031 | ENSG00000077463 | SIRT6    | Supported | Nucleoplasm                 |
| 1032 | ENSG00000077498 | TYR      | Enhanced  | Vesicles                    |
| 1033 | ENSG00000077514 | POLD3    | Supported | Nucleoplasm                 |
| 1034 | ENSG00000077522 | ACTN2    | Uncertain | Actin fil                   |
| 1035 | ENSG00000077549 | CAPZB    | Approved  | Cytosol;Nucleoplas          |
| 1036 | ENSG00000077616 | NAALAD2  | Approved  | Nucleoplasm                 |
| 1037 | ENSG00000077684 | JADE1    | Approved  | Mitochondria                |
| 1038 | ENSG00000077713 | SLC25A43 | Approved  | Nucleoplasm                 |
| 1039 | ENSG00000077721 | UBE2A    | Supported | Cytosol;Nucleoplasm;Plasma  |
| 1040 | ENSG00000077935 | SMC1B    | Supported | NucleoplaCytosol            |
| 1041 | ENSG00000077942 | FBLN1    | Approved  | Endoplasmic reticu          |
| 1042 | ENSG00000078043 | PIAS2    | Supported | Nucleoplasm                 |
| 1043 | ENSG00000078053 | AMPH     | Supported | Cytosol Plasma membrane     |

|      |                 |           |           |                            |                             |
|------|-----------------|-----------|-----------|----------------------------|-----------------------------|
| 1044 | ENSG00000078061 | ARAF      | Approved  |                            | Nucleoli fibrillar          |
| 1045 | ENSG00000078070 | MCCC1     | Supported |                            | Mitochondria                |
| 1046 | ENSG00000078081 | LAMP3     | Enhanced  | Vesicles                   |                             |
| 1047 | ENSG00000078140 | UBE2K     | Supported |                            | Cytosol Actin filaments;In  |
| 1048 | ENSG00000078177 | N4BP2     | Approved  |                            | Cytosol;Nucleoplas          |
| 1049 | ENSG00000078237 | TIGAR     | Supported |                            | Cytosol                     |
| 1050 | ENSG00000078246 | TULP3     | Supported |                            | Nucleoli;Nucleoplasm;Plasma |
| 1051 | ENSG00000078269 | SYNJ2     | Approved  |                            | Cytosol;Microtubul          |
| 1052 | ENSG00000078304 | PPP2R5C   | Approved  |                            | Cytosol;Golgi appa          |
| 1053 | ENSG00000078328 | RBFOX1    | Approved  | Nucleoplasm                | Cytosol;Golgi appa          |
| 1054 | ENSG00000078369 | GNB1      | Approved  |                            | Golgi apparatus;Pl          |
| 1055 | ENSG00000078399 | HOXA9     | Supported |                            | Nucleoplasm                 |
| 1056 | ENSG00000078401 | EDN1      | Approved  |                            | Golgi appNucleoli;          |
| 1057 | ENSG00000078403 | MLLT10    | Supported |                            | Nucleoplasm                 |
| 1058 | ENSG00000078487 | ZCWPW1    | Approved  |                            | Golgi apparatus             |
| 1059 | ENSG00000078549 | ADCYAP1R1 | Enhanced  | Vesicles                   |                             |
| 1060 | ENSG00000078596 | ITM2A     | Approved  |                            | Golgi apparatus;Pl          |
| 1061 | ENSG00000078618 | NRDC      | Approved  |                            | Nucleoplasm                 |
| 1062 | ENSG00000078668 | VDAC3     | Supported |                            | Mitochondria                |
| 1063 | ENSG00000078674 | PCM1      | Enhanced  | Centrosome                 | Cytosol;Nuclear me          |
| 1064 | ENSG00000078687 | TNRC6C    | Approved  |                            | Nucleoplasm                 |
| 1065 | ENSG00000078699 | CBFA2T2   | Approved  |                            | Nuclear speckles            |
| 1066 | ENSG00000078725 | BRINP1    | Uncertain |                            | Microtubu                   |
| 1067 | ENSG00000078747 | ITCH      | Enhanced  | Nucleoplasm;Vesicles       |                             |
| 1068 | ENSG00000078795 | PKD2L2    | Approved  |                            | Cytosol;Plasma mem          |
| 1069 | ENSG00000078808 | SDF4      | Supported |                            | Golgi apparatus             |
| 1070 | ENSG00000078898 | BPIFB2    | Approved  |                            | Vesicles                    |
| 1071 | ENSG00000078900 | TP73      | Supported |                            | Golgi apparatus;Nucleoplasm |
| 1072 | ENSG00000078902 | TOLLIP    | Approved  |                            | Cytosol;Plasma mem          |
| 1073 | ENSG00000078967 | UBE2D4    | Approved  |                            | Cytosol;Plasma mem          |
| 1074 | ENSG00000079101 | CLUL1     | Approved  |                            | Endoplasmic reticu          |
| 1075 | ENSG00000079102 | RUNX1T1   | Supported |                            | Nucleoplasm                 |
| 1076 | ENSG00000079112 | CDH17     | Enhanced  | Cell Junctions;Nucleoplasm |                             |
| 1077 | ENSG00000079134 | THOC1     | Enhanced  | Nuclear speckles           |                             |
| 1078 | ENSG00000079150 | FKBP7     | Supported |                            | Endoplasmic reticulum       |
| 1079 | ENSG00000079156 | OSBPL6    | Approved  |                            | Plasma membrane             |
| 1080 | ENSG00000079215 | SLC1A3    | Approved  |                            | Mitochondria;Nucle          |
| 1081 | ENSG00000079246 | XRCC5     | Enhanced  | Nucleoplasm                |                             |
| 1082 | ENSG00000079257 | LXN       | Approved  |                            | Cytosol;Nucleoplas          |
| 1083 | ENSG00000079263 | SP140     | Approved  |                            | Mitochondria;Nucle          |
| 1084 | ENSG00000079277 | MKNK1     | Supported |                            | Nucleoplasm                 |
| 1085 | ENSG00000079308 | TNS1      | Enhanced  | Focal adhesion sites       |                             |
| 1086 | ENSG00000079313 | REXO1     | Supported |                            | Nuclear bodies;Nucleoplasm  |
| 1087 | ENSG00000079332 | SAR1A     | Supported |                            | Endoplasmic reticulum       |
| 1088 | ENSG00000079335 | CDC14A    | Supported |                            | NucleoplaCytosol;Nuclear bo |
| 1089 | ENSG00000079337 | RAPGEF3   | Approved  |                            | Cytosol                     |
| 1090 | ENSG00000079387 | SENP1     | Supported | Nucleoplasm                | Focal adhesion sit          |
| 1091 | ENSG00000079432 | CIC       | Supported |                            | NucleoplaVesicles           |
| 1092 | ENSG00000079435 | LIPE      | Supported |                            | Cytosol                     |
| 1093 | ENSG00000079459 | FDFT1     | Supported |                            | Endoplasmic reticulum       |
| 1094 | ENSG00000079462 | PAFAH1B3  | Approved  |                            | Intermediate filam          |
| 1095 | ENSG00000079482 | OPHN1     | Approved  |                            | Nucleoplasm;Plasma          |
| 1096 | ENSG00000079616 | KIF22     | Supported |                            | Nuclear speckles            |
| 1097 | ENSG00000079689 | SCGN      | Supported |                            | Cytosol                     |
| 1098 | ENSG00000079691 | CARMIL1   | Supported |                            | Cytosol                     |

|      |                 |          |           |                                     |                             |
|------|-----------------|----------|-----------|-------------------------------------|-----------------------------|
| 1099 | ENSG00000079739 | PGM1     | Approved  |                                     | Cytosol                     |
| 1100 | ENSG00000079785 | DDX1     | Enhanced  | Cytosol;Nucleoplasm                 |                             |
| 1101 | ENSG00000079805 | DNM2     | Approved  |                                     | Cytosol;Golgi appa          |
| 1102 | ENSG00000079819 | EPB41L2  | Enhanced  | Plasma meCell Junctions;Nucleoplasm |                             |
| 1103 | ENSG00000079931 | MOXD1    | Approved  |                                     | Cytosol                     |
| 1104 | ENSG00000079950 | STX7     | Supported |                                     | Lysosomes                   |
| 1105 | ENSG00000079974 | RABL2B   | Approved  |                                     | Centrosome;Vesicle          |
| 1106 | ENSG00000079999 | KEAP1    | Supported |                                     | Cytosol;NCentriolar satelli |
| 1107 | ENSG00000080031 | PTPRH    | Approved  |                                     | Mitochondria                |
| 1108 | ENSG00000080166 | DCT      | Supported |                                     | Plasma membrane;Vesicles    |
| 1109 | ENSG00000080189 | SLC35C2  | Supported |                                     | Golgi appNucleoplasm        |
| 1110 | ENSG00000080200 | CRYBG3   | Approved  |                                     | Cytosol;Nucleoplas          |
| 1111 | ENSG00000080224 | EPHA6    | Enhanced  | Nucleoplasm                         |                             |
| 1112 | ENSG00000080298 | RFX3     | Approved  |                                     | Nucleoplasm;Vesicl          |
| 1113 | ENSG00000080345 | RIF1     | Uncertain |                                     | Nuclear bodies;NucPlasma me |
| 1114 | ENSG00000080503 | SMARCA2  | Approved  |                                     | Nucleoplasm Intermedi       |
| 1115 | ENSG00000080546 | SESN1    | Supported |                                     | Nucleoli fibrillar center;N |
| 1116 | ENSG00000080603 | SRCAP    | Supported |                                     | Nuclear bodies;Nucleoplasm  |
| 1117 | ENSG00000080608 | PUM3     | Supported |                                     | Nucleoli                    |
| 1118 | ENSG00000080709 | KCNN2    | Uncertain |                                     | Cytosol;N                   |
| 1119 | ENSG00000080815 | PSEN1    | Approved  |                                     | Golgi appCell Junctions;Nuc |
| 1120 | ENSG00000080819 | CPOX     | Enhanced  | Mitochondria                        |                             |
| 1121 | ENSG00000080822 | CLDND1   | Approved  |                                     | Cytosol;Nucleoli;N          |
| 1122 | ENSG00000080823 | MOK      | Supported |                                     | Endoplasmic reticulum       |
| 1123 | ENSG00000080824 | HSP90AA1 | Supported | Cytosol                             |                             |
| 1124 | ENSG00000080839 | RBL1     | Enhanced  | Nucleoplasm                         |                             |
| 1125 | ENSG00000080845 | DLGAP4   | Approved  |                                     | Cytosol;Focal adhe          |
| 1126 | ENSG00000080854 | IGSF9B   | Approved  |                                     | Cytosol                     |
| 1127 | ENSG00000080986 | NDC80    | Supported |                                     | NucleoplaCentrosome         |
| 1128 | ENSG00000081019 | RSBN1    | Supported |                                     | NucleoplaNuclear bodies;Ves |
| 1129 | ENSG00000081026 | MAGI3    | Supported |                                     | Cell Junctions              |
| 1130 | ENSG00000081051 | AFP      | Approved  |                                     | Cytosol;Golgi appa          |
| 1131 | ENSG00000081059 | TCF7     | Enhanced  | Nucleoplasm                         |                             |
| 1132 | ENSG00000081087 | OSTM1    | Approved  |                                     | Vesicles Cytosol;Nucleoplas |
| 1133 | ENSG00000081154 | PCNP     | Enhanced  | Nuclear bodies;Nucleoplasm          |                             |
| 1134 | ENSG00000081177 | EXD2     | Approved  |                                     | Intermediate filam          |
| 1135 | ENSG00000081181 | ARG2     | Supported |                                     | Mitochondria                |
| 1136 | ENSG00000081189 | MEF2C    | Supported |                                     | Vesicles Nucleoplasm        |
| 1137 | ENSG00000081237 | PTPRC    | Uncertain |                                     | Nucleopla                   |
| 1138 | ENSG00000081277 | PKP1     | Approved  |                                     | Nucleoplasm;Plasma          |
| 1139 | ENSG00000081307 | UBA5     | Enhanced  | Cytosol                             | Vesicles                    |
| 1140 | ENSG00000081320 | STK17B   | Uncertain |                                     | Cytosol;P                   |
| 1141 | ENSG00000081377 | CDC14B   | Supported |                                     | Nucleoplasm                 |
| 1142 | ENSG00000081386 | ZNF510   | Approved  |                                     | Nucleoplasm;Plasma          |
| 1143 | ENSG00000081479 | LRP2     | Approved  |                                     | Mitochondria;Vesic          |
| 1144 | ENSG00000081692 | JMJD4    | Approved  |                                     | Plasma membrane;Ve          |
| 1145 | ENSG00000081721 | DUSP12   | Supported |                                     | Nucleoplasm                 |
| 1146 | ENSG00000081760 | AACS     | Approved  |                                     | Vesicles                    |
| 1147 | ENSG00000081791 | KIAA0141 | Uncertain |                                     | Golgi app                   |
| 1148 | ENSG00000081803 | CADPS2   | Approved  |                                     | Vesicles Nucleopla          |
| 1149 | ENSG00000081818 | PCDHB4   | Uncertain |                                     | Cytosol;I                   |
| 1150 | ENSG00000081842 | PCDHA6   | Approved  |                                     | Vesicles                    |
| 1151 | ENSG00000081853 | PCDHGA2  | Approved  |                                     | Plasma meCytosol;F          |
| 1152 | ENSG00000081870 | HSPB11   | Approved  |                                     | Cytosol;Nucleoplas          |
| 1153 | ENSG00000081923 | ATP8B1   | Approved  | Plasma membrane                     | Cytosol;N                   |



|      |                 |         |           |                                |                         |
|------|-----------------|---------|-----------|--------------------------------|-------------------------|
| 1154 | ENSG00000081985 | IL12RB2 | Supported |                                | Plasma membrane         |
| 1155 | ENSG00000082014 | SMARCD3 | Enhanced  | Nucleoplasm                    |                         |
| 1156 | ENSG00000082068 | WDR70   | Approved  |                                | Cytosol;Mitochondr      |
| 1157 | ENSG00000082074 | FYB1    | Approved  |                                | Nucleoplasm;Plasma      |
| 1158 | ENSG00000082126 | MPP4    | Supported | Cytosol                        | Actin filaments         |
| 1159 | ENSG00000082146 | STRADB  | Supported | Cytosol                        | Aggresome               |
| 1160 | ENSG00000082153 | BZW1    | Approved  |                                | Vesicles                |
| 1161 | ENSG00000082196 | C1QTNF3 | Approved  |                                | Golgi apparatus         |
| 1162 | ENSG00000082212 | ME2     | Supported | Mitochondria                   |                         |
| 1163 | ENSG00000082213 | C5orf22 | Approved  |                                | Nuclear membrane        |
| 1164 | ENSG00000082258 | CCNT2   | Approved  |                                | Cytosol;Nucleoplas      |
| 1165 | ENSG00000082269 | FAM135A | Approved  |                                | Cytosol;Nucleoplas      |
| 1166 | ENSG00000082397 | EPB41L3 | Enhanced  | Cell Junctions;Plasma membrane |                         |
| 1167 | ENSG00000082438 | COBLL1  | Approved  |                                | Cell Junctions          |
| 1168 | ENSG00000082458 | DLG3    | Approved  |                                | Nucleoli;Nucleopla      |
| 1169 | ENSG00000082497 | SERTAD4 | Supported | Nucleoplasm                    |                         |
| 1170 | ENSG00000082515 | MRPL22  | Approved  |                                | Mitochondria            |
| 1171 | ENSG00000082516 | GEMIN5  | Enhanced  | Cytosol                        | Nuclear bodies          |
| 1172 | ENSG00000082556 | OPRK1   | Supported | Plasma membrane                | Cytosol;N               |
| 1173 | ENSG00000082641 | NFE2L1  | Approved  |                                | Cytosol;Nucleoplas      |
| 1174 | ENSG00000082684 | SEMA5B  | Supported | Cytosol                        |                         |
| 1175 | ENSG00000082701 | GSK3B   | Supported | Nucleoplasm                    |                         |
| 1176 | ENSG00000082781 | ITGB5   | Approved  |                                | Mitochondria;Plasm      |
| 1177 | ENSG00000082805 | ERC1    | Supported | Cytosol;Plasma membrane;Ves    |                         |
| 1178 | ENSG00000082898 | XP01    | Enhanced  | Cytosol;N                      | Vesicles                |
| 1179 | ENSG00000082996 | RNF13   | Supported | Vesicles                       | Cytosol;Nucleoplas      |
| 1180 | ENSG00000083067 | TRPM3   | Approved  |                                | Vesicles                |
| 1181 | ENSG00000083093 | PALB2   | Supported | Nucleoplasm                    |                         |
| 1182 | ENSG00000083097 | DOPEY1  | Approved  |                                | Nucleoplasm;Vesicl      |
| 1183 | ENSG00000083099 | LYRM2   | Approved  |                                | Cytosol                 |
| 1184 | ENSG00000083123 | BCKDHB  | Supported | Mitochondria                   | Nucleoli                |
| 1185 | ENSG00000083168 | KAT6A   | Approved  |                                | Cytosol;Nuclear sp      |
| 1186 | ENSG00000083223 | ZCCHC6  | Supported | Cytosol                        | Nucleoplasm             |
| 1187 | ENSG00000083307 | GRHL2   | Supported | Nucleoplasm                    |                         |
| 1188 | ENSG00000083312 | TNP01   | Supported | Cytoplasmic bodies;Cytosol;    |                         |
| 1189 | ENSG00000083444 | PLOD1   | Uncertain |                                | Nucleopla               |
| 1190 | ENSG00000083454 | P2RX5   | Supported | Cytosol                        |                         |
| 1191 | ENSG00000083520 | DIS3    | Enhanced  | Cytosol;Nucleoplasm            |                         |
| 1192 | ENSG00000083535 | PIBF1   | Supported |                                | Centriolar satellite    |
| 1193 | ENSG00000083544 | TDRD3   | Enhanced  | Nucleopla                      | Cytosol Golgi apparatus |
| 1194 | ENSG00000083635 | NUFIP1  | Enhanced  | Nucleoli;Nucleoplasm           |                         |
| 1195 | ENSG00000083642 | PDS5B   | Enhanced  | Nucleoplasm                    |                         |
| 1196 | ENSG00000083720 | OXCT1   | Enhanced  | Mitochondria                   |                         |
| 1197 | ENSG00000083750 | RRAGB   | Approved  |                                | Golgi apparatus;Ve      |
| 1198 | ENSG00000083799 | CYLD    | Supported | Centriola                      | Nucleoplasm             |
| 1199 | ENSG00000083812 | ZNF324  | Approved  |                                | Cytosol;Nuclear me      |
| 1200 | ENSG00000083814 | ZNF671  | Approved  |                                | Nucleoplasm             |
| 1201 | ENSG00000083817 | ZNF416  | Approved  |                                | Cytosol;Nuclear bo      |
| 1202 | ENSG00000083828 | ZNF586  | Approved  |                                | Nucleoli fibrillar      |
| 1203 | ENSG00000083838 | ZNF446  | Approved  |                                | Nuclear speckles        |
| 1204 | ENSG00000083844 | ZNF264  | Approved  |                                | Nucleoplasm             |
| 1205 | ENSG00000083845 | RPS5    | Supported | Cytosol;Endoplasmic reticul    |                         |
| 1206 | ENSG00000083896 | YTHDC1  | Approved  |                                | Nucleoplasm;Plasma      |
| 1207 | ENSG00000083937 | CHMP2B  | Supported | Cytosol                        |                         |
| 1208 | ENSG00000084072 | PPIE    | Supported |                                | Nuclear speckles        |

|      |                 |          |           |                                     |                             |
|------|-----------------|----------|-----------|-------------------------------------|-----------------------------|
| 1209 | ENSG00000084073 | ZMPSTE24 | Approved  |                                     | Cytosol;Golgi appa          |
| 1210 | ENSG00000084090 | STARD7   | Approved  |                                     | Mitochondria                |
| 1211 | ENSG00000084092 | NOA1     | Supported |                                     | Mitochondria                |
| 1212 | ENSG00000084093 | REST     | Supported |                                     | Cytosol;Nucleoplasm         |
| 1213 | ENSG00000084110 | HAL      | Approved  |                                     | Cytosol                     |
| 1214 | ENSG00000084112 | SSH1     | Uncertain |                                     | Cytosol;N                   |
| 1215 | ENSG00000084207 | GSTP1    | Supported |                                     | Cytosol;Mitochondria        |
| 1216 | ENSG00000084234 | APLP2    | Approved  |                                     | Vesicles                    |
| 1217 | ENSG00000084444 | FAM234B  | Approved  |                                     | Endoplasmic reticu          |
| 1218 | ENSG00000084453 | SLC01A2  | Supported |                                     | Plasma membrane             |
| 1219 | ENSG00000084463 | WBP11    | Enhanced  | Nucleoplasm                         |                             |
| 1220 | ENSG00000084623 | EIF3I    | Approved  |                                     | Cytosol                     |
| 1221 | ENSG00000084636 | COL16A1  | Approved  |                                     | Cytosol;Golgi appa          |
| 1222 | ENSG00000084652 | TXLNA    | Approved  |                                     | Centrosome;Cytosol          |
| 1223 | ENSG00000084674 | APOB     | Supported |                                     | Cytosol Vesicles            |
| 1224 | ENSG00000084676 | NCOA1    | Enhanced  | Cytosol;Nucleoplasm;Plasma membrane |                             |
| 1225 | ENSG00000084693 | AGBL5    | Supported |                                     | CytokinetCytosol;Microtubul |
| 1226 | ENSG00000084710 | EFR3B    | Supported |                                     | Cytosol;Plasma memActin fil |
| 1227 | ENSG00000084731 | KIF3C    | Approved  |                                     | Intermediate filam          |
| 1228 | ENSG00000084734 | GCKR     | Approved  |                                     | Intermediate filam          |
| 1229 | ENSG00000084754 | HADHA    | Enhanced  | Mitochondria                        |                             |
| 1230 | ENSG00000084764 | MAPRE3   | Supported |                                     | Cytosol                     |
| 1231 | ENSG00000084774 | CAD      | Supported |                                     | Nucleoplasm                 |
| 1232 | ENSG00000085063 | CD59     | Uncertain |                                     | Golgi app                   |
| 1233 | ENSG00000085117 | CD82     | Approved  |                                     | Vesicles                    |
| 1234 | ENSG00000085185 | BCORL1   | Approved  |                                     | Nucleoplasm Plasma me       |
| 1235 | ENSG00000085224 | ATRX     | Supported |                                     | Nuclear bodies              |
| 1236 | ENSG00000085231 | AK6      | Supported |                                     | Nuclear sCentrosome;Cytosol |
| 1237 | ENSG00000085274 | MYNN     | Supported |                                     | Nucleoplasm                 |
| 1238 | ENSG00000085276 | MECOM    | Supported |                                     | Nuclear speckles            |
| 1239 | ENSG00000085365 | SCAMP1   | Approved  |                                     | Cell Junctions;Nuc          |
| 1240 | ENSG00000085377 | PREP     | Supported |                                     | Cytosol                     |
| 1241 | ENSG00000085382 | HACE1    | Supported |                                     | EndoplasmNuclear bodies     |
| 1242 | ENSG00000085433 | WDR47    | Approved  |                                     | Actin filaments;Nu          |
| 1243 | ENSG00000085491 | SLC25A24 | Enhanced  | Mitochondria                        |                             |
| 1244 | ENSG00000085511 | MAP3K4   | Approved  |                                     | Cytosol                     |
| 1245 | ENSG00000085563 | ABCB1    | Approved  |                                     | Cytosol;Focal adhe          |
| 1246 | ENSG00000085644 | ZNF213   | Approved  |                                     | Cytosol;Nuclear me          |
| 1247 | ENSG00000085662 | AKR1B1   | Supported |                                     | Cytosol;Nucleoplasm         |
| 1248 | ENSG00000085719 | CPNE3    | Supported |                                     | Cytosol;N                   |
| 1249 | ENSG00000085721 | RRN3     | Supported |                                     | Mitochondria                |
| 1250 | ENSG00000085733 | CTTN     | Supported |                                     | Nucleoli                    |
| 1251 | ENSG00000085741 | WNT11    | Approved  |                                     | Plasma meCytosol;Golgi appa |
| 1252 | ENSG00000085760 | MTIF2    | Enhanced  | Mitochondria                        | Centrosome;Cytosol          |
| 1253 | ENSG00000085788 | DDHD2    | Supported |                                     | Cytosol Centriolar satelli  |
| 1254 | ENSG00000085831 | TTC39A   | Approved  |                                     | Centrosome                  |
| 1255 | ENSG00000085832 | EPS15    | Enhanced  | Cytosol;Vesicles                    |                             |
| 1256 | ENSG00000085840 | ORC1     | Supported |                                     | Nucleoplasm                 |
| 1257 | ENSG00000085978 | ATG16L1  | Approved  |                                     | Cytosol                     |
| 1258 | ENSG00000085982 | USP40    | Approved  |                                     | Vesicles                    |
| 1259 | ENSG00000085999 | RAD54L   | Enhanced  | Nucleoplasm                         |                             |
| 1260 | ENSG00000086015 | MAST2    | Approved  |                                     | Cytosol                     |
| 1261 | ENSG00000086061 | DNAJA1   | Supported |                                     | Cytosol;Microtubules        |
| 1262 | ENSG00000086062 | B4GALT1  | Enhanced  | Golgi apparatus                     |                             |
| 1263 | ENSG00000086065 | CHMP5    | Supported |                                     | Cytosol;Microtubules;Midbod |

|      |                 |          |           |                       |                       |
|------|-----------------|----------|-----------|-----------------------|-----------------------|
| 1264 | ENSG00000086102 | NFX1     | Enhanced  | Nucleoplasm           | Cytosol               |
| 1265 | ENSG00000086189 | DIMT1    | Supported | Nucleoli              | Nucleoplasm           |
| 1266 | ENSG00000086200 | IP011    | Supported | Cytosol               | Nucleoplasm           |
| 1267 | ENSG00000086232 | EIF2AK1  | Supported | Cytosol               | Nucleoplasm           |
| 1268 | ENSG00000086300 | SNX10    | Supported | Microtubule           | Nucleoli              |
| 1269 | ENSG00000086475 | SEPHS1   | Uncertain |                       | Nucleoplasm           |
| 1270 | ENSG00000086504 | MRPL28   | Supported | Mitochondria          |                       |
| 1271 | ENSG00000086506 | HBQ1     | Approved  |                       | Lipid droplets        |
| 1272 | ENSG00000086544 | ITPKC    | Supported |                       | Nuclear speckles      |
| 1273 | ENSG00000086589 | RBM22    | Enhanced  | Nucleoplasm           |                       |
| 1274 | ENSG00000086598 | TMED2    | Supported |                       | Vesicles              |
| 1275 | ENSG00000086696 | HSD17B2  | Approved  |                       | Endoplasmic reticulum |
| 1276 | ENSG00000086712 | TXLNG    | Approved  |                       | Cytosol               |
| 1277 | ENSG00000086717 | PPEF1    | Uncertain |                       | Cytokinesis           |
| 1278 | ENSG00000086730 | LAT2     | Supported |                       | Plasma membrane       |
| 1279 | ENSG00000086758 | HUWE1    | Enhanced  | Cytosol               | Nucleoplasm           |
| 1280 | ENSG00000086827 | ZW10     | Supported | Cytosol               | Endoplasmic reticulum |
| 1281 | ENSG00000086848 | ALG9     | Approved  |                       | Endoplasmic reticulum |
| 1282 | ENSG00000086991 | NOX4     | Approved  |                       | Nucleoplasm           |
| 1283 | ENSG00000087008 | ACOX3    | Approved  |                       | Peroxisomes           |
| 1284 | ENSG00000087053 | MTMR2    | Supported |                       | Vesicles              |
| 1285 | ENSG00000087074 | PPP1R15A | Uncertain |                       | Vesicles              |
| 1286 | ENSG00000087077 | TRIP6    | Supported | Cytosol               | Plasma membrane       |
| 1287 | ENSG00000087085 | ACHE     | Approved  |                       | Golgi apparatus       |
| 1288 | ENSG00000087086 | FTL      | Approved  |                       | Cytosol               |
| 1289 | ENSG00000087087 | SRRT     | Enhanced  | Nucleoplasm           |                       |
| 1290 | ENSG00000087095 | NLK      | Supported | Cell Junctions        | Nucleoli              |
| 1291 | ENSG00000087116 | ADAMTS2  | Approved  |                       | Plasma membrane       |
| 1292 | ENSG00000087152 | ATXN7L3  | Approved  |                       | Nuclear speckles      |
| 1293 | ENSG00000087157 | PGS1     | Approved  |                       | Cell Junctions        |
| 1294 | ENSG00000087191 | PSMC5    | Supported | Cytosol               | Plasma membrane       |
| 1295 | ENSG00000087206 | UIMC1    | Supported |                       | Nuclear bodies        |
| 1296 | ENSG00000087245 | MMP2     | Approved  |                       | Vesicles              |
| 1297 | ENSG00000087253 | LPCAT2   | Supported | Endoplasmic reticulum | Lipid                 |
| 1298 | ENSG00000087263 | OGFOD1   | Supported | Cytosol               | Nucleoplasm           |
| 1299 | ENSG00000087266 | SH3BP2   | Approved  |                       | Actin filaments       |
| 1300 | ENSG00000087269 | NOP14    | Enhanced  | Nucleoli              | Nucleoplasm           |
| 1301 | ENSG00000087274 | ADD1     | Enhanced  | Nucleoplasm           | Plasma membrane       |
| 1302 | ENSG00000087299 | L2HGDH   | Enhanced  | Mitochondria          |                       |
| 1303 | ENSG00000087301 | TXNDC16  | Approved  |                       | Mitochondria          |
| 1304 | ENSG00000087302 | RTRAF    | Supported |                       | Nucleoplasm           |
| 1305 | ENSG00000087303 | NID2     | Enhanced  | Plasma membrane       |                       |
| 1306 | ENSG00000087365 | SF3B2    | Enhanced  | Nuclear speckles      |                       |
| 1307 | ENSG00000087460 | GNAS     | Approved  | Plasma membrane       | Cytosol               |
| 1308 | ENSG00000087470 | DNM1L    | Enhanced  | Cytosol               | Vesicles              |
| 1309 | ENSG00000087494 | PTHLH    | Supported | Cytosol               | Golgi apparatus       |
| 1310 | ENSG00000087495 | PHACTR3  | Enhanced  | Nucleoplasm           |                       |
| 1311 | ENSG00000087502 | ERGIC2   | Supported | Golgi apparatus       | Nucleoli              |
| 1312 | ENSG00000087510 | TFAP2C   | Supported | Nucleoplasm           |                       |
| 1313 | ENSG00000087586 | AURKA    | Approved  |                       | Centrosome            |
| 1314 | ENSG00000087842 | PIR      | Supported | Cytosol               |                       |
| 1315 | ENSG00000087884 | AAMDC    | Approved  |                       | Cytosol               |
| 1316 | ENSG00000087903 | RFX2     | Approved  |                       | Cytosol               |
| 1317 | ENSG00000088002 | SULT2B1  | Supported | Cytosol               | Vesicles              |
| 1318 | ENSG00000088035 | ALG6     | Supported | Endoplasmic reticulum |                       |

|      |                 |           |           |                                     |                             |
|------|-----------------|-----------|-----------|-------------------------------------|-----------------------------|
| 1319 | ENSG00000088038 | CNOT3     | Approved  |                                     | Cytosol                     |
| 1320 | ENSG00000088053 | GP6       | Approved  |                                     | Nucleoplasm                 |
| 1321 | ENSG00000088179 | PTPN4     | Approved  |                                     | Cytosol;Nucleoplas          |
| 1322 | ENSG00000088205 | DDX18     | Supported |                                     | Nucleoli                    |
| 1323 | ENSG00000088247 | KHSRP     | Enhanced  | Nucleoplasm                         |                             |
| 1324 | ENSG00000088280 | ASAP3     | Supported |                                     | Vesicles Nucleopla          |
| 1325 | ENSG00000088305 | DNMT3B    | Supported |                                     | Nucleoplasm                 |
| 1326 | ENSG00000088325 | TPX2      | Supported |                                     | Cytokinetic bridge;Mitotic  |
| 1327 | ENSG00000088356 | PDRG1     | Approved  |                                     | Actin filaments             |
| 1328 | ENSG00000088367 | EPB41L1   | Supported |                                     | Plasma membrane             |
| 1329 | ENSG00000088386 | SLC15A1   | Approved  |                                     | Cytosol;Nucleoplas          |
| 1330 | ENSG00000088448 | ANKRD10   | Approved  |                                     | Cytosol;Microtubul          |
| 1331 | ENSG00000088451 | TGDS      | Approved  |                                     | Cytosol;Nucleoli;N          |
| 1332 | ENSG00000088538 | DOCK3     | Enhanced  | Cytosol                             |                             |
| 1333 | ENSG00000088543 | C3orf18   | Approved  |                                     | Cytosol                     |
| 1334 | ENSG00000088726 | TMEM40    | Approved  |                                     | Cytosol                     |
| 1335 | ENSG00000088756 | ARHGAP28  | Supported |                                     | Cell Junctions              |
| 1336 | ENSG00000088808 | PPP1R13B  | Supported |                                     | Cytosol;Nucleoplasm         |
| 1337 | ENSG00000088812 | ATRN      | Approved  |                                     | Cytosol                     |
| 1338 | ENSG00000088826 | SMOX      | Supported |                                     | Nuclear Vesicles            |
| 1339 | ENSG00000088833 | NSFL1C    | Enhanced  | Cytosol;Nucleoplasm;Plasma membrane |                             |
| 1340 | ENSG00000088836 | SLC4A11   | Uncertain |                                     | Nucleopla                   |
| 1341 | ENSG00000088854 | C20orf194 | Approved  |                                     | Cytosol;Nucleoli f          |
| 1342 | ENSG00000088876 | ZNF343    | Approved  |                                     | Nucleoplasm                 |
| 1343 | ENSG00000088888 | MAVS      | Enhanced  | Mitochondria                        |                             |
| 1344 | ENSG00000088899 | LZTS3     | Approved  |                                     | Vesicles                    |
| 1345 | ENSG00000088926 | F11       | Approved  |                                     | Vesicles                    |
| 1346 | ENSG00000088930 | XRN2      | Enhanced  | Nucleoli;Nucleoplasm                |                             |
| 1347 | ENSG00000088986 | DYNLL1    | Approved  |                                     | Cytosol;Nuclear bo          |
| 1348 | ENSG00000088992 | TESC      | Supported |                                     | Cytosol;Nucleoplasm         |
| 1349 | ENSG00000089006 | SNX5      | Supported |                                     | Cytosol;Vesicles            |
| 1350 | ENSG00000089009 | RPL6      | Approved  |                                     | Cytokinetic bridge          |
| 1351 | ENSG00000089022 | MAPKAPK5  | Supported |                                     | Cytosol;Nucleoplasm         |
| 1352 | ENSG00000089048 | ESF1      | Approved  |                                     | Nucleoli;Nucleopla          |
| 1353 | ENSG00000089050 | RBBP9     | Supported |                                     | Nucleoplasm                 |
| 1354 | ENSG00000089053 | ANAPC5    | Approved  |                                     | Nucleoplasm                 |
| 1355 | ENSG00000089057 | SLC23A2   | Uncertain |                                     | Golgi app                   |
| 1356 | ENSG00000089063 | TMEM230   | Enhanced  | Endoplasmic reticulum               |                             |
| 1357 | ENSG00000089091 | DZANK1    | Approved  |                                     | Nucleoli fibrillar          |
| 1358 | ENSG00000089094 | KDM2B     | Uncertain |                                     | Nucleopla                   |
| 1359 | ENSG00000089123 | TASP1     | Approved  |                                     | Plasma membrane             |
| 1360 | ENSG00000089127 | OAS1      | Supported |                                     | Cytosol;Nucleoplasm         |
| 1361 | ENSG00000089154 | GCN1      | Enhanced  | Cytosol                             |                             |
| 1362 | ENSG00000089157 | RPLP0     | Supported |                                     | Cytosol;Endoplasmic reticul |
| 1363 | ENSG00000089159 | PXN       | Enhanced  | Cytosol;Focal adhe                  | Centrosome                  |
| 1364 | ENSG00000089177 | KIF16B    | Uncertain |                                     | Mitochond                   |
| 1365 | ENSG00000089195 | TRMT6     | Enhanced  | Nucleoplasm                         | Cell Junctions              |
| 1366 | ENSG00000089199 | CHGB      | Enhanced  | Vesicles                            |                             |
| 1367 | ENSG00000089220 | PEBP1     | Supported |                                     | Plasma membrane             |
| 1368 | ENSG00000089225 | TBX5      | Approved  |                                     | Nucleoplasm                 |
| 1369 | ENSG00000089234 | BRAP      | Supported |                                     | Cytosol Nuclear membrane    |
| 1370 | ENSG00000089248 | ERP29     | Uncertain |                                     | Microtubu                   |
| 1371 | ENSG00000089250 | NOS1      | Supported |                                     | Plasma meNucleoplasm        |
| 1372 | ENSG00000089280 | FUS       | Enhanced  | Nucleoplasm                         |                             |
| 1373 | ENSG00000089289 | IGBP1     | Approved  |                                     | Microtubules                |

|      |                 |           |           |                    |                             |
|------|-----------------|-----------|-----------|--------------------|-----------------------------|
| 1374 | ENSG00000089327 | FXVD5     | Approved  |                    | Endoplasmic reticu          |
| 1375 | ENSG00000089335 | ZNF302    | Approved  |                    | Cytokinetic bridge          |
| 1376 | ENSG00000089351 | GRAMD1A   | Supported | Plasma me          | Cytosol                     |
| 1377 | ENSG00000089356 | FXVD3     | Approved  |                    | Nucleoplasm;Plasma          |
| 1378 | ENSG00000089472 | HEPH      | Approved  |                    | Nuclear bodies;Nuc          |
| 1379 | ENSG00000089486 | CDIP1     | Supported | Centrosome;        | Nucleoplasm                 |
| 1380 | ENSG00000089505 | CMTM1     | Approved  |                    | Nucleoplasm                 |
| 1381 | ENSG00000089597 | GANAB     | Approved  |                    | Endoplasmic reticu          |
| 1382 | ENSG00000089639 | GMIP      | Enhanced  | Cytosol;Nucleoplas | Plasma membrane             |
| 1383 | ENSG00000089682 | RBM41     | Approved  |                    | Cytosol;Nuclear sp          |
| 1384 | ENSG00000089685 | BIRC5     | Supported |                    | Cytokinetic bridge          |
| 1385 | ENSG00000089693 | MLF2      | Approved  |                    | Cytosol;Nucleoplas          |
| 1386 | ENSG00000089737 | DDX24     | Approved  |                    | Cytosol;Nucleoli            |
| 1387 | ENSG00000089775 | ZBTB25    | Enhanced  | Nucleoplasm        |                             |
| 1388 | ENSG00000089818 | NECAP1    | Approved  |                    | Cytosol;Vesicles            |
| 1389 | ENSG00000089820 | ARHGAP4   | Approved  |                    | Focal adhNucleopla          |
| 1390 | ENSG00000089847 | ANKRD24   | Uncertain |                    | Cytosol;M                   |
| 1391 | ENSG00000089902 | RCOR1     | Enhanced  | Nucleoplasm        |                             |
| 1392 | ENSG00000089916 | GPATCH2L  | Approved  |                    | Cytosol;Nucleoplas          |
| 1393 | ENSG00000090013 | BLVRB     | Supported | Cytosol            | Nucleopla                   |
| 1394 | ENSG00000090020 | SLC9A1    | Supported |                    | Plasma membrane             |
| 1395 | ENSG00000090054 | SPTLC1    | Supported |                    | Endoplasmic reticulum       |
| 1396 | ENSG00000090060 | PAPOLA    | Supported |                    | Nucleoplasm                 |
| 1397 | ENSG00000090061 | CCNK      | Supported |                    | Nucleoplasm                 |
| 1398 | ENSG00000090097 | PCBP4     | Supported |                    | Cytosol                     |
| 1399 | ENSG00000090266 | NDUFB2    | Approved  |                    | Mitochondria;Nucle          |
| 1400 | ENSG00000090273 | NUDC      | Enhanced  | Cytosol            |                             |
| 1401 | ENSG00000090316 | MAEA      | Enhanced  | Nucleoplasm        |                             |
| 1402 | ENSG00000090339 | ICAM1     | Uncertain |                    | Cytosol;P                   |
| 1403 | ENSG00000090372 | STRN4     | Approved  |                    | Cytosol                     |
| 1404 | ENSG00000090376 | IRAK3     | Approved  |                    | Vesicles                    |
| 1405 | ENSG00000090382 | LYZ       | Approved  |                    | Golgi apparatus Actin fil   |
| 1406 | ENSG00000090432 | MUL1      | Approved  | Mitochond          | Cytosol;Nucleoplas          |
| 1407 | ENSG00000090447 | TFAP4     | Supported | Nucleopla          | Mitochondria                |
| 1408 | ENSG00000090470 | PDCD7     | Approved  |                    | Nucleoli;Plasma me          |
| 1409 | ENSG00000090487 | SPG21     | Supported |                    | Cytosol;Vesicles            |
| 1410 | ENSG00000090520 | DNAJB11   | Supported |                    | Endoplasmic reticulum       |
| 1411 | ENSG00000090530 | P3H2      | Supported |                    | Golgi appNucleoplasm        |
| 1412 | ENSG00000090565 | RAB11FIP3 | Supported |                    | Centriolar satellite;Cytoki |
| 1413 | ENSG00000090581 | GNPTG     | Approved  |                    | Cytosol;Endoplasmic         |
| 1414 | ENSG00000090612 | ZNF268    | Approved  |                    | Actin filaments;Cy          |
| 1415 | ENSG00000090615 | GOLGA3    | Supported | Golgi apparatus    | Nucleoplasm                 |
| 1416 | ENSG00000090621 | PABPC4    | Enhanced  | Cytosol            |                             |
| 1417 | ENSG00000090661 | CERS4     | Supported |                    | NucleoplaVesicles           |
| 1418 | ENSG00000090674 | MCOLN1    | Supported |                    | Vesicles Golgi appNucleopla |
| 1419 | ENSG00000090686 | USP48     | Supported |                    | Cytosol;Mitochondria;Nucleo |
| 1420 | ENSG00000090776 | EFNB1     | Supported |                    | Plasma membrane             |
| 1421 | ENSG00000090857 | PDPR      | Approved  |                    | Mitochondria                |
| 1422 | ENSG00000090861 | AARS      | Enhanced  | Cytosol            |                             |
| 1423 | ENSG00000090863 | GLG1      | Supported |                    | Golgi apparatus             |
| 1424 | ENSG00000090889 | KIF4A     | Supported |                    | Midbody;Nucleoplasm         |
| 1425 | ENSG00000090905 | TNRC6A    | Approved  |                    | Vesicles Golgi appNucleopla |
| 1426 | ENSG00000090924 | PLEKHG2   | Approved  |                    | Cytosol;Nucleoplas          |
| 1427 | ENSG00000090932 | DLL3      | Approved  |                    | Nucleoplasm;Plasma          |
| 1428 | ENSG00000090971 | NAT14     | Approved  |                    | Mitochondria                |

|      |                 |         |           |                                  |                             |
|------|-----------------|---------|-----------|----------------------------------|-----------------------------|
| 1429 | ENSG00000090975 | PITPNM2 | Supported |                                  | Vesicles                    |
| 1430 | ENSG00000090989 | EXOC1   | Approved  |                                  | Cytosol;Microtubul          |
| 1431 | ENSG00000091009 | RBM27   | Approved  |                                  | Nuclear speckles            |
| 1432 | ENSG00000091010 | POU4F3  | Supported |                                  | Nucleoplasm                 |
| 1433 | ENSG00000091039 | OSBPL8  | Approved  |                                  | Cytosol;Vesicles            |
| 1434 | ENSG00000091073 | DTX2    | Supported |                                  | Nuclear membrane;Nucleoplas |
| 1435 | ENSG00000091127 | PUS7    | Approved  |                                  | Nucleoplasm                 |
| 1436 | ENSG00000091129 | NRCAM   | Approved  |                                  | Nucleoplasm;Plasma          |
| 1437 | ENSG00000091140 | DLD     | Supported |                                  | Mitochondria                |
| 1438 | ENSG00000091157 | WDR7    | Approved  |                                  | Cytosol;Nucleoplas          |
| 1439 | ENSG00000091164 | TXNL1   | Enhanced  | Cytosol                          |                             |
| 1440 | ENSG00000091262 | ABCC6   | Supported |                                  | Plasma membrane             |
| 1441 | ENSG00000091317 | CMTM6   | Approved  |                                  | Vesicles                    |
| 1442 | ENSG00000091428 | RAPGEF4 | Approved  |                                  | Focal adhesion sit          |
| 1443 | ENSG00000091436 | MAP3K20 | Supported |                                  | Cytosol                     |
| 1444 | ENSG00000091482 | SMPX    | Approved  |                                  | Plasma membrane             |
| 1445 | ENSG00000091483 | FH      | Enhanced  | Mitochondria                     |                             |
| 1446 | ENSG00000091490 | SEL1L3  | Enhanced  | Nucleoplasm                      |                             |
| 1447 | ENSG00000091527 | CDV3    | Enhanced  | Cytosol;Nucleoli;Plasma membrane |                             |
| 1448 | ENSG00000091542 | ALKBH5  | Approved  |                                  | Cytosol;Golgi appa          |
| 1449 | ENSG00000091583 | APOH    | Supported |                                  | Golgi apparatus             |
| 1450 | ENSG00000091592 | NLRP1   | Supported |                                  | Cytosol;Nucleoplasm         |
| 1451 | ENSG00000091622 | PITPNM3 | Approved  |                                  | Plasma membrane             |
| 1452 | ENSG00000091640 | SPAG7   | Supported |                                  | Nucleoplasm                 |
| 1453 | ENSG00000091651 | ORC6    | Approved  |                                  | Nucleoli fibrillar          |
| 1454 | ENSG00000091656 | ZFHX4   | Approved  |                                  | Nucleoli fibrillar          |
| 1455 | ENSG00000091732 | ZC3HC1  | Supported |                                  | Nuclear membrane;Nucleoplas |
| 1456 | ENSG00000091831 | ESR1    | Approved  |                                  | Nucleoplasm;Vesicl          |
| 1457 | ENSG00000091844 | RGS17   | Approved  |                                  | Vesicles                    |
| 1458 | ENSG00000091947 | TMEM101 | Approved  |                                  | Cytosol;Nucleoplas          |
| 1459 | ENSG00000092010 | PSME1   | Approved  |                                  | Cytosol;Nuclear bo          |
| 1460 | ENSG00000092020 | PPP2R3C | Supported |                                  | Cytosol;NGolgi apparatus    |
| 1461 | ENSG00000092036 | HAUS4   | Supported |                                  | Focal adhesion sites;Plasma |
| 1462 | ENSG00000092051 | JPH4    | Uncertain |                                  | Cytosol;N                   |
| 1463 | ENSG00000092067 | CEBPE   | Supported |                                  | NucleoplaCytosol            |
| 1464 | ENSG00000092094 | OSGEP   | Supported |                                  | NucleoplaPlasma membrane    |
| 1465 | ENSG00000092098 | RNF31   | Approved  |                                  | Cytosol                     |
| 1466 | ENSG00000092108 | SCFD1   | Approved  |                                  | Cytosol;Nucleoplas          |
| 1467 | ENSG00000092140 | G2E3    | Approved  |                                  | Cytosol Golgi apparatus;Ve  |
| 1468 | ENSG00000092148 | HECTD1  | Enhanced  | Nucleoli;Nucleoplasm             |                             |
| 1469 | ENSG00000092199 | HNRNPC  | Enhanced  | Nucleoplasm                      |                             |
| 1470 | ENSG00000092201 | SUPT16H | Supported |                                  | NucleoplaNucleoli fibrillar |
| 1471 | ENSG00000092203 | TOX4    | Approved  |                                  | Nucleoli;Nucleopla          |
| 1472 | ENSG00000092208 | GEMIN2  | Supported |                                  | Nuclear bNucleoli;Nucleopla |
| 1473 | ENSG00000092330 | TINF2   | Enhanced  | Nuclear bodies;Nucleoplasm       |                             |
| 1474 | ENSG00000092421 | SEMA6A  | Approved  |                                  | Intermediate filam          |
| 1475 | ENSG00000092439 | TRPM7   | Approved  |                                  | Cytosol;Plasma mem          |
| 1476 | ENSG00000092470 | WDR76   | Approved  |                                  | Nuclear bodies;Nuc          |
| 1477 | ENSG00000092531 | SNAP23  | Supported |                                  | Plasma membrane             |
| 1478 | ENSG00000092607 | TBX15   | Approved  |                                  | Centrosome;Nucleop          |
| 1479 | ENSG00000092621 | PHGDH   | Enhanced  | Cytosol;Plasma mem               | Nucleoplasm                 |
| 1480 | ENSG00000092758 | COL9A3  | Approved  |                                  | Intermediate filam          |
| 1481 | ENSG00000092820 | EZR     | Enhanced  | Plasma membrane                  |                             |
| 1482 | ENSG00000092850 | TEKT2   | Uncertain |                                  | Microtubu                   |
| 1483 | ENSG00000092853 | CLSPN   | Enhanced  | Nucleopla                        | Golgi apparatus             |

|      |                 |          |           |                   |                             |
|------|-----------------|----------|-----------|-------------------|-----------------------------|
| 1484 | ENSG00000092871 | RFFL     | Approved  |                   | Vesicles                    |
| 1485 | ENSG00000092929 | UNC13D   | Supported |                   | Cytosol;Vesicles            |
| 1486 | ENSG00000092931 | MFS11    | Approved  |                   | Nuclear speckles            |
| 1487 | ENSG00000092964 | DPYSL2   | Supported |                   | Cytosol Plasma membrane     |
| 1488 | ENSG00000092978 | GPATCH2  | Supported |                   | Nuclear speckles            |
| 1489 | ENSG00000093000 | NUP50    | Enhanced  | Nuclear membrane; | Nucleoplasm                 |
| 1490 | ENSG00000093009 | CDC45    | Supported |                   | Cytosol;NCentrosome         |
| 1491 | ENSG00000093010 | COMT     | Supported |                   | Endoplasmic reticulum;Vesic |
| 1492 | ENSG00000093144 | ECHDC1   | Approved  |                   | Vesicles                    |
| 1493 | ENSG00000093167 | LRRFIP2  | Approved  |                   | Actin filaments;Pl          |
| 1494 | ENSG00000093183 | SEC22C   | Approved  |                   | Golgi apparatus;Nu          |
| 1495 | ENSG00000093217 | XYLB     | Approved  |                   | Nuclear speckles            |
| 1496 | ENSG00000094631 | HDAC6    | Supported |                   | Nucleoplasm                 |
| 1497 | ENSG00000094804 | CDC6     | Supported |                   | Cytokinetic bridge;Cytosol; |
| 1498 | ENSG00000094841 | UPRT     | Supported |                   | NucleoplaVesicles           |
| 1499 | ENSG00000094914 | AAAS     | Approved  |                   | Centrosome;Cytosol          |
| 1500 | ENSG00000094916 | CBX5     | Enhanced  | Nucleoplasm       |                             |
| 1501 | ENSG00000094975 | SUCO     | Approved  |                   | Cytosol;Nucleoli f          |
| 1502 | ENSG00000095002 | MSH2     | Supported |                   | Nucleoplasm;Vesicles        |
| 1503 | ENSG00000095015 | MAP3K1   | Approved  |                   | Cytosol                     |
| 1504 | ENSG00000095059 | DHPS     | Approved  |                   | Cytosol;Nucleoplas          |
| 1505 | ENSG00000095066 | HOOK2    | Supported |                   | Cytosol;Vesicles            |
| 1506 | ENSG00000095139 | ARCNI    | Enhanced  | Vesicles          | Golgi apparatus             |
| 1507 | ENSG00000095203 | EPB41LAB | Approved  |                   | Cytosol;Plasma mem          |
| 1508 | ENSG00000095261 | PSMD5    | Approved  |                   | Cytosol;Nucleoplas          |
| 1509 | ENSG00000095303 | PTGS1    | Supported |                   | Golgi apparatus;Vesicles    |
| 1510 | ENSG00000095319 | NUP188   | Uncertain |                   | Cytosol;N                   |
| 1511 | ENSG00000095321 | CRAT     | Approved  |                   | Nuclear membrane;N          |
| 1512 | ENSG00000095380 | NANS     | Approved  |                   | Nucleoplasm                 |
| 1513 | ENSG00000095383 | TBC1D2   | Approved  |                   | Cytosol;Nucleoplas          |
| 1514 | ENSG00000095485 | CWF19L1  | Approved  |                   | Golgi apparatus;Nu          |
| 1515 | ENSG00000095539 | SEMA4G   | Uncertain |                   | Lipid dro                   |
| 1516 | ENSG00000095564 | BTA1     | Approved  |                   | NucleoplaVesicles           |
| 1517 | ENSG00000095574 | IKZF5    | Supported |                   | Cytosol;Nucleoplasm;Plasma  |
| 1518 | ENSG00000095585 | BLNK     | Supported |                   | Cytoplasmic bodies;Plasma m |
| 1519 | ENSG00000095637 | SORBS1   | Supported |                   | Focal adhCentrosome         |
| 1520 | ENSG00000095739 | BAMBI    | Approved  |                   | Lipid droplets;Nuc          |
| 1521 | ENSG00000095777 | MYO3A    | Supported |                   | Actin filCytoplasmic bodies |
| 1522 | ENSG00000095787 | WAC      | Enhanced  | Nucleoplasm       |                             |
| 1523 | ENSG00000095794 | CREM     | Supported |                   | NucleoplaVesicles           |
| 1524 | ENSG00000095906 | NUBP2    | Approved  |                   | Cytosol;Nucleoplas          |
| 1525 | ENSG00000095917 | TPSD1    | Uncertain |                   | Nuclear s                   |
| 1526 | ENSG00000095932 | SMIM24   | Approved  |                   | Cytosol;Nucleoplas          |
| 1527 | ENSG00000095951 | HIVEP1   | Supported |                   | Nuclear bMitochondria       |
| 1528 | ENSG00000096060 | FKBP5    | Enhanced  | Nucleoplasm       |                             |
| 1529 | ENSG00000096063 | SRPK1    | Supported |                   | Cytosol;NPlasma membrane    |
| 1530 | ENSG00000096070 | BRPF3    | Approved  |                   | Mitochondria;Nucle          |
| 1531 | ENSG00000096088 | PGC      | Approved  |                   | Nucleoplasm                 |
| 1532 | ENSG00000096092 | TMEM14A  | Approved  |                   | Endoplasmic reticu          |
| 1533 | ENSG00000096384 | HSP90AB1 | Supported |                   | Cytosol                     |
| 1534 | ENSG00000096401 | CDC5L    | Supported |                   | Nucleoplasm                 |
| 1535 | ENSG00000096433 | ITPR3    | Uncertain |                   | Vesicles                    |
| 1536 | ENSG00000096654 | ZNF184   | Supported |                   | Nucleoplasm                 |
| 1537 | ENSG00000096696 | DSP      | Supported |                   | Cell Junctions              |
| 1538 | ENSG00000096717 | SIRT1    | Supported |                   | Cytosol;Mitochondria;Nucleo |



|      |                 |          |           |                                      |
|------|-----------------|----------|-----------|--------------------------------------|
| 1539 | ENSG00000096746 | HNRNPH3  | Supported | Nucleoplasm                          |
| 1540 | ENSG00000096872 | IFT74    | Approved  | Golgi apparatus                      |
| 1541 | ENSG00000096968 | JAK2     | Supported | Nucleoplasm;Focal adhesion sit       |
| 1542 | ENSG00000096996 | IL12RB1  | Approved  | Plasma membrane                      |
| 1543 | ENSG00000097007 | ABL1     | Enhanced  | Nuclear bodies;Nucleoplasm           |
| 1544 | ENSG00000097021 | ACOT7    | Supported | Cytosol Nucleoplasm                  |
| 1545 | ENSG00000097033 | SH3GLB1  | Supported | Cytosol                              |
| 1546 | ENSG00000097046 | CDC7     | Supported | Cytokinetic bridge;Mitotic           |
| 1547 | ENSG00000097096 | SYDE2    | Approved  | Golgi apparatus;Nu                   |
| 1548 | ENSG00000099139 | PCSK5    | Supported | Golgi apparatus                      |
| 1549 | ENSG00000099194 | SCD      | Enhanced  | Endoplasmic reticulum                |
| 1550 | ENSG00000099204 | ABLIM1   | Supported | Cytosol                              |
| 1551 | ENSG00000099256 | PRTFDC1  | Approved  | Cytosol;Golgi appa                   |
| 1552 | ENSG00000099260 | PALMD    | Supported | Actin filFocal adhesion sit          |
| 1553 | ENSG00000099282 | TSPAN15  | Approved  | Cytosol;Nucleoplas                   |
| 1554 | ENSG00000099284 | H2AFY2   | Supported | Nucleoplasm                          |
| 1555 | ENSG00000099290 | WASHC2A  | Supported | Vesicles Nucleoli Cytosol            |
| 1556 | ENSG00000099308 | MAST3    | Approved  | Nuclear speckles                     |
| 1557 | ENSG00000099326 | MZF1     | Supported | Nucleoplasm                          |
| 1558 | ENSG00000099330 | OCEL1    | Approved  | Golgi apparatus                      |
| 1559 | ENSG00000099331 | MYO9B    | Supported | Cytosol                              |
| 1560 | ENSG00000099337 | KCNK6    | Approved  | Actin filaments;Cy                   |
| 1561 | ENSG00000099338 | CATSPERG | Approved  | Cytosol;Nucleoli;N                   |
| 1562 | ENSG00000099341 | PSMD8    | Approved  | Cytosol;Nuclear sp                   |
| 1563 | ENSG00000099364 | FBXL19   | Approved  | Intermediate filam                   |
| 1564 | ENSG00000099377 | HSD3B7   | Enhanced  | Lipid droplets                       |
| 1565 | ENSG00000099381 | SETD1A   | Supported | Nuclear speckles                     |
| 1566 | ENSG00000099385 | BCL7C    | Approved  | Nucleoplasm                          |
| 1567 | ENSG00000099399 | MAGEB2   | Approved  | Cytosol                              |
| 1568 | ENSG00000099617 | EFNA2    | Approved  | Cytosol;Mitochondr                   |
| 1569 | ENSG00000099622 | CIRBP    | Supported | Nucleoplasm                          |
| 1570 | ENSG00000099625 | CBARP    | Approved  | Nucleoplasm                          |
| 1571 | ENSG00000099783 | HNRNPM   | Enhanced  | Nucleoplasm                          |
| 1572 | ENSG00000099785 | 3/2/2019 | Supported | Endoplasm;Cytosol                    |
| 1573 | ENSG00000099797 | TECR     | Supported | Endoplasmic reticulum                |
| 1574 | ENSG00000099800 | TIMM13   | Supported | MitochondNucleoli fibrillar          |
| 1575 | ENSG00000099804 | CDC34    | Supported | Cytosol;Nuclear speckles             |
| 1576 | ENSG00000099810 | MTAP     | Approved  | Cytosol                              |
| 1577 | ENSG00000099812 | MISP     | Enhanced  | Focal adhesion sites;Plasma membrane |
| 1578 | ENSG00000099814 | CEP170B  | Approved  | Centrosome;Cytosol                   |
| 1579 | ENSG00000099817 | POLR2E   | Supported | Nucleoplasm                          |
| 1580 | ENSG00000099821 | POLRMT   | Supported | Mitochondria                         |
| 1581 | ENSG00000099849 | RASSF7   | Supported | Centriolar satellite                 |
| 1582 | ENSG00000099860 | GADD45B  | Approved  | Cytosol;Nucleoplas                   |
| 1583 | ENSG00000099864 | PALM     | Enhanced  | Nucleoplasm;Plasma membrane          |
| 1584 | ENSG00000099875 | MKNK2    | Supported | Nuclear bodies                       |
| 1585 | ENSG00000099889 | ARVCF    | Enhanced  | Cell Junctions;Plasma membrane       |
| 1586 | ENSG00000099899 | TRMT2A   | Approved  | Cytosol;Nucleoplas                   |
| 1587 | ENSG00000099901 | RANBP1   | Enhanced  | Cytosol                              |
| 1588 | ENSG00000099904 | ZDHHC8   | Approved  | Cytosol;Nucleoplas                   |
| 1589 | ENSG00000099910 | KLHL22   | Supported | MicrotubuCytokinetic bridge          |
| 1590 | ENSG00000099917 | MED15    | Supported | Nucleoplasm                          |
| 1591 | ENSG00000099937 | SERPIND1 | Approved  | Vesicles                             |
| 1592 | ENSG00000099940 | SNAP29   | Supported | Cytosol;Nucleoplasm                  |
| 1593 | ENSG00000099942 | CRKL     | Enhanced  | Nucleoplasm Cytosol                  |

|      |                 |          |           |                      |                             |
|------|-----------------|----------|-----------|----------------------|-----------------------------|
| 1594 | ENSG00000099949 | LZTR1    | Approved  |                      | Centrosome;Cytosol          |
| 1595 | ENSG00000099954 | CECR2    | Approved  |                      | Nucleoplasm;Vesicl          |
| 1596 | ENSG00000099956 | SMARCB1  | Supported |                      | Nucleoli fibrillar center;N |
| 1597 | ENSG00000099957 | P2RX6    | Approved  |                      | Cytosol;Nucleoli            |
| 1598 | ENSG00000099958 | DERL3    | Uncertain |                      | Vesicles                    |
| 1599 | ENSG00000099968 | BCL2L13  | Enhanced  | Mitochondria         |                             |
| 1600 | ENSG00000099977 | DDT      | Approved  |                      | Mitochondria                |
| 1601 | ENSG00000099991 | CABIN1   | Supported |                      | NucleoplaCytosol            |
| 1602 | ENSG00000099992 | TBC1D10A | Enhanced  | Plasma membrane      |                             |
| 1603 | ENSG00000099994 | SUSD2    | Approved  |                      | Plasma membrane             |
| 1604 | ENSG00000099995 | SF3A1    | Enhanced  | Nuclear speckles     |                             |
| 1605 | ENSG00000099998 | GGT5     | Approved  |                      | Nucleoli fibrillar          |
| 1606 | ENSG00000099999 | RNF215   | Approved  |                      | Microtubules;Nucle          |
| 1607 | ENSG00000100003 | SEC14L2  | Supported |                      | Cytosol;Nucleoplasm         |
| 1608 | ENSG00000100014 | SPECC1L  | Supported |                      | Actin filaments             |
| 1609 | ENSG00000100023 | PPIL2    | Enhanced  | Nucleoplasm          |                             |
| 1610 | ENSG00000100028 | SNRPD3   | Supported |                      | Cytosol;Nuclear bodies;Nucl |
| 1611 | ENSG00000100029 | PES1     | Enhanced  | Nucleoli;Nucleoplasm |                             |
| 1612 | ENSG00000100031 | GGT1     | Approved  |                      | Vesicles                    |
| 1613 | ENSG00000100034 | PPM1F    | Approved  |                      | Nucleoplasm;Plasma          |
| 1614 | ENSG00000100036 | SLC35E4  | Approved  |                      | Cytosol                     |
| 1615 | ENSG00000100038 | TOP3B    | Approved  |                      | Nucleoplasm                 |
| 1616 | ENSG00000100056 | ESS2     | Approved  |                      | Nucleoplasm                 |
| 1617 | ENSG00000100060 | MFNG     | Approved  |                      | Vesicles                    |
| 1618 | ENSG00000100065 | CARD10   | Approved  |                      | Cytosol;Intermedia          |
| 1619 | ENSG00000100068 | LRP5L    | Approved  |                      | Nucleoplasm                 |
| 1620 | ENSG00000100077 | GRK3     | Approved  |                      | Nucleoplasm;Plasma          |
| 1621 | ENSG00000100079 | LGALS2   | Approved  |                      | Mitochondria;Nucle          |
| 1622 | ENSG00000100083 | GGA1     | Supported |                      | Golgi apparatus;VeNucleopla |
| 1623 | ENSG00000100084 | HIRA     | Enhanced  | Nucleoplasm          |                             |
| 1624 | ENSG00000100092 | SH3BP1   | Approved  |                      | Cytosol                     |
| 1625 | ENSG00000100095 | SEZ6L    | Approved  |                      | Vesicles                    |
| 1626 | ENSG00000100097 | LGALS1   | Approved  |                      | Cytosol;Nucleoplas          |
| 1627 | ENSG00000100099 | HPS4     | Approved  |                      | Centrosome                  |
| 1628 | ENSG00000100104 | SRRD     | Approved  |                      | Cytosol                     |
| 1629 | ENSG00000100105 | PATZ1    | Supported |                      | Nucleoplasm                 |
| 1630 | ENSG00000100109 | TFIP11   | Approved  |                      | Cytosol;Nucleoplas          |
| 1631 | ENSG00000100116 | GCAT     | Supported |                      | Mitochondria;Nuclear speckl |
| 1632 | ENSG00000100124 | ANKRD54  | Approved  |                      | Microtubules;Midbo          |
| 1633 | ENSG00000100129 | EIF3L    | Approved  |                      | Nucleoli;Nucleopla          |
| 1634 | ENSG00000100139 | MICALL1  | Supported |                      | Cell Junctions;Centriolar s |
| 1635 | ENSG00000100142 | POLR2F   | Supported |                      | Nucleoli fibrillar center;N |
| 1636 | ENSG00000100146 | SOX10    | Supported |                      | Nucleoplasm                 |
| 1637 | ENSG00000100151 | PICK1    | Approved  |                      | MitochondCytosol            |
| 1638 | ENSG00000100154 | TTC28    | Approved  |                      | Mitochondria;Nucle          |
| 1639 | ENSG00000100156 | SLC16A8  | Approved  |                      | Focal adhesion sit          |
| 1640 | ENSG00000100162 | CENPM    | Enhanced  | Cytosol              |                             |
| 1641 | ENSG00000100167 | 9/3/2019 | Approved  |                      | Actin filaments;Nu          |
| 1642 | ENSG00000100170 | SLC5A1   | Approved  |                      | Nucleoplasm;Vesicl          |
| 1643 | ENSG00000100196 | KDEL3    | Supported |                      | Endoplasmic reticulum       |
| 1644 | ENSG00000100197 | CYP2D6   | Approved  |                      | Golgi apparatus             |
| 1645 | ENSG00000100201 | DDX17    | Supported |                      | Nuclear speckles            |
| 1646 | ENSG00000100206 | DMC1     | Approved  |                      | Nucleoplasm                 |
| 1647 | ENSG00000100207 | TCF20    | Supported |                      | Nuclear bodies;Nucleoplasm  |
| 1648 | ENSG00000100209 | HSCB     | Supported |                      | Cytosol;MNucleoplasm        |

|      |                 |          |           |                          |                             |
|------|-----------------|----------|-----------|--------------------------|-----------------------------|
| 1649 | ENSG00000100216 | TOMM22   | Enhanced  | Mitochondria             |                             |
| 1650 | ENSG00000100218 | RSPH14   | Uncertain |                          | Nucleoli                    |
| 1651 | ENSG00000100220 | RTCB     | Supported |                          | Cytosol;NVesicles           |
| 1652 | ENSG00000100225 | FBX07    | Supported |                          | Cytosol;Nucleoplasm         |
| 1653 | ENSG00000100226 | GTPBP1   | Approved  |                          | Cytosol;Golgi appa          |
| 1654 | ENSG00000100227 | POLDIP3  | Enhanced  | Nuclear s                | Cytoplasmic bodies          |
| 1655 | ENSG00000100228 | RAB36    | Approved  |                          | Vesicles                    |
| 1656 | ENSG00000100239 | PPP6R2   | Supported |                          | Cytosol Vesicles            |
| 1657 | ENSG00000100241 | SBF1     | Supported |                          | Nuclear bodies              |
| 1658 | ENSG00000100242 | SUN2     | Supported |                          | Nuclear membrane            |
| 1659 | ENSG00000100243 | CYB5R3   | Supported |                          | Endoplasmic reticulum       |
| 1660 | ENSG00000100246 | DNAL4    | Approved  |                          | Centrosome;Cytosol          |
| 1661 | ENSG00000100258 | LMF2     | Approved  |                          | Centrosome                  |
| 1662 | ENSG00000100263 | RHBDD3   | Approved  |                          | Microtubules                |
| 1663 | ENSG00000100266 | PACSIN2  | Supported | Plasma me                | Cytosol;Nuclear sp          |
| 1664 | ENSG00000100271 | TTLL1    | Approved  |                          | Mitochondria;Nucle          |
| 1665 | ENSG00000100280 | AP1B1    | Enhanced  | Golgi apparatus;Ve       | Cytosol                     |
| 1666 | ENSG00000100284 | TOM1     | Approved  |                          | Centriolar satelli          |
| 1667 | ENSG00000100288 | CHKB     | Approved  |                          | Cytosol                     |
| 1668 | ENSG00000100292 | HMOX1    | Uncertain |                          | Golgi app                   |
| 1669 | ENSG00000100294 | MCAT     | Supported |                          | Mitochondria                |
| 1670 | ENSG00000100296 | THOC5    | Supported |                          | Nucleoplasm                 |
| 1671 | ENSG00000100297 | MCM5     | Enhanced  | Nucleoplasm              |                             |
| 1672 | ENSG00000100298 | APOBEC3H | Supported |                          | Nucleoplasm                 |
| 1673 | ENSG00000100299 | ARSA     | Approved  |                          | Cytosol;Golgi appa          |
| 1674 | ENSG00000100300 | TSPO     | Approved  | Mitochondria             | Cytosol;V                   |
| 1675 | ENSG00000100302 | RASD2    | Approved  |                          | Cytosol;Plasma mem          |
| 1676 | ENSG00000100304 | TTLL12   | Approved  |                          | Cytosol;Plasma mem          |
| 1677 | ENSG00000100307 | CBX7     | Supported |                          | Cytosol;Nucleoplasm         |
| 1678 | ENSG00000100311 | PDGFB    | Approved  |                          | Vesicles                    |
| 1679 | ENSG00000100316 | RPL3     | Supported |                          | Cytosol;Nucleoli            |
| 1680 | ENSG00000100319 | ZMAT5    | Supported |                          | Nucleoplasm                 |
| 1681 | ENSG00000100320 | RBFOX2   | Supported |                          | NucleoplaCytosol            |
| 1682 | ENSG00000100321 | SYNGR1   | Supported |                          | Cytosol                     |
| 1683 | ENSG00000100324 | TAB1     | Enhanced  | Cytosol;Nuclear speckles |                             |
| 1684 | ENSG00000100325 | ASCC2    | Approved  |                          | Cytosol;Focal adhe          |
| 1685 | ENSG00000100330 | MTMR3    | Supported |                          | Cytosol;Nucleoplasm         |
| 1686 | ENSG00000100335 | MIEF1    | Approved  |                          | Intermediate filam          |
| 1687 | ENSG00000100336 | APOL4    | Supported |                          | Vesicles                    |
| 1688 | ENSG00000100344 | PNPLA3   | Approved  |                          | Cytosol;Mitochondr          |
| 1689 | ENSG00000100345 | MYH9     | Supported |                          | Actin filaments;Cytosol;Pla |
| 1690 | ENSG00000100347 | SAMM50   | Supported |                          | Mitochondria                |
| 1691 | ENSG00000100348 | TXN2     | Enhanced  | Mitochondria             |                             |
| 1692 | ENSG00000100351 | GRAP2    | Supported |                          | Cytosol;NPlasma membrane    |
| 1693 | ENSG00000100353 | EIF3D    | Supported |                          | Cytosol                     |
| 1694 | ENSG00000100359 | SGSM3    | Supported |                          | Golgi apparatus             |
| 1695 | ENSG00000100360 | IFT27    | Approved  |                          | Mitochondria;Nucle          |
| 1696 | ENSG00000100362 | PVALB    | Approved  |                          | Cell Junctions;Nuc          |
| 1697 | ENSG00000100364 | KIAA0930 | Approved  |                          | Mitochondria;Nucle          |
| 1698 | ENSG00000100365 | NCF4     | Enhanced  | Cytosol                  |                             |
| 1699 | ENSG00000100368 | CSF2RB   | Approved  |                          | Golgi apparatus             |
| 1700 | ENSG00000100372 | SLC25A17 | Supported |                          | Peroxisomes                 |
| 1701 | ENSG00000100373 | UPK3A    | Uncertain |                          | Nuclear b                   |
| 1702 | ENSG00000100376 | FAM118A  | Approved  |                          | Cytosol;Intermedia          |
| 1703 | ENSG00000100380 | ST13     | Enhanced  | Cytosol                  |                             |

|      |                 |          |           |                                   |
|------|-----------------|----------|-----------|-----------------------------------|
| 1704 | ENSG00000100387 | RBX1     | Supported | Nucleoplasm                       |
| 1705 | ENSG00000100393 | EP300    | Enhanced  | Nucleoplasm                       |
| 1706 | ENSG00000100395 | L3MBTL2  | Approved  | Nucleoplasm                       |
| 1707 | ENSG00000100401 | RANGAP1  | Enhanced  | Cytosol;Nuclear membrane;Vesicles |
| 1708 | ENSG00000100403 | ZC3H7B   | Uncertain | Cytosol                           |
| 1709 | ENSG00000100410 | PHF5A    | Enhanced  | Nucleoplasm                       |
| 1710 | ENSG00000100412 | AC02     | Approved  | Mitochondria                      |
| 1711 | ENSG00000100413 | POLR3H   | Supported | Centrosome;Nucleoplasm;Vesi       |
| 1712 | ENSG00000100416 | TRMU     | Supported | MitochondNucleoplasm              |
| 1713 | ENSG00000100417 | PMM1     | Supported | Cytosol                           |
| 1714 | ENSG00000100418 | DESI1    | Approved  | Cytokinetic bridge                |
| 1715 | ENSG00000100422 | CERK     | Approved  | Vesicles                          |
| 1716 | ENSG00000100425 | BRD1     | Supported | Nuclear speckles                  |
| 1717 | ENSG00000100426 | ZBED4    | Supported | Nucleoplasm                       |
| 1718 | ENSG00000100439 | ABHD4    | Approved  | Nucleoplasm                       |
| 1719 | ENSG00000100441 | KHNYN    | Approved  | Cytosol;Nucleoplas                |
| 1720 | ENSG00000100442 | FKBP3    | Supported | Cytosol                           |
| 1721 | ENSG00000100445 | SDR39U1  | Approved  | Cytosol;Nucleoplas                |
| 1722 | ENSG00000100461 | RBM23    | Approved  | Intermediate filam                |
| 1723 | ENSG00000100462 | PRMT5    | Supported | Cytosol;Nucleoplasm               |
| 1724 | ENSG00000100473 | COCH     | Supported | Vesicles                          |
| 1725 | ENSG00000100478 | AP4S1    | Supported | Vesicles                          |
| 1726 | ENSG00000100479 | POLE2    | Supported | Nuclear bVesicles                 |
| 1727 | ENSG00000100483 | VCPKMT   | Supported | Cytosol                           |
| 1728 | ENSG00000100485 | SOS2     | Approved  | Nucleoplasm;Vesicl                |
| 1729 | ENSG00000100490 | CDKL1    | Enhanced  | Nucleoplasm;Vesicles              |
| 1730 | ENSG00000100503 | NIN      | Enhanced  | Centrosome;Nucleoli Nucleopla     |
| 1731 | ENSG00000100504 | PYGL     | Supported | Cytosol;Plasma membrane           |
| 1732 | ENSG00000100519 | PSMC6    | Approved  | Cytosol;Nucleoplas                |
| 1733 | ENSG00000100526 | CDKN3    | Enhanced  | Cytosol                           |
| 1734 | ENSG00000100528 | CNIH1    | Approved  | Vesicles                          |
| 1735 | ENSG00000100532 | CGRRF1   | Supported | NucleoplaVesicles                 |
| 1736 | ENSG00000100554 | ATP6V1D  | Approved  | Nucleoplasm                       |
| 1737 | ENSG00000100557 | CCDC198  | Uncertain | Cytosol;N                         |
| 1738 | ENSG00000100558 | PLEK2    | Uncertain | Cytosol;V                         |
| 1739 | ENSG00000100568 | VTI1B    | Enhanced  | Golgi apparatus;Vesicles          |
| 1740 | ENSG00000100575 | TIMM9    | Supported | Mitochondria                      |
| 1741 | ENSG00000100577 | GSTZ1    | Approved  | Cytosol;Nucleoplas                |
| 1742 | ENSG00000100578 | KIAA0586 | Approved  | Cytosol;Nucleoplas                |
| 1743 | ENSG00000100583 | SAMD15   | Approved  | Nuclear membrane;N                |
| 1744 | ENSG00000100591 | AHSA1    | Supported | Cytosol                           |
| 1745 | ENSG00000100592 | DAAM1    | Approved  | Cytosol;Plasma mem                |
| 1746 | ENSG00000100593 | ISM2     | Supported | Nucleoplasm                       |
| 1747 | ENSG00000100596 | SPTLC2   | Approved  | Mitochondria                      |
| 1748 | ENSG00000100600 | LGMN     | Approved  | Nucleoplasm;Vesicl                |
| 1749 | ENSG00000100601 | ALKBH1   | Supported | Nucleoplasm Endoplasm             |
| 1750 | ENSG00000100603 | SNW1     | Enhanced  | Nucleoplasm Cytosol               |
| 1751 | ENSG00000100604 | CHGA     | Supported | Vesicles                          |
| 1752 | ENSG00000100605 | ITPK1    | Approved  | Mitochondria                      |
| 1753 | ENSG00000100612 | DHRS7    | Approved  | Mitochondria;Nucle                |
| 1754 | ENSG00000100614 | PPM1A    | Supported | Cytosol Plasma membrane           |
| 1755 | ENSG00000100625 | SIX4     | Approved  | Nucleoplasm                       |
| 1756 | ENSG00000100626 | GALNT16  | Approved  | Nucleoplasm                       |
| 1757 | ENSG00000100628 | ASB2     | Approved  | Cytosol;Nucleoli f                |
| 1758 | ENSG00000100629 | CEP128   | Supported | CentriolaCytosol                  |

|      |                 |          |           |                                      |                             |
|------|-----------------|----------|-----------|--------------------------------------|-----------------------------|
| 1759 | ENSG00000100632 | ERH      | Approved  |                                      | Cytosol;Nucleoplas          |
| 1760 | ENSG00000100644 | HIF1A    | Supported | NucleoplaNuclear                     | bodies;Plasma membr         |
| 1761 | ENSG00000100647 | SUSD6    | Approved  |                                      | Intermediate filam          |
| 1762 | ENSG00000100650 | SRSF5    | Supported | Nucleoplasm                          | Cytosol;Nucleoli            |
| 1763 | ENSG00000100664 | EIF5     | Enhanced  | Cytosol;Plasma membrane              |                             |
| 1764 | ENSG00000100697 | DICER1   | Supported |                                      | Cytosol                     |
| 1765 | ENSG00000100714 | MTHFD1   | Enhanced  | Cytosol                              |                             |
| 1766 | ENSG00000100721 | TCL1A    | Enhanced  | Cytosol;Endoplasmic reticulum;Nucleo |                             |
| 1767 | ENSG00000100722 | ZC3H14   | Enhanced  | Nuclear speckles                     | Nucleoli                    |
| 1768 | ENSG00000100726 | TEL02    | Supported |                                      | Cytosol;Nuclear bodies      |
| 1769 | ENSG00000100731 | PCNX1    | Approved  |                                      | Nucleoplasm                 |
| 1770 | ENSG00000100744 | GSKIP    | Approved  |                                      | Golgi apparatus;Nu          |
| 1771 | ENSG00000100749 | VRK1     | Supported |                                      | Cytosol;Nucleoplasm         |
| 1772 | ENSG00000100764 | PSMC1    | Enhanced  | Cytosol;Nucleoplasm                  |                             |
| 1773 | ENSG00000100767 | PAPLN    | Approved  |                                      | Nucleoplasm                 |
| 1774 | ENSG00000100784 | RPS6KA5  | Enhanced  | Nucleoplasm                          |                             |
| 1775 | ENSG00000100796 | PPP4R3A  | Supported |                                      | Cytosol;Nuclear speckles;Nu |
| 1776 | ENSG00000100802 | C14orf93 | Approved  |                                      | Nucleoplasm;Plasma          |
| 1777 | ENSG00000100804 | PSMB5    | Supported |                                      | Centrosome;Nucleoplasm      |
| 1778 | ENSG00000100811 | YY1      | Supported |                                      | Nucleoli Vesicles           |
| 1779 | ENSG00000100813 | ACIN1    | Supported |                                      | Nucleoplasm Cytosol;P       |
| 1780 | ENSG00000100815 | TRIP11   | Enhanced  | Golgi apparatus                      | Nucleoplasm                 |
| 1781 | ENSG00000100823 | APEX1    | Supported |                                      | Nucleoplasm                 |
| 1782 | ENSG00000100836 | PABPN1   | Approved  |                                      | Nuclear speckles;N          |
| 1783 | ENSG00000100842 | EFS      | Uncertain |                                      | Cytosol;N                   |
| 1784 | ENSG00000100852 | ARHGAP5  | Supported | Cytosol                              | Endoplasmic reticu          |
| 1785 | ENSG00000100867 | DHRS2    | Supported |                                      | Mitochondria;Nucleoplasm    |
| 1786 | ENSG00000100883 | SRP54    | Supported | Cytosol                              | Nucleoli                    |
| 1787 | ENSG00000100888 | CHD8     | Enhanced  | Nucleoplasm                          | Plasma membrane             |
| 1788 | ENSG00000100889 | PCK2     | Enhanced  | Mitochondria                         |                             |
| 1789 | ENSG00000100890 | KIAA0391 | Supported |                                      | MitochondNucleoplasm        |
| 1790 | ENSG00000100897 | DCAF11   | Enhanced  | Nucleoplasm                          |                             |
| 1791 | ENSG00000100902 | PSMA6    | Supported |                                      | Nucleoplasm                 |
| 1792 | ENSG00000100906 | NFKBIA   | Enhanced  | Cytosol                              |                             |
| 1793 | ENSG00000100908 | EMC9     | Approved  |                                      | Golgi apparatus             |
| 1794 | ENSG00000100911 | PSME2    | Approved  |                                      | Nucleoplasm                 |
| 1795 | ENSG00000100916 | BRMS1L   | Supported |                                      | Nucleoplasm                 |
| 1796 | ENSG00000100918 | REC8     | Approved  |                                      | Nucleoplasm                 |
| 1797 | ENSG00000100926 | TM9SF1   | Approved  |                                      | Golgi apparatus             |
| 1798 | ENSG00000100934 | SEC23A   | Approved  |                                      | Nucleoplasm;Vesicl          |
| 1799 | ENSG00000100938 | GMPR2    | Approved  |                                      | Nucleoli;Nucleopla          |
| 1800 | ENSG00000100941 | PNN      | Supported |                                      | Nuclear speckles            |
| 1801 | ENSG00000100949 | RABGGTA  | Enhanced  | Nucleoplasm                          |                             |
| 1802 | ENSG00000100968 | NFATC4   | Supported |                                      | Cytosol;Nuclear speckles    |
| 1803 | ENSG00000100982 | PCIF1    | Supported |                                      | Cytokinetic bridge;Microtub |
| 1804 | ENSG00000100983 | GSS      | Supported |                                      | Nucleoplasm                 |
| 1805 | ENSG00000100985 | MMP9     | Approved  |                                      | Cytosol                     |
| 1806 | ENSG00000100991 | TRPC4AP  | Approved  |                                      | Cytosol                     |
| 1807 | ENSG00000100994 | PYGB     | Approved  |                                      | Cytosol                     |
| 1808 | ENSG00000101003 | GINS1    | Approved  |                                      | Nucleoplasm                 |
| 1809 | ENSG00000101004 | NINL     | Approved  |                                      | Cytokinetic bridge          |
| 1810 | ENSG00000101019 | UQCC1    | Approved  |                                      | Actin filaments;Nu          |
| 1811 | ENSG00000101040 | ZMYND8   | Supported | Nucleopla                            | Golgi apparatus             |
| 1812 | ENSG00000101049 | SGK2     | Supported |                                      | Nucleoplasm                 |
| 1813 | ENSG00000101052 | IFT52    | Approved  |                                      | Cytosol                     |

|      |                 |          |           |                                |                             |
|------|-----------------|----------|-----------|--------------------------------|-----------------------------|
| 1814 | ENSG00000101057 | MYBL2    | Supported | Nucleoplasm                    | Cytosol                     |
| 1815 | ENSG00000101076 | HNF4A    | Supported | Nucleoplasm                    |                             |
| 1816 | ENSG00000101082 | SLA2     | Approved  |                                | Golgi apparatus;Nu          |
| 1817 | ENSG00000101084 | C20orf24 | Approved  |                                | Cytosol                     |
| 1818 | ENSG00000101096 | NFATC2   | Supported |                                | Cytosol;Nucleoplasm         |
| 1819 | ENSG00000101098 | RIMS4    | Approved  |                                | Nucleoplasm                 |
| 1820 | ENSG00000101104 | PABPC1L  | Approved  |                                | Cytosol;Nuclear bo          |
| 1821 | ENSG00000101109 | STK4     | Supported |                                | Cytosol;Nuclear bodies;Nucl |
| 1822 | ENSG00000101115 | SALL4    | Enhanced  | Nucleoplasm                    |                             |
| 1823 | ENSG00000101126 | ADNP     | Approved  |                                | Nucleoplasm                 |
| 1824 | ENSG00000101134 | DOK5     | Approved  |                                | Focal adhesion sit          |
| 1825 | ENSG00000101138 | CSTF1    | Enhanced  | Nucleoplasm                    |                             |
| 1826 | ENSG00000101144 | BMP7     | Approved  |                                | Nucleoli;Nucleopla          |
| 1827 | ENSG00000101146 | RAE1     | Uncertain | Nucleoplasm                    | Nucleoli                    |
| 1828 | ENSG00000101150 | TPD52L2  | Approved  |                                | Cytosol;Vesicles            |
| 1829 | ENSG00000101152 | DNAJC5   | Uncertain |                                | Golgi app                   |
| 1830 | ENSG00000101158 | NELFCD   | Supported |                                | Nuclear bCytosol;Vesicles   |
| 1831 | ENSG00000101160 | CTSZ     | Supported |                                | Vesicles                    |
| 1832 | ENSG00000101161 | PRPF6    | Supported |                                | Nuclear speckles            |
| 1833 | ENSG00000101166 | PRELID3B | Approved  |                                | Nucleoplasm                 |
| 1834 | ENSG00000101187 | SLC04A1  | Supported |                                | Cell Junctions              |
| 1835 | ENSG00000101188 | NTSR1    | Supported |                                | Plasma membrane             |
| 1836 | ENSG00000101189 | MRGBP    | Supported |                                | Nucleoplasm                 |
| 1837 | ENSG00000101190 | TCFL5    | Supported |                                | Nucleoplasm                 |
| 1838 | ENSG00000101191 | DID01    | Approved  |                                | Cytosol;Nucleoplas          |
| 1839 | ENSG00000101193 | GID8     | Supported |                                | Cell Junctions;Nucleoplasm  |
| 1840 | ENSG00000101194 | SLC17A9  | Approved  |                                | Nucleoplasm                 |
| 1841 | ENSG00000101197 | BIRC7    | Enhanced  | Centrosome;Cytosol;Nucleoplasm |                             |
| 1842 | ENSG00000101199 | ARFGAP1  | Supported |                                | Golgi apparatus;VeNuclear m |
| 1843 | ENSG00000101210 | EEF1A2   | Supported |                                | Cytosol                     |
| 1844 | ENSG00000101213 | PTK6     | Supported |                                | Cytosol;Nuclear bodies      |
| 1845 | ENSG00000101216 | GMEB2    | Enhanced  | Nucleoplasm                    | Cytosol                     |
| 1846 | ENSG00000101220 | C20orf27 | Approved  |                                | Cytosol;Nucleoplas          |
| 1847 | ENSG00000101224 | CDC25B   | Supported |                                | Mitotic spindle;Vesicles    |
| 1848 | ENSG00000101236 | RNF24    | Supported |                                | Golgi apparatus             |
| 1849 | ENSG00000101246 | ARFRP1   | Supported |                                | Golgi apparatus             |
| 1850 | ENSG00000101255 | TRIB3    | Supported |                                | Nucleoplasm                 |
| 1851 | ENSG00000101265 | RASSF2   | Supported |                                | Cytosol;NGolgi apparatus;Pl |
| 1852 | ENSG00000101266 | CSNK2A1  | Supported |                                | Nucleoplasm                 |
| 1853 | ENSG00000101290 | CDS2     | Approved  |                                | Cytosol;Endoplasmic         |
| 1854 | ENSG00000101294 | HM13     | Supported |                                | Endoplasmic reticulum       |
| 1855 | ENSG00000101298 | SNPH     | Uncertain |                                | Cytokinet                   |
| 1856 | ENSG00000101306 | MYLK2    | Supported |                                | Endoplasmic reticulum       |
| 1857 | ENSG00000101307 | SIRPB1   | Uncertain |                                | Vesicles                    |
| 1858 | ENSG00000101310 | SEC23B   | Supported |                                | Vesicles                    |
| 1859 | ENSG00000101331 | CCM2L    | Approved  |                                | Nucleoplasm                 |
| 1860 | ENSG00000101333 | PLCB4    | Approved  |                                | Microtubules;Nucle          |
| 1861 | ENSG00000101335 | MYL9     | Approved  |                                | Nucleoli fibrillar          |
| 1862 | ENSG00000101336 | HCK      | Approved  |                                | Nucleoplasm;Plasma          |
| 1863 | ENSG00000101346 | POFUT1   | Approved  |                                | Centrosome                  |
| 1864 | ENSG00000101347 | SAMHD1   | Supported |                                | Nucleoplasm                 |
| 1865 | ENSG00000101349 | PAK5     | Approved  |                                | Nucleoplasm                 |
| 1866 | ENSG00000101350 | KIF3B    | Uncertain |                                | Golgi app                   |
| 1867 | ENSG00000101353 | MROH8    | Approved  |                                | Nucleoplasm                 |
| 1868 | ENSG00000101361 | NOP56    | Enhanced  |                                | Nucleoli fibrillar center   |

|      |                 |          |           |                              |                             |
|------|-----------------|----------|-----------|------------------------------|-----------------------------|
| 1869 | ENSG00000101363 | MANBAL   | Approved  |                              | Mitochondria;Nucle          |
| 1870 | ENSG00000101365 | IDH3B    | Enhanced  | Mitochondria                 |                             |
| 1871 | ENSG00000101367 | MAPRE1   | Enhanced  | Centriolar satellite;Cytosol |                             |
| 1872 | ENSG00000101384 | JAG1     | Approved  |                              | Golgi apparatus;Pl          |
| 1873 | ENSG00000101391 | CDK5RAP1 | Approved  |                              | Mitochondria;Nucle          |
| 1874 | ENSG00000101407 | TTI1     | Approved  |                              | Nucleoplasm;Vesicl          |
| 1875 | ENSG00000101412 | E2F1     | Enhanced  | Centrosome;Nucleoplasm       |                             |
| 1876 | ENSG00000101413 | RPRD1B   | Supported |                              | Nucleoplasm                 |
| 1877 | ENSG00000101417 | PXMP4    | Approved  |                              | Nucleoli fibrillar          |
| 1878 | ENSG00000101439 | CST3     | Supported |                              | Golgi apparatus;Vesicles    |
| 1879 | ENSG00000101440 | ASIP     | Supported |                              | Vesicles                    |
| 1880 | ENSG00000101444 | AHCY     | Supported |                              | Cytosol                     |
| 1881 | ENSG00000101445 | PPP1R16B | Supported |                              | Nuclear speckles;Plasma mem |
| 1882 | ENSG00000101447 | FAM83D   | Supported |                              | Cytosol;MCytokinetic bridge |
| 1883 | ENSG00000101452 | DHX35    | Approved  |                              | Centrosome;Nuclear          |
| 1884 | ENSG00000101457 | DNTTIP1  | Supported |                              | Nucleoli;Nucleoplasm        |
| 1885 | ENSG00000101460 | MAP1LC3A | Supported |                              | Vesicles                    |
| 1886 | ENSG00000101463 | SYNDIG1  | Enhanced  | Vesicles                     |                             |
| 1887 | ENSG00000101464 | PIGU     | Approved  |                              | Cytosol;Nucleoplas          |
| 1888 | ENSG00000101470 | TNNC2    | Approved  |                              | Nucleoplasm;Vesicl          |
| 1889 | ENSG00000101473 | ACOT8    | Supported | Vesicles                     | Mitochondria                |
| 1890 | ENSG00000101474 | APMAP    | Approved  |                              | Plasma membrane             |
| 1891 | ENSG00000101489 | CELF4    | Supported |                              | Nucleoplasm                 |
| 1892 | ENSG00000101493 | ZNF516   | Approved  |                              | Cytosol;Nucleoplas          |
| 1893 | ENSG00000101544 | ADNP2    | Approved  |                              | Cytosol;Mitochondr          |
| 1894 | ENSG00000101546 | RBFA     | Supported |                              | Mitochondria                |
| 1895 | ENSG00000101557 | USP14    | Supported |                              | Cytosol                     |
| 1896 | ENSG00000101558 | VAPA     | Enhanced  | Endoplasmic reticulum        |                             |
| 1897 | ENSG00000101574 | METTL4   | Approved  |                              | Mitochondria                |
| 1898 | ENSG00000101577 | LPIN2    | Supported |                              | Actin filaments;Cytosol;Pla |
| 1899 | ENSG00000101596 | SMCHD1   | Approved  |                              | Nuclear bodies;Nuc          |
| 1900 | ENSG00000101608 | MYL12A   | Approved  |                              | Nucleoli fibrillar          |
| 1901 | ENSG00000101638 | ST8SIA5  | Approved  |                              | Midbody;Plasma mem          |
| 1902 | ENSG00000101639 | CEP192   | Approved  |                              | Centrosome;Cytosol          |
| 1903 | ENSG00000101654 | RNMT     | Supported |                              | Nucleoli fibrillar center;N |
| 1904 | ENSG00000101665 | SMAD7    | Supported |                              | Cytosol;Nucleoplasm         |
| 1905 | ENSG00000101695 | RNF125   | Supported |                              | Golgi apparatus Nucleoli    |
| 1906 | ENSG00000101745 | ANKRD12  | Supported |                              | NucleoplaCytosol            |
| 1907 | ENSG00000101746 | NOL4     | Supported |                              | Nucleoplasm                 |
| 1908 | ENSG00000101751 | POLI     | Supported |                              | Nuclear sCytoplasmic bodies |
| 1909 | ENSG00000101752 | MIB1     | Supported |                              | Plasma meVesicles           |
| 1910 | ENSG00000101773 | RBBP8    | Supported |                              | Nucleoplasm                 |
| 1911 | ENSG00000101782 | RIOK3    | Approved  |                              | Centriolar satelli          |
| 1912 | ENSG00000101811 | CSTF2    | Enhanced  | Nuclear bodies;Nucleoplasm   |                             |
| 1913 | ENSG00000101842 | VSIG1    | Approved  |                              | Cytosol;Vesicles            |
| 1914 | ENSG00000101843 | PSMD10   | Supported |                              | Cytosol;Intermediate filame |
| 1915 | ENSG00000101844 | ATG4A    | Approved  |                              | Actin filaments;Mi          |
| 1916 | ENSG00000101849 | TBL1X    | Approved  |                              | Nucleoli;Nucleopla          |
| 1917 | ENSG00000101856 | PGRMC1   | Enhanced  | Endoplasmic reticu           | Nucleoli                    |
| 1918 | ENSG00000101868 | POLA1    | Supported |                              | NucleoplaCytosol            |
| 1919 | ENSG00000101871 | MID1     | Approved  |                              | Centriolar satelli          |
| 1920 | ENSG00000101882 | NKAP     | Supported |                              | NucleoplaCytosol            |
| 1921 | ENSG00000101888 | NXT2     | Supported |                              | Cytosol;Nucleoplasm         |
| 1922 | ENSG00000101911 | PRPS2    | Uncertain |                              | Vesicles                    |
| 1923 | ENSG00000101928 | MOSPD1   | Approved  |                              | Nucleoplasm;Vesicl          |

|      |                 |          |           |                        |                    |
|------|-----------------|----------|-----------|------------------------|--------------------|
| 1924 | ENSG00000101935 | AMMECR1  | Approved  | Nucleoplasm            | Mitochond          |
| 1925 | ENSG00000101940 | WDR13    | Supported | Nucleopla              | Centriolar satelli |
| 1926 | ENSG00000101951 | PAGE4    | Approved  |                        | Golgi apparatus;Ve |
| 1927 | ENSG00000101966 | XIAP     | Supported | Cytosol;N              | Plasma membrane    |
| 1928 | ENSG00000101997 | CCDC22   | Approved  |                        | Cytosol;Nucleoplas |
| 1929 | ENSG00000102010 | BMX      | Supported | Plasma me              | Nucleoplasm        |
| 1930 | ENSG00000102024 | PLS3     | Approved  | Cytosol                | Plasma membrane    |
| 1931 | ENSG00000102030 | NAA10    | Supported | Cytosol;               | Nucleoli           |
| 1932 | ENSG00000102034 | ELF4     | Supported | Nuclear b              | Nucleoplasm        |
| 1933 | ENSG00000102038 | SMARCA1  | Supported | Nucleopla              | Vesicles           |
| 1934 | ENSG00000102053 | ZC3H12B  | Approved  |                        | Endoplasmic reticu |
| 1935 | ENSG00000102054 | RBBP7    | Enhanced  | Nucleoplasm            |                    |
| 1936 | ENSG00000102057 | KCND1    | Uncertain |                        | Nucleopla          |
| 1937 | ENSG00000102078 | SLC25A14 | Approved  |                        | Mitochondria       |
| 1938 | ENSG00000102081 | FMR1     | Enhanced  | Cytosol                |                    |
| 1939 | ENSG00000102096 | PIM2     | Approved  |                        | Cytosol            |
| 1940 | ENSG00000102098 | SCML2    | Approved  |                        | Cytosol;Nucleoli   |
| 1941 | ENSG00000102100 | SLC35A2  | Supported |                        | Golgi apparatus    |
| 1942 | ENSG00000102103 | PQBP1    | Enhanced  | Nuclear speckles       |                    |
| 1943 | ENSG00000102109 | PCSK1N   | Approved  |                        | Vesicles           |
| 1944 | ENSG00000102119 | EMD      | Enhanced  | Endoplasmic reticulum; | Nuclear membra     |
| 1945 | ENSG00000102125 | TAZ      | Approved  |                        | Plasma membrane    |
| 1946 | ENSG00000102128 | RAB40AL  | Uncertain |                        | Vesicles           |
| 1947 | ENSG00000102145 | GATA1    | Supported | Nucleoplasm            |                    |
| 1948 | ENSG00000102172 | SMS      | Approved  |                        | Cytosol;Nuclear bo |
| 1949 | ENSG00000102178 | UBL4A    | Supported | Cytosol;Nucleoplasm    |                    |
| 1950 | ENSG00000102181 | CD99L2   | Supported | Plasma membrane        |                    |
| 1951 | ENSG00000102189 | EEA1     | Supported | Vesicles               |                    |
| 1952 | ENSG00000102195 | GPR50    | Supported | Plasma me              | Nucleoplasm        |
| 1953 | ENSG00000102218 | RP2      | Approved  | Plasma membrane        | Nuclear b          |
| 1954 | ENSG00000102221 | JADE3    | Approved  |                        | Nucleoli;Nucleopla |
| 1955 | ENSG00000102225 | CDK16    | Uncertain |                        | Cytosol;M          |
| 1956 | ENSG00000102226 | USP11    | Supported | Nucleoplasm            |                    |
| 1957 | ENSG00000102241 | HTATSF1  | Enhanced  | Nucleoplasm            |                    |
| 1958 | ENSG00000102243 | VGLL1    | Supported | Nucleoplasm            |                    |
| 1959 | ENSG00000102265 | TIMP1    | Approved  |                        | Golgi apparatus    |
| 1960 | ENSG00000102271 | KLHL4    | Supported | Microtubu              | Centriolar satelli |
| 1961 | ENSG00000102302 | FGD1     | Approved  |                        | Cytosol;Plasma mem |
| 1962 | ENSG00000102309 | PIN4     | Supported | Nucleoli               | Nucleoplasm        |
| 1963 | ENSG00000102312 | PORCN    | Approved  |                        | Vesicles           |
| 1964 | ENSG00000102316 | MAGED2   | Enhanced  | Cytosol;Nucleoli;      | Nucleoplasm        |
| 1965 | ENSG00000102317 | RBM3     | Enhanced  | Nucleoplasm            |                    |
| 1966 | ENSG00000102349 | KLF8     | Supported | Nucleoplasm            |                    |
| 1967 | ENSG00000102362 | SYTL4    | Approved  |                        | Vesicles           |
| 1968 | ENSG00000102383 | ZDHHC15  | Approved  |                        | Cytosol;Nuclear sp |
| 1969 | ENSG00000102384 | CENPI    | Supported | Nuclear b              | Cytosol            |
| 1970 | ENSG00000102385 | DRP2     | Approved  |                        | Nuclear speckles;P |
| 1971 | ENSG00000102387 | TAF7L    | Approved  |                        | Nucleoplasm        |
| 1972 | ENSG00000102390 | PBDC1    | Approved  |                        | Cytosol;Nucleoli;N |
| 1973 | ENSG00000102401 | ARMCX3   | Approved  |                        | Cytosol;Golgi appa |
| 1974 | ENSG00000102409 | BEX4     | Supported | Cytosol;Nucleoplasm    |                    |
| 1975 | ENSG00000102445 | RUBCNL   | Supported | Cytosol                |                    |
| 1976 | ENSG00000102466 | FGF14    | Approved  |                        | Nucleoli fibrillar |
| 1977 | ENSG00000102471 | NDFIP2   | Supported | Vesicles               |                    |
| 1978 | ENSG00000102531 | FNDC3A   | Approved  |                        | Endoplasmic reticu |



|      |                 |          |           |                |                             |
|------|-----------------|----------|-----------|----------------|-----------------------------|
| 1979 | ENSG00000102543 | CDADC1   | Approved  |                | Nucleoplasm                 |
| 1980 | ENSG00000102547 | CAB39L   | Approved  |                | Vesicles                    |
| 1981 | ENSG00000102554 | KLF5     | Supported |                | Nucleoplasm Golgi app       |
| 1982 | ENSG00000102572 | STK24    | Supported |                | Cytosol;Nucleoli            |
| 1983 | ENSG00000102575 | ACP5     | Approved  |                | Cytosol                     |
| 1984 | ENSG00000102580 | DNAJC3   | Approved  |                | Endoplasmic reticu          |
| 1985 | ENSG00000102699 | PARP4    | Supported |                | Cytosol                     |
| 1986 | ENSG00000102710 | SUPT20H  | Approved  |                | Nucleoli fibrillar          |
| 1987 | ENSG00000102738 | MRPS31   | Supported |                | Mitochondria Nucleoli       |
| 1988 | ENSG00000102753 | KPNA3    | Approved  |                | Cytosol;Nucleoplas          |
| 1989 | ENSG00000102755 | FLT1     | Supported |                | Plasma meActin filaments    |
| 1990 | ENSG00000102760 | RGCC     | Supported |                | Nucleoli;Nucleoplasm        |
| 1991 | ENSG00000102763 | VWA8     | Approved  |                | Lipid droplets;Ves          |
| 1992 | ENSG00000102781 | KATNAL1  | Uncertain |                | Cytosol;N                   |
| 1993 | ENSG00000102786 | INTS6    | Supported |                | NucleoplaActin filaments    |
| 1994 | ENSG00000102796 | DHRS12   | Supported |                | NucleoplaGolgi apparatus;Ve |
| 1995 | ENSG00000102804 | TSC22D1  | Approved  |                | Nuclear bodies;Nuc          |
| 1996 | ENSG00000102837 | OLFM4    | Supported |                | Cytosol;NucleoplasCytokinet |
| 1997 | ENSG00000102854 | MSLN     | Supported |                | Vesicles Nucleoplasm        |
| 1998 | ENSG00000102858 | MGRN1    | Approved  |                | Vesicles                    |
| 1999 | ENSG00000102870 | ZNF629   | Supported |                | NucleoplaGolgi apparatus    |
| 2000 | ENSG00000102871 | TRADD    | Approved  |                | Cytosol                     |
| 2001 | ENSG00000102878 | HSF4     | Supported |                | Nuclear speckles            |
| 2002 | ENSG00000102879 | CORO1A   | Approved  |                | Cytosol                     |
| 2003 | ENSG00000102882 | MAPK3    | Approved  |                | Nucleoplasm                 |
| 2004 | ENSG00000102886 | GDPD3    | Approved  |                | Cytokinetic bridge          |
| 2005 | ENSG00000102890 | ELMO3    | Approved  |                | Cell Junctions;Pla          |
| 2006 | ENSG00000102893 | PHKB     | Approved  |                | Golgi apparatus             |
| 2007 | ENSG00000102897 | LYRM1    | Supported |                | NucleoplaMidbody            |
| 2008 | ENSG00000102898 | NUTF2    | Approved  |                | Microtubules                |
| 2009 | ENSG00000102901 | CENPT    | Enhanced  | Nuclear bodies |                             |
| 2010 | ENSG00000102904 | TSNAXIP1 | Approved  |                | Cytosol;Nucleoplas          |
| 2011 | ENSG00000102908 | NFAT5    | Supported |                | Cytosol;Nucleoplasm         |
| 2012 | ENSG00000102921 | N4BP1    | Approved  |                | Nucleoli fibrillar          |
| 2013 | ENSG00000102935 | ZNF423   | Enhanced  | Nucleoplasm    |                             |
| 2014 | ENSG00000102967 | DHODH    | Enhanced  | Mitochondria   | Cytosol;Nucleoplas          |
| 2015 | ENSG00000102974 | CTCF     | Supported |                | Nucleoplasm                 |
| 2016 | ENSG00000102977 | ACD      | Enhanced  | Nuclear bodies |                             |
| 2017 | ENSG00000102978 | POLR2C   | Supported |                | Cytosol;Microtubules;Nucleo |
| 2018 | ENSG00000102981 | PARD6A   | Supported |                | Actin filaments;Cell Juncti |
| 2019 | ENSG00000102984 | ZNF821   | Supported |                | Nuclear sNucleoplasm        |
| 2020 | ENSG00000102996 | MMP15    | Approved  |                | Cytosol;Nucleoplas          |
| 2021 | ENSG00000103005 | USB1     | Supported |                | Nucleoplasm                 |
| 2022 | ENSG00000103018 | CYB5B    | Approved  |                | Centriolar satelli          |
| 2023 | ENSG00000103024 | NME3     | Approved  |                | Cytosol;Nucleoplas          |
| 2024 | ENSG00000103034 | NDRG4    | Uncertain |                | Cytosol;N                   |
| 2025 | ENSG00000103035 | PSMD7    | Enhanced  | Nucleoplasm    |                             |
| 2026 | ENSG00000103037 | SETD6    | Supported |                | Nucleoplasm Cytosol         |
| 2027 | ENSG00000103042 | SLC38A7  | Approved  |                | Cytosol;Nucleoplas          |
| 2028 | ENSG00000103043 | VAC14    | Supported | Vesicles       | Cytosol                     |
| 2029 | ENSG00000103044 | HAS3     | Approved  |                | Microtubules                |
| 2030 | ENSG00000103047 | TANG06   | Approved  |                | Cytosol;Golgi appa          |
| 2031 | ENSG00000103051 | COG4     | Approved  |                | Golgi apparatus;Ve          |
| 2032 | ENSG00000103056 | SMPD3    | Supported |                | Endoplasmic reticulum       |
| 2033 | ENSG00000103061 | SLC7A6OS | Approved  |                | Cytosol;Nucleoplas          |

|      |                 |           |           |                       |                             |
|------|-----------------|-----------|-----------|-----------------------|-----------------------------|
| 2034 | ENSG00000103064 | SLC7A6    | Approved  |                       | Plasma membrane;Ve          |
| 2035 | ENSG00000103066 | PLA2G15   | Supported |                       | Vesicles Nucleoplasm        |
| 2036 | ENSG00000103067 | ESRP2     | Enhanced  | Nucleoplasm           |                             |
| 2037 | ENSG00000103089 | FA2H      | Uncertain |                       | Nuclear m                   |
| 2038 | ENSG00000103091 | WDR59     | Approved  |                       | Cytosol                     |
| 2039 | ENSG00000103111 | MON1B     | Approved  |                       | Cytosol                     |
| 2040 | ENSG00000103121 | CMC2      | Supported |                       | Mitochondria                |
| 2041 | ENSG00000103126 | AXIN1     | Supported |                       | Nucleoli;Vesicles           |
| 2042 | ENSG00000103145 | HCFC1R1   | Approved  |                       | Nucleoplasm                 |
| 2043 | ENSG00000103148 | NPRL3     | Approved  |                       | Cytosol                     |
| 2044 | ENSG00000103152 | MPG       | Supported |                       | Cytosol;Nucleoplasm         |
| 2045 | ENSG00000103160 | HSDL1     | Approved  |                       | Mitochondria Intermedi      |
| 2046 | ENSG00000103168 | TAF1C     | Supported |                       | Nucleoli fibrillar center;N |
| 2047 | ENSG00000103184 | SEC14L5   | Uncertain |                       | Cytosol;G                   |
| 2048 | ENSG00000103187 | COTL1     | Supported |                       | Cytosol                     |
| 2049 | ENSG00000103194 | USP10     | Enhanced  | Cytosol               | Nucleoplasm                 |
| 2050 | ENSG00000103196 | CRISPLD2  | Approved  |                       | Nucleoli;Nucleopla          |
| 2051 | ENSG00000103197 | TSC2      | Enhanced  | Cytosol               |                             |
| 2052 | ENSG00000103199 | ZNF500    | Enhanced  | Cytosol;Nucleoplasm   |                             |
| 2053 | ENSG00000103202 | NME4      | Supported |                       | Mitochondria                |
| 2054 | ENSG00000103222 | ABCC1     | Supported |                       | Plasma membrane             |
| 2055 | ENSG00000103241 | FOXF1     | Approved  |                       | Nucleoplasm                 |
| 2056 | ENSG00000103245 | NARFL     | Approved  |                       | Cytosol;Plasma mem          |
| 2057 | ENSG00000103248 | MTHFSD    | Approved  |                       | Nucleoplasm;Vesicl          |
| 2058 | ENSG00000103249 | CLCN7     | Supported |                       | Nucleoplasm                 |
| 2059 | ENSG00000103254 | FAM173A   | Approved  |                       | Cytosol                     |
| 2060 | ENSG00000103257 | SLC7A5    | Supported |                       | Cytosol;PVesicles           |
| 2061 | ENSG00000103260 | METRN     | Approved  |                       | Cytosol;Nuclear me          |
| 2062 | ENSG00000103264 | FBX031    | Approved  |                       | Cytosol;Golgi appa          |
| 2063 | ENSG00000103266 | STUB1     | Supported |                       | Cytosol;Nucleoplasm         |
| 2064 | ENSG00000103269 | RHBDL1    | Approved  |                       | Nucleoplasm                 |
| 2065 | ENSG00000103274 | NUBP1     | Supported |                       | Cytosol                     |
| 2066 | ENSG00000103313 | MEFV      | Supported |                       | Cytosol;Nucleoplasm         |
| 2067 | ENSG00000103316 | CRYM      | Supported |                       | Cytosol                     |
| 2068 | ENSG00000103319 | EEF2K     | Approved  |                       | Nucleoplasm                 |
| 2069 | ENSG00000103326 | CAPN15    | Approved  |                       | Nucleoplasm                 |
| 2070 | ENSG00000103342 | GSPT1     | Approved  |                       | Cytosol;Vesicles            |
| 2071 | ENSG00000103343 | ZNF174    | Supported |                       | NucleoplaActin filaments;Cy |
| 2072 | ENSG00000103351 | CLUAP1    | Supported |                       | NucleoplaVesicles           |
| 2073 | ENSG00000103353 | UBFD1     | Approved  |                       | Nucleoli;Nucleopla          |
| 2074 | ENSG00000103356 | EARS2     | Supported |                       | MitochondNucleoplasm        |
| 2075 | ENSG00000103365 | GGA2      | Enhanced  | Golgi apparatus       |                             |
| 2076 | ENSG00000103381 | CPPED1    | Supported |                       | Cytosol;Plasma membrane     |
| 2077 | ENSG00000103404 | USP31     | Approved  |                       | Cytosol                     |
| 2078 | ENSG00000103415 | HMOX2     | Approved  |                       | Cytosol;Vesicles            |
| 2079 | ENSG00000103423 | DNAJA3    | Enhanced  | Mitochondria;Vesicles |                             |
| 2080 | ENSG00000103426 | COR07-PAM | Approved  |                       | Mitochondria Microtubu      |
| 2081 | ENSG00000103449 | SALL1     | Approved  |                       | Cytosol;Nuclear sp          |
| 2082 | ENSG00000103460 | TOX3      | Enhanced  | NucleoplaCytosol      |                             |
| 2083 | ENSG00000103479 | RBL2      | Supported |                       | Nucleoli;Cytosol            |
| 2084 | ENSG00000103489 | XYLT1     | Approved  |                       | Endoplasmic reticu          |
| 2085 | ENSG00000103490 | PYCARD    | Supported |                       | Cytosol;Nucleoli;Nucleoplas |
| 2086 | ENSG00000103494 | RPGRIP1L  | Supported |                       | Cytosol Plasma membrane     |
| 2087 | ENSG00000103495 | MAZ       | Enhanced  | Nucleoplasm           |                             |
| 2088 | ENSG00000103496 | STX4      | Enhanced  | Plasma membrane       |                             |

|      |                 |          |           |                               |                             |
|------|-----------------|----------|-----------|-------------------------------|-----------------------------|
| 2089 | ENSG00000103502 | CDIPT    | Approved  |                               | Nuclear membrane;N          |
| 2090 | ENSG00000103507 | BCKDK    | Supported |                               | Mitochondria                |
| 2091 | ENSG00000103510 | KAT8     | Supported |                               | Nucleoplasm                 |
| 2092 | ENSG00000103512 | NOM01    | Approved  |                               | Endoplasmic reticu          |
| 2093 | ENSG00000103522 | IL21R    | Uncertain |                               | Cytosol;P                   |
| 2094 | ENSG00000103528 | SYT17    | Approved  |                               | Cytosol;Nucleoplas          |
| 2095 | ENSG00000103534 | TMC5     | Approved  |                               | Nucleoplasm;Plasma          |
| 2096 | ENSG00000103540 | CCP110   | Supported |                               | Centrosome                  |
| 2097 | ENSG00000103544 | VPS35L   | Approved  |                               | Mitochondria                |
| 2098 | ENSG00000103546 | SLC6A2   | Approved  |                               | Cytosol;Mitochondr          |
| 2099 | ENSG00000103549 | RNF40    | Supported |                               | Nucleoplasm                 |
| 2100 | ENSG00000103550 | KNOP1    | Enhanced  | Nucleoli                      | Cytosol                     |
| 2101 | ENSG00000103591 | AAGAB    | Supported |                               | Cytosol Nuclear speckles    |
| 2102 | ENSG00000103599 | IQCH     | Approved  |                               | Cytosol                     |
| 2103 | ENSG00000103642 | LACTB    | Supported |                               | Mitochondria                |
| 2104 | ENSG00000103647 | COR02B   | Approved  |                               | Focal adhesion sit          |
| 2105 | ENSG00000103653 | CSK      | Approved  |                               | Cytosol;Vesicles            |
| 2106 | ENSG00000103671 | TRIP4    | Supported |                               | Nuclear bodies;Nucleoplasm  |
| 2107 | ENSG00000103707 | MTFMT    | Approved  |                               | Cytosol;Nucleoplas          |
| 2108 | ENSG00000103723 | AP3B2    | Approved  |                               | Cytosol;Golgi appa          |
| 2109 | ENSG00000103740 | ACSBG1   | Approved  |                               | Vesicles                    |
| 2110 | ENSG00000103742 | IGDCC4   | Approved  |                               | Cytosol;Nucleoplas          |
| 2111 | ENSG00000103769 | RAB11A   | Enhanced  | Centriolar satellite;Vesicles |                             |
| 2112 | ENSG00000103811 | CTSH     | Supported |                               | Vesicles Cytoplasmic bodies |
| 2113 | ENSG00000103852 | TTC23    | Approved  |                               | Cytosol;Plasma mem          |
| 2114 | ENSG00000103855 | CD276    | Approved  |                               | Vesicles                    |
| 2115 | ENSG00000103876 | FAH      | Approved  |                               | Cytosol                     |
| 2116 | ENSG00000103932 | RPAP1    | Approved  |                               | Cytosol;Nucleoplas          |
| 2117 | ENSG00000103942 | HOMER2   | Supported |                               | Cytosol                     |
| 2118 | ENSG00000103966 | EHD4     | Approved  |                               | Plasma membrane             |
| 2119 | ENSG00000103978 | TMEM87A  | Supported |                               | Golgi apparatus             |
| 2120 | ENSG00000103994 | ZNF106   | Approved  |                               | Cytosol;Nucleoli;N          |
| 2121 | ENSG00000103995 | CEP152   | Supported |                               | Centrosome                  |
| 2122 | ENSG00000104043 | ATP8B4   | Approved  |                               | Nucleoplasm;Vesicl          |
| 2123 | ENSG00000104044 | OCA2     | Approved  |                               | Cytosol;Plasma mem          |
| 2124 | ENSG00000104047 | DTWD1    | Approved  |                               | Nucleoli;Nucleopla          |
| 2125 | ENSG00000104059 | FAM189A1 | Supported |                               | Nucleoplasm                 |
| 2126 | ENSG00000104064 | GABPB1   | Supported |                               | Nucleoplasm Cytoplasm       |
| 2127 | ENSG00000104067 | TJP1     | Enhanced  | Cell Junctions                |                             |
| 2128 | ENSG00000104081 | BMF      | Approved  |                               | Nucleoplasm                 |
| 2129 | ENSG00000104112 | SCG3     | Supported |                               | Vesicles                    |
| 2130 | ENSG00000104129 | DNAJC17  | Approved  |                               | Nucleoplasm                 |
| 2131 | ENSG00000104131 | EIF3J    | Enhanced  | Cytosol                       |                             |
| 2132 | ENSG00000104133 | SPG11    | Supported |                               | Cytosol;Nucleoli;Plasma mem |
| 2133 | ENSG00000104147 | OIP5     | Supported |                               | Nuclear sVesicles           |
| 2134 | ENSG00000104177 | MYEF2    | Supported |                               | Nucleoplasm                 |
| 2135 | ENSG00000104205 | SGK3     | Supported |                               | Vesicles Nucleoplasm        |
| 2136 | ENSG00000104213 | PDGFRL   | Approved  |                               | Golgi apparatus;Nu          |
| 2137 | ENSG00000104218 | CSPP1    | Supported |                               | Centriolar satellite        |
| 2138 | ENSG00000104221 | BRF2     | Supported |                               | Nucleoli                    |
| 2139 | ENSG00000104228 | TRIM35   | Approved  |                               | Nucleoplasm                 |
| 2140 | ENSG00000104231 | ZFAND1   | Approved  |                               | Centrosome;Cytosol          |
| 2141 | ENSG00000104299 | INTS9    | Enhanced  | Nucleoplasm                   |                             |
| 2142 | ENSG00000104312 | RIPK2    | Enhanced  | Cytosol                       |                             |
| 2143 | ENSG00000104313 | EYA1     | Supported |                               | Nuclear bodies;Nucleoplasm  |

|      |                 |           |           |                            |                             |
|------|-----------------|-----------|-----------|----------------------------|-----------------------------|
| 2144 | ENSG00000104320 | NBN       | Approved  |                            | Golgi apparatus;Nu          |
| 2145 | ENSG00000104324 | CPQ       | Supported |                            | Golgi apparatus;Vesicles    |
| 2146 | ENSG00000104325 | DECR1     | Supported |                            | Mitochondria Cytosol        |
| 2147 | ENSG00000104327 | CALB1     | Supported |                            | Vesicles                    |
| 2148 | ENSG00000104331 | IMPAD1    | Supported |                            | Golgi appCytosol;Nucleoplas |
| 2149 | ENSG00000104332 | SFRP1     | Approved  |                            | Cytosol;Nucleoli            |
| 2150 | ENSG00000104341 | LAPTM4B   | Approved  |                            | Golgi apparatus             |
| 2151 | ENSG00000104343 | UBE2W     | Approved  |                            | Nucleoli                    |
| 2152 | ENSG00000104356 | POP1      | Supported |                            | Nucleoli                    |
| 2153 | ENSG00000104365 | IKBKB     | Approved  |                            | Cytosol                     |
| 2154 | ENSG00000104368 | PLAT      | Approved  |                            | Actin filaments             |
| 2155 | ENSG00000104369 | JPH1      | Enhanced  | Nucleoplasm                |                             |
| 2156 | ENSG00000104375 | STK3      | Approved  |                            | Intermediate filam          |
| 2157 | ENSG00000104381 | GDAP1     | Supported |                            | MitochondCytosol            |
| 2158 | ENSG00000104408 | EIF3E     | Supported |                            | Cytosol                     |
| 2159 | ENSG00000104413 | ESRP1     | Enhanced  | Nuclear bodies;Nucleoplasm |                             |
| 2160 | ENSG00000104415 | WISP1     | Approved  |                            | Cytosol                     |
| 2161 | ENSG00000104419 | NDRG1     | Supported |                            | Cytosol;Microtubules        |
| 2162 | ENSG00000104427 | ZC2HC1A   | Approved  |                            | Actin filaments;Cy          |
| 2163 | ENSG00000104435 | STMN2     | Approved  |                            | Endoplasmic reticu          |
| 2164 | ENSG00000104442 | ARMC1     | Supported |                            | Mitochondria                |
| 2165 | ENSG00000104447 | TRPS1     | Supported |                            | Nucleoplasm                 |
| 2166 | ENSG00000104450 | SPAG1     | Supported |                            | Cytosol                     |
| 2167 | ENSG00000104472 | CHRAC1    | Approved  |                            | Nucleoplasm                 |
| 2168 | ENSG00000104497 | SNX16     | Supported |                            | Vesicles                    |
| 2169 | ENSG00000104517 | UBR5      | Supported |                            | Cytosol;Nucleoplasm         |
| 2170 | ENSG00000104518 | GSDMD     | Supported |                            | Nucleoplasm                 |
| 2171 | ENSG00000104522 | TSTA3     | Approved  |                            | Cytosol;Nucleoplas          |
| 2172 | ENSG00000104524 | PYCR3     | Approved  |                            | Cytosol;Nucleoplas          |
| 2173 | ENSG00000104529 | EEF1D     | Supported |                            | Nucleoli fibrillar center;N |
| 2174 | ENSG00000104537 | ANXA13    | Supported |                            | Plasma meNucleoplasm        |
| 2175 | ENSG00000104549 | SQLE      | Uncertain |                            | Cytosol;V                   |
| 2176 | ENSG00000104611 | SH2D4A    | Enhanced  | Cytosol                    |                             |
| 2177 | ENSG00000104613 | INTS10    | Approved  |                            | Cytosol;Nucleoplas          |
| 2178 | ENSG00000104626 | ERI1      | Approved  |                            | Microtubules;Vesic          |
| 2179 | ENSG00000104635 | SLC39A14  | Approved  |                            | Endoplasmic reticu          |
| 2180 | ENSG00000104643 | MTMR9     | Approved  |                            | Actin filaments;Ce          |
| 2181 | ENSG00000104671 | DCTN6     | Supported |                            | Cytosol;Nucleoli;Plasma mem |
| 2182 | ENSG00000104679 | R3HCC1    | Approved  |                            | Cytosol;Nucleoplas          |
| 2183 | ENSG00000104687 | GSR       | Supported |                            | Cytosol Plasma membrane     |
| 2184 | ENSG00000104689 | TNFRSF10A | Supported |                            | Nucleoplasm                 |
| 2185 | ENSG00000104691 | UBXN8     | Supported |                            | Endoplasmic reticuNucleoli; |
| 2186 | ENSG00000104695 | PPP2CB    | Supported |                            | Nucleoplasm                 |
| 2187 | ENSG00000104714 | ERICH1    | Approved  |                            | Cytosol;Nucleoli f          |
| 2188 | ENSG00000104722 | NEFM      | Enhanced  | Intermediate filaments     |                             |
| 2189 | ENSG00000104728 | ARHGEF10  | Approved  |                            | Nucleoplasm                 |
| 2190 | ENSG00000104731 | KLHDC4    | Approved  |                            | Nucleoli                    |
| 2191 | ENSG00000104738 | MCM4      | Enhanced  | Nucleoplasm                |                             |
| 2192 | ENSG00000104756 | KCTD9     | Supported |                            | NucleoplaCytosol;Intermedia |
| 2193 | ENSG00000104765 | BNIP3L    | Supported | MitochondNuclear speckles  |                             |
| 2194 | ENSG00000104774 | MAN2B1    | Approved  |                            | Vesicles Nucleopla          |
| 2195 | ENSG00000104805 | NUCB1     | Supported |                            | Golgi apparatus;Microtubule |
| 2196 | ENSG00000104808 | DHDH      | Approved  |                            | Actin filaments;Nu          |
| 2197 | ENSG00000104812 | GYS1      | Approved  |                            | Cytosol;Microtubul          |
| 2198 | ENSG00000104814 | MAP4K1    | Uncertain |                            | Nucleopla                   |

|      |                 |          |           |                     |                             |
|------|-----------------|----------|-----------|---------------------|-----------------------------|
| 2199 | ENSG00000104818 | CGB2     | Approved  |                     | Cytosol                     |
| 2200 | ENSG00000104823 | ECH1     | Enhanced  | Mitochondria        |                             |
| 2201 | ENSG00000104824 | HNRNPL   | Enhanced  | Nucleoplasm         |                             |
| 2202 | ENSG00000104825 | NFKBIB   | Approved  |                     | Centrosome;Cytosol          |
| 2203 | ENSG00000104826 | LHB      | Approved  |                     | Cytosol                     |
| 2204 | ENSG00000104827 | CGB3     | Approved  |                     | Cytosol                     |
| 2205 | ENSG00000104833 | TUBB4A   | Supported |                     | Microtubules                |
| 2206 | ENSG00000104835 | SARS2    | Uncertain |                     | MitochondNucleopla          |
| 2207 | ENSG00000104852 | SNRNP70  | Enhanced  | Nucleoplasm         |                             |
| 2208 | ENSG00000104853 | CLPTM1   | Approved  |                     | Centriolar satelli          |
| 2209 | ENSG00000104856 | RELB     | Approved  |                     | Nucleoplasm Cytosol         |
| 2210 | ENSG00000104859 | CLASRP   | Enhanced  | Nucleoplasm         |                             |
| 2211 | ENSG00000104866 | PPP1R37  | Approved  |                     | Cytosol                     |
| 2212 | ENSG00000104872 | PIH1D1   | Approved  |                     | Cytosol                     |
| 2213 | ENSG00000104880 | ARHGEF18 | Enhanced  | Cytosol             |                             |
| 2214 | ENSG00000104881 | PPP1R13L | Enhanced  | Cytosol             |                             |
| 2215 | ENSG00000104884 | ERCC2    | Supported |                     | NucleoplaCytosol            |
| 2216 | ENSG00000104885 | DOT1L    | Enhanced  | Nucleoplasm         |                             |
| 2217 | ENSG00000104886 | PLEKHJ1  | Approved  |                     | Mitochondria                |
| 2218 | ENSG00000104889 | RNASEH2A | Enhanced  | Cytosol;Nucleoplasm |                             |
| 2219 | ENSG00000104892 | KLC3     | Approved  |                     | Actin filaments;Cy          |
| 2220 | ENSG00000104897 | SF3A2    | Approved  |                     | Nucleoplasm                 |
| 2221 | ENSG00000104899 | AMH      | Approved  |                     | Aggresome;Vesicles          |
| 2222 | ENSG00000104901 | DKKL1    | Approved  |                     | Vesicles                    |
| 2223 | ENSG00000104903 | LYL1     | Approved  |                     | Golgi apparatus             |
| 2224 | ENSG00000104904 | OAZ1     | Approved  |                     | Centriolar satelli          |
| 2225 | ENSG00000104907 | TRMT1    | Approved  |                     | Cytosol;Nucleoplas          |
| 2226 | ENSG00000104915 | STX10    | Approved  |                     | Golgi apparatus             |
| 2227 | ENSG00000104936 | DMPK     | Approved  |                     | Vesicles Cytosol            |
| 2228 | ENSG00000104951 | IL4I1    | Approved  |                     | Cytosol;Nucleoplas          |
| 2229 | ENSG00000104957 | CCDC130  | Approved  |                     | Vesicles                    |
| 2230 | ENSG00000104960 | PTOV1    | Supported |                     | Nucleoplasm                 |
| 2231 | ENSG00000104964 | AES      | Supported |                     | Nucleoplasm                 |
| 2232 | ENSG00000104967 | NOVA2    | Approved  |                     | Golgi apparatus;Nu          |
| 2233 | ENSG00000104969 | SGTA     | Approved  |                     | Nucleoplasm                 |
| 2234 | ENSG00000104973 | MED25    | Supported |                     | Nucleoplasm                 |
| 2235 | ENSG00000104976 | SNAPC2   | Supported |                     | Nuclear bodies;NucCytosol   |
| 2236 | ENSG00000104979 | C19orf53 | Approved  |                     | Nucleoli;Nucleopla          |
| 2237 | ENSG00000104980 | TIMM44   | Enhanced  | Mitochondria        |                             |
| 2238 | ENSG00000104983 | CCDC61   | Approved  |                     | Nucleoplasm                 |
| 2239 | ENSG00000104998 | IL27RA   | Approved  |                     | Vesicles                    |
| 2240 | ENSG00000105011 | ASF1B    | Supported |                     | Nucleoplasm                 |
| 2241 | ENSG00000105048 | TNNT1    | Approved  |                     | Cytosol;Golgi appa          |
| 2242 | ENSG00000105053 | VRK3     | Supported |                     | NucleoplaVesicles           |
| 2243 | ENSG00000105058 | FAM32A   | Supported |                     | Nucleoli;Nucleoplasm        |
| 2244 | ENSG00000105063 | PPP6R1   | Enhanced  | Cytosol             |                             |
| 2245 | ENSG00000105072 | C19orf44 | Approved  |                     | Nuclear bodies;Nuc          |
| 2246 | ENSG00000105085 | MED26    | Approved  |                     | Cytosol;Nucleoplas          |
| 2247 | ENSG00000105088 | OLFM2    | Approved  |                     | Nucleoplasm                 |
| 2248 | ENSG00000105122 | RASAL3   | Approved  |                     | Plasma meNucleoplasm        |
| 2249 | ENSG00000105127 | AKAP8    | Supported |                     | Nucleoplasm                 |
| 2250 | ENSG00000105131 | EPHX3    | Approved  |                     | Nucleoplasm                 |
| 2251 | ENSG00000105135 | ILVBL    | Approved  |                     | Golgi apparatus;Ve          |
| 2252 | ENSG00000105136 | ZNF419   | Supported |                     | Nucleoli fibrillar center;N |
| 2253 | ENSG00000105137 | SYDE1    | Approved  |                     | Cytosol;Golgi appa          |

|      |                 |          |           |                                    |                             |
|------|-----------------|----------|-----------|------------------------------------|-----------------------------|
| 2254 | ENSG00000105141 | CASP14   | Approved  |                                    | Cytosol;Mitochondr          |
| 2255 | ENSG00000105143 | SLC1A6   | Supported |                                    | Plasma meIntermediate filam |
| 2256 | ENSG00000105173 | CCNE1    | Enhanced  | Nucleoplasm                        |                             |
| 2257 | ENSG00000105176 | URI1     | Supported |                                    | Cytosol;Nucleoplasm         |
| 2258 | ENSG00000105185 | PDCD5    | Approved  |                                    | Cytosol;Nucleoplas          |
| 2259 | ENSG00000105186 | ANKRD27  | Approved  |                                    | Cytosol                     |
| 2260 | ENSG00000105193 | RPS16    | Supported |                                    | Cytosol;Endoplasmic reticul |
| 2261 | ENSG00000105197 | TIMM50   | Supported |                                    | Mitochondria;Nucleoplasm    |
| 2262 | ENSG00000105202 | FBL      | Supported |                                    | Nucleoli fibrillar center   |
| 2263 | ENSG00000105204 | DYRK1B   | Supported |                                    | Nucleoplasm                 |
| 2264 | ENSG00000105220 | GPI      | Supported |                                    | Cytosol;PNucleoplasm        |
| 2265 | ENSG00000105221 | AKT2     | Supported |                                    | Cytosol;NVesicles           |
| 2266 | ENSG00000105223 | PLD3     | Supported |                                    | EndoplasmCytosol            |
| 2267 | ENSG00000105227 | PRX      | Approved  |                                    | Golgi apparatus;Pl          |
| 2268 | ENSG00000105229 | PIAS4    | Approved  |                                    | Nucleoplasm                 |
| 2269 | ENSG00000105248 | CCDC94   | Supported |                                    | Nucleoplasm                 |
| 2270 | ENSG00000105251 | SHD      | Uncertain |                                    | Centriola                   |
| 2271 | ENSG00000105254 | TBCB     | Supported |                                    | Cytosol                     |
| 2272 | ENSG00000105258 | POLR2I   | Enhanced  | Nucleoplasm                        |                             |
| 2273 | ENSG00000105278 | ZFR2     | Uncertain |                                    | Nucleopla                   |
| 2274 | ENSG00000105281 | SLC1A5   | Enhanced  | Plasma membrane                    |                             |
| 2275 | ENSG00000105287 | PRKD2    | Supported |                                    | Cytosol;Nucleoplasm         |
| 2276 | ENSG00000105289 | TJP3     | Enhanced  | Cell Junctions;Nucleoplasm         |                             |
| 2277 | ENSG00000105298 | CACTIN   | Supported |                                    | Nuclear speckles;NCytosol   |
| 2278 | ENSG00000105321 | CCDC9    | Approved  |                                    | Cytosol                     |
| 2279 | ENSG00000105323 | HNRNPUL1 | Enhanced  | Nucleoplasm                        |                             |
| 2280 | ENSG00000105325 | FZR1     | Supported |                                    | Nuclear membrane;Nucleoplas |
| 2281 | ENSG00000105327 | BBC3     | Approved  |                                    | Cytosol                     |
| 2282 | ENSG00000105329 | TGFB1    | Approved  |                                    | Golgi appCytosol            |
| 2283 | ENSG00000105339 | DENND3   | Approved  |                                    | Cytosol;Vesicles            |
| 2284 | ENSG00000105341 | DMAC2    | Approved  |                                    | Mitochondria                |
| 2285 | ENSG00000105355 | PLIN3    | Enhanced  | Lipid droplets                     |                             |
| 2286 | ENSG00000105357 | MYH14    | Approved  |                                    | Nucleoplasm                 |
| 2287 | ENSG00000105366 | SIGLEC8  | Uncertain |                                    | Cytosol                     |
| 2288 | ENSG00000105372 | RPS19    | Supported |                                    | Nucleoplasm                 |
| 2289 | ENSG00000105373 | NOP53    | Supported |                                    | Nucleoli                    |
| 2290 | ENSG00000105374 | NKG7     | Approved  |                                    | Vesicles                    |
| 2291 | ENSG00000105379 | ETFB     | Enhanced  | Mitochondria                       |                             |
| 2292 | ENSG00000105383 | CD33     | Supported |                                    | Plasma meNucleoplasm        |
| 2293 | ENSG00000105388 | CEACAM5  | Supported |                                    | Plasma membrane             |
| 2294 | ENSG00000105393 | BABAM1   | Enhanced  | Cytosol;Nuclear bodies;Nucleoplasm |                             |
| 2295 | ENSG00000105397 | TYK2     | Approved  |                                    | Cytosol                     |
| 2296 | ENSG00000105398 | SULT2A1  | Supported |                                    | Cytosol                     |
| 2297 | ENSG00000105401 | CDC37    | Supported |                                    | Cytosol                     |
| 2298 | ENSG00000105402 | NAPA     | Uncertain |                                    | Cytosol                     |
| 2299 | ENSG00000105404 | RABAC1   | Approved  |                                    | Nuclear membrane;N          |
| 2300 | ENSG00000105419 | MEIS3    | Approved  |                                    | Nucleoplasm                 |
| 2301 | ENSG00000105426 | PTPRS    | Approved  |                                    | Plasma membrane Cytosol     |
| 2302 | ENSG00000105427 | CNFN     | Approved  |                                    | Cytokinetic bridge          |
| 2303 | ENSG00000105438 | KDELRL1  | Supported |                                    | Golgi appCytosol            |
| 2304 | ENSG00000105443 | CYTH2    | Supported |                                    | Cytosol;PGolgi apparatus    |
| 2305 | ENSG00000105447 | GRWD1    | Enhanced  | Nucleoli;Nucleoplasm               |                             |
| 2306 | ENSG00000105467 | SYNGR4   | Approved  |                                    | Golgi apparatus             |
| 2307 | ENSG00000105472 | CLEC11A  | Approved  |                                    | Centrosome                  |
| 2308 | ENSG00000105483 | CARD8    | Supported |                                    | Nucleoplasm                 |

|      |                 |         |           |                                |
|------|-----------------|---------|-----------|--------------------------------|
| 2309 | ENSG00000105486 | LIG1    | Supported | Nucleoplasm;Golgi apparatus;Ve |
| 2310 | ENSG00000105497 | ZNF175  | Supported | Cytosol;Intermediate filam     |
| 2311 | ENSG00000105499 | PLA2G4C | Approved  | Cytosol                        |
| 2312 | ENSG00000105509 | HAS1    | Supported | Plasma membrane;Nucleoplasm    |
| 2313 | ENSG00000105514 | RAB3D   | Approved  | Vesicles                       |
| 2314 | ENSG00000105518 | TMEM205 | Approved  | Endoplasmic reticu             |
| 2315 | ENSG00000105519 | CAPS    | Approved  | Cytosol;Nucleoplasm            |
| 2316 | ENSG00000105520 | PLPPR2  | Approved  | Nucleoplasm                    |
| 2317 | ENSG00000105552 | BCAT2   | Supported | Mitochondria                   |
| 2318 | ENSG00000105556 | MIER2   | Approved  | Cytosol;Nucleoplasm            |
| 2319 | ENSG00000105559 | PLEKHA4 | Approved  | Centriolar satelli             |
| 2320 | ENSG00000105568 | PPP2R1A | Approved  | Cytosol                        |
| 2321 | ENSG00000105576 | TNPO2   | Approved  | Nucleoli;Nucleoplasm           |
| 2322 | ENSG00000105583 | WDR830S | Approved  | Endoplasmic reticu             |
| 2323 | ENSG00000105607 | GCDH    | Supported | Mitochondria                   |
| 2324 | ENSG00000105610 | KLF1    | Supported | Nucleoplasm                    |
| 2325 | ENSG00000105613 | MAST1   | Approved  | Vesicles                       |
| 2326 | ENSG00000105617 | LENG1   | Approved  | Nucleoplasm;Plasma             |
| 2327 | ENSG00000105618 | PRPF31  | Supported | Nucleoplasm                    |
| 2328 | ENSG00000105619 | TFPT    | Supported | Nuclear membrane;Nucleoplasm   |
| 2329 | ENSG00000105639 | JAK3    | Approved  | Cytosol;Plasma mem             |
| 2330 | ENSG00000105640 | RPL18A  | Approved  | Cytosol;Nucleoli               |
| 2331 | ENSG00000105642 | KCNN1   | Approved  | Actin filaments;Cy             |
| 2332 | ENSG00000105643 | ARRDC2  | Approved  | Nucleoplasm                    |
| 2333 | ENSG00000105647 | PIK3R2  | Approved  | Golgi apparatus                |
| 2334 | ENSG00000105649 | RAB3A   | Approved  | Centrosome;Cytosol             |
| 2335 | ENSG00000105655 | ISYNA1  | Approved  | Cytosol;Nucleoplasm            |
| 2336 | ENSG00000105662 | CRTC1   | Supported | Cytosol;Nucleoplasm            |
| 2337 | ENSG00000105664 | COMP    | Approved  | Golgi apparatus                |
| 2338 | ENSG00000105669 | COPE    | Enhanced  | Golgi apparatus                |
| 2339 | ENSG00000105671 | DDX49   | Approved  | Mitochondria;Nucle             |
| 2340 | ENSG00000105676 | ARMC6   | Enhanced  | Cytosol                        |
| 2341 | ENSG00000105677 | TMEM147 | Approved  | Golgi apparatus;Actin fil      |
| 2342 | ENSG00000105679 | GAPDHS  | Approved  | Centrosome;Nucleoplasm         |
| 2343 | ENSG00000105696 | TMEM59L | Approved  | Actin filaments;Nu             |
| 2344 | ENSG00000105698 | USF2    | Supported | Nucleoplasm;Vesicles           |
| 2345 | ENSG00000105699 | LSR     | Approved  | Cytosol;Nucleoplasm            |
| 2346 | ENSG00000105700 | KXD1    | Approved  | Centrosome;Cytosol             |
| 2347 | ENSG00000105701 | FKBP8   | Supported | Cytosol;Endoplasmic reticul    |
| 2348 | ENSG00000105705 | SUGP1   | Enhanced  | Nucleoplasm                    |
| 2349 | ENSG00000105708 | ZNF14   | Approved  | Cytosol;Nucleoplasm            |
| 2350 | ENSG00000105717 | PBX4    | Approved  | Vesicles                       |
| 2351 | ENSG00000105722 | ERF     | Enhanced  | Nucleoplasm                    |
| 2352 | ENSG00000105723 | GSK3A   | Approved  | Cytosol                        |
| 2353 | ENSG00000105726 | ATP13A1 | Approved  | Vesicles                       |
| 2354 | ENSG00000105732 | ZNF574  | Supported | Nucleoplasm                    |
| 2355 | ENSG00000105737 | GRIK5   | Supported | Plasma membrane;Nucleoplasm    |
| 2356 | ENSG00000105738 | SIPA1L3 | Supported | Plasma membrane;Golgi app      |
| 2357 | ENSG00000105750 | ZNF85   | Supported | Nucleoplasm                    |
| 2358 | ENSG00000105755 | ETHE1   | Enhanced  | Mitochondria                   |
| 2359 | ENSG00000105767 | CADM4   | Approved  | Nuclear membrane;N             |
| 2360 | ENSG00000105771 | SMG9    | Approved  | Cytosol;Mitochondr             |
| 2361 | ENSG00000105778 | AVL9    | Approved  | Endoplasmic reticu             |
| 2362 | ENSG00000105808 | RASA4   | Uncertain | Vesicles                       |
| 2363 | ENSG00000105810 | CDK6    | Supported | Cytosol;Nucleoplasm            |

|      |                 |          |           |                                      |
|------|-----------------|----------|-----------|--------------------------------------|
| 2364 | ENSG00000105819 | PMPCB    | Enhanced  | Mitochondria                         |
| 2365 | ENSG00000105821 | DNAJC2   | Supported | Cytosol                              |
| 2366 | ENSG00000105835 | NAMPT    | Approved  | Cell Junctions;Nuc                   |
| 2367 | ENSG00000105849 | TWISTNB  | Supported | Nucleoli fibrillar center;Nucleoplas |
| 2368 | ENSG00000105851 | PIK3CG   | Supported | Cytosol;Plasma membrane              |
| 2369 | ENSG00000105855 | ITGB8    | Approved  | Cytosol;Plasma mem                   |
| 2370 | ENSG00000105856 | HBP1     | Supported | Nuclear speckles                     |
| 2371 | ENSG00000105865 | DUS4L    | Approved  | Cytosol                              |
| 2372 | ENSG00000105866 | SP4      | Enhanced  | Nucleoplasm Cytosol                  |
| 2373 | ENSG00000105879 | CBLL1    | Supported | Nuclear speckles                     |
| 2374 | ENSG00000105880 | DLX5     | Approved  | Nucleoplasm                          |
| 2375 | ENSG00000105887 | MTPN     | Approved  | Cytosol;Plasma mem                   |
| 2376 | ENSG00000105894 | PTN      | Supported | Endoplasmic reticulum                |
| 2377 | ENSG00000105928 | GSDME    | Enhanced  | Cytosol                              |
| 2378 | ENSG00000105929 | ATP6V0A4 | Approved  | Cytosol                              |
| 2379 | ENSG00000105939 | ZC3HAV1  | Supported | Cytosol Golgi apparatus              |
| 2380 | ENSG00000105948 | TTC26    | Approved  | Cytosol;Intermedia                   |
| 2381 | ENSG00000105953 | OGDH     | Enhanced  | Mitochondria                         |
| 2382 | ENSG00000105963 | ADAP1    | Supported | Cytosol Plasma membrane              |
| 2383 | ENSG00000105967 | TFEC     | Supported | Nucleoplasm                          |
| 2384 | ENSG00000105971 | CAV2     | Approved  | Vesicles                             |
| 2385 | ENSG00000105974 | CAV1     | Supported | Golgi apparatus                      |
| 2386 | ENSG00000105976 | MET      | Supported | Cytosol;Plasma membrane              |
| 2387 | ENSG00000105983 | LMBR1    | Approved  | Cytosol                              |
| 2388 | ENSG00000105989 | WNT2     | Approved  | Vesicles                             |
| 2389 | ENSG00000105993 | DNAJB6   | Enhanced  | NucleoplaCytosol                     |
| 2390 | ENSG00000105996 | HOXA2    | Approved  | Nucleoplasm;Vesicl                   |
| 2391 | ENSG00000105997 | HOXA3    | Supported | Nucleoplasm                          |
| 2392 | ENSG00000106006 | HOXA6    | Supported | Nuclear speckles;Nucleoplas          |
| 2393 | ENSG00000106009 | BRAT1    | Supported | Nucleoplasm                          |
| 2394 | ENSG00000106012 | IQCE     | Approved  | Cytosol;Nucleoplas                   |
| 2395 | ENSG00000106013 | ANKRD7   | Enhanced  | Nucleoplasm                          |
| 2396 | ENSG00000106018 | VIPR2    | Approved  | Focal adhesion sit                   |
| 2397 | ENSG00000106025 | TSPAN12  | Approved  | Microtubules;Vesic                   |
| 2398 | ENSG00000106028 | SSBP1    | Supported | Mitochondria                         |
| 2399 | ENSG00000106031 | HOXA13   | Supported | Nucleoplasm Intermedi                |
| 2400 | ENSG00000106034 | CPED1    | Approved  | Nucleoplasm                          |
| 2401 | ENSG00000106038 | EVX1     | Approved  | Nucleoplasm                          |
| 2402 | ENSG00000106052 | TAX1BP1  | Approved  | Cytosol;Nucleoplas                   |
| 2403 | ENSG00000106066 | CPVL     | Supported | Endoplasmic reticulum                |
| 2404 | ENSG00000106069 | CHN2     | Approved  | Nucleoplasm                          |
| 2405 | ENSG00000106070 | GRB10    | Supported | Vesicles                             |
| 2406 | ENSG00000106077 | ABHD11   | Supported | Mitochondria                         |
| 2407 | ENSG00000106078 | COBL     | Approved  | Cell Junctions;Pla                   |
| 2408 | ENSG00000106080 | FKBP14   | Approved  | Cytosol;Golgi appa                   |
| 2409 | ENSG00000106086 | PLEKHA8  | Supported | Golgi appNucleoplasm                 |
| 2410 | ENSG00000106100 | NOD1     | Approved  | Mitochondria                         |
| 2411 | ENSG00000106105 | GARS     | Supported | Cytosol                              |
| 2412 | ENSG00000106123 | EPHB6    | Approved  | Nuclear speckles                     |
| 2413 | ENSG00000106125 | MINDY4   | Supported | Cytosol;Vesicles                     |
| 2414 | ENSG00000106144 | CASP2    | Approved  | Nucleoplasm                          |
| 2415 | ENSG00000106153 | CHCHD2   | Enhanced  | Mitochondria                         |
| 2416 | ENSG00000106211 | HSPB1    | Enhanced  | Cytosol;Plasma membrane              |
| 2417 | ENSG00000106236 | NPTX2    | Approved  | Actin filaments;Ce                   |
| 2418 | ENSG00000106244 | PDAP1    | Enhanced  | Cytosol;Plasma membrane              |



|      |                 |          |           |             |                             |
|------|-----------------|----------|-----------|-------------|-----------------------------|
| 2419 | ENSG00000106245 | BUD31    | Approved  |             | Centrosome;Microtu          |
| 2420 | ENSG00000106246 | PTCD1    | Approved  |             | Mitochondria                |
| 2421 | ENSG00000106258 | CYP3A5   | Uncertain |             | Cytosol                     |
| 2422 | ENSG00000106261 | ZKSCAN1  | Approved  |             | Mitochondria;Nucle          |
| 2423 | ENSG00000106263 | EIF3B    | Approved  |             | Cytosol;Nucleoplas          |
| 2424 | ENSG00000106266 | SNX8     | Supported |             | Vesicles                    |
| 2425 | ENSG00000106268 | NUDT1    | Supported |             | Cytosol                     |
| 2426 | ENSG00000106278 | PTPRZ1   | Approved  |             | Cytosol;Vesicles            |
| 2427 | ENSG00000106290 | TAF6     | Supported |             | NucleoplaCytosol            |
| 2428 | ENSG00000106299 | WASL     | Approved  |             | Cytosol;Nucleoli            |
| 2429 | ENSG00000106305 | AIMP2    | Approved  |             | Cytosol                     |
| 2430 | ENSG00000106330 | MOSPD3   | Approved  |             | Cytosol;Nucleoplas          |
| 2431 | ENSG00000106333 | PCOLCE   | Approved  |             | Golgi apparatus;Ve          |
| 2432 | ENSG00000106344 | RBM28    | Supported | Nucleoli    |                             |
| 2433 | ENSG00000106346 | USP42    | Approved  |             | Nucleoplasm                 |
| 2434 | ENSG00000106348 | IMPDH1   | Supported |             | Cytosol;Rods & Rings        |
| 2435 | ENSG00000106366 | SERPINE1 | Approved  |             | Cytosol                     |
| 2436 | ENSG00000106367 | AP1S1    | Supported |             | Golgi apparatus;Vesicles    |
| 2437 | ENSG00000106384 | MOGAT3   | Approved  |             | Centrosome                  |
| 2438 | ENSG00000106392 | C1GALT1  | Approved  |             | Cytosol;Nuclear bo          |
| 2439 | ENSG00000106400 | ZNHIT1   | Approved  |             | Nucleoplasm                 |
| 2440 | ENSG00000106415 | GLCCI1   | Approved  |             | Nucleoli                    |
| 2441 | ENSG00000106436 | MYL10    | Uncertain |             | Microtubu                   |
| 2442 | ENSG00000106443 | PHF14    | Approved  |             | Cytosol;Nucleoplas          |
| 2443 | ENSG00000106459 | NRF1     | Supported |             | Nucleoplasm Cytosol         |
| 2444 | ENSG00000106460 | TMEM106B | Supported |             | Endosomes;Lysosomes         |
| 2445 | ENSG00000106462 | EZH2     | Supported |             | Nucleoplasm                 |
| 2446 | ENSG00000106479 | ZNF862   | Approved  |             | Mitochondria                |
| 2447 | ENSG00000106484 | MEST     | Approved  |             | Cytosol;Golgi appa          |
| 2448 | ENSG00000106524 | ANKMY2   | Approved  |             | Cytosol;Nucleoplas          |
| 2449 | ENSG00000106537 | TSPAN13  | Approved  |             | Nucleoplasm                 |
| 2450 | ENSG00000106541 | AGR2     | Supported |             | Endoplasmic reticulum       |
| 2451 | ENSG00000106546 | AHR      | Supported |             | Cytosol;Nucleoplasm         |
| 2452 | ENSG00000106554 | CHCHD3   | Supported |             | Mitochondria                |
| 2453 | ENSG00000106565 | TMEM176B | Approved  |             | Golgi apparatus;Nu          |
| 2454 | ENSG00000106603 | COA1     | Supported |             | Mitochondria                |
| 2455 | ENSG00000106605 | BLVRA    | Supported |             | Cytosol                     |
| 2456 | ENSG00000106608 | URGCP    | Supported |             | Cytosol                     |
| 2457 | ENSG00000106609 | TMEM248  | Approved  |             | Vesicles                    |
| 2458 | ENSG00000106617 | PRKAG2   | Approved  |             | Nucleoplasm                 |
| 2459 | ENSG00000106624 | AEBP1    | Supported |             | Vesicles Cytosol;Nucleoplas |
| 2460 | ENSG00000106628 | POLD2    | Enhanced  | Nucleoplasm |                             |
| 2461 | ENSG00000106633 | GCK      | Approved  |             | Cytosol;Golgi appa          |
| 2462 | ENSG00000106635 | BCL7B    | Approved  |             | Nucleoplasm                 |
| 2463 | ENSG00000106636 | YKT6     | Approved  |             | Cytosol;Mitochondr          |
| 2464 | ENSG00000106638 | TBL2     | Supported |             | Cytosol                     |
| 2465 | ENSG00000106682 | EIF4H    | Approved  |             | Cytosol;Nuclear bo          |
| 2466 | ENSG00000106683 | LIMK1    | Supported |             | Cytosol;Nuclear speckles    |
| 2467 | ENSG00000106689 | LHX2     | Approved  |             | Nucleoplasm                 |
| 2468 | ENSG00000106701 | FSD1L    | Approved  |             | Actin filaments;Pl          |
| 2469 | ENSG00000106723 | SPIN1    | Supported |             | Nucleoplasm                 |
| 2470 | ENSG00000106733 | NMRK1    | Approved  |             | Cytosol;Nucleoplas          |
| 2471 | ENSG00000106771 | TMEM245  | Approved  |             | Cytosol;Plasma mem          |
| 2472 | ENSG00000106780 | MEGF9    | Approved  |             | Cytosol;Nucleoplas          |
| 2473 | ENSG00000106785 | TRIM14   | Approved  |             | Cytosol;Nucleoplas          |

|      |                 |           |           |                  |                             |
|------|-----------------|-----------|-----------|------------------|-----------------------------|
| 2474 | ENSG00000106789 | CORO2A    | Approved  |                  | Cytosol;Plasma mem          |
| 2475 | ENSG00000106799 | TGFBR1    | Supported |                  | Plasma membrane             |
| 2476 | ENSG00000106803 | SEC61B    | Supported |                  | Endoplasmic reticulum       |
| 2477 | ENSG00000106809 | OGN       | Supported |                  | Endoplasmic reticulum       |
| 2478 | ENSG00000106829 | TLE4      | Supported |                  | Nucleoplasm                 |
| 2479 | ENSG00000106852 | LHX6      | Uncertain |                  | Nucleoli                    |
| 2480 | ENSG00000106868 | SUSD1     | Approved  |                  | Nucleoplasm                 |
| 2481 | ENSG00000106927 | AMBP      | Approved  |                  | Golgi appCytosol            |
| 2482 | ENSG00000106948 | AKNA      | Supported |                  | Centrosome;Nucleoplasm      |
| 2483 | ENSG00000106976 | DNM1      | Supported |                  | Nucleoplasm                 |
| 2484 | ENSG00000106991 | ENG       | Supported |                  | Nuclear bPlasma membrane    |
| 2485 | ENSG00000106992 | AK1       | Supported |                  | Cytosol                     |
| 2486 | ENSG00000106993 | CDC37L1   | Supported |                  | Cytosol                     |
| 2487 | ENSG00000107020 | PLGRKT    | Uncertain |                  | Mitochondria                |
| 2488 | ENSG00000107021 | TBC1D13   | Approved  |                  | Nucleoli                    |
| 2489 | ENSG00000107077 | KDM4C     | Approved  |                  | Nucleoplasm                 |
| 2490 | ENSG00000107099 | DOCK8     | Approved  |                  | CentrosomCytosol;Mitochondr |
| 2491 | ENSG00000107104 | KANK1     | Supported |                  | Plasma membrane             |
| 2492 | ENSG00000107105 | ELAVL2    | Approved  |                  | Cytosol;Nucleoplas          |
| 2493 | ENSG00000107130 | NCS1      | Enhanced  | Plasma membrane  |                             |
| 2494 | ENSG00000107159 | CA9       | Enhanced  | Plasma me        | Cytosol                     |
| 2495 | ENSG00000107164 | FUBP3     | Approved  |                  | Cytosol;Nucleoplas          |
| 2496 | ENSG00000107165 | TYRP1     | Supported |                  | Vesicles                    |
| 2497 | ENSG00000107175 | CREB3     | Supported |                  | Cytosol                     |
| 2498 | ENSG00000107185 | RGP1      | Supported |                  | Cytosol Plasma membrane     |
| 2499 | ENSG00000107201 | DDX58     | Approved  |                  | Cytosol;Plasma mem          |
| 2500 | ENSG00000107223 | EDF1      | Supported |                  | Cytosol;Nucleoplasm         |
| 2501 | ENSG00000107242 | PIP5K1B   | Approved  |                  | Nucleoplasm;Vesicl          |
| 2502 | ENSG00000107249 | GLIS3     | Supported |                  | Nucleoplasm                 |
| 2503 | ENSG00000107262 | BAG1      | Supported |                  | Nucleoplasm                 |
| 2504 | ENSG00000107263 | RAPGEF1   | Supported |                  | Vesicles                    |
| 2505 | ENSG00000107281 | NPDC1     | Approved  |                  | Cytosol;Nucleoplas          |
| 2506 | ENSG00000107282 | APBA1     | Supported |                  | Golgi apparatus             |
| 2507 | ENSG00000107290 | SETX      | Supported |                  | NucleoplaCytokinetic bridge |
| 2508 | ENSG00000107295 | SH3GL2    | Approved  |                  | Cytokinetic bridge          |
| 2509 | ENSG00000107338 | SHB       | Supported | Cytosol          | Cytoplasmic bodies          |
| 2510 | ENSG00000107341 | UBE2R2    | Approved  |                  | Nucleoli;Nucleopla          |
| 2511 | ENSG00000107371 | EXOSC3    | Supported |                  | Nucleoplasm                 |
| 2512 | ENSG00000107372 | ZFAND5    | Approved  |                  | Cytosol;Nucleoplas          |
| 2513 | ENSG00000107438 | PDLIM1    | Supported |                  | Actin filCell Junctions;Pla |
| 2514 | ENSG00000107443 | CCNJ      | Approved  |                  | Golgi apparatus;Nu          |
| 2515 | ENSG00000107447 | DNTT      | Supported |                  | Cytosol;Nucleoplasm         |
| 2516 | ENSG00000107485 | GATA3     | Supported |                  | Nucleoplasm                 |
| 2517 | ENSG00000107518 | ATRNL1    | Approved  |                  | Mitochondria;Nucle          |
| 2518 | ENSG00000107551 | RASSF4    | Approved  |                  | Cell Junctions;Nuc          |
| 2519 | ENSG00000107554 | DNMBP     | Approved  |                  | Cytosol;Golgi appa          |
| 2520 | ENSG00000107560 | RAB11FIP2 | Supported |                  | Vesicles Nucleoplasm        |
| 2521 | ENSG00000107566 | ERLIN1    | Supported |                  | Endoplasmic reticulum       |
| 2522 | ENSG00000107581 | EIF3A     | Supported |                  | Cytosol Nucleoplasm         |
| 2523 | ENSG00000107614 | TRDMT1    | Approved  |                  | Centrosome;Nucleol          |
| 2524 | ENSG00000107625 | DDX50     | Enhanced  | Nucleoli         |                             |
| 2525 | ENSG00000107651 | SEC23IP   | Enhanced  | Vesicles         |                             |
| 2526 | ENSG00000107669 | ATE1      | Supported |                  | Nucleoplasm                 |
| 2527 | ENSG00000107672 | NSMCE4A   | Enhanced  | Nucleoplasm      |                             |
| 2528 | ENSG00000107679 | PLEKHA1   | Enhanced  | NucleoplaCytosol |                             |

|      |                 |          |           |                           |                             |
|------|-----------------|----------|-----------|---------------------------|-----------------------------|
| 2529 | ENSG00000107738 | VSIR     | Approved  |                           | Nucleoplasm                 |
| 2530 | ENSG00000107745 | MICU1    | Supported | Mitochondria              |                             |
| 2531 | ENSG00000107758 | PPP3CB   | Approved  |                           | Mitochondria                |
| 2532 | ENSG00000107771 | CCSER2   | Approved  |                           | Cytosol;Nucleoplas          |
| 2533 | ENSG00000107779 | BMPR1A   | Approved  |                           | Cytosol                     |
| 2534 | ENSG00000107796 | ACTA2    | Supported |                           | Actin filaments             |
| 2535 | ENSG00000107798 | LIPA     | Supported |                           | Vesicles                    |
| 2536 | ENSG00000107807 | TLX1     | Supported |                           | Nucleoplasm                 |
| 2537 | ENSG00000107816 | LZTS2    | Approved  |                           | Cytosol Plasma me           |
| 2538 | ENSG00000107819 | SFXN3    | Enhanced  | Mitochondria              |                             |
| 2539 | ENSG00000107829 | FBXW4    | Approved  |                           | Golgi apparatus             |
| 2540 | ENSG00000107833 | NPM3     | Approved  |                           | Actin filaments;Cy          |
| 2541 | ENSG00000107854 | TNKS2    | Approved  |                           | Microtubules                |
| 2542 | ENSG00000107862 | GBF1     | Supported |                           | Golgi apparatus             |
| 2543 | ENSG00000107863 | ARHGAP21 | Supported |                           | Cell JuncActin filaments    |
| 2544 | ENSG00000107864 | CPEB3    | Approved  |                           | Intermediate filam          |
| 2545 | ENSG00000107874 | CUEDC2   | Enhanced  | Cytosol;Nucleoplasm       |                             |
| 2546 | ENSG00000107882 | SUFU     | Supported |                           | Nucleoplasm                 |
| 2547 | ENSG00000107890 | ANKRD26  | Approved  |                           | Golgi apparatus;Ve          |
| 2548 | ENSG00000107897 | ACBD5    | Enhanced  | Peroxisomes               |                             |
| 2549 | ENSG00000107902 | LHPP     | Supported |                           | Cytosol;Nuclear speckles    |
| 2550 | ENSG00000107929 | LARP4B   | Enhanced  | Cytosol                   |                             |
| 2551 | ENSG00000107937 | GTPBP4   | Supported | Nucleoli                  | Nuclear m                   |
| 2552 | ENSG00000107938 | EDRF1    | Approved  |                           | Centrosome;Cytosol          |
| 2553 | ENSG00000107949 | BCCIP    | Supported |                           | NucleoplaCytosol            |
| 2554 | ENSG00000107951 | MTPAP    | Supported |                           | Mitochondria                |
| 2555 | ENSG00000107959 | PITRM1   | Supported |                           | Mitochondria                |
| 2556 | ENSG00000107960 | STN1     | Supported |                           | Nucleoplasm                 |
| 2557 | ENSG00000107968 | MAP3K8   | Supported |                           | Cytosol                     |
| 2558 | ENSG00000108001 | EBF3     | Approved  |                           | Nucleoplasm;Vesicl          |
| 2559 | ENSG00000108018 | SORCS1   | Approved  |                           | Cytosol;Plasma mem          |
| 2560 | ENSG00000108021 | FAM208B  | Enhanced  | NucleoplaCytosol          |                             |
| 2561 | ENSG00000108039 | XPNPEP1  | Enhanced  | Cytosol                   |                             |
| 2562 | ENSG00000108055 | SMC3     | Supported |                           | Nucleoplasm                 |
| 2563 | ENSG00000108061 | SHOC2    | Approved  |                           | Cytosol Nucleoplasm         |
| 2564 | ENSG00000108064 | TFAM     | Enhanced  | Mitochondria              |                             |
| 2565 | ENSG00000108091 | CCDC6    | Supported |                           | Cytosol                     |
| 2566 | ENSG00000108094 | CUL2     | Enhanced  | Nucleoplasm               |                             |
| 2567 | ENSG00000108106 | UBE2S    | Approved  |                           | Nucleoplasm;Plasma          |
| 2568 | ENSG00000108107 | RPL28    | Supported |                           | Cytosol;Endoplasmic reticul |
| 2569 | ENSG00000108175 | ZMIZ1    | Approved  |                           | Nucleoplasm;Vesicl          |
| 2570 | ENSG00000108179 | PPIF     | Supported |                           | Mitochondria                |
| 2571 | ENSG00000108187 | PBLD     | Approved  |                           | Vesicles                    |
| 2572 | ENSG00000108219 | TSPAN14  | Supported |                           | Vesicles                    |
| 2573 | ENSG00000108239 | TBC1D12  | Approved  |                           | Nuclear speckles;N          |
| 2574 | ENSG00000108244 | KRT23    | Approved  |                           | Cytosol;Intermedia          |
| 2575 | ENSG00000108256 | NUFIP2   | Supported |                           | Cytosol;Nuclear bodies;Nucl |
| 2576 | ENSG00000108262 | GIT1     | Supported |                           | Cytosol;FMitochondria       |
| 2577 | ENSG00000108298 | RPL19    | Enhanced  | Cytosol;Nucleoli          |                             |
| 2578 | ENSG00000108306 | FBXL20   | Supported |                           | Microtubules                |
| 2579 | ENSG00000108309 | RUNDC3A  | Approved  |                           | Vesicles                    |
| 2580 | ENSG00000108312 | UBTF     | Enhanced  | Nucleoli fibrillar center |                             |
| 2581 | ENSG00000108344 | PSMD3    | Supported |                           | Cytosol;Nucleoplasm         |
| 2582 | ENSG00000108349 | CASC3    | Approved  |                           | Nuclear membrane            |
| 2583 | ENSG00000108352 | RAPGEFL1 | Approved  |                           | Cytokinetic bridge          |

|      |                 |           |           |                                      |
|------|-----------------|-----------|-----------|--------------------------------------|
| 2584 | ENSG00000108370 | RGS9      | Approved  | Nucleoplasm;Vesicl                   |
| 2585 | ENSG00000108379 | WNT3      | Approved  | Vesicles                             |
| 2586 | ENSG00000108381 | ASPA      | Uncertain | Cytosol                              |
| 2587 | ENSG00000108384 | RAD51C    | Supported | Cytosol;MCell Junctions;Ves          |
| 2588 | ENSG00000108387 | 9/4/2019  | Supported | Nucleoplasm                          |
| 2589 | ENSG00000108406 | DHX40     | Supported | Nucleoplasm                          |
| 2590 | ENSG00000108423 | TUBD1     | Enhanced  | Cytosol;Nucleoplasm                  |
| 2591 | ENSG00000108424 | KPNB1     | Enhanced  | Cytosol;Nuclear membrane;Nucleoplasm |
| 2592 | ENSG00000108433 | GOSR2     | Supported | Golgi apparatus;Nucleoplasm          |
| 2593 | ENSG00000108439 | PNPO      | Enhanced  | Cytosol;Nucleoplasm                  |
| 2594 | ENSG00000108443 | RPS6KB1   | Supported | Nucleoplasm                          |
| 2595 | ENSG00000108448 | TRIM16L   | Approved  | Cytosol;Plasma mem                   |
| 2596 | ENSG00000108465 | CDK5RAP3  | Supported | Cytosol Nucleoli;Vesicles            |
| 2597 | ENSG00000108468 | CBX1      | Supported | Nuclear bodies;Nucleoplasm           |
| 2598 | ENSG00000108469 | RECQL5    | Supported | Cytosol;Nucleoplasm                  |
| 2599 | ENSG00000108474 | PIGL      | Approved  | Cytosol;Nucleoplas                   |
| 2600 | ENSG00000108479 | GALK1     | Approved  | Cytosol;Golgi appa                   |
| 2601 | ENSG00000108509 | CAMTA2    | Approved  | Actin filaments;Mi                   |
| 2602 | ENSG00000108510 | MED13     | Supported | Nucleoplasm                          |
| 2603 | ENSG00000108511 | HOXB6     | Supported | NucleoplaGolgi apparatus             |
| 2604 | ENSG00000108515 | ENO3      | Supported | Cytosol;Plasma membrane              |
| 2605 | ENSG00000108518 | PFN1      | Supported | Cytosol                              |
| 2606 | ENSG00000108551 | RASD1     | Approved  | Nucleoplasm;Plasma                   |
| 2607 | ENSG00000108557 | RAI1      | Enhanced  | Nucleoplasm                          |
| 2608 | ENSG00000108559 | NUP88     | Approved  | Nucleoplasm                          |
| 2609 | ENSG00000108561 | C1QBP     | Approved  | Mitochondria;Plasm                   |
| 2610 | ENSG00000108576 | SLC6A4    | Supported | Golgi apparatus;Vesicles             |
| 2611 | ENSG00000108578 | BLMH      | Supported | Cytosol Nuclear bodies;Nuc           |
| 2612 | ENSG00000108582 | CPD       | Approved  | Nuclear membrane;N                   |
| 2613 | ENSG00000108588 | CCDC47    | Enhanced  | Endoplasmic reticulum                |
| 2614 | ENSG00000108590 | MED31     | Approved  | Nucleoplasm                          |
| 2615 | ENSG00000108591 | DRG2      | Supported | Cytosol Nucleoplasm;Vesicl           |
| 2616 | ENSG00000108592 | FTSJ3     | Enhanced  | Nucleoli                             |
| 2617 | ENSG00000108599 | AKAP10    | Supported | Cytosol Plasma membrane              |
| 2618 | ENSG00000108602 | ALDH3A1   | Supported | Cytosol Nucleoplasm;Plasma           |
| 2619 | ENSG00000108604 | SMARCD2   | Enhanced  | Nucleoplasm                          |
| 2620 | ENSG00000108622 | ICAM2     | Approved  | Plasma meCytosol                     |
| 2621 | ENSG00000108639 | SYNGR2    | Approved  | Golgi apparatus                      |
| 2622 | ENSG00000108651 | UTP6      | Enhanced  | Nucleoli                             |
| 2623 | ENSG00000108654 | DDX5      | Enhanced  | Nucleoplasm                          |
| 2624 | ENSG00000108666 | C17orf75  | Approved  | Cytosol;Golgi appa                   |
| 2625 | ENSG00000108669 | CYTH1     | Uncertain | Nucleoli;                            |
| 2626 | ENSG00000108671 | PSMD11    | Approved  | Golgi apparatus;Nu                   |
| 2627 | ENSG00000108691 | CCL2      | Approved  | Golgi apparatus;Ve                   |
| 2628 | ENSG00000108771 | DHX58     | Approved  | Cytosol;GNucleoplasm                 |
| 2629 | ENSG00000108774 | RAB5C     | Enhanced  | Endosomes                            |
| 2630 | ENSG00000108786 | HSD17B1   | Supported | Cytosol                              |
| 2631 | ENSG00000108788 | MLX       | Supported | Cytosol;NNuclear membrane            |
| 2632 | ENSG00000108797 | CNTNAP1   | Approved  | Nucleoplasm                          |
| 2633 | ENSG00000108799 | EZH1      | Supported | Nucleoplasm                          |
| 2634 | ENSG00000108813 | DLX4      | Supported | Nucleoplasm                          |
| 2635 | ENSG00000108821 | COL1A1    | Approved  | Cytosol;Vesicles                     |
| 2636 | ENSG00000108825 | PTGES3L-A | Approved  | Cytosol;Nuclear me                   |
| 2637 | ENSG00000108829 | LRRC59    | Enhanced  | Endoplasmic reticulum                |
| 2638 | ENSG00000108839 | ALOX12    | Supported | Cytosol Nuclear speckles             |

|      |                 |          |           |                          |                             |
|------|-----------------|----------|-----------|--------------------------|-----------------------------|
| 2639 | ENSG00000108840 | HDAC5    | Supported |                          | Cytosol;NGolgi apparatus    |
| 2640 | ENSG00000108846 | ABCC3    | Supported |                          | Plasma membrane             |
| 2641 | ENSG00000108848 | LUC7L3   | Enhanced  | Nuclear speckles         |                             |
| 2642 | ENSG00000108852 | MPP2     | Approved  |                          | Cytosol;Mitochondr          |
| 2643 | ENSG00000108854 | SMURF2   | Supported |                          | Nuclear speckles            |
| 2644 | ENSG00000108861 | DUSP3    | Supported |                          | NucleoplaCytosol            |
| 2645 | ENSG00000108883 | EFTUD2   | Approved  | Nucleoplasm              | Cytosol;Vesicles            |
| 2646 | ENSG00000108924 | HLF      | Enhanced  | Nucleoplasm              |                             |
| 2647 | ENSG00000108932 | SLC16A6  | Approved  |                          | Vesicles                    |
| 2648 | ENSG00000108946 | PRKAR1A  | Approved  |                          | Cytosol                     |
| 2649 | ENSG00000108953 | YWHAE    | Supported |                          | Cytosol;Nucleoli;Nucleoplas |
| 2650 | ENSG00000108960 | MMD      | Approved  |                          | Vesicles                    |
| 2651 | ENSG00000108961 | RANGRF   | Supported |                          | Cytosol;Nucleoplasm         |
| 2652 | ENSG00000108963 | DPH1     | Approved  | Nucleoplasm              | Cell Junc                   |
| 2653 | ENSG00000108984 | MAP2K6   | Supported |                          | Cytosol;Nucleoplasm         |
| 2654 | ENSG00000109016 | DHRS7B   | Approved  |                          | Cell Junctions;Cyt          |
| 2655 | ENSG00000109046 | WSB1     | Approved  |                          | Mitochondria                |
| 2656 | ENSG00000109062 | SLC9A3R1 | Approved  |                          | Centriolar satelli          |
| 2657 | ENSG00000109065 | NAT9     | Approved  |                          | Nucleoplasm                 |
| 2658 | ENSG00000109066 | TMEM104  | Approved  |                          | Golgi apparatus;Nu          |
| 2659 | ENSG00000109072 | VTN      | Supported |                          | Endoplasmic reticulum;Vesic |
| 2660 | ENSG00000109079 | TNFAIP1  | Approved  |                          | Nucleoli                    |
| 2661 | ENSG00000109083 | IFT20    | Approved  |                          | Microtubules                |
| 2662 | ENSG00000109084 | TMEM97   | Supported |                          | Endoplasmic reticulum       |
| 2663 | ENSG00000109089 | CDR2L    | Approved  |                          | Cytosol                     |
| 2664 | ENSG00000109107 | ALDOC    | Approved  |                          | Cytosol;Nucleoli f          |
| 2665 | ENSG00000109111 | SUPT6H   | Approved  |                          | Cytosol;Nucleoplas          |
| 2666 | ENSG00000109118 | PHF12    | Enhanced  | Nucleoplasm              |                             |
| 2667 | ENSG00000109132 | PHOX2B   | Enhanced  | Nucleoplasm              |                             |
| 2668 | ENSG00000109171 | SLAIN2   | Enhanced  | Centrosome;Cytosol       |                             |
| 2669 | ENSG00000109180 | OCIAD1   | Approved  |                          | Mitochondria                |
| 2670 | ENSG00000109184 | DCUN1D4  | Supported |                          | Vesicles Nucleoplasm        |
| 2671 | ENSG00000109189 | USP46    | Approved  |                          | Nucleoli                    |
| 2672 | ENSG00000109193 | SULT1E1  | Uncertain |                          | Cytosol;N                   |
| 2673 | ENSG00000109205 | ODAM     | Supported |                          | Cytosol;Nucleoplasm         |
| 2674 | ENSG00000109220 | CHIC2    | Enhanced  | Plasma membrane;Vesicles |                             |
| 2675 | ENSG00000109265 | KIAA1211 | Approved  |                          | Golgi apparatus;Nu          |
| 2676 | ENSG00000109320 | NFKB1    | Supported |                          | Cytosol;Nucleoplasm         |
| 2677 | ENSG00000109321 | AREG     | Approved  |                          | Mitochondria                |
| 2678 | ENSG00000109323 | MANBA    | Supported |                          | Vesicles                    |
| 2679 | ENSG00000109332 | UBE2D3   | Approved  |                          | Plasma membrane Cytosol     |
| 2680 | ENSG00000109381 | ELF2     | Supported |                          | Nuclear bodies;Nucleoplasm  |
| 2681 | ENSG00000109390 | NDUFC1   | Supported |                          | Mitochondria                |
| 2682 | ENSG00000109436 | TBC1D9   | Approved  |                          | Cytosol;Nucleoplas          |
| 2683 | ENSG00000109445 | ZNF330   | Supported |                          | Nucleoli                    |
| 2684 | ENSG00000109452 | INPP4B   | Approved  |                          | Centrosome                  |
| 2685 | ENSG00000109458 | GAB1     | Approved  |                          | Cytosol;Nucleoli f          |
| 2686 | ENSG00000109466 | KLHL2    | Uncertain |                          | Vesicles Nucleopla          |
| 2687 | ENSG00000109472 | CPE      | Approved  |                          | Centrosome;Nucleop          |
| 2688 | ENSG00000109475 | RPL34    | Supported |                          | Cytosol;Endoplasmic reticul |
| 2689 | ENSG00000109511 | ANXA10   | Approved  |                          | Nucleoli;Nucleopla          |
| 2690 | ENSG00000109519 | GRPEL1   | Supported |                          | Mitochondria                |
| 2691 | ENSG00000109534 | GAR1     | Supported |                          | Nucleoli Nucleoplasm        |
| 2692 | ENSG00000109572 | CLCN3    | Supported |                          | Vesicles                    |
| 2693 | ENSG00000109576 | AADAT    | Approved  |                          | Plasma membrane;Ve          |

|      |                 |          |           |                                     |                                  |
|------|-----------------|----------|-----------|-------------------------------------|----------------------------------|
| 2694 | ENSG00000109586 | GALNT7   | Approved  |                                     | Golgi apparatus;Nu               |
| 2695 | ENSG00000109606 | DHX15    | Enhanced  | Nuclear speckles                    |                                  |
| 2696 | ENSG00000109618 | SEPSECS  | Approved  |                                     | Vesicles                         |
| 2697 | ENSG00000109625 | CPZ      | Approved  |                                     | Plasma membrane                  |
| 2698 | ENSG00000109654 | TRIM2    | Approved  |                                     | Centrosome                       |
| 2699 | ENSG00000109670 | FBXW7    | Supported |                                     | Nucleoplasm;Vesicles             |
| 2700 | ENSG00000109674 | NEIL3    | Enhanced  | Nucleoplasm                         |                                  |
| 2701 | ENSG00000109680 | TBC1D19  | Approved  |                                     | Nuclear membrane;N               |
| 2702 | ENSG00000109684 | CLNK     | Uncertain |                                     | Vesicles                         |
| 2703 | ENSG00000109685 | NSD2     | Supported |                                     | Nucleoplasm                      |
| 2704 | ENSG00000109686 | SH3D19   | Supported |                                     | Cytosol;Nucleoplasm              |
| 2705 | ENSG00000109705 | NKX3-2   | Approved  |                                     | Nucleoplasm                      |
| 2706 | ENSG00000109736 | MFSD10   | Approved  |                                     | Nuclear membrane;N               |
| 2707 | ENSG00000109756 | RAPGEF2  | Supported |                                     | Vesicles Centrosome;Nucleop      |
| 2708 | ENSG00000109762 | SNX25    | Supported |                                     | Vesicles                         |
| 2709 | ENSG00000109775 | UFSP2    | Approved  |                                     | Cytosol;Nucleoplas               |
| 2710 | ENSG00000109787 | KLF3     | Enhanced  | Nucleoplasm                         |                                  |
| 2711 | ENSG00000109794 | FAM149A  | Approved  |                                     | Golgi apparatus                  |
| 2712 | ENSG00000109814 | UGDH     | Supported |                                     | Nucleoplasm                      |
| 2713 | ENSG00000109819 | PPARGC1A | Supported |                                     | Nucleoplasm                      |
| 2714 | ENSG00000109846 | CRYAB    | Enhanced  | Cytosol;Plasma membrane             |                                  |
| 2715 | ENSG00000109854 | HTATIP2  | Supported |                                     | Cytosol                          |
| 2716 | ENSG00000109861 | CTSC     | Supported |                                     | Vesicles                         |
| 2717 | ENSG00000109881 | CCDC34   | Approved  |                                     | Nuclear membrane;N               |
| 2718 | ENSG00000109911 | ELP4     | Supported |                                     | Nucleoplasm                      |
| 2719 | ENSG00000109917 | ZPR1     | Approved  |                                     | Vesicles                         |
| 2720 | ENSG00000109919 | MTCH2    | Supported |                                     | Mitochondria                     |
| 2721 | ENSG00000109920 | FBNP4    | Enhanced  | Nuclear speckles                    |                                  |
| 2722 | ENSG00000109929 | SC5D     | Approved  |                                     | Cytosol;Endoplasmic              |
| 2723 | ENSG00000109944 | JHY      | Supported |                                     | Nucleoplasm;Golgi apparatus      |
| 2724 | ENSG00000109956 | B3GAT1   | Supported |                                     | Vesicles                         |
| 2725 | ENSG00000109971 | HSPA8    | Approved  |                                     | Nucleoplasm;Vesicles             |
| 2726 | ENSG00000110002 | VWA5A    | Enhanced  | Nucleoplasm                         | Nucleoli                         |
| 2727 | ENSG00000110025 | SNX15    | Supported |                                     | Cytosol;Plasma membrane;Nucleoli |
| 2728 | ENSG00000110031 | LPXN     | Supported |                                     | Cytosol;Focal adhesion site      |
| 2729 | ENSG00000110042 | DTX4     | Approved  |                                     | Vesicles                         |
| 2730 | ENSG00000110046 | ATG2A    | Approved  |                                     | Cytosol;Nucleoplasm              |
| 2731 | ENSG00000110047 | EHD1     | Supported |                                     | Plasma membrane                  |
| 2732 | ENSG00000110048 | OSBP     | Supported | Golgi apparatus                     | Cytosol Nucleoplasm              |
| 2733 | ENSG00000110057 | UNC93B1  | Approved  |                                     | Nucleoplasm                      |
| 2734 | ENSG00000110060 | PUS3     | Approved  |                                     | Cytosol;Nucleoplasm              |
| 2735 | ENSG00000110063 | DCPS     | Supported |                                     | Cytosol;Nucleoplasm              |
| 2736 | ENSG00000110066 | KMT5B    | Supported |                                     | Nucleoplasm                      |
| 2737 | ENSG00000110074 | FOXRED1  | Supported |                                     | Mitochondria                     |
| 2738 | ENSG00000110075 | PPP6R3   | Enhanced  | Cytosol;Nucleoplasm;Plasma membrane |                                  |
| 2739 | ENSG00000110090 | CPT1A    | Supported |                                     | Mitochondria                     |
| 2740 | ENSG00000110092 | CCND1    | Supported |                                     | Nucleoplasm                      |
| 2741 | ENSG00000110104 | CCDC86   | Enhanced  | Nucleoli;Nucleoplasm                |                                  |
| 2742 | ENSG00000110107 | PRPF19   | Enhanced  | Nuclear speckles                    |                                  |
| 2743 | ENSG00000110108 | TMEM109  | Approved  |                                     | Cytosol;Nuclear membrane         |
| 2744 | ENSG00000110171 | TRIM3    | Approved  |                                     | Mitochondria                     |
| 2745 | ENSG00000110172 | CHORDC1  | Supported |                                     | Cytosol                          |
| 2746 | ENSG00000110195 | FOLR1    | Approved  |                                     | Nuclear membrane                 |
| 2747 | ENSG00000110200 | ANAPC15  | Approved  |                                     | Nucleoplasm;Vesicles             |
| 2748 | ENSG00000110218 | PANX1    | Enhanced  | Plasma membrane                     |                                  |

|      |                 |           |           |             |                             |
|------|-----------------|-----------|-----------|-------------|-----------------------------|
| 2749 | ENSG00000110237 | ARHGEF17  | Approved  |             | Cytosol                     |
| 2750 | ENSG00000110244 | APOA4     | Approved  |             | Vesicles                    |
| 2751 | ENSG00000110245 | APOC3     | Approved  |             | Cell Junctions;Nuc          |
| 2752 | ENSG00000110274 | CEP164    | Enhanced  | Centrosom   | Nucleoplasm                 |
| 2753 | ENSG00000110315 | RNF141    | Approved  |             | Microtubules;Nucle          |
| 2754 | ENSG00000110318 | CEP126    | Uncertain |             | Cytosol;N                   |
| 2755 | ENSG00000110321 | EIF4G2    | Enhanced  | Cytosol     |                             |
| 2756 | ENSG00000110328 | GALNT18   | Approved  |             | Mitochondria                |
| 2757 | ENSG00000110330 | BIRC2     | Supported |             | Cytosol;Nucleoli fibrillar  |
| 2758 | ENSG00000110344 | UBE4A     | Supported |             | Nuclear speckles            |
| 2759 | ENSG00000110367 | DDX6      | Supported |             | CytoplasmCytosol            |
| 2760 | ENSG00000110395 | CBL       | Supported |             | Cytosol                     |
| 2761 | ENSG00000110422 | HIPK3     | Supported |             | Cytosol;Nuclear bodies      |
| 2762 | ENSG00000110427 | KIAA1549L | Approved  |             | Nucleoplasm;Vesicl          |
| 2763 | ENSG00000110429 | FBXO3     | Approved  |             | Cytosol;Nucleoplas          |
| 2764 | ENSG00000110435 | PDHX      | Approved  |             | Mitochondria;Nucle          |
| 2765 | ENSG00000110442 | COMMD9    | Approved  |             | NucleoplaCytosol;Golgi appa |
| 2766 | ENSG00000110446 | SLC15A3   | Supported |             | Vesicles                    |
| 2767 | ENSG00000110455 | ACCS      | Approved  |             | Golgi apparatus             |
| 2768 | ENSG00000110492 | MDK       | Approved  |             | Vesicles                    |
| 2769 | ENSG00000110497 | AMBRA1    | Approved  |             | Mitochondria;Vesic          |
| 2770 | ENSG00000110514 | MADD      | Supported | Cytosol     | Plasma membrane             |
| 2771 | ENSG00000110536 | PTPMT1    | Supported |             | Mitochondria                |
| 2772 | ENSG00000110583 | NAA40     | Approved  |             | Nuclear bodies              |
| 2773 | ENSG00000110619 | CARS      | Enhanced  | Cytosol     |                             |
| 2774 | ENSG00000110651 | CD81      | Supported |             | Plasma membrane             |
| 2775 | ENSG00000110660 | SLC35F2   | Approved  |             | Mitochondria                |
| 2776 | ENSG00000110665 | C11orf21  | Approved  |             | Cytosol;Nucleoplas          |
| 2777 | ENSG00000110675 | ELMOD1    | Uncertain |             | NucleoplaCytosol            |
| 2778 | ENSG00000110693 | SOX6      | Supported |             | Nucleoplasm                 |
| 2779 | ENSG00000110696 | C11orf58  | Approved  |             | Endoplasmic reticu          |
| 2780 | ENSG00000110697 | PITPNM1   | Supported | Cytosol     | Cytoplasmic bodies          |
| 2781 | ENSG00000110700 | RPS13     | Approved  |             | Endoplasmic reticu          |
| 2782 | ENSG00000110711 | AIP       | Supported |             | Cytosol                     |
| 2783 | ENSG00000110713 | NUP98     | Supported |             | Nucleoplasm Vesicles        |
| 2784 | ENSG00000110717 | NDUFS8    | Supported |             | Mitochondria                |
| 2785 | ENSG00000110719 | TCIRG1    | Approved  |             | Mitochondria                |
| 2786 | ENSG00000110721 | CHKA      | Approved  |             | Endoplasmic reticu          |
| 2787 | ENSG00000110768 | GTF2H1    | Enhanced  | Nucleoplasm |                             |
| 2788 | ENSG00000110786 | PTPN5     | Approved  |             | Endoplasmic reticu          |
| 2789 | ENSG00000110801 | PSMD9     | Supported | Cytosol     | Plasma membrane             |
| 2790 | ENSG00000110811 | P3H3      | Approved  |             | Cytosol;Nucleoli;P          |
| 2791 | ENSG00000110841 | PPFIBP1   | Approved  |             | Cytosol;Plasma mem          |
| 2792 | ENSG00000110844 | PRPF40B   | Approved  |             | Nuclear bAggresome;Cytosol; |
| 2793 | ENSG00000110851 | PRDM4     | Supported |             | Nucleoplasm                 |
| 2794 | ENSG00000110871 | COQ5      | Uncertain |             | Mitochondria Nucleoli       |
| 2795 | ENSG00000110881 | ASIC1     | Supported |             | Plasma meGolgi apparatus    |
| 2796 | ENSG00000110888 | CAPRIN2   | Supported | Cytosol     | Centrosome;Nucleop          |
| 2797 | ENSG00000110900 | TSPAN11   | Approved  |             | Vesicles                    |
| 2798 | ENSG00000110906 | KCTD10    | Supported |             | NucleoplaCytosol            |
| 2799 | ENSG00000110911 | SLC11A2   | Supported |             | Mitochondria                |
| 2800 | ENSG00000110921 | MVK       | Supported | Cytosol     | Vesicles                    |
| 2801 | ENSG00000110925 | CSRNP2    | Approved  |             | Nuclear speckles            |
| 2802 | ENSG00000110931 | CAMKK2    | Supported | Cytosol     |                             |
| 2803 | ENSG00000110934 | BIN2      | Approved  |             | Plasma membrane             |

|      |                 |          |           |                                     |                            |
|------|-----------------|----------|-----------|-------------------------------------|----------------------------|
| 2804 | ENSG00000110944 | IL23A    | Approved  |                                     | Cytosol                    |
| 2805 | ENSG00000110955 | ATP5F1B  | Enhanced  | Mitochondria                        |                            |
| 2806 | ENSG00000110958 | PTGES3   | Approved  |                                     | Cytosol;Nucleoplas         |
| 2807 | ENSG00000110975 | SYT10    | Approved  |                                     | Vesicles Nucleopla         |
| 2808 | ENSG00000110987 | BCL7A    | Approved  |                                     | Nucleoplasm;Vesicl         |
| 2809 | ENSG00000111011 | RSRC2    | Approved  |                                     | Cytosol;Nuclear sp         |
| 2810 | ENSG00000111049 | MYF5     | Supported |                                     | Nucleoplasm                |
| 2811 | ENSG00000111057 | KRT18    | Supported |                                     | Cytosol                    |
| 2812 | ENSG00000111058 | ACSS3    | Approved  |                                     | Mitochondria               |
| 2813 | ENSG00000111087 | GLI1     | Enhanced  | Cytosol;Nucleoplasm                 |                            |
| 2814 | ENSG00000111110 | PPM1H    | Supported |                                     | Nucleoplasm                |
| 2815 | ENSG00000111142 | METAP2   | Supported |                                     | Cytosol Plasma membrane    |
| 2816 | ENSG00000111144 | LTA4H    | Approved  |                                     | Cytosol Nucleopla          |
| 2817 | ENSG00000111145 | ELK3     | Supported |                                     | NucleoplaMitochondria      |
| 2818 | ENSG00000111181 | SLC6A12  | Approved  |                                     | Vesicles                   |
| 2819 | ENSG00000111186 | WNT5B    | Approved  |                                     | Vesicles                   |
| 2820 | ENSG00000111203 | ITFG2    | Approved  |                                     | Cytokinetic bridge         |
| 2821 | ENSG00000111206 | FOXMI    | Supported |                                     | Nucleoli;NucleoplaCytosol  |
| 2822 | ENSG00000111224 | PARP11   | Supported |                                     | Nuclear bCytosol           |
| 2823 | ENSG00000111229 | ARPC3    | Uncertain |                                     | Nucleopla                  |
| 2824 | ENSG00000111231 | GPN3     | Approved  |                                     | Cytosol;Nuclear sp         |
| 2825 | ENSG00000111237 | VPS29    | Supported |                                     | Cytosol Vesicles           |
| 2826 | ENSG00000111245 | MYL2     | Uncertain |                                     | Microtubu                  |
| 2827 | ENSG00000111247 | RAD51AP1 | Approved  |                                     | Nucleoplasm                |
| 2828 | ENSG00000111252 | SH2B3    | Approved  |                                     | Nucleoplasm                |
| 2829 | ENSG00000111261 | MANSC1   | Approved  |                                     | Golgi apparatus;Ve         |
| 2830 | ENSG00000111266 | DUSP16   | Supported |                                     | Nucleoplasm                |
| 2831 | ENSG00000111269 | CREBL2   | Approved  |                                     | Cytosol;Mitochondr         |
| 2832 | ENSG00000111276 | CDKN1B   | Supported |                                     | NucleoplaVesicles          |
| 2833 | ENSG00000111300 | NAA25    | Supported |                                     | Cytosol Golgi apparatus    |
| 2834 | ENSG00000111321 | LTBR     | Supported |                                     | Golgi apparatus            |
| 2835 | ENSG00000111325 | OGFOD2   | Supported |                                     | Nuclear bodies;Nucleoplasm |
| 2836 | ENSG00000111328 | CDK2AP1  | Supported |                                     | Nucleoplasm                |
| 2837 | ENSG00000111331 | OAS3     | Supported |                                     | Cytosol;NPlasma membrane   |
| 2838 | ENSG00000111335 | OAS2     | Approved  |                                     | Centrosome                 |
| 2839 | ENSG00000111339 | ART4     | Approved  |                                     | Rods & Rings               |
| 2840 | ENSG00000111344 | RASAL1   | Approved  |                                     | Cell Junctions;Cyt         |
| 2841 | ENSG00000111348 | ARHGDI   | Supported |                                     | Cytosol                    |
| 2842 | ENSG00000111358 | GTF2H3   | Supported |                                     | Nucleoplasm                |
| 2843 | ENSG00000111361 | EIF2B1   | Supported |                                     | Cytosol                    |
| 2844 | ENSG00000111364 | DDX55    | Enhanced  | Nucleoli;Nucleoplasm                |                            |
| 2845 | ENSG00000111404 | RERGL    | Approved  |                                     | Nucleoplasm                |
| 2846 | ENSG00000111424 | VDR      | Supported |                                     | NucleoplaCytosol Intermedi |
| 2847 | ENSG00000111432 | FZD10    | Approved  |                                     | Nucleoplasm                |
| 2848 | ENSG00000111445 | RFC5     | Approved  |                                     | Nucleoplasm                |
| 2849 | ENSG00000111450 | STX2     | Approved  |                                     | Cytosol;Nucleoplas         |
| 2850 | ENSG00000111452 | ADGRD1   | Approved  |                                     | Cytosol;Nucleoplas         |
| 2851 | ENSG00000111490 | TBC1D30  | Supported |                                     | Plasma meCytosol           |
| 2852 | ENSG00000111530 | CAND1    | Enhanced  | Cytosol;Golgi apparatus;Nucleoplasm |                            |
| 2853 | ENSG00000111540 | RAB5B    | Supported |                                     | Vesicles                   |
| 2854 | ENSG00000111554 | MDM1     | Supported |                                     | Centrosome Cytosol         |
| 2855 | ENSG00000111581 | NUP107   | Uncertain |                                     | Nuclear membrane Centrosom |
| 2856 | ENSG00000111596 | CNOT2    | Approved  |                                     | Cytosol;Nucleoplas         |
| 2857 | ENSG00000111602 | TIMELESS | Supported |                                     | Nucleoplasm                |
| 2858 | ENSG00000111605 | CPSF6    | Enhanced  | Nuclear speckles;Nucleoplasm        |                            |



|      |                 |           |           |                  |                            |
|------|-----------------|-----------|-----------|------------------|----------------------------|
| 2859 | ENSG00000111615 | KRR1      | Enhanced  | Nucleoli         | Nucleoplasm                |
| 2860 | ENSG00000111639 | MRPL51    | Supported |                  | Mitochondria               |
| 2861 | ENSG00000111640 | GAPDH     | Supported |                  | Cytosol;PNuclear membrane  |
| 2862 | ENSG00000111641 | NOP2      | Supported |                  | Nucleoli                   |
| 2863 | ENSG00000111642 | CHD4      | Enhanced  | Nucleoplasm      |                            |
| 2864 | ENSG00000111644 | ACRBP     | Approved  |                  | Nucleoplasm;Vesicl         |
| 2865 | ENSG00000111647 | UHRF1BP1L | Approved  |                  | Cytosol;VNucleoplasm       |
| 2866 | ENSG00000111652 | COPS7A    | Supported |                  | Cytosol;Nucleoplasm        |
| 2867 | ENSG00000111653 | ING4      | Supported |                  | Nucleoplasm                |
| 2868 | ENSG00000111664 | GNB3      | Approved  |                  | Golgi apparatus;Pl         |
| 2869 | ENSG00000111665 | CDCA3     | Approved  |                  | Cytosol                    |
| 2870 | ENSG00000111666 | CHPT1     | Supported | Vesicles         |                            |
| 2871 | ENSG00000111667 | USP5      | Approved  |                  | Cytosol;Nucleoplas         |
| 2872 | ENSG00000111669 | TPI1      | Approved  |                  | Nucleoplasm;Vesicl         |
| 2873 | ENSG00000111670 | GNPTAB    | Supported |                  | Golgi apparatus            |
| 2874 | ENSG00000111674 | ENO2      | Supported |                  | Cytosol;Plasma membrane    |
| 2875 | ENSG00000111676 | ATN1      | Enhanced  | Nucleoplasm      |                            |
| 2876 | ENSG00000111678 | C12orf57  | Enhanced  | Nuclear speckles |                            |
| 2877 | ENSG00000111679 | PTPN6     | Supported |                  | Nucleoli;Nucleoplasm       |
| 2878 | ENSG00000111696 | NT5DC3    | Approved  |                  | Cytosol;Mitochondr         |
| 2879 | ENSG00000111700 | SLC01B3   | Supported |                  | Plasma membrane            |
| 2880 | ENSG00000111707 | SUDS3     | Supported |                  | Nuclear bCytosol           |
| 2881 | ENSG00000111711 | GOLT1B    | Supported | Vesicles         | Nucleopla                  |
| 2882 | ENSG00000111716 | LDHB      | Supported |                  | Cytosol                    |
| 2883 | ENSG00000111725 | PRKAB1    | Approved  |                  | Cytosol;Nucleoplas         |
| 2884 | ENSG00000111726 | CMAS      | Uncertain | Nucleoli         | Cytosol                    |
| 2885 | ENSG00000111727 | HCFC2     | Supported |                  | Cytosol;NPlasma membrane   |
| 2886 | ENSG00000111731 | C2CD5     | Approved  |                  | Centriolar satelli         |
| 2887 | ENSG00000111752 | PHC1      | Supported |                  | Nucleoplasm                |
| 2888 | ENSG00000111775 | COX6A1    | Supported |                  | Mitochondria               |
| 2889 | ENSG00000111780 | AL021546. | Approved  |                  | Mitochondria               |
| 2890 | ENSG00000111783 | RFX4      | Approved  |                  | Nucleoplasm                |
| 2891 | ENSG00000111786 | SRSF9     | Supported | Nucleopla        | Nucleoli                   |
| 2892 | ENSG00000111790 | FGFR10P2  | Approved  |                  | Mitochondria               |
| 2893 | ENSG00000111796 | KLRB1     | Uncertain |                  | Cytosol;N                  |
| 2894 | ENSG00000111799 | COL12A1   | Approved  |                  | Nucleoplasm                |
| 2895 | ENSG00000111802 | TDP2      | Supported |                  | Nuclear bodies;Nucleoplasm |
| 2896 | ENSG00000111816 | FRK       | Supported |                  | NucleoplaCytosol           |
| 2897 | ENSG00000111817 | DSE       | Enhanced  | Nucleopla        | Cytosol                    |
| 2898 | ENSG00000111834 | RSPH4A    | Approved  |                  | Nucleoplasm                |
| 2899 | ENSG00000111845 | PAK1IP1   | Supported |                  | Nucleoli                   |
| 2900 | ENSG00000111846 | GCNT2     | Supported |                  | Golgi apparatus            |
| 2901 | ENSG00000111850 | SMIM8     | Approved  |                  | Vesicles                   |
| 2902 | ENSG00000111859 | NEDD9     | Approved  |                  | Cytosol;NPlasma membrane   |
| 2903 | ENSG00000111863 | ADTRP     | Uncertain |                  | Nucleoli                   |
| 2904 | ENSG00000111875 | ASF1A     | Enhanced  | Nucleoplasm      |                            |
| 2905 | ENSG00000111877 | MCM9      | Approved  |                  | Nucleoplasm                |
| 2906 | ENSG00000111879 | FAM184A   | Supported | Golgi app        | Cytosol;Nucleoplas         |
| 2907 | ENSG00000111880 | RNGTT     | Approved  |                  | Nucleoplasm                |
| 2908 | ENSG00000111885 | MAN1A1    | Supported | Golgi apparatus  |                            |
| 2909 | ENSG00000111897 | SERINC1   | Approved  |                  | Cytosol                    |
| 2910 | ENSG00000111906 | HDDC2     | Approved  |                  | Nucleoli;Nucleopla         |
| 2911 | ENSG00000111907 | TPD52L1   | Approved  |                  | Cell Junctions;Cyt         |
| 2912 | ENSG00000111911 | HINT3     | Approved  |                  | Cytosol;Mitochondr         |
| 2913 | ENSG00000111912 | NCOA7     | Approved  |                  | Golgi apparatus;Nu         |

|      |                 |          |           |                         |                             |
|------|-----------------|----------|-----------|-------------------------|-----------------------------|
| 2914 | ENSG00000111961 | SASH1    | Approved  |                         | Cytosol;Nucleoplas          |
| 2915 | ENSG00000111981 | ULBP1    | Supported |                         | Plasma meCytosol            |
| 2916 | ENSG00000112029 | FBX05    | Supported |                         | Nucleoplasm                 |
| 2917 | ENSG00000112039 | FANCE    | Supported |                         | Nucleoplasm                 |
| 2918 | ENSG00000112062 | MAPK14   | Supported |                         | Cytosol;Nuclear speckles    |
| 2919 | ENSG00000112077 | RHAG     | Approved  |                         | Endoplasmic reticu          |
| 2920 | ENSG00000112078 | KCTD20   | Approved  |                         | Endoplasmic reticu          |
| 2921 | ENSG00000112079 | STK38    | Approved  |                         | Cytosol                     |
| 2922 | ENSG00000112081 | SRSF3    | Supported |                         | Nucleoplasm                 |
| 2923 | ENSG00000112096 | SOD2     | Enhanced  | Mitochondria            |                             |
| 2924 | ENSG00000112118 | MCM3     | Enhanced  | Nucleoplasm             |                             |
| 2925 | ENSG00000112130 | RNF8     | Supported |                         | NucleoplaCytosol            |
| 2926 | ENSG00000112137 | PHACTR1  | Uncertain |                         | Plasma me                   |
| 2927 | ENSG00000112139 | MDGA1    | Supported |                         | Plasma membrane Golgi app   |
| 2928 | ENSG00000112144 | ICK      | Approved  |                         | Nucleoli fibrillar          |
| 2929 | ENSG00000112146 | FBX09    | Approved  |                         | Centrosome                  |
| 2930 | ENSG00000112159 | MDN1     | Approved  |                         | Nucleoli Cytosol;I          |
| 2931 | ENSG00000112167 | SAYS1    | Supported |                         | Vesicles                    |
| 2932 | ENSG00000112182 | BACH2    | Supported |                         | Cytosol;Nucleoplasm         |
| 2933 | ENSG00000112183 | RBM24    | Enhanced  | Cytosol;Nucleoplasm     |                             |
| 2934 | ENSG00000112186 | CAP2     | Approved  |                         | Cytosol;Nucleoplas          |
| 2935 | ENSG00000112200 | ZNF451   | Approved  |                         | Nucleoplasm                 |
| 2936 | ENSG00000112208 | BAG2     | Supported |                         | Nucleoplasm                 |
| 2937 | ENSG00000112210 | RAB23    | Enhanced  | Cytosol;Plasma membrane |                             |
| 2938 | ENSG00000112218 | GPR63    | Approved  |                         | Plasma meCytosol;N          |
| 2939 | ENSG00000112234 | FBXL4    | Supported |                         | Nuclear speckles            |
| 2940 | ENSG00000112237 | CCNC     | Supported |                         | NucleoplaCytosol            |
| 2941 | ENSG00000112242 | E2F3     | Supported |                         | Nuclear sCytosol            |
| 2942 | ENSG00000112246 | SIM1     | Approved  |                         | Nuclear speckles            |
| 2943 | ENSG00000112249 | ASCC3    | Supported |                         | Cytosol Golgi apparatus     |
| 2944 | ENSG00000112276 | BVES     | Supported |                         | Cell Junctions;Plasma membr |
| 2945 | ENSG00000112282 | MED23    | Approved  |                         | Nucleoplasm;Vesicl          |
| 2946 | ENSG00000112294 | ALDH5A1  | Supported |                         | Mitochondria                |
| 2947 | ENSG00000112297 | CRYBG1   | Approved  |                         | Cytosol;Microtubul          |
| 2948 | ENSG00000112304 | ACOT13   | Approved  |                         | Cell Junctions              |
| 2949 | ENSG00000112305 | SMAP1    | Approved  |                         | Cytosol;Golgi appa          |
| 2950 | ENSG00000112306 | RPS12    | Supported |                         | Cytosol Golgi apparatus;Ve  |
| 2951 | ENSG00000112308 | C6orf62  | Approved  |                         | Cytosol                     |
| 2952 | ENSG00000112312 | GMNN     | Enhanced  | Nucleoplasm             |                             |
| 2953 | ENSG00000112319 | EYA4     | Approved  |                         | Nucleoplasm                 |
| 2954 | ENSG00000112320 | SOBP     | Approved  |                         | Nucleoplasm;Vesicl          |
| 2955 | ENSG00000112333 | NR2E1    | Approved  |                         | Nuclear bodies              |
| 2956 | ENSG00000112339 | HBS1L    | Approved  |                         | Cytosol;Nuclear bo          |
| 2957 | ENSG00000112343 | TRIM38   | Approved  |                         | Cell Junctions;Cen          |
| 2958 | ENSG00000112357 | PEX7     | Supported |                         | Vesicles Nucleoplasm        |
| 2959 | ENSG00000112365 | ZBTB24   | Approved  |                         | Centrosome;Cytokin          |
| 2960 | ENSG00000112367 | FIG4     | Approved  |                         | Vesicles Lipid dro          |
| 2961 | ENSG00000112394 | SLC16A10 | Supported |                         | Cell JuncVesicles           |
| 2962 | ENSG00000112425 | EPM2A    | Enhanced  | Nucleoplasm             |                             |
| 2963 | ENSG00000112473 | SLC39A7  | Supported |                         | Endoplasmic reticulum       |
| 2964 | ENSG00000112511 | PHF1     | Approved  |                         | Nucleoplasm                 |
| 2965 | ENSG00000112514 | CUTA     | Approved  |                         | Focal adhesion sit          |
| 2966 | ENSG00000112531 | QKI      | Supported |                         | Nucleoplasm                 |
| 2967 | ENSG00000112539 | C6orf118 | Uncertain |                         | Mitochond                   |
| 2968 | ENSG00000112559 | MDFI     | Approved  |                         | Nucleoplasm                 |

|      |                 |          |           |                                      |
|------|-----------------|----------|-----------|--------------------------------------|
| 2969 | ENSG00000112561 | TFEB     | Supported | Nucleoplasm                          |
| 2970 | ENSG00000112576 | CCND3    | Supported | Cytosol;Nuclear bodies;Nucl          |
| 2971 | ENSG00000112578 | BYSL     | Enhanced  | Nucleoli;Nucleoplasm                 |
| 2972 | ENSG00000112584 | FAM120B  | Approved  | Cytosol;Nucleoplas                   |
| 2973 | ENSG00000112592 | TBP      | Supported | Nucleoplasm                          |
| 2974 | ENSG00000112624 | BICRAL   | Supported | Nucleoplasm                          |
| 2975 | ENSG00000112640 | PPP2R5D  | Approved  | Cytosol;Nucleoplas                   |
| 2976 | ENSG00000112651 | MRPL2    | Approved  | Mitochondria;Nucle                   |
| 2977 | ENSG00000112658 | SRF      | Supported | Nucleoplasm                          |
| 2978 | ENSG00000112659 | CUL9     | Approved  | Cytosol                              |
| 2979 | ENSG00000112667 | DNPH1    | Approved  | Cytosol Nucleoplasm                  |
| 2980 | ENSG00000112679 | DUSP22   | Approved  | Nucleoplasm;Vesicl                   |
| 2981 | ENSG00000112685 | EXOC2    | Supported | Vesicles                             |
| 2982 | ENSG00000112697 | TMEM30A  | Supported | Mitochondria                         |
| 2983 | ENSG00000112701 | SENP6    | Supported | NucleoplaCytosol                     |
| 2984 | ENSG00000112739 | PRPF4B   | Supported | Nuclear speckles                     |
| 2985 | ENSG00000112742 | TTK      | Approved  | Cytosol;Nucleoli                     |
| 2986 | ENSG00000112761 | WISP3    | Approved  | Endoplasmic reticu                   |
| 2987 | ENSG00000112763 | BTN2A1   | Approved  | Plasma membrane                      |
| 2988 | ENSG00000112769 | LAMA4    | Approved  | Cytosol;Plasma mem                   |
| 2989 | ENSG00000112773 | FAM46A   | Approved  | Cytosol;Nucleoplas                   |
| 2990 | ENSG00000112782 | CLIC5    | Supported | Plasma meNuclear speckles            |
| 2991 | ENSG00000112787 | FBRSL1   | Approved  | Cytosol;Nucleoplas                   |
| 2992 | ENSG00000112796 | ENPP5    | Approved  | Cytosol;Nucleoplas                   |
| 2993 | ENSG00000112851 | ERBIN    | Supported | Nuclear speckles;Plasma mem          |
| 2994 | ENSG00000112852 | PCDHB2   | Approved  | Nucleoplasm                          |
| 2995 | ENSG00000112855 | HARS2    | Approved  | Cytosol                              |
| 2996 | ENSG00000112877 | CEP72    | Supported | Centrosome                           |
| 2997 | ENSG00000112893 | MAN2A1   | Supported | Golgi apparatus                      |
| 2998 | ENSG00000112941 | PAPD7    | Supported | Golgi apparatus;Nuclear mem          |
| 2999 | ENSG00000112964 | GHR      | Supported | Plasma meCytoplasmic bodies          |
| 3000 | ENSG00000112972 | HMGCS1   | Supported | Cytosol;Nucleoplasm;Plasma           |
| 3001 | ENSG00000112977 | DAP      | Approved  | Mitochondria;Nucle                   |
| 3002 | ENSG00000112981 | NME5     | Approved  | Nuclear bodies;Nuc                   |
| 3003 | ENSG00000112983 | BRD8     | Supported | Nucleoplasm Mitochond                |
| 3004 | ENSG00000112984 | KIF20A   | Enhanced  | NucleoplaCleavage Cytokinetic bridge |
| 3005 | ENSG00000112992 | NNT      | Approved  | Mitochondria                         |
| 3006 | ENSG00000113013 | HSPA9    | Supported | Mitochondria                         |
| 3007 | ENSG00000113048 | MRPS27   | Approved  | Mitochondria Nucleoli;               |
| 3008 | ENSG00000113068 | PFDN1    | Approved  | Cytosol;Nucleoli;P                   |
| 3009 | ENSG00000113083 | LOX      | Supported | Endoplasmic reticulum                |
| 3010 | ENSG00000113108 | APBB3    | Supported | Cytosol Actin filaments              |
| 3011 | ENSG00000113119 | TMC06    | Approved  | Mitochondria;Nucle                   |
| 3012 | ENSG00000113140 | SPARC    | Approved  | Vesicles                             |
| 3013 | ENSG00000113141 | IK       | Enhanced  | Nuclear speckles                     |
| 3014 | ENSG00000113163 | COL4A3BP | Enhanced  | Golgi apparatus;Nucleoplasm          |
| 3015 | ENSG00000113194 | FAF2     | Enhanced  | Lipid droEndoplasmic reticulum       |
| 3016 | ENSG00000113196 | HAND1    | Uncertain | Nuclear m                            |
| 3017 | ENSG00000113205 | PCDHB3   | Supported | Vesicles                             |
| 3018 | ENSG00000113211 | PCDHB6   | Uncertain | Cytosol;N                            |
| 3019 | ENSG00000113231 | PDE8B    | Approved  | Cytosol;Nucleoplas                   |
| 3020 | ENSG00000113240 | CLK4     | Approved  | Actin filaments                      |
| 3021 | ENSG00000113248 | PCDHB15  | Approved  | Mitochondria                         |
| 3022 | ENSG00000113249 | HAVCR1   | Approved  | Vesicles                             |
| 3023 | ENSG00000113273 | ARSB     | Approved  | Golgi apparatus                      |

|      |                 |          |           |                  |                          |           |
|------|-----------------|----------|-----------|------------------|--------------------------|-----------|
| 3024 | ENSG00000113282 | CLINT1   | Supported |                  | Vesicles                 | Nucleopla |
| 3025 | ENSG00000113296 | THBS4    | Approved  |                  | Vesicles                 |           |
| 3026 | ENSG00000113300 | CNOT6    | Approved  |                  | Cytosol                  |           |
| 3027 | ENSG00000113312 | TTC1     | Enhanced  | Cytosol          |                          |           |
| 3028 | ENSG00000113318 | MSH3     | Approved  |                  | Nuclear bodies           |           |
| 3029 | ENSG00000113319 | RASGRF2  | Supported |                  | Endoplasmic reticulum    |           |
| 3030 | ENSG00000113328 | CCNG1    | Supported |                  | Nucleoplasm              |           |
| 3031 | ENSG00000113356 | POLR3G   | Enhanced  | Nucleoplasm      | Cytosol                  |           |
| 3032 | ENSG00000113361 | CDH6     | Supported |                  | Cell Junctions           |           |
| 3033 | ENSG00000113368 | LMNB1    | Enhanced  | Nuclear membrane |                          |           |
| 3034 | ENSG00000113384 | GOLPH3   | Supported |                  | Golgi apparatus;Vesicles |           |
| 3035 | ENSG00000113387 | SUB1     | Supported |                  | Nucleoli;Nucleoplasm     |           |
| 3036 | ENSG00000113389 | NPR3     | Approved  |                  | Cytosol                  |           |
| 3037 | ENSG00000113391 | FAM172A  | Supported |                  | Cytosol;Nucleoplasm      |           |
| 3038 | ENSG00000113396 | SLC27A6  | Approved  |                  | Nuclear bodies           |           |
| 3039 | ENSG00000113407 | TARS     | Supported |                  | Cytosol Actin filaments  |           |
| 3040 | ENSG00000113430 | IRX4     | Uncertain |                  | Nucleopla                |           |
| 3041 | ENSG00000113448 | PDE4D    | Supported |                  | Plasma meCytosol         |           |
| 3042 | ENSG00000113456 | RAD1     | Supported |                  | NucleoplaVesicles        |           |
| 3043 | ENSG00000113460 | BRIX1    | Supported |                  | Nucleoli Nucleoplasm     |           |
| 3044 | ENSG00000113504 | SLC12A7  | Uncertain |                  | Cytosol                  |           |
| 3045 | ENSG00000113522 | RAD50    | Supported |                  | Nucleoplasm              |           |
| 3046 | ENSG00000113532 | ST8SIA4  | Approved  |                  | Golgi apparatus          |           |
| 3047 | ENSG00000113552 | GNPDA1   | Approved  |                  | Golgi apparatus;Ve       |           |
| 3048 | ENSG00000113558 | SKP1     | Supported |                  | NucleoplaCytosol         |           |
| 3049 | ENSG00000113569 | NUP155   | Enhanced  | Nuclear membrane |                          |           |
| 3050 | ENSG00000113578 | FGF1     | Supported |                  | Nucleoplasm              |           |
| 3051 | ENSG00000113580 | NR3C1    | Supported | Cytosol;N        | Mitochondria             |           |
| 3052 | ENSG00000113583 | C5orf15  | Approved  |                  | Golgi apparatus          |           |
| 3053 | ENSG00000113593 | PPWD1    | Supported |                  | Nuclear bodies           |           |
| 3054 | ENSG00000113594 | LIFR     | Approved  |                  | Golgi apparatus;Nu       |           |
| 3055 | ENSG00000113597 | TRAPPC13 | Approved  |                  | Nucleoplasm;Plasma       |           |
| 3056 | ENSG00000113615 | SEC24A   | Approved  |                  | Nucleoli fibrillar       |           |
| 3057 | ENSG00000113621 | TXNDC15  | Approved  |                  | Golgi apparatus          |           |
| 3058 | ENSG00000113638 | TTC33    | Approved  |                  | Golgi apparatus;Nu       |           |
| 3059 | ENSG00000113643 | RARS     | Enhanced  | Cytosol          | Nucleoplasm              |           |
| 3060 | ENSG00000113645 | WWC1     | Approved  |                  | Golgi apparatus          |           |
| 3061 | ENSG00000113648 | H2AFY    | Supported |                  | Nucleoplasm              |           |
| 3062 | ENSG00000113649 | TCERG1   | Enhanced  | Nucleoplasm      |                          |           |
| 3063 | ENSG00000113657 | DPYSL3   | Supported |                  | Cytosol                  |           |
| 3064 | ENSG00000113658 | SMAD5    | Supported |                  | Cytosol;Nucleoplasm      |           |
| 3065 | ENSG00000113712 | CSNK1A1  | Supported |                  | Cytosol                  |           |
| 3066 | ENSG00000113716 | HMGXB3   | Approved  |                  | Nucleoli                 |           |
| 3067 | ENSG00000113719 | ERGIC1   | Enhanced  | Vesicles         | Nucleoplasm              |           |
| 3068 | ENSG00000113721 | PDGFRB   | Supported |                  | Vesicles Golgi apparatus |           |
| 3069 | ENSG00000113734 | BNIP1    | Supported |                  | Endoplasmic reticulum    |           |
| 3070 | ENSG00000113739 | STC2     | Approved  |                  | Endoplasmic reticu       |           |
| 3071 | ENSG00000113742 | CPEB4    | Approved  |                  | Golgi apparatus;Nu       |           |
| 3072 | ENSG00000113758 | DBN1     | Supported |                  | Actin filPlasma membrane |           |
| 3073 | ENSG00000113763 | UNC5A    | Approved  |                  | Cytosol;Plasma mem       |           |
| 3074 | ENSG00000113810 | SMC4     | Supported |                  | Cytosol;Nuclear speckles |           |
| 3075 | ENSG00000113811 | SELENOK  | Approved  |                  | Cytosol Nucleopla        |           |
| 3076 | ENSG00000113812 | ACTR8    | Supported |                  | NucleoplaCentrosome      |           |
| 3077 | ENSG00000113845 | TIMMDC1  | Enhanced  | MitochondN       | Nucleoplasm              |           |
| 3078 | ENSG00000113916 | BCL6     | Supported | Nucleoplasm      | Golgi apparatus          |           |

|      |                 |          |           |                               |                             |
|------|-----------------|----------|-----------|-------------------------------|-----------------------------|
| 3079 | ENSG00000113924 | HGD      | Approved  |                               | Golgi apparatus             |
| 3080 | ENSG00000113966 | ARL6     | Approved  |                               | Nucleoplasm;Vesicl          |
| 3081 | ENSG00000114019 | AMOTL2   | Approved  |                               | Cell Junctions              |
| 3082 | ENSG00000114021 | NIT2     | Supported | Cytosol                       | Centrosome                  |
| 3083 | ENSG00000114023 | FAM162A  | Enhanced  | Mitochondr                    | Cytosol                     |
| 3084 | ENSG00000114026 | OGG1     | Enhanced  |                               | Nucleoplasm                 |
| 3085 | ENSG00000114030 | KPNA1    | Enhanced  |                               | Cytosol;Nucleoplasm         |
| 3086 | ENSG00000114062 | UBE3A    | Approved  |                               | Cytosol;Nucleoplas          |
| 3087 | ENSG00000114098 | ARMC8    | Approved  |                               | Cytosol;Nucleoplas          |
| 3088 | ENSG00000114107 | CEP70    | Approved  | Centrosom                     | Cytosol;Nucleoplas          |
| 3089 | ENSG00000114113 | RBP2     | Approved  |                               | Golgi apparatus             |
| 3090 | ENSG00000114115 | RBP1     | Approved  | Cytosol                       | Nucleoplasm                 |
| 3091 | ENSG00000114120 | SLC25A36 | Approved  |                               | Cytosol;Mitochondr          |
| 3092 | ENSG00000114125 | RNF7     | Supported |                               | Nucleoplasm                 |
| 3093 | ENSG00000114126 | TFDP2    | Supported |                               | NucleoplaMitotic spindle;Ve |
| 3094 | ENSG00000114127 | XRN1     | Supported |                               | Cytosol;Plasma membrane     |
| 3095 | ENSG00000114166 | KAT2B    | Supported |                               | Centrosome;Nucleoplasm      |
| 3096 | ENSG00000114268 | PFKFB4   | Approved  |                               | Nucleoli                    |
| 3097 | ENSG00000114279 | FGF12    | Approved  |                               | Cytosol;Nucleoplas          |
| 3098 | ENSG00000114315 | HES1     | Supported |                               | Nucleoplasm                 |
| 3099 | ENSG00000114316 | USP4     | Supported | Cytosol                       | Plasma membrane             |
| 3100 | ENSG00000114331 | ACAP2    | Approved  |                               | Endosomes                   |
| 3101 | ENSG00000114346 | ECT2     | Enhanced  | Cytosol;Nucleoplasm           |                             |
| 3102 | ENSG00000114353 | GNAI2    | Supported |                               | Cytosol;Plasma memNucleopla |
| 3103 | ENSG00000114354 | TFG      | Supported |                               | Cytosol;Vesicles            |
| 3104 | ENSG00000114374 | USP9Y    | Uncertain |                               | Vesicles                    |
| 3105 | ENSG00000114383 | TUSC2    | Approved  |                               | Cytosol;Vesicles            |
| 3106 | ENSG00000114388 | NPRL2    | Supported |                               | Cytosol                     |
| 3107 | ENSG00000114391 | RPL24    | Enhanced  | Cytosol;Endoplasmic reticulum |                             |
| 3108 | ENSG00000114405 | C3orf14  | Approved  |                               | Cytosol;Plasma mem          |
| 3109 | ENSG00000114416 | FXR1     | Enhanced  | Cytosol                       |                             |
| 3110 | ENSG00000114423 | CBLB     | Supported |                               | Cytosol Nucleoplasm         |
| 3111 | ENSG00000114439 | BBX      | Enhanced  | Cytosol;Nucleoplasm           |                             |
| 3112 | ENSG00000114446 | IFT57    | Approved  |                               | Cytosol;Mitochondr          |
| 3113 | ENSG00000114450 | GNB4     | Supported |                               | Plasma membrane             |
| 3114 | ENSG00000114473 | IQCG     | Approved  |                               | Actin filaments;Cy          |
| 3115 | ENSG00000114480 | GBE1     | Approved  |                               | Cytosol;Nucleoplas          |
| 3116 | ENSG00000114491 | UMPS     | Supported |                               | Cytosol                     |
| 3117 | ENSG00000114503 | NCBP2    | Enhanced  | Nucleoplasm                   |                             |
| 3118 | ENSG00000114544 | SLC41A3  | Supported |                               | Plasma membrane             |
| 3119 | ENSG00000114554 | PLXNA1   | Supported |                               | Cytosol;Nucleoplasm         |
| 3120 | ENSG00000114573 | ATP6V1A  | Supported |                               | Cytosol;Nucleoplasm;Vesicle |
| 3121 | ENSG00000114626 | ABTB1    | Supported |                               | Cytosol Nucleoli            |
| 3122 | ENSG00000114631 | PODXL2   | Approved  |                               | Golgi apparatus;Ve          |
| 3123 | ENSG00000114646 | CSPG5    | Approved  |                               | Mitochondria;Nucle          |
| 3124 | ENSG00000114648 | KLHL18   | Approved  |                               | Nuclear bodies;Nuc          |
| 3125 | ENSG00000114670 | NEK11    | Supported |                               | Nucleoplasm                 |
| 3126 | ENSG00000114698 | PLSCR4   | Approved  |                               | Nuclear bodies;Nuc          |
| 3127 | ENSG00000114737 | CISH     | Approved  |                               | Cytokinetic bridge          |
| 3128 | ENSG00000114738 | MAPKAPK3 | Supported |                               | Nucleoplasm                 |
| 3129 | ENSG00000114739 | ACVR2B   | Approved  |                               | Cytosol;Nuclear bo          |
| 3130 | ENSG00000114742 | WDR48    | Supported |                               | Vesicles                    |
| 3131 | ENSG00000114744 | COMMD2   | Approved  |                               | Nuclear bodies;Nuc          |
| 3132 | ENSG00000114745 | GORASP1  | Supported |                               | Golgi apparatus             |
| 3133 | ENSG00000114767 | RRP9     | Supported |                               | Nucleoplasm                 |

|      |                 |           |           |                      |                             |
|------|-----------------|-----------|-----------|----------------------|-----------------------------|
| 3134 | ENSG00000114770 | ABCC5     | Approved  |                      | Cell Junctions;Nuc          |
| 3135 | ENSG00000114779 | ABHD14B   | Approved  |                      | Cytosol;Nucleoli            |
| 3136 | ENSG00000114786 | ABHD14A-A | Uncertain |                      | Vesicles                    |
| 3137 | ENSG00000114790 | ARHGEF26  | Supported |                      | Plasma meCytosol;Nucleoplas |
| 3138 | ENSG00000114805 | PLCH1     | Enhanced  | Vesicles             |                             |
| 3139 | ENSG00000114853 | ZBTB47    | Approved  |                      | Nucleoplasm                 |
| 3140 | ENSG00000114854 | TNNC1     | Approved  |                      | Actin filaments;Mi          |
| 3141 | ENSG00000114857 | NKTR      | Supported | Cytosol;F            | Nucleoplasm                 |
| 3142 | ENSG00000114859 | CLCN2     | Approved  |                      | Cytosol                     |
| 3143 | ENSG00000114861 | FOXP1     | Enhanced  | Nucleoplasm          |                             |
| 3144 | ENSG00000114867 | EIF4G1    | Enhanced  | Cytosol              |                             |
| 3145 | ENSG00000114902 | SPCS1     | Approved  |                      | Golgi apparatus;Ve          |
| 3146 | ENSG00000114904 | NEK4      | Supported | Cytosol              |                             |
| 3147 | ENSG00000114923 | SLC4A3    | Approved  |                      | Nucleoplasm                 |
| 3148 | ENSG00000114942 | EEF1B2    | Approved  |                      | Cytosol;Nucleoli f          |
| 3149 | ENSG00000114978 | MOB1A     | Approved  |                      | Cytosol;Nucleoli;N          |
| 3150 | ENSG00000114982 | KANSL3    | Supported | Nucleoplasm          |                             |
| 3151 | ENSG00000114993 | RTKN      | Approved  |                      | Mitochondria;Nucle          |
| 3152 | ENSG00000114999 | TTL       | Approved  |                      | Nucleoplasm;Vesicl          |
| 3153 | ENSG00000115020 | PIKFYVE   | Supported |                      | Vesicles                    |
| 3154 | ENSG00000115041 | KCNIP3    | Approved  |                      | Vesicles                    |
| 3155 | ENSG00000115053 | NCL       | Enhanced  | Nucleoli;Nucleoplasm |                             |
| 3156 | ENSG00000115073 | ACTR1B    | Approved  |                      | Microtubules                |
| 3157 | ENSG00000115084 | SLC35F5   | Uncertain |                      | Plasma me                   |
| 3158 | ENSG00000115107 | STEAP3    | Approved  |                      | Cytosol;Nucleoli            |
| 3159 | ENSG00000115109 | EPB41L5   | Enhanced  | Plasma membrane      |                             |
| 3160 | ENSG00000115112 | TFCP2L1   | Approved  |                      | Nucleoli Mitochond          |
| 3161 | ENSG00000115128 | SF3B6     | Supported | Nucleoplasm          |                             |
| 3162 | ENSG00000115129 | TP53I3    | Supported |                      | Vesicles                    |
| 3163 | ENSG00000115137 | DNAJC27   | Supported |                      | Cytosol                     |
| 3164 | ENSG00000115145 | STAM2     | Supported |                      | Vesicles Cytosol;Nucleoplas |
| 3165 | ENSG00000115163 | CENPA     | Supported |                      | Nucleoplasm                 |
| 3166 | ENSG00000115165 | CYTIP     | Approved  |                      | Cytosol;Nucleoplas          |
| 3167 | ENSG00000115170 | ACVR1     | Approved  |                      | Cytosol;Nucleoli            |
| 3168 | ENSG00000115194 | SLC30A3   | Approved  |                      | Cytosol;Nucleoli;N          |
| 3169 | ENSG00000115207 | GTF3C2    | Supported | Nucleoplasm          |                             |
| 3170 | ENSG00000115211 | EIF2B4    | Approved  |                      | Actin filaments;Nu          |
| 3171 | ENSG00000115216 | NRBP1     | Supported | Cytosol              |                             |
| 3172 | ENSG00000115221 | ITGB6     | Approved  | Cell Junctions       | Centrosom                   |
| 3173 | ENSG00000115226 | FNDC4     | Approved  |                      | Aggresome;Cytosol;          |
| 3174 | ENSG00000115232 | ITGA4     | Approved  |                      | Plasma membrane             |
| 3175 | ENSG00000115233 | PSMD14    | Supported |                      | Nucleoplasm                 |
| 3176 | ENSG00000115234 | SNX17     | Supported |                      | Vesicles                    |
| 3177 | ENSG00000115241 | PPM1G     | Enhanced  | Nucleoplasm          |                             |
| 3178 | ENSG00000115252 | PDE1A     | Approved  |                      | Nucleoplasm                 |
| 3179 | ENSG00000115255 | REEP6     | Supported |                      | Endoplasmic reticulum       |
| 3180 | ENSG00000115263 | GCG       | Approved  |                      | Endoplasmic reticu          |
| 3181 | ENSG00000115266 | APC2      | Supported |                      | Cytokinetic bridge;Cytosol; |
| 3182 | ENSG00000115268 | RPS15     | Approved  |                      | Cytosol;Endoplasmic         |
| 3183 | ENSG00000115271 | GCA       | Supported | Cytosol              | Plasma membrane             |
| 3184 | ENSG00000115274 | IN080B    | Supported |                      | Nucleoli;Nucleoplasm        |
| 3185 | ENSG00000115275 | MOGS      | Supported |                      | Endoplasmic reticulum       |
| 3186 | ENSG00000115282 | TTC31     | Approved  |                      | Cytosol;Nucleoplas          |
| 3187 | ENSG00000115289 | PCGF1     | Enhanced  | Nucleoplasm          |                             |
| 3188 | ENSG00000115290 | GRB14     | Approved  |                      | Cytosol;Nucleoplas          |

|      |                 |         |           |                                      |                             |
|------|-----------------|---------|-----------|--------------------------------------|-----------------------------|
| 3189 | ENSG00000115295 | CLIP4   | Enhanced  | Vesicles                             |                             |
| 3190 | ENSG00000115297 | TLX2    | Approved  |                                      | Nucleoplasm                 |
| 3191 | ENSG00000115306 | SPTBN1  | Approved  |                                      | Golgi apparatus             |
| 3192 | ENSG00000115307 | AUP1    | Approved  |                                      | Nucleoplasm;Vesicl          |
| 3193 | ENSG00000115310 | RTN4    | Enhanced  | Endoplasmic reticulum                |                             |
| 3194 | ENSG00000115317 | HTRA2   | Supported |                                      | Mitochondria                |
| 3195 | ENSG00000115325 | DOK1    | Supported |                                      | Cytosol                     |
| 3196 | ENSG00000115339 | GALNT3  | Supported |                                      | Golgi apparatus             |
| 3197 | ENSG00000115350 | POLE4   | Approved  |                                      | Cytosol;Nucleoplas          |
| 3198 | ENSG00000115363 | EVA1A   | Supported |                                      | Vesicles Plasma membrane    |
| 3199 | ENSG00000115364 | MRPL19  | Supported |                                      | Mitochondria                |
| 3200 | ENSG00000115365 | LANCL1  | Uncertain |                                      | Microtubu                   |
| 3201 | ENSG00000115368 | WDR75   | Approved  |                                      | Nucleoplasm                 |
| 3202 | ENSG00000115380 | EFEMP1  | Supported | Mitochondria                         |                             |
| 3203 | ENSG00000115392 | FANCL   | Approved  |                                      | Nuclear bodies;Ves          |
| 3204 | ENSG00000115415 | STAT1   | Enhanced  | Cytosol;Nucleoplasm                  |                             |
| 3205 | ENSG00000115419 | GLS     | Supported |                                      | Mitochondria                |
| 3206 | ENSG00000115421 | PAPOLG  | Enhanced  | Nucleoplasm                          |                             |
| 3207 | ENSG00000115425 | PECR    | Supported |                                      | Peroxisomes                 |
| 3208 | ENSG00000115457 | IGFBP2  | Approved  |                                      | Endoplasmic reticu          |
| 3209 | ENSG00000115459 | ELMOD3  | Approved  |                                      | Mitochondria;Nucle          |
| 3210 | ENSG00000115461 | IGFBP5  | Approved  |                                      | Golgi apparatus;Nu          |
| 3211 | ENSG00000115464 | USP34   | Approved  |                                      | Nucleoplasm                 |
| 3212 | ENSG00000115468 | EFHD1   | Supported |                                      | Golgi appNucleoli fibrillar |
| 3213 | ENSG00000115484 | CCT4    | Supported |                                      | Cytosol Nucleoplasm         |
| 3214 | ENSG00000115504 | EHBP1   | Enhanced  | Cytosol;Plasma membrane              |                             |
| 3215 | ENSG00000115507 | OTX1    | Uncertain |                                      | Cytosol;N                   |
| 3216 | ENSG00000115514 | TXNDC9  | Enhanced  | Cytosol                              |                             |
| 3217 | ENSG00000115520 | COQ10B  | Approved  |                                      | Cytosol                     |
| 3218 | ENSG00000115524 | SF3B1   | Enhanced  | Nuclear speckles                     |                             |
| 3219 | ENSG00000115525 | ST3GAL5 | Approved  |                                      | Vesicles                    |
| 3220 | ENSG00000115526 | CHST10  | Approved  |                                      | Cytosol                     |
| 3221 | ENSG00000115539 | PDCL3   | Enhanced  | Cytosol;Nucleoplasm                  |                             |
| 3222 | ENSG00000115548 | KDM3A   | Enhanced  | Nucleoplasm                          |                             |
| 3223 | ENSG00000115556 | PLCD4   | Approved  |                                      | Cytosol;Nuclear me          |
| 3224 | ENSG00000115568 | ZNF142  | Approved  |                                      | Nucleoli fibrillar          |
| 3225 | ENSG00000115594 | IL1R1   | Approved  |                                      | Cytosol;Nucleoplas          |
| 3226 | ENSG00000115602 | IL1RL1  | Supported |                                      | Plasma meCytosol;Focal adhe |
| 3227 | ENSG00000115604 | IL18R1  | Approved  |                                      | Mitochondria                |
| 3228 | ENSG00000115616 | SLC9A2  | Supported |                                      | Cell Junctions              |
| 3229 | ENSG00000115641 | FHL2    | Enhanced  | Actin filaments;Focal adhesion sites |                             |
| 3230 | ENSG00000115657 | ABCB6   | Supported |                                      | Golgi appCytosol Nucleopla  |
| 3231 | ENSG00000115661 | STK16   | Approved  |                                      | Cytosol                     |
| 3232 | ENSG00000115665 | SLC5A7  | Approved  |                                      | Cell Junctions;Int          |
| 3233 | ENSG00000115677 | HDLBP   | Supported |                                      | Cytosol                     |
| 3234 | ENSG00000115685 | PPP1R7  | Approved  |                                      | Nucleoli                    |
| 3235 | ENSG00000115687 | PASK    | Supported |                                      | Cytosol                     |
| 3236 | ENSG00000115738 | ID2     | Approved  |                                      | Centrosome;Nuclear          |
| 3237 | ENSG00000115750 | TAF1B   | Supported |                                      | Nucleoli Nucleoplasm        |
| 3238 | ENSG00000115758 | ODC1    | Approved  |                                      | Cytosol;Plasma mem          |
| 3239 | ENSG00000115760 | BIRC6   | Supported |                                      | Golgi apparatus;Mitotic spi |
| 3240 | ENSG00000115761 | NOL10   | Supported |                                      | Nucleoli                    |
| 3241 | ENSG00000115806 | GORASP2 | Enhanced  | Golgi apparatus                      |                             |
| 3242 | ENSG00000115808 | STRN    | Approved  |                                      | Cytosol;Nucleoplas          |
| 3243 | ENSG00000115816 | CEBPZ   | Approved  |                                      | NucleoplaVesicles           |

|      |                 |          |           |                     |                             |
|------|-----------------|----------|-----------|---------------------|-----------------------------|
| 3244 | ENSG00000115825 | PRKD3    | Supported | Cytosol             | Nucleoplasm                 |
| 3245 | ENSG00000115827 | DCAF17   | Supported | Nucleoplasm         |                             |
| 3246 | ENSG00000115828 | QPCT     | Approved  | Cytosol             |                             |
| 3247 | ENSG00000115839 | RAB3GAP1 | Approved  | Cytosol             | Nucleoplasm                 |
| 3248 | ENSG00000115840 | SLC25A12 | Uncertain |                     | Cytosol                     |
| 3249 | ENSG00000115841 | RMDN2    | Supported | Cytosol             | Mitochondria                |
| 3250 | ENSG00000115844 | DLX2     | Approved  |                     | Nuclear speckles            |
| 3251 | ENSG00000115866 | DARS     | Enhanced  | Cytosol             |                             |
| 3252 | ENSG00000115875 | SRSF7    | Enhanced  | Nucleoplasm         |                             |
| 3253 | ENSG00000115884 | SDC1     | Supported |                     | Focal adhesion sites        |
| 3254 | ENSG00000115902 | SLC1A4   | Enhanced  | Centrosome          |                             |
| 3255 | ENSG00000115904 | SOS1     | Approved  |                     | Cytosol                     |
| 3256 | ENSG00000115919 | KYNU     | Supported | Cytosol             | Nucleoplasm                 |
| 3257 | ENSG00000115935 | WIPF1    | Approved  |                     | Cytosol;Plasma mem          |
| 3258 | ENSG00000115942 | ORC2     | Supported |                     | Nucleoplasm                 |
| 3259 | ENSG00000115944 | COX7A2L  | Enhanced  | Mitochondria        | Nucleoli                    |
| 3260 | ENSG00000115946 | PN01     | Supported |                     | Nucleoli Nucleoplasm        |
| 3261 | ENSG00000115947 | ORC4     | Supported |                     | Nucleoli;Nucleoplasm        |
| 3262 | ENSG00000115956 | PLEK     | Approved  |                     | Nucleoli                    |
| 3263 | ENSG00000115966 | ATF2     | Enhanced  | Nucleoplasm         |                             |
| 3264 | ENSG00000115970 | THADA    | Approved  |                     | Cytosol                     |
| 3265 | ENSG00000115977 | AAK1     | Supported |                     | Cytosol;Plasma membrane     |
| 3266 | ENSG00000115993 | TRAK2    | Approved  |                     | Nuclear bodies;Nuc          |
| 3267 | ENSG00000115998 | C2orf42  | Enhanced  | Nucleoplasm         |                             |
| 3268 | ENSG00000116001 | TIA1     | Supported |                     | Cytosol;Nucleoplasm         |
| 3269 | ENSG00000116014 | KISS1R   | Supported |                     | Plasma membrane             |
| 3270 | ENSG00000116016 | EPAS1    | Supported | Nucleoplasm         | Vesicles                    |
| 3271 | ENSG00000116017 | ARID3A   | Supported |                     | Cytosol                     |
| 3272 | ENSG00000116030 | SUM01    | Supported |                     | Cytosol;Nucleoplasm         |
| 3273 | ENSG00000116031 | CD207    | Approved  |                     | Nuclear bodies;Nuclear memb |
| 3274 | ENSG00000116035 | VAX2     | Approved  |                     | Cytosol                     |
| 3275 | ENSG00000116039 | ATP6V1B1 | Approved  |                     | Nuclear speckles            |
| 3276 | ENSG00000116044 | NFE2L2   | Approved  |                     | Nuclear membrane;N          |
| 3277 | ENSG00000116062 | MSH6     | Supported |                     | Cytosol;Nucleoplasm         |
| 3278 | ENSG00000116095 | PLEKHA3  | Enhanced  |                     | Plasma membrane             |
| 3279 | ENSG00000116096 | SPR      | Supported | Golgi apparatus     | Nucleoplasm                 |
| 3280 | ENSG00000116117 | PARD3B   | Supported |                     | Cytosol Nucleoplasm         |
| 3281 | ENSG00000116120 | FARSB    | Supported |                     | Cell Junctions              |
| 3282 | ENSG00000116127 | ALMS1    | Enhanced  |                     | Cytosol;Nucleoplasm         |
| 3283 | ENSG00000116128 | BCL9     | Approved  | Centrosome          | Nucleoplasm                 |
| 3284 | ENSG00000116132 | PRRX1    | Supported |                     | Nuclear bodies;Nuc          |
| 3285 | ENSG00000116138 | DNAJC16  | Approved  |                     | Nucleoplasm                 |
| 3286 | ENSG00000116151 | MORN1    | Approved  |                     | Vesicles                    |
| 3287 | ENSG00000116161 | CACYBP   | Enhanced  |                     | Mitochondria;Nucle          |
| 3288 | ENSG00000116171 | SCP2     | Supported | Cytosol;Nucleoplasm |                             |
| 3289 | ENSG00000116183 | PAPPA2   | Approved  |                     | Peroxisomes                 |
| 3290 | ENSG00000116191 | RALGPS2  | Uncertain |                     | Endoplasmic reticu          |
| 3291 | ENSG00000116199 | FAM20B   | Supported |                     | Cytosol;N                   |
| 3292 | ENSG00000116205 | TCEANC2  | Approved  |                     | Golgi apparatus Nucleoplasm |
| 3293 | ENSG00000116212 | LRRC42   | Enhanced  |                     | Nucleoplasm;Vesic           |
| 3294 | ENSG00000116221 | MRPL37   | Supported | Nucleoplasm         |                             |
| 3295 | ENSG00000116251 | RPL22    | Approved  |                     | Mitochondria                |
| 3296 | ENSG00000116254 | CHD5     | Supported |                     | Nucleoli;Nucleoplasm        |
| 3297 | ENSG00000116260 | QSOX1    | Supported |                     | Nuclear speckles            |
| 3298 | ENSG00000116266 | STXBP3   | Approved  |                     | Cytosol                     |
|      |                 |          |           |                     | Nucleoplasm                 |



|      |                 |          |           |                            |                             |
|------|-----------------|----------|-----------|----------------------------|-----------------------------|
| 3299 | ENSG00000116285 | ERRFI1   | Enhanced  | Cytosol                    |                             |
| 3300 | ENSG00000116288 | PARK7    | Supported |                            | Cytosol;Nucleoplasm         |
| 3301 | ENSG00000116299 | KIAA1324 | Supported |                            | Plasma membrane             |
| 3302 | ENSG00000116337 | AMPD2    | Enhanced  | Cytosol                    |                             |
| 3303 | ENSG00000116350 | SRSF4    | Supported |                            | Nuclear speckles            |
| 3304 | ENSG00000116353 | MECR     | Supported |                            | Mitochondria                |
| 3305 | ENSG00000116396 | KCNC4    | Approved  |                            | Cytosol Nucleoli            |
| 3306 | ENSG00000116406 | EDEM3    | Approved  |                            | Endoplasmic reticu          |
| 3307 | ENSG00000116455 | WDR77    | Supported |                            | Cytosol;NGolgi apparatus    |
| 3308 | ENSG00000116459 | ATP5PB   | Supported |                            | Mitochondria                |
| 3309 | ENSG00000116478 | HDAC1    | Enhanced  | Nucleoplasm                |                             |
| 3310 | ENSG00000116497 | S100PBP  | Supported |                            | Nuclear speckles            |
| 3311 | ENSG00000116514 | RNF19B   | Approved  |                            | Cytosol                     |
| 3312 | ENSG00000116521 | SCAMP3   | Supported |                            | Vesicles                    |
| 3313 | ENSG00000116525 | TRIM62   | Approved  |                            | Focal adhesion sit          |
| 3314 | ENSG00000116539 | ASH1L    | Supported |                            | NucleoplaGolgi apparatus    |
| 3315 | ENSG00000116560 | SFPQ     | Enhanced  | Nucleoplasm                |                             |
| 3316 | ENSG00000116580 | GON4L    | Enhanced  | Nuclear bodies;Nucleoplasm |                             |
| 3317 | ENSG00000116586 | LAMTOR2  | Approved  |                            | Nucleoplasm;Vesicl          |
| 3318 | ENSG00000116604 | MEF2D    | Enhanced  | Nucleoplasm;Vesicles       |                             |
| 3319 | ENSG00000116649 | SRM      | Approved  |                            | Cytosol;Nucleoplas          |
| 3320 | ENSG00000116661 | FBX02    | Approved  |                            | Cytosol;Nucleoplas          |
| 3321 | ENSG00000116667 | Clorf21  | Approved  |                            | Cytosol;Nucleoplas          |
| 3322 | ENSG00000116668 | SWT1     | Approved  |                            | Cytosol                     |
| 3323 | ENSG00000116670 | MAD2L2   | Approved  |                            | Cytosol;Nucleoli            |
| 3324 | ENSG00000116675 | DNAJC6   | Approved  |                            | Cytosol;Nucleoplas          |
| 3325 | ENSG00000116679 | IVNS1ABP | Supported | Cytosol                    |                             |
| 3326 | ENSG00000116685 | KIAA2013 | Approved  |                            | Cytosol;Golgi appa          |
| 3327 | ENSG00000116691 | MIIP     | Approved  |                            | Cytosol;Nucleoplas          |
| 3328 | ENSG00000116698 | SMG7     | Supported | Cytosol                    | Intermediate filam          |
| 3329 | ENSG00000116701 | NCF2     | Supported | Cytosol                    | Nucleoli                    |
| 3330 | ENSG00000116711 | PLA2G4A  | Supported | Cytosol                    |                             |
| 3331 | ENSG00000116717 | GADD45A  | Supported |                            | Nuclear speckles            |
| 3332 | ENSG00000116726 | PRAMEF12 | Uncertain |                            | Nucleopla                   |
| 3333 | ENSG00000116729 | WLS      | Supported | Endoplasm                  | Cytosol                     |
| 3334 | ENSG00000116731 | PRDM2    | Approved  |                            | NucleoplaGolgi apparatus    |
| 3335 | ENSG00000116741 | RGS2     | Supported | Cytosol                    |                             |
| 3336 | ENSG00000116747 | TROVE2   | Approved  |                            | Cytosol;Nucleoplas          |
| 3337 | ENSG00000116750 | UCHL5    | Supported |                            | NucleoplaMitochondria       |
| 3338 | ENSG00000116752 | BCAS2    | Supported |                            | Nuclear sCentrosome         |
| 3339 | ENSG00000116754 | SRSF11   | Supported |                            | Nuclear speckles            |
| 3340 | ENSG00000116774 | OLFML3   | Supported |                            | Vesicles                    |
| 3341 | ENSG00000116791 | CRYZ     | Supported | Cytosol                    |                             |
| 3342 | ENSG00000116793 | PHTF1    | Approved  |                            | Nuclear bodies;Nuc          |
| 3343 | ENSG00000116830 | TTF2     | Supported | Cytosol                    |                             |
| 3344 | ENSG00000116833 | NR5A2    | Uncertain |                            | Nuclear s                   |
| 3345 | ENSG00000116852 | KIF21B   | Approved  |                            | Cytosol;Mitotic sp          |
| 3346 | ENSG00000116863 | ADPRHL2  | Enhanced  | Nucleoplasm                |                             |
| 3347 | ENSG00000116871 | MAP7D1   | Approved  |                            | Cytosol;Microtubul          |
| 3348 | ENSG00000116874 | WARS2    | Supported |                            | MitochondPlasma membrane    |
| 3349 | ENSG00000116885 | OSCP1    | Approved  |                            | Nucleoli;Nucleopla          |
| 3350 | ENSG00000116898 | MRPS15   | Supported |                            | Mitochondria                |
| 3351 | ENSG00000116903 | EXOC8    | Supported |                            | Cytosol                     |
| 3352 | ENSG00000116918 | TSNAX    | Enhanced  | Nucleoplasm                | Cytosol;Golgi appa          |
| 3353 | ENSG00000116922 | Clorf109 | Supported |                            | Cytosol;Nucleoli;Nucleoplas |

|      |                 |           |           |                             |
|------|-----------------|-----------|-----------|-----------------------------|
| 3354 | ENSG00000116954 | RRAGC     | Supported | Nucleoplasm;Vesicles        |
| 3355 | ENSG00000116977 | LGALS8    | Approved  | Plasma membrane             |
| 3356 | ENSG00000116983 | HPCAL4    | Approved  | Cytosol                     |
| 3357 | ENSG00000116984 | MTR       | Supported | Cytosol                     |
| 3358 | ENSG00000116990 | MYCL      | Enhanced  | Nucleoplasm                 |
| 3359 | ENSG00000116991 | SIPA1L2   | Approved  | Golgi apparatus;Nu          |
| 3360 | ENSG00000117000 | RLF       | Approved  | Nucleoli;Nucleopla          |
| 3361 | ENSG00000117010 | ZNF684    | Approved  | Cytosol;Nucleoplas          |
| 3362 | ENSG00000117016 | RIMS3     | Approved  | Mitochondria;Nucle          |
| 3363 | ENSG00000117020 | AKT3      | Supported | Cytosol                     |
| 3364 | ENSG00000117036 | ETV3      | Supported | Nucleoplasm                 |
| 3365 | ENSG00000117054 | ACADM     | Enhanced  | Mitochondria                |
| 3366 | ENSG00000117069 | ST6GALNAC | Approved  | Vesicles                    |
| 3367 | ENSG00000117091 | CD48      | Supported | Plasma meCytosol;Nucleoli f |
| 3368 | ENSG00000117114 | ADGRL2    | Approved  | Cell Junctions;Pla          |
| 3369 | ENSG00000117118 | SDHB      | Supported | Mitochondria Nucleopla      |
| 3370 | ENSG00000117133 | RPF1      | Supported | Nucleoli                    |
| 3371 | ENSG00000117139 | KDM5B     | Supported | NucleoplaCytosol            |
| 3372 | ENSG00000117143 | UAP1      | Supported | Cytosol Nucleoplasm;Plasma  |
| 3373 | ENSG00000117148 | ACTL8     | Approved  | Cytosol                     |
| 3374 | ENSG00000117151 | CTBS      | Uncertain | Cytosol                     |
| 3375 | ENSG00000117152 | RGS4      | Approved  | Intermediate filam          |
| 3376 | ENSG00000117153 | KLHL12    | Supported | Vesicles Centriolar satell  |
| 3377 | ENSG00000117155 | SSX2IP    | Approved  | Cell Junctions              |
| 3378 | ENSG00000117174 | ZNHIT6    | Approved  | Nuclear speckles;V          |
| 3379 | ENSG00000117222 | RBBP5     | Supported | Nucleoli;Nucleoplasm        |
| 3380 | ENSG00000117245 | KIF17     | Approved  | Nucleoplasm;Plasma          |
| 3381 | ENSG00000117262 | GPR89A    | Approved  | Endoplasmic reticu          |
| 3382 | ENSG00000117266 | CDK18     | Approved  | Actin filaments             |
| 3383 | ENSG00000117308 | GALE      | Approved  | Cytosol;Nucleoplas          |
| 3384 | ENSG00000117318 | ID3       | Supported | Nucleoplasm                 |
| 3385 | ENSG00000117335 | CD46      | Uncertain | Plasma me                   |
| 3386 | ENSG00000117360 | PRPF3     | Enhanced  | Nucleoplasm                 |
| 3387 | ENSG00000117385 | P3H1      | Approved  | Nucleoli;Vesicles           |
| 3388 | ENSG00000117394 | SLC2A1    | Enhanced  | Plasma membrane             |
| 3389 | ENSG00000117395 | EBNA1BP2  | Enhanced  | Nucleoli                    |
| 3390 | ENSG00000117399 | CDC20     | Enhanced  | Cytosol;Nucleoplasm         |
| 3391 | ENSG00000117400 | MPL       | Supported | Plasma meNuclear membrane   |
| 3392 | ENSG00000117410 | ATP6V0B   | Approved  | Cytosol                     |
| 3393 | ENSG00000117411 | B4GALT2   | Supported | Golgi appVesicles           |
| 3394 | ENSG00000117419 | ERI3      | Approved  | Cytosol;Nucleoplas          |
| 3395 | ENSG00000117448 | AKR1A1    | Supported | Cytosol Nucleoplasm         |
| 3396 | ENSG00000117450 | PRDX1     | Supported | Mitochondria                |
| 3397 | ENSG00000117461 | PIK3R3    | Approved  | Nucleoplasm;Vesicl          |
| 3398 | ENSG00000117472 | TSPAN1    | Approved  | Nucleoplasm;Vesicl          |
| 3399 | ENSG00000117475 | BLZF1     | Supported | Golgi apparatus;Nucleoplasm |
| 3400 | ENSG00000117477 | CCDC181   | Approved  | Nuclear speckles            |
| 3401 | ENSG00000117479 | SLC19A2   | Approved  | Cytosol                     |
| 3402 | ENSG00000117480 | FAAH      | Approved  | Cytosol                     |
| 3403 | ENSG00000117505 | DR1       | Supported | Nucleoplasm                 |
| 3404 | ENSG00000117519 | CNN3      | Enhanced  | Actin filaments;Cytosol     |
| 3405 | ENSG00000117523 | PRRC2C    | Enhanced  | Cytosol                     |
| 3406 | ENSG00000117525 | F3        | Approved  | Vesicles                    |
| 3407 | ENSG00000117528 | ABCD3     | Enhanced  | Peroxisomes                 |
| 3408 | ENSG00000117533 | VAMP4     | Approved  | Golgi apparatus             |

|      |                 |         |           |                              |                             |
|------|-----------------|---------|-----------|------------------------------|-----------------------------|
| 3409 | ENSG00000117543 | DPH5    | Approved  |                              | Golgi apparatus             |
| 3410 | ENSG00000117569 | PTBP2   | Approved  |                              | Nucleoplasm                 |
| 3411 | ENSG00000117586 | TNFSF4  | Approved  |                              | Nucleoplasm;Vesicl          |
| 3412 | ENSG00000117592 | PRDX6   | Supported | Cytosol                      | Plasma membrane             |
| 3413 | ENSG00000117593 | DARS2   | Supported | Mitochond                    | Nucleoplasm                 |
| 3414 | ENSG00000117595 | IRF6    | Supported | Cytosol                      | Nucleoplasm                 |
| 3415 | ENSG00000117598 | PLPPR5  | Approved  |                              | Cytosol;Plasma mem          |
| 3416 | ENSG00000117602 | RCAN3   | Approved  |                              | Nuclear speckles;N          |
| 3417 | ENSG00000117614 | SYF2    | Supported |                              | Nuclear speckles            |
| 3418 | ENSG00000117616 | RSRP1   | Approved  |                              | Nucleoplasm                 |
| 3419 | ENSG00000117625 | RCOR3   | Approved  |                              | Cytosol;Nucleoplas          |
| 3420 | ENSG00000117632 | STMN1   | Supported | Cytosol                      |                             |
| 3421 | ENSG00000117640 | MTFR1L  | Approved  |                              | Cell Junctions;Mit          |
| 3422 | ENSG00000117643 | MAN1C1  | Uncertain |                              | Nucleopla                   |
| 3423 | ENSG00000117650 | NEK2    | Supported |                              | Centrosome;Nucleoplasm      |
| 3424 | ENSG00000117676 | RPS6KA1 | Supported |                              | Cytosol;Nucleoplasm         |
| 3425 | ENSG00000117682 | DHDDS   | Uncertain |                              | Plasma me                   |
| 3426 | ENSG00000117691 | NENF    | Enhanced  | Nucleoplasm                  |                             |
| 3427 | ENSG00000117697 | NSL1    | Supported |                              | Nuclear speckles            |
| 3428 | ENSG00000117707 | PROX1   | Supported |                              | Nucleoplasm Cytosol         |
| 3429 | ENSG00000117713 | ARID1A  | Enhanced  | Nucleoplasm                  |                             |
| 3430 | ENSG00000117724 | CENPF   | Supported |                              | Nucleoplasm                 |
| 3431 | ENSG00000117748 | RPA2    | Enhanced  | Nuclear bodies;Nucleoplasm   |                             |
| 3432 | ENSG00000117751 | PPP1R8  | Enhanced  | Nuclear speckles;Nucleoplasm |                             |
| 3433 | ENSG00000117758 | STX12   | Supported |                              | Golgi apparatus;Nucleoplasm |
| 3434 | ENSG00000117834 | SLC5A9  | Approved  |                              | Actin filaments;Cy          |
| 3435 | ENSG00000117859 | OSBPL9  | Supported |                              | Golgi apparatus;Vesicles    |
| 3436 | ENSG00000117868 | ESYT2   | Uncertain |                              | Cytosol                     |
| 3437 | ENSG00000117877 | CD3EAP  | Enhanced  | Nucleoli fibrillar           | Mitochondria                |
| 3438 | ENSG00000117899 | MESD    | Supported |                              | Cytosol;Endoplasmic reticul |
| 3439 | ENSG00000117906 | RCN2    | Enhanced  | Endoplasmic reticulum        |                             |
| 3440 | ENSG00000117971 | CHRNB4  | Approved  |                              | Cell JuncEndoplasmic reticu |
| 3441 | ENSG00000117983 | MUC5B   | Supported |                              | Vesicles                    |
| 3442 | ENSG00000118007 | STAG1   | Enhanced  | Nuclear bodies;Nucleoplasm   |                             |
| 3443 | ENSG00000118046 | STK11   | Supported |                              | Cytosol;Nucleoplasm         |
| 3444 | ENSG00000118058 | KMT2A   | Supported |                              | NucleoplaCytosol            |
| 3445 | ENSG00000118096 | IFT46   | Approved  |                              | Actin filaments             |
| 3446 | ENSG00000118137 | APOA1   | Approved  |                              | Cytosol;Vesicles            |
| 3447 | ENSG00000118156 | ZNF541  | Approved  |                              | Cytosol;Nucleoplas          |
| 3448 | ENSG00000118162 | KPTN    | Approved  |                              | Cytosol;Nucleoplas          |
| 3449 | ENSG00000118181 | RPS25   | Approved  |                              | Cytosol;Endoplasmic         |
| 3450 | ENSG00000118193 | KIF14   | Supported |                              | Cytosol;Midbody ring        |
| 3451 | ENSG00000118194 | TNNT2   | Uncertain |                              | Focal adh                   |
| 3452 | ENSG00000118197 | DDX59   | Approved  |                              | Actin filaments;Nu          |
| 3453 | ENSG00000118200 | CAMSAP2 | Supported | Microtubu                    | Cytosol                     |
| 3454 | ENSG00000118231 | CRYGD   | Approved  |                              | Cytokinetic bridge          |
| 3455 | ENSG00000118242 | MREG    | Approved  |                              | Vesicles                    |
| 3456 | ENSG00000118246 | FASTKD2 | Supported |                              | Mitochondria                |
| 3457 | ENSG00000118257 | NRP2    | Supported |                              | Plasma membrane;Vesicles    |
| 3458 | ENSG00000118260 | CREB1   | Enhanced  | Nucleoplasm                  |                             |
| 3459 | ENSG00000118263 | KLF7    | Approved  |                              | Golgi apparatus             |
| 3460 | ENSG00000118271 | TTR     | Approved  |                              | Golgi apparatus             |
| 3461 | ENSG00000118292 | C1orf54 | Approved  |                              | Plasma membrane             |
| 3462 | ENSG00000118298 | CA14    | Approved  |                              | Plasma membrane             |
| 3463 | ENSG00000118308 | LRMP    | Uncertain |                              | Cytosol;N                   |

|      |                 |          |           |                             |                            |
|------|-----------------|----------|-----------|-----------------------------|----------------------------|
| 3464 | ENSG00000118363 | SPCS2    | Approved  |                             | Nucleoplasm                |
| 3465 | ENSG00000118369 | USP35    | Approved  |                             | Nucleoli fibrillar         |
| 3466 | ENSG00000118407 | FILIP1   | Approved  |                             | Actin filPlasma me         |
| 3467 | ENSG00000118412 | CASP8AP2 | Approved  |                             | Nuclear bodies;Nuc         |
| 3468 | ENSG00000118418 | HMG3     | Supported |                             | NucleoplaCytosol           |
| 3469 | ENSG00000118420 | UBE3D    | Approved  |                             | Rods & Rings               |
| 3470 | ENSG00000118432 | CNR1     | Supported |                             | Plasma membrane Actin fil  |
| 3471 | ENSG00000118473 | SGIP1    | Approved  |                             | Mitochondria               |
| 3472 | ENSG00000118482 | PHF3     | Approved  |                             | Nucleoplasm                |
| 3473 | ENSG00000118492 | ADGB     | Uncertain |                             | Mitochond                  |
| 3474 | ENSG00000118495 | PLAGL1   | Supported |                             | Nuclear bodies Golgi app   |
| 3475 | ENSG00000118496 | FBX030   | Approved  |                             | Microtubules               |
| 3476 | ENSG00000118503 | TNFAIP3  | Supported |                             | Vesicles                   |
| 3477 | ENSG00000118507 | AKAP7    | Approved  |                             | Vesicles                   |
| 3478 | ENSG00000118508 | RAB32    | Approved  |                             | Cytosol                    |
| 3479 | ENSG00000118513 | MYB      | Supported |                             | NucleoplaCytosol           |
| 3480 | ENSG00000118514 | ALDH8A1  | Supported |                             | Centrosome                 |
| 3481 | ENSG00000118515 | SGK1     | Enhanced  | Nuclear speckles            |                            |
| 3482 | ENSG00000118518 | RNF146   | Supported |                             | Cytosol;PNucleoplasm       |
| 3483 | ENSG00000118523 | CTGF     | Approved  |                             | Golgi apparatus;Ve         |
| 3484 | ENSG00000118557 | PMFBP1   | Approved  |                             | Endoplasmic reticu         |
| 3485 | ENSG00000118579 | MED28    | Supported |                             | Nucleoplasm                |
| 3486 | ENSG00000118596 | SLC16A7  | Approved  |                             | Plasma meNucleoplasm       |
| 3487 | ENSG00000118600 | RXYLT1   | Approved  |                             | Golgi apparatus;Nu         |
| 3488 | ENSG00000118640 | VAMP8    | Supported |                             | Golgi appNucleoplasm       |
| 3489 | ENSG00000118655 | DCLRE1B  | Supported |                             | Nuclear bodies;Nucleoplasm |
| 3490 | ENSG00000118680 | MYL12B   | Approved  |                             | Nucleoli fibrillar         |
| 3491 | ENSG00000118689 | FOXO3    | Enhanced  | Nucleoplasm                 |                            |
| 3492 | ENSG00000118690 | ARMC2    | Approved  |                             | Nucleoplasm                |
| 3493 | ENSG00000118705 | RPN2     | Supported |                             | Endoplasmic reticulum      |
| 3494 | ENSG00000118707 | TGIF2    | Enhanced  | Nucleoplasm                 | Centrosome                 |
| 3495 | ENSG00000118733 | OLFM3    | Uncertain |                             | Vesicles                   |
| 3496 | ENSG00000118762 | PKD2     | Supported |                             | Endoplasmic reticulum      |
| 3497 | ENSG00000118777 | ABCG2    | Supported | Plasma membrane             | Nucleoplasm                |
| 3498 | ENSG00000118785 | SPP1     | Enhanced  | Golgi apparatus             |                            |
| 3499 | ENSG00000118804 | STBD1    | Supported |                             | Cytosol                    |
| 3500 | ENSG00000118816 | CCNI     | Approved  | Golgi apparatus             | Nuclear bodies;Nuc         |
| 3501 | ENSG00000118849 | RARRES1  | Approved  |                             | Endoplasmic reticu         |
| 3502 | ENSG00000118855 | MFS1     | Approved  |                             | Nucleoli;Nucleopla         |
| 3503 | ENSG00000118873 | RAB3GAP2 | Supported |                             | Cytosol Plasma membrane    |
| 3504 | ENSG00000118894 | EEF2KMT  | Uncertain |                             | Vesicles                   |
| 3505 | ENSG00000118898 | PPL      | Approved  | Plasma meCytosol;Nucleoplas |                            |
| 3506 | ENSG00000118900 | UBN1     | Supported |                             | Nuclear bodies;Nucleoplasm |
| 3507 | ENSG00000118922 | KLF12    | Approved  |                             | Cytosol;Nucleoplas         |
| 3508 | ENSG00000118939 | UCHL3    | Supported |                             | Cytosol Nucleoplasm        |
| 3509 | ENSG00000118946 | PCDH17   | Approved  |                             | Cytosol;Plasma mem         |
| 3510 | ENSG00000118960 | HS1BP3   | Approved  |                             | Cytosol;Nucleoli           |
| 3511 | ENSG00000118961 | LDAH     | Uncertain |                             | Cytosol;N                  |
| 3512 | ENSG00000118971 | CCND2    | Enhanced  | Nucleoplasm                 |                            |
| 3513 | ENSG00000118985 | ELL2     | Supported |                             | Nucleoplasm                |
| 3514 | ENSG00000118997 | DNAH7    | Supported |                             | Cytosol                    |
| 3515 | ENSG00000119004 | CYP20A1  | Uncertain |                             | Actin fil                  |
| 3516 | ENSG00000119041 | GTF3C3   | Supported |                             | NucleoplaNuclear membrane  |
| 3517 | ENSG00000119042 | SATB2    | Supported |                             | Nucleoplasm                |
| 3518 | ENSG00000119048 | UBE2B    | Supported |                             | Cytosol;Nucleoplasm;Plasma |

|      |                 |          |           |                                      |
|------|-----------------|----------|-----------|--------------------------------------|
| 3519 | ENSG00000119125 | GDA      | Approved  | Nucleoplasm                          |
| 3520 | ENSG00000119138 | KLF9     | Approved  | Nucleoplasm;Cytosol;Plasma mem       |
| 3521 | ENSG00000119139 | TJP2     | Enhanced  | Cell Junctions;Plasma membrane       |
| 3522 | ENSG00000119185 | ITGB1BP1 | Supported | Nucleoplasm                          |
| 3523 | ENSG00000119227 | PIGZ     | Uncertain | Cytosol;Nucleoplasm                  |
| 3524 | ENSG00000119231 | SENP5    | Supported | Centriolar satelli                   |
| 3525 | ENSG00000119242 | CCDC92   | Supported | Vesicles                             |
| 3526 | ENSG00000119280 | Clorf198 | Supported | Nucleoli Plasma membrane             |
| 3527 | ENSG00000119285 | HEATR1   | Enhanced  | Centrosom;Nucleoplasm                |
| 3528 | ENSG00000119314 | PTBP3    | Approved  | Cytosol                              |
| 3529 | ENSG00000119318 | RAD23B   | Supported | Mitochondria;Nucleoli fibrillar cent |
| 3530 | ENSG00000119321 | FKBP15   | Approved  | Nucleoplasm                          |
| 3531 | ENSG00000119328 | FAM206A  | Supported | Cytosol;Nucleoplasm                  |
| 3532 | ENSG00000119333 | WDR34    | Approved  | Cytosol;Nucleoli                     |
| 3533 | ENSG00000119335 | SET      | Enhanced  | Cytosol;Nucleoplasm                  |
| 3534 | ENSG00000119383 | PTPA     | Enhanced  | Cytosol;Nucleoplasm                  |
| 3535 | ENSG00000119392 | GLE1     | Supported | Nuclear membrane;Nucleoli            |
| 3536 | ENSG00000119396 | RAB14    | Supported | Vesicles                             |
| 3537 | ENSG00000119397 | CNTRL    | Supported | Centrosom;Cytosol                    |
| 3538 | ENSG00000119401 | TRIM32   | Approved  | Intermediate filam                   |
| 3539 | ENSG00000119402 | FBXW2    | Approved  | Nucleoplasm                          |
| 3540 | ENSG00000119408 | NEK6     | Supported | Centriolar satellite;Cytosol         |
| 3541 | ENSG00000119411 | BSPRY    | Approved  | Nucleoplasm                          |
| 3542 | ENSG00000119421 | NDUFA8   | Supported | Mitochondria                         |
| 3543 | ENSG00000119431 | HDHD3    | Enhanced  | Nucleoli;Vesicles                    |
| 3544 | ENSG00000119446 | RBM18    | Approved  | Cytosol;Midbody;Nu                   |
| 3545 | ENSG00000119471 | HSDL2    | Enhanced  | Mitochondria                         |
| 3546 | ENSG00000119487 | MAPKAP1  | Supported | Nucleoplasm;Cytosol                  |
| 3547 | ENSG00000119509 | INVS     | Approved  | Cytosol                              |
| 3548 | ENSG00000119522 | DENND1A  | Supported | Vesicles;Cytosol;Nucleoplasm         |
| 3549 | ENSG00000119523 | ALG2     | Enhanced  | Actin filaments;Cytosol              |
| 3550 | ENSG00000119541 | VPS4B    | Approved  | Vesicles;Intermediate                |
| 3551 | ENSG00000119547 | ONECUT2  | Supported | Nucleoplasm;Actin filaments          |
| 3552 | ENSG00000119559 | C19orf25 | Approved  | Intermediate filam                   |
| 3553 | ENSG00000119574 | ZBTB45   | Approved  | Cytosol                              |
| 3554 | ENSG00000119596 | YLPM1    | Supported | Nuclear speckles;Nucleoplasm         |
| 3555 | ENSG00000119599 | DCAF4    | Approved  | Nucleoplasm                          |
| 3556 | ENSG00000119616 | FCF1     | Approved  | Nucleoplasm                          |
| 3557 | ENSG00000119630 | PGF      | Approved  | Cytosol;Mitochondria                 |
| 3558 | ENSG00000119632 | IFI27L2  | Approved  | Cytosol;Nucleoli                     |
| 3559 | ENSG00000119636 | BBOF1    | Approved  | Centriolar satelli                   |
| 3560 | ENSG00000119638 | NEK9     | Approved  | Mitochondria                         |
| 3561 | ENSG00000119640 | ACYP1    | Approved  | Cytosol;Nucleoplasm                  |
| 3562 | ENSG00000119650 | IFT43    | Supported | Centriolar satellite;Microt          |
| 3563 | ENSG00000119661 | DNAL1    | Approved  | Centriolar satelli                   |
| 3564 | ENSG00000119669 | IRF2BPL  | Enhanced  | Nucleoplasm                          |
| 3565 | ENSG00000119673 | ACOT2    | Approved  | Mitochondria                         |
| 3566 | ENSG00000119681 | LTBP2    | Approved  | Nucleoplasm                          |
| 3567 | ENSG00000119684 | MLH3     | Approved  | Nucleoplasm                          |
| 3568 | ENSG00000119685 | TTLL5    | Supported | Cytosol;Plasma membrane              |
| 3569 | ENSG00000119698 | PPP4R4   | Supported | Cytosol                              |
| 3570 | ENSG00000119699 | TGFB3    | Approved  | Vesicles                             |
| 3571 | ENSG00000119703 | ZC2HC1C  | Approved  | Mitochondria;Nucle                   |
| 3572 | ENSG00000119705 | SLIRP    | Supported | Mitochondria                         |
| 3573 | ENSG00000119707 | RBM25    | Enhanced  | Nuclear speckles                     |

|      |                 |          |           |                             |
|------|-----------------|----------|-----------|-----------------------------|
| 3574 | ENSG00000119711 | ALDH6A1  | Enhanced  | Mitochondria                |
| 3575 | ENSG00000119718 | EIF2B2   | Approved  | Focal adhesion sit          |
| 3576 | ENSG00000119720 | NRDE2    | Supported | Mitochondria;Nucleoplasm    |
| 3577 | ENSG00000119725 | ZNF410   | Approved  | Nuclear bodies              |
| 3578 | ENSG00000119729 | RHOQ     | Approved  | Cytosol;Vesicles            |
| 3579 | ENSG00000119760 | SUPT7L   | Approved  | Nucleoplasm                 |
| 3580 | ENSG00000119771 | KLHL29   | Approved  | Cytosol;Mitochondr          |
| 3581 | ENSG00000119772 | DNMT3A   | Supported | Nucleoplasm                 |
| 3582 | ENSG00000119777 | TMEM214  | Supported | EndoplasmCytosol;Golgi appa |
| 3583 | ENSG00000119778 | ATAD2B   | Supported | Nucleoplasm                 |
| 3584 | ENSG00000119782 | FKBP1B   | Approved  | Vesicles                    |
| 3585 | ENSG00000119787 | ATL2     | Supported | Endoplasmic reticulum       |
| 3586 | ENSG00000119801 | YPEL5    | Approved  | Cytosol;Nucleoplas          |
| 3587 | ENSG00000119812 | FAM98A   | Supported | Vesicles                    |
| 3588 | ENSG00000119820 | YIPF4    | Supported | Golgi appPlasma membrane;Ve |
| 3589 | ENSG00000119844 | AFTPH    | Supported | Cytosol;Golgi apparatus;Ves |
| 3590 | ENSG00000119862 | LGALS1   | Approved  | Nucleoplasm                 |
| 3591 | ENSG00000119865 | CNRIP1   | Approved  | Cytosol                     |
| 3592 | ENSG00000119866 | BCL11A   | Supported | Nuclear bodies;Nucleoplasm  |
| 3593 | ENSG00000119878 | CRIPT    | Approved  | Nucleoli fibrillar          |
| 3594 | ENSG00000119888 | EPCAM    | Supported | Plasma membrane             |
| 3595 | ENSG00000119899 | SLC17A5  | Supported | Plasma meCytosol            |
| 3596 | ENSG00000119900 | OGFRL1   | Approved  | Golgi apparatus;Nu          |
| 3597 | ENSG00000119906 | SLF2     | Supported | NucleoplaVesicles           |
| 3598 | ENSG00000119915 | ELOVL3   | Approved  | Cytosol;Vesicles            |
| 3599 | ENSG00000119917 | IFIT3    | Supported | Cytosol;Mitochondria        |
| 3600 | ENSG00000119919 | NKX2-3   | Uncertain | Cytosol;N                   |
| 3601 | ENSG00000119922 | IFIT2    | Approved  | Vesicles                    |
| 3602 | ENSG00000119927 | GPAM     | Approved  | Mitochondria                |
| 3603 | ENSG00000119929 | CUTC     | Supported | Cytosol;NucleoplasNucleoli  |
| 3604 | ENSG00000119943 | PYROXD2  | Approved  | Mitochondria                |
| 3605 | ENSG00000119946 | CNNM1    | Uncertain | Cytosol;P                   |
| 3606 | ENSG00000119950 | MXI1     | Supported | NucleoplaCytosol;Nucleoli   |
| 3607 | ENSG00000119953 | SMNDC1   | Enhanced  | NucleoplaNuclear bodies     |
| 3608 | ENSG00000119969 | HELLS    | Approved  | Golgi apparatus;Nu          |
| 3609 | ENSG00000119977 | TCTN3    | Approved  | Microtubules                |
| 3610 | ENSG00000119979 | FAM45A   | Approved  | Centrosome;Cytosol          |
| 3611 | ENSG00000119986 | AVPI1    | Approved  | Nucleoplasm;Plasma          |
| 3612 | ENSG00000120008 | WDR11    | Approved  | Cytosol;Microtubul          |
| 3613 | ENSG00000120029 | C10orf76 | Approved  | Vesicles                    |
| 3614 | ENSG00000120049 | KCNIP2   | Approved  | Vesicles                    |
| 3615 | ENSG00000120051 | CFAP58   | Approved  | Cytosol;Plasma mem          |
| 3616 | ENSG00000120053 | GOT1     | Supported | Cytosol;Nucleoplasm         |
| 3617 | ENSG00000120063 | GNA13    | Supported | Cytosol                     |
| 3618 | ENSG00000120068 | HOXB8    | Supported | Nucleoplasm                 |
| 3619 | ENSG00000120071 | KANSL1   | Supported | Nucleoplasm                 |
| 3620 | ENSG00000120075 | HOXB5    | Supported | NucleoplaCytosol;Nucleoli f |
| 3621 | ENSG00000120093 | HOXB3    | Supported | Nucleoplasm                 |
| 3622 | ENSG00000120129 | DUSP1    | Approved  | Cytosol;Nucleoli            |
| 3623 | ENSG00000120137 | PANK3    | Approved  | Golgi apparatus;Nu          |
| 3624 | ENSG00000120149 | MSX2     | Supported | Nuclear speckles            |
| 3625 | ENSG00000120156 | TEK      | Supported | Plasma membrane Centriola   |
| 3626 | ENSG00000120158 | RCL1     | Approved  | Nucleoplasm                 |
| 3627 | ENSG00000120159 | CAAP1    | Approved  | Vesicles                    |
| 3628 | ENSG00000120162 | MOB3B    | Uncertain | Cytosol;I                   |

|      |                 |          |           |                                      |
|------|-----------------|----------|-----------|--------------------------------------|
| 3629 | ENSG00000120254 | MTHFD1L  | Supported | Mitochondria                         |
| 3630 | ENSG00000120256 | LRP11    | Approved  | Mitochondria                         |
| 3631 | ENSG00000120262 | CCDC170  | Approved  | Cell Junctions;Gol                   |
| 3632 | ENSG00000120265 | PCMT1    | Supported | Cytosol                              |
| 3633 | ENSG00000120278 | PLEKHG1  | Enhanced  | Nucleoplasm                          |
| 3634 | ENSG00000120279 | MYCT1    | Supported | Nucleoplasm Vesicles                 |
| 3635 | ENSG00000120280 | CXorf21  | Approved  | Nucleoplasm;Vesicl                   |
| 3636 | ENSG00000120314 | WDR55    | Enhanced  | Nucleoli;Nucleoplasm                 |
| 3637 | ENSG00000120327 | PCDHB14  | Approved  | Vesicles                             |
| 3638 | ENSG00000120328 | PCDHB12  | Approved  | Plasma membrane                      |
| 3639 | ENSG00000120333 | MRPS14   | Supported | Mitochondria;Nuclear membra          |
| 3640 | ENSG00000120341 | SEC16B   | Approved  | Actin filaments;En                   |
| 3641 | ENSG00000120370 | GORAB    | Enhanced  | Cytosol;Golgi apparatus;Nucleoli;Nuc |
| 3642 | ENSG00000120437 | ACAT2    | Supported | Cytosol Nucleoplasm                  |
| 3643 | ENSG00000120440 | TTLL2    | Approved  | Nuclear membrane;N                   |
| 3644 | ENSG00000120451 | SNX19    | Supported | Mitochondria                         |
| 3645 | ENSG00000120458 | MSANTD2  | Supported | Nuclear bodies;Nucleoplasm           |
| 3646 | ENSG00000120526 | NUDCD1   | Supported | Cytosol;Nucleoplasm                  |
| 3647 | ENSG00000120533 | ENY2     | Approved  | Mitochondria;Nucle                   |
| 3648 | ENSG00000120539 | MASTL    | Enhanced  | Nucleoplasm                          |
| 3649 | ENSG00000120549 | KIAA1217 | Approved  | Cytosol;Nucleoplas                   |
| 3650 | ENSG00000120594 | PLXDC2   | Supported | Nuclear bodies                       |
| 3651 | ENSG00000120616 | EPC1     | Supported | Nuclear bodies;Nucleoplasm           |
| 3652 | ENSG00000120645 | IQSEC3   | Supported | Cytosol Nucleoplasm                  |
| 3653 | ENSG00000120647 | CCDC77   | Approved  | Nuclear membrane                     |
| 3654 | ENSG00000120658 | ENOX1    | Supported | Plasma membrane                      |
| 3655 | ENSG00000120669 | SOHLH2   | Uncertain | Vesicles                             |
| 3656 | ENSG00000120685 | PROSER1  | Approved  | Cytosol;Nucleoplas                   |
| 3657 | ENSG00000120688 | WBP4     | Supported | Nucleoplasm Plasma me                |
| 3658 | ENSG00000120690 | ELF1     | Supported | Nucleoplasm                          |
| 3659 | ENSG00000120693 | SMAD9    | Supported | Cytosol;Nucleoplasm                  |
| 3660 | ENSG00000120694 | HSPH1    | Enhanced  | Cytosol;Nucleoplasm                  |
| 3661 | ENSG00000120697 | ALG5     | Approved  | Cytosol                              |
| 3662 | ENSG00000120699 | EXOSC8   | Supported | Nucleoli Vesicles                    |
| 3663 | ENSG00000120727 | PAIP2    | Supported | Vesicles                             |
| 3664 | ENSG00000120733 | KDM3B    | Enhanced  | Nucleoplasm                          |
| 3665 | ENSG00000120738 | EGR1     | Enhanced  | Nucleoplasm                          |
| 3666 | ENSG00000120742 | SERP1    | Approved  | Endoplasmic reticu                   |
| 3667 | ENSG00000120784 | ZFP30    | Approved  | Cytosol                              |
| 3668 | ENSG00000120798 | NR2C1    | Supported | NucleoplaCell Junctions;Cyt          |
| 3669 | ENSG00000120800 | UTP20    | Supported | Nucleoli Plasma membrane             |
| 3670 | ENSG00000120802 | TMPO     | Enhanced  | Nuclear membrane                     |
| 3671 | ENSG00000120805 | ARL1     | Supported | Golgi apparatus                      |
| 3672 | ENSG00000120820 | GLT8D2   | Approved  | Golgi apparatus;Ve                   |
| 3673 | ENSG00000120833 | SOCS2    | Approved  | Endoplasmic reticu                   |
| 3674 | ENSG00000120837 | NFYB     | Supported | Nucleoplasm                          |
| 3675 | ENSG00000120860 | WASHC3   | Approved  | Vesicles                             |
| 3676 | ENSG00000120868 | APAF1    | Supported | Cytosol Golgi apparatus;Nu           |
| 3677 | ENSG00000120875 | DUSP4    | Supported | Nucleoplasm                          |
| 3678 | ENSG00000120896 | SORBS3   | Approved  | Cytosol;Focal adhes                  |
| 3679 | ENSG00000120899 | PTK2B    | Supported | Cytosol;Plasma membrane              |
| 3680 | ENSG00000120910 | PPP3CC   | Approved  | Vesicles                             |
| 3681 | ENSG00000120913 | PDLIM2   | Supported | Actin filaments;Focal adhes          |
| 3682 | ENSG00000120915 | EPHX2    | Enhanced  | Cytosol                              |
| 3683 | ENSG00000120942 | UBIAD1   | Approved  | Vesicles                             |

|      |                 |          |           |                                     |
|------|-----------------|----------|-----------|-------------------------------------|
| 3684 | ENSG00000120948 | TARDBP   | Enhanced  | Nucleoplasm                         |
| 3685 | ENSG00000120949 | TNFRSF8  | Supported | Plasma membrane                     |
| 3686 | ENSG00000120963 | ZNF706   | Approved  | Plasma membrane                     |
| 3687 | ENSG00000120992 | LYPLA1   | Approved  | Cytosol;Nucleoplas                  |
| 3688 | ENSG00000121022 | COPS5    | Enhanced  | Nucleoplasm                         |
| 3689 | ENSG00000121039 | RDH10    | Supported | Lipid droplets                      |
| 3690 | ENSG00000121057 | AKAP1    | Supported | Mitochondria                        |
| 3691 | ENSG00000121058 | COIL     | Enhanced  | Nuclear bodies;Nucleoli;Nucleoplasm |
| 3692 | ENSG00000121060 | TRIM25   | Approved  | Cytosol Nuclear bNucleopla          |
| 3693 | ENSG00000121064 | SCPEP1   | Approved  | Golgi apparatus                     |
| 3694 | ENSG00000121068 | TBX2     | Approved  | Cytosol;Nucleoplas                  |
| 3695 | ENSG00000121073 | SLC35B1  | Approved  | Endoplasmic reticu                  |
| 3696 | ENSG00000121075 | TBX4     | Approved  | Vesicles                            |
| 3697 | ENSG00000121101 | TEX14    | Approved  | Cell Junctions;Cyt                  |
| 3698 | ENSG00000121104 | FAM117A  | Approved  | Nucleoplasm                         |
| 3699 | ENSG00000121152 | NCAPH    | Supported | Cytosol;Nucleoplasm                 |
| 3700 | ENSG00000121207 | LRAT     | Uncertain | Endoplasm                           |
| 3701 | ENSG00000121210 | TMEM131L | Approved  | Vesicles Nucleoli                   |
| 3702 | ENSG00000121281 | ADCY7    | Approved  | Cytosol                             |
| 3703 | ENSG00000121289 | CEP89    | Supported | Cytosol Plasma membrane             |
| 3704 | ENSG00000121297 | TSHZ3    | Enhanced  | Nucleoplasm Plasma membrane         |
| 3705 | ENSG00000121310 | ECHDC2   | Approved  | Mitochondria                        |
| 3706 | ENSG00000121350 | PYROXD1  | Approved  | Nuclear speckles                    |
| 3707 | ENSG00000121380 | BCL2L14  | Uncertain | Cytosol                             |
| 3708 | ENSG00000121390 | PSPC1    | Supported | Nucleoli fibrillar center;N         |
| 3709 | ENSG00000121406 | ZNF549   | Approved  | Cytosol;Nucleoplas                  |
| 3710 | ENSG00000121413 | ZSCAN18  | Approved  | Nucleoplasm                         |
| 3711 | ENSG00000121417 | ZNF211   | Approved  | Mitochondria;Rods                   |
| 3712 | ENSG00000121454 | LHX4     | Approved  | Nuclear speckles                    |
| 3713 | ENSG00000121481 | RNF2     | Enhanced  | NucleoplaNuclear bodies             |
| 3714 | ENSG00000121486 | TRMT1L   | Approved  | Nucleoli;Nucleopla                  |
| 3715 | ENSG00000121552 | CSTA     | Approved  | Cytosol;Nucleoplas                  |
| 3716 | ENSG00000121570 | DPPA4    | Approved  | Cytosol;Nucleoli;N                  |
| 3717 | ENSG00000121578 | B4GALT4  | Supported | Golgi apparatus                     |
| 3718 | ENSG00000121621 | KIF18A   | Supported | Cytokinetic bridge;Microtub         |
| 3719 | ENSG00000121644 | DESI2    | Approved  | Vesicles                            |
| 3720 | ENSG00000121653 | MAPK8IP1 | Enhanced  | Plasma membrane                     |
| 3721 | ENSG00000121671 | CRY2     | Supported | Cytosol;Nuclear speckles            |
| 3722 | ENSG00000121690 | DEPDC7   | Approved  | Cytosol;Nucleoli;N                  |
| 3723 | ENSG00000121691 | CAT      | Enhanced  | Vesicles                            |
| 3724 | ENSG00000121716 | PILRB    | Approved  | Mitochondria                        |
| 3725 | ENSG00000121741 | ZMYM2    | Approved  | Endoplasmic reticu                  |
| 3726 | ENSG00000121742 | GJB6     | Supported | Cell Junctions                      |
| 3727 | ENSG00000121749 | TBC1D15  | Supported | Cytosol;Mitochondria                |
| 3728 | ENSG00000121753 | ADGRB2   | Enhanced  | Centrosome                          |
| 3729 | ENSG00000121769 | FABP3    | Uncertain | Golgi appFocal adh                  |
| 3730 | ENSG00000121774 | KHDRBS1  | Enhanced  | Nucleoplasm                         |
| 3731 | ENSG00000121775 | TMEM39B  | Approved  | Vesicles                            |
| 3732 | ENSG00000121858 | TNFSF10  | Approved  | Microtubules                        |
| 3733 | ENSG00000121864 | ZNF639   | Supported | Nucleoplasm                         |
| 3734 | ENSG00000121871 | SLITRK3  | Approved  | Mitochondria                        |
| 3735 | ENSG00000121879 | PIK3CA   | Approved  | Cytosol                             |
| 3736 | ENSG00000121892 | PDS5A    | Enhanced  | Nucleoplasm                         |
| 3737 | ENSG00000121897 | LIAS     | Approved  | Cytosol;Mitochondr                  |
| 3738 | ENSG00000121900 | TMEM54   | Approved  | Vesicles                            |



|      |                 |           |           |                                      |                             |
|------|-----------------|-----------|-----------|--------------------------------------|-----------------------------|
| 3739 | ENSG00000121903 | ZSCAN20   | Approved  |                                      | Nucleoplasm                 |
| 3740 | ENSG00000121931 | LRIF1     | Supported |                                      | NucleoplaCentriolar satelli |
| 3741 | ENSG00000121940 | CLCC1     | Enhanced  | Endoplasmic reticulum                |                             |
| 3742 | ENSG00000121957 | GPSM2     | Supported |                                      | Cytosol                     |
| 3743 | ENSG00000121964 | GTDC1     | Approved  |                                      | Cytosol                     |
| 3744 | ENSG00000121988 | ZRANB3    | Supported |                                      | Nucleoplasm                 |
| 3745 | ENSG00000121989 | ACVR2A    | Approved  |                                      | Cytosol                     |
| 3746 | ENSG00000122008 | POLK      | Enhanced  | Nuclear bodies;                      | Nucleoplasm                 |
| 3747 | ENSG00000122012 | SV2C      | Supported |                                      | NucleoplaVesicles           |
| 3748 | ENSG00000122025 | FLT3      | Approved  |                                      | Endoplasmic reticu          |
| 3749 | ENSG00000122026 | RPL21     | Supported |                                      | Cytosol;Endoplasmic reticul |
| 3750 | ENSG00000122033 | MTIF3     | Supported |                                      | Mitochondria;Nucleoplasm    |
| 3751 | ENSG00000122034 | GTF3A     | Supported |                                      | Nucleoplasm                 |
| 3752 | ENSG00000122035 | RASL11A   | Approved  |                                      | Nuclear bodies              |
| 3753 | ENSG00000122042 | UBL3      | Approved  |                                      | Centrosome                  |
| 3754 | ENSG00000122068 | FYTTD1    | Supported |                                      | Nuclear speckles            |
| 3755 | ENSG00000122085 | MTERF4    | Supported | Mitochond                            | Cytosol                     |
| 3756 | ENSG00000122121 | XPNPEP2   | Approved  |                                      | Cytosol;Plasma mem          |
| 3757 | ENSG00000122122 | SASH3     | Approved  |                                      | Nuclear bodies;Nuc          |
| 3758 | ENSG00000122126 | OCRL      | Approved  |                                      | Centriolar satelli          |
| 3759 | ENSG00000122140 | MRPS2     | Supported |                                      | Mitochondria                |
| 3760 | ENSG00000122180 | MYOG      | Supported |                                      | Nucleoplasm                 |
| 3761 | ENSG00000122188 | LAX1      | Enhanced  | Cytosol;Golgi apparatus;Plasma membr |                             |
| 3762 | ENSG00000122203 | KIAA1191  | Approved  |                                      | Nucleoplasm                 |
| 3763 | ENSG00000122218 | COPA      | Approved  |                                      | Cytosol;Golgi appa          |
| 3764 | ENSG00000122257 | RBBP6     | Enhanced  | Nuclear speckles                     |                             |
| 3765 | ENSG00000122299 | ZC3H7A    | Supported |                                      | Cytosol                     |
| 3766 | ENSG00000122359 | ANXA11    | Supported |                                      | Cytosol;Nucleoplasm         |
| 3767 | ENSG00000122367 | LDB3      | Supported |                                      | Cytosol;FNucleoplasm        |
| 3768 | ENSG00000122376 | FAM35A    | Approved  |                                      | Actin filaments;Nu          |
| 3769 | ENSG00000122386 | ZNF205    | Approved  |                                      | Nucleoplasm                 |
| 3770 | ENSG00000122390 | NAA60     | Uncertain |                                      | Actin fil                   |
| 3771 | ENSG00000122406 | RPL5      | Supported |                                      | Cytosol;Endoplasmic reticul |
| 3772 | ENSG00000122435 | TRMT13    | Approved  |                                      | Cytosol;Nuclear bo          |
| 3773 | ENSG00000122482 | ZNF644    | Uncertain |                                      | Vesicles                    |
| 3774 | ENSG00000122483 | CCDC18    | Approved  |                                      | Cytosol;Nucleoplas          |
| 3775 | ENSG00000122484 | RPAP2     | Supported |                                      | Cytosol;Nucleoli            |
| 3776 | ENSG00000122490 | PQLC1     | Approved  |                                      | Nucleoplasm                 |
| 3777 | ENSG00000122512 | PMS2      | Enhanced  | Nucleoplasm                          |                             |
| 3778 | ENSG00000122515 | ZMIZ2     | Supported |                                      | Nucleoplasm Mitochond       |
| 3779 | ENSG00000122545 | 9/7/2019  | Enhanced  | Actin filCytosol;MNucleoli           |                             |
| 3780 | ENSG00000122547 | EEPD1     | Approved  |                                      | Nuclear speckles;P          |
| 3781 | ENSG00000122550 | KLHL7     | Enhanced  | Cytosol;NucleoplasPlasma membrane    |                             |
| 3782 | ENSG00000122557 | HERPUD2   | Approved  |                                      | Nucleoli                    |
| 3783 | ENSG00000122565 | CBX3      | Supported |                                      | Nuclear bodies;Nucleoplasm  |
| 3784 | ENSG00000122566 | HNRNPA2B1 | Enhanced  | Nucleoplasm                          |                             |
| 3785 | ENSG00000122574 | WIPF3     | Uncertain |                                      | Mitochond                   |
| 3786 | ENSG00000122585 | NPY       | Enhanced  | Golgi apparatus                      |                             |
| 3787 | ENSG00000122591 | FAM126A   | Supported |                                      | Cytosol;Plasma membrane     |
| 3788 | ENSG00000122592 | HOXA7     | Supported |                                      | NucleoplaNuclear membrane   |
| 3789 | ENSG00000122642 | FKBP9     | Approved  |                                      | Golgi apparatus;Mi          |
| 3790 | ENSG00000122644 | ARL4A     | Supported |                                      | Cytosol;Nucleoplasm         |
| 3791 | ENSG00000122674 | CCZ1      | Enhanced  | Vesicles                             |                             |
| 3792 | ENSG00000122678 | POLM      | Supported |                                      | Nucleoplasm                 |
| 3793 | ENSG00000122692 | SMU1      | Approved  |                                      | Vesicles                    |

|      |                 |          |           |                                 |                             |
|------|-----------------|----------|-----------|---------------------------------|-----------------------------|
| 3794 | ENSG00000122694 | GLIPR2   | Uncertain |                                 | Microtubu                   |
| 3795 | ENSG00000122696 | SLC25A51 | Approved  |                                 | Mitochondria                |
| 3796 | ENSG00000122705 | CLTA     | Enhanced  | Endosomes;Lysosomes;Vesicles    |                             |
| 3797 | ENSG00000122707 | RECK     | Supported |                                 | Plasma membrane             |
| 3798 | ENSG00000122711 | SPINK4   | Approved  |                                 | Golgi apparatus;Nu          |
| 3799 | ENSG00000122729 | AC01     | Supported | Cytosol                         | Mitochondria                |
| 3800 | ENSG00000122741 | DCAF10   | Approved  |                                 | Nucleoli fibrillar          |
| 3801 | ENSG00000122778 | KIAA1549 | Approved  |                                 | Intermediate filam          |
| 3802 | ENSG00000122779 | TRIM24   | Enhanced  | Nucleoplasm                     |                             |
| 3803 | ENSG00000122786 | CALD1    | Enhanced  | Actin filaments;Plasma membrane |                             |
| 3804 | ENSG00000122787 | AKR1D1   | Approved  | Cytosol                         | Nucleoplasm                 |
| 3805 | ENSG00000122824 | NUDT10   | Approved  |                                 | Cytosol                     |
| 3806 | ENSG00000122859 | NEUROG3  | Approved  |                                 | Nuclear speckles;N          |
| 3807 | ENSG00000122862 | SRGN     | Supported |                                 | Golgi apparatus             |
| 3808 | ENSG00000122863 | CHST3    | Approved  |                                 | Cytosol;Golgi appa          |
| 3809 | ENSG00000122870 | BICC1    | Approved  |                                 | Nucleoplasm                 |
| 3810 | ENSG00000122873 | CISD1    | Supported |                                 | Mitochondria                |
| 3811 | ENSG00000122877 | EGR2     | Supported |                                 | Nucleoplasm                 |
| 3812 | ENSG00000122882 | ECD      | Supported |                                 | Cytosol;Nucleoplasm         |
| 3813 | ENSG00000122884 | P4HA1    | Supported | Endoplasm                       | Mitochondria;Vesic          |
| 3814 | ENSG00000122912 | SLC25A16 | Approved  |                                 | Mitochondria                |
| 3815 | ENSG00000122952 | ZWINT    | Enhanced  | Nuclear b                       | Cytosol                     |
| 3816 | ENSG00000122958 | VPS26A   | Enhanced  | EndosomesLysosomes              |                             |
| 3817 | ENSG00000122965 | RBM19    | Supported |                                 | Nucleoli                    |
| 3818 | ENSG00000122966 | CIT      | Approved  |                                 | Cytosol                     |
| 3819 | ENSG00000122970 | IFT81    | Approved  |                                 | Centrosome;Cytosol          |
| 3820 | ENSG00000122971 | ACADS    | Enhanced  | Mitochondria                    | Nucleoplasm                 |
| 3821 | ENSG00000123064 | DDX54    | Approved  |                                 | Golgi apparatus;Nu          |
| 3822 | ENSG00000123066 | MED13L   | Approved  |                                 | Golgi apparatus;Nu          |
| 3823 | ENSG00000123080 | CDKN2C   | Approved  |                                 | Cytosol;Nucleoplas          |
| 3824 | ENSG00000123094 | RASSF8   | Approved  |                                 | Cytosol;Mitochondr          |
| 3825 | ENSG00000123095 | BHLHE41  | Supported | Nucleoplasm                     | Vesicles                    |
| 3826 | ENSG00000123096 | SSPN     | Approved  |                                 | Nuclear membrane;N          |
| 3827 | ENSG00000123104 | ITPR2    | Supported | Endoplasmic reticu              | Nucleopla                   |
| 3828 | ENSG00000123106 | CCDC91   | Supported | Golgi app                       | Nucleoplasm                 |
| 3829 | ENSG00000123119 | NECAB1   | Supported |                                 | Cytosol;Nucleoplasm         |
| 3830 | ENSG00000123124 | WWP1     | Approved  |                                 | Cytosol;Golgi appa          |
| 3831 | ENSG00000123130 | ACOT9    | Approved  |                                 | Cytosol;Nucleoplas          |
| 3832 | ENSG00000123131 | PRDX4    | Supported |                                 | Cytosol;Endoplasmic reticul |
| 3833 | ENSG00000123136 | DDX39A   | Approved  |                                 | Nuclear speckles            |
| 3834 | ENSG00000123143 | PKN1     | Supported |                                 | Cytosol;Nuclear bodies;Nucl |
| 3835 | ENSG00000123144 | TRIR     | Approved  |                                 | Nucleoplasm                 |
| 3836 | ENSG00000123146 | ADGRE5   | Approved  |                                 | Cytosol                     |
| 3837 | ENSG00000123154 | WDR83    | Approved  | Vesicles                        | Centrosome;Nucleop          |
| 3838 | ENSG00000123159 | GIPC1    | Approved  |                                 | Cell Junctions;Nuc          |
| 3839 | ENSG00000123178 | SPRYD7   | Approved  |                                 | Vesicles                    |
| 3840 | ENSG00000123179 | EBPL     | Supported | Endoplasmic reticulum           |                             |
| 3841 | ENSG00000123191 | ATP7B    | Supported |                                 | Golgi apparatus             |
| 3842 | ENSG00000123200 | ZC3H13   | Approved  |                                 | Actin filaments;Nu          |
| 3843 | ENSG00000123213 | NLN      | Approved  |                                 | Mitochondria                |
| 3844 | ENSG00000123240 | OPTN     | Enhanced  | Cytosol                         |                             |
| 3845 | ENSG00000123243 | ITIH5    | Approved  |                                 | Golgi apparatus;Ve          |
| 3846 | ENSG00000123268 | ATF1     | Enhanced  | Nucleoplasm                     |                             |
| 3847 | ENSG00000123297 | TSMF     | Supported |                                 | MitochondNucleoplasm        |
| 3848 | ENSG00000123338 | NCKAP1L  | Uncertain |                                 | Cytosol;P                   |

|      |                 |           |           |                      |                             |
|------|-----------------|-----------|-----------|----------------------|-----------------------------|
| 3849 | ENSG00000123342 | MMP19     | Approved  |                      | Endoplasmic reticu          |
| 3850 | ENSG00000123349 | PFDN5     | Supported |                      | Cytosol;Intermediate filame |
| 3851 | ENSG00000123352 | SPATS2    | Enhanced  | Cytosol              |                             |
| 3852 | ENSG00000123353 | ORMDL2    | Supported |                      | Endoplasmic reticulum       |
| 3853 | ENSG00000123358 | NR4A1     | Supported |                      | Cytosol;Nuclear membrane    |
| 3854 | ENSG00000123374 | CDK2      | Enhanced  | Nucleopla            | Centrosome;Cytosol          |
| 3855 | ENSG00000123384 | LRP1      | Approved  |                      | NucleoplaVesicles           |
| 3856 | ENSG00000123388 | HOXC11    | Supported |                      | NucleoplaCytosol            |
| 3857 | ENSG00000123405 | NFE2      | Approved  |                      | Actin filaments;Nu          |
| 3858 | ENSG00000123411 | IKZF4     | Supported |                      | Nuclear bodies;Nucleoplasm  |
| 3859 | ENSG00000123415 | SMUG1     | Supported |                      | NucleoplaCytosol;Nucleoli f |
| 3860 | ENSG00000123416 | TUBA1B    | Supported |                      | Microtubules                |
| 3861 | ENSG00000123427 | EEF1AKMT3 | Approved  |                      | Centrosome Nucleopla        |
| 3862 | ENSG00000123444 | KBTBD4    | Approved  |                      | Cytosol;Nucleoplas          |
| 3863 | ENSG00000123453 | SARDH     | Approved  |                      | Mitochondria                |
| 3864 | ENSG00000123454 | DBH       | Supported | Vesicles             | Endoplasmic reticu          |
| 3865 | ENSG00000123472 | ATPAF1    | Approved  |                      | Mitochondria                |
| 3866 | ENSG00000123473 | STIL      | Approved  |                      | Cytosol;Plasma mem          |
| 3867 | ENSG00000123485 | HJURP     | Enhanced  | Nucleoli;Nucleoplasm | Mitochond                   |
| 3868 | ENSG00000123496 | IL13RA2   | Approved  |                      | Cell JuncNucleopla          |
| 3869 | ENSG00000123500 | COL10A1   | Approved  |                      | Endoplasmic reticu          |
| 3870 | ENSG00000123505 | AMD1      | Approved  |                      | Nucleoplasm                 |
| 3871 | ENSG00000123545 | NDUFAF4   | Supported |                      | Mitochondria                |
| 3872 | ENSG00000123552 | USP45     | Approved  |                      | Cytosol;Nucleoplas          |
| 3873 | ENSG00000123562 | MORF4L2   | Enhanced  | Nucleoplasm          |                             |
| 3874 | ENSG00000123572 | NRK       | Approved  |                      | Cytosol;Nucleoplas          |
| 3875 | ENSG00000123575 | FAM199X   | Approved  |                      | Cytosol;Golgi appa          |
| 3876 | ENSG00000123576 | ESX1      | Supported |                      | Nuclear speckles            |
| 3877 | ENSG00000123584 | MAGEA9    | Approved  |                      | Golgi apparatus;Nu          |
| 3878 | ENSG00000123595 | RAB9A     | Uncertain |                      | Cytosol;N                   |
| 3879 | ENSG00000123600 | METT18    | Approved  |                      | Cytosol                     |
| 3880 | ENSG00000123607 | TTC21B    | Supported |                      | Mitochondria                |
| 3881 | ENSG00000123609 | NMI       | Supported |                      | Cytosol Nucleoplasm         |
| 3882 | ENSG00000123636 | BAZ2B     | Approved  |                      | Cytosol;Nucleoplas          |
| 3883 | ENSG00000123737 | EXOSC9    | Enhanced  | Nucleoli Nucleoplasm |                             |
| 3884 | ENSG00000123815 | COQ8B     | Enhanced  | Mitochondria         |                             |
| 3885 | ENSG00000123836 | PFKFB2    | Enhanced  | Nucleoplasm          |                             |
| 3886 | ENSG00000123892 | RAB38     | Uncertain |                      | Mitochond                   |
| 3887 | ENSG00000123908 | AGO2      | Supported |                      | NucleoplaCell Junctions     |
| 3888 | ENSG00000123933 | MXD4      | Supported |                      | Cytosol                     |
| 3889 | ENSG00000123975 | CKS2      | Approved  |                      | Cytosol;Mitochondr          |
| 3890 | ENSG00000123977 | DAW1      | Approved  |                      | Nuclear bodies;Nuc          |
| 3891 | ENSG00000123983 | ACSL3     | Approved  |                      | Lipid droplets;Nuc          |
| 3892 | ENSG00000123989 | CHPF      | Supported | Cytosol              | Centrosome;Vesicle          |
| 3893 | ENSG00000123992 | DNPEP     | Supported | Cytosol              |                             |
| 3894 | ENSG00000123999 | INHA      | Approved  |                      | Vesicles                    |
| 3895 | ENSG00000124006 | OBSL1     | Approved  |                      | Centrosome                  |
| 3896 | ENSG00000124019 | FAM124B   | Approved  | Nucleoplasm          | Mitochond                   |
| 3897 | ENSG00000124067 | SLC12A4   | Approved  |                      | Endosomes                   |
| 3898 | ENSG00000124074 | ENKD1     | Supported | Cytosol;P            | Centrosome                  |
| 3899 | ENSG00000124092 | CTCF1     | Approved  |                      | Cytosol;Nuclear bo          |
| 3900 | ENSG00000124098 | FAM210B   | Approved  |                      | Cytosol;Plasma mem          |
| 3901 | ENSG00000124102 | PI3       | Approved  |                      | Plasma membrane             |
| 3902 | ENSG00000124104 | SNX21     | Approved  |                      | Centriolar satelli          |
| 3903 | ENSG00000124107 | SLPI      | Approved  |                      | Golgi apparatus             |

|      |                 |           |           |                                     |                             |
|------|-----------------|-----------|-----------|-------------------------------------|-----------------------------|
| 3904 | ENSG00000124120 | TTPAL     | Approved  |                                     | Cytosol;Golgi appa          |
| 3905 | ENSG00000124126 | PREX1     | Supported |                                     | Cytosol Vesicles            |
| 3906 | ENSG00000124143 | ARHGAP40  | Supported |                                     | Cytosol;PCentrosome;Nucleop |
| 3907 | ENSG00000124145 | SDC4      | Approved  |                                     | Golgi apparatus;Pl          |
| 3908 | ENSG00000124151 | NCOA3     | Supported |                                     | Cytosol;Nucleoplasm         |
| 3909 | ENSG00000124160 | NCOA5     | Supported |                                     | Actin filaments;Nucleoplasm |
| 3910 | ENSG00000124164 | VAPB      | Enhanced  | Endoplasmic reticulum               |                             |
| 3911 | ENSG00000124171 | PARD6B    | Supported |                                     | Cytosol                     |
| 3912 | ENSG00000124177 | CHD6      | Approved  |                                     | Nucleoplasm                 |
| 3913 | ENSG00000124181 | PLCG1     | Enhanced  | Cytosol                             |                             |
| 3914 | ENSG00000124191 | TOX2      | Supported |                                     | Nucleoplasm                 |
| 3915 | ENSG00000124193 | SRSF6     | Supported |                                     | Nuclear speckles            |
| 3916 | ENSG00000124194 | GDAP1L1   | Approved  |                                     | Endoplasmic reticu          |
| 3917 | ENSG00000124196 | GTSF1L    | Uncertain |                                     | Nucleoli                    |
| 3918 | ENSG00000124198 | ARFGF2    | Supported |                                     | Golgi apparatus             |
| 3919 | ENSG00000124201 | ZNFX1     | Approved  |                                     | Mitochondria                |
| 3920 | ENSG00000124207 | CSE1L     | Enhanced  | Cytosol;Nucleoplasm                 |                             |
| 3921 | ENSG00000124208 | TMEM189-U | Supported |                                     | Nucleoplasm                 |
| 3922 | ENSG00000124209 | RAB22A    | Uncertain |                                     | Centrosom                   |
| 3923 | ENSG00000124212 | PTGIS     | Approved  |                                     | Endoplasmic reticu          |
| 3924 | ENSG00000124214 | STAU1     | Supported |                                     | Cytosol                     |
| 3925 | ENSG00000124215 | CDH26     | Supported |                                     | Plasma meMicrotubules       |
| 3926 | ENSG00000124216 | SNAI1     | Supported |                                     | Cytosol;Nucleoplasm         |
| 3927 | ENSG00000124222 | STX16     | Enhanced  | Vesicles                            |                             |
| 3928 | ENSG00000124225 | PMEPA1    | Supported |                                     | Vesicles                    |
| 3929 | ENSG00000124226 | RNF114    | Supported |                                     | Cytosol Plasma membrane     |
| 3930 | ENSG00000124228 | DDX27     | Approved  |                                     | Nucleoli                    |
| 3931 | ENSG00000124243 | BCAS4     | Approved  |                                     | Cytosol;Intermedia          |
| 3932 | ENSG00000124257 | NEURL2    | Approved  |                                     | Vesicles                    |
| 3933 | ENSG00000124260 | MAGEA10   | Supported |                                     | NucleoplaCytosol            |
| 3934 | ENSG00000124275 | MTRR      | Approved  |                                     | Cytosol;Intermedia          |
| 3935 | ENSG00000124279 | FASTKD3   | Supported |                                     | MitochondNucleoplasm        |
| 3936 | ENSG00000124299 | PEPD      | Approved  |                                     | Nucleoplasm                 |
| 3937 | ENSG00000124313 | IQSEC2    | Approved  |                                     | Vesicles                    |
| 3938 | ENSG00000124333 | VAMP7     | Supported |                                     | Vesicles                    |
| 3939 | ENSG00000124356 | STAMPB    | Enhanced  | Cytosol;Nucleoplasm;Plasma membrane |                             |
| 3940 | ENSG00000124357 | NAGK      | Approved  |                                     | Cytosol;Nucleoplas          |
| 3941 | ENSG00000124370 | MCEE      | Approved  |                                     | Nucleoli                    |
| 3942 | ENSG00000124374 | PAIP2B    | Approved  |                                     | Cytosol                     |
| 3943 | ENSG00000124380 | SNRNP27   | Approved  |                                     | Nucleoplasm                 |
| 3944 | ENSG00000124383 | MPHOSPH10 | Enhanced  | Nucleoli                            |                             |
| 3945 | ENSG00000124406 | ATP8A1    | Supported |                                     | Vesicles                    |
| 3946 | ENSG00000124422 | USP22     | Approved  |                                     | Nuclear speckles            |
| 3947 | ENSG00000124429 | POF1B     | Supported |                                     | Golgi appNucleoplasm        |
| 3948 | ENSG00000124440 | HIF3A     | Supported |                                     | Cytosol;NPlasma membrane    |
| 3949 | ENSG00000124444 | ZNF576    | Approved  |                                     | Golgi apparatus;Nu          |
| 3950 | ENSG00000124459 | ZNF45     | Supported |                                     | Nucleoplasm                 |
| 3951 | ENSG00000124466 | LYPD3     | Approved  |                                     | Endoplasmic reticu          |
| 3952 | ENSG00000124479 | NDP       | Supported |                                     | Vesicles Nucleoli;Nucleopla |
| 3953 | ENSG00000124486 | USP9X     | Uncertain |                                     | Vesicles                    |
| 3954 | ENSG00000124496 | TRERF1    | Enhanced  | Nucleoplasm                         | Cytosol;Nucleoli f          |
| 3955 | ENSG00000124507 | PACSIN1   | Approved  |                                     | Nucleoplasm;Vesicl          |
| 3956 | ENSG00000124508 | BTN2A2    | Approved  |                                     | Mitochondria                |
| 3957 | ENSG00000124523 | SIRT5     | Supported |                                     | Mitochondria                |
| 3958 | ENSG00000124535 | WRNIP1    | Approved  |                                     | Nucleoplasm                 |

|      |                 |           |           |                         |                             |                    |
|------|-----------------|-----------|-----------|-------------------------|-----------------------------|--------------------|
| 3959 | ENSG00000124541 | RRP36     | Supported |                         | Nucleoli                    | Nucleoplasm        |
| 3960 | ENSG00000124562 | SNRPC     | Enhanced  | Nucleoplasm             |                             |                    |
| 3961 | ENSG00000124568 | SLC17A1   | Approved  |                         |                             | Golgi apparatus    |
| 3962 | ENSG00000124570 | SERPINB6  | Approved  |                         |                             | Centrosome         |
| 3963 | ENSG00000124571 | XPO5      | Enhanced  | Nucleoplasm             |                             |                    |
| 3964 | ENSG00000124587 | PEX6      | Supported |                         | Vesicles                    | Nuclear bodies;Nuc |
| 3965 | ENSG00000124588 | NQO2      | Supported |                         | Cytosol                     | Nucleoplasm        |
| 3966 | ENSG00000124596 | OARD1     | Approved  |                         |                             | Nucleoli;Nucleopla |
| 3967 | ENSG00000124602 | UNC5CL    | Approved  |                         |                             | Centrosome         |
| 3968 | ENSG00000124608 | AARS2     | Enhanced  | Mitochondria            |                             |                    |
| 3969 | ENSG00000124614 | RPS10     | Approved  |                         |                             | Cytosol            |
| 3970 | ENSG00000124615 | MOCS1     | Approved  |                         |                             | Cytosol;Plasma mem |
| 3971 | ENSG00000124635 | HIST1H2BJ | Approved  |                         |                             | Cytosol;Nucleoplas |
| 3972 | ENSG00000124641 | MED20     | Approved  |                         |                             | Centrosome;Nucleop |
| 3973 | ENSG00000124659 | TBCC      | Supported |                         | Cytosol                     |                    |
| 3974 | ENSG00000124664 | SPDEF     | Supported |                         | Nucleoli;Nucleoplasm        |                    |
| 3975 | ENSG00000124688 | MAD2L1BP  | Supported |                         | Nuclear membrane;Nucleoli;N |                    |
| 3976 | ENSG00000124702 | KLHDC3    | Enhanced  | Nucleoplasm             |                             |                    |
| 3977 | ENSG00000124713 | GNMT      | Approved  |                         |                             | Cytosol            |
| 3978 | ENSG00000124733 | MEA1      | Approved  |                         |                             | Cytosol;Nucleoplas |
| 3979 | ENSG00000124749 | COL21A1   | Supported |                         | Cytosol                     |                    |
| 3980 | ENSG00000124762 | CDKN1A    | Supported |                         | Nuclear bodies;Nucleoplasm  |                    |
| 3981 | ENSG00000124766 | SOX4      | Supported |                         | Nucleoplasm                 | Mitochond          |
| 3982 | ENSG00000124767 | GL01      | Supported |                         | Cytosol;Nucleoplasm;Plasma  |                    |
| 3983 | ENSG00000124772 | CPNE5     | Approved  |                         |                             | Cytosol            |
| 3984 | ENSG00000124780 | KCNK17    | Approved  |                         | Plasma meCytosol;Nucleoplas |                    |
| 3985 | ENSG00000124782 | RREB1     | Supported |                         | Nuclear speckles            | Nucleoli           |
| 3986 | ENSG00000124783 | SSR1      | Supported |                         | Endoplasmic reticulum       |                    |
| 3987 | ENSG00000124784 | RIOK1     | Approved  |                         |                             | Cytosol;Nuclear sp |
| 3988 | ENSG00000124787 | RPP40     | Approved  |                         |                             | Nucleoplasm        |
| 3989 | ENSG00000124788 | ATXN1     | Supported |                         | Cytosol;Nucleoli;Nucleoplas |                    |
| 3990 | ENSG00000124789 | NUP153    | Enhanced  | Nuclear membrane        |                             |                    |
| 3991 | ENSG00000124795 | DEK       | Enhanced  | Nucleoplasm             |                             |                    |
| 3992 | ENSG00000124802 | EEF1E1    | Supported |                         | Cytosol;Nucleoplasm         |                    |
| 3993 | ENSG00000124813 | RUNX2     | Enhanced  | Nucleoplasm             |                             |                    |
| 3994 | ENSG00000124831 | LRRFIP1   | Supported |                         | Cytosol                     |                    |
| 3995 | ENSG00000124882 | EREG      | Approved  |                         |                             | Vesicles           |
| 3996 | ENSG00000124900 | TRIM51    | Approved  |                         |                             | Nucleoli;Vesicles  |
| 3997 | ENSG00000124920 | MYRF      | Approved  |                         |                             | Cytosol;Nucleoplas |
| 3998 | ENSG00000124939 | SCGB2A1   | Approved  |                         |                             | Vesicles           |
| 3999 | ENSG00000124942 | AHNAK     | Enhanced  | Cytosol;Plasma membrane |                             |                    |
| 4000 | ENSG00000125037 | EMC3      | Approved  |                         |                             | Cytosol;Microtubul |
| 4001 | ENSG00000125089 | SH3TC1    | Approved  |                         |                             | Cytosol;Nucleoli;N |
| 4002 | ENSG00000125107 | CNOT1     | Supported |                         | Cytosol                     |                    |
| 4003 | ENSG00000125122 | LRRC29    | Uncertain |                         |                             | Nucleopla          |
| 4004 | ENSG00000125149 | C16orf70  | Approved  |                         |                             | Cytosol;Nuclear sp |
| 4005 | ENSG00000125170 | DOK4      | Uncertain |                         |                             | Cytokinet          |
| 4006 | ENSG00000125246 | CLYBL     | Approved  |                         |                             | Cytosol            |
| 4007 | ENSG00000125247 | TMTC4     | Approved  |                         |                             | Vesicles           |
| 4008 | ENSG00000125257 | ABCC4     | Approved  |                         |                             | Golgi apparatus;Nu |
| 4009 | ENSG00000125266 | EFNB2     | Supported |                         | Cytosol;Nucleoplasm         |                    |
| 4010 | ENSG00000125285 | SOX21     | Approved  |                         |                             | Nucleoplasm        |
| 4011 | ENSG00000125319 | C17orf53  | Approved  |                         |                             | Cytosol;Nucleoplas |
| 4012 | ENSG00000125347 | IRF1      | Supported |                         | Cytosol;Nucleoplasm         |                    |
| 4013 | ENSG00000125351 | UPF3B     | Enhanced  | Cytosol                 | Nucleoli;Nucleoplasm        |                    |

|      |                 |          |           |                             |
|------|-----------------|----------|-----------|-----------------------------|
| 4014 | ENSG00000125352 | RNF113A  | Supported | Nucleoplasm                 |
| 4015 | ENSG00000125354 | 9/6/2019 | Approved  | Cytosol                     |
| 4016 | ENSG00000125355 | TMEM255A | Uncertain | Nuclear b                   |
| 4017 | ENSG00000125356 | NDUFA1   | Supported | MitochondCytosol            |
| 4018 | ENSG00000125375 | ATP5S    | Approved  | Mitochondria;Nucle          |
| 4019 | ENSG00000125386 | FAM193A  | Approved  | Cytosol;Plasma mem          |
| 4020 | ENSG00000125388 | GRK4     | Supported | Vesicles                    |
| 4021 | ENSG00000125398 | SOX9     | Enhanced  | Nucleoplasm                 |
| 4022 | ENSG00000125430 | HS3ST3B1 | Approved  | Vesicles                    |
| 4023 | ENSG00000125434 | SLC25A35 | Approved  | Mitochondria;Vesic          |
| 4024 | ENSG00000125445 | MRPS7    | Approved  | Mitochondria                |
| 4025 | ENSG00000125447 | GGA3     | Supported | Golgi apparatus             |
| 4026 | ENSG00000125449 | ARMC7    | Supported | Cytosol                     |
| 4027 | ENSG00000125450 | NUP85    | Supported | Cytosol;Nucleoplasm         |
| 4028 | ENSG00000125457 | MIF4GD   | Supported | Cytosol;Nucleoli Golgi app  |
| 4029 | ENSG00000125458 | NT5C     | Supported | Cytosol                     |
| 4030 | ENSG00000125482 | TTF1     | Supported | Nucleoli;Nucleoplasm        |
| 4031 | ENSG00000125484 | GTF3C4   | Supported | Nucleoplasm Mitochond       |
| 4032 | ENSG00000125485 | DDX31    | Supported | Nucleoli Golgi apparatus;Ve |
| 4033 | ENSG00000125505 | MBOAT7   | Approved  | Cytosol                     |
| 4034 | ENSG00000125508 | SRMS     | Approved  | Actin filaments;Cy          |
| 4035 | ENSG00000125520 | SLC2A4RG | Approved  | Nuclear speckles            |
| 4036 | ENSG00000125531 | FNDC11   | Approved  | Aggresome;Nucleopl          |
| 4037 | ENSG00000125534 | PPDPF    | Approved  | Microtubules;Nucle          |
| 4038 | ENSG00000125571 | IL37     | Supported | Nucleoplasm;Vesicles        |
| 4039 | ENSG00000125611 | CHCHD5   | Supported | Mitochondria                |
| 4040 | ENSG00000125618 | PAX8     | Enhanced  | Nucleoplasm                 |
| 4041 | ENSG00000125630 | POLR1B   | Supported | Nucleoli Cytosol            |
| 4042 | ENSG00000125633 | CCDC93   | Enhanced  | Plasma membrane;Vesicles    |
| 4043 | ENSG00000125648 | SLC25A23 | Supported | Mitochondria                |
| 4044 | ENSG00000125651 | GTF2F1   | Enhanced  | NucleoplaCell Junctions     |
| 4045 | ENSG00000125652 | ALKBH7   | Supported | Mitochondria                |
| 4046 | ENSG00000125656 | CLPP     | Supported | Mitochondria                |
| 4047 | ENSG00000125657 | TNFSF9   | Approved  | Golgi apparatus             |
| 4048 | ENSG00000125676 | THOC2    | Approved  | Nucleoplasm                 |
| 4049 | ENSG00000125686 | MED1     | Supported | Nucleoplasm                 |
| 4050 | ENSG00000125691 | RPL23    | Supported | Cytosol                     |
| 4051 | ENSG00000125703 | ATG4C    | Approved  | Cytosol;Nucleoplas          |
| 4052 | ENSG00000125726 | CD70     | Uncertain | Nucleopla                   |
| 4053 | ENSG00000125731 | SH2D3A   | Approved  | Cytokinetic bridge          |
| 4054 | ENSG00000125733 | TRIP10   | Supported | Vesicles Nucleoplasm        |
| 4055 | ENSG00000125734 | GPR108   | Approved  | Golgi apparatus;Ve          |
| 4056 | ENSG00000125740 | FOSB     | Supported | Nucleoplasm Vesicles        |
| 4057 | ENSG00000125741 | OPA3     | Approved  | Cytosol;Nucleoplas          |
| 4058 | ENSG00000125743 | SNRPD2   | Supported | Cytosol                     |
| 4059 | ENSG00000125744 | RTN2     | Approved  | Nuclear speckles            |
| 4060 | ENSG00000125746 | EML2     | Approved  | Vesicles                    |
| 4061 | ENSG00000125753 | VASP     | Supported | Cell Junctions;Focal adhesi |
| 4062 | ENSG00000125755 | SYMPK    | Supported | NucleoplaCytosol            |
| 4063 | ENSG00000125772 | GPCPD1   | Approved  | Nucleoplasm                 |
| 4064 | ENSG00000125775 | SDCBP2   | Approved  | Cytosol;Vesicles            |
| 4065 | ENSG00000125779 | PANK2    | Supported | Cytosol                     |
| 4066 | ENSG00000125798 | FOXA2    | Supported | NucleoplaCell Junctions     |
| 4067 | ENSG00000125810 | CD93     | Approved  | Plasma membrane;Ve          |
| 4068 | ENSG00000125812 | GZF1     | Supported | Nucleoli;Nucleoplasm        |

|      |                 |         |           |                       |                             |
|------|-----------------|---------|-----------|-----------------------|-----------------------------|
| 4069 | ENSG00000125814 | NAPB    | Uncertain |                       | Cytosol                     |
| 4070 | ENSG00000125816 | NKX2-4  | Approved  |                       | Nuclear bodies              |
| 4071 | ENSG00000125817 | CENPB   | Enhanced  | Nuclear bodies;       | Nucleoplasm                 |
| 4072 | ENSG00000125818 | PSMF1   | Enhanced  | Cytosol               |                             |
| 4073 | ENSG00000125821 | DTD1    | Uncertain |                       | Cytosol;N                   |
| 4074 | ENSG00000125827 | TMX4    | Supported |                       | Nuclear membrane            |
| 4075 | ENSG00000125834 | STK35   | Supported |                       | NucleoplaNuclear bodies     |
| 4076 | ENSG00000125835 | SNRPB   | Supported |                       | Nucleoplasm                 |
| 4077 | ENSG00000125841 | NRSN2   | Approved  |                       | Cytosol;Nucleoplas          |
| 4078 | ENSG00000125843 | AP5S1   | Enhanced  | Cytosol;Nucleoplasm   |                             |
| 4079 | ENSG00000125844 | RRBP1   | Enhanced  | Endoplasmic reticulum |                             |
| 4080 | ENSG00000125845 | BMP2    | Enhanced  | Vesicles              |                             |
| 4081 | ENSG00000125846 | ZNF133  | Approved  |                       | Nucleoplasm;Vesicl          |
| 4082 | ENSG00000125848 | FLRT3   | Supported | Plasma me             | Cell Junctions;Cyt          |
| 4083 | ENSG00000125850 | OVOL2   | Approved  |                       | Cytosol;Nucleoplas          |
| 4084 | ENSG00000125851 | PCSK2   | Approved  |                       | Vesicles                    |
| 4085 | ENSG00000125863 | MKKS    | Supported |                       | Centrosome                  |
| 4086 | ENSG00000125864 | BFSP1   | Supported |                       | Cytosol;Plasma membrane     |
| 4087 | ENSG00000125869 | LAMP5   | Uncertain |                       | Centriola                   |
| 4088 | ENSG00000125870 | SNRPB2  | Enhanced  | Nuclear speckles      | Cytoplasm                   |
| 4089 | ENSG00000125871 | MGME1   | Supported |                       | Mitochondria                |
| 4090 | ENSG00000125877 | ITPA    | Supported |                       | Cytosol Nuclear bodies;Nuc  |
| 4091 | ENSG00000125878 | TCF15   | Supported |                       | Nuclear speckles            |
| 4092 | ENSG00000125885 | MCM8    | Supported |                       | Nucleoplasm                 |
| 4093 | ENSG00000125895 | TMEM74B | Approved  |                       | Golgi apparatus;Nu          |
| 4094 | ENSG00000125898 | FAM110A | Supported |                       | Cytosol;VNucleoplasm        |
| 4095 | ENSG00000125901 | MRPS26  | Supported |                       | Mitochondria;Nucleoplasm    |
| 4096 | ENSG00000125910 | S1PR4   | Supported |                       | Mitochondria                |
| 4097 | ENSG00000125912 | NCLN    | Approved  |                       | Lipid droplets;Nuc          |
| 4098 | ENSG00000125931 | CITED1  | Supported |                       | Cytosol;Nucleoplasm         |
| 4099 | ENSG00000125944 | HNRNPR  | Enhanced  | Nucleoplasm           |                             |
| 4100 | ENSG00000125945 | ZNF436  | Supported |                       | NucleoplaCytosol            |
| 4101 | ENSG00000125952 | MAX     | Supported |                       | NucleoplaGolgi apparatus;Ve |
| 4102 | ENSG00000125962 | ARMCX5  | Approved  |                       | Cytosol;Nuclear sp          |
| 4103 | ENSG00000125966 | MMP24   | Approved  |                       | Nucleoli;Plasma me          |
| 4104 | ENSG00000125967 | NECAB3  | Supported |                       | Golgi apparatus             |
| 4105 | ENSG00000125968 | ID1     | Enhanced  | Nucleoplasm           |                             |
| 4106 | ENSG00000125970 | RALY    | Enhanced  | Nucleoplasm;Vesicles  |                             |
| 4107 | ENSG00000125977 | EIF2S2  | Supported |                       | EndoplasmNucleoli           |
| 4108 | ENSG00000125991 | ERGIC3  | Supported |                       | Nucleoplasm                 |
| 4109 | ENSG00000126001 | CEP250  | Supported |                       | Centrosome                  |
| 4110 | ENSG00000126003 | PLAGL2  | Approved  |                       | Cytosol;Nucleoplas          |
| 4111 | ENSG00000126010 | GRPR    | Supported |                       | Plasma membrane             |
| 4112 | ENSG00000126012 | KDM5C   | Enhanced  | NucleoplaCytosol      |                             |
| 4113 | ENSG00000126016 | AMOT    | Supported |                       | Cell Junctions Nucleopla    |
| 4114 | ENSG00000126062 | TMEM115 | Supported |                       | Golgi apparatus             |
| 4115 | ENSG00000126067 | PSMB2   | Enhanced  | Nucleoplasm           |                             |
| 4116 | ENSG00000126070 | AGO3    | Supported |                       | CytoplasmNucleoplasm        |
| 4117 | ENSG00000126088 | UROD    | Supported |                       | Cytosol;Nucleoplasm         |
| 4118 | ENSG00000126106 | TMEM53  | Approved  |                       | Focal adhesion sit          |
| 4119 | ENSG00000126214 | KLC1    | Uncertain |                       | Cytosol;N                   |
| 4120 | ENSG00000126215 | XRCC3   | Enhanced  | Nucleoplasm           |                             |
| 4121 | ENSG00000126226 | PCID2   | Approved  |                       | Nucleoli;Nucleopla          |
| 4122 | ENSG00000126246 | IGFLR1  | Approved  |                       | Focal adhesion sit          |
| 4123 | ENSG00000126247 | CAPNS1  | Approved  |                       | Cytosol;Nucleoplas          |

|      |                 |         |           |                       |                             |
|------|-----------------|---------|-----------|-----------------------|-----------------------------|
| 4124 | ENSG00000126249 | PDCD2L  | Approved  |                       | Mitochondria                |
| 4125 | ENSG00000126254 | RBM42   | Approved  |                       | Cytosol;Nucleoplas          |
| 4126 | ENSG00000126259 | KIRREL2 | Supported |                       | Centriolar satellite        |
| 4127 | ENSG00000126261 | UBA2    | Supported |                       | Nucleoplasm                 |
| 4128 | ENSG00000126264 | HCST    | Supported |                       | Plasma meCentriolar satelli |
| 4129 | ENSG00000126267 | COX6B1  | Supported |                       | Mitochondria                |
| 4130 | ENSG00000126351 | THRA    | Supported |                       | Cytosol                     |
| 4131 | ENSG00000126353 | CCR7    | Approved  |                       | Mitochondria                |
| 4132 | ENSG00000126368 | NR1D1   | Supported |                       | Nuclear bodies              |
| 4133 | ENSG00000126391 | FRMD8   | Approved  |                       | Cytosol;Nucleoli;N          |
| 4134 | ENSG00000126432 | PRDX5   | Enhanced  | Mitochondria          |                             |
| 4135 | ENSG00000126453 | BCL2L12 | Approved  |                       | Plasma membrane;Ve          |
| 4136 | ENSG00000126456 | IRF3    | Supported |                       | Cytosol                     |
| 4137 | ENSG00000126457 | PRMT1   | Supported |                       | Nucleoplasm                 |
| 4138 | ENSG00000126458 | RRAS    | Approved  |                       | Vesicles                    |
| 4139 | ENSG00000126460 | PRRG2   | Approved  |                       | Cytosol;Nucleoli;N          |
| 4140 | ENSG00000126461 | SCAF1   | Approved  |                       | Cytosol;Nucleoplas          |
| 4141 | ENSG00000126464 | PRR12   | Approved  |                       | Cytosol                     |
| 4142 | ENSG00000126522 | ASL     | Approved  |                       | Cytosol                     |
| 4143 | ENSG00000126524 | SBDS    | Supported |                       | Cytosol;Nucleoplasm         |
| 4144 | ENSG00000126561 | STAT5A  | Enhanced  | Cytosol;Nucleoplasm   |                             |
| 4145 | ENSG00000126602 | TRAP1   | Enhanced  | Mitochondria          |                             |
| 4146 | ENSG00000126603 | GLIS2   | Approved  |                       | Cytosol;Nucleoplas          |
| 4147 | ENSG00000126653 | NSRP1   | Supported |                       | Nucleoplasm                 |
| 4148 | ENSG00000126698 | DNAJC8  | Enhanced  | Nucleoplasm           |                             |
| 4149 | ENSG00000126705 | AHDC1   | Supported | Nucleoplasm           |                             |
| 4150 | ENSG00000126709 | IFI6    | Approved  |                       | Mitochondria                |
| 4151 | ENSG00000126733 | DACH2   | Approved  |                       | Nucleoplasm                 |
| 4152 | ENSG00000126746 | ZNF384  | Approved  |                       | Nucleoplasm                 |
| 4153 | ENSG00000126749 | EMG1    | Supported |                       | Nucleoli Nucleoplasm        |
| 4154 | ENSG00000126752 | SSX1    | Approved  |                       | Nucleoli;Nucleopla          |
| 4155 | ENSG00000126756 | UXT     | Supported |                       | Centriolar satellite;Nucleo |
| 4156 | ENSG00000126767 | ELK1    | Enhanced  | Nucleoplasm           |                             |
| 4157 | ENSG00000126768 | TIMM17B | Approved  |                       | Microtubules;Mitoc          |
| 4158 | ENSG00000126773 | PCNX4   | Approved  |                       | Cytosol                     |
| 4159 | ENSG00000126777 | KTN1    | Enhanced  | Endoplasmic reticulum |                             |
| 4160 | ENSG00000126778 | SIX1    | Supported |                       | Nucleoli;Nucleoplasm        |
| 4161 | ENSG00000126785 | RHOJ    | Approved  |                       | Nucleoli;Nucleopla          |
| 4162 | ENSG00000126787 | DLGAP5  | Supported |                       | Cytosol Centriolar satelli  |
| 4163 | ENSG00000126790 | L3HYPDH | Uncertain |                       | Vesicles                    |
| 4164 | ENSG00000126803 | HSPA2   | Approved  |                       | Nucleoplasm;Vesicl          |
| 4165 | ENSG00000126804 | ZBTB1   | Supported |                       | Nuclear membrane;Nucleoplas |
| 4166 | ENSG00000126814 | TRMT5   | Approved  |                       | Nucleoli;Nucleopla          |
| 4167 | ENSG00000126821 | SGPP1   | Enhanced  | Nucleoplasm           |                             |
| 4168 | ENSG00000126822 | PLEKHG3 | Supported |                       | Cytosol;NCentrosome;Cytokin |
| 4169 | ENSG00000126856 | PRDM7   | Uncertain |                       | Nuclear s                   |
| 4170 | ENSG00000126860 | EVI2A   | Approved  |                       | Nuclear bodies;Nuc          |
| 4171 | ENSG00000126870 | WDR60   | Approved  |                       | Centriolar satelli          |
| 4172 | ENSG00000126882 | FAM78A  | Uncertain |                       | Nucleopla                   |
| 4173 | ENSG00000126883 | NUP214  | Approved  |                       | NucleoplaFocal adh          |
| 4174 | ENSG00000126890 | CTAG2   | Enhanced  | Nucleoplasm;Vesicl    | Nuclear bodies              |
| 4175 | ENSG00000126903 | SLC10A3 | Approved  |                       | Intermediate filam          |
| 4176 | ENSG00000126934 | MAP2K2  | Supported |                       | Cytosol                     |
| 4177 | ENSG00000126945 | HNRNP2  | Enhanced  | Nucleoplasm           |                             |
| 4178 | ENSG00000126947 | ARMCX1  | Approved  |                       | Cytosol;Mitochondr          |



|      |                 |          |           |                             |                    |
|------|-----------------|----------|-----------|-----------------------------|--------------------|
| 4179 | ENSG00000126950 | TMEM35A  | Supported | Vesicles                    | Cytosol;F          |
| 4180 | ENSG00000126953 | TIMM8A   | Supported | Mitochondria                |                    |
| 4181 | ENSG00000126970 | ZC4H2    | Approved  | Microtubules;Vesic          |                    |
| 4182 | ENSG00000127022 | CANX     | Enhanced  | Endoplasmic reticulum       |                    |
| 4183 | ENSG00000127054 | INTS11   | Supported | Cytosol;Nucleoplasm         |                    |
| 4184 | ENSG00000127080 | IPPK     | Approved  | Cytosol                     |                    |
| 4185 | ENSG00000127081 | ZNF484   | Approved  | Cytosol;Nuclear me          |                    |
| 4186 | ENSG00000127083 | OMD      | Approved  | Endoplasmic reticu          |                    |
| 4187 | ENSG00000127084 | FGD3     | Approved  | Cytosol;Nucleoplas          |                    |
| 4188 | ENSG00000127124 | HIVEP3   | Supported | Nucleoplasm                 |                    |
| 4189 | ENSG00000127125 | PPCS     | Approved  | Mitochondria                | Nucleoli fibrillar |
| 4190 | ENSG00000127129 | EDN2     | Approved  | Cytosol                     |                    |
| 4191 | ENSG00000127152 | BCL11B   | Approved  | Nucleoli fibrillar          |                    |
| 4192 | ENSG00000127191 | TRAF2    | Enhanced  | Cytosol                     |                    |
| 4193 | ENSG00000127220 | ABHD8    | Approved  | Nuclear bodies;Nuc          |                    |
| 4194 | ENSG00000127241 | MASP1    | Enhanced  | Cytosol;Nucleoplasm         |                    |
| 4195 | ENSG00000127249 | ATP13A4  | Approved  | Nucleoplasm                 |                    |
| 4196 | ENSG00000127252 | HRASLS   | Approved  | Cytosol;Focal adhe          |                    |
| 4197 | ENSG00000127324 | TSPAN8   | Approved  | Nucleoplasm                 |                    |
| 4198 | ENSG00000127328 | RAB3IP   | Approved  | Intermediate filam          |                    |
| 4199 | ENSG00000127329 | PTPRB    | Approved  | Cell Junctions;Pla          |                    |
| 4200 | ENSG00000127334 | DYRK2    | Supported | Cytosol;Nucleoplasm         |                    |
| 4201 | ENSG00000127337 | YEATS4   | Approved  | Nuclear membrane;N          |                    |
| 4202 | ENSG00000127366 | TAS2R5   | Approved  | Cytoplasmic bodies          |                    |
| 4203 | ENSG00000127399 | LRRC61   | Approved  | Nucleoplasm                 |                    |
| 4204 | ENSG00000127415 | IDUA     | Supported | Vesicles                    |                    |
| 4205 | ENSG00000127418 | FGFRL1   | Supported | Vesicles                    |                    |
| 4206 | ENSG00000127419 | TMEM175  | Approved  | Nuclear membrane;N          |                    |
| 4207 | ENSG00000127423 | AUNIP    | Supported | Centrosome                  |                    |
| 4208 | ENSG00000127445 | PIN1     | Enhanced  | Cytosol;Nucleoplasm         |                    |
| 4209 | ENSG00000127452 | FBXL12   | Approved  | Mitochondria                |                    |
| 4210 | ENSG00000127481 | UBR4     | Supported | Cytosol;NCentrosome         |                    |
| 4211 | ENSG00000127483 | HP1BP3   | Supported | Nuclear speckles            |                    |
| 4212 | ENSG00000127507 | ADGRE2   | Uncertain | Cytosol;V                   |                    |
| 4213 | ENSG00000127511 | SIN3B    | Approved  | Nucleoplasm;Plasma          |                    |
| 4214 | ENSG00000127526 | SLC35E1  | Enhanced  | Golgi apparatus             |                    |
| 4215 | ENSG00000127527 | EPS15L1  | Approved  | Vesicles                    |                    |
| 4216 | ENSG00000127528 | KLF2     | Approved  | Nucleoplasm                 |                    |
| 4217 | ENSG00000127533 | F2RL3    | Enhanced  | Plasma membrane             | Cytosol            |
| 4218 | ENSG00000127554 | GFER     | Enhanced  | Cytosol;Mitochondria        |                    |
| 4219 | ENSG00000127561 | SYNGR3   | Approved  | Plasma membrane             |                    |
| 4220 | ENSG00000127564 | PKMYT1   | Supported | Golgi apparatus             | Nucleoli;          |
| 4221 | ENSG00000127580 | WDR24    | Supported | Vesicles                    | Cytosol            |
| 4222 | ENSG00000127586 | CHTF18   | Enhanced  | Nucleoplasm                 |                    |
| 4223 | ENSG00000127603 | MACF1    | Supported | Actin filaments;Cell Juncti |                    |
| 4224 | ENSG00000127616 | SMARCA4  | Supported | Nucleoplasm                 |                    |
| 4225 | ENSG00000127663 | KDM4B    | Supported | NucleoplaCytosol            |                    |
| 4226 | ENSG00000127666 | TICAM1   | Uncertain | Nucleoli;                   |                    |
| 4227 | ENSG00000127720 | METTLL25 | Uncertain | Cytosol;M                   |                    |
| 4228 | ENSG00000127774 | EMC6     | Approved  | Centrosome;Nucleop          |                    |
| 4229 | ENSG00000127804 | METTLL16 | Supported | NucleoplaCytosol            |                    |
| 4230 | ENSG00000127824 | TUBA4A   | Enhanced  | Microtubules                |                    |
| 4231 | ENSG00000127831 | VIL1     | Enhanced  | Plasma membrane             |                    |
| 4232 | ENSG00000127837 | AAMP     | Supported | Cytosol                     | Microtubules       |
| 4233 | ENSG00000127838 | PNKD     | Enhanced  | Mitochondria                |                    |

|      |                 |          |           |                        |                             |
|------|-----------------|----------|-----------|------------------------|-----------------------------|
| 4234 | ENSG00000127863 | TNFRSF19 | Approved  |                        | Mitochondria;Nucle          |
| 4235 | ENSG00000127870 | RNF6     | Supported |                        | Nuclear membrane            |
| 4236 | ENSG00000127884 | ECHS1    | Enhanced  | Mitochondria           |                             |
| 4237 | ENSG00000127903 | ZNF835   | Approved  |                        | Microtubules                |
| 4238 | ENSG00000127914 | AKAP9    | Enhanced  | Golgi app              | Centrosome                  |
| 4239 | ENSG00000127922 | SEM1     | Approved  |                        | Cytosol                     |
| 4240 | ENSG00000127946 | HIP1     | Enhanced  | Vesicles               |                             |
| 4241 | ENSG00000127947 | PTPN12   | Approved  |                        | Cytosol;Plasma mem          |
| 4242 | ENSG00000127948 | POR      | Approved  |                        | Cytosol;Nucleoplas          |
| 4243 | ENSG00000127952 | STYXL1   | Approved  |                        | Nuclear speckles            |
| 4244 | ENSG00000127954 | STEAP4   | Approved  |                        | Plasma membrane Nucleopla   |
| 4245 | ENSG00000127955 | GNAI1    | Supported | Centrosom              | Nucleoli;Nucleopla          |
| 4246 | ENSG00000127980 | PEX1     | Supported |                        | Peroxisomes                 |
| 4247 | ENSG00000127989 | MTERF1   | Supported |                        | Mitochondria                |
| 4248 | ENSG00000127990 | SGCE     | Approved  |                        | Golgi apparatus;Nu          |
| 4249 | ENSG00000127993 | RBM48    | Enhanced  | Nucleoplasm            |                             |
| 4250 | ENSG00000127995 | CASD1    | Approved  |                        | Nucleoplasm                 |
| 4251 | ENSG00000128000 | ZNF780B  | Approved  |                        | Centrosome;Nucleop          |
| 4252 | ENSG00000128016 | ZFP36    | Approved  |                        | Intermediate filam          |
| 4253 | ENSG00000128039 | SRD5A3   | Approved  |                        | Cytosol;Plasma mem          |
| 4254 | ENSG00000128045 | RASL11B  | Approved  |                        | Nuclear bodies              |
| 4255 | ENSG00000128050 | PAICS    | Approved  |                        | Cytosol                     |
| 4256 | ENSG00000128052 | KDR      | Supported |                        | Plasma membrane             |
| 4257 | ENSG00000128059 | PPAT     | Approved  |                        | Midbody ring                |
| 4258 | ENSG00000128242 | GAL3ST1  | Approved  |                        | Vesicles                    |
| 4259 | ENSG00000128245 | YWHAH    | Approved  |                        | Cytosol;Nucleoli            |
| 4260 | ENSG00000128250 | RFPL1    | Approved  |                        | Nuclear speckles;P          |
| 4261 | ENSG00000128253 | RFPL2    | Approved  |                        | Nuclear speckles;P          |
| 4262 | ENSG00000128266 | GNAZ     | Approved  |                        | Vesicles                    |
| 4263 | ENSG00000128272 | ATF4     | Supported |                        | Centriolar satellite;Cytoso |
| 4264 | ENSG00000128274 | A4GALT   | Uncertain |                        | Mitochond                   |
| 4265 | ENSG00000128276 | RFPL3    | Approved  |                        | Nuclear speckles;P          |
| 4266 | ENSG00000128283 | CDC42EP1 | Supported |                        | Actin filPlasma membrane    |
| 4267 | ENSG00000128309 | MPST     | Approved  |                        | Cytosol;Mitochondr          |
| 4268 | ENSG00000128311 | TST      | Supported |                        | Mitochondria                |
| 4269 | ENSG00000128322 | IGLL1    | Approved  |                        | Endoplasmic reticu          |
| 4270 | ENSG00000128335 | APOL2    | Approved  |                        | Cytosol;Nuclear bo          |
| 4271 | ENSG00000128342 | LIF      | Supported |                        | Cytosol                     |
| 4272 | ENSG00000128346 | C22orf23 | Approved  |                        | Nucleoplasm                 |
| 4273 | ENSG00000128383 | APOBEC3A | Uncertain |                        | Nucleopla                   |
| 4274 | ENSG00000128394 | APOBEC3F | Uncertain |                        | Cytosol;N                   |
| 4275 | ENSG00000128422 | KRT17    | Enhanced  | Intermediate filaments |                             |
| 4276 | ENSG00000128463 | EMC4     | Supported |                        | Focal adhesion sites        |
| 4277 | ENSG00000128482 | RNF112   | Approved  |                        | Nuclear speckles            |
| 4278 | ENSG00000128487 | SPECC1   | Supported |                        | NucleoplaCytosol;Nucleoli f |
| 4279 | ENSG00000128510 | CPA4     | Approved  |                        | Centrosome;Cytosol          |
| 4280 | ENSG00000128512 | DOCK4    | Approved  | Plasma me              | Cytosol Golgi app           |
| 4281 | ENSG00000128513 | POT1     | Supported |                        | Nucleoplasm                 |
| 4282 | ENSG00000128534 | LSM8     | Approved  |                        | Nucleoplasm;Vesicl          |
| 4283 | ENSG00000128536 | CDHR3    | Approved  |                        | Nucleoli fibrillar          |
| 4284 | ENSG00000128563 | PRKRIP1  | Supported |                        | Actin filaments;Cytosol     |
| 4285 | ENSG00000128564 | VGF      | Supported |                        | Vesicles Golgi apparatus    |
| 4286 | ENSG00000128567 | PODXL    | Approved  |                        | Plasma meCentriolar satelli |
| 4287 | ENSG00000128573 | FOXP2    | Enhanced  | Nucleoplasm            |                             |
| 4288 | ENSG00000128578 | STRIP2   | Approved  |                        | Cytosol                     |

|      |                 |          |           |                            |                              |
|------|-----------------|----------|-----------|----------------------------|------------------------------|
| 4289 | ENSG00000128581 | IFT22    | Approved  |                            | Cytosol;Microtubul           |
| 4290 | ENSG00000128585 | MKLN1    | Approved  |                            | Cytosol;Plasma mem           |
| 4291 | ENSG00000128590 | DNAJB9   | Approved  |                            | Cytosol;Endoplasmic          |
| 4292 | ENSG00000128591 | FLNC     | Supported |                            | Cytosol;Plasma membrane      |
| 4293 | ENSG00000128594 | LRRC4    | Approved  |                            | Golgi apparatus              |
| 4294 | ENSG00000128595 | CALU     | Supported |                            | Endoplasmic reticulum        |
| 4295 | ENSG00000128596 | CCDC136  | Uncertain |                            | Nucleoli                     |
| 4296 | ENSG00000128606 | LRRC17   | Approved  |                            | Cytokinetic bridge           |
| 4297 | ENSG00000128607 | KLHDC10  | Approved  |                            | Nucleoplasm                  |
| 4298 | ENSG00000128610 | FEZF1    | Supported |                            | Nucleoplasm;Cytosol          |
| 4299 | ENSG00000128617 | OPN1SW   | Approved  |                            | Cytokinetic bridge           |
| 4300 | ENSG00000128641 | MYO1B    | Enhanced  | Plasma membrane            |                              |
| 4301 | ENSG00000128645 | HOXD1    | Enhanced  | Nucleoplasm                |                              |
| 4302 | ENSG00000128652 | HOXD3    | Supported |                            | Nucleoplasm;Nuclear bodies   |
| 4303 | ENSG00000128654 | MTX2     | Supported |                            | Mitochondria Nucleoli        |
| 4304 | ENSG00000128656 | CHN1     | Approved  |                            | Cytosol                      |
| 4305 | ENSG00000128683 | GAD1     | Approved  |                            | Vesicles                     |
| 4306 | ENSG00000128694 | OSGEPL1  | Supported |                            | Mitochondria                 |
| 4307 | ENSG00000128699 | ORMDL1   | Supported |                            | Endoplasmic reticulum        |
| 4308 | ENSG00000128708 | HAT1     | Supported |                            | Nucleoplasm                  |
| 4309 | ENSG00000128709 | HOXD9    | Supported |                            | Nucleoli;Nucleoplasm         |
| 4310 | ENSG00000128710 | HOXD10   | Approved  |                            | Cytoplasmic bodies           |
| 4311 | ENSG00000128713 | HOXD11   | Supported |                            | Nucleoplasm                  |
| 4312 | ENSG00000128714 | HOXD13   | Approved  |                            | Nucleoplasm                  |
| 4313 | ENSG00000128731 | HERC2    | Supported |                            | Cytosol Plasma membrane      |
| 4314 | ENSG00000128739 | SNRPN    | Approved  |                            | Nucleoplasm                  |
| 4315 | ENSG00000128789 | PSMG2    | Approved  |                            | Nuclear bodies;Nuc           |
| 4316 | ENSG00000128791 | TWSG1    | Supported |                            | Centrosome;Cytosol           |
| 4317 | ENSG00000128805 | ARHGAP22 | Supported |                            | Cytosol;Nucleoplasm;Plasma   |
| 4318 | ENSG00000128815 | WDFY4    | Approved  |                            | Cytosol;Nucleoplasm          |
| 4319 | ENSG00000128829 | EIF2AK4  | Approved  |                            | Cytosol                      |
| 4320 | ENSG00000128833 | MYO5C    | Supported |                            | Cytosol;Nucleoplasm          |
| 4321 | ENSG00000128849 | CGNL1    | Supported |                            | Cell Junctions Nuclear b     |
| 4322 | ENSG00000128872 | TMOD2    | Approved  |                            | Nucleoli fibrillar           |
| 4323 | ENSG00000128881 | TTBK2    | Uncertain |                            | Intermedi                    |
| 4324 | ENSG00000128886 | ELL3     | Supported |                            | Nucleoli;Nucleoplasm         |
| 4325 | ENSG00000128891 | CCDC32   | Approved  |                            | Nuclear speckles;V           |
| 4326 | ENSG00000128908 | INO80    | Enhanced  | Nuclear bodies;Nucleoplasm |                              |
| 4327 | ENSG00000128915 | ICE2     | Supported |                            | Nuclear bodies;Nucleoplasm   |
| 4328 | ENSG00000128923 | MINDY2   | Enhanced  | Nucleoplasm                |                              |
| 4329 | ENSG00000128928 | IVD      | Supported |                            | Mitochondria;Nucleoplasm     |
| 4330 | ENSG00000128944 | KNSTRN   | Enhanced  | Centriolar satelli         | Plasma membrane              |
| 4331 | ENSG00000128951 | DUT      | Supported |                            | Nucleoplasm                  |
| 4332 | ENSG00000128965 | CHAC1    | Approved  |                            | Mitochondria                 |
| 4333 | ENSG00000128973 | CLN6     | Approved  |                            | Endoplasmic reticu;Nucleoli; |
| 4334 | ENSG00000129003 | VPS13C   | Approved  |                            | Microtubules                 |
| 4335 | ENSG00000129007 | CALML4   | Approved  |                            | Cytosol;Golgi appa           |
| 4336 | ENSG00000129009 | ISLR     | Approved  |                            | Golgi apparatus;Pl           |
| 4337 | ENSG00000129028 | THAP10   | Approved  |                            | Cytosol;Nucleoplasm          |
| 4338 | ENSG00000129038 | LOXL1    | Approved  |                            | Endoplasmic reticu           |
| 4339 | ENSG00000129048 | ACKR4    | Approved  |                            | Vesicles Mitochond           |
| 4340 | ENSG00000129055 | ANAPC13  | Approved  |                            | Cytosol;Mitochondr           |
| 4341 | ENSG00000129071 | MBD4     | Supported |                            | Nuclear speckles             |
| 4342 | ENSG00000129083 | COPB1    | Enhanced  | Cytosol;G                  | Vesicles                     |
| 4343 | ENSG00000129084 | PSMA1    | Enhanced  | Nucleoplasm                |                              |

|      |                 |          |           |                             |                             |
|------|-----------------|----------|-----------|-----------------------------|-----------------------------|
| 4344 | ENSG00000129103 | SUMF2    | Uncertain |                             | Plasma me                   |
| 4345 | ENSG00000129116 | PALLD    | Supported | Actin fil                   | Plasma membrane             |
| 4346 | ENSG00000129151 | BBOX1    | Uncertain |                             | Actin fil                   |
| 4347 | ENSG00000129152 | MYOD1    | Enhanced  | Nucleoplasm                 |                             |
| 4348 | ENSG00000129158 | SERGEF   | Enhanced  | Cytosol;Nucleoplasm         |                             |
| 4349 | ENSG00000129159 | KCNC1    | Approved  |                             | Cytosol;Nuclear me          |
| 4350 | ENSG00000129167 | TPH1     | Uncertain |                             | Cytosol                     |
| 4351 | ENSG00000129173 | E2F8     | Supported | Cytosol;Nucleoli;Nucleoplas |                             |
| 4352 | ENSG00000129187 | DCTD     | Approved  |                             | Cytosol;Nucleoplas          |
| 4353 | ENSG00000129194 | SOX15    | Supported | Nucleoplasm                 | Golgi apparatus;Nu          |
| 4354 | ENSG00000129195 | PIMREG   | Enhanced  | Nucleoplasm                 |                             |
| 4355 | ENSG00000129197 | RPAIN    | Approved  | Nucleopla                   | Nucleoli fibrillar          |
| 4356 | ENSG00000129204 | USP6     | Uncertain |                             | Vesicles                    |
| 4357 | ENSG00000129221 | AIPL1    | Uncertain |                             | Cytosol;N                   |
| 4358 | ENSG00000129226 | CD68     | Supported | Vesicles                    | Golgi apparatus             |
| 4359 | ENSG00000129245 | FXR2     | Supported | Cytosol                     |                             |
| 4360 | ENSG00000129255 | MPDU1    | Supported | Endoplasmic reticulum;Mitoc |                             |
| 4361 | ENSG00000129292 | PHF20L1  | Approved  |                             | Nucleoplasm;Plasma          |
| 4362 | ENSG00000129315 | CCNT1    | Enhanced  | Nucleoplasm                 |                             |
| 4363 | ENSG00000129317 | PUS7L    | Supported |                             | Nuclear speckles            |
| 4364 | ENSG00000129347 | KRI1     | Enhanced  | Nucleoli                    |                             |
| 4365 | ENSG00000129351 | ILF3     | Supported |                             | Nucleoli;Mitochondria       |
| 4366 | ENSG00000129353 | SLC44A2  | Approved  |                             | Cell Junctions;Ves          |
| 4367 | ENSG00000129354 | AP1M2    | Supported |                             | Vesicles                    |
| 4368 | ENSG00000129355 | CDKN2D   | Supported |                             | Cytosol;Nucleoplasm         |
| 4369 | ENSG00000129422 | MTUS1    | Enhanced  | Microtubu                   | Nucleoli                    |
| 4370 | ENSG00000129455 | KLK8     | Approved  |                             | Vesicles                    |
| 4371 | ENSG00000129460 | NGDN     | Approved  |                             | Mitochondria;Nucle          |
| 4372 | ENSG00000129473 | BCL2L2   | Uncertain |                             | Nucleopla                   |
| 4373 | ENSG00000129474 | AJUBA    | Approved  |                             | Golgi apparatus;Nu          |
| 4374 | ENSG00000129480 | DTD2     | Approved  |                             | Vesicles                    |
| 4375 | ENSG00000129484 | PARP2    | Supported |                             | Nucleoli;Nucleoplasm        |
| 4376 | ENSG00000129514 | FOXA1    | Supported |                             | Nucleoli fibrillar center;N |
| 4377 | ENSG00000129515 | SNX6     | Supported |                             | Endosomes;Lysosomes         |
| 4378 | ENSG00000129518 | EAPP     | Approved  |                             | Cytosol;NGolgi apparatus    |
| 4379 | ENSG00000129521 | EGLN3    | Supported |                             | Cytosol                     |
| 4380 | ENSG00000129534 | MIS18BP1 | Approved  |                             | Nucleoli Cytosol            |
| 4381 | ENSG00000129535 | NRL      | Supported |                             | Nucleoplasm Cytosol         |
| 4382 | ENSG00000129538 | RNASE1   | Approved  |                             | Nucleoplasm;Vesicl          |
| 4383 | ENSG00000129559 | NEDD8    | Enhanced  | Cytosol;Nucleoplasm         |                             |
| 4384 | ENSG00000129562 | DAD1     | Approved  |                             | Cytosol                     |
| 4385 | ENSG00000129566 | TEP1     | Supported |                             | Nucleoplasm;Vesicles        |
| 4386 | ENSG00000129595 | EPB41L4A | Approved  |                             | Nucleoplasm;Plasma          |
| 4387 | ENSG00000129596 | CD01     | Uncertain |                             | Cytosol;Nucleoplas          |
| 4388 | ENSG00000129625 | REEP5    | Approved  |                             | Endoplasmic reticu          |
| 4389 | ENSG00000129636 | ITFG1    | Approved  |                             | Aggresome;Intermed          |
| 4390 | ENSG00000129646 | QRICH2   | Approved  |                             | Nuclear membrane;N          |
| 4391 | ENSG00000129657 | SEC14L1  | Supported | Cytosol                     | Nucleoplasm                 |
| 4392 | ENSG00000129673 | AANAT    | Supported | Cytosol                     |                             |
| 4393 | ENSG00000129675 | ARHGEF6  | Approved  |                             | Cytosol                     |
| 4394 | ENSG00000129680 | MAP7D3   | Enhanced  | Centrosome                  |                             |
| 4395 | ENSG00000129682 | FGF13    | Supported |                             | Cytosol                     |
| 4396 | ENSG00000129691 | ASH2L    | Supported |                             | Nucleoplasm;Plasma membrane |
| 4397 | ENSG00000129696 | TTI2     | Enhanced  | Centrosome                  |                             |
| 4398 | ENSG00000129757 | CDKN1C   | Approved  |                             | Cytosol;Nuclear bo          |

|      |                 |          |           |                                 |                             |
|------|-----------------|----------|-----------|---------------------------------|-----------------------------|
| 4399 | ENSG00000129810 | SG01     | Supported |                                 | Cytosol;Nuclear bodies;Nucl |
| 4400 | ENSG00000129910 | CDH15    | Enhanced  | Golgi apparatus;Plasma membrane |                             |
| 4401 | ENSG00000129911 | KLF16    | Supported |                                 | Nucleoplasm                 |
| 4402 | ENSG00000129925 | TMEM8A   | Supported |                                 | NucleoplaCytokinetic bridge |
| 4403 | ENSG00000129932 | DOHH     | Approved  |                                 | Cytosol;Nucleoli;N          |
| 4404 | ENSG00000129933 | MAU2     | Supported |                                 | Nuclear bodies;Nucleoplasm  |
| 4405 | ENSG00000129946 | SHC2     | Approved  |                                 | Cytosol                     |
| 4406 | ENSG00000129951 | PLPPR3   | Approved  |                                 | Cytosol;Golgi appa          |
| 4407 | ENSG00000129968 | ABHD17A  | Approved  |                                 | Vesicles                    |
| 4408 | ENSG00000129991 | TNNI3    | Approved  |                                 | Cytosol;Vesicles            |
| 4409 | ENSG00000129993 | CBFA2T3  | Enhanced  | Nucleoplasm                     |                             |
| 4410 | ENSG00000130023 | ERMARD   | Approved  |                                 | Cytosol                     |
| 4411 | ENSG00000130024 | PHF10    | Supported |                                 | Nucleoplasm                 |
| 4412 | ENSG00000130035 | GALNT8   | Approved  |                                 | Golgi apparatus;Ve          |
| 4413 | ENSG00000130045 | NXNL2    | Approved  |                                 | Cytosol                     |
| 4414 | ENSG00000130119 | GNL3L    | Supported |                                 | Nucleoli Cytosol;Nucleoplas |
| 4415 | ENSG00000130150 | MOSPD2   | Approved  |                                 | Endoplasmic reticu          |
| 4416 | ENSG00000130158 | DOCK6    | Supported |                                 | Cytosol                     |
| 4417 | ENSG00000130159 | ECSIT    | Supported |                                 | Cytosol;Nucleoplasm         |
| 4418 | ENSG00000130165 | ELOF1    | Approved  |                                 | Cytosol                     |
| 4419 | ENSG00000130173 | ANGPTL8  | Approved  |                                 | Golgi appNucleopla          |
| 4420 | ENSG00000130175 | PRKCSH   | Enhanced  | Endoplasmic reticulum           |                             |
| 4421 | ENSG00000130176 | CNN1     | Approved  |                                 | Actin filaments             |
| 4422 | ENSG00000130193 | THEM6    | Approved  |                                 | Cytosol;Nuclear sp          |
| 4423 | ENSG00000130202 | NECTIN2  | Approved  |                                 | Cell Junctions;Nuc          |
| 4424 | ENSG00000130203 | APOE     | Approved  |                                 | Vesicles                    |
| 4425 | ENSG00000130204 | TOMM40   | Enhanced  | Mitochondria                    | Cytosol                     |
| 4426 | ENSG00000130224 | LRCH2    | Approved  |                                 | Nucleoli;Plasma me          |
| 4427 | ENSG00000130244 | FAM98C   | Approved  |                                 | Cytosol;Nucleoli;N          |
| 4428 | ENSG00000130254 | SAFB2    | Supported |                                 | Nuclear bVesicles           |
| 4429 | ENSG00000130255 | RPL36    | Uncertain |                                 | Cytosol;E                   |
| 4430 | ENSG00000130294 | KIF1A    | Approved  |                                 | Centriolar satelli          |
| 4431 | ENSG00000130299 | GTPBP3   | Supported |                                 | Mitochondria                |
| 4432 | ENSG00000130300 | PLVAP    | Approved  |                                 | Centrosome;Cytosol          |
| 4433 | ENSG00000130303 | BST2     | Supported |                                 | Cytosol;Golgi apparatus;Pla |
| 4434 | ENSG00000130304 | SLC27A1  | Approved  |                                 | Cytosol;Mitochondr          |
| 4435 | ENSG00000130305 | NSUN5    | Enhanced  | Nucleoli;Nucleoplasm            |                             |
| 4436 | ENSG00000130309 | COLGALT1 | Approved  |                                 | Vesicles                    |
| 4437 | ENSG00000130311 | DDA1     | Approved  |                                 | Nucleoli;Nucleopla          |
| 4438 | ENSG00000130313 | PGLS     | Supported |                                 | Cytosol;Nucleoplasm         |
| 4439 | ENSG00000130332 | LSM7     | Approved  |                                 | Nucleoli fibrillar          |
| 4440 | ENSG00000130340 | SNX9     | Enhanced  | Cytosol;Plasma membrane         |                             |
| 4441 | ENSG00000130348 | QRSL1    | Approved  |                                 | Centrosome;Vesicle          |
| 4442 | ENSG00000130363 | RSPH3    | Approved  |                                 | Cytosol;Plasma mem          |
| 4443 | ENSG00000130377 | ACSBG2   | Uncertain |                                 | Cytosol                     |
| 4444 | ENSG00000130382 | MLLT1    | Supported |                                 | Nucleoplasm                 |
| 4445 | ENSG00000130396 | AFDN     | Enhanced  | Cell JuncNucleoplasm            |                             |
| 4446 | ENSG00000130402 | ACTN4    | Approved  |                                 | Cytosol;NActin filaments    |
| 4447 | ENSG00000130413 | STK33    | Approved  |                                 | Cytosol;Nucleoli;N          |
| 4448 | ENSG00000130414 | NDUFA10  | Supported |                                 | Mitochondria                |
| 4449 | ENSG00000130429 | ARPC1B   | Supported |                                 | Cytosol;Vesicles            |
| 4450 | ENSG00000130433 | CACNG6   | Approved  |                                 | Cytosol;Nucleoli f          |
| 4451 | ENSG00000130449 | ZSWIM6   | Approved  |                                 | Cytosol                     |
| 4452 | ENSG00000130475 | FCH01    | Enhanced  | Cytosol;Nucleoplasm             |                             |
| 4453 | ENSG00000130479 | MAP1S    | Enhanced  | Cytosol                         |                             |

|      |                 |         |           |                     |                              |
|------|-----------------|---------|-----------|---------------------|------------------------------|
| 4454 | ENSG00000130487 | KLHDC7B | Approved  |                     | Plasma membrane              |
| 4455 | ENSG00000130489 | SC02    | Approved  |                     | Mitochondria                 |
| 4456 | ENSG00000130513 | GDF15   | Enhanced  | Golgi apparatus     |                              |
| 4457 | ENSG00000130517 | PGPEP1  | Approved  |                     | Golgi apparatus              |
| 4458 | ENSG00000130520 | LSM4    | Approved  |                     | Vesicles                     |
| 4459 | ENSG00000130522 | JUND    | Supported |                     | Nucleoplasm                  |
| 4460 | ENSG00000130529 | TRPM4   | Supported |                     | Plasma membrane              |
| 4461 | ENSG00000130544 | ZNF557  | Approved  |                     | Cytosol;Intermediate         |
| 4462 | ENSG00000130545 | CRB3    | Supported |                     | Cell Junctions               |
| 4463 | ENSG00000130558 | OLFM1   | Approved  |                     | Cytosol;Nucleoli;N           |
| 4464 | ENSG00000130559 | CAMSAP1 | Supported |                     | Cytosol;Mitotic spindle      |
| 4465 | ENSG00000130560 | UBAC1   | Supported |                     | Cytosol Golgi apparatus;Pl   |
| 4466 | ENSG00000130584 | ZBTB46  | Approved  |                     | Nucleoplasm                  |
| 4467 | ENSG00000130590 | SAMD10  | Approved  |                     | Nucleoplasm                  |
| 4468 | ENSG00000130598 | TNNI2   | Approved  |                     | Intermediate filam           |
| 4469 | ENSG00000130635 | COL5A1  | Approved  |                     | Vesicles                     |
| 4470 | ENSG00000130638 | ATXN10  | Supported |                     | Cytosol Plasma membrane      |
| 4471 | ENSG00000130640 | TUBGCP2 | Supported |                     | CentrosomeNucleoplasm        |
| 4472 | ENSG00000130653 | PNPLA7  | Uncertain |                     | Centriola                    |
| 4473 | ENSG00000130656 | HBZ     | Approved  |                     | NucleoplasmCytosol           |
| 4474 | ENSG00000130669 | PAK4    | Supported |                     | Cell Junctions;Plasma membr  |
| 4475 | ENSG00000130675 | MNX1    | Approved  |                     | Cytosol;Nucleoli;N           |
| 4476 | ENSG00000130684 | ZNF337  | Approved  |                     | Nuclear speckles;P           |
| 4477 | ENSG00000130695 | CEP85   | Supported |                     | CentrosomeCytosol;Golgi appa |
| 4478 | ENSG00000130699 | TAF4    | Enhanced  | Nucleoplasm         |                              |
| 4479 | ENSG00000130700 | GATA5   | Approved  |                     | Cytosol;Nucleoplas           |
| 4480 | ENSG00000130702 | LAMA5   | Supported |                     | Vesicles Nucleoplasm         |
| 4481 | ENSG00000130703 | OSBPL2  | Approved  |                     | Cytosol                      |
| 4482 | ENSG00000130706 | ADRM1   | Supported |                     | Cytosol;NPlasma membrane     |
| 4483 | ENSG00000130707 | ASS1    | Approved  |                     | Cytosol;Nucleoplas           |
| 4484 | ENSG00000130711 | PRDM12  | Approved  |                     | Nucleoplasm                  |
| 4485 | ENSG00000130713 | EXOSC2  | Supported |                     | Nucleoli;Nucleoplasm         |
| 4486 | ENSG00000130714 | POMT1   | Approved  |                     | Golgi apparatus              |
| 4487 | ENSG00000130717 | UCK1    | Approved  |                     | Nucleoplasm                  |
| 4488 | ENSG00000130720 | FIBCD1  | Supported |                     | Cell Junctions               |
| 4489 | ENSG00000130723 | PRRC2B  | Approved  |                     | Cytosol;Nuclear bo           |
| 4490 | ENSG00000130724 | CHMP2A  | Approved  |                     | Cytosol;PNucleopla           |
| 4491 | ENSG00000130725 | UBE2M   | Approved  |                     | Cytosol;Nuclear bo           |
| 4492 | ENSG00000130726 | TRIM28  | Enhanced  | Nucleoplasm         |                              |
| 4493 | ENSG00000130731 | METTL26 | Approved  |                     | Golgi apparatus              |
| 4494 | ENSG00000130733 | YIPF2   | Approved  |                     | Golgi apparatus;Mi           |
| 4495 | ENSG00000130734 | ATG4D   | Supported |                     | MitochondNucleoplasm         |
| 4496 | ENSG00000130749 | ZC3H4   | Enhanced  | Cytosol;Nucleoplasm |                              |
| 4497 | ENSG00000130751 | NPAS1   | Approved  |                     | Nucleoplasm                  |
| 4498 | ENSG00000130755 | GMFG    | Approved  |                     | Cytosol;Nuclear bo           |
| 4499 | ENSG00000130758 | MAP3K10 | Approved  |                     | Actin filaments;Cy           |
| 4500 | ENSG00000130764 | LRRC47  | Approved  |                     | Nucleoli fibrillar           |
| 4501 | ENSG00000130766 | SESN2   | Approved  |                     | Cytosol                      |
| 4502 | ENSG00000130768 | SMPDL3B | Approved  |                     | Cytosol;Golgi appa           |
| 4503 | ENSG00000130770 | ATP5IF1 | Enhanced  | Mitochondria        |                              |
| 4504 | ENSG00000130772 | MED18   | Approved  |                     | Nucleoplasm                  |
| 4505 | ENSG00000130775 | THEMIS2 | Approved  |                     | Nucleoplasm                  |
| 4506 | ENSG00000130779 | CLIP1   | Supported |                     | Cytosol;Microtubule ends     |
| 4507 | ENSG00000130783 | CCDC62  | Approved  |                     | Nucleoplasm;Plasma           |
| 4508 | ENSG00000130787 | HIP1R   | Supported |                     | Cytosol;VPlasma membrane     |

|      |                 |          |           |                                      |
|------|-----------------|----------|-----------|--------------------------------------|
| 4509 | ENSG00000130803 | ZNF317   | Enhanced  | Nucleoplasm                          |
| 4510 | ENSG00000130811 | EIF3G    | Enhanced  | Cytosol                              |
| 4511 | ENSG00000130813 | C19orf66 | Supported | Cytosol;Nucleoplasm                  |
| 4512 | ENSG00000130816 | DNMT1    | Supported | Nucleoplasm                          |
| 4513 | ENSG00000130818 | ZNF426   | Approved  | Nucleoplasm                          |
| 4514 | ENSG00000130822 | PNCK     | Approved  | Cytosol;Golgi appa                   |
| 4515 | ENSG00000130826 | DKC1     | Supported | Nucleoli fibrillar center;N          |
| 4516 | ENSG00000130827 | PLXNA3   | Approved  | Plasma meNucleoplasm;Vesicl          |
| 4517 | ENSG00000130829 | DUSP9    | Approved  | Endoplasmic reticu                   |
| 4518 | ENSG00000130830 | MPP1     | Supported | Plasma meCentriolar satelli          |
| 4519 | ENSG00000130844 | ZNF331   | Approved  | Nucleoplasm                          |
| 4520 | ENSG00000130856 | ZNF236   | Approved  | Cell Junctions;Cyt                   |
| 4521 | ENSG00000130876 | SLC7A10  | Uncertain | Nucleoli;                            |
| 4522 | ENSG00000130881 | LRP3     | Approved  | Lipid droplets                       |
| 4523 | ENSG00000130921 | C12orf65 | Approved  | Cytosol;Mitochondr                   |
| 4524 | ENSG00000130935 | NOL11    | Supported | Nucleoli                             |
| 4525 | ENSG00000130940 | CASZ1    | Supported | NucleoplaCytosol                     |
| 4526 | ENSG00000130948 | HSD17B3  | Supported | Vesicles                             |
| 4527 | ENSG00000130950 | NUTM2F   | Approved  | Nuclear bodies                       |
| 4528 | ENSG00000130956 | HABP4    | Supported | Cytosol;NGolgi apparatus             |
| 4529 | ENSG00000130957 | FBP2     | Approved  | Nucleoplasm;Plasma                   |
| 4530 | ENSG00000130958 | SLC35D2  | Supported | Golgi apparatus                      |
| 4531 | ENSG00000130962 | PRRG1    | Approved  | Nucleoplasm;Plasma                   |
| 4532 | ENSG00000130985 | UBA1     | Enhanced  | Nucleoplasm                          |
| 4533 | ENSG00000130988 | RGN      | Approved  | Nucleoplasm                          |
| 4534 | ENSG00000130997 | POLN     | Enhanced  | Nucleoplasm                          |
| 4535 | ENSG00000131013 | PPIL4    | Enhanced  | Nucleoplasm                          |
| 4536 | ENSG00000131015 | ULBP2    | Supported | Plasma meVesicles                    |
| 4537 | ENSG00000131016 | AKAP12   | Enhanced  | Cytosol;Plasma membrane              |
| 4538 | ENSG00000131018 | SYNE1    | Supported | Nuclear membrane;Nucleoplas          |
| 4539 | ENSG00000131019 | ULBP3    | Uncertain | Centriola                            |
| 4540 | ENSG00000131023 | LATS1    | Approved  | Nucleoplasm;Vesicl                   |
| 4541 | ENSG00000131037 | EPS8L1   | Supported | Cytosol                              |
| 4542 | ENSG00000131043 | AAR2     | Approved  | Cytosol                              |
| 4543 | ENSG00000131044 | TTLL9    | Uncertain | Microtubu                            |
| 4544 | ENSG00000131051 | RBM39    | Supported | Nuclear sNucleoplaCentriola          |
| 4545 | ENSG00000131061 | ZNF341   | Approved  | NucleoplaNuclear b                   |
| 4546 | ENSG00000131067 | GGT7     | Approved  | Nucleoplasm;Vesicl                   |
| 4547 | ENSG00000131069 | ACSS2    | Approved  | Cytosol Vesicles Nucleopla           |
| 4548 | ENSG00000131080 | EDA2R    | Approved  | Cell Junctions                       |
| 4549 | ENSG00000131089 | ARHGEF9  | Supported | Cytosol                              |
| 4550 | ENSG00000131095 | GFAP     | Supported | Intermediate filaments               |
| 4551 | ENSG00000131100 | ATP6V1E1 | Approved  | Nucleoplasm                          |
| 4552 | ENSG00000131115 | ZNF227   | Approved  | Plasma membrane                      |
| 4553 | ENSG00000131116 | ZNF428   | Approved  | Mitochondria;Nucle                   |
| 4554 | ENSG00000131143 | COX4I1   | Supported | Mitochondria                         |
| 4555 | ENSG00000131148 | EMC8     | Supported | Cytosol                              |
| 4556 | ENSG00000131149 | GSE1     | Approved  | Mitochondria;Nucle                   |
| 4557 | ENSG00000131153 | GINS2    | Supported | Nucleoplasm                          |
| 4558 | ENSG00000131171 | SH3BGRL  | Approved  | Vesicles                             |
| 4559 | ENSG00000131183 | SLC34A1  | Approved  | Plasma membrane Cytosol;M            |
| 4560 | ENSG00000131188 | PRR7     | Approved  | Cytosol;Nucleoplas                   |
| 4561 | ENSG00000131196 | NFATC1   | Supported | Nuclear bodies;Nucleoplasm           |
| 4562 | ENSG00000131203 | IDO1     | Supported | Cytosol;NucleoplasMitochondria;Vesic |
| 4563 | ENSG00000131236 | CAP1     | Supported | Cytosol                              |

|      |                 |         |           |                       |                             |
|------|-----------------|---------|-----------|-----------------------|-----------------------------|
| 4564 | ENSG00000131238 | PPT1    | Supported |                       | Golgi apparatus;Vesicles    |
| 4565 | ENSG00000131263 | RLIM    | Supported |                       | Nucleoplasm Cytosol         |
| 4566 | ENSG00000131269 | ABCB7   | Supported |                       | Mitochondria                |
| 4567 | ENSG00000131368 | MRPS25  | Supported |                       | Mitochondria                |
| 4568 | ENSG00000131370 | SH3BP5  | Enhanced  | Nuclear bodies;       | Nucleoplasm                 |
| 4569 | ENSG00000131373 | HACL1   | Approved  |                       | Nucleoplasm;Vesicl          |
| 4570 | ENSG00000131374 | TBC1D5  | Supported |                       | Vesicles Golgi apparatus    |
| 4571 | ENSG00000131379 | C3orf20 | Uncertain |                       | Cytosol;P                   |
| 4572 | ENSG00000131381 | RBSN    | Supported |                       | Vesicles                    |
| 4573 | ENSG00000131386 | GALNT15 | Approved  |                       | Cytosol;Golgi appa          |
| 4574 | ENSG00000131389 | SLC6A6  | Approved  |                       | Cell Junctions;Cyt          |
| 4575 | ENSG00000131408 | NR1H2   | Enhanced  | Nucleoplasm           | Vesicles                    |
| 4576 | ENSG00000131435 | PDLIM4  | Approved  |                       | Actin filaments;Cy          |
| 4577 | ENSG00000131437 | KIF3A   | Approved  |                       | Cytosol;Intermedia          |
| 4578 | ENSG00000131459 | GFPT2   | Supported |                       | Vesicles                    |
| 4579 | ENSG00000131467 | PSME3   | Enhanced  | Nucleoplasm           |                             |
| 4580 | ENSG00000131470 | PSMC3IP | Supported |                       | Nucleoplasm                 |
| 4581 | ENSG00000131471 | AOC3    | Approved  |                       | Cytosol;Golgi appa          |
| 4582 | ENSG00000131473 | ACLY    | Supported |                       | Cytosol;Nucleoplasm;Plasma  |
| 4583 | ENSG00000131475 | VPS25   | Approved  |                       | Centrosome                  |
| 4584 | ENSG00000131477 | RAMP2   | Approved  |                       | Vesicles                    |
| 4585 | ENSG00000131504 | DIAPH1  | Approved  |                       | Plasma membrane             |
| 4586 | ENSG00000131508 | UBE2D2  | Approved  |                       | Cytosol;Plasma mem          |
| 4587 | ENSG00000131558 | EXOC4   | Approved  |                       | Nucleoli Cytosol;N          |
| 4588 | ENSG00000131584 | ACAP3   | Approved  |                       | Golgi apparatus;Nu          |
| 4589 | ENSG00000131620 | ANO1    | Supported |                       | Plasma membrane Nucleopla   |
| 4590 | ENSG00000131626 | PPFIA1  | Supported |                       | Cytosol Focal adhesion sit  |
| 4591 | ENSG00000131650 | KREMEN2 | Approved  |                       | Nucleoli                    |
| 4592 | ENSG00000131652 | THOC6   | Supported |                       | Nuclear speckles;Nucleoplas |
| 4593 | ENSG00000131653 | TRAF7   | Supported |                       | Vesicles Plasma membrane    |
| 4594 | ENSG00000131668 | BARX1   | Approved  |                       | Nucleoplasm;Vesicl          |
| 4595 | ENSG00000131697 | NPHP4   | Approved  |                       | Cytosol;Nuclear bo          |
| 4596 | ENSG00000131711 | MAP1B   | Enhanced  | Cytosol               |                             |
| 4597 | ENSG00000131721 | RHOXF2  | Approved  |                       | Nucleoplasm;Plasma          |
| 4598 | ENSG00000131724 | IL13RA1 | Approved  |                       | Nucleoplasm;Vesicl          |
| 4599 | ENSG00000131725 | WDR44   | Supported |                       | Golgi apparatus             |
| 4600 | ENSG00000131732 | ZCCHC9  | Supported |                       | Nucleoli;Nucleoplasm        |
| 4601 | ENSG00000131737 | KRT34   | Approved  |                       | Nucleoplasm;Vesicl          |
| 4602 | ENSG00000131747 | TOP2A   | Supported |                       | NucleoplaNucleoli           |
| 4603 | ENSG00000131748 | STARD3  | Approved  |                       | Vesicles EndoplasmNucleopla |
| 4604 | ENSG00000131759 | RARA    | Supported |                       | Cytosol;Nucleoplasm         |
| 4605 | ENSG00000131773 | KHDRBS3 | Supported |                       | Nucleoplasm                 |
| 4606 | ENSG00000131778 | CHD1L   | Supported |                       | Nucleoplasm                 |
| 4607 | ENSG00000131779 | PEX11B  | Supported |                       | Vesicles                    |
| 4608 | ENSG00000131781 | FM05    | Supported |                       | Endoplasm Cytosol           |
| 4609 | ENSG00000131788 | PIAS3   | Supported |                       | Nucleoplasm                 |
| 4610 | ENSG00000131791 | PRKAB2  | Approved  |                       | Nucleoplasm                 |
| 4611 | ENSG00000131828 | PDHA1   | Supported |                       | Mitochondria                |
| 4612 | ENSG00000131831 | RAI2    | Approved  |                       | Plasma membrane             |
| 4613 | ENSG00000131844 | MCCC2   | Enhanced  | Mitochondria          |                             |
| 4614 | ENSG00000131845 | ZNF304  | Approved  |                       | Nuclear speckles            |
| 4615 | ENSG00000131848 | ZSCAN5A | Uncertain |                       | Nuclear s                   |
| 4616 | ENSG00000131849 | ZNF132  | Approved  |                       | Intermediate filam          |
| 4617 | ENSG00000131871 | SELENOS | Enhanced  | Endoplasmic reticulum |                             |
| 4618 | ENSG00000131876 | SNRPA1  | Supported |                       | Nuclear bodies;Nuclear spec |



|      |                 |          |           |                      |                             |
|------|-----------------|----------|-----------|----------------------|-----------------------------|
| 4619 | ENSG00000131914 | LIN28A   | Supported |                      | Cytosol Nucleoli;Rods & Ri  |
| 4620 | ENSG00000131931 | THAP1    | Supported |                      | Nucleoplasm                 |
| 4621 | ENSG00000131943 | C19orf12 | Supported |                      | Cytosol                     |
| 4622 | ENSG00000131944 | FAAP24   | Supported |                      | NucleoplaVesicles           |
| 4623 | ENSG00000131966 | ACTR10   | Approved  |                      | Nucleoli                    |
| 4624 | ENSG00000131969 | ABHD12B  | Uncertain |                      | Nucleopla                   |
| 4625 | ENSG00000131979 | GCH1     | Supported |                      | Cytosol;Nuclear membrane;Nu |
| 4626 | ENSG00000131981 | LGALS3   | Supported |                      | Cytosol;NPlasma membrane    |
| 4627 | ENSG00000132002 | DNAJB1   | Supported |                      | Nucleoplasm                 |
| 4628 | ENSG00000132004 | FBXW9    | Approved  |                      | Cytosol                     |
| 4629 | ENSG00000132005 | RFX1     | Enhanced  | Nucleoplasm          | Vesicles                    |
| 4630 | ENSG00000132010 | ZNF20    | Approved  |                      | Nucleoplasm;Plasma          |
| 4631 | ENSG00000132016 | C19orf57 | Approved  |                      | Nucleoplasm                 |
| 4632 | ENSG00000132017 | DCAF15   | Approved  |                      | Mitochondria;Vesic          |
| 4633 | ENSG00000132024 | CC2D1A   | Supported | Cytosol              | Nucleoli fibrillar          |
| 4634 | ENSG00000132026 | RTBDN    | Approved  |                      | Endoplasmic reticu          |
| 4635 | ENSG00000132031 | MATN3    | Approved  |                      | Endoplasmic reticu          |
| 4636 | ENSG00000132109 | TRIM21   | Approved  |                      | Nucleoplasm                 |
| 4637 | ENSG00000132122 | SPATA6   | Approved  |                      | Golgi apparatus;Nu          |
| 4638 | ENSG00000132128 | LRRC41   | Approved  |                      | Nuclear bodies;Nuc          |
| 4639 | ENSG00000132141 | CCT6B    | Approved  |                      | Cytosol                     |
| 4640 | ENSG00000132153 | DHX30    | Supported |                      | Cytosol;Mitochondria        |
| 4641 | ENSG00000132155 | RAF1     | Approved  |                      | Nuclear speckles            |
| 4642 | ENSG00000132164 | SLC6A11  | Uncertain |                      | Nucleopla                   |
| 4643 | ENSG00000132170 | PPARG    | Enhanced  | Nucleoplasm;Vesicles |                             |
| 4644 | ENSG00000132207 | SLX1A    | Approved  |                      | Nucleoplasm                 |
| 4645 | ENSG00000132254 | ARFIP2   | Approved  |                      | Golgi apparatus;Nu          |
| 4646 | ENSG00000132256 | TRIM5    | Supported |                      | Cytosol                     |
| 4647 | ENSG00000132274 | TRIM22   | Supported |                      | Nuclear bodies;Nucleoplasm  |
| 4648 | ENSG00000132275 | RRP8     | Supported |                      | Cytosol;Nucleoli;Nucleoplas |
| 4649 | ENSG00000132294 | EFR3A    | Supported |                      | Cytosol;Plasma membrane     |
| 4650 | ENSG00000132300 | PTCD3    | Supported | Mitochondria         |                             |
| 4651 | ENSG00000132305 | IMMT     | Enhanced  | Mitochondria         |                             |
| 4652 | ENSG00000132321 | IQCA1    | Uncertain |                      | Nucleopla                   |
| 4653 | ENSG00000132323 | ILKAP    | Supported |                      | Nucleoplasm                 |
| 4654 | ENSG00000132329 | RAMP1    | Approved  |                      | Nuclear membrane;N          |
| 4655 | ENSG00000132330 | SCLY     | Approved  |                      | Golgi apparatus             |
| 4656 | ENSG00000132334 | PTPRE    | Approved  |                      | Intermediate filam          |
| 4657 | ENSG00000132341 | RAN      | Uncertain |                      | Nucleopla                   |
| 4658 | ENSG00000132356 | PRKAA1   | Supported |                      | Nuclear speckles            |
| 4659 | ENSG00000132359 | RAP1GAP2 | Supported |                      | Cytosol Nuclear membrane    |
| 4660 | ENSG00000132361 | CLUH     | Supported |                      | Vesicles Nuclear bodies     |
| 4661 | ENSG00000132382 | MYBBP1A  | Supported |                      | Nucleoli Vesicles           |
| 4662 | ENSG00000132383 | RPA1     | Enhanced  | Nucleoplasm          |                             |
| 4663 | ENSG00000132388 | UBE2G1   | Approved  |                      | Cytosol;Nucleoplas          |
| 4664 | ENSG00000132394 | EEFSEC   | Approved  |                      | Cytosol;Nuclear bo          |
| 4665 | ENSG00000132405 | TBC1D14  | Supported |                      | Golgi appNucleoplasm        |
| 4666 | ENSG00000132423 | COQ3     | Approved  |                      | Mitochondria;Nucle          |
| 4667 | ENSG00000132424 | PNISR    | Supported |                      | Nuclear sCytosol;Plasma mem |
| 4668 | ENSG00000132429 | POPDC3   | Approved  |                      | Cytosol;Nucleoli            |
| 4669 | ENSG00000132434 | LANCL2   | Supported |                      | Cytosol;Nucleoplasm         |
| 4670 | ENSG00000132437 | DDC      | Approved  |                      | Actin filaments             |
| 4671 | ENSG00000132463 | GRSF1    | Enhanced  | Mitochondria         |                             |
| 4672 | ENSG00000132466 | ANKRD17  | Supported |                      | NucleoplaNuclear membrane   |
| 4673 | ENSG00000132467 | UTP3     | Supported |                      | Nucleoli Vesicles           |

|      |                 |          |           |                                     |
|------|-----------------|----------|-----------|-------------------------------------|
| 4674 | ENSG00000132470 | ITGB4    | Supported | Cell Junctions;Plasma membr         |
| 4675 | ENSG00000132471 | WBP2     | Approved  | Cytosol;Nucleoplas                  |
| 4676 | ENSG00000132475 | H3F3B    | Enhanced  | Nucleoplasm                         |
| 4677 | ENSG00000132478 | UNK      | Supported | Cytoplasmic bodies;Cytosol          |
| 4678 | ENSG00000132481 | TRIM47   | Supported | Cytosol                             |
| 4679 | ENSG00000132485 | ZRANB2   | Enhanced  | Nucleoplasm                         |
| 4680 | ENSG00000132507 | EIF5A    | Supported | Cytosol;Nucleoplasm                 |
| 4681 | ENSG00000132510 | KDM6B    | Approved  | Nuclear speckles                    |
| 4682 | ENSG00000132522 | GPS2     | Supported | Nucleoplasm                         |
| 4683 | ENSG00000132530 | XAF1     | Supported | MitochondNucleoplasm;Rods &         |
| 4684 | ENSG00000132549 | VPS13B   | Approved  | Cell Junctions                      |
| 4685 | ENSG00000132570 | PCBD2    | Approved  | Plasma membrane                     |
| 4686 | ENSG00000132581 | SDF2     | Approved  | Vesicles                            |
| 4687 | ENSG00000132589 | FLOT2    | Supported | Plasma membrane;Vesicles            |
| 4688 | ENSG00000132591 | ERAL1    | Enhanced  | Cytosol;Mitochondria                |
| 4689 | ENSG00000132600 | PRMT7    | Enhanced  | Nucleoplasm Nucleoli fibrillar      |
| 4690 | ENSG00000132603 | NIP7     | Supported | Nucleoli;Nucleoplasm                |
| 4691 | ENSG00000132604 | TERF2    | Enhanced  | Nuclear bodies;Nucleoplasm          |
| 4692 | ENSG00000132612 | VPS4A    | Supported | Midbody                             |
| 4693 | ENSG00000132613 | MTSS1L   | Supported | Focal adhesion sites                |
| 4694 | ENSG00000132622 | HSPA12B  | Approved  | Nucleoplasm                         |
| 4695 | ENSG00000132623 | ANKEF1   | Approved  | Cytosol;Nucleoli f                  |
| 4696 | ENSG00000132635 | PCED1A   | Approved  | Cytosol;Nucleoplas                  |
| 4697 | ENSG00000132639 | SNAP25   | Approved  | Cytosol;Plasma mem                  |
| 4698 | ENSG00000132640 | BTBD3    | Supported | Vesicles                            |
| 4699 | ENSG00000132646 | PCNA     | Enhanced  | Nucleoplasm                         |
| 4700 | ENSG00000132661 | NXT1     | Supported | Cytosol;Nucleoplasm                 |
| 4701 | ENSG00000132664 | POLR3F   | Approved  | Nucleoplasm                         |
| 4702 | ENSG00000132669 | RIN2     | Approved  | Cytosol;Golgi appa                  |
| 4703 | ENSG00000132670 | PTPRA    | Approved  | Nucleoplasm;Vesicl                  |
| 4704 | ENSG00000132676 | DAP3     | Supported | Mitochondria Nucleoplasm            |
| 4705 | ENSG00000132677 | RHBG     | Approved  | Nucleoplasm                         |
| 4706 | ENSG00000132680 | KHDC4    | Approved  | Nucleoplasm                         |
| 4707 | ENSG00000132688 | NES      | Enhanced  | Intermediate filaments              |
| 4708 | ENSG00000132693 | CRP      | Approved  | Vesicles Intermediate filam         |
| 4709 | ENSG00000132694 | ARHGEF11 | Supported | Plasma meNucleoplasm                |
| 4710 | ENSG00000132698 | RAB25    | Uncertain | Cell Junc                           |
| 4711 | ENSG00000132716 | DCAF8    | Approved  | Cytosol;Nucleoplas                  |
| 4712 | ENSG00000132740 | IGHMBP2  | Enhanced  | Nucleoplasm                         |
| 4713 | ENSG00000132749 | TESMIN   | Supported | Nucleoplasm                         |
| 4714 | ENSG00000132763 | MMACHC   | Supported | NucleoplaCytosol;Plasma mem         |
| 4715 | ENSG00000132768 | DPH2     | Approved  | Nucleoplasm                         |
| 4716 | ENSG00000132773 | TOE1     | Enhanced  | Nuclear bodies;Nucleoplasm          |
| 4717 | ENSG00000132780 | NASP     | Enhanced  | Nucleoplasm                         |
| 4718 | ENSG00000132781 | MUTYH    | Supported | Nucleoplasm                         |
| 4719 | ENSG00000132792 | CTNBL1   | Enhanced  | Nucleoplasm Centrosome;Cytosol      |
| 4720 | ENSG00000132793 | LPIN3    | Supported | Cytosol                             |
| 4721 | ENSG00000132801 | ZSWIM3   | Approved  | Cytosol;Nucleoli f                  |
| 4722 | ENSG00000132819 | RBM38    | Supported | Cytosol;Nucleoplasm                 |
| 4723 | ENSG00000132823 | OSER1    | Approved  | Nuclear speckles;N                  |
| 4724 | ENSG00000132825 | PPP1R3D  | Approved  | Mitochondria;Nucle                  |
| 4725 | ENSG00000132837 | DMGDH    | Supported | Mitochondria                        |
| 4726 | ENSG00000132842 | AP3B1    | Approved  | Golgi apparatus;Nu                  |
| 4727 | ENSG00000132846 | ZBED3    | Approved  | Nucleoplasm;Plasma                  |
| 4728 | ENSG00000132849 | PATJ     | Enhanced  | Cell Junctions;Centriolar satellite |

|      |                 |          |           |                  |                             |                    |
|------|-----------------|----------|-----------|------------------|-----------------------------|--------------------|
| 4729 | ENSG00000132854 | KANK4    | Uncertain |                  |                             | Cytosol;M          |
| 4730 | ENSG00000132872 | SYT4     | Supported |                  | Vesicles                    | Plasma membrane    |
| 4731 | ENSG00000132879 | FBX044   | Approved  |                  |                             | Nucleoplasm        |
| 4732 | ENSG00000132881 | RSG1     | Enhanced  | Nucleoplasm      |                             |                    |
| 4733 | ENSG00000132906 | CASP9    | Approved  |                  |                             | Mitochondria       |
| 4734 | ENSG00000132911 | NMUR2    | Supported |                  | Plasma membrane             |                    |
| 4735 | ENSG00000132912 | DCTN4    | Approved  |                  |                             | Centrosome;Nucleop |
| 4736 | ENSG00000132932 | ATP8A2   | Supported |                  | Plasma membrane             | Nucleopla          |
| 4737 | ENSG00000132938 | MTUS2    | Supported |                  | Cytokinetic bridge;Microtub |                    |
| 4738 | ENSG00000132950 | ZMYM5    | Approved  |                  |                             | Golgi apparatus;Nu |
| 4739 | ENSG00000132953 | XP04     | Supported |                  | Cytosol;Nucleoplasm         |                    |
| 4740 | ENSG00000132958 | TPTE2    | Approved  |                  | Endoplasm                   | Cytosol            |
| 4741 | ENSG00000132963 | POMP     | Supported |                  | Nuclear speckles            |                    |
| 4742 | ENSG00000132964 | CDK8     | Approved  |                  |                             | Nucleoplasm        |
| 4743 | ENSG00000133019 | CHRM3    | Supported |                  | Plasma membrane             |                    |
| 4744 | ENSG00000133026 | MYH10    | Supported | Actin filaments  |                             | Cytosol;Mitochondr |
| 4745 | ENSG00000133027 | PEMT     | Approved  |                  |                             | Cytosol            |
| 4746 | ENSG00000133030 | MPRIP    | Supported |                  | Actin fil                   | Cytosol            |
| 4747 | ENSG00000133048 | CHI3L1   | Approved  |                  |                             | Golgi apparatus    |
| 4748 | ENSG00000133055 | MYBPH    | Approved  |                  |                             | Mitochondria;Nucle |
| 4749 | ENSG00000133056 | PIK3C2B  | Approved  |                  |                             | Cytosol;Nucleoplas |
| 4750 | ENSG00000133059 | DSTYK    | Uncertain |                  |                             | Intermedi          |
| 4751 | ENSG00000133065 | SLC41A1  | Approved  |                  |                             | Mitochondria       |
| 4752 | ENSG00000133067 | LGR6     | Approved  |                  |                             | Plasma meNucleopla |
| 4753 | ENSG00000133083 | DCLK1    | Approved  |                  |                             | Cytosol;Nucleoplas |
| 4754 | ENSG00000133101 | CCNA1    | Approved  |                  |                             | Nuclear bodies;Nuc |
| 4755 | ENSG00000133103 | COG6     | Approved  |                  |                             | Golgi apparatus;Nu |
| 4756 | ENSG00000133104 | SPART    | Supported |                  | Cytosol                     | Plasma membrane    |
| 4757 | ENSG00000133110 | POSTN    | Approved  |                  | Golgi app                   | Nucleoplasm        |
| 4758 | ENSG00000133111 | RFXAP    | Approved  |                  |                             | Nuclear speckles   |
| 4759 | ENSG00000133112 | TPT1     | Supported |                  | Cytosol                     |                    |
| 4760 | ENSG00000133114 | GPALPP1  | Approved  |                  |                             | Nucleoli;Nucleopla |
| 4761 | ENSG00000133115 | STOML3   | Supported |                  | Plasma membrane             |                    |
| 4762 | ENSG00000133119 | RFC3     | Supported |                  | Nucleopla                   | Vesicles           |
| 4763 | ENSG00000133131 | MORC4    | Enhanced  | Nucleoplasm      |                             |                    |
| 4764 | ENSG00000133134 | BEX2     | Uncertain |                  |                             | Cytosol            |
| 4765 | ENSG00000133138 | TBC1D8B  | Approved  |                  |                             | Cytosol            |
| 4766 | ENSG00000133169 | BEX1     | Approved  |                  |                             | Cytosol            |
| 4767 | ENSG00000133193 | FAM104A  | Approved  |                  |                             | Cytosol;Nucleoplas |
| 4768 | ENSG00000133195 | SLC39A11 | Approved  |                  |                             | Nucleoplasm        |
| 4769 | ENSG00000133216 | EPHB2    | Supported |                  | Plasma me                   | Nucleoplasm        |
| 4770 | ENSG00000133226 | SRRM1    | Enhanced  | Nuclear speckles |                             |                    |
| 4771 | ENSG00000133246 | PRAM1    | Approved  |                  |                             | Golgi apparatus    |
| 4772 | ENSG00000133247 | KMT5C    | Approved  |                  |                             | Nucleoplasm        |
| 4773 | ENSG00000133250 | ZNF414   | Approved  |                  |                             | Cytosol;Nucleoplas |
| 4774 | ENSG00000133256 | PDE6B    | Approved  |                  |                             | Cytosol            |
| 4775 | ENSG00000133265 | HSPBP1   | Approved  |                  |                             | Centrosome;Cytosol |
| 4776 | ENSG00000133275 | CSNK1G2  | Approved  |                  |                             | Vesicles           |
| 4777 | ENSG00000133302 | SLF1     | Approved  |                  |                             | Nucleoplasm        |
| 4778 | ENSG00000133313 | CNDP2    | Enhanced  | Nucleopla        | Cytosol                     |                    |
| 4779 | ENSG00000133315 | MACROD1  | Supported |                  | Nucleoplasm                 |                    |
| 4780 | ENSG00000133316 | WDR74    | Supported |                  | Nucleoli                    | Nucleoplasm        |
| 4781 | ENSG00000133318 | RTN3     | Supported |                  | Endoplasmic reticulum       |                    |
| 4782 | ENSG00000133328 | HRASLS2  | Approved  |                  |                             | Mitochondria       |
| 4783 | ENSG00000133392 | MYH11    | Supported |                  | Cytosol;Plasma membrane     |                    |

|      |                 |          |           |                               |
|------|-----------------|----------|-----------|-------------------------------|
| 4784 | ENSG00000133393 | FOPNL    | Supported | Centrosome                    |
| 4785 | ENSG00000133398 | MED10    | Enhanced  | Nucleoplasm                   |
| 4786 | ENSG00000133401 | PDZD2    | Approved  | Cytosol Plasma membrane       |
| 4787 | ENSG00000133422 | MORC2    | Supported | Cytosol;Nucleoplasm           |
| 4788 | ENSG00000133433 | GSTT2B   | Supported | Cytosol Nucleoplasm           |
| 4789 | ENSG00000133454 | MYO18B   | Supported | Centrosome;Nucleoplasm        |
| 4790 | ENSG00000133460 | SLC2A11  | Uncertain | Cell Junc                     |
| 4791 | ENSG00000133466 | C1QTNF6  | Approved  | Nucleoplasm                   |
| 4792 | ENSG00000133475 | GGT2     | Approved  | Vesicles                      |
| 4793 | ENSG00000133477 | FAM83F   | Approved  | Mitochondria;Nucle            |
| 4794 | ENSG00000133488 | SEC14L4  | Approved  | Centrosome                    |
| 4795 | ENSG00000133597 | ADCK2    | Uncertain | Centrosom                     |
| 4796 | ENSG00000133606 | MKRN1    | Approved  | Cytosol;Nuclear me            |
| 4797 | ENSG00000133619 | KRBA1    | Approved  | Cytosol;Nucleoplas            |
| 4798 | ENSG00000133639 | BTG1     | Approved  | Cytosol;Nucleoplas            |
| 4799 | ENSG00000133641 | C12orf29 | Approved  | Vesicles                      |
| 4800 | ENSG00000133657 | ATP13A3  | Approved  | Cytosol;Nucleoli;P            |
| 4801 | ENSG00000133678 | TMEM254  | Approved  | Nucleoplasm;Plasma            |
| 4802 | ENSG00000133687 | TMTC1    | Approved  | Cytosol;Nucleoplas            |
| 4803 | ENSG00000133704 | IPO8     | Supported | Nucleoplasm                   |
| 4804 | ENSG00000133706 | LARS     | Enhanced  | Cytosol;Nuclear bodies        |
| 4805 | ENSG00000133710 | SPINK5   | Enhanced  | Vesicles                      |
| 4806 | ENSG00000133731 | IMPA1    | Approved  | Mitochondria;Nucle            |
| 4807 | ENSG00000133739 | LRRCC1   | Supported | Centrosome                    |
| 4808 | ENSG00000133740 | E2F5     | Enhanced  | Nucleoplasm Nucleoli;Vesicles |
| 4809 | ENSG00000133773 | CCDC59   | Approved  | Nucleoli;Nucleopla            |
| 4810 | ENSG00000133789 | SWAP70   | Supported | Actin filaments;Plasma memb   |
| 4811 | ENSG00000133794 | ARNTL    | Supported | Nucleoplasm Vesicles          |
| 4812 | ENSG00000133805 | AMPD3    | Enhanced  | Nuclear membrane              |
| 4813 | ENSG00000133812 | SBF2     | Approved  | Cytosol;Intermedia            |
| 4814 | ENSG00000133816 | MICAL2   | Uncertain | Cytosol;G                     |
| 4815 | ENSG00000133818 | RRAS2    | Approved  | Cytosol;Nucleoplas            |
| 4816 | ENSG00000133835 | HSD17B4  | Enhanced  | Peroxisomes                   |
| 4817 | ENSG00000133858 | ZFC3H1   | Approved  | Intermediate filam            |
| 4818 | ENSG00000133863 | TEX15    | Approved  | Cytosol;Nucleoplas            |
| 4819 | ENSG00000133872 | SARAF    | Supported | EndoplasmRods & Rings         |
| 4820 | ENSG00000133878 | DUSP26   | Supported | Nucleoplasm                   |
| 4821 | ENSG00000133884 | DPF2     | Supported | Nucleoplasm                   |
| 4822 | ENSG00000133895 | MEN1     | Supported | NucleoplaCytosol              |
| 4823 | ENSG00000133935 | ERG28    | Approved  | Cytosol;Nucleoplas            |
| 4824 | ENSG00000133943 | DGLUCY   | Supported | Cytosol                       |
| 4825 | ENSG00000133958 | UNC79    | Approved  | Nucleoplasm;Plasma            |
| 4826 | ENSG00000133961 | NUMB     | Enhanced  | Cell Junctions                |
| 4827 | ENSG00000133962 | CATSPERB | Uncertain | Vesicles                      |
| 4828 | ENSG00000133980 | VRTN     | Approved  | Nucleoplasm                   |
| 4829 | ENSG00000133983 | COX16    | Supported | Mitochondria                  |
| 4830 | ENSG00000133997 | MED6     | Enhanced  | Nucleoplasm                   |
| 4831 | ENSG00000134001 | EIF2S1   | Enhanced  | Cytosol                       |
| 4832 | ENSG00000134013 | LOXL2    | Enhanced  | Nucleoplasm                   |
| 4833 | ENSG00000134014 | ELP3     | Supported | Cytosol                       |
| 4834 | ENSG00000134030 | CTIF     | Supported | Cytosol                       |
| 4835 | ENSG00000134046 | MBD2     | Enhanced  | Nucleoplasm                   |
| 4836 | ENSG00000134049 | IER3IP1  | Supported | Endoplasmic reticulum         |
| 4837 | ENSG00000134056 | MRPS36   | Enhanced  | Mitochondria                  |
| 4838 | ENSG00000134057 | CCNB1    | Enhanced  | Cytosol                       |

|      |                 |           |           |                             |                             |
|------|-----------------|-----------|-----------|-----------------------------|-----------------------------|
| 4839 | ENSG00000134070 | IRAK2     | Approved  |                             | Vesicles                    |
| 4840 | ENSG00000134072 | CAMK1     | Approved  |                             | Cytosol                     |
| 4841 | ENSG00000134077 | THUMPD3   | Enhanced  | Cytosol;Nucleoli            |                             |
| 4842 | ENSG00000134086 | VHL       | Enhanced  | NucleoplaCytosol            |                             |
| 4843 | ENSG00000134107 | BHLHE40   | Supported |                             | Nuclear bodies              |
| 4844 | ENSG00000134109 | EDEM1     | Enhanced  | Endoplasmic reticulum       | Aggresome                   |
| 4845 | ENSG00000134138 | MEIS2     | Approved  |                             | Cytosol;Nucleoplas          |
| 4846 | ENSG00000134146 | DPH6      | Enhanced  | Nucleoli;Nucleoplasm        |                             |
| 4847 | ENSG00000134152 | KATNBL1   | Supported |                             | Mitotic sCleavage furrow;Mi |
| 4848 | ENSG00000134153 | EMC7      | Approved  |                             | Nucleoplasm                 |
| 4849 | ENSG00000134160 | TRPM1     | Uncertain |                             | Plasma meCentriola          |
| 4850 | ENSG00000134184 | GSTM1     | Approved  |                             | Cytosol                     |
| 4851 | ENSG00000134198 | TSPAN2    | Enhanced  | Nucleoplasm                 |                             |
| 4852 | ENSG00000134201 | GSTM5     | Approved  |                             | Cytokinetic bridge          |
| 4853 | ENSG00000134202 | GSTM3     | Supported | Cytosol                     |                             |
| 4854 | ENSG00000134207 | SYT6      | Approved  |                             | Vesicles                    |
| 4855 | ENSG00000134222 | PSRC1     | Approved  |                             | Cytosol;Nucleoplas          |
| 4856 | ENSG00000134240 | HMGCS2    | Supported |                             | Mitochondria                |
| 4857 | ENSG00000134242 | PTPN22    | Uncertain |                             | Plasma meNucleopla          |
| 4858 | ENSG00000134243 | SORT1     | Approved  | Plasma meCytosol;Golgi appa |                             |
| 4859 | ENSG00000134245 | WNT2B     | Approved  |                             | Nucleoplasm;Vesicl          |
| 4860 | ENSG00000134248 | LAMTOR5   | Supported | Cytosol                     |                             |
| 4861 | ENSG00000134250 | NOTCH2    | Supported | Nucleoplasm;Plasma membrane |                             |
| 4862 | ENSG00000134253 | TRIM45    | Supported | Cytokinetic bridge;Cytosol  |                             |
| 4863 | ENSG00000134256 | CD101     | Uncertain |                             | Mitochond                   |
| 4864 | ENSG00000134258 | VTCN1     | Approved  | Plasma meCell Junctions;Foc |                             |
| 4865 | ENSG00000134262 | AP4B1     | Approved  |                             | Vesicles                    |
| 4866 | ENSG00000134265 | NAPG      | Approved  |                             | Cytosol;Plasma mem          |
| 4867 | ENSG00000134278 | SPIRE1    | Approved  | Cytosol                     | Nucleopla                   |
| 4868 | ENSG00000134283 | PPhLN1    | Supported | Nucleoplasm                 | Golgi apparatus             |
| 4869 | ENSG00000134285 | FKBP11    | Approved  |                             | Centrosome                  |
| 4870 | ENSG00000134294 | SLC38A2   | Approved  |                             | Vesicles                    |
| 4871 | ENSG00000134308 | YWHAQ     | Supported | Cytosol                     | Nucleoli;                   |
| 4872 | ENSG00000134313 | KIDINS220 | Approved  |                             | Nucleoplasm                 |
| 4873 | ENSG00000134317 | GRHL1     | Supported | NucleoplaVesicles           |                             |
| 4874 | ENSG00000134318 | ROCK2     | Supported | Cytosol                     |                             |
| 4875 | ENSG00000134321 | RSAD2     | Supported | EndoplasmNucleoli fibrillar |                             |
| 4876 | ENSG00000134323 | MYCN      | Approved  |                             | Nucleoli;Nucleopla          |
| 4877 | ENSG00000134324 | LPIN1     | Approved  |                             | Cytosol;Plasma mem          |
| 4878 | ENSG00000134326 | CMPK2     | Approved  |                             | Mitochondria                |
| 4879 | ENSG00000134330 | IAH1      | Supported | Nucleoplasm                 |                             |
| 4880 | ENSG00000134333 | LDHA      | Supported | Cytosol                     | Vesicles                    |
| 4881 | ENSG00000134352 | IL6ST     | Supported |                             | Golgi apparatus;Plasma memb |
| 4882 | ENSG00000134369 | NAV1      | Approved  |                             | Microtubules                |
| 4883 | ENSG00000134371 | CDC73     | Supported | NucleoplaCytosol            |                             |
| 4884 | ENSG00000134375 | TIMM17A   | Supported | Mitochondria                | Nucleopla                   |
| 4885 | ENSG00000134376 | CRB1      | Uncertain |                             | Vesicles                    |
| 4886 | ENSG00000134440 | NARS      | Supported | Cytosol                     |                             |
| 4887 | ENSG00000134444 | KIAA1468  | Approved  |                             | Centriolar satelli          |
| 4888 | ENSG00000134453 | RBM17     | Supported | Nucleoplasm                 |                             |
| 4889 | ENSG00000134461 | ANKRD16   | Approved  |                             | Endoplasmic reticu          |
| 4890 | ENSG00000134480 | CCNH      | Supported | Nucleoplasm                 |                             |
| 4891 | ENSG00000134490 | TMEM241   | Approved  |                             | Golgi apparatus;Ve          |
| 4892 | ENSG00000134504 | KCTD1     | Approved  |                             | Centriolar satelli          |
| 4893 | ENSG00000134508 | CABLES1   | Supported |                             | Nuclear bodies;Nucleoplasm  |

|      |                 |          |           |                     |                                                   |
|------|-----------------|----------|-----------|---------------------|---------------------------------------------------|
| 4894 | ENSG00000134531 | EMP1     | Approved  |                     | Nucleoplasm                                       |
| 4895 | ENSG00000134532 | SOX5     | Supported |                     | Nucleoplasm                                       |
| 4896 | ENSG00000134545 | KLRC1    | Approved  |                     | Plasma membrane                                   |
| 4897 | ENSG00000134569 | LRP4     | Uncertain |                     | Mitochondrion                                     |
| 4898 | ENSG00000134574 | DDB2     | Supported |                     | Nucleoplasm;Cell Junctions                        |
| 4899 | ENSG00000134594 | RAB33A   | Uncertain |                     | Vesicles                                          |
| 4900 | ENSG00000134595 | SOX3     | Enhanced  | Nucleoplasm         |                                                   |
| 4901 | ENSG00000134597 | RBMX2    | Approved  |                     | Nuclear membrane;Nucleoplasm                      |
| 4902 | ENSG00000134602 | STK26    | Uncertain |                     | Cytosol;Golgi apparatus;Centrosome                |
| 4903 | ENSG00000134627 | PIWIL4   | Approved  |                     | Mitochondria;Nucleoplasm                          |
| 4904 | ENSG00000134644 | PUM1     | Enhanced  | Cytosol             | Nucleoplasm                                       |
| 4905 | ENSG00000134668 | SPOCD1   | Approved  |                     | Cytosol;Nucleoli;Nucleoplasm                      |
| 4906 | ENSG00000134684 | YARS     | Enhanced  | Cytosol             |                                                   |
| 4907 | ENSG00000134686 | PHC2     | Supported |                     | Nucleoplasm                                       |
| 4908 | ENSG00000134690 | CDC42    | Enhanced  | Cytosol             | Nucleoplasm                                       |
| 4909 | ENSG00000134697 | GNL2     | Enhanced  |                     | Nucleoli                                          |
| 4910 | ENSG00000134717 | BTF3L4   | Approved  |                     | Cytosol;Nucleoplasm                               |
| 4911 | ENSG00000134744 | ZCCHC11  | Supported |                     | Cytosol                                           |
| 4912 | ENSG00000134748 | PRPF38A  | Enhanced  | Nucleoplasm         | Nucleoli                                          |
| 4913 | ENSG00000134758 | RNF138   | Approved  |                     | Mitochondria                                      |
| 4914 | ENSG00000134759 | ELP2     | Supported |                     | Cytosol;Nucleoplasm                               |
| 4915 | ENSG00000134762 | DSC3     | Enhanced  | Cell Junctions      | Plasma membrane                                   |
| 4916 | ENSG00000134769 | DTNA     | Approved  |                     | Cell Junctions;Intermediate filaments;Nucleoplasm |
| 4917 | ENSG00000134802 | SLC43A3  | Approved  |                     | Plasma membrane;Nucleoplasm                       |
| 4918 | ENSG00000134809 | TIMM10   | Enhanced  | Mitochondria        |                                                   |
| 4919 | ENSG00000134815 | DHX34    | Uncertain |                     | Intermediate filaments                            |
| 4920 | ENSG00000134825 | TMEM258  | Approved  |                     | Cytosol;Plasma membrane                           |
| 4921 | ENSG00000134851 | TMEM165  | Enhanced  | Golgi apparatus     |                                                   |
| 4922 | ENSG00000134852 | CLOCK    | Enhanced  | Nucleoplasm         | Vesicles                                          |
| 4923 | ENSG00000134853 | PDGFRA   | Approved  |                     | Plasma membrane;Cell Junctions;Nucleoplasm        |
| 4924 | ENSG00000134871 | COL4A2   | Supported |                     | Vesicles                                          |
| 4925 | ENSG00000134874 | DZIP1    | Supported |                     | Cytosol;Centriolar satellite                      |
| 4926 | ENSG00000134882 | UBAC2    | Approved  |                     | Cytosol                                           |
| 4927 | ENSG00000134884 | ARGLU1   | Enhanced  | Nucleoplasm         | Cytosol;Mitochondria                              |
| 4928 | ENSG00000134897 | BIVM     | Approved  |                     | Nucleoplasm                                       |
| 4929 | ENSG00000134899 | ERCC5    | Enhanced  | Nucleoplasm         |                                                   |
| 4930 | ENSG00000134900 | TPP2     | Supported |                     | Cytosol;Nuclear bodies                            |
| 4931 | ENSG00000134901 | KDELC1   | Supported |                     | Nucleoplasm                                       |
| 4932 | ENSG00000134905 | CARS2    | Approved  |                     | Mitochondria;Nucleoplasm                          |
| 4933 | ENSG00000134909 | ARHGAP32 | Approved  |                     | Golgi apparatus                                   |
| 4934 | ENSG00000134910 | STT3A    | Uncertain |                     | Nucleoli                                          |
| 4935 | ENSG00000134954 | ETS1     | Enhanced  | Nucleoplasm         | Cytosol;Nucleoplasm                               |
| 4936 | ENSG00000134986 | NREP     | Approved  |                     | Vesicles                                          |
| 4937 | ENSG00000134987 | WDR36    | Supported |                     | Nucleoli                                          |
| 4938 | ENSG00000134996 | OSTF1    | Supported |                     | Cytosol                                           |
| 4939 | ENSG00000135002 | RFK      | Approved  |                     | Golgi apparatus                                   |
| 4940 | ENSG00000135018 | UBQLN1   | Supported |                     | Cytosol;Nucleoplasm                               |
| 4941 | ENSG00000135040 | NAA35    | Supported |                     | Vesicles                                          |
| 4942 | ENSG00000135045 | C9orf40  | Approved  |                     | Centrosome;Cytosol                                |
| 4943 | ENSG00000135046 | ANXA1    | Enhanced  | Cytosol;Nucleoplasm | Plasma membrane                                   |
| 4944 | ENSG00000135047 | CTSL     | Approved  |                     | Vesicles                                          |
| 4945 | ENSG00000135048 | TMEM2    | Supported |                     | Golgi apparatus                                   |
| 4946 | ENSG00000135049 | AGTPBP1  | Approved  |                     | Plasma membrane;Vesicles                          |
| 4947 | ENSG00000135052 | GOLM1    | Enhanced  |                     | Nucleoli;Vesicles                                 |
| 4948 | ENSG00000135069 | PSAT1    | Enhanced  | Golgi apparatus     | Cytosol                                           |

|      |                 |         |           |                                      |
|------|-----------------|---------|-----------|--------------------------------------|
| 4949 | ENSG00000135074 | ADAM19  | Approved  | Vesicles                             |
| 4950 | ENSG00000135083 | CCNJL   | Approved  | Nuclear speckles                     |
| 4951 | ENSG00000135090 | TAOK3   | Uncertain | Mitochondr                           |
| 4952 | ENSG00000135094 | SDS     | Approved  | Cytosol;Mitochondr                   |
| 4953 | ENSG00000135097 | MSI1    | Approved  | Cytosol;Nucleoplas                   |
| 4954 | ENSG00000135100 | HNF1A   | Supported | Nucleoplasm                          |
| 4955 | ENSG00000135108 | FBX021  | Approved  | Mitochondria                         |
| 4956 | ENSG00000135111 | TBX3    | Supported | NucleoplaCytosol                     |
| 4957 | ENSG00000135114 | OASL    | Supported | Cytosol Nucleoplasm                  |
| 4958 | ENSG00000135119 | RNFT2   | Approved  | Cytosol;Nucleoplas                   |
| 4959 | ENSG00000135127 | BICDL1  | Approved  | Cytosol Nucleoplasm;Vesicl           |
| 4960 | ENSG00000135144 | DTX1    | Supported | Cytosol;Nuclear bodies;Nucl          |
| 4961 | ENSG00000135148 | TRAFD1  | Approved  | Cytosol;Nucleoplas                   |
| 4962 | ENSG00000135164 | DMTF1   | Supported | Nucleoplasm                          |
| 4963 | ENSG00000135205 | CCDC146 | Approved  | Golgi apparatus;Ve                   |
| 4964 | ENSG00000135218 | CD36    | Enhanced  | Golgi apparatus                      |
| 4965 | ENSG00000135241 | PNPLA8  | Approved  | Cytosol;Golgi appa                   |
| 4966 | ENSG00000135245 | HILPDA  | Supported | Lipid droplets Nucleopla             |
| 4967 | ENSG00000135248 | FAM71F1 | Uncertain | Cytosol                              |
| 4968 | ENSG00000135249 | RINT1   | Approved  | Golgi apparatus                      |
| 4969 | ENSG00000135250 | SRPK2   | Supported | Cytosol;Nucleoplasm                  |
| 4970 | ENSG00000135269 | TES     | Supported | Cytosol;Focal adheCell Junctions;Pla |
| 4971 | ENSG00000135272 | MDFIC   | Supported | NucleoplaGolgi apparatus             |
| 4972 | ENSG00000135297 | MT01    | Approved  | Cytosol;Nucleoplas                   |
| 4973 | ENSG00000135299 | ANKRD6  | Enhanced  | Vesicles                             |
| 4974 | ENSG00000135312 | HTR1B   | Supported | Plasma membrane                      |
| 4975 | ENSG00000135314 | KHDC1   | Approved  | Cytosol;Mitochondr                   |
| 4976 | ENSG00000135315 | CEP162  | Enhanced  | Cytosol;Plasma membrane              |
| 4977 | ENSG00000135316 | SYNCRIP | Supported | NucleoplaCytosol                     |
| 4978 | ENSG00000135317 | SNX14   | Supported | Cytosol                              |
| 4979 | ENSG00000135318 | NT5E    | Supported | Plasma meCytosol;Nucleoplas          |
| 4980 | ENSG00000135334 | AKIRIN2 | Supported | Nucleoplasm                          |
| 4981 | ENSG00000135336 | ORC3    | Supported | Nucleoplasm                          |
| 4982 | ENSG00000135341 | MAP3K7  | Supported | Cytosol;Plasma memNuclear s          |
| 4983 | ENSG00000135362 | PRR5L   | Approved  | Cytokinetic bridge                   |
| 4984 | ENSG00000135363 | LM02    | Enhanced  | Nucleoplasm                          |
| 4985 | ENSG00000135365 | PHF21A  | Approved  | Nucleoplasm                          |
| 4986 | ENSG00000135372 | NAT10   | Enhanced  | Nucleoli Midbody                     |
| 4987 | ENSG00000135373 | EHF     | Supported | NucleoplaGolgi apparatus             |
| 4988 | ENSG00000135374 | ELF5    | Approved  | Nucleoplasm                          |
| 4989 | ENSG00000135378 | PRRG4   | Approved  | Golgi apparatus                      |
| 4990 | ENSG00000135387 | CAPRIN1 | Enhanced  | Cytosol                              |
| 4991 | ENSG00000135404 | CD63    | Supported | Vesicles                             |
| 4992 | ENSG00000135409 | AMHR2   | Approved  | Vesicles Centriolar satelli          |
| 4993 | ENSG00000135414 | GDF11   | Approved  | Vesicles                             |
| 4994 | ENSG00000135424 | ITGA7   | Approved  | Nuclear speckles;P                   |
| 4995 | ENSG00000135437 | RDH5    | Approved  | Vesicles                             |
| 4996 | ENSG00000135439 | AGAP2   | Supported | Cytosol;NMidbody ring                |
| 4997 | ENSG00000135446 | CDK4    | Supported | Cytosol;Nuclear membrane;Nu          |
| 4998 | ENSG00000135452 | TSPAN31 | Approved  | Cytokinetic bridge                   |
| 4999 | ENSG00000135457 | TFCP2   | Supported | Nucleoplasm Cytosol                  |
| 5000 | ENSG00000135469 | COQ10A  | Approved  | Cytosol;Endoplasm                    |
| 5001 | ENSG00000135472 | FAIM2   | Approved  | Intermediate filam                   |
| 5002 | ENSG00000135476 | ESPL1   | Supported | Nucleoplasm;Vesicles                 |
| 5003 | ENSG00000135480 | KRT7    | Supported | Intermediate filaments               |

|      |                 |           |           |                               |                             |
|------|-----------------|-----------|-----------|-------------------------------|-----------------------------|
| 5004 | ENSG00000135482 | ZC3H10    | Approved  |                               | Vesicles                    |
| 5005 | ENSG00000135486 | HNRNPA1   | Enhanced  | Nucleoplasm                   |                             |
| 5006 | ENSG00000135503 | ACVR1B    | Approved  |                               | Cytosol                     |
| 5007 | ENSG00000135506 | OS9       | Supported |                               | Endoplasmic reticulum       |
| 5008 | ENSG00000135519 | KCNH3     | Approved  |                               | Mitochondria;Nucle          |
| 5009 | ENSG00000135521 | LTV1      | Enhanced  | Cytosol;Nucleoplasm           |                             |
| 5010 | ENSG00000135525 | MAP7      | Supported |                               | Cytosol;Microtubules        |
| 5011 | ENSG00000135537 | AFG1L     | Approved  |                               | Cytosol;Plasma mem          |
| 5012 | ENSG00000135540 | NHSL1     | Approved  |                               | Nuclear membrane;N          |
| 5013 | ENSG00000135541 | AHI1      | Approved  |                               | Centrosome                  |
| 5014 | ENSG00000135547 | HEY2      | Approved  |                               | Aggresome;Nuclear           |
| 5015 | ENSG00000135577 | NMBR      | Supported |                               | Cytosol;Plasma membrane     |
| 5016 | ENSG00000135587 | SMPD2     | Approved  |                               | Cell Junctions;Pla          |
| 5017 | ENSG00000135597 | REPS1     | Approved  |                               | Cytosol;Plasma mem          |
| 5018 | ENSG00000135605 | TEC       | Supported |                               | Plasma membrane             |
| 5019 | ENSG00000135622 | SEMA4F    | Approved  |                               | Centrosome;Nucleop          |
| 5020 | ENSG00000135624 | CCT7      | Approved  |                               | Cytosol                     |
| 5021 | ENSG00000135631 | RAB11FIP5 | Enhanced  | Centriolar satellite;Vesicles |                             |
| 5022 | ENSG00000135632 | SMYD5     | Approved  |                               | Mitochondria                |
| 5023 | ENSG00000135636 | DYSF      | Supported |                               | Plasma meCentriolar satelli |
| 5024 | ENSG00000135638 | EMX1      | Supported |                               | Nucleoli                    |
| 5025 | ENSG00000135643 | KCNMB4    | Approved  |                               | Cytosol                     |
| 5026 | ENSG00000135655 | USP15     | Enhanced  | Cytosol                       |                             |
| 5027 | ENSG00000135678 | CPM       | Uncertain |                               | Vesicles                    |
| 5028 | ENSG00000135679 | MDM2      | Supported |                               | Nucleoplasm                 |
| 5029 | ENSG00000135686 | KLHL36    | Approved  |                               | Cytosol                     |
| 5030 | ENSG00000135697 | BCO1      | Uncertain |                               | Actin fil                   |
| 5031 | ENSG00000135698 | MPHOSPH6  | Supported |                               | Nucleoli Nucleoplasm        |
| 5032 | ENSG00000135709 | KIAA0513  | Uncertain |                               | Cytosol;N                   |
| 5033 | ENSG00000135720 | DYNC1L12  | Approved  |                               | Centrosome;Cytosol          |
| 5034 | ENSG00000135722 | FBXL8     | Approved  |                               | Golgi apparatus             |
| 5035 | ENSG00000135723 | FHOD1     | Supported |                               | Cytosol                     |
| 5036 | ENSG00000135736 | CCDC102A  | Approved  |                               | Nuclear bodies;Nuc          |
| 5037 | ENSG00000135740 | SLC9A5    | Approved  |                               | Cytosol;Nucleoplas          |
| 5038 | ENSG00000135749 | PCNX2     | Approved  |                               | Endoplasmic reticu          |
| 5039 | ENSG00000135750 | KCNK1     | Approved  |                               | Vesicles                    |
| 5040 | ENSG00000135763 | URB2      | Enhanced  | Nucleoli                      |                             |
| 5041 | ENSG00000135775 | COG2      | Approved  |                               | Golgi apparatus             |
| 5042 | ENSG00000135778 | NTPCR     | Approved  |                               | Cytosol                     |
| 5043 | ENSG00000135801 | TAF5L     | Supported |                               | Nuclear sCytoplasmic bodies |
| 5044 | ENSG00000135821 | GLUL      | Supported | Cytosol                       | Mitochondria                |
| 5045 | ENSG00000135823 | STX6      | Enhanced  |                               | Golgi apparatus;Nucleoplasm |
| 5046 | ENSG00000135828 | RNASEL    | Supported |                               | Cytosol                     |
| 5047 | ENSG00000135829 | DHX9      | Supported |                               | Nucleoplasm                 |
| 5048 | ENSG00000135835 | KIAA1614  | Approved  |                               | Nuclear membrane;V          |
| 5049 | ENSG00000135837 | CEP350    | Enhanced  | Centrosome                    |                             |
| 5050 | ENSG00000135838 | NPL       | Approved  |                               | Plasma membrane;Ve          |
| 5051 | ENSG00000135842 | FAM129A   | Supported |                               | Cytosol Plasma membrane     |
| 5052 | ENSG00000135862 | LAMC1     | Approved  |                               | Endoplasmic reticu          |
| 5053 | ENSG00000135870 | RC3H1     | Supported |                               | Cytosol;Plasma membrane     |
| 5054 | ENSG00000135899 | SP110     | Supported |                               | Nucleoplasm                 |
| 5055 | ENSG00000135900 | MRPL44    | Approved  |                               | MitochondNucleoplasm;Plasma |
| 5056 | ENSG00000135902 | CHRND     | Supported |                               | Plasma meCytosol;Nucleoplas |
| 5057 | ENSG00000135903 | PAX3      | Enhanced  | Nucleoplasm                   |                             |
| 5058 | ENSG00000135905 | DOCK10    | Supported |                               | Cytosol;Nucleoplasm         |



|      |                 |          |           |                      |                             |
|------|-----------------|----------|-----------|----------------------|-----------------------------|
| 5059 | ENSG00000135912 | TLL4     | Approved  |                      | Mitochondria                |
| 5060 | ENSG00000135913 | USP37    | Approved  |                      | Nucleoli;Nucleopla          |
| 5061 | ENSG00000135914 | HTR2B    | Supported |                      | Nucleoplasm                 |
| 5062 | ENSG00000135917 | SLC19A3  | Approved  |                      | Cytosol;Nucleoplas          |
| 5063 | ENSG00000135924 | DNAJB2   | Enhanced  | Nuclear membrane     |                             |
| 5064 | ENSG00000135926 | TMBIM1   | Supported |                      | Vesicles                    |
| 5065 | ENSG00000135929 | CYP27A1  | Supported |                      | Mitochondria                |
| 5066 | ENSG00000135930 | EIF4E2   | Enhanced  | Mitochondria         | Cytosol                     |
| 5067 | ENSG00000135932 | CAB39    | Approved  |                      | Cytosol;Nucleoli f          |
| 5068 | ENSG00000135940 | COX5B    | Enhanced  | Mitochondria         |                             |
| 5069 | ENSG00000135945 | REV1     | Approved  |                      | Cytosol                     |
| 5070 | ENSG00000135951 | TSGA10   | Approved  |                      | Cytosol                     |
| 5071 | ENSG00000135953 | MFS9     | Approved  |                      | Nucleoli                    |
| 5072 | ENSG00000135966 | TGFBAP1  | Approved  |                      | Vesicles                    |
| 5073 | ENSG00000135968 | GCC2     | Enhanced  | Golgi app            | Nucleoplasm                 |
| 5074 | ENSG00000135972 | MRPS9    | Enhanced  | Mitochondria         |                             |
| 5075 | ENSG00000135974 | C2orf49  | Supported |                      | NucleoplaMitochondria       |
| 5076 | ENSG00000135976 | ANKRD36  | Approved  |                      | Cytosol;Nucleoplas          |
| 5077 | ENSG00000135999 | EPC2     | Approved  |                      | Nuclear speckles            |
| 5078 | ENSG00000136003 | ISCU     | Supported |                      | Cytosol                     |
| 5079 | ENSG00000136010 | ALDH1L2  | Enhanced  | Mitochondria         |                             |
| 5080 | ENSG00000136011 | STAB2    | Supported |                      | Cytosol                     |
| 5081 | ENSG00000136014 | USP44    | Approved  |                      | Microtubules;Nucle          |
| 5082 | ENSG00000136026 | CKAP4    | Uncertain |                      | Cytoplasm                   |
| 5083 | ENSG00000136040 | PLXNC1   | Approved  |                      | Mitochondria                |
| 5084 | ENSG00000136045 | PWP1     | Approved  |                      | Golgi apparatus;Nu          |
| 5085 | ENSG00000136051 | WASHC4   | Enhanced  | Nucleoplasm          |                             |
| 5086 | ENSG00000136068 | FLNB     | Supported |                      | Cytosol;PActin filaments;Go |
| 5087 | ENSG00000136098 | NEK3     | Approved  |                      | Microtubules                |
| 5088 | ENSG00000136099 | PCDH8    | Uncertain |                      | Cytosol;G                   |
| 5089 | ENSG00000136100 | VPS36    | Supported |                      | LysosomesCell Junctions     |
| 5090 | ENSG00000136104 | RNASEH2B | Enhanced  | Nucleoplasm          |                             |
| 5091 | ENSG00000136108 | CKAP2    | Approved  |                      | Microtubules Cytosol        |
| 5092 | ENSG00000136111 | TBC1D4   | Supported |                      | Cytosol                     |
| 5093 | ENSG00000136114 | THSD1    | Supported |                      | Cytosol                     |
| 5094 | ENSG00000136122 | BORA     | Approved  |                      | Cytosol;Nucleoli f          |
| 5095 | ENSG00000136141 | LRCH1    | Approved  |                      | Actin filaments;Cy          |
| 5096 | ENSG00000136143 | SUCLA2   | Enhanced  | Mitochondria         |                             |
| 5097 | ENSG00000136144 | RCBTB1   | Approved  |                      | Nucleoplasm                 |
| 5098 | ENSG00000136146 | MED4     | Supported |                      | Nucleoplasm                 |
| 5099 | ENSG00000136147 | PHF11    | Supported |                      | Nuclear membrane;Nucleoplas |
| 5100 | ENSG00000136152 | COG3     | Supported | Golgi app            | Cytosol;PNucleoplasm        |
| 5101 | ENSG00000136153 | LMO7     | Supported |                      | Actin filCytosol            |
| 5102 | ENSG00000136155 | SCEL     | Supported |                      | Cytosol;Nucleoplasm;Plasma  |
| 5103 | ENSG00000136156 | ITM2B    | Enhanced  | Golgi apparatus;     | Vesicles                    |
| 5104 | ENSG00000136158 | SPRY2    | Supported |                      | Actin filaments;Microtubule |
| 5105 | ENSG00000136159 | NUDT15   | Supported |                      | Nucleoplasm                 |
| 5106 | ENSG00000136160 | EDNRB    | Supported |                      | Plasma membrane Cytosol     |
| 5107 | ENSG00000136161 | RCBTB2   | Approved  |                      | Golgi apparatus;Nu          |
| 5108 | ENSG00000136167 | LCP1     | Approved  |                      | Actin filaments;Cy          |
| 5109 | ENSG00000136169 | SETDB2   | Approved  |                      | Nucleoplasm                 |
| 5110 | ENSG00000136193 | SCRN1    | Approved  |                      | Cytosol                     |
| 5111 | ENSG00000136197 | C7orf25  | Supported |                      | NucleoplaCytosol            |
| 5112 | ENSG00000136205 | TNS3     | Enhanced  | Focal adhesion sites |                             |
| 5113 | ENSG00000136213 | CHST12   | Approved  |                      | Golgi apparatus             |

|      |                 |          |           |                                      |
|------|-----------------|----------|-----------|--------------------------------------|
| 5114 | ENSG00000136231 | IGF2BP3  | Supported | Cytosol                              |
| 5115 | ENSG00000136237 | RAPGEF5  | Supported | Nuclear bodies;Nucleoplasm           |
| 5116 | ENSG00000136238 | RAC1     | Approved  | Cytosol;Nucleoli;N                   |
| 5117 | ENSG00000136243 | NUPL2    | Supported | Nucleoplasm                          |
| 5118 | ENSG00000136244 | IL6      | Approved  | Vesicles                             |
| 5119 | ENSG00000136247 | ZDHHC4   | Approved  | Nuclear bodies                       |
| 5120 | ENSG00000136261 | BZW2     | Approved  | Actin filaments;Cy                   |
| 5121 | ENSG00000136270 | TBRG4    | Enhanced  | Mitochondria                         |
| 5122 | ENSG00000136271 | DDX56    | Supported | Nucleoli                             |
| 5123 | ENSG00000136274 | NACAD    | Approved  | Cytosol;Nucleoplas                   |
| 5124 | ENSG00000136279 | DBNL     | Supported | Cytosol;Nucleoplasm                  |
| 5125 | ENSG00000136280 | CCM2     | Enhanced  | Mitochondria                         |
| 5126 | ENSG00000136319 | TTC5     | Supported | Nucleoplasm                          |
| 5127 | ENSG00000136327 | NKX2-8   | Approved  | Nucleoplasm;Plasma                   |
| 5128 | ENSG00000136352 | NKX2-1   | Uncertain | Golgi app                            |
| 5129 | ENSG00000136367 | ZFHX2    | Approved  | Nucleoli fibrillar                   |
| 5130 | ENSG00000136371 | MTHFS    | Supported | Cytosol                              |
| 5131 | ENSG00000136378 | ADAMTS7  | Supported | Vesicles                             |
| 5132 | ENSG00000136381 | IREB2    | Approved  | Cell Junctions;Cyt                   |
| 5133 | ENSG00000136383 | ALPK3    | Approved  | Nucleoplasm                          |
| 5134 | ENSG00000136436 | CALCOCO2 | Supported | Cytosol Vesicles                     |
| 5135 | ENSG00000136444 | RSAD1    | Approved  | Cytosol;Nucleoplas                   |
| 5136 | ENSG00000136448 | NMT1     | Supported | Cytosol Plasma membrane              |
| 5137 | ENSG00000136449 | MYCBPAP  | Approved  | Vesicles                             |
| 5138 | ENSG00000136450 | SRSF1    | Approved  | Nucleoplasm                          |
| 5139 | ENSG00000136451 | VEZF1    | Enhanced  | Nucleoplasm                          |
| 5140 | ENSG00000136463 | TACO1    | Enhanced  | Mitochondria                         |
| 5141 | ENSG00000136478 | TEX2     | Approved  | Nucleoplasm                          |
| 5142 | ENSG00000136485 | DCAF7    | Supported | Cytosol;Nucleoplasm                  |
| 5143 | ENSG00000136490 | LIMD2    | Supported | Cytosol;Nucleoplasm                  |
| 5144 | ENSG00000136492 | BRIP1    | Supported | Nuclear membrane;Nucleoplas          |
| 5145 | ENSG00000136504 | KAT7     | Supported | NucleoplaCytosol                     |
| 5146 | ENSG00000136514 | RTP4     | Supported | Nucleoplasm                          |
| 5147 | ENSG00000136518 | ACTL6A   | Enhanced  | Nucleoplasm Cytosol                  |
| 5148 | ENSG00000136521 | NDUFB5   | Supported | MitochondNucleoplasm                 |
| 5149 | ENSG00000136522 | MRPL47   | Supported | Mitochondria                         |
| 5150 | ENSG00000136527 | TRA2B    | Enhanced  | Nucleoplasm Cytosol                  |
| 5151 | ENSG00000136536 | 3/7/2019 | Supported | Cytosol;Plasma membrane              |
| 5152 | ENSG00000136541 | ERMN     | Approved  | Cell Junctions;Cyt                   |
| 5153 | ENSG00000136542 | GALNT5   | Approved  | Cytosol;Golgi appa                   |
| 5154 | ENSG00000136560 | TANK     | Supported | Cytosol;Nucleoli                     |
| 5155 | ENSG00000136573 | BLK      | Approved  | Nucleoplasm                          |
| 5156 | ENSG00000136574 | GATA4    | Supported | Nuclear bodies                       |
| 5157 | ENSG00000136603 | SKIL     | Approved  | Cytosol;Nucleoplas                   |
| 5158 | ENSG00000136628 | EPRS     | Enhanced  | Cytosol                              |
| 5159 | ENSG00000136630 | HLX      | Approved  | Cytosol;Nucleoplas                   |
| 5160 | ENSG00000136631 | VPS45    | Approved  | Microtubules                         |
| 5161 | ENSG00000136636 | KCTD3    | Approved  | Cytosol                              |
| 5162 | ENSG00000136643 | RPS6KC1  | Enhanced  | Endosomes;Lysosomes                  |
| 5163 | ENSG00000136682 | CBWD2    | Approved  | Plasma membrane                      |
| 5164 | ENSG00000136689 | IL1RN    | Approved  | Cytosol Centrosome;Nucleop           |
| 5165 | ENSG00000136699 | SMPD4    | Approved  | Cytosol;Nuclear me                   |
| 5166 | ENSG00000136709 | WDR33    | Enhanced  | Nucleoli fibrillar center;Nucleoplas |
| 5167 | ENSG00000136710 | CCDC115  | Supported | Plasma meVesicles                    |
| 5168 | ENSG00000136715 | SAP130   | Supported | Nuclear speckles                     |

|      |                 |           |           |                                      |
|------|-----------------|-----------|-----------|--------------------------------------|
| 5169 | ENSG00000136717 | BIN1      | Supported | Cytosol                              |
| 5170 | ENSG00000136718 | IMP4      | Enhanced  | Nucleoli                             |
| 5171 | ENSG00000136720 | HS6ST1    | Approved  | Nuclear speckles;N                   |
| 5172 | ENSG00000136731 | UGGT1     | Uncertain | Cytosol                              |
| 5173 | ENSG00000136732 | GYPC      | Supported | Plasma membrane                      |
| 5174 | ENSG00000136738 | STAM      | Supported | Vesicles                             |
| 5175 | ENSG00000136754 | ABI1      | Enhanced  | Cell Junctions;Cytosol;Plasma membra |
| 5176 | ENSG00000136758 | YME1L1    | Supported | Mitochondria Nuclear b               |
| 5177 | ENSG00000136770 | DNAJC1    | Approved  | Endoplasmic reticu                   |
| 5178 | ENSG00000136807 | CDK9      | Approved  | Cytoplasmic bodies                   |
| 5179 | ENSG00000136810 | TXN       | Enhanced  | Cytosol;Nucleoplasm                  |
| 5180 | ENSG00000136811 | ODF2      | Supported | Centrosome                           |
| 5181 | ENSG00000136813 | ECPAS     | Supported | Nucleoplasm                          |
| 5182 | ENSG00000136816 | TOR1B     | Approved  | Cytosol;Nuclear sp                   |
| 5183 | ENSG00000136819 | C9orf78   | Enhanced  | Nucleoplasm                          |
| 5184 | ENSG00000136824 | SMC2      | Supported | Nucleoli;Nucleoplasm                 |
| 5185 | ENSG00000136826 | KLF4      | Supported | Nucleoplasm                          |
| 5186 | ENSG00000136827 | TOR1A     | Supported | Nuclear membrane;Vesicles            |
| 5187 | ENSG00000136830 | FAM129B   | Enhanced  | Cytosol;PNucleoplasm                 |
| 5188 | ENSG00000136840 | ST6GALNAC | Approved  | Golgi apparatus;Nu                   |
| 5189 | ENSG00000136854 | STXBP1    | Approved  | Cytosol;Nucleoplas                   |
| 5190 | ENSG00000136856 | SLC2A8    | Approved  | Vesicles                             |
| 5191 | ENSG00000136859 | ANGPTL2   | Approved  | Golgi apparatus                      |
| 5192 | ENSG00000136861 | CDK5RAP2  | Enhanced  | CentrosomCell Junctions              |
| 5193 | ENSG00000136866 | ZFP37     | Approved  | Nucleoplasm;Vesicl                   |
| 5194 | ENSG00000136867 | SLC31A2   | Approved  | Intermediate filam                   |
| 5195 | ENSG00000136869 | TLR4      | Supported | Plasma meGolgi apparatus             |
| 5196 | ENSG00000136870 | ZNF189    | Approved  | Intermediate filam                   |
| 5197 | ENSG00000136874 | STX17     | Uncertain | Cytosol;N                            |
| 5198 | ENSG00000136875 | PRPF4     | Enhanced  | Nuclear speckles                     |
| 5199 | ENSG00000136878 | USP20     | Approved  | Cytosol;Nucleoplas                   |
| 5200 | ENSG00000136881 | BAAT      | Uncertain | Vesicles                             |
| 5201 | ENSG00000136883 | KIF12     | Approved  | Nucleoplasm                          |
| 5202 | ENSG00000136888 | ATP6V1G1  | Approved  | Nucleoli;Nucleopla                   |
| 5203 | ENSG00000136895 | GARNL3    | Approved  | Nucleoplasm;Vesicl                   |
| 5204 | ENSG00000136925 | TSTD2     | Approved  | Nucleoplasm                          |
| 5205 | ENSG00000136929 | HEMGN     | Enhanced  | Nucleoplasm                          |
| 5206 | ENSG00000136930 | PSMB7     | Supported | Cytosol;Nucleoplasm                  |
| 5207 | ENSG00000136932 | TRMO      | Approved  | Nucleoplasm                          |
| 5208 | ENSG00000136933 | RABEPK    | Uncertain | Plasma me                            |
| 5209 | ENSG00000136935 | GOLGA1    | Enhanced  | Golgi apparatus                      |
| 5210 | ENSG00000136936 | XPA       | Approved  | Cytokinetic bridge                   |
| 5211 | ENSG00000136937 | NCBP1     | Supported | Cytosol;Nucleoplasm                  |
| 5212 | ENSG00000136938 | ANP32B    | Enhanced  | CentrosomCytosol                     |
| 5213 | ENSG00000136940 | PDCL      | Approved  | Cytosol;Nucleoplas                   |
| 5214 | ENSG00000136942 | RPL35     | Approved  | Cytosol;Endoplasmic                  |
| 5215 | ENSG00000136943 | CTSV      | Approved  | Cytosol;Nucleoli f                   |
| 5216 | ENSG00000136944 | LMX1B     | Approved  | Nucleoplasm                          |
| 5217 | ENSG00000136960 | ENPP2     | Approved  | Actin filaments;Go                   |
| 5218 | ENSG00000136982 | DSCC1     | Approved  | Nucleoplasm                          |
| 5219 | ENSG00000136986 | DERL1     | Supported | Endoplasmic reticulum                |
| 5220 | ENSG00000136997 | MYC       | Enhanced  | Nucleoplasm                          |
| 5221 | ENSG00000136999 | NOV       | Enhanced  | Vesicles                             |
| 5222 | ENSG00000137040 | RANBP6    | Supported | Vesicles                             |
| 5223 | ENSG00000137054 | POLR1E    | Supported | Nucleoli fibrillar center;N          |

|      |                 |          |           |                                 |
|------|-----------------|----------|-----------|---------------------------------|
| 5224 | ENSG00000137055 | PLAA     | Supported | Cytosol;Nucleoplasm;Plasma      |
| 5225 | ENSG00000137073 | UBAP2    | Approved  | Cytosol                         |
| 5226 | ENSG00000137074 | APTX     | Supported | Nucleoli;Nucleoplasm            |
| 5227 | ENSG00000137075 | RNF38    | Supported | Nucleoplasm                     |
| 5228 | ENSG00000137076 | TLN1     | Supported | Centriolar satellite;Cytoso     |
| 5229 | ENSG00000137094 | DNAJB5   | Approved  | Cytosol;Nucleoplas              |
| 5230 | ENSG00000137100 | DCTN3    | Supported | Cytosol Nucleoli                |
| 5231 | ENSG00000137101 | CD72     | Approved  | Mitochondria;Nucle              |
| 5232 | ENSG00000137103 | TMEM8B   | Approved  | Vesicles                        |
| 5233 | ENSG00000137106 | GRHPR    | Approved  | Cytosol;Nucleoplas              |
| 5234 | ENSG00000137124 | ALDH1B1  | Supported | Mitochondria;Nucleoplasm;Ve     |
| 5235 | ENSG00000137133 | HINT2    | Enhanced  | Mitochondria                    |
| 5236 | ENSG00000137142 | IGFBPL1  | Approved  | Nucleoplasm;Vesicl              |
| 5237 | ENSG00000137145 | DENND4C  | Supported | Cytosol;Golgi apparatus;Ves     |
| 5238 | ENSG00000137154 | RPS6     | Enhanced  | Cytosol;Endoplasmic reticulum   |
| 5239 | ENSG00000137166 | FOXP4    | Approved  | Cytosol;Nucleoplas              |
| 5240 | ENSG00000137168 | PPIL1    | Approved  | Nucleoli                        |
| 5241 | ENSG00000137171 | KLC4     | Approved  | Cytosol;Mitochondr              |
| 5242 | ENSG00000137185 | ZSCAN9   | Approved  | Nucleoplasm                     |
| 5243 | ENSG00000137193 | PIM1     | Supported | Cytosol;Nucleoli                |
| 5244 | ENSG00000137200 | CMTR1    | Enhanced  | Cytosol;Nucleoplasm             |
| 5245 | ENSG00000137203 | TFAP2A   | Enhanced  | Nucleoplasm                     |
| 5246 | ENSG00000137207 | YIPF3    | Enhanced  | Golgi apparatus Nucleoplasm     |
| 5247 | ENSG00000137216 | TMEM63B  | Enhanced  | Actin filaments;Plasma membrane |
| 5248 | ENSG00000137218 | FRS3     | Uncertain | Nucleopla                       |
| 5249 | ENSG00000137221 | TJAP1    | Enhanced  | Golgi apparatus                 |
| 5250 | ENSG00000137261 | KIAA0319 | Approved  | Vesicles                        |
| 5251 | ENSG00000137265 | IRF4     | Supported | Nucleoplasm Cytosol             |
| 5252 | ENSG00000137266 | SLC22A23 | Approved  | Cytosol;Nucleoplas              |
| 5253 | ENSG00000137267 | TUBB2A   | Supported | Microtubules                    |
| 5254 | ENSG00000137269 | LRRC1    | Supported | Cytosol                         |
| 5255 | ENSG00000137270 | GCM1     | Approved  | Vesicles                        |
| 5256 | ENSG00000137274 | BPHL     | Approved  | Mitochondria                    |
| 5257 | ENSG00000137275 | RIPK1    | Enhanced  | Cytosol Plasma membrane         |
| 5258 | ENSG00000137288 | UQCC2    | Supported | MitochondNuclear bodies         |
| 5259 | ENSG00000137309 | HMGA1    | Approved  | Nucleoli;Nucleopla              |
| 5260 | ENSG00000137312 | FLOT1    | Approved  | Plasma meGolgi apparatus        |
| 5261 | ENSG00000137337 | MDC1     | Supported | Nuclear bodies;Nucleoplasm      |
| 5262 | ENSG00000137338 | PGBD1    | Approved  | Cytosol;Nucleoplas              |
| 5263 | ENSG00000137343 | ATAT1    | Approved  | Cytosol;Golgi appa              |
| 5264 | ENSG00000137393 | RNF144B  | Approved  | Mitochondria Nucleoli           |
| 5265 | ENSG00000137404 | NRM      | Enhanced  | Nuclear membrane                |
| 5266 | ENSG00000137411 | VAR52    | Approved  | Mitochondria                    |
| 5267 | ENSG00000137413 | TAF8     | Enhanced  | Nucleoplasm                     |
| 5268 | ENSG00000137414 | FAM8A1   | Approved  | Golgi apparatus                 |
| 5269 | ENSG00000137434 | C6orf52  | Approved  | Intermediate filam              |
| 5270 | ENSG00000137449 | CPEB2    | Approved  | Cytosol                         |
| 5271 | ENSG00000137462 | TLR2     | Supported | Mitochondria;Nucleoplasm        |
| 5272 | ENSG00000137463 | MGARP    | Supported | Mitochondria                    |
| 5273 | ENSG00000137474 | MYO7A    | Approved  | Cytosol                         |
| 5274 | ENSG00000137478 | FCHSD2   | Approved  | Actin filaments;Fo              |
| 5275 | ENSG00000137486 | ARRB1    | Supported | Nucleoplasm                     |
| 5276 | ENSG00000137492 | THAP12   | Approved  | Nucleoplasm                     |
| 5277 | ENSG00000137494 | ANKRD42  | Approved  | Cytosol;Nucleoplas              |
| 5278 | ENSG00000137496 | IL18BP   | Approved  | Endoplasmic reticu              |

|      |                 |          |           |                                               |
|------|-----------------|----------|-----------|-----------------------------------------------|
| 5279 | ENSG00000137497 | NUMA1    | Enhanced  | Nucleoplasm                                   |
| 5280 | ENSG00000137500 | CCDC90B  | Enhanced  | Mitochondria                                  |
| 5281 | ENSG00000137501 | SYTL2    | Approved  | Plasma membrane;Golgi apparatus;Nucleoplasm   |
| 5282 | ENSG00000137502 | RAB30    | Enhanced  | Vesicles                                      |
| 5283 | ENSG00000137504 | CREBZF   | Approved  | Mitochondria;Nucleoplasm                      |
| 5284 | ENSG00000137507 | LRRC32   | Enhanced  | Nucleoplasm                                   |
| 5285 | ENSG00000137509 | PRCP     | Supported | Vesicles                                      |
| 5286 | ENSG00000137513 | NARS2    | Approved  | Cytosol;Mitochondria                          |
| 5287 | ENSG00000137522 | RNF121   | Approved  | Golgi apparatus;Nucleoplasm                   |
| 5288 | ENSG00000137558 | PI15     | Approved  | Cytosol;Vesicles                              |
| 5289 | ENSG00000137571 | SLC05A1  | Supported | Plasma membrane;Vesicles                      |
| 5290 | ENSG00000137574 | TGS1     | Supported | Cytosol                                       |
| 5291 | ENSG00000137575 | SDCBP    | Supported | Cytosol;Nuclear membrane;Nucleoplasm          |
| 5292 | ENSG00000137601 | NEK1     | Supported | Cytosol;Nuclear membrane;Centriolar satellite |
| 5293 | ENSG00000137628 | DDX60    | Supported | Cytosol;Intermediate filament                 |
| 5294 | ENSG00000137648 | TMPRSS4  | Approved  | Cytosol;Nucleoplasm                           |
| 5295 | ENSG00000137656 | BUD13    | Enhanced  | Nucleoplasm                                   |
| 5296 | ENSG00000137673 | MMP7     | Approved  | Nucleoplasm;Vesicles                          |
| 5297 | ENSG00000137691 | C11orf70 | Approved  | Centrosome                                    |
| 5298 | ENSG00000137692 | DCUN1D5  | Approved  | Nucleoli;Nucleoplasm                          |
| 5299 | ENSG00000137693 | YAP1     | Supported | Nucleoli;Nucleoplasm                          |
| 5300 | ENSG00000137699 | TRIM29   | Supported | Intermediate filaments;Nucleoplasm            |
| 5301 | ENSG00000137700 | SLC37A4  | Approved  | Mitochondria                                  |
| 5302 | ENSG00000137707 | BTG4     | Approved  | Endoplasmic reticulum                         |
| 5303 | ENSG00000137709 | POU2F3   | Approved  | Nucleoplasm;Cytosol;Nuclear membrane          |
| 5304 | ENSG00000137710 | RDX      | Supported | Plasma membrane;Nucleoplasm                   |
| 5305 | ENSG00000137713 | PPP2R1B  | Approved  | Centrosome;Cytosol                            |
| 5306 | ENSG00000137714 | FDX1     | Enhanced  | Mitochondria                                  |
| 5307 | ENSG00000137720 | C11orf1  | Enhanced  | Nucleoplasm                                   |
| 5308 | ENSG00000137726 | FXYD6    | Approved  | Cytosol;Nucleoplasm                           |
| 5309 | ENSG00000137727 | ARHGAP20 | Approved  | Mitochondria                                  |
| 5310 | ENSG00000137731 | FXYD2    | Approved  | Mitochondria                                  |
| 5311 | ENSG00000137752 | CASP1    | Supported | Cytosol;Nucleoplasm                           |
| 5312 | ENSG00000137760 | ALKBH8   | Supported | Nuclear bodies;Nucleoplasm                    |
| 5313 | ENSG00000137764 | MAP2K5   | Approved  | Microtubules;Nucleoplasm                      |
| 5314 | ENSG00000137767 | SQOR     | Supported | Mitochondria                                  |
| 5315 | ENSG00000137770 | CTDSPL2  | Enhanced  | Nucleoplasm                                   |
| 5316 | ENSG00000137776 | SLTM     | Enhanced  | Nuclear bodies;Nucleoplasm                    |
| 5317 | ENSG00000137801 | THBS1    | Approved  | Plasma membrane                               |
| 5318 | ENSG00000137802 | MAPKBP1  | Supported | Nucleoli;Nucleoplasm                          |
| 5319 | ENSG00000137804 | NUSAP1   | Supported | Nucleoli;Fibrillar center;Nucleoplasm         |
| 5320 | ENSG00000137806 | NDUFAF1  | Enhanced  | Cytosol                                       |
| 5321 | ENSG00000137807 | KIF23    | Enhanced  | Nucleoplasm;Midbody ring;Mitotic spindle      |
| 5322 | ENSG00000137812 | KNL1     | Enhanced  | Nuclear bodies;Nucleoplasm                    |
| 5323 | ENSG00000137814 | HAUS2    | Approved  | Centrosome;Cytosol                            |
| 5324 | ENSG00000137815 | RTF1     | Approved  | Cytosol;Nucleoplasm                           |
| 5325 | ENSG00000137817 | PARP6    | Approved  | Plasma membrane                               |
| 5326 | ENSG00000137818 | RPLP1    | Supported | Cytosol;Endoplasmic reticulum                 |
| 5327 | ENSG00000137819 | PAQR5    | Approved  | Vesicles                                      |
| 5328 | ENSG00000137822 | TUBGCP4  | Supported | Centrosome                                    |
| 5329 | ENSG00000137824 | RMDN3    | Enhanced  | Cytokinetic bridge;Mitochondria               |
| 5330 | ENSG00000137825 | ITPKA    | Approved  | Vesicles                                      |
| 5331 | ENSG00000137831 | UACA     | Supported | Cytosol;Nucleoplasm                           |
| 5332 | ENSG00000137834 | SMAD6    | Supported | Nuclear bodies;Nucleoplasm;Golgi apparatus    |
| 5333 | ENSG00000137841 | PLCB2    | Approved  | Cytosol                                       |

|      |                 |          |           |                      |                                |
|------|-----------------|----------|-----------|----------------------|--------------------------------|
| 5334 | ENSG00000137842 | TMEM62   | Approved  |                      | Cytoplasmic bodies             |
| 5335 | ENSG00000137843 | PAK6     | Approved  |                      | Nucleoplasm;Nucleoli Cell Junc |
| 5336 | ENSG00000137845 | ADAM10   | Supported |                      | Plasma membrane;VeNucleoplasm  |
| 5337 | ENSG00000137869 | CYP19A1  | Approved  |                      | Mitochondria                   |
| 5338 | ENSG00000137871 | ZNF280D  | Approved  |                      | Centrosome;Cytosol             |
| 5339 | ENSG00000137872 | SEMA6D   | Approved  |                      | Plasma membrane;Golgi app      |
| 5340 | ENSG00000137876 | RSL24D1  | Enhanced  | Nucleoli;Nucleoplasm |                                |
| 5341 | ENSG00000137878 | GCOM1    | Approved  |                      | Nucleoplasm                    |
| 5342 | ENSG00000137880 | GCHFR    | Supported |                      | Nucleoplasm                    |
| 5343 | ENSG00000137936 | BCAR3    | Approved  |                      | Centrosome;Cytosol             |
| 5344 | ENSG00000137942 | FNBP1L   | Supported |                      | Cytosol                        |
| 5345 | ENSG00000137944 | KYAT3    | Approved  |                      | Cytosol;Nucleoli               |
| 5346 | ENSG00000137947 | GTF2B    | Supported |                      | Nuclear bodies;Nucleoplasm     |
| 5347 | ENSG00000137955 | RABGGTB  | Approved  |                      | Vesicles                       |
| 5348 | ENSG00000137959 | IFI44L   | Approved  |                      | Nucleoplasm                    |
| 5349 | ENSG00000137960 | GIPC2    | Approved  |                      | Cytosol Nucleoplasm            |
| 5350 | ENSG00000137962 | ARHGAP29 | Approved  |                      | Centrosome;Cytosol             |
| 5351 | ENSG00000137965 | IFI44    | Approved  |                      | Nucleoplasm                    |
| 5352 | ENSG00000137968 | SLC44A5  | Approved  |                      | Cytosol                        |
| 5353 | ENSG00000137975 | CLCA2    | Supported |                      | Cell JuncNucleoplasm           |
| 5354 | ENSG00000137992 | DBT      | Supported |                      | Mitochondria                   |
| 5355 | ENSG00000137996 | RTCA     | Enhanced  | Nucleoplasm          |                                |
| 5356 | ENSG00000138002 | IFT172   | Approved  |                      | Vesicles                       |
| 5357 | ENSG00000138028 | CGREF1   | Approved  |                      | Golgi apparatus                |
| 5358 | ENSG00000138029 | HADHB    | Supported |                      | Mitochondria                   |
| 5359 | ENSG00000138030 | KHK      | Approved  |                      | Cytosol                        |
| 5360 | ENSG00000138032 | PPM1B    | Approved  |                      | Cytosol;Nucleoli               |
| 5361 | ENSG00000138035 | PNPT1    | Enhanced  | Mitochondria         |                                |
| 5362 | ENSG00000138036 | DYNC2LI1 | Approved  |                      | Cytosol                        |
| 5363 | ENSG00000138050 | THUMP2   | Uncertain |                      | Nucleoplasm                    |
| 5364 | ENSG00000138061 | CYP11B1  | Uncertain |                      | Mitochondria                   |
| 5365 | ENSG00000138069 | RAB1A    | Supported |                      | Cytosol;Endoplasmic reticul    |
| 5366 | ENSG00000138071 | ACTR2    | Approved  |                      | Cytosol                        |
| 5367 | ENSG00000138073 | PREB     | Approved  |                      | Endoplasmic reticul            |
| 5368 | ENSG00000138074 | SLC5A6   | Approved  |                      | Cell Junctions                 |
| 5369 | ENSG00000138079 | SLC3A1   | Approved  |                      | Mitochondria;Nuclear b         |
| 5370 | ENSG00000138081 | FBXO11   | Supported |                      | Nucleoplasm                    |
| 5371 | ENSG00000138083 | SIX3     | Approved  |                      | Nucleoplasm                    |
| 5372 | ENSG00000138092 | CENPO    | Supported |                      | Nuclear bodies;Nucleoplasm     |
| 5373 | ENSG00000138095 | LRPPRC   | Enhanced  | Mitochondria         |                                |
| 5374 | ENSG00000138100 | TRIM54   | Approved  |                      | Cytosol;Plasma mem             |
| 5375 | ENSG00000138101 | DTNB     | Approved  |                      | Mitochondria                   |
| 5376 | ENSG00000138107 | ACTR1A   | Approved  |                      | Microtubules                   |
| 5377 | ENSG00000138111 | MFS13A   | Approved  |                      | Cytosol;Golgi appa             |
| 5378 | ENSG00000138119 | MYOF     | Supported |                      | Plasma membrane;Vesicles       |
| 5379 | ENSG00000138131 | LOXL4    | Approved  |                      | Vesicles                       |
| 5380 | ENSG00000138134 | STAMBPL1 | Approved  |                      | Plasma membrane                |
| 5381 | ENSG00000138136 | LBX1     | Approved  |                      | Nuclear bodies;Nuc             |
| 5382 | ENSG00000138138 | ATAD1    | Approved  |                      | Mitochondria;Nucle             |
| 5383 | ENSG00000138152 | BTBD16   | Uncertain |                      | Cytosol;N                      |
| 5384 | ENSG00000138160 | KIF11    | Supported |                      | Cytosol;Mitotic spindle        |
| 5385 | ENSG00000138161 | CUZD1    | Approved  |                      | Nucleoli;Vesicles              |
| 5386 | ENSG00000138162 | TACC2    | Supported |                      | Cytosol;Nucleoplasm;Plasma me  |
| 5387 | ENSG00000138172 | CALHM2   | Approved  |                      | Cytosol;Mitochondria           |
| 5388 | ENSG00000138175 | ARL3     | Supported |                      | Centrosome;Nucleoplasm         |

|      |                 |           |           |                         |                    |
|------|-----------------|-----------|-----------|-------------------------|--------------------|
| 5389 | ENSG00000138180 | CEP55     | Supported | Centriola               | Plasma membrane    |
| 5390 | ENSG00000138182 | KIF20B    | Supported | Cytokinetic bridge;     | Cytosol;           |
| 5391 | ENSG00000138185 | ENTPD1    | Uncertain |                         | Microtubuli        |
| 5392 | ENSG00000138190 | EXOC6     | Supported | Vesicles                | Nucleoplasm        |
| 5393 | ENSG00000138193 | PLCE1     | Supported |                         | Cytosol            |
| 5394 | ENSG00000138231 | DBR1      | Enhanced  | Nucleoplasm             |                    |
| 5395 | ENSG00000138246 | DNAJC13   | Supported | Vesicles                | Cytosol            |
| 5396 | ENSG00000138271 | GPR87     | Approved  |                         | Lipid droplets;Mit |
| 5397 | ENSG00000138279 | ANXA7     | Approved  |                         | Cytosol;Nucleoplas |
| 5398 | ENSG00000138286 | FAM149B1  | Approved  |                         | Nucleoplasm        |
| 5399 | ENSG00000138303 | ASCC1     | Approved  |                         | Cytosol;Nucleoplas |
| 5400 | ENSG00000138311 | ZNF365    | Supported | Centriola               | Vesicles           |
| 5401 | ENSG00000138326 | RPS24     | Approved  |                         | Cytosol;Endoplasm  |
| 5402 | ENSG00000138336 | TET1      | Supported | Nuclear membrane;       | Nucleoplas         |
| 5403 | ENSG00000138346 | DNA2      | Supported | Mitochondria            |                    |
| 5404 | ENSG00000138347 | MYPN      | Approved  |                         | Cytosol;Nucleoplas |
| 5405 | ENSG00000138363 | ATIC      | Enhanced  | Cytosol;Plasma membrane |                    |
| 5406 | ENSG00000138376 | BARD1     | Supported | Nuclear speckles        | Cytoplasm          |
| 5407 | ENSG00000138380 | CARF      | Approved  |                         | Cytosol;Nucleoli f |
| 5408 | ENSG00000138381 | ASNSD1    | Approved  |                         | Cytosol            |
| 5409 | ENSG00000138382 | METTL5    | Approved  |                         | Cytosol;Nucleoli   |
| 5410 | ENSG00000138385 | SSB       | Approved  |                         | Nucleoplasm        |
| 5411 | ENSG00000138386 | NAB1      | Approved  |                         | Golgi apparatus;Nu |
| 5412 | ENSG00000138395 | CDK15     | Approved  |                         | Golgi apparatus;Nu |
| 5413 | ENSG00000138398 | PPIG      | Supported | Nuclear speckles        | Cytosol            |
| 5414 | ENSG00000138399 | FASTKD1   | Approved  |                         | Nucleoplasm        |
| 5415 | ENSG00000138413 | IDH1      | Approved  | Cytosol                 | Nuclear bodies     |
| 5416 | ENSG00000138430 | OLA1      | Enhanced  | Cytosol                 |                    |
| 5417 | ENSG00000138433 | CIR1      | Supported |                         | Nuclear speckles   |
| 5418 | ENSG00000138434 | SSFA2     | Supported | Cytosol                 | Nucleoplasm;Plasma |
| 5419 | ENSG00000138435 | CHRNA1    | Supported |                         | Plasma membrane    |
| 5420 | ENSG00000138439 | FAM117B   | Approved  |                         | Centrosome;Nucleop |
| 5421 | ENSG00000138442 | WDR12     | Approved  |                         | Cytosol;Nucleoli;P |
| 5422 | ENSG00000138443 | ABI2      | Approved  |                         | Nucleoplasm;Vesic  |
| 5423 | ENSG00000138448 | ITGAV     | Approved  | Focal adhesion sit      | Cytosol            |
| 5424 | ENSG00000138449 | SLC40A1   | Approved  | Plasma me               | Cytosol;Nucleoplas |
| 5425 | ENSG00000138459 | SLC35A5   | Approved  |                         | Golgi apparatus    |
| 5426 | ENSG00000138463 | DIRC2     | Supported | Vesicles                |                    |
| 5427 | ENSG00000138468 | SENP7     | Approved  |                         | Cytosol;Nucleoplas |
| 5428 | ENSG00000138472 | GUCA1C    | Approved  |                         | Focal adhesion sit |
| 5429 | ENSG00000138495 | COX17     | Supported | Mitochondria            |                    |
| 5430 | ENSG00000138496 | PARP9     | Supported | Cytosol;N               | Mitochondria       |
| 5431 | ENSG00000138587 | MNS1      | Approved  |                         | Nuclear speckles;N |
| 5432 | ENSG00000138592 | USP8      | Supported | Cytosol;Golgi apparatus |                    |
| 5433 | ENSG00000138593 | SECISBP2L | Approved  |                         | Nucleoplasm        |
| 5434 | ENSG00000138594 | TMOD3     | Approved  |                         | Actin filaments;Cy |
| 5435 | ENSG00000138600 | SPPL2A    | Supported | Vesicles                |                    |
| 5436 | ENSG00000138604 | GLCE      | Approved  |                         | Mitochondria       |
| 5437 | ENSG00000138606 | SHF       | Approved  |                         | Nucleoplasm        |
| 5438 | ENSG00000138614 | INTS14    | Approved  |                         | Mitochondria;Nucle |
| 5439 | ENSG00000138621 | PPCDC     | Approved  |                         | Cytosol            |
| 5440 | ENSG00000138623 | SEMA7A    | Uncertain |                         | Vesicles           |
| 5441 | ENSG00000138629 | UBL7      | Approved  |                         | Cytosol;Nucleoplas |
| 5442 | ENSG00000138639 | ARHGAP24  | Approved  |                         | Cytosol;Plasma mem |
| 5443 | ENSG00000138640 | FAM13A    | Approved  |                         | Cell Junctions;Cy  |

|      |                 |           |           |                         |                             |
|------|-----------------|-----------|-----------|-------------------------|-----------------------------|
| 5444 | ENSG00000138641 | HERC3     | Approved  |                         | Cytosol                     |
| 5445 | ENSG00000138642 | HERC6     | Approved  | Cytosol                 | Nucleopla                   |
| 5446 | ENSG00000138650 | PCDH10    | Approved  |                         | Golgi apparatus;Nu          |
| 5447 | ENSG00000138658 | ZGRF1     | Approved  |                         | Cytosol                     |
| 5448 | ENSG00000138660 | AP1AR     | Supported |                         | Golgi apparatus             |
| 5449 | ENSG00000138663 | COPS4     | Supported |                         | Nuclear speckles            |
| 5450 | ENSG00000138668 | HNRNPD    | Enhanced  | Nucleoplasm             |                             |
| 5451 | ENSG00000138670 | RASGEF1B  | Approved  |                         | Nucleoplasm;Vesicl          |
| 5452 | ENSG00000138674 | SEC31A    | Supported |                         | Vesicles Cytosol            |
| 5453 | ENSG00000138675 | FGF5      | Supported |                         | Nucleoli Cytosol            |
| 5454 | ENSG00000138678 | GPAT3     | Uncertain |                         | Cytosol;P                   |
| 5455 | ENSG00000138685 | FGF2      | Supported |                         | Nuclear bodies;Nucleoplasm  |
| 5456 | ENSG00000138688 | KIAA1109  | Approved  |                         | Centrosome;Nucleop          |
| 5457 | ENSG00000138698 | RAP1GDS1  | Supported |                         | Cytosol                     |
| 5458 | ENSG00000138709 | LARP1B    | Approved  |                         | Cytosol                     |
| 5459 | ENSG00000138722 | MMRN1     | Approved  |                         | Endoplasmic reticu          |
| 5460 | ENSG00000138735 | PDE5A     | Approved  |                         | Centriolar satelli          |
| 5461 | ENSG00000138738 | PRDM5     | Supported |                         | Nuclear bodies;Nucleoli;Nuc |
| 5462 | ENSG00000138750 | NUP54     | Approved  |                         | Nucleoplasm                 |
| 5463 | ENSG00000138756 | BMP2K     | Supported |                         | Nuclear speckles            |
| 5464 | ENSG00000138757 | G3BP2     | Enhanced  | Cytosol                 |                             |
| 5465 | ENSG00000138758 | #####     | Approved  |                         | Cytosol                     |
| 5466 | ENSG00000138760 | SCARB2    | Approved  |                         | Cytosol                     |
| 5467 | ENSG00000138764 | CCNG2     | Approved  |                         | Cytosol;Nucleoplas          |
| 5468 | ENSG00000138767 | CNOT6L    | Supported |                         | Cytosol                     |
| 5469 | ENSG00000138768 | USO1      | Supported | Golgi apparatus         | Nucleoli fibrillar          |
| 5470 | ENSG00000138769 | CDKL2     | Approved  |                         | NucleoplaCentrosome         |
| 5471 | ENSG00000138772 | ANXA3     | Enhanced  | Cytosol                 |                             |
| 5472 | ENSG00000138777 | PPA2      | Approved  |                         | Mitochondria;Nucle          |
| 5473 | ENSG00000138778 | CENPE     | Approved  |                         | Cytosol;Microtubul          |
| 5474 | ENSG00000138780 | GSTCD     | Supported |                         | Nucleoplasm                 |
| 5475 | ENSG00000138785 | INTS12    | Approved  |                         | Nuclear bodies;NucCytosol;P |
| 5476 | ENSG00000138794 | CASP6     | Supported |                         | Cytosol Nucleoplasm         |
| 5477 | ENSG00000138795 | LEF1      | Approved  |                         | Nucleoplasm                 |
| 5478 | ENSG00000138796 | HADH      | Supported |                         | Mitochondria                |
| 5479 | ENSG00000138801 | PAPSS1    | Approved  |                         | Nucleoli;Nucleopla          |
| 5480 | ENSG00000138802 | SEC24B    | Approved  |                         | Nucleoplasm;Vesicl          |
| 5481 | ENSG00000138814 | PPP3CA    | Enhanced  | Cytosol;Nucleoplasm     |                             |
| 5482 | ENSG00000138823 | MTTP      | Approved  |                         | Cytosol                     |
| 5483 | ENSG00000138829 | FBN2      | Approved  |                         | Cytosol;Nucleoplas          |
| 5484 | ENSG00000138834 | MAPK8IP3  | Approved  |                         | Vesicles                    |
| 5485 | ENSG00000138835 | RGS3      | Supported |                         | Plasma membrane             |
| 5486 | ENSG00000138867 | GUCD1     | Approved  |                         | Nucleoplasm                 |
| 5487 | ENSG00000138944 | SHISAL1   | Approved  |                         | Cytosol;Vesicles            |
| 5488 | ENSG00000139044 | B4GALNT3  | Supported |                         | Golgi appVesicles           |
| 5489 | ENSG00000139053 | PDE6H     | Uncertain |                         | Vesicles                    |
| 5490 | ENSG00000139083 | ETV6      | Approved  |                         | Cytosol;Nucleoli            |
| 5491 | ENSG00000139112 | GABARAPL1 | Approved  |                         | Vesicles                    |
| 5492 | ENSG00000139116 | KIF21A    | Enhanced  | Cytosol;Plasma membrane |                             |
| 5493 | ENSG00000139131 | YARS2     | Supported |                         | MitochondNuclear bodies     |
| 5494 | ENSG00000139132 | FGD4      | Supported |                         | Actin filaments             |
| 5495 | ENSG00000139133 | ALG10     | Approved  |                         | Endoplasmic reticu          |
| 5496 | ENSG00000139146 | SINHCAF   | Approved  |                         | Cytosol;Nucleoplas          |
| 5497 | ENSG00000139154 | AEBP2     | Enhanced  | Nucleoplasm             |                             |
| 5498 | ENSG00000139163 | ETNK1     | Supported |                         | Cytosol;Nucleoplasm;Plasma  |



|      |                 |          |           |             |                            |
|------|-----------------|----------|-----------|-------------|----------------------------|
| 5499 | ENSG00000139174 | PRICKLE1 | Approved  |             | Nucleoplasm                |
| 5500 | ENSG00000139178 | C1RL     | Approved  |             | Cytosol;Microtubul         |
| 5501 | ENSG00000139180 | NDUFA9   | Supported |             | MitochondNucleoplasm       |
| 5502 | ENSG00000139187 | KLRG1    | Enhanced  | Vesicles    |                            |
| 5503 | ENSG00000139194 | RBP5     | Approved  |             | Golgi apparatus;Ve         |
| 5504 | ENSG00000139197 | PEX5     | Supported |             | Cytosol;Golgi apparatus    |
| 5505 | ENSG00000139200 | PIANP    | Approved  |             | Nucleoplasm                |
| 5506 | ENSG00000139211 | AMIG02   | Approved  |             | Cytosol;Golgi appa         |
| 5507 | ENSG00000139218 | SCAF11   | Enhanced  | Nucleopla   | Nuclear bodies             |
| 5508 | ENSG00000139219 | COL2A1   | Approved  |             | Nucleoplasm                |
| 5509 | ENSG00000139223 | ANP32D   | Enhanced  | Centrosom   | Cytosol                    |
| 5510 | ENSG00000139233 | LLPH     | Enhanced  | Nucleoli    |                            |
| 5511 | ENSG00000139263 | LRIG3    | Approved  |             | Cytosol                    |
| 5512 | ENSG00000139269 | INHBE    | Supported |             | Vesicles                   |
| 5513 | ENSG00000139289 | PHLDA1   | Supported |             | Nucleoli Nucleopla         |
| 5514 | ENSG00000139304 | PTPRQ    | Approved  |             | Cytosol                    |
| 5515 | ENSG00000139318 | DUSP6    | Supported | Cytosol     | Nucleoplasm                |
| 5516 | ENSG00000139344 | AMDHD1   | Approved  |             | Cytosol;Nucleoplas         |
| 5517 | ENSG00000139350 | NEDD1    | Approved  | Centrosom   | Nucleoplasm;Plasma         |
| 5518 | ENSG00000139352 | ASCL1    | Approved  |             | Cytosol;Nucleoplas         |
| 5519 | ENSG00000139370 | SLC15A4  | Supported |             | Nucleoplasm                |
| 5520 | ENSG00000139372 | TDG      | Supported |             | Nucleoplasm                |
| 5521 | ENSG00000139405 | RITA1    | Supported |             | Nucleoplasm                |
| 5522 | ENSG00000139410 | SDSL     | Approved  |             | Cytosol                    |
| 5523 | ENSG00000139428 | MMAB     | Approved  |             | Mitochondria               |
| 5524 | ENSG00000139433 | GLTP     | Supported |             | Cytosol                    |
| 5525 | ENSG00000139436 | GIT2     | Approved  |             | Microtubules               |
| 5526 | ENSG00000139437 | TCHP     | Supported |             | Cytosol;PCentrosome        |
| 5527 | ENSG00000139438 | FAM222A  | Approved  |             | Focal adhesion sit         |
| 5528 | ENSG00000139445 | FOXN4    | Approved  |             | Cytosol;Mitochondr         |
| 5529 | ENSG00000139508 | SLC46A3  | Approved  |             | Actin filaments;Cy         |
| 5530 | ENSG00000139515 | PDX1     | Supported |             | Nucleoplasm                |
| 5531 | ENSG00000139517 | LNx2     | Approved  |             | Cytosol;Plasma mem         |
| 5532 | ENSG00000139537 | CCDC65   | Approved  |             | Centriolar satelli         |
| 5533 | ENSG00000139540 | SLC39A5  | Approved  |             | Nucleoplasm;Vesicl         |
| 5534 | ENSG00000139546 | TARBP2   | Supported |             | NucleoplaNuclear bodies    |
| 5535 | ENSG00000139579 | NABP2    | Enhanced  | Nucleoplasm |                            |
| 5536 | ENSG00000139597 | N4BP2L1  | Uncertain |             | Cytosol;N                  |
| 5537 | ENSG00000139613 | SMARCC2  | Enhanced  | Nucleoplasm |                            |
| 5538 | ENSG00000139618 | BRCA2    | Approved  |             | NucleoplaCytosol           |
| 5539 | ENSG00000139620 | KANSL2   | Supported |             | Cytosol;Nucleoplasm;Plasma |
| 5540 | ENSG00000139624 | CERS5    | Approved  |             | Nucleoli;Nucleopla         |
| 5541 | ENSG00000139625 | MAP3K12  | Approved  |             | Cell Junctions;Nuc         |
| 5542 | ENSG00000139626 | ITGB7    | Uncertain |             | Cytosol;P                  |
| 5543 | ENSG00000139629 | GALNT6   | Approved  |             | Golgi apparatus;Nu         |
| 5544 | ENSG00000139637 | C12orf10 | Supported |             | Nucleoplasm                |
| 5545 | ENSG00000139641 | ESYT1    | Supported |             | Endoplasmic reticulum      |
| 5546 | ENSG00000139645 | ANKRD52  | Approved  |             | Mitochondria;Nucle         |
| 5547 | ENSG00000139651 | ZNF740   | Approved  |             | Nucleoplasm                |
| 5548 | ENSG00000139656 | SMIM2    | Uncertain |             | Nuclear b                  |
| 5549 | ENSG00000139684 | ESD      | Approved  |             | Cytosol;Golgi apparatus    |
| 5550 | ENSG00000139687 | RB1      | Enhanced  | Nucleoplasm |                            |
| 5551 | ENSG00000139697 | SBN01    | Approved  |             | Nucleoplasm                |
| 5552 | ENSG00000139714 | MORN3    | Approved  |             | Nucleoplasm                |
| 5553 | ENSG00000139718 | SETD1B   | Enhanced  | Nucleoplasm |                            |

|      |                 |           |           |                          |                             |
|------|-----------------|-----------|-----------|--------------------------|-----------------------------|
| 5554 | ENSG00000139719 | VPS33A    | Approved  |                          | Nucleoplasm                 |
| 5555 | ENSG00000139725 | RHOF      | Approved  |                          | Golgi apparatus;Nu          |
| 5556 | ENSG00000139726 | DENR      | Approved  |                          | Cytosol                     |
| 5557 | ENSG00000139734 | DIAPH3    | Supported |                          | Microtubules;Plasma membran |
| 5558 | ENSG00000139746 | RBM26     | Approved  |                          | Nuclear speckles            |
| 5559 | ENSG00000139793 | MBNL2     | Supported |                          | Nucleoplasm                 |
| 5560 | ENSG00000139800 | ZIC5      | Uncertain |                          | Nucleopla                   |
| 5561 | ENSG00000139826 | ABHD13    | Approved  |                          | Cytosol                     |
| 5562 | ENSG00000139832 | RAB20     | Enhanced  | Golgi apparatus;Vesicles |                             |
| 5563 | ENSG00000139842 | CUL4A     | Approved  |                          | Nucleoplasm                 |
| 5564 | ENSG00000139865 | TTC6      | Approved  |                          | Centrosome                  |
| 5565 | ENSG00000139874 | SSTR1     | Supported |                          | Plasma membrane             |
| 5566 | ENSG00000139880 | CDH24     | Approved  |                          | Cell Junctions;Cen          |
| 5567 | ENSG00000139899 | CBLN3     | Approved  |                          | Nucleoplasm                 |
| 5568 | ENSG00000139908 | TSSK4     | Approved  |                          | Cell Junctions              |
| 5569 | ENSG00000139910 | NOVA1     | Supported |                          | Nucleoli;Nucleoplasm        |
| 5570 | ENSG00000139921 | TMX1      | Supported |                          | Endoplasmic reticulum;Nucle |
| 5571 | ENSG00000139926 | FRMD6     | Approved  |                          | Mitochondria                |
| 5572 | ENSG00000139946 | PELI2     | Approved  |                          | Intermediate filam          |
| 5573 | ENSG00000139970 | RTN1      | Supported | Endoplasmic reticu       | Nuclear bodies              |
| 5574 | ENSG00000139971 | C14orf37  | Approved  |                          | Plasma membrane             |
| 5575 | ENSG00000139973 | SYT16     | Approved  |                          | Cytosol                     |
| 5576 | ENSG00000139974 | SLC38A6   | Approved  |                          | Cell Junctions;Mic          |
| 5577 | ENSG00000139977 | NAA30     | Supported |                          | Cytosol                     |
| 5578 | ENSG00000139990 | DCAF5     | Approved  |                          | Mitochondria                |
| 5579 | ENSG00000139998 | RAB15     | Approved  |                          | Centriolar satelli          |
| 5580 | ENSG00000140006 | WDR89     | Approved  |                          | Cytosol;Intermedia          |
| 5581 | ENSG00000140015 | KCNH5     | Approved  |                          | Centrosome;Cytosol          |
| 5582 | ENSG00000140022 | STON2     | Supported |                          | Cytosol Nucleoli            |
| 5583 | ENSG00000140025 | EFCAB11   | Approved  |                          | Cell Junctions;Cyt          |
| 5584 | ENSG00000140030 | GPR65     | Approved  |                          | Cytosol;Nucleoli;V          |
| 5585 | ENSG00000140043 | PTGR2     | Approved  |                          | Vesicles                    |
| 5586 | ENSG00000140044 | JDP2      | Approved  |                          | Nuclear speckles;N          |
| 5587 | ENSG00000140092 | FBLN5     | Supported |                          | Plasma membrane             |
| 5588 | ENSG00000140093 | SERPINA10 | Approved  |                          | Cytosol;Nucleoplas          |
| 5589 | ENSG00000140104 | CLBA1     | Approved  |                          | Cytosol;Nuclear bo          |
| 5590 | ENSG00000140105 | WARS      | Enhanced  | Cytosol                  |                             |
| 5591 | ENSG00000140157 | NIPA2     | Approved  |                          | Golgi apparatus             |
| 5592 | ENSG00000140199 | SLC12A6   | Approved  |                          | Cytosol;Vesicles            |
| 5593 | ENSG00000140259 | MFAP1     | Supported |                          | Nucleoplasm Centrosom       |
| 5594 | ENSG00000140262 | TCF12     | Supported |                          | Nuclear speckles;Nucleoplas |
| 5595 | ENSG00000140263 | SORD      | Approved  |                          | Cytosol                     |
| 5596 | ENSG00000140264 | SERF2     | Uncertain |                          | Nucleoli;                   |
| 5597 | ENSG00000140265 | ZSCAN29   | Approved  |                          | Actin filaments;Nu          |
| 5598 | ENSG00000140280 | LYSMD2    | Approved  |                          | Mitochondria;Nucle          |
| 5599 | ENSG00000140285 | FGF7      | Approved  |                          | Nucleoli;Nucleopla          |
| 5600 | ENSG00000140287 | HDC       | Approved  |                          | Nuclear bodies              |
| 5601 | ENSG00000140297 | GCNT3     | Approved  |                          | Golgi apparatus;Ve          |
| 5602 | ENSG00000140307 | GTF2A2    | Supported |                          | Nucleoplasm                 |
| 5603 | ENSG00000140319 | SRP14     | Approved  |                          | Nucleoli;Nucleopla          |
| 5604 | ENSG00000140320 | BAHD1     | Supported |                          | Nucleoplasm                 |
| 5605 | ENSG00000140323 | DISP2     | Approved  |                          | Nucleoplasm;Vesicl          |
| 5606 | ENSG00000140326 | CDAN1     | Enhanced  | Cytosol                  | Plasma membrane             |
| 5607 | ENSG00000140332 | TLE3      | Supported |                          | Nucleoplasm                 |
| 5608 | ENSG00000140350 | ANP32A    | Enhanced  | Centrosom                | Cytosol                     |

|      |                 |          |           |                             |
|------|-----------------|----------|-----------|-----------------------------|
| 5609 | ENSG00000140365 | COMMD4   | Supported | NucleoplaPlasma membrane    |
| 5610 | ENSG00000140374 | ETFA     | Enhanced  | Mitochondria                |
| 5611 | ENSG00000140382 | HMG20A   | Approved  | Nucleoplasm                 |
| 5612 | ENSG00000140386 | SCAPER   | Supported | NucleoplaCytosol            |
| 5613 | ENSG00000140391 | TSPAN3   | Approved  | Golgi apparatus;Nu          |
| 5614 | ENSG00000140395 | WDR61    | Enhanced  | NucleoplaCytosol            |
| 5615 | ENSG00000140396 | NCOA2    | Supported | Nuclear bodies;Nucleoplasm  |
| 5616 | ENSG00000140398 | NEIL1    | Supported | Nucleoplasm                 |
| 5617 | ENSG00000140400 | MAN2C1   | Enhanced  | Nucleoplasm                 |
| 5618 | ENSG00000140403 | DNAJA4   | Approved  | Cytosol;Plasma mem          |
| 5619 | ENSG00000140406 | TLNRD1   | Approved  | Cytoplasmic bodies          |
| 5620 | ENSG00000140416 | TPM1     | Approved  | Actin filaments;Cy          |
| 5621 | ENSG00000140443 | IGF1R    | Approved  | Vesicles                    |
| 5622 | ENSG00000140450 | ARRDC4   | Supported | Plasma membrane;Vesicles    |
| 5623 | ENSG00000140451 | PIF1     | Supported | Nucleoplasm                 |
| 5624 | ENSG00000140455 | USP3     | Supported | Nucleoplasm                 |
| 5625 | ENSG00000140463 | BBS4     | Supported | Cytosol                     |
| 5626 | ENSG00000140464 | PML      | Enhanced  | Nuclear bodies              |
| 5627 | ENSG00000140470 | ADAMTS17 | Approved  | Nucleoplasm                 |
| 5628 | ENSG00000140471 | LINS1    | Approved  | Nucleoplasm                 |
| 5629 | ENSG00000140497 | SCAMP2   | Supported | Golgi apparatus;Vesicles    |
| 5630 | ENSG00000140511 | HAPLN3   | Approved  | Cytosol;Plasma mem          |
| 5631 | ENSG00000140521 | POLG     | Supported | Mitochondria                |
| 5632 | ENSG00000140522 | RLBP1    | Supported | Cytosol Centrosome;Nucleop  |
| 5633 | ENSG00000140525 | FANCI    | Enhanced  | Nucleoplasm                 |
| 5634 | ENSG00000140526 | ABHD2    | Approved  | Cytosol;Nucleoplas          |
| 5635 | ENSG00000140527 | WDR93    | Uncertain | Actin fil                   |
| 5636 | ENSG00000140534 | TICRR    | Enhanced  | Nucleoplasm                 |
| 5637 | ENSG00000140538 | NTRK3    | Supported | Nucleoli Nuclear membrane   |
| 5638 | ENSG00000140543 | DET1     | Approved  | Cytokinetic bridge          |
| 5639 | ENSG00000140545 | MFGE8    | Approved  | Cytosol                     |
| 5640 | ENSG00000140548 | ZNF710   | Approved  | Mitochondria;Nucle          |
| 5641 | ENSG00000140553 | UNC45A   | Supported | Cytosol;Nuclear speckles    |
| 5642 | ENSG00000140557 | ST8SIA2  | Approved  | Centriolar satelli          |
| 5643 | ENSG00000140563 | MCTP2    | Enhanced  | Cytosol;Nucleoplasm         |
| 5644 | ENSG00000140564 | FURIN    | Supported | Golgi appNucleoplasm        |
| 5645 | ENSG00000140575 | IQGAP1   | Supported | Cell Junctions;Plasma membr |
| 5646 | ENSG00000140577 | CRTC3    | Enhanced  | Cytosol;Nucleoplasm         |
| 5647 | ENSG00000140598 | EFL1     | Approved  | Cytosol                     |
| 5648 | ENSG00000140600 | SH3GL3   | Approved  | Mitochondria                |
| 5649 | ENSG00000140612 | SEC11A   | Approved  | Golgi apparatus;Nu          |
| 5650 | ENSG00000140623 | #####    | Uncertain | Microtubu                   |
| 5651 | ENSG00000140632 | GLYR1    | Supported | Nucleoplasm Cytosol         |
| 5652 | ENSG00000140650 | PMM2     | Approved  | Cytosol;Nucleoplas          |
| 5653 | ENSG00000140682 | TGFB1I1  | Supported | Focal adhCytosol            |
| 5654 | ENSG00000140688 | C16orf58 | Approved  | Cytosol;Golgi appa          |
| 5655 | ENSG00000140691 | ARMC5    | Approved  | Cytosol;Focal adhe          |
| 5656 | ENSG00000140694 | PARN     | Supported | Nuclear speckles            |
| 5657 | ENSG00000140718 | FTO      | Approved  | Cytosol;Vesicles            |
| 5658 | ENSG00000140740 | UQCRC2   | Enhanced  | Mitochondria                |
| 5659 | ENSG00000140743 | CDR2     | Approved  | Nucleoplasm                 |
| 5660 | ENSG00000140750 | ARHGAP17 | Approved  | Cytosol Nucleopla           |
| 5661 | ENSG00000140795 | MYLK3    | Approved  | Nucleoplasm;Vesicl          |
| 5662 | ENSG00000140807 | NKD1     | Approved  | Nucleoli fibrillar          |
| 5663 | ENSG00000140829 | DHX38    | Supported | Nucleoplasm                 |

|      |                 |          |           |                     |                                      |
|------|-----------------|----------|-----------|---------------------|--------------------------------------|
| 5664 | ENSG00000140830 | TXNL4B   | Supported | Nucleoplasm         | Cytosol                              |
| 5665 | ENSG00000140832 | MARVELD3 | Approved  |                     | Intermediate filament                |
| 5666 | ENSG00000140848 | CPNE2    | Approved  |                     | Cytosol;Mitochondrion                |
| 5667 | ENSG00000140853 | NLRC5    | Enhanced  | Centrosome          |                                      |
| 5668 | ENSG00000140854 | KATNB1   | Supported |                     | Cytosol;Plasma membrane              |
| 5669 | ENSG00000140873 | ADAMTS18 | Approved  |                     | Midbody;Mitotic spindle              |
| 5670 | ENSG00000140876 | NUDT7    | Approved  |                     | Golgi apparatus;Nucleolus            |
| 5671 | ENSG00000140905 | GCSH     | Approved  |                     | Vesicles                             |
| 5672 | ENSG00000140931 | CMTM3    | Approved  |                     | Nucleoplasm                          |
| 5673 | ENSG00000140939 | NOL3     | Supported |                     | Cytosol;Nucleoplasm                  |
| 5674 | ENSG00000140941 | MAP1LC3B | Approved  |                     | Vesicles Nucleoplasm                 |
| 5675 | ENSG00000140945 | CDH13    | Supported |                     | Plasma membrane                      |
| 5676 | ENSG00000140948 | ZCCHC14  | Uncertain |                     | Nuclear membrane                     |
| 5677 | ENSG00000140950 | TLDC1    | Supported |                     | Cytosol Nucleolus;                   |
| 5678 | ENSG00000140961 | OSGIN1   | Approved  |                     | Cytosol;Nucleoplasm                  |
| 5679 | ENSG00000140968 | IRF8     | Enhanced  | Nucleoplasm         |                                      |
| 5680 | ENSG00000140983 | RHOT2    | Supported |                     | Mitochondria Nucleoplasm             |
| 5681 | ENSG00000140986 | RPL3L    | Approved  |                     | Nuclear speckles                     |
| 5682 | ENSG00000140987 | ZSCAN32  | Approved  |                     | Nucleoplasm                          |
| 5683 | ENSG00000140988 | RPS2     | Approved  |                     | Cytosol;Endoplasmic reticulum        |
| 5684 | ENSG00000140992 | PDPK1    | Approved  |                     | Vesicles                             |
| 5685 | ENSG00000140993 | TIGD7    | Supported |                     | Cytosol;Plasma membrane              |
| 5686 | ENSG00000140995 | DEF8     | Approved  |                     | Cytosol;Nucleoplasm                  |
| 5687 | ENSG00000141012 | GALNS    | Approved  |                     | Cytosol                              |
| 5688 | ENSG00000141013 | GAS8     | Approved  |                     | Cytosol;Plasma membrane              |
| 5689 | ENSG00000141026 | MED9     | Approved  |                     | Midbody;Nucleoplasm                  |
| 5690 | ENSG00000141027 | NCOR1    | Enhanced  | Cytosol;Nucleoplasm |                                      |
| 5691 | ENSG00000141030 | COPS3    | Supported |                     | Cytosol;Nucleoplasm                  |
| 5692 | ENSG00000141034 | GID4     | Approved  |                     | Cytosol                              |
| 5693 | ENSG00000141040 | ZNF287   | Approved  |                     | Golgi apparatus                      |
| 5694 | ENSG00000141052 | MYOCD    | Approved  |                     | Nucleoplasm                          |
| 5695 | ENSG00000141076 | UTP4     | Supported |                     | Nucleolus fibrillar center           |
| 5696 | ENSG00000141098 | GFOD2    | Supported |                     | Nucleoplasm                          |
| 5697 | ENSG00000141101 | NOB1     | Approved  |                     | Cytosol;Focal adhesion               |
| 5698 | ENSG00000141127 | PRPSAP2  | Approved  |                     | Cytosol;Nucleoplasm                  |
| 5699 | ENSG00000141161 | UNC45B   | Supported |                     | Cytosol                              |
| 5700 | ENSG00000141179 | PCTP     | Approved  |                     | Nucleolus;Nucleoplasm                |
| 5701 | ENSG00000141200 | KIF2B    | Supported | Mitotic spindle     | Cytokinesis Nucleolus                |
| 5702 | ENSG00000141219 | C17orf80 | Approved  |                     | Nucleoplasm;Vesicles                 |
| 5703 | ENSG00000141232 | TOB1     | Approved  |                     | Nucleoplasm;Vesicles                 |
| 5704 | ENSG00000141258 | SGSM2    | Approved  |                     | Cytosol;Nucleoplasm                  |
| 5705 | ENSG00000141279 | NPEPPS   | Supported |                     | Cytosol                              |
| 5706 | ENSG00000141293 | SKAP1    | Approved  |                     | Cytosol;Nucleoplasm                  |
| 5707 | ENSG00000141294 | LRRC46   | Approved  |                     | Cytosol                              |
| 5708 | ENSG00000141295 | SCRN2    | Supported |                     | Nucleoplasm                          |
| 5709 | ENSG00000141338 | ABCA8    | Approved  |                     | Golgi apparatus                      |
| 5710 | ENSG00000141349 | G6PC3    | Supported |                     | Cytosol;Nucleoplasm                  |
| 5711 | ENSG00000141367 | CLTC     | Enhanced  | Endosomes           | Mitotic spindle                      |
| 5712 | ENSG00000141371 | C17orf64 | Approved  |                     | Cytosol                              |
| 5713 | ENSG00000141376 | BCAS3    | Approved  |                     | Nucleoplasm;Vesicles                 |
| 5714 | ENSG00000141378 | PTRH2    | Supported |                     | Nucleolus                            |
| 5715 | ENSG00000141380 | SS18     | Supported |                     | Mitochondria                         |
| 5716 | ENSG00000141384 | TAF4B    | Supported |                     | Cytosol;Nucleoplasm                  |
| 5717 | ENSG00000141385 | AFG3L2   | Supported |                     | Nucleolus fibrillar center;Nucleolus |
| 5718 | ENSG00000141401 | IMPA2    | Approved  |                     | Mitochondria                         |
|      |                 |          |           |                     | Mitochondria;Nucleolus               |

|      |                 |           |           |                         |                       |
|------|-----------------|-----------|-----------|-------------------------|-----------------------|
| 5719 | ENSG00000141404 | GNAL      | Approved  |                         | Cytosol;Nucleoplas    |
| 5720 | ENSG00000141424 | SLC39A6   | Uncertain | Plasma membrane         | Cytosol;N             |
| 5721 | ENSG00000141425 | RPRD1A    | Supported | Nucleoplas              | Golgi apparatus       |
| 5722 | ENSG00000141428 | C18orf21  | Approved  |                         | Nucleoli;Plasma me    |
| 5723 | ENSG00000141437 | SLC25A52  | Approved  |                         | Mitochondria          |
| 5724 | ENSG00000141441 | GAREM1    | Approved  |                         | Cytosol;Nucleoplas    |
| 5725 | ENSG00000141447 | OSBPL1A   | Approved  |                         | Cytosol Nucleopla     |
| 5726 | ENSG00000141448 | GATA6     | Supported | Nucleoplasm             |                       |
| 5727 | ENSG00000141449 | GREB1L    | Approved  |                         | Cytosol               |
| 5728 | ENSG00000141452 | RMC1      | Uncertain |                         | Nucleopla             |
| 5729 | ENSG00000141456 | PELP1     | Enhanced  | Nucleoli;Nucleoplasm    |                       |
| 5730 | ENSG00000141458 | NPC1      | Supported | Vesicles                | Nucleoplasm           |
| 5731 | ENSG00000141469 | SLC14A1   | Supported | Plasma membrane         |                       |
| 5732 | ENSG00000141480 | ARRB2     | Supported | Vesicles                |                       |
| 5733 | ENSG00000141485 | SLC13A5   | Supported | Plasma membrane         | Cytosol;N             |
| 5734 | ENSG00000141497 | ZMYND15   | Uncertain |                         | Cytosol;N             |
| 5735 | ENSG00000141499 | WRAP53    | Enhanced  | Cytosol;Nuclear bo      | Nucleoplasm           |
| 5736 | ENSG00000141505 | ASGR1     | Supported | Vesicles                | Cell Junctions        |
| 5737 | ENSG00000141506 | PIK3R5    | Supported | Centriolar satellite;   | Cytoso                |
| 5738 | ENSG00000141510 | TP53      | Enhanced  | Nucleoplasm             |                       |
| 5739 | ENSG00000141519 | CCDC40    | Approved  |                         | Microtubules          |
| 5740 | ENSG00000141522 | ARHGDI1A  | Supported | Cytosol                 |                       |
| 5741 | ENSG00000141526 | SLC16A3   | Supported | Plasma me               | Nuclear membrane      |
| 5742 | ENSG00000141542 | RAB40B    | Approved  |                         | Vesicles              |
| 5743 | ENSG00000141543 | EIF4A3    | Supported | Nucleoplasm             |                       |
| 5744 | ENSG00000141551 | CSNK1D    | Approved  | Nucleopla               | Nucleoli fibrillar    |
| 5745 | ENSG00000141552 | ANAPC11   | Enhanced  | Nucleoli;Nucleoplasm    |                       |
| 5746 | ENSG00000141560 | FN3KRP    | Approved  |                         | Nucleoplasm           |
| 5747 | ENSG00000141562 | NARF      | Supported | Nucleopla               | Nucleoli              |
| 5748 | ENSG00000141564 | RPTOR     | Enhanced  | Lysosomes               | Vesicles              |
| 5749 | ENSG00000141568 | FOXK2     | Supported |                         | Nucleoplasm Mitochond |
| 5750 | ENSG00000141569 | TRIM65    | Supported | Nucleopla               | Cytosol Vesicles      |
| 5751 | ENSG00000141570 | CBX8      | Enhanced  | Nucleoplasm             |                       |
| 5752 | ENSG00000141576 | RNF157    | Approved  |                         | Golgi apparatus;Ve    |
| 5753 | ENSG00000141577 | CEP131    | Supported | Centriolar satellite;   | Cytoki                |
| 5754 | ENSG00000141580 | WDR45B    | Approved  |                         | Cytosol;Golgi appa    |
| 5755 | ENSG00000141582 | CBX4      | Enhanced  | Nucleopla               | Nuclear bodies        |
| 5756 | ENSG00000141622 | RNF165    | Approved  |                         | Nucleoplasm;Plasma    |
| 5757 | ENSG00000141627 | DYM       | Supported |                         | Golgi apparatus       |
| 5758 | ENSG00000141639 | MAPK4     | Approved  |                         | Golgi apparatus;Mi    |
| 5759 | ENSG00000141642 | ELAC1     | Supported |                         | Cytosol;Nucleoplasm   |
| 5760 | ENSG00000141644 | MBD1      | Enhanced  | Nucleoplasm;            | Vesicles              |
| 5761 | ENSG00000141646 | SMAD4     | Supported |                         | Cytosol;NCentrosome   |
| 5762 | ENSG00000141655 | TNFRSF11A | Supported | Plasma membrane         | Cytosol               |
| 5763 | ENSG00000141664 | ZCCHC2    | Approved  |                         | Cytosol;Nucleoli;N    |
| 5764 | ENSG00000141682 | PMAIP1    | Approved  |                         | Vesicles              |
| 5765 | ENSG00000141699 | RETREG3   | Approved  |                         | Cytosol;Nuclear me    |
| 5766 | ENSG00000141736 | ERBB2     | Supported | Cytosol;Plasma membrane |                       |
| 5767 | ENSG00000141738 | GRB7      | Supported | Cytosol;Plasma membrane |                       |
| 5768 | ENSG00000141750 | STAC2     | Approved  |                         | Plasma membrane       |
| 5769 | ENSG00000141756 | FKBP10    | Approved  |                         | Vesicles              |
| 5770 | ENSG00000141759 | TXNL4A    | Approved  |                         | Cytosol;Nuclear me    |
| 5771 | ENSG00000141837 | CACNA1A   | Uncertain |                         | Endoplasm             |
| 5772 | ENSG00000141858 | SAMD1     | Approved  |                         | Cytosol;Mitochondr    |
| 5773 | ENSG00000141867 | BRD4      | Enhanced  | Nucleoplasm             |                       |

|      |                 |          |           |                     |                             |
|------|-----------------|----------|-----------|---------------------|-----------------------------|
| 5774 | ENSG00000141873 | SLC39A3  | Approved  |                     | Vesicles                    |
| 5775 | ENSG00000141905 | NFIC     | Supported |                     | Nucleoli fibrillar center;N |
| 5776 | ENSG00000141934 | PLPP2    | Approved  |                     | Mitochondria                |
| 5777 | ENSG00000141956 | PRDM15   | Supported |                     | Nuclear bodies;Nucleoplasm  |
| 5778 | ENSG00000141965 | FEM1A    | Supported |                     | Golgi appCytosol            |
| 5779 | ENSG00000141968 | VAV1     | Approved  |                     | Cytosol                     |
| 5780 | ENSG00000141971 | MVB12A   | Supported |                     | NucleoplaGolgi apparatus    |
| 5781 | ENSG00000141985 | SH3GL1   | Enhanced  | Cytosol             |                             |
| 5782 | ENSG00000141994 | DUS3L    | Approved  |                     | Cytosol;Nucleoplas          |
| 5783 | ENSG00000142002 | DPP9     | Supported |                     | Cytosol                     |
| 5784 | ENSG00000142039 | CCDC97   | Supported |                     | NucleoplaCytosol;Plasma mem |
| 5785 | ENSG00000142065 | ZFP14    | Approved  |                     | Nuclear speckles            |
| 5786 | ENSG00000142102 | PGGHG    | Enhanced  | Cytosol             |                             |
| 5787 | ENSG00000142149 | HUNK     | Approved  |                     | Nucleoplasm;Plasma          |
| 5788 | ENSG00000142156 | COL6A1   | Approved  |                     | Cytosol                     |
| 5789 | ENSG00000142168 | SOD1     | Supported | Cytosol;P           | Nucleoplasm                 |
| 5790 | ENSG00000142173 | COL6A2   | Approved  |                     | Cytosol;Plasma mem          |
| 5791 | ENSG00000142178 | SIK1     | Approved  |                     | Nucleoplasm;Vesicl          |
| 5792 | ENSG00000142182 | DNMT3L   | Approved  |                     | Nuclear speckles            |
| 5793 | ENSG00000142185 | TRPM2    | Approved  |                     | Nuclear membrane            |
| 5794 | ENSG00000142186 | SCYL1    | Supported | Cytosol             |                             |
| 5795 | ENSG00000142188 | TMEM50B  | Approved  |                     | Nucleoli fibrillar          |
| 5796 | ENSG00000142192 | APP      | Approved  |                     | Golgi apparatus;Ve          |
| 5797 | ENSG00000142197 | DOPEY2   | Approved  |                     | Mitochondria;Nucle          |
| 5798 | ENSG00000142207 | URB1     | Supported |                     | Nucleoli fibrillar center   |
| 5799 | ENSG00000142208 | AKT1     | Supported |                     | Microtubules;Nucleoplasm    |
| 5800 | ENSG00000142227 | EMP3     | Approved  |                     | Plasma membrane;Ve          |
| 5801 | ENSG00000142235 | LMTK3    | Approved  |                     | Cell Junctions;Nuc          |
| 5802 | ENSG00000142252 | GEMIN7   | Supported | Cytosol;Nucleoplasm |                             |
| 5803 | ENSG00000142273 | CBLC     | Approved  |                     | Nucleoplasm                 |
| 5804 | ENSG00000142319 | SLC6A3   | Approved  |                     | Vesicles                    |
| 5805 | ENSG00000142327 | RNPEPL1  | Approved  |                     | Nucleoli;Nucleopla          |
| 5806 | ENSG00000142330 | CAPN10   | Approved  |                     | Cytosol;Nucleoplas          |
| 5807 | ENSG00000142405 | NLRP12   | Uncertain |                     | Nuclear s                   |
| 5808 | ENSG00000142409 | ZNF787   | Approved  |                     | Mitochondria;Nucle          |
| 5809 | ENSG00000142444 | TIMM29   | Supported |                     | MitochondNucleoplasm        |
| 5810 | ENSG00000142453 | CARM1    | Enhanced  | Nucleoplasm         |                             |
| 5811 | ENSG00000142459 | EVI5L    | Approved  |                     | Nuclear bodies              |
| 5812 | ENSG00000142484 | TM4SF5   | Uncertain |                     | Cell Junc                   |
| 5813 | ENSG00000142507 | PSMB6    | Supported |                     | Cytosol;Nucleoplasm         |
| 5814 | ENSG00000142512 | SIGLEC10 | Supported |                     | Actin filaments;Cytosol;Pla |
| 5815 | ENSG00000142528 | ZNF473   | Supported |                     | Nucleoplasm                 |
| 5816 | ENSG00000142530 | FAM71E1  | Approved  |                     | Nucleoli fibrillar          |
| 5817 | ENSG00000142534 | RPS11    | Supported | Cytosol;E           | Nucleoli                    |
| 5818 | ENSG00000142541 | RPL13A   | Approved  |                     | Cytosol;Nucleoli            |
| 5819 | ENSG00000142546 | NOSIP    | Enhanced  | Nucleoplasm         |                             |
| 5820 | ENSG00000142552 | RCN3     | Approved  |                     | Endoplasmic reticu          |
| 5821 | ENSG00000142556 | ZNF614   | Approved  |                     | Cytosol;Nucleoplas          |
| 5822 | ENSG00000142611 | PRDM16   | Supported |                     | Nucleoplasm                 |
| 5823 | ENSG00000142619 | PADI3    | Approved  |                     | Nucleoplasm;Vesicl          |
| 5824 | ENSG00000142623 | PADI1    | Approved  | Cytosol             | Nucleoplasm                 |
| 5825 | ENSG00000142627 | EPHA2    | Supported |                     | Cell JuncGolgi apparatus;Nu |
| 5826 | ENSG00000142632 | ARHGEF19 | Approved  |                     | Nuclear bodies              |
| 5827 | ENSG00000142634 | EFHD2    | Approved  |                     | Cytosol                     |
| 5828 | ENSG00000142655 | PEX14    | Supported | Peroxisomes         | Nucleoli fibrillar          |

|      |                 |           |           |                     |                    |
|------|-----------------|-----------|-----------|---------------------|--------------------|
| 5829 | ENSG00000142657 | PGD       | Approved  |                     | Cytosol;Intermedia |
| 5830 | ENSG00000142661 | MYOM3     | Approved  |                     | Cytokinetic bridge |
| 5831 | ENSG00000142669 | SH3BGR3   | Approved  |                     | Nuclear bodies     |
| 5832 | ENSG00000142675 | CNKSR1    | Approved  |                     | Cytosol            |
| 5833 | ENSG00000142676 | RPL11     | Approved  |                     | Vesicles           |
| 5834 | ENSG00000142684 | ZNF593    | Enhanced  | Nucleoli            | Nucleoplasm        |
| 5835 | ENSG00000142686 | Clorf216  | Approved  |                     | Cytosol;Nucleoplas |
| 5836 | ENSG00000142687 | KIAA0319L | Supported | Golgi app           | Nucleoli           |
| 5837 | ENSG00000142694 | EVA1B     | Approved  |                     | Cytosol            |
| 5838 | ENSG00000142698 | Clorf94   | Approved  |                     | Cytosol;Nucleoplas |
| 5839 | ENSG00000142700 | DMRTA2    | Approved  |                     | Mitochondria;Nucle |
| 5840 | ENSG00000142731 | PLK4      | Supported | Centrosom           | Cytosol            |
| 5841 | ENSG00000142733 | MAP3K6    | Approved  |                     | Actin filaments;Cy |
| 5842 | ENSG00000142784 | WDTC1     | Supported | Vesicles            | Golgi apparatus    |
| 5843 | ENSG00000142789 | CELA3A    | Approved  |                     | Cytosol            |
| 5844 | ENSG00000142794 | NBPF3     | Approved  |                     | Nuclear bodies;Nuc |
| 5845 | ENSG00000142798 | HSPG2     | Approved  |                     | Cytosol;Nucleoplas |
| 5846 | ENSG00000142856 | ITGB3BP   | Supported |                     | Nucleoplasm        |
| 5847 | ENSG00000142864 | SERBP1    | Enhanced  | Cytosol             |                    |
| 5848 | ENSG00000142867 | BCL10     | Approved  |                     | Nucleoplasm        |
| 5849 | ENSG00000142875 | PRKACB    | Approved  |                     | Cytosol            |
| 5850 | ENSG00000142920 | AZIN2     | Approved  |                     | Cytosol            |
| 5851 | ENSG00000142937 | RPS8      | Enhanced  | Cytosol;Endoplasmic | reticulum          |
| 5852 | ENSG00000142945 | KIF2C     | Supported | Centrosom           | Midbody            |
| 5853 | ENSG00000142949 | PTPRF     | Approved  |                     | Golgi apparatus    |
| 5854 | ENSG00000142961 | MOB3C     | Uncertain |                     | Cytosol;I          |
| 5855 | ENSG00000142973 | CYP4B1    | Supported | Vesicles            |                    |
| 5856 | ENSG00000143013 | LMO4      | Supported | Nucleopla           | Midbody ring       |
| 5857 | ENSG00000143028 | SYPL2     | Approved  |                     | Cytosol;Plasma mem |
| 5858 | ENSG00000143033 | MTF2      | Enhanced  | Nucleoplasm         |                    |
| 5859 | ENSG00000143061 | IGSF3     | Approved  |                     | Cytosol;Nucleoplas |
| 5860 | ENSG00000143067 | ZNF697    | Approved  |                     | Nucleoplasm        |
| 5861 | ENSG00000143079 | CTTNBP2NL | Approved  |                     | Cytosol;Nucleoli f |
| 5862 | ENSG00000143093 | STRIP1    | Supported | Cytosol             |                    |
| 5863 | ENSG00000143105 | KCNA10    | Uncertain |                     | Cytosol;N          |
| 5864 | ENSG00000143106 | PSMA5     | Supported | Cytosol             |                    |
| 5865 | ENSG00000143107 | FNDC7     | Approved  |                     | Actin filaments;Nu |
| 5866 | ENSG00000143126 | CELSR2    | Approved  |                     | Cytosol            |
| 5867 | ENSG00000143147 | GPR161    | Approved  |                     | Nucleoli;Nucleopla |
| 5868 | ENSG00000143149 | ALDH9A1   | Approved  |                     | Cytosol            |
| 5869 | ENSG00000143155 | TIPRL     | Supported | Cytosol;Vesicles    |                    |
| 5870 | ENSG00000143156 | NME7      | Approved  |                     | Mitochondria       |
| 5871 | ENSG00000143157 | POGK      | Supported | Nucleopla           | Vesicles           |
| 5872 | ENSG00000143162 | CREG1     | Approved  |                     | Microtubules;Vesic |
| 5873 | ENSG00000143164 | DCAF6     | Supported | Nucleopla           | Focal adhesion sit |
| 5874 | ENSG00000143171 | RXRG      | Approved  |                     | Nuclear bodies;Nuc |
| 5875 | ENSG00000143178 | TBX19     | Approved  |                     | Nuclear speckles   |
| 5876 | ENSG00000143179 | UCK2      | Approved  |                     | Nucleoplasm        |
| 5877 | ENSG00000143183 | TMC01     | Supported | Endoplasmic         | reticulum          |
| 5878 | ENSG00000143190 | POU2F1    | Supported | Nucleopla           | Endoplasmic reticu |
| 5879 | ENSG00000143195 | ILDR2     | Approved  |                     | Plasma membrane    |
| 5880 | ENSG00000143196 | DPT       | Approved  |                     | Vesicles           |
| 5881 | ENSG00000143198 | MGST3     | Approved  |                     | Nucleoplasm        |
| 5882 | ENSG00000143217 | NECTIN4   | Supported | Plasma              | membrane           |
| 5883 | ENSG00000143222 | UFC1      | Approved  |                     | Cytosol;Nuclear sp |

|      |                 |          |           |                  |                             |
|------|-----------------|----------|-----------|------------------|-----------------------------|
| 5884 | ENSG00000143224 | PPOX     | Supported | Vesicles         | Golgi apparatus             |
| 5885 | ENSG00000143226 | FCGR2A   | Supported |                  | Plasma meGolgi apparatus    |
| 5886 | ENSG00000143228 | NUF2     | Enhanced  | Nucleoplasm      |                             |
| 5887 | ENSG00000143256 | PFDN2    | Enhanced  | Cytosol          |                             |
| 5888 | ENSG00000143257 | NR1I3    | Approved  |                  | Nucleoplasm                 |
| 5889 | ENSG00000143258 | USP21    | Supported |                  | Cytosol;NucleoplasPlasma me |
| 5890 | ENSG00000143294 | PRCC     | Enhanced  | Nuclear speckles |                             |
| 5891 | ENSG00000143303 | RRNAD1   | Approved  |                  | Cytosol;Nucleoli            |
| 5892 | ENSG00000143318 | CASQ1    | Uncertain |                  | Mitochond                   |
| 5893 | ENSG00000143319 | ISG20L2  | Approved  |                  | Nucleoplasm                 |
| 5894 | ENSG00000143320 | CRABP2   | Supported |                  | Cytosol;Nucleoplasm         |
| 5895 | ENSG00000143321 | HDGF     | Enhanced  | Nucleoplasm      |                             |
| 5896 | ENSG00000143322 | ABL2     | Supported |                  | Nucleoplasm                 |
| 5897 | ENSG00000143333 | RGS16    | Approved  |                  | Cytosol                     |
| 5898 | ENSG00000143337 | TOR1AIP1 | Enhanced  | Nuclear membrane |                             |
| 5899 | ENSG00000143344 | RGL1     | Approved  |                  | Golgi apparatus;Nu          |
| 5900 | ENSG00000143353 | LYPLAL1  | Supported |                  | Cytosol                     |
| 5901 | ENSG00000143355 | LHX9     | Approved  |                  | Nucleoplasm                 |
| 5902 | ENSG00000143363 | PRUNE1   | Supported |                  | Cytosol                     |
| 5903 | ENSG00000143365 | RORC     | Supported |                  | Nuclear bodies              |
| 5904 | ENSG00000143367 | TUFT1    | Approved  |                  | Vesicles                    |
| 5905 | ENSG00000143368 | SF3B4    | Approved  |                  | Nuclear speckles            |
| 5906 | ENSG00000143369 | ECM1     | Approved  |                  | Cytosol;Nucleoplas          |
| 5907 | ENSG00000143373 | ZNF687   | Enhanced  | Nucleoplasm      |                             |
| 5908 | ENSG00000143374 | TARS2    | Approved  |                  | Cytosol;Intermedia          |
| 5909 | ENSG00000143375 | CGN      | Supported |                  | Cell Junctions;Plasma membr |
| 5910 | ENSG00000143376 | SNX27    | Approved  |                  | Cytosol;Nucleoplas          |
| 5911 | ENSG00000143379 | SETDB1   | Supported |                  | NucleoplaVesicles           |
| 5912 | ENSG00000143382 | ADAMTSL4 | Approved  |                  | Cytosol;Plasma mem          |
| 5913 | ENSG00000143384 | MCL1     | Enhanced  | Mitochondria     |                             |
| 5914 | ENSG00000143387 | CTSK     | Supported |                  | Vesicles                    |
| 5915 | ENSG00000143393 | PI4KB    | Supported |                  | Golgi apparatus             |
| 5916 | ENSG00000143398 | PIP5K1A  | Supported |                  | Cytosol;Nucleoplasm;Plasma  |
| 5917 | ENSG00000143401 | ANP32E   | Enhanced  | Centrosom        | Cytosol                     |
| 5918 | ENSG00000143409 | MINDY1   | Enhanced  | Nucleoplasm      |                             |
| 5919 | ENSG00000143412 | ANXA9    | Approved  |                  | Cytosol;Nuclear sp          |
| 5920 | ENSG00000143416 | SELENBP1 | Supported |                  | Nucleoli                    |
| 5921 | ENSG00000143418 | CERS2    | Supported |                  | Endoplasmic reticulum;Nucle |
| 5922 | ENSG00000143420 | ENSA     | Approved  |                  | Cytosol;Microtubul          |
| 5923 | ENSG00000143434 | SEMA6C   | Approved  |                  | Plasma meCytosol;Nucleoli f |
| 5924 | ENSG00000143436 | MRPL9    | Supported |                  | Mitochondria                |
| 5925 | ENSG00000143437 | ARNT     | Supported |                  | Nuclear bodies;Nucleoplasm  |
| 5926 | ENSG00000143442 | POGZ     | Enhanced  | Nucleoplasm      |                             |
| 5927 | ENSG00000143450 | OAZ3     | Supported |                  | Nucleoplasm                 |
| 5928 | ENSG00000143452 | HORMAD1  | Approved  |                  | Nucleoli;Nucleopla          |
| 5929 | ENSG00000143457 | GOLPH3L  | Approved  |                  | Plasma meCytosol;Nucleoplas |
| 5930 | ENSG00000143458 | GABPB2   | Supported |                  | NucleoplaCytosol            |
| 5931 | ENSG00000143469 | SYT14    | Supported |                  | Vesicles                    |
| 5932 | ENSG00000143473 | KCNH1    | Supported |                  | Vesicles                    |
| 5933 | ENSG00000143476 | DTL      | Supported |                  | Nucleoplasm Cytosol;N       |
| 5934 | ENSG00000143479 | DYRK3    | Supported |                  | Nucleoplasm Cytosol         |
| 5935 | ENSG00000143486 | EIF2D    | Approved  |                  | Cytosol Nuclear b           |
| 5936 | ENSG00000143493 | INTS7    | Supported |                  | Nuclear bodies              |
| 5937 | ENSG00000143494 | VASH2    | Approved  |                  | Cytosol                     |
| 5938 | ENSG00000143498 | TAF1A    | Supported |                  | Nucleoplasm                 |



|      |                 |          |           |                       |                             |
|------|-----------------|----------|-----------|-----------------------|-----------------------------|
| 5939 | ENSG00000143499 | SMYD2    | Approved  |                       | Cytosol;Intermedia          |
| 5940 | ENSG00000143502 | SUSD4    | Approved  |                       | Vesicles                    |
| 5941 | ENSG00000143507 | DUSP10   | Supported |                       | Cytosol;NGolgi apparatus    |
| 5942 | ENSG00000143512 | HHIPL2   | Uncertain |                       | Cytosol;M                   |
| 5943 | ENSG00000143514 | TP53BP2  | Enhanced  | Cell Junctions;       | Cytosol                     |
| 5944 | ENSG00000143537 | ADAM15   | Uncertain |                       | Vesicles                    |
| 5945 | ENSG00000143543 | JTB      | Approved  |                       | Actin filaments;Ve          |
| 5946 | ENSG00000143545 | RAB13    | Supported |                       | Cytosol;Plasma membrane     |
| 5947 | ENSG00000143546 | S100A8   | Supported |                       | Cytosol;Intermediate filame |
| 5948 | ENSG00000143549 | TPM3     | Approved  |                       | Actin filaments;Cy          |
| 5949 | ENSG00000143552 | NUP210L  | Approved  |                       | Nuclear bodies              |
| 5950 | ENSG00000143553 | SNAPIN   | Approved  |                       | Golgi appNucleoli           |
| 5951 | ENSG00000143554 | SLC27A3  | Enhanced  | Endoplasmic reticulum |                             |
| 5952 | ENSG00000143556 | S100A7   | Uncertain |                       | Cytosol                     |
| 5953 | ENSG00000143569 | UBAP2L   | Approved  |                       | Cytosol;Nuclear sp          |
| 5954 | ENSG00000143575 | HAX1     | Supported | Mitochondria          |                             |
| 5955 | ENSG00000143578 | CREB3L4  | Approved  |                       | Mitochondria;Nucle          |
| 5956 | ENSG00000143595 | AQP10    | Approved  |                       | Plasma meNuclear b          |
| 5957 | ENSG00000143603 | KCNN3    | Approved  |                       | Nucleoplasm                 |
| 5958 | ENSG00000143614 | GATAD2B  | Enhanced  | Nucleoplasm           |                             |
| 5959 | ENSG00000143621 | ILF2     | Supported |                       | Nucleoplasm                 |
| 5960 | ENSG00000143624 | INTS3    | Approved  |                       | NucleoplaNucleoli           |
| 5961 | ENSG00000143627 | PKLR     | Approved  |                       | Cytosol;Golgi appa          |
| 5962 | ENSG00000143631 | FLG      | Enhanced  | Cytoplasmic bodies    |                             |
| 5963 | ENSG00000143641 | GALNT2   | Supported |                       | Golgi apparatus             |
| 5964 | ENSG00000143643 | TTC13    | Approved  |                       | Nucleoplasm                 |
| 5965 | ENSG00000143653 | SCCPDH   | Approved  |                       | Vesicles                    |
| 5966 | ENSG00000143669 | LYST     | Supported | Nucleoplasm           | Centriolar satelli          |
| 5967 | ENSG00000143674 | MAP3K21  | Approved  |                       | Cytosol;Plasma mem          |
| 5968 | ENSG00000143702 | CEP170   | Enhanced  | Centrosom             | Cytosol;Mitotic spindle     |
| 5969 | ENSG00000143727 | ACP1     | Approved  |                       | Cytosol;Nucleoplas          |
| 5970 | ENSG00000143740 | SNAP47   | Approved  |                       | Cytosol                     |
| 5971 | ENSG00000143748 | NVL      | Enhanced  | Nucleoli              |                             |
| 5972 | ENSG00000143751 | SDE2     | Supported | Nuclear s             | Cytosol;Plasma memGolgi app |
| 5973 | ENSG00000143753 | DEGS1    | Supported |                       | Mitochondria                |
| 5974 | ENSG00000143756 | FBXO28   | Supported |                       | Nucleoplasm Focal adh       |
| 5975 | ENSG00000143761 | ARF1     | Approved  |                       | Cytosol;Plasma mem          |
| 5976 | ENSG00000143772 | ITPKB    | Approved  |                       | Nucleoplasm                 |
| 5977 | ENSG00000143774 | GUK1     | Uncertain |                       | Cytosol;N                   |
| 5978 | ENSG00000143776 | CDC42BPA | Approved  |                       | Intermediate filam          |
| 5979 | ENSG00000143793 | Clorf35  | Approved  |                       | Cytosol;Nuclear sp          |
| 5980 | ENSG00000143797 | MBOAT2   | Approved  |                       | Vesicles                    |
| 5981 | ENSG00000143799 | PARP1    | Enhanced  | Nucleoplasm           |                             |
| 5982 | ENSG00000143801 | PSEN2    | Supported |                       | Nucleoplasm                 |
| 5983 | ENSG00000143811 | PYCR2    | Approved  |                       | Mitochondria                |
| 5984 | ENSG00000143815 | LBR      | Enhanced  | Nuclear membrane      |                             |
| 5985 | ENSG00000143842 | SOX13    | Enhanced  | Nucleoplasm           |                             |
| 5986 | ENSG00000143850 | PLEKHA6  | Approved  |                       | Cell Junctions;Ves          |
| 5987 | ENSG00000143870 | PDIA6    | Supported |                       | EndoplasmCytosol            |
| 5988 | ENSG00000143882 | ATP6V1C2 | Uncertain |                       | Mitochondr                  |
| 5989 | ENSG00000143889 | HNRNPLL  | Approved  |                       | Cytosol;Mitochondr          |
| 5990 | ENSG00000143891 | GALM     | Approved  |                       | Nucleoplasm                 |
| 5991 | ENSG00000143919 | CAMKMT   | Supported |                       | Nucleoplasm                 |
| 5992 | ENSG00000143921 | ABCG8    | Approved  |                       | Vesicles                    |
| 5993 | ENSG00000143924 | EML4     | Supported |                       | MicrotubuCytosol;Intermedia |

|      |                 |          |           |                 |                             |
|------|-----------------|----------|-----------|-----------------|-----------------------------|
| 5994 | ENSG00000143942 | CHAC2    | Approved  |                 | Cytosol                     |
| 5995 | ENSG00000143947 | RPS27A   | Supported |                 | Cytosol;Endoplasmic reticul |
| 5996 | ENSG00000143951 | WDPCP    | Approved  |                 | Cell Junctions              |
| 5997 | ENSG00000143952 | VPS54    | Enhanced  | Golgi apparatus | Nucleoplasm                 |
| 5998 | ENSG00000143954 | REG3G    | Approved  |                 | Cytosol                     |
| 5999 | ENSG00000143970 | ASXL2    | Enhanced  | Nucleoplasm     |                             |
| 6000 | ENSG00000143971 | ETAA1    | Approved  |                 | Cytosol;Nucleoplas          |
| 6001 | ENSG00000143977 | SNRPG    | Approved  |                 | Nucleoplasm                 |
| 6002 | ENSG00000143995 | MEIS1    | Approved  |                 | Nucleoplasm                 |
| 6003 | ENSG00000144021 | CIAO1    | Approved  |                 | Cytosol;Nucleoplas          |
| 6004 | ENSG00000144026 | ZNF514   | Approved  |                 | Nuclear bodies;Nuc          |
| 6005 | ENSG00000144028 | SNRNP200 | Supported |                 | Nucleoplasm                 |
| 6006 | ENSG00000144029 | MRPS5    | Supported |                 | Mitochondria                |
| 6007 | ENSG00000144034 | TPRKB    | Supported |                 | Cytosol                     |
| 6008 | ENSG00000144035 | NAT8     | Approved  |                 | Endoplasmic reticu          |
| 6009 | ENSG00000144036 | EXOC6B   | Approved  |                 | Cytosol;Nuclear bo          |
| 6010 | ENSG00000144040 | SFXN5    | Approved  |                 | Mitochondria;Nucle          |
| 6011 | ENSG00000144043 | TEX261   | Approved  |                 | Cytosol;Nucleoplas          |
| 6012 | ENSG00000144045 | DQX1     | Approved  |                 | Cytosol;Plasma mem          |
| 6013 | ENSG00000144048 | DUSP11   | Supported |                 | NucleoplaCytokinetic bridge |
| 6014 | ENSG00000144057 | ST6GAL2  | Approved  |                 | Nucleoli fibrillar          |
| 6015 | ENSG00000144061 | NPHP1    | Uncertain |                 | Vesicles                    |
| 6016 | ENSG00000144120 | TMEM177  | Approved  |                 | Nucleoli fibrillar          |
| 6017 | ENSG00000144134 | RABL2A   | Approved  |                 | Centrosome;Vesicle          |
| 6018 | ENSG00000144136 | SLC20A1  | Approved  |                 | Vesicles                    |
| 6019 | ENSG00000144152 | FBLN7    | Approved  |                 | Cell Junctions;Pla          |
| 6020 | ENSG00000144161 | ZC3H8    | Supported |                 | Nuclear bodies;Nucleoplasm  |
| 6021 | ENSG00000144218 | AFF3     | Supported |                 | NucleoplaCytosol            |
| 6022 | ENSG00000144224 | UBXN4    | Supported |                 | Endoplasmic reticulum       |
| 6023 | ENSG00000144228 | SPOPL    | Approved  |                 | Vesicles                    |
| 6024 | ENSG00000144229 | THSD7B   | Approved  |                 | Cytosol;Nucleoplas          |
| 6025 | ENSG00000144230 | GPR17    | Approved  |                 | Vesicles                    |
| 6026 | ENSG00000144231 | POLR2D   | Supported |                 | Nuclear speckles;Nucleoplas |
| 6027 | ENSG00000144233 | AMMECR1L | Approved  |                 | Cytosol;Nucleoplas          |
| 6028 | ENSG00000144283 | PKP4     | Enhanced  | Cell Junc       | Plasma membrane             |
| 6029 | ENSG00000144285 | SCN1A    | Supported |                 | Plasma meNuclear bodies;Nuc |
| 6030 | ENSG00000144306 | SCRN3    | Approved  |                 | Cytosol;Vesicles            |
| 6031 | ENSG00000144320 | LNPB     | Supported |                 | Endoplasmic reticuNucleopla |
| 6032 | ENSG00000144331 | ZNF385B  | Approved  |                 | Nucleoli fibrillar          |
| 6033 | ENSG00000144354 | CDCA7    | Supported |                 | Cytosol;Nucleoplasm         |
| 6034 | ENSG00000144357 | UBR3     | Approved  |                 | Nucleoli;Nucleopla          |
| 6035 | ENSG00000144362 | PHOSPHO2 | Approved  |                 | Vesicles                    |
| 6036 | ENSG00000144366 | GULP1    | Approved  |                 | Vesicles                    |
| 6037 | ENSG00000144369 | FAM171B  | Approved  |                 | Mitochondria;Nucle          |
| 6038 | ENSG00000144381 | HSPD1    | Enhanced  | Mitochondria    |                             |
| 6039 | ENSG00000144395 | CCDC150  | Approved  |                 | Nucleoplasm                 |
| 6040 | ENSG00000144401 | METTL21A | Approved  |                 | Cytosol;Nucleoplas          |
| 6041 | ENSG00000144406 | UNC80    | Approved  |                 | Nuclear bodies;Ves          |
| 6042 | ENSG00000144426 | NBEAL1   | Approved  |                 | Cytosol;Nucleoplas          |
| 6043 | ENSG00000144445 | KANSL1L  | Approved  |                 | Cytosol                     |
| 6044 | ENSG00000144451 | SPAG16   | Approved  |                 | Cytosol;Plasma mem          |
| 6045 | ENSG00000144452 | ABCA12   | Approved  |                 | Cytosol;Nucleoli;P          |
| 6046 | ENSG00000144460 | NYAP2    | Approved  |                 | Intermediate filam          |
| 6047 | ENSG00000144468 | RHBDD1   | Supported |                 | Endoplasmic reticulum       |
| 6048 | ENSG00000144476 | ACKR3    | Supported |                 | Plasma meVesicles           |

|      |                 |          |           |                |                             |
|------|-----------------|----------|-----------|----------------|-----------------------------|
| 6049 | ENSG00000144485 | HES6     | Approved  |                | Cytosol;Nuclear bo          |
| 6050 | ENSG00000144504 | ANKMY1   | Approved  |                | Cytosol;Nuclear bo          |
| 6051 | ENSG00000144524 | COPS7B   | Supported |                | Nucleoplasm                 |
| 6052 | ENSG00000144554 | FANCD2   | Supported |                | Nuclear bodies;NucCytosol   |
| 6053 | ENSG00000144559 | TAMM41   | Approved  |                | Cytosol                     |
| 6054 | ENSG00000144560 | VGLL4    | Approved  |                | Nucleoli fibrillar          |
| 6055 | ENSG00000144567 | RETREG2  | Approved  |                | Cytosol                     |
| 6056 | ENSG00000144579 | CTDSP1   | Supported |                | Nucleoplasm                 |
| 6057 | ENSG00000144580 | CNOT9    | Approved  |                | Cytoplasmic bodies          |
| 6058 | ENSG00000144589 | STK11IP  | Enhanced  | Vesicles       |                             |
| 6059 | ENSG00000144591 | GMPPA    | Approved  |                | Nucleoplasm                 |
| 6060 | ENSG00000144596 | GRIP2    | Approved  |                | Cytosol                     |
| 6061 | ENSG00000144597 | EAF1     | Supported | Nuclear bodies | NucleoplaCytokinet          |
| 6062 | ENSG00000144635 | DYNC1LI1 | Supported |                | Centrosome;Cytosol          |
| 6063 | ENSG00000144642 | RBMS3    | Approved  |                | Vesicles                    |
| 6064 | ENSG00000144644 | GADL1    | Approved  |                | Cytosol;Plasma mem          |
| 6065 | ENSG00000144645 | OSBPL10  | Approved  |                | Cytosol;Golgi appa          |
| 6066 | ENSG00000144648 | ACKR2    | Supported |                | Cytosol;VNucleoplasm        |
| 6067 | ENSG00000144649 | FAM198A  | Supported |                | Vesicles                    |
| 6068 | ENSG00000144655 | CSRNP1   | Supported | Nucleoplasm    | Vesicles                    |
| 6069 | ENSG00000144668 | ITGA9    | Approved  |                | Cell Junctions;Nuc          |
| 6070 | ENSG00000144674 | GOLGA4   | Supported | Golgi app      | Nucleoplasm                 |
| 6071 | ENSG00000144677 | CTDSPL   | Approved  |                | Nucleoplasm;Vesicl          |
| 6072 | ENSG00000144681 | STAC     | Uncertain |                | Nucleopla                   |
| 6073 | ENSG00000144711 | IQSEC1   | Supported |                | Nucleoli Vesicles           |
| 6074 | ENSG00000144712 | CAND2    | Approved  |                | Cytosol;Nuclear bo          |
| 6075 | ENSG00000144713 | RPL32    | Approved  |                | Cytosol;Endoplasmic         |
| 6076 | ENSG00000144724 | PTPRG    | Approved  |                | Plasma membrane             |
| 6077 | ENSG00000144730 | IL17RD   | Supported |                | Golgi apparatus;Nucleoplasm |
| 6078 | ENSG00000144736 | SHQ1     | Supported |                | Nucleoplasm                 |
| 6079 | ENSG00000144741 | SLC25A26 | Supported |                | Mitochondria                |
| 6080 | ENSG00000144744 | UBA3     | Approved  |                | Centrosome;Cytosol          |
| 6081 | ENSG00000144746 | ARL6IP5  | Approved  |                | Endoplasmic reticu          |
| 6082 | ENSG00000144747 | TMF1     | Supported |                | Golgi apparatus             |
| 6083 | ENSG00000144749 | LRIG1    | Approved  |                | Cytosol                     |
| 6084 | ENSG00000144785 | AC073896 | Approved  |                | Centriolar satelli          |
| 6085 | ENSG00000144791 | LIMD1    | Supported |                | Focal adhesion sites;Nucleo |
| 6086 | ENSG00000144792 | ZNF660   | Uncertain |                | Cytosol;N                   |
| 6087 | ENSG00000144802 | NFKBIZ   | Supported |                | Nuclear sCytoplasmic bodies |
| 6088 | ENSG00000144810 | COL8A1   | Supported |                | Vesicles                    |
| 6089 | ENSG00000144815 | NXPE3    | Approved  |                | Nucleoplasm;Vesicl          |
| 6090 | ENSG00000144824 | PHLDB2   | Supported |                | Cytosol;Plasma membrane     |
| 6091 | ENSG00000144827 | ABHD10   | Approved  |                | Mitochondria                |
| 6092 | ENSG00000144837 | PLA1A    | Approved  |                | Cytoplasmic bodies          |
| 6093 | ENSG00000144840 | RABL3    | Approved  |                | Nucleoplasm                 |
| 6094 | ENSG00000144843 | ADPRH    | Approved  |                | Nuclear membrane;N          |
| 6095 | ENSG00000144847 | IGSF11   | Approved  |                | Cell Junctions;Cyt          |
| 6096 | ENSG00000144848 | ATG3     | Supported |                | Cytosol;Plasma membrane     |
| 6097 | ENSG00000144852 | NR1I2    | Enhanced  | Nucleoplasm    |                             |
| 6098 | ENSG00000144857 | BOC      | Enhanced  | Nucleopla      | Plasma membrane             |
| 6099 | ENSG00000144867 | SRPRB    | Approved  |                | Plasma membrane             |
| 6100 | ENSG00000144868 | TMEM108  | Approved  |                | Cytosol;Nucleoli;P          |
| 6101 | ENSG00000144891 | AGTR1    | Uncertain |                | Vesicles                    |
| 6102 | ENSG00000144893 | MED12L   | Approved  |                | Nucleoli                    |
| 6103 | ENSG00000144895 | EIF2A    | Approved  |                | Cytosol;Mitochondr          |

|      |                 |          |           |                                      |                             |
|------|-----------------|----------|-----------|--------------------------------------|-----------------------------|
| 6104 | ENSG00000144908 | ALDH1L1  | Supported | Cytosol                              |                             |
| 6105 | ENSG00000144909 | OSBPL11  | Approved  |                                      | Golgi apparatus;Nu          |
| 6106 | ENSG00000144935 | TRPC1    | Approved  |                                      | Vesicles                    |
| 6107 | ENSG00000144959 | NCEH1    | Approved  |                                      | Endoplasmic reticu          |
| 6108 | ENSG00000145002 | FAM86B2  | Uncertain |                                      | Vesicles                    |
| 6109 | ENSG00000145012 | LPP      | Enhanced  | Cytosol;Focal adhesion sites         |                             |
| 6110 | ENSG00000145014 | TMEM44   | Approved  |                                      | Cytosol                     |
| 6111 | ENSG00000145016 | RUBCN    | Supported |                                      | Vesicles Cytosol            |
| 6112 | ENSG00000145020 | AMT      | Supported |                                      | MitochondNucleoplasm        |
| 6113 | ENSG00000145022 | TCTA     | Approved  |                                      | Cytosol                     |
| 6114 | ENSG00000145029 | NICN1    | Supported |                                      | Nucleoplasm                 |
| 6115 | ENSG00000145041 | DCAF1    | Supported |                                      | Nucleoli fibrillar center;N |
| 6116 | ENSG00000145050 | MANF     | Supported |                                      | Endoplasmic reticulum       |
| 6117 | ENSG00000145191 | EIF2B5   | Enhanced  | Cytosol                              |                             |
| 6118 | ENSG00000145192 | AHSG     | Enhanced  | Golgi apparatus                      |                             |
| 6119 | ENSG00000145198 | VWA5B2   | Approved  |                                      | Golgi apparatus;Nu          |
| 6120 | ENSG00000145216 | FIP1L1   | Enhanced  | Nucleoplasm                          |                             |
| 6121 | ENSG00000145217 | SLC26A1  | Approved  |                                      | Microtubules                |
| 6122 | ENSG00000145220 | LYAR     | Enhanced  | Nucleoli;Nucleoplasm                 |                             |
| 6123 | ENSG00000145241 | CENPC    | Enhanced  | Nuclear bNucleoplasm                 |                             |
| 6124 | ENSG00000145244 | CORIN    | Approved  |                                      | Plasma meActin fil          |
| 6125 | ENSG00000145246 | ATP10D   | Supported |                                      | Plasma meNucleoplasm        |
| 6126 | ENSG00000145247 | OCIAD2   | Enhanced  | Mitochondria                         |                             |
| 6127 | ENSG00000145287 | PLAC8    | Approved  |                                      | Cytosol                     |
| 6128 | ENSG00000145293 | ENOPH1   | Approved  |                                      | Nuclear bodies;Nu           |
| 6129 | ENSG00000145331 | TRMT10A  | Supported |                                      | Nucleoli;NucleoplaActin fil |
| 6130 | ENSG00000145332 | KLHL8    | Enhanced  | Nucleoplasm                          |                             |
| 6131 | ENSG00000145337 | PYURF    | Approved  |                                      | Nucleoplasm                 |
| 6132 | ENSG00000145348 | TBCK     | Approved  |                                      | Nucleoli fibrillar          |
| 6133 | ENSG00000145349 | CAMK2D   | Approved  |                                      | Cell Junctions;Cyt          |
| 6134 | ENSG00000145354 | CISD2    | Supported |                                      | Endoplasmic reticulum       |
| 6135 | ENSG00000145358 | DDIT4L   | Uncertain |                                      | Actin fil                   |
| 6136 | ENSG00000145362 | ANK2     | Supported |                                      | Plasma membrane             |
| 6137 | ENSG00000145365 | TIFA     | Approved  |                                      | Cytosol;Nucleoli;N          |
| 6138 | ENSG00000145375 | SPATA5   | Approved  |                                      | Cytosol                     |
| 6139 | ENSG00000145384 | FABP2    | Approved  |                                      | Actin filaments;Cy          |
| 6140 | ENSG00000145386 | CCNA2    | Enhanced  | Cytosol;Nucleoplasm                  |                             |
| 6141 | ENSG00000145388 | METTL14  | Supported |                                      | Nucleoplasm                 |
| 6142 | ENSG00000145390 | USP53    | Approved  |                                      | Golgi apparatus;Nu          |
| 6143 | ENSG00000145391 | SETD7    | Enhanced  | Nucleoli                             |                             |
| 6144 | ENSG00000145414 | NAF1     | Enhanced  | NucleoplaCytosol                     |                             |
| 6145 | ENSG00000145416 | 3/1/2019 | Supported |                                      | Mitochondria                |
| 6146 | ENSG00000145423 | SFRP2    | Approved  |                                      | Intermediate filam          |
| 6147 | ENSG00000145425 | RPS3A    | Enhanced  | Cytosol;Endoplasmic reticulum;Nucleo |                             |
| 6148 | ENSG00000145431 | PDGFC    | Supported |                                      | Cytosol;Plasma membrane     |
| 6149 | ENSG00000145476 | CYP4V2   | Approved  |                                      | Nuclear speckles            |
| 6150 | ENSG00000145495 | 3/6/2019 | Supported |                                      | Endoplasmic reticulum       |
| 6151 | ENSG00000145536 | ADAMTS16 | Approved  |                                      | Midbody ring;Mitoc          |
| 6152 | ENSG00000145555 | MYO10    | Supported | Cytosol;Plasma memNucleoli           |                             |
| 6153 | ENSG00000145569 | FAM105A  | Approved  |                                      | Cytosol;Nucleoli            |
| 6154 | ENSG00000145604 | SKP2     | Supported | Cytosol;Nucleoplasm                  |                             |
| 6155 | ENSG00000145623 | OSMR     | Approved  |                                      | Nucleoli                    |
| 6156 | ENSG00000145626 | UGT3A1   | Approved  |                                      | Cytosol;Vesicles            |
| 6157 | ENSG00000145632 | PLK2     | Approved  |                                      | Cytosol;Mitochondr          |
| 6158 | ENSG00000145675 | PIK3R1   | Approved  |                                      | Cytosol                     |

|      |                 |          |           |                             |
|------|-----------------|----------|-----------|-----------------------------|
| 6159 | ENSG00000145681 | HAPLN1   | Supported | Vesicles                    |
| 6160 | ENSG00000145685 | LHFPL2   | Approved  | Actin filaments;Ve          |
| 6161 | ENSG00000145687 | SSBP2    | Supported | Nucleoplasm                 |
| 6162 | ENSG00000145692 | BHMT     | Supported | Cytosol                     |
| 6163 | ENSG00000145703 | IQGAP2   | Approved  | Plasma membrane;Ve          |
| 6164 | ENSG00000145721 | LIX1     | Approved  | Cytokinetic bridge          |
| 6165 | ENSG00000145723 | GIN1     | Approved  | Nucleoli;Nucleopla          |
| 6166 | ENSG00000145725 | PIP5K2   | Approved  | Vesicles                    |
| 6167 | ENSG00000145730 | PAM      | Approved  | Cytosol;Golgi appa          |
| 6168 | ENSG00000145734 | BDP1     | Enhanced  | Nucleoplasm                 |
| 6169 | ENSG00000145736 | GTF2H2   | Supported | Nuclear speckles            |
| 6170 | ENSG00000145740 | SLC30A5  | Supported | Golgi appNucleoplasm        |
| 6171 | ENSG00000145741 | BTF3     | Supported | Cytosol                     |
| 6172 | ENSG00000145743 | FBXL17   | Supported | Nucleoplasm                 |
| 6173 | ENSG00000145757 | SPATA9   | Approved  | Mitochondria                |
| 6174 | ENSG00000145777 | TSLP     | Uncertain | Golgi app                   |
| 6175 | ENSG00000145779 | TNFAIP8  | Enhanced  | Nucleoplasm                 |
| 6176 | ENSG00000145780 | FEM1C    | Enhanced  | Nucleoplasm                 |
| 6177 | ENSG00000145781 | COMMD10  | Supported | Nucleoplasm                 |
| 6178 | ENSG00000145808 | ADAMTS19 | Approved  | Midbody;Vesicles            |
| 6179 | ENSG00000145817 | YIPF5    | Supported | EndoplasmNucleoplasm        |
| 6180 | ENSG00000145819 | ARHGAP26 | Approved  | Cytosol                     |
| 6181 | ENSG00000145832 | SLC25A48 | Approved  | Actin filaments;In          |
| 6182 | ENSG00000145833 | DDX46    | Enhanced  | Nuclear speckles            |
| 6183 | ENSG00000145860 | RNF145   | Approved  | Cytosol;Nucleoplas          |
| 6184 | ENSG00000145861 | C1QTNF2  | Approved  | Centrosome;Golgi a          |
| 6185 | ENSG00000145868 | FBX038   | Supported | NucleoplaCytokinetic bridge |
| 6186 | ENSG00000145882 | PCYOX1L  | Approved  | Mitochondria;Nucle          |
| 6187 | ENSG00000145901 | TNIP1    | Supported | Cytosol;Nucleoplasm         |
| 6188 | ENSG00000145907 | G3BP1    | Supported | Cytosol                     |
| 6189 | ENSG00000145908 | ZNF300   | Supported | Nuclear bodies;Nucleoli;Nuc |
| 6190 | ENSG00000145911 | N4BP3    | Supported | Centrosome;Nucleop          |
| 6191 | ENSG00000145912 | NHP2     | Supported | NucleoplaCytosol            |
| 6192 | ENSG00000145916 | RMND5B   | Approved  | Nucleoplasm                 |
| 6193 | ENSG00000145920 | CPLX2    | Uncertain | Vesicles                    |
| 6194 | ENSG00000145934 | TENM2    | Approved  | Nucleoli                    |
| 6195 | ENSG00000145945 | FAM50B   | Supported | Cytokinetic bridge;Nucleopl |
| 6196 | ENSG00000145949 | MYLK4    | Approved  | Golgi apparatus;Nu          |
| 6197 | ENSG00000145982 | FARS2    | Uncertain | Plasma me                   |
| 6198 | ENSG00000145990 | GFOD1    | Approved  | Cytosol;Nucleoplas          |
| 6199 | ENSG00000145996 | CDKAL1   | Uncertain | Vesicles                    |
| 6200 | ENSG00000146007 | ZMAT2    | Approved  | Mitochondria;Nucle          |
| 6201 | ENSG00000146013 | GFRA3    | Uncertain | Cytosol;P                   |
| 6202 | ENSG00000146038 | DCDC2    | Enhanced  | CentriolaMicrotubules       |
| 6203 | ENSG00000146054 | TRIM7    | Approved  | Cytosol;Nucleoplas          |
| 6204 | ENSG00000146063 | TRIM41   | Supported | Nuclear bodies;Nucleoli     |
| 6205 | ENSG00000146066 | HIGD2A   | Supported | MitochondCytosol            |
| 6206 | ENSG00000146067 | FAM193B  | Enhanced  | Nucleoli;Nucleoplasm        |
| 6207 | ENSG00000146072 | TNFRSF21 | Supported | Plasma meCytosol            |
| 6208 | ENSG00000146083 | RNF44    | Approved  | Nucleoplasm                 |
| 6209 | ENSG00000146085 | MUT      | Approved  | Cytosol;Mitochondr          |
| 6210 | ENSG00000146090 | RASGEF1C | Approved  | Mitochondria                |
| 6211 | ENSG00000146109 | ABT1     | Approved  | Vesicles                    |
| 6212 | ENSG00000146112 | PPP1R18  | Approved  | Nucleoplasm;Plasma          |
| 6213 | ENSG00000146122 | DAAM2    | Supported | NucleoplaCytosol;Vesicles   |

|      |                 |          |           |                                |
|------|-----------------|----------|-----------|--------------------------------|
| 6214 | ENSG00000146143 | PRIM2    | Supported | Nucleoplasm                    |
| 6215 | ENSG00000146147 | MLIP     | Approved  | Nucleoplasm                    |
| 6216 | ENSG00000146166 | LGSN     | Approved  | Nucleoplasm;Vesicl             |
| 6217 | ENSG00000146197 | SCUBE3   | Approved  | Plasma membrane                |
| 6218 | ENSG00000146215 | CRIP3    | Approved  | Nuclear speckles               |
| 6219 | ENSG00000146216 | TTBK1    | Supported | Cytosol Nucleopla              |
| 6220 | ENSG00000146221 | TCTE1    | Uncertain | Vesicles                       |
| 6221 | ENSG00000146223 | RPL7L1   | Approved  | Mitochondria;Nucle             |
| 6222 | ENSG00000146232 | NFKBIE   | Supported | Cytosol;Nucleoli fibrillar     |
| 6223 | ENSG00000146242 | TPBG     | Approved  | Nucleoplasm                    |
| 6224 | ENSG00000146243 | IRAK1BP1 | Approved  | Vesicles                       |
| 6225 | ENSG00000146247 | PHIP     | Supported | Nucleoplasm                    |
| 6226 | ENSG00000146263 | MMS22L   | Supported | Nucleoplasm                    |
| 6227 | ENSG00000146267 | FAXC     | Approved  | Nucleoplasm                    |
| 6228 | ENSG00000146278 | PNRC1    | Approved  | Nucleoli;Nucleopla             |
| 6229 | ENSG00000146281 | PM20D2   | Enhanced  | Nucleoplasm                    |
| 6230 | ENSG00000146285 | SCML4    | Supported | Nucleoplasm                    |
| 6231 | ENSG00000146350 | TBC1D32  | Approved  | Mitochondria                   |
| 6232 | ENSG00000146376 | ARHGAP18 | Approved  | Cytosol;Nuclear sp             |
| 6233 | ENSG00000146386 | ABRACL   | Approved  | Cytosol;Nucleoplas             |
| 6234 | ENSG00000146409 | SLC18B1  | Supported | Cytosol Golgi apparatus        |
| 6235 | ENSG00000146410 | MTFR2    | Uncertain | Vesicles                       |
| 6236 | ENSG00000146411 | SLC2A12  | Supported | Plasma meCell Junctions        |
| 6237 | ENSG00000146414 | SHPRH    | Approved  | Mitochondria                   |
| 6238 | ENSG00000146416 | AIG1     | Approved  | Golgi apparatus                |
| 6239 | ENSG00000146425 | DYNLT1   | Supported | Nucleoplasm                    |
| 6240 | ENSG00000146426 | TIAM2    | Supported | Cytosol;Nucleoli fibrillar     |
| 6241 | ENSG00000146433 | TMEM181  | Approved  | Golgi apparatus;Ve             |
| 6242 | ENSG00000146457 | WTAP     | Enhanced  | Nuclear speckles               |
| 6243 | ENSG00000146463 | ZMYM4    | Approved  | Cytosol;Nucleoli;N             |
| 6244 | ENSG00000146469 | VIP      | Approved  | Endoplasmic reticu             |
| 6245 | ENSG00000146476 | ARMT1    | Approved  | Cytosol;Nuclear bo             |
| 6246 | ENSG00000146477 | SLC22A3  | Approved  | Cytosol;Nucleoplas             |
| 6247 | ENSG00000146530 | VWDE     | Approved  | Cytosol;Nucleoplas             |
| 6248 | ENSG00000146535 | GNA12    | Supported | Cytosol                        |
| 6249 | ENSG00000146540 | C7orf50  | Approved  | Nucleoli;Nucleopla             |
| 6250 | ENSG00000146555 | SDK1     | Approved  | Cytosol                        |
| 6251 | ENSG00000146574 | CCZ1B    | Enhanced  | Vesicles                       |
| 6252 | ENSG00000146576 | C7orf26  | Approved  | Cytosol;Intermedia             |
| 6253 | ENSG00000146587 | RBAK     | Supported | Nucleoplasm                    |
| 6254 | ENSG00000146592 | CREB5    | Approved  | Nucleoplasm;Plasma             |
| 6255 | ENSG00000146648 | EGFR     | Enhanced  | Cell Junctions;Plasma membrane |
| 6256 | ENSG00000146670 | CDCA5    | Supported | Nucleoplasm                    |
| 6257 | ENSG00000146674 | IGFBP3   | Approved  | Cytosol;Nucleoplas             |
| 6258 | ENSG00000146676 | PURB     | Supported | Nucleoplasm                    |
| 6259 | ENSG00000146678 | IGFBP1   | Approved  | Golgi apparatus                |
| 6260 | ENSG00000146701 | MDH2     | Enhanced  | Mitochondria                   |
| 6261 | ENSG00000146707 | POMZP3   | Approved  | Nuclear membrane;N             |
| 6262 | ENSG00000146729 | NIPSNAP2 | Supported | Mitochondria                   |
| 6263 | ENSG00000146731 | CCT6A    | Approved  | Cytosol                        |
| 6264 | ENSG00000146733 | PSPH     | Approved  | Cytosol                        |
| 6265 | ENSG00000146755 | TRIM50   | Approved  | Cytosol                        |
| 6266 | ENSG00000146757 | ZNF92    | Approved  | Nucleoplasm                    |
| 6267 | ENSG00000146776 | ATXN7L1  | Approved  | Cytosol;Nucleoplas             |
| 6268 | ENSG00000146802 | TMEM168  | Approved  | Cytosol;Golgi appa             |

|      |                 |           |           |                               |                             |
|------|-----------------|-----------|-----------|-------------------------------|-----------------------------|
| 6269 | ENSG00000146826 | C7orf43   | Enhanced  | Centriolar satellite          | Plasma membrane             |
| 6270 | ENSG00000146830 | GIGYF1    | Approved  |                               | Microtubules;Vesic          |
| 6271 | ENSG00000146833 | TRIM4     | Supported | Cytosol                       | Plasma membrane             |
| 6272 | ENSG00000146834 | MEPCE     | Approved  |                               | Cell Junctions;Nuc          |
| 6273 | ENSG00000146842 | TMEM209   | Approved  |                               | Nuclear membrane;N          |
| 6274 | ENSG00000146856 | AGBL3     | Uncertain |                               | Cytosol;M                   |
| 6275 | ENSG00000146858 | ZC3HAV1L  | Enhanced  | Cytosol                       |                             |
| 6276 | ENSG00000146909 | NOM1      | Enhanced  | Nucleoli                      |                             |
| 6277 | ENSG00000146918 | NCAPG2    | Supported | Nuclear speckles;             | Nucleoplas                  |
| 6278 | ENSG00000146950 | SHROOM2   | Approved  |                               | Cell Junctions;Cyt          |
| 6279 | ENSG00000146963 | LUC7L2    | Approved  |                               | Nucleoplasm                 |
| 6280 | ENSG00000147003 | CLTRN     | Approved  |                               | Endoplasmic reticu          |
| 6281 | ENSG00000147010 | SH3KBP1   | Supported | Cytosol                       |                             |
| 6282 | ENSG00000147027 | TMEM47    | Approved  |                               | Nuclear membrane            |
| 6283 | ENSG00000147036 | LANCL3    | Approved  |                               | Mitochondria                |
| 6284 | ENSG00000147041 | SYTL5     | Approved  |                               | Cytosol;Microtubul          |
| 6285 | ENSG00000147044 | CASK      | Approved  |                               | Cytosol;Nucleoplas          |
| 6286 | ENSG00000147050 | KDM6A     | Approved  |                               | Nucleoli;Nucleopla          |
| 6287 | ENSG00000147059 | SPIN2A    | Approved  |                               | Nucleoplasm                 |
| 6288 | ENSG00000147065 | MSN       | Enhanced  | Plasma membrane               |                             |
| 6289 | ENSG00000147082 | CCNB3     | Supported |                               | Nuclear speckles            |
| 6290 | ENSG00000147099 | HDAC8     | Approved  | Nucleoplasm                   | Plasma me                   |
| 6291 | ENSG00000147100 | SLC16A2   | Approved  |                               | Plasma membrane             |
| 6292 | ENSG00000147118 | ZNF182    | Approved  |                               | Nucleoplasm                 |
| 6293 | ENSG00000147119 | CHST7     | Approved  |                               | Nucleoplasm;Vesicl          |
| 6294 | ENSG00000147121 | KRBOX4    | Approved  |                               | Nucleoplasm                 |
| 6295 | ENSG00000147123 | NDUFB11   | Approved  |                               | Mitochondria                |
| 6296 | ENSG00000147124 | ZNF41     | Approved  |                               | Nucleoplasm                 |
| 6297 | ENSG00000147130 | ZMYM3     | Enhanced  | Nucleoplasm                   |                             |
| 6298 | ENSG00000147133 | TAF1      | Enhanced  | Nucleoplasm                   |                             |
| 6299 | ENSG00000147138 | GPR174    | Uncertain |                               | Vesicles                    |
| 6300 | ENSG00000147140 | NONO      | Enhanced  | Nucleoli                      | Nuclear speckles            |
| 6301 | ENSG00000147144 | CCDC120   | Uncertain |                               | Mitochond                   |
| 6302 | ENSG00000147145 | LPAR4     | Supported | Plasma me                     | Vesicles Nuclear b          |
| 6303 | ENSG00000147155 | EBP       | Supported |                               | Endoplasmic reticulum       |
| 6304 | ENSG00000147162 | OGT       | Supported | Nucleoplasm;                  | Plasma membrane             |
| 6305 | ENSG00000147166 | ITGB1BP2  | Approved  |                               | Cytosol                     |
| 6306 | ENSG00000147168 | IL2RG     | Approved  |                               | Vesicles                    |
| 6307 | ENSG00000147174 | GCNA      | Approved  |                               | Vesicles                    |
| 6308 | ENSG00000147180 | ZNF711    | Approved  |                               | Nucleoplasm                 |
| 6309 | ENSG00000147202 | DIAPH2    | Supported | Vesicles                      | EndoplasmNucleoli           |
| 6310 | ENSG00000147206 | NXF3      | Supported | Nucleoplasm                   |                             |
| 6311 | ENSG00000147231 | CXorf57   | Approved  |                               | Intermediate filam          |
| 6312 | ENSG00000147251 | DOCK11    | Approved  |                               | Nuclear membrane;N          |
| 6313 | ENSG00000147255 | IGSF1     | Approved  |                               | Cytosol                     |
| 6314 | ENSG00000147256 | ARHGAP36  | Approved  |                               | Nucleoplasm;Plasma          |
| 6315 | ENSG00000147257 | GPC3      | Supported | Plasma membrane               |                             |
| 6316 | ENSG00000147274 | RBMX      | Approved  |                               | Nucleoplasm                 |
| 6317 | ENSG00000147316 | MCPH1     | Approved  |                               | Nuclear bodies;Nuc          |
| 6318 | ENSG00000147324 | MFHAS1    | Approved  |                               | Cytosol;Nucleoplas          |
| 6319 | ENSG00000147381 | MAGEA4    | Approved  |                               | Cytosol;Nuclear sp          |
| 6320 | ENSG00000147383 | NSDHL     | Enhanced  | Endoplasmic reticulum;        | Lipid droplets              |
| 6321 | ENSG00000147394 | ZNF185    | Supported |                               | Actin filaments;Cytosol;Foc |
| 6322 | ENSG00000147403 | RPL10     | Enhanced  | Cytosol;Endoplasmic reticulum |                             |
| 6323 | ENSG00000147408 | CSGALNACT | Uncertain |                               | Actin fil                   |

|      |                 |          |           |                       |                             |
|------|-----------------|----------|-----------|-----------------------|-----------------------------|
| 6324 | ENSG00000147416 | ATP6V1B2 | Supported |                       | Vesicles                    |
| 6325 | ENSG00000147419 | CCDC25   | Approved  |                       | Cytosol;Golgi appa          |
| 6326 | ENSG00000147421 | HMBX1    | Supported |                       | Cytosol;Nuclear bodies;Nucl |
| 6327 | ENSG00000147454 | SLC25A37 | Approved  |                       | Cytosol;Mitochondr          |
| 6328 | ENSG00000147457 | CHMP7    | Supported |                       | Cytosol;Nucleoplasm         |
| 6329 | ENSG00000147459 | DOCK5    | Enhanced  | Cytosol               |                             |
| 6330 | ENSG00000147471 | PLPBP    | Enhanced  | Cytosol               |                             |
| 6331 | ENSG00000147475 | ERLIN2   | Supported |                       | Endoplasmic reticulum       |
| 6332 | ENSG00000147485 | PXDNL    | Approved  |                       | Cytosol Nucleopla           |
| 6333 | ENSG00000147526 | TACC1    | Approved  |                       | Cytosol                     |
| 6334 | ENSG00000147535 | PLPP5    | Approved  |                       | Vesicles                    |
| 6335 | ENSG00000147536 | GINS4    | Supported |                       | NucleoplaCentrosome         |
| 6336 | ENSG00000147548 | NSD3     | Approved  |                       | NucleoplaMitochondria       |
| 6337 | ENSG00000147573 | TRIM55   | Approved  |                       | Cytosol;Golgi appa          |
| 6338 | ENSG00000147576 | ADHFE1   | Approved  |                       | Vesicles                    |
| 6339 | ENSG00000147586 | MRPS28   | Supported |                       | Mitochondria                |
| 6340 | ENSG00000147592 | LACTB2   | Supported |                       | Cytosol;Golgi apparatus;Nuc |
| 6341 | ENSG00000147596 | PRDM14   | Uncertain |                       | Nucleopla                   |
| 6342 | ENSG00000147601 | TERF1    | Approved  |                       | Nuclear bNucleoli fibrillar |
| 6343 | ENSG00000147604 | RPL7     | Approved  |                       | Cytosol;Endoplasmic         |
| 6344 | ENSG00000147613 | PSKH2    | Approved  |                       | Cytosol;Nuclear bo          |
| 6345 | ENSG00000147614 | ATP6V0D2 | Approved  |                       | Vesicles                    |
| 6346 | ENSG00000147642 | SYBU     | Supported |                       | Vesicles                    |
| 6347 | ENSG00000147649 | MTDH     | Enhanced  | Endoplasmic reticulum |                             |
| 6348 | ENSG00000147650 | LRP12    | Approved  |                       | Mitochondria;Nucle          |
| 6349 | ENSG00000147654 | EBAG9    | Enhanced  | Golgi apparatus       |                             |
| 6350 | ENSG00000147669 | POLR2K   | Approved  |                       | Intermediate filam          |
| 6351 | ENSG00000147677 | EIF3H    | Approved  |                       | Cytosol                     |
| 6352 | ENSG00000147679 | UTP23    | Approved  |                       | Nucleoli                    |
| 6353 | ENSG00000147684 | NDUFB9   | Supported |                       | Mitochondria                |
| 6354 | ENSG00000147687 | TATDN1   | Supported |                       | Nucleoplasm                 |
| 6355 | ENSG00000147689 | FAM83A   | Approved  |                       | Nucleoplasm                 |
| 6356 | ENSG00000147697 | GSDMC    | Enhanced  | Mitochondria          |                             |
| 6357 | ENSG00000147724 | FAM135B  | Approved  |                       | Nuclear membrane;N          |
| 6358 | ENSG00000147789 | ZNF7     | Approved  |                       | Mitochondria                |
| 6359 | ENSG00000147799 | ARHGAP39 | Approved  |                       | Cytokinetic bridge          |
| 6360 | ENSG00000147813 | NAPRT    | Approved  |                       | Cytosol Golgi apparatus;Nu  |
| 6361 | ENSG00000147852 | VLDLR    | Approved  |                       | Centriolar satelli          |
| 6362 | ENSG00000147853 | AK3      | Supported |                       | Mitochondria                |
| 6363 | ENSG00000147854 | UHRF2    | Enhanced  | Nucleoplasm           |                             |
| 6364 | ENSG00000147862 | NFIB     | Supported |                       | Nucleoli fibrillar center;N |
| 6365 | ENSG00000147872 | PLIN2    | Supported |                       | Lipid droplets              |
| 6366 | ENSG00000147874 | HAUS6    | Supported |                       | CentriolaCytosol;Nuclear sp |
| 6367 | ENSG00000147883 | CDKN2B   | Approved  |                       | Nucleoplasm                 |
| 6368 | ENSG00000147889 | CDKN2A   | Supported |                       | Nucleoli                    |
| 6369 | ENSG00000147905 | ZCCHC7   | Enhanced  | Cytosol;Nucleoli      |                             |
| 6370 | ENSG00000147912 | FBXO10   | Approved  |                       | Cytosol;Nucleoplas          |
| 6371 | ENSG00000147996 | CBWD5    | Approved  |                       | Plasma membrane             |
| 6372 | ENSG00000148053 | NTRK2    | Approved  |                       | Cytosol                     |
| 6373 | ENSG00000148057 | IDNK     | Approved  |                       | Cytosol;Mitochondr          |
| 6374 | ENSG00000148082 | SHC3     | Supported |                       | Nucleoplasm                 |
| 6375 | ENSG00000148110 | MFSD14B  | Approved  |                       | Cytosol;Nucleoplas          |
| 6376 | ENSG00000148120 | C9orf3   | Approved  |                       | Cell Junctions              |
| 6377 | ENSG00000148123 | PLPPR1   | Supported |                       | Nucleoplasm                 |
| 6378 | ENSG00000148143 | ZNF462   | Approved  |                       | Nucleoplasm                 |



|      |                 |          |           |                             |                             |
|------|-----------------|----------|-----------|-----------------------------|-----------------------------|
| 6379 | ENSG00000148153 | INIP     | Supported |                             | Nucleoplasm                 |
| 6380 | ENSG00000148158 | SNX30    | Approved  |                             | Cytosol;Nucleoli;N          |
| 6381 | ENSG00000148175 | STOM     | Enhanced  | Plasma membrane             | Cytosol;Vesicles            |
| 6382 | ENSG00000148180 | GSN      | Supported |                             | Actin filaments             |
| 6383 | ENSG00000148187 | MRRF     | Approved  |                             | Cytokinetic bridge          |
| 6384 | ENSG00000148200 | NR6A1    | Supported | Nucleoplasm                 | Centrosome;Cytosol          |
| 6385 | ENSG00000148219 | ASTN2    | Approved  |                             | Cytosol;Nucleoplas          |
| 6386 | ENSG00000148225 | WDR31    | Approved  |                             | Cytosol;Nuclear bo          |
| 6387 | ENSG00000148229 | POLE3    | Approved  |                             | Nucleoli;Nucleopla          |
| 6388 | ENSG00000148291 | SURF2    | Enhanced  | Nucleoli;Nucleoplasm        |                             |
| 6389 | ENSG00000148296 | SURF6    | Enhanced  | Nucleoli                    | Nucleoplasm                 |
| 6390 | ENSG00000148297 | MED22    | Approved  |                             | Nucleoplasm                 |
| 6391 | ENSG00000148300 | REX04    | Supported |                             | Nucleoli;Nucleoplasm        |
| 6392 | ENSG00000148303 | RPL7A    | Approved  |                             | Nucleoli;Vesicles           |
| 6393 | ENSG00000148308 | GTF3C5   | Enhanced  | Nucleoplasm                 |                             |
| 6394 | ENSG00000148334 | PTGES2   | Approved  |                             | Mitochondria                |
| 6395 | ENSG00000148335 | NTMT1    | Enhanced  | Cytosol;Nucleoplasm         |                             |
| 6396 | ENSG00000148337 | CIZ1     | Enhanced  | Nucleoplasm                 |                             |
| 6397 | ENSG00000148339 | SLC25A25 | Supported |                             | MitochondVesicles           |
| 6398 | ENSG00000148341 | SH3GLB2  | Supported |                             | Cytosol Nucleoplasm         |
| 6399 | ENSG00000148343 | MIGA2    | Approved  |                             | Cytosol Cell Junctions      |
| 6400 | ENSG00000148344 | PTGES    | Supported |                             | Endoplasmic reticulum       |
| 6401 | ENSG00000148346 | LCN2     | Supported |                             | Endoplasmic reticulum       |
| 6402 | ENSG00000148356 | LRSAM1   | Approved  |                             | Cytosol                     |
| 6403 | ENSG00000148357 | HMCN2    | Approved  |                             | Vesicles                    |
| 6404 | ENSG00000148358 | GPR107   | Approved  |                             | Golgi apparatus;Nu          |
| 6405 | ENSG00000148362 | PAXX     | Supported |                             | Nucleoplasm                 |
| 6406 | ENSG00000148396 | SEC16A   | Supported |                             | Endoplasmic reticulum;Golgi |
| 6407 | ENSG00000148399 | DPH7     | Approved  |                             | Nuclear bodies              |
| 6408 | ENSG00000148400 | NOTCH1   | Approved  |                             | Nucleoplasm                 |
| 6409 | ENSG00000148411 | NACC2    | Approved  |                             | Mitochondria;Nucle          |
| 6410 | ENSG00000148426 | PROSER2  | Uncertain |                             | Cytosol;P                   |
| 6411 | ENSG00000148459 | PDSS1    | Approved  |                             | Cytosol                     |
| 6412 | ENSG00000148468 | FAM171A1 | Approved  |                             | Plasma meNucleopla          |
| 6413 | ENSG00000148481 | MINDY3   | Supported | Nuclear membrane;Nucleoplas |                             |
| 6414 | ENSG00000148484 | RSU1     | Approved  |                             | Vesicles                    |
| 6415 | ENSG00000148488 | ST8SIA6  | Approved  |                             | Endoplasmic reticu          |
| 6416 | ENSG00000148498 | PARD3    | Supported | Cell JuncCytoplasmic bodies |                             |
| 6417 | ENSG00000148513 | ANKRD30A | Uncertain |                             | Nucleoli                    |
| 6418 | ENSG00000148516 | ZEB1     | Supported |                             | Nucleoplasm                 |
| 6419 | ENSG00000148541 | FAM13C   | Approved  |                             | Cytosol;Nucleoplas          |
| 6420 | ENSG00000148572 | NRBF2    | Approved  |                             | Cytosol;Nucleoplas          |
| 6421 | ENSG00000148584 | A1CF     | Supported |                             | Nucleoplasm                 |
| 6422 | ENSG00000148606 | POLR3A   | Supported |                             | Nucleoplasm                 |
| 6423 | ENSG00000148634 | HERC4    | Supported |                             | Cytosol Nucleoli fibrillar  |
| 6424 | ENSG00000148655 | LRMDA    | Supported |                             | NucleoplaCytosol            |
| 6425 | ENSG00000148660 | CAMK2G   | Approved  |                             | Cell Junctions;Cyt          |
| 6426 | ENSG00000148671 | ADIRF    | Supported |                             | NucleoplaCytosol            |
| 6427 | ENSG00000148672 | GLUD1    | Supported |                             | Mitochondria                |
| 6428 | ENSG00000148677 | ANKRD1   | Approved  |                             | NucleoplaNucleoli fibrillar |
| 6429 | ENSG00000148680 | HTR7     | Supported |                             | Plasma meCytosol;Nuclear sp |
| 6430 | ENSG00000148688 | RPP30    | Approved  |                             | Cytosol;Microtubul          |
| 6431 | ENSG00000148700 | ADD3     | Supported |                             | Plasma membrane             |
| 6432 | ENSG00000148704 | VAX1     | Approved  |                             | Nucleoli;Nucleopla          |
| 6433 | ENSG00000148719 | DNAJB12  | Supported |                             | Endoplasmic reticulum;Nucle |

|      |                 |          |           |                             |
|------|-----------------|----------|-----------|-----------------------------|
| 6434 | ENSG00000148730 | EIF4EBP2 | Approved  | Mitochondria;Nucle          |
| 6435 | ENSG00000148735 | PLEKHS1  | Approved  | Centrosome;Vesicle          |
| 6436 | ENSG00000148737 | TCF7L2   | Approved  | Nuclear bCytosol;Nucleoplas |
| 6437 | ENSG00000148773 | MKI67    | Enhanced  | Nucleoli;Nucleoplasm        |
| 6438 | ENSG00000148798 | INA      | Approved  | Intermediate filam          |
| 6439 | ENSG00000148814 | LRRC27   | Approved  | Golgi apparatus;Nu          |
| 6440 | ENSG00000148824 | MTG1     | Supported | Mitochondria                |
| 6441 | ENSG00000148832 | PAOX     | Uncertain | Centrosom                   |
| 6442 | ENSG00000148834 | GSTO1    | Approved  | Cytosol Nucleoplasm         |
| 6443 | ENSG00000148835 | TAF5     | Supported | Nucleoplasm                 |
| 6444 | ENSG00000148840 | PPRC1    | Enhanced  | Nucleoplasm                 |
| 6445 | ENSG00000148841 | ITPRIP   | Uncertain | Vesicles                    |
| 6446 | ENSG00000148842 | CNNM2    | Enhanced  | Vesicles                    |
| 6447 | ENSG00000148843 | PDCD11   | Supported | Nucleoli Vesicles           |
| 6448 | ENSG00000148848 | ADAM12   | Supported | Plasma membrane             |
| 6449 | ENSG00000148908 | RGS10    | Supported | Nucleoplasm;Plasma membrane |
| 6450 | ENSG00000148925 | BTBD10   | Supported | Nucleoli fibrillar center;N |
| 6451 | ENSG00000148935 | GAS2     | Approved  | Cytosol;Nucleoli;N          |
| 6452 | ENSG00000148948 | LRRC4C   | Approved  | Cytosol                     |
| 6453 | ENSG00000148985 | PGAP2    | Approved  | Microtubules                |
| 6454 | ENSG00000149016 | TUT1     | Supported | NucleoplaCytosol            |
| 6455 | ENSG00000149054 | ZNF215   | Approved  | Nucleoplasm;Vesicl          |
| 6456 | ENSG00000149089 | APIP     | Approved  | Cytosol;Nucleoplas          |
| 6457 | ENSG00000149091 | DGKZ     | Supported | Nuclear speckles            |
| 6458 | ENSG00000149100 | EIF3M    | Supported | Cytosol                     |
| 6459 | ENSG00000149136 | SSRP1    | Approved  | Cytosol;Nucleoplas          |
| 6460 | ENSG00000149150 | SLC43A1  | Approved  | Golgi apparatus;Pl          |
| 6461 | ENSG00000149179 | C11orf49 | Approved  | Nuclear speckles            |
| 6462 | ENSG00000149182 | ARFGAP2  | Supported | Golgi apparatus             |
| 6463 | ENSG00000149187 | CELF1    | Enhanced  | Nucleoplasm                 |
| 6464 | ENSG00000149196 | HIKESHI  | Approved  | Nuclear bodies;Nuc          |
| 6465 | ENSG00000149212 | SESN3    | Approved  | Cytosol;Nucleoplas          |
| 6466 | ENSG00000149218 | ENDOD1   | Approved  | Nuclear membrane            |
| 6467 | ENSG00000149231 | CCDC82   | Approved  | Cytosol;Nuclear bo          |
| 6468 | ENSG00000149243 | KLHL35   | Approved  | Centrosome;Nucleol          |
| 6469 | ENSG00000149257 | SERPINH1 | Supported | Endoplasmic reticulum       |
| 6470 | ENSG00000149260 | CAPN5    | Approved  | Cytosol;Nucleoplas          |
| 6471 | ENSG00000149262 | INTS4    | Supported | Nucleoli                    |
| 6472 | ENSG00000149269 | PAK1     | Supported | Cytosol;Plasma membrane     |
| 6473 | ENSG00000149273 | RPS3     | Supported | Cytosol;Endoplasmic reticul |
| 6474 | ENSG00000149289 | ZC3H12C  | Approved  | Golgi apparatus;Nu          |
| 6475 | ENSG00000149292 | TTC12    | Approved  | Nucleoplasm                 |
| 6476 | ENSG00000149294 | NCAM1    | Enhanced  | Cytosol;Plasma membrane     |
| 6477 | ENSG00000149300 | C11orf52 | Enhanced  | Cell Junctions              |
| 6478 | ENSG00000149308 | NPAT     | Enhanced  | Nuclear bodies;Nucleoplasm  |
| 6479 | ENSG00000149311 | ATM      | Enhanced  | NucleoplaVesicles           |
| 6480 | ENSG00000149328 | GLB1L2   | Supported | Nucleoplasm                 |
| 6481 | ENSG00000149346 | SLX4IP   | Approved  | Cytosol                     |
| 6482 | ENSG00000149357 | LAMTOR1  | Supported | Golgi apparatus;Plasma memb |
| 6483 | ENSG00000149418 | ST14     | Approved  | Nucleoplasm;Vesicl          |
| 6484 | ENSG00000149451 | ADAM33   | Uncertain | Nuclear s                   |
| 6485 | ENSG00000149474 | KAT14    | Approved  | Vesicles                    |
| 6486 | ENSG00000149476 | TKFC     | Approved  | Cytosol;Nucleoplas          |
| 6487 | ENSG00000149480 | MTA2     | Enhanced  | Nucleoplasm                 |
| 6488 | ENSG00000149483 | TMEM138  | Approved  | Microtubules                |

|      |                 |           |           |                             |                             |
|------|-----------------|-----------|-----------|-----------------------------|-----------------------------|
| 6489 | ENSG00000149489 | ROM1      | Approved  |                             | Cytosol;Plasma mem          |
| 6490 | ENSG00000149503 | INCENP    | Supported | Midbody;Nuclear bodies;Nucl |                             |
| 6491 | ENSG00000149516 | MS4A3     | Approved  |                             | Golgi apparatus;Ve          |
| 6492 | ENSG00000149532 | CPSF7     | Supported | Cytosol;Nucleoplasm         |                             |
| 6493 | ENSG00000149547 | EI24      | Supported | Cytosol;Endoplasmic reticul |                             |
| 6494 | ENSG00000149548 | CCDC15    | Approved  |                             | Cytosol;Plasma mem          |
| 6495 | ENSG00000149554 | CHEK1     | Supported | NucleoplaVesicles           |                             |
| 6496 | ENSG00000149557 | FEZ1      | Supported | MicrotubuCytosol            |                             |
| 6497 | ENSG00000149564 | ESAM      | Approved  |                             | Microtubules                |
| 6498 | ENSG00000149573 | MPZL2     | Approved  |                             | Cell Junctions              |
| 6499 | ENSG00000149582 | TMEM25    | Approved  |                             | Golgi apparatus;Ve          |
| 6500 | ENSG00000149591 | TAGLN     | Approved  |                             | Cytosol;Microtubul          |
| 6501 | ENSG00000149599 | DUSP15    | Approved  |                             | Cytosol;Plasma mem          |
| 6502 | ENSG00000149600 | COMMD7    | Approved  |                             | Vesicles                    |
| 6503 | ENSG00000149633 | KIAA1755  | Approved  |                             | Golgi apparatus;Nu          |
| 6504 | ENSG00000149634 | SPATA25   | Approved  |                             | Golgi apparatus             |
| 6505 | ENSG00000149636 | DSN1      | Enhanced  | NucleoplaNuclear b          | Cytosol;Nucleoli f          |
| 6506 | ENSG00000149639 | SOGA1     | Approved  |                             | Cytosol;Nucleoli            |
| 6507 | ENSG00000149657 | LSM14B    | Supported | Vesicles                    | Nucleoli fibrillar          |
| 6508 | ENSG00000149679 | CABLES2   | Approved  |                             | Cell JuncNucleopla          |
| 6509 | ENSG00000149716 | ORAOV1    | Approved  |                             | Nucleoplasm                 |
| 6510 | ENSG00000149735 | GPHA2     | Approved  |                             | Vesicles                    |
| 6511 | ENSG00000149743 | TRPT1     | Approved  |                             | Mitochondria                |
| 6512 | ENSG00000149761 | NUDT22    | Enhanced  | Nucleoplasm                 |                             |
| 6513 | ENSG00000149781 | FERMT3    | Approved  |                             | Vesicles                    |
| 6514 | ENSG00000149782 | PLCB3     | Enhanced  | Nucleoplasm                 |                             |
| 6515 | ENSG00000149798 | CDC42EP2  | Supported | MicrotubuCytosol            |                             |
| 6516 | ENSG00000149806 | FAU       | Supported |                             | Cytosol;Endoplasmic reticul |
| 6517 | ENSG00000149809 | TM7SF2    | Supported | Endoplasm                   | Vesicles                    |
| 6518 | ENSG00000149823 | VPS51     | Approved  |                             | Golgi appNucleoli           |
| 6519 | ENSG00000149922 | TBX6      | Approved  |                             | Nucleoplasm                 |
| 6520 | ENSG00000149923 | PPP4C     | Supported |                             | Cytosol;NPlasma membrane    |
| 6521 | ENSG00000149925 | ALDOA     | Supported |                             | Cytosol                     |
| 6522 | ENSG00000149927 | DOC2A     | Uncertain |                             | Cell Junc                   |
| 6523 | ENSG00000149929 | HIRIP3    | Enhanced  | Nucleoplasm                 |                             |
| 6524 | ENSG00000149930 | TAOK2     | Supported |                             | Nucleoli;Cytosol            |
| 6525 | ENSG00000149948 | HMGA2     | Supported |                             | Nucleoli;Nucleoplasm        |
| 6526 | ENSG00000149968 | MMP3      | Supported |                             | Vesicles                    |
| 6527 | ENSG00000149970 | CNKSR2    | Approved  |                             | Golgi apparatus;Pl          |
| 6528 | ENSG00000150051 | MKX       | Approved  |                             | Nuclear speckles;N          |
| 6529 | ENSG00000150054 | MPP7      | Supported | Cell Junctions              | Nucleopla                   |
| 6530 | ENSG00000150093 | ITGB1     | Supported | Focal adh                   | Endoplasmic reticu          |
| 6531 | ENSG00000150316 | CWC15     | Approved  |                             | Mitochondria;Nucle          |
| 6532 | ENSG00000150347 | ARID5B    | Approved  |                             | Cytosol;Endoplasmic         |
| 6533 | ENSG00000150394 | CDH8      | Approved  |                             | Plasma membrane             |
| 6534 | ENSG00000150401 | DCUN1D2   | Approved  |                             | Cytosol;Plasma mem          |
| 6535 | ENSG00000150403 | TMC03     | Approved  |                             | Cytosol                     |
| 6536 | ENSG00000150433 | TMEM218   | Approved  |                             | Cytosol;Plasma mem          |
| 6537 | ENSG00000150455 | TIRAP     | Approved  |                             | Cytokinetic bridge          |
| 6538 | ENSG00000150456 | EEF1AKMT1 | Approved  |                             | Cytosol;Plasma mem          |
| 6539 | ENSG00000150457 | LATS2     | Supported | Centriolar satellite;       | Cytoso                      |
| 6540 | ENSG00000150459 | SAP18     | Supported | Cytosol;Nuclear bodies;Nucl |                             |
| 6541 | ENSG00000150477 | KIAA1328  | Approved  |                             | Lipid droplets;Nuc          |
| 6542 | ENSG00000150510 | FAM124A   | Approved  |                             | Cytosol;Nucleoplas          |
| 6543 | ENSG00000150527 | CTAGE5    | Supported |                             | Endoplasmic reticulum       |

|      |                 |          |           |                             |           |
|------|-----------------|----------|-----------|-----------------------------|-----------|
| 6544 | ENSG00000150540 | HNMT     | Approved  | Cytosol                     | Centrosom |
| 6545 | ENSG00000150593 | PDCD4    | Approved  | Nucleoplasm                 |           |
| 6546 | ENSG00000150627 | WDR17    | Approved  | Nuclear speckles            |           |
| 6547 | ENSG00000150636 | CCDC102B | Approved  | Cytosol;Mitochondr          |           |
| 6548 | ENSG00000150637 | CD226    | Uncertain | Midbody                     |           |
| 6549 | ENSG00000150667 | FSIP1    | Uncertain | Nucleopla                   |           |
| 6550 | ENSG00000150672 | DLG2     | Approved  | Plasma membrane;Ve          |           |
| 6551 | ENSG00000150676 | CCDC83   | Uncertain | Cytosol;N                   |           |
| 6552 | ENSG00000150681 | RGS18    | Approved  | Golgi apparatus             |           |
| 6553 | ENSG00000150722 | PPP1R1C  | Approved  | Golgi apparatus;Nu          |           |
| 6554 | ENSG00000150756 | FAM173B  | Approved  | Nucleoplasm;Vesicl          |           |
| 6555 | ENSG00000150760 | DOCK1    | Enhanced  | Nucleoplasm                 |           |
| 6556 | ENSG00000150764 | DIXDC1   | Supported | Cytosol                     |           |
| 6557 | ENSG00000150768 | DLAT     | Enhanced  | Mitochondria                |           |
| 6558 | ENSG00000150773 | PIH1D2   | Uncertain | Cytosol;N                   |           |
| 6559 | ENSG00000150776 | NKAPD1   | Supported | Cytosol                     |           |
| 6560 | ENSG00000150782 | IL18     | Approved  | Cytosol;GNucleopla          |           |
| 6561 | ENSG00000150787 | PTS      | Approved  | Cytosol                     |           |
| 6562 | ENSG00000150867 | PIP4K2A  | Approved  | Cytosol;PGolgi apparatus    |           |
| 6563 | ENSG00000150893 | FREM2    | Approved  | Cytosol                     |           |
| 6564 | ENSG00000150907 | FOXO1    | Supported | Cytosol;Nucleoplasm         |           |
| 6565 | ENSG00000150961 | SEC24D   | Approved  | Vesicles                    |           |
| 6566 | ENSG00000150967 | ABCB9    | Supported | Vesicles                    |           |
| 6567 | ENSG00000150977 | RILPL2   | Supported | Cytosol                     |           |
| 6568 | ENSG00000150990 | DHX37    | Approved  | Nuclear membrane            |           |
| 6569 | ENSG00000150995 | ITPR1    | Approved  | Vesicles                    |           |
| 6570 | ENSG00000151012 | SLC7A11  | Approved  | Vesicles                    |           |
| 6571 | ENSG00000151014 | NOCT     | Supported | Cytosol;NNucleoplasm        |           |
| 6572 | ENSG00000151025 | GPR158   | Approved  | Cytosol                     |           |
| 6573 | ENSG00000151065 | DCP1B    | Supported | Cytosol Vesicles            |           |
| 6574 | ENSG00000151090 | THRB     | Supported | Nuclear bodies              |           |
| 6575 | ENSG00000151093 | OXSM     | Approved  | Mitochondria Cytosol        |           |
| 6576 | ENSG00000151116 | UEVLD    | Approved  | Cytosol;Nucleoplas          |           |
| 6577 | ENSG00000151117 | TMEM86A  | Approved  | Golgi apparatus;Nu          |           |
| 6578 | ENSG00000151131 | C12orf45 | Approved  | Nuclear membrane;N          |           |
| 6579 | ENSG00000151136 | BTBD11   | Supported | NucleoplaCytosol            |           |
| 6580 | ENSG00000151148 | UBE3B    | Approved  | Mitochondria;Nucle          |           |
| 6581 | ENSG00000151150 | ANK3     | Supported | Plasma membrane             |           |
| 6582 | ENSG00000151151 | IPMK     | Enhanced  | Nucleoplasm                 |           |
| 6583 | ENSG00000151208 | DLG5     | Supported | Cell Junctions              |           |
| 6584 | ENSG00000151229 | SLC2A13  | Approved  | Nuclear membrane            |           |
| 6585 | ENSG00000151239 | TWF1     | Supported | Cytosol                     |           |
| 6586 | ENSG00000151240 | DIP2C    | Approved  | Cytosol;Nucleoplas          |           |
| 6587 | ENSG00000151247 | EIF4E    | Enhanced  | Cytoplasmic bodies;Cytosol  |           |
| 6588 | ENSG00000151276 | MAGI1    | Supported | Cell JuncNucleoplasm        |           |
| 6589 | ENSG00000151304 | SRFBP1   | Supported | Nucleoli;Vesicles           |           |
| 6590 | ENSG00000151322 | NPAS3    | Supported | Nucleoplasm                 |           |
| 6591 | ENSG00000151327 | FAM177A1 | Approved  | Nucleoplasm;Vesicl          |           |
| 6592 | ENSG00000151332 | MBIP     | Supported | Cytosol;Nucleoli;Nucleoplas |           |
| 6593 | ENSG00000151338 | MIPOL1   | Approved  | Cytosol                     |           |
| 6594 | ENSG00000151348 | EXT2     | Supported | Golgi apparatus             |           |
| 6595 | ENSG00000151353 | TMEM18   | Approved  | Mitochondria                |           |
| 6596 | ENSG00000151364 | KCTD14   | Approved  | Cytosol;Nucleoplas          |           |
| 6597 | ENSG00000151365 | THRSP    | Approved  | Nucleoplasm                 |           |
| 6598 | ENSG00000151366 | NDUFC2   | Supported | Mitochondria                |           |

|      |                 |          |           |              |                             |
|------|-----------------|----------|-----------|--------------|-----------------------------|
| 6599 | ENSG00000151388 | ADAMTS12 | Approved  |              | Mitochondria;Nucle          |
| 6600 | ENSG00000151413 | NUBPL    | Approved  |              | Mitochondria                |
| 6601 | ENSG00000151414 | NEK7     | Supported |              | Nucleoplasm                 |
| 6602 | ENSG00000151422 | FER      | Supported |              | Cytosol                     |
| 6603 | ENSG00000151458 | ANKRD50  | Approved  |              | Cytosol;Nucleoplas          |
| 6604 | ENSG00000151461 | UPF2     | Supported |              | Cytoplasmic bodies;Cytosol  |
| 6605 | ENSG00000151465 | CDC123   | Approved  |              | Cytosol;Golgi appa          |
| 6606 | ENSG00000151468 | CCDC3    | Approved  |              | Cytosol;Nucleoplas          |
| 6607 | ENSG00000151470 | C4orf33  | Approved  |              | Golgi apparatus;Nu          |
| 6608 | ENSG00000151474 | FRMD4A   | Approved  |              | Golgi apparatus;Nu          |
| 6609 | ENSG00000151475 | SLC25A31 | Enhanced  | Mitochondria |                             |
| 6610 | ENSG00000151491 | EPS8     | Approved  |              | Golgi apparatus             |
| 6611 | ENSG00000151500 | THYN1    | Supported |              | Nucleoli Cytosol            |
| 6612 | ENSG00000151503 | NCAPD3   | Supported |              | Nucleoplasm                 |
| 6613 | ENSG00000151532 | VTI1A    | Supported |              | Golgi apparatus;Vesicles    |
| 6614 | ENSG00000151552 | QDPR     | Approved  |              | Mitochondria                |
| 6615 | ENSG00000151553 | FAM160B1 | Approved  |              | Cytosol;Nuclear sp          |
| 6616 | ENSG00000151575 | TEX9     | Approved  |              | Cytosol;Plasma mem          |
| 6617 | ENSG00000151576 | QTRT2    | Approved  |              | Intermediate filam          |
| 6618 | ENSG00000151611 | MMAA     | Approved  |              | Cytosol                     |
| 6619 | ENSG00000151612 | ZNF827   | Approved  |              | Nucleoplasm                 |
| 6620 | ENSG00000151617 | EDNRA    | Uncertain |              | Plasma membrane Cytosol     |
| 6621 | ENSG00000151623 | NR3C2    | Supported |              | Nucleoplasm                 |
| 6622 | ENSG00000151632 | AKR1C2   | Approved  |              | Cytosol;Endoplasmic         |
| 6623 | ENSG00000151640 | DPYSL4   | Approved  |              | Mitochondria;Vesic          |
| 6624 | ENSG00000151650 | VENTX    | Uncertain |              | Cytosol;N                   |
| 6625 | ENSG00000151655 | ITIH2    | Approved  |              | Golgi apparatus             |
| 6626 | ENSG00000151657 | KIN      | Enhanced  | Nucleoplasm  |                             |
| 6627 | ENSG00000151687 | ANKAR    | Approved  |              | Centriolar satelli          |
| 6628 | ENSG00000151689 | INPP1    | Approved  |              | Centriolar satelli          |
| 6629 | ENSG00000151690 | MFSD6    | Approved  |              | Actin filaments;Cy          |
| 6630 | ENSG00000151692 | RNF144A  | Approved  |              | Vesicles                    |
| 6631 | ENSG00000151693 | ASAP2    | Supported |              | Cytosol                     |
| 6632 | ENSG00000151694 | ADAM17   | Supported |              | Cytosol                     |
| 6633 | ENSG00000151702 | FLI1     | Supported |              | Nuclear bodies;Nucleoplasm  |
| 6634 | ENSG00000151715 | TMEM45B  | Approved  |              | Nucleoplasm                 |
| 6635 | ENSG00000151718 | WWC2     | Approved  |              | Microtubules                |
| 6636 | ENSG00000151725 | CENPU    | Supported |              | Centriolar satellite;Nucleo |
| 6637 | ENSG00000151726 | ACSL1    | Supported |              | Mitochondria;Nucleoplasm    |
| 6638 | ENSG00000151729 | SLC25A4  | Supported |              | Mitochondria                |
| 6639 | ENSG00000151743 | AMN1     | Approved  |              | Centrosome                  |
| 6640 | ENSG00000151746 | BICD1    | Approved  |              | Vesicles                    |
| 6641 | ENSG00000151748 | SAV1     | Supported |              | Cytosol                     |
| 6642 | ENSG00000151773 | CCDC122  | Approved  |              | Nucleoplasm;Vesicl          |
| 6643 | ENSG00000151778 | SERP2    | Approved  |              | Endoplasmic reticu          |
| 6644 | ENSG00000151779 | NBAS     | Approved  |              | Golgi appNuclear m          |
| 6645 | ENSG00000151790 | TD02     | Uncertain |              | Cytosol;P                   |
| 6646 | ENSG00000151806 | GUF1     | Approved  |              | Mitochondria;Nucle          |
| 6647 | ENSG00000151812 | SLC35F4  | Approved  |              | Nucleoli fibrillar          |
| 6648 | ENSG00000151838 | CCDC175  | Approved  |              | Cytosol;Nucleoli;N          |
| 6649 | ENSG00000151846 | PABPC3   | Approved  |              | Cytosol                     |
| 6650 | ENSG00000151849 | CENPJ    | Approved  |              | Centrosome Nucleopla        |
| 6651 | ENSG00000151876 | FBX04    | Approved  |              | Nucleoplasm                 |
| 6652 | ENSG00000151881 | TMEM267  | Approved  |              | Nucleoplasm                 |
| 6653 | ENSG00000151883 | PARP8    | Approved  |              | Cytosol;Midbody ri          |

|      |                 |          |           |                             |                    |
|------|-----------------|----------|-----------|-----------------------------|--------------------|
| 6654 | ENSG00000151892 | GFRA1    | Approved  |                             | Golgi apparatus;Nu |
| 6655 | ENSG00000151893 | CACUL1   | Approved  |                             | Nucleoplasm        |
| 6656 | ENSG00000151914 | DST      | Approved  |                             | Cytosol;Microtubul |
| 6657 | ENSG00000151917 | BEND6    | Approved  |                             | Nucleoplasm;Plasma |
| 6658 | ENSG00000151923 | TIAL1    | Approved  |                             | Nucleoplasm;Vesicl |
| 6659 | ENSG00000151929 | BAG3     | Enhanced  | Cytosol;Plasma membrane     |                    |
| 6660 | ENSG00000151948 | GLT1D1   | Enhanced  | Cytosol                     |                    |
| 6661 | ENSG00000151967 | SCHIP1   | Approved  | Cytosol                     | Cell Junctions;Nuc |
| 6662 | ENSG00000152049 | KCNE4    | Approved  |                             | Microtubules;Nucle |
| 6663 | ENSG00000152056 | AP1S3    | Supported | Vesicles                    |                    |
| 6664 | ENSG00000152076 | CCDC74B  | Uncertain |                             | Vesicles           |
| 6665 | ENSG00000152078 | TMEM56   | Approved  |                             | Nuclear speckles   |
| 6666 | ENSG00000152082 | MZT2B    | Supported | Centrosom                   | Cytosol            |
| 6667 | ENSG00000152086 | TUBA3E   | Supported | Microtubules                |                    |
| 6668 | ENSG00000152092 | ASTN1    | Approved  |                             | Golgi apparatus;Ve |
| 6669 | ENSG00000152104 | PTPN14   | Supported | Nucleoplasm                 |                    |
| 6670 | ENSG00000152133 | GPATCH11 | Supported | Nucleoplasm                 |                    |
| 6671 | ENSG00000152137 | HSPB8    | Supported | Cytosol                     | Nuclear bodies;Nuc |
| 6672 | ENSG00000152147 | GEMIN6   | Supported | Nuclear bodies;Nucleoplasm  |                    |
| 6673 | ENSG00000152154 | TMEM178A | Approved  |                             | Nucleoplasm;Vesicl |
| 6674 | ENSG00000152193 | RNF219   | Approved  |                             | Cytosol;Nuclear bo |
| 6675 | ENSG00000152217 | SETBP1   | Supported | Nuclear bodies;Nuc          | Cytosol            |
| 6676 | ENSG00000152219 | ARL14EP  | Supported | Cytosol;Focal adhe          | Nucleopla          |
| 6677 | ENSG00000152223 | EPG5     | Approved  |                             | Nuclear speckles   |
| 6678 | ENSG00000152229 | PSTPIP2  | Approved  |                             | Mitochondria;Nucle |
| 6679 | ENSG00000152234 | ATP5F1A  | Supported | Mitochondria                |                    |
| 6680 | ENSG00000152240 | HAUS1    | Supported | Centrosome;Cytosol          |                    |
| 6681 | ENSG00000152242 | C18orf25 | Approved  |                             | Cytosol;Nucleoplas |
| 6682 | ENSG00000152253 | SPC25    | Enhanced  | Cytosol                     |                    |
| 6683 | ENSG00000152256 | PDK1     | Approved  | Mitochondria                | Nucleoli           |
| 6684 | ENSG00000152270 | PDE3B    | Approved  |                             | Endoplasmic reticu |
| 6685 | ENSG00000152284 | TCF7L1   | Supported | Nucleopla                   | Cytosol            |
| 6686 | ENSG00000152291 | TGOLN2   | Enhanced  | Golgi apparatus;Nucleoplasm |                    |
| 6687 | ENSG00000152315 | KCNK13   | Approved  |                             | Cell Junctions;Nuc |
| 6688 | ENSG00000152332 | UHMK1    | Approved  | Nucleopla                   | Midbody Golgi app  |
| 6689 | ENSG00000152348 | ATG10    | Approved  |                             | Nucleoli;Nucleopla |
| 6690 | ENSG00000152359 | POC5     | Enhanced  | Nucleoplasm                 |                    |
| 6691 | ENSG00000152377 | SPOCK1   | Approved  |                             | Vesicles           |
| 6692 | ENSG00000152380 | FAM151B  | Approved  |                             | Cytosol            |
| 6693 | ENSG00000152382 | TADA1    | Supported | Nucleopla                   | Cytosol;Focal adhe |
| 6694 | ENSG00000152404 | CWF19L2  | Approved  |                             | Cytosol;Nuclear sp |
| 6695 | ENSG00000152409 | JMY      | Uncertain |                             | Nucleopla          |
| 6696 | ENSG00000152413 | HOMER1   | Approved  |                             | Cytosol            |
| 6697 | ENSG00000152422 | XRCC4    | Enhanced  | Nucleoplasm                 |                    |
| 6698 | ENSG00000152439 | ZNF773   | Approved  |                             | Nucleoli fibrillar |
| 6699 | ENSG00000152443 | ZNF776   | Approved  |                             | Cytosol;Nucleoplas |
| 6700 | ENSG00000152454 | ZNF256   | Supported | Nucleoplasm                 |                    |
| 6701 | ENSG00000152455 | SUV39H2  | Approved  |                             | Mitochondria       |
| 6702 | ENSG00000152457 | DCLRE1C  | Supported | Nucleopla                   | Golgi apparatus    |
| 6703 | ENSG00000152464 | RPP38    | Supported | Nucleoli                    |                    |
| 6704 | ENSG00000152465 | NMT2     | Supported | Cytosol;Golgi apparatus;Pla |                    |
| 6705 | ENSG00000152467 | ZSCAN1   | Approved  |                             | Nucleoli           |
| 6706 | ENSG00000152475 | ZNF837   | Uncertain |                             | Nucleoli           |
| 6707 | ENSG00000152484 | USP12    | Approved  |                             | Nucleoplasm        |
| 6708 | ENSG00000152492 | CCDC50   | Supported | Cytosol                     |                    |

|      |                 |          |           |                                      |
|------|-----------------|----------|-----------|--------------------------------------|
| 6709 | ENSG00000152495 | CAMK4    | Supported | Nucleoli fibrillar center;N          |
| 6710 | ENSG00000152503 | TRIM36   | Approved  | Cytosol;Nucleoplas                   |
| 6711 | ENSG00000152527 | PLEKHH2  | Approved  | Cytosol;Nuclear bo                   |
| 6712 | ENSG00000152556 | PFKM     | Approved  | Endoplasmic reticu                   |
| 6713 | ENSG00000152558 | TMEM123  | Supported | Golgi appCytosol;Vesicles            |
| 6714 | ENSG00000152580 | IGSF10   | Approved  | Intermediate filam                   |
| 6715 | ENSG00000152601 | MBNL1    | Enhanced  | NucleoplaCytosol                     |
| 6716 | ENSG00000152611 | CAPSL    | Approved  | Microtubules;Nucle                   |
| 6717 | ENSG00000152661 | GJA1     | Supported | Cell JuncNucleoplasm;Vesicl          |
| 6718 | ENSG00000152683 | SLC30A6  | Enhanced  | Golgi apparatus                      |
| 6719 | ENSG00000152684 | PELO     | Approved  | Nucleoli fibrillar                   |
| 6720 | ENSG00000152689 | RASGRP3  | Approved  | Golgi apparatus;Nu                   |
| 6721 | ENSG00000152700 | SAR1B    | Approved  | Endoplasmic reticu                   |
| 6722 | ENSG00000152749 | GPR180   | Approved  | Vesicles                             |
| 6723 | ENSG00000152766 | ANKRD22  | Approved  | Nucleoplasm                          |
| 6724 | ENSG00000152767 | FARP1    | Supported | Cytosol                              |
| 6725 | ENSG00000152778 | IFIT5    | Supported | Plasma membrane                      |
| 6726 | ENSG00000152779 | SLC16A12 | Approved  | Mitochondria                         |
| 6727 | ENSG00000152784 | PRDM8    | Approved  | Nuclear bodies                       |
| 6728 | ENSG00000152795 | HNRNPDL  | Enhanced  | Nucleoplasm                          |
| 6729 | ENSG00000152804 | HHEX     | Approved  | Mitochondria;Nucle                   |
| 6730 | ENSG00000152818 | UTRN     | Supported | Plasma meNucleoplasm                 |
| 6731 | ENSG00000152822 | GRM1     | Approved  | Vesicles                             |
| 6732 | ENSG00000152894 | PTPRK    | Supported | Cell Junctions;PlaVesicles           |
| 6733 | ENSG00000152926 | ZNF117   | Approved  | Cytosol;Nucleoli f                   |
| 6734 | ENSG00000152932 | RAB3C    | Approved  | Cytosol                              |
| 6735 | ENSG00000152936 | LMNTD1   | Approved  | Centrosome;Nucleop                   |
| 6736 | ENSG00000152939 | MARVELD2 | Supported | Cell Junctions                       |
| 6737 | ENSG00000152942 | RAD17    | Enhanced  | Nucleoplasm                          |
| 6738 | ENSG00000152944 | MED21    | Approved  | Cytosol;Nucleoli;N                   |
| 6739 | ENSG00000152952 | PLOD2    | Uncertain | Cytosol;N                            |
| 6740 | ENSG00000152953 | STK32B   | Approved  | Microtubules;Vesic                   |
| 6741 | ENSG00000152954 | NRSN1    | Approved  | Cytosol;Plasma mem                   |
| 6742 | ENSG00000152977 | ZIC1     | Supported | Nucleoplasm                          |
| 6743 | ENSG00000153006 | SREK1IP1 | Approved  | Nucleoli;Nucleopla                   |
| 6744 | ENSG00000153012 | LGI2     | Approved  | Centrosome                           |
| 6745 | ENSG00000153015 | CWC27    | Enhanced  | Nucleoplasm                          |
| 6746 | ENSG00000153029 | MR1      | Supported | Plasma membrane                      |
| 6747 | ENSG00000153044 | CENPH    | Supported | Nucleoli;Nucleoplasm                 |
| 6748 | ENSG00000153046 | CDYL     | Supported | Nuclear speckles                     |
| 6749 | ENSG00000153060 | TEKT5    | Supported | Actin filaments                      |
| 6750 | ENSG00000153064 | BANK1    | Approved  | Cytosol;Nucleoplas                   |
| 6751 | ENSG00000153066 | TXNDC11  | Supported | Cytosol;Plasma membrane              |
| 6752 | ENSG00000153071 | DAB2     | Enhanced  | Plasma membrane;VeNucleoli fibrillar |
| 6753 | ENSG00000153093 | ACOXL    | Supported | Cytosol Nucleoli                     |
| 6754 | ENSG00000153107 | ANAPC1   | Approved  | Vesicles                             |
| 6755 | ENSG00000153113 | CAST     | Enhanced  | Cytosol;Endoplasmic reticulum        |
| 6756 | ENSG00000153130 | SCOC     | Approved  | Golgi appNucleoplasm                 |
| 6757 | ENSG00000153132 | CLGN     | Supported | Endoplasmic reticulum                |
| 6758 | ENSG00000153140 | CETN3    | Supported | Centrosome                           |
| 6759 | ENSG00000153147 | SMARCA5  | Supported | Nucleoli fibrillar center;N          |
| 6760 | ENSG00000153157 | SYCP2L   | Supported | Nucleoplasm                          |
| 6761 | ENSG00000153162 | BMP6     | Approved  | Mitochondria                         |
| 6762 | ENSG00000153165 | RGPD3    | Approved  | Nuclear membrane;V                   |
| 6763 | ENSG00000153179 | RASSF3   | Supported | Cytosol Plasma membrane              |

|      |                 |          |           |                              |
|------|-----------------|----------|-----------|------------------------------|
| 6764 | ENSG00000153187 | HNRNPU   | Enhanced  | Nucleoplasm                  |
| 6765 | ENSG00000153201 | RANBP2   | Enhanced  | Nuclear membrane;Vesicles    |
| 6766 | ENSG00000153207 | AHCTF1   | Supported | Nuclear membrane             |
| 6767 | ENSG00000153208 | MERTK    | Approved  | Cytosol;Endoplasmic          |
| 6768 | ENSG00000153214 | TMEM87B  | Approved  | Golgi apparatus;Ve           |
| 6769 | ENSG00000153233 | PTPRR    | Supported | Cell Junctions;Cytosol;Plas  |
| 6770 | ENSG00000153234 | NR4A2    | Supported | Nuclear speckles             |
| 6771 | ENSG00000153237 | CCDC148  | Uncertain | Nucleoli;                    |
| 6772 | ENSG00000153246 | PLA2R1   | Approved  | Cytosol                      |
| 6773 | ENSG00000153250 | RBMS1    | Enhanced  | Cytosol                      |
| 6774 | ENSG00000153291 | SLC25A27 | Supported | Mitochondria                 |
| 6775 | ENSG00000153294 | ADGRF4   | Uncertain | Mitochond                    |
| 6776 | ENSG00000153303 | FRMD1    | Approved  | Actin filaments              |
| 6777 | ENSG00000153310 | FAM49B   | Approved  | Cytosol;Nucleoplas           |
| 6778 | ENSG00000153317 | ASAP1    | Approved  | Centrosome;Cytosol           |
| 6779 | ENSG00000153339 | TRAPPC8  | Approved  | Cytosol;Microtubul           |
| 6780 | ENSG00000153391 | INO80C   | Approved  | Nucleoli fibrillar           |
| 6781 | ENSG00000153395 | LPCAT1   | Supported | Endoplasmic reticulum;Lipid  |
| 6782 | ENSG00000153404 | PLEKHG4B | Approved  | Nucleoplasm                  |
| 6783 | ENSG00000153406 | NMRAL1   | Enhanced  | Nucleoplasm                  |
| 6784 | ENSG00000153443 | UBALD1   | Approved  | Cell Junctions;Cyt           |
| 6785 | ENSG00000153485 | TMEM251  | Approved  | Cell Junctions;Gol           |
| 6786 | ENSG00000153487 | ING1     | Approved  | Cytosol;Nucleoplas           |
| 6787 | ENSG00000153531 | ADPRHL1  | Approved  | Nucleoplasm                  |
| 6788 | ENSG00000153551 | CMTM7    | Approved  | Plasma membrane              |
| 6789 | ENSG00000153558 | FBXL2    | Approved  | Plasma meNucleoli;Nucleopla  |
| 6790 | ENSG00000153560 | UBP1     | Supported | Nucleoplasm                  |
| 6791 | ENSG00000153561 | RMND5A   | Approved  | Nucleoplasm                  |
| 6792 | ENSG00000153563 | CD8A     | Supported | Plasma membrane              |
| 6793 | ENSG00000153574 | RPIA     | Approved  | Nucleoplasm;Plasma           |
| 6794 | ENSG00000153707 | PTPRD    | Approved  | Nucleoplasm;Vesicl           |
| 6795 | ENSG00000153714 | LURAP1L  | Approved  | Nucleoli;Nucleopla           |
| 6796 | ENSG00000153721 | CNKSR3   | Approved  | Cytosol;Mitochondr           |
| 6797 | ENSG00000153767 | GTF2E1   | Enhanced  | Nucleoplasm                  |
| 6798 | ENSG00000153774 | CFDP1    | Approved  | NucleoplaVesicles            |
| 6799 | ENSG00000153779 | TGIF2LX  | Approved  | Nucleoplasm                  |
| 6800 | ENSG00000153786 | ZDHHC7   | Supported | Golgi appNucleoplasm         |
| 6801 | ENSG00000153790 | C7orf31  | Approved  | Mitochondria;Nucle           |
| 6802 | ENSG00000153814 | JAZF1    | Supported | NucleoplaNucleoli fibrillar  |
| 6803 | ENSG00000153815 | CMIP     | Supported | Cytosol;Nucleoplasm          |
| 6804 | ENSG00000153822 | KCNJ16   | Uncertain | Vesicles                     |
| 6805 | ENSG00000153823 | PID1     | Approved  | Endoplasmic reticu           |
| 6806 | ENSG00000153827 | TRIP12   | Approved  | Nuclear speckles             |
| 6807 | ENSG00000153832 | FBX036   | Approved  | Nucleoli;Nucleopla           |
| 6808 | ENSG00000153879 | CEBPG    | Supported | Nucleoplasm                  |
| 6809 | ENSG00000153885 | KCTD15   | Approved  | Golgi apparatus;Nu           |
| 6810 | ENSG00000153896 | ZNF599   | Approved  | Cytosol;Nucleoplas           |
| 6811 | ENSG00000153898 | MCOLN2   | Supported | Intermediate filaments       |
| 6812 | ENSG00000153902 | LGI4     | Approved  | Golgi apparatus              |
| 6813 | ENSG00000153904 | DDAH1    | Approved  | Cytosol;Nucleoli;P           |
| 6814 | ENSG00000153914 | SREK1    | Enhanced  | Nuclear speckles;Nucleoplasm |
| 6815 | ENSG00000153922 | CHD1     | Approved  | Nucleoli fibrillar           |
| 6816 | ENSG00000153930 | ANKFN1   | Approved  | Nucleoplasm;Plasma           |
| 6817 | ENSG00000153933 | DGKE     | Approved  | Cytosol Nucleopla            |
| 6818 | ENSG00000153936 | HS2ST1   | Approved  | Mitochondria                 |



|      |                 |          |           |                                     |
|------|-----------------|----------|-----------|-------------------------------------|
| 6819 | ENSG00000153944 | MSI2     | Supported | Cytosol                             |
| 6820 | ENSG00000153975 | ZUFSP    | Approved  | Cytosol;Nucleoplas                  |
| 6821 | ENSG00000153976 | HS3ST3A1 | Approved  | Microtubules                        |
| 6822 | ENSG00000153989 | NUS1     | Approved  | Plasma membrane;Ve                  |
| 6823 | ENSG00000153993 | SEMA3D   | Approved  | Golgi apparatus;Pl                  |
| 6824 | ENSG00000154001 | PPP2R5E  | Supported | Cytosol                             |
| 6825 | ENSG00000154016 | GRAP     | Approved  | Centrosome                          |
| 6826 | ENSG00000154027 | AK5      | Supported | Cytosol Centriolar satelli          |
| 6827 | ENSG00000154040 | CABYR    | Supported | Cytosol;Nucleoplasm                 |
| 6828 | ENSG00000154059 | IMPACT   | Approved  | Nucleoplasm                         |
| 6829 | ENSG00000154065 | ANKRD29  | Approved  | Nuclear bodies;Nuc                  |
| 6830 | ENSG00000154079 | SDHAF4   | Approved  | Mitochondria;Nucle                  |
| 6831 | ENSG00000154096 | THY1     | Approved  | Nucleoplasm;Plasma                  |
| 6832 | ENSG00000154099 | DNAAF1   | Approved  | Cytosol;Nuclear sp                  |
| 6833 | ENSG00000154102 | C16orf74 | Approved  | Centrosome;Plasma                   |
| 6834 | ENSG00000154114 | TBCEL    | Uncertain | Cytosol                             |
| 6835 | ENSG00000154118 | JPH3     | Approved  | Cytosol;Nucleoplas                  |
| 6836 | ENSG00000154122 | ANKH     | Approved  | Cytosol                             |
| 6837 | ENSG00000154124 | OTULIN   | Approved  | MitochondPlasma me                  |
| 6838 | ENSG00000154127 | UBASH3B  | Approved  | Plasma membrane                     |
| 6839 | ENSG00000154133 | ROB04    | Approved  | Plasma membrane                     |
| 6840 | ENSG00000154134 | ROB03    | Approved  | Plasma membrane;Ve                  |
| 6841 | ENSG00000154144 | TBRG1    | Enhanced  | Nucleoplasm                         |
| 6842 | ENSG00000154153 | RETREG1  | Supported | Endoplasmic reticulum               |
| 6843 | ENSG00000154162 | CDH12    | Uncertain | Vesicles                            |
| 6844 | ENSG00000154174 | TOMM70   | Enhanced  | Mitochondria                        |
| 6845 | ENSG00000154217 | PITPNC1  | Approved  | Cytosol;Nucleoplas                  |
| 6846 | ENSG00000154222 | CC2D1B   | Supported | NucleoplaVesicles                   |
| 6847 | ENSG00000154227 | CERS3    | Supported | Nucleoplasm                         |
| 6848 | ENSG00000154229 | PRKCA    | Enhanced  | Cytosol;Plasma membrane             |
| 6849 | ENSG00000154237 | LRRK1    | Supported | Cytosol Mitochondria                |
| 6850 | ENSG00000154240 | CEP112   | Approved  | Golgi apparatus;Nu                  |
| 6851 | ENSG00000154258 | ABCA9    | Approved  | Endoplasmic reticu                  |
| 6852 | ENSG00000154262 | ABCA6    | Enhanced  | Nucleoplasm                         |
| 6853 | ENSG00000154265 | ABCA5    | Approved  | Nucleoplasm                         |
| 6854 | ENSG00000154274 | C4orf19  | Supported | Cell Junctions                      |
| 6855 | ENSG00000154277 | UCHL1    | Supported | Cytosol Nucleoplasm                 |
| 6856 | ENSG00000154305 | MIA3     | Enhanced  | Vesicles                            |
| 6857 | ENSG00000154309 | DISP1    | Approved  | Nuclear bodies                      |
| 6858 | ENSG00000154310 | TNIK     | Supported | Cytosol;Nucleoplasm                 |
| 6859 | ENSG00000154319 | FAM167A  | Approved  | Mitochondria                        |
| 6860 | ENSG00000154328 | NEIL2    | Supported | Nucleoplasm Vesicles                |
| 6861 | ENSG00000154330 | PGM5     | Uncertain | Cytosol                             |
| 6862 | ENSG00000154342 | WNT3A    | Approved  | Vesicles                            |
| 6863 | ENSG00000154358 | OBSCN    | Approved  | Cytosol;Plasma mem                  |
| 6864 | ENSG00000154359 | LONRF1   | Approved  | Centrosome;Cytosol                  |
| 6865 | ENSG00000154370 | TRIM11   | Enhanced  | Cytosol;Nucleoplasm                 |
| 6866 | ENSG00000154380 | ENAH     | Enhanced  | Cytosol;Focal adhesion sites;Plasma |
| 6867 | ENSG00000154438 | ASZ1     | Approved  | Cytosol;Nucleoplas                  |
| 6868 | ENSG00000154447 | SH3RF1   | Supported | Vesicles Intermediate filam         |
| 6869 | ENSG00000154473 | BUB3     | Supported | Nucleoplasm                         |
| 6870 | ENSG00000154493 | C10orf90 | Supported | Cytosol Nucleoplasm;Plasma          |
| 6871 | ENSG00000154511 | FAM69A   | Approved  | Cytosol;Nucleoplas                  |
| 6872 | ENSG00000154553 | PDLIM3   | Supported | Cytosol                             |
| 6873 | ENSG00000154582 | ELOC     | Approved  | Cell Junctions;Nuc                  |

|      |                 |          |           |                                |                               |
|------|-----------------|----------|-----------|--------------------------------|-------------------------------|
| 6874 | ENSG00000154589 | LY96     | Approved  |                                | Vesicles                      |
| 6875 | ENSG00000154639 | CXADR    | Enhanced  | Cell Junctions;Plasma membrane |                               |
| 6876 | ENSG00000154642 | C21orf91 | Approved  |                                | Cytokinetic bridge            |
| 6877 | ENSG00000154646 | TMPRSS15 | Approved  |                                | Nucleoli;Plasma membrane      |
| 6878 | ENSG00000154654 | NCAM2    | Supported | Plasma membrane                | Nuclear bodies                |
| 6879 | ENSG00000154655 | L3MBTL4  | Approved  |                                | Nucleoplasm;Vesicles          |
| 6880 | ENSG00000154678 | PDE1C    | Approved  |                                | Nucleoplasm                   |
| 6881 | ENSG00000154710 | RABGEF1  | Supported | Cytosol                        | Nucleoli                      |
| 6882 | ENSG00000154721 | JAM2     | Supported | Plasma membrane                | Nucleoplasm                   |
| 6883 | ENSG00000154723 | ATP5PF   | Supported |                                | Mitochondria                  |
| 6884 | ENSG00000154727 | GABPA    | Enhanced  | Nucleoplasm                    |                               |
| 6885 | ENSG00000154734 | ADAMTS1  | Approved  |                                | Plasma membrane               |
| 6886 | ENSG00000154736 | ADAMTS5  | Supported |                                | Nucleoplasm                   |
| 6887 | ENSG00000154743 | TSEN2    | Supported | Nucleoplasm                    | Centrosome;Cytosol            |
| 6888 | ENSG00000154760 | SLFN13   | Approved  |                                | Cytokinetic bridge            |
| 6889 | ENSG00000154767 | XPC      | Enhanced  | Nucleoplasm;Plasma membrane    |                               |
| 6890 | ENSG00000154781 | CCDC174  | Enhanced  | Nucleoplasm                    |                               |
| 6891 | ENSG00000154783 | FGD5     | Supported |                                | Plasma membrane               |
| 6892 | ENSG00000154803 | FLCN     | Supported |                                | Cytosol;Plasma membrane       |
| 6893 | ENSG00000154813 | DPH3     | Supported |                                | Cytosol;Nucleoplasm           |
| 6894 | ENSG00000154814 | OXNAD1   | Approved  |                                | Nucleoplasm                   |
| 6895 | ENSG00000154832 | CXXC1    | Enhanced  | Nucleoplasm                    |                               |
| 6896 | ENSG00000154839 | SKA1     | Supported |                                | Microtubules                  |
| 6897 | ENSG00000154845 | PPP4R1   | Approved  |                                | Nucleoplasm                   |
| 6898 | ENSG00000154864 | PIEZO2   | Approved  |                                | Cytosol;Nucleoplasm           |
| 6899 | ENSG00000154889 | MPPE1    | Approved  | Golgi apparatus                | Nucleoplasm                   |
| 6900 | ENSG00000154917 | RAB6B    | Approved  |                                | Golgi apparatus               |
| 6901 | ENSG00000154920 | EME1     | Approved  |                                | Nuclear bodies;Cytosol        |
| 6902 | ENSG00000154928 | EPHB1    | Approved  | Plasma membrane                | Cytosol;Endoplasmic reticulum |
| 6903 | ENSG00000154945 | ANKRD40  | Approved  |                                | Cytosol;Golgi apparatus       |
| 6904 | ENSG00000154957 | ZNF18    | Approved  |                                | Cytosol;Golgi apparatus       |
| 6905 | ENSG00000154975 | CA10     | Approved  |                                | Vesicles                      |
| 6906 | ENSG00000155008 | APOOL    | Approved  |                                | Mitochondria                  |
| 6907 | ENSG00000155011 | DKK2     | Supported | Golgi apparatus                |                               |
| 6908 | ENSG00000155016 | CYP2U1   | Approved  |                                | Golgi apparatus;Nucleoplasm   |
| 6909 | ENSG00000155034 | FBXL18   | Approved  |                                | Cytosol;Nucleoplasm           |
| 6910 | ENSG00000155052 | CNTNAP5  | Supported | Nucleoli                       | Nucleoplasm;Vesicles          |
| 6911 | ENSG00000155066 | PROM2    | Approved  |                                | Cell Junctions;Nucleoplasm    |
| 6912 | ENSG00000155085 | AK9      | Enhanced  | Nuclear membrane;Nucleoplasm   |                               |
| 6913 | ENSG00000155093 | PTPRN2   | Approved  |                                | Vesicles                      |
| 6914 | ENSG00000155096 | AZIN1    | Approved  |                                | Vesicles                      |
| 6915 | ENSG00000155097 | ATP6V1C1 | Supported | Cytosol;Nucleoplasm            |                               |
| 6916 | ENSG00000155100 | OTUD6B   | Approved  |                                | Cytosol;Golgi apparatus       |
| 6917 | ENSG00000155111 | CDK19    | Approved  |                                | Nucleoplasm;Vesicles          |
| 6918 | ENSG00000155115 | GTF3C6   | Supported |                                | Nuclear bodies;Nucleoplasm    |
| 6919 | ENSG00000155158 | TTC39B   | Approved  |                                | Endoplasmic reticulum         |
| 6920 | ENSG00000155189 | AGPAT5   | Supported |                                | Mitochondria                  |
| 6921 | ENSG00000155229 | MMS19    | Enhanced  | Nucleoplasm                    |                               |
| 6922 | ENSG00000155252 | PI4K2A   | Approved  |                                | Plasma membrane               |
| 6923 | ENSG00000155256 | ZFYVE27  | Approved  | Vesicles                       | Cytosol Nucleoplasm           |
| 6924 | ENSG00000155275 | TRMT44   | Approved  |                                | Nucleoplasm                   |
| 6925 | ENSG00000155307 | SAMSN1   | Approved  | Nucleoplasm                    | Plasma membrane               |
| 6926 | ENSG00000155313 | USP25    | Supported | Cytosol                        |                               |
| 6927 | ENSG00000155324 | GRAMD2B  | Approved  |                                | Cytosol;Golgi apparatus       |
| 6928 | ENSG00000155329 | ZCCHC10  | Approved  |                                | Nucleoli;Nucleoplasm          |

|      |                 |          |           |                                |                            |
|------|-----------------|----------|-----------|--------------------------------|----------------------------|
| 6929 | ENSG00000155330 | C16orf87 | Approved  |                                | Nucleoplasm                |
| 6930 | ENSG00000155363 | MOV10    | Approved  |                                | Cytosol                    |
| 6931 | ENSG00000155367 | PPM1J    | Approved  |                                | Vesicles                   |
| 6932 | ENSG00000155380 | SLC16A1  | Enhanced  | Cell Junctions;Plasma membrane |                            |
| 6933 | ENSG00000155393 | HEATR3   | Approved  |                                | Cytosol;Nucleoplas         |
| 6934 | ENSG00000155428 | TRIM74   | Approved  |                                | Cytosol                    |
| 6935 | ENSG00000155438 | NIFK     | Enhanced  | Nucleoli                       |                            |
| 6936 | ENSG00000155463 | OXA1L    | Supported |                                | Mitochondria               |
| 6937 | ENSG00000155495 | MAGEC1   | Approved  |                                | Cytosol;Nucleoplas         |
| 6938 | ENSG00000155506 | LARP1    | Supported | Cytosol                        | Endoplasmic reticu         |
| 6939 | ENSG00000155542 | SETD9    | Approved  |                                | Nucleoplasm                |
| 6940 | ENSG00000155545 | MIER3    | Enhanced  | Nucleoplasm                    |                            |
| 6941 | ENSG00000155592 | ZKSCAN2  | Approved  |                                | Golgi apparatus;Nu         |
| 6942 | ENSG00000155621 | C9orf85  | Approved  |                                | Golgi apparatus;Nu         |
| 6943 | ENSG00000155629 | PIK3AP1  | Approved  |                                | Cytosol;Nucleoplas         |
| 6944 | ENSG00000155636 | RBM45    | Supported |                                | Nucleoplasm                |
| 6945 | ENSG00000155659 | VSIG4    | Uncertain |                                | Cytosol;N                  |
| 6946 | ENSG00000155660 | PDIA4    | Supported |                                | Endoplasmic reticulum      |
| 6947 | ENSG00000155666 | KDM8     | Approved  |                                | Cytosol;Nucleoplas         |
| 6948 | ENSG00000155729 | KCTD18   | Approved  |                                | Mitochondria               |
| 6949 | ENSG00000155744 | FAM126B  | Supported | Cell Junc                      | Nucleoplasm                |
| 6950 | ENSG00000155749 | ALS2CR12 | Approved  |                                | Cytosol;Plasma mem         |
| 6951 | ENSG00000155760 | FZD7     | Supported |                                | Vesicles                   |
| 6952 | ENSG00000155792 | DEPTOR   | Supported | Mitochond                      | Nucleoplasm                |
| 6953 | ENSG00000155816 | FMN2     | Approved  |                                | Actin filaments;Pl         |
| 6954 | ENSG00000155827 | RNF20    | Enhanced  | Nucleoplasm                    |                            |
| 6955 | ENSG00000155846 | PPARGC1B | Supported |                                | Nucleoplasm                |
| 6956 | ENSG00000155850 | SLC26A2  | Approved  |                                | Vesicles                   |
| 6957 | ENSG00000155858 | LSM11    | Supported |                                | Nuclear bodies;Nucleoplasm |
| 6958 | ENSG00000155868 | MED7     | Supported |                                | Nuclear bodies             |
| 6959 | ENSG00000155876 | RRAGA    | Approved  |                                | Golgi apparatus;Ve         |
| 6960 | ENSG00000155890 | TRIM42   | Uncertain |                                | Mitochond                  |
| 6961 | ENSG00000155903 | RASA2    | Approved  |                                | Vesicles                   |
| 6962 | ENSG00000155906 | RMND1    | Supported |                                | Mitochondria               |
| 6963 | ENSG00000155957 | TMBIM4   | Supported |                                | Golgi apparatus            |
| 6964 | ENSG00000155959 | VBP1     | Supported |                                | Cytosol;Vesicles           |
| 6965 | ENSG00000155962 | CLIC2    | Supported |                                | Plasma meNucleoplasm       |
| 6966 | ENSG00000155975 | VPS37A   | Approved  |                                | Centrosome;Cytosol         |
| 6967 | ENSG00000155980 | KIF5A    | Approved  |                                | Cytosol;Mitotic sp         |
| 6968 | ENSG00000156011 | PSD3     | Approved  |                                | Cytosol;Nucleoplas         |
| 6969 | ENSG00000156026 | MCU      | Supported |                                | Mitochondria               |
| 6970 | ENSG00000156030 | ELMSAN1  | Enhanced  | Nucleoplasm                    |                            |
| 6971 | ENSG00000156052 | GNAQ     | Approved  |                                | Cytosol;Nuclear sp         |
| 6972 | ENSG00000156103 | MMP16    | Approved  |                                | Cytosol;Vesicles           |
| 6973 | ENSG00000156110 | ADK      | Supported |                                | Cytosol;Nucleoplasm        |
| 6974 | ENSG00000156127 | BATF     | Enhanced  | Nucleoplasm                    |                            |
| 6975 | ENSG00000156136 | DCK      | Supported |                                | Nucleoplasm                |
| 6976 | ENSG00000156140 | ADAMTS3  | Approved  |                                | Intermediate filam         |
| 6977 | ENSG00000156150 | ALX3     | Approved  |                                | Nucleoli fibrillar         |
| 6978 | ENSG00000156171 | DRAM2    | Enhanced  | Golgi apparatus;Vesicles       |                            |
| 6979 | ENSG00000156172 | C8orf37  | Approved  |                                | Cell Junctions;Cyt         |
| 6980 | ENSG00000156218 | ADAMTSL3 | Approved  |                                | Vesicles                   |
| 6981 | ENSG00000156232 | WHAMM    | Supported |                                | Cytosol                    |
| 6982 | ENSG00000156239 | N6AMT1   | Approved  |                                | Centrosome;Nucleop         |
| 6983 | ENSG00000156256 | USP16    | Approved  |                                | Cytosol;Nucleoplas         |

|      |                 |           |           |                                      |
|------|-----------------|-----------|-----------|--------------------------------------|
| 6984 | ENSG00000156261 | CCT8      | Approved  | IntermediCytosol;Nucleoplas          |
| 6985 | ENSG00000156265 | MAP3K7CL  | Approved  | Nucleoplasm                          |
| 6986 | ENSG00000156269 | NAA11     | Supported | Cytosol;NCentrosome;Golgi a          |
| 6987 | ENSG00000156273 | BACH1     | Approved  | Cytosol;Nucleoplas                   |
| 6988 | ENSG00000156299 | TIAM1     | Supported | Cell JuncNucleoplaCytokinetic bridge |
| 6989 | ENSG00000156304 | SCAF4     | Enhanced  | Nucleoplasm                          |
| 6990 | ENSG00000156313 | RPGR      | Supported | Golgi apparatus                      |
| 6991 | ENSG00000156345 | CDK20     | Supported | Nucleoplasm                          |
| 6992 | ENSG00000156398 | SFXN2     | Approved  | Mitochondria                         |
| 6993 | ENSG00000156411 | ATP5MPL   | Supported | Mitochondria;Nucleoli fibri          |
| 6994 | ENSG00000156413 | FUT6      | Supported | Golgi apparatus                      |
| 6995 | ENSG00000156453 | PCDH1     | Approved  | Cell Junctions Nucleoli;             |
| 6996 | ENSG00000156463 | SH3RF2    | Enhanced  | Nucleoplasm                          |
| 6997 | ENSG00000156466 | GDF6      | Supported | Vesicles Nuclear membrane;N          |
| 6998 | ENSG00000156469 | MTERF3    | Supported | MitochondNucleoplasm                 |
| 6999 | ENSG00000156471 | PTDSS1    | Approved  | Endoplasmic reticu                   |
| 7000 | ENSG00000156475 | PPP2R2B   | Approved  | Cytosol                              |
| 7001 | ENSG00000156482 | RPL30     | Approved  | Cytosol;Endoplasmic                  |
| 7002 | ENSG00000156500 | FAM122C   | Uncertain | Nucleopla                            |
| 7003 | ENSG00000156502 | SUPV3L1   | Supported | Mitochondria                         |
| 7004 | ENSG00000156504 | FAM122B   | Approved  | Nucleoplasm                          |
| 7005 | ENSG00000156508 | EEF1A1    | Supported | Cytosol                              |
| 7006 | ENSG00000156510 | HKDC1     | Enhanced  | Mitochondria                         |
| 7007 | ENSG00000156515 | HK1       | Supported | Mitochondria                         |
| 7008 | ENSG00000156521 | TYSND1    | Uncertain | Centrosom                            |
| 7009 | ENSG00000156531 | PHF6      | Supported | Nucleoli;Nucleoplasm                 |
| 7010 | ENSG00000156535 | CD109     | Supported | Plasma membrane                      |
| 7011 | ENSG00000156564 | LRFN2     | Supported | Vesicles                             |
| 7012 | ENSG00000156587 | UBE2L6    | Approved  | Cytosol                              |
| 7013 | ENSG00000156599 | ZDHHC5    | Approved  | Cell Junctions;Nuc                   |
| 7014 | ENSG00000156603 | MED19     | Enhanced  | Nuclear bodies                       |
| 7015 | ENSG00000156639 | ZFAND3    | Approved  | Nucleoplasm;Vesicl                   |
| 7016 | ENSG00000156642 | NPTN      | Approved  | Cytokinetic bridge                   |
| 7017 | ENSG00000156650 | KAT6B     | Approved  | Nuclear bodies;Nuc                   |
| 7018 | ENSG00000156671 | SAMD8     | Supported | Endoplasmic reticulum                |
| 7019 | ENSG00000156675 | RAB11FIP1 | Enhanced  | Vesicles                             |
| 7020 | ENSG00000156689 | GLYATL2   | Approved  | Mitochondria                         |
| 7021 | ENSG00000156697 | UTP14A    | Supported | Nucleoli Cytosol                     |
| 7022 | ENSG00000156711 | MAPK13    | Approved  | Cytosol;Nucleoli;N                   |
| 7023 | ENSG00000156738 | MS4A1     | Supported | Plasma membrane                      |
| 7024 | ENSG00000156787 | TBC1D31   | Approved  | Centrosome                           |
| 7025 | ENSG00000156795 | WDYHV1    | Supported | Nucleoplasm;Vesicles                 |
| 7026 | ENSG00000156802 | ATAD2     | Enhanced  | Nucleoplasm                          |
| 7027 | ENSG00000156804 | FBX032    | Enhanced  | Cytosol;Nucleoplasm                  |
| 7028 | ENSG00000156831 | NSMCE2    | Supported | Nuclear bodies;Nucleoplasm           |
| 7029 | ENSG00000156853 | ZNF689    | Approved  | Nucleoli fibrillar                   |
| 7030 | ENSG00000156858 | PRR14     | Approved  | Nucleoplasm                          |
| 7031 | ENSG00000156860 | FBRS      | Approved  | Nucleoplasm                          |
| 7032 | ENSG00000156873 | PHKG2     | Supported | Cytosol                              |
| 7033 | ENSG00000156875 | MFSD14A   | Approved  | Vesicles                             |
| 7034 | ENSG00000156876 | SASS6     | Supported | CentriolaCytosol                     |
| 7035 | ENSG00000156925 | ZIC3      | Supported | Nucleoplasm                          |
| 7036 | ENSG00000156928 | MALSU1    | Enhanced  | Mitochondria                         |
| 7037 | ENSG00000156931 | VPS8      | Approved  | Cytosol;Plasma mem                   |
| 7038 | ENSG00000156958 | GALK2     | Approved  | Cytosol;Nucleoplas                   |

|      |                 |          |           |                  |                          |
|------|-----------------|----------|-----------|------------------|--------------------------|
| 7039 | ENSG00000156959 | LHFPL4   | Approved  |                  | Golgi apparatus;Nu       |
| 7040 | ENSG00000156968 | MPV17L   | Supported | Vesicles         |                          |
| 7041 | ENSG00000156970 | BUB1B    | Supported | Cytosol          |                          |
| 7042 | ENSG00000156976 | EIF4A2   | Approved  |                  | Cytosol                  |
| 7043 | ENSG00000156983 | BRPF1    | Approved  |                  | Cytosol;Plasma mem       |
| 7044 | ENSG00000156990 | RPUSD3   | Approved  |                  | Nucleoplasm              |
| 7045 | ENSG00000157014 | TATDN2   | Approved  |                  | Nuclear speckles         |
| 7046 | ENSG00000157020 | SEC13    | Supported |                  | Nucleoplasm;Vesicles     |
| 7047 | ENSG00000157036 | EXOG     | Supported |                  | Mitochondria             |
| 7048 | ENSG00000157045 | NTAN1    | Approved  |                  | Golgi apparatus;Nu       |
| 7049 | ENSG00000157077 | ZFYVE9   | Enhanced  | Cytosol;Vesicles |                          |
| 7050 | ENSG00000157103 | SLC6A1   | Uncertain |                  | Mitochond                |
| 7051 | ENSG00000157106 | SMG1     | Supported |                  | Nucleoplasm              |
| 7052 | ENSG00000157107 | FCHO2    | Approved  |                  | Centrosome;Cytosol       |
| 7053 | ENSG00000157110 | RBPMS    | Supported |                  | Cytosol;Nucleoplasm      |
| 7054 | ENSG00000157152 | SYN2     | Approved  |                  | Nucleoplasm              |
| 7055 | ENSG00000157168 | NRG1     | Approved  |                  | Nucleoplasm              |
| 7056 | ENSG00000157181 | ODR4     | Approved  |                  | Nucleoplasm;Plasma       |
| 7057 | ENSG00000157184 | CPT2     | Supported | Mitochondria     | Nucleoli;                |
| 7058 | ENSG00000157191 | NECAP2   | Approved  |                  | Endoplasmic reticu       |
| 7059 | ENSG00000157212 | PAXIP1   | Approved  |                  | Nucleoplasm;Vesicl       |
| 7060 | ENSG00000157214 | STEAP2   | Supported |                  | Vesicles                 |
| 7061 | ENSG00000157227 | MMP14    | Approved  |                  | Cytosol;Intermedia       |
| 7062 | ENSG00000157240 | FZD1     | Supported |                  | Plasma membrane          |
| 7063 | ENSG00000157259 | GATAD1   | Enhanced  |                  | Nucleoplasm              |
| 7064 | ENSG00000157303 | SUSD3    | Approved  |                  | Nucleoplasm              |
| 7065 | ENSG00000157326 | DHRS4    | Approved  |                  | Nuclear membrane;V       |
| 7066 | ENSG00000157330 | Clorf158 | Uncertain |                  | Cytosol                  |
| 7067 | ENSG00000157343 | ARMC12   | Approved  |                  | Nucleoplasm;Plasma       |
| 7068 | ENSG00000157349 | DDX19B   | Uncertain |                  | Nucleopla                |
| 7069 | ENSG00000157350 | ST3GAL2  | Approved  |                  | Vesicles                 |
| 7070 | ENSG00000157353 | FUK      | Approved  |                  | Vesicles                 |
| 7071 | ENSG00000157379 | DHRS1    | Approved  |                  | Centrosome;Cytosol       |
| 7072 | ENSG00000157388 | CACNA1D  | Approved  |                  | Nuclear membrane         |
| 7073 | ENSG00000157399 | ARSE     | Supported |                  | Golgi apparatus          |
| 7074 | ENSG00000157404 | KIT      | Supported |                  | Plasma membrane          |
| 7075 | ENSG00000157423 | HYDIN    | Approved  |                  | Cytosol;Plasma mem       |
| 7076 | ENSG00000157429 | ZNF19    | Approved  |                  | Mitochondria             |
| 7077 | ENSG00000157445 | CACNA2D3 | Uncertain |                  | Nucleopla                |
| 7078 | ENSG00000157450 | RNF111   | Supported |                  | Cytosol;Nucleoplasm      |
| 7079 | ENSG00000157456 | CCNB2    | Enhanced  | Cytosol          | Golgi apparatus          |
| 7080 | ENSG00000157470 | FAM81A   | Approved  |                  | Cytosol;Nucleoplas       |
| 7081 | ENSG00000157500 | APPL1    | Uncertain |                  | Centrosom                |
| 7082 | ENSG00000157514 | TSC22D3  | Approved  |                  | Cytosol;Golgi appa       |
| 7083 | ENSG00000157538 | VPS26C   | Approved  |                  | Mitochondria             |
| 7084 | ENSG00000157540 | DYRK1A   | Approved  |                  | Cytosol;Nucleoli f       |
| 7085 | ENSG00000157551 | KCNJ15   | Approved  |                  | Cytosol;Plasma mem       |
| 7086 | ENSG00000157554 | ERG      | Approved  |                  | Cytosol;Nucleoplas       |
| 7087 | ENSG00000157557 | ETS2     | Enhanced  | Nucleoplasm      | Cytosol;P                |
| 7088 | ENSG00000157578 | LCA5L    | Uncertain |                  | Cytosol;N                |
| 7089 | ENSG00000157593 | SLC35B2  | Approved  |                  | Vesicles                 |
| 7090 | ENSG00000157600 | TMEM164  | Approved  |                  | Cell Junctions;Ves       |
| 7091 | ENSG00000157601 | MX1      | Supported |                  | Cytosol;Nuclear membrane |
| 7092 | ENSG00000157617 | C2CD2    | Approved  |                  | Nucleoplasm              |
| 7093 | ENSG00000157625 | TAB3     | Approved  |                  | Cytosol;Nuclear sp       |

|      |                 |           |           |                             |
|------|-----------------|-----------|-----------|-----------------------------|
| 7094 | ENSG00000157637 | SLC38A10  | Enhanced  | Golgi apparatus             |
| 7095 | ENSG00000157653 | C9orf43   | Approved  | Cytosol                     |
| 7096 | ENSG00000157654 | PALM2-AKA | Approved  | Nuclear bodies;Nuc          |
| 7097 | ENSG00000157657 | ZNF618    | Approved  | Nucleoplasm                 |
| 7098 | ENSG00000157693 | TMEM268   | Approved  | Cytosol;Plasma mem          |
| 7099 | ENSG00000157734 | SNX22     | Approved  | Nucleoplasm;Vesicl          |
| 7100 | ENSG00000157741 | UBN2      | Enhanced  | Nucleoplasm                 |
| 7101 | ENSG00000157764 | BRAF      | Approved  | Cytosol Vesicles            |
| 7102 | ENSG00000157765 | SLC34A2   | Supported | Plasma meCytosol;Golgi appa |
| 7103 | ENSG00000157796 | WDR19     | Approved  | Nucleoplasm                 |
| 7104 | ENSG00000157823 | AP3S2     | Approved  | Vesicles                    |
| 7105 | ENSG00000157827 | FMNL2     | Approved  | Cytosol;Golgi appa          |
| 7106 | ENSG00000157833 | GAREM2    | Approved  | Cytosol                     |
| 7107 | ENSG00000157837 | SPPL3     | Supported | Plasma membrane;Vesicles    |
| 7108 | ENSG00000157851 | DPYSL5    | Approved  | Cytosol;Nucleoplas          |
| 7109 | ENSG00000157873 | TNFRSF14  | Approved  | Cytosol;Rods & Rin          |
| 7110 | ENSG00000157881 | PANK4     | Approved  | Cytosol                     |
| 7111 | ENSG00000157895 | C12orf43  | Supported | Nucleoli Golgi apparatus    |
| 7112 | ENSG00000157911 | PEX10     | Approved  | Nucleoplasm                 |
| 7113 | ENSG00000157916 | RER1      | Supported | Golgi apparatus             |
| 7114 | ENSG00000157927 | RADIL     | Approved  | Nuclear membrane;N          |
| 7115 | ENSG00000157933 | SKI       | Supported | Nuclear bodies;Nucleoplasm  |
| 7116 | ENSG00000157954 | WIPI2     | Approved  | Cytosol;Nucleoplas          |
| 7117 | ENSG00000157978 | LDLRAP1   | Approved  | Microtubules                |
| 7118 | ENSG00000157992 | KRTCAP3   | Approved  | Cytosol;Nucleoplas          |
| 7119 | ENSG00000157999 | ANKRD61   | Enhanced  | Nucleoplasm                 |
| 7120 | ENSG00000158014 | SLC30A2   | Approved  | Vesicles                    |
| 7121 | ENSG00000158019 | BABAM2    | Supported | Cytosol                     |
| 7122 | ENSG00000158023 | WDR66     | Uncertain | Cytosol;P                   |
| 7123 | ENSG00000158050 | DUSP2     | Supported | Nuclear membrane;Nucleoplas |
| 7124 | ENSG00000158055 | GRHL3     | Approved  | Nucleoplasm                 |
| 7125 | ENSG00000158062 | UBXN11    | Approved  | Cytosol;Nucleoli            |
| 7126 | ENSG00000158077 | NLRP14    | Uncertain | Cytosol                     |
| 7127 | ENSG00000158079 | PTPDC1    | Enhanced  | Nucleoplasm                 |
| 7128 | ENSG00000158089 | GALNT14   | Approved  | Golgi apparatus;Nu          |
| 7129 | ENSG00000158092 | NCK1      | Enhanced  | Cytosol;Plasma membrane     |
| 7130 | ENSG00000158104 | HPD       | Uncertain | Nuclear s                   |
| 7131 | ENSG00000158106 | RHPN1     | Approved  | Nucleoplasm                 |
| 7132 | ENSG00000158109 | TPRG1L    | Approved  | Cytosol;Vesicles            |
| 7133 | ENSG00000158113 | LRRC43    | Approved  | Golgi apparatus;Ve          |
| 7134 | ENSG00000158125 | XDH       | Uncertain | Nucleoli;                   |
| 7135 | ENSG00000158156 | XKR8      | Approved  | Golgi apparatus             |
| 7136 | ENSG00000158158 | CNNM4     | Uncertain | Plasma membrane Actin fil   |
| 7137 | ENSG00000158161 | EYA3      | Enhanced  | Nucleoplasm                 |
| 7138 | ENSG00000158163 | DZIP1L    | Supported | Cytokinetic bridgeNucleopla |
| 7139 | ENSG00000158169 | FANCC     | Supported | Nucleoplasm                 |
| 7140 | ENSG00000158186 | MRAS      | Approved  | Cytosol                     |
| 7141 | ENSG00000158195 | WASF2     | Approved  | Cytosol;Plasma mem          |
| 7142 | ENSG00000158201 | ABHD3     | Approved  | Nucleoplasm;Plasma          |
| 7143 | ENSG00000158234 | FAIM      | Approved  | Cytosol;Plasma mem          |
| 7144 | ENSG00000158258 | CLSTN2    | Uncertain | Cytokinet                   |
| 7145 | ENSG00000158270 | COLEC12   | Approved  | Cell Junctions;Gol          |
| 7146 | ENSG00000158286 | RNF207    | Approved  | Cytosol                     |
| 7147 | ENSG00000158290 | CUL4B     | Enhanced  | Nucleoplasm                 |
| 7148 | ENSG00000158296 | SLC13A3   | Supported | Plasma membrane             |

|      |                 |           |           |                            |                             |
|------|-----------------|-----------|-----------|----------------------------|-----------------------------|
| 7149 | ENSG00000158301 | GPRASP2   | Approved  |                            | Cytosol;Nucleoplas          |
| 7150 | ENSG00000158321 | AUTS2     | Approved  |                            | Cytosol;Nucleoplas          |
| 7151 | ENSG00000158352 | SHROOM4   | Approved  |                            | Focal adhesion sit          |
| 7152 | ENSG00000158373 | HIST1H2BD | Approved  |                            | Cytosol;Nucleoplas          |
| 7153 | ENSG00000158402 | CDC25C    | Supported |                            | Nuclear speckles            |
| 7154 | ENSG00000158411 | MITD1     | Enhanced  | Vesicles                   |                             |
| 7155 | ENSG00000158417 | EIF5B     | Approved  |                            | Cytosol;Plasma mem          |
| 7156 | ENSG00000158423 | RIBC1     | Approved  |                            | Nuclear bodies              |
| 7157 | ENSG00000158435 | CNOT11    | Approved  |                            | Nucleoplasm                 |
| 7158 | ENSG00000158457 | TSPAN33   | Approved  |                            | Microtubules                |
| 7159 | ENSG00000158458 | NRG2      | Supported |                            | Nucleoli;Nucleoplasm        |
| 7160 | ENSG00000158467 | AHCYL2    | Approved  |                            | Cytosol;Nucleoplas          |
| 7161 | ENSG00000158473 | CD1D      | Supported |                            | Endoplasmic reticulum       |
| 7162 | ENSG00000158480 | SPATA2    | Approved  |                            | Nucleoli fibrillar          |
| 7163 | ENSG00000158486 | DNAH3     | Approved  |                            | Intermediate filam          |
| 7164 | ENSG00000158516 | CPA2      | Approved  |                            | Golgi apparatus             |
| 7165 | ENSG00000158525 | CPA5      | Approved  |                            | Nucleoplasm                 |
| 7166 | ENSG00000158526 | TSR2      | Approved  |                            | Cell Junctions;Cyt          |
| 7167 | ENSG00000158528 | PPP1R9A   | Approved  |                            | Plasma membrane             |
| 7168 | ENSG00000158545 | ZC3H18    | Enhanced  | Nuclear speckles           |                             |
| 7169 | ENSG00000158552 | ZFAND2B   | Approved  |                            | Cytosol;Nucleoli;N          |
| 7170 | ENSG00000158555 | GDPD5     | Approved  |                            | Golgi apparatus             |
| 7171 | ENSG00000158615 | PPP1R15B  | Approved  |                            | Golgi apparatus             |
| 7172 | ENSG00000158636 | EMSY      | Enhanced  |                            | Nucleoplasm                 |
| 7173 | ENSG00000158639 | PAGE5     | Approved  |                            | Mitochondria                |
| 7174 | ENSG00000158691 | ZSCAN12   | Approved  |                            | Cytosol;Microtubul          |
| 7175 | ENSG00000158710 | TAGLN2    | Approved  |                            | Actin filaments;Cy          |
| 7176 | ENSG00000158711 | ELK4      | Supported |                            | Nucleoplasm                 |
| 7177 | ENSG00000158715 | SLC45A3   | Approved  |                            | Nucleoplasm;Vesicl          |
| 7178 | ENSG00000158716 | DUSP23    | Supported |                            | Nucleoplasm                 |
| 7179 | ENSG00000158717 | RNF166    | Approved  |                            | Cytosol;Nucleoplas          |
| 7180 | ENSG00000158769 | F11R      | Supported |                            | Cell JuncMicrotubules       |
| 7181 | ENSG00000158773 | USF1      | Enhanced  | Nucleoplasm                |                             |
| 7182 | ENSG00000158792 | SPATA2L   | Approved  |                            | Cytosol;Mitochondr          |
| 7183 | ENSG00000158796 | DEDD      | Approved  |                            | Nucleoplasm                 |
| 7184 | ENSG00000158805 | ZNF276    | Approved  |                            | Cytosol;Nucleoli;N          |
| 7185 | ENSG00000158806 | NPM2      | Approved  |                            | Nucleoli;Nucleopla          |
| 7186 | ENSG00000158813 | EDA       | Supported | Vesicles                   | Lipid droplets              |
| 7187 | ENSG00000158816 | VWA5B1    | Approved  |                            | Cytosol;Mitochondr          |
| 7188 | ENSG00000158825 | CDA       | Approved  |                            | Nucleoplasm                 |
| 7189 | ENSG00000158850 | B4GALT3   | Supported |                            | Golgi appCytosol            |
| 7190 | ENSG00000158859 | ADAMTS4   | Supported |                            | Nuclear speckles            |
| 7191 | ENSG00000158863 | FAM160B2  | Approved  |                            | Cytosol;Nucleoplas          |
| 7192 | ENSG00000158864 | NDUFS2    | Supported |                            | Mitochondria                |
| 7193 | ENSG00000158865 | SLC5A11   | Approved  |                            | Cytosol;Nucleoplas          |
| 7194 | ENSG00000158941 | CCAR2     | Enhanced  | Nuclear bodies;Nucleoplasm |                             |
| 7195 | ENSG00000158966 | CACHD1    | Uncertain |                            | Nucleoli;                   |
| 7196 | ENSG00000158987 | RAPGEF6   | Approved  |                            | Cytosol Centrosome          |
| 7197 | ENSG00000159023 | EPB41     | Supported |                            | Cell JuncCytokinetic bridge |
| 7198 | ENSG00000159055 | MIS18A    | Approved  |                            | Cytosol;Nucleoplas          |
| 7199 | ENSG00000159063 | ALG8      | Approved  |                            | Nucleoplasm                 |
| 7200 | ENSG00000159069 | FBXW5     | Approved  |                            | Mitochondria                |
| 7201 | ENSG00000159082 | SYNJ1     | Approved  |                            | Centrosome;Cytosol          |
| 7202 | ENSG00000159086 | PAXBP1    | Approved  |                            | Cytosol;Nucleoplas          |
| 7203 | ENSG00000159111 | MRPL10    | Enhanced  | Mitochondria               |                             |

|      |                 |          |           |                      |                              |
|------|-----------------|----------|-----------|----------------------|------------------------------|
| 7204 | ENSG00000159128 | IFNGR2   | Approved  |                      | Golgi apparatus;Nu           |
| 7205 | ENSG00000159131 | GART     | Uncertain |                      | Cytosol;M                    |
| 7206 | ENSG00000159140 | SON      | Enhanced  | Nuclear speckles     |                              |
| 7207 | ENSG00000159147 | DONSON   | Approved  |                      | Cell Junctions;Cyt           |
| 7208 | ENSG00000159164 | SV2A     | Approved  |                      | Cytosol                      |
| 7209 | ENSG00000159166 | LAD1     | Enhanced  | Actin filaments      |                              |
| 7210 | ENSG00000159173 | TNNI1    | Uncertain |                      | Nucleoli;                    |
| 7211 | ENSG00000159182 | PRAC1    | Supported |                      | Nucleoplasm;Cytosol          |
| 7212 | ENSG00000159184 | HOXB13   | Enhanced  | Nucleoplasm          |                              |
| 7213 | ENSG00000159200 | RCAN1    | Approved  |                      | Cytosol                      |
| 7214 | ENSG00000159202 | UBE2Z    | Supported |                      | Cytosol;Nucleoplasm          |
| 7215 | ENSG00000159208 | CIART    | Approved  |                      | Nucleoplasm                  |
| 7216 | ENSG00000159210 | SNF8     | Supported |                      | Cytosol;Nucleoplasm          |
| 7217 | ENSG00000159214 | CCDC24   | Approved  |                      | Cytosol;Nucleoli;P           |
| 7218 | ENSG00000159216 | RUNX1    | Enhanced  | Nucleoplasm;Vesicles |                              |
| 7219 | ENSG00000159217 | IGF2BP1  | Supported |                      | Cytosol                      |
| 7220 | ENSG00000159228 | CBR1     | Approved  |                      | Cytosol Nucleoplasm          |
| 7221 | ENSG00000159231 | CBR3     | Approved  |                      | Cytosol Nucleoplasm          |
| 7222 | ENSG00000159256 | MORC3    | Enhanced  | Nucleoplasm          | Mitochond                    |
| 7223 | ENSG00000159259 | CHAF1B   | Supported |                      | Nucleoplasm                  |
| 7224 | ENSG00000159261 | CLDN14   | Uncertain |                      | Vesicles                     |
| 7225 | ENSG00000159263 | SIM2     | Supported |                      | Nuclear bodies;Nucleoplasm   |
| 7226 | ENSG00000159267 | HLCS     | Supported |                      | Cytosol                      |
| 7227 | ENSG00000159314 | ARHGAP27 | Uncertain |                      | Nucleoplasm                  |
| 7228 | ENSG00000159322 | ADPGK    | Approved  |                      | Centrosome                   |
| 7229 | ENSG00000159335 | PTMS     | Approved  |                      | Nucleoli;Nucleoplasm         |
| 7230 | ENSG00000159348 | CYB5R1   | Uncertain |                      | Cytosol;M                    |
| 7231 | ENSG00000159352 | PSMD4    | Enhanced  | Nucleoplasm;Cytosol  |                              |
| 7232 | ENSG00000159374 | MIAP     | Approved  |                      | Mitochondria;Nucleoplasm     |
| 7233 | ENSG00000159387 | IRX6     | Approved  |                      | Mitochondria;Nucleoplasm     |
| 7234 | ENSG00000159388 | BTG2     | Approved  |                      | Nucleoplasm;Vesicles         |
| 7235 | ENSG00000159403 | C1R      | Uncertain |                      | Cytosol;N                    |
| 7236 | ENSG00000159409 | CELF3    | Approved  |                      | Nucleoplasm                  |
| 7237 | ENSG00000159459 | UBR1     | Approved  |                      | Nucleoplasm;Vesicles         |
| 7238 | ENSG00000159461 | AMFR     | Supported | Endoplasm            | Golgi apparatus              |
| 7239 | ENSG00000159479 | MED8     | Approved  |                      | Golgi apparatus;Nu           |
| 7240 | ENSG00000159496 | RGL4     | Approved  |                      | Centrosome                   |
| 7241 | ENSG00000159556 | ISL2     | Approved  |                      | Rods & Rings                 |
| 7242 | ENSG00000159592 | GPBP1L1  | Approved  |                      | Focal adhesion sites         |
| 7243 | ENSG00000159593 | NAE1     | Approved  |                      | Centrosome;Microtubules      |
| 7244 | ENSG00000159596 | TMEM69   | Approved  |                      | Nucleoplasm                  |
| 7245 | ENSG00000159618 | ADGRG5   | Approved  |                      | Nuclear membrane;Nucleoplasm |
| 7246 | ENSG00000159640 | ACE      | Approved  |                      | Vesicles                     |
| 7247 | ENSG00000159658 | EFCAB14  | Approved  |                      | Cytosol;Golgi apparatus      |
| 7248 | ENSG00000159674 | SPON2    | Approved  |                      | Vesicles                     |
| 7249 | ENSG00000159685 | CHCHD6   | Supported |                      | Mitochondria                 |
| 7250 | ENSG00000159692 | CTBP1    | Enhanced  | Nucleoplasm          |                              |
| 7251 | ENSG00000159713 | TPPP3    | Approved  |                      | Nucleoli fibrillar           |
| 7252 | ENSG00000159714 | ZDHHC1   | Approved  |                      | Cytosol                      |
| 7253 | ENSG00000159733 | ZFYVE28  | Approved  |                      | Cytosol;Nucleoplasm          |
| 7254 | ENSG00000159784 | FAM131B  | Enhanced  | Cytosol;Nucleoplasm  |                              |
| 7255 | ENSG00000159788 | RGS12    | Supported |                      | Nucleoli;Cytosol             |
| 7256 | ENSG00000159792 | PSKH1    | Approved  |                      | Nucleoplasm                  |
| 7257 | ENSG00000159840 | ZYX      | Enhanced  | Focal adhesion sites |                              |
| 7258 | ENSG00000159842 | ABR      | Approved  |                      | Cytosol;Nucleoplasm          |



|      |                 |          |           |                              |                             |
|------|-----------------|----------|-----------|------------------------------|-----------------------------|
| 7259 | ENSG00000159871 | LYPD5    | Approved  |                              | Cytosol;Nucleoplas          |
| 7260 | ENSG00000159873 | CCDC117  | Approved  |                              | Cytosol;Microtubul          |
| 7261 | ENSG00000159882 | ZNF230   | Approved  |                              | Mitochondria                |
| 7262 | ENSG00000159884 | CCDC107  | Approved  |                              | Cell Junctions;Nuc          |
| 7263 | ENSG00000159885 | ZNF222   | Approved  |                              | Nuclear bodies;Nuc          |
| 7264 | ENSG00000159905 | ZNF221   | Approved  |                              | Nuclear bodies              |
| 7265 | ENSG00000159915 | ZNF233   | Approved  |                              | Nucleoplasm                 |
| 7266 | ENSG00000159917 | ZNF235   | Approved  |                              | Nucleoplasm                 |
| 7267 | ENSG00000159921 | GNE      | Supported |                              | Cytosol                     |
| 7268 | ENSG00000160007 | ARHGAP35 | Supported |                              | Nuclear bodies Aggresome    |
| 7269 | ENSG00000160049 | DFFA     | Supported |                              | Cytosol Plasma membrane     |
| 7270 | ENSG00000160051 | IQCC     | Supported |                              | Vesicles                    |
| 7271 | ENSG00000160055 | TMEM234  | Approved  |                              | Vesicles                    |
| 7272 | ENSG00000160058 | BSDC1    | Supported | Golgi apparatus              | Plasma membrane             |
| 7273 | ENSG00000160062 | ZBTB8A   | Approved  |                              | Focal adhesion sit          |
| 7274 | ENSG00000160072 | ATAD3B   | Supported |                              | Mitochondria                |
| 7275 | ENSG00000160075 | SSU72    | Approved  |                              | Cytosol;Nucleoplas          |
| 7276 | ENSG00000160094 | ZNF362   | Approved  |                              | Nucleoli;Nucleopla          |
| 7277 | ENSG00000160111 | CPAMD8   | Uncertain |                              | Focal adh                   |
| 7278 | ENSG00000160117 | ANKLE1   | Approved  |                              | Cytosol;Nucleoplas          |
| 7279 | ENSG00000160124 | CCDC58   | Approved  |                              | Intermediate filam          |
| 7280 | ENSG00000160145 | KALRN    | Approved  |                              | Cytosol;Nucleoplas          |
| 7281 | ENSG00000160179 | ABCG1    | Supported | Golgi apparatus;Vesicles     |                             |
| 7282 | ENSG00000160180 | TFF3     | Approved  |                              | Nucleoli;Nucleopla          |
| 7283 | ENSG00000160185 | UBASH3A  | Supported |                              | NucleoplaGolgi apparatus    |
| 7284 | ENSG00000160188 | RSPH1    | Supported |                              | Centrosome                  |
| 7285 | ENSG00000160191 | PDE9A    | Approved  |                              | Nucleoplasm;Vesicl          |
| 7286 | ENSG00000160193 | WDR4     | Supported |                              | NucleoplaCytosol            |
| 7287 | ENSG00000160194 | NDUFV3   | Enhanced  | Mitochondria                 |                             |
| 7288 | ENSG00000160199 | PKNOX1   | Supported |                              | Nucleoplasm                 |
| 7289 | ENSG00000160200 | CBS      | Approved  |                              | Nucleoli;Vesicles           |
| 7290 | ENSG00000160201 | U2AF1    | Enhanced  | Nucleoplasm                  |                             |
| 7291 | ENSG00000160202 | CRYAA    | Approved  |                              | Cytosol;Nucleoplasm         |
| 7292 | ENSG00000160207 | HSF2BP   | Approved  |                              | Cytosol;Nucleoplas          |
| 7293 | ENSG00000160208 | RRP1B    | Enhanced  | Nucleoli Nucleoplasm         |                             |
| 7294 | ENSG00000160209 | PDXK     | Enhanced  | Nucleoplasm                  |                             |
| 7295 | ENSG00000160211 | G6PD     | Enhanced  | Centriolar satellite;Cytosol |                             |
| 7296 | ENSG00000160213 | CSTB     | Supported |                              | Cytosol Nucleoli            |
| 7297 | ENSG00000160214 | RRP1     | Enhanced  | Nucleoli                     |                             |
| 7298 | ENSG00000160221 | C21orf33 | Approved  |                              | Centrosome;Mitoch           |
| 7299 | ENSG00000160223 | ICOSLG   | Approved  |                              | Cytoplasmic bodies          |
| 7300 | ENSG00000160226 | C21orf2  | Supported |                              | Cytosol;Vesicles            |
| 7301 | ENSG00000160255 | ITGB2    | Supported |                              | Plasma meRods & Rings       |
| 7302 | ENSG00000160256 | FAM207A  | Approved  |                              | Golgi apparatus;Ve          |
| 7303 | ENSG00000160271 | RALGDS   | Uncertain |                              | Nucleopla                   |
| 7304 | ENSG00000160282 | FTCD     | Approved  |                              | Cytosol;Plasma mem          |
| 7305 | ENSG00000160284 | SPATC1L  | Approved  |                              | Cytosol;Plasma mem          |
| 7306 | ENSG00000160285 | LSS      | Approved  |                              | Cytosol                     |
| 7307 | ENSG00000160293 | VAV2     | Approved  |                              | Vesicles                    |
| 7308 | ENSG00000160294 | MCM3AP   | Supported |                              | Cytosol;Nuclear membrane;Nu |
| 7309 | ENSG00000160298 | C21orf58 | Supported |                              | NucleoplaNuclear bodies     |
| 7310 | ENSG00000160299 | PCNT     | Enhanced  | Centrosome                   |                             |
| 7311 | ENSG00000160305 | DIP2A    | Approved  |                              | Nucleoplasm                 |
| 7312 | ENSG00000160307 | S100B    | Supported |                              | Cytosol;Nucleoplasm         |
| 7313 | ENSG00000160310 | PRMT2    | Supported |                              | Cytosol;Nucleoplasm         |

|      |                 |          |           |                             |
|------|-----------------|----------|-----------|-----------------------------|
| 7314 | ENSG00000160318 | CLDND2   | Approved  | Nucleoplasm                 |
| 7315 | ENSG00000160323 | ADAMTS13 | Approved  | Vesicles                    |
| 7316 | ENSG00000160325 | CACFD1   | Approved  | Nucleoplasm                 |
| 7317 | ENSG00000160345 | C9orf116 | Approved  | Cytosol;Nucleoplas          |
| 7318 | ENSG00000160360 | GPSM1    | Supported | Golgi appNucleoplasm        |
| 7319 | ENSG00000160392 | C19orf47 | Enhanced  | Nucleoplasm                 |
| 7320 | ENSG00000160401 | CFAP157  | Enhanced  | Cytosol;Plasma membrane     |
| 7321 | ENSG00000160410 | SHKBP1   | Approved  | Cell Junctions              |
| 7322 | ENSG00000160439 | RDH13    | Supported | MitochondCytosol            |
| 7323 | ENSG00000160445 | ZER1     | Approved  | Cytosol                     |
| 7324 | ENSG00000160446 | ZDHHC12  | Approved  | NucleoplaIntermedi          |
| 7325 | ENSG00000160447 | PKN3     | Approved  | Vesicles                    |
| 7326 | ENSG00000160460 | SPTBN4   | Approved  | Nucleoli;Nucleopla          |
| 7327 | ENSG00000160469 | BRSK1    | Supported | Nucleoplasm                 |
| 7328 | ENSG00000160471 | COX6B2   | Approved  | Cytosol;Nucleoplas          |
| 7329 | ENSG00000160505 | NLRP4    | Approved  | Mitochondria                |
| 7330 | ENSG00000160539 | PLPP7    | Approved  | NucleoplaVesicles           |
| 7331 | ENSG00000160551 | TAOK1    | Approved  | Vesicles                    |
| 7332 | ENSG00000160563 | MED27    | Supported | Nucleoli;Cytosol            |
| 7333 | ENSG00000160570 | DEDD2    | Approved  | Nucleoplasm                 |
| 7334 | ENSG00000160584 | SIK3     | Enhanced  | Nucleoplasm                 |
| 7335 | ENSG00000160588 | MPZL3    | Approved  | Golgi apparatus             |
| 7336 | ENSG00000160633 | SAFB     | Enhanced  | Nucleoplasm                 |
| 7337 | ENSG00000160654 | CD3G     | Supported | Plasma meCytosol            |
| 7338 | ENSG00000160679 | CHTOP    | Enhanced  | Nuclear speckles            |
| 7339 | ENSG00000160685 | ZBTB7B   | Enhanced  | Nucleoplasm                 |
| 7340 | ENSG00000160688 | FLAD1    | Supported | Cytosol Plasma membrane     |
| 7341 | ENSG00000160691 | SHC1     | Enhanced  | Cytosol                     |
| 7342 | ENSG00000160695 | VPS11    | Approved  | Cytosol                     |
| 7343 | ENSG00000160703 | NLRX1    | Supported | MitochondCell Junctions;Pla |
| 7344 | ENSG00000160710 | ADAR     | Enhanced  | Nucleoli;Nucleoplasm        |
| 7345 | ENSG00000160714 | UBE2Q1   | Approved  | Centrosome;Nucleop          |
| 7346 | ENSG00000160741 | CRTC2    | Enhanced  | Nucleoplasm                 |
| 7347 | ENSG00000160746 | ANO10    | Supported | Plasma membrane Vesicles    |
| 7348 | ENSG00000160752 | FDPS     | Approved  | Cytosol;Nucleoplas          |
| 7349 | ENSG00000160753 | RUSC1    | Enhanced  | Cytosol                     |
| 7350 | ENSG00000160767 | FAM189B  | Supported | Nucleoplasm                 |
| 7351 | ENSG00000160781 | PAQR6    | Approved  | Nucleoli;Nucleopla          |
| 7352 | ENSG00000160783 | PMF1     | Approved  | Nucleoplasm;Vesicl          |
| 7353 | ENSG00000160785 | SLC25A44 | Approved  | Mitochondria;Nucle          |
| 7354 | ENSG00000160789 | LMNA     | Enhanced  | Cytosol;Nuclear bodies      |
| 7355 | ENSG00000160799 | CCDC12   | Supported | Nucleoplasm                 |
| 7356 | ENSG00000160803 | UBQLN4   | Supported | Nucleoplasm                 |
| 7357 | ENSG00000160808 | MYL3     | Approved  | Mitochondria;Nucle          |
| 7358 | ENSG00000160813 | PPP1R35  | Approved  | Nucleoplasm                 |
| 7359 | ENSG00000160818 | GPATCH4  | Enhanced  | Nucleoli;Nucleoplasm        |
| 7360 | ENSG00000160868 | CYP3A4   | Uncertain | Cytosol                     |
| 7361 | ENSG00000160870 | CYP3A7   | Uncertain | Cytosol                     |
| 7362 | ENSG00000160877 | NACC1    | Enhanced  | Nucleoplasm;Vesicles        |
| 7363 | ENSG00000160886 | LY6K     | Supported | Plasma membrane Nucleopla   |
| 7364 | ENSG00000160888 | IER2     | Enhanced  | Nucleoplasm                 |
| 7365 | ENSG00000160908 | ZNF394   | Approved  | Cytosol;Nucleoplas          |
| 7366 | ENSG00000160917 | CPSF4    | Supported | Nucleoplasm                 |
| 7367 | ENSG00000160949 | TONSL    | Enhanced  | NucleoplaNuclear bodies     |
| 7368 | ENSG00000160953 | MUM1     | Approved  | Nucleoplasm Cytosol         |

|      |                 |          |           |                  |                             |
|------|-----------------|----------|-----------|------------------|-----------------------------|
| 7369 | ENSG00000160957 | RECQL4   | Enhanced  | Nucleoplasm      |                             |
| 7370 | ENSG00000160959 | LRRC14   | Approved  |                  | Cytosol;Nucleoplas          |
| 7371 | ENSG00000160961 | ZNF333   | Approved  |                  | Nucleoplasm                 |
| 7372 | ENSG00000160963 | COL26A1  | Approved  |                  | Vesicles                    |
| 7373 | ENSG00000160972 | PPP1R16A | Approved  |                  | Plasma membrane             |
| 7374 | ENSG00000160991 | ORAI2    | Approved  |                  | Nucleoplasm                 |
| 7375 | ENSG00000160999 | SH2B2    | Approved  |                  | Cytosol                     |
| 7376 | ENSG00000161010 | MRNIP    | Approved  |                  | Cytosol;Plasma mem          |
| 7377 | ENSG00000161011 | SQSTM1   | Enhanced  | Cytosol;Vesicles |                             |
| 7378 | ENSG00000161016 | RPL8     | Supported |                  | Cytosol;Endoplasmic reticul |
| 7379 | ENSG00000161021 | MAML1    | Supported |                  | Nucleoplasm                 |
| 7380 | ENSG00000161031 | PGLYRP2  | Approved  |                  | Cell Junctions              |
| 7381 | ENSG00000161036 | LRWD1    | Supported |                  | Nucleoli;Nucleoplas         |
| 7382 | ENSG00000161048 | NAPEPLD  | Enhanced  | Cytosol          | Vesicles                    |
| 7383 | ENSG00000161057 | PSMC2    | Supported |                  | Cytoplasmic bodies;Cytosol  |
| 7384 | ENSG00000161091 | MFS12    | Approved  |                  | Mitochondria;Nucle          |
| 7385 | ENSG00000161179 | YDJC     | Approved  |                  | Nucleoplasm                 |
| 7386 | ENSG00000161202 | DVL3     | Approved  |                  | Centrosome;Interme          |
| 7387 | ENSG00000161203 | AP2M1    | Supported |                  | Plasma membrane             |
| 7388 | ENSG00000161204 | ABCF3    | Approved  |                  | Cytosol;Nucleoli            |
| 7389 | ENSG00000161217 | PCYT1A   | Approved  |                  | Nucleoplasm                 |
| 7390 | ENSG00000161243 | FBX027   | Approved  |                  | Nucleoplasm                 |
| 7391 | ENSG00000161249 | DMKN     | Approved  |                  | Cytosol;Nucleoplas          |
| 7392 | ENSG00000161265 | U2AF1L4  | Approved  |                  | Nucleoplasm                 |
| 7393 | ENSG00000161267 | BDH1     | Enhanced  | Mitochondria     |                             |
| 7394 | ENSG00000161277 | THAP8    | Enhanced  | Nucleoplasm      |                             |
| 7395 | ENSG00000161298 | ZNF382   | Approved  |                  | Nuclear speckles            |
| 7396 | ENSG00000161395 | PGAP3    | Approved  |                  | Cytosol;Plasma mem          |
| 7397 | ENSG00000161405 | IKZF3    | Supported |                  | Cytosol;NPlasma membrane    |
| 7398 | ENSG00000161513 | FDXR     | Enhanced  | Mitochondria     |                             |
| 7399 | ENSG00000161526 | SAP30BP  | Enhanced  | Nucleoplasm      |                             |
| 7400 | ENSG00000161533 | ACOX1    | Approved  |                  | Nucleoli;Peroxisom          |
| 7401 | ENSG00000161542 | PRPSAP1  | Approved  |                  | Cytosol                     |
| 7402 | ENSG00000161544 | CYGB     | Supported |                  | Nuclear sCytosol            |
| 7403 | ENSG00000161547 | SRSF2    | Approved  |                  | NucleoplasCytosol           |
| 7404 | ENSG00000161551 | ZNF577   | Supported |                  | Nucleoli;Nucleoplasm        |
| 7405 | ENSG00000161558 | TMEM143  | Approved  |                  | Nucleoli fibrillar          |
| 7406 | ENSG00000161618 | ALDH16A1 | Approved  |                  | Mitochondria                |
| 7407 | ENSG00000161640 | SIGLEC11 | Uncertain |                  | Golgi app                   |
| 7408 | ENSG00000161642 | ZNF385A  | Supported |                  | Cytosol Nucleoplasm         |
| 7409 | ENSG00000161647 | MPP3     | Approved  |                  | Cytosol;Nucleoplas          |
| 7410 | ENSG00000161653 | NAGS     | Supported |                  | Mitochondria                |
| 7411 | ENSG00000161654 | LSM12    | Approved  |                  | Cytosol                     |
| 7412 | ENSG00000161664 | ASB16    | Approved  |                  | Focal adhesion sit          |
| 7413 | ENSG00000161681 | SHANK1   | Supported |                  | Plasma membrane             |
| 7414 | ENSG00000161692 | DBF4B    | Supported |                  | Nucleoplasm                 |
| 7415 | ENSG00000161714 | PLCD3    | Approved  |                  | Plasma membrane             |
| 7416 | ENSG00000161791 | FMNL3    | Supported |                  | Cytosol;PGolgi apparatus;Ve |
| 7417 | ENSG00000161798 | AQP5     | Approved  |                  | Plasma membrane             |
| 7418 | ENSG00000161800 | RACGAP1  | Enhanced  | Nucleoplasm      |                             |
| 7419 | ENSG00000161813 | LARP4    | Enhanced  | Cytosol          | Nucleoli fibrillar          |
| 7420 | ENSG00000161835 | GRASP    | Approved  |                  | Nuclear bodies;Ves          |
| 7421 | ENSG00000161847 | RAVER1   | Supported |                  | Nucleoplasm                 |
| 7422 | ENSG00000161860 | SYCE2    | Supported |                  | Nucleoplasm                 |
| 7423 | ENSG00000161888 | SPC24    | Supported |                  | Nucleoli;Nucleoplasm        |

|      |                 |           |           |                                      |
|------|-----------------|-----------|-----------|--------------------------------------|
| 7424 | ENSG00000161896 | IP6K3     | Approved  | Cytosol;Nucleoplas                   |
| 7425 | ENSG00000161904 | LEMD2     | Supported | Nuclear membrane                     |
| 7426 | ENSG00000161914 | ZNF653    | Supported | Nucleoplasm                          |
| 7427 | ENSG00000161920 | MED11     | Approved  | Nuclear bodies;Nuc                   |
| 7428 | ENSG00000161921 | CXCL16    | Approved  | Golgi apparatus;Ve                   |
| 7429 | ENSG00000161939 | RNASEK-C1 | Uncertain | Cytosol;N                            |
| 7430 | ENSG00000161940 | BCL6B     | Approved  | Vesicles                             |
| 7431 | ENSG00000161944 | ASGR2     | Supported | Plasma meEndoplasmic reticu          |
| 7432 | ENSG00000161956 | SENP3     | Supported | Nucleoli;Nucleoplasm                 |
| 7433 | ENSG00000161958 | FGF11     | Approved  | Centrosome                           |
| 7434 | ENSG00000161960 | EIF4A1    | Approved  | Cytosol                              |
| 7435 | ENSG00000161970 | RPL26     | Supported | Cytosol;ENucleoli                    |
| 7436 | ENSG00000161980 | POLR3K    | Uncertain | Cytosol;N                            |
| 7437 | ENSG00000161981 | SNRNP25   | Supported | NucleoplaCytokinetic bridge          |
| 7438 | ENSG00000161996 | WDR90     | Approved  | Nuclear speckles                     |
| 7439 | ENSG00000162009 | SSTR5     | Supported | Plasma membrane                      |
| 7440 | ENSG00000162032 | SPSB3     | Approved  | Mitochondria                         |
| 7441 | ENSG00000162062 | TEDC2     | Approved  | Cell Junctions;Nuc                   |
| 7442 | ENSG00000162063 | CCNF      | Supported | Centrosome                           |
| 7443 | ENSG00000162065 | TBC1D24   | Supported | Cell Junctions;Plasma membr          |
| 7444 | ENSG00000162066 | AMDHD2    | Approved  | Cytosol;Nucleoli                     |
| 7445 | ENSG00000162069 | BICDL2    | Approved  | Actin filaments;Cy                   |
| 7446 | ENSG00000162073 | PAQR4     | Approved  | Vesicles                             |
| 7447 | ENSG00000162076 | FLYWCH2   | Approved  | Nucleoplasm                          |
| 7448 | ENSG00000162078 | ZG16B     | Approved  | Nucleoplasm;Vesicl                   |
| 7449 | ENSG00000162086 | ZNF75A    | Approved  | Nucleoli fibrillar                   |
| 7450 | ENSG00000162104 | ADCY9     | Approved  | Cytosol                              |
| 7451 | ENSG00000162105 | SHANK2    | Approved  | Nuclear speckles;N                   |
| 7452 | ENSG00000162139 | NEU3      | Supported | NucleoplaVesicles                    |
| 7453 | ENSG00000162144 | CYB561A3  | Approved  | Vesicles Cytosol;Nucleoli;N          |
| 7454 | ENSG00000162174 | ASRGL1    | Approved  | Microtubules;Nucle                   |
| 7455 | ENSG00000162191 | UBXN1     | Approved  | Nucleoplasm                          |
| 7456 | ENSG00000162222 | TTC9C     | Approved  | Nucleoplasm                          |
| 7457 | ENSG00000162227 | TAF6L     | Supported | Nucleoplasm                          |
| 7458 | ENSG00000162231 | NXF1      | Supported | Nucleoplasm                          |
| 7459 | ENSG00000162236 | STX5      | Supported | Golgi appNucleoplasm                 |
| 7460 | ENSG00000162241 | SLC25A45  | Approved  | Cytosol;Nucleoplas                   |
| 7461 | ENSG00000162244 | RPL29     | Supported | Cytosol;Endoplasmic reticul          |
| 7462 | ENSG00000162298 | SYVN1     | Supported | EndoplasmNucleoplasm;Plasma membrane |
| 7463 | ENSG00000162300 | ZFPL1     | Enhanced  | Golgi apparatus                      |
| 7464 | ENSG00000162302 | RPS6KA4   | Supported | Nucleoplasm Cytosol                  |
| 7465 | ENSG00000162341 | TPCN2     | Approved  | Nucleoli                             |
| 7466 | ENSG00000162366 | PDZK1IP1  | Approved  | Cytosol;Nuclear sp                   |
| 7467 | ENSG00000162367 | TAL1      | Enhanced  | Nucleoplasm                          |
| 7468 | ENSG00000162368 | CMPK1     | Supported | Nucleoplasm                          |
| 7469 | ENSG00000162373 | BEND5     | Approved  | Cytosol;Nuclear sp                   |
| 7470 | ENSG00000162374 | ELAVL4    | Approved  | Nucleoplasm;Vesicl                   |
| 7471 | ENSG00000162377 | COA7      | Approved  | Mitochondria;Nucle                   |
| 7472 | ENSG00000162378 | ZYG11B    | Approved  | Golgi apparatus;In                   |
| 7473 | ENSG00000162384 | C1orf123  | Approved  | Cytosol;Mitotic sp                   |
| 7474 | ENSG00000162385 | MAGOH     | Supported | Nucleoplasm                          |
| 7475 | ENSG00000162390 | ACOT11    | Supported | Cytosol                              |
| 7476 | ENSG00000162396 | PARS2     | Approved  | Mitochondria;Nucle                   |
| 7477 | ENSG00000162402 | USP24     | Supported | Cytosol;Nucleoplasm                  |
| 7478 | ENSG00000162407 | PLPP3     | Supported | Golgi apparatus                      |

|      |                 |          |           |                      |                             |
|------|-----------------|----------|-----------|----------------------|-----------------------------|
| 7479 | ENSG00000162408 | NOL9     | Supported | Nucleoli             | Intermediate filam          |
| 7480 | ENSG00000162409 | PRKAA2   | Supported | Nuclear s            | Golgi apparatus             |
| 7481 | ENSG00000162413 | KLHL21   | Supported | Centrosome           |                             |
| 7482 | ENSG00000162415 | ZSWIM5   | Approved  |                      | Nuclear speckles            |
| 7483 | ENSG00000162419 | GMEB1    | Enhanced  | Nucleoplasm          |                             |
| 7484 | ENSG00000162430 | SELENON  | Supported | Cytosol              |                             |
| 7485 | ENSG00000162433 | AK4      | Supported | Mitochondria         |                             |
| 7486 | ENSG00000162437 | RAVER2   | Approved  |                      | Nucleoplasm                 |
| 7487 | ENSG00000162441 | LZIC     | Approved  |                      | Cytosol;Nucleoplas          |
| 7488 | ENSG00000162444 | RBP7     | Uncertain |                      | Cytosol;N                   |
| 7489 | ENSG00000162458 | FBLIM1   | Enhanced  | Cell Junctions;Foc   | Nucleoli fibrillar          |
| 7490 | ENSG00000162460 | TMEM82   | Uncertain |                      | Cytosol;N                   |
| 7491 | ENSG00000162461 | SLC25A34 | Approved  |                      | Mitochondria                |
| 7492 | ENSG00000162482 | AKR7A3   | Approved  |                      | Cytosol                     |
| 7493 | ENSG00000162493 | PDPN     | Approved  |                      | Vesicles                    |
| 7494 | ENSG00000162496 | DHRS3    | Approved  |                      | Mitochondria;Nucle          |
| 7495 | ENSG00000162511 | LAPTM5   | Approved  |                      | Cytosol                     |
| 7496 | ENSG00000162512 | SDC3     | Approved  |                      | Mitochondria;Nucle          |
| 7497 | ENSG00000162517 | PEF1     | Approved  | Cytosol;Vesicles     | Nucleopla                   |
| 7498 | ENSG00000162520 | SYNC     | Approved  |                      | Golgi apparatus;Pl          |
| 7499 | ENSG00000162521 | RBBP4    | Enhanced  | Nucleoplasm          |                             |
| 7500 | ENSG00000162522 | KIAA1522 | Supported | Cell Junc            | Nucleoplasm                 |
| 7501 | ENSG00000162526 | TSSK3    | Approved  |                      | Nuclear bodies;Nuc          |
| 7502 | ENSG00000162542 | TMC04    | Approved  |                      | Endoplasmic reticu          |
| 7503 | ENSG00000162551 | ALPL     | Approved  |                      | Cytosol                     |
| 7504 | ENSG00000162552 | WNT4     | Approved  |                      | Vesicles                    |
| 7505 | ENSG00000162572 | SCNN1D   | Supported | Actin filaments;     | Plasma memb                 |
| 7506 | ENSG00000162576 | MXRA8    | Approved  |                      | Nucleoli                    |
| 7507 | ENSG00000162585 | FAAP20   | Supported | Nuclear bodies;Nuc   | Cell Junc                   |
| 7508 | ENSG00000162591 | MEGF6    | Approved  |                      | Cytokinetic bridge          |
| 7509 | ENSG00000162595 | DIRAS3   | Approved  |                      | Cytosol;Nuclear me          |
| 7510 | ENSG00000162599 | NFIA     | Enhanced  | Nucleoplasm          |                             |
| 7511 | ENSG00000162600 | OMA1     | Approved  |                      | Mitochondria;Nucle          |
| 7512 | ENSG00000162601 | MYSM1    | Supported | Nucleoplasm          | Plasma me                   |
| 7513 | ENSG00000162604 | TM2D1    | Supported | Nucleoplasm          |                             |
| 7514 | ENSG00000162607 | USP1     | Supported | Nucleoplasm          |                             |
| 7515 | ENSG00000162613 | FUBP1    | Enhanced  | Nucleoplasm          |                             |
| 7516 | ENSG00000162614 | NEXN     | Supported |                      | Actin filaments             |
| 7517 | ENSG00000162616 | DNAJB4   | Enhanced  | Cytosol;Nucleoplasm; | Plasma membrane             |
| 7518 | ENSG00000162620 | LRRIQ3   | Approved  |                      | Nucleoplasm;Plasma          |
| 7519 | ENSG00000162623 | TYW3     | Approved  |                      | Cytosol;Plasma mem          |
| 7520 | ENSG00000162624 | LHX8     | Approved  |                      | Cytosol;Nucleoli;N          |
| 7521 | ENSG00000162627 | SNX7     | Approved  |                      | Cytosol;Nucleoli f          |
| 7522 | ENSG00000162630 | B3GALT2  | Approved  |                      | Microtubules;Plasm          |
| 7523 | ENSG00000162631 | NTNG1    | Supported |                      | Plasma membrane             |
| 7524 | ENSG00000162636 | FAM102B  | Approved  |                      | Cytosol;Nucleoli            |
| 7525 | ENSG00000162639 | HENMT1   | Approved  |                      | Focal adhesion sit          |
| 7526 | ENSG00000162642 | C1orf52  | Enhanced  | Nucleoplasm          |                             |
| 7527 | ENSG00000162645 | GBP2     | Supported |                      | Actin filaments;Cytosol;Nuc |
| 7528 | ENSG00000162650 | ATXN7L2  | Approved  |                      | Cytosol;Nucleoli;V          |
| 7529 | ENSG00000162654 | GBP4     | Supported |                      | Golgi apparatus Plasma me   |
| 7530 | ENSG00000162664 | ZNF326   | Enhanced  | Golgi apparatus;     | Nucleoplasm;Vesicles        |
| 7531 | ENSG00000162669 | HFM1     | Supported |                      | Golgi apparatus;Vesicles    |
| 7532 | ENSG00000162687 | KCNT2    | Approved  |                      | Vesicles                    |
| 7533 | ENSG00000162688 | AGL      | Supported |                      | Cytosol;Nuclear bodies;Nucl |

|      |                 |          |           |                     |                             |
|------|-----------------|----------|-----------|---------------------|-----------------------------|
| 7534 | ENSG00000162692 | VCAM1    | Approved  |                     | Cell Junctions              |
| 7535 | ENSG00000162694 | EXTL2    | Approved  |                     | Cytosol;Nucleoplas          |
| 7536 | ENSG00000162695 | SLC30A7  | Supported |                     | Golgi apparatus             |
| 7537 | ENSG00000162702 | ZNF281   | Enhanced  | Nucleoplasm         |                             |
| 7538 | ENSG00000162704 | ARPC5    | Approved  |                     | Cell Junctions;Cyt          |
| 7539 | ENSG00000162706 | CADM3    | Approved  |                     | Cytosol                     |
| 7540 | ENSG00000162714 | ZNF496   | Uncertain |                     | Golgi app                   |
| 7541 | ENSG00000162729 | IGSF8    | Supported |                     | Vesicles                    |
| 7542 | ENSG00000162733 | DDR2     | Supported | Plasma me           | Actin filaments             |
| 7543 | ENSG00000162734 | PEA15    | Approved  |                     | Cytosol;Nucleoplas          |
| 7544 | ENSG00000162735 | PEX19    | Supported |                     | Peroxisomes                 |
| 7545 | ENSG00000162736 | NCSTN    | Approved  |                     | Cytosol                     |
| 7546 | ENSG00000162739 | SLAMF6   | Approved  |                     | Cytosol;Plasma mem          |
| 7547 | ENSG00000162745 | OLFML2B  | Approved  |                     | Cytosol                     |
| 7548 | ENSG00000162746 | FCRLB    | Supported |                     | Cytosol                     |
| 7549 | ENSG00000162755 | KLHDC9   | Approved  |                     | Nucleoli;Nucleopla          |
| 7550 | ENSG00000162757 | C1orf74  | Approved  |                     | Cytosol;Plasma mem          |
| 7551 | ENSG00000162761 | LMX1A    | Approved  |                     | Golgi apparatus;Nu          |
| 7552 | ENSG00000162769 | FLVCR1   | Approved  |                     | Cell Junctions              |
| 7553 | ENSG00000162772 | ATF3     | Supported |                     | Nucleoli;Nucleoplasm        |
| 7554 | ENSG00000162775 | RBM15    | Enhanced  | Nucleoplasm         |                             |
| 7555 | ENSG00000162777 | DENND2D  | Approved  |                     | Cytosol Nucleopla           |
| 7556 | ENSG00000162783 | IER5     | Approved  |                     | Nucleoli;Nucleopla          |
| 7557 | ENSG00000162813 | BPNT1    | Approved  |                     | Nuclear speckles            |
| 7558 | ENSG00000162814 | SPATA17  | Approved  |                     | Nucleoli;Nucleopla          |
| 7559 | ENSG00000162819 | BROX     | Approved  |                     | Cytosol;Golgi appa          |
| 7560 | ENSG00000162825 | NBPF20   | Approved  |                     | Nuclear bodies;Nuc          |
| 7561 | ENSG00000162849 | KIF26B   | Approved  |                     | Microtubules;Plasm          |
| 7562 | ENSG00000162851 | TFB2M    | Enhanced  | Mitochondria        |                             |
| 7563 | ENSG00000162852 | CNST     | Supported |                     | Vesicles                    |
| 7564 | ENSG00000162869 | PPP1R21  | Approved  |                     | Nucleoplasm;Vesicl          |
| 7565 | ENSG00000162885 | B3GALNT2 | Approved  |                     | Golgi apparatus;Nu          |
| 7566 | ENSG00000162889 | MAPKAPK2 | Supported |                     | Centrosome;Nucleoplasm      |
| 7567 | ENSG00000162894 | FCMR     | Approved  |                     | Cytosol;Focal adhe          |
| 7568 | ENSG00000162909 | CAPN2    | Supported |                     | Cytosol                     |
| 7569 | ENSG00000162923 | WDR26    | Enhanced  | Cytosol;Nucleoplasm |                             |
| 7570 | ENSG00000162927 | PUS10    | Approved  |                     | Mitochondria;Nucle          |
| 7571 | ENSG00000162928 | PEX13    | Supported |                     | Vesicles                    |
| 7572 | ENSG00000162929 | KIAA1841 | Approved  |                     | Nucleoli;Nucleopla          |
| 7573 | ENSG00000162931 | TRIM17   | Approved  |                     | Vesicles                    |
| 7574 | ENSG00000162946 | DISC1    | Approved  |                     | Intermediate filam          |
| 7575 | ENSG00000162949 | CAPN13   | Approved  |                     | Nucleoplasm                 |
| 7576 | ENSG00000162959 | MEMO1    | Approved  |                     | Vesicles                    |
| 7577 | ENSG00000162961 | DPY30    | Supported |                     | Golgi apparatus;Nucleoplasm |
| 7578 | ENSG00000162971 | TYW5     | Approved  |                     | Nuclear bodies              |
| 7579 | ENSG00000162972 | MAIP1    | Approved  |                     | Mitochondria                |
| 7580 | ENSG00000162975 | KCNF1    | Approved  |                     | Golgi apparatus             |
| 7581 | ENSG00000162976 | PQLC3    | Approved  |                     | Cytosol                     |
| 7582 | ENSG00000162981 | FAM84A   | Approved  |                     | Nucleoplasm                 |
| 7583 | ENSG00000162994 | CLHC1    | Approved  |                     | Centrosome;Nucleol          |
| 7584 | ENSG00000162999 | DUSP19   | Approved  |                     | Nucleoplasm                 |
| 7585 | ENSG00000163001 | CFAP36   | Supported |                     | Cytosol;Nucleoplasm         |
| 7586 | ENSG00000163002 | NUP35    | Supported | Nuclear m           | Plasma membrane             |
| 7587 | ENSG00000163006 | CCDC138  | Approved  |                     | Cytosol;Nucleoplas          |
| 7588 | ENSG00000163013 | FBX041   | Approved  |                     | Cytosol;Nucleoplas          |

|      |                 |           |           |                             |                    |
|------|-----------------|-----------|-----------|-----------------------------|--------------------|
| 7589 | ENSG00000163026 | WDCP      | Approved  |                             | Cytosol;Nucleoli   |
| 7590 | ENSG00000163029 | SMC6      | Supported | Nucleoplasm                 |                    |
| 7591 | ENSG00000163032 | VSNL1     | Approved  |                             | Cytosol            |
| 7592 | ENSG00000163040 | CCDC74A   | Uncertain |                             | Vesicles           |
| 7593 | ENSG00000163041 | H3F3A     | Supported | Nucleoplasm                 |                    |
| 7594 | ENSG00000163050 | COQ8A     | Supported | Mitochondria                |                    |
| 7595 | ENSG00000163053 | SLC16A14  | Approved  |                             | Endoplasmic reticu |
| 7596 | ENSG00000163060 | TEKT4     | Uncertain |                             | Intermedi          |
| 7597 | ENSG00000163064 | EN1       | Supported | Nucleoli;Nucleoplasm        |                    |
| 7598 | ENSG00000163069 | SGCB      | Approved  |                             | Cytosol            |
| 7599 | ENSG00000163071 | SPATA18   | Supported | Mitochondria                |                    |
| 7600 | ENSG00000163072 | NOSTRIN   | Approved  | Vesicles                    | Cytosol            |
| 7601 | ENSG00000163092 | XIRP2     | Approved  |                             | Plasma meNucleopla |
| 7602 | ENSG00000163104 | SMARCD1   | Enhanced  | Nucleoplasm                 |                    |
| 7603 | ENSG00000163106 | HPGDS     | Approved  |                             | Cytosol Nucleopla  |
| 7604 | ENSG00000163110 | PDLIM5    | Supported | Focal adhesion sites;Nucleo |                    |
| 7605 | ENSG00000163114 | PDHA2     | Supported | Mitochondria                |                    |
| 7606 | ENSG00000163125 | RPRD2     | Approved  |                             | Nucleoplasm;Vesicl |
| 7607 | ENSG00000163126 | ANKRD23   | Supported | Actin filaments;Nucleoplasm |                    |
| 7608 | ENSG00000163131 | CTSS      | Approved  |                             | Vesicles           |
| 7609 | ENSG00000163132 | MSX1      | Supported | Nucleoplasm                 |                    |
| 7610 | ENSG00000163138 | PACRGL    | Approved  |                             | Nucleoplasm;Vesicl |
| 7611 | ENSG00000163141 | BNIP1     | Uncertain |                             | Cytosol            |
| 7612 | ENSG00000163145 | C1QTNF7   | Approved  |                             | Vesicles           |
| 7613 | ENSG00000163154 | TNFAIP8L2 | Approved  |                             | Vesicles           |
| 7614 | ENSG00000163155 | LYSMD1    | Enhanced  | Nucleoplasm                 |                    |
| 7615 | ENSG00000163156 | SCNM1     | Approved  |                             | Nucleoplasm        |
| 7616 | ENSG00000163159 | VPS72     | Approved  |                             | Nuclear speckles   |
| 7617 | ENSG00000163161 | ERCC3     | Enhanced  | Nucleoplasm                 |                    |
| 7618 | ENSG00000163162 | RNF149    | Approved  |                             | Plasma membrane;Ve |
| 7619 | ENSG00000163166 | IWS1      | Enhanced  | Nucleoplasm                 |                    |
| 7620 | ENSG00000163170 | BOLA3     | Supported | Mitochond                   | Cytosol;Nuclear bo |
| 7621 | ENSG00000163171 | CDC42EP3  | Supported | Actin filaments;Plasma memb |                    |
| 7622 | ENSG00000163207 | IVL       | Supported | Cytosol                     | Centrosome;Nuclear |
| 7623 | ENSG00000163214 | DHX57     | Approved  |                             | Cytosol;Intermedia |
| 7624 | ENSG00000163218 | PGLYRP4   | Supported | Plasma membrane;Vesicles    |                    |
| 7625 | ENSG00000163219 | ARHGAP25  | Approved  |                             | Nucleoplasm;Vesicl |
| 7626 | ENSG00000163220 | S100A9    | Supported | Cell Junctions;CytNucleopla |                    |
| 7627 | ENSG00000163235 | TGFA      | Approved  |                             | Vesicles           |
| 7628 | ENSG00000163239 | TDRD10    | Approved  |                             | Vesicles           |
| 7629 | ENSG00000163249 | CCNYL1    | Approved  |                             | Plasma membrane    |
| 7630 | ENSG00000163257 | DCAF16    | Approved  |                             | Cytosol;Plasma mem |
| 7631 | ENSG00000163281 | GNPDA2    | Approved  |                             | Golgi apparatus;Ve |
| 7632 | ENSG00000163283 | ALPP      | Approved  |                             | Plasma membrane    |
| 7633 | ENSG00000163286 | ALPPL2    | Approved  |                             | Plasma membrane    |
| 7634 | ENSG00000163293 | NIPAL1    | Approved  |                             | Golgi apparatus    |
| 7635 | ENSG00000163295 | ALPI      | Approved  |                             | Plasma membrane    |
| 7636 | ENSG00000163312 | HELQ      | Approved  |                             | Nuclear speckles;N |
| 7637 | ENSG00000163320 | CGGBP1    | Enhanced  | Nucleoplasm                 |                    |
| 7638 | ENSG00000163322 | ABRAXAS1  | Supported |                             | Nuclear bodies     |
| 7639 | ENSG00000163328 | GPR155    | Approved  |                             | Cytosol Nuclear b  |
| 7640 | ENSG00000163331 | DAPL1     | Approved  |                             | Microtubules;Nucle |
| 7641 | ENSG00000163346 | PBXIP1    | Approved  |                             | Cytosol;Vesicles   |
| 7642 | ENSG00000163348 | PYG02     | Approved  |                             | Nucleoplasm        |
| 7643 | ENSG00000163349 | HIPK1     | Approved  |                             | Centrosome;Cytosol |

|      |                 |          |           |                             |
|------|-----------------|----------|-----------|-----------------------------|
| 7644 | ENSG00000163374 | YY1AP1   | Approved  | Nucleoli fibrillar          |
| 7645 | ENSG00000163378 | E0GT     | Approved  | Cytosol;Nuclear me          |
| 7646 | ENSG00000163382 | NAXE     | Enhanced  | Cytosol;Nucleoplasm         |
| 7647 | ENSG00000163389 | POGLUT1  | Supported | Endoplasm;Cytosol           |
| 7648 | ENSG00000163395 | IGFN1    | Approved  | Midbody ring                |
| 7649 | ENSG00000163412 | EIF4E3   | Approved  | Nucleoli fibrillar          |
| 7650 | ENSG00000163428 | LRRC58   | Approved  | Cytosol;Nucleoplas          |
| 7651 | ENSG00000163430 | FSTL1    | Approved  | Cytosol;Vesicles            |
| 7652 | ENSG00000163431 | LMOD1    | Approved  | Cytosol                     |
| 7653 | ENSG00000163435 | ELF3     | Enhanced  | Nucleoplasm                 |
| 7654 | ENSG00000163444 | TMEM183A | Approved  | Cell Junctions;Nuc          |
| 7655 | ENSG00000163449 | TMEM169  | Approved  | Centrosome;Cytosol          |
| 7656 | ENSG00000163453 | IGFBP7   | Approved  | Golgi apparatus             |
| 7657 | ENSG00000163466 | ARPC2    | Supported | Cytosol;Golgi apparatus     |
| 7658 | ENSG00000163467 | TSACC    | Approved  | Nuclear bodies;Nuc          |
| 7659 | ENSG00000163468 | CCT3     | Supported | Cytosol;Plasma membrane     |
| 7660 | ENSG00000163472 | TMEM79   | Approved  | Nucleoli fibrillar          |
| 7661 | ENSG00000163481 | RNF25    | Approved  | Cytosol;Nucleoplas          |
| 7662 | ENSG00000163482 | STK36    | Supported | Cytosol                     |
| 7663 | ENSG00000163485 | ADORA1   | Supported | Plasma membrane             |
| 7664 | ENSG00000163491 | NEK10    | Approved  | Nucleoplasm;Vesicl          |
| 7665 | ENSG00000163492 | CCDC141  | Approved  | Nucleoplasm                 |
| 7666 | ENSG00000163497 | FEV      | Supported | Nuclear speckles            |
| 7667 | ENSG00000163507 | CIP2A    | Supported | Cytosol;Plasma membrane     |
| 7668 | ENSG00000163508 | EOMES    | Uncertain | Vesicles                    |
| 7669 | ENSG00000163510 | CWC22    | Supported | Nuclear speckles Cytosol    |
| 7670 | ENSG00000163513 | TGFBR2   | Supported | Plasma membrane             |
| 7671 | ENSG00000163516 | ANKZF1   | Approved  | Cytosol;Nuclear bo          |
| 7672 | ENSG00000163520 | FBLN2    | Supported | Plasma membrane             |
| 7673 | ENSG00000163527 | STT3B    | Supported | Endoplasmic reticulum       |
| 7674 | ENSG00000163528 | CHCHD4   | Supported | Mitochondria                |
| 7675 | ENSG00000163530 | DPPA2    | Approved  | Nucleoplasm                 |
| 7676 | ENSG00000163535 | SGO2     | Enhanced  | Nucleoplasm Nuclear bodies  |
| 7677 | ENSG00000163536 | SERPINI1 | Approved  | Cytosol                     |
| 7678 | ENSG00000163539 | CLASP2   | Supported | Golgi app;Cytosol           |
| 7679 | ENSG00000163541 | SUCLG1   | Supported | Mitochondria;Plasma membran |
| 7680 | ENSG00000163545 | NUAK2    | Approved  | Cytosol;Nucleoli f          |
| 7681 | ENSG00000163558 | PRKCI    | Supported | Cytosol Cytokinetic bridge  |
| 7682 | ENSG00000163563 | MNDA     | Supported | Nucleoli;Nucleoplasm        |
| 7683 | ENSG00000163565 | IFI16    | Supported | Nucleoli;Cytosol            |
| 7684 | ENSG00000163568 | AIM2     | Supported | Cytosol;Mitochondria;Nucleo |
| 7685 | ENSG00000163576 | EFHB     | Approved  | Nucleoli                    |
| 7686 | ENSG00000163577 | EIF5A2   | Supported | Vesicles                    |
| 7687 | ENSG00000163581 | SLC2A2   | Supported | Plasma membrane             |
| 7688 | ENSG00000163584 | RPL22L1  | Approved  | Nucleoli;Nucleopla          |
| 7689 | ENSG00000163586 | FABP1    | Approved  | Cytosol Nucleopla           |
| 7690 | ENSG00000163590 | PPM1L    | Approved  | Cytosol;Nucleoplas          |
| 7691 | ENSG00000163596 | ICA1L    | Supported | Mitochondria                |
| 7692 | ENSG00000163600 | ICOS     | Approved  | Plasma meActin fil          |
| 7693 | ENSG00000163602 | RYBP     | Supported | Nucleoplasm                 |
| 7694 | ENSG00000163605 | PPP4R2   | Enhanced  | Nucleoplasm                 |
| 7695 | ENSG00000163606 | CD200R1  | Supported | Plasma membrane             |
| 7696 | ENSG00000163607 | GTPBP8   | Enhanced  | Mitochondria                |
| 7697 | ENSG00000163608 | NEPRO    | Supported | Nucleoli;Nucleoplasm        |
| 7698 | ENSG00000163611 | SPICE1   | Supported | Centrosome                  |



|      |                 |          |           |                                      |
|------|-----------------|----------|-----------|--------------------------------------|
| 7699 | ENSG00000163617 | CCDC191  | Approved  | Mitochondria                         |
| 7700 | ENSG00000163618 | CADPS    | Approved  | Vesicles                             |
| 7701 | ENSG00000163623 | NKX6-1   | Supported | Nucleoplasm                          |
| 7702 | ENSG00000163624 | CDS1     | Approved  | Nuclear membrane;N                   |
| 7703 | ENSG00000163625 | WDFY3    | Approved  | Cytosol Nucleoli;                    |
| 7704 | ENSG00000163629 | PTPN13   | Supported | Nucleoplasm;Cytosol;Nucleoli f       |
| 7705 | ENSG00000163631 | ALB      | Enhanced  | Endoplasmic reticulum;Golgi apparatu |
| 7706 | ENSG00000163633 | C4orf36  | Approved  | Focal adhesion sit                   |
| 7707 | ENSG00000163634 | THOC7    | Supported | Cytosol;Nuclear speckles             |
| 7708 | ENSG00000163635 | ATXN7    | Approved  | Cytosol;Nucleoplas                   |
| 7709 | ENSG00000163636 | PSMD6    | Supported | Golgi apparatus;Vesicles             |
| 7710 | ENSG00000163637 | PRICKLE2 | Approved  | Golgi apparatus;Ve                   |
| 7711 | ENSG00000163638 | ADAMTS9  | Approved  | Endoplasmic Vesicles                 |
| 7712 | ENSG00000163644 | PPM1K    | Supported | Mitochondria                         |
| 7713 | ENSG00000163655 | GMPS     | Approved  | Cytosol                              |
| 7714 | ENSG00000163659 | TIPARP   | Approved  | Microtubules                         |
| 7715 | ENSG00000163660 | CCNL1    | Supported | Nuclear bodies;Nucleoplasm           |
| 7716 | ENSG00000163661 | PTX3     | Approved  | Plasma membrane                      |
| 7717 | ENSG00000163666 | HESX1    | Approved  | Nucleoplasm                          |
| 7718 | ENSG00000163681 | SLMAP    | Approved  | Endoplasmic reticu                   |
| 7719 | ENSG00000163682 | RPL9     | Supported | Cytosol;Endoplasmic reticul          |
| 7720 | ENSG00000163684 | RPP14    | Approved  | Cytosol;Nucleoplas                   |
| 7721 | ENSG00000163686 | ABHD6    | Approved  | Nucleoplasm;Vesicl                   |
| 7722 | ENSG00000163689 | C3orf67  | Approved  | Golgi apparatus                      |
| 7723 | ENSG00000163694 | RBM47    | Supported | Cytosol;Nucleoplasm                  |
| 7724 | ENSG00000163697 | APBB2    | Approved  | Mitochondria                         |
| 7725 | ENSG00000163703 | CRELD1   | Approved  | Cytosol;Nucleoli                     |
| 7726 | ENSG00000163704 | PRRT3    | Approved  | Cytosol;Nucleoplas                   |
| 7727 | ENSG00000163710 | PCOLCE2  | Approved  | Cytosol;Nucleoplas                   |
| 7728 | ENSG00000163714 | U2SURP   | Supported | Nucleoplasm                          |
| 7729 | ENSG00000163728 | TTC14    | Supported | Nucleoplasm                          |
| 7730 | ENSG00000163743 | RCHY1    | Supported | Cytosol;Nucleoplasm                  |
| 7731 | ENSG00000163751 | CPA3     | Approved  | Golgi apparatus;Nu                   |
| 7732 | ENSG00000163754 | GYG1     | Supported | Vesicles                             |
| 7733 | ENSG00000163755 | HPS3     | Approved  | Golgi apparatus;Pl                   |
| 7734 | ENSG00000163762 | TM4SF18  | Approved  | Cytosol;Vesicles                     |
| 7735 | ENSG00000163781 | TOPBP1   | Supported | Nucleoplasm                          |
| 7736 | ENSG00000163785 | RYK      | Approved  | Cytosol;Golgi appa                   |
| 7737 | ENSG00000163788 | SNRK     | Approved  | Cell Junctions;Nuc                   |
| 7738 | ENSG00000163792 | TCF23    | Approved  | Nuclear speckles                     |
| 7739 | ENSG00000163794 | UCN      | Approved  | Endoplasmic reticu                   |
| 7740 | ENSG00000163798 | SLC4A1AP | Supported | Nucleoplasm;Plasma membrane;Ve       |
| 7741 | ENSG00000163806 | SPDYA    | Supported | Nucleoplasm                          |
| 7742 | ENSG00000163807 | KIAA1143 | Approved  | Cytokinetic bridge                   |
| 7743 | ENSG00000163812 | ZDHHC3   | Approved  | Golgi apparatus                      |
| 7744 | ENSG00000163818 | LZTFL1   | Supported | Cytosol                              |
| 7745 | ENSG00000163820 | FYC01    | Enhanced  | Vesicles                             |
| 7746 | ENSG00000163825 | RTP3     | Uncertain | Mitochond                            |
| 7747 | ENSG00000163827 | LRRC2    | Approved  | Nucleoplasm                          |
| 7748 | ENSG00000163832 | ELP6     | Approved  | Centrosome;Cytosol                   |
| 7749 | ENSG00000163840 | DTX3L    | Supported | Cytosol;Nucleoplasm                  |
| 7750 | ENSG00000163848 | ZNF148   | Supported | Nucleoplasm Golgi app                |
| 7751 | ENSG00000163864 | NMNAT3   | Supported | Mitochondria                         |
| 7752 | ENSG00000163866 | SMIM12   | Approved  | Mitochondria                         |
| 7753 | ENSG00000163867 | ZMYM6    | Approved  | Nucleoplasm                          |

|      |                 |         |           |                            |                             |
|------|-----------------|---------|-----------|----------------------------|-----------------------------|
| 7754 | ENSG00000163870 | TPRA1   | Approved  |                            | Vesicles                    |
| 7755 | ENSG00000163872 | YEATS2  | Approved  |                            | Nucleoplasm                 |
| 7756 | ENSG00000163874 | ZC3H12A | Supported |                            | Cytoplasmic bodies;Nucleopl |
| 7757 | ENSG00000163877 | SNIP1   | Supported |                            | Cytosol;Nucleoplasm         |
| 7758 | ENSG00000163882 | POLR2H  | Supported |                            | Nucleoplasm                 |
| 7759 | ENSG00000163888 | CAMK2N2 | Supported |                            | NucleoplaCentrosome         |
| 7760 | ENSG00000163900 | TMEM41A | Approved  |                            | Cytosol;Golgi appa          |
| 7761 | ENSG00000163902 | RPN1    | Enhanced  | Endoplasmic reticulum      |                             |
| 7762 | ENSG00000163904 | SENP2   | Supported |                            | Cytosol                     |
| 7763 | ENSG00000163909 | HEYL    | Approved  |                            | Cytosol;Mitochondr          |
| 7764 | ENSG00000163913 | IFT122  | Supported |                            | Cytosol;Nucleoplasm         |
| 7765 | ENSG00000163918 | RFC4    | Enhanced  | Nucleoplasm                |                             |
| 7766 | ENSG00000163930 | BAP1    | Enhanced  | Cytosol;Nucleoplasm        |                             |
| 7767 | ENSG00000163931 | TKT     | Enhanced  | Nucleoplasm                |                             |
| 7768 | ENSG00000163932 | PRKCD   | Enhanced  | Cytosol                    | Endoplasmic reticulum;Golgi |
| 7769 | ENSG00000163933 | RFT1    | Approved  |                            | Vesicles                    |
| 7770 | ENSG00000163935 | SFMBT1  | Enhanced  | Nucleoplasm                |                             |
| 7771 | ENSG00000163938 | GNL3    | Enhanced  | Nucleoli                   | Nuclear bodies              |
| 7772 | ENSG00000163939 | PBRM1   | Enhanced  | Nucleoplasm                |                             |
| 7773 | ENSG00000163945 | UVSSA   | Approved  |                            | Nucleoplasm                 |
| 7774 | ENSG00000163946 | FAM208A | Enhanced  | Nucleoplasm                |                             |
| 7775 | ENSG00000163947 | ARHGEF3 | Approved  |                            | Cytosol                     |
| 7776 | ENSG00000163950 | SLBP    | Supported |                            | Cytosol;Nucleoli;Nucleoplas |
| 7777 | ENSG00000163956 | LRPAP1  | Supported |                            | Endoplasmic reticulum       |
| 7778 | ENSG00000163960 | UBXN7   | Enhanced  | Nucleoplasm                |                             |
| 7779 | ENSG00000163961 | RNF168  | Enhanced  | Nuclear bodies;Nucleoplasm |                             |
| 7780 | ENSG00000163964 | PIGX    | Approved  |                            | Cytosol;Nucleoplas          |
| 7781 | ENSG00000163993 | S100P   | Supported |                            | Nuclear bodies              |
| 7782 | ENSG00000163995 | ABLIM2  | Uncertain |                            | Mitochond                   |
| 7783 | ENSG00000164002 | EXO5    | Supported |                            | Cytosol;Nucleoplasm         |
| 7784 | ENSG00000164010 | ERMAP   | Approved  |                            | Cytosol Golgi apparatus     |
| 7785 | ENSG00000164011 | ZNF691  | Approved  |                            | Nucleoli;Nucleopla          |
| 7786 | ENSG00000164022 | AIMP1   | Enhanced  | Cytosol                    |                             |
| 7787 | ENSG00000164024 | METAP1  | Approved  |                            | Cytosol;Nucleoplas          |
| 7788 | ENSG00000164032 | H2AFZ   | Supported |                            | Nucleoplasm                 |
| 7789 | ENSG00000164037 | SLC9B1  | Supported |                            | Centriolar satellite;Mitoch |
| 7790 | ENSG00000164038 | SLC9B2  | Approved  |                            | Cell JuncNucleoplasm        |
| 7791 | ENSG00000164039 | BDH2    | Supported |                            | Cytosol                     |
| 7792 | ENSG00000164040 | PGRMC2  | Approved  |                            | Cytosol;Nuclear bo          |
| 7793 | ENSG00000164045 | CDC25A  | Approved  |                            | Golgi apparatus;Nu          |
| 7794 | ENSG00000164048 | ZNF589  | Supported |                            | Nucleoplasm                 |
| 7795 | ENSG00000164051 | CCDC51  | Supported |                            | MitochondCentrosome         |
| 7796 | ENSG00000164053 | ATRIP   | Supported |                            | Nucleoplasm                 |
| 7797 | ENSG00000164056 | SPRY1   | Approved  |                            | Cytosol;Golgi appa          |
| 7798 | ENSG00000164062 | APEH    | Enhanced  | Cytosol                    |                             |
| 7799 | ENSG00000164066 | INTU    | Approved  |                            | Vesicles                    |
| 7800 | ENSG00000164068 | RNF123  | Approved  |                            | Cytosol                     |
| 7801 | ENSG00000164070 | HSPA4L  | Approved  |                            | Centrosome;Cytosol          |
| 7802 | ENSG00000164073 | MFSD8   | Supported |                            | Nucleoplasm;Vesicles        |
| 7803 | ENSG00000164074 | ABHD18  | Approved  |                            | Nuclear membrane            |
| 7804 | ENSG00000164076 | CAMKV   | Approved  |                            | Cytokinetic bridge          |
| 7805 | ENSG00000164077 | MON1A   | Approved  |                            | Cytosol                     |
| 7806 | ENSG00000164078 | MST1R   | Approved  |                            | Cytosol                     |
| 7807 | ENSG00000164080 | RAD54L2 | Approved  |                            | Cytosol;Nucleoplas          |
| 7808 | ENSG00000164081 | TEX264  | Approved  |                            | Cytosol;Nucleoli            |

|      |                 |          |           |              |                             |
|------|-----------------|----------|-----------|--------------|-----------------------------|
| 7809 | ENSG00000164088 | PPM1M    | Approved  |              | Nuclear bodies              |
| 7810 | ENSG00000164089 | ETNPPL   | Approved  |              | Nucleoplasm                 |
| 7811 | ENSG00000164091 | WDR82    | Supported |              | Nucleoli                    |
| 7812 | ENSG00000164093 | PITX2    | Enhanced  | Nucleoplasm  |                             |
| 7813 | ENSG00000164096 | C4orf3   | Approved  |              | Endoplasmic reticu          |
| 7814 | ENSG00000164099 | PRSS12   | Approved  |              | Actin filaments;Nu          |
| 7815 | ENSG00000164104 | HMGB2    | Supported |              | NucleoplaNucleoli           |
| 7816 | ENSG00000164105 | SAP30    | Supported |              | Nucleoplasm                 |
| 7817 | ENSG00000164107 | HAND2    | Supported |              | NucleoplaVesicles           |
| 7818 | ENSG00000164109 | MAD2L1   | Approved  |              | Nucleoplasm                 |
| 7819 | ENSG00000164111 | ANXA5    | Approved  |              | Nuclear membrane            |
| 7820 | ENSG00000164116 | GUCY1A1  | Supported |              | Nucleoplasm                 |
| 7821 | ENSG00000164117 | FBX08    | Approved  |              | Cytosol;Nucleoplas          |
| 7822 | ENSG00000164120 | HPGD     | Supported | Cytosol      | Nucleoplasm                 |
| 7823 | ENSG00000164122 | ASB5     | Approved  |              | Plasma membrane             |
| 7824 | ENSG00000164124 | TMEM144  | Approved  |              | Mitochondria                |
| 7825 | ENSG00000164125 | FAM198B  | Approved  |              | Golgi apparatus;Nu          |
| 7826 | ENSG00000164128 | NPY1R    | Approved  |              | Cytosol;Mitochondr          |
| 7827 | ENSG00000164134 | NAA15    | Enhanced  | Cytosol      |                             |
| 7828 | ENSG00000164136 | IL15     | Supported |              | Nuclear speckles;Nucleoplas |
| 7829 | ENSG00000164142 | FAM160A1 | Approved  |              | Cytosol                     |
| 7830 | ENSG00000164144 | ARFIP1   | Supported |              | Golgi appNucleoplasm        |
| 7831 | ENSG00000164151 | ICE1     | Supported |              | Nuclear bodies;Nucleoplasm  |
| 7832 | ENSG00000164161 | HHIP     | Approved  |              | Nucleoplasm                 |
| 7833 | ENSG00000164162 | ANAPC10  | Approved  |              | Golgi apparatus;Nu          |
| 7834 | ENSG00000164163 | ABCE1    | Enhanced  | Cytosol      |                             |
| 7835 | ENSG00000164164 | OTUD4    | Supported |              | Cytosol                     |
| 7836 | ENSG00000164167 | LSM6     | Approved  |              | Actin filaments             |
| 7837 | ENSG00000164168 | TMEM184C | Approved  |              | Nucleoplasm;Vesicl          |
| 7838 | ENSG00000164169 | PRMT9    | Approved  |              | Cytosol;Microtubul          |
| 7839 | ENSG00000164171 | ITGA2    | Approved  |              | Cytosol;Nucleoplas          |
| 7840 | ENSG00000164172 | MOCS2    | Approved  |              | Cytosol Nucleopla           |
| 7841 | ENSG00000164182 | NDUFAF2  | Enhanced  | Mitochondria |                             |
| 7842 | ENSG00000164187 | LMBRD2   | Approved  |              | Cytosol;Nucleoplas          |
| 7843 | ENSG00000164188 | RANBP3L  | Uncertain |              | Nucleopla                   |
| 7844 | ENSG00000164190 | NIPBL    | Supported |              | NucleoplaCytosol;Vesicles   |
| 7845 | ENSG00000164197 | RNF180   | Approved  |              | Cytosol                     |
| 7846 | ENSG00000164199 | ADGRV1   | Approved  |              | Lipid droplets              |
| 7847 | ENSG00000164209 | SLC25A46 | Supported |              | Mitochondria                |
| 7848 | ENSG00000164211 | STARD4   | Approved  |              | Plasma membrane             |
| 7849 | ENSG00000164219 | PGGT1B   | Approved  |              | Cytosol;Endoplasmic         |
| 7850 | ENSG00000164221 | CCDC112  | Supported |              | Cytosol;Nucleoplasm;Plasma  |
| 7851 | ENSG00000164236 | ANKRD33B | Approved  |              | Mitochondria                |
| 7852 | ENSG00000164241 | C5orf63  | Approved  |              | Mitochondria                |
| 7853 | ENSG00000164244 | PRRC1    | Approved  |              | Vesicles                    |
| 7854 | ENSG00000164251 | F2RL1    | Approved  |              | Plasma membrane             |
| 7855 | ENSG00000164253 | WDR41    | Approved  |              | Cytosol;Golgi appa          |
| 7856 | ENSG00000164258 | NDUFS4   | Supported |              | Mitochondria                |
| 7857 | ENSG00000164284 | GRPEL2   | Enhanced  | Mitochondria |                             |
| 7858 | ENSG00000164291 | ARSK     | Approved  |              | Nucleoplasm;Vesicl          |
| 7859 | ENSG00000164292 | RHOBTB3  | Uncertain |              | Vesicles                    |
| 7860 | ENSG00000164294 | GPX8     | Supported |              | Actin filaments;Cytosol     |
| 7861 | ENSG00000164296 | TIGD6    | Approved  |              | Actin filaments;Nu          |
| 7862 | ENSG00000164300 | SERINC5  | Supported |              | Cytosol;Plasma memCentrosom |
| 7863 | ENSG00000164303 | ENPP6    | Approved  |              | Golgi apparatus             |

|      |                 |           |           |                                             |
|------|-----------------|-----------|-----------|---------------------------------------------|
| 7864 | ENSG00000164305 | CASP3     | Supported | Mitochondria;Nucleoplasm                    |
| 7865 | ENSG00000164306 | PRIMPOL   | Approved  | Nucleoplasm;Cytosol                         |
| 7866 | ENSG00000164307 | ERAP1     | Approved  | Cytosol;Nucleoplasm                         |
| 7867 | ENSG00000164308 | ERAP2     | Approved  | Golgi apparatus                             |
| 7868 | ENSG00000164323 | CFAP97    | Supported | Nucleoli fibrillar center                   |
| 7869 | ENSG00000164327 | RICTOR    | Approved  | Mitochondria                                |
| 7870 | ENSG00000164329 | PAPD4     | Approved  | Cytosol                                     |
| 7871 | ENSG00000164330 | EBF1      | Approved  | Nucleoplasm;Vesicles                        |
| 7872 | ENSG00000164331 | ANKRA2    | Enhanced  | Nucleoplasm;Plasma Cell Junctions           |
| 7873 | ENSG00000164332 | UBLCP1    | Supported | Nucleoli;Nucleoplasm                        |
| 7874 | ENSG00000164338 | UTP15     | Supported | Nucleoli Endoplasmic reticulum              |
| 7875 | ENSG00000164346 | NSA2      | Supported | Nucleoli;Nucleoplasm                        |
| 7876 | ENSG00000164347 | GFM2      | Approved  | Mitochondria;Nucleoplasm                    |
| 7877 | ENSG00000164362 | TERT      | Supported | Cytosol;Nuclear speckles;Nucleoli fibrillar |
| 7878 | ENSG00000164366 | CCDC127   | Approved  | Nucleoli fibrillar                          |
| 7879 | ENSG00000164379 | FOXQ1     | Supported | Nucleoplasm                                 |
| 7880 | ENSG00000164400 | CSF2      | Enhanced  | Vesicles                                    |
| 7881 | ENSG00000164402 | 9/8/2019  | Approved  | Actin filaments;Cytosol                     |
| 7882 | ENSG00000164403 | SHROOM1   | Approved  | Vesicles                                    |
| 7883 | ENSG00000164405 | UQCRQ     | Enhanced  | Mitochondria                                |
| 7884 | ENSG00000164430 | CGAS      | Approved  | Cytosol Centriolar satelli                  |
| 7885 | ENSG00000164434 | FABP7     | Approved  | Cytosol Golgi apparatus;Nu                  |
| 7886 | ENSG00000164438 | TLX3      | Enhanced  | Nucleoplasm                                 |
| 7887 | ENSG00000164442 | CITED2    | Supported | Nucleoplasm                                 |
| 7888 | ENSG00000164458 | TBXT      | Supported | Nucleoplasm                                 |
| 7889 | ENSG00000164463 | CREBRF    | Supported | Nucleoplasm                                 |
| 7890 | ENSG00000164465 | DCBLD1    | Approved  | Cytosol                                     |
| 7891 | ENSG00000164466 | SFXN1     | Enhanced  | Mitochondria                                |
| 7892 | ENSG00000164494 | PDSS2     | Enhanced  | Cytosol                                     |
| 7893 | ENSG00000164506 | STXBP5    | Enhanced  | Cytosol                                     |
| 7894 | ENSG00000164509 | IL31RA    | Approved  | Nucleoplasm;Vesicles                        |
| 7895 | ENSG00000164512 | ANKRD55   | Approved  | Cytosol;Nuclear speckles                    |
| 7896 | ENSG00000164520 | RAET1E    | Supported | Cytosol;Focal adhesion site                 |
| 7897 | ENSG00000164535 | DAGLB     | Supported | Plasma membrane;Nucleoplasm                 |
| 7898 | ENSG00000164542 | KIAA0895  | Approved  | Cell Junctions;Cytosol                      |
| 7899 | ENSG00000164543 | STK17A    | Approved  | Nuclear speckles;Plasma membrane            |
| 7900 | ENSG00000164548 | TRA2A     | Supported | Nucleoli;Vesicles                           |
| 7901 | ENSG00000164574 | GALNT10   | Approved  | Golgi apparatus;Nucleoplasm                 |
| 7902 | ENSG00000164587 | RPS14     | Supported | Cytosol;Endoplasmic reticulum               |
| 7903 | ENSG00000164597 | COG5      | Enhanced  | Golgi apparatus Nucleoplasm                 |
| 7904 | ENSG00000164603 | BMT2      | Approved  | Cytosol                                     |
| 7905 | ENSG00000164609 | SLU7      | Approved  | Nuclear speckles;Nucleoplasm                |
| 7906 | ENSG00000164610 | RP9       | Enhanced  | Cytosol;Nucleoplasm;Vesicles                |
| 7907 | ENSG00000164611 | PTTG1     | Supported | Cytosol Nucleoli                            |
| 7908 | ENSG00000164615 | CAMLG     | Approved  | Nucleoli;Nucleoplasm                        |
| 7909 | ENSG00000164620 | RELL2     | Uncertain | Vesicles                                    |
| 7910 | ENSG00000164626 | KCNK5     | Approved  | Nucleoplasm                                 |
| 7911 | ENSG00000164627 | KIF6      | Approved  | Centrosome                                  |
| 7912 | ENSG00000164631 | ZNF12     | Supported | Nucleoplasm;Centrosome                      |
| 7913 | ENSG00000164638 | SLC29A4   | Approved  | Cytokinetic bridge                          |
| 7914 | ENSG00000164645 | TEX47     | Uncertain | Mitochondria                                |
| 7915 | ENSG00000164649 | CDCA7L    | Supported | Cytosol;Nucleoli;Nucleoplasm                |
| 7916 | ENSG00000164651 | SP8       | Approved  | Nucleoplasm                                 |
| 7917 | ENSG00000164654 | MIOS      | Enhanced  | Cytosol;Nucleoplasm                         |
| 7918 | ENSG00000164659 | KIAA1324L | Approved  | Endoplasmic reticulum                       |

|      |                 |          |           |                             |                             |
|------|-----------------|----------|-----------|-----------------------------|-----------------------------|
| 7919 | ENSG00000164674 | SYTL3    | Approved  |                             | Nucleoli fibrillar          |
| 7920 | ENSG00000164675 | IQUB     | Approved  |                             | Cytosol;Intermedia          |
| 7921 | ENSG00000164683 | HEY1     | Approved  |                             | Cytosol;Nuclear me          |
| 7922 | ENSG00000164684 | ZNF704   | Approved  |                             | Nucleoplasm                 |
| 7923 | ENSG00000164687 | FABP5    | Supported | Cytosol                     | Plasma membrane             |
| 7924 | ENSG00000164691 | TAGAP    | Uncertain |                             | Cytosol                     |
| 7925 | ENSG00000164692 | COL1A2   | Supported | Endoplasmic reticulum       |                             |
| 7926 | ENSG00000164694 | FNDC1    | Approved  |                             | Nuclear speckles            |
| 7927 | ENSG00000164708 | PGAM2    | Approved  | Nucleoplasm                 | Cytosol;Nucleoli            |
| 7928 | ENSG00000164715 | LMTK2    | Approved  |                             | Centriolar satelli          |
| 7929 | ENSG00000164733 | CTSB     | Supported | Nucleoli;Vesicles           |                             |
| 7930 | ENSG00000164736 | SOX17    | Approved  |                             | Nucleoplasm                 |
| 7931 | ENSG00000164741 | DLC1     | Approved  |                             | Golgi apparatus;Nu          |
| 7932 | ENSG00000164742 | ADCY1    | Approved  |                             | Mitochondria                |
| 7933 | ENSG00000164743 | C8orf48  | Approved  |                             | Cytosol;Nucleoplas          |
| 7934 | ENSG00000164744 | SUN3     | Approved  |                             | Golgi apparatus             |
| 7935 | ENSG00000164749 | HNF4G    | Supported | Cytosol;Nucleoplasm         |                             |
| 7936 | ENSG00000164751 | PEX2     | Supported | Vesicles                    |                             |
| 7937 | ENSG00000164754 | RAD21    | Enhanced  | Nucleoplasm                 |                             |
| 7938 | ENSG00000164758 | MED30    | Approved  |                             | Nucleoplasm                 |
| 7939 | ENSG00000164764 | SBSPON   | Approved  |                             | Vesicles                    |
| 7940 | ENSG00000164778 | EN2      | Supported |                             | Nucleoli fibrillar center;N |
| 7941 | ENSG00000164808 | SPIDR    | Supported |                             | Nucleoplasm                 |
| 7942 | ENSG00000164815 | ORC5     | Supported |                             | Cytosol;Nucleoplasm         |
| 7943 | ENSG00000164816 | DEFA5    | Approved  |                             | Midbody;Vesicles            |
| 7944 | ENSG00000164818 | DNAAF5   | Approved  |                             | Cytosol;Nucleoplas          |
| 7945 | ENSG00000164823 | OSGIN2   | Approved  |                             | Nucleoli                    |
| 7946 | ENSG00000164828 | SUN1     | Enhanced  | Nuclear membrane            |                             |
| 7947 | ENSG00000164830 | OXR1     | Approved  |                             | Vesicles                    |
| 7948 | ENSG00000164841 | TMEM74   | Approved  |                             | Cytosol                     |
| 7949 | ENSG00000164853 | UNCX     | Approved  |                             | Nucleoplasm                 |
| 7950 | ENSG00000164855 | TMEM184A | Approved  |                             | Nucleoplasm                 |
| 7951 | ENSG00000164871 | SPAG11B  | Approved  |                             | Golgi apparatus             |
| 7952 | ENSG00000164880 | INTS1    | Approved  |                             | Nucleoplasm                 |
| 7953 | ENSG00000164885 | CDK5     | Supported | Nucleoplasm;Plasma membrane |                             |
| 7954 | ENSG00000164889 | SLC4A2   | Approved  |                             | Cytosol;Nuclear sp          |
| 7955 | ENSG00000164896 | FASTK    | Approved  |                             | Mitochondria;Nucle          |
| 7956 | ENSG00000164897 | TMUB1    | Supported | Cytosol;Nucleoplasm         |                             |
| 7957 | ENSG00000164898 | FMC1     | Approved  |                             | Mitochondria                |
| 7958 | ENSG00000164902 | PHAX     | Enhanced  | Nucleoplasm                 |                             |
| 7959 | ENSG00000164904 | ALDH7A1  | Supported |                             | Cytosol;Mitochondria        |
| 7960 | ENSG00000164916 | FOXK1    | Supported |                             | NucleoplaNucleoli fibrillar |
| 7961 | ENSG00000164919 | COX6C    | Enhanced  | Mitochondria                |                             |
| 7962 | ENSG00000164920 | OSR2     | Approved  |                             | Nucleoplasm;Plasma          |
| 7963 | ENSG00000164924 | YWHAZ    | Approved  | Cytosol                     | Nucleoli;                   |
| 7964 | ENSG00000164929 | BAALC    | Supported | Cytosol                     | Nucleoplasm                 |
| 7965 | ENSG00000164930 | FZD6     | Approved  |                             | Plasma membrane             |
| 7966 | ENSG00000164932 | CTHRC1   | Approved  |                             | Nucleoplasm                 |
| 7967 | ENSG00000164933 | SLC25A32 | Supported | Mitochondria                |                             |
| 7968 | ENSG00000164934 | DCAF13   | Supported |                             | Nucleoli;Cell Junctions;Cen |
| 7969 | ENSG00000164938 | TP53INP1 | Supported |                             | Cytosol                     |
| 7970 | ENSG00000164941 | INTS8    | Approved  |                             | Nucleoplasm                 |
| 7971 | ENSG00000164944 | VIRMA    | Supported |                             | Nuclear bodies;Nucleoplasm  |
| 7972 | ENSG00000164951 | PDP1     | Supported |                             | Cytosol;Mitochondria;Nucleo |
| 7973 | ENSG00000164961 | WASHC5   | Enhanced  | Nucleoplasm                 |                             |

|      |                 |          |           |                               |
|------|-----------------|----------|-----------|-------------------------------|
| 7974 | ENSG00000164967 | RPP25L   | Supported | Nucleoplasm                   |
| 7975 | ENSG00000164970 | FAM219A  | Supported | Golgi apparatus;Nucleoplasm   |
| 7976 | ENSG00000164975 | SNAPC3   | Supported | NucleoplaNuclear bodies;Nuc   |
| 7977 | ENSG00000164976 | MYORG    | Approved  | Mitochondria                  |
| 7978 | ENSG00000164978 | NUDT2    | Enhanced  | Nucleoplasm                   |
| 7979 | ENSG00000164983 | TMEM65   | Approved  | Nucleoplasm                   |
| 7980 | ENSG00000164985 | PSIP1    | Enhanced  | Nucleoplasm                   |
| 7981 | ENSG00000164989 | CCDC171  | Uncertain | Nucleoli;                     |
| 7982 | ENSG00000165006 | UBAP1    | Supported | Cytosol;VPlasma membrane      |
| 7983 | ENSG00000165025 | SYK      | Approved  | Cytosol;Plasma mem            |
| 7984 | ENSG00000165029 | ABCA1    | Approved  | Nucleoplasm;Vesicl            |
| 7985 | ENSG00000165030 | NFIL3    | Approved  | Nuclear bodies                |
| 7986 | ENSG00000165046 | LETM2    | Approved  | Cytosol;Nuclear bo            |
| 7987 | ENSG00000165059 | PRKACG   | Approved  | Cytosol                       |
| 7988 | ENSG00000165060 | FXN      | Supported | Cytosol;Mitochondria          |
| 7989 | ENSG00000165061 | ZMAT4    | Approved  | Nucleoli;Nucleopla            |
| 7990 | ENSG00000165071 | TMEM71   | Enhanced  | Mitochondria                  |
| 7991 | ENSG00000165072 | MAMDC2   | Approved  | Nuclear speckles;P            |
| 7992 | ENSG00000165084 | C8orf34  | Supported | Nucleoli;Golgi apparatus      |
| 7993 | ENSG00000165092 | ALDH1A1  | Enhanced  | Cytosol                       |
| 7994 | ENSG00000165097 | KDM1B    | Supported | Nucleoplasm                   |
| 7995 | ENSG00000165105 | RASEF    | Approved  | Microtubules                  |
| 7996 | ENSG00000165113 | GKAP1    | Approved  | Centriolar satelli            |
| 7997 | ENSG00000165118 | C9orf64  | Approved  | Golgi apparatus               |
| 7998 | ENSG00000165119 | HNRNPK   | Enhanced  | Nucleoplasm                   |
| 7999 | ENSG00000165138 | ANKS6    | Approved  | Cytosol;Nucleoli;N            |
| 8000 | ENSG00000165140 | FBP1     | Uncertain | Mitochond                     |
| 8001 | ENSG00000165152 | TMEM246  | Approved  | Mitochondria                  |
| 8002 | ENSG00000165156 | ZHX1     | Enhanced  | Nucleoplasm                   |
| 8003 | ENSG00000165171 | METTL27  | Supported | Focal adhesion sites          |
| 8004 | ENSG00000165181 | C9orf84  | Approved  | Cytosol;Vesicles              |
| 8005 | ENSG00000165185 | KIAA1958 | Approved  | Cytosol;Plasma mem            |
| 8006 | ENSG00000165194 | PCDH19   | Approved  | Cytosol                       |
| 8007 | ENSG00000165215 | CLDN3    | Supported | Cell Junctions                |
| 8008 | ENSG00000165219 | GAPVD1   | Enhanced  | Cytosol;Plasma membrane       |
| 8009 | ENSG00000165233 | CARD19   | Supported | Mitochondria                  |
| 8010 | ENSG00000165238 | WNK2     | Approved  | Cytosol                       |
| 8011 | ENSG00000165240 | ATP7A    | Supported | Golgi apparatus;Vesicles      |
| 8012 | ENSG00000165244 | ZNF367   | Supported | Nucleoplasm                   |
| 8013 | ENSG00000165259 | HDX      | Approved  | Cytosol                       |
| 8014 | ENSG00000165264 | NDUFB6   | Enhanced  | Mitochondria                  |
| 8015 | ENSG00000165271 | NOL6     | Enhanced  | Nucleoli;Nucleoplasm          |
| 8016 | ENSG00000165272 | AQP3     | Supported | Plasma membrane Nucleopla     |
| 8017 | ENSG00000165275 | TRMT10B  | Approved  | Nucleoplasm;Plasma            |
| 8018 | ENSG00000165280 | VCP      | Enhanced  | Cytosol;Nucleoplasm           |
| 8019 | ENSG00000165282 | PIGO     | Approved  | Nucleoli;Nucleopla            |
| 8020 | ENSG00000165283 | STOML2   | Supported | Cytosol;Plasma membrane       |
| 8021 | ENSG00000165288 | BRWD3    | Approved  | Cytosol;Nucleoplas            |
| 8022 | ENSG00000165300 | SLITRK5  | Supported | Golgi apparatus;Nucleoplasm   |
| 8023 | ENSG00000165312 | OTUD1    | Approved  | Golgi apparatus;Nu            |
| 8024 | ENSG00000165338 | HECTD2   | Approved  | Nucleoplasm                   |
| 8025 | ENSG00000165355 | FBXO33   | Approved  | Nucleoplasm                   |
| 8026 | ENSG00000165359 | INTS6L   | Approved  | Centrosome Mitochondria;Nucle |
| 8027 | ENSG00000165376 | CLDN2    | Supported | Cell JuncNucleoplasm          |
| 8028 | ENSG00000165392 | WRN      | Supported | Nuclear speckles              |

|      |                 |          |           |                                      |                             |
|------|-----------------|----------|-----------|--------------------------------------|-----------------------------|
| 8029 | ENSG00000165410 | CFL2     | Approved  |                                      | Cytosol;Nucleoplas          |
| 8030 | ENSG00000165416 | SUGT1    | Approved  | Cytosol                              | Nucleoplasm;Plasma          |
| 8031 | ENSG00000165417 | GTF2A1   | Supported | Nucleoplasm                          | Cytosol                     |
| 8032 | ENSG00000165424 | ZCCHC24  | Approved  |                                      | Mitochondria;Nucle          |
| 8033 | ENSG00000165434 | PGM2L1   | Approved  |                                      | Mitochondria                |
| 8034 | ENSG00000165443 | PHYHIPL  | Approved  |                                      | Cytosol                     |
| 8035 | ENSG00000165449 | SLC16A9  | Approved  |                                      | Cell Junctions;Nuc          |
| 8036 | ENSG00000165458 | INPL1    | Supported |                                      | Cytosol;Golgi apparatus     |
| 8037 | ENSG00000165462 | PHOX2A   | Enhanced  | Nucleoplasm                          | Cytosol;Nuclear me          |
| 8038 | ENSG00000165474 | GJB2     | Approved  |                                      | Mitochondria                |
| 8039 | ENSG00000165475 | CRYL1    | Approved  |                                      | Golgi apparatus;Nu          |
| 8040 | ENSG00000165478 | HEPACAM  | Approved  |                                      | Vesicles                    |
| 8041 | ENSG00000165480 | SKA3     | Enhanced  | Centrosome;Cytosol;Microtubules;Mito |                             |
| 8042 | ENSG00000165487 | MICU2    | Approved  | Mitochond                            | Nucleoplasm                 |
| 8043 | ENSG00000165490 | DDIAS    | Approved  |                                      | Cytosol;Plasma mem          |
| 8044 | ENSG00000165494 | PCF11    | Supported |                                      | NucleoplaMitochondria       |
| 8045 | ENSG00000165495 | PKNOX2   | Enhanced  | Nucleoplasm                          | Cytokinetic bridge          |
| 8046 | ENSG00000165496 | RPL10L   | Approved  |                                      | Cytosol;Endoplasm           |
| 8047 | ENSG00000165501 | LRR1     | Approved  |                                      | Nuclear membrane;N          |
| 8048 | ENSG00000165502 | RPL36AL  | Approved  |                                      | Cytosol;Endoplasm           |
| 8049 | ENSG00000165506 | DNAAF2   | Supported |                                      | Cytosol                     |
| 8050 | ENSG00000165507 | DEPP1    | Supported |                                      | Mitochondria;Vesicles       |
| 8051 | ENSG00000165512 | ZNF22    | Enhanced  | Nucleoplasm                          |                             |
| 8052 | ENSG00000165516 | KLHDC2   | Supported |                                      | Nuclear bodies;Nuclear memb |
| 8053 | ENSG00000165525 | NEMF     | Approved  |                                      | Cytosol;Nuclear bo          |
| 8054 | ENSG00000165526 | RPUSD4   | Approved  |                                      | Mitochondria;Nucle          |
| 8055 | ENSG00000165548 | TMEM63C  | Approved  |                                      | Centrosome                  |
| 8056 | ENSG00000165556 | CDX2     | Enhanced  | Nucleoplasm                          |                             |
| 8057 | ENSG00000165568 | AKR1E2   | Enhanced  | Golgi apparatus;Nucleoplasm          |                             |
| 8058 | ENSG00000165583 | SSX5     | Approved  |                                      | Nucleoli;Nucleopla          |
| 8059 | ENSG00000165584 | SSX3     | Approved  |                                      | Nucleoli;Nucleopla          |
| 8060 | ENSG00000165588 | OTX2     | Supported |                                      | Nucleoplasm;Vesicles        |
| 8061 | ENSG00000165606 | DRGX     | Approved  |                                      | Cytosol;Nucleoli;N          |
| 8062 | ENSG00000165609 | NUDT5    | Approved  |                                      | Centrosome;Nucleop          |
| 8063 | ENSG00000165617 | DACT1    | Supported |                                      | Nucleoplasm                 |
| 8064 | ENSG00000165621 | OXGR1    | Supported |                                      | Plasma membrane             |
| 8065 | ENSG00000165626 | BEND7    | Approved  |                                      | Nucleoli fibrillar          |
| 8066 | ENSG00000165630 | PRPF18   | Approved  |                                      | Cytosol;Nuclear sp          |
| 8067 | ENSG00000165632 | TAF3     | Supported |                                      | NucleoplaNuclear membrane   |
| 8068 | ENSG00000165633 | VSTM4    | Approved  |                                      | Nucleoplasm;Vesicl          |
| 8069 | ENSG00000165637 | VDAC2    | Supported |                                      | Mitochondria                |
| 8070 | ENSG00000165643 | SOHLH1   | Approved  |                                      | Nuclear speckles            |
| 8071 | ENSG00000165644 | COMTD1   | Approved  |                                      | Cytosol;Golgi appa          |
| 8072 | ENSG00000165646 | SLC18A2  | Supported | Vesicles                             | Centrosom                   |
| 8073 | ENSG00000165650 | PDZD8    | Approved  |                                      | Nucleoli fibrillar          |
| 8074 | ENSG00000165655 | ZNF503   | Approved  |                                      | Cytosol;Nucleoplas          |
| 8075 | ENSG00000165660 | ABRAXAS2 | Supported |                                      | Cytosol                     |
| 8076 | ENSG00000165661 | QSOX2    | Enhanced  | Golgi apparatus                      | Nucleoplasm                 |
| 8077 | ENSG00000165669 | FAM204A  | Supported |                                      | Nucleoli;Nucleoplasm        |
| 8078 | ENSG00000165671 | NSD1     | Supported |                                      | Nucleoplasm;Plasma membrane |
| 8079 | ENSG00000165675 | ENOX2    | Supported |                                      | Plasma membrane             |
| 8080 | ENSG00000165678 | GHITM    | Supported |                                      | Mitochondria                |
| 8081 | ENSG00000165684 | SNAPC4   | Approved  |                                      | Nuclear membrane;N          |
| 8082 | ENSG00000165685 | TMEM52B  | Approved  |                                      | Focal adhesion sit          |
| 8083 | ENSG00000165688 | PMPCA    | Enhanced  | Mitochondria                         |                             |

|      |                 |          |           |                         |                             |
|------|-----------------|----------|-----------|-------------------------|-----------------------------|
| 8084 | ENSG00000165698 | SPACA9   | Approved  |                         | Mitochondria                |
| 8085 | ENSG00000165699 | TSC1     | Enhanced  | Cytosol                 |                             |
| 8086 | ENSG00000165702 | GFI1B    | Supported |                         | Nucleoplasm                 |
| 8087 | ENSG00000165704 | HPRT1    | Supported |                         | Cytosol                     |
| 8088 | ENSG00000165714 | BORCS5   | Supported |                         | Cytosol                     |
| 8089 | ENSG00000165716 | FAM69B   | Approved  |                         | Nuclear bodies;Nuc          |
| 8090 | ENSG00000165724 | ZMYND19  | Approved  |                         | Golgi apparatus;Ve          |
| 8091 | ENSG00000165730 | STOX1    | Supported |                         | Cytosol;Nucleoli fibrillar  |
| 8092 | ENSG00000165731 | RET      | Approved  |                         | Plasma meCytosol;Golgi appa |
| 8093 | ENSG00000165732 | DDX21    | Enhanced  | Nucleoli;Nucleoplasm    |                             |
| 8094 | ENSG00000165733 | BMS1     | Enhanced  | Nucleoli;Nucleoplasm    |                             |
| 8095 | ENSG00000165757 | JCAD     | Supported |                         | Cell Junctions;Vesicles     |
| 8096 | ENSG00000165792 | METTL17  | Enhanced  | Nucleoplasm             |                             |
| 8097 | ENSG00000165794 | SLC39A2  | Approved  |                         | Cytoplasmic bodies          |
| 8098 | ENSG00000165795 | NDRG2    | Approved  | Cytosol                 | CentriolaNucleopla          |
| 8099 | ENSG00000165801 | ARHGEF40 | Supported | Cytosol                 | Nucleoplasm                 |
| 8100 | ENSG00000165802 | NSMF     | Supported |                         | Nucleoplasm                 |
| 8101 | ENSG00000165804 | ZNF219   | Supported |                         | Nucleoplasm                 |
| 8102 | ENSG00000165810 | BTNL9    | Approved  |                         | Nuclear membrane;V          |
| 8103 | ENSG00000165813 | CCDC186  | Approved  |                         | Golgi apparatus             |
| 8104 | ENSG00000165821 | SALL2    | Approved  |                         | Nucleoplasm;Vesicl          |
| 8105 | ENSG00000165832 | TRUB1    | Supported |                         | Actin filaments;Vesicles    |
| 8106 | ENSG00000165861 | ZFYVE1   | Supported |                         | Endoplasmic reticulum       |
| 8107 | ENSG00000165863 | C10orf82 | Approved  |                         | Mitochondria                |
| 8108 | ENSG00000165868 | HSPA12A  | Approved  |                         | Cytosol;Golgi appa          |
| 8109 | ENSG00000165879 | FRAT1    | Approved  |                         | Cytosol;Vesicles            |
| 8110 | ENSG00000165886 | UBTD1    | Approved  |                         | Cytosol;Plasma mem          |
| 8111 | ENSG00000165887 | ANKRD2   | Enhanced  | Vesicles                |                             |
| 8112 | ENSG00000165891 | E2F7     | Supported |                         | Nuclear speckles            |
| 8113 | ENSG00000165895 | ARHGAP42 | Approved  |                         | Cytosol;Nuclear sp          |
| 8114 | ENSG00000165899 | OTOGL    | Approved  |                         | Cytosol                     |
| 8115 | ENSG00000165912 | PACSIN3  | Supported | Cytosol                 | Plasma me                   |
| 8116 | ENSG00000165914 | TTC7B    | Supported |                         | Plasma membrane             |
| 8117 | ENSG00000165916 | PSMC3    | Supported |                         | Cytosol;Nucleoplasm         |
| 8118 | ENSG00000165917 | RAPSN    | Approved  |                         | Centrosome;Cytosol          |
| 8119 | ENSG00000165929 | TC2N     | Approved  |                         | Nuclear bodies;Nuc          |
| 8120 | ENSG00000165934 | CPSF2    | Approved  |                         | Nucleoplasm;Vesicl          |
| 8121 | ENSG00000165943 | MOAP1    | Approved  |                         | Cell Junctions;Nuc          |
| 8122 | ENSG00000165959 | CLMN     | Approved  |                         | Cytosol;Nuclear bo          |
| 8123 | ENSG00000165983 | PTER     | Approved  |                         | Cytosol;Nucleoplas          |
| 8124 | ENSG00000165995 | CACNB2   | Approved  |                         | Cytokinetic bridge          |
| 8125 | ENSG00000166004 | CEP295   | Enhanced  | Cytosol;Plasma membrane |                             |
| 8126 | ENSG00000166006 | KCNC2    | Supported |                         | Cytosol;Plasma membrane     |
| 8127 | ENSG00000166012 | TAF1D    | Supported |                         | NucleoplaCentriolar satelli |
| 8128 | ENSG00000166016 | ABTB2    | Enhanced  | Nucleoplasm             |                             |
| 8129 | ENSG00000166024 | R3HCC1L  | Approved  |                         | Nuclear speckles;N          |
| 8130 | ENSG00000166025 | AMOTL1   | Approved  |                         | Cell Junctions;Cyt          |
| 8131 | ENSG00000166033 | HTRA1    | Supported |                         | Plasma membrane             |
| 8132 | ENSG00000166037 | CEP57    | Supported |                         | Cytosol;Microtubules        |
| 8133 | ENSG00000166046 | TCP11L2  | Supported |                         | Nuclear speckles            |
| 8134 | ENSG00000166049 | PASD1    | Enhanced  | Nuclear speckles        |                             |
| 8135 | ENSG00000166068 | SPRED1   | Supported |                         | Nucleoplasm                 |
| 8136 | ENSG00000166086 | JAM3     | Enhanced  | Golgi apparatus         |                             |
| 8137 | ENSG00000166091 | CMTM5    | Approved  |                         | Golgi apparatus;Ve          |
| 8138 | ENSG00000166106 | ADAMTS15 | Approved  |                         | Cytosol                     |



|      |                 |          |           |                           |                             |
|------|-----------------|----------|-----------|---------------------------|-----------------------------|
| 8139 | ENSG00000166123 | GPT2     | Approved  |                           | Mitochondria                |
| 8140 | ENSG00000166128 | RAB8B    | Supported |                           | Vesicles Nucleopla          |
| 8141 | ENSG00000166130 | IKBIP    | Enhanced  | Endoplasmic reticulum     |                             |
| 8142 | ENSG00000166133 | RPUSD2   | Approved  |                           | Microtubules;Nucle          |
| 8143 | ENSG00000166135 | HIF1AN   | Supported |                           | Cytosol;Nucleoplasm         |
| 8144 | ENSG00000166136 | NDUFB8   | Approved  |                           | Mitochondria                |
| 8145 | ENSG00000166145 | SPINT1   | Supported |                           | Cytosol;PNucleoplasm        |
| 8146 | ENSG00000166147 | FBN1     | Approved  |                           | Cytosol                     |
| 8147 | ENSG00000166153 | DEPDC4   | Approved  |                           | Microtubules                |
| 8148 | ENSG00000166159 | LRTM2    | Approved  |                           | Cytosol                     |
| 8149 | ENSG00000166164 | BRD7     | Enhanced  | Cytosol;Nucleoplasm       |                             |
| 8150 | ENSG00000166165 | CKB      | Supported |                           | Cytosol                     |
| 8151 | ENSG00000166167 | BTRC     | Approved  |                           | Cytosol;Nucleoplas          |
| 8152 | ENSG00000166169 | POLL     | Supported |                           | NucleoplaGolgi apparatus    |
| 8153 | ENSG00000166170 | BAG5     | Supported |                           | Vesicles                    |
| 8154 | ENSG00000166171 | DPCD     | Approved  |                           | Nuclear speckles            |
| 8155 | ENSG00000166173 | LARP6    | Approved  |                           | Cytokinetic bridge          |
| 8156 | ENSG00000166181 | API5     | Enhanced  | Nuclear speckles          |                             |
| 8157 | ENSG00000166188 | ZNF319   | Approved  |                           | Nucleoplasm                 |
| 8158 | ENSG00000166192 | SENP8    | Approved  |                           | Nucleoplasm;Vesicl          |
| 8159 | ENSG00000166197 | NOLC1    | Enhanced  | Nucleoli fibrillar center |                             |
| 8160 | ENSG00000166199 | ALKBH3   | Supported | Nucleoplasm               | Mitochondria                |
| 8161 | ENSG00000166200 | COPS2    | Supported |                           | Cytokinetic bridge;Vesicles |
| 8162 | ENSG00000166224 | SGPL1    | Supported |                           | Endoplasmic reticulum       |
| 8163 | ENSG00000166225 | FRS2     | Uncertain |                           | Cell Junc                   |
| 8164 | ENSG00000166226 | CCT2     | Supported |                           | Cytosol                     |
| 8165 | ENSG00000166228 | PCBD1    | Enhanced  | Cytosol;Nucleoplasm       |                             |
| 8166 | ENSG00000166233 | ARIH1    | Approved  |                           | Golgi appNucleopla          |
| 8167 | ENSG00000166246 | C16orf71 | Uncertain |                           | Nuclear s                   |
| 8168 | ENSG00000166257 | SCN3B    | Approved  |                           | Cytosol;Intermedia          |
| 8169 | ENSG00000166261 | ZNF202   | Approved  |                           | Nuclear bodies;Nuc          |
| 8170 | ENSG00000166262 | FAM227B  | Approved  |                           | Nuclear speckles            |
| 8171 | ENSG00000166263 | STXBP4   | Approved  |                           | Cytosol;Plasma mem          |
| 8172 | ENSG00000166265 | CYYR1    | Approved  |                           | Nucleoplasm                 |
| 8173 | ENSG00000166266 | CUL5     | Approved  |                           | Cytosol;Golgi appa          |
| 8174 | ENSG00000166268 | MYRFL    | Approved  |                           | Nucleoli                    |
| 8175 | ENSG00000166272 | WBP1L    | Approved  |                           | Microtubules;Nucle          |
| 8176 | ENSG00000166275 | BORCS7   | Approved  |                           | Cytosol;Nuclear sp          |
| 8177 | ENSG00000166292 | TMEM100  | Uncertain |                           | Nucleopla                   |
| 8178 | ENSG00000166295 | ANAPC16  | Supported |                           | Cytosol                     |
| 8179 | ENSG00000166313 | APBB1    | Supported |                           | Plasma membrane             |
| 8180 | ENSG00000166317 | SYNP02L  | Supported | Cytosol;Nuclear sp        | Cell Junctions              |
| 8181 | ENSG00000166321 | NUDT13   | Approved  |                           | Nucleoplasm                 |
| 8182 | ENSG00000166326 | TRIM44   | Approved  |                           | Plasma membrane;Ve          |
| 8183 | ENSG00000166333 | ILK      | Supported | Cell Junc                 | Nucleoplasm                 |
| 8184 | ENSG00000166337 | TAF10    | Supported |                           | Nucleoplasm                 |
| 8185 | ENSG00000166341 | DCHS1    | Approved  |                           | Plasma membrane             |
| 8186 | ENSG00000166342 | NETO1    | Approved  |                           | Golgi apparatus             |
| 8187 | ENSG00000166343 | MSS51    | Uncertain |                           | Cytosol;V                   |
| 8188 | ENSG00000166347 | CYB5A    | Enhanced  | Cytosol;Vesicles          |                             |
| 8189 | ENSG00000166348 | USP54    | Approved  |                           | Mitochondria                |
| 8190 | ENSG00000166349 | RAG1     | Supported |                           | Nucleoplasm                 |
| 8191 | ENSG00000166352 | C11orf74 | Approved  |                           | Aggresome;Cytosol           |
| 8192 | ENSG00000166359 | WDR88    | Approved  |                           | Golgi apparatus;Nu          |
| 8193 | ENSG00000166387 | PPFIBP2  | Approved  |                           | Mitochondria                |

|      |                 |          |           |                                      |                            |
|------|-----------------|----------|-----------|--------------------------------------|----------------------------|
| 8194 | ENSG00000166394 | CYB5R2   | Approved  |                                      | Golgi apparatus;Nu         |
| 8195 | ENSG00000166396 | SERPINB7 | Approved  |                                      | Endoplasmic reticu         |
| 8196 | ENSG00000166398 | KIAA0355 | Approved  |                                      | Nucleoplasm                |
| 8197 | ENSG00000166401 | SERPINB8 | Approved  | Cytosol                              | Nucleoplasm                |
| 8198 | ENSG00000166402 | TUB      | Approved  |                                      | Centriolar satelli         |
| 8199 | ENSG00000166411 | IDH3A    | Enhanced  | Mitochondria                         |                            |
| 8200 | ENSG00000166415 | WDR72    | Approved  |                                      | Vesicles                   |
| 8201 | ENSG00000166432 | ZMAT1    | Approved  |                                      | Nucleoplasm                |
| 8202 | ENSG00000166435 | XRRA1    | Supported |                                      | Nuclear bodies;Nucleoplasm |
| 8203 | ENSG00000166436 | TRIM66   | Supported |                                      | Nucleoplasm                |
| 8204 | ENSG00000166439 | RNF169   | Enhanced  | Nuclear b                            | Nucleoplasm Cytosol        |
| 8205 | ENSG00000166441 | RPL27A   | Enhanced  | Cytosol;Endoplasmic reticulum        |                            |
| 8206 | ENSG00000166444 | ST5      | Approved  |                                      | Nucleoplasm                |
| 8207 | ENSG00000166448 | TMEM130  | Supported |                                      | Golgi apparatus            |
| 8208 | ENSG00000166450 | PRTG     | Approved  |                                      | Cytosol;Plasma mem         |
| 8209 | ENSG00000166451 | CENPN    | Supported |                                      | Nucleoplasm                |
| 8210 | ENSG00000166452 | AKIP1    | Supported |                                      | Nucleoplasm                |
| 8211 | ENSG00000166454 | ATMIN    | Supported |                                      | Nuclear bodies             |
| 8212 | ENSG00000166455 | C16orf46 | Approved  |                                      | Cytosol;Nucleoplas         |
| 8213 | ENSG00000166471 | TMEM41B  | Approved  |                                      | Peroxisomes                |
| 8214 | ENSG00000166477 | LEO1     | Enhanced  | Nucleoli fibrillar                   | Centrosome                 |
| 8215 | ENSG00000166478 | ZNF143   | Approved  |                                      | Nuclear bodies;Nuc         |
| 8216 | ENSG00000166482 | MFAP4    | Approved  |                                      | Endoplasmic reticu         |
| 8217 | ENSG00000166483 | WEE1     | Approved  |                                      | Nucleoli                   |
| 8218 | ENSG00000166484 | MAPK7    | Enhanced  | Nucleopla                            | Cytosol                    |
| 8219 | ENSG00000166501 | PRKCB    | Supported |                                      | Cytosol;Nucleoplasm        |
| 8220 | ENSG00000166503 | HDGFL3   | Supported |                                      | Nucleoplasm                |
| 8221 | ENSG00000166507 | NDST2    | Approved  |                                      | Cytosol                    |
| 8222 | ENSG00000166508 | MCM7     | Enhanced  | Nucleoplasm                          |                            |
| 8223 | ENSG00000166510 | CCDC68   | Approved  |                                      | Cytosol;Golgi appa         |
| 8224 | ENSG00000166523 | CLEC4E   | Uncertain |                                      | Cytosol                    |
| 8225 | ENSG00000166526 | ZNF3     | Approved  |                                      | Nucleoplasm                |
| 8226 | ENSG00000166529 | ZSCAN21  | Approved  |                                      | Endoplasmic reticu         |
| 8227 | ENSG00000166532 | RIMKLB   | Approved  |                                      | Centriolar satelli         |
| 8228 | ENSG00000166546 | BEAN1    | Uncertain |                                      | Centrosom                  |
| 8229 | ENSG00000166557 | TMED3    | Supported |                                      | Golgi apparatus            |
| 8230 | ENSG00000166562 | SEC11C   | Approved  |                                      | Golgi apparatus;Nu         |
| 8231 | ENSG00000166575 | TMEM135  | Supported |                                      | Vesicles                   |
| 8232 | ENSG00000166578 | IQCD     | Approved  |                                      | Nucleoplasm                |
| 8233 | ENSG00000166582 | CENPV    | Approved  | Midbody;N                            | Cytosol                    |
| 8234 | ENSG00000166592 | RRAD     | Approved  |                                      | Golgi apparatus;Nu         |
| 8235 | ENSG00000166595 | FAM96B   | Supported |                                      | Cytosol;Nucleoplasm        |
| 8236 | ENSG00000166598 | HSP90B1  | Enhanced  | Endoplasmic reticulum                |                            |
| 8237 | ENSG00000166619 | BLCAP    | Approved  |                                      | Nucleoli                   |
| 8238 | ENSG00000166670 | MMP10    | Approved  |                                      | Cytosol;Plasma mem         |
| 8239 | ENSG00000166676 | TVP23A   | Approved  |                                      | Vesicles                   |
| 8240 | ENSG00000166681 | BEX3     | Supported | Cytosol                              |                            |
| 8241 | ENSG00000166682 | TMPRSS5  | Approved  |                                      | Nucleoplasm                |
| 8242 | ENSG00000166689 | PLEKHA7  | Enhanced  | Cell Junc                            | Cytosol                    |
| 8243 | ENSG00000166704 | ZNF606   | Supported |                                      | Nucleoplasm                |
| 8244 | ENSG00000166707 | ZCCHC18  | Approved  |                                      | Vesicles                   |
| 8245 | ENSG00000166710 | B2M      | Enhanced  | Cytosol;Golgi apparatus;Plasma membr |                            |
| 8246 | ENSG00000166716 | ZNF592   | Approved  |                                      | Nucleoplasm                |
| 8247 | ENSG00000166734 | CASC4    | Enhanced  | Golgi apparatus                      |                            |
| 8248 | ENSG00000166741 | NNMT     | Approved  |                                      | Cytosol;Golgi appa         |

|      |                 |          |           |                                 |
|------|-----------------|----------|-----------|---------------------------------|
| 8249 | ENSG00000166747 | AP1G1    | Enhanced  | Cytosol;Vesicles                |
| 8250 | ENSG00000166750 | SLFN5    | Approved  | Nucleoplasm;Vesicles            |
| 8251 | ENSG00000166780 | C16orf45 | Approved  | Cytosol;Nucleoplasm             |
| 8252 | ENSG00000166783 | MARF1    | Supported | Golgi apparatus;Vesicles        |
| 8253 | ENSG00000166788 | SAAL1    | Supported | Nucleoplasm                     |
| 8254 | ENSG00000166794 | PPIB     | Supported | Endoplasm;Nucleoplasm           |
| 8255 | ENSG00000166797 | FAM96A   | Enhanced  | Cytosol Nucleoplasm             |
| 8256 | ENSG00000166801 | FAM111A  | Approved  | Nucleoli fibrillar              |
| 8257 | ENSG00000166803 | PCLAF    | Supported | Centrosome                      |
| 8258 | ENSG00000166816 | LDHD     | Approved  | Cytosol                         |
| 8259 | ENSG00000166819 | PLIN1    | Uncertain | Peroxisom                       |
| 8260 | ENSG00000166823 | MESP1    | Supported | NucleoplaNucleoli               |
| 8261 | ENSG00000166825 | ANPEP    | Supported | Plasma membrane                 |
| 8262 | ENSG00000166828 | SCNN1G   | Supported | Plasma meNucleoplasm            |
| 8263 | ENSG00000166833 | NAV2     | Supported | Nucleoplasm                     |
| 8264 | ENSG00000166839 | ANKDD1A  | Approved  | Nucleoplasm                     |
| 8265 | ENSG00000166840 | GLYATL1  | Uncertain | Cytosol;G                       |
| 8266 | ENSG00000166845 | C18orf54 | Approved  | Nucleoplasm                     |
| 8267 | ENSG00000166847 | DCTN5    | Approved  | Nuclear membrane;N              |
| 8268 | ENSG00000166848 | TERF2IP  | Supported | Nuclear bodies;Nucleoplasm      |
| 8269 | ENSG00000166855 | CLPX     | Supported | MitochondCytosol;Nucleoplas     |
| 8270 | ENSG00000166860 | ZBTB39   | Approved  | Vesicles                        |
| 8271 | ENSG00000166863 | TAC3     | Approved  | Vesicles                        |
| 8272 | ENSG00000166866 | MYO1A    | Approved  | Nucleoplasm                     |
| 8273 | ENSG00000166881 | NEMP1    | Approved  | Nucleoplasm                     |
| 8274 | ENSG00000166886 | NAB2     | Approved  | Cytosol;Nucleoplas              |
| 8275 | ENSG00000166888 | STAT6    | Supported | Cytosol;Nucleoplasm             |
| 8276 | ENSG00000166889 | PATL1    | Supported | Cytoplasmic bodies              |
| 8277 | ENSG00000166896 | ATP23    | Enhanced  | Plasma meCell Junctions;Cytosol |
| 8278 | ENSG00000166897 | ELFN2    | Approved  | Nucleoplasm;Vesicles            |
| 8279 | ENSG00000166900 | STX3     | Approved  | Nuclear bodies;Nuc              |
| 8280 | ENSG00000166908 | PIP4K2C  | Approved  | Vesicles                        |
| 8281 | ENSG00000166912 | MTMR10   | Approved  | Cytosol;Nuclear bo              |
| 8282 | ENSG00000166913 | YWHAB    | Supported | Cytosol Nucleoli;               |
| 8283 | ENSG00000166924 | NYAP1    | Supported | Golgi apparatus;Vesicles        |
| 8284 | ENSG00000166925 | TSC22D4  | Approved  | Cytosol                         |
| 8285 | ENSG00000166928 | MS4A14   | Approved  | Nucleoplasm;Plasma              |
| 8286 | ENSG00000166938 | DIS3L    | Approved  | Centrosome;Cytosol              |
| 8287 | ENSG00000166946 | CCNDBP1  | Enhanced  | Nuclear bodies;Nucleoplasm      |
| 8288 | ENSG00000166947 | EPB42    | Uncertain | Cytosol;N                       |
| 8289 | ENSG00000166949 | SMAD3    | Enhanced  | Cytosol;Nucleoplasm             |
| 8290 | ENSG00000166961 | MS4A15   | Approved  | Cytosol;Plasma mem              |
| 8291 | ENSG00000166963 | MAP1A    | Approved  | Cytosol                         |
| 8292 | ENSG00000166965 | RCCD1    | Enhanced  | Cytosol;Plasma membrane         |
| 8293 | ENSG00000166974 | MAPRE2   | Uncertain | Nucleopla                       |
| 8294 | ENSG00000166986 | MARS     | Enhanced  | Cytosol                         |
| 8295 | ENSG00000166987 | MBD6     | Enhanced  | Nucleoplasm                     |
| 8296 | ENSG00000166997 | CNPY4    | Approved  | Vesicles                        |
| 8297 | ENSG00000167004 | PDIA3    | Enhanced  | Endoplasmic reticulum           |
| 8298 | ENSG00000167005 | NUDT21   | Supported | Nuclear bodies Centriola        |
| 8299 | ENSG00000167011 | NAT16    | Approved  | Nucleoplasm                     |
| 8300 | ENSG00000167014 | TERB2    | Uncertain | Nucleoli;                       |
| 8301 | ENSG00000167034 | NKX3-1   | Supported | NucleoplaCytosol                |
| 8302 | ENSG00000167065 | DUSP18   | Supported | Nucleoplasm                     |
| 8303 | ENSG00000167081 | PBX3     | Approved  | Cytosol;Nuclear bo              |

|      |                 |          |           |                              |                             |
|------|-----------------|----------|-----------|------------------------------|-----------------------------|
| 8304 | ENSG00000167085 | PHB      | Supported |                              | Mitochondria;Vesicles       |
| 8305 | ENSG00000167100 | SAMD14   | Approved  |                              | Nucleoli fibrillar          |
| 8306 | ENSG00000167103 | PIP5KL1  | Supported |                              | Cytosol                     |
| 8307 | ENSG00000167105 | TMEM92   | Enhanced  | Nucleoplasm                  |                             |
| 8308 | ENSG00000167106 | FAM102A  | Approved  |                              | Cytosol                     |
| 8309 | ENSG00000167107 | ACSF2    | Approved  |                              | Cytosol;Microtubul          |
| 8310 | ENSG00000167110 | GOLGA2   | Enhanced  | Golgi apparatus              |                             |
| 8311 | ENSG00000167113 | COQ4     | Supported |                              | Mitochondria                |
| 8312 | ENSG00000167114 | SLC27A4  | Supported |                              | Vesicles                    |
| 8313 | ENSG00000167118 | URM1     | Approved  |                              | Nucleoplasm;Vesicl          |
| 8314 | ENSG00000167123 | CERCAM   | Approved  |                              | Cell Junctions;Nuc          |
| 8315 | ENSG00000167130 | DOLPP1   | Approved  |                              | Intermediate filam          |
| 8316 | ENSG00000167131 | CCDC103  | Approved  |                              | Cytosol                     |
| 8317 | ENSG00000167157 | PRRX2    | Approved  |                              | Nuclear bodies;Nuc          |
| 8318 | ENSG00000167173 | C15orf39 | Enhanced  | Cytosol                      |                             |
| 8319 | ENSG00000167182 | SP2      | Supported | Nucleoplasm                  | Vesicles                    |
| 8320 | ENSG00000167183 | PRR15L   | Approved  |                              | Cytosol                     |
| 8321 | ENSG00000167186 | COQ7     | Approved  |                              | Nucleoplasm;Plasma          |
| 8322 | ENSG00000167191 | GPRC5B   | Supported | Vesicles                     | Nucleoli;Nucleopla          |
| 8323 | ENSG00000167193 | CRK      | Approved  |                              | Plasma membrane             |
| 8324 | ENSG00000167202 | TBC1D2B  | Enhanced  | Cytosol                      |                             |
| 8325 | ENSG00000167207 | NOD2     | Approved  |                              | Cytosol Golgi app           |
| 8326 | ENSG00000167208 | SNX20    | Uncertain |                              | Nucleopla                   |
| 8327 | ENSG00000167216 | KATNAL2  | Approved  |                              | Intermediate filam          |
| 8328 | ENSG00000167220 | HDHD2    | Approved  |                              | Vesicles                    |
| 8329 | ENSG00000167244 | IGF2     | Approved  |                              | Cytosol;Nucleoplas          |
| 8330 | ENSG00000167257 | RNF214   | Approved  |                              | Cytosol;Golgi appa          |
| 8331 | ENSG00000167258 | CDK12    | Enhanced  | Nuclear speckles;Nucleoplasm |                             |
| 8332 | ENSG00000167264 | DUS2     | Enhanced  | Cytosol                      |                             |
| 8333 | ENSG00000167272 | POP5     | Approved  |                              | Nucleoli;Nucleopla          |
| 8334 | ENSG00000167280 | ENGASE   | Approved  |                              | Centrosome;Cytosol          |
| 8335 | ENSG00000167281 | RBFOX3   | Supported |                              | Nucleoplasm                 |
| 8336 | ENSG00000167283 | ATP5MG   | Supported |                              | Mitochondria                |
| 8337 | ENSG00000167291 | TBC1D16  | Approved  |                              | Intermediate filam          |
| 8338 | ENSG00000167302 | TEPSIN   | Supported | Golgi app                    | Nuclear membrane;N          |
| 8339 | ENSG00000167306 | MYO5B    | Approved  |                              | Plasma membrane             |
| 8340 | ENSG00000167315 | ACAA2    | Supported |                              | Mitochondria                |
| 8341 | ENSG00000167323 | STIM1    | Enhanced  | Endoplasmic reticulum        |                             |
| 8342 | ENSG00000167325 | RRM1     | Enhanced  | Cytosol                      |                             |
| 8343 | ENSG00000167333 | TRIM68   | Supported |                              | Cytosol;Nucleoplasm         |
| 8344 | ENSG00000167363 | FN3K     | Approved  |                              | Mitochondria                |
| 8345 | ENSG00000167371 | PRRT2    | Supported |                              | Plasma membrane             |
| 8346 | ENSG00000167377 | ZNF23    | Approved  |                              | Cytosol                     |
| 8347 | ENSG00000167378 | IRGQ     | Supported |                              | Vesicles                    |
| 8348 | ENSG00000167380 | ZNF226   | Approved  |                              | Nuclear bodies              |
| 8349 | ENSG00000167384 | ZNF180   | Approved  |                              | Nucleoplasm                 |
| 8350 | ENSG00000167393 | PPP2R3B  | Supported |                              | Nucleoplasm                 |
| 8351 | ENSG00000167394 | ZNF668   | Approved  |                              | Nucleoli;Nucleopla          |
| 8352 | ENSG00000167395 | ZNF646   | Approved  |                              | Cytosol;Nucleoplas          |
| 8353 | ENSG00000167397 | VKORC1   | Supported |                              | Endoplasmic reticulum       |
| 8354 | ENSG00000167434 | CA4      | Supported |                              | Vesicles                    |
| 8355 | ENSG00000167447 | SMG8     | Approved  |                              | Nucleoplasm                 |
| 8356 | ENSG00000167460 | TPM4     | Approved  |                              | Actin filaments;Cy          |
| 8357 | ENSG00000167461 | RAB8A    | Supported |                              | Nucleoplasm;Plasma membrane |
| 8358 | ENSG00000167468 | GPX4     | Supported |                              | Mitochondria;Nucleoplasm    |

|      |                 |          |           |                                      |
|------|-----------------|----------|-----------|--------------------------------------|
| 8359 | ENSG00000167470 | MIDN     | Approved  | Nucleoplasm                          |
| 8360 | ENSG00000167476 | JSRP1    | Approved  | Endoplasmic reticu                   |
| 8361 | ENSG00000167483 | FAM129C  | Approved  | Cytosol;Nucleoplas                   |
| 8362 | ENSG00000167491 | GATAD2A  | Enhanced  | Nucleoplasm                          |
| 8363 | ENSG00000167508 | MVD      | Approved  | Cell Junctions;Cyt                   |
| 8364 | ENSG00000167513 | CDT1     | Supported | Nuclear bodies;Nucleoplasm           |
| 8365 | ENSG00000167515 | TRAPPC2L | Supported | Cytosol Vesicles                     |
| 8366 | ENSG00000167522 | ANKRD11  | Enhanced  | Cytosol;NucleoplasPlasma membrane    |
| 8367 | ENSG00000167523 | SPATA33  | Approved  | Nucleoplasm;Vesicl                   |
| 8368 | ENSG00000167524 | SGK494   | Approved  | Nucleoplasm;Plasma                   |
| 8369 | ENSG00000167526 | RPL13    | Enhanced  | Cytosol;Endoplasmic reticulum;Nucleo |
| 8370 | ENSG00000167528 | ZNF641   | Supported | Nucleoplasm                          |
| 8371 | ENSG00000167535 | CACNB3   | Approved  | Golgi apparatus;Ve                   |
| 8372 | ENSG00000167536 | DHRS13   | Approved  | Vesicles                             |
| 8373 | ENSG00000167548 | KMT2D    | Approved  | Cytosol;Nucleoplas                   |
| 8374 | ENSG00000167549 | COR06    | Supported | Golgi apparatus                      |
| 8375 | ENSG00000167550 | RHEBL1   | Uncertain | Centrosom                            |
| 8376 | ENSG00000167552 | TUBA1A   | Enhanced  | Microtubules                         |
| 8377 | ENSG00000167553 | TUBA1C   | Supported | Microtubules                         |
| 8378 | ENSG00000167554 | ZNF610   | Approved  | Nucleoplasm                          |
| 8379 | ENSG00000167555 | ZNF528   | Approved  | Cytosol;Nuclear sp                   |
| 8380 | ENSG00000167562 | ZNF701   | Approved  | Centriolar satelli                   |
| 8381 | ENSG00000167565 | SERTAD3  | Approved  | Nucleoli                             |
| 8382 | ENSG00000167566 | NCKAP5L  | Approved  | Golgi apparatus                      |
| 8383 | ENSG00000167595 | PROSER3  | Approved  | Golgi apparatus                      |
| 8384 | ENSG00000167600 | CYP2S1   | Supported | Endoplasmic reticulum                |
| 8385 | ENSG00000167601 | AXL      | Supported | Plasma meActin filaments;Ve          |
| 8386 | ENSG00000167604 | NFKBID   | Approved  | Mitochondria                         |
| 8387 | ENSG00000167613 | LAIR1    | Supported | Plasma membrane                      |
| 8388 | ENSG00000167615 | LENG8    | Supported | Nucleoplasm                          |
| 8389 | ENSG00000167619 | TMEM145  | Approved  | Vesicles                             |
| 8390 | ENSG00000167625 | ZNF526   | Approved  | Golgi apparatus;Nu                   |
| 8391 | ENSG00000167632 | TRAPPC9  | Approved  | Golgi apparatus;Nu                   |
| 8392 | ENSG00000167634 | NLRP7    | Uncertain | Golgi apparatus                      |
| 8393 | ENSG00000167635 | ZNF146   | Supported | Nucleoli                             |
| 8394 | ENSG00000167637 | ZNF283   | Approved  | Nucleoplasm                          |
| 8395 | ENSG00000167641 | PPP1R14A | Supported | NucleoplaNuclear bodies              |
| 8396 | ENSG00000167642 | SPINT2   | Uncertain | Cytosol;I                            |
| 8397 | ENSG00000167644 | C19orf33 | Supported | Cytosol;NPlasma membrane             |
| 8398 | ENSG00000167645 | YIF1B    | Approved  | Golgi apparatus;Ve                   |
| 8399 | ENSG00000167646 | DNAAF3   | Approved  | Mitochondria;Nucle                   |
| 8400 | ENSG00000167653 | PSCA     | Supported | Plasma membrane                      |
| 8401 | ENSG00000167657 | DAPK3    | Approved  | Nucleoplasm                          |
| 8402 | ENSG00000167658 | EEF2     | Enhanced  | Cytosol;Plasma membrane              |
| 8403 | ENSG00000167670 | CHAF1A   | Supported | Nucleoplasm Cytosol                  |
| 8404 | ENSG00000167671 | UBXN6    | Approved  | Cytosol;Golgi appa                   |
| 8405 | ENSG00000167674 | HDGFL2   | Supported | Nucleoplasm Mitochondria             |
| 8406 | ENSG00000167676 | PLIN4    | Supported | Lipid droplets;PlaCytosol;Vesicles   |
| 8407 | ENSG00000167685 | ZNF444   | Supported | Nucleoli;Nucleoplasm                 |
| 8408 | ENSG00000167693 | NXN      | Supported | Cytosol;Golgi apparatus              |
| 8409 | ENSG00000167699 | GL0D4    | Approved  | Cytosol;Nucleoli;N                   |
| 8410 | ENSG00000167700 | MFS3     | Approved  | Vesicles                             |
| 8411 | ENSG00000167702 | KIFC2    | Supported | Cytosol;Nucleoplasm                  |
| 8412 | ENSG00000167716 | WDR81    | Approved  | Nucleoplasm                          |
| 8413 | ENSG00000167720 | SRR      | Approved  | Vesicles                             |

|      |                 |          |           |                                |
|------|-----------------|----------|-----------|--------------------------------|
| 8414 | ENSG00000167721 | TSR1     | Supported | Nucleoplasm                    |
| 8415 | ENSG00000167723 | TRPV3    | Approved  | Centrosome;Cytosol             |
| 8416 | ENSG00000167733 | HSD11B1L | Supported | Vesicles                       |
| 8417 | ENSG00000167740 | CYB5D2   | Approved  | Centrosome;Nuclear             |
| 8418 | ENSG00000167747 | C19orf48 | Approved  | Plasma membrane                |
| 8419 | ENSG00000167755 | KLK6     | Supported | Nucleoplasm;Cytokinetic bridge |
| 8420 | ENSG00000167766 | ZNF83    | Approved  | Nucleoplasm                    |
| 8421 | ENSG00000167767 | KRT80    | Enhanced  | Intermediate filaments         |
| 8422 | ENSG00000167770 | OTUB1    | Approved  | Cytosol;Nucleoplasm            |
| 8423 | ENSG00000167771 | RCOR2    | Approved  | Midbody;Nucleoplasm            |
| 8424 | ENSG00000167772 | ANGPTL4  | Approved  | Nucleoplasm;Vesicle            |
| 8425 | ENSG00000167775 | CD320    | Approved  | Cytosol                        |
| 8426 | ENSG00000167778 | SPRYD3   | Approved  | Actin filaments;Cy             |
| 8427 | ENSG00000167792 | NDUFV1   | Supported | Mitochondria Cytosol           |
| 8428 | ENSG00000167797 | CDK2AP2  | Approved  | Nucleoplasm                    |
| 8429 | ENSG00000167799 | NUDT8    | Approved  | Cytosol;Nucleoli               |
| 8430 | ENSG00000167840 | ZNF232   | Supported | Cytosol;Nucleoplasm;Vesicle    |
| 8431 | ENSG00000167850 | CD300C   | Uncertain | Golgi app                      |
| 8432 | ENSG00000167861 | HID1     | Supported | Cytosol;Golgi apparatus        |
| 8433 | ENSG00000167862 | MRPL58   | Supported | Mitochondria;Nucleoplasm       |
| 8434 | ENSG00000167863 | ATP5PD   | Supported | Mitochondria                   |
| 8435 | ENSG00000167880 | EVPL     | Supported | Cytosol;Intermediate filame    |
| 8436 | ENSG00000167881 | SRP68    | Supported | Cytosol                        |
| 8437 | ENSG00000167889 | MGAT5B   | Approved  | Cytokinetic bridge             |
| 8438 | ENSG00000167895 | TMC8     | Uncertain | Golgi app                      |
| 8439 | ENSG00000167904 | TMEM68   | Approved  | Vesicles                       |
| 8440 | ENSG00000167914 | GSDMA    | Supported | Cytosol;Nuclear bodies;Nucl    |
| 8441 | ENSG00000167916 | KRT24    | Approved  | Cytosol;Intermedia             |
| 8442 | ENSG00000167930 | FAM234A  | Uncertain | Mitochond                      |
| 8443 | ENSG00000167962 | ZNF598   | Approved  | Cytosol;Plasma mem             |
| 8444 | ENSG00000167964 | RAB26    | Uncertain | Centrosom                      |
| 8445 | ENSG00000167965 | MLST8    | Approved  | Cell Junctions;Gol             |
| 8446 | ENSG00000167967 | E4F1     | Enhanced  | Nucleoplasm                    |
| 8447 | ENSG00000167968 | DNASE1L2 | Approved  | Mitochondria                   |
| 8448 | ENSG00000167969 | ECI1     | Enhanced  | Mitochondria                   |
| 8449 | ENSG00000167971 | CASKIN1  | Approved  | Cytosol;Nucleoplasm            |
| 8450 | ENSG00000167972 | ABCA3    | Approved  | Cytosol;Nucleoplasm            |
| 8451 | ENSG00000167978 | SRRM2    | Enhanced  | Nuclear speckles               |
| 8452 | ENSG00000167981 | ZNF597   | Approved  | Nucleoli;Nucleoplasm           |
| 8453 | ENSG00000167984 | NLRC3    | Supported | Cytosol CentriolaVesicles      |
| 8454 | ENSG00000167985 | SDHAF2   | Approved  | Mitochondria Cytosol;N         |
| 8455 | ENSG00000167986 | DDB1     | Enhanced  | Nucleoplasm                    |
| 8456 | ENSG00000167987 | VPS37C   | Approved  | Nucleoplasm;Vesicle            |
| 8457 | ENSG00000167992 | VWCE     | Supported | Cytosol;Nucleoplasm;Vesicle    |
| 8458 | ENSG00000167994 | RAB3IL1  | Approved  | Centriolar satelli             |
| 8459 | ENSG00000167996 | FTH1     | Approved  | Microtubules                   |
| 8460 | ENSG00000168002 | POLR2G   | Supported | Nucleoplasm                    |
| 8461 | ENSG00000168003 | SLC3A2   | Supported | Cytosol;Nucleoplasm;Plasma     |
| 8462 | ENSG00000168004 | HRASLS5  | Uncertain | Plasma me                      |
| 8463 | ENSG00000168005 | SPINDOC  | Approved  | Nuclear speckles               |
| 8464 | ENSG00000168010 | ATG16L2  | Enhanced  | Nucleoplasm                    |
| 8465 | ENSG00000168014 | C2CD3    | Approved  | CentriolaNucleoplasm           |
| 8466 | ENSG00000168016 | TRANK1   | Approved  | Nucleoplasm                    |
| 8467 | ENSG00000168026 | TTC21A   | Supported | Nucleoplasm                    |
| 8468 | ENSG00000168028 | RPSA     | Supported | Cytosol;Plasma membrane        |

|      |                 |           |           |                                        |
|------|-----------------|-----------|-----------|----------------------------------------|
| 8469 | ENSG00000168036 | CTNNB1    | Enhanced  | Plasma membrane                        |
| 8470 | ENSG00000168038 | ULK4      | Approved  | Cytosol;Mitochondr                     |
| 8471 | ENSG00000168040 | FADD      | Supported | Cytosol;Nucleoplasm                    |
| 8472 | ENSG00000168056 | LTBP3     | Approved  | Nucleoplasm                            |
| 8473 | ENSG00000168060 | NAALADL1  | Uncertain | Cytosol                                |
| 8474 | ENSG00000168061 | SAC3D1    | Approved  | Cytosol                                |
| 8475 | ENSG00000168062 | BATF2     | Approved  | Nucleoli                               |
| 8476 | ENSG00000168066 | SF1       | Supported | Nucleoplasm                            |
| 8477 | ENSG00000168067 | MAP4K2    | Approved  | Vesicles                               |
| 8478 | ENSG00000168071 | CCDC88B   | Approved  | Centrosome;Cytosol                     |
| 8479 | ENSG00000168077 | SCARA3    | Supported | Endoplasm;Cytosol                      |
| 8480 | ENSG00000168078 | PBK       | Approved  | Cytosol                                |
| 8481 | ENSG00000168090 | COPS6     | Supported | Nucleoplasm                            |
| 8482 | ENSG00000168092 | PAFAH1B2  | Supported | Cytosol Nucleoli;                      |
| 8483 | ENSG00000168096 | ANKS3     | Supported | Cytosol;Nucleoplasm                    |
| 8484 | ENSG00000168101 | NUDT16L1  | Approved  | Cytosol;Plasma mem                     |
| 8485 | ENSG00000168116 | KIAA1586  | Approved  | Nuclear membrane;N                     |
| 8486 | ENSG00000168137 | SETD5     | Enhanced  | Cytosol;Nucleoplasm                    |
| 8487 | ENSG00000168140 | VASN      | Approved  | Mitochondria;Nucle                     |
| 8488 | ENSG00000168148 | HIST3H3   | Supported | Nucleoplasm                            |
| 8489 | ENSG00000168152 | THAP9     | Approved  | Mitochondria                           |
| 8490 | ENSG00000168159 | RNF187    | Supported | Cytosol;Nucleoplasm                    |
| 8491 | ENSG00000168172 | HOOK3     | Supported | Centriola;Cytosol                      |
| 8492 | ENSG00000168175 | MAPK1IP1L | Approved  | Cytosol;Nucleoplas                     |
| 8493 | ENSG00000168209 | DDIT4     | Supported | Cytosol                                |
| 8494 | ENSG00000168214 | RBPJ      | Supported | Nucleoplasm                            |
| 8495 | ENSG00000168228 | ZCCHC4    | Approved  | Golgi apparatus;Nu                     |
| 8496 | ENSG00000168234 | TTC39C    | Approved  | Nucleoplasm                            |
| 8497 | ENSG00000168237 | GLYCTK    | Approved  | Cytosol Golgi apparatus;Ro             |
| 8498 | ENSG00000168255 | POLR2J3   | Approved  | Nucleoplasm                            |
| 8499 | ENSG00000168256 | NKIRAS2   | Approved  | Nucleoli;Nucleopla                     |
| 8500 | ENSG00000168259 | DNAJC7    | Supported | Cytosol;Nucleoplasm                    |
| 8501 | ENSG00000168264 | IRF2BP2   | Enhanced  | Nucleoplasm                            |
| 8502 | ENSG00000168267 | PTF1A     | Approved  | Nucleoplasm                            |
| 8503 | ENSG00000168269 | FOXI1     | Uncertain | Nucleoli;                              |
| 8504 | ENSG00000168273 | SMIM4     | Approved  | Mitochondria;Nucle                     |
| 8505 | ENSG00000168275 | COA6      | Supported | Mitochondr;Nucleoplasm                 |
| 8506 | ENSG00000168280 | KIF5C     | Approved  | Vesicles                               |
| 8507 | ENSG00000168282 | MGAT2     | Supported | Golgi apparatus                        |
| 8508 | ENSG00000168283 | BMI1      | Approved  | Cytosol;Nuclear bo                     |
| 8509 | ENSG00000168286 | THAP11    | Supported | Cytosol;N;Cytokinetic bridge           |
| 8510 | ENSG00000168291 | PDHB      | Supported | Mitochondria;Nucleoplasm               |
| 8511 | ENSG00000168297 | PXK       | Supported | Centriolar satellite;Cytoso            |
| 8512 | ENSG00000168298 | HIST1H1E  | Supported | Nuclear speckles                       |
| 8513 | ENSG00000168300 | PCMTD1    | Approved  | Nucleoplasm;Plasma                     |
| 8514 | ENSG00000168301 | KCTD6     | Approved  | Mitochondria;Nucle                     |
| 8515 | ENSG00000168303 | MPLKIP    | Supported | Golgi apparatus;Nucleoplasm            |
| 8516 | ENSG00000168306 | ACOX2     | Approved  | Vesicles Cytosol                       |
| 8517 | ENSG00000168309 | FAM107A   | Supported | Nuclear speckles                       |
| 8518 | ENSG00000168310 | IRF2      | Enhanced  | Cytosol;N;Cell Junctions               |
| 8519 | ENSG00000168314 | MOBP      | Supported | Cytoplasmic bodies                     |
| 8520 | ENSG00000168334 | XIRP1     | Approved  | Actin filaments;Nu                     |
| 8521 | ENSG00000168348 | INSM2     | Approved  | Nucleoplasm                            |
| 8522 | ENSG00000168350 | DEGS2     | Approved  | Nucleoli;Nucleopla                     |
| 8523 | ENSG00000168385 | 9/2/2019  | Enhanced  | Actin fil;Cytokinet;Nucleoplasm;Plasma |

|      |                 |          |           |                         |                                            |
|------|-----------------|----------|-----------|-------------------------|--------------------------------------------|
| 8524 | ENSG00000168386 | FILIP1L  | Approved  |                         | Plasma membrane                            |
| 8525 | ENSG00000168389 | MFSD2A   | Approved  |                         | Plasma membrane;Cyttoplasmic bodies        |
| 8526 | ENSG00000168393 | DTYMK    | Approved  |                         | Mitochondria                               |
| 8527 | ENSG00000168394 | TAP1     | Supported |                         | Endoplasmic reticulum;Centriolar satellite |
| 8528 | ENSG00000168397 | ATG4B    | Approved  |                         | Cytosol;Nucleoplasm                        |
| 8529 | ENSG00000168398 | BDKRB2   | Supported |                         | Plasma membrane                            |
| 8530 | ENSG00000168411 | RFWD3    | Enhanced  | Nucleoplasm             | Cytosol                                    |
| 8531 | ENSG00000168421 | RHOH     | Approved  |                         | Golgi apparatus;Vesicles                   |
| 8532 | ENSG00000168427 | KLHL30   | Approved  |                         | Centriolar satellite                       |
| 8533 | ENSG00000168434 | COG7     | Supported |                         | Golgi apparatus                            |
| 8534 | ENSG00000168438 | CDC40    | Supported |                         | Nucleoplasm                                |
| 8535 | ENSG00000168439 | STIP1    | Supported |                         | Cytosol;Nucleoplasm;Plasma membrane        |
| 8536 | ENSG00000168453 | HR       | Supported |                         | Nucleoplasm                                |
| 8537 | ENSG00000168476 | REEP4    | Approved  |                         | Cytosol                                    |
| 8538 | ENSG00000168481 | LGI3     | Approved  |                         | Cytosol                                    |
| 8539 | ENSG00000168488 | ATXN2L   | Enhanced  | Cytosol                 |                                            |
| 8540 | ENSG00000168490 | PHYHIP   | Approved  |                         | Mitochondria;Nucleoplasm                   |
| 8541 | ENSG00000168495 | POLR3D   | Enhanced  | Nucleoplasm             |                                            |
| 8542 | ENSG00000168496 | FEN1     | Enhanced  | Nucleoli;Nucleoplasm    |                                            |
| 8543 | ENSG00000168497 | CAVIN2   | Enhanced  | Cytosol;Plasma membrane |                                            |
| 8544 | ENSG00000168505 | GBX2     | Approved  |                         | Nucleoplasm                                |
| 8545 | ENSG00000168517 | HEXIM2   | Supported |                         | Nuclear speckles;Nucleoplasm               |
| 8546 | ENSG00000168522 | FNTA     | Approved  |                         | Cytosol                                    |
| 8547 | ENSG00000168528 | SERINC2  | Approved  |                         | Nucleoplasm;Plasma membrane                |
| 8548 | ENSG00000168539 | CHRM1    | Approved  |                         | Cytosol;Nucleoplasm                        |
| 8549 | ENSG00000168542 | COL3A1   | Approved  |                         | Endoplasmic reticulum                      |
| 8550 | ENSG00000168546 | GFRA2    | Uncertain |                         | Vesicles                                   |
| 8551 | ENSG00000168556 | ING2     | Supported |                         | Cytosol;Golgi apparatus;Nucleoplasm        |
| 8552 | ENSG00000168564 | CDKN2AIP | Enhanced  | Nucleoplasm             |                                            |
| 8553 | ENSG00000168566 | SNRNP48  | Supported |                         | Nucleoplasm;Cytosol                        |
| 8554 | ENSG00000168569 | TMEM223  | Approved  |                         | Mitochondria;Nucleoplasm                   |
| 8555 | ENSG00000168591 | TMUB2    | Approved  |                         | Cytosol;Vesicles                           |
| 8556 | ENSG00000168610 | STAT3    | Supported |                         | Cytosol;Nucleoplasm                        |
| 8557 | ENSG00000168612 | ZSWIM1   | Approved  |                         | Cytosol;Plasma membrane                    |
| 8558 | ENSG00000168615 | ADAM9    | Approved  |                         | Endoplasmic reticulum                      |
| 8559 | ENSG00000168621 | GDNF     | Approved  |                         | Vesicles;Nucleoplasm                       |
| 8560 | ENSG00000168646 | AXIN2    | Uncertain |                         | Cytosol;Nucleoplasm                        |
| 8561 | ENSG00000168658 | VWA3B    | Supported | Cytosol                 | Nucleoplasm                                |
| 8562 | ENSG00000168661 | ZNF30    | Approved  |                         | Cytosol;Nucleoplasm                        |
| 8563 | ENSG00000168671 | UGT3A2   | Approved  |                         | Cytosol;Golgi apparatus                    |
| 8564 | ENSG00000168672 | FAM84B   | Approved  |                         | Nucleoplasm                                |
| 8565 | ENSG00000168675 | LDLRAD4  | Supported |                         | Vesicles                                   |
| 8566 | ENSG00000168679 | SLC16A4  | Approved  |                         | Cytokinetic bridge                         |
| 8567 | ENSG00000168685 | IL7R     | Supported |                         | Plasma membrane;Centriolar satellite       |
| 8568 | ENSG00000168702 | LRP1B    | Approved  |                         | Vesicles                                   |
| 8569 | ENSG00000168710 | AHCYL1   | Supported |                         | Cytosol                                    |
| 8570 | ENSG00000168724 | DNAJC21  | Approved  |                         | Vesicles                                   |
| 8571 | ENSG00000168734 | PKIG     | Supported |                         | Cytosol;Nucleoplasm                        |
| 8572 | ENSG00000168743 | NPNT     | Approved  |                         | Cell Junctions;Cytosol                     |
| 8573 | ENSG00000168754 | FAM178B  | Uncertain |                         | Golgi apparatus                            |
| 8574 | ENSG00000168757 | TSPY2    | Approved  |                         | Cytosol                                    |
| 8575 | ENSG00000168763 | CNNM3    | Approved  |                         | Cytosol                                    |
| 8576 | ENSG00000168765 | GSTM4    | Approved  |                         | Cytokinetic bridge                         |
| 8577 | ENSG00000168769 | TET2     | Approved  |                         | Nucleoplasm                                |
| 8578 | ENSG00000168772 | CXXC4    | Uncertain |                         | Golgi apparatus                            |



|      |                 |           |           |                         |                             |
|------|-----------------|-----------|-----------|-------------------------|-----------------------------|
| 8579 | ENSG00000168778 | TCTN2     | Approved  |                         | Golgi apparatus;Ve          |
| 8580 | ENSG00000168781 | PIP5K1    | Supported |                         | Cytosol;Plasma membrane     |
| 8581 | ENSG00000168792 | ABHD15    | Approved  |                         | Cytosol;Nucleoplas          |
| 8582 | ENSG00000168795 | ZBTB5     | Approved  |                         | Golgi apparatus;Nu          |
| 8583 | ENSG00000168802 | CHTF8     | Enhanced  | Nucleoplasm             |                             |
| 8584 | ENSG00000168803 | ADAL      | Approved  |                         | Microtubules                |
| 8585 | ENSG00000168806 | LCMT2     | Approved  |                         | Nucleoplasm;Vesicl          |
| 8586 | ENSG00000168813 | ZNF507    | Supported |                         | Cytosol;Nucleoli            |
| 8587 | ENSG00000168818 | STX18     | Approved  |                         | Plasma membrane             |
| 8588 | ENSG00000168826 | ZBTB49    | Approved  |                         | Cytosol;Microtubul          |
| 8589 | ENSG00000168827 | GFM1      | Approved  |                         | Mitochondria;Nucle          |
| 8590 | ENSG00000168872 | DDX19A    | Uncertain |                         | Nucleoplas                  |
| 8591 | ENSG00000168874 | ATO8      | Supported | Nucleoplasm             |                             |
| 8592 | ENSG00000168876 | ANKRD49   | Approved  |                         | Golgi apparatus;Nu          |
| 8593 | ENSG00000168883 | USP39     | Supported |                         | Nucleoplasm                 |
| 8594 | ENSG00000168884 | TNIP2     | Enhanced  | Cytosol;Nucleoplasm     |                             |
| 8595 | ENSG00000168887 | C2orf68   | Approved  |                         | Mitochondria;Nucle          |
| 8596 | ENSG00000168894 | RNF181    | Approved  |                         | Cytosol;Nucleoplas          |
| 8597 | ENSG00000168899 | VAMP5     | Approved  |                         | Nucleoplasm;Plasma          |
| 8598 | ENSG00000168904 | LRR28     | Approved  |                         | Golgi apparatus;Mi          |
| 8599 | ENSG00000168906 | MAT2A     | Approved  |                         | Cytosol;Nucleoplas          |
| 8600 | ENSG00000168907 | PLA2G4F   | Approved  |                         | Nucleoplasm;Vesicl          |
| 8601 | ENSG00000168916 | ZNF608    | Approved  |                         | Mitochondria;Nucle          |
| 8602 | ENSG00000168917 | SLC35G2   | Supported |                         | Plasma membrane             |
| 8603 | ENSG00000168918 | INPP5D    | Approved  |                         | Cytosol                     |
| 8604 | ENSG00000168924 | LETM1     | Supported |                         | Mitochondria                |
| 8605 | ENSG00000168939 | SPRY3     | Approved  |                         | Cytosol;Nucleoli            |
| 8606 | ENSG00000168944 | CEP120    | Approved  |                         | Cytosol;Microtubul          |
| 8607 | ENSG00000168955 | TM4SF20   | Supported |                         | Plasma meFocal adhesion sit |
| 8608 | ENSG00000168958 | MFF       | Supported |                         | Mitochondria                |
| 8609 | ENSG00000168961 | LGALS9    | Approved  |                         | Cytosol                     |
| 8610 | ENSG00000168970 | JMJD7-PLA | Approved  |                         | Cytosol                     |
| 8611 | ENSG00000168993 | CPLX1     | Uncertain |                         | Vesicles                    |
| 8612 | ENSG00000168994 | PXDC1     | Approved  |                         | Plasma membrane             |
| 8613 | ENSG00000169016 | E2F6      | Supported |                         | Nucleoplasm                 |
| 8614 | ENSG00000169018 | FEM1B     | Supported |                         | Cytosol;Nucleoplasm         |
| 8615 | ENSG00000169019 | COMMD8    | Supported |                         | Cytosol;Nucleoplasm         |
| 8616 | ENSG00000169020 | ATP5ME    | Supported |                         | Mitochondria                |
| 8617 | ENSG00000169021 | UQRFS1    | Approved  |                         | Mitochondria                |
| 8618 | ENSG00000169031 | COL4A3    | Approved  |                         | Endoplasmic reticu          |
| 8619 | ENSG00000169032 | MAP2K1    | Enhanced  | Cytosol;Plasma membrane |                             |
| 8620 | ENSG00000169035 | KLK7      | Supported |                         | Plasma meNuclear membrane   |
| 8621 | ENSG00000169045 | HNRNP1    | Enhanced  | Nucleoplasm             |                             |
| 8622 | ENSG00000169047 | IRS1      | Supported |                         | Cytosol;Nucleoplasm;Plasma  |
| 8623 | ENSG00000169057 | MECP2     | Approved  |                         | Nucleoplasm                 |
| 8624 | ENSG00000169062 | UPF3A     | Approved  |                         | Cytosol;Nucleoplas          |
| 8625 | ENSG00000169083 | AR        | Approved  |                         | Mitochondria                |
| 8626 | ENSG00000169084 | DHRSX     | Approved  |                         | Actin filaments;Cy          |
| 8627 | ENSG00000169085 | C8orf46   | Approved  |                         | Nuclear speckles            |
| 8628 | ENSG00000169087 | HSPBAP1   | Approved  |                         | Mitochondria                |
| 8629 | ENSG00000169093 | ASMTL     | Enhanced  | Cytosol                 |                             |
| 8630 | ENSG00000169100 | SLC25A6   | Supported |                         | Mitochondria                |
| 8631 | ENSG00000169105 | CHST14    | Approved  |                         | Vesicles                    |
| 8632 | ENSG00000169116 | PARM1     | Approved  |                         | Vesicles Cytosol;N          |
| 8633 | ENSG00000169118 | CSNK1G1   | Supported |                         | Cytosol                     |

|      |                 |          |           |             |                             |
|------|-----------------|----------|-----------|-------------|-----------------------------|
| 8634 | ENSG00000169122 | FAM110B  | Supported |             | Cytosol;Mitochondria        |
| 8635 | ENSG00000169129 | AFAP1L2  | Supported |             | Cytosol;Plasma membrane     |
| 8636 | ENSG00000169131 | ZNF354A  | Supported |             | Nucleoli;NucleoplaCytosol   |
| 8637 | ENSG00000169136 | ATF5     | Supported |             | Cytosol;Nucleoplasm         |
| 8638 | ENSG00000169139 | UBE2V2   | Supported |             | Nucleoplasm                 |
| 8639 | ENSG00000169155 | ZBTB43   | Approved  |             | Nucleoli;Nucleopla          |
| 8640 | ENSG00000169169 | CPT1C    | Approved  |             | Centrosome                  |
| 8641 | ENSG00000169180 | XP06     | Approved  |             | Cytosol;Nucleoli;N          |
| 8642 | ENSG00000169184 | MN1      | Approved  |             | Nucleoplasm                 |
| 8643 | ENSG00000169188 | APEX2    | Supported |             | Nucleoli fibrillar center;N |
| 8644 | ENSG00000169189 | NSMCE1   | Supported |             | NucleoplaVesicles           |
| 8645 | ENSG00000169193 | CCDC126  | Approved  |             | Nucleoplasm                 |
| 8646 | ENSG00000169194 | IL13     | Approved  |             | Cytosol;Plasma mem          |
| 8647 | ENSG00000169203 | NPIP12   | Approved  |             | Nucleoplasm                 |
| 8648 | ENSG00000169213 | RAB3B    | Approved  |             | Cell Junctions              |
| 8649 | ENSG00000169217 | CD2BP2   | Enhanced  | Nuclear s   | Cytosol                     |
| 8650 | ENSG00000169220 | RGS14    | Approved  |             | Intermediate filam          |
| 8651 | ENSG00000169224 | GCSAML   | Approved  |             | Cytosol                     |
| 8652 | ENSG00000169228 | RAB24    | Approved  |             | Focal adhesion sit          |
| 8653 | ENSG00000169230 | PRELID1  | Supported |             | Mitochondria;Nucleoplasm    |
| 8654 | ENSG00000169231 | THBS3    | Approved  |             | Vesicles                    |
| 8655 | ENSG00000169239 | CA5B     | Supported |             | Mitochondria                |
| 8656 | ENSG00000169246 | NPIP3    | Approved  |             | Nucleoplasm                 |
| 8657 | ENSG00000169247 | SH3TC2   | Approved  |             | Cytosol;Nucleoplas          |
| 8658 | ENSG00000169251 | NMD3     | Supported |             | Nucleoli;Nucleoplasm        |
| 8659 | ENSG00000169252 | ADRB2    | Uncertain |             | Cytosol                     |
| 8660 | ENSG00000169255 | B3GALNT1 | Approved  |             | Vesicles                    |
| 8661 | ENSG00000169258 | GPRIN1   | Supported |             | Plasma meVesicles           |
| 8662 | ENSG00000169271 | HSPB3    | Supported |             | Nuclear speckles            |
| 8663 | ENSG00000169282 | KCNAB1   | Approved  |             | Plasma meNucleoplasm;Vesicl |
| 8664 | ENSG00000169288 | MRPL1    | Supported |             | Mitochondria                |
| 8665 | ENSG00000169297 | NROB1    | Supported | Nuclear s   | Centriolar satellite;Vesicl |
| 8666 | ENSG00000169299 | PGM2     | Approved  |             | Intermediate filam          |
| 8667 | ENSG00000169302 | STK32A   | Approved  |             | Centrosome                  |
| 8668 | ENSG00000169330 | KIAA1024 | Approved  |             | Golgi apparatus             |
| 8669 | ENSG00000169359 | SLC33A1  | Approved  |             | Nucleoplasm                 |
| 8670 | ENSG00000169371 | SNUPN    | Supported |             | Nuclear membrane            |
| 8671 | ENSG00000169372 | CRADD    | Approved  |             | Cytosol;Nucleoplas          |
| 8672 | ENSG00000169375 | SIN3A    | Enhanced  | Nucleoplasm |                             |
| 8673 | ENSG00000169379 | ARL13B   | Uncertain |             | Cytosol;M                   |
| 8674 | ENSG00000169398 | PTK2     | Supported |             | Cytosol;FVesicles           |
| 8675 | ENSG00000169403 | PTAFR    | Uncertain |             | Plasma membrane Nucleopla   |
| 8676 | ENSG00000169410 | PTPN9    | Approved  |             | Vesicles                    |
| 8677 | ENSG00000169418 | NPR1     | Approved  |             | Nucleoli;Nucleopla          |
| 8678 | ENSG00000169427 | KCNK9    | Approved  |             | Plasma membrane             |
| 8679 | ENSG00000169432 | SCN9A    | Approved  |             | Actin filaments;Fo          |
| 8680 | ENSG00000169435 | RASSF6   | Approved  |             | Golgi apparatus;Nu          |
| 8681 | ENSG00000169436 | COL22A1  | Supported | Vesicles    | Endoplasmic reticu          |
| 8682 | ENSG00000169439 | SDC2     | Approved  |             | Cytosol;Plasma mem          |
| 8683 | ENSG00000169490 | TM2D2    | Approved  |             | Nucleoplasm;Plasma          |
| 8684 | ENSG00000169499 | PLEKHA2  | Uncertain |             | Cytosol;N                   |
| 8685 | ENSG00000169504 | CLIC4    | Supported | Cytosol     |                             |
| 8686 | ENSG00000169508 | GPR183   | Approved  |             | Nuclear membrane;V          |
| 8687 | ENSG00000169515 | CCDC8    | Approved  |             | Cytosol;Nucleoplas          |
| 8688 | ENSG00000169519 | METTL15  | Approved  |             | Actin filaments;Go          |

|      |                 |           |           |                                     |
|------|-----------------|-----------|-----------|-------------------------------------|
| 8689 | ENSG00000169548 | ZNF280A   | Approved  | Nucleoplasm                         |
| 8690 | ENSG00000169551 | CT55      | Approved  | Vesicles                            |
| 8691 | ENSG00000169554 | ZEB2      | Approved  | Cytosol;Nucleoli;N                  |
| 8692 | ENSG00000169564 | PCBP1     | Enhanced  | Cytoplasmic bodies;Nuclear speckles |
| 8693 | ENSG00000169567 | HINT1     | Supported | Cytosol;Nucleoplasm;Plasma          |
| 8694 | ENSG00000169570 | DTWD2     | Supported | Nuclear bodies                      |
| 8695 | ENSG00000169583 | CLIC3     | Supported | Nuclear bodies                      |
| 8696 | ENSG00000169592 | IN080E    | Supported | Nucleoli;Nucleoplasm                |
| 8697 | ENSG00000169594 | BNC1      | Enhanced  | Nucleoplasm                         |
| 8698 | ENSG00000169598 | DFFB      | Approved  | Nucleoli;Nucleopla                  |
| 8699 | ENSG00000169599 | NFU1      | Supported | Cytosol;Nucleoplasm                 |
| 8700 | ENSG00000169604 | ANTXR1    | Uncertain | Vesicles                            |
| 8701 | ENSG00000169607 | CKAP2L    | Supported | Mitotic sCytosol                    |
| 8702 | ENSG00000169609 | C15orf40  | Approved  | Cytosol;Nucleoplas                  |
| 8703 | ENSG00000169612 | FAM103A1  | Supported | Nucleoplasm                         |
| 8704 | ENSG00000169621 | APLF      | Supported | Nucleoplasm                         |
| 8705 | ENSG00000169627 | BOLA2B    | Uncertain | Nucleopla                           |
| 8706 | ENSG00000169629 | RGPD8     | Uncertain | Nuclear m                           |
| 8707 | ENSG00000169635 | HIC2      | Supported | Nucleoplasm                         |
| 8708 | ENSG00000169641 | LUZP1     | Uncertain | Actin fil                           |
| 8709 | ENSG00000169660 | HEXDC     | Approved  | Mitochondria;Nucle                  |
| 8710 | ENSG00000169679 | BUB1      | Supported | NucleoplaCytosol                    |
| 8711 | ENSG00000169682 | SPNS1     | Approved  | Vesicles Cytosol;G                  |
| 8712 | ENSG00000169683 | LRRC45    | Supported | CentrosomNucleoplasm;Plasma         |
| 8713 | ENSG00000169684 | CHRNA5    | Approved  | Plasma meFocal adhesion sit         |
| 8714 | ENSG00000169692 | AGPAT2    | Approved  | Centrosome                          |
| 8715 | ENSG00000169696 | ASPSCR1   | Supported | Nucleoplasm;Plasma membrane         |
| 8716 | ENSG00000169710 | FASN      | Enhanced  | Cytosol;Plasma membrane             |
| 8717 | ENSG00000169714 | CNBP      | Supported | Cytosol;Nucleoplasm                 |
| 8718 | ENSG00000169715 | MT1E      | Approved  | Nucleoplasm                         |
| 8719 | ENSG00000169718 | DUS1L     | Approved  | Plasma membrane                     |
| 8720 | ENSG00000169727 | GPS1      | Enhanced  | Cytosol;Nucleoplasm                 |
| 8721 | ENSG00000169733 | RFNG      | Supported | Nucleoplasm                         |
| 8722 | ENSG00000169738 | DCXR      | Uncertain | Microtubu                           |
| 8723 | ENSG00000169740 | ZNF32     | Approved  | Nuclear bodies;Nuc                  |
| 8724 | ENSG00000169744 | LDB2      | Supported | Nucleoli;NucleoplaPlasma me         |
| 8725 | ENSG00000169756 | LIMS1     | Supported | Cytosol;Focal adhesion site         |
| 8726 | ENSG00000169758 | TMEM266   | Supported | Cytosol;Plasma membrane             |
| 8727 | ENSG00000169760 | NLGN1     | Uncertain | Nuclear b                           |
| 8728 | ENSG00000169762 | TAPT1     | Approved  | Vesicles                            |
| 8729 | ENSG00000169764 | UGP2      | Approved  | Centrosome;Mitocho                  |
| 8730 | ENSG00000169783 | LINGO1    | Approved  | Plasma membrane                     |
| 8731 | ENSG00000169813 | HNRNPF    | Enhanced  | Nucleoplasm                         |
| 8732 | ENSG00000169826 | CSGALNACT | Approved  | Endoplasmic reticu                  |
| 8733 | ENSG00000169851 | PCDH7     | Enhanced  | Cell Junctions;Plasma membrane      |
| 8734 | ENSG00000169855 | ROBO1     | Enhanced  | Plasma membrane                     |
| 8735 | ENSG00000169857 | AVEN      | Approved  | Actin filaments;Ce                  |
| 8736 | ENSG00000169862 | CTNND2    | Approved  | Cell Junctions;Gol                  |
| 8737 | ENSG00000169871 | TRIM56    | Approved  | Cytosol;Nucleoplas                  |
| 8738 | ENSG00000169884 | WNT10B    | Approved  | Golgi apparatus                     |
| 8739 | ENSG00000169895 | SYAP1     | Enhanced  | Golgi appCytosol;Nucleoplasm        |
| 8740 | ENSG00000169902 | TPST1     | Supported | Golgi apparatus                     |
| 8741 | ENSG00000169903 | TM4SF4    | Approved  | Cytosol;Plasma mem                  |
| 8742 | ENSG00000169905 | TOR1AIP2  | Enhanced  | Endoplasmic reticulum               |
| 8743 | ENSG00000169914 | OTUD3     | Approved  | Cytosol;Intermedia                  |

|      |                 |          |           |                 |                             |
|------|-----------------|----------|-----------|-----------------|-----------------------------|
| 8744 | ENSG00000169918 | OTUD7A   | Approved  |                 | Cytosol;Nucleoli            |
| 8745 | ENSG00000169919 | GUSB     | Supported | Vesicles        |                             |
| 8746 | ENSG00000169925 | BRD3     | Approved  |                 | Nuclear bodies              |
| 8747 | ENSG00000169946 | ZFPM2    | Supported | Nucleoplasm     |                             |
| 8748 | ENSG00000169951 | ZNF764   | Approved  |                 | Cytosol                     |
| 8749 | ENSG00000169955 | ZNF747   | Approved  |                 | Centrosome;Cytosol          |
| 8750 | ENSG00000169957 | ZNF768   | Approved  |                 | Nucleoplasm;Vesicl          |
| 8751 | ENSG00000169964 | TMEM42   | Uncertain |                 | Nucleoli;                   |
| 8752 | ENSG00000169967 | MAP3K2   | Supported |                 | Cytosol;Nucleoplasm         |
| 8753 | ENSG00000169972 | PUSL1    | Enhanced  | Vesicles        |                             |
| 8754 | ENSG00000169976 | SF3B5    | Enhanced  | Nucleoplasm     |                             |
| 8755 | ENSG00000169981 | ZNF35    | Approved  |                 | Nucleoplasm                 |
| 8756 | ENSG00000169989 | TIGD4    | Approved  |                 | Cytosol;Nucleoplas          |
| 8757 | ENSG00000169991 | IFFO2    | Approved  |                 | Nucleoplasm;Plasma          |
| 8758 | ENSG00000169992 | NLGN2    | Approved  |                 | Mitochondria                |
| 8759 | ENSG00000170004 | CHD3     | Approved  |                 | Centriolar satelli          |
| 8760 | ENSG00000170006 | TMEM154  | Approved  |                 | Nuclear membrane;N          |
| 8761 | ENSG00000170011 | MYRIP    | Approved  |                 | Golgi apparatus;Nu          |
| 8762 | ENSG00000170027 | YWHAG    | Supported | Cytosol         | Nucleoli;Nucleopla          |
| 8763 | ENSG00000170037 | CNTROB   | Supported |                 | Centrosome;Cytosol          |
| 8764 | ENSG00000170044 | ZPLD1    | Approved  |                 | Nucleoplasm                 |
| 8765 | ENSG00000170049 | KCNAB3   | Approved  |                 | Mitochondria                |
| 8766 | ENSG00000170085 | SIMC1    | Supported | Nucleoplasm     | Nucleoli fibrillar          |
| 8767 | ENSG00000170088 | TMEM192  | Supported |                 | EndosomesNucleoplasm        |
| 8768 | ENSG00000170091 | NSG2     | Enhanced  | Golgi apparatus |                             |
| 8769 | ENSG00000170100 | ZNF778   | Supported |                 | Nuclear bodies;Nucleoplasm  |
| 8770 | ENSG00000170122 | FOXD4    | Approved  |                 | Nucleoplasm                 |
| 8771 | ENSG00000170142 | UBE2E1   | Approved  |                 | Nucleoplasm                 |
| 8772 | ENSG00000170144 | HNRNPA3  | Enhanced  | Nucleoplasm     |                             |
| 8773 | ENSG00000170145 | SIK2     | Approved  |                 | Golgi apparatus             |
| 8774 | ENSG00000170160 | CCDC144A | Approved  |                 | Nucleoplasm;Vesicl          |
| 8775 | ENSG00000170166 | HOXD4    | Supported | Nucleopla       | Cell Junctions              |
| 8776 | ENSG00000170180 | GYPA     | Approved  | Plasma me       | Cytosol;Nucleoplas          |
| 8777 | ENSG00000170185 | USP38    | Approved  |                 | Centrosome;Cytosol          |
| 8778 | ENSG00000170191 | NANP     | Approved  |                 | Nuclear membrane            |
| 8779 | ENSG00000170214 | ADRA1B   | Supported |                 | Plasma membrane             |
| 8780 | ENSG00000170234 | PWWP2A   | Supported |                 | NucleoplaFocal adhesion sit |
| 8781 | ENSG00000170248 | PDCD6IP  | Enhanced  | Vesicles        |                             |
| 8782 | ENSG00000170260 | ZNF212   | Supported |                 | Nucleoplasm                 |
| 8783 | ENSG00000170265 | ZNF282   | Approved  |                 | Cytosol;Nucleoplas          |
| 8784 | ENSG00000170266 | GLB1     | Supported |                 | Vesicles Golgi apparatus    |
| 8785 | ENSG00000170270 | GON7     | Supported |                 | Nucleoli;Nucleoplasm        |
| 8786 | ENSG00000170275 | CRTAP    | Approved  |                 | Actin filaments;Cy          |
| 8787 | ENSG00000170290 | SLN      | Approved  |                 | Microtubules                |
| 8788 | ENSG00000170291 | ELP5     | Supported |                 | Cytosol;Nucleoplasm         |
| 8789 | ENSG00000170293 | CMTM8    | Approved  |                 | Nucleoplasm                 |
| 8790 | ENSG00000170296 | GABARAP  | Approved  |                 | Vesicles                    |
| 8791 | ENSG00000170298 | LGALS9B  | Uncertain |                 | Cytosol                     |
| 8792 | ENSG00000170310 | STX8     | Approved  |                 | Cytosol;Golgi appa          |
| 8793 | ENSG00000170312 | CDK1     | Supported |                 | Cytosol;Nucleoplasm         |
| 8794 | ENSG00000170322 | NFRKB    | Enhanced  | Nucleoplasm     |                             |
| 8795 | ENSG00000170325 | PRDM10   | Approved  |                 | Nucleoli fibrillar          |
| 8796 | ENSG00000170340 | B3GNT2   | Approved  |                 | Vesicles                    |
| 8797 | ENSG00000170345 | FOS      | Supported |                 | Nucleoplasm                 |
| 8798 | ENSG00000170348 | TMED10   | Supported |                 | Golgi apparatus             |

|      |                 |          |           |                             |
|------|-----------------|----------|-----------|-----------------------------|
| 8799 | ENSG00000170364 | SETMAR   | Supported | Nucleoli                    |
| 8800 | ENSG00000170365 | SMAD1    | Supported | Cytosol;Nucleoplasm;Plasma  |
| 8801 | ENSG00000170370 | EMX2     | Approved  | Nucleoplasm                 |
| 8802 | ENSG00000170379 | TCAF2    | Supported | Cell Junctions;Plasma membr |
| 8803 | ENSG00000170381 | SEMA3E   | Approved  | Nucleoplasm;Vesicl          |
| 8804 | ENSG00000170382 | LRRN2    | Approved  | Endoplasmic reticu          |
| 8805 | ENSG00000170385 | SLC30A1  | Supported | Plasma membrane;Vesicles    |
| 8806 | ENSG00000170396 | ZNF804A  | Approved  | Endoplasmic reticu          |
| 8807 | ENSG00000170412 | GPRC5C   | Uncertain | Centriola                   |
| 8808 | ENSG00000170417 | TMEM182  | Approved  | Nucleoplasm;Vesicl          |
| 8809 | ENSG00000170421 | KRT8     | Supported | Intermediate filaments      |
| 8810 | ENSG00000170425 | ADORA2B  | Uncertain | Cytosol                     |
| 8811 | ENSG00000170430 | MGMT     | Enhanced  | Nucleoplasm                 |
| 8812 | ENSG00000170439 | METTL7B  | Supported | Microtubules;Vesicles       |
| 8813 | ENSG00000170442 | KRT86    | Approved  | Cytosol                     |
| 8814 | ENSG00000170445 | HARS     | Enhanced  | Cytosol                     |
| 8815 | ENSG00000170448 | NFXL1    | Approved  | Nucleoplasm                 |
| 8816 | ENSG00000170454 | KRT75    | Approved  | Cytosol;Plasma mem          |
| 8817 | ENSG00000170456 | DENND5B  | Approved  | Microtubules;Nucle          |
| 8818 | ENSG00000170458 | CD14     | Supported | Vesicles                    |
| 8819 | ENSG00000170464 | DNAJC18  | Supported | Cell Junctions              |
| 8820 | ENSG00000170465 | KRT6C    | Approved  | Intermediate filam          |
| 8821 | ENSG00000170468 | RIOX1    | Supported | Nucleoli                    |
| 8822 | ENSG00000170469 | SPATA24  | Supported | Cytosol;Nucleoplasm         |
| 8823 | ENSG00000170471 | RALGAPB  | Approved  | Nuclear speckles            |
| 8824 | ENSG00000170473 | PYM1     | Supported | Cytosol;NCell Junctions     |
| 8825 | ENSG00000170477 | KRT4     | Supported | Intermediate filaments      |
| 8826 | ENSG00000170485 | NPAS2    | Approved  | Nucleoplasm                 |
| 8827 | ENSG00000170498 | KISS1    | Approved  | Vesicles                    |
| 8828 | ENSG00000170500 | LONRF2   | Supported | Nucleoplasm                 |
| 8829 | ENSG00000170502 | NUDT9    | Approved  | MitochondCell Junctions;Nuc |
| 8830 | ENSG00000170509 | HSD17B13 | Approved  | Golgi apparatus;Ve          |
| 8831 | ENSG00000170515 | PA2G4    | Approved  | Cytosol                     |
| 8832 | ENSG00000170525 | PFKFB3   | Enhanced  | Nucleoplasm                 |
| 8833 | ENSG00000170537 | TMC7     | Approved  | Vesicles                    |
| 8834 | ENSG00000170540 | ARL6IP1  | Approved  | Endoplasmic reticu          |
| 8835 | ENSG00000170542 | SERPINB9 | Approved  | Cytosol Nucleoplasm         |
| 8836 | ENSG00000170545 | SMAGP    | Supported | Nucleoplasm;Plasma membrane |
| 8837 | ENSG00000170549 | IRX1     | Approved  | Golgi apparatus;Nu          |
| 8838 | ENSG00000170558 | CDH2     | Supported | Cell Junctions;Plasma membr |
| 8839 | ENSG00000170561 | IRX2     | Approved  | Nucleoli;Nucleopla          |
| 8840 | ENSG00000170577 | SIX2     | Supported | NucleoplaNuclear membrane   |
| 8841 | ENSG00000170581 | STAT2    | Supported | Cytosol;Plasma membrane     |
| 8842 | ENSG00000170584 | NUDCD2   | Approved  | CytokinetCytosol;Microtubul |
| 8843 | ENSG00000170604 | IRF2BP1  | Supported | Nucleoplasm                 |
| 8844 | ENSG00000170606 | HSPA4    | Supported | Cytosol;Nucleoplasm         |
| 8845 | ENSG00000170608 | FOXA3    | Approved  | Nucleoplasm                 |
| 8846 | ENSG00000170619 | COMMD5   | Supported | Cytosol;Nucleoplasm         |
| 8847 | ENSG00000170627 | GTSF1    | Approved  | Nucleoplasm                 |
| 8848 | ENSG00000170631 | ZNF16    | Supported | Nucleoli;Nucleoplasm        |
| 8849 | ENSG00000170632 | ARMC10   | Enhanced  | Mitochondria                |
| 8850 | ENSG00000170633 | RNF34    | Supported | Nuclear bodies;Nucleoplasm  |
| 8851 | ENSG00000170634 | ACYP2    | Approved  | Nucleoplasm                 |
| 8852 | ENSG00000170638 | TRABD    | Approved  | Mitochondria;Nucle          |
| 8853 | ENSG00000170653 | ATF7     | Approved  | Cytosol;Nucleoplas          |

|      |                 |          |           |             |                          |
|------|-----------------|----------|-----------|-------------|--------------------------|
| 8854 | ENSG00000170667 | RASA4B   | Uncertain |             | Cell Junc                |
| 8855 | ENSG00000170677 | SOCS6    | Approved  |             | Cytosol;Nuclear sp       |
| 8856 | ENSG00000170681 | CAVIN4   | Supported | Plasma me   | Golgi apparatus;Nu       |
| 8857 | ENSG00000170684 | ZNF296   | Approved  |             | Centrosome;Nucleop       |
| 8858 | ENSG00000170689 | HOXB9    | Approved  |             | Mitochondria;Nucle       |
| 8859 | ENSG00000170703 | TTLL6    | Approved  |             | Microtubules;Vesic       |
| 8860 | ENSG00000170734 | POLH     | Enhanced  | Nucleoplasm | Cytosol                  |
| 8861 | ENSG00000170745 | KCNS3    | Supported |             | Cytosol;PGolgi apparatus |
| 8862 | ENSG00000170759 | KIF5B    | Enhanced  | Cytosol     | Centriolar satellite     |
| 8863 | ENSG00000170775 | GPR37    | Approved  |             | Cytosol;Nuclear me       |
| 8864 | ENSG00000170776 | AKAP13   | Supported |             | Cytosol                  |
| 8865 | ENSG00000170779 | CDCA4    | Supported |             | Cytosol;Nucleoplasm      |
| 8866 | ENSG00000170791 | CHCHD7   | Approved  |             | Aggresome;Cell Jun       |
| 8867 | ENSG00000170801 | HTRA3    | Approved  |             | Vesicles                 |
| 8868 | ENSG00000170802 | FOXN2    | Supported |             | Nucleoplasm;Vesicles     |
| 8869 | ENSG00000170819 | BFSP2    | Uncertain |             | Cytosol;P                |
| 8870 | ENSG00000170832 | USP32    | Approved  |             | Cytosol;Golgi appa       |
| 8871 | ENSG00000170836 | PPM1D    | Approved  |             | Endoplasmic reticu       |
| 8872 | ENSG00000170837 | GPR27    | Approved  |             | Actin filaments;Cy       |
| 8873 | ENSG00000170852 | KBTBD2   | Approved  |             | Nucleoli fibrillar       |
| 8874 | ENSG00000170854 | RIOX2    | Supported |             | Nucleoli;Nucleoplasm     |
| 8875 | ENSG00000170855 | TRIAP1   | Approved  |             | Mitochondria;Nucle       |
| 8876 | ENSG00000170860 | LSM3     | Approved  |             | Nucleoli;Nucleopla       |
| 8877 | ENSG00000170871 | KIAA0232 | Approved  |             | Cytosol                  |
| 8878 | ENSG00000170873 | MTSS1    | Uncertain |             | Cytosol;P                |
| 8879 | ENSG00000170891 | CYTL1    | Supported | Endoplasm   | Nuclear membrane         |
| 8880 | ENSG00000170892 | TSEN34   | Supported |             | Nucleoplasm              |
| 8881 | ENSG00000170903 | MSANTD4  | Approved  |             | Nucleoplasm              |
| 8882 | ENSG00000170909 | OSCAR    | Approved  |             | Cytosol;Nucleoplas       |
| 8883 | ENSG00000170915 | PAQR8    | Supported | Plasma me   | Golgi apparatus          |
| 8884 | ENSG00000170921 | TANC2    | Approved  |             | Cytosol                  |
| 8885 | ENSG00000170946 | DNAJC24  | Approved  |             | Cytosol                  |
| 8886 | ENSG00000170949 | ZNF160   | Approved  |             | Cytosol;Nuclear sp       |
| 8887 | ENSG00000170954 | ZNF415   | Approved  |             | Microtubules;Nucle       |
| 8888 | ENSG00000170955 | CAVIN3   | Approved  |             | Plasma membrane          |
| 8889 | ENSG00000170961 | HAS2     | Approved  |             | Nuclear speckles         |
| 8890 | ENSG00000170962 | PDGFD    | Approved  |             | Golgi apparatus;Ve       |
| 8891 | ENSG00000170989 | S1PR1    | Supported |             | Vesicles                 |
| 8892 | ENSG00000171004 | HS6ST2   | Uncertain |             | Nucleopla                |
| 8893 | ENSG00000171016 | PYG01    | Approved  |             | Cytosol;Nucleoplas       |
| 8894 | ENSG00000171044 | XKR6     | Approved  |             | Actin filaments          |
| 8895 | ENSG00000171045 | TSNARE1  | Approved  |             | Nucleoplasm              |
| 8896 | ENSG00000171051 | FPR1     | Approved  |             | Golgi apparatus;Nu       |
| 8897 | ENSG00000171055 | FEZ2     | Approved  |             | Cytosol;Golgi appa       |
| 8898 | ENSG00000171056 | SOX7     | Approved  |             | Golgi apparatus;Nu       |
| 8899 | ENSG00000171060 | C8orf74  | Uncertain |             | Nucleopla                |
| 8900 | ENSG00000171067 | C11orf24 | Uncertain | Vesicles    | Nucleopla                |
| 8901 | ENSG00000171094 | ALK      | Supported |             | Plasma membrane          |
| 8902 | ENSG00000171097 | KYAT1    | Supported |             | Cytosol                  |
| 8903 | ENSG00000171100 | MTM1     | Supported |             | Plasma membrane          |
| 8904 | ENSG00000171103 | TRMT61B  | Uncertain |             | Cytosol                  |
| 8905 | ENSG00000171105 | INSR     | Approved  | Plasma me   | Vesicles                 |
| 8906 | ENSG00000171109 | MFN1     | Supported |             | Mitochondria             |
| 8907 | ENSG00000171119 | NRTN     | Approved  |             | Golgi apparatus          |
| 8908 | ENSG00000171121 | KCNMB3   | Approved  |             | Mitochondria;Nucle       |

|      |                 |           |           |                        |                             |
|------|-----------------|-----------|-----------|------------------------|-----------------------------|
| 8909 | ENSG00000171126 | KCNG3     | Approved  |                        | Cytoplasmic bodies          |
| 8910 | ENSG00000171132 | PRKCE     | Approved  |                        | Vesicles                    |
| 8911 | ENSG00000171135 | JAGN1     | Approved  |                        | Vesicles                    |
| 8912 | ENSG00000171148 | TADA3     | Supported | Nucleoplasm            |                             |
| 8913 | ENSG00000171150 | SOCS5     | Approved  |                        | Cytosol;Nucleoplas          |
| 8914 | ENSG00000171155 | C1GALT1C1 | Approved  |                        | Cytosol                     |
| 8915 | ENSG00000171159 | C9orf16   | Approved  |                        | Microtubules                |
| 8916 | ENSG00000171161 | ZNF672    | Enhanced  | Nucleoplasm            |                             |
| 8917 | ENSG00000171163 | ZNF692    | Enhanced  | Nucleoli;Nucleoplasm   |                             |
| 8918 | ENSG00000171169 | NAIF1     | Approved  |                        | Cytosol;Nucleoplas          |
| 8919 | ENSG00000171174 | RBKS      | Approved  |                        | Cytosol                     |
| 8920 | ENSG00000171202 | TMEM126A  | Approved  |                        | Cytosol;Nucleoplas          |
| 8921 | ENSG00000171204 | TMEM126B  | Supported | Mitochondria           |                             |
| 8922 | ENSG00000171206 | TRIM8     | Supported | Nucleopla              | Cytosol;Vesicles            |
| 8923 | ENSG00000171208 | NETO2     | Approved  |                        | Golgi apparatus             |
| 8924 | ENSG00000171219 | CDC42BPG  | Supported |                        | Cytosol                     |
| 8925 | ENSG00000171222 | SCAND1    | Supported |                        | Actin filaments;Cytosol;Nuc |
| 8926 | ENSG00000171223 | JUNB      | Supported |                        | Nucleoplasm                 |
| 8927 | ENSG00000171224 | FAM241B   | Approved  |                        | Centrosome;Cytosol          |
| 8928 | ENSG00000171227 | TMEM37    | Approved  |                        | Cytosol;Nucleoli f          |
| 8929 | ENSG00000171236 | LRG1      | Approved  |                        | Vesicles                    |
| 8930 | ENSG00000171241 | SHCBP1    | Uncertain | Midbody;M              | MicrotubuNuclear b          |
| 8931 | ENSG00000171262 | FAM98B    | Supported | Nucleopla              | Vesicles                    |
| 8932 | ENSG00000171291 | ZNF439    | Uncertain |                        | Nucleopla                   |
| 8933 | ENSG00000171295 | ZNF440    | Approved  |                        | Nucleoplasm                 |
| 8934 | ENSG00000171307 | ZDHHC16   | Supported | Nucleopla              | Cytosol;Nuclear me          |
| 8935 | ENSG00000171310 | CHST11    | Approved  |                        | Golgi apparatus             |
| 8936 | ENSG00000171311 | EXOSC1    | Approved  |                        | Nuclear bodies;Nuc          |
| 8937 | ENSG00000171314 | PGAM1     | Approved  |                        | Nucleoplasm                 |
| 8938 | ENSG00000171316 | CHD7      | Supported | Nucleoli;Nucleoplasm   |                             |
| 8939 | ENSG00000171320 | ESCO2     | Supported | Golgi apparatus;Nu     | Cell Junctions              |
| 8940 | ENSG00000171345 | KRT19     | Supported |                        | Intermediate filaments      |
| 8941 | ENSG00000171346 | KRT15     | Supported |                        | Intermediate filamNucleopla |
| 8942 | ENSG00000171357 | LURAP1    | Supported |                        | Cytosol Vesicles            |
| 8943 | ENSG00000171365 | CLCN5     | Supported |                        | Golgi apparatus;PI          |
| 8944 | ENSG00000171368 | TPPP      | Supported |                        | Cytosol Mitochondria        |
| 8945 | ENSG00000171401 | KRT13     | Enhanced  | Intermediate filaments |                             |
| 8946 | ENSG00000171405 | XAGE5     | Approved  |                        | Nucleoplasm;Vesicl          |
| 8947 | ENSG00000171408 | PDE7B     | Approved  |                        | Nucleoplasm                 |
| 8948 | ENSG00000171421 | MRPL36    | Supported | Mitochond              | Nuclear bodies              |
| 8949 | ENSG00000171431 | KRT20     | Supported |                        | Cytosol                     |
| 8950 | ENSG00000171433 | GLOD5     | Uncertain |                        | Mitochond                   |
| 8951 | ENSG00000171443 | ZNF524    | Approved  |                        | Nucleoplasm                 |
| 8952 | ENSG00000171444 | MCC       | Supported |                        | Cytosol;Nucleoplas          |
| 8953 | ENSG00000171451 | DSEL      | Approved  |                        | Cytoplasm                   |
| 8954 | ENSG00000171453 | POLR1C    | Supported |                        | Nucleoplasm;Plasma          |
| 8955 | ENSG00000171453 | POLR1C    | Supported | Nucleoplasm            |                             |
| 8955 | ENSG00000171456 | ASXL1     | Approved  |                        | Nucleoli;Nucleopla          |
| 8956 | ENSG00000171462 | DLK2      | Approved  |                        | Nucleoli;Nucleopla          |
| 8957 | ENSG00000171466 | ZNF562    | Approved  |                        | Nucleoplasm                 |
| 8958 | ENSG00000171467 | ZNF318    | Supported | Nucleoplasm            | Cytosol                     |
| 8959 | ENSG00000171469 | ZNF561    | Approved  |                        | Nucleoplasm                 |
| 8960 | ENSG00000171475 | WIPF2     | Supported | Nucleoplasm            |                             |
| 8961 | ENSG00000171476 | HOPX      | Approved  |                        | Cytosol;Nuclear bo          |
| 8962 | ENSG00000171488 | LRRRC8C   | Approved  |                        | Golgi apparatus             |
| 8963 | ENSG00000171490 | RSL1D1    | Enhanced  | Nucleoli               |                             |

|      |                 |          |           |                             |
|------|-----------------|----------|-----------|-----------------------------|
| 8964 | ENSG00000171492 | LRRC8D   | Approved  | Mitochondria;Nucle          |
| 8965 | ENSG00000171497 | PPID     | Supported | Cytosol;Nucleoli;Nucleoplas |
| 8966 | ENSG00000171517 | LPAR3    | Supported | Plasma membrane             |
| 8967 | ENSG00000171530 | TBCA     | Supported | Microtubules Nucleoli       |
| 8968 | ENSG00000171533 | MAP6     | Uncertain | Plasma me                   |
| 8969 | ENSG00000171551 | ECEL1    | Approved  | Nuclear membrane;N          |
| 8970 | ENSG00000171552 | BCL2L1   | Approved  | Mitochondria                |
| 8971 | ENSG00000171557 | FGG      | Approved  | Endoplasmic reticu          |
| 8972 | ENSG00000171560 | FGA      | Approved  | Endoplasmic reticu          |
| 8973 | ENSG00000171564 | FGB      | Enhanced  | Endoplasmic reticulum       |
| 8974 | ENSG00000171566 | PLRG1    | Enhanced  | Nuclear sNuclear membrane   |
| 8975 | ENSG00000171574 | ZNF584   | Approved  | Nuclear speckles            |
| 8976 | ENSG00000171587 | DSCAM    | Approved  | Cytosol;Nucleoplas          |
| 8977 | ENSG00000171604 | CXXC5    | Supported | NucleoplasCytosol           |
| 8978 | ENSG00000171606 | ZNF274   | Supported | Centrosome;Nucleoplasm      |
| 8979 | ENSG00000171608 | PIK3CD   | Approved  | Cytokinetic bridge          |
| 8980 | ENSG00000171617 | ENC1     | Uncertain | Plasma me                   |
| 8981 | ENSG00000171634 | BPTF     | Enhanced  | Nucleoplasm                 |
| 8982 | ENSG00000171649 | ZIK1     | Approved  | Intermediate filam          |
| 8983 | ENSG00000171659 | GPR34    | Uncertain | Cytosol;N                   |
| 8984 | ENSG00000171680 | PLEKHG5  | Approved  | Nucleoplasm                 |
| 8985 | ENSG00000171681 | ATF7IP   | Enhanced  | Nuclear bodies;Nucleoplasm  |
| 8986 | ENSG00000171695 | LKAAEAR1 | Approved  | Nucleoplasm                 |
| 8987 | ENSG00000171700 | RGS19    | Supported | Cell JuncNucleoli fibrillar |
| 8988 | ENSG00000171703 | TCEA2    | Supported | Centrosome;Nucleoplasm      |
| 8989 | ENSG00000171720 | HDAC3    | Supported | Golgi apparatus;Nucleoplasm |
| 8990 | ENSG00000171723 | GPHN     | Uncertain | Cytoplasm                   |
| 8991 | ENSG00000171724 | VAT1L    | Approved  | Cytosol                     |
| 8992 | ENSG00000171729 | TMEM51   | Approved  | Cytosol;Nucleoplas          |
| 8993 | ENSG00000171735 | CAMTA1   | Supported | Cytosol                     |
| 8994 | ENSG00000171747 | LGALS4   | Uncertain | Plasma me                   |
| 8995 | ENSG00000171757 | LRRC34   | Approved  | Cell Junctions;Mic          |
| 8996 | ENSG00000171759 | PAH      | Approved  | Endoplasmic reticu          |
| 8997 | ENSG00000171763 | SPATA5L1 | Approved  | Nucleoli;Nucleoplas         |
| 8998 | ENSG00000171766 | GATM     | Supported | Mitochondria                |
| 8999 | ENSG00000171772 | SYCE1    | Uncertain | Cytosol;N                   |
| 9000 | ENSG00000171777 | RASGRP4  | Supported | Cytosol;PNucleoplasm        |
| 9001 | ENSG00000171786 | NHLH1    | Approved  | Golgi apparatus             |
| 9002 | ENSG00000171790 | SLFNL1   | Approved  | Cytosol                     |
| 9003 | ENSG00000171791 | BCL2     | Supported | Nuclear nNucleoplasm        |
| 9004 | ENSG00000171793 | CTPS1    | Supported | Actin filaments;Cytosol     |
| 9005 | ENSG00000171806 | METTL18  | Approved  | Cytosol;Nucleoplas          |
| 9006 | ENSG00000171812 | COL8A2   | Uncertain | Golgi app                   |
| 9007 | ENSG00000171813 | PWWP2B   | Enhanced  | Nucleoplasm                 |
| 9008 | ENSG00000171817 | ZNF540   | Supported | Cytosol;Nucleoplasm;Vesicle |
| 9009 | ENSG00000171823 | FBXL14   | Approved  | Cytosol;Golgi appa          |
| 9010 | ENSG00000171824 | EXOSC10  | Supported | Cytosol;Nucleoli;Nucleoplas |
| 9011 | ENSG00000171827 | ZNF570   | Approved  | Nucleoplasm                 |
| 9012 | ENSG00000171840 | NINJ2    | Approved  | Endoplasmic reticu          |
| 9013 | ENSG00000171843 | MLLT3    | Supported | Nucleoplasm Cytosol         |
| 9014 | ENSG00000171848 | RRM2     | Supported | Cytosol                     |
| 9015 | ENSG00000171853 | TRAPPC12 | Supported | Golgi apparatus;Nucleoplasm |
| 9016 | ENSG00000171858 | RPS21    | Supported | Cytosol;Endoplasmic reticul |
| 9017 | ENSG00000171861 | MRM3     | Supported | Mitochondria                |
| 9018 | ENSG00000171862 | PTEN     | Supported | Cytosol;Nucleoplasm         |



|      |                 |           |           |                  |                                         |
|------|-----------------|-----------|-----------|------------------|-----------------------------------------|
| 9019 | ENSG00000171863 | RPS7      | Approved  |                  | Cytosol;Endoplasmic                     |
| 9020 | ENSG00000171867 | PRNP      | Approved  |                  | Cytosol;Nuclear membrane                |
| 9021 | ENSG00000171885 | AQP4      | Approved  |                  | Cell Junctions;Plasma membrane          |
| 9022 | ENSG00000171914 | TLN2      | Supported |                  | Cytosol;Focal adhesion site             |
| 9023 | ENSG00000171916 | LGALS9C   | Approved  |                  | Cytosol                                 |
| 9024 | ENSG00000171928 | TVP23B    | Approved  |                  | Golgi apparatus                         |
| 9025 | ENSG00000171931 | FBXW10    | Approved  |                  | Nucleoplasm                             |
| 9026 | ENSG00000171940 | ZNF217    | Enhanced  | Nuclear speckles |                                         |
| 9027 | ENSG00000171943 | SRGAP2C   | Approved  |                  | Cytosol                                 |
| 9028 | ENSG00000171951 | SCG2      | Approved  |                  | Golgi apparatus;Vesicles                |
| 9029 | ENSG00000171953 | ATPAF2    | Enhanced  | Cytosol          |                                         |
| 9030 | ENSG00000171956 | FOXB1     | Approved  |                  | Mitochondria;Nucleoplasm                |
| 9031 | ENSG00000171970 | ZNF57     | Approved  |                  | Nucleoli                                |
| 9032 | ENSG00000171984 | C20orf196 | Approved  |                  | Endoplasmic reticulum                   |
| 9033 | ENSG00000171988 | JMJD1C    | Supported |                  | Cytosol;Nucleoplasm                     |
| 9034 | ENSG00000171992 | SYNPO     | Approved  |                  | Actin filaments;Cytosol                 |
| 9035 | ENSG00000172000 | ZNF556    | Approved  |                  | Nucleoplasm                             |
| 9036 | ENSG00000172005 | MAL       | Approved  |                  | Centrosome;Golgi apparatus              |
| 9037 | ENSG00000172006 | ZNF554    | Supported |                  | Nucleoli;Nucleoplasm                    |
| 9038 | ENSG00000172009 | THOP1     | Supported |                  | Cytosol                                 |
| 9039 | ENSG00000172016 | REG3A     | Approved  |                  | Cytosol                                 |
| 9040 | ENSG00000172020 | GAP43     | Enhanced  | Plasma membrane  |                                         |
| 9041 | ENSG00000172031 | EPHX4     | Approved  |                  | Vesicles                                |
| 9042 | ENSG00000172037 | LAMB2     | Approved  |                  | Cytosol;Vesicles                        |
| 9043 | ENSG00000172053 | QARS      | Enhanced  | Cytosol          |                                         |
| 9044 | ENSG00000172057 | ORMDL3    | Supported |                  | Endoplasmic reticulum                   |
| 9045 | ENSG00000172058 | SERF1A    | Approved  |                  | Nuclear bodies                          |
| 9046 | ENSG00000172059 | KLF11     | Supported |                  | Nucleoplasm;Cytosol;Focal adhesion site |
| 9047 | ENSG00000172061 | LRRC15    | Approved  |                  | Plasma membrane;Vesicles                |
| 9048 | ENSG00000172062 | SMN1      | Supported |                  | Cytosol;Nuclear bodies                  |
| 9049 | ENSG00000172081 | MOB3A     | Uncertain |                  | Cytosol;Intermediate filaments          |
| 9050 | ENSG00000172086 | KRCC1     | Approved  |                  | Cytosol;Nucleoli                        |
| 9051 | ENSG00000172113 | NME6      | Approved  |                  | Vesicles                                |
| 9052 | ENSG00000172115 | CYCS      | Supported | Mitochondria     |                                         |
| 9053 | ENSG00000172116 | CD8B      | Supported |                  | Plasma membrane                         |
| 9054 | ENSG00000172137 | CALB2     | Enhanced  | Cytosol          |                                         |
| 9055 | ENSG00000172159 | FRMD3     | Approved  |                  | Golgi apparatus;Nucleoplasm             |
| 9056 | ENSG00000172167 | MTBP      | Approved  |                  | Nuclear bodies;Nucleoplasm              |
| 9057 | ENSG00000172171 | TEFM      | Enhanced  | Mitochondria     |                                         |
| 9058 | ENSG00000172175 | MALT1     | Approved  |                  | Cytosol;Nucleoli                        |
| 9059 | ENSG00000172201 | ID4       | Supported |                  | Nucleoplasm                             |
| 9060 | ENSG00000172216 | CEBPB     | Enhanced  | Nucleoplasm      |                                         |
| 9061 | ENSG00000172232 | AZU1      | Enhanced  | Vesicles         |                                         |
| 9062 | ENSG00000172239 | PAIP1     | Approved  |                  | Cytosol;Plasma membrane                 |
| 9063 | ENSG00000172260 | NEGR1     | Approved  |                  | Actin filaments;Cytosol                 |
| 9064 | ENSG00000172262 | ZNF131    | Enhanced  | Nucleoplasm      | Intermediate filaments                  |
| 9065 | ENSG00000172264 | MACROD2   | Supported |                  | Nucleoli;Nucleoplasm                    |
| 9066 | ENSG00000172270 | BSG       | Approved  |                  | Vesicles                                |
| 9067 | ENSG00000172292 | CERS6     | Supported |                  | Nucleoplasm                             |
| 9068 | ENSG00000172296 | SPTLC3    | Approved  |                  | Microtubules                            |
| 9069 | ENSG00000172301 | COPRS     | Supported |                  | Cytosol;Nucleoplasm;Plasma membrane     |
| 9070 | ENSG00000172331 | BPGM      | Approved  |                  | Nucleoli;Nucleoplasm                    |
| 9071 | ENSG00000172336 | POP7      | Supported |                  | Nucleoli;Vesicles                       |
| 9072 | ENSG00000172339 | ALG14     | Approved  |                  | Nucleoli;Nucleoplasm                    |
| 9073 | ENSG00000172340 | SUCLG2    | Supported |                  | Mitochondria;Plasma membrane            |

|      |                 |         |           |                          |                             |
|------|-----------------|---------|-----------|--------------------------|-----------------------------|
| 9074 | ENSG00000172345 | STARD5  | Approved  |                          | Cytosol;Vesicles            |
| 9075 | ENSG00000172346 | CSDC2   | Approved  |                          | Cytosol;Nucleoplas          |
| 9076 | ENSG00000172348 | RCAN2   | Approved  |                          | Mitochondria;Nucle          |
| 9077 | ENSG00000172349 | IL16    | Supported | Nuclear speckles         | Cytosol;Midbody ri          |
| 9078 | ENSG00000172354 | GNB2    | Supported |                          | Plasma membrane             |
| 9079 | ENSG00000172361 | CFAP53  | Approved  |                          | Midbody                     |
| 9080 | ENSG00000172375 | C2CD2L  | Approved  |                          | Cytosol;Nuclear me          |
| 9081 | ENSG00000172379 | ARNT2   | Supported |                          | Nucleoplasm                 |
| 9082 | ENSG00000172380 | GNG12   | Approved  |                          | Mitochondria                |
| 9083 | ENSG00000172382 | PRSS27  | Approved  |                          | Vesicles                    |
| 9084 | ENSG00000172399 | MYOZ2   | Approved  |                          | Cytosol;Nucleoplas          |
| 9085 | ENSG00000172403 | SYNP02  | Enhanced  | Actin filaments;Vesicles |                             |
| 9086 | ENSG00000172409 | CLP1    | Supported |                          | Nucleoplasm                 |
| 9087 | ENSG00000172425 | TTC36   | Uncertain |                          | Nucleopla                   |
| 9088 | ENSG00000172428 | COPS9   | Approved  |                          | Cytosol;Nucleoplas          |
| 9089 | ENSG00000172432 | GTPBP2  | Enhanced  | Vesicles                 |                             |
| 9090 | ENSG00000172456 | FGGY    | Approved  |                          | Nuclear bodies;Nuc          |
| 9091 | ENSG00000172461 | FUT9    | Approved  |                          | Cytokinetic bridge          |
| 9092 | ENSG00000172465 | TCEAL1  | Enhanced  | Nucleoplasm              |                             |
| 9093 | ENSG00000172466 | ZNF24   | Supported |                          | Nucleoplasm                 |
| 9094 | ENSG00000172469 | MANEA   | Supported |                          | Golgi apparatus             |
| 9095 | ENSG00000172476 | RAB40A  | Uncertain |                          | Vesicles                    |
| 9096 | ENSG00000172478 | C2orf54 | Approved  |                          | Golgi apparatus;Nu          |
| 9097 | ENSG00000172482 | AGXT    | Supported |                          | Vesicles                    |
| 9098 | ENSG00000172493 | AFF1    | Approved  |                          | Mitochondria;Nucle          |
| 9099 | ENSG00000172497 | ACOT12  | Approved  |                          | Cytosol;Nucleoplas          |
| 9100 | ENSG00000172500 | FIBP    | Supported |                          | Nuclear speckles            |
| 9101 | ENSG00000172530 | BANP    | Supported |                          | Nuclear bodies;Nucleoplasm  |
| 9102 | ENSG00000172531 | PPP1CA  | Supported |                          | Cytosol;NPlasma membrane    |
| 9103 | ENSG00000172534 | HCFC1   | Supported |                          | Mitochondria;Nucleoplasm    |
| 9104 | ENSG00000172572 | PDE3A   | Approved  |                          | Plasma membrane             |
| 9105 | ENSG00000172575 | RASGRP1 | Supported |                          | Cytosol;Plasma membrane     |
| 9106 | ENSG00000172578 | KLHL6   | Approved  |                          | Centriolar satelli          |
| 9107 | ENSG00000172586 | CHCHD1  | Supported |                          | Mitochondria;Nucleoli fibri |
| 9108 | ENSG00000172590 | MRPL52  | Supported |                          | MitochondNucleoplasm        |
| 9109 | ENSG00000172594 | SMPDL3A | Approved  |                          | Mitochondria;Nucle          |
| 9110 | ENSG00000172602 | RND1    | Supported |                          | Actin filVesicles           |
| 9111 | ENSG00000172613 | RAD9A   | Enhanced  | Nucleoplasm              |                             |
| 9112 | ENSG00000172661 | WASHC2C | Supported |                          | Vesicles Nucleoli Cytosol   |
| 9113 | ENSG00000172663 | TMEM134 | Supported |                          | Cytosol                     |
| 9114 | ENSG00000172667 | ZMAT3   | Supported |                          | Nucleoplasm                 |
| 9115 | ENSG00000172671 | ZFAND4  | Approved  |                          | Golgi apparatus             |
| 9116 | ENSG00000172716 | SLFN11  | Enhanced  | Nucleoplasm              |                             |
| 9117 | ENSG00000172725 | CORO1B  | Enhanced  | Cytosol;Plasma membrane  |                             |
| 9118 | ENSG00000172728 | FUT10   | Approved  |                          | Endoplasmic reticu          |
| 9119 | ENSG00000172731 | LRRC20  | Approved  |                          | Cytosol;Nucleoplas          |
| 9120 | ENSG00000172732 | MUS81   | Supported |                          | Nucleoli Nucleoplasm        |
| 9121 | ENSG00000172733 | PURG    | Approved  |                          | Nucleoli;Nucleopla          |
| 9122 | ENSG00000172738 | TMEM217 | Supported |                          | Nucleoli                    |
| 9123 | ENSG00000172748 | ZNF596  | Approved  |                          | Mitochondria;Nucle          |
| 9124 | ENSG00000172766 | NAA16   | Enhanced  | Cytosol                  |                             |
| 9125 | ENSG00000172771 | EFCAB12 | Approved  |                          | Midbody ring;Nucle          |
| 9126 | ENSG00000172775 | FAM192A | Supported |                          | Nucleoplasm;Vesicles        |
| 9127 | ENSG00000172780 | RAB43   | Supported |                          | Plasma membrane             |
| 9128 | ENSG00000172785 | CBWD1   | Approved  |                          | Plasma membrane             |

|      |                 |          |           |                        |                             |                    |
|------|-----------------|----------|-----------|------------------------|-----------------------------|--------------------|
| 9129 | ENSG00000172789 | HOXC5    | Supported |                        | Nucleoplasm                 | Cell Junctions     |
| 9130 | ENSG00000172795 | DCP2     | Approved  |                        |                             | Cell Junctions;Cyt |
| 9131 | ENSG00000172803 | SNX32    | Uncertain |                        |                             | Cell Junc          |
| 9132 | ENSG00000172809 | RPL38    | Supported |                        | Cytosol;Endoplasmic reticul |                    |
| 9133 | ENSG00000172818 | OVOL1    | Approved  |                        |                             | Nucleoplasm        |
| 9134 | ENSG00000172819 | RARG     | Supported |                        | Nucleoplasm                 |                    |
| 9135 | ENSG00000172824 | CES4A    | Approved  |                        |                             | Cytosol            |
| 9136 | ENSG00000172828 | CES3     | Approved  |                        |                             | Endoplasmic reticu |
| 9137 | ENSG00000172830 | SSH3     | Approved  |                        |                             | Actin filaments;Cy |
| 9138 | ENSG00000172831 | CES2     | Approved  |                        |                             | Cytosol;Golgi appa |
| 9139 | ENSG00000172840 | PDP2     | Supported |                        | Mitochondria                |                    |
| 9140 | ENSG00000172867 | KRT2     | Approved  |                        |                             | Cytosol;Golgi appa |
| 9141 | ENSG00000172869 | DMXL1    | Supported |                        | Cytosol;Nucleoli            |                    |
| 9142 | ENSG00000172878 | METAP1D  | Uncertain |                        |                             | Vesicles           |
| 9143 | ENSG00000172888 | ZNF621   | Enhanced  | Nuclear speckles       |                             |                    |
| 9144 | ENSG00000172890 | NADSYN1  | Approved  |                        | Vesicles                    | Cytosol;Golgi appa |
| 9145 | ENSG00000172893 | DHCR7    | Supported |                        | Cytosol;Endoplasmic reticul |                    |
| 9146 | ENSG00000172915 | NBEA     | Supported |                        | Cytosol;Nucleoli;Nucleopla  |                    |
| 9147 | ENSG00000172922 | RNASEH2C | Approved  |                        |                             | Nucleoplasm        |
| 9148 | ENSG00000172927 | MYEOV    | Approved  |                        |                             | Nucleoplasm;Vesicl |
| 9149 | ENSG00000172932 | ANKRD13D | Approved  |                        |                             | Mitochondria;Nucle |
| 9150 | ENSG00000172935 | MRGPRF   | Supported |                        | Plasma membrane             | Nuclear membrane   |
| 9151 | ENSG00000172936 | MYD88    | Supported |                        | Cytosol                     | Mitochondria;Vesic |
| 9152 | ENSG00000172939 | OXSRI    | Enhanced  | Cytosol                |                             |                    |
| 9153 | ENSG00000172943 | PHF8     | Supported |                        | Nucleoplasm                 |                    |
| 9154 | ENSG00000172954 | LCLAT1   | Supported |                        | Endoplasmic reticu          | Cytosol            |
| 9155 | ENSG00000172977 | KAT5     | Supported |                        | Nucleoplasm                 |                    |
| 9156 | ENSG00000172985 | SH3RF3   | Supported | Nucleoplasm            |                             | Centrosome;Cytosol |
| 9157 | ENSG00000172986 | GXYLT2   | Approved  |                        |                             | Cytokinetic bridge |
| 9158 | ENSG00000172992 | DCAKD    | Approved  |                        |                             | Nucleoplasm        |
| 9159 | ENSG00000172995 | ARPP21   | Approved  |                        |                             | Cytosol;Nucleoli   |
| 9160 | ENSG00000173011 | TADA2B   | Approved  |                        |                             | Nuclear speckles   |
| 9161 | ENSG00000173020 | GRK2     | Approved  |                        |                             | Vesicles           |
| 9162 | ENSG00000173039 | RELA     | Enhanced  | Cytosol                |                             |                    |
| 9163 | ENSG00000173040 | EVC2     | Approved  |                        |                             | Mitochondria       |
| 9164 | ENSG00000173041 | ZNF680   | Approved  |                        |                             | Nucleoplasm        |
| 9165 | ENSG00000173064 | HECTD4   | Approved  |                        |                             | Nucleoplasm;Vesicl |
| 9166 | ENSG00000173065 | FAM222B  | Enhanced  | Nucleoplasm            |                             |                    |
| 9167 | ENSG00000173068 | BNC2     | Supported |                        | Nucleoplasm                 |                    |
| 9168 | ENSG00000173083 | HPSE     | Supported |                        | Nucleoplasm;Vesicles        |                    |
| 9169 | ENSG00000173085 | COQ2     | Approved  |                        |                             | Cytosol            |
| 9170 | ENSG00000173093 | CCDC63   | Approved  |                        |                             | Nuclear bodies;Nuc |
| 9171 | ENSG00000173110 | HSPA6    | Approved  |                        | Nucleoplasm;Vesicl          |                    |
| 9172 | ENSG00000173113 | TRMT112  | Approved  |                        |                             | Microtubules;Nucle |
| 9173 | ENSG00000173114 | LRRN3    | Approved  |                        | Cytosol;Nucleoplas          |                    |
| 9174 | ENSG00000173120 | KDM2A    | Approved  |                        |                             | Nucleoplasm        |
| 9175 | ENSG00000173137 | ADCK5    | Approved  |                        |                             | Cytosol;Plasma mem |
| 9176 | ENSG00000173141 | MRPL57   | Supported |                        | Mitochondria                |                    |
| 9177 | ENSG00000173145 | NOC3L    | Enhanced  | Nucleoli               | Nucleoplasm                 |                    |
| 9178 | ENSG00000173153 | ESRRA    | Supported |                        | Nucleoli                    | Cytokinetic bridge |
| 9179 | ENSG00000173163 | COMMD1   | Supported |                        | Cytosol;Nucleoplasm         |                    |
| 9180 | ENSG00000173166 | RAPH1    | Approved  |                        | Plasma membrane             | Cytosol Nuclear b  |
| 9181 | ENSG00000173171 | MTX1     | Supported |                        | Mitochondria                |                    |
| 9182 | ENSG00000173175 | ADCY5    | Enhanced  | Intermediate filaments |                             |                    |
| 9183 | ENSG00000173193 | PARP14   | Supported |                        | Cytosol                     |                    |

|      |                 |           |           |                 |                             |
|------|-----------------|-----------|-----------|-----------------|-----------------------------|
| 9184 | ENSG00000173200 | PARP15    | Approved  |                 | Mitochondria                |
| 9185 | ENSG00000173207 | CKS1B     | Approved  |                 | Cytosol;Mitochondr          |
| 9186 | ENSG00000173210 | ABLIM3    | Approved  |                 | Cell Junctions;Nuc          |
| 9187 | ENSG00000173212 | MAB21L3   | Approved  |                 | Nucleoplasm                 |
| 9188 | ENSG00000173218 | VANGL1    | Approved  |                 | Plasma membrane             |
| 9189 | ENSG00000173221 | GLRX      | Approved  |                 | Cytosol Plasma me           |
| 9190 | ENSG00000173226 | IQCB1     | Supported |                 | Cytokinetic bridge;Microtub |
| 9191 | ENSG00000173230 | GOLGB1    | Enhanced  | Golgi apparatus |                             |
| 9192 | ENSG00000173258 | ZNF483    | Approved  |                 | Nucleoli                    |
| 9193 | ENSG00000173261 | PLAC8L1   | Approved  |                 | Nucleoplasm                 |
| 9194 | ENSG00000173262 | SLC2A14   | Approved  |                 | Plasma membrane             |
| 9195 | ENSG00000173264 | GPR137    | Approved  |                 | Actin filaments;Nu          |
| 9196 | ENSG00000173267 | SNCG      | Supported | Centrosom       | Nuclear bodies              |
| 9197 | ENSG00000173269 | MMRN2     | Approved  |                 | Vesicles                    |
| 9198 | ENSG00000173272 | MZT2A     | Supported | Centrosom       | Cytosol                     |
| 9199 | ENSG00000173273 | TNKS      | Approved  |                 | Nuclear membrane;N          |
| 9200 | ENSG00000173275 | ZNF449    | Approved  |                 | Cytosol;Nucleoplas          |
| 9201 | ENSG00000173276 | ZBTB21    | Enhanced  | Nucleoplasm     |                             |
| 9202 | ENSG00000173281 | PPP1R3B   | Approved  |                 | Cytosol                     |
| 9203 | ENSG00000173320 | STOX2     | Uncertain |                 | Actin fil                   |
| 9204 | ENSG00000173327 | MAP3K11   | Supported |                 | Centriolar satellite;Cytoso |
| 9205 | ENSG00000173334 | TRIB1     | Approved  |                 | Cytosol;Plasma mem          |
| 9206 | ENSG00000173338 | KCNK7     | Approved  |                 | Plasma membrane             |
| 9207 | ENSG00000173376 | NDNF      | Supported |                 | Vesicles                    |
| 9208 | ENSG00000173391 | OLR1      | Supported |                 | Plasma meVesicles Nucleopla |
| 9209 | ENSG00000173402 | DAG1      | Supported |                 | Vesicles                    |
| 9210 | ENSG00000173406 | DAB1      | Enhanced  | Vesicles        |                             |
| 9211 | ENSG00000173409 | ARV1      | Approved  |                 | Vesicles                    |
| 9212 | ENSG00000173418 | NAA20     | Supported |                 | Cytosol                     |
| 9213 | ENSG00000173421 | CCDC36    | Approved  |                 | Nucleoplasm                 |
| 9214 | ENSG00000173436 | MINOS1    | Supported |                 | Mitochondria                |
| 9215 | ENSG00000173451 | THAP2     | Approved  |                 | Golgi apparatus;Nu          |
| 9216 | ENSG00000173452 | TMEM196   | Uncertain |                 | Golgi app                   |
| 9217 | ENSG00000173456 | RNF26     | Approved  |                 | Cytosol;Nucleoplas          |
| 9218 | ENSG00000173465 | SSSCA1    | Approved  |                 | Cytosol                     |
| 9219 | ENSG00000173467 | AGR3      | Supported | Endoplasm       | Vesicles                    |
| 9220 | ENSG00000173473 | SMARCC1   | Enhanced  | Nucleoplasm     |                             |
| 9221 | ENSG00000173480 | ZNF417    | Uncertain |                 | Nucleopla                   |
| 9222 | ENSG00000173482 | PTPRM     | Approved  |                 | Plasma membrane             |
| 9223 | ENSG00000173486 | FKBP2     | Approved  |                 | Plasma membrane             |
| 9224 | ENSG00000173530 | TNFRSF10D | Approved  |                 | Actin filaments;Pl          |
| 9225 | ENSG00000173540 | GMPPB     | Supported |                 | Nucleoplasm                 |
| 9226 | ENSG00000173542 | MOB1B     | Approved  |                 | Cytosol Nucleoli;Nucleopla  |
| 9227 | ENSG00000173545 | ZNF622    | Supported | Cytosol;G       | Nucleoli;Nucleoplasm        |
| 9228 | ENSG00000173546 | CSPG4     | Enhanced  | Plasma me       | Nucleoplasm                 |
| 9229 | ENSG00000173557 | C2orf70   | Approved  |                 | Nuclear membrane;V          |
| 9230 | ENSG00000173559 | NABP1     | Enhanced  | Nucleopla       | Cytosol                     |
| 9231 | ENSG00000173575 | CHD2      | Enhanced  | Nucleoplasm     |                             |
| 9232 | ENSG00000173581 | CCDC106   | Supported |                 | Nucleoplasm Cytosol         |
| 9233 | ENSG00000173588 | CEP83     | Approved  |                 | Golgi apparatus;Nu          |
| 9234 | ENSG00000173597 | SULT1B1   | Approved  |                 | Golgi apparatus;Nu          |
| 9235 | ENSG00000173598 | NUDT4     | Approved  |                 | Cytosol                     |
| 9236 | ENSG00000173599 | PC        | Enhanced  | Mitochondria    |                             |
| 9237 | ENSG00000173611 | SCAI      | Supported |                 | NucleoplaNuclear membrane   |
| 9238 | ENSG00000173614 | NMNAT1    | Supported |                 | Nuclear bodies;Nucleoplasm  |

|      |                 |          |           |                          |                        |
|------|-----------------|----------|-----------|--------------------------|------------------------|
| 9239 | ENSG00000173638 | SLC19A1  | Approved  |                          | Plasma membrane        |
| 9240 | ENSG00000173641 | HSPB7    | Approved  |                          | Nucleoplasm            |
| 9241 | ENSG00000173673 | HES3     | Approved  |                          | Nucleoplasm            |
| 9242 | ENSG00000173674 | EIF1AX   | Approved  |                          | Cytosol                |
| 9243 | ENSG00000173681 | BCLAF3   | Approved  |                          | Nucleoplasm            |
| 9244 | ENSG00000173692 | PSMD1    | Approved  |                          | Actin filaments;Nu     |
| 9245 | ENSG00000173698 | ADGRG2   | Approved  | Plasma me                | Cytosol                |
| 9246 | ENSG00000173705 | SUSD5    | Uncertain |                          | Golgi app              |
| 9247 | ENSG00000173706 | HEG1     | Approved  |                          | Vesicles               |
| 9248 | ENSG00000173715 | C11orf80 | Approved  |                          | Centrosome             |
| 9249 | ENSG00000173726 | TOMM20   | Enhanced  | Mitochondria             |                        |
| 9250 | ENSG00000173728 | C1orf100 | Approved  |                          | Cytosol;Nuclear bo     |
| 9251 | ENSG00000173744 | AGFG1    | Supported |                          | Vesicles               |
| 9252 | ENSG00000173786 | CNP      | Enhanced  | Cytosol;Nucleoplasm      |                        |
| 9253 | ENSG00000173801 | JUP      | Supported | Cell Junc                | Plasma me              |
| 9254 | ENSG00000173805 | HAP1     | Supported |                          | Vesicles               |
| 9255 | ENSG00000173821 | RNF213   | Supported |                          | Cytosol                |
| 9256 | ENSG00000173825 | TIGD3    | Approved  |                          | Nucleoli               |
| 9257 | ENSG00000173838 | #####    | Approved  |                          | Nuclear membrane;N     |
| 9258 | ENSG00000173848 | NET1     | Approved  |                          | Cytosol;Plasma mem     |
| 9259 | ENSG00000173852 | DPY19L1  | Approved  |                          | Nucleoplasm;Vesicl     |
| 9260 | ENSG00000173868 | PHOSPHO1 | Approved  |                          | Vesicles               |
| 9261 | ENSG00000173875 | ZNF791   | Approved  |                          | Actin filaments;Pl     |
| 9262 | ENSG00000173889 | PHC3     | Supported |                          | Nucleoplasm            |
| 9263 | ENSG00000173890 | GPR160   | Supported |                          | Plasma membrane        |
| 9264 | ENSG00000173894 | CBX2     | Supported |                          | Nucleoplasm            |
| 9265 | ENSG00000173898 | SPTBN2   | Supported |                          | Cell Junctions;Cytosol |
| 9266 | ENSG00000173905 | GOLIM4   | Enhanced  | Golgi apparatus          |                        |
| 9267 | ENSG00000173914 | RBM4B    | Approved  |                          | Cytosol;Nucleoplas     |
| 9268 | ENSG00000173915 | ATP5MD   | Supported | Mitochondria             |                        |
| 9269 | ENSG00000173917 | HOXB2    | Supported |                          | Nucleoplasm            |
| 9270 | ENSG00000173918 | C1QTNF1  | Approved  |                          | Cytosol;Nucleoplas     |
| 9271 | ENSG00000173926 | 3/3/2019 | Supported |                          | Vesicles               |
| 9272 | ENSG00000173930 | SLC04C1  | Approved  |                          | Cytosol;Nucleoplas     |
| 9273 | ENSG00000173933 | RBM4     | Approved  |                          | Cytosol;Nucleoplas     |
| 9274 | ENSG00000173960 | UBXN2A   | Approved  |                          | Centrosome             |
| 9275 | ENSG00000173988 | LRRC63   | Approved  |                          | Golgi apparatus        |
| 9276 | ENSG00000174007 | CEP19    | Supported | Centrosome               |                        |
| 9277 | ENSG00000174010 | KLHL15   | Approved  |                          | Aggresome;Cytosol      |
| 9278 | ENSG00000174013 | FBX045   | Approved  |                          | Cytosol                |
| 9279 | ENSG00000174015 | SPERT    | Approved  |                          | Cell Junctions;Pla     |
| 9280 | ENSG00000174032 | SLC25A30 | Approved  |                          | Nucleoplasm            |
| 9281 | ENSG00000174038 | C9orf131 | Approved  |                          | Mitochondria           |
| 9282 | ENSG00000174059 | CD34     | Approved  |                          | Cell Junctions;Nuc     |
| 9283 | ENSG00000174080 | CTSF     | Approved  |                          | Cytosol;Plasma mem     |
| 9284 | ENSG00000174106 | LEMD3    | Supported | Nuclear membrane         |                        |
| 9285 | ENSG00000174123 | TLR10    | Approved  |                          | Centrosome;Cytosol     |
| 9286 | ENSG00000174130 | TLR6     | Approved  |                          | Endoplasmic reticu     |
| 9287 | ENSG00000174132 | FAM174A  | Approved  |                          | Cytosol;Golgi appa     |
| 9288 | ENSG00000174136 | RGMB     | Approved  |                          | Nucleoplasm            |
| 9289 | ENSG00000174137 | FAM53A   | Uncertain |                          | Nucleopla              |
| 9290 | ENSG00000174156 | GSTA3    | Supported | Cytosol                  |                        |
| 9291 | ENSG00000174165 | ZDHHC24  | Approved  |                          | Cytosol;Vesicles       |
| 9292 | ENSG00000174173 | TRMT10C  | Supported | Mitochondria;Nucleoplasm |                        |
| 9293 | ENSG00000174177 | CTU2     | Supported | Mitochondria             |                        |

|      |                 |           |           |                            |                             |
|------|-----------------|-----------|-----------|----------------------------|-----------------------------|
| 9294 | ENSG00000174197 | MGA       | Supported |                            | Cytosol;Nucleoplasm         |
| 9295 | ENSG00000174206 | C12orf66  | Supported |                            | LysosomesCytokinetic bridge |
| 9296 | ENSG00000174226 | SNX31     | Approved  |                            | Cytosol;Golgi appa          |
| 9297 | ENSG00000174227 | PIGG      | Uncertain |                            | Nucleopla                   |
| 9298 | ENSG00000174231 | PRPF8     | Enhanced  | Nucleoplasm                |                             |
| 9299 | ENSG00000174233 | ADCY6     | Approved  |                            | Golgi apparatus             |
| 9300 | ENSG00000174238 | PITPNA    | Approved  |                            | Cytosol;Vesicles            |
| 9301 | ENSG00000174243 | DDX23     | Supported |                            | Nucleoli;Nucleoplasm        |
| 9302 | ENSG00000174282 | ZBTB4     | Supported |                            | Nuclear bodies;NucCytosol   |
| 9303 | ENSG00000174292 | TNK1      | Approved  |                            | Cell Junctions              |
| 9304 | ENSG00000174306 | ZHX3      | Supported |                            | Nucleoplasm                 |
| 9305 | ENSG00000174325 | DIRC1     | Approved  |                            | Nucleoplasm                 |
| 9306 | ENSG00000174327 | SLC16A13  | Supported |                            | Golgi appCytosol            |
| 9307 | ENSG00000174370 | C11orf45  | Approved  |                            | Cytosol                     |
| 9308 | ENSG00000174371 | EXO1      | Enhanced  | Nuclear bodies;Nucleoplasm |                             |
| 9309 | ENSG00000174373 | RALGAP1   | Approved  |                            | Cytosol;Mitochondr          |
| 9310 | ENSG00000174405 | LIG4      | Supported |                            | NucleoplaCytoplasmic bodies |
| 9311 | ENSG00000174428 | GTF2IRD2B | Approved  |                            | Nucleoplasm                 |
| 9312 | ENSG00000174444 | RPL4      | Supported |                            | Cytosol;ENuclear bodies     |
| 9313 | ENSG00000174446 | SNAPC5    | Supported |                            | Nucleoplasm                 |
| 9314 | ENSG00000174456 | C12orf76  | Approved  |                            | Actin filaments;Pl          |
| 9315 | ENSG00000174460 | ZCCHC12   | Approved  |                            | Nuclear bodies              |
| 9316 | ENSG00000174483 | BBS1      | Uncertain |                            | Midbody                     |
| 9317 | ENSG00000174485 | DENND4A   | Approved  |                            | Nucleoli;Nucleopla          |
| 9318 | ENSG00000174498 | IGDCC3    | Uncertain |                            | Nucleopla                   |
| 9319 | ENSG00000174501 | ANKRD36C  | Approved  |                            | Cytosol;Nucleoplas          |
| 9320 | ENSG00000174502 | SLC26A9   | Approved  |                            | Cell Junctions              |
| 9321 | ENSG00000174516 | PELI3     | Approved  |                            | Nucleoli;Nucleopla          |
| 9322 | ENSG00000174529 | TMEM81    | Approved  |                            | Intermediate filam          |
| 9323 | ENSG00000174547 | MRPL11    | Supported |                            | Mitochondria                |
| 9324 | ENSG00000174564 | IL20RB    | Approved  |                            | Cytosol;Vesicles            |
| 9325 | ENSG00000174574 | AKIRIN1   | Approved  |                            | NucleoplaNuclear membrane   |
| 9326 | ENSG00000174579 | MSL2      | Approved  |                            | Midbody;Nucleoplas          |
| 9327 | ENSG00000174586 | ZNF497    | Approved  |                            | Cell Junctions;Nuc          |
| 9328 | ENSG00000174599 | TRAM1L1   | Approved  |                            | Mitochondria                |
| 9329 | ENSG00000174606 | ANGEL2    | Supported | Nucleoplasm                | Mitochondria;Nucle          |
| 9330 | ENSG00000174607 | UGT8      | Approved  |                            | Mitochondria                |
| 9331 | ENSG00000174611 | KY        | Approved  |                            | Nucleoplasm                 |
| 9332 | ENSG00000174628 | IQCK      | Approved  |                            | Cytosol;Nuclear sp          |
| 9333 | ENSG00000174652 | ZNF266    | Supported | Vesicles                   | Nucleoplasm;Rods &          |
| 9334 | ENSG00000174669 | SLC29A2   | Uncertain |                            | Nucleopla                   |
| 9335 | ENSG00000174672 | BRSK2     | Approved  |                            | Golgi apparatus             |
| 9336 | ENSG00000174695 | TMEM167A  | Approved  |                            | Vesicles                    |
| 9337 | ENSG00000174705 | SH3PXD2B  | Approved  |                            | Nucleoli fibrillar          |
| 9338 | ENSG00000174718 | KIAA1551  | Supported |                            | Nucleoli Cytosol;Intermedia |
| 9339 | ENSG00000174720 | LARP7     | Supported |                            | NucleoplaCytosol            |
| 9340 | ENSG00000174738 | NR1D2     | Approved  |                            | Nucleoplasm                 |
| 9341 | ENSG00000174744 | BRMS1     | Approved  |                            | Centrosome                  |
| 9342 | ENSG00000174749 | FAM241A   | Enhanced  | Golgi apparatus            |                             |
| 9343 | ENSG00000174775 | HRAS      | Approved  |                            | Cytosol;Nucleoplas          |
| 9344 | ENSG00000174776 | WDR49     | Approved  |                            | Cytosol;Nuclear bo          |
| 9345 | ENSG00000174788 | PCP2      | Approved  |                            | Nuclear speckles;V          |
| 9346 | ENSG00000174791 | RIN1      | Approved  |                            | Nuclear membrane;N          |
| 9347 | ENSG00000174796 | THAP6     | Approved  |                            | Centrosome;Nucleop          |
| 9348 | ENSG00000174799 | CEP135    | Uncertain |                            | Focal adh                   |

|      |                 |          |           |                                      |
|------|-----------------|----------|-----------|--------------------------------------|
| 9349 | ENSG00000174804 | FZD4     | Approved  | Nucleoplasm;Plasma                   |
| 9350 | ENSG00000174807 | CD248    | Approved  | Nucleoplasm;Plasma                   |
| 9351 | ENSG00000174827 | PDZK1    | Approved  | Cytosol;Nucleoplas                   |
| 9352 | ENSG00000174839 | DENND6A  | Supported | Vesicles                             |
| 9353 | ENSG00000174842 | GLMN     | Approved  | Cytosol;Nucleoplas                   |
| 9354 | ENSG00000174851 | YIF1A    | Supported | Centriolar satellite;Golgi           |
| 9355 | ENSG00000174886 | NDUFA11  | Uncertain | Mitochond                            |
| 9356 | ENSG00000174891 | RSRC1    | Approved  | Nuclear speckles                     |
| 9357 | ENSG00000174899 | PQLC2L   | Approved  | Nuclear bodies;Nuc                   |
| 9358 | ENSG00000174903 | RAB1B    | Supported | Endoplasmic reticulum;Golgi          |
| 9359 | ENSG00000174917 | C19orf70 | Supported | Mitochondria Nucleopla               |
| 9360 | ENSG00000174928 | C3orf33  | Approved  | Cytosol;Nucleoplas                   |
| 9361 | ENSG00000174943 | KCTD13   | Supported | Nuclear bodies;Nucleoplasm           |
| 9362 | ENSG00000174950 | CD164L2  | Approved  | Cytosol;Plasma mem                   |
| 9363 | ENSG00000174953 | DHX36    | Supported | Cytosol;Nucleoplasm                  |
| 9364 | ENSG00000174963 | ZIC4     | Approved  | Cytosol;Nucleoplas                   |
| 9365 | ENSG00000174989 | FBXW8    | Supported | Cytosol                              |
| 9366 | ENSG00000174996 | KLC2     | Supported | Cytosol;Plasma memMitochondria;Nucle |
| 9367 | ENSG00000175029 | CTBP2    | Approved  | Cytosol                              |
| 9368 | ENSG00000175040 | CHST2    | Supported | Golgi appCytosol Nucleopla           |
| 9369 | ENSG00000175048 | ZDHHC14  | Approved  | Mitochondria;Nucle                   |
| 9370 | ENSG00000175054 | ATR      | Supported | Golgi apparatus;Nucleoplasm          |
| 9371 | ENSG00000175063 | UBE2C    | Supported | Cytosol;Plasma membrane              |
| 9372 | ENSG00000175066 | GK5      | Approved  | Cytosol;Nucleoplas                   |
| 9373 | ENSG00000175073 | VCPIP1   | Approved  | Centrosome;Plasma                    |
| 9374 | ENSG00000175084 | DES      | Supported | Intermediate filaments               |
| 9375 | ENSG00000175087 | PDIK1L   | Supported | Nucleoplasm                          |
| 9376 | ENSG00000175093 | SPSB4    | Approved  | Golgi apparatus;Nu                   |
| 9377 | ENSG00000175097 | RAG2     | Approved  | Nucleoplasm                          |
| 9378 | ENSG00000175104 | TRAF6    | Supported | Mitochondria;Nucleoli                |
| 9379 | ENSG00000175105 | ZNF654   | Approved  | Cytokinetic bridge                   |
| 9380 | ENSG00000175106 | TVP23C   | Enhanced  | Golgi apparatus                      |
| 9381 | ENSG00000175110 | MRPS22   | Supported | Mitochondria                         |
| 9382 | ENSG00000175115 | PACS1    | Approved  | Cytosol;Microtubul                   |
| 9383 | ENSG00000175130 | MARCKSL1 | Supported | Actin filaments;Cytosol;Nuc          |
| 9384 | ENSG00000175137 | SH3BP5L  | Approved  | Golgi apparatus;Nu                   |
| 9385 | ENSG00000175170 | FAM182B  | Approved  | Nucleoplasm                          |
| 9386 | ENSG00000175175 | PPM1E    | Approved  | Nucleoli;Nucleopla                   |
| 9387 | ENSG00000175182 | FAM131A  | Approved  | Nucleoli                             |
| 9388 | ENSG00000175193 | PARL     | Approved  | Mitochondria                         |
| 9389 | ENSG00000175197 | DDIT3    | Supported | Nucleoplasm                          |
| 9390 | ENSG00000175198 | PCCA     | Supported | Mitochondria                         |
| 9391 | ENSG00000175202 | HIGD2B   | Supported | MitochondCytosol                     |
| 9392 | ENSG00000175203 | DCTN2    | Supported | Centrosome                           |
| 9393 | ENSG00000175213 | ZNF408   | Approved  | Centriolar satelli                   |
| 9394 | ENSG00000175215 | CTDSP2   | Approved  | Mitochondria;Nucle                   |
| 9395 | ENSG00000175216 | CKAP5    | Approved  | Centrosome Nucleoli;                 |
| 9396 | ENSG00000175220 | ARHGAP1  | Supported | Vesicles                             |
| 9397 | ENSG00000175221 | MED16    | Approved  | Nucleoli                             |
| 9398 | ENSG00000175224 | ATG13    | Approved  | Cytosol;Nucleoplas                   |
| 9399 | ENSG00000175265 | GOLGA8A  | Approved  | Cytosol;Golgi appa                   |
| 9400 | ENSG00000175274 | TP53I11  | Supported | Endoplasmic reticulum;Golgi          |
| 9401 | ENSG00000175283 | DOLK     | Enhanced  | Nucleoli;Nucleoplasm Cytosol         |
| 9402 | ENSG00000175287 | PHYHD1   | Approved  | Nuclear speckles                     |
| 9403 | ENSG00000175309 | PHYKPL   | Approved  | Mitochondria                         |

|      |                 |          |           |                         |                             |
|------|-----------------|----------|-----------|-------------------------|-----------------------------|
| 9404 | ENSG00000175311 | ANKS4B   | Approved  |                         | Cytosol;Nucleoplas          |
| 9405 | ENSG00000175315 | CST6     | Approved  |                         | Cytosol;Plasma mem          |
| 9406 | ENSG00000175318 | GRAMD2A  | Approved  |                         | Cytosol;Nuclear sp          |
| 9407 | ENSG00000175322 | ZNF519   | Approved  |                         | Nucleoli                    |
| 9408 | ENSG00000175324 | LSM1     | Supported |                         | Cytosol;Vesicles            |
| 9409 | ENSG00000175329 | ISX      | Supported |                         | Nuclear bodies;Nucleoplasm  |
| 9410 | ENSG00000175334 | BANF1    | Supported |                         | Cytosol;Nucleoplasm         |
| 9411 | ENSG00000175352 | NRIP3    | Approved  |                         | Cytosol                     |
| 9412 | ENSG00000175354 | PTPN2    | Supported |                         | Nucleoplasm                 |
| 9413 | ENSG00000175376 | EIF1AD   | Supported |                         | Nucleoplasm;Vesicles        |
| 9414 | ENSG00000175387 | SMAD2    | Supported |                         | Cytosol;Nucleoli;Nucleoplas |
| 9415 | ENSG00000175395 | ZNF25    | Approved  |                         | Golgi apparatus;Nu          |
| 9416 | ENSG00000175416 | CLTB     | Supported |                         | Vesicles Cytosol;Plasma mem |
| 9417 | ENSG00000175445 | LPL      | Supported |                         | Vesicles                    |
| 9418 | ENSG00000175449 | RFESD    | Approved  |                         | Nucleoplasm                 |
| 9419 | ENSG00000175455 | CCDC14   | Enhanced  | Centrosome              |                             |
| 9420 | ENSG00000175463 | TBC1D10C | Approved  |                         | Nuclear bodies              |
| 9421 | ENSG00000175467 | SART1    | Enhanced  | Nuclear s               | Golgi apparatus             |
| 9422 | ENSG00000175470 | PPP2R2D  | Approved  |                         | Cytosol                     |
| 9423 | ENSG00000175471 | MCTP1    | Approved  |                         | Cytosol;Nucleoplas          |
| 9424 | ENSG00000175482 | POLD4    | Approved  |                         | Centriolar satelli          |
| 9425 | ENSG00000175505 | CLCF1    | Approved  |                         | Nuclear bodies;Ves          |
| 9426 | ENSG00000175536 | LIPT2    | Approved  |                         | Centrosome;Vesicle          |
| 9427 | ENSG00000175548 | ALG10B   | Approved  |                         | Endoplasmic reticu          |
| 9428 | ENSG00000175550 | DRAP1    | Approved  |                         | Cytosol                     |
| 9429 | ENSG00000175556 | LONRF3   | Approved  |                         | Nucleoplasm;Plasma          |
| 9430 | ENSG00000175564 | UCP3     | Approved  |                         | Cytosol;Nucleoplas          |
| 9431 | ENSG00000175567 | UCP2     | Supported |                         | Mitochondria                |
| 9432 | ENSG00000175573 | C11orf68 | Approved  |                         | Nucleoli;Nucleopla          |
| 9433 | ENSG00000175575 | PAAF1    | Approved  |                         | Cytosol;Nucleoplas          |
| 9434 | ENSG00000175582 | RAB6A    | Approved  |                         | Golgi apparatus             |
| 9435 | ENSG00000175591 | P2RY2    | Uncertain |                         | Cytosol                     |
| 9436 | ENSG00000175592 | FOSL1    | Supported |                         | Nucleoplasm                 |
| 9437 | ENSG00000175595 | ERCC4    | Supported | Nuclear bodies          | Cell Junctions;Nuc          |
| 9438 | ENSG00000175606 | TMEM70   | Supported |                         | Mitochondria;Nucleoplasm    |
| 9439 | ENSG00000175634 | RPS6KB2  | Supported |                         | Cytosol                     |
| 9440 | ENSG00000175643 | RMI2     | Supported |                         | Cytosol;Nuclear speckles    |
| 9441 | ENSG00000175662 | TOM1L2   | Supported |                         | Golgi apparatus;Intermediat |
| 9442 | ENSG00000175691 | ZNF77    | Approved  |                         | Nucleoli;Nucleopla          |
| 9443 | ENSG00000175697 | GPR156   | Supported |                         | Plasma membrane             |
| 9444 | ENSG00000175707 | KDF1     | Supported |                         | Cell JuncMitotic spindle;Nu |
| 9445 | ENSG00000175711 | B3GNTL1  | Approved  |                         | Nucleoli                    |
| 9446 | ENSG00000175745 | NR2F1    | Approved  |                         | Cytosol;Nucleoplas          |
| 9447 | ENSG00000175756 | AURKAIP1 | Supported |                         | Mitochondria;Nucleoplasm    |
| 9448 | ENSG00000175768 | TOMM5    | Supported |                         | Mitochondria                |
| 9449 | ENSG00000175785 | PRIMA1   | Approved  |                         | Cytosol;Nucleoli;P          |
| 9450 | ENSG00000175787 | ZNF169   | Approved  |                         | Cytosol;Nuclear sp          |
| 9451 | ENSG00000175792 | RUVBL1   | Supported |                         | Cytosol;Nucleoplasm         |
| 9452 | ENSG00000175793 | SFN      | Supported |                         | Cytosol Nucleoli            |
| 9453 | ENSG00000175806 | MSRA     | Approved  |                         | Cytosol;Nuclear bo          |
| 9454 | ENSG00000175826 | CTDNBP1  | Approved  |                         | Lipid droplets              |
| 9455 | ENSG00000175832 | ETV4     | Supported |                         | Nucleoli                    |
| 9456 | ENSG00000175854 | SWI5     | Supported |                         | Cytosol;Nucleoplasm         |
| 9457 | ENSG00000175866 | BAIAP2   | Enhanced  | Cytosol;Plasma membrane |                             |
| 9458 | ENSG00000175877 | TMEM270  | Approved  |                         | Vesicles                    |



|      |                 |         |           |                     |                             |
|------|-----------------|---------|-----------|---------------------|-----------------------------|
| 9459 | ENSG00000175893 | ZDHHC21 | Approved  |                     | Cytosol;Golgi appa          |
| 9460 | ENSG00000175906 | ARL4D   | Approved  |                     | Golgi apparatus;Ve          |
| 9461 | ENSG00000175920 | DOK7    | Enhanced  | Nucleopla           | Mitochondria                |
| 9462 | ENSG00000175931 | UBE20   | Supported |                     | Nuclear bodies;Nucleoplasm  |
| 9463 | ENSG00000175938 | ORAI3   | Approved  |                     | Cytosol;Nucleoplas          |
| 9464 | ENSG00000175946 | KLHL38  | Approved  |                     | Cytosol;Nucleoplas          |
| 9465 | ENSG00000175970 | UNC119B | Approved  |                     | Cytokinetic bridge          |
| 9466 | ENSG00000175984 | DENND2C | Approved  |                     | Nucleoplasm                 |
| 9467 | ENSG00000176018 | LYSMD3  | Approved  |                     | Cytosol                     |
| 9468 | ENSG00000176024 | ZNF613  | Approved  |                     | Nucleoplasm;Vesicl          |
| 9469 | ENSG00000176046 | NUPR1   | Supported | Nucleoplasm         |                             |
| 9470 | ENSG00000176049 | JAKMIP2 | Supported | Golgi apparatus     |                             |
| 9471 | ENSG00000176055 | MBLAC2  | Approved  |                     | Mitochondria;Nucle          |
| 9472 | ENSG00000176058 | TPRN    | Approved  |                     | Plasma membrane             |
| 9473 | ENSG00000176076 | KCNE5   | Uncertain |                     | Cytosol                     |
| 9474 | ENSG00000176087 | SLC35A4 | Approved  |                     | Nucleoplasm                 |
| 9475 | ENSG00000176092 | CRYBG2  | Approved  |                     | Nucleoplasm                 |
| 9476 | ENSG00000176095 | IP6K1   | Supported |                     | Cytosol;Nucleoli fibrillar  |
| 9477 | ENSG00000176102 | CSTF3   | Enhanced  | Nucleoplasm         |                             |
| 9478 | ENSG00000176105 | YES1    | Supported |                     | Cytosol;Plasma membrane     |
| 9479 | ENSG00000176142 | TMEM39A | Approved  |                     | Nucleoplasm;Vesicl          |
| 9480 | ENSG00000176148 | TCP11L1 | Approved  |                     | Cytosol                     |
| 9481 | ENSG00000176153 | GPX2    | Approved  |                     | Cytosol;Nucleoplas          |
| 9482 | ENSG00000176155 | CCDC57  | Approved  |                     | Centriolar satelli          |
| 9483 | ENSG00000176170 | SPHK1   | Supported |                     | Cytosol;Plasma membrane     |
| 9484 | ENSG00000176171 | BNIP3   | Uncertain |                     | Cytosol                     |
| 9485 | ENSG00000176182 | MYPOP   | Approved  |                     | Nucleoplasm                 |
| 9486 | ENSG00000176208 | ATAD5   | Approved  |                     | Centriolar satelli          |
| 9487 | ENSG00000176209 | SMIM19  | Approved  |                     | Nuclear speckles            |
| 9488 | ENSG00000176222 | ZNF404  | Supported | Nucleoli            | Intermediate filam          |
| 9489 | ENSG00000176244 | ACBD7   | Approved  |                     | Cytosol;Vesicles            |
| 9490 | ENSG00000176248 | ANAPC2  | Enhanced  | Nucleoplasm         |                             |
| 9491 | ENSG00000176261 | ZBTB80S | Approved  |                     | Plasma membrane             |
| 9492 | ENSG00000176293 | ZNF135  | Approved  |                     | Cytosol                     |
| 9493 | ENSG00000176371 | ZSCAN2  | Approved  |                     | Cytosol;Nucleoplas          |
| 9494 | ENSG00000176383 | B3GNT4  | Approved  |                     | Mitochondria;Nucle          |
| 9495 | ENSG00000176386 | CDC26   | Approved  |                     | Nucleoplasm                 |
| 9496 | ENSG00000176387 | HSD11B2 | Approved  |                     | Vesicles                    |
| 9497 | ENSG00000176390 | CRLF3   | Supported |                     | Cytosol;Plasma membrane     |
| 9498 | ENSG00000176393 | RNPEP   | Supported |                     | Golgi apparatus;Nucleoplasm |
| 9499 | ENSG00000176396 | EID2    | Supported | Nucleoplasm         |                             |
| 9500 | ENSG00000176399 | DMRTA1  | Approved  |                     | Vesicles                    |
| 9501 | ENSG00000176406 | RIMS2   | Approved  |                     | Cytosol;Plasma mem          |
| 9502 | ENSG00000176407 | KCMF1   | Enhanced  | Cytosol;Nucleoplasm |                             |
| 9503 | ENSG00000176422 | SPRYD4  | Approved  |                     | Nucleoplasm                 |
| 9504 | ENSG00000176428 | VPS37D  | Approved  |                     | Vesicles                    |
| 9505 | ENSG00000176435 | CLEC14A | Supported | Endoplasm           | Golgi apparatus             |
| 9506 | ENSG00000176438 | SYNE3   | Supported |                     | Nuclear membrane            |
| 9507 | ENSG00000176444 | CLK2    | Enhanced  | Nucleopla           | Nuclear bodies              |
| 9508 | ENSG00000176472 | ZNF575  | Approved  |                     | Cytosol;Nucleoli f          |
| 9509 | ENSG00000176473 | WDR25   | Supported | Nucleoplasm         |                             |
| 9510 | ENSG00000176476 | SGF29   | Approved  |                     | Nucleoli;Nucleopla          |
| 9511 | ENSG00000176485 | PLA2G16 | Uncertain |                     | Mitochond                   |
| 9512 | ENSG00000176531 | PHLDB3  | Approved  |                     | Cytosol;Nuclear sp          |
| 9513 | ENSG00000176532 | PRR15   | Uncertain |                     | Cell Junc                   |

|      |                 |          |           |                              |
|------|-----------------|----------|-----------|------------------------------|
| 9514 | ENSG00000176542 | USF3     | Uncertain | Centrosom                    |
| 9515 | ENSG00000176563 | CNTD1    | Uncertain | Focal adh                    |
| 9516 | ENSG00000176595 | KBTBD11  | Approved  | Intermediate filam           |
| 9517 | ENSG00000176597 | B3GNT5   | Approved  | Nucleoli                     |
| 9518 | ENSG00000176601 | MAP3K19  | Uncertain | Cytosol                      |
| 9519 | ENSG00000176619 | LMNB2    | Supported | Nuclear membrane             |
| 9520 | ENSG00000176623 | RMDN1    | Supported | Centrosom;Actin filaments    |
| 9521 | ENSG00000176624 | MEX3C    | Approved  | Vesicles                     |
| 9522 | ENSG00000176658 | MYO1D    | Approved  | Cytosol                      |
| 9523 | ENSG00000176681 | LRRC37A  | Approved  | Vesicles                     |
| 9524 | ENSG00000176692 | FOXC2    | Supported | Nuclear bodies;Nucleoplasm   |
| 9525 | ENSG00000176697 | BDNF     | Supported | Mitochondria;Nuclear speckl  |
| 9526 | ENSG00000176714 | CCDC121  | Approved  | Actin filaments;Cy           |
| 9527 | ENSG00000176731 | C8orf59  | Approved  | Cytosol;Nucleoli;N           |
| 9528 | ENSG00000176749 | CDK5R1   | Supported | Nucleoplasm;Vesicles         |
| 9529 | ENSG00000176771 | NCKAP5   | Approved  | Cytosol;Golgi appa           |
| 9530 | ENSG00000176783 | RUFY1    | Supported | Cytosol;Nuclear speckles     |
| 9531 | ENSG00000176788 | BASP1    | Enhanced  | Plasma membrane              |
| 9532 | ENSG00000176809 | LRRC37A3 | Approved  | Vesicles                     |
| 9533 | ENSG00000176834 | VSIG10   | Approved  | Centriolar satelli           |
| 9534 | ENSG00000176842 | IRX5     | Approved  | Cytosol;Microtubul           |
| 9535 | ENSG00000176853 | FAM91A1  | Approved  | Microtubules;Nucle           |
| 9536 | ENSG00000176887 | SOX11    | Supported | Nucleoplasm                  |
| 9537 | ENSG00000176896 | TCEANC   | Approved  | Nuclear speckles             |
| 9538 | ENSG00000176907 | TCIM     | Approved  | Cytosol;Nucleoplas           |
| 9539 | ENSG00000176909 | MAMSTR   | Approved  | Nuclear speckles             |
| 9540 | ENSG00000176915 | ANKLE2   | Supported | Endoplasm;Plasma membrane    |
| 9541 | ENSG00000176920 | FUT2     | Uncertain | Cytosol;P                    |
| 9542 | ENSG00000176928 | GCNT4    | Supported | Golgi app;Nucleoplasm        |
| 9543 | ENSG00000176945 | MUC20    | Approved  | Cytosol;Nucleoplas           |
| 9544 | ENSG00000176946 | THAP4    | Approved  | Nuclear speckles;N           |
| 9545 | ENSG00000176953 | NFATC2IP | Approved  | Nucleoplasm                  |
| 9546 | ENSG00000176974 | SHMT1    | Supported | Cytosol;Nucleoplasm          |
| 9547 | ENSG00000176978 | DPP7     | Supported | Vesicles Golgi apparatus     |
| 9548 | ENSG00000176986 | SEC24C   | Supported | Vesicles                     |
| 9549 | ENSG00000176994 | SMCR8    | Enhanced  | Nucleoplasm                  |
| 9550 | ENSG00000177000 | MTHFR    | Approved  | Cell Junctions               |
| 9551 | ENSG00000177025 | C19orf18 | Approved  | Golgi apparatus              |
| 9552 | ENSG00000177030 | DEAF1    | Supported | Nucleopla;Nucleoli fibrillar |
| 9553 | ENSG00000177034 | MTX3     | Approved  | Mitochondria                 |
| 9554 | ENSG00000177042 | TMEM80   | Approved  | Golgi apparatus              |
| 9555 | ENSG00000177051 | FBXO46   | Approved  | Cytosol;Nucleoplas           |
| 9556 | ENSG00000177054 | ZDHHC13  | Enhanced  | Vesicles                     |
| 9557 | ENSG00000177058 | SLC38A9  | Supported | Vesicles                     |
| 9558 | ENSG00000177084 | POLE     | Supported | Nucleoplasm Plasma me        |
| 9559 | ENSG00000177106 | EPS8L2   | Supported | Cytosol;Plasma membrane      |
| 9560 | ENSG00000177108 | ZDHHC22  | Enhanced  | Plasma membrane              |
| 9561 | ENSG00000177119 | ANO6     | Approved  | Plasma membrane Cytosol      |
| 9562 | ENSG00000177125 | ZBTB34   | Supported | Nucleoplasm                  |
| 9563 | ENSG00000177138 | FAM9B    | Uncertain | Nucleopla                    |
| 9564 | ENSG00000177144 | NUDT4B   | Approved  | Cytosol                      |
| 9565 | ENSG00000177150 | FAM210A  | Approved  | Golgi apparatus;Mi           |
| 9566 | ENSG00000177156 | TALDO1   | Approved  | Cytosol;Nucleoplas           |
| 9567 | ENSG00000177169 | ULK1     | Approved  | Cytosol                      |
| 9568 | ENSG00000177181 | RIMKLA   | Uncertain | Nucleoli                     |

|      |                 |          |           |              |                                     |
|------|-----------------|----------|-----------|--------------|-------------------------------------|
| 9569 | ENSG00000177189 | RPS6KA3  | Approved  |              | Cytosol;Nucleoli;N                  |
| 9570 | ENSG00000177192 | PUS1     | Supported |              | Mitochondria;Nucleoplasm            |
| 9571 | ENSG00000177200 | CHD9     | Approved  |              | Cytosol;Plasma mem                  |
| 9572 | ENSG00000177225 | GATD1    | Supported |              | Nucleoplasm                         |
| 9573 | ENSG00000177238 | TRIM72   | Approved  |              | Nucleoplasm;Vesicl                  |
| 9574 | ENSG00000177239 | MAN1B1   | Uncertain |              | Vesicles                            |
| 9575 | ENSG00000177283 | FZD8     | Approved  |              | Endoplasmic reticu                  |
| 9576 | ENSG00000177303 | CASKIN2  | Supported |              | Plasma membrane                     |
| 9577 | ENSG00000177311 | ZBTB38   | Enhanced  | Nucleoplasm  |                                     |
| 9578 | ENSG00000177352 | CCDC71   | Approved  |              | Nuclear membrane                    |
| 9579 | ENSG00000177354 | C10orf71 | Approved  |              | Mitochondria;Nucle                  |
| 9580 | ENSG00000177363 | LRRN4CL  | Approved  |              | Nuclear bodies;Nuc                  |
| 9581 | ENSG00000177380 | PPFIA3   | Uncertain |              | Nucleoli                            |
| 9582 | ENSG00000177383 | MAGEF1   | Approved  |              | Actin filaments                     |
| 9583 | ENSG00000177409 | SAMD9L   | Approved  |              | Cytosol                             |
| 9584 | ENSG00000177425 | PAWR     | Approved  |              | Actin filaments;Pl                  |
| 9585 | ENSG00000177426 | TGIF1    | Supported |              | Nucleoplasm                         |
| 9586 | ENSG00000177432 | NAP1L5   | Approved  |              | Cytosol;Nucleoplas                  |
| 9587 | ENSG00000177453 | NIM1K    | Approved  |              | Cytosol                             |
| 9588 | ENSG00000177459 | ERICH5   | Approved  |              | Cytosol;Golgi appa                  |
| 9589 | ENSG00000177463 | NR2C2    | Enhanced  | Nucleoplasm  |                                     |
| 9590 | ENSG00000177469 | CAVIN1   | Supported |              | Plasma meVesicles                   |
| 9591 | ENSG00000177479 | ARIH2    | Enhanced  | Nucleoplasm  |                                     |
| 9592 | ENSG00000177485 | ZBTB33   | Enhanced  |              | Cytosol;Nucleoplasm;Plasma membrane |
| 9593 | ENSG00000177494 | ZBED2    | Approved  |              | Cytosol;Mitochondr                  |
| 9594 | ENSG00000177508 | IRX3     | Approved  |              | Vesicles                            |
| 9595 | ENSG00000177511 | ST8SIA3  | Supported |              | Golgi apparatus                     |
| 9596 | ENSG00000177542 | SLC25A22 | Approved  |              | Mitochondria;Nucle                  |
| 9597 | ENSG00000177548 | RABEP2   | Supported |              | Cytosol;Vesicles                    |
| 9598 | ENSG00000177551 | NHLH2    | Approved  |              | Nuclear bodies;Nuc                  |
| 9599 | ENSG00000177556 | ATOX1    | Approved  |              | Nucleoplasm;Plasma                  |
| 9600 | ENSG00000177565 | TBL1XR1  | Approved  |              | Nucleoplasm                         |
| 9601 | ENSG00000177570 | SAMD12   | Approved  |              | Cytosol;Golgi appa                  |
| 9602 | ENSG00000177575 | CD163    | Approved  |              | Plasma membrane                     |
| 9603 | ENSG00000177576 | C18orf32 | Approved  |              | Nucleoplasm;Vesicl                  |
| 9604 | ENSG00000177595 | PIDD1    | Approved  |              | Cytosol Golgi apparatus             |
| 9605 | ENSG00000177600 | RPLP2    | Approved  |              | Mitochondria                        |
| 9606 | ENSG00000177602 | HASPIN   | Supported |              | Nucleoplasm                         |
| 9607 | ENSG00000177606 | JUN      | Enhanced  | Nucleoplasm  |                                     |
| 9608 | ENSG00000177613 | CSTF2T   | Enhanced  |              | Nucleoplasm;Vesicles                |
| 9609 | ENSG00000177614 | PGBD5    | Approved  |              | Nucleoplasm                         |
| 9610 | ENSG00000177627 | C12orf54 | Approved  |              | Intermediate filam                  |
| 9611 | ENSG00000177646 | ACAD9    | Enhanced  | Mitochondria |                                     |
| 9612 | ENSG00000177663 | IL17RA   | Approved  |              | Cytosol;Nucleoplas                  |
| 9613 | ENSG00000177666 | PNPLA2   | Enhanced  |              | Lipid droplets Nucleoplasm          |
| 9614 | ENSG00000177669 | MBOAT4   | Supported |              | Golgi apparatus                     |
| 9615 | ENSG00000177674 | AGTRAP   | Supported |              | Vesicles                            |
| 9616 | ENSG00000177675 | CD163L1  | Approved  |              | Centrosome;Cytosol                  |
| 9617 | ENSG00000177679 | SRRM3    | Approved  |              | Intermediate filam                  |
| 9618 | ENSG00000177683 | THAP5    | Approved  |              | Nucleoplasm                         |
| 9619 | ENSG00000177688 | SUMO4    | Approved  |              | Nuclear bodies;Nuc                  |
| 9620 | ENSG00000177694 | NAALADL2 | Enhanced  | Nucleoplasm  |                                     |
| 9621 | ENSG00000177706 | FAM20C   | Approved  |              | Golgi apparatus;Nu                  |
| 9622 | ENSG00000177707 | NECTIN3  | Approved  |              | Centriolar satelli                  |
| 9623 | ENSG00000177721 | ANXA2R   | Approved  |              | Cytoplasmic bodies                  |

|      |                 |          |           |                                                    |                                       |
|------|-----------------|----------|-----------|----------------------------------------------------|---------------------------------------|
| 9624 | ENSG00000177728 | TMEM94   | Supported | Nucleoplasm                                        | Nuclear bodies                        |
| 9625 | ENSG00000177731 | FLII     | Enhanced  | Centriolar satellite                               | Cytosol;Nucleoplasm                   |
| 9626 | ENSG00000177732 | SOX12    | Enhanced  | Nucleoplasm                                        |                                       |
| 9627 | ENSG00000177733 | HNRNPA0  | Enhanced  | Nucleoplasm                                        |                                       |
| 9628 | ENSG00000177830 | CHID1    | Uncertain |                                                    | Intermediate filament                 |
| 9629 | ENSG00000177842 | ZNF620   | Approved  |                                                    | Centrosome                            |
| 9630 | ENSG00000177853 | ZNF518A  | Approved  |                                                    | Nucleoplasm                           |
| 9631 | ENSG00000177854 | TMEM187  | Approved  |                                                    | Cytosol;Nucleoli                      |
| 9632 | ENSG00000177868 | SVBP     | Approved  |                                                    | Cytosol;Nuclear bodies                |
| 9633 | ENSG00000177873 | ZNF619   | Approved  |                                                    | Intermediate filament                 |
| 9634 | ENSG00000177875 | CCDC184  | Approved  |                                                    | Cytosol;Mitochondria                  |
| 9635 | ENSG00000177879 | AP3S1    | Approved  |                                                    | Vesicles                              |
| 9636 | ENSG00000177885 | GRB2     | Enhanced  | Nucleoplasm                                        |                                       |
| 9637 | ENSG00000177888 | ZBTB41   | Approved  |                                                    | Cytosol;Nuclear membrane              |
| 9638 | ENSG00000177889 | UBE2N    | Supported |                                                    | Nucleoli fibrillar center;Nucleoplasm |
| 9639 | ENSG00000177917 | ARL6IP6  | Approved  |                                                    | Cytosol;Nuclear membrane              |
| 9640 | ENSG00000177932 | ZNF354C  | Supported |                                                    | Cytosol;Nuclear membrane              |
| 9641 | ENSG00000177943 | MAMDC4   | Approved  |                                                    | Cytosol;Nucleoplasm                   |
| 9642 | ENSG00000177946 | CENPBD1  | Approved  |                                                    | Nucleoli;Vesicles                     |
| 9643 | ENSG00000177951 | BET1L    | Supported | Golgi apparatus                                    | Nucleoplasm                           |
| 9644 | ENSG00000177954 | RPS27    | Approved  |                                                    | Cytosol;Endoplasmic reticulum         |
| 9645 | ENSG00000177963 | RIC8A    | Supported |                                                    | Cytosol                               |
| 9646 | ENSG00000177971 | IMP3     | Enhanced  | Nucleoli;Nucleoplasm                               |                                       |
| 9647 | ENSG00000177990 | DPY19L2  | Approved  |                                                    | Mitochondria;Nucleoplasm              |
| 9648 | ENSG00000178021 | TSPYL6   | Approved  |                                                    | Cytosol;Nucleoli;Nucleoplasm          |
| 9649 | ENSG00000178026 | LRRC75B  | Approved  |                                                    | Cytosol;Nucleoplasm                   |
| 9650 | ENSG00000178028 | DMAP1    | Supported |                                                    | Cytosol;Nucleoplasm                   |
| 9651 | ENSG00000178031 | ADAMTSL1 | Approved  |                                                    | Vesicles                              |
| 9652 | ENSG00000178033 | CALHM5   | Approved  |                                                    | Golgi apparatus                       |
| 9653 | ENSG00000178035 | IMPDH2   | Enhanced  | Cytosol                                            | Rods & Rings                          |
| 9654 | ENSG00000178053 | MLF1     | Approved  |                                                    | Cytosol;Nucleoplasm                   |
| 9655 | ENSG00000178075 | GRAMD1C  | Uncertain |                                                    | Cytosol;Plasma membrane               |
| 9656 | ENSG00000178104 | PDE4DIP  | Supported |                                                    | Golgi apparatus                       |
| 9657 | ENSG00000178105 | DDX10    | Approved  |                                                    | Nucleoli                              |
| 9658 | ENSG00000178127 | NDUFV2   | Supported |                                                    | Mitochondria                          |
| 9659 | ENSG00000178149 | DALRD3   | Approved  |                                                    | Cytosol;Nuclear bodies                |
| 9660 | ENSG00000178150 | ZNF114   | Approved  |                                                    | Cytosol;Nucleoplasm                   |
| 9661 | ENSG00000178163 | ZNF518B  | Approved  |                                                    | Nucleoplasm                           |
| 9662 | ENSG00000178171 | AMER3    | Approved  |                                                    | Nuclear bodies;Cytosol;Nucleoplasm    |
| 9663 | ENSG00000178177 | LCORL    | Supported |                                                    | Nuclear membrane;Nucleoplasm          |
| 9664 | ENSG00000178184 | PARD6G   | Approved  |                                                    | Plasma membrane                       |
| 9665 | ENSG00000178188 | SH2B1    | Approved  |                                                    | Vesicles                              |
| 9666 | ENSG00000178199 | ZC3H12D  | Supported |                                                    | Cytoplasmic bodies;Nucleoplasm        |
| 9667 | ENSG00000178201 | VN1R1    | Uncertain |                                                    | Nucleoplasm                           |
| 9668 | ENSG00000178202 | KDEL2    | Approved  |                                                    | Nucleoplasm;Vesicles                  |
| 9669 | ENSG00000178209 | PLEC     | Enhanced  | Cytosol;Focal adhesion sites;Intermediate filament |                                       |
| 9670 | ENSG00000178229 | ZNF543   | Approved  |                                                    | Nucleoplasm                           |
| 9671 | ENSG00000178252 | WDR6     | Supported | Cytosol                                            | Plasma membrane                       |
| 9672 | ENSG00000178287 | SPAG11A  | Approved  |                                                    | Golgi apparatus                       |
| 9673 | ENSG00000178295 | GEN1     | Approved  |                                                    | Nucleoplasm                           |
| 9674 | ENSG00000178301 | AQP11    | Approved  |                                                    | Nucleoplasm;Vesicles                  |
| 9675 | ENSG00000178307 | TMEM11   | Supported |                                                    | Mitochondria                          |
| 9676 | ENSG00000178338 | ZNF354B  | Approved  |                                                    | Nucleoplasm                           |
| 9677 | ENSG00000178343 | SHISA3   | Approved  |                                                    | Cytosol;Lipid droplets                |
| 9678 | ENSG00000178372 | CALML5   | Approved  |                                                    | Cytosol;Plasma membrane               |

|      |                 |          |           |                     |                             |
|------|-----------------|----------|-----------|---------------------|-----------------------------|
| 9679 | ENSG00000178385 | PLEKHM3  | Approved  |                     | Cytosol;Vesicles            |
| 9680 | ENSG00000178386 | ZNF223   | Approved  |                     | Mitochondria;Nucle          |
| 9681 | ENSG00000178397 | FAM220A  | Approved  |                     | Vesicles                    |
| 9682 | ENSG00000178401 | DNAJC22  | Approved  |                     | Vesicles                    |
| 9683 | ENSG00000178404 | CEP295NL | Approved  |                     | Vesicles                    |
| 9684 | ENSG00000178409 | BEND3    | Approved  |                     | Nucleoplasm                 |
| 9685 | ENSG00000178445 | GLDC     | Supported |                     | Mitochondria Nucleopla      |
| 9686 | ENSG00000178449 | COX14    | Supported |                     | Mitochondria                |
| 9687 | ENSG00000178460 | MCMDC2   | Approved  |                     | Actin filaments             |
| 9688 | ENSG00000178467 | P4HTM    | Uncertain |                     | Cytosol;V                   |
| 9689 | ENSG00000178498 | DTX3     | Approved  |                     | Golgi apparatus;Nu          |
| 9690 | ENSG00000178522 | AMBN     | Approved  |                     | Vesicles Nucleoplasm        |
| 9691 | ENSG00000178531 | CTXN1    | Approved  |                     | Cell Junctions;Nuc          |
| 9692 | ENSG00000178537 | SLC25A20 | Supported |                     | Cytosol;Mitochondria        |
| 9693 | ENSG00000178585 | CTNNBIP1 | Approved  |                     | Cell Junctions;Mit          |
| 9694 | ENSG00000178597 | PSAPL1   | Enhanced  | Cytosol             |                             |
| 9695 | ENSG00000178605 | GTPBP6   | Uncertain |                     | Mitochond                   |
| 9696 | ENSG00000178662 | CSRNP3   | Uncertain |                     | Nucleoli;                   |
| 9697 | ENSG00000178665 | ZNF713   | Approved  |                     | Nucleoli                    |
| 9698 | ENSG00000178685 | PARP10   | Supported |                     | Cytosol;NGolgi apparatus    |
| 9699 | ENSG00000178691 | SUZ12    | Supported |                     | Nuclear bodies;Nucleoli;Nuc |
| 9700 | ENSG00000178694 | NSUN3    | Approved  |                     | Nuclear membrane;N          |
| 9701 | ENSG00000178695 | KCTD12   | Approved  |                     | Mitochondria                |
| 9702 | ENSG00000178700 | DHFR2    | Supported |                     | Mitochondria                |
| 9703 | ENSG00000178718 | RPP25    | Supported |                     | Centriolar satellite;Nucleo |
| 9704 | ENSG00000178719 | GRINA    | Approved  |                     | Cytosol;Nucleoli f          |
| 9705 | ENSG00000178726 | THBD     | Approved  |                     | Cytosol;Nucleoplas          |
| 9706 | ENSG00000178732 | GP5      | Uncertain |                     | Cytosol                     |
| 9707 | ENSG00000178750 | STX19    | Approved  |                     | Cytosol;Intermedia          |
| 9708 | ENSG00000178761 | FAM219B  | Approved  |                     | Golgi apparatus;Nu          |
| 9709 | ENSG00000178764 | ZHX2     | Enhanced  | Nucleoplasm         |                             |
| 9710 | ENSG00000178776 | C5orf46  | Approved  |                     | Mitochondria;Nucle          |
| 9711 | ENSG00000178796 | RIIAD1   | Approved  |                     | Cytosol;Nucleoplas          |
| 9712 | ENSG00000178802 | MPI      | Approved  |                     | Cytosol;Plasma mem          |
| 9713 | ENSG00000178809 | TRIM73   | Uncertain |                     | Cytosol                     |
| 9714 | ENSG00000178814 | OPLAH    | Approved  |                     | Nucleoli fibrillar          |
| 9715 | ENSG00000178826 | TMEM139  | Approved  |                     | Focal adhesion sit          |
| 9716 | ENSG00000178852 | EFCAB13  | Enhanced  | Cytosol;Nucleoplas  | Nuclear speckles            |
| 9717 | ENSG00000178860 | MSC      | Supported |                     | Nucleoplasm                 |
| 9718 | ENSG00000178878 | APOLD1   | Enhanced  | Cytosol;Nucleoplasm |                             |
| 9719 | ENSG00000178882 | RFLNA    | Approved  |                     | Golgi apparatus;Nu          |
| 9720 | ENSG00000178896 | EXOSC4   | Supported |                     | Cytosol;Intermediate filame |
| 9721 | ENSG00000178904 | DPY19L3  | Approved  |                     | Microtubules                |
| 9722 | ENSG00000178913 | TAF7     | Supported |                     | Golgi apparatus;Nucleoplasm |
| 9723 | ENSG00000178917 | ZNF852   | Approved  |                     | Cytosol                     |
| 9724 | ENSG00000178921 | PFAS     | Approved  |                     | Vesicles                    |
| 9725 | ENSG00000178922 | HYI      | Approved  |                     | Cytosol;Golgi appa          |
| 9726 | ENSG00000178927 | C17orf62 | Approved  |                     | Cell Junctions;Pla          |
| 9727 | ENSG00000178935 | ZNF552   | Uncertain |                     | Nucleopla                   |
| 9728 | ENSG00000178950 | GAK      | Supported |                     | Golgi appVesicles           |
| 9729 | ENSG00000178951 | ZBTB7A   | Approved  |                     | Nucleoplasm                 |
| 9730 | ENSG00000178952 | TUFM     | Enhanced  | Mitochondria        |                             |
| 9731 | ENSG00000178966 | RMI1     | Supported |                     | Nuclear bodies;Nucleoplasm  |
| 9732 | ENSG00000178974 | FBX034   | Approved  |                     | Nuclear speckles            |
| 9733 | ENSG00000178982 | EIF3K    | Supported |                     | Cytosol                     |

|      |                 |           |           |                             |
|------|-----------------|-----------|-----------|-----------------------------|
| 9734 | ENSG00000178996 | SNX18     | Approved  | Cytosol                     |
| 9735 | ENSG00000178999 | AURKB     | Supported | Midbody;Nucleoplasm         |
| 9736 | ENSG00000179008 | C14orf39  | Approved  | Nucleoli;Nucleopla          |
| 9737 | ENSG00000179010 | MRFAP1    | Supported | Nucleoplasm                 |
| 9738 | ENSG00000179021 | C3orf38   | Approved  | Cytosol;Nucleoplas          |
| 9739 | ENSG00000179023 | KLHDC7A   | Approved  | Nuclear speckles            |
| 9740 | ENSG00000179029 | TMEM107   | Approved  | Plasma membrane Midbody r   |
| 9741 | ENSG00000179041 | RRS1      | Enhanced  | Nucleoli                    |
| 9742 | ENSG00000179044 | EXOC3L1   | Approved  | Plasma membrane;Ve          |
| 9743 | ENSG00000179046 | TRIML2    | Approved  | Cytosol;Plasma mem          |
| 9744 | ENSG00000179071 | CCDC89    | Approved  | Nucleoplasm                 |
| 9745 | ENSG00000179083 | FAM133A   | Uncertain | Nucleoli;                   |
| 9746 | ENSG00000179091 | CYC1      | Supported | Mitochondria Cytosol;N      |
| 9747 | ENSG00000179094 | PER1      | Supported | Cytosol;Nucleoplasm         |
| 9748 | ENSG00000179104 | TMTC2     | Approved  | Actin filaments;Pl          |
| 9749 | ENSG00000179111 | HES7      | Approved  | Nucleoli;Nucleopla          |
| 9750 | ENSG00000179115 | FARSA     | Supported | Cytosol                     |
| 9751 | ENSG00000179119 | SPTY2D1   | Enhanced  | Nucleoli;Nucleoplasm        |
| 9752 | ENSG00000179133 | C10orf67  | Approved  | Nuclear speckles;N          |
| 9753 | ENSG00000179134 | SAMD4B    | Enhanced  | Cytosol                     |
| 9754 | ENSG00000179144 | GIMAP7    | Supported | Cytosol;Vesicles            |
| 9755 | ENSG00000179148 | ALOXE3    | Approved  | Cytosol;Plasma mem          |
| 9756 | ENSG00000179151 | EDC3      | Supported | Cytoplasmic bodies          |
| 9757 | ENSG00000179178 | TMEM125   | Approved  | Cytosol;Midbody             |
| 9758 | ENSG00000179195 | ZNF664    | Approved  | Nucleoplasm                 |
| 9759 | ENSG00000179218 | CALR      | Supported | Endoplasmic reticulum       |
| 9760 | ENSG00000179222 | MAGED1    | Approved  | Cytosol                     |
| 9761 | ENSG00000179240 | GVQW3     | Approved  | Centrosome;Endopla          |
| 9762 | ENSG00000179241 | LDLRAD3   | Approved  | Cell Junctions              |
| 9763 | ENSG00000179242 | CDH4      | Supported | Plasma membrane             |
| 9764 | ENSG00000179262 | RAD23A    | Enhanced  | Cytosol;Nucleoplasm         |
| 9765 | ENSG00000179271 | GADD45GIP | Enhanced  | Mitochondria                |
| 9766 | ENSG00000179284 | DAND5     | Approved  | Mitochondria                |
| 9767 | ENSG00000179292 | TMEM151A  | Approved  | Cytosol;Nucleoli            |
| 9768 | ENSG00000179295 | PTPN11    | Supported | Cytosol;NActin filaments    |
| 9769 | ENSG00000179299 | NSUN7     | Supported | Vesicles                    |
| 9770 | ENSG00000179300 | RTL3      | Approved  | Golgi apparatus;Nu          |
| 9771 | ENSG00000179314 | WSCD1     | Approved  | Golgi apparatus;Nu          |
| 9772 | ENSG00000179335 | CLK3      | Supported | Intermediate filaments;Nucl |
| 9773 | ENSG00000179344 | HLA-DQB1  | Supported | Rods & RiGolgi apparatus    |
| 9774 | ENSG00000179348 | GATA2     | Supported | Nucleoplasm                 |
| 9775 | ENSG00000179361 | ARID3B    | Supported | Nucleoplasm                 |
| 9776 | ENSG00000179363 | TMEM31    | Approved  | Nucleoli fibrillar          |
| 9777 | ENSG00000179364 | PACS2     | Approved  | Mitochondria                |
| 9778 | ENSG00000179387 | ELMOD2    | Approved  | Cytosol;Nucleoli;N          |
| 9779 | ENSG00000179388 | EGR3      | Uncertain | Nucleopla                   |
| 9780 | ENSG00000179399 | GPC5      | Approved  | Cytosol;Nucleoplas          |
| 9781 | ENSG00000179409 | GEMIN4    | Supported | Cytosol;Nuclear bodies      |
| 9782 | ENSG00000179431 | FJX1      | Approved  | Vesicles                    |
| 9783 | ENSG00000179454 | KLHL28    | Approved  | Cytosol                     |
| 9784 | ENSG00000179455 | MKRN3     | Approved  | Cytosol;Nucleoplas          |
| 9785 | ENSG00000179456 | ZBTB18    | Supported | Nuclear speckles            |
| 9786 | ENSG00000179476 | C14orf28  | Approved  | Cytosol                     |
| 9787 | ENSG00000179477 | ALOX12B   | Approved  | Cytosol                     |
| 9788 | ENSG00000179526 | SHARPIN   | Supported | Cytosol;Nucleoplasm         |

|      |                 |           |           |                          |                             |
|------|-----------------|-----------|-----------|--------------------------|-----------------------------|
| 9789 | ENSG00000179528 | LBX2      | Approved  |                          | Midbody;Nucleoplas          |
| 9790 | ENSG00000179532 | DNHD1     | Approved  |                          | Cytokinetic bridge          |
| 9791 | ENSG00000179542 | SLITRK4   | Uncertain |                          | Microtubu                   |
| 9792 | ENSG00000179562 | GCC1      | Supported | Golgi app                | Cytosol Plasma membrane     |
| 9793 | ENSG00000179583 | CIITA     | Supported | Nucleoplasm              |                             |
| 9794 | ENSG00000179588 | ZFPM1     | Approved  |                          | Cytosol;Nucleoplas          |
| 9795 | ENSG00000179593 | ALOX15B   | Supported |                          | Cytosol;Plasma membrane     |
| 9796 | ENSG00000179604 | CDC42EP4  | Supported | Actin fil                | Microtubules;Plasma membran |
| 9797 | ENSG00000179627 | ZBTB42    | Supported |                          | Nucleoplasm                 |
| 9798 | ENSG00000179632 | MAF1      | Supported |                          | NucleoplaNucleoli;Vesicles  |
| 9799 | ENSG00000179715 | PCED1B    | Approved  |                          | Golgi apparatus;Ve          |
| 9800 | ENSG00000179750 | APOBEC3B  | Approved  |                          | Nucleoplasm                 |
| 9801 | ENSG00000179772 | FOXS1     | Approved  |                          | Cytosol;Nucleoplas          |
| 9802 | ENSG00000179776 | CDH5      | Supported | Plasma me                | Nuclear membrane;N          |
| 9803 | ENSG00000179820 | MYADM     | Approved  |                          | Nuclear speckles            |
| 9804 | ENSG00000179832 | MROH1     | Approved  |                          | Nucleoplasm                 |
| 9805 | ENSG00000179833 | SERTAD2   | Supported |                          | Cytosol;Nucleoplasm         |
| 9806 | ENSG00000179841 | AKAP5     | Approved  |                          | Nucleoplasm                 |
| 9807 | ENSG00000179855 | GIPC3     | Approved  |                          | Golgi apparatus;Nu          |
| 9808 | ENSG00000179862 | CITED4    | Approved  |                          | Vesicles                    |
| 9809 | ENSG00000179869 | ABCA13    | Approved  |                          | Centrosome;Cytosol          |
| 9810 | ENSG00000179873 | NLRP11    | Supported |                          | Cytosol                     |
| 9811 | ENSG00000179889 | PDXDC1    | Enhanced  | Golgi apparatus;Vesicles |                             |
| 9812 | ENSG00000179902 | C1orf194  | Uncertain |                          | Cytosol;N                   |
| 9813 | ENSG00000179909 | ZNF154    | Approved  |                          | Nucleoli fibrillar          |
| 9814 | ENSG00000179912 | R3HDM2    | Supported |                          | Nucleoplasm                 |
| 9815 | ENSG00000179915 | NRXN1     | Supported |                          | Plasma membrane             |
| 9816 | ENSG00000179918 | SEPHS2    | Approved  |                          | Nucleoplasm                 |
| 9817 | ENSG00000179922 | ZNF784    | Approved  |                          | Nucleoplasm                 |
| 9818 | ENSG00000179933 | C14orf119 | Supported |                          | Cytosol;Mitochondria        |
| 9819 | ENSG00000179943 | FIZ1      | Approved  |                          | Nucleoplasm                 |
| 9820 | ENSG00000179950 | PUF60     | Enhanced  | Nucleoplasm              |                             |
| 9821 | ENSG00000179954 | SSC5D     | Approved  |                          | Cytosol;Nucleoplas          |
| 9822 | ENSG00000179958 | DCTPP1    | Approved  |                          | Cytosol;Nucleoplas          |
| 9823 | ENSG00000179965 | ZNF771    | Enhanced  | Nucleoli;Nucleoplasm     |                             |
| 9824 | ENSG00000179981 | TSHZ1     | Approved  |                          | Nucleoplasm                 |
| 9825 | ENSG00000179988 | PSTK      | Approved  |                          | Actin filaments;Nu          |
| 9826 | ENSG00000180008 | SOCS4     | Approved  |                          | Cytosol;Nucleoplas          |
| 9827 | ENSG00000180011 | ZADH2     | Approved  |                          | Golgi apparatus;Nu          |
| 9828 | ENSG00000180035 | ZNF48     | Supported |                          | Mitochondria                |
| 9829 | ENSG00000180071 | ANKRD18A  | Supported |                          | Cytosol;Nucleoli            |
| 9830 | ENSG00000180089 | TMEM86B   | Uncertain |                          | Centrosom                   |
| 9831 | ENSG00000180096 | 9/1/2019  | Uncertain |                          | Actin fil                   |
| 9832 | ENSG00000180098 | TRNAU1AP  | Approved  |                          | Cytosol;Nucleoplas          |
| 9833 | ENSG00000180104 | EXOC3     | Approved  |                          | Mitochondria;Nucle          |
| 9834 | ENSG00000180116 | C12orf40  | Approved  |                          | Cytosol;Golgi appa          |
| 9835 | ENSG00000180138 | CSNK1A1L  | Uncertain |                          | Cytosol                     |
| 9836 | ENSG00000180176 | TH        | Approved  |                          | Cytosol                     |
| 9837 | ENSG00000180182 | MED14     | Approved  |                          | Nucleoplasm                 |
| 9838 | ENSG00000180185 | FAHD1     | Enhanced  | Mitochondria;Nucleoplasm |                             |
| 9839 | ENSG00000180190 | TDRP      | Supported |                          | Cytosol Vesicles            |
| 9840 | ENSG00000180198 | RCC1      | Supported |                          | Nuclear membrane;Nucleoplas |
| 9841 | ENSG00000180228 | PRKRA     | Supported |                          | Cytosol;Nucleoplasm         |
| 9842 | ENSG00000180251 | SLC9A4    | Approved  |                          | Nucleoplasm;Plasma          |
| 9843 | ENSG00000180257 | ZNF816    | Approved  |                          | Nucleoli                    |

|      |                 |           |           |                         |                             |
|------|-----------------|-----------|-----------|-------------------------|-----------------------------|
| 9844 | ENSG00000180263 | FGD6      | Approved  |                         | Vesicles                    |
| 9845 | ENSG00000180287 | PLD5      | Approved  |                         | Cytosol;Mitochondr          |
| 9846 | ENSG00000180304 | OAZ2      | Approved  |                         | Golgi apparatus             |
| 9847 | ENSG00000180316 | PNPLA1    | Uncertain |                         | Intermedi                   |
| 9848 | ENSG00000180318 | ALX1      | Supported |                         | Nuclear bodies;NucGolgi app |
| 9849 | ENSG00000180329 | CCDC43    | Enhanced  | Cytosol                 |                             |
| 9850 | ENSG00000180332 | KCTD4     | Approved  |                         | Centriolar satelli          |
| 9851 | ENSG00000180336 | MEIOC     | Uncertain |                         | Cell Junc                   |
| 9852 | ENSG00000180340 | FZD2      | Approved  |                         | Cell Junctions;Nuc          |
| 9853 | ENSG00000180346 | TIGD2     | Approved  |                         | Nuclear bodies              |
| 9854 | ENSG00000180347 | CCDC129   | Uncertain |                         | Nucleopla                   |
| 9855 | ENSG00000180353 | HCLS1     | Supported |                         | Cytosol;Plasma membrane     |
| 9856 | ENSG00000180354 | MTURN     | Approved  |                         | Cytosol                     |
| 9857 | ENSG00000180357 | ZNF609    | Enhanced  | Nucleoplasm             | Cytosol                     |
| 9858 | ENSG00000180370 | PAK2      | Approved  |                         | Nucleoplasm;Vesicl          |
| 9859 | ENSG00000180376 | CCDC66    | Supported |                         | CentriolaCell Junctions;Cyt |
| 9860 | ENSG00000180423 | HARBI1    | Enhanced  | Cytosol;Plasma membrane |                             |
| 9861 | ENSG00000180425 | C11orf71  | Supported |                         | Nucleoplasm                 |
| 9862 | ENSG00000180440 | SERTM1    | Enhanced  | Vesicles                |                             |
| 9863 | ENSG00000180447 | GAS1      | Approved  |                         | Nuclear speckles            |
| 9864 | ENSG00000180479 | ZNF571    | Approved  |                         | Nucleoli;Nucleopla          |
| 9865 | ENSG00000180481 | GLIPR1L2  | Approved  |                         | Cytosol;Golgi appa          |
| 9866 | ENSG00000180488 | MIGA1     | Supported |                         | Mitochondria                |
| 9867 | ENSG00000180530 | NRIP1     | Supported |                         | Nucleoli;Cytosol            |
| 9868 | ENSG00000180535 | BHLHA15   | Approved  |                         | Golgi apparatus;Nu          |
| 9869 | ENSG00000180537 | RNF182    | Approved  |                         | Golgi apparatus;Nu          |
| 9870 | ENSG00000180543 | TSPYL5    | Approved  |                         | Cytosol;Golgi appa          |
| 9871 | ENSG00000180549 | FUT7      | Approved  |                         | Golgi apparatus             |
| 9872 | ENSG00000180592 | SKIDA1    | Approved  |                         | Cytosol;Nuclear bo          |
| 9873 | ENSG00000180596 | HIST1H2BC | Approved  |                         | Cytosol;Nucleoplas          |
| 9874 | ENSG00000180611 | MB21D2    | Approved  |                         | Cytosol                     |
| 9875 | ENSG00000180616 | SSTR2     | Supported |                         | Cytosol                     |
| 9876 | ENSG00000180626 | ZNF594    | Enhanced  | Nucleoplasm             |                             |
| 9877 | ENSG00000180628 | PCGF5     | Approved  |                         | Nucleoli                    |
| 9878 | ENSG00000180644 | PRF1      | Approved  |                         | Cytosol                     |
| 9879 | ENSG00000180660 | MAB21L1   | Approved  |                         | Nucleoplasm                 |
| 9880 | ENSG00000180667 | YOD1      | Supported |                         | Cytosol;Nucleoplasm;Plasma  |
| 9881 | ENSG00000180720 | CHRM4     | Uncertain |                         | Golgi app                   |
| 9882 | ENSG00000180730 | SHISA2    | Approved  |                         | Nuclear bodies;Nuc          |
| 9883 | ENSG00000180758 | GPR157    | Uncertain |                         | Cell Junc                   |
| 9884 | ENSG00000180773 | SLC36A4   | Approved  |                         | Cytosol;Golgi appa          |
| 9885 | ENSG00000180776 | ZDHHC20   | Approved  | Plasma membrane         | Vesicles                    |
| 9886 | ENSG00000180777 | ANKRD30B  | Uncertain |                         | Nucleoli                    |
| 9887 | ENSG00000180787 | ZFP3      | Approved  |                         | Cytosol;Nucleoplas          |
| 9888 | ENSG00000180801 | ARSJ      | Supported |                         | Actin filaments             |
| 9889 | ENSG00000180806 | HOXC9     | Enhanced  | Nucleoplasm             |                             |
| 9890 | ENSG00000180815 | MAP3K15   | Approved  |                         | Vesicles                    |
| 9891 | ENSG00000180817 | PPA1      | Supported |                         | Vesicles                    |
| 9892 | ENSG00000180818 | HOXC10    | Supported |                         | Nuclear bodies;Nucleoplasm  |
| 9893 | ENSG00000180822 | PSMG4     | Approved  |                         | Mitochondria;Nucle          |
| 9894 | ENSG00000180834 | MAP6D1    | Approved  |                         | Cytosol                     |
| 9895 | ENSG00000180855 | ZNF443    | Approved  |                         | Centriolar satelli          |
| 9896 | ENSG00000180871 | CXCR2     | Supported | Plasma membrane         | Microtubules;Mitot          |
| 9897 | ENSG00000180881 | CAPS2     | Approved  |                         | Centrosome;Nucleol          |
| 9898 | ENSG00000180884 | ZNF792    | Approved  |                         | Nuclear bodies;Nuc          |



|      |                 |          |           |                                |                             |
|------|-----------------|----------|-----------|--------------------------------|-----------------------------|
| 9899 | ENSG00000180891 | CUEDC1   | Approved  |                                | Centrosome;Cytosol          |
| 9900 | ENSG00000180900 | SCRIB    | Enhanced  | Cell Junctions;NucRods & Rings |                             |
| 9901 | ENSG00000180902 | D2HGDH   | Supported |                                | Mitochondria                |
| 9902 | ENSG00000180917 | CMTR2    | Approved  |                                | Cell Junctions;Nuc          |
| 9903 | ENSG00000180921 | FAM83H   | Approved  |                                | Cytosol                     |
| 9904 | ENSG00000180938 | ZNF572   | Approved  |                                | Nuclear speckles            |
| 9905 | ENSG00000180957 | PITPNB   | Approved  |                                | Cytosol;Vesicles            |
| 9906 | ENSG00000180964 | TCEAL8   | Approved  |                                | Nucleoplasm                 |
| 9907 | ENSG00000180979 | LRRC57   | Approved  |                                | Cytosol;Mitochondr          |
| 9908 | ENSG00000180992 | MRPL14   | Supported |                                | Mitochondria                |
| 9909 | ENSG00000180998 | GPR137C  | Approved  |                                | Vesicles                    |
| 9910 | ENSG00000181007 | ZFP82    | Approved  |                                | Cytosol;Nuclear me          |
| 9911 | ENSG00000181016 | LSMEM1   | Enhanced  | Cytosol                        |                             |
| 9912 | ENSG00000181019 | NQ01     | Enhanced  | Cytosol                        |                             |
| 9913 | ENSG00000181026 | AEN      | Supported |                                | Nuclear membrane;Nucleoli;N |
| 9914 | ENSG00000181027 | FKRP     | Approved  |                                | Cytosol;Golgi appa          |
| 9915 | ENSG00000181029 | TRAPPC5  | Approved  |                                | Vesicles                    |
| 9916 | ENSG00000181035 | SLC25A42 | Supported |                                | Mitochondria                |
| 9917 | ENSG00000181038 | METTL23  | Approved  |                                | Vesicles                    |
| 9918 | ENSG00000181045 | SLC26A11 | Supported |                                | Vesicles Golgi apparatus;Nu |
| 9919 | ENSG00000181061 | HIGD1A   | Supported |                                | Mitochondria;Nucleoplasm    |
| 9920 | ENSG00000181085 | MAPK15   | Approved  |                                | Cell Junctions;Cyt          |
| 9921 | ENSG00000181090 | EHMT1    | Supported |                                | Nuclear bodies;Nucleoplasm  |
| 9922 | ENSG00000181135 | ZNF707   | Approved  |                                | Nucleoplasm                 |
| 9923 | ENSG00000181163 | NPM1     | Enhanced  | Nucleoli;Nucleoplasm           |                             |
| 9924 | ENSG00000181191 | PJA1     | Approved  |                                | Nucleoli;Nucleopla          |
| 9925 | ENSG00000181192 | DHTKD1   | Supported |                                | Mitochondria                |
| 9926 | ENSG00000181222 | POLR2A   | Approved  |                                | Nucleoplasm                 |
| 9927 | ENSG00000181234 | TMEM132C | Supported |                                | Centrosome;Cytosol          |
| 9928 | ENSG00000181264 | TMEM136  | Approved  |                                | Cytosol;Vesicles            |
| 9929 | ENSG00000181274 | FRAT2    | Approved  |                                | Mitochondria;Nucle          |
| 9930 | ENSG00000181284 | TMEM102  | Approved  |                                | Vesicles                    |
| 9931 | ENSG00000181291 | TMEM132E | Approved  |                                | Cytosol;Golgi appa          |
| 9932 | ENSG00000181315 | ZNF322   | Supported |                                | Cytosol;NCentrosome         |
| 9933 | ENSG00000181350 | LRRC75A  | Approved  |                                | Cytosol;Nucleoli;N          |
| 9934 | ENSG00000181381 | DDX60L   | Approved  |                                | Cytosol;Plasma mem          |
| 9935 | ENSG00000181396 | OGFOD3   | Approved  |                                | Nucleoplasm                 |
| 9936 | ENSG00000181404 | WASHC1   | Supported |                                | Vesicles                    |
| 9937 | ENSG00000181409 | AATK     | Uncertain |                                | Mitochond                   |
| 9938 | ENSG00000181418 | DDN      | Supported |                                | Cytosol;Nucleoplasm         |
| 9939 | ENSG00000181433 | SAGE1    | Enhanced  | Nuclear bodies;Nucleoplasm     |                             |
| 9940 | ENSG00000181444 | ZNF467   | Approved  |                                | Mitochondria                |
| 9941 | ENSG00000181449 | SOX2     | Enhanced  | Nucleoplasm                    |                             |
| 9942 | ENSG00000181450 | ZNF678   | Approved  |                                | Cytosol;Mitochondr          |
| 9943 | ENSG00000181458 | TMEM45A  | Approved  |                                | Endoplasmic reticu          |
| 9944 | ENSG00000181472 | ZBTB2    | Supported |                                | Cytosol;Nucleoplasm         |
| 9945 | ENSG00000181481 | RNF135   | Approved  |                                | Vesicles                    |
| 9946 | ENSG00000181513 | ACBD4    | Approved  |                                | Nucleoplasm;Vesicl          |
| 9947 | ENSG00000181541 | MAB21L2  | Enhanced  | Nucleoplasm                    |                             |
| 9948 | ENSG00000181555 | SETD2    | Approved  |                                | Cytosol;Nuclear sp          |
| 9949 | ENSG00000181577 | C6orf223 | Approved  |                                | Nucleoli fibrillar          |
| 9950 | ENSG00000181585 | TMIE     | Uncertain |                                | Cytosol;V                   |
| 9951 | ENSG00000181610 | MRPS23   | Supported |                                | MitochondNuclear membrane   |
| 9952 | ENSG00000181625 | SLX1B    | Approved  |                                | Nucleoplasm                 |
| 9953 | ENSG00000181634 | TNFSF15  | Approved  |                                | Cytosol;Nuclear me          |

|       |                 |          |           |                              |
|-------|-----------------|----------|-----------|------------------------------|
| 9954  | ENSG00000181638 | ZFP41    | Approved  | Nucleoli;Nucleopla           |
| 9955  | ENSG00000181649 | PHLDA2   | Uncertain | Nucleoli                     |
| 9956  | ENSG00000181666 | HKR1     | Approved  | Mitochondria;Nucle           |
| 9957  | ENSG00000181690 | PLAG1    | Supported | Nuclear sCentrosome;Cytosol  |
| 9958  | ENSG00000181704 | YIPF6    | Approved  | Vesicles                     |
| 9959  | ENSG00000181722 | ZBTB20   | Enhanced  | Nuclear bodies;Nucleoplasm   |
| 9960  | ENSG00000181754 | AMIG01   | Approved  | Nuclear bodies;Nuc           |
| 9961  | ENSG00000181788 | SIAH2    | Approved  | Nucleoplasm;Vesicl           |
| 9962  | ENSG00000181789 | COPG1    | Supported | Golgi appCytosol;Nucleoplas  |
| 9963  | ENSG00000181817 | LSM10    | Supported | Nuclear bodies;Nucleoplasm   |
| 9964  | ENSG00000181826 | RELL1    | Supported | Microtubules;Plasma membran  |
| 9965  | ENSG00000181827 | RFX7     | Approved  | Nuclear membrane;N           |
| 9966  | ENSG00000181830 | SLC35C1  | Supported | Golgi apparatus              |
| 9967  | ENSG00000181852 | RNF41    | Approved  | Midbody ring;Nucle           |
| 9968  | ENSG00000181873 | IBA57    | Supported | Mitochondria                 |
| 9969  | ENSG00000181885 | CLDN7    | Approved  | Cell JuncVesicles            |
| 9970  | ENSG00000181894 | ZNF329   | Approved  | Nuclear membrane;N           |
| 9971  | ENSG00000181904 | C5orf24  | Supported | Nucleoplasm                  |
| 9972  | ENSG00000181924 | COA4     | Approved  | Mitochondria;Nucle           |
| 9973  | ENSG00000181929 | PRKAG1   | Approved  | Cytosol;Nucleoplas           |
| 9974  | ENSG00000181938 | GINS3    | Enhanced  | Nucleoplasm                  |
| 9975  | ENSG00000181982 | CCDC149  | Approved  | Nucleoli                     |
| 9976  | ENSG00000181991 | MRPS11   | Supported | Mitochondria                 |
| 9977  | ENSG00000182010 | RTKN2    | Approved  | Mitochondria;Nucle           |
| 9978  | ENSG00000182013 | PNMA8A   | Approved  | Cytosol;Nuclear bo           |
| 9979  | ENSG00000182022 | CHST15   | Approved  | Centrosome;Cytosol           |
| 9980  | ENSG00000182054 | IDH2     | Supported | Mitochondria                 |
| 9981  | ENSG00000182087 | TMEM259  | Approved  | Endoplasmic reticu           |
| 9982  | ENSG00000182095 | TNRC18   | Supported | MitochondCytosol;Nucleoplasm |
| 9983  | ENSG00000182103 | FAM181B  | Approved  | Mitochondria;Nucle           |
| 9984  | ENSG00000182108 | DEXI     | Approved  | Cytosol;Nuclear sp           |
| 9985  | ENSG00000182117 | NOP10    | Supported | Nuclear bodies               |
| 9986  | ENSG00000182118 | FAM89A   | Approved  | Golgi apparatus;Nu           |
| 9987  | ENSG00000182132 | KCNIP1   | Approved  | Vesicles                     |
| 9988  | ENSG00000182134 | TDRKH    | Approved  | Centrosome;Cytosol           |
| 9989  | ENSG00000182149 | IST1     | Supported | Vesicles                     |
| 9990  | ENSG00000182150 | ERCC6L2  | Supported | NucleoplaCytosol             |
| 9991  | ENSG00000182154 | MRPL41   | Supported | Mitochondria                 |
| 9992  | ENSG00000182158 | CREB3L2  | Supported | NucleoplaEndoplasmic reticu  |
| 9993  | ENSG00000182175 | RGMA     | Approved  | Cytosol;Nucleoplas           |
| 9994  | ENSG00000182179 | UBA7     | Approved  | Cytosol;Nucleoplas           |
| 9995  | ENSG00000182180 | MRPS16   | Supported | MitochondCytosol             |
| 9996  | ENSG00000182185 | RAD51B   | Approved  | Nuclear bodies;Nuc           |
| 9997  | ENSG00000182195 | LDOC1    | Supported | Nucleoli;Nucleoplasm         |
| 9998  | ENSG00000182199 | SHMT2    | Enhanced  | Microtubules;Mitochondria    |
| 9999  | ENSG00000182208 | MOB2     | Supported | Cytosol;Nucleoli;Nucleoplas  |
| 10000 | ENSG00000182224 | CYB5D1   | Approved  | Golgi apparatus;Nu           |
| 10001 | ENSG00000182247 | UBE2E2   | Approved  | Nucleoplasm                  |
| 10002 | ENSG00000182253 | SYNM     | Supported | Intermediate filaments       |
| 10003 | ENSG00000182261 | NLRP10   | Approved  | Nuclear membrane;N           |
| 10004 | ENSG00000182263 | FIGN     | Approved  | Cell Junctions;Cyt           |
| 10005 | ENSG00000182271 | TMIGD1   | Approved  | Mitochondria                 |
| 10006 | ENSG00000182272 | B4GALNT4 | Approved  | Cytokinetic bridge           |
| 10007 | ENSG00000182287 | AP1S2    | Supported | Golgi apparatus;Vesicles     |
| 10008 | ENSG00000182307 | C8orf33  | Uncertain | Nucleopla                    |

|       |                 |          |           |                            |                             |
|-------|-----------------|----------|-----------|----------------------------|-----------------------------|
| 10009 | ENSG00000182318 | ZSCAN22  | Approved  |                            | Actin filaments;Cy          |
| 10010 | ENSG00000182324 | KCNJ14   | Approved  |                            | Nucleoli                    |
| 10011 | ENSG00000182325 | FBXL6    | Approved  |                            | Nucleoplasm;Vesicl          |
| 10012 | ENSG00000182326 | C1S      | Approved  |                            | Cytosol;Nucleoplas          |
| 10013 | ENSG00000182327 | GLTPD2   | Approved  |                            | Vesicles                    |
| 10014 | ENSG00000182362 | YBEY     | Approved  |                            | Nucleoplasm                 |
| 10015 | ENSG00000182378 | PLCXD1   | Approved  |                            | Cytosol                     |
| 10016 | ENSG00000182400 | TRAPPC6B | Approved  |                            | Endoplasmic reticu          |
| 10017 | ENSG00000182405 | PGBD4    | Approved  |                            | Centrosome;Nucleop          |
| 10018 | ENSG00000182446 | NPLOC4   | Supported | Nucleopla                  | Cytosol                     |
| 10019 | ENSG00000182463 | TSHZ2    | Approved  |                            | Golgi apparatus;Nu          |
| 10020 | ENSG00000182472 | CAPN12   | Approved  |                            | Focal adhesion sit          |
| 10021 | ENSG00000182473 | EXOC7    | Approved  |                            | Cytosol;Plasma mem          |
| 10022 | ENSG00000182481 | KPNA2    | Enhanced  | Nucleopla                  | Cytosol                     |
| 10023 | ENSG00000182492 | BGN      | Approved  |                            | Endoplasmic reticu          |
| 10024 | ENSG00000182504 | CEP97    | Supported | Centriolar satellite;      | Cytoso                      |
| 10025 | ENSG00000182511 | FES      | Approved  |                            | Cytosol;Nucleoplas          |
| 10026 | ENSG00000182512 | GLRX5    | Supported | Mitochondria               |                             |
| 10027 | ENSG00000182533 | CAV3     | Approved  |                            | Plasma membrane;Ve          |
| 10028 | ENSG00000182534 | MXRA7    | Enhanced  | Endoplasmic reticulum      |                             |
| 10029 | ENSG00000182541 | LIMK2    | Supported |                            | Cytosol;Nucleoplasm         |
| 10030 | ENSG00000182551 | ADI1     | Supported | Nucleoplasm                | Golgi apparatus             |
| 10031 | ENSG00000182552 | RWDD4    | Approved  |                            | Intermediate filam          |
| 10032 | ENSG00000182568 | SATB1    | Supported | Nuclear bodies;Nucleoplasm |                             |
| 10033 | ENSG00000182578 | CSF1R    | Supported | Plasma me                  | Vesicles                    |
| 10034 | ENSG00000182585 | EPGN     | Approved  |                            | Cytosol;Nucleoplas          |
| 10035 | ENSG00000182600 | SNORC    | Approved  |                            | Nucleoli;Nucleopla          |
| 10036 | ENSG00000182606 | TRAK1    | Approved  |                            | Endoplasmic reticu          |
| 10037 | ENSG00000182621 | PLCB1    | Approved  |                            | Plasma membrane             |
| 10038 | ENSG00000182636 | NDN      | Approved  |                            | Cytosol;Nucleoplas          |
| 10039 | ENSG00000182670 | TTC3     | Approved  |                            | Nucleoli;Cytosol            |
| 10040 | ENSG00000182674 | KCNB2    | Approved  |                            | Midbody;Nucleoli;P          |
| 10041 | ENSG00000182685 | BRICD5   | Approved  |                            | Actin filaments;Nu          |
| 10042 | ENSG00000182700 | IGIP     | Approved  |                            | Vesicles                    |
| 10043 | ENSG00000182704 | TSKU     | Approved  |                            | Nuclear bodies;Nuc          |
| 10044 | ENSG00000182712 | CMC4     | Supported | Mitochondria               |                             |
| 10045 | ENSG00000182718 | ANXA2    | Approved  |                            | Cytosol;Plasma mem          |
| 10046 | ENSG00000182732 | RGS6     | Approved  | Nucleoplasm                | Nucleoli;                   |
| 10047 | ENSG00000182742 | HOXB4    | Supported | Nucleopla                  | Centrosome                  |
| 10048 | ENSG00000182747 | SLC35D3  | Approved  |                            | Centriolar satell           |
| 10049 | ENSG00000182749 | PAQR7    | Approved  |                            | Cytosol                     |
| 10050 | ENSG00000182768 | NGRN     | Supported | Mitochond                  | NucleoplaCytokinetic bridge |
| 10051 | ENSG00000182774 | RPS17    | Approved  |                            | Cytosol;Endoplasm           |
| 10052 | ENSG00000182782 | HCAR2    | Supported | Cell Junctions             |                             |
| 10053 | ENSG00000182793 | GSTA5    | Approved  |                            | Cytosol                     |
| 10054 | ENSG00000182795 | C1orf116 | Enhanced  | Cytosol;Plasma membrane    |                             |
| 10055 | ENSG00000182798 | MAGEB17  | Uncertain |                            | Nucleopla                   |
| 10056 | ENSG00000182809 | CRIP2    | Approved  |                            | Nucleoli;Nucleopla          |
| 10057 | ENSG00000182810 | DDX28    | Supported | Cytosol;Mitochondria;      | Nucleo                      |
| 10058 | ENSG00000182827 | ACBD3    | Supported | Golgi apparatus            |                             |
| 10059 | ENSG00000182831 | C16orf72 | Approved  |                            | Nucleoplasm;Vesicl          |
| 10060 | ENSG00000182836 | PLCXD3   | Approved  |                            | Golgi apparatus             |
| 10061 | ENSG00000182858 | ALG12    | Approved  |                            | Endoplasmic reticu          |
| 10062 | ENSG00000182866 | LCK      | Approved  |                            | Golgi apparatus             |
| 10063 | ENSG00000182870 | GALNT9   | Approved  |                            | Vesicles                    |

|       |                 |          |           |                         |                      |
|-------|-----------------|----------|-----------|-------------------------|----------------------|
| 10064 | ENSG00000182871 | COL18A1  | Approved  |                         | Golgi apparatus      |
| 10065 | ENSG00000182872 | RBM10    | Enhanced  | Nuclear speckles        |                      |
| 10066 | ENSG00000182890 | GLUD2    | Supported |                         | Mitochondria         |
| 10067 | ENSG00000182898 | TCHHL1   | Approved  |                         | Nuclear membrane;N   |
| 10068 | ENSG00000182901 | RGS7     | Supported | Cytosol                 | Mitochondria         |
| 10069 | ENSG00000182903 | ZNF721   | Approved  |                         | Centriolar satelli   |
| 10070 | ENSG00000182916 | TCEAL7   | Supported |                         | Nucleoplasm          |
| 10071 | ENSG00000182919 | C11orf54 | Approved  |                         | Nuclear bodies;Nuc   |
| 10072 | ENSG00000182923 | CEP63    | Approved  |                         | Nucleoplasm          |
| 10073 | ENSG00000182944 | EWSR1    | Enhanced  | Nucleopla               | Nucleoli             |
| 10074 | ENSG00000182952 | HMGNA4   | Uncertain |                         | Nucleopla            |
| 10075 | ENSG00000182957 | SPATA13  | Enhanced  | Cytosol;Nucleoplasm     |                      |
| 10076 | ENSG00000182963 | GJC1     | Uncertain | Cell Junctions          | Cytosol;N            |
| 10077 | ENSG00000182973 | CNOT10   | Approved  |                         | Centrosome;Cytosol   |
| 10078 | ENSG00000182979 | MTA1     | Enhanced  | Nucleopla               | Cytosol              |
| 10079 | ENSG00000182985 | CADM1    | Supported |                         | Cell Junctions       |
| 10080 | ENSG00000182986 | ZNF320   | Uncertain |                         | Cytoplasm            |
| 10081 | ENSG00000182993 | C12orf60 | Approved  |                         | Cytosol;Nucleoplas   |
| 10082 | ENSG00000183011 | NAA38    | Supported |                         | Nucleoplasm          |
| 10083 | ENSG00000183020 | AP2A2    | Supported |                         | Vesicles Nucleoplasm |
| 10084 | ENSG00000183023 | SLC8A1   | Supported | Plasma me               | Nucleoplasm          |
| 10085 | ENSG00000183036 | PCP4     | Approved  |                         | Nucleoli fibrillar   |
| 10086 | ENSG00000183044 | ABAT     | Supported |                         | Mitochondria         |
| 10087 | ENSG00000183048 | SLC25A10 | Supported | Mitochond               | Nucleoplasm          |
| 10088 | ENSG00000183049 | CAMK1D   | Approved  |                         | Cytosol;Nucleoplas   |
| 10089 | ENSG00000183054 | RGPD6    | Uncertain |                         | Nuclear m            |
| 10090 | ENSG00000183060 | LYSMD4   | Approved  |                         | Actin filaments;Cy   |
| 10091 | ENSG00000183067 | IGSF5    | Approved  |                         | Focal adhesion sit   |
| 10092 | ENSG00000183072 | NKX2-5   | Approved  |                         | Cytosol;Nucleoplas   |
| 10093 | ENSG00000183077 | AFMID    | Approved  |                         | Mitochondria         |
| 10094 | ENSG00000183087 | GAS6     | Approved  |                         | Centriolar satelli   |
| 10095 | ENSG00000183092 | BEGAIN   | Uncertain |                         | Cytosol;G            |
| 10096 | ENSG00000183098 | GPC6     | Approved  |                         | Golgi apparatus;Ve   |
| 10097 | ENSG00000183111 | ARHGEF37 | Approved  |                         | Cytosol              |
| 10098 | ENSG00000183114 | FAM43B   | Approved  |                         | Cytosol              |
| 10099 | ENSG00000183117 | CSMD1    | Approved  |                         | Vesicles             |
| 10100 | ENSG00000183128 | CALHM3   | Approved  |                         | Nucleoplasm          |
| 10101 | ENSG00000183137 | CEP57L1  | Approved  |                         | Cytosol;Plasma mem   |
| 10102 | ENSG00000183155 | RAB1F    | Approved  |                         | Cytokinetic bridge   |
| 10103 | ENSG00000183161 | FANCF    | Supported |                         | Nucleoplasm          |
| 10104 | ENSG00000183166 | CALN1    | Uncertain |                         | Plasma me            |
| 10105 | ENSG00000183172 | SMDT1    | Supported | Mitochond               | Nucleoplasm          |
| 10106 | ENSG00000183186 | C2CD4C   | Approved  |                         | Vesicles             |
| 10107 | ENSG00000183207 | RUVBL2   | Supported | Cytosol;N               | Centrosome           |
| 10108 | ENSG00000183208 | GDPGP1   | Approved  |                         | Cytosol              |
| 10109 | ENSG00000183246 | RIMBP3C  | Uncertain |                         | Plasma me            |
| 10110 | ENSG00000183248 | PRR36    | Approved  |                         | Golgi apparatus;Nu   |
| 10111 | ENSG00000183255 | PTTG1IP  | Supported |                         | Nucleoplasm          |
| 10112 | ENSG00000183258 | DDX41    | Supported | Nucleopla               | Nucleoli             |
| 10113 | ENSG00000183260 | ABHD16B  | Approved  |                         | Nucleoplasm          |
| 10114 | ENSG00000183283 | DAZAP2   | Supported |                         | Nuclear speckles     |
| 10115 | ENSG00000183287 | CCBE1    | Supported | Cytosol;Plasma membrane |                      |
| 10116 | ENSG00000183291 | SELENOF  | Approved  |                         | Cytosol;Nucleoli     |
| 10117 | ENSG00000183307 | TMEM121B | Approved  |                         | Nucleoplasm;Plasma   |
| 10118 | ENSG00000183309 | ZNF623   | Approved  |                         | Nucleoplasm          |

|       |                 |           |           |                      |                             |
|-------|-----------------|-----------|-----------|----------------------|-----------------------------|
| 10119 | ENSG00000183323 | CCDC125   | Uncertain |                      | Intermedi                   |
| 10120 | ENSG00000183336 | BOLA2     | Uncertain |                      | Nucleopla                   |
| 10121 | ENSG00000183337 | BCOR      | Enhanced  | Nucleoplasm          |                             |
| 10122 | ENSG00000183340 | JRKL      | Approved  |                      | Cytokinetic bridge          |
| 10123 | ENSG00000183346 | CABCOC01  | Approved  |                      | Centrosome;Cytosol          |
| 10124 | ENSG00000183354 | KIAA2026  | Approved  |                      | Cytosol;Nucleoplas          |
| 10125 | ENSG00000183386 | FHL3      | Approved  |                      | Nucleoplasm                 |
| 10126 | ENSG00000183397 | C19orf71  | Approved  |                      | Cytosol;Endoplasmic         |
| 10127 | ENSG00000183401 | CCDC159   | Approved  |                      | Cytosol;Nuclear bo          |
| 10128 | ENSG00000183423 | LRIT3     | Approved  |                      | Cytosol;Mitochondr          |
| 10129 | ENSG00000183426 | NPIPA1    | Approved  |                      | Nucleoplasm                 |
| 10130 | ENSG00000183431 | SF3A3     | Supported | Nuclear s            | Nucleoplasm                 |
| 10131 | ENSG00000183439 | TRIM61    | Approved  |                      | Endoplasmic reticu          |
| 10132 | ENSG00000183474 | GTF2H2C   | Approved  |                      | Nuclear speckles            |
| 10133 | ENSG00000183475 | ASB7      | Approved  |                      | Golgi apparatus;Nu          |
| 10134 | ENSG00000183495 | EP400     | Supported | Nucleoplasm          |                             |
| 10135 | ENSG00000183496 | MEX3B     | Approved  |                      | Cytosol;Nucleoplas          |
| 10136 | ENSG00000183508 | FAM46C    | Approved  |                      | Nucleoplasm                 |
| 10137 | ENSG00000183513 | COA5      | Supported | Mitochondria         |                             |
| 10138 | ENSG00000183520 | UTP11     | Approved  |                      | Nucleoplasm                 |
| 10139 | ENSG00000183527 | PSMG1     | Approved  | Cytosol;G            | Nucleoplasm                 |
| 10140 | ENSG00000183530 | PRR14L    | Approved  |                      | Nucleoplasm                 |
| 10141 | ENSG00000183549 | ACSM5     | Uncertain |                      | Vesicles                    |
| 10142 | ENSG00000183570 | PCBP3     | Approved  |                      | Mitochondria;Nucle          |
| 10143 | ENSG00000183576 | SETD3     | Approved  |                      | Mitochondria                |
| 10144 | ENSG00000183578 | TNFAIP8L3 | Supported | Cytosol              | Nucleoplasm                 |
| 10145 | ENSG00000183579 | ZNRF3     | Uncertain |                      | Golgi app                   |
| 10146 | ENSG00000183615 | FAM167B   | Approved  |                      | Actin filaments             |
| 10147 | ENSG00000183617 | MRPL54    | Approved  |                      | Mitochondria                |
| 10148 | ENSG00000183621 | ZNF438    | Supported | Cytosol;Nucleoplasm  |                             |
| 10149 | ENSG00000183624 | HMCES     | Approved  |                      | Nucleoplasm                 |
| 10150 | ENSG00000183647 | ZNF530    | Approved  |                      | Vesicles                    |
| 10151 | ENSG00000183648 | NDUFB1    | Supported | Mitochondria         | Nuclear s                   |
| 10152 | ENSG00000183655 | KLHL25    | Approved  |                      | Cytosol;Nucleoplas          |
| 10153 | ENSG00000183665 | TRMT12    | Approved  |                      | Mitochondria;Nucle          |
| 10154 | ENSG00000183671 | GPR1      | Supported | Plasma me            | Nucleoplasm;Vesic           |
| 10155 | ENSG00000183684 | ALYREF    | Enhanced  | Nuclear speckles     |                             |
| 10156 | ENSG00000183688 | RFLNB     | Approved  | Actin fil            | Cytosol;Plasma mem          |
| 10157 | ENSG00000183690 | EFHC2     | Approved  |                      | Nucleoli fibrillar          |
| 10158 | ENSG00000183696 | UPP1      | Enhanced  | Nucleoplasm          |                             |
| 10159 | ENSG00000183706 | OR4N4     | Uncertain |                      | Centrosom                   |
| 10160 | ENSG00000183718 | TRIM52    | Approved  |                      | Intermediate filam          |
| 10161 | ENSG00000183722 | LHFPL6    | Approved  |                      | Nucleoli                    |
| 10162 | ENSG00000183723 | CMTM4     | Approved  |                      | Golgi apparatus;Pl          |
| 10163 | ENSG00000183726 | TMEM50A   | Approved  |                      | Actin filaments;Cy          |
| 10164 | ENSG00000183735 | TBK1      | Enhanced  | Nucleoplasm;Vesicles |                             |
| 10165 | ENSG00000183741 | CBX6      | Approved  |                      | Mitochondria;Nucle          |
| 10166 | ENSG00000183742 | MACC1     | Approved  |                      | Mitochondria                |
| 10167 | ENSG00000183751 | TBL3      | Enhanced  | Nucleoli             |                             |
| 10168 | ENSG00000183762 | KREMEN1   | Approved  |                      | Cytosol;Nuclear bo          |
| 10169 | ENSG00000183763 | TRAIIP    | Supported | Plasma me            | Cytosol                     |
| 10170 | ENSG00000183765 | CHEK2     | Supported | Nucleopla            | Golgi apparatus             |
| 10171 | ENSG00000183770 | FOXL2     | Supported |                      | Cytokinetic bridge;Nucleopl |
| 10172 | ENSG00000183773 | AIFM3     | Approved  |                      | Mitochondria                |
| 10173 | ENSG00000183775 | KCTD16    | Approved  |                      | Nuclear speckles            |

|       |                 |           |           |                     |                             |
|-------|-----------------|-----------|-----------|---------------------|-----------------------------|
| 10174 | ENSG00000183780 | SLC35F3   | Approved  |                     | Golgi apparatus;Nu          |
| 10175 | ENSG00000183783 | KCTD8     | Approved  |                     | Vesicles                    |
| 10176 | ENSG00000183785 | TUBA8     | Supported |                     | Microtubules                |
| 10177 | ENSG00000183793 | NPIPA5    | Approved  |                     | Nucleoplasm                 |
| 10178 | ENSG00000183808 | RBM12B    | Approved  |                     | Nucleoplasm                 |
| 10179 | ENSG00000183813 | CCR4      | Supported |                     | Plasma membrane             |
| 10180 | ENSG00000183814 | LIN9      | Supported |                     | Nucleoplasm                 |
| 10181 | ENSG00000183826 | BTBD9     | Approved  |                     | Nucleoplasm                 |
| 10182 | ENSG00000183828 | NUDT14    | Approved  |                     | Microtubules;Nucle          |
| 10183 | ENSG00000183831 | ANKRD45   | Approved  | Cytosol             | Centrosome;Plasma           |
| 10184 | ENSG00000183844 | FAM3B     | Approved  |                     | Vesicles                    |
| 10185 | ENSG00000183856 | IQGAP3    | Approved  |                     | Nucleoli;Nucleopla          |
| 10186 | ENSG00000183864 | TOB2      | Approved  |                     | Cytosol                     |
| 10187 | ENSG00000183873 | SCN5A     | Supported |                     | Plasma meNucleoli;Nucleopla |
| 10188 | ENSG00000183876 | ARSI      | Approved  |                     | Golgi apparatus             |
| 10189 | ENSG00000183878 | UTY       | Approved  |                     | Nucleoli;Nucleopla          |
| 10190 | ENSG00000183888 | SRARP     | Approved  |                     | Nucleoplasm                 |
| 10191 | ENSG00000183889 | AC138969. | Approved  |                     | Nucleoplasm                 |
| 10192 | ENSG00000183891 | TTC32     | Approved  |                     | Mitochondria;Nucle          |
| 10193 | ENSG00000183914 | DNAH2     | Approved  |                     | Microtubules                |
| 10194 | ENSG00000183943 | PRKX      | Supported |                     | Nucleoplasm                 |
| 10195 | ENSG00000183955 | KMT5A     | Approved  |                     | Cytosol;Nucleoplas          |
| 10196 | ENSG00000183960 | KCNH8     | Supported |                     | Plasma membrane             |
| 10197 | ENSG00000183963 | SMTN      | Supported |                     | Actin filaments;Nucleoplasm |
| 10198 | ENSG00000183977 | PP2D1     | Uncertain |                     | Intermedi                   |
| 10199 | ENSG00000183978 | COA3      | Supported |                     | Mitochondria                |
| 10200 | ENSG00000184005 | ST6GALNAC | Enhanced  | Nucleoplasm         |                             |
| 10201 | ENSG00000184012 | TMPRSS2   | Supported |                     | Cell Junctions Nucleopla    |
| 10202 | ENSG00000184014 | DENND5A   | Approved  |                     | Golgi apparatus;Ve          |
| 10203 | ENSG00000184047 | DIABLO    | Enhanced  | Mitochondria        |                             |
| 10204 | ENSG00000184058 | TBX1      | Approved  |                     | Cytoplasmic bodies          |
| 10205 | ENSG00000184083 | FAM120C   | Approved  |                     | Nuclear speckles            |
| 10206 | ENSG00000184110 | EIF3C     | Supported | Cytosol             |                             |
| 10207 | ENSG00000184154 | LRTOMT    | Uncertain |                     | Microtubu                   |
| 10208 | ENSG00000184162 | NR2C2AP   | Supported |                     | Nucleoplasm                 |
| 10209 | ENSG00000184163 | C1QTNF12  | Approved  |                     | Vesicles                    |
| 10210 | ENSG00000184178 | SCFD2     | Approved  |                     | Nucleoplasm                 |
| 10211 | ENSG00000184182 | UBE2F     | Approved  |                     | Cytosol                     |
| 10212 | ENSG00000184185 | KCNJ12    | Uncertain |                     | Cytosol;G                   |
| 10213 | ENSG00000184194 | GPR173    | Approved  |                     | Cytosol;Plasma mem          |
| 10214 | ENSG00000184203 | PPP1R2    | Approved  |                     | Cytosol;Nucleoplas          |
| 10215 | ENSG00000184207 | PGP       | Approved  |                     | Nuclear bodies              |
| 10216 | ENSG00000184208 | C22orf46  | Approved  |                     | Nucleoli;Nucleopla          |
| 10217 | ENSG00000184209 | SNRNP35   | Approved  |                     | Nucleoli                    |
| 10218 | ENSG00000184216 | IRAK1     | Supported | Cytosol;Nucleoplasm |                             |
| 10219 | ENSG00000184220 | CMSS1     | Approved  |                     | Mitochondria;Nucle          |
| 10220 | ENSG00000184226 | PCDH9     | Approved  |                     | Centrosome;Nucleop          |
| 10221 | ENSG00000184227 | ACOT1     | Approved  |                     | Mitochondria                |
| 10222 | ENSG00000184232 | OAF       | Approved  |                     | Nucleoplasm                 |
| 10223 | ENSG00000184254 | ALDH1A3   | Supported | Cytosol;Nucleoplasm |                             |
| 10224 | ENSG00000184258 | CDR1      | Approved  |                     | Centrosome;Golgi a          |
| 10225 | ENSG00000184270 | HIST2H2AB | Approved  |                     | Nucleoplasm                 |
| 10226 | ENSG00000184271 | POU6F1    | Supported | Nuclear bodies      | Actin fil                   |
| 10227 | ENSG00000184277 | TM2D3     | Approved  |                     | Cytosol;Nucleoplas          |
| 10228 | ENSG00000184281 | TSSC4     | Approved  |                     | Cytosol;Nucleoplas          |

|       |                 |           |           |                           |                          |
|-------|-----------------|-----------|-----------|---------------------------|--------------------------|
| 10229 | ENSG00000184292 | TACSTD2   | Supported | Plasma membrane           | Nucleoli; Vesicles       |
| 10230 | ENSG00000184293 | CLECL1    | Supported | Plasma membrane           | Centriola                |
| 10231 | ENSG00000184302 | SIX6      | Approved  |                           | Nucleoplasm              |
| 10232 | ENSG00000184304 | PRKD1     | Supported | Cytosol; Plasma membrane  |                          |
| 10233 | ENSG00000184307 | ZDHHC23   | Approved  |                           | Nucleoplasm              |
| 10234 | ENSG00000184330 | S100A7A   | Uncertain |                           | Cytosol                  |
| 10235 | ENSG00000184347 | SLIT3     | Supported | Cell Junctions            |                          |
| 10236 | ENSG00000184349 | EFNA5     | Approved  |                           | Cytosol; Vesicles        |
| 10237 | ENSG00000184357 | HIST1H1B  | Supported |                           | Nucleoplasm              |
| 10238 | ENSG00000184363 | PKP3      | Enhanced  | Cell Junctions            | Nucleoplasm              |
| 10239 | ENSG00000184368 | MAP7D2    | Approved  |                           | Cytosol; Nucleoplasm     |
| 10240 | ENSG00000184371 | CSF1      | Supported | Plasma membrane           | Nuclear b                |
| 10241 | ENSG00000184378 | ACTRT3    | Approved  |                           | Nucleoplasm              |
| 10242 | ENSG00000184381 | PLA2G6    | Approved  |                           | Centriolar satellite     |
| 10243 | ENSG00000184384 | MAML2     | Supported | Nuclear b                 | Cytosol                  |
| 10244 | ENSG00000184402 | SS18L1    | Supported | Cytosol; Nucleoplasm      |                          |
| 10245 | ENSG00000184428 | TOP1MT    | Supported |                           | Mitochondria             |
| 10246 | ENSG00000184432 | COPB2     | Approved  |                           | Cytosol                  |
| 10247 | ENSG00000184436 | THAP7     | Approved  |                           | Nucleoplasm; Vesicles    |
| 10248 | ENSG00000184445 | KNTC1     | Supported | Cytosol; Plasma membrane  |                          |
| 10249 | ENSG00000184451 | CCR10     | Supported |                           | Endoplasmic reticulum    |
| 10250 | ENSG00000184465 | WDR27     | Enhanced  | Nucleoplasm               |                          |
| 10251 | ENSG00000184470 | TXNRD2    | Supported | Cytosol; Mitochondria     |                          |
| 10252 | ENSG00000184481 | FOXO4     | Supported | Cytosol; Nuclear speckles |                          |
| 10253 | ENSG00000184486 | POU3F2    | Supported |                           | Nucleoplasm              |
| 10254 | ENSG00000184492 | FOXD4L1   | Approved  |                           | Nucleoplasm              |
| 10255 | ENSG00000184497 | TMEM255B  | Approved  |                           | Nucleoplasm              |
| 10256 | ENSG00000184508 | HDHC3     | Approved  | Cytosol; Nucleoplasm      |                          |
| 10257 | ENSG00000184517 | ZFP1      | Approved  |                           | Nucleoplasm              |
| 10258 | ENSG00000184524 | CEND1     | Approved  |                           | Mitochondria             |
| 10259 | ENSG00000184545 | DUSP8     | Approved  |                           | Cytosol                  |
| 10260 | ENSG00000184557 | SOCS3     | Approved  |                           | Cytosol; Plasma membrane |
| 10261 | ENSG00000184564 | SLITRK6   | Supported |                           | Plasma membrane          |
| 10262 | ENSG00000184575 | XPOT      | Enhanced  | Cytosol; Nucleoplasm      |                          |
| 10263 | ENSG00000184584 | TMEM173   | Supported | Cytosol                   | Nucleoplasm              |
| 10264 | ENSG00000184588 | PDE4B     | Approved  |                           | Cytosol; Golgi apparatus |
| 10265 | ENSG00000184602 | SNN       | Approved  |                           | Cytosol                  |
| 10266 | ENSG00000184613 | NELL2     | Approved  |                           | Vesicles                 |
| 10267 | ENSG00000184619 | KRBA2     | Approved  |                           | Nucleoplasm              |
| 10268 | ENSG00000184634 | MED12     | Approved  |                           | Nucleoplasm              |
| 10269 | ENSG00000184640 | 9/9/2019  | Enhanced  | Actin filaments           |                          |
| 10270 | ENSG00000184659 | FOXD4L4   | Approved  |                           | Nucleoplasm              |
| 10271 | ENSG00000184661 | CDCA2     | Enhanced  | Nucleoplasm               |                          |
| 10272 | ENSG00000184672 | RALYL     | Approved  |                           | Nucleoplasm              |
| 10273 | ENSG00000184675 | AMER1     | Supported | Nuclear b                 | Vesicles                 |
| 10274 | ENSG00000184677 | ZBTB40    | Approved  |                           | Nucleoplasm              |
| 10275 | ENSG00000184678 | HIST2H2BE | Approved  |                           | Cytosol; Nucleoplasm     |
| 10276 | ENSG00000184702 | 9/5/2019  | Approved  |                           | Actin filaments; Cy      |
| 10277 | ENSG00000184708 | EIF4ENIF1 | Enhanced  | Vesicles                  |                          |
| 10278 | ENSG00000184709 | LRRC26    | Supported | Plasma membrane           | Nucleoli fibrillar       |
| 10279 | ENSG00000184735 | DDX53     | Supported | Nucleoplasm               | Cytosol; Nucleoli        |
| 10280 | ENSG00000184743 | ATL3      | Enhanced  | Endoplasmic reticulum     |                          |
| 10281 | ENSG00000184752 | NDUFA12   | Supported |                           | Mitochondria             |
| 10282 | ENSG00000184792 | OSBP2     | Approved  |                           | Cytosol                  |
| 10283 | ENSG00000184831 | APO0      | Approved  |                           | Cytosol; Mitochondria    |

|       |                 |           |           |                             |                             |
|-------|-----------------|-----------|-----------|-----------------------------|-----------------------------|
| 10284 | ENSG00000184838 | PRR16     | Approved  |                             | Cytosol;Midbody;Nu          |
| 10285 | ENSG00000184857 | TMEM186   | Approved  |                             | Cell Junctions              |
| 10286 | ENSG00000184863 | RBM33     | Approved  |                             | Nucleoplasm                 |
| 10287 | ENSG00000184867 | ARMCX2    | Approved  |                             | Mitochondria;Nucle          |
| 10288 | ENSG00000184887 | BTBD6     | Approved  |                             | Nucleoplasm                 |
| 10289 | ENSG00000184897 | H1FX      | Enhanced  | Nucleoli;Nucleoplasm        |                             |
| 10290 | ENSG00000184898 | RBM43     | Approved  |                             | Nucleoli;Nucleopla          |
| 10291 | ENSG00000184900 | SUM03     | Enhanced  | Nuclear bodies;Nucleoplasm  |                             |
| 10292 | ENSG00000184903 | IMMP2L    | Approved  |                             | Mitochondria                |
| 10293 | ENSG00000184905 | TCEAL2    | Approved  |                             | Cytosol;Nuclear sp          |
| 10294 | ENSG00000184916 | JAG2      | Supported |                             | Cytosol;Vesicles            |
| 10295 | ENSG00000184922 | FMNL1     | Approved  |                             | Cytosol                     |
| 10296 | ENSG00000184923 | NUTM2A    | Approved  |                             | Nuclear bodies              |
| 10297 | ENSG00000184924 | PTRHD1    | Approved  |                             | Nucleoplasm                 |
| 10298 | ENSG00000184937 | WT1       | Enhanced  | Nucleoplasm                 |                             |
| 10299 | ENSG00000184939 | ZFP90     | Supported |                             | Centrosome;Plasma           |
| 10300 | ENSG00000184949 | FAM227A   | Uncertain |                             | Nucleopla                   |
| 10301 | ENSG00000184967 | NOC4L     | Supported | Nucleoli                    | Nucleoplasm                 |
| 10302 | ENSG00000184979 | USP18     | Approved  |                             | Cytosol                     |
| 10303 | ENSG00000184985 | SORCS2    | Approved  |                             | Cytosol;Nucleoplas          |
| 10304 | ENSG00000184986 | TMEM121   | Approved  |                             | Cytosol                     |
| 10305 | ENSG00000184990 | SIVA1     | Supported | Nucleoplasm                 |                             |
| 10306 | ENSG00000184992 | BRI3BP    | Approved  |                             | Mitochondria;Nucle          |
| 10307 | ENSG00000185000 | DGAT1     | Approved  |                             | Endoplasmic reticu          |
| 10308 | ENSG00000185008 | ROBO2     | Approved  |                             | Centriolar satelli          |
| 10309 | ENSG00000185015 | CA13      | Uncertain |                             | Nucleoli;                   |
| 10310 | ENSG00000185019 | UBOX5     | Approved  |                             | Nucleoplasm                 |
| 10311 | ENSG00000185022 | MAFF      | Approved  | Nucleoplasm                 | Mitochond                   |
| 10312 | ENSG00000185024 | BRF1      | Approved  |                             | Nuclear bodies;Nuc          |
| 10313 | ENSG00000185028 | LRRC14B   | Approved  |                             | Cytosol;Nucleoplas          |
| 10314 | ENSG00000185033 | SEMA4B    | Approved  |                             | Cell Junctions;Nuc          |
| 10315 | ENSG00000185038 | MROH2A    | Uncertain |                             | Cytosol                     |
| 10316 | ENSG00000185043 | CIB1      | Supported | Nucleoplasm;Plasma membrane |                             |
| 10317 | ENSG00000185046 | ANKS1B    | Supported | Cytosol                     | Plasma membrane;Ve          |
| 10318 | ENSG00000185049 | NELFA     | Enhanced  | Nucleopla                   | Nuclear bodies              |
| 10319 | ENSG00000185052 | SLC24A3   | Uncertain |                             | Golgi app                   |
| 10320 | ENSG00000185085 | INTS5     | Enhanced  | Nucleopla                   | Cytosol                     |
| 10321 | ENSG00000185088 | RPS27L    | Supported |                             | Cytosol;Endoplasmic reticul |
| 10322 | ENSG00000185090 | MANEAL    | Approved  |                             | Golgi apparatus             |
| 10323 | ENSG00000185101 | AN09      | Uncertain |                             | Golgi app                   |
| 10324 | ENSG00000185104 | FAF1      | Enhanced  | Nucleoplasm                 |                             |
| 10325 | ENSG00000185112 | FAM43A    | Approved  |                             | Vesicles                    |
| 10326 | ENSG00000185122 | HSF1      | Supported | Cytosol;Nucleoplasm         |                             |
| 10327 | ENSG00000185130 | HIST1H2BL | Approved  |                             | Cytosol;Nucleoplas          |
| 10328 | ENSG00000185133 | INPP5J    | Approved  |                             | Cytosol;Nucleoli            |
| 10329 | ENSG00000185155 | MIXL1     | Approved  |                             | Nucleoplasm                 |
| 10330 | ENSG00000185158 | LRRC37B   | Approved  |                             | Cytosol                     |
| 10331 | ENSG00000185163 | DDX51     | Approved  |                             | Cytosol;Nucleoli;N          |
| 10332 | ENSG00000185187 | SIGIRR    | Approved  |                             | Cytosol;Nucleoli f          |
| 10333 | ENSG00000185189 | NRBP2     | Approved  |                             | Cytosol                     |
| 10334 | ENSG00000185215 | TNFAIP2   | Approved  |                             | Cytosol;Golgi appa          |
| 10335 | ENSG00000185219 | ZNF445    | Approved  |                             | Cytosol;Mitochondr          |
| 10336 | ENSG00000185220 | PGBD2     | Supported | Vesicles                    |                             |
| 10337 | ENSG00000185222 | TCEAL9    | Approved  |                             | Cytosol;Nucleoplas          |
| 10338 | ENSG00000185236 | RAB11B    | Approved  |                             | Centriolar satelli          |



|       |                 |          |           |                             |
|-------|-----------------|----------|-----------|-----------------------------|
| 10339 | ENSG00000185246 | PRPF39   | Approved  | Nucleoplasm                 |
| 10340 | ENSG00000185247 | MAGEA11  | Supported | Cytosol;Nuclear bodies;Nucl |
| 10341 | ENSG00000185250 | PPIL6    | Approved  | Cytosol;Golgi appa          |
| 10342 | ENSG00000185252 | ZNF74    | Supported | Actin filaments;Nucleoplasm |
| 10343 | ENSG00000185272 | RBM11    | Supported | Nucleoplasm                 |
| 10344 | ENSG00000185274 | GALNT17  | Uncertain | Golgi app                   |
| 10345 | ENSG00000185278 | ZBTB37   | Approved  | Cytosol;Nucleoli f          |
| 10346 | ENSG00000185298 | CCDC137  | Supported | Nucleoli                    |
| 10347 | ENSG00000185304 | RGPD2    | Approved  | Nuclear membrane;V          |
| 10348 | ENSG00000185305 | ARL15    | Approved  | Cell Junctions;Gol          |
| 10349 | ENSG00000185324 | CDK10    | Supported | Nucleoplasm Midbody;M       |
| 10350 | ENSG00000185338 | SOCS1    | Supported | NucleoplaCytoplasmic bodies |
| 10351 | ENSG00000185339 | TCN2     | Approved  | Cytosol                     |
| 10352 | ENSG00000185340 | GAS2L1   | Approved  | Cell Junctions;Pla          |
| 10353 | ENSG00000185344 | ATP6VOA2 | Approved  | Cytosol;Plasma mem          |
| 10354 | ENSG00000185345 | PRKN     | Supported | Cytosol;Nuclear speckles    |
| 10355 | ENSG00000185347 | TEDC1    | Approved  | Cytosol;Golgi appa          |
| 10356 | ENSG00000185352 | HS6ST3   | Approved  | Actin filaments;Nu          |
| 10357 | ENSG00000185359 | HGS      | Enhanced  | EndosomesCytosol;Lysosomes  |
| 10358 | ENSG00000185386 | MAPK11   | Approved  | Mitochondria                |
| 10359 | ENSG00000185404 | SP140L   | Approved  | Nucleoplasm                 |
| 10360 | ENSG00000185418 | TARSL2   | Approved  | Cytosol                     |
| 10361 | ENSG00000185420 | SMYD3    | Approved  | Cytosol;Nucleoplas          |
| 10362 | ENSG00000185432 | METTL7A  | Supported | Lipid droplets              |
| 10363 | ENSG00000185436 | IFNLR1   | Approved  | Cytosol                     |
| 10364 | ENSG00000185437 | SH3BGR   | Approved  | Cytosol;Plasma mem          |
| 10365 | ENSG00000185442 | FAM174B  | Approved  | Intermediate filam          |
| 10366 | ENSG00000185453 | ZSWIM9   | Approved  | Nucleoplasm                 |
| 10367 | ENSG00000185475 | TMEM179B | Enhanced  | Nuclear speckles            |
| 10368 | ENSG00000185477 | GPRIN3   | Approved  | Nucleoli;Nucleopla          |
| 10369 | ENSG00000185479 | KRT6B    | Approved  | Intermediate filam          |
| 10370 | ENSG00000185480 | PARPBP   | Supported | Nucleoplasm                 |
| 10371 | ENSG00000185482 | STAC3    | Enhanced  | Cytosol;Nucleoplasm         |
| 10372 | ENSG00000185483 | ROR1     | Approved  | Microtubules                |
| 10373 | ENSG00000185499 | MUC1     | Supported | Plasma membrane             |
| 10374 | ENSG00000185504 | FAAP100  | Supported | Nucleoplasm                 |
| 10375 | ENSG00000185507 | IRF7     | Approved  | Cytosol;Nucleoplas          |
| 10376 | ENSG00000185513 | L3MBTL1  | Supported | Nucleoplasm                 |
| 10377 | ENSG00000185515 | BRCC3    | Supported | Nucleoplasm                 |
| 10378 | ENSG00000185519 | FAM131C  | Approved  | Cytosol;Intermedia          |
| 10379 | ENSG00000185522 | LMNTD2   | Approved  | Cytoplasmic bodies          |
| 10380 | ENSG00000185527 | PDE6G    | Uncertain | Vesicles                    |
| 10381 | ENSG00000185532 | PRKG1    | Approved  | Cytosol;Vesicles            |
| 10382 | ENSG00000185551 | NR2F2    | Approved  | Cytosol;Nucleoplas          |
| 10383 | ENSG00000185559 | DLK1     | Approved  | Golgi apparatus             |
| 10384 | ENSG00000185561 | TLCD2    | Approved  | Nucleoli;Vesicles           |
| 10385 | ENSG00000185565 | LSAMP    | Enhanced  | Cytosol                     |
| 10386 | ENSG00000185567 | AHNAK2   | Enhanced  | Cytosol;Plasma membrane     |
| 10387 | ENSG00000185585 | OLFML2A  | Approved  | Cytosol;Nucleoplas          |
| 10388 | ENSG00000185591 | SP1      | Enhanced  | Nucleoplasm                 |
| 10389 | ENSG00000185608 | MRPL40   | Supported | MitochondNucleoli           |
| 10390 | ENSG00000185614 | FAM212A  | Approved  | Nucleoplasm;Vesicl          |
| 10391 | ENSG00000185619 | PCGF3    | Supported | Nucleoplasm                 |
| 10392 | ENSG00000185621 | LMLN     | Supported | Cytosol;Focal adhesion site |
| 10393 | ENSG00000185624 | P4HB     | Supported | Endoplasmic reticulum       |

|       |                 |          |           |                       |                             |
|-------|-----------------|----------|-----------|-----------------------|-----------------------------|
| 10394 | ENSG00000185627 | PSMD13   | Approved  |                       | Cytosol;Nuclear sp          |
| 10395 | ENSG00000185630 | PBX1     | Enhanced  | Nucleoplasm           | Cytosol;Nuclear bo          |
| 10396 | ENSG00000185633 | NDUFA4L2 | Approved  |                       | Mitochondria                |
| 10397 | ENSG00000185634 | SHC4     | Approved  |                       | Cytosol                     |
| 10398 | ENSG00000185640 | KRT79    | Approved  |                       | Cytosol;Nuclear me          |
| 10399 | ENSG00000185651 | UBE2L3   | Approved  |                       | Cytosol;Nucleoplas          |
| 10400 | ENSG00000185652 | NTF3     | Approved  |                       | Vesicles                    |
| 10401 | ENSG00000185658 | BRWD1    | Supported |                       | Cytosol;Nucleoli;Nucleoplas |
| 10402 | ENSG00000185664 | PMEL     | Supported |                       | Endoplasmic reticulum;Golgi |
| 10403 | ENSG00000185668 | POU3F1   | Enhanced  | Nucleoplasm           |                             |
| 10404 | ENSG00000185669 | SNAI3    | Approved  |                       | Nucleoplasm                 |
| 10405 | ENSG00000185670 | ZBTB3    | Approved  |                       | Mitochondria                |
| 10406 | ENSG00000185686 | PRAME    | Approved  |                       | Plasma meNucleoplasm        |
| 10407 | ENSG00000185697 | MYBL1    | Supported |                       | Nucleoplasm                 |
| 10408 | ENSG00000185721 | DRG1     | Supported |                       | Cytosol Nuclear bodies      |
| 10409 | ENSG00000185722 | ANKFY1   | Enhanced  | Endosomes             |                             |
| 10410 | ENSG00000185728 | YTHDF3   | Approved  |                       | Cytosol;Nuclear me          |
| 10411 | ENSG00000185730 | ZNF696   | Approved  |                       | Nucleoli;Nucleopla          |
| 10412 | ENSG00000185737 | NRG3     | Uncertain |                       | Vesicles                    |
| 10413 | ENSG00000185745 | IFIT1    | Supported |                       | Cytosol                     |
| 10414 | ENSG00000185753 | CXorf38  | Approved  |                       | Cytosol                     |
| 10415 | ENSG00000185760 | KCNQ5    | Approved  |                       | Vesicles                    |
| 10416 | ENSG00000185761 | ADAMTSL5 | Approved  |                       | Golgi apparatus             |
| 10417 | ENSG00000185774 | KCNIP4   | Approved  |                       | Vesicles                    |
| 10418 | ENSG00000185787 | MORF4L1  | Supported |                       | Nuclear speckles            |
| 10419 | ENSG00000185798 | WDR53    | Approved  |                       | Cytosol;Plasma mem          |
| 10420 | ENSG00000185800 | DMWD     | Approved  |                       | Actin filaments;Pl          |
| 10421 | ENSG00000185808 | PIGP     | Approved  |                       | Vesicles                    |
| 10422 | ENSG00000185813 | PCYT2    | Supported |                       | Centrosome;Intermediate fil |
| 10423 | ENSG00000185818 | NAT8L    | Approved  |                       | Mitochondria                |
| 10424 | ENSG00000185825 | BCAP31   | Enhanced  | Endoplasmic reticulum |                             |
| 10425 | ENSG00000185838 | GNB1L    | Approved  |                       | Cytosol                     |
| 10426 | ENSG00000185842 | DNAH14   | Supported |                       | Centrosome                  |
| 10427 | ENSG00000185860 | CCDC190  | Approved  |                       | Vesicles                    |
| 10428 | ENSG00000185864 | NPIP4    | Approved  |                       | Nucleoplasm                 |
| 10429 | ENSG00000185869 | ZNF829   | Approved  |                       | Nuclear bodies;Nuc          |
| 10430 | ENSG00000185875 | THNSL1   | Approved  |                       | Cytosol;Mitochondr          |
| 10431 | ENSG00000185883 | ATP6V0C  | Approved  |                       | Cytosol                     |
| 10432 | ENSG00000185885 | IFITM1   | Supported |                       | Cytosol                     |
| 10433 | ENSG00000185900 | POMK     | Approved  |                       | Cytosol;Nucleoplas          |
| 10434 | ENSG00000185909 | KLHDC8B  | Enhanced  | Cytosol               |                             |
| 10435 | ENSG00000185917 | SETD4    | Approved  |                       | Nuclear speckles            |
| 10436 | ENSG00000185920 | PTCH1    | Approved  |                       | Golgi apparatus             |
| 10437 | ENSG00000185946 | RNPC3    | Supported |                       | Nucleoplasm                 |
| 10438 | ENSG00000185947 | ZNF267   | Approved  |                       | Nucleoplasm                 |
| 10439 | ENSG00000185950 | IRS2     | Supported |                       | Cytosol Aggresome           |
| 10440 | ENSG00000185955 | C7orf61  | Approved  |                       | Vesicles                    |
| 10441 | ENSG00000185960 | SHOX     | Enhanced  | Nucleoplasm           | Vesicles                    |
| 10442 | ENSG00000185963 | BICD2    | Supported |                       | Golgi appCytosol Plasma me  |
| 10443 | ENSG00000185973 | TMLHE    | Supported |                       | Mitochondria                |
| 10444 | ENSG00000186001 | LRCH3    | Enhanced  | Cytosol               |                             |
| 10445 | ENSG00000186007 | LEMD1    | Approved  |                       | Cytosol;Nucleoli            |
| 10446 | ENSG00000186010 | NDUFA13  | Supported |                       | Mitochondria                |
| 10447 | ENSG00000186017 | ZNF566   | Approved  |                       | Nucleoplasm                 |
| 10448 | ENSG00000186020 | ZNF529   | Approved  |                       | Nucleoplasm                 |

|       |                 |          |           |                               |                         |
|-------|-----------------|----------|-----------|-------------------------------|-------------------------|
| 10449 | ENSG00000186051 | TAL2     | Approved  |                               | Cytosol                 |
| 10450 | ENSG00000186063 | AIDA     | Approved  |                               | Cytokinetic bridge      |
| 10451 | ENSG00000186073 | C15orf41 | Approved  |                               | Nucleoplasm             |
| 10452 | ENSG00000186081 | KRT5     | Approved  |                               | Intermediate filam      |
| 10453 | ENSG00000186086 | NBPF6    | Approved  |                               | Cytosol;Nucleoplas      |
| 10454 | ENSG00000186088 | GSAP     | Supported | Vesicles                      |                         |
| 10455 | ENSG00000186106 | ANKRD46  | Approved  |                               | Cytosol                 |
| 10456 | ENSG00000186111 | PIP5K1C  | Approved  |                               | Cytosol;Nucleoplas      |
| 10457 | ENSG00000186130 | ZBTB6    | Approved  | Nucleopla                     | Mitochondria            |
| 10458 | ENSG00000186132 | C2orf76  | Approved  |                               | Endoplasmic reticu      |
| 10459 | ENSG00000186136 | TAS2R42  | Approved  |                               | Actin filaments;Fo      |
| 10460 | ENSG00000186141 | POLR3C   | Enhanced  | Nucleoplasm                   |                         |
| 10461 | ENSG00000186153 | WFOX     | Supported |                               | Cytosol;Golgi apparatus |
| 10462 | ENSG00000186166 | CCDC84   | Approved  |                               | Nucleoplasm             |
| 10463 | ENSG00000186174 | BCL9L    | Enhanced  | Nucleoplasm                   |                         |
| 10464 | ENSG00000186184 | POLR1D   | Approved  |                               | Golgi apparatus;Nu      |
| 10465 | ENSG00000186185 | KIF18B   | Supported | Cytosol;M                     | Nuclear bodies          |
| 10466 | ENSG00000186188 | FFAR4    | Uncertain |                               | Plasma me               |
| 10467 | ENSG00000186193 | SAPCD2   | Supported | Cytosol;Nucleoli;Nucleoplas   |                         |
| 10468 | ENSG00000186197 | EDARADD  | Approved  |                               | Cytosol;Nucleoplas      |
| 10469 | ENSG00000186198 | SLC51B   | Approved  |                               | Mitochondria;Vesic      |
| 10470 | ENSG00000186205 | 3/1/2019 | Supported | Mitochondria                  |                         |
| 10471 | ENSG00000186212 | SOWAHB   | Approved  |                               | Nucleoli fibrillar      |
| 10472 | ENSG00000186222 | BLOC1S4  | Approved  |                               | Cytosol;Vesicles        |
| 10473 | ENSG00000186230 | ZNF749   | Approved  |                               | Nuclear membrane;N      |
| 10474 | ENSG00000186260 | MKL2     | Supported | Nuclear speckles              |                         |
| 10475 | ENSG00000186280 | KDM4D    | Approved  |                               | Nucleoplasm             |
| 10476 | ENSG00000186281 | GPAT2    | Approved  |                               | Mitochondria            |
| 10477 | ENSG00000186297 | GABRA5   | Supported | Plasma membrane               |                         |
| 10478 | ENSG00000186310 | NAP1L3   | Approved  |                               | Vesicles                |
| 10479 | ENSG00000186314 | PRELID2  | Approved  |                               | Nucleoplasm             |
| 10480 | ENSG00000186318 | BACE1    | Supported | Plasma membrane               |                         |
| 10481 | ENSG00000186326 | RGS9BP   | Approved  |                               | Plasma membrane         |
| 10482 | ENSG00000186329 | TMEM212  | Approved  |                               | Endoplasmic reticu      |
| 10483 | ENSG00000186340 | THBS2    | Approved  |                               | Cytosol;Nuclear sp      |
| 10484 | ENSG00000186350 | RXRA     | Supported | Golgi apparatus;Nucleoplasm   |                         |
| 10485 | ENSG00000186352 | ANKRD37  | Supported | Cytosol;N                     | Mitochondria            |
| 10486 | ENSG00000186364 | NUDT17   | Approved  |                               | Centrosome;Cytosol      |
| 10487 | ENSG00000186376 | ZNF75D   | Approved  |                               | Golgi apparatus;Nu      |
| 10488 | ENSG00000186416 | NKRF     | Supported | Nucleoli                      | Nucleoplasm             |
| 10489 | ENSG00000186431 | FCAR     | Supported | Plasma membrane               |                         |
| 10490 | ENSG00000186432 | KPNA4    | Enhanced  | Nucleoplasm                   |                         |
| 10491 | ENSG00000186439 | TRDN     | Approved  |                               | Cytosol;Plasma mem      |
| 10492 | ENSG00000186446 | ZNF501   | Approved  |                               | Endoplasmic reticu      |
| 10493 | ENSG00000186448 | ZNF197   | Approved  |                               | Nucleoplasm             |
| 10494 | ENSG00000186451 | SPATA12  | Approved  |                               | Cytosol;Nucleoplas      |
| 10495 | ENSG00000186462 | NAP1L2   | Enhanced  | Cytosol;Plasma membrane       |                         |
| 10496 | ENSG00000186468 | RPS23    | Enhanced  | Cytosol;Endoplasmic reticulum |                         |
| 10497 | ENSG00000186469 | GNG2     | Approved  |                               | Plasma membrane;Ve      |
| 10498 | ENSG00000186472 | PCL0     | Approved  |                               | Nuclear speckles;P      |
| 10499 | ENSG00000186479 | RGS7BP   | Uncertain |                               | Actin filaments;Cy      |
| 10500 | ENSG00000186480 | INSIG1   | Approved  |                               | Vesicles                |
| 10501 | ENSG00000186487 | MYT1L    | Approved  |                               | Vesicles                |
| 10502 | ENSG00000186493 | C5orf38  | Approved  |                               | Golgi apparatus;Ve      |
| 10503 | ENSG00000186501 | TMEM222  | Approved  |                               | Cytosol;Plasma mem      |

|       |                 |          |           |                               |
|-------|-----------------|----------|-----------|-------------------------------|
| 10504 | ENSG00000186517 | ARHGAP30 | Supported | Vesicles                      |
| 10505 | ENSG00000186522 | #####    | Supported | Actin filaments               |
| 10506 | ENSG00000186523 | FAM86B1  | Uncertain | Vesicles                      |
| 10507 | ENSG00000186532 | SMYD4    | Approved  | Cytosol;Golgi appa            |
| 10508 | ENSG00000186566 | GPATCH8  | Approved  | Mitochondria;Nucle            |
| 10509 | ENSG00000186567 | CEACAM19 | Approved  | Mitochondria;Nucle            |
| 10510 | ENSG00000186575 | NF2      | Enhanced  | Cytosol;PNucleoplasm          |
| 10511 | ENSG00000186591 | UBE2H    | Supported | Mitochondria                  |
| 10512 | ENSG00000186603 | HPDL     | Supported | Mitochondria                  |
| 10513 | ENSG00000186625 | KATNA1   | Supported | Centriolar satellite;Nucleo   |
| 10514 | ENSG00000186628 | FSD2     | Approved  | Cytosol                       |
| 10515 | ENSG00000186635 | ARAP1    | Approved  | Cytosol;Nucleoplas            |
| 10516 | ENSG00000186642 | PDE2A    | Supported | Cytosol                       |
| 10517 | ENSG00000186660 | ZFP91    | Supported | Nucleoplasm Cytosol           |
| 10518 | ENSG00000186665 | C17orf58 | Approved  | Cytosol;Plasma mem            |
| 10519 | ENSG00000186666 | BCDIN3D  | Supported | Cytosol;Nucleoplasm           |
| 10520 | ENSG00000186684 | CYP27C1  | Enhanced  | Vesicles                      |
| 10521 | ENSG00000186710 | CFAP73   | Approved  | Nucleoli fibrillar            |
| 10522 | ENSG00000186716 | BCR      | Approved  | Cytosol;Nucleoplas            |
| 10523 | ENSG00000186767 | SPIN4    | Approved  | Cytosol;Nucleoli              |
| 10524 | ENSG00000186787 | SPIN2B   | Approved  | Nucleoplasm                   |
| 10525 | ENSG00000186806 | VSIG10L  | Approved  | Nucleoplasm                   |
| 10526 | ENSG00000186812 | ZNF397   | Approved  | Cytosol;Microtubul            |
| 10527 | ENSG00000186814 | ZSCAN30  | Approved  | Cytosol;Nucleoplas            |
| 10528 | ENSG00000186832 | KRT16    | Approved  | Intermediate filam            |
| 10529 | ENSG00000186834 | HEXIM1   | Enhanced  | Nucleoplasm;Vesicles          |
| 10530 | ENSG00000186847 | KRT14    | Enhanced  | Intermediate filaments        |
| 10531 | ENSG00000186862 | PDZD7    | Supported | Nucleoplasm                   |
| 10532 | ENSG00000186868 | MAPT     | Supported | Plasma meNuclear speckles     |
| 10533 | ENSG00000186871 | ERCC6L   | Supported | Centrosome;Cytosol;Nucleopl   |
| 10534 | ENSG00000186889 | TMEM17   | Approved  | Actin filaments               |
| 10535 | ENSG00000186908 | ZDHHC17  | Supported | Golgi apparatus;Vesicles      |
| 10536 | ENSG00000186918 | ZNF395   | Approved  | Cytosol;Nucleoplas            |
| 10537 | ENSG00000186951 | PPARA    | Enhanced  | Nucleoplasm                   |
| 10538 | ENSG00000186976 | EFCAB6   | Uncertain | Nucleopla                     |
| 10539 | ENSG00000186994 | KANK3    | Approved  | Plasma membrane               |
| 10540 | ENSG00000187010 | RHD      | Uncertain | Plasma meNucleopla            |
| 10541 | ENSG00000187017 | ESPN     | Approved  | Vesicles                      |
| 10542 | ENSG00000187051 | RPS19BP1 | Approved  | Nucleoli;NucleoplaCytosol     |
| 10543 | ENSG00000187068 | C3orf70  | Approved  | Cytosol                       |
| 10544 | ENSG00000187079 | TEAD1    | Enhanced  | Nucleoplasm                   |
| 10545 | ENSG00000187091 | PLCD1    | Approved  | Microtubules                  |
| 10546 | ENSG00000187097 | ENTPD5   | Approved  | Cytosol                       |
| 10547 | ENSG00000187109 | NAP1L1   | Uncertain | Microtubu                     |
| 10548 | ENSG00000187122 | SLIT1    | Approved  | Plasma membrane               |
| 10549 | ENSG00000187123 | LYPD6    | Approved  | Cytosol                       |
| 10550 | ENSG00000187134 | AKR1C1   | Enhanced  | Cytosol;Endoplasmic reticulum |
| 10551 | ENSG00000187144 | SPATA21  | Approved  | Cytosol;Vesicles              |
| 10552 | ENSG00000187147 | RNF220   | Approved  | Nucleoplasm                   |
| 10553 | ENSG00000187164 | SHTN1    | Approved  | Cytosol;Nucleoplas            |
| 10554 | ENSG00000187186 | AL162231 | Approved  | Endoplasmic reticu            |
| 10555 | ENSG00000187187 | ZNF546   | Approved  | Cytosol;Nucleoplas            |
| 10556 | ENSG00000187210 | GCNT1    | Supported | Nuclear speckles              |
| 10557 | ENSG00000187231 | SESTD1   | Enhanced  | Intermediate filaments        |
| 10558 | ENSG00000187240 | DYNC2H1  | Supported | Mitochondria                  |

|       |                 |          |           |                             |
|-------|-----------------|----------|-----------|-----------------------------|
| 10559 | ENSG00000187244 | BCAM     | Approved  | Nucleoli fibrillar          |
| 10560 | ENSG00000187257 | RSBN1L   | Supported | Nuclear sPlasma membrane    |
| 10561 | ENSG00000187266 | EPOR     | Supported | Plasma membrane Nuclear s   |
| 10562 | ENSG00000187323 | DCC      | Supported | Golgi apparatus             |
| 10563 | ENSG00000187325 | TAF9B    | Approved  | Nucleoplasm                 |
| 10564 | ENSG00000187398 | LUZP2    | Approved  | Cytosol;Nucleoplas          |
| 10565 | ENSG00000187416 | LHFPL3   | Approved  | Vesicles                    |
| 10566 | ENSG00000187446 | CHP1     | Approved  | Vesicles                    |
| 10567 | ENSG00000187479 | C11orf96 | Approved  | Cytosol;Focal adhe          |
| 10568 | ENSG00000187514 | PTMA     | Supported | NucleoplaCytosol            |
| 10569 | ENSG00000187531 | SIRT7    | Supported | Nucleoli Vesicles           |
| 10570 | ENSG00000187546 | AGMO     | Uncertain | Vesicles                    |
| 10571 | ENSG00000187554 | TLR5     | Approved  | Cytosol;Golgi appa          |
| 10572 | ENSG00000187559 | FOXD4L3  | Approved  | Nucleoplasm                 |
| 10573 | ENSG00000187566 | NHLRC1   | Uncertain | Vesicles                    |
| 10574 | ENSG00000187583 | PLEKHN1  | Approved  | Nuclear speckles            |
| 10575 | ENSG00000187601 | MAGEH1   | Approved  | Nucleoli                    |
| 10576 | ENSG00000187605 | TET3     | Approved  | Cytosol;Nucleoplas          |
| 10577 | ENSG00000187607 | ZNF286A  | Approved  | Nucleoli                    |
| 10578 | ENSG00000187609 | EXD3     | Approved  | Actin filaments;Fo          |
| 10579 | ENSG00000187624 | C17orf97 | Approved  | Cytosol;Nucleoli            |
| 10580 | ENSG00000187626 | ZKSCAN4  | Supported | Nucleoplasm                 |
| 10581 | ENSG00000187627 | RGPD1    | Approved  | Nuclear membrane;V          |
| 10582 | ENSG00000187630 | DHRS4L2  | Uncertain | Nuclear m                   |
| 10583 | ENSG00000187634 | SAMD11   | Approved  | Nucleoplasm;Vesicl          |
| 10584 | ENSG00000187678 | SPRY4    | Approved  | Cytosol Golgi apparatus     |
| 10585 | ENSG00000187688 | TRPV2    | Supported | Plasma membrane             |
| 10586 | ENSG00000187690 | CXorf67  | Enhanced  | Nucleoplasm                 |
| 10587 | ENSG00000187726 | DNAJB13  | Approved  | Plasma membrane             |
| 10588 | ENSG00000187730 | GABRD    | Uncertain | Golgi app                   |
| 10589 | ENSG00000187735 | TCEA1    | Supported | NucleoplaNucleoli           |
| 10590 | ENSG00000187736 | NHEJ1    | Supported | Nucleoli fibrillar center;N |
| 10591 | ENSG00000187741 | FANCA    | Supported | Nucleoplasm                 |
| 10592 | ENSG00000187742 | SECISBP2 | Supported | Nucleoplasm                 |
| 10593 | ENSG00000187754 | SSX7     | Approved  | Nucleoli;Nucleopla          |
| 10594 | ENSG00000187758 | ADH1A    | Approved  | Cytosol;Plasma mem          |
| 10595 | ENSG00000187764 | SEMA4D   | Supported | Endoplasmic reticulum;Vesic |
| 10596 | ENSG00000187772 | LIN28B   | Supported | Cytosol;Nucleoli;Nucleoplas |
| 10597 | ENSG00000187775 | DNAH17   | Approved  | Cytosol;Nucleoplas          |
| 10598 | ENSG00000187778 | MCRS1    | Supported | Nucleoplasm                 |
| 10599 | ENSG00000187790 | FANCM    | Supported | Nucleoplasm                 |
| 10600 | ENSG00000187792 | ZNF70    | Supported | Cytosol                     |
| 10601 | ENSG00000187800 | PEAR1    | Approved  | Cell JuncCentrosome;Nucleop |
| 10602 | ENSG00000187801 | ZFP69B   | Approved  | Cytosol;Nucleoplas          |
| 10603 | ENSG00000187815 | ZFP69    | Approved  | Nucleoplasm                 |
| 10604 | ENSG00000187823 | RTL4     | Approved  | Cytosol;Nucleoplas          |
| 10605 | ENSG00000187824 | TMEM220  | Uncertain | Nucleopla                   |
| 10606 | ENSG00000187837 | HIST1H1C | Supported | Nucleoli;Nucleoplasm        |
| 10607 | ENSG00000187838 | PLSCR3   | Supported | Mitochondria                |
| 10608 | ENSG00000187840 | EIF4EBP1 | Supported | Cytosol;Nucleoplasm         |
| 10609 | ENSG00000187862 | TTC24    | Approved  | Nucleoplasm                 |
| 10610 | ENSG00000187866 | FAM122A  | Approved  | Nuclear bodies;Nuc          |
| 10611 | ENSG00000187867 | PALM3    | Approved  | Nuclear bodies;Nuc          |
| 10612 | ENSG00000187902 | SHISA7   | Approved  | Cytosol                     |
| 10613 | ENSG00000187908 | DMBT1    | Approved  | Centriolar satelli          |

|       |                 |          |           |                                      |
|-------|-----------------|----------|-----------|--------------------------------------|
| 10614 | ENSG00000187954 | CYHR1    | Enhanced  | Nucleoplasm                          |
| 10615 | ENSG00000187955 | COL14A1  | Approved  | Vesicles                             |
| 10616 | ENSG00000187961 | KLHL17   | Uncertain | Nuclear b                            |
| 10617 | ENSG00000187994 | RINL     | Approved  | Nucleoplasm;Vesicl                   |
| 10618 | ENSG00000188001 | TPRG1    | Supported | Nucleoplasm                          |
| 10619 | ENSG00000188010 | MORN2    | Approved  | Nucleoplasm                          |
| 10620 | ENSG00000188015 | S100A3   | Enhanced  | Cytosol;Golgi apparatus;Plasma membr |
| 10621 | ENSG00000188021 | UBQLN2   | Supported | Cytosol Plasma membrane              |
| 10622 | ENSG00000188026 | RILPL1   | Approved  | Cytosol;Nucleoplas                   |
| 10623 | ENSG00000188042 | ARL4C    | Supported | Cytosol;Plasma membrane              |
| 10624 | ENSG00000188051 | TMEM221  | Approved  | Nuclear membrane                     |
| 10625 | ENSG00000188060 | RAB42    | Approved  | Endoplasmic reticu                   |
| 10626 | ENSG00000188070 | C11orf95 | Approved  | Intermediate filam                   |
| 10627 | ENSG00000188092 | GPR89B   | Approved  | Endoplasmic reticu                   |
| 10628 | ENSG00000188112 | C6orf132 | Approved  | Cytosol;Golgi appa                   |
| 10629 | ENSG00000188130 | MAPK12   | Approved  | Cytosol;Nuclear sp                   |
| 10630 | ENSG00000188133 | TMEM215  | Supported | NucleoplaEndoplasmic reticu          |
| 10631 | ENSG00000188152 | NUTM2G   | Approved  | Nuclear bodies                       |
| 10632 | ENSG00000188157 | AGRN     | Supported | Cytosol;Plasma membrane              |
| 10633 | ENSG00000188158 | NHS      | Supported | Cell Junctions                       |
| 10634 | ENSG00000188167 | TMPPE    | Approved  | Mitochondria;Nucle                   |
| 10635 | ENSG00000188171 | ZNF626   | Approved  | Nuclear membrane;N                   |
| 10636 | ENSG00000188175 | HEPACAM2 | Supported | Mitotic sNucleoplasm;Vesicl          |
| 10637 | ENSG00000188177 | ZC3H6    | Approved  | Golgi apparatus;Nu                   |
| 10638 | ENSG00000188186 | LAMTOR4  | Supported | Vesicles                             |
| 10639 | ENSG00000188199 | NUTM2B   | Approved  | Nuclear bodies                       |
| 10640 | ENSG00000188215 | DCUN1D3  | Approved  | Cytosol;Nucleoplas                   |
| 10641 | ENSG00000188227 | ZNF793   | Approved  | Cytosol;Nucleoli;N                   |
| 10642 | ENSG00000188229 | TUBB4B   | Supported | Microtubules                         |
| 10643 | ENSG00000188266 | HYKK     | Approved  | Aggresome;Vesicles                   |
| 10644 | ENSG00000188283 | ZNF383   | Supported | Nuclear membrane;Nucleoplas          |
| 10645 | ENSG00000188290 | HES4     | Approved  | Cytosol;Nucleoplas                   |
| 10646 | ENSG00000188312 | CENPP    | Supported | NucleoplaNucleoli                    |
| 10647 | ENSG00000188313 | PLSCR1   | Supported | NucleoplaGolgi apparatus             |
| 10648 | ENSG00000188315 | C3orf62  | Approved  | Nuclear speckles                     |
| 10649 | ENSG00000188316 | ENO4     | Approved  | Mitochondria;Nucle                   |
| 10650 | ENSG00000188321 | ZNF559   | Supported | NucleoplaCytosol                     |
| 10651 | ENSG00000188338 | SLC38A3  | Approved  | Cytosol;Microtubul                   |
| 10652 | ENSG00000188342 | GTF2F2   | Supported | Microtubules;Nucleoplasm             |
| 10653 | ENSG00000188343 | FAM92A   | Approved  | Mitochondria                         |
| 10654 | ENSG00000188352 | FOCAD    | Uncertain | Mitochond                            |
| 10655 | ENSG00000188368 | PRR19    | Approved  | Mitochondria;Nucle                   |
| 10656 | ENSG00000188386 | PPP3R2   | Approved  | Cytosol;Plasma mem                   |
| 10657 | ENSG00000188393 | CLEC2A   | Uncertain | Plasma me                            |
| 10658 | ENSG00000188404 | SELL     | Uncertain | Cytosol                              |
| 10659 | ENSG00000188419 | CHM      | Approved  | Cytosol Nucleopla                    |
| 10660 | ENSG00000188428 | BLOC1S5  | Supported | Vesicles                             |
| 10661 | ENSG00000188452 | CERKL    | Supported | Cytosol;Nucleoplasm                  |
| 10662 | ENSG00000188483 | IER5L    | Approved  | Nucleoplasm                          |
| 10663 | ENSG00000188486 | H2AFX    | Supported | Nuclear speckles;Nucleoplas          |
| 10664 | ENSG00000188488 | SERPINA5 | Approved  | Mitochondria                         |
| 10665 | ENSG00000188501 | LCTL     | Approved  | Endoplasmic reticu                   |
| 10666 | ENSG00000188517 | COL25A1  | Approved  | Cytosol;Endoplasmic                  |
| 10667 | ENSG00000188522 | FAM83G   | Approved  | Cytosol                              |
| 10668 | ENSG00000188523 | CFAP77   | Approved  | Cytosol                              |

|       |                 |          |           |                             |
|-------|-----------------|----------|-----------|-----------------------------|
| 10669 | ENSG00000188529 | SRSF10   | Supported | Nucleoplasm                 |
| 10670 | ENSG00000188542 | DUSP28   | Uncertain | Cytosol;N                   |
| 10671 | ENSG00000188549 | CCDC9B   | Approved  | Cytosol;Nucleoplas          |
| 10672 | ENSG00000188554 | NBR1     | Supported | Vesicles Nuclear bodies;Nuc |
| 10673 | ENSG00000188559 | RALGAPA2 | Supported | Cytosol Plasma membrane     |
| 10674 | ENSG00000188566 | NDOR1    | Approved  | Cytosol;Intermedia          |
| 10675 | ENSG00000188573 | FBLL1    | Supported | Nucleoli Nucleoplasm        |
| 10676 | ENSG00000188580 | NKAIN2   | Approved  | Cytosol                     |
| 10677 | ENSG00000188596 | CFAP54   | Approved  | Cytosol;Microtubul          |
| 10678 | ENSG00000188610 | FAM72B   | Approved  | Cytosol;Plasma mem          |
| 10679 | ENSG00000188611 | ASAH2    | Approved  | Focal adhesion sit          |
| 10680 | ENSG00000188612 | SUM02    | Approved  | Nuclear bodies;Nuc          |
| 10681 | ENSG00000188613 | NANOS1   | Supported | Cytosol;Nucleoplasm         |
| 10682 | ENSG00000188620 | HMX3     | Approved  | Centriolar satelli          |
| 10683 | ENSG00000188636 | RTL6     | Approved  | Cytosol;Nuclear sp          |
| 10684 | ENSG00000188643 | S100A16  | Approved  | Cytosol Plasma membrane     |
| 10685 | ENSG00000188647 | PTAR1    | Approved  | Centriolar satelli          |
| 10686 | ENSG00000188649 | CC2D2B   | Approved  | Nucleoli                    |
| 10687 | ENSG00000188659 | SAX02    | Approved  | Golgi apparatus;Nu          |
| 10688 | ENSG00000188672 | RHCE     | Uncertain | Nucleopla                   |
| 10689 | ENSG00000188674 | C2orf80  | Approved  | Golgi apparatus             |
| 10690 | ENSG00000188677 | PARVB    | Approved  | Cytosol                     |
| 10691 | ENSG00000188690 | UROS     | Approved  | Cytosol;Nucleoplas          |
| 10692 | ENSG00000188706 | ZDHHC9   | Supported | Endoplasm Cytosol           |
| 10693 | ENSG00000188707 | ZBED6CL  | Approved  | Nuclear membrane;V          |
| 10694 | ENSG00000188732 | FAM221A  | Approved  | Cytosol                     |
| 10695 | ENSG00000188735 | TMEM120B | Approved  | Cytosol;Nucleoli f          |
| 10696 | ENSG00000188738 | FSIP2    | Approved  | Microtubules;Mitoc          |
| 10697 | ENSG00000188739 | RBM34    | Supported | Nucleoli Nucleoplasm        |
| 10698 | ENSG00000188747 | NOXA1    | Approved  | Vesicles                    |
| 10699 | ENSG00000188760 | TMEM198  | Approved  | Vesicles                    |
| 10700 | ENSG00000188766 | SPRED3   | Uncertain | Cytosol;N                   |
| 10701 | ENSG00000188785 | ZNF548   | Approved  | Nucleoplasm                 |
| 10702 | ENSG00000188786 | MTF1     | Supported | Nucleoplasm                 |
| 10703 | ENSG00000188807 | TMEM201  | Supported | Nuclear membrane;Nucleoplas |
| 10704 | ENSG00000188818 | ZDHHC11  | Approved  | Lipid droplets              |
| 10705 | ENSG00000188827 | SLX4     | Supported | Cell Junctions;Cytosol;Nucl |
| 10706 | ENSG00000188833 | ENTPD8   | Approved  | Cytosol;Nucleoplas          |
| 10707 | ENSG00000188846 | RPL14    | Supported | Cytosol;Endoplasmic reticul |
| 10708 | ENSG00000188848 | BEND4    | Approved  | Cytosol;Nucleoli f          |
| 10709 | ENSG00000188859 | FAM78B   | Approved  | Golgi apparatus;Ve          |
| 10710 | ENSG00000188869 | TMC3     | Supported | Cytosol                     |
| 10711 | ENSG00000188878 | FBF1     | Supported | Centrosome                  |
| 10712 | ENSG00000188883 | KLRG2    | Uncertain | Nucleopla                   |
| 10713 | ENSG00000188895 | MSL1     | Enhanced  | Nucleoplasm                 |
| 10714 | ENSG00000188906 | LRRK2    | Approved  | Nucleoplasm;Vesicl          |
| 10715 | ENSG00000188910 | GJB3     | Supported | Cell JuncVesicles           |
| 10716 | ENSG00000188917 | TRMT2B   | Approved  | Nuclear bodies;Nuc          |
| 10717 | ENSG00000188959 | C9orf152 | Supported | Nucleoplasm                 |
| 10718 | ENSG00000188976 | NOC2L    | Enhanced  | Nucleoli                    |
| 10719 | ENSG00000188986 | NELFB    | Supported | Nucleoplasm                 |
| 10720 | ENSG00000188994 | ZNF292   | Approved  | Nuclear membrane;N          |
| 10721 | ENSG00000188996 | HUS1B    | Approved  | Cytosol;Nucleoplas          |
| 10722 | ENSG00000188997 | KCTD21   | Approved  | Cytosol                     |
| 10723 | ENSG00000189001 | SBSN     | Approved  | Vesicles                    |

|       |                 |          |           |              |                             |
|-------|-----------------|----------|-----------|--------------|-----------------------------|
| 10724 | ENSG00000189007 | ADAT2    | Approved  |              | Cytosol;Golgi appa          |
| 10725 | ENSG00000189023 | MAGEB16  | Approved  |              | Centrosome;Nucleop          |
| 10726 | ENSG00000189042 | ZNF567   | Approved  |              | Cytosol;Nucleoplas          |
| 10727 | ENSG00000189043 | NDUFA4   | Supported |              | Mitochondria                |
| 10728 | ENSG00000189046 | ALKBH2   | Enhanced  | Nucleoplasm  |                             |
| 10729 | ENSG00000189050 | RNFT1    | Approved  |              | Nucleoli                    |
| 10730 | ENSG00000189052 | CGB5     | Approved  |              | Cytosol                     |
| 10731 | ENSG00000189056 | RELN     | Approved  |              | Focal adhesion sit          |
| 10732 | ENSG00000189057 | FAM111B  | Approved  |              | Cytosol;Nucleoplas          |
| 10733 | ENSG00000189058 | APOD     | Approved  |              | Plasma membrane             |
| 10734 | ENSG00000189060 | H1FO     | Supported |              | Nuclear bodies;NucActin fil |
| 10735 | ENSG00000189064 | GAGE2A   | Approved  |              | Cytosol;Golgi appa          |
| 10736 | ENSG00000189067 | LITAF    | Supported |              | Cytosol;Nucleoplasm;Vesicle |
| 10737 | ENSG00000189068 | VSTM1    | Approved  |              | Vesicles                    |
| 10738 | ENSG00000189079 | ARID2    | Supported |              | NucleoplaPlasma membrane    |
| 10739 | ENSG00000189091 | SF3B3    | Supported |              | Nucleoli;Nucleoplasm        |
| 10740 | ENSG00000189114 | BLOC1S3  | Approved  |              | Golgi apparatus             |
| 10741 | ENSG00000189120 | SP6      | Supported |              | NucleoplaCentrosome;Mitotic |
| 10742 | ENSG00000189127 | ANKRD34B | Approved  |              | Cytosol Mitochondria;Nucle  |
| 10743 | ENSG00000189143 | CLDN4    | Supported |              | Plasma membrane             |
| 10744 | ENSG00000189144 | ZNF573   | Approved  |              | Cytosol;Intermedia          |
| 10745 | ENSG00000189152 | GRAPL    | Approved  |              | Centrosome                  |
| 10746 | ENSG00000189157 | FAM47E   | Approved  |              | Cytosol;Plasma mem          |
| 10747 | ENSG00000189159 | JPT1     | Supported |              | NucleoplaNuclear membrane;N |
| 10748 | ENSG00000189164 | ZNF527   | Approved  |              | Golgi apparatus;Nu          |
| 10749 | ENSG00000189171 | S100A13  | Approved  |              | Cytosol Nucleoli;Nucleopla  |
| 10750 | ENSG00000189180 | ZNF33A   | Approved  |              | Endoplasmic reticu          |
| 10751 | ENSG00000189182 | KRT77    | Approved  |              | Nuclear membrane;P          |
| 10752 | ENSG00000189184 | PCDH18   | Approved  |              | Cytosol;Golgi appa          |
| 10753 | ENSG00000189195 | BTBD8    | Supported |              | Nucleoplasm                 |
| 10754 | ENSG00000189221 | MAOA     | Enhanced  | Mitochondria | Cytosol                     |
| 10755 | ENSG00000189227 | C15orf61 | Approved  |              | Cytosol;Nucleoli;V          |
| 10756 | ENSG00000189241 | TSPYL1   | Supported |              | Nucleoli;Nucleoplasm        |
| 10757 | ENSG00000189252 | SPANXN3  | Approved  |              | Nucleoli fibrillar          |
| 10758 | ENSG00000189266 | PNRC2    | Supported |              | Golgi apparatus;Nucleoplasm |
| 10759 | ENSG00000189269 | DRICH1   | Approved  |              | Nucleoli;Nucleopla          |
| 10760 | ENSG00000189283 | FHIT     | Approved  |              | Nucleoli fibrillar          |
| 10761 | ENSG00000189298 | ZKSCAN3  | Supported |              | Nucleoplasm                 |
| 10762 | ENSG00000189299 | FOXR2    | Supported |              | Nucleoplasm                 |
| 10763 | ENSG00000189306 | RRP7A    | Approved  |              | Cell Junctions;Nuc          |
| 10764 | ENSG00000189308 | LIN54    | Approved  |              | Cytosol                     |
| 10765 | ENSG00000189319 | FAM53B   | Approved  |              | Cytosol                     |
| 10766 | ENSG00000189320 | FAM180A  | Approved  |              | Nucleoplasm                 |
| 10767 | ENSG00000189334 | S100A14  | Approved  |              | Cytosol Cell Junctions;Nuc  |
| 10768 | ENSG00000189337 | KAZN     | Supported |              | Cytosol;Nuclear speckles;Nu |
| 10769 | ENSG00000189339 | SLC35E2B | Uncertain |              | Nucleopla                   |
| 10770 | ENSG00000189362 | NEMP2    | Approved  |              | Nucleoplasm                 |
| 10771 | ENSG00000189367 | KIAA0408 | Approved  |              | Cytosol;Nucleoplas          |
| 10772 | ENSG00000189369 | GSPT2    | Enhanced  | Cytosol      |                             |
| 10773 | ENSG00000189376 | C8orf76  | Uncertain |              | Cytosol;N                   |
| 10774 | ENSG00000189403 | HMGB1    | Supported |              | Nucleoplasm                 |
| 10775 | ENSG00000189410 | SH2D5    | Supported |              | Cytosol                     |
| 10776 | ENSG00000189430 | NCR1     | Approved  |              | Endoplasmic reticu          |
| 10777 | ENSG00000189431 | RASSF10  | Approved  |              | Cytosol Vesicles            |
| 10778 | ENSG00000189433 | GJB4     | Supported |              | Cell Junctions              |



|       |                 |           |           |                               |
|-------|-----------------|-----------|-----------|-------------------------------|
| 10779 | ENSG00000196074 | SYCP2     | Supported | Cytosol;Nucleoplasm;Plasma    |
| 10780 | ENSG00000196083 | IL1RAP    | Approved  | Cytosol;Vesicles              |
| 10781 | ENSG00000196092 | PAX5      | Approved  | NucleoplaCytosol;Vesicles     |
| 10782 | ENSG00000196116 | TDRD7     | Supported | CytoplasmNucleoplasm          |
| 10783 | ENSG00000196118 | CCDC189   | Approved  | Cytosol                       |
| 10784 | ENSG00000196123 | KIAA0895L | Approved  | Nucleoplasm;Vesicl            |
| 10785 | ENSG00000196132 | MYT1      | Supported | Cytosol;Nucleoplasm           |
| 10786 | ENSG00000196139 | AKR1C3    | Approved  | Cytosol Endoplasmic reticu    |
| 10787 | ENSG00000196141 | SPATS2L   | Enhanced  | Cytosol;Nucleoli              |
| 10788 | ENSG00000196150 | ZNF250    | Supported | Nuclear speckles              |
| 10789 | ENSG00000196151 | WDSUB1    | Approved  | Cytosol;Nucleoli;N            |
| 10790 | ENSG00000196152 | ZNF79     | Approved  | Cytosol;Nucleoplas            |
| 10791 | ENSG00000196154 | S100A4    | Enhanced  | Plasma membrane               |
| 10792 | ENSG00000196155 | PLEKHG4   | Approved  | Cell Junctions                |
| 10793 | ENSG00000196159 | FAT4      | Approved  | Cytosol                       |
| 10794 | ENSG00000196169 | KIF19     | Approved  | Actin filaments;Ce            |
| 10795 | ENSG00000196177 | ACADSB    | Supported | Mitochondria                  |
| 10796 | ENSG00000196182 | STK40     | Supported | Cytosol;Nucleoplasm           |
| 10797 | ENSG00000196187 | TMEM63A   | Enhanced  | Centriolar satellite;Vesicles |
| 10798 | ENSG00000196196 | HRCT1     | Approved  | Nucleoplasm                   |
| 10799 | ENSG00000196199 | MPHOSPH8  | Supported | Nucleoplasm Cytosol;P         |
| 10800 | ENSG00000196208 | GREB1     | Approved  | Cytosol;Mitochondr            |
| 10801 | ENSG00000196209 | SIRPB2    | Approved  | Nuclear bodies                |
| 10802 | ENSG00000196214 | ZNF766    | Supported | Centrosome                    |
| 10803 | ENSG00000196218 | RYR1      | Approved  | Cytosol;Golgi appa            |
| 10804 | ENSG00000196220 | SRGAP3    | Uncertain | Cytosol;N                     |
| 10805 | ENSG00000196227 | FAM217B   | Enhanced  | Nucleoplasm                   |
| 10806 | ENSG00000196230 | TUBB      | Supported | Microtubules                  |
| 10807 | ENSG00000196233 | LCOR      | Enhanced  | Nucleoplasm                   |
| 10808 | ENSG00000196235 | SUPT5H    | Enhanced  | Nucleoplasm                   |
| 10809 | ENSG00000196242 | OR2C3     | Approved  | Plasma membrane               |
| 10810 | ENSG00000196263 | ZNF471    | Supported | Nucleoplasm                   |
| 10811 | ENSG00000196275 | GTF2IRD2  | Approved  | Nucleoplasm                   |
| 10812 | ENSG00000196277 | GRM7      | Uncertain | Cytosol                       |
| 10813 | ENSG00000196284 | SUPT3H    | Supported | Nucleoplasm                   |
| 10814 | ENSG00000196290 | NIF3L1    | Approved  | Vesicles                      |
| 10815 | ENSG00000196296 | ATP2A1    | Approved  | Endoplasmic reticu            |
| 10816 | ENSG00000196305 | IARS      | Supported | Cytosol                       |
| 10817 | ENSG00000196313 | POM121    | Enhanced  | Nuclear membrane;Nucleoplasm  |
| 10818 | ENSG00000196323 | ZBTB44    | Approved  | Nucleoplasm                   |
| 10819 | ENSG00000196337 | CGB7      | Approved  | Cytosol                       |
| 10820 | ENSG00000196338 | NLGN3     | Supported | Cell JuncGolgi apparatus      |
| 10821 | ENSG00000196344 | ADH7      | Supported | Cytosol Plasma membrane       |
| 10822 | ENSG00000196345 | ZKSCAN7   | Supported | Cytosol Nuclear speckles      |
| 10823 | ENSG00000196353 | CPNE4     | Approved  | Cytosol;Nucleoplas            |
| 10824 | ENSG00000196357 | ZNF565    | Approved  | Nuclear bodies;Nuc            |
| 10825 | ENSG00000196358 | NTNG2     | Approved  | Cytokinetic bridge            |
| 10826 | ENSG00000196363 | WDR5      | Supported | Nucleoplasm                   |
| 10827 | ENSG00000196365 | LONP1     | Enhanced  | Mitochondria;Nucleoplasm      |
| 10828 | ENSG00000196367 | TRRAP     | Supported | NucleoplaGolgi apparatus      |
| 10829 | ENSG00000196368 | NUDT11    | Approved  | Cytosol                       |
| 10830 | ENSG00000196369 | SRGAP2B   | Approved  | Cytosol                       |
| 10831 | ENSG00000196371 | FUT4      | Supported | Vesicles                      |
| 10832 | ENSG00000196372 | ASB13     | Approved  | Golgi apparatus;Nu            |
| 10833 | ENSG00000196376 | SLC35F1   | Approved  | Centriolar satelli            |

|       |                 |          |           |                             |
|-------|-----------------|----------|-----------|-----------------------------|
| 10834 | ENSG00000196378 | ZNF34    | Enhanced  | Cytosol;Nucleoplasm         |
| 10835 | ENSG00000196381 | ZNF781   | Approved  | Nucleoplasm                 |
| 10836 | ENSG00000196388 | INCA1    | Approved  | Nuclear bodies;Nuc          |
| 10837 | ENSG00000196391 | ZNF774   | Supported | IntermediCytosol            |
| 10838 | ENSG00000196396 | PTPN1    | Enhanced  | Endoplasmic reticulum       |
| 10839 | ENSG00000196405 | EVL      | Approved  | Cytosol;Vesicles            |
| 10840 | ENSG00000196406 | SPANXD   | Approved  | Nucleoplasm;Vesicl          |
| 10841 | ENSG00000196418 | ZNF124   | Approved  | Nuclear membrane;N          |
| 10842 | ENSG00000196419 | XRCC6    | Enhanced  | Nucleoplasm                 |
| 10843 | ENSG00000196420 | S100A5   | Approved  | Nucleoplasm                 |
| 10844 | ENSG00000196422 | PPP1R26  | Enhanced  | Nucleoplasm                 |
| 10845 | ENSG00000196427 | NBPF4    | Approved  | Cytosol;Nucleoplas          |
| 10846 | ENSG00000196428 | TSC22D2  | Approved  | Cytosol                     |
| 10847 | ENSG00000196436 | NPIP15   | Approved  | Nucleoplasm                 |
| 10848 | ENSG00000196437 | ZNF569   | Approved  | Golgi apparatus;Nu          |
| 10849 | ENSG00000196440 | ARMCX4   | Approved  | Nucleoplasm;Vesicl          |
| 10850 | ENSG00000196449 | YRDC     | Approved  | Mitochondria                |
| 10851 | ENSG00000196453 | ZNF777   | Approved  | Nucleoplasm                 |
| 10852 | ENSG00000196455 | PIK3R4   | Approved  | Microtubules;Vesic          |
| 10853 | ENSG00000196458 | ZNF605   | Approved  | Nucleoplasm;Vesicl          |
| 10854 | ENSG00000196459 | TRAPPC2  | Approved  | EndoplasmNucleoplasm;Vesicl |
| 10855 | ENSG00000196460 | RFX8     | Approved  | Nuclear bodies;Nuc          |
| 10856 | ENSG00000196465 | MYL6B    | Approved  | Vesicles                    |
| 10857 | ENSG00000196466 | ZNF799   | Approved  | Centriolar satell           |
| 10858 | ENSG00000196470 | SIAH1    | Approved  | NucleoplaMitochondria       |
| 10859 | ENSG00000196476 | C20orf96 | Approved  | Centriolar satell           |
| 10860 | ENSG00000196482 | ESRRG    | Approved  | Nucleoplasm                 |
| 10861 | ENSG00000196497 | IP04     | Approved  | Cytosol                     |
| 10862 | ENSG00000196498 | NCOR2    | Supported | Nucleoplasm                 |
| 10863 | ENSG00000196503 | ARL9     | Approved  | Mitochondria;Nucle          |
| 10864 | ENSG00000196504 | PRPF40A  | Enhanced  | Nuclear speckles            |
| 10865 | ENSG00000196505 | GDAP2    | Approved  | Endoplasmic reticu          |
| 10866 | ENSG00000196510 | ANAPC7   | Approved  | Cytosol;Nucleoplas          |
| 10867 | ENSG00000196511 | TPK1     | Approved  | Vesicles                    |
| 10868 | ENSG00000196517 | SLC6A9   | Approved  | Golgi apparatus;Nu          |
| 10869 | ENSG00000196526 | AFAP1    | Supported | Actin filCytosol;Focal adhe |
| 10870 | ENSG00000196531 | NACA     | Approved  | Cytosol                     |
| 10871 | ENSG00000196542 | SPTSSB   | Approved  | Nuclear speckles            |
| 10872 | ENSG00000196544 | BORCS6   | Supported | Centrosome;Cytosol          |
| 10873 | ENSG00000196547 | MAN2A2   | Approved  | Cytoplasmic bodies          |
| 10874 | ENSG00000196550 | FAM72A   | Approved  | Cytosol;Plasma mem          |
| 10875 | ENSG00000196557 | CACNA1H  | Approved  | Nucleoplasm;Vesicl          |
| 10876 | ENSG00000196584 | XRCC2    | Approved  | Nucleoplasm;Vesicl          |
| 10877 | ENSG00000196586 | MYO6     | Enhanced  | Nucleoplasm                 |
| 10878 | ENSG00000196588 | MKL1     | Supported | Cytosol;Nucleoplasm         |
| 10879 | ENSG00000196591 | HDAC2    | Enhanced  | Nucleoplasm                 |
| 10880 | ENSG00000196597 | ZNF782   | Approved  | Mitochondria;Nucle          |
| 10881 | ENSG00000196605 | ZNF846   | Approved  | Actin filaments             |
| 10882 | ENSG00000196611 | MMP1     | Approved  | Vesicles                    |
| 10883 | ENSG00000196616 | ADH1B    | Approved  | Cytosol;Plasma mem          |
| 10884 | ENSG00000196628 | TCF4     | Supported | NucleoplaCytosol            |
| 10885 | ENSG00000196632 | WNK3     | Approved  | Vesicles                    |
| 10886 | ENSG00000196636 | SDHAF3   | Approved  | Microtubules;Mitoc          |
| 10887 | ENSG00000196639 | HRH1     | Supported | Plasma meCytosol            |
| 10888 | ENSG00000196642 | RABL6    | Approved  | Cytosol Centrosome          |

|       |                 |           |           |                                      |
|-------|-----------------|-----------|-----------|--------------------------------------|
| 10889 | ENSG00000196646 | ZNF136    | Approved  | Nucleoli                             |
| 10890 | ENSG00000196652 | ZKSCAN5   | Approved  | Intermediate filam                   |
| 10891 | ENSG00000196655 | TRAPPC4   | Approved  | Cytosol                              |
| 10892 | ENSG00000196659 | TTC30B    | Approved  | Centrosome;Nucleop                   |
| 10893 | ENSG00000196663 | TECPR2    | Approved  | Nucleoplasm                          |
| 10894 | ENSG00000196670 | ZFP62     | Approved  | Actin filaments;Nu                   |
| 10895 | ENSG00000196678 | ERI2      | Supported | Golgi apparatus;Nucleoplasm          |
| 10896 | ENSG00000196684 | HSH2D     | Approved  | Cytosol;Focal adhe                   |
| 10897 | ENSG00000196693 | ZNF33B    | Approved  | Endoplasmic reticu                   |
| 10898 | ENSG00000196700 | ZNF512B   | Approved  | Nucleoplasm                          |
| 10899 | ENSG00000196704 | AMZ2      | Supported | NucleoplaCytosol;Nuclear bo          |
| 10900 | ENSG00000196712 | NF1       | Approved  | Mitochondria                         |
| 10901 | ENSG00000196715 | VKORC1L1  | Supported | Endoplasmic reticulum                |
| 10902 | ENSG00000196724 | ZNF418    | Uncertain | Nucleopla                            |
| 10903 | ENSG00000196730 | DAPK1     | Approved  | Centrosome                           |
| 10904 | ENSG00000196754 | S100A2    | Approved  | Cytosol;Nucleoli;N                   |
| 10905 | ENSG00000196757 | ZNF700    | Uncertain | Nucleopla                            |
| 10906 | ENSG00000196767 | POU3F4    | Supported | Nucleoplasm                          |
| 10907 | ENSG00000196776 | CD47      | Supported | Plasma meVesicles                    |
| 10908 | ENSG00000196781 | TLE1      | Supported | Nucleoplasm                          |
| 10909 | ENSG00000196782 | MAML3     | Supported | Nuclear speckles                     |
| 10910 | ENSG00000196792 | STRN3     | Supported | Cytosol Actin filaments;Nu           |
| 10911 | ENSG00000196793 | ZNF239    | Approved  | Nuclear bodies;Nuc                   |
| 10912 | ENSG00000196812 | ZSCAN16   | Approved  | Nucleoplasm                          |
| 10913 | ENSG00000196814 | MVB12B    | Approved  | Golgi apparatus;Ve                   |
| 10914 | ENSG00000196821 | C6orf106  | Approved  | Centrosome;Nuclear                   |
| 10915 | ENSG00000196839 | ADA       | Supported | Cytosol;Plasma membrane              |
| 10916 | ENSG00000196843 | ARID5A    | Supported | NucleoplaNucleoli                    |
| 10917 | ENSG00000196850 | PPTC7     | Approved  | Cytosol;Plasma mem                   |
| 10918 | ENSG00000196862 | RGPD4     | Uncertain | Nuclear m                            |
| 10919 | ENSG00000196865 | NHLRC2    | Approved  | Nucleoplasm                          |
| 10920 | ENSG00000196867 | ZFP28     | Approved  | Cytosol;Nucleoplas                   |
| 10921 | ENSG00000196872 | KIAA1211L | Approved  | Centrosome;Cytokin                   |
| 10922 | ENSG00000196873 | CBWD3     | Approved  | Plasma membrane                      |
| 10923 | ENSG00000196876 | SCN8A     | Approved  | Plasma meCell Junctions;Ves          |
| 10924 | ENSG00000196878 | LAMB3     | Approved  | Vesicles                             |
| 10925 | ENSG00000196890 | HIST3H2BB | Approved  | Cytosol;Nucleoplas                   |
| 10926 | ENSG00000196911 | KPNA5     | Supported | Cytosol                              |
| 10927 | ENSG00000196912 | ANKRD36B  | Approved  | Cytosol;Nucleoplas                   |
| 10928 | ENSG00000196914 | ARHGEF12  | Approved  | Cytosol;Nucleoplas                   |
| 10929 | ENSG00000196923 | PDLIM7    | Enhanced  | Actin filaments;Focal adhesion sites |
| 10930 | ENSG00000196924 | FLNA      | Enhanced  | Actin filaments;Cytosol;Plasma membr |
| 10931 | ENSG00000196935 | SRGAP1    | Approved  | Cytosol                              |
| 10932 | ENSG00000196937 | FAM3C     | Enhanced  | Golgi apparatus                      |
| 10933 | ENSG00000196943 | NOP9      | Approved  | Cytosol;Nucleoli;N                   |
| 10934 | ENSG00000196950 | SLC39A10  | Approved  | Cytosol;Nucleoplas                   |
| 10935 | ENSG00000196954 | CASP4     | Approved  | Cytosol;Plasma mem                   |
| 10936 | ENSG00000196961 | AP2A1     | Supported | Vesicles                             |
| 10937 | ENSG00000196968 | FUT11     | Approved  | Golgi apparatus;Nu                   |
| 10938 | ENSG00000196975 | ANXA4     | Approved  | Cytosol                              |
| 10939 | ENSG00000196976 | LAGE3     | Supported | Nuclear bodies;Nucleoplasm           |
| 10940 | ENSG00000196990 | FAM163B   | Approved  | Cytosol;Nuclear bo                   |
| 10941 | ENSG00000196993 | NPIP3     | Approved  | Nucleoplasm                          |
| 10942 | ENSG00000196998 | WDR45     | Uncertain | Nucleoli                             |
| 10943 | ENSG00000197006 | METTL9    | Approved  | Cell Junctions;Cyt                   |

|       |                 |          |           |                     |                             |
|-------|-----------------|----------|-----------|---------------------|-----------------------------|
| 10944 | ENSG00000197013 | ZNF429   | Approved  |                     | Nucleoplasm                 |
| 10945 | ENSG00000197016 | ZNF470   | Supported | Nuclear             | bodies;Nucleoplasm          |
| 10946 | ENSG00000197019 | SERTAD1  | Approved  |                     | Golgi apparatus;Nu          |
| 10947 | ENSG00000197024 | ZNF398   | Approved  |                     | Mitochondria;Nucle          |
| 10948 | ENSG00000197037 | ZSCAN25  | Approved  |                     | Nucleoli fibrillar          |
| 10949 | ENSG00000197043 | ANXA6    | Approved  |                     | Cytosol                     |
| 10950 | ENSG00000197044 | ZNF441   | Approved  |                     | Nuclear speckles            |
| 10951 | ENSG00000197045 | GMFB     | Approved  |                     | Cytosol;Nuclear bo          |
| 10952 | ENSG00000197046 | SIGLEC15 | Supported | Golgi app           | Nucleoplasm                 |
| 10953 | ENSG00000197050 | ZNF420   | Approved  |                     | Nucleoplasm                 |
| 10954 | ENSG00000197054 | ZNF763   | Uncertain |                     | Nucleopla                   |
| 10955 | ENSG00000197056 | ZMYM1    | Approved  |                     | Centriolar satell           |
| 10956 | ENSG00000197062 | ZSCAN26  | Enhanced  | Nucleopla           | Nucleoli                    |
| 10957 | ENSG00000197077 | KIAA1671 | Approved  |                     | Microtubules                |
| 10958 | ENSG00000197081 | IGF2R    | Enhanced  | Golgi apparatus;    | Vesicles                    |
| 10959 | ENSG00000197093 | GAL3ST4  | Approved  |                     | Cytosol;Nucleoplas          |
| 10960 | ENSG00000197102 | DYNC1H1  | Supported |                     | Centrosome;Cytosol          |
| 10961 | ENSG00000197106 | SLC6A17  | Approved  |                     | Golgi apparatus;Nu          |
| 10962 | ENSG00000197111 | PCBP2    | Supported |                     | Cytosol;Nucleoplasm         |
| 10963 | ENSG00000197114 | ZGPAT    | Supported | Nucleopla           | Plasma membrane             |
| 10964 | ENSG00000197122 | SRC      | Supported | Cell Junctions;     | Cytosol;Plas                |
| 10965 | ENSG00000197124 | ZNF682   | Uncertain |                     | Golgi app                   |
| 10966 | ENSG00000197128 | ZNF772   | Approved  |                     | Cytosol                     |
| 10967 | ENSG00000197136 | PCNX3    | Approved  |                     | Cytosol                     |
| 10968 | ENSG00000197140 | ADAM32   | Approved  |                     | Nucleoplasm;Vesicl          |
| 10969 | ENSG00000197142 | ACSL5    | Supported | Mitochond           | Nucleoplasm                 |
| 10970 | ENSG00000197147 | LRRC8B   | Approved  |                     | Nuclear speckles            |
| 10971 | ENSG00000197150 | ABCB8    | Supported | Mitochond           | Nucleoplasm                 |
| 10972 | ENSG00000197157 | SND1     | Enhanced  | Cytosol             |                             |
| 10973 | ENSG00000197162 | ZNF785   | Approved  |                     | Nucleoplasm;Plasma          |
| 10974 | ENSG00000197170 | PSMD12   | Approved  |                     | Cytosol;Microtubul          |
| 10975 | ENSG00000197183 | NOL4L    | Enhanced  | Nucleoplasm         |                             |
| 10976 | ENSG00000197191 | CYSRT1   | Approved  |                     | Midbody;Nuclear sp          |
| 10977 | ENSG00000197208 | SLC22A4  | Approved  |                     | Mitochondria                |
| 10978 | ENSG00000197213 | ZSCAN5B  | Uncertain |                     | Nuclear s                   |
| 10979 | ENSG00000197217 | ENTPD4   | Supported |                     | Vesicles                    |
| 10980 | ENSG00000197223 | C1D      | Supported |                     | Nucleoli;Nucleoplasm        |
| 10981 | ENSG00000197226 | TBC1D9B  | Approved  |                     | Nucleoli fibrillar          |
| 10982 | ENSG00000197249 | SERPINA1 | Enhanced  | Vesicles            |                             |
| 10983 | ENSG00000197261 | C6orf141 | Approved  |                     | Nuclear membrane            |
| 10984 | ENSG00000197265 | GTF2E2   | Enhanced  | Nucleopla           | Cytosol                     |
| 10985 | ENSG00000197279 | ZNF165   | Approved  |                     | Microtubules;Nucle          |
| 10986 | ENSG00000197283 | SYNGAP1  | Approved  |                     | Nucleoplasm                 |
| 10987 | ENSG00000197299 | BLM      | Supported | Nucleopla           | Cytosol                     |
| 10988 | ENSG00000197302 | ZNF720   | Approved  |                     | Cytosol;Nucleoplas          |
| 10989 | ENSG00000197312 | DDI2     | Enhanced  | Cytosol;Nucleoplasm |                             |
| 10990 | ENSG00000197321 | SVIL     | Supported |                     | Actin filaments;Cytosol;Pla |
| 10991 | ENSG00000197323 | TRIM33   | Approved  |                     | Nucleoplasm;Vesicl          |
| 10992 | ENSG00000197324 | LRP10    | Approved  |                     | Nucleoli;Nucleopla          |
| 10993 | ENSG00000197329 | PELI1    | Approved  |                     | Intermediate filam          |
| 10994 | ENSG00000197343 | ZNF655   | Supported |                     | Nucleoplasm;Plasma membrane |
| 10995 | ENSG00000197345 | MRPL21   | Approved  |                     | Mitochondria;Nucle          |
| 10996 | ENSG00000197355 | UAP1L1   | Approved  |                     | Cytosol;Intermedia          |
| 10997 | ENSG00000197361 | FBXL22   | Uncertain |                     | Cytosol;N                   |
| 10998 | ENSG00000197362 | ZNF786   | Approved  |                     | Nuclear speckles;N          |

|       |                 |           |           |                                     |                     |
|-------|-----------------|-----------|-----------|-------------------------------------|---------------------|
| 10999 | ENSG00000197363 | ZNF517    | Approved  |                                     | Nucleoplasm         |
| 11000 | ENSG00000197375 | SLC22A5   | Approved  |                                     | Mitochondria        |
| 11001 | ENSG00000197380 | DACT3     | Approved  |                                     | Nucleoplasm;Vesicl  |
| 11002 | ENSG00000197381 | ADARB1    | Supported | Nucleopla                           | Cytosol             |
| 11003 | ENSG00000197385 | ZNF860    | Approved  |                                     | Nucleoli;Nucleopla  |
| 11004 | ENSG00000197386 | HTT       | Supported | Cytosol;Nucleoplasm                 |                     |
| 11005 | ENSG00000197405 | C5AR1     | Supported | Vesicles                            |                     |
| 11006 | ENSG00000197408 | CYP2B6    | Approved  |                                     | Cytosol;Nucleopla   |
| 11007 | ENSG00000197410 | DCHS2     | Approved  |                                     | Plasma membrane;Ve  |
| 11008 | ENSG00000197415 | VEPH1     | Approved  |                                     | Cytosol;Nucleoli;N  |
| 11009 | ENSG00000197417 | SHPK      | Approved  |                                     | Nuclear speckles;N  |
| 11010 | ENSG00000197442 | MAP3K5    | Supported | Cytosol                             |                     |
| 11011 | ENSG00000197444 | OGDHL     | Approved  |                                     | Nucleoli fibrillar  |
| 11012 | ENSG00000197448 | GSTK1     | Supported | Peroxisomes                         |                     |
| 11013 | ENSG00000197451 | HNRNPAB   | Enhanced  | Nucleoplasm                         |                     |
| 11014 | ENSG00000197461 | PDGFA     | Approved  |                                     | Centriolar satelli  |
| 11015 | ENSG00000197471 | SPN       | Approved  |                                     | Plasma membrane     |
| 11016 | ENSG00000197472 | ZNF695    | Approved  |                                     | Nuclear speckles    |
| 11017 | ENSG00000197479 | PCDHB11   | Approved  |                                     | Plasma membrane     |
| 11018 | ENSG00000197483 | ZNF628    | Approved  |                                     | Nucleoplasm         |
| 11019 | ENSG00000197496 | SLC2A10   | Approved  | Vesicles                            | Nucleopla           |
| 11020 | ENSG00000197497 | ZNF665    | Approved  |                                     | Nuclear membrane    |
| 11021 | ENSG00000197498 | RPF2      | Supported | Nucleoli                            | Nucleoplasm         |
| 11022 | ENSG00000197535 | MYO5A     | Approved  |                                     | Centriolar satelli  |
| 11023 | ENSG00000197548 | ATG7      | Supported | Cytosol                             | Nucleoplasm;Plasma  |
| 11024 | ENSG00000197555 | SIPA1L1   | Approved  |                                     | Actin filaments;Pl  |
| 11025 | ENSG00000197557 | TTC30A    | Approved  |                                     | Centrosome;Nucleop  |
| 11026 | ENSG00000197562 | RAB40C    | Approved  |                                     | Vesicles            |
| 11027 | ENSG00000197563 | PIGN      | Enhanced  | Cytosol;Plasma membrane             |                     |
| 11028 | ENSG00000197565 | COL4A6    | Approved  |                                     | Endoplasmic reticu  |
| 11029 | ENSG00000197566 | ZNF624    | Approved  |                                     | Vesicles            |
| 11030 | ENSG00000197568 | HHLA3     | Approved  |                                     | Nucleoplasm;Vesicl  |
| 11031 | ENSG00000197576 | HOXA4     | Supported | Nuclear bodies                      |                     |
| 11032 | ENSG00000197579 | TOPORS    | Supported | Nucleoplasm                         |                     |
| 11033 | ENSG00000197586 | ENTPD6    | Supported | Golgi apparatus                     |                     |
| 11034 | ENSG00000197599 | CCDC154   | Approved  |                                     | Golgi apparatus;Pl  |
| 11035 | ENSG00000197601 | FAR1      | Supported | Peroxisomes                         |                     |
| 11036 | ENSG00000197603 | C5orf42   | Approved  |                                     | Cytosol             |
| 11037 | ENSG00000197619 | ZNF615    | Approved  |                                     | Mitochondria;Nucle  |
| 11038 | ENSG00000197622 | CDC42SE1  | Supported | Cell Junctions                      |                     |
| 11039 | ENSG00000197641 | SERPINB13 | Approved  | Cytosol                             | Nuclear s           |
| 11040 | ENSG00000197646 | PDCD1LG2  | Approved  |                                     | Cytosol             |
| 11041 | ENSG00000197647 | ZNF433    | Approved  |                                     | Nuclear bodies      |
| 11042 | ENSG00000197694 | SPTAN1    | Approved  | Microtubules                        | Vesicles            |
| 11043 | ENSG00000197696 | NMB       | Approved  |                                     | Nucleoplasm;Plasma  |
| 11044 | ENSG00000197702 | PARVA     | Supported | Actin filaments;Cytosol;Foc         |                     |
| 11045 | ENSG00000197705 | KLHL14    | Supported | Cytosol                             | Actin filaments     |
| 11046 | ENSG00000197712 | FAM114A1  | Enhanced  | Cytosol;Golgi apparatus;Nucleoplasm |                     |
| 11047 | ENSG00000197713 | RPE       | Approved  |                                     | Cytosol;Nucleoplas  |
| 11048 | ENSG00000197714 | ZNF460    | Approved  |                                     | Nucleoplasm         |
| 11049 | ENSG00000197724 | PHF2      | Supported | Nucleoli                            | Nucleopla           |
| 11050 | ENSG00000197728 | RPS26     | Enhanced  | Cytosol;Nucleoli                    |                     |
| 11051 | ENSG00000197746 | PSAP      | Supported | Vesicles                            |                     |
| 11052 | ENSG00000197747 | S100A10   | Approved  |                                     | Mitochondria        |
| 11053 | ENSG00000197756 | RPL37A    | Approved  |                                     | Cytosol;Endoplasmic |

|       |                 |           |           |                                     |
|-------|-----------------|-----------|-----------|-------------------------------------|
| 11054 | ENSG00000197757 | HOXC6     | Supported | Nucleoplasm                         |
| 11055 | ENSG00000197763 | TXNRD3    | Enhanced  | Cytosol;Nucleoplasm                 |
| 11056 | ENSG00000197768 | STPG3     | Uncertain | Vesicles                            |
| 11057 | ENSG00000197769 | MAP1LC3C  | Supported | Cytoplasmic bodies                  |
| 11058 | ENSG00000197771 | MCMBP     | Enhanced  | Cytosol;Nucleoplasm                 |
| 11059 | ENSG00000197776 | KLHDC1    | Supported | Cell Junctions                      |
| 11060 | ENSG00000197780 | TAF13     | Enhanced  | Cytosol                             |
| 11061 | ENSG00000197782 | ZNF780A   | Approved  | Nucleoli;Nucleoplasm                |
| 11062 | ENSG00000197785 | ATAD3A    | Supported | Centrosome;Nucleoplasm              |
| 11063 | ENSG00000197808 | ZNF461    | Approved  | Mitochondria                        |
| 11064 | ENSG00000197822 | OCLN      | Supported | Golgi apparatus;Nucleoplasm         |
| 11065 | ENSG00000197826 | C4orf22   | Approved  | Cell Junctions;Plasma membrane      |
| 11066 | ENSG00000197837 | HIST4H4   | Supported | Cytosol;Plasma membrane             |
| 11067 | ENSG00000197841 | ZNF181    | Approved  | Nucleoplasm                         |
| 11068 | ENSG00000197852 | FAM212B   | Supported | Nucleoplasm                         |
| 11069 | ENSG00000197857 | ZNF44     | Approved  | Nucleoplasm                         |
| 11070 | ENSG00000197859 | ADAMTSL2  | Approved  | Cytosol;Microtubules                |
| 11071 | ENSG00000197860 | SGTB      | Uncertain | Vesicles                            |
| 11072 | ENSG00000197863 | ZNF790    | Approved  | Nucleoplasm                         |
| 11073 | ENSG00000197872 | FAM49A    | Approved  | Nucleoli                            |
| 11074 | ENSG00000197879 | MYO1C     | Enhanced  | Nucleoplasm                         |
| 11075 | ENSG00000197885 | NKIRAS1   | Approved  | Plasma membrane;Nuclear bodies      |
| 11076 | ENSG00000197903 | HIST1H2BK | Approved  | Microtubules                        |
| 11077 | ENSG00000197905 | TEAD4     | Supported | Cytosol;Nucleoplasm                 |
| 11078 | ENSG00000197915 | HRNR      | Approved  | Nucleoplasm                         |
| 11079 | ENSG00000197921 | HES5      | Approved  | Mitochondria                        |
| 11080 | ENSG00000197928 | ZNF677    | Approved  | Cytosol;Nuclear speckles            |
| 11081 | ENSG00000197937 | ZNF347    | Approved  | Centrosome;Nucleoplasm              |
| 11082 | ENSG00000197943 | PLCG2     | Approved  | Microtubules                        |
| 11083 | ENSG00000197948 | FCHSD1    | Approved  | Vesicles                            |
| 11084 | ENSG00000197951 | ZNF71     | Approved  | Cytosol;Nucleoplasm                 |
| 11085 | ENSG00000197956 | S100A6    | Enhanced  | Nucleoli;Nucleoplasm                |
| 11086 | ENSG00000197958 | RPL12     | Approved  | Cytosol;Plasma membrane             |
| 11087 | ENSG00000197959 | DNM3      | Approved  | Golgi apparatus                     |
| 11088 | ENSG00000197961 | ZNF121    | Approved  | Golgi apparatus                     |
| 11089 | ENSG00000197965 | MPZL1     | Supported | Centrosome;Nucleoplasm              |
| 11090 | ENSG00000197971 | MBP       | Approved  | Plasma membrane;Vesicles            |
| 11091 | ENSG00000197976 | AKAP17A   | Supported | Plasma membrane                     |
| 11092 | ENSG00000197980 | LEKR1     | Approved  | Nuclear speckles;Cytosol            |
| 11093 | ENSG00000197991 | AL592490  | Approved  | Nucleoli;Nucleoplasm                |
| 11094 | ENSG00000197993 | KEL       | Supported | Cytokinetic bridge                  |
| 11095 | ENSG00000198000 | NOL8      | Supported | Plasma membrane;Cytosol;Nucleoplasm |
| 11096 | ENSG00000198001 | IRAK4     | Approved  | Nucleoli                            |
| 11097 | ENSG00000198003 | CCDC151   | Approved  | Cytosol;Microtubules;Nucleoli       |
| 11098 | ENSG00000198015 | MRPL42    | Supported | Nucleoplasm                         |
| 11099 | ENSG00000198018 | ENTPD7    | Approved  | Mitochondria;Plasma membrane        |
| 11100 | ENSG00000198021 | SPANXA1   | Supported | Nucleoplasm                         |
| 11101 | ENSG00000198026 | ZNF335    | Enhanced  | Nucleoplasm                         |
| 11102 | ENSG00000198028 | ZNF560    | Enhanced  | Nucleoplasm                         |
| 11103 | ENSG00000198033 | TUBA3C    | Supported | Nuclear speckles                    |
| 11104 | ENSG00000198039 | ZNF273    | Approved  | Microtubules                        |
| 11105 | ENSG00000198040 | ZNF84     | Supported | Nucleoplasm                         |
| 11106 | ENSG00000198042 | MAK16     | Supported | Nucleoplasm                         |
| 11107 | ENSG00000198046 | ZNF667    | Approved  | Nucleoli;Vesicles                   |
| 11108 | ENSG00000198055 | GRK6      | Approved  | Nucleoplasm                         |
|       |                 |           |           | Mitochondria                        |

|       |                 |           |           |                             |
|-------|-----------------|-----------|-----------|-----------------------------|
| 11109 | ENSG00000198056 | PRIM1     | Supported | Vesicles                    |
| 11110 | ENSG00000198060 | 3/5/2019  | Supported | Mitochondria                |
| 11111 | ENSG00000198064 | NPIP13    | Approved  | Nucleoplasm                 |
| 11112 | ENSG00000198074 | AKR1B10   | Supported | Cytosol;Plasma membrane     |
| 11113 | ENSG00000198075 | SULT1C4   | Approved  | Cytosol                     |
| 11114 | ENSG00000198081 | ZBTB14    | Supported | Nucleoplasm                 |
| 11115 | ENSG00000198087 | CD2AP     | Supported | Cytosol;PNucleoli fibrillar |
| 11116 | ENSG00000198099 | ADH4      | Uncertain | Cytosol;N                   |
| 11117 | ENSG00000198105 | ZNF248    | Approved  | Nucleoplasm                 |
| 11118 | ENSG00000198113 | TOR4A     | Approved  | Nucleoplasm                 |
| 11119 | ENSG00000198121 | LPAR1     | Approved  | Plasma meNuclear speckles   |
| 11120 | ENSG00000198130 | HIBCH     | Approved  | Mitochondria;Nucle          |
| 11121 | ENSG00000198131 | ZNF544    | Approved  | Nucleoplasm                 |
| 11122 | ENSG00000198142 | SOWAHC    | Approved  | Cytosol                     |
| 11123 | ENSG00000198156 | NPIP16    | Approved  | Nucleoplasm                 |
| 11124 | ENSG00000198157 | HMG15     | Supported | Nucleoplasm Mitochond       |
| 11125 | ENSG00000198160 | MIER1     | Enhanced  | Nucleoplasm                 |
| 11126 | ENSG00000198162 | MAN1A2    | Enhanced  | Golgi apparatus             |
| 11127 | ENSG00000198169 | ZNF251    | Approved  | Nucleoplasm                 |
| 11128 | ENSG00000198171 | DDRGK1    | Supported | Endoplasmic reticuNucleoli  |
| 11129 | ENSG00000198176 | TFDP1     | Supported | Cytosol;Nucleoplasm         |
| 11130 | ENSG00000198182 | ZNF607    | Approved  | Nucleoplasm                 |
| 11131 | ENSG00000198185 | ZNF334    | Approved  | Cytosol;Nucleoplas          |
| 11132 | ENSG00000198189 | HSD17B11  | Supported | Lipid droplets              |
| 11133 | ENSG00000198198 | SZT2      | Approved  | Actin filaments;Nu          |
| 11134 | ENSG00000198205 | ZXDA      | Approved  | Nucleoplasm                 |
| 11135 | ENSG00000198208 | RPS6KL1   | Approved  | Nucleoplasm                 |
| 11136 | ENSG00000198211 | AC092143. | Supported | Microtubules                |
| 11137 | ENSG00000198216 | CACNA1E   | Approved  | Actin filaments;Cy          |
| 11138 | ENSG00000198218 | QRICH1    | Enhanced  | Nucleoplasm                 |
| 11139 | ENSG00000198231 | DDX42     | Enhanced  | Nuclear speckles            |
| 11140 | ENSG00000198242 | RPL23A    | Approved  | Cytosol;Endoplasmic         |
| 11141 | ENSG00000198246 | SLC29A3   | Supported | Vesicles Golgi apparatus    |
| 11142 | ENSG00000198252 | STYX      | Approved  | Nucleoplasm                 |
| 11143 | ENSG00000198265 | HELZ      | Approved  | Actin filaments;Nu          |
| 11144 | ENSG00000198270 | TMEM116   | Approved  | Microtubules;Nucle          |
| 11145 | ENSG00000198276 | UCKL1     | Approved  | Endoplasmic reticu          |
| 11146 | ENSG00000198300 | PEG3      | Supported | Nucleoplasm                 |
| 11147 | ENSG00000198301 | SDAD1     | Supported | Nucleoli Nucleoplasm        |
| 11148 | ENSG00000198315 | ZKSCAN8   | Approved  | Cytosol;Nucleoplas          |
| 11149 | ENSG00000198331 | HYLS1     | Supported | Cytosol Plasma membrane     |
| 11150 | ENSG00000198336 | MYL4      | Approved  | Plasma membrane             |
| 11151 | ENSG00000198342 | ZNF442    | Approved  | Nuclear membrane;V          |
| 11152 | ENSG00000198346 | ZNF813    | Approved  | Vesicles                    |
| 11153 | ENSG00000198353 | HOXC4     | Supported | Nucleoplasm                 |
| 11154 | ENSG00000198354 | DCAF12L2  | Uncertain | Cytosol                     |
| 11155 | ENSG00000198355 | PIM3      | Supported | Cytosol                     |
| 11156 | ENSG00000198356 | ASNA1     | Enhanced  | Nucleoli;Nucleoplasm        |
| 11157 | ENSG00000198363 | ASPH      | Enhanced  | Endoplasmic reticulum       |
| 11158 | ENSG00000198369 | SPRED2    | Uncertain | Cytosol Nucleopla           |
| 11159 | ENSG00000198380 | GFPT1     | Approved  | Nucleoli;Nucleopla          |
| 11160 | ENSG00000198393 | ZNF26     | Approved  | Mitochondria;Nucle          |
| 11161 | ENSG00000198399 | ITSN2     | Approved  | Plasma membrane;Ve          |
| 11162 | ENSG00000198400 | NTRK1     | Approved  | Vesicles Cytosol            |
| 11163 | ENSG00000198408 | MGEA5     | Supported | Cytosol                     |

|       |                 |          |           |         |                      |                            |
|-------|-----------------|----------|-----------|---------|----------------------|----------------------------|
| 11164 | ENSG00000198429 | ZNF69    | Uncertain |         |                      | Nucleopla                  |
| 11165 | ENSG00000198431 | TXNRD1   | Supported |         | Nucleoplasm          |                            |
| 11166 | ENSG00000198435 | NRARP    | Approved  |         |                      | Cytosol;Nucleoplas         |
| 11167 | ENSG00000198440 | ZNF583   | Approved  |         |                      | Cytosol;Nucleoli           |
| 11168 | ENSG00000198453 | ZNF568   | Approved  |         |                      | Nucleoplasm                |
| 11169 | ENSG00000198455 | ZXDB     | Approved  |         |                      | Nucleoplasm                |
| 11170 | ENSG00000198464 | ZNF480   | Supported |         | Nucleoplasm          |                            |
| 11171 | ENSG00000198466 | ZNF587   | Uncertain |         |                      | Nucleopla                  |
| 11172 | ENSG00000198478 | SH3BGRL2 | Supported |         | Nucleoplasm          |                            |
| 11173 | ENSG00000198483 | ANKRD35  | Approved  |         |                      | Nucleoplasm;Plasma         |
| 11174 | ENSG00000198492 | YTHDF2   | Enhanced  | Cytosol |                      | Cytoplasmic bodies         |
| 11175 | ENSG00000198498 | TMA16    | Enhanced  |         | Nucleoli;Nucleoplasm |                            |
| 11176 | ENSG00000198515 | CNGA1    | Approved  |         |                      | Nucleoplasm;Plasma         |
| 11177 | ENSG00000198517 | MAFK     | Enhanced  |         | Nucleoplasm          |                            |
| 11178 | ENSG00000198520 | Clorf228 | Uncertain |         |                      | Cytosol                    |
| 11179 | ENSG00000198522 | GPN1     | Supported |         |                      | Cytosol;NMitochondria      |
| 11180 | ENSG00000198551 | ZNF627   | Approved  |         |                      | Nucleoli;Nucleopla         |
| 11181 | ENSG00000198553 | KCNRG    | Uncertain |         |                      | Vesicles                   |
| 11182 | ENSG00000198554 | WDHD1    | Enhanced  |         | Nucleoplasm          |                            |
| 11183 | ENSG00000198556 | ZNF789   | Enhanced  |         | Nucleoplasm          |                            |
| 11184 | ENSG00000198561 | CTNND1   | Enhanced  |         | Plasma membrane      |                            |
| 11185 | ENSG00000198563 | DDX39B   | Enhanced  |         | Nuclear speckles     |                            |
| 11186 | ENSG00000198573 | SPANXC   | Supported |         |                      | NucleoplaVesicles          |
| 11187 | ENSG00000198576 | ARC      | Approved  |         |                      | Microtubules;Vesic         |
| 11188 | ENSG00000198585 | NUDT16   | Supported |         |                      | Nucleoli;Nucleoplasm       |
| 11189 | ENSG00000198586 | TLK1     | Supported |         | Nucleoplasm          |                            |
| 11190 | ENSG00000198589 | LRBA     | Approved  |         |                      | Cytosol;Golgi appa         |
| 11191 | ENSG00000198597 | ZNF536   | Approved  |         |                      | Cell Junctions;Nuc         |
| 11192 | ENSG00000198604 | BAZ1A    | Uncertain |         |                      | Endoplasm                  |
| 11193 | ENSG00000198610 | AKR1C4   | Approved  |         |                      | Cytosol Endoplasmic reticu |
| 11194 | ENSG00000198612 | COPS8    | Supported |         |                      | Cytosol;Nucleoplasm        |
| 11195 | ENSG00000198624 | CCDC69   | Approved  |         |                      | Actin filaments;Go         |
| 11196 | ENSG00000198625 | MDM4     | Supported |         | Nucleoplasm          |                            |
| 11197 | ENSG00000198626 | RYR2     | Approved  |         |                      | Cytosol;Nucleoplas         |
| 11198 | ENSG00000198642 | KLHL9    | Approved  |         |                      | Cytosol                    |
| 11199 | ENSG00000198646 | NCOA6    | Supported |         | Nucleoplasm          |                            |
| 11200 | ENSG00000198648 | STK39    | Supported |         |                      | Cytosol;NVesicles          |
| 11201 | ENSG00000198668 | CALM1    | Approved  |         |                      | Vesicles                   |
| 11202 | ENSG00000198677 | TTC37    | Supported |         |                      | Cytosol;Nucleoplasm        |
| 11203 | ENSG00000198680 | TUSC1    | Approved  |         |                      | Nucleoplasm;Vesicl         |
| 11204 | ENSG00000198681 | MAGEA1   | Supported |         |                      | Cytosol                    |
| 11205 | ENSG00000198682 | PAPSS2   | Approved  |         |                      | Mitochondria               |
| 11206 | ENSG00000198689 | SLC9A6   | Supported |         |                      | Vesicles                   |
| 11207 | ENSG00000198690 | FAN1     | Supported |         |                      | Nucleoplasm Cytokinet      |
| 11208 | ENSG00000198692 | EIF1AY   | Approved  |         |                      | Cytosol                    |
| 11209 | ENSG00000198700 | IP09     | Approved  |         |                      | Cytosol;Vesicles           |
| 11210 | ENSG00000198707 | CEP290   | Supported |         |                      | Centrosome                 |
| 11211 | ENSG00000198718 | TOGARAM1 | Approved  |         |                      | Nucleoplasm                |
| 11212 | ENSG00000198719 | DLL1     | Uncertain |         |                      | Nucleopla                  |
| 11213 | ENSG00000198720 | ANKRD13B | Supported |         |                      | Vesicles                   |
| 11214 | ENSG00000198721 | ECI2     | Enhanced  |         |                      | Mitochondria;Peroxisomes   |
| 11215 | ENSG00000198722 | UNC13B   | Approved  |         |                      | Golgi appIntermedi         |
| 11216 | ENSG00000198727 | MT-CYB   | Approved  |         |                      | Mitochondria               |
| 11217 | ENSG00000198728 | LDB1     | Approved  |         |                      | Nucleoplasm                |
| 11218 | ENSG00000198730 | CTR9     | Enhanced  |         |                      | Nucleoplasm                |



|       |                 |           |           |                                           |                                    |
|-------|-----------------|-----------|-----------|-------------------------------------------|------------------------------------|
| 11219 | ENSG00000198732 | SMOC1     | Approved  |                                           | Plasma membrane                    |
| 11220 | ENSG00000198734 | F5        | Approved  |                                           | Golgi apparatus                    |
| 11221 | ENSG00000198736 | MSRB1     | Enhanced  | Nucleoplasm                               |                                    |
| 11222 | ENSG00000198739 | LRRTM3    | Supported |                                           | Nucleoplasm; Nuclear bodies        |
| 11223 | ENSG00000198740 | ZNF652    | Approved  |                                           | Nucleoplasm                        |
| 11224 | ENSG00000198742 | SMURF1    | Uncertain |                                           | Vesicles; Nucleoplasm              |
| 11225 | ENSG00000198743 | SLC5A3    | Approved  |                                           | Cytosol; Plasma membrane           |
| 11226 | ENSG00000198746 | GPATCH3   | Approved  |                                           | Cytosol; Nucleoplasm               |
| 11227 | ENSG00000198755 | RPL10A    | Supported |                                           | Cytosol; Endoplasmic reticulum     |
| 11228 | ENSG00000198756 | COLGALT2  | Approved  |                                           | Nucleoplasm; Vesicles              |
| 11229 | ENSG00000198758 | EPS8L3    | Approved  |                                           | Vesicles                           |
| 11230 | ENSG00000198768 | APCDD1L   | Uncertain |                                           | Mitochondria                       |
| 11231 | ENSG00000198771 | RCS1      | Approved  |                                           | Plasma membrane                    |
| 11232 | ENSG00000198780 | FAM169A   | Supported | Nuclear membrane                          | Cytosol                            |
| 11233 | ENSG00000198783 | ZNF830    | Enhanced  | Nucleoplasm                               |                                    |
| 11234 | ENSG00000198791 | CNOT7     | Supported |                                           | Nuclear bodies                     |
| 11235 | ENSG00000198792 | TMEM184B  | Approved  |                                           | Cytosol; Golgi apparatus           |
| 11236 | ENSG00000198793 | MTOR      | Approved  |                                           | Cytosol; Vesicles                  |
| 11237 | ENSG00000198795 | ZNF521    | Approved  |                                           | Nucleoplasm                        |
| 11238 | ENSG00000198796 | ALPK2     | Approved  |                                           | Cytosol                            |
| 11239 | ENSG00000198799 | LRIG2     | Approved  |                                           | Golgi apparatus; Nucleoplasm       |
| 11240 | ENSG00000198804 | MT-CO1    | Supported |                                           | Mitochondria                       |
| 11241 | ENSG00000198805 | PNP       | Supported |                                           | Cytosol                            |
| 11242 | ENSG00000198807 | PAX9      | Approved  |                                           | Nucleoplasm; Mitochondria          |
| 11243 | ENSG00000198815 | FOXJ3     | Approved  |                                           | Nuclear speckles; Nucleoplasm      |
| 11244 | ENSG00000198816 | ZNF358    | Approved  |                                           | Nucleoplasm                        |
| 11245 | ENSG00000198818 | SFT2D1    | Approved  |                                           | Cytosol; Nuclear bodies            |
| 11246 | ENSG00000198824 | CHAMP1    | Enhanced  | Midbody ring; Nuclear bodies; Nucleoplasm |                                    |
| 11247 | ENSG00000198825 | INPP5F    | Supported |                                           | Vesicles                           |
| 11248 | ENSG00000198826 | ARHGAP11A | Approved  |                                           | Cytosol; Nucleoli                  |
| 11249 | ENSG00000198830 | HMG2      | Supported |                                           | Nucleoli; Nucleoplasm              |
| 11250 | ENSG00000198832 | SELENOM   | Approved  |                                           | Cytosol; Nucleoplasm               |
| 11251 | ENSG00000198835 | GJC2      | Supported |                                           | Plasma membrane; Cytosol           |
| 11252 | ENSG00000198836 | OPA1      | Supported |                                           | Mitochondria; Nucleoplasm          |
| 11253 | ENSG00000198837 | DENND4B   | Supported |                                           | Golgi apparatus; Nucleoplasm       |
| 11254 | ENSG00000198838 | RYR3      | Approved  |                                           | Vesicles                           |
| 11255 | ENSG00000198839 | ZNF277    | Approved  |                                           | Nucleoplasm; Plasma membrane       |
| 11256 | ENSG00000198840 | MT-ND3    | Approved  |                                           | Cytosol                            |
| 11257 | ENSG00000198841 | KTI12     | Approved  |                                           | Cytoplasmic bodies                 |
| 11258 | ENSG00000198842 | DUSP27    | Approved  |                                           | Nucleoplasm                        |
| 11259 | ENSG00000198844 | ARHGEF15  | Supported |                                           | Plasma membrane                    |
| 11260 | ENSG00000198846 | TOX       | Approved  |                                           | Nucleoli fibrillar                 |
| 11261 | ENSG00000198848 | CES1      | Supported |                                           | Endoplasmic reticulum              |
| 11262 | ENSG00000198855 | FICD      | Approved  |                                           | Nucleoplasm                        |
| 11263 | ENSG00000198858 | R3HDM4    | Approved  |                                           | Cytosol; Nucleoplasm               |
| 11264 | ENSG00000198860 | TSEN15    | Approved  |                                           | Nucleoli; Nucleoplasm              |
| 11265 | ENSG00000198862 | LTN1      | Enhanced  | Cytosol                                   |                                    |
| 11266 | ENSG00000198863 | RUNDC1    | Approved  |                                           | Cytosol; Nuclear speckles          |
| 11267 | ENSG00000198865 | CCDC152   | Approved  |                                           | Cytosol; Nucleoplasm               |
| 11268 | ENSG00000198873 | GRK5      | Supported |                                           | Nuclear membrane; Nuclear speckles |
| 11269 | ENSG00000198874 | TYW1      | Approved  |                                           | Nucleoli; Nucleoplasm              |
| 11270 | ENSG00000198879 | SFMBT2    | Supported |                                           | Nuclear speckles; Nucleoplasm      |
| 11271 | ENSG00000198887 | SMC5      | Supported |                                           | Nuclear speckles                   |
| 11272 | ENSG00000198889 | DCAF12L1  | Uncertain |                                           | Cytosol                            |
| 11273 | ENSG00000198890 | PRMT6     | Supported |                                           | Nucleoli; Nucleoplasm              |

|       |                 |           |           |                        |                             |
|-------|-----------------|-----------|-----------|------------------------|-----------------------------|
| 11274 | ENSG00000198898 | CAPZA2    | Approved  |                        | Cytosol;Endoplasmic         |
| 11275 | ENSG00000198900 | TOP1      | Supported |                        | Nucleoli fibrillar center;N |
| 11276 | ENSG00000198901 | PRC1      | Supported |                        | CytokinetPlasma membrane    |
| 11277 | ENSG00000198908 | BHLHB9    | Supported |                        | Cytosol;Nucleoplasm         |
| 11278 | ENSG00000198909 | MAP3K3    | Approved  |                        | Nucleoplasm                 |
| 11279 | ENSG00000198910 | L1CAM     | Approved  |                        | Plasma meNucleoplasm        |
| 11280 | ENSG00000198911 | SREBF2    | Supported |                        | Endoplasmic reticulum;Nucle |
| 11281 | ENSG00000198912 | Clorf174  | Enhanced  | Nucleoplasm            |                             |
| 11282 | ENSG00000198914 | POU3F3    | Enhanced  | Nucleoplasm            |                             |
| 11283 | ENSG00000198915 | RASGEF1A  | Approved  |                        | Golgi apparatus             |
| 11284 | ENSG00000198919 | DZIP3     | Approved  |                        | Vesicles                    |
| 11285 | ENSG00000198920 | KIAA0753  | Enhanced  | Centrosome;Cytosol     |                             |
| 11286 | ENSG00000198924 | DCLRE1A   | Supported |                        | NucleoplaNucleoli fibrillar |
| 11287 | ENSG00000198925 | ATG9A     | Supported |                        | Vesicles                    |
| 11288 | ENSG00000198929 | NOS1AP    | Approved  |                        | Nucleoplasm;Vesicl          |
| 11289 | ENSG00000198931 | APRT      | Supported | Cytosol                | Nucleoplasm                 |
| 11290 | ENSG00000198932 | GPRASP1   | Supported | Cytosol                |                             |
| 11291 | ENSG00000198933 | TBKBP1    | Approved  |                        | Nucleoplasm                 |
| 11292 | ENSG00000198934 | MAGEE1    | Approved  |                        | Cytokinetic bridge          |
| 11293 | ENSG00000198937 | CCDC167   | Approved  |                        | Cytosol                     |
| 11294 | ENSG00000198945 | L3MBTL3   | Supported |                        | Nucleoli;Nucleoplasm        |
| 11295 | ENSG00000198948 | MFAP3L    | Supported |                        | Cell Junctions;Nucleoplasm  |
| 11296 | ENSG00000198952 | SMG5      | Uncertain |                        | Cytoplasm                   |
| 11297 | ENSG00000198959 | TGM2      | Approved  |                        | Cytosol;Plasma mem          |
| 11298 | ENSG00000198960 | ARMCX6    | Supported | Cytosol                | Nuclear membrane;N          |
| 11299 | ENSG00000198961 | PJA2      | Enhanced  | Intermediate filaments |                             |
| 11300 | ENSG00000198963 | RORB      | Approved  |                        | Nucleoplasm                 |
| 11301 | ENSG00000198964 | SGMS1     | Approved  |                        | Cytosol;Golgi appa          |
| 11302 | ENSG00000203485 | INF2      | Approved  |                        | Endoplasmic reticu          |
| 11303 | ENSG00000203666 | EFCAB2    | Approved  |                        | Cytosol;Plasma mem          |
| 11304 | ENSG00000203667 | COX20     | Enhanced  | Mitochondria           |                             |
| 11305 | ENSG00000203668 | CHML      | Supported |                        | Cytosol;Nucleoplasm         |
| 11306 | ENSG00000203685 | STUM      | Approved  |                        | Cytosol                     |
| 11307 | ENSG00000203697 | CAPN8     | Approved  |                        | Nuclear membrane;N          |
| 11308 | ENSG00000203705 | TATDN3    | Approved  |                        | Focal adhesion sit          |
| 11309 | ENSG00000203722 | RAET1G    | Supported |                        | Vesicles                    |
| 11310 | ENSG00000203724 | Clorf53   | Approved  |                        | Aggresome;Vesicles          |
| 11311 | ENSG00000203727 | SAMD5     | Supported |                        | Vesicles                    |
| 11312 | ENSG00000203760 | CENPW     | Supported |                        | Nucleoplasm                 |
| 11313 | ENSG00000203778 | FAM229B   | Approved  |                        | Golgi apparatus;Nu          |
| 11314 | ENSG00000203780 | FANK1     | Supported |                        | Nucleoplasm                 |
| 11315 | ENSG00000203791 | EEF1AKMT2 | Approved  |                        | Nuclear bodies;Nuc          |
| 11316 | ENSG00000203797 | DDO       | Enhanced  | Cytosol                |                             |
| 11317 | ENSG00000203805 | PLPP4     | Approved  |                        | Nucleoli;Nucleopla          |
| 11318 | ENSG00000203814 | HIST2H2BF | Approved  |                        | Cytosol;Nucleoplas          |
| 11319 | ENSG00000203857 | HSD3B1    | Approved  |                        | EndoplasmCytokinet          |
| 11320 | ENSG00000203859 | HSD3B2    | Uncertain |                        | EndoplasmCytokinet          |
| 11321 | ENSG00000203867 | RBM20     | Approved  |                        | Cytokinetic bridge          |
| 11322 | ENSG00000203872 | C6orf163  | Uncertain |                        | Nucleopla                   |
| 11323 | ENSG00000203879 | GDI1      | Approved  |                        | Vesicles                    |
| 11324 | ENSG00000203880 | PCMTD2    | Approved  |                        | Mitochondria;Nucle          |
| 11325 | ENSG00000203883 | SOX18     | Approved  |                        | Nucleoplasm                 |
| 11326 | ENSG00000203926 | SPANXA2   | Supported |                        | NucleoplaVesicles           |
| 11327 | ENSG00000203943 | SAMD13    | Approved  |                        | Mitochondria                |
| 11328 | ENSG00000203963 | Clorf141  | Uncertain |                        | Intermedi                   |

|       |                 |          |           |                            |                             |
|-------|-----------------|----------|-----------|----------------------------|-----------------------------|
| 11329 | ENSG00000203965 | EFCAB7   | Approved  |                            | Cytosol;Nucleoli;N          |
| 11330 | ENSG00000203985 | LDLRAD1  | Uncertain |                            | Golgi app                   |
| 11331 | ENSG00000203989 | RHOXF2B  | Approved  |                            | Nucleoplasm;Plasma          |
| 11332 | ENSG00000203995 | ZYG11A   | Approved  |                            | Nucleoplasm                 |
| 11333 | ENSG00000204052 | LRRC73   | Approved  |                            | Cytosol                     |
| 11334 | ENSG00000204065 | TCEAL5   | Uncertain |                            | Cytosol;N                   |
| 11335 | ENSG00000204084 | INPP5B   | Approved  |                            | Cytosol                     |
| 11336 | ENSG00000204103 | MAFB     | Approved  |                            | Cytosol;Golgi appa          |
| 11337 | ENSG00000204116 | CHIC1    | Approved  |                            | Cytosol;Nuclear sp          |
| 11338 | ENSG00000204120 | GIGYF2   | Enhanced  | Cytosol                    |                             |
| 11339 | ENSG00000204128 | C2orf72  | Approved  |                            | Nucleoplasm;Plasma          |
| 11340 | ENSG00000204130 | RUFY2    | Approved  |                            | Nucleoplasm                 |
| 11341 | ENSG00000204131 | NHSL2    | Approved  |                            | Cell Junctions;Pla          |
| 11342 | ENSG00000204138 | PHACTR4  | Approved  |                            | Cytosol;Intermedia          |
| 11343 | ENSG00000204147 | ASAH2B   | Approved  |                            | Focal adhesion sit          |
| 11344 | ENSG00000204160 | ZDHHC18  | Approved  |                            | Microtubules                |
| 11345 | ENSG00000204175 | GPRIN2   | Approved  |                            | Nucleoplasm                 |
| 11346 | ENSG00000204176 | SYT15    | Approved  |                            | Golgi apparatus             |
| 11347 | ENSG00000204178 | MACO1    | Approved  |                            | Cytosol                     |
| 11348 | ENSG00000204179 | PTPN20   | Supported |                            | Centriolar satellite        |
| 11349 | ENSG00000204186 | ZDBF2    | Approved  |                            | Cytosol;Nucleoplas          |
| 11350 | ENSG00000204209 | DAXX     | Enhanced  | Nuclear bodies;Nucleoplasm |                             |
| 11351 | ENSG00000204217 | BMPR2    | Supported |                            | Plasma membrane Nucleopla   |
| 11352 | ENSG00000204219 | TCEA3    | Approved  |                            | Nucleoplasm;Vesicl          |
| 11353 | ENSG00000204220 | PFDN6    | Approved  |                            | Golgi apparatus;Nu          |
| 11354 | ENSG00000204227 | RING1    | Approved  |                            | Cytosol;Nucleoplas          |
| 11355 | ENSG00000204231 | RXR8     | Supported |                            | Nucleoplasm                 |
| 11356 | ENSG00000204237 | OXL1     | Approved  |                            | Cytosol;Vesicles            |
| 11357 | ENSG00000204256 | BRD2     | Enhanced  | Nuclear speckles           |                             |
| 11358 | ENSG00000204257 | HLA-DMA  | Approved  |                            | Vesicles                    |
| 11359 | ENSG00000204264 | PSMB8    | Approved  |                            | Cytokinetic bridge          |
| 11360 | ENSG00000204267 | TAP2     | Approved  |                            | EndoplasmNuclear s          |
| 11361 | ENSG00000204271 | SPIN3    | Approved  |                            | Nucleoplasm                 |
| 11362 | ENSG00000204291 | COL15A1  | Approved  |                            | Endoplasmic reticu          |
| 11363 | ENSG00000204304 | PBX2     | Approved  |                            | Nucleoplasm                 |
| 11364 | ENSG00000204305 | AGER     | Approved  |                            | Cell JuncNucleoli fibrillar |
| 11365 | ENSG00000204308 | RNF5     | Supported |                            | Endoplasmic reticulum       |
| 11366 | ENSG00000204310 | AGPAT1   | Supported |                            | EndoplasmRods & Rings       |
| 11367 | ENSG00000204311 | PJVK     | Supported |                            | Mitochondria                |
| 11368 | ENSG00000204315 | FKBP1    | Approved  |                            | Mitotic spindle;Nu          |
| 11369 | ENSG00000204316 | MRPL38   | Supported |                            | Mitochondria                |
| 11370 | ENSG00000204323 | SMIM5    | Approved  |                            | Golgi apparatus;Ve          |
| 11371 | ENSG00000204334 | ERICH2   | Approved  |                            | Nucleoli fibrillar          |
| 11372 | ENSG00000204335 | SP5      | Approved  |                            | Nucleoli;Nucleopla          |
| 11373 | ENSG00000204344 | STK19    | Supported |                            | Nuclear speckles            |
| 11374 | ENSG00000204348 | DXO      | Approved  |                            | NucleoplaCytosol;Plasma mem |
| 11375 | ENSG00000204351 | SKIV2L   | Approved  |                            | Nucleoplasm                 |
| 11376 | ENSG00000204352 | C9orf129 | Uncertain |                            | Mitochond                   |
| 11377 | ENSG00000204356 | NELFE    | Enhanced  | Nuclear bodies;Nucleoplasm |                             |
| 11378 | ENSG00000204366 | ZBTB12   | Approved  |                            | Nucleoplasm                 |
| 11379 | ENSG00000204371 | EHMT2    | Supported |                            | Nuclear speckles;Nucleoplas |
| 11380 | ENSG00000204379 | XAGE1A   | Approved  |                            | Nucleoplasm                 |
| 11381 | ENSG00000204381 | LAYN     | Approved  |                            | Cytosol                     |
| 11382 | ENSG00000204382 | XAGE1B   | Approved  |                            | Nucleoplasm                 |
| 11383 | ENSG00000204386 | NEU1     | Supported |                            | Cell Junctions;Vesicles     |

|       |                 |          |           |                     |                    |
|-------|-----------------|----------|-----------|---------------------|--------------------|
| 11384 | ENSG00000204388 | HSPA1B   | Approved  |                     | Cytosol;Nucleoplas |
| 11385 | ENSG00000204389 | HSPA1A   | Approved  |                     | Cytosol;Nucleoplas |
| 11386 | ENSG00000204390 | HSPA1L   | Approved  |                     | Nucleoplasm;Vesic  |
| 11387 | ENSG00000204392 | LSM2     | Enhanced  | Nucleoplasm         |                    |
| 11388 | ENSG00000204394 | VARS     | Enhanced  | Cytosol             |                    |
| 11389 | ENSG00000204396 | VWA7     | Approved  |                     | Cytosol;Plasma mem |
| 11390 | ENSG00000204397 | CARD16   | Uncertain |                     | Mitochond          |
| 11391 | ENSG00000204406 | MBD5     | Supported | Nucleopla           | Midbody            |
| 11392 | ENSG00000204410 | MSH5     | Approved  |                     | Endoplasmic reticu |
| 11393 | ENSG00000204420 | MPIG6B   | Approved  | Endoplasm           | Cytosol;Plasma mem |
| 11394 | ENSG00000204428 | LY6G5C   | Approved  |                     | Cytosol;Nucleoplas |
| 11395 | ENSG00000204438 | GPANK1   | Approved  |                     | Endoplasmic reticu |
| 11396 | ENSG00000204439 | C6orf47  | Approved  |                     | Cytosol            |
| 11397 | ENSG00000204442 | FAM155A  | Approved  |                     | Centrosome;Nucleop |
| 11398 | ENSG00000204444 | APOM     | Approved  |                     | Golgi apparatus    |
| 11399 | ENSG00000204463 | BAG6     | Enhanced  | Cytosol;Nucleoplasm |                    |
| 11400 | ENSG00000204469 | PRRC2A   | Supported | Cytosol;Nucleoplas  | Plasma me          |
| 11401 | ENSG00000204472 | AIF1     | Uncertain |                     | Cytosol            |
| 11402 | ENSG00000204498 | NFKBIL1  | Supported | Nucleoplasm         |                    |
| 11403 | ENSG00000204514 | ZNF814   | Uncertain |                     | Nucleopla          |
| 11404 | ENSG00000204516 | MICB     | Approved  |                     | Golgi apparatus;Ve |
| 11405 | ENSG00000204519 | ZNF551   | Approved  |                     | Nuclear speckles;N |
| 11406 | ENSG00000204524 | ZNF805   | Approved  |                     | Nucleoplasm        |
| 11407 | ENSG00000204531 | POU5F1   | Supported | Cytosol;Nucleoplasm |                    |
| 11408 | ENSG00000204532 | ZSCAN5C  | Uncertain |                     | Nuclear s          |
| 11409 | ENSG00000204536 | CCHCR1   | Supported | Cytosol             |                    |
| 11410 | ENSG00000204540 | PSORS1C1 | Uncertain |                     | Nucleopla          |
| 11411 | ENSG00000204560 | DHX16    | Supported | Nucleoplasm         |                    |
| 11412 | ENSG00000204568 | MRPS18B  | Supported | Mitochond           | Cell Junctions     |
| 11413 | ENSG00000204569 | PPP1R10  | Enhanced  | Nucleopla           | Nuclear bodies     |
| 11414 | ENSG00000204574 | ABCF1    | Enhanced  | Cytosol             |                    |
| 11415 | ENSG00000204576 | PRR3     | Approved  |                     | Cytosol;Nucleoplas |
| 11416 | ENSG00000204580 | DDR1     | Approved  |                     | Cell Junctions;Nuc |
| 11417 | ENSG00000204590 | GNL1     | Supported | Vesicles            |                    |
| 11418 | ENSG00000204592 | HLA-E    | Approved  |                     | Vesicles           |
| 11419 | ENSG00000204599 | TRIM39   | Supported | Cytosol             |                    |
| 11420 | ENSG00000204604 | ZNF468   | Uncertain |                     | Cytoplasm          |
| 11421 | ENSG00000204610 | TRIM15   | Approved  |                     | Centriolar satelli |
| 11422 | ENSG00000204611 | ZNF616   | Approved  |                     | Centrosome         |
| 11423 | ENSG00000204618 | RNF39    | Approved  |                     | Centrosome;Plasma  |
| 11424 | ENSG00000204619 | PPP1R11  | Approved  |                     | Vesicles           |
| 11425 | ENSG00000204624 | DISP3    | Uncertain |                     | Cytosol;N          |
| 11426 | ENSG00000204628 | RACK1    | Supported | Nucleopla           | Vesicles           |
| 11427 | ENSG00000204634 | TBC1D8   | Supported | Nucleoplasm         |                    |
| 11428 | ENSG00000204653 | ASPDH    | Approved  |                     | Cytokinetic bridge |
| 11429 | ENSG00000204673 | AKT1S1   | Supported | Cytosol             |                    |
| 11430 | ENSG00000204681 | GABBR1   | Approved  |                     | Centrosome         |
| 11431 | ENSG00000204682 | CASC10   | Approved  |                     | Nucleoplasm        |
| 11432 | ENSG00000204687 | MAS1L    | Approved  |                     | Cytosol;Nucleoplas |
| 11433 | ENSG00000204713 | TRIM27   | Approved  |                     | Nucleoli;Nucleopla |
| 11434 | ENSG00000204740 | MALRD1   | Enhanced  | Golgi apparatus     |                    |
| 11435 | ENSG00000204764 | RANBP17  | Approved  |                     | Cytosol;Nuclear bo |
| 11436 | ENSG00000204779 | FOXD4L5  | Approved  |                     | Nucleoplasm        |
| 11437 | ENSG00000204822 | MRPL53   | Supported | Mitochondria        |                    |
| 11438 | ENSG00000204839 | MROH6    | Approved  |                     | Nucleoplasm        |

|       |                 |           |           |                        |                             |
|-------|-----------------|-----------|-----------|------------------------|-----------------------------|
| 11439 | ENSG00000204842 | ATXN2     | Enhanced  | Cytosol                |                             |
| 11440 | ENSG00000204843 | DCTN1     | Supported |                        | Cytokinetic bridge;Microtub |
| 11441 | ENSG00000204852 | TCTN1     | Approved  |                        | Actin filaments;Nu          |
| 11442 | ENSG00000204856 | FAM216A   | Approved  |                        | Actin filaments             |
| 11443 | ENSG00000204859 | ZBTB48    | Approved  |                        | Cytosol;Nucleoplas          |
| 11444 | ENSG00000204866 | IGFL2     | Approved  |                        | Nucleoplasm;Plasma          |
| 11445 | ENSG00000204869 | IGFL4     | Approved  |                        | Cytosol                     |
| 11446 | ENSG00000204882 | GPR20     | Supported | Plasma me              | Cytosol                     |
| 11447 | ENSG00000204897 | KRT25     | Approved  |                        | Vesicles                    |
| 11448 | ENSG00000204909 | SPINK9    | Approved  |                        | Nucleoplasm;Vesicl          |
| 11449 | ENSG00000204920 | ZNF155    | Approved  |                        | Cytosol;Nucleoplas          |
| 11450 | ENSG00000204922 | UQCC3     | Approved  |                        | Cytosol;Mitochondr          |
| 11451 | ENSG00000204923 | FBX048    | Approved  |                        | Nuclear bodies              |
| 11452 | ENSG00000204946 | ZNF783    | Approved  |                        | Cytosol;Plasma mem          |
| 11453 | ENSG00000204947 | ZNF425    | Supported | Nucleoplasm            |                             |
| 11454 | ENSG00000204950 | LRRC10B   | Approved  |                        | Nucleoli;Nucleopla          |
| 11455 | ENSG00000204954 | C12orf73  | Approved  |                        | Centrosome;Mitocho          |
| 11456 | ENSG00000204956 | PCDHGA1   | Uncertain |                        | Plasma meCytosol;N          |
| 11457 | ENSG00000204965 | PCDHA5    | Approved  |                        | Mitochondria;Nucle          |
| 11458 | ENSG00000204967 | PCDHA4    | Supported | Plasma me              | Cytosol;Nucleoplas          |
| 11459 | ENSG00000204970 | PCDHA1    | Approved  |                        | Plasma membrane             |
| 11460 | ENSG00000204978 | ERICH4    | Approved  |                        | Cytosol;Nucleoplas          |
| 11461 | ENSG00000204983 | PRSS1     | Approved  |                        | Endoplasmic reticu          |
| 11462 | ENSG00000204991 | SPIRE2    | Approved  |                        | Intermediate filam          |
| 11463 | ENSG00000205002 | AARD      | Approved  |                        | Lipid droplets              |
| 11464 | ENSG00000205078 | SYCE1L    | Enhanced  | Intermediate filaments |                             |
| 11465 | ENSG00000205084 | TMEM231   | Approved  |                        | Vesicles                    |
| 11466 | ENSG00000205085 | FAM71F2   | Approved  |                        | Nucleoplasm                 |
| 11467 | ENSG00000205089 | CCNI2     | Approved  |                        | Cytosol;Golgi appa          |
| 11468 | ENSG00000205129 | C4orf47   | Approved  |                        | Vesicles                    |
| 11469 | ENSG00000205138 | SDHAF1    | Approved  |                        | Mitochondria                |
| 11470 | ENSG00000205177 | C11orf91  | Supported | Vesicles               |                             |
| 11471 | ENSG00000205189 | ZBTB10    | Enhanced  | Nucleoplasm            |                             |
| 11472 | ENSG00000205208 | C4orf46   | Approved  |                        | Nucleoplasm                 |
| 11473 | ENSG00000205212 | CCDC144NL | Approved  |                        | Nucleoplasm;Plasma          |
| 11474 | ENSG00000205213 | LGR4      | Approved  |                        | Centriolar satelli          |
| 11475 | ENSG00000205220 | PSMB10    | Supported | Cytosol                | Vesicles                    |
| 11476 | ENSG00000205250 | E2F4      | Supported | Nucleoplasm            |                             |
| 11477 | ENSG00000205269 | TMEM170B  | Approved  |                        | Centrosome                  |
| 11478 | ENSG00000205302 | SNX2      | Supported | Endosomes;Lysosomes    |                             |
| 11479 | ENSG00000205307 | SAP25     | Approved  |                        | Nuclear bodies              |
| 11480 | ENSG00000205323 | SARNP     | Supported |                        | Nuclear speckles            |
| 11481 | ENSG00000205339 | IPO7      | Supported |                        | Cytosol;Nucleoplasm         |
| 11482 | ENSG00000205352 | PRR13     | Supported |                        | Nucleoplasm                 |
| 11483 | ENSG00000205356 | TECPR1    | Supported |                        | Vesicles                    |
| 11484 | ENSG00000205363 | C15orf59  | Approved  |                        | Cytosol;Nucleoplas          |
| 11485 | ENSG00000205413 | SAMD9     | Enhanced  | Cytosol;Vesicles       |                             |
| 11486 | ENSG00000205420 | KRT6A     | Enhanced  | Intermediate filaments |                             |
| 11487 | ENSG00000205423 | CNEP1R1   | Supported | Cytosol                |                             |
| 11488 | ENSG00000205464 | ATP6AP1L  | Approved  |                        | Cytosol;Nucleoli            |
| 11489 | ENSG00000205476 | CCDC85C   | Approved  |                        | Cell Junctions;Nuc          |
| 11490 | ENSG00000205517 | RGL3      | Uncertain |                        | Cytosol;N                   |
| 11491 | ENSG00000205531 | NAP1L4    | Supported | Nucleoplasm            |                             |
| 11492 | ENSG00000205542 | TMSB4X    | Approved  |                        | Cytosol;Nucleoplas          |
| 11493 | ENSG00000205544 | TMEM256   | Approved  |                        | Vesicles                    |

|       |                 |           |           |                                   |
|-------|-----------------|-----------|-----------|-----------------------------------|
| 11494 | ENSG00000205571 | SMN2      | Supported | Cytosol;Nuclear bodies            |
| 11495 | ENSG00000205572 | SERF1B    | Approved  | Nuclear bodies                    |
| 11496 | ENSG00000205581 | HMG1      | Supported | Nucleoplasm                       |
| 11497 | ENSG00000205593 | DENND6B   | Uncertain | Plasma membrane                   |
| 11498 | ENSG00000205609 | EIF3CL    | Approved  | Cytosol                           |
| 11499 | ENSG00000205629 | LCMT1     | Approved  | Cytosol;Nucleoplasm               |
| 11500 | ENSG00000205643 | CDPF1     | Approved  | Cytosol;Nucleoplasm               |
| 11501 | ENSG00000205659 | LIN52     | Approved  | Nuclear speckles                  |
| 11502 | ENSG00000205670 | SMIM11A   | Approved  | Focal adhesion sites              |
| 11503 | ENSG00000205683 | DPF3      | Enhanced  | Nucleoplasm                       |
| 11504 | ENSG00000205710 | C17orf107 | Approved  | Nucleoplasm                       |
| 11505 | ENSG00000205726 | ITSN1     | Supported | Plasma membrane                   |
| 11506 | ENSG00000205730 | ITPRIPL2  | Approved  | Centrosome                        |
| 11507 | ENSG00000205744 | DENND1C   | Approved  | Centrosome;Cytosol                |
| 11508 | ENSG00000205758 | CRYZL1    | Approved  | Cytosol;Nucleoplasm               |
| 11509 | ENSG00000205765 | C5orf51   | Enhanced  | Nucleoplasm;Cytosol               |
| 11510 | ENSG00000205777 | GAGE1     | Approved  | Cytosol;Golgi apparatus           |
| 11511 | ENSG00000205808 | PLPP6     | Approved  | Cytosol;Nucleoplasm               |
| 11512 | ENSG00000205809 | KLRC2     | Approved  | Plasma membrane                   |
| 11513 | ENSG00000205810 | KLRC3     | Uncertain | Vesicles                          |
| 11514 | ENSG00000205922 | ONECUT3   | Supported | Nucleoplasm                       |
| 11515 | ENSG00000205923 | CEMP1     | Approved  | Nucleoplasm                       |
| 11516 | ENSG00000205927 | OLIG2     | Uncertain | Nucleoplasm                       |
| 11517 | ENSG00000205937 | RNPS1     | Supported | Nucleoplasm                       |
| 11518 | ENSG00000205978 | NYNRIN    | Approved  | Golgi apparatus;Nucleoplasm       |
| 11519 | ENSG00000206043 | C18orf63  | Approved  | Mitochondria                      |
| 11520 | ENSG00000206052 | DOK6      | Approved  | Cytosol;Focal adhesion            |
| 11521 | ENSG00000206053 | JPT2      | Enhanced  | Cytosol;Plasma membrane           |
| 11522 | ENSG00000206075 | SERPIN5   | Supported | Vesicles                          |
| 11523 | ENSG00000206077 | ZDHHC11B  | Approved  | Lipid droplets                    |
| 11524 | ENSG00000206262 | FOXL2NB   | Enhanced  | Nucleoli fibrillar center         |
| 11525 | ENSG00000206418 | RAB12     | Approved  | Vesicles                          |
| 11526 | ENSG00000206432 | TMEM200C  | Approved  | Microtubules                      |
| 11527 | ENSG00000206503 | HLA-A     | Supported | Plasma membrane;Golgi apparatus   |
| 11528 | ENSG00000206535 | LNP1      | Approved  | Cytosol;Nuclear speckles          |
| 11529 | ENSG00000206538 | VGLL3     | Approved  | Cytosol;Nucleoli                  |
| 11530 | ENSG00000206557 | TRIM71    | Approved  | Actin filaments;Focal adhesion    |
| 11531 | ENSG00000206559 | ZCWPW2    | Approved  | Nuclear speckles                  |
| 11532 | ENSG00000206561 | COLQ      | Approved  | Cell Junctions;Plasma membrane    |
| 11533 | ENSG00000206562 | METTL6    | Approved  | Vesicles                          |
| 11534 | ENSG00000206579 | XKR4      | Approved  | Vesicles                          |
| 11535 | ENSG00000211448 | DIO2      | Supported | Cytosol;Nucleoplasm               |
| 11536 | ENSG00000211450 | SELENOH   | Approved  | Nucleoli;Nucleoplasm              |
| 11537 | ENSG00000211455 | STK38L    | Approved  | Cytosol                           |
| 11538 | ENSG00000211456 | SACM1L    | Approved  | Golgi apparatus;Nucleoplasm       |
| 11539 | ENSG00000211460 | TSN       | Supported | Nucleoplasm;Endoplasmic reticulum |
| 11540 | ENSG00000211584 | SLC48A1   | Supported | Vesicles                          |
| 11541 | ENSG00000212123 | PRR22     | Approved  | Cytosol;Nucleoplasm               |
| 11542 | ENSG00000212719 | C17orf51  | Approved  | Nuclear bodies;Nucleoplasm        |
| 11543 | ENSG00000212864 | RNF208    | Enhanced  | Nucleoplasm                       |
| 11544 | ENSG00000212907 | MT-ND4L   | Approved  | Mitochondria                      |
| 11545 | ENSG00000212993 | POU5F1B   | Supported | Nucleoplasm                       |
| 11546 | ENSG00000213015 | ZNF580    | Approved  | Nucleoplasm                       |
| 11547 | ENSG00000213024 | NUP62     | Supported | Nuclear membrane;Nucleoplasm      |
| 11548 | ENSG00000213030 | CGB8      | Approved  | Cytosol                           |

|       |                 |          |           |                                     |                       |
|-------|-----------------|----------|-----------|-------------------------------------|-----------------------|
| 11549 | ENSG00000213047 | DENND1B  | Supported | Cytosol                             | Nuclear speckles      |
| 11550 | ENSG00000213066 | FGFR10P  | Supported | Centrosome                          |                       |
| 11551 | ENSG00000213079 | SCAF8    | Enhanced  | Nucleoplasm                         |                       |
| 11552 | ENSG00000213085 | CFAP45   | Enhanced  | Nucleoplasm                         |                       |
| 11553 | ENSG00000213123 | TCTEX1D2 | Approved  |                                     | Cytosol               |
| 11554 | ENSG00000213139 | CRYGS    | Uncertain |                                     | Cytosol               |
| 11555 | ENSG00000213145 | CRIP1    | Approved  |                                     | Centrosome;Cytosol    |
| 11556 | ENSG00000213160 | KLHL23   | Approved  |                                     | Actin filaments;Nu    |
| 11557 | ENSG00000213186 | TRIM59   | Approved  |                                     | Rods & Rings          |
| 11558 | ENSG00000213190 | MLLT11   | Supported | Cytosol;Nucleoplasm                 |                       |
| 11559 | ENSG00000213199 | ASIC3    | Approved  |                                     | Cytosol;Nucleoplas    |
| 11560 | ENSG00000213203 | GIMAP1   | Supported |                                     | Endoplasmic reticulum |
| 11561 | ENSG00000213221 | DNLZ     | Supported | Mitochond                           | Nucleoplasm           |
| 11562 | ENSG00000213231 | TCL1B    | Approved  |                                     | Cytosol               |
| 11563 | ENSG00000213246 | SUPT4H1  | Approved  |                                     | Nucleoplasm           |
| 11564 | ENSG00000213316 | LTC4S    | Approved  | Endoplasm                           | Cytosol;Nucleoplas    |
| 11565 | ENSG00000213337 | ANKRD39  | Approved  |                                     | Nucleoplasm;Vesicl    |
| 11566 | ENSG00000213339 | QTRT1    | Approved  |                                     | Mitochondria          |
| 11567 | ENSG00000213341 | CHUK     | Supported | Cytosol;N                           | Vesicles              |
| 11568 | ENSG00000213347 | MXD3     | Approved  |                                     | Nucleoli;Nucleopla    |
| 11569 | ENSG00000213366 | GSTM2    | Uncertain | Cytosol                             | Cytokinet             |
| 11570 | ENSG00000213390 | ARHGAP19 | Enhanced  | Plasma membrane                     |                       |
| 11571 | ENSG00000213397 | HAUS7    | Approved  | Centrosome                          | Cytosol;N             |
| 11572 | ENSG00000213398 | LCAT     | Approved  |                                     | Nucleoplasm           |
| 11573 | ENSG00000213413 | PVRIG    | Approved  |                                     | Endoplasmic reticu    |
| 11574 | ENSG00000213424 | KRT222   | Approved  |                                     | Lipid droplets;Ves    |
| 11575 | ENSG00000213445 | SIPA1    | Approved  |                                     | Golgi apparatus;Nu    |
| 11576 | ENSG00000213462 | ERV3-1   | Approved  |                                     | Vesicles              |
| 11577 | ENSG00000213463 | SYNJ2BP  | Approved  |                                     | Mitochondria          |
| 11578 | ENSG00000213465 | ARL2     | Approved  |                                     | Cytosol;Focal adhe    |
| 11579 | ENSG00000213516 | RBMXL1   | Approved  |                                     | Nucleoplasm           |
| 11580 | ENSG00000213523 | SRA1     | Supported | Cytosol;N                           | Microtubules          |
| 11581 | ENSG00000213533 | STIMATE  | Approved  |                                     | Cytosol               |
| 11582 | ENSG00000213551 | DNAJC9   | Supported | Nucleoplasm;Plasma membrane         |                       |
| 11583 | ENSG00000213563 | C8orf82  | Approved  |                                     | Nucleoplasm           |
| 11584 | ENSG00000213585 | VDAC1    | Uncertain |                                     | Vesicles              |
| 11585 | ENSG00000213588 | ZBTB9    | Approved  |                                     | Nuclear membrane;N    |
| 11586 | ENSG00000213593 | TMX2     | Approved  |                                     | Cytosol;Nucleoplas    |
| 11587 | ENSG00000213619 | NDUFS3   | Supported | Mitochond                           | Nuclear bodies        |
| 11588 | ENSG00000213625 | LEPROT   | Approved  |                                     | Centrosome            |
| 11589 | ENSG00000213626 | LBH      | Approved  |                                     | Vesicles              |
| 11590 | ENSG00000213638 | ADAT3    | Approved  |                                     | Nucleoplasm           |
| 11591 | ENSG00000213639 | PPP1CB   | Enhanced  | Cytosol;Nucleoplasm;Plasma membrane |                       |
| 11592 | ENSG00000213658 | LAT      | Supported | Plasma me                           | Golgi apparatus       |
| 11593 | ENSG00000213672 | NCKIPSD  | Enhanced  | Plasma membrane                     |                       |
| 11594 | ENSG00000213676 | ATF6B    | Approved  |                                     | Nucleoli;Nucleopla    |
| 11595 | ENSG00000213689 | TREX1    | Supported | Cytosol                             |                       |
| 11596 | ENSG00000213699 | SLC35F6  | Approved  |                                     | Cytosol;Nucleoplas    |
| 11597 | ENSG00000213719 | CLIC1    | Supported | Cytosol                             |                       |
| 11598 | ENSG00000213722 | DDAH2    | Supported | Cytosol                             | Centriolar satelli    |
| 11599 | ENSG00000213741 | RPS29    | Supported | Cytosol;Endoplasmic reticul         |                       |
| 11600 | ENSG00000213762 | ZNF134   | Approved  |                                     | Nucleoplasm           |
| 11601 | ENSG00000213780 | GTF2H4   | Supported |                                     | Nuclear speckles      |
| 11602 | ENSG00000213782 | DDX47    | Supported |                                     | Nucleoli              |
| 11603 | ENSG00000213809 | KLRK1    | Supported |                                     | Plasma membrane       |

|       |                 |          |           |             |                             |
|-------|-----------------|----------|-----------|-------------|-----------------------------|
| 11604 | ENSG00000213822 | CEACAM18 | Approved  |             | Midbody                     |
| 11605 | ENSG00000213853 | EMP2     | Approved  |             | Cytosol;Nucleoplas          |
| 11606 | ENSG00000213859 | KCTD11   | Approved  |             | Nucleoplasm                 |
| 11607 | ENSG00000213865 | C8orf44  | Enhanced  | Nucleoplasm |                             |
| 11608 | ENSG00000213886 | UBD      | Supported |             | NucleoplaNucleoli fibrillar |
| 11609 | ENSG00000213889 | PPM1N    | Supported |             | Vesicles                    |
| 11610 | ENSG00000213901 | SLC23A3  | Approved  |             | Cell Junctions;Nuc          |
| 11611 | ENSG00000213906 | LTB4R2   | Supported |             | Plasma membrane Nucleopla   |
| 11612 | ENSG00000213918 | DNASE1   | Supported |             | Vesicles                    |
| 11613 | ENSG00000213920 | MDP1     | Approved  |             | Nucleoplasm                 |
| 11614 | ENSG00000213921 | LEUTX    | Approved  |             | Nucleoli;Nucleopla          |
| 11615 | ENSG00000213923 | CSNK1E   | Approved  |             | Cytosol;Nucleoplas          |
| 11616 | ENSG00000213928 | IRF9     | Supported |             | Cytosol                     |
| 11617 | ENSG00000213930 | GALT     | Approved  |             | Cytosol                     |
| 11618 | ENSG00000213937 | CLDN9    | Supported |             | Cell JuncVesicles           |
| 11619 | ENSG00000213965 | NUDT19   | Uncertain |             | Cytosol;N                   |
| 11620 | ENSG00000213977 | TAX1BP3  | Approved  |             | Actin filaments;Nu          |
| 11621 | ENSG00000213988 | ZNF90    | Approved  |             | Golgi apparatus;Nu          |
| 11622 | ENSG00000213999 | MEF2B    | Approved  |             | Cell Junctions;Cyt          |
| 11623 | ENSG00000214013 | GANC     | Approved  |             | Actin filaments;Nu          |
| 11624 | ENSG00000214022 | REPIN1   | Supported |             | Nucleoplasm                 |
| 11625 | ENSG00000214026 | MRPL23   | Supported |             | MitochondNucleoli fibrillar |
| 11626 | ENSG00000214029 | ZNF891   | Approved  |             | Nucleoplasm;Vesicl          |
| 11627 | ENSG00000214046 | SMIM7    | Approved  |             | Golgi apparatus             |
| 11628 | ENSG00000214050 | FBXO16   | Approved  |             | Cytosol;Nucleoplas          |
| 11629 | ENSG00000214078 | CPNE1    | Supported |             | Nuclear membrane;Nucleoplas |
| 11630 | ENSG00000214102 | WEE2     | Enhanced  | Nucleoplasm |                             |
| 11631 | ENSG00000214113 | LYRM4    | Supported |             | Nuclear bodies              |
| 11632 | ENSG00000214114 | MYCBP    | Approved  |             | Mitochondria;Nucle          |
| 11633 | ENSG00000214193 | SH3D21   | Supported |             | Nucleoplasm;Plasma membrane |
| 11634 | ENSG00000214212 | C19orf38 | Uncertain |             | Cytosol;G                   |
| 11635 | ENSG00000214253 | FIS1     | Supported |             | Mitochondria                |
| 11636 | ENSG00000214274 | ANG      | Approved  |             | Nucleoli Actin fil          |
| 11637 | ENSG00000214338 | SOGA3    | Approved  |             | Cytosol;Nucleoplas          |
| 11638 | ENSG00000214357 | NEURL1B  | Supported |             | Vesicles                    |
| 11639 | ENSG00000214367 | HAUS3    | Approved  |             | Mitotic sCytokinetic bridge |
| 11640 | ENSG00000214376 | VSTM5    | Uncertain |             | Endoplasm                   |
| 11641 | ENSG00000214435 | AS3MT    | Approved  |             | Mitochondria                |
| 11642 | ENSG00000214447 | FAM187A  | Approved  |             | Cytosol                     |
| 11643 | ENSG00000214456 | PLIN5    | Supported |             | Lipid droplets;Vesicles     |
| 11644 | ENSG00000214491 | SEC14L6  | Approved  |             | Nucleoplasm                 |
| 11645 | ENSG00000214510 | SPINK13  | Approved  |             | Nucleoplasm;Plasma          |
| 11646 | ENSG00000214517 | PPME1    | Supported |             | NucleoplaNuclear bodies     |
| 11647 | ENSG00000214530 | STARD10  | Supported |             | Cytosol                     |
| 11648 | ENSG00000214562 | NUTM2D   | Approved  |             | Nuclear bodies              |
| 11649 | ENSG00000214575 | CPEB1    | Supported |             | Cytosol;Nucleoplasm         |
| 11650 | ENSG00000214595 | EML6     | Approved  |             | Mitochondria;Vesic          |
| 11651 | ENSG00000214652 | ZNF727   | Uncertain |             | Nucleopla                   |
| 11652 | ENSG00000214655 | ZSWIM8   | Approved  |             | Cytosol;Plasma mem          |
| 11653 | ENSG00000214694 | ARHGEF33 | Supported |             | Vesicles                    |
| 11654 | ENSG00000214717 | ZBED1    | Approved  |             | Nucleoplasm Centrosom       |
| 11655 | ENSG00000214736 | TOMM6    | Supported |             | Mitochondria                |
| 11656 | ENSG00000214753 | HNRNPUL2 | Enhanced  | Nucleoplasm |                             |
| 11657 | ENSG00000214827 | MTCP1    | Approved  |             | Nucleoplasm;Plasma          |
| 11658 | ENSG00000214860 | EVPLL    | Approved  |             | Nuclear bodies;Nuc          |



|       |                 |           |           |                             |
|-------|-----------------|-----------|-----------|-----------------------------|
| 11659 | ENSG00000214940 | NPIPA8    | Approved  | Nucleoplasm                 |
| 11660 | ENSG00000214941 | ZSWIM7    | Uncertain | Cytosol                     |
| 11661 | ENSG00000214944 | ARHGEF28  | Approved  | Cytosol;Microtubul          |
| 11662 | ENSG00000214954 | LRRC69    | Approved  | Plasma membrane             |
| 11663 | ENSG00000214960 | ISPD      | Approved  | Nucleoli fibrillar          |
| 11664 | ENSG00000214967 | NPIPA7    | Approved  | Nucleoplasm                 |
| 11665 | ENSG00000215018 | COL28A1   | Approved  | Cytosol;Nucleoplas          |
| 11666 | ENSG00000215021 | PHB2      | Enhanced  | Mitochondria                |
| 11667 | ENSG00000215045 | GRID2IP   | Approved  | Plasma membrane             |
| 11668 | ENSG00000215114 | UBXN2B    | Approved  | Nucleoplasm                 |
| 11669 | ENSG00000215126 | CBWD6     | Approved  | Plasma membrane             |
| 11670 | ENSG00000215183 | MSMP      | Supported | Vesicles Cytosol            |
| 11671 | ENSG00000215218 | UBE2QL1   | Supported | Nucleoplasm Plasma me       |
| 11672 | ENSG00000215252 | GOLGA8B   | Approved  | Cytosol;Golgi appa          |
| 11673 | ENSG00000215262 | KCNU1     | Uncertain | Plasma me                   |
| 11674 | ENSG00000215269 | GAGE12G   | Approved  | Cytosol;Golgi appa          |
| 11675 | ENSG00000215271 | HOMEZ     | Supported | Nucleoli;Nucleoplasm        |
| 11676 | ENSG00000215274 | GAGE10    | Uncertain | Cytosol;G                   |
| 11677 | ENSG00000215301 | DDX3X     | Approved  | Cytosol;Nucleoplas          |
| 11678 | ENSG00000215375 | MYL5      | Approved  | Nucleoli;Nucleopla          |
| 11679 | ENSG00000215397 | SCRT2     | Approved  | Nucleoplasm                 |
| 11680 | ENSG00000215421 | ZNF407    | Approved  | Nucleoplasm;Plasma          |
| 11681 | ENSG00000215440 | NPEPL1    | Approved  | Nucleoplasm                 |
| 11682 | ENSG00000215472 | RPL17-C18 | Supported | Cytosol;Endoplasmic reticul |
| 11683 | ENSG00000215644 | GCGR      | Approved  | Golgi apparatus             |
| 11684 | ENSG00000215695 | RSC1A1    | Supported | Nucleoplasm Cell Junc       |
| 11685 | ENSG00000215784 | FAM72D    | Approved  | Cytosol;Plasma mem          |
| 11686 | ENSG00000215788 | TNFRSF25  | Approved  | Actin filaments;Fo          |
| 11687 | ENSG00000215790 | SLC35E2   | Uncertain | Nucleopla                   |
| 11688 | ENSG00000215817 | ZC3H11B   | Approved  | Nuclear speckles            |
| 11689 | ENSG00000215845 | TSTD1     | Approved  | Cytoplasmic bodies          |
| 11690 | ENSG00000215883 | CYB5RL    | Enhanced  | Nucleoplasm                 |
| 11691 | ENSG00000215915 | ATAD3C    | Approved  | Mitochondria                |
| 11692 | ENSG00000216490 | IFI30     | Supported | Vesicles Cytosol            |
| 11693 | ENSG00000216588 | IGSF23    | Approved  | Cell Junctions;Nuc          |
| 11694 | ENSG00000216649 | GAGE12E   | Uncertain | Cytosol;G                   |
| 11695 | ENSG00000216921 | AC131097. | Approved  | Nucleoplasm                 |
| 11696 | ENSG00000216937 | CCDC7     | Approved  | Cytosol;Mitotic sp          |
| 11697 | ENSG00000217236 | SP9       | Approved  | Mitochondria                |
| 11698 | ENSG00000217442 | SYCE3     | Approved  | Golgi apparatus;Nu          |
| 11699 | ENSG00000217555 | CKLF      | Approved  | Vesicles                    |
| 11700 | ENSG00000217930 | PAM16     | Approved  | Mitochondria Microtubu      |
| 11701 | ENSG00000218336 | TENM3     | Approved  | Nucleoplasm                 |
| 11702 | ENSG00000218739 | CEBPZOS   | Approved  | Nucleoplasm                 |
| 11703 | ENSG00000218891 | ZNF579    | Approved  | Nucleoplasm                 |
| 11704 | ENSG00000219073 | CELA3B    | Approved  | Cytosol                     |
| 11705 | ENSG00000219435 | CATSPERZ  | Approved  | Nucleoplasm                 |
| 11706 | ENSG00000219481 | NBPF1     | Approved  | Nuclear bodies;Nuc          |
| 11707 | ENSG00000219545 | UMAD1     | Approved  | Nucleoplasm                 |
| 11708 | ENSG00000219626 | FAM228B   | Approved  | Golgi apparatus             |
| 11709 | ENSG00000220008 | LINGO3    | Approved  | Mitochondria                |
| 11710 | ENSG00000220201 | ZGLP1     | Approved  | Nucleoplasm;Vesicl          |
| 11711 | ENSG00000221821 | C6orf226  | Approved  | Nuclear speckles            |
| 11712 | ENSG00000221823 | PPP3R1    | Approved  | Cytosol;Plasma mem          |
| 11713 | ENSG00000221829 | FANCG     | Supported | Cytosol;NPlasma membrane    |

|       |                 |           |           |             |                     |
|-------|-----------------|-----------|-----------|-------------|---------------------|
| 11714 | ENSG00000221843 | C2orf16   | Uncertain |             | Nuclear b           |
| 11715 | ENSG00000221866 | PLXNA4    | Approved  |             | Plasma membrane     |
| 11716 | ENSG00000221869 | CEBPD     | Supported |             | Nucleoplasm         |
| 11717 | ENSG00000221874 | ZNF816-ZN | Uncertain |             | Nucleopla           |
| 11718 | ENSG00000221886 | ZBED8     | Enhanced  | Nucleoplasm |                     |
| 11719 | ENSG00000221890 | NPTXR     | Approved  |             | Cytosol;Nucleoplas  |
| 11720 | ENSG00000221914 | PPP2R2A   | Approved  |             | Cytosol             |
| 11721 | ENSG00000221916 | C19orf73  | Approved  |             | Cytosol;Nucleoplas  |
| 11722 | ENSG00000221926 | TRIM16    | Supported | Cytosol     | Plasma membrane     |
| 11723 | ENSG00000221932 | HEPN1     | Approved  |             | Golgi apparatus     |
| 11724 | ENSG00000221944 | TIGD1     | Approved  |             | Nuclear bodies;Nuc  |
| 11725 | ENSG00000221947 | XKR9      | Approved  |             | Mitochondria        |
| 11726 | ENSG00000221955 | SLC12A8   | Supported |             | Nucleoplasm         |
| 11727 | ENSG00000221963 | APOL6     | Supported |             | Nuclear bCytosol    |
| 11728 | ENSG00000221968 | FADS3     | Approved  |             | Nucleoli fibrillar  |
| 11729 | ENSG00000221972 | C3orf36   | Approved  |             | Cytosol;Nucleoli f  |
| 11730 | ENSG00000221978 | CCNL2     | Supported |             | Nucleoplasm         |
| 11731 | ENSG00000221983 | UBA52     | Approved  |             | Cytosol;Endoplasmic |
| 11732 | ENSG00000221994 | ZNF630    | Approved  |             | Cytosol;Nucleoplas  |
| 11733 | ENSG00000222009 | BTBD19    | Uncertain |             | Cytosol             |
| 11734 | ENSG00000222011 | FAM185A   | Enhanced  | Cytosol     |                     |
| 11735 | ENSG00000222014 | RAB6C     | Uncertain |             | Golgi app           |
| 11736 | ENSG00000222047 | C10orf55  | Approved  |             | Nucleoplasm         |
| 11737 | ENSG00000223510 | CDRT15    | Approved  |             | Plasma membrane     |
| 11738 | ENSG00000223638 | RFPL4A    | Approved  |             | Centrosome;Cytosol  |
| 11739 | ENSG00000223802 | CERS1     | Approved  |             | Endoplasmic reticu  |
| 11740 | ENSG00000223865 | HLA-DPB1  | Approved  | Cell Junc   | Nucleoplasm         |
| 11741 | ENSG00000224051 | CPTP      | Approved  |             | Cytosol             |
| 11742 | ENSG00000224383 | PRR29     | Uncertain |             | Nucleoli            |
| 11743 | ENSG00000224470 | ATXN1L    | Enhanced  | Nucleoplasm |                     |
| 11744 | ENSG00000224531 | SMIM13    | Approved  |             | Golgi apparatus;Nu  |
| 11745 | ENSG00000224578 | HNRNPA1P4 | Uncertain |             | Nucleopla           |
| 11746 | ENSG00000224659 | GAGE12J   | Approved  |             | Cytosol;Golgi appa  |
| 11747 | ENSG00000224712 | NPIPA3    | Approved  |             | Nucleoplasm         |
| 11748 | ENSG00000224877 | NDUFAF8   | Approved  |             | Mitochondria        |
| 11749 | ENSG00000224902 | GAGE12H   | Approved  |             | Cytosol;Golgi appa  |
| 11750 | ENSG00000224940 | PRRT4     | Approved  |             | Nucleoplasm;Peroxi  |
| 11751 | ENSG00000224982 | TMEM233   | Approved  |             | Nucleoplasm         |
| 11752 | ENSG00000225190 | PLEKHM1   | Supported | Vesicles    | Nucleoli            |
| 11753 | ENSG00000225526 | MKRN20S   | Approved  |             | Golgi apparatus     |
| 11754 | ENSG00000225528 | Z82206.1  | Approved  |             | Nuclear bodies;Nuc  |
| 11755 | ENSG00000225614 | ZNF469    | Approved  |             | Vesicles            |
| 11756 | ENSG00000225663 | MCRIP1    | Approved  |             | Cytosol             |
| 11757 | ENSG00000225697 | SLC26A6   | Uncertain |             | Cytosol             |
| 11758 | ENSG00000225830 | ERCC6     | Approved  |             | Nuclear bodies;Nuc  |
| 11759 | ENSG00000225950 | NTF4      | Approved  |             | Golgi apparatus     |
| 11760 | ENSG00000225968 | ELFN1     | Approved  |             | Cell Junctions;Nuc  |
| 11761 | ENSG00000226124 | FTCDNL1   | Uncertain |             | Vesicles            |
| 11762 | ENSG00000226479 | TMEM185B  | Approved  |             | Endoplasmic reticu  |
| 11763 | ENSG00000226650 | KIF4B     | Uncertain |             | Midbody;N           |
| 11764 | ENSG00000226742 | HSBP1L1   | Approved  |             | Nucleoplasm         |
| 11765 | ENSG00000226784 | PGAM4     | Approved  |             | Nucleoplasm         |
| 11766 | ENSG00000226887 | ERVMER34  | Approved  |             | Cytosol;Nucleoplas  |
| 11767 | ENSG00000227124 | ZNF717    | Approved  |             | Nuclear bodies;Nuc  |
| 11768 | ENSG00000227234 | SPANXB1   | Approved  | Nucleopla   | Vesicles            |

|       |                 |           |           |                             |
|-------|-----------------|-----------|-----------|-----------------------------|
| 11769 | ENSG00000227268 | KLLN      | Supported | Nucleopla                   |
| 11770 | ENSG00000227345 | PARG      | Supported | Nucleoli                    |
| 11771 | ENSG00000227471 | AKR1B15   | Supported | Cytosol; Vesicles           |
| 11772 | ENSG00000227488 | GAGE12D   | Approved  | Cytosol; Plasma membrane    |
| 11773 | ENSG00000227500 | SCAMP4    | Approved  | Cytosol; Golgi appa         |
| 11774 | ENSG00000227507 | LTB       | Approved  | Golgi apparatus; Li         |
| 11775 | ENSG00000228049 | POLR2J2   | Approved  | Centrosome                  |
| 11776 | ENSG00000228278 | ORM2      | Approved  | Nucleoplasm                 |
| 11777 | ENSG00000228300 | C19orf24  | Approved  | Golgi apparatus; Ve         |
| 11778 | ENSG00000228570 | NUTM2E    | Approved  | Golgi apparatus; Nu         |
| 11779 | ENSG00000228672 | PROB1     | Approved  | Nuclear bodies              |
| 11780 | ENSG00000228716 | DHFR      | Supported | Nucleoplasm                 |
| 11781 | ENSG00000228727 | SAPCD1    | Approved  | Mitochondria                |
| 11782 | ENSG00000228836 | CT45A5    | Approved  | Cell Junctions; Ves         |
| 11783 | ENSG00000228927 | TSPY3     | Approved  | Nucleoli; Nucleopla         |
| 11784 | ENSG00000229117 | RPL41     | Supported | Cytosol                     |
| 11785 | ENSG00000229292 | RFPL4AL1  | Approved  | Endoplasmic reticulum       |
| 11786 | ENSG00000229314 | ORM1      | Approved  | Centrosome; Cytosol         |
| 11787 | ENSG00000229549 | TSPY8     | Approved  | Golgi apparatus; Ve         |
| 11788 | ENSG00000229809 | ZNF688    | Approved  | Cytosol                     |
| 11789 | ENSG00000229833 | PET100    | Approved  | Cell Junctions; Nuc         |
| 11790 | ENSG00000230124 | ACBD6     | Approved  | Mitochondria; Nucle         |
| 11791 | ENSG00000230453 | ANKRD18B  | Approved  | Cytosol Nucleoplasm         |
| 11792 | ENSG00000230510 | PPP5D1    | Uncertain | Cytosol; Nucleoli           |
| 11793 | ENSG00000230626 | AC011005  | Approved  | Cytosol                     |
| 11794 | ENSG00000230667 | SETSIP    | Supported | Cytosol                     |
| 11795 | ENSG00000230797 | YY2       | Approved  | Lipid droplets; Nucleoplasm |
| 11796 | ENSG00000230873 | STMND1    | Approved  | Nuclear bodies              |
| 11797 | ENSG00000231274 | SBK3      | Approved  | Actin filaments             |
| 11798 | ENSG00000231389 | HLA-DPA1  | Supported | Mitochondria                |
| 11799 | ENSG00000231500 | RPS18     | Supported | Vesicles                    |
| 11800 | ENSG00000231767 | AL136454  | Approved  | Cytosol                     |
| 11801 | ENSG00000231989 | PPP1R2B   | Approved  | Cytosol; Endoplasmic        |
| 11802 | ENSG00000232040 | ZBED9     | Approved  | Cytosol; Nucleoplas         |
| 11803 | ENSG00000232112 | TMA7      | Approved  | Golgi apparatus; Nu         |
| 11804 | ENSG00000232119 | MCTS1     | Supported | Nuclear bodies; Nuc         |
| 11805 | ENSG00000232263 | KRTAP25-1 | Approved  | Cytosol Plasma me           |
| 11806 | ENSG00000232388 | SMIM26    | Approved  | Cytosol; Nuclear me         |
| 11807 | ENSG00000232434 | AJM1      | Approved  | Cytosol; Nucleoplas         |
| 11808 | ENSG00000233024 | AC126755  | Uncertain | Cytosol; Focal adhe         |
| 11809 | ENSG00000233041 | PHGR1     | Approved  | Nucleopla                   |
| 11810 | ENSG00000233087 | RAB6D     | Approved  | Vesicles                    |
| 11811 | ENSG00000233232 | NPIP7     | Approved  | Golgi apparatus             |
| 11812 | ENSG00000233608 | TWIST2    | Supported | Nucleoplasm                 |
| 11813 | ENSG00000233670 | PIRT      | Uncertain | Nucleoli; Nucleoplasm       |
| 11814 | ENSG00000233803 | TSPY4     | Approved  | Cytosol; P                  |
| 11815 | ENSG00000233822 | HIST1H2BN | Approved  | Cytosol                     |
| 11816 | ENSG00000233927 | RPS28     | Approved  | Cytosol; Nucleoplas         |
| 11817 | ENSG00000234127 | TRIM26    | Supported | Cytosol                     |
| 11818 | ENSG00000234224 | TMEM229A  | Approved  | Cytosol; Nucleoplasm        |
| 11819 | ENSG00000234284 | ZNF879    | Approved  | Plasma membrane             |
| 11820 | ENSG00000234289 | H2BFS     | Approved  | Nucleoplasm                 |
| 11821 | ENSG00000234409 | CCDC188   | Approved  | Cytosol; Nucleoplas         |
| 11822 | ENSG00000234444 | ZNF736    | Uncertain | Nuclear bodies; Nuc         |
| 11823 | ENSG00000234465 | PINLYP    | Approved  | Nucleopla                   |
|       |                 |           |           | Vesicles                    |

|       |                 |          |           |                                  |
|-------|-----------------|----------|-----------|----------------------------------|
| 11824 | ENSG00000234545 | FAM133B  | Enhanced  | Nucleoli;Nucleoplasm             |
| 11825 | ENSG00000234602 | MCIDAS   | Supported | Nuclear bodies                   |
| 11826 | ENSG00000234616 | JRK      | Approved  | Nuclear bodies;Nuc               |
| 11827 | ENSG00000234719 | NPIP2    | Approved  | Nucleoplasm                      |
| 11828 | ENSG00000235034 | C19orf81 | Approved  | Aggresome;Vesicles               |
| 11829 | ENSG00000235098 | ANKRD65  | Approved  | Nucleoplasm                      |
| 11830 | ENSG00000235109 | ZSCAN31  | Approved  | Cytosol;Nucleoplas               |
| 11831 | ENSG00000235162 | C12orf75 | Approved  | Vesicles                         |
| 11832 | ENSG00000235173 | HGH1     | Supported | Cytosol;Nuclear bo               |
| 11833 | ENSG00000235194 | PPP1R3E  | Approved  | Microtubules;Mitoc               |
| 11834 | ENSG00000235376 | RPEL1    | Approved  | Cytosol;Nucleoplas               |
| 11835 | ENSG00000235711 | ANKRD34C | Approved  | Mitochondria                     |
| 11836 | ENSG00000235750 | KIAA0040 | Approved  | Nucleoplasm                      |
| 11837 | ENSG00000235961 | PNMA6A   | Uncertain | Mitochond                        |
| 11838 | ENSG00000236104 | ZBTB22   | Approved  | Nucleoplasm                      |
| 11839 | ENSG00000236287 | ZBED5    | Approved  | Golgi apparatus;Nu               |
| 11840 | ENSG00000236362 | GAGE12F  | Approved  | Cytosol;Golgi appa               |
| 11841 | ENSG00000236424 | TSPY10   | Approved  | Cytosol                          |
| 11842 | ENSG00000236444 | UBE2L5   | Uncertain | Cytosol;N                        |
| 11843 | ENSG00000236609 | ZNF853   | Approved  | Nucleoli                         |
| 11844 | ENSG00000236699 | ARHGEF38 | Approved  | Centrosome;Nucleop               |
| 11845 | ENSG00000237172 | B3GNT9   | Approved  | Golgi apparatus;Nu               |
| 11846 | ENSG00000237441 | RGL2     | Approved  | Nucleoplasm                      |
| 11847 | ENSG00000237452 | BHMG1    | Approved  | Nucleoplasm                      |
| 11848 | ENSG00000237649 | KIFC1    | Approved  | Centrosome                       |
| 11849 | ENSG00000237651 | C2orf74  | Approved  | Centrosome                       |
| 11850 | ENSG00000237671 | GAGE12C  | Approved  | Cytosol;Golgi appa               |
| 11851 | ENSG00000238083 | LRRC37A2 | Approved  | Vesicles                         |
| 11852 | ENSG00000238227 | TMEM250  | Supported | Nucleoplasm                      |
| 11853 | ENSG00000239264 | TXNDC5   | Approved  | Endoplasmic reticu               |
| 11854 | ENSG00000239306 | RBM14    | Supported | Nuclear speckles                 |
| 11855 | ENSG00000239382 | ALKBH6   | Supported | NucleoplaFocal adhesion sit      |
| 11856 | ENSG00000239474 | KLHL41   | Supported | Cytosol Nucleopla                |
| 11857 | ENSG00000239605 | STPG4    | Approved  | Cytosol;Nucleoplas               |
| 11858 | ENSG00000239672 | NME1     | Supported | Cytosol NucleoplaPlasma membrane |
| 11859 | ENSG00000239697 | TNFSF12  | Approved  | Vesicles                         |
| 11860 | ENSG00000239704 | CDRT4    | Approved  | Mitochondria                     |
| 11861 | ENSG00000239713 | APOBEC3G | Uncertain | Cytosol;N                        |
| 11862 | ENSG00000239779 | WBP1     | Approved  | Cytosol                          |
| 11863 | ENSG00000239857 | GET4     | Supported | Cytosol Nucleoli;Nucleopla       |
| 11864 | ENSG00000239887 | C1orf226 | Approved  | Nucleoplasm                      |
| 11865 | ENSG00000239900 | ADSL     | Enhanced  | Cytosol                          |
| 11866 | ENSG00000240065 | PSMB9    | Supported | Cytosol                          |
| 11867 | ENSG00000240184 | PCDHGC3  | Approved  | Plasma membrane                  |
| 11868 | ENSG00000240204 | SMKR1    | Approved  | Nucleoli                         |
| 11869 | ENSG00000240230 | COX19    | Supported | Cytosol                          |
| 11870 | ENSG00000240344 | PPIL3    | Supported | Nucleoplasm                      |
| 11871 | ENSG00000240583 | AQP1     | Supported | Plasma membrane                  |
| 11872 | ENSG00000240682 | ISY1     | Enhanced  | Nuclear speckles                 |
| 11873 | ENSG00000240747 | KRBOX1   | Approved  | Golgi apparatus;Nu               |
| 11874 | ENSG00000240764 | PCDHGC5  | Uncertain | Plasma meCytosol;N               |
| 11875 | ENSG00000240771 | ARHGEF25 | Approved  | Vesicles                         |
| 11876 | ENSG00000240849 | TMEM189  | Supported | Endoplasmic reticulum            |
| 11877 | ENSG00000240857 | RDH14    | Approved  | Cytosol;Nucleoplas               |
| 11878 | ENSG00000240891 | PLCXD2   | Approved  | Nucleoplasm                      |

|       |                 |           |           |                             |                    |
|-------|-----------------|-----------|-----------|-----------------------------|--------------------|
| 11879 | ENSG00000240972 | MIF       | Approved  | Cytosol                     | Nucleoplasm        |
| 11880 | ENSG00000241058 | NSUN6     | Approved  |                             | Golgi apparatus    |
| 11881 | ENSG00000241127 | YAE1D1    | Approved  |                             | Cytosol            |
| 11882 | ENSG00000241186 | TDGF1     | Uncertain |                             | Cytosol;V          |
| 11883 | ENSG00000241258 | CRCP      | Approved  |                             | Nuclear bodies     |
| 11884 | ENSG00000241322 | CDRT1     | Approved  |                             | Nucleoli;Nucleopla |
| 11885 | ENSG00000241343 | RPL36A    | Supported | Cytosol;E                   | Plasma membrane    |
| 11886 | ENSG00000241404 | EGFL8     | Approved  |                             | Nuclear speckles;V |
| 11887 | ENSG00000241468 | ATP5MF    | Supported | Mitochondria                |                    |
| 11888 | ENSG00000241476 | SSX2      | Approved  |                             | Nucleoli;Nucleopla |
| 11889 | ENSG00000241484 | ARHGAP8   | Approved  |                             | Nucleoplasm        |
| 11890 | ENSG00000241644 | INMT      | Approved  |                             | Golgi apparatus;Ve |
| 11891 | ENSG00000241685 | ARPC1A    | Approved  |                             | Cell Junctions;Cyt |
| 11892 | ENSG00000241837 | ATP5P0    | Enhanced  | Mitochondria                |                    |
| 11893 | ENSG00000241839 | PLEKH02   | Approved  |                             | Cytosol;Nucleoplas |
| 11894 | ENSG00000241852 | C8orf58   | Approved  |                             | Nuclear bodies     |
| 11895 | ENSG00000241878 | PISD      | Approved  |                             | Cytosol;Golgi appa |
| 11896 | ENSG00000241945 | PWP2      | Supported | Nucleoli                    | Cytosol            |
| 11897 | ENSG00000241973 | PI4KA     | Approved  |                             | Nucleoplasm;Plasma |
| 11898 | ENSG00000242028 | HYPK      | Supported | Nucleopla                   | Microtubules       |
| 11899 | ENSG00000242110 | AMACR     | Supported | Vesicles                    | Plasma membrane    |
| 11900 | ENSG00000242114 | MTFP1     | Approved  |                             | Mitochondria       |
| 11901 | ENSG00000242173 | ARHGDI    | Approved  |                             | Cytosol Plasma me  |
| 11902 | ENSG00000242247 | ARFGAP3   | Supported | Cytosol;Golgi apparatus     |                    |
| 11903 | ENSG00000242259 | C22orf39  | Approved  |                             | Endoplasmic reticu |
| 11904 | ENSG00000242265 | PEG10     | Approved  |                             | Cytosol;Nucleoplas |
| 11905 | ENSG00000242372 | EIF6      | Supported | Nucleoplasm                 |                    |
| 11906 | ENSG00000242419 | PCDHGC4   | Uncertain |                             | Cytosol;N          |
| 11907 | ENSG00000242485 | MRPL20    | Supported | Mitochondria                |                    |
| 11908 | ENSG00000242550 | SERPINB10 | Supported | Cytosol;Nucleoplasm         |                    |
| 11909 | ENSG00000242574 | HLA-DMB   | Supported | Vesicles                    |                    |
| 11910 | ENSG00000242612 | DECR2     | Approved  |                             | Peroxisomes        |
| 11911 | ENSG00000242689 | CNTF      | Approved  |                             | Vesicles           |
| 11912 | ENSG00000242732 | RTL5      | Approved  |                             | Nucleoplasm        |
| 11913 | ENSG00000242802 | AP5Z1     | Supported | Nuclear speckles;Nucleoplas |                    |
| 11914 | ENSG00000242852 | ZNF709    | Approved  |                             | Nucleoplasm        |
| 11915 | ENSG00000243156 | MICAL3    | Supported | Midbody r                   | Cytosol Plasma me  |
| 11916 | ENSG00000243232 | PCDHAC2   | Approved  |                             | Mitochondria;Nucle |
| 11917 | ENSG00000243279 | PRAF2     | Approved  |                             | Endoplasmic reticu |
| 11918 | ENSG00000243317 | STMP1     | Approved  |                             | Mitochondria       |
| 11919 | ENSG00000243444 | PALM2     | Approved  |                             | Plasma membrane    |
| 11920 | ENSG00000243449 | C4orf48   | Supported | Cytosol                     |                    |
| 11921 | ENSG00000243646 | IL10RB    | Approved  |                             | Cytosol            |
| 11922 | ENSG00000243649 | CFB       | Approved  |                             | Cell Junctions;End |
| 11923 | ENSG00000243660 | ZNF487    | Approved  |                             | Cytosol;Nuclear me |
| 11924 | ENSG00000243667 | WDR92     | Approved  |                             | Nucleoplasm        |
| 11925 | ENSG00000243678 | NME2      | Supported | Cytosol;Nucleoplasm         |                    |
| 11926 | ENSG00000243710 | CFAP57    | Approved  |                             | Cytosol            |
| 11927 | ENSG00000243716 | NPIP5     | Approved  |                             | Nucleoplasm        |
| 11928 | ENSG00000243725 | TTC4      | Enhanced  | Intermediate filam          | Cytoplasmic bodies |
| 11929 | ENSG00000243749 | TMEM35B   | Approved  |                             | Nucleoli;Nucleopla |
| 11930 | ENSG00000243789 | JMJD7     | Approved  |                             | Cytosol            |
| 11931 | ENSG00000243927 | MRPS6     | Supported | Mitochondria                |                    |
| 11932 | ENSG00000243943 | ZNF512    | Approved  |                             | Nucleoplasm        |
| 11933 | ENSG00000243955 | GSTA1     | Supported | Cytosol                     |                    |

|       |                 |           |           |              |                             |
|-------|-----------------|-----------|-----------|--------------|-----------------------------|
| 11934 | ENSG00000244005 | NFS1      | Supported |              | Cytosol;Nucleoplasm         |
| 11935 | ENSG00000244038 | DDOST     | Supported |              | Endoplasmic reticulum       |
| 11936 | ENSG00000244067 | GSTA2     | Supported |              | Cytosol                     |
| 11937 | ENSG00000244187 | TMEM141   | Supported |              | MitochondCell Junctions     |
| 11938 | ENSG00000244255 | AL645922. | Approved  |              | Cell Junctions;End          |
| 11939 | ENSG00000244274 | DBNDD2    | Approved  |              | Cytosol;Nucleoplas          |
| 11940 | ENSG00000244405 | ETV5      | Supported |              | Nucleoplasm                 |
| 11941 | ENSG00000244414 | CFHR1     | Approved  |              | Vesicles                    |
| 11942 | ENSG00000244462 | RBM12     | Enhanced  | Nucleoplasm  |                             |
| 11943 | ENSG00000244486 | SCARF2    | Approved  |              | Cytosol;Nuclear bo          |
| 11944 | ENSG00000244509 | APOBEC3C  | Approved  |              | Intermediate filam          |
| 11945 | ENSG00000244607 | CCDC13    | Supported |              | Centrosome                  |
| 11946 | ENSG00000244687 | UBE2V1    | Enhanced  | Nucleoplasm  |                             |
| 11947 | ENSG00000244694 | PTCHD4    | Approved  |              | Cytosol;Plasma mem          |
| 11948 | ENSG00000244752 | CRYBB2    | Approved  |              | Nucleoplasm                 |
| 11949 | ENSG00000244754 | N4BP2L2   | Approved  |              | Nucleoplasm                 |
| 11950 | ENSG00000245680 | ZNF585B   | Approved  |              | Cytoplasmic bodies          |
| 11951 | ENSG00000245848 | CEBPA     | Approved  |              | NucleoplaVesicles           |
| 11952 | ENSG00000246922 | UBAP1L    | Uncertain |              | Nuclear b                   |
| 11953 | ENSG00000247077 | PGAM5     | Supported |              | Mitochondria                |
| 11954 | ENSG00000247315 | ZCCHC3    | Approved  |              | Vesicles                    |
| 11955 | ENSG00000247596 | TWF2      | Supported |              | Plasma membrane             |
| 11956 | ENSG00000247746 | USP51     | Approved  |              | Cytosol;Nucleoli f          |
| 11957 | ENSG00000248144 | ADH1C     | Supported |              | Cytosol;Plasma membrane     |
| 11958 | ENSG00000248167 | TRIM39-RP | Approved  |              | Cytosol                     |
| 11959 | ENSG00000248333 | CDK11B    | Approved  |              | Nuclear speckles            |
| 11960 | ENSG00000248383 | PCDHAC1   | Approved  |              | Nucleoli;Nucleopla          |
| 11961 | ENSG00000248483 | POU5F2    | Approved  |              | Nucleoplasm                 |
| 11962 | ENSG00000248485 | PCP4L1    | Approved  |              | Mitochondria;Nucle          |
| 11963 | ENSG00000248487 | ABHD14A   | Enhanced  | Vesicles     |                             |
| 11964 | ENSG00000248592 | TMEM110-M | Approved  |              | Cytosol                     |
| 11965 | ENSG00000248643 | RBM14-RBM | Approved  |              | Cytosol;Nucleoplas          |
| 11966 | ENSG00000248712 | CCDC153   | Uncertain |              | Cytosol                     |
| 11967 | ENSG00000248746 | ACTN3     | Uncertain |              | Actin fil                   |
| 11968 | ENSG00000248871 | TNFSF12-T | Approved  |              | Vesicles                    |
| 11969 | ENSG00000248905 | FMN1      | Supported |              | Cytosol;Nucleoplasm         |
| 11970 | ENSG00000248919 | ATP5MF-PT | Approved  |              | Mitochondria                |
| 11971 | ENSG00000249158 | PCDHA11   | Approved  |              | Cell Junctions;Cyt          |
| 11972 | ENSG00000249222 | ATP5MGL   | Supported | Mitochondria |                             |
| 11973 | ENSG00000249459 | ZNF286B   | Approved  |              | Cytosol;Nuclear sp          |
| 11974 | ENSG00000249471 | ZNF324B   | Approved  |              | Cytosol;Nucleoli            |
| 11975 | ENSG00000249481 | SPATS1    | Approved  |              | Nucleoplasm                 |
| 11976 | ENSG00000249709 | ZNF564    | Approved  |              | Golgi apparatus             |
| 11977 | ENSG00000249751 | ECSCR     | Supported |              | Plasma meNucleoplasm;Vesicl |
| 11978 | ENSG00000249915 | PDCD6     | Approved  |              | Cytosol                     |
| 11979 | ENSG00000249967 | AL355315. | Uncertain |              | Plasma me                   |
| 11980 | ENSG00000250021 | C15orf38- | Approved  |              | Vesicles                    |
| 11981 | ENSG00000250067 | YJEFN3    | Approved  |              | Mitochondria                |
| 11982 | ENSG00000250254 | PTTG2     | Approved  |              | Cytosol;Nucleoli            |
| 11983 | ENSG00000250264 | AL669918. | Approved  |              | EndoplasmNuclear s          |
| 11984 | ENSG00000250305 | TRMT9B    | Approved  |              | Cytosol;Nucleoplas          |
| 11985 | ENSG00000250317 | SMIM20    | Approved  |              | Cytosol;Nucleoli;N          |
| 11986 | ENSG00000250424 | AC004691. | Approved  |              | Plasma membrane             |
| 11987 | ENSG00000250479 | CHCHD10   | Supported |              | Mitochondria                |
| 11988 | ENSG00000250506 | CDK3      | Approved  |              | Cytosol                     |

|       |                 |           |           |                    |                    |
|-------|-----------------|-----------|-----------|--------------------|--------------------|
| 11989 | ENSG00000250510 | GPR162    | Approved  |                    | Centriolar satelli |
| 11990 | ENSG00000250571 | GLI4      | Approved  |                    | Cytokinetic bridge |
| 11991 | ENSG00000250709 | CCDC169   | Uncertain |                    | Vesicles           |
| 11992 | ENSG00000250722 | SELENOP   | Approved  |                    | Golgi apparatus;Nu |
| 11993 | ENSG00000250799 | PRODH2    | Approved  |                    | Cytosol;Nucleoplas |
| 11994 | ENSG00000251192 | ZNF674    | Approved  |                    | Nucleoplasm        |
| 11995 | ENSG00000251287 | ALG1L2    | Uncertain |                    | Endoplasm          |
| 11996 | ENSG00000251322 | SHANK3    | Approved  |                    | Nucleoplasm;Plasma |
| 11997 | ENSG00000251369 | ZNF550    | Approved  |                    | Microtubules;Vesic |
| 11998 | ENSG00000251537 | AC005324  | Approved  |                    | Cytosol;Plasma mem |
| 11999 | ENSG00000251664 | PCDHA12   | Approved  |                    | Cytosol;Plasma mem |
| 12000 | ENSG00000253159 | PCDHGA12  | Uncertain |                    | Plasma meCytosol;N |
| 12001 | ENSG00000253251 | AC008560  | Supported | Nucleoli;          | Nucleoplasm        |
| 12002 | ENSG00000253276 | CCDC71L   | Approved  |                    | Actin filaments;Cy |
| 12003 | ENSG00000253293 | HOXA10    | Supported | Nuclear bodies;    | Nucleoplasm        |
| 12004 | ENSG00000253305 | PCDHGB6   | Uncertain |                    | Cytosol;N          |
| 12005 | ENSG00000253313 | Clorf210  | Uncertain |                    | Nucleoli           |
| 12006 | ENSG00000253457 | SMIM18    | Uncertain |                    | Centrosom          |
| 12007 | ENSG00000253485 | PCDHGA5   | Uncertain |                    | Plasma meCytosol;N |
| 12008 | ENSG00000253506 | NACA2     | Approved  |                    | Cytosol            |
| 12009 | ENSG00000253537 | PCDHGA7   | Uncertain |                    | Plasma meCytosol;N |
| 12010 | ENSG00000253598 | SLC10A5   | Approved  |                    | Plasma membrane    |
| 12011 | ENSG00000253719 | ATXN7L3B  | Approved  |                    | Nucleoplasm        |
| 12012 | ENSG00000253729 | PRKDC     | Enhanced  | Nucleoplasm        |                    |
| 12013 | ENSG00000253731 | PCDHGA6   | Uncertain |                    | Plasma meCytosol;N |
| 12014 | ENSG00000253767 | PCDHGA8   | Uncertain |                    | Plasma meCytosol;N |
| 12015 | ENSG00000253797 | UTP14C    | Approved  |                    | Nucleoli Cytosol   |
| 12016 | ENSG00000253846 | PCDHGA10  | Uncertain |                    | Cytosol;N          |
| 12017 | ENSG00000253873 | PCDHGA11  | Uncertain |                    | Cytosol;N          |
| 12018 | ENSG00000253910 | PCDHGB2   | Supported | Cytosol;Plasma mem | Nucleopla          |
| 12019 | ENSG00000253953 | PCDHGB4   | Uncertain |                    | Cytosol;N          |
| 12020 | ENSG00000253958 | CLDN23    | Uncertain |                    | Nucleopla          |
| 12021 | ENSG00000254004 | ZNF260    | Supported | Nucleoplasm        | Cytosol            |
| 12022 | ENSG00000254087 | LYN       | Supported | Golgi apparatus;   | Plasma memb        |
| 12023 | ENSG00000254093 | PINX1     | Supported | Nucleoli;          | Nucleoplasm        |
| 12024 | ENSG00000254122 | PCDHGB7   | Uncertain |                    | Cytosol;N          |
| 12025 | ENSG00000254206 | NPIP11    | Approved  |                    | Nucleoplasm        |
| 12026 | ENSG00000254221 | PCDHGB1   | Approved  |                    | Focal adhNucleopla |
| 12027 | ENSG00000254245 | PCDHGA3   | Uncertain |                    | Plasma meCytosol;N |
| 12028 | ENSG00000254402 | LRRC24    | Approved  |                    | Vesicles           |
| 12029 | ENSG00000254469 | AP002495  | Enhanced  | Nucleoli           |                    |
| 12030 | ENSG00000254470 | AP5B1     | Approved  |                    | Golgi apparatus;Nu |
| 12031 | ENSG00000254536 | AL360181  | Approved  |                    | Mitochondria       |
| 12032 | ENSG00000254598 | CSNK2A3   | Approved  |                    | Nucleoplasm        |
| 12033 | ENSG00000254656 | RTL1      | Approved  |                    | Cytosol            |
| 12034 | ENSG00000254685 | FPGT      | Uncertain |                    | Vesicles           |
| 12035 | ENSG00000254692 | AL136295  | Approved  |                    | Golgi apparatus    |
| 12036 | ENSG00000254726 | MEX3A     | Supported | Cytosol            |                    |
| 12037 | ENSG00000254772 | EEF1G     | Approved  |                    | Mitochondria       |
| 12038 | ENSG00000254827 | SLC22A18A | Supported | Nucleoplasm        |                    |
| 12039 | ENSG00000254852 | NPIPA2    | Approved  |                    | Nucleoplasm        |
| 12040 | ENSG00000254901 | BORCS8    | Approved  |                    | Nucleoplasm;Vesicl |
| 12041 | ENSG00000254986 | DPP3      | Supported | Cytosol            |                    |
| 12042 | ENSG00000254999 | BRK1      | Approved  |                    | Cell Junctions;Nuc |
| 12043 | ENSG00000255112 | CHMP1B    | Supported | Midbody            | Nucleoplasm        |

|       |                 |           |           |                             |
|-------|-----------------|-----------|-----------|-----------------------------|
| 12044 | ENSG00000255150 | EID3      | Supported | Nucleoli;Nucleoplasm        |
| 12045 | ENSG00000255151 | GLYATL1B  | Uncertain | Cytosol;G                   |
| 12046 | ENSG00000255154 | HTD2      | Supported | Mitochondria Nucleoli       |
| 12047 | ENSG00000255245 | FXVD6-FXY | Approved  | Nuclear membrane;V          |
| 12048 | ENSG00000255302 | EID1      | Supported | Nucleoplasm                 |
| 12049 | ENSG00000255398 | HCAR3     | Approved  | Cell Junctions              |
| 12050 | ENSG00000255423 | EBLN2     | Approved  | Nuclear bodies;Nuc          |
| 12051 | ENSG00000255439 | AC135050. | Approved  | Endoplasmic reticu          |
| 12052 | ENSG00000255524 | NPIP8     | Approved  | Nucleoplasm                 |
| 12053 | ENSG00000255526 | NEDD8-MDP | Approved  | Nucleoplasm                 |
| 12054 | ENSG00000255529 | POLR2M    | Approved  | Nucleoplasm                 |
| 12055 | ENSG00000255552 | LY6G6E    | Approved  | Nucleoplasm                 |
| 12056 | ENSG00000255561 | FDXACB1   | Uncertain | Cytosol;N                   |
| 12057 | ENSG00000256060 | TRAPPC2B  | Approved  | EndoplasmNucleoplasm;Vesicl |
| 12058 | ENSG00000256061 | DNAAF4    | Approved  | Cytosol Plasma me           |
| 12059 | ENSG00000256087 | ZNF432    | Enhanced  | Nucleoplasm                 |
| 12060 | ENSG00000256223 | ZNF10     | Approved  | Nucleoplasm;Plasma          |
| 12061 | ENSG00000256235 | SMIM3     | Approved  | Vesicles                    |
| 12062 | ENSG00000256269 | HMBS      | Approved  | Lipid droplets              |
| 12063 | ENSG00000256294 | ZNF225    | Approved  | Nucleoplasm                 |
| 12064 | ENSG00000256349 | AP002748. | Uncertain | Midbody                     |
| 12065 | ENSG00000256500 | AL139300. | Uncertain | Cytosol;N                   |
| 12066 | ENSG00000256514 | AP003419. | Approved  | Centriolar satelli          |
| 12067 | ENSG00000256525 | POLG2     | Approved  | MitochondNuclear bodies     |
| 12068 | ENSG00000256671 | LIMS4     | Uncertain | Cytosol;F                   |
| 12069 | ENSG00000256683 | ZNF350    | Supported | Nuclear bodies;Nucleoplasm  |
| 12070 | ENSG00000256806 | C17orf100 | Approved  | Cytokinetic bridge          |
| 12071 | ENSG00000256812 | CAPNS2    | Approved  | Cytosol                     |
| 12072 | ENSG00000256977 | LIMS3     | Approved  | Cytosol;Focal adhe          |
| 12073 | ENSG00000257008 | GPR142    | Uncertain | Cell Junc                   |
| 12074 | ENSG00000257017 | HP        | Approved  | Vesicles                    |
| 12075 | ENSG00000257093 | KIAA1147  | Approved  | Golgi apparatus             |
| 12076 | ENSG00000257103 | LSM14A    | Supported | Cytoplasmic bodies;Cytosol  |
| 12077 | ENSG00000257108 | NHLRC4    | Approved  | Mitochondria                |
| 12078 | ENSG00000257315 | ZBED6     | Approved  | Centriolar satelli          |
| 12079 | ENSG00000257365 | FNTB      | Approved  | Centrosome                  |
| 12080 | ENSG00000257390 | AC023055. | Approved  | Cytoplasmic bodies          |
| 12081 | ENSG00000257446 | ZNF878    | Approved  | Nucleoli;Nucleopla          |
| 12082 | ENSG00000257529 | RPL36A-HN | Approved  | Cytosol;Endoplasmic         |
| 12083 | ENSG00000257591 | ZNF625    | Approved  | Mitochondria;Nucle          |
| 12084 | ENSG00000257594 | GALNT4    | Approved  | Golgi apparatus             |
| 12085 | ENSG00000257727 | CNPY2     | Supported | Cytosol                     |
| 12086 | ENSG00000257743 | MGAM2     | Approved  | Cytosol;Vesicles            |
| 12087 | ENSG00000257923 | CUX1      | Supported | Golgi apparatus;Nucleoplasm |
| 12088 | ENSG00000257949 | TEN1      | Supported | Nucleoplasm                 |
| 12089 | ENSG00000258102 | MAP1LC3B2 | Approved  | Nucleoplasm;Vesicl          |
| 12090 | ENSG00000258227 | CLEC5A    | Supported | Plasma meCytosol            |
| 12091 | ENSG00000258289 | CHURC1    | Approved  | Cytosol                     |
| 12092 | ENSG00000258315 | C17orf49  | Uncertain | Cytosol;N                   |
| 12093 | ENSG00000258366 | RTEL1     | Approved  | Nuclear bodies;Nuc          |
| 12094 | ENSG00000258429 | PDF       | Approved  | Mitochondria;Nucle          |
| 12095 | ENSG00000258465 | AL139011. | Approved  | Cytosol;Mitochondr          |
| 12096 | ENSG00000258472 | AC005726. | Approved  | Nucleoplasm;Plasma          |
| 12097 | ENSG00000258529 | AP001781. | Approved  | Endoplasmic reticu          |
| 12098 | ENSG00000258588 | TRIM6-TRI | Uncertain | Centrosom                   |



|       |                 |           |           |                             |
|-------|-----------------|-----------|-----------|-----------------------------|
| 12099 | ENSG00000258643 | BCL2L2-PA | Uncertain | Nuclear s                   |
| 12100 | ENSG00000258644 | SYNJ2BP-C | Approved  | Mitochondria                |
| 12101 | ENSG00000258659 | TRIM34    | Approved  | Centrosome;Nucleol          |
| 12102 | ENSG00000258724 | AC105001. | Approved  | Golgi apparatus;Nu          |
| 12103 | ENSG00000258890 | CEP95     | Approved  | CentrosomNucleoplasm;Vesicl |
| 12104 | ENSG00000258986 | TMEM179   | Uncertain | Mitochond                   |
| 12105 | ENSG00000258992 | TSPY1     | Approved  | Cytosol                     |
| 12106 | ENSG00000259024 | TVP23C-CD | Approved  | Golgi apparatus             |
| 12107 | ENSG00000259030 | FPGT-TNNI | Approved  | Vesicles                    |
| 12108 | ENSG00000259075 | POC1B-GAL | Approved  | Golgi apparatus             |
| 12109 | ENSG00000259112 | NDUFC2-KC | Supported | Mitochondria                |
| 12110 | ENSG00000259120 | SMIM6     | Approved  | Nucleoplasm                 |
| 12111 | ENSG00000259132 | AL132780. | Approved  | Focal adhesion sit          |
| 12112 | ENSG00000259207 | ITGB3     | Supported | Plasma membrane Nucleopla   |
| 12113 | ENSG00000259288 | BUB1B-PAK | Approved  | Cell Junctions;Nuc          |
| 12114 | ENSG00000259305 | ZHX1-C8or | Uncertain | Cytosol;N                   |
| 12115 | ENSG00000259431 | THTPA     | Uncertain | Nucleoli;                   |
| 12116 | ENSG00000259494 | MRPL46    | Supported | Mitochondria Cell Junc      |
| 12117 | ENSG00000259956 | RBM15B    | Enhanced  | Nucleoplasm                 |
| 12118 | ENSG00000260001 | TGFBR3L   | Approved  | Vesicles                    |
| 12119 | ENSG00000260027 | HOXB7     | Supported | Nuclear bodies;NucCytosol   |
| 12120 | ENSG00000260238 | PMF1-BGLA | Approved  | Nucleoplasm;Vesicl          |
| 12121 | ENSG00000260287 | TBC1D3G   | Approved  | Vesicles                    |
| 12122 | ENSG00000260342 | AC138811. | Approved  | Endoplasmic reticu          |
| 12123 | ENSG00000260456 | C16orf95  | Approved  | Endoplasmic reticu          |
| 12124 | ENSG00000260458 | KCNJ18    | Uncertain | Cytosol;G                   |
| 12125 | ENSG00000260537 | AC012184. | Uncertain | Nucleopla                   |
| 12126 | ENSG00000260596 | DUX4      | Approved  | Nucleoli;NucleoplaCytosol;G |
| 12127 | ENSG00000260643 | AC092718. | Approved  | Vesicles                    |
| 12128 | ENSG00000260836 | AC245033. | Approved  | Cytosol;Endoplasmic         |
| 12129 | ENSG00000260914 | AC026464. | Approved  | Midbody                     |
| 12130 | ENSG00000260916 | CCPG1     | Approved  | Endoplasmic reticu          |
| 12131 | ENSG00000261115 | TMEM178B  | Approved  | Nucleoli;Vesicles           |
| 12132 | ENSG00000261150 | EPPK1     | Enhanced  | Intermediate filaments      |
| 12133 | ENSG00000261221 | ZNF865    | Approved  | Nucleoli;Nucleopla          |
| 12134 | ENSG00000261236 | BOP1      | Enhanced  | Nucleoli;Nucleoplasm        |
| 12135 | ENSG00000261609 | GAN       | Supported | Microtubules                |
| 12136 | ENSG00000261652 | C15orf65  | Approved  | Cytosol;Nucleoplas          |
| 12137 | ENSG00000261678 | SCRT1     | Supported | Nuclear bodies              |
| 12138 | ENSG00000261701 | HPR       | Approved  | Vesicles                    |
| 12139 | ENSG00000261796 | ISY1-RAB4 | Enhanced  | Nuclear speckles            |
| 12140 | ENSG00000261832 | AC138894. | Approved  | Nucleoplasm                 |
| 12141 | ENSG00000261934 | PCDHGA9   | Uncertain | Plasma meCytosol;N          |
| 12142 | ENSG00000262179 | MYMX      | Approved  | Cytosol;Mitochondr          |
| 12143 | ENSG00000262209 | PCDHGB3   | Approved  | Plasma meCytosol;N          |
| 12144 | ENSG00000262576 | PCDHGA4   | Uncertain | Plasma meCytosol;N          |
| 12145 | ENSG00000262655 | SPON1     | Approved  | Actin filaments;Cy          |
| 12146 | ENSG00000262660 | AC139530. | Enhanced  | Mitochondria                |
| 12147 | ENSG00000262664 | OVCA2     | Supported | Cytosol;Nucleoplasm         |
| 12148 | ENSG00000262814 | MRPL12    | Supported | Mitochondria                |
| 12149 | ENSG00000262874 | C19orf84  | Approved  | Vesicles                    |
| 12150 | ENSG00000262919 | CCNQ      | Approved  | Cytosol;Nucleoplas          |
| 12151 | ENSG00000263001 | GTF2I     | Enhanced  | Nucleoplasm                 |
| 12152 | ENSG00000263002 | ZNF234    | Approved  | Nuclear bodies              |
| 12153 | ENSG00000263465 | SRSF8     | Supported | NucleoplaCytosol            |

|       |                 |           |           |                             |
|-------|-----------------|-----------|-----------|-----------------------------|
| 12154 | ENSG00000263513 | FAM72C    | Approved  | Cytosol;Plasma mem          |
| 12155 | ENSG00000263528 | IKBKE     | Supported | Cytosol                     |
| 12156 | ENSG00000263956 | NBPF11    | Approved  | Nuclear bodies;Nuc          |
| 12157 | ENSG00000263961 | RHEX      | Supported | Plasma membrane             |
| 12158 | ENSG00000264230 | ANXA8L1   | Approved  | Nucleoplasm                 |
| 12159 | ENSG00000264364 | DYNLL2    | Uncertain | Cytosol;N                   |
| 12160 | ENSG00000264522 | OTUD7B    | Approved  | Microtubules;Nucle          |
| 12161 | ENSG00000264668 | AC138696. | Approved  | Nucleoli;Nucleopla          |
| 12162 | ENSG00000265190 | ANXA8     | Approved  | Nucleoplasm                 |
| 12163 | ENSG00000265241 | RBM8A     | Supported | Nuclear speckles            |
| 12164 | ENSG00000265354 | TIMM23    | Supported | Mitochondria                |
| 12165 | ENSG00000265491 | RNF115    | Approved  | Mitochondria;Nucle          |
| 12166 | ENSG00000265681 | RPL17     | Supported | Cytosol;Endoplasmic reticul |
| 12167 | ENSG00000265763 | ZNF488    | Supported | NucleoplaCytosol            |
| 12168 | ENSG00000265817 | FSBP      | Supported | Nucleoplasm                 |
| 12169 | ENSG00000265972 | TXNIP     | Approved  | Cytosol;Plasma mem          |
| 12170 | ENSG00000266028 | SRGAP2    | Approved  | Cytosol;Nucleoplas          |
| 12171 | ENSG00000266074 | BAHCC1    | Approved  | Nucleoli                    |
| 12172 | ENSG00000266173 | STRADA    | Supported | Cytosol;Nucleoplasm         |
| 12173 | ENSG00000266338 | NBPF15    | Approved  | Nuclear bodies;Nuc          |
| 12174 | ENSG00000266412 | NCOA4     | Approved  | Cytosol;Golgi appa          |
| 12175 | ENSG00000266472 | MRPS21    | Supported | Mitochondria                |
| 12176 | ENSG00000266524 | GDF10     | Approved  | Vesicles                    |
| 12177 | ENSG00000266714 | MYO15B    | Approved  | Cytosol                     |
| 12178 | ENSG00000266826 | AC011195. | Approved  | Microtubules                |
| 12179 | ENSG00000266964 | FXYD1     | Approved  | Cytosol;Nucleoli;N          |
| 12180 | ENSG00000266967 | AARSD1    | Approved  | Cytosol;Nuclear me          |
| 12181 | ENSG00000267041 | ZNF850    | Approved  | Nucleoplasm                 |
| 12182 | ENSG00000267179 | AC008770. | Uncertain | Nucleopla                   |
| 12183 | ENSG00000267281 | AC023509. | Approved  | Cytosol;Nucleoplas          |
| 12184 | ENSG00000267335 | AC008687. | Approved  | Cytosol                     |
| 12185 | ENSG00000267534 | S1PR2     | Uncertain | Golgi app                   |
| 12186 | ENSG00000267561 | AC093155. | Uncertain | Mitochond                   |
| 12187 | ENSG00000267631 | CGB1      | Approved  | Cytosol                     |
| 12188 | ENSG00000267680 | ZNF224    | Supported | Nuclear membrane;Nucleoplas |
| 12189 | ENSG00000267697 | LUZP6     | Approved  | Lipid droplets              |
| 12190 | ENSG00000267740 | AC024592. | Uncertain | Mitochond                   |
| 12191 | ENSG00000267795 | SMIM22    | Approved  | Cytosol;Nucleoplas          |
| 12192 | ENSG00000267796 | LIN37     | Supported | Nucleoplasm                 |
| 12193 | ENSG00000267855 | NDUFA7    | Supported | Mitochondria                |
| 12194 | ENSG00000267978 | MAGEA9B   | Approved  | Golgi apparatus;Nu          |
| 12195 | ENSG00000268009 | SSX4      | Approved  | Nucleoli;Nucleopla          |
| 12196 | ENSG00000268043 | NBPF12    | Approved  | Nuclear bodies;Nuc          |
| 12197 | ENSG00000268083 | AC008982. | Uncertain | Mitochond                   |
| 12198 | ENSG00000268104 | SLC6A14   | Approved  | Vesicles                    |
| 12199 | ENSG00000268182 | SMIM17    | Approved  | Vesicles                    |
| 12200 | ENSG00000268447 | SSX2B     | Approved  | Nucleoli;Nucleopla          |
| 12201 | ENSG00000268465 | AC008403. | Uncertain | Cytosol;P                   |
| 12202 | ENSG00000268674 | FAM231C   | Approved  | Intermediate filam          |
| 12203 | ENSG00000268861 | AC008878. | Uncertain | Cytosol                     |
| 12204 | ENSG00000268870 | AC008758. | Uncertain | Centriola                   |
| 12205 | ENSG00000268940 | CT45A1    | Approved  | Nucleoli;Nucleopla          |
| 12206 | ENSG00000268988 | SPANXN2   | Approved  | Nucleoli fibrillar          |
| 12207 | ENSG00000269026 | AC003006. | Approved  | Nucleoplasm                 |
| 12208 | ENSG00000269035 | AC010319. | Uncertain | Nuclear m                   |

|       |                 |           |           |                    |                    |
|-------|-----------------|-----------|-----------|--------------------|--------------------|
| 12209 | ENSG00000269096 | CT45A3    | Approved  |                    | Nucleoli;Nucleopla |
| 12210 | ENSG00000269313 | MAGIX     | Approved  |                    | Nucleoplasm        |
| 12211 | ENSG00000269335 | IKBKG     | Enhanced  | Cytosol            |                    |
| 12212 | ENSG00000269343 | ZNF587B   | Uncertain |                    | Nucleopla          |
| 12213 | ENSG00000269547 | AC011455. | Uncertain |                    | MitochondNucleopla |
| 12214 | ENSG00000269556 | TMEM185A  | Approved  |                    | Endoplasmic reticu |
| 12215 | ENSG00000269586 | CT45A10   | Approved  |                    | Nucleoli;Nucleopla |
| 12216 | ENSG00000269590 | AC010422. | Approved  |                    | Endoplasmic reticu |
| 12217 | ENSG00000269699 | ZIM2      | Approved  |                    | Cytosol;Nuclear sp |
| 12218 | ENSG00000269713 | NBPF9     | Approved  |                    | Nuclear bodies;Nuc |
| 12219 | ENSG00000269791 | SSX4B     | Approved  |                    | Nucleoli;Nucleopla |
| 12220 | ENSG00000269858 | EGLN2     | Supported | Nucleoplasm        |                    |
| 12221 | ENSG00000269881 | AC004754. | Uncertain |                    | Mitochond          |
| 12222 | ENSG00000269897 | COMMD3-BM | Approved  |                    | Cytosol;Nuclear bo |
| 12223 | ENSG00000269955 | C7orf55-L | Approved  |                    | Nucleoplasm        |
| 12224 | ENSG00000270181 | BIVM-ERCC | Enhanced  | Nucleoplasm        |                    |
| 12225 | ENSG00000270249 | AC093668. | Uncertain |                    | Nucleopla          |
| 12226 | ENSG00000270629 | NBPF14    | Approved  |                    | Nuclear bodies;Nuc |
| 12227 | ENSG00000270647 | TAF15     | Enhanced  | Nucleoplasm        |                    |
| 12228 | ENSG00000270800 | RPS10-NUD | Approved  |                    | Cytosol            |
| 12229 | ENSG00000270806 | C17orf50  | Supported | Nucleoplasm        |                    |
| 12230 | ENSG00000270885 | RASL10B   | Approved  |                    | Vesicles           |
| 12231 | ENSG00000270946 | CT45A9    | Approved  |                    | Nucleoli;Nucleopla |
| 12232 | ENSG00000271254 | AC240274. | Approved  |                    | Nuclear bodies;Nuc |
| 12233 | ENSG00000271383 | NBPF19    | Approved  |                    | Nuclear bodies;Nuc |
| 12234 | ENSG00000271425 | NBPF10    | Approved  |                    | Nuclear bodies;Nuc |
| 12235 | ENSG00000271447 | MMP28     | Approved  |                    | Focal adhesion sit |
| 12236 | ENSG00000271449 | CT45A2    | Approved  |                    | Nucleoli;Nucleopla |
| 12237 | ENSG00000271601 | LIX1L     | Approved  |                    | Cytosol            |
| 12238 | ENSG00000272031 | ANKRD34A  | Enhanced  | Cytosol            |                    |
| 12239 | ENSG00000272325 | NUDT3     | Approved  |                    | Cytosol            |
| 12240 | ENSG00000272333 | KMT2B     | Approved  |                    | Cytosol;Nucleoplas |
| 12241 | ENSG00000272391 | POM121C   | Approved  |                    | Nuclear membrane;N |
| 12242 | ENSG00000272398 | CD24      | Enhanced  | Vesicles           |                    |
| 12243 | ENSG00000272414 | FAM47E-ST | Uncertain |                    | Cytosol;P          |
| 12244 | ENSG00000272514 | CFAP206   | Approved  |                    | Cell Junctions;Nuc |
| 12245 | ENSG00000272617 | COG8      | Supported | Golgi apparatus    |                    |
| 12246 | ENSG00000272674 | PCDHB16   | Approved  |                    | Plasma membrane;Ve |
| 12247 | ENSG00000272822 | AC073610. | Approved  |                    | Nuclear bodies;Nuc |
| 12248 | ENSG00000272886 | DCP1A     | Supported | Cytoplasmic bodies |                    |
| 12249 | ENSG00000273136 | NBPF26    | Approved  |                    | Nuclear bodies;Nuc |
| 12250 | ENSG00000273173 | SNURF     | Supported | Nuclear speckles   |                    |
| 12251 | ENSG00000273217 | AC008695. | Approved  |                    | Centrosome;Cytosol |
| 12252 | ENSG00000273513 | TBC1D3K   | Uncertain |                    | Vesicles           |
| 12253 | ENSG00000273514 | FOXD4L6   | Approved  |                    | Nucleoplasm        |
| 12254 | ENSG00000273559 | CWC25     | Enhanced  | Nuclear speckles   |                    |
| 12255 | ENSG00000273590 | SMIM11B   | Approved  |                    | Focal adhesion sit |
| 12256 | ENSG00000273604 | EPOP      | Supported | Nucleopla          | Cytoplasmic bodies |
| 12257 | ENSG00000273611 | ZNHIT3    | Approved  |                    | Mitochondria       |
| 12258 | ENSG00000273696 | CT45A7    | Approved  |                    | Nucleoli;Nucleopla |
| 12259 | ENSG00000273703 | HIST1H2BM | Approved  |                    | Cytosol;Nucleoplas |
| 12260 | ENSG00000273706 | LHX1      | Approved  |                    | Golgi apparatus;Nu |
| 12261 | ENSG00000273802 | HIST1H2BG | Approved  |                    | Cytosol;Nucleoplas |
| 12262 | ENSG00000273820 | USP27X    | Approved  |                    | Nucleoplasm;Vesicl |
| 12263 | ENSG00000273841 | TAF9      | Enhanced  | Nucleoplasm        |                    |

|       |                 |           |           |                             |
|-------|-----------------|-----------|-----------|-----------------------------|
| 12264 | ENSG00000273899 | NOL12     | Approved  | Nucleoli;Nucleopla          |
| 12265 | ENSG00000274211 | SOCS7     | Approved  | Cytosol                     |
| 12266 | ENSG00000274226 | TBC1D3H   | Approved  | Vesicles                    |
| 12267 | ENSG00000274274 | GAGE13    | Approved  | Cytosol;Golgi appa          |
| 12268 | ENSG00000274276 | CBSL      | Approved  | Nucleoli;Vesicles           |
| 12269 | ENSG00000274290 | HIST1H2BE | Approved  | Cytosol;Nucleoplas          |
| 12270 | ENSG00000274349 | ZNF658    | Approved  | Nucleoplasm                 |
| 12271 | ENSG00000274391 | TPTE      | Approved  | Cytosol;Endoplasm           |
| 12272 | ENSG00000274419 | TBC1D3D   | Uncertain | Vesicles                    |
| 12273 | ENSG00000274512 | TBC1D3L   | Uncertain | Vesicles                    |
| 12274 | ENSG00000274523 | RCC1L     | Approved  | Cytosol;Nucleoplas          |
| 12275 | ENSG00000274559 | H2BFS     | Supported | NucleoplaCytosol            |
| 12276 | ENSG00000274600 | RIMBP3B   | Uncertain | Plasma me                   |
| 12277 | ENSG00000274611 | TBC1D3    | Uncertain | Vesicles                    |
| 12278 | ENSG00000274641 | HIST1H2BO | Approved  | Cytosol;Nucleoplas          |
| 12279 | ENSG00000274792 | AC171558. | Uncertain | Centrosom                   |
| 12280 | ENSG00000274808 | TBC1D3B   | Uncertain | Vesicles                    |
| 12281 | ENSG00000274847 | MAFIP     | Uncertain | Intermedi                   |
| 12282 | ENSG00000274933 | TBC1D3I   | Uncertain | Vesicles                    |
| 12283 | ENSG00000274944 | AL139260. | Approved  | Mitochondria;Nucle          |
| 12284 | ENSG00000275004 | ZNF280B   | Approved  | Nucleoplasm                 |
| 12285 | ENSG00000275023 | MLLT6     | Approved  | Nucleoplasm                 |
| 12286 | ENSG00000275052 | PPP4R3B   | Supported | Centrosome;Nuclear speckles |
| 12287 | ENSG00000275066 | SYNRG     | Approved  | Cytosol                     |
| 12288 | ENSG00000275074 | NUDT18    | Supported | Golgi apparatus;Nucleoplasm |
| 12289 | ENSG00000275111 | ZNF2      | Approved  | Cytosol;Nucleoplas          |
| 12290 | ENSG00000275113 | GAGE2E    | Approved  | Cytosol;Golgi appa          |
| 12291 | ENSG00000275183 | LENG9     | Approved  | Nucleoli fibrillar          |
| 12292 | ENSG00000275395 | FCGBP     | Approved  | Cytokinetic bridge          |
| 12293 | ENSG00000275410 | HNF1B     | Supported | NucleoplaVesicles           |
| 12294 | ENSG00000275464 | FP565260. | Approved  | Nucleoli Cytosol            |
| 12295 | ENSG00000275489 | C17orf98  | Approved  | Intermediate filam          |
| 12296 | ENSG00000275700 | AATF      | Supported | Nucleoli Nucleoplasm        |
| 12297 | ENSG00000275713 | HIST1H2BH | Approved  | Cytosol;Nucleoplas          |
| 12298 | ENSG00000275718 | CCL15     | Approved  | Golgi apparatus;Ve          |
| 12299 | ENSG00000275740 | AC091959. | Approved  | Nuclear speckles            |
| 12300 | ENSG00000275793 | RIMBP3    | Uncertain | Plasma me                   |
| 12301 | ENSG00000275832 | ARHGAP23  | Approved  | Cytosol;Nucleoplas          |
| 12302 | ENSG00000275835 | TUBGCP5   | Supported | Centrosome;Cytosol          |
| 12303 | ENSG00000275895 | U2AF1L5   | Uncertain | Nucleopla                   |
| 12304 | ENSG00000275896 | PRSS2     | Approved  | Endoplasmic reticu          |
| 12305 | ENSG00000275954 | TBC1D3F   | Uncertain | Vesicles                    |
| 12306 | ENSG00000275993 | SIK1B     | Approved  | Nucleoplasm;Vesicl          |
| 12307 | ENSG00000276023 | DUSP14    | Approved  | Cytosol;Nucleoplas          |
| 12308 | ENSG00000276043 | UHRF1     | Supported | Nucleoplasm                 |
| 12309 | ENSG00000276045 | ORAI1     | Enhanced  | Cytosol                     |
| 12310 | ENSG00000276076 | CRYAA2    | Approved  | Cytosol;Nucleoplas          |
| 12311 | ENSG00000276231 | PIK3R6    | Approved  | Cytosol;Golgi appa          |
| 12312 | ENSG00000276234 | TADA2A    | Approved  | Nuclear speckles            |
| 12313 | ENSG00000276293 | PIP4K2B   | Supported | Nucleoplasm                 |
| 12314 | ENSG00000276345 | AC004556. | Supported | MitochondNucleoli fibrillar |
| 12315 | ENSG00000276410 | HIST1H2BB | Approved  | Cytosol;Nucleoplas          |
| 12316 | ENSG00000276547 | PCDHGB5   | Uncertain | Cytosol;N                   |
| 12317 | ENSG00000276644 | DACH1     | Supported | NucleoplaVesicles           |
| 12318 | ENSG00000277075 | HIST1H2AE | Supported | Nucleoplasm                 |

|       |                 |           |           |                             |
|-------|-----------------|-----------|-----------|-----------------------------|
| 12319 | ENSG00000277117 | FP565260. | Approved  | Cytoplasmic bodies          |
| 12320 | ENSG00000277149 | TYW1B     | Approved  | Nucleoli;Nucleopla          |
| 12321 | ENSG00000277161 | PIGW      | Approved  | Plasma membrane             |
| 12322 | ENSG00000277224 | HIST1H2BF | Approved  | Cytosol;Nucleoplas          |
| 12323 | ENSG00000277258 | PCGF2     | Supported | Nucleoplasm                 |
| 12324 | ENSG00000277363 | SRCIN1    | Approved  | Cell Junctions              |
| 12325 | ENSG00000277443 | MARCKS    | Approved  | Plasma meCytosol;Endoplasm  |
| 12326 | ENSG00000277462 | ZNF670    | Approved  | Cytosol;Nucleoplas          |
| 12327 | ENSG00000277586 | NEFL      | Approved  | Intermediate filam          |
| 12328 | ENSG00000277758 | F0681492. | Approved  | Golgi apparatus             |
| 12329 | ENSG00000278023 | RDM1      | Supported | Cytosol;Nucleoli            |
| 12330 | ENSG00000278053 | DDX52     | Supported | Nucleoli Nucleoplasm        |
| 12331 | ENSG00000278085 | CT45A8    | Approved  | Nucleoli;Nucleopla          |
| 12332 | ENSG00000278129 | ZNF8      | Approved  | Nuclear bodies;Nuc          |
| 12333 | ENSG00000278224 | PRICKLE4  | Approved  | Centriolar satell           |
| 12334 | ENSG00000278259 | MYO19     | Supported | MitochondCytosol            |
| 12335 | ENSG00000278289 | CT45A6    | Approved  | Nucleoli;Nucleopla          |
| 12336 | ENSG00000278299 | TBC1D3C   | Uncertain | Vesicles                    |
| 12337 | ENSG00000278311 | GGNBP2    | Approved  | Endoplasmic reticu          |
| 12338 | ENSG00000278318 | ZNF229    | Approved  | Plasma membrane;Ve          |
| 12339 | ENSG00000278535 | DHRS11    | Approved  | Cytosol;Golgi appa          |
| 12340 | ENSG00000278540 | ACACA     | Supported | Cytosol Actin fil           |
| 12341 | ENSG00000278588 | HIST1H2BI | Approved  | Cytosol;Nucleoplas          |
| 12342 | ENSG00000278599 | TBC1D3E   | Uncertain | Vesicles                    |
| 12343 | ENSG00000278619 | MRM1      | Supported | Mitochondria                |
| 12344 | ENSG00000278845 | MRPL45    | Enhanced  | Mitochondria                |
| 12345 | ENSG00000279408 | AC135068. | Uncertain | Centrosom                   |
| 12346 | ENSG00000280071 | FP565260. | Approved  | Centrosome;Mitocho          |
| 12347 | ENSG00000280165 | PCDH20    | Approved  | Cytokinetic bridge          |
| 12348 | ENSG00000280709 | LINC02203 | Approved  | Centrosome                  |
| 12349 | ENSG00000280987 | MATR3     | Approved  | Nucleoplasm                 |
| 12350 | ENSG00000281028 | AC104662. | Uncertain | Cytosol                     |
| 12351 | ENSG00000281887 | GIMAP1-GI | Supported | Endoplasmic reticulum       |
| 12352 | ENSG00000282218 | AL132671. | Approved  | Golgi apparatus             |
| 12353 | ENSG00000282278 | AC058822. | Supported | Nucleoplasm                 |
| 12354 | ENSG00000282301 | CYP3A7-CY | Uncertain | Cytosol                     |
| 12355 | ENSG00000283088 | AC010487. | Uncertain | Cytoplasm                   |
| 12356 | ENSG00000283149 | AC068631. | Uncertain | Endoplasm                   |
| 12357 | ENSG00000283154 | IQCJ-SCHI | Approved  | Cytosol                     |
| 12358 | ENSG00000283528 | TCAF2C    | Supported | Cell Junctions;Plasma membr |
| 12359 | ENSG00000283632 | EXOC3L2   | Approved  | Cytosol;Golgi appa          |
| 12360 | ENSG00000283761 | AC118553. | Approved  | Vesicles                    |
| 12361 | ENSG00000283765 | AC131160. | Approved  | Mitochondria                |
| 12362 | ENSG00000283782 | AC116366. | Approved  | Nucleoplasm                 |
| 12363 | ENSG00000284057 | AP001273. | Approved  | Cytosol;Nuclear sp          |
| 12364 | ENSG00000284194 | SC02      | Approved  | Mitochondria                |
| 12365 | ENSG00000284292 | AC004922. | Approved  | Cell Junctions;Cyt          |
| 12366 | ENSG00000284308 | C2orf81   | Approved  | Nucleoli fibrillar          |
| 12367 | ENSG00000284512 | AC092718. | Approved  | Vesicles                    |
| 12368 | ENSG00000284723 | OR8S1     | Supported | Plasma membrane             |
| 12369 | ENSG00000284753 | EEF1AKMT4 | Uncertain | Cytosol;N                   |
| 12370 | ENSG00000284776 | AL121900. | Uncertain | Cytosol;N                   |
| 12371 | ENSG00000284824 | GCSAML-AS | Uncertain | Plasma me                   |
| 12372 | ENSG00000284906 | AC091057. | Uncertain | Vesicles                    |
| 12373 | ENSG00000284917 | EEF1AKMT4 | Uncertain | Cytosol;N                   |

|       |                 |                     |                       |
|-------|-----------------|---------------------|-----------------------|
| 12374 | ENSG00000284922 | AP000812. Uncertain | Microtubu             |
| 12375 | ENSG00000284934 | DIABLO Approved     | Mitochondria          |
| 12376 | ENSG00000284969 | AL049629. Uncertain | Golgi app             |
| 12377 | ENSG00000285043 | ALDOA Supported     | Cytosol               |
| 12378 | ENSG00000285077 | ARHGAP11B Uncertain | Vesicles              |
| 12379 | ENSG00000285130 | AL358113. Approved  | Cell Junctions;Nuc    |
| 12380 | ENSG00000285245 | AL162417. Uncertain | Nucleopla             |
| 12381 | ENSG00000285258 | ATXN7 Approved      | Cytosol;Nucleoplas    |
| 12382 | ENSG00000285283 | AL035078. Supported | Endoplasmic reticulum |
| 12383 | ENSG00000285292 | ABCF2 Uncertain     | Cytosol               |
| 12384 | ENSG00000285304 | Z83844.3 Uncertain  | Cytosol               |
| 12385 | ENSG00000285382 | F0393400. Uncertain | Vesicles              |
| 12386 | ENSG00000285396 | AC012476. Approved  | Cytosol;Nucleoli      |
| 12387 | ENSG00000285437 | POLR2J3 Approved    | Nucleoplasm           |
| 12388 | ENSG00000285458 | AC093827. Approved  | Focal adhesion sit    |
| 12389 | ENSG00000285472 | AC134980. Approved  | Centrosome            |
| 12390 | ENSG00000285509 | AP000646. Uncertain | Cytosol               |

| GO id                           | UniProt | ISwissProt annotations            | High quality dataset? |
|---------------------------------|---------|-----------------------------------|-----------------------|
| Cell Junctions (GO:00043657)    |         | Membrane; Multi-pass mem          | 0                     |
| Microtubules (GO:0015081)       |         | Cytoplasm {ECO:0000269 P}         | 0                     |
| Mitochondria (GO:0005096)       |         |                                   | 0                     |
| Aggresome (GO:0016235)          | P09769  | Cell membrane {ECO:0000305};      | 0                     |
| Vesicles (GO:0043231)           | P08603  | Secreted.                         | 0                     |
| Cytosol (GO:0005829)            | P48506  |                                   | 0                     |
| Nucleoplasm (GO:0005623)        | P23511  | Nucleus.                          | 1                     |
| Nucleoplasm (GO:0005623)        | Q5TH74  | Cytoplasm {ECO:0000250}.          | 0                     |
| Nucleoplasm (GO:0005623)        | Q6P499  | Membrane {ECO:0000305};           | 0                     |
| Centriolar satellite            | Q9Y4W2  | Nucleus, nucleolus {ECO:0000305}. | 0                     |
| Cytosol (GO:0005829)            | Q9P2G1  |                                   | 0                     |
| Endoplasmic reticulum           | Q16850  | Endoplasmic reticulum me          | 1                     |
| Vesicles (GO:0043231)           | 000522  | Cytoplasm, cytoskeleton.          | 0                     |
| Nuclear speckles (GO:0043231)   | P43351  | Nucleus {ECO:0000305}.            | 0                     |
| Mitochondria (GO:0005096)       | Q92934  | Mitochondrion outer memb          | 0                     |
| Cytosol (GO:0005829)            | P28838  | Cytoplasm.                        | 1                     |
| Golgi apparatus (GO:0005829)    | 0P14209 | Membrane {ECO:0000305};           | 0                     |
| Vesicles (GO:0043231)           | 014792  | Golgi apparatus lumen {E          | 0                     |
| Cytosol (GO:0005829)            | Q76N89  | Cytoplasm {ECO:0000269 P}         | 1                     |
| Nuclear membrane (GO:0005829)   | Q9Y6D9  | Nucleus. Chromosome, cen          | 0                     |
| Cytosol (GO:0005829)            | Q14847  | Cytoplasm, cell cortex {          | 0                     |
| Cytosol (GO:0005829)            | Q9Y5W9  | Membrane {ECO:0000305};           | 0                     |
| Mitochondria (GO:0005096)       | Q96HP8  | Membrane {ECO:0000305};           | 0                     |
| Cytosol (GO:0005829)            | Q9P2N7  |                                   | 0                     |
| Cytosol (GO:0005829)            | Q9NR63  | Endoplasmic reticulum me          | 0                     |
| Cytosol (GO:0005829)            | Q05084  | Cytoplasm, cytosol {ECO:          | 0                     |
| Cytosol (GO:0005829)            | Q9H9R9  |                                   | 0                     |
| Cytosol (GO:0005829)            | Q96Q42  |                                   | 0                     |
| Golgi apparatus (GO:0005829)    | 0Q92851 |                                   | 0                     |
| Cytosol (GO:0005829)            | 015519  |                                   | 0                     |
| Cytosol (GO:0005829)            | P10646  | Isoform Alpha: Secreted.          | 0                     |
| Nucleoplasm (GO:0005623)        | P52756  | Nucleus {ECO:0000269 Pub          | 1                     |
| Cytosol (GO:0005829)            | Q9Y216  | Cytoplasm {ECO:0000269 P}         | 0                     |
| Cell Junctions (GO:0005829)     | 0P52569 | Cell membrane {ECO:00002          | 0                     |
| Vesicles (GO:0043231)           | Q6SZW1  | Cytoplasm. Cell projecti          | 0                     |
| Mitochondria (GO:0005096)       | Q9Y2S7  | Nucleus {ECO:0000305}.            | 0                     |
| Plasma membrane (GO:0005829)    | 0P28907 | Membrane; Single-pass ty          | 1                     |
| Cytosol (GO:0005829)            | Q02790  | Cytoplasm, cytosol {ECO:          | 0                     |
| Cytosol (GO:0005829)            | 060341  | Nucleus {ECO:0000269 Pub          | 1                     |
| Cytoplasmic bodies (GO:0005829) | GP78332 | Nucleus {ECO:0000305}.            | 0                     |
| Cytosol (GO:0005829)            | Q8N5S9  | Cytoplasm {ECO:0000250}.          | 0                     |
| Nucleoplasm (GO:0005623)        | P46063  | Nucleus {ECO:0000269 Pub          | 1                     |
| Cytosol (GO:0005829)            | Q96JG6  | Recycling endosome {ECO:          | 0                     |
| Cytosol (GO:0005829)            | 014558  | Cytoplasm {ECO:0000269 P}         | 0                     |
| Actin filaments (GO:0005829)    | 0014559 |                                   | 0                     |
| Mitochondria (GO:0005096)       | 014561  | Mitochondrion {ECO:00002          | 1                     |
| Cytosol (GO:0005829)            | 075800  | Cytoplasm {ECO:0000250 U          | 0                     |
| Mitochondria (GO:0005096)       | Q9UJS0  | Mitochondrion inner memb          | 1                     |
| Cytosol (GO:0005829)            | Q9NRC1  | Membrane {ECO:0000305};           | 0                     |
| Nucleoplasm (GO:0005623)        | P30260  | Nucleus.                          | 1                     |
| Mitochondria (GO:0005096)       | P53701  | Mitochondrion inner memb          | 0                     |
| Nuclear bodies (GO:0005829)     | 0014641 | Cell membrane {ECO:00002          | 0                     |
| Nucleoplasm (GO:0005623)        | Q9GZN4  | Secreted {ECO:0000269 Pu          | 0                     |

|                             |                          |   |
|-----------------------------|--------------------------|---|
| Nucleoplasm (GO:00056Q92900 | Cytoplasm. Cytoplasm, P- | 0 |
| Cytosol (GO:0005829);075563 | Cytoplasm {ECO:0000269 P | 1 |
| Mitochondria (GO:0005P05141 | Mitochondrion inner memb | 1 |
| Mitochondria (GO:0005Q9NWR8 | Mitochondrion inner memb | 0 |
| Nucleoplasm (GO:00056P31270 | Nucleus.                 | 1 |
| Nucleoplasm (GO:00056P52435 | Nucleus {ECO:0000269 Pub | 0 |
| Nucleoli (GO:0005730)Q9H6R0 | Nucleus, nucleolus {ECO: | 0 |
| Cytokinetic bridge (GP50221 | Nucleus {ECO:0000250 Uni | 0 |
| Nucleoplasm (GO:00056P49916 | Isoform 1: Mitochondrion | 0 |
| Cytosol (GO:0005829) Q9H6T3 |                          | 0 |
| Endoplasmic reticulumQ96IC2 |                          | 0 |
| Mitochondria (GO:0005Q6FI81 | Cytoplasm {ECO:0000255 H | 0 |
| Centrosome (GO:000581Q8TCT7 | Cell membrane {ECO:00002 | 0 |
| Nucleoli fibrillar ceQ7L5A3 |                          | 0 |
| Mitochondria (GO:0005P31323 | Cytoplasm {ECO:0000269 P | 0 |
| Nucleoplasm (GO:00056Q8N5Y2 | Nucleus {ECO:0000305}.   | 0 |
| Nuclear bodies (GO:00Q92793 | Cytoplasm. Nucleus. Note | 0 |
| Nucleoplasm (GO:00056P05164 | Lysosome.                | 0 |
| Nucleoplasm (GO:00056P16383 | Nucleus, nucleoplasm {EC | 0 |
| Cytosol (GO:0005829);Q9H977 |                          | 0 |
| Vesicles (GO:0043231)Q9UKG9 | Peroxisome {ECO:0000305} | 0 |
| Actin filaments (GO:0P21439 | Cell membrane {ECO:00002 | 0 |
| Nuclear bodies (GO:00Q8IZD2 | Chromosome {ECO:0000269  | 0 |
| Golgi apparatus (GO:0Q6NTF9 | Golgi apparatus, cis-Gol | 1 |
| Nucleoplasm (GO:00056P57073 | Nucleus {ECO:0000255 PRO | 1 |
| Nucleoplasm (GO:00056Q9P2D0 | Cytoplasm. Membrane; Per | 0 |
| Cytosol (GO:0005829);014628 | Nucleus {ECO:0000305}.   | 0 |
| Nucleoplasm (GO:00056075592 | Nucleus {ECO:0000269 Pub | 0 |
| Nuclear bodies (GO:00Q9UKT7 | Nucleus {ECO:0000269 Pub | 0 |
| Mitochondria (GO:0005Q15119 | Mitochondrion matrix.    | 1 |
| Plasma membrane (GO:0P26006 | Cell membrane {ECO:00002 | 0 |
| Nucleoli (GO:0005730)P17010 | Nucleus.                 | 0 |
| Plasma membrane (GO:0P13473 | Cell membrane {ECO:00002 | 0 |
| Plasma membrane (GO:0P08514 | Membrane; Single-pass ty | 0 |
| Nucleoli (GO:0005730)Q9NZC3 | Cell membrane {ECO:00002 | 0 |
| Vesicles (GO:0043231)Q96EN9 |                          | 0 |
| Cytosol (GO:0005829);Q9BZF2 | Cytoplasm, cytosol {ECO: | 0 |
| Nucleoplasm (GO:00056Q9Y2Y6 | Cell membrane {ECO:00002 | 0 |
| Cytosol (GO:0005829);Q99558 | Cytoplasm.               | 1 |
| Cytosol (GO:0005829);Q09428 | Cell membrane {ECO:00002 | 0 |
| Mitochondria (GO:0005Q24JP5 | Golgi apparatus membrane | 0 |
| Vesicles (GO:0043231)P63010 | Cell membrane {ECO:00002 | 0 |
| Cytosol (GO:0005829);014978 | Nucleus {ECO:0000255 PRO | 0 |
| Plasma membrane (GO:0P78423 | Cell membrane {ECO:00002 | 0 |
| Nucleoplasm (GO:00056Q8TB22 | Secreted {ECO:0000305}.  | 0 |
| Cytosol (GO:0005829);Q9NP84 | Membrane; Single-pass ty | 0 |
| Nuclear bodies (GO:00P56179 | Nucleus {ECO:0000255 PRO | 0 |
| Nucleoli (GO:0005730)P80192 |                          | 0 |
| Focal adhesion sites P11233 | Cell membrane {ECO:00002 | 0 |
| Cytosol (GO:0005829);Q9UHR4 | Cytoplasm, cytoskeleton  | 0 |
| Nucleoli (GO:0005730)Q6ZMT4 | Nucleus.                 | 0 |
| Nucleoplasm (GO:00056P50549 | Nucleus {ECO:0000305}.   | 0 |
| Mitochondria (GO:0005Q53H12 | Mitochondrion inner memb | 1 |
| Cytosol (GO:0005829);Q8N3S3 | Nucleus {ECO:0000305}.   | 0 |
| Cytosol (GO:0005829) 094887 |                          | 0 |



|                              |                          |   |
|------------------------------|--------------------------|---|
| Cytosol (GO:0005829) Q9Y6N9  | Cytoplasm, cytosol {ECO: | 0 |
| Nuclear bodies (GO:00Q9UBU7  | Nucleus {ECO:0000269 Pub | 1 |
| Nuclear speckles (GO:P21731  | Cell membrane; Multi-pas | 1 |
| Cytosol (GO:0005829); 000458 |                          | 0 |
| Nucleoplasm (GO:00056Q8TCE9  | Nucleus {ECO:0000269 Pub | 1 |
| Cytosol (GO:0005829); Q12887 | Mitochondrion membrane;  | 1 |
| Cytosol (GO:0005829); Q9UHL9 | Nucleus.                 | 1 |
| Nucleoplasm (GO:00056Q8N7H5  | Nucleus {ECO:0000269 Pub | 1 |
| Nucleoplasm (GO:00056Q9BQ52  | Mitochondrion {ECO:00002 | 0 |
| Plasma membrane (GO:0Q9Y6U3  | Cytoplasm, cytoskeleton  | 0 |
| Lipid droplets (GO:00P51689  | Lysosome {ECO:0000305}.  | 0 |
| Nucleoplasm (GO:00056Q8IVW4  | Cytoplasm {ECO:0000250}. | 0 |
| Mitochondria (GO:0005095045  |                          | 0 |
| Cytosol (GO:0005829) Q9Y6M0  | Cell membrane {ECO:00003 | 0 |
| Cytosol (GO:0005829) Q96L34  | Cytoplasm, cytoskeleton, | 0 |
| Cytosol (GO:0005829); Q96CT7 | Cytoplasm, cytoskeleton, | 0 |
| Centrosome (GO:000581P43034  | Cytoplasm, cytoskeleton. | 0 |
| Cytosol (GO:0005829); Q14667 | Secreted {ECO:0000305}.  | 0 |
| Actin filaments (GO:0060861  | Cytoplasm {ECO:0000250}. | 0 |
| Centriolar satellite P42679  | Cytoplasm {ECO:0000269 P | 0 |
| Centriolar satellite P35499  | Cell membrane {ECO:00002 | 0 |
| Centrosome (GO:000581Q8TDW4  | Membrane {ECO:0000305};  | 0 |
| Cytosol (GO:0005829) P51854  | Cytoplasm {ECO:0000269 P | 0 |
| Nucleoplasm (GO:00056P26367  | Nucleus.                 | 1 |
| Cell Junctions (GO:00Q9UJJ7  |                          | 0 |
| Vesicles (GO:0043231) Q96CC6 | Endoplasmic reticulum me | 0 |
| Mitochondria (GO:0005Q9NQ29  |                          | 0 |
| Vesicles (GO:0043231) Q9NY47 | Membrane {ECO:0000305};  | 0 |
| Cytosol (GO:0005829); Q9UJK0 |                          | 0 |
| Golgi apparatus (GO:0Q9BRB3  | Membrane {ECO:0000305};  | 0 |
| Cytosol (GO:0005829); Q96RY5 | Nucleus {ECO:0000255 PRO | 0 |
| Cytosol (GO:0005829) Q9NVH1  | Mitochondrion {ECO:00002 | 0 |
| Nucleoplasm (GO:00056P20618  | Cytoplasm {ECO:0000269 P | 0 |
| Mitochondria (GO:0005Q92833  | Nucleus {ECO:0000255 PRO | 1 |
| Nucleoplasm (GO:00056076039  | Nucleus {ECO:0000269 Pub | 0 |
| Cytosol (GO:0005829); Q9UQ88 | Cytoplasm. Nucleus.      | 0 |
| Nucleoplasm (GO:00056095544  |                          | 0 |
| Nucleoplasm (GO:00056Q92481  | Nucleus {ECO:0000305}.   | 0 |
| Cytosol (GO:0005829) Q9Y238  | Cytoplasm {ECO:0000269 P | 1 |
| Cytosol (GO:0005829); 043739 | Cytoplasm, cytosol. Cell | 0 |
| Cell Junctions (GO:00Q9P0K1  | Cell membrane {ECO:00002 | 0 |
| Centriolar satellite 060271  | Cytoplasm {ECO:0000250 U | 0 |
| Mitochondria (GO:0005Q9UDR5  | Mitochondrion {ECO:00002 | 0 |
| Cell Junctions (GO:00Q3KR16  | Cell projection, microvi | 0 |
| Mitochondria (GO:0005Q9UHA2  |                          | 0 |
| Nucleoli (GO:0005730) Q8N594 |                          | 0 |
| Endoplasmic reticulumP10620  | Microsome {ECO:0000250}. | 0 |
| Microtubules (GO:0015Q16526  | Cytoplasm. Nucleus {ECO: | 0 |
| Nucleoplasm (GO:00056Q14938  | Nucleus.                 | 1 |
| Plasma membrane (GO:0Q9BYZ6  |                          | 0 |
| Cytosol (GO:0005829); Q9P2D3 |                          | 0 |
| Endoplasmic reticulumQ99442  | Endoplasmic reticulum me | 0 |
| Cytosol (GO:0005829); P60866 | Cytoplasm {ECO:0000250}. | 0 |
| Cytosol (GO:0005829); 075534 | Cytoplasm.               | 0 |
| Mitochondria (GO:0005Q15386  | Nucleus {ECO:0000305}.   | 0 |

|                              |                          |   |
|------------------------------|--------------------------|---|
| Nucleoplasm (GO:00056060673  | Nucleus {ECO:0000305}.   | 0 |
| Golgi apparatus (GO:0000187  | Secreted.                | 0 |
| Plasma membrane (GO:006PHW0  | Cell membrane {ECO:00002 | 0 |
| Cytosol (GO:0005829); Q8TAV0 |                          | 0 |
| Vesicles (GO:0043231) Q9Y228 | Membrane {ECO:0000305};  | 0 |
| Cytosol (GO:0005829); Q9NP79 | Cytoplasm {ECO:0000269 P | 0 |
| Nucleoplasm (GO:00056Q9NP71  | Nucleus.                 | 1 |
| Nuclear bodies (GO:00Q9UIG0  | Nucleus {ECO:0000255 PRO | 1 |
| Cytosol (GO:0005829); Q96S59 | Cytoplasm {ECO:0000269 P | 0 |
| Nucleoplasm (GO:00056Q9Y603  | Nucleus.                 | 1 |
| Nucleoplasm (GO:00056Q9H040  | Nucleus. Chromosome. Not | 1 |
| Cytosol (GO:0005829) Q8N6R0  |                          | 0 |
| Vesicles (GO:0043231) Q9NR20 | Isoform 1: Cytoplasm {EC | 0 |
| Nucleoplasm (GO:00056043670  | Nucleus {ECO:0000269 Pub | 0 |
| Cytosol (GO:0005829); P31930 | Mitochondrion inner memb | 1 |
| Vesicles (GO:0043231) 095772 | Late endosome membrane { | 0 |
| Plasma membrane (GO:0P21926  | Cell membrane {ECO:00002 | 0 |
| Cytosol (GO:0005829); Q15021 | Nucleus {ECO:0000269 Pub | 0 |
| Golgi apparatus (GO:0Q9BWX1  | Nucleus {ECO:0000269 Pub | 1 |
| Cytosol (GO:0005829); Q9NY15 | Membrane {ECO:0000305};  | 0 |
| Cytosol (GO:0005829) Q9BT04  | Cytoplasm {ECO:0000250 U | 0 |
| Cytosol (GO:0005829); Q9NSD5 | Cell membrane {ECO:00002 | 0 |
| Endoplasmic reticulum P35030 | Secreted {ECO:0000269 Pu | 0 |
| Mitochondria (GO:0005P98182  | Nucleus {ECO:0000305}.   | 0 |
| Plasma membrane (GO:0P01730  | Cell membrane {ECO:00002 | 1 |
| Nucleoli (GO:0005730) Q53EV4 |                          | 0 |
| Cytosol (GO:0005829); Q06187 | Cytoplasm. Cell membrane | 0 |
| Nucleoplasm (GO:00056Q30201  | Cell membrane {ECO:00002 | 1 |
| Cytosol (GO:0005829); Q96GD3 | Nucleus {ECO:0000305}.   | 1 |
| Cytosol (GO:0005829); P06241 | Cytoplasm. Nucleus. Cell | 0 |
| Nucleoplasm (GO:00056P31629  | Nucleus.                 | 1 |
| Cytosol (GO:0005829); Q14241 | Nucleus {ECO:0000305}.   | 0 |
| Cytosol (GO:0005829); 095372 | Cytoplasm {ECO:0000305}. | 0 |
| Cytosol (GO:0005829); P51797 | Endosome membrane {ECO:0 | 0 |
| Cytosol (GO:0005829)         |                          | 0 |
| Cytosol (GO:0005829); 075954 | Membrane {ECO:0000250};  | 0 |
| Focal adhesion sites Q9P203  | Nucleus {ECO:0000250}.   | 0 |
| Vesicles (GO:0043231) 096018 | Cytoplasm, perinuclear r | 0 |
| Vesicles (GO:0043231) Q8WTS1 | Cytoplasm {ECO:0000269 P | 0 |
| Nuclear speckles (GO:Q9ULX6  | Nucleus {ECO:0000269 Pub | 0 |
| Cytosol (GO:0005829); Q05BQ5 | Nucleus {ECO:0000305}.   | 0 |
| Nuclear membrane (GO:Q9Y5J1  | Nucleus, nucleolus {ECO: | 1 |
| Cytosol (GO:0005829); Q9NWF9 | Cytoplasm.               | 1 |
| Mitochondria (GO:0005Q6DKK2  | Mitochondrion inner memb | 1 |
| Nucleoplasm (GO:00056P26599  | Nucleus.                 | 1 |
| Cytosol (GO:0005829); Q92782 | Cytoplasm {ECO:0000305}. | 0 |
| Mitochondria (GO:0005Q15031  | Mitochondrion matrix {EC | 1 |
| Nucleoplasm (GO:00056000443  | Cell membrane {ECO:00002 | 0 |
| Plasma membrane (GO:0Q03405  | Cell membrane {ECO:00002 | 0 |
| Midbody (GO:0030496); Q9NQW6 | Nucleus. Cytoplasm, cyto | 0 |
| Midbody (GO:0030496); 095785 | Nucleus {ECO:0000250}.   | 1 |
| Cytosol (GO:0005829) Q9Y3P9  | Cytoplasm, cytosol {ECO: | 0 |
| Golgi apparatus (GO:0Q9NXS2  | Golgi apparatus membrane | 1 |
| Cytosol (GO:0005829); P53041 | Nucleus {ECO:0000269 Pub | 0 |
| Centriolar satellite Q76N32  | Cytoplasm, cytoskeleton, | 1 |

|                              |                            |   |
|------------------------------|----------------------------|---|
| Centriolar satellite Q8IVH8  |                            | 0 |
| Vesicles (GO:0043231) Q96B96 | Membrane {ECO:0000305};    | 0 |
| Nuclear bodies (GO:00P38398  | Nucleus {ECO:0000269 Pub   | 0 |
| Nucleoplasm (GO:00056P07992  | Isoform 1: Nucleus.; Iso   | 0 |
| Cytosol (GO:0005829); 043462 | Membrane {ECO:0000305 Pu   | 0 |
| Nucleoplasm (GO:00056Q96RI1  | Nucleus {ECO:0000269 Pub   | 0 |
| Endoplasmic reticulum Q9NYP7 | Endoplasmic reticulum me   | 0 |
| Nucleoplasm (GO:00056P09917  | Cytoplasm. Nucleus matri   | 0 |
| Nucleoli fibrillar ce Q9BY66 | Nucleus {ECO:0000269 Pub   | 0 |
| Cytosol (GO:0005829); Q9P1Z2 | Cytoplasm. Nucleus. Note   | 0 |
| Nucleoplasm (GO:00056Q8N806  |                            | 0 |
| Cytosol (GO:0005829); Plasma | meCytoplasm {ECO:0000269 P | 0 |
| Plasma membrane (GO:0Q9NZN3  | Recycling endosome membr   | 0 |
| Cytosol (GO:0005829); P43686 | Cytoplasm. Nucleus.        | 1 |
| Cytosol (GO:0005829); Q8TBB6 | Lysosome membrane {ECO:0   | 0 |
| Cell Junctions (GO:00075508  | Cell junction, tight jun   | 0 |
| Cytosol (GO:0005829) Q14764  | Cytoplasm {ECO:0000269 P   | 0 |
| Nucleoli (GO:0005730) Q9Y5A7 | Nucleus {ECO:0000269 Pub   | 0 |
| Cytosol (GO:0005829); 095394 |                            | 0 |
| Vesicles (GO:0043231) Q9UIY3 |                            | 0 |
| Nuclear membrane (GO:P49759  | Nucleus.                   | 0 |
| Nuclear speckles (GO:Q9NW08  | Nucleus {ECO:0000250}.     | 0 |
| Nucleoplasm (GO:00056Q9UNK9  |                            | 0 |
| Cytosol (GO:0005829) Q9UBS8  | Cytoplasm {ECO:0000269 P   | 0 |
| Centrosome (GO:000581Q96FC9  | Nucleus {ECO:0000269 Pub   | 0 |
| Nucleoplasm (GO:00056Q9NRV9  | Cytoplasm {ECO:0000269 P   | 0 |
| Plasma membrane (GO:0Q8NFJ5  | Cell membrane {ECO:00002   | 1 |
| Nucleoplasm (GO:00056Q13495  | Nucleus {ECO:0000269 Pub   | 1 |
| Centriolar satellite Q9Y6A5  | Cytoplasm {ECO:0000250}.   | 0 |
| Endoplasmic reticulum 094874 | Endoplasmic reticulum {E   | 0 |
| Nucleoplasm (GO:00056Q14181  | Nucleus.                   | 1 |
| Nucleoplasm (GO:00056Q8IXZ2  | Nucleus {ECO:0000250 Uni   | 0 |
| Cytosol (GO:0005829) P07384  | Cytoplasm {ECO:0000269 P   | 0 |
| Centrosome (GO:000581P40925  | Cytoplasm.                 | 1 |
| Centrosome (GO:000581A4FU01  |                            | 0 |
| Mitochondria (GO:0005Q7KZN9  | Mitochondrion membrane {   | 1 |
| Nucleoli fibrillar ce Q9P219 | Cytoplasm {ECO:0000269 P   | 0 |
| Nucleoplasm (GO:00056Q8IY57  | Nucleus {ECO:0000269 Pub   | 1 |
| Nucleoplasm (GO:00056Q15326  | Nucleus {ECO:0000269 Pub   | 1 |
| Cytosol (GO:0005829); P42768 | Cytoplasm, cytoskeleton    | 0 |
| Cell Junctions (GO:00P16444  | Apical cell membrane; Li   | 0 |
| Cytosol (GO:0005829) P55957  | Cytoplasm {ECO:0000269 P   | 0 |
| Nucleoplasm (GO:00056P43243  | Nucleus matrix.            | 0 |
| Cytosol (GO:0005829); Q9H1B5 | Golgi apparatus membrane   | 0 |
| Nuclear membrane (GO:Q99666  | Cytoplasm {ECO:0000269 P   | 0 |
| Golgi apparatus (GO:0Q9H169  | Golgi apparatus {ECO:000   | 0 |
| Cytosol (GO:0005829); Q8IVD9 |                            | 0 |
| Nucleoplasm (GO:00056P61371  | Nucleus {ECO:0000250 Uni   | 0 |
| Cytosol (GO:0005829) Q9UHF4  | Membrane {ECO:0000250};    | 0 |
| Aggresome (GO:0016235Q14CN2  | Cell membrane {ECO:00002   | 0 |
| Mitochondria (GO:0005Q68CQ7  | Membrane {ECO:0000305};    | 0 |
| Golgi apparatus (GO:0P98194  | Golgi apparatus membrane   | 1 |
| Cytosol (GO:0005829); Q8WUX1 | Cell membrane {ECO:00002   | 0 |
| Cytosol (GO:0005829); Q15311 | Membrane {ECO:0000269 Pu   | 0 |
| Cytosol (GO:0005829) Q7L099  | Cytoplasm {ECO:0000269 P   | 0 |

|                               |                           |   |
|-------------------------------|---------------------------|---|
| Cytosol (GO:0005829);Q9GZV5   | Nucleus. Cytoplasm. Note  | 1 |
| Peroxisomes (GO:0005700)116   | Peroxisome membrane {ECO: | 1 |
| Centrosome (GO:000581)Q9H5V9  | Nucleus {ECO:0000269 Pub  | 0 |
| Mitochondria (GO:0005)Q6P3X3  |                           | 0 |
| Cytosol (GO:0005829);Q96NG8   | Nucleus {ECO:0000305}.    | 0 |
| Nucleoplasm (GO:00056)Q96IQ7  | Membrane {ECO:0000305};   | 0 |
| Mitotic spindle (GO:0)Q86UU1  |                           | 0 |
| Golgi apparatus (GO:0)Q9UEW3  | Cell membrane {ECO:00002  | 0 |
| Mitochondria (GO:0005)Q07973  | Mitochondrion.            | 1 |
| Vesicles (GO:0043231)Q7L8C5   | Membrane {ECO:0000250};   | 0 |
| Nucleoplasm (GO:00056)043623  | Nucleus {ECO:0000269 Pub  | 0 |
| Golgi apparatus (GO:0)P04233  | Cell membrane {ECO:00003  | 0 |
| Centrosome (GO:000581)P14210  |                           | 0 |
| Cytosol (GO:0005829);Q9UGI0   | Cytoplasm. Nucleus. Note  | 1 |
| Cytosol (GO:0005829) Q9UBB6   | Cytoplasm, cytosol. Cell  | 0 |
| Nucleoplasm (GO:00056)Q9NTW7  | Nucleus {ECO:0000305}.    | 0 |
| Nucleoplasm (GO:00056)P51948  | Nucleus.                  | 1 |
| Cell Junctions (GO:0)Q9UPU9   | Cytoplasm {ECO:0000269 P  | 0 |
| Cytosol (GO:0005829);Q13761   | Nucleus {ECO:0000255 PRO  | 0 |
| Nucleoplasm (GO:00056)P49959  | Nucleus {ECO:0000269 Pub  | 1 |
| Cytoplasmic bodies (GP30740   | Secreted {ECO:0000269 Pu  | 0 |
| Cytosol (GO:0005829) Q9HB55   | Endoplasmic reticulum me  | 0 |
| Cytosol (GO:0005829);Q9UBP0   | Membrane {ECO:0000255 HA  | 0 |
| Vesicles (GO:0043231)Q9H0X9   | Endoplasmic reticulum me  | 0 |
| Nucleoplasm (GO:00056)060306  | Nucleus {ECO:0000269 Pub  | 1 |
| Nucleoli (GO:0005730)P31327   | Mitochondrion {ECO:00002  | 0 |
| Cytosol (GO:0005829);Q13642   | Isoform 1: Cytoplasm.; I  | 0 |
| Nucleoli (GO:0005730)Q9BY42   | Chromosome {ECO:0000269   | 0 |
| Cytosol (GO:0005829);Q9NX02   | Cytoplasm {ECO:0000269 P  | 1 |
| Plasma membrane (GO:0)Q5BKX6  | Membrane {ECO:0000305};   | 0 |
| Mitochondria (GO:0005)Q8N5U6  | Cytoplasm {ECO:0000269 P  | 0 |
| Nucleoplasm (GO:00056)A8K0R7  |                           | 0 |
| Intermediate filamentQ3KR37   | Endoplasmic reticulum me  | 0 |
| Cytosol (GO:0005829);P13489   | Cytoplasm.                | 1 |
| Mitochondria (GO:0005)P28331  | Mitochondrion inner memb  | 1 |
| Cytosol (GO:0005829);Q8TDY2   | Nucleus {ECO:0000269 Pub  | 0 |
| Mitochondria (GO:0005)P13196  | Mitochondrion matrix.     | 0 |
| Cytosol (GO:0005829);Q13489   | Cytoplasm {ECO:0000269 P  | 1 |
| Cytosol (GO:0005829);Q9UKA4   | Cytoplasm. Cytoplasm, cy  | 0 |
| Nucleoplasm (GO:00056)Q9NS18  | Isoform 1: Mitochondrion  | 0 |
| Nucleoli (GO:0005730)Q16533   | Nucleus.                  | 0 |
| Nucleoplasm (GO:00056)Q9Y315  | Cytoplasm {ECO:0000269 P  | 0 |
| Cytosol (GO:0005829) Q9Y3F4   | Cytoplasm. Nucleus. Note  | 0 |
| Nucleoplasm (GO:00056)Q9H4E7  | Cytoplasm {ECO:0000269 P  | 0 |
| Mitochondria (GO:0005)Q53GL0  | Cell membrane {ECO:00002  | 0 |
| Cytosol (GO:0005829);P48507   |                           | 0 |
| Nucleoplasm (GO:00056)Q8I WV8 | Nucleus {ECO:0000250}. N  | 0 |
| Plasma membrane (GO:0)Q9NZN4  | Cell membrane {ECO:00002  | 0 |
| Nucleoli fibrillar ceQ5TB30   | Nucleus {ECO:0000269 Pub  | 0 |
| Nucleoplasm (GO:00056)Q8IWP9  |                           | 0 |
| Centrosome (GO:000581)Q9NQL2  | Cytoplasm {ECO:0000269 P  | 0 |
| Nucleoplasm (GO:00056)Q03933  | Cytoplasm {ECO:0000269 P  | 0 |
| Cytosol (GO:0005829);Q9BVI0   | Nucleus {ECO:0000269 Pub  | 1 |
| Nucleoplasm (GO:00056)014756  | Microsome membrane {ECO:  | 0 |
| Golgi apparatus (GO:0)P19971  |                           | 0 |

|                             |                          |   |
|-----------------------------|--------------------------|---|
| Cytokinetic bridge (G06IBW4 | Nucleus {ECO:0000269 Pub | 1 |
| Endoplasmic reticulumQ9UGP8 | Endoplasmic reticulum me | 1 |
| Cytosol (G0:0005829);060684 |                          | 0 |
| Intermediate filamentP08670 | Cytoplasm {ECO:0000269 P | 0 |
| Cytosol (G0:0005829);P25445 | Isoform 1: Cell membrane | 0 |
| Golgi apparatus (G0:0P16070 | Cell membrane {ECO:00002 | 0 |
| Vesicles (G0:0043231)Q9UIX4 | Cell membrane {ECO:00002 | 0 |
| Golgi apparatus (G0:0Q9NRZ5 | Endoplasmic reticulum me | 0 |
| Vesicles (G0:0043231)Q9NQ25 | Membrane; Single-pass ty | 0 |
| Vesicles (G0:0043231)000481 | Cell membrane {ECO:00002 | 0 |
| Mitochondria (G0:0005Q99797 | Mitochondrion matrix.    | 1 |
| Cytosol (G0:0005829);P24723 | Cytoplasm {ECO:0000250}. | 0 |
| Plasma membrane (G0:0P15260 | Cell membrane {ECO:00002 | 1 |
| Endoplasmic reticulumQ86Y07 | Isoform 1: Cytoplasm. En | 0 |
| Cytosol (G0:0005829);Q9HBM0 | Cell membrane {ECO:00002 | 0 |
| Nucleoplasm (G0:00056P09086 | Cytoplasm {ECO:0000250}. | 0 |
| Nucleoplasm (G0:00056Q9H8M2 |                          | 0 |
| Endosomes (G0:0005768Q13596 | Endosome membrane {ECO:0 | 0 |
| Nucleoli (G0:0005730)P62380 | Cytoplasm {ECO:0000250}. | 0 |
| Nucleoli (G0:0005730)Q8WYA1 | Nucleus {ECO:0000255 PRO | 0 |
| Nuclear speckles (G0:Q9NYF8 | Cytoplasm. Nucleus. Nucl | 0 |
| Endoplasmic reticulumQ9NUM3 | Membrane {ECO:0000305};  | 0 |
| Vesicles (G0:0043231)Q15276 | Cytoplasm. Early endosom | 0 |
| Nucleoli (G0:0005730)015347 | Nucleus {ECO:0000250 Uni | 0 |
| Cytosol (G0:0005829);Q9UKS7 | Nucleus {ECO:0000250}.   | 0 |
| Endoplasmic reticulumP28799 | Secreted {ECO:0000269 Pu | 0 |
| Nucleoplasm (G0:00056Q9NYF5 |                          | 0 |
| Nucleoplasm (G0:00056Q7L2Z9 | Nucleus {ECO:0000269 Pub | 1 |
| Cytosol (G0:0005829) P49591 | Cytoplasm {ECO:0000269 P | 0 |
| Nucleoplasm (G0:00056Q9H6Z4 | Cytoplasm {ECO:0000269 P | 0 |
| Cytosol (G0:0005829);P29374 | Nucleus {ECO:0000255 PRO | 1 |
| Intermediate filamentQ53HC9 | Golgi apparatus, trans-G | 0 |
| Endoplasmic reticulumQ9BT22 | Endoplasmic reticulum me | 0 |
| Nucleoplasm (G0:00056Q6NZY4 | Nucleus, nucleoplasm {EC | 1 |
| Cytosol (G0:0005829) Q9UG63 |                          | 0 |
| Cytosol (G0:0005829);Q9P2E5 | Golgi apparatus, Golgi s | 0 |
| Centrosome (G0:000581Q96NW7 | Cytoplasm {ECO:0000269 P | 0 |
| Cytosol (G0:0005829);Q9BYC5 | Golgi apparatus, Golgi s | 1 |
| Cytosol (G0:0005829);A0AVT1 |                          | 0 |
| Plasma membrane (G0:0Q9UQC2 | Cytoplasm {ECO:0000269 P | 0 |
| Cytosol (G0:0005829);Q93050 | Cytoplasmic vesicle memb | 0 |
| Microtubules (G0:0015075925 | Nucleus speckle {ECO:000 | 0 |
| Cytosol (G0:0005829);Q9Y6M7 | Basolateral cell membran | 0 |
| Golgi apparatus (G0:0Q99767 |                          | 0 |
| Cytosol (G0:0005829);P46734 |                          | 0 |
| Nucleoplasm (G0:00056Q9HAE3 |                          | 0 |
| Endoplasmic reticulumQ2TB18 |                          | 0 |
| Nucleoplasm (G0:00056P56589 | Peroxisome membrane {ECO | 1 |
| Cytosol (G0:0005829);P60520 | Golgi apparatus {ECO:000 | 0 |
| Nucleoplasm (G0:00056Q96HL8 |                          | 0 |
| Mitochondria (G0:0005Q96C01 |                          | 0 |
| Focal adhesion sites P18206 | Cell membrane {ECO:00002 | 0 |
| Cytosol (G0:0005829);Q8WUY9 |                          | 0 |
| Golgi apparatus (G0:0Q9UIK4 | Cytoplasm. Cytoplasmic v | 0 |
| Nucleoli (G0:0005730)Q92636 |                          | 0 |

|                             |                          |   |
|-----------------------------|--------------------------|---|
| Cytosol (GO:0005829);P30520 | Cytoplasm. Note=Partiall | 1 |
| Nucleoplasm (GO:00056Q9ULZ2 | Nucleus {ECO:0000269 Pub | 0 |
| Nucleoplasm (GO:00056P35251 | Nucleus.                 | 1 |
| Golgi apparatus (GO:0Q9NUY8 | Golgi apparatus, trans-G | 0 |
| Mitochondria (GO:0005P54296 | Cytoplasm, myofibril, sa | 0 |
| Mitochondria (GO:0005P00480 | Mitochondrion matrix.    | 1 |
| Nucleoli (GO:0005730)Q8IYH5 | Nucleus {ECO:0000255 PRO | 0 |
| Cytosol (GO:0005829);075604 | Cytoplasm {ECO:0000250 U | 0 |
| Centriolar satellite Q9NRH3 | Cytoplasm, cytoskeleton, | 1 |
| Cytosol (GO:0005829);Q9UNX3 |                          | 0 |
| Cell Junctions (GO:00P35916 | Cell membrane {ECO:00002 | 0 |
| Nucleoplasm (GO:00056Q08J23 | Nucleus, nucleolus. Cyto | 0 |
| Nucleoplasm (GO:00056Q6P3S6 |                          | 0 |
| Golgi apparatus (GO:0P55082 | Cell membrane {ECO:00003 | 0 |
| Cytosol (GO:0005829);Q9BV20 | Nucleus {ECO:0000255 HAM | 0 |
| Nucleoplasm (GO:00056Q9UBP6 | Nucleus {ECO:0000269 Pub | 1 |
| Microtubules (GO:0015P31273 | Nucleus.                 | 1 |
| Cytosol (GO:0005829) Q8TCG2 | Cytoplasm. Membrane. Not | 0 |
| Nucleoplasm (GO:00056Q8NFC6 | Chromosome {ECO:0000269  | 1 |
| Plasma membrane (GO:0Q9NZL9 |                          | 0 |
| Vesicles (GO:0043231)043897 | Secreted {ECO:0000305}.  | 0 |
| Cytoplasmic bodies (GQ6P2E9 | Cytoplasm, P-body {ECO:0 | 0 |
| Cytosol (GO:0005829);075962 | Cytoplasm {ECO:0000305 P | 0 |
| Vesicles (GO:0043231)P13611 | Secreted, extracellular  | 0 |
| Nucleoplasm (GO:00056Q2KHT3 | Endosome membrane {ECO:0 | 0 |
| Cell Junctions (GO:00P12830 | Cell junction, adherens  | 0 |
| Nucleoplasm (GO:00056P42285 | Nucleus, nucleoplasm. Nu | 0 |
| Cytosol (GO:0005829);Q7Z3T8 | Cytoplasm {ECO:0000269 P | 0 |
| Cytosol (GO:0005829);Q6ZS17 | Cytoplasm {ECO:0000269 P | 0 |
| Actin filaments (GO:0Q9P0K7 | Cytoplasm, cytoskeleton  | 0 |
| Nucleoli (GO:0005730)Q96T60 | Nucleus {ECO:0000269 Pub | 0 |
| Vesicles (GO:0043231)Q6ZVD8 | Cytoplasm. Membrane; Per | 0 |
| Cytosol (GO:0005829) Q96EA4 | Cytoplasm, cytoskeleton, | 0 |
| Cytosol (GO:0005829);Q9NUL3 | Cytoplasm. Nucleus. Nucl | 0 |
| Vesicles (GO:0043231)Q6ZP29 | Lysosome membrane {ECO:0 | 0 |
| Intermediate filament060931 | Isoform 1: Lysosome memb | 0 |
| Actin filaments (GO:0Q9BZR6 | Cell membrane {ECO:00002 | 0 |
| Nucleoplasm (GO:00056Q9BUL5 | Nucleus {ECO:0000269 Pub | 0 |
| Nuclear membrane (GO:Q96PE3 | Early endosome membrane  | 0 |
| Cytosol (GO:0005829);000194 | Membrane; Lipid-anchor.  | 0 |
| Cytosol (GO:0005829);P25789 | Cytoplasm {ECO:0000269 P | 0 |
| Vesicles (GO:0043231)Q9Y6X6 | Cytoplasm {ECO:0000250 U | 0 |
| Cytosol (GO:0005829);Q9H089 | Cytoplasm {ECO:0000269 P | 0 |
| Nuclear bodies (GO:00Q9Y6F1 | Nucleus {ECO:0000269 Pub | 0 |
| Mitochondria (GO:0005Q8WTV1 |                          | 0 |
| Nucleoplasm (GO:00056Q96MK2 |                          | 0 |
| Nucleoplasm (GO:00056Q9NUW8 | Nucleus {ECO:0000269 Pub | 0 |
| Cytosol (GO:0005829);Q9BRQ8 | Cytoplasm. Mitochondrion | 0 |
| Cytosol (GO:0005829);Q9P0W8 | Cytoplasm, cytoskeleton, | 0 |
| Cytosol (GO:0005829);Q9NVC6 | Nucleus {ECO:0000305}.   | 0 |
| Nucleoli (GO:0005730)Q6NUM9 | Endoplasmic reticulum me | 0 |
| Nucleoplasm (GO:00056P40121 | Nucleus {ECO:0000269 Pub | 0 |
| Mitochondria (GO:0005Q9UKQ2 | Isoform 1: Cell membrane | 0 |
| Cytosol (GO:0005829);Q9UMQ3 | Nucleus.                 | 1 |
| Cytosol (GO:0005829);Q96GG9 | Nucleus {ECO:0000269 Pub | 0 |

|                             |                          |   |
|-----------------------------|--------------------------|---|
| Nucleoplasm (GO:00056Q9NQC1 |                          | 0 |
| Nuclear bodies (GO:00095409 | Nucleus. Cytoplasm {ECO: | 0 |
| Cytosol (GO:0005829);Q9H3H1 | Isoform 1: Mitochondrion | 0 |
| Cell Junctions (GO:00P35221 | Isoform 1: Cytoplasm, cy | 0 |
| Nucleoplasm (GO:00056P46019 | Cell membrane {ECO:00003 | 0 |
| Centrosome (GO:000581Q9NXG0 | Cytoplasm, cytoskeleton, | 1 |
| Actin filaments (GO:0P29320 | Isoform 1: Cell membrane | 0 |
| Cytosol (GO:0005829) P11021 | Endoplasmic reticulum lu | 0 |
| Cell Junctions (GO:00Q14126 | Cell membrane; Single-pa | 0 |
| Cytosol (GO:0005829);Q9NWZ8 | Nucleus, gem {ECO:000026 | 0 |
| Microtubules (GO:0015075665 | Cytoplasm, cytoskeleton, | 0 |
| Cytosol (GO:0005829);Q9UBF1 | Cytoplasm {ECO:0000269 P | 1 |
| Endoplasmic reticulumQ70Z35 |                          | 0 |
| Intermediate filamentQ9Y2I8 |                          | 0 |
| Cytoplasmic bodies (GQ9H6S0 | Cytoplasm {ECO:0000250 U | 0 |
| Cytosol (GO:0005829);Q9NRF8 |                          | 0 |
| Actin filaments (GO:0Q9UI12 |                          | 0 |
| Nucleoplasm (GO:00056P30876 | Nucleus {ECO:0000269 Pub | 1 |
| Nucleoplasm (GO:00056Q32MH5 |                          | 0 |
| Actin filaments (GO:0Q8WZ64 | Cytoplasm {ECO:0000250}. | 0 |
| Nuclear membrane (GO:P12270 | Nucleus {ECO:0000269 Pub | 0 |
| Nuclear speckles (GO:060303 | Cytoplasm, cytoskeleton, | 0 |
| Microtubules (GO:0015Q96EV8 | Isoform 1: Cytoplasm {EC | 0 |
| Mitochondria (GO:0005P51811 | Membrane {ECO:0000305};  | 0 |
| Nucleoplasm (GO:00056Q9NQ90 | Cell membrane {ECO:00002 | 1 |
| Nuclear bodies (GO:00Q9NQ89 | Cytoplasm {ECO:0000250 U | 0 |
| Nucleoplasm (GO:00056Q9UN30 | Nucleus {ECO:0000305}.   | 0 |
| Actin filaments (GO:0Q9ULE0 |                          | 0 |
| Cytosol (GO:0005829) 043182 | Cytoplasm {ECO:0000269 P | 1 |
| Cytosol (GO:0005829);P27816 | Cytoplasm, cytoskeleton. | 0 |
| Golgi apparatus (GO:0Q9HD26 | Cytoplasm. Golgi apparat | 0 |
| Vesicles (GO:0043231)P08922 | Cell membrane {ECO:00003 | 0 |
| Nuclear bodies (GO:00Q96RU2 | Nucleus, nucleoplasm {EC | 1 |
| Nucleoplasm (GO:00056Q9UKV0 | Nucleus {ECO:0000250}.   | 0 |
| Nucleoplasm (GO:00056Q96FV3 | Membrane {ECO:0000305};  | 0 |
| Nucleoli (GO:0005730)Q9Y3C1 | Nucleus, nucleolus {ECO: | 1 |
| Cytosol (GO:0005829);Q7LG56 | Cytoplasm. Nucleus. Note | 1 |
| Cytosol (GO:0005829);Q2TB10 | Nucleus {ECO:0000305}.   | 0 |
| Actin filaments (GO:0P82664 | Mitochondrion {ECO:00002 | 0 |
| Plasma membrane (GO:0P43080 | Membrane; Lipid-anchor.  | 0 |
| Nucleoplasm (GO:00056Q96T23 | Nucleus {ECO:0000269 Pub | 1 |
| Cytosol (GO:0005829);Q5THJ4 |                          | 0 |
| Cytokinetic bridge (G095319 | Nucleus. Cytoplasm. Note | 0 |
| Cytosol (GO:0005829) Q9NZB2 | Cytoplasm {ECO:0000269 P | 0 |
| Cytosol (GO:0005829);Q15032 |                          | 0 |
| Nucleoplasm (GO:00056Q14055 | Secreted, extracellular  | 0 |
| Vesicles (GO:0043231)P21583 | Isoform 1: Cell membrane | 0 |
| Nuclear speckles (GO:Q13216 | Nucleus {ECO:0000305}.   | 0 |
| Cytosol (GO:0005829) 095479 | Endoplasmic reticulum lu | 0 |
| Cytosol (GO:0005829) P56645 | Cytoplasm {ECO:0000269 P | 0 |
| Nucleoli (GO:0005730)Q07011 | Membrane; Single-pass ty | 0 |
| Nucleoplasm (GO:00056Q9H201 | Cytoplasm {ECO:0000269 P | 0 |
| Cytosol (GO:0005829) Q14766 | Secreted {ECO:0000269 Pu | 0 |
| Endoplasmic reticulumQ15293 | Endoplasmic reticulum lu | 1 |
| Plasma membrane (GO:0P15502 | Secreted, extracellular  | 0 |

|                             |                          |   |
|-----------------------------|--------------------------|---|
| Golgi apparatus (GO:0P35250 | Nucleus {ECO:0000305}.   | 1 |
| Nucleoplasm (GO:00056Q8NFD5 | Nucleus {ECO:0000255 PRO | 1 |
| Endoplasmic reticulumQ96KA5 | Membrane {ECO:0000305};  | 0 |
| Nucleoplasm (GO:00056Q9BZS1 | Nucleus {ECO:0000255 PRO | 0 |
| Nucleoplasm (GO:00056Q6ZSY5 | Membrane {ECO:0000250};  | 0 |
| Cytosol (GO:0005829);Q5QGS0 | Nucleus {ECO:0000269 Pub | 0 |
| Nucleoplasm (GO:00056Q9P055 | Endoplasmic reticulum me | 0 |
| Cytosol (GO:0005829);Q9UBP4 | Secreted.                | 0 |
| Cytosol (GO:0005829);Q12774 | Cytoplasm {ECO:0000269 P | 0 |
| Nucleoplasm (GO:00056Q9Y4A8 | Nucleus {ECO:0000255 PRO | 0 |
| Actin filaments (GO:0Q9UHB6 | Cytoplasm. Cell junction | 1 |
| Mitochondria (GO:0005Q6P1Q0 | Mitochondrion outer memb | 1 |
| Plasma membrane (GO:0Q2Y0W8 | Membrane {ECO:0000269 Pu | 0 |
| Cytosol (GO:0005829);P56945 | Cell junction, focal adh | 0 |
| Mitochondria (GO:0005Q8N612 |                          | 0 |
| Cytosol (GO:0005829);Q15011 | Endoplasmic reticulum me | 0 |
| Cytoplasmic bodies (GQ9NSC5 | Cytoplasm {ECO:0000250}. | 0 |
| Cytosol (GO:0005829);Q06609 | Nucleus {ECO:0000269 Pub | 0 |
| Cytosol (GO:0005829);075417 | Nucleus {ECO:0000250 Uni | 0 |
| Midbody (GO:0030496);P42338 | Cytoplasm {ECO:0000269 P | 0 |
| Nucleoplasm (GO:00056Q96J01 | Nucleus {ECO:0000305}. N | 0 |
| Cytosol (GO:0005829);Q99550 | Cytoplasm, cytoskeleton, | 0 |
| Cytosol (GO:0005829);Q9HAU0 | Cytoplasm {ECO:0000269 P | 1 |
| Focal adhesion sites Q9BRV8 | Cytoplasm {ECO:0000269 P | 0 |
| Cytosol (GO:0005829);Q5JTH9 | Nucleus, nucleolus {ECO: | 0 |
| Centriolar satellite Q9P278 | Cytoplasm {ECO:0000269 P | 0 |
| Cytosol (GO:0005829);Q96AE7 | Cytoplasm {ECO:0000269 P | 0 |
| Nucleoplasm (GO:00056Q9H161 | Nucleus {ECO:0000255 PRO | 1 |
| Mitochondria (GO:0005Q6MZW2 | Secreted {ECO:0000305}.  | 0 |
| Nucleoplasm (GO:00056Q00409 | Nucleus {ECO:0000305}.   | 0 |
| Cytosol (GO:0005829) 043488 | Golgi apparatus {ECO:000 | 0 |
| Nuclear membrane (GO:Q9UKD2 | Nucleus, nucleolus {ECO: | 0 |
| Cytosol (GO:0005829);Q86YR7 |                          | 0 |
| Cytosol (GO:0005829);Q9BQI9 | Nucleus {ECO:0000250}.   | 0 |
| Endoplasmic reticulumQ16787 | Secreted, extracellular  | 0 |
| Intermediate filamentQ9UJX5 |                          | 0 |
| Cytosol (GO:0005829);043617 | Golgi apparatus, cis-Gol | 0 |
| Nuclear speckles (GO:Q9Y2W1 | Nucleus {ECO:0000269 Pub | 0 |
| Cytosol (GO:0005829);Q9NRX4 | Cytoplasm {ECO:0000250}. | 0 |
| Golgi apparatus (GO:0060449 | Membrane {ECO:0000250};  | 0 |
| Nucleoplasm (GO:00056Q4LE39 | Nucleus {ECO:0000255 PRO | 0 |
| Nucleoplasm (GO:00056Q9H1Y3 | Membrane; Multi-pass mem | 0 |
| Centrosome (GO:000581Q86SQ7 | Cytoplasm, cytoskeleton, | 0 |
| Endoplasmic reticulumQ16849 | Membrane {ECO:0000250 Un | 0 |
| Golgi apparatus (GO:0Q5VTY9 | Endoplasmic reticulum me | 0 |
| Cytosol (GO:0005829);Q12948 | Nucleus {ECO:0000269 Pub | 1 |
| Golgi apparatus (GO:0Q8WUA7 |                          | 0 |
| Intermediate filamentQ8WXH0 | Nucleus outer membrane { | 0 |
| Centrosome (GO:000581Q9ULM0 |                          | 0 |
| Nucleoplasm (GO:00056Q92567 |                          | 0 |
| Nucleoplasm (GO:00056Q969Z4 | Cell membrane {ECO:00002 | 0 |
| Nucleoli fibrillar ceQ9Y2X3 | Nucleus, nucleolus. Nucl | 1 |
| Cytosol (GO:0005829);Q7Z422 |                          | 0 |
| Nucleoli (GO:0005730)Q13616 |                          | 0 |
| Vesicles (GO:0043231)Q9NRY5 |                          | 0 |



|                             |                          |   |
|-----------------------------|--------------------------|---|
| Cytosol (GO:0005829);Q96F07 | Cytoplasm {ECO:0000269 P | 0 |
| Nucleoli fibrillar ceQ9NU53 | Membrane {ECO:0000305};  | 0 |
| Cytosol (GO:0005829) P19525 | Cytoplasm. Nucleus. Cyto | 0 |
| Nuclear speckles (GO:Q9P275 | Nucleus, nucleolus {ECO: | 0 |
| Nucleoplasm (GO:00056Q8NEZ4 | Nucleus {ECO:0000305}.   | 0 |
| Cytosol (GO:0005829);Q8TDD5 | Cell membrane {ECO:00002 | 0 |
| Cytosol (GO:0005829) Q8TB72 | Cytoplasm {ECO:0000305 P | 1 |
| Mitochondria (GO:0005Q8N983 | Mitochondrion {ECO:00002 | 1 |
| Vesicles (GO:0043231)Q14624 | Secreted.                | 0 |
| Vesicles (GO:0043231)P19827 | Secreted.                | 0 |
| Cytokinetic bridge (GQ9NWX4 |                          | 0 |
| Nucleoplasm (GO:00056Q96KR1 | Nucleus {ECO:0000250}. C | 0 |
| Nucleoli fibrillar ceQ8ND82 | Nucleus {ECO:0000305}.   | 0 |
| Actin filaments (GO:0Q9Y5X5 | Cell membrane; Multi-pas | 1 |
| Nucleoli fibrillar ceQ96EK2 |                          | 0 |
| Nucleoplasm (GO:00056Q13077 |                          | 0 |
| Vesicles (GO:0043231)Q9HBD1 | Cytoplasm, P-body {ECO:0 | 0 |
| Golgi apparatus (GO:0043734 |                          | 0 |
| Cytosol (GO:0005829);015488 |                          | 0 |
| Cytosol (GO:0005829);Q96PD2 | Membrane {ECO:0000269 Pu | 0 |
| Cytosol (GO:0005829);P29508 | Cytoplasm {ECO:0000269 P | 1 |
| Endoplasmic reticulumP35610 | Endoplasmic reticulum me | 1 |
| Cell Junctions (GO:00Q99959 | Nucleus {ECO:0000269 Pub | 0 |
| Mitochondria (GO:0005P08709 | Secreted.                | 0 |
| Nucleoli (GO:0005730)075626 | Nucleus {ECO:0000250 Uni | 0 |
| Centrosome (GO:000581Q9H1Y0 | Cytoplasm {ECO:0000269 P | 0 |
| Endoplasmic reticulumQ9ULS5 | Endoplasmic reticulum me | 0 |
| Nucleoplasm (GO:00056Q9BTC8 | Nucleus {ECO:0000255 PRO | 1 |
| Cytosol (GO:0005829);Q92995 |                          | 0 |
| Centriolar satellite Q9Y2G3 | Recycling endosome membr | 0 |
| Cytosol (GO:0005829) Q13753 | Secreted, extracellular  | 0 |
| Cytosol (GO:0005829);094921 | Cell membrane; Periphera | 0 |
| Endoplasmic reticulumP61619 | Endoplasmic reticulum me | 1 |
| Actin filaments (GO:0014974 | Cytoplasm {ECO:0000269 P | 1 |
| Golgi apparatus (GO:0Q13972 |                          | 0 |
| Cell Junctions (GO:00Q13554 | Cytoplasm, cytoskeleton  | 0 |
| Centrosome (GO:000581Q5TZA2 | Cytoplasm, cytoskeleton, | 0 |
| Nucleoplasm (GO:00056Q9NVU0 | Nucleus.                 | 1 |
| Plasma membrane (GO:0P23634 | Cell membrane {ECO:00002 | 0 |
| Nuclear speckles (GO:075152 |                          | 0 |
| Cytosol (GO:0005829);Q9BVS4 | Cytoplasm {ECO:0000269 P | 0 |
| Nucleoplasm (GO:00056Q9Y548 | Golgi apparatus, cis-Gol | 0 |
| Actin filaments (GO:0Q9BTX1 | Nucleus, nuclear pore co | 0 |
| Plasma membrane (GO:0P49619 | Cytoplasm. Membrane. Not | 0 |
| Cytosol (GO:0005829);Q4VC44 | Nucleus {ECO:0000305}.   | 1 |
| Cytosol (GO:0005829) Q9H9P5 | Isoform 4: Cytoplasm. Nu | 0 |
| Nucleoplasm (GO:00056Q9H0J9 | Nucleus {ECO:0000305}.   | 0 |
| Mitochondria (GO:0005P54886 | Mitochondrion inner memb | 1 |
| Nuclear speckles (GO:Q13395 |                          | 0 |
| Mitochondria (GO:0005075879 | Mitochondrion {ECO:00002 | 1 |
| Cytosol (GO:0005829);Q05195 | Nucleus.                 | 0 |
| Cytosol (GO:0005829);Q00537 |                          | 0 |
| Cytosol (GO:0005829);Q9H1X3 | Membrane {ECO:0000305};  | 0 |
| Plasma membrane (GO:0P11169 | Cell membrane {ECO:00002 | 0 |
| Cytosol (GO:0005829);A5PKW4 | Cell membrane {ECO:00002 | 0 |

|                              |                          |   |
|------------------------------|--------------------------|---|
| Nucleoplasm (GO:00056Q9Y5B0  | Nucleus {ECO:0000269 Pub | 0 |
| Cytosol (GO:0005829) P16989  | Cytoplasm. Nucleus.      | 0 |
| Nucleoplasm (GO:00056Q6J9G0  | Membrane {ECO:0000305};  | 0 |
| Cytosol (GO:0005829) Q9H4A3  | Cytoplasm {ECO:0000269 P | 1 |
| Golgi apparatus (GO:0Q8IX12  | Cytoplasm, perinuclear r | 0 |
| Nucleoplasm (GO:00056Q9NZZT2 | Cytoplasm {ECO:0000250}. | 0 |
| Cytosol (GO:0005829);Q9NUD9  | Endoplasmic reticulum me | 1 |
| Nuclear speckles (GO:Q96DI7  | Nucleus {ECO:0000269 Pub | 0 |
| Cytosol (GO:0005829);015034  | Cell membrane {ECO:00002 | 0 |
| Endoplasmic reticulumP12107  | Secreted, extracellular  | 0 |
| Cytosol (GO:0005829);Q2KHR3  |                          | 0 |
| Mitochondria (GO:0005Q9Y5U8  | Mitochondrion inner memb | 1 |
| Peroxisomes (GO:00057P09110  | Peroxisome.              | 1 |
| Cytosol (GO:0005829) Q8WUI4  | Nucleus. Cytoplasm. Note | 0 |
| Nucleoli (GO:0005730) Q9Y250 | Cytoplasm {ECO:0000250}. | 0 |
| Nucleoplasm (GO:00056Q9NQX0  | Nucleus {ECO:0000250 Uni | 0 |
| Cytosol (GO:0005829) Q9Y2A7  | Cell membrane {ECO:00002 | 0 |
| Cytosol (GO:0005829);P82673  | Mitochondrion {ECO:00002 | 0 |
| Cytosol (GO:0005829) Q02153  | Cytoplasm {ECO:0000250 U | 0 |
| Cytosol (GO:0005829);Q12872  | Nucleus {ECO:0000305}.   | 0 |
| Cytosol (GO:0005829) Q07912  | Cell membrane. Nucleus.  | 0 |
| Nucleoli fibrillar ceQ7Z3U7  |                          | 0 |
| Cell Junctions (GO:00P22223  | Cell membrane; Single-pa | 1 |
| Cytosol (GO:0005829) P54793  | Secreted {ECO:0000305}.  | 0 |
| Cytosol (GO:0005829);Q86WP2  | Nucleus {ECO:0000269 Pub | 0 |
| Centrosome (GO:000581Q9UJU3  | Nucleus {ECO:0000305}.   | 0 |
| Mitochondria (GO:0005075390  | Mitochondrion matrix.    | 1 |
| Vesicles (GO:0043231)P29376  | Membrane; Single-pass ty | 0 |
| Cytosol (GO:0005829) Q96JJ3  | Cytoplasm {ECO:0000269 P | 0 |
| Endoplasmic reticulumQ96GC9  | Endoplasmic reticulum-Go | 0 |
| Centriolar satellite Q92624  | Nucleus. Cytoplasm, cyto | 0 |
| Nucleoplasm (GO:00056P28340  | Nucleus {ECO:0000269 Pub | 1 |
| Cytosol (GO:0005829) P23588  |                          | 0 |
| Golgi apparatus (GO:0Q9GZN6  | Membrane; Multi-pass mem | 0 |
| Nucleoplasm (GO:00056Q9NZM4  |                          | 0 |
| Vesicles (GO:0043231) Q9NRA0 | Cytoplasm {ECO:0000269 P | 0 |
| Cytosol (GO:0005829);Q07020  | Cytoplasm, cytosol {ECO: | 0 |
| Microtubules (GO:0015075493  | Secreted {ECO:0000305}.  | 0 |
| Cytosol (GO:0005829);Q96AB3  | Cytoplasm {ECO:0000269 P | 0 |
| Nuclear speckles (GO:P26368  | Nucleus.                 | 0 |
| Cytosol (GO:0005829);Q9Y6I3  | Cytoplasm {ECO:0000250}. | 0 |
| Nucleoplasm (GO:00056Q9NX70  | Nucleus {ECO:0000269 Pub | 1 |
| Cytosol (GO:0005829);A9YTQ3  | Cytoplasm {ECO:0000269 P | 1 |
| Nucleoli (GO:0005730) Q9NSD4 | Nucleus {ECO:0000305}.   | 0 |
| Centrosome (GO:000581Q13613  | Cell membrane {ECO:00002 | 0 |
| Cytosol (GO:0005829);P35052  | Cell membrane; Lipid-anc | 0 |
| Nucleoplasm (GO:00056Q86TW2  | Secreted {ECO:0000305}.  | 0 |
| Microtubule ends (GO:P78317  | Cytoplasm. Nucleus. Nucl | 0 |
| Cytosol (GO:0005829);Q14790  | Cytoplasm.               | 1 |
| Actin filaments (GO:0Q9UPQ0  | Cytoplasm, cytoskeleton, | 0 |
| Nuclear bodies (GO:00Q9NVM9  | Nucleus {ECO:0000269 Pub | 0 |
| Cytosol (GO:0005829);Q9NS93  | Cell membrane {ECO:00002 | 0 |
| Vesicles (GO:0043231) Q15506 | Membrane {ECO:0000305};  | 0 |
| Nucleoplasm (GO:00056Q96QS1  | Membrane {ECO:0000305};  | 0 |
| Focal adhesion sites 075185  | Membrane {ECO:0000305};  | 0 |

|                              |                            |   |
|------------------------------|----------------------------|---|
| Nucleoplasm (GO:00056P08138  | Cell membrane {ECO:00002   | 0 |
| Nucleoplasm (GO:00056Q9H2X6  | Nucleus, PML body {ECO:0   | 0 |
| Vesicles (GO:0043231)Q9Y5L0  | Cytoplasm {ECO:0000269 P   | 0 |
| Cell Junctions (GO:0030054); | Cytosol (GO:0005829);Nucle | 0 |
| Nucleoplasm (GO:00056014593  | Cytoplasm {ECO:0000250 U   | 0 |
| Cytosol (GO:0005829) Q9NX61  | Membrane {ECO:0000305};    | 0 |
| Vesicles (GO:0043231)P10619  | Lysosome.                  | 0 |
| Nuclear bodies (GO:00Q8IX01  | Nucleus {ECO:0000305}.     | 1 |
| Plasma membrane (GO:0P55011  | Membrane; Multi-pass mem   | 0 |
| Vesicles (GO:0043231)Q9Y343  | Cytoplasmic vesicle memb   | 0 |
| Cytosol (GO:0005829) 000167  | Cytoplasm {ECO:0000269 P   | 0 |
| Actin filaments (GO:0Q99439  |                            | 0 |
| Cell Junctions (GO:00Q8IZY2  | Cell membrane {ECO:00002   | 0 |
| Cytoplasmic bodies (GQ9Y6H5  | Cytoplasm {ECO:0000269 P   | 1 |
| Cytosol (GO:0005829);Q9UHI6  | Cytoplasm. Nucleus, gem.   | 1 |
| Cytoplasmic bodies (GQ9H0C5  | Cytoplasm {ECO:0000269 P   | 1 |
| Golgi apparatus (GO:0Q96K12  | Peroxisome membrane {ECO   | 0 |
| Vesicles (GO:0043231)075363  | Cytoplasm {ECO:0000269 P   | 0 |
| Nuclear bodies (GO:00P54277  | Nucleus {ECO:0000255 PRO   | 1 |
| Nucleoplasm (GO:00056Q9P0W2  | Nucleus. Chromosome. Not   | 1 |
| Plasma membrane (GO:0Q16602  | Cell membrane; Multi-pas   | 1 |
| Golgi apparatus (GO:0Q15544  | Nucleus.                   | 1 |
| Cytosol (GO:0005829);Q92625  | Cytoplasm. Cell projecti   | 0 |
| Cytosol (GO:0005829) 014617  | Cytoplasm {ECO:0000250}.   | 0 |
| Cytosol (GO:0005829);P36508  | Nucleus {ECO:0000305}.     | 0 |
| Plasma membrane (GO:0Q15599  | Endomembrane system {ECO   | 0 |
| Cytosol (GO:0005829);Q6BDS2  |                            | 0 |
| Centrosome (GO:000581P08754  | Cytoplasm {ECO:0000269 P   | 0 |
| Cytosol (GO:0005829);000410  | Cytoplasm. Nucleus. Nucl   | 0 |
| Mitochondria (GO:0005P04181  | Mitochondrion matrix {EC   | 1 |
| Nucleoli (GO:0005730)Q9UNX4  | Nucleus, nucleolus {ECO:   | 0 |
| Centrosome (GO:000581Q16513  | Cytoplasm {ECO:0000269 P   | 0 |
| Nucleoplasm (GO:00056Q9BV38  | Nucleus, nucleolus {ECO:   | 0 |
| Cytosol (GO:0005829) Q15035  | Membrane {ECO:0000305};    | 0 |
| Plasma membrane (GO:0Q95838  | Cell membrane; Multi-pas   | 1 |
| Nucleoli (GO:0005730)Q7L590  | Nucleus {ECO:0000269 Pub   | 0 |
| Mitochondria (GO:0005P23743  |                            | 0 |
| Actin filaments (GO:0P21860  | Isoform 1: Cell membrane   | 0 |
| Mitochondria (GO:0005Q8N8A2  |                            | 0 |
| Cytosol (GO:0005829) Q15046  | Isoform Cytoplasmic: Cyt   | 0 |
| Nucleoplasm (GO:00056Q9BUB4  |                            | 0 |
| Golgi apparatus (GO:0Q14554  | Endoplasmic reticulum lu   | 0 |
| Cytosol (GO:0005829);Q9NU19  |                            | 0 |
| Mitochondria (GO:0005095168  | Mitochondrion inner memb   | 1 |
| Nucleoplasm (GO:00056Q96T58  | Nucleus {ECO:0000269 Pub   | 1 |
| Actin filaments (GO:0Q15746  | Cytoplasm {ECO:0000269 P   | 0 |
| Cytosol (GO:0005829) Q8WU90  | Cytoplasm {ECO:0000269 P   | 0 |
| Cell Junctions (GO:00P45985  | Cytoplasm {ECO:0000250}.   | 0 |
| Centrosome (GO:000581060641  | Cell membrane {ECO:00002   | 0 |
| Cytosol (GO:0005829);Q9H2G2  | Cytoplasm {ECO:0000250}.   | 0 |
| Golgi apparatus (GO:0Q9UMD9  | Cell junction, hemidesmo   | 0 |
| Centriolar satellite Q04759  | Cytoplasm. Cell membrane   | 0 |
| Focal adhesion sites Q04725  | Nucleus.                   | 1 |
| Nucleoplasm (GO:00056Q9Y576  |                            | 0 |
| Golgi apparatus (GO:0Q9H098  |                            | 0 |

|                             |                          |   |
|-----------------------------|--------------------------|---|
| Cytosol (GO:0005829);P48163 | Cytoplasm {ECO:0000269 P | 1 |
| Nucleoli (GO:0005730)Q86TI0 | Nucleus {ECO:0000250}.   | 0 |
| Nuclear speckles (GO:Q14004 | Nucleus speckle {ECO:000 | 1 |
| Vesicles (GO:0043231)Q96T83 | Golgi apparatus, trans-G | 0 |
| Nucleoli fibrillar ceQ9P0K8 | Nucleus.                 | 0 |
| Cytosol (GO:0005829);P67809 | Cytoplasm. Nucleus. Cyto | 0 |
| Plasma membrane (GO:0P27815 | Isoform 1: Cytoplasm, pe | 0 |
| Cytosol (GO:0005829) Q15172 | Cytoplasm {ECO:0000269 P | 0 |
| Cytosol (GO:0005829);Q15717 | Cytoplasm {ECO:0000269 P | 0 |
| Endoplasmic reticulumQ9P265 |                          | 0 |
| Nucleoplasm (GO:00056Q96GM5 | Nucleus {ECO:0000269 Pub | 1 |
| Nucleoli fibrillar ce075164 | Nucleus {ECO:0000255 PRO | 0 |
| Nucleoplasm (GO:00056Q13952 | Nucleus.                 | 1 |
| Plasma membrane (GO:0P48764 | Apical cell membrane {EC | 1 |
| Cytosol (GO:0005829);Q8N5V2 | Cytoplasm {ECO:0000250}. | 0 |
| Cytosol (GO:0005829);Q8IZT6 | Cytoplasm {ECO:0000250}. | 0 |
| Plasma membrane (GO:0Q9UIB8 | Cell membrane {ECO:00002 | 1 |
| Endoplasmic reticulumQ9BW60 | Endoplasmic reticulum me | 0 |
| Nucleoplasm (GO:00056P17947 | Nucleus {ECO:0000255 PRO | 1 |
| Nucleoli fibrillar ceQ9P1U0 | Nucleus, nucleolus {ECO: | 1 |
| Mitochondria (GO:0005Q15777 |                          | 0 |
| Nucleoplasm (GO:00056Q95625 | Nucleus {ECO:0000305}.   | 1 |
| Nucleoli (GO:0005730)P54252 | Nucleus matrix {ECO:0000 | 0 |
| Golgi apparatus (GO:0Q8TBA6 | Golgi apparatus membrane | 1 |
| Cell Junctions (GO:00P21802 | Cell membrane; Single-pa | 0 |
| Nucleoli (GO:0005730)Q9H9A6 |                          | 0 |
| Endoplasmic reticulumQ96CN7 |                          | 0 |
| Nuclear bodies (GO:00Q7Z4G4 |                          | 0 |
| Cytosol (GO:0005829) Q9NXG2 |                          | 0 |
| Nucleoplasm (GO:00056Q96H12 |                          | 0 |
| Cytosol (GO:0005829);Q9ULI4 | Cytoplasm, cytoskeleton  | 0 |
| Nucleoplasm (GO:00056Q96BY7 | Preautophagosomal struct | 0 |
| Cytosol (GO:0005829);Q9Y6D6 | Cytoplasm. Cytoplasm, pe | 0 |
| Nuclear bodies (GO:00Q9P243 | Nucleus {ECO:0000250}. C | 0 |
| Cytosol (GO:0005829);Q15390 | Mitochondrion {ECO:00002 | 1 |
| Plasma membrane (GO:0B2RTY4 | Membrane {ECO:0000255};  | 0 |
| Cytosol (GO:0005829);015523 | Cytoplasm {ECO:0000269 P | 1 |
| Cytosol (GO:0005829) Q01813 | Cytoplasm {ECO:0000255 H | 1 |
| Nuclear bodies (GO:00P23497 | Nucleus. Nucleus, PML bo | 0 |
| Cytosol (GO:0005829);Q99612 | Nucleus.                 | 0 |
| Plasma membrane (GO:0014494 | Cell membrane; Multi-pas | 1 |
| Golgi apparatus (GO:0Q92859 | Cell membrane; Single-pa | 1 |
| Vesicles (GO:0043231)P46020 | Cell membrane {ECO:00003 | 0 |
| Cytosol (GO:0005829) Q9UBI4 | Membrane {ECO:0000305};  | 0 |
| Cytosol (GO:0005829) P14618 | Cytoplasm {ECO:0000269 P | 0 |
| Cytosol (GO:0005829) Q7Z478 | Cytoplasm {ECO:0000255 H | 0 |
| Nucleoli (GO:0005730)Q5QJE6 | Nucleus {ECO:0000269 Pub | 0 |
| Nucleoli (GO:0005730)Q9BUU2 | Nucleus {ECO:0000269 Pub | 0 |
| Nuclear bodies (GO:00Q12888 | Nucleus {ECO:0000269 Pub | 1 |
| Nucleoli fibrillar ceQ12816 |                          | 0 |
| Mitochondria (GO:0005Q9Y3B9 |                          | 0 |
| Cytosol (GO:0005829);P61586 | Cell membrane; Lipid-anc | 0 |
| Nuclear bodies (GO:00Q14562 | Nucleus {ECO:0000269 Pub | 1 |
| Cytosol (GO:0005829);Q05513 | Cytoplasm {ECO:0000269 P | 0 |
| Nucleoli (GO:0005730)P08048 | Nucleus.                 | 0 |

|                              |                          |   |
|------------------------------|--------------------------|---|
| Mitochondria (GO:0005Q9NSE4  | Mitochondrion matrix {EC | 1 |
| Cytosol (GO:0005829);Q8IVL0  | Nucleus outer membrane { | 0 |
| Mitochondria (GO:0005P51553  | Mitochondrion {ECO:00002 | 1 |
| Cytosol (GO:0005829);Q13951  | Nucleus {ECO:0000305}.   | 0 |
| Mitochondria (GO:0005Q15120  | Mitochondrion matrix.    | 1 |
| Cytosol (GO:0005829);P56524  | Nucleus. Cytoplasm. Note | 0 |
| Endoplasmic reticulumP22607  | Isoform 1: Cell membrane | 0 |
| Cytosol (GO:0005829);P80217  | Nucleus. Note=Nuclear fo | 0 |
| Mitochondria (GO:0005Q6AI08  |                          | 0 |
| Golgi apparatus (GO:0Q7Z736  |                          | 0 |
| Nucleoplasm (GO:00056Q02078  | Nucleus {ECO:0000255 PRO | 1 |
| Cytosol (GO:0005829);Q96G74  |                          | 0 |
| Cytosol (GO:0005829);P19532  | Nucleus.                 | 1 |
| Golgi apparatus (GO:0Q60488  | Mitochondrion outer memb | 0 |
| Endoplasmic reticulumQ14642  | Cell membrane {ECO:00003 | 0 |
| Nucleoplasm (GO:00056Q92917  | Nucleus {ECO:0000269 Pub | 1 |
| Cytosol (GO:0005829);Q4V328  | Early endosome membrane  | 0 |
| Cytosol (GO:0005829) Q9UET6  | Cytoplasm {ECO:0000255 H | 0 |
| Endoplasmic reticulumQ96HE9  | Cytoplasm {ECO:0000269 P | 0 |
| Vesicles (GO:0043231)P98196  | Cell membrane {ECO:00002 | 0 |
| Intermediate filament095602  | Nucleus, nucleolus {ECO: | 1 |
| Golgi apparatus (GO:0Q15012  | Endomembrane system {ECO | 0 |
| Cell Junctions (GO:0Q9UHH9   | Nucleus {ECO:0000269 Pub | 0 |
| Cytosol (GO:0005829);Q8N5C6  |                          | 0 |
| Centrosome (GO:000581000139  | Cytoplasm {ECO:0000250}. | 0 |
| Nucleoplasm (GO:00056Q14997  | Cytoplasm, cytosol {ECO: | 0 |
| Cytosol (GO:0005829);Q8IXJ6  | Nucleus. Cytoplasm, peri | 0 |
| Mitochondria (GO:0005075459  |                          | 0 |
| Nucleoli (GO:0005730)P78337  | Nucleus.                 | 0 |
| Actin filaments (GO:0Q9HCX4  | Cell membrane {ECO:00002 | 0 |
| Cytosol (GO:0005829);015021  | Cytoplasm {ECO:0000305}. | 0 |
| Nucleoplasm (GO:00056Q58EX2  | Cell membrane {ECO:00002 | 0 |
| Nuclear membrane (GO:Q8WUM0  | Nucleus, nuclear pore co | 0 |
| Nucleoli (GO:0005730)Q9H1E3  | Nucleus.                 | 1 |
| Endosomes (GO:0005768Q96QK1  | Cytoplasm. Membrane; Per | 0 |
| Cytosol (GO:0005829);060884  | Membrane {ECO:0000305};  | 0 |
| Midbody (GO:0030496);P20749  | Nucleus. Cytoplasm {ECO: | 0 |
| Cytosol (GO:0005829);060706  | Membrane {ECO:0000255 PR | 0 |
| Golgi apparatus (GO:0P22466  | Secreted {ECO:0000269 Pu | 0 |
| Golgi apparatus (GO:0Q9UHP7  | Cell membrane {ECO:00002 | 0 |
| Cytosol (GO:0005829) Q03167  | Secreted. Secreted, extr | 0 |
| Plasma membrane (GO:0P54709  | Cell membrane {ECO:00002 | 0 |
| Cytosol (GO:0005829) P46934  | Cytoplasm {ECO:0000250}. | 0 |
| Cytosol (GO:0005829);Q92521  | Endoplasmic reticulum me | 0 |
| Cytosol (GO:0005829) Q16659  | Cytoplasm {ECO:0000250}. | 0 |
| Centrosome (GO:000581014775  | Membrane {ECO:0000250 Un | 0 |
| Mitochondria (GO:0005Q9BXW7  |                          | 0 |
| Cytosol (GO:0005829);Q92890  | Nucleus {ECO:0000250 Uni | 0 |
| Vesicles (GO:0043231)P25092  | Cell membrane {ECO:00002 | 0 |
| Cytosol (GO:0005829);095163  | Cytoplasm {ECO:0000269 P | 1 |
| Golgi apparatus (GO:0005794) | Golgi apparatus {ECO:000 | 0 |
| Cytosol (GO:0005829) P11277  | Cytoplasm, cytoskeleton. | 0 |
| Mitochondria (GO:0005Q8WWI5  | Cell membrane {ECO:00002 | 0 |
| Cytosol (GO:0005829);Q9NX78  | Membrane {ECO:0000305};  | 0 |
| Cytosol (GO:0005829);Q86US8  | Nucleus, nucleolus. Chro | 0 |

|                             |                           |   |
|-----------------------------|---------------------------|---|
| Vesicles (GO:0043231)P53675 | Cytoplasmic vesicle memb  | 0 |
| Nucleoplasm (GO:00056095633 | Isoform 1: Secreted. ; Is | 0 |
| Cytosol (GO:0005829);Q9BV68 | Cytoplasm {ECO:0000269 P  | 0 |
| Nucleoplasm (GO:00056Q99583 | Nucleus.                  | 1 |
| Nucleoli (GO:0005730)Q2QGD7 | Nucleus {ECO:0000305}.    | 0 |
| Nucleoplasm (GO:00056Q6NYC1 | Nucleus, nucleoplasm {EC  | 0 |
| Vesicles (GO:0043231)P06746 | Nucleus. Cytoplasm. Note  | 0 |
| Golgi apparatus (GO:0Q9NSC7 | Golgi apparatus membrane  | 0 |
| Cytosol (GO:0005829);Q5MNZ9 | Golgi apparatus, trans-G  | 0 |
| Cytosol (GO:0005829);Q9HCG7 | Endoplasmic reticulum me  | 0 |
| Cytosol (GO:0005829) P08243 |                           | 0 |
| Cytosol (GO:0005829);Q14028 | Membrane; Multi-pass mem  | 0 |
| Cytosol (GO:0005829) P11940 | Cytoplasm {ECO:0000269 P  | 0 |
| Nucleoplasm (GO:00056Q96S53 | Nucleus {ECO:0000269 Pub  | 1 |
| Nucleoplasm (GO:00056Q9Y6A4 | Nucleus. Cytoplasm, cyto  | 0 |
| Centriolar satellite Q16825 | Cytoplasm, cytoskeleton   | 0 |
| Cytosol (GO:0005829);Q9NR50 |                           | 0 |
| Cell Junctions (GO:00Q9UQM7 | Cell junction, synapse {  | 0 |
| Nucleoli fibrillar ceQ13428 | Nucleus, nucleolus {ECO:  | 1 |
| Cytokinetic bridge (GP60953 | Cell membrane {ECO:00003  | 0 |
| Cytosol (GO:0005829);Q9H4L5 | Endoplasmic reticulum me  | 0 |
| Nuclear bodies (GO:00Q9NS91 | Nucleus {ECO:0000269 Pub  | 0 |
| Plasma membrane (GO:0P20020 | Cell membrane {ECO:00002  | 0 |
| Golgi apparatus (GO:0Q9UM21 | Alpha-1, 3-mannosyl-glyco | 0 |
| Cell Junctions (GO:00075083 | Cytoplasm, cytoskeleton   | 0 |
| Cytosol (GO:0005829);Q9NXJ0 | Membrane; Multi-pass mem  | 0 |
| Cytosol (GO:0005829);A1A4S6 | Cytoplasm {ECO:0000250}.  | 0 |
| Nucleoplasm (GO:00056Q15349 | Nucleus {ECO:0000269 Pub  | 0 |
| Nucleoplasm (GO:00056Q9NXR8 | Nucleus.                  | 1 |
| Cell Junctions (GO:00Q9NZU5 | Cytoplasm {ECO:0000250}.  | 1 |
| Nucleoli (GO:0005730)043709 | Nucleus {ECO:0000269 Pub  | 0 |
| Nucleoplasm (GO:00056Q15645 |                           | 0 |
| Cytosol (GO:0005829);Q15904 | Endoplasmic reticulum me  | 0 |
| Nucleoplasm (GO:00056P15923 | Nucleus.                  | 1 |
| Cytosol (GO:0005829);Q92519 | Cytoplasm {ECO:0000250}.  | 0 |
| Cytosol (GO:0005829);Q96EP5 | Cytoplasm {ECO:0000269 P  | 1 |
| Nucleoplasm (GO:00056095983 | Nucleus. Chromosome. Not  | 1 |
| Nucleoplasm (GO:00056Q14527 | Cytoplasm {ECO:0000250}.  | 0 |
| Nucleoplasm (GO:00056Q14320 | Nucleus {ECO:0000305}.    | 1 |
| Nucleoli (GO:0005730)P98173 | Secreted {ECO:0000305}.   | 0 |
| Nucleoplasm (GO:00056Q10570 | Nucleus, nucleoplasm.     | 1 |
| Cytosol (GO:0005829);Q53TN4 | Membrane {ECO:0000269 Pu  | 0 |
| Cytokinetic bridge (GQ16342 | Nucleus {ECO:0000305}.    | 0 |
| Nucleoli (GO:0005730)Q9H2J7 | Membrane {ECO:0000305};   | 0 |
| Cytosol (GO:0005829) P17612 | Cytoplasm. Cell membrane  | 0 |
| Actin filaments (GO:0P12814 | Cytoplasm, cytoskeleton   | 0 |
| Mitochondria (GO:0005Q9UK32 | Cytoplasm, cytosol {ECO:  | 0 |
| Vesicles (GO:0043231)095208 | Cytoplasm {ECO:0000269 P  | 0 |
| Intermediate filamentQ99952 | Nucleus {ECO:0000250}. C  | 0 |
| Focal adhesion sites Q7Z4I7 | Nucleus {ECO:0000305}. C  | 0 |
| Centriolar satellite Q96FT7 | Membrane {ECO:0000250};   | 0 |
| Vesicles (GO:0043231)Q15772 | Isoform 3: Nucleus.       | 0 |
| Cell Junctions (GO:00Q8TBB1 | Cytoplasm {ECO:0000250}.  | 0 |
| Endosomes (GO:0005768P02786 | Cell membrane {ECO:00002  | 0 |
| Cytosol (GO:0005829);P36956 | Endoplasmic reticulum me  | 0 |

|                              |        |                          |   |
|------------------------------|--------|--------------------------|---|
| Nucleoli fibrillar ce        | Q9UHB7 | Nucleus {ECO:0000269 Pub | 0 |
| Cytosol (GO:0005829);        | P51668 | Cytoplasm {ECO:0000269 P | 1 |
| Cytosol (GO:0005829);        | Q8N3R9 | Golgi apparatus {ECO:000 | 0 |
| Cytosol (GO:0005829);        | 094844 |                          | 0 |
| Nucleoplasm (GO:00056Q14683  |        | Nucleus {ECO:0000269 Pub | 1 |
| Nucleoplasm (GO:00056Q7KZI7  |        | Cell membrane; Periphera | 0 |
| Centrosome (GO:000581075330  |        | Cell surface {ECO:000025 | 0 |
| Microtubules (GO:0015Q96EP1  |        | Nucleus, PML body {ECO:0 | 0 |
| Endoplasmic reticulum        | 015460 | Endoplasmic reticulum lu | 0 |
| Cytosol (GO:0005829);        | Q12968 | Cytoplasm {ECO:0000269 P | 1 |
| Mitochondria (GO:0005Q96Q11  |        | Mitochondrion {ECO:00002 | 1 |
| Cytosol (GO:0005829);        | P49748 | Mitochondrion inner memb | 1 |
| Nucleoplasm (GO:00056Q94804  |        | Cell membrane {ECO:00002 | 0 |
| Nucleoli (GO:0005730) Q9UKB1 |        | Cytoplasm {ECO:0000250}. | 0 |
| Golgi apparatus (GO:0Q15027  |        | Recycling endosome membr | 0 |
| Centrosome (GO:000581Q14194  |        | Cytoplasm {ECO:0000269 P | 0 |
| Cytosol (GO:0005829);        | P57679 | Cell membrane {ECO:00002 | 0 |
| Endoplasmic reticulum        | Q9GZP9 | Endoplasmic reticulum me | 1 |
| Cytosol (GO:0005829);        | Q9Y6F6 | Cytoplasm, perinuclear r | 0 |
| Nucleoplasm (GO:00056Q9H6F2  |        | Sarcoplasmic reticulum m | 0 |
| Nucleoplasm (GO:00056P15151  |        | Isoform Alpha: Cell memb | 0 |
| Nucleoplasm (GO:00056P18887  |        | Nucleus {ECO:0000269 Pub | 1 |
| Vesicles (GO:0043231) Q8WTV0 |        | Cell membrane {ECO:00002 | 0 |
| Nucleoplasm (GO:00056P49736  |        | Nucleus {ECO:0000269 Pub | 1 |
| Plasma membrane (GO:0Q96RD6  |        | Cell membrane {ECO:00003 | 0 |
| Nucleoplasm (GO:00056Q9H3D4  |        | Nucleus {ECO:0000269 Pub | 1 |
| Centrosome (GO:000581Q96QP1  |        | Cytoplasm, cytosol {ECO: | 0 |
| Cytosol (GO:0005829);        | Q6P1M3 | Cytoplasm {ECO:0000269 P | 1 |
| Golgi apparatus (GO:0Q060658 |        |                          | 0 |
| Vesicles (GO:0043231) P51793 |        | Early endosome membrane  | 0 |
| Nucleoli (GO:0005730) Q9NVX2 |        | Nucleus, nucleolus {ECO: | 1 |
| Mitochondria (GO:0005P31040  |        | Mitochondrion inner memb | 1 |
| Nucleoplasm (GO:00056Q969G3  |        | Nucleus {ECO:0000255 PRO | 1 |
| Cytosol (GO:0005829);        | Q8TAX9 | Cytoplasm {ECO:0000269 P | 0 |
| Cytosol (GO:0005829);        | P29375 | Nucleus, nucleolus {ECO: | 0 |
| Golgi apparatus (GO:0Q06190  |        |                          | 0 |
| Focal adhesion sites         | Q96AC1 | Cytoplasm. Cytoplasm, ce | 0 |
| Cytosol (GO:0005829);        | 095342 | Membrane; Multi-pass mem | 0 |
| Endoplasmic reticulum        | P35354 | Microsome membrane; Peri | 1 |
| Cytosol (GO:0005829)         | Q9Y6M1 | Nucleus. Cytoplasm. Note | 0 |
| Centriolar satellite         | 043283 | Cytoplasm {ECO:0000269 P | 0 |
| Vesicles (GO:0043231) Q13492 |        | Cell membrane {ECO:00002 | 0 |
| Cytosol (GO:0005829)         | P46459 | Cytoplasm.               | 1 |
| Nucleoli (GO:0005730) P10070 |        | Nucleus {ECO:0000269 Pub | 0 |
| Mitochondria (GO:0005P82930  |        | Mitochondrion {ECO:00002 | 1 |
| Actin filaments (GO:0Q9UM47  |        | Cell membrane {ECO:00002 | 0 |
| Cytosol (GO:0005829);        | P54105 | Cytoplasm, cytosol {ECO: | 0 |
| Cytosol (GO:0005829)         | Q9Y2T4 |                          | 0 |
| Nucleoplasm (GO:00056Q15562  |        | Nucleus.                 | 1 |
| Nucleoplasm (GO:00056Q75530  |        | Nucleus. Chromosome. Not | 1 |
| Cytosol (GO:0005829);        | Q99816 | Cytoplasm {ECO:0000269 P | 0 |
| Nuclear speckles (GO:Q53F19  |        | Nucleus {ECO:0000269 Pub | 0 |
| Nucleoplasm (GO:00056Q43570  |        | Membrane; Single-pass ty | 0 |
| Nucleoplasm (GO:00056Q99685  |        | Cytoplasm, cytosol {ECO: | 0 |
| Microtubules (GO:0015Q60285  |        | Nucleus {ECO:0000269 Pub | 0 |

|                              |                          |   |
|------------------------------|--------------------------|---|
| Cytosol (GO:0005829) Q6V1X1  | Cytoplasm {ECO:0000269 P | 1 |
| Microtubules (GO:0015060721  | Membrane; Multi-pass mem | 0 |
| Golgi apparatus (GO:0Q9HCE3  | Nucleus {ECO:0000305}.   | 0 |
| Cytosol (GO:0005829) P49257  | Endoplasmic reticulum-Go | 0 |
| Endoplasmic reticulum Q9P035 | Endoplasmic reticulum me | 1 |
| Cytoplasmic bodies (GQ8WWN9  | Cytoplasm {ECO:0000250}. | 0 |
| Mitochondria (GO:0005043149  |                          | 0 |
| Vesicles (GO:0043231) Q9HBY0 | Membrane {ECO:0000305};  | 0 |
| Cytosol (GO:0005829); P06733 | Cytoplasm {ECO:0000269 P | 0 |
| Nucleoplasm (GO:00056Q13621  | Membrane; Multi-pass mem | 0 |
| Nucleoli fibrillar ce Q9HCE9 | Cell membrane {ECO:00002 | 0 |
| Cytosol (GO:0005829); Q9HCE6 | Cytoplasm {ECO:0000269 P | 0 |
| Vesicles (GO:0043231) P42681 | Cytoplasm {ECO:0000269 P | 0 |
| Nucleoplasm (GO:00056Q2TBF2  | Membrane {ECO:0000305};  | 0 |
| Endoplasmic reticulum 043526 | Cell membrane {ECO:00002 | 0 |
| Plasma membrane (GO:0P21452  | Cell membrane; Multi-pas | 0 |
| Cytosol (GO:0005829); Q9GZN1 | Cytoplasm, cytoskeleton  | 0 |
| Cytosol (GO:0005829); P30626 | Cytoplasm. Sarcoplasmic  | 0 |
| Cytosol (GO:0005829) 043432  |                          | 0 |
| Nucleoplasm (GO:00056Q8NFH4  | Chromosome, centromere,  | 0 |
| Nucleoplasm (GO:00056Q14563  | Secreted {ECO:0000250}.  | 0 |
| Centrosome (GO:000581Q9NYZ3  | Cytoplasm, cytoskeleton. | 0 |
| Cytosol (GO:0005829); Q99985 | Secreted.                | 0 |
| Cytosol (GO:0005829) Q5R3I4  |                          | 0 |
| Mitochondria (GO:0005P24752  | Mitochondrion {ECO:00002 | 1 |
| Plasma membrane (GO:0Q9NYQ6  | Cell membrane; Multi-pas | 1 |
| Nucleoplasm (GO:00056Q14966  | Nucleus speckle {ECO:000 | 0 |
| Cytosol (GO:0005829); P35612 | Cytoplasm, cytoskeleton. | 0 |
| Focal adhesion sites Q9UJF2  |                          | 0 |
| Cytosol (GO:0005829); Q9Y2B5 |                          | 0 |
| Vesicles (GO:0043231) P17032 | Nucleus {ECO:0000269 Pub | 0 |
| Mitochondria (GO:0005Q00325  | Mitochondrion inner memb | 1 |
| Endoplasmic reticulum Q53EP0 | Membrane {ECO:0000250};  | 0 |
| Nucleoplasm (GO:00056P15408  | Nucleus.                 | 1 |
| Cytosol (GO:0005829) Q9UBN1  | Cell membrane {ECO:00003 | 0 |
| Cytokinetic bridge (G094915  |                          | 0 |
| Intermediate filament Q92545 | Membrane {ECO:0000305};  | 0 |
| Cytosol (GO:0005829); Q16658 | Cytoplasm, cytosol {ECO: | 0 |
| Cytosol (GO:0005829); Q96EN8 |                          | 0 |
| Centriolar satellite 043379  | Nucleus {ECO:0000269 Pub | 0 |
| Plasma membrane (GO:0Q12959  | Membrane {ECO:0000269 Pu | 0 |
| Lysosomes (GO:0005764P51149  | Cytoplasmic vesicle, pha | 0 |
| Cytosol (GO:0005829) Q9UHQ4  | Endoplasmic reticulum me | 0 |
| Cytosol (GO:0005829); Q9NQW1 | Cytoplasm {ECO:0000269 P | 0 |
| Nucleoplasm (GO:00056Q15020  | Nucleus, nucleoplasm {EC | 0 |
| Golgi apparatus (GO:0Q53QZ3  | Cytoplasm {ECO:0000269 P | 0 |
| Microtubules (GO:0015P0DPH8  | Cytoplasm, cytoskeleton. | 1 |
| Golgi apparatus (GO:0Q02962  | Nucleus.                 | 0 |
| Nuclear speckles (GO:Q15024  | Nucleus, nucleolus {ECO: | 0 |
| Cytosol (GO:0005829); Q9H000 |                          | 0 |
| Nucleoplasm (GO:00056Q14566  | Nucleus. Note=Binds to c | 1 |
| Focal adhesion sites Q9Y3B8  | Isoform 1: Mitochondrion | 0 |
| Nucleoplasm (GO:00056Q9Y580  | Nucleus {ECO:0000269 Pub | 1 |
| Cytosol (GO:0005829); Q15434 | Nucleus {ECO:0000305}.   | 0 |
| Nuclear speckles (GO:Q9UIF9  | Nucleus, nucleolus {ECO: | 0 |



|                             |                          |   |
|-----------------------------|--------------------------|---|
| Nuclear bodies (GO:00Q9H3S7 | Nucleus. Cytoplasm. Cyto | 0 |
| Nucleoplasm (GO:00056P40692 | Nucleus {ECO:0000269 Pub | 1 |
| Cytosol (GO:0005829) P13051 | Isoform 1: Mitochondrion | 0 |
| Cytosol (GO:0005829);P31512 | Microsome membrane {ECO: | 0 |
| Cytosol (GO:0005829);Q9Y2M5 | Cytoplasm, perinuclear r | 0 |
| Cytosol (GO:0005829);Q96NT5 | Apical cell membrane; Mu | 0 |
| Plasma membrane (GO:0Q8IZ07 | Cell membrane {ECO:00002 | 0 |
| Cytosol (GO:0005829);P55327 |                          | 0 |
| Plasma membrane (GO:0Q9NWQ8 | Cell membrane {ECO:00002 | 1 |
| Cell Junctions (GO:00Q9BRR8 |                          | 0 |
| Mitochondria (GO:0005P32942 | Membrane; Single-pass ty | 0 |
| Plasma membrane (GO:0P43121 | Membrane; Single-pass ty | 0 |
| Nucleoplasm (GO:00056075487 | Cell membrane {ECO:00002 | 0 |
| Golgi apparatus (GO:0Q9NUK0 | Nucleus {ECO:0000269 Pub | 0 |
| Centrosome (GO:000581Q9P1Y5 | Cytoplasm, cytoskeleton  | 0 |
| Cytosol (GO:0005829) P47736 | Golgi apparatus membrane | 0 |
| Nucleoplasm (GO:00056Q9HCS7 | Nucleus {ECO:0000269 Pub | 1 |
| Cytosol (GO:0005829);Q92888 | Cytoplasm {ECO:0000269 P | 0 |
| Cytosol (GO:0005829) Q15833 |                          | 0 |
| Cytosol (GO:0005829);014733 | Nucleus. Cytoplasm {ECO: | 0 |
| Nucleoplasm (GO:00056Q9NPI5 |                          | 0 |
| Cytosol (GO:0005829) Q16760 | Isoform 2: Cytoplasm {EC | 0 |
| Cytosol (GO:0005829);Q8WZ74 | Cytoplasm, cell cortex { | 0 |
| Nucleoli (GO:0005730)094805 | Nucleus {ECO:0000303 Pub | 0 |
| Nucleoplasm (GO:00056P10826 | Nucleus {ECO:0000269 Pub | 0 |
| Nucleoplasm (GO:00056Q02880 | Cytoplasm. Nucleus, nucl | 0 |
| Golgi apparatus (GO:0Q9HD45 | Membrane {ECO:0000305};  | 0 |
| Cytosol (GO:0005829);Q00653 | Nucleus. Cytoplasm. Note | 0 |
| Nucleoli (GO:0005730)Q9NPD8 | Nucleus {ECO:0000269 Pub | 0 |
| Actin filaments (GO:0060237 | Cytoplasm, cytoskeleton  | 0 |
| Nucleoli (GO:0005730)Q12789 | Nucleus.                 | 0 |
| Centriolar satellite P24394 | Cell membrane; Single-pa | 0 |
| Golgi apparatus (GO:0Q8TEY7 | Cytoplasm, perinuclear r | 0 |
| Cytosol (GO:0005829) 075914 | Cytoplasm {ECO:0000250}. | 0 |
| Vesicles (GO:0043231)Q9Y6Q1 | Cytoplasm, perinuclear r | 0 |
| Cytosol (GO:0005829) 043602 | Cytoplasm {ECO:0000305}. | 0 |
| Nucleoplasm (GO:00056P09012 | Nucleus.                 | 1 |
| Nucleoli (GO:0005730)Q9NQ4  | Nucleus, nucleolus {ECO: | 0 |
| Cytosol (GO:0005829);Q13409 | Cytoplasm, cytoskeleton  | 0 |
| Cytosol (GO:0005829);Q7Z5R6 | Cell membrane {ECO:00002 | 0 |
| Cytosol (GO:0005829);075427 |                          | 0 |
| Nucleoli fibrillar ceQ5HYJ3 | Nucleus speckle {ECO:000 | 0 |
| Nucleoplasm (GO:00056Q8N6T7 | Nucleus, nucleoplasm {EC | 1 |
| Vesicles (GO:0043231)P14679 | Melanosome membrane {ECO | 0 |
| Nucleoplasm (GO:00056Q15054 | Cytoplasm {ECO:0000250 U | 0 |
| Actin filaments (GO:0P35609 | Cytoplasm, myofibril, sa | 0 |
| Cytosol (GO:0005829);P47756 | Cytoplasm, cytoskeleton  | 0 |
| Nucleoplasm (GO:00056Q9Y3Q0 | Cell membrane {ECO:00002 | 0 |
| Mitochondria (GO:0005Q6IE81 | Cytoplasm {ECO:0000269 P | 0 |
| Nucleoplasm (GO:00056Q8WUT9 | Mitochondrion inner memb | 0 |
| Cytosol (GO:0005829);P49459 |                          | 0 |
| Cytosol (GO:0005829);Q8NDV3 | Nucleus {ECO:0000250 Uni | 1 |
| Endoplasmic reticulumP23142 | Secreted, extracellular  | 0 |
| Nucleoplasm (GO:00056075928 | Nucleus speckle {ECO:000 | 0 |
| Cytosol (GO:0005829);P49418 | Cytoplasmic vesicle, sec | 0 |

|                             |                          |   |
|-----------------------------|--------------------------|---|
| Nucleoli fibrillar ceP10398 |                          | 0 |
| Mitochondria (GO:0005Q96RQ3 | Mitochondrion matrix {EC | 1 |
| Vesicles (GO:0043231)Q9UQV4 | Lysosome membrane {ECO:0 | 0 |
| Actin filaments (GO:0P61086 | Cytoplasm {ECO:0000250 U | 1 |
| Cytosol (GO:0005829);Q86UW6 | Cytoplasm {ECO:0000250}. | 0 |
| Cytosol (GO:0005829) Q9NQ88 | Cytoplasm {ECO:0000269 P | 0 |
| Nucleoli (GO:0005730)075386 | Nucleus. Cell membrane.  | 0 |
| Cytosol (GO:0005829);015056 | Cytoplasm {ECO:0000269 P | 0 |
| Cytosol (GO:0005829);Q13362 | Nucleus. Chromosome, cen | 0 |
| Cytosol (GO:0005829);Q9NWB1 | Nucleus {ECO:0000250}. C | 0 |
| Golgi apparatus (GO:0P62873 |                          | 0 |
| Nucleoplasm (GO:00056P31269 | Nucleus.                 | 1 |
| Golgi apparatus (GO:0P05305 | Secreted.                | 0 |
| Nucleoplasm (GO:00056P55197 | Nucleus {ECO:0000269 Pub | 1 |
| Golgi apparatus (GO:0Q9H0M4 |                          | 0 |
| Vesicles (GO:0043231)P41586 | Cell membrane; Multi-pas | 0 |
| Golgi apparatus (GO:0043736 | Membrane {ECO:0000305};  | 0 |
| Nucleoplasm (GO:00056043847 |                          | 0 |
| Mitochondria (GO:0005Q9Y277 | Mitochondrion outer memb | 1 |
| Centrosome (GO:000581Q15154 | Cytoplasm, cytoskeleton. | 0 |
| Nucleoplasm (GO:00056Q9HCJ0 |                          | 0 |
| Nuclear speckles (GO:043439 | Nucleus {ECO:0000305}.   | 0 |
| Microtubules (GO:0015060477 | Cytoplasm {ECO:0000269 P | 0 |
| Nucleoplasm (GO:00056Q96J02 | Cell membrane {ECO:00002 | 0 |
| Cytosol (GO:0005829);Q9NZM6 | Membrane {ECO:0000305};  | 0 |
| Golgi apparatus (GO:0Q9BRK5 | Isoform 1: Golgi apparat | 0 |
| Vesicles (GO:0043231)Q8N4F0 | Secreted {ECO:0000250}.  | 0 |
| Golgi apparatus (GO:0015350 | Nucleus {ECO:0000269 Pub | 0 |
| Cytosol (GO:0005829);Q9H0E2 | Cytoplasm {ECO:0000305}. | 0 |
| Cytosol (GO:0005829);Q9Y2X8 |                          | 0 |
| Endoplasmic reticulumQ15846 | Secreted {ECO:0000305}.  | 0 |
| Nucleoplasm (GO:00056Q06455 | Nucleus {ECO:0000255 PRO | 1 |
| Cell Junctions (GO:00Q12864 | Cell membrane {ECO:00003 | 0 |
| Nuclear speckles (GO:Q96FV9 | Isoform 1: Nucleus speck | 0 |
| Endoplasmic reticulumQ9Y680 | Endoplasmic reticulum lu | 1 |
| Plasma membrane (GO:0Q9BZF3 | Cytoplasm, cytosol {ECO: | 0 |
| Mitochondria (GO:0005P43003 | Cell membrane {ECO:00002 | 0 |
| Nucleoplasm (GO:00056P13010 | Nucleus {ECO:0000269 Pub | 0 |
| Cytosol (GO:0005829);Q9BS40 | Cytoplasm {ECO:0000305}. | 0 |
| Mitochondria (GO:0005Q13342 | Nucleus {ECO:0000269 Pub | 0 |
| Nucleoplasm (GO:00056Q9BUB5 | Isoform 2: Cytoplasm.; I | 0 |
| Focal adhesion sites Q9HBL0 | Cell surface {ECO:000026 | 0 |
| Nuclear bodies (GO:00Q8N1G1 | Nucleus {ECO:0000269 Pub | 1 |
| Endoplasmic reticulumQ9NR31 | Endoplasmic reticulum {E | 0 |
| Cytosol (GO:0005829);Q9UNH5 | Nucleus {ECO:0000269 Pub | 0 |
| Cytosol (GO:0005829) 095398 | Endomembrane system {ECO | 0 |
| Focal adhesion sites Q9POU3 | Nucleus {ECO:0000269 Pub | 0 |
| Nucleoplasm (GO:00056Q96RK0 | Nucleus {ECO:0000255 PRO | 1 |
| Cytosol (GO:0005829) Q05469 | Cell membrane. Membrane, | 0 |
| Endoplasmic reticulumP37268 | Endoplasmic reticulum me | 1 |
| Intermediate filamentQ15102 | Cytoplasm.               | 0 |
| Nucleoplasm (GO:00056060890 | Cell junction, synapse.  | 0 |
| Nuclear speckles (GO:Q14807 | Nucleus {ECO:0000269 Pub | 0 |
| Cytosol (GO:0005829) 076038 | Cytoplasm. Secreted {ECO | 0 |
| Cytosol (GO:0005829) Q5VZK9 | Cytoplasm {ECO:0000269 P | 0 |

|                                |                          |   |
|--------------------------------|--------------------------|---|
| Cytosol (GO:0005829) P36871    | Isoform 1: Cytoplasm.    | 0 |
| Cytosol (GO:0005829);Q92499    | Nucleus. Cytoplasm. Cyto | 0 |
| Cytosol (GO:0005829);P50570    | Cytoplasm. Cytoplasm, cy | 0 |
| Cell Junctions (GO:00043491    | Cytoplasm, cytoskeleton  | 0 |
| Cytosol (GO:0005829) Q6UVY6    | Endoplasmic reticulum me | 0 |
| Lysosomes (GO:0005764015400    | Early endosome membrane  | 0 |
| Centrosome (GO:000581Q9UNT1    | Cytoplasm, cytoskeleton, | 0 |
| Centriolar satellite Q14145    | Cytoplasm. Nucleus. Note | 1 |
| Mitochondria (GO:0005Q9HD43    | Cell projection, microvi | 0 |
| Plasma membrane (GO:0P40126    | Melanosome membrane {ECO | 0 |
| Golgi apparatus (GO:0Q9NQ7     | Membrane {ECO:0000305};  | 0 |
| Cytosol (GO:0005829);Q68DQ2    |                          | 0 |
| Nucleoplasm (GO:00056Q9UF33    | Membrane {ECO:0000250};  | 0 |
| Nucleoplasm (GO:00056P48380    | Nucleus {ECO:0000305}.   | 0 |
| Nuclear bodies (GO:00Q5UIP0    | Nucleus {ECO:0000269 Pub | 0 |
| Intermediate filamentP51531    | Nucleus.                 | 1 |
| Nucleoli fibrillar ceQ9Y6P5    | Nucleus {ECO:0000269 Pub | 0 |
| Nuclear bodies (GO:00Q6ZRS2    | Nucleus {ECO:0000255 PRO | 1 |
| Nucleoli (GO:0005730)Q15397    | Nucleus, nucleolus {ECO: | 0 |
| Cytosol (GO:0005829);Q9H2S1    | Membrane; Multi-pass mem | 0 |
| Cell Junctions (GO:00P49768    | Endoplasmic reticulum {E | 0 |
| Mitochondria (GO:0005P36551    | Mitochondrion intermembr | 1 |
| Cytosol (GO:0005829);Q9NY35    | Membrane {ECO:0000305};  | 0 |
| Endoplasmic reticulumQ9UQ07    | Cytoplasm {ECO:0000250 U | 0 |
| Cytosol (GO:0005829) P07900    | Nucleus {ECO:0000250 Uni | 0 |
| Nucleoplasm (GO:00056P28749    | Nucleus {ECO:0000305}.   | 1 |
| Cytosol (GO:0005829);Q9Y2H0    | Membrane {ECO:0000250};  | 0 |
| Cytosol (GO:0005829) Q9UPX0    | Cell junction, synapse,  | 0 |
| Centrosome (GO:000581014777    | Nucleus. Chromosome, cen | 1 |
| Nuclear bodies (GO:00Q5VWQ0    | Nucleus {ECO:0000250}.   | 1 |
| Cell Junctions (GO:00Q5TCQ9    | Cell membrane; Periphera | 0 |
| Cytosol (GO:0005829);P02771    | Secreted.                | 0 |
| Nucleoplasm (GO:00056P36402    | Nucleus.                 | 1 |
| Cytosol (GO:0005829);Q86WC4    | Lysosome membrane {ECO:0 | 0 |
| Nuclear bodies (GO:00Q8WW12    | Nucleus {ECO:0000269 Pub | 1 |
| Intermediate filamentQ9NVH0    | Nucleus {ECO:0000269 Pub | 0 |
| Mitochondria (GO:0005P78540    | Mitochondrion {ECO:00002 | 1 |
| Nucleoplasm (GO:00056Q06413    | Nucleus {ECO:0000250 Uni | 0 |
| Nucleoplasm (GO:0005654);Vesic | Cell membrane {ECO:00002 | 0 |
| Nucleoplasm (GO:00056Q13835    | Isoform 1: Nucleus. Cell | 0 |
| Cytosol (GO:0005829);Q9GZZ9    | Cytoplasm {ECO:0000269 P | 0 |
| Cytosol (GO:0005829);094768    | Nucleus {ECO:0000269 Pub | 0 |
| Nucleoplasm (GO:00056060729    | Nucleus, nucleolus. Nucl | 0 |
| Nucleoplasm (GO:00056Q9Y2H8    | Nucleus {ECO:0000305}.   | 0 |
| Mitochondria (GO:0005P98164    | Apical cell membrane {EC | 0 |
| Plasma membrane (GO:0Q9H9V9    | Cytoplasm {ECO:0000269 P | 0 |
| Nucleoplasm (GO:00056Q9UNI6    | Nucleus {ECO:0000269 Pub | 0 |
| Vesicles (GO:0043231)Q86V21    | Cytoplasm, cytosol {ECO: | 0 |
| Golgi apparatus (GO:0Q14154    | Mitochondrion {ECO:00002 | 0 |
| Nucleoplasm (GO:00056Q86UW7    | Cytoplasmic vesicle memb | 0 |
| Cytosol (GO:0005829);Q9Y5E5    | Cell membrane {ECO:00002 | 0 |
| Vesicles (GO:0043231)Q9UN73    | Isoform 1: Cell membrane | 0 |
| Cytosol (GO:0005829);Q9Y5H1    | Cell membrane {ECO:00002 | 0 |
| Cytosol (GO:0005829);Q9Y547    | Cell projection, cilium  | 0 |
| Cytosol (GO:0005829);043520    | Cell membrane {ECO:00002 | 0 |

|                             |                          |   |
|-----------------------------|--------------------------|---|
| Plasma membrane (GO:0Q99665 | Membrane; Single-pass ty | 1 |
| Nucleoplasm (GO:00056Q6STE5 | Nucleus {ECO:0000269 Pub | 1 |
| Cytosol (GO:0005829);Q9NW82 |                          | 0 |
| Nucleoplasm (GO:00056015117 | Cytoplasm {ECO:0000269 P | 0 |
| Actin filaments (GO:0Q96JB8 | Cytoplasm {ECO:0000269 P | 1 |
| Aggresome (GO:0016235Q9C0K7 | Nucleus {ECO:0000269 Pub | 0 |
| Vesicles (GO:0043231)Q7L1Q6 |                          | 0 |
| Golgi apparatus (GO:0Q9BXJ4 | Secreted {ECO:0000305}.  | 0 |
| Mitochondria (GO:0005P23368 | Mitochondrion matrix.    | 1 |
| Nuclear membrane (GO:Q49AR2 |                          | 0 |
| Cytosol (GO:0005829);060583 | Cytoplasm, perinuclear r | 0 |
| Cytosol (GO:0005829);Q9P2D6 |                          | 0 |
| Cell Junctions (GO:00Q9Y2J2 | Cytoplasm, cytoskeleton  | 0 |
| Cell Junctions (GO:00Q53SF7 |                          | 0 |
| Nucleoli (GO:0005730)Q92796 |                          | 0 |
| Nucleoplasm (GO:00056Q9NUC0 |                          | 0 |
| Mitochondria (GO:0005Q9NWU5 | Mitochondrion {ECO:00002 | 0 |
| Cytosol (GO:0005829);Q8TEQ6 | Nucleus, nucleoplasm {EC | 0 |
| Cytosol (GO:0005829);P41145 | Cell membrane {ECO:00002 | 1 |
| Cytosol (GO:0005829);Q14494 | Endoplasmic reticulum me | 0 |
| Cytosol (GO:0005829) Q9P283 | Membrane; Single-pass ty | 0 |
| Nucleoplasm (GO:00056P49841 | Cytoplasm {ECO:0000269 P | 0 |
| Mitochondria (GO:0005P18084 | Membrane; Single-pass ty | 0 |
| Cytosol (GO:0005829);Q8IUD2 | Cytoplasm, cytoskeleton, | 0 |
| Cytosol (GO:0005829);014980 | Cytoplasm. Nucleus, nucl | 0 |
| Cytosol (GO:0005829);043567 | Endoplasmic reticulum me | 0 |
| Vesicles (GO:0043231)Q9HCF6 | Membrane {ECO:0000269 Pu | 0 |
| Nucleoplasm (GO:00056Q86YC2 | Nucleus {ECO:0000269 Pub | 1 |
| Nucleoplasm (GO:00056Q5JWR5 | Golgi apparatus membrane | 0 |
| Cytosol (GO:0005829) Q9NU23 |                          | 0 |
| Mitochondria (GO:0005P21953 | Mitochondrion matrix.    | 1 |
| Cytosol (GO:0005829);Q92794 | Nucleus. Nucleus, nucleo | 0 |
| Cytosol (GO:0005829);Q5VYS8 | Cytoplasm {ECO:0000269 P | 1 |
| Nucleoplasm (GO:00056Q6ISB3 | Nucleus {ECO:0000269 Pub | 0 |
| Cytoplasmic bodies (GQ92973 | Cytoplasm. Nucleus.      | 1 |
| Nucleoplasm (GO:00056Q02809 | Rough endoplasmic reticu | 0 |
| Cytosol (GO:0005829) Q93086 | Membrane; Multi-pass mem | 0 |
| Cytosol (GO:0005829);Q9Y2L1 | Cytoplasm {ECO:0000269 P | 0 |
| Centriolar satellite Q8WXW3 | Cytoplasm, cytoskeleton, | 0 |
| Cytosol (GO:0005829);Q9H7E2 | Cytoplasm {ECO:0000269 P | 0 |
| Nucleoli (GO:0005730)Q9UHK0 | Nucleus {ECO:0000269 Pub | 0 |
| Nucleoplasm (GO:00056Q9NTI5 | Nucleus {ECO:0000250 Uni | 1 |
| Mitochondria (GO:0005P55809 | Mitochondrion matrix.    | 1 |
| Golgi apparatus (GO:0Q5VZM2 | Cytoplasm {ECO:0000269 P | 0 |
| Centriolar satellite Q9NQC7 | Cytoplasm {ECO:0000269 P | 0 |
| Cytosol (GO:0005829);075467 | Nucleus {ECO:0000305}.   | 0 |
| Nucleoplasm (GO:00056Q8TAW3 | Nucleus {ECO:0000305}.   | 0 |
| Cytosol (GO:0005829);Q9BWM5 | Nucleus {ECO:0000305}.   | 0 |
| Nucleoli fibrillar ceQ9NXT0 | Nucleus {ECO:0000305}.   | 0 |
| Nuclear speckles (GO:Q9NWS9 | Nucleus {ECO:0000255 PRO | 0 |
| Nucleoplasm (GO:00056043296 | Nucleus {ECO:0000305}.   | 0 |
| Cytosol (GO:0005829);P46782 |                          | 0 |
| Nucleoplasm (GO:00056Q96MU7 | Nucleus {ECO:0000269 Pub | 0 |
| Cytosol (GO:0005829) Q9UQN3 | Cytoplasm, cytosol {ECO: | 0 |
| Nuclear speckles (GO:Q9UNP9 | Nucleus {ECO:0000269 Pub | 0 |

|                                |                          |   |
|--------------------------------|--------------------------|---|
| Cytosol (GO:0005829);075844    | Endoplasmic reticulum me | 0 |
| Mitochondria (GO:0005Q9NQZ5    | Mitochondrion {ECO:00003 | 0 |
| Mitochondria (GO:0005Q8NC60    | Mitochondrion inner memb | 1 |
| Cytosol (GO:0005829);Q13127    | Nucleus {ECO:0000269 Pub | 1 |
| Cytosol (GO:0005829) P42357    |                          | 0 |
| Cytosol (GO:0005829);Q8WYL5    | Cytoplasm, cytoskeleton. | 0 |
| Cytosol (GO:0005829);P09211    | Cytoplasm {ECO:0000269 P | 0 |
| Vesicles (GO:0043231)Q06481    | Cell membrane {ECO:00003 | 0 |
| Endoplasmic reticulumA2RU67    | Membrane {ECO:0000305};  | 0 |
| Plasma membrane (GO:0P46721    | Cell membrane; Multi-pas | 1 |
| Nucleoplasm (GO:00056Q9Y2W2    | Nucleus. Cytoplasm. Note | 0 |
| Cytosol (GO:0005829) Q13347    | Cytoplasm {ECO:0000255 H | 0 |
| Cytosol (GO:0005829);Q07092    | Secreted, extracellular  | 0 |
| Centrosome (GO:000581P40222    |                          | 0 |
| Cytosol (GO:0005829);P04114    | Cytoplasm {ECO:0000269 P | 0 |
| Cytosol (GO:0005829);Q15788    | Nucleus {ECO:0000255 PRO | 0 |
| Cytokinetic bridge (GQ8NDL9    | Cytoplasm, cytosol {ECO: | 0 |
| Actin filaments (GO:0Q9Y2G0    | Cell membrane {ECO:00002 | 1 |
| Intermediate filament014782    | Cytoplasm, cytoskeleton  | 0 |
| Intermediate filaments (GO:004 | Cytoplasm {ECO:0000269 P | 0 |
| Mitochondria (GO:0005P40939    | Mitochondrion {ECO:00002 | 1 |
| Cytosol (GO:0005829) Q9UPY8    | Cytoplasm, cytoskeleton  | 0 |
| Nucleoplasm (GO:00056P27708    | Cytoplasm {ECO:0000269 P | 0 |
| Golgi apparatus (GO:0P13987    | Cell membrane; Lipid-anc | 0 |
| Vesicles (GO:0043231)P27701    | Cell membrane {ECO:00002 | 0 |
| Nucleoplasm (GO:00056Q5H9F3    | Nucleus {ECO:0000269 Pub | 1 |
| Nuclear bodies (GO:00P46100    | Nucleus. Chromosome, tel | 1 |
| Centrosome (GO:000581Q9Y3D8    | Nucleus, nucleoplasm. Nu | 0 |
| Nucleoplasm (GO:00056Q9NPC7    | Nucleus {ECO:0000269 Pub | 1 |
| Nuclear speckles (GO:Q03112    | Nucleus {ECO:0000269 Pub | 0 |
| Cell Junctions (GO:00015126    | Golgi apparatus, trans-G | 0 |
| Cytosol (GO:0005829) P48147    | Cytoplasm.               | 1 |
| Endoplasmic reticulumQ8IYU2    | Golgi apparatus, Golgi s | 0 |
| Actin filaments (GO:0094967    | Cytoplasm, cytoskeleton  | 0 |
| Mitochondria (GO:0005Q6NUK1    | Mitochondrion inner memb | 1 |
| Cytosol (GO:0005829) Q9Y6R4    | Cytoplasm, perinuclear r | 0 |
| Cytosol (GO:0005829);P08183    | Cell membrane {ECO:00002 | 0 |
| Cytosol (GO:0005829);014771    | Nucleus {ECO:0000255 PRO | 0 |
| Cytosol (GO:0005829);P15121    | Cytoplasm.               | 0 |
| Cytosol (GO:0005829);075131    | Nucleus {ECO:0000269 Pub | 0 |
| Nucleoli (GO:0005730)Q9NYV6    | Nucleus, nucleolus {ECO: | 1 |
| Cytosol (GO:0005829);Q14247    | Cytoplasm, cytoskeleton  | 0 |
| Centrosome (GO:000581096014    | Secreted, extracellular  | 0 |
| Mitochondria (GO:0005P46199    | Mitochondrion.           | 1 |
| Centriolar satellite 094830    | Cytoplasm, cytosol. Endo | 0 |
| Centrosome (GO:000581Q5SRH9    |                          | 0 |
| Cytosol (GO:0005829);P42566    | Cytoplasm. Cell membrane | 0 |
| Nucleoplasm (GO:00056Q13415    | Nucleus.                 | 1 |
| Cytosol (GO:0005829) Q676U5    | Cytoplasm {ECO:0000269 P | 0 |
| Vesicles (GO:0043231)Q9NVE5    |                          | 0 |
| Nucleoplasm (GO:00056Q92698    | Nucleus {ECO:0000269 Pub | 1 |
| Cytosol (GO:0005829) Q6P0Q8    | Cytoplasm, cytoskeleton  | 0 |
| Cytosol (GO:0005829);P31689    | Membrane {ECO:0000305 Pu | 0 |
| Golgi apparatus (GO:0P15291    | Isoform Long: Golgi appa | 0 |
| Cytosol (GO:0005829);Q9NZZ3    | Cytoplasm, cytosol. Endo | 0 |

|                             |                          |   |
|-----------------------------|--------------------------|---|
| Cytosol (GO:0005829);Q12986 | Nucleus.                 | 1 |
| Cytosol (GO:0005829);Q9UNQ2 | Nucleus, nucleoplasm {EC | 1 |
| Cytosol (GO:0005829);Q9UI26 | Cytoplasm {ECO:0000269 P | 1 |
| Cytosol (GO:0005829);Q9BQI3 | Cytoplasm {ECO:0000250}. | 0 |
| Microtubules (GO:0015Q9Y5X0 | Cytoplasm. Endosome memb | 0 |
| Nucleoplasm (GO:00056P49903 | Isoform 1: Cell membrane | 0 |
| Mitochondria (GO:0005Q13084 | Mitochondrion {ECO:00002 | 1 |
| Lipid droplets (GO:00P09105 |                          | 0 |
| Nuclear speckles (GO:Q96DU7 | Nucleus {ECO:0000269 Pub | 0 |
| Nucleoplasm (GO:00056Q9NW64 | Nucleus {ECO:0000269 Pub | 0 |
| Vesicles (GO:0043231)Q15363 | Cytoplasmic vesicle memb | 0 |
| Endoplasmic reticulumP37059 | Membrane {ECO:0000305};  | 0 |
| Cytosol (GO:0005829) Q9NUQ3 | Nucleus membrane {ECO:00 | 0 |
| Cytokinetic bridge (G014829 |                          | 0 |
| Plasma membrane (GO:0Q9GZY6 | Cell membrane {ECO:00002 | 1 |
| Cytosol (GO:0005829);Q7Z6Z7 | Cytoplasm {ECO:0000269 P | 1 |
| Cytosol (GO:0005829);043264 | Cytoplasm {ECO:0000269 P | 0 |
| Endoplasmic reticulumQ9H6U8 | Endoplasmic reticulum me | 0 |
| Nucleoplasm (GO:00056Q9NPH5 | Endoplasmic reticulum me | 0 |
| Peroxisomes (GO:00057015254 | Peroxisome {ECO:0000305} | 0 |
| Vesicles (GO:0043231)Q13614 | Cytoplasm {ECO:0000269 P | 0 |
| Vesicles (GO:0043231)075807 | Endoplasmic reticulum me | 0 |
| Cytosol (GO:0005829);Q15654 | Cytoplasm, cytoskeleton  | 0 |
| Golgi apparatus (GO:0P22303 | Cell junction, synapse { | 0 |
| Cytosol (GO:0005829) P02792 |                          | 0 |
| Nucleoplasm (GO:00056Q9BXP5 | Nucleus, nucleoplasm {EC | 0 |
| Cell Junctions (GO:00Q9UBE8 | Nucleus {ECO:0000250}. C | 0 |
| Plasma membrane (GO:0095450 | Secreted, extracellular  | 0 |
| Nuclear speckles (GO:Q14CW9 | Nucleus {ECO:0000255 HAM | 0 |
| Cell Junctions (GO:00Q32NB8 | Mitochondrion {ECO:00002 | 0 |
| Cytosol (GO:0005829);P62195 | Cytoplasm {ECO:0000305}. | 0 |
| Nuclear bodies (GO:00Q96RL1 | Nucleus {ECO:0000269 Pub | 1 |
| Vesicles (GO:0043231)P08253 | Isoform 1: Secreted, ext | 0 |
| Endoplasmic reticulumQ7L5N7 | Endoplasmic reticulum me | 0 |
| Cytosol (GO:0005829);Q8N543 | Isoform 1: Cytoplasm. Nu | 1 |
| Actin filaments (GO:0P78314 |                          | 0 |
| Nucleoli (GO:0005730)P78316 | Nucleus, nucleolus {ECO: | 0 |
| Nucleoplasm (GO:00056P35611 | Cytoplasm, cytoskeleton. | 0 |
| Mitochondria (GO:0005Q9H9P8 | Mitochondrion {ECO:00002 | 1 |
| Mitochondria (GO:0005Q9P2K2 | Secreted {ECO:0000269 Pu | 0 |
| Nucleoplasm (GO:00056Q9Y224 | Nucleus {ECO:0000269 Pub | 0 |
| Plasma membrane (GO:0Q14112 | Secreted, extracellular  | 0 |
| Nuclear speckles (GO:Q13435 | Nucleus {ECO:0000269 Pub | 0 |
| Cytosol (GO:0005829);095467 | Cytoplasmic vesicle, sec | 0 |
| Cytosol (GO:0005829);000429 | Cytoplasm, cytosol. Golg | 0 |
| Cytosol (GO:0005829);P12272 | Cytoplasm. Nucleus. Secr | 0 |
| Nucleoplasm (GO:00056Q96KR7 | Nucleus matrix. Note=Loc | 1 |
| Golgi apparatus (GO:0Q96RQ1 | Endoplasmic reticulum-Go | 0 |
| Nucleoplasm (GO:00056Q92754 | Nucleus {ECO:0000269 Pub | 1 |
| Centrosome (GO:000581014965 | Cytoplasm, cytoskeleton, | 0 |
| Cytosol (GO:0005829) 000625 | Nucleus {ECO:0000269 Pub | 0 |
| Cytosol (GO:0005829);Q9H7C9 | Cytoplasm {ECO:0000250}. | 0 |
| Cytosol (GO:0005829);P48378 | Nucleus {ECO:0000250 Uni | 0 |
| Cytosol (GO:0005829);000204 | Cytoplasm, cytosol {ECO: | 0 |
| Endoplasmic reticulumQ9Y672 | Endoplasmic reticulum me | 1 |

|                             |                          |   |
|-----------------------------|--------------------------|---|
| Cytosol (GO:0005829) 075175 | Cytoplasm {ECO:0000305}. | 0 |
| Nucleoplasm (GO:00056Q9HCN6 | Isoform 1: Cell membrane | 0 |
| Cytosol (GO:0005829);P29074 | Cell membrane {ECO:00002 | 0 |
| Nucleoli (GO:0005730)Q9NVP1 | Nucleus, nucleolus {ECO: | 0 |
| Nucleoplasm (GO:00056Q92945 | Nucleus {ECO:0000269 Pub | 0 |
| Nucleoplasm (GO:00056Q8TDY4 | Cytoplasm {ECO:0000269 P | 0 |
| Nucleoplasm (GO:00056Q9UBC3 | Nucleus {ECO:0000269 Pub | 1 |
| Cytokinetic bridge (GQ9ULW0 | Nucleus {ECO:0000269 Pub | 1 |
| Actin filaments (GO:0Q9NUG6 | Cytoplasm {ECO:0000305}. | 0 |
| Plasma membrane (GO:0Q9H4G0 | Cytoplasm, cytoskeleton. | 0 |
| Cytosol (GO:0005829);P46059 | Membrane; Multi-pass mem | 0 |
| Cytosol (GO:0005829);Q9NXR5 |                          | 0 |
| Cytosol (GO:0005829);095455 |                          | 0 |
| Cytosol (GO:0005829) Q8IZD9 | Cytoplasm {ECO:0000250}. | 1 |
| Cytosol (GO:0005829) Q9UK00 | Membrane {ECO:0000305};  | 0 |
| Cytosol (GO:0005829) Q8WWA1 | Membrane {ECO:0000269 Re | 0 |
| Cell Junctions (GO:00Q9P2N2 |                          | 0 |
| Cytosol (GO:0005829);Q96KQ4 | Cytoplasm {ECO:0000269 P | 1 |
| Cytosol (GO:0005829) 075882 | Isoform 1: Cell membrane | 0 |
| Nuclear membrane (GO:Q9NWM0 | Isoform 1: Cytoplasm. Nu | 0 |
| Cytosol (GO:0005829);Q9UNZ2 | Nucleus {ECO:0000250 Uni | 0 |
| Nucleoplasm (GO:00056Q8NBS3 | Cell membrane {ECO:00002 | 0 |
| Cytosol (GO:0005829);Q5TEA3 |                          | 0 |
| Nucleoplasm (GO:00056Q6P1L6 | Nucleus {ECO:0000305}.   | 0 |
| Mitochondria (GO:0005Q7Z434 | Mitochondrion outer memb | 0 |
| Vesicles (GO:0043231)060299 | Cell junction, synapse { | 0 |
| Vesicles (GO:0043231)P03951 | Secreted.                | 0 |
| Nucleoli (GO:0005730)Q9H0D6 | Nucleus, nucleolus {ECO: | 0 |
| Cytosol (GO:0005829);P63167 | Cytoplasm, cytoskeleton, | 0 |
| Cytosol (GO:0005829);Q96BS2 | Nucleus {ECO:0000269 Pub | 0 |
| Cytosol (GO:0005829);Q9Y5X3 | Endosome {ECO:0000269 Pu | 0 |
| Cytokinetic bridge (GQ02878 | Cytoplasm, cytosol {ECO: | 0 |
| Cytosol (GO:0005829);Q8IW41 | Cytoplasm. Nucleus. Note | 1 |
| Nucleoli (GO:0005730)Q9H501 | Nucleus, nucleolus {ECO: | 0 |
| Nucleoplasm (GO:00056075884 | Cytoplasm {ECO:0000269 P | 0 |
| Nucleoplasm (GO:00056Q9UJX4 |                          | 0 |
| Golgi apparatus (GO:0Q9UGH3 | Cell membrane {ECO:00002 | 0 |
| Endoplasmic reticulumQ96A57 | Membrane {ECO:0000305};  | 0 |
| Nucleoli fibrillar ceQ9NVP4 |                          | 0 |
| Nucleoplasm (GO:00056Q8NHM5 | Nucleus, nucleolus {ECO: | 0 |
| Plasma membrane (GO:0Q9H6P5 |                          | 0 |
| Cytosol (GO:0005829);P00973 | Cytoplasm {ECO:0000269 P | 0 |
| Cytosol (GO:0005829) Q92616 | Cytoplasm {ECO:0000250 U | 1 |
| Cytosol (GO:0005829);P05388 | Nucleus {ECO:0000269 Pub | 0 |
| Centrosome (GO:000581P49023 | Cytoplasm, cytoskeleton  | 0 |
| Mitochondria (GO:0005Q96L93 | Cytoplasm, cytoskeleton  | 0 |
| Cell Junctions (GO:00Q9UJA5 | Nucleus {ECO:0000250 Uni | 1 |
| Vesicles (GO:0043231)P05060 | Secreted. Note=Neuroendo | 0 |
| Plasma membrane (GO:0P30086 | Cytoplasm {ECO:0000250}. | 0 |
| Nucleoplasm (GO:00056Q99593 | Nucleus {ECO:0000255 PRO | 0 |
| Cytosol (GO:0005829);Q7Z569 | Cytoplasm {ECO:0000269 P | 1 |
| Microtubules (GO:0015P30040 | Endoplasmic reticulum lu | 0 |
| Nucleoplasm (GO:00056P29475 | Cell membrane, sarcolemm | 0 |
| Nucleoplasm (GO:00056P35637 | Nucleus {ECO:0000269 Pub | 1 |
| Microtubules (GO:0015P78318 | Cytoplasm {ECO:0000305}. | 0 |

|                       |                       |                          |   |
|-----------------------|-----------------------|--------------------------|---|
| Endoplasmic reticulum | Q96DB9                | Membrane {ECO:0000305};  | 0 |
| Cytokinetic bridge    | (G0:0005829); Q9NR11  | Nucleus {ECO:0000305}.   | 0 |
| Cytosol               | (G0:0005829); Q96CP6  | Endoplasmic reticulum me | 0 |
| Nucleoplasm           | (G0:0005829); Q14802  | Cell membrane {ECO:00003 | 0 |
| Nuclear bodies        | (G0:0005829); Q9BQS7  | Membrane {ECO:0000305};  | 0 |
| Centrosome            | (G0:0005829); Q9H305  | Late endosome membrane { | 0 |
| Nucleoplasm           | (G0:0005829); Q8IZ96  | Membrane; Multi-pass mem | 0 |
| Endoplasmic reticulum | Q14697                | Endoplasmic reticulum {E | 0 |
| Cytosol               | (G0:0005829); Q9P107  |                          | 0 |
| Cytosol               | (G0:0005829); Q96IZ5  |                          | 0 |
| Cytokinetic bridge    | (G0:0005829); Q15392  | Cytoplasm {ECO:0000269 P | 0 |
| Cytosol               | (G0:0005829); Q15773  | Cytoplasm {ECO:0000250}. | 0 |
| Cytosol               | (G0:0005829); Q9GZR7  |                          | 0 |
| Nucleoplasm           | (G0:0005829); P24278  | Nucleus.                 | 1 |
| Cytosol               | (G0:0005829); Q8NC96  | Cytoplasmic vesicle, cla | 0 |
| Focal adhesion sites  | P98171                | Cytoplasm. Note=Just bel | 0 |
| Cytosol               | (G0:0005829); Q8TF21  |                          | 0 |
| Nucleoplasm           | (G0:0005829); Q9UKL0  | Nucleus {ECO:0000255 PRO | 1 |
| Cytosol               | (G0:0005829); Q9NWQ4  |                          | 0 |
| Cytosol               | (G0:0005829); P30043  | Cytoplasm {ECO:0000269 P | 1 |
| Plasma membrane       | (G0:0005829); P19634  | Membrane; Multi-pass mem | 0 |
| Endoplasmic reticulum | 015269                | Endoplasmic reticulum me | 1 |
| Nucleoplasm           | (G0:0005829); P51003  | Cytoplasm. Nucleus. Note | 0 |
| Nucleoplasm           | (G0:0005829); P075909 | Nucleus {ECO:0000269 Pub | 1 |
| Cytosol               | (G0:0005829); P57723  | Cytoplasm {ECO:0000269 P | 1 |
| Mitochondria          | (G0:0005829); Q095178 | Mitochondrion inner memb | 0 |
| Cytosol               | (G0:0005829); Q9Y266  | Cytoplasm, cytoskeleton. | 0 |
| Nucleoplasm           | (G0:0005829); Q7L5Y9  | Cytoplasm {ECO:0000250 U | 0 |
| Cytosol               | (G0:0005829); P05362  | Membrane; Single-pass ty | 0 |
| Cytosol               | (G0:0005829); Q9NRL3  | Cytoplasm {ECO:0000250}. | 0 |
| Vesicles              | (G0:0005829); Q9Y616  |                          | 0 |
| Actin filaments       | (G0:0005829); P61626  | Secreted.                | 0 |
| Cytosol               | (G0:0005829); Q969V5  | Mitochondrion outer memb | 0 |
| Mitochondria          | (G0:0005829); Q01664  | Nucleus.                 | 1 |
| Nucleoli              | (G0:0005829); Q8N8D1  | Nucleus {ECO:0000305}.   | 0 |
| Cytosol               | (G0:0005829); Q9NZD8  | Cytoplasm, cytosol {ECO: | 0 |
| Endoplasmic reticulum | Q9UBS4                | Endoplasmic reticulum lu | 1 |
| Golgi apparatus       | (G0:0005829); Q8IVL5  | Endoplasmic reticulum {E | 0 |
| Centriolar satellite  | 075154                | Recycling endosome membr | 0 |
| Cytosol               | (G0:0005829); Q9UJJ9  | Secreted {ECO:0000269 Pu | 0 |
| Actin filaments       | (G0:0005829); Q14587  | Isoform 1: Nucleus {ECO: | 0 |
| Golgi apparatus       | (G0:0005829); Q08378  | Cytoplasm. Golgi apparat | 0 |
| Cytosol               | (G0:0005829); Q13310  | Cytoplasm {ECO:0000269 P | 1 |
| Nucleoplasm           | (G0:0005829); Q9HA82  | Endoplasmic reticulum me | 0 |
| Golgi apparatus       | (G0:0005829); Q9GZU1  | Late endosome membrane { | 0 |
| Cytosol               | (G0:0005829); Q86UV5  | Cytoplasm {ECO:0000269 P | 0 |
| Plasma membrane       | (G0:0005829); P98172  | Cell membrane {ECO:00002 | 0 |
| Mitochondria          | (G0:0005829); Q8NCN5  | Mitochondrion matrix {EC | 0 |
| Cytosol               | (G0:0005829); P49588  | Cytoplasm {ECO:0000255 H | 1 |
| Golgi apparatus       | (G0:0005829); Q92896  | Golgi apparatus membrane | 1 |
| Midbody               | (G0:0005829); Q95239  | Nucleus matrix. Cytoplas | 0 |
| Golgi apparatus       | (G0:0005829); Q8NDV7  | Cytoplasm, P-body {ECO:0 | 0 |
| Cytosol               | (G0:0005829); Q9H7P9  |                          | 0 |
| Nucleoplasm           | (G0:0005829); Q9NYJ7  | Membrane {ECO:0000305};  | 0 |
| Mitochondria          | (G0:0005829); Q8WUY8  | Membrane {ECO:0000305};  | 0 |



|                                       |                          |   |
|---------------------------------------|--------------------------|---|
| Vesicles (GO:0043231) Q9BZ72          | Endomembrane system {ECO | 0 |
| Cytosol (GO:0005829); Q9NV70          | Midbody, Midbody ring {E | 0 |
| Nuclear speckles (GO: Q9P2N5          | Cytoplasm. Nucleus speck | 0 |
| Nucleoplasm (GO:00056Q15319           | Nucleus {ECO:0000269 Pub | 0 |
| Cytosol (GO:0005829); Q9BZF1          | Isoform 1: Endoplasmic r | 0 |
| Nuclear membrane (GO: Q86UW9          | Cytoplasm {ECO:0000269 P | 0 |
| Nucleoplasm (GO:00056Q96PZ0           | Nucleus {ECO:0000269 Pub | 0 |
| Nucleoplasm (GO:00056Q92823           | Cell membrane {ECO:00002 | 0 |
| Mitochondria (GO:0005P09622           | Mitochondrion matrix {EC | 0 |
| Cytosol (GO:0005829); Q9Y4E6          |                          | 0 |
| Cytosol (GO:0005829) 043396           | Cytoplasm {ECO:0000269 P | 0 |
| Plasma membrane (GO:0095255           | Isoform 1: Basolateral c | 0 |
| Vesicles (GO:0043231) Q9NX76          | Cell membrane {ECO:00002 | 0 |
| Focal adhesion sites Q8WZA2           | Cytoplasm. Membrane {ECO | 0 |
| Cytosol (GO:0005829) Q9NYL2           | Cytoplasm {ECO:0000269 P | 0 |
| Plasma membrane (GO:009UHP9           |                          | 0 |
| Mitochondria (GO:0005P07954           | Isoform Mitochondrial: M | 0 |
| Nucleoplasm (GO:00056Q68CR1           | Membrane {ECO:0000305};  | 0 |
| Cytosol (GO:0005829); Q9UKY7          | Cytoplasm {ECO:0000250}. | 0 |
| Cytosol (GO:0005829); Q6P6C2          | Nucleus speckle {ECO:000 | 0 |
| Golgi apparatus (GO:0005829) Q9C000   | Secreted.                | 0 |
| Cytosol (GO:0005829); Q9C000          | Cytoplasm, cytosol {ECO: | 1 |
| Plasma membrane (GO:009BZ71           | Endomembrane system {ECO | 0 |
| Nucleoplasm (GO:00056Q75391           | Nucleus {ECO:0000305}.   | 1 |
| Nucleoli fibrillar ce Q9Y5N6          | Nucleus.                 | 0 |
| Nucleoli fibrillar ce Q86UP3          | Nucleus {ECO:0000305}.   | 0 |
| Nuclear membrane (GO: Q86WB0          | Nucleus {ECO:0000269 Pub | 0 |
| Nucleoplasm (GO:00056P03372           | Isoform 1: Nucleus {ECO: | 0 |
| Vesicles (GO:0043231) Q9UGC6          | Membrane {ECO:0000250 Un | 0 |
| Cytosol (GO:0005829); Q96IK0          | Membrane {ECO:0000305};  | 0 |
| Cytosol (GO:0005829); Q06323          |                          | 0 |
| Cytosol (GO:0005829); Q969Q6          | Nucleus {ECO:0000269 Pub | 1 |
| Focal adhesion sites Q9H6D7           | Cytoplasm, cytoskeleton, | 0 |
| Cytosol (GO:0005829); Q96JJ6          | Cell membrane {ECO:00002 | 0 |
| Cytosol (GO:0005829); Q15744          | Nucleus {ECO:0000269 Pub | 1 |
| Nucleoplasm (GO:00056Q9NPF4           | Cytoplasm {ECO:0000255 H | 0 |
| Cytosol (GO:0005829) Q96EP0           | Cytoplasm {ECO:0000250 U | 0 |
| Cytosol (GO:0005829); Q8WVM8          | Cytoplasm {ECO:0000250}. | 0 |
| Cytosol (GO:0005829); Q7L622          | Nucleus, nucleolus {ECO: | 0 |
| Nucleoli (GO:0005730) Q9ULT8          |                          | 0 |
| Nucleoplasm (GO:00056P07910           | Nucleus. Note=Component  | 1 |
| Nucleoli fibrillar ce Q9Y5B9          | Nucleus {ECO:0000269 Pub | 1 |
| Nucleoli (GO:0005730) 094842          | Nucleus {ECO:0000305 Pub | 0 |
| Nuclear bodies (GO:00014893           | Nucleus, gem. Cytoplasm. | 0 |
| Nuclear bodies (GO:00014893) Q9BSI4   | Nucleus {ECO:0000269 Pub | 1 |
| Intermediate filament Q9H2E6          | Cell membrane; Single-pa | 0 |
| Cytosol (GO:0005829); Q96QT4          | Membrane {ECO:0000305};  | 0 |
| Nuclear bodies (GO:00014893) Q9H967   |                          | 0 |
| Plasma membrane (GO:0000161           | Cell membrane; Periphera | 0 |
| Centrosome (GO:000581Q96SF7           | Nucleus {ECO:0000255 PRO | 0 |
| Cytosol (GO:0005829); 043175          |                          | 0 |
| Intermediate filament Q14050          | Secreted, extracellular  | 0 |
| Plasma membrane (GO:0000161) Q9P15311 | Apical cell membrane {EC | 0 |
| Microtubules (GO:0000161) Q9UIF3      | Cytoplasm, cytoskeleton, | 0 |
| Golgi apparatus (GO:0005829) Q9HAW4   | Nucleus {ECO:0000269 Pub | 1 |

|                              |                          |   |
|------------------------------|--------------------------|---|
| Vesicles (GO:0043231) Q8WZ73 | Cytoplasm, cytosol. Cell | 0 |
| Cytosol (GO:0005829); Q70J99 | Cytoplasm. Membrane; Per | 0 |
| Nuclear speckles (GO:043934  | Membrane {ECO:0000305};  | 0 |
| Cytosol (GO:0005829); Q16555 | Cytoplasm, cytosol {ECO: | 0 |
| Nuclear speckles (GO:Q9NW75  | Nucleus speckle {ECO:000 | 0 |
| Nuclear membrane (GO:Q9UKX7  | Nucleus, nuclear pore co | 1 |
| Centrosome (GO:000581075419  | Cytoplasm. Nucleus.      | 1 |
| Endoplasmic reticulum P21964 | Isoform Soluble: Cytopla | 0 |
| Vesicles (GO:0043231) Q9NTX5 | Cytoplasm, cytosol {ECO: | 0 |
| Actin filaments (GO:0Q9Y608  |                          | 0 |
| Golgi apparatus (GO:0Q9BRL7  | Endoplasmic reticulum me | 0 |
| Nuclear speckles (GO:075191  |                          | 0 |
| Nucleoplasm (GO:00056Q9UBN7  | Nucleus. Cytoplasm. Peri | 0 |
| Cytokinetic bridge (GQ99741  | Nucleus {ECO:0000269 Pub | 0 |
| Nucleoplasm (GO:00056Q96BW1  | Cytoplasm {ECO:0000269 P | 0 |
| Centrosome (GO:000581Q9NRG9  | Nucleus, nuclear pore co | 0 |
| Nucleoplasm (GO:00056P45973  | Nucleus {ECO:0000269 Pub | 1 |
| Cytosol (GO:0005829); Q9UBS9 | Rough endoplasmic reticu | 0 |
| Nucleoplasm (GO:00056P43246  | Nucleus {ECO:0000269 Pub | 0 |
| Cytosol (GO:0005829) Q13233  |                          | 0 |
| Cytosol (GO:0005829); P49366 |                          | 0 |
| Cytosol (GO:0005829); Q96ED9 | Cytoplasm, cytoskeleton, | 0 |
| Golgi apparatus (GO:0P48444  | Cytoplasm {ECO:0000250}. | 0 |
| Cytosol (GO:0005829); Q9H329 | Cytoplasm {ECO:0000269 P | 0 |
| Cytosol (GO:0005829); Q16401 |                          | 0 |
| Golgi apparatus (GO:0P23219  | Microsome membrane; Peri | 0 |
| Cytosol (GO:0005829); Q5SRE5 | Nucleus, nuclear pore co | 0 |
| Nuclear membrane (GO:P43155  | Endoplasmic reticulum {E | 0 |
| Nucleoplasm (GO:00056Q9NR45  |                          | 0 |
| Cytosol (GO:0005829); Q9BYX2 | Cytoplasm {ECO:0000269 P | 0 |
| Golgi apparatus (GO:0Q69YN2  |                          | 0 |
| Lipid droplets (GO:0Q9NTN9   | Cell membrane; Single-pa | 0 |
| Nucleoplasm (GO:00056014981  | Nucleus.                 | 1 |
| Cytosol (GO:0005829); Q9H5V7 | Nucleus {ECO:0000305}.   | 0 |
| Cytoplasmic bodies (GQ8WV28  | Cytoplasm {ECO:0000269 P | 1 |
| Centrosome (GO:000581Q9BX66  | Cell junction, adherens  | 0 |
| Lipid droplets (GO:0Q13145   | Membrane {ECO:0000305};  | 0 |
| Actin filaments (GO:0Q8NEV4  | Cytoplasm, cytoskeleton. | 0 |
| Nucleoplasm (GO:00056Q9BTA9  | Nucleus speckle {ECO:000 | 0 |
| Nucleoplasm (GO:00056Q03060  | Nucleus.; Isoform 6: Cyt | 0 |
| Cytosol (GO:0005829); Q9Y5Y2 | Nucleus {ECO:0000255 HAM | 0 |
| Nuclear speckles (GO:Q9BZJ3  | Secreted {ECO:0000250}.  | 0 |
| Cytosol (GO:0005829); 075264 | Membrane {ECO:0000305};  | 0 |
| Mitochondria (GO:0005P15822  | Isoform 1: Nucleus.; Iso | 0 |
| Nucleoplasm (GO:00056Q13451  | Cytoplasm. Nucleus.      | 0 |
| Cytosol (GO:0005829); Q96SB4 | Isoform 2: Cytoplasm. Nu | 0 |
| Mitochondria (GO:0005Q9ULD4  |                          | 0 |
| Nucleoplasm (GO:00056P20142  | Secreted.                | 0 |
| Endoplasmic reticulum Q9Y6G1 | Mitochondrion membrane { | 0 |
| Cytosol (GO:0005829) P08238  | Cytoplasm {ECO:0000269 P | 0 |
| Nucleoplasm (GO:00056Q99459  | Nucleus {ECO:0000269 Pub | 0 |
| Vesicles (GO:0043231) Q14573 | Endoplasmic reticulum me | 0 |
| Nucleoplasm (GO:00056Q99676  | Nucleus {ECO:0000305}.   | 1 |
| Cell Junctions (GO:00P15924  | Cell junction, desmosome | 0 |
| Cytosol (GO:0005829); Q96EB6 | Nucleus, PML body {ECO:0 | 1 |

|                             |                          |   |
|-----------------------------|--------------------------|---|
| Nucleoplasm (GO:00056P31942 | Nucleus {ECO:0000269 Pub | 1 |
| Golgi apparatus (GO:0Q96LB3 | Cell projection, cilium. | 0 |
| Focal adhesion sites 060674 | Endomembrane system {ECO | 0 |
| Plasma membrane (GO:0P42701 | Membrane; Single-pass ty | 0 |
| Nuclear bodies (GO:00P00519 | Cytoplasm, cytoskeleton. | 0 |
| Cytosol (GO:0005829);000154 | Isoform 4: Cytoplasm, cy | 0 |
| Cytosol (GO:0005829) Q9Y371 | Cytoplasm {ECO:0000269 P | 0 |
| Cytokinetic bridge (G000311 | Nucleus.                 | 0 |
| Golgi apparatus (GO:0Q5VT97 |                          | 0 |
| Golgi apparatus (GO:0Q92824 | Isoform PC6A: Secreted.  | 0 |
| Endoplasmic reticulum000767 | Endoplasmic reticulum me | 1 |
| Cytosol (GO:0005829) 014639 | Cytoplasm {ECO:0000250}. | 0 |
| Cytosol (GO:0005829);Q9NRG1 |                          | 0 |
| Actin filaments (GO:0Q9NP74 | Cytoplasm {ECO:0000269 P | 0 |
| Cytosol (GO:0005829);095858 | Cell membrane {ECO:00002 | 0 |
| Nucleoplasm (GO:00056Q9P0M6 | Nucleus {ECO:0000269 Pub | 1 |
| Cytosol (GO:0005829);Q641Q2 | Early endosome membrane  | 0 |
| Nuclear speckles (GO:060307 |                          | 0 |
| Nucleoplasm (GO:00056P28698 | Nucleus.                 | 1 |
| Golgi apparatus (GO:0Q9H607 |                          | 0 |
| Cytosol (GO:0005829) Q13459 | Cytoplasm, cell cortex { | 0 |
| Actin filaments (GO:0Q9Y257 | Membrane {ECO:0000305};  | 0 |
| Cytosol (GO:0005829);Q6ZRH7 | Membrane {ECO:0000305};  | 0 |
| Cytosol (GO:0005829);P48556 |                          | 0 |
| Intermediate filamentQ6PCT2 |                          | 0 |
| Lipid droplets (GO:00Q9H2F3 | Endoplasmic reticulum me | 0 |
| Nuclear speckles (GO:015047 | Nucleus speckle {ECO:000 | 0 |
| Nucleoplasm (GO:00056Q8WUZO |                          | 0 |
| Cytosol (GO:0005829) 015479 |                          | 0 |
| Cytosol (GO:0005829);043921 | Cell membrane {ECO:00003 | 0 |
| Nucleoplasm (GO:00056Q14011 | Nucleus, nucleoplasm {EC | 0 |
| Nucleoplasm (GO:00056Q8N350 | Cytoplasmic vesicle, sec | 0 |
| Nucleoplasm (GO:00056P52272 | Nucleus, nucleolus {ECO: | 0 |
| Cytosol (GO:0005829);Q9P0N8 | Endoplasmic reticulum me | 0 |
| Endoplasmic reticulumQ9NZ01 | Endoplasmic reticulum me | 1 |
| Mitochondria (GO:0005Q9Y5L4 | Mitochondrion inner memb | 1 |
| Cytosol (GO:0005829);P49427 | Cytoplasm. Nucleus. Note | 0 |
| Cytosol (GO:0005829) Q13126 | Cytoplasm. Nucleus {ECO: | 0 |
| Focal adhesion sites Q8IVT2 | Cell junction, focal adh | 0 |
| Centrosome (GO:000581Q9Y4F5 | Cytoplasm, cytoskeleton  | 0 |
| Nucleoplasm (GO:00056P19388 | Nucleus {ECO:0000269 Pub | 1 |
| Mitochondria (GO:0005000411 | Mitochondrion {ECO:00002 | 1 |
| Centriolar satellite Q02833 | Cytoplasm, cytoskeleton, | 1 |
| Cytosol (GO:0005829);075293 |                          | 0 |
| Nucleoplasm (GO:00056075781 | Cell membrane {ECO:00002 | 0 |
| Nuclear bodies (GO:00Q9HBH9 | Isoform 2: Nucleus, PML  | 0 |
| Cell Junctions (GO:00000192 |                          | 0 |
| Cytosol (GO:0005829);Q8IZ69 |                          | 0 |
| Cytosol (GO:0005829) P43487 |                          | 0 |
| Cytosol (GO:0005829);Q9ULC8 | Cytoplasmic vesicle memb | 0 |
| Cytokinetic bridge (GQ53GT1 | Cytoplasm, cytosol {ECO: | 0 |
| Nucleoplasm (GO:00056Q96RN5 | Cytoplasm. Nucleus.      | 0 |
| Vesicles (GO:0043231)P05546 |                          | 0 |
| Cytosol (GO:0005829);095721 | Cytoplasm {ECO:0000269 P | 0 |
| Cytosol (GO:0005829);P46109 |                          | 0 |

|                             |                          |   |
|-----------------------------|--------------------------|---|
| Centrosome (GO:000581Q8N653 | Endomembrane system {ECO | 0 |
| Nucleoplasm (GO:00056Q9BXF3 |                          | 0 |
| Nucleoli fibrillar ceQ12824 | Nucleus.                 | 0 |
| Cytosol (GO:0005829);015547 | Membrane; Multi-pass mem | 0 |
| Vesicles (GO:0043231)Q96Q80 | Endoplasmic reticulum me | 0 |
| Mitochondria (GO:0005Q9BXX5 | Isoform 2: Mitochondrion | 0 |
| Mitochondria (GO:0005P30046 | Cytoplasm {ECO:0000250}. | 0 |
| Cytosol (GO:0005829);Q9Y6J0 | Nucleus {ECO:0000269 Pub | 1 |
| Plasma membrane (GO:0Q9BXI6 | Cell projection, microvi | 0 |
| Plasma membrane (GO:0Q9UGT4 | Cell membrane {ECO:00002 | 0 |
| Nuclear speckles (GO:Q15459 | Nucleus {ECO:0000269 Pub | 0 |
| Nucleoli fibrillar ceP36269 | Membrane {ECO:0000250};  | 0 |
| Microtubules (GO:0015Q9Y6U7 | Membrane {ECO:0000305};  | 0 |
| Cytosol (GO:0005829);076054 | Cytoplasm. Nucleus. Note | 1 |
| Actin filaments (GO:0Q69YQ0 | Cytoplasm, cytoskeleton  | 0 |
| Nucleoplasm (GO:00056Q13356 | Nucleus {ECO:0000269 Pub | 1 |
| Cytosol (GO:0005829);P62318 | Cytoplasm, cytosol {ECO: | 1 |
| Nucleoli (GO:0005730)000541 | Nucleus, nucleolus. Nucl | 1 |
| Vesicles (GO:0043231)P19440 | Cell membrane {ECO:00002 | 0 |
| Nucleoplasm (GO:00056P49593 |                          | 0 |
| Cytosol (GO:0005829) Q6ICL7 | Membrane {ECO:0000305};  | 0 |
| Nucleoplasm (GO:00056095985 |                          | 0 |
| Nucleoplasm (GO:00056Q96DF8 | Nucleus {ECO:0000250 Uni | 0 |
| Vesicles (GO:0043231)000587 | Golgi apparatus membrane | 0 |
| Cytosol (GO:0005829);Q9BWT7 | Cytoplasm {ECO:0000250}. | 0 |
| Nucleoplasm (GO:00056A4QPB2 |                          | 0 |
| Nucleoplasm (GO:00056P35626 |                          | 0 |
| Mitochondria (GO:0005P05162 |                          | 0 |
| Golgi apparatus (GO:0Q9UJY5 | Golgi apparatus, trans-G | 0 |
| Nucleoplasm (GO:00056P54198 | Nucleus. Nucleus, PML bo | 1 |
| Cytosol (GO:0005829) Q9Y3L3 | Cell projection {ECO:000 | 0 |
| Vesicles (GO:0043231)Q9BYH1 | Endoplasmic reticulum me | 0 |
| Cytosol (GO:0005829);P09382 | Secreted, extracellular  | 0 |
| Centrosome (GO:000581Q9NQG7 |                          | 0 |
| Cytosol (GO:0005829) Q9UH36 | Cytoplasm {ECO:0000250 U | 0 |
| Nucleoplasm (GO:00056Q9HBE1 | Nucleus {ECO:0000269 Pub | 1 |
| Cytosol (GO:0005829);Q9UBB9 | Cytoplasm {ECO:0000250}. | 0 |
| Mitochondria (GO:0005075600 | Mitochondrion {ECO:00002 | 0 |
| Microtubules (GO:0015Q6NXT1 | Nucleus {ECO:0000250}. C | 0 |
| Nucleoli (GO:0005730)Q9Y262 | Cytoplasm {ECO:0000255 H | 0 |
| Cell Junctions (GO:0Q8N3F8  | Recycling endosome membr | 0 |
| Nucleoli fibrillar ceP61218 | Nucleus {ECO:0000269 Pub | 0 |
| Nucleoplasm (GO:00056P56693 | Cytoplasm {ECO:0000269 P | 0 |
| Cytosol (GO:0005829);Q9NRD5 | Cytoplasm, perinuclear r | 0 |
| Mitochondria (GO:0005Q96AY4 | Cytoplasm, cytoskeleton  | 0 |
| Focal adhesion sites 095907 | Cell membrane; Multi-pas | 0 |
| Cytosol (GO:0005829) Q9NSP4 | Nucleus. Cytoplasm. Chro | 0 |
| Actin filaments (GO:0Q9UH03 | Cytoplasm. Cytoplasm, cy | 0 |
| Nucleoplasm (GO:00056P13866 | Membrane; Multi-pass mem | 0 |
| Endoplasmic reticulum043731 | Endoplasmic reticulum me | 0 |
| Golgi apparatus (GO:0P10635 | Endoplasmic reticulum me | 0 |
| Nuclear speckles (GO:Q92841 | Nucleus {ECO:0000269 Pub | 0 |
| Nucleoplasm (GO:00056Q14565 | Nucleus {ECO:0000305}. C | 0 |
| Nuclear bodies (GO:0Q9UGU0  | Nucleus.                 | 1 |
| Cytosol (GO:0005829);Q8IWL3 | Iron-sulfur cluster co-c | 1 |

|                              |                          |   |
|------------------------------|--------------------------|---|
| Mitochondria (GO:0005Q9NS69  | Mitochondrion outer memb | 1 |
| Nucleoli (GO:0005730) Q9UHP6 |                          | 0 |
| Cytosol (GO:0005829); Q9Y3I0 | Nucleus {ECO:0000269 Pub | 1 |
| Cytosol (GO:0005829); Q9Y3I1 | Cytoplasm. Nucleus. Mito | 0 |
| Cytosol (GO:0005829); 000178 | Cytoplasm {ECO:0000250}. | 0 |
| Cytoplasmic bodies (GQ9BY77  | Nucleus. Nucleus speckle | 0 |
| Vesicles (GO:0043231) 095755 | Golgi apparatus membrane | 0 |
| Cytosol (GO:0005829); 075170 | Cytoplasm {ECO:0000269 P | 1 |
| Nuclear bodies (GO:00095248  | Cytoplasm {ECO:0000269 P | 0 |
| Nuclear membrane (GO:Q9UH99  | Nucleus inner membrane { | 0 |
| Endoplasmic reticulum P00387 | Isoform 1: Endoplasmic r | 0 |
| Centrosome (GO:000581096015  | Cytoplasm, cytoskeleton, | 0 |
| Centrosome (GO:000581Q9BU23  | Endoplasmic reticulum me | 0 |
| Microtubules (GO:0015Q9Y3P4  | Membrane {ECO:0000305};  | 0 |
| Cytosol (GO:0005829); Q9UNF0 | Cytoplasm {ECO:0000250}. | 0 |
| Mitochondria (GO:0005095922  | Cytoplasm, cytoskeleton  | 0 |
| Cytosol (GO:0005829); Q10567 | Golgi apparatus. Cytopla | 1 |
| Centriolar satellite 060784  | Cytoplasm {ECO:0000305}. | 0 |
| Cytosol (GO:0005829) Q9Y259  |                          | 0 |
| Golgi apparatus (GO:0P09601  | Microsome {ECO:0000269 P | 0 |
| Mitochondria (GO:0005Q8IVS2  | Mitochondrion {ECO:00002 | 1 |
| Nucleoplasm (GO:00056Q13769  | Nucleus {ECO:0000269 Pub | 0 |
| Nucleoplasm (GO:00056P33992  | Nucleus {ECO:0000269 Pub | 0 |
| Nucleoplasm (GO:00056Q6NTF7  | Nucleus. Cytoplasm. Cyto | 0 |
| Cytosol (GO:0005829); P15289 | Endoplasmic reticulum {E | 0 |
| Cytosol (GO:0005829); B1AH88 |                          | 0 |
| Cytosol (GO:0005829); Q96D21 | Cell membrane {ECO:00002 | 0 |
| Cytosol (GO:0005829); Q14166 |                          | 0 |
| Cytosol (GO:0005829); 095931 | Nucleus {ECO:0000269 Pub | 0 |
| Vesicles (GO:0043231) P01127 | Secreted. Note=Released  | 0 |
| Cytosol (GO:0005829); P39023 | Nucleus, nucleolus {ECO: | 1 |
| Nucleoplasm (GO:00056Q9UDW3  | Nucleus {ECO:0000269 Pub | 1 |
| Cytosol (GO:0005829); 043251 | Nucleus. Cytoplasm {ECO: | 0 |
| Cytosol (GO:0005829) 043759  | Cytoplasmic vesicle, sec | 0 |
| Cytosol (GO:0005829); Q15750 |                          | 0 |
| Cytosol (GO:0005829); Q9H1I8 | Nucleus {ECO:0000269 Pub | 0 |
| Cytosol (GO:0005829); Q13615 | Cytoplasm {ECO:0000269 P | 0 |
| Intermediate filament Q9NQG6 | Mitochondrion outer memb | 0 |
| Vesicles (GO:0043231) Q9BPW4 | Secreted {ECO:0000305}.  | 0 |
| Cytosol (GO:0005829); Q9NST1 | Membrane {ECO:0000269 Pu | 0 |
| Actin filaments (GO:0P35579  | Cytoplasm, cytoskeleton  | 0 |
| Mitochondria (GO:0005Q9Y512  | Mitochondrion outer memb | 0 |
| Mitochondria (GO:0005Q99757  | Mitochondrion {ECO:00002 | 1 |
| Cytosol (GO:0005829); 075791 | Nucleus {ECO:0000269 Pub | 0 |
| Cytosol (GO:0005829) 015371  | Cytoplasm {ECO:0000255 H | 1 |
| Golgi apparatus (GO:0Q96HU1  | Cytoplasm {ECO:0000269 P | 0 |
| Mitochondria (GO:0005Q9BW83  | Cell projection, cilium  | 0 |
| Cell Junctions (GO:00P20472  |                          | 0 |
| Mitochondria (GO:0005Q6ICG6  |                          | 0 |
| Cytosol (GO:0005829) Q15080  | Cytoplasm, cytosol {ECO: | 0 |
| Golgi apparatus (GO:0P32927  | Membrane; Single-pass ty | 0 |
| Peroxisomes (GO:00057043808  | Cytoplasm. Peroxisome me | 0 |
| Nuclear bodies (GO:00075631  | Endoplasmic reticulum me | 0 |
| Cytosol (GO:0005829); Q9NWS6 | Membrane {ECO:0000305};  | 0 |
| Cytosol (GO:0005829) P50502  | Cytoplasm {ECO:0000250}. | 1 |

|                             |                          |   |
|-----------------------------|--------------------------|---|
| Nucleoplasm (GO:00056P62877 | Cytoplasm {ECO:0000269 P | 0 |
| Nucleoplasm (GO:00056Q09472 | Cytoplasm {ECO:0000269 P | 0 |
| Nucleoplasm (GO:00056Q969R5 | Nucleus {ECO:0000305}.   | 0 |
| Cytosol (GO:0005829);P46060 | Cytoplasm {ECO:0000269 P | 0 |
| Cytosol (GO:0005829) Q9UGR2 | Nucleus {ECO:0000269 Pub | 0 |
| Nucleoplasm (GO:00056Q7RTV0 | Nucleus {ECO:0000269 Pub | 0 |
| Mitochondria (GO:0005Q99798 | Mitochondrion {ECO:00002 | 0 |
| Centrosome (GO:000581Q9Y535 | Nucleus.                 | 0 |
| Mitochondria (GO:0005075648 | Mitochondrion {ECO:00002 | 1 |
| Cytosol (GO:0005829) Q92871 | Cytoplasm.               | 1 |
| Cytokinetic bridge (GQ6ICB0 | Cytoplasm {ECO:0000269 P | 0 |
| Vesicles (GO:0043231)Q8TCT0 | Cytoplasm {ECO:0000269 P | 0 |
| Nuclear speckles (GO:095696 | Nucleus {ECO:0000269 Pub | 0 |
| Nucleoplasm (GO:00056075132 | Nucleus. Cytoplasm.      | 0 |
| Nucleoplasm (GO:00056Q8TB40 |                          | 0 |
| Cytosol (GO:0005829);015037 |                          | 0 |
| Cytosol (GO:0005829) Q00688 | Nucleus.                 | 0 |
| Cytosol (GO:0005829);Q9NRG7 |                          | 0 |
| Intermediate filamentQ86U06 | Nucleus {ECO:0000305}.   | 0 |
| Cytosol (GO:0005829);014744 | Cytoplasm {ECO:0000269 P | 0 |
| Vesicles (GO:0043231)043405 | Secreted, extracellular  | 0 |
| Vesicles (GO:0043231)Q9Y587 | Golgi apparatus, trans-G | 0 |
| Nuclear bodies (GO:00P56282 | Nucleus.                 | 1 |
| Cytosol (GO:0005829) Q9H867 | Cytoplasm {ECO:0000269 P | 1 |
| Nucleoplasm (GO:00056Q07890 |                          | 0 |
| Nucleoplasm (GO:00056Q00532 | Cytoplasm {ECO:0000269 P | 0 |
| Centrosome (GO:000581Q8N4C6 | Cytoplasm, cytoskeleton, | 0 |
| Cytosol (GO:0005829);P06737 |                          | 0 |
| Cytosol (GO:0005829);P62333 | Cytoplasm {ECO:0000250}. | 0 |
| Cytosol (GO:0005829) Q16667 | Cytoplasm, perinuclear r | 1 |
| Vesicles (GO:0043231)095406 | Endoplasmic reticulum me | 0 |
| Nucleoplasm (GO:00056Q99675 | Nucleus {ECO:0000269 Pub | 0 |
| Nucleoplasm (GO:00056Q9Y5K8 | Membrane {ECO:0000305 Pu | 0 |
| Cytosol (GO:0005829);Q9NVL8 |                          | 0 |
| Cytosol (GO:0005829);Q9NYT0 | Cell projection, lamelli | 0 |
| Golgi apparatus (GO:0Q9UEU0 | Early endosome membrane  | 0 |
| Mitochondria (GO:0005Q9Y5J7 | Mitochondrion inner memb | 1 |
| Cytosol (GO:0005829);043708 | Cytoplasm {ECO:0000250}. | 0 |
| Cytosol (GO:0005829);Q9BVV6 | Cytoplasm, cytoskeleton, | 0 |
| Nuclear membrane (GO:Q9P1V8 |                          | 0 |
| Cytosol (GO:0005829) 095433 | Cytoplasm, cytosol {ECO: | 0 |
| Cytosol (GO:0005829);Q9Y4D1 | Cytoplasm {ECO:0000269 P | 0 |
| Nucleoplasm (GO:00056Q6H9L7 | Secreted {ECO:0000305}.  | 0 |
| Mitochondria (GO:0005015270 | Endoplasmic reticulum me | 0 |
| Nucleoplasm (GO:00056Q99538 | Lysosome {ECO:0000250}.  | 0 |
| Endoplasmic reticulumQ13686 | Nucleus {ECO:0000269 Pub | 0 |
| Cytosol (GO:0005829);Q13573 | Nucleus {ECO:0000269 Pub | 1 |
| Vesicles (GO:0043231)P10645 | Cytoplasmic vesicle, sec | 0 |
| Mitochondria (GO:0005Q13572 |                          | 0 |
| Mitochondria (GO:0005Q9Y394 |                          | 0 |
| Cytosol (GO:0005829);P35813 | Nucleus {ECO:0000269 Pub | 0 |
| Nucleoplasm (GO:00056Q9UIU6 | Nucleus {ECO:0000250 Uni | 0 |
| Nucleoplasm (GO:00056Q8N428 | Golgi apparatus membrane | 0 |
| Cytosol (GO:0005829);Q96Q27 |                          | 0 |
| Centriolar satellite Q6ZU80 | Cytoplasm, cytoskeleton, | 0 |

|                             |                          |   |
|-----------------------------|--------------------------|---|
| Cytosol (GO:0005829);P84090 |                          | 0 |
| Nuclear bodies (GO:00Q16665 | Cytoplasm {ECO:0000269 P | 0 |
| Intermediate filamentQ92537 | Membrane {ECO:0000305};  | 0 |
| Cytosol (GO:0005829);Q13243 | Nucleus.                 | 1 |
| Cytosol (GO:0005829);P55010 |                          | 0 |
| Cytosol (GO:0005829) Q9UPY3 | Cytoplasm {ECO:0000269 P | 1 |
| Cytosol (GO:0005829) P11586 | Cytoplasm.               | 1 |
| Cytosol (GO:0005829);P56279 | Cytoplasm {ECO:0000250}. | 1 |
| Nuclear speckles (GO:Q6PJT7 | Nucleus speckle {ECO:000 | 0 |
| Cytosol (GO:0005829);Q9Y4R8 | Cytoplasm. Membrane. Nuc | 0 |
| Nucleoplasm (GO:00056Q96RV3 | Membrane {ECO:0000305};  | 0 |
| Golgi apparatus (GO:0Q9P0R6 | Cytoplasm {ECO:0000269 P | 0 |
| Cytosol (GO:0005829);Q99986 | Cytoplasm. Nucleus. Cyto | 0 |
| Cytosol (GO:0005829);P62191 | Cytoplasm. Nucleus. Memb | 0 |
| Nucleoplasm (GO:00056095428 | Secreted {ECO:0000305}.  | 0 |
| Nucleoplasm (GO:00056075582 | Nucleus. Cytoplasm. Note | 0 |
| Cytosol (GO:0005829);Q6IN85 | Cytoplasm {ECO:0000269 P | 0 |
| Nucleoplasm (GO:00056Q9H972 | Secreted {ECO:0000305}.  | 0 |
| Centrosome (GO:000581P28074 | Cytoplasm {ECO:0000269 P | 0 |
| Nucleoli fibrillar ceP25490 | Nucleus matrix {ECO:0000 | 0 |
| Cytosol (GO:0005829);Q9UKV3 | Nucleus. Nucleus speckle | 0 |
| Golgi apparatus (GO:0Q15643 | Golgi apparatus, cis-Gol | 0 |
| Nucleoplasm (GO:00056P27695 | Nucleus. Nucleus, nucleo | 0 |
| Nuclear speckles (GO:Q86U42 | Nucleus {ECO:0000269 Pub | 0 |
| Cytosol (GO:0005829);043281 |                          | 0 |
| Cytosol (GO:0005829);Q13017 | Cytoplasm {ECO:0000269 P | 0 |
| Mitochondria (GO:0005Q13268 | Mitochondrion matrix. Nu | 1 |
| Cytosol (GO:0005829);P61011 | Nucleus speckle {ECO:000 | 0 |
| Nucleoplasm (GO:00056Q9HCK8 | Nucleus {ECO:0000255 HAM | 1 |
| Mitochondria (GO:0005Q16822 | Mitochondrion.           | 1 |
| Mitochondria (GO:0005015091 | Mitochondrion {ECO:00002 | 1 |
| Nucleoplasm (GO:00056Q8TEB1 |                          | 0 |
| Nucleoplasm (GO:00056P60900 | Cytoplasm {ECO:0000269 P | 0 |
| Cytosol (GO:0005829) P25963 | Cytoplasm. Nucleus. Note | 0 |
| Golgi apparatus (GO:0Q9Y3B6 | Cytoplasm {ECO:0000269 P | 0 |
| Nucleoplasm (GO:00056Q9UL46 |                          | 0 |
| Nucleoplasm (GO:00056Q5PSV4 | Nucleus {ECO:0000305}.   | 1 |
| Nucleoplasm (GO:00056095072 | Nucleus {ECO:0000250 Uni | 0 |
| Golgi apparatus (GO:0015321 | Lysosome membrane {ECO:0 | 0 |
| Nucleoplasm (GO:00056Q15436 | Cytoplasmic vesicle, COP | 0 |
| Nucleoli (GO:0005730)Q9P2T1 |                          | 0 |
| Nuclear speckles (GO:Q9H307 | Nucleus speckle. Cell ju | 0 |
| Nucleoplasm (GO:00056Q92696 |                          | 0 |
| Cytosol (GO:0005829);Q14934 | Cytoplasm, cytosol {ECO: | 0 |
| Cytokinetic bridge (GQ9H4Z3 | Nucleus {ECO:0000269 Pub | 0 |
| Nucleoplasm (GO:00056P48637 |                          | 0 |
| Cytosol (GO:0005829) P14780 | Secreted, extracellular  | 0 |
| Cytosol (GO:0005829) Q8TEL6 |                          | 0 |
| Cytosol (GO:0005829) P11216 |                          | 0 |
| Nucleoplasm (GO:00056Q14691 | Nucleus {ECO:0000250}.   | 0 |
| Cytokinetic bridge (GQ9Y2I6 | Cytoplasm, cytoskeleton, | 0 |
| Actin filaments (GO:0Q9NVA1 | Mitochondrion inner memb | 0 |
| Golgi apparatus (GO:0Q9ULU4 | Nucleus {ECO:0000269 Pub | 0 |
| Nucleoplasm (GO:00056Q9HBY8 | Cytoplasm {ECO:0000269 P | 0 |
| Cytosol (GO:0005829) Q9Y366 | Cell projection, cilium  | 0 |

|                              |                           |   |
|------------------------------|---------------------------|---|
| Cytosol (GO:0005829);P10244  | Nucleus.                  | 1 |
| Nucleoplasm (GO:00056P41235  | Nucleus.                  | 1 |
| Golgi apparatus (GO:0Q9H6Q3  | Cytoplasm. ; Isoform 1: C | 0 |
| Cytosol (GO:0005829) Q9BUV8  |                           | 0 |
| Cytosol (GO:0005829);Q13469  | Cytoplasm. Nucleus. Note  | 1 |
| Nucleoplasm (GO:00056Q9H426  | Cell junction, synapse {  | 0 |
| Cytosol (GO:0005829);Q4VXU2  |                           | 0 |
| Cytosol (GO:0005829);Q13043  | Cytoplasm. Nucleus. Note  | 1 |
| Nucleoplasm (GO:00056Q9UJQ4  | Cytoplasm. Nucleus.       | 0 |
| Nucleoplasm (GO:00056Q9H2P0  | Nucleus {ECO:0000255 PRO  | 0 |
| Focal adhesion sites Q9P104  |                           | 0 |
| Nucleoplasm (GO:00056Q05048  | Nucleus.                  | 1 |
| Nucleoli (GO:0005730)P18075  | Secreted.                 | 0 |
| Nucleoli fibrillar ceP78406  | Cytoplasm {ECO:0000269 P  | 0 |
| Cytosol (GO:0005829);043399  |                           | 0 |
| Golgi apparatus (GO:0Q9H3Z4  | Membrane {ECO:0000250 Un  | 0 |
| Cytosol (GO:0005829);Nuclear | bNucleus {ECO:0000305}.   | 1 |
| Vesicles (GO:0043231)Q9UBR2  | Lysosome.                 | 0 |
| Nuclear speckles (GO:094906  | Nucleus, nucleoplasm {EC  | 0 |
| Nucleoplasm (GO:00056Q9Y3B1  |                           | 0 |
| Cell Junctions (GO:00Q96BD0  | Cell membrane; Multi-pas  | 0 |
| Plasma membrane (GO:0P30989  | Cell membrane {ECO:00002  | 0 |
| Nucleoplasm (GO:00056Q9NV56  | Nucleus.                  | 1 |
| Nucleoplasm (GO:00056Q9UL49  | Nucleus {ECO:0000255 PRO  | 1 |
| Cytosol (GO:0005829);Q9BTC0  | Cytoplasm {ECO:0000250}.  | 0 |
| Cell Junctions (GO:00Q9NWU2  | Cytoplasm {ECO:0000269 P  | 0 |
| Nucleoplasm (GO:00056Q9BYT1  | Membrane {ECO:0000305};   | 0 |
| Centrosome (GO:000581Q96CA5  | Nucleus {ECO:0000269 Pub  | 0 |
| Golgi apparatus (GO:0Q8N6T3  | Cytoplasm {ECO:0000250}.  | 0 |
| Cytosol (GO:0005829) Q05639  | Nucleus {ECO:0000250}.    | 0 |
| Cytosol (GO:0005829);Q13882  | Cytoplasm. Nucleus. Cell  | 0 |
| Cytosol (GO:0005829);Q9UKD1  | Nucleus. Cytoplasm. Note  | 0 |
| Cytosol (GO:0005829);Q9GZN8  |                           | 0 |
| Mitotic spindle (GO:0P30305  | Cytoplasm, cytoskeleton,  | 0 |
| Golgi apparatus (GO:0Q9Y225  | Golgi apparatus membrane  | 1 |
| Golgi apparatus (GO:0Q13795  | Golgi apparatus {ECO:000  | 1 |
| Nucleoplasm (GO:00056Q96RU7  | Nucleus {ECO:0000269 Pub  | 1 |
| Cytosol (GO:0005829);P50749  | Nucleus. Cytoplasm. Chro  | 1 |
| Nucleoplasm (GO:00056P68400  | Nucleus {ECO:0000269 Pub  | 1 |
| Cytosol (GO:0005829);095674  | Mitochondrion inner memb  | 0 |
| Endoplasmic reticulumQ8TCT9  | Endoplasmic reticulum me  | 0 |
| Cytokinetic bridge (G015079  | Membrane {ECO:0000305};   | 0 |
| Endoplasmic reticulumQ9H1R3  | Cytoplasm. Note=Colocali  | 0 |
| Vesicles (GO:0043231)000241  | Cell membrane {ECO:00002  | 0 |
| Vesicles (GO:0043231)Q15437  | Cytoplasmic vesicle, COP  | 0 |
| Nucleoplasm (GO:00056Q9NUG4  |                           | 0 |
| Microtubules (GO:0015Q15147  |                           | 0 |
| Nucleoli fibrillar ceP24844  |                           | 0 |
| Nucleoplasm (GO:00056P08631  | Isoform 1: Lysosome. Mem  | 0 |
| Centrosome (GO:000581Q9H488  | Endoplasmic reticulum {E  | 0 |
| Nucleoplasm (GO:00056Q9Y3Z3  | Nucleus {ECO:0000269 Pub  | 1 |
| Nucleoplasm (GO:00056Q9P286  | Mitochondrion. Cytoplasm  | 0 |
| Golgi apparatus (GO:0015066  | Cytoplasm, cytoskeleton   | 0 |
| Nucleoplasm (GO:00056Q9H579  |                           | 0 |
| Nucleoli fibrillar ce000567  | Nucleus, nucleolus {ECO:  | 0 |



|                              |                          |   |
|------------------------------|--------------------------|---|
| Mitochondria (GO:0005Q9NQG1  | Membrane {ECO:0000305};  | 0 |
| Mitochondria (GO:0005043837  | Mitochondrion.           | 1 |
| Centriolar satellite Q15691  | Cytoplasm, cytoskeleton  | 0 |
| Golgi apparatus (GO:0P78504  | Membrane; Single-pass ty | 0 |
| Mitochondria (GO:0005Q96SZ6  |                          | 0 |
| Nucleoplasm (GO:00056043156  | Cytoplasm {ECO:0000269 P | 0 |
| Centrosome (GO:000581Q01094  | Nucleus {ECO:0000269 Pub | 0 |
| Nucleoplasm (GO:00056Q9NQG5  | Nucleus {ECO:0000269 Pub | 1 |
| Nucleoli fibrillar ceQ9Y6I8  | Peroxisome membrane {ECO | 0 |
| Golgi apparatus (GO:0P01034  | Secreted {ECO:0000269 Pu | 0 |
| Vesicles (GO:0043231)P42127  | Secreted.                | 0 |
| Cytosol (GO:0005829) P23526  | Cytoplasm {ECO:0000269 P | 0 |
| Nuclear speckles (GO:Q96T49  | Cell membrane {ECO:00002 | 0 |
| Cytokinetic bridge (GQ9H4H8  | Cytoplasm. Cytoplasm, cy | 0 |
| Centrosome (GO:000581Q9H5Z1  |                          | 0 |
| Nucleoli (GO:0005730) Q9H147 | Nucleus {ECO:0000269 Pub | 0 |
| Vesicles (GO:0043231) Q9H492 | Cytoplasm, cytoskeleton. | 0 |
| Vesicles (GO:0043231) Q9H7V2 | Cell membrane; Single-pa | 0 |
| Cytosol (GO:0005829); Q9H490 | Endoplasmic reticulum me | 0 |
| Nucleoplasm (GO:00056P02585  |                          | 0 |
| Mitochondria (GO:0005014734  | Peroxisome matrix {ECO:0 | 0 |
| Plasma membrane (GO:0Q9HDC9  | Membrane {ECO:0000269 Pu | 0 |
| Nucleoplasm (GO:00056Q9BZC1  | Nucleus {ECO:0000269 Pub | 0 |
| Cytosol (GO:0005829); Q92618 | Nucleus {ECO:0000250 Uni | 0 |
| Cytosol (GO:0005829); Q6IQ32 | Nucleus {ECO:0000305}.   | 0 |
| Mitochondria (GO:0005Q8N0V3  | Mitochondrion {ECO:00003 | 1 |
| Cytosol (GO:0005829) P54578  | Cytoplasm {ECO:0000269 P | 0 |
| Endoplasmic reticulum Q9P0L0 | Endoplasmic reticulum me | 0 |
| Mitochondria (GO:0005Q8N3J2  |                          | 0 |
| Actin filaments (GO:0Q92539  | Nucleus {ECO:0000250}. C | 0 |
| Nuclear bodies (GO:00A6NHR9  | Chromosome {ECO:0000269  | 0 |
| Nucleoli fibrillar ceP19105  |                          | 0 |
| Midbody (GO:0030496); 015466 | Golgi apparatus membrane | 0 |
| Centrosome (GO:000581Q8TEP8  | Cytoplasm, cytoskeleton, | 0 |
| Nucleoli fibrillar ce043148  | Nucleus {ECO:0000269 Pub | 0 |
| Cytosol (GO:0005829); 015105 | Nucleus {ECO:0000269 Pub | 1 |
| Golgi apparatus (GO:0Q96EQ8  | Golgi apparatus membrane | 1 |
| Cytosol (GO:0005829); Q6UB98 | Nucleus {ECO:0000269 Pub | 1 |
| Nucleoplasm (GO:00056094818  | Nucleus, nucleolus {ECO: | 0 |
| Cytoplasmic bodies (GQ9UNA4  | Nucleus {ECO:0000269 Pub | 0 |
| Plasma membrane (GO:0Q86YT6  | Cytoplasm {ECO:0000269 P | 0 |
| Nucleoplasm (GO:00056Q99708  | Nucleus {ECO:0000269 Pub | 1 |
| Centriolar satellite 014730  | Cytoplasm {ECO:0000269 P | 0 |
| Nuclear bodies (GO:00P33240  | Nucleus {ECO:0000269 Pub | 1 |
| Cytosol (GO:0005829); Q86XK7 | Membrane {ECO:0000305};  | 0 |
| Cytosol (GO:0005829); 075832 | Cytoplasm {ECO:0000269 P | 0 |
| Actin filaments (GO:0Q8WYN0  | Cytoplasm {ECO:0000250}. | 0 |
| Nucleoli (GO:0005730) 060907 | Nucleus {ECO:0000250}. N | 0 |
| Endoplasmic reticulum 000264 | Microsome membrane {ECO: | 1 |
| Cytosol (GO:0005829); P09884 | Nucleus {ECO:0000269 Pub | 0 |
| Centriolar satellite 015344  | Cytoplasm {ECO:0000269 P | 0 |
| Cytosol (GO:0005829); Q8N5F7 | Nucleus {ECO:0000269 Pub | 1 |
| Cytosol (GO:0005829); Q9NPJ8 | Nucleus. Cytoplasm. Note | 1 |
| Vesicles (GO:0043231) P11908 |                          | 0 |
| Nucleoplasm (GO:00056Q9UJG1  | Endoplasmic reticulum me | 0 |

|                             |                          |   |
|-----------------------------|--------------------------|---|
| Mitochondria (GO:0005Q9Y4X0 | Nucleus {ECO:0000269 Pub | 1 |
| Centriolar satellite Q9H1Z4 | Nucleus {ECO:0000269 Pub | 1 |
| Golgi apparatus (GO:0060829 |                          | 0 |
| Cytosol (GO:0005829);P98170 | Cytoplasm. Nucleus. Note | 1 |
| Cytosol (GO:0005829);060826 | Endosome {ECO:0000305 Pu | 0 |
| Nucleoplasm (GO:00056P51813 | Cytoplasm {ECO:0000269 P | 0 |
| Cytosol (GO:0005829);P13797 | Cytoplasm.               | 1 |
| Cytosol (GO:0005829);P41227 | Cytoplasm {ECO:0000269 P | 0 |
| Nuclear bodies (GO:00Q99607 | Nucleus, PML body {ECO:0 | 1 |
| Nucleoplasm (GO:00056P28370 | Nucleus.                 | 1 |
| Endoplasmic reticulumQ5HYM0 |                          | 0 |
| Nucleoplasm (GO:00056Q16576 | Nucleus.                 | 1 |
| Nucleoplasm (GO:00056Q9NSA2 | Membrane; Multi-pass mem | 0 |
| Mitochondria (GO:0005095258 | Mitochondrion inner memb | 0 |
| Cytosol (GO:0005829) Q06787 | Nucleus {ECO:0000269 Pub | 0 |
| Cytosol (GO:0005829) Q9P1W9 |                          | 0 |
| Cytosol (GO:0005829);Q9UQR0 | Nucleus {ECO:0000305}.   | 0 |
| Golgi apparatus (GO:0P78381 | Golgi apparatus membrane | 1 |
| Nuclear speckles (GO:060828 | Nucleus {ECO:0000269 Pub | 0 |
| Vesicles (GO:0043231)Q9UHG2 | Secreted {ECO:0000250 Un | 0 |
| Endoplasmic reticulumP50402 | Nucleus inner membrane { | 0 |
| Plasma membrane (GO:0Q16635 | Isoform 1: Membrane; Sin | 0 |
| Vesicles (GO:0043231)P0C0E4 | Membrane {ECO:0000305};  | 0 |
| Nucleoplasm (GO:00056P15976 | Nucleus.                 | 1 |
| Cytosol (GO:0005829);P52788 |                          | 0 |
| Cytosol (GO:0005829);P11441 | Cytoplasm, cytosol {ECO: | 1 |
| Plasma membrane (GO:0Q8TCZ2 | Cell membrane {ECO:00002 | 0 |
| Vesicles (GO:0043231)Q15075 | Cytoplasm. Early endosom | 0 |
| Nucleoplasm (GO:00056Q13585 | Cell membrane; Multi-pas | 1 |
| Nuclear bodies (GO:00075695 | Cell membrane {ECO:00002 | 0 |
| Nucleoli (GO:0005730)Q92613 |                          | 0 |
| Cytosol (GO:0005829);Q00536 | Cytoplasm. Cytoplasmic v | 0 |
| Nucleoplasm (GO:00056P51784 | Nucleus {ECO:0000269 Pub | 0 |
| Nucleoplasm (GO:00056043719 | Nucleus {ECO:0000269 Pub | 1 |
| Nucleoplasm (GO:00056Q99990 | Nucleus.                 | 1 |
| Golgi apparatus (GO:0P01033 | Secreted {ECO:0000269 Pu | 0 |
| Centriolar satellite Q9C0H6 | Cytoplasm, cytoskeleton. | 1 |
| Cytosol (GO:0005829);P98174 | Cytoplasm {ECO:0000250}. | 0 |
| Nucleoli (GO:0005730)Q9Y237 | Isoform 1: Nucleus, nucl | 0 |
| Vesicles (GO:0043231)Q9H237 | Endoplasmic reticulum me | 0 |
| Cytosol (GO:0005829);Q9UNF1 |                          | 0 |
| Nucleoplasm (GO:00056P98179 | Nucleus {ECO:0000250}. C | 0 |
| Nucleoplasm (GO:00056095600 | Nucleus {ECO:0000269 Pub | 1 |
| Vesicles (GO:0043231)Q96C24 | Membrane {ECO:0000250};  | 0 |
| Cytosol (GO:0005829);Q96MV8 | Golgi apparatus membrane | 0 |
| Cytosol (GO:0005829);Q92674 | Nucleus. Chromosome, cen | 1 |
| Nuclear speckles (GO:Q13474 | Cell junction, synapse,  | 0 |
| Nucleoplasm (GO:00056Q5H9L4 | Nucleus {ECO:0000250}. C | 0 |
| Cytosol (GO:0005829);Q9BVG4 |                          | 0 |
| Cytosol (GO:0005829);Q9UH62 | Mitochondrion outer memb | 0 |
| Cytosol (GO:0005829);Q9NWD9 | Cytoplasm, cytoskeleton, | 0 |
| Cytosol (GO:0005829) Q9H714 | Cytoplasmic vesicle, aut | 0 |
| Nucleoli fibrillar ceQ92915 | Nucleus {ECO:0000305}.   | 0 |
| Vesicles (GO:0043231)Q9NV92 | Endosome membrane {ECO:0 | 0 |
| Endoplasmic reticulumQ9Y2H6 | Golgi apparatus membrane | 0 |

|                                |                          |   |
|--------------------------------|--------------------------|---|
| Nucleoplasm (GO:00056Q9BWV3    |                          | 0 |
| Vesicles (GO:0043231)Q9H9S4    |                          | 0 |
| Golgi apparatus (GO:0Q13887    | Nucleus {ECO:0000269 Pub | 1 |
| Cytosol (GO:0005829);Q9Y6E0    | Cytoplasm. Nucleus. Memb | 0 |
| Cytosol (GO:0005829) P13686    | Lysosome.                | 0 |
| Endoplasmic reticulumQ13217    | Endoplasmic reticulum {E | 0 |
| Cytosol (GO:0005829) Q9UKK3    | Cytoplasm {ECO:0000269 P | 0 |
| Nucleoli fibrillar ceQ8NEM7    | Nucleus {ECO:0000269 Pub | 0 |
| Mitochondria (GO:0005Q92665    | Mitochondrion {ECO:00002 | 1 |
| Cytosol (GO:0005829);000505    | Cytoplasm {ECO:0000250}. | 0 |
| Actin filaments (GO:0P17948    | Isoform 1: Cell membrane | 0 |
| Nucleoli (GO:0005730)Q9H4X1    | Cytoplasm. Nucleus. Cyto | 0 |
| Lipid droplets (GO:00A3KMH1    | Isoform 1: Mitochondrion | 0 |
| Cytosol (GO:0005829);Q9BW62    | Cytoplasm, cytoskeleton  | 0 |
| Actin filaments (GO:0Q9UL03    | Nucleus {ECO:0000269 Pub | 1 |
| Golgi apparatus (GO:0A0PJE2    |                          | 0 |
| Nuclear bodies (GO:00Q15714    | Cytoplasm {ECO:0000250}. | 0 |
| Cytokinetic bridge (GQ6UX06    | Secreted, extracellular  | 0 |
| Nucleoplasm (GO:00056Q13421    | Cell membrane; Lipid-anc | 0 |
| Vesicles (GO:0043231)060291    | Early endosome {ECO:0000 | 0 |
| Golgi apparatus (GO:0Q9UEG4    | Nucleus {ECO:0000305}.   | 1 |
| Cytosol (GO:0005829) Q15628    | Nucleus {ECO:0000250}. C | 0 |
| Nuclear speckles (GO:Q9ULV5    | Nucleus.                 | 0 |
| Cytosol (GO:0005829) P31146    | Cytoplasm, cytoskeleton  | 0 |
| Nucleoplasm (GO:00056P27361    | Cytoplasm. Nucleus. Memb | 0 |
| Cytokinetic bridge (GQ7L5L3    | Membrane {ECO:0000250 Un | 0 |
| Cell Junctions (GO:00Q96BJ8    | Cytoplasm {ECO:0000250}. | 0 |
| Golgi apparatus (GO:0Q93100    | Cell membrane {ECO:00003 | 0 |
| Midbody (GO:0030496);043325    | Nucleus {ECO:0000269 Pub | 1 |
| Microtubules (GO:0015P61970    | Cytoplasm, cytosol {ECO: | 0 |
| Nuclear bodies (GO:00Q96BT3    | Nucleus. Chromosome, cen | 1 |
| Cytosol (GO:0005829);Q2TAA8    | Cytoplasm, perinuclear r | 0 |
| Cytosol (GO:0005829);094916    | Nucleus {ECO:0000269 Pub | 1 |
| Nucleoli fibrillar ce075113    | Nucleus, nucleolus {ECO: | 0 |
| Nucleoplasm (GO:00056Q2M1K9    | Nucleus {ECO:0000269 Pub | 1 |
| Cytosol (GO:0005829);Q02127    | Mitochondrion inner memb | 1 |
| Nucleoplasm (GO:00056P49711    | Nucleus, nucleoplasm {EC | 1 |
| Nuclear bodies (GO:00Q96AP0    | Nucleus {ECO:0000269 Pub | 1 |
| Cytosol (GO:0005829);P19387    | Nucleus {ECO:0000269 Pub | 0 |
| Actin filaments (GO:0Q9NPB6    | Cytoplasm. Cell membrane | 0 |
| Nuclear speckles (GO:075541    | Nucleus {ECO:0000305}.   | 0 |
| Cytosol (GO:0005829);P51511    | Membrane {ECO:0000305};  | 0 |
| Nucleoplasm (GO:00056Q9BQ65    | Nucleus {ECO:0000255 HAM | 1 |
| Centriolar satellite 043169    | Mitochondrion outer memb | 0 |
| Cytosol (GO:0005829);Q13232    |                          | 0 |
| Cytosol (GO:0005829);Q9ULP0    | Cytoplasm, cytosol {ECO: | 0 |
| Nucleoplasm (GO:00056P51665    |                          | 0 |
| Cytosol (GO:0005829);Q8TBK2    | Nucleus {ECO:0000269 Pub | 1 |
| Cytosol (GO:0005829);Q9NVC3    | Membrane {ECO:0000250};  | 0 |
| Cytosol (GO:0005829);Q08AM6    | Endosome membrane {ECO:0 | 0 |
| Microtubules (GO:0015000219    | Membrane {ECO:0000305};  | 0 |
| Cytosol (GO:0005829);Q9COB7    | Membrane {ECO:0000305};  | 0 |
| Golgi apparatus (GO:0005794);V | Cytoplasm, cytosol {ECO: | 0 |
| Endoplasmic reticulumQ9NY59    | Golgi apparatus membrane | 0 |
| Cytosol (GO:0005829);Q96CW6    | Cytoplasm {ECO:0000250}. | 0 |

|                                                          |                          |   |
|----------------------------------------------------------|--------------------------|---|
| Plasma membrane (GO:0Q92536                              | Basolateral cell membran | 0 |
| Nucleoplasm (GO:00056Q8NCC3                              | Lysosome {ECO:0000269 Pu | 0 |
| Nucleoplasm (GO:00056Q9H6T0                              | Nucleus {ECO:0000269 Pub | 1 |
| Nuclear membrane (GO:Q7L5A8                              | Endoplasmic reticulum me | 0 |
| Cytosol (GO:0005829) Q6PJI9                              | Lysosome membrane {ECO:0 | 0 |
| Cytosol (GO:0005829) Q7L1V2                              |                          | 0 |
| Mitochondria (GO:0005Q9NRP2                              | Mitochondrion {ECO:00002 | 1 |
| Nucleoli (GO:0005730) 015169                             | Cytoplasm {ECO:0000269 P | 0 |
| Nucleoplasm (GO:00056Q9NWW0                              | Cytoplasm {ECO:0000269 P | 0 |
| Cytosol (GO:0005829) Q12980                              | Lysosome membrane {ECO:0 | 0 |
| Cytosol (GO:0005829); P29372                             | Cytoplasm {ECO:0000269 P | 0 |
| Intermediate filamentQ3SXM5                              | Mitochondrion {ECO:00002 | 1 |
| Nucleoli fibrillar ceQ15572                              | Nucleus.                 | 0 |
| Cytosol (GO:0005829); 043304                             |                          | 0 |
| Cytosol (GO:0005829) Q14019                              | Cytoplasm {ECO:0000269 P | 0 |
| Cytosol (GO:0005829); Q14694                             | Cytoplasm {ECO:0000269 P | 0 |
| Nucleoli (GO:0005730) Q9H0B8                             | Secreted {ECO:0000250}.  | 0 |
| Cytosol (GO:0005829) P49815                              | Cytoplasm. Membrane; Per | 0 |
| Cytosol (GO:0005829); 060304                             | Nucleus {ECO:0000255 PRO | 0 |
| Mitochondria (GO:0005000746                              | Mitochondrion intermembr | 1 |
| Plasma membrane (GO:0P33527                              | Cell membrane {ECO:00002 | 1 |
| Nucleoplasm (GO:00056Q12946                              | Nucleus {ECO:0000305}.   | 0 |
| Cytosol (GO:0005829); Q9H6Q4                             |                          | 0 |
| Nucleoplasm (GO:00056Q2M296                              |                          | 0 |
| Nucleoplasm (GO:00056P51798                              | Lysosome membrane {ECO:0 | 0 |
| Cytosol (GO:0005829) Q9BQD7                              | Membrane {ECO:0000305};  | 0 |
| Cytosol (GO:0005829); Q01650                             | Apical cell membrane {EC | 0 |
| Cytosol (GO:0005829); Q9UJH8                             | Secreted {ECO:0000250}.  | 0 |
| Cytosol (GO:0005829); Q5XUX0                             |                          | 0 |
| Cytosol (GO:0005829); Q9UNE7                             | Cytoplasm {ECO:0000269 P | 1 |
| Nucleoplasm (GO:00056075783                              | Membrane; Multi-pass mem | 0 |
| Cytosol (GO:0005829) P53384                              | Cytoplasm {ECO:0000255 H | 0 |
| Cytosol (GO:0005829); 015553                             | Isoform 1: Cytoplasm, cy | 0 |
| Cytosol (GO:0005829) Q14894                              | Cytoplasm.               | 1 |
| Nucleoplasm (GO:00056000418                              |                          | 0 |
| Nucleoplasm (GO:00056075808                              |                          | 0 |
| Cytosol (GO:0005829); P15170                             |                          | 0 |
| Actin filaments (GO:0Q15697                              | Nucleus.                 | 1 |
| Nucleoplasm (GO:00056Q96AJ1                              | Cell projection, cilium  | 0 |
| Nucleoli (GO:0005730) 014562                             |                          | 0 |
| Mitochondria (GO:0005Q5JPH6                              | Mitochondrion matrix {EC | 1 |
| Golgi apparatus (GO:0Q9UJY4                              | Golgi apparatus, trans-G | 0 |
| Cytosol (GO:0005829); Q9BRF8                             | Cytoplasm {ECO:0000269 P | 0 |
| Cytosol (GO:0005829) Q70CQ4                              |                          | 0 |
| Cytosol (GO:0005829); P30519                             | Microsome. Endoplasmic r | 0 |
| Mitochondria (GO:0005Q96EY1                              | Mitochondrion matrix. Cy | 0 |
| Microtubules (GO:0015630); Mitochondria (GO:0005739); Nu |                          | 0 |
| Cytosol (GO:0005829); Q9NSC2                             | Nucleus {ECO:0000250}.   | 0 |
| Cytosol (GO:0005829); 015405                             | Nucleus {ECO:0000305}.   | 1 |
| Cytosol (GO:0005829); Q08999                             | Nucleus.                 | 0 |
| Endoplasmic reticulumQ86Y38                              | Golgi apparatus membrane | 0 |
| Cytosol (GO:0005829); Q9ULZ3                             | Cytoplasm. Endoplasmic r | 0 |
| Cytosol (GO:0005829); Q68CZ1                             | Cytoplasm. Cytoplasm, cy | 0 |
| Nucleoplasm (GO:00056P56270                              | Nucleus {ECO:0000305 Pub | 1 |
| Plasma membrane (GO:0Q12846                              | Cell membrane {ECO:00003 | 1 |

|                             |                          |   |
|-----------------------------|--------------------------|---|
| Nuclear membrane (GO:014735 | Endoplasmic reticulum me | 0 |
| Mitochondria (GO:0005014874 | Mitochondrion matrix. Mi | 1 |
| Nucleoplasm (GO:00056Q9H7Z6 | Nucleus {ECO:0000269 Pub | 1 |
| Endoplasmic reticulumQ15155 | Membrane {ECO:0000305};  | 0 |
| Cytosol (GO:0005829);Q9HBE5 | Membrane; Single-pass ty | 0 |
| Cytosol (GO:0005829);Q9BSW7 | Membrane {ECO:0000250};  | 0 |
| Nucleoplasm (GO:00056Q6UXY8 | Membrane {ECO:0000305};  | 0 |
| Centrosome (GO:000581043303 | Cytoplasm, cytoskeleton, | 0 |
| Mitochondria (GO:0005Q7Z3J2 | Membrane {ECO:0000255};  | 0 |
| Cytosol (GO:0005829);P23975 | Cell membrane {ECO:00002 | 0 |
| Nucleoplasm (GO:00056075150 | Nucleus {ECO:0000269 Pub | 1 |
| Cytosol (GO:0005829);Q1ED39 | Nucleus, nucleolus {ECO: | 1 |
| Cytosol (GO:0005829);Q6PD74 | Cytoplasm, cytosol {ECO: | 1 |
| Cytosol (GO:0005829) Q86VS3 |                          | 0 |
| Mitochondria (GO:0005P83111 | Mitochondrion {ECO:00002 | 1 |
| Focal adhesion sites Q9UQ03 | Cytoplasm, cytoskeleton  | 0 |
| Cytosol (GO:0005829);P41240 | Cytoplasm {ECO:0000250}. | 0 |
| Nuclear bodies (GO:00Q15650 | Nucleus {ECO:0000269 Pub | 0 |
| Cytosol (GO:0005829);Q96DP5 | Mitochondrion {ECO:00002 | 0 |
| Cytosol (GO:0005829);Q13367 | Cytoplasmic vesicle, cla | 0 |
| Vesicles (GO:0043231)Q96GR2 | Cytoplasm {ECO:0000269 P | 0 |
| Cytosol (GO:0005829);Q8TDY8 | Cell membrane {ECO:00003 | 0 |
| Centriolar satellite P62491 | Cell membrane {ECO:00002 | 0 |
| Cytoplasmic bodies (GP09668 | Lysosome.                | 0 |
| Cytosol (GO:0005829);Q5W5X9 |                          | 0 |
| Vesicles (GO:0043231)Q5ZPR3 | Membrane {ECO:0000305};  | 0 |
| Cytosol (GO:0005829) P16930 |                          | 0 |
| Cytosol (GO:0005829);Q9BWH6 | Nucleus {ECO:0000250}.   | 0 |
| Cytosol (GO:0005829) Q9NSB8 | Cytoplasm {ECO:0000269 P | 0 |
| Plasma membrane (GO:0Q9H223 | Early endosome membrane  | 0 |
| Golgi apparatus (GO:0Q8NBN3 | Golgi apparatus membrane | 1 |
| Cytosol (GO:0005829);Q9H2Y7 | Nucleus, nucleolus {ECO: | 0 |
| Centrosome (GO:000581094986 | Cytoplasm, cytoskeleton, | 1 |
| Nucleoplasm (GO:00056Q8TF62 | Cell membrane {ECO:00002 | 0 |
| Cytosol (GO:0005829);Q04671 | Melanosome membrane {ECO | 0 |
| Nucleoli (GO:0005730)Q8N5C7 |                          | 0 |
| Nucleoplasm (GO:00056060320 | Membrane {ECO:0000305};  | 0 |
| Cytoplasmic bodies (GQ06547 | Nucleus.                 | 1 |
| Cell Junctions (GO:00Q07157 | Cell membrane {ECO:00002 | 0 |
| Nucleoplasm (GO:00056Q96LC9 |                          | 0 |
| Vesicles (GO:0043231)Q8WXD2 | Cytoplasmic vesicle, sec | 0 |
| Nucleoplasm (GO:00056Q9NVM6 | Cytoplasm {ECO:0000250 U | 0 |
| Cytosol (GO:0005829) 075822 | Cytoplasm {ECO:0000255 H | 1 |
| Cytosol (GO:0005829);Q96JI7 | Cytoplasm, cytosol {ECO: | 0 |
| Nuclear speckles (GO:043482 | Nucleus {ECO:0000269 Pub | 0 |
| Nucleoplasm (GO:0005654)    | Nucleus.                 | 1 |
| Nucleoplasm (GO:00056Q96BR1 | Cytoplasmic vesicle {ECO | 0 |
| Golgi apparatus (GO:0Q15198 | Secreted {ECO:0000305}.  | 0 |
| Centriolar satellite Q1MSJ5 | Cytoplasm, cytoskeleton, | 0 |
| Nucleoli (GO:0005730)Q9HAW0 | Nucleus {ECO:0000269 Pub | 0 |
| Nucleoplasm (GO:00056Q9UPQ4 | Cytoplasm {ECO:0000269 P | 0 |
| Centrosome (GO:000581Q8TCF1 | Cytoplasm, Stress granul | 0 |
| Nucleoplasm (GO:00056Q9NV88 | Nucleus {ECO:0000269 Pub | 1 |
| Cytosol (GO:0005829) 043353 | Cytoplasm {ECO:0000305}. | 1 |
| Nuclear bodies (GO:00Q99502 | Cytoplasm {ECO:0000269 P | 0 |

|                             |                          |   |
|-----------------------------|--------------------------|---|
| Golgi apparatus (GO:0060934 | Nucleus {ECO:0000269 Pub | 0 |
| Golgi apparatus (GO:0Q9Y646 | Endoplasmic reticulum {E | 0 |
| Cytosol (GO:0005829);Q16698 | Mitochondrion {ECO:00002 | 1 |
| Vesicles (GO:0043231)P05937 |                          | 0 |
| Cytosol (GO:0005829);Q9NX62 | Golgi apparatus, trans-G | 1 |
| Cytosol (GO:0005829);Q8N474 | Secreted. Note=Cell memb | 0 |
| Golgi apparatus (GO:0Q86VI4 | Endomembrane system {ECO | 0 |
| Nucleoli (GO:0005730)Q96B02 | Nucleus {ECO:0000269 Pub | 0 |
| Nucleoli (GO:0005730)Q99575 | Nucleus, nucleolus {ECO: | 1 |
| Cytosol (GO:0005829) 014920 | Cytoplasm {ECO:0000269 P | 0 |
| Actin filaments (GO:0P00750 | Secreted, extracellular  | 0 |
| Nucleoplasm (GO:00056Q9HDC5 | Cell membrane {ECO:00002 | 0 |
| Intermediate filamentQ13188 | Cytoplasm {ECO:0000250}. | 0 |
| Cytosol (GO:0005829);Q8TB36 | Mitochondrion outer memb | 0 |
| Cytosol (GO:0005829) P60228 | Cytoplasm. Nucleus, PML  | 0 |
| Nuclear bodies (GO:00Q6NXG1 | Nucleus {ECO:0000269 Pub | 1 |
| Cytosol (GO:0005829) 095388 | Secreted.                | 0 |
| Cytosol (GO:0005829);Q92597 | Cytoplasm, cytosol. Cyto | 0 |
| Actin filaments (GO:0Q96GY0 |                          | 0 |
| Endoplasmic reticulumQ93045 | Cytoplasm {ECO:0000250}. | 0 |
| Mitochondria (GO:0005Q9NVT9 |                          | 0 |
| Nucleoplasm (GO:00056Q9UHF7 | Nucleus {ECO:0000269 Pub | 1 |
| Cytosol (GO:0005829) Q07617 | Cytoplasm {ECO:0000269 P | 1 |
| Nucleoplasm (GO:00056Q9NRG0 | Nucleus {ECO:0000305}.   | 0 |
| Vesicles (GO:0043231)P57768 | Early endosome membrane; | 0 |
| Cytosol (GO:0005829);095071 | Nucleus.                 | 0 |
| Nucleoplasm (GO:00056P57764 | Gasdermin-D: Cytoplasm,  | 0 |
| Cytosol (GO:0005829);Q13630 |                          | 0 |
| Cytosol (GO:0005829);Q53H96 | Cytoplasm {ECO:0000269 P | 0 |
| Nucleoli fibrillar ceP29692 | Isoform 2: Nucleus {ECO: | 0 |
| Nucleoplasm (GO:00056P27216 | Apical cell membrane {EC | 0 |
| Cytosol (GO:0005829);Q14534 | Microsome membrane {ECO: | 0 |
| Cytosol (GO:0005829) Q9H788 | Cytoplasm {ECO:0000269 P | 1 |
| Cytosol (GO:0005829);Q9NVR2 | Nucleus {ECO:0000269 Pub | 0 |
| Microtubules (GO:0015Q8IV48 | Cytoplasm {ECO:0000269 P | 0 |
| Endoplasmic reticulumQ15043 | Cell membrane {ECO:00002 | 0 |
| Actin filaments (GO:0Q96QG7 | Cytoplasm {ECO:0000269 P | 0 |
| Cytosol (GO:0005829);000399 | Cytoplasm, cytoskeleton  | 0 |
| Cytosol (GO:0005829);Q9Y3T6 |                          | 0 |
| Cytosol (GO:0005829);P00390 | Isoform Mitochondrial: M | 0 |
| Nucleoplasm (GO:00056000220 | Membrane; Single-pass ty | 0 |
| Endoplasmic reticulum000124 | Endoplasmic reticulum me | 1 |
| Nucleoplasm (GO:00056P62714 | Cytoplasm {ECO:0000269 P | 0 |
| Cytosol (GO:0005829);Q86X53 |                          | 0 |
| Intermediate filamentP07197 |                          | 0 |
| Nucleoplasm (GO:00056015013 |                          | 0 |
| Nucleoli (GO:0005730)Q8TBB5 |                          | 0 |
| Nucleoplasm (GO:00056P33991 | Nucleus {ECO:0000250}.   | 1 |
| Cytosol (GO:0005829);Q7L273 |                          | 0 |
| Mitochondria (GO:0005060238 | Nucleus envelope. Endopl | 0 |
| Nucleoplasm (GO:00056000754 | Lysosome.                | 0 |
| Golgi apparatus (GO:0Q02818 | Golgi apparatus, cis-Gol | 0 |
| Actin filaments (GO:0Q9UQ10 |                          | 0 |
| Cytosol (GO:0005829);P13807 |                          | 0 |
| Nucleoplasm (GO:00056Q92918 |                          | 0 |

|                              |                          |   |
|------------------------------|--------------------------|---|
| Cytosol (GO:0005829)         | Secreted.                | 0 |
| Mitochondria (GO:0005Q13011) | Mitochondrion {ECO:00002 | 0 |
| Nucleoplasm (GO:00056P14866) | Nucleus, nucleoplasm {EC | 0 |
| Centrosome (GO:000581Q15653) | Cytoplasm {ECO:0000250}. | 0 |
| Cytosol (GO:0005829) P01229  | Secreted.                | 0 |
| Cytosol (GO:0005829) P0DN86  | Secreted {ECO:0000269 Pu | 0 |
| Microtubules (GO:0015P04350) | Cytoplasm, cytoskeleton. | 1 |
| Mitochondria (GO:0005Q9NP81) | Mitochondrion matrix {EC | 0 |
| Nucleoplasm (GO:00056P08621) | Nucleus speckle {ECO:000 | 0 |
| Centriolar satellite 096005  | Membrane {ECO:0000305};  | 0 |
| Cytosol (GO:0005829); Q01201 | Nucleus {ECO:0000269 Pub | 0 |
| Nucleoplasm (GO:00056Q8N2M8) | Nucleus {ECO:0000250}.   | 1 |
| Cytosol (GO:0005829) 075864  |                          | 0 |
| Cytosol (GO:0005829) Q9NWS0  |                          | 0 |
| Cytosol (GO:0005829) Q6ZSZ5  | Cytoplasm {ECO:0000269 P | 0 |
| Cytosol (GO:0005829) Q8WUF5  | Cytoplasm {ECO:0000269 P | 0 |
| Cytosol (GO:0005829); P18074 | Nucleus {ECO:0000269 Pub | 0 |
| Nucleoplasm (GO:00056Q8TEK3) | Nucleus {ECO:0000269 Pub | 1 |
| Mitochondria (GO:0005Q9NW61) |                          | 0 |
| Cytosol (GO:0005829); 075792 | Nucleus {ECO:0000305}.   | 0 |
| Actin filaments (GO:0Q6P597) | Cytoplasm, cytoskeleton  | 0 |
| Nucleoplasm (GO:00056Q15428) | Nucleus {ECO:0000255 PRO | 0 |
| Aggresome (GO:0016235P03971) | Secreted.                | 0 |
| Vesicles (GO:0043231) Q9UK85 | Secreted {ECO:0000250 Un | 0 |
| Golgi apparatus (GO:0P12980) | Nucleus {ECO:0000255 PRO | 0 |
| Centriolar satellite P54368  |                          | 0 |
| Cytosol (GO:0005829); Q9NXH9 |                          | 0 |
| Golgi apparatus (GO:0060499) | Golgi apparatus membrane | 0 |
| Cytosol (GO:0005829); Q09013 | Endoplasmic reticulum me | 0 |
| Cytosol (GO:0005829); Q96RQ9 | Isoform 1: Lysosome {ECO | 0 |
| Vesicles (GO:0043231) P13994 |                          | 0 |
| Nucleoplasm (GO:00056Q86YD1) | Cell membrane. Cytoplasm | 0 |
| Nucleoplasm (GO:00056Q08117) | Nucleus {ECO:0000250}.   | 1 |
| Golgi apparatus (GO:0Q9UNW9) | Nucleus {ECO:0000250}.   | 0 |
| Nucleoplasm (GO:00056043765) | Cytoplasm {ECO:0000269 P | 0 |
| Nucleoplasm (GO:00056Q71SY5) | Nucleus {ECO:0000269 Pub | 1 |
| Cytosol (GO:0005829); Q13487 | Nucleus.                 | 1 |
| Nucleoli (GO:0005730) Q9UNZ5 |                          | 0 |
| Mitochondria (GO:0005043615) | Mitochondrion inner memb | 1 |
| Nucleoplasm (GO:00056Q9Y6R9) |                          | 0 |
| Vesicles (GO:0043231) Q6UWB1 | Membrane; Single-pass ty | 0 |
| Nucleoplasm (GO:00056Q9NVP2) | Nucleus {ECO:0000269 Pub | 1 |
| Cytosol (GO:0005829); P13805 |                          | 0 |
| Nucleoplasm (GO:00056Q8IV63) | Nucleus {ECO:0000269 Pub | 1 |
| Nucleoli (GO:0005730) Q9Y421 | Isoform 1: Nucleus.; Iso | 0 |
| Cytosol (GO:0005829) Q9UPN7  | Cytoplasm {ECO:0000269 P | 1 |
| Nuclear bodies (GO:00Q9H6X5) |                          | 0 |
| Cytosol (GO:0005829); 095402 | Nucleus {ECO:0000305}.   | 0 |
| Nucleoplasm (GO:00056095897) | Secreted {ECO:0000269 Pu | 0 |
| Nucleoplasm (GO:00056Q86YV0) | Cytoplasm {ECO:0000269 P | 0 |
| Nucleoplasm (GO:00056043823) | Nucleus {ECO:0000269 Pub | 0 |
| Nucleoplasm (GO:00056Q9H6B9) | Microsome membrane {ECO: | 0 |
| Golgi apparatus (GO:0A1L0T0) | Membrane; Single-pass me | 0 |
| Nucleoli fibrillar ce Q96HQ0 | Nucleus {ECO:0000305}.   | 0 |
| Cytosol (GO:0005829); Q6ZW31 |                          | 0 |

|                              |                          |   |
|------------------------------|--------------------------|---|
| Cytosol (GO:0005829);P31944  | Cytoplasm {ECO:0000269 P | 0 |
| Intermediate filamentP48664  | Cell membrane {ECO:00002 | 1 |
| Nucleoplasm (GO:00056P24864  | Nucleus {ECO:0000269 Pub | 1 |
| Cytosol (GO:0005829);094763  | Nucleus. Cytoplasm. Mito | 0 |
| Cytosol (GO:0005829);014737  |                          | 0 |
| Cytosol (GO:0005829) Q96NW4  | Early endosome {ECO:0000 | 0 |
| Cytosol (GO:0005829);P62249  |                          | 0 |
| Mitochondria (GO:0005Q3ZCQ8  | Mitochondrion inner memb | 0 |
| Nucleoli fibrillar ceP22087  | Nucleus, nucleolus {ECO: | 1 |
| Nucleoplasm (GO:00056Q9Y463  | Nucleus.                 | 1 |
| Cytosol (GO:0005829);P06744  | Cytoplasm {ECO:0000269 P | 0 |
| Cytosol (GO:0005829);P31751  | Cytoplasm. Nucleus. Cell | 0 |
| Cytosol (GO:0005829);Q8IV08  | Endoplasmic reticulum me | 1 |
| Golgi apparatus (GO:0Q9BXM0  | Isoform 1: Cell membrane | 0 |
| Nucleoplasm (GO:00056Q8N2W9  | Nucleus, PML body {ECO:0 | 0 |
| Nucleoplasm (GO:00056Q9BW85  | Nucleus {ECO:0000255 HAM | 0 |
| Centriolar satellite Q96IW2  |                          | 0 |
| Cytosol (GO:0005829) Q99426  | Cytoplasm {ECO:0000269 P | 0 |
| Nucleoplasm (GO:00056P36954  | Nucleus, nucleolus {ECO: | 0 |
| Nucleoplasm (GO:00056Q9UPR6  |                          | 0 |
| Plasma membrane (GO:0Q15758  | Cell membrane {ECO:00002 | 0 |
| Cytosol (GO:0005829);Q9BZL6  | Cytoplasm {ECO:0000269 P | 0 |
| Cell Junctions (GO:00095049  | Cell membrane {ECO:00002 | 0 |
| Cytosol (GO:0005829);Q8WUQ7  | Nucleus {ECO:0000269 Pub | 0 |
| Cytosol (GO:0005829) Q9Y3X0  |                          | 0 |
| Nucleoplasm (GO:00056Q9BUJ2  | Nucleus {ECO:0000269 Pub | 1 |
| Nuclear membrane (GO:Q9UM11  | Isoform 2: Nucleus.; Iso | 0 |
| Cytosol (GO:0005829) Q96PG8  | Note=Contrary to isoform | 0 |
| Cytosol (GO:0005829);P01137  | Latency-associated pepti | 0 |
| Cytosol (GO:0005829);A2RUS2  | Cytoplasm {ECO:0000250 U | 0 |
| Mitochondria (GO:0005Q9NW81  | Mitochondrion {ECO:00002 | 0 |
| Lipid droplets (GO:00060664  | Cytoplasm {ECO:0000269 P | 0 |
| Nucleoplasm (GO:00056Q7Z406  |                          | 0 |
| Cytosol (GO:0005829) Q9NYZ4  | Membrane; Single-pass ty | 0 |
| Nucleoplasm (GO:00056P39019  | Nucleus {ECO:0000269 Pub | 1 |
| Nucleoli (GO:0005730) Q9NZM5 | Nucleus, nucleolus {ECO: | 0 |
| Vesicles (GO:0043231) Q16617 | Cell membrane {ECO:00002 | 0 |
| Mitochondria (GO:0005P38117  | Mitochondrion matrix {EC | 1 |
| Nucleoplasm (GO:00056P20138  | Isoform CD33M: Cell memb | 0 |
| Plasma membrane (GO:0P06731  | Cell membrane {ECO:00002 | 0 |
| Cytosol (GO:0005829);Q9NWV8  | Cytoplasm {ECO:0000269 P | 1 |
| Cytosol (GO:0005829) P29597  |                          | 0 |
| Cytosol (GO:0005829) Q06520  | Cytoplasm.               | 1 |
| Cytosol (GO:0005829) Q16543  | Cytoplasm {ECO:0000269 P | 1 |
| Cytosol (GO:0005829) P54920  | Cell membrane {ECO:00002 | 0 |
| Nuclear membrane (GO:Q9UI14  | Cell membrane {ECO:00002 | 0 |
| Nucleoplasm (GO:00056Q99687  | Nucleus {ECO:0000250 Uni | 0 |
| Cytosol (GO:0005829);Q13332  | Cell membrane {ECO:00002 | 0 |
| Cytokinetic bridge (GQ9BYD5  | Cytoplasm. Note=Constitu | 0 |
| Cytosol (GO:0005829);P24390  | Golgi apparatus membrane | 0 |
| Cytosol (GO:0005829);Q99418  | Cell membrane {ECO:00002 | 0 |
| Nucleoli (GO:0005730) Q9BQ67 | Nucleus, nucleolus {ECO: | 1 |
| Golgi apparatus (GO:0095473  | Membrane; Multi-pass mem | 0 |
| Centrosome (GO:000581Q9Y240  | Cytoplasm {ECO:0000269 P | 0 |
| Nucleoplasm (GO:00056Q9Y2G2  | Cytoplasm {ECO:0000269 P | 0 |



|                                                        |                          |   |
|--------------------------------------------------------|--------------------------|---|
| Golgi apparatus (GO:0P18858                            | Nucleus.                 | 1 |
| Cytosol (GO:0005829);Q9Y473                            | Cytoplasm. Nucleus.      | 1 |
| Cytosol (GO:0005829) Q9UP65                            | Membrane {ECO:0000269 Pu | 0 |
| Nucleoplasm (GO:00056Q92839                            | Membrane {ECO:0000305};  | 1 |
| Vesicles (GO:0043231) 095716                           | Cell membrane {ECO:00003 | 0 |
| Endoplasmic reticulumQ6UW68                            | Membrane {ECO:0000269 Pu | 0 |
| Cytosol (GO:0005829);Nucleoplasm (GO:0005654);Plasma m |                          | 0 |
| Nucleoplasm (GO:00056Q96GM1                            | Membrane {ECO:0000305};  | 0 |
| Mitochondria (GO:0005015382                            | Isoform A: Mitochondrion | 0 |
| Cytosol (GO:0005829);Q8N344                            | Nucleus {ECO:0000255 PRO | 0 |
| Centriolar satellite Q9H4M7                            | Cytoplasm {ECO:0000305}. | 0 |
| Cytosol (GO:0005829) P30153                            | Cytoplasm {ECO:0000250 U | 0 |
| Nucleoli (GO:0005730) 014787                           | Cytoplasm {ECO:0000250}. | 0 |
| Endoplasmic reticulumQ9Y284                            | Membrane {ECO:0000305};  | 0 |
| Mitochondria (GO:0005Q92947                            | Mitochondrion matrix.    | 1 |
| Nucleoplasm (GO:00056Q13351                            | Nucleus {ECO:0000269 Pub | 1 |
| Vesicles (GO:0043231) Q9Y2H9                           | Cell membrane {ECO:00002 | 0 |
| Nucleoplasm (GO:00056Q96BZ8                            |                          | 0 |
| Nucleoplasm (GO:00056Q8WWY3                            | Nucleus {ECO:0000269 Pub | 0 |
| Nuclear membrane (GO:P0C1Z6                            | Nucleus {ECO:0000269 Pub | 0 |
| Cytosol (GO:0005829);P52333                            | Endomembrane system {ECO | 0 |
| Cytosol (GO:0005829);Q02543                            |                          | 0 |
| Actin filaments (GO:0Q92952                            | Membrane; Multi-pass mem | 0 |
| Nucleoplasm (GO:00056Q8TBH0                            |                          | 0 |
| Golgi apparatus (GO:0000459                            |                          | 0 |
| Centrosome (GO:000581P20336                            | Cytoplasm, cytosol {ECO: | 0 |
| Cytosol (GO:0005829);Q9NPH2                            | Cytoplasm {ECO:0000250}. | 0 |
| Cytosol (GO:0005829);Q6UUUV9                           | Cytoplasm {ECO:0000269 P | 1 |
| Golgi apparatus (GO:0P49747                            | Secreted, extracellular  | 0 |
| Golgi apparatus (GO:0014579                            | Cytoplasm {ECO:0000250}. | 0 |
| Mitochondria (GO:0005Q9Y6V7                            |                          | 0 |
| Cytosol (GO:0005829) Q6NXE6                            |                          | 0 |
| Actin filaments (GO:0Q9BVK8                            | Endoplasmic reticulum me | 0 |
| Centrosome (GO:000581014556                            | Cytoplasm {ECO:0000250}. | 0 |
| Actin filaments (GO:0Q9UK28                            | Golgi apparatus membrane | 0 |
| Nucleoplasm (GO:00056Q15853                            | Nucleus.                 | 1 |
| Cytosol (GO:0005829);Q86X29                            | Cell membrane {ECO:00003 | 0 |
| Centrosome (GO:000581Q9BQD3                            | Lysosome membrane {ECO:0 | 0 |
| Cytosol (GO:0005829);Q14318                            | Mitochondrion {ECO:00002 | 0 |
| Nucleoplasm (GO:00056Q8IWZ8                            | Nucleus {ECO:0000305}.   | 1 |
| Cytosol (GO:0005829);P17017                            | Nucleus {ECO:0000305}.   | 0 |
| Vesicles (GO:0043231) Q9BYU1                           | Nucleus {ECO:0000255 PRO | 0 |
| Nucleoplasm (GO:00056P50548                            | Nucleus.                 | 1 |
| Cytosol (GO:0005829) P49840                            |                          | 0 |
| Vesicles (GO:0043231) Q9HD20                           | Endoplasmic reticulum me | 0 |
| Nucleoplasm (GO:00056Q6ZN55                            | Nucleus {ECO:0000305}.   | 1 |
| Nucleoplasm (GO:00056Q16478                            | Cell membrane; Multi-pas | 0 |
| Golgi apparatus (GO:0060292                            | Apical cell membrane {EC | 1 |
| Nucleoplasm (GO:00056Q03923                            | Nucleus {ECO:0000269 Pub | 1 |
| Mitochondria (GO:0005095571                            | Cytoplasm {ECO:0000269 P | 0 |
| Nuclear membrane (GO:Q8NFZ8                            | Membrane {ECO:0000305};  | 0 |
| Cytosol (GO:0005829);Q9HOW8                            |                          | 0 |
| Endoplasmic reticulumQ8NBF6                            | Recycling endosome {ECO: | 0 |
| Vesicles (GO:0043231) 043374                           | Cytoplasm, cytosol {ECO: | 0 |
| Cytosol (GO:0005829);Q00534                            | Cytoplasm. Nucleus. Cell | 0 |

|                               |                          |   |
|-------------------------------|--------------------------|---|
| Mitochondria (GO:0005075439   | Mitochondrion matrix {EC | 1 |
| Cytosol (GO:0005829) Q99543   | Nucleus {ECO:0000269 Pub | 0 |
| Cell Junctions (GO:00P43490   | Nucleus {ECO:0000269 Pub | 0 |
| Nucleoli fibrillar ceQ3B726   | Nucleus, nucleolus {ECO: | 0 |
| Cytosol (GO:0005829);P48736   | Cytoplasm {ECO:0000269 P | 1 |
| Cytosol (GO:0005829);P26012   | Cell membrane {ECO:00002 | 0 |
| Nuclear speckles (GO:060381   | Nucleus {ECO:0000255 PRO | 0 |
| Cytosol (GO:0005829) 095620   |                          | 0 |
| Cytosol (GO:0005829);Q02446   | Nucleus.                 | 1 |
| Nuclear speckles (GO:Q75N03   | Nucleus speckle {ECO:000 | 0 |
| Nucleoplasm (GO:00056P56178   | Nucleus {ECO:0000255 PRO | 0 |
| Cytosol (GO:0005829);P58546   | Cytoplasm {ECO:0000305}. | 0 |
| Endoplasmic reticulumP21246   | Secreted {ECO:0000269 Pu | 0 |
| Cytosol (GO:0005829) 060443   | Gasdermin-E, N-terminal: | 0 |
| Cytosol (GO:0005829) Q9HBG4   | Apical cell membrane; Mu | 0 |
| Cytosol (GO:0005829);Q7Z2W4   | Isoform 1: Cytoplasm {EC | 0 |
| Cytosol (GO:0005829);A0AVF1   | Cell projection, cilium  | 0 |
| Mitochondria (GO:0005Q02218   | Mitochondrion matrix {EC | 0 |
| Cytosol (GO:0005829);075689   | Nucleus. Cytoplasm. Note | 0 |
| Nucleoplasm (GO:00056014948   | Nucleus {ECO:0000255 PRO | 1 |
| Vesicles (GO:0043231)P51636   | Nucleus. Cytoplasm. Golg | 0 |
| Golgi apparatus (GO:0Q03135   | Golgi apparatus membrane | 0 |
| Cytosol (GO:0005829);P08581   | Membrane; Single-pass ty | 0 |
| Cytosol (GO:0005829) Q8WVP7   | Membrane {ECO:0000250};  | 0 |
| Vesicles (GO:0043231)P09544   | Secreted, extracellular  | 0 |
| Cytosol (GO:0005829);075190   | Cytoplasm, perinuclear r | 0 |
| Nucleoplasm (GO:00056043364   | Nucleus.                 | 0 |
| Nucleoplasm (GO:00056043365   | Nucleus.                 | 1 |
| Nuclear speckles (GO:P31267   | Nucleus.                 | 0 |
| Nucleoplasm (GO:00056Q6PJG6   | Nucleus {ECO:0000269 Pub | 0 |
| Cytosol (GO:0005829);Q6IPM2   | Cell projection, cilium  | 0 |
| Nucleoplasm (GO:00056Q92527   |                          | 0 |
| Focal adhesion sites P41587   | Cell membrane; Multi-pas | 0 |
| Microtubules (GO:0015095859   | Cell membrane {ECO:00002 | 0 |
| Mitochondria (GO:0005Q04837   | Mitochondrion {ECO:00002 | 1 |
| Intermediate filamentP31271   | Nucleus.                 | 1 |
| Nucleoplasm (GO:00056A4D0V7   |                          | 0 |
| Nucleoplasm (GO:00056P49640   | Nucleus.                 | 0 |
| Cytosol (GO:0005829);Q86VP1   |                          | 0 |
| Endoplasmic reticulumQ9H3G5   |                          | 0 |
| Nucleoplasm (GO:00056P52757   | Membrane {ECO:0000305};  | 0 |
| Vesicles (GO:0043231)Q13322   | Cytoplasm {ECO:0000250}. | 0 |
| Mitochondria (GO:0005Q8NFV4   |                          | 0 |
| Cell Junctions (GO:00075128   | Cell membrane {ECO:00002 | 0 |
| Cytosol (GO:0005829);Q9NWM8   | Endoplasmic reticulum lu | 0 |
| Golgi apparatus (GO:0Q96JA3   | Golgi apparatus, trans-G | 0 |
| Mitochondria (GO:0005Q9Y239   | Cytoplasm. Cell membrane | 0 |
| Cytosol (GO:0005829) P41250   | Cytoplasm {ECO:0000269 P | 0 |
| Nuclear speckles (GO:0016607) | Membrane; Single-pass ty | 0 |
| Cytosol (GO:0005829);Q4G0A6   |                          | 0 |
| Nucleoplasm (GO:00056P42575   |                          | 0 |
| Mitochondria (GO:0005Q9Y6H1   | Nucleus {ECO:0000269 Pub | 0 |
| Cytosol (GO:0005829);P04792   | Cytoplasm {ECO:0000269 P | 0 |
| Actin filaments (GO:0P47972   | Secreted {ECO:0000250}.  | 0 |
| Cytosol (GO:0005829);Q13442   |                          | 0 |

|                             |                          |   |
|-----------------------------|--------------------------|---|
| Centrosome (GO:000581P41223 | Nucleus {ECO:0000269 Pub | 0 |
| Mitochondria (GO:0005075127 | Mitochondrion {ECO:00002 | 0 |
| Cytosol (GO:0005829) P20815 | Endoplasmic reticulum me | 0 |
| Mitochondria (GO:0005P17029 | Nucleus {ECO:0000255 PRO | 0 |
| Cytosol (GO:0005829);P55884 | Cytoplasm {ECO:0000255 H | 0 |
| Vesicles (GO:0043231)Q9Y5X2 | Early endosome membrane  | 0 |
| Cytosol (GO:0005829) P36639 | Isoform p18: Cytoplasm,  | 0 |
| Cytosol (GO:0005829);P23471 | Isoform 1: Cell membrane | 0 |
| Cytosol (GO:0005829);P49848 | Nucleus.; Isoform 4: Nuc | 1 |
| Cytosol (GO:0005829);000401 | Cytoplasm, cytoskeleton  | 0 |
| Cytosol (GO:0005829) Q13155 | Cytoplasm, cytosol {ECO: | 0 |
| Cytosol (GO:0005829);075425 | Membrane {ECO:0000305};  | 0 |
| Golgi apparatus (GO:0Q15113 | Secreted.                | 0 |
| Nucleoli (GO:0005730)Q9NW13 | Nucleus, nucleolus {ECO: | 1 |
| Nucleoplasm (GO:00056Q9H9J4 |                          | 0 |
| Cytosol (GO:0005829);P20839 | Cytoplasm {ECO:0000255 H | 0 |
| Cytosol (GO:0005829) P05121 | Secreted {ECO:0000269 Pu | 0 |
| Golgi apparatus (GO:0P61966 | Golgi apparatus {ECO:000 | 0 |
| Centrosome (GO:000581Q86VF5 | Endoplasmic reticulum me | 0 |
| Cytosol (GO:0005829);Q9NS00 | Membrane {ECO:0000250};  | 0 |
| Nucleoplasm (GO:00056043257 | Nucleus {ECO:0000269 Pub | 0 |
| Nucleoli (GO:0005730)Q86VQ1 |                          | 0 |
| Microtubules (GO:0015Q9BUA6 |                          | 0 |
| Cytosol (GO:0005829);094880 |                          | 0 |
| Cytosol (GO:0005829);Q16656 | Nucleus.                 | 1 |
| Endosomes (GO:0005768Q9NUM4 | Late endosome membrane;  | 0 |
| Nucleoplasm (GO:00056Q15910 | Nucleus {ECO:0000269 Pub | 1 |
| Mitochondria (GO:0005060290 | Nucleus {ECO:0000305}.   | 0 |
| Cytosol (GO:0005829);Q5EB52 | Endoplasmic reticulum me | 0 |
| Cytosol (GO:0005829);Q8IV38 | Cell projection, cilium  | 0 |
| Nucleoplasm (GO:00056095857 | Membrane {ECO:0000305};  | 0 |
| Endoplasmic reticulum095994 | Secreted {ECO:0000269 Pu | 0 |
| Cytosol (GO:0005829);P35869 | Cytoplasm {ECO:0000250 U | 1 |
| Mitochondria (GO:0005Q9NX63 | Mitochondrion inner memb | 0 |
| Golgi apparatus (GO:0Q3YBM2 | Nucleus membrane {ECO:00 | 0 |
| Mitochondria (GO:0005Q9GZY4 | Mitochondrion inner memb | 1 |
| Cytosol (GO:0005829) P53004 | Cytoplasm.               | 1 |
| Cytosol (GO:0005829) Q8TCY9 | Cytoplasm {ECO:0000269 P | 0 |
| Vesicles (GO:0043231)Q9NWD8 | Membrane {ECO:0000305};  | 0 |
| Nucleoplasm (GO:00056Q9UGJ0 |                          | 0 |
| Cytosol (GO:0005829);Q8IUX7 | Isoform 1: Secreted {ECO | 0 |
| Nucleoplasm (GO:00056P49005 | Nucleus {ECO:0000269 Pub | 1 |
| Cytosol (GO:0005829);P35557 | Cytoplasm {ECO:0000269 P | 0 |
| Nucleoplasm (GO:00056Q9BQE9 |                          | 0 |
| Cytosol (GO:0005829);015498 | Cytoplasm, cytosol. Cyto | 0 |
| Cytosol (GO:0005829) Q9Y4P3 |                          | 0 |
| Cytosol (GO:0005829);Q15056 | Cytoplasm, perinuclear r | 0 |
| Cytosol (GO:0005829);P53667 | Cytoplasm. Nucleus. Cell | 0 |
| Nucleoplasm (GO:00056P50458 | Nucleus {ECO:0000305}.   | 0 |
| Actin filaments (GO:0Q9BXM9 |                          | 0 |
| Nucleoplasm (GO:00056Q9Y657 | Nucleus {ECO:0000269 Pub | 0 |
| Cytosol (GO:0005829);Q9NWW6 |                          | 0 |
| Cytosol (GO:0005829);Q9H330 | Membrane {ECO:0000305};  | 0 |
| Cytosol (GO:0005829);Q9H1U4 | Membrane {ECO:0000305};  | 0 |
| Cytosol (GO:0005829);Q14142 | Mitochondrion outer memb | 0 |

|                              |                          |   |
|------------------------------|--------------------------|---|
| Cytosol (GO:0005829);Q92828  |                          | 0 |
| Plasma membrane (GO:0P36897  | Cell membrane {ECO:00002 | 0 |
| Endoplasmic reticulumP60468  | Endoplasmic reticulum me | 1 |
| Endoplasmic reticulumP20774  | Secreted, extracellular  | 0 |
| Nucleoplasm (GO:00056Q04727  | Nucleus.                 | 1 |
| Nucleoli fibrillar ceQ9UPM6  | Nucleus {ECO:0000305}.   | 0 |
| Nucleoplasm (GO:00056Q6UWL2  | Membrane {ECO:0000305};  | 0 |
| Cytosol (GO:0005829);P02760  | Secreted.                | 0 |
| Centrosome (GO:000581Q7Z591  | Cytoplasm, cytoskeleton, | 1 |
| Nucleoplasm (GO:00056Q05193  | Cytoplasm {ECO:0000269 P | 0 |
| Nuclear bodies (GO:00P17813  | Cell membrane {ECO:00002 | 0 |
| Cytosol (GO:0005829) P00568  | Cytoplasm.               | 1 |
| Cytosol (GO:0005829) Q7L3B6  | Cytoplasm {ECO:0000269 P | 1 |
| Mitochondria (GO:0005Q9HBL7  | Cell membrane {ECO:00002 | 0 |
| Nucleoli (GO:0005730) Q9NVG8 | Membrane {ECO:0000250 Un | 0 |
| Nucleoplasm (GO:00056Q9H3R0  | Nucleus {ECO:0000255 PRO | 0 |
| Centrosome (GO:000581Q8NF50  | Cytoplasm {ECO:0000269 P | 0 |
| Plasma membrane (GO:0Q14678  | Cell projection, ruffle  | 0 |
| Cytosol (GO:0005829);Q12926  |                          | 0 |
| Plasma membrane (GO:0P62166  | Golgi apparatus {ECO:000 | 0 |
| Cytosol (GO:0005829);Q16790  | Nucleus {ECO:0000269 Pub | 0 |
| Cytosol (GO:0005829);Q96I24  | Nucleus {ECO:0000305}.   | 0 |
| Vesicles (GO:0043231)P17643  | Melanosome membrane {ECO | 0 |
| Cytosol (GO:0005829) 043889  | Isoform 1: Endoplasmic r | 0 |
| Cytosol (GO:0005829);Q92546  | Cytoplasm, cytosol {ECO: | 0 |
| Cytosol (GO:0005829);095786  | Cytoplasm. Cell projecti | 0 |
| Cytosol (GO:0005829);060869  | Cytoplasm. Nucleus. Note | 1 |
| Nucleoplasm (GO:00056014986  | Endomembrane system {ECO | 0 |
| Nucleoplasm (GO:00056Q8NEA6  | Nucleus {ECO:0000250}.   | 1 |
| Nucleoplasm (GO:00056Q99933  | Isoform 1: Nucleus. Cyto | 0 |
| Vesicles (GO:0043231)Q13905  | Early endosome {ECO:0000 | 0 |
| Cytosol (GO:0005829);Q9NQX5  | Membrane {ECO:0000305};  | 0 |
| Golgi apparatus (GO:0Q02410  | Cytoplasm {ECO:0000269 P | 0 |
| Cytokinetic bridge (GQ7Z333  | Nucleus {ECO:0000269 Pub | 0 |
| Cytokinetic bridge (GQ99962  | Cytoplasm {ECO:0000250 U | 0 |
| Cytoplasmic bodies (GQ15464  | Cytoplasm. Cell membrane | 0 |
| Nucleoli (GO:0005730) Q712K3 |                          | 0 |
| Nucleoplasm (GO:00056Q9NQ5   | Cytoplasm {ECO:0000269 P | 0 |
| Cytosol (GO:0005829);076080  | Cytoplasm {ECO:0000250}. | 0 |
| Actin filaments (GO:0000151  | Cytoplasm {ECO:0000269 P | 0 |
| Golgi apparatus (GO:0Q5T5M9  |                          | 0 |
| Cytosol (GO:0005829);P04053  | Nucleus {ECO:0000269 Pub | 0 |
| Nucleoplasm (GO:00056P23771  | Nucleus.                 | 1 |
| Mitochondria (GO:0005Q5VV63  | Membrane {ECO:0000305};  | 0 |
| Cell Junctions (GO:0Q9H2L5   |                          | 0 |
| Cytosol (GO:0005829);Q6XZF7  | Cytoplasm {ECO:0000269 P | 0 |
| Nucleoplasm (GO:00056Q7L804  | Cell projection, phagocy | 0 |
| Endoplasmic reticulum075477  | Endoplasmic reticulum me | 1 |
| Cytosol (GO:0005829);Q14152  | Cytoplasm {ECO:0000255 H | 1 |
| Centrosome (GO:000581014717  | Nucleus {ECO:0000305}.   | 0 |
| Nucleoli (GO:0005730) Q9BQ39 | Nucleus, nucleolus {ECO: | 1 |
| Vesicles (GO:0043231) Q9Y6Y8 | Cytoplasmic vesicle, COP | 0 |
| Nucleoplasm (GO:00056095260  | Isoform ATE1-1: Nucleus  | 0 |
| Nucleoplasm (GO:00056Q9NXX6  | Nucleus {ECO:0000269 Pub | 1 |
| Cytosol (GO:0005829);Q9HB21  | Cytoplasm {ECO:0000269 P | 0 |

|                             |                          |   |
|-----------------------------|--------------------------|---|
| Nucleoplasm (GO:00056Q9H7M9 | Cell membrane {ECO:00002 | 0 |
| Mitochondria (GO:0005Q9BPX6 | Mitochondrion inner memb | 1 |
| Mitochondria (GO:0005P16298 | Cytoplasm {ECO:0000269 P | 0 |
| Cytosol (GO:0005829);Q9H7U1 | Cytoplasm, cytoskeleton  | 0 |
| Cytosol (GO:0005829) P36894 | Cell membrane {ECO:00002 | 0 |
| Actin filaments (GO:0P62736 | Cytoplasm, cytoskeleton. | 1 |
| Vesicles (GO:0043231)P38571 | Lysosome.                | 0 |
| Nucleoplasm (GO:00056P31314 | Nucleus {ECO:0000305}.   | 1 |
| Cytosol (GO:0005829);Q9BRK4 | Cytoplasm. Cytoplasm, cy | 0 |
| Mitochondria (GO:0005Q9BWM7 | Mitochondrion membrane { | 1 |
| Golgi apparatus (GO:0P57775 |                          | 0 |
| Actin filaments (GO:0075607 | Nucleus {ECO:0000269 Pub | 0 |
| Microtubules (GO:0015Q9H2K2 | Cytoplasm. Golgi apparat | 0 |
| Golgi apparatus (GO:0Q92538 | Golgi apparatus, cis-Gol | 0 |
| Actin filaments (GO:0Q5T5U3 | Golgi apparatus membrane | 0 |
| Intermediate filamentQ8NE35 | Cytoplasm {ECO:0000269 P | 0 |
| Cytosol (GO:0005829);Q9H467 | Cytoplasm {ECO:0000269 P | 1 |
| Nucleoplasm (GO:00056Q9UMX1 | Cytoplasm {ECO:0000269 P | 0 |
| Golgi apparatus (GO:0Q9UPS8 |                          | 0 |
| Peroxisomes (GO:00057Q5T8D3 | Peroxisome membrane {ECO | 1 |
| Cytosol (GO:0005829);Q9H008 | Cytoplasm {ECO:0000269 P | 0 |
| Cytosol (GO:0005829) Q92615 | Cytoplasm, cytosol {ECO: | 1 |
| Nuclear membrane (GO:Q9BZE4 | Nucleus, nucleolus {ECO: | 1 |
| Centrosome (GO:000581Q3B7T1 | Nucleus {ECO:0000305}.   | 0 |
| Cytosol (GO:0005829);Q9P287 | Nucleus {ECO:0000269 Pub | 0 |
| Mitochondria (GO:0005Q9NVV4 | Cytoplasm {ECO:0000269 P | 0 |
| Mitochondria (GO:0005Q5JRX3 | Mitochondrion matrix {EC | 1 |
| Nucleoplasm (GO:00056Q9H668 | Nucleus {ECO:0000269 Pub | 1 |
| Cytosol (GO:0005829) P41279 | Cytoplasm {ECO:0000269 P | 1 |
| Nucleoplasm (GO:00056Q9H4W6 | Nucleus {ECO:0000269 Pub | 0 |
| Cytosol (GO:0005829);Q8WY21 | Membrane; Single-pass ty | 0 |
| Cytosol (GO:0005829);Q5VWN6 |                          | 0 |
| Cytosol (GO:0005829) Q9NQW7 | Cytoplasm {ECO:0000250}. | 1 |
| Nucleoplasm (GO:00056Q9UQE7 | Nucleus {ECO:0000250 Uni | 1 |
| Cytosol (GO:0005829);Q9UQ13 | Cytoplasm {ECO:0000269 P | 0 |
| Mitochondria (GO:0005Q00059 | Mitochondrion {ECO:00002 | 1 |
| Cytosol (GO:0005829) Q16204 | Cytoplasm. Cytoplasm, cy | 0 |
| Nucleoplasm (GO:00056Q13617 |                          | 0 |
| Nucleoplasm (GO:00056Q16763 |                          | 0 |
| Cytosol (GO:0005829);P46779 |                          | 0 |
| Nucleoplasm (GO:00056Q9ULJ6 | Nucleus speckle {ECO:000 | 0 |
| Mitochondria (GO:0005P30405 | Mitochondrion matrix {EC | 1 |
| Vesicles (GO:0043231)P30039 |                          | 0 |
| Vesicles (GO:0043231)Q8NG11 | Cell membrane {ECO:00002 | 0 |
| Nuclear speckles (GO:060347 |                          | 0 |
| Cytosol (GO:0005829);Q9C075 |                          | 0 |
| Cytosol (GO:0005829);Q7Z417 | Nucleus {ECO:0000269 Pub | 1 |
| Cytosol (GO:0005829);Q9Y2X7 | Cytoplasm {ECO:0000269 P | 0 |
| Cytosol (GO:0005829);P84098 |                          | 0 |
| Microtubules (GO:0015Q96IG2 | Cytoplasm {ECO:0000250}. | 0 |
| Vesicles (GO:0043231)Q59EK9 |                          | 0 |
| Nucleoli fibrillar ceP17480 | Nucleus, nucleolus {ECO: | 1 |
| Cytosol (GO:0005829);043242 |                          | 0 |
| Nuclear membrane (GO:015234 | Cytoplasm {ECO:0000269 P | 0 |
| Cytokinetic bridge (GQ9UHV5 |                          | 0 |

|                              |                          |   |
|------------------------------|--------------------------|---|
| Nucleoplasm (GO:00056075916  | Isoform 3: Membrane; Per | 0 |
| Vesicles (GO:0043231)P56703  | Secreted, extracellular  | 0 |
| Cytosol (GO:0005829) P45381  | Cytoplasm. Nucleus {ECO: | 0 |
| Cell Junctions (GO:00043502  | Nucleus. Cytoplasm. Cyto | 1 |
| Nucleoplasm (GO:00056043236  | Cytoplasm {ECO:0000250}. | 0 |
| Nucleoplasm (GO:00056081X18  |                          | 0 |
| Cytosol (GO:0005829);Q9UJT1  | Nucleus {ECO:0000250 Uni | 0 |
| Cytosol (GO:0005829);Q14974  | Cytoplasm {ECO:0000269 P | 0 |
| Golgi apparatus (GO:0014653  | Golgi apparatus, cis-Gol | 0 |
| Cytosol (GO:0005829);Q9NVS9  |                          | 0 |
| Nucleoplasm (GO:00056023443  | Cell junction, synapse,  | 0 |
| Cytosol (GO:0005829);Q309B1  | Cytoplasm {ECO:0000250}. | 0 |
| Cytosol (GO:0005829);Q96JB5  | Nucleus {ECO:0000269 Pub | 0 |
| Nuclear bodies (GO:00083916  | Nucleus {ECO:0000269 Pub | 1 |
| Cytosol (GO:0005829);094762  | Isoform Beta: Nucleus, n | 1 |
| Cytosol (GO:0005829);Q9Y2B2  | Endoplasmic reticulum me | 0 |
| Cytosol (GO:0005829);P51570  |                          | 0 |
| Actin filaments (GO:0094983  | Nucleus {ECO:0000305 Pub | 0 |
| Nucleoplasm (GO:0005609UHV7  | Nucleus.                 | 1 |
| Golgi apparatus (GO:0017509  | Nucleus.                 | 1 |
| Cytosol (GO:0005829);P13929  | Cytoplasm. Note=Localize | 0 |
| Cytosol (GO:0005829) P07737  | Cytoplasm, cytoskeleton. | 0 |
| Nucleoplasm (GO:0005609Y272  | Cell membrane {ECO:00003 | 0 |
| Nucleoplasm (GO:0005607Z5J4  | Cytoplasm. Nucleus. Note | 0 |
| Nucleoplasm (GO:00056099567  | Nucleus, nuclear pore co | 0 |
| Mitochondria (GO:000507021   | Mitochondrion matrix {EC | 0 |
| Golgi apparatus (GO:00131645 | Cell membrane {ECO:00002 | 0 |
| Cytosol (GO:0005829);Q13867  | Cytoplasm.               | 1 |
| Nuclear membrane (GO:0075976 | Cell membrane {ECO:00002 | 0 |
| Endoplasmic reticulumQ96A33  | Endoplasmic reticulum me | 1 |
| Nucleoplasm (GO:0005609Y3C7  | Nucleus {ECO:0000305}.   | 0 |
| Cytosol (GO:0005829);P55039  | Nucleus {ECO:0000269 Pub | 0 |
| Nucleoli (GO:0005730)Q8IY81  | Nucleus, nucleolus {ECO: | 1 |
| Cytosol (GO:0005829);043572  | Mitochondrion {ECO:00002 | 0 |
| Cytosol (GO:0005829);P30838  | Cytoplasm {ECO:0000250 U | 1 |
| Nucleoplasm (GO:00056092925  | Nucleus {ECO:0000305}.   | 1 |
| Cytosol (GO:0005829);P13598  | Membrane {ECO:0000255};  | 0 |
| Golgi apparatus (GO:0043760  | Cytoplasmic vesicle memb | 0 |
| Nucleoli (GO:0005730)Q9NYH9  | Nucleus, nucleolus {ECO: | 1 |
| Nucleoplasm (GO:00056017844  | Nucleus, nucleolus {ECO: | 0 |
| Cytosol (GO:0005829);Q9HAS0  | Golgi apparatus, trans-G | 0 |
| Nucleoli (GO:0005730)Q15438  | Cell membrane {ECO:00002 | 0 |
| Golgi apparatus (GO:0000231  | Nucleus {ECO:0000250}. C | 0 |
| Golgi apparatus (GO:0013500  | Secreted {ECO:0000269 Pu | 0 |
| Cytosol (GO:0005829);Q96C10  | Cytoplasm {ECO:0000269 P | 0 |
| Endosomes (GO:0005768P51148  | Cell membrane {ECO:00002 | 0 |
| Cytosol (GO:0005829) P14061  | Cytoplasm.               | 1 |
| Cytosol (GO:0005829);Q9UH92  | Isoform Alpha: Cytoplasm | 1 |
| Nucleoplasm (GO:00056078357  | Membrane {ECO:0000305};  | 0 |
| Nucleoplasm (GO:00056092800  | Nucleus {ECO:0000269 Pub | 1 |
| Nucleoplasm (GO:00056092988  | Nucleus {ECO:0000269 Pub | 1 |
| Cytosol (GO:0005829);P02452  | Secreted, extracellular  | 0 |
| Cytosol (GO:0005829);Q9BTE6  | Cytoplasm {ECO:0000250}. | 0 |
| Endoplasmic reticulumQ96AG4  | Microsome membrane {ECO: | 0 |
| Cytosol (GO:0005829);P18054  | Cytoplasm, cytosol. Memb | 0 |

|                              |                          |   |
|------------------------------|--------------------------|---|
| Cytosol (GO:0005829);Q9UQL6  | Nucleus. Cytoplasm. Note | 0 |
| Plasma membrane (GO:0015438) | Membrane; Multi-pass mem | 1 |
| Nuclear speckles (GO:095232) | Nucleus speckle {ECO:000 | 1 |
| Cytosol (GO:0005829);Q14168  | Cytoplasm, cytoskeleton  | 0 |
| Nuclear speckles (GO:Q9HAU4) | Nucleus {ECO:0000269 Pub | 0 |
| Cytosol (GO:0005829);P51452  | Nucleus {ECO:0000269 Pub | 1 |
| Cytosol (GO:0005829);Q15029  | Nucleus {ECO:0000269 Pub | 1 |
| Nucleoplasm (GO:00056Q16534) | Nucleus {ECO:0000305}.   | 1 |
| Vesicles (GO:0043231)015403  | Cell membrane; Multi-pas | 0 |
| Cytosol (GO:0005829) P10644  | Cell membrane {ECO:00002 | 0 |
| Cytosol (GO:0005829);P62258  | Nucleus {ECO:0000269 Pub | 0 |
| Vesicles (GO:0043231)Q15546  | Late endosome membrane { | 0 |
| Cytosol (GO:0005829);Q9HD47  | Nucleus {ECO:0000269 Pub | 0 |
| Cell Junctions (GO:00Q9BZG8) | Nucleus {ECO:0000269 Pub | 0 |
| Cytosol (GO:0005829);P52564  | Nucleus {ECO:0000269 Pub | 0 |
| Cell Junctions (GO:00Q6IAN0) | Endoplasmic reticulum me | 0 |
| Mitochondria (GO:0005Q9Y6I7) |                          | 0 |
| Centriolar satellite 014745  | Cytoplasm {ECO:0000250}. | 0 |
| Nucleoplasm (GO:00056Q9BTE0) |                          | 0 |
| Golgi apparatus (GO:0Q8NE00) | Membrane {ECO:0000305};  | 0 |
| Endoplasmic reticulumP04004  | Secreted, extracellular  | 0 |
| Nucleoli (GO:0005730)Q13829  | Cytoplasm. Nucleus. Endo | 0 |
| Microtubules (GO:0015Q8IY31) | Golgi apparatus, cis-Gol | 0 |
| Endoplasmic reticulumQ5BJF2  | Nucleus membrane {ECO:00 | 0 |
| Cytosol (GO:0005829) Q86X02  |                          | 0 |
| Cytosol (GO:0005829);P09972  |                          | 0 |
| Cytosol (GO:0005829);Q7KZ85  | Nucleus {ECO:0000305}.   | 0 |
| Nucleoplasm (GO:00056Q96QT6) | Nucleus {ECO:0000269 Pub | 1 |
| Nucleoplasm (GO:00056Q99453) | Nucleus {ECO:0000255 PRO | 1 |
| Centrosome (GO:000581Q9P270) | Cytoplasm, cytoskeleton. | 0 |
| Mitochondria (GO:0005Q9NX40) | Endosome {ECO:0000250 Un | 0 |
| Nucleoplasm (GO:00056Q92564) |                          | 0 |
| Nucleoli (GO:0005730)P62068  |                          | 0 |
| Cytosol (GO:0005829);P49888  | Cytoplasm.               | 0 |
| Cytosol (GO:0005829);A1E959  | Secreted {ECO:0000250 Un | 0 |
| Plasma membrane (GO:0Q9UKJ5) | Cell membrane {ECO:00002 | 1 |
| Golgi apparatus (GO:0Q6ZU35) | Cytoplasm, cytosol {ECO: | 0 |
| Cytosol (GO:0005829);P19838  | Nucleus. Cytoplasm. Note | 1 |
| Mitochondria (GO:0005P15514) | Membrane; Single-pass me | 0 |
| Vesicles (GO:0043231)000462  | Lysosome {ECO:0000305}.  | 0 |
| Cytosol (GO:0005829);P61077  | Cell membrane {ECO:00002 | 0 |
| Nuclear bodies (GO:00Q15723) | Nucleus.                 | 1 |
| Mitochondria (GO:0005043677) | Mitochondrion inner memb | 1 |
| Cytosol (GO:0005829);Q6ZT07  |                          | 0 |
| Nucleoli (GO:0005730)Q9Y3S2  | Nucleus {ECO:0000269 Pub | 0 |
| Centrosome (GO:000581015327) |                          | 0 |
| Cytosol (GO:0005829);Q13480  |                          | 0 |
| Nucleoplasm (GO:00056095198) | Cytoplasm, cytoskeleton. | 0 |
| Centrosome (GO:000581P16870) | Isoform 1: Cytoplasmic v | 0 |
| Cytosol (GO:0005829);P49207  | Cytoplasm, cytosol {ECO: | 0 |
| Nucleoli (GO:0005730)Q9UJ72  |                          | 0 |
| Mitochondria (GO:0005Q9HAV7) | Mitochondrion matrix {EC | 1 |
| Nucleoli fibrillar ceQ9NY12  | Nucleus, nucleolus. Nucl | 0 |
| Vesicles (GO:0043231)P51790  | Isoform 1: Early endosom | 0 |
| Plasma membrane (GO:0Q8N5Z0) | Mitochondrion {ECO:00003 | 0 |

|                             |                          |   |
|-----------------------------|--------------------------|---|
| Golgi apparatus (GO:0Q86SF2 | Golgi apparatus membrane | 0 |
| Nuclear speckles (GO:043143 | Nucleus. Nucleus, nucleo | 0 |
| Vesicles (GO:0043231)Q9HD40 | Cytoplasm {ECO:0000305}. | 0 |
| Plasma membrane (GO:0Q66K79 | Secreted, extracellular  | 0 |
| Centrosome (GO:000581Q9C040 | Cytoplasm {ECO:0000250 U | 0 |
| Nucleoplasm (GO:00056Q969H0 | Isoform 1: Nucleus, nucl | 0 |
| Nucleoplasm (GO:00056Q8TAT5 | Nucleus {ECO:0000269 Pub | 1 |
| Nuclear membrane (GO:Q8N5T2 |                          | 0 |
| Vesicles (GO:0043231)Q7Z7G1 |                          | 0 |
| Nucleoplasm (GO:00056096028 | Nucleus {ECO:0000255 PRO | 0 |
| Cytosol (GO:0005829);Q5HYK7 | Cytoplasm {ECO:0000269 P | 1 |
| Nucleoplasm (GO:00056P78367 | Nucleus {ECO:0000305}.   | 0 |
| Nuclear membrane (GO:Q14728 | Membrane {ECO:0000255};  | 0 |
| Centrosome (GO:000581Q9Y4G8 | Cytoplasm. Cytoplasm, pe | 0 |
| Vesicles (GO:0043231)Q9H3E2 | Endosome membrane {ECO:0 | 0 |
| Cytosol (GO:0005829);Q9NUQ7 | Cytoplasm {ECO:0000250}. | 0 |
| Nucleoplasm (GO:00056P57682 | Nucleus {ECO:0000305}.   | 1 |
| Golgi apparatus (GO:0A5PLN7 |                          | 0 |
| Nucleoplasm (GO:00056060701 |                          | 0 |
| Nucleoplasm (GO:00056Q9UBK2 | Isoform 1: Nucleus. Nucl | 0 |
| Cytosol (GO:0005829);P02511 | Cytoplasm {ECO:0000269 P | 0 |
| Cytosol (GO:0005829) Q9BUP3 | Cytoplasm {ECO:0000269 P | 0 |
| Vesicles (GO:0043231)P53634 | Lysosome.                | 0 |
| Nuclear membrane (GO:Q96HJ3 |                          | 0 |
| Nucleoplasm (GO:00056Q96EB1 | Cytoplasm. Nucleus.      | 0 |
| Vesicles (GO:0043231)075312 | Nucleus. Nucleus, nucleo | 0 |
| Mitochondria (GO:0005Q9Y6C9 | Mitochondrion inner memb | 1 |
| Nuclear speckles (GO:Q8N3X1 |                          | 0 |
| Cytosol (GO:0005829);075845 | Endoplasmic reticulum me | 0 |
| Golgi apparatus (GO:0Q6NUN7 |                          | 0 |
| Vesicles (GO:0043231)Q9P2W7 | Isoform 1: Golgi apparat | 0 |
| Nucleoplasm (GO:00056P11142 | Cytoplasm. Melanosome. N | 0 |
| Nucleoli (GO:0005730)000534 |                          | 0 |
| Cytosol (GO:0005829);Q9NRS6 | Cytoplasm {ECO:0000269 P | 1 |
| Cytosol (GO:0005829);060711 | Cytoplasm. Cell junction | 0 |
| Vesicles (GO:0043231)Q9Y2E6 | Cytoplasm {ECO:0000250}. | 0 |
| Cytosol (GO:0005829);Q2TAZO | Preautophagosomal struct | 0 |
| Plasma membrane (GO:0Q9H4M9 | Recycling endosome membr | 0 |
| Cytosol (GO:0005829);P22059 | Cytoplasm, cytosol {ECO: | 0 |
| Nucleoplasm (GO:00056Q9H1C4 | Endoplasmic reticulum me | 0 |
| Cytosol (GO:0005829);Q9BZE2 | Nucleus {ECO:0000305}.   | 0 |
| Cytosol (GO:0005829);Q96C86 | Cytoplasm. Nucleus. Note | 1 |
| Nucleoplasm (GO:00056Q4FZB7 | Nucleus {ECO:0000269 Pub | 1 |
| Mitochondria (GO:0005Q96CU9 | Mitochondrion inner memb | 1 |
| Cytosol (GO:0005829);Q5H9R7 | Cytoplasm. Nucleus.      | 0 |
| Mitochondria (GO:0005P50416 | Mitochondrion outer memb | 1 |
| Nucleoplasm (GO:00056P24385 | Nucleus {ECO:0000269 Pub | 0 |
| Nucleoli (GO:0005730)Q9H6F5 | Nucleus {ECO:0000250}.   | 0 |
| Nuclear speckles (GO:Q9UMS4 | Nucleus {ECO:0000269 Pub | 0 |
| Cytosol (GO:0005829);Q9BVC6 | Nucleus outer membrane { | 0 |
| Mitochondria (GO:0005075382 | Cytoplasm {ECO:0000250}. | 0 |
| Cytosol (GO:0005829) Q9UHD1 |                          | 0 |
| Nuclear membrane (GO:P15328 | Cell membrane; Lipid-anc | 0 |
| Nucleoplasm (GO:00056P60006 |                          | 0 |
| Plasma membrane (GO:0Q96RD7 | Cell membrane {ECO:00003 | 0 |



|                              |                          |   |
|------------------------------|--------------------------|---|
| Cytosol (GO:0005829) Q96PE2  |                          | 0 |
| Vesicles (GO:0043231) P06727 | Secreted.                | 0 |
| Cell Junctions (GO:00P02656  | Secreted {ECO:0000303 Pu | 0 |
| Centrosome (GO:000581Q9UPV0  | Cytoplasm, cytoskeleton, | 0 |
| Microtubules (GO:0015Q8WVD5  | Membrane {ECO:0000305};  | 0 |
| Cytosol (GO:0005829); Q9P2H0 | Midbody {ECO:0000269 Pub | 0 |
| Cytosol (GO:0005829) P78344  |                          | 0 |
| Mitochondria (GO:0005Q6P9A2  | Golgi apparatus membrane | 0 |
| Cytosol (GO:0005829); Q13490 | Cytoplasm. Nucleus. Note | 1 |
| Nuclear speckles (GO:Q14139  | Cytoplasm {ECO:0000250 U | 0 |
| Cytoplasmic bodies (GP26196  | Cytoplasm, P-body {ECO:0 | 0 |
| Cytosol (GO:0005829) P22681  | Cytoplasm. Cell membrane | 0 |
| Cytosol (GO:0005829); Q9H422 | Cytoplasm {ECO:0000269 P | 1 |
| Nucleoplasm (GO:00056Q6ZVL6  | Membrane {ECO:0000305};  | 0 |
| Cytosol (GO:0005829); Q9UK99 | Nucleus. Note=Colocalize | 0 |
| Mitochondria (GO:0005000330  | Mitochondrion matrix.    | 0 |
| Cytosol (GO:0005829); Q9P000 | Nucleus {ECO:0000269 Pub | 0 |
| Vesicles (GO:0043231) Q8IY34 | Lysosome membrane {ECO:0 | 0 |
| Golgi apparatus (GO:0Q96QU6  |                          | 0 |
| Vesicles (GO:0043231) P21741 | Secreted.                | 0 |
| Mitochondria (GO:0005Q9C0C7  | Cytoplasmic vesicle, aut | 0 |
| Cytosol (GO:0005829); Q8WXG6 | Membrane {ECO:0000269 Pu | 0 |
| Mitochondria (GO:0005Q8WUK0  | Mitochondrion inner memb | 1 |
| Nuclear bodies (GO:00Q86UY6  | Cytoplasm {ECO:0000269 P | 0 |
| Cytosol (GO:0005829) P49589  | Cytoplasm.               | 1 |
| Plasma membrane (GO:0P60033  | Cell membrane {ECO:00002 | 1 |
| Mitochondria (GO:0005Q8IXU6  | Membrane {ECO:0000305};  | 0 |
| Cytosol (GO:0005829); Q9P2W6 | Cytoplasm.               | 0 |
| Cytosol (GO:0005829); Q8N336 |                          | 0 |
| Nucleoplasm (GO:00056P35712  | Nucleus {ECO:0000255 PRO | 1 |
| Endoplasmic reticulum000193  |                          | 0 |
| Cytoplasmic bodies (G000562  | Cytoplasm. Golgi apparat | 0 |
| Endoplasmic reticulumP62277  |                          | 0 |
| Cytosol (GO:0005829) 000170  | Cytoplasm.               | 1 |
| Nucleoplasm (GO:00056P52948  | Nucleus membrane {ECO:00 | 0 |
| Mitochondria (GO:0005000217  | Mitochondrion {ECO:00003 | 1 |
| Mitochondria (GO:0005Q13488  | Membrane {ECO:0000250};  | 0 |
| Endoplasmic reticulumP35790  | Cytoplasm.               | 0 |
| Nucleoplasm (GO:00056P32780  | Nucleus.                 | 1 |
| Endoplasmic reticulumP54829  | Endoplasmic reticulum me | 0 |
| Cytosol (GO:0005829); 000233 |                          | 0 |
| Cytosol (GO:0005829); Q8IVL6 | Endoplasmic reticulum {E | 0 |
| Cytosol (GO:0005829); Q86W92 |                          | 0 |
| Aggresome (GO:0016235Q6NWX9  | Nucleus speckle {ECO:000 | 0 |
| Nucleoplasm (GO:00056Q9UKN5  | Nucleus {ECO:0000305}.   | 1 |
| Mitochondria (GO:0005Q5HYK3  | Mitochondrion inner memb | 1 |
| Golgi apparatus (GO:0P78348  | Cell membrane {ECO:00002 | 1 |
| Centrosome (GO:000581Q6IMN6  | Isoform 1: Cytoplasm.; I | 0 |
| Vesicles (GO:0043231) A1L157 | Membrane {ECO:0000305};  | 0 |
| Cytosol (GO:0005829); Q9H3F6 | Nucleus {ECO:0000269 Pub | 1 |
| Mitochondria (GO:0005P49281  | Isoform 2: Cell membrane | 0 |
| Cytosol (GO:0005829); Q03426 | Cytoplasm {ECO:0000269 P | 0 |
| Nuclear speckles (GO:Q9H175  | Nucleus {ECO:0000250}.   | 0 |
| Cytosol (GO:0005829) Q96RR4  | Nucleus {ECO:0000250}. C | 0 |
| Plasma membrane (GO:0005886) | Cytoplasm {ECO:0000269 P | 0 |

|                             |                          |   |
|-----------------------------|--------------------------|---|
| Cytosol (GO:0005829) Q9NPF7 | Secreted {ECO:0000269 Pu | 0 |
| Mitochondria (GO:0005P06576 | Mitochondrion inner memb | 1 |
| Cytosol (GO:0005829);Q15185 | Cytoplasm {ECO:0000250 U | 0 |
| Nucleoplasm (GO:00056Q6XYQ8 | Cytoplasmic vesicle, sec | 0 |
| Nucleoplasm (GO:00056Q4VC05 |                          | 0 |
| Cytosol (GO:0005829);Q7L4I2 |                          | 0 |
| Nucleoplasm (GO:00056P13349 | Nucleus {ECO:0000269 Pub | 1 |
| Cytosol (GO:0005829) P05783 | Cytoplasm, perinuclear r | 0 |
| Mitochondria (GO:0005Q9H6R3 | Mitochondrion matrix {EC | 0 |
| Cytosol (GO:0005829);P08151 | Cytoplasm {ECO:0000269 P | 1 |
| Nucleoplasm (GO:00056Q9ULR3 | Nucleus {ECO:0000269 Pub | 0 |
| Cytosol (GO:0005829);P50579 | Cytoplasm {ECO:0000255 H | 1 |
| Cytosol (GO:0005829);P09960 | Cytoplasm.               | 1 |
| Mitochondria (GO:0005P41970 | Nucleus.                 | 1 |
| Vesicles (GO:0043231)P48065 | Membrane; Multi-pass mem | 0 |
| Vesicles (GO:0043231)Q9H1J7 | Secreted, extracellular  | 0 |
| Cytokinetic bridge (GQ969R8 | Lysosome membrane {ECO:0 | 0 |
| Cytosol (GO:0005829);Q08050 | Nucleus.                 | 0 |
| Cytosol (GO:0005829);Q9NR21 | Nucleus, nuclear pore co | 1 |
| Nucleoplasm (GO:00056015145 | Cytoplasm, cytoskeleton  | 0 |
| Cytosol (GO:0005829);Q9UHW5 |                          | 0 |
| Cytosol (GO:0005829);Q9UBQ0 | Cytoplasm. Membrane; Per | 0 |
| Microtubules (GO:0015P10916 | Cytoplasm, myofibril, sa | 0 |
| Nucleoplasm (GO:00056Q96B01 | Nucleus {ECO:0000250}. N | 0 |
| Nucleoplasm (GO:00056Q9UQQ2 |                          | 0 |
| Golgi apparatus (GO:0Q9H8J5 | Membrane {ECO:0000305};  | 0 |
| Nucleoplasm (GO:00056Q9BY84 | Cytoplasm. Nucleus. Cyto | 0 |
| Cytosol (GO:0005829);060519 | Nucleus {ECO:0000250}.   | 0 |
| Nucleoplasm (GO:00056P46527 | Nucleus. Cytoplasm. Endo | 0 |
| Cytosol (GO:0005829);Q14CX7 | Cytoplasm {ECO:0000269 P | 1 |
| Golgi apparatus (GO:0P36941 | Membrane; Single-pass ty | 0 |
| Nuclear bodies (GO:00Q6N063 |                          | 0 |
| Nucleoplasm (GO:00056014519 |                          | 0 |
| Cytosol (GO:0005829);Q9Y6K5 | Cytoplasm. Nucleus.      | 1 |
| Centrosome (GO:000581P29728 | Cytoplasm {ECO:0000269 P | 0 |
| Rods & Rings () Q93070      | Cell membrane; Lipid-anc | 0 |
| Cell Junctions (GO:00095294 |                          | 0 |
| Cytosol (GO:0005829) P52566 | Cytoplasm, cytosol {ECO: | 1 |
| Nucleoplasm (GO:00056Q13889 | Nucleus {ECO:0000269 Pub | 1 |
| Cytosol (GO:0005829) Q14232 |                          | 0 |
| Nucleoli (GO:0005730)Q8NHQ9 |                          | 0 |
| Nucleoplasm (GO:00056Q9H628 |                          | 0 |
| Cytosol (GO:0005829);P11473 | Nucleus {ECO:0000255 PRO | 0 |
| Nucleoplasm (GO:00056Q9ULW2 | Cell membrane {ECO:00003 | 0 |
| Nucleoplasm (GO:00056P40937 | Nucleus {ECO:0000305}.   | 0 |
| Cytosol (GO:0005829);P32856 | Membrane; Single-pass ty | 0 |
| Cytosol (GO:0005829);Q6QNK2 | Cell membrane {ECO:00002 | 0 |
| Cytosol (GO:0005829);Q9Y2I9 | Cell membrane {ECO:00002 | 1 |
| Cytosol (GO:0005829);Q86VP6 | Cytoplasm {ECO:0000269 P | 0 |
| Vesicles (GO:0043231)P61020 | Cell membrane {ECO:00002 | 0 |
| Centrosome (GO:000581Q8TC05 | Nucleus {ECO:0000269 Pub | 0 |
| Centrosome (GO:000581P57740 | Nucleus membrane {ECO:00 | 0 |
| Cytosol (GO:0005829);Q9NZN8 | Cytoplasm {ECO:0000269 P | 0 |
| Nucleoplasm (GO:00056Q9UNS1 | Nucleus {ECO:0000269 Pub | 1 |
| Nuclear speckles (GO:Q16630 | Nucleus {ECO:0000269 Pub | 0 |

|                              |                          |   |
|------------------------------|--------------------------|---|
| Nucleoli (GO:0005730) Q13601 | Cytoplasm {ECO:0000269 R | 0 |
| Mitochondria (GO:0005Q4U2R6  | Mitochondrion {ECO:00002 | 1 |
| Cytosol (GO:0005829); P04406 | Cytoplasm, cytosol {ECO: | 0 |
| Nucleoli (GO:0005730) P46087 | Nucleus, nucleolus {ECO: | 1 |
| Nucleoplasm (GO:00056Q14839  | Nucleus {ECO:0000269 Pub | 0 |
| Nucleoplasm (GO:00056Q8NEB7  | Secreted {ECO:0000250 Un | 0 |
| Cytosol (GO:0005829); A0JNW5 | Cytoplasm, cytosol {ECO: | 0 |
| Cytosol (GO:0005829); Q9UBW8 | Cytoplasm {ECO:0000269 P | 1 |
| Nucleoplasm (GO:00056Q9UNL4  | Nucleus {ECO:0000269 Pub | 1 |
| Golgi apparatus (GO:0P16520  |                          | 0 |
| Cytosol (GO:0005829) Q99618  | Cytoplasm, cytosol {ECO: | 0 |
| Vesicles (GO:0043231) Q8WUD6 | Golgi apparatus membrane | 0 |
| Cytosol (GO:0005829); P45974 |                          | 0 |
| Nucleoplasm (GO:00056P60174  | Cytoplasm {ECO:0000255 P | 0 |
| Golgi apparatus (GO:0Q3T906  | N-acetylglucosamine-1-ph | 1 |
| Cytosol (GO:0005829); P09104 | Cytoplasm {ECO:0000250}. | 1 |
| Nucleoplasm (GO:00056P54259  | Nucleus. Cytoplasm, peri | 0 |
| Nuclear speckles (GO:Q99622  | Cytoplasm {ECO:0000269 P | 0 |
| Nucleoli (GO:0005730) P29350 | Cytoplasm. Nucleus. Note | 0 |
| Cytosol (GO:0005829); Q86UY8 |                          | 0 |
| Plasma membrane (GO:0Q9NPD5  | Basolateral cell membran | 1 |
| Cytosol (GO:0005829); Q9H7L9 | Nucleus {ECO:0000269 Pub | 1 |
| Nucleoplasm (GO:00056Q9Y3E0  | Golgi apparatus membrane | 0 |
| Cytosol (GO:0005829) P07195  | Cytoplasm.               | 1 |
| Cytosol (GO:0005829); Q9Y478 |                          | 0 |
| Cytosol (GO:0005829); Q8NFW8 | Nucleus {ECO:0000269 Pub | 0 |
| Cytosol (GO:0005829); Q9Y5Z7 | Cytoplasm {ECO:0000269 P | 1 |
| Centriolar satellite Q86YS7  | Cytoplasmic vesicle memb | 0 |
| Nucleoplasm (GO:00056P78364  | Nucleus {ECO:0000269 Pub | 1 |
| Mitochondria (GO:0005P12074  | Mitochondrion inner memb | 1 |
| Mitochondria (GO:0005739)    |                          | 0 |
| Nucleoplasm (GO:00056Q33E94  | Nucleus {ECO:0000255 PRO | 0 |
| Nucleoli (GO:0005730) Q13242 | Nucleus {ECO:0000269 Pub | 1 |
| Mitochondria (GO:0005Q9NVK5  | Cytoplasm {ECO:0000250}. | 0 |
| Cytosol (GO:0005829); Q12918 | Membrane {ECO:0000305};  | 0 |
| Nucleoplasm (GO:00056Q99715  | Secreted, extracellular  | 0 |
| Nuclear bodies (GO:00095551  | Nucleus {ECO:0000269 Pub | 0 |
| Cytosol (GO:0005829); P42685 | Cytoplasm {ECO:0000269 P | 0 |
| Cytosol (GO:0005829); Q9UL01 | Membrane {ECO:0000305};  | 0 |
| Nucleoplasm (GO:00056Q5TD94  | Cytoplasm, cytoskeleton, | 0 |
| Nucleoli (GO:0005730) Q9NWT1 | Nucleus, nucleolus {ECO: | 1 |
| Golgi apparatus (GO:0Q8NOV5  | Golgi apparatus membrane | 1 |
| Vesicles (GO:0043231) Q96KF7 | Membrane {ECO:0000305};  | 0 |
| Cytosol (GO:0005829); Q14511 | Cytoplasm, cell cortex.  | 0 |
| Nucleoli (GO:0005730) Q96IZ2 | Cell membrane {ECO:00002 | 0 |
| Nucleoplasm (GO:00056Q9Y294  | Nucleus {ECO:0000269 Pub | 1 |
| Nucleoplasm (GO:00056Q9NXL9  | Nucleus {ECO:0000269 Pub | 0 |
| Cytosol (GO:0005829); Q8NB25 |                          | 0 |
| Nucleoplasm (GO:00056O60942  | Nucleus {ECO:0000250}.   | 0 |
| Golgi apparatus (GO:0P33908  | Golgi apparatus membrane | 1 |
| Cytosol (GO:0005829) Q9NRX5  | Endoplasmic reticulum me | 0 |
| Nucleoli (GO:0005730) Q7Z4H3 |                          | 0 |
| Cell Junctions (GO:00Q16890  |                          | 0 |
| Cytosol (GO:0005829); Q9NQE9 | Cytoplasm {ECO:0000269 P | 0 |
| Golgi apparatus (GO:0Q8NI08  | Nucleus {ECO:0000305}.   | 0 |

|                             |                          |   |
|-----------------------------|--------------------------|---|
| Cytosol (GO:0005829);094885 |                          | 0 |
| Cytosol (GO:0005829);Q9BZM6 | Cell membrane {ECO:00002 | 0 |
| Nucleoplasm (GO:00056Q9UKT4 | Nucleus {ECO:0000269 Pub | 0 |
| Nucleoplasm (GO:00056Q9HB96 | Nucleus {ECO:0000269 Pub | 1 |
| Cytosol (GO:0005829);Q16539 | Cytoplasm {ECO:0000269 P | 0 |
| Endoplasmic reticulumQ02094 | Membrane {ECO:0000269 Pu | 0 |
| Endoplasmic reticulumQ7Z5Y7 | Cytoplasm {ECO:0000250 U | 0 |
| Cytosol (GO:0005829) Q15208 | Nucleus. Cytoplasm.      | 0 |
| Nucleoplasm (GO:00056P84103 | Nucleus {ECO:0000269 Pub | 0 |
| Mitochondria (GO:0005739)   | Mitochondrion matrix.    | 1 |
| Nucleoplasm (GO:00056P25205 | Nucleus.                 | 1 |
| Cytosol (GO:0005829);076064 | Nucleus {ECO:0000255 HAM | 0 |
| Plasma membrane (GO:0Q9C0D0 | Cytoplasm {ECO:0000250}. | 0 |
| Golgi apparatus (GO:0Q8NFP4 | Cell membrane {ECO:00002 | 1 |
| Nucleoli fibrillar ceQ9UPZ9 | Nucleus {ECO:0000269 Pub | 0 |
| Centrosome (GO:000581Q9UK97 | Cytoplasm {ECO:0000269 P | 0 |
| Cytosol (GO:0005829);Q9NU22 | Nucleus, nucleolus {ECO: | 0 |
| Vesicles (GO:0043231)Q9NPB0 | Cytoplasmic vesicle memb | 1 |
| Cytosol (GO:0005829);Q9BYV9 | Cytoplasm {ECO:0000269 P | 1 |
| Cytosol (GO:0005829);Q9BX46 | Nucleus {ECO:0000250 Uni | 1 |
| Cytosol (GO:0005829);P40123 | Cell membrane {ECO:00002 | 0 |
| Nucleoplasm (GO:00056Q9Y4E5 | Nucleus {ECO:0000269 Pub | 0 |
| Nucleoplasm (GO:00056095816 |                          | 0 |
| Cytosol (GO:0005829);Q9ULC3 | Cell membrane {ECO:00002 | 0 |
| Cytosol (GO:0005829);Q9BZJ6 | Cell membrane; Multi-pas | 0 |
| Nuclear speckles (GO:Q9UKA2 | Cytoplasm. Nucleus. Mito | 0 |
| Cytosol (GO:0005829);P24863 | Nucleus {ECO:0000305}.   | 1 |
| Cytosol (GO:0005829);000716 | Nucleus.                 | 0 |
| Nuclear speckles (GO:P81133 | Nucleus {ECO:0000255 PRO | 0 |
| Cytosol (GO:0005829);Q8N3C0 | Nucleus {ECO:0000269 Pub | 0 |
| Cell Junctions (GO:00Q8NE79 | Lateral cell membrane {E | 1 |
| Nucleoplasm (GO:00056Q9ULK4 | Nucleus {ECO:0000305}.   | 0 |
| Mitochondria (GO:0005P51649 | Mitochondrion.           | 1 |
| Cytosol (GO:0005829);Q9Y4K1 |                          | 0 |
| Cell Junctions (GO:00Q9NPJ3 | Cytoplasm, cytosol {ECO: | 0 |
| Cytosol (GO:0005829);Q8IYB5 | Cell membrane {ECO:00002 | 0 |
| Cytosol (GO:0005829);P25398 | Cytoplasm.               | 1 |
| Cytosol (GO:0005829) Q9GZU0 |                          | 0 |
| Nucleoplasm (GO:00056075496 | Cytoplasm. Nucleus. Note | 0 |
| Nucleoplasm (GO:00056095677 | Cytoplasm {ECO:0000250 U | 0 |
| Nucleoplasm (GO:00056A7XYQ1 |                          | 0 |
| Nuclear bodies (GO:00Q9Y466 | Nucleus {ECO:0000255 PRO | 0 |
| Cytosol (GO:0005829);Q9Y450 |                          | 0 |
| Cell Junctions (GO:00000635 |                          | 0 |
| Nucleoplasm (GO:00056000628 | Peroxisome {ECO:0000250  | 0 |
| Centrosome (GO:000581043167 | Nucleus {ECO:0000305}.   | 0 |
| Lipid droplets (GO:00Q92562 | Endosome membrane {ECO:0 | 0 |
| Cell Junctions (GO:00Q8TF71 | Cell membrane {ECO:00002 | 0 |
| Nucleoplasm (GO:00056095278 | Cytoplasm {ECO:0000269 P | 0 |
| Endoplasmic reticulumQ92504 | Endoplasmic reticulum me | 0 |
| Nucleoplasm (GO:00056043189 | Nucleus. Cytoplasm, cyto | 0 |
| Focal adhesion sites 060888 |                          | 0 |
| Nucleoplasm (GO:00056Q96PU8 | Nucleus {ECO:0000250}. C | 0 |
| Mitochondria (GO:0005Q5T5N4 |                          | 0 |
| Nucleoplasm (GO:00056Q99750 | Nucleus {ECO:0000250}. C | 0 |

|                             |                          |   |
|-----------------------------|--------------------------|---|
| Nucleoplasm (GO:00056P19484 | Cytoplasm {ECO:0000269 P | 0 |
| Cytosol (GO:0005829);P30281 | Nucleus {ECO:0000269 Pub | 0 |
| Nucleoli (GO:0005730)Q13895 | Cytoplasm {ECO:0000269 P | 0 |
| Cytosol (GO:0005829);Q96EK7 | Nucleus {ECO:0000250}.   | 0 |
| Nucleoplasm (GO:00056P20226 | Nucleus {ECO:0000269 Pub | 1 |
| Nucleoplasm (GO:00056Q6AI39 |                          | 0 |
| Cytosol (GO:0005829);Q14738 | Cytoplasm. Nucleus. Note | 0 |
| Mitochondria (GO:0005Q5T653 | Mitochondrion {ECO:00002 | 0 |
| Nucleoplasm (GO:00056P11831 | Nucleus {ECO:0000255 PRO | 1 |
| Cytosol (GO:0005829) Q8IWT3 | Cytoplasm {ECO:0000269 P | 0 |
| Cytosol (GO:0005829);043598 | Cytoplasm {ECO:0000255 H | 0 |
| Nucleoplasm (GO:00056Q9NRW4 | Cytoplasm {ECO:0000250}. | 0 |
| Vesicles (GO:0043231)Q96KP1 | Midbody, Midbody ring {E | 0 |
| Mitochondria (GO:0005Q9NV96 | Membrane {ECO:0000250};  | 0 |
| Cytosol (GO:0005829);Q9GZR1 | Nucleus {ECO:0000269 Pub | 1 |
| Nuclear speckles (GO:Q13523 | Nucleus.                 | 0 |
| Cytosol (GO:0005829);P33981 |                          | 0 |
| Endoplasmic reticulum095389 | Secreted {ECO:0000269 Pu | 0 |
| Plasma membrane (GO:0Q7KYR7 | Membrane {ECO:0000250};  | 0 |
| Cytosol (GO:0005829);Q16363 | Secreted, extracellular  | 0 |
| Cytosol (GO:0005829);Q96IP4 |                          | 0 |
| Nuclear speckles (GO:Q9NZA1 | Isoform 1: Cytoplasm, cy | 0 |
| Cytosol (GO:0005829);Q9HCM7 |                          | 0 |
| Cytosol (GO:0005829);Q9UJA9 | Secreted {ECO:0000305}.  | 0 |
| Nuclear speckles (GO:Q96RT1 | Cell junction, hemidesmo | 0 |
| Nucleoplasm (GO:00056Q9Y5E7 | Cell membrane {ECO:00002 | 0 |
| Cytosol (GO:0005829) P49590 | Mitochondrion matrix {EC | 0 |
| Centrosome (GO:000581Q9P209 | Cytoplasm, cytoskeleton, | 1 |
| Golgi apparatus (GO:0Q16706 | Golgi apparatus membrane | 1 |
| Golgi apparatus (GO:0Q5XG87 | Cytoplasm {ECO:0000269 P | 0 |
| Cytoplasmic bodies (GP10912 | Cell membrane; Single-pa | 0 |
| Cytosol (GO:0005829);Q01581 | Cytoplasm.               | 0 |
| Mitochondria (GO:0005P51397 |                          | 0 |
| Nuclear bodies (GO:00P56597 |                          | 0 |
| Mitochondria (GO:0005Q9H0E9 | Nucleus.                 | 1 |
| Cleavage furrow (GO:0095235 | Golgi apparatus {ECO:000 | 0 |
| Mitochondria (GO:0005Q13423 | Mitochondrion inner memb | 0 |
| Mitochondria (GO:0005P38646 | Mitochondrion {ECO:00002 | 0 |
| Mitochondria (GO:0005Q92552 | Cytoplasm {ECO:0000269 P | 0 |
| Cytosol (GO:0005829);060925 |                          | 0 |
| Endoplasmic reticulumP28300 | Secreted {ECO:0000250 Un | 0 |
| Actin filaments (GO:0095704 | Cytoplasm {ECO:0000269 P | 0 |
| Mitochondria (GO:0005Q96DC7 | Membrane {ECO:0000305};  | 0 |
| Vesicles (GO:0043231)P09486 | Secreted, extracellular  | 0 |
| Nuclear speckles (GO:Q13123 | Nucleus {ECO:0000269 Pub | 0 |
| Golgi apparatus (GO:0Q9Y5P4 | Cytoplasm {ECO:0000269 P | 0 |
| Endoplasmic reticulumQ96CS3 | Cytoplasm {ECO:0000269 P | 0 |
| Nuclear membrane (GO:096004 | Nucleus, nucleoplasm {EC | 0 |
| Vesicles (GO:0043231)Q9Y5E6 | Cell membrane {ECO:00002 | 0 |
| Cytosol (GO:0005829);Q9Y5E3 | Cell membrane {ECO:00002 | 0 |
| Cytosol (GO:0005829);095263 |                          | 0 |
| Actin filaments (GO:0Q9HAZ1 | Nucleus {ECO:0000250}.   | 0 |
| Mitochondria (GO:0005Q9Y5E8 | Cell membrane {ECO:00002 | 0 |
| Vesicles (GO:0043231)Q96D42 | Membrane {ECO:0000305};  | 0 |
| Golgi apparatus (GO:0P15848 | Lysosome {ECO:0000250 Un | 0 |

|                             |                          |   |
|-----------------------------|--------------------------|---|
| Nucleoplasm (GO:00056Q14677 | Cytoplasm. Cytoplasm, pe | 0 |
| Vesicles (GO:0043231)P35443 | Endoplasmic reticulum {E | 0 |
| Cytosol (GO:0005829) Q9ULM6 | Cytoplasm {ECO:0000250 U | 0 |
| Cytosol (GO:0005829) Q99614 |                          | 0 |
| Nuclear bodies (GO:00P20585 |                          | 0 |
| Endoplasmic reticulum014827 | Cytoplasm. Cell membrane | 0 |
| Nucleoplasm (GO:00056P51959 | Nucleus {ECO:0000269 Pub | 1 |
| Cytosol (GO:0005829);015318 | Nucleus {ECO:0000269 Pub | 0 |
| Cell Junctions (GO:00P55285 | Cell membrane; Single-pa | 0 |
| Nuclear membrane (GO:P20700 | Nucleus inner membrane;  | 1 |
| Golgi apparatus (GO:0Q9H4A6 | Golgi apparatus, Golgi s | 0 |
| Nucleoli (GO:0005730)P53999 | Nucleus.                 | 0 |
| Cytosol (GO:0005829) P17342 | Membrane; Single-pass ty | 0 |
| Cytosol (GO:0005829);Q8WUF8 | Nucleus {ECO:0000250 Uni | 0 |
| Nuclear bodies (GO:00Q9Y2P4 | Membrane {ECO:0000305};  | 0 |
| Actin filaments (GO:0P26639 | Cytoplasm {ECO:0000250 U | 1 |
| Nucleoplasm (GO:00056P78413 | Nucleus {ECO:0000305}.   | 0 |
| Cytosol (GO:0005829);Q08499 | Apical cell membrane {EC | 0 |
| Nucleoplasm (GO:00056060671 | Nucleus {ECO:0000269 Pub | 1 |
| Nucleoli (GO:0005730)Q8TDN6 | Nucleus, nucleolus.      | 1 |
| Cytosol (GO:0005829) Q9Y666 | Cell membrane; Multi-pas | 0 |
| Nucleoplasm (GO:00056Q92878 | Nucleus {ECO:0000269 Pub | 1 |
| Golgi apparatus (GO:0Q92187 | Golgi apparatus membrane | 0 |
| Golgi apparatus (GO:0P46926 | Cytoplasm {ECO:0000250}. | 0 |
| Cytosol (GO:0005829);P63208 |                          | 0 |
| Nuclear membrane (GO:075694 | Nucleus, nuclear pore co | 0 |
| Nucleoplasm (GO:00056P05230 | Secreted. Cytoplasm. Cyt | 0 |
| Cytosol (GO:0005829);P04150 | Isoform Alpha: Cytoplasm | 0 |
| Golgi apparatus (GO:0Q8NC54 | Membrane {ECO:0000305};  | 0 |
| Nuclear bodies (GO:00Q96BP3 | Nucleus {ECO:0000269 Pub | 1 |
| Golgi apparatus (GO:0P42702 | Isoform 1: Cell membrane | 0 |
| Nucleoplasm (GO:00056A5PLN9 |                          | 0 |
| Nucleoli fibrillar ce095486 | Cytoplasmic vesicle, COP | 0 |
| Golgi apparatus (GO:0Q96J42 | Membrane {ECO:0000305};  | 0 |
| Golgi apparatus (GO:0Q6PID6 |                          | 0 |
| Cytosol (GO:0005829);P54136 | Cytoplasm {ECO:0000269 P | 1 |
| Golgi apparatus (GO:0Q8IX03 | Cytoplasm. Cytoplasm, pe | 0 |
| Nucleoplasm (GO:00056075367 | Nucleus {ECO:0000269 Pub | 1 |
| Nucleoplasm (GO:00056014776 | Nucleus {ECO:0000269 Pub | 1 |
| Cytosol (GO:0005829) Q14195 | Cytoplasm {ECO:0000250}. | 0 |
| Cytosol (GO:0005829);Q99717 | Cytoplasm. Nucleus. Note | 1 |
| Cytosol (GO:0005829) P48729 | Cytoplasm {ECO:0000269 P | 0 |
| Nucleoli (GO:0005730)Q12766 | Nucleus {ECO:0000255 PRO | 0 |
| Nucleoplasm (GO:00056Q969X5 | Endoplasmic reticulum me | 0 |
| Golgi apparatus (GO:0P09619 | Cell membrane; Single-pa | 0 |
| Endoplasmic reticulumQ12981 | Endoplasmic reticulum me | 0 |
| Endoplasmic reticulum076061 | Secreted {ECO:0000305}.  | 0 |
| Golgi apparatus (GO:0Q17RY0 | Cytoplasm {ECO:0000250 U | 0 |
| Actin filaments (GO:0Q16643 | Cytoplasm {ECO:0000269 P | 0 |
| Cytosol (GO:0005829);Q6ZN44 | Cell membrane {ECO:00002 | 0 |
| Cytosol (GO:0005829);Q9NTJ3 | Nucleus {ECO:0000269 Pub | 0 |
| Cytosol (GO:0005829);Q9Y6D0 | Endoplasmic reticulum me | 0 |
| Centrosome (GO:000581Q9H981 | Nucleus {ECO:0000269 Pub | 1 |
| Mitochondria (GO:0005Q9NPL8 | Mitochondrion membrane { | 1 |
| Golgi apparatus (GO:0P41182 | Nucleus {ECO:0000269 Pub | 1 |

|                             |                          |   |
|-----------------------------|--------------------------|---|
| Golgi apparatus (GO:0Q93099 |                          | 0 |
| Nucleoplasm (GO:00056Q9H0F7 | Cell projection, cilium  | 0 |
| Cell Junctions (GO:00Q9Y2J4 | Recycling endosome {ECO: | 0 |
| Centrosome (GO:000581Q9NQR4 | Cytoplasm {ECO:0000269 P | 1 |
| Cytosol (GO:0005829);Q96A26 | Membrane {ECO:0000305};  | 0 |
| Nucleoplasm (GO:00056015527 | Nucleus, nucleoplasm {EC | 0 |
| Cytosol (GO:0005829);P52294 | Cytoplasm {ECO:0000269 P | 1 |
| Cytosol (GO:0005829);Q05086 | Cytoplasm {ECO:0000250 U | 0 |
| Cytosol (GO:0005829);Q8IUR7 | Nucleus {ECO:0000269 Pub | 0 |
| Centrosome (GO:000581Q8NHQ1 | Cytoplasm, cytoskeleton, | 1 |
| Golgi apparatus (GO:0P50120 | Cytoplasm.               | 0 |
| Cytosol (GO:0005829);P09455 | Cytoplasm {ECO:0000305 P | 0 |
| Cytosol (GO:0005829);Q96CQ1 | Mitochondrion inner memb | 0 |
| Nucleoplasm (GO:00056Q9UBF6 | Cytoplasm {ECO:0000269 P | 0 |
| Mitotic spindle (GO:0Q14188 | Nucleus.                 | 1 |
| Cytosol (GO:0005829);Q8IZH2 | Cytoplasm {ECO:0000269 P | 0 |
| Centrosome (GO:000581Q92831 | Nucleus {ECO:0000269 Pub | 1 |
| Nucleoli (GO:0005730)Q16877 |                          | 0 |
| Cytosol (GO:0005829);P61328 | Nucleus {ECO:0000305}.   | 0 |
| Nucleoplasm (GO:00056Q14469 | Nucleus.                 | 1 |
| Cytosol (GO:0005829);Q13107 | Cytoplasm {ECO:0000269 P | 0 |
| Endosomes (GO:0005768Q15057 | Endosome membrane {ECO:0 | 0 |
| Cytosol (GO:0005829);Q9H8V3 | Nucleus. Cytoplasm. Cyto | 0 |
| Cytosol (GO:0005829);P04899 | Cytoplasm {ECO:0000269 P | 0 |
| Cytosol (GO:0005829);Q92734 | Endoplasmic reticulum {E | 0 |
| Vesicles (GO:0043231)000507 | Cytoplasm {ECO:0000250}. | 0 |
| Cytosol (GO:0005829);075896 |                          | 0 |
| Cytosol (GO:0005829) Q8WTW4 | Lysosome membrane {ECO:0 | 0 |
| Cytosol (GO:0005829);P83731 |                          | 0 |
| Cytosol (GO:0005829);Q9HBI5 |                          | 0 |
| Cytosol (GO:0005829) P51114 | Cytoplasm {ECO:0000269 P | 1 |
| Cytosol (GO:0005829);Q13191 | Cytoplasm {ECO:0000269 P | 1 |
| Cytosol (GO:0005829);Q8WY36 | Nucleus {ECO:0000305}.   | 0 |
| Cytosol (GO:0005829);Q9NWB7 | Cytoplasm, cytoskeleton, | 0 |
| Plasma membrane (GO:0Q9HAV0 |                          | 0 |
| Actin filaments (GO:0Q9H095 | Cytoplasm {ECO:0000269 P | 0 |
| Cytosol (GO:0005829);Q04446 |                          | 0 |
| Cytosol (GO:0005829) P11172 |                          | 0 |
| Nucleoplasm (GO:00056P52298 | Nucleus {ECO:0000269 Pub | 0 |
| Plasma membrane (GO:0Q96GZ6 | Cell membrane; Multi-pas | 1 |
| Cytosol (GO:0005829);Q9UIW2 | Cell membrane {ECO:00003 | 0 |
| Cytosol (GO:0005829);P38606 | Cytoplasm {ECO:0000269 P | 0 |
| Cytosol (GO:0005829);Q969K4 | Cytoplasm {ECO:0000269 P | 1 |
| Golgi apparatus (GO:0Q9NZ53 | Membrane {ECO:0000305};  | 0 |
| Mitochondria (GO:0005095196 | Cell membrane {ECO:00002 | 0 |
| Nuclear bodies (GO:00094889 |                          | 0 |
| Nucleoplasm (GO:00056Q8NG66 | Nucleus {ECO:0000269 Pub | 0 |
| Nuclear bodies (GO:00Q9NRQ2 | Membrane {ECO:0000250};  | 0 |
| Cytokinetic bridge (GQ9NSE2 |                          | 0 |
| Nucleoplasm (GO:00056Q16644 | Nucleus {ECO:0000269 Pub | 0 |
| Cytosol (GO:0005829);Q13705 | Cell membrane {ECO:00002 | 0 |
| Vesicles (GO:0043231)Q8TAF3 | Nucleus {ECO:0000269 Pub | 0 |
| Nuclear bodies (GO:00Q86X83 | Cytoplasm {ECO:0000269 P | 0 |
| Golgi apparatus (GO:0Q9BQQ3 | Golgi apparatus, cis-Gol | 0 |
| Nucleoplasm (GO:00056043818 | Nucleus, nucleolus {ECO: | 0 |

|                             |                          |   |
|-----------------------------|--------------------------|---|
| Cell Junctions (GO:00015440 | Membrane; Multi-pass mem | 0 |
| Cytosol (GO:0005829);Q96IU4 | Cytoplasm. Nucleus. Note | 1 |
| Vesicles (GO:0043231)       |                          | 0 |
| Cytosol (GO:0005829);Q96DR7 | Cell projection, ruffle  | 0 |
| Vesicles (GO:0043231)Q4KWH8 | Cytoplasm {ECO:0000269 P | 0 |
| Nucleoplasm (GO:00056Q9UFB7 | Nucleus {ECO:0000305}.   | 0 |
| Actin filaments (GO:0P63316 |                          | 0 |
| Cytosol (GO:0005829);P30414 | Cell membrane {ECO:00002 | 0 |
| Cytosol (GO:0005829) P51788 | Cell membrane {ECO:00002 | 0 |
| Nucleoplasm (GO:00056Q9H334 | Nucleus {ECO:0000269 Pub | 1 |
| Cytosol (GO:0005829) Q04637 |                          | 0 |
| Golgi apparatus (GO:0Q9Y6A9 | Microsome membrane {ECO: | 0 |
| Cytosol (GO:0005829) P51957 | Cell projection, cilium  | 0 |
| Nucleoplasm (GO:00056P48751 | Membrane; Multi-pass mem | 0 |
| Cytosol (GO:0005829);P24534 |                          | 0 |
| Cytosol (GO:0005829);Q9H8S9 |                          | 0 |
| Nucleoplasm (GO:00056Q9P2N6 | Nucleus {ECO:0000269 Pub | 1 |
| Mitochondria (GO:0005Q9BST9 |                          | 0 |
| Nucleoplasm (GO:00056Q8NG68 |                          | 0 |
| Vesicles (GO:0043231)Q9Y2I7 | Endosome membrane {ECO:0 | 0 |
| Vesicles (GO:0043231)Q9Y2W7 | Cytoplasm {ECO:0000269 P | 0 |
| Nucleoli (GO:0005730)P19338 | Nucleus, nucleolus. Cyto | 0 |
| Microtubules (GO:0015P42025 | Cytoplasm, cytoskeleton. | 0 |
| Plasma membrane (GO:0Q8WV83 | Membrane {ECO:0000305};  | 0 |
| Cytosol (GO:0005829);Q658P3 | Endosome membrane {ECO:0 | 0 |
| Plasma membrane (GO:0Q9HCM4 | Cytoplasm. Cell junction | 0 |
| Mitochondria (GO:0005Q9NZI6 | Nucleus {ECO:0000269 Pub | 0 |
| Nucleoplasm (GO:00056Q9Y3B4 | Nucleus {ECO:0000269 Pub | 1 |
| Vesicles (GO:0043231)Q53FA7 |                          | 0 |
| Cytosol (GO:0005829) Q9NZQ0 | Nucleus {ECO:0000250 Uni | 0 |
| Cytosol (GO:0005829);075886 | Cytoplasm {ECO:0000250}. | 0 |
| Nucleoplasm (GO:00056P49450 | Nucleus {ECO:0000269 Pub | 1 |
| Cytosol (GO:0005829);060759 | Cytoplasm. Early endosom | 0 |
| Cytosol (GO:0005829);Q04771 | Membrane; Single-pass ty | 0 |
| Cytosol (GO:0005829);Q99726 | Cytoplasmic vesicle, sec | 0 |
| Nucleoplasm (GO:00056Q8WUA4 | Nucleus.                 | 1 |
| Actin filaments (GO:0Q9UI10 |                          | 0 |
| Cytosol (GO:0005829) Q9UHY1 | Cytoplasm, cell cortex { | 0 |
| Cell Junctions (GO:00P18564 | Membrane; Single-pass ty | 0 |
| Aggresome (GO:0016235Q9H6D8 | Membrane {ECO:0000305};  | 0 |
| Plasma membrane (GO:0P13612 | Membrane; Single-pass ty | 0 |
| Nucleoplasm (GO:00056000487 |                          | 0 |
| Vesicles (GO:0043231)Q15036 | Cytoplasm {ECO:0000269 P | 0 |
| Nucleoplasm (GO:00056015355 | Cytoplasm {ECO:0000305}. | 0 |
| Nucleoplasm (GO:00056P54750 |                          | 0 |
| Endoplasmic reticulumQ96HR9 | Endoplasmic reticulum me | 0 |
| Endoplasmic reticulumP01275 | Secreted.                | 0 |
| Cytokinetic bridge (G095996 | Cytoplasm, cytoskeleton  | 0 |
| Cytosol (GO:0005829);P62841 |                          | 0 |
| Cytosol (GO:0005829);P28676 | Cytoplasm {ECO:0000269 P | 1 |
| Nucleoli (GO:0005730)Q9C086 | Nucleus {ECO:0000269 Pub | 1 |
| Endoplasmic reticulumQ13724 | Endoplasmic reticulum me | 1 |
| Cytosol (GO:0005829);Q49AM3 |                          | 0 |
| Nucleoplasm (GO:00056Q9BSM1 | Nucleus {ECO:0000269 Pub | 1 |
| Cytosol (GO:0005829);Q14449 | Cytoplasm {ECO:0000269 P | 0 |



|                               |                          |   |
|-------------------------------|--------------------------|---|
| Vesicles (GO:0043231) Q8N3C7  |                          | 0 |
| Nucleoplasm (GO:00056043763   | Nucleus {ECO:0000305}.   | 0 |
| Golgi apparatus (GO:0001082   | Cytoplasm, cytoskeleton  | 0 |
| Nucleoplasm (GO:0005609Y679   | Endoplasmic reticulum me | 0 |
| Endoplasmic reticulum Q9NQC3  | Isoform A: Endoplasmic r | 0 |
| Mitochondria (GO:0005043464   | Mitochondrion intermembr | 1 |
| Cytosol (GO:0005829) Q99704   | Isoform 1: Cytoplasm. Nu | 0 |
| Golgi apparatus (GO:00014435  | Golgi apparatus, Golgi s | 1 |
| Cytosol (GO:0005829); Q9NR33  | Nucleus {ECO:0000305}.   | 0 |
| Plasma membrane (GO:0009H8M9  | Endoplasmic reticulum me | 0 |
| Mitochondria (GO:0005P49406   | Mitochondrion {ECO:00002 | 1 |
| Microtubules (GO:0015043813   | Cytoplasm {ECO:0000269 P | 0 |
| Nucleoplasm (GO:0005608IWA0   | Nucleus, nucleolus {ECO: | 0 |
| Mitochondria (GO:0005Q12805   | Secreted, extracellular  | 0 |
| Nuclear bodies (GO:0009NW38   | Cytoplasm. Nucleus.      | 0 |
| Cytosol (GO:0005829); P42224  | Cytoplasm {ECO:0000269 P | 1 |
| Mitochondria (GO:0005094925   | Isoform 1: Mitochondrion | 0 |
| Nucleoplasm (GO:0005609BWT3   | Nucleus {ECO:0000269 Pub | 1 |
| Peroxisomes (GO:0005709BY49   | Peroxisome {ECO:0000269  | 1 |
| Endoplasmic reticulum P18065  | Secreted.                | 0 |
| Mitochondria (GO:0005Q96FG2   | Cell projection, stereoc | 0 |
| Golgi apparatus (GO:00024593  | Secreted.                | 0 |
| Nucleoplasm (GO:00056070CQ2   |                          | 0 |
| Golgi apparatus (GO:00099BUP0 | Mitochondrion inner memb | 0 |
| Cytosol (GO:0005829); P50991  | Cytoplasm {ECO:0000269 P | 0 |
| Cytosol (GO:0005829); Q8NDI1  | Cytoplasm {ECO:0000269 P | 0 |
| Cytosol (GO:0005829); P32242  | Nucleus {ECO:0000305}.   | 0 |
| Cytosol (GO:0005829) 014530   | Cytoplasm {ECO:0000250 U | 0 |
| Cytosol (GO:0005829) Q9H8M1   | Mitochondrion inner memb | 0 |
| Nuclear speckles (GO:00075533 | Nucleus {ECO:0000269 Pub | 0 |
| Vesicles (GO:0043231) Q9UNP4  | Golgi apparatus membrane | 0 |
| Cytosol (GO:0005829) 043529   | Golgi apparatus membrane | 0 |
| Cytosol (GO:0005829); Q9H2J4  | Cytoplasm {ECO:0000269 P | 0 |
| Nucleoplasm (GO:0005609Y4C1   | Cytoplasm {ECO:0000250}. | 0 |
| Cytosol (GO:0005829); Q9BRC7  | Membrane {ECO:0000250};  | 0 |
| Nucleoli fibrillar ce P52746  | Nucleus {ECO:0000305}.   | 0 |
| Cytosol (GO:0005829); P14778  | Membrane {ECO:0000269 Pu | 0 |
| Cytosol (GO:0005829); Q01638  | Isoform C: Cell membrane | 0 |
| Mitochondria (GO:0005Q13478   | Membrane {ECO:0000269 Pu | 0 |
| Cell Junctions (GO:00099UBY0  | Membrane; Multi-pass mem | 0 |
| Actin filaments (GO:00014192  | Cytoplasm {ECO:0000269 P | 0 |
| Cytosol (GO:0005829); Q9NP58  | Cell membrane {ECO:00002 | 0 |
| Cytosol (GO:0005829) 075716   | Cytoplasm, perinuclear r | 0 |
| Cell Junctions (GO:00099GZV3  | Membrane {ECO:0000269 Pu | 0 |
| Cytosol (GO:0005829) Q00341   | Cytoplasm {ECO:0000269 P | 0 |
| Nucleoli (GO:0005730) Q15435  | Nucleus {ECO:0000250}.   | 0 |
| Cytosol (GO:0005829) Q96RG2   | Cytoplasm {ECO:0000269 P | 0 |
| Centrosome (GO:000581Q02363   | Cytoplasm {ECO:0000250 U | 0 |
| Nucleoli (GO:0005730) Q53T94  | Nucleus, nucleolus.      | 1 |
| Cytosol (GO:0005829); P11926  |                          | 0 |
| Golgi apparatus (GO:00099NR09 | Golgi apparatus, trans-G | 0 |
| Nucleoli (GO:0005730) Q9BSC4  | Nucleus, nucleolus {ECO: | 1 |
| Golgi apparatus (GO:0009H8Y8  | Golgi apparatus membrane | 0 |
| Cytosol (GO:0005829); 043815  | Cytoplasm {ECO:0000250}. | 0 |
| Nucleoplasm (GO:000560Q03701  | Nucleus.                 | 1 |

|                                |                          |   |
|--------------------------------|--------------------------|---|
| Cytosol (GO:0005829);094806    | Cytoplasm {ECO:0000269 P | 0 |
| Nucleoplasm (GO:00056Q5H9S7    | Membrane {ECO:0000305};  | 0 |
| Cytosol (GO:0005829) Q16769    | Secreted {ECO:0000269 Pu | 0 |
| Cytosol (GO:0005829);Q15042    | Cytoplasm {ECO:0000269 P | 0 |
| Cytosol (GO:0005829);075746    | Mitochondrion inner memb | 0 |
| Cytosol (GO:0005829);Q96LZ7    | Membrane {ECO:0000305};  | 0 |
| Nuclear speckles (GO:Q07687    | Nucleus {ECO:0000305}.   | 0 |
| Cytosol (GO:0005829) P14868    | Cytoplasm, cytosol {ECO: | 1 |
| Nucleoplasm (GO:00056Q16629    | Nucleus {ECO:0000269 Pub | 0 |
| Focal adhesion sites P18827    | Membrane {ECO:0000255};  | 0 |
| Centrosome (GO:000581P43007    | Membrane {ECO:0000269 Pu | 0 |
| Cytosol (GO:0005829) Q07889    |                          | 0 |
| Cytosol (GO:0005829);Q16719    | Cytoplasm, cytosol {ECO: | 1 |
| Cytosol (GO:0005829);043516    | Cytoplasmic vesicle {ECO | 0 |
| Cytosol (GO:0005829);Q13416    | Nucleus.                 | 1 |
| Mitochondria (GO:0005014548    | Mitochondrion inner memb | 0 |
| Nucleoli (GO:0005730) Q9NRX1   | Nucleus, nucleolus {ECO: | 1 |
| Nucleoli (GO:0005730) 043929   | Nucleus.                 | 0 |
| Nucleoli (GO:0005730) P08567   |                          | 0 |
| Nucleoplasm (GO:00056P15336    | Nucleus. Cytoplasm. Mito | 0 |
| Cytosol (GO:0005829) Q6YHU6    |                          | 0 |
| Cytosol (GO:0005829);Q2M2I8    | Cell membrane {ECO:00002 | 0 |
| Nuclear bodies (GO:00060296    | Cytoplasm {ECO:0000250}. | 0 |
| Nucleoplasm (GO:00056Q9NWW7    |                          | 0 |
| Cytosol (GO:0005829);P31483    | Cytoplasm, Stress granul | 1 |
| Plasma membrane (GO:0Q969F8    | Cell membrane; Multi-pas | 1 |
| Cytosol (GO:0005829);Q99814    | Nucleus {ECO:0000250 Uni | 0 |
| Cytosol (GO:0005829);Q99856    | Nucleus {ECO:0000255 PRO | 1 |
| Nuclear bodies (GO:00P63165    | Nucleus membrane. Nucleu | 0 |
| Cytosol (GO:0005829) Q9UJ71    | Membrane {ECO:0000269 Pu | 0 |
| Nuclear speckles (GO:Q9UIW0    | Nucleus {ECO:0000305}.   | 0 |
| Nuclear membrane (GO:P15313    | Endomembrane system; Per | 0 |
| Cytosol (GO:0005829);Q16236    | Cytoplasm, cytosol {ECO: | 1 |
| Golgi apparatus (GO:0P52701    | Nucleus {ECO:0000269 Pub | 1 |
| Golgi apparatus (GO:0Q9HB20    | Golgi apparatus, trans-G | 1 |
| Cytosol (GO:0005829);P35270    | Cytoplasm.               | 1 |
| Cell Junctions (GO:00Q8TEW8    | Endomembrane system. Cel | 0 |
| Cytosol (GO:0005829);Q9NSD9    | Cytoplasm {ECO:0000305 P | 0 |
| Centrosome (GO:0005813);Cytoso | Cytoplasm. Cytoplasm, cy | 0 |
| Nuclear bodies (GO:00000512    | Nucleus {ECO:0000250}.   | 0 |
| Nucleoplasm (GO:00056P54821    | Nucleus.                 | 1 |
| Vesicles (GO:0043231) Q9Y2G8   | Membrane {ECO:0000305};  | 0 |
| Mitochondria (GO:0005Q5T089    |                          | 0 |
| Cytosol (GO:0005829);Q9HB71    | Nucleus {ECO:0000269 Pub | 1 |
| Peroxisomes (GO:00057P22307    | Cytoplasm {ECO:0000269 P | 0 |
| Endoplasmic reticulum Q9BXP8   | Secreted {ECO:0000250}.  | 0 |
| Cytosol (GO:0005829);Q86X27    | Cytoplasm {ECO:0000250}. | 0 |
| Golgi apparatus (GO:0075063    | Golgi apparatus membrane | 1 |
| Nucleoplasm (GO:00056Q96MN5    | Nucleus {ECO:0000255 PRO | 0 |
| Nucleoplasm (GO:00056Q9Y546    |                          | 0 |
| Mitochondria (GO:0005Q9BZE1    | Mitochondrion {ECO:00002 | 1 |
| Nucleoli (GO:0005730) P35268   |                          | 0 |
| Cytosol (GO:0005829);Q8TDI0    | Nucleus {ECO:0000269 Pub | 0 |
| Golgi apparatus (GO:0000391    | Isoform 1: Golgi apparat | 0 |
| Cytosol (GO:0005829);000186    | Cytoplasm, cytosol {ECO: | 0 |

|                              |                          |   |
|------------------------------|--------------------------|---|
| Cytosol (GO:0005829) Q9UJM3  | Cytoplasm {ECO:0000269 P | 0 |
| Cytosol (GO:0005829);Q99497  | Cell membrane {ECO:00002 | 0 |
| Plasma membrane (GO:0Q6UXG2  | Cell membrane {ECO:00002 | 0 |
| Cytosol (GO:0005829) Q01433  |                          | 0 |
| Nuclear speckles (GO:Q08170  | Nucleus speckle {ECO:000 | 1 |
| Mitochondria (GO:0005Q9BV79  | Isoform 1: Mitochondrion | 0 |
| Cytosol (GO:0005829);Q03721  | Membrane; Multi-pass mem | 0 |
| Endoplasmic reticulumQ9BZQ6  | Endoplasmic reticulum lu | 0 |
| Cytosol (GO:0005829);Q9BQA1  | Nucleus {ECO:0000269 Pub | 1 |
| Mitochondria (GO:0005P24539  | Mitochondrion. Mitochond | 1 |
| Nucleoplasm (GO:00056Q13547  | Nucleus {ECO:0000269 Pub | 1 |
| Nuclear speckles (GO:Q96BU1  | Nucleus {ECO:0000269 Pub | 0 |
| Cytosol (GO:0005829) Q6ZMZ0  | Cytoplasmic granule memb | 0 |
| Vesicles (GO:0043231) 014828 | Membrane; Multi-pass mem | 0 |
| Focal adhesion sites Q9BVG3  | Cytoplasm {ECO:0000269 P | 0 |
| Golgi apparatus (GO:0Q9NR48  | Nucleus {ECO:0000269 Pub | 0 |
| Nucleoplasm (GO:00056P23246  | Nucleus speckle {ECO:000 | 0 |
| Nuclear bodies (GO:00Q3T8J9  | Nucleus {ECO:0000255 PRO | 1 |
| Nucleoplasm (GO:00056Q9Y2Q5  | Late endosome membrane { | 0 |
| Nucleoplasm (GO:00056Q14814  | Nucleus {ECO:0000255 PRO | 0 |
| Cytosol (GO:0005829);P19623  |                          | 0 |
| Cytosol (GO:0005829);Q9UK22  | Cytoplasm {ECO:0000250}. | 0 |
| Cytosol (GO:0005829);Q9H246  |                          | 0 |
| Cytosol (GO:0005829) Q5T5J6  |                          | 0 |
| Cytosol (GO:0005829);Q9UI95  | Nucleus {ECO:0000269 Pub | 0 |
| Cytosol (GO:0005829);075061  |                          | 0 |
| Cytosol (GO:0005829) Q9Y6Y0  | Cytoplasm {ECO:0000269 P | 0 |
| Cytosol (GO:0005829);Q8IYS2  | Membrane {ECO:0000305};  | 0 |
| Cytosol (GO:0005829);Q5JXC2  |                          | 0 |
| Cytosol (GO:0005829);Q92540  | Cytoplasm. Nucleus. Note | 0 |
| Cytosol (GO:0005829);P19878  | Cytoplasm.               | 1 |
| Cytosol (GO:0005829) P47712  | Cytoplasm. Cytoplasmic v | 0 |
| Nuclear speckles (GO:P24522  | Nucleus {ECO:0000269 Pub | 0 |
| Nucleoplasm (GO:00056095522  |                          | 0 |
| Cytosol (GO:0005829);Q5T9L3  | Golgi apparatus membrane | 0 |
| Golgi apparatus (GO:0Q13029  | Nucleus {ECO:0000269 Pub | 1 |
| Cytosol (GO:0005829) P41220  | Isoform 1: Cell membrane | 0 |
| Cytosol (GO:0005829);P10155  | Cytoplasm {ECO:0000269 P | 0 |
| Mitochondria (GO:0005Q9Y5K5  | Cytoplasm {ECO:0000269 P | 0 |
| Centrosome (GO:000581075934  | Nucleus {ECO:0000269 Pub | 0 |
| Nuclear speckles (GO:Q05519  | Nucleus. Note=Colocalize | 0 |
| Vesicles (GO:0043231) Q9NRN5 | Secreted {ECO:0000269 Pu | 0 |
| Cytosol (GO:0005829) Q08257  | Cytoplasm {ECO:0000269 P | 1 |
| Nuclear bodies (GO:00Q9UMS5  | Nucleus {ECO:0000305}.   | 0 |
| Cytosol (GO:0005829) Q9UNY4  | Cytoplasm {ECO:0000269 P | 0 |
| Nuclear speckles (GO:000482  | Nucleus {ECO:0000305}.   | 0 |
| Cytosol (GO:0005829);075037  | Cytoplasm, cytoskeleton  | 0 |
| Nucleoplasm (GO:00056Q9NX46  | Nucleus {ECO:0000269 Pub | 0 |
| Cytosol (GO:0005829);Q3KQU3  | Cytoplasm, cytoskeleton, | 0 |
| Mitochondria (GO:0005Q9UGM6  | Mitochondrion matrix {EC | 1 |
| Nucleoli (GO:0005730) Q8WVF1 | Basal cell membrane. Not | 0 |
| Mitochondria (GO:0005P82914  | Mitochondrion {ECO:00002 | 1 |
| Cytosol (GO:0005829) Q8IYI6  | Cytoplasm {ECO:0000250 U | 0 |
| Cytosol (GO:0005829);Q99598  | Cytoplasm, perinuclear r | 0 |
| Cytosol (GO:0005829);Q9NX04  | Nucleus {ECO:0000269 Pub | 0 |

|                              |                          |   |
|------------------------------|--------------------------|---|
| Nucleoplasm (GO:00056Q9HB90  | Cytoplasm {ECO:0000269 P | 0 |
| Plasma membrane (GO:0000214  | Cytoplasmic vesicle {ECO | 0 |
| Cytosol (GO:0005829) Q9UM19  |                          | 0 |
| Cytosol (GO:0005829) Q99707  | Cytoplasm.               | 1 |
| Nucleoplasm (GO:00056P12524  | Nucleus {ECO:0000255 PRO | 1 |
| Golgi apparatus (GO:0Q9P2F8  |                          | 0 |
| Nucleoli (GO:0005730) Q13129 | Nucleus {ECO:0000305}.   | 0 |
| Cytosol (GO:0005829); Q5T5D7 | Nucleus {ECO:0000305}.   | 0 |
| Mitochondria (GO:0005Q9UJD0  | Cell junction, synapse { | 0 |
| Cytosol (GO:0005829) Q9Y243  | Nucleus {ECO:0000269 Pub | 0 |
| Nucleoplasm (GO:00056P41162  | Nucleus {ECO:0000255 PRO | 1 |
| Mitochondria (GO:0005P11310  | Mitochondrion matrix.    | 1 |
| Vesicles (GO:0043231) Q9BVH7 | Golgi apparatus membrane | 0 |
| Cytosol (GO:0005829); P09326 | Cell membrane {ECO:00002 | 1 |
| Cell Junctions (GO:00095490  | Membrane {ECO:0000255};  | 0 |
| Mitochondria (GO:0005P21912  | Mitochondrion inner memb | 1 |
| Nucleoli (GO:0005730) Q9H9Y2 | Nucleus, nucleolus {ECO: | 1 |
| Cytosol (GO:0005829); Q9UGL1 | Nucleus {ECO:0000255 PRO | 1 |
| Cytosol (GO:0005829); Q16222 | Cytoplasm. Note=In sperm | 1 |
| Cytosol (GO:0005829) Q9H568  | Cytoplasm, cytoskeleton  | 0 |
| Cytosol (GO:0005829) Q01459  | Lysosome.                | 0 |
| Intermediate filamentP49798  |                          | 0 |
| Centriolar satellite Q53G59  | Cytoplasmic vesicle, COP | 1 |
| Cell Junctions (GO:0009Y2D8  | Cell junction, adherens  | 0 |
| Nuclear speckles (GO:Q9NWK9  |                          | 0 |
| Nucleoli (GO:0005730) Q15291 | Nucleus {ECO:0000269 Pub | 0 |
| Nucleoplasm (GO:00056Q9P2E2  | Cytoplasm, cytoskeleton  | 0 |
| Endoplasmic reticulumB7ZAQ6  | Golgi apparatus membrane | 0 |
| Actin filaments (GO:0Q07002  |                          | 0 |
| Cytosol (GO:0005829); Q14376 |                          | 0 |
| Nucleoplasm (GO:00056Q02535  | Nucleus.                 | 1 |
| Plasma membrane (GO:0P15529  | Cytoplasmic vesicle, sec | 0 |
| Nucleoplasm (GO:00056043395  | Nucleus {ECO:0000269 Pub | 0 |
| Nucleoli (GO:0005730) Q32P28 | Isoform 1: Endoplasmic r | 0 |
| Plasma membrane (GO:0P11166  | Cell membrane {ECO:00002 | 0 |
| Nucleoli (GO:0005730) Q99848 | Nucleus, nucleolus {ECO: | 1 |
| Cytosol (GO:0005829); Q12834 | Cytoplasm, cytoskeleton, | 0 |
| Nuclear membrane (GO:P40238  | Cell membrane {ECO:00002 | 0 |
| Cytosol (GO:0005829) Q99437  | Vacuole membrane; Multi- | 0 |
| Golgi apparatus (GO:0060909  | Golgi apparatus, Golgi s | 1 |
| Cytosol (GO:0005829); 043414 |                          | 0 |
| Cytosol (GO:0005829); P14550 | Cytoplasm, cytosol {ECO: | 0 |
| Mitochondria (GO:0005Q06830  | Cytoplasm {ECO:0000269 P | 0 |
| Nucleoplasm (GO:00056Q92569  |                          | 0 |
| Nucleoplasm (GO:00056060635  | Lysosome membrane {ECO:0 | 0 |
| Golgi apparatus (GO:0Q9H2G9  | Golgi apparatus membrane | 0 |
| Nuclear speckles (GO:Q5TID7  | Cytoplasm, cytoskeleton  | 0 |
| Cytosol (GO:0005829) 060779  | Cell membrane {ECO:00003 | 0 |
| Cytosol (GO:0005829) 000519  | Endomembrane system {ECO | 0 |
| Nucleoplasm (GO:00056Q01658  | Nucleus.                 | 1 |
| Actin filaments (GO:0Q15417  |                          | 0 |
| Cytosol (GO:0005829) Q9Y520  |                          | 0 |
| Vesicles (GO:0043231) P13726 | Isoform 1: Membrane {ECO | 0 |
| Peroxisomes (GO:00057P28288  | Peroxisome membrane {ECO | 1 |
| Golgi apparatus (GO:0075379  | Golgi apparatus, trans-G | 0 |

|                             |                          |   |
|-----------------------------|--------------------------|---|
| Golgi apparatus (GO:0Q9H2P9 |                          | 0 |
| Nucleoplasm (GO:00056Q9UKA9 | Nucleus {ECO:0000250}.   | 0 |
| Nucleoplasm (GO:00056P23510 | Membrane; Single-pass ty | 0 |
| Cytosol (GO:0005829);P30041 | Cytoplasm {ECO:0000269 P | 0 |
| Mitochondria (GO:0005Q6PI48 | Mitochondrion matrix {EC | 1 |
| Cytosol (GO:0005829);014896 | Nucleus {ECO:0000305}. C | 0 |
| Cytosol (GO:0005829);Q32ZL2 | Cell membrane {ECO:00002 | 0 |
| Nuclear speckles (GO:Q9UKA8 |                          | 0 |
| Nuclear speckles (GO:095926 | Nucleus {ECO:0000269 Pub | 0 |
| Nucleoplasm (GO:00056Q9BUV0 |                          | 0 |
| Cytosol (GO:0005829);Q9P2K3 | Nucleus {ECO:0000255 PRO | 0 |
| Cytosol (GO:0005829) P16949 | Cytoplasm, cytoskeleton. | 0 |
| Cell Junctions (GO:00Q9H019 |                          | 0 |
| Nucleoplasm (GO:00056Q9NR34 | Golgi apparatus membrane | 0 |
| Centrosome (GO:000581P51955 | Isoform 1: Nucleus. Nucl | 0 |
| Cytosol (GO:0005829);Q15418 | Nucleus. Cytoplasm.      | 1 |
| Plasma membrane (GO:0Q86SQ9 | Endoplasmic reticulum me | 0 |
| Nucleoplasm (GO:00056Q9UMX5 | Secreted, extracellular  | 0 |
| Nuclear speckles (GO:Q96IY1 | Nucleus {ECO:0000269 Pub | 0 |
| Cytosol (GO:0005829);Q92786 | Nucleus {ECO:0000250 Uni | 1 |
| Nucleoplasm (GO:00056014497 | Nucleus {ECO:0000255 PRO | 1 |
| Nucleoplasm (GO:00056P49454 | Cytoplasm, perinuclear r | 0 |
| Nuclear bodies (GO:00P15927 | Nucleus {ECO:0000269 Pub | 1 |
| Nuclear speckles (GO:Q12972 | Nucleus. Nucleus speckle | 0 |
| Golgi apparatus (GO:0Q86Y82 | Endosome membrane; Singl | 0 |
| Actin filaments (GO:0Q2M3M2 | Membrane {ECO:0000305};  | 0 |
| Golgi apparatus (GO:0Q96SU4 | Late endosome membrane { | 0 |
| Cytosol (GO:0005829) A0FGR8 | Cell membrane {ECO:00002 | 0 |
| Mitochondria (GO:0005015446 | Nucleus, nucleolus {ECO: | 1 |
| Cytosol (GO:0005829);Q14696 | Endoplasmic reticulum {E | 0 |
| Endoplasmic reticulumQ14257 | Endoplasmic reticulum lu | 1 |
| Cell Junctions (GO:00P30926 | Cell junction, synapse,  | 0 |
| Vesicles (GO:0043231)Q9HC84 | Secreted.                | 0 |
| Nuclear bodies (GO:00Q8WVM7 | Nucleus. Chromosome. Chr | 1 |
| Cytosol (GO:0005829);Q15831 | Nucleus. Cytoplasm. Memb | 0 |
| Cytosol (GO:0005829);Q03164 | Nucleus {ECO:0000269 Pub | 1 |
| Actin filaments (GO:0Q9NQ8  | Cytoplasm, cytoskeleton, | 0 |
| Cytosol (GO:0005829);P02647 | Secreted.                | 0 |
| Cytosol (GO:0005829);Q9H0D2 | Nucleus {ECO:0000250 Uni | 0 |
| Cytosol (GO:0005829);Q9Y664 | Lysosome membrane {ECO:0 | 0 |
| Cytosol (GO:0005829);P62851 |                          | 0 |
| Cytosol (GO:0005829);Q15058 | Nucleus {ECO:0000269 Pub | 0 |
| Focal adhesion sites P45379 |                          | 0 |
| Actin filaments (GO:0Q5T1V6 | Cytoplasm {ECO:0000269 P | 0 |
| Cytosol (GO:0005829);Q08AD1 | Cytoplasm, cytoskeleton  | 0 |
| Cytokinetic bridge (GP07320 |                          | 0 |
| Vesicles (GO:0043231)Q8N565 | Apical cell membrane {EC | 0 |
| Mitochondria (GO:0005Q9NYY8 | Mitochondrion matrix, mi | 1 |
| Plasma membrane (GO:0060462 | Membrane {ECO:0000269 Pu | 0 |
| Nucleoplasm (GO:00056P16220 | Nucleus {ECO:0000255 PRO | 1 |
| Golgi apparatus (GO:0075840 | Nucleus {ECO:0000269 Pub | 0 |
| Golgi apparatus (GO:0P02766 | Secreted. Cytoplasm.     | 0 |
| Plasma membrane (GO:0Q8WWF1 | Secreted {ECO:0000305}.  | 0 |
| Plasma membrane (GO:0Q9ULX7 | Membrane {ECO:0000305};  | 0 |
| Cytosol (GO:0005829);Q12912 | Processed lymphoid-restr | 0 |

|                                |                          |   |
|--------------------------------|--------------------------|---|
| Nucleoplasm (GO:00056Q15005    | Microsome membrane {ECO: | 0 |
| Nucleoli fibrillar ceQ9P2H5    |                          | 0 |
| Actin filaments (GO:0Q7Z7B0    | Cytoplasm, cytoskeleton  | 0 |
| Nuclear bodies (GO:0016604);Nu | Cytoplasm. Nucleus. Nucl | 0 |
| Cytosol (GO:0005829);Q15651    | Nucleus.                 | 1 |
| Rods & Rings () Q7Z6J8         | Cytoplasm {ECO:0000305}. | 0 |
| Actin filaments (GO:0P21554    | Cell membrane {ECO:00002 | 0 |
| Mitochondria (GO:0005Q9BQI5    | Membrane, clathrin-coate | 0 |
| Nucleoplasm (GO:00056Q92576    |                          | 0 |
| Mitochondria (GO:0005Q8N7X0    |                          | 0 |
| Golgi apparatus (GO:0Q9UM63    | Nucleus {ECO:0000269 Pub | 1 |
| Microtubules (GO:0015Q8TB52    |                          | 0 |
| Vesicles (GO:0043231)P21580    | Cytoplasm. Nucleus. Lyso | 0 |
| Vesicles (GO:0043231)043687    | Isoform Alpha: Lateral c | 0 |
| Cytosol (GO:0005829) Q13637    | Mitochondrion {ECO:00002 | 0 |
| Cytosol (GO:0005829);P10242    | Nucleus {ECO:0000255 PRO | 1 |
| Centrosome (GO:000581Q9H2A2    | Cytoplasm {ECO:0000250}. | 0 |
| Nuclear speckles (GO:000141    | Cytoplasm. Nucleus. Endo | 0 |
| Cytosol (GO:0005829);Q9NTX7    | Cytoplasm, cytosol. Nucl | 0 |
| Golgi apparatus (GO:0P29279    | Secreted, extracellular  | 0 |
| Endoplasmic reticulumQ8TBY8    | Cell projection, cilium, | 0 |
| Nucleoplasm (GO:00056Q9H204    | Nucleus {ECO:0000269 Pub | 0 |
| Nucleoplasm (GO:00056060669    | Cell membrane {ECO:00002 | 1 |
| Golgi apparatus (GO:0Q9Y2B1    | Golgi apparatus membrane | 0 |
| Golgi apparatus (GO:0Q9BV40    | Lysosome membrane {ECO:0 | 0 |
| Nuclear bodies (GO:00Q9H816    | Chromosome, telomere. Nu | 0 |
| Nucleoli fibrillar ce014950    |                          | 0 |
| Nucleoplasm (GO:00056043524    | Cytoplasm, cytosol {ECO: | 0 |
| Nucleoplasm (GO:00056Q8NEN0    |                          | 0 |
| Endoplasmic reticulumP04844    | Endoplasmic reticulum {E | 1 |
| Centrosome (GO:000581Q9GZN2    | Nucleus. Note=Excluded f | 1 |
| Vesicles (GO:0043231)Q96PB7    | Secreted {ECO:0000250}.  | 0 |
| Endoplasmic reticulumQ13563    | Cell projection, cilium  | 0 |
| Nucleoplasm (GO:00056Q9UNQ0    | Cell membrane {ECO:00002 | 0 |
| Golgi apparatus (GO:0P10451    | Secreted.                | 0 |
| Cytosol (GO:0005829) 095210    | Preautophagosomal struct | 0 |
| Golgi apparatus (GO:0Q14094    |                          | 0 |
| Endoplasmic reticulumP49788    | Membrane {ECO:0000269 Pu | 0 |
| Nucleoli (GO:0005730)Q9H3U5    | Membrane {ECO:0000305};  | 0 |
| Cytosol (GO:0005829);Q9H2M9    | Cytoplasm. Note=In neuro | 1 |
| Vesicles (GO:0043231)Q96G04    | Cytoplasm {ECO:0000269 P | 0 |
| Cytosol (GO:0005829);060437    | Cell junction, desmosome | 0 |
| Nuclear bodies (GO:00Q9NPG3    | Nucleus, nucleoplasm. Nu | 0 |
| Cytosol (GO:0005829);Q9Y4X4    | Nucleus.                 | 0 |
| Cytosol (GO:0005829);P15374    | Cytoplasm.               | 1 |
| Cytosol (GO:0005829);014917    | Cell membrane {ECO:00002 | 0 |
| Cytosol (GO:0005829);Q53T59    |                          | 0 |
| Cytosol (GO:0005829);Q9H6V9    | Lipid droplet {ECO:00002 | 0 |
| Nucleoplasm (GO:00056P30279    | Nucleus {ECO:0000269 Pub | 0 |
| Nucleoplasm (GO:00056000472    | Nucleus.                 | 1 |
| Cytosol (GO:0005829) Q8WXX0    | Cytoplasm, cytoskeleton, | 0 |
| Actin filaments (GO:0Q6UW02    | Membrane {ECO:0000305};  | 0 |
| Nuclear membrane (GO:Q9Y5Q9    | Nucleus.                 | 1 |
| Nucleoplasm (GO:00056Q9UPW6    | Nucleus matrix {ECO:0000 | 1 |
| Cytosol (GO:0005829);P63146    | Cell membrane {ECO:00002 | 0 |

|                             |                          |   |
|-----------------------------|--------------------------|---|
| Nucleoplasm (GO:00056Q9Y2T3 |                          | 0 |
| Cytosol (GO:0005829);Q13886 | Nucleus {ECO:0000269 Pub | 1 |
| Cell Junctions (GO:00Q9UDY2 | Cell junction, adherens  | 0 |
| Centriolar satellite 014713 | Nucleus. Cytoplasm. Cyto | 0 |
| Vesicles (GO:0043231)Q86VD9 | Endoplasmic reticulum me | 0 |
| Nucleoli (GO:0005730)Q96HI0 | Nucleus, nucleolus {ECO: | 1 |
| Centrosome (GO:000581Q53HC0 | Cytoplasm, cytoskeleton, | 1 |
| Cytosol (GO:0005829) Q9H425 | Cytoplasm {ECO:0000269 P | 1 |
| Mitochondria (GO:0005Q9H583 | Nucleus, nucleolus {ECO: | 0 |
| Nucleoplasm (GO:00056095758 |                          | 0 |
| Cytosol (GO:0005829);P54727 | Nucleus. Cytoplasm. Note | 1 |
| Cytosol (GO:0005829);Q5T1M5 | Cytoplasm {ECO:0000250 U | 0 |
| Cytokinetic bridge (GQ9NX38 | Nucleus speckle {ECO:000 | 0 |
| Cytosol (GO:0005829) Q96EX3 | Cytoplasm {ECO:0000269 P | 0 |
| Lipid droplets (GO:00Q01105 | Cytoplasm, cytosol. Endo | 0 |
| Cytosol (GO:0005829);Q15257 | Cytoplasm {ECO:0000269 P | 1 |
| Nuclear membrane (GO:Q53GS7 | Nucleus {ECO:0000269 Pub | 0 |
| Vesicles (GO:0043231)P61106 | Recycling endosome {ECO: | 0 |
| Centrosome (GO:000581Q7Z7A1 | Cytoplasm, cytoskeleton, | 0 |
| Intermediate filamentQ13049 | Cytoplasm. Note=Localize | 0 |
| Nucleoplasm (GO:00056Q9UKT8 |                          | 0 |
| Centriolar satellite Q9HC98 | Cytoplasm. Nucleus. Nucl | 0 |
| Cytosol (GO:0005829);Q5W0U4 | Cytoplasm. Membrane {ECO | 0 |
| Mitochondria (GO:0005P51970 | Mitochondrion inner memb | 1 |
| Nucleoli (GO:0005730)Q9BSH5 |                          | 0 |
| Cytosol (GO:0005829);Q96H35 |                          | 0 |
| Mitochondria (GO:0005Q6YN16 | Peroxisome {ECO:0000269  | 0 |
| Cytosol (GO:0005829);Q9BPZ7 | Cell membrane; Periphera | 0 |
| Cytosol (GO:0005829) Q9Y283 | Cytoplasm {ECO:0000250}. | 0 |
| Cytosol (GO:0005829);Q8TEH3 | Cytoplasmic vesicle, cla | 0 |
| Actin filaments (GO:0Q9H553 | Membrane {ECO:0000305};  | 0 |
| Intermediate filament075351 | Prevacuolar compartment  | 0 |
| Actin filaments (GO:0095948 | Nucleus.                 | 1 |
| Intermediate filamentQ9UFG5 |                          | 0 |
| Cytosol (GO:0005829) Q96K62 | Nucleus {ECO:0000305}.   | 0 |
| Nuclear speckles (GO:P49750 | Nucleus {ECO:0000269 Pub | 1 |
| Nucleoplasm (GO:00056Q8WV16 |                          | 0 |
| Nucleoplasm (GO:00056Q9Y324 | Nucleus, nucleolus {ECO: | 0 |
| Cytosol (GO:0005829);P49763 | Secreted. Note=The three | 0 |
| Cytosol (GO:0005829);Q9H2X8 | Mitochondrion membrane { | 0 |
| Centriolar satellite Q8ND07 | Cytoplasm, cytoskeleton, | 0 |
| Mitochondria (GO:0005Q8TD19 | Cytoplasm {ECO:0000269 P | 0 |
| Cytosol (GO:0005829);P07311 |                          | 0 |
| Centriolar satellite Q96FT9 | Cytoplasm, cytoskeleton  | 0 |
| Centriolar satellite Q4LDG9 | Cytoplasm, cytoskeleton, | 0 |
| Nucleoplasm (GO:00056Q9H1B7 | Nucleus {ECO:0000250 Uni | 1 |
| Mitochondria (GO:0005P49753 | Mitochondrion {ECO:00002 | 0 |
| Nucleoplasm (GO:00056Q14767 | Secreted, extracellular  | 0 |
| Nucleoplasm (GO:00056Q9UHC1 | Nucleus {ECO:0000305}.   | 0 |
| Cytosol (GO:0005829);Q6EMB2 | Cell projection, cilium  | 0 |
| Cytosol (GO:0005829) Q6NUP7 | Cytoplasm {ECO:0000269 P | 1 |
| Vesicles (GO:0043231)P10600 | Latency-associated pepti | 0 |
| Mitochondria (GO:0005Q53FD0 |                          | 0 |
| Mitochondria (GO:0005Q9GZT3 | Mitochondrion {ECO:00002 | 0 |
| Nuclear speckles (GO:P49756 | Nucleus speckle. Cytopla | 0 |

|                             |                          |   |
|-----------------------------|--------------------------|---|
| Mitochondria (GO:0005Q02252 | Mitochondrion.           | 1 |
| Focal adhesion sites P49770 |                          | 0 |
| Mitochondria (GO:0005Q9H7Z3 |                          | 0 |
| Nuclear bodies (GO:00Q86VK4 | Nucleus {ECO:0000305}.   | 0 |
| Cytosol (GO:0005829);P17081 | Cytoplasm {ECO:0000269 P | 0 |
| Nucleoplasm (GO:00056094864 | Nucleus {ECO:0000269 Pub | 0 |
| Cytosol (GO:0005829);Q96CT2 |                          | 0 |
| Nucleoplasm (GO:00056Q9Y6K1 | Nucleus {ECO:0000269 Pub | 0 |
| Cytosol (GO:0005829);Q6NUQ4 | Endoplasmic reticulum me | 1 |
| Nucleoplasm (GO:00056Q9ULI0 | Nucleus {ECO:0000269 Pub | 1 |
| Vesicles (GO:0043231)P68106 | Cytoplasm {ECO:0000250}. | 0 |
| Endoplasmic reticulumQ8NHH9 | Endoplasmic reticulum me | 1 |
| Cytosol (GO:0005829);P62699 | Nucleus {ECO:0000250 Uni | 0 |
| Vesicles (GO:0043231)Q8NCA5 |                          | 0 |
| Golgi apparatus (GO:0Q9BSR8 | Golgi apparatus, cis-Gol | 1 |
| Cytosol (GO:0005829);Q6ULP2 | Cytoplasm {ECO:0000269 P | 0 |
| Nucleoplasm (GO:00056Q3ZCW2 |                          | 0 |
| Cytosol (GO:0005829) Q96F85 |                          | 0 |
| Nuclear bodies (GO:00Q9H165 | Cytoplasm {ECO:0000269 P | 0 |
| Nucleoli fibrillar ceQ9P021 | Cytoplasm {ECO:0000250}. | 0 |
| Plasma membrane (GO:0P16422 | Lateral cell membrane {E | 0 |
| Cytosol (GO:0005829);Q9NRA2 | Cell membrane {ECO:00002 | 0 |
| Golgi apparatus (GO:0Q5TC84 |                          | 0 |
| Nucleoplasm (GO:00056Q8IX21 | Nucleus {ECO:0000269 Pub | 1 |
| Cytosol (GO:0005829);Q9HB03 | Endoplasmic reticulum me | 0 |
| Cytosol (GO:0005829);014879 | Cytoplasm. Mitochondrion | 1 |
| Cytosol (GO:0005829);Q8TAU0 | Nucleus {ECO:0000255 PRO | 0 |
| Vesicles (GO:0043231)P09913 | Cytoplasm {ECO:0000269 P | 0 |
| Mitochondria (GO:0005Q9HCL2 | Mitochondrion outer memb | 0 |
| Cytosol (GO:0005829);Q9NTM9 | Cytoplasm {ECO:0000269 P | 1 |
| Mitochondria (GO:0005Q8N2H3 |                          | 0 |
| Cytosol (GO:0005829);Q9NRU3 | Cell membrane {ECO:00002 | 0 |
| Cytosol (GO:0005829);P50539 | Nucleus.                 | 1 |
| Nuclear bodies (GO:00075940 | Nucleus speckle. Nucleus | 0 |
| Golgi apparatus (GO:0Q9NRZ9 | Nucleus {ECO:0000250}. N | 0 |
| Microtubules (GO:0015Q6NUS6 | Membrane {ECO:0000305};  | 0 |
| Centrosome (GO:000581Q8TCE6 |                          | 0 |
| Nucleoplasm (GO:00056Q5T686 |                          | 0 |
| Cytosol (GO:0005829);Q9BZH6 | Cytoplasm, cytoskeleton, | 0 |
| Vesicles (GO:0043231)Q5T2E6 | Membrane {ECO:0000305};  | 0 |
| Vesicles (GO:0043231)Q9NS61 | Isoform 1: Cell membrane | 0 |
| Cytosol (GO:0005829);Q5T655 | Cell projection, cilium  | 0 |
| Cytosol (GO:0005829);P17174 | Cytoplasm {ECO:0000269 P | 0 |
| Cytosol (GO:0005829) Q14344 | Cell membrane {ECO:00002 | 0 |
| Nucleoplasm (GO:00056P17481 | Nucleus.                 | 1 |
| Nucleoplasm (GO:00056Q7Z3B3 | Nucleus {ECO:0000269 Pub | 1 |
| Cytosol (GO:0005829);P09067 | Nucleus.                 | 1 |
| Nucleoplasm (GO:00056P14651 | Nucleus.                 | 1 |
| Cytosol (GO:0005829);P28562 | Nucleus {ECO:0000250 Uni | 0 |
| Golgi apparatus (GO:0Q9H999 | Cytoplasm {ECO:0000305}. | 0 |
| Nuclear speckles (GO:P35548 | Nucleus.                 | 0 |
| Centriolar satellite Q02763 | Cell membrane {ECO:00002 | 0 |
| Nucleoplasm (GO:00056Q9Y2P8 | Nucleus, nucleolus {ECO: | 0 |
| Vesicles (GO:0043231)Q9H8G2 |                          | 0 |
| Cytosol (GO:0005829);Q86TA1 |                          | 0 |



|                              |                          |   |
|------------------------------|--------------------------|---|
| Mitochondria (GO:0005Q6UB35  | Mitochondrion {ECO:00002 | 1 |
| Mitochondria (GO:0005Q86VZ4  | Membrane {ECO:0000305};  | 0 |
| Cell Junctions (GO:00Q8IYT3  |                          | 0 |
| Cytosol (GO:0005829) P22061  | Cytoplasm.               | 1 |
| Nucleoplasm (GO:00056Q9ULL1  |                          | 0 |
| Nucleoplasm (GO:00056Q8N699  | Nucleus {ECO:0000269 Pub | 1 |
| Nucleoplasm (GO:00056Q9HAI6  |                          | 0 |
| Nucleoli (GO:0005730) Q9H6Y2 | Nucleus, nucleolus {ECO: | 0 |
| Vesicles (GO:0043231) Q9Y5E9 | Cell membrane {ECO:00002 | 0 |
| Plasma membrane (GO:0Q9Y5F1  | Cell membrane {ECO:00002 | 0 |
| Mitochondria (GO:0005060783  | Mitochondrion {ECO:00002 | 0 |
| Actin filaments (GO:0Q96JE7  | Endoplasmic reticulum me | 0 |
| Cytosol (GO:0005829); Q5T7V8 | Cytoplasm {ECO:0000269 P | 0 |
| Cytosol (GO:0005829); Q9BWD1 | Cytoplasm, cytosol {ECO: | 1 |
| Nuclear membrane (GO:Q9BWV7  |                          | 0 |
| Mitochondria (GO:0005Q92543  | Early endosome membrane  | 0 |
| Nuclear bodies (GO:00Q6P1R3  |                          | 0 |
| Cytosol (GO:0005829); Q96RS6 | Isoform 1: Cytoplasm. Nu | 1 |
| Mitochondria (GO:0005Q9NPA8  | Nucleus, nucleoplasm {EC | 0 |
| Nucleoplasm (GO:00056Q96GX5  | Cytoplasm, cytoskeleton, | 0 |
| Cytosol (GO:0005829); Q5T5P2 | Cytoplasm {ECO:0000250 U | 0 |
| Nuclear bodies (GO:00Q6UX71  | Membrane {ECO:0000305};  | 0 |
| Nuclear bodies (GO:00Q9H2F5  | Nucleus {ECO:0000269 Pub | 1 |
| Cytosol (GO:0005829); Q9UPP2 | Cytoplasm {ECO:0000269 P | 0 |
| Nuclear membrane (GO:Q9BR77  |                          | 0 |
| Plasma membrane (GO:0Q8TC92  | Cell membrane {ECO:00002 | 0 |
| Vesicles (GO:0043231) Q9NX45 | Nucleus {ECO:0000250 Uni | 0 |
| Cytosol (GO:0005829); Q86XN7 |                          | 0 |
| Nucleoplasm (GO:00056075554  | Nucleus {ECO:0000269 Pub | 0 |
| Nucleoplasm (GO:00056P32519  | Nucleus.                 | 1 |
| Cytosol (GO:0005829); 015198 | Cytoplasm {ECO:0000250}. | 1 |
| Cytosol (GO:0005829); Q92598 | Cytoplasm {ECO:0000269 P | 0 |
| Cytosol (GO:0005829) Q9Y673  | Endoplasmic reticulum me | 0 |
| Nucleoli fibrillar ce Q96B26 | Cytoplasm {ECO:0000269 P | 0 |
| Vesicles (GO:0043231) Q9BPZ3 | Cytoplasm {ECO:0000269 P | 0 |
| Nucleoplasm (GO:00056Q7LBC6  | Nucleus {ECO:0000250}.   | 1 |
| Nucleoplasm (GO:00056P18146  | Nucleus {ECO:0000269 Pub | 0 |
| Endoplasmic reticulum Q9Y6X1 | Membrane; Single-pass ty | 0 |
| Cytosol (GO:0005829) Q9Y2G7  | Nucleus {ECO:0000305}.   | 0 |
| Cell Junctions (GO:00P13056  | Nucleus {ECO:0000255 PRO | 1 |
| Nucleoli (GO:0005730) 075691 | Nucleus, nucleolus {ECO: | 1 |
| Nuclear membrane (GO:P42166  | Nucleus. Chromosome. Not | 0 |
| Golgi apparatus (GO:0P40616  | Golgi apparatus membrane | 0 |
| Golgi apparatus (GO:0Q9H1C3  | Membrane {ECO:0000305};  | 0 |
| Endoplasmic reticulum 014508 |                          | 0 |
| Nucleoplasm (GO:00056P25208  | Nucleus.                 | 1 |
| Vesicles (GO:0043231) Q9Y3C0 | Early endosome {ECO:0000 | 0 |
| Cytosol (GO:0005829); 014727 | Cytoplasm {ECO:0000269 P | 1 |
| Nucleoplasm (GO:00056Q13115  | Nucleus {ECO:0000269 Pub | 1 |
| Cytosol (GO:0005829); 060504 | Isoform Alpha: Cell junc | 0 |
| Cytosol (GO:0005829); Q14289 | Cytoplasm. Cytoplasm, pe | 0 |
| Vesicles (GO:0043231) P48454 |                          | 0 |
| Actin filaments (GO:0Q96JY6  | Cytoplasm {ECO:0000269 P | 0 |
| Cytosol (GO:0005829) P34913  | Cytoplasm. Peroxisome.   | 0 |
| Vesicles (GO:0043231) Q9Y5Z9 | Endoplasmic reticulum me | 0 |

|                             |                          |   |
|-----------------------------|--------------------------|---|
| Nucleoplasm (GO:00056Q13148 | Nucleus {ECO:0000269 Pub | 0 |
| Plasma membrane (GO:0P28908 | Isoform 1: Cell membrane | 0 |
| Plasma membrane (GO:0Q9Y5V0 | Cytoplasm {ECO:0000250 U | 0 |
| Cytosol (GO:0005829);075608 | Cytoplasm {ECO:0000250}. | 0 |
| Nucleoplasm (GO:00056Q92905 | Cytoplasm, cytosol {ECO: | 0 |
| Lipid droplets (GO:0Q8IZV5  | Microsome membrane {ECO: | 0 |
| Mitochondria (GO:0005Q92667 | Mitochondrion outer memb | 1 |
| Nuclear bodies (GO:0P38432  | Nucleus {ECO:0000269 Pub | 0 |
| Cytosol (GO:0005829);Q14258 | Cytoplasm {ECO:0000269 P | 1 |
| Golgi apparatus (GO:0Q9HB40 | Secreted {ECO:0000305}.  | 0 |
| Cytosol (GO:0005829);Q13207 | Nucleus {ECO:0000269 Pub | 0 |
| Endoplasmic reticulumP78383 | Endoplasmic reticulum me | 0 |
| Vesicles (GO:0043231)P57082 | Nucleus {ECO:0000255 PRO | 0 |
| Cell Junctions (GO:0Q8IWB6  | Cytoplasm {ECO:0000250}. | 0 |
| Nucleoplasm (GO:00056Q9C073 |                          | 0 |
| Cytosol (GO:0005829);Q15003 | Nucleus {ECO:0000269 Pub | 1 |
| Endoplasmic reticulum095237 | Endoplasmic reticulum me | 0 |
| Nucleoli fibrillar ceA2VDJ0 | Cell membrane {ECO:00002 | 0 |
| Cytosol (GO:0005829) P51828 | Membrane; Multi-pass mem | 0 |
| Cytosol (GO:0005829);Q96ST8 | Cytoplasm, cytosol. Cyto | 0 |
| Nucleoplasm (GO:00056Q63HK5 | Nucleus {ECO:0000255 PRO | 0 |
| Mitochondria (GO:0005Q86YB7 | Mitochondrion {ECO:00003 | 0 |
| Nuclear speckles (GO:Q8WU10 | Nucleus {ECO:0000269 Pub | 0 |
| Cytosol (GO:0005829) Q9BZR8 | Cytoplasm {ECO:0000269 P | 0 |
| Nucleoli fibrillar ceQ8WXF1 | Nucleus, nucleolus. Nucl | 0 |
| Cytosol (GO:0005829);Q6P9A3 | Nucleus {ECO:0000305}.   | 0 |
| Nucleoplasm (GO:00056Q8TBC5 | Nucleus {ECO:0000255 PRO | 0 |
| Mitochondria (GO:0005Q13398 | Nucleus {ECO:0000305}.   | 0 |
| Nuclear speckles (GO:Q969G2 | Nucleus {ECO:0000255 PRO | 0 |
| Nuclear bodies (GO:0Q99496  | Nucleus {ECO:0000269 Pub | 1 |
| Nucleoli (GO:0005730)Q7Z2T5 |                          | 0 |
| Cytosol (GO:0005829);P01040 | Cytoplasm {ECO:0000269 P | 0 |
| Cytosol (GO:0005829);Q7L190 | Nucleus {ECO:0000250 Uni | 0 |
| Golgi apparatus (GO:0060513 | Golgi apparatus, Golgi s | 1 |
| Cytokinetic bridge (GQ8NI77 | Cell projection, ruffle. | 0 |
| Vesicles (GO:0043231)Q9BSY9 | Cytoplasm {ECO:0000250 U | 0 |
| Plasma membrane (GO:0Q9UQF2 | Cytoplasm {ECO:0000250}. | 0 |
| Cytosol (GO:0005829);Q49AN0 | Cytoplasm {ECO:0000269 P | 0 |
| Cytosol (GO:0005829);Q96QD5 |                          | 0 |
| Vesicles (GO:0043231)P04040 | Peroxisome.              | 0 |
| Mitochondria (GO:0005Q9UKJ0 | Membrane {ECO:0000305};  | 0 |
| Endoplasmic reticulumQ9UBW7 | Nucleus {ECO:0000305}.   | 0 |
| Cell Junctions (GO:00095452 | Cell membrane; Multi-pas | 0 |
| Cytosol (GO:0005829);Q8TC07 | Cytoplasm {ECO:0000250}. | 0 |
| Centrosome (GO:000581060241 | Cell membrane {ECO:00002 | 0 |
| Focal adhesion sites P05413 | Cytoplasm.               | 0 |
| Nucleoplasm (GO:00056Q07666 | Nucleus {ECO:0000269 Pub | 0 |
| Vesicles (GO:0043231)Q9GZU3 | Membrane {ECO:0000305};  | 0 |
| Microtubules (GO:0015P50591 | Cell membrane {ECO:00002 | 0 |
| Nucleoplasm (GO:00056Q9UID6 | Nucleus {ECO:0000269 Pub | 1 |
| Mitochondria (GO:0005Q94933 | Membrane {ECO:0000305};  | 0 |
| Cytosol (GO:0005829) P42336 |                          | 0 |
| Nucleoplasm (GO:00056Q29RF7 | Nucleus {ECO:0000269 Pub | 1 |
| Cytosol (GO:0005829);043766 | Mitochondrion {ECO:00002 | 0 |
| Vesicles (GO:0043231)Q969K7 | Membrane {ECO:0000305};  | 0 |

|                              |                          |   |
|------------------------------|--------------------------|---|
| Nucleoplasm (GO:00056P17040  | Nucleus {ECO:0000255 PRO | 0 |
| Centriolar satellite Q5T3J3  | Chromosome {ECO:0000269  | 1 |
| Endoplasmic reticulumQ96S66  | Membrane {ECO:0000305};  | 0 |
| Cytosol (GO:0005829) P81274  | Cytoplasm {ECO:0000269 P | 0 |
| Cytosol (GO:0005829) Q4AE62  |                          | 0 |
| Nucleoplasm (GO:00056Q5FWF4  | Nucleus {ECO:0000269 Pub | 1 |
| Cytosol (GO:0005829) P27037  | Membrane; Single-pass ty | 0 |
| Nuclear bodies (GO:00Q9UBT6  | Nucleus {ECO:0000269 Pub | 1 |
| Nucleoplasm (GO:00056Q496J9  | Cytoplasmic vesicle, sec | 0 |
| Endoplasmic reticulumP36888  | Membrane; Single-pass ty | 0 |
| Cytosol (GO:0005829);P46778  | Cytoplasm, cytosol {ECO: | 0 |
| Mitochondria (GO:0005Q9H2K0  | Mitochondrion {ECO:00003 | 0 |
| Nucleoplasm (GO:00056Q92664  | Nucleus.                 | 1 |
| Nuclear bodies (GO:00Q6T310  | Nucleus, nucleolus {ECO: | 0 |
| Centrosome (GO:000581095164  | Cell membrane {ECO:00002 | 0 |
| Nuclear speckles (GO:Q96QD9  | Nucleus, nucleoplasm {EC | 0 |
| Cytosol (GO:0005829);Q7Z6M4  | Mitochondrion {ECO:00002 | 1 |
| Cytosol (GO:0005829);043895  | Cell membrane {ECO:00002 | 0 |
| Nuclear bodies (GO:00075995  |                          | 0 |
| Centriolar satellite Q01968  | Cytoplasmic vesicle, pha | 0 |
| Mitochondria (GO:0005Q9Y399  | Mitochondrion {ECO:00002 | 1 |
| Nucleoplasm (GO:00056P15173  | Nucleus. Note=Recruited  | 1 |
| Cytosol (GO:0005829);Q8I WV1 | Cell membrane {ECO:00002 | 0 |
| Nucleoplasm (GO:00056Q96A73  | Cytoplasm {ECO:0000250}. | 0 |
| Cytosol (GO:0005829);P53621  | Cytoplasm {ECO:0000250}. | 0 |
| Nuclear speckles (GO:Q7Z6E9  | Nucleus, nucleolus. Chro | 0 |
| Cytosol (GO:0005829) Q8IWR0  | Nucleus {ECO:0000305}.   | 0 |
| Cytosol (GO:0005829);P50995  | Cytoplasm {ECO:0000269 P | 0 |
| Cytosol (GO:0005829);075112  | Cytoplasm, perinuclear r | 0 |
| Actin filaments (GO:0Q86V20  | Nucleus {ECO:0000269 Pub | 0 |
| Nucleoplasm (GO:00056095201  | Nucleus {ECO:0000305}.   | 0 |
| Actin filaments (GO:0Q9H7X0  | Golgi apparatus membrane | 0 |
| Cytosol (GO:0005829);P46777  | Cytoplasm {ECO:0000269 P | 0 |
| Cytosol (GO:0005829);Q9NUP7  |                          | 0 |
| Vesicles (GO:0043231) Q9H582 | Nucleus.                 | 0 |
| Cytosol (GO:0005829);Q5T9S5  |                          | 0 |
| Cytosol (GO:0005829);Q8IXW5  | Cytoplasm {ECO:0000269 P | 0 |
| Nucleoplasm (GO:00056Q8N2U9  | Membrane {ECO:0000305};  | 0 |
| Nucleoplasm (GO:00056P54278  | Nucleus {ECO:0000269 Pub | 1 |
| Mitochondria (GO:0005Q8NF64  | Nucleus {ECO:0000269 Pub | 1 |
| Actin filaments (GO:0Q16181  | Cytoplasm {ECO:0000269 P | 0 |
| Nuclear speckles (GO:Q7L9B9  |                          | 0 |
| Cytosol (GO:0005829);Q8IXQ5  | Nucleus {ECO:0000269 Pub | 1 |
| Nucleoli (GO:0005730) Q9BSE4 | Membrane {ECO:0000305};  | 0 |
| Nuclear bodies (GO:00Q13185  | Nucleus {ECO:0000305}. N | 1 |
| Nucleoplasm (GO:00056P22626  | Nucleus, nucleoplasm {EC | 0 |
| Mitochondria (GO:0005A6NGB9  | Cytoplasm. Note=In hippo | 0 |
| Golgi apparatus (GO:0P01303  | Secreted.                | 0 |
| Cytosol (GO:0005829);Q9BYI3  | Cytoplasm, cytosol {ECO: | 1 |
| Nuclear membrane (GO:P31268  | Nucleus.                 | 1 |
| Golgi apparatus (GO:0095302  | Endoplasmic reticulum {E | 0 |
| Cytosol (GO:0005829);P40617  | Cell membrane. Cytoplasm | 0 |
| Vesicles (GO:0043231) P86791 | Lysosome membrane {ECO:0 | 0 |
| Nucleoplasm (GO:00056Q9NP87  | Nucleus {ECO:0000250}.   | 1 |
| Vesicles (GO:0043231) Q2TAY7 | Cytoplasm {ECO:0000250 U | 0 |

|                                |                          |   |
|--------------------------------|--------------------------|---|
| Microtubules (GO:0015Q9H4G4    | Golgi apparatus membrane | 0 |
| Mitochondria (GO:0005Q9H1U9    | Mitochondrion inner memb | 0 |
| Endosomes (GO:0005768P09496    | Cytoplasmic vesicle memb | 0 |
| Plasma membrane (GO:0095980    | Cell membrane {ECO:00002 | 1 |
| Golgi apparatus (GO:0060575    | Secreted {ECO:0000250}.  | 0 |
| Cytosol (GO:0005829);P21399    | Cytoplasm.               | 1 |
| Nucleoli fibrillar ceQ5QP82    |                          | 0 |
| Intermediate filamentQ9HCM3    | Membrane {ECO:0000305};  | 0 |
| Nucleoplasm (GO:00056015164    | Nucleus {ECO:0000269 Pub | 0 |
| Actin filaments (GO:0005682    | Cytoplasm, cytoskeleton  | 0 |
| Cytosol (GO:0005829);P51857    | Cytoplasm {ECO:0000269 P | 1 |
| Cytosol (GO:0005829) Q8NFP7    | Cytoplasm {ECO:0000305 P | 0 |
| Nuclear speckles (GO:Q9Y4Z2    | Nucleus {ECO:0000255 PRO | 0 |
| Golgi apparatus (GO:0010124    | Cytoplasmic granule {ECO | 0 |
| Cytosol (GO:0005829);Q7LGC8    | Golgi apparatus membrane | 0 |
| Nucleoplasm (GO:0005609H694    | Cytoplasm {ECO:0000250}. | 0 |
| Mitochondria (GO:0005Q9NZ45    | Mitochondrion outer memb | 1 |
| Nucleoplasm (GO:00056P11161    | Nucleus.                 | 1 |
| Cytosol (GO:0005829);095905    | Cytoplasm {ECO:0000269 P | 1 |
| Endoplasmic reticulumP13674    | Endoplasmic reticulum lu | 1 |
| Mitochondria (GO:0005P16260    | Mitochondrion inner memb | 0 |
| Cytosol (GO:0005829);095229    | Nucleus. Chromosome, cen | 1 |
| Endosomes (GO:0005768075436    | Cytoplasm {ECO:0000269 P | 0 |
| Nucleoli (GO:0005730)Q9Y4C8    | Nucleus, nucleolus {ECO: | 0 |
| Cytosol (GO:0005829) 014578    | Cytoplasm {ECO:0000250}. | 0 |
| Centrosome (GO:000581Q8WYAO    | Cell projection, cilium  | 0 |
| Mitochondria (GO:0005P16219    | Mitochondrion matrix.    | 1 |
| Golgi apparatus (GO:0008TDD1   | Nucleus, nucleolus {ECO: | 0 |
| Golgi apparatus (GO:00071F56   | Nucleus {ECO:0000305}.   | 0 |
| Cytosol (GO:0005829);P42773    |                          | 0 |
| Cytosol (GO:0005829);Q8NHQ8    |                          | 0 |
| Nucleoplasm (GO:00056Q9C0J9    | Nucleus {ECO:0000255 PRO | 1 |
| Nuclear membrane (GO:Q14714    | Cell membrane {ECO:00002 | 0 |
| Endoplasmic reticulumQ14571    | Endoplasmic reticulum me | 1 |
| Golgi apparatus (GO:0007Z6B0   | Membrane {ECO:0000269 Pu | 0 |
| Cytosol (GO:0005829);Q8N987    | Cytoplasm {ECO:0000250}. | 0 |
| Cytosol (GO:0005829);Q9H0M0    | Cytoplasm {ECO:0000250}. | 0 |
| Cytosol (GO:0005829);Q9Y305    | Mitochondrion {ECO:00002 | 0 |
| Cytosol (GO:0005829);Q13162    | Cytoplasm {ECO:0000269 P | 1 |
| Nuclear speckles (GO:000148    | Nucleus {ECO:0000269 Pub | 0 |
| Cytosol (GO:0005829);Q16512    | Cytoplasm {ECO:0000269 P | 0 |
| Nucleoplasm (GO:00056Q9BQ61    |                          | 0 |
| Cytosol (GO:0005829) P48960    | Cell membrane; Multi-pas | 0 |
| Centrosome (GO:000581Q9BRX9    | Cytoplasm {ECO:0000250}. | 0 |
| Cell Junctions (GO:00014908    | Cytoplasm. Membrane; Per | 0 |
| Vesicles (GO:0043231)Q5W111    |                          | 0 |
| Endoplasmic reticulumQ9BY08    | Endoplasmic reticulum me | 1 |
| Golgi apparatus (GO:00035670   | Golgi apparatus, trans-G | 0 |
| Actin filaments (GO:0005T200   | Nucleus speckle {ECO:000 | 0 |
| Mitochondria (GO:0005Q9BYT8    | Mitochondrion intermembr | 0 |
| Cytosol (GO:0005829) Q96CV9    | Cytoplasm, perinuclear r | 0 |
| Golgi apparatus (GO:0005794);V | Secreted {ECO:0000250}.  | 0 |
| Nucleoplasm (GO:00056P18846    | Nucleus.                 | 1 |
| Mitochondria (GO:0005P43897    | Mitochondrion.           | 1 |
| Cytosol (GO:0005829);P55160    | Cell membrane {ECO:00002 | 0 |

|                        |        |                          |   |
|------------------------|--------|--------------------------|---|
| Endoplasmic reticulum  | Q99542 | Secreted, extracellular  | 0 |
| Cytosol (GO:0005829);  | Q99471 | Isoform 1: Nucleus.; Iso | 0 |
| Cytosol (GO:0005829)   | Q86XZ4 | Cytoplasm {ECO:0000250}. | 1 |
| Endoplasmic reticulum  | Q53FV1 | Endoplasmic reticulum me | 1 |
| Cytosol (GO:0005829);  | P22736 | Nucleus {ECO:0000269 Pub | 0 |
| Centrosome (GO:000581P | 24941  | Cytoplasm, cytoskeleton, | 0 |
| Nucleoplasm (GO:00056Q | 07954  | Low-density lipoprotein  | 0 |
| Cytosol (GO:0005829);  | 043248 | Nucleus.                 | 1 |
| Actin filaments (GO:0Q | 16621  | Nucleus, PML body. Cytop | 0 |
| Nuclear bodies (GO:00Q | 9H2S9  | Nucleus {ECO:0000269 Pub | 1 |
| Cytosol (GO:0005829);  | Q53HV7 | Nucleus {ECO:0000269 Pub | 1 |
| Microtubules (GO:0015P | 68363  | Cytoplasm, cytoskeleton. | 1 |
| Centrosome (GO:000581Q | 96AZ1  | Cytoplasm {ECO:0000269 P | 0 |
| Cytosol (GO:0005829);  | Q9NVX7 |                          | 0 |
| Mitochondria (GO:0005Q | 9UL12  | Mitochondrion matrix {EC | 0 |
| Endoplasmic reticulum  | P09172 | Soluble dopamine beta-hy | 0 |
| Mitochondria (GO:0005Q | 5TC12  | Mitochondrion {ECO:00002 | 0 |
| Cytosol (GO:0005829);  | Q15468 | Cytoplasm, cytosol {ECO: | 0 |
| Mitochondria (GO:0005Q | 8NCD3  | Nucleus, nucleolus. Chro | 1 |
| Cell Junctions (GO:00Q | 14627  | Membrane; Single-pass ty | 0 |
| Endoplasmic reticulum  | Q03692 | Secreted, extracellular  | 0 |
| Nucleoplasm (GO:00056P | 17707  |                          | 0 |
| Mitochondria (GO:0005Q | 9P032  | Mitochondrion {ECO:00002 | 0 |
| Cytosol (GO:0005829);  | Q70EL2 |                          | 0 |
| Nucleoplasm (GO:00056Q | 15014  | Nucleus.                 | 1 |
| Cytosol (GO:0005829);  | Q7Z2Y5 |                          | 0 |
| Cytosol (GO:0005829);  | Q6PEV8 |                          | 0 |
| Nuclear speckles (GO:Q | 8N693  | Cytoplasm {ECO:0000269 P | 0 |
| Golgi apparatus (GO:0P | 43362  |                          | 0 |
| Cytosol (GO:0005829);  | P51151 | Cell membrane {ECO:00003 | 0 |
| Cytosol (GO:0005829)   | Q9H825 | Cytoplasm {ECO:0000250}. | 0 |
| Mitochondria (GO:0005Q | 7Z4L5  | Cytoplasm, cytoskeleton, | 0 |
| Cytosol (GO:0005829);  | Q13287 | Cytoplasm.               | 1 |
| Cytosol (GO:0005829);  | Q9UIF8 | Nucleus {ECO:0000255 PRO | 0 |
| Nucleoli (GO:0005730)  | Q06265 | Cytoplasm {ECO:0000269 P | 0 |
| Mitochondria (GO:0005Q | 96D53  | Mitochondrion membrane { | 0 |
| Nucleoplasm (GO:00056Q | 060825 |                          | 0 |
| Mitochondria (GO:0005P | 57729  | Cell membrane {ECO:00003 | 0 |
| Cell Junctions (GO:00Q | 9UKV8  | Cytoplasm, P-body {ECO:0 | 0 |
| Cytosol (GO:0005829)   | Q14582 | Nucleus {ECO:0000255 PRO | 0 |
| Cytosol (GO:0005829);  | P33552 |                          | 0 |
| Nuclear bodies (GO:00Q | 8N136  | Cell projection, cilium  | 0 |
| Lipid droplets (GO:00Q | 95573  | Mitochondrion outer memb | 0 |
| Centrosome (GO:000581Q | 8IZ52  | Isoform 1: Golgi apparat | 0 |
| Cytosol (GO:0005829)   | Q9ULA0 | Cytoplasm {ECO:0000269 P | 1 |
| Vesicles (GO:0043231)  | P05111 | Secreted.                | 0 |
| Centrosome (GO:000581Q | 075147 | Cytoplasm {ECO:0000269 P | 0 |
| Mitochondria (GO:0005Q | 9H5Z6  | Nucleus {ECO:0000269 Pub | 1 |
| Endosomes (GO:0005768Q | 9UP95  | Membrane; Multi-pass mem | 0 |
| Centrosome (GO:000581Q | 9H0I2  |                          | 0 |
| Cytosol (GO:0005829);  | Q8NI51 | Cytoplasm. Nucleus.      | 0 |
| Cytosol (GO:0005829);  | Q96KR6 | Mitochondrion {ECO:00002 | 0 |
| Plasma membrane (GO:0P | 19957  | Secreted.                | 0 |
| Centriolar satellite   | Q969T3 | Cytoplasmic vesicle memb | 0 |
| Golgi apparatus (GO:0P | 03973  | Secreted {ECO:0000269 Pu | 0 |

|                              |                          |   |
|------------------------------|--------------------------|---|
| Cytosol (GO:0005829);Q9BTX7  |                          | 0 |
| Cytosol (GO:0005829);Q8TCU6  | Cytoplasm, cytosol. Cell | 0 |
| Centrosome (GO:000581Q5TG30  |                          | 0 |
| Golgi apparatus (GO:0P31431  | Isoform 1: Membrane {ECO | 0 |
| Cytosol (GO:0005829);Q9Y6Q9  | Cytoplasm. Nucleus. Note | 1 |
| Actin filaments (GO:0Q9HCD5  | Nucleus.                 | 0 |
| Endoplasmic reticulum095292  | Endoplasmic reticulum me | 1 |
| Cytosol (GO:0005829) Q9BYG5  | Cytoplasm. Cell membrane | 0 |
| Nucleoplasm (GO:00056Q8TD26  | Nucleus, nucleoplasm {EC | 0 |
| Cytosol (GO:0005829) P19174  | Cell projection, lamelli | 0 |
| Nucleoplasm (GO:00056Q96NM4  | Nucleus {ECO:0000255 PRO | 1 |
| Nuclear speckles (GO:Q13247  | Nucleus {ECO:0000269 Pub | 0 |
| Endoplasmic reticulumQ96MZ0  |                          | 0 |
| Nucleoli (GO:0005730) Q9H1H1 |                          | 0 |
| Golgi apparatus (GO:0Q9Y6D5  | Cytoplasm. Membrane. Gol | 0 |
| Mitochondria (GO:0005Q9P2E3  |                          | 0 |
| Cytosol (GO:0005829);P55060  | Cytoplasm {ECO:0000269 P | 1 |
| Nucleoplasm (GO:0005654)     |                          | 0 |
| Centrosome (GO:000581Q9UL26  | Endosome membrane {ECO:0 | 0 |
| Endoplasmic reticulumQ16647  | Endoplasmic reticulum me | 0 |
| Cytosol (GO:0005829) 095793  | Cytoplasm {ECO:0000269 P | 0 |
| Microtubules (GO:0015Q8IXH8  | Cell membrane {ECO:00002 | 1 |
| Cytosol (GO:0005829);095863  | Nucleus {ECO:0000269 Pub | 1 |
| Vesicles (GO:0043231) 014662 | Golgi apparatus membrane | 0 |
| Vesicles (GO:0043231) Q969W9 | Early endosome membrane; | 0 |
| Cytosol (GO:0005829);Q9Y508  | Cytoplasm {ECO:0000269 P | 0 |
| Nucleoli (GO:0005730) Q96GQ7 | Nucleus, nucleolus {ECO: | 0 |
| Cytosol (GO:0005829);Q8TDM0  | Cytoplasm {ECO:0000305}. | 0 |
| Vesicles (GO:0043231) Q9BR09 | Cytoplasm {ECO:0000250}. | 0 |
| Cytosol (GO:0005829);P43363  | Nucleus {ECO:0000269 Pub | 1 |
| Cytosol (GO:0005829);Q9UBK8  | Isoform B: Cytoplasm.; I | 0 |
| Mitochondria (GO:0005Q14CZ7  | Mitochondrion {ECO:00002 | 1 |
| Nucleoplasm (GO:00056P12955  |                          | 0 |
| Vesicles (GO:0043231) Q5JU85 | Cytoplasm {ECO:0000305}. | 0 |
| Vesicles (GO:0043231) P51809 | Cytoplasmic vesicle, sec | 0 |
| Cytosol (GO:0005829);095630  | Nucleus. Membrane; Perip | 0 |
| Cytosol (GO:0005829);Q9UJ70  |                          | 0 |
| Nucleoli (GO:0005730) Q96PE7 | Mitochondrion {ECO:00003 | 0 |
| Cytosol (GO:0005829) Q9ULR5  |                          | 0 |
| Nucleoplasm (GO:00056Q8WVK2  | Nucleus {ECO:0000305}.   | 0 |
| Nucleoli (GO:0005730) 000566 | Nucleus, nucleolus {ECO: | 0 |
| Vesicles (GO:0043231) Q9Y2Q0 | Cytoplasmic vesicle, sec | 0 |
| Nuclear speckles (GO:Q9UPT9  | Nucleus {ECO:0000250 Uni | 0 |
| Golgi apparatus (GO:0Q8WVV4  | Cell junction, tight jun | 0 |
| Cytosol (GO:0005829);Q9Y2N7  | Nucleus {ECO:0000269 Pub | 0 |
| Golgi apparatus (GO:0Q9H609  | Nucleus {ECO:0000305}.   | 0 |
| Nucleoplasm (GO:00056Q02386  | Nucleus.                 | 1 |
| Endoplasmic reticulum095274  | Cell membrane; Lipid-anc | 0 |
| Nucleoli (GO:0005730) Q00604 | Secreted {ECO:0000269 Pu | 0 |
| Vesicles (GO:0043231) Q93008 | Cytoplasm {ECO:0000269 P | 0 |
| Cytosol (GO:0005829);Q96PN7  | Nucleus {ECO:0000255 PRO | 1 |
| Nucleoplasm (GO:00056Q9BY11  | Cytoplasm {ECO:0000250}. | 0 |
| Mitochondria (GO:0005Q8WVV5  | Membrane {ECO:0000305};  | 0 |
| Mitochondria (GO:0005Q9NXA8  | Mitochondrion matrix. Mi | 0 |
| Nucleoplasm (GO:00056Q96S55  | Nucleus {ECO:0000269 Pub | 0 |

|                              |                          |   |
|------------------------------|--------------------------|---|
| Nucleoli (GO:0005730) Q96EU6 | Nucleus, nucleolus {ECO: | 1 |
| Nucleoplasm (GO:00056P09234  | Nucleus {ECO:0000255 HAM | 1 |
| Golgi apparatus (GO:0Q14916  | Apical cell membrane {EC | 0 |
| Centrosome (GO:000581P35237  | Cytoplasm {ECO:0000269 P | 0 |
| Nucleoplasm (GO:00056Q9HAV4  | Nucleus {ECO:0000269 Pub | 0 |
| Nuclear bodies (GO:00Q13608  | Cytoplasm. Peroxisome me | 0 |
| Cytosol (GO:0005829); P16083 | Cytoplasm.               | 1 |
| Nucleoli (GO:0005730) Q9Y530 | Nucleus, nucleoplasm {EC | 0 |
| Centrosome (GO:000581Q8IV45  | Membrane {ECO:0000305};  | 0 |
| Mitochondria (GO:0005Q5JTZ9  | Mitochondrion {ECO:00002 | 1 |
| Cytosol (GO:0005829) P46783  | Cytoplasm {ECO:0000269 P | 0 |
| Cytosol (GO:0005829); Q9NZB8 |                          | 0 |
| Cytosol (GO:0005829); P06899 | Nucleus. Chromosome.     | 0 |
| Centrosome (GO:000581Q9H944  | Nucleus {ECO:0000305}.   | 0 |
| Cytosol (GO:0005829) Q15814  | Cytoplasm {ECO:0000269 P | 1 |
| Nucleoli (GO:0005730) 095238 | Nucleus {ECO:0000305}.   | 0 |
| Nuclear membrane (GO:Q15013  | Nucleus. Cytoplasm, cyto | 0 |
| Nucleoplasm (GO:00056Q9BQ90  | Cytoplasm. Note=Also fou | 0 |
| Cytosol (GO:0005829) Q14749  | Cytoplasm.               | 0 |
| Cytosol (GO:0005829); Q16626 |                          | 0 |
| Cytosol (GO:0005829) Q96P44  | Secreted, extracellular  | 0 |
| Nuclear bodies (GO:00P38936  | Cytoplasm. Nucleus.      | 0 |
| Mitochondria (GO:0005Q06945  | Nucleus {ECO:0000255 PRO | 1 |
| Cytosol (GO:0005829); Q04760 |                          | 0 |
| Cytosol (GO:0005829) Q9HCH3  | Perikaryon {ECO:0000250  | 0 |
| Cytosol (GO:0005829); Q96T54 | Membrane; Multi-pass mem | 1 |
| Nuclear speckles (GO:Q92766  | Nucleus speckle {ECO:000 | 1 |
| Endoplasmic reticulum P43307 | Endoplasmic reticulum me | 1 |
| Cytosol (GO:0005829); Q9BRS2 | Cytoplasm, cytosol {ECO: | 0 |
| Nucleoplasm (GO:00056Q75818  | Nucleus, nucleolus {ECO: | 0 |
| Cytosol (GO:0005829); P54253 | Cytoplasm {ECO:0000269 P | 0 |
| Nuclear membrane (GO:P49790  | Nucleus. Nucleus membran | 0 |
| Nucleoplasm (GO:00056P35659  | Nucleus {ECO:0000269 Pub | 1 |
| Cytosol (GO:0005829); 043324 | Cytoplasm {ECO:0000269 P | 1 |
| Nucleoplasm (GO:00056Q13950  | Nucleus {ECO:0000269 Pub | 1 |
| Cytosol (GO:0005829) Q32MZ4  | Nucleus. Cytoplasm.      | 0 |
| Vesicles (GO:0043231) 014944 | Epiregulin: Secreted, ex | 0 |
| Nucleoli (GO:0005730) Q9BSJ1 |                          | 0 |
| Cytosol (GO:0005829); Q9Y2G1 | Myelin regulatory factor | 0 |
| Vesicles (GO:0043231) 075556 | Secreted {ECO:0000305}.  | 0 |
| Cytosol (GO:0005829); Q09666 | Nucleus.                 | 0 |
| Cytosol (GO:0005829); Q9P0I2 | Membrane {ECO:0000269 Pu | 0 |
| Cytosol (GO:0005829); Q8TE82 |                          | 0 |
| Cytosol (GO:0005829) A5YKK6  | Cytoplasm, P-body {ECO:0 | 0 |
| Nucleoplasm (GO:00056Q8WV35  |                          | 0 |
| Cytosol (GO:0005829); Q9BSU1 |                          | 0 |
| Cytokinetic bridge (GQ8TEW6  |                          | 0 |
| Cytosol (GO:0005829) Q8NOX4  | Mitochondrion {ECO:00002 | 0 |
| Vesicles (GO:0043231) Q5T4D3 | Membrane {ECO:0000305};  | 0 |
| Golgi apparatus (GO:0015439  | Membrane; Multi-pass mem | 0 |
| Cytosol (GO:0005829); P52799 | Cell membrane {ECO:00002 | 0 |
| Nucleoplasm (GO:00056Q9Y651  | Nucleus {ECO:0000255 PRO | 0 |
| Cytosol (GO:0005829); Q8N3J3 |                          | 0 |
| Cytosol (GO:0005829); P10914 | Nucleus. Cytoplasm. Note | 1 |
| Cytosol (GO:0005829); Q9BZI7 | Nucleus. Cytoplasm. Note | 0 |

|                             |                          |   |
|-----------------------------|--------------------------|---|
| Nucleoplasm (GO:00056015541 | Nucleus {ECO:0000269 Pub | 0 |
| Cytosol (GO:0005829) Q14141 | Cytoplasm {ECO:0000269 P | 0 |
| Nuclear bodies (GO:00Q5JRV8 | Membrane {ECO:0000305};  | 0 |
| Cytosol (GO:0005829);015239 | Mitochondrion inner memb | 1 |
| Mitochondria (GO:0005Q99766 | Mitochondrion {ECO:00002 | 0 |
| Cytosol (GO:0005829);P78312 |                          | 0 |
| Vesicles (GO:0043231)P32298 | Cytoplasm. Cytoplasm, ce | 0 |
| Nucleoplasm (GO:00056P48436 | Nucleus {ECO:0000255 PRO | 1 |
| Vesicles (GO:0043231)Q9Y662 | Golgi apparatus membrane | 0 |
| Mitochondria (GO:0005Q3KQZ1 | Mitochondrion inner memb | 0 |
| Mitochondria (GO:0005Q9Y2R9 | Mitochondrion {ECO:00002 | 0 |
| Golgi apparatus (GO:0Q9NZ52 | Golgi apparatus, trans-G | 0 |
| Cytosol (GO:0005829) Q9H6L4 |                          | 0 |
| Cytosol (GO:0005829);Q9BW27 | Nucleus, nuclear pore co | 0 |
| Cytosol (GO:0005829);A9UHW6 | Cytoplasm {ECO:0000269 P | 0 |
| Cytosol (GO:0005829) Q8TCD5 | Cytoplasm.               | 1 |
| Nucleoli (GO:0005730)Q15361 | Nucleus. Nucleus, nucleo | 1 |
| Mitochondria (GO:0005Q9UKN8 | Nucleus.                 | 1 |
| Golgi apparatus (GO:0Q9H8H2 | Nucleus, nucleolus {ECO: | 1 |
| Cytosol (GO:0005829) Q96N66 | Endoplasmic reticulum me | 0 |
| Actin filaments (GO:0Q9H3Y6 | Cytoplasm {ECO:0000269 P | 0 |
| Nuclear speckles (GO:Q9NR83 | Cytoplasm. Nucleus. Note | 0 |
| Aggresome (GO:0016235Q9BVV2 |                          | 0 |
| Microtubules (GO:0015Q9H3Y8 |                          | 0 |
| Nucleoplasm (GO:00056Q9NZH6 | Cytoplasm, cytosol {ECO: | 0 |
| Mitochondria (GO:0005Q9BSY4 | Mitochondrion intermembr | 1 |
| Nucleoplasm (GO:00056Q06710 | Nucleus.                 | 1 |
| Cytosol (GO:0005829);Q9H9Y6 | Nucleus, nucleolus {ECO: | 1 |
| Plasma membrane (GO:0Q567U6 | Early endosome {ECO:0000 | 0 |
| Mitochondria (GO:0005Q9BV35 | Mitochondrion inner memb | 1 |
| Cell Junctions (GO:00P35269 | Nucleus.                 | 1 |
| Mitochondria (GO:0005Q9BT30 | Mitochondrion matrix {EC | 1 |
| Mitochondria (GO:0005Q16740 | Mitochondrion matrix {EC | 1 |
| Golgi apparatus (GO:0P41273 | Membrane; Single-pass ty | 0 |
| Nucleoplasm (GO:00056Q8NI27 | Nucleus {ECO:0000305}. N | 0 |
| Nucleoplasm (GO:00056Q15648 | Nucleus {ECO:0000269 Pub | 1 |
| Cytosol (GO:0005829) P62829 |                          | 0 |
| Cytosol (GO:0005829);Q96DT6 | Cytoplasm {ECO:0000250}. | 0 |
| Nucleoplasm (GO:00056P32970 | Membrane; Single-pass ty | 0 |
| Cytokinetic bridge (GQ9BRG2 |                          | 0 |
| Nucleoplasm (GO:00056Q15642 | Cytoplasm, cytoskeleton. | 0 |
| Golgi apparatus (GO:0Q9NPR9 | Membrane {ECO:0000305};  | 0 |
| Nucleoplasm (GO:00056P53539 | Nucleus.                 | 1 |
| Cytosol (GO:0005829);Q9H6K4 | Mitochondrion {ECO:00003 | 0 |
| Cytosol (GO:0005829) P62316 | Cytoplasm, cytosol {ECO: | 0 |
| Nuclear speckles (GO:075298 | Endoplasmic reticulum me | 0 |
| Vesicles (GO:0043231)095834 | Cytoplasm, cytoskeleton  | 0 |
| Cell Junctions (GO:00P50552 | Cytoplasm. Cytoplasm, cy | 0 |
| Cytosol (GO:0005829);Q92797 | Cytoplasm, cytoskeleton. | 0 |
| Nucleoplasm (GO:00056Q9NPB8 | Cytoplasm, cytosol {ECO: | 0 |
| Cytosol (GO:0005829);Q9H190 | Cytoplasm {ECO:0000269 P | 0 |
| Cytosol (GO:0005829) Q9BZ23 | Isoform 1: Mitochondrion | 0 |
| Cell Junctions (GO:00Q9Y261 | Nucleus {ECO:0000255 PRO | 0 |
| Plasma membrane (GO:0Q9NPY3 | Membrane; Single-pass ty | 0 |
| Nucleoli (GO:0005730)Q9H116 | Cytoplasm {ECO:0000269 P | 0 |



|                              |                          |   |
|------------------------------|--------------------------|---|
| Cytosol (GO:0005829) Q9H115  | Membrane {ECO:0000250};  | 0 |
| Nuclear bodies (GO:00Q9H2Z4  | Nucleus {ECO:0000255 PRO | 0 |
| Nuclear bodies (GO:00P07199  | Nucleus {ECO:0000255 PRO | 1 |
| Cytosol (GO:0005829) Q92530  | Cytoplasm {ECO:0000269 P | 0 |
| Cytosol (GO:0005829); Q8TEA8 | Nucleus {ECO:0000269 Pub | 0 |
| Nuclear membrane (GO:Q9H1E5  | Membrane {ECO:0000305};  | 0 |
| Nuclear bodies (GO:00Q8TDR2  | Nucleus. Nucleus, nucleo | 0 |
| Nucleoplasm (GO:00056P14678  | Cytoplasm, cytosol {ECO: | 0 |
| Cytosol (GO:0005829); Q9GZP1 | Membrane {ECO:0000305};  | 0 |
| Cytosol (GO:0005829); Q9NUS5 | Cytoplasm, cytosol {ECO: | 0 |
| Endoplasmic reticulum Q9P2E9 | Endoplasmic reticulum me | 1 |
| Vesicles (GO:0043231) P12643 | Secreted.                | 0 |
| Nucleoplasm (GO:00056P52736  | Nucleus {ECO:0000305}.   | 0 |
| Cell Junctions (GO:00Q9NZU0  | Cell membrane {ECO:00002 | 0 |
| Cytosol (GO:0005829); Q9BRP0 | Nucleus {ECO:0000250 Uni | 0 |
| Vesicles (GO:0043231) P16519 | Cytoplasmic vesicle, sec | 0 |
| Centrosome (GO:000581Q9NPJ1  | Cytoplasm, cytoskeleton, | 0 |
| Cytosol (GO:0005829); Q12934 | Cell membrane {ECO:00002 | 0 |
| Centriolar satellite Q9UJQ1  | Cell membrane {ECO:00002 | 0 |
| Cytoplasmic bodies (GP08579  | Nucleus {ECO:0000269 Pub | 0 |
| Mitochondria (GO:0005Q9BQP7  | Mitochondrion {ECO:00002 | 1 |
| Cytosol (GO:0005829); Q9BY32 | Cytoplasm {ECO:0000255 H | 1 |
| Nuclear speckles (GO:Q12870  | Nucleus {ECO:0000255 PRO | 0 |
| Nucleoplasm (GO:00056Q9UJA3  | Nucleus {ECO:0000269 Pub | 1 |
| Golgi apparatus (GO:0Q9NUR3  | Membrane {ECO:0000305};  | 0 |
| Cytosol (GO:0005829); Q9BQ89 | Cytoplasm {ECO:0000269 P | 0 |
| Mitochondria (GO:0005Q9BYN8  | Mitochondrion {ECO:00002 | 0 |
| Mitochondria (GO:0005095977  | Cell membrane; Multi-pas | 0 |
| Lipid droplets (GO:00Q969V3  | Endoplasmic reticulum me | 0 |
| Cytosol (GO:0005829); Q99966 | Nucleus {ECO:0000269 Pub | 1 |
| Nucleoplasm (GO:00056043390  | Nucleus {ECO:0000250 Uni | 0 |
| Cytosol (GO:0005829); Q9C0F3 | Nucleus {ECO:0000269 Pub | 1 |
| Golgi apparatus (GO:0P61244  | Nucleus. Cell projection | 0 |
| Cytosol (GO:0005829); Q6P1M9 |                          | 0 |
| Nucleoli (GO:0005730) Q9Y5R2 | Matrix metalloproteinase | 0 |
| Golgi apparatus (GO:0Q96P71  | Golgi apparatus {ECO:000 | 1 |
| Nucleoplasm (GO:00056P41134  | Cytoplasm {ECO:0000250}. | 0 |
| Nucleoplasm (GO:00056Q9UKM9  | Nucleus {ECO:0000250 Uni | 0 |
| Endoplasmic reticulum P20042 |                          | 0 |
| Nucleoplasm (GO:00056Q9Y282  | Endoplasmic reticulum-Go | 0 |
| Centrosome (GO:000581Q9BV73  | Cytoplasm, perinuclear r | 0 |
| Cytosol (GO:0005829); Q9UPG8 | Nucleus {ECO:0000305}.   | 0 |
| Plasma membrane (GO:0P30550  | Cell membrane {ECO:00002 | 1 |
| Cytosol (GO:0005829); P41229 | Nucleus {ECO:0000255 PRO | 1 |
| Cell Junctions (GO:00Q4VCS5  | Cell junction, tight jun | 1 |
| Golgi apparatus (GO:0Q12893  | Golgi apparatus, Golgi s | 1 |
| Nucleoplasm (GO:00056P49721  | Cytoplasm {ECO:0000269 P | 0 |
| Cytoplasmic bodies (GQ9H9G7  | Cytoplasm, P-body {ECO:0 | 1 |
| Cytosol (GO:0005829); P06132 | Cytoplasm.               | 0 |
| Focal adhesion sites Q6P2H8  | Membrane {ECO:0000305};  | 0 |
| Cytosol (GO:0005829); Q07866 | Cell projection, growth  | 0 |
| Nucleoplasm (GO:00056043542  | Nucleus. Cytoplasm. Cyto | 0 |
| Nucleoli (GO:0005730) Q5JVF3 | Cytoplasm {ECO:0000269 P | 0 |
| Focal adhesion sites Q9H665  | Cell membrane {ECO:00002 | 0 |
| Cytosol (GO:0005829); P04632 | Cytoplasm {ECO:0000250}. | 0 |

|                              |                          |   |
|------------------------------|--------------------------|---|
| Mitochondria (GO:0005Q9BRP1  |                          | 0 |
| Cytosol (GO:0005829);Q9BTD8  | Nucleus {ECO:0000250}. C | 0 |
| Centriolar satellite Q6UWL6  | Cell membrane {ECO:00002 | 0 |
| Nucleoplasm (GO:00056Q9UBT2  | Cytoplasm. Nucleus. Note | 0 |
| Centriolar satellite Q9UBK5  | Membrane {ECO:0000269 Pu | 1 |
| Mitochondria (GO:0005P14854  | Mitochondrion intermembr | 1 |
| Cytosol (GO:0005829) P10827  | Nucleus.; Isoform Alpha- | 0 |
| Mitochondria (GO:0005P32248  | Cell membrane; Multi-pas | 0 |
| Nuclear bodies (GO:00P20393  | Nucleus {ECO:0000250 Uni | 0 |
| Cytosol (GO:0005829);Q9BZ67  | Cytoplasm, cytosol {ECO: | 0 |
| Mitochondria (GO:0005P30044  | Isoform Mitochondrial: M | 0 |
| Plasma membrane (GO:0Q9HB09  |                          | 0 |
| Cytosol (GO:0005829) Q14653  | Cytoplasm {ECO:0000269 P | 0 |
| Nucleoplasm (GO:00056Q99873  | Nucleus {ECO:0000269 Pub | 0 |
| Vesicles (GO:0043231) P10301 | Cell membrane {ECO:00002 | 0 |
| Cytosol (GO:0005829);014669  | Membrane; Single-pass ty | 0 |
| Cytosol (GO:0005829);Q9H7N4  | Nucleus {ECO:0000305}.   | 0 |
| Cytosol (GO:0005829) Q9ULL5  | Nucleus {ECO:0000250 Uni | 0 |
| Cytosol (GO:0005829) P04424  |                          | 0 |
| Cytosol (GO:0005829);Q9Y3A5  | Cytoplasm. Nucleus, nucl | 0 |
| Cytosol (GO:0005829);P42229  | Cytoplasm {ECO:0000269 P | 1 |
| Mitochondria (GO:0005Q12931  | Mitochondrion {ECO:00002 | 1 |
| Cytosol (GO:0005829);Q9BZE0  | Nucleus speckle {ECO:000 | 0 |
| Nucleoplasm (GO:00056Q9H0G5  | Nucleus {ECO:0000269 Pub | 0 |
| Nucleoplasm (GO:00056075937  | Nucleus {ECO:0000269 Pub | 1 |
| Nucleoplasm (GO:00056Q5TGY3  |                          | 0 |
| Mitochondria (GO:0005P09912  | Mitochondrion inner memb | 0 |
| Nucleoplasm (GO:00056Q96NX9  | Nucleus {ECO:0000305}.   | 0 |
| Nucleoplasm (GO:00056Q8TF68  | Nucleus {ECO:0000250}.   | 0 |
| Nucleoli (GO:0005730) Q92979 | Nucleus, nucleolus {ECO: | 1 |
| Nucleoli (GO:0005730) Q16384 |                          | 0 |
| Centriolar satellite Q9UBK9  | Isoform 1: Cytoplasm {EC | 0 |
| Nucleoplasm (GO:00056P19419  | Nucleus.                 | 1 |
| Microtubules (GO:0015060830  | Mitochondrion inner memb | 0 |
| Cytosol (GO:0005829) Q63HM2  | Membrane {ECO:0000305};  | 0 |
| Endoplasmic reticulum Q86UP2 | Endoplasmic reticulum me | 1 |
| Nucleoli (GO:0005730) Q15475 | Nucleus {ECO:0000269 Pub | 0 |
| Nucleoli (GO:0005730) Q9H4E5 | Cell membrane {ECO:00002 | 0 |
| Centriolar satellite Q15398  | Nucleus. Cytoplasm. Cyto | 0 |
| Vesicles (GO:0043231) Q96EM0 |                          | 0 |
| Nucleoplasm (GO:00056P54652  | Cytoplasm, cytoskeleton, | 0 |
| Nuclear membrane (GO:Q9Y2K1  | Nucleus {ECO:0000269 Pub | 0 |
| Nucleoli (GO:0005730) Q32P41 | Mitochondrion matrix {EC | 0 |
| Nucleoplasm (GO:00056Q9BX95  | Endoplasmic reticulum me | 0 |
| Centrosome (GO:000581A1L390  |                          | 0 |
| Nuclear speckles (GO:Q9NQW5  | Nucleus {ECO:0000305}. C | 0 |
| Nuclear bodies (GO:00P22794  | Membrane; Single-pass ty | 0 |
| Centriolar satellite Q8WVS4  | Cell projection, cilium  | 0 |
| Nucleoplasm (GO:00056Q5JUQ0  |                          | 0 |
| Focal adhesion sites P35658  | Nucleus, nuclear pore co | 0 |
| Nuclear bodies (GO:00075638  |                          | 0 |
| Intermediate filament P09131 | Membrane {ECO:0000305};  | 0 |
| Cytosol (GO:0005829) P36507  | Cytoplasm {ECO:0000269 P | 0 |
| Nucleoplasm (GO:00056P55795  | Nucleus, nucleoplasm.    | 1 |
| Cytosol (GO:0005829);Q9P291  | Mitochondrion {ECO:00002 | 0 |

|                                |                          |   |
|--------------------------------|--------------------------|---|
| Cytosol (GO:0005829);Q53FP2    | Peroxisome membrane {ECO | 0 |
| Mitochondria (GO:0005060)220   | Mitochondrion inner memb | 1 |
| Microtubules (GO:001509)NQZ6   | Cytoplasm {ECO:0000269 P | 0 |
| Endoplasmic reticulumP27824    | Endoplasmic reticulum me | 1 |
| Cytosol (GO:0005829);Q5TA45    | Nucleus {ECO:0000269 Pub | 1 |
| Cytosol (GO:0005829) Q9H8X2    | Cytoplasm {ECO:0000250}. | 0 |
| Cytosol (GO:0005829);Q5JVG2    | Nucleus {ECO:0000305}.   | 0 |
| Endoplasmic reticulumQ99983    | Secreted, extracellular  | 0 |
| Cytosol (GO:0005829);Q5JSP0    | Cytoplasm {ECO:0000305}. | 0 |
| Nucleoplasm (GO:00056)Q5T1R4   | Cytoplasm {ECO:0000250}. | 0 |
| Mitochondria (GO:0005)Q9HAB8   |                          | 0 |
| Cytosol (GO:0005829) P20800    | Secreted.                | 0 |
| Nucleoli fibrillar ceQ9C0K0    | Nucleus {ECO:0000305}.   | 0 |
| Cytosol (GO:0005829) Q12933    | Cytoplasm {ECO:0000269 P | 1 |
| Nuclear bodies (GO:00)Q96I13   |                          | 0 |
| Cytosol (GO:0005829);P48740    | Secreted {ECO:0000269 Pu | 0 |
| Nucleoplasm (GO:00056)Q4VNC1   | Membrane {ECO:0000305};  | 0 |
| Cytosol (GO:0005829);Focal adh | Isoform 1: Cytoplasm {EC | 0 |
| Nucleoplasm (GO:00056)P19075   | Membrane; Multi-pass mem | 0 |
| Intermediate filamentQ96QF0    | Cytoplasm. Nucleus. Cyto | 0 |
| Cell Junctions (GO:00)P23467   | Membrane {ECO:0000305};  | 0 |
| Cytosol (GO:0005829);Q92630    | Cytoplasm. Nucleus. Note | 1 |
| Nuclear membrane (GO:09)5619   | Nucleus {ECO:0000255 PRO | 0 |
| Cytoplasmic bodies (G)Q9NYW4   | Membrane; Multi-pass mem | 0 |
| Nucleoplasm (GO:00056)Q9BV99   |                          | 0 |
| Vesicles (GO:0043231)P35475    | Lysosome.                | 0 |
| Vesicles (GO:0043231)Q8N441    | Membrane {ECO:0000269 Pu | 0 |
| Nuclear membrane (GO:Q9)BSA9   | Endosome membrane {ECO:0 | 0 |
| Centrosome (GO:000581)Q9H7T9   | Nucleus {ECO:0000269 Pub | 0 |
| Cytosol (GO:0005829);Q13526    | Nucleus {ECO:0000269 Pub | 0 |
| Mitochondria (GO:0005)Q9NXX8   |                          | 0 |
| Centrosome (GO:000581)Q5T4S7   | Membrane {ECO:0000305};  | 0 |
| Nuclear speckles (GO:Q5)SSJ5   | Nucleus {ECO:0000269 Pub | 0 |
| Cytosol (GO:0005829);Q9UHX3    | Cell membrane {ECO:00002 | 0 |
| Nucleoplasm (GO:00056)075182   | Nucleus {ECO:0000255 PRO | 0 |
| Golgi apparatus (GO:0)Q96K37   | Membrane {ECO:0000305};  | 0 |
| Vesicles (GO:0043231)Q9UBC2    | Cell membrane {ECO:00002 | 0 |
| Nucleoplasm (GO:00056)Q9Y5W3   | Nucleus {ECO:0000250}.   | 0 |
| Cytosol (GO:0005829);Q96RI0    | Cell membrane; Multi-pas | 1 |
| Cytosol (GO:0005829);P55789    | Isoform 1: Mitochondrion | 0 |
| Plasma membrane (GO:00)43761   | Cytoplasmic vesicle, sec | 0 |
| Golgi apparatus (GO:0)Q99640   | Endoplasmic reticulum me | 0 |
| Cytosol (GO:0005829);Q96S15    | Lysosome membrane {ECO:0 | 0 |
| Nucleoplasm (GO:00056)Q8WVB6   | Nucleus {ECO:0000269 Pub | 1 |
| Actin filaments (GO:0)Q9UPN3   | Isoform 2: Cytoplasm, cy | 0 |
| Nucleoplasm (GO:00056)P51532   | Nucleus {ECO:0000255 PRO | 1 |
| Cytosol (GO:0005829);094953    | Nucleus {ECO:0000255 PRO | 1 |
| Nucleoli (GO:0005730)Q8IUC6    | Cytoplasmic vesicle, aut | 0 |
| Cytosol (GO:0005829);Q8N6Q8    |                          | 0 |
| Centrosome (GO:000581)Q9BV81   | Membrane {ECO:0000269 Pu | 0 |
| Cytosol (GO:0005829);Q86W50    | Nucleus {ECO:0000269 Pub | 1 |
| Microtubules (GO:0015)P68366   | Cytoplasm, cytoskeleton. | 1 |
| Plasma membrane (GO:0)P09327   | Cytoplasm, cytoskeleton. | 0 |
| Cytosol (GO:0005829);Q13685    | Cell membrane. Cytoplasm | 0 |
| Mitochondria (GO:0005)Q8N490   | Isoform 1: Membrane; Per | 0 |

|                                     |                          |   |
|-------------------------------------|--------------------------|---|
| Mitochondria (GO:0005Q9NS68         | Membrane {ECO:0000305};  | 0 |
| Nuclear membrane (GO:Q9Y252         | Nucleus {ECO:0000269 Pub | 0 |
| Mitochondria (GO:0005P30084         | Mitochondrion matrix.    | 1 |
| Microtubules (GO:0015Q9Y2P0         | Nucleus {ECO:0000305}.   | 0 |
| Centrosome (GO:000581Q99996         | Golgi apparatus {ECO:000 | 0 |
| Cytosol (GO:0005829) P60896         |                          | 0 |
| Vesicles (GO:0043231) 000291        | Cytoplasm. Nucleus. Endo | 0 |
| Cytosol (GO:0005829); Q05209        | Cytoplasm {ECO:0000250 U | 0 |
| Cytosol (GO:0005829); P16435        | Endoplasmic reticulum me | 0 |
| Nuclear speckles (GO:Q9Y6J8         | Mitochondrion matrix {EC | 0 |
| Nucleoplasm (GO:00056Q687X5         | Cell membrane {ECO:00002 | 0 |
| Centrosome (GO:000581P63096         | Nucleus {ECO:0000250 Uni | 0 |
| Peroxisomes (GO:00057043933         | Cytoplasm. Peroxisome me | 0 |
| Mitochondria (GO:0005Q99551         | Mitochondrion.           | 1 |
| Golgi apparatus (GO:0043556         | Cell membrane, sarcolemm | 0 |
| Nucleoplasm (GO:00056Q5RL73         |                          | 0 |
| Nucleoplasm (GO:00056Q96PB1         | Golgi apparatus membrane | 0 |
| Centrosome (GO:000581Q9Y6R6         | Nucleus {ECO:0000305}.   | 0 |
| Intermediate filaments (GO:0045111) |                          | 0 |
| Cytosol (GO:0005829); Q9H8P0        | Endoplasmic reticulum me | 0 |
| Nuclear bodies (GO:00Q9BPW5         |                          | 0 |
| Cytosol (GO:0005829) P22234         |                          | 0 |
| Plasma membrane (GO:0P35968         | Cell junction {ECO:00002 | 0 |
| Midbody ring (GO:0090Q06203         |                          | 0 |
| Vesicles (GO:0043231) Q99999        | Golgi apparatus membrane | 0 |
| Cytosol (GO:0005829); Q04917        |                          | 0 |
| Nuclear speckles (GO:075677         | Cytoplasm {ECO:0000269 P | 0 |
| Nuclear speckles (GO:075678         |                          | 0 |
| Vesicles (GO:0043231) P19086        | Membrane; Lipid-anchor.  | 0 |
| Centriolar satellite P18848         | Cytoplasm {ECO:0000250 U | 0 |
| Mitochondria (GO:0005Q9NPC4         | Golgi apparatus membrane | 0 |
| Nuclear speckles (GO:075679         | Cytoplasm {ECO:0000269 P | 0 |
| Actin filaments (GO:0Q00587         | Endomembrane system {ECO | 0 |
| Cytosol (GO:0005829); P25325        | Cytoplasm {ECO:0000250 U | 0 |
| Mitochondria (GO:0005Q16762         | Mitochondrion matrix.    | 1 |
| Endoplasmic reticulum P15814        | Secreted {ECO:0000269 Pu | 0 |
| Cytosol (GO:0005829); Q9BQE5        | Cytoplasm {ECO:0000305}. | 0 |
| Cytosol (GO:0005829) P15018         | Secreted.                | 0 |
| Nucleoplasm (GO:00056Q9BZE7         |                          | 0 |
| Nucleoplasm (GO:00056P31941         | Nucleus. Cytoplasm.      | 0 |
| Cytosol (GO:0005829); Q8IUX4        | Cytoplasm. Cytoplasm, P- | 0 |
| Intermediate filament Q04695        | Cytoplasm {ECO:0000250 U | 0 |
| Focal adhesion sites Q5J8M3         | Membrane {ECO:0000269 Pu | 0 |
| Nuclear speckles (GO:Q9ULX5         | Membrane {ECO:0000250 Un | 0 |
| Cytosol (GO:0005829); Q5M775        | Nucleus {ECO:0000269 Pub | 0 |
| Centrosome (GO:000581Q9UI42         | Secreted {ECO:0000250}.  | 0 |
| Cytosol (GO:0005829); Q8N1I0        | Cell membrane {ECO:00002 | 0 |
| Nucleoplasm (GO:00056Q9NUX5         | Nucleus {ECO:0000269 Pub | 1 |
| Nucleoplasm (GO:00056095777         | Nucleus {ECO:0000269 Pub | 0 |
| Nucleoli fibrillar ce Q6ZTQ4        | Cell membrane {ECO:00002 | 0 |
| Actin filaments (GO:0Q9H875         | Nucleus {ECO:0000269 Pub | 0 |
| Golgi apparatus (GO:0015240         | Neurosecretory protein V | 0 |
| Centriolar satellite 000592         | Apical cell membrane. Ce | 0 |
| Nucleoplasm (GO:00056015409         | Nucleus {ECO:0000305}.   | 1 |
| Cytosol (GO:0005829) Q9ULQ0         | Cytoplasm {ECO:0000269 P | 0 |

|                             |                          |   |
|-----------------------------|--------------------------|---|
| Cytosol (GO:0005829);Q9H7X7 | Cell projection, cilium  | 0 |
| Cytosol (GO:0005829);Q9UL63 | Cytoplasm {ECO:0000269 P | 0 |
| Cytosol (GO:0005829);Q9UBS3 | Endoplasmic reticulum lu | 0 |
| Cytosol (GO:0005829);Q14315 | Cytoplasm {ECO:0000269 P | 0 |
| Golgi apparatus (GO:009HBW1 | Membrane; Single-pass ty | 0 |
| Endoplasmic reticulum043852 | Endoplasmic reticulum me | 0 |
| Nucleoli (GO:0005730)Q96JN2 | Cytoplasmic vesicle, sec | 0 |
| Cytokinetic bridge (GQ8N6Y2 | Secreted, extracellular  | 0 |
| Nucleoplasm (GO:00056Q6PID8 | Nucleus {ECO:0000269 Pub | 0 |
| Cytosol (GO:0005829);A0PJY2 | Nucleus {ECO:0000269 Pub | 1 |
| Cytokinetic bridge (GP03999 | Membrane {ECO:0000269 Pu | 0 |
| Plasma membrane (GO:0043795 |                          | 0 |
| Nucleoplasm (GO:00056Q9GZZ0 | Nucleus.                 | 1 |
| Nuclear bodies (GO:00P31249 | Nucleus.                 | 1 |
| Mitochondria (GO:0005075431 | Mitochondrion outer memb | 1 |
| Cytosol (GO:0005829) P15882 |                          | 0 |
| Vesicles (GO:0043231)Q99259 |                          | 0 |
| Mitochondria (GO:0005Q9H4B0 | Mitochondrion {ECO:00002 | 1 |
| Endoplasmic reticulumQ9POS3 | Endoplasmic reticulum me | 1 |
| Nucleoplasm (GO:00056014929 | Isoform A: Nucleus matri | 0 |
| Nucleoli (GO:0005730)P28356 | Nucleus.                 | 0 |
| Cytoplasmic bodies (GP28358 | Nucleus.                 | 0 |
| Nucleoplasm (GO:00056P31277 | Nucleus.                 | 1 |
| Nucleoplasm (GO:00056P35453 | Nucleus {ECO:0000305 Pub | 0 |
| Cytosol (GO:0005829);095714 | Cytoplasm. Cytoplasm, cy | 0 |
| Nucleoplasm (GO:00056P63162 | Nucleus.                 | 0 |
| Nuclear bodies (GO:00Q969U7 | Nucleus {ECO:0000250 Uni | 0 |
| Centrosome (GO:000581Q9GZX9 | Secreted {ECO:0000250}.  | 0 |
| Cytosol (GO:0005829);Q7Z5H3 | Cytoplasm {ECO:0000250}. | 0 |
| Cytosol (GO:0005829);Q6ZS81 | Membrane {ECO:0000305};  | 0 |
| Cytosol (GO:0005829) Q9P2K8 | Cytoplasm {ECO:0000250 U | 0 |
| Cytosol (GO:0005829);Q9NQX4 |                          | 0 |
| Cell Junctions (GO:00Q0VF96 | Cell junction, tight jun | 1 |
| Nucleoli fibrillar ceQ9NZR1 | Cytoplasm, cytoskeleton  | 0 |
| Intermediate filamentQ6IQ55 | Cell projection, cilium  | 0 |
| Nucleoli (GO:0005730)Q9HB65 | Nucleus {ECO:0000269 Pub | 0 |
| Nuclear speckles (GO:Q9BV29 |                          | 0 |
| Nuclear bodies (GO:00Q9ULG1 | Cytoplasm {ECO:0000269 P | 0 |
| Nuclear bodies (GO:00Q659A1 | Nucleus {ECO:0000269 Pub | 1 |
| Nucleoplasm (GO:00056Q8NBR6 |                          | 0 |
| Mitochondria (GO:0005P26440 | Mitochondrion matrix.    | 1 |
| Centriolar satellite Q9Y448 | Nucleus {ECO:0000269 Pub | 0 |
| Nucleoplasm (GO:00056P33316 | Isoform 2: Nucleus {ECO: | 0 |
| Mitochondria (GO:0005Q9BUX1 | Cytoplasm, cytosol {ECO: | 0 |
| Endoplasmic reticulumQ9NWW5 | Endoplasmic reticulum me | 1 |
| Microtubules (GO:0015Q709C8 | Mitochondrion outer memb | 0 |
| Cytosol (GO:0005829);Q96GE6 |                          | 0 |
| Golgi apparatus (GO:0014498 | Secreted {ECO:0000305}.  | 0 |
| Cytosol (GO:0005829);Q9P2Z0 |                          | 0 |
| Endoplasmic reticulumQ08397 | Secreted, extracellular  | 0 |
| Mitochondria (GO:0005Q9NPB9 | Early endosome {ECO:0000 | 0 |
| Cytosol (GO:0005829);Q9BS18 | Nucleus {ECO:0000305}.   | 0 |
| Nuclear speckles (GO:095243 | Nucleus.                 | 0 |
| Cytosol (GO:0005829);P53618 | Cytoplasm. Golgi apparat | 0 |
| Nucleoplasm (GO:00056P25786 | Cytoplasm {ECO:0000269 P | 0 |

|                             |                          |   |
|-----------------------------|--------------------------|---|
| Plasma membrane (GO:0Q8NBJ7 | Endoplasmic reticulum lu | 0 |
| Actin filaments (GO:0Q8WX93 | Cytoplasm, cytoskeleton  | 0 |
| Actin filaments (GO:0075936 | Cytoplasm.               | 0 |
| Nucleoplasm (GO:00056P15172 | Nucleus.                 | 1 |
| Cytosol (GO:0005829);Q9UGK8 | Cytoplasm {ECO:0000269 P | 1 |
| Cytosol (GO:0005829);P48547 | Cell membrane {ECO:00002 | 0 |
| Cytosol (GO:0005829) P17752 |                          | 0 |
| Cytosol (GO:0005829);A0AVK6 | Nucleus {ECO:0000269 Pub | 0 |
| Cytosol (GO:0005829);P32321 |                          | 0 |
| Golgi apparatus (GO:0060248 | Nucleus {ECO:0000255 PRO | 1 |
| Nucleoplasm (GO:00056Q9BSJ6 | Nucleus {ECO:0000269 Pub | 0 |
| Nucleoli fibrillar ceQ86UA6 | Isoform 1: Cytoplasm. Nu | 0 |
| Vesicles (GO:0043231)P35125 | Cell membrane. Cytoplasm | 0 |
| Cytosol (GO:0005829);Q9NZN9 | Cytoplasm {ECO:0000269 P | 0 |
| Golgi apparatus (GO:0P34810 | Isoform Short: Cell memb | 0 |
| Cytosol (GO:0005829) P51116 | Cytoplasm.               | 1 |
| Endoplasmic reticulum075352 | Membrane {ECO:0000305};  | 0 |
| Nucleoplasm (GO:00056A8MW92 |                          | 0 |
| Nucleoplasm (GO:00056060563 | Nucleus {ECO:0000269 Pub | 1 |
| Nuclear speckles (GO:Q9H0K6 |                          | 0 |
| Nucleoli (GO:0005730)Q8N9T8 |                          | 0 |
| Mitochondria (GO:0005Q12906 | Nucleus, nucleolus {ECO: | 0 |
| Cell Junctions (GO:00Q8IWA5 | Membrane {ECO:0000250};  | 0 |
| Vesicles (GO:0043231)Q9Y6Q5 | Golgi apparatus. Cytopla | 0 |
| Cytosol (GO:0005829);P55273 | Nucleus {ECO:0000269 Pub | 1 |
| Microtubules (GO:0015Q9ULD2 | Mitochondrion {ECO:00002 | 0 |
| Vesicles (GO:0043231)060259 | Secreted {ECO:0000269 Pu | 0 |
| Mitochondria (GO:0005Q8NEJ9 | Nucleus {ECO:0000250}. N | 0 |
| Nucleoplasm (GO:00056Q92843 | Mitochondrion membrane { | 0 |
| Golgi apparatus (GO:0Q96IF1 | Cytoplasm, cytoskeleton. | 0 |
| Vesicles (GO:0043231)Q96FN9 | Cytoplasm {ECO:0000305}. | 0 |
| Nucleoli (GO:0005730)Q9UGN5 | Nucleus {ECO:0000269 Pub | 0 |
| Nucleoli fibrillar ceP55317 | Nucleus {ECO:0000255 PRO | 0 |
| Endosomes (GO:0005768Q9UNH7 | Early endosome {ECO:0000 | 0 |
| Cytosol (GO:0005829);Q56P03 | Cytoplasm. Nucleus.      | 1 |
| Cytosol (GO:0005829) Q9H6Z9 | Nucleus. Cytoplasm. Note | 0 |
| Cytosol (GO:0005829);Q6P0N0 | Nucleus. Chromosome. Chr | 0 |
| Cytosol (GO:0005829);P54845 | Cytoplasm {ECO:0000269 P | 0 |
| Nucleoplasm (GO:00056P07998 | Secreted.                | 0 |
| Cytosol (GO:0005829);Q15843 | Nucleus {ECO:0000269 Pub | 0 |
| Cytosol (GO:0005829) P61803 | Endoplasmic reticulum me | 0 |
| Nucleoplasm (GO:00056Q99973 | Nucleus {ECO:0000305}. C | 0 |
| Nucleoplasm (GO:00056Q9HCS5 | Cytoplasm, cytoskeleton  | 0 |
| Cytosol (GO:0005829);Q16878 |                          | 0 |
| Endoplasmic reticulumQ00765 | Membrane {ECO:0000255};  | 0 |
| Aggresome (GO:0016235Q8TB96 | Secreted {ECO:0000305}.  | 0 |
| Nuclear membrane (GO:Q9H0J4 |                          | 0 |
| Cytosol (GO:0005829);Q92503 | Cytoplasm {ECO:0000269 P | 0 |
| Cytosol (GO:0005829) Q16613 | Cytoplasm {ECO:0000269 P | 1 |
| Cytosol (GO:0005829) Q15052 | Cell projection, lamelli | 0 |
| Centrosome (GO:000581Q8IWC1 | Cytoplasm, cytoskeleton, | 0 |
| Cytosol (GO:0005829) Q92913 | Cell projection, filopod | 0 |
| Nucleoplasm (GO:00056Q9UBL3 | Nucleus {ECO:0000305 Pub | 0 |
| Centrosome (GO:000581Q6NXR4 |                          | 0 |
| Cytosol (GO:0005829);P49918 | Nucleus {ECO:0000250}.   | 0 |

|                              |                          |   |
|------------------------------|--------------------------|---|
| Cytosol (GO:0005829); Q5FBB7 | Nucleus {ECO:0000305 Pub | 0 |
| Golgi apparatus (GO:0P55291  | Cell membrane; Single-pa | 0 |
| Nucleoplasm (GO:00056Q9BXX1  | Nucleus {ECO:0000250}.   | 1 |
| Cytokinetic bridge (GQ9HCN3  | Cell membrane {ECO:00002 | 0 |
| Cytosol (GO:0005829); Q9BU89 |                          | 0 |
| Nuclear bodies (GO:00Q9Y6X3  | Nucleus, nucleoplasm {EC | 1 |
| Cytosol (GO:0005829) P98077  |                          | 0 |
| Cytosol (GO:0005829); Q6T4P5 | Membrane {ECO:0000305};  | 0 |
| Vesicles (GO:0043231) Q96GS6 | Cell membrane {ECO:00002 | 0 |
| Cytosol (GO:0005829); P19429 |                          | 0 |
| Nucleoplasm (GO:00056075081  | Isoform 1: Nucleus, nucl | 0 |
| Cytosol (GO:0005829) Q5T6L9  | Endoplasmic reticulum me | 0 |
| Nucleoplasm (GO:00056Q8WUB8  | Nucleus {ECO:0000250}.   | 1 |
| Golgi apparatus (GO:0Q9NY28  | Golgi apparatus membrane | 0 |
| Cytosol (GO:0005829) Q5VZ03  |                          | 0 |
| Cytosol (GO:0005829); Q9NVN8 | Nucleus, nucleolus {ECO: | 1 |
| Endoplasmic reticulum Q8NHP6 | Cell membrane {ECO:00002 | 0 |
| Cytosol (GO:0005829) Q96HP0  | Cytoplasm {ECO:0000269 P | 1 |
| Cytosol (GO:0005829); Q9BQ95 | Cytoplasm {ECO:0000269 P | 0 |
| Cytosol (GO:0005829) P60002  | Nucleus {ECO:0000250}.   | 0 |
| Golgi apparatus (GO:0Q6UXH0  | Secreted {ECO:0000269 Pu | 0 |
| Endoplasmic reticulum P14314 | Endoplasmic reticulum {E | 1 |
| Actin filaments (GO:0P51911  |                          | 0 |
| Cytosol (GO:0005829); Q8WUY1 | Secreted {ECO:0000305}.  | 0 |
| Cell Junctions (GO:00Q92692  | Cell membrane; Single-pa | 0 |
| Vesicles (GO:0043231) P02649 | Secreted {ECO:0000269 Pu | 0 |
| Cytosol (GO:0005829); Q96008 | Mitochondrion outer memb | 1 |
| Nucleoli (GO:0005730) Q5VUJ6 |                          | 0 |
| Cytosol (GO:0005829); Q17RN3 |                          | 0 |
| Nuclear bodies (GO:00Q14151  | Cytoplasm. Nucleus.      | 0 |
| Cytosol (GO:0005829); Q9Y3U8 | Cytoplasm, cytosol {ECO: | 0 |
| Centriolar satellite Q12756  | Cytoplasm, cytoskeleton  | 0 |
| Mitochondria (GO:0005Q969Y2  | Mitochondrion {ECO:00002 | 1 |
| Centrosome (GO:000581Q9BX97  | Cell membrane {ECO:00002 | 0 |
| Cytosol (GO:0005829); Q10589 | Golgi apparatus, trans-G | 0 |
| Cytosol (GO:0005829); Q6PCB7 | Cell membrane {ECO:00002 | 0 |
| Nucleoli (GO:0005730) Q96P11 |                          | 0 |
| Vesicles (GO:0043231) Q8NBJS | Endoplasmic reticulum lu | 0 |
| Nucleoli (GO:0005730) Q9BW61 |                          | 0 |
| Cytosol (GO:0005829); Q95336 | Cytoplasm {ECO:0000250}. | 0 |
| Nucleoli fibrillar ce Q9UK45 | Nucleus {ECO:0000269 Pub | 0 |
| Cytosol (GO:0005829); Q9Y5X1 | Cytoplasmic vesicle memb | 0 |
| Centrosome (GO:000581Q9HOR6  | Mitochondrion {ECO:00002 | 0 |
| Cytosol (GO:0005829); Q86UC2 | Cytoplasm, cytoskeleton, | 0 |
| Cytosol (GO:0005829) Q5FVE4  | Cytoplasm. Membrane; Per | 0 |
| Nucleoplasm (GO:00056Q03111  | Nucleus.                 | 1 |
| Cell Junctions (GO:00P55196  | Cell junction, adherens  | 0 |
| Actin filaments (GO:0043707  | Nucleus {ECO:0000269 Pub | 0 |
| Cytosol (GO:0005829); Q9BYT3 | Cytoplasm, perinuclear r | 0 |
| Mitochondria (GO:0005095299  | Mitochondrion matrix {EC | 1 |
| Cytosol (GO:0005829); Q15143 | Cytoplasm, cytoskeleton  | 0 |
| Cytosol (GO:0005829); Q9BXT2 | Cell membrane {ECO:00003 | 0 |
| Cytosol (GO:0005829) Q9HCJ5  |                          | 0 |
| Cytosol (GO:0005829); Q14526 | Membrane, clathrin-coate | 0 |
| Cytosol (GO:0005829) Q66K74  | Nucleus. Cytoplasm, cyto | 0 |

|                             |                          |   |
|-----------------------------|--------------------------|---|
| Plasma membrane (GO:0Q96G42 |                          | 0 |
| Mitochondria (GO:0005043819 | Mitochondrion inner memb | 0 |
| Golgi apparatus (GO:0Q99988 | Secreted {ECO:0000269 Pu | 0 |
| Golgi apparatus (GO:0Q9NXJ5 | Cytoplasm {ECO:0000250}. | 0 |
| Vesicles (GO:0043231)Q9Y4Z0 | Nucleus {ECO:0000269 Pub | 0 |
| Nucleoplasm (GO:00056P17535 | Nucleus.                 | 1 |
| Nucleoplasm (GO:00056Q8TD43 | Isoform 1: Cell membrane | 0 |
| Cytosol (GO:0005829);Q8N988 | Nucleus {ECO:0000305}.   | 0 |
| Cell Junctions (GO:00Q9BUF7 | Apical cell membrane; Si | 0 |
| Cytosol (GO:0005829);Q99784 | Secreted {ECO:0000250 Un | 0 |
| Cytosol (GO:0005829);Q5T5Y3 | Cytoplasm, cytoskeleton  | 0 |
| Cytosol (GO:0005829);Q9BSL1 | Cytoplasm {ECO:0000269 P | 1 |
| Nucleoplasm (GO:00056Q86UZ6 | Nucleus {ECO:0000305}.   | 0 |
| Nucleoplasm (GO:00056Q9BYL1 |                          | 0 |
| Intermediate filamentP48788 |                          | 0 |
| Vesicles (GO:0043231)P20908 | Secreted, extracellular  | 0 |
| Cytosol (GO:0005829);Q9UBB4 | Cytoplasm, perinuclear r | 1 |
| Centrosome (GO:000581Q9BSJ2 | Cytoplasm, cytoskeleton, | 1 |
| Centriolar satellite Q6ZV29 | Membrane {ECO:0000305};  | 0 |
| Cytosol (GO:0005829);P02008 |                          | 0 |
| Cell Junctions (GO:00096013 | Cytoplasm {ECO:0000269 P | 0 |
| Cytosol (GO:0005829);P50219 | Nucleus.                 | 0 |
| Nuclear speckles (GO:Q9Y3M9 | Nucleus {ECO:0000305}.   | 0 |
| Centrosome (GO:000581Q6P2H3 | Cytoplasm, cytoskeleton, | 0 |
| Nucleoplasm (GO:00056000268 | Nucleus.                 | 1 |
| Cytosol (GO:0005829);Q9BWX5 | Nucleus {ECO:0000250}.   | 0 |
| Nucleoplasm (GO:00056015230 | Secreted, extracellular  | 0 |
| Cytosol (GO:0005829) Q9H1P3 | Cytoplasm, cytosol {ECO: | 0 |
| Cytosol (GO:0005829);Q16186 | Cytoplasm {ECO:0000269 P | 1 |
| Cytosol (GO:0005829);P00966 | Cytoplasm, cytosol {ECO: | 0 |
| Nucleoplasm (GO:00056Q9H4Q4 | Nucleus {ECO:0000269 Pub | 0 |
| Nucleoli (GO:0005730)Q13868 | Cytoplasm. Nucleus, nucl | 0 |
| Golgi apparatus (GO:0Q9Y6A1 | Endoplasmic reticulum me | 0 |
| Nucleoplasm (GO:00056Q9HA47 |                          | 0 |
| Cell Junctions (GO:00Q8N539 | Membrane {ECO:0000305};  | 0 |
| Cytosol (GO:0005829);Q5JSZ5 |                          | 0 |
| Cytosol (GO:0005829);043633 | Late endosome membrane { | 0 |
| Cytosol (GO:0005829);P61081 |                          | 0 |
| Nucleoplasm (GO:00056Q13263 | Nucleus {ECO:0000269 Pub | 1 |
| Golgi apparatus (GO:0Q96S19 |                          | 0 |
| Golgi apparatus (GO:0Q9BWQ6 | Golgi apparatus, cis-Gol | 0 |
| Mitochondria (GO:0005Q86TLO | Cysteine protease ATG4D: | 0 |
| Cytosol (GO:0005829);Q9UPT8 |                          | 0 |
| Nucleoplasm (GO:00056Q99742 | Nucleus {ECO:0000255 PRO | 0 |
| Cytosol (GO:0005829);060234 |                          | 0 |
| Actin filaments (GO:0Q02779 |                          | 0 |
| Nucleoli fibrillar ceQ8N1G4 |                          | 0 |
| Cytosol (GO:0005829) P58004 | Cytoplasm {ECO:0000269 P | 0 |
| Cytosol (GO:0005829);Q92485 | Secreted {ECO:0000250}.  | 0 |
| Mitochondria (GO:0005Q9UII2 | Mitochondrion {ECO:00002 | 1 |
| Nucleoplasm (GO:00056Q9BUE0 | Nucleus {ECO:0000305}.   | 0 |
| Nucleoplasm (GO:00056Q5TEJ8 |                          | 0 |
| Cytosol (GO:0005829);P30622 | Cytoplasm {ECO:0000305}. | 0 |
| Nucleoplasm (GO:00056Q6P9F0 | Cytoplasm {ECO:0000269 P | 0 |
| Cytosol (GO:0005829);075146 | Cytoplasm, perinuclear r | 0 |



|                             |                          |   |
|-----------------------------|--------------------------|---|
| Nucleoplasm (GO:00056Q96PQ6 | Nucleus {ECO:0000305}.   | 1 |
| Cytosol (GO:0005829) 075821 | Cytoplasm {ECO:0000255 H | 0 |
| Cytosol (GO:0005829);Q9NUL5 | Cytoplasm {ECO:0000269 P | 1 |
| Nucleoplasm (GO:00056P26358 | Nucleus {ECO:0000269 Pub | 1 |
| Nucleoplasm (GO:00056Q9BUY5 | Nucleus {ECO:0000305}.   | 0 |
| Cytosol (GO:0005829);Q6P2M8 | Cytoplasm {ECO:0000250}. | 0 |
| Nucleoli fibrillar ce060832 | Isoform 1: Nucleus, nucl | 0 |
| Nucleoplasm (GO:00056P51805 | Cell membrane {ECO:00002 | 1 |
| Endoplasmic reticulumQ99956 | Cytoplasm.               | 0 |
| Centriolar satellite Q00013 | Cell membrane {ECO:00002 | 0 |
| Nucleoplasm (GO:00056Q9NQX6 | Nucleus {ECO:0000305}.   | 0 |
| Cell Junctions (GO:00Q9UL36 | Nucleus {ECO:0000305}.   | 0 |
| Nucleoli (GO:0005730)Q9NS82 | Membrane {ECO:0000305};  | 0 |
| Lipid droplets (GO:00075074 | Membrane {ECO:0000305};  | 0 |
| Cytosol (GO:0005829);Q9H3J6 | Mitochondrion {ECO:00002 | 0 |
| Nucleoli (GO:0005730)Q9H8H0 | Nucleus, nucleolus {ECO: | 1 |
| Cytosol (GO:0005829);Q86V15 | Nucleus {ECO:0000269 Pub | 1 |
| Vesicles (GO:0043231)P37058 | Endoplasmic reticulum {E | 0 |
| Nuclear bodies (GO:00A1L443 |                          | 0 |
| Cytosol (GO:0005829);Q5JVS0 | Nucleus {ECO:0000269 Pub | 0 |
| Nucleoplasm (GO:00056000757 | Cell junction {ECO:00002 | 0 |
| Golgi apparatus (GO:0Q76EJ3 | Golgi apparatus membrane | 1 |
| Nucleoplasm (GO:00056014668 | Membrane {ECO:0000305};  | 0 |
| Nucleoplasm (GO:00056P22314 | Cytoplasm {ECO:0000269 P | 0 |
| Nucleoplasm (GO:00056Q15493 | Cytoplasm {ECO:0000250}. | 0 |
| Nucleoplasm (GO:00056Q7Z5Q5 | Nucleus {ECO:0000269 Pub | 1 |
| Nucleoplasm (GO:00056Q8WUA2 | Nucleus {ECO:0000305}.   | 1 |
| Plasma membrane (GO:0Q9BZM5 | Cell membrane {ECO:00002 | 0 |
| Cytosol (GO:0005829);Q02952 | Cytoplasm, cell cortex { | 0 |
| Nuclear membrane (GO:Q8NF91 | Nucleus outer membrane { | 0 |
| Centriolar satellite Q9BZM4 | Cell membrane {ECO:00002 | 0 |
| Nucleoplasm (GO:00056095835 | Cytoplasm, cytoskeleton, | 0 |
| Cytosol (GO:0005829) Q8TE68 | Cytoplasm {ECO:0000269 P | 1 |
| Cytosol (GO:0005829) Q9Y312 |                          | 0 |
| Microtubules (GO:0015Q3SXZ7 | Cytoplasm, cytoskeleton, | 0 |
| Centriolar satellite Q14498 | Nucleus speckle. Note=Co | 1 |
| Nuclear bodies (GO:00Q9BYN7 | Nucleus {ECO:0000269 Pub | 0 |
| Nucleoplasm (GO:00056Q9UJ14 | Membrane {ECO:0000250};  | 0 |
| Cytosol (GO:0005829);Q9NR19 | Cytoplasm, cytosol {ECO: | 1 |
| Cell Junctions (GO:00Q9HAV5 | Membrane; Single-pass ty | 0 |
| Cytosol (GO:0005829) 043307 | Cytoplasm {ECO:0000269 P | 0 |
| Intermediate filamentP14136 | Cytoplasm {ECO:0000269 P | 0 |
| Nucleoplasm (GO:00056P36543 |                          | 0 |
| Plasma membrane (GO:0Q86WZ6 | Nucleus {ECO:0000305}.   | 0 |
| Mitochondria (GO:0005Q96B54 |                          | 0 |
| Mitochondria (GO:0005P13073 | Mitochondrion inner memb | 1 |
| Cytosol (GO:0005829) 043402 | Cytoplasm {ECO:0000269 P | 1 |
| Mitochondria (GO:0005Q14687 |                          | 0 |
| Nucleoplasm (GO:00056Q9Y248 | Nucleus {ECO:0000250}.   | 1 |
| Vesicles (GO:0043231)075368 |                          | 0 |
| Cytosol (GO:0005829);Q06495 | Apical cell membrane {EC | 1 |
| Cytosol (GO:0005829);Q8TB68 | Cell membrane {ECO:00002 | 0 |
| Nuclear bodies (GO:00095644 | Cytoplasm {ECO:0000269 P | 0 |
| Cytosol (GO:0005829);P14902 | Cytoplasm, cytosol {ECO: | 0 |
| Cytosol (GO:0005829) Q01518 | Cell membrane {ECO:00002 | 0 |

|                             |                          |   |
|-----------------------------|--------------------------|---|
| Golgi apparatus (GO:0P50897 | Lysosome {ECO:0000269 Pu | 0 |
| Cytosol (GO:0005829);Q9NVW2 | Nucleus {ECO:0000269 Pub | 1 |
| Mitochondria (GO:0005075027 | Mitochondrion inner memb | 1 |
| Mitochondria (GO:0005P82663 | Mitochondrion {ECO:00002 | 1 |
| Nuclear bodies (GO:00060239 | Cytoplasmic vesicle memb | 0 |
| Nucleoplasm (GO:00056Q9UJ83 | Peroxisome.              | 0 |
| Golgi apparatus (GO:0Q92609 | Endosome membrane {ECO:0 | 0 |
| Cytosol (GO:0005829);Q8ND61 | Membrane {ECO:0000305};  | 0 |
| Vesicles (GO:0043231)Q9H1K0 | Cell membrane; Lipid-anc | 0 |
| Cytosol (GO:0005829);Q8N3T1 | Golgi apparatus membrane | 0 |
| Cell Junctions (GO:00P31641 | Cell membrane; Multi-pas | 0 |
| Nucleoplasm (GO:00056P55055 | Nucleus {ECO:0000255 PRO | 1 |
| Actin filaments (GO:0P50479 | Isoform 1: Cytoplasm, cy | 0 |
| Cytosol (GO:0005829);Q9Y496 | Cytoplasm, cytoskeleton  | 0 |
| Vesicles (GO:0043231)094808 |                          | 0 |
| Nucleoplasm (GO:00056P61289 | Nucleus {ECO:0000269 Pub | 0 |
| Nucleoplasm (GO:00056Q9P2W1 | Nucleus {ECO:0000269 Pub | 1 |
| Cytosol (GO:0005829);Q16853 | Cell membrane {ECO:00002 | 0 |
| Cytosol (GO:0005829);P53396 | Cytoplasm, cytosol {ECO: | 0 |
| Centrosome (GO:000581Q9BRG1 | Cytoplasm. Endosome memb | 0 |
| Vesicles (GO:0043231)060895 | Membrane; Single-pass ty | 0 |
| Plasma membrane (GO:0060610 | Cell membrane {ECO:00002 | 0 |
| Cytosol (GO:0005829);P62837 |                          | 0 |
| Cytosol (GO:0005829);Q96A65 | Midbody, Midbody ring {E | 0 |
| Golgi apparatus (GO:0Q96P50 |                          | 0 |
| Nucleoplasm (GO:00056Q5XXA6 | Cell membrane {ECO:00002 | 0 |
| Cytosol (GO:0005829);Q13136 | Cytoplasm {ECO:0000269 P | 1 |
| Nucleoli (GO:0005730)Q8NCW0 | Membrane {ECO:0000305};  | 0 |
| Nuclear speckles (GO:Q86W42 | Nucleus {ECO:0000269 Pub | 1 |
| Plasma membrane (GO:0Q6Q0C0 | Cytoplasmic vesicle {ECO | 1 |
| Nucleoplasm (GO:00056Q9HBU1 | Nucleus {ECO:0000305}.   | 0 |
| Cytosol (GO:0005829);075161 | Cytoplasm, cytoskeleton, | 0 |
| Cytosol (GO:0005829)P46821  | Cytoplasm, cytoskeleton  | 0 |
| Nucleoplasm (GO:00056Q9BQY4 | Nucleus {ECO:0000255 PRO | 0 |
| Nucleoplasm (GO:00056P78552 | Membrane; Single-pass ty | 0 |
| Golgi apparatus (GO:0Q5JSH3 | Cytoplasm, cytosol. Cyto | 0 |
| Nucleoli (GO:0005730)Q8N567 | Nucleus, nucleolus {ECO: | 1 |
| Nucleoplasm (GO:00056076011 |                          | 0 |
| Nucleoli (GO:0005730)P11388 | Cytoplasm {ECO:0000269 P | 0 |
| Endoplasmic reticulumQ14849 | Late endosome membrane { | 0 |
| Cytosol (GO:0005829);P10276 | Nucleus {ECO:0000269 Pub | 1 |
| Nucleoplasm (GO:00056075525 | Nucleus {ECO:0000269 Pub | 1 |
| Nucleoplasm (GO:00056Q86WJ1 | Nucleus {ECO:0000269 Pub | 1 |
| Vesicles (GO:0043231)096011 | Peroxisome membrane {ECO | 0 |
| Cytosol (GO:0005829);P49326 | Microsome membrane. Endo | 1 |
| Nucleoplasm (GO:00056Q9Y6X2 | Cytoplasm {ECO:0000250 U | 0 |
| Nucleoplasm (GO:00056043741 |                          | 0 |
| Mitochondria (GO:0005P08559 | Mitochondrion matrix.    | 1 |
| Plasma membrane (GO:0Q9Y5P3 |                          | 0 |
| Mitochondria (GO:0005Q9HCC0 | Mitochondrion matrix {EC | 1 |
| Nuclear speckles (GO:Q9HCX3 | Nucleus {ECO:0000305 Pub | 0 |
| Nuclear speckles (GO:Q9BUG6 | Nucleus {ECO:0000255 PRO | 0 |
| Intermediate filamentP52740 | Nucleus {ECO:0000305}.   | 0 |
| Endoplasmic reticulumQ9BQE4 | Endoplasmic reticulum me | 0 |
| Nuclear bodies (GO:00P09661 | Nucleus {ECO:0000269 Pub | 0 |

|                              |                          |   |
|------------------------------|--------------------------|---|
| Cytosol (GO:0005829);Q9H9Z2  | Cytoplasm {ECO:0000269 P | 0 |
| Nucleoplasm (GO:00056Q9NVV9  | Nucleus, nucleoplasm {EC | 1 |
| Cytosol (GO:0005829) Q9NSK7  | Mitochondrion {ECO:00002 | 0 |
| Nucleoplasm (GO:00056Q9BTP7  | Nucleus {ECO:0000269 Pub | 1 |
| Nucleoli (GO:0005730) Q9NZ32 | Cytoplasm, cytoskeleton  | 0 |
| Nucleoplasm (GO:00056Q7Z5M8  |                          | 0 |
| Cytosol (GO:0005829);P30793  | Cytoplasm {ECO:0000269 P | 0 |
| Cytosol (GO:0005829);P17931  | Cytoplasm. Nucleus. Secr | 0 |
| Nucleoplasm (GO:00056P25685  | Cytoplasm {ECO:0000269 P | 0 |
| Cytosol (GO:0005829) Q5XUX1  |                          | 0 |
| Nucleoplasm (GO:00056P22670  | Nucleus.                 | 1 |
| Nucleoplasm (GO:00056P17024  | Nucleus {ECO:0000305}.   | 0 |
| Nucleoplasm (GO:00056Q0VDD7  |                          | 0 |
| Mitochondria (GO:0005Q66K64  |                          | 0 |
| Cytosol (GO:0005829);Q6P1N0  | Cytoplasm {ECO:0000269 P | 0 |
| Endoplasmic reticulumQ9BSG5  | Secreted, extracellular  | 0 |
| Endoplasmic reticulum015232  | Secreted.                | 0 |
| Nucleoplasm (GO:00056P19474  | Cytoplasm {ECO:0000269 P | 0 |
| Golgi apparatus (GO:0Q9NWH7  | Secreted {ECO:0000250 Un | 0 |
| Nuclear bodies (GO:00Q15345  |                          | 0 |
| Cytosol (GO:0005829) Q92526  | Cytoplasm {ECO:0000305 P | 0 |
| Cytosol (GO:0005829);Q7L2E3  | Cytoplasm {ECO:0000269 P | 1 |
| Nuclear speckles (GO:P04049  | Cytoplasm. Cell membrane | 0 |
| Nucleoplasm (GO:00056P48066  | Membrane; Multi-pass mem | 0 |
| Nucleoplasm (GO:00056P37231  | Nucleus. Cytoplasm. Note | 0 |
| Nucleoplasm (GO:00056Q9BQ83  | Nucleus {ECO:0000255 HAM | 0 |
| Golgi apparatus (GO:0P53365  |                          | 0 |
| Cytosol (GO:0005829) Q9C035  | Cytoplasm {ECO:0000269 P | 0 |
| Nuclear bodies (GO:00Q8IYM9  | Cytoplasm {ECO:0000269 P | 0 |
| Cytosol (GO:0005829);043159  | Nucleus, nucleolus {ECO: | 0 |
| Cytosol (GO:0005829);Q14156  | Cell membrane {ECO:00002 | 1 |
| Mitochondria (GO:0005Q96EY7  | Mitochondrion {ECO:00002 | 1 |
| Mitochondria (GO:0005Q16891  | Mitochondrion inner memb | 1 |
| Nucleoplasm (GO:00056Q86XH1  | Cytoplasm, cytoskeleton, | 0 |
| Nucleoplasm (GO:00056Q9HOC8  | Cytoplasm {ECO:0000269 P | 0 |
| Nuclear membrane (GO:060894  | Membrane; Single-pass ty | 0 |
| Golgi apparatus (GO:0Q96I15  | Cytoplasm, cytosol {ECO: | 0 |
| Intermediate filamentP23469  | Isoform 1: Cell membrane | 0 |
| Nucleoplasm (GO:00056P62826  | Nucleus {ECO:0000269 Pub | 0 |
| Nuclear speckles (GO:Q13131  | Cytoplasm {ECO:0000269 P | 0 |
| Cytosol (GO:0005829);Q684P5  | Cytoplasm {ECO:0000269 P | 1 |
| Nuclear bodies (GO:00075153  | Cytoplasm {ECO:0000255 H | 0 |
| Nucleoli (GO:0005730) Q9BQG0 | Cytoplasm {ECO:0000269 P | 0 |
| Nucleoplasm (GO:00056P27694  | Nucleus {ECO:0000269 Pub | 1 |
| Cytosol (GO:0005829);P62253  |                          | 0 |
| Cytosol (GO:0005829);P57772  | Cytoplasm {ECO:0000305}. | 0 |
| Golgi apparatus (GO:0Q9P2M4  | Golgi apparatus, cis-Gol | 0 |
| Mitochondria (GO:0005Q9NZJ6  | Mitochondrion inner memb | 0 |
| Cytosol (GO:0005829);Q8TF01  | Nucleus speckle {ECO:000 | 1 |
| Cytosol (GO:0005829);Q9HBV1  | Membrane {ECO:0000305};  | 0 |
| Cytosol (GO:0005829);Q9NS86  | Nucleus {ECO:0000269 Pub | 0 |
| Actin filaments (GO:0P20711  |                          | 0 |
| Mitochondria (GO:0005Q12849  | Cytoplasm. Mitochondrion | 0 |
| Nuclear membrane (GO:075179  | Cytoplasm {ECO:0000269 P | 0 |
| Nucleoli (GO:0005730) Q9NQZ2 | Nucleus {ECO:0000250}.   | 0 |

|                             |                          |   |
|-----------------------------|--------------------------|---|
| Cell Junctions (GO:00P16144 | Cell membrane; Single-pa | 1 |
| Cytosol (GO:0005829);Q969T9 | Cytoplasm {ECO:0000269 P | 0 |
| Nucleoplasm (GO:00056P84243 | Nucleus. Chromosome.     | 1 |
| Cytoplasmic bodies (GQ9C0B0 | Cytoplasm {ECO:0000269 P | 1 |
| Cytosol (GO:0005829) Q96LD4 | Cytoplasm {ECO:0000269 P | 0 |
| Nucleoplasm (GO:00056095218 | Nucleus {ECO:0000269 Pub | 1 |
| Cytosol (GO:0005829);P63241 | Cytoplasm. Nucleus. Endo | 0 |
| Nuclear speckles (GO:015054 | Nucleus {ECO:0000305 Pub | 0 |
| Nucleoplasm (GO:00056Q13227 | Nucleus {ECO:0000269 Pub | 0 |
| Mitochondria (GO:0005Q6GPH4 | Cytoplasm. Nucleus. Mito | 0 |
| Cell Junctions (GO:00Q7Z7G8 |                          | 0 |
| Plasma membrane (GO:0Q9H0N5 |                          | 0 |
| Vesicles (GO:0043231)Q99470 | Secreted {ECO:0000305}.  | 0 |
| Plasma membrane (GO:0Q14254 | Cell membrane {ECO:00002 | 0 |
| Cytosol (GO:0005829);075616 | Mitochondrion matrix. Mi | 0 |
| Nucleoli fibrillar ceQ9NVM4 | Cytoplasm, cytosol {ECO: | 0 |
| Nucleoli (GO:0005730)Q9Y221 | Nucleus, nucleolus {ECO: | 0 |
| Nuclear bodies (GO:00Q15554 | Nucleus {ECO:0000255 PRO | 1 |
| Midbody (GO:0030496) Q9UN37 | Prevacuolar compartment  | 0 |
| Focal adhesion sites Q765P7 | Cytoplasm {ECO:0000269 P | 0 |
| Nucleoplasm (GO:00056Q96MM6 |                          | 0 |
| Cytosol (GO:0005829);Q9NU02 |                          | 0 |
| Cytosol (GO:0005829);Q9H1Q7 |                          | 0 |
| Cytosol (GO:0005829);P60880 | Cytoplasm, perinuclear r | 0 |
| Vesicles (GO:0043231)Q9Y2F9 | Cytoplasm, cytosol {ECO: | 0 |
| Nucleoplasm (GO:00056P12004 | Nucleus {ECO:0000269 Pub | 1 |
| Cytosol (GO:0005829);Q9UKK6 | Nucleus. Nucleus speckle | 0 |
| Nucleoplasm (GO:00056Q9H1D9 | Nucleus {ECO:0000250}.   | 0 |
| Cytosol (GO:0005829);Q8WYP3 | Cytoplasm {ECO:0000305}. | 0 |
| Nucleoplasm (GO:00056P18433 | Membrane; Single-pass ty | 0 |
| Mitochondria (GO:0005P51398 | Mitochondrion {ECO:00002 | 1 |
| Nucleoplasm (GO:00056Q9H310 | Basolateral cell membran | 0 |
| Nucleoplasm (GO:00056Q7Z7F0 | Nucleus {ECO:0000269 Pub | 0 |
| Intermediate filamentP48681 |                          | 0 |
| Intermediate filamentP02741 | Secreted.                | 0 |
| Nucleoplasm (GO:00056015085 | Cytoplasm {ECO:0000269 P | 0 |
| Cell Junctions (GO:00P57735 | Cell membrane {ECO:00003 | 0 |
| Cytosol (GO:0005829);Q5TAQ9 | Nucleus {ECO:0000269 Pub | 0 |
| Nucleoplasm (GO:00056P38935 | Nucleus {ECO:0000269 Pub | 0 |
| Nucleoplasm (GO:00056Q9Y4I5 | Cytoplasm {ECO:0000250 U | 0 |
| Cytosol (GO:0005829);Q9Y4U1 | Cytoplasm {ECO:0000269 P | 0 |
| Nucleoplasm (GO:00056Q9BQC3 |                          | 0 |
| Nuclear bodies (GO:00Q96GM8 | Nucleus, nucleolus {ECO: | 0 |
| Nucleoplasm (GO:00056P49321 | Cytoplasm {ECO:0000250 U | 0 |
| Nucleoplasm (GO:00056Q9UIF7 | Nucleus {ECO:0000269 Pub | 0 |
| Centrosome (GO:000581Q8WYA6 | Isoform 1: Nucleus.; Iso | 0 |
| Cytosol (GO:0005829) Q9BQK8 | Nucleus {ECO:0000305}.   | 0 |
| Cytosol (GO:0005829);Q96MP5 |                          | 0 |
| Cytosol (GO:0005829);Q9H0Z9 | Cytoplasm, cytosol {ECO: | 1 |
| Nuclear speckles (GO:Q9NX31 |                          | 0 |
| Mitochondria (GO:0005095685 |                          | 0 |
| Mitochondria (GO:0005Q9UI17 | Mitochondrion.           | 1 |
| Golgi apparatus (GO:0000203 | Cytoplasmic vesicle, cla | 0 |
| Nucleoplasm (GO:00056Q96IU2 | Cytoplasm {ECO:0000250}. | 0 |
| Cell Junctions (GO:00Q8NI35 | Cell junction, tight jun | 0 |

|                              |                          |   |
|------------------------------|--------------------------|---|
| Cytosol (GO:0005829); Q5T7N3 | Cytoplasm {ECO:0000269 P | 0 |
| Plasma membrane (GO:009H2B2  | Cytoplasmic vesicle, sec | 1 |
| Nucleoplasm (GO:00056Q9H4M3  |                          | 0 |
| Nucleoplasm (GO:00056Q9BU20  | Cytoplasm, cytoskeleton, | 0 |
| Mitochondria (GO:0005P55211  |                          | 0 |
| Plasma membrane (GO:009GZQ4  | Cell membrane; Multi-pas | 1 |
| Centrosome (GO:000581Q9UJW0  | Cytoplasm, cytoskeleton  | 0 |
| Nucleoplasm (GO:00056Q9NTI2  | Membrane {ECO:0000305};  | 0 |
| Cytokinetic bridge (GQ5JR59  | Cytoplasm, cytoskeleton  | 1 |
| Golgi apparatus (GO:009UJ78  | Nucleus {ECO:0000305}.   | 0 |
| Cytosol (GO:0005829); Q9C0E2 | Cytoplasm {ECO:0000269 P | 1 |
| Cytosol (GO:0005829); Q6XPS3 | Isoform 3: Endoplasmic r | 0 |
| Nuclear speckles (GO:Q9Y244  | Cytoplasm, cytosol. Nucl | 0 |
| Nucleoplasm (GO:00056P49336  | Nucleus {ECO:0000305}.   | 0 |
| Plasma membrane (GO:0P20309  | Cell membrane; Multi-pas | 0 |
| Actin filaments (GO:0P35580  | Cell projection, lamelli | 0 |
| Cytosol (GO:0005829) Q9UBM1  | Isoform 1: Endoplasmic r | 0 |
| Actin filaments (GO:0Q6WCQ1  | Cytoplasm, cytoskeleton  | 1 |
| Golgi apparatus (GO:0P36222  | Secreted, extracellular  | 0 |
| Mitochondria (GO:0005Q13203  |                          | 0 |
| Cytosol (GO:0005829); 000750 | Microsome {ECO:0000269 P | 0 |
| Intermediate filament Q6XUX3 | Cytoplasm {ECO:0000269 P | 0 |
| Mitochondria (GO:0005Q8IVJ1  | Cell membrane; Multi-pas | 0 |
| Nucleoplasm (GO:00056Q9HBX8  | Cell membrane {ECO:00002 | 0 |
| Cytosol (GO:0005829); 015075 |                          | 0 |
| Nuclear bodies (GO:00P78396  | Nucleus {ECO:0000250}.   | 0 |
| Golgi apparatus (GO:009Y2V7  | Golgi apparatus membrane | 0 |
| Cytosol (GO:0005829); Q8N0X7 | Cytoplasm {ECO:0000269 P | 0 |
| Golgi apparatus (GO:0Q15063  | Golgi apparatus {ECO:000 | 0 |
| Nuclear speckles (GO:000287  | Nucleus.                 | 0 |
| Cytosol (GO:0005829) P13693  | Cytoplasm {ECO:0000269 P | 1 |
| Nucleoli (GO:0005730) Q8IXQ4 |                          | 0 |
| Plasma membrane (GO:0Q8TAV4  | Cell membrane {ECO:00002 | 1 |
| Nucleoplasm (GO:00056P40938  | Nucleus {ECO:0000305}.   | 1 |
| Nucleoplasm (GO:00056Q8TE76  | Nucleus {ECO:0000305 Pub | 1 |
| Cytosol (GO:0005829) Q9BXY8  | Cytoplasm {ECO:0000250}. | 0 |
| Cytosol (GO:0005829) Q0IIM8  |                          | 0 |
| Cytosol (GO:0005829) Q9HBH7  | Nucleus. Cytoplasm. Note | 0 |
| Cytosol (GO:0005829); Q969W3 |                          | 0 |
| Nucleoplasm (GO:00056Q8N1S5  | Cell membrane {ECO:00002 | 0 |
| Nucleoplasm (GO:00056P29323  | Cell membrane; Single-pa | 0 |
| Nuclear speckles (GO:Q8IYB3  | Nucleus matrix {ECO:0000 | 0 |
| Golgi apparatus (GO:0Q96QH2  |                          | 0 |
| Nucleoplasm (GO:00056Q86Y97  | Nucleus. Chromosome {ECO | 0 |
| Cytosol (GO:0005829); Q96IQ9 | Nucleus {ECO:0000305}.   | 0 |
| Cytosol (GO:0005829) P35913  | Membrane; Lipid-anchor.  | 0 |
| Centrosome (GO:000581Q9NZL4  |                          | 0 |
| Vesicles (GO:0043231) P78368 | Cytoplasm {ECO:0000269 P | 0 |
| Nucleoplasm (GO:00056Q9BQI6  | Nucleus {ECO:0000269 Pub | 0 |
| Cytosol (GO:0005829); Q96KP4 | Cytoplasm {ECO:0000269 P | 1 |
| Nucleoplasm (GO:00056Q9BQ69  | Nucleus {ECO:0000269 Pub | 1 |
| Nucleoli (GO:0005730) Q6RFH5 | Nucleus, nucleolus {ECO: | 0 |
| Endoplasmic reticulum 095197 | Endoplasmic reticulum me | 0 |
| Mitochondria (GO:0005Q9NWW9  | Cytoplasm {ECO:0000269 P | 0 |
| Cytosol (GO:0005829); P35749 | Melanosome {ECO:0000269  | 0 |

|                                |                          |   |
|--------------------------------|--------------------------|---|
| Centrosome (GO:000581Q96NB1    | Cytoplasm, cytoskeleton, | 0 |
| Nucleoplasm (GO:00056Q9BTT4    | Nucleus {ECO:0000305}.   | 1 |
| Cytosol (GO:0005829);015018    | Nucleus {ECO:0000250 Uni | 0 |
| Cytosol (GO:0005829);Q9Y6X9    | Nucleus {ECO:0000269 Pub | 1 |
| Cytosol (GO:0005829);POCG30    | Cytoplasm.               | 1 |
| Centrosome (GO:0005813);Nucleo | Cytoplasm. Nucleus. Cyto | 0 |
| Cell Junctions (GO:00Q9BYW1    | Cell membrane {ECO:00002 | 0 |
| Nucleoplasm (GO:00056Q9BXI9    | Secreted {ECO:0000305}.  | 0 |
| Vesicles (GO:0043231)P36268    | Cytoplasm, perinuclear r | 0 |
| Mitochondria (GO:0005Q8NEG4    |                          | 0 |
| Centrosome (GO:000581Q9UDX3    |                          | 0 |
| Centrosome (GO:000581Q7Z695    | Membrane {ECO:0000305};  | 0 |
| Cytosol (GO:0005829);Q9UHC7    |                          | 0 |
| Cytosol (GO:0005829);A5PL33    |                          | 0 |
| Cytosol (GO:0005829);P62324    |                          | 0 |
| Vesicles (GO:0043231)Q8N999    |                          | 0 |
| Cytosol (GO:0005829);Q9H7F0    | Membrane {ECO:0000250};  | 0 |
| Nucleoplasm (GO:00056Q8TBM7    | Membrane {ECO:0000305};  | 0 |
| Cytosol (GO:0005829);Q8IUR5    | Membrane {ECO:0000305};  | 0 |
| Nucleoplasm (GO:00056015397    | Cytoplasm {ECO:0000250}. | 0 |
| Cytosol (GO:0005829);Q9P2J5    | Cytoplasm {ECO:0000250}. | 0 |
| Vesicles (GO:0043231)Q9NQ38    | Secreted.                | 0 |
| Mitochondria (GO:0005P29218    | Cytoplasm {ECO:0000269 P | 0 |
| Centrosome (GO:000581Q9C099    | Cytoplasm, cytoskeleton, | 1 |
| Nucleoli (GO:0005730)Q15329    | Nucleus.                 | 1 |
| Nucleoli (GO:0005730)Q9P031    | Nucleus {ECO:0000305}.   | 0 |
| Actin filaments (GO:0Q9UH65    | Cytoplasm {ECO:0000269 P | 0 |
| Nucleoplasm (GO:00056000327    | Nucleus {ECO:0000255 PRO | 0 |
| Nuclear membrane (GO:Q01432    |                          | 0 |
| Cytosol (GO:0005829);Q86WG5    | Cytoplasm {ECO:0000269 P | 0 |
| Cytosol (GO:0005829);094851    | Nucleus {ECO:0000269 Pub | 0 |
| Cytosol (GO:0005829);P62070    | Cell membrane {ECO:00002 | 0 |
| Peroxisomes (GO:00057P51659    | Peroxisome.              | 1 |
| Intermediate filament060293    | Nucleus {ECO:0000269 Pub | 0 |
| Cytosol (GO:0005829);Q9BXT5    | Cytoplasm {ECO:0000250 U | 0 |
| Endoplasmic reticulumQ96BY9    | Endoplasmic reticulum me | 1 |
| Nucleoplasm (GO:00056Q9BV47    | Cytoplasm. Nucleus. Golg | 0 |
| Nucleoplasm (GO:00056Q92785    | Nucleus {ECO:0000269 Pub | 0 |
| Cytosol (GO:0005829);000255    | Nucleus {ECO:0000269 Pub | 1 |
| Cytosol (GO:0005829);Q9UKR5    | Endoplasmic reticulum me | 0 |
| Cytosol (GO:0005829) Q7Z3D6    | Mitochondrion matrix {EC | 0 |
| Nucleoplasm (GO:00056Q9P2D8    | Membrane {ECO:0000305};  | 0 |
| Cell Junctions (GO:00P49757    | Membrane; Peripheral mem | 0 |
| Vesicles (GO:0043231)Q9H7T0    | Membrane {ECO:0000250};  | 0 |
| Nucleoplasm (GO:00056Q9H8Y1    |                          | 0 |
| Mitochondria (GO:0005Q9POS2    | Mitochondrion inner memb | 1 |
| Nucleoplasm (GO:00056075586    | Nucleus.                 | 1 |
| Cytosol (GO:0005829) P05198    | Cytoplasm, Stress granul | 1 |
| Nucleoplasm (GO:00056Q9Y4K0    | Secreted, extracellular  | 0 |
| Cytosol (GO:0005829) Q9H9T3    | Cytoplasm {ECO:0000269 P | 0 |
| Cytosol (GO:0005829) 043310    | Cytoplasm, perinuclear r | 1 |
| Nucleoplasm (GO:00056Q9UBB5    | Nucleus {ECO:0000269 Pub | 1 |
| Endoplasmic reticulumQ9Y5U9    | Endoplasmic reticulum me | 1 |
| Mitochondria (GO:0005P82909    | Mitochondrion.           | 1 |
| Cytosol (GO:0005829) P14635    | Cytoplasm. Nucleus. Cyto | 0 |

|                                |                          |   |
|--------------------------------|--------------------------|---|
| Vesicles (GO:0043231) 043187   |                          | 0 |
| Cytosol (GO:0005829) Q14012    | Cytoplasm {ECO:0000250}. | 0 |
| Cytosol (GO:0005829); Q9BV44   |                          | 0 |
| Cytosol (GO:0005829); P40337   | Isoform 1: Cytoplasm. Me | 0 |
| Nuclear bodies (GO:00014503)   | Cytoplasm {ECO:0000269 P | 0 |
| Aggresome (GO:0016235) Q92611  | Endoplasmic reticulum me | 1 |
| Cytosol (GO:0005829); 014770   | Nucleus {ECO:0000255 PRO | 0 |
| Nucleoli (GO:0005730) Q7L8W6   |                          | 0 |
| Cleavage furrow (GO:009H079)   | Nucleus {ECO:0000269 Pub | 0 |
| Nucleoplasm (GO:00056) Q9NPA0  | Membrane {ECO:0000269 Pu | 0 |
| Centriolar satellite Q7Z4N2    | Cell membrane {ECO:00002 | 0 |
| Cytosol (GO:0005829) P09488    | Cytoplasm.               | 0 |
| Nucleoplasm (GO:00056) 060636  | Membrane {ECO:0000305};  | 0 |
| Cytokinetic bridge (GP46439)   | Cytoplasm.               | 0 |
| Cytosol (GO:0005829) P21266    | Cytoplasm.               | 1 |
| Vesicles (GO:0043231) Q5T7P8   | Cytoplasmic vesicle, sec | 0 |
| Cytosol (GO:0005829); Q6PGN9   | Cytoplasm. Cytoplasm, cy | 0 |
| Mitochondria (GO:0005) P54868  | Mitochondrion.           | 1 |
| Nucleoplasm (GO:00056) Q9Y2R2  | Cytoplasm {ECO:0000250}. | 0 |
| Cytosol (GO:0005829); Q99523   | Membrane; Single-pass ty | 0 |
| Nucleoplasm (GO:00056) Q93097  | Secreted, extracellular  | 0 |
| Cytosol (GO:0005829) 043504    | Cytoplasm. Lysosome.     | 0 |
| Nucleoplasm (GO:00056) Q04721  | Notch 2 extracellular tr | 0 |
| Cytokinetic bridge (GQ9H8W5)   | Cytoplasm {ECO:0000269 P | 0 |
| Mitochondria (GO:0005) Q93033  | Membrane {ECO:0000305};  | 0 |
| Cell Junctions (GO:00) Q7Z7D3  | Cell membrane {ECO:00002 | 1 |
| Vesicles (GO:0043231) Q9Y6B7   | Golgi apparatus, trans-G | 0 |
| Cytosol (GO:0005829); Q99747   | Membrane {ECO:0000250};  | 0 |
| Cytosol (GO:0005829); Q08AE8   | Cytoplasm, cytoskeleton  | 0 |
| Golgi apparatus (GO:00) Q8NEY8 | Nucleus {ECO:0000269 Pub | 0 |
| Centrosome (GO:000581) Q9NYL4  | Membrane {ECO:0000305};  | 0 |
| Vesicles (GO:0043231) Q96QD8   | Cell membrane {ECO:00002 | 0 |
| Cytosol (GO:0005829); P27348   | Cytoplasm. Note=In neuro | 1 |
| Nucleoplasm (GO:00056) Q9ULH0  | Membrane {ECO:0000305};  | 0 |
| Nucleoplasm (GO:00056) Q9NZI5  | Nucleus {ECO:0000269 Pub | 1 |
| Cytosol (GO:0005829) 075116    | Cytoplasm. Cell membrane | 0 |
| Endoplasmic reticulum Q8WYG1   | Endoplasmic reticulum me | 0 |
| Nucleoli (GO:0005730) P04198   | Nucleus.                 | 0 |
| Cytosol (GO:0005829); Q14693   | Nucleus membrane {ECO:00 | 0 |
| Mitochondria (GO:0005) Q5EBM0  | Mitochondrion {ECO:00002 | 0 |
| Nucleoplasm (GO:00056) Q2TAA2  |                          | 0 |
| Cytosol (GO:0005829); P00338   | Cytoplasm.               | 1 |
| Golgi apparatus (GO:00) P40189 | Isoform 1: Cell membrane | 0 |
| Microtubules (GO:0015) Q8NEY1  | Cytoplasm, cytoskeleton  | 0 |
| Cytosol (GO:0005829); Q6P1J9   | Nucleus {ECO:0000269 Pub | 1 |
| Mitochondria (GO:0005) Q99595  | Mitochondrion inner memb | 1 |
| Vesicles (GO:0043231) P82279   | Isoform 1: Apical cell m | 0 |
| Cytosol (GO:0005829) 043776    | Cytoplasm.               | 1 |
| Centriolar satellite Q9P260    | Recycling endosome {ECO: | 0 |
| Nucleoplasm (GO:00056) Q96I25  | Nucleus {ECO:0000269 Pub | 1 |
| Endoplasmic reticulum Q6P6B7   | Cytoplasm {ECO:0000250 U | 0 |
| Nucleoplasm (GO:00056) P51946  | Nucleus.                 | 1 |
| Golgi apparatus (GO:00) Q24JQ0 | Membrane {ECO:0000305};  | 0 |
| Centriolar satellite Q719H9    | Nucleus {ECO:0000269 Pub | 0 |
| Nuclear bodies (GO:00) Q8TDN4  | Nucleus {ECO:0000250}. C | 0 |

|                             |                          |   |
|-----------------------------|--------------------------|---|
| Nucleoplasm (GO:00056P54849 | Membrane; Multi-pass mem | 0 |
| Nucleoplasm (GO:00056P35711 | Nucleus {ECO:0000255 PRO | 1 |
| Plasma membrane (GO:0P26715 | Membrane; Single-pass ty | 0 |
| Mitochondria (GO:0005075096 | Cell membrane {ECO:00002 | 0 |
| Cell Junctions (GO:00Q92466 | Nucleus {ECO:0000269 Pub | 1 |
| Vesicles (GO:0043231)Q14088 | Cell membrane {ECO:00003 | 0 |
| Nucleoplasm (GO:00056P41225 | Nucleus.                 | 1 |
| Nuclear membrane (GO:Q9Y388 | Nucleus {ECO:0000269 Pub | 0 |
| Centrosome (GO:000581Q9P289 | Cytoplasm {ECO:0000269 P | 1 |
| Mitochondria (GO:0005Q7Z3Z4 | Nucleus {ECO:0000269 Pub | 0 |
| Cytosol (GO:0005829);Q14671 | Cytoplasm {ECO:0000305 P | 1 |
| Cytosol (GO:0005829);Q6ZMY3 |                          | 0 |
| Cytosol (GO:0005829) P54577 | Cytoplasm {ECO:0000269 P | 1 |
| Nucleoplasm (GO:00056Q8IXK0 | Nucleus {ECO:0000269 Pub | 1 |
| Cytokinetic bridge (GQ53HL2 | Nucleus, nucleolus {ECO: | 0 |
| Nucleoli (GO:0005730)Q13823 | Nucleus, nucleolus {ECO: | 1 |
| Cytosol (GO:0005829);Q96K17 |                          | 0 |
| Cytosol (GO:0005829);Q5TAX3 | Nucleus {ECO:0000269 Pub | 0 |
| Nucleoplasm (GO:00056Q8NAV1 | Nucleus {ECO:0000269 Pub | 1 |
| Mitochondria (GO:0005Q8WVD3 | Chromosome {ECO:0000269  | 0 |
| Cytosol (GO:0005829);Q6IA86 | Cytoplasm. Nucleus.      | 1 |
| Cell Junctions (GO:00Q14574 | Cell membrane; Single-pa | 1 |
| Cell Junctions (GO:00Q9Y4J8 | Cytoplasm. Cell junction | 0 |
| Nucleoplasm (GO:00056Q8NBI5 | Membrane {ECO:0000305};  | 0 |
| Mitochondria (GO:0005P62072 | Mitochondrion inner memb | 1 |
| Intermediate filamentQ14147 |                          | 0 |
| Cytosol (GO:0005829);P61165 | Membrane {ECO:0000305};  | 0 |
| Golgi apparatus (GO:0Q9HC07 | Golgi apparatus membrane | 0 |
| Nucleoplasm (GO:00056015516 | Nucleus {ECO:0000269 Pub | 0 |
| Cell Junctions (GO:00P16234 | Cell membrane {ECO:00002 | 0 |
| Vesicles (GO:0043231)P08572 | Secreted, extracellular  | 0 |
| Centriolar satellite Q86YF9 | Nucleus {ECO:0000269 Pub | 0 |
| Cytosol (GO:0005829) Q8NBM4 | Endoplasmic reticulum me | 0 |
| Cytosol (GO:0005829);Q9NWB6 | Nucleus {ECO:0000269 Pub | 1 |
| Nucleoplasm (GO:00056Q86UB2 | Cytoplasm {ECO:0000269 P | 0 |
| Nucleoplasm (GO:00056P28715 | Nucleus {ECO:0000269 Pub | 1 |
| Cytosol (GO:0005829);P29144 | Cytoplasm {ECO:0000269 P | 1 |
| Nucleoplasm (GO:00056Q6UW63 | Endoplasmic reticulum lu | 0 |
| Mitochondria (GO:0005Q9HA77 | Mitochondrion matrix {EC | 0 |
| Golgi apparatus (GO:0A7KAX9 | Cell junction, synapse,  | 0 |
| Cytosol (GO:0005829);P46977 | Endoplasmic reticulum {E | 0 |
| Nucleoplasm (GO:00056P14921 | Cytoplasm {ECO:0000269 P | 0 |
| Vesicles (GO:0043231)Q16612 | Cytoplasm {ECO:0000269 P | 0 |
| Nucleoli (GO:0005730)Q8NI36 | Nucleus, nucleolus {ECO: | 1 |
| Cytosol (GO:0005829) Q92882 | Cytoplasm {ECO:0000305}. | 1 |
| Golgi apparatus (GO:0Q969G6 | Cytoplasm {ECO:0000250}. | 0 |
| Cytosol (GO:0005829);Q9UMX0 | Cytoplasm {ECO:0000269 P | 0 |
| Vesicles (GO:0043231)Q5VZE5 | Cytoplasm {ECO:0000269 P | 0 |
| Centrosome (GO:000581Q8IXQ3 |                          | 0 |
| Cytosol (GO:0005829);P04083 | Nucleus {ECO:0000269 Pub | 0 |
| Golgi apparatus (GO:0P07711 | Lysosome.                | 0 |
| Plasma membrane (GO:0Q9UHN6 | Cell membrane {ECO:00002 | 1 |
| Nucleoli (GO:0005730)Q9UPW5 | Cytoplasm {ECO:0000269 P | 0 |
| Golgi apparatus (GO:0Q8NBJ4 | Golgi apparatus, cis-Gol | 1 |
| Cytosol (GO:0005829) Q9Y617 |                          | 0 |



|                              |                          |   |
|------------------------------|--------------------------|---|
| Vesicles (GO:0043231) Q9H013 | Membrane; Single-pass ty | 0 |
| Nuclear speckles (GO:Q8IV13) |                          | 0 |
| Mitochondria (GO:0005Q9H2K8) | Cytoplasm {ECO:0000269 P | 0 |
| Cytosol (GO:0005829); P20132 | Cytoplasm.               | 0 |
| Cytosol (GO:0005829); 043347 | Cytoplasm {ECO:0000250}. | 0 |
| Nucleoplasm (GO:0005654)     | Nucleus {ECO:0000255 PRO | 1 |
| Mitochondria (GO:0005094952) |                          | 0 |
| Cytosol (GO:0005829); 015119 | Nucleus {ECO:0000255 PRO | 1 |
| Cytosol (GO:0005829); Q15646 | Isoform p56: Nucleus, nu | 0 |
| Cytosol (GO:0005829); Q96EX2 | Membrane {ECO:0000305};  | 0 |
| Cytosol (GO:0005829); Q6ZP65 | Cytoplasm, cytoskeleton, | 0 |
| Cytosol (GO:0005829); Q86Y01 | Cytoplasm. Nucleus. Note | 1 |
| Cytosol (GO:0005829); 014545 |                          | 0 |
| Nucleoplasm (GO:00056Q9Y222) | Nucleus {ECO:0000255 PRO | 1 |
| Golgi apparatus (GO:0Q8IYE0) | Cytoplasm, cytoskeleton, | 0 |
| Golgi apparatus (GO:0P16671) | Cell membrane {ECO:00002 | 0 |
| Cytosol (GO:0005829); Q9NP80 | Endoplasmic reticulum me | 0 |
| Lipid droplets (GO:00Q9Y5L2) | Lipid droplet. Secreted. | 0 |
| Cytosol (GO:0005829) Q96KD3  |                          | 0 |
| Golgi apparatus (GO:0Q6NUQ1) | Cytoplasm. Endoplasmic r | 0 |
| Cytosol (GO:0005829); P78362 | Cytoplasm. Nucleus. Note | 1 |
| Cell Junctions (GO:00Q9UGI8) | Cytoplasm. Cell junction | 1 |
| Golgi apparatus (GO:0Q9P1T7) | Isoform 1: Nucleus, nucl | 0 |
| Cytosol (GO:0005829); Q9Y2Z2 | Mitochondrion {ECO:00002 | 0 |
| Vesicles (GO:0043231) Q9Y2G4 |                          | 0 |
| Plasma membrane (GO:0P28222) | Cell membrane {ECO:00002 | 1 |
| Cytosol (GO:0005829); Q4VXA5 | Membrane {ECO:0000305};  | 0 |
| Cytosol (GO:0005829); Q5TB80 | Cytoplasm, cytoskeleton, | 0 |
| Cytosol (GO:0005829); 060506 | Cytoplasm {ECO:0000269 P | 0 |
| Cytosol (GO:0005829) Q9Y5W7  | Lysosome membrane {ECO:0 | 0 |
| Cytosol (GO:0005829); P21589 | Cell membrane; Lipid-anc | 1 |
| Nucleoplasm (GO:00056Q53H80) | Nucleus {ECO:0000269 Pub | 1 |
| Nucleoplasm (GO:00056Q9UBD5) | Nucleus.                 | 1 |
| Cytosol (GO:0005829); 043318 | Cytoplasm {ECO:0000269 P | 1 |
| Cytokinetic bridge (GQ6MZQ0) |                          | 0 |
| Nucleoplasm (GO:00056P25791) | Nucleus {ECO:0000305}.   | 1 |
| Nucleoplasm (GO:00056Q96BD5) | Nucleus {ECO:0000250}.   | 0 |
| Midbody (GO:0030496); Q9H0A0 | Nucleus, nucleolus {ECO: | 0 |
| Golgi apparatus (GO:0Q9NZC4) | Nucleus {ECO:0000255 PRO | 1 |
| Nucleoplasm (GO:00056Q9UKW6) | Nucleus {ECO:0000255 PRO | 0 |
| Golgi apparatus (GO:0Q9BZD6) | Endoplasmic reticulum-Go | 0 |
| Cytosol (GO:0005829) Q14444  | Cytoplasm, cytosol. Cell | 0 |
| Vesicles (GO:0043231) P08962 | Cell membrane {ECO:00002 | 0 |
| Centriolar satellite Q16671  | Membrane; Single-pass ty | 0 |
| Vesicles (GO:0043231) 095390 | Secreted {ECO:0000305}.  | 0 |
| Nuclear speckles (GO:Q13683) | Membrane; Single-pass ty | 0 |
| Vesicles (GO:0043231) Q92781 | Endoplasmic reticulum me | 0 |
| Cytosol (GO:0005829); Q99490 | Isoform 1: Cytoplasm. Nu | 1 |
| Cytosol (GO:0005829); P11802 | Cytoplasm. Nucleus. Memb | 0 |
| Cytokinetic bridge (GQ12999) | Membrane; Multi-pass mem | 0 |
| Cytosol (GO:0005829); Q12800 | Nucleus {ECO:0000269 Pub | 1 |
| Cytosol (GO:0005829); Q96MF6 | Mitochondrion inner memb | 0 |
| Intermediate filament Q9BWQ8 | Cell membrane {ECO:00002 | 0 |
| Nucleoplasm (GO:00056Q14674) | Cytoplasm. Nucleus.      | 0 |
| Intermediate filament P08729 | Cytoplasm {ECO:0000269 P | 0 |

|                              |                          |   |
|------------------------------|--------------------------|---|
| Vesicles (GO:0043231) Q96K80 | Nucleus {ECO:0000269 Pub | 0 |
| Nucleoplasm (GO:00056P09651  | Nucleus {ECO:0000269 Pub | 0 |
| Cytosol (GO:0005829) P36896  | Cell membrane {ECO:00002 | 0 |
| Endoplasmic reticulum Q13438 | Endoplasmic reticulum lu | 1 |
| Mitochondria (GO:0005Q9ULD8  | Membrane; Multi-pass mem | 0 |
| Cytosol (GO:0005829); Q96GA3 |                          | 0 |
| Cytosol (GO:0005829); Q14244 | Cytoplasm, perinuclear r | 0 |
| Cytosol (GO:0005829); Q8WV93 | Mitochondrion membrane { | 0 |
| Nuclear membrane (GO:Q5SYE7  |                          | 0 |
| Centrosome (GO:000581Q8N157  | Cytoplasm, cytoskeleton, | 0 |
| Aggresome (GO:0016235 Q9UBP5 | Nucleus {ECO:0000255 PRO | 0 |
| Cytosol (GO:0005829); P28336 | Cell membrane; Multi-pas | 0 |
| Cell Junctions (GO:00060906  | Membrane; Multi-pass mem | 0 |
| Cytosol (GO:0005829); Q96D71 | Membrane, clathrin-coate | 0 |
| Plasma membrane (GO:0P42680  | Cytoplasm. Cell membrane | 0 |
| Centrosome (GO:000581095754  | Cell membrane {ECO:00003 | 0 |
| Cytosol (GO:0005829) Q99832  | Cytoplasm {ECO:0000250 U | 0 |
| Centriolar satellite Q9BXF6  | Cytoplasm. Recycling end | 0 |
| Mitochondria (GO:0005Q6GMV2  |                          | 0 |
| Centriolar satellite 075923  | Cell membrane, sarcolemm | 0 |
| Nucleoli (GO:0005730) Q04741 | Nucleus {ECO:0000255 PRO | 0 |
| Cytosol (GO:0005829) Q86W47  | Membrane; Multi-pass mem | 0 |
| Cytosol (GO:0005829) Q9Y4E8  | Cytoplasm {ECO:0000269 P | 0 |
| Vesicles (GO:0043231) P14384 | Cell membrane {ECO:00002 | 0 |
| Nucleoplasm (GO:00056Q00987  | Nucleus, nucleoplasm. Cy | 0 |
| Cytosol (GO:0005829) Q8N4N3  |                          | 0 |
| Actin filaments (GO:0Q9HAY6  |                          | 0 |
| Nucleoli (GO:0005730) Q99547 | Nucleus, nucleolus. Cyto | 0 |
| Cytosol (GO:0005829); 060268 | Cytoplasm {ECO:0000305 P | 0 |
| Centrosome (GO:000581043237  | Cytoplasm, cytoskeleton  | 0 |
| Golgi apparatus (GO:0Q96CD0  |                          | 0 |
| Cytosol (GO:0005829) Q9Y613  | Cytoplasm. Cytoplasm, cy | 0 |
| Nuclear bodies (GO:00Q96A19  |                          | 0 |
| Cytosol (GO:0005829); Q14940 | Membrane; Multi-pass mem | 0 |
| Endoplasmic reticulum A6NKB5 | Membrane {ECO:0000305};  | 0 |
| Vesicles (GO:0043231) 000180 | Cell membrane {ECO:00002 | 0 |
| Nucleoli (GO:0005730) Q14146 | Nucleus, nucleolus {ECO: | 1 |
| Golgi apparatus (GO:0Q14746  | Golgi apparatus membrane | 0 |
| Cytosol (GO:0005829) Q9BSD7  |                          | 0 |
| Cytoplasmic bodies (G075529  | Nucleus {ECO:0000269 Pub | 0 |
| Cytosol (GO:0005829); P15104 | Cytoplasm, cytosol {ECO: | 0 |
| Golgi apparatus (GO:0043752  | Golgi apparatus membrane | 0 |
| Cytosol (GO:0005829) Q05823  | Cytoplasm {ECO:0000269 P | 0 |
| Nucleoplasm (GO:00056Q08211  | Nucleus {ECO:0000269 Pub | 0 |
| Nuclear membrane (GO:Q5VZ46  |                          | 0 |
| Centrosome (GO:000581Q5VT06  | Cytoplasm, cytoskeleton, | 0 |
| Plasma membrane (GO:0Q9BXD5  | Cytoplasm {ECO:0000250}. | 0 |
| Cytosol (GO:0005829); Q9BZQ8 | Cytoplasm {ECO:0000269 P | 0 |
| Endoplasmic reticulum P11047 | Secreted, extracellular  | 0 |
| Cytosol (GO:0005829); Q5TC82 | Cytoplasm, P-body {ECO:0 | 0 |
| Nucleoplasm (GO:00056Q9HB58  | Nucleus {ECO:0000255 PRO | 1 |
| Mitochondria (GO:0005Q9H9J2  | Mitochondrion {ECO:00002 | 1 |
| Cytosol (GO:0005829); Q07001 | Cell junction, synapse,  | 0 |
| Nucleoplasm (GO:00056P23760  | Nucleus {ECO:0000269 Pub | 1 |
| Cytosol (GO:0005829); Q96BY6 | Nucleus {ECO:0000269 Pub | 0 |

|                              |                          |   |
|------------------------------|--------------------------|---|
| Mitochondria (GO:0005Q14679  | Cell projection, cilium  | 0 |
| Nucleoli (GO:0005730) Q86T82 |                          | 0 |
| Nucleoplasm (GO:00056P41595  | Cell membrane {ECO:00002 | 0 |
| Cytosol (GO:0005829); Q9BZV2 | Membrane {ECO:0000305};  | 0 |
| Nuclear membrane (GO:P25686  | Isoform 2: Cytoplasm {EC | 0 |
| Vesicles (GO:0043231) Q969X1 | Membrane {ECO:0000250};  | 0 |
| Mitochondria (GO:0005Q02318  | Mitochondrion inner memb | 1 |
| Cytosol (GO:0005829); 060573 |                          | 0 |
| Cytosol (GO:0005829); Q9Y376 | Cytoplasm {ECO:0000305}. | 0 |
| Mitochondria (GO:0005P10606  | Mitochondrion inner memb | 1 |
| Cytosol (GO:0005829) Q9UBZ9  | Nucleus {ECO:0000305}.   | 0 |
| Cytosol (GO:0005829) Q9BZW7  | Cytoplasm {ECO:0000250 U | 0 |
| Nucleoli (GO:0005730) Q8NBP5 | Membrane {ECO:0000305};  | 0 |
| Vesicles (GO:0043231) Q8WUH2 | Cytoplasm {ECO:0000269 P | 0 |
| Golgi apparatus (GO:0Q8IWJ2  | Cytoplasm. Golgi apparat | 0 |
| Mitochondria (GO:0005P82933  | Mitochondrion {ECO:00002 | 1 |
| Mitochondria (GO:0005Q9BVC5  |                          | 0 |
| Cytosol (GO:0005829); A6QL64 |                          | 0 |
| Nuclear speckles (GO:Q52LR7  | Nucleus {ECO:0000250}.   | 0 |
| Cytosol (GO:0005829) Q9H1K1  | Isoform 1: Mitochondrion | 0 |
| Mitochondria (GO:0005Q3SY69  | Mitochondrion {ECO:00002 | 1 |
| Cytosol (GO:0005829) Q8WWQ8  | Cell membrane {ECO:00002 | 0 |
| Microtubules (GO:0015Q9H0E7  | Nucleus {ECO:0000269 Pub | 0 |
| Cytoplasmic bodies (GQ07065  | Endoplasmic reticulum me | 0 |
| Mitochondria (GO:0005060486  | Membrane {ECO:0000305};  | 0 |
| Golgi apparatus (GO:0Q13610  | Nucleus {ECO:0000269 Pub | 0 |
| Nucleoplasm (GO:00056Q2M389  | Early endosome {ECO:0000 | 0 |
| Actin filaments (GO:0075369  | Isoform 1: Cytoplasm, ce | 0 |
| Microtubules (GO:0015P51956  | Cytoplasm {ECO:0000250}. | 0 |
| Cytosol (GO:0005829); 095206 | Cell membrane {ECO:00002 | 0 |
| Cell Junctions (GO:00Q86VN1  | Cytoplasm. Endosome. Lat | 0 |
| Nucleoplasm (GO:00056Q5TBB1  | Nucleus {ECO:0000305}.   | 1 |
| Cytosol (GO:0005829); Q8WWK9 | Cytoplasm, cytoskeleton. | 0 |
| Cytosol (GO:0005829) 060343  | Cytoplasm {ECO:0000269 P | 1 |
| Cytosol (GO:0005829) Q9NS62  | Isoform 1: Membrane {ECO | 0 |
| Cytosol (GO:0005829); Q6PGQ7 |                          | 0 |
| Actin filaments (GO:0Q9Y2L9  | Cytoplasm {ECO:0000269 P | 0 |
| Mitochondria (GO:0005Q9P2R7  | Mitochondrion {ECO:00002 | 1 |
| Nucleoplasm (GO:00056Q8NDN9  | Nucleus {ECO:0000305}.   | 0 |
| Nucleoplasm (GO:00056Q9NPJ6  | Nucleus.                 | 1 |
| Nuclear membrane (GO:Q9UIL8  | Nucleus {ECO:0000269 Pub | 0 |
| Cytosol (GO:0005829); Q96JB2 | Golgi apparatus, Golgi s | 1 |
| Actin filaments (GO:0Q8WWI1  |                          | 0 |
| Cytosol (GO:0005829); 095171 | Cytoplasm. Membrane. Not | 0 |
| Golgi apparatus (GO:0Q9Y287  | Integral membrane protei | 0 |
| Actin filaments (GO:0043597  | Cytoplasm, cytoskeleton  | 0 |
| Nucleoplasm (GO:00056Q9NV35  |                          | 0 |
| Cytosol (GO:0005829); P24530 | Cell membrane {ECO:00002 | 1 |
| Golgi apparatus (GO:0095199  | Cytoplasmic vesicle, sec | 0 |
| Actin filaments (GO:0P13796  | Cytoplasm, cytoskeleton  | 0 |
| Nucleoplasm (GO:00056Q96T68  | Nucleus {ECO:0000269 Pub | 0 |
| Cytosol (GO:0005829) Q12765  | Cytoplasm {ECO:0000250}. | 0 |
| Cytosol (GO:0005829); Q9BPX7 |                          | 0 |
| Focal adhesion sites Q68CZ2  | Cell junction, focal adh | 1 |
| Golgi apparatus (GO:0Q9NRB3  | Golgi apparatus membrane | 0 |

|                              |                          |   |
|------------------------------|--------------------------|---|
| Cytosol (GO:0005829) 000425  | Nucleus. Cytoplasm. Note | 0 |
| Nuclear bodies (GO:0092565)  | Nucleus.                 | 1 |
| Cytosol (GO:0005829);P63000  | Cell membrane {ECO:00002 | 0 |
| Nucleoplasm (GO:00056015504) | Nucleus, nuclear pore co | 0 |
| Vesicles (GO:0043231)P05231  | Secreted.                | 0 |
| Nuclear bodies (GO:009NPG8)  | Endoplasmic reticulum me | 0 |
| Actin filaments (GO:009Y6E2) |                          | 0 |
| Mitochondria (GO:0005Q969Z0) | Mitochondrion matrix {EC | 1 |
| Nucleoli (GO:0005730)Q9NY93  | Nucleus, nucleolus {ECO: | 1 |
| Cytosol (GO:0005829);015069  | Cytoplasm {ECO:0000250}. | 0 |
| Cytosol (GO:0005829);Q9UJU6  | Cytoplasm, cytoskeleton  | 0 |
| Mitochondria (GO:0005Q9BSQ5) | Cytoplasm {ECO:0000250}. | 0 |
| Nucleoplasm (GO:00056Q8N0Z6) | Nucleus. Cytoplasm. Note | 0 |
| Nucleoplasm (GO:00056015522) | Nucleus {ECO:0000305}.   | 0 |
| Golgi apparatus (GO:0P43699) | Nucleus {ECO:0000250 Uni | 0 |
| Nucleoli fibrillar ceQ9C0A1  | Nucleus {ECO:0000269 Pub | 0 |
| Cytosol (GO:0005829) P49914  | Cytoplasm.               | 1 |
| Vesicles (GO:0043231)Q9UKP4  | Secreted, extracellular  | 0 |
| Cell Junctions (GO:00P48200) | Cytoplasm.               | 0 |
| Nucleoplasm (GO:00056Q96L96) | Nucleus {ECO:0000250 Uni | 0 |
| Cytosol (GO:0005829);Q13137  | Cytoplasm, perinuclear r | 0 |
| Cytosol (GO:0005829);Q9HA92  | Mitochondrion {ECO:00003 | 0 |
| Cytosol (GO:0005829);P30419  | Cytoplasm {ECO:0000269 P | 0 |
| Vesicles (GO:0043231)Q8TBZ2  | Cytoplasm {ECO:0000269 P | 0 |
| Nucleoplasm (GO:00056Q07955) | Cytoplasm {ECO:0000269 P | 0 |
| Nucleoplasm (GO:00056Q14119) | Nucleus {ECO:0000269 Pub | 1 |
| Mitochondria (GO:0005Q9BSH4) | Mitochondrion {ECO:00002 | 1 |
| Nucleoplasm (GO:00056Q8IWB9) | Membrane {ECO:0000305};  | 0 |
| Cytosol (GO:0005829);P61962  | Cytoplasm. Nucleus. Note | 1 |
| Cytosol (GO:0005829);Q9BT23  | Cytoplasm {ECO:0000269 P | 1 |
| Nuclear membrane (GO:Q9BX63) | Nucleus {ECO:0000269 Pub | 0 |
| Cytosol (GO:0005829);095251  | Nucleus, nucleoplasm {EC | 0 |
| Nucleoplasm (GO:00056Q96DX8) | Membrane {ECO:0000305};  | 0 |
| Cytosol (GO:0005829);096019  | Nucleus {ECO:0000269 Pub | 1 |
| Mitochondria (GO:0005043674) | Mitochondrion inner memb | 1 |
| Mitochondria (GO:0005Q9HD33) | Mitochondrion {ECO:00002 | 1 |
| Cytosol (GO:0005829);P62995  | Nucleus {ECO:0000269 Pub | 1 |
| Cytosol (GO:0005829);Q9H992  |                          | 0 |
| Cell Junctions (GO:00Q8TAM6) | Cytoplasm, cytoskeleton  | 0 |
| Cytosol (GO:0005829);Q7Z7M9  | Golgi apparatus membrane | 0 |
| Cytosol (GO:0005829);Q92844  | Cytoplasm.               | 0 |
| Nucleoplasm (GO:00056P51451) | Cell membrane {ECO:00002 | 0 |
| Nuclear bodies (GO:00P43694) | Nucleus {ECO:0000269 Pub | 1 |
| Cytosol (GO:0005829);P12757  |                          | 0 |
| Cytosol (GO:0005829) P07814  | Cytoplasm, cytosol {ECO: | 0 |
| Cytosol (GO:0005829);Q14774  | Nucleus {ECO:0000255 PRO | 0 |
| Microtubules (GO:0015Q9NRW7) | Golgi apparatus membrane | 0 |
| Cytosol (GO:0005829) Q9Y597  | Cell membrane {ECO:00002 | 0 |
| Endosomes (GO:0005768Q96S38) | Cytoplasm {ECO:0000269 P | 0 |
| Plasma membrane (GO:0Q8IUF1) |                          | 0 |
| Centrosome (GO:000581P18510) | Isoform 1: Secreted.; Is | 0 |
| Cytosol (GO:0005829);Q9NXE4  | Endoplasmic reticulum me | 0 |
| Nucleoli fibrillar ceQ9C0J8  | Nucleus {ECO:0000269 Pub | 0 |
| Plasma membrane (GO:0Q96NT0) | Endosome {ECO:0000250 Un | 0 |
| Nuclear speckles (GO:Q9H0E3) | Nucleus {ECO:0000269 Pub | 0 |

|                              |                          |   |
|------------------------------|--------------------------|---|
| Cytosol (GO:0005829) 000499  | Isoform BIN1: Nucleus {E | 0 |
| Nucleoli (GO:0005730) Q96G21 | Nucleus, nucleolus {ECO: | 1 |
| Nuclear speckles (GO:060243  | Membrane {ECO:0000305};  | 0 |
| Cytosol (GO:0005829) Q9NYU2  | Endoplasmic reticulum lu | 0 |
| Plasma membrane (GO:0P04921  | Cell membrane; Single-pa | 1 |
| Vesicles (GO:0043231) Q92783 | Cytoplasm {ECO:0000305}. | 0 |
| Cell Junctions (GO:00Q8IZP0  | Cytoplasm {ECO:0000250}. | 0 |
| Mitochondria (GO:0005Q96TA2  | Mitochondrion inner memb | 1 |
| Endoplasmic reticulum Q96KC8 | Endoplasmic reticulum me | 0 |
| Cytoplasmic bodies (GP50750  | Nucleus. Cytoplasm. Nucl | 0 |
| Cytosol (GO:0005829); P10599 | Nucleus {ECO:0000269 Pub | 0 |
| Centrosome (GO:000581Q5BJF6  | Cytoplasm, cytoskeleton, | 0 |
| Nucleoplasm (GO:00056Q5VYK3  | Endoplasmic reticulum {E | 0 |
| Cytosol (GO:0005829); 014657 | Endoplasmic reticulum lu | 0 |
| Nucleoplasm (GO:00056Q9NZ63  |                          | 0 |
| Nucleoli (GO:0005730) 095347 | Nucleus {ECO:0000269 Pub | 0 |
| Nucleoplasm (GO:00056043474  | Nucleus.                 | 1 |
| Nuclear membrane (GO:014656  | Endoplasmic reticulum lu | 0 |
| Cytosol (GO:0005829); Q96TA1 | Cytoplasm, cytosol. Cell | 0 |
| Golgi apparatus (GO:0Q9H4F1  | Golgi apparatus membrane | 0 |
| Cytosol (GO:0005829); P61764 | Cytoplasm, cytosol {ECO: | 0 |
| Vesicles (GO:0043231) Q9NY64 | Cell membrane {ECO:00002 | 0 |
| Golgi apparatus (GO:0Q9UKU9  | Secreted.                | 0 |
| Cell Junctions (GO:00Q96SN8  | Cytoplasm, cytoskeleton, | 0 |
| Nucleoplasm (GO:00056Q9Y6Q3  | Nucleus {ECO:0000305}.   | 0 |
| Intermediate filament 015432 | Membrane {ECO:0000305};  | 0 |
| Golgi apparatus (GO:0000206  | Cell membrane {ECO:00002 | 0 |
| Intermediate filament 075820 | Nucleus {ECO:0000305}.   | 0 |
| Cytosol (GO:0005829); P56962 | Endoplasmic reticulum me | 0 |
| Nuclear speckles (GO:043172  | Nucleus {ECO:0000269 Pub | 0 |
| Cytosol (GO:0005829); Q9Y2K6 | Cytoplasm, perinuclear r | 0 |
| Vesicles (GO:0043231) Q14032 | Cytoplasm {ECO:0000269 P | 0 |
| Nucleoplasm (GO:00056Q96FN5  | Cytoplasm, cytoskeleton  | 0 |
| Nucleoli (GO:0005730) 075348 |                          | 0 |
| Nucleoplasm (GO:00056Q5VYW2  |                          | 0 |
| Nucleoplasm (GO:00056Q5T7W7  |                          | 0 |
| Nucleoplasm (GO:00056Q9BXL5  | Nucleus {ECO:0000269 Pub | 1 |
| Cytosol (GO:0005829); Q99436 | Cytoplasm {ECO:0000269 P | 1 |
| Nucleoplasm (GO:00056Q9BU70  |                          | 0 |
| Plasma membrane (GO:0Q7Z6M1  | Cytoplasm. Endosome memb | 0 |
| Golgi apparatus (GO:0Q92805  | Golgi apparatus membrane | 0 |
| Cytokinetic bridge (GP23025  | Nucleus {ECO:0000269 Pub | 0 |
| Cytosol (GO:0005829); Q09161 | Nucleus {ECO:0000269 Pub | 1 |
| Centrosome (GO:000581Q92688  | Isoform 1: Nucleus. Note | 0 |
| Cytosol (GO:0005829); Q13371 | Cell projection, cilium  | 0 |
| Cytosol (GO:0005829); P42766 |                          | 0 |
| Cytosol (GO:0005829); 060911 | Lysosome {ECO:0000305}.  | 0 |
| Nucleoplasm (GO:00056060663  | Nucleus {ECO:0000255 PRO | 0 |
| Actin filaments (GO:0Q13822  | Secreted {ECO:0000269 Pu | 0 |
| Nucleoplasm (GO:00056Q9BVC3  | Nucleus {ECO:0000250}.   | 0 |
| Endoplasmic reticulum Q9BUN8 | Endoplasmic reticulum me | 1 |
| Nucleoplasm (GO:00056P01106  | Nucleus, nucleoplasm {EC | 0 |
| Vesicles (GO:0043231) P48745 | Secreted. Cytoplasm {ECO | 0 |
| Vesicles (GO:0043231) 060518 | Cytoplasm {ECO:0000250}. | 0 |
| Nucleoli fibrillar ce Q9GZS1 | Nucleus, nucleolus {ECO: | 0 |

|                              |                          |   |
|------------------------------|--------------------------|---|
| Cytosol (GO:0005829); Q9Y263 | Nucleus {ECO:0000269 Pub | 0 |
| Cytosol (GO:0005829) Q5T6F2  |                          | 0 |
| Nucleoli (GO:0005730) Q7Z2E3 | Nucleus, nucleoplasm {EC | 0 |
| Nucleoplasm (GO:00056 Q9H0F5 | Nucleus {ECO:0000269 Pub | 1 |
| Centriolar satellite Q9Y490  | Cell projection, ruffle  | 0 |
| Cytosol (GO:0005829); 075953 |                          | 0 |
| Cytosol (GO:0005829); 075935 | Cytoplasm {ECO:0000269 P | 0 |
| Mitochondria (GO:0005P21854  | Membrane; Single-pass ty | 0 |
| Vesicles (GO:0043231) A6NDV4 | Isoform 2: Cell membrane | 0 |
| Cytosol (GO:0005829); Q9UBQ7 |                          | 0 |
| Mitochondria (GO:0005P30837  | Mitochondrion matrix.    | 0 |
| Mitochondria (GO:0005Q9BX68  | Mitochondrion {ECO:00002 | 1 |
| Nucleoplasm (GO:00056 Q8WX77 | Secreted {ECO:0000269 Pu | 0 |
| Cytosol (GO:0005829); Q5VZ89 | Cytoplasmic vesicle memb | 0 |
| Cytosol (GO:0005829); P62753 |                          | 0 |
| Cytosol (GO:0005829); Q8IVH2 | Nucleus {ECO:0000255 PRO | 0 |
| Nucleoli (GO:0005730) Q9Y3C6 | Nucleus {ECO:0000269 Pub | 0 |
| Cytosol (GO:0005829); Q9NSK0 | Cytoplasm, cytoskeleton  | 0 |
| Nucleoplasm (GO:00056 015535 | Nucleus {ECO:0000255 PRO | 0 |
| Cytosol (GO:0005829); P11309 | Isoform 1: Cytoplasm. Nu | 0 |
| Cytosol (GO:0005829); Q8N1G2 | Nucleus {ECO:0000269 Pub | 0 |
| Nucleoplasm (GO:00056 P05549 | Nucleus {ECO:0000269 Pub | 1 |
| Golgi apparatus (GO:0 Q9GZM5 | Cell membrane; Multi-pas | 0 |
| Actin filaments (GO:0 Q5T3F8 | Membrane {ECO:0000305};  | 0 |
| Nucleoplasm (GO:00056 043559 | Membrane; Lipid-anchor.  | 0 |
| Golgi apparatus (GO:0 Q5JTD0 | Golgi apparatus {ECO:000 | 0 |
| Vesicles (GO:0043231) Q5VV43 | Cell membrane {ECO:00002 | 0 |
| Cytosol (GO:0005829); Q15306 | Nucleus.                 | 1 |
| Cytosol (GO:0005829); A1A5C7 | Membrane {ECO:0000305};  | 0 |
| Microtubules (GO:0015Q13885  | Cytoplasm, cytoskeleton  | 1 |
| Cytosol (GO:0005829) Q9BTT6  | Cytoplasm {ECO:0000269 P | 0 |
| Vesicles (GO:0043231) Q9NP62 | Nucleus {ECO:0000255 PRO | 0 |
| Mitochondria (GO:0005Q86WA6  |                          | 0 |
| Cytosol (GO:0005829); Q13546 | Cytoplasm. Cell membrane | 0 |
| Mitochondria (GO:0005Q9BRT2  | Mitochondrion matrix, mi | 1 |
| Nucleoli (GO:0005730) P17096 | Nucleus. Chromosome.     | 0 |
| Golgi apparatus (GO:0075955  | Cell membrane; Periphera | 0 |
| Nuclear bodies (GO:00 Q14676 | Nucleus {ECO:0000269 Pub | 1 |
| Cytosol (GO:0005829); Q96JS3 |                          | 0 |
| Cytosol (GO:0005829); Q5SQI0 | Cytoplasm {ECO:0000255 H | 0 |
| Mitochondria (GO:0005Q7Z419  | Mitochondrion membrane { | 0 |
| Nuclear membrane (GO:Q8IXM6  | Nucleus inner membrane { | 1 |
| Mitochondria (GO:0005Q5ST30  | Mitochondrion {ECO:00003 | 0 |
| Nucleoplasm (GO:00056 Q7Z7C8 | Nucleus {ECO:0000269 Pub | 0 |
| Golgi apparatus (GO:0 Q9UBU6 | Membrane {ECO:0000305};  | 0 |
| Intermediate filament Q5T4I8 |                          | 0 |
| Cytosol (GO:0005829) Q7Z5Q1  | Cytoplasm {ECO:0000250 U | 0 |
| Mitochondria (GO:0005060603  | Membrane {ECO:0000250 Un | 0 |
| Mitochondria (GO:0005Q8TDB4  | Mitochondrion {ECO:00002 | 1 |
| Cytosol (GO:0005829) Q13402  | Cytoplasm {ECO:0000250 U | 0 |
| Actin filaments (GO:0094868  | Cytoplasm {ECO:0000250 U | 0 |
| Nucleoplasm (GO:00056 P49407 | Cytoplasm. Nucleus. Cell | 0 |
| Nucleoplasm (GO:00056 043422 |                          | 0 |
| Cytosol (GO:0005829); Q8N9B4 |                          | 0 |
| Endoplasmic reticulum 095998 | Secreted {ECO:0000305}.  | 0 |

|                              |                          |   |
|------------------------------|--------------------------|---|
| Nucleoplasm (GO:00056Q14980  | Nucleus {ECO:0000269 Pub | 0 |
| Mitochondria (GO:0005Q9GZT6  | Mitochondrion membrane { | 1 |
| Golgi apparatus (GO:0Q9HCH5  | Isoform 1: Cytoplasm {EC | 0 |
| Vesicles (GO:0043231) Q15771 | Membrane {ECO:0000250};  | 0 |
| Mitochondria (GO:0005Q9NS37  | Nucleus {ECO:0000269 Pub | 0 |
| Nucleoplasm (GO:00056Q14392  | Cell membrane {ECO:00002 | 0 |
| Vesicles (GO:0043231) P42785 | Lysosome.                | 0 |
| Cytosol (GO:0005829); Q96I59 | Mitochondrion matrix {EC | 0 |
| Golgi apparatus (GO:0Q9H920  | Membrane {ECO:0000305};  | 0 |
| Cytosol (GO:0005829); 043692 | Secreted {ECO:0000269 Pu | 0 |
| Plasma membrane (GO:0Q9H2Y9  | Cell membrane; Multi-pas | 1 |
| Cytosol (GO:0005829) Q96RS0  | Cytoplasm {ECO:0000269 P | 0 |
| Cytosol (GO:0005829); 000560 | Cell junction, focal adh | 0 |
| Centriolar satellite Q96PY6  | Nucleus {ECO:0000269 Pub | 0 |
| Cytosol (GO:0005829); Q8IY21 | Cytoplasm {ECO:0000269 P | 1 |
| Cytosol (GO:0005829); Q9NRS4 | Membrane {ECO:0000305};  | 0 |
| Nucleoplasm (GO:00056Q9BRD0  | Nucleus {ECO:0000269 Pub | 1 |
| Nucleoplasm (GO:00056P09237  | Secreted, extracellular  | 0 |
| Centrosome (GO:000581Q9BRQ4  | Cytoplasm {ECO:0000250 U | 0 |
| Nucleoli (GO:0005730) Q9BTE7 |                          | 0 |
| Nucleoli (GO:0005730) P46937 | Cytoplasm {ECO:0000269 P | 0 |
| Intermediate filament Q14134 | Cytoplasm {ECO:0000269 P | 0 |
| Mitochondria (GO:0005739)    | Endoplasmic reticulum me | 0 |
| Endoplasmic reticulum Q9NY30 |                          | 0 |
| Cytosol (GO:0005829); Q9UKI9 | Nucleus.                 | 1 |
| Nucleoplasm (GO:00056P35241  | Cell membrane; Periphera | 0 |
| Centrosome (GO:000581P30154  |                          | 0 |
| Mitochondria (GO:0005P10109  | Mitochondrion matrix {EC | 1 |
| Nucleoplasm (GO:00056Q9H5F2  | Nucleus {ECO:0000269 Pub | 1 |
| Cytosol (GO:0005829); Q9H0Q3 | Membrane {ECO:0000305};  | 0 |
| Mitochondria (GO:0005Q9P2F6  |                          | 0 |
| Mitochondria (GO:0005P54710  | Membrane {ECO:0000305};  | 0 |
| Cytosol (GO:0005829); P29466 | Cytoplasm {ECO:0000269 P | 0 |
| Nuclear bodies (GO:00Q96BT7  | Cytoplasm {ECO:0000269 P | 0 |
| Microtubules (GO:0015Q13163  |                          | 0 |
| Mitochondria (GO:0005Q9Y6N5  | Mitochondrion {ECO:00003 | 1 |
| Nucleoplasm (GO:00056Q05D32  |                          | 0 |
| Nuclear bodies (GO:00Q9NWH9  | Nucleus {ECO:0000250}. N | 1 |
| Plasma membrane (GO:0P07996  | Secreted {ECO:0000269 Pu | 0 |
| Nucleoli (GO:0005730) 060336 | Cytoplasm {ECO:0000269 P | 0 |
| Nucleoli fibrillar ce Q9BXS6 | Cytoplasm {ECO:0000250}. | 0 |
| Cytosol (GO:0005829) Q9Y375  | Mitochondrion {ECO:00002 | 0 |
| Midbody ring (GO:0090Q02241  | Nucleus. Cytoplasm, cyto | 0 |
| Nuclear bodies (GO:00Q8NG31  | Nucleus. Chromosome, cen | 1 |
| Centrosome (GO:000581Q9NVX0  | Cytoplasm, cytoskeleton, | 0 |
| Cytosol (GO:0005829); Q92541 | Nucleus, nucleoplasm {EC | 0 |
| Plasma membrane (GO:0Q2NL67  |                          | 0 |
| Cytosol (GO:0005829); P05386 |                          | 0 |
| Vesicles (GO:0043231) Q9NXX6 | Cell membrane {ECO:00003 | 0 |
| Centrosome (GO:000581Q9UGJ1  | Cytoplasm, cytoskeleton, | 1 |
| Cytokinetic bridge (GQ96TC7  | Mitochondrion membrane;  | 0 |
| Vesicles (GO:0043231) P23677 |                          | 0 |
| Cytosol (GO:0005829); Q9BZF9 | Nucleus {ECO:0000269 Pub | 0 |
| Golgi apparatus (GO:0043541  | Nucleus {ECO:0000269 Pub | 1 |
| Cytosol (GO:0005829) Q00722  |                          | 0 |

|                             |                          |   |
|-----------------------------|--------------------------|---|
| Cytoplasmic bodies (G00P6H9 | Membrane {ECO:0000305};  | 0 |
| Cell Junctions (G0:00Q9NQU5 | Cytoplasm. Nucleus. Note | 0 |
| Nucleoplasm (G0:00056014672 | Cell membrane {ECO:00002 | 0 |
| Mitochondria (G0:0005P11511 | Membrane; Peripheral mem | 0 |
| Centrosome (G0:000581Q6N043 | Nucleus {ECO:0000305}.   | 0 |
| Golgi apparatus (G0:0Q8NFY4 | Isoform 1: Cell membrane | 0 |
| Nucleoli (G0:0005730)Q9UHA3 | Nucleus, nucleolus {ECO: | 0 |
| Nucleoplasm (G0:0005654)    |                          | 0 |
| Nucleoplasm (G0:00056P30047 | Nucleus {ECO:0000269 Pub | 0 |
| Centrosome (G0:000581075815 |                          | 0 |
| Cytosol (G0:0005829) Q5TON5 | Cytoplasm {ECO:0000269 P | 0 |
| Cytosol (G0:0005829);Q6YP21 |                          | 0 |
| Nuclear bodies (G0:00Q00403 | Nucleus {ECO:0000269 Pub | 1 |
| Vesicles (G0:0043231)P53611 |                          | 0 |
| Nucleoplasm (G0:00056Q53G44 | Cytoplasm {ECO:0000305}. | 0 |
| Cytosol (G0:0005829);Q8TF65 | Cytoplasm {ECO:0000305}. | 1 |
| Centrosome (G0:000581Q52LW3 |                          | 0 |
| Nucleoplasm (G0:00056Q8TCB0 | Cytoplasm {ECO:0000305}. | 0 |
| Cytosol (G0:0005829) Q8NCS7 | Membrane {ECO:0000250};  | 0 |
| Cell Junctions (G0:00Q9UQC9 | Cell membrane; Single-pa | 0 |
| Mitochondria (G0:0005P11182 | Mitochondrion matrix.    | 1 |
| Nucleoplasm (G0:00056000442 | Nucleus, nucleoplasm.    | 1 |
| Vesicles (G0:0043231)Q9UG01 | Cell projection, cilium  | 0 |
| Golgi apparatus (G0:0Q99674 | Secreted {ECO:0000250}.  | 0 |
| Mitochondria (G0:0005P55084 | Mitochondrion {ECO:00002 | 0 |
| Cytosol (G0:0005829) P50053 |                          | 0 |
| Cytosol (G0:0005829);075688 | Cytoplasm, cytosol {ECO: | 0 |
| Mitochondria (G0:0005Q8TCS8 | Cytoplasm. Mitochondrion | 0 |
| Cytosol (G0:0005829) Q8TCX1 | Cytoplasm {ECO:0000269 P | 0 |
| Nucleoplasm (G0:00056Q9BTF0 |                          | 0 |
| Mitochondria (G0:0005Q16678 | Endoplasmic reticulum me | 0 |
| Cytosol (G0:0005829);P62820 | Golgi apparatus {ECO:000 | 0 |
| Cytosol (G0:0005829) P61160 | Cytoplasm, cytoskeleton  | 0 |
| Endoplasmic reticulumQ9HCU5 | Endoplasmic reticulum me | 0 |
| Cell Junctions (G0:00Q9Y289 | Membrane; Multi-pass mem | 0 |
| Mitochondria (G0:0005Q07837 | Membrane {ECO:0000269 Pu | 0 |
| Nucleoplasm (G0:00056Q86XK2 | Nucleus. Chromosome.     | 1 |
| Nucleoplasm (G0:00056095343 | Nucleus {ECO:0000250 Uni | 0 |
| Nuclear bodies (G0:00Q9BU64 | Nucleus. Chromosome, cen | 1 |
| Mitochondria (G0:0005P42704 | Mitochondrion. Nucleus,  | 0 |
| Cytosol (G0:0005829);Q9BYV2 | Cytoplasm, cytoskeleton  | 0 |
| Mitochondria (G0:0005060941 | Cytoplasm.               | 0 |
| Microtubules (G0:0015P61163 | Cytoplasm, cytoskeleton  | 0 |
| Cytosol (G0:0005829);Q14CX5 | Membrane {ECO:0000305};  | 0 |
| Plasma membrane (G0:0Q9NZM1 | Cell membrane; Single-pa | 0 |
| Vesicles (G0:0043231)Q96JB6 | Secreted, extracellular  | 0 |
| Plasma membrane (G0:0Q96FJ0 |                          | 0 |
| Nuclear bodies (G0:00P52954 | Nucleus {ECO:0000305}.   | 0 |
| Mitochondria (G0:0005Q8NBU5 | Peroxisome {ECO:0000250  | 0 |
| Cytosol (G0:0005829);Q32M84 |                          | 0 |
| Cytosol (G0:0005829);P52732 | Cytoplasm {ECO:0000269 P | 0 |
| Nucleoli (G0:0005730)Q86UP6 | Cytoplasmic vesicle, sec | 0 |
| Cytosol (G0:0005829);095359 | Cytoplasm {ECO:0000269 P | 0 |
| Cytosol (G0:0005829);Q9HA72 | Membrane {ECO:0000305};  | 0 |
| Centrosome (G0:000581P36405 | Golgi apparatus membrane | 0 |



|                               |                          |   |
|-------------------------------|--------------------------|---|
| Centriolar satellite Q53EZ4   | Cytoplasm {ECO:0000269 P | 0 |
| Cytokinetic bridge (G0:Q96Q89 | Nucleus {ECO:0000269 Pub | 0 |
| Microtubules (G0:0015P49961   | Membrane {ECO:0000305};  | 0 |
| Nucleoplasm (G0:00056Q8TAG9   | Cytoplasm {ECO:0000250 U | 0 |
| Cytosol (G0:0005829) Q9P212   | Cytoplasm, cytosol. Cell | 0 |
| Nucleoplasm (G0:00056Q9UK59   | Nucleus {ECO:0000305}.   | 1 |
| Cytosol (G0:0005829);075165   | Early endosome {ECO:0000 | 0 |
| Lipid droplets (G0:00Q9BY21   | Cell membrane {ECO:00002 | 0 |
| Cytosol (G0:0005829);P20073   |                          | 0 |
| Nucleoplasm (G0:00056Q96BN6   |                          | 0 |
| Cytosol (G0:0005829);Q8N9N2   | Nucleus {ECO:0000269 Pub | 0 |
| Centriolar satellite Q70YC4   |                          | 0 |
| Cytosol (G0:0005829);P62847   |                          | 0 |
| Nuclear membrane (G0:Q8NFU7   | Nucleus {ECO:0000305}.   | 0 |
| Mitochondria (G0:0005P51530   | Nucleus. Mitochondrion.  | 0 |
| Cytosol (G0:0005829);Q86TC9   | Cytoplasm {ECO:0000269 P | 0 |
| Cytosol (G0:0005829);P31939   |                          | 0 |
| Cytoplasmic bodies (G0:Q99728 | Nucleus. Note=During S p | 0 |
| Cytosol (G0:0005829);Q8N187   | Nucleus {ECO:0000250}.   | 0 |
| Cytosol (G0:0005829) Q9NWL6   |                          | 0 |
| Cytosol (G0:0005829);Q9NRN9   |                          | 0 |
| Nucleoplasm (G0:00056P05455   | Nucleus {ECO:0000305}.   | 0 |
| Golgi apparatus (G0:0Q13506   | Nucleus {ECO:0000250}.   | 0 |
| Golgi apparatus (G0:0Q96Q40   |                          | 0 |
| Cytosol (G0:0005829);Q13427   | Nucleus matrix {ECO:0000 | 0 |
| Nucleoplasm (G0:00056Q53R41   | Mitochondrion {ECO:00002 | 0 |
| Cytosol (G0:0005829);075874   | Cytoplasm, cytosol {ECO: | 0 |
| Cytosol (G0:0005829) Q9NTK5   | Cytoplasm {ECO:0000255 H | 0 |
| Nuclear speckles (G0:Q86X95   | Nucleus speckle. Cytopla | 0 |
| Cytosol (G0:0005829);P28290   | Cytoplasm {ECO:0000269 P | 1 |
| Plasma membrane (G0:0P02708   | Cell junction, synapse,  | 0 |
| Centrosome (G0:000581Q6P1L5   |                          | 0 |
| Cytosol (G0:0005829);Q9GZL7   | Nucleus, nucleolus {ECO: | 0 |
| Nucleoplasm (G0:00056Q9NYB9   | Cytoplasm {ECO:0000269 P | 0 |
| Cytosol (G0:0005829);P06756   | Cell membrane; Single-pa | 0 |
| Cytosol (G0:0005829);Q9NP59   | Cell membrane {ECO:00002 | 1 |
| Golgi apparatus (G0:0Q9BS91   | Membrane {ECO:0000305};  | 0 |
| Vesicles (G0:0043231) Q96SL1  | Lysosome membrane {ECO:0 | 0 |
| Cytosol (G0:0005829);Q9BQF6   |                          | 0 |
| Focal adhesion sites 095843   |                          | 0 |
| Mitochondria (G0:0005Q14061   | Mitochondrion intermembr | 0 |
| Cytosol (G0:0005829);Q8IXQ6   | Cytoplasm, cytosol {ECO: | 1 |
| Nuclear speckles (G0:Q8NEH6   | Nucleus {ECO:0000250}.   | 0 |
| Cytosol (G0:0005829);P40818   | Cytoplasm {ECO:0000269 P | 0 |
| Nucleoplasm (G0:00056Q93073   |                          | 0 |
| Actin filaments (G0:0Q9NYL9   | Cytoplasm, cytoskeleton  | 0 |
| Vesicles (G0:0043231) Q8TCT8  | Late endosome membrane { | 0 |
| Mitochondria (G0:0005094923   | Golgi apparatus membrane | 0 |
| Nucleoplasm (G0:00056Q7M4L6   |                          | 0 |
| Mitochondria (G0:0005Q96SY0   | Nucleus {ECO:0000250 Uni | 0 |
| Cytosol (G0:0005829) Q96CD2   |                          | 0 |
| Vesicles (G0:0043231) 075326  | Cell membrane {ECO:00002 | 0 |
| Cytosol (G0:0005829);Q96S82   |                          | 0 |
| Cytosol (G0:0005829);Q8N264   | Cytoplasm, cytoskeleton. | 0 |
| Cell Junctions (G0:00094988   |                          | 0 |

|                              |                          |   |
|------------------------------|--------------------------|---|
| Cytosol (GO:0005829) Q15034  | Cytoplasm. Cytoplasmic v | 0 |
| Cytosol (GO:0005829);Q8IVU3  | Cytoplasm, cytosol {ECO: | 1 |
| Golgi apparatus (GO:009P2E7  | Cell membrane {ECO:00002 | 0 |
| Cytosol (GO:0005829) Q86YA3  | Membrane {ECO:0000305};  | 0 |
| Golgi apparatus (GO:0063HQ0  | Golgi apparatus, trans-G | 0 |
| Nuclear speckles (GO:Q9BT78  | Cytoplasm. Nucleus. Cyto | 0 |
| Nucleoplasm (GO:00056Q14103  | Nucleus. Cytoplasm. Note | 0 |
| Nucleoplasm (GO:00056Q0VAM2  | Early endosome {ECO:0000 | 0 |
| Cytosol (GO:0005829);094979  | Cytoplasm {ECO:0000250}. | 0 |
| Cytosol (GO:0005829);P12034  | Secreted {ECO:0000305}.  | 0 |
| Cytosol (GO:0005829);Q53EU6  | Endoplasmic reticulum me | 0 |
| Nuclear bodies (GO:00P09038  | Secreted. Nucleus. Note= | 0 |
| Centrosome (GO:000581Q2LD37  | Membrane {ECO:0000255};  | 0 |
| Cytosol (GO:0005829) P52306  |                          | 0 |
| Cytosol (GO:0005829) Q659C4  |                          | 0 |
| Endoplasmic reticulumQ13201  | Secreted {ECO:0000305}.  | 0 |
| Centriolar satellite 076074  |                          | 0 |
| Nuclear bodies (GO:00Q9NQX1  | Nucleus {ECO:0000269 Pub | 0 |
| Nucleoplasm (GO:00056Q7Z3B4  | Nucleus, nuclear pore co | 0 |
| Nuclear speckles (GO:Q9NSY1  | Nucleus {ECO:0000269 Pub | 0 |
| Cytosol (GO:0005829) Q9UN86  | Cytoplasm {ECO:0000269 P | 1 |
| Cytosol (GO:0005829) Q9NVA2  | Cytoplasm, cytoskeleton. | 0 |
| Cytosol (GO:0005829) Q14108  | Lysosome membrane {ECO:0 | 0 |
| Cytosol (GO:0005829);Q16589  | Cytoplasm {ECO:0000250}. | 0 |
| Cytosol (GO:0005829) Q96LI5  | Cytoplasm {ECO:0000269 P | 0 |
| Golgi apparatus (GO:0060763  | Cytoplasm, cytosol {ECO: | 0 |
| Centrosome (GO:000581Q92772  | Cytoplasm {ECO:0000269 P | 0 |
| Cytosol (GO:0005829) P12429  |                          | 0 |
| Mitochondria (GO:0005Q9H2U2  | Mitochondrion {ECO:00003 | 0 |
| Cytosol (GO:0005829);Q02224  | Chromosome, centromere,  | 0 |
| Nucleoplasm (GO:00056Q8NEC7  | Cytoplasm {ECO:0000269 P | 0 |
| Cytosol (GO:0005829);Q96CB8  | Nucleus {ECO:0000269 Pub | 1 |
| Cytosol (GO:0005829);P55212  | Cytoplasm.               | 1 |
| Nucleoplasm (GO:00056Q9UJU2  | Nucleus {ECO:0000255 PRO | 0 |
| Mitochondria (GO:0005Q16836  | Mitochondrion matrix.    | 1 |
| Nucleoli (GO:0005730) 043252 |                          | 0 |
| Nucleoplasm (GO:00056Q95487  | Cytoplasmic vesicle, COP | 0 |
| Cytosol (GO:0005829);Q08209  | Cytoplasm {ECO:0000269 P | 0 |
| Cytosol (GO:0005829) P55157  | Endoplasmic reticulum {E | 0 |
| Cytosol (GO:0005829);P35556  | Secreted, extracellular  | 0 |
| Vesicles (GO:0043231) Q9UPT6 | Cytoplasm {ECO:0000250 U | 0 |
| Plasma membrane (GO:0P49796  | Cytoplasm {ECO:0000269 P | 0 |
| Nucleoplasm (GO:00056Q96NT3  |                          | 0 |
| Cytosol (GO:0005829);Q3SXP7  | Membrane {ECO:0000305};  | 0 |
| Golgi apparatus (GO:006L9W6  | Golgi apparatus, Golgi s | 1 |
| Vesicles (GO:0043231) Q13956 |                          | 0 |
| Cytosol (GO:0005829);P41212  | Nucleus.                 | 0 |
| Vesicles (GO:0043231) Q9HOR8 | Cytoplasm, cytoskeleton. | 0 |
| Cytosol (GO:0005829);Q7Z4S6  | Cytoplasm, cytoskeleton  | 0 |
| Mitochondria (GO:0005Q9Y2Z4  | Mitochondrion matrix {EC | 1 |
| Actin filaments (GO:00Q96M96 | Cytoplasm, cytoskeleton  | 0 |
| Endoplasmic reticulumQ5BKT4  | Endoplasmic reticulum me | 0 |
| Cytosol (GO:0005829);Q9NP50  | Nucleus {ECO:0000250 Uni | 0 |
| Nucleoplasm (GO:00056Q6ZN18  | Nucleus {ECO:0000305}.   | 1 |
| Cytosol (GO:0005829);Q9HBU6  | Cytoplasm.               | 0 |

|                             |                          |   |
|-----------------------------|--------------------------|---|
| Nucleoplasm (GO:00056Q96MT3 | Nucleus membrane {ECO:00 | 0 |
| Cytosol (GO:0005829);Q9NZP8 | Secreted {ECO:0000269 Pu | 0 |
| Mitochondria (GO:0005Q16795 | Mitochondrion matrix {EC | 1 |
| Vesicles (GO:0043231)Q96E93 | Cell membrane {ECO:00002 | 0 |
| Golgi apparatus (GO:0P82980 | Cytoplasm {ECO:0000250}. | 0 |
| Cytosol (GO:0005829);P50542 | Cytoplasm {ECO:0000269 P | 0 |
| Nucleoplasm (GO:00056Q8IYJ0 | Membrane {ECO:0000305};  | 0 |
| Cytosol (GO:0005829);Q86SJ2 | Cell membrane {ECO:00002 | 0 |
| Nuclear bodies (GO:00Q99590 | Nucleus {ECO:0000269 Pub | 1 |
| Nucleoplasm (GO:00056P02458 | Secreted, extracellular  | 0 |
| Centrosome (GO:000581095626 |                          | 0 |
| Nucleoli (GO:0005730)Q9BRT6 | Nucleus, nucleolus {ECO: | 0 |
| Cytosol (GO:0005829) Q6UXM1 | Cell membrane {ECO:00002 | 0 |
| Vesicles (GO:0043231)P58166 | Secreted {ECO:0000250}.  | 0 |
| Nucleoli (GO:0005730)Q8WV24 | Cytoplasm {ECO:0000269 P | 0 |
| Cytosol (GO:0005829)        |                          | 0 |
| Cytosol (GO:0005829);Q16828 | Cytoplasm {ECO:0000269 P | 1 |
| Cytosol (GO:0005829);Q96NU7 |                          | 0 |
| Centrosome (GO:000581Q8NHV4 | Cytoplasm, cytoskeleton, | 1 |
| Cytosol (GO:0005829);P50553 | Nucleus {ECO:0000250 Uni | 0 |
| Nucleoplasm (GO:00056Q8N697 | Membrane {ECO:0000305};  | 0 |
| Nucleoplasm (GO:00056Q13569 | Nucleus {ECO:0000269 Pub | 1 |
| Nucleoplasm (GO:00056Q96K30 | Cytoplasm {ECO:0000269 P | 0 |
| Cytosol (GO:0005829) Q96GA7 |                          | 0 |
| Mitochondria (GO:0005Q96EY8 | Mitochondrion {ECO:00003 | 0 |
| Cytosol (GO:0005829) Q9NZD2 | Cytoplasm {ECO:0000269 P | 1 |
| Microtubules (GO:0015Q14161 |                          | 0 |
| Centrosome (GO:000581Q9BT92 | Cytoplasm, cytoskeleton  | 0 |
| Focal adhesion sites Q5U5X8 |                          | 0 |
| Cytosol (GO:0005829);Q96NZ1 | Nucleus {ECO:0000255 PRO | 0 |
| Actin filaments (GO:0Q7Z3Q1 | Membrane {ECO:0000305};  | 0 |
| Nucleoplasm (GO:00056P52945 | Nucleus. Cytoplasm, cyto | 0 |
| Cytosol (GO:0005829);Q8N448 |                          | 0 |
| Centriolar satellite Q8IXS2 | Cytoplasm, cytoskeleton, | 0 |
| Nucleoplasm (GO:00056Q6ZMH5 | Basolateral cell membran | 0 |
| Nuclear bodies (GO:00Q15633 | Cytoplasm. Cytoplasm, pe | 0 |
| Nucleoplasm (GO:00056Q9BQ15 | Nucleus {ECO:0000269 Pub | 1 |
| Cytosol (GO:0005829);Q5TBK1 |                          | 0 |
| Nucleoplasm (GO:00056Q8TAQ2 | Nucleus.                 | 1 |
| Cytosol (GO:0005829);P51587 | Nucleus {ECO:0000269 Pub | 0 |
| Cytosol (GO:0005829);Q9H9L4 | Nucleus {ECO:0000269 Pub | 0 |
| Nucleoli (GO:0005730)Q8N5B7 | Endoplasmic reticulum me | 0 |
| Cell Junctions (GO:00Q12852 | Cytoplasm {ECO:0000250 U | 0 |
| Cytosol (GO:0005829);P26010 | Membrane; Single-pass ty | 0 |
| Golgi apparatus (GO:0Q8NCL4 | Golgi apparatus membrane | 0 |
| Nucleoplasm (GO:00056Q9HB07 | Nucleus {ECO:0000269 Pub | 0 |
| Endoplasmic reticulumQ9BSJ8 | Endoplasmic reticulum me | 0 |
| Mitochondria (GO:0005Q8NB46 |                          | 0 |
| Nucleoplasm (GO:00056Q8NDX6 | Nucleus {ECO:0000305}.   | 0 |
| Nuclear bodies (GO:00Q9BVW6 | Membrane {ECO:0000305};  | 0 |
| Cytosol (GO:0005829);P10768 | Cytoplasm. Cytoplasmic v | 0 |
| Nucleoplasm (GO:00056P06400 | Nucleus {ECO:0000269 Pub | 1 |
| Nucleoplasm (GO:00056A3KN83 |                          | 0 |
| Nucleoplasm (GO:00056Q6PF18 |                          | 0 |
| Nucleoplasm (GO:00056Q9UPS6 | Nucleus speckle {ECO:000 | 0 |

|                              |                          |   |
|------------------------------|--------------------------|---|
| Nucleoplasm (GO:00056Q96AX1  | Cytoplasmic vesicle {ECO | 0 |
| Golgi apparatus (GO:0Q9HBH0  | Cell membrane {ECO:00003 | 0 |
| Cytosol (GO:0005829) 043583  |                          | 0 |
| Microtubules (GO:0015Q9NSV4  | Cytoplasm {ECO:0000269 P | 0 |
| Nuclear speckles (GO:Q5T8P6  |                          | 0 |
| Nucleoplasm (GO:00056Q5VZF2  | Nucleus {ECO:0000269 Pub | 0 |
| Nucleoplasm (GO:00056Q96T25  | Nucleus {ECO:0000250}.   | 0 |
| Cytosol (GO:0005829) Q7L211  | Membrane {ECO:0000305};  | 0 |
| Golgi apparatus (GO:0Q9NX57  | Golgi apparatus {ECO:000 | 1 |
| Nucleoplasm (GO:00056Q13619  |                          | 0 |
| Centrosome (GO:000581Q86TZ1  |                          | 0 |
| Plasma membrane (GO:0P30872  | Cell membrane; Multi-pas | 1 |
| Cell Junctions (GO:0Q86UP0   | Cell membrane {ECO:00003 | 0 |
| Nucleoplasm (GO:00056Q6UW01  | Endoplasmic reticulum {E | 0 |
| Cell Junctions (GO:0Q6SA08   | Cytoplasmic vesicle, sec | 0 |
| Nucleoli (GO:0005730) P51513 | Nucleus.                 | 0 |
| Endoplasmic reticulum Q9H3N1 | Membrane {ECO:0000305};  | 0 |
| Mitochondria (GO:0005Q96NE9  | Cytoplasm {ECO:0000269 P | 0 |
| Intermediate filament Q9HAT8 |                          | 0 |
| Endoplasmic reticulum Q16799 | Endoplasmic reticulum me | 0 |
| Plasma membrane (GO:0Q86TY3  | Membrane {ECO:0000305};  | 0 |
| Cytosol (GO:0005829) Q17RD7  |                          | 0 |
| Cell Junctions (GO:0Q8IZM9   | Cell membrane {ECO:00002 | 0 |
| Cytosol (GO:0005829) Q147X3  | Cytoplasm {ECO:0000269 P | 0 |
| Mitochondria (GO:0005Q96JK2  |                          | 0 |
| Centriolar satellite P59190  | Cell membrane {ECO:00003 | 0 |
| Cytosol (GO:0005829); Q96FK6 |                          | 0 |
| Centrosome (GO:000581Q8NCM2  | Membrane; Multi-pass mem | 0 |
| Cytosol (GO:0005829); Q8WXE9 | Cytoplasm {ECO:0000269 P | 0 |
| Cell Junctions (GO:0Q9BUY7   |                          | 0 |
| Cytosol (GO:0005829); Q8IYL9 | Cell membrane {ECO:00002 | 0 |
| Vesicles (GO:0043231) Q8N8N7 | Cytoplasm {ECO:0000250}. | 0 |
| Nuclear speckles (GO:Q8WYK2  | Nucleus {ECO:0000305}.   | 0 |
| Plasma membrane (GO:0Q9UBX5  | Secreted {ECO:0000269 Pu | 0 |
| Cytosol (GO:0005829); Q9UK55 | Secreted.                | 0 |
| Cytosol (GO:0005829); Q96F83 |                          | 0 |
| Cytosol (GO:0005829) P23381  | Cytoplasm.               | 1 |
| Golgi apparatus (GO:0Q8N8Q9  | Cell membrane {ECO:00003 | 0 |
| Cytosol (GO:0005829); Q9UHW9 | Basolateral cell membran | 0 |
| Centrosome (GO:000581P55081  | Nucleus {ECO:0000269 Pub | 1 |
| Nuclear speckles (GO:Q99081  | Nucleus.                 | 0 |
| Cytosol (GO:0005829) Q00796  | Mitochondrion membrane { | 0 |
| Nucleoli (GO:0005730) P84101 |                          | 0 |
| Actin filaments (GO:0Q8IWY8  | Nucleus {ECO:0000305}.   | 0 |
| Mitochondria (GO:0005Q8IV50  |                          | 0 |
| Nucleoli (GO:0005730) P21781 | Secreted.                | 0 |
| Nuclear bodies (GO:00P19113  |                          | 0 |
| Golgi apparatus (GO:0095395  | Golgi apparatus membrane | 0 |
| Nucleoplasm (GO:00056P52657  | Nucleus.                 | 1 |
| Nucleoli (GO:0005730) P37108 | Cytoplasm.               | 0 |
| Nucleoplasm (GO:00056Q8TBEO  | Nucleus {ECO:0000269 Pub | 1 |
| Nucleoplasm (GO:00056A7MBM2  | Membrane {ECO:0000305};  | 0 |
| Cytosol (GO:0005829); Q8IWY9 | Cytoplasm. Nucleus. Memb | 0 |
| Nucleoplasm (GO:00056Q04726  | Nucleus.                 | 1 |
| Centrosome (GO:000581P39687  | Nucleus. Cytoplasm. Endo | 0 |

|                              |                          |   |
|------------------------------|--------------------------|---|
| Nucleoplasm (GO:00056Q9H0A8  | Cytoplasm {ECO:0000269 P | 0 |
| Mitochondria (GO:0005P13804  | Mitochondrion matrix {EC | 1 |
| Nucleoplasm (GO:00056Q9NP66  | Nucleus {ECO:0000255 PRO | 0 |
| Cytosol (GO:0005829); Q9BY12 | Endoplasmic reticulum {E | 0 |
| Golgi apparatus (GO:0060637  | Membrane {ECO:0000305};  | 0 |
| Cytosol (GO:0005829); Q9GZS3 | Nucleus {ECO:0000269 Pub | 0 |
| Nuclear bodies (GO:00Q15596  | Nucleus.                 | 1 |
| Nucleoplasm (GO:00056Q96FI4  | Cytoplasm, cytoskeleton, | 0 |
| Nucleoplasm (GO:00056Q9NTJ4  | Cytoplasm {ECO:0000269 P | 0 |
| Cytosol (GO:0005829); Q8WW22 | Membrane {ECO:0000305};  | 0 |
| Cytoplasmic bodies (GQ9H1K6  |                          | 0 |
| Actin filaments (GO:0P09493  | Cytoplasm, cytoskeleton  | 0 |
| Vesicles (GO:0043231) P08069 | Cell membrane {ECO:00002 | 0 |
| Plasma membrane (GO:0Q8NCT1  | Early endosome {ECO:0000 | 0 |
| Nucleoplasm (GO:00056Q9H611  | Nucleus {ECO:0000255 HAM | 0 |
| Nucleoplasm (GO:00056Q9Y6I4  | Nucleus {ECO:0000269 Pub | 1 |
| Cytosol (GO:0005829) Q96RK4  | Cytoplasm, cytoskeleton, | 0 |
| Nuclear bodies (GO:00P29590  | Nucleus. Nucleus, nucleo | 0 |
| Nucleoplasm (GO:00056Q8TE56  | Secreted, extracellular  | 0 |
| Nucleoplasm (GO:00056Q8NG48  |                          | 0 |
| Golgi apparatus (GO:0015127  | Golgi apparatus, trans-G | 0 |
| Cytosol (GO:0005829); Q96S86 | Secreted, extracellular  | 0 |
| Mitochondria (GO:0005P54098  | Mitochondrion {ECO:00002 | 1 |
| Centrosome (GO:000581P12271  | Cytoplasm.               | 1 |
| Nucleoplasm (GO:00056Q9NVI1  | Nucleus {ECO:0000269 Pub | 1 |
| Cytosol (GO:0005829); P08910 | Cell projection, cilium, | 0 |
| Actin filaments (GO:0Q6P2C0  |                          | 0 |
| Nucleoplasm (GO:00056Q7Z2Z1  | Nucleus {ECO:0000269 Pub | 1 |
| Nuclear membrane (GO:Q16288  | Membrane; Single-pass ty | 0 |
| Cytokinetic bridge (GQ7L5Y6  | Nucleus {ECO:0000305}.   | 0 |
| Cytosol (GO:0005829) Q08431  | Membrane {ECO:0000269 Pu | 0 |
| Mitochondria (GO:0005Q8N1W2  | Nucleus {ECO:0000305}.   | 0 |
| Cytosol (GO:0005829); Q9H3U1 | Cytoplasm {ECO:0000269 P | 0 |
| Centriolar satellite Q92186  | Golgi apparatus membrane | 0 |
| Cytosol (GO:0005829); Q6DN12 | Membrane {ECO:0000305};  | 0 |
| Golgi apparatus (GO:0P09958  | Golgi apparatus, trans-G | 0 |
| Cell Junctions (GO:00P46940  | Cell membrane {ECO:00002 | 0 |
| Cytosol (GO:0005829); Q6UUV7 | Nucleus {ECO:0000269 Pub | 1 |
| Cytosol (GO:0005829) Q7Z2Z2  |                          | 0 |
| Mitochondria (GO:0005Q99963  | Cytoplasm {ECO:0000250 U | 0 |
| Golgi apparatus (GO:0P67812  | Microsome membrane {ECO: | 0 |
| Microtubules (GO:0015Q8IYM1  | Cytoplasm. Cytoplasm, cy | 0 |
| Cytosol (GO:0005829); Q49A26 | Nucleus {ECO:0000269 Pub | 1 |
| Cytosol (GO:0005829); 015305 | Cytoplasm.               | 0 |
| Cytosol (GO:0005829); 043294 | Cell junction, focal adh | 0 |
| Cytosol (GO:0005829); Q96GQ5 | Membrane {ECO:0000305};  | 0 |
| Cytosol (GO:0005829); Q96C12 | Cytoplasm {ECO:0000269 P | 0 |
| Nuclear speckles (GO:095453  | Nucleus {ECO:0000269 Pub | 0 |
| Cytosol (GO:0005829); Q9C0B1 | Nucleus {ECO:0000269 Pub | 0 |
| Mitochondria (GO:0005P22695  | Mitochondrion inner memb | 1 |
| Nucleoplasm (GO:00056Q01850  |                          | 0 |
| Cytosol (GO:0005829); Q68EM7 | Membrane; Peripheral mem | 0 |
| Nucleoplasm (GO:00056Q32MK0  | Cytoplasm {ECO:0000250}. | 0 |
| Nucleoli fibrillar ce Q969G9 | Cell membrane {ECO:00002 | 0 |
| Nucleoplasm (GO:00056Q92620  | Nucleus {ECO:0000269 Pub | 1 |

|                              |                          |   |
|------------------------------|--------------------------|---|
| Cytosol (GO:0005829);Q9NX01  | Nucleus {ECO:0000269 Pub | 1 |
| Intermediate filamentQ96A59  | Membrane {ECO:0000305};  | 0 |
| Cytosol (GO:0005829);Q96FN4  | Cytoplasm {ECO:0000250 U | 0 |
| Centrosome (GO:000581)Q86WI3 | Cytoplasm {ECO:0000269 P | 0 |
| Cytosol (GO:0005829);Q9BVA0  | Cytoplasm {ECO:0000269 P | 0 |
| Midbody (GO:0030496);Q8TE60  | Secreted, extracellular  | 0 |
| Golgi apparatus (GO:0P0C024  | Peroxisome {ECO:0000250} | 0 |
| Vesicles (GO:0043231)P23434  | Mitochondrion {ECO:00002 | 0 |
| Nucleoplasm (GO:00056)Q96MX0 | Membrane; Multi-pass mem | 0 |
| Cytosol (GO:0005829);060936  | Isoform 1: Nucleus, nucl | 0 |
| Nucleoplasm (GO:00056)Q9GZQ8 | Cytoplasm, cytoskeleton. | 0 |
| Plasma membrane (GO:0P55290  | Cell membrane; Lipid-anc | 1 |
| Nuclear membrane (GO:Q8WYQ9  |                          | 0 |
| Cytosol (GO:0005829);Q6P9B6  | Membrane {ECO:0000269 Pu | 0 |
| Cytosol (GO:0005829);Q9UJX0  |                          | 0 |
| Nucleoplasm (GO:00056)Q02556 | Nucleus {ECO:0000269 Pub | 0 |
| Mitochondria (GO:0005)Q8IXI1 | Mitochondrion outer memb | 1 |
| Nuclear speckles (GO:Q92901  |                          | 0 |
| Nucleoplasm (GO:00056)Q9NX65 | Nucleus {ECO:0000255 PRO | 0 |
| Cytosol (GO:0005829);P15880  |                          | 0 |
| Vesicles (GO:0043231)015530  | Cytoplasm. Nucleus. Cell | 0 |
| Cytosol (GO:0005829);Q6NT04  | Nucleus {ECO:0000305}.   | 0 |
| Cytosol (GO:0005829);Q6ZN54  |                          | 0 |
| Cytosol (GO:0005829) P34059  | Lysosome.                | 0 |
| Cytosol (GO:0005829);095995  | Cytoplasm {ECO:0000250 U | 0 |
| Midbody (GO:0030496);Q9NWA0  | Nucleus {ECO:0000305}.   | 0 |
| Cytosol (GO:0005829);075376  | Nucleus {ECO:0000255 PRO | 0 |
| Cytosol (GO:0005829);Q9UNS2  | Cytoplasm {ECO:0000269 P | 1 |
| Cytosol (GO:0005829) Q8IVV7  |                          | 0 |
| Golgi apparatus (GO:0Q9HBT7  | Nucleus {ECO:0000305}.   | 0 |
| Nucleoplasm (GO:00056)Q8IZQ8 | Nucleus {ECO:0000250}.   | 0 |
| Nucleoli fibrillar ceQ969X6  | Nucleus, nucleolus {ECO: | 0 |
| Cytosol (GO:0005829);Q3B7J2  | Secreted, extracellular  | 0 |
| Cytosol (GO:0005829);Q9ULX3  | Nucleus {ECO:0000269 Pub | 0 |
| Cytosol (GO:0005829);060256  |                          | 0 |
| Cytosol (GO:0005829) Q8IWX7  | Cytoplasm, cytosol {ECO: | 1 |
| Nucleoli (GO:0005730)Q9UKL6  | Cytoplasm {ECO:0000250 U | 0 |
| Cytokinetic bridge (GQ8N4N8  | Cytoplasm, cytoskeleton, | 0 |
| Nucleoplasm (GO:00056)Q9BSJ5 | Membrane {ECO:0000305};  | 0 |
| Nucleoplasm (GO:00056)P50616 | Cytoplasm {ECO:0000250}. | 0 |
| Cytosol (GO:0005829);043147  | Cytoplasm {ECO:0000269 P | 0 |
| Cytosol (GO:0005829) P55786  | Cytoplasm, cytosol {ECO: | 0 |
| Cytosol (GO:0005829);Q86WV1  | Cytoplasm. Nucleus. Cell | 0 |
| Cytosol (GO:0005829) Q96FV0  |                          | 0 |
| Golgi apparatus (GO:0Q96FV2  |                          | 0 |
| Cytosol (GO:0005829);094911  | Cell membrane {ECO:00003 | 0 |
| Endoplasmic reticulumQ9BUM1  | Endoplasmic reticulum me | 1 |
| Cytosol (GO:0005829);Q00610  | Cytoplasmic vesicle memb | 0 |
| Nucleoplasm (GO:00056)Q86WR6 |                          | 0 |
| Nucleoli (GO:0005730)Q9H6U6  | Nucleus {ECO:0000269 Pub | 0 |
| Mitochondria (GO:0005)Q9Y3E5 | Mitochondrion.           | 1 |
| Cytosol (GO:0005829);Q15532  | Nucleus {ECO:0000305}.   | 0 |
| Nucleoli fibrillar ceQ92750  | Nucleus {ECO:0000269 Pub | 0 |
| Mitochondria (GO:0005)Q9Y4W6 | Mitochondrion {ECO:00002 | 1 |
| Mitochondria (GO:0005)014732 |                          | 0 |

|                                |                          |   |
|--------------------------------|--------------------------|---|
| Cytosol (GO:0005829);P38405    |                          | 0 |
| Cytosol (GO:0005829);Q13433    | Cell membrane {ECO:00002 | 1 |
| Golgi apparatus (GO:0096P16    |                          | 0 |
| Nucleoli (GO:0005730)Q32NC0    |                          | 0 |
| Mitochondria (GO:0005739)      | Mitochondrion inner memb | 0 |
| Cytosol (GO:0005829);Q9H706    |                          | 0 |
| Cytosol (GO:0005829);Q9BXW6    | Late endosome {ECO:00002 | 0 |
| Nucleoplasm (GO:00056Q92908    | Nucleus {ECO:0000269 Pub | 1 |
| Cytosol (GO:0005829) Q9C091    | Membrane {ECO:0000305};  | 0 |
| Nucleoplasm (GO:00056Q96DM3    | Lysosome membrane {ECO:0 | 0 |
| Nucleoli (GO:0005730)Q8IZL8    | Nucleus, nucleolus {ECO: | 0 |
| Nucleoplasm (GO:00056015118    | Late endosome membrane { | 0 |
| Plasma membrane (GO:00Q13336   | Cell membrane {ECO:00002 | 1 |
| Vesicles (GO:0043231)P32121    | Cytoplasm. Nucleus. Cell | 0 |
| Cytosol (GO:0005829);Q86YT5    | Membrane; Multi-pass mem | 1 |
| Cytosol (GO:0005829);Q9H091    | Nucleus {ECO:0000250}. C | 0 |
| Cytosol (GO:0005829);Q9BUR4    | Nucleus, Cajal body {ECO | 0 |
| Cell Junctions (GO:00P07306    | Isoform H1a: Membrane; S | 0 |
| Centriolar satellite Q8WYR1    | Nucleus {ECO:0000250 Uni | 0 |
| Nucleoplasm (GO:00056P04637    | Cytoplasm {ECO:0000269 P | 0 |
| Microtubules (GO:0015Q4G0X9    | Cytoplasm {ECO:0000250 U | 0 |
| Cytosol (GO:0005829) P52565    | Cytoplasm {ECO:0000269 P | 1 |
| Nuclear membrane (GO:015427    | Cell membrane; Multi-pas | 1 |
| Vesicles (GO:0043231)Q12829    | Cell membrane {ECO:00003 | 0 |
| Nucleoplasm (GO:00056P38919    | Nucleus {ECO:0000269 Pub | 0 |
| Nucleoli fibrillar ceP48730    | Cytoplasm. Nucleus. Cyto | 0 |
| Nucleoli (GO:0005730)Q9NYG5    | Cytoplasm {ECO:0000269 P | 0 |
| Nucleoplasm (GO:00056Q9HA64    |                          | 0 |
| Nucleoli (GO:0005730)Q9UHQ1    | Nucleus {ECO:0000269 Pub | 1 |
| Lysosomes (GO:0005764Q8N122    | Cytoplasm. Lysosome. Cyt | 0 |
| Mitochondria (GO:0005Q01167    | Nucleus {ECO:0000269 Pub | 0 |
| Cytosol (GO:0005829);Q6PJ69    |                          | 0 |
| Nucleoplasm (GO:00056Q9HC52    | Nucleus {ECO:0000269 Pub | 1 |
| Golgi apparatus (GO:0096PX1    | Cytoplasm {ECO:0000250 U | 0 |
| Centriolar satellite Q9UPN4    | Cytoplasm, cytoskeleton, | 0 |
| Cytosol (GO:0005829);Q5MNZ6    | Preautophagosomal struct | 0 |
| Nuclear bodies (GO:00000257    | Nucleus {ECO:0000269 Pub | 0 |
| Nucleoplasm (GO:00056Q6ZSG1    | Nucleus {ECO:0000250 Uni | 0 |
| Golgi apparatus (GO:007RTS9    | Cytoplasm. Golgi apparat | 0 |
| Golgi apparatus (GO:0P31152    | Cytoplasm {ECO:0000250}. | 0 |
| Cytosol (GO:0005829);Q9H777    | Cytoplasm, cytosol {ECO: | 1 |
| Nucleoplasm (GO:00056Q9UIS9    | Nucleus {ECO:0000250}. N | 0 |
| Centrosome (GO:000581Q13485    | Cytoplasm {ECO:0000269 P | 1 |
| Cytosol (GO:0005829);Q9Y6Q6    | Isoform 1: Cell membrane | 1 |
| Cytosol (GO:0005829);Q9C0B9    |                          | 0 |
| Vesicles (GO:0043231)Q13794    | Mitochondrion {ECO:00002 | 0 |
| Cytosol (GO:0005829);Q86VR2    | Membrane {ECO:0000305};  | 0 |
| Cytosol (GO:0005829);P04626    | Isoform 1: Cell membrane | 0 |
| Cytosol (GO:0005829);Q14451    | Cytoplasm {ECO:0000269 P | 0 |
| Plasma membrane (GO:00Q6ZMT1   | Cytoplasm, cytosol {ECO: | 0 |
| Vesicles (GO:0043231)Q96AY3    | Endoplasmic reticulum lu | 0 |
| Cytosol (GO:0005829);P83876    | Nucleus {ECO:0000269 Pub | 0 |
| Endoplasmic reticulum000555    | Cell membrane {ECO:00002 | 0 |
| Cytosol (GO:0005829);Mitochond | Cytoplasm {ECO:0000269 P | 0 |
| Nucleoplasm (GO:00056060885    | Nucleus {ECO:0000269 Pub | 1 |

|                                 |                          |   |
|---------------------------------|--------------------------|---|
| Vesicles (GO:0043231) Q9BRY0    | Membrane {ECO:0000305};  | 0 |
| Nucleoli fibrillar ceP08651     | Nucleus.                 | 0 |
| Mitochondria (GO:0005043688     | Membrane; Multi-pass mem | 0 |
| Nuclear bodies (GO:00P57071     | Nucleus {ECO:0000269 Pub | 1 |
| Cytosol (GO:0005829); Q9BSK4    | Cytoplasm {ECO:0000305}. | 0 |
| Cytosol (GO:0005829) P15498     |                          | 0 |
| Golgi apparatus (GO:0Q96EY5     | Cytoplasm. Nucleus. Endo | 0 |
| Cytosol (GO:0005829) Q99961     | Cytoplasm {ECO:0000250}. | 0 |
| Cytosol (GO:0005829); Q96G46    |                          | 0 |
| Cytosol (GO:0005829) Q86TI2     | Isoform 1: Cytoplasm, cy | 0 |
| Cytosol (GO:0005829); Q96F63    |                          | 0 |
| Nuclear speckles (GO: Q9HCL3    | Nucleus {ECO:0000305}.   | 0 |
| Cytosol (GO:0005829) Q32M88     |                          | 0 |
| Nucleoplasm (GO:00056P57058     |                          | 0 |
| Cytosol (GO:0005829) P12109     | Secreted, extracellular  | 0 |
| Cytosol (GO:0005829); P00441    | Cytoplasm {ECO:0000269 P | 0 |
| Cytosol (GO:0005829); P12110    | Secreted, extracellular  | 0 |
| Nucleoplasm (GO:00056P57059     | Cytoplasm {ECO:0000269 P | 0 |
| Nuclear speckles (GO: Q9UJW3    | Nucleus {ECO:0000305}.   | 0 |
| Nuclear membrane (GO: 094759    | Cell membrane {ECO:00002 | 0 |
| Cytosol (GO:0005829) Q96KG9     | Cytoplasm, cytoskeleton, | 0 |
| Nucleoli fibrillar ceP56557     | Endoplasmic reticulum me | 0 |
| Golgi apparatus (GO: 0P05067    | Cell membrane {ECO:00002 | 0 |
| Mitochondria (GO:0005Q9Y3R5     | Golgi apparatus membrane | 0 |
| Nucleoli fibrillar ce060287     | Nucleus, nucleolus {ECO: | 1 |
| Microtubules (GO:0015P31749     | Cytoplasm {ECO:0000250 U | 0 |
| Plasma membrane (GO: 0P54852    | Membrane; Multi-pass mem | 0 |
| Cell Junctions (GO: 00Q96Q04    | Membrane {ECO:0000250 Un | 0 |
| Cytosol (GO:0005829); Q9H840    | Nucleus, nucleoplasm {EC | 1 |
| Nucleoplasm (GO:00056Q9ULV8     |                          | 0 |
| Vesicles (GO:0043231) Q01959    | Cell membrane {ECO:00002 | 0 |
| Nucleoli (GO:0005730) Q9HAU8    |                          | 0 |
| Cytosol (GO:0005829); Q9HC96    |                          | 0 |
| Nuclear speckles (GO: P59046    | Cytoplasm {ECO:0000269 P | 0 |
| Mitochondria (GO:0005739); Nuc1 | Nucleus {ECO:0000305}.   | 0 |
| Mitochondria (GO:0005Q9BSF4     | Mitochondrion inner memb | 1 |
| Nucleoplasm (GO:00056Q86X55     | Nucleus. Cytoplasm. Note | 0 |
| Nuclear bodies (GO: 00Q96CN4    |                          | 0 |
| Cell Junctions (GO: 00014894    | Membrane; Multi-pass mem | 0 |
| Cytosol (GO:0005829); P28072    | Cytoplasm {ECO:0000269 P | 1 |
| Actin filaments (GO: 0Q96LC7    | Isoform 1: Cell membrane | 0 |
| Nucleoplasm (GO:00056Q8WTR7     | Nucleus {ECO:0000269 Pub | 1 |
| Nucleoli fibrillar ceQ6IPT2     |                          | 0 |
| Cytosol (GO:0005829); P62280    |                          | 0 |
| Cytosol (GO:0005829); P40429    | Cytoplasm {ECO:0000305 P | 0 |
| Nucleoplasm (GO:00056Q9Y314     | Cytoplasm {ECO:0000269 P | 0 |
| Endoplasmic reticulum Q96D15    | Endoplasmic reticulum lu | 0 |
| Cytosol (GO:0005829); Q8N883    | Nucleus {ECO:0000305}.   | 0 |
| Nucleoplasm (GO:00056Q9HAZ2     | Nucleus {ECO:0000269 Pub | 0 |
| Nucleoplasm (GO:00056Q9ULW8     | Cytoplasm {ECO:0000269 P | 0 |
| Cytosol (GO:0005829); Q9ULC6    | Cytoplasm {ECO:0000269 P | 1 |
| Cell Junctions (GO: 00P29317    | Cell membrane {ECO:00002 | 0 |
| Nuclear bodies (GO: 00Q8IW93    |                          | 0 |
| Cytosol (GO:0005829) Q96C19     | Membrane raft {ECO:00002 | 0 |
| Nucleoli fibrillar ce075381     | Peroxisome membrane {ECO | 1 |



|                              |                          |   |
|------------------------------|--------------------------|---|
| Cytosol (GO:0005829);P52209  | Cytoplasm {ECO:0000250}. | 0 |
| Cytokinetic bridge (GQ5VTT5  | Cytoplasm, myofibril, sa | 0 |
| Nuclear bodies (GO:00Q9H299  | Cytoplasm. Nucleus.      | 0 |
| Cytosol (GO:0005829) Q969H4  | Cytoplasm {ECO:0000250}. | 0 |
| Vesicles (GO:0043231)P62913  | Nucleus, nucleolus {ECO: | 0 |
| Nucleoli (GO:0005730) 000488 | Nucleus, nucleolus {ECO: | 1 |
| Cytosol (GO:0005829);Q8TAB5  |                          | 0 |
| Golgi apparatus (GO:0Q8IZA0  | Cytoplasmic granule memb | 0 |
| Cytosol (GO:0005829) Q9NVM1  | Membrane {ECO:0000305};  | 0 |
| Cytosol (GO:0005829);Q6P1W5  |                          | 0 |
| Mitochondria (GO:0005Q96SC8  | Nucleus {ECO:0000255 PRO | 0 |
| Centrosome (GO:000581000444  | Cytoplasm, cytoskeleton, | 0 |
| Actin filaments (GO:0095382  |                          | 0 |
| Golgi apparatus (GO:0Q8N5D0  |                          | 0 |
| Cytosol (GO:0005829) P09093  |                          | 0 |
| Nuclear bodies (GO:00Q9H094  | Cytoplasm {ECO:0000305}. | 0 |
| Cytosol (GO:0005829);P98160  | Secreted, extracellular  | 0 |
| Nucleoplasm (GO:00056Q13352  | Isoform 1: Nucleus. Chro | 0 |
| Cytosol (GO:0005829) Q8NC51  | Cytoplasm {ECO:0000269 P | 0 |
| Nucleoplasm (GO:00056095999  | Cytoplasm, perinuclear r | 0 |
| Cytosol (GO:0005829) P22694  | Cytoplasm {ECO:0000269 P | 0 |
| Cytosol (GO:0005829) Q96A70  | Nucleus. Cytoplasm {ECO: | 0 |
| Cytosol (GO:0005829);P62241  | Cytoplasm {ECO:0000269 P | 0 |
| Centrosome (GO:000581Q99661  | Cytoplasm, cytoskeleton  | 0 |
| Golgi apparatus (GO:0P10586  | Membrane; Single-pass ty | 0 |
| Cytosol (GO:0005829);Q70IA8  |                          | 0 |
| Vesicles (GO:0043231)P13584  | Endoplasmic reticulum me | 0 |
| Midbody ring (GO:0090P61968  |                          | 0 |
| Cytosol (GO:0005829);Q5VXT5  | Membrane {ECO:0000250};  | 0 |
| Nucleoplasm (GO:00056Q9Y483  | Nucleus {ECO:0000250}.   | 1 |
| Cytosol (GO:0005829);075054  | Membrane {ECO:0000305};  | 0 |
| Nucleoplasm (GO:00056Q5TEC3  | Nucleus {ECO:0000305}.   | 0 |
| Cytosol (GO:0005829);Q9P2B4  | Cytoplasm, cytoskeleton, | 0 |
| Cytosol (GO:0005829) Q5VSL9  | Cytoplasm {ECO:0000269 P | 1 |
| Cytosol (GO:0005829);Q16322  | Membrane {ECO:0000269 Pu | 0 |
| Cytosol (GO:0005829) P28066  | Cytoplasm {ECO:0000269 P | 0 |
| Actin filaments (GO:0Q5VTL7  | Secreted {ECO:0000305}.  | 0 |
| Cytosol (GO:0005829) Q9HCU4  | Cell membrane; Multi-pas | 0 |
| Nucleoli (GO:0005730)Q8N6U8  | Cell projection, cilium  | 0 |
| Cytosol (GO:0005829) P49189  | Cytoplasm, cytosol {ECO: | 0 |
| Cytosol (GO:0005829);075663  | Cytoplasm {ECO:0000269 P | 0 |
| Mitochondria (GO:0005Q9Y5B8  |                          | 0 |
| Nucleoplasm (GO:00056Q9P215  | Nucleus {ECO:0000305}.   | 1 |
| Microtubules (GO:0015075629  | Secreted {ECO:0000269 Pu | 0 |
| Focal adhesion sites Q58WW2  | Nucleus {ECO:0000269 Pub | 1 |
| Nuclear bodies (GO:00P48443  | Nucleus {ECO:0000255 PRO | 0 |
| Nuclear speckles (GO:060806  | Nucleus {ECO:0000255 PRO | 0 |
| Nucleoplasm (GO:00056Q9BZX2  |                          | 0 |
| Endoplasmic reticulumQ9UM00  | Endoplasmic reticulum me | 0 |
| Endoplasmic reticulumP14859  | Nucleus.                 | 0 |
| Plasma membrane (GO:0Q71H61  | Endoplasmic reticulum me | 0 |
| Vesicles (GO:0043231)Q07507  | Secreted, extracellular  | 0 |
| Nucleoplasm (GO:00056014880  | Endoplasmic reticulum me | 0 |
| Plasma membrane (GO:0Q96NY8  | Cell membrane {ECO:00003 | 0 |
| Cytosol (GO:0005829);Q9Y3C8  |                          | 0 |

|                              |                          |   |
|------------------------------|--------------------------|---|
| Golgi apparatus (GO:0P50336  | Mitochondrion inner memb | 0 |
| Golgi apparatus (GO:0P12318  | Cell membrane {ECO:00002 | 1 |
| Nucleoplasm (GO:00056Q9BZD4  | Nucleus. Chromosome, cen | 1 |
| Cytosol (GO:0005829) Q9UHV9  | Nucleus {ECO:0000269 Pub | 0 |
| Nucleoplasm (GO:00056Q14994  | Nucleus. Cytoplasm. Cyto | 0 |
| Cytosol (GO:0005829); Q9UK80 | Cytoplasm {ECO:0000269 P | 1 |
| Nuclear speckles (GO:Q92733  | Nucleus {ECO:0000269 Pub | 0 |
| Cytosol (GO:0005829); Q96FB5 | Membrane {ECO:0000305};  | 0 |
| Mitochondria (GO:0005P31415  | Endoplasmic reticulum {E | 0 |
| Nucleoplasm (GO:00056Q9H9L3  | Nucleus, nucleolus {ECO: | 0 |
| Cytosol (GO:0005829); P29373 | Cytoplasm. Endoplasmic r | 0 |
| Nucleoplasm (GO:00056P51858  | Isoform 1: Nucleus {ECO: | 0 |
| Nucleoplasm (GO:00056P42684  | Cytoplasm, cytoskeleton. | 0 |
| Cytosol (GO:0005829) 015492  | Membrane {ECO:0000250 Un | 0 |
| Nuclear membrane (GO:Q5JTV8  | Nucleus inner membrane { | 1 |
| Golgi apparatus (GO:0Q9NZL6  |                          | 0 |
| Cytosol (GO:0005829) Q5VWZ2  | Isoform 1: Cytoplasm, cy | 1 |
| Nucleoplasm (GO:00056Q9NQ69  | Nucleus {ECO:0000255 PRO | 0 |
| Cytosol (GO:0005829) Q86TP1  | Cytoplasm. Nucleus. Cell | 0 |
| Nuclear bodies (GO:00P51449  | Nucleus {ECO:0000269 Pub | 1 |
| Vesicles (GO:0043231) Q9NNX1 | Secreted {ECO:0000250 Un | 0 |
| Nuclear speckles (GO:Q15427  | Nucleus {ECO:0000269 Pub | 0 |
| Cytosol (GO:0005829); Q16610 | Secreted, extracellular  | 0 |
| Nucleoplasm (GO:00056Q8N1G0  | Cytoplasm {ECO:0000269 P | 0 |
| Cytosol (GO:0005829); Q9BW92 | Mitochondrion matrix {EC | 0 |
| Cell Junctions (GO:00Q9P2M7  | Cell junction, tight jun | 0 |
| Cytosol (GO:0005829); Q96L92 | Early endosome membrane; | 0 |
| Nucleoplasm (GO:00056Q15047  | Nucleus {ECO:0000269 Pub | 0 |
| Cytosol (GO:0005829); Q6UY14 | Secreted, extracellular  | 0 |
| Mitochondria (GO:0005Q07820  | Membrane {ECO:0000305};  | 0 |
| Vesicles (GO:0043231) P43235 | Lysosome.                | 0 |
| Golgi apparatus (GO:0Q9UBF8  | Endomembrane system. Mit | 0 |
| Cytosol (GO:0005829); Q99755 | Cell membrane. Cytoplasm | 0 |
| Centrosome (GO:000581Q9BTT0  | Cytoplasm {ECO:0000250}. | 0 |
| Nucleoplasm (GO:00056Q8N5J2  |                          | 0 |
| Cytosol (GO:0005829); 076027 |                          | 0 |
| Nucleoli (GO:0005730) Q13228 | Nucleus {ECO:0000269 Pub | 0 |
| Endoplasmic reticulum Q96G23 | Endoplasmic reticulum me | 0 |
| Cytosol (GO:0005829); 043768 | Cytoplasm {ECO:0000250}. | 0 |
| Cytosol (GO:0005829); Q9H3T2 | Cell membrane; Single-pa | 1 |
| Mitochondria (GO:0005Q9BYD2  | Mitochondrion {ECO:00002 | 1 |
| Nuclear bodies (GO:00P27540  | Nucleus.                 | 1 |
| Nucleoplasm (GO:00056Q7Z3K3  | Nucleus. Chromosome. Cyt | 0 |
| Nucleoplasm (GO:00056Q9UMX2  | Nucleus. Cytoplasm {ECO: | 0 |
| Nucleoli (GO:0005730) Q86X24 | Nucleus {ECO:0000250 Uni | 0 |
| Cytosol (GO:0005829); Q9H4A5 | Golgi apparatus, Golgi s | 0 |
| Cytosol (GO:0005829); Q8TAK5 | Nucleus {ECO:0000250}.   | 1 |
| Vesicles (GO:0043231) Q8NB59 | Membrane {ECO:0000269 Pu | 0 |
| Vesicles (GO:0043231) 095259 | Cell membrane {ECO:00002 | 0 |
| Cytosol (GO:0005829); Q9NZJ0 | Nucleus {ECO:0000269 Pub | 0 |
| Cytosol (GO:0005829); 043781 | Nucleus {ECO:0000269 Pub | 0 |
| Cytosol (GO:0005829); P41214 | Cytoplasm {ECO:0000269 P | 1 |
| Nuclear bodies (GO:00Q9NVH2  | Nucleus {ECO:0000269 Pub | 0 |
| Cytosol (GO:0005829) Q86V25  | Cytoplasm {ECO:0000269 P | 0 |
| Nucleoplasm (GO:00056Q15573  | Nucleus.                 | 1 |

|                             |                          |   |
|-----------------------------|--------------------------|---|
| Cytosol (GO:0005829);Q9NRG4 | Cytoplasm, cytosol {ECO: | 0 |
| Vesicles (GO:0043231)Q5VX71 | Isoform 1: Membrane {ECO | 0 |
| Cytosol (GO:0005829);Q9Y6W6 | Cytoplasm. Nucleus.      | 1 |
| Cytosol (GO:0005829);Q6UWX4 | Secreted {ECO:0000305}.  | 0 |
| Cell Junctions (GO:00Q13625 | Cytoplasm, perinuclear r | 0 |
| Vesicles (GO:0043231)Q13444 | Endomembrane system {ECO | 0 |
| Actin filaments (GO:0076095 | Membrane {ECO:0000305};  | 0 |
| Cytosol (GO:0005829);P51153 | Cell membrane {ECO:00002 | 0 |
| Cytosol (GO:0005829);P05109 | Secreted. Cytoplasm. Cyt | 0 |
| Actin filaments (GO:0P06753 | Cytoplasm, cytoskeleton  | 0 |
| Nuclear bodies (GO:00Q5VU65 | Membrane {ECO:0000305};  | 0 |
| Golgi apparatus (GO:0095295 | Membrane {ECO:0000250 Un | 0 |
| Endoplasmic reticulumQ5K4L6 | Mitochondrion membrane { | 0 |
| Cytosol (GO:0005829) P31151 | Cytoplasm {ECO:0000269 P | 0 |
| Cytosol (GO:0005829);Q14157 |                          | 0 |
| Mitochondria (GO:0005000165 | Mitochondrion {ECO:00002 | 0 |
| Mitochondria (GO:0005Q8TEY5 | Endoplasmic reticulum me | 0 |
| Nuclear bodies (GO:00Q96PS8 | Apical cell membrane {EC | 0 |
| Nucleoplasm (GO:00056Q9UGI6 | Membrane; Multi-pass mem | 0 |
| Nucleoplasm (GO:00056Q8WXI9 | Nucleus speckle {ECO:000 | 0 |
| Nucleoplasm (GO:00056Q12905 | Nucleus, nucleolus. Cyto | 0 |
| Nucleoli (GO:0005730)Q68E01 | Nucleus {ECO:0000269 Pub | 0 |
| Cytosol (GO:0005829);P30613 |                          | 0 |
| Cytoplasmic bodies (GP20930 | Cytoplasmic granule {ECO | 1 |
| Golgi apparatus (GO:0Q10471 | Golgi apparatus, Golgi s | 0 |
| Nucleoplasm (GO:00056Q8NBPO |                          | 0 |
| Vesicles (GO:0043231)Q8NBX0 |                          | 0 |
| Centriolar satellite Q99698 | Cytoplasm {ECO:0000305}. | 0 |
| Cytosol (GO:0005829);Q5TCX8 |                          | 0 |
| Centrosome (GO:000581Q5SW79 | Cytoplasm, cytoskeleton, | 0 |
| Cytosol (GO:0005829);P24666 | Cytoplasm.               | 0 |
| Cytosol (GO:0005829) Q5SQN1 | Endomembrane system {ECO | 0 |
| Nucleoli (GO:0005730)015381 | Isoform 2: Nucleus, nucl | 0 |
| Cytosol (GO:0005829);Q6IQ49 | Nucleus {ECO:0000269 Pub | 0 |
| Mitochondria (GO:0005015121 | Mitochondrion {ECO:00002 | 0 |
| Focal adhesion sites Q9NVF7 | Chromosome, centromere,  | 1 |
| Cytosol (GO:0005829);P84077 | Golgi apparatus {ECO:000 | 0 |
| Nucleoplasm (GO:00056P27987 |                          | 0 |
| Cytosol (GO:0005829);Q16774 |                          | 0 |
| Intermediate filamentQ5VT25 | Cytoplasm {ECO:0000250 U | 0 |
| Cytosol (GO:0005829);Q9BU76 |                          | 0 |
| Vesicles (GO:0043231)Q6ZWT7 | Membrane {ECO:0000305};  | 0 |
| Nucleoplasm (GO:00056P09874 | Nucleus {ECO:0000269 Pub | 0 |
| Nucleoplasm (GO:00056P49810 | Endoplasmic reticulum me | 0 |
| Mitochondria (GO:0005Q96C36 | Cytoplasm {ECO:0000269 P | 0 |
| Nuclear membrane (GO:Q14739 | Nucleus inner membrane { | 0 |
| Nucleoplasm (GO:00056Q9UN79 | Nucleus {ECO:0000255 PRO | 1 |
| Cell Junctions (GO:00Q9Y2H5 |                          | 0 |
| Cytosol (GO:0005829);Q15084 | Endoplasmic reticulum lu | 0 |
| Mitochondria (GO:0005Q8NEY4 |                          | 0 |
| Cytosol (GO:0005829);Q8WVV9 |                          | 0 |
| Nucleoplasm (GO:00056Q96C23 | Cytoplasm {ECO:0000305}. | 0 |
| Nucleoplasm (GO:00056Q7Z624 | Isoform 1: Cytoplasm {EC | 0 |
| Vesicles (GO:0043231)Q9H221 | Cell membrane {ECO:00003 | 0 |
| Cytosol (GO:0005829);Q9HC35 | Cytoplasm, cytoskeleton  | 1 |

|                              |                          |   |
|------------------------------|--------------------------|---|
| Cytosol (GO:0005829) Q8WUX2  | Cytoplasm, cytosol {ECO: | 0 |
| Cytosol (GO:0005829);P62979  | Ubiquitin: Cytoplasm {EC | 0 |
| Cell Junctions (GO:00095876  | Cell membrane {ECO:00002 | 0 |
| Golgi apparatus (GO:0099100  | Golgi apparatus, trans-G | 1 |
| Cytosol (GO:0005829) Q6UW15  | Secreted. Cytoplasm {ECO | 0 |
| Nucleoplasm (GO:00056076L83  | Nucleus {ECO:0000305}.   | 1 |
| Cytosol (GO:0005829);Q9NY74  | Nucleus {ECO:0000269 Pub | 0 |
| Nucleoplasm (GO:000560762308 | Cytoplasm, cytosol {ECO: | 0 |
| Nucleoplasm (GO:00056000470  | Nucleus {ECO:0000255 PRO | 0 |
| Cytosol (GO:0005829);076071  | Cytoplasm {ECO:0000269 P | 0 |
| Nuclear bodies (GO:00996K75  | Nucleus {ECO:0000305}.   | 0 |
| Nucleoplasm (GO:00056075643  | Nucleus {ECO:0000269 Pub | 1 |
| Mitochondria (GO:0005P82675  | Mitochondrion {ECO:00002 | 1 |
| Cytosol (GO:0005829) Q9Y3C4  | Cytoplasm, cytosol {ECO: | 0 |
| Endoplasmic reticulum Q9UHE5 | Endoplasmic reticulum-Go | 0 |
| Cytosol (GO:0005829);Q9Y2D4  |                          | 0 |
| Mitochondria (GO:0005Q8TD22  | Mitochondrion membrane { | 0 |
| Cytosol (GO:0005829);Q6UWH6  | Membrane {ECO:0000305};  | 0 |
| Cytosol (GO:0005829);Q8TE96  | Nucleus {ECO:0000250}.   | 0 |
| Cytokinetic bridge (G075319  | Nucleus {ECO:0000269 Pub | 0 |
| Nucleoli fibrillar ce Q96JF0 | Golgi apparatus, Golgi s | 0 |
| Vesicles (GO:0043231) 015259 | Cell junction {ECO:00002 | 0 |
| Nucleoli fibrillar ce Q53S58 | Mitochondrion inner memb | 0 |
| Centrosome (GO:000581Q9UBK7  |                          | 0 |
| Vesicles (GO:0043231) Q8WUM9 | Membrane; Multi-pass mem | 0 |
| Cell Junctions (GO:00053RD9  | Secreted, extracellular  | 0 |
| Nuclear bodies (GO:0008N5P1  | Nucleus {ECO:0000269 Pub | 1 |
| Cytosol (GO:0005829);P51826  | Nucleus.                 | 1 |
| Endoplasmic reticulum Q92575 | Endoplasmic reticulum me | 0 |
| Vesicles (GO:0043231) Q6IQ16 | Nucleus {ECO:0000250}.   | 0 |
| Cytosol (GO:0005829);Q9C0I4  | Membrane {ECO:0000305};  | 0 |
| Vesicles (GO:0043231) Q13304 | Cell membrane; Multi-pas | 0 |
| Nuclear speckles (GO:015514  | Nucleus {ECO:0000269 Pub | 0 |
| Cytosol (GO:0005829);Q6DCA0  |                          | 0 |
| Cell Junctions (GO:00099569  | Cell junction, desmosome | 0 |
| Nuclear bodies (GO:000P35498 | Cell membrane {ECO:00002 | 1 |
| Cytosol (GO:0005829);Q0VDG4  |                          | 0 |
| Endoplasmic reticulum Q9C0E8 | Endoplasmic reticulum me | 1 |
| Nucleoli fibrillar ce Q569K4 | Nucleus {ECO:0000269 Pub | 0 |
| Cytosol (GO:0005829);Q9BWT1  | Nucleus. Cytoplasm. Note | 1 |
| Nucleoli (GO:0005730) Q6ZT12 | Membrane {ECO:0000305};  | 0 |
| Vesicles (GO:0043231) Q8TCD6 |                          | 0 |
| Vesicles (GO:0043231) Q9UBP9 | Cytoplasm {ECO:0000269 P | 0 |
| Mitochondria (GO:0005Q6P995  | Membrane {ECO:0000305};  | 0 |
| Mitochondria (GO:0005P10809  | Mitochondrion matrix.    | 1 |
| Nucleoplasm (GO:0005608NXC0  |                          | 0 |
| Cytosol (GO:0005829);Q8WXB1  | Cytoplasm {ECO:0000269 P | 0 |
| Nuclear bodies (GO:0008N2C7  | Membrane {ECO:0000305};  | 0 |
| Cytosol (GO:0005829);Q6ZS30  |                          | 0 |
| Cytosol (GO:0005829) A0AUZ9  |                          | 0 |
| Cytosol (GO:0005829);Q8N0X2  | Cytoplasm {ECO:0000250 U | 0 |
| Cytosol (GO:0005829);Q86UK0  | Membrane {ECO:0000305};  | 0 |
| Intermediate filament Q9P242 |                          | 0 |
| Endoplasmic reticulum Q8TEB9 | Endoplasmic reticulum me | 0 |
| Plasma membrane (GO:0P25106  | Cell membrane; Multi-pas | 0 |

|                                                        |                          |   |
|--------------------------------------------------------|--------------------------|---|
| Cytosol (GO:0005829);Q96HZ4                            | Nucleus {ECO:0000305}.   | 0 |
| Cytosol (GO:0005829);Q9P2S6                            |                          | 0 |
| Nucleoplasm (GO:00056Q9H9Q2                            | Cytoplasm. Nucleus.      | 0 |
| Cytosol (GO:0005829);Q9BXW9                            | Nucleus {ECO:0000269 Pub | 0 |
| Cytosol (GO:0005829) Q96BW9                            | Mitochondrion inner memb | 0 |
| Nucleoli fibrillar ceQ14135                            | Nucleus {ECO:0000250}.   | 0 |
| Cytosol (GO:0005829) Q8NC44                            | Membrane {ECO:0000305};  | 0 |
| Nucleoplasm (GO:00056Q9GZU7                            | Nucleus {ECO:0000269 Pub | 1 |
| Cytoplasmic bodies (GQ92600                            | Nucleus {ECO:0000250 Uni | 0 |
| Vesicles (GO:0043231)                                  | Cytoplasm {ECO:0000269 P | 0 |
| Nucleoplasm (GO:00056Q96IJ6                            | Cytoplasm {ECO:0000269 P | 0 |
| Cytosol (GO:0005829)                                   | Cytoplasm {ECO:0000250}. | 0 |
| Cytokinetic bridge (GQ96JC9                            | Nucleus speckle {ECO:000 | 0 |
| Centrosome (GO:000581Q9Y6G9                            | Cytoplasm {ECO:0000250}. | 0 |
| Vesicles (GO:0043231) Q6XE24                           | Cytoplasm {ECO:0000269 P | 0 |
| Cytosol (GO:0005829);Q6ZQY3                            |                          | 0 |
| Cytosol (GO:0005829);Q9BXB5                            | Cytoplasm, cytoskeleton  | 0 |
| Cytosol (GO:0005829);000590                            | Early endosome. Recyclin | 0 |
| Vesicles (GO:0043231) Q9UFP1                           | Secreted {ECO:0000305}.  | 0 |
| Nucleoplasm (GO:00056Q96S65                            | Nucleus {ECO:0000250}.   | 1 |
| Cell Junctions (GO:00Q13797                            | Membrane {ECO:0000255};  | 0 |
| Golgi apparatus (GO:0Q13439                            | Cytoplasm. Golgi apparat | 0 |
| Nucleoplasm (GO:00056015194                            | Nucleus {ECO:0000250}.   | 0 |
| Nucleoplasm (GO:00056Q99469                            | Cytoplasm, cytosol {ECO: | 0 |
| Nucleoli (GO:0005730) Q6DN90                           | Cytoplasm {ECO:0000269 P | 0 |
| Cytosol (GO:0005829);075155                            | Nucleus {ECO:0000250}.   | 0 |
| Cytosol (GO:0005829);P62910                            |                          | 0 |
| Plasma membrane (GO:0P23470                            | Membrane {ECO:0000305};  | 0 |
| Golgi apparatus (GO:0Q8NFM7                            | Golgi apparatus membrane | 0 |
| Nucleoplasm (GO:00056Q6PI26                            | Cytoplasm, cytosol {ECO: | 0 |
| Mitochondria (GO:0005Q70HW3                            | Mitochondrion inner memb | 1 |
| Centrosome (GO:000581Q8TBC4                            |                          | 0 |
| Endoplasmic reticulum075915                            | Endoplasmic reticulum me | 0 |
| Golgi apparatus (GO:0P82094                            | Cytoplasm. Nucleus. Golg | 0 |
| Cytosol (GO:0005829) Q96JA1                            | Cell membrane {ECO:00002 | 0 |
| Centriolar satellite (GO:0034451);Nucleoplasm (GO:0005 |                          | 0 |
| Focal adhesion sites Q9UGP4                            | Cytoplasm. Nucleus. Cyto | 0 |
| Cytosol (GO:0005829);Q6AZW8                            | Nucleus {ECO:0000305}.   | 0 |
| Cytoplasmic bodies (GQ9BYH8                            | Nucleus {ECO:0000269 Pub | 0 |
| Vesicles (GO:0043231) P27658                           | Secreted, extracellular  | 0 |
| Nucleoplasm (GO:00056Q969Y0                            | Secreted {ECO:0000305}.  | 0 |
| Cytosol (GO:0005829);Q86SQ0                            | Cytoplasm {ECO:0000269 P | 1 |
| Mitochondria (GO:0005Q9NUJ1                            | Mitochondrion {ECO:00003 | 0 |
| Cytoplasmic bodies (GQ53H76                            | Secreted {ECO:0000305}.  | 0 |
| Nucleoplasm (GO:00056Q5HYI8                            |                          | 0 |
| Nuclear membrane (GO:P54922                            |                          | 0 |
| Cell Junctions (GO:00Q5DX21                            | Cell membrane {ECO:00002 | 0 |
| Cytosol (GO:0005829);Q9NT62                            | Cytoplasm {ECO:0000269 P | 0 |
| Nucleoplasm (GO:00056075469                            | Nucleus {ECO:0000255 PRO | 1 |
| Nucleoplasm (GO:00056Q9BWV1                            | Cell membrane {ECO:00002 | 1 |
| Plasma membrane (GO:0Q9Y5M8                            | Endoplasmic reticulum me | 0 |
| Cytosol (GO:0005829);Q6UXF1                            | Membrane {ECO:0000250 Un | 0 |
| Vesicles (GO:0043231) P30556                           | Cell membrane; Multi-pas | 0 |
| Nucleoli (GO:0005730) Q86YW9                           | Nucleus {ECO:0000305}.   | 0 |
| Cytosol (GO:0005829);Q9BY44                            |                          | 0 |

|                                           |                          |   |
|-------------------------------------------|--------------------------|---|
| Cytosol (GO:0005829) 075891               | Cytoplasm.               | 1 |
| Golgi apparatus (GO:0095015) 09BXB4       | Late endosome membrane { | 0 |
| Vesicles (GO:0043231) P48995              | Membrane; Multi-pass mem | 0 |
| Endoplasmic reticulum Q6PIU2              | Membrane {ECO:0000305 Pu | 0 |
| Vesicles (GO:0043231) P0C5J1              |                          | 0 |
| Cytosol (GO:0005829); Q93052              | Nucleus. Cytoplasm. Cell | 0 |
| Cytosol (GO:0005829) Q2T9K0               | Membrane {ECO:0000305};  | 0 |
| Cytosol (GO:0005829); Q92622              | Late endosome {ECO:00002 | 0 |
| Mitochondria (GO:0005P48728               | Mitochondrion {ECO:00003 | 1 |
| Cytosol (GO:0005829) P57738               | Membrane {ECO:0000305};  | 0 |
| Nucleoplasm (GO:0005609) Q9BSH3           | Nucleus {ECO:0000269 Pub | 1 |
| Nucleoli fibrillar ce Q9Y4B6              | Cytoplasm. Nucleus. Note | 0 |
| Endoplasmic reticulum (GO:0005505) Q13144 | Secreted {ECO:0000269 Pu | 0 |
| Cytosol (GO:0005829) Q13144               |                          | 0 |
| Golgi apparatus (GO:0095015) P02765       | Secreted.                | 0 |
| Golgi apparatus (GO:0095015) Q8N398       |                          | 0 |
| Nucleoplasm (GO:0005609) Q6UN15           | Nucleus.                 | 1 |
| Microtubules (GO:0015468) Q9H2B4          | Cell membrane {ECO:00002 | 0 |
| Nucleoli (GO:0005730) Q9NX58              | Nucleus {ECO:0000269 Pub | 0 |
| Nuclear bodies (GO:0070838) Q03188        | Nucleus {ECO:0000269 Pub | 1 |
| Actin filaments (GO:0070838) Q9Y5Q5       | Cell membrane {ECO:00002 | 0 |
| Nucleoplasm (GO:0005609) Q9P241           | Cell membrane {ECO:00002 | 0 |
| Mitochondria (GO:0005505) Q56VL3          | Endosome {ECO:0000305}.  | 0 |
| Cytosol (GO:0005829) Q9NZF1               |                          | 0 |
| Nuclear bodies (GO:0070838) Q9UHY7        | Cytoplasm {ECO:0000255 H | 0 |
| Actin filaments (GO:0070838) Q8TBZ6       | Nucleus {ECO:0000269 Pub | 1 |
| Nucleoplasm (GO:0005609) Q9P2G9           |                          | 0 |
| Nucleoplasm (GO:0005609) Q96I23           | Mitochondrion {ECO:00003 | 0 |
| Nucleoli fibrillar ce Q8TEA7              | Cytoplasm {ECO:0000269 P | 0 |
| Cell Junctions (GO:0070838) Q13557        | Cell membrane, sarcolemm | 0 |
| Endoplasmic reticulum Q8N5K1              | Endoplasmic reticulum me | 0 |
| Actin filaments (GO:0070838) Q96D03       | Cytoplasm {ECO:0000250}. | 0 |
| Plasma membrane (GO:0070838) Q01484       | Cytoplasm, cytoskeleton  | 0 |
| Cytosol (GO:0005829); Q96CG3              | Cytoplasm {ECO:0000269 P | 0 |
| Cytosol (GO:0005829) Q8NB90               | Cytoplasm {ECO:0000250 U | 0 |
| Actin filaments (GO:0070838) P12104       | Cytoplasm.               | 0 |
| Cytosol (GO:0005829); P20248              | Nucleus {ECO:0000269 Pub | 1 |
| Nucleoplasm (GO:0005609) Q9HCE5           | Nucleus {ECO:0000269 Pub | 1 |
| Golgi apparatus (GO:0095015) Q70EK8       | Cell junction, tight jun | 0 |
| Nucleoli (GO:0005730) Q8WTS6              | Nucleus. Chromosome {ECO | 0 |
| Cytosol (GO:0005829); Q96HR8              | Cytoplasm. Nucleus. Note | 0 |
| Mitochondria (GO:0005505) Q8TCQ1          | Golgi apparatus, trans-G | 0 |
| Intermediate filament Q96HF1              | Secreted {ECO:0000250}.  | 0 |
| Cytosol (GO:0005829); P61247              | Cytoplasm {ECO:0000255 H | 0 |
| Cytosol (GO:0005829); Q9NRA1              | Cytoplasm, cytosol {ECO: | 0 |
| Nuclear speckles (GO:0070838) Q6ZWL3      | Endoplasmic reticulum me | 0 |
| Endoplasmic reticulum Q60337              | Endoplasmic reticulum me | 1 |
| Midbody ring (GO:0095015) Q8TE57          | Secreted, extracellular  | 0 |
| Cytosol (GO:0005829); Q9HD67              | Cytoplasm, cytosol {ECO: | 0 |
| Cytosol (GO:0005829); Q9NUU6              | Cytoplasm {ECO:0000269 P | 0 |
| Cytosol (GO:0005829); Q13309              | Cytoplasm {ECO:0000269 P | 1 |
| Nucleoli (GO:0005730) Q99650              | Membrane {ECO:0000305};  | 0 |
| Cytosol (GO:0005829); Q6NUS8              | Membrane {ECO:0000305};  | 0 |
| Cytosol (GO:0005829); Q9NYY3              | Cytoplasm, cytoskeleton, | 0 |
| Cytosol (GO:0005829) P27986               |                          | 0 |

|                             |                          |   |
|-----------------------------|--------------------------|---|
| Vesicles (GO:0043231)P10915 | Secreted, extracellular  | 0 |
| Actin filaments (GO:006ZUX7 | Membrane {ECO:0000305};  | 0 |
| Nucleoplasm (GO:00056P81877 | Nucleus {ECO:0000250}.   | 1 |
| Cytosol (GO:0005829) Q93088 | Cytoplasm.               | 1 |
| Plasma membrane (GO:0013576 |                          | 0 |
| Cytokinetic bridge (G08N485 |                          | 0 |
| Nucleoli (GO:0005730)Q9NXP7 |                          | 0 |
| Vesicles (GO:0043231)043314 | Cytoplasm, cytosol {ECO: | 0 |
| Cytosol (GO:0005829);P19021 | Cytoplasmic vesicle, sec | 0 |
| Nucleoplasm (GO:00056A6H8Y1 | Nucleus {ECO:0000269 Pub | 1 |
| Nuclear speckles (GO:Q13888 | Nucleus {ECO:0000269 Pub | 0 |
| Golgi apparatus (GO:008TAD4 | Golgi apparatus, trans-G | 1 |
| Cytosol (GO:0005829) P20290 | Cytoplasm {ECO:0000269 P | 0 |
| Nucleoplasm (GO:00056Q9UF56 | Cytoplasm {ECO:0000269 P | 0 |
| Mitochondria (GO:0005Q9BWV2 | Membrane {ECO:0000305};  | 0 |
| Golgi apparatus (GO:00969D9 | Secreted {ECO:0000269 Pu | 0 |
| Nucleoplasm (GO:00056095379 | Cytoplasm {ECO:0000269 P | 0 |
| Nucleoplasm (GO:00056Q96JP0 | Cytoplasm {ECO:0000250}. | 0 |
| Nucleoplasm (GO:00056Q9Y6G5 | Cytoplasm {ECO:0000269 P | 0 |
| Midbody (GO:0030496);Q8TE59 | Secreted, extracellular  | 0 |
| Endoplasmic reticulumQ969M3 | Endoplasmic reticulum me | 1 |
| Cytosol (GO:0005829) Q9UNA1 | Cell junction, focal adh | 0 |
| Actin filaments (GO:006ZT89 | Mitochondrion inner memb | 0 |
| Nuclear speckles (GO:Q7L014 | Nucleus speckle {ECO:000 | 0 |
| Cytosol (GO:0005829);Q96MT1 | Endoplasmic reticulum me | 0 |
| Centrosome (GO:000581Q9BXJ5 | Secreted {ECO:0000305}.  | 0 |
| Cytokinetic bridge (G06PIJ6 | Cytoplasm, cytosol {ECO: | 0 |
| Mitochondria (GO:0005Q8NBM8 | Secreted.                | 0 |
| Cytosol (GO:0005829);Q15025 | Cytoplasm. Nucleus. Note | 1 |
| Cytosol (GO:0005829) Q13283 | Cytoplasm, cytosol {ECO: | 0 |
| Nuclear bodies (GO:00Q96RE9 | Nucleus {ECO:0000269 Pub | 0 |
| Centrosome (GO:000581015049 | Cytoplasmic vesicle {ECO | 0 |
| Cytosol (GO:0005829);Q9NX24 | Nucleus, nucleolus. Nucl | 0 |
| Nucleoplasm (GO:00056Q96G75 | Cytoplasm, cytosol {ECO: | 0 |
| Vesicles (GO:0043231)Q6PUV4 | Cytoplasm, cytosol. Note | 0 |
| Nucleoli (GO:0005730)Q9NT68 | Cell membrane {ECO:00002 | 0 |
| Cytokinetic bridge (G09Y247 |                          | 0 |
| Golgi apparatus (GO:0086YV6 |                          | 0 |
| Plasma membrane (GO:0095363 | Mitochondrion matrix {EC | 0 |
| Cytosol (GO:0005829);Q9NXC2 | Secreted {ECO:0000305}.  | 0 |
| Vesicles (GO:0043231)Q5VV42 | Endoplasmic reticulum me | 0 |
| Mitochondria (GO:0005Q96NC0 | Nucleus {ECO:0000269 Pub | 0 |
| Cytosol (GO:0005829);060609 | Cell membrane; Lipid-anc | 0 |
| Centriolar satellite Q9UHG0 | Cell projection, cilium  | 0 |
| Cytosol (GO:0005829);Q9C029 |                          | 0 |
| Nuclear bodies (GO:00Q8WV44 | Cytoplasm {ECO:0000269 P | 0 |
| Cytosol (GO:0005829);Q9BW72 | Mitochondrion membrane { | 1 |
| Nucleoli (GO:0005730)Q96PV7 | Cytoplasm {ECO:0000269 P | 0 |
| Cytosol (GO:0005829);075509 | Cell membrane {ECO:00002 | 1 |
| Nucleoplasm (GO:00056Q7L0R7 |                          | 0 |
| Cytosol (GO:0005829);P22033 | Mitochondrion matrix.    | 0 |
| Mitochondria (GO:0005Q8N431 |                          | 0 |
| Vesicles (GO:0043231)Q9ULW3 | Nucleus {ECO:0000250}. N | 0 |
| Nucleoplasm (GO:00056Q6NYC8 | Isoform 1: Cytoplasm, cy | 0 |
| Cytosol (GO:0005829);Q86T65 |                          | 0 |

|                              |                          |   |
|------------------------------|--------------------------|---|
| Nucleoplasm (GO:00056P49643  |                          | 0 |
| Nucleoplasm (GO:00056Q5VWP3  | Nucleus {ECO:0000250 Uni | 0 |
| Nucleoplasm (GO:00056Q5TDP6  |                          | 0 |
| Plasma membrane (GO:0Q8IX30  | Secreted {ECO:0000269 Pu | 0 |
| Nuclear speckles (GO:Q6Q6R5  | Cytoplasm {ECO:0000250}. | 0 |
| Cytosol (GO:0005829); Q5TCY1 | Cytoplasm {ECO:0000269 P | 1 |
| Vesicles (GO:0043231) Q5JU00 | Cell projection, cilium, | 0 |
| Mitochondria (GO:0005Q6DKI1  |                          | 0 |
| Cytosol (GO:0005829); 000221 | Cytoplasm {ECO:0000250}. | 0 |
| Nucleoplasm (GO:00056Q13641  | Cell membrane {ECO:00002 | 0 |
| Vesicles (GO:0043231) Q5VVH5 | Cytoplasm {ECO:0000250}. | 0 |
| Nucleoplasm (GO:00056Q8WWQ0  | Nucleus {ECO:0000250}.   | 1 |
| Nucleoplasm (GO:00056Q6ZRQ5  | Nucleus {ECO:0000269 Pub | 1 |
| Nucleoplasm (GO:00056Q5TGI0  | Membrane {ECO:0000305};  | 0 |
| Nucleoli (GO:0005730) Q12796 | Nucleus {ECO:0000305}.   | 0 |
| Nucleoplasm (GO:00056Q8IYS1  |                          | 0 |
| Nucleoplasm (GO:00056Q8N228  | Nucleus {ECO:0000305}.   | 1 |
| Mitochondria (GO:0005Q96NH3  | Cytoplasm {ECO:0000250}. | 0 |
| Cytosol (GO:0005829); Q8N392 | Cytoplasm {ECO:0000269 P | 0 |
| Cytosol (GO:0005829); Q9P1F3 |                          | 0 |
| Cytosol (GO:0005829); Q6NT16 | Membrane {ECO:0000305};  | 0 |
| Vesicles (GO:0043231) Q6P444 | Mitochondrion {ECO:00002 | 0 |
| Cell Junctions (GO:00Q8TD20  | Cell membrane {ECO:00002 | 0 |
| Mitochondria (GO:0005Q149N8  |                          | 0 |
| Golgi apparatus (GO:0Q9NVV5  | Cell membrane {ECO:00002 | 0 |
| Nucleoplasm (GO:00056P63172  | Golgi apparatus {ECO:000 | 0 |
| Cytosol (GO:0005829); Q8IVF5 | Cytoplasm {ECO:0000250}. | 0 |
| Golgi apparatus (GO:0Q9P2C4  | Membrane {ECO:0000305};  | 0 |
| Nuclear speckles (GO:Q15007  | Nucleus speckle {ECO:000 | 0 |
| Cytosol (GO:0005829); Q5VZL5 |                          | 0 |
| Endoplasmic reticulum P01282 | Secreted.                | 0 |
| Cytosol (GO:0005829); Q9H993 |                          | 0 |
| Cytosol (GO:0005829); 075751 | Membrane; Multi-pass mem | 0 |
| Cytosol (GO:0005829); Q8N2E2 | Secreted {ECO:0000305}.  | 0 |
| Cytosol (GO:0005829) Q03113  | Cell membrane {ECO:00002 | 0 |
| Nucleoli (GO:0005730) Q9BRJ6 |                          | 0 |
| Cytosol (GO:0005829) Q7Z5N4  | Cell membrane {ECO:00002 | 0 |
| Vesicles (GO:0043231) P86790 | Lysosome membrane {ECO:0 | 0 |
| Cytosol (GO:0005829); Q96N11 |                          | 0 |
| Nucleoplasm (GO:00056Q9NYW8  | Nucleus {ECO:0000269 Pub | 1 |
| Nucleoplasm (GO:00056Q02930  | Nucleus {ECO:0000305}.   | 0 |
| Cell Junctions (GO:00P00533  | Cell membrane {ECO:00002 | 0 |
| Nucleoplasm (GO:00056Q96FF9  | Nucleus {ECO:0000269 Pub | 0 |
| Cytosol (GO:0005829); P17936 | Secreted {ECO:0000269 Pu | 0 |
| Nucleoplasm (GO:00056Q96QR8  | Nucleus {ECO:0000269 Pub | 1 |
| Golgi apparatus (GO:0P08833  | Secreted.                | 0 |
| Mitochondria (GO:0005P40926  | Mitochondrion matrix {EC | 1 |
| Nuclear membrane (GO:Q6PJE2  |                          | 0 |
| Mitochondria (GO:0005075323  | Cytoplasm {ECO:0000250 U | 0 |
| Cytosol (GO:0005829) P40227  | Cytoplasm {ECO:0000269 P | 0 |
| Cytosol (GO:0005829) P78330  |                          | 0 |
| Cytosol (GO:0005829) Q86XT4  | Cytoplasm {ECO:0000269 P | 0 |
| Nucleoplasm (GO:00056Q03936  | Nucleus {ECO:0000305}.   | 0 |
| Cytosol (GO:0005829); Q9ULK2 |                          | 0 |
| Cytosol (GO:0005829); Q9H0V1 | Membrane {ECO:0000305};  | 0 |



|                              |                          |   |
|------------------------------|--------------------------|---|
| Centriolar satellite Q8WVR3  | Cytoplasm, cytoskeleton, | 0 |
| Microtubules (GO:0015075420) |                          | 0 |
| Cytosol (GO:0005829); Q9C037 | Cytoplasm {ECO:0000269 P | 1 |
| Cell Junctions (GO:00Q7L2J0) |                          | 0 |
| Nuclear membrane (GO:Q96SK2) | Membrane {ECO:0000305};  | 0 |
| Cytosol (GO:0005829); Q8NEM8 | Cytoplasm, cytosol {ECO: | 0 |
| Cytosol (GO:0005829) Q96H79  |                          | 0 |
| Nucleoli (GO:0005730) Q5C9Z4 | Nucleus, nucleolus {ECO: | 1 |
| Nuclear speckles (GO:Q86XI2) | Nucleus {ECO:0000269 Pub | 0 |
| Cell Junctions (GO:00Q13796) | Apical cell membrane {EC | 0 |
| Nucleoplasm (GO:00056Q9Y383) | Nucleus speckle {ECO:000 | 0 |
| Endoplasmic reticulum Q9HBJ8 | Cell membrane {ECO:00002 | 0 |
| Cytosol (GO:0005829) Q96B97  | Cytoplasm {ECO:0000269 P | 0 |
| Nuclear membrane (GO:Q9BQJ4) | Membrane {ECO:0000305};  | 0 |
| Mitochondria (GO:0005Q6ZV70) |                          | 0 |
| Cytosol (GO:0005829); Q8TDW5 | Membrane {ECO:0000250};  | 0 |
| Cytosol (GO:0005829); 014936 | Nucleus {ECO:0000250 Uni | 0 |
| Nucleoli (GO:0005730) 015550 | Nucleus {ECO:0000305}.   | 0 |
| Nucleoplasm (GO:00056Q99865) | Nucleus {ECO:0000250 Uni | 0 |
| Plasma membrane (GO:0P26038) | Cell membrane {ECO:00002 | 0 |
| Nuclear speckles (GO:Q8WWL7) | Nucleus {ECO:0000269 Pub | 0 |
| Nucleoplasm (GO:00056Q9BY41) | Nucleus. Cytoplasm. Note | 0 |
| Plasma membrane (GO:0P36021) | Cell membrane {ECO:00002 | 0 |
| Nucleoplasm (GO:00056P17025) | Nucleus {ECO:0000305}.   | 0 |
| Nucleoplasm (GO:00056Q9NS84) | Golgi apparatus membrane | 0 |
| Nucleoplasm (GO:00056Q5JUW0) |                          | 0 |
| Mitochondria (GO:0005Q9NX14) | Mitochondrion inner memb | 0 |
| Nucleoplasm (GO:00056P51814) | Nucleus {ECO:0000305}.   | 0 |
| Nucleoplasm (GO:00056Q14202) | Nucleus {ECO:0000250}.   | 1 |
| Nucleoplasm (GO:00056P21675) | Nucleus {ECO:0000269 Pub | 1 |
| Vesicles (GO:0043231) Q9BXC1 | Cell membrane; Multi-pas | 0 |
| Nuclear speckles (GO:Q15233) | Nucleus. Nucleus, nucleo | 0 |
| Mitochondria (GO:0005Q96HB5) | Cytoplasm, cytoskeleton, | 0 |
| Nuclear bodies (GO:00Q99677) | Cell membrane; Multi-pas | 1 |
| Endoplasmic reticulum Q15125 | Endoplasmic reticulum me | 0 |
| Nucleoplasm (GO:00056015294) | Nucleus {ECO:0000269 Pub | 0 |
| Cytosol (GO:0005829) Q9UKP3  |                          | 0 |
| Vesicles (GO:0043231) P31785 | Cell membrane {ECO:00002 | 0 |
| Vesicles (GO:0043231) Q96QF7 | Nucleus {ECO:0000269 Pub | 0 |
| Nucleoplasm (GO:00056Q9Y462) | Nucleus {ECO:0000305 Pub | 0 |
| Endoplasmic reticulum 060879 | Isoform 3: Cytoplasm, cy | 0 |
| Nucleoplasm (GO:00056Q9H4D5) | Nucleus. Cytoplasm. Note | 0 |
| Intermediate filament Q6NSI4 | Chromosome {ECO:0000269  | 0 |
| Nuclear membrane (GO:Q5JSL3) |                          | 0 |
| Cytosol (GO:0005829) Q8N6C5  | Isoform 1: Membrane {ECO | 0 |
| Nucleoplasm (GO:00056Q6ZRI8) |                          | 0 |
| Plasma membrane (GO:0P51654) | Cell membrane {ECO:00002 | 1 |
| Nucleoplasm (GO:00056P38159) | Nucleus {ECO:0000269 Pub | 0 |
| Nuclear bodies (GO:00Q8NEM0) | Cytoplasm, cytoskeleton, | 0 |
| Cytosol (GO:0005829); Q9Y4C4 | Cytoplasm {ECO:0000269 P | 0 |
| Cytosol (GO:0005829); P43358 |                          | 0 |
| Endoplasmic reticulum Q15738 | Endoplasmic reticulum me | 1 |
| Actin filaments (GO:0015231) | Cytoplasm, cytoskeleton  | 0 |
| Cytosol (GO:0005829); P27635 |                          | 0 |
| Actin filaments (GO:0Q8TDX6) | Golgi apparatus, Golgi s | 0 |

|                              |                          |   |
|------------------------------|--------------------------|---|
| Vesicles (GO:0043231)P21281  | Endomembrane system; Per | 0 |
| Cytosol (GO:0005829);Q86WR0  |                          | 0 |
| Cytosol (GO:0005829);Q6NT76  | Nucleus {ECO:0000269 Pub | 1 |
| Cytosol (GO:0005829);Q9NYZ2  | Mitochondrion inner memb | 0 |
| Cytosol (GO:0005829);Q8WUX9  | Cytoplasm {ECO:0000269 P | 0 |
| Cytosol (GO:0005829) Q9H7D0  | Cytoplasm {ECO:0000269 P | 0 |
| Cytosol (GO:0005829) 094903  |                          | 0 |
| Endoplasmic reticulum094905  | Endoplasmic reticulum me | 1 |
| Cytosol (GO:0005829);A1KZ92  | Secreted {ECO:0000305}.; | 0 |
| Cytosol (GO:0005829) 075410  | Cytoplasm {ECO:0000269 P | 0 |
| Vesicles (GO:0043231)Q8NEB5  | Membrane {ECO:0000305};  | 0 |
| Centrosome (GO:000581)Q9BRT9 | Cytoplasm {ECO:0000250}. | 0 |
| Mitochondria (GO:0005)Q9BZ95 | Nucleus {ECO:0000250}. C | 1 |
| Cytosol (GO:0005829);Q9BYV6  | Cytoplasm {ECO:0000250}. | 0 |
| Vesicles (GO:0043231)Q8IWW8  | Mitochondrion {ECO:00002 | 0 |
| Mitochondria (GO:0005)Q9Y2Q9 | Mitochondrion {ECO:00002 | 1 |
| Cytosol (GO:0005829);Q53H82  | Mitochondrion matrix {EC | 0 |
| Nucleoplasm (GO:00056)Q9GZV8 | Nucleus {ECO:0000269 Pub | 0 |
| Nuclear bodies (GO:00)P54274 | Nucleus. Cytoplasm, cyto | 0 |
| Cytosol (GO:0005829);P18124  |                          | 0 |
| Cytosol (GO:0005829);Q96QS6  |                          | 0 |
| Vesicles (GO:0043231)Q8N8Y2  |                          | 0 |
| Vesicles (GO:0043231)Q9NX95  | Isoform 1: Cytoplasm, cy | 0 |
| Endoplasmic reticulumQ86UE4  | Endoplasmic reticulum me | 0 |
| Mitochondria (GO:0005)Q9Y561 | Membrane {ECO:0000269 Pu | 0 |
| Golgi apparatus (GO:0000559  | Golgi apparatus membrane | 1 |
| Intermediate filamentP53803  | Nucleus {ECO:0000250}.   | 0 |
| Cytosol (GO:0005829) 015372  | Cytoplasm {ECO:0000255 H | 0 |
| Nucleoli (GO:0005730)Q9BRU9  | Nucleus, nucleolus {ECO: | 0 |
| Mitochondria (GO:0005)Q9Y6M9 | Mitochondrion inner memb | 1 |
| Nucleoplasm (GO:00056)Q6P1N9 | Nucleus {ECO:0000305}.   | 1 |
| Nucleoplasm (GO:00056)Q86UY5 | Cytoplasm {ECO:0000305 P | 0 |
| Mitochondria (GO:0005)Q9BYG8 | Cytoplasm, cytosol {ECO: | 0 |
| Nuclear membrane (GO:Q49AJ0  |                          | 0 |
| Mitochondria (GO:0005)P17097 | Nucleus {ECO:0000305}.   | 0 |
| Cytokinetic bridge (G)Q9COH5 | Nucleus {ECO:0000305}.   | 0 |
| Cytosol (GO:0005829);Q6XQN6  | Cytoplasm, cytosol {ECO: | 1 |
| Centriolar satellite P98155  | Membrane; Single-pass ty | 0 |
| Mitochondria (GO:0005)Q9UIJ7 | Mitochondrion matrix {EC | 1 |
| Nucleoplasm (GO:00056)Q96PU4 | Nucleus {ECO:0000255 PRO | 1 |
| Nucleoli fibrillar ce000712  | Nucleus.                 | 0 |
| Lipid droplets (GO:00)Q99541 | Membrane {ECO:0000305};  | 0 |
| Centriolar satellite Q7Z4H7  | Cytoplasm, cytoskeleton  | 0 |
| Nucleoplasm (GO:00056)P42772 | Cytoplasm {ECO:0000269 P | 0 |
| Nucleoli (GO:0005730)P42771  | Cytoplasm {ECO:0000269 P | 0 |
| Cytosol (GO:0005829);Q8N3Z6  | Nucleus, nucleolus {ECO: | 0 |
| Cytosol (GO:0005829);Q9UK96  | Cytoplasm {ECO:0000269 P | 0 |
| Plasma membrane (GO:Q05RIA9  |                          | 0 |
| Cytosol (GO:0005829) Q16620  | Cell membrane {ECO:00002 | 0 |
| Cytosol (GO:0005829);Q5T6J7  |                          | 0 |
| Nucleoplasm (GO:00056)Q92529 |                          | 0 |
| Cytosol (GO:0005829);Q5SR56  | Membrane {ECO:0000305};  | 0 |
| Cell Junctions (GO:00)Q8N6M6 | Nucleus, nucleolus {ECO: | 0 |
| Nucleoplasm (GO:00056)Q8TBJ4 | Membrane {ECO:0000305};  | 0 |
| Nucleoplasm (GO:00056)Q96JM2 | Nucleus {ECO:0000269 Pub | 0 |

|                             |                          |   |
|-----------------------------|--------------------------|---|
| Nucleoplasm (GO:00056Q9NRY2 | Nucleus {ECO:0000269 Pub | 1 |
| Cytosol (GO:0005829);Q5VWJ9 |                          | 0 |
| Cytosol (GO:0005829);P27105 | Cell membrane {ECO:00002 | 0 |
| Actin filaments (GO:0P06396 | Isoform 2: Cytoplasm, cy | 0 |
| Cytokinetic bridge (GQ96E11 | Mitochondrion {ECO:00002 | 0 |
| Centrosome (GO:000581Q15406 | Nucleus {ECO:0000305}.   | 1 |
| Cytosol (GO:0005829);075129 | Membrane {ECO:0000250 Un | 0 |
| Cytosol (GO:0005829);Q8NA23 |                          | 0 |
| Nucleoli (GO:0005730)Q9NRF9 | Nucleus {ECO:0000305}.   | 0 |
| Nucleoli (GO:0005730)Q15527 |                          | 0 |
| Nucleoli (GO:0005730)075683 | Nucleus, nucleoplasm {EC | 0 |
| Nucleoplasm (GO:00056Q15528 | Nucleus {ECO:0000305}.   | 0 |
| Nucleoli (GO:0005730)Q9GZR2 | Nucleus, nucleolus {ECO: | 0 |
| Nucleoli (GO:0005730)P62424 |                          | 0 |
| Nucleoplasm (GO:00056Q9Y5Q8 | Nucleus.                 | 1 |
| Mitochondria (GO:0005Q9H7Z7 | Golgi apparatus membrane | 0 |
| Cytosol (GO:0005829);Q9BV86 | Nucleus {ECO:0000269 Pub | 0 |
| Nucleoplasm (GO:00056Q9ULV3 | Nucleus.                 | 1 |
| Mitochondria (GO:0005Q6KCM7 | Mitochondrion inner memb | 1 |
| Cytosol (GO:0005829);Q9NR46 | Cytoplasm {ECO:0000269 P | 1 |
| Cell Junctions (GO:00Q7L4E1 | Mitochondrion outer memb | 0 |
| Endoplasmic reticulum014684 | Membrane {ECO:0000269 Pu | 0 |
| Endoplasmic reticulumP80188 | Secreted {ECO:0000269 Pu | 0 |
| Cytosol (GO:0005829) Q6UWEO | Cytoplasm {ECO:0000269 P | 0 |
| Vesicles (GO:0043231)Q8NDA2 | Secreted, extracellular  | 0 |
| Golgi apparatus (GO:0Q5VW38 | Cell membrane {ECO:00002 | 0 |
| Nucleoplasm (GO:00056Q9BUH6 | Nucleus {ECO:0000269 Pub | 1 |
| Endoplasmic reticulum015027 | Endoplasmic reticulum me | 0 |
| Nuclear bodies (GO:00Q9BTV6 |                          | 0 |
| Nucleoplasm (GO:00056P46531 | Cell membrane {ECO:00002 | 0 |
| Mitochondria (GO:0005Q96BF6 | Nucleus {ECO:0000269 Pub | 0 |
| Cytosol (GO:0005829);Q86WR7 |                          | 0 |
| Cytosol (GO:0005829) Q5T2R2 | Mitochondrion {ECO:00003 | 0 |
| Nucleoplasm (GO:00056Q5VUB5 | Cell membrane {ECO:00002 | 0 |
| Nuclear membrane (GO:Q9H8M7 | Nucleus {ECO:0000269 Pub | 0 |
| Vesicles (GO:0043231)Q15404 |                          | 0 |
| Endoplasmic reticulumP61647 | Golgi apparatus membrane | 0 |
| Cell Junctions (GO:00Q8TEW0 | Cytoplasm {ECO:0000250}. | 0 |
| Nucleoli (GO:0005730)Q9BXX3 |                          | 0 |
| Nucleoplasm (GO:00056P37275 | Nucleus {ECO:0000269 Pub | 1 |
| Cytosol (GO:0005829);Q8NE31 |                          | 0 |
| Cytosol (GO:0005829);Q96F24 | Nucleus {ECO:0000250 Uni | 0 |
| Nucleoplasm (GO:00056Q9NQ94 | Nucleus {ECO:0000269 Pub | 0 |
| Nucleoplasm (GO:00056014802 | Nucleus.                 | 1 |
| Cytosol (GO:0005829);Q5GLZ8 | Cytoplasm, cytosol {ECO: | 1 |
| Cytosol (GO:0005829);Q9H2I8 |                          | 0 |
| Cell Junctions (GO:00Q13555 | Sarcoplasmic reticulum m | 0 |
| Cytosol (GO:0005829);Q15847 | Nucleus {ECO:0000269 Pub | 1 |
| Mitochondria (GO:0005P00367 | Mitochondrion matrix.    | 1 |
| Nucleoli fibrillar ceQ15327 | Nucleus {ECO:0000269 Pub | 1 |
| Cytosol (GO:0005829);P34969 | Cell membrane; Multi-pas | 1 |
| Cytosol (GO:0005829);P78346 | Nucleus, nucleolus {ECO: | 0 |
| Plasma membrane (GO:0Q9UEY8 | Cytoplasm, cytoskeleton. | 0 |
| Nucleoli (GO:0005730)Q5SQQ9 | Nucleus {ECO:0000255 PRO | 0 |
| Endoplasmic reticulumQ9NXW2 | Endoplasmic reticulum me | 1 |

|                             |                          |   |
|-----------------------------|--------------------------|---|
| Mitochondria (GO:0005Q13542 |                          | 0 |
| Centrosome (GO:000581Q5SXH7 |                          | 0 |
| Cytosol (GO:0005829);Q9NQB0 | Nucleus, PML body {ECO:0 | 1 |
| Nucleoli (GO:0005730)P46013 | Chromosome {ECO:0000269  | 1 |
| Intermediate filamentQ16352 |                          | 0 |
| Golgi apparatus (GO:0Q9C0I9 |                          | 0 |
| Mitochondria (GO:0005Q9BT17 | Mitochondrion inner memb | 1 |
| Centrosome (GO:000581Q6QHF9 | Peroxisome {ECO:0000250} | 0 |
| Cytosol (GO:0005829);P78417 | Cytoplasm, cytosol {ECO: | 1 |
| Nucleoplasm (GO:00056Q15542 | Nucleus.                 | 1 |
| Nucleoplasm (GO:00056Q5VV67 | Nucleus {ECO:0000269 Pub | 1 |
| Vesicles (GO:0043231)Q8IWB1 | Cell membrane {ECO:00002 | 0 |
| Vesicles (GO:0043231)Q9H8M5 | Cell membrane {ECO:00002 | 0 |
| Nucleoli (GO:0005730)Q14690 | Nucleus, nucleolus {ECO: | 1 |
| Plasma membrane (GO:0043184 | Isoform 1: Cell membrane | 0 |
| Nucleoplasm (GO:00056Q43665 | Isoform 1: Cytoplasm, cy | 0 |
| Nucleoli fibrillar ceQ9BSF8 | Nucleus {ECO:0000269 Pub | 0 |
| Cytosol (GO:0005829);043903 | Cytoplasm, cytoskeleton, | 0 |
| Cytosol (GO:0005829) Q9HCJ2 | Cell junction, synapse,  | 0 |
| Microtubules (GO:0015Q9UHJ9 | Golgi apparatus membrane | 0 |
| Cytosol (GO:0005829);Q9H6E5 | Nucleus, nucleolus {ECO: | 0 |
| Nucleoplasm (GO:00056Q9UL58 | Nucleus {ECO:0000305}.   | 0 |
| Cytosol (GO:0005829);Q96GX9 | Cytoplasm {ECO:0000255 H | 0 |
| Nuclear speckles (GO:Q13574 | Cytoplasm {ECO:0000269 P | 0 |
| Cytosol (GO:0005829) Q7L2H7 | Cytoplasm {ECO:0000255 H | 1 |
| Cytosol (GO:0005829);Q08945 | Nucleus {ECO:0000269 Pub | 0 |
| Golgi apparatus (GO:0075387 | Membrane {ECO:0000305};  | 0 |
| Nuclear speckles (GO:Q9H6J7 |                          | 0 |
| Golgi apparatus (GO:0Q8N6H7 | Cytoplasm {ECO:0000269 P | 0 |
| Nucleoplasm (GO:00056Q92879 | Nucleus {ECO:0000269 Pub | 0 |
| Nuclear bodies (GO:00Q53FT3 | Cytoplasm {ECO:0000250 U | 0 |
| Cytosol (GO:0005829);P58005 | Cytoplasm {ECO:0000305 P | 0 |
| Nuclear membrane (GO:094919 | Secreted {ECO:0000305}.  | 0 |
| Cytosol (GO:0005829);Q8N4S0 |                          | 0 |
| Centrosome (GO:000581Q6PF15 |                          | 0 |
| Endoplasmic reticulumP50454 | Endoplasmic reticulum lu | 1 |
| Cytosol (GO:0005829);015484 |                          | 0 |
| Nucleoli (GO:0005730)Q96HW7 | Nucleus {ECO:0000269 Pub | 0 |
| Cytosol (GO:0005829);Q13153 | Cytoplasm {ECO:0000269 P | 0 |
| Cytosol (GO:0005829);P23396 | Cytoplasm {ECO:0000269 P | 0 |
| Golgi apparatus (GO:0Q9C0D7 |                          | 0 |
| Nucleoplasm (GO:00056Q9H892 |                          | 0 |
| Cytosol (GO:0005829);P13591 | Isoform 1: Cell membrane | 0 |
| Cell Junctions (GO:00Q96A22 |                          | 0 |
| Nuclear bodies (GO:00Q14207 | Nucleus. Nucleus, Cajal  | 1 |
| Nucleoplasm (GO:00056Q13315 | Nucleus {ECO:0000269 Pub | 0 |
| Nucleoplasm (GO:00056Q8IW92 | Secreted {ECO:0000305}.  | 0 |
| Cytosol (GO:0005829) Q5VYV7 |                          | 0 |
| Golgi apparatus (GO:0Q6IAA8 | Late endosome membrane;  | 0 |
| Nucleoplasm (GO:00056Q9Y5Y6 | Membrane {ECO:0000305};  | 0 |
| Nuclear speckles (GO:Q9BZ11 | Membrane; Single-pass ty | 0 |
| Vesicles (GO:0043231)Q9H8E8 | Nucleus. Cytoplasm. Note | 0 |
| Cytosol (GO:0005829);Q3LXA3 |                          | 0 |
| Nucleoplasm (GO:00056Q94776 | Nucleus {ECO:0000255 PRO | 1 |
| Microtubules (GO:0015Q9NPIO | Vacuole membrane {ECO:00 | 0 |

|                             |                          |   |
|-----------------------------|--------------------------|---|
| Cytosol (GO:0005829);Q03395 | Membrane; Multi-pass mem | 0 |
| Midbody (GO:0030496);Q9NQS7 | Nucleus {ECO:0000269 Pub | 0 |
| Golgi apparatus (GO:0096HJ5 | Endomembrane system {ECO | 0 |
| Cytosol (GO:0005829);Q8N684 | Nucleus {ECO:0000269 Pub | 1 |
| Cytosol (GO:0005829);014681 | Nucleus membrane {ECO:00 | 0 |
| Cytosol (GO:0005829);Q0P6D6 |                          | 0 |
| Nucleoplasm (GO:00056014757 | Nucleus. Cytoplasm. Cyto | 0 |
| Cytosol (GO:0005829);Q99689 | Cytoplasm, cytoskeleton, | 0 |
| Microtubules (GO:0015Q96AP7 | Cell junction, adherens  | 0 |
| Cell Junctions (GO:00060487 | Membrane {ECO:0000305};  | 0 |
| Golgi apparatus (GO:0086YD3 | Isoform 1: Cell membrane | 0 |
| Cytosol (GO:0005829);Q01995 | Cytoplasm {ECO:0000305}. | 0 |
| Cytosol (GO:0005829);Q9H1R2 | Cytoplasm {ECO:0000305 P | 0 |
| Vesicles (GO:0043231)Q86VX2 | Cytoplasmic vesicle {ECO | 0 |
| Golgi apparatus (GO:005JYT7 |                          | 0 |
| Golgi apparatus (GO:009BR10 | Membrane {ECO:0000305};  | 0 |
| Cytosol (GO:0005829);Q9H410 | Nucleus {ECO:0000269 Pub | 1 |
| Cytosol (GO:0005829);094964 | C-terminal 80 kDa form:  | 0 |
| Nucleoli fibrillar ceQ9BX40 |                          | 0 |
| Cell Junctions (GO:009BTV7  |                          | 0 |
| Nucleoplasm (GO:00056Q8WV07 | Nucleus {ECO:0000250 Uni | 0 |
| Vesicles (GO:0043231)Q96T91 | Secreted.                | 0 |
| Mitochondria (GO:0005Q86TN4 |                          | 0 |
| Nucleoplasm (GO:00056Q9BRQ3 |                          | 0 |
| Vesicles (GO:0043231)Q86UX7 | Cell projection, podosom | 0 |
| Nucleoplasm (GO:00056Q01970 | Membrane; Peripheral mem | 0 |
| Cytosol (GO:0005829);014613 | Endomembrane system {ECO | 0 |
| Cytosol (GO:0005829);P35544 |                          | 0 |
| Endoplasmic reticulum076062 | Microsome membrane {ECO: | 1 |
| Golgi apparatus (GO:009UID3 | Golgi apparatus, trans-G | 0 |
| Nucleoplasm (GO:00056095947 | Nucleus {ECO:0000255 PRO | 0 |
| Cytosol (GO:0005829);P60510 | Cytoplasm. Nucleus. Cyto | 0 |
| Cytosol (GO:0005829) P04075 | Cytoplasm, myofibril, sa | 1 |
| Cell Junctions (GO:00Q14183 | Lysosome {ECO:0000250}.  | 0 |
| Nucleoplasm (GO:00056Q9BW71 | Nucleus {ECO:0000269 Pub | 1 |
| Cytosol (GO:0005829);Q9UL54 | Cytoplasmic vesicle memb | 0 |
| Nucleoli (GO:0005730)P52926 | Nucleus.                 | 0 |
| Vesicles (GO:0043231)P08254 | Secreted, extracellular  | 0 |
| Golgi apparatus (GO:008WXI2 | Cytoplasm. Membrane; Per | 0 |
| Nuclear speckles (GO:Q8IYA7 | Nucleus {ECO:0000305}.   | 0 |
| Cell Junctions (GO:00Q5T2T1 | Membrane; Peripheral mem | 0 |
| Endoplasmic reticulumP05556 | Cell membrane {ECO:00003 | 0 |
| Mitochondria (GO:0005Q9P013 | Nucleus {ECO:0000269 Pub | 0 |
| Cytosol (GO:0005829);Q14865 | Nucleus {ECO:0000255 PRO | 0 |
| Plasma membrane (GO:0P55286 | Cell membrane; Single-pa | 0 |
| Cytosol (GO:0005829);Q6PH85 |                          | 0 |
| Cytosol (GO:0005829) Q6UWJ1 | Membrane {ECO:0000305};  | 0 |
| Cytosol (GO:0005829);A2RU14 | Membrane {ECO:0000305};  | 0 |
| Cytokinetic bridge (GP58753 | Cytoplasm {ECO:0000269 P | 0 |
| Cytosol (GO:0005829);Q8WVE0 | Cytoplasm {ECO:0000255 H | 0 |
| Centriolar satellite Q9NRM7 | Cytoplasm, cytoskeleton, | 0 |
| Cytosol (GO:0005829);000422 | Nucleus {ECO:0000269 Pub | 0 |
| Lipid droplets (GO:00Q86T90 |                          | 0 |
| Cytosol (GO:0005829);Q86V42 |                          | 0 |
| Endoplasmic reticulumQ96PC5 | Endoplasmic reticulum me | 1 |

|                              |                          |   |
|------------------------------|--------------------------|---|
| Centrosome (GO:000581P50135  | Cytoplasm {ECO:0000269 P | 0 |
| Nucleoplasm (GO:00056Q53EL6  | Nucleus {ECO:0000250 Uni | 0 |
| Nuclear speckles (GO:Q8IZU2  |                          | 0 |
| Cytosol (GO:0005829);Q68D86  |                          | 0 |
| Midbody (GO:0030496) Q15762  | Cell membrane {ECO:00003 | 0 |
| Nucleoplasm (GO:00056Q8NA03  |                          | 0 |
| Plasma membrane (GO:0Q15700  | Cell membrane {ECO:00002 | 0 |
| Cytosol (GO:0005829);Q8IWF9  |                          | 0 |
| Golgi apparatus (GO:0Q9NS28  | Cytoplasm {ECO:0000250}. | 0 |
| Golgi apparatus (GO:0Q8WVI7  | Cytoplasm {ECO:0000250}. | 0 |
| Nucleoplasm (GO:00056Q6P4H8  | Mitochondrion membrane { | 0 |
| Nucleoplasm (GO:00056Q14185  | Cytoplasm {ECO:0000305}. | 0 |
| Cytosol (GO:0005829) Q155Q3  | Cell junction, focal adh | 0 |
| Mitochondria (GO:0005P10515  | Mitochondrion matrix.    | 1 |
| Cytosol (GO:0005829);Q8WWB5  |                          | 0 |
| Cytosol (GO:0005829) Q6ZUT1  |                          | 0 |
| Cytosol (GO:0005829);Q14116  | Secreted {ECO:0000269 Pu | 0 |
| Cytosol (GO:0005829) Q03393  |                          | 0 |
| Cytosol (GO:0005829);P48426  | Cell membrane {ECO:00002 | 0 |
| Cytosol (GO:0005829) Q5SZK8  | Cell membrane {ECO:00003 | 0 |
| Cytosol (GO:0005829);Q12778  | Cytoplasm {ECO:0000250 U | 1 |
| Vesicles (GO:0043231) 094855 | Cytoplasmic vesicle, COP | 0 |
| Vesicles (GO:0043231) Q9NP78 | Lysosome membrane {ECO:0 | 0 |
| Cytosol (GO:0005829) Q969X0  | Cytoplasm, cytosol {ECO: | 0 |
| Nuclear membrane (GO:Q8IY37  |                          | 0 |
| Vesicles (GO:0043231) Q14643 | Endoplasmic reticulum me | 0 |
| Vesicles (GO:0043231) Q9UPY5 | Membrane {ECO:0000269 Pu | 0 |
| Cytosol (GO:0005829);Q9UK39  | Cytoplasm {ECO:0000250 U | 1 |
| Cytosol (GO:0005829) Q5T848  | Cell membrane; Multi-pas | 0 |
| Cytosol (GO:0005829);Q8IZD4  | Cytoplasm {ECO:0000269 P | 0 |
| Nuclear bodies (GO:00P10828  | Nucleus.                 | 1 |
| Cytosol (GO:0005829);Q9NWU1  | Mitochondrion {ECO:00002 | 1 |
| Cytosol (GO:0005829);Q8IX04  |                          | 0 |
| Golgi apparatus (GO:0Q8N2M4  | Membrane {ECO:0000305};  | 0 |
| Nuclear membrane (GO:Q8N5I9  |                          | 0 |
| Cytosol (GO:0005829);A6QL63  | Membrane {ECO:0000305};  | 0 |
| Mitochondria (GO:0005Q7Z3V4  |                          | 0 |
| Plasma membrane (GO:0Q12955  | Cytoplasm, cytoskeleton  | 0 |
| Nucleoplasm (GO:00056Q8NFX5  | Nucleus {ECO:0000269 Pub | 1 |
| Cell Junctions (GO:00Q8TDM6  | Cell junction {ECO:00002 | 0 |
| Nuclear membrane (GO:Q96QE2  | Cell membrane {ECO:00002 | 0 |
| Cytosol (GO:0005829) Q12792  | Cytoplasm. Cytoplasm, cy | 0 |
| Cytosol (GO:0005829);Q9Y2E4  |                          | 0 |
| Cytoplasmic bodies (GP06730  | Cytoplasm, P-body {ECO:0 | 1 |
| Cell Junctions (GO:00Q96QZ7  | Cell junction, tight jun | 0 |
| Nucleoli (GO:0005730) Q8NEF9 | Cytoplasm, perinuclear r | 0 |
| Nucleoplasm (GO:00056Q8IXF0  | Nucleus {ECO:0000255 PRO | 1 |
| Nucleoplasm (GO:00056Q8N128  |                          | 0 |
| Cytosol (GO:0005829);Q9NS73  | Nucleus. Cytoplasm. Note | 0 |
| Cytosol (GO:0005829) Q8TD10  |                          | 0 |
| Golgi apparatus (GO:0Q93063  | Endoplasmic reticulum me | 0 |
| Mitochondria (GO:0005Q96B42  | Cytoplasm {ECO:0000269 P | 0 |
| Cytosol (GO:0005829);Q9BQ13  |                          | 0 |
| Nucleoplasm (GO:00056Q92748  | Nucleus {ECO:0000269 Pub | 0 |
| Mitochondria (GO:0005095298  | Mitochondrion inner memb | 1 |

|                              |                          |   |
|------------------------------|--------------------------|---|
| Mitochondria (GO:0005P58397  | Secreted, extracellular  | 0 |
| Mitochondria (GO:0005Q8TB37  | Mitochondrion {ECO:00002 | 0 |
| Nucleoplasm (GO:00056Q8TDX7  | Nucleus. Cytoplasm. Cyto | 0 |
| Cytosol (GO:0005829) P16591  | Cytoplasm. Cytoplasm, cy | 0 |
| Cytosol (GO:0005829); Q9ULJ7 | Endosome {ECO:0000305}.  | 0 |
| Cytoplasmic bodies (GQ9HAU5  | Cytoplasm, perinuclear r | 1 |
| Cytosol (GO:0005829); 075794 | Cytoplasm {ECO:0000250}. | 0 |
| Cytosol (GO:0005829); Q9BQI4 | Secreted {ECO:0000250 Un | 0 |
| Golgi apparatus (GO:0Q8N1A6  |                          | 0 |
| Golgi apparatus (GO:0Q9P2Q2  | Cytoplasm, cytoskeleton  | 0 |
| Mitochondria (GO:0005Q9H0C2  | Mitochondrion inner memb | 0 |
| Golgi apparatus (GO:0Q12929  | Cytoplasm, cell cortex { | 0 |
| Cytosol (GO:0005829); Q9P016 | Nucleus {ECO:0000250}.   | 0 |
| Nucleoplasm (GO:00056P42695  | Nucleus {ECO:0000269 Pub | 1 |
| Golgi apparatus (GO:0Q96AJ9  | Cytoplasmic vesicle {ECO | 1 |
| Mitochondria (GO:0005P09417  |                          | 0 |
| Cytosol (GO:0005829); Q5W0V3 |                          | 0 |
| Cytosol (GO:0005829); Q8N6V9 |                          | 0 |
| Intermediate filament Q9H974 | Cytoplasm {ECO:0000255 H | 0 |
| Cytosol (GO:0005829) Q8IVH4  | Mitochondrion {ECO:00003 | 0 |
| Nucleoplasm (GO:00056Q17R98  | Nucleus {ECO:0000250}.   | 0 |
| Cytosol (GO:0005829); P25101 | Cell membrane; Multi-pas | 1 |
| Nucleoplasm (GO:00056P08235  | Cytoplasm. Nucleus. Endo | 0 |
| Cytosol (GO:0005829); P52895 | Cytoplasm {ECO:0000305}. | 0 |
| Mitochondria (GO:0005014531  | Cytoplasm {ECO:0000250}. | 0 |
| Cytosol (GO:0005829); 095231 | Nucleus {ECO:0000305}.   | 0 |
| Golgi apparatus (GO:0P19823  | Secreted.                | 0 |
| Nucleoplasm (GO:00056060870  | Nucleus {ECO:0000269 Pub | 0 |
| Centriolar satellite Q7Z5J8  | Membrane {ECO:0000305};  | 0 |
| Centriolar satellite P49441  |                          | 0 |
| Actin filaments (GO:0Q6ZSS7  | Membrane {ECO:0000305};  | 0 |
| Vesicles (GO:0043231) P50876 | Cell membrane {ECO:00002 | 0 |
| Cytosol (GO:0005829) 043150  | Cytoplasm. Golgi apparat | 0 |
| Cytosol (GO:0005829) P78536  | Membrane; Single-pass ty | 0 |
| Nuclear bodies (GO:0Q01543   | Nucleus {ECO:0000269 Pub | 1 |
| Nucleoplasm (GO:00056Q96B21  | Membrane {ECO:0000305};  | 0 |
| Microtubules (GO:0015Q6AWC2  |                          | 0 |
| Centriolar satellite Q71F23  | Cytoplasm. Nucleus. Chro | 0 |
| Mitochondria (GO:0005P33121  | Mitochondrion outer memb | 0 |
| Mitochondria (GO:0005P12235  | Mitochondrion inner memb | 1 |
| Centrosome (GO:000581Q8IY45  |                          | 0 |
| Vesicles (GO:0043231) Q96G01 | Golgi apparatus.         | 0 |
| Cytosol (GO:0005829) Q9H4B6  | Nucleus {ECO:0000269 Pub | 0 |
| Nucleoplasm (GO:00056Q5T0U0  |                          | 0 |
| Endoplasmic reticulum Q8N6R1 | Membrane; Single-pass ty | 0 |
| Golgi apparatus (GO:0A2RRP1  | Cytoplasm {ECO:0000269 P | 0 |
| Cytosol (GO:0005829); P48775 |                          | 0 |
| Mitochondria (GO:0005Q8N442  | Mitochondrion inner memb | 0 |
| Nucleoli fibrillar ceA4IF30  | Membrane {ECO:0000305};  | 0 |
| Cytosol (GO:0005829); P0C221 |                          | 0 |
| Cytosol (GO:0005829) Q9H361  | Cytoplasm {ECO:0000250}. | 0 |
| Centrosome (GO:000581Q9HC77  | Cytoplasm, cytoskeleton, | 1 |
| Nucleoplasm (GO:00056Q9UKT5  | Cytoplasm {ECO:0000250}. | 0 |
| Nucleoplasm (GO:00056Q0VDI3  | Membrane {ECO:0000305};  | 0 |
| Cytosol (GO:0005829); Q8N3A8 |                          | 0 |

|                             |                          |   |
|-----------------------------|--------------------------|---|
| Golgi apparatus (GO:0P56159 | Cell membrane {ECO:00002 | 0 |
| Nucleoplasm (GO:00056Q86Y37 |                          | 0 |
| Cytosol (GO:0005829);Q03001 | Cytoplasm, cytoskeleton  | 0 |
| Nucleoplasm (GO:00056Q5SZJ8 | Nucleus {ECO:0000250 Uni | 0 |
| Nucleoplasm (GO:00056Q01085 | Cytoplasm {ECO:0000250}. | 0 |
| Cytosol (GO:0005829);095817 | Nucleus {ECO:0000269 Pub | 0 |
| Cytosol (GO:0005829) Q96MS3 | Secreted {ECO:0000305}.  | 0 |
| Cell Junctions (GO:00P0DPB3 | Cytoplasm {ECO:0000269 P | 1 |
| Microtubules (GO:0015Q8WWG9 | Membrane {ECO:0000305};  | 0 |
| Vesicles (GO:0043231)Q96PC3 | Golgi apparatus. Cytopla | 0 |
| Vesicles (GO:0043231)Q96LY2 |                          | 0 |
| Nuclear speckles (GO:Q96MV1 | Membrane {ECO:0000305};  | 0 |
| Centrosome (GO:000581Q6NZ67 | Cytoplasm, cytoskeleton, | 0 |
| Microtubules (GO:0015Q6PEY2 | Cytoplasm, cytoskeleton  | 1 |
| Golgi apparatus (GO:0014525 | Cell membrane {ECO:00002 | 0 |
| Nucleoplasm (GO:00056Q15678 | Cytoplasm. Cytoplasm, cy | 0 |
| Nucleoplasm (GO:00056Q8N954 | Chromosome, centromere,  | 1 |
| Cytosol (GO:0005829);Q9UJY1 | Cytoplasm {ECO:0000269 P | 0 |
| Nuclear bodies (GO:00Q8WXD5 | Nucleus, nucleoplasm {EC | 0 |
| Nucleoplasm (GO:00056Q8NBL3 | Endoplasmic reticulum me | 0 |
| Cytosol (GO:0005829);Q5W0B1 |                          | 0 |
| Cytosol (GO:0005829);Q9Y6X0 | Nucleus {ECO:0000269 Pub | 1 |
| Cytosol (GO:0005829);Q8N8R7 | Cytoplasm {ECO:0000269 P | 0 |
| Nuclear speckles (GO:Q9HCE0 | Cytoplasm, perinuclear r | 0 |
| Mitochondria (GO:0005Q9H939 | Cytoplasm {ECO:0000250}. | 0 |
| Mitochondria (GO:0005P25705 | Mitochondrion {ECO:00002 | 0 |
| Centrosome (GO:000581Q96CS2 | Cytoplasm {ECO:0000305}. | 0 |
| Cytosol (GO:0005829);Q96B23 |                          | 0 |
| Cytosol (GO:0005829) Q9HBM1 | Nucleus. Chromosome, cen | 0 |
| Mitochondria (GO:0005Q15118 | Mitochondrion matrix {EC | 1 |
| Endoplasmic reticulumQ13370 | Membrane {ECO:0000305};  | 0 |
| Cytosol (GO:0005829);Q9HCS4 | Nucleus.                 | 1 |
| Golgi apparatus (GO:0043493 | Cell membrane; Single-pa | 0 |
| Cell Junctions (GO:00Q9HB14 | Membrane {ECO:0000305};  | 0 |
| Golgi apparatus (GO:0Q8TAS1 | Nucleus {ECO:0000269 Pub | 1 |
| Nucleoli (GO:0005730)Q9H0Y0 | Cytoplasm {ECO:0000305}. | 0 |
| Nucleoplasm (GO:00056Q8NA72 | Cytoplasm, cytoskeleton, | 0 |
| Vesicles (GO:0043231)Q08629 | Secreted, extracellular  | 0 |
| Cytosol (GO:0005829) Q6UXP7 |                          | 0 |
| Cytosol (GO:0005829);Q96BN2 | Nucleus {ECO:0000269 Pub | 1 |
| Cytosol (GO:0005829);Q2TBE0 |                          | 0 |
| Nucleoplasm (GO:00056Q8N9B5 | Nucleus {ECO:0000250}. C | 0 |
| Cytosol (GO:0005829) Q86YM7 | Cytoplasm {ECO:0000250}. | 0 |
| Nucleoplasm (GO:00056Q13426 | Nucleus {ECO:0000269 Pub | 1 |
| Nucleoli fibrillar ceQ6PK81 | Nucleus {ECO:0000305}.   | 0 |
| Cytosol (GO:0005829);Q68DI1 | Nucleus {ECO:0000305}.   | 0 |
| Nucleoplasm (GO:00056Q9Y2P7 | Nucleus {ECO:0000269 Pub | 1 |
| Mitochondria (GO:0005Q9H5I1 | Nucleus {ECO:0000250}. C | 0 |
| Golgi apparatus (GO:0Q96SD1 | Nucleus {ECO:0000269 Pub | 1 |
| Nucleoli (GO:0005730)P78345 | Nucleus, nucleolus {ECO: | 1 |
| Cytosol (GO:0005829);060551 | Cytoplasm {ECO:0000269 P | 0 |
| Nucleoli (GO:0005730)Q8NBB4 | Nucleus {ECO:0000255 PRO | 0 |
| Nucleoli (GO:0005730)Q96EG3 | Nucleus {ECO:0000305}.   | 0 |
| Nucleoplasm (GO:00056075317 |                          | 0 |
| Cytosol (GO:0005829) Q8IVM0 | Cytoplasm. Note=Associat | 1 |



|                             |                          |   |
|-----------------------------|--------------------------|---|
| Nucleoli fibrillar ceQ16566 | Cytoplasm. Nucleus. Note | 0 |
| Cytosol (GO:0005829);Q9NQ86 | Cytoplasm {ECO:0000269 P | 0 |
| Cytosol (GO:0005829);Q8IVE3 | Cytoplasm {ECO:0000269 P | 0 |
| Endoplasmic reticulumP08237 | Cytoplasm {ECO:0000255 H | 0 |
| Cytosol (GO:0005829);Q8N131 | Membrane {ECO:0000305};  | 0 |
| Intermediate filamentQ6WRI0 | Secreted {ECO:0000269 Pu | 0 |
| Cytosol (GO:0005829);Q9NR56 | Nucleus {ECO:0000269 Pub | 0 |
| Microtubules (GO:0015Q8WWF8 | Cytoplasm {ECO:0000305}. | 0 |
| Cell Junctions (GO:00P17302 | Cell membrane {ECO:00002 | 0 |
| Golgi apparatus (GO:0Q6NXT4 | Golgi apparatus, trans-G | 1 |
| Nucleoli fibrillar ceQ9BRX2 | Nucleus {ECO:0000305}. C | 0 |
| Golgi apparatus (GO:0Q8IV61 |                          | 0 |
| Endoplasmic reticulumQ9Y6B6 | Endoplasmic reticulum me | 0 |
| Vesicles (GO:0043231)Q86V85 | Membrane {ECO:0000305};  | 0 |
| Nucleoplasm (GO:00056Q5VYY1 |                          | 0 |
| Cytosol (GO:0005829) Q9Y4F1 | Cell membrane; Periphera | 0 |
| Plasma membrane (GO:0Q13325 | Cell projection, ruffle  | 0 |
| Mitochondria (GO:0005739)   | Cell membrane {ECO:00002 | 0 |
| Nuclear bodies (GO:00Q9NQV8 | Nucleus {ECO:0000269 Pub | 0 |
| Nucleoplasm (GO:00056014979 | Nucleus {ECO:0000269 Pub | 0 |
| Mitochondria (GO:0005Q03014 | Nucleus {ECO:0000250 Uni | 0 |
| Nucleoplasm (GO:00056P46939 | Cell junction, synapse,  | 0 |
| Vesicles (GO:0043231)Q13255 | Cell membrane {ECO:00002 | 0 |
| Cell Junctions (GO:00Q15262 | Cell junction, adherens  | 1 |
| Cytosol (GO:0005829);Q03924 | Nucleus {ECO:0000305}.   | 0 |
| Cytosol (GO:0005829) Q96E17 | Cell membrane {ECO:00003 | 0 |
| Centrosome (GO:000581Q8N9Z9 |                          | 0 |
| Cell Junctions (GO:00Q8N4S9 | Cell membrane {ECO:00002 | 0 |
| Nucleoplasm (GO:00056075943 | Nucleus {ECO:0000269 Pub | 1 |
| Cytosol (GO:0005829);Q13503 | Nucleus {ECO:0000305}.   | 0 |
| Cytosol (GO:0005829);000469 | Rough endoplasmic reticu | 0 |
| Microtubules (GO:0015Q9NY57 |                          | 0 |
| Cytosol (GO:0005829);Q8IZ57 | Membrane {ECO:0000305};  | 0 |
| Nucleoplasm (GO:00056Q15915 | Nucleus. Cytoplasm {ECO: | 0 |
| Nucleoli (GO:0005730)Q8N9Q2 |                          | 0 |
| Centrosome (GO:000581Q8NOV4 | Secreted {ECO:0000305}.  | 0 |
| Nucleoplasm (GO:00056Q6UX04 | Nucleus {ECO:0000305 Pub | 1 |
| Plasma membrane (GO:0Q95460 | Cell membrane; Single-pa | 0 |
| Nucleoli (GO:0005730)Q9H3R5 | Nucleus. Chromosome, cen | 0 |
| Nuclear speckles (GO:Q9Y232 | Isoform 2: Nucleus {ECO: | 0 |
| Actin filaments (GO:0Q96M29 | Cell projection, cilium, | 0 |
| Cytosol (GO:0005829);Q8NDB2 |                          | 0 |
| Cytosol (GO:0005829);Q6PKC3 | Endoplasmic reticulum me | 0 |
| Nucleoli fibrillar ceP98082 | Cytoplasm. Cytoplasmic v | 0 |
| Cytosol (GO:0005829);Q9NUZ1 |                          | 0 |
| Vesicles (GO:0043231)Q9H1A4 |                          | 0 |
| Cytosol (GO:0005829);P20810 |                          | 0 |
| Golgi apparatus (GO:0Q9UIL1 | Golgi apparatus membrane | 0 |
| Endoplasmic reticulum014967 | Endoplasmic reticulum me | 1 |
| Centrosome (GO:000581015182 | Cytoplasm, cytoskeleton, | 0 |
| Nucleoli fibrillar ce060264 | Nucleus {ECO:0000255 PRO | 0 |
| Nucleoplasm (GO:00056Q5T4T6 | Nucleus {ECO:0000269 Pub | 1 |
| Mitochondria (GO:0005P22004 | Secreted {ECO:0000250}.  | 0 |
| Nuclear membrane (GO:A6NKT7 |                          | 0 |
| Cytosol (GO:0005829);Q86WH2 | Cytoplasm {ECO:0000269 P | 0 |

|                             |                          |   |
|-----------------------------|--------------------------|---|
| Nucleoplasm (GO:00056Q00839 | Nucleus {ECO:0000269 Pub | 0 |
| Nuclear membrane (GO:P49792 | Nucleus {ECO:0000269 Pub | 0 |
| Nuclear membrane (GO:Q8WYP5 | Cytoplasm {ECO:0000250 U | 0 |
| Cytosol (GO:0005829);Q12866 | Membrane {ECO:0000250};  | 0 |
| Golgi apparatus (GO:0Q96K49 | Golgi apparatus membrane | 0 |
| Cell Junctions (GO:00Q15256 | Isoform Alpha: Cell memb | 0 |
| Nuclear speckles (GO:P43354 | Cytoplasm. Nucleus. Note | 0 |
| Nucleoli (GO:0005730)Q8NFR7 |                          | 0 |
| Cytosol (GO:0005829) Q13018 | Cell membrane {ECO:00002 | 0 |
| Cytosol (GO:0005829) P29558 | Nucleus.                 | 0 |
| Mitochondria (GO:0005095847 | Mitochondrion inner memb | 1 |
| Mitochondria (GO:0005Q8IZF3 | Membrane {ECO:0000255};  | 0 |
| Actin filaments (GO:0Q8N878 |                          | 0 |
| Cytosol (GO:0005829);Q9NUQ9 | Membrane {ECO:0000305};  | 0 |
| Centrosome (GO:000581Q9ULH1 | Cytoplasm {ECO:0000250}. | 0 |
| Cytosol (GO:0005829);Q9Y2L5 | Golgi apparatus, cis-Gol | 0 |
| Nucleoli fibrillar ceQ6PI98 | Nucleus {ECO:0000269 Pub | 0 |
| Endoplasmic reticulumQ8NF37 | Endoplasmic reticulum me | 0 |
| Nucleoplasm (GO:00056Q96PX9 |                          | 0 |
| Nucleoplasm (GO:00056Q9HBL8 | Cytoplasm. Cytoplasm, pe | 0 |
| Cell Junctions (GO:00Q8TB05 |                          | 0 |
| Cell Junctions (GO:00Q8N6I4 | Membrane {ECO:0000305};  | 0 |
| Cytosol (GO:0005829);Q9UK53 | Nucleus {ECO:0000305}.   | 0 |
| Nucleoplasm (GO:00056Q8NDY3 |                          | 0 |
| Plasma membrane (GO:0Q96FZ5 | Membrane; Multi-pass mem | 0 |
| Nucleoli (GO:0005730)Q9UKC9 | Membrane {ECO:0000269 Pu | 1 |
| Nucleoplasm (GO:00056Q9NZI7 | Nucleus {ECO:0000269 Pub | 1 |
| Nucleoplasm (GO:00056Q9H871 | Nucleus, nucleoplasm {EC | 0 |
| Plasma membrane (GO:0P01732 | Isoform 1: Cell membrane | 0 |
| Nucleoplasm (GO:00056P49247 |                          | 0 |
| Nucleoplasm (GO:00056P23468 | Membrane; Single-pass ty | 0 |
| Nucleoli (GO:0005730)Q8IV03 |                          | 0 |
| Cytosol (GO:0005829);Q6P9H4 | Cytoplasm {ECO:0000269 P | 0 |
| Nucleoplasm (GO:00056P29083 | Nucleus {ECO:0000269 Pub | 1 |
| Nucleoplasm (GO:00056Q9UEE9 | Chromosome, centromere,  | 0 |
| Nucleoplasm (GO:00056Q8IUE1 | Nucleus {ECO:0000255 PRO | 0 |
| Golgi apparatus (GO:0Q9NXF8 | Golgi apparatus membrane | 1 |
| Mitochondria (GO:0005Q8N865 | Cytoplasm, cytoskeleton, | 0 |
| Nucleoli fibrillar ceQ86VZ6 | Nucleus {ECO:0000269 Pub | 1 |
| Cytosol (GO:0005829);Q8IY22 | Nucleus {ECO:0000269 Pub | 1 |
| Vesicles (GO:0043231)Q9NPI9 | Membrane {ECO:0000269 Pu | 0 |
| Endoplasmic reticulumQ7Z2X4 | Cytoplasm {ECO:0000269 P | 0 |
| Nuclear speckles (GO:Q14669 | Nucleus, nucleoplasm {EC | 0 |
| Nucleoli (GO:0005730)Q8NEA4 |                          | 0 |
| Nucleoplasm (GO:00056P53567 | Nucleus {ECO:0000250 Uni | 1 |
| Golgi apparatus (GO:0Q96SII |                          | 0 |
| Cytosol (GO:0005829);Q96NL3 | Nucleus {ECO:0000305}.   | 0 |
| Intermediate filamentQ8IZK6 | Cell membrane {ECO:00002 | 0 |
| Golgi apparatus (GO:0Q8N135 | Secreted {ECO:0000305}.  | 0 |
| Cytosol (GO:0005829);094760 |                          | 0 |
| Nuclear speckles (GO:Q8WXA9 | Nucleus.                 | 0 |
| Nucleoli fibrillar ce014646 | Nucleus {ECO:0000250 Uni | 0 |
| Nucleoplasm (GO:00056Q8N957 |                          | 0 |
| Cytosol (GO:0005829);P52429 | Membrane {ECO:0000305};  | 0 |
| Mitochondria (GO:0005Q7LGA3 | Golgi apparatus membrane | 0 |

|                             |                          |   |
|-----------------------------|--------------------------|---|
| Cytosol (GO:0005829) Q96DH6 | Cytoplasm. Note=Associat | 1 |
| Cytosol (GO:0005829);Q96AP4 | Cytoplasm {ECO:0000269 P | 0 |
| Microtubules (GO:0015Q9Y663 | Golgi apparatus membrane | 0 |
| Plasma membrane (GO:0Q96E22 | Endoplasmic reticulum me | 0 |
| Golgi apparatus (GO:0095025 | Secreted {ECO:0000250}.  | 0 |
| Cytosol (GO:0005829) Q16537 | Cytoplasm.               | 1 |
| Centrosome (GO:000581Q13588 |                          | 0 |
| Centriolar satellite Q9Y6K8 | Cytoplasm {ECO:0000269 P | 1 |
| Cytosol (GO:0005829);075952 | Cytoplasm, cytoskeleton. | 0 |
| Nucleoplasm (GO:00056Q9P2X3 | Cytoplasm {ECO:0000250 U | 0 |
| Nuclear bodies (GO:00Q8N6D5 |                          | 0 |
| Mitochondria (GO:0005Q5VUM1 | Mitochondrion matrix {EC | 0 |
| Nucleoplasm (GO:00056P04216 | Cell membrane {ECO:00002 | 0 |
| Cytosol (GO:0005829);Q8NEP3 | Cell projection, cilium  | 0 |
| Centrosome (GO:000581Q96GX8 |                          | 0 |
| Cytosol (GO:0005829) Q5QJ74 | Cytoplasm, cytoskeleton  | 0 |
| Cytosol (GO:0005829);Q8WXH2 | Cell membrane {ECO:00002 | 0 |
| Cytosol (GO:0005829) Q9HCJ1 | Membrane {ECO:0000305};  | 0 |
| Mitochondria (GO:0005Q96BN8 | Cytoplasm {ECO:0000269 P | 0 |
| Plasma membrane (GO:0Q8TF42 | Cytoplasm {ECO:0000250}. | 0 |
| Plasma membrane (GO:0Q8WZ75 |                          | 0 |
| Plasma membrane (GO:0Q96MS0 | Membrane {ECO:0000250 Un | 0 |
| Nucleoplasm (GO:00056Q3YBR2 | Nucleus {ECO:0000269 Pub | 1 |
| Endoplasmic reticulumQ9H6L5 | Golgi apparatus, cis-Gol | 0 |
| Vesicles (GO:0043231)P55289 | Cell membrane; Single-pa | 0 |
| Mitochondria (GO:0005094826 | Mitochondrion outer memb | 1 |
| Cytosol (GO:0005829);Q9UKF7 | Cytoplasm {ECO:0000269 P | 0 |
| Nucleoplasm (GO:00056Q5T0F9 | Nucleus {ECO:0000269 Pub | 1 |
| Nucleoplasm (GO:00056Q8IU89 | Endoplasmic reticulum me | 0 |
| Cytosol (GO:0005829);P17252 | Cytoplasm {ECO:0000269 P | 0 |
| Cytosol (GO:0005829);Q38SD2 | Cytoplasm {ECO:0000269 P | 1 |
| Golgi apparatus (GO:0Q8N8E3 | Cytoplasm, cytoskeleton, | 0 |
| Endoplasmic reticulumQ8IUA7 | Membrane {ECO:0000305};  | 0 |
| Nucleoplasm (GO:00056Q8N139 | Membrane {ECO:0000305};  | 0 |
| Nucleoplasm (GO:00056Q8WWZ7 | Lysosome membrane; Multi | 0 |
| Cell Junctions (GO:00Q8IY42 |                          | 0 |
| Cytosol (GO:0005829);P09936 | Cytoplasm {ECO:0000269 P | 0 |
| Vesicles (GO:0043231)Q5JRA6 | Endoplasmic reticulum me | 0 |
| Nuclear bodies (GO:00Q96F81 | Membrane {ECO:0000305};  | 0 |
| Cytosol (GO:0005829);Q9UKE5 | Nucleus. Cytoplasm. Recy | 0 |
| Mitochondria (GO:0005Q96KS9 |                          | 0 |
| Nucleoplasm (GO:00056Q969S2 | Nucleus {ECO:0000269 Pub | 1 |
| Cytosol (GO:0005829) Q15124 | Cell junction, adherens  | 0 |
| Vesicles (GO:0043231)P56704 | Secreted, extracellular  | 0 |
| Cytosol (GO:0005829);Q5VST9 | Isoform 3: Cytoplasm, my | 0 |
| Centrosome (GO:000581Q17RB8 |                          | 0 |
| Cytosol (GO:0005829);Q96F44 | Cytoplasm. Nucleus.      | 1 |
| Cytosol (GO:0005829);Q8N8S7 | Cytoplasm. Cytoplasm, cy | 0 |
| Cytosol (GO:0005829);Q8WWH4 | Cytoplasm {ECO:0000250}. | 0 |
| Intermediate filamentQ7Z6J0 | Cytoplasm, perinuclear r | 0 |
| Nucleoplasm (GO:00056043684 | Nucleus. Chromosome, cen | 1 |
| Cytosol (GO:0005829);Q96M02 | Cytoplasm {ECO:0000269 P | 0 |
| Cytosol (GO:0005829);Q5T7M9 | Endoplasmic reticulum me | 0 |
| Cytosol (GO:0005829) Q53GG5 | Cytoplasm, myofibril, sa | 1 |
| Cell Junctions (GO:00Q15369 | Nucleus {ECO:0000305}.   | 0 |

|                              |                          |   |
|------------------------------|--------------------------|---|
| Vesicles (GO:0043231) Q9Y6Y9 | Secreted, extracellular  | 0 |
| Cell Junctions (GO:00P78310  | Isoform 1: Cell membrane | 0 |
| Cytokinetic bridge (GQ9NYK6  |                          | 0 |
| Nucleoli (GO:0005730) P98073 | Membrane {ECO:0000305};  | 0 |
| Nuclear bodies (GO:00015394  | Cell membrane; Single-pa | 1 |
| Nucleoplasm (GO:00056Q8NA19  | Nucleus {ECO:0000305}.   | 0 |
| Nucleoplasm (GO:00056Q14123  |                          | 0 |
| Cytosol (GO:0005829); Q9UJ41 | Cytoplasm {ECO:0000269 P | 0 |
| Nucleoplasm (GO:00056P57087  | Cell junction, tight jun | 0 |
| Mitochondria (GO:0005P18859  | Mitochondrion. Mitochond | 1 |
| Nucleoplasm (GO:00056Q06546  | Nucleus.                 | 1 |
| Plasma membrane (GO:0Q9UHI8  | Secreted, extracellular  | 0 |
| Nucleoplasm (GO:00056Q9UNAO  | Secreted, extracellular  | 0 |
| Centrosome (GO:000581Q8NCEO  | Nucleus {ECO:0000269 Pub | 0 |
| Cytokinetic bridge (GQ68D06  | Cytoplasm {ECO:0000269 P | 0 |
| Nucleoplasm (GO:00056Q01831  | Nucleus. Cytoplasm. Note | 0 |
| Nucleoplasm (GO:00056Q6PII3  | Nucleus {ECO:0000269 Pub | 1 |
| Plasma membrane (GO:0Q6ZNL6  | Cytoplasm, cytoskeleton  | 0 |
| Cytosol (GO:0005829); Q8NFG4 | Cytoplasm {ECO:0000269 P | 0 |
| Cytosol (GO:0005829); Q96FX2 | Cytoplasm {ECO:0000269 P | 1 |
| Nucleoplasm (GO:00056Q96HP4  |                          | 0 |
| Nucleoplasm (GO:00056Q9P0U4  | Nucleus speckle {ECO:000 | 0 |
| Microtubules (GO:0015Q96BD8  | Cytoplasm, cytoskeleton, | 0 |
| Nucleoplasm (GO:00056Q8TF05  |                          | 0 |
| Cytosol (GO:0005829); Q9H5I5 | Membrane {ECO:0000305};  | 0 |
| Golgi apparatus (GO:0Q53F39  | Endoplasmic reticulum-Go | 0 |
| Golgi apparatus (GO:0Q9NRW1  | Golgi apparatus membrane | 0 |
| Cytosol (GO:0005829); Q96AY2 | Nucleus, nucleolus {ECO: | 0 |
| Cytosol (GO:0005829); P54762 | Cell membrane {ECO:00002 | 0 |
| Cytosol (GO:0005829); Q6AI12 |                          | 0 |
| Cytosol (GO:0005829); P17022 | Nucleus {ECO:0000255 PRO | 0 |
| Vesicles (GO:0043231) Q9NS85 |                          | 0 |
| Mitochondria (GO:0005Q6UXV4  | Mitochondrion inner memb | 0 |
| Golgi apparatus (GO:0Q9UBU2  | Secreted.                | 0 |
| Golgi apparatus (GO:0Q7Z449  | Endoplasmic reticulum me | 0 |
| Cytosol (GO:0005829); Q96ME1 |                          | 0 |
| Nucleoli fibrillar ce Q8WYK1 | Membrane {ECO:0000305};  | 0 |
| Cell Junctions (GO:0Q8N271   | Apical cell membrane {EC | 0 |
| Nuclear membrane (GO:Q5TCS8  | Cytoplasm {ECO:0000269 P | 0 |
| Vesicles (GO:0043231) Q92932 | Cytoplasmic vesicle, sec | 0 |
| Vesicles (GO:0043231) 014977 | Nucleus {ECO:0000250 Uni | 0 |
| Cytosol (GO:0005829); P21283 |                          | 0 |
| Cytosol (GO:0005829); Q8N6M0 |                          | 0 |
| Nucleoplasm (GO:00056Q9BWU1  |                          | 0 |
| Nuclear bodies (GO:0Q969F1   | Nucleus {ECO:0000269 Pub | 1 |
| Endoplasmic reticulum Q5VTQ0 |                          | 0 |
| Mitochondria (GO:0005Q9NUQ2  | Endoplasmic reticulum me | 0 |
| Nucleoplasm (GO:00056Q96T76  | Nucleus {ECO:0000269 Pub | 0 |
| Plasma membrane (GO:0Q9BTU6  | Golgi apparatus, trans-G | 0 |
| Cytosol (GO:0005829); Q5T4F4 | Recycling endosome membr | 0 |
| Nucleoplasm (GO:00056Q8IYL2  | Cytoplasm {ECO:0000305}. | 0 |
| Nucleoplasm (GO:00056Q9NSI8  | Nucleus {ECO:0000269 Pub | 0 |
| Cytosol (GO:0005829) Q9UHP3  | Cytoplasm {ECO:0000269 P | 0 |
| Cytosol (GO:0005829); Q96HH9 |                          | 0 |
| Nucleoli (GO:0005730) Q8TBK6 |                          | 0 |

|                              |                          |   |
|------------------------------|--------------------------|---|
| Nucleoplasm (GO:00056Q6PH81  |                          | 0 |
| Cytosol (GO:0005829) Q9HCE1  | Cytoplasm, P-body {ECO:0 | 0 |
| Vesicles (GO:0043231) Q5JR12 |                          | 0 |
| Cell Junctions (GO:00P53985  | Cell membrane {ECO:00002 | 0 |
| Cytosol (GO:0005829); Q7Z4Q2 |                          | 0 |
| Cytosol (GO:0005829) Q86UV6  |                          | 0 |
| Nucleoli (GO:0005730) Q9BYG3 | Nucleus, nucleolus. Chro | 0 |
| Mitochondria (GO:0005Q15070  | Mitochondrion inner memb | 1 |
| Cytosol (GO:0005829); 060732 |                          | 0 |
| Cytosol (GO:0005829); Q6PKG0 | Cytoplasm {ECO:0000269 P | 1 |
| Nucleoplasm (GO:00056Q8NE22  |                          | 0 |
| Nucleoplasm (GO:00056Q7Z3K6  | Nucleus {ECO:0000255 PRO | 1 |
| Golgi apparatus (GO:0Q63HK3  | Nucleus {ECO:0000305}.   | 0 |
| Golgi apparatus (GO:0Q96MD7  |                          | 0 |
| Cytosol (GO:0005829); Q6ZUJ8 | Cytoplasm {ECO:0000250}. | 0 |
| Nucleoplasm (GO:00056Q8IUH3  | Cytoplasm {ECO:0000269 P | 0 |
| Cytosol (GO:0005829); Q9Y279 | Membrane {ECO:0000305};  | 0 |
| Endoplasmic reticulumP13667  | Endoplasmic reticulum lu | 1 |
| Cytosol (GO:0005829); Q8N371 | Nucleus {ECO:0000269 Pub | 0 |
| Mitochondria (GO:0005Q6PI47  |                          | 0 |
| Cell Junctions (GO:00Q8IXS8  | Cytoplasm, cytosol {ECO: | 0 |
| Cytosol (GO:0005829); Q96Q35 | Cytoplasm {ECO:0000250 U | 0 |
| Vesicles (GO:0043231) 075084 | Cell membrane {ECO:00002 | 0 |
| Mitochondria (GO:0005Q8TB45  |                          | 0 |
| Actin filaments (GO:0Q9NZ56  | Cytoplasm, cytoskeleton  | 0 |
| Nucleoplasm (GO:00056Q5VTR2  | Nucleus {ECO:0000269 Pub | 1 |
| Nucleoplasm (GO:00056Q86YN6  | Nucleus {ECO:0000269 Pub | 1 |
| Vesicles (GO:0043231) P50443 | Cell membrane {ECO:00002 | 0 |
| Nuclear bodies (GO:00P83369  | Nucleus {ECO:0000269 Pub | 1 |
| Nuclear bodies (GO:00043513  | Nucleus.                 | 1 |
| Golgi apparatus (GO:0Q7L523  | Cytoplasm {ECO:0000269 P | 0 |
| Mitochondria (GO:0005Q8IWZ5  |                          | 0 |
| Vesicles (GO:0043231) Q15283 | Cytoplasm. Cytoplasm, pe | 0 |
| Mitochondria (GO:0005Q9NWS8  | Mitochondrion {ECO:00002 | 1 |
| Golgi apparatus (GO:0Q9HC24  | Golgi apparatus membrane | 1 |
| Cytosol (GO:0005829); P61758 | Cytoplasm. Nucleus. Note | 0 |
| Nucleoplasm (GO:00056015247  | Cytoplasm {ECO:0000269 P | 0 |
| Centrosome (GO:000581Q8NEZ2  | Late endosome membrane;  | 0 |
| Cytosol (GO:0005829); Q12840 | Cytoplasm, perinuclear r | 0 |
| Cytosol (GO:0005829); Q9NYI0 | Cell membrane {ECO:00002 | 0 |
| Mitochondria (GO:0005Q8NE86  | Mitochondrion inner memb | 1 |
| Nucleoplasm (GO:00056Q6PJG2  | Nucleus {ECO:0000255 PRO | 1 |
| Cytosol (GO:0005829); P50148 | Nucleus {ECO:0000250}. M | 0 |
| Cytosol (GO:0005829); P51512 | Isoform Long: Cell membr | 0 |
| Cytosol (GO:0005829); P55263 | Isoform 1: Nucleus {ECO: | 1 |
| Nucleoplasm (GO:00056Q16520  | Nucleus {ECO:0000255 PRO | 0 |
| Nucleoplasm (GO:00056P27707  | Nucleus {ECO:0000269 Pub | 1 |
| Intermediate filament015072  | Secreted {ECO:0000269 Pu | 0 |
| Nucleoli fibrillar ce095076  | Nucleus {ECO:0000255 PRO | 0 |
| Golgi apparatus (GO:0Q6UX65  | Lysosome membrane {ECO:0 | 0 |
| Cell Junctions (GO:00Q96NL8  | Cytoplasm {ECO:0000250 U | 0 |
| Vesicles (GO:0043231) P82987 | Secreted, extracellular  | 0 |
| Cytosol (GO:0005829) Q8TF30  | Cytoplasm {ECO:0000269 P | 0 |
| Centrosome (GO:000581Q9Y5N5  | Nucleus {ECO:0000250 Uni | 0 |
| Cytosol (GO:0005829); Q9Y5T5 | Nucleus {ECO:0000305 Pub | 0 |

|                              |                          |   |
|------------------------------|--------------------------|---|
| Cytosol (GO:0005829);P50990  | Cytoplasm {ECO:0000269 P | 0 |
| Nucleoplasm (GO:00056P57077  |                          | 0 |
| Centrosome (GO:000581Q9BSU3  | Cytoplasm {ECO:0000269 P | 1 |
| Cytosol (GO:0005829);014867  | Nucleus {ECO:0000255 PRO | 0 |
| Cell Junctions (GO:00Q13009  | Cell junction. Cell memb | 0 |
| Nucleoplasm (GO:00056095104  | Nucleus {ECO:0000269 Pub | 1 |
| Golgi apparatus (GO:0Q92834  | Cytoplasm, cytoskeleton, | 0 |
| Nucleoplasm (GO:00056Q8IZL9  | Nucleus {ECO:0000269 Pub | 0 |
| Mitochondria (GO:0005Q96NB2  | Mitochondrion membrane { | 0 |
| Mitochondria (GO:0005P56378  | Mitochondrion membrane { | 0 |
| Golgi apparatus (GO:0P51993  | Golgi apparatus, Golgi s | 1 |
| Cell Junctions (GO:00Q08174  | Cell junction. Cell memb | 0 |
| Nucleoplasm (GO:00056Q8TEC5  | Nucleus {ECO:0000269 Pub | 1 |
| Nuclear membrane (GO:Q6KF10  | Secreted {ECO:0000269 Pu | 0 |
| Mitochondria (GO:0005Q96E29  | Mitochondrion {ECO:00002 | 1 |
| Endoplasmic reticulumP48651  | Endoplasmic reticulum me | 0 |
| Cytosol (GO:0005829) Q00005  | Isoform 1: Cytoplasm {EC | 0 |
| Cytosol (GO:0005829);P62888  |                          | 0 |
| Nucleoplasm (GO:00056Q6P4D5  |                          | 0 |
| Mitochondria (GO:0005Q8IYB8  | Nucleus {ECO:0000269 Pub | 0 |
| Nucleoplasm (GO:00056Q7Z309  |                          | 0 |
| Cytosol (GO:0005829) P68104  | Cytoplasm {ECO:0000269 P | 0 |
| Mitochondria (GO:0005Q2TB90  | Mitochondrion membrane { | 1 |
| Mitochondria (GO:0005P19367  | Mitochondrion outer memb | 0 |
| Centrosome (GO:000581Q2T9J0  | Peroxisome {ECO:0000269  | 0 |
| Nucleoli (GO:0005730) Q8IWS0 | Nucleus. Nucleus, nucleo | 1 |
| Plasma membrane (GO:0Q6YHK3  | Cell membrane {ECO:00002 | 1 |
| Vesicles (GO:0043231) Q9ULH4 | Membrane; Single-pass ty | 0 |
| Cytosol (GO:0005829) 014933  |                          | 0 |
| Cell Junctions (GO:00Q9C0B5  | Cell membrane {ECO:00002 | 0 |
| Nuclear bodies (GO:00A0JLT2  | Nucleus {ECO:0000305}.   | 1 |
| Nucleoplasm (GO:00056Q9H8U3  |                          | 0 |
| Cytokinetic bridge (GQ9Y639  | Cell membrane {ECO:00003 | 0 |
| Nuclear bodies (GO:00Q8WYB5  | Nucleus {ECO:0000305}.   | 0 |
| Endoplasmic reticulumQ96LT4  | Endoplasmic reticulum me | 1 |
| Vesicles (GO:0043231) Q6WKZ4 | Recycling endosome {ECO: | 0 |
| Mitochondria (GO:0005Q8WU03  | Endoplasmic reticulum {E | 0 |
| Cytosol (GO:0005829);Q9BVJ6  | Nucleus, nucleolus {ECO: | 1 |
| Cytosol (GO:0005829);015264  |                          | 0 |
| Plasma membrane (GO:0P11836  | Cellmembrane {ECO:00002  | 1 |
| Centrosome (GO:000581Q96DN5  |                          | 0 |
| Nucleoplasm (GO:00056Q96HA8  | Cytoplasm, cytosol {ECO: | 0 |
| Nucleoplasm (GO:00056Q6PL18  | Nucleus {ECO:0000269 Pub | 1 |
| Cytosol (GO:0005829);Q969P5  | Cytoplasm {ECO:0000269 P | 1 |
| Nuclear bodies (GO:00Q96MF7  | Nucleus {ECO:0000269 Pub | 1 |
| Nucleoli fibrillar ceQ96CS4  | Nucleus {ECO:0000305}.   | 0 |
| Nucleoplasm (GO:00056Q9BWN1  | Chromosome {ECO:0000269  | 0 |
| Nucleoplasm (GO:00056Q9HAH7  |                          | 0 |
| Cytosol (GO:0005829) P15735  |                          | 0 |
| Vesicles (GO:0043231) Q96MC6 | Membrane {ECO:0000305};  | 0 |
| Centriolar satellite Q6UVJ0  | Cytoplasm, cytoskeleton, | 1 |
| Nucleoplasm (GO:00056060481  | Nucleus. Cytoplasm {ECO: | 0 |
| Mitochondria (GO:0005Q96EH3  | Mitochondrion matrix {EC | 1 |
| Cytosol (GO:0005829);Q8N3P4  | Early endosome {ECO:0000 | 0 |
| Cytosol (GO:0005829);Q01415  |                          | 0 |

|                             |                          |   |
|-----------------------------|--------------------------|---|
| Golgi apparatus (GO:0Q7Z7J7 | Cell projection, dendrit | 0 |
| Vesicles (GO:0043231)Q2QL34 | Isoform 1: Peroxisome me | 0 |
| Cytosol (GO:0005829) 060566 | Cytoplasm. Nucleus. Chro | 0 |
| Cytosol (GO:0005829) Q14240 |                          | 0 |
| Cytosol (GO:0005829);P55201 | Nucleus {ECO:0000269 Pub | 0 |
| Nucleoplasm (GO:00056Q6P087 | Mitochondrion matrix {EC | 0 |
| Nuclear speckles (GO:Q93075 | Nucleus {ECO:0000305}.   | 0 |
| Nucleoplasm (GO:00056P55735 | Cytoplasmic vesicle, COP | 0 |
| Mitochondria (GO:0005Q9Y2C4 | Mitochondrion inner memb | 1 |
| Golgi apparatus (GO:0Q96AB6 | Cytoplasm {ECO:0000250 U | 0 |
| Cytosol (GO:0005829);095405 | Cytoplasm. Early endosom | 0 |
| Mitochondria (GO:0005P30531 | Cell membrane; Multi-pas | 0 |
| Nucleoplasm (GO:00056Q96Q15 | Nucleus {ECO:0000269 Pub | 0 |
| Centrosome (GO:000581Q0JRZ9 | Membrane, clathrin-coate | 0 |
| Cytosol (GO:0005829);Q93062 | Nucleus {ECO:0000269 Pub | 1 |
| Nucleoplasm (GO:0005654)    | Cell junction, synapse.  | 0 |
| Nucleoplasm (GO:00056Q02297 | Pro-neuregulin-1, membra | 0 |
| Nucleoplasm (GO:00056Q5SWX8 | Membrane {ECO:0000255};  | 0 |
| Mitochondria (GO:0005P23786 | Mitochondrion inner memb | 1 |
| Endoplasmic reticulumQ9NVZ3 | Cytoplasmic vesicle, cla | 0 |
| Nucleoplasm (GO:00056Q6ZW49 | Nucleus matrix {ECO:0000 | 0 |
| Vesicles (GO:0043231)Q8NFT2 | Endosome membrane {ECO:0 | 0 |
| Cytosol (GO:0005829);P50281 | Membrane {ECO:0000305};  | 0 |
| Plasma membrane (GO:0Q9UP38 | Cell membrane {ECO:00002 | 1 |
| Nucleoplasm (GO:00056Q8WUU5 | Nucleus {ECO:0000269 Pub | 1 |
| Nucleoplasm (GO:00056Q96L08 | Cell membrane {ECO:00002 | 0 |
| Nuclear membrane (GO:Q9BTZ2 | Peroxisome {ECO:0000269  | 0 |
| Cytosol (GO:0005829) Q8N1D5 |                          | 0 |
| Nucleoplasm (GO:00056Q5T9G4 |                          | 0 |
| Nucleoplasm (GO:00056Q9UMR2 | Cytoplasm. Nucleus, nucl | 0 |
| Vesicles (GO:0043231)Q16842 | Golgi apparatus, Golgi s | 0 |
| Vesicles (GO:0043231)Q8NOW3 |                          | 0 |
| Centrosome (GO:000581Q96LJ7 |                          | 0 |
| Nuclear membrane (GO:Q01668 | Membrane {ECO:0000269 Pu | 0 |
| Golgi apparatus (GO:0P51690 | Golgi apparatus, Golgi s | 1 |
| Plasma membrane (GO:0P10721 | Isoform 1: Cell membrane | 0 |
| Cytosol (GO:0005829);Q4G0P3 | Cell projection, cilium  | 0 |
| Mitochondria (GO:0005P17023 | Nucleus {ECO:0000305}.   | 0 |
| Nucleoplasm (GO:00056Q8IZS8 | Membrane {ECO:0000305};  | 0 |
| Cytosol (GO:0005829);Q6ZNA4 | Nucleus {ECO:0000269 Pub | 1 |
| Cytosol (GO:0005829);095067 |                          | 0 |
| Cytosol (GO:0005829);Q8TBF8 |                          | 0 |
| Centrosome (GO:000581Q9UKG1 | Early endosome membrane  | 0 |
| Cytosol (GO:0005829);Q99576 | Isoform 1: Cytoplasm {EC | 0 |
| Mitochondria (GO:0005014972 | Endosome {ECO:0000305 Pu | 0 |
| Cytosol (GO:0005829);Q13627 | Nucleus {ECO:0000269 Pub | 0 |
| Cytosol (GO:0005829);Q99712 | Membrane; Multi-pass mem | 0 |
| Cytosol (GO:0005829);P11308 | Nucleus {ECO:0000255 PRO | 0 |
| Cytosol (GO:0005829);P15036 | Nucleus.                 | 1 |
| Cytosol (GO:0005829);095447 |                          | 0 |
| Vesicles (GO:0043231)Q8TB61 | Golgi apparatus membrane | 0 |
| Cell Junctions (GO:00Q5U3C3 | Membrane {ECO:0000305};  | 0 |
| Cytosol (GO:0005829);P20591 | Cytoplasm {ECO:0000269 P | 0 |
| Nucleoplasm (GO:00056Q9Y426 | Membrane {ECO:0000305};  | 0 |
| Cytosol (GO:0005829);Q8N5C8 |                          | 0 |

|                                                        |                          |   |
|--------------------------------------------------------|--------------------------|---|
| Golgi apparatus (GO:0Q9HBR0                            | Membrane {ECO:0000305};  | 0 |
| Cytosol (GO:0005829) Q8TAL5                            |                          | 0 |
| Nuclear bodies (GO:0016604);Nucleoplasm (GO:0005654);P |                          | 0 |
| Nucleoplasm (GO:00056Q5T7W0                            | Nucleus {ECO:0000305}.   | 0 |
| Cytosol (GO:0005829);Q5VZI3                            | Membrane {ECO:0000305};  | 0 |
| Nucleoplasm (GO:00056Q96L94                            | Cytoplasmic vesicle memb | 0 |
| Nucleoplasm (GO:00056Q6ZU65                            |                          | 0 |
| Cytosol (GO:0005829);P15056                            | Nucleus {ECO:0000250}. C | 0 |
| Cytosol (GO:0005829);095436                            | Membrane; Multi-pass mem | 1 |
| Nucleoplasm (GO:00056Q8NEZ3                            | Cell projection, cilium  | 0 |
| Vesicles (GO:0043231)P59780                            | Golgi apparatus. Cytopla | 0 |
| Cytosol (GO:0005829);Q96PY5                            | Cytoplasm {ECO:0000250}. | 0 |
| Cytosol (GO:0005829) Q75VX8                            |                          | 0 |
| Plasma membrane (GO:0Q8TCT6                            | Endoplasmic reticulum me | 0 |
| Cytosol (GO:0005829);Q9BPU6                            | Cytoplasm {ECO:0000305}. | 0 |
| Cytosol (GO:0005829);Q92956                            | Cell membrane {ECO:00002 | 0 |
| Cytosol (GO:0005829) Q9NVE7                            | Cytoplasm {ECO:0000250 U | 0 |
| Golgi apparatus (GO:0Q96C57                            | Nucleus envelope {ECO:00 | 0 |
| Nucleoplasm (GO:00056060683                            | Peroxisome membrane {ECO | 0 |
| Golgi apparatus (GO:0015258                            | Golgi apparatus membrane | 1 |
| Nuclear membrane (GO:Q96JH8                            |                          | 0 |
| Nuclear bodies (GO:00P12755                            | Nucleus.                 | 1 |
| Cytosol (GO:0005829);Q9Y4P8                            | Preautophagosomal struct | 0 |
| Microtubules (GO:0015Q5SW96                            | Cytoplasm {ECO:0000269 P | 0 |
| Cytosol (GO:0005829);Q53RY4                            | Membrane; Multi-pass mem | 0 |
| Nucleoplasm (GO:00056A6NGH8                            |                          | 0 |
| Vesicles (GO:0043231)Q9BRI3                            | Vacuole membrane {ECO:00 | 0 |
| Cytosol (GO:0005829) Q9NXR7                            | Cytoplasm {ECO:0000269 P | 0 |
| Cytosol (GO:0005829);Q8TBY9                            | Cytoplasm, cytoskeleton, | 0 |
| Nuclear membrane (GO:Q05923                            | Nucleus.                 | 0 |
| Nucleoplasm (GO:00056Q8TE85                            | Nucleus {ECO:0000269 Pub | 0 |
| Cytosol (GO:0005829);Q5T124                            | Cytoplasm, cytoskeleton  | 0 |
| Cytosol (GO:0005829) Q86W24                            | Cytoplasm {ECO:0000250 U | 0 |
| Nucleoplasm (GO:00056A2A3K4                            |                          | 0 |
| Golgi apparatus (GO:0Q96FL9                            | Golgi apparatus membrane | 0 |
| Cytosol (GO:0005829);P16333                            | Cytoplasm. Endoplasmic r | 0 |
| Nuclear speckles (GO:P32754                            |                          | 0 |
| Nucleoplasm (GO:00056Q8TCX5                            |                          | 0 |
| Cytosol (GO:0005829);Q5T0D9                            | Cytoplasmic vesicle, sec | 0 |
| Golgi apparatus (GO:0Q8N309                            |                          | 0 |
| Nucleoli (GO:0005730)P47989                            | Cytoplasm {ECO:0000250}. | 0 |
| Golgi apparatus (GO:0Q9H6D3                            | Cell membrane {ECO:00002 | 0 |
| Actin filaments (GO:0Q6P4Q7                            | Cell membrane {ECO:00002 | 1 |
| Nucleoplasm (GO:00056Q99504                            | Cytoplasm {ECO:0000250 U | 0 |
| Cytokinetic bridge (GQ8IYY4                            | Cytoplasm, cytoskeleton, | 0 |
| Nucleoplasm (GO:00056Q00597                            | Nucleus. Cytoplasm. Note | 0 |
| Cytosol (GO:0005829) 014807                            | Cell membrane {ECO:00003 | 0 |
| Cytosol (GO:0005829);Q9Y6W5                            | Cytoplasm, cytoskeleton  | 0 |
| Nucleoplasm (GO:00056Q8WU67                            | Membrane {ECO:0000305};  | 0 |
| Cytosol (GO:0005829);Q9NVQ4                            | Cytoplasm {ECO:0000250}. | 0 |
| Cytokinetic bridge (GQ9H4D0                            | Cell membrane {ECO:00003 | 0 |
| Cell Junctions (GO:00Q5KU26                            | Membrane {ECO:0000269 Pu | 0 |
| Cytosol (GO:0005829) Q6ZRF8                            | Cytoplasm {ECO:0000269 P | 0 |
| Nucleoplasm (GO:00056Q13620                            | Nucleus {ECO:0000269 Pub | 1 |
| Plasma membrane (GO:0Q8WWT9                            | Cell membrane {ECO:00002 | 1 |



|                                |                          |   |
|--------------------------------|--------------------------|---|
| Cytosol (GO:0005829);Q96D09    |                          | 0 |
| Cytosol (GO:0005829);Q8WXX7    | Nucleus {ECO:0000269 Pub | 0 |
| Focal adhesion sites Q9ULL8    | Cytoplasm, cytoskeleton  | 0 |
| Cytosol (GO:0005829);P58876    | Nucleus. Chromosome.     | 0 |
| Nuclear speckles (GO:P30307    | Nucleus {ECO:0000269 Pub | 0 |
| Vesicles (GO:0043231)Q8WV92    | Late endosome membrane;  | 0 |
| Cytosol (GO:0005829);060841    | Cytoplasm {ECO:0000250 U | 0 |
| Nuclear bodies (GO:00Q8N443    |                          | 0 |
| Nucleoplasm (GO:00056Q9UKZ1    | Cytoplasm {ECO:0000305}. | 0 |
| Microtubules (GO:0015Q86UF1    | Cell membrane {ECO:00002 | 0 |
| Nucleoli (GO:0005730)014511    | Pro-neuregulin-2, membra | 0 |
| Cytosol (GO:0005829);Q96HN2    | Cytoplasm {ECO:0000250 U | 0 |
| Endoplasmic reticulumP15813    | Cell membrane {ECO:00002 | 0 |
| Nucleoli fibrillar ceQ9UM82    | Cytoplasm {ECO:0000269 P | 0 |
| Intermediate filamentQ8TD57    | Cytoplasm, cytoskeleton, | 0 |
| Golgi apparatus (GO:0P48052    | Secreted.                | 0 |
| Nucleoplasm (GO:00056Q8WXQ8    | Secreted {ECO:0000250}.  | 0 |
| Cell Junctions (GO:00Q969E8    |                          | 0 |
| Plasma membrane (GO:0Q9ULJ8    | Cytoplasm, cytoskeleton  | 0 |
| Nuclear speckles (GO:Q86VM9    | Nucleus {ECO:0000250}.   | 0 |
| Cytosol (GO:0005829);Q8WV99    | Endoplasmic reticulum me | 0 |
| Golgi apparatus (GO:0Q8WTR4    | Endomembrane system {ECO | 0 |
| Golgi apparatus (GO:0Q5SWA1    |                          | 0 |
| Nucleoplasm (GO:00056Q7Z589    | Nucleus {ECO:0000269 Pub | 1 |
| Mitochondria (GO:0005Q96GU1    |                          | 0 |
| Cytosol (GO:0005829);043309    | Nucleus {ECO:0000255 PRO | 0 |
| Actin filaments (GO:0P37802    |                          | 0 |
| Nucleoplasm (GO:00056P28324    | Nucleus.                 | 1 |
| Nucleoplasm (GO:00056Q96JT2    | Membrane {ECO:0000305};  | 0 |
| Nucleoplasm (GO:00056Q9BVJ7    | Cytoplasm, cytosol. Nucl | 0 |
| Cytosol (GO:0005829);Q96A37    |                          | 0 |
| Cell Junctions (GO:00Q9Y624    | Cell junction, tight jun | 0 |
| Nucleoplasm (GO:00056P22415    | Nucleus.                 | 1 |
| Cytosol (GO:0005829);Q8IUW3    |                          | 0 |
| Nucleoplasm (GO:00056075618    | Cytoplasm. Nucleus, nucl | 0 |
| Cytosol (GO:0005829);Q8N554    | Nucleus {ECO:0000305}. C | 0 |
| Nucleoli (GO:0005730)Q86SE8    | Nucleus {ECO:0000250}. N | 0 |
| Lipid droplets (GO:00Q92838    | Cell membrane {ECO:00002 | 0 |
| Cytosol (GO:0005829);Q5TIE3    | Secreted {ECO:0000305}.  | 0 |
| Nucleoplasm (GO:00056P32320    |                          | 0 |
| Cytosol (GO:0005829);060512    | Golgi apparatus, Golgi s | 1 |
| Nuclear speckles (GO:075173    | Secreted, extracellular  | 0 |
| Cytosol (GO:0005829);Q86V87    |                          | 0 |
| Mitochondria (GO:0005075306    | Mitochondrion inner memb | 1 |
| Cytosol (GO:0005829);Q8WWX8    | Membrane {ECO:0000250 Un | 0 |
| Nuclear bodies (GO:00Q8N163    | Nucleus {ECO:0000269 Pub | 0 |
| Nucleoli (GO:0005730);Nucleop1 | Membrane {ECO:0000305};  | 0 |
| Centrosome (GO:000581Q8TEU7    | Cytoplasm {ECO:0000269 P | 0 |
| Cell Junctions (GO:00P11171    | Cytoplasm, cytoskeleton  | 0 |
| Cytosol (GO:0005829);Q9NYP9    | Nucleus {ECO:0000269 Pub | 0 |
| Nucleoplasm (GO:00056Q9BVK2    | Endoplasmic reticulum me | 0 |
| Mitochondria (GO:0005Q969U6    | Cytoplasm {ECO:0000269 P | 0 |
| Centrosome (GO:000581043426    | Cytoplasm, perinuclear r | 0 |
| Cytosol (GO:0005829);Q9Y5B6    | Nucleus {ECO:0000250}.   | 0 |
| Mitochondria (GO:0005Q7Z7H8    | Mitochondrion {ECO:00002 | 1 |

|                             |                          |   |
|-----------------------------|--------------------------|---|
| Golgi apparatus (GO:0P38484 | Cell membrane {ECO:00002 | 0 |
| Cytosol (GO:0005829);P22102 |                          | 0 |
| Nuclear speckles (GO:P18583 | Nucleus speckle {ECO:000 | 1 |
| Cell Junctions (GO:00Q9NYP3 | Nucleus {ECO:0000269 Pub | 0 |
| Cytosol (GO:0005829) Q7L0J3 | Cell junction, synapse { | 0 |
| Actin filaments (GO:0000515 | Secreted, extracellular  | 0 |
| Nucleoli (GO:0005730)P19237 |                          | 0 |
| Cytosol (GO:0005829);Q96KF2 | Nucleus {ECO:0000269 Pub | 1 |
| Nucleoplasm (GO:00056Q92826 | Nucleus.                 | 1 |
| Cytosol (GO:0005829) P53805 |                          | 0 |
| Cytosol (GO:0005829);Q9H832 | Cytoplasm {ECO:0000269 P | 1 |
| Nucleoplasm (GO:00056Q8N365 | Nucleus {ECO:0000250}. N | 0 |
| Cytosol (GO:0005829);Q96H20 | Cytoplasm. Endosome memb | 0 |
| Cytosol (GO:0005829);Q8N4L8 |                          | 0 |
| Nucleoplasm (GO:00056Q01196 | Nucleus.                 | 0 |
| Cytosol (GO:0005829) Q9NZI8 | Nucleus. Cytoplasm. Cyto | 0 |
| Cytosol (GO:0005829);P16152 | Cytoplasm.               | 1 |
| Cytosol (GO:0005829);075828 | Cytoplasm {ECO:0000269 P | 1 |
| Mitochondria (GO:0005Q14149 | Nucleus, nucleoplasm {EC | 1 |
| Nucleoplasm (GO:00056Q13112 | Nucleus {ECO:0000269 Pub | 0 |
| Vesicles (GO:0043231)095500 | Cell junction, tight jun | 0 |
| Nuclear bodies (GO:00Q14190 | Nucleus {ECO:0000255 PRO | 1 |
| Cytosol (GO:0005829) P50747 | Cytoplasm. Mitochondrion | 0 |
| Nucleoplasm (GO:00056Q6ZUM4 | Cytoplasm {ECO:0000250}. | 0 |
| Centrosome (GO:000581Q9BRR6 | Secreted {ECO:0000305}.  | 0 |
| Nucleoli (GO:0005730)P20962 |                          | 0 |
| Cytosol (GO:0005829);Q9UHQ9 | Membrane {ECO:0000305};  | 0 |
| Cytosol (GO:0005829);P55036 |                          | 0 |
| Mitochondria (GO:0005Q8TC57 | Cytoplasm {ECO:0000250}. | 0 |
| Mitochondria (GO:0005P78412 | Nucleus {ECO:0000305}.   | 0 |
| Nucleoplasm (GO:00056P78543 |                          | 0 |
| Cytosol (GO:0005829);P00736 | Secreted {ECO:0000269 Pu | 0 |
| Nucleoplasm (GO:00056Q5SZQ8 | Nucleus {ECO:0000250}. C | 0 |
| Nucleoplasm (GO:00056Q8IWW7 | Cytoplasm, cytosol {ECO: | 0 |
| Endoplasmic reticulumQ9UKV5 | Endoplasmic reticulum me | 1 |
| Golgi apparatus (GO:0Q96G25 | Nucleus {ECO:0000305}.   | 0 |
| Centrosome (GO:000581Q8IZJ4 | Cytoplasmic vesicle {ECO | 0 |
| Rods & Rings () Q96A47      | Nucleus {ECO:0000255 PRO | 0 |
| Focal adhesion sites Q9HC44 | Nucleus {ECO:0000305}.   | 0 |
| Centrosome (GO:000581Q13564 | Cell membrane {ECO:00002 | 0 |
| Nucleoplasm (GO:00056Q5SWH9 | Membrane {ECO:0000305};  | 0 |
| Nuclear membrane (GO:Q8IZF4 | Cell membrane {ECO:00002 | 0 |
| Vesicles (GO:0043231)P12821 | Angiotensin-converting e | 0 |
| Cytosol (GO:0005829);075071 |                          | 0 |
| Vesicles (GO:0043231)Q9BUD6 | Secreted, extracellular  | 0 |
| Mitochondria (GO:0005Q9BRQ6 | Mitochondrion inner memb | 1 |
| Nucleoplasm (GO:00056Q13363 | Cytoplasm {ECO:0000269 P | 0 |
| Nucleoli fibrillar ceQ9BW30 | Cytoplasm, cytoskeleton  | 0 |
| Cytosol (GO:0005829) Q8WTX9 | Membrane {ECO:0000305};  | 0 |
| Cytosol (GO:0005829);Q9HCC9 | Cytoplasm, cytosol {ECO: | 0 |
| Cytosol (GO:0005829);Q86XD5 |                          | 0 |
| Cytosol (GO:0005829);014924 | Nucleus {ECO:0000269 Pub | 0 |
| Nucleoplasm (GO:00056P11801 | Golgi apparatus. Cytopla | 0 |
| Focal adhesion sites Q15942 | Cytoplasm. Cytoplasm, cy | 0 |
| Cytosol (GO:0005829);Q12979 | Cell projection, dendrit | 0 |

|                                |                          |   |
|--------------------------------|--------------------------|---|
| Cytosol (GO:0005829);Q6UWN5    | Cell membrane {ECO:00003 | 0 |
| Cytosol (GO:0005829);Q8IWD4    |                          | 0 |
| Mitochondria (GO:0005Q9UIE0    | Nucleus {ECO:0000305}.   | 0 |
| Cell Junctions (GO:00Q8WV48    | Membrane {ECO:0000305};  | 0 |
| Nuclear bodies (GO:00Q9UK12    | Nucleus {ECO:0000305}.   | 0 |
| Nuclear bodies (GO:0016604)    | Nucleus {ECO:0000305}.   | 0 |
| Nucleoplasm (GO:00056A6NK53    | Nucleus {ECO:0000305}.   | 0 |
| Nucleoplasm (GO:00056Q14590    | Nucleus {ECO:0000305}.   | 0 |
| Cytosol (GO:0005829) Q9Y223    | Cytoplasm {ECO:0000250}. | 1 |
| Aggresome (GO:0016235Q9NRY4    | Cytoplasm, cytoskeleton, | 0 |
| Cytosol (GO:0005829);000273    | Cytoplasm.               | 1 |
| Vesicles (GO:0043231)Q4KMZ1    |                          | 0 |
| Vesicles (GO:0043231)Q8WY98    | Membrane {ECO:0000305};  | 0 |
| Golgi apparatus (GO:0Q9NW68    |                          | 0 |
| Focal adhesion sites Q96BR9    | Nucleus {ECO:0000305}.   | 0 |
| Mitochondria (GO:0005Q5T9A4    | Mitochondrion inner memb | 1 |
| Cytosol (GO:0005829);Q9NP77    | Nucleus. Cytoplasm. Note | 0 |
| Nucleoli (GO:0005730)Q5T0B9    | Nucleus {ECO:0000305}.   | 0 |
| Focal adhesion sites Q8IZJ3    | Secreted {ECO:0000305 Pu | 0 |
| Cytosol (GO:0005829);Q8NAG6    | Cytoplasm {ECO:0000269 P | 0 |
| Intermediate filamentQ4VC31    |                          | 0 |
| Cytosol (GO:0005829);060229    | Cytoplasm {ECO:0000269 P | 0 |
| Golgi apparatus (GO:0P45844    | Endoplasmic reticulum me | 0 |
| Nucleoli (GO:0005730);Nucleopl | Secreted, extracellular  | 0 |
| Golgi apparatus (GO:0P57075    | Cytoplasm. Nucleus.      | 0 |
| Centrosome (GO:000581Q8WYR4    | Cytoplasm {ECO:0000250}. | 0 |
| Nucleoplasm (GO:00056076083    | Isoform PDE9A1: Cell pro | 0 |
| Cytosol (GO:0005829);P57081    | Nucleus {ECO:0000269 Pub | 1 |
| Mitochondria (GO:0005P56181    | Mitochondrion inner memb | 1 |
| Nucleoplasm (GO:00056P55347    | Nucleus {ECO:0000305}.   | 1 |
| Nucleoli (GO:0005730)P35520    | Cytoplasm {ECO:0000269 P | 0 |
| Nucleoplasm (GO:00056Q01081    | Nucleus {ECO:0000269 Pub | 0 |
| Cytosol (GO:0005829);P02489    | Cytoplasm {ECO:0000269 P | 1 |
| Cytosol (GO:0005829);075031    | Cytoplasm {ECO:0000250 U | 0 |
| Nucleoli (GO:0005730)Q14684    | Nucleus, nucleolus {ECO: | 0 |
| Nucleoplasm (GO:00056000764    | Cytoplasm.               | 0 |
| Centriolar satellite P11413    |                          | 0 |
| Cytosol (GO:0005829);P04080    | Cytoplasm {ECO:0000269 P | 0 |
| Nucleoli (GO:0005730)P56182    | Nucleus, nucleolus {ECO: | 1 |
| Centrosome (GO:000581P0DPI2    | Mitochondrion {ECO:00003 | 0 |
| Cytoplasmic bodies (G075144    | Cell membrane {ECO:00002 | 0 |
| Cytosol (GO:0005829);043822    | Mitochondrion {ECO:00002 | 0 |
| Plasma membrane (GO:0P05107    | Cell membrane {ECO:00002 | 0 |
| Golgi apparatus (GO:0Q9NSI2    |                          | 0 |
| Nucleoplasm (GO:00056Q12967    | Cytoplasm {ECO:0000250 U | 0 |
| Cytosol (GO:0005829);095954    | Cytoplasm, cytoskeleton, | 0 |
| Cytosol (GO:0005829);Q9H0A9    |                          | 0 |
| Cytosol (GO:0005829) P48449    | Endoplasmic reticulum me | 0 |
| Vesicles (GO:0043231)P52735    |                          | 0 |
| Cytosol (GO:0005829);060318    | Isoform GANP: Nucleus en | 1 |
| Nuclear bodies (GO:00P58505    |                          | 0 |
| Centrosome (GO:000581095613    | Cytoplasm, cytoskeleton, | 1 |
| Nucleoplasm (GO:00056Q14689    | Nucleus {ECO:0000305}.   | 0 |
| Cytosol (GO:0005829);P04271    | Cytoplasm {ECO:0000269 P | 1 |
| Cytosol (GO:0005829);P55345    | Isoform 1: Cytoplasm. Nu | 0 |

|                                                |                          |   |
|------------------------------------------------|--------------------------|---|
| Nucleoplasm (GO:00056Q8NHS1                    | Membrane {ECO:0000305};  | 0 |
| Vesicles (GO:0043231)Q76LX8                    | Secreted {ECO:0000269 Pu | 0 |
| Nucleoplasm (GO:00056Q9UGQ2                    | Membrane {ECO:0000305};  | 0 |
| Cytosol (GO:0005829);Q5BN46                    |                          | 0 |
| Golgi apparatus (GO:0Q86YR5                    | Cytoplasm, cytosol. Endo | 0 |
| Nucleoplasm (GO:00056Q8N9M1                    |                          | 0 |
| Cytosol (GO:0005829);Q5JU67                    | Cytoplasm, cytoskeleton, | 0 |
| Cell Junctions (GO:0Q8TBC3                     | Lysosome {ECO:0000269 Pu | 0 |
| Cytosol (GO:0005829);Q8NBN7                    | Mitochondrion inner memb | 1 |
| Cytosol (GO:0005829) Q7Z7L7                    |                          | 0 |
| Intermediate filamentQ96GR4                    | Membrane {ECO:0000305};  | 0 |
| Vesicles (GO:0043231)Q6P5Z2                    | Nucleus {ECO:0000269 Pub | 0 |
| Nucleoli (GO:0005730)Q9H254                    | Cytoplasm, cytoskeleton  | 0 |
| Nucleoplasm (GO:00056Q8TDC3                    | Cytoplasm {ECO:0000269 P | 0 |
| Cytosol (GO:0005829);Q6YFQ2                    | Mitochondrion intermembr | 0 |
| Mitochondria (GO:0005Q96MN2                    |                          | 0 |
| Nucleoplasm (GO:00056Q8NBV4                    | Nucleus envelope. Endopl | 0 |
| Vesicles (GO:0043231)Q7L7X3                    | Cytoplasm {ECO:0000269 P | 0 |
| Cytosol (GO:0005829);Q6P2C8                    | Nucleus {ECO:0000269 Pub | 0 |
| Nucleoplasm (GO:00056Q8WXF8                    | Nucleus, nucleolus {ECO: | 0 |
| Nucleoplasm (GO:0005654)                       | Cytoplasm {ECO:0000269 P | 0 |
| Golgi apparatus (GO:0Q6UWV2                    | Membrane {ECO:0000305};  | 0 |
| Nucleoplasm (GO:00056Q15424                    | Nucleus {ECO:0000269 Pub | 1 |
| Cytosol (GO:0005829);P09693                    | Cell membrane {ECO:00002 | 1 |
| Nuclear speckles (GO:Q9Y3Y2                    | Nucleus {ECO:0000269 Pub | 0 |
| Nucleoplasm (GO:00056Q15156                    | Nucleus {ECO:0000250 Uni | 1 |
| Cytosol (GO:0005829);Q8NFF5                    | Isoform 1: Mitochondrion | 0 |
| Cytosol (GO:0005829) P29353                    | Cytoplasm.; Isoform p46S | 0 |
| Cytosol (GO:0005829) Q9H270                    | Endosome {ECO:0000269 Pu | 0 |
| Cell Junctions (GO:0Q86UT6                     | Mitochondrion outer memb | 1 |
| Nucleoli (GO:0005730)P55265                    | Isoform 1: Cytoplasm {EC | 0 |
| Centrosome (GO:000581Q7Z7E8                    | Nucleus {ECO:0000250 Uni | 0 |
| Nucleoplasm (GO:00056Q53ET0                    | Cytoplasm {ECO:0000269 P | 0 |
| Plasma membrane (GO:0Q9NW15                    | Cell membrane {ECO:00002 | 1 |
| Cytosol (GO:0005829);P14324                    | Cytoplasm.               | 0 |
| Cytosol (GO:0005829) Q9BVN2                    | Cytoplasm. Nucleus. Cyto | 0 |
| Nucleoplasm (GO:00056P81408                    | Membrane {ECO:0000305};  | 0 |
| Nucleoli (GO:0005730)Q6TCH4                    | Cell membrane {ECO:00002 | 0 |
| Nucleoplasm (GO:00056Q6P1K2                    | Nucleus {ECO:0000269 Pub | 0 |
| Mitochondria (GO:0005Q96H78                    | Mitochondrion inner memb | 0 |
| Cytosol (GO:0005829);P02545                    | Nucleus {ECO:0000269 Pub | 0 |
| Nucleoplasm (GO:00056Q8WUD4                    |                          | 0 |
| Nucleoplasm (GO:00056Q9NRR5                    | Nucleus {ECO:0000269 Pub | 0 |
| Mitochondria (GO:0005P08590                    |                          | 0 |
| Nucleoplasm (GO:00056Q8TAP8                    |                          | 0 |
| Nucleoli (GO:0005730);Nucleoplasm (GO:0005654) |                          | 0 |
| Cytosol (GO:0005829) P08684                    | Endoplasmic reticulum me | 0 |
| Cytosol (GO:0005829) P24462                    | Endoplasmic reticulum me | 0 |
| Nucleoplasm (GO:00056Q96RE7                    | Nucleus. Cytoplasm. Note | 0 |
| Nucleoplasm (GO:00056Q17RY6                    | Secreted {ECO:0000269 Pu | 0 |
| Nucleoplasm (GO:00056Q9BTL4                    | Cytoplasm {ECO:0000269 P | 0 |
| Cytosol (GO:0005829);Q53GI3                    | Nucleus {ECO:0000255 PRO | 0 |
| Nucleoplasm (GO:00056Q95639                    | Nucleus.                 | 1 |
| Nuclear bodies (GO:0Q96HA7                     | Cytoplasm. Nucleus. Note | 0 |
| Cytosol (GO:0005829);Q2TAK8                    | Nucleus {ECO:0000269 Pub | 1 |

|                             |                          |   |
|-----------------------------|--------------------------|---|
| Nucleoplasm (GO:0005654)    | Cytoplasm {ECO:0000269 P | 0 |
| Cytosol (GO:0005829);Q15048 | Cytoplasm {ECO:0000269 P | 0 |
| Nucleoplasm (GO:00056Q96JL9 | Nucleus {ECO:0000305}.   | 0 |
| Vesicles (GO:0043231)Q96A83 | Secreted, extracellular  | 0 |
| Plasma membrane (GO:0Q96I34 | Cell membrane {ECO:00002 | 0 |
| Nucleoplasm (GO:00056Q96SN7 | Membrane {ECO:0000250};  | 0 |
| Cytosol (GO:0005829)        | Cytoplasm {ECO:0000269 P | 0 |
| Cytosol (GO:0005829);Q6NTE8 | Nucleus {ECO:0000269 Pub | 0 |
| Cytosol (GO:0005829);Q13501 | Cytoplasm, cytosol {ECO: | 0 |
| Cytosol (GO:0005829);P62917 | Cytoplasm {ECO:0000303 P | 0 |
| Nucleoplasm (GO:00056Q92585 | Nucleus speckle {ECO:000 | 0 |
| Cell Junctions (GO:00Q96PD5 | Secreted. Membrane.      | 0 |
| Nucleoli (GO:0005730)Q9UFC0 | Nucleus. Chromosome, cen | 0 |
| Cytosol (GO:0005829) Q6IQ20 | Golgi apparatus membrane | 0 |
| Cytoplasmic bodies (GP35998 | Cytoplasm {ECO:0000269 P | 1 |
| Mitochondria (GO:0005Q6NUT3 | Membrane {ECO:0000305};  | 0 |
| Nucleoplasm (GO:00056A8MPS7 |                          | 0 |
| Centrosome (GO:000581Q92997 | Cytoplasm {ECO:0000250 U | 0 |
| Plasma membrane (GO:0Q96CW1 | Cell membrane. Membrane, | 1 |
| Cytosol (GO:0005829);Q9NUQ8 |                          | 0 |
| Nucleoplasm (GO:00056P49585 | Cytoplasm, cytosol {ECO: | 0 |
| Nucleoplasm (GO:00056Q8NI29 |                          | 0 |
| Cytosol (GO:0005829);Q6E0U4 | Secreted {ECO:0000269 Pu | 0 |
| Nucleoplasm (GO:00056Q8WU68 | Nucleus {ECO:0000250 Uni | 0 |
| Mitochondria (GO:0005Q02338 | Mitochondrion inner memb | 1 |
| Nucleoplasm (GO:00056Q8NA92 |                          | 0 |
| Nuclear speckles (GO:Q96SR6 | Nucleus {ECO:0000250}.   | 0 |
| Cytosol (GO:0005829);Q96FM1 | Golgi apparatus membrane | 0 |
| Cytosol (GO:0005829);Q9UKT9 | Nucleus. Cytoplasm.      | 1 |
| Mitochondria (GO:0005P22570 | Mitochondrion inner memb | 1 |
| Nucleoplasm (GO:00056Q9UHR5 | Nucleus {ECO:0000269 Pub | 1 |
| Nucleoli (GO:0005730)Q15067 | Peroxisome {ECO:0000250  | 0 |
| Cytosol (GO:0005829) Q14558 |                          | 0 |
| Cytosol (GO:0005829);Q8WWM9 | Cytoplasm {ECO:0000250}. | 0 |
| Cytosol (GO:0005829);Q01130 | Nucleus {ECO:0000269 Pub | 0 |
| Nucleoli (GO:0005730)Q9BSK1 | Nucleus {ECO:0000305}.   | 0 |
| Nucleoli fibrillar ceQ96AN5 | Membrane {ECO:0000305};  | 0 |
| Mitochondria (GO:0005Q8IZ83 |                          | 0 |
| Golgi apparatus (GO:0Q96RL6 | Membrane; Single-pass ty | 0 |
| Cytosol (GO:0005829);Q96PM9 | Cytoplasm {ECO:0000269 P | 0 |
| Cytosol (GO:0005829);Q13368 |                          | 0 |
| Mitochondria (GO:0005Q8N159 | Mitochondrion matrix {EC | 1 |
| Cytosol (GO:0005829) Q3MHD2 |                          | 0 |
| Focal adhesion sites Q96NS5 |                          | 0 |
| Plasma membrane (GO:0Q9Y566 | Cytoplasm {ECO:0000250}. | 0 |
| Nucleoplasm (GO:00056Q8NFT6 | Nucleus {ECO:0000269 Pub | 1 |
| Plasma membrane (GO:0Q8N3E9 | Membrane; Peripheral mem | 0 |
| Cytosol (GO:0005829);Q8IVF7 | Cytoplasm {ECO:0000269 P | 1 |
| Plasma membrane (GO:0P55064 | Apical cell membrane {EC | 0 |
| Nucleoplasm (GO:00056Q9H0H5 | Nucleus. Cytoplasm. Cyto | 0 |
| Cytosol (GO:0005829);Q71RC2 | Cytoplasm, Stress granul | 1 |
| Nuclear bodies (GO:00Q7Z6J2 | Cytoplasm, perinuclear r | 0 |
| Nucleoplasm (GO:00056Q8IY67 | Nucleus {ECO:0000250}. C | 0 |
| Nucleoplasm (GO:00056Q6PIF2 | Nucleus. Note=Associates | 1 |
| Nucleoli (GO:0005730)Q8NBT2 | Nucleus {ECO:0000269 Pub | 0 |

|                                               |                          |   |
|-----------------------------------------------|--------------------------|---|
| Cytosol (GO:0005829);Q96PC2                   | Cytoplasm {ECO:0000269 P | 0 |
| Nuclear membrane (GO:Q8NC56                   | Nucleus inner membrane { | 1 |
| Nucleoplasm (GO:00056Q96CK0                   | Nucleus {ECO:0000305}.   | 1 |
| Nuclear bodies (GO:00Q9P086                   | Nucleus {ECO:0000305}.   | 0 |
| Golgi apparatus (GO:0Q9H2A7                   | Cell membrane {ECO:00003 | 0 |
| Cytosol (GO:0005829);Nucleoplasm (GO:0005654) |                          | 0 |
| Vesicles (GO:0043231)Q8N143                   | Nucleus {ECO:0000250}.   | 0 |
| Endoplasmic reticulumP07307                   | Membrane; Single-pass ty | 1 |
| Nucleoli (GO:0005730)Q9H4L4                   | Nucleus, nucleolus {ECO: | 0 |
| Centrosome (GO:000581Q92914                   |                          | 0 |
| Cytosol (GO:0005829) P60842                   |                          | 0 |
| Cytosol (GO:0005829);P61254                   |                          | 0 |
| Cytosol (GO:0005829);Q9Y2Y1                   | Nucleus, nucleolus {ECO: | 0 |
| Cytokinetic bridge (GQ9BV90                   | Nucleus {ECO:0000269 Pub | 1 |
| Nuclear speckles (GO:Q96KV7                   | Cytoplasm, cytoskeleton, | 0 |
| Plasma membrane (GO:0P35346                   | Cell membrane; Multi-pas | 1 |
| Mitochondria (GO:0005Q6PJ21                   |                          | 0 |
| Cell Junctions (GO:00Q7L2K0                   |                          | 0 |
| Centrosome (GO:000581P41002                   | Nucleus. Cytoplasm, cyto | 0 |
| Cell Junctions (GO:00Q9ULP9                   | Cell membrane {ECO:00002 | 0 |
| Cytosol (GO:0005829);Q9Y303                   |                          | 0 |
| Actin filaments (GO:0A1A5D9                   |                          | 0 |
| Vesicles (GO:0043231)Q8N4S7                   | Membrane {ECO:0000305};  | 0 |
| Nucleoplasm (GO:00056Q96CP2                   |                          | 0 |
| Nucleoplasm (GO:00056Q96DA0                   | Secreted {ECO:0000305}.  | 0 |
| Nucleoli fibrillar ceQ96N20                   | Nucleus {ECO:0000305}.   | 0 |
| Cytosol (GO:0005829) 060503                   | Cell membrane {ECO:00002 | 0 |
| Nuclear speckles (GO:Q9UPX8                   | Apical cell membrane {EC | 0 |
| Nucleoplasm (GO:00056Q9UQ49                   | Cell membrane {ECO:00002 | 0 |
| Cytosol (GO:0005829);Q8NBI2                   | Late endosome membrane { | 0 |
| Microtubules (GO:0015Q7L266                   | Cytoplasm {ECO:0000269 P | 0 |
| Nucleoplasm (GO:00056Q04323                   | Cytoplasm {ECO:0000269 P | 0 |
| Nucleoplasm (GO:00056Q8N5M4                   |                          | 0 |
| Nucleoplasm (GO:00056Q9Y6J9                   | Nucleus {ECO:0000269 Pub | 1 |
| Nucleoplasm (GO:00056Q9UBU9                   | Nucleus {ECO:0000269 Pub | 0 |
| Golgi apparatus (GO:0Q13190                   | Endoplasmic reticulum-Go | 0 |
| Cytosol (GO:0005829);Q8N413                   | Mitochondrion inner memb | 0 |
| Cytosol (GO:0005829);P47914                   |                          | 0 |
| Endoplasmic reticulumQ86TM6                   | Endoplasmic reticulum me | 1 |
| Golgi apparatus (GO:0095159                   | Golgi apparatus, cis-Gol | 1 |
| Cytosol (GO:0005829);075676                   | Nucleus {ECO:0000269 Pub | 1 |
| Nucleoli (GO:0005730)Q8NHX9                   | Lysosome membrane {ECO:0 | 0 |
| Cytosol (GO:0005829);Q13113                   | Membrane; Single-pass me | 0 |
| Nucleoplasm (GO:00056P17542                   | Nucleus {ECO:0000255 PRO | 1 |
| Nucleoplasm (GO:00056P30085                   | Nucleus {ECO:0000255 HAM | 0 |
| Cytosol (GO:0005829);Q7L4P6                   |                          | 0 |
| Nucleoplasm (GO:00056P26378                   |                          | 0 |
| Mitochondria (GO:0005Q96BR5                   | Mitochondrion intermembr | 0 |
| Golgi apparatus (GO:0Q9C0D3                   |                          | 0 |
| Cytosol (GO:0005829);Q9NWX4                   |                          | 0 |
| Nucleoplasm (GO:00056P61326                   | Nucleus {ECO:0000269 Pub | 0 |
| Cytosol (GO:0005829) Q8WXI4                   | Mitochondrion matrix {EC | 0 |
| Mitochondria (GO:0005Q7L3T8                   | Mitochondrion matrix {EC | 0 |
| Cytosol (GO:0005829);Q9UPU5                   |                          | 0 |
| Golgi apparatus (GO:0014495                   | Golgi apparatus, trans-G | 0 |

|                       |                      |                          |   |
|-----------------------|----------------------|--------------------------|---|
| Intermediate filament | Q5SY16               | Nucleus {ECO:0000250}. N | 0 |
| Golgi apparatus       | (GO:0P54646          | Cytoplasm {ECO:0000250}. | 0 |
| Centrosome            | (GO:000581Q9UJP4     | Cytoplasm, cytoskeleton, | 0 |
| Nuclear speckles      | (GO:Q9P217           |                          | 0 |
| Nucleoplasm           | (GO:00056Q9Y692      | Nucleus. Cytoplasm. Note | 0 |
| Cytosol               | (GO:0005829) Q9NZV5  | Isoform 2: Endoplasmic r | 0 |
| Mitochondria          | (GO:0005P27144       | Mitochondrion matrix {EC | 1 |
| Nucleoplasm           | (GO:00056Q9HCJ3      | Nucleus {ECO:0000250}. C | 0 |
| Cytosol               | (GO:0005829); Q8WZA0 |                          | 0 |
| Cytosol               | (GO:0005829); Q96R05 | Cytoplasm {ECO:0000250}. | 0 |
| Cell Junctions        | (GO:00Q8WUP2         | Cell junction, focal adh | 0 |
| Cytosol               | (GO:0005829); A0PJX8 | Membrane {ECO:0000305};  | 0 |
| Mitochondria          | (GO:0005Q6PIV7       | Mitochondrion inner memb | 0 |
| Cytosol               | (GO:0005829) 095154  | Cytoplasm.               | 0 |
| Vesicles              | (GO:0043231) Q86YL7  | Podoplanin: Membrane {EC | 0 |
| Mitochondria          | (GO:0005075911       | Membrane {ECO:0000305};  | 0 |
| Cytosol               | (GO:0005829) Q13571  | Lysosome membrane {ECO:0 | 0 |
| Mitochondria          | (GO:0005075056       | Cell membrane; Single-pa | 0 |
| Cytosol               | (GO:0005829); Q9UBV8 | Cytoplasm {ECO:0000269 P | 0 |
| Golgi apparatus       | (GO:0Q9H7C4          | Cytoplasm, perinuclear r | 0 |
| Nucleoplasm           | (GO:00056Q09028      | Nucleus.                 | 1 |
| Cell Junctions        | (GO:00Q9P206         |                          | 0 |
| Nuclear bodies        | (GO:00Q96PN8         |                          | 0 |
| Endoplasmic reticulum | Q5TGY1               | Membrane {ECO:0000305};  | 0 |
| Cytosol               | (GO:0005829) P05186  | Cell membrane {ECO:00002 | 0 |
| Vesicles              | (GO:0043231) P56705  | Secreted, extracellular  | 0 |
| Actin filaments       | (GO:0P51172          | Cell membrane {ECO:00002 | 0 |
| Nucleoli              | (GO:0005730) Q9BRK3  | Cell membrane {ECO:00002 | 0 |
| Cell Junctions        | (GO:00Q6NZ36         | Nucleus {ECO:0000269 Pub | 1 |
| Cytokinetic bridge    | (G075095             | Secreted {ECO:0000305}.  | 0 |
| Cytosol               | (GO:0005829); 095661 | Cell membrane {ECO:00003 | 0 |
| Nucleoplasm           | (GO:00056Q12857      | Nucleus.                 | 1 |
| Mitochondria          | (GO:0005Q96E52       | Mitochondrion inner memb | 0 |
| Nucleoplasm           | (GO:00056Q5VVJ2      | Nucleus {ECO:0000255 PRO | 1 |
| Nucleoplasm           | (GO:00056Q9BX74      | Membrane {ECO:0000269 Pu | 0 |
| Nucleoplasm           | (GO:00056094782      | Nucleus {ECO:0000269 Pub | 1 |
| Nucleoplasm           | (GO:00056Q96AE4      | Nucleus {ECO:0000305}.   | 1 |
| Actin filaments       | (GO:0Q0ZGT2          | Cytoplasm, cytoskeleton  | 0 |
| Cytosol               | (GO:0005829); Q9UDY4 | Cytoplasm {ECO:0000269 P | 0 |
| Nucleoplasm           | (GO:00056A6PVS8      |                          | 0 |
| Cytosol               | (GO:0005829); Q6IPR3 |                          | 0 |
| Cytosol               | (GO:0005829); Q68G74 | Nucleus {ECO:0000305}.   | 0 |
| Cytosol               | (GO:0005829); Q9UNH6 | Cytoplasmic vesicle memb | 0 |
| Microtubules          | (GO:0015043825       | Golgi apparatus membrane | 0 |
| Plasma membrane       | (GO:0Q9Y2I2          | Cell membrane {ECO:00002 | 1 |
| Cytosol               | (GO:0005829); Q5T8I3 |                          | 0 |
| Focal adhesion sites  | Q5T8I9               | Cytoplasm {ECO:0000250 U | 0 |
| Nucleoplasm           | (GO:00056Q8N6N3      |                          | 0 |
| Actin filaments       | (GO:0P32456          | Cytoplasm {ECO:0000269 P | 0 |
| Cytosol               | (GO:0005829); Q5T6C5 |                          | 0 |
| Golgi apparatus       | (GO:0Q96PP9          | Cytoplasm {ECO:0000269 P | 0 |
| Golgi apparatus       | (GO:0Q5BKZ1          | Nucleus matrix {ECO:0000 | 0 |
| Golgi apparatus       | (GO:0A2PYH4          |                          | 0 |
| Vesicles              | (GO:0043231) Q6UVM3  | Cell membrane {ECO:00002 | 0 |
| Cytosol               | (GO:0005829); P35573 | Cytoplasm {ECO:0000269 P | 0 |

|                                |                          |   |
|--------------------------------|--------------------------|---|
| Cell Junctions (GO:00P19320    | Membrane; Single-pass ty | 0 |
| Cytosol (GO:0005829);Q9UBQ6    | Endoplasmic reticulum me | 0 |
| Golgi apparatus (GO:0Q8NEW0    | Golgi apparatus, trans-G | 1 |
| Nucleoplasm (GO:00056Q9Y2X9    | Nucleus {ECO:0000269 Pub | 1 |
| Cell Junctions (GO:00015511    | Cytoplasm, cytoskeleton  | 0 |
| Cytosol (GO:0005829) Q8N126    | Cell membrane {ECO:00002 | 0 |
| Golgi apparatus (GO:0Q96IT1    | Nucleus {ECO:0000255 PRO | 0 |
| Vesicles (GO:0043231)Q969P0    | Cell membrane {ECO:00002 | 0 |
| Actin filaments (GO:0Q16832    | Cell membrane {ECO:00002 | 1 |
| Cytosol (GO:0005829);Q15121    | Cytoplasm. Note=Associat | 0 |
| Peroxisomes (GO:00057P40855    | Cytoplasm {ECO:0000269 P | 0 |
| Cytosol (GO:0005829) Q92542    | Membrane {ECO:0000269 Pu | 0 |
| Cytosol (GO:0005829);Q96DU3    | Cell membrane {ECO:00003 | 0 |
| Cytosol (GO:0005829) Q68BL8    | Secreted {ECO:0000250}.  | 0 |
| Cytosol (GO:0005829) Q6BAA4    | Cytoplasm {ECO:0000269 P | 0 |
| Nucleoli (GO:0005730)Q8NEP7    |                          | 0 |
| Cytosol (GO:0005829);Q96LT6    |                          | 0 |
| Golgi apparatus (GO:0Q8TE12    | Nucleus {ECO:0000255 PRO | 0 |
| Cell Junctions (GO:00Q9Y5Y0    | Isoform 1: Cell membrane | 0 |
| Nucleoli (GO:0005730)P18847    | Nucleus {ECO:0000255 PRO | 0 |
| Nucleoplasm (GO:00056Q96T37    | Nucleus speckle {ECO:000 | 0 |
| Cytosol (GO:0005829);Q9H6A0    | Cytoplasm {ECO:0000269 P | 1 |
| Nucleoli (GO:0005730)Q5VY09    | Nucleus {ECO:0000269 Pub | 0 |
| Nuclear speckles (GO:095861    |                          | 0 |
| Nucleoli (GO:0005730)Q96L03    | Cytoplasm {ECO:0000250}. | 0 |
| Cytosol (GO:0005829);Q5VW32    | Membrane {ECO:0000305};  | 0 |
| Nuclear bodies (GO:0016604);Nu | Cytoplasm {ECO:0000305}. | 0 |
| Microtubules (GO:0015Q2KJY2    | Cytoplasm {ECO:0000250}. | 0 |
| Mitochondria (GO:0005Q9H5Q4    | Mitochondrion.           | 1 |
| Vesicles (GO:0043231)Q6PJW8    | Cell membrane {ECO:00002 | 0 |
| Nucleoplasm (GO:00056Q6ZMIO    |                          | 0 |
| Golgi apparatus (GO:0Q8NCRO    | Golgi apparatus membrane | 0 |
| Centrosome (GO:000581P49137    | Cytoplasm {ECO:0000269 P | 0 |
| Cytosol (GO:0005829);060667    | Isoform 1: Membrane {ECO | 0 |
| Cytosol (GO:0005829) P17655    | Cytoplasm. Cell membrane | 0 |
| Cytosol (GO:0005829);Q9H7D7    | Cytoplasm {ECO:0000269 P | 0 |
| Mitochondria (GO:0005Q3MIT2    |                          | 0 |
| Vesicles (GO:0043231)Q92968    | Peroxisome membrane {ECO | 0 |
| Nucleoli (GO:0005730)Q6NSI8    |                          | 0 |
| Vesicles (GO:0043231)Q9Y577    |                          | 0 |
| Intermediate filamentQ9NRI5    | Cytoplasm {ECO:0000269 P | 0 |
| Nucleoplasm (GO:00056Q6MZZ7    |                          | 0 |
| Vesicles (GO:0043231)Q9Y316    |                          | 0 |
| Golgi apparatus (GO:0Q9C005    | Nucleus {ECO:0000269 Pub | 1 |
| Nuclear bodies (GO:00A2RUC4    |                          | 0 |
| Mitochondria (GO:0005Q8WWC4    | Mitochondrion matrix {EC | 0 |
| Golgi apparatus (GO:0Q9H3M0    | Membrane; Multi-pass mem | 0 |
| Cytosol (GO:0005829) Q8N755    | Membrane {ECO:0000305};  | 0 |
| Nucleoplasm (GO:00056Q96KN4    | Cytoplasm {ECO:0000269 P | 0 |
| Centrosome (GO:000581Q8NHS4    |                          | 0 |
| Nucleoplasm (GO:00056Q8WTR2    |                          | 0 |
| Cytosol (GO:0005829);Q96G28    | Nucleus {ECO:0000303 Pub | 0 |
| Nuclear membrane (GO:Q8NFB5    | Nucleus, nuclear pore co | 1 |
| Cytosol (GO:0005829);Q96M89    |                          | 0 |
| Cytosol (GO:0005829);Q8TF61    |                          | 0 |



|                              |                          |   |
|------------------------------|--------------------------|---|
| Cytosol (GO:0005829); Q9H6R7 |                          | 0 |
| Nucleoplasm (GO:00056Q96SB8  | Nucleus {ECO:0000269 Pub | 0 |
| Cytosol (GO:0005829) P62760  |                          | 0 |
| Vesicles (GO:0043231) Q96AQ1 |                          | 0 |
| Nucleoplasm (GO:00056P84243  | Nucleus. Chromosome.     | 1 |
| Mitochondria (GO:0005Q8NI60  | Mitochondrion {ECO:00002 | 0 |
| Endoplasmic reticulum Q7RTX9 | Cell membrane {ECO:00002 | 0 |
| Intermediate filament Q8WW24 | Cell projection, cilium, | 0 |
| Nucleoli (GO:0005730) Q05925 | Nucleus.                 | 0 |
| Cytosol (GO:0005829) Q16585  | Cell membrane, sarcolemm | 0 |
| Mitochondria (GO:0005Q8TC71  | Cytoplasm {ECO:0000269 P | 0 |
| Cytosol (GO:0005829); Q8IVI9 | Isoform 1: Cell membrane | 0 |
| Nucleoplasm (GO:00056A4UGR9  | Cell junction {ECO:00002 | 0 |
| Nucleoplasm (GO:00056Q9H4L7  | Nucleus. Chromosome. Not | 1 |
| Cytosol (GO:0005829); 060760 | Cytoplasm {ECO:0000269 P | 1 |
| Focal adhesion sites Q96HC4  | Cell junction, synapse,  | 0 |
| Mitochondria (GO:0005P29803  | Mitochondrion matrix.    | 1 |
| Nucleoplasm (GO:00056Q5VT52  |                          | 0 |
| Actin filaments (GO:0Q86SG2  | Nucleus. Note=Sarcomeric | 0 |
| Vesicles (GO:0043231) P25774 | Lysosome.                | 0 |
| Nucleoplasm (GO:00056P28360  | Nucleus.                 | 1 |
| Nucleoplasm (GO:00056Q8N7B6  |                          | 0 |
| Cytosol (GO:0005829) Q7Z465  |                          | 0 |
| Vesicles (GO:0043231) Q9BXJ2 | Secreted {ECO:0000305}.  | 0 |
| Vesicles (GO:0043231) Q6P589 |                          | 0 |
| Nucleoplasm (GO:00056Q96S90  |                          | 0 |
| Nucleoplasm (GO:00056Q9BWG6  | Nucleus, nucleoplasm {EC | 0 |
| Nuclear speckles (GO:Q15906  | Nucleus {ECO:0000305 Pub | 0 |
| Nucleoplasm (GO:00056P19447  | Nucleus.                 | 1 |
| Plasma membrane (GO:0Q8NC42  | Membrane {ECO:0000305};  | 0 |
| Nucleoplasm (GO:00056Q96ST2  | Nucleus {ECO:0000255 PRO | 1 |
| Cytosol (GO:0005829); Q53S33 | Mitochondrion {ECO:00002 | 1 |
| Actin filaments (GO:0Q9UKI2  | Endomembrane system {ECO | 0 |
| Centrosome (GO:000581P07476  | Cytoplasm. Note=Constitu | 1 |
| Cytosol (GO:0005829); Q6P158 |                          | 0 |
| Plasma membrane (GO:0Q96LB8  | Secreted {ECO:0000269 Pu | 0 |
| Nucleoplasm (GO:00056P42331  |                          | 0 |
| Cell Junctions (GO:00P06702  | Secreted. Cytoplasm. Cyt | 0 |
| Vesicles (GO:0043231) P01135 | Transforming growth fact | 0 |
| Vesicles (GO:0043231) Q5VZ19 |                          | 0 |
| Plasma membrane (GO:0Q8N7R7  |                          | 0 |
| Cytosol (GO:0005829); Q9NXF7 |                          | 0 |
| Golgi apparatus (GO:0Q8TDQ7  | Cytoplasm {ECO:0000250}. | 0 |
| Plasma membrane (GO:0P05187  | Cell membrane; Lipid-anc | 0 |
| Plasma membrane (GO:0P10696  | Cell membrane; Lipid-anc | 0 |
| Golgi apparatus (GO:0Q6NVV3  | Membrane {ECO:0000305};  | 0 |
| Plasma membrane (GO:0P09923  | Cell membrane; Lipid-anc | 0 |
| Nuclear speckles (GO:Q8TDG4  |                          | 0 |
| Nucleoplasm (GO:00056Q9UFW8  | Nucleus {ECO:0000269 Pub | 1 |
| Nuclear bodies (GO:00Q6UWZ7  | Nucleus {ECO:0000269 Pub | 1 |
| Cytosol (GO:0005829); Q7Z3F1 | Membrane; Multi-pass mem | 0 |
| Microtubules (GO:0015A0PJW8  |                          | 0 |
| Cytosol (GO:0005829); Q96AQ6 | Cytoplasm, cytoskeleton  | 0 |
| Nucleoplasm (GO:00056Q9BRQ0  | Nucleus {ECO:0000305}.   | 0 |
| Centrosome (GO:000581Q86Z02  | Nucleus. Cytoplasm. Note | 0 |

|                              |                          |   |
|------------------------------|--------------------------|---|
| Nucleoli fibrillar ceQ9H869  | Cytoplasm {ECO:0000269 P | 0 |
| Cytosol (GO:0005829);Q5NDL2  | Endoplasmic reticulum lu | 0 |
| Cytosol (GO:0005829);Q8NCW5  | Mitochondrion {ECO:00002 | 0 |
| Cytosol (GO:0005829);Q8NBL1  | Endoplasmic reticulum lu | 1 |
| Midbody ring (GO:0090Q86VF2  | Nucleus {ECO:0000250}. C | 0 |
| Nucleoli fibrillar ceQ8N5X7  |                          | 0 |
| Cytosol (GO:0005829);Q96CX6  |                          | 0 |
| Cytosol (GO:0005829);Q12841  | Secreted {ECO:0000305}.  | 0 |
| Cytosol (GO:0005829) P29536  | Cytoplasm, myofibril, sa | 0 |
| Nucleoplasm (GO:00056P78545  | Cytoplasm {ECO:0000269 P | 0 |
| Cell Junctions (GO:00Q8IXX5  | Membrane {ECO:0000305};  | 0 |
| Centrosome (GO:000581Q96HH4  | Membrane {ECO:0000305};  | 0 |
| Golgi apparatus (GO:0Q16270  | Secreted.                | 0 |
| Cytosol (GO:0005829);015144  | Cytoplasm, cytoskeleton  | 0 |
| Nuclear bodies (GO:00Q96A04  |                          | 0 |
| Cytosol (GO:0005829);P49368  | Cytoplasm {ECO:0000305}. | 0 |
| Nucleoli fibrillar ceQ9BSE2  | Lysosome {ECO:0000250}.  | 0 |
| Cytosol (GO:0005829);Q96BH1  |                          | 0 |
| Cytosol (GO:0005829) Q9NRP7  | Cytoplasm {ECO:0000269 P | 0 |
| Plasma membrane (GO:0P30542  | Cell membrane {ECO:00002 | 1 |
| Nucleoplasm (GO:00056Q6ZWH5  |                          | 0 |
| Nucleoplasm (GO:0005654)     | Cytoplasm {ECO:0000250 U | 0 |
| Nuclear speckles (GO:Q99581  | Nucleus {ECO:0000255 PRO | 0 |
| Cytosol (GO:0005829);Q8TCG1  | Membrane {ECO:0000305};  | 1 |
| Vesicles (GO:0043231) 095936 | Nucleus {ECO:0000305}.   | 0 |
| Cytosol (GO:0005829);Q9HCG8  | Nucleus {ECO:0000269 Pub | 0 |
| Plasma membrane (GO:0P37173  | Cell membrane {ECO:00002 | 0 |
| Cytosol (GO:0005829);Q9H8Y5  | Cytoplasm {ECO:0000269 P | 0 |
| Plasma membrane (GO:0P98095  | Secreted, extracellular  | 0 |
| Endoplasmic reticulumQ8TCJ2  | Endoplasmic reticulum {E | 1 |
| Mitochondria (GO:0005Q8N4Q1  | Mitochondrion intermembr | 1 |
| Nucleoplasm (GO:00056Q7Z7J5  | Nucleus {ECO:0000269 Pub | 0 |
| Nuclear bodies (GO:00Q562F6  | Nucleus {ECO:0000305 Pub | 1 |
| Cytosol (GO:0005829) Q99574  | Secreted {ECO:0000269 Pu | 0 |
| Cytosol (GO:0005829);075122  | Cytoplasm, cytoskeleton  | 0 |
| Mitochondria (GO:0005P53597  | Mitochondrion {ECO:00002 | 0 |
| Cytosol (GO:0005829);Q9H093  |                          | 0 |
| Cytokinetic bridge (GP41743  | Cytoplasm {ECO:0000269 P | 0 |
| Nucleoli (GO:0005730) P41218 | Nucleus. Cytoplasm. Note | 0 |
| Cytosol (GO:0005829);Q16666  | Nucleus. Cytoplasm. Note | 0 |
| Cytosol (GO:0005829);014862  | Nucleus. Cytoplasm. Note | 0 |
| Nucleoli (GO:0005730) Q8N7U6 | Cytoplasm {ECO:0000305 P | 0 |
| Vesicles (GO:0043231) Q9GZV4 | Cytoplasm {ECO:0000250}. | 0 |
| Plasma membrane (GO:0P11168  | Cell membrane {ECO:00002 | 1 |
| Nucleoli (GO:0005730) Q6P5R6 |                          | 0 |
| Cytosol (GO:0005829);P07148  | Cytoplasm.               | 1 |
| Cytosol (GO:0005829);Q5SGD2  | Membrane {ECO:0000305};  | 0 |
| Mitochondria (GO:0005Q8NDH6  |                          | 0 |
| Actin filaments (GO:0Q9Y6W8  | Isoform 1: Cell membrane | 0 |
| Nucleoplasm (GO:00056Q8N488  | Nucleus {ECO:0000269 Pub | 0 |
| Nucleoplasm (GO:00056Q9NY27  | Cytoplasm, cytoskeleton, | 0 |
| Plasma membrane (GO:0Q8TD46  | Isoform 1: Cell membrane | 0 |
| Mitochondria (GO:0005Q8N3Z3  |                          | 0 |
| Nucleoli (GO:0005730) Q6NW34 | Nucleus {ECO:0000250 Uni | 1 |
| Centrosome (GO:000581Q8N0Z3  | Cytoplasm, cytoskeleton, | 0 |

|                                |                          |   |
|--------------------------------|--------------------------|---|
| Mitochondria (GO:0005Q8NCU4    |                          | 0 |
| Vesicles (GO:0043231)Q9ULU8    | Cytoplasmic vesicle memb | 0 |
| Nucleoplasm (GO:00056P78426    | Nucleus {ECO:0000305}.   | 1 |
| Nuclear membrane (GO:Q92903    | Endoplasmic reticulum me | 0 |
| Cytosol (GO:0005829);Q8IZQ1    | Nucleus membrane {ECO:00 | 0 |
| Cytosol (GO:0005829);Q12923    | Cytoplasm, cytoskeleton  | 0 |
| Endoplasmic reticulumP02768    | Secreted.                | 0 |
| Focal adhesion sites Q96KX1    |                          | 0 |
| Cytosol (GO:0005829);Q6I9Y2    | Cytoplasm {ECO:0000269 P | 0 |
| Cytosol (GO:0005829);015265    | Isoform a: Nucleus. Nucl | 0 |
| Golgi apparatus (GO:0Q15008    |                          | 0 |
| Golgi apparatus (GO:0Q7Z3G6    | Nucleus membrane {ECO:00 | 0 |
| Endoplasmic reticulumQ9P2N4    | Secreted, extracellular  | 0 |
| Mitochondria (GO:0005Q8N3J5    | Mitochondrion matrix {EC | 1 |
| Cytosol (GO:0005829) P49915    | Cytoplasm.               | 0 |
| Microtubules (GO:0015Q7Z3E1    | Nucleus {ECO:0000269 Pub | 0 |
| Nuclear bodies (GO:00Q9UK58    | Nucleus speckle {ECO:000 | 0 |
| Plasma membrane (GO:0P26022    | Secreted.                | 0 |
| Nucleoplasm (GO:00056Q9UBX0    | Nucleus {ECO:0000269 Pub | 0 |
| Endoplasmic reticulumQ14BN4    | Cell membrane, sarcolemm | 0 |
| Cytosol (GO:0005829);P32969    |                          | 0 |
| Cytosol (GO:0005829);095059    | Nucleus, nucleolus {ECO: | 0 |
| Nucleoplasm (GO:00056Q9BV23    | Late endosome membrane { | 0 |
| Golgi apparatus (GO:0Q6ZVT6    |                          | 0 |
| Cytosol (GO:0005829);A0AV96    | Nucleus {ECO:0000250}.   | 0 |
| Mitochondria (GO:0005Q92870    |                          | 0 |
| Cytosol (GO:0005829);Q96HD1    | Membrane {ECO:0000305};  | 0 |
| Cytosol (GO:0005829);Q5FWE3    | Membrane {ECO:0000305};  | 0 |
| Cytosol (GO:0005829);Q9UKZ9    | Secreted {ECO:0000305}.  | 0 |
| Nucleoplasm (GO:00056015042    | Nucleus {ECO:0000269 Pub | 1 |
| Nucleoplasm (GO:00056Q96N46    |                          | 0 |
| Cytosol (GO:0005829);Q96PM5    | Nucleus. Nucleus speckle | 0 |
| Golgi apparatus (GO:0P15088    | Cytoplasmic vesicle, sec | 0 |
| Vesicles (GO:0043231)P46976    |                          | 0 |
| Golgi apparatus (GO:0Q969F9    | Cytoplasm {ECO:0000250 U | 0 |
| Cytosol (GO:0005829);Q96CE8    | Membrane {ECO:0000305};  | 0 |
| Nucleoplasm (GO:00056Q92547    | Nucleus. Cytoplasm, cyto | 0 |
| Cytosol (GO:0005829);Golgi app | Membrane {ECO:0000250};  | 0 |
| Cell Junctions (GO:00Q9NRH2    | Nucleus {ECO:0000250}.   | 0 |
| Nuclear speckles (GO:Q7RTU1    | Nucleus {ECO:0000255 PRO | 0 |
| Endoplasmic reticulumP55089    | Secreted.                | 0 |
| Nucleoplasm (GO:00056Q9BWU0    | Nucleus {ECO:0000269 Pub | 0 |
| Nucleoplasm (GO:00056Q5MJ70    | Nucleus {ECO:0000269 Pub | 1 |
| Cytokinetic bridge (GQ96AT1    |                          | 0 |
| Golgi apparatus (GO:0Q9NYG2    | Golgi apparatus membrane | 0 |
| Cytosol (GO:0005829) Q9NQ48    | Cytoplasm {ECO:0000269 P | 1 |
| Vesicles (GO:0043231)Q9BQS8    | Cytoplasmic vesicle, aut | 0 |
| Mitochondria (GO:0005Q9BQQ7    | Membrane {ECO:0000305};  | 0 |
| Nucleoplasm (GO:00056Q9BYS8    |                          | 0 |
| Centrosome (GO:000581Q0PNE2    |                          | 0 |
| Cytosol (GO:0005829);Q8TDB6    | Cytoplasm {ECO:0000269 P | 0 |
| Golgi apparatus (GO:0Q9UQR1    | Nucleus.                 | 1 |
| Mitochondria (GO:0005Q96T66    | Mitochondrion {ECO:00002 | 1 |
| Mitochondria (GO:0005Q96EX1    | Membrane {ECO:0000305};  | 0 |
| Nucleoplasm (GO:00056095789    | Nucleus {ECO:0000305}.   | 0 |

|                              |                          |   |
|------------------------------|--------------------------|---|
| Vesicles (GO:0043231) Q86W33 | Membrane; Multi-pass mem | 0 |
| Nucleoplasm (GO:00056Q9ULM3  | Nucleus {ECO:0000305 Pub | 0 |
| Cytoplasmic bodies (GQ5D1E8  | Nucleus {ECO:0000269 Pub | 0 |
| Cytosol (GO:0005829); Q8TAD8 | Nucleus {ECO:0000269 Pub | 0 |
| Nucleoplasm (GO:00056P52434  | Nucleus, nucleolus {ECO: | 0 |
| Centrosome (GO:000581Q96S95  | Nucleus. Cytoplasm, cyto | 0 |
| Cytosol (GO:0005829); Q96HV5 | Membrane {ECO:0000305};  | 0 |
| Endoplasmic reticulumP04843  | Endoplasmic reticulum {E | 1 |
| Cytosol (GO:0005829) Q9HC62  | Nucleus, nuclear pore co | 0 |
| Cytosol (GO:0005829); Q9NQ87 | Nucleus {ECO:0000255 PRO | 0 |
| Cytosol (GO:0005829); Q9HBG6 | Cell projection, cilium  | 0 |
| Nucleoplasm (GO:00056P35249  | Nucleus {ECO:0000305}.   | 1 |
| Cytosol (GO:0005829); Q92560 | Cytoplasm {ECO:0000269 P | 1 |
| Nucleoplasm (GO:00056P29401  |                          | 0 |
| Cytosol (GO:0005829); Q05655 | Cytoplasm {ECO:0000269 P | 0 |
| Vesicles (GO:0043231) Q96AA3 | Membrane {ECO:0000305};  | 0 |
| Nucleoplasm (GO:00056Q9UHJ3  | Nucleus {ECO:0000269 Pub | 1 |
| Nuclear bodies (GO:00Q9BVP2  | Nucleus {ECO:0000250 Uni | 0 |
| Nucleoplasm (GO:00056Q86U86  | Nucleus {ECO:0000303 Pub | 1 |
| Nucleoplasm (GO:00056Q2YD98  | Chromosome {ECO:0000269  | 0 |
| Nucleoplasm (GO:00056Q9UK61  | Nucleus {ECO:0000269 Pub | 1 |
| Cytosol (GO:0005829) Q9NR81  | Cytoplasm {ECO:0000250}. | 0 |
| Cytosol (GO:0005829); Q14493 | Cytoplasm. Nucleus. Note | 0 |
| Endoplasmic reticulumP30533  | Rough endoplasmic reticu | 0 |
| Nucleoplasm (GO:00056094888  | Nucleus {ECO:0000269 Pub | 1 |
| Nuclear bodies (GO:00Q8IYW5  | Nucleus {ECO:0000255 HAM | 1 |
| Cytosol (GO:0005829); Q8TBF5 | Endoplasmic reticulum me | 0 |
| Nuclear bodies (GO:00P25815  | Nucleus. Cytoplasm. Cell | 0 |
| Mitochondria (GO:0005Q6H8Q1  | Cytoplasm. Note=In skele | 0 |
| Cytosol (GO:0005829); Q9H790 | Nucleus {ECO:0000269 Pub | 1 |
| Cytosol (GO:0005829); Q96PL5 | Cell membrane {ECO:00002 | 0 |
| Nucleoli (GO:0005730) Q5VV52 | Nucleus {ECO:0000305}.   | 0 |
| Cytosol (GO:0005829) Q12904  | Nucleus {ECO:0000269 Pub | 0 |
| Cytosol (GO:0005829); P53582 | Cytoplasm {ECO:0000255 H | 0 |
| Nucleoplasm (GO:00056P0C0S5  | Nucleus. Chromosome.     | 1 |
| Centriolar satellite Q4ZJI4  | Cell projection, cilium, | 0 |
| Cell Junctions (GO:00Q86UD5  | Cell membrane {ECO:00002 | 0 |
| Cytosol (GO:0005829) Q9BUT1  | Cytoplasm {ECO:0000269 P | 1 |
| Cytosol (GO:0005829); 015173 | Membrane {ECO:0000305};  | 0 |
| Golgi apparatus (GO:0P30304  |                          | 0 |
| Nucleoplasm (GO:00056Q86UQ0  | Nucleus {ECO:0000269 Pub | 1 |
| Centrosome (GO:000581Q96ER9  | Membrane {ECO:0000305};  | 0 |
| Nucleoplasm (GO:00056Q8WXE1  | Nucleus {ECO:0000269 Pub | 1 |
| Cytosol (GO:0005829); 043609 | Cytoplasm. Membrane; Per | 0 |
| Cytosol (GO:0005829) P13798  | Cytoplasm.               | 1 |
| Vesicles (GO:0043231) Q9ULD6 | Cytoplasm {ECO:0000250 U | 0 |
| Cytosol (GO:0005829) Q5XPI4  | Cytoplasm {ECO:0000269 P | 0 |
| Centrosome (GO:000581095757  | Cytoplasm {ECO:0000250}. | 0 |
| Nucleoplasm (GO:00056Q8NHS3  | Lysosome membrane {ECO:0 | 0 |
| Nuclear membrane (GO:Q0P651  | Secreted {ECO:0000305}.  | 0 |
| Cytokinetic bridge (GQ8NCB2  | Cell membrane {ECO:00002 | 0 |
| Cytosol (GO:0005829) Q86VX9  |                          | 0 |
| Cytosol (GO:0005829) Q04912  | Membrane; Single-pass ty | 0 |
| Cytosol (GO:0005829); Q9Y4B4 | Nucleus {ECO:0000250}. N | 0 |
| Cytosol (GO:0005829); Q9Y6I9 | Secreted {ECO:0000305}.  | 0 |

|                             |                          |   |
|-----------------------------|--------------------------|---|
| Nuclear bodies (GO:00Q96MI6 | Nucleus {ECO:0000250}.   | 0 |
| Nucleoplasm (GO:00056Q8TBG4 | Mitochondrion {ECO:00003 | 0 |
| Nucleoli (GO:0005730)Q6UXN9 | Nucleus {ECO:0000269 Pub | 0 |
| Nucleoplasm (GO:00056Q99697 | Nucleus.                 | 1 |
| Endoplasmic reticulumQ8WVX3 | Membrane {ECO:0000305};  | 0 |
| Actin filaments (GO:0P56730 | Secreted.                | 0 |
| Nucleoli (GO:0005730)P26583 | Nucleus {ECO:0000269 Pub | 0 |
| Nucleoplasm (GO:00056075446 | Nucleus.                 | 1 |
| Nucleoplasm (GO:00056P61296 | Nucleus {ECO:0000255 PRO | 1 |
| Nucleoplasm (GO:00056Q13257 | Nucleus. Chromosome, cen | 0 |
| Nuclear membrane (GO:P08758 |                          | 0 |
| Nucleoplasm (GO:00056Q02108 | Cytoplasm {ECO:0000305}. | 0 |
| Cytosol (GO:0005829);Q9NRD0 |                          | 0 |
| Cytosol (GO:0005829);P15428 | Cytoplasm.               | 1 |
| Plasma membrane (GO:0Q8WWX0 |                          | 0 |
| Mitochondria (GO:0005Q7Z5S9 | Membrane {ECO:0000305};  | 0 |
| Golgi apparatus (GO:0Q6UWH4 | Golgi apparatus membrane | 0 |
| Cytosol (GO:0005829);P25929 | Cell membrane; Multi-pas | 0 |
| Cytosol (GO:0005829) Q9BXJ9 | Cytoplasm. Nucleus. Note | 0 |
| Nuclear speckles (GO:P40933 | Isoform IL15-S48AA: Secr | 0 |
| Cytosol (GO:0005829) Q05DH4 |                          | 0 |
| Golgi apparatus (GO:0P53367 |                          | 0 |
| Nuclear bodies (GO:00Q9Y2F5 | Nucleus {ECO:0000269 Pub | 1 |
| Nucleoplasm (GO:00056Q96QV1 | Cell membrane {ECO:00002 | 0 |
| Golgi apparatus (GO:0Q9UM13 |                          | 0 |
| Cytosol (GO:0005829) P61221 | Cytoplasm {ECO:0000269 P | 0 |
| Cytosol (GO:0005829) Q01804 | Cytoplasm {ECO:0000269 P | 0 |
| Actin filaments (GO:0P62312 | Cytoplasm {ECO:0000269 P | 0 |
| Nucleoplasm (GO:00056Q9NVA4 | Membrane {ECO:0000305};  | 0 |
| Cytosol (GO:0005829);Q6P2P2 | Cytoplasm {ECO:0000269 P | 0 |
| Cytosol (GO:0005829);P17301 | Membrane; Single-pass ty | 0 |
| Cytosol (GO:0005829);096007 | Cytoplasm, cytosol {ECO: | 1 |
| Mitochondria (GO:0005Q8N183 | Mitochondrion {ECO:00002 | 1 |
| Cytosol (GO:0005829);Q68DH5 | Membrane {ECO:0000305};  | 0 |
| Nucleoplasm (GO:00056Q86VV4 | Nucleus {ECO:0000305 Pub | 0 |
| Cytosol (GO:0005829);Q6KC79 | Nucleus {ECO:0000269 Pub | 1 |
| Cytosol (GO:0005829) Q86T96 | Endoplasmic reticulum me | 0 |
| Lipid droplets (GO:00Q8WXG9 | Cell membrane {ECO:00002 | 0 |
| Mitochondria (GO:0005Q96AG3 | Mitochondrion outer memb | 1 |
| Plasma membrane (GO:0Q96DR4 |                          | 0 |
| Cytosol (GO:0005829);P53609 |                          | 0 |
| Cytosol (GO:0005829);Q8NEF3 |                          | 0 |
| Mitochondria (GO:0005A6NCL7 |                          | 0 |
| Mitochondria (GO:0005A6NC05 |                          | 0 |
| Vesicles (GO:0043231)Q96M27 | Golgi apparatus {ECO:000 | 0 |
| Plasma membrane (GO:0P55085 | Cell membrane; Multi-pas | 0 |
| Cytosol (GO:0005829);Q9HAD4 | Cytoplasm {ECO:0000269 P | 0 |
| Mitochondria (GO:0005043181 | Mitochondrion inner memb | 1 |
| Mitochondria (GO:0005Q8TAA5 | Mitochondrion matrix {EC | 1 |
| Nucleoplasm (GO:00056Q6UWY0 | Secreted {ECO:0000305}.  | 0 |
| Vesicles (GO:0043231)094955 | Golgi apparatus {ECO:000 | 0 |
| Actin filaments (GO:0Q8TED1 | Membrane {ECO:0000305};  | 0 |
| Actin filaments (GO:0Q17RP2 | Nucleus {ECO:0000305}.   | 0 |
| Centrosome (GO:000581Q86VE9 | Cell membrane {ECO:00002 | 1 |
| Golgi apparatus (GO:0Q6UWR7 | Cell membrane {ECO:00002 | 0 |

|                              |                          |   |
|------------------------------|--------------------------|---|
| Mitochondria (GO:0005P42574  | Cytoplasm.               | 0 |
| Cytosol (GO:0005829);Q96LW4  | Nucleus. Mitochondrion m | 0 |
| Cytosol (GO:0005829);Q9NZ08  | Endoplasmic reticulum me | 0 |
| Golgi apparatus (GO:0Q6P179  | Endoplasmic reticulum me | 0 |
| Nucleoli fibrillar ceQ9P2B7  |                          | 0 |
| Mitochondria (GO:0005Q6R327  |                          | 0 |
| Cytosol (GO:0005829) Q6PIY7  | Cytoplasm {ECO:0000250 U | 0 |
| Nucleoplasm (GO:00056Q9UH73  | Nucleus {ECO:0000305}.   | 0 |
| Cell Junctions (GO:00Q9H9E1  | Cytoplasm, cytoskeleton  | 0 |
| Nucleoli (GO:0005730) Q8WVY7 | Nucleus {ECO:0000269 Pub | 0 |
| Endoplasmic reticulum Q8TED0 | Nucleus, nucleolus {ECO: | 1 |
| Nucleoli (GO:0005730) 095478 | Nucleus, nucleolus {ECO: | 0 |
| Mitochondria (GO:0005Q969S9  | Mitochondrion {ECO:00002 | 0 |
| Cytosol (GO:0005829);014746  | Nucleus, nucleolus {ECO: | 0 |
| Nucleoli fibrillar ceQ96BQ5  |                          | 0 |
| Nucleoplasm (GO:00056Q9C009  | Nucleus {ECO:0000255 PRO | 1 |
| Vesicles (GO:0043231) P04141 | Secreted {ECO:0000269 Pu | 0 |
| Actin filaments (GO:0Q92599  | Cytoplasm {ECO:0000250 U | 0 |
| Vesicles (GO:0043231) Q2M3G4 | Cytoplasm, cytoskeleton  | 0 |
| Mitochondria (GO:0005014949  | Mitochondrion inner memb | 1 |
| Centriolar satellite Q8N884  | Cell membrane {ECO:00002 | 0 |
| Cytosol (GO:0005829);015540  | Cytoplasm.               | 1 |
| Nucleoplasm (GO:00056043711  | Nucleus {ECO:0000305}.   | 1 |
| Nucleoplasm (GO:00056Q99967  | Nucleus {ECO:0000269 Pub | 1 |
| Nucleoplasm (GO:00056015178  | Nucleus {ECO:0000269 Pub | 1 |
| Nucleoplasm (GO:00056Q8IUR6  | Nucleus {ECO:0000269 Pub | 1 |
| Cytosol (GO:0005829) Q8N8Z6  | Membrane {ECO:0000305};  | 0 |
| Mitochondria (GO:0005Q9H9B4  | Mitochondrion inner memb | 1 |
| Cytosol (GO:0005829) Q86YH6  | Mitochondrion {ECO:00003 | 0 |
| Cytosol (GO:0005829) Q5T5C0  | Cytoplasm {ECO:0000250}. | 0 |
| Nucleoplasm (GO:00056Q8NI17  | Cell membrane {ECO:00003 | 0 |
| Cytosol (GO:0005829);Q3KP44  |                          | 0 |
| Cytosol (GO:0005829);Q8TD07  | Membrane {ECO:0000269 Pu | 0 |
| Nucleoplasm (GO:00056Q8NCG7  | Cell membrane {ECO:00002 | 1 |
| Cell Junctions (GO:00Q8NCT3  |                          | 0 |
| Nuclear speckles (GO:Q9UEE5  | Nucleus {ECO:0000269 Pub | 0 |
| Nucleoli (GO:0005730) Q13595 | Nucleus {ECO:0000269 Pub | 0 |
| Golgi apparatus (GO:0Q86SR1  | Golgi apparatus membrane | 0 |
| Cytosol (GO:0005829);P62263  |                          | 0 |
| Golgi apparatus (GO:0Q9UP83  | Cytoplasm, cytosol {ECO: | 0 |
| Cytosol (GO:0005829) Q1RMZ1  |                          | 0 |
| Nuclear speckles (GO:095391  | Nucleus {ECO:0000269 Pub | 0 |
| Cytosol (GO:0005829);Q8TA86  | Nucleus {ECO:0000250}.   | 0 |
| Cytosol (GO:0005829);095997  | Cytoplasm. Nucleus.      | 0 |
| Nucleoli (GO:0005730) P49069 | Membrane; Multi-pass mem | 0 |
| Vesicles (GO:0043231) Q8NC24 | Cell membrane {ECO:00002 | 0 |
| Nucleoplasm (GO:00056095279  | Membrane {ECO:0000305};  | 0 |
| Centrosome (GO:000581Q6ZMV9  | Cytoplasm, cytoskeleton  | 0 |
| Centrosome (GO:000581P17014  | Nucleus {ECO:0000269 Pub | 1 |
| Cytokinetic bridge (GQ7RTT9  | Cell membrane {ECO:00003 | 0 |
| Mitochondria (GO:0005Q8TBZ9  |                          | 0 |
| Cytosol (GO:0005829);Q96GN5  | Cytoplasm. Nucleus. Note | 0 |
| Nucleoplasm (GO:00056Q8IXZ3  | Nucleus {ECO:0000305}.   | 0 |
| Cytosol (GO:0005829);Q9NXC5  | Lysosome membrane {ECO:0 | 0 |
| Endoplasmic reticulum A8MWY0 | Membrane {ECO:0000305};  | 0 |

|                             |                          |   |
|-----------------------------|--------------------------|---|
| Nucleoli fibrillar ceQ4VX76 | Endomembrane system {ECO | 0 |
| Cytosol (GO:0005829);Q8NA54 |                          | 0 |
| Cytosol (GO:0005829);Q9Y5J3 | Nucleus {ECO:0000255 PRO | 0 |
| Nucleoplasm (GO:00056Q6ZNC4 | Nucleus {ECO:0000250 Uni | 0 |
| Cytosol (GO:0005829);Q01469 | Cytoplasm {ECO:0000269 P | 0 |
| Cytosol (GO:0005829) Q8N103 |                          | 0 |
| Endoplasmic reticulumP08123 | Secreted, extracellular  | 0 |
| Nuclear speckles (GO:Q4ZHG4 | Secreted {ECO:0000305}.  | 0 |
| Cytosol (GO:0005829);P15259 |                          | 0 |
| Centriolar satellite Q8IWU2 | Membrane {ECO:0000269 Pu | 0 |
| Nucleoli (GO:0005730)P07858 | Lysosome {ECO:0000269 Pu | 0 |
| Nucleoplasm (GO:00056Q9H6I2 | Nucleus {ECO:0000255 PRO | 0 |
| Golgi apparatus (GO:0Q96QB1 | Cytoplasm. Cell junction | 0 |
| Mitochondria (GO:0005Q08828 | Membrane {ECO:0000250 Un | 0 |
| Cytosol (GO:0005829);Q96LL4 |                          | 0 |
| Golgi apparatus (GO:0Q8TAQ9 | Membrane {ECO:0000305};  | 0 |
| Cytosol (GO:0005829);Q14541 | Nucleus {ECO:0000255 PRO | 0 |
| Vesicles (GO:0043231)P28328 | Peroxisome membrane; Mul | 0 |
| Nucleoplasm (GO:00056Q60216 | Double-strand-break repa | 0 |
| Nucleoplasm (GO:00056Q96HR3 | Nucleus {ECO:0000305}.   | 0 |
| Vesicles (GO:0043231)Q8IVN8 | Secreted, extracellular  | 0 |
| Nucleoli fibrillar ceP19622 | Nucleus.                 | 0 |
| Nucleoplasm (GO:00056Q14159 | Nucleus {ECO:0000269 Pub | 1 |
| Cytosol (GO:0005829);043913 | Nucleus.                 | 0 |
| Midbody (GO:0030496);Q01523 | Secreted {ECO:0000269 Pu | 0 |
| Cytosol (GO:0005829);Q86Y56 | Cytoplasm {ECO:0000269 P | 0 |
| Nucleoli (GO:0005730)Q9Y236 |                          | 0 |
| Nuclear membrane (GO:094901 | Nucleus inner membrane { | 1 |
| Vesicles (GO:0043231)Q8N573 | Mitochondrion {ECO:00002 | 0 |
| Cytosol (GO:0005829) Q96NL1 | Lysosome membrane {ECO:0 | 0 |
| Nucleoplasm (GO:00056A6NJTO | Nucleus {ECO:0000255 PRO | 0 |
| Nucleoplasm (GO:00056Q6ZMB5 | Cell membrane {ECO:00002 | 0 |
| Golgi apparatus (GO:0Q08648 | Secreted.                | 0 |
| Nucleoplasm (GO:00056Q8N201 | Nucleus membrane {ECO:00 | 0 |
| Nucleoplasm (GO:00056Q00535 | Isoform 1: Cytoplasm. Ce | 0 |
| Cytosol (GO:0005829);P04920 | Membrane; Multi-pass mem | 0 |
| Mitochondria (GO:0005Q14296 | Isoform 4: Mitochondrion | 0 |
| Cytosol (GO:0005829);Q9BVT8 | Membrane {ECO:0000250 Un | 0 |
| Mitochondria (GO:0005Q96HJ9 | Mitochondrion {ECO:00002 | 0 |
| Nucleoplasm (GO:00056Q9H814 | Nucleus, nucleoplasm {EC | 0 |
| Cytosol (GO:0005829);P49419 | Cytoplasm, cytosol {ECO: | 0 |
| Nucleoli fibrillar ceP85037 | Nucleus {ECO:0000269 Pub | 0 |
| Mitochondria (GO:0005P09669 | Mitochondrion inner memb | 1 |
| Nucleoplasm (GO:00056Q8N2R0 | Nucleus {ECO:0000305}.   | 0 |
| Cytosol (GO:0005829);P63104 | Cytoplasm {ECO:0000269 P | 0 |
| Cytosol (GO:0005829);Q8WXS3 | Cytoplasm {ECO:0000269 P | 0 |
| Plasma membrane (GO:0060353 | Membrane {ECO:0000250 Un | 0 |
| Nucleoplasm (GO:00056Q96CG8 | Secreted, extracellular  | 0 |
| Mitochondria (GO:0005Q9H2D1 | Mitochondrion inner memb | 1 |
| Cell Junctions (GO:00Q9NV06 | Nucleus, nucleolus {ECO: | 0 |
| Cytosol (GO:0005829) Q96A56 | Cytoplasm, cytosol. Nucl | 0 |
| Nucleoplasm (GO:00056Q75QN2 | Nucleus {ECO:0000305}.   | 0 |
| Nuclear bodies (GO:00Q69YN4 | Nucleus speckle {ECO:000 | 0 |
| Cytosol (GO:0005829);Q9P0J1 | Mitochondrion matrix {EC | 0 |
| Nucleoplasm (GO:00056Q12768 | Cytoplasm, cytosol {ECO: | 0 |

|                             |                          |   |
|-----------------------------|--------------------------|---|
| Nucleoplasm (GO:00056Q8N5L8 | Nucleus {ECO:0000305}.   | 1 |
| Golgi apparatus (GO:0Q8IW50 |                          | 0 |
| Nuclear bodies (GO:00Q92966 | Nucleus.                 | 1 |
| Mitochondria (GO:0005Q6NSJ0 | Nucleus membrane {ECO:00 | 0 |
| Nucleoplasm (GO:00056P50583 |                          | 0 |
| Nucleoplasm (GO:00056Q6PI78 | Cell membrane {ECO:00002 | 0 |
| Nucleoplasm (GO:00056075475 | Nucleus {ECO:0000269 Pub | 1 |
| Nucleoli (GO:0005730)Q6TFL3 |                          | 0 |
| Cytosol (GO:0005829);Q9NZ09 | Cytoplasm, cytosol {ECO: | 0 |
| Cytosol (GO:0005829);P43405 | Cell membrane {ECO:00003 | 0 |
| Nucleoplasm (GO:00056095477 | Membrane {ECO:0000269 Pu | 0 |
| Nuclear bodies (GO:00Q16649 | Nucleus {ECO:0000255 PRO | 0 |
| Cytosol (GO:0005829);Q2VYF4 | Mitochondrion inner memb | 0 |
| Cytosol (GO:0005829) P22612 |                          | 0 |
| Cytosol (GO:0005829);Q16595 | Mitochondrion {ECO:00002 | 1 |
| Nucleoli (GO:0005730)Q9H898 | Nucleus {ECO:0000305}.   | 0 |
| Mitochondria (GO:0005Q6P5X7 | Membrane {ECO:0000305};  | 0 |
| Nuclear speckles (GO:Q7Z304 | Secreted, extracellular  | 0 |
| Golgi apparatus (GO:0Q49A92 |                          | 0 |
| Cytosol (GO:0005829) P00352 | Cytoplasm, cytosol {ECO: | 1 |
| Nucleoplasm (GO:00056Q8NB78 | Nucleus {ECO:0000250}.   | 1 |
| Microtubules (GO:0015Q8IZ41 | Cytoplasm, perinuclear r | 0 |
| Centriolar satellite Q5VSY0 | Golgi apparatus {ECO:000 | 0 |
| Golgi apparatus (GO:0Q5T6V5 |                          | 0 |
| Nucleoplasm (GO:00056P61978 | Cytoplasm {ECO:0000269 P | 0 |
| Cytosol (GO:0005829);Q68DC2 | Cell projection, cilium  | 0 |
| Mitochondria (GO:0005P09467 |                          | 0 |
| Mitochondria (GO:0005Q9BRR3 | Membrane {ECO:0000305};  | 0 |
| Nucleoplasm (GO:00056Q9UKY1 | Nucleus {ECO:0000255 PRO | 1 |
| Focal adhesion sites Q8N6F8 |                          | 0 |
| Cytosol (GO:0005829);Q5VXU9 | Chromosome {ECO:0000250  | 0 |
| Cytosol (GO:0005829);Q8N8K9 |                          | 0 |
| Cytosol (GO:0005829) Q8TAB3 | Cell membrane {ECO:00002 | 0 |
| Cell Junctions (GO:00015551 | Cell junction, tight jun | 0 |
| Cytosol (GO:0005829);Q14C86 | Membrane {ECO:0000269 Pu | 0 |
| Mitochondria (GO:0005Q96LW7 | Isoform 1: Nucleus {ECO: | 0 |
| Cytosol (GO:0005829) Q9Y3S1 | Cytoplasm {ECO:0000269 P | 0 |
| Golgi apparatus (GO:0Q04656 | Golgi apparatus, trans-G | 0 |
| Nucleoplasm (GO:00056Q7RTV3 | Nucleus {ECO:0000269 Pub | 1 |
| Cytosol (GO:0005829) Q7Z353 | Nucleus {ECO:0000255 PRO | 0 |
| Mitochondria (GO:0005095139 | Mitochondrion inner memb | 1 |
| Nucleoli (GO:0005730)Q9H6R4 | Nucleus, nucleolus {ECO: | 1 |
| Nucleoplasm (GO:00056Q92482 | Cell membrane {ECO:00002 | 1 |
| Nucleoplasm (GO:00056Q6PF06 |                          | 0 |
| Cytosol (GO:0005829);P55072 | Cytoplasm, cytosol {ECO: | 0 |
| Nucleoli (GO:0005730)Q8TEQ8 | Endoplasmic reticulum me | 0 |
| Cytosol (GO:0005829);Q9UJZ1 | Cell membrane {ECO:00002 | 0 |
| Cytosol (GO:0005829);Q6RI45 |                          | 0 |
| Golgi apparatus (GO:0094991 | Membrane {ECO:0000305};  | 0 |
| Golgi apparatus (GO:0Q5VV17 |                          | 0 |
| Nucleoplasm (GO:00056Q5U5R9 |                          | 0 |
| Nucleoplasm (GO:00056Q7Z6M2 |                          | 0 |
| Centrosome (GO:000581Q5JSJ4 |                          | 0 |
| Cell Junctions (GO:00P57739 | Cell junction, tight jun | 0 |
| Nuclear speckles (GO:Q14191 | Nucleus, nucleolus {ECO: | 0 |



|                             |                          |   |
|-----------------------------|--------------------------|---|
| Cytosol (GO:0005829);Q9Y281 | Nucleus matrix {ECO:0000 | 0 |
| Cytosol (GO:0005829);Q9Y2Z0 | Cytoplasm {ECO:0000269 P | 0 |
| Cytosol (GO:0005829);P52655 | Nucleus.                 | 1 |
| Mitochondria (GO:0005Q8N2G6 |                          | 0 |
| Mitochondria (GO:0005Q6PCE3 |                          | 0 |
| Cytosol (GO:0005829) Q96FC7 |                          | 0 |
| Cell Junctions (GO:00Q7RTY1 | Cell membrane {ECO:00002 | 0 |
| Cytosol (GO:0005829);015357 | Cytoplasm, cytosol {ECO: | 0 |
| Cytosol (GO:0005829);014813 | Nucleus {ECO:0000255 PRO | 1 |
| Mitochondria (GO:0005P29033 | Cell membrane {ECO:00002 | 0 |
| Golgi apparatus (GO:0Q9Y2S2 | Cytoplasm {ECO:0000250}. | 0 |
| Vesicles (GO:0043231)Q14CZ8 | Cytoplasm {ECO:0000269 P | 0 |
| Centrosome (GO:000581Q8IX90 | Cytoplasm, cytoskeleton, | 0 |
| Mitochondria (GO:0005Q8IYU8 | Mitochondrion intermembr | 1 |
| Cytosol (GO:0005829);Q8IXT1 | Cytoplasm {ECO:0000250}. | 0 |
| Mitochondria (GO:0005094913 | Nucleus.                 | 1 |
| Cytokinetic bridge (GQ96KN3 | Nucleus {ECO:0000255 PRO | 1 |
| Cytosol (GO:0005829);Q96L21 |                          | 0 |
| Nuclear membrane (GO:Q96L50 |                          | 0 |
| Cytosol (GO:0005829);Q969Q0 | Cytoplasm {ECO:0000305}. | 0 |
| Cytosol (GO:0005829) Q9NVR5 | Cytoplasm {ECO:0000255 H | 1 |
| Mitochondria (GO:0005Q9NTK1 | Cytoplasm {ECO:0000269 P | 0 |
| Nucleoplasm (GO:00056P17026 | Nucleus {ECO:0000250}.   | 1 |
| Nuclear bodies (GO:00Q9Y2U9 | Nucleus {ECO:0000269 Pub | 0 |
| Cytosol (GO:0005829);060524 | Nucleus {ECO:0000305}.   | 0 |
| Mitochondria (GO:0005Q96CM3 | Mitochondrion matrix {EC | 0 |
| Centrosome (GO:000581Q9P1W3 | Membrane {ECO:0000305};  | 0 |
| Nucleoplasm (GO:00056Q99626 | Nucleus.                 | 1 |
| Golgi apparatus (GO:0Q96JD6 | Cytoplasm {ECO:0000305}. | 0 |
| Nucleoli (GO:0005730)060225 |                          | 0 |
| Nucleoli (GO:0005730)Q99909 |                          | 0 |
| Nucleoplasm (GO:00056P32243 | Nucleus {ECO:0000269 Pub | 0 |
| Cytosol (GO:0005829);A6NNA5 | Nucleus {ECO:0000255 PRO | 0 |
| Centrosome (GO:000581Q9UKK9 | Nucleus {ECO:0000305 Pub | 0 |
| Nucleoplasm (GO:00056Q9NYF0 | Cytoplasm. Nucleus. Cell | 0 |
| Plasma membrane (GO:0Q96P68 | Cell membrane; Multi-pas | 1 |
| Nucleoli fibrillar ceQ8N7W2 |                          | 0 |
| Cytosol (GO:0005829);Q99633 | Nucleus speckle {ECO:000 | 0 |
| Nuclear membrane (GO:Q5VWG9 | Nucleus {ECO:0000269 Pub | 1 |
| Nucleoplasm (GO:00056Q8IW00 | Peptide Lv: Secreted {EC | 0 |
| Mitochondria (GO:0005P45880 | Mitochondrion outer memb | 1 |
| Nuclear speckles (GO:Q5JUK2 | Cytoplasm {ECO:0000250 U | 0 |
| Cytosol (GO:0005829);Q86VU5 | Membrane {ECO:0000305};  | 0 |
| Centrosome (GO:000581Q05940 | Cytoplasmic vesicle memb | 1 |
| Nucleoli fibrillar ceQ8NEN9 | Endoplasmic reticulum me | 0 |
| Cytosol (GO:0005829);Q96F45 | Nucleus {ECO:0000250}.   | 0 |
| Cytosol (GO:0005829) Q15018 | Cytoplasm {ECO:0000269 P | 0 |
| Golgi apparatus (GO:0Q6ZRP7 | Membrane {ECO:0000269 Pu | 0 |
| Nucleoli (GO:0005730)Q9H8W3 |                          | 0 |
| Nucleoplasm (GO:00056Q96L73 | Nucleus. Chromosome {ECO | 0 |
| Plasma membrane (GO:0Q16206 | Cell membrane. Secreted, | 0 |
| Mitochondria (GO:0005Q9H3K2 | Mitochondrion inner memb | 1 |
| Nuclear membrane (GO:Q5SXM2 | Nucleus {ECO:0000255 PRO | 0 |
| Focal adhesion sites Q4KMG9 | Membrane {ECO:0000305};  | 0 |
| Mitochondria (GO:0005Q10713 | Mitochondrion matrix {EC | 1 |

|                              |                          |   |
|------------------------------|--------------------------|---|
| Mitochondria (GO:0005Q96E40  | Cytoplasm {ECO:0000250 U | 0 |
| Cytosol (GO:0005829) Q92574  | Cytoplasm {ECO:0000269 P | 0 |
| Nucleoplasm (GO:00056Q5VTD9  | Nucleus {ECO:0000269 Pub | 1 |
| Cytosol (GO:0005829) P00492  | Cytoplasm.               | 1 |
| Cytosol (GO:0005829) Q969J3  | Lysosome membrane {ECO:0 | 0 |
| Nuclear bodies (GO:00Q5VUD6  | Endoplasmic reticulum me | 0 |
| Golgi apparatus (GO:0Q96E35  | Cytoplasm {ECO:0000269 P | 0 |
| Cytosol (GO:0005829); Q6ZVD7 | Isoform A: Cytoplasm {EC | 0 |
| Cytosol (GO:0005829); P07949 | Cell membrane {ECO:00002 | 0 |
| Nucleoli (GO:0005730) Q9NR30 | Nucleus, nucleolus {ECO: | 0 |
| Nucleoli (GO:0005730) Q14692 | Nucleus, nucleolus {ECO: | 0 |
| Cell Junctions (GO:00Q9P266  | Cell junction, adherens  | 0 |
| Nucleoplasm (GO:00056Q9H7H0  | Mitochondrion {ECO:00002 | 0 |
| Cytoplasmic bodies (GQ9NP94  | Cell membrane; Multi-pas | 0 |
| Centriolar satellite Q9UN36  | Cytoplasm. Cytoplasm, pe | 0 |
| Cytosol (GO:0005829); Q8TER5 | Cytoplasm {ECO:0000269 P | 1 |
| Nucleoplasm (GO:00056Q6X4W1  | Nucleus {ECO:0000269 Pub | 0 |
| Nucleoplasm (GO:00056Q9P2Y4  | Nucleus {ECO:0000269 Pub | 1 |
| Nuclear membrane (GO:Q6UXG8  | Membrane {ECO:0000250};  | 0 |
| Golgi apparatus (GO:0Q7Z3E2  |                          | 0 |
| Nucleoplasm (GO:00056Q9Y467  | Nucleus {ECO:0000305}.   | 0 |
| Actin filaments (GO:0Q8WWH5  | Nucleus {ECO:0000269 Pub | 0 |
| Endoplasmic reticulum Q9HBF4 | Golgi apparatus, Golgi s | 0 |
| Mitochondria (GO:0005Q8WW14  |                          | 0 |
| Cytosol (GO:0005829); 043301 | Cytoplasm {ECO:0000250 U | 0 |
| Cytosol (GO:0005829); Q92837 | Cytoplasm.               | 0 |
| Cytosol (GO:0005829); Q9HAC8 |                          | 0 |
| Vesicles (GO:0043231) Q9GZV1 | Cytoplasm, myofibril, sa | 0 |
| Nuclear speckles (GO:Q96AV8  | Nucleus {ECO:0000269 Pub | 0 |
| Cytosol (GO:0005829); A6NI28 |                          | 0 |
| Cytosol (GO:0005829) Q3ZCN5  | Secreted {ECO:0000305}.  | 0 |
| Cytosol (GO:0005829); Q9UKS6 | Cytoplasm {ECO:0000269 P | 0 |
| Plasma membrane (GO:0Q86TV6  | Cytoplasm, cytosol {ECO: | 0 |
| Cytosol (GO:0005829); P17980 | Cytoplasm {ECO:0000305}. | 1 |
| Centrosome (GO:000581Q13702  | Cell membrane; Periphera | 0 |
| Nuclear bodies (GO:00Q8N9U0  | Nucleus {ECO:0000250}.   | 0 |
| Nucleoplasm (GO:00056Q9P2I0  | Nucleus {ECO:0000305}.   | 0 |
| Cell Junctions (GO:00Q96BY2  |                          | 0 |
| Cytosol (GO:0005829); Q96JQ2 | Membrane {ECO:0000305};  | 0 |
| Cytosol (GO:0005829); Q96BW5 |                          | 0 |
| Cytokinetic bridge (GQ08289  | Cell membrane, sarcolemm | 0 |
| Cytosol (GO:0005829); Q9COD2 | Cytoplasm, cytoskeleton, | 0 |
| Cytosol (GO:0005829); Q96PR1 | Cell membrane {ECO:00002 | 0 |
| Centriolar satellite Q9H5J8  | Nucleus {ECO:0000269 Pub | 1 |
| Nucleoplasm (GO:00056Q8N961  |                          | 0 |
| Nuclear speckles (GO:Q7Z5L2  |                          | 0 |
| Cell Junctions (GO:00Q8IY63  | Cell junction, tight jun | 0 |
| Plasma membrane (GO:0Q92743  | Cell membrane {ECO:00002 | 0 |
| Cytosol (GO:0005829); Q86XR8 | Nucleus {ECO:0000250}. C | 0 |
| Nuclear speckles (GO:Q8N4U5  |                          | 0 |
| Nuclear speckles (GO:Q8IV76  | Isoform 1: Nucleus {ECO: | 0 |
| Nucleoplasm (GO:00056Q7Z699  | Cell membrane {ECO:00002 | 0 |
| Golgi apparatus (GO:0Q9BX67  | Cell membrane {ECO:00002 | 0 |
| Golgi apparatus (GO:0Q96DZ9  | Membrane; Multi-pass mem | 0 |
| Cytosol (GO:0005829) Q8TE58  | Secreted, extracellular  | 0 |

|                              |                          |   |
|------------------------------|--------------------------|---|
| Mitochondria (GO:0005Q8TD30  |                          | 0 |
| Nucleoplasm (GO:00056Q92930  | Cell membrane {ECO:00003 | 0 |
| Endoplasmic reticulumQ70UQ0  | Endoplasmic reticulum me | 1 |
| Microtubules (GO:0015Q8IZ73  |                          | 0 |
| Cytosol (GO:0005829);Q9NWT6  | Nucleus. Cytoplasm. Cyto | 1 |
| Mitochondria (GO:0005095169  | Mitochondrion inner memb | 0 |
| Cytosol (GO:0005829);043278  | Secreted.                | 0 |
| Cytosol (GO:0005829) P35555  | Secreted {ECO:0000269 Pu | 0 |
| Microtubules (GO:0015Q8N2C3  |                          | 0 |
| Cytosol (GO:0005829) Q8N967  | Membrane {ECO:0000305};  | 0 |
| Cytosol (GO:0005829);Q9NPI1  | Isoform 2: Nucleus.      | 0 |
| Cytosol (GO:0005829) P12277  | Cytoplasm.               | 1 |
| Cytosol (GO:0005829);Q9Y297  | Cytoplasm {ECO:0000250 U | 0 |
| Golgi apparatus (GO:0Q9UGP5  | Nucleus {ECO:0000269 Pub | 1 |
| Vesicles (GO:0043231) Q9UL15 |                          | 0 |
| Nuclear speckles (GO:Q9BVM2  |                          | 0 |
| Cytokinetic bridge (GQ9BRS8  | Cytoplasm {ECO:0000269 P | 0 |
| Nuclear speckles (GO:Q9BZZ5  | Nucleus {ECO:0000269 Pub | 0 |
| Nucleoplasm (GO:00056Q9P2F9  | Nucleus {ECO:0000305}.   | 0 |
| Nucleoplasm (GO:00056Q96LD8  |                          | 0 |
| Nucleoli fibrillar ceQ14978  | Nucleus, nucleolus {ECO: | 0 |
| Mitochondria (GO:0005Q96Q83  | Nucleus {ECO:0000269 Pub | 0 |
| Cytokinetic bridge (GP61201  | Cytoplasm {ECO:0000269 P | 0 |
| Endoplasmic reticulum095470  | Endoplasmic reticulum me | 1 |
| Cell Junctions (GO:00Q8WU20  | Endomembrane system. Not | 0 |
| Cytosol (GO:0005829) P78371  | Cytoplasm {ECO:0000269 P | 1 |
| Cytosol (GO:0005829);P61457  | Cytoplasm. Nucleus. Note | 1 |
| Golgi apparatus (GO:0Q9Y4X5  | Cytoplasm {ECO:0000269 P | 0 |
| Nuclear speckles (GO:Q8IYS4  |                          | 0 |
| Cytosol (GO:0005829);Q9NY72  | Membrane; Single-pass ty | 0 |
| Nuclear bodies (GO:00095125  | Nucleus.                 | 0 |
| Nuclear speckles (GO:Q96M60  |                          | 0 |
| Cytosol (GO:0005829);Q6ZWJ1  | Cytoplasm {ECO:0000250}. | 0 |
| Nucleoplasm (GO:00056Q96J86  | Membrane {ECO:0000305};  | 0 |
| Cytosol (GO:0005829);Q93034  |                          | 0 |
| Nucleoli (GO:0005730) Q96LU7 | Membrane {ECO:0000305};  | 0 |
| Microtubules (GO:0015Q9NX94  | Membrane {ECO:0000305};  | 0 |
| Cytosol (GO:0005829);Q96B45  | Lysosome membrane {ECO:0 | 0 |
| Nucleoplasm (GO:00056Q9NV29  | Cell membrane; Multi-pas | 0 |
| Cytosol (GO:0005829) Q96DE5  | Cytoplasm {ECO:0000269 P | 0 |
| Plasma membrane (GO:0000213  | Cell membrane. Cytoplasm | 0 |
| Cell Junctions (GO:00Q9H987  | Cytoplasm, cytoskeleton  | 0 |
| Nucleoplasm (GO:00056Q86X67  |                          | 0 |
| Plasma membrane (GO:0Q96DX7  |                          | 0 |
| Cell Junctions (GO:00Q13418  | Cell junction, focal adh | 0 |
| Nucleoplasm (GO:00056Q12962  | Nucleus {ECO:0000269 Pub | 1 |
| Plasma membrane (GO:0Q96JQ0  | Cell membrane {ECO:00002 | 0 |
| Golgi apparatus (GO:0Q8TDF5  | Isoform 2: Cell membrane | 0 |
| Cytosol (GO:0005829);Q4VC12  |                          | 0 |
| Cytosol (GO:0005829);P00167  | Isoform 1: Endoplasmic r | 0 |
| Mitochondria (GO:0005Q70EL1  |                          | 0 |
| Nucleoplasm (GO:00056P15918  | Nucleus {ECO:0000255 PRO | 1 |
| Aggresome (GO:0016235Q86VG3  |                          | 0 |
| Golgi apparatus (GO:0Q6ZMY6  |                          | 0 |
| Mitochondria (GO:0005Q8ND30  |                          | 0 |

|                             |                          |   |
|-----------------------------|--------------------------|---|
| Golgi apparatus (GO:0Q6BCY4 |                          | 0 |
| Endoplasmic reticulum075635 | Cytoplasm {ECO:0000250}. | 0 |
| Nucleoplasm (GO:00056015063 |                          | 0 |
| Cytosol (GO:0005829);P50452 | Cytoplasm.               | 1 |
| Centriolar satellite P50607 | Cytoplasm {ECO:0000250}. | 0 |
| Mitochondria (GO:0005P50213 | Mitochondrion.           | 1 |
| Vesicles (GO:0043231)Q3MJ13 | Cytoplasmic vesicle {ECO | 0 |
| Nucleoplasm (GO:00056Q5H9K5 | Nucleus {ECO:0000305}.   | 0 |
| Nuclear bodies (GO:00Q6P2D8 | Cytoplasm {ECO:0000269 P | 0 |
| Nucleoplasm (GO:00056015016 | Nucleus. Note=Forms disc | 1 |
| Cytosol (GO:0005829);Q8NCN4 | Nucleus, nucleoplasm {EC | 1 |
| Cytosol (GO:0005829);P46776 |                          | 0 |
| Nucleoplasm (GO:00056P78524 | Isoform 1: Cytoplasm, ce | 0 |
| Golgi apparatus (GO:0Q8N3G9 | Golgi apparatus membrane | 1 |
| Cytosol (GO:0005829);Q2VWP7 | Membrane {ECO:0000255};  | 0 |
| Nucleoplasm (GO:00056Q96H22 | Nucleus. Chromosome, cen | 1 |
| Nucleoplasm (GO:00056Q9NQ31 | Nucleus {ECO:0000269 Pub | 1 |
| Nuclear bodies (GO:00043313 | Nucleus {ECO:0000269 Pub | 1 |
| Cytosol (GO:0005829);Q6P387 |                          | 0 |
| Peroxisomes (GO:00057Q5BJD5 | Endoplasmic reticulum me | 0 |
| Centrosome (GO:000581Q8WVC0 | Nucleus {ECO:0000269 Pub | 0 |
| Nuclear bodies (GO:00P52747 | Nucleus {ECO:0000305}.   | 0 |
| Endoplasmic reticulumP55083 | Secreted, extracellular  | 0 |
| Nucleoli (GO:0005730)P30291 | Nucleus.                 | 0 |
| Cytosol (GO:0005829);Q13164 | Cytoplasm. Nucleus. Nucl | 0 |
| Cytosol (GO:0005829);P05771 | Cytoplasm {ECO:0000250}. | 0 |
| Nucleoplasm (GO:00056Q9Y3E1 | Nucleus {ECO:0000269 Pub | 1 |
| Cytosol (GO:0005829) P52849 | Golgi apparatus membrane | 0 |
| Nucleoplasm (GO:00056P33993 | Nucleus {ECO:0000250}.   | 1 |
| Cytosol (GO:0005829);Q9H2F9 | Cytoplasm, cytoskeleton, | 0 |
| Cytosol (GO:0005829) Q9ULY5 | Membrane {ECO:0000305 Pu | 0 |
| Nucleoplasm (GO:00056P17036 | Nucleus {ECO:0000305}.   | 0 |
| Endoplasmic reticulumQ9Y5A6 | Nucleus {ECO:0000255 PRO | 0 |
| Centriolar satellite Q9ULI2 | Cytoplasm {ECO:0000250}. | 0 |
| Centrosome (GO:000581Q3B7T3 | Membrane {ECO:0000305};  | 0 |
| Golgi apparatus (GO:0Q9Y3Q3 | Endoplasmic reticulum-Go | 0 |
| Golgi apparatus (GO:0Q9BY50 | Microsome membrane {ECO: | 0 |
| Vesicles (GO:0043231)Q86UB9 | Mitochondrion membrane { | 0 |
| Nucleoplasm (GO:00056Q96DY2 | Cytoplasm, cytoskeleton, | 0 |
| Cytosol (GO:0005829);Q7Z7K6 | Chromosome, centromere,  | 0 |
| Golgi apparatus (GO:0P55042 | Cell membrane {ECO:00002 | 0 |
| Cytosol (GO:0005829);Q9Y3D0 | Nucleus {ECO:0000269 Pub | 0 |
| Endoplasmic reticulumP14625 | Endoplasmic reticulum lu | 1 |
| Nucleoli (GO:0005730)P62952 | Membrane {ECO:0000305};  | 0 |
| Cytosol (GO:0005829);P09238 | Secreted, extracellular  | 0 |
| Vesicles (GO:0043231)A6NH52 | Membrane {ECO:0000305};  | 0 |
| Cytosol (GO:0005829) Q00994 | Nucleus. Cytoplasm. Note | 0 |
| Nucleoplasm (GO:00056Q9H3S3 | Cell membrane {ECO:00003 | 0 |
| Cell Junctions (GO:00Q6IQ23 | Cell junction, adherens  | 0 |
| Nucleoplasm (GO:00056Q8WXB4 | Nucleus {ECO:0000269 Pub | 1 |
| Vesicles (GO:0043231)P0CG32 |                          | 0 |
| Cytosol (GO:0005829);P61769 | Secreted {ECO:0000269 Pu | 0 |
| Nucleoplasm (GO:00056Q92610 | Nucleus {ECO:0000305}.   | 0 |
| Golgi apparatus (GO:0Q6P4E1 | Membrane {ECO:0000305};  | 0 |
| Cytosol (GO:0005829);P40261 | Cytoplasm.               | 0 |

|                             |                          |   |
|-----------------------------|--------------------------|---|
| Cytosol (GO:0005829);043747 | Golgi apparatus {ECO:000 | 0 |
| Nucleoplasm (GO:00056Q08AF3 |                          | 0 |
| Cytosol (GO:0005829);Q96MC5 |                          | 0 |
| Golgi apparatus (GO:0Q9Y4F3 | Peroxisome {ECO:0000269  | 0 |
| Nucleoplasm (GO:00056Q96ER3 | Nucleus {ECO:0000269 Pub | 1 |
| Endoplasmic reticulumP23284 | Endoplasmic reticulum lu | 1 |
| Cytosol (GO:0005829);Q9H5X1 | Cytoplasm {ECO:0000269 P | 1 |
| Nucleoli fibrillar ceQ96PZ2 | Nucleus. Cytoplasm. Note | 0 |
| Centrosome (GO:000581Q15004 | Nucleus {ECO:0000269 Pub | 0 |
| Cytosol (GO:0005829) Q86WU2 | Mitochondrion {ECO:00002 | 0 |
| Peroxisomes (GO:00057060240 | Endoplasmic reticulum {E | 0 |
| Nucleoli (GO:0005730)Q9BRJ9 | Nucleus {ECO:0000305}.   | 1 |
| Plasma membrane (GO:0P15144 | Cell membrane {ECO:00002 | 1 |
| Nucleoplasm (GO:00056P51170 | Apical cell membrane {EC | 1 |
| Nucleoplasm (GO:00056Q8IVL1 | Nucleus {ECO:0000269 Pub | 1 |
| Nucleoplasm (GO:00056Q495B1 |                          | 0 |
| Cytosol (GO:0005829);Q969I3 |                          | 0 |
| Nucleoplasm (GO:00056Q8IYD9 | Secreted {ECO:0000305}.  | 0 |
| Nuclear membrane (GO:Q9BTE1 | Cytoplasm, cytoskeleton  | 0 |
| Nuclear bodies (GO:00Q9NYB0 | Nucleus {ECO:0000250 Uni | 0 |
| Cytosol (GO:0005829);076031 | Mitochondrion. Mitochond | 1 |
| Vesicles (GO:0043231)015060 | Nucleus {ECO:0000305}.   | 0 |
| Vesicles (GO:0043231)Q9UHF0 | Secreted.                | 0 |
| Nucleoplasm (GO:00056Q9UBC5 |                          | 0 |
| Nucleoplasm (GO:00056014524 | Nucleus inner membrane { | 0 |
| Cytosol (GO:0005829);Q15742 | Nucleus {ECO:0000250}. N | 0 |
| Cytosol (GO:0005829);P42226 | Cytoplasm. Nucleus. Note | 1 |
| Cytoplasmic bodies (GQ86TB9 | Cytoplasm, P-body. Nucle | 0 |
| Cell Junctions (GO:00Q9Y6H3 |                          | 0 |
| Nucleoplasm (GO:00056Q5R3F8 | Membrane {ECO:0000305};  | 0 |
| Nuclear bodies (GO:00Q13277 | Membrane {ECO:0000305};  | 0 |
| Vesicles (GO:0043231)Q8TBX8 | Cytoplasm. Membrane. Not | 0 |
| Cytosol (GO:0005829);Q9NXD2 |                          | 0 |
| Cytosol (GO:0005829);P31946 | Cytoplasm {ECO:0000269 P | 0 |
| Golgi apparatus (GO:0Q6ZVC0 |                          | 0 |
| Cytosol (GO:0005829) Q9Y3Q8 | Nucleus {ECO:0000305}.   | 0 |
| Nucleoplasm (GO:00056Q96JA4 | Membrane {ECO:0000305};  | 0 |
| Centrosome (GO:000581Q8TF46 | Cytoplasm {ECO:0000269 P | 0 |
| Nuclear bodies (GO:00095273 | Cytoplasm. Nucleus.      | 0 |
| Cytosol (GO:0005829);P16452 | Cell membrane; Lipid-anc | 0 |
| Cytosol (GO:0005829);P84022 | Cytoplasm {ECO:0000269 P | 1 |
| Cytosol (GO:0005829);Q8N5U1 | Membrane {ECO:0000305};  | 0 |
| Cytosol (GO:0005829) P78559 | Cytoplasm, cytoskeleton  | 0 |
| Cytosol (GO:0005829);A6NED2 | Chromosome {ECO:0000269  | 0 |
| Nucleoplasm (GO:00056Q15555 | Cytoplasm, cytoskeleton  | 0 |
| Cytosol (GO:0005829) P56192 | Cytoplasm, cytosol {ECO: | 0 |
| Nucleoplasm (GO:00056Q96DN6 | Nucleus {ECO:0000269 Pub | 1 |
| Vesicles (GO:0043231)Q8N129 | Secreted {ECO:0000305}.  | 0 |
| Endoplasmic reticulumP30101 | Endoplasmic reticulum {E | 1 |
| Centriolar satellite 043809 | Nucleus {ECO:0000269 Pub | 0 |
| Nucleoplasm (GO:00056Q8N8M0 |                          | 0 |
| Nucleoli (GO:0005730)Q8NHR7 | Chromosome, telomere {EC | 0 |
| Cytosol (GO:0005829);Q99801 | Nucleus {ECO:0000255 PRO | 1 |
| Nucleoplasm (GO:00056Q8NEJ0 | Cytoplasm {ECO:0000269 P | 0 |
| Cytosol (GO:0005829);P40426 | Nucleus {ECO:0000305}.   | 0 |

|                              |                          |   |
|------------------------------|--------------------------|---|
| Mitochondria (GO:0005P35232  | Mitochondrion inner memb | 0 |
| Nucleoli fibrillar ceQ8IZD0  |                          | 0 |
| Cytosol (GO:0005829) Q5T9C9  | Cytoplasm. Membrane. Not | 0 |
| Nucleoplasm (GO:00056Q6UXU6  | Membrane {ECO:0000305};  | 0 |
| Cytosol (GO:0005829) Q5T9C2  |                          | 0 |
| Cytosol (GO:0005829); Q96CM8 | Mitochondrion {ECO:00003 | 0 |
| Golgi apparatus (GO:0Q08379  | Golgi apparatus, cis-Gol | 0 |
| Mitochondria (GO:0005Q9Y3A0  | Isoform 1: Mitochondrion | 1 |
| Vesicles (GO:0043231) Q6P1M0 | Membrane {ECO:0000305};  | 0 |
| Nucleoplasm (GO:00056Q9BTM9  | Cytoplasm.               | 0 |
| Cell Junctions (GO:00Q5T4B2  | Endoplasmic reticulum lu | 0 |
| Intermediate filamentQ86YN1  | Endoplasmic reticulum me | 0 |
| Cytosol (GO:0005829) Q8IW40  | Cytoplasm {ECO:0000250}. | 0 |
| Nuclear bodies (GO:00Q99811  | Nucleus {ECO:0000255 PRO | 0 |
| Cytosol (GO:0005829) Q6ZRI6  |                          | 0 |
| Nucleoplasm (GO:00056Q02086  | Nucleus.                 | 1 |
| Cytosol (GO:0005829) Q9BU68  |                          | 0 |
| Nucleoplasm (GO:00056Q99807  | Mitochondrion inner memb | 0 |
| Nucleoli (GO:0005730) Q9NZH0 | Cell membrane {ECO:00002 | 0 |
| Plasma membrane (GO:0P46108  | Cytoplasm {ECO:0000250}. | 0 |
| Cytosol (GO:0005829) Q9UPU7  |                          | 0 |
| Cytosol (GO:0005829); Q9HC29 | Cytoplasm {ECO:0000269 P | 0 |
| Nucleoplasm (GO:00056Q7Z614  | Early endosome membrane  | 0 |
| Intermediate filamentQ8IYT4  | Cytoplasm, cytoskeleton  | 0 |
| Vesicles (GO:0043231) Q9HOR4 |                          | 0 |
| Cytosol (GO:0005829); P01344 | Secreted {ECO:0000269 Pu | 0 |
| Cytosol (GO:0005829); Q8ND24 |                          | 0 |
| Nuclear speckles (GO:Q9NYV4  | Nucleus. Nucleus speckle | 1 |
| Cytosol (GO:0005829) Q9NX74  | Cytoplasm {ECO:0000269 P | 0 |
| Nucleoli (GO:0005730) Q969H6 | Nucleus, nucleolus {ECO: | 0 |
| Centrosome (GO:000581Q8NFI3  | Cytoplasm, cytosol {ECO: | 0 |
| Nucleoplasm (GO:00056A6NFN3  | Nucleus {ECO:0000269 Pub | 0 |
| Mitochondria (GO:0005075964  | Mitochondrion. Mitochond | 1 |
| Intermediate filamentQ8TBPO  |                          | 0 |
| Golgi apparatus (GO:0Q96N21  | Golgi apparatus, trans-G | 0 |
| Plasma membrane (GO:0Q9ULV0  | Cytoplasm {ECO:0000250 U | 0 |
| Mitochondria (GO:0005P42765  | Mitochondrion {ECO:00002 | 1 |
| Endoplasmic reticulumQ13586  | Cell membrane; Single-pa | 0 |
| Cytosol (GO:0005829) P23921  | Cytoplasm.               | 1 |
| Cytosol (GO:0005829); Q6AZZ1 | Cytoplasm, perinuclear r | 1 |
| Mitochondria (GO:0005Q9H479  |                          | 0 |
| Plasma membrane (GO:0Q7Z6L0  | Cell membrane {ECO:00002 | 0 |
| Cytosol (GO:0005829) P17027  | Nucleus {ECO:0000305}.   | 0 |
| Vesicles (GO:0043231) Q8WZA9 |                          | 0 |
| Nuclear bodies (GO:00Q9NYT6  | Nucleus {ECO:0000305}.   | 0 |
| Nucleoplasm (GO:00056Q9UJW8  | Nucleus {ECO:0000305}.   | 0 |
| Nucleoplasm (GO:00056Q9Y5P8  | Nucleus {ECO:0000269 Pub | 1 |
| Nucleoli (GO:0005730) Q96K58 | Nucleus {ECO:0000305}.   | 0 |
| Cytosol (GO:0005829); 015015 | Nucleus {ECO:0000305}.   | 0 |
| Endoplasmic reticulumQ9BQB6  | Endoplasmic reticulum me | 1 |
| Vesicles (GO:0043231) P22748 | Cell membrane; Lipid-anc | 0 |
| Nucleoplasm (GO:00056Q8ND04  |                          | 0 |
| Actin filaments (GO:0P67936  | Cytoplasm, cytoskeleton  | 0 |
| Nucleoplasm (GO:00056P61006  | Cell membrane {ECO:00002 | 0 |
| Mitochondria (GO:0005P36969  | Isoform Mitochondrial: M | 0 |

|                                                        |                          |   |
|--------------------------------------------------------|--------------------------|---|
| Nucleoplasm (GO:00056Q504T8                            | Nucleus, nucleolus {ECO: | 0 |
| Endoplasmic reticulumQ96MG2                            | Sarcoplasmic reticulum m | 0 |
| Cytosol (GO:0005829);Q86XR2                            |                          | 0 |
| Nucleoplasm (GO:00056Q86YP4                            | Nucleus speckle {ECO:000 | 0 |
| Cell Junctions (GO:00P53602                            |                          | 0 |
| Nuclear bodies (GO:00Q9H211                            | Nucleus {ECO:0000269 Pub | 1 |
| Cytosol (GO:0005829);Q9UL33                            | Cytoplasm, perinuclear r | 0 |
| Cytosol (GO:0005829);Q6UB99                            | Nucleus {ECO:0000269 Pub | 0 |
| Nucleoplasm (GO:00056Q96N06                            | Cytoplasm, cytosol {ECO: | 0 |
| Nucleoplasm (GO:0005654);Plasma membrane (GO:0005886); |                          | 0 |
| Cytosol (GO:0005829);P26373                            |                          | 0 |
| Nucleoplasm (GO:00056Q96N77                            | Nucleus {ECO:0000269 Pub | 1 |
| Golgi apparatus (GO:0P54284                            | Cytoplasm {ECO:0000250 U | 0 |
| Vesicles (GO:0043231)Q6UX07                            | Secreted {ECO:0000305}.  | 0 |
| Cytosol (GO:0005829);014686                            | Nucleus {ECO:0000305}.   | 0 |
| Golgi apparatus (GO:0Q6QEF8                            |                          | 0 |
| Centrosome (GO:000581Q8TAI7                            | Endomembrane system {ECO | 0 |
| Microtubules (GO:0015Q71U36                            | Cytoplasm, cytoskeleton. | 1 |
| Microtubules (GO:0015Q9BQE3                            | Cytoplasm, cytoskeleton. | 1 |
| Nucleoplasm (GO:00056Q8N9Z0                            | Nucleus {ECO:0000305}.   | 0 |
| Cytosol (GO:0005829);Q3MIS6                            | Nucleus {ECO:0000305}.   | 0 |
| Centriolar satellite Q9NV72                            | Nucleus {ECO:0000305}.   | 0 |
| Nucleoli (GO:0005730)Q9UJW9                            | Nucleus {ECO:0000269 Pub | 0 |
| Golgi apparatus (GO:0Q9HCHO                            | Cytoplasm, cytoskeleton, | 0 |
| Golgi apparatus (GO:0Q2NL68                            |                          | 0 |
| Endoplasmic reticulumQ96SQ9                            | Endoplasmic reticulum me | 1 |
| Actin filaments (GO:0P30530                            | Cell membrane {ECO:00002 | 1 |
| Mitochondria (GO:0005Q8NI38                            | Nucleus {ECO:0000250 Uni | 0 |
| Plasma membrane (GO:0Q6GTX8                            | Cell membrane {ECO:00002 | 1 |
| Nucleoplasm (GO:00056Q96PV6                            |                          | 0 |
| Vesicles (GO:0043231)Q8NBT3                            | Membrane {ECO:0000305};  | 0 |
| Golgi apparatus (GO:0Q8TF50                            | Nucleus {ECO:0000305}.   | 0 |
| Golgi apparatus (GO:0Q96Q05                            | Golgi apparatus, cis-Gol | 0 |
| Golgi apparatus (GO:0Q8WX94                            |                          | 0 |
| Nucleoli (GO:0005730)Q15072                            | Nucleus {ECO:0000269 Pub | 0 |
| Nucleoplasm (GO:00056Q8N7M2                            | Nucleus {ECO:0000305}.   | 0 |
| Nuclear bodies (GO:00Q96A00                            | Cytoplasm {ECO:0000250}. | 0 |
| Cytosol (GO:0005829);043291                            | Membrane {ECO:0000305};  | 0 |
| Cytosol (GO:0005829);Q9GZP8                            | Nucleus {ECO:0000269 Pub | 0 |
| Golgi apparatus (GO:0Q5BJH7                            | Membrane {ECO:0000305};  | 0 |
| Mitochondria (GO:0005739);Nuc1                         | Cytoplasm {ECO:0000250}. | 0 |
| Plasma membrane (GO:0043653                            | Cell membrane {ECO:00002 | 1 |
| Nucleoplasm (GO:00056043293                            | Nucleus {ECO:0000269 Pub | 0 |
| Cytosol (GO:0005829);P13639                            | Cytoplasm {ECO:0000269 P | 0 |
| Cytosol (GO:0005829);Q13111                            | Nucleus {ECO:0000269 Pub | 1 |
| Cytosol (GO:0005829);Q9BZV1                            | Cytoplasm {ECO:0000269 P | 0 |
| Mitochondria (GO:0005Q7Z4V5                            | Nucleus {ECO:0000250 Uni | 1 |
| Cytosol (GO:0005829);Q96Q06                            | Cell membrane {ECO:00002 | 0 |
| Nucleoli (GO:0005730)Q8N0Y2                            | Nucleus {ECO:0000255 PRO | 0 |
| Cytosol (GO:0005829);Q6DKJ4                            | Cytoplasm, cytosol {ECO: | 0 |
| Cytosol (GO:0005829);Q9HC38                            | Mitochondrion {ECO:00003 | 0 |
| Vesicles (GO:0043231)Q96ES6                            | Membrane {ECO:0000305};  | 0 |
| Cytosol (GO:0005829);Q96AC6                            | Cytoplasm, cytoskeleton  | 0 |
| Nucleoplasm (GO:00056Q562E7                            | Early endosome membrane  | 0 |
| Vesicles (GO:0043231)Q9GZT4                            |                          | 0 |

|                             |                          |   |
|-----------------------------|--------------------------|---|
| Nucleoplasm (GO:00056Q2NL82 | Nucleus, nucleolus {ECO: | 0 |
| Centrosome (GO:000581Q8NET8 | Membrane; Multi-pass mem | 0 |
| Vesicles (GO:0043231)Q7Z5J1 | Secreted {ECO:0000305}.  | 0 |
| Centrosome (GO:000581Q8WUJ1 | Secreted {ECO:0000250}.  | 0 |
| Plasma membrane (GO:0Q6RUI8 |                          | 0 |
| Cytokinetic bridge (GQ92876 | Secreted. Nucleus, nucle | 0 |
| Nucleoplasm (GO:00056P51522 | Nucleus {ECO:0000305}.   | 0 |
| Intermediate filamentQ6KB66 |                          | 0 |
| Cytosol (GO:0005829);Q96FW1 | Cytoplasm {ECO:0000250}. | 0 |
| Midbody (GO:0030496);Q8IZ40 | Nucleus {ECO:0000255 PRO | 0 |
| Nucleoplasm (GO:00056Q9BY76 | Secreted {ECO:0000269 Pu | 0 |
| Cytosol (GO:0005829) Q9NPF0 | Cell membrane {ECO:00002 | 0 |
| Actin filaments (GO:0Q8NCJ5 |                          | 0 |
| Cytosol (GO:0005829);P49821 | Mitochondrion inner memb | 1 |
| Nucleoplasm (GO:00056075956 | Cytoplasm {ECO:0000250 U | 0 |
| Cytosol (GO:0005829);Q8WV74 |                          | 0 |
| Cytosol (GO:0005829);Q9UNY5 | Nucleus.                 | 0 |
| Golgi apparatus (GO:0Q08708 | Cell membrane {ECO:00003 | 0 |
| Cytosol (GO:0005829);Q8IV36 | Cytoplasm {ECO:0000269 P | 1 |
| Mitochondria (GO:0005Q14197 | Mitochondrion {ECO:00002 | 0 |
| Mitochondria (GO:0005075947 | Mitochondrion. Mitochond | 1 |
| Cytosol (GO:0005829);Q92817 | Cell junction, desmosome | 0 |
| Cytosol (GO:0005829) Q9UHB9 | Cytoplasm. Nucleus, nucl | 0 |
| Cytokinetic bridge (GQ3V5L5 | Golgi apparatus membrane | 0 |
| Golgi apparatus (GO:0Q8IU68 | Endoplasmic reticulum me | 0 |
| Vesicles (GO:0043231)Q96MH6 | Membrane {ECO:0000305};  | 0 |
| Cytosol (GO:0005829);Q96QA5 | Cytoplasm, perinuclear r | 0 |
| Cytosol (GO:0005829);Q2M2I5 |                          | 0 |
| Mitochondria (GO:0005Q9H0X4 | Membrane {ECO:0000305};  | 0 |
| Cytosol (GO:0005829);Plasma | membrane (GO:0005886)    | 0 |
| Centrosome (GO:000581Q9ULW5 | Golgi apparatus membrane | 0 |
| Cell Junctions (GO:0Q9BVC4  | Cytoplasm {ECO:0000250 U | 0 |
| Nucleoplasm (GO:00056Q66K89 | Nucleus, nucleoplasm. Cy | 0 |
| Mitochondria (GO:0005Q92874 | Cytoplasm {ECO:0000269 P | 0 |
| Mitochondria (GO:0005P42126 | Mitochondrion matrix.    | 1 |
| Cytosol (GO:0005829);Q8WXD9 | Cytoplasm {ECO:0000250}. | 0 |
| Cytosol (GO:0005829);Q99758 | Membrane {ECO:0000305};  | 0 |
| Nuclear speckles (GO:Q9UQ35 | Nucleus {ECO:0000269 Pub | 0 |
| Nucleoli (GO:0005730)Q96LX8 | Nucleus {ECO:0000305}.   | 0 |
| Centriolar satellite Q7RTR2 | Cytoplasm {ECO:0000269 P | 1 |
| Cytosol (GO:0005829);Q9NX18 | Mitochondrion matrix {EC | 1 |
| Nucleoplasm (GO:00056Q16531 | Cytoplasm. Nucleus. Note | 0 |
| Nucleoplasm (GO:00056A5D8V6 | Late endosome membrane { | 0 |
| Cytosol (GO:0005829);Q96DN2 | Secreted {ECO:0000305}.  | 0 |
| Centriolar satellite Q8TBN0 |                          | 0 |
| Microtubules (GO:0015P02794 |                          | 0 |
| Nucleoplasm (GO:00056P62487 | Nucleus {ECO:0000269 Pub | 1 |
| Cytosol (GO:0005829);P08195 | Apical cell membrane {EC | 0 |
| Plasma membrane (GO:0Q96KN8 |                          | 0 |
| Nuclear speckles (GO:Q9BUA3 |                          | 0 |
| Nucleoplasm (GO:00056Q8NAA4 | Cytoplasm {ECO:0000250}. | 0 |
| Centriolar satellite Q4AC94 | Cytoplasm, cytoskeleton, | 0 |
| Nucleoplasm (GO:00056015050 |                          | 0 |
| Nucleoplasm (GO:00056Q8NDW8 |                          | 0 |
| Cytosol (GO:0005829);P08865 | Cell membrane. Cytoplasm | 0 |



|                              |                          |   |
|------------------------------|--------------------------|---|
| Plasma membrane (GO:0P35222  | Cytoplasm {ECO:0000269 P | 0 |
| Cytosol (GO:0005829);Q96C45  |                          | 0 |
| Cytosol (GO:0005829);Q13158  |                          | 0 |
| Nucleoplasm (GO:00056Q9NS15  | Secreted {ECO:0000269 Pu | 0 |
| Cytosol (GO:0005829) Q9UQQ1  | Apical cell membrane {EC | 0 |
| Cytosol (GO:0005829)         | Cytoplasm, cytoskeleton, | 0 |
| Nucleoli (GO:0005730) Q8N1L9 | Nucleus {ECO:0000255 PRO | 0 |
| Nucleoplasm (GO:00056Q15637  | Nucleus.                 | 1 |
| Vesicles (GO:0043231) Q12851 | Cytoplasm {ECO:0000250}. | 0 |
| Centrosome (GO:000581A6NC98  | Membrane {ECO:0000250 Un | 0 |
| Cytosol (GO:0005829);Q6AZY7  | Endoplasmic reticulum me | 1 |
| Cytosol (GO:0005829) Q96KB5  |                          | 0 |
| Nucleoplasm (GO:00056Q7L5N1  | Nucleus. Cytoplasm. Note | 0 |
| Cytosol (GO:0005829);P68402  | Cytoplasm.               | 1 |
| Cytosol (GO:0005829);Q6ZW76  |                          | 0 |
| Cytosol (GO:0005829);Q9BRJ7  | Nucleus {ECO:0000269 Pub | 0 |
| Nuclear membrane (GO:Q9HCI6  |                          | 0 |
| Cytosol (GO:0005829);Q9C0A6  | Nucleus {ECO:0000250 Uni | 0 |
| Mitochondria (GO:0005Q6EMK4  | Membrane {ECO:0000305 Pu | 0 |
| Nucleoplasm (GO:00056Q16695  | Nucleus. Chromosome.     | 1 |
| Mitochondria (GO:0005Q9H5L6  |                          | 0 |
| Cytosol (GO:0005829);Q5TA31  | Cytoplasm {ECO:0000269 P | 1 |
| Centriolar satellite Q86VS8  | Cytoplasm, cytoskeleton  | 0 |
| Cytosol (GO:0005829);Q8NDC0  |                          | 0 |
| Cytosol (GO:0005829) Q9NX09  | Mitochondrion {ECO:00002 | 0 |
| Nucleoplasm (GO:00056Q06330  | Nucleus. Cytoplasm. Note | 0 |
| Golgi apparatus (GO:0Q9H5U6  | Cytoplasm {ECO:0000269 P | 0 |
| Nucleoplasm (GO:00056Q8N584  |                          | 0 |
| Cytosol (GO:0005829);Q8IVS8  | Isoform 1: Cytoplasm {EC | 0 |
| Nucleoplasm (GO:0005654)     | Nucleus {ECO:0000250}.   | 0 |
| Nucleoli (GO:0005730) Q9NYR9 | Cytoplasm {ECO:0000250}. | 0 |
| Cytosol (GO:0005829);Q99615  | Cytoplasm {ECO:0000269 P | 0 |
| Nucleoplasm (GO:00056Q7Z5L9  | Cytoplasm. Nucleus.      | 0 |
| Nucleoplasm (GO:00056Q7RTS3  | Nucleus {ECO:0000255 PRO | 0 |
| Nucleoli (GO:0005730) Q12951 | Nucleus.                 | 0 |
| Mitochondria (GO:0005Q8WVIO  | Membrane {ECO:0000305};  | 0 |
| Mitochondria (GO:0005Q5JTJ3  | Mitochondrion intermembr | 1 |
| Vesicles (GO:0043231) Q60282 | Cytoplasm, cytoskeleton  | 0 |
| Golgi apparatus (GO:0Q10469  | Golgi apparatus membrane | 1 |
| Cytosol (GO:0005829);P35226  | Nucleus {ECO:0000269 Pub | 0 |
| Cytokinetic bridge (GQ96EK4  | Nucleus {ECO:0000269 Pub | 1 |
| Mitochondria (GO:0005P11177  | Mitochondrion matrix.    | 0 |
| Centriolar satellite Q7Z7A4  | Cytoplasm {ECO:0000269 P | 0 |
| Nuclear speckles (GO:P10412  | Nucleus. Chromosome. Not | 0 |
| Nucleoplasm (GO:00056Q96MG8  | Cytoplasm {ECO:0000250}. | 0 |
| Mitochondria (GO:0005Q8NC69  | Cytoplasm, myofibril, sa | 0 |
| Golgi apparatus (GO:0Q8TAP9  | Nucleus. Cytoplasm. Cyto | 0 |
| Cytosol (GO:0005829);Q99424  | Peroxisome {ECO:0000269  | 0 |
| Nuclear speckles (GO:095990  | Nucleus {ECO:0000269 Pub | 0 |
| Cell Junctions (GO:00P14316  | Nucleus.                 | 0 |
| Cytoplasmic bodies (GQ13875  | Cytoplasm, perinuclear r | 1 |
| Actin filaments (GO:0Q702N8  | Cell junction {ECO:00002 | 0 |
| Nucleoplasm (GO:00056Q96T92  | Cytoplasm {ECO:0000250}. | 0 |
| Nucleoli (GO:0005730) Q6QHC5 | Endoplasmic reticulum me | 0 |
| Actin filaments (GO:0Q15019  | Cytoplasm {ECO:0000269 P | 0 |

|                                                         |                          |   |
|---------------------------------------------------------|--------------------------|---|
| Plasma membrane (GO:0Q4L180                             | Cytoplasm {ECO:0000269 P | 0 |
| Cytoplasmic bodies (GQ8NA29                             | Cell membrane {ECO:00002 | 0 |
| Mitochondria (GO:0005P23919                             |                          | 0 |
| Centriolar satellite Q03518                             | Endoplasmic reticulum me | 1 |
| Cytosol (GO:0005829); Q9Y4P1                            | Cytoplasm {ECO:0000250}. | 0 |
| Plasma membrane (GO:0P30411                             | Cell membrane; Multi-pas | 1 |
| Cytosol (GO:0005829); Q6PCD5                            | Nucleus {ECO:0000269 Pub | 0 |
| Golgi apparatus (GO:0Q15669                             | Cytoplasm {ECO:0000269 P | 0 |
| Centriolar satellite Q0D2K2                             |                          | 0 |
| Golgi apparatus (GO:0P83436                             | Golgi apparatus membrane | 1 |
| Nucleoplasm (GO:00056060508                             | Nucleus {ECO:0000269 Pub | 0 |
| Cytosol (GO:0005829); P31948                            | Cytoplasm {ECO:0000250 U | 0 |
| Nucleoplasm (GO:00056043593                             | Nucleus.                 | 1 |
| Cytosol (GO:0005829) Q9H6H4                             | Endoplasmic reticulum me | 0 |
| Cytosol (GO:0005829) Q8N145                             | Secreted {ECO:0000305}.  | 0 |
| Cytosol (GO:0005829) Q8WWM7                             | Membrane {ECO:0000269 Pu | 0 |
| Mitochondria (GO:0005Q92561                             |                          | 0 |
| Nucleoplasm (GO:00056P05423                             | Nucleus.                 | 1 |
| Nucleoli (GO:0005730) P39748                            | Isoform 1: Nucleus, nucl | 0 |
| Cytosol (GO:0005829); 095810                            | Cytoplasm, cytosol {ECO: | 1 |
| Nucleoplasm (GO:00056P52951                             | Nucleus {ECO:0000305}.   | 0 |
| Nuclear speckles (GO:Q96MH2                             | Nucleus {ECO:0000269 Pub | 0 |
| Cytosol (GO:0005829) P49354                             |                          | 0 |
| Nucleoplasm (GO:00056Q96SA4                             | Membrane {ECO:0000305};  | 0 |
| Cytosol (GO:0005829); P11229                            | Cell membrane; Multi-pas | 0 |
| Endoplasmic reticulum P02461                            | Secreted, extracellular  | 0 |
| Vesicles (GO:0043231) 000451                            | Cell membrane {ECO:00002 | 0 |
| Cytosol (GO:0005829); Q9H160                            | Nucleus {ECO:0000269 Pub | 0 |
| Nucleoplasm (GO:00056Q9NXV6                             | Nucleus, nucleoplasm {EC | 1 |
| Cytosol (GO:0005829); Q6IEG0                            | Nucleus {ECO:0000269 Pub | 1 |
| Mitochondria (GO:0005A0PJW6                             | Membrane {ECO:0000305};  | 0 |
| Cytosol (GO:0005829); Q71RG4                            | Membrane {ECO:0000305};  | 0 |
| Cytosol (GO:0005829); P40763                            | Cytoplasm. Nucleus {ECO: | 1 |
| Cytosol (GO:0005829); Q9BR11                            |                          | 0 |
| Endoplasmic reticulum Q13443                            | Isoform 1: Cell membrane | 0 |
| Nucleoplasm (GO:00056P39905                             | Secreted {ECO:0000269 Pu | 0 |
| Cytosol (GO:0005829); Q9Y2T1                            | Cytoplasm {ECO:0000269 P | 0 |
| Cytosol (GO:0005829); Q502W6                            | Cytoplasm {ECO:0000269 P | 1 |
| Cytosol (GO:0005829); P17039                            | Nucleus {ECO:0000305}.   | 0 |
| Cytosol (GO:0005829); Q3SY77                            | Membrane {ECO:0000305};  | 0 |
| Nucleoplasm (GO:00056Q96KN1                             |                          | 0 |
| Vesicles (GO:0043231) 015165                            | Early endosome membrane  | 0 |
| Cytokinetic bridge (G015374                             | Cell membrane; Multi-pas | 0 |
| Centriolar satellite P16871                             | Isoform 1: Cell membrane | 0 |
| Vesicles (GO:0043231) Q9NZR2                            | Membrane {ECO:0000305};  | 0 |
| Cytosol (GO:0005829) 043865                             | Endoplasmic reticulum {E | 0 |
| Vesicles (GO:0043231) Q5F1R6                            | Cytoplasm {ECO:0000269 P | 0 |
| Cytosol (GO:0005829); Q9Y2B9                            |                          | 0 |
| Cell Junctions (GO:0Q6UXI9                              | Secreted, extracellular  | 0 |
| Golgi apparatus (GO:0Q8IXR5                             |                          | 0 |
| Cytosol (GO:0005829) A6NKD2                             |                          | 0 |
| Cytosol (GO:0005829) Q8NE01                             | Cell membrane {ECO:00002 | 0 |
| Cytokinetic bridge (GQ03013                             | Cytoplasm.               | 0 |
| Nucleoplasm (GO:00056Q6N021                             |                          | 0 |
| Golgi apparatus (GO:0005794); NCytoplasm {ECO:0000250}. |                          | 0 |

|                              |                          |   |
|------------------------------|--------------------------|---|
| Golgi apparatus (GO:0Q96GX1  | Membrane {ECO:0000305};  | 0 |
| Cytosol (GO:0005829);Q6PFW1  | Cytoplasm, cytosol {ECO: | 1 |
| Cytosol (GO:0005829);Q6UXT9  | Secreted {ECO:0000305}.  | 0 |
| Golgi apparatus (GO:0015062  | Nucleus {ECO:0000305}.   | 0 |
| Nucleoplasm (GO:00056P0CG13  | Nucleus {ECO:0000269 Pub | 1 |
| Microtubules (GO:0015Q6DHV7  |                          | 0 |
| Nucleoplasm (GO:00056060294  |                          | 0 |
| Cytosol (GO:0005829);Q8TCN5  | Nucleus {ECO:0000305}.   | 0 |
| Plasma membrane (GO:0Q9P2W9  | Endoplasmic reticulum me | 0 |
| Cytosol (GO:0005829);Q6ZSB9  | Isoform 1: Cytoplasm {EC | 0 |
| Mitochondria (GO:0005Q96RP9  | Mitochondrion {ECO:00002 | 0 |
| Nucleoplasm (GO:00056Q9NUU7  | Cytoplasm {ECO:0000250}. | 0 |
| Nucleoplasm (GO:00056Q96SQ7  | Nucleus {ECO:0000269 Pub | 0 |
| Golgi apparatus (GO:0Q8WVL7  | Nucleus {ECO:0000250 Uni | 0 |
| Nucleoplasm (GO:00056Q53GS9  | Nucleus {ECO:0000269 Pub | 1 |
| Cytosol (GO:0005829);Q8NFZ5  | Cytoplasm {ECO:0000269 P | 1 |
| Mitochondria (GO:0005Q2NKX9  |                          | 0 |
| Cytosol (GO:0005829);Q9P0P0  |                          | 0 |
| Nucleoplasm (GO:00056095183  | Cell membrane {ECO:00003 | 0 |
| Golgi apparatus (GO:0Q86X40  |                          | 0 |
| Cytosol (GO:0005829);P31153  |                          | 0 |
| Nucleoplasm (GO:00056Q68DD2  | Cytoplasm, cytosol. Lyso | 0 |
| Mitochondria (GO:0005Q9ULD9  |                          | 0 |
| Plasma membrane (GO:0Q8TBE7  | Cell membrane {ECO:00002 | 1 |
| Cytosol (GO:0005829) Q92835  | Cytoplasm {ECO:0000269 P | 0 |
| Mitochondria (GO:0005095202  | Mitochondrion inner memb | 1 |
| Cytosol (GO:0005829);043610  | Cytoplasm. Membrane; Per | 0 |
| Cytosol (GO:0005829);Q8N960  | Cytoplasm, cytoskeleton, | 0 |
| Focal adhesion sites Q53R12  | Membrane {ECO:0000269 Pu | 0 |
| Mitochondria (GO:0005Q9GZY8  | Mitochondrion outer memb | 0 |
| Cytosol (GO:0005829) 000182  | Cytoplasm {ECO:0000269 P | 0 |
| Cytosol (GO:0005829)         |                          | 0 |
| Vesicles (GO:0043231) 014810 | Cytoplasm, cytosol {ECO: | 0 |
| Plasma membrane (GO:0Q5TGL8  |                          | 0 |
| Nucleoplasm (GO:00056075461  | Nucleus.                 | 1 |
| Cytosol (GO:0005829);Q9UK73  | Cytoplasm {ECO:0000269 P | 1 |
| Cytosol (GO:0005829);Q9NX08  | Cytoplasm {ECO:0000269 P | 1 |
| Mitochondria (GO:0005P56385  | Mitochondrion. Mitochond | 1 |
| Mitochondria (GO:0005P47985  | Mitochondrion inner memb | 0 |
| Endoplasmic reticulum Q01955 | Secreted, extracellular  | 0 |
| Cytosol (GO:0005829);Q02750  | Cytoplasm, cytoskeleton, | 0 |
| Nuclear membrane (GO:P49862  | Secreted {ECO:0000269 Pu | 0 |
| Nucleoplasm (GO:00056P31943  | Nucleus, nucleoplasm.    | 1 |
| Cytosol (GO:0005829);P35568  |                          | 0 |
| Nucleoplasm (GO:00056P51608  | Nucleus {ECO:0000250 Uni | 0 |
| Cytosol (GO:0005829);Q9H1J1  | Nucleus. Cytoplasm. Note | 0 |
| Mitochondria (GO:0005P10275  | Nucleus {ECO:0000269 Pub | 0 |
| Actin filaments (GO:0Q8N5I4  | Secreted {ECO:0000269 Pu | 0 |
| Nuclear speckles (GO:Q8TAG6  | Cell membrane {ECO:00002 | 0 |
| Mitochondria (GO:0005Q96EW2  | Cytoplasm {ECO:0000250}. | 0 |
| Cytosol (GO:0005829) 095671  |                          | 0 |
| Mitochondria (GO:0005P12236  | Mitochondrion inner memb | 1 |
| Vesicles (GO:0043231) Q8NCHO | Golgi apparatus membrane | 0 |
| Cytosol (GO:0005829);Q6UWI2  | Cell membrane {ECO:00002 | 0 |
| Cytosol (GO:0005829) Q9HCP0  | Cytoplasm.               | 1 |

|                              |                           |   |
|------------------------------|---------------------------|---|
| Cytosol (GO:0005829);Q8TC76  | Cytoplasm {ECO:0000269 P  | 0 |
| Cytosol (GO:0005829);Q8N4X5  | Cytoplasm {ECO:0000269 P  | 0 |
| Cytosol (GO:0005829);060765  | Nucleus {ECO:0000269 Pub  | 0 |
| Cytosol (GO:0005829);Q9Y2D1  | Cytoplasm {ECO:0000269 P  | 0 |
| Nucleoplasm (GO:00056Q15819  |                           | 0 |
| Nucleoli (GO:0005730)043298  | Nucleus {ECO:0000305}.    | 0 |
| Centrosome (GO:000581Q8TCG5  | Mitochondrion outer memb  | 0 |
| Cytosol (GO:0005829);Q96QU8  | Nucleus {ECO:0000269 Pub  | 0 |
| Nucleoplasm (GO:00056Q10571  |                           | 0 |
| Nucleoli fibrillar ceQ9UBZ4  | Nucleus. Cytoplasm. Mito  | 0 |
| Nucleoplasm (GO:00056Q8WV22  | Nucleus {ECO:0000269 Pub  | 1 |
| Nucleoplasm (GO:00056Q96EE4  | Secreted {ECO:0000305}.   | 0 |
| Cytosol (GO:0005829);P35225  | Secreted.                 | 0 |
| Nucleoplasm (GO:0005654)     |                           | 0 |
| Cell Junctions (GO:00P20337  | Cell membrane {ECO:00003  | 0 |
| Cytosol (GO:0005829);095400  | Cytoplasm. Nucleus. Note  | 0 |
| Intermediate filament043566  | Nucleus {ECO:0000250}. N  | 0 |
| Cytosol (GO:0005829) Q5JQS6  |                           | 0 |
| Focal adhesion sites Q969Q5  | Cytoplasm, cytosol {ECO:  | 0 |
| Mitochondria (GO:0005Q9Y255  | Mitochondrion. Mitochond  | 0 |
| Vesicles (GO:0043231)P49746  |                           | 0 |
| Mitochondria (GO:0005Q9Y2D0  | Mitochondrion.            | 1 |
| Nucleoplasm (GO:00056Q92617  | Membrane {ECO:0000305};   | 0 |
| Cytosol (GO:0005829);Q8TF17  |                           | 0 |
| Nucleoli (GO:0005730)Q96D46  | Cytoplasm {ECO:0000269 P  | 0 |
| Cytosol (GO:0005829) P07550  | Cell membrane {ECO:00002  | 0 |
| Vesicles (GO:0043231)075752  | Golgi apparatus membrane  | 0 |
| Plasma membrane (GO:0Q7Z2K8  | Cell membrane {ECO:00002  | 0 |
| Nuclear speckles (GO:Q12988  | Cytoplasm {ECO:0000269 P  | 0 |
| Nucleoplasm (GO:00056Q14722  | Cytoplasm {ECO:0000269 P  | 0 |
| Mitochondria (GO:0005Q9BYD6  | Mitochondrion {ECO:00002  | 1 |
| Centriolar satellite P51843  | Nucleus {ECO:0000269 Pub  | 0 |
| Intermediate filamentQ96G03  | Cytoplasm {ECO:0000250}.  | 0 |
| Centrosome (GO:000581Q8WU08  | Cell membrane; Lipid-anc  | 0 |
| Golgi apparatus (GO:0Q9UPX6  | Cell membrane {ECO:00002  | 0 |
| Nucleoplasm (GO:00056000400  | Endoplasmic reticulum me  | 0 |
| Nuclear membrane (GO:095149  | Nucleus {ECO:0000269 Pub  | 0 |
| Cytosol (GO:0005829);P78560  | Cytoplasm {ECO:0000250 U  | 0 |
| Nucleoplasm (GO:00056Q96ST3  | Nucleus {ECO:0000255 PRO  | 0 |
| Cytosol (GO:0005829);Q3SXY8  | Cell projection, cilium   | 0 |
| Cytosol (GO:0005829);Q05397  | Cell junction, focal adh  | 0 |
| Nucleoplasm (GO:00056P25105  | Cell membrane {ECO:00002  | 1 |
| Vesicles (GO:0043231)P43378  | Cytoplasm {ECO:0000305}.  | 0 |
| Nucleoli (GO:0005730)P16066  | Membrane; Single-pass ty  | 0 |
| Plasma membrane (GO:0Q9NPC2  | Cell membrane {ECO:00003  | 0 |
| Actin filaments (GO:0Q15858  | Cell membrane {ECO:00002  | 0 |
| Golgi apparatus (GO:0Q6ZTQ3  |                           | 0 |
| Endoplasmic reticulumQ8NFW1  | Secreted, extracellular   | 0 |
| Cytosol (GO:0005829);P34741  | Membrane; Single-pass ty  | 0 |
| Nucleoplasm (GO:00056Q9BX73  | Membrane {ECO:0000305};   | 0 |
| Cytosol (GO:0005829);Nuclear | bCytoplasm {ECO:0000250}. | 0 |
| Cytosol (GO:0005829) Q9Y696  | Cytoplasm, cytoskeleton,  | 0 |
| Nuclear membrane (GO:P32249  | Cell membrane {ECO:00002  | 0 |
| Cytosol (GO:0005829);Q9HOW5  | Cytoplasm {ECO:0000269 P  | 0 |
| Actin filaments (GO:0A6NJ78  |                           | 0 |

|                             |                          |   |
|-----------------------------|--------------------------|---|
| Nucleoplasm (GO:00056P59817 | Nucleus {ECO:0000305}.   | 0 |
| Vesicles (GO:0043231)Q8WUE5 |                          | 0 |
| Cytosol (GO:0005829);060315 | Nucleus {ECO:0000269 Pub | 0 |
| Cytoplasmic bodies (GQ15365 | Nucleus. Cytoplasm. Note | 0 |
| Cytosol (GO:0005829);P49773 | Cytoplasm. Nucleus. Note | 0 |
| Nuclear bodies (GO:00Q8NBA8 |                          | 0 |
| Nuclear bodies (GO:00095833 | Nucleus. Membrane; Singl | 0 |
| Nucleoli (GO:0005730)Q8NBZ0 | Nucleus {ECO:0000269 Pub | 0 |
| Nucleoplasm (GO:00056Q01954 | Nucleus {ECO:0000269 Pub | 0 |
| Nucleoli (GO:0005730)076075 | Cytoplasm. Nucleus.      | 0 |
| Cytosol (GO:0005829);Q9UMS0 | Mitochondrion. Cytoplasm | 0 |
| Vesicles (GO:0043231)Q9H6X2 | Cell membrane {ECO:00002 | 0 |
| Cytosol (GO:0005829);Q8IYA6 | Cytoplasm, cytoskeleton, | 0 |
| Cytosol (GO:0005829);Q8WUR7 |                          | 0 |
| Nucleoplasm (GO:00056Q9BTL3 | Nucleus {ECO:0000269 Pub | 1 |
| Nucleoplasm (GO:00056Q8IW19 | Nucleus {ECO:0000269 Pub | 0 |
| Nucleoplasm (GO:00056Q9H3K6 | Cytoplasm {ECO:0000269 P | 0 |
| Nuclear membrane (GO:014715 |                          | 0 |
| Nucleoplasm (GO:00056Q96JB3 | Nucleus.                 | 1 |
| Actin filaments (GO:0Q86V48 | Nucleus. Note=Also detec | 0 |
| Mitochondria (GO:0005Q8WVB3 | Cytoplasm {ECO:0000250 U | 0 |
| Cytosol (GO:0005829);043683 | Nucleus. Chromosome, cen | 1 |
| Cytosol (GO:0005829);Q9H2V7 | Mitochondrion inner memb | 0 |
| Centrosome (GO:000581Q96CN5 | Cytoplasm, cytoskeleton, | 0 |
| Focal adhesion sites P30532 | Cell junction, synapse,  | 0 |
| Centrosome (GO:000581015120 | Endoplasmic reticulum me | 0 |
| Nucleoplasm (GO:00056Q9BZE9 | Endomembrane system {ECO | 0 |
| Cytosol (GO:0005829);P49327 | Cytoplasm {ECO:0000269 P | 0 |
| Cytosol (GO:0005829);P62633 | Cytoplasm {ECO:0000250}. | 0 |
| Nucleoplasm (GO:00056P04732 |                          | 0 |
| Plasma membrane (GO:0Q6P1R4 |                          | 0 |
| Cytosol (GO:0005829);Q13098 | Cytoplasm {ECO:0000269 P | 1 |
| Nucleoplasm (GO:00056Q9Y644 | Golgi apparatus membrane | 0 |
| Microtubules (GO:0015Q7Z4W1 | Membrane {ECO:0000250};  | 0 |
| Nuclear bodies (GO:00P17041 | Nucleus {ECO:0000305}.   | 0 |
| Nucleoli (GO:0005730)043679 | Nucleus {ECO:0000269 Pub | 0 |
| Cytosol (GO:0005829);P48059 | Cell junction, focal adh | 0 |
| Cytosol (GO:0005829);Q2M3C6 | Cell membrane {ECO:00002 | 0 |
| Nuclear bodies (GO:00Q8N2Q7 | Cell membrane {ECO:00002 | 0 |
| Vesicles (GO:0043231)Q6NXT6 | Cytoplasm, cytoskeleton, | 0 |
| Centrosome (GO:000581Q16851 | Cytoplasm {ECO:0000269 P | 0 |
| Plasma membrane (GO:0Q96FE5 | Cell membrane {ECO:00002 | 0 |
| Nucleoplasm (GO:00056P52597 | Nucleus, nucleoplasm.    | 1 |
| Endoplasmic reticulumQ8N6G5 | Golgi apparatus, Golgi s | 0 |
| Cell Junctions (GO:00060245 | Cell membrane; Single-pa | 0 |
| Plasma membrane (GO:0Q9Y6N7 | Cell membrane {ECO:00002 | 0 |
| Actin filaments (GO:0Q9NQS1 | Endomembrane system; Per | 0 |
| Cell Junctions (GO:00Q9UQB3 | Nucleus {ECO:0000250 Uni | 0 |
| Cytosol (GO:0005829);Q9BRZ2 | Cytoplasm {ECO:0000269 P | 0 |
| Golgi apparatus (GO:0000744 | Secreted, extracellular  | 0 |
| Cytosol (GO:0005829);Q96A49 | Cytoplasm, perinuclear r | 0 |
| Golgi apparatus (GO:0060507 | Golgi apparatus membrane | 1 |
| Cytosol (GO:0005829);P48230 | Membrane; Multi-pass mem | 0 |
| Endoplasmic reticulumQ8NFQ8 | Endoplasmic reticulum me | 0 |
| Cytosol (GO:0005829);Q5T2D3 |                          | 0 |

|                             |                          |   |
|-----------------------------|--------------------------|---|
| Cytosol (GO:0005829);Q8TE49 | Cytoplasm {ECO:0000250}. | 0 |
| Vesicles (GO:0043231)P08236 | Lysosome.                | 0 |
| Nuclear bodies (GO:00Q15059 | Nucleus {ECO:0000250 Uni | 0 |
| Nucleoplasm (GO:00056Q8WW38 | Nucleus {ECO:0000269 Pub | 1 |
| Cytosol (GO:0005829) Q96H86 | Nucleus {ECO:0000305}.   | 0 |
| Centrosome (GO:000581Q9BV97 |                          | 0 |
| Nucleoplasm (GO:00056Q9H5H4 | Nucleus {ECO:0000305}.   | 0 |
| Nucleoli (GO:0005730)Q69YGO | Membrane {ECO:0000305};  | 0 |
| Cytosol (GO:0005829);Q9Y2U5 | Cytoplasm {ECO:0000269 P | 1 |
| Vesicles (GO:0043231)Q8N0Z8 |                          | 0 |
| Nucleoplasm (GO:00056Q9BWJ5 | Nucleus {ECO:0000269 Pub | 1 |
| Nucleoplasm (GO:00056P13682 | Nucleus {ECO:0000305}.   | 0 |
| Cytosol (GO:0005829);Q8IY51 | Nucleus {ECO:0000305}.   | 0 |
| Nucleoplasm (GO:00056Q5TF58 |                          | 0 |
| Mitochondria (GO:0005Q8NFZ4 | Cell membrane {ECO:00002 | 0 |
| Centriolar satellite Q12873 | Nucleus {ECO:0000269 Pub | 0 |
| Nuclear membrane (GO:Q6P9G4 | Membrane {ECO:0000305};  | 0 |
| Golgi apparatus (GO:0Q8NFW9 | Cytoplasm {ECO:0000250 U | 0 |
| Cytosol (GO:0005829);P61981 | Cytoplasm {ECO:0000250}. | 1 |
| Centrosome (GO:000581Q8N137 | Cytoplasm, cytoskeleton, | 0 |
| Nucleoplasm (GO:00056Q8TCW7 | Zona pellucida-like doma | 0 |
| Mitochondria (GO:0005043448 | Cytoplasm {ECO:0000305}. | 0 |
| Nucleoli fibrillar ceQ8NDZ2 |                          | 0 |
| Endosomes (GO:0005768Q8IY95 | Lysosome membrane {ECO:0 | 1 |
| Golgi apparatus (GO:0Q9Y328 | Membrane {ECO:0000250 Un | 0 |
| Nuclear bodies (GO:00Q96MU6 | Nucleus {ECO:0000305}.   | 1 |
| Nucleoplasm (GO:00056Q12950 | Nucleus.                 | 0 |
| Nucleoplasm (GO:00056P51965 | Nucleus {ECO:0000269 Pub | 0 |
| Nucleoplasm (GO:00056P51991 | Nucleus {ECO:0000250}. N | 1 |
| Golgi apparatus (GO:0Q9H0K1 | Cytoplasm {ECO:0000250}. | 0 |
| Nucleoplasm (GO:00056A2RUR9 |                          | 0 |
| Cell Junctions (GO:00P09016 | Nucleus.                 | 1 |
| Cytosol (GO:0005829);P02724 | Cell membrane {ECO:00002 | 1 |
| Centrosome (GO:000581Q8NB14 |                          | 0 |
| Nuclear membrane (GO:Q8TBE9 |                          | 0 |
| Plasma membrane (GO:0P35368 | Nucleus membrane; Multi- | 0 |
| Focal adhesion sites Q96N64 | Nucleus {ECO:0000269 Pub | 1 |
| Vesicles (GO:0043231)Q8WUM4 | Cytoplasm, cytosol {ECO: | 0 |
| Nucleoplasm (GO:00056Q9UDV6 | Nucleus {ECO:0000305}.   | 1 |
| Cytosol (GO:0005829);Q9UDV7 | Nucleus {ECO:0000305}.   | 0 |
| Golgi apparatus (GO:0P16278 | Isoform 1: Lysosome {ECO | 0 |
| Nucleoli (GO:0005730)Q9BXV9 | Nucleus {ECO:0000269 Pub | 0 |
| Actin filaments (GO:0075718 | Secreted, extracellular  | 0 |
| Microtubules (GO:0015000631 | Sarcoplasmic reticulum m | 0 |
| Cytosol (GO:0005829);Q8TE02 | Nucleus. Cytoplasm.      | 1 |
| Nucleoplasm (GO:00056Q8IZV2 | Isoform 1: Membrane; Mul | 0 |
| Vesicles (GO:0043231)095166 | Endomembrane system {ECO | 0 |
| Cytosol (GO:0005829) Q3B8N2 |                          | 0 |
| Cytosol (GO:0005829);Q9UNK0 | Membrane {ECO:0000250};  | 0 |
| Cytosol (GO:0005829);P06493 | Nucleus. Cytoplasm. Mito | 0 |
| Nucleoplasm (GO:00056Q6P4R8 | Nucleus {ECO:0000269 Pub | 1 |
| Nucleoli fibrillar ceQ9NQV6 | Nucleus {ECO:0000250}.   | 0 |
| Vesicles (GO:0043231)Q9NY97 | Golgi apparatus membrane | 0 |
| Nucleoplasm (GO:00056P01100 | Nucleus. Endoplasmic ret | 0 |
| Golgi apparatus (GO:0P49755 | Golgi apparatus, cis-Gol | 0 |

|                              |                          |   |
|------------------------------|--------------------------|---|
| Nucleoli (GO:0005730) Q53H47 | Nucleus {ECO:0000269 Pub | 0 |
| Cytosol (GO:0005829); Q15797 | Cytoplasm {ECO:0000269 P | 0 |
| Nucleoplasm (GO:00056Q04743  | Nucleus {ECO:0000305}.   | 0 |
| Cell Junctions (GO:00A6NFQ2  | Isoform 2: Cell membrane | 0 |
| Nucleoplasm (GO:00056015041  | Secreted {ECO:0000250}.  | 0 |
| Endoplasmic reticulum 075325 | Membrane {ECO:0000305};  | 0 |
| Plasma membrane (GO:0Q9Y6M5  | Cell membrane {ECO:00003 | 0 |
| Endoplasmic reticulum Q7Z570 |                          | 0 |
| Centriolar satellite Q9NQ84  | Cell membrane; Multi-pas | 0 |
| Nucleoplasm (GO:00056Q6ZP80  | Membrane {ECO:0000305};  | 0 |
| Intermediate filament P05787 | Cytoplasm {ECO:0000269 P | 0 |
| Cytosol (GO:0005829) P29275  | Cell membrane; Multi-pas | 0 |
| Nucleoplasm (GO:00056P16455  | Nucleus.                 | 1 |
| Microtubules (GO:0015Q6UX53  |                          | 0 |
| Cytosol (GO:0005829) 043790  |                          | 0 |
| Cytosol (GO:0005829) P12081  | Cytoplasm.               | 1 |
| Nucleoplasm (GO:00056Q6ZNB6  | Membrane {ECO:0000305};  | 0 |
| Cytosol (GO:0005829); 095678 |                          | 0 |
| Microtubules (GO:0015Q6ZUT9  | Membrane {ECO:0000305};  | 0 |
| Vesicles (GO:0043231) P08571 | Cell membrane {ECO:00002 | 0 |
| Cell Junctions (GO:00Q9H819  | Membrane {ECO:0000305};  | 0 |
| Intermediate filament P48668 |                          | 0 |
| Nucleoli (GO:0005730) Q9H6W3 | Nucleus, nucleolus. Nucl | 0 |
| Cytosol (GO:0005829); Q86W54 | Cytoplasm {ECO:0000269 P | 0 |
| Nuclear speckles (GO:Q86X10  |                          | 0 |
| Cell Junctions (GO:00Q9BRP8  | Cytoplasm {ECO:0000269 P | 1 |
| Intermediate filament P19013 |                          | 0 |
| Nucleoplasm (GO:00056Q99743  | Nucleus {ECO:0000255 PRO | 0 |
| Vesicles (GO:0043231) Q15726 | Secreted.                | 0 |
| Nucleoplasm (GO:00056Q1L5Z9  |                          | 0 |
| Cell Junctions (GO:00Q9BW91  | Isoform 1: Mitochondrion | 1 |
| Golgi apparatus (GO:0Q7Z5P4  | Endoplasmic reticulum {E | 0 |
| Cytosol (GO:0005829) Q9UQ80  | Isoform 1: Cytoplasm {EC | 0 |
| Nucleoplasm (GO:00056Q16875  |                          | 0 |
| Vesicles (GO:0043231) Q7Z402 | Membrane {ECO:0000305};  | 0 |
| Endoplasmic reticulum Q15041 | Endomembrane system {ECO | 0 |
| Cytosol (GO:0005829); P50453 | Cytoplasm.               | 1 |
| Nucleoplasm (GO:00056Q0VAQ4  | Cell membrane {ECO:00002 | 0 |
| Golgi apparatus (GO:0P78414  | Nucleus {ECO:0000305}.   | 0 |
| Cell Junctions (GO:00P19022  | Cell membrane {ECO:00002 | 1 |
| Nucleoli (GO:0005730) Q9BZ11 | Nucleus {ECO:0000255 PRO | 0 |
| Nuclear membrane (GO:Q9NPC8  | Nucleus {ECO:0000250 Uni | 1 |
| Cytosol (GO:0005829); P52630 | Cytoplasm {ECO:0000269 P | 0 |
| Cytokinetic bridge (GQ8WVJ2  | Chromosome, centromere,  | 0 |
| Nucleoplasm (GO:00056Q8IU81  | Nucleus {ECO:0000269 Pub | 1 |
| Cytosol (GO:0005829); P34932 | Cytoplasm {ECO:0000305}. | 0 |
| Nucleoplasm (GO:00056P55318  | Nucleus {ECO:0000255 PRO | 0 |
| Cytosol (GO:0005829); Q9GZQ3 | Cytoplasm {ECO:0000269 P | 1 |
| Nucleoplasm (GO:00056Q8WW33  | Cytoplasm {ECO:0000250 U | 0 |
| Nucleoli (GO:0005730) P17020 | Nucleus {ECO:0000269 Pub | 0 |
| Mitochondria (GO:0005Q8N2F6  | Endoplasmic reticulum me | 0 |
| Nuclear bodies (GO:00Q969K3  | Cell membrane {ECO:00002 | 0 |
| Nucleoplasm (GO:00056P14621  |                          | 0 |
| Mitochondria (GO:0005Q9H4I3  |                          | 0 |
| Cytosol (GO:0005829); P17544 | Nucleus {ECO:0000255 PRO | 0 |

|                             |                          |   |
|-----------------------------|--------------------------|---|
| Cell Junctions (GO:00C9J798 | Cytoplasm, cytosol {ECO: | 0 |
| Cytosol (GO:0005829);014544 |                          | 0 |
| Golgi apparatus (GO:0Q5BKX8 | Cytoplasm, myofibril, sa | 0 |
| Centrosome (GO:000581Q8WUU4 | Nucleus {ECO:0000250 Uni | 0 |
| Mitochondria (GO:0005P17482 | Nucleus.                 | 0 |
| Microtubules (GO:0015Q8N841 | Cell projection, cilium  | 0 |
| Cytosol (GO:0005829);Q9Y253 | Nucleus {ECO:0000269 Pub | 1 |
| Cytosol (GO:0005829);Q9BQ31 | Cell membrane {ECO:00002 | 0 |
| Centriolar satellite P33176 | Cytoplasm, cytoskeleton  | 0 |
| Cytosol (GO:0005829);015354 | Cell membrane {ECO:00002 | 0 |
| Cytosol (GO:0005829) Q12802 | Cytoplasm, cytosol {ECO: | 0 |
| Cytosol (GO:0005829);Q9BXL8 | Nucleus {ECO:0000269 Pub | 0 |
| Aggresome (GO:0016235Q9BUK0 | Mitochondrion intermembr | 0 |
| Vesicles (GO:0043231)P83110 | Secreted {ECO:0000269 Pu | 0 |
| Nucleoplasm (GO:00056P32314 | Nucleus.                 | 0 |
| Cytosol (GO:0005829);Q13515 | Cell membrane {ECO:00002 | 0 |
| Cytosol (GO:0005829);Q8NFA0 | Membrane {ECO:0000305};  | 0 |
| Endoplasmic reticulum015297 | Nucleus {ECO:0000269 Pub | 0 |
| Actin filaments (GO:0Q9NS67 | Cell membrane {ECO:00002 | 0 |
| Nucleoli fibrillar ceQ8IY47 |                          | 0 |
| Nucleoli (GO:0005730)Q8IUF8 | Nucleus {ECO:0000269 Pub | 1 |
| Mitochondria (GO:0005043715 | Cytoplasm, perinuclear r | 0 |
| Nucleoli (GO:0005730)P62310 | Nucleus {ECO:0000269 Pub | 0 |
| Cytosol (GO:0005829) Q92628 |                          | 0 |
| Cytosol (GO:0005829);043312 | Cytoplasm, cytoskeleton. | 0 |
| Endoplasmic reticulumQ9NRR1 | Secreted {ECO:0000269 Pu | 0 |
| Nucleoplasm (GO:00056Q9BSV6 | Nucleus {ECO:0000269 Pub | 0 |
| Nucleoplasm (GO:00056Q8NCY6 |                          | 0 |
| Cytosol (GO:0005829);Q8IYS5 | Isoform 1: Secreted {ECO | 0 |
| Golgi apparatus (GO:0Q8TEZ7 | Cell membrane {ECO:00002 | 1 |
| Cytosol (GO:0005829) Q9HCD6 |                          | 0 |
| Cytosol (GO:0005829)        | Cytoplasm, cytoskeleton  | 0 |
| Cytosol (GO:0005829);Q9HCG1 | Nucleus {ECO:0000305}.   | 0 |
| Microtubules (GO:0015Q09FC8 | Nucleus {ECO:0000269 Pub | 0 |
| Plasma membrane (GO:0Q969G5 | Cytoplasm {ECO:0000250 U | 0 |
| Nuclear speckles (GO:Q92819 | Membrane {ECO:0000305};  | 0 |
| Golgi apparatus (GO:0Q9GZP0 | Secreted {ECO:0000269 Pu | 0 |
| Vesicles (GO:0043231)P21453 | Cell membrane; Multi-pas | 0 |
| Nucleoplasm (GO:00056Q96MM7 | Membrane {ECO:0000305};  | 0 |
| Cytosol (GO:0005829);Q9Y3Y4 | Nucleus {ECO:0000305}.   | 0 |
| Actin filaments (GO:0Q5GH73 | Membrane {ECO:0000305};  | 0 |
| Nucleoplasm (GO:00056Q96NA8 | Membrane {ECO:0000250};  | 0 |
| Golgi apparatus (GO:0P21462 | Cell membrane {ECO:00002 | 0 |
| Cytosol (GO:0005829);Q9UHY8 |                          | 0 |
| Golgi apparatus (GO:0Q9BT81 | Nucleus {ECO:0000255 PRO | 0 |
| Nucleoplasm (GO:00056Q6P047 |                          | 0 |
| Nucleoplasm (GO:00056Q96F05 | Cell membrane {ECO:00002 | 0 |
| Plasma membrane (GO:0Q9UM73 | Cell membrane {ECO:00002 | 1 |
| Cytosol (GO:0005829) Q16773 | Cytoplasm.               | 1 |
| Plasma membrane (GO:0Q13496 | Cytoplasm {ECO:0000269 P | 0 |
| Cytosol (GO:0005829) Q9BVS5 | Mitochondrion {ECO:00002 | 0 |
| Plasma membrane (GO:0P06213 | Cell membrane {ECO:00002 | 0 |
| Mitochondria (GO:0005739)   | Mitochondrion outer memb | 0 |
| Golgi apparatus (GO:0Q99748 | Secreted.                | 0 |
| Mitochondria (GO:0005Q9NPA1 | Membrane; Multi-pass mem | 0 |



|                              |                          |   |
|------------------------------|--------------------------|---|
| Cytoplasmic bodies (GQ8TAE7  | Cell membrane {ECO:00002 | 0 |
| Vesicles (GO:0043231) Q02156 | Cytoplasm {ECO:0000269 P | 0 |
| Vesicles (GO:0043231) Q8N5M9 | Endoplasmic reticulum me | 0 |
| Nucleoplasm (GO:00056075528  | Nucleus {ECO:0000269 Pub | 1 |
| Cytosol (GO:0005829); 075159 |                          | 0 |
| Cytosol (GO:0005829) Q96EU7  | Membrane {ECO:0000305};  | 0 |
| Microtubules (GO:0015Q9BUW7  |                          | 0 |
| Nucleoplasm (GO:00056Q499Z4  | Nucleus {ECO:0000305}.   | 1 |
| Nucleoli (GO:0005730) Q9BU19 | Nucleus {ECO:0000305}.   | 0 |
| Cytosol (GO:0005829); Q69YI7 | Nucleus {ECO:0000269 Pub | 0 |
| Cytosol (GO:0005829) Q9H477  | Cytoplasm {ECO:0000250 U | 0 |
| Cytosol (GO:0005829); Q9H061 | Mitochondrion inner memb | 0 |
| Mitochondria (GO:0005Q8IUX1  | Mitochondrion membrane { | 1 |
| Cytosol (GO:0005829); Q9BZR9 | Cytoplasm {ECO:0000269 P | 0 |
| Golgi apparatus (GO:0Q8NC67  | Membrane {ECO:0000305};  | 0 |
| Cytosol (GO:0005829) Q6DT37  | Cytoplasm {ECO:0000269 P | 1 |
| Actin filaments (GO:0P57086  | Nucleus {ECO:0000255 PRO | 0 |
| Nucleoplasm (GO:00056P17275  | Nucleus.                 | 1 |
| Centrosome (GO:000581Q96D05  | Membrane {ECO:0000250 Un | 0 |
| Cytosol (GO:0005829); Q8WXS4 | Membrane {ECO:0000305};  | 0 |
| Vesicles (GO:0043231) P02750 | Secreted.                | 0 |
| Microtubules (GO:0015Q8NEM2  | Midbody {ECO:0000269 Pub | 1 |
| Nucleoplasm (GO:00056Q52LJ0  | Nucleus {ECO:0000269 Pub | 0 |
| Nucleoplasm (GO:00056Q8NDP4  | Nucleus {ECO:0000305}.   | 0 |
| Nucleoplasm (GO:00056Q8IYI8  | Nucleus {ECO:0000305}.   | 0 |
| Cytosol (GO:0005829); Q969W1 | Endoplasmic reticulum me | 0 |
| Golgi apparatus (GO:0Q9NPF2  | Golgi apparatus membrane | 0 |
| Nuclear bodies (GO:00Q9Y3B2  | Nucleus, nucleolus {ECO: | 0 |
| Nucleoplasm (GO:00056P18669  |                          | 0 |
| Nucleoli (GO:0005730) Q9P2D1 | Isoform 1: Nucleus {ECO: | 1 |
| Cell Junctions (GO:00Q56NI9  | Nucleus {ECO:0000269 Pub | 0 |
| Intermediate filamentP08727  |                          | 0 |
| Intermediate filamentP19012  |                          | 0 |
| Cytosol (GO:0005829); Q96LR2 | Cytoplasm {ECO:0000269 P | 1 |
| Cytosol (GO:0005829); P51795 | Golgi apparatus membrane | 0 |
| Cytosol (GO:0005829); 094811 | Cytoplasm. Cytoplasm, cy | 0 |
| Intermediate filamentP13646  |                          | 0 |
| Nucleoplasm (GO:00056Q8WWM1  |                          | 0 |
| Nucleoplasm (GO:00056Q9NP56  |                          | 0 |
| Mitochondria (GO:0005Q9P0J6  | Mitochondrion {ECO:00002 | 1 |
| Cytosol (GO:0005829) P35900  | Cytoplasm {ECO:0000269 P | 1 |
| Mitochondria (GO:0005A6NK44  |                          | 0 |
| Nucleoplasm (GO:00056Q96C55  | Nucleus {ECO:0000305}.   | 0 |
| Cytoplasmic bodies (GP23508  | Cell membrane. Cell proj | 0 |
| Nucleoplasm (GO:00056Q8IZU8  | Membrane {ECO:0000305};  | 0 |
| Nucleoplasm (GO:00056015160  | Nucleus {ECO:0000269 Pub | 1 |
| Nucleoli (GO:0005730) Q8IXJ9 | Nucleus {ECO:0000305}.   | 0 |
| Nucleoli (GO:0005730) Q6UY11 | Membrane {ECO:0000305};  | 0 |
| Nucleoplasm (GO:00056Q6V9R5  | Nucleus {ECO:0000305}.   | 0 |
| Cytosol (GO:0005829); Q5VUA4 | Nucleus {ECO:0000269 Pub | 1 |
| Nucleoplasm (GO:00056Q8N587  | Nucleus {ECO:0000305}.   | 0 |
| Nucleoplasm (GO:00056Q8TF74  | Cytoplasm, cytoskeleton  | 0 |
| Cytosol (GO:0005829); Q9BPY8 | Nucleus {ECO:0000250 Uni | 0 |
| Golgi apparatus (GO:0Q8TDW0  | Cell membrane {ECO:00002 | 0 |
| Nucleoli (GO:0005730) 076021 | Nucleus, nucleolus {ECO: | 1 |

|                             |                          |   |
|-----------------------------|--------------------------|---|
| Mitochondria (GO:0005Q7L1W4 | Cell membrane {ECO:00002 | 0 |
| Cytosol (GO:0005829);Q08752 | Cytoplasm {ECO:0000269 P | 1 |
| Plasma membrane (GO:0Q9UBY5 | Cell membrane; Multi-pas | 1 |
| Microtubules (GO:0015075347 | Cytoplasm, cytoskeleton. | 1 |
| Plasma membrane (GO:0Q96JE9 | Cytoplasm, cytoskeleton  | 0 |
| Nuclear membrane (GO:095672 | Membrane {ECO:0000250};  | 0 |
| Mitochondria (GO:0005Q07817 | Isoform Bcl-X(L): Mitoch | 0 |
| Endoplasmic reticulumP02679 | Secreted {ECO:0000269 Pu | 0 |
| Endoplasmic reticulumP02671 | Secreted {ECO:0000269 Pu | 0 |
| Endoplasmic reticulumP02675 | Secreted {ECO:0000269 Pu | 0 |
| Nuclear membrane (GO:043660 | Nucleus {ECO:0000269 Pub | 0 |
| Nuclear speckles (GO:Q8IVC4 | Nucleus {ECO:0000305}.   | 0 |
| Cytosol (GO:0005829);060469 | Isoform Short: Secreted  | 0 |
| Cytosol (GO:0005829);Q7LFL8 | Nucleus {ECO:0000269 Pub | 0 |
| Centrosome (GO:000581Q96GC6 | Cytoplasm {ECO:0000250}. | 0 |
| Cytokinetic bridge (G000329 | Cytoplasm {ECO:0000269 P | 0 |
| Plasma membrane (GO:0014682 | Nucleus matrix {ECO:0000 | 0 |
| Nucleoplasm (GO:00056Q12830 | Cytoplasm. Nucleus. Note | 0 |
| Intermediate filamentQ3SY52 | Nucleus {ECO:0000305}.   | 0 |
| Cytosol (GO:0005829);Q9UPC5 | Cell membrane {ECO:00002 | 0 |
| Nucleoplasm (GO:00056094827 | Cytoplasm {ECO:0000250 U | 0 |
| Nuclear bodies (GO:00Q6VMQ6 | Nucleus {ECO:0000269 Pub | 1 |
| Nucleoplasm (GO:00056Q8TD35 |                          | 0 |
| Cell Junctions (GO:00P49795 | Membrane; Lipid-anchor.  | 0 |
| Centrosome (GO:000581Q15560 | Nucleus.                 | 0 |
| Golgi apparatus (GO:0015379 | Nucleus {ECO:0000269 Pub | 0 |
| Cytoplasmic bodies (GQ9NQX3 | Cell junction, synapse { | 0 |
| Cytosol (GO:0005829) Q9HCJ6 |                          | 0 |
| Cytosol (GO:0005829);Q9NW97 | Membrane {ECO:0000305};  | 0 |
| Cytosol (GO:0005829) Q9Y6Y1 | Nucleus {ECO:0000305}. C | 0 |
| Plasma membrane (GO:0P56470 |                          | 0 |
| Cell Junctions (GO:00Q8IZ02 | Nucleus {ECO:0000250 Uni | 0 |
| Endoplasmic reticulumP00439 |                          | 0 |
| Nucleoli (GO:0005730)Q9BVQ7 | Cytoplasm {ECO:0000305}. | 0 |
| Mitochondria (GO:0005P50440 | Isoform 1: Mitochondrion | 0 |
| Cytosol (GO:0005829);Q8N0S2 | Nucleus {ECO:0000250 Uni | 0 |
| Cytosol (GO:0005829);Q8TDF6 | Cytoplasm. Cell membrane | 1 |
| Golgi apparatus (GO:0Q02575 | Nucleus {ECO:0000255 PRO | 0 |
| Cytosol (GO:0005829) Q499Z3 |                          | 0 |
| Nuclear membrane (GO:P10415 | Mitochondrion outer memb | 0 |
| Actin filaments (GO:0P17812 |                          | 0 |
| Cytosol (GO:0005829);095568 |                          | 0 |
| Golgi apparatus (GO:0P25067 | Secreted, extracellular  | 0 |
| Nucleoplasm (GO:00056Q6NUJ5 |                          | 0 |
| Cytosol (GO:0005829);Q8NDQ6 | Nucleus {ECO:0000269 Pub | 0 |
| Cytosol (GO:0005829);Q8N1E6 | Cytoplasm {ECO:0000269 P | 0 |
| Cytosol (GO:0005829);Q01780 | Cytoplasm. Nucleus, nucl | 1 |
| Nucleoplasm (GO:00056Q96NI8 | Nucleus {ECO:0000305}.   | 0 |
| Endoplasmic reticulumQ9NZG7 | Membrane; Multi-pass mem | 0 |
| Cytosol (GO:0005829);P42568 | Nucleus {ECO:0000255 PRO | 1 |
| Cytosol (GO:0005829) P31350 | Cytoplasm.               | 1 |
| Golgi apparatus (GO:0Q8WVT3 | Endoplasmic reticulum-Go | 0 |
| Cytosol (GO:0005829);P63220 | Cytoplasm, cytosol {ECO: | 1 |
| Mitochondria (GO:0005Q9HC36 | Mitochondrion {ECO:00002 | 1 |
| Cytosol (GO:0005829);P60484 | Cytoplasm {ECO:0000269 P | 0 |

|                              |                          |   |
|------------------------------|--------------------------|---|
| Cytosol (GO:0005829);P62081  | Cytoplasm, cytoskeleton, | 0 |
| Cytosol (GO:0005829);P04156  | Cell membrane; Lipid-anc | 0 |
| Cell Junctions (GO:00P55087  | Cell membrane {ECO:00002 | 0 |
| Cytosol (GO:0005829);Q9Y4G6  | Cytoplasm {ECO:0000269 P | 0 |
| Cytosol (GO:0005829) Q6DKI2  |                          | 0 |
| Golgi apparatus (GO:0Q9NYZ1  | Membrane {ECO:0000305};  | 0 |
| Nucleoplasm (GO:00056Q5XX13  |                          | 0 |
| Nuclear speckles (GO:075362  | Nucleus {ECO:0000305}.   | 0 |
| Cytosol (GO:0005829) PODJJO  |                          | 0 |
| Golgi apparatus (GO:0P13521  | Secreted. Note=Neuroendo | 0 |
| Cytosol (GO:0005829) Q8N5M1  | Mitochondrion {ECO:00003 | 0 |
| Mitochondria (GO:0005Q99853  | Nucleus {ECO:0000255 PRO | 0 |
| Nucleoli (GO:0005730) Q68EA5 | Nucleus {ECO:0000305}.   | 0 |
| Endoplasmic reticulumQ8IYI0  | Chromosome {ECO:0000269  | 0 |
| Cytosol (GO:0005829);Q15652  | Nucleus {ECO:0000250}.   | 0 |
| Actin filaments (GO:0Q8N3V7  | Cytoplasm, cytoskeleton  | 0 |
| Nucleoplasm (GO:00056Q9HAH1  | Nucleus {ECO:0000305}.   | 0 |
| Centrosome (GO:000581P21145  | Membrane; Multi-pass mem | 0 |
| Nucleoli (GO:0005730) Q86TJ5 | Nucleus {ECO:0000305}.   | 0 |
| Cytosol (GO:0005829) P52888  | Cytoplasm.               | 1 |
| Cytosol (GO:0005829) Q06141  | Secreted. Note=Found in  | 0 |
| Plasma membrane (GO:0P17677  | Cell membrane {ECO:00002 | 0 |
| Vesicles (GO:0043231) Q8IUS5 | Membrane {ECO:0000305};  | 0 |
| Cytosol (GO:0005829);P55268  | Secreted, extracellular  | 0 |
| Cytosol (GO:0005829) P47897  | Cytoplasm, cytosol {ECO: | 1 |
| Endoplasmic reticulumQ8N138  | Endoplasmic reticulum me | 1 |
| Nuclear bodies (GO:00075920  |                          | 0 |
| Cytosol (GO:0005829);014901  | Nucleus {ECO:0000269 Pub | 1 |
| Plasma membrane (GO:0Q8TF66  | Membrane {ECO:0000305};  | 0 |
| Cytosol (GO:0005829);Q16637  | Nucleus, gem {ECO:000026 | 0 |
| Cytosol (GO:0005829);Q96BX8  |                          | 0 |
| Cytosol (GO:0005829);Q9NPI7  |                          | 0 |
| Vesicles (GO:0043231) 075414 |                          | 0 |
| Mitochondria (GO:0005P99999  | Mitochondrion intermembr | 1 |
| Plasma membrane (GO:0P10966  | Isoform 1: Cell membrane | 0 |
| Cytosol (GO:0005829) P22676  |                          | 0 |
| Golgi apparatus (GO:0A2A2Y4  | Membrane {ECO:0000305};  | 0 |
| Nuclear bodies (GO:00Q96DY7  |                          | 0 |
| Mitochondria (GO:0005Q96QE5  | Mitochondrion matrix {EC | 1 |
| Cytosol (GO:0005829);Q9UDY8  | Cytoplasm, perinuclear r | 0 |
| Nucleoplasm (GO:00056P47928  | Nucleus.                 | 1 |
| Nucleoplasm (GO:00056P17676  | Nucleus {ECO:0000269 Pub | 0 |
| Vesicles (GO:0043231) P20160 | Cytoplasmic granule memb | 0 |
| Cytosol (GO:0005829);Q9H074  | Cytoplasm {ECO:0000305}. | 0 |
| Actin filaments (GO:0Q7Z3B1  | Cell membrane {ECO:00002 | 0 |
| Intermediate filamentP52739  | Nucleus {ECO:0000269 Pub | 1 |
| Nucleoli (GO:0005730) A1Z1Q3 | Nucleus {ECO:0000269 Pub | 0 |
| Vesicles (GO:0043231) P35613 | Cell membrane {ECO:00002 | 0 |
| Nucleoplasm (GO:00056Q6ZMG9  | Endoplasmic reticulum me | 0 |
| Microtubules (GO:0015Q9NUV7  | Endoplasmic reticulum me | 0 |
| Cytosol (GO:0005829);Q9NQ92  | Nucleus {ECO:0000269 Pub | 0 |
| Nucleoli (GO:0005730) P07738 |                          | 0 |
| Nucleoli (GO:0005730) 075817 | Nucleus, nucleolus {ECO: | 0 |
| Nucleoli (GO:0005730) Q96F25 | Endoplasmic reticulum me | 0 |
| Mitochondria (GO:0005Q96I99  | Mitochondrion {ECO:00002 | 1 |

|                              |                          |   |
|------------------------------|--------------------------|---|
| Cytosol (GO:0005829);Q9NSY2  |                          | 0 |
| Cytosol (GO:0005829);Q9Y534  | Nucleus {ECO:0000250}. C | 0 |
| Mitochondria (GO:0005Q14206  |                          | 0 |
| Cytosol (GO:0005829);Q14005  | Interleukin-16: Secreted | 0 |
| Plasma membrane (GO:0P62879  | Cytoplasm, perinuclear r | 0 |
| Midbody (GO:0030496) Q96M91  | Cell projection, cilium  | 0 |
| Cytosol (GO:0005829);014523  | Endoplasmic reticulum me | 0 |
| Nucleoplasm (GO:00056Q9HBZ2  | Nucleus {ECO:0000255 PRO | 1 |
| Mitochondria (GO:0005Q9UBI6  | Cell membrane {ECO:00003 | 0 |
| Vesicles (GO:0043231) Q9BQR3 | Secreted.                | 0 |
| Cytosol (GO:0005829);Q9NPC6  | Cytoplasm, myofibril, sa | 0 |
| Actin filaments (GO:0Q9UMS6  | Nucleus {ECO:0000250 Uni | 0 |
| Nucleoplasm (GO:00056Q92989  | Nucleus {ECO:0000255 HAM | 1 |
| Nucleoplasm (GO:00056A6NLP5  |                          | 0 |
| Cytosol (GO:0005829);Q8WXC6  | Isoform 1: Nucleus {ECO: | 0 |
| Vesicles (GO:0043231) Q9BX10 |                          | 0 |
| Nuclear bodies (GO:00Q96C11  |                          | 0 |
| Cytokinetic bridge (GQ9Y231  | Golgi apparatus, Golgi s | 0 |
| Nucleoplasm (GO:00056Q15170  | Nucleus.                 | 1 |
| Nucleoplasm (GO:00056P17028  | Nucleus {ECO:0000255 PRO | 1 |
| Golgi apparatus (GO:0Q5SRI9  | Golgi apparatus membrane | 1 |
| Vesicles (GO:0043231) Q8WXH6 | Cell membrane {ECO:00003 | 0 |
| Golgi apparatus (GO:0Q08AI8  |                          | 0 |
| Vesicles (GO:0043231) P21549 | Peroxisome {ECO:0000269  | 0 |
| Mitochondria (GO:0005P51825  | Nucleus {ECO:0000305}.   | 0 |
| Cytosol (GO:0005829);Q8WYK0  | Cytoplasm, cytosol {ECO: | 0 |
| Nuclear speckles (GO:043427  | Nucleus. Endomembrane sy | 0 |
| Nuclear bodies (GO:00Q8N9N5  | Nucleus {ECO:0000269 Pub | 1 |
| Cytosol (GO:0005829);P62136  | Cytoplasm {ECO:0000269 P | 0 |
| Mitochondria (GO:0005P51610  | Cytoplasm {ECO:0000269 P | 0 |
| Plasma membrane (GO:0Q14432  | Membrane {ECO:0000305};  | 0 |
| Cytosol (GO:0005829);095267  | Cytoplasm, cytosol. Cell | 0 |
| Centriolar satellite Q8WZ60  |                          | 0 |
| Mitochondria (GO:0005Q96BP2  | Mitochondrion {ECO:00002 | 0 |
| Mitochondria (GO:0005Q86TS9  | Mitochondrion {ECO:00002 | 1 |
| Mitochondria (GO:0005Q92484  | Secreted {ECO:0000269 Pu | 0 |
| Actin filaments (GO:0Q92730  | Cell membrane {ECO:00002 | 1 |
| Nucleoplasm (GO:00056Q99638  | Nucleus {ECO:0000269 Pub | 1 |
| Cytosol (GO:0005829);Q9Y4E1  | Early endosome membrane  | 0 |
| Cytosol (GO:0005829) Q9H6X4  | Membrane {ECO:0000305};  | 0 |
| Nucleoplasm (GO:00056Q9HA38  | Nucleus {ECO:0000269 Pub | 0 |
| Golgi apparatus (GO:0Q86XD8  |                          | 0 |
| Nucleoplasm (GO:00056Q7Z7L1  | Nucleus {ECO:0000269 Pub | 1 |
| Cytosol (GO:0005829);Q9BR76  | Cytoplasm, cytoskeleton  | 0 |
| Endoplasmic reticulum Q6P4F1 | Golgi apparatus, Golgi s | 0 |
| Cytosol (GO:0005829);Q8TCA0  |                          | 0 |
| Nucleoli fibrillar ceQ96NY9  | Nucleus, nucleolus {ECO: | 1 |
| Nucleoli (GO:0005730) Q9UJV8 | Nucleus {ECO:0000250}.   | 0 |
| Nucleoli (GO:0005730) Q8N7C4 | Membrane {ECO:0000305};  | 0 |
| Mitochondria (GO:0005Q8TC21  | Nucleus {ECO:0000305}.   | 0 |
| Cytosol (GO:0005829) Q6N069  |                          | 0 |
| Midbody ring (GO:0090Q6NXPO  |                          | 0 |
| Nucleoplasm (GO:00056Q9GZU8  | Nucleus {ECO:0000269 Pub | 0 |
| Plasma membrane (GO:0Q86YS6  | Cytoplasmic vesicle, pha | 0 |
| Plasma membrane (GO:0Q9BRT8  |                          | 0 |

|                                |                          |   |
|--------------------------------|--------------------------|---|
| Cell Junctions (GO:00Q00444    | Nucleus.                 | 1 |
| Cell Junctions (GO:00Q8IU60    | Cytoplasm, P-body {ECO:0 | 0 |
| Cell Junctions (GO:00Q86XE0    |                          | 0 |
| Cytosol (GO:0005829);P63173    |                          | 0 |
| Nucleoplasm (GO:00056014753    | Nucleus {ECO:0000250}.   | 0 |
| Nucleoplasm (GO:00056P13631    | Nucleus {ECO:0000269 Pub | 0 |
| Cytosol (GO:0005829) Q5XG92    | Secreted {ECO:0000305}.  | 0 |
| Endoplasmic reticulumQ6UWW8    | Endoplasmic reticulum lu | 0 |
| Actin filaments (GO:0Q8TE77    | Cytoplasm, cytoskeleton  | 0 |
| Cytosol (GO:0005829);000748    | Endoplasmic reticulum lu | 0 |
| Mitochondria (GO:0005Q9P2J9    | Mitochondrion matrix {EC | 1 |
| Cytosol (GO:0005829);P35908    |                          | 0 |
| Cytosol (GO:0005829);Q9Y485    |                          | 0 |
| Vesicles (GO:0043231)Q6UB28    | Mitochondrion {ECO:00002 | 0 |
| Nuclear speckles (GO:Q6ZSS3    | Nucleus {ECO:0000305}.   | 0 |
| Cytosol (GO:0005829);Q6IA69    |                          | 0 |
| Cytosol (GO:0005829);Q9UBM7    | Endoplasmic reticulum me | 0 |
| Cytosol (GO:0005829);Q8NFP9    | Cytoplasm {ECO:0000250}. | 0 |
| Nucleoplasm (GO:00056Q8TDP1    | Nucleus {ECO:0000305}.   | 0 |
| Nucleoplasm (GO:00056Q96EZ4    |                          | 0 |
| Mitochondria (GO:0005Q6ZTN6    | Cell membrane {ECO:00002 | 0 |
| Nuclear membrane (GO:Q96AM1    | Cell membrane; Multi-pas | 1 |
| Cytosol (GO:0005829);Q99836    | Cytoplasm {ECO:0000269 P | 0 |
| Cytosol (GO:0005829) 095747    | Cytoplasm {ECO:0000269 P | 1 |
| Nucleoplasm (GO:00056Q9UPP1    | Nucleus. Nucleus, nucleo | 0 |
| Cytosol (GO:0005829);Q6UWP7    | Endoplasmic reticulum me | 1 |
| Nucleoplasm (GO:00056Q92993    | Nucleus {ECO:0000269 Pub | 0 |
| Centrosome (GO:000581Q8TEJ3    |                          | 0 |
| Cytokinetic bridge (GA0PJZ3    | Membrane {ECO:0000305};  | 0 |
| Nucleoplasm (GO:00056Q8WVC6    |                          | 0 |
| Cytosol (GO:0005829);Q9UBL0    | Cytoplasm {ECO:0000250}. | 0 |
| Nuclear speckles (GO:Q86TJ2    | Nucleus {ECO:0000305}.   | 0 |
| Vesicles (GO:0043231)P25098    | Cytoplasm {ECO:0000250 U | 0 |
| Cytosol (GO:0005829) Q04206    | Nucleus {ECO:0000269 Pub | 0 |
| Mitochondria (GO:0005Q86UK5    | Cell membrane {ECO:00002 | 0 |
| Nucleoplasm (GO:00056Q8NEM1    | Nucleus {ECO:0000305}.   | 0 |
| Nucleoplasm (GO:0005654);Vesic | Membrane {ECO:0000305};  | 0 |
| Nucleoplasm (GO:00056Q8WU58    |                          | 0 |
| Nucleoplasm (GO:00056Q6ZN30    | Nucleus {ECO:0000269 Pub | 1 |
| Nucleoplasm (GO:00056Q9Y251    | Lysosome membrane; Perip | 0 |
| Cytosol (GO:0005829) Q96H96    | Mitochondrion inner memb | 0 |
| Nuclear bodies (GO:00Q8NA47    |                          | 0 |
| Nucleoplasm (GO:00056P17066    |                          | 0 |
| Microtubules (GO:0015Q9UI30    | Nucleus, nucleoplasm {EC | 0 |
| Cytosol (GO:0005829);Q9H3W5    | Membrane {ECO:0000305};  | 0 |
| Nucleoplasm (GO:00056Q9Y2K7    | Nucleus, nucleoplasm {EC | 0 |
| Cytosol (GO:0005829);Q3MIX3    | Membrane {ECO:0000305};  | 0 |
| Mitochondria (GO:0005Q9BQC6    | Mitochondrion {ECO:00002 | 1 |
| Nucleoli (GO:0005730)Q8WTT2    | Nucleus, nucleolus. Nucl | 0 |
| Cytokinetic bridge (GP11474    | Nucleus {ECO:0000255 PRO | 0 |
| Cytosol (GO:0005829);Q8N668    | Nucleus {ECO:0000269 Pub | 0 |
| Cytosol (GO:0005829);Q70E73    | Cell membrane {ECO:00002 | 0 |
| Mitochondria (GO:0005Q13505    | Membrane {ECO:0000305};  | 0 |
| Intermediate filament095622    | Cell membrane {ECO:00003 | 0 |
| Cytosol (GO:0005829) Q460N5    | Nucleus {ECO:0000250 Uni | 0 |

|                                |                          |   |
|--------------------------------|--------------------------|---|
| Mitochondria (GO:0005Q460N3    | Nucleus {ECO:0000305 Pub | 0 |
| Cytosol (GO:0005829);P61024    |                          | 0 |
| Cell Junctions (GO:00094929    | Cytoplasm {ECO:0000250}. | 0 |
| Nucleoplasm (GO:00056Q8N8X9    |                          | 0 |
| Plasma membrane (GO:0Q8TAA9    | Cell membrane {ECO:00002 | 0 |
| Cytosol (GO:0005829);P35754    | Cytoplasm.               | 1 |
| Cytokinetic bridge (GQ15051    | Cytoplasm, cytoskeleton, | 0 |
| Golgi apparatus (GO:0Q14789    | Golgi apparatus membrane | 1 |
| Nucleoli (GO:0005730)Q8TF39    | Nucleus {ECO:0000305}.   | 0 |
| Nucleoplasm (GO:00056A1L4L8    |                          | 0 |
| Plasma membrane (GO:0Q8TDB8    | Cell membrane {ECO:00002 | 0 |
| Actin filaments (GO:0Q96N19    | Membrane {ECO:0000305};  | 0 |
| Centrosome (GO:000581076070    | Cytoplasm, perinuclear r | 0 |
| Vesicles (GO:0043231)Q9H8L6    | Secreted, extracellular  | 0 |
| Centrosome (GO:000581Q6P582    | Cytoplasm, cytoskeleton, | 0 |
| Nuclear membrane (GO:095271    | Cytoplasm {ECO:0000269 P | 0 |
| Cytosol (GO:0005829);Q6P9G9    | Nucleus {ECO:0000255 PRO | 0 |
| Nucleoplasm (GO:00056Q9ULJ3    | Nucleus {ECO:0000269 Pub | 1 |
| Cytosol (GO:0005829) Q86XI6    |                          | 0 |
| Actin filaments (GO:0Q9P2F5    |                          | 0 |
| Centriolar satellite Q16584    | Cytoplasm, cytoskeleton, | 0 |
| Cytosol (GO:0005829);Q96RU8    |                          | 0 |
| Plasma membrane (GO:0Q9Y2U2    | Membrane {ECO:0000305};  | 0 |
| Vesicles (GO:0043231)Q8TB73    | Secreted {ECO:0000269 Pu | 0 |
| Nucleoplasm (GO:00056P78380    | Cell membrane; Lipid-anc | 0 |
| Vesicles (GO:0043231)Q14118    | Alpha-dystroglycan: Secr | 0 |
| Vesicles (GO:0043231)075553    |                          | 0 |
| Vesicles (GO:0043231)Q9H2C2    | Endoplasmic reticulum me | 0 |
| Cytosol (GO:0005829) P61599    | Cytoplasm {ECO:0000269 P | 0 |
| Nucleoplasm (GO:00056Q8IYA8    | Chromosome {ECO:0000250  | 0 |
| Mitochondria (GO:0005Q5TGZ0    | Mitochondrion inner memb | 1 |
| Golgi apparatus (GO:0Q9H0W7    |                          | 0 |
| Golgi apparatus (GO:0Q5HYL7    | Membrane {ECO:0000305};  | 0 |
| Cytosol (GO:0005829);Q9BY78    | Endoplasmic reticulum me | 0 |
| Cytosol (GO:0005829) 060232    |                          | 0 |
| Endoplasmic reticulumQ8TD06    | Endoplasmic reticulum {E | 1 |
| Nucleoplasm (GO:00056Q92922    | Nucleus {ECO:0000269 Pub | 0 |
| Nucleoplasm (GO:00056Q8TAU3    | Nucleus {ECO:0000305}.   | 0 |
| Plasma membrane (GO:0P28827    | Membrane; Single-pass ty | 0 |
| Plasma membrane (GO:0P26885    | Endoplasmic reticulum me | 0 |
| Actin filaments (GO:0Q9UBN6    | Membrane; Single-pass ty | 0 |
| Nucleoplasm (GO:00056Q9Y5P6    | Cytoplasm {ECO:0000269 P | 0 |
| Cytosol (GO:0005829);Q7L9L4    | Cytoplasm {ECO:0000269 P | 0 |
| Cytosol (GO:0005829);Q969S3    | Cytoplasm {ECO:0000269 P | 0 |
| Nucleoplasm (GO:00056Q6UVK1    | Cell membrane {ECO:00002 | 0 |
| Nuclear membrane (GO:A6NJV1    |                          | 0 |
| Cytosol (GO:0005829);Q96AH0    | Nucleus {ECO:0000269 Pub | 1 |
| Nucleoplasm (GO:00056014647    | Nucleus {ECO:0000250}. N | 1 |
| Cytosol (GO:0005829);Q9BWC9    | Nucleus {ECO:0000269 Pub | 1 |
| Golgi apparatus (GO:0005794);N | Cytoplasm, cytoskeleton, | 0 |
| Golgi apparatus (GO:0043704    | Cytoplasm {ECO:0000250}. | 0 |
| Cytosol (GO:0005829) Q9NZJ9    | Cytoplasm {ECO:0000269 P | 0 |
| Mitochondria (GO:0005P11498    | Mitochondrion matrix.    | 1 |
| Nuclear membrane (GO:Q8N9R8    | Membrane {ECO:0000305};  | 0 |
| Nuclear bodies (GO:00Q9HAN9    | Nucleus {ECO:0000269 Pub | 1 |

|                              |                          |   |
|------------------------------|--------------------------|---|
| Plasma membrane (GO:0P41440  | Cell membrane {ECO:00002 | 0 |
| Nucleoplasm (GO:00056Q9UBY9  | Cytoplasm {ECO:0000269 P | 0 |
| Nucleoplasm (GO:00056Q5TGS1  | Nucleus {ECO:0000255 PRO | 0 |
| Cytosol (GO:0005829) P47813  |                          | 0 |
| Nucleoplasm (GO:00056A2AJT9  | Mitochondrion {ECO:00003 | 0 |
| Actin filaments (GO:0Q99460  |                          | 0 |
| Cytosol (GO:0005829);Q8IZP9  | Apical cell membrane {EC | 1 |
| Golgi apparatus (GO:0060279  | Membrane; Single-pass ty | 0 |
| Vesicles (GO:0043231)Q9ULI3  | Isoform 1: Cell membrane | 0 |
| Centrosome (GO:000581Q8N6T0  | Chromosome {ECO:0000250  | 0 |
| Mitochondria (GO:0005Q15388  | Mitochondrion outer memb | 1 |
| Cytosol (GO:0005829);Q5SVJ3  |                          | 0 |
| Vesicles (GO:0043231)P52594  | Nucleus {ECO:0000269 Pub | 0 |
| Cytosol (GO:0005829);P09543  | Membrane; Lipid-anchor.  | 0 |
| Cell Junctions (GO:00P14923  | Cell junction, adherens  | 0 |
| Cytosol (GO:0005829);P54257  | Cytoplasm {ECO:0000269 P | 0 |
| Cytosol (GO:0005829) Q63HN8  | Cytoplasm, cytosol {ECO: | 1 |
| Nuclear membrane (GO:Q6B0B8  | Nucleus {ECO:0000255 PRO | 0 |
| Cytosol (GO:0005829);Q8NA82  |                          | 0 |
| Nucleoplasm (GO:00056Q7Z628  | Cytoplasm {ECO:0000250}. | 0 |
| Vesicles (GO:0043231)Q2PZI1  | Membrane {ECO:0000305};  | 0 |
| Actin filaments (GO:0Q8TCT1  |                          | 0 |
| Nucleoplasm (GO:00056Q3KP31  | Nucleus {ECO:0000305}.   | 0 |
| Nucleoplasm (GO:00056Q8NDX5  | Nucleus {ECO:0000269 Pub | 1 |
| Plasma membrane (GO:0Q9UJ42  | Cell membrane; Multi-pas | 1 |
| Nucleoplasm (GO:00056Q14781  | Nucleus {ECO:0000269 Pub | 1 |
| Cell Junctions (GO:00015020  | Cytoplasm, cytoskeleton. | 0 |
| Golgi apparatus (GO:0000461  | Golgi apparatus, Golgi s | 0 |
| Cytosol (GO:0005829);Q9BQ04  | Nucleus. Nucleus, nucleo | 0 |
| Mitochondria (GO:0005Q96IX5  | Mitochondrion membrane { | 1 |
| Nucleoplasm (GO:00056P14652  | Nucleus.                 | 1 |
| Cytosol (GO:0005829);Q9BXJ1  | Secreted {ECO:0000305}.  | 0 |
| Vesicles (GO:0043231)Q86UD3  | Cytoplasmic vesicle memb | 0 |
| Cytosol (GO:0005829);Q6ZQN7  | Basolateral cell membran | 0 |
| Cytosol (GO:0005829);Q9BWF3  | Nucleus. Nucleus, nucleo | 0 |
| Centrosome (GO:000581P68543  |                          | 0 |
| Golgi apparatus (GO:0005794) |                          | 0 |
| Centrosome (GO:000581Q96LK0  | Cytoplasm, cytoskeleton, | 0 |
| Aggresome (GO:0016235Q96M94  | Nucleus {ECO:0000269 Pub | 0 |
| Cytosol (GO:0005829) P0C2W1  | Cell junction, synapse,  | 0 |
| Cell Junctions (GO:00Q8NA61  |                          | 0 |
| Nucleoplasm (GO:00056Q5SVS4  | Mitochondrion inner memb | 0 |
| Mitochondria (GO:0005Q5VYM1  |                          | 0 |
| Cell Junctions (GO:00P28906  | Membrane; Single-pass ty | 0 |
| Cytosol (GO:0005829);Q9UBX1  | Lysosome.                | 0 |
| Nuclear membrane (GO:Q9Y2U8  | Nucleus inner membrane { | 1 |
| Centrosome (GO:000581Q9BXR5  | Membrane {ECO:0000250};  | 0 |
| Endoplasmic reticulumQ9Y2C9  | Cell membrane {ECO:00002 | 0 |
| Cytosol (GO:0005829);Q8TBP5  | Membrane {ECO:0000305};  | 0 |
| Nucleoplasm (GO:00056Q6NW40  | Cell membrane {ECO:00002 | 0 |
| Nucleoplasm (GO:00056Q6NSI3  | Nucleus {ECO:0000250 Uni | 0 |
| Cytosol (GO:0005829) Q16772  | Cytoplasm.               | 1 |
| Cytosol (GO:0005829);Q6UX98  | Membrane {ECO:0000305};  | 0 |
| Mitochondria (GO:0005Q7LOY3  | Mitochondrion matrix, mi | 0 |
| Mitochondria (GO:0005Q2VPK5  | Cytoplasm.               | 0 |

|                             |                          |   |
|-----------------------------|--------------------------|---|
| Cytosol (GO:0005829);Q8IWI9 | Nucleus {ECO:0000305}.   | 0 |
| Cytokinetic bridge (G096MD2 | Lysosome membrane {ECO:0 | 1 |
| Cytosol (GO:0005829);Q8N9S9 |                          | 0 |
| Nucleoplasm (GO:00056Q5H8A4 | Endoplasmic reticulum me | 0 |
| Nucleoplasm (GO:00056Q6P2Q9 | Nucleus {ECO:0000269 Pub | 0 |
| Golgi apparatus (GO:0043306 | Cell membrane {ECO:00002 | 0 |
| Cytosol (GO:0005829);Q00169 | Cytoplasm.               | 0 |
| Nucleoli (GO:0005730)Q9BUQ8 | Nucleus {ECO:0000269 Pub | 0 |
| Cytosol (GO:0005829);Q9P1Z0 | Nucleus {ECO:0000269 Pub | 1 |
| Cell Junctions (GO:00Q13470 | Cytoplasm {ECO:0000269 P | 0 |
| Nucleoplasm (GO:00056Q9H4I2 | Nucleus {ECO:0000255 PRO | 1 |
| Nucleoplasm (GO:00056Q969H9 |                          | 0 |
| Cytosol (GO:0005829);Q7RTY0 | Golgi apparatus membrane | 0 |
| Cytosol (GO:0005829) Q8TAV5 | Secreted {ECO:0000305}.  | 0 |
| Nuclear bodies (GO:00Q9UQ84 | Nucleus {ECO:0000269 Pub | 1 |
| Cytosol (GO:0005829);Q6GYQ0 | Cytoplasm {ECO:0000250}. | 0 |
| Cytoplasmic bodies (GP49917 | Nucleus.                 | 1 |
| Nucleoplasm (GO:00056Q6EKJ0 | Nucleus.                 | 0 |
| Cytosol (GO:0005829);P36578 |                          | 0 |
| Nucleoplasm (GO:00056075971 | Nucleus.                 | 1 |
| Actin filaments (GO:0Q8N812 |                          | 0 |
| Nuclear bodies (GO:00Q6PEW1 |                          | 0 |
| Midbody (GO:0030496) Q8NFI9 | Cell projection, cilium  | 0 |
| Nucleoli (GO:0005730)Q7Z401 | Nucleus {ECO:0000305}.   | 0 |
| Nucleoplasm (GO:00056Q8IVU1 | Membrane; Single-pass ty | 0 |
| Cytosol (GO:0005829);Q5JPF3 |                          | 0 |
| Cell Junctions (GO:00Q7LBE3 | Membrane {ECO:0000305};  | 0 |
| Nucleoli (GO:0005730)Q8N2H9 |                          | 0 |
| Intermediate filamentQ6P7N7 | Membrane {ECO:0000305};  | 0 |
| Mitochondria (GO:0005Q9Y3B7 | Mitochondrion {ECO:00002 | 1 |
| Cytosol (GO:0005829);Q6UXL0 | Membrane {ECO:0000250};  | 0 |
| Nuclear membrane (GO:Q9H9L7 | Nucleus {ECO:0000269 Pub | 1 |
| Midbody (GO:0030496);Q9HCI7 |                          | 0 |
| Cell Junctions (GO:00Q6ZNH5 | Nucleus {ECO:0000305}.   | 0 |
| Mitochondria (GO:0005Q8N609 | Endoplasmic reticulum me | 0 |
| Mitochondria (GO:0005Q5VTE6 |                          | 0 |
| Mitochondria (GO:0005Q16880 | Membrane {ECO:0000305};  | 0 |
| Nucleoplasm (GO:00056Q8NBH2 | Cytoplasm, cytoskeleton  | 0 |
| Cytosol (GO:0005829);Q8N0W5 |                          | 0 |
| Nucleoplasm (GO:00056Q14584 | Nucleus {ECO:0000305}.   | 0 |
| Nucleoplasm (GO:00056Q14542 | Basolateral cell membran | 0 |
| Golgi apparatus (GO:0Q8IWQ3 | Cytoplasm, cytoskeleton, | 0 |
| Vesicles (GO:0043231)Q8TBQ9 | Golgi apparatus membrane | 0 |
| Nucleoli fibrillar ceA1X283 | Cytoplasm {ECO:0000250}. | 0 |
| Cytosol (GO:0005829);Q9HCM1 | Nucleus {ECO:0000250 Uni | 0 |
| Cytosol (GO:0005829);Q4G0J3 | Nucleus, nucleoplasm {EC | 1 |
| Nucleoplasm (GO:00056Q14995 | Nucleus {ECO:0000255 PRO | 0 |
| Centrosome (GO:000581Q9HCU9 | Nucleus. Cytoplasm. Note | 0 |
| Golgi apparatus (GO:0Q8N8J7 | Membrane {ECO:0000305};  | 0 |
| Cytosol (GO:0005829);P01112 | Cell membrane; Lipid-anc | 0 |
| Cytosol (GO:0005829);Q8IV35 |                          | 0 |
| Nuclear speckles (GO:Q8IVA1 |                          | 0 |
| Nuclear membrane (GO:Q13671 | Cytoplasm {ECO:0000269 P | 0 |
| Centrosome (GO:000581Q8TBB0 |                          | 0 |
| Focal adhesion sites Q66GS9 | Cytoplasm, cytoskeleton, | 0 |



|                             |                          |   |
|-----------------------------|--------------------------|---|
| Nucleoplasm (GO:00056Q9ULV1 | Membrane; Multi-pass mem | 0 |
| Nucleoplasm (GO:00056Q9HCU0 | Membrane {ECO:0000305};  | 0 |
| Cytosol (GO:0005829);Q5T2W1 | Membrane {ECO:0000250 Un | 0 |
| Vesicles (GO:0043231)Q8IWF6 | Recycling endosome {ECO: | 0 |
| Cytosol (GO:0005829);Q92990 |                          | 0 |
| Centriolar satellite 095070 | Endoplasmic reticulum me | 0 |
| Mitochondria (GO:0005Q86Y39 | Mitochondrion inner memb | 0 |
| Nuclear speckles (GO:Q96IZ7 | Nucleus {ECO:0000250}. N | 0 |
| Nuclear bodies (GO:00A1A4F0 |                          | 0 |
| Endoplasmic reticulumQ9H0U4 | Cytoplasm {ECO:0000269 P | 0 |
| Mitochondria (GO:0005Q5XKP0 | Mitochondrion inner memb | 1 |
| Cytosol (GO:0005829);Q6P1S2 | Isoform 1: Membrane {ECO | 0 |
| Nuclear bodies (GO:00Q8WZ19 | Nucleus {ECO:0000269 Pub | 1 |
| Cytosol (GO:0005829);Q6UWJ8 | Membrane {ECO:0000305};  | 0 |
| Cytosol (GO:0005829);Q9H2U1 | Nucleus {ECO:0000269 Pub | 0 |
| Cytosol (GO:0005829);Q8N9L1 | Nucleus {ECO:0000250}.   | 0 |
| Cytosol (GO:0005829) Q8N3Y1 | Cytoplasm, perinuclear r | 0 |
| Cytosol (GO:0005829);Q9H0B6 | Cytoplasm, cytoskeleton  | 0 |
| Cytosol (GO:0005829) P56545 | Nucleus {ECO:0000305}. C | 0 |
| Cytosol (GO:0005829);Q9Y4C5 | Golgi apparatus, trans-G | 1 |
| Mitochondria (GO:0005Q8IZN3 | Membrane {ECO:0000305};  | 0 |
| Golgi apparatus (GO:0Q13535 | Nucleus {ECO:0000269 Pub | 0 |
| Cytosol (GO:0005829);000762 |                          | 0 |
| Cytosol (GO:0005829);Q6ZS86 |                          | 0 |
| Centrosome (GO:000581Q96JH7 | Endoplasmic reticulum {E | 0 |
| Intermediate filamentP17661 | Cytoplasm, myofibril, sa | 0 |
| Nucleoplasm (GO:00056Q8N165 | Nucleus {ECO:0000269 Pub | 1 |
| Golgi apparatus (GO:0Q96A44 | Cytoplasm {ECO:0000305}. | 0 |
| Nucleoplasm (GO:00056P55895 | Nucleus {ECO:0000250}.   | 0 |
| Mitochondria (GO:0005Q9Y4K3 | Cytoplasm {ECO:0000269 P | 0 |
| Cytokinetic bridge (GQ8IZM8 | Nucleus {ECO:0000305}.   | 0 |
| Golgi apparatus (GO:0Q96ET8 | Membrane {ECO:0000305};  | 0 |
| Mitochondria (GO:0005P82650 | Mitochondrion {ECO:00002 | 1 |
| Cytosol (GO:0005829);Q6VY07 | Golgi apparatus, trans-G | 0 |
| Actin filaments (GO:0P49006 | Cytoplasm, cytoskeleton  | 0 |
| Golgi apparatus (GO:0Q7L8J4 |                          | 0 |
| Nucleoplasm (GO:00056Q5T319 |                          | 0 |
| Nucleoli (GO:0005730)Q8WY54 | Nucleus {ECO:0000269 Pub | 0 |
| Nucleoli (GO:0005730)Q6UXB0 |                          | 0 |
| Mitochondria (GO:0005Q9H300 | Mitochondrion inner memb | 0 |
| Nucleoplasm (GO:00056P35638 | Cytoplasm {ECO:0000269 P | 0 |
| Mitochondria (GO:0005P05165 | Mitochondrion matrix {EC | 1 |
| Cytosol (GO:0005829);Q4VC39 | Membrane {ECO:0000255 PR | 0 |
| Centrosome (GO:000581Q13561 | Cytoplasm, cytoskeleton, | 0 |
| Centriolar satellite Q9H9D4 | Nucleus {ECO:0000269 Pub | 0 |
| Mitochondria (GO:0005014595 | Nucleus {ECO:0000250}.   | 0 |
| Centrosome (GO:000581Q14008 | Cytoplasm, cytoskeleton, | 0 |
| Vesicles (GO:0043231)Q07960 | Cytoplasm.               | 0 |
| Nucleoli (GO:0005730)Q9Y2X0 | Nucleus {ECO:0000305}.   | 0 |
| Cytosol (GO:0005829);075143 | Cytoplasm, cytosol {ECO: | 0 |
| Cytosol (GO:0005829);A7E2F4 | Golgi apparatus, Golgi s | 0 |
| Endoplasmic reticulum014683 | Membrane {ECO:0000305};  | 0 |
| Cytosol (GO:0005829);Q9UPQ8 | Endoplasmic reticulum me | 0 |
| Nuclear speckles (GO:Q5SRE7 |                          | 0 |
| Mitochondria (GO:0005Q8IUZ5 | Mitochondrion {ECO:00003 | 0 |

|                             |                          |   |
|-----------------------------|--------------------------|---|
| Cytosol (GO:0005829);Q8N8V4 | Cell projection, microvi | 0 |
| Cytosol (GO:0005829);Q15828 | Secreted.                | 0 |
| Cytosol (GO:0005829);Q8IUY3 | Endoplasmic reticulum me | 0 |
| Nucleoli (GO:0005730)Q8TB69 | Nucleus {ECO:0000305}.   | 0 |
| Cytosol (GO:0005829);015116 | Cytoplasm {ECO:0000305 P | 0 |
| Nuclear bodies (GO:00Q2M1V0 | Nucleus {ECO:0000255 PRO | 1 |
| Cytosol (GO:0005829);075531 | Barrier-to-autointegrati | 0 |
| Cytosol (GO:0005829) Q9NQ35 |                          | 0 |
| Nucleoplasm (GO:00056P17706 | Isoform 1: Endoplasmic r | 0 |
| Nucleoplasm (GO:00056Q8N9N8 | Nucleus {ECO:0000269 Pub | 0 |
| Cytosol (GO:0005829);Q15796 | Cytoplasm {ECO:0000269 P | 0 |
| Golgi apparatus (GO:0P17030 | Nucleus {ECO:0000305}.   | 0 |
| Cytosol (GO:0005829);P09497 | Cytoplasmic vesicle memb | 0 |
| Vesicles (GO:0043231)P06858 | Cell membrane {ECO:00002 | 0 |
| Nucleoplasm (GO:00056Q8TAC1 |                          | 0 |
| Centrosome (GO:000581Q49A88 | Cytoplasm, cytoskeleton, | 1 |
| Nuclear bodies (GO:00Q8IV04 |                          | 0 |
| Golgi apparatus (GO:0043290 | Nucleus {ECO:0000269 Pub | 0 |
| Cytosol (GO:0005829) Q66LE6 | Cytoplasm {ECO:0000250}. | 0 |
| Cytosol (GO:0005829);Q6DN14 | Cytoplasmic vesicle, sec | 0 |
| Centriolar satellite Q9HCU8 | Nucleus {ECO:0000269 Pub | 0 |
| Nuclear bodies (GO:00Q9UBD9 | Secreted {ECO:0000250}.  | 0 |
| Centrosome (GO:000581A6NK58 | Mitochondrion {ECO:00002 | 0 |
| Endoplasmic reticulumQ5I7T1 | Cell membrane {ECO:00002 | 0 |
| Cytosol (GO:0005829) Q14919 | Nucleus {ECO:0000305}.   | 0 |
| Nucleoplasm (GO:00056Q496Y0 |                          | 0 |
| Cytosol (GO:0005829);P55916 | Mitochondrion inner memb | 0 |
| Mitochondria (GO:0005P55851 | Mitochondrion inner memb | 1 |
| Nucleoli (GO:0005730)Q9H3H3 |                          | 0 |
| Cytosol (GO:0005829);Q9BRP4 |                          | 0 |
| Golgi apparatus (GO:0P20340 | Golgi apparatus membrane | 0 |
| Cytosol (GO:0005829) P41231 | Cell membrane; Multi-pas | 0 |
| Nucleoplasm (GO:00056P15407 | Nucleus.                 | 1 |
| Cell Junctions (GO:00Q92889 | Nucleus {ECO:0000305}.   | 1 |
| Mitochondria (GO:0005Q9BUB7 | Mitochondrion inner memb | 0 |
| Cytosol (GO:0005829) Q9UBS0 | Cytoplasm. Nucleus.      | 0 |
| Cytosol (GO:0005829);Q96E14 | Nucleus {ECO:0000269 Pub | 0 |
| Golgi apparatus (GO:0Q6ZVM7 |                          | 0 |
| Nucleoli (GO:0005730)Q15935 | Nucleus {ECO:0000305}.   | 0 |
| Plasma membrane (GO:0Q8NFN8 | Cell membrane; Multi-pas | 1 |
| Cell Junctions (GO:00Q8NAX2 | Cytoplasm {ECO:0000250 U | 0 |
| Nucleoli (GO:0005730)Q67FW5 |                          | 0 |
| Cytosol (GO:0005829);P10589 | Nucleus {ECO:0000305}.   | 0 |
| Mitochondria (GO:0005Q9NWT8 | Mitochondrion {ECO:00002 | 1 |
| Mitochondria (GO:0005Q8N4H5 | Mitochondrion outer memb | 1 |
| Cytosol (GO:0005829);Q86XR5 | Cell membrane {ECO:00002 | 0 |
| Cytosol (GO:0005829);Q14929 | Nucleus {ECO:0000305}.   | 0 |
| Cytosol (GO:0005829);Q9Y265 | Nucleus matrix. Nucleus, | 0 |
| Cytosol (GO:0005829);P31947 | Cytoplasm. Nucleus {ECO: | 0 |
| Cytosol (GO:0005829);Q9UJ68 | Isoform 1: Mitochondrion | 0 |
| Lipid droplets (GO:00095476 | Endoplasmic reticulum me | 0 |
| Nucleoli (GO:0005730)P43268 | Nucleus.                 | 0 |
| Cytosol (GO:0005829);Q1ZZU3 | Nucleus {ECO:0000250}.   | 0 |
| Cytosol (GO:0005829);Q9UQB8 | Cytoplasm. Membrane; Per | 0 |
| Vesicles (GO:0043231)Q6UE05 | Membrane {ECO:0000305};  | 0 |

|                             |                          |   |
|-----------------------------|--------------------------|---|
| Cytosol (GO:0005829);Q8IVQ6 | Membrane {ECO:0000305};  | 0 |
| Golgi apparatus (GO:0P49703 | Nucleus, nucleolus {ECO: | 0 |
| Mitochondria (GO:0005Q18PE1 | Cell membrane {ECO:00002 | 0 |
| Nuclear bodies (GO:00Q9C0C9 | Cytoplasm {ECO:0000269 P | 0 |
| Cytosol (GO:0005829);Q9BRQ5 | Membrane {ECO:0000250};  | 0 |
| Cytosol (GO:0005829);Q2WGJ6 |                          | 0 |
| Cytokinetic bridge (GA6NIH7 | Cell projection, cilium  | 0 |
| Nucleoplasm (GO:00056Q68D51 |                          | 0 |
| Cytosol (GO:0005829) Q7Z3D4 | Membrane {ECO:0000305};  | 0 |
| Nucleoplasm (GO:00056Q6PF04 | Nucleus {ECO:0000305}.   | 0 |
| Nucleoplasm (GO:00056060356 | Nucleus {ECO:0000269 Pub | 0 |
| Golgi apparatus (GO:0Q96AA8 | Golgi apparatus {ECO:000 | 1 |
| Mitochondria (GO:0005Q68D91 |                          | 0 |
| Plasma membrane (GO:0Q4KMQ1 | Cell projection, stereoc | 0 |
| Cytosol (GO:0005829) Q9UJ90 | Membrane {ECO:0000269 Pu | 0 |
| Nucleoplasm (GO:00056LOR6Q1 | Membrane {ECO:0000255};  | 0 |
| Nucleoplasm (GO:00056Q8N1P7 |                          | 0 |
| Cytosol (GO:0005829);Q92551 | Cytoplasm {ECO:0000269 P | 0 |
| Nucleoplasm (GO:00056Q12996 | Nucleus.                 | 1 |
| Cytosol (GO:0005829);P07947 | Cell membrane. Cytoplasm | 0 |
| Nucleoplasm (GO:00056Q9NV64 | Membrane {ECO:0000305};  | 0 |
| Cytosol (GO:0005829) Q9NUJ3 |                          | 0 |
| Cytosol (GO:0005829);P18283 | Cytoplasm. Note=Mainly c | 0 |
| Centriolar satellite Q2TAC2 |                          | 0 |
| Cytosol (GO:0005829);Q9NYA1 | Cytoplasm {ECO:0000269 P | 0 |
| Cytosol (GO:0005829) Q12983 | Mitochondrion. Mitochond | 0 |
| Nucleoplasm (GO:00056Q86VE0 | Nucleus {ECO:0000250}.   | 0 |
| Centriolar satellite Q96QE3 | Nucleus {ECO:0000305}.   | 0 |
| Nuclear speckles (GO:Q96E16 | Membrane {ECO:0000305};  | 0 |
| Intermediate filamentQ494X3 | Nucleus {ECO:0000305}.   | 0 |
| Cytosol (GO:0005829);Q8N6N7 |                          | 0 |
| Nucleoplasm (GO:00056Q9UJX6 |                          | 0 |
| Plasma membrane (GO:0Q8IWT0 |                          | 0 |
| Cytosol (GO:0005829) P52742 | Nucleus {ECO:0000305}.   | 0 |
| Cytosol (GO:0005829);Q7Z7L9 | Nucleus {ECO:0000255 PRO | 0 |
| Mitochondria (GO:0005Q9C0J1 | Golgi apparatus membrane | 0 |
| Nucleoplasm (GO:00056Q8NHZ8 | Nucleus {ECO:0000250}.   | 0 |
| Vesicles (GO:0043231)P80365 | Microsome {ECO:0000269 P | 0 |
| Cytosol (GO:0005829);Q8IUI8 | Cytoplasm {ECO:0000269 P | 0 |
| Golgi apparatus (GO:0Q9H4A4 | Secreted {ECO:0000250}.  | 0 |
| Nucleoplasm (GO:00056Q8N6I1 | Nucleus {ECO:0000269 Pub | 1 |
| Vesicles (GO:0043231)Q5VZB9 | Nucleus {ECO:0000255 PRO | 0 |
| Cytosol (GO:0005829);Q9UQ26 | Cell membrane {ECO:00002 | 0 |
| Cytosol (GO:0005829);Q9P0J7 |                          | 0 |
| Nucleoplasm (GO:00056Q8WW59 |                          | 0 |
| Vesicles (GO:0043231)Q86XT2 | Late endosome membrane { | 0 |
| Endoplasmic reticulumQ86T13 | Membrane {ECO:0000305};  | 0 |
| Nuclear membrane (GO:Q6ZMZ3 | Nucleus outer membrane { | 0 |
| Nuclear bodies (GO:00P49760 | Isoform 1: Nucleus. Nucl | 0 |
| Cytosol (GO:0005829);Q86XF7 | Nucleus {ECO:0000305}.   | 0 |
| Nucleoplasm (GO:00056Q64LD2 |                          | 0 |
| Nucleoli (GO:0005730)Q96ES7 | Nucleus {ECO:0000250 Uni | 0 |
| Mitochondria (GO:0005P53816 | Cell membrane {ECO:00002 | 0 |
| Cytosol (GO:0005829);Q6NSJ2 |                          | 0 |
| Cell Junctions (GO:00Q8IV56 |                          | 0 |

|                              |                          |   |
|------------------------------|--------------------------|---|
| Centrosome (GO:000581Q68DE3  | Nucleus {ECO:0000255 PRO | 0 |
| Focal adhesion sites Q8N815  |                          | 0 |
| Intermediate filament094819  |                          | 0 |
| Nucleoli (GO:0005730) Q9BYG0 | Golgi apparatus membrane | 0 |
| Cytosol (GO:0005829) Q56UN5  |                          | 0 |
| Nuclear membrane (GO:Q03252  | Nucleus inner membrane;  | 1 |
| Actin filaments (GO:Q96DB5   | Cytoplasm {ECO:0000269 P | 0 |
| Vesicles (GO:0043231) Q5U5Q3 | Cytoplasm {ECO:0000269 P | 0 |
| Cytosol (GO:0005829) 094832  | Cytoplasm {ECO:0000250 U | 0 |
| Vesicles (GO:0043231) A6NMS7 | Membrane {ECO:0000305};  | 0 |
| Nuclear bodies (GO:00Q99958  | Nucleus {ECO:0000255 PRO | 1 |
| Mitochondria (GO:0005P23560  | Secreted {ECO:0000269 Pu | 0 |
| Actin filaments (GO:Q6ZUS5   |                          | 0 |
| Cytosol (GO:0005829); Q8N0T1 | Nucleus, nucleolus {ECO: | 0 |
| Nucleoplasm (GO:00056Q15078  | Cyclin-dependent kinase  | 0 |
| Cytosol (GO:0005829); 014513 |                          | 0 |
| Cytosol (GO:0005829); Q96T51 | Cytoplasm. Early endosom | 0 |
| Plasma membrane (GO:0P80723  | Cell membrane; Lipid-anc | 0 |
| Vesicles (GO:0043231) 060309 | Membrane {ECO:0000305};  | 0 |
| Centriolar satellite Q8N0Z9  | Membrane {ECO:0000305};  | 0 |
| Cytosol (GO:0005829); P78411 | Nucleus {ECO:0000305}.   | 0 |
| Microtubules (GO:0015Q658Y4  | Golgi apparatus, trans-G | 0 |
| Nucleoplasm (GO:00056P35716  | Nucleus {ECO:0000255 PRO | 1 |
| Nuclear speckles (GO:Q8N8B7  |                          | 0 |
| Cytosol (GO:0005829); Q9NR00 | Cytoplasm {ECO:0000269 P | 0 |
| Nuclear speckles (GO:Q6ZN01  | Nucleus {ECO:0000250}.   | 0 |
| Endoplasmic reticulum Q86XL3 | Endoplasmic reticulum me | 1 |
| Cytosol (GO:0005829); Q10981 | Golgi apparatus, Golgi s | 0 |
| Golgi apparatus (GO:Q99P109  | Golgi apparatus membrane | 1 |
| Cytosol (GO:0005829); Q8N307 | Secreted {ECO:0000305}.  | 0 |
| Nuclear speckles (GO:Q8WY91  |                          | 0 |
| Nucleoplasm (GO:00056Q8NCF5  | Nucleus {ECO:0000250}. C | 0 |
| Cytosol (GO:0005829); P34896 | Cytoplasm.               | 0 |
| Golgi apparatus (GO:Q99UHL4  | Lysosome {ECO:0000269 Pu | 0 |
| Vesicles (GO:0043231) P53992 | Cytoplasmic vesicle, COP | 0 |
| Nucleoplasm (GO:00056Q8TEV9  | Cytoplasm {ECO:0000269 P | 0 |
| Cell Junctions (GO:00P42898  |                          | 0 |
| Golgi apparatus (GO:Q98NEA5  | Membrane {ECO:0000305};  | 0 |
| Nucleoli fibrillar ce075398  | Isoform 1: Nucleus. Cyto | 0 |
| Mitochondria (GO:0005Q5HYI7  | Mitochondrion {ECO:00002 | 0 |
| Golgi apparatus (GO:Q96HE8   | Membrane {ECO:0000305};  | 0 |
| Cytosol (GO:0005829); Q6PJ61 |                          | 0 |
| Vesicles (GO:0043231) Q8IUH4 | Golgi apparatus membrane | 0 |
| Vesicles (GO:0043231) Q8NBW4 | Lysosome membrane {ECO:0 | 0 |
| Nucleoplasm (GO:00056Q07864  | Nucleus.                 | 1 |
| Cytosol (GO:0005829); Q9H6S3 | Cytoplasm {ECO:0000269 P | 0 |
| Plasma membrane (GO:Q98N966  | Membrane {ECO:0000305};  | 1 |
| Cytosol (GO:0005829); Q4KMQ2 | Cell membrane {ECO:00002 | 1 |
| Nucleoplasm (GO:00056Q8NCN2  | Nucleus {ECO:0000269 Pub | 1 |
| Nucleoplasm (GO:00056Q8IZU0  | Nucleus {ECO:0000269 Pub | 0 |
| Cytosol (GO:0005829)         | Cytoplasm {ECO:0000250 U | 0 |
| Golgi apparatus (GO:Q96NDO   | Membrane {ECO:0000255, E | 0 |
| Cytosol (GO:0005829); P37837 | Cytoplasm {ECO:0000305}. | 0 |
| Cytosol (GO:0005829) 075385  | Cytoplasm, cytosol {ECO: | 0 |
| Nucleoli fibrillar ceQ8IXN7  | Cytoplasm {ECO:0000305}. | 0 |

|                                                        |                          |   |
|--------------------------------------------------------|--------------------------|---|
| Cytosol (GO:0005829);P51812                            | Nucleus {ECO:0000269 Pub | 0 |
| Mitochondria (GO:0005Q9Y606                            | Isoform 1: Mitochondrion | 1 |
| Cytosol (GO:0005829);Q3L8U1                            | Cytoplasm {ECO:0000269 P | 0 |
| Nucleoplasm (GO:00056Q8NB37                            | Secreted {ECO:0000305}.  | 0 |
| Nucleoplasm (GO:00056Q6ZMU5                            | Cell membrane, sarcolemm | 0 |
| Vesicles (GO:0043231)Q9UKM7                            | Endoplasmic reticulum me | 0 |
| Endoplasmic reticulumQ9H461                            | Membrane; Multi-pass mem | 0 |
| Plasma membrane (GO:0Q8WXE0                            | Cytoplasm {ECO:0000250}. | 0 |
| Nucleoplasm (GO:00056Q8NAP3                            | Nucleus {ECO:0000269 Pub | 1 |
| Nuclear membrane (GO:Q8IV32                            |                          | 0 |
| Mitochondria (GO:0005Q711Q0                            | Cytoplasm, myofibril, sa | 0 |
| Nuclear bodies (GO:00Q8ND94                            | Membrane {ECO:0000305};  | 0 |
| Nucleoli fibrillar ce075145                            | Cytoplasm {ECO:0000250 U | 0 |
| Actin filaments (GO:0Q9HAY2                            |                          | 0 |
| Cytosol (GO:0005829) Q8IVG5                            | Early endosome {ECO:0000 | 0 |
| Actin filaments (GO:0Q96IZ0                            | Cytoplasm. Nucleus. Note | 0 |
| Nucleoplasm (GO:00056Q15583                            | Nucleus.                 | 1 |
| Cytosol (GO:0005829);Q96NT1                            | Nucleus {ECO:0000305}.   | 0 |
| Cytosol (GO:0005829) Q8IY84                            |                          | 0 |
| Cytosol (GO:0005829);Q6P6B1                            |                          | 0 |
| Nucleoplasm (GO:00056P49116                            | Nucleus {ECO:0000255 PRO | 1 |
| Plasma membrane (GO:0Q6NZI2                            | Membrane, caveola {ECO:0 | 0 |
| Nucleoplasm (GO:00056Q95376                            | Nucleus {ECO:0000269 Pub | 0 |
| Cytosol (GO:0005829);Q86T24                            | Nucleus {ECO:0000269 Pub | 0 |
| Cytosol (GO:0005829);Q9BTP6                            |                          | 0 |
| Vesicles (GO:0043231)P78415                            | Nucleus {ECO:0000305}.   | 0 |
| Golgi apparatus (GO:0043173                            | Golgi apparatus membrane | 1 |
| Mitochondria (GO:0005Q9H936                            | Mitochondrion inner memb | 0 |
| Cytosol (GO:0005829);Q9H5N1                            | Cytoplasm {ECO:0000269 P | 0 |
| Nuclear bodies (GO:00Q02577                            | Nucleus {ECO:0000255 PRO | 0 |
| Nucleoplasm (GO:00056Q00244                            |                          | 0 |
| Nucleoplasm (GO:00056Q9BZK7                            | Nucleus {ECO:0000305}.   | 0 |
| Cytosol (GO:0005829);Q8N8I0                            |                          | 0 |
| Plasma membrane (GO:0Q86VB7                            | Soluble CD163: Secreted  | 0 |
| Nucleoplasm (GO:00056Q8TCD1                            |                          | 0 |
| Cytosol (GO:0005829);Q9HB75                            | Cytoplasm {ECO:0000269 P | 0 |
| Mitochondria (GO:0005P05387                            |                          | 0 |
| Nucleoplasm (GO:00056Q8TF76                            | Nucleus {ECO:0000269 Pub | 0 |
| Nucleoplasm (GO:00056P05412                            | Nucleus.                 | 1 |
| Nucleoplasm (GO:00056Q9H0L4                            | Nucleus {ECO:0000250}.   | 0 |
| Nucleoplasm (GO:00056Q8N414                            | Nucleus {ECO:0000269 Pub | 0 |
| Intermediate filamentQ6X4T0                            |                          | 0 |
| Mitochondria (GO:0005Q9H845                            | Mitochondrion {ECO:00002 | 1 |
| Cytosol (GO:0005829);Q96F46                            | Isoform 1: Cell membrane | 0 |
| Lipid droplets (GO:00Q96AD5                            | Lipid droplet. Cell memb | 0 |
| Golgi apparatus (GO:0Q96T53                            | Endoplasmic reticulum me | 0 |
| Vesicles (GO:0043231)Q6RW13                            | Endoplasmic reticulum me | 0 |
| Centrosome (GO:000581Q9NR16                            | Isoform 1: Cell membrane | 0 |
| Intermediate filaments (GO:0045111);Microtubules (GO:0 |                          | 0 |
| Nucleoplasm (GO:00056Q7Z6K1                            | Nucleus {ECO:0000269 Pub | 0 |
| Nuclear bodies (GO:00Q6EEV6                            |                          | 0 |
| Nucleoplasm (GO:00056Q58DX5                            | Membrane {ECO:0000305};  | 0 |
| Golgi apparatus (GO:0Q8IXL6                            | Secreted {ECO:0000269 Pu | 0 |
| Centriolar satellite Q9NQS3                            | Cell membrane {ECO:00003 | 0 |
| Cytoplasmic bodies (GQ3ZCQ2                            |                          | 0 |

|                             |                          |   |
|-----------------------------|--------------------------|---|
| Nuclear bodies (GO:00Q12767 | Membrane {ECO:0000305};  | 0 |
| Centriolar satellite Q13045 | Nucleus {ECO:0000250}. C | 0 |
| Nucleoplasm (GO:00056015370 | Nucleus {ECO:0000255 PRO | 1 |
| Nucleoplasm (GO:00056Q13151 | Nucleus {ECO:0000250}. N | 1 |
| Intermediate filamentQ9BWS9 | Secreted {ECO:0000269 Pu | 0 |
| Centrosome (GO:000581Q6ZNG0 | Nucleus {ECO:0000305}.   | 0 |
| Nucleoplasm (GO:00056Q6AHZ1 | Nucleus {ECO:0000305}.   | 0 |
| Cytosol (GO:0005829);Q14656 | Membrane {ECO:0000305};  | 0 |
| Cytosol (GO:0005829);Q8N300 | Cytoplasm {ECO:0000250 U | 0 |
| Intermediate filamentQ8N2I2 | Nucleus {ECO:0000305}.   | 0 |
| Cytosol (GO:0005829);Q52MB2 |                          | 0 |
| Vesicles (GO:0043231)Q92572 | Golgi apparatus. Cytopla | 0 |
| Nucleoplasm (GO:00056P62993 | Nucleus {ECO:0000269 Pub | 0 |
| Cytosol (GO:0005829);Q5SVQ8 | Nucleus {ECO:0000305}.   | 0 |
| Nucleoli fibrillar ceP61088 | Nucleus {ECO:0000269 Pub | 0 |
| Cytosol (GO:0005829);Q8N6S5 | Membrane {ECO:0000305};  | 0 |
| Cytosol (GO:0005829);Q86Y25 | Nucleus {ECO:0000269 Pub | 0 |
| Cytosol (GO:0005829);Q6UXC1 | Membrane {ECO:0000250};  | 0 |
| Nucleoli (GO:0005730)B2RD01 | Nucleus {ECO:0000255 PRO | 0 |
| Golgi apparatus (GO:0Q9NYM9 | Golgi apparatus membrane | 1 |
| Cytosol (GO:0005829);P42677 |                          | 0 |
| Cytosol (GO:0005829) Q9NPQ8 | Cytoplasm {ECO:0000250}. | 0 |
| Nucleoli (GO:0005730)Q9NV31 | Nucleus, nucleolus {ECO: | 0 |
| Mitochondria (GO:0005Q6NUT2 | Membrane {ECO:0000305};  | 0 |
| Cytosol (GO:0005829);Q8N831 |                          | 0 |
| Cytosol (GO:0005829);Q2VPJ9 |                          | 0 |
| Cytosol (GO:0005829);Q9NPF5 | Nucleus. Cytoplasm. Note | 1 |
| Vesicles (GO:0043231)Q8N6G6 | Secreted, extracellular  | 0 |
| Golgi apparatus (GO:0Q8N5C1 | Membrane {ECO:0000305};  | 0 |
| Cytosol (GO:0005829);P12268 | Cytoplasm {ECO:0000255 H | 0 |
| Cytosol (GO:0005829);P58340 | Cytoplasm {ECO:0000250 U | 0 |
| Cytosol (GO:0005829);Q8IYS0 | Endoplasmic reticulum me | 0 |
| Golgi apparatus (GO:0Q5VU43 | Golgi apparatus {ECO:000 | 0 |
| Nucleoli (GO:0005730)Q13206 |                          | 0 |
| Mitochondria (GO:0005P19404 | Mitochondrion inner memb | 1 |
| Cytosol (GO:0005829);Q5D0E6 |                          | 0 |
| Cytosol (GO:0005829);Q8NC26 | Nucleus {ECO:0000305}.   | 0 |
| Nucleoplasm (GO:00056Q9C0D4 | Nucleus {ECO:0000305}.   | 0 |
| Cytosol (GO:0005829);Q8N944 | Cell membrane {ECO:00002 | 0 |
| Nuclear membrane (GO:Q8N3X6 | Nucleus {ECO:0000255 PRO | 0 |
| Plasma membrane (GO:0Q9BYG4 | Cytoplasm. Cell membrane | 0 |
| Vesicles (GO:0043231)Q9NRF2 | Cytoplasm {ECO:0000250}. | 0 |
| Cytoplasmic bodies (GA2A288 | Cytoplasm, P-body {ECO:0 | 1 |
| Nucleoplasm (GO:00056Q9GZP7 | Cell membrane; Multi-pas | 0 |
| Nucleoplasm (GO:00056Q7Z4H8 | Endoplasmic reticulum lu | 0 |
| Cytosol (GO:0005829);Q15149 | Cytoplasm, cytoskeleton  | 0 |
| Nucleoplasm (GO:00056Q08ER8 | Nucleus {ECO:0000305}.   | 0 |
| Cytosol (GO:0005829);Q9NNW5 | Cytoplasm {ECO:0000269 P | 1 |
| Golgi apparatus (GO:0Q6PDA7 | Secreted.                | 0 |
| Nucleoplasm (GO:00056Q17RS7 | Nucleus {ECO:0000305 Pub | 0 |
| Nucleoplasm (GO:00056Q8NBQ7 | Cytoplasmic vesicle memb | 0 |
| Mitochondria (GO:0005P17152 | Mitochondrion inner memb | 1 |
| Nucleoplasm (GO:00056Q96LW1 | Nucleus {ECO:0000305}.   | 0 |
| Cytosol (GO:0005829);A0PJX4 | Endoplasmic reticulum me | 0 |
| Cytosol (GO:0005829);Q9NZT1 |                          | 0 |

|                             |                          |   |
|-----------------------------|--------------------------|---|
| Cytosol (GO:0005829);Q6ZWE6 | Cytoplasm {ECO:0000250 U | 0 |
| Mitochondria (GO:0005Q9UK11 | Nucleus {ECO:0000305}.   | 0 |
| Vesicles (GO:0043231)Q7Z4H9 | Nucleus {ECO:0000250}.   | 0 |
| Vesicles (GO:0043231)Q8N4W6 | Membrane {ECO:0000305};  | 0 |
| Vesicles (GO:0043231)Q96MC4 | Cell projection, cilium  | 0 |
| Nucleoplasm (GO:00056Q5T5X7 | Nucleus {ECO:0000269 Pub | 0 |
| Mitochondria (GO:0005P23378 | Mitochondrion {ECO:00002 | 1 |
| Mitochondria (GO:0005Q96I36 | Mitochondrion membrane { | 1 |
| Actin filaments (GO:0Q4G0Z9 |                          | 0 |
| Cytosol (GO:0005829);Q9NXG6 | Endoplasmic reticulum me | 0 |
| Golgi apparatus (GO:0Q8N9I9 | Cytoplasm {ECO:0000305}. | 0 |
| Nucleoplasm (GO:00056Q9NP70 | Secreted, extracellular  | 0 |
| Cell Junctions (GO:00P60606 | Membrane {ECO:0000305};  | 0 |
| Cytosol (GO:0005829);043772 | Mitochondrion inner memb | 0 |
| Cell Junctions (GO:00Q9NSA3 | Cytoplasm {ECO:0000250}. | 0 |
| Cytosol (GO:0005829) Q6NUJ1 | Secreted {ECO:0000305}.  | 0 |
| Mitochondria (GO:0005739)   |                          | 0 |
| Nucleoli (GO:0005730)Q8WYN3 | Nucleus {ECO:0000250}.   | 0 |
| Nucleoli (GO:0005730)Q8N859 | Nucleus {ECO:0000305}.   | 0 |
| Cytosol (GO:0005829);Q53GL7 | Nucleus, nucleolus {ECO: | 1 |
| Nuclear bodies (GO:00Q15022 | Nucleus {ECO:0000269 Pub | 0 |
| Nuclear membrane (GO:Q9H649 | Mitochondrion matrix {EC | 0 |
| Mitochondria (GO:0005Q96CX2 | Cell junction, synapse,  | 0 |
| Mitochondria (GO:0005Q86XF0 | Mitochondrion {ECO:00002 | 1 |
| Centriolar satellite Q9BUL9 | Nucleus, nucleolus {ECO: | 0 |
| Cytosol (GO:0005829);Q7Z429 | Membrane {ECO:0000305};  | 0 |
| Cytosol (GO:0005829);P07204 | Membrane; Single-pass ty | 0 |
| Cytosol (GO:0005829) P40197 | Membrane; Single-pass ty | 0 |
| Cytosol (GO:0005829);Q8N4C7 | Cell membrane {ECO:00002 | 0 |
| Golgi apparatus (GO:0Q5XKK7 |                          | 0 |
| Nucleoplasm (GO:00056Q9Y6X8 | Nucleus {ECO:0000255 PRO | 1 |
| Mitochondria (GO:0005Q6UWT4 | Secreted {ECO:0000305}.  | 0 |
| Cytosol (GO:0005829);A6NNX1 |                          | 0 |
| Cytosol (GO:0005829);P34949 | Cytoplasm {ECO:0000305}. | 0 |
| Cytosol (GO:0005829) Q86UV7 |                          | 0 |
| Nucleoli fibrillar ce014841 |                          | 0 |
| Focal adhesion sites Q8IV31 | Membrane {ECO:0000305};  | 0 |
| Cytosol (GO:0005829);Q8IY85 |                          | 0 |
| Nucleoplasm (GO:00056060682 | Nucleus.                 | 1 |
| Cytosol (GO:0005829);Q96LR9 | Cell membrane {ECO:00003 | 0 |
| Golgi apparatus (GO:0Q6ZTI6 | Cytoplasm, cytoskeleton  | 0 |
| Cytosol (GO:0005829);Q9NPD3 | Cytoplasm {ECO:0000269 P | 0 |
| Microtubules (GO:0015Q6ZPD9 | Membrane {ECO:0000305};  | 0 |
| Golgi apparatus (GO:0Q15545 | Nucleus {ECO:0000250 Uni | 0 |
| Cytosol (GO:0005829) Q6ZMS4 | Nucleus {ECO:0000250}.   | 0 |
| Vesicles (GO:0043231)015067 | Cytoplasm {ECO:0000250}. | 0 |
| Cytosol (GO:0005829);Q5T013 |                          | 0 |
| Cell Junctions (GO:00Q9BQA9 | Endoplasmic reticulum me | 0 |
| Nucleoplasm (GO:00056Q9H707 | Nucleus {ECO:0000305}.   | 0 |
| Golgi apparatus (GO:0014976 | Cytoplasm, perinuclear r | 0 |
| Nucleoplasm (GO:00056095365 | Nucleus {ECO:0000269 Pub | 0 |
| Mitochondria (GO:0005P49411 | Mitochondrion {ECO:00002 | 1 |
| Nuclear bodies (GO:00Q9H9A7 | Nucleus {ECO:0000269 Pub | 1 |
| Nuclear speckles (GO:Q9NWN3 |                          | 0 |
| Cytosol (GO:0005829) Q9UBQ5 | Nucleus {ECO:0000255 HAM | 0 |

|                                 |                          |   |
|---------------------------------|--------------------------|---|
| Cytosol (GO:0005829) Q96RF0     | Endomembrane system; Per | 0 |
| Midbody (GO:0030496); Q96GD4    | Nucleus. Chromosome. Chr | 0 |
| Nucleoli (GO:0005730) Q8N1H7    | Chromosome {ECO:0000250  | 0 |
| Nucleoplasm (GO:00056 Q9Y605    | Nucleus {ECO:0000269 Pub | 0 |
| Cytosol (GO:0005829); Q5JPI3    |                          | 0 |
| Nuclear speckles (GO: Q5VTJ3    | Membrane {ECO:0000305};  | 0 |
| Midbody ring (GO:0090 Q6UX40    | Membrane {ECO:0000305};  | 0 |
| Nucleoli (GO:0005730) Q15050    | Nucleus, nucleolus {ECO: | 1 |
| Plasma membrane (GO: Q86VI1     | Cytoplasmic vesicle, sec | 0 |
| Cytosol (GO:0005829); Q8N7C3    |                          | 0 |
| Nucleoplasm (GO:00056 Q8N998    | Cytoplasm {ECO:0000250}. | 0 |
| Nucleoli (GO:0005730) Q8N9E0    |                          | 0 |
| Cytosol (GO:0005829); P08574    | Mitochondrion inner memb | 1 |
| Cytosol (GO:0005829); 015534    | Nucleus. Cytoplasm. Note | 1 |
| Actin filaments (GO: Q8N394     | Membrane {ECO:0000305};  | 0 |
| Nucleoli (GO:0005730) Q9BYE0    | Nucleus {ECO:0000305}.   | 0 |
| Cytosol (GO:0005829) Q9Y285     | Cytoplasm {ECO:0000250 U | 1 |
| Nucleoli (GO:0005730) Q68D10    | Nucleus, nucleolus {ECO: | 0 |
| Nuclear speckles (GO: Q8IYJ2    | Mitochondrion {ECO:00002 | 0 |
| Cytosol (GO:0005829) Q5PRF9     | Cytoplasm {ECO:0000269 P | 0 |
| Cytosol (GO:0005829); Q8NHV1    | Lipid droplet {ECO:00002 | 0 |
| Cytosol (GO:0005829); Q9BYJ1    | Cytoplasm {ECO:0000255 P | 0 |
| Cytoplasmic bodies (G Q96F86    | Cytoplasm, P-body {ECO:0 | 1 |
| Cytosol (GO:0005829); Q96AQ2    | Membrane {ECO:0000305};  | 0 |
| Nucleoplasm (GO:00056 Q8N3J9    | Nucleus {ECO:0000305}.   | 0 |
| Endoplasmic reticulum P27797    | Endoplasmic reticulum lu | 0 |
| Cytosol (GO:0005829) Q9Y5V3     | Cytoplasm {ECO:0000250}. | 0 |
| Centrosome (GO:000581 Q3ZCU0    |                          | 0 |
| Cell Junctions (GO: Q86YD5      | Cell membrane {ECO:00002 | 0 |
| Plasma membrane (GO: P55283     | Cell membrane; Single-pa | 1 |
| Cytosol (GO:0005829); P54725    | Nucleus.                 | 0 |
| Mitochondria (GO:0005 Q8TAE8    | Mitochondrion {ECO:00002 | 0 |
| Mitochondria (GO:0005 Q8N907    | Secreted {ECO:0000305}.  | 0 |
| Cytosol (GO:0005829); Q8N4L1    | Membrane {ECO:0000305};  | 0 |
| Actin filaments (GO: Q06124     | Cytoplasm {ECO:0000269 P | 0 |
| Vesicles (GO: Q043231) Q8NE18   |                          | 0 |
| Golgi apparatus (GO: Q8N8U3     | Nucleus {ECO:0000250 Uni | 0 |
| Golgi apparatus (GO: Q658N2     | Membrane {ECO:0000305};  | 0 |
| Intermediate filament P49761    | Isoform 1: Nucleus. Cyto | 0 |
| Golgi apparatus (GO:0005794); R | Cell membrane; Single-pa | 0 |
| Nucleoplasm (GO:00056 P23769    | Nucleus.                 | 1 |
| Nucleoplasm (GO:00056 Q8IVW6    | Nucleus {ECO:0000255 PRO | 1 |
| Nucleoli fibrillar ce Q5JXX7    | Membrane {ECO:0000305};  | 0 |
| Mitochondria (GO:0005 Q86VP3    | Endoplasmic reticulum {E | 0 |
| Cytosol (GO:0005829); Q8IZ81    |                          | 0 |
| Nucleoplasm (GO:00056 Q06889    | Nucleus {ECO:0000305}.   | 0 |
| Cytosol (GO:0005829); P78333    | Cell membrane {ECO:00002 | 0 |
| Cytosol (GO:0005829); P57678    | Cytoplasm. Nucleus. Nucl | 0 |
| Vesicles (GO: Q043231) Q86VR8   | Secreted {ECO:0000250}.  | 0 |
| Cytosol (GO:0005829) Q9NXS3     |                          | 0 |
| Cytosol (GO:0005829); Q13064    |                          | 0 |
| Nuclear speckles (GO: Q99592    | Nucleus. Note=Associates | 0 |
| Cytosol (GO:0005829) Q4W4Y0     |                          | 0 |
| Cytosol (GO:0005829) 075342     | Cytoplasm {ECO:0000255 P | 0 |
| Cytosol (GO:0005829); Q9H0F6    | Cytoplasm, cytosol {ECO: | 0 |



|                                 |                          |   |
|---------------------------------|--------------------------|---|
| Midbody (GO:0030496); Q6XYB7    | Nucleus {ECO:0000255 PRO | 0 |
| Cytokinetic bridge (GQ96M86     |                          | 0 |
| Microtubules (GO:0015Q8IW52     | Membrane {ECO:0000305};  | 0 |
| Cytosol (GO:0005829); Q96CN9    | Cytoplasm {ECO:0000269 P | 0 |
| Nucleoplasm (GO:00056P33076     | Nucleus {ECO:0000269 Pub | 1 |
| Cytosol (GO:0005829); Q8IX07    | Nucleus {ECO:0000250}.   | 0 |
| Cytosol (GO:0005829); 015296    | Isoform A: Nucleus. Note | 0 |
| Actin filaments (GO:0Q9H3Q1     | Endomembrane system; Per | 0 |
| Nucleoplasm (GO:00056B2RXF5     | Cytoplasm {ECO:0000250 U | 0 |
| Nucleoli (GO:0005730) Q9H063    | Nucleus {ECO:0000269 Pub | 0 |
| Golgi apparatus (GO:0Q96HM7     |                          | 0 |
| Nucleoplasm (GO:00056Q9UH17     | Nucleus {ECO:0000269 Pub | 0 |
| Cytosol (GO:0005829); 043638    | Nucleus {ECO:0000255 PRO | 0 |
| Nuclear membrane (GO:P33151     | Cell junction {ECO:00002 | 0 |
| Nuclear speckles (GO:Q96S97     | Membrane {ECO:0000305};  | 0 |
| Nucleoplasm (GO:00056Q8NDA8     |                          | 0 |
| Cytosol (GO:0005829); Q14140    | Nucleus {ECO:0000269 Pub | 1 |
| Nucleoplasm (GO:00056P24588     | Membrane {ECO:0000269 Pu | 0 |
| Golgi apparatus (GO:0Q8TF64     |                          | 0 |
| Vesicles (GO:0043231) Q96RK1    | Nucleus {ECO:0000269 Pub | 0 |
| Centrosome (GO:0005813); Cytoso | Membrane {ECO:0000305};  | 0 |
| Cytosol (GO:0005829) P59045     |                          | 0 |
| Golgi apparatus (GO:0Q6P996     |                          | 0 |
| Cytosol (GO:0005829); Q5T5A4    |                          | 0 |
| Nucleoli fibrillar ceQ13106     | Nucleus {ECO:0000305}.   | 0 |
| Nucleoplasm (GO:00056Q9Y2K5     | Nucleus {ECO:0000305}.   | 1 |
| Plasma membrane (GO:0P58400     | Cell junction, synapse,  | 0 |
| Nucleoplasm (GO:00056Q99611     |                          | 0 |
| Nucleoplasm (GO:00056Q8NCA9     | Nucleus {ECO:0000305}.   | 0 |
| Cytosol (GO:0005829); Q9NWQ9    | Mitochondrion {ECO:00002 | 0 |
| Nucleoplasm (GO:00056Q96SL8     | Cytoplasm {ECO:0000250}. | 0 |
| Nucleoplasm (GO:00056Q9UHX1     | Nucleus {ECO:0000269 Pub | 1 |
| Cytosol (GO:0005829); A1L4H1    | Secreted {ECO:0000250}.  | 0 |
| Cytosol (GO:0005829); Q9H773    | Mitochondrion {ECO:00002 | 0 |
| Nucleoli (GO:0005730) Q7L3S4    | Nucleus {ECO:0000305}.   | 0 |
| Nucleoplasm (GO:00056Q6ZSZ6     | Nucleus {ECO:0000305}.   | 0 |
| Actin filaments (GO:0Q8IV42     |                          | 0 |
| Cytosol (GO:0005829); Q8WXH5    |                          | 0 |
| Golgi apparatus (GO:0Q8N4Q0     | Peroxisome {ECO:0000250  | 0 |
| Mitochondria (GO:0005Q96MX3     | Nucleus {ECO:0000305}.   | 0 |
| Cytosol (GO:0005829); Q8IVF6    |                          | 0 |
| Centrosome (GO:000581Q8N661     | Membrane {ECO:0000305};  | 0 |
| Actin filaments (GO:0015629)    |                          | 0 |
| Cytosol (GO:0005829); Q9NX07    | Nucleus {ECO:0000250}. C | 0 |
| Mitochondria (GO:0005060645     | Cytoplasm {ECO:0000250 U | 0 |
| Cytosol (GO:0005829); Q86WS4    |                          | 0 |
| Cytosol (GO:0005829) Q8N752     | Cytoplasm {ECO:0000250}. | 0 |
| Cytosol (GO:0005829) P07101     |                          | 0 |
| Nucleoplasm (GO:00056060244     | Nucleus {ECO:0000305}.   | 0 |
| Mitochondria (GO:0005Q6P587     | Mitochondrion {ECO:00002 | 0 |
| Cytosol (GO:0005829); Q86YL5    | Nucleus {ECO:0000269 Pub | 0 |
| Nuclear membrane (GO:P18754     | Nucleus {ECO:0000269 Pub | 0 |
| Cytosol (GO:0005829); 075569    | Cytoplasm, perinuclear r | 0 |
| Nucleoplasm (GO:00056Q6AI14     | Apical cell membrane {EC | 0 |
| Nucleoli (GO:0005730) Q0VGE8    | Nucleus {ECO:0000305}.   | 0 |

|                               |                            |   |
|-------------------------------|----------------------------|---|
| Vesicles (GO:0043231) Q6ZV73  | Cytoplasm {ECO:0000305}.   | 0 |
| Cytosol (GO:0005829); Q8N7P1  | Membrane {ECO:0000305};    | 0 |
| Golgi apparatus (GO:0095190   | Nucleus {ECO:0000250}.     | 0 |
| Intermediate filament Q8N8W4  | Cytoplasm {ECO:0000269 P   | 0 |
| Golgi apparatus (GO:0015699   | Nucleus {ECO:0000269 Pub   | 1 |
| Cytosol (GO:0005829) Q96MW1   |                            | 0 |
| Centriolar satellite Q8WVF5   |                            | 0 |
| Cell Junctions (GO:00A2RUB1   | Cytoplasm {ECO:0000250 U   | 0 |
| Cell Junctions (GO:00Q14332   | Membrane; Multi-pass mem   | 0 |
| Nuclear bodies (GO:00Q4W5G0   | Nucleus {ECO:0000255 PRO   | 0 |
| Nucleoplasm (GO:0005606ZRS4   |                            | 0 |
| Cytosol (GO:0005829); P14317  | Membrane {ECO:0000269 Pu   | 0 |
| Cytosol (GO:0005829) Q8N3F0   |                            | 0 |
| Cytosol (GO:0005829); 015014  | Isoform 2: Nucleus {ECO:   | 1 |
| Nucleoplasm (GO:0005606Q13177 | Serine/threonine-protein   | 0 |
| Cell Junctions (GO:00A2RUB6   | Cytoplasm, cytoskeleton,   | 0 |
| Cytosol (GO:0005829); Q96MB7  | Nucleus {ECO:0000269 Pub   | 0 |
| Nucleoplasm (GO:0005606IPW1   |                            | 0 |
| Vesicles (GO:0043231) A2A2V5  | Membrane {ECO:0000305};    | 0 |
| Nuclear speckles (GO: P54826  | Cell membrane {ECO:00002   | 0 |
| Nucleoli (GO:0005730) Q7Z3V5  | Nucleus {ECO:0000305}.     | 0 |
| Cytosol (GO:0005829); Q4G1C9  | Membrane {ECO:0000305};    | 0 |
| Mitochondria (GO:0005Q8NAN2   | Mitochondrion outer memb   | 1 |
| Cytosol (GO:0005829); P48552  | Nucleus {ECO:0000269 Pub   | 0 |
| Golgi apparatus (GO:00Q7RTS1  | Nucleus {ECO:0000305}.     | 0 |
| Golgi apparatus (GO:00Q8N6D2  | Membrane {ECO:0000305};    | 0 |
| Cytosol (GO:0005829); Q86VY4  |                            | 0 |
| Golgi apparatus (GO:00Q11130  | Golgi apparatus, Golgi s   | 0 |
| Cytosol (GO:0005829); Nuclear | bodies (GO:0016604); Nucle | 0 |
| Cytosol (GO:0005829); P62807  | Nucleus. Chromosome.       | 0 |
| Cytosol (GO:0005829) Q8IYB1   |                            | 0 |
| Cytosol (GO:0005829) P30874   | Cell membrane; Multi-pas   | 0 |
| Nucleoplasm (GO:0005606Q96JF6 | Nucleus {ECO:0000305}.     | 1 |
| Nucleoli (GO:0005730) Q86SE9  | Nucleus {ECO:0000269 Pub   | 0 |
| Cytosol (GO:0005829) P14222   | Cytoplasmic granule lume   | 0 |
| Nucleoplasm (GO:0005606Q13394 | Nucleus {ECO:0000250 Uni   | 0 |
| Cytosol (GO:0005829); Q5VVQ6  | Cytoplasm {ECO:0000269 P   | 0 |
| Golgi apparatus (GO:00P08173  | Cell membrane; Multi-pas   | 0 |
| Nuclear bodies (GO:00Q6UWI4   | Endoplasmic reticulum me   | 0 |
| Cell Junctions (GO:00Q5UAW9   | Cell projection, cilium    | 0 |
| Cytosol (GO:0005829); Q6YBV0  | Membrane {ECO:0000305};    | 0 |
| Plasma membrane (GO:00Q5W0Z9  | Golgi apparatus membrane   | 0 |
| Nucleoli (GO:0005730) Q9BXX2  |                            | 0 |
| Cytosol (GO:0005829); Q96NJ6  | Nucleus {ECO:0000305}.     | 0 |
| Actin filaments (GO:00Q5FYB0  | Secreted {ECO:0000305}.    | 0 |
| Nucleoplasm (GO:0005606P31274 | Nucleus.                   | 1 |
| Vesicles (GO:0043231) Q6ZN16  |                            | 0 |
| Vesicles (GO:0043231) Q15181  | Cytoplasm {ECO:0000250}.   | 0 |
| Nuclear bodies (GO:00Q9NYD6   | Nucleus.                   | 1 |
| Mitochondria (GO:0005Q5JS54   |                            | 0 |
| Cytosol (GO:0005829) Q9H9H5   | Golgi apparatus. Cytopla   | 0 |
| Centriolar satellite Q9Y2A4   | Nucleus {ECO:0000305}.     | 0 |
| Microtubules (GO:0015P25025   | Cell membrane; Multi-pas   | 1 |
| Centrosome (GO:000581Q9BXY5   |                            | 0 |
| Nuclear bodies (GO:00Q3KQV3   | Nucleus {ECO:0000305}.     | 0 |

|                             |                          |   |
|-----------------------------|--------------------------|---|
| Centrosome (GO:000581Q9NWM3 |                          | 0 |
| Cell Junctions (GO:00Q14160 | Cell membrane {ECO:00002 | 0 |
| Mitochondria (GO:0005Q8N465 | Mitochondrion {ECO:00003 | 1 |
| Cell Junctions (GO:00Q8IYT2 | Nucleus {ECO:0000269 Pub | 0 |
| Cytosol (GO:0005829) Q6ZRV2 | Cytoplasm, cytoskeleton  | 0 |
| Nuclear speckles (GO:Q7Z3I7 | Nucleus {ECO:0000305}.   | 0 |
| Cytosol (GO:0005829);P48739 | Cytoplasm {ECO:0000250}. | 0 |
| Nucleoplasm (GO:00056Q8IYN2 | Nucleus {ECO:0000305}.   | 0 |
| Cytosol (GO:0005829);Q8N9N7 | Membrane {ECO:0000305};  | 0 |
| Mitochondria (GO:0005Q6P1L8 | Mitochondrion {ECO:00002 | 1 |
| Vesicles (GO:0043231)Q8N3F9 | Membrane {ECO:0000305};  | 0 |
| Cytosol (GO:0005829);Q8N141 | Nucleus {ECO:0000305}.   | 0 |
| Cytosol (GO:0005829) Q8N8F7 | Membrane {ECO:0000305};  | 0 |
| Cytosol (GO:0005829) P15559 | Cytoplasm.               | 1 |
| Nuclear membrane (GO:Q8WTP8 | Nucleus. Nucleus, nucleo | 0 |
| Cytosol (GO:0005829);Q9H9S5 | Golgi apparatus membrane | 0 |
| Vesicles (GO:0043231)Q8IUR0 | Golgi apparatus, cis-Gol | 0 |
| Mitochondria (GO:0005Q86VD7 | Mitochondrion inner memb | 1 |
| Vesicles (GO:0043231)Q86XA0 | Cytoplasm {ECO:0000269 P | 0 |
| Golgi apparatus (GO:0Q86WA9 | Cell membrane {ECO:00002 | 0 |
| Mitochondria (GO:0005Q9Y241 | Mitochondrion membrane { | 0 |
| Cell Junctions (GO:00Q8TD08 | Cytoplasm, cytoskeleton, | 0 |
| Nuclear bodies (GO:00Q9H9B1 | Nucleus. Chromosome. Not | 1 |
| Nucleoplasm (GO:00056Q96C28 | Nucleus {ECO:0000305}.   | 0 |
| Nucleoli (GO:0005730)P06748 | Nucleus, nucleolus {ECO: | 0 |
| Nucleoli (GO:0005730)Q8NG27 |                          | 0 |
| Mitochondria (GO:0005Q96HY7 | Mitochondrion {ECO:00002 | 1 |
| Nucleoplasm (GO:00056P24928 | Nucleus {ECO:0000269 Pub | 0 |
| Centrosome (GO:000581Q8N3T6 | Membrane {ECO:0000305};  | 0 |
| Cytosol (GO:0005829);Q6ZRR5 | Membrane {ECO:0000305};  | 0 |
| Mitochondria (GO:0005075474 |                          | 0 |
| Vesicles (GO:0043231)Q8N9M5 | Cell membrane {ECO:00002 | 0 |
| Cytosol (GO:0005829);Q6IEE7 | Membrane {ECO:0000305};  | 0 |
| Centrosome (GO:000581Q6U7Q0 | Cytoplasm {ECO:0000269 P | 1 |
| Cytosol (GO:0005829);Q8NAA5 |                          | 0 |
| Cytosol (GO:0005829);Q5H9U9 |                          | 0 |
| Nucleoplasm (GO:00056Q6PK18 | Membrane {ECO:0000305};  | 0 |
| Vesicles (GO:0043231)A8K0Z3 | Early endosome membrane  | 0 |
| Mitochondria (GO:0005Q6ZMQ8 | Membrane {ECO:0000250};  | 0 |
| Cytosol (GO:0005829);094850 | Cell projection, dendrit | 0 |
| Nuclear bodies (GO:00Q9NXZ1 |                          | 0 |
| Mitochondria (GO:0005Q7Z7K2 | Nucleus {ECO:0000250}.   | 0 |
| Nucleoplasm (GO:00056P48431 | Nucleus.                 | 1 |
| Cytosol (GO:0005829);Q5SXM1 | Nucleus {ECO:0000305}.   | 0 |
| Endoplasmic reticulumQ9NWC5 | Membrane {ECO:0000305};  | 0 |
| Cytosol (GO:0005829);Q8N680 | Nucleus {ECO:0000305}.   | 0 |
| Vesicles (GO:0043231)Q8IUD6 | Cytoplasm {ECO:0000269 P | 0 |
| Nucleoplasm (GO:00056Q8NC06 |                          | 0 |
| Nucleoplasm (GO:00056Q9Y586 | Nucleus {ECO:0000269 Pub | 0 |
| Cytosol (GO:0005829);Q9BYW2 | Nucleus {ECO:0000250 Uni | 0 |
| Nucleoli fibrillar ceQ8N319 |                          | 0 |
| Cytosol (GO:0005829);Q8NEW7 | Membrane {ECO:0000305};  | 0 |
| Mitochondria (GO:0005Q9Y3D9 | Mitochondrion {ECO:00002 | 1 |
| Nucleoplasm (GO:00056Q9BQ83 | Nucleus {ECO:0000255 HAM | 0 |
| Cytosol (GO:0005829);095150 | Membrane {ECO:0000305 Pu | 0 |

|                                   |                          |   |
|-----------------------------------|--------------------------|---|
| Nucleoli (GO:0005730);Nucleoplasm | Nucleus {ECO:0000250}.   | 0 |
| Nucleoli (GO:0005730)Q53GA4       | Cytoplasm {ECO:0000250}. | 0 |
| Mitochondria (GO:0005P10072       | Nucleus {ECO:0000305}.   | 0 |
| Centrosome (GO:000581Q6DJT9       | Nucleus {ECO:0000269 Pub | 0 |
| Vesicles (GO:0043231)Q96EC8       | Golgi apparatus membrane | 0 |
| Nuclear bodies (GO:00Q9HC78       | Nucleus {ECO:0000250 Uni | 1 |
| Nuclear bodies (GO:00Q86WK6       | Cell membrane {ECO:00002 | 0 |
| Nucleoplasm (GO:00056043255       | Cytoplasm {ECO:0000269 P | 0 |
| Cytosol (GO:0005829);Q9Y678       | Cytoplasm {ECO:0000269 P | 0 |
| Nuclear bodies (GO:00Q969L4       | Nucleus {ECO:0000269 Pub | 1 |
| Microtubules (GO:0015Q8IUW5       | Cell membrane {ECO:00002 | 0 |
| Nuclear membrane (GO:Q2KHR2       | Nucleus {ECO:0000255 PRO | 0 |
| Golgi apparatus (GO:0Q96A29       | Golgi apparatus membrane | 1 |
| Midbody ring (GO:0090Q9H4P4       |                          | 0 |
| Mitochondria (GO:0005Q5T440       | Mitochondrion {ECO:00002 | 1 |
| Cell Junctions (GO:00095471       | Cell membrane {ECO:00002 | 0 |
| Nuclear membrane (GO:Q86UD4       | Nucleus {ECO:0000305}.   | 0 |
| Nucleoplasm (GO:00056Q7Z6I8       |                          | 0 |
| Mitochondria (GO:0005Q9NYJ1       | Mitochondrion {ECO:00002 | 0 |
| Cytosol (GO:0005829);P54619       |                          | 0 |
| Nucleoplasm (GO:00056Q9BRX5       | Nucleus {ECO:0000250}.   | 1 |
| Nucleoli (GO:0005730)Q6ZUS6       |                          | 0 |
| Mitochondria (GO:0005P82912       | Mitochondrion {ECO:00002 | 1 |
| Mitochondria (GO:0005Q8IZC4       |                          | 0 |
| Cytosol (GO:0005829);Q86V59       |                          | 0 |
| Centrosome (GO:000581Q7LFX5       | Golgi apparatus membrane | 0 |
| Mitochondria (GO:0005P48735       | Mitochondrion.           | 1 |
| Endoplasmic reticulumQ4ZIN3       | Endoplasmic reticulum me | 0 |
| Cytosol (GO:0005829);015417       |                          | 0 |
| Mitochondria (GO:0005A6NEQ2       |                          | 0 |
| Cytosol (GO:0005829);095424       |                          | 0 |
| Nuclear bodies (GO:00Q9NPE3       | Nucleus, nucleolus {ECO: | 0 |
| Golgi apparatus (GO:0Q96GI7       |                          | 0 |
| Vesicles (GO:0043231)Q9NZI2       | Cell membrane {ECO:00002 | 0 |
| Centrosome (GO:000581Q9Y2W6       | Cytoplasm {ECO:0000250 U | 0 |
| Vesicles (GO:0043231)P53990       | Cytoplasmic vesicle {ECO | 0 |
| Cytosol (GO:0005829);Q5T890       | Nucleus. Cytoplasm, cyto | 0 |
| Mitochondria (GO:0005Q8IXM3       | Mitochondrion {ECO:00002 | 1 |
| Endoplasmic reticulumQ70SY1       | Endoplasmic reticulum me | 0 |
| Cytosol (GO:0005829);Q96B86       | Cell membrane {ECO:00002 | 0 |
| Cytosol (GO:0005829);P41226       |                          | 0 |
| Cytosol (GO:0005829);Q9Y3D3       | Mitochondrion {ECO:00002 | 1 |
| Nuclear bodies (GO:00015315       | Nucleus {ECO:0000305}.   | 0 |
| Nucleoli (GO:0005730)095751       | Nucleus {ECO:0000269 Pub | 0 |
| Microtubules (GO:0015P34897       | Mitochondrion {ECO:00002 | 0 |
| Cytosol (GO:0005829);Q70IA6       | Nucleus {ECO:0000269 Pub | 0 |
| Golgi apparatus (GO:0Q6P9G0       |                          | 0 |
| Nucleoplasm (GO:00056Q96LR5       |                          | 0 |
| Intermediate filament015061       | Cytoplasm, cytoskeleton. | 0 |
| Nuclear membrane (GO:Q86W26       | Cytoplasm {ECO:0000269 P | 0 |
| Cell Junctions (GO:00Q5HY92       | Nucleus matrix {ECO:0000 | 0 |
| Mitochondria (GO:0005Q6UXZ0       | Cell membrane {ECO:00002 | 0 |
| Cytokinetic bridge (GQ76KP1       | Golgi apparatus, Golgi s | 0 |
| Golgi apparatus (GO:0P56377       | Golgi apparatus. Cytopla | 0 |
| Nucleoplasm (GO:00056Q9H7E9       |                          | 0 |

|                              |                          |   |
|------------------------------|--------------------------|---|
| Actin filaments (GO:0P10073  | Nucleus {ECO:0000255 PRO | 0 |
| Nucleoli (GO:0005730) Q9UNX9 | Membrane; Multi-pass mem | 0 |
| Nucleoplasm (GO:00056Q8N531  |                          | 0 |
| Cytosol (GO:0005829); P09871 |                          | 0 |
| Vesicles (GO:0043231) A6NH11 |                          | 0 |
| Nucleoplasm (GO:00056P58557  | Nucleus {ECO:0000269 Pub | 0 |
| Cytosol (GO:0005829) Q9NUJ7  | Cytoplasm {ECO:0000269 P | 0 |
| Endoplasmic reticulum Q86SZ2 | Golgi apparatus, cis-Gol | 0 |
| Centrosome (GO:000581Q96DM1  |                          | 0 |
| Cytosol (GO:0005829); Q8TAT6 | Cytoplasm, cytosol {ECO: | 0 |
| Golgi apparatus (GO:0Q9NRE2  | Nucleus {ECO:0000305}.   | 0 |
| Focal adhesion sites Q6ZSI9  |                          | 0 |
| Cytosol (GO:0005829); Q9UPT5 | Cytoplasm, cytosol {ECO: | 0 |
| Cytosol (GO:0005829); P52292 | Cytoplasm {ECO:0000269 P | 0 |
| Endoplasmic reticulum P21810 | Secreted, extracellular  | 0 |
| Centriolar satellite Q8IW35  | Cytoplasm, cytoskeleton, | 0 |
| Cytosol (GO:0005829); P07332 | Cytoplasm, cytosol. Cyto | 0 |
| Mitochondria (GO:0005Q86SX6  | Mitochondrion matrix {EC | 1 |
| Plasma membrane (GO:0P56539  | Golgi apparatus membrane | 0 |
| Endoplasmic reticulum P84157 | Membrane {ECO:0000305};  | 0 |
| Cytosol (GO:0005829); P53671 | Isoform LIMK2a: Cytoplas | 1 |
| Golgi apparatus (GO:0Q9BV57  | Cytoplasm. Nucleus. Cell | 0 |
| Intermediate filament Q6NW29 |                          | 0 |
| Nuclear bodies (GO:0Q01826   | Nucleus matrix. Nucleus, | 1 |
| Plasma membrane (GO:0P07333  | Cell membrane; Single-pa | 1 |
| Cytosol (GO:0005829); Q6UW88 | Isoform 1: Membrane {ECO | 0 |
| Nucleoli (GO:0005730) Q6UX34 | Membrane {ECO:0000305};  | 0 |
| Endoplasmic reticulum Q9UPV9 | Cytoplasm {ECO:0000269 P | 0 |
| Plasma membrane (GO:0Q9NQ66  | Nucleus membrane {ECO:00 | 0 |
| Cytosol (GO:0005829); Q99608 | Perikaryon. Nucleus. Not | 0 |
| Cytosol (GO:0005829); P53804 | Nucleus {ECO:0000269 Pub | 0 |
| Midbody (GO:0030496); Q92953 | Cell membrane {ECO:00002 | 0 |
| Actin filaments (GO:0Q6PL45  | Membrane {ECO:0000305};  | 0 |
| Vesicles (GO:0043231) A6NJ69 | Secreted {ECO:0000250}.  | 0 |
| Nuclear bodies (GO:0Q8WUA8   | Secreted {ECO:0000305}.  | 0 |
| Mitochondria (GO:0005P56277  | Mitochondrion {ECO:00002 | 1 |
| Cytosol (GO:0005829); P07355 | Secreted, extracellular  | 0 |
| Nucleoli (GO:0005730) P49758 | Cytoplasm {ECO:0000269 P | 0 |
| Centrosome (GO:000581P17483  | Nucleus.                 | 1 |
| Centriolar satellite Q5M8T2  | Membrane {ECO:0000305};  | 0 |
| Cytosol (GO:0005829) Q86WK9  | Cell membrane {ECO:00003 | 0 |
| Cytokinetic bridge (GQ9NPE2  | Nucleus {ECO:0000269 Pub | 0 |
| Cytosol (GO:0005829); P08708 |                          | 0 |
| Cell Junctions (GO:0Q8TDS4   | Cell membrane {ECO:00002 | 0 |
| Cytosol (GO:0005829) Q7RTV2  | Cytoplasm {ECO:0000250}. | 0 |
| Cytosol (GO:0005829); Q9BW04 | Cytoplasm {ECO:0000269 P | 0 |
| Nucleoplasm (GO:00056A8MXT2  |                          | 0 |
| Nucleoli (GO:0005730) P52943 |                          | 0 |
| Cytosol (GO:0005829); Q9NUL7 | Nucleus {ECO:0000269 Pub | 0 |
| Golgi apparatus (GO:0Q9H3P7  | Golgi apparatus membrane | 0 |
| Nucleoplasm (GO:00056Q14CZ0  |                          | 0 |
| Golgi apparatus (GO:0Q63HM9  | Cytoplasm {ECO:0000269 P | 0 |
| Endoplasmic reticulum Q9BV10 | Endoplasmic reticulum me | 0 |
| Golgi apparatus (GO:0P06239  | Cytoplasm {ECO:0000269 P | 0 |
| Vesicles (GO:0043231) Q9HCQ5 | Golgi apparatus membrane | 0 |

|                               |                          |   |
|-------------------------------|--------------------------|---|
| Golgi apparatus (GO:0P39060   | Secreted, extracellular  | 0 |
| Nuclear speckles (GO:P98175   | Nucleus {ECO:0000269 Pub | 0 |
| Mitochondria (GO:0005P49448   | Mitochondrion matrix {EC | 1 |
| Nuclear membrane (GO:Q5QJ38   |                          | 0 |
| Cytosol (GO:0005829);P49802   | Cytoplasm, cytosol {ECO: | 0 |
| Centriolar satellite Q8TF20   | Nucleus {ECO:0000305}.   | 0 |
| Nucleoplasm (GO:00056Q9BRU2   | Nucleus {ECO:0000269 Pub | 1 |
| Nuclear bodies (GO:00Q9H0W9   | Nucleus {ECO:0000269 Pub | 0 |
| Nucleoplasm (GO:00056Q96MT8   | Cytoplasm, cytoskeleton, | 0 |
| Nucleoli (GO:0005730)Q01844   | Nucleus {ECO:0000269 Pub | 0 |
| Nucleoplasm (GO:00056000479   | Nucleus {ECO:0000250}.   | 0 |
| Cytosol (GO:0005829);Q96N96   | Cytoplasm. Cell projecti | 0 |
| Cell Junctions (GO:00P36383   | Cell membrane; Multi-pas | 0 |
| Centrosome (GO:000581Q9H9A5   | Cytoplasm {ECO:0000305}. | 0 |
| Cytosol (GO:0005829);Q13330   | Isoform Short: Cytoplasm | 0 |
| Cell Junctions (GO:00Q9BY67   | Cell membrane {ECO:00002 | 0 |
| Cytoplasmic bodies (GA2RRD8   | Nucleus {ECO:0000305}.   | 0 |
| Cytosol (GO:0005829);Q5U649   |                          | 0 |
| Nucleoplasm (GO:00056Q9BRA0   | Cytoplasm {ECO:0000269 P | 0 |
| Nucleoplasm (GO:00056094973   | Cell membrane {ECO:00002 | 0 |
| Nucleoplasm (GO:00056P32418   | Cell membrane {ECO:00002 | 1 |
| Nucleoli fibrillar ceP48539   |                          | 0 |
| Mitochondria (GO:0005P80404   | Mitochondrion matrix.    | 1 |
| Mitochondria (GO:0005Q9UBX3   | Mitochondrion inner memb | 1 |
| Cytosol (GO:0005829);Q8IU85   | Cytoplasm {ECO:0000305}. | 0 |
| Nuclear membrane (GO:Q99666   | Cytoplasm {ECO:0000269 P | 0 |
| Actin filaments (GO:0Q5XG99   | Membrane {ECO:0000305};  | 0 |
| Focal adhesion sites Q9NSI5   | Apical cell membrane {EC | 0 |
| Cytosol (GO:0005829);P52952   | Nucleus {ECO:0000305}.   | 0 |
| Mitochondria (GO:0005Q63HM1   | Cytoplasm, cytosol {ECO: | 0 |
| Centriolar satellite Q14393   | Secreted {ECO:0000269 Pu | 0 |
| Cytosol (GO:0005829);Q9BUH8   | Cytoplasm {ECO:0000250}. | 0 |
| Golgi apparatus (GO:0Q9Y625   | Cell membrane {ECO:00002 | 0 |
| Cytosol (GO:0005829) A1IGU5   |                          | 0 |
| Cytosol (GO:0005829) Q6ZT52   |                          | 0 |
| Vesicles (GO:0043231)         | Membrane {ECO:0000305};  | 0 |
| Nucleoplasm (GO:00056Q86XJ0   | Membrane {ECO:0000305};  | 0 |
| Cytosol (GO:0005829);Q8IYX8   | Cytoplasm, cytoskeleton, | 0 |
| Cytokinetic bridge (GP47224   |                          | 0 |
| Nucleoplasm (GO:00056Q9NPI8   | Nucleus {ECO:0000269 Pub | 1 |
| Plasma membrane (GO:0Q9BXU9   | Golgi apparatus, trans-G | 0 |
| Mitochondria (GO:0005Q9H4I9   | Mitochondrion inner memb | 1 |
| Vesicles (GO:0043231)Q8TF44   |                          | 0 |
| Centrosome (GO:000581Q9Y230   | Nucleus matrix. Nucleus, | 0 |
| Cytosol (GO:0005829) Q6ZNW5   | Cytoplasm {ECO:0000250}. | 0 |
| Plasma membrane (GO:0A6NJZ7   | Cytoplasm, cytoskeleton  | 0 |
| Golgi apparatus (GO:0Q9H6K5   |                          | 0 |
| Nucleoplasm (GO:00056P53801   | Membrane {ECO:0000305};  | 0 |
| Nucleoli (GO:0005730)Q9UJV9   | Nucleus {ECO:0000269 Pub | 1 |
| Nucleoplasm (GO:00056Q9H3Z7   |                          | 0 |
| Nuclear speckles (GO:Q15038   | Cytoplasm. Nucleus. Note | 0 |
| Cytosol (GO:0005829);Q6UXH8   | Secreted {ECO:0000305}.  | 0 |
| Cytosol (GO:0005829);Nucleoli | Endoplasmic reticulum lu | 0 |
| Nucleoplasm (GO:00056Q9BXQ6   |                          | 0 |
| Nucleoplasm (GO:00056075123   | Nucleus {ECO:0000305}.   | 0 |

|                               |                          |   |
|-------------------------------|--------------------------|---|
| Intermediate filamentQ86Z20   | Cytoplasm {ECO:0000269 P | 0 |
| Nucleoplasm (GO:00056Q9H3K6   | Cytoplasm {ECO:0000269 P | 0 |
| Nucleoplasm (GO:00056Q6W2J9   | Nucleus {ECO:0000269 Pub | 1 |
| Cytokinetic bridge (GQ9Y4A0   | Nucleus {ECO:0000255 PRO | 0 |
| Centrosome (GO:000581Q8IVU9   | Cytoplasm {ECO:0000250 U | 0 |
| Cytosol (GO:0005829);Q5HYC2   |                          | 0 |
| Nucleoplasm (GO:00056Q13643   |                          | 0 |
| Cytosol (GO:0005829);A6NCJ1   |                          | 0 |
| Cytosol (GO:0005829);POC7I6   |                          | 0 |
| Cytosol (GO:0005829);Q3SXY7   | Cell projection, dendrit | 0 |
| Nucleoplasm (GO:00056Q9UND3   | Nucleus, nuclear pore co | 0 |
| Nuclear speckles (GO:Q12874   | Nucleus speckle {ECO:000 | 0 |
| Endoplasmic reticulumQ5EBN2   |                          | 0 |
| Nuclear speckles (GO:Q6P1K8   | Nucleus {ECO:0000250}.   | 0 |
| Golgi apparatus (GO:0Q9H672   |                          | 0 |
| Nucleoplasm (GO:00056Q96L91   | Nucleus {ECO:0000255 PRO | 1 |
| Cytosol (GO:0005829);Q6ZN04   | Nucleus {ECO:0000269 Pub | 0 |
| Nucleoplasm (GO:00056Q5VWP2   | Nucleus {ECO:0000269 Pub | 0 |
| Mitochondria (GO:0005Q86WW8   |                          | 0 |
| Nucleoplasm (GO:00056Q9Y3A2   | Nucleus, nucleolus {ECO: | 0 |
| Cytosol (GO:0005829);095456   | Cytoplasm. Endoplasmic r | 0 |
| Nucleoplasm (GO:00056Q5THK1   |                          | 0 |
| Vesicles (GO:0043231)Q6NUN0   | Mitochondrion matrix {EC | 0 |
| Mitochondria (GO:0005P57721   | Cytoplasm {ECO:0000269 P | 0 |
| Mitochondria (GO:0005Q86TU7   | Cytoplasm {ECO:0000269 P | 0 |
| Cytosol (GO:0005829);Q5GJ75   | Cytoplasm {ECO:0000269 P | 0 |
| Golgi apparatus (GO:0Q9ULT6   | Cell membrane {ECO:00002 | 0 |
| Actin filaments (GO:0Q9BTA0   |                          | 0 |
| Mitochondria (GO:0005Q6P161   | Mitochondrion {ECO:00002 | 0 |
| Cytosol (GO:0005829);Q7Z4V0   | Nucleus {ECO:0000269 Pub | 0 |
| Nucleoplasm (GO:00056Q96FZ2   | Chromosome {ECO:0000269  | 0 |
| Vesicles (GO:0043231)Q6P9A1   | Nucleus {ECO:0000305}.   | 0 |
| Mitochondria (GO:0005075438   | Mitochondrion inner memb | 1 |
| Cytosol (GO:0005829);Q9H0H3   |                          | 0 |
| Mitochondria (GO:0005Q53H54   |                          | 0 |
| Nucleoplasm (GO:00056P46091   | Cell membrane {ECO:00002 | 1 |
| Nuclear speckles (GO:0016607) | Nucleus {ECO:0000269 Pub | 0 |
| Actin filaments (GO:0Q8N5W9   | Cytoplasm, cytoskeleton  | 1 |
| Nucleoli fibrillar ceQ5JST6   |                          | 0 |
| Nucleoplasm (GO:00056Q16831   |                          | 0 |
| Centrosome (GO:000581Q8N0Y3   | Cell membrane; Multi-pas | 0 |
| Intermediate filamentQ96A61   |                          | 0 |
| Nucleoli (GO:0005730)Q9Y693   | Membrane {ECO:0000305};  | 0 |
| Golgi apparatus (GO:0Q8IZR5   | Membrane {ECO:0000255};  | 0 |
| Actin filaments (GO:0095807   | Membrane {ECO:0000305};  | 0 |
| Nucleoplasm (GO:00056Q9UHD2   | Cytoplasm {ECO:0000269 P | 0 |
| Mitochondria (GO:0005095503   | Nucleus {ECO:0000269 Pub | 0 |
| Mitochondria (GO:0005Q6ZN28   | Cytoplasm {ECO:0000269 P | 0 |
| Nucleoli (GO:0005730)Q12788   | Nucleus, nucleolus {ECO: | 1 |
| Cytosol (GO:0005829);Q96MU8   | Cell membrane {ECO:00002 | 0 |
| Cytosol (GO:0005829);Q9BWF2   | Cytoplasm. Cytoplasm, pe | 0 |
| Golgi apparatus (GO:0096017   | Isoform 2: Nucleus. Note | 1 |
| Cytokinetic bridge (GP58012   | Nucleus {ECO:0000255 PRO | 0 |
| Mitochondria (GO:0005Q96NN9   | Mitochondrion {ECO:00002 | 0 |
| Nuclear speckles (GO:Q68DU8   | Cell junction, synapse,  | 0 |

|                                        |                          |   |
|----------------------------------------|--------------------------|---|
| Golgi apparatus (GO:0081Y50            | Membrane {ECO:0000305};  | 0 |
| Vesicles (GO:0043231)Q6ZWB6            | Cell junction, synapse,  | 0 |
| Microtubules (GO:0015Q9NY65            | Cytoplasm, cytoskeleton. | 1 |
| Nucleoplasm (GO:00056E9PKD4            |                          | 0 |
| Nucleoplasm (GO:00056Q8IXT5            |                          | 0 |
| Plasma membrane (GO:0P51679            | Cell membrane; Multi-pas | 1 |
| Nucleoplasm (GO:00056Q5TKA1            | Nucleus, nucleoplasm {EC | 1 |
| Nucleoplasm (GO:00056Q96Q07            |                          | 0 |
| Microtubules (GO:0015095848            | Cytoplasm {ECO:0000269 P | 0 |
| Centrosome (GO:000581Q5TZF3            |                          | 0 |
| Vesicles (GO:0043231)P58499            | Secreted. Note=Present i | 0 |
| Nucleoli (GO:0005730)Q86VI3            |                          | 0 |
| Cytosol (GO:0005829) Q14106            | Cytoplasm.               | 0 |
| Nucleoli (GO:0005730)Q14524            | Cell membrane {ECO:00002 | 0 |
| Golgi apparatus (GO:0Q5FYB1            | Secreted {ECO:0000269 Pu | 0 |
| Nucleoli (GO:0005730)014607            | Nucleus {ECO:0000305}.   | 0 |
| Nucleoplasm (GO:00056Q8NEQ6            |                          | 0 |
| Nucleoplasm (GO:0005654)               |                          | 0 |
| Mitochondria (GO:0005Q5IOX7            |                          | 0 |
| Microtubules (GO:0015Q9P225            | Cytoplasm, cytoskeleton, | 0 |
| Nucleoplasm (GO:00056P51817            | Cytoplasm. Nucleus. Note | 0 |
| Cytosol (GO:0005829);Q9NQR1            | Nucleus. Chromosome. Not | 0 |
| Plasma membrane (GO:0Q96L42            | Membrane; Multi-pass mem | 1 |
| Actin filaments (GO:0P53814            | Cytoplasm, cytoskeleton. | 0 |
| Intermediate filamentA8MPX8            |                          | 0 |
| Mitochondria (GO:0005Q9Y2R0            | Mitochondrion inner memb | 1 |
| Nucleoplasm (GO:00056Q8NDV1            | Golgi apparatus membrane | 0 |
| Cell Junctions (GO:00015393            | Cell membrane {ECO:00002 | 0 |
| Golgi apparatus (GO:0Q6IQ26            | Golgi apparatus membrane | 0 |
| Mitochondria (GO:0005Q9NR28            | Mitochondrion {ECO:00002 | 1 |
| Cytoplasmic bodies (G043435            | Nucleus {ECO:0000255 PRO | 0 |
| Nuclear speckles (GO:Q9NX05            |                          | 0 |
| Cytosol (GO:0005829) Q99613            | Cytoplasm {ECO:0000255 H | 1 |
| Microtubules (GO:0015Q8WZ04            | Isoform 1: Membrane {ECO | 0 |
| Nucleoplasm (GO:00056Q86WQ0            | Nucleus {ECO:0000269 Pub | 1 |
| Vesicles (GO:0043231)Q5T7M4            | Adipolin fC1QTNF12: Secr | 0 |
| Nucleoplasm (GO:00056Q8WU76            |                          | 0 |
| Cytosol (GO:0005829) Q969M7            |                          | 0 |
| Cytosol (GO:0005829);Q14500            | Membrane; Multi-pass mem | 0 |
| Cytosol (GO:0005829);Q9NS66            | Cellmembrane {ECO:00002  | 0 |
| Cytosol (GO:0005829);P41236            |                          | 0 |
| Nuclear bodies (GO:00A6NDG6            |                          | 0 |
| Nucleoli (GO:0005730)C9J442            | Secreted {ECO:0000305}.  | 0 |
| Nucleoli (GO:0005730)Q16560            | Nucleus {ECO:0000269 Pub | 0 |
| Cytosol (GO:0005829);P51617            | Cytoplasm {ECO:0000269 P | 0 |
| Mitochondria (GO:0005Q9BQ75            |                          | 0 |
| Centrosome (GO:000581Q9HC56            | Cell membrane {ECO:00002 | 0 |
| Mitochondria (GO:0005Q86TX2            | Cytoplasm, cytosol {ECO: | 0 |
| Nucleoplasm (GO:00056Q86UD1            |                          | 0 |
| Cytosol (GO:0005829);P47895            | Cytoplasm {ECO:0000250 U | 0 |
| Centrosome (GO:000581P51861            |                          | 0 |
| Nucleoplasm (GO:00056Q8IUE6            | Nucleus. Chromosome.     | 0 |
| Actin filaments (GO:0015629);NNucleus. |                          | 1 |
| Cytosol (GO:0005829);Q9BRN9            | Membrane {ECO:0000305};  | 0 |
| Cytosol (GO:0005829);Q9Y5U2            |                          | 0 |



|                              |                          |   |
|------------------------------|--------------------------|---|
| Nucleoli (GO:0005730)P09758  | Membrane; Single-pass ty | 1 |
| Centriolar satellite Q8IZS7  | Cell membrane {ECO:00002 | 1 |
| Nucleoplasm (GO:00056095475  | Nucleus {ECO:0000255 PRO | 0 |
| Cytosol (GO:0005829);Q15139  | Cytoplasm {ECO:0000269 P | 0 |
| Nucleoplasm (GO:00056Q8IYP9  | Membrane {ECO:0000305};  | 0 |
| Cytosol (GO:0005829) Q86SG5  | Cytoplasm {ECO:0000250}. | 0 |
| Cell Junctions (GO:00075094  | Secreted {ECO:0000250}.  | 0 |
| Cytosol (GO:0005829);P52803  | Cell membrane {ECO:00002 | 0 |
| Nucleoplasm (GO:00056P16401  | Nucleus. Chromosome. Not | 1 |
| Cell Junctions (GO:0009Y446  | Nucleus. Cell junction,  | 0 |
| Cytosol (GO:0005829);Q96T17  |                          | 0 |
| Nuclear bodies (GO:000P09603 | Cell membrane {ECO:00002 | 0 |
| Nucleoplasm (GO:00056Q9BYD9  | Cytoplasm, cytoskeleton  | 0 |
| Centriolar satellite 060733  | Isoform LH-iPLA2: Membra | 0 |
| Cytosol (GO:0005829);Q8IZL2  | Nucleus speckle {ECO:000 | 0 |
| Cytosol (GO:0005829);075177  | Nucleus {ECO:0000250}. C | 0 |
| Mitochondria (GO:0005Q969P6  | Mitochondrion {ECO:00002 | 1 |
| Cytosol (GO:0005829) P35606  | Cytoplasm, cytosol {ECO: | 0 |
| Nucleoplasm (GO:00056Q9BT49  | Nucleus. Chromosome.     | 0 |
| Cytosol (GO:0005829);P50748  | Cytoplasm. Nucleus. Chro | 0 |
| Endoplasmic reticulumP46092  | Cell membrane; Multi-pas | 0 |
| Nucleoplasm (GO:00056A2RRH5  |                          | 0 |
| Cytosol (GO:0005829);Q9NNW7  | Mitochondrion {ECO:00002 | 0 |
| Cytosol (GO:0005829);P98177  | Cytoplasm. Nucleus. Note | 0 |
| Nucleoplasm (GO:00056P20265  | Nucleus.                 | 1 |
| Nucleoplasm (GO:00056Q9NU39  | Nucleus {ECO:0000255 PRO | 0 |
| Nucleoplasm (GO:00056Q8WV15  | Membrane {ECO:0000305};  | 0 |
| Cytosol (GO:0005829);Q8N4P3  |                          | 0 |
| Nucleoplasm (GO:00056Q6P2D0  | Nucleus {ECO:0000250 Uni | 0 |
| Mitochondria (GO:0005Q8N111  | Membrane {ECO:0000305};  | 0 |
| Cytosol (GO:0005829) Q13202  | Cytoplasm {ECO:0000250 U | 0 |
| Cytosol (GO:0005829);014543  |                          | 0 |
| Plasma membrane (GO:0009H5Y7 | Cell membrane {ECO:00002 | 1 |
| Cytosol (GO:0005829);043592  | Nucleus. Cytoplasm. Note | 1 |
| Cytosol (GO:0005829);Q86WV6  | Endoplasmic reticulum me | 0 |
| Cytosol (GO:0005829);Q07343  |                          | 0 |
| Cytosol (GO:0005829) 075324  | Mitochondrion outer memb | 0 |
| Vesicles (GO:0043231)Q99435  | Secreted {ECO:0000250 Un | 0 |
| Nucleoplasm (GO:00056Q6ZNG9  |                          | 0 |
| Nucleoplasm (GO:00056Q93074  | Nucleus {ECO:0000305}.   | 0 |
| Actin filaments (GO:0009UHD8 | Cytoplasm, cytoskeleton  | 1 |
| Nucleoplasm (GO:00056Q8WXT5  | Nucleus {ECO:0000255 PRO | 0 |
| Nucleoplasm (GO:00056Q69YH5  | Nucleus {ECO:0000269 Pub | 1 |
| Nucleoplasm (GO:00056Q86SE5  |                          | 0 |
| Nuclear bodies (GO:000Q5JTC6 | Cytoplasm. Cell membrane | 0 |
| Nucleoplasm (GO:00056Q9NUA8  | Nucleus {ECO:0000305}.   | 0 |
| Cytosol (GO:0005829);Q16778  | Nucleus. Chromosome.     | 0 |
| Actin filaments (GO:00099719 | Cytoplasm {ECO:0000250}. | 0 |
| Vesicles (GO:0043231)Q9NRA8  | Cytoplasm {ECO:0000269 P | 0 |
| Nucleoli fibrillar ceQ2IOM4  | Cell membrane; Single-pa | 0 |
| Cytosol (GO:0005829);Q86TM3  | Nucleus {ECO:0000269 Pub | 1 |
| Endoplasmic reticulumQ6DD88  | Endoplasmic reticulum me | 1 |
| Mitochondria (GO:0005Q9UI09  | Mitochondrion inner memb | 1 |
| Cytosol (GO:0005829) Q969R2  | Membrane; Peripheral mem | 0 |
| Cytosol (GO:0005829);Q9BUR5  | Mitochondrion inner memb | 0 |

|                                 |                          |   |
|---------------------------------|--------------------------|---|
| Cytosol (GO:0005829); Q569H4    |                          | 0 |
| Cell Junctions (GO:0096B77)     | Membrane {ECO:0000305};  | 0 |
| Nucleoplasm (GO:00056Q96EV2)    |                          | 0 |
| Mitochondria (GO:0005Q7L311)    | Mitochondrion {ECO:00002 | 0 |
| Nucleoplasm (GO:00056Q96KE9)    | Cytoplasm {ECO:0000250 U | 0 |
| Nucleoli (GO:0005730) Q92522    | Nucleus. Chromosome.     | 0 |
| Nucleoli (GO:0005730) Q6ZSC3    |                          | 0 |
| Nuclear bodies (GO:00P55854)    | Cytoplasm. Nucleus. Nucl | 0 |
| Mitochondria (GO:0005Q96T52)    | Mitochondrion inner memb | 0 |
| Cytosol (GO:0005829); Q9H3H9    | Nucleus {ECO:0000305}.   | 0 |
| Cytosol (GO:0005829); Q9Y219    | Membrane; Single-pass ty | 0 |
| Cytosol (GO:0005829) Q95466     | Cytoplasm {ECO:0000250}. | 0 |
| Nuclear bodies (GO:00Q8IVF1)    |                          | 0 |
| Nucleoplasm (GO:00056Q6GMV3)    |                          | 0 |
| Nucleoplasm (GO:00056P19544)    | Nucleus {ECO:0000269 Pub | 0 |
| Centrosome (GO:000581Q8TF47)    | Nucleus {ECO:0000250 Uni | 0 |
| Nucleoplasm (GO:00056F5H4B4)    |                          | 0 |
| Nucleoli (GO:0005730) Q9BVI4    | Nucleus membrane {ECO:00 | 0 |
| Cytosol (GO:0005829) Q9UMW8     | Isoform 1: Cytoplasm {EC | 0 |
| Cytosol (GO:0005829); Q96PQ0    | Cell membrane {ECO:00002 | 0 |
| Cytosol (GO:0005829) Q9BTD3     | Membrane {ECO:0000305};  | 0 |
| Nucleoplasm (GO:00056015304)    | Cytoplasm {ECO:0000269 P | 0 |
| Mitochondria (GO:0005Q8WY22)    | Mitochondrion outer memb | 0 |
| Endoplasmic reticulum Q75907    | Endoplasmic reticulum me | 0 |
| Centriolar satellite Q9HCK4     | Membrane {ECO:0000305};  | 0 |
| Nucleoli (GO:0005730) Q8N1Q1    |                          | 0 |
| Nucleoplasm (GO:00056094941)    | Nucleus {ECO:0000269 Pub | 0 |
| Mitochondria (GO:0005Q9ULX9)    | Nucleus.                 | 1 |
| Nuclear bodies (GO:00Q92994)    | Nucleus {ECO:0000250}.   | 0 |
| Cytosol (GO:0005829); A6NHZ5    |                          | 0 |
| Cell Junctions (GO:0030054); Nu | Membrane; Single-pass ty | 0 |
| Cytosol (GO:0005829) A6NES4     |                          | 0 |
| Nucleoplasm (GO:00056Q99828)    | Membrane; Lipid-anchor.  | 0 |
| Cytosol (GO:0005829); Q7Z6G8    | Cytoplasm {ECO:0000269 P | 0 |
| Nuclear bodies (GO:00Q9H3P2)    | Nucleus {ECO:0000269 Pub | 1 |
| Golgi apparatus (GO:0Q9HC58)    | Membrane; Multi-pass mem | 0 |
| Cytosol (GO:0005829); Q6P9B9    | Nucleus membrane {ECO:00 | 0 |
| Cytosol (GO:0005829); Q71UM5    |                          | 0 |
| Golgi apparatus (GO:0Q5VSG8)    | Golgi apparatus membrane | 0 |
| Golgi apparatus (GO:0A1A5B4)    | Cell membrane {ECO:00002 | 0 |
| Nucleoplasm (GO:00056Q9UNN5)    | Nucleus {ECO:0000269 Pub | 1 |
| Vesicles (GO:0043231) Q8N2R8    |                          | 0 |
| Cytosol (GO:0005829); Q00613    | Nucleus {ECO:0000269 Pub | 0 |
| Cytosol (GO:0005829); Q99880    | Nucleus. Chromosome.     | 0 |
| Cytosol (GO:0005829); Q15735    | Cytoplasm {ECO:0000250}. | 0 |
| Nucleoplasm (GO:00056Q9H2W2)    | Nucleus {ECO:0000255 PRO | 0 |
| Cytosol (GO:0005829) Q96QE4     | Membrane {ECO:0000305};  | 0 |
| Cytosol (GO:0005829); Q8N8A6    | Nucleus, nucleolus {ECO: | 0 |
| Cytosol (GO:0005829); Q6IA17    | Membrane {ECO:0000305};  | 0 |
| Cytosol (GO:0005829) Q9NSY0     | Cytoplasm {ECO:0000250}. | 0 |
| Cytosol (GO:0005829); Q03169    |                          | 0 |
| Cytosol (GO:0005829); P59923    | Nucleus {ECO:0000255 PRO | 0 |
| Vesicles (GO:0043231) Q6P3X8    |                          | 0 |
| Cytosol (GO:0005829); Q9UHQ7    | Nucleus {ECO:0000305}.   | 0 |
| Centriolar satellite Q15907     | Recycling endosome membr | 0 |

|                             |                          |   |
|-----------------------------|--------------------------|---|
| Nucleoplasm (GO:00056Q86UA1 | Nucleus {ECO:0000250}.   | 0 |
| Cytosol (GO:0005829);P43364 | Nucleus {ECO:0000269 Pub | 1 |
| Cytosol (GO:0005829);Q8IXY8 |                          | 0 |
| Actin filaments (GO:0Q16587 | Nucleus.                 | 0 |
| Nucleoplasm (GO:00056P57052 | Nucleus, nucleoplasm {EC | 0 |
| Golgi apparatus (GO:0Q6IS24 | Golgi apparatus membrane | 0 |
| Cytosol (GO:0005829);Q5TC79 | Nucleus {ECO:0000305}.   | 0 |
| Nucleoli (GO:0005730)Q6PK04 | Chromosome {ECO:0000269  | 0 |
| Nuclear membrane (GO:P0DJD1 |                          | 0 |
| Cell Junctions (GO:00Q9NXU5 |                          | 0 |
| Midbody (GO:0030496);Q15131 | Cytoplasm, cytoskeleton, | 0 |
| Cytoplasmic bodies (G015524 | Nucleus {ECO:0000269 Pub | 0 |
| Cytosol (GO:0005829) P20062 | Secreted {ECO:0000269 Pu | 0 |
| Cell Junctions (GO:00Q99501 | Cytoplasm, cytoskeleton  | 0 |
| Cytosol (GO:0005829);Q9Y487 | Cell membrane; Multi-pas | 0 |
| Cytosol (GO:0005829);060260 | Cytoplasm, cytosol {ECO: | 0 |
| Cytosol (GO:0005829);Q86SX3 |                          | 0 |
| Actin filaments (GO:0Q8IZP7 | Membrane {ECO:0000305};  | 0 |
| Cytosol (GO:0005829);014964 | Cytoplasm {ECO:0000250 U | 0 |
| Mitochondria (GO:0005Q15759 | Cytoplasm {ECO:0000250}. | 0 |
| Nucleoplasm (GO:00056Q9H930 |                          | 0 |
| Cytosol (GO:0005829) A2RTX5 | Cytoplasm {ECO:0000250 U | 0 |
| Cytosol (GO:0005829);Q9H7B4 | Cytoplasm {ECO:0000269 P | 0 |
| Lipid droplets (GO:00Q9H8H3 | Lipid droplet {ECO:00002 | 0 |
| Cytosol (GO:0005829) Q8IU57 | Membrane {ECO:0000250};  | 0 |
| Cytosol (GO:0005829);P55822 |                          | 0 |
| Intermediate filamentQ3ZCQ3 | Membrane {ECO:0000305};  | 0 |
| Nucleoplasm (GO:00056Q86XI8 |                          | 0 |
| Nuclear speckles (GO:Q7Z7N9 | Membrane {ECO:0000305};  | 0 |
| Nucleoli (GO:0005730)Q6ZVF9 |                          | 0 |
| Intermediate filamentP04259 |                          | 0 |
| Nucleoplasm (GO:00056Q9NWS1 | Cytoplasm {ECO:0000250}. | 0 |
| Cytosol (GO:0005829);Q96MF2 | Cytoplasm {ECO:0000250 U | 0 |
| Microtubules (GO:0015Q01973 | Membrane {ECO:0000269 Pu | 0 |
| Plasma membrane (GO:0P15941 | Apical cell membrane {EC | 0 |
| Nucleoplasm (GO:00056Q0VG06 | Nucleus {ECO:0000269 Pub | 1 |
| Cytosol (GO:0005829);Q92985 | Nucleus. Cytoplasm. Note | 0 |
| Nucleoplasm (GO:00056Q9Y468 | Nucleus {ECO:0000269 Pub | 1 |
| Nucleoplasm (GO:00056P46736 | Nucleus {ECO:0000269 Pub | 0 |
| Cytosol (GO:0005829);Q96AQ9 |                          | 0 |
| Cytoplasmic bodies (GQ8IXW0 |                          | 0 |
| Vesicles (GO:0043231)P18545 |                          | 0 |
| Cytosol (GO:0005829);Q13976 | Cytoplasm {ECO:0000250}. | 0 |
| Cytosol (GO:0005829);P24468 | Nucleus.                 | 0 |
| Golgi apparatus (GO:0P80370 | Membrane; Single-pass ty | 0 |
| Nucleoli (GO:0005730)A6NGC4 | Cell membrane {ECO:00003 | 0 |
| Cytosol (GO:0005829) Q13449 | Cell membrane; Lipid-anc | 0 |
| Cytosol (GO:0005829);Q8IVF2 | Nucleus {ECO:0000250}.   | 0 |
| Cytosol (GO:0005829);Q68BL7 | Secreted {ECO:0000250 Un | 0 |
| Nucleoplasm (GO:00056P08047 | Nucleus. Cytoplasm. Note | 0 |
| Mitochondria (GO:0005Q9NQ50 | Mitochondrion {ECO:00002 | 1 |
| Nucleoplasm (GO:00056Q96EL1 | Nucleus {ECO:0000269 Pub | 0 |
| Nucleoplasm (GO:00056Q3KNV8 | Nucleus {ECO:0000269 Pub | 1 |
| Cytosol (GO:0005829);Q96KR4 | Cytoplasm {ECO:0000269 P | 0 |
| Endoplasmic reticulumP07237 | Endoplasmic reticulum {E | 0 |

|                              |                          |   |
|------------------------------|--------------------------|---|
| Cytosol (GO:0005829);Q9UNM6  |                          | 0 |
| Cytosol (GO:0005829);P40424  | Nucleus {ECO:0000269 Pub | 1 |
| Mitochondria (GO:0005Q9NRX3  |                          | 0 |
| Cytosol (GO:0005829) Q6S5L8  | Cell junction, synapse,  | 0 |
| Cytosol (GO:0005829);Q5XKE5  |                          | 0 |
| Cytosol (GO:0005829);P68036  | Nucleus {ECO:0000269 Pub | 0 |
| Vesicles (GO:0043231)P20783  | Secreted.                | 0 |
| Cytosol (GO:0005829);Q9NSI6  | Cytoplasm. Nucleus {ECO: | 0 |
| Endoplasmic reticulumP40967  | Endoplasmic reticulum me | 0 |
| Nucleoplasm (GO:00056Q03052  | Nucleus.                 | 1 |
| Nucleoplasm (GO:00056Q3KNW1  | Nucleus {ECO:0000250}.   | 0 |
| Mitochondria (GO:0005Q9H5J0  | Nucleus {ECO:0000305}.   | 0 |
| Nucleoplasm (GO:00056P78395  | Nucleus {ECO:0000305 Pub | 0 |
| Nucleoplasm (GO:00056P10243  | Nucleus {ECO:0000250 Uni | 1 |
| Cytosol (GO:0005829);Q9Y295  | Nucleus {ECO:0000269 Pub | 0 |
| Endosomes (GO:0005768Q9P2R3  | Cytoplasm {ECO:0000269 P | 0 |
| Cytosol (GO:0005829);Q7Z739  | Cytoplasm, cytosol {ECO: | 0 |
| Nucleoli (GO:0005730)Q9H7X3  | Nucleus {ECO:0000305}.   | 0 |
| Vesicles (GO:0043231)P56975  | Pro-neuregulin-3, membra | 0 |
| Cytosol (GO:0005829) P09914  | Cytoplasm {ECO:0000269 P | 1 |
| Cytosol (GO:0005829) Q8TB03  |                          | 0 |
| Vesicles (GO:0043231)Q9NR82  | Cell membrane {ECO:00002 | 0 |
| Golgi apparatus (GO:0005794) | Secreted {ECO:0000269 Pu | 0 |
| Vesicles (GO:0043231)Q6PIL6  | Cell membrane {ECO:00002 | 0 |
| Nuclear speckles (GO:Q9UBU8  | Nucleus.                 | 0 |
| Cytosol (GO:0005829);Q7Z5U6  |                          | 0 |
| Actin filaments (GO:0Q09019  | Perikaryon {ECO:0000250  | 0 |
| Vesicles (GO:0043231)P57054  | Membrane {ECO:0000305};  | 0 |
| Centrosome (GO:000581Q99447  |                          | 0 |
| Mitochondria (GO:0005Q8N9F0  | Cytoplasm. Membrane {ECO | 0 |
| Endoplasmic reticulumP51572  | Endoplasmic reticulum me | 1 |
| Cytosol (GO:0005829) Q9BYB4  |                          | 0 |
| Centrosome (GO:000581Q0VDD8  | Cytoplasm, cytoskeleton, | 0 |
| Vesicles (GO:0043231)Q86UF4  |                          | 0 |
| Nucleoplasm (GO:00056C9JG80  | Membrane {ECO:0000305};  | 0 |
| Nuclear bodies (GO:00Q3KNS6  | Nucleus {ECO:0000305}.   | 0 |
| Cytosol (GO:0005829);Q8IYQ7  |                          | 0 |
| Cytosol (GO:0005829) P27449  | Vacuole membrane; Multi- | 0 |
| Cytosol (GO:0005829) P13164  | Cell membrane {ECO:00002 | 0 |
| Cytosol (GO:0005829);Q9H5K3  | Endoplasmic reticulum me | 0 |
| Cytosol (GO:0005829) Q8IXV7  | Cytoplasm {ECO:0000269 P | 0 |
| Nuclear speckles (GO:Q9NVD3  | Cytoplasm, cytosol {ECO: | 0 |
| Golgi apparatus (GO:0Q13635  | Cell membrane {ECO:00002 | 0 |
| Nucleoplasm (GO:00056Q96LT9  | Nucleus {ECO:0000269 Pub | 1 |
| Nucleoplasm (GO:00056Q14586  | Nucleus {ECO:0000305}.   | 0 |
| Aggresome (GO:0016235Q9Y4H2  | Cytoplasm, cytosol {ECO: | 1 |
| Vesicles (GO:0043231)Q8IZ16  |                          | 0 |
| Nucleoplasm (GO:00056015266  | Nucleus {ECO:0000255 PRO | 1 |
| Cytosol (GO:0005829);Q8TD16  | Golgi apparatus {ECO:000 | 0 |
| Mitochondria (GO:0005Q9NVH6  | Mitochondrion matrix {EC | 1 |
| Cytosol (GO:0005829) Q96I18  | Secreted {ECO:0000305}.  | 0 |
| Cytosol (GO:0005829);Q68G75  | Membrane {ECO:0000305};  | 0 |
| Mitochondria (GO:0005Q9P0J0  | Mitochondrion inner memb | 0 |
| Nucleoplasm (GO:00056Q969W8  | Nucleus {ECO:0000305}.   | 0 |
| Nucleoplasm (GO:00056Q6P280  | Nucleus {ECO:0000305}.   | 0 |

|                              |                          |   |
|------------------------------|--------------------------|---|
| Cytosol (GO:0005829) Q16559  |                          | 0 |
| Cytokinetic bridge (GQ96BJ3  |                          | 0 |
| Nucleoplasm (GO:00056Q9Y2V0  |                          | 0 |
| Intermediate filamentP13647  |                          | 0 |
| Cytosol (GO:0005829); Q5VWK0 | Cytoplasm {ECO:0000305}. | 0 |
| Vesicles (GO:0043231) A4D1B5 | Golgi apparatus, trans-G | 0 |
| Cytosol (GO:0005829) Q86W74  | Membrane {ECO:0000305};  | 0 |
| Cytosol (GO:0005829); 060331 | Cell membrane; Periphera | 0 |
| Mitochondria (GO:0005Q15916  | Nucleus {ECO:0000269 Pub | 1 |
| Endoplasmic reticulumQ3KRA6  |                          | 0 |
| Actin filaments (GO:0Q7RTR8  | Membrane; Multi-pass mem | 0 |
| Nucleoplasm (GO:00056Q9BUI4  | Nucleus {ECO:0000250}.   | 1 |
| Cytosol (GO:0005829); Q9NZC7 | Cytoplasm {ECO:0000269 P | 0 |
| Nucleoplasm (GO:00056Q86UT8  |                          | 0 |
| Nucleoplasm (GO:00056Q86UU0  | Nucleus {ECO:0000269 Pub | 1 |
| Golgi apparatus (GO:0P0DPB5  |                          | 0 |
| Cytosol (GO:0005829); Q86Y91 | Nucleus. Cytoplasm. Cyto | 1 |
| Plasma membrane (GO:0Q5NUL3  | Cell membrane {ECO:00002 | 0 |
| Cytosol (GO:0005829); Q86UD0 | Cytoplasm {ECO:0000269 P | 0 |
| Cytosol (GO:0005829); Q8WWZ3 | Cytoplasm {ECO:0000305}. | 0 |
| Mitochondria (GO:0005Q86UW2  | Cell membrane {ECO:00002 | 0 |
| Mitochondria (GO:0005Q5VT66  | Mitochondrion outer memb | 0 |
| Nucleoli fibrillar ceA6NEL2  |                          | 0 |
| Cytosol (GO:0005829); Q9NUP1 | Cytoplasm {ECO:0000250}. | 0 |
| Nuclear membrane (GO:043361  | Nucleus {ECO:0000305}.   | 0 |
| Nuclear speckles (GO:Q9ULH7  | Nucleus {ECO:0000250}.   | 0 |
| Nucleoplasm (GO:00056Q6B0I6  | Nucleus {ECO:0000255 PRO | 0 |
| Mitochondria (GO:0005Q6NUI2  | Mitochondrion outer memb | 0 |
| Plasma membrane (GO:0P31644  | Cell junction, synapse,  | 0 |
| Vesicles (GO:0043231) Q99457 | Nucleus {ECO:0000250}.   | 0 |
| Nucleoplasm (GO:00056Q8N945  |                          | 0 |
| Plasma membrane (GO:0P56817  | Cell membrane {ECO:00002 | 0 |
| Plasma membrane (GO:0Q6ZS82  | Membrane {ECO:0000250};  | 0 |
| Endoplasmic reticulumA6NML5  | Membrane {ECO:0000305};  | 0 |
| Cytosol (GO:0005829); P35442 |                          | 0 |
| Golgi apparatus (GO:0P19793  | Nucleus {ECO:0000255 PRO | 0 |
| Cytosol (GO:0005829); Q7Z713 | Nucleus {ECO:0000269 Pub | 1 |
| Centrosome (GO:000581P0C025  |                          | 0 |
| Golgi apparatus (GO:0P51815  | Nucleus {ECO:0000255 PRO | 0 |
| Nucleoli (GO:0005730) 015226 | Nucleus, nucleolus {ECO: | 1 |
| Plasma membrane (GO:0P24071  | Isoform A.1: Cell membra | 0 |
| Nucleoplasm (GO:00056000629  | Cytoplasm {ECO:0000250}. | 0 |
| Cytosol (GO:0005829); Q13061 | Cell membrane {ECO:00002 | 0 |
| Endoplasmic reticulumQ96CX3  | Nucleus {ECO:0000305}.   | 0 |
| Nucleoplasm (GO:00056014709  | Nucleus {ECO:0000305}.   | 0 |
| Cytosol (GO:0005829); Q7Z6I5 |                          | 0 |
| Cytosol (GO:0005829); Q9ULW6 | Nucleus {ECO:0000305}.   | 0 |
| Cytosol (GO:0005829); P62266 | Cytoplasm, cytosol {ECO: | 1 |
| Plasma membrane (GO:0P59768  | Cell membrane {ECO:00003 | 0 |
| Nuclear speckles (GO:Q9Y6V0  | Cell junction, synapse { | 0 |
| Actin filaments (GO:0Q6MZT1  | Nucleus {ECO:0000250 Uni | 0 |
| Vesicles (GO:0043231) 015503 | Endoplasmic reticulum me | 0 |
| Vesicles (GO:0043231) Q9UL68 | Nucleus {ECO:0000250 Uni | 0 |
| Golgi apparatus (GO:0Q86SI9  | Secreted {ECO:0000305}.  | 0 |
| Cytosol (GO:0005829); Q9HOR3 | Membrane {ECO:0000305};  | 0 |

|                                                                  |                                    |   |
|------------------------------------------------------------------|------------------------------------|---|
| Vesicles (GO:0043231) Q7Z6I6                                     | Cytoplasmic vesicle {ECO:0000269 P | 1 |
| Actin filaments (GO:0099049) Q8IYR2                              | Cytoplasm {ECO:0000269 P           | 0 |
| Vesicles (GO:0043231) Q8N7N1                                     |                                    | 0 |
| Cytosol (GO:0005829); Q8IYR2                                     |                                    | 0 |
| Mitochondria (GO:0005992) Q9UKJ3                                 |                                    | 0 |
| Mitochondria (GO:0005992) Q7Z692                                 | Membrane {ECO:0000305};            | 0 |
| Cytosol (GO:0005829); P35240                                     | Isoform 1: Cell projecti           | 0 |
| Mitochondria (GO:0005992) P62256                                 |                                    | 0 |
| Mitochondria (GO:0005992) Q96IR7                                 |                                    | 0 |
| Centriolar satellite 075449                                      | Cytoplasm {ECO:0000269 P           | 0 |
| Cytosol (GO:0005829) A1L4K1                                      | Nucleus {ECO:0000250 Uni           | 0 |
| Cytosol (GO:0005829); Q96P48                                     | Cytoplasm. Golgi apparat           | 0 |
| Cytosol (GO:0005829) 000408                                      | Isoform PDE2A3: Cell mem           | 0 |
| Cytosol (GO:0005829); Q96JP5                                     | Nucleus {ECO:0000269 Pub           | 1 |
| Cytosol (GO:0005829); Q2M2W7                                     |                                    | 0 |
| Cytosol (GO:0005829); Q7Z5W3                                     | Cytoplasm {ECO:0000269 P           | 0 |
| Vesicles (GO:0043231) Q4G0S4                                     | Membrane {ECO:0000305}.            | 0 |
| Nucleoli fibrillar ceA6NFT4                                      | Cytoplasm, cytoskeleton,           | 0 |
| Cytosol (GO:0005829); P11274                                     | Cell junction, synapse,            | 0 |
| Cytosol (GO:0005829); Q56A73                                     |                                    | 0 |
| Nucleoplasm (GO:0005623) Q9BPZ2                                  | Nucleus {ECO:0000269 Pub           | 0 |
| Nucleoplasm (GO:0005623) Q86VR7                                  | Membrane {ECO:0000305};            | 0 |
| Cytosol (GO:0005829); Q8NF99                                     | Isoform 1: Nucleus.; Iso           | 0 |
| Cytosol (GO:0005829); Q86W11                                     | Nucleus {ECO:0000305}.             | 0 |
| Intermediate filament P08779                                     |                                    | 0 |
| Nucleoplasm (GO:0005623) 094992                                  | Nucleus {ECO:0000269 Pub           | 0 |
| Intermediate filament P02533                                     | Cytoplasm. Nucleus. Note           | 0 |
| Nucleoplasm (GO:0005623) Q9H5P4                                  | Cell projection, cilium            | 0 |
| Nuclear speckles (GO:0005623) P10636                             | Cytoplasm, cytosol {ECO:           | 0 |
| Centrosome (GO:0005829) Q2NKX8                                   | Chromosome, centromere {           | 0 |
| Actin filaments (GO:0005829) Q86X19                              | Cell projection, cilium            | 0 |
| Golgi apparatus (GO:0005829) Q8IUH5                              | Golgi apparatus membrane           | 0 |
| Cytosol (GO:0005829); Q9H8N7                                     | Cytoplasm. Nucleus. Note           | 0 |
| Nucleoplasm (GO:0005623) Q07869                                  | Nucleus.                           | 1 |
| Nucleoplasm (GO:0005623) Q5THR3                                  | Nucleus {ECO:0000269 Pub           | 0 |
| Plasma membrane (GO:0005829) Q6NY19                              |                                    | 0 |
| Nucleoplasm (GO:0005623) Q02161                                  | Cell membrane {ECO:00002           | 0 |
| Vesicles (GO:0043231) B1AK53                                     | Cytoplasm, cytoskeleton            | 0 |
| Cytosol (GO:0005829); Q86WX3                                     | Nucleus, nucleolus {ECO:           | 0 |
| Cytosol (GO:0005829) A6NLC5                                      |                                    | 0 |
| Nucleoplasm (GO:0005623) P28347                                  | Nucleus.                           | 1 |
| Microtubules (GO:0005829) P51178                                 |                                    | 0 |
| Cytosol (GO:0005829) 075356                                      | Endoplasmic reticulum {E           | 0 |
| Microtubules (GO:0005829) P55209                                 | Nucleus {ECO:0000269 Pub           | 0 |
| Plasma membrane (GO:0005829) 075093                              | Secreted {ECO:0000250}.            | 0 |
| Cytosol (GO:0005829) Q86Y78                                      | Secreted {ECO:0000305}.            | 0 |
| Cytosol (GO:0005829); Q04828                                     | Cytoplasm.                         | 0 |
| Cytosol (GO:0005829); Q7Z572                                     |                                    | 0 |
| Nucleoplasm (GO:0005623) Q5VTB9                                  | Cytoplasm {ECO:0000250 U           | 0 |
| Cytosol (GO:0005829); A0MZ66                                     | Perikaryon {ECO:0000250            | 0 |
| Endoplasmic reticulum (GO:0005829); Nucleoli (GO:0005829) Q86UE3 | Nucleus {ECO:0000305}.             | 0 |
| Cytosol (GO:0005829); Q86UE3                                     | Nucleus {ECO:0000305}.             | 0 |
| Nuclear speckles (GO:0005829) Q02742                             | Golgi apparatus membrane           | 0 |
| Intermediate filament Q86VW0                                     |                                    | 0 |
| Mitochondria (GO:0005829) Q8NCM8                                 | Cytoplasm, cytoskeleton,           | 0 |

|                                                        |                          |   |
|--------------------------------------------------------|--------------------------|---|
| Nucleoli fibrillar ceP50895                            | Membrane; Single-pass ty | 0 |
| Nuclear speckles (GO:Q6PCB5                            | Nucleus {ECO:0000250 Uni | 0 |
| Nuclear speckles (GO:P19235                            | Cell membrane; Single-pa | 0 |
| Golgi apparatus (GO:0P43146                            | Membrane; Single-pass ty | 0 |
| Nucleoplasm (GO:00056Q9HBM6                            | Nucleus {ECO:0000250}.   | 0 |
| Cytosol (GO:0005829);Q86TE4                            | Secreted {ECO:0000305}.  | 0 |
| Vesicles (GO:0043231)Q86UP9                            | Membrane {ECO:0000305};  | 0 |
| Vesicles (GO:0043231)Q99653                            | Nucleus {ECO:0000250 Uni | 0 |
| Cytosol (GO:0005829);Focal adhesion sites (GO:0005925) |                          | 0 |
| Cytosol (GO:0005829);P06454                            | Nucleus.                 | 1 |
| Nucleoli fibrillar ceQ9NRC8                            | Cytoplasm. Nucleus, nucl | 0 |
| Vesicles (GO:0043231)Q6ZNB7                            | Endoplasmic reticulum me | 0 |
| Cytosol (GO:0005829);O60602                            | Cell membrane {ECO:00002 | 0 |
| Nucleoplasm (GO:00056Q6VB84                            | Nucleus {ECO:0000255 PRO | 0 |
| Vesicles (GO:0043231)Q6VVB1                            | Endoplasmic reticulum. N | 0 |
| Nuclear speckles (GO:Q494U1                            | Cell membrane {ECO:00002 | 0 |
| Nucleoli (GO:0005730)Q9H213                            |                          | 0 |
| Cytosol (GO:0005829);O43151                            | Nucleus {ECO:0000250 Uni | 0 |
| Nucleoli (GO:0005730)Q9HBT8                            | Nucleus {ECO:0000305}.   | 0 |
| Actin filaments (GO:OQ8N9H8                            |                          | 0 |
| Cytosol (GO:0005829);Q6ZQX7                            |                          | 0 |
| Nucleoplasm (GO:00056Q969J2                            | Nucleus {ECO:0000255 PRO | 1 |
| Nuclear membrane (GO:P0DJD0                            |                          | 0 |
| Nuclear membrane (GO:Q6PKH6                            | Secreted {ECO:0000305}.  | 0 |
| Nucleoplasm (GO:00056Q96NU1                            | Nucleus {ECO:0000250}.   | 0 |
| Cytosol (GO:0005829);Q9C004                            | Cytoplasm {ECO:0000269 P | 0 |
| Plasma membrane (GO:OQ9Y5S1                            | Cell membrane {ECO:00002 | 0 |
| Nucleoplasm (GO:00056Q86X51                            | Nucleus {ECO:0000269 Pub | 0 |
| Plasma membrane (GO:0P59910                            | Cell projection, cilium, | 0 |
| Golgi apparatus (GO:0O14764                            | Cell junction, synapse,  | 0 |
| Nucleoli (GO:0005730)P23193                            | Nucleus.                 | 1 |
| Nucleoli fibrillar ceQ9H9Q4                            | Nucleus {ECO:0000269 Pub | 0 |
| Nucleoplasm (GO:00056O15360                            | Nucleus. Cytoplasm. Note | 0 |
| Nucleoplasm (GO:00056Q96T21                            | Isoform 1: Nucleus {ECO: | 0 |
| Nucleoli (GO:0005730)Q7RTT5                            |                          | 0 |
| Cytosol (GO:0005829);P07327                            | Cytoplasm.               | 0 |
| Endoplasmic reticulumQ92854                            | Cell membrane {ECO:00002 | 0 |
| Cytosol (GO:0005829);Q6ZN17                            | Nucleus. Nucleus, nucleo | 1 |
| Cytosol (GO:0005829);Q9UFH2                            | Cytoplasm, cytoskeleton, | 0 |
| Nucleoplasm (GO:00056Q96EZ8                            | Nucleus {ECO:0000269 Pub | 0 |
| Nucleoplasm (GO:00056Q8IYD8                            | Nucleus {ECO:0000269 Pub | 1 |
| Cytosol (GO:0005829) Q9UC06                            | Nucleus {ECO:0000305}.   | 0 |
| Cell Junctions (GO:0OQ5VY43                            | Cell membrane {ECO:00003 | 0 |
| Cytosol (GO:0005829);Q9UJL9                            | Nucleus {ECO:0000305}.   | 0 |
| Nucleoplasm (GO:00056Q49AA0                            | Nucleus {ECO:0000250 Uni | 0 |
| Cytosol (GO:0005829);Q6ZR62                            |                          | 0 |
| Nucleoplasm (GO:00056Q6QAJ8                            | Membrane {ECO:0000305};  | 0 |
| Nucleoli (GO:0005730)P16403                            | Nucleus. Chromosome. Not | 0 |
| Mitochondria (GO:0005Q9NRY6                            | Mitochondrion membrane { | 1 |
| Cytosol (GO:0005829);Q13541                            |                          | 0 |
| Nucleoplasm (GO:00056A2A3L6                            |                          | 0 |
| Nuclear bodies (GO:0OQ96E09                            |                          | 0 |
| Nuclear bodies (GO:0O A6NDB9                           | Cytoplasm {ECO:0000250}. | 0 |
| Cytosol (GO:0005829) A6NL88                            | Cell junction, synapse,  | 0 |
| Centriolar satellite Q9UGM3                            | Secreted {ECO:0000250}.  | 0 |

|                             |                          |   |
|-----------------------------|--------------------------|---|
| Nucleoplasm (GO:00056Q6ZMK1 | Cytoplasm {ECO:0000250}. | 0 |
| Vesicles (GO:0043231)Q05707 | Secreted, extracellular  | 0 |
| Nuclear bodies (GO:00Q6TDP4 | Cell junction, synapse,  | 0 |
| Nucleoplasm (GO:00056Q6ZS11 | Cell projection, ruffle  | 0 |
| Nucleoplasm (GO:00056Q6ZUI0 | Cytoplasm {ECO:0000250 U | 0 |
| Nucleoplasm (GO:00056Q502X0 | Cytoplasmic vesicle, sec | 0 |
| Cytosol (GO:0005829);P33764 | Cytoplasm {ECO:0000269 P | 0 |
| Cytosol (GO:0005829);Q9UHD9 | Cytoplasm {ECO:0000269 P | 0 |
| Cytosol (GO:0005829);Q5EBL4 | Cytoplasm, cytosol {ECO: | 0 |
| Cytosol (GO:0005829);P56559 | Cell projection, filopod | 0 |
| Nuclear membrane (GO:A6NGB7 | Membrane {ECO:0000305};  | 0 |
| Endoplasmic reticulumQ8N4Z0 | Membrane {ECO:0000250 Un | 0 |
| Intermediate filamentC9JLR9 |                          | 0 |
| Endoplasmic reticulumP0CG08 | Golgi apparatus membrane | 0 |
| Cytosol (GO:0005829);Q5T0Z8 |                          | 0 |
| Cytosol (GO:0005829);P53778 | Cytoplasm. Nucleus. Mito | 0 |
| Endoplasmic reticulumQ68D42 | Membrane {ECO:0000305};  | 0 |
| Nuclear bodies (GO:00Q5VZR2 |                          | 0 |
| Cytosol (GO:0005829);000468 | Isoform 1: Secreted, ext | 0 |
| Cell Junctions (GO:00Q6T4R5 | Isoform 1: Apical cell m | 0 |
| Mitochondria (GO:0005Q6ZT21 | Membrane {ECO:0000305};  | 0 |
| Nuclear membrane (GO:Q68DY1 | Nucleus {ECO:0000305}.   | 0 |
| Mitotic spindle (GO:0A8MVW5 | Golgi apparatus membrane | 0 |
| Golgi apparatus (GO:0P61129 |                          | 0 |
| Vesicles (GO:0043231)Q0VGL1 | Lysosome {ECO:0000269 Pu | 0 |
| Nuclear bodies (GO:00A6NNL0 |                          | 0 |
| Cytosol (GO:0005829);Q8IWE4 | Cell membrane {ECO:00002 | 0 |
| Cytosol (GO:0005829);Q6ZN11 | Nucleus {ECO:0000305}.   | 0 |
| Microtubules (GO:0015P68371 | Cytoplasm, cytoskeleton. | 1 |
| Aggresome (GO:0016235A2RU49 | Cytoplasm {ECO:0000305}. | 0 |
| Nuclear membrane (GO:Q8NA42 | Nucleus {ECO:0000269 Pub | 0 |
| Cytosol (GO:0005829);Q9HCC6 | Nucleus {ECO:0000255 PRO | 0 |
| Nucleoli (GO:0005730)Q6IPU0 | Nucleus {ECO:0000269 Pub | 1 |
| Golgi apparatus (GO:0015162 | Cell membrane {ECO:00002 | 0 |
| Nuclear speckles (GO:Q6ZUJ4 |                          | 0 |
| Mitochondria (GO:0005A6NNW6 |                          | 0 |
| Cytosol (GO:0005829);Q9BR84 | Nucleus {ECO:0000305}.   | 1 |
| Cytosol (GO:0005829);Q99624 | Cell membrane {ECO:00002 | 0 |
| Microtubules (GO:0015P13984 | Nucleus {ECO:0000269 Pub | 0 |
| Mitochondria (GO:0005A1XBS5 | Cytoplasm {ECO:0000269 P | 0 |
| Mitochondria (GO:0005Q5VW36 | Membrane {ECO:0000305};  | 0 |
| Mitochondria (GO:0005A6NJB7 |                          | 0 |
| Cytosol (GO:0005829);Q96LZ3 |                          | 0 |
| Plasma membrane (GO:0Q6UVW9 | Cell membrane {ECO:00002 | 0 |
| Cytosol (GO:0005829) P14151 | Cell membrane {ECO:00002 | 0 |
| Cytosol (GO:0005829);P24386 | Cytoplasm, cytosol {ECO: | 1 |
| Vesicles (GO:0043231)Q8TDH9 |                          | 0 |
| Cytosol (GO:0005829);Q49MI3 | Cytoplasm. Nucleus, nucl | 0 |
| Nucleoplasm (GO:00056Q5T953 |                          | 0 |
| Nuclear speckles (GO:P16104 | Nucleus {ECO:0000269 Pub | 0 |
| Mitochondria (GO:0005P05154 | Secreted, extracellular  | 0 |
| Endoplasmic reticulumQ6UWM7 | Endoplasmic reticulum me | 0 |
| Cytosol (GO:0005829);Q9BXS0 | Membrane {ECO:0000305};  | 0 |
| Cytosol (GO:0005829) A6ND36 | Cytoplasm, cytosol {ECO: | 0 |
| Cytosol (GO:0005829) Q6ZQR2 | Cell projection, cilium  | 0 |



|                             |                          |   |
|-----------------------------|--------------------------|---|
| Nucleoplasm (GO:00056075494 | Nucleus speckle {ECO:000 | 0 |
| Cytosol (GO:0005829);Q4G0W2 |                          | 0 |
| Cytosol (GO:0005829);Q6ZUT6 |                          | 0 |
| Nuclear bodies (GO:00Q14596 | Cytoplasm {ECO:0000269 P | 0 |
| Cytosol (GO:0005829);Q2PPJ7 | Cytoplasm {ECO:0000269 P | 1 |
| Cytosol (GO:0005829);Q9UHB4 | Cytoplasm, perinuclear r | 0 |
| Nucleoli fibrillar ceA6NHQ2 | Nucleus, nucleolus. Note | 1 |
| Cytosol (GO:0005829) Q5VXU1 | Cell membrane {ECO:00003 | 0 |
| Cytosol (GO:0005829);Q96N23 | Cytoplasm, cytoskeleton, | 0 |
| Cytosol (GO:0005829);Q86X60 |                          | 0 |
| Focal adhesion sites Q9NR71 | Neutral ceramidase: Cell | 0 |
| Nuclear bodies (GO:00P61956 | Nucleus. Nucleus, PML bo | 0 |
| Cytosol (GO:0005829);Q8WY41 | Cytoplasm, perinuclear r | 0 |
| Centriolar satellite A6NHT5 | Nucleus {ECO:0000255 PRO | 0 |
| Cytosol (GO:0005829);Q6ICC9 |                          | 0 |
| Cytosol (GO:0005829);Q96FQ6 | Nucleus, nucleolus {ECO: | 0 |
| Centriolar satellite Q7Z6K3 |                          | 0 |
| Nucleoli (GO:0005730)Q6DHV5 |                          | 0 |
| Golgi apparatus (GO:0Q658L1 |                          | 0 |
| Nucleoplasm (GO:00056P18577 | Membrane; Multi-pass mem | 0 |
| Golgi apparatus (GO:0Q0P641 |                          | 0 |
| Cytosol (GO:0005829) Q9HBI1 | Cell junction, focal adh | 0 |
| Cytosol (GO:0005829);P10746 |                          | 0 |
| Cytosol (GO:0005829);Q9Y397 | Endoplasmic reticulum me | 1 |
| Nuclear membrane (GO:Q96FA7 |                          | 0 |
| Cytosol (GO:0005829) A4D161 |                          | 0 |
| Cytosol (GO:0005829);A0PK00 | Nucleus inner membrane { | 0 |
| Microtubules (GO:0015Q5CZC0 |                          | 0 |
| Nucleoli (GO:0005730)P42696 | Nucleus, nucleolus {ECO: | 1 |
| Vesicles (GO:0043231)Q86UR1 | Cytoplasm. Cell membrane | 0 |
| Vesicles (GO:0043231)Q66K66 | Membrane {ECO:0000305};  | 0 |
| Cytosol (GO:0005829);Q2MJR0 | Membrane {ECO:0000250};  | 0 |
| Nucleoplasm (GO:00056Q8NEK5 | Nucleus {ECO:0000305}.   | 0 |
| Nucleoplasm (GO:00056Q14872 | Nucleus {ECO:0000305}.   | 1 |
| Nuclear membrane (GO:Q5SNT2 | Isoform 2: Nucleus inner | 0 |
| Lipid droplets (GO:00Q9H8X9 | Membrane {ECO:0000305};  | 0 |
| Cell Junctions (GO:00Q8IY92 | Nucleus {ECO:0000269 Pub | 0 |
| Cytosol (GO:0005829);Q5MY95 | Cell membrane {ECO:00002 | 0 |
| Cytosol (GO:0005829);P50914 |                          | 0 |
| Cytosol (GO:0005829);Q6ZU67 |                          | 0 |
| Golgi apparatus (GO:0Q5VT40 |                          | 0 |
| Cytosol (GO:0005829) Q7Z5M5 | Membrane {ECO:0000255};  | 0 |
| Centrosome (GO:000581Q8TES7 | Cytoplasm, cytoskeleton, | 0 |
| Nucleoplasm (GO:00056A4D1S0 | Membrane {ECO:0000305};  | 0 |
| Nucleoplasm (GO:00056Q68DK7 | Nucleus {ECO:0000269 Pub | 1 |
| Nucleoplasm (GO:00056Q5S007 | Membrane; Peripheral mem | 0 |
| Cell Junctions (GO:00075712 | Cell membrane; Multi-pas | 0 |
| Nuclear bodies (GO:00Q96GJ1 |                          | 0 |
| Nucleoplasm (GO:00056Q5JTZ5 |                          | 0 |
| Nucleoli (GO:0005730)Q9Y3T9 | Nucleus, nucleoplasm. Nu | 0 |
| Nucleoplasm (GO:00056Q8WX92 | Nucleus {ECO:0000269 Pub | 1 |
| Nuclear membrane (GO:060281 | Nucleus {ECO:0000305}.   | 0 |
| Cytosol (GO:0005829);Q8NHY5 |                          | 0 |
| Cytosol (GO:0005829) Q4G0X4 |                          | 0 |
| Vesicles (GO:0043231)Q6UWP8 | Secreted {ECO:0000250}.  | 0 |

|                             |                          |   |
|-----------------------------|--------------------------|---|
| Cytosol (GO:0005829);Q7Z6V5 |                          | 0 |
| Centrosome (GO:000581A2A368 |                          | 0 |
| Cytosol (GO:0005829);Q8N184 | Nucleus {ECO:0000305}.   | 0 |
| Mitochondria (GO:0005000483 | Mitochondrion inner memb | 1 |
| Nucleoplasm (GO:00056Q6NS38 | Nucleus {ECO:0000269 Pub | 1 |
| Nucleoli (GO:0005730)Q5M7Z0 | Endoplasmic reticulum me | 0 |
| Cytosol (GO:0005829) P0DN86 | Secreted {ECO:0000269 Pu | 0 |
| Focal adhesion sites P78509 | Secreted, extracellular  | 0 |
| Cytosol (GO:0005829);Q6SJ93 |                          | 0 |
| Plasma membrane (GO:0P05090 | Secreted.                | 0 |
| Actin filaments (GO:0P07305 | Nucleus {ECO:0000255 PRO | 1 |
| Cytosol (GO:0005829);Q6NT46 |                          | 0 |
| Cytosol (GO:0005829);Q99732 | Cytoplasm {ECO:0000269 P | 0 |
| Vesicles (GO:0043231)Q6UX27 | Isoform 1: Membrane {ECO | 0 |
| Nucleoplasm (GO:00056Q68CP9 | Nucleus.                 | 1 |
| Nucleoli (GO:0005730)Q15393 | Nucleus {ECO:0000269 Pub | 0 |
| Golgi apparatus (GO:0Q6QNY0 | Cytoplasm {ECO:0000250}. | 0 |
| Centrosome (GO:000581Q3SY56 | Nucleus {ECO:0000250}.   | 1 |
| Cytosol (GO:0005829);A5PLL1 | Cytoplasm. Nucleus {ECO: | 0 |
| Plasma membrane (GO:0014493 | Cell junction, tight jun | 0 |
| Cytosol (GO:0005829);Q86YE8 | Nucleus {ECO:0000305}.   | 0 |
| Centrosome (GO:000581Q8TC17 |                          | 0 |
| Cytosol (GO:0005829);Q6ZV65 |                          | 0 |
| Nuclear membrane (GO:Q9UK76 | Nucleus {ECO:0000269 Pub | 0 |
| Golgi apparatus (GO:0Q8NB42 | Nucleus {ECO:0000305}.   | 0 |
| Cytosol (GO:0005829);Q99584 | Cytoplasm. Secreted. Not | 0 |
| Endoplasmic reticulumQ06730 | Nucleus {ECO:0000305}.   | 0 |
| Nuclear membrane (GO:Q7Z794 |                          | 0 |
| Cytosol (GO:0005829);Q9HCL0 | Cell membrane {ECO:00002 | 0 |
| Nucleoplasm (GO:00056Q5XKL5 | Nucleus {ECO:0000269 Pub | 1 |
| Cytosol (GO:0005829);P21397 | Mitochondrion outer memb | 1 |
| Cytosol (GO:0005829);A6NNL5 | Secreted {ECO:0000305}.  | 0 |
| Nucleoli (GO:0005730)Q9H0U9 | Nucleus, nucleolus {ECO: | 0 |
| Nucleoli fibrillar ceQ5MJ09 |                          | 0 |
| Golgi apparatus (GO:0Q9NPJ4 | Nucleus {ECO:0000269 Pub | 0 |
| Nucleoli (GO:0005730)Q6PGQ1 |                          | 0 |
| Nucleoli fibrillar ceP49789 | Cytoplasm. Mitochondrion | 0 |
| Nucleoplasm (GO:00056Q9BRR0 | Nucleus. Cytoplasm. Note | 0 |
| Nucleoplasm (GO:00056Q6PJQ5 | Nucleus {ECO:0000255 PRO | 1 |
| Cell Junctions (GO:00Q9Y3A4 |                          | 0 |
| Cytosol (GO:0005829) Q6MZP7 | Nucleus {ECO:0000305}.   | 0 |
| Cytosol (GO:0005829) Q14153 | Nucleus {ECO:0000269 Pub | 0 |
| Nucleoplasm (GO:00056Q6UWF9 | Secreted {ECO:0000305}.  | 0 |
| Cell Junctions (GO:00Q9HCY8 | Cytoplasm {ECO:0000269 P | 1 |
| Cytosol (GO:0005829);Q674X7 | Cytoplasm, cytoskeleton  | 0 |
| Nucleoplasm (GO:00056P0CK96 | Membrane {ECO:0000305};  | 0 |
| Nucleoplasm (GO:00056A6NFY4 | Nucleus inner membrane { | 0 |
| Cytosol (GO:0005829);Q6ZU52 |                          | 0 |
| Cytosol (GO:0005829) Q8IYD1 | Cytoplasm {ECO:0000305}. | 1 |
| Cytosol (GO:0005829);Q96K31 |                          | 0 |
| Nucleoplasm (GO:00056P09429 | Nucleus {ECO:0000269 Pub | 0 |
| Cytosol (GO:0005829) Q6ZV89 | Cell junction, synapse,  | 0 |
| Endoplasmic reticulum076036 | Cell membrane {ECO:00003 | 0 |
| Cytosol (GO:0005829);A6NK89 | Cytoplasm, cytosol {ECO: | 0 |
| Cell Junctions (GO:00Q9NTQ9 | Cell membrane {ECO:00002 | 0 |

|                             |                          |   |
|-----------------------------|--------------------------|---|
| Cytosol (GO:0005829);Q9BX26 | Nucleus {ECO:0000250 Uni | 0 |
| Cytosol (GO:0005829);Q9NPH3 | Isoform 1: Cell membrane | 0 |
| Cytosol (GO:0005829);Q02548 | Nucleus.                 | 1 |
| Cytoplasmic bodies (G08NHU6 | Cytoplasm {ECO:0000269 P | 1 |
| Cytosol (GO:0005829) A1A4V9 |                          | 0 |
| Nucleoplasm (GO:00056Q68EN5 |                          | 0 |
| Cytosol (GO:0005829);Q01538 | Nucleus.                 | 0 |
| Cytosol (GO:0005829);P42330 | Cytoplasm.               | 1 |
| Cytosol (GO:0005829);Q9NUQ6 | Cytoplasm {ECO:0000269 P | 1 |
| Nuclear speckles (GO:P15622 | Nucleus {ECO:0000305}.   | 0 |
| Cytosol (GO:0005829);Q8N9V3 |                          | 0 |
| Cytosol (GO:0005829);Q15937 | Nucleus {ECO:0000305}.   | 0 |
| Plasma membrane (GO:0P26447 |                          | 0 |
| Cell Junctions (GO:00Q58EX7 |                          | 0 |
| Cytosol (GO:0005829) Q6V0I7 | Membrane {ECO:0000305};  | 0 |
| Actin filaments (GO:0Q2TAC6 | Cytoplasm, cytoskeleton  | 0 |
| Mitochondria (GO:0005P45954 | Mitochondrion matrix.    | 1 |
| Cytosol (GO:0005829);Q8N2I9 | Nucleus {ECO:0000269 Pub | 1 |
| Centriolar satellite 094886 | Lysosome membrane {ECO:0 | 0 |
| Nucleoplasm (GO:00056Q6UXD1 | Membrane {ECO:0000305};  | 0 |
| Cytosol (GO:0005829);Q99549 | Nucleus {ECO:0000269 Pub | 1 |
| Cytosol (GO:0005829);Q4ZG55 | Membrane {ECO:0000305};  | 0 |
| Nuclear bodies (GO:00Q5JXA9 | Membrane {ECO:0000305};  | 0 |
| Centrosome (GO:000581Q5HY98 | Nucleus {ECO:0000305}.   | 0 |
| Cytosol (GO:0005829);P21817 | Sarcoplasmic reticulum m | 0 |
| Cytosol (GO:0005829);043295 |                          | 0 |
| Nucleoplasm (GO:00056Q9NTX9 |                          | 0 |
| Microtubules (GO:0015P07437 | Cytoplasm, cytoskeleton  | 1 |
| Nucleoplasm (GO:00056Q96JN0 | Nucleus {ECO:0000255 PRO | 1 |
| Nucleoplasm (GO:00056000267 | Nucleus {ECO:0000269 Pub | 1 |
| Plasma membrane (GO:0Q8N628 | Cell membrane; Multi-pas | 0 |
| Nucleoplasm (GO:00056Q9BX82 | Nucleus {ECO:0000305}.   | 1 |
| Nucleoplasm (GO:00056Q86UP8 | Nucleus.                 | 0 |
| Cytosol (GO:0005829) Q14831 | Cell membrane; Multi-pas | 0 |
| Nucleoplasm (GO:00056075486 | Nucleus {ECO:0000269 Pub | 1 |
| Vesicles (GO:0043231)Q9GZT8 | Cytoplasm {ECO:0000269 P | 0 |
| Endoplasmic reticulum014983 | Endoplasmic reticulum me | 0 |
| Cytosol (GO:0005829) P41252 | Cytoplasm {ECO:0000269 P | 1 |
| Nuclear membrane (GO:Q96HA1 | Nucleus, nuclear pore co | 0 |
| Nucleoplasm (GO:00056Q8NCP5 | Nucleus {ECO:0000250}.   | 0 |
| Cytosol (GO:0005829) PODN87 | Secreted {ECO:0000269 Pu | 0 |
| Cell Junctions (GO:00Q9NZ94 | Cell membrane {ECO:00002 | 0 |
| Cytosol (GO:0005829);P40394 | Cytoplasm.               | 1 |
| Cytosol (GO:0005829);Q9P0L1 | Nucleus {ECO:0000255 PRO | 0 |
| Cytosol (GO:0005829);Q96A23 |                          | 0 |
| Nuclear bodies (GO:00Q8N9K5 | Nucleus {ECO:0000305}.   | 0 |
| Cytokinetic bridge (GQ96CW9 | Cell membrane {ECO:00002 | 0 |
| Nucleoplasm (GO:00056P61964 | Nucleus {ECO:0000269 Pub | 1 |
| Mitochondria (GO:0005P36776 | Mitochondrion matrix {EC | 0 |
| Golgi apparatus (GO:0Q9Y4A5 | Nucleus {ECO:0000269 Pub | 1 |
| Cytosol (GO:0005829) Q96G61 | Cytoplasm {ECO:0000269 P | 0 |
| Cytosol (GO:0005829) PODMP2 |                          | 0 |
| Vesicles (GO:0043231)P22083 | Golgi apparatus, Golgi s | 0 |
| Golgi apparatus (GO:0Q8WXX3 |                          | 0 |
| Centriolar satellite Q5T1Q4 | Membrane {ECO:0000305};  | 0 |

|                                |                          |   |
|--------------------------------|--------------------------|---|
| Cytosol (GO:0005829);Q8IZ26    | Nucleus {ECO:0000305}.   | 0 |
| Nucleoplasm (GO:00056Q8N8C0    | Nucleus {ECO:0000305}.   | 0 |
| Nuclear bodies (GO:00Q0VD86    | Nucleus {ECO:0000269 Pub | 0 |
| Cytosol (GO:0005829);Q6NX45    | Nucleus {ECO:0000305}.   | 0 |
| Endoplasmic reticulumP18031    | Endoplasmic reticulum me | 1 |
| Cytosol (GO:0005829);Q9UI08    | Cytoplasm, cytoskeleton  | 0 |
| Nucleoplasm (GO:00056Q9BXN6    | Cytoplasm {ECO:0000250}. | 0 |
| Nuclear membrane (GO:Q15973    | Nucleus {ECO:0000305}.   | 0 |
| Nucleoplasm (GO:00056P12956    | Nucleus {ECO:0000269 Pub | 1 |
| Nucleoplasm (GO:00056P33763    |                          | 0 |
| Nucleoplasm (GO:00056Q5T8A7    | Nucleus, nucleolus {ECO: | 0 |
| Cytosol (GO:0005829);Q96M43    | Cytoplasm {ECO:0000305}. | 0 |
| Cytosol (GO:0005829) 075157    |                          | 0 |
| Nucleoplasm (GO:00056A6NHN6    | Secreted {ECO:0000305}.  | 0 |
| Golgi apparatus (GO:0Q5MCW4    | Nucleus {ECO:0000250}.   | 0 |
| Nucleoplasm (GO:0005654);Vesic | Membrane {ECO:0000255};  | 0 |
| Mitochondria (GO:0005Q86U90    | Mitochondrion {ECO:00003 | 0 |
| Nucleoplasm (GO:00056Q9ULD5    | Nucleus {ECO:0000305}.   | 0 |
| Microtubules (GO:0015Q99570    | Late endosome {ECO:00002 | 0 |
| Nucleoplasm (GO:00056Q86T29    | Nucleus {ECO:0000305}.   | 0 |
| Endoplasmic reticulumP0DI81    | Cytoplasm, perinuclear r | 0 |
| Nuclear bodies (GO:00Q6ZV50    | Nucleus {ECO:0000255 PRO | 0 |
| Vesicles (GO:0043231)P14649    |                          | 0 |
| Centriolar satellite Q96GE5    | Nucleus {ECO:0000305}.   | 0 |
| Mitochondria (GO:0005Q8IUQ4    | Cytoplasm. Nucleus. Note | 0 |
| Centriolar satellite Q9NUD7    |                          | 0 |
| Nucleoplasm (GO:00056P62508    | Nucleus {ECO:0000305}.   | 0 |
| Cytosol (GO:0005829) Q8TEX9    | Cytoplasm {ECO:0000250}. | 0 |
| Nucleoplasm (GO:00056Q9Y618    | Nucleus.                 | 1 |
| Mitochondria (GO:0005Q6T311    |                          | 0 |
| Nuclear speckles (GO:075400    | Nucleus speckle {ECO:000 | 0 |
| Endoplasmic reticulumQ9NXN4    |                          | 0 |
| Cytosol (GO:0005829);Q9UJX3    |                          | 0 |
| Vesicles (GO:0043231)Q9H3S4    |                          | 0 |
| Golgi apparatus (GO:0P48067    | Membrane; Multi-pass mem | 0 |
| Actin filaments (GO:0Q8N556    | Cytoplasm, cytoskeleton, | 1 |
| Cytosol (GO:0005829) E9PAV3    | Cytoplasm {ECO:0000250 U | 0 |
| Nuclear speckles (GO:Q8NFR3    | Endoplasmic reticulum me | 0 |
| Centrosome (GO:000581Q96GS4    | Lysosome membrane {ECO:0 | 0 |
| Cytoplasmic bodies (GP49641    | Golgi apparatus membrane | 0 |
| Cytosol (GO:0005829);Q5TYM5    | Cytoplasm. Mitochondrion | 0 |
| Nucleoplasm (GO:00056095180    | Cell membrane {ECO:00002 | 0 |
| Nucleoplasm (GO:00056043543    | Nucleus {ECO:0000269 Pub | 0 |
| Nucleoplasm (GO:00056Q9UM54    | Golgi apparatus, trans-G | 0 |
| Cytosol (GO:0005829);Q969V6    | Cytoplasm {ECO:0000269 P | 1 |
| Nucleoplasm (GO:00056Q92769    | Nucleus {ECO:0000269 Pub | 0 |
| Mitochondria (GO:0005Q6ZMW2    | Nucleus {ECO:0000305}.   | 0 |
| Actin filaments (GO:0Q147U1    | Nucleus {ECO:0000250}.   | 0 |
| Vesicles (GO:0043231)P03956    | Secreted, extracellular  | 0 |
| Cytosol (GO:0005829);P00325    | Cytoplasm.               | 0 |
| Cytosol (GO:0005829);P15884    | Nucleus {ECO:0000255 PRO | 1 |
| Vesicles (GO:0043231)Q9BYP7    | Cytoplasm {ECO:0000269 P | 0 |
| Microtubules (GO:0015Q9NRP4    | Mitochondrion matrix {EC | 0 |
| Cytosol (GO:0005829);P35367    | Cell membrane {ECO:00002 | 1 |
| Centrosome (GO:000581Q3YEC7    | Isoform 1: Cytoplasm {EC | 0 |

|                              |                           |   |
|------------------------------|---------------------------|---|
| Nucleoli (GO:0005730) P52737 | Nucleus {ECO:0000305}.    | 0 |
| Intermediate filament Q9Y2L8 | Nucleus {ECO:0000255 PRO} | 0 |
| Cytosol (GO:0005829) Q9Y296  | Golgi apparatus, cis-Gol  | 0 |
| Centrosome (GO:000581Q8N4P2  | Cell projection, cilium   | 0 |
| Nucleoplasm (GO:00056015040  |                           | 0 |
| Actin filaments (GO:0Q8NB50  | Nucleus {ECO:0000305}.    | 0 |
| Golgi apparatus (GO:0A8K979  |                           | 0 |
| Cytosol (GO:0005829); Q96JZ2 | Cytoplasm. Nucleus.       | 0 |
| Endoplasmic reticulum Q06732 | Nucleus {ECO:0000305}.    | 0 |
| Nucleoplasm (GO:00056Q96KM6  | Nucleus {ECO:0000305}.    | 0 |
| Cytosol (GO:0005829); Q86W34 |                           | 0 |
| Mitochondria (GO:0005P21359  | Nucleus {ECO:0000269 Pub  | 0 |
| Endoplasmic reticulum Q8N0U8 | Endoplasmic reticulum me  | 1 |
| Nucleoplasm (GO:00056Q8TF45  | Nucleus {ECO:0000305}.    | 0 |
| Centrosome (GO:000581P53355  | Isoform 1: Cytoplasm. Cy  | 0 |
| Cytosol (GO:0005829); P29034 |                           | 0 |
| Nucleoplasm (GO:00056Q9H0M5  | Nucleus {ECO:0000305}.    | 0 |
| Nucleoplasm (GO:00056P49335  | Nucleus.                  | 1 |
| Plasma membrane (GO:0Q08722  | Cell membrane {ECO:00002  | 1 |
| Nucleoplasm (GO:00056Q04724  | Nucleus {ECO:0000269 Pub  | 1 |
| Nuclear speckles (GO:Q96JK9  | Nucleus speckle {ECO:000  | 1 |
| Actin filaments (GO:0Q13033  | Cytoplasm {ECO:0000250}.  | 0 |
| Nuclear bodies (GO:0Q16600   | Nucleus {ECO:0000305}.    | 0 |
| Nucleoplasm (GO:00056Q9H4T2  | Nucleus {ECO:0000305}.    | 0 |
| Golgi apparatus (GO:0Q9H7P6  | Endosome {ECO:0000305}.   | 0 |
| Centrosome (GO:000581Q9H6K1  | Cytoplasm {ECO:0000269 P  | 0 |
| Cytosol (GO:0005829); P00813 | Cell membrane {ECO:00002  | 0 |
| Nucleoli (GO:0005730) Q03989 | Nucleus {ECO:0000255 PRO  | 1 |
| Cytosol (GO:0005829); Q8NI37 | Mitochondrion matrix {EC  | 0 |
| Nuclear membrane (GO:Q7Z3J3  |                           | 0 |
| Nucleoplasm (GO:00056Q8NBF2  | Cytoplasm, cytosol {ECO:  | 0 |
| Cytosol (GO:0005829); Q8NHV6 | Nucleus {ECO:0000305}.    | 0 |
| Centrosome (GO:000581Q6NV74  |                           | 0 |
| Plasma membrane (GO:0Q5JTY5  |                           | 0 |
| Cell Junctions (GO:0Q9UQD0   | Cell membrane {ECO:00002  | 0 |
| Vesicles (GO:0043231) Q13751 | Secreted, extracellular   | 0 |
| Cytosol (GO:0005829); Q8N257 | Nucleus. Chromosome.      | 0 |
| Cytosol (GO:0005829) 015131  | Cytoplasm.                | 1 |
| Cytosol (GO:0005829); Q8N2N9 |                           | 0 |
| Cytosol (GO:0005829); Q9NZN5 | Cytoplasm {ECO:0000305}.  | 0 |
| Actin filaments (GO:0Q9NR12  | Cytoplasm {ECO:0000250}.  | 0 |
| Actin filaments (GO:0P21333  | Cytoplasm, cell cortex.   | 0 |
| Cytosol (GO:0005829) Q7Z6B7  |                           | 0 |
| Golgi apparatus (GO:0Q92520  | Secreted {ECO:0000250}.   | 0 |
| Cytosol (GO:0005829); Q86U38 |                           | 0 |
| Cytosol (GO:0005829); Q9ULF5 | Membrane {ECO:0000305};   | 0 |
| Cytosol (GO:0005829); P49662 | Cytoplasm, cytosol {ECO:  | 0 |
| Vesicles (GO:0043231) 095782 | Cell membrane {ECO:00002  | 0 |
| Golgi apparatus (GO:0Q495W5  | Golgi apparatus, Golgi s  | 0 |
| Cytosol (GO:0005829) P09525  |                           | 0 |
| Nuclear bodies (GO:0Q14657   | Cytoplasm {ECO:0000269 P  | 0 |
| Cytosol (GO:0005829); P0C2L3 | Membrane {ECO:0000305};   | 0 |
| Nucleoplasm (GO:00056F8W1W9  |                           | 0 |
| Nucleoli fibrillar ce Q9Y484 | Preautophagosomal struct  | 0 |
| Cell Junctions (GO:0Q9H1A3   |                           | 0 |

|                              |                           |   |
|------------------------------|---------------------------|---|
| Nucleoplasm (GO:00056Q86V71  | Nucleus {ECO:0000305}.    | 0 |
| Nuclear bodies (GO:00Q6ECI4  | Nucleus {ECO:0000269 Pub  | 1 |
| Golgi apparatus (GO:0Q9UHV2  |                           | 0 |
| Mitochondria (GO:0005Q8TD17  | Nucleus {ECO:0000305}.    | 0 |
| Nucleoli fibrillar ceQ6NSZ9  | Nucleus {ECO:0000255 PRO  | 0 |
| Cytosol (GO:0005829) P08133  | Cytoplasm {ECO:0000250}.  | 0 |
| Nuclear speckles (GO:Q8N8Z8  | Nucleus {ECO:0000305}.    | 0 |
| Cytosol (GO:0005829);P60983  |                           | 0 |
| Golgi apparatus (GO:0Q6ZMC9  | Membrane; Single-pass ty  | 0 |
| Nucleoplasm (GO:00056Q8TAQ5  | Nucleus {ECO:0000305}.    | 0 |
| Nucleoplasm (GO:00056Q0D2J5  | Nucleus {ECO:0000305}.    | 0 |
| Centriolar satellite Q5SVZ6  | Nucleus {ECO:0000305}.    | 0 |
| Nucleoli (GO:0005730)Q16670  | Nucleus {ECO:0000255 PRO  | 1 |
| Microtubules (GO:0015Q9BY89  |                           | 0 |
| Golgi apparatus (GO:0P11717  | Lysosome membrane {ECO:0  | 0 |
| Cytosol (GO:0005829);Q96RP7  | Golgi apparatus, Golgi s  | 0 |
| Centrosome (GO:000581Q14204  | Cytoplasm, cytoskeleton.  | 0 |
| Golgi apparatus (GO:0Q9H1V8  | Cytoplasmic vesicle, sec  | 0 |
| Cytosol (GO:0005829);Q15366  | Nucleus {ECO:0000269 Pub  | 1 |
| Nucleoplasm (GO:00056Q8N5A5  | Nucleus {ECO:0000269 Pub  | 1 |
| Cell Junctions (GO:00P12931  | Cell membrane {ECO:00002  | 0 |
| Golgi apparatus (GO:0095780  | Nucleus {ECO:0000305}.    | 0 |
| Cytosol (GO:0005829) Q68DY9  | Nucleus {ECO:0000305}.    | 0 |
| Cytosol (GO:0005829) Q9H6A9  | Membrane {ECO:0000305};   | 0 |
| Nucleoplasm (GO:00056Q8TC27  | Membrane {ECO:0000305};   | 0 |
| Mitochondria (GO:0005Q9ULC5  | Mitochondrion {ECO:00002  | 0 |
| Nuclear speckles (GO:Q6P9F7  | Cell membrane {ECO:00002  | 0 |
| Mitochondria (GO:0005Q9NUT2  | Mitochondrion inner memb  | 1 |
| Cytosol (GO:0005829) Q7KZF4  | Cytoplasm {ECO:0000269 P  | 0 |
| Nucleoplasm (GO:00056A8K8V0  | Nucleus {ECO:0000305}.    | 0 |
| Cytosol (GO:0005829);000232  |                           | 0 |
| Nucleoplasm (GO:00056Q96MY1  |                           | 0 |
| Midbody (GO:0030496);Nuclear | speckles (GO:0016607);Ves | 0 |
| Mitochondria (GO:0005Q9H015  | Membrane; Multi-pass mem  | 0 |
| Nuclear speckles (GO:A6NJL1  | Nucleus {ECO:0000255 PRO  | 0 |
| Vesicles (GO:0043231)Q9Y227  | Golgi apparatus membrane  | 0 |
| Nucleoli (GO:0005730)Q13901  | Nucleus {ECO:0000269 Pub  | 0 |
| Nucleoli fibrillar ceQ66K14  | Membrane {ECO:0000305};   | 0 |
| Vesicles (GO:0043231)P01009  | Secreted. Endoplasmic re  | 0 |
| Nuclear membrane (GO:Q5SZD1  |                           | 0 |
| Cytosol (GO:0005829);P29084  | Nucleus {ECO:0000269 Pub  | 1 |
| Microtubules (GO:0015P49910  | Nucleus {ECO:0000255 PRO  | 0 |
| Nucleoplasm (GO:00056Q96PV0  |                           | 0 |
| Cytosol (GO:0005829);P54132  | Nucleus {ECO:0000269 Pub  | 1 |
| Cytosol (GO:0005829);Q7Z2F6  |                           | 0 |
| Cytosol (GO:0005829);Q5TDH0  | Cytoplasm, cytosol {ECO:  | 1 |
| Actin filaments (GO:0095425  | Cell membrane; Periphera  | 0 |
| Nucleoplasm (GO:00056Q9UPN9  | Nucleus {ECO:0000269 Pub  | 0 |
| Nucleoli (GO:0005730)Q7Z4F1  | Membrane {ECO:0000305};   | 0 |
| Intermediate filamentQ96FA3  |                           | 0 |
| Nucleoplasm (GO:00056Q8N720  | Nucleus {ECO:0000305}.    | 0 |
| Mitochondria (GO:0005Q7Z2W9  | Mitochondrion {ECO:00002  | 0 |
| Cytosol (GO:0005829);Q3KQV9  |                           | 0 |
| Cytosol (GO:0005829);Q6P050  | Cytoplasm, myofibril, sa  | 0 |
| Nuclear speckles (GO:Q8N393  | Nucleus {ECO:0000305}.    | 0 |

|                                                        |                          |   |
|--------------------------------------------------------|--------------------------|---|
| Nucleoplasm (GO:00056Q6ZMY9                            | Nucleus {ECO:0000305}.   | 0 |
| Mitochondria (GO:0005076082                            | Membrane {ECO:0000269 Pu | 0 |
| Nucleoplasm (GO:00056Q96B18                            |                          | 0 |
| Cytosol (GO:0005829);P78563                            | Nucleus. Nucleus, nucleo | 0 |
| Nucleoli (GO:0005730)A6NHJ4                            | Nucleus {ECO:0000250}.   | 0 |
| Cytosol (GO:0005829);P42858                            | Huntingtin: Cytoplasm {E | 0 |
| Vesicles (GO:0043231)P21730                            | Cell membrane {ECO:00002 | 0 |
| Cytosol (GO:0005829);P20813                            | Endoplasmic reticulum me | 0 |
| Plasma membrane (GO:0005886);VMembrane {ECO:0000305};  |                          | 0 |
| Cytosol (GO:0005829);Q14D04                            | Cell membrane {ECO:00002 | 0 |
| Nuclear speckles (GO:Q9UHJ6                            | Cytoplasm {ECO:0000250}. | 0 |
| Cytosol (GO:0005829) Q99683                            | Cytoplasm. Endoplasmic r | 0 |
| Nucleoli fibrillar ceQ9ULD0                            | Mitochondrion matrix {EC | 0 |
| Peroxisomes (GO:00057Q9Y2Q3                            | Peroxisome {ECO:0000269  | 1 |
| Nucleoplasm (GO:00056Q99729                            | Nucleus {ECO:0000269 Pub | 0 |
| Centriolar satellite P04085                            | Secreted. Note=Released  | 0 |
| Plasma membrane (GO:0P16150                            | Membrane {ECO:0000255};  | 0 |
| Nuclear speckles (GO:Q8IW36                            | Nucleus {ECO:0000305}.   | 0 |
| Plasma membrane (GO:0Q9Y5F2                            | Cell membrane {ECO:00002 | 0 |
| Nucleoplasm (GO:00056Q5EBL2                            | Nucleus {ECO:0000250}.   | 0 |
| Nucleoplasm (GO:00056095528                            | Endomembrane system {ECO | 0 |
| Nuclear membrane (GO:Q9H7R5                            | Nucleus {ECO:0000305}.   | 0 |
| Nucleoli (GO:0005730)Q9H7B2                            | Nucleus, nucleolus {ECO: | 1 |
| Centriolar satellite Q9Y4I1                            |                          | 0 |
| Cytosol (GO:0005829);095352                            | Cytoplasm {ECO:0000250}. | 0 |
| Actin filaments (GO:0043166                            | Cytoplasm, cytoskeleton  | 0 |
| Centrosome (GO:000581Q86WT1                            | Cell projection, cilium  | 0 |
| Vesicles (GO:0043231)Q96S21                            | Cell membrane {ECO:00003 | 0 |
| Cytosol (GO:0005829);095427                            | Endoplasmic reticulum me | 0 |
| Endoplasmic reticulumQ14031                            | Secreted, extracellular  | 0 |
| Vesicles (GO:0043231)Q9P2J8                            | Nucleus {ECO:0000305}.   | 0 |
| Nucleoplasm (GO:00056Q9XR5                             |                          | 0 |
| Nuclear bodies (GO:00Q00056                            | Nucleus.                 | 1 |
| Nucleoplasm (GO:00056Q9NS56                            | Nucleus. Nucleus, PML bo | 1 |
| Golgi apparatus (GO:0075354                            | Golgi apparatus membrane | 0 |
| Golgi apparatus (GO:0A6NI56                            | Early endosome {ECO:0000 | 0 |
| Peroxisomes (GO:00057Q8WVX9                            | Peroxisome membrane {ECO | 1 |
| Cytosol (GO:0005829) Q9H799                            | Membrane {ECO:0000305};  | 0 |
| Mitochondria (GO:0005Q8N8J6                            | Nucleus {ECO:0000305}.   | 0 |
| Cell Junctions (GO:00Q9NRR8                            | Cytoplasm, cytoskeleton. | 0 |
| Cytosol (GO:0005829);Q9UIV8                            | Cytoplasm.               | 1 |
| Cytosol (GO:0005829) Q9BQ51                            | Isoform 3: Secreted {ECO | 0 |
| Nuclear bodies (GO:00Q8N7K0                            | Nucleus {ECO:0000305}.   | 0 |
| Microtubules (GO:0015Q13813                            | Cytoplasm, cytoskeleton. | 0 |
| Nucleoplasm (GO:00056P08949                            | Secreted.                | 0 |
| Actin filaments (GO:0015629);CCell junction, focal adh |                          | 0 |
| Actin filaments (GO:0Q9P2G3                            | Cytoplasm, cytosol {ECO: | 0 |
| Cytosol (GO:0005829);Q8IWE2                            | Cytoplasm {ECO:0000250}. | 0 |
| Cytosol (GO:0005829);Q96AT9                            |                          | 0 |
| Nucleoplasm (GO:00056Q14592                            | Nucleus {ECO:0000305}.   | 0 |
| Nucleoli (GO:0005730)075151                            | Nucleus, nucleolus {ECO: | 0 |
| Cytosol (GO:0005829);P62854                            | Cytoplasm, cytosol {ECO: | 1 |
| Vesicles (GO:0043231)P07602                            | Lysosome {ECO:0000269 Pu | 0 |
| Mitochondria (GO:0005P60903                            |                          | 0 |
| Cytosol (GO:0005829);P61513                            |                          | 0 |

|                                                       |                          |   |
|-------------------------------------------------------|--------------------------|---|
| Cytosol (GO:0005829);P09630                           | Nucleus.                 | 1 |
| Cytosol (GO:0005829);Q86VQ6                           | Cytoplasm {ECO:0000250 U | 0 |
| Vesicles (GO:0043231)Q8N7X2                           |                          | 0 |
| Cytoplasmic bodies (G0:Q9BXW4                         | Cytoplasm, cytoskeleton  | 0 |
| Cell Junctions (GO:00Q9BTE3                           | Nucleus {ECO:0000269 Pub | 0 |
| Cytosol (GO:0005829) Q8N7A1                           | Cytoplasm {ECO:0000269 P | 1 |
| Nucleoli (GO:0005730)Q15543                           | Nucleus {ECO:0000269 Pub | 0 |
| Centrosome (GO:000581075290                           | Nucleus {ECO:0000305}.   | 0 |
| Mitochondria (GO:0005Q9NVI7                           | Mitochondrion inner memb | 1 |
| Golgi apparatus (GO:0Q8TAF7                           | Nucleus {ECO:0000305}.   | 0 |
| Cell Junctions (GO:00Q16625                           | Cell membrane {ECO:00002 | 1 |
| Cytosol (GO:0005829);Q6V702                           | Cytoplasm {ECO:0000250 U | 0 |
| Nucleoplasm (GO:00056P62805                           | Nucleus. Chromosome.     | 1 |
| Nucleoplasm (GO:00056Q2M3W8                           | Nucleus {ECO:0000305}.   | 0 |
| Nucleoplasm (GO:00056Q9NTI7                           | Nucleus {ECO:0000269 Pub | 1 |
| Cytosol (GO:0005829);P15621                           | Nucleus {ECO:0000305}.   | 0 |
| Vesicles (GO:0043231)Q86TH1                           | Secreted {ECO:0000305}.  | 0 |
| Nucleoplasm (GO:00056Q96EQ0                           |                          | 0 |
| Nucleoli (GO:0005730)Q6PG37                           | Nucleus {ECO:0000305}.   | 0 |
| Nucleoplasm (GO:00056Q9H0Q0                           |                          | 0 |
| Nuclear bodies (GO:00000159                           | Isoform 1: Cytoplasm {EC | 0 |
| Microtubules (GO:0015Q9NYS0                           | Cytoplasm {ECO:0000269 P | 0 |
| Cytosol (GO:0005829);060814                           | Nucleus. Chromosome.     | 0 |
| Nucleoplasm (GO:00056Q15561                           | Nucleus.                 | 1 |
| Mitochondria (GO:0005Q86YZ3                           | Cytoplasmic granule {ECO | 0 |
| Cytosol (GO:0005829);Q5TA89                           | Nucleus {ECO:0000255 PRO | 0 |
| Centrosome (GO:000581Q86XU0                           | Nucleus {ECO:0000305}.   | 0 |
| Microtubules (GO:0015Q96SE7                           | Nucleus {ECO:0000305}.   | 0 |
| Vesicles (GO:0043231)P16885                           |                          | 0 |
| Cytosol (GO:0005829);Q86WN1                           | Cytoplasm {ECO:0000250 U | 0 |
| Nucleoli (GO:0005730)Q9NQZ8                           | Nucleus {ECO:0000305}.   | 0 |
| Cytosol (GO:0005829);P06703                           | Nucleus envelope. Cytopl | 0 |
| Golgi apparatus (GO:0P30050                           |                          | 0 |
| Golgi apparatus (GO:0Q9UQ16                           | Cytoplasm {ECO:0000305}. | 0 |
| Centrosome (GO:000581P58317                           | Nucleus {ECO:0000305}.   | 0 |
| Plasma membrane (GO:0095297                           | Membrane {ECO:0000305};  | 1 |
| Plasma membrane (GO:0P02686                           | Myelin membrane; Periphe | 0 |
| Cytosol (GO:0005829);Q02040                           | Nucleus speckle {ECO:000 | 1 |
| Nucleoli (GO:0005730)Q6ZMV7                           |                          | 0 |
| Cytokinetic bridge (GO:0045171);Vesicles (GO:0043231) |                          | 0 |
| Cytosol (GO:0005829);P23276                           | Cell membrane; Single-pa | 1 |
| Nucleoli (GO:0005730)Q76FK4                           | Nucleus, nucleolus {ECO: | 1 |
| Cytosol (GO:0005829);Q9NWZ3                           | Cytoplasm {ECO:0000269 P | 1 |
| Nucleoplasm (GO:00056A5D8V7                           | Cell projection, cilium  | 0 |
| Mitochondria (GO:0005Q9Y6G3                           | Mitochondrion {ECO:00002 | 1 |
| Nucleoplasm (GO:00056Q9NQZ7                           | Cytoplasmic vesicle memb | 0 |
| Nucleoplasm (GO:00056Q9NS26                           | Cytoplasm {ECO:0000269 P | 0 |
| Nucleoplasm (GO:00056Q9H4Z2                           | Nucleus {ECO:0000269 Pub | 1 |
| Nuclear speckles (GO:Q96MR9                           | Nucleus {ECO:0000305}.   | 1 |
| Microtubules (GO:0015P0DPH7                           | Cytoplasm, cytoskeleton. | 1 |
| Nucleoplasm (GO:00056Q14593                           | Nucleus {ECO:0000305}.   | 0 |
| Nucleoplasm (GO:00056P51523                           | Nucleus {ECO:0000305}.   | 1 |
| Nucleoli (GO:0005730)Q9BXY0                           | Nucleus, nucleolus {ECO: | 1 |
| Nucleoplasm (GO:00056Q5HYK9                           | Nucleus {ECO:0000305}.   | 0 |
| Mitochondria (GO:0005P43250                           | Membrane; Lipid-anchor.  | 0 |



|                              |                          |   |
|------------------------------|--------------------------|---|
| Vesicles (GO:0043231) P49642 |                          | 0 |
| Mitochondria (GO:0005Q9NX47  | Mitochondrion outer memb | 0 |
| Nucleoplasm (GO:00056A6NJU9  | Membrane {ECO:0000255};  | 0 |
| Cytosol (GO:0005829); 060218 | Lysosome {ECO:0000269 Pu | 0 |
| Cytosol (GO:0005829) 075897  | Cytoplasm.               | 0 |
| Nucleoplasm (GO:00056043829  | Nucleus {ECO:0000269 Pub | 1 |
| Cytosol (GO:0005829); Q9Y5K6 | Cytoplasm, cytoskeleton  | 0 |
| Cytosol (GO:0005829); P08319 | Cytoplasm.               | 0 |
| Nucleoplasm (GO:00056Q8NDW4  | Nucleus {ECO:0000305}.   | 0 |
| Nucleoplasm (GO:00056Q9NXH8  | Membrane {ECO:0000305};  | 0 |
| Nuclear speckles (GO:Q92633  | Cell surface {ECO:000026 | 0 |
| Mitochondria (GO:0005Q6NVY1  | Mitochondrion {ECO:00002 | 0 |
| Nucleoplasm (GO:00056Q6NX49  | Nucleus {ECO:0000305}.   | 0 |
| Cytosol (GO:0005829) Q53LP3  |                          | 0 |
| Nucleoplasm (GO:00056E9PJ23  |                          | 0 |
| Mitochondria (GO:0005P82970  | Nucleus {ECO:0000269 Pub | 1 |
| Nucleoplasm (GO:00056Q8N108  | Isoform 1: Nucleus.; Iso | 0 |
| Golgi apparatus (GO:0060476  | Golgi apparatus membrane | 1 |
| Nucleoplasm (GO:00056Q9BRH9  | Nucleus {ECO:0000305}.   | 0 |
| Endoplasmic reticulum Q96HY6 | Endoplasmic reticulum {E | 1 |
| Cytosol (GO:0005829); Q14186 | Nucleus {ECO:0000250 Uni | 1 |
| Nucleoplasm (GO:00056Q96SK3  | Nucleus {ECO:0000305}.   | 0 |
| Cytosol (GO:0005829); Q9HCZ1 | Nucleus {ECO:0000305}.   | 0 |
| Lipid droplets (GO:00Q8NBQ5  | Endoplasmic reticulum {E | 0 |
| Actin filaments (GO:0Q5T011  | Lysosome membrane {ECO:0 | 0 |
| Nucleoplasm (GO:00056P98168  | Nucleus {ECO:0000305}.   | 0 |
| Nucleoplasm (GO:00056Q9Y6S9  |                          | 0 |
| Microtubules (GO:0015630)    |                          | 0 |
| Actin filaments (GO:0Q15878  | Membrane; Multi-pass mem | 0 |
| Nucleoplasm (GO:00056Q2TAL8  |                          | 0 |
| Nuclear speckles (GO:Q86XP3  | Cytoplasm. Nucleus speck | 0 |
| Cytosol (GO:0005829); P62750 |                          | 0 |
| Golgi apparatus (GO:0Q9BZD2  | Membrane; Multi-pass mem | 0 |
| Nucleoplasm (GO:00056Q8WUJ0  | Nucleus {ECO:0000269 Pub | 0 |
| Actin filaments (GO:0P42694  | Nucleus {ECO:0000305}.   | 0 |
| Microtubules (GO:0015Q8NCL8  | Membrane {ECO:0000305};  | 0 |
| Endoplasmic reticulum Q9NWZ5 | Cytoplasm {ECO:0000269 P | 0 |
| Nucleoplasm (GO:00056Q9GZU2  | Nucleus {ECO:0000255 PRO | 0 |
| Nucleoli (GO:0005730) Q9NVU7 | Nucleus, nucleolus {ECO: | 1 |
| Cytosol (GO:0005829); Q15776 | Nucleus {ECO:0000255 PRO | 0 |
| Cytosol (GO:0005829); Q96M11 | Cytoplasm {ECO:0000269 P | 0 |
| Plasma membrane (GO:0P12829  |                          | 0 |
| Nuclear membrane (GO:Q9H7R0  | Nucleus {ECO:0000305}.   | 0 |
| Vesicles (GO:0043231) Q6ZN06 | Nucleus {ECO:0000305}.   | 0 |
| Nucleoplasm (GO:00056P09017  | Nucleus.                 | 1 |
| Cytosol (GO:0005829) Q5VW00  |                          | 0 |
| Cytosol (GO:0005829) Q86V86  | Cytoplasm {ECO:0000269 P | 1 |
| Nucleoli (GO:0005730) 043681 | Cytoplasm. Endoplasmic r | 0 |
| Endoplasmic reticulum Q12797 | Isoform 1: Endoplasmic r | 1 |
| Cytosol (GO:0005829); Q7Z698 | Cell membrane {ECO:00002 | 0 |
| Nucleoli (GO:0005730) Q06210 |                          | 0 |
| Mitochondria (GO:0005P17031  | Nucleus {ECO:0000305}.   | 0 |
| Plasma membrane (GO:0Q9NZM3  | Cytoplasm.               | 0 |
| Cytosol (GO:0005829); P04629 | Cell membrane {ECO:00002 | 0 |
| Cytosol (GO:0005829) 060502  | Isoform 3: Nucleus {ECO: | 0 |

|                              |                          |   |
|------------------------------|--------------------------|---|
| Nucleoplasm (GO:00056Q9UC07  | Nucleus {ECO:0000305}.   | 0 |
| Nucleoplasm (GO:00056Q16881  | Cytoplasm {ECO:0000250}. | 0 |
| Cytosol (GO:0005829); Q7Z6K4 |                          | 0 |
| Cytosol (GO:0005829); Q96ND8 | Nucleus {ECO:0000305}.   | 0 |
| Nucleoplasm (GO:00056Q3ZCX4  | Nucleus {ECO:0000250 Uni | 0 |
| Nucleoplasm (GO:00056P98169  | Nucleus {ECO:0000305}.   | 0 |
| Nucleoplasm (GO:00056Q8WV37  | Nucleus {ECO:0000269 Pub | 1 |
| Nucleoplasm (GO:00056Q96SQ5  | Nucleus {ECO:0000305}.   | 0 |
| Nucleoplasm (GO:00056Q9UJC5  | Nucleus {ECO:0000269 Pub | 1 |
| Nucleoplasm (GO:00056Q8N283  |                          | 0 |
| Cytoplasmic bodies (GQ9Y5A9  | Cytoplasm, cytosol {ECO: | 0 |
| Nucleoli (GO:0005730) Q96EY4 |                          | 0 |
| Nucleoplasm (GO:00056P29973  | Membrane; Multi-pass mem | 0 |
| Nucleoplasm (GO:00056O60675  | Nucleus.                 | 1 |
| Cytosol (GO:0005829) Q6PIY5  |                          | 0 |
| Cytosol (GO:0005829); Q9HCN4 | Cytoplasm {ECO:0000269 P | 1 |
| Nucleoli (GO:0005730) Q7L945 | Nucleus {ECO:0000305}.   | 0 |
| Vesicles (GO:0043231) Q8N5I3 | Endoplasmic reticulum {E | 0 |
| Nucleoplasm (GO:00056O75717  | Nucleus, nucleoplasm {EC | 1 |
| Nucleoplasm (GO:00056Q5FWF6  | Nucleus {ECO:0000305}.   | 1 |
| Plasma membrane (GO:0060716  | Cytoplasm {ECO:0000269 P | 0 |
| Nuclear speckles (GO:Q13838  | Nucleus. Nucleus speckle | 0 |
| Nucleoplasm (GO:00056Q9NY87  | Cytoplasm {ECO:0000269 P | 0 |
| Microtubules (GO:0015Q7LC44  | Extracellular vesicle me | 0 |
| Nucleoli (GO:0005730) Q96DE0 | Nucleus {ECO:0000269 Pub | 0 |
| Nucleoplasm (GO:00056Q9UKI8  | Nucleus {ECO:0000269 Pub | 1 |
| Cytosol (GO:0005829); P50851 | Cell membrane {ECO:00003 | 0 |
| Cell Junctions (GO:00015090  | Nucleus {ECO:0000305}.   | 0 |
| Endoplasmic reticulum Q9NRL2 | Nucleus. Note=May target | 0 |
| Cytosol (GO:0005829); P17516 | Cytoplasm.               | 1 |
| Cytosol (GO:0005829); Q99627 | Cytoplasm {ECO:0000269 P | 1 |
| Actin filaments (GO:0A6NI79  | Cytoplasm, cytoskeleton, | 0 |
| Nucleoplasm (GO:00056O15151  | Nucleus.                 | 1 |
| Cytosol (GO:0005829); Q92736 | Sarcoplasmic reticulum m | 0 |
| Cytosol (GO:0005829) Q9P2J3  |                          | 0 |
| Nucleoplasm (GO:00056Q14686  | Nucleus.                 | 1 |
| Cytosol (GO:0005829); Q9UEW8 | Cytoplasm {ECO:0000305}. | 1 |
| Vesicles (GO:0043231) P0DP23 | Cytoplasm, cytoskeleton, | 0 |
| Cytosol (GO:0005829); Q6PGP7 | Cytoplasm {ECO:0000269 P | 1 |
| Nucleoplasm (GO:00056Q2TAM9  |                          | 0 |
| Cytosol (GO:0005829) P43355  | Cytoplasm. Nucleus.      | 0 |
| Mitochondria (GO:0005O95340  |                          | 0 |
| Vesicles (GO:0043231) Q92581 | Endosome membrane {ECO:0 | 0 |
| Cytokinetic bridge (GQ9Y2M0  | Nucleus {ECO:0000269 Pub | 1 |
| Cytosol (GO:0005829) O14602  |                          | 0 |
| Cytosol (GO:0005829); Q96P70 | Cytoplasm {ECO:0000269 P | 0 |
| Centrosome (GO:000581O15078  | Cytoplasm, cytoskeleton, | 0 |
| Nucleoplasm (GO:00056Q9Y4F4  | Cell projection, cilium  | 0 |
| Nucleoplasm (GO:00056O00548  | Apical cell membrane {EC | 0 |
| Vesicles (GO:0043231) Q86YJ7 | Cell membrane {ECO:00002 | 0 |
| Mitochondria (GO:0005O75521  | Isoform 1: Mitochondrion | 1 |
| Golgi apparatus (GO:0014795  | Cytoplasm {ECO:0000250}. | 0 |
| Mitochondria (GO:0005P00156  | Mitochondrion inner memb | 0 |
| Nucleoplasm (GO:00056Q86U70  | Nucleus {ECO:0000305}.   | 0 |
| Nucleoplasm (GO:00056Q6PD62  | Nucleus speckle {ECO:000 | 0 |

|                             |                          |   |
|-----------------------------|--------------------------|---|
| Plasma membrane (GO:0Q9H4F8 | Secreted, extracellular  | 0 |
| Golgi apparatus (GO:0P12259 | Secreted {ECO:0000250}.  | 0 |
| Nucleoplasm (GO:00056Q9NZV6 | Cytoplasm {ECO:0000250 U | 0 |
| Nuclear bodies (GO:00Q86VH5 | Cell membrane {ECO:00002 | 0 |
| Nucleoplasm (GO:00056Q9Y2D9 | Nucleus {ECO:0000305}.   | 0 |
| Nucleoplasm (GO:00056Q9HCE7 | Cytoplasm {ECO:0000269 P | 0 |
| Cytosol (GO:0005829);P53794 | Membrane; Multi-pass mem | 0 |
| Cytosol (GO:0005829);Q96I76 | Nucleus {ECO:0000269 Pub | 0 |
| Cytosol (GO:0005829);P62906 |                          | 0 |
| Nucleoplasm (GO:00056Q8IYK4 | Endoplasmic reticulum lu | 0 |
| Vesicles (GO:0043231)Q8TE67 | Cytoplasm {ECO:0000269 P | 0 |
| Mitochondria (GO:0005Q8NCL9 | Membrane {ECO:0000305};  | 0 |
| Plasma membrane (GO:0Q6JBY9 |                          | 0 |
| Cytosol (GO:0005829);Q9Y6X4 | Nucleus envelope {ECO:00 | 1 |
| Nucleoplasm (GO:00056Q96NB3 | Nucleus {ECO:0000269 Pub | 0 |
| Nuclear bodies (GO:00Q9UIV1 | Nucleus. Cytoplasm, P-bo | 0 |
| Cytosol (GO:0005829);Q9Y519 | Membrane {ECO:0000305};  | 0 |
| Cytosol (GO:0005829);P42345 | Endoplasmic reticulum me | 0 |
| Nucleoplasm (GO:00056Q96K83 | Nucleus {ECO:0000250}.   | 0 |
| Cytosol (GO:0005829) Q86TB3 |                          | 0 |
| Golgi apparatus (GO:0094898 | Cell membrane {ECO:00002 | 0 |
| Mitochondria (GO:0005P00395 | Mitochondrion inner memb | 1 |
| Cytosol (GO:0005829) P00491 | Cytoplasm, cytoskeleton  | 0 |
| Mitochondria (GO:0005P55771 | Nucleus.                 | 1 |
| Nuclear speckles (GO:Q9UPW0 | Nucleus {ECO:0000255 PRO | 0 |
| Nucleoplasm (GO:00056Q9NW07 | Nucleus {ECO:0000305}.   | 0 |
| Cytosol (GO:0005829);Q8WV19 | Membrane {ECO:0000255};  | 0 |
| Midbody ring (GO:0090Q96JM3 | Nucleus {ECO:0000269 Pub | 0 |
| Vesicles (GO:0043231)Q9Y2H2 | Membrane, clathrin-coate | 0 |
| Cytosol (GO:0005829);Q6P4F7 |                          | 0 |
| Nucleoli (GO:0005730)P05204 | Nucleus {ECO:0000269 Pub | 0 |
| Cytosol (GO:0005829);Q8WWX9 | Cytoplasm, perinuclear r | 0 |
| Cytosol (GO:0005829);Q5T442 | Cell membrane; Multi-pas | 0 |
| Mitochondria (GO:0005060313 | Mitochondrion inner memb | 1 |
| Golgi apparatus (GO:0075064 | Golgi apparatus {ECO:000 | 1 |
| Vesicles (GO:0043231)Q15413 | Sarcoplasmic reticulum m | 0 |
| Nucleoplasm (GO:00056Q9NRM2 | Nucleus {ECO:0000305}.   | 0 |
| Cytosol (GO:0005829) P03897 | Mitochondrion membrane { | 0 |
| Cytoplasmic bodies (GQ96EK9 |                          | 0 |
| Nucleoplasm (GO:00056Q5VZP5 | Cytoplasm, myofibril, sa | 0 |
| Plasma membrane (GO:0094989 | Cell projection, dendrit | 0 |
| Nucleoli fibrillar ce094900 | Nucleus {ECO:0000255 PRO | 0 |
| Endoplasmic reticulumP23141 | Endoplasmic reticulum lu | 1 |
| Nucleoplasm (GO:00056Q9BVA6 | Endoplasmic reticulum me | 0 |
| Cytosol (GO:0005829);Q96D70 | Nucleus {ECO:0000305}.   | 0 |
| Nucleoli (GO:0005730)Q8WW01 | Nucleus {ECO:0000305}. N | 0 |
| Cytosol (GO:0005829) 094822 |                          | 0 |
| Cytosol (GO:0005829);Q96C34 |                          | 0 |
| Cytosol (GO:0005829);Q4G0S7 |                          | 0 |
| Nuclear membrane (GO:P34947 | Cytoplasm. Nucleus. Cell | 0 |
| Nucleoli (GO:0005730)Q9NV66 |                          | 0 |
| Nuclear speckles (GO:Q5VUG0 | Nucleus {ECO:0000269 Pub | 0 |
| Nuclear speckles (GO:Q8IY18 | Nucleus {ECO:0000269 Pub | 0 |
| Cytosol (GO:0005829) Q5VU92 |                          | 0 |
| Nucleoli (GO:0005730)Q96LA8 | Nucleus {ECO:0000269 Pub | 0 |

|                                |                          |   |
|--------------------------------|--------------------------|---|
| Cytosol (GO:0005829);P47755    |                          | 0 |
| Nucleoli fibrillar ceP11387    | Nucleus, nucleolus {ECO: | 1 |
| Cytokinetic bridge (G043663    | Nucleus {ECO:0000269 Pub | 0 |
| Cytosol (GO:0005829);Q6PI77    | Cytoplasm {ECO:0000269 P | 1 |
| Nucleoplasm (GO:00056Q99759    |                          | 0 |
| Nucleoplasm (GO:00056P32004    | Cell membrane {ECO:00002 | 0 |
| Endoplasmic reticulumQ12772    | Endoplasmic reticulum me | 0 |
| Nucleoplasm (GO:00056Q8IYL3    | Nucleus {ECO:0000269 Pub | 1 |
| Nucleoplasm (GO:00056P20264    | Nucleus.                 | 1 |
| Golgi apparatus (GO:0Q8N9B8    |                          | 0 |
| Vesicles (GO:0043231)Q86Y13    | Cytoplasm {ECO:0000269 P | 0 |
| Centrosome (GO:000581Q2KHM9    | Cytoplasm, cytoskeleton, | 0 |
| Nucleoli fibrillar ceQ6PJP8    | Nucleus {ECO:0000269 Pub | 1 |
| Vesicles (GO:0043231)Q7Z3C6    | Cytoplasmic vesicle, aut | 0 |
| Nucleoplasm (GO:00056075052    |                          | 0 |
| Cytosol (GO:0005829);P07741    | Cytoplasm.               | 1 |
| Cytosol (GO:0005829) Q5JY77    | Cytoplasm {ECO:0000269 P | 1 |
| Nucleoplasm (GO:00056A7MCY6    |                          | 0 |
| Cytokinetic bridge (GQ9HCI5    | Cytoplasm, perinuclear r | 0 |
| Cytosol (GO:0005829) Q9POB6    | Membrane {ECO:0000305};  | 0 |
| Nucleoli (GO:0005730)Q96JM7    | Nucleus {ECO:0000250}.   | 0 |
| Cell Junctions (GO:00075121    | Cell membrane {ECO:00002 | 0 |
| Cytoplasmic bodies (GQ9UPR3    | Cytoplasm {ECO:0000269 P | 0 |
| Cytosol (GO:0005829);P21980    |                          | 0 |
| Cytosol (GO:0005829);Q7L4S7    | Mitochondrion {ECO:00002 | 0 |
| Intermediate filament043164    | Cytoplasm {ECO:0000269 P | 0 |
| Nucleoplasm (GO:00056Q92753    | Nucleus {ECO:0000255 PRO | 0 |
| Cytosol (GO:0005829);Golgi app | Golgi apparatus membrane | 0 |
| Endoplasmic reticulumQ27J81    | Cytoplasm, perinuclear r | 0 |
| Cytosol (GO:0005829);Q5VUJ9    | Cytoplasm, cytoskeleton, | 0 |
| Mitochondria (GO:0005Q5RI15    | Mitochondrion inner memb | 1 |
| Cytosol (GO:0005829);P26374    | Cytoplasm, cytosol {ECO: | 0 |
| Cytosol (GO:0005829) Q69YW2    | Membrane {ECO:0000305};  | 0 |
| Nuclear membrane (GO:A6NHC0    | Cytoplasm {ECO:0000250}. | 0 |
| Focal adhesion sites Q17R31    | Nucleus {ECO:0000305}.   | 0 |
| Vesicles (GO:0043231)Q6H3X3    | Isoform 1: Cell membrane | 0 |
| Aggresome (GO:0016235Q5VUE5    |                          | 0 |
| Vesicles (GO:0043231)Q5TGI4    | Cytoplasm {ECO:0000269 P | 0 |
| Nucleoplasm (GO:00056Q5EE01    | Nucleus {ECO:0000269 Pub | 0 |
| Golgi apparatus (GO:0Q4G0N7    |                          | 0 |
| Nucleoplasm (GO:00056Q8TC84    | Nucleus {ECO:0000269 Pub | 0 |
| Nuclear bodies (GO:00Q5JPI9    | Cytoplasm {ECO:0000255 H | 0 |
| Cytosol (GO:0005829) Q99489    | Peroxisome.              | 0 |
| Nucleoli (GO:0005730)Q5VZY2    | Membrane {ECO:0000305};  | 0 |
| Cytosol (GO:0005829);Q5QNW6    | Nucleus. Chromosome.     | 0 |
| Cytokinetic bridge (GP14060    | Endoplasmic reticulum me | 0 |
| Cytokinetic bridge (GP26439    | Endoplasmic reticulum me | 0 |
| Cytokinetic bridge (GQ5T481    | Nucleus {ECO:0000255 PRO | 0 |
| Nucleoplasm (GO:00056Q5TEZ5    |                          | 0 |
| Vesicles (GO:0043231)P31150    | Cytoplasm {ECO:0000269 P | 0 |
| Mitochondria (GO:0005Q9NV79    | Cytoplasm {ECO:0000250}. | 0 |
| Nucleoplasm (GO:00056P35713    | Nucleus {ECO:0000255 PRO | 0 |
| Nucleoplasm (GO:00056Q9NS26    | Cytoplasm {ECO:0000269 P | 0 |
| Mitochondria (GO:0005Q5VXD3    |                          | 0 |
| Intermediate filamentQ5JVX7    |                          | 0 |

|                              |                          |   |
|------------------------------|--------------------------|---|
| Cytosol (GO:0005829);A8K855  | Cell projection, cilium  | 0 |
| Golgi apparatus (GO:005T700  | Membrane {ECO:0000305};  | 0 |
| Nucleoplasm (GO:00056P0C7M4  | Nucleus {ECO:0000255 PRO | 0 |
| Nucleoplasm (GO:00056Q6WRX3  |                          | 0 |
| Cytosol (GO:0005829) Q5JTD7  |                          | 0 |
| Cytosol (GO:0005829);Q5H9L2  | Nucleus {ECO:0000305}.   | 0 |
| Cytosol (GO:0005829) P32019  | Cytoplasm, cytosol {ECO: | 0 |
| Cytosol (GO:0005829);Q9Y5Q3  | Nucleus {ECO:0000255 PRO | 0 |
| Cytosol (GO:0005829);Q5VXU3  | Cell membrane {ECO:00002 | 0 |
| Cytosol (GO:0005829) Q6Y7W6  |                          | 0 |
| Nucleoplasm (GO:00056A6NCS6  |                          | 0 |
| Nucleoplasm (GO:00056Q8WXA3  | Nucleus {ECO:0000250}.   | 0 |
| Cell Junctions (GO:00Q5HYW2  |                          | 0 |
| Cytosol (GO:0005829);Q8IZ21  | Cytoplasm {ECO:0000250}. | 0 |
| Focal adhesion sites P0C7U1  |                          | 0 |
| Microtubules (GO:0015Q9NUE0  | Membrane {ECO:0000305};  | 0 |
| Nucleoplasm (GO:00056060269  |                          | 0 |
| Golgi apparatus (GO:009BQS2  | Isoform 1: Cell membrane | 0 |
| Cytosol (GO:0005829) Q8N5G2  | Nucleus membrane {ECO:00 | 0 |
| Centriolar satellite Q4JDL3  | Nucleus {ECO:0000269 Pub | 0 |
| Cytosol (GO:0005829);Q9HCK1  |                          | 0 |
| Nuclear bodies (GO:00Q9UER7  | Cytoplasm {ECO:0000269 P | 0 |
| Nucleoplasm (GO:00056Q13873  | Cell membrane {ECO:00002 | 1 |
| Nucleoplasm (GO:00056075764  | Nucleus {ECO:0000255 PRO | 0 |
| Golgi apparatus (GO:0015212  |                          | 0 |
| Cytosol (GO:0005829);Q06587  | Nucleus {ECO:0000269 Pub | 0 |
| Nucleoplasm (GO:00056P28702  | Nucleus {ECO:0000269 Pub | 0 |
| Cytosol (GO:0005829);Q5BKU9  |                          | 0 |
| Nuclear speckles (GO:P25440  | Nucleus {ECO:0000305}. N | 0 |
| Vesicles (GO:0043231)P28067  | Late endosome membrane;  | 0 |
| Cytokinetic bridge (GP28062  | Cytoplasm {ECO:0000255 P | 0 |
| Endoplasmic reticulumQ03519  | Endoplasmic reticulum me | 0 |
| Nucleoplasm (GO:00056Q5JUX0  |                          | 0 |
| Endoplasmic reticulumP39059  | Secreted, extracellular  | 0 |
| Nucleoplasm (GO:00056P40425  | Nucleus {ECO:0000305}.   | 0 |
| Cell Junctions (GO:00Q15109  | Isoform 1: Cell membrane | 0 |
| Endoplasmic reticulumQ99942  | Membrane; Multi-pass mem | 0 |
| Endoplasmic reticulumQ99943  | Endoplasmic reticulum me | 1 |
| Mitochondria (GO:0005Q0ZLH3  |                          | 0 |
| Mitotic spindle (GO:00Q9UIM3 |                          | 0 |
| Mitochondria (GO:0005Q96DV4  | Mitochondrion {ECO:00002 | 1 |
| Golgi apparatus (GO:00Q71RC9 | Membrane {ECO:0000305};  | 0 |
| Nucleoli fibrillar ceA1L162  |                          | 0 |
| Nucleoli (GO:0005730)Q6BEB4  | Nucleus {ECO:0000250}.   | 0 |
| Nuclear speckles (GO:P49842  | Nucleus {ECO:0000269 Pub | 0 |
| Cytosol (GO:0005829);077932  | Nucleus {ECO:0000269 Pub | 1 |
| Nucleoplasm (GO:00056Q15477  | Nucleus {ECO:0000305}. C | 0 |
| Mitochondria (GO:0005Q5T035  |                          | 0 |
| Nuclear bodies (GO:00P18615  | Nucleus.                 | 1 |
| Nucleoplasm (GO:00056Q9Y330  | Nucleus {ECO:0000305}.   | 0 |
| Nuclear speckles (GO:Q96KQ7  | Nucleus {ECO:0000269 Pub | 0 |
| Nucleoplasm (GO:00056Q9HD64  |                          | 0 |
| Cytosol (GO:0005829) Q6UX15  | Membrane {ECO:0000305};  | 0 |
| Nucleoplasm (GO:00056Q9HD64  |                          | 0 |
| Cell Junctions (GO:00Q99519  | Lysosome membrane; Perip | 0 |

|                              |                          |   |
|------------------------------|--------------------------|---|
| Cytosol (GO:0005829);P0DMV9  | Cytoplasm {ECO:0000269 P | 0 |
| Cytosol (GO:0005829);P0DMV8  | Cytoplasm {ECO:0000269 P | 0 |
| Nucleoplasm (GO:00056P34931  |                          | 0 |
| Nucleoplasm (GO:00056Q9Y333  | Nucleus {ECO:0000269 Pub | 1 |
| Cytosol (GO:0005829) P26640  |                          | 0 |
| Cytosol (GO:0005829);Q9Y334  | Secreted {ECO:0000305}.  | 0 |
| Mitochondria (GO:0005Q5EG05  |                          | 0 |
| Midbody (GO:0030496);Q9P267  | Isoform 1: Nucleus. Chro | 1 |
| Endoplasmic reticulum043196  |                          | 0 |
| Cytosol (GO:0005829);095866  | Isoform E: Endoplasmic r | 0 |
| Cytosol (GO:0005829);Q5SRR4  | Secreted {ECO:0000305}.  | 0 |
| Endoplasmic reticulum095872  |                          | 0 |
| Cytosol (GO:0005829) 095873  |                          | 0 |
| Centrosome (GO:000581B1AL88  | Membrane {ECO:0000305};  | 0 |
| Golgi apparatus (GO:0095445  | Secreted {ECO:0000269 Pu | 0 |
| Cytosol (GO:0005829);P46379  | Cytoplasm, cytosol {ECO: | 0 |
| Cytosol (GO:0005829);P48634  | Cytoplasm {ECO:0000269 P | 1 |
| Cytosol (GO:0005829) P55008  | Cytoplasm, cytoskeleton  | 0 |
| Nucleoplasm (GO:00056Q9UBC1  | Nucleus {ECO:0000269 Pub | 1 |
| Nucleoplasm (GO:00056B7Z6K7  |                          | 0 |
| Golgi apparatus (GO:00Q29980 | Cell membrane {ECO:00002 | 0 |
| Nuclear speckles (GO:Q7Z340  | Nucleus {ECO:0000305}.   | 0 |
| Nucleoplasm (GO:00056Q5CZA5  | Nucleus {ECO:0000305}.   | 0 |
| Cytosol (GO:0005829);Q01860  | Cytoplasm. Nucleus. Note | 1 |
| Nuclear speckles (GO:A6NGD5  | Nucleus {ECO:0000255 PRO | 0 |
| Cytosol (GO:0005829) Q8TD31  | Cytoplasm. Nucleus.      | 0 |
| Nucleoplasm (GO:00056Q9UIG5  |                          | 0 |
| Nucleoplasm (GO:00056060231  | Nucleus {ECO:0000269 Pub | 1 |
| Cell Junctions (GO:00Q9Y676  | Mitochondrion {ECO:00002 | 1 |
| Nuclear bodies (GO:00Q96QC0  | Nucleus {ECO:0000255 PRO | 1 |
| Cytosol (GO:0005829) Q8NE71  | Isoform 2: Cytoplasm {EC | 0 |
| Cytosol (GO:0005829);P79522  |                          | 0 |
| Cell Junctions (GO:00Q08345  | Isoform 1: Cell membrane | 0 |
| Vesicles (GO:0043231)P36915  |                          | 0 |
| Vesicles (GO:0043231)        | Cell membrane {ECO:00002 | 0 |
| Cytosol (GO:0005829) Q9HCM9  | Cytoplasm, cytosol {ECO: | 0 |
| Cytoplasmic bodies (GQ5VIY5  | Nucleus {ECO:0000305}.   | 0 |
| Centriolar satellite Q9C019  |                          | 0 |
| Centrosome (GO:000581Q08AN1  | Nucleus {ECO:0000305}.   | 0 |
| Centrosome (GO:000581Q9H2S5  | Cytoplasm {ECO:0000250}. | 0 |
| Vesicles (GO:0043231) 060927 |                          | 0 |
| Cytosol (GO:0005829);Q9P2K9  | Endoplasmic reticulum me | 0 |
| Nucleoplasm (GO:00056P63244  | Cell membrane {ECO:00002 | 0 |
| Nucleoplasm (GO:00056095759  |                          | 0 |
| Cytokinetic bridge (GA6ND91  |                          | 0 |
| Cytosol (GO:0005829) Q96B36  | Cytoplasm, cytosol {ECO: | 1 |
| Centrosome (GO:000581Q9UBS5  | Cell membrane {ECO:00002 | 0 |
| Nucleoplasm (GO:00056Q5T4H9  |                          | 0 |
| Cytosol (GO:0005829);P35410  | Cell membrane; Multi-pas | 0 |
| Nucleoli (GO:0005730)P14373  | Nucleus {ECO:0000269 Pub | 0 |
| Golgi apparatus (GO:00Q5VYJ5 | Cytoplasmic vesicle memb | 0 |
| Cytosol (GO:0005829);Q9H2T7  | Cytoplasm {ECO:0000250}. | 0 |
| Nucleoplasm (GO:00056Q5VV16  | Nucleus {ECO:0000255 PRO | 0 |
| Mitochondria (GO:0005Q96EL3  | Mitochondrion {ECO:00002 | 1 |
| Nucleoplasm (GO:00056A6NGR9  |                          | 0 |

|                              |                          |   |
|------------------------------|--------------------------|---|
| Cytosol (GO:0005829) Q99700  | Cytoplasm {ECO:0000250}. | 1 |
| Cytokinetic bridge (GQ14203) | Cytoplasm {ECO:0000269 P | 0 |
| Actin filaments (GO:0Q2MV58) | Cytoplasm, cytoskeleton, | 0 |
| Actin filaments (GO:0Q8WUB2) |                          | 0 |
| Cytosol (GO:0005829);P10074  | Nucleus {ECO:0000305}. C | 0 |
| Nucleoplasm (GO:00056Q6UWQ7) | Secreted {ECO:0000305}.  | 0 |
| Cytosol (GO:0005829) Q6B9Z1  | Secreted {ECO:0000305}.  | 0 |
| Cytosol (GO:0005829);Q99678  | Cell membrane {ECO:00002 | 1 |
| Vesicles (GO:0043231) Q7Z3Z0 | Cytoplasm {ECO:0000250 U | 0 |
| Nucleoplasm (GO:00056Q5DT21) | Secreted {ECO:0000305}.  | 0 |
| Cytosol (GO:0005829);Q12901  | Nucleus {ECO:0000305}.   | 0 |
| Cytosol (GO:0005829);Q6UW78  | Mitochondrion inner memb | 0 |
| Nuclear bodies (GO:00Q5FWF7) |                          | 0 |
| Cytosol (GO:0005829);Q6ZMS7  | Nucleus {ECO:0000305}.   | 0 |
| Nucleoplasm (GO:00056Q6IV72) | Nucleus {ECO:0000269 Pub | 0 |
| Nucleoli (GO:0005730) A6NIK2 |                          | 0 |
| Centrosome (GO:000581Q69YU5) | Secreted {ECO:0000305}.  | 0 |
| Cytosol (GO:0005829);Q9Y5H4  | Cell membrane {ECO:00002 | 0 |
| Mitochondria (GO:0005Q9Y5H7) | Cell membrane {ECO:00002 | 0 |
| Cytosol (GO:0005829);Q9UN74  | Cell membrane {ECO:00002 | 1 |
| Plasma membrane (GO:0Q9Y5I3) | Isoform 1: Cell membrane | 0 |
| Cytosol (GO:0005829);A6NGS2  |                          | 0 |
| Endoplasmic reticulumP07477  | Secreted, extracellular  | 0 |
| Intermediate filamentQ8WWL2  | Cytoplasm, cytoskeleton  | 0 |
| Lipid droplets (GO:00Q4LEZ3) |                          | 0 |
| Intermediate filamentA8MT33  |                          | 0 |
| Vesicles (GO:0043231) Q9H6L2 | Cell projection, cilium  | 0 |
| Nucleoplasm (GO:00056Q6NXP2) |                          | 0 |
| Cytosol (GO:0005829);Q6ZMN8  |                          | 0 |
| Vesicles (GO:0043231) A7E2U8 | Cytoplasm, cytoskeleton, | 0 |
| Mitochondria (GO:0005A6NFY7) | Mitochondrion matrix {EC | 0 |
| Vesicles (GO:0043231) Q3C1V1 |                          | 0 |
| Nucleoplasm (GO:00056Q96DT7) | Nucleus {ECO:0000305}.   | 1 |
| Nucleoplasm (GO:00056Q504U0) | Cytoplasm {ECO:0000269 P | 0 |
| Nucleoplasm (GO:00056Q6NUI1) |                          | 0 |
| Centriolar satellite Q9BXB1  | Cell membrane {ECO:00002 | 0 |
| Cytosol (GO:0005829);P40306  | Cytoplasm {ECO:0000255 P | 0 |
| Nucleoplasm (GO:00056Q16254) | Nucleus.                 | 1 |
| Centrosome (GO:000581Q5T4T1) | Cell membrane {ECO:00002 | 0 |
| Endosomes (GO:0005768060749) | Early endosome membrane  | 0 |
| Nuclear bodies (GO:00Q8TEE9) | Nucleus {ECO:0000250}. C | 0 |
| Nuclear speckles (GO:P82979) | Nucleus. Nucleus speckle | 0 |
| Cytosol (GO:0005829);095373  | Cytoplasm. Nucleus.      | 1 |
| Nucleoplasm (GO:00056Q9NZ81) | Nucleus {ECO:0000269 Pub | 1 |
| Vesicles (GO:0043231) Q7Z6L1 | Cytoplasmic vesicle, aut | 0 |
| Cytosol (GO:0005829);Q2T9L4  | Cell junction, synapse,  | 0 |
| Cytosol (GO:0005829);Q5K651  | Cytoplasm {ECO:0000269 P | 0 |
| Intermediate filamentP02538  |                          | 0 |
| Cytosol (GO:0005829) Q8N9A8  | Nucleus membrane {ECO:00 | 0 |
| Cytosol (GO:0005829);Q52LC2  | Membrane {ECO:0000305};  | 0 |
| Cell Junctions (GO:00A6NKD9) | Cell junction, tight jun | 0 |
| Cytosol (GO:0005829);Q3MIN7  |                          | 0 |
| Nucleoplasm (GO:00056Q99733) | Nucleus {ECO:0000269 Pub | 0 |
| Cytosol (GO:0005829);P62328  | Cytoplasm, cytoskeleton. | 0 |
| Vesicles (GO:0043231) Q8N2U0 | Membrane {ECO:0000305};  | 0 |

|                              |                          |   |
|------------------------------|--------------------------|---|
| Cytosol (GO:0005829);Q16637  | Nucleus, gem {ECO:000026 | 0 |
| Nuclear bodies (GO:00075920  |                          | 0 |
| Nucleoplasm (GO:00056P05114  | Nucleus. Cytoplasm. Note | 0 |
| Plasma membrane (GO:0Q8NEG7  | Recycling endosome {ECO: | 0 |
| Cytosol (GO:0005829) B5ME19  | Cytoplasm {ECO:0000250 U | 0 |
| Cytosol (GO:0005829);Q9UIC8  |                          | 0 |
| Cytosol (GO:0005829);Q6NVV7  |                          | 0 |
| Nuclear speckles (GO:Q52LA3  |                          | 0 |
| Focal adhesion sites P58511  | Membrane {ECO:0000305};  | 0 |
| Nucleoplasm (GO:00056Q92784  | Nucleus {ECO:0000305}.   | 1 |
| Nucleoplasm (GO:00056Q6ZR85  |                          | 0 |
| Plasma membrane (GO:0Q15811  | Endomembrane system {ECO | 0 |
| Centrosome (GO:000581Q3MIP1  | Membrane; Single-pass ty | 0 |
| Centrosome (GO:000581Q8IV53  | Cytoplasm, cytosol {ECO: | 0 |
| Cytosol (GO:0005829);095825  |                          | 0 |
| Cytosol (GO:0005829);A6NDU8  |                          | 0 |
| Cytosol (GO:0005829);Q13065  |                          | 0 |
| Cytosol (GO:0005829);Q8IY26  | Membrane {ECO:0000305};  | 0 |
| Plasma membrane (GO:0P26717  | Membrane; Single-pass ty | 0 |
| Vesicles (GO:0043231)Q07444  | Membrane; Single-pass ty | 0 |
| Nucleoplasm (GO:00056Q060422 | Nucleus {ECO:0000255 PRO | 1 |
| Nucleoplasm (GO:00056Q6PRD7  | Cytoplasm {ECO:0000269 P | 0 |
| Nucleoplasm (GO:00056Q13516  | Nucleus {ECO:0000255 PRO | 0 |
| Nucleoplasm (GO:00056Q15287  | Nucleus. Nucleus speckle | 0 |
| Golgi apparatus (GO:0Q9P2P1  | Membrane {ECO:0000305};  | 0 |
| Mitochondria (GO:0005Q68DL7  |                          | 0 |
| Cytosol (GO:0005829);Q6PKX4  |                          | 0 |
| Cytosol (GO:0005829);Q9H910  | Cytoplasm {ECO:0000269 P | 0 |
| Vesicles (GO:0043231)P36952  | Secreted, extracellular  | 0 |
| Lipid droplets (GO:00P0C7U3  | Membrane {ECO:0000305};  | 0 |
| Nucleoli fibrillar ceQ6ZUU3  |                          | 0 |
| Vesicles (GO:0043231)Q6IQ22  | Recycling endosome membr | 0 |
| Microtubules (GO:0015A6NKL6  | Membrane {ECO:0000305};  | 0 |
| Golgi apparatus (GO:0P04439  | Cell membrane {ECO:00002 | 0 |
| Cytosol (GO:0005829);A1A4G5  |                          | 0 |
| Cytosol (GO:0005829);A8MV65  | Nucleus {ECO:0000250 Uni | 0 |
| Actin filaments (GO:0Q2Q1W2  | Cytoplasm, P-body {ECO:0 | 0 |
| Nuclear speckles (GO:Q504Y3  |                          | 0 |
| Cell Junctions (GO:00Q9Y215  | Cell junction, synapse.  | 0 |
| Vesicles (GO:0043231)Q8TCB7  |                          | 0 |
| Vesicles (GO:0043231)Q5GH76  | Membrane {ECO:0000305};  | 0 |
| Cytosol (GO:0005829);Q92813  | Membrane {ECO:0000305};  | 0 |
| Nucleoli (GO:0005730)Q8IZQ5  |                          | 0 |
| Cytosol (GO:0005829) Q9Y2H1  | Cytoplasm. Cytoplasm, cy | 0 |
| Golgi apparatus (GO:0Q9NTJ5  | Endoplasmic reticulum me | 0 |
| Endoplasmic reticulumQ15631  | Cytoplasm {ECO:0000269 P | 0 |
| Vesicles (GO:0043231)Q6P1K1  | Endosome membrane {ECO:0 | 0 |
| Cytosol (GO:0005829);Q8IZ63  |                          | 0 |
| Nuclear bodies (GO:00A8MQB3  |                          | 0 |
| Nucleoplasm (GO:00056Q9H0X6  |                          | 0 |
| Mitochondria (GO:0005P03901  | Mitochondrion membrane { | 0 |
| Nucleoplasm (GO:00056Q06416  | Nucleus {ECO:0000255 PRO | 1 |
| Nucleoplasm (GO:00056Q9UK33  | Nucleus {ECO:0000269 Pub | 0 |
| Nuclear membrane (GO:P37198  | Nucleus, nuclear pore co | 0 |
| Cytosol (GO:0005829) PODN86  | Secreted {ECO:0000269 Pu | 0 |



|                              |                          |   |
|------------------------------|--------------------------|---|
| Cytosol (GO:0005829);Q6P3S1  | Cytoplasm, cytosol {ECO: | 0 |
| Centrosome (GO:0005810)95684 | Cytoplasm, cytoskeleton, | 0 |
| Nucleoplasm (GO:00056Q9UPN6  | Nucleus {ECO:0000269 Pub | 1 |
| Nucleoplasm (GO:00056Q9UL16  | Cell projection, cilium  | 0 |
| Cytosol (GO:0005829) Q8WW35  |                          | 0 |
| Cytosol (GO:0005829) P22914  |                          | 0 |
| Centrosome (GO:000581P50238  |                          | 0 |
| Actin filaments (GO:0Q8NBE8  |                          | 0 |
| Rods & Rings () Q8IWR1       | Endoplasmic reticulum me | 0 |
| Cytosol (GO:0005829);Q13015  | Nucleus {ECO:0000269 Pub | 0 |
| Cytosol (GO:0005829);Q9UHC3  | Cell membrane {ECO:00002 | 0 |
| Endoplasmic reticulumQ8WWP7  | Endoplasmic reticulum me | 0 |
| Mitochondria (GO:0005Q5SXM8  | Mitochondrion {ECO:00002 | 1 |
| Cytosol (GO:0005829) 095988  |                          | 0 |
| Nucleoplasm (GO:00056P63272  | Nucleus {ECO:0000269 Pub | 0 |
| Cytosol (GO:0005829);Q16873  | Nucleus outer membrane;  | 0 |
| Nucleoplasm (GO:00056Q53RE8  |                          | 0 |
| Mitochondria (GO:0005Q9BXR0  | Cytoplasm {ECO:0000255 H | 0 |
| Cytosol (GO:0005829);015111  | Cytoplasm {ECO:0000269 P | 1 |
| Nucleoli (GO:0005730)Q9BW11  | Nucleus {ECO:0000255 PRO | 0 |
| Cytokinetic bridge (GP28161  | Cytoplasm.               | 1 |
| Plasma membrane (GO:0Q14CB8  | Nucleus {ECO:0000269 Pub | 0 |
| Centrosome (GO:000581Q99871  | Cytoplasm, cytoskeleton, | 0 |
| Nucleoplasm (GO:00056P04180  | Secreted {ECO:0000269 Pu | 0 |
| Endoplasmic reticulumQ6DKI7  | Cell membrane {ECO:00002 | 0 |
| Lipid droplets (GO:00Q8N1A0  |                          | 0 |
| Golgi apparatus (GO:0Q96FS4  | Nucleus {ECO:0000269 Pub | 0 |
| Vesicles (GO:0043231)Q14264  | Virion.                  | 0 |
| Mitochondria (GO:0005P57105  | Mitochondrion outer memb | 0 |
| Cytosol (GO:0005829);P36404  | Mitochondrion intermembr | 0 |
| Nucleoplasm (GO:00056Q96E39  | Nucleus {ECO:0000250}.   | 0 |
| Cytosol (GO:0005829);Q9HD15  | Nucleus {ECO:0000269 Pub | 1 |
| Cytosol (GO:0005829) Q86TL2  | Endoplasmic reticulum me | 0 |
| Nucleoplasm (GO:00056Q8WXX5  | Nucleus {ECO:0000269 Pub | 0 |
| Nucleoplasm (GO:00056Q6P1X6  |                          | 0 |
| Vesicles (GO:0043231)P21796  | Mitochondrion outer memb | 0 |
| Nuclear membrane (GO:Q96C00  | Nucleus {ECO:0000305}.   | 0 |
| Cytosol (GO:0005829);Q9Y320  | Membrane {ECO:0000305};  | 0 |
| Mitochondria (GO:0005075489  | Mitochondrion inner memb | 1 |
| Centrosome (GO:000581015243  | Golgi apparatus membrane | 0 |
| Vesicles (GO:0043231)Q53QV2  | Nucleus {ECO:0000269 Pub | 0 |
| Nucleoplasm (GO:0005654)     |                          | 0 |
| Cytosol (GO:0005829);P62140  | Cytoplasm {ECO:0000269 P | 0 |
| Golgi apparatus (GO:0043561  | Cell membrane {ECO:00002 | 1 |
| Plasma membrane (GO:0Q9NZQ3  | Nucleus. Note=Colocalize | 0 |
| Nucleoli (GO:0005730)Q99941  | Endoplasmic reticulum me | 0 |
| Cytosol (GO:0005829) Q9NSU2  | Nucleus. Cytoplasm, cyto | 0 |
| Cytosol (GO:0005829);Q8N357  | Mitochondrion. Lysosome  | 0 |
| Cytosol (GO:0005829) 000299  | Nucleus {ECO:0000269 Pub | 0 |
| Centriolar satellite 095865  | Cytoplasm {ECO:0000269 P | 0 |
| Cytosol (GO:0005829);P62273  | Cytoplasm, cytosol {ECO: | 1 |
| Nucleoplasm (GO:00056P52741  | Nucleus {ECO:0000305}.   | 0 |
| Nuclear speckles (GO:Q92759  | Nucleus.                 | 0 |
| Nucleoli (GO:0005730)Q9H0S4  | Nucleus, nucleolus {ECO: | 1 |
| Plasma membrane (GO:0P26718  | Cell membrane {ECO:00002 | 1 |

|                             |                          |   |
|-----------------------------|--------------------------|---|
| Midbody (GO:0030496) A8MTB9 |                          | 0 |
| Cytosol (GO:0005829);P54851 | Golgi apparatus membrane | 0 |
| Nucleoplasm (GO:00056Q693B1 |                          | 0 |
| Nucleoplasm (GO:00056Q96CB5 |                          | 0 |
| Nucleoli fibrillar ce015205 | Nucleus {ECO:0000269 Pub | 0 |
| Vesicles (GO:0043231)Q8N819 |                          | 0 |
| Cell Junctions (GO:00Q6PIS1 | Membrane {ECO:0000305};  | 0 |
| Nucleoplasm (GO:00056Q9NPC1 | Cell membrane; Multi-pas | 1 |
| Vesicles (GO:0043231)P24855 | Secreted {ECO:0000269 Pu | 0 |
| Nucleoplasm (GO:00056Q86V88 |                          | 0 |
| Nucleoli (GO:0005730)A8MZ59 | Nucleus {ECO:0000255 PRO | 0 |
| Cytosol (GO:0005829);P49674 | Cytoplasm {ECO:0000250}. | 0 |
| Cytosol (GO:0005829) Q00978 | Cytoplasm {ECO:0000269 P | 0 |
| Cytosol (GO:0005829) P07902 |                          | 0 |
| Cell Junctions (GO:00095484 | Cell junction, tight jun | 0 |
| Cytosol (GO:0005829);A8MXV4 | Peroxisome {ECO:0000250} | 0 |
| Actin filaments (GO:0014907 | Cytoplasm. Nucleus. Cell | 0 |
| Golgi apparatus (GO:0Q03938 | Nucleus {ECO:0000305}.   | 0 |
| Cell Junctions (GO:00Q02080 | Nucleus.                 | 0 |
| Actin filaments (GO:0Q8TET4 |                          | 0 |
| Nucleoplasm (GO:00056Q9BWE0 | Nucleus {ECO:0000269 Pub | 1 |
| Mitochondria (GO:0005Q16540 | Mitochondrion {ECO:00002 | 1 |
| Nucleoplasm (GO:00056A8MT65 | Nucleus {ECO:0000250}.   | 0 |
| Golgi apparatus (GO:0Q9BQ49 | Membrane {ECO:0000305};  | 0 |
| Cytosol (GO:0005829);Q8IX29 |                          | 0 |
| Nuclear membrane (GO:Q99829 | Nucleus {ECO:0000269 Pub | 0 |
| Nucleoplasm (GO:00056P0C1S8 | Nucleus {ECO:0000269 Pub | 1 |
| Nuclear bodies (GO:00Q9HD34 | Mitochondrion. Nucleus.  | 0 |
| Mitochondria (GO:0005Q99417 | Cytoplasm. Nucleus. Mito | 0 |
| Nucleoplasm (GO:00056A4FU49 |                          | 0 |
| Cytosol (GO:0005829);A8MVS5 | Membrane; Single-pass ty | 0 |
| Mitochondria (GO:0005Q9Y3D6 | Mitochondrion outer memb | 0 |
| Actin filaments (GO:0P03950 | Cytoplasmic vesicle, sec | 0 |
| Cytosol (GO:0005829);Q5TF21 | Membrane {ECO:0000305};  | 0 |
| Vesicles (GO:0043231)A8MQ27 | Cytoplasm {ECO:0000269 P | 0 |
| Cytokinetic bridge (GQ68CZ6 | Cytoplasm, cytoskeleton, | 0 |
| Endoplasmic reticulumA8MXK1 | Cell membrane {ECO:00002 | 0 |
| Mitochondria (GO:0005Q9HBK9 | Cytoplasm, cytosol {ECO: | 0 |
| Cytosol (GO:0005829) A6NFU0 | Membrane {ECO:0000305};  | 0 |
| Lipid droplets (GO:00Q00G26 | Lipid droplet {ECO:00002 | 0 |
| Nucleoplasm (GO:00056B5MCN3 |                          | 0 |
| Nucleoplasm (GO:00056Q1W4C9 | Secreted {ECO:0000250}.  | 0 |
| Nuclear bodies (GO:00Q9Y570 |                          | 0 |
| Cytosol (GO:0005829) Q9Y365 | Cell projection, cilium, | 0 |
| Nuclear bodies (GO:00Q5VT03 |                          | 0 |
| Cytosol (GO:0005829);Q9BZB8 | Cytoplasm {ECO:0000269 P | 0 |
| Mitochondria (GO:0005Q6ZMW3 | Cytoplasm, cytoskeleton  | 0 |
| Nucleoplasm (GO:00056A8MUV8 | Nucleus {ECO:0000250}.   | 0 |
| Cytosol (GO:0005829);A7E2V4 |                          | 0 |
| Vesicles (GO:0043231)A8MVX0 |                          | 0 |
| Centrosome (GO:000581096006 | Nucleus {ECO:0000269 Pub | 1 |
| Mitochondria (GO:0005Q96B49 | Mitochondrion outer memb | 1 |
| Nucleoplasm (GO:00056Q1KMD3 | Nucleus {ECO:0000250 Uni | 1 |
| Nucleoplasm (GO:00056P56278 |                          | 0 |
| Nuclear bodies (GO:00A8MZ36 |                          | 0 |

|                                                        |                          |   |
|--------------------------------------------------------|--------------------------|---|
| Nucleoplasm (GO:00056P0DM63                            |                          | 0 |
| Cytosol (GO:0005829) Q19AV6                            | Nucleus {ECO:0000305}.   | 0 |
| Cytosol (GO:0005829);Q8N1W1                            | Cytoplasm {ECO:0000250}. | 0 |
| Plasma membrane (GO:0Q6ZNQ3                            |                          | 0 |
| Nucleoli fibrillar ceA4D126                            | Cytoplasm, cytosol {ECO: | 0 |
| Nucleoplasm (GO:00056E9PJI5                            |                          | 0 |
| Cytosol (GO:0005829);Q2UY09                            | Secreted, extracellular  | 0 |
| Mitochondria (GO:0005Q99623                            | Mitochondrion inner memb | 0 |
| Plasma membrane (GO:0A4D2P6                            | Cell junction, synapse,  | 0 |
| Nucleoplasm (GO:00056Q14CS0                            | Nucleus {ECO:0000250 Uni | 0 |
| Plasma membrane (GO:0Q4V339                            |                          | 0 |
| Cytosol (GO:0005829);Q1L6U9                            | Secreted {ECO:0000269 Pu | 0 |
| Nucleoplasm (GO:00056A1L167                            | Nucleus {ECO:0000269 Pub | 1 |
| Cytosol (GO:0005829);A8MQT2                            | Golgi apparatus, Golgi s | 0 |
| Plasma membrane (GO:0A8MYU2                            | Cell membrane {ECO:00002 | 0 |
| Cytosol (GO:0005829);POCL81                            |                          | 0 |
| Nucleoli (GO:0005730)Q8IX15                            | Nucleus {ECO:0000255 PRO | 0 |
| Cytosol (GO:0005829);A6NGK3                            |                          | 0 |
| Cytosol (GO:0005829);000571                            | Nucleus speckle. Cytopla | 0 |
| Nucleoli (GO:0005730)Q02045                            |                          | 0 |
| Nucleoplasm (GO:00056Q9NQ03                            | Nucleus {ECO:0000305}.   | 0 |
| Nucleoplasm (GO:00056Q9C0G0                            | Nucleus {ECO:0000305}.   | 0 |
| Nucleoplasm (GO:00056Q8NDH3                            |                          | 0 |
| Cytosol (GO:0005829);Endoplasmic reticulum (GO:0005783 |                          | 0 |
| Golgi apparatus (GO:0P47871                            | Cell membrane {ECO:00002 | 0 |
| Cell Junctions (GO:00Q92681                            | Cell membrane {ECO:00002 | 0 |
| Cytosol (GO:0005829);Q6L9T8                            |                          | 0 |
| Actin filaments (GO:0Q93038                            | Isoform 1: Cell membrane | 0 |
| Nucleoplasm (GO:00056P0CK97                            | Membrane {ECO:0000305};  | 0 |
| Nuclear speckles (GO:0016607)                          |                          | 0 |
| Cytoplasmic bodies (GQ8NFU3                            | Cytoplasm, perinuclear r | 0 |
| Nucleoplasm (GO:00056Q6IPT4                            |                          | 0 |
| Mitochondria (GO:0005Q5T2N8                            |                          | 0 |
| Cytosol (GO:0005829);P13284                            | Secreted {ECO:0000269 Pu | 0 |
| Cell Junctions (GO:00A1L1A6                            | Membrane {ECO:0000305};  | 0 |
| Cytosol (GO:0005829);A1L429                            |                          | 0 |
| Nucleoplasm (GO:0005654)                               |                          | 0 |
| Cytosol (GO:0005829);Q96M83                            |                          | 0 |
| Mitochondria (GO:0005P0CG40                            | Nucleus {ECO:0000305}.   | 0 |
| Golgi apparatus (GO:0A1L190                            | Nucleus {ECO:0000250 Uni | 0 |
| Vesicles (GO:0043231)Q9UBR5                            | Isoform 1: Secreted {ECO | 0 |
| Microtubules (GO:0015Q9Y3D7                            | Mitochondrion inner memb | 1 |
| Nucleoplasm (GO:00056Q9P273                            | Cell membrane {ECO:00002 | 0 |
| Nucleoplasm (GO:00056A8MTT3                            | Mitochondrion membrane { | 0 |
| Nucleoplasm (GO:00056Q8NAF0                            | Nucleus {ECO:0000305}.   | 0 |
| Cytosol (GO:0005829) P08861                            |                          | 0 |
| Nucleoplasm (GO:00056Q9NTU4                            | Cell projection, cilium, | 0 |
| Nuclear bodies (GO:0016604);NuCytoplasm {ECO:0000269 P |                          | 0 |
| Nucleoplasm (GO:0005654)                               |                          | 0 |
| Golgi apparatus (GO:0005794)                           |                          | 0 |
| Mitochondria (GO:0005P0C6S8                            | Membrane {ECO:0000305};  | 0 |
| Nucleoplasm (GO:00056P0C6A0                            | Nucleus {ECO:0000250}.   | 0 |
| Nuclear speckles (GO:Q5I0X4                            |                          | 0 |
| Cytosol (GO:0005829);P63098                            | Cytoplasm, cytosol {ECO: | 0 |
| Cytosol (GO:0005829);015287                            | Nucleus {ECO:0000269 Pub | 0 |

|                                                        |                          |   |
|--------------------------------------------------------|--------------------------|---|
| Nuclear bodies (GO:00Q68DN1                            |                          | 0 |
| Plasma membrane (GO:0Q9HCM2                            | Cell membrane {ECO:00003 | 0 |
| Nucleoplasm (GO:00056P49716                            | Nucleus {ECO:0000305 Pub | 1 |
| Nucleoplasm (GO:0005654)                               |                          | 0 |
| Nucleoplasm (GO:00056Q8IZ13                            |                          | 0 |
| Cytosol (GO:0005829);095502                            | Membrane {ECO:0000305};  | 0 |
| Cytosol (GO:0005829) P63151                            |                          | 0 |
| Cytosol (GO:0005829);Q9NVV2                            |                          | 0 |
| Cytosol (GO:0005829);095361                            | Cytoplasm {ECO:0000269 P | 1 |
| Golgi apparatus (GO:0Q6WQI6                            | Cytoplasm {ECO:0000269 P | 0 |
| Nuclear bodies (GO:00Q96MW7                            | Nucleus {ECO:0000305}.   | 0 |
| Mitochondria (GO:0005Q5GH70                            | Membrane {ECO:0000305};  | 0 |
| Nucleoplasm (GO:00056A0AV02                            | Membrane {ECO:0000305};  | 0 |
| Cytosol (GO:0005829);Q9BWW8                            | Cytoplasm {ECO:0000305}. | 0 |
| Nucleoli fibrillar ceQ9Y5Q0                            | Endoplasmic reticulum me | 0 |
| Cytosol (GO:0005829);Q3SXR2                            |                          | 0 |
| Nucleoplasm (GO:00056Q96S94                            | Nucleus speckle {ECO:000 | 0 |
| Cytosol (GO:0005829);P62987                            | Ubiquitin: Cytoplasm {EC | 0 |
| Cytosol (GO:0005829);Q2M218                            | Nucleus {ECO:0000305}.   | 0 |
| Cytosol (GO:0005829) C9JJ37                            |                          | 0 |
| Cytosol (GO:0005829) Q8NOU4                            |                          | 0 |
| Golgi apparatus (GO:0Q9H0N0                            | Nucleus {ECO:0000269 Pub | 0 |
| Nucleoplasm (GO:00056Q5SWW7                            |                          | 0 |
| Plasma membrane (GO:0Q96T59                            |                          | 0 |
| Centrosome (GO:000581A6NLU0                            | Cytoplasm {ECO:0000250 U | 0 |
| Endoplasmic reticulumP27544                            | Endoplasmic reticulum me | 0 |
| Cell Junctions (GO:00P04440                            | Cell membrane; Single-pa | 0 |
| Cytosol (GO:0005829) Q5TA50                            | Cytoplasm, cytosol {ECO: | 0 |
| Nucleoli (GO:0005730)P0C7W0                            |                          | 0 |
| Nucleoplasm (GO:00056P0C7T5                            | Nucleus {ECO:0000269 Pub | 0 |
| Golgi apparatus (GO:0P0DJ93                            | Membrane {ECO:0000305};  | 0 |
| Nucleoplasm (GO:0005654)                               |                          | 0 |
| Cytosol (GO:0005829);A6NER3                            |                          | 0 |
| Nucleoplasm (GO:00056F8WFD2                            |                          | 0 |
| Mitochondria (GO:0005A1L188                            | Mitochondrion {ECO:00002 | 0 |
| Cytosol (GO:0005829);A6NDE8                            |                          | 0 |
| Nucleoplasm (GO:00056C9JH25                            | Membrane {ECO:0000305};  | 0 |
| Nucleoplasm (GO:00056B4DJY2                            | Membrane {ECO:0000305};  | 0 |
| Nucleoli (GO:0005730)Q9Y4G2                            | Cytoplasm {ECO:0000305}. | 0 |
| Golgi apparatus (GO:0H3BPM6                            |                          | 0 |
| Nuclear bodies (GO:0016604);Nucleoli (GO:0005730);Nucl |                          | 0 |
| Vesicles (GO:0043231)Q96JG9                            | Nucleus {ECO:0000305}.   | 0 |
| Cytosol (GO:0005829) C9JLW8                            | Nucleus {ECO:0000269 Pub | 0 |
| Cytosol (GO:0005829) Q9BXS9                            | Cell membrane; Multi-pas | 0 |
| Nuclear bodies (GO:00Q03468                            | Nucleus {ECO:0000269 Pub | 0 |
| Golgi apparatus (GO:0P34130                            | Secreted.                | 0 |
| Cell Junctions (GO:00P0C7U0                            | Membrane {ECO:0000305};  | 0 |
| Vesicles (GO:0043231)E5RQL4                            |                          | 0 |
| Endoplasmic reticulumQ9H7F4                            | Membrane {ECO:0000305};  | 0 |
| Midbody (GO:0030496);Q2VIQ3                            | Nucleus matrix {ECO:0000 | 0 |
| Nucleoplasm (GO:00056C9JCN9                            |                          | 0 |
| Nucleoplasm (GO:00056Q8NOY7                            |                          | 0 |
| Cytosol (GO:0005829);Q9H9K5                            | Endogenous retroviral en | 0 |
| Nuclear bodies (GO:0016604);Nu                         | Nucleus {ECO:0000305}.   | 0 |
| Nucleoplasm (GO:00056Q9NS25                            | Cytoplasm {ECO:0000269 P | 0 |

|                                                         |                          |   |
|---------------------------------------------------------|--------------------------|---|
| Nucleoli (GO:0005730) B2CW77                            | Nucleus {ECO:0000269 Pub | 1 |
| Cytosol (GO:0005829); Q86W56                            | Isoform 1: Nucleus {ECO: | 0 |
| Cytosol (GO:0005829); C9JRZ8                            | Isoform 1: Mitochondrion | 0 |
| Cytosol (GO:0005829); A1L429                            |                          | 0 |
| Golgi apparatus (GO:00969E2)                            | Membrane; Multi-pass mem | 0 |
| Centrosome (GO:000581Q06643                             | Membrane {ECO:0000305};  | 0 |
| Nucleoplasm (GO:00056Q9GZM3                             | Nucleus {ECO:0000250}.   | 0 |
| Golgi apparatus (GO:0P19652                             | Secreted.                | 0 |
| Golgi apparatus (GO:0Q9BVV8                             | Membrane {ECO:0000305};  | 0 |
| Nuclear bodies (GO:00B1AL46                             |                          | 0 |
| Nucleoplasm (GO:00056E7EW31                             |                          | 0 |
| Mitochondria (GO:0005P00374                             | Mitochondrion {ECO:00002 | 0 |
| Cell Junctions (GO:00Q5SSQ6                             |                          | 0 |
| Nucleoli (GO:0005730) P0DMU8                            |                          | 0 |
| Cytosol (GO:0005829) P0CV98                             |                          | 0 |
| Endoplasmic reticulum P62945                            |                          | 0 |
| Centrosome (GO:000581F8VTS6                             |                          | 0 |
| Golgi apparatus (GO:0P02763                             | Secreted.                | 0 |
| Cytosol (GO:0005829) P0CW00                             |                          | 0 |
| Cell Junctions (GO:00P0C7X2                             | Nucleus {ECO:0000305}.   | 0 |
| Mitochondria (GO:0005P0DJ07                             | Membrane {ECO:0000305};  | 0 |
| Cytosol (GO:0005829); Q9BR61                            | Cytoplasm {ECO:0000269 P | 1 |
| Cytosol (GO:0005829); A2A2Z9                            |                          | 0 |
| Cytosol (GO:0005829) E7EU14                             |                          | 0 |
| Cytosol (GO:0005829)                                    |                          | 0 |
| Lipid droplets (GO:00P0DME0                             | Cytoplasm {ECO:0000269 P | 0 |
| Nuclear bodies (GO:00015391                             | Nucleus {ECO:0000305}.   | 0 |
| Actin filaments (GO:0H3BQB6                             |                          | 0 |
| Mitochondria (GO:0005P0C264                             |                          | 0 |
| Vesicles (GO:0043231) P20036                            | Cell membrane; Single-pa | 0 |
| Cytosol (GO:0005829) P62269                             | Cytoplasm.               | 1 |
| Cytosol (GO:0005829); Endoplasmic reticulum (GO:0005783 |                          | 0 |
| Cytosol (GO:0005829); Nucleoplasm (GO:0005654)          |                          | 0 |
| Golgi apparatus (GO:0Q6R2W3                             |                          | 0 |
| Nuclear bodies (GO:00Q9Y2S6                             |                          | 0 |
| Cytosol (GO:0005829); Q9ULC4                            | Cytoplasm {ECO:0000269 P | 1 |
| Cytosol (GO:0005829); Q3LHN0                            |                          | 0 |
| Cytosol (GO:0005829); A0A096LP0                         | Membrane {ECO:0000255};  | 0 |
| Cytosol (GO:0005829); C9J069                            | Apical cell membrane {EC | 0 |
| Nucleoplasm (GO:0005654)                                |                          | 0 |
| Vesicles (GO:0043231) C9JFL3                            |                          | 0 |
| Golgi apparatus (GO:0005794)                            |                          | 0 |
| Nucleoplasm (GO:00056075200                             | Secreted {ECO:0000305}.  | 0 |
| Nucleoli (GO:0005730) Q8WVJ9                            | Nucleus {ECO:0000255 PRO | 0 |
| Cytosol (GO:0005829); P0C851                            | Membrane {ECO:0000305};  | 0 |
| Cytosol (GO:0005829) P0CV99                             |                          | 0 |
| Cytosol (GO:0005829); Q99877                            | Nucleus. Chromosome.     | 0 |
| Cytosol (GO:0005829) P62857                             | Cytoplasm, cytosol {ECO: | 0 |
| Cytosol (GO:0005829); Q12899                            | Cytoplasm {ECO:0000269 P | 1 |
| Plasma membrane (GO:0B2RXF0                             | Membrane {ECO:0000305};  | 0 |
| Nucleoplasm (GO:00056B4DU55                             | Nucleus {ECO:0000305}.   | 0 |
| Cytosol (GO:0005829); P57053                            | Nucleus. Chromosome.     | 0 |
| Nuclear bodies (GO:00H7C350                             | Membrane {ECO:0000255};  | 0 |
| Nucleoplasm (GO:00056B4DX44                             | Nucleus {ECO:0000250}.   | 0 |
| Vesicles (GO:0043231) A6NC86                            | Secreted {ECO:0000305}.  | 0 |

|                                               |                          |   |
|-----------------------------------------------|--------------------------|---|
| Nucleoli (GO:0005730) Q5BKY9                  |                          | 0 |
| Nuclear bodies (GO:00D6RGH6                   | Nucleus {ECO:0000269 Pub | 1 |
| Nuclear bodies (GO:0016604);Nu                | Nucleus {ECO:0000255 PRO | 0 |
| Nucleoplasm (GO:00056A6NJ64                   | Nucleus {ECO:0000250}.   | 0 |
| Aggresome (GO:0016235 C9J6K1                  |                          | 0 |
| Nucleoplasm (GO:00056E5RJM6                   |                          | 0 |
| Cytosol (GO:0005829); Q96LW9                  | Nucleus {ECO:0000305}.   | 0 |
| Vesicles (GO:0043231) Q8TAD7                  |                          | 0 |
| Cytosol (GO:0005829); Q9BTY7                  |                          | 0 |
| Microtubules (GO:0015Q9H7J1                   |                          | 0 |
| Cytosol (GO:0005829); Q2QD12                  |                          | 0 |
| Mitochondria (GO:0005P0C6C1                   |                          | 0 |
| Nucleoplasm (GO:00056Q15053                   | Membrane {ECO:0000255};  | 0 |
| Mitochondria (GO:0005P0CW24                   |                          | 0 |
| Nucleoplasm (GO:00056015209                   | Nucleus {ECO:0000305}.   | 0 |
| Golgi apparatus (GO:0Q49AG3                   |                          | 0 |
| Cytosol (GO:0005829); P0CL80                  |                          | 0 |
| Cytosol (GO:0005829)                          |                          | 0 |
| Cytosol (GO:0005829);Nucleoplasm (GO:0005654) |                          | 0 |
| Nucleoli (GO:0005730) P0CG23                  |                          | 0 |
| Centrosome (GO:000581Q9NXL2                   |                          | 0 |
| Golgi apparatus (GO:0Q6UX72                   | Golgi apparatus membrane | 0 |
| Nucleoplasm (GO:00056015211                   |                          | 0 |
| Nucleoplasm (GO:00056C9JSJ3                   | Nucleus {ECO:0000255 PRO | 0 |
| Centrosome (GO:000581Q9BW19                   | Nucleus {ECO:0000250 Uni | 0 |
| Centrosome (GO:000581A8MZ97                   | Membrane {ECO:0000305};  | 0 |
| Cytosol (GO:0005829); A1L429                  |                          | 0 |
| Vesicles (GO:0043231) A6NM11                  | Membrane {ECO:0000305};  | 0 |
| Nucleoplasm (GO:00056H0YL14                   | Membrane {ECO:0000305};  | 0 |
| Endoplasmic reticulum Q8NBS9                  | Endoplasmic reticulum lu | 0 |
| Nuclear speckles (GO:Q96PK6                   | Nucleus {ECO:0000269 Pub | 0 |
| Focal adhesion sites Q3KRA9                   | Cytoplasm {ECO:0000269 P | 0 |
| Cytosol (GO:0005829); 060662                  | Cytoplasm {ECO:0000269 P | 0 |
| Cytosol (GO:0005829); Q8N801                  | Cytoplasm {ECO:0000250 U | 0 |
| Cytosol (GO:0005829); P15531                  | Cytoplasm {ECO:0000269 P | 0 |
| Vesicles (GO:0043231) 043508                  | Cell membrane {ECO:00002 | 0 |
| Mitochondria (GO:0005739)                     |                          | 0 |
| Cytosol (GO:0005829); Q9HC16                  | Cytoplasm. Nucleus. Cyto | 0 |
| Cytosol (GO:0005829) Q96G27                   |                          | 0 |
| Cytosol (GO:0005829); Q7L5D6                  | Cytoplasm, cytosol {ECO: | 1 |
| Nucleoplasm (GO:00056A1L170                   |                          | 0 |
| Cytosol (GO:0005829) P30566                   |                          | 0 |
| Cytosol (GO:0005829) P28065                   | Cytoplasm {ECO:0000255 P | 0 |
| Plasma membrane (GO:0Q9UN70                   | Cell membrane {ECO:00002 | 0 |
| Nucleoli (GO:0005730) H3BMG3                  |                          | 0 |
| Cytosol (GO:0005829) Q49B96                   | Cytoplasm, cytosol {ECO: | 0 |
| Nucleoplasm (GO:00056Q9H2H8                   |                          | 0 |
| Plasma membrane (GO:0P29972                   | Cell membrane {ECO:00002 | 1 |
| Nuclear speckles (GO:Q9ULR0                   | Nucleus {ECO:0000269 Pub | 0 |
| Golgi apparatus (GO:0C9JBD0                   |                          | 0 |
| Cytosol (GO:0005829); Q9Y5F6                  | Cell membrane {ECO:00002 | 0 |
| Vesicles (GO:0043231) Q86VW2                  | Cell membrane {ECO:00002 | 0 |
| Endoplasmic reticulum A5PLL7                  | Endoplasmic reticulum me | 1 |
| Cytosol (GO:0005829); Q9HBH5                  |                          | 0 |
| Nucleoplasm (GO:00056Q0VAA5                   | Nucleus {ECO:0000269 Pub | 0 |

|                              |                          |   |
|------------------------------|--------------------------|---|
| Cytosol (GO:0005829);P14174  | Secreted {ECO:0000269 Pu | 0 |
| Golgi apparatus (GO:008781)  |                          | 0 |
| Cytosol (GO:0005829) Q9NRH1  | Cytoplasm {ECO:0000250 U | 0 |
| Cytosol (GO:0005829);P13385  | Cell membrane {ECO:00002 | 0 |
| Nuclear bodies (GO:00075575  | Nucleus {ECO:0000250}. C | 0 |
| Nucleoli (GO:0005730) 095170 |                          | 0 |
| Cytosol (GO:0005829);P83881  | Cytoplasm.               | 0 |
| Nuclear speckles (GO:Q99944  | Secreted {ECO:0000305}.  | 0 |
| Mitochondria (GO:0005P56134  | Mitochondrion. Mitochond | 1 |
| Nucleoli (GO:0005730) Q16385 | Nucleus.                 | 0 |
| Nucleoplasm (GO:00056P85298  |                          | 0 |
| Golgi apparatus (GO:0095050  | Cytoplasm {ECO:0000250}. | 0 |
| Cell Junctions (GO:0092747   | Cytoplasm, cytoskeleton  | 0 |
| Mitochondria (GO:0005P48047  | Mitochondrion {ECO:00002 | 1 |
| Cytosol (GO:0005829);Q8TD55  |                          | 0 |
| Nuclear bodies (GO:00Q8NAV2  |                          | 0 |
| Cytosol (GO:0005829);Q9UG56  | Phosphatidylserine decar | 0 |
| Cytosol (GO:0005829);Q15269  | Nucleus, nucleolus {ECO: | 1 |
| Nucleoplasm (GO:00056P42356  | Cytoplasm {ECO:0000269 P | 0 |
| Microtubules (GO:0015Q9NX55  | Nucleus. Cytoplasm.      | 0 |
| Plasma membrane (GO:009UHK6  | Peroxisome {ECO:0000269  | 0 |
| Mitochondria (GO:0005Q9UDX5  | Mitochondrion inner memb | 0 |
| Cytosol (GO:0005829);Q99819  | Cytoplasm.               | 0 |
| Cytosol (GO:0005829);Q9NP61  | Cytoplasm {ECO:0000269 P | 1 |
| Endoplasmic reticulum Q6P5X5 |                          | 0 |
| Cytosol (GO:0005829);Q86TG7  | Nucleus. Cytoplasm. Note | 0 |
| Nucleoplasm (GO:00056P56537  | Cytoplasm. Nucleus, nucl | 0 |
| Cytosol (GO:0005829);Q9Y5F7  | Cell membrane {ECO:00002 | 0 |
| Mitochondria (GO:0005Q9BYC9  | Mitochondrion {ECO:00002 | 1 |
| Cytosol (GO:0005829);P48595  | Nucleus. Cytoplasm. Note | 1 |
| Vesicles (GO:0043231) P28068 | Late endosome membrane { | 0 |
| Peroxisomes (GO:00057Q9NUI1  | Peroxisome {ECO:0000250  | 0 |
| Vesicles (GO:0043231) P26441 | Cytoplasm.               | 0 |
| Nucleoplasm (GO:00056Q5HYW3  |                          | 0 |
| Nuclear speckles (GO:043299  | Cytoplasm {ECO:0000269 P | 0 |
| Nucleoplasm (GO:00056Q8N972  | Nucleus {ECO:0000305}.   | 0 |
| Cytosol (GO:0005829);Q7RTP6  | Cytoplasm {ECO:0000269 P | 0 |
| Mitochondria (GO:0005Q9Y5I4  | Cell membrane {ECO:00002 | 0 |
| Endoplasmic reticulum 060831 | Endosome membrane {ECO:0 | 0 |
| Mitochondria (GO:0005E0CX11  | Mitochondrion membrane { | 0 |
| Plasma membrane (GO:00Q8IXS6 | Cell membrane {ECO:00002 | 0 |
| Cytosol (GO:0005829) Q5BLP8  | Secreted {ECO:0000305}.  | 0 |
| Cytosol (GO:0005829) Q08334  | Membrane; Single-pass ty | 0 |
| Cell Junctions (GO:00P00751  | Secreted.                | 0 |
| Cytosol (GO:0005829);B1APH4  | Nucleus {ECO:0000305}.   | 0 |
| Nucleoplasm (GO:00056Q96MX6  |                          | 0 |
| Cytosol (GO:0005829);P22392  | Cytoplasm {ECO:0000269 P | 0 |
| Cytosol (GO:0005829) Q96MR6  |                          | 0 |
| Nucleoplasm (GO:00056A8MRT5  | Membrane {ECO:0000305};  | 0 |
| Cytoplasmic bodies (G095801  |                          | 0 |
| Nucleoli (GO:0005730) Q8NCS4 | Membrane {ECO:0000305};  | 0 |
| Cytosol (GO:0005829) P0C870  | Nucleus {ECO:0000269 Pub | 0 |
| Mitochondria (GO:0005P82932  | Mitochondrion {ECO:00002 | 1 |
| Nucleoplasm (GO:00056Q96ME7  | Nucleus {ECO:0000305}.   | 0 |
| Cytosol (GO:0005829) P08263  | Cytoplasm.               | 1 |

|                                                        |                            |   |
|--------------------------------------------------------|----------------------------|---|
| Cytosol (GO:0005829);Q9Y697                            | Isoform Mitochondrial: M   | 0 |
| Endoplasmic reticulumP39656                            | Endoplasmic reticulum me   | 1 |
| Cytosol (GO:0005829) P09210                            | Cytoplasm.                 | 1 |
| Cell Junctions (GO:00Q96I45                            | Membrane {ECO:0000305};    | 0 |
| Cell Junctions (GO:0030054);                           | Endoplasmic reticulum (GO: | 0 |
| Cytosol (GO:0005829);Q9BQY9                            |                            | 0 |
| Nucleoplasm (GO:00056P41161                            | Nucleus.                   | 1 |
| Vesicles (GO:0043231)Q03591                            | Secreted.                  | 0 |
| Nucleoplasm (GO:00056Q9NTZ6                            | Nucleus {ECO:0000269 Pub   | 1 |
| Cytosol (GO:0005829);Q96GP6                            | Membrane {ECO:0000305};    | 0 |
| Intermediate filamentQ9NRW3                            | Nucleus. Cytoplasm.        | 0 |
| Centrosome (GO:000581Q8IYE1                            | Cytoplasm, cytoskeleton,   | 0 |
| Nucleoplasm (GO:00056Q13404                            | Nucleus {ECO:0000269 Pub   | 1 |
| Cytosol (GO:0005829);Q6ZW05                            | Membrane {ECO:0000305};    | 0 |
| Nucleoplasm (GO:00056P43320                            |                            | 0 |
| Nucleoplasm (GO:00056Q92802                            |                            | 0 |
| Cytoplasmic bodies (GQ52M93                            | Nucleus {ECO:0000305}.     | 0 |
| Nucleoplasm (GO:00056P49715                            | Nucleus {ECO:0000269 Pub   | 0 |
| Nuclear bodies (GO:00F5GYI3                            |                            | 0 |
| Mitochondria (GO:0005Q96HS1                            | Mitochondrion outer memb   | 1 |
| Vesicles (GO:0043231)Q9NUD5                            | Cytoplasm {ECO:0000269 P   | 0 |
| Plasma membrane (GO:0Q6IBS0                            | Cytoplasm, cytoskeleton    | 0 |
| Cytosol (GO:0005829);Q70EK9                            | Chromosome {ECO:0000305    | 0 |
| Cytosol (GO:0005829);P00326                            | Cytoplasm.                 | 0 |
| Cytosol (GO:0005829)                                   |                            | 0 |
| Nuclear speckles (GO:0016607)                          | Cytoplasm. Nucleus.        | 0 |
| Nucleoli (GO:0005730)Q9H158                            | Cell membrane {ECO:00002   | 0 |
| Nucleoplasm (GO:00056Q8N7G0                            | Nucleus {ECO:0000255 PRO   | 0 |
| Mitochondria (GO:0005A6NKN8                            |                            | 0 |
| Vesicles (GO:0043231)Q9BUJO                            | Cytoplasm {ECO:0000250}.   | 0 |
| Cytosol (GO:0005829)                                   |                            | 0 |
| Cytosol (GO:0005829);Nucleoplasm (GO:0005654)          |                            | 0 |
| Cytosol (GO:0005829) Q494R4                            |                            | 0 |
| Actin filaments (GO:0Q08043                            |                            | 0 |
| Vesicles (GO:0043231)                                  |                            | 0 |
| Cytosol (GO:0005829);Q68DA7                            | Nucleus {ECO:0000250}. C   | 0 |
| Mitochondria (GO:0005739)                              |                            | 0 |
| Cell Junctions (GO:00Q9Y5I1                            | Cell membrane {ECO:00002   | 0 |
| Mitochondria (GO:0005Q7Z4Y8                            | Mitochondrion membrane {   | 1 |
| Cytosol (GO:0005829);P0CG31                            | Nucleus {ECO:0000305}.     | 0 |
| Cytosol (GO:0005829);Q6AW86                            | Nucleus {ECO:0000305}.     | 0 |
| Nucleoplasm (GO:00056Q496A3                            |                            | 0 |
| Golgi apparatus (GO:0Q8TBZ8                            | Nucleus {ECO:0000305}.     | 0 |
| Nucleoplasm (GO:00056Q19T08                            | Cell membrane; Single-pa   | 0 |
| Cytosol (GO:0005829) 075340                            | Endoplasmic reticulum me   | 0 |
| Plasma membrane (GO:0005886)                           |                            | 0 |
| Vesicles (GO:0043231)                                  |                            | 0 |
| Mitochondria (GO:0005A6XGLO                            |                            | 0 |
| Cytosol (GO:0005829);Q9NZH5                            | Cytoplasm {ECO:0000250}.   | 0 |
| Endoplasmic reticulum (GO:0005783);Nuclear speckles (G |                            | 0 |
| Cytosol (GO:0005829);Q9P272                            |                            | 0 |
| Cytosol (GO:0005829);Q8N5G0                            | Mitochondrion inner memb   | 0 |
| Plasma membrane (GO:0005886)                           |                            | 0 |
| Mitochondria (GO:0005Q8WYQ3                            | Mitochondrion intermembr   | 1 |
| Cytosol (GO:0005829) Q00526                            |                            | 0 |



|                                |                          |   |
|--------------------------------|--------------------------|---|
| Centriolar satellite Q16538    | Cell membrane {ECO:00002 | 0 |
| Cytokinetic bridge (GP10075    | Nucleus {ECO:0000305}.   | 0 |
| Vesicles (GO:0043231)          |                          | 0 |
| Golgi apparatus (GO:0P49908    | Secreted {ECO:0000269 Pu | 0 |
| Cytosol (GO:0005829); Q9UF12   |                          | 0 |
| Nucleoplasm (GO:00056Q2M3X9    | Nucleus {ECO:0000305}.   | 0 |
| Endoplasmic reticulum C9J202   |                          | 0 |
| Nucleoplasm (GO:0005654); Plas | Cytoplasm {ECO:0000269 P | 0 |
| Microtubules (GO:0015Q7Z398    | Nucleus {ECO:0000305}.   | 0 |
| Cytosol (GO:0005829); Plasma   | membrane (GO:0005886)    | 0 |
| Cytosol (GO:0005829); Q9UN75   | Cell membrane {ECO:00002 | 0 |
| Cytosol (GO:0005829); 060330   | Cell membrane {ECO:00002 | 0 |
| Nucleoli (GO:0005730) Q6ZNX1   | Chromosome {ECO:0000269  | 0 |
| Actin filaments (GO:0Q8N9Z2    |                          | 0 |
| Nuclear bodies (GO:00P31260    | Nucleus.                 | 1 |
| Cytosol (GO:0005829); Q9Y5F9   | Cell membrane {ECO:00002 | 0 |
| Nucleoli (GO:0005730) Q8IVY1   | Membrane {ECO:0000305};  | 0 |
| Centrosome (GO:000581P0DKX4    | Membrane {ECO:0000305};  | 0 |
| Cytosol (GO:0005829); Q9Y5G8   | Cell membrane {ECO:00002 | 0 |
| Cytosol (GO:0005829) Q9H009    | Cytoplasm {ECO:0000250}. | 0 |
| Cytosol (GO:0005829); Q9Y5G6   | Cell membrane {ECO:00002 | 0 |
| Plasma membrane (GO:0Q5PT55    | Membrane {ECO:0000305};  | 0 |
| Nucleoplasm (GO:00056Q96GX2    | Cytoplasm {ECO:0000269 P | 0 |
| Nucleoplasm (GO:00056P78527    | Nucleus {ECO:0000269 Pub | 0 |
| Cytosol (GO:0005829); Q9Y5G7   | Cell membrane {ECO:00002 | 0 |
| Cytosol (GO:0005829); Q9Y5G5   | Cell membrane {ECO:00002 | 0 |
| Cytosol (GO:0005829); Q5TAP6   | Nucleus, nucleolus {ECO: | 0 |
| Cytosol (GO:0005829); Q9Y5H3   | Cell membrane {ECO:00002 | 0 |
| Cytosol (GO:0005829); Q9Y5H2   | Cell membrane {ECO:00002 | 0 |
| Cytosol (GO:0005829); Q9Y5G2   | Cell membrane {ECO:00002 | 0 |
| Cytosol (GO:0005829); Q9UN71   | Cell membrane {ECO:00002 | 0 |
| Nucleoplasm (GO:00056Q96B33    | Cell junction, tight jun | 0 |
| Cytosol (GO:0005829); Q3ZCT1   | Nucleus {ECO:0000269 Pub | 1 |
| Golgi apparatus (GO:0P07948    | Cell membrane. Nucleus.  | 0 |
| Nucleoli (GO:0005730) Q96BK5   | Nucleus. Nucleus, nucleo | 1 |
| Cytosol (GO:0005829); Q9Y5F8   | Cell membrane {ECO:00002 | 0 |
| Nucleoplasm (GO:00056E5RHQ5    | Membrane {ECO:0000305};  | 0 |
| Focal adhesion sites Q9Y5G3    | Cell membrane {ECO:00002 | 0 |
| Cytosol (GO:0005829); Q9Y5H0   | Cell membrane {ECO:00002 | 0 |
| Vesicles (GO:0043231) Q50LG9   | Membrane {ECO:0000305};  | 0 |
| Nucleoli (GO:0005730) Q6ZNB5   |                          | 0 |
| Golgi apparatus (GO:0Q2VPB7    |                          | 0 |
| Mitochondria (GO:0005739)      |                          | 0 |
| Nucleoplasm (GO:00056Q8NEV1    |                          | 0 |
| Cytosol (GO:0005829) A6NKG5    | Membrane {ECO:0000305};  | 0 |
| Vesicles (GO:0043231) 014772   | Cytoplasm.               | 0 |
| Golgi apparatus (GO:0005794)   |                          | 0 |
| Cytosol (GO:0005829) A1L020    | Cytoplasm {ECO:0000269 P | 0 |
| Mitochondria (GO:0005P26641    |                          | 0 |
| Nucleoplasm (GO:00056Q8N1D0    |                          | 0 |
| Nucleoplasm (GO:00056E9PIF3    |                          | 0 |
| Nucleoplasm (GO:00056Q96FH0    | Lysosome membrane {ECO:0 | 0 |
| Cytosol (GO:0005829) Q9NY33    | Cytoplasm, cytosol {ECO: | 1 |
| Cell Junctions (GO:0Q8WUW1     | Cytoplasm, cytoskeleton  | 0 |
| Midbody (GO:0030496); Q7LBR1   | Cytoplasm, cytosol. Endo | 0 |

|                                                        |                          |   |
|--------------------------------------------------------|--------------------------|---|
| Nucleoli (GO:0005730)Q8N140                            | Nucleus {ECO:0000269 Pub | 0 |
| Cytosol (GO:0005829);Golgi apparatus (GO:0005794)      |                          | 0 |
| Mitochondria (GO:0005P86397                            | Mitochondrion {ECO:00002 | 1 |
| Nuclear membrane (GO:0031965);Vesicles (GO:0043231)    |                          | 0 |
| Nucleoplasm (GO:00056Q9Y6B2                            | Nucleus {ECO:0000269 Pub | 0 |
| Cell Junctions (GO:00P49019                            | Cell membrane; Multi-pas | 0 |
| Nuclear bodies (GO:00Q6P2I7                            |                          | 0 |
| Endoplasmic reticulum (GO:0005783)                     |                          | 0 |
| Nucleoplasm (GO:00056E9PQR5                            |                          | 0 |
| Nucleoplasm (GO:0005654)                               |                          | 0 |
| Nucleoplasm (GO:00056P0CAP2                            | Isoform 1: Nucleus {ECO: | 0 |
| Nucleoplasm (GO:0005654)                               |                          | 0 |
| Cytosol (GO:0005829);Q9BRP7                            |                          | 0 |
| Endoplasmic reticulumP0DI82                            | Nucleus {ECO:0000250 Uni | 0 |
| Cytosol (GO:0005829);Q8WXU2                            | Nucleus. Cytoplasm.      | 0 |
| Nucleoplasm (GO:00056094892                            | Nucleus {ECO:0000305}.   | 1 |
| Nucleoplasm (GO:00056P21506                            | Nucleus {ECO:0000269 Pub | 0 |
| Vesicles (GO:0043231)Q9BZL3                            | Membrane {ECO:0000305};  | 0 |
| Lipid droplets (GO:00P08397                            | Cytoplasm {ECO:0000305}. | 0 |
| Nucleoplasm (GO:00056Q9UK10                            | Nucleus {ECO:0000305}.   | 0 |
| Midbody (GO:0030496)                                   |                          | 0 |
| Cytosol (GO:0005829);Nucleoplasm (GO:0005654);Plasma m |                          | 0 |
| Centriolar satellite (GO:0034451)                      |                          | 0 |
| Mitochondria (GO:0005Q9UHN1                            | Mitochondrion.           | 1 |
| Cytosol (GO:0005829);P0CW20                            |                          | 0 |
| Nuclear bodies (GO:00Q9GZX5                            | Nucleus. Nucleus matrix. | 1 |
| Cytokinetic bridge (GO:0045171);Cytosol (GO:0005829);N |                          | 0 |
| Cytosol (GO:0005829) Q96L46                            | Cytoplasm {ECO:0000250}. | 0 |
| Cytosol (GO:0005829);P0CW19                            | Cytoplasm {ECO:0000305}. | 0 |
| Cell Junctions (GO:00Q7Z601                            | Cell membrane; Multi-pas | 0 |
| Vesicles (GO:0043231)P00738                            | Secreted.                | 0 |
| Golgi apparatus (GO:0A4D1U4                            |                          | 0 |
| Cytoplasmic bodies (GQ8ND56                            | Cytoplasm, P-body {ECO:0 | 1 |
| Mitochondria (GO:0005P0CG21                            |                          | 0 |
| Centriolar satellite P86452                            | Nucleus {ECO:0000250 Uni | 0 |
| Centrosome (GO:000581P49356                            |                          | 0 |
| Cytoplasmic bodies (GO:0036464);Nuclear speckles (GO:0 |                          | 0 |
| Nucleoli (GO:0005730)C9JN71                            | Nucleus {ECO:0000305}.   | 0 |
| Cytosol (GO:0005829);Endoplasmic reticulum (GO:0005783 |                          | 0 |
| Mitochondria (GO:0005Q96I27                            | Nucleus {ECO:0000305}.   | 0 |
| Golgi apparatus (GO:0Q8N4A0                            | Golgi apparatus membrane | 0 |
| Cytosol (GO:0005829) Q9Y2B0                            | Endoplasmic reticulum {E | 0 |
| Cytosol (GO:0005829);Q2M2H8                            | Membrane {ECO:0000305};  | 0 |
| Golgi apparatus (GO:0P39880                            | Nucleus.                 | 0 |
| Nucleoplasm (GO:00056Q86WV5                            | Nucleus {ECO:0000269 Pub | 1 |
| Nucleoplasm (GO:00056A6NCE7                            | Cytoplasm, cytoskeleton  | 0 |
| Cytosol (GO:0005829);Q9NY25                            | Cell membrane {ECO:00002 | 1 |
| Cytosol (GO:0005829) Q8WUH1                            |                          | 0 |
| Cytosol (GO:0005829);Q8IXM2                            | Nucleus {ECO:0000305}.   | 0 |
| Nuclear bodies (GO:00Q9NZ71                            | Nucleus {ECO:0000255 HAM | 0 |
| Mitochondria (GO:0005Q9HBH1                            | Mitochondrion {ECO:00003 | 0 |
| Cytosol (GO:0005829);Mitochondria (GO:0005739);Nucleop |                          | 0 |
| Nucleoplasm (GO:0005654);Plasma membrane (GO:0005886); |                          | 0 |
| Endoplasmic reticulum (GO:0005783)                     |                          | 0 |
| Centrosome (GO:0005813);Nucleoli (GO:0005730)          |                          | 0 |

|                                    |                                   |   |
|------------------------------------|-----------------------------------|---|
| Nuclear speckles (GO:Q92843        | Mitochondrion membrane {          | 0 |
| Mitochondria (GO:0005739)          |                                   | 0 |
| Centrosome (GO:000581Q9BYJ4        | Cytoplasm {ECO:0000269 P          | 0 |
| Golgi apparatus (GO:0005794);      | Nuclear speckles (GO:0016         | 0 |
| Centrosome (GO:000581Q96GE4        | Cytoplasm, cytoskeleton,          | 0 |
| Mitochondria (GO:0005Q6ZVK1        | Membrane {ECO:0000305};           | 0 |
| Cytosol (GO:0005829) Q01534        | Cytoplasm {ECO:0000269 P          | 0 |
| Golgi apparatus (GO:0005794)       |                                   | 0 |
| Vesicles (GO:0043231)              |                                   | 0 |
| Golgi apparatus (GO:0005794)       |                                   | 0 |
| Mitochondria (GO:0005E9PQ53        | Mitochondrion inner memb          | 1 |
| Nucleoplasm (GO:00056P0DI80        | Membrane {ECO:0000305};           | 0 |
| Focal adhesion sites (GO:0005925); | Plasma membrane (GO:              | 0 |
| Nucleoplasm (GO:00056P05106        | Cell membrane {ECO:00002          | 0 |
| Cell Junctions (GO:0030054);       | Nucleoli fibrillar center         | 0 |
| Cytosol (GO:0005829); Q96EF9       |                                   | 0 |
| Nucleoli (GO:0005730) Q9BU02       | Cytoplasm {ECO:0000269 P          | 0 |
| Cell Junctions (GO:00Q9H2W6        | Mitochondrion {ECO:00002          | 1 |
| Nucleoplasm (GO:00056Q8NDT2        | Nucleus, nucleoplasm {EC          | 0 |
| Vesicles (GO:0043231) H3BV60       | Membrane {ECO:0000305};           | 0 |
| Cytosol (GO:0005829); P09629       | Nucleus.                          | 1 |
| Nucleoplasm (GO:0005654);          | Vesicles (GO:0043231)             | 0 |
| Vesicles (GO:0043231) Q6DHY5       | Cell membrane {ECO:00002          | 0 |
| Endoplasmic reticulum (GO:0005783) |                                   | 0 |
| Endoplasmic reticulum Q9H693       |                                   | 0 |
| Cytosol (GO:0005829); B7U540       | Cell membrane {ECO:00002          | 0 |
| Nucleoplasm (GO:0005654)           |                                   | 0 |
| Cytosol (GO:0005829); Q9UBX2       | Isoform 1: Nucleus {ECO:          | 0 |
| Vesicles (GO:0043231)              |                                   | 0 |
| Cytosol (GO:0005829);              | Endoplasmic reticulum (GO:0005783 | 0 |
| Midbody (GO:0030496)               |                                   | 0 |
| Endoplasmic reticulum Q9ULG6       | Cytoplasmic granule memb          | 0 |
| Nucleoli (GO:0005730) H3BS89       | Membrane {ECO:0000305};           | 0 |
| Intermediate filaments (GO:004     | Cytoplasm, cytoskeleton           | 0 |
| Nucleoli (GO:0005730) P0CJ78       | Nucleus {ECO:0000250}.            | 0 |
| Nucleoli (GO:0005730) Q14137       | Nucleus, nucleolus {ECO:          | 1 |
| Microtubules (GO:0015Q9H2C0        | Cytoplasm. Cytoplasm, cy          | 0 |
| Cytosol (GO:0005829); H3BRN8       |                                   | 0 |
| Nuclear bodies (GO:00Q9BWW7        | Nucleus {ECO:0000269 Pub          | 1 |
| Vesicles (GO:0043231) P00739       | Secreted {ECO:0000269 Pu          | 0 |
| Nuclear speckles (GO:0016607)      |                                   | 0 |
| Nucleoplasm (GO:0005654)           |                                   | 0 |
| Cytosol (GO:0005829); Q9Y5G4       | Cell membrane {ECO:00002          | 0 |
| Cytosol (GO:0005829); A0A1B0GTQ    | Cell membrane {ECO:00002          | 0 |
| Cytosol (GO:0005829); Q9Y5G1       | Cell membrane {ECO:00002          | 0 |
| Cytosol (GO:0005829); Q9Y5G9       | Cell membrane {ECO:00002          | 0 |
| Actin filaments (GO:0Q9HCB6        | Secreted, extracellular           | 0 |
| Mitochondria (GO:0005739)          |                                   | 0 |
| Cytosol (GO:0005829); Q8WZ82       |                                   | 0 |
| Mitochondria (GO:0005P52815        | Mitochondrion {ECO:00002          | 1 |
| Vesicles (GO:0043231) I3L1E1       |                                   | 0 |
| Cytosol (GO:0005829); Q8N1B3       |                                   | 0 |
| Nucleoplasm (GO:00056P78347        | Cytoplasm {ECO:0000269 P          | 0 |
| Nuclear bodies (GO:00Q14588        | Nucleus {ECO:0000305}.            | 0 |
| Cytosol (GO:0005829); Q9BRL6       | Nucleus {ECO:0000269 Pub          | 1 |

|                                                        |                          |   |
|--------------------------------------------------------|--------------------------|---|
| Cytosol (GO:0005829);H0Y354                            |                          | 0 |
| Cytosol (GO:0005829) Q14164                            | Cytoplasm {ECO:0000269 P | 0 |
| Nuclear bodies (GO:00Q86T75                            | Cytoplasm {ECO:0000305}. | 0 |
| Plasma membrane (GO:0Q6ZWK4                            | Cell membrane {ECO:00002 | 1 |
| Nucleoplasm (GO:00056Q5VT79                            |                          | 0 |
| Cytosol (GO:0005829);Q96FJ2                            | Cytoplasm, cytoskeleton  | 0 |
| Microtubules (GO:0015Q6GQQ9                            | Cytoplasm {ECO:0000269 P | 0 |
| Nucleoli (GO:0005730);Nucleoplasm (GO:0005654);Plasma  |                          | 0 |
| Nucleoplasm (GO:00056P13928                            |                          | 0 |
| Nuclear speckles (GO:Q9Y5S9                            | Nucleus {ECO:0000269 Pub | 0 |
| Mitochondria (GO:0005014925                            | Mitochondrion inner memb | 1 |
| Mitochondria (GO:0005Q9Y4L5                            | Cytoplasm, cytosol {ECO: | 0 |
| Cytosol (GO:0005829);P18621                            |                          | 0 |
| Cytosol (GO:0005829);Q96MN9                            | Nucleus {ECO:0000250 Uni | 1 |
| Nucleoplasm (GO:00056095073                            | Nucleus {ECO:0000269 Pub | 1 |
| Cytosol (GO:0005829);Q9H3M7                            | Cytoplasm {ECO:0000250}. | 0 |
| Cytosol (GO:0005829);075044                            | Cell membrane. Cell proj | 0 |
| Nucleoli (GO:0005730)                                  |                          | 0 |
| Cytosol (GO:0005829);Q7RTN6                            | Nucleus {ECO:0000269 Pub | 1 |
| Nuclear bodies (GO:00Q8N660                            | Cytoplasm {ECO:0000305}. | 0 |
| Cytosol (GO:0005829);Q13772                            |                          | 0 |
| Mitochondria (GO:0005739)                              | Mitochondrion {ECO:00002 | 1 |
| Vesicles (GO:0043231)P55107                            | Secreted {ECO:0000250 Un | 0 |
| Cytosol (GO:0005829)                                   | Cytoplasm {ECO:0000305}. | 0 |
| Microtubules (GO:0015630)                              |                          | 0 |
| Cytosol (GO:0005829);000168                            | Cell membrane, sarcolemm | 0 |
| Cytosol (GO:0005829);Q9BTE6                            | Cytoplasm {ECO:0000250}. | 0 |
| Nucleoplasm (GO:00056A8MQ14                            | Nucleus {ECO:0000250}.   | 0 |
| Nucleoplasm (GO:0005654)                               |                          | 0 |
| Cytosol (GO:0005829);Nucleoplasm (GO:0005654)          |                          | 0 |
| Cytosol (GO:0005829)                                   |                          | 0 |
| Golgi apparatus (GO:0095136                            | Cell membrane; Multi-pas | 0 |
| Mitochondria (GO:0005739)                              |                          | 0 |
| Cytosol (GO:0005829) A6NKQ9                            | Secreted.                | 0 |
| Nuclear membrane (GO:Q9NZL3                            | Nucleus {ECO:0000269 Pub | 0 |
| Lipid droplets (GO:00Q538Z0                            |                          | 0 |
| Mitochondria (GO:0005739)                              |                          | 0 |
| Cytosol (GO:0005829);K7EJ46                            | Membrane {ECO:0000305};  | 0 |
| Nucleoplasm (GO:00056Q96GY3                            |                          | 0 |
| Mitochondria (GO:0005095182                            | Mitochondrion inner memb | 1 |
| Golgi apparatus (GO:0P43362                            |                          | 0 |
| Nucleoli (GO:0005730) 060224                           |                          | 0 |
| Nuclear bodies (GO:0016604);NuCytoplasm {ECO:0000305}. |                          | 0 |
| Mitochondria (GO:0005739)                              |                          | 0 |
| Vesicles (GO:0043231)Q9UN76                            | Membrane; Multi-pass mem | 0 |
| Vesicles (GO:0043231)P0DL12                            | Membrane {ECO:0000305};  | 0 |
| Nucleoli (GO:0005730) Q16385                           | Nucleus.                 | 0 |
| Cytosol (GO:0005829);Plasma membrane (GO:0005886)      |                          | 0 |
| Intermediate filamentP0DMU3                            |                          | 0 |
| Cytosol (GO:0005829)                                   |                          | 0 |
| Centriolar satellite (GO:0034451);Nucleoplasm (GO:0005 |                          | 0 |
| Nucleoli (GO:0005730) Q5HYN5                           |                          | 0 |
| Nucleoli fibrillar ceQ5MJ10                            |                          | 0 |
| Nucleoplasm (GO:0005654)                               |                          | 0 |
| Nuclear membrane (GO:0031965)                          |                          | 0 |

|                                                        |                          |   |
|--------------------------------------------------------|--------------------------|---|
| Nucleoli (GO:0005730) Q8NHU0                           | 0                        |   |
| Nucleoplasm (GO:0005654)                               | 0                        |   |
| Cytosol (GO:0005829) Q9Y6K9                            | Cytoplasm {ECO:0000269 P | 0 |
| Nucleoplasm (GO:00056E7ETH6                            | Nucleus {ECO:0000305}.   | 0 |
| Mitochondria (GO:0005739);Nucleoplasm (GO:0005654);Ves |                          | 0 |
| Endoplasmic reticulum Q8NFB2                           | Cell projection, dendrit | 0 |
| Nucleoli (GO:0005730) P0DMU9                           |                          | 0 |
| Endoplasmic reticulum (GO:0005783);Nuclear membrane (G |                          | 0 |
| Cytosol (GO:0005829);Q9NZV7                            | Nucleus {ECO:0000305}.   | 0 |
| Nuclear bodies (GO:0016604);NuCytoplasm {ECO:0000305}. |                          | 0 |
| Nucleoli (GO:0005730) 060224                           |                          | 0 |
| Nucleoplasm (GO:00056Q96KS0                            | Nucleus {ECO:0000269 Pub | 1 |
| Mitochondria (GO:0005739);Nucleoplasm (GO:0005654)     |                          | 0 |
| Cytosol (GO:0005829);Nuclear bodies (GO:0016604);Nucle |                          | 0 |
| Nucleoplasm (GO:0005654)                               |                          | 0 |
| Nucleoplasm (GO:0005654)                               |                          | 0 |
| Nucleoplasm (GO:0005654)                               |                          | 0 |
| Nuclear bodies (GO:0016604);NuCytoplasm {ECO:0000305}. |                          | 0 |
| Nucleoplasm (GO:00056Q92804                            | Nucleus {ECO:0000269 Pub | 0 |
| Cytosol (GO:0005829)                                   |                          | 0 |
| Nucleoplasm (GO:00056Q8WW18                            |                          | 0 |
| Vesicles (GO:0043231) Q96S79                           | Cell membrane {ECO:00003 | 0 |
| Nucleoli (GO:0005730) P0DMV2                           |                          | 0 |
| Nuclear bodies (GO:0016604);Nucleoplasm (GO:0005654)   |                          | 0 |
| Nuclear bodies (GO:00A0A087WULCytoplasm {ECO:0000305}. |                          | 0 |
| Nuclear bodies (GO:0016604);NuCytoplasm {ECO:0000305}. |                          | 0 |
| Focal adhesion sites Q9H239                            | Secreted, extracellular  | 0 |
| Nucleoli (GO:0005730) Q5DJT8                           |                          | 0 |
| Cytosol (GO:0005829) Q8IVB5                            |                          | 0 |
| Cytosol (GO:0005829) Q69YU3                            |                          | 0 |
| Cytosol (GO:0005829) 095989                            | Cytoplasm {ECO:0000305}. | 0 |
| Cytosol (GO:0005829);Q9UMN6                            | Nucleus {ECO:0000250}.   | 0 |
| Nuclear membrane (GO:0031965);Nucleus, nuclear pore co |                          | 0 |
| Vesicles (GO:0043231)                                  | Cell membrane; Lipid-anc | 0 |
| Cytosol (GO:0005829);Plasma membrane (GO:0005886)      |                          | 0 |
| Cell Junctions (GO:00Q8IYR0                            | Cytoplasm, cytoskeleton, | 0 |
| Golgi apparatus (GO:0Q96MW5                            | Golgi apparatus membrane | 1 |
| Plasma membrane (GO:0Q9NRJ7                            | Membrane {ECO:0000250};  | 0 |
| Nuclear bodies (GO:0016604);Nucleoplasm (GO:0005654)   |                          | 0 |
| Cytoplasmic bodies (GQ9NPI6                            | Cytoplasm, P-body {ECO:0 | 0 |
| Nuclear bodies (GO:0016604);NuCytoplasm {ECO:0000250}. |                          | 0 |
| Nuclear speckles (GO:Q9Y675                            | Nucleus {ECO:0000269 Pub | 0 |
| Centrosome (GO:0005813);Cytosol (GO:0005829)           |                          | 0 |
| Vesicles (GO:0043231) A0A087X1G                        | Cell membrane {ECO:00002 | 0 |
| Nucleoplasm (GO:00056Q3SYB3                            | Nucleus {ECO:0000255 PRO | 0 |
| Nuclear speckles (GO:Q9NXE8                            | Nucleus {ECO:0000269 Pub | 0 |
| Focal adhesion sites Q8TCY0                            | Membrane {ECO:0000255};  | 0 |
| Cytoplasmic bodies (GA6NHQ4                            | Nucleus {ECO:0000250 Uni | 1 |
| Mitochondria (GO:0005Q15649                            | Cytoplasm {ECO:0000269 P | 0 |
| Nucleoli (GO:0005730) P0DMV0                           |                          | 0 |
| Cytosol (GO:0005829);Q99879                            | Nucleus. Chromosome.     | 0 |
| Golgi apparatus (GO:0P48742                            | Nucleus {ECO:0000305}.   | 0 |
| Cytosol (GO:0005829);P62807                            | Nucleus. Chromosome.     | 0 |
| Nucleoplasm (GO:00056A6NNY8                            | Cytoplasm, cytosol {ECO: | 0 |
| Nucleoplasm (GO:00056Q16594                            | Nucleus {ECO:0000269 Pub | 1 |

|                                                        |                          |   |
|--------------------------------------------------------|--------------------------|---|
| Nucleoli (GO:0005730) Q9UGY1                           | Nucleus, nucleolus {ECO: | 0 |
| Cytosol (GO:0005829) 014512                            | Cytoplasm. Cell membrane | 0 |
| Vesicles (GO:0043231) P0C7X1                           | Cell membrane {ECO:00002 | 0 |
| Cytosol (GO:0005829);Golgi apparatus (GO:0005794);Plas |                          | 0 |
| Nucleoli (GO:0005730) P0DN79                           | Cytoplasm {ECO:0000250 U | 0 |
| Cytosol (GO:0005829);P62807                            | Nucleus. Chromosome.     | 0 |
| Nucleoplasm (GO:00056Q5TYW1                            | Nucleus {ECO:0000305}.   | 0 |
| Cytosol (GO:0005829);P56180                            | Membrane; Multi-pass mem | 0 |
| Vesicles (GO:0043231) A0A087WVFC                       | Cell membrane {ECO:00002 | 0 |
| Vesicles (GO:0043231) B9A6J9                           | Cell membrane {ECO:00002 | 0 |
| Cytosol (GO:0005829);Q96I51                            | Mitochondrion membrane { | 0 |
| Cytosol (GO:0005829);Nucleopla                         | Nucleus. Chromosome.     | 1 |
| Plasma membrane (GO:0A6NNM3                            | Cytoplasm, cytoskeleton  | 0 |
| Vesicles (GO:0043231) Q8IZP1                           | Cell membrane {ECO:00002 | 0 |
| Cytosol (GO:0005829);P23527                            | Nucleus. Chromosome.     | 0 |
| Centrosome (GO:0005813)                                |                          | 0 |
| Vesicles (GO:0043231) A6NDS4                           | Cell membrane {ECO:00002 | 0 |
| Intermediate filaments (GO:004                         | Cytoplasm {ECO:0000269 P | 0 |
| Vesicles (GO:0043231) A0A087WXSC                       | Cell membrane {ECO:00002 | 0 |
| Mitochondria (GO:0005739);Nucleoplasm (GO:0005654)     |                          | 0 |
| Nucleoplasm (GO:00056Q86YH2                            | Nucleus {ECO:0000305}.   | 0 |
| Nucleoplasm (GO:0005654)                               | Nucleus {ECO:0000305}.   | 0 |
| Centrosome (GO:000581Q5MIZ7                            | Cytoplasm {ECO:0000269 P | 0 |
| Cytosol (GO:0005829) Q9UMZ2                            | Cytoplasm {ECO:0000250}. | 0 |
| Golgi apparatus (GO:0Q6ZVK8                            |                          | 0 |
| Cytosol (GO:0005829);Q9BSG1                            | Nucleus {ECO:0000305}.   | 0 |
| Cytosol (GO:0005829);Golgi apparatus (GO:0005794);Plas |                          | 0 |
| Nucleoli fibrillar center (GO:0001650)                 |                          | 0 |
| Cytokinetic bridge (GO:0045171                         | Secreted {ECO:0000305}.  | 0 |
| Nucleoplasm (GO:00056P35680                            | Nucleus.                 | 1 |
| Cytosol (GO:0005829);Nucleoli (GO:0005730)             |                          | 0 |
| Intermediate filamentA8MV24                            |                          | 0 |
| Nucleoli (GO:0005730) Q9NY61                           | Nucleus, nucleolus {ECO: | 1 |
| Cytosol (GO:0005829);Q93079                            | Nucleus. Chromosome.     | 0 |
| Golgi apparatus (GO:0Q16663                            | Secreted.                | 0 |
| Nuclear speckles (GO:0016607)                          |                          | 0 |
| Plasma membrane (GO:0Q9UFD9                            | Cytoplasm, cytoskeleton  | 0 |
| Cytosol (GO:0005829);Q9P227                            |                          | 0 |
| Centrosome (GO:000581Q96RT8                            | Cytoplasm, cytoskeleton, | 0 |
| Nucleoplasm (GO:00056P0DN76                            | Nucleus {ECO:0000250 Uni | 0 |
| Endoplasmic reticulumP07478                            | Secreted, extracellular  | 0 |
| Vesicles (GO:0043231)                                  | Cell membrane {ECO:00002 | 0 |
| Nucleoplasm (GO:0005654);Vesicles (GO:0043231)         |                          | 0 |
| Cytosol (GO:0005829);095147                            |                          | 0 |
| Nucleoplasm (GO:00056Q96T88                            | Nucleus {ECO:0000255 PRO | 1 |
| Cytosol (GO:0005829) Q96D31                            | Cell membrane {ECO:00002 | 0 |
| Cytosol (GO:0005829);Nucleopla                         | Cytoplasm {ECO:0000269 P | 0 |
| Cytosol (GO:0005829);Q5UE93                            | Cytoplasm {ECO:0000250 U | 0 |
| Nuclear speckles (GO:0016607)                          | Nucleus {ECO:0000269 Pub | 0 |
| Nucleoplasm (GO:00056P78356                            | Endoplasmic reticulum me | 0 |
| Mitochondria (GO:0005739);Nucleoli fibrillar center (G |                          | 0 |
| Cytosol (GO:0005829);P33778                            | Nucleus. Chromosome.     | 0 |
| Cytosol (GO:0005829);Q9Y5G0                            | Cell membrane {ECO:00002 | 0 |
| Nucleoplasm (GO:00056Q9UI36                            | Nucleus {ECO:0000269 Pub | 1 |
| Nucleoplasm (GO:00056P04908                            | Nucleus. Chromosome.     | 1 |

|                                                        |   |
|--------------------------------------------------------|---|
| Cytoplasmic bodies (GO:0036464);Plasma membrane (GO:00 | 0 |
| Nucleoli (GO:0005730);Nucleoplasm (GO:0005654)         | 0 |
| Plasma membrane (GO:0Q7Z7B1 Endoplasmic reticulum me   | 0 |
| Cytosol (GO:0005829);P62807 Nucleus. Chromosome.       | 0 |
| Nucleoplasm (GO:00056P35227 Nucleus {ECO:0000269 Pub   | 1 |
| Cell Junctions (GO:00Q9C0H9 Cytoplasm. Cytoplasm, cy   | 0 |
| Cytosol (GO:0005829);P29966 Cytoplasm, cytoskeleton    | 0 |
| Cytosol (GO:0005829);Q9BS34 Nucleus {ECO:0000305}.     | 0 |
| Intermediate filamentP07196                            | 0 |
| Golgi apparatus (GO:0005794)                           | 0 |
| Cytosol (GO:0005829);Q8NG50 Nucleus {ECO:0000269 Pub   | 0 |
| Nucleoli (GO:0005730)Q9Y2R4 Nucleus, nucleolus {ECO:   | 1 |
| Nucleoli (GO:0005730)P0DMV1                            | 0 |
| Nuclear bodies (GO:00P17098 Nucleus {ECO:0000305}.     | 0 |
| Centriolar satellite Q2TBC4                            | 0 |
| Cytosol (GO:0005829);Q96H55 Mitochondrion outer memb   | 0 |
| Nucleoli (GO:0005730)P0DMU7                            | 0 |
| Vesicles (GO:0043231)Q6IPX1 Cell membrane {ECO:00002   | 0 |
| Endoplasmic reticulumQ9H3C7 Cytoplasmic vesicle {ECO   | 0 |
| Plasma membrane (GO:0Q9UJW7 Nucleus {ECO:0000305}.     | 0 |
| Cytosol (GO:0005829);Q6UWP2 Secreted {ECO:0000305}.    | 0 |
| Actin filaments (GO:0Q13085 Cytoplasm.                 | 1 |
| Cytosol (GO:0005829);P62807 Nucleus. Chromosome.       | 0 |
| Vesicles (GO:0043231)A0A087X17Cell membrane {ECO:00002 | 0 |
| Mitochondria (GO:0005Q6IN84 Mitochondrion {ECO:00002   | 1 |
| Mitochondria (GO:0005739) Mitochondrion {ECO:00002     | 1 |
| Centrosome (GO:0005813)                                | 0 |
| Centrosome (GO:0005813);Mitochondria (GO:0005739)      | 0 |
| Cytokinetic bridge (GQ8N6Y1 Cell membrane {ECO:00002   | 0 |
| Centrosome (GO:0005813)                                | 0 |
| Nucleoplasm (GO:0005654) Nucleus matrix.               | 0 |
| Cytosol (GO:0005829)                                   | 0 |
| Endoplasmic reticulum (GO:0005783)                     | 0 |
| Golgi apparatus (GO:0005794)                           | 0 |
| Nucleoplasm (GO:0005654)                               | 0 |
| Cytosol (GO:0005829) P24462 Endoplasmic reticulum me   | 0 |
| Cytoplasmic bodies (GO:0036464);Nucleoplasm (GO:000565 | 0 |
| Endoplasmic reticulum (GO:0005783)                     | 0 |
| Cytosol (GO:0005829) B3KU38 Cell projection, axon {E   | 0 |
| Cell Junctions (GO:0030054);Plasma membrane (GO:000588 | 0 |
| Cytosol (GO:0005829);Q2M3D2                            | 0 |
| Vesicles (GO:0043231)                                  | 0 |
| Mitochondria (GO:0005739)                              | 0 |
| Nucleoplasm (GO:0005654)                               | 0 |
| Cytosol (GO:0005829);Nuclear speckles (GO:0016607)     | 0 |
| Mitochondria (GO:0005739) Mitochondrion inner memb     | 0 |
| Cell Junctions (GO:0030054);Cytosol (GO:0005829)       | 0 |
| Nucleoli fibrillar center (GO:0001650);Nucleoplasm (GO | 0 |
| Vesicles (GO:0043231)                                  | 0 |
| Plasma membrane (GO:0Q8NH09 Cell membrane; Multi-pas   | 1 |
| Cytosol (GO:0005829);P0DPD7                            | 0 |
| Cytosol (GO:0005829);Nucleoli (GO:0005730)             | 0 |
| Plasma membrane (GO:0Q8N628 Cell membrane; Multi-pas   | 0 |
| Vesicles (GO:0043231)Q3KRB8                            | 0 |
| Cytosol (GO:0005829);P0DPD8 Golgi apparatus membrane   | 0 |

|                                                        |   |
|--------------------------------------------------------|---|
| Microtubules (GO:0015630)                              | 0 |
| Mitochondria (GO:0005Q9NR28 Mitochondrion {ECO:00002   | 0 |
| Golgi apparatus (GO:0005794);Vesicles (GO:0043231)     | 0 |
| Cytosol (GO:0005829) P04075 Cytoplasm, myofibril, sa   | 1 |
| Vesicles (GO:0043231) Q3KRB8                           | 0 |
| Cell Junctions (GO:0030054);Nucleoplasm (GO:0005654);P | 0 |
| Nucleoplasm (GO:0005654)                               | 0 |
| Cytosol (GO:0005829);015265 Isoform a: Nucleus. Nucl   | 0 |
| Endoplasmic reticulumQ15293 Endoplasmic reticulum lu   | 1 |
| Cytosol (GO:0005829) Q9UG63                            | 0 |
| Cytosol (GO:0005829)                                   | 0 |
| Vesicles (GO:0043231)                                  | 0 |
| Cytosol (GO:0005829);Nucleoli (GO:0005730)             | 0 |
| Nucleoplasm (GO:0005654) Nucleus {ECO:0000250}.        | 0 |
| Focal adhesion sites Q96KX1                            | 0 |
| Centrosome (GO:0005813)                                | 0 |
| Cytosol (GO:0005829)                                   | 0 |



Table S-2. Subcellular location annotations of Immunohistochemistry images

| NO. | Gene            | Gene name | Reliability | Staining                                   | Subcellular locations              |
|-----|-----------------|-----------|-------------|--------------------------------------------|------------------------------------|
| 1   | ENSG00000000003 | TSPAN6    | Approved    | Cytoplasm                                  | cytoplasm;plasma membrane          |
| 2   | ENSG00000000005 | TNMD      | Uncertain   | Estimation of protein expression could not |                                    |
| 3   | ENSG00000000419 | DPM1      | Approved    | Ubiquitous                                 | cytoplasm                          |
| 4   | ENSG00000000457 | SCYL3     | Approved    | General                                    | cytoplasm                          |
| 5   | ENSG00000000460 | Clorf112  | Uncertain   | Nuclear                                    | cytoplasm;nucleus                  |
| 6   | ENSG00000000938 | FGR       | Enhanced    | Cytoplasm                                  | cytoplasm                          |
| 7   | ENSG00000000971 | CFH       | Supported   | Distinct                                   | plasma membrane                    |
| 8   | ENSG00000001036 | FUCA2     | Approved    | Extracellular                              | positivity in a few tissues.       |
| 9   | ENSG00000001084 | GCLC      | Approved    | Cytoplasm                                  | cytoplasm                          |
| 10  | ENSG00000001167 | NFYA      | Enhanced    | General                                    | nucleus                            |
| 11  | ENSG00000001461 | NIPAL3    | Approved    | General                                    | cytoplasm                          |
| 12  | ENSG00000001497 | LAS1L     | Supported   | Ubiquitous                                 | nucleus                            |
| 13  | ENSG00000001561 | ENPP4     | Approved    | Cytoplasm                                  | cytoplasm;plasma membrane          |
| 14  | ENSG00000001617 | SEMA3F    | Approved    | Cytoplasm                                  | cytoplasm                          |
| 15  | ENSG00000001626 | CFTR      | Enhanced    | Membranous                                 | plasma membrane                    |
| 16  | ENSG00000001629 | ANKIB1    | Uncertain   | General                                    | nucleus                            |
| 17  | ENSG00000001630 | CYP51A1   | Enhanced    | Cytoplasm                                  | cytoplasm                          |
| 18  | ENSG00000001631 | KRIT1     | Supported   | Distinct                                   | expression in endothelial cells in |
| 19  | ENSG00000002330 | BAD       | Approved    | Ubiquitous                                 | cytoplasm                          |
| 20  | ENSG00000002549 | LAP3      | Enhanced    | Cytoplasm                                  | cytoplasm                          |
| 21  | ENSG00000002586 | CD99      | Supported   | Membranous                                 | plasma membrane                    |
| 22  | ENSG00000002587 | HS3ST1    | Approved    | Selective                                  | expression in CNS.                 |
| 23  | ENSG00000002726 | AOC1      | Approved    | Cytoplasm                                  | cytoplasm;plasma membrane          |
| 24  | ENSG00000002746 | HECW1     | Approved    | General                                    | cytoplasm;nucleus                  |
| 25  | ENSG00000002822 | MAD1L1    | Supported   | Nuclear                                    | nucleus;plasma membrane            |
| 26  | ENSG00000002834 | LASP1     | Enhanced    | Cytoplasm                                  | cytoplasm                          |
| 27  | ENSG00000002919 | SNX11     | Approved    | Cytoplasm                                  | cytoplasm;plasma membrane          |
| 28  | ENSG00000002933 | TMEM176A  | Approved    | Ubiquitous                                 | cytoplasm                          |
| 29  | ENSG00000003056 | M6PR      | Approved    | General                                    | cytoplasm                          |
| 30  | ENSG00000003096 | KLHL13    | Approved    | Cytoplasm                                  | cytoplasm;nucleus                  |
| 31  | ENSG00000003137 | CYP26B1   | Uncertain   | Cytoplasm                                  | cytoplasm                          |
| 32  | ENSG00000003147 | ICA1      | Approved    | General                                    | cytoplasm                          |
| 33  | ENSG00000003249 | DBNDD1    | Uncertain   | General                                    | nucleus                            |
| 34  | ENSG00000003393 | ALS2      | Enhanced    | General                                    | cytoplasm                          |
| 35  | ENSG00000003400 | CASP10    | Approved    | Cytoplasm                                  | cytoplasm                          |
| 36  | ENSG00000003402 | CFLAR     | Uncertain   | Ubiquitous                                 | cytoplasm                          |
| 37  | ENSG00000003436 | TFPI      | Supported   | General                                    | cytoplasm                          |
| 38  | ENSG00000003509 | NDUFAF7   | Uncertain   | Cytoplasm                                  | cytoplasm                          |
| 39  | ENSG00000003756 | RBM5      | Approved    | Ubiquitous                                 | nucleus                            |
| 40  | ENSG00000004139 | SARM1     | Uncertain   | Cytoplasm                                  | cytoplasm                          |
| 41  | ENSG00000004399 | PLXND1    | Approved    | Ubiquitous                                 | cytoplasm;plasma membrane          |
| 42  | ENSG00000004455 | AK2       | Approved    | Cytoplasm                                  | cytoplasm                          |
| 43  | ENSG00000004468 | CD38      | Enhanced    | Distinct                                   | cytoplasm;plasma membrane          |
| 44  | ENSG00000004478 | FKBP4     | Approved    | Cytoplasm                                  | cytoplasm;nucleus                  |
| 45  | ENSG00000004487 | KDM1A     | Supported   | Ubiquitous                                 | nucleus                            |
| 46  | ENSG00000004534 | RBM6      | Enhanced    | High and                                   | nucleus                            |
| 47  | ENSG00000004660 | CAMKK1    | Approved    | Cytoplasm                                  | cytoplasm                          |
| 48  | ENSG00000004700 | RECQL     | Enhanced    | General                                    | nucleus                            |
| 49  | ENSG00000004766 | VPS50     | Approved    | Ubiquitous                                 | cytoplasm;nucleus                  |
| 50  | ENSG00000004776 | HSPB6     | Enhanced    | Cytoplasm                                  | cytoplasm                          |
| 51  | ENSG00000004777 | ARHGAP33  | Supported   | Cytoplasm                                  | cytoplasm                          |
| 52  | ENSG00000004779 | NDUFAB1   | Uncertain   | General                                    | cytoplasm;nucleus                  |
| 53  | ENSG00000004799 | PDK4      | Approved    | General                                    | cytoplasm                          |

|     |                 |          |           |                                             |
|-----|-----------------|----------|-----------|---------------------------------------------|
| 54  | ENSG00000004809 | SLC22A16 | Uncertain | Granular cytoplasm                          |
| 55  | ENSG00000004864 | SLC25A13 | Approved  | Granular cytoplasm                          |
| 56  | ENSG00000004866 | ST7      | Approved  | Membranouplasma membrane                    |
| 57  | ENSG00000004897 | CDC27    | Supported | Ubiquitousnucleus                           |
| 58  | ENSG00000004939 | SLC4A1   | Enhanced  | Selectivecytoplasm                          |
| 59  | ENSG00000004948 | CALCR    | Enhanced  | Membranoucytoplasm;plasma membrane          |
| 60  | ENSG00000004961 | HCCS     | Approved  | General ccytoplasm                          |
| 61  | ENSG00000004975 | DVL2     | Approved  | Ubiquitouscytoplasm                         |
| 62  | ENSG00000005001 | PRSS22   | Approved  | Cytoplasmcytoplasm                          |
| 63  | ENSG00000005007 | UPF1     | Approved  | Mainly ccytoplasm                           |
| 64  | ENSG00000005020 | SKAP2    | Enhanced  | Cytoplasmcytoplasm                          |
| 65  | ENSG00000005022 | SLC25A5  | Approved  | Granular cytoplasm                          |
| 66  | ENSG00000005059 | MCUB     | Enhanced  | Cytoplasmcytoplasm                          |
| 67  | ENSG00000005073 | HOXA11   | Enhanced  | Selectivenucleus                            |
| 68  | ENSG00000005100 | DHX33    | Supported | Nucleolarnucleus                            |
| 69  | ENSG00000005102 | MEOX1    | Uncertain | Nuclear acytoplasm;nucleus                  |
| 70  | ENSG00000005108 | THSD7A   | Supported | Membranouplasma membrane                    |
| 71  | ENSG00000005156 | LIG3     | Supported | Ubiquitousnucleus                           |
| 72  | ENSG00000005175 | RPAP3    | Enhanced  | Ubiquitouscytoplasm                         |
| 73  | ENSG00000005187 | ACSM3    | Uncertain | Membranoucytoplasm;plasma membrane          |
| 74  | ENSG00000005189 | REX05    | Enhanced  | Cytoplasmcytoplasm                          |
| 75  | ENSG00000005194 | CIAPIN1  | Enhanced  | Cytoplasmcytoplasm;nucleus                  |
| 76  | ENSG00000005206 | SPPL2B   | Approved  | Cytoplasmcytoplasm                          |
| 77  | ENSG00000005238 | FAM214B  | Approved  | Cytoplasmcytoplasm                          |
| 78  | ENSG00000005243 | COPZ2    | Uncertain | Cytoplasmcytoplasm                          |
| 79  | ENSG00000005249 | PRKAR2B  | Enhanced  | Expression in connective tissue, most abund |
| 80  | ENSG00000005302 | MSL3     | Uncertain | Mainly nunucleus                            |
| 81  | ENSG00000005339 | CREBBP   | Supported | Ubiquitousnucleus                           |
| 82  | ENSG00000005379 | TSP0AP1  | Enhanced  | Ubiquitouscytoplasm                         |
| 83  | ENSG00000005381 | MPO      | Enhanced  | Selectivecytoplasm                          |
| 84  | ENSG00000005421 | PON1     | Approved  | Positivitplasma membrane                    |
| 85  | ENSG00000005448 | WDR54    | Enhanced  | Cytoplasmcytoplasm;plasma membrane          |
| 86  | ENSG00000005469 | CROT     | Enhanced  | Cytoplasmcytoplasm                          |
| 87  | ENSG00000005471 | ABCB4    | Enhanced  | Expression in bile canaliculi of liver.     |
| 88  | ENSG00000005483 | KMT2E    | Approved  | Cytoplasmcytoplasm                          |
| 89  | ENSG00000005486 | RHBDD2   | Uncertain | Cytoplasmcytoplasm                          |
| 90  | ENSG00000005700 | IBTK     | Uncertain | Cytoplasmcytoplasm                          |
| 91  | ENSG00000005801 | ZNF195   | Uncertain | General ncytoplasm;nucleus                  |
| 92  | ENSG00000005844 | ITGAL    | Enhanced  | High expression of immune cells in lymphoid |
| 93  | ENSG00000005882 | PDK2     | Supported | Ubiquitouscytoplasm                         |
| 94  | ENSG00000005884 | ITGA3    | Enhanced  | Membranouplasma membrane                    |
| 95  | ENSG00000005889 | ZFX      | Supported | General nnucleus                            |
| 96  | ENSG00000005893 | LAMP2    | Supported | Ubiquitouscytoplasm                         |
| 97  | ENSG00000005961 | ITGA2B   | Enhanced  | Selectivecytoplasm                          |
| 98  | ENSG00000005981 | ASB4     | Uncertain | Estimation of protein expression could not  |
| 99  | ENSG00000006015 | REX1BD   | Approved  | Cytoplasmcytoplasm;plasma membrane          |
| 100 | ENSG00000006016 | CRLF1    | Approved  | General ccytoplasm;plasma membrane          |
| 101 | ENSG00000006025 | OSBPL7   | Uncertain | Cytoplasmcytoplasm                          |
| 102 | ENSG00000006042 | TMEM98   | Uncertain | General ccytoplasm                          |
| 103 | ENSG00000006047 | YBX2     | Enhanced  | Selectivecytoplasm                          |
| 104 | ENSG00000006059 | KRT33A   | Supported | Highly expressed in hair follicle cortex.   |
| 105 | ENSG00000006062 | MAP3K14  | Approved  | General ccytoplasm                          |
| 106 | ENSG00000006071 | ABCC8    | Approved  | Cytoplasmcytoplasm                          |
| 107 | ENSG00000006116 | CACNG3   | Enhanced  | Synaptic positivity in brain.               |
| 108 | ENSG00000006118 | TMEM132A | Enhanced  | Cytoplasmcytoplasm                          |

|     |                 |           |                                                       |
|-----|-----------------|-----------|-------------------------------------------------------|
| 109 | ENSG00000006125 | AP2B1     | Approved Cytoplasm cytoplasm                          |
| 110 | ENSG00000006128 | TAC1      | Enhanced Cytoplasm cytoplasm                          |
| 111 | ENSG00000006194 | ZNF263    | Approved General c cytoplasm                          |
| 112 | ENSG00000006210 | CX3CL1    | Approved General c cytoplasm; plasma membrane         |
| 113 | ENSG00000006282 | SPATA20   | Enhanced Cytoplasm cytoplasm                          |
| 114 | ENSG00000006283 | CACNA1G   | Uncertain Estimation of protein expression could not  |
| 115 | ENSG00000006327 | TNFRSF12A | Approved Cytoplasm cytoplasm; plasma membrane         |
| 116 | ENSG00000006377 | DLX6      | Uncertain Estimation of protein expression could not  |
| 117 | ENSG00000006432 | MAP3K9    | Approved Mainly c cytoplasm                           |
| 118 | ENSG00000006451 | RALA      | Approved General c cytoplasm                          |
| 119 | ENSG00000006453 | BAIAP2L1  | Enhanced Ubiquitous cytoplasm                         |
| 120 | ENSG00000006459 | KDM7A     | Uncertain General c cytoplasm                         |
| 121 | ENSG00000006530 | AGK       | Supported Ubiquitous cytoplasm                        |
| 122 | ENSG00000006534 | ALDH3B1   | Uncertain Expression in several tissues, including c: |
| 123 | ENSG00000006555 | TTC22     | Uncertain General c cytoplasm                         |
| 124 | ENSG00000006576 | PHTF2     | Uncertain Nuclear o cytoplasm; nucleus                |
| 125 | ENSG00000006607 | FARP2     | Approved General m cytoplasm                          |
| 126 | ENSG00000006611 | USH1C     | Enhanced Cytoplasm cytoplasm; plasma membrane         |
| 127 | ENSG00000006625 | GGCT      | Approved General c cytoplasm                          |
| 128 | ENSG00000006652 | IFRD1     | Approved General c cytoplasm                          |
| 129 | ENSG00000006695 | COX10     | Supported Ubiquitous cytoplasm                        |
| 130 | ENSG00000006704 | GTF2IRD1  | Approved Cytoplasm cytoplasm; nucleus                 |
| 131 | ENSG00000006712 | PAF1      | Approved Nuclear a cytoplasm; nucleus                 |
| 132 | ENSG00000006715 | VPS41     | Approved General c cytoplasm                          |
| 133 | ENSG00000006740 | ARHGAP44  | Approved Cytoplasm cytoplasm                          |
| 134 | ENSG00000006744 | ELAC2     | Approved General n cytoplasm; nucleus                 |
| 135 | ENSG00000006747 | SCIN      | Enhanced Distinct cytoplasm                           |
| 136 | ENSG00000006756 | ARSD      | Approved General c cytoplasm                          |
| 137 | ENSG00000006757 | PNPLA4    | Approved General c cytoplasm                          |
| 138 | ENSG00000006831 | ADIPOR2   | Approved Cytoplasm cytoplasm                          |
| 139 | ENSG00000007038 | PRSS21    | Enhanced Cytoplasm cytoplasm                          |
| 140 | ENSG00000007047 | MARK4     | Approved Cytoplasm cytoplasm; plasma membrane         |
| 141 | ENSG00000007062 | PROM1     | Enhanced Membranous cytoplasm; plasma membrane        |
| 142 | ENSG00000007080 | CCDC124   | Supported Ubiquitous cytoplasm                        |
| 143 | ENSG00000007129 | CEACAM21  | Uncertain General c cytoplasm                         |
| 144 | ENSG00000007168 | PAFAH1B1  | Approved Cytoplasm cytoplasm                          |
| 145 | ENSG00000007171 | NOS2      | Enhanced Cytoplasm cytoplasm; plasma membrane         |
| 146 | ENSG00000007174 | DNAH9     | Enhanced Expression in cilia                          |
| 147 | ENSG00000007202 | KIAA0100  | Uncertain Cytoplasm cytoplasm                         |
| 148 | ENSG00000007216 | SLC13A2   | Enhanced Selective plasma membrane                    |
| 149 | ENSG00000007237 | GAS7      | Enhanced Cytoplasm cytoplasm                          |
| 150 | ENSG00000007255 | TRAPPC6A  | Approved Cytoplasm cytoplasm                          |
| 151 | ENSG00000007264 | MATK      | Approved Cytoplasm cytoplasm                          |
| 152 | ENSG00000007306 | CEACAM7   | Supported Expressive plasma membrane                  |
| 153 | ENSG00000007312 | CD79B     | Enhanced High and cytoplasm                           |
| 154 | ENSG00000007341 | ST7L      | Uncertain Cytoplasm cytoplasm                         |
| 155 | ENSG00000007350 | TKTL1     | Enhanced Selective cytoplasm                          |
| 156 | ENSG00000007372 | PAX6      | Enhanced Distinct nucleus                             |
| 157 | ENSG00000007376 | RPUSD1    | Approved General c cytoplasm                          |
| 158 | ENSG00000007392 | LUC7L     | Supported Ubiquitous nucleus                          |
| 159 | ENSG00000007402 | CACNA2D2  | Enhanced Cytoplasm cytoplasm                          |
| 160 | ENSG00000007516 | BAIAP3    | Uncertain General c cytoplasm                         |
| 161 | ENSG00000007520 | TSR3      | Uncertain Ubiquitous cytoplasm                        |
| 162 | ENSG00000007541 | PIGQ      | Approved General c cytoplasm; plasma membrane         |
| 163 | ENSG00000007545 | CRAMP1    | Uncertain Cytoplasm cytoplasm; nucleus                |

|     |                 |          |                                                      |
|-----|-----------------|----------|------------------------------------------------------|
| 164 | ENSG00000007866 | TEAD3    | UncertainEstimation of protein expression could not  |
| 165 | ENSG00000007908 | SELE     | Enhanced Cytoplasmcytoplasm                          |
| 166 | ENSG00000007923 | DNAJC11  | UncertainEstimation of protein expression could not  |
| 167 | ENSG00000007933 | FM03     | Enhanced Selectivecytoplasm                          |
| 168 | ENSG00000007968 | E2F2     | UncertainNuclear enucleus                            |
| 169 | ENSG00000008018 | PSMB1    | Enhanced General ccytoplasm;nucleus                  |
| 170 | ENSG00000008056 | SYN1     | Enhanced Selective expression in neuropil and peripl |
| 171 | ENSG00000008083 | JARID2   | Approved Ubiquitounucleus                            |
| 172 | ENSG00000008086 | CDKL5    | SupportedUbiquitounucleus                            |
| 173 | ENSG00000008128 | CDK11A   | SupportedUbiquitocytoplasm;nucleus                   |
| 174 | ENSG00000008130 | NADK     | UncertainGeneral ccytoplasm;plasma membrane          |
| 175 | ENSG00000008196 | TFAP2B   | Enhanced Nuclear enucleus                            |
| 176 | ENSG00000008226 | DLEC1    | Enhanced Cytoplasmcytoplasm                          |
| 177 | ENSG00000008256 | CYTH3    | UncertainCytoplasmcytoplasm                          |
| 178 | ENSG00000008282 | SYPL1    | Approved Ubiquitocytoplasm                           |
| 179 | ENSG00000008283 | CYB561   | Approved Cytoplasmcytoplasm                          |
| 180 | ENSG00000008294 | SPAG9    | Enhanced Ubiquitocytoplasm                           |
| 181 | ENSG00000008300 | CELSR3   | Approved Cytoplasmcytoplasm                          |
| 182 | ENSG00000008311 | AASS     | Enhanced General ccytoplasm                          |
| 183 | ENSG00000008323 | PLEKHG6  | UncertainCytoplasmcytoplasm                          |
| 184 | ENSG00000008324 | SS18L2   | UncertainGranular cytoplasm                          |
| 185 | ENSG00000008382 | MPND     | Approved General ccytoplasm                          |
| 186 | ENSG00000008394 | MGST1    | Enhanced Cytoplasmcytoplasm                          |
| 187 | ENSG00000008405 | CRY1     | Approved Ubiquitocytoplasm;nucleus                   |
| 188 | ENSG00000008438 | PGLYRP1  | Enhanced Cytoplasmcytoplasm                          |
| 189 | ENSG00000008441 | NFIX     | SupportedNuclear enucleus                            |
| 190 | ENSG00000008513 | ST3GAL1  | Approved Ubiquitocytoplasm                           |
| 191 | ENSG00000008516 | MMP25    | UncertainGeneral ccytoplasm                          |
| 192 | ENSG00000008517 | IL32     | UncertainRNA-based expert annotation gave inconclus: |
| 193 | ENSG00000008710 | PKD1     | Approved Cytoplasmcytoplasm                          |
| 194 | ENSG00000008735 | MAPK8IP2 | UncertainEstimation of protein expression could not  |
| 195 | ENSG00000008853 | RHOBTB2  | Approved Cytoplasmcytoplasm                          |
| 196 | ENSG00000008869 | HEATR5B  | Approved General ncytoplasm;nucleus                  |
| 197 | ENSG00000008952 | SEC62    | Approved General ccytoplasm                          |
| 198 | ENSG00000008988 | RPS20    | Approved General ccytoplasm                          |
| 199 | ENSG00000009307 | CSDE1    | SupportedCytoplasmcytoplasm                          |
| 200 | ENSG00000009335 | UBE3C    | Approved Ubiquitocytoplasm                           |
| 201 | ENSG00000009413 | REV3L    | UncertainMainly ccytoplasm                           |
| 202 | ENSG00000009694 | TENM1    | UncertainEstimation of protein expression could not  |
| 203 | ENSG00000009724 | MASP2    | UncertainCytoplasmcytoplasm;plasma membrane          |
| 204 | ENSG00000009765 | IYD      | Enhanced High cytocytoplasm                          |
| 205 | ENSG00000009780 | FAM76A   | UncertainCytoplasmcytoplasm                          |
| 206 | ENSG00000009790 | TRAF3IP3 | Enhanced Cytoplasmcytoplasm;plasma membrane          |
| 207 | ENSG00000009830 | POMT2    | UncertainCytoplasmcytoplasm                          |
| 208 | ENSG00000009844 | VTA1     | Approved Ubiquitocytoplasm                           |
| 209 | ENSG00000009954 | BAZ1B    | SupportedUbiquitounucleus                            |
| 210 | ENSG00000010017 | RANBP9   | Approved General ncytoplasm;nucleus                  |
| 211 | ENSG00000010030 | ETV7     | UncertainEstimation of protein expression could not  |
| 212 | ENSG00000010072 | SPRTN    | UncertainCytoplasmcytoplasm                          |
| 213 | ENSG00000010165 | METTL13  | Approved General ccytoplasm                          |
| 214 | ENSG00000010219 | DYRK4    | Enhanced Cytoplasmcytoplasm                          |
| 215 | ENSG00000010244 | ZNF207   | Enhanced Ubiquitounucleus                            |
| 216 | ENSG00000010256 | UQCRC1   | Enhanced Ubiquitocytoplasm                           |
| 217 | ENSG00000010270 | STARD3NL | Enhanced Ubiquitocytoplasm                           |
| 218 | ENSG00000010278 | CD9      | SupportedUbiquitocytoplasm                           |

|     |                 |           |                                                      |
|-----|-----------------|-----------|------------------------------------------------------|
| 219 | ENSG00000010282 | HHATL     | Enhanced Cytoplasm cytoplasm                         |
| 220 | ENSG00000010292 | NCAPD2    | Approved General ncytoplasm;nucleus                  |
| 221 | ENSG00000010295 | IFF01     | Approved Cytoplasm cytoplasm;nucleus                 |
| 222 | ENSG00000010310 | GIPR      | Uncertain Cytoplasm cytoplasm                        |
| 223 | ENSG00000010318 | PHF7      | Enhanced Selective expression in testis.             |
| 224 | ENSG00000010319 | SEMA3G    | Uncertain Estimation of protein expression could not |
| 225 | ENSG00000010322 | NISCH     | Approved Ubiquitous cytoplasm                        |
| 226 | ENSG00000010327 | STAB1     | Approved General ccytoplasm                          |
| 227 | ENSG00000010361 | FUZ       | Approved Mainly ccytoplasm                           |
| 228 | ENSG00000010404 | IDS       | Approved Granular cytoplasm                          |
| 229 | ENSG00000010438 | PRSS3     | Supported Selective cytoplasm                        |
| 230 | ENSG00000010539 | ZNF200    | Uncertain Cytoplasm cytoplasm;nucleus                |
| 231 | ENSG00000010610 | CD4       | Enhanced Selective cytoplasm                         |
| 232 | ENSG00000010626 | LRRC23    | Enhanced Distinct expression in cilia.               |
| 233 | ENSG00000010671 | BTK       | Enhanced Cytoplasm cytoplasm                         |
| 234 | ENSG00000010704 | HFE       | Approved Cytoplasm cytoplasm                         |
| 235 | ENSG00000010810 | FYN       | Approved Cytoplasm cytoplasm                         |
| 236 | ENSG00000010932 | FM01      | Uncertain General ccytoplasm                         |
| 237 | ENSG00000011007 | ELOA      | Approved Ubiquitous nucleus                          |
| 238 | ENSG00000011021 | CLCN6     | Approved General ccytoplasm                          |
| 239 | ENSG00000011028 | MRC2      | Enhanced Cytoplasm cytoplasm                         |
| 240 | ENSG00000011052 | NME1-NME2 | Approved General ccytoplasm                          |
| 241 | ENSG00000011083 | SLC6A7    | Uncertain Estimation of protein expression could not |
| 242 | ENSG00000011105 | TSPAN9    | Uncertain General ccytoplasm;nucleus                 |
| 243 | ENSG00000011114 | BTBD7     | Uncertain General ccytoplasm                         |
| 244 | ENSG00000011132 | APBA3     | Approved Cytoplasm cytoplasm;nucleus                 |
| 245 | ENSG00000011143 | MKS1      | Enhanced Cytoplasm cytoplasm;plasma membrane         |
| 246 | ENSG00000011198 | ABHD5     | Approved Cytoplasm cytoplasm                         |
| 247 | ENSG00000011243 | AKAP8L    | Enhanced Ubiquitous nucleus                          |
| 248 | ENSG00000011258 | MBTD1     | Approved General ccytoplasm                          |
| 249 | ENSG00000011260 | UTP18     | Approved Nuclear anucleus                            |
| 250 | ENSG00000011275 | RNF216    | Supported Ubiquitous cytoplasm                       |
| 251 | ENSG00000011295 | TTC19     | Enhanced General ccytoplasm                          |
| 252 | ENSG00000011304 | PTBP1     | Supported Ubiquitous nucleus                         |
| 253 | ENSG00000011332 | DPF1      | Enhanced Nuclear enucleus                            |
| 254 | ENSG00000011347 | SYT7      | Enhanced Cytoplasm cytoplasm                         |
| 255 | ENSG00000011376 | LARS2     | Approved Ubiquitous cytoplasm                        |
| 256 | ENSG00000011405 | PIK3C2A   | Uncertain General ccytoplasm;nucleus                 |
| 257 | ENSG00000011422 | PLAUR     | Uncertain High cyto cytoplasm                        |
| 258 | ENSG00000011426 | ANLN      | Enhanced Nuclear enucleus                            |
| 259 | ENSG00000011451 | WIZ       | Supported General nucleus                            |
| 260 | ENSG00000011454 | RABGAP1   | Enhanced Ubiquitous cytoplasm                        |
| 261 | ENSG00000011465 | DCN       | Enhanced Mainly extracellular positivity in most tis |
| 262 | ENSG00000011478 | QPCTL     | Approved Cytoplasm cytoplasm                         |
| 263 | ENSG00000011485 | PPP5C     | Approved General ccytoplasm                          |
| 264 | ENSG00000011523 | CEP68     | Enhanced Granular cytoplasm                          |
| 265 | ENSG00000011566 | MAP4K3    | Approved Cytoplasm cytoplasm                         |
| 266 | ENSG00000011590 | ZBTB32    | Enhanced Expression in seminiferous duct cells and ; |
| 267 | ENSG00000011600 | TYROBP    | Enhanced Cytoplasm cytoplasm                         |
| 268 | ENSG00000011638 | TMEM159   | Approved Cytoplasm cytoplasm                         |
| 269 | ENSG00000011677 | GABRA3    | Approved Cytoplasm cytoplasm                         |
| 270 | ENSG00000012048 | BRCA1     | Approved Nuclear acytoplasm;nucleus                  |
| 271 | ENSG00000012061 | ERCC1     | Supported Ubiquitous nucleus                         |
| 272 | ENSG00000012124 | CD22      | Enhanced High and cytoplasm                          |
| 273 | ENSG00000012171 | SEMA3B    | Approved General ccytoplasm;plasma membrane          |

|     |                 |          |                                                      |
|-----|-----------------|----------|------------------------------------------------------|
| 274 | ENSG00000012174 | MBTPS2   | Approved Cytoplasm cytoplasm                         |
| 275 | ENSG00000012211 | PRICKLE3 | Uncertain Cytoplasm cytoplasm                        |
| 276 | ENSG00000012223 | LTF      | Enhanced Cytoplasm cytoplasm                         |
| 277 | ENSG00000012232 | EXTL3    | Approved Cytoplasm cytoplasm                         |
| 278 | ENSG00000012660 | ELOVL5   | Enhanced Cytoplasm cytoplasm                         |
| 279 | ENSG00000012779 | ALOX5    | Enhanced Nuclear anucleus; plasma membrane           |
| 280 | ENSG00000012822 | CALCOO1  | Approved Ubiquitous cytoplasm                        |
| 281 | ENSG00000012963 | UBR7     | Approved General nucleus                             |
| 282 | ENSG00000012983 | MAP4K5   | Uncertain Cytoplasm cytoplasm                        |
| 283 | ENSG00000013016 | EHD3     | Approved Cytoplasm cytoplasm                         |
| 284 | ENSG00000013275 | PSMC4    | Approved Cytoplasm cytoplasm; nucleus                |
| 285 | ENSG00000013293 | SLC7A14  | Approved Cytoplasm cytoplasm                         |
| 286 | ENSG00000013297 | CLDN11   | Enhanced Membrane plasma membrane                    |
| 287 | ENSG00000013306 | SLC25A39 | Approved Expression in subset of immune cells.       |
| 288 | ENSG00000013364 | MVP      | Enhanced Cytoplasm cytoplasm; plasma membrane        |
| 289 | ENSG00000013374 | NUB1     | Approved Nuclear a cytoplasm; nucleus                |
| 290 | ENSG00000013375 | PGM3     | Enhanced Cytoplasm cytoplasm; nucleus                |
| 291 | ENSG00000013392 | RWDD2A   | Uncertain Cytoplasm cytoplasm; nucleus               |
| 292 | ENSG00000013441 | CLK1     | Approved Cytoplasm cytoplasm                         |
| 293 | ENSG00000013503 | POLR3B   | Supported Ubiquitous nucleus                         |
| 294 | ENSG00000013523 | ANGEL1   | Uncertain Cytoplasm cytoplasm                        |
| 295 | ENSG00000013561 | RNF14    | Approved Ubiquitous cytoplasm                        |
| 296 | ENSG00000013563 | DNASE1L1 | Approved General c cytoplasm                         |
| 297 | ENSG00000013573 | DDX11    | Supported General nucleus                            |
| 298 | ENSG00000013583 | HEBP1    | Approved Cytoplasm cytoplasm; nucleus                |
| 299 | ENSG00000013588 | GPRC5A   | Enhanced Cytoplasm cytoplasm                         |
| 300 | ENSG00000013619 | MAMLD1   | Uncertain Cytoplasm cytoplasm                        |
| 301 | ENSG00000013725 | CD6      | Enhanced Highly se cytoplasm                         |
| 302 | ENSG00000013810 | TACC3    | Enhanced Cytoplasm cytoplasm                         |
| 303 | ENSG00000014123 | UFL1     | Enhanced Cytoplasm cytoplasm                         |
| 304 | ENSG00000014138 | POLA2    | Supported General nucleus                            |
| 305 | ENSG00000014164 | ZC3H3    | Uncertain Granular cytoplasm                         |
| 306 | ENSG00000014216 | CAPN1    | Enhanced Ubiquitous cytoplasm                        |
| 307 | ENSG00000014257 | ACPP     | Enhanced Selective cytoplasm                         |
| 308 | ENSG00000014641 | MDH1     | Uncertain Cytoplasm cytoplasm                        |
| 309 | ENSG00000014824 | SLC30A9  | Approved Ubiquitous cytoplasm                        |
| 310 | ENSG00000014914 | MTMR11   | Approved Cytoplasm cytoplasm                         |
| 311 | ENSG00000014919 | COX15    | Uncertain Cytoplasm cytoplasm                        |
| 312 | ENSG00000015133 | CCDC88C  | Approved Ubiquitous nucleus                          |
| 313 | ENSG00000015153 | YAF2     | Supported Ubiquitous nucleus                         |
| 314 | ENSG00000015285 | WAS      | Enhanced High cyto cytoplasm                         |
| 315 | ENSG00000015413 | DPEP1    | Enhanced Cytoplasm cytoplasm; plasma membrane        |
| 316 | ENSG00000015475 | BID      | Enhanced Cytoplasm cytoplasm                         |
| 317 | ENSG00000015479 | MATR3    | Supported Ubiquitous nucleus                         |
| 318 | ENSG00000015520 | NPC1L1   | Enhanced Selective plasma membrane                   |
| 319 | ENSG00000015568 | RGPD5    | Uncertain Estimation of protein expression could not |
| 320 | ENSG00000015676 | NUDCD3   | Enhanced Cytoplasm cytoplasm                         |
| 321 | ENSG00000016082 | ISL1     | Approved Nuclear enucleus                            |
| 322 | ENSG00000016391 | CHDH     | Enhanced Cytoplasm cytoplasm                         |
| 323 | ENSG00000016402 | IL20RA   | Approved Cytoplasm cytoplasm; plasma membrane        |
| 324 | ENSG00000016490 | CLCA1    | Enhanced Selective cytoplasm                         |
| 325 | ENSG00000016602 | CLCA4    | Uncertain Cytoplasm cytoplasm; plasma membrane       |
| 326 | ENSG00000016864 | GLT8D1   | Approved Cytoplasm cytoplasm                         |
| 327 | ENSG00000017260 | ATP2C1   | Supported Ubiquitous cytoplasm                       |
| 328 | ENSG00000017427 | IGF1     | Approved Positivit plasma membrane                   |

|     |                 |          |                                                      |
|-----|-----------------|----------|------------------------------------------------------|
| 329 | ENSG00000017483 | SLC38A5  | Approved Membranou cytoplasm;plasma membrane         |
| 330 | ENSG00000017797 | RALBP1   | Approved Cytoplasm cytoplasm;plasma membrane         |
| 331 | ENSG00000018189 | RUFY3    | Enhanced Cytoplasm cytoplasm                         |
| 332 | ENSG00000018236 | CNTN1    | Enhanced Expression in brain.                        |
| 333 | ENSG00000018280 | SLC11A1  | Uncertain Cytoplasm cytoplasm                        |
| 334 | ENSG00000018408 | WWTR1    | Enhanced Ubiquitou nucleus                           |
| 335 | ENSG00000018510 | AGPS     | Supported Ubiquitou cytoplasm                        |
| 336 | ENSG00000018610 | CXorf56  | Uncertain General c cytoplasm;nucleus                |
| 337 | ENSG00000018625 | ATP1A2   | Enhanced Cytoplasm cytoplasm                         |
| 338 | ENSG00000018699 | TTC27    | Approved General c cytoplasm                         |
| 339 | ENSG00000018869 | ZNF582   | Uncertain General c cytoplasm                        |
| 340 | ENSG00000019102 | VSIG2    | Enhanced High memb cytoplasm;plasma membrane         |
| 341 | ENSG00000019144 | PHLDB1   | Approved Mainly c cytoplasm                          |
| 342 | ENSG00000019169 | MARCO    | Enhanced Cytoplasm cytoplasm;plasma membrane         |
| 343 | ENSG00000019186 | CYP24A1  | Enhanced Granular cytoplasm                          |
| 344 | ENSG00000019485 | PRDM11   | Approved Ubiquitou nucleus                           |
| 345 | ENSG00000019505 | SYT13    | Uncertain Cytoplasm cytoplasm                        |
| 346 | ENSG00000019549 | SNAI2    | Supported General n nucleus                          |
| 347 | ENSG00000019582 | CD74     | Enhanced Cytoplasm cytoplasm;plasma membrane         |
| 348 | ENSG00000019991 | HGF      | Approved Cytoplasm cytoplasm                         |
| 349 | ENSG00000019995 | ZRANB1   | Approved Cytoplasm cytoplasm                         |
| 350 | ENSG00000020129 | NCDN     | Enhanced High cyto cytoplasm                         |
| 351 | ENSG00000020181 | ADGRA2   | Uncertain Estimation of protein expression could not |
| 352 | ENSG00000020256 | ZFP64    | Uncertain Estimation of protein expression could not |
| 353 | ENSG00000020426 | MNAT1    | Approved Nuclear enucleus                            |
| 354 | ENSG00000020577 | SAMD4A   | Approved Mainly c cytoplasm                          |
| 355 | ENSG00000020633 | RUNX3    | Enhanced Nuclear enucleus                            |
| 356 | ENSG00000020922 | MRE11    | Supported Ubiquitou nucleus                          |
| 357 | ENSG00000021355 | SERPINB1 | Enhanced Cytoplasm cytoplasm                         |
| 358 | ENSG00000021461 | CYP3A43  | Enhanced Granular cytoplasm                          |
| 359 | ENSG00000021488 | SLC7A9   | Enhanced Expressi o plasma membrane                  |
| 360 | ENSG00000021574 | SPAST    | Approved Ubiquitou cytoplasm                         |
| 361 | ENSG00000021645 | NRXN3    | Approved Expression in CNS.                          |
| 362 | ENSG00000021762 | OSBPL5   | Approved General c cytoplasm                         |
| 363 | ENSG00000021826 | CPS1     | Enhanced Selective cytoplasm                         |
| 364 | ENSG00000021852 | C8B      | Supported Cytoplasm cytoplasm                        |
| 365 | ENSG00000022267 | FHL1     | Enhanced Distinct expression in muscle tissue and tl |
| 366 | ENSG00000022277 | RTF2     | Approved Cytoplasm cytoplasm                         |
| 367 | ENSG00000022355 | GABRA1   | Enhanced Selective expression in neuropil and subse  |
| 368 | ENSG00000022567 | SLC45A4  | Uncertain Cytoplasm cytoplasm;plasma membrane        |
| 369 | ENSG00000022840 | RNF10    | Approved General c cytoplasm                         |
| 370 | ENSG00000022976 | ZNF839   | Uncertain Mainly n nucleus                           |
| 371 | ENSG00000023041 | ZDHHC6   | Approved General c cytoplasm                         |
| 372 | ENSG00000023171 | GRAMD1B  | Approved General c cytoplasm                         |
| 373 | ENSG00000023191 | RNH1     | Enhanced Cytoplasm cytoplasm                         |
| 374 | ENSG00000023228 | NDUFS1   | Approved Cytoplasm cytoplasm                         |
| 375 | ENSG00000023287 | RB1CC1   | Approved Cytoplasm cytoplasm                         |
| 376 | ENSG00000023318 | ERP44    | Supported Ubiquitou cytoplasm                        |
| 377 | ENSG00000023330 | ALAS1    | Enhanced Ubiquitou cytoplasm                         |
| 378 | ENSG00000023445 | BIRC3    | Enhanced Expression in several tissues, most abunda  |
| 379 | ENSG00000023516 | AKAP11   | Enhanced Ubiquitou cytoplasm                         |
| 380 | ENSG00000023572 | GLRX2    | Supported Ubiquitou nucleus                          |
| 381 | ENSG00000023734 | STRAP    | Approved Mainly c cytoplasm;nucleus                  |
| 382 | ENSG00000023839 | ABCC2    | Enhanced High memb plasma membrane                   |
| 383 | ENSG00000023892 | DEF6     | Enhanced Cytoplasm cytoplasm                         |

|     |                 |          |                                                      |
|-----|-----------------|----------|------------------------------------------------------|
| 384 | ENSG00000023909 | GCLM     | UncertainGeneral ccytoplasm                          |
| 385 | ENSG00000024048 | UBR2     | Approved Ubiquitouscytoplasm;nucleus                 |
| 386 | ENSG00000024422 | EHD2     | Approved Cytoplasmcytoplasm                          |
| 387 | ENSG00000024526 | DEPDC1   | Approved Nuclear enucleus                            |
| 388 | ENSG00000024862 | CCDC28A  | Approved Ubiquitouscytoplasm                         |
| 389 | ENSG00000025039 | RRAGD    | Approved Nuclear enucleus                            |
| 390 | ENSG00000025156 | HSF2     | Approved Selective expression in basal cells of the  |
| 391 | ENSG00000025293 | PHF20    | Approved Nuclear anucleus;plasma membrane            |
| 392 | ENSG00000025423 | HSD17B6  | Enhanced Expression in several tissues, most abundan |
| 393 | ENSG00000025434 | NR1H3    | Approved General nnucleus                            |
| 394 | ENSG00000025708 | TYMP     | Enhanced Cytoplasmcytoplasm;nucleus                  |
| 395 | ENSG00000025770 | NCAPH2   | Enhanced Nuclear enucleus                            |
| 396 | ENSG00000025772 | TOMM34   | Enhanced Cytoplasmcytoplasm                          |
| 397 | ENSG00000025796 | SEC63    | SupportedGeneral ccytoplasm                          |
| 398 | ENSG00000025800 | KPNA6    | SupportedUbiquitousnucleus                           |
| 399 | ENSG00000026025 | VIM      | Enhanced Distinct cytoplasm;plasma membrane          |
| 400 | ENSG00000026103 | FAS      | UncertainRNA-based expert annotation gave inconclus: |
| 401 | ENSG00000026297 | RNASET2  | Approved General ccytoplasm                          |
| 402 | ENSG00000026508 | CD44     | Enhanced Cytoplasmcytoplasm;plasma membrane          |
| 403 | ENSG00000026559 | KCNG1    | Approved Ubiquitouscytoplasm                         |
| 404 | ENSG00000026652 | AGPAT4   | Approved Cytoplasmcytoplasm                          |
| 405 | ENSG00000026751 | SLAMF7   | Enhanced Cytoplasmcytoplasm                          |
| 406 | ENSG00000026950 | BTN3A1   | Approved Cytoplasmcytoplasm                          |
| 407 | ENSG00000027001 | MIPEP    | Approved General ccytoplasm                          |
| 408 | ENSG00000027075 | PRKCH    | Approved Ubiquitouscytoplasm                         |
| 409 | ENSG00000027644 | INSRR    | UncertainEstimation of protein expression could not  |
| 410 | ENSG00000027697 | IFNGR1   | Approved Membranouplasma membrane                    |
| 411 | ENSG00000027847 | B4GALT7  | SupportedGeneral ccytoplasm                          |
| 412 | ENSG00000028116 | VRK2     | Approved Cytoplasmcytoplasm                          |
| 413 | ENSG00000028137 | TNFRSF1B | Approved Cytoplasmcytoplasm;plasma membrane          |
| 414 | ENSG00000028203 | VEZT     | Approved General ccytoplasm                          |
| 415 | ENSG00000028277 | POU2F2   | Enhanced Nuclear acytoplasm;nucleus                  |
| 416 | ENSG00000028310 | BRD9     | UncertainGeneral ncytoplasm;nucleus                  |
| 417 | ENSG00000028528 | SNX1     | Approved Ubiquitouscytoplasm                         |
| 418 | ENSG00000028839 | TBPL1    | Enhanced General nnucleus                            |
| 419 | ENSG00000029153 | ARNTL2   | UncertainNuclear mnucleus;plasma membrane            |
| 420 | ENSG00000029363 | BCLAF1   | Enhanced Ubiquitousnucleus                           |
| 421 | ENSG00000029364 | SLC39A9  | Approved General ccytoplasm                          |
| 422 | ENSG00000029534 | ANK1     | SupportedSelectiveplasma membrane                    |
| 423 | ENSG00000029639 | TFB1M    | Approved General ccytoplasm                          |
| 424 | ENSG00000029725 | RABEP1   | SupportedGeneral ccytoplasm                          |
| 425 | ENSG00000029993 | HMGB3    | Enhanced Nuclear enucleus                            |
| 426 | ENSG00000030110 | BAK1     | Enhanced General ccytoplasm                          |
| 427 | ENSG00000030419 | IKZF2    | Approved General nnucleus                            |
| 428 | ENSG00000030582 | GRN      | UncertainRNA-based expert annotation gave inconclus: |
| 429 | ENSG00000031003 | FAM13B   | UncertainCytoplasmcytoplasm                          |
| 430 | ENSG00000031081 | ARHGAP31 | Approved Cytoplasmcytoplasm                          |
| 431 | ENSG00000031691 | CENPQ    | Approved Expression in several different tissue typ  |
| 432 | ENSG00000031698 | SARS     | UncertainUbiquitouscytoplasm                         |
| 433 | ENSG00000031823 | RANBP3   | Enhanced Ubiquitouscytoplasm;nucleus                 |
| 434 | ENSG00000032389 | EIPR1    | Approved General ccytoplasm                          |
| 435 | ENSG00000032444 | PNPLA6   | UncertainGeneral ncytoplasm;nucleus                  |
| 436 | ENSG00000033011 | ALG1     | Approved Ubiquitouscytoplasm                         |
| 437 | ENSG00000033030 | ZCCHC8   | SupportedUbiquitousnucleus                           |
| 438 | ENSG00000033050 | ABCF2    | Approved Widely dicytoplasm                          |



|     |                 |           |                                                         |
|-----|-----------------|-----------|---------------------------------------------------------|
| 439 | ENSG00000033100 | CHPF2     | Approved Cytoplasm cytoplasm                            |
| 440 | ENSG00000033170 | FUT8      | Enhanced Cytoplasm cytoplasm                            |
| 441 | ENSG00000033178 | UBA6      | Approved Cytoplasm cytoplasm                            |
| 442 | ENSG00000033327 | GAB2      | Enhanced General c cytoplasm                            |
| 443 | ENSG00000033627 | ATP6V0A1  | Enhanced General c cytoplasm                            |
| 444 | ENSG00000033800 | PIAS1     | Supported Ubiquitous nucleus                            |
| 445 | ENSG00000033867 | SLC4A7    | Enhanced Membrane plasma membrane                       |
| 446 | ENSG00000034053 | APBA2     | Uncertain General c cytoplasm                           |
| 447 | ENSG00000034152 | MAP2K3    | Approved Cytoplasm cytoplasm                            |
| 448 | ENSG00000034239 | EFCAB1    | Enhanced Selective expression in sperms and in cilia    |
| 449 | ENSG00000034533 | ASTE1     | Supported Cytoplasm cytoplasm                           |
| 450 | ENSG00000034677 | RNF19A    | Approved General c cytoplasm                            |
| 451 | ENSG00000034693 | PEX3      | Supported General c cytoplasm                           |
| 452 | ENSG00000034713 | GABARAPL2 | Uncertain Ubiquitous cytoplasm                          |
| 453 | ENSG00000034971 | MYOC      | Uncertain Cytoplasm cytoplasm                           |
| 454 | ENSG00000035115 | SH3YL1    | Approved Cytoplasm cytoplasm                            |
| 455 | ENSG00000035141 | FAM136A   | Enhanced General c cytoplasm                            |
| 456 | ENSG00000035403 | VCL       | Enhanced Cytoplasm cytoplasm                            |
| 457 | ENSG00000035499 | DEPDC1B   | Approved Cytoplasm cytoplasm                            |
| 458 | ENSG00000035681 | NSMAF     | Uncertain General n cytoplasm; nucleus                  |
| 459 | ENSG00000035687 | ADSS      | Supported Ubiquitous cytoplasm; nucleus                 |
| 460 | ENSG00000035720 | STAP1     | Enhanced Cytoplasm cytoplasm                            |
| 461 | ENSG00000035862 | TIMP2     | Approved Extracellular cytoplasm                        |
| 462 | ENSG00000035928 | RFC1      | Supported Ubiquitous nucleus                            |
| 463 | ENSG00000036054 | TBC1D23   | Approved General c cytoplasm; nucleus                   |
| 464 | ENSG00000036257 | CUL3      | Supported Ubiquitous nucleus                            |
| 465 | ENSG00000036448 | MYOM2     | Enhanced Ubiquitous cytoplasm                           |
| 466 | ENSG00000036473 | OTC       | Enhanced Granular cytoplasm                             |
| 467 | ENSG00000036549 | AC118549  | Uncertain Membrane cytoplasm; plasma membrane           |
| 468 | ENSG00000036565 | SLC18A1   | Enhanced Distinct expression in adrenal medulla and     |
| 469 | ENSG00000036672 | USP2      | Approved General c cytoplasm                            |
| 470 | ENSG00000036828 | CASR      | Enhanced Cytoplasm cytoplasm; plasma membrane           |
| 471 | ENSG00000037042 | TUBG2     | Approved Ubiquitous cytoplasm                           |
| 472 | ENSG00000037241 | RPL26L1   | Approved General c cytoplasm                            |
| 473 | ENSG00000037280 | FLT4      | Approved Cytoplasm cytoplasm; plasma membrane; plasma m |
| 474 | ENSG00000037474 | NSUN2     | Supported Ubiquitous nucleus                            |
| 475 | ENSG00000037637 | FBX042    | Approved Mainly c cytoplasm                             |
| 476 | ENSG00000037749 | MFAP3     | Approved General c cytoplasm                            |
| 477 | ENSG00000037757 | MRI1      | Approved General c cytoplasm; nucleus                   |
| 478 | ENSG00000037897 | METTL1    | Uncertain Nuclear nucleus                               |
| 479 | ENSG00000037965 | HOXC8     | Uncertain Estimation of protein expression could not    |
| 480 | ENSG00000038002 | AGA       | Enhanced Ubiquitous cytoplasm                           |
| 481 | ENSG00000038210 | PI4K2B    | Approved General c cytoplasm; plasma membrane           |
| 482 | ENSG00000038219 | BOD1L1    | Approved Cytoplasm cytoplasm; nucleus                   |
| 483 | ENSG00000038274 | MAT2B     | Uncertain Cytoplasm cytoplasm; plasma membrane          |
| 484 | ENSG00000038358 | EDC4      | Supported Ubiquitous cytoplasm                          |
| 485 | ENSG00000038382 | TRIO      | Supported General c cytoplasm                           |
| 486 | ENSG00000038427 | VCAN      | Supported Expression mainly in extracellular matrix :   |
| 487 | ENSG00000038532 | CLEC16A   | Enhanced Cytoplasm cytoplasm                            |
| 488 | ENSG00000038945 | MSR1      | Enhanced Selective cytoplasm                            |
| 489 | ENSG00000039068 | CDH1      | Enhanced Cytoplasm cytoplasm; plasma membrane           |
| 490 | ENSG00000039123 | MTREX     | Supported Ubiquitous nucleus                            |
| 491 | ENSG00000039139 | DNAH5     | Enhanced Distinct expression in cilia in fallopian t    |
| 492 | ENSG00000039319 | ZFYVE16   | Supported Cytoplasm cytoplasm                           |
| 493 | ENSG00000039523 | RIPOR1    | Uncertain Cytoplasm cytoplasm                           |

|     |                 |         |                                                     |
|-----|-----------------|---------|-----------------------------------------------------|
| 494 | ENSG00000039537 | C6      | Enhanced Distinct plasma membrane                   |
| 495 | ENSG00000039560 | RAI14   | SupportedMembranoucytoplasm;plasma membrane         |
| 496 | ENSG00000039600 | SOX30   | Enhanced Selectivenucleus                           |
| 497 | ENSG00000039650 | PNKP    | SupportedUbiquitousnucleus                          |
| 498 | ENSG00000039987 | BEST2   | Approved Cytoplasmcytoplasm                         |
| 499 | ENSG00000040199 | PHLPP2  | Approved Cytoplasmcytoplasm;plasma membrane         |
| 500 | ENSG00000040275 | SPDL1   | Enhanced Cytoplasmcytoplasm                         |
| 501 | ENSG00000040341 | STAU2   | Approved Cytoplasmcytoplasm;nucleus                 |
| 502 | ENSG00000040487 | PQLC2   | Approved Cytoplasmcytoplasm                         |
| 503 | ENSG00000040633 | PHF23   | Approved Ubiquitouscytoplasm;nucleus                |
| 504 | ENSG00000040731 | CDH10   | Approved Cytoplasmcytoplasm                         |
| 505 | ENSG00000040933 | INPP4A  | Approved General ccytoplasm                         |
| 506 | ENSG00000041353 | RAB27B  | Enhanced Cytoplasmcytoplasm;plasma membrane         |
| 507 | ENSG00000041357 | PSMA4   | SupportedCytoplasmcytoplasm;nucleus                 |
| 508 | ENSG00000041515 | MYO16   | UncertainEstimation of protein expression could not |
| 509 | ENSG00000041802 | LSG1    | Approved Cytoplasmcytoplasm;nucleus                 |
| 510 | ENSG00000041880 | PARP3   | SupportedUbiquitouscytoplasm                        |
| 511 | ENSG00000041982 | TNC     | Approved Cytoplasmcytoplasm                         |
| 512 | ENSG00000041988 | THAP3   | Approved General nnucleus                           |
| 513 | ENSG00000042062 | RIPOR3  | UncertainNuclear acytoplasm;nucleus                 |
| 514 | ENSG00000042088 | TDP1    | Approved General acytoplasm;nucleus                 |
| 515 | ENSG00000042286 | AIFM2   | Approved Cytoplasmcytoplasm                         |
| 516 | ENSG00000042304 | C2orf83 | Approved Nuclear ecytoplasm;nucleus;plasma membrane |
| 517 | ENSG00000042317 | SPATA7  | Enhanced Cytoplasmcytoplasm                         |
| 518 | ENSG00000042445 | RETSAT  | UncertainCytoplasmcytoplasm                         |
| 519 | ENSG00000042493 | CAPG    | Enhanced Cytoplasmcytoplasm                         |
| 520 | ENSG00000042813 | ZBPB    | Enhanced Selectivecytoplasm                         |
| 521 | ENSG00000042832 | TG      | Enhanced Selective expression in thyroid gland.     |
| 522 | ENSG00000042980 | ADAM28  | Enhanced Cytoplasmcytoplasm                         |
| 523 | ENSG00000043039 | BARX2   | Enhanced Nuclear enucleus                           |
| 524 | ENSG00000043093 | DCUN1D1 | UncertainCytoplasmcytoplasm                         |
| 525 | ENSG00000043143 | JADE2   | UncertainLuminal mplasma membrane                   |
| 526 | ENSG00000043462 | LCP2    | Enhanced Cytoplasmcytoplasm                         |
| 527 | ENSG00000043514 | TRIT1   | Approved Cytoplasmcytoplasm                         |
| 528 | ENSG00000043591 | ADRB1   | Enhanced Cytoplasmcytoplasm                         |
| 529 | ENSG00000044090 | CUL7    | Approved General ccytoplasm                         |
| 530 | ENSG00000044115 | CTNNA1  | Approved Membranoucytoplasm;plasma membrane         |
| 531 | ENSG00000044446 | PHKA2   | Approved Ubiquitouscytoplasm                        |
| 532 | ENSG00000044459 | CNTLN   | UncertainUbiquitouscytoplasm                        |
| 533 | ENSG00000044524 | EPHA3   | Approved Cytoplasmcytoplasm                         |
| 534 | ENSG00000044574 | HSPA5   | Enhanced Ubiquitouscytoplasm                        |
| 535 | ENSG00000046604 | DSG2    | Enhanced Cytoplasmcytoplasm;plasma membrane         |
| 536 | ENSG00000046647 | GEMIN8  | UncertainUbiquitouscytoplasm                        |
| 537 | ENSG00000046651 | OFD1    | Approved General ccytoplasm                         |
| 538 | ENSG00000046653 | GPM6B   | Approved High expression in CNS.                    |
| 539 | ENSG00000046774 | MAGEC2  | Enhanced Selectivenucleus                           |
| 540 | ENSG00000046889 | PREX2   | Enhanced Cytoplasmcytoplasm;plasma membrane         |
| 541 | ENSG00000047056 | WDR37   | Enhanced Ubiquitouscytoplasm                        |
| 542 | ENSG00000047188 | YTHDC2  | Approved Cytoplasmcytoplasm                         |
| 543 | ENSG00000047230 | CTPS2   | UncertainGeneral ccytoplasm                         |
| 544 | ENSG00000047249 | ATP6V1H | Approved Ubiquitouscytoplasm                        |
| 545 | ENSG00000047315 | POLR2B  | SupportedGeneral nnucleus                           |
| 546 | ENSG00000047346 | FAM214A | Approved Mainly ccytoplasm                          |
| 547 | ENSG00000047365 | ARAP2   | Approved Cytoplasmcytoplasm;plasma membrane         |
| 548 | ENSG00000047410 | TPR     | Enhanced Ubiquitousnucleus;plasma membrane          |

|     |                 |          |                                                                   |
|-----|-----------------|----------|-------------------------------------------------------------------|
| 549 | ENSG00000047457 | CP       | SupportedDistinct plasma membrane                                 |
| 550 | ENSG00000047578 | KIAA0556 | Enhanced Ubiquitouscytoplasm                                      |
| 551 | ENSG00000047579 | DTNBP1   | Approved Mainly cytoplasm                                         |
| 552 | ENSG00000047597 | XK       | Approved Cytoplasmcytoplasm                                       |
| 553 | ENSG00000047617 | ANO2     | Enhanced Expression in outer plexiform layer of retina            |
| 554 | ENSG00000047621 | C12orf4  | UncertainUbiquitouscytoplasm                                      |
| 555 | ENSG00000047634 | SCML1    | Enhanced Distinct nucleus                                         |
| 556 | ENSG00000047644 | WWC3     | UncertainUbiquitouscytoplasm                                      |
| 557 | ENSG00000047648 | ARHGAP6  | Enhanced Ubiquitouscytoplasm                                      |
| 558 | ENSG00000047662 | FAM184B  | Enhanced Cytoplasmcytoplasm                                       |
| 559 | ENSG00000047849 | MAP4     | Enhanced General cytoplasm                                        |
| 560 | ENSG00000047932 | GOPC     | Approved Ubiquitouscytoplasm                                      |
| 561 | ENSG00000047936 | ROS1     | UncertainEstimation of protein expression could not be determined |
| 562 | ENSG00000048028 | USP28    | Enhanced Ubiquitousnucleus                                        |
| 563 | ENSG00000048052 | HDAC9    | UncertainMainly genucleus                                         |
| 564 | ENSG00000048162 | NOP16    | Approved Nucleolarnucleus                                         |
| 565 | ENSG00000048342 | CC2D2A   | Approved Expression in ciliated cells of fallopian tube           |
| 566 | ENSG00000048392 | RRM2B    | Approved Cytoplasmcytoplasm;nucleus                               |
| 567 | ENSG00000048405 | ZNF800   | Approved General nnucleus                                         |
| 568 | ENSG00000048471 | SNX29    | Approved Cytoplasmcytoplasm                                       |
| 569 | ENSG00000048544 | MRPS10   | SupportedUbiquitouscytoplasm                                      |
| 570 | ENSG00000048545 | GUCA1A   | Enhanced Cytoplasmcytoplasm                                       |
| 571 | ENSG00000048649 | RSF1     | SupportedUbiquitousnucleus                                        |
| 572 | ENSG00000048707 | VPS13D   | UncertainExpression in subsets of immune cells.                   |
| 573 | ENSG00000048740 | CELF2    | Enhanced Selective expression in neuronal cells, brain            |
| 574 | ENSG00000048828 | FAM120A  | Approved General cytoplasm                                        |
| 575 | ENSG00000049089 | COL9A2   | SupportedCytoplasmcytoplasm                                       |
| 576 | ENSG00000049130 | KITLG    | Approved Cytoplasmcytoplasm;nucleus                               |
| 577 | ENSG00000049192 | ADAMTS6  | Enhanced Granular cytoplasm                                       |
| 578 | ENSG00000049239 | H6PD     | Approved Ubiquitouscytoplasm                                      |
| 579 | ENSG00000049246 | PER3     | Approved General cytoplasm                                        |
| 580 | ENSG00000049247 | UTS2     | UncertainEstimation of protein expression could not be determined |
| 581 | ENSG00000049283 | EPN3     | Approved Mainly cytoplasm                                         |
| 582 | ENSG00000049323 | LTBP1    | Approved Cytoplasmcytoplasm                                       |
| 583 | ENSG00000049449 | RCN1     | Approved Cytoplasmcytoplasm                                       |
| 584 | ENSG00000049540 | ELN      | SupportedDistinct expression in connective tissue, blood          |
| 585 | ENSG00000049541 | RFC2     | Approved Mainly nnucleus                                          |
| 586 | ENSG00000049618 | ARID1B   | Approved Mainly nnucleus                                          |
| 587 | ENSG00000049656 | CLPTM1L  | Approved General cytoplasm                                        |
| 588 | ENSG00000049759 | NEDD4L   | Approved Cytoplasmcytoplasm                                       |
| 589 | ENSG00000049768 | FOXP3    | Enhanced Nuclear enucleus                                         |
| 590 | ENSG00000049769 | PPP1R3F  | Approved Cytoplasmcytoplasm                                       |
| 591 | ENSG00000049860 | HEXB     | Enhanced Granular cytoplasm                                       |
| 592 | ENSG00000049883 | PTCD2    | Approved Cytoplasmcytoplasm                                       |
| 593 | ENSG00000050030 | NEXMIF   | UncertainEstimation of protein expression could not be determined |
| 594 | ENSG00000050130 | JKAMP    | SupportedUbiquitouscytoplasm                                      |
| 595 | ENSG00000050165 | DKK3     | Approved General cytoplasm                                        |
| 596 | ENSG00000050327 | ARHGEF5  | Enhanced General cytoplasm                                        |
| 597 | ENSG00000050344 | NFE2L3   | Enhanced Cytoplasmcytoplasm                                       |
| 598 | ENSG00000050405 | LIMA1    | Enhanced Plasma membrane;plasma membrane                          |
| 599 | ENSG00000050555 | LAMC3    | Enhanced Cytoplasmcytoplasm                                       |
| 600 | ENSG00000050628 | PTGER3   | UncertainNuclear enucleus                                         |
| 601 | ENSG00000050730 | TNIP3    | UncertainEstimation of protein expression could not be determined |
| 602 | ENSG00000050748 | MAPK9    | Approved General cytoplasm;nucleus                                |
| 603 | ENSG00000050767 | COL23A1  | UncertainEstimation of protein expression could not be determined |

|     |                 |          |                                                      |
|-----|-----------------|----------|------------------------------------------------------|
| 604 | ENSG00000050820 | BCAR1    | Approved Cytoplasm cytoplasm                         |
| 605 | ENSG00000051009 | FAM160A2 | Approved General c cytoplasm                         |
| 606 | ENSG00000051108 | HERPUD1  | Approved Ubiquitous cytoplasm                        |
| 607 | ENSG00000051128 | HOMER3   | Enhanced Distinct cytoplasm                          |
| 608 | ENSG00000051180 | RAD51    | Enhanced Expressed mainly in thymus and a subset of  |
| 609 | ENSG00000051382 | PIK3CB   | Approved General c cytoplasm                         |
| 610 | ENSG00000051523 | CYBA     | Enhanced Selective cytoplasm                         |
| 611 | ENSG00000051596 | THOC3    | Approved General n nucleus                           |
| 612 | ENSG00000051620 | HEBP2    | Approved Ubiquitous cytoplasm                        |
| 613 | ENSG00000051825 | MPHOSPH9 | Approved Cytoplasm cytoplasm                         |
| 614 | ENSG00000052126 | PLEKHA5  | Uncertain Cytoplasm cytoplasm; plasma membrane       |
| 615 | ENSG00000052344 | PRSS8    | Uncertain Cytoplasm cytoplasm                        |
| 616 | ENSG00000052723 | SIKE1    | Supported General c cytoplasm                        |
| 617 | ENSG00000052795 | FNIP2    | Approved General c cytoplasm                         |
| 618 | ENSG00000052802 | MSM01    | Enhanced Cytoplasm cytoplasm                         |
| 619 | ENSG00000052841 | TTC17    | Approved General c cytoplasm; plasma membrane        |
| 620 | ENSG00000053108 | FSTL4    | Uncertain Estimation of protein expression could not |
| 621 | ENSG00000053254 | FOXN3    | Approved General c cytoplasm; nucleus                |
| 622 | ENSG00000053328 | METTL24  | Uncertain Estimation of protein expression could not |
| 623 | ENSG00000053371 | AKR7A2   | Enhanced Ubiquitous cytoplasm                        |
| 624 | ENSG00000053372 | MRT04    | Approved Nuclear e nucleus                           |
| 625 | ENSG00000053501 | USE1     | Approved General c cytoplasm                         |
| 626 | ENSG00000053524 | MCF2L2   | Uncertain Estimation of protein expression could not |
| 627 | ENSG00000053702 | NRIP2    | Enhanced Nuclear a cytoplasm; nucleus                |
| 628 | ENSG00000053747 | LAMA3    | Uncertain Cytoplasm cytoplasm                        |
| 629 | ENSG00000053770 | AP5M1    | Approved Cytoplasm cytoplasm                         |
| 630 | ENSG00000053900 | ANAPC4   | Approved General n cytoplasm; nucleus                |
| 631 | ENSG00000053918 | KCNQ1    | Enhanced Cytoplasm cytoplasm; plasma membrane        |
| 632 | ENSG00000054116 | TRAPPC3  | Approved Cytoplasm cytoplasm; plasma membrane        |
| 633 | ENSG00000054118 | THRAP3   | Supported Ubiquitous nucleus                         |
| 634 | ENSG00000054148 | PHPT1    | Approved General c cytoplasm                         |
| 635 | ENSG00000054179 | ENTPD2   | Approved Cytoplasm cytoplasm                         |
| 636 | ENSG00000054219 | LY75     | Enhanced Cytoplasm cytoplasm                         |
| 637 | ENSG00000054267 | ARID4B   | Approved General n nucleus                           |
| 638 | ENSG00000054277 | OPN3     | Uncertain General c cytoplasm                        |
| 639 | ENSG00000054282 | SDCCAG8  | Approved General c cytoplasm; nucleus                |
| 640 | ENSG00000054356 | PTPRN    | Enhanced Expression in neuronal and neuroendocrine 1 |
| 641 | ENSG00000054392 | HHAT     | Approved Cytoplasm cytoplasm                         |
| 642 | ENSG00000054523 | KIF1B    | Approved Cytoplasm cytoplasm                         |
| 643 | ENSG00000054598 | FOXC1    | Enhanced Nuclear a cytoplasm; nucleus                |
| 644 | ENSG00000054611 | TBC1D22A | Uncertain Cytoplasm cytoplasm; plasma membrane       |
| 645 | ENSG00000054654 | SYNE2    | Enhanced Nuclear m nucleus; plasma membrane          |
| 646 | ENSG00000054690 | PLEKHH1  | Uncertain Estimation of protein expression could not |
| 647 | ENSG00000054793 | ATP9A    | Enhanced Cytoplasm cytoplasm                         |
| 648 | ENSG00000054938 | CHRDL2   | Uncertain General c cytoplasm                        |
| 649 | ENSG00000054965 | FAM168A  | Enhanced Cytoplasm cytoplasm                         |
| 650 | ENSG00000054983 | GALC     | Approved Cytoplasm cytoplasm                         |
| 651 | ENSG00000055044 | NOP58    | Supported Distinct nucleus                           |
| 652 | ENSG00000055070 | SZRD1    | Uncertain Ubiquitous cytoplasm; nucleus              |
| 653 | ENSG00000055130 | CUL1     | Supported Ubiquitous nucleus                         |
| 654 | ENSG00000055147 | FAM114A2 | Approved Cytoplasm cytoplasm                         |
| 655 | ENSG00000055163 | CYFIP2   | Uncertain Cytoplasm cytoplasm; plasma membrane       |
| 656 | ENSG00000055208 | TAB2     | Approved General c cytoplasm                         |
| 657 | ENSG00000055211 | GINM1    | Approved General c cytoplasm                         |
| 658 | ENSG00000055332 | EIF2AK2  | Approved Cytoplasm cytoplasm                         |

|     |                 |          |                                                      |
|-----|-----------------|----------|------------------------------------------------------|
| 659 | ENSG00000055483 | USP36    | UncertainNuclear enucleus                            |
| 660 | ENSG00000055732 | MCOLN3   | Enhanced Granular cytoplasm                          |
| 661 | ENSG00000055813 | CCDC85A  | UncertainNuclear acytoplasm;nucleus                  |
| 662 | ENSG00000055917 | PUM2     | Approved Granular cytoplasm                          |
| 663 | ENSG00000055955 | ITIH4    | Enhanced Plasma poplasma membrane                    |
| 664 | ENSG00000055957 | ITIH1    | Approved Plasma explasma membrane                    |
| 665 | ENSG00000056050 | HPF1     | UncertainExtracellcytoplasm                          |
| 666 | ENSG00000056097 | ZFR      | SupportedUbiquitouucleus                             |
| 667 | ENSG00000056277 | ZNF280C  | Enhanced General nnucleus                            |
| 668 | ENSG00000056487 | PHF21B   | Enhanced Cytoplasmcytoplasm                          |
| 669 | ENSG00000056558 | TRAF1    | Enhanced Cytoplasmcytoplasm                          |
| 670 | ENSG00000056586 | RC3H2    | Approved Cytoplasmcytoplasm                          |
| 671 | ENSG00000056736 | IL17RB   | Enhanced Cytoplasmcytoplasm                          |
| 672 | ENSG00000056972 | TRAF3IP2 | Approved Ubiquitocytoplasm                           |
| 673 | ENSG00000056998 | GYG2     | Enhanced Cytoplasmcytoplasm                          |
| 674 | ENSG00000057019 | DCBLD2   | Approved General ccytoplasm                          |
| 675 | ENSG00000057149 | SERPINB3 | Enhanced Selectivecytoplasm                          |
| 676 | ENSG00000057252 | SOAT1    | Enhanced Cytoplasmcytoplasm                          |
| 677 | ENSG00000057294 | PKP2     | Enhanced Cytoplasmcytoplasm                          |
| 678 | ENSG00000057608 | GDI2     | SupportedGeneral ccytoplasm                          |
| 679 | ENSG00000057657 | PRDM1    | Approved Nuclear enucleus                            |
| 680 | ENSG00000057663 | ATG5     | Approved Cytoplasmcytoplasm                          |
| 681 | ENSG00000057704 | TMCC3    | Approved General ccytoplasm                          |
| 682 | ENSG00000057757 | PITHD1   | UncertainNuclear enucleus                            |
| 683 | ENSG00000057935 | MTA3     | Approved General nnucleus                            |
| 684 | ENSG00000058056 | USP13    | Enhanced General ccytoplasm                          |
| 685 | ENSG00000058063 | ATP11B   | UncertainCytoplasmcytoplasm                          |
| 686 | ENSG00000058085 | LAMC2    | Enhanced Distinct plasma membrane                    |
| 687 | ENSG00000058091 | CDK14    | Approved Cytoplasmcytoplasm;nucleus                  |
| 688 | ENSG00000058272 | PPP1R12A | Approved Cytoplasmcytoplasm;plasma membrane          |
| 689 | ENSG00000058335 | RASGRF1  | Approved General ccytoplasm                          |
| 690 | ENSG00000058404 | CAMK2B   | Enhanced Expression in CNS, heart and skeletal musc  |
| 691 | ENSG00000058453 | CROCC    | Enhanced Selective expression in ciliary rootlets of |
| 692 | ENSG00000058600 | POLR3E   | Approved Ubiquitouucleus                             |
| 693 | ENSG00000058668 | ATP2B4   | Enhanced Ubiquitoupasma membrane                     |
| 694 | ENSG00000058673 | ZC3H11A  | Approved General nnucleus                            |
| 695 | ENSG00000058729 | RIOK2    | UncertainUbiquitocytoplasm                           |
| 696 | ENSG00000058799 | YIPF1    | Approved Cytoplasmcytoplasm                          |
| 697 | ENSG00000058804 | NDC1     | Approved Nuclear enucleus                            |
| 698 | ENSG00000058866 | DGKG     | Approved Cytoplasmcytoplasm                          |
| 699 | ENSG00000059122 | FLYWCH1  | Approved General ccytoplasm;nucleus                  |
| 700 | ENSG00000059145 | UNKL     | UncertainCytoplasmcytoplasm;plasma membrane          |
| 701 | ENSG00000059377 | TBXAS1   | Enhanced Distinct cytoplasm                          |
| 702 | ENSG00000059378 | PARP12   | Approved General ccytoplasm                          |
| 703 | ENSG00000059573 | ALDH18A1 | Approved Cytoplasmcytoplasm                          |
| 704 | ENSG00000059588 | TARBP1   | UncertainEstimation of protein expression could not  |
| 705 | ENSG00000059691 | GATB     | UncertainGeneral ccytoplasm;plasma membrane          |
| 706 | ENSG00000059728 | MXD1     | Enhanced Ubiquitouucleus                             |
| 707 | ENSG00000059758 | CDK17    | Approved General ccytoplasm                          |
| 708 | ENSG00000059769 | DNAJC25  | Approved Ubiquitocytoplasm                           |
| 709 | ENSG00000059804 | SLC2A3   | Approved Cytoplasmcytoplasm;plasma membrane          |
| 710 | ENSG00000059915 | PSD      | UncertainEstimation of protein expression could not  |
| 711 | ENSG00000060069 | CTDP1    | Approved General ccytoplasm;nucleus                  |
| 712 | ENSG00000060138 | YBX3     | Approved Cytoplasmcytoplasm;nucleus                  |
| 713 | ENSG00000060140 | STYK1    | Enhanced Cytoplasmcytoplasm;plasma membrane          |

|     |                 |         |                                                                    |
|-----|-----------------|---------|--------------------------------------------------------------------|
| 714 | ENSG00000060237 | WNK1    | Enhanced Ubiquitous cytoplasm                                      |
| 715 | ENSG00000060339 | CCAR1   | Supported Ubiquitous nucleus                                       |
| 716 | ENSG00000060491 | OGFR    | Supported General nucleus                                          |
| 717 | ENSG00000060558 | GNA15   | Approved Expression in several different tissue types              |
| 718 | ENSG00000060566 | CREB3L3 | Enhanced Cytoplasm cytoplasm                                       |
| 719 | ENSG00000060656 | PTPRU   | Approved General cytoplasm                                         |
| 720 | ENSG00000060688 | SNRNP40 | Supported Ubiquitous nucleus                                       |
| 721 | ENSG00000060749 | QSER1   | Approved General cytoplasm;nucleus                                 |
| 722 | ENSG00000060762 | MPC1    | Enhanced General cytoplasm                                         |
| 723 | ENSG00000060971 | ACAA1   | Enhanced Cytoplasm cytoplasm                                       |
| 724 | ENSG00000060982 | BCAT1   | Uncertain Estimation of protein expression could not be determined |
| 725 | ENSG00000061337 | LZTS1   | Approved Cytoplasm cytoplasm                                       |
| 726 | ENSG00000061455 | PRDM6   | Uncertain Estimation of protein expression could not be determined |
| 727 | ENSG00000061492 | WNT8A   | Uncertain Estimation of protein expression could not be determined |
| 728 | ENSG00000061656 | SPAG4   | Approved Cytoplasm cytoplasm                                       |
| 729 | ENSG00000061676 | NCKAP1  | Enhanced General cytoplasm                                         |
| 730 | ENSG00000061794 | MRPS35  | Supported Ubiquitous cytoplasm                                     |
| 731 | ENSG00000061918 | GUCY1B1 | Approved Cytoplasm cytoplasm                                       |
| 732 | ENSG00000061936 | SFSWAP  | Approved General nucleus;cytoplasm                                 |
| 733 | ENSG00000061938 | TNK2    | Approved General cytoplasm                                         |
| 734 | ENSG00000061987 | MON2    | Uncertain Estimation of protein expression could not be determined |
| 735 | ENSG00000062038 | CDH3    | Enhanced Membrane plasma membrane                                  |
| 736 | ENSG00000062194 | GPBP1   | Approved Ubiquitous cytoplasm;nucleus                              |
| 737 | ENSG00000062370 | ZNF112  | Approved Cytoplasm cytoplasm;nucleus                               |
| 738 | ENSG00000062485 | CS      | Enhanced Ubiquitous cytoplasm                                      |
| 739 | ENSG00000062524 | LTK     | Uncertain Estimation of protein expression could not be determined |
| 740 | ENSG00000062582 | MRPS24  | Approved General cytoplasm                                         |
| 741 | ENSG00000062598 | ELMO2   | Approved Cytoplasm cytoplasm                                       |
| 742 | ENSG00000062650 | WAPL    | Enhanced Ubiquitous cytoplasm;nucleus                              |
| 743 | ENSG00000062716 | VMP1    | Approved Mainly cytoplasm                                          |
| 744 | ENSG00000062822 | POLD1   | Supported General nucleus                                          |
| 745 | ENSG00000063015 | SEZ6    | Enhanced Expression mainly in CNS.                                 |
| 746 | ENSG00000063046 | EIF4B   | Approved General cytoplasm                                         |
| 747 | ENSG00000063169 | BICRA   | Approved Ubiquitous nucleus                                        |
| 748 | ENSG00000063177 | RPL18   | Approved Ubiquitous cytoplasm                                      |
| 749 | ENSG00000063241 | ISOC2   | Enhanced Ubiquitous cytoplasm                                      |
| 750 | ENSG00000063244 | U2AF2   | Supported Ubiquitous nucleus                                       |
| 751 | ENSG00000063245 | EPN1    | Approved Cytoplasm cytoplasm                                       |
| 752 | ENSG00000063515 | GSC2    | Uncertain Nuclear nucleus                                          |
| 753 | ENSG00000063587 | ZNF275  | Approved Ubiquitous nucleus                                        |
| 754 | ENSG00000063601 | MTMR1   | Approved General cytoplasm;nucleus                                 |
| 755 | ENSG00000063660 | GPC1    | Approved Cytoplasm cytoplasm;plasma membrane                       |
| 756 | ENSG00000063761 | ADCK1   | Uncertain Cytoplasm cytoplasm                                      |
| 757 | ENSG00000063854 | HAGH    | Approved General cytoplasm                                         |
| 758 | ENSG00000063978 | RNF4    | Approved Cytoplasm cytoplasm                                       |
| 759 | ENSG00000064012 | CASP8   | Approved Cytoplasm cytoplasm                                       |
| 760 | ENSG00000064042 | LIMCH1  | Uncertain Expression in several tissues.                           |
| 761 | ENSG00000064102 | INTS13  | Uncertain Cytoplasm cytoplasm                                      |
| 762 | ENSG00000064199 | SPA17   | Enhanced Cytoplasm cytoplasm                                       |
| 763 | ENSG00000064201 | TSPAN32 | Uncertain General cytoplasm;nucleus                                |
| 764 | ENSG00000064205 | WISP2   | Approved Extracellular positivity in several tissues               |
| 765 | ENSG00000064218 | DMRT3   | Approved Expression in testis.                                     |
| 766 | ENSG00000064225 | ST3GAL6 | Approved General cytoplasm                                         |
| 767 | ENSG00000064270 | ATP2C2  | Approved Cytoplasm cytoplasm;plasma membrane                       |
| 768 | ENSG00000064300 | NGFR    | Enhanced Selective cytoplasm                                       |

|     |                 |           |           |                                               |
|-----|-----------------|-----------|-----------|-----------------------------------------------|
| 769 | ENSG00000064309 | CDON      | Uncertain | Estimation of protein expression could not    |
| 770 | ENSG00000064393 | HIPK2     | Supported | Ubiquitous nucleus                            |
| 771 | ENSG00000064419 | TNP03     | Approved  | General cytoplasm                             |
| 772 | ENSG00000064489 | BORCS8-ME | Uncertain | Estimation of protein expression could not    |
| 773 | ENSG00000064490 | RFXANK    | Approved  | Mainly nucleus                                |
| 774 | ENSG00000064545 | TMEM161A  | Approved  | Cytoplasm cytoplasm; plasma membrane          |
| 775 | ENSG00000064547 | LPAR2     | Approved  | Cytoplasm cytoplasm                           |
| 776 | ENSG00000064601 | CTSA      | Enhanced  | Ubiquitous cytoplasm                          |
| 777 | ENSG00000064607 | SUGP2     | Enhanced  | Nuclear nucleus                               |
| 778 | ENSG00000064651 | SLC12A2   | Approved  | Cytoplasm cytoplasm                           |
| 779 | ENSG00000064652 | SNX24     | Approved  | Cytoplasm cytoplasm                           |
| 780 | ENSG00000064655 | EYA2      | Uncertain | General nucleus                               |
| 781 | ENSG00000064666 | CNN2      | Approved  | Cytoplasm cytoplasm                           |
| 782 | ENSG00000064687 | ABCA7     | Enhanced  | Cytoplasm cytoplasm                           |
| 783 | ENSG00000064692 | SNCAIP    | Uncertain | Estimation of protein expression could not    |
| 784 | ENSG00000064703 | DDX20     | Enhanced  | Cytoplasm cytoplasm                           |
| 785 | ENSG00000064726 | BTBD1     | Enhanced  | Ubiquitous cytoplasm                          |
| 786 | ENSG00000064763 | FAR2      | Approved  | Cytoplasm cytoplasm                           |
| 787 | ENSG00000064787 | BCAS1     | Enhanced  | Cytoplasm cytoplasm                           |
| 788 | ENSG00000064835 | POU1F1    | Enhanced  | Nuclear nucleus                               |
| 789 | ENSG00000064886 | CHI3L2    | Approved  | Cytoplasm cytoplasm                           |
| 790 | ENSG00000064932 | SBN02     | Approved  | Ubiquitous cytoplasm                          |
| 791 | ENSG00000064961 | HMG20B    | Approved  | Ubiquitous nucleus                            |
| 792 | ENSG00000064989 | CALCRL    | Uncertain | Cytoplasm cytoplasm                           |
| 793 | ENSG00000064999 | ANKS1A    | Approved  | Cytoplasm cytoplasm                           |
| 794 | ENSG00000065029 | ZNF76     | Approved  | Ubiquitous cytoplasm; nucleus                 |
| 795 | ENSG00000065054 | SLC9A3R2  | Enhanced  | Membrane plasma membrane                      |
| 796 | ENSG00000065057 | NTHL1     | Supported | Ubiquitous nucleus                            |
| 797 | ENSG00000065060 | UHRF1BP1  | Uncertain | Cytoplasm cytoplasm                           |
| 798 | ENSG00000065135 | GNAI3     | Approved  | Cytoplasm cytoplasm; plasma membrane          |
| 799 | ENSG00000065150 | IPO5      | Approved  | Cytoplasm cytoplasm; nucleus                  |
| 800 | ENSG00000065154 | OAT       | Enhanced  | Cytoplasm cytoplasm                           |
| 801 | ENSG00000065243 | PKN2      | Approved  | Cytoplasm cytoplasm; nucleus                  |
| 802 | ENSG00000065268 | WDR18     | Approved  | Nuclear cytoplasm; nucleus                    |
| 803 | ENSG00000065308 | TRAM2     | Approved  | Membrane plasma membrane                      |
| 804 | ENSG00000065320 | NTN1      | Approved  | Extracellular positivity in several tissues   |
| 805 | ENSG00000065325 | GLP2R     | Supported | Selective expression in enteroendocrine cells |
| 806 | ENSG00000065328 | MCM10     | Approved  | Nuclear cytoplasm; nucleus                    |
| 807 | ENSG00000065357 | DGKA      | Approved  | Cytoplasm cytoplasm                           |
| 808 | ENSG00000065361 | ERBB3     | Uncertain | Cytoplasm cytoplasm; plasma membrane          |
| 809 | ENSG00000065371 | ROPN1     | Supported | Expressed in sperm flagella.                  |
| 810 | ENSG00000065413 | ANKRD44   | Approved  | Cytoplasm cytoplasm                           |
| 811 | ENSG00000065427 | KARS      | Enhanced  | Ubiquitous cytoplasm                          |
| 812 | ENSG00000065457 | ADAT1     | Approved  | cytoplasm cytoplasm                           |
| 813 | ENSG00000065485 | PDIA5     | Enhanced  | Cytoplasm cytoplasm                           |
| 814 | ENSG00000065491 | TBC1D22B  | Uncertain | Estimation of protein expression could not    |
| 815 | ENSG00000065518 | NDUFB4    | Enhanced  | Ubiquitous cytoplasm                          |
| 816 | ENSG00000065526 | SPEN      | Supported | Ubiquitous nucleus                            |
| 817 | ENSG00000065534 | MYLK      | Enhanced  | Selective cytoplasm                           |
| 818 | ENSG00000065548 | ZC3H15    | Enhanced  | Ubiquitous cytoplasm                          |
| 819 | ENSG00000065559 | MAP2K4    | Enhanced  | Nuclear cytoplasm; nucleus                    |
| 820 | ENSG00000065600 | TMEM206   | Uncertain | Estimation of protein expression could not    |
| 821 | ENSG00000065609 | SNAP91    | Enhanced  | Selective expression in neuropil, neuronal    |
| 822 | ENSG00000065613 | SLK       | Approved  | General cytoplasm                             |
| 823 | ENSG00000065615 | CYB5R4    | Approved  | General cytoplasm; plasma membrane            |

|     |                 |          |                                                      |
|-----|-----------------|----------|------------------------------------------------------|
| 824 | ENSG00000065618 | COL17A1  | Enhanced Cytoplasm cytoplasm;plasma membrane         |
| 825 | ENSG00000065621 | GSTO2    | Approved Nuclear a cytoplasm;nucleus                 |
| 826 | ENSG00000065717 | TLE2     | Enhanced Nuclear enucleus                            |
| 827 | ENSG00000065802 | ASB1     | UncertainExpression in CNS, adrenal medulla, parathy |
| 828 | ENSG00000065809 | FAM107B  | Approved Membranou cytoplasm;plasma membrane         |
| 829 | ENSG00000065833 | ME1      | Enhanced Cytoplasm cytoplasm                         |
| 830 | ENSG00000065882 | TBC1D1   | Approved Cytoplasm cytoplasm;plasma membrane         |
| 831 | ENSG00000065883 | CDK13    | UncertainExpression in several tissues.              |
| 832 | ENSG00000065911 | MTHFD2   | Approved Cytoplasm cytoplasm                         |
| 833 | ENSG00000065923 | SLC9A7   | Approved Cytoplasm cytoplasm                         |
| 834 | ENSG00000065970 | FOXJ2    | Approved Mainly nunucleus                            |
| 835 | ENSG00000065978 | YBX1     | Approved Ubiquitou cytoplasm                         |
| 836 | ENSG00000065989 | PDE4A    | UncertainEstimation of protein expression could not  |
| 837 | ENSG00000066032 | CTNNA2   | Enhanced Distinct expression in neuropil.            |
| 838 | ENSG00000066044 | ELAVL1   | Approved Nuclear enucleus                            |
| 839 | ENSG00000066084 | DIP2B    | Enhanced General c cytoplasm                         |
| 840 | ENSG00000066117 | SMARCD1  | SupportedUbiquitounucleus                            |
| 841 | ENSG00000066135 | KDM4A    | UncertainCytoplasm cytoplasm;nucleus                 |
| 842 | ENSG00000066230 | SLC9A3   | Enhanced Selective expression in the gastrointestin  |
| 843 | ENSG00000066248 | NGEF     | Approved Cytoplasm cytoplasm;plasma membrane         |
| 844 | ENSG00000066294 | CD84     | Enhanced Selective cytoplasm                         |
| 845 | ENSG00000066322 | ELOVL1   | Approved Cytoplasm cytoplasm                         |
| 846 | ENSG00000066336 | SPI1     | Enhanced High nuclnucleus                            |
| 847 | ENSG00000066379 | ZNRD1    | SupportedUbiquitounucleus                            |
| 848 | ENSG00000066405 | CLDN18   | Enhanced Distinct plasma membrane                    |
| 849 | ENSG00000066422 | ZBTB11   | Approved Nuclear a cytoplasm;nucleus                 |
| 850 | ENSG00000066427 | ATXN3    | UncertainCytoplasm cytoplasm;nucleus                 |
| 851 | ENSG00000066455 | GOLGA5   | Enhanced Granular cytoplasm                          |
| 852 | ENSG00000066468 | FGFR2    | UncertainGeneral c cytoplasm                         |
| 853 | ENSG00000066557 | LRRC40   | Approved Cytoplasm cytoplasm                         |
| 854 | ENSG00000066629 | EML1     | UncertainCytoplasm cytoplasm                         |
| 855 | ENSG00000066654 | THUMPD1  | Approved General c cytoplasm;nucleus                 |
| 856 | ENSG00000066735 | KIF26A   | UncertainEstimation of protein expression could not  |
| 857 | ENSG00000066739 | ATG2B    | Approved Cytoplasm cytoplasm                         |
| 858 | ENSG00000066777 | ARFGEF1  | SupportedUbiquitou cytoplasm                         |
| 859 | ENSG00000066813 | ACSM2B   | SupportedGranular cytoplasm                          |
| 860 | ENSG00000066827 | ZFAT     | Enhanced Selective nucleus                           |
| 861 | ENSG00000066855 | MTFR1    | UncertainCytoplasm cytoplasm                         |
| 862 | ENSG00000066923 | STAG3    | Enhanced Nuclear enucleus                            |
| 863 | ENSG00000066926 | FECH     | Approved Cytoplasm cytoplasm                         |
| 864 | ENSG00000066933 | MYO9A    | Approved General c cytoplasm                         |
| 865 | ENSG00000067048 | DDX3Y    | Enhanced Cytoplasm cytoplasm                         |
| 866 | ENSG00000067057 | PFKP     | UncertainGeneral c cytoplasm                         |
| 867 | ENSG00000067064 | IDI1     | Approved Ubiquitou cytoplasm                         |
| 868 | ENSG00000067066 | SP100    | Enhanced Ubiquitounucleus                            |
| 869 | ENSG00000067082 | KLF6     | SupportedGeneral n nucleus                           |
| 870 | ENSG00000067113 | PLPP1    | Enhanced Membranou cytoplasm;plasma membrane         |
| 871 | ENSG00000067141 | NEO1     | UncertainGeneral c cytoplasm                         |
| 872 | ENSG00000067167 | TRAM1    | Approved Cytoplasm cytoplasm;nucleus                 |
| 873 | ENSG00000067177 | PHKA1    | Enhanced Cytoplasm cytoplasm                         |
| 874 | ENSG00000067182 | TNFRSF1A | Approved Cytoplasm cytoplasm                         |
| 875 | ENSG00000067191 | CACNB1   | Approved Mainly c cytoplasm                          |
| 876 | ENSG00000067208 | EVI5     | Approved General c cytoplasm;nucleus                 |
| 877 | ENSG00000067221 | STOML1   | Approved General c cytoplasm                         |
| 878 | ENSG00000067225 | PKM      | UncertainCytoplasm cytoplasm                         |



|     |                 |           |                                                      |
|-----|-----------------|-----------|------------------------------------------------------|
| 879 | ENSG00000067248 | DHX29     | Approved Ubiquitous cytoplasm; plasma membrane       |
| 880 | ENSG00000067334 | DNTTIP2   | Supported Nucleolar nucleus                          |
| 881 | ENSG00000067365 | METTL22   | Uncertain General cytoplasm                          |
| 882 | ENSG00000067369 | TP53BP1   | Supported Ubiquitous nucleus                         |
| 883 | ENSG00000067533 | RRP15     | Approved General cytoplasm                           |
| 884 | ENSG00000067560 | RHOA      | Approved Cytoplasm cytoplasm                         |
| 885 | ENSG00000067596 | DHX8      | Approved Cytoplasm cytoplasm; nucleus                |
| 886 | ENSG00000067606 | PRKCZ     | Enhanced Membranous cytoplasm; plasma membrane       |
| 887 | ENSG00000067646 | ZFY       | Uncertain General nucleus                            |
| 888 | ENSG00000067704 | IARS2     | Enhanced Granular cytoplasm                          |
| 889 | ENSG00000067715 | SYT1      | Enhanced Selective expression in neuropil in CNS.    |
| 890 | ENSG00000067798 | NAV3      | Approved Cytoplasm cytoplasm                         |
| 891 | ENSG00000067829 | IDH3G     | Supported Granular cytoplasm                         |
| 892 | ENSG00000067836 | ROGDI     | Uncertain Cytoplasm cytoplasm                        |
| 893 | ENSG00000067840 | PDZD4     | Enhanced Nuclear cytoplasm; nucleus                  |
| 894 | ENSG00000067842 | ATP2B3    | Enhanced Cytoplasm cytoplasm                         |
| 895 | ENSG00000067900 | ROCK1     | Approved Cytoplasm cytoplasm                         |
| 896 | ENSG00000067955 | CBFB      | Uncertain Estimation of protein expression could not |
| 897 | ENSG00000067992 | PDK3      | Approved Cytoplasm cytoplasm                         |
| 898 | ENSG00000068001 | HYAL2     | Uncertain Membranous cytoplasm; plasma membrane      |
| 899 | ENSG00000068024 | HDAC4     | Approved General nucleus                             |
| 900 | ENSG00000068028 | RASSF1    | Approved Ubiquitous cytoplasm                        |
| 901 | ENSG00000068078 | FGFR3     | Enhanced Cytoplasm cytoplasm                         |
| 902 | ENSG00000068079 | IFI35     | Approved General cytoplasm                           |
| 903 | ENSG00000068097 | HEATR6    | Uncertain Estimation of protein expression could not |
| 904 | ENSG00000068120 | COASY     | Approved General cytoplasm                           |
| 905 | ENSG00000068137 | PLEKHH3   | Uncertain Estimation of protein expression could not |
| 906 | ENSG00000068305 | MEF2A     | Approved General nucleus                             |
| 907 | ENSG00000068308 | OTUD5     | Approved General cytoplasm                           |
| 908 | ENSG00000068323 | TFE3      | Approved Ubiquitous nucleus                          |
| 909 | ENSG00000068354 | TBC1D25   | Approved General cytoplasm; nucleus                  |
| 910 | ENSG00000068366 | ACSL4     | Supported Ubiquitous cytoplasm                       |
| 911 | ENSG00000068383 | INPP5A    | Enhanced Ubiquitous cytoplasm                        |
| 912 | ENSG00000068394 | GPKOW     | Enhanced Nuclear nucleus                             |
| 913 | ENSG00000068400 | GRIPAP1   | Approved Cytoplasm cytoplasm                         |
| 914 | ENSG00000068438 | FTSJ1     | Approved Mainly cytoplasm                            |
| 915 | ENSG00000068489 | PRR11     | Uncertain Estimation of protein expression could not |
| 916 | ENSG00000068615 | REEP1     | Enhanced Cytoplasm cytoplasm                         |
| 917 | ENSG00000068650 | ATP11A    | Approved Membranous cytoplasm; plasma membrane       |
| 918 | ENSG00000068654 | POLR1A    | Supported General nucleus                            |
| 919 | ENSG00000068697 | LAPTM4A   | Approved General cytoplasm                           |
| 920 | ENSG00000068724 | TTC7A     | Enhanced Ubiquitous cytoplasm                        |
| 921 | ENSG00000068745 | IP6K2     | Approved Nuclear cytoplasm; nucleus                  |
| 922 | ENSG00000068781 | STON1-GTF | Uncertain Estimation of protein expression could not |
| 923 | ENSG00000068784 | SRBD1     | Approved Cytoplasm cytoplasm                         |
| 924 | ENSG00000068796 | KIF2A     | Approved Cytoplasm cytoplasm; nucleus                |
| 925 | ENSG00000068831 | RASGRP2   | Approved Cytoplasm cytoplasm                         |
| 926 | ENSG00000068878 | PSME4     | Approved Ubiquitous cytoplasm; nucleus               |
| 927 | ENSG00000068885 | IFT80     | Uncertain General cytoplasm                          |
| 928 | ENSG00000068903 | SIRT2     | Approved Cytoplasm cytoplasm                         |
| 929 | ENSG00000068912 | ERLEC1    | Enhanced Ubiquitous cytoplasm; plasma membrane       |
| 930 | ENSG00000068971 | PPP2R5B   | Approved Cytoplasm cytoplasm                         |
| 931 | ENSG00000068976 | PYGM      | Enhanced Cytoplasm cytoplasm                         |
| 932 | ENSG00000068985 | PAGE1     | Enhanced Selective nucleus                           |
| 933 | ENSG00000069011 | PITX1     | Approved Nuclear nucleus                             |

|     |                 |           |                                                      |
|-----|-----------------|-----------|------------------------------------------------------|
| 934 | ENSG00000069018 | TRPC7     | UncertainEstimation of protein expression could not  |
| 935 | ENSG00000069020 | MAST4     | Approved Mainly cytoplasm                            |
| 936 | ENSG00000069206 | ADAM7     | Enhanced Cytoplasmcytoplasm;plasma membrane          |
| 937 | ENSG00000069248 | NUP133    | Approved Nuclear acytoplasm;nucleus                  |
| 938 | ENSG00000069275 | NUCKS1    | SupportedUbiquitousnucleus                           |
| 939 | ENSG00000069329 | VPS35     | SupportedUbiquitouscytoplasm                         |
| 940 | ENSG00000069345 | DNAJA2    | Approved Cytoplasmcytoplasm                          |
| 941 | ENSG00000069399 | BCL3      | Approved Mainly nunucleus                            |
| 942 | ENSG00000069424 | KCNAB2    | Enhanced Granular cytoplasm                          |
| 943 | ENSG00000069431 | ABCC9     | UncertainEstimation of protein expression could not  |
| 944 | ENSG00000069482 | GAL       | Enhanced Selectivecytoplasm                          |
| 945 | ENSG00000069493 | CLEC2D    | UncertainCytoplasmcytoplasm                          |
| 946 | ENSG00000069509 | FUNDC1    | UncertainUbiquitouscytoplasm                         |
| 947 | ENSG00000069535 | MAOB      | Enhanced Ubiquitouscytoplasm                         |
| 948 | ENSG00000069667 | RORA      | Approved Ubiquitousnucleus                           |
| 949 | ENSG00000069702 | TGFBR3    | SupportedCytoplasmcytoplasm;plasma membrane          |
| 950 | ENSG00000069764 | PLA2G10   | UncertainEstimation of protein expression could not  |
| 951 | ENSG00000069812 | HES2      | UncertainEstimation of protein expression could not  |
| 952 | ENSG00000069849 | ATP1B3    | Enhanced Cytoplasmcytoplasm;plasma membrane          |
| 953 | ENSG00000069869 | NEDD4     | Approved General ccytoplasm                          |
| 954 | ENSG00000069943 | PIGB      | UncertainGeneral ccytoplasm;nucleus                  |
| 955 | ENSG00000069956 | MAPK6     | Approved General ccytoplasm                          |
| 956 | ENSG00000069966 | GNB5      | UncertainCytoplasmcytoplasm                          |
| 957 | ENSG00000069974 | RAB27A    | Enhanced Cytoplasmcytoplasm                          |
| 958 | ENSG00000069998 | HDHD5     | Approved General ccytoplasm                          |
| 959 | ENSG00000070010 | UFD1      | Approved Cytoplasmcytoplasm                          |
| 960 | ENSG00000070018 | LRP6      | Enhanced Cytoplasmcytoplasm;plasma membrane          |
| 961 | ENSG00000070019 | GUCY2C    | UncertainEstimation of protein expression could not  |
| 962 | ENSG00000070031 | SCT       | Enhanced Selectivecytoplasm                          |
| 963 | ENSG00000070047 | PHRF1     | UncertainEstimation of protein expression could not  |
| 964 | ENSG00000070061 | ELP1      | Approved General ccytoplasm                          |
| 965 | ENSG00000070081 | NUCB2     | Approved Cytoplasmcytoplasm                          |
| 966 | ENSG00000070087 | PFN2      | Enhanced Cytoplasmcytoplasm                          |
| 967 | ENSG00000070159 | PTPN3     | Approved Cytoplasmcytoplasm;plasma membrane          |
| 968 | ENSG00000070182 | SPTB      | Enhanced Membranouplasma membrane                    |
| 969 | ENSG00000070190 | DAPP1     | Approved General ccytoplasm;plasma membrane          |
| 970 | ENSG00000070193 | FGF10     | UncertainEstimation of protein expression could not  |
| 971 | ENSG00000070269 | TMEM260   | UncertainExpression in most tissues.                 |
| 972 | ENSG00000070366 | SMG6      | Approved General ncytoplasm;nucleus                  |
| 973 | ENSG00000070367 | EXOC5     | Approved Ubiquitouscytoplasm                         |
| 974 | ENSG00000070371 | CLTCL1    | Enhanced Cytoplasmcytoplasm                          |
| 975 | ENSG00000070404 | FSTL3     | Approved Nuclear enucleus                            |
| 976 | ENSG00000070413 | DGCR2     | UncertainGranular expression in islets of Langerhan: |
| 977 | ENSG00000070423 | RNF126    | Approved Cytoplasmcytoplasm                          |
| 978 | ENSG00000070495 | JMJD6     | SupportedUbiquitousnucleus                           |
| 979 | ENSG00000070501 | POLB      | Enhanced General nnucleus                            |
| 980 | ENSG00000070526 | ST6GALNAC | Enhanced Cytoplasmcytoplasm                          |
| 981 | ENSG00000070540 | WIPI1     | Enhanced General ccytoplasm                          |
| 982 | ENSG00000070601 | FRMPD1    | UncertainGeneral ccytoplasm                          |
| 983 | ENSG00000070610 | GBA2      | Approved General ccytoplasm                          |
| 984 | ENSG00000070614 | NDST1     | Approved Cytoplasmcytoplasm                          |
| 985 | ENSG00000070669 | ASNS      | Approved Cytoplasmcytoplasm                          |
| 986 | ENSG00000070718 | AP3M2     | Approved General ccytoplasm                          |
| 987 | ENSG00000070731 | ST6GALNAC | UncertainEstimation of protein expression could not  |
| 988 | ENSG00000070748 | CHAT      | SupportedCytoplasmcytoplasm                          |

|      |                 |         |                                                      |
|------|-----------------|---------|------------------------------------------------------|
| 989  | ENSG00000070756 | PABPC1  | SupportedUbiquitoucytoplasm                          |
| 990  | ENSG00000070759 | TESK2   | UncertainNuclear enucleus                            |
| 991  | ENSG00000070761 | CFAP20  | UncertainGeneral ccytoplasm                          |
| 992  | ENSG00000070778 | PTPN21  | Approved General ccytoplasm                          |
| 993  | ENSG00000070785 | EIF2B3  | SupportedCytoplasmcytoplasm                          |
| 994  | ENSG00000070808 | CAMK2A  | SupportedSelective expression in neuropil and neuro  |
| 995  | ENSG00000070814 | TCOF1   | Enhanced Ubiquitounucleus                            |
| 996  | ENSG00000070831 | CDC42   | Approved Cytoplasmcytoplasm;plasma membrane          |
| 997  | ENSG00000070882 | OSBPL3  | Enhanced Cytoplasmcytoplasm                          |
| 998  | ENSG00000070886 | EPHA8   | UncertainEstimation of protein expression could not  |
| 999  | ENSG00000070915 | SLC12A3 | Enhanced Selective expression in a subset of renal 1 |
| 1000 | ENSG00000070950 | RAD18   | SupportedSelectivenucleus                            |
| 1001 | ENSG00000070961 | ATP2B1  | Enhanced Ubiquitoucytoplasm;plasma membrane          |
| 1002 | ENSG00000070985 | TRPM5   | UncertainGranular cytoplasm;plasma membrane          |
| 1003 | ENSG00000071051 | NCK2    | Approved Cytoplasmcytoplasm;plasma membrane          |
| 1004 | ENSG00000071054 | MAP4K4  | UncertainCytoplasmcytoplasm                          |
| 1005 | ENSG00000071073 | MGAT4A  | Enhanced Cytoplasmcytoplasm                          |
| 1006 | ENSG00000071082 | RPL31   | Approved Cytoplasmcytoplasm                          |
| 1007 | ENSG00000071127 | WDR1    | Approved Ubiquitoucytoplasm;plasma membrane          |
| 1008 | ENSG00000071203 | MS4A12  | Enhanced Luminal mplasma membrane                    |
| 1009 | ENSG00000071242 | RPS6KA2 | Approved General nnucleus                            |
| 1010 | ENSG00000071243 | ING3    | Approved Nuclear enucleus                            |
| 1011 | ENSG00000071246 | VASH1   | UncertainCytoplasmcytoplasm                          |
| 1012 | ENSG00000071282 | LMCD1   | Enhanced Cytoplasmcytoplasm                          |
| 1013 | ENSG00000071462 | BUD23   | Approved Cytoplasmcytoplasm                          |
| 1014 | ENSG00000071537 | SEL1L   | Enhanced Ubiquitoucytoplasm                          |
| 1015 | ENSG00000071539 | TRIP13  | Enhanced Cytoplasmcytoplasm                          |
| 1016 | ENSG00000071553 | ATP6AP1 | UncertainUbiquitoucytoplasm;nucleus                  |
| 1017 | ENSG00000071564 | TCF3    | Approved Nuclear enucleus                            |
| 1018 | ENSG00000071575 | TRIB2   | Approved Cytoplasmcytoplasm                          |
| 1019 | ENSG00000071626 | DAZAP1  | Enhanced Ubiquitounucleus                            |
| 1020 | ENSG00000071655 | MBD3    | SupportedUbiquitounucleus                            |
| 1021 | ENSG00000071677 | PRLH    | Approved Cytoplasmcytoplasm;nucleus                  |
| 1022 | ENSG00000071794 | HLTF    | UncertainNuclear enucleus                            |
| 1023 | ENSG00000071859 | FAM50A  | SupportedUbiquitounucleus                            |
| 1024 | ENSG00000071889 | FAM3A   | UncertainExtracellcytoplasm                          |
| 1025 | ENSG00000071909 | MYO3B   | Approved Expressed in stereocilia in epididymis.     |
| 1026 | ENSG00000071967 | CYBRD1  | Approved General mcytoplasm;plasma membrane          |
| 1027 | ENSG00000071991 | CDH19   | UncertainEstimation of protein expression could not  |
| 1028 | ENSG00000071994 | PDCD2   | UncertainEstimation of protein expression could not  |
| 1029 | ENSG00000072041 | SLC6A15 | UncertainGranular cytoplasm                          |
| 1030 | ENSG00000072042 | RDH11   | Enhanced Cytoplasmcytoplasm                          |
| 1031 | ENSG00000072062 | PRKACA  | Approved Ubiquitoucytoplasm                          |
| 1032 | ENSG00000072071 | ADGRL1  | UncertainMembranoucytoplasm;plasma membrane          |
| 1033 | ENSG00000072110 | ACTN1   | Approved High cytocytoplasm;plasma membrane          |
| 1034 | ENSG00000072121 | ZFYVE26 | Approved Cytoplasmcytoplasm                          |
| 1035 | ENSG00000072133 | RPS6KA6 | UncertainGeneral ccytoplasm                          |
| 1036 | ENSG00000072134 | EPN2    | Approved Expression in CNS.                          |
| 1037 | ENSG00000072135 | PTPN18  | UncertainUbiquitoucytoplasm;nucleus                  |
| 1038 | ENSG00000072163 | LIMS2   | Enhanced Expression in smooth muscle cells and endo  |
| 1039 | ENSG00000072195 | SPEG    | Enhanced Cytoplasmcytoplasm;plasma membrane          |
| 1040 | ENSG00000072201 | LNX1    | Approved General ccytoplasm                          |
| 1041 | ENSG00000072210 | ALDH3A2 | Approved Cytoplasmcytoplasm                          |
| 1042 | ENSG00000072274 | TFRC    | Enhanced Cytoplasmcytoplasm;plasma membrane          |
| 1043 | ENSG00000072310 | SREBF1  | UncertainCytoplasmcytoplasm                          |

|      |                 |          |                                                      |
|------|-----------------|----------|------------------------------------------------------|
| 1044 | ENSG00000072364 | AFF4     | Approved Ubiquitousnucleus                           |
| 1045 | ENSG00000072401 | UBE2D1   | Approved Cytoplasmcytoplasm;nucleus;plasma membrane  |
| 1046 | ENSG00000072415 | MPP5     | Enhanced Membranouplasma membrane                    |
| 1047 | ENSG00000072422 | RHOBTB1  | Approved General ccytoplasm                          |
| 1048 | ENSG00000072501 | SMC1A    | SupportedNuclear enucleus                            |
| 1049 | ENSG00000072506 | HSD17B10 | Approved General ccytoplasm                          |
| 1050 | ENSG00000072518 | MARK2    | Approved General ccytoplasm                          |
| 1051 | ENSG00000072571 | HMMR     | Enhanced Cytoplasmcytoplasm                          |
| 1052 | ENSG00000072609 | CHFR     | Approved Nuclear enucleus                            |
| 1053 | ENSG00000072682 | P4HA2    | Enhanced Cytoplasmcytoplasm                          |
| 1054 | ENSG00000072694 | FCGR2B   | Enhanced Cytoplasmcytoplasm                          |
| 1055 | ENSG00000072756 | TRNT1    | UncertainGeneral ncytoplasm;nucleus                  |
| 1056 | ENSG00000072778 | ACADVL   | Enhanced General ccytoplasm                          |
| 1057 | ENSG00000072786 | STK10    | Enhanced Mainly ccytoplasm                           |
| 1058 | ENSG00000072803 | FBXW11   | Approved General ccytoplasm                          |
| 1059 | ENSG00000072818 | ACAP1    | Approved Granular cytoplasm                          |
| 1060 | ENSG00000072832 | CRMP1    | Approved Cytoplasmcytoplasm                          |
| 1061 | ENSG00000072840 | EVC      | UncertainUbiquitouscytoplasm;nucleus                 |
| 1062 | ENSG00000072849 | DERL2    | Enhanced Cytoplasmcytoplasm                          |
| 1063 | ENSG00000072858 | SIDT1    | Approved General ccytoplasm                          |
| 1064 | ENSG00000072864 | NDE1     | Approved Cytoplasmcytoplasm                          |
| 1065 | ENSG00000072952 | MRVI1    | UncertainUbiquitouscytoplasm                         |
| 1066 | ENSG00000072954 | TMEM38A  | Enhanced Distinct nucleus;plasma membrane            |
| 1067 | ENSG00000072958 | AP1M1    | UncertainMainly ccytoplasm                           |
| 1068 | ENSG00000073008 | PVR      | Approved Cytoplasmcytoplasm;plasma membrane          |
| 1069 | ENSG00000073050 | XRCC1    | SupportedUbiquitousnucleus                           |
| 1070 | ENSG00000073060 | SCARB1   | Enhanced Membranouplasma membrane                    |
| 1071 | ENSG00000073067 | CYP2W1   | UncertainCytoplasmcytoplasm                          |
| 1072 | ENSG00000073111 | MCM2     | Enhanced Distinct nucleus                            |
| 1073 | ENSG00000073146 | MOV10L1  | Approved Cytoplasmcytoplasm;nucleus                  |
| 1074 | ENSG00000073150 | PANX2    | Enhanced Cytoplasmcytoplasm                          |
| 1075 | ENSG00000073282 | TP63     | Enhanced Nuclear enucleus                            |
| 1076 | ENSG00000073331 | ALPK1    | Approved General ccytoplasm                          |
| 1077 | ENSG00000073350 | LLGL2    | UncertainGeneral ccytoplasm                          |
| 1078 | ENSG00000073417 | PDE8A    | Approved Ubiquitouscytoplasm                         |
| 1079 | ENSG00000073464 | CLCN4    | Enhanced Cytoplasmcytoplasm                          |
| 1080 | ENSG00000073536 | NLE1     | Approved Ubiquitousnucleus                           |
| 1081 | ENSG00000073578 | SDHA     | Enhanced Ubiquitouscytoplasm                         |
| 1082 | ENSG00000073584 | SMARCE1  | SupportedUbiquitousnucleus                           |
| 1083 | ENSG00000073598 | FNDC8    | SupportedDistinct expression in testis.              |
| 1084 | ENSG00000073605 | GSDMB    | Enhanced Cytoplasmcytoplasm                          |
| 1085 | ENSG00000073670 | ADAM11   | Enhanced Expression in neuronal and glial cells.     |
| 1086 | ENSG00000073711 | PPP2R3A  | UncertainGeneral ccytoplasm;nucleus                  |
| 1087 | ENSG00000073712 | FERMT2   | UncertainCytoplasmcytoplasm                          |
| 1088 | ENSG00000073734 | ABCB11   | Enhanced Distinct expression in liver bile canalicu. |
| 1089 | ENSG00000073737 | DHRS9    | Approved Cytoplasmcytoplasm                          |
| 1090 | ENSG00000073754 | CD5L     | Enhanced Cytoplasmcytoplasm                          |
| 1091 | ENSG00000073756 | PTGS2    | Approved Cytoplasmcytoplasm;plasma membrane          |
| 1092 | ENSG00000073792 | IGF2BP2  | Enhanced Mainly ccytoplasm                           |
| 1093 | ENSG00000073803 | MAP3K13  | UncertainCytoplasmcytoplasm;plasma membrane          |
| 1094 | ENSG00000073849 | ST6GAL1  | SupportedCytoplasmcytoplasm                          |
| 1095 | ENSG00000073861 | TBX21    | Enhanced Selectivenucleus                            |
| 1096 | ENSG00000073910 | FRY      | Approved General ccytoplasm                          |
| 1097 | ENSG00000073921 | PICALM   | Enhanced Ubiquitouscytoplasm;plasma membrane         |
| 1098 | ENSG00000073969 | NSF      | Enhanced High exprcytoplasm                          |

|      |                 |           |                                                     |
|------|-----------------|-----------|-----------------------------------------------------|
| 1099 | ENSG00000074047 | GLI2      | Approved Ubiquitousnucleus                          |
| 1100 | ENSG00000074054 | CLASP1    | UncertainCytoplasmcytoplasm                         |
| 1101 | ENSG00000074071 | MRPS34    | SupportedUbiquitouscytoplasm                        |
| 1102 | ENSG00000074181 | NOTCH3    | Approved General ccytoplasm;nucleus                 |
| 1103 | ENSG00000074201 | CLNS1A    | Approved Cytoplasmcytoplasm;nucleus                 |
| 1104 | ENSG00000074211 | PPP2R2C   | Approved General ccytoplasm                         |
| 1105 | ENSG00000074266 | EED       | SupportedNuclear enucleus                           |
| 1106 | ENSG00000074276 | CDHR2     | Enhanced Expressioplasmamembrane                    |
| 1107 | ENSG00000074317 | SNCB      | Enhanced Selective expression in neuropil and cells |
| 1108 | ENSG00000074319 | TSG101    | Approved General ccytoplasm;plasma membrane         |
| 1109 | ENSG00000074356 | NCBP3     | SupportedGeneral nnucleus                           |
| 1110 | ENSG00000074370 | ATP2A3    | Approved Ubiquitouscytoplasm                        |
| 1111 | ENSG00000074410 | CA12      | Enhanced Membranouplasmamembrane                    |
| 1112 | ENSG00000074416 | MGLL      | Enhanced Granular cytoplasm                         |
| 1113 | ENSG00000074527 | NTN4      | Approved Membranoucytoplasm;plasma membrane         |
| 1114 | ENSG00000074582 | BCS1L     | SupportedUbiquitouscytoplasm                        |
| 1115 | ENSG00000074603 | DPP8      | Approved General ccytoplasm;plasma membrane         |
| 1116 | ENSG00000074621 | SLC24A1   | Enhanced Cytoplasmcytoplasm                         |
| 1117 | ENSG00000074657 | ZNF532    | Approved Ubiquitousnucleus                          |
| 1118 | ENSG00000074660 | SCARF1    | Enhanced Membranouplasmamembrane                    |
| 1119 | ENSG00000074695 | LMAN1     | SupportedCytoplasmcytoplasm                         |
| 1120 | ENSG00000074696 | HACD3     | Enhanced Cytoplasmcytoplasm                         |
| 1121 | ENSG00000074706 | IPCEF1    | Enhanced Cytoplasmcytoplasm                         |
| 1122 | ENSG00000074755 | ZZEF1     | UncertainEstimation of protein expression could not |
| 1123 | ENSG00000074800 | ENO1      | SupportedUbiquitouscytoplasm;nucleus                |
| 1124 | ENSG00000074803 | SLC12A1   | Enhanced Selectivecytoplasm                         |
| 1125 | ENSG00000074842 | MYDGF     | Approved Cytoplasmcytoplasm                         |
| 1126 | ENSG00000074855 | ANO8      | UncertainCytoplasmcytoplasm;nucleus                 |
| 1127 | ENSG00000074935 | TUBE1     | Approved Cytoplasmcytoplasm;plasma membrane         |
| 1128 | ENSG00000074964 | ARHGEF10L | Approved Ubiquitouscytoplasm                        |
| 1129 | ENSG00000075035 | WSCD2     | Approved Cytoplasmcytoplasm                         |
| 1130 | ENSG00000075043 | KCNQ2     | Enhanced Highly expressed in the CNS.               |
| 1131 | ENSG00000075089 | ACTR6     | UncertainCytoplasmcytoplasm                         |
| 1132 | ENSG00000075131 | TIPIN     | Enhanced Nuclear enucleus                           |
| 1133 | ENSG00000075142 | SRI       | Enhanced Cytoplasmcytoplasm;nucleus                 |
| 1134 | ENSG00000075151 | EIF4G3    | Enhanced General ccytoplasm                         |
| 1135 | ENSG00000075188 | NUP37     | SupportedExpressionnucleus;plasma membrane          |
| 1136 | ENSG00000075213 | SEMA3A    | Approved Extracellular positivity in most tissues.  |
| 1137 | ENSG00000075234 | TTC38     | Approved Cytoplasmcytoplasm                         |
| 1138 | ENSG00000075239 | ACAT1     | Enhanced Ubiquitouscytoplasm                        |
| 1139 | ENSG00000075290 | WNT8B     | UncertainEstimation of protein expression could not |
| 1140 | ENSG00000075292 | ZNF638    | SupportedUbiquitousnucleus                          |
| 1141 | ENSG00000075303 | SLC25A40  | UncertainCytoplasmcytoplasm;nucleus                 |
| 1142 | ENSG00000075336 | TIMM21    | UncertainNuclear enucleus                           |
| 1143 | ENSG00000075340 | ADD2      | Enhanced Cytoplasmcytoplasm                         |
| 1144 | ENSG00000075388 | FGF4      | UncertainEstimation of protein expression could not |
| 1145 | ENSG00000075391 | RASAL2    | Enhanced Selectivecytoplasm;plasma membrane         |
| 1146 | ENSG00000075399 | VPS9D1    | UncertainCytoplasmcytoplasm                         |
| 1147 | ENSG00000075407 | ZNF37A    | Approved General ccytoplasm;nucleus                 |
| 1148 | ENSG00000075413 | MARK3     | Approved General ccytoplasm                         |
| 1149 | ENSG00000075420 | FNDC3B    | UncertainEstimation of protein expression could not |
| 1150 | ENSG00000075426 | FOSL2     | SupportedNuclear enucleus                           |
| 1151 | ENSG00000075429 | CACNG5    | UncertainEstimation of protein expression could not |
| 1152 | ENSG00000075461 | CACNG4    | Enhanced Cytoplasmcytoplasm                         |
| 1153 | ENSG00000075539 | FRYL      | SupportedCytoplasmcytoplasm                         |

|      |                 |          |                                                       |
|------|-----------------|----------|-------------------------------------------------------|
| 1154 | ENSG00000075568 | TMEM131  | Approved Cytoplasm cytoplasm                          |
| 1155 | ENSG00000075618 | FSCN1    | Enhanced Cytoplasm cytoplasm                          |
| 1156 | ENSG00000075624 | ACTB     | Supported High myoepithelial expression in all tissue |
| 1157 | ENSG00000075643 | MOCOS    | Uncertain Estimation of protein expression could not  |
| 1158 | ENSG00000075651 | PLD1     | Enhanced Cytoplasm cytoplasm; plasma membrane         |
| 1159 | ENSG00000075673 | ATP12A   | Approved Membrane cytoplasm; plasma membrane          |
| 1160 | ENSG00000075702 | WDR62    | Enhanced Cytoplasm cytoplasm                          |
| 1161 | ENSG00000075711 | DLG1     | Supported Ubiquitous cytoplasm; plasma membrane       |
| 1162 | ENSG00000075785 | RAB7A    | Supported Ubiquitous cytoplasm                        |
| 1163 | ENSG00000075790 | BCAP29   | Enhanced General cytoplasm                            |
| 1164 | ENSG00000075826 | SEC31B   | Uncertain General cytoplasm                           |
| 1165 | ENSG00000075856 | SART3    | Approved Ubiquitous nucleus                           |
| 1166 | ENSG00000075886 | TUBA3D   | Uncertain Estimation of protein expression could not  |
| 1167 | ENSG00000075891 | PAX2     | Enhanced Distinct nucleus                             |
| 1168 | ENSG00000075914 | EXOSC7   | Approved Mainly nucleus                               |
| 1169 | ENSG00000075945 | KIFAP3   | Supported Ubiquitous cytoplasm                        |
| 1170 | ENSG00000075975 | MKRN2    | Enhanced Ubiquitous cytoplasm; nucleus                |
| 1171 | ENSG00000076003 | MCM6     | Enhanced Nuclear nucleus                              |
| 1172 | ENSG00000076043 | REXO2    | Enhanced Cytoplasm cytoplasm                          |
| 1173 | ENSG00000076053 | RBM7     | Supported Mainly nucleus                              |
| 1174 | ENSG00000076067 | RBMS2    | Approved Nuclear cytoplasm; nucleus                   |
| 1175 | ENSG00000076201 | PTPN23   | Approved General cytoplasm                            |
| 1176 | ENSG00000076242 | MLH1     | Supported General nucleus                             |
| 1177 | ENSG00000076248 | UNG      | Uncertain Ubiquitous cytoplasm                        |
| 1178 | ENSG00000076258 | FM04     | Uncertain General cytoplasm                           |
| 1179 | ENSG00000076321 | KLHL20   | Approved Mainly cytoplasm                             |
| 1180 | ENSG00000076344 | RGS11    | Uncertain Cytoplasm cytoplasm                         |
| 1181 | ENSG00000076351 | SLC46A1  | Approved Cytoplasm cytoplasm                          |
| 1182 | ENSG00000076356 | PLXNA2   | Approved Cytoplasm cytoplasm                          |
| 1183 | ENSG00000076382 | SPAG5    | Approved Cytoplasm cytoplasm                          |
| 1184 | ENSG00000076513 | ANKRD13A | Enhanced Cytoplasm cytoplasm                          |
| 1185 | ENSG00000076554 | TPD52    | Enhanced Ubiquitous cytoplasm                         |
| 1186 | ENSG00000076555 | ACACB    | Enhanced Cytoplasm cytoplasm; nucleus                 |
| 1187 | ENSG00000076604 | TRAF4    | Enhanced General cytoplasm; plasma membrane           |
| 1188 | ENSG00000076641 | PAG1     | Enhanced Cytoplasm cytoplasm; plasma membrane         |
| 1189 | ENSG00000076650 | GPATCH1  | Approved Cytoplasm cytoplasm; nucleus                 |
| 1190 | ENSG00000076662 | ICAM3    | Enhanced Highly abundant cytoplasm                    |
| 1191 | ENSG00000076685 | NT5C2    | Approved Cytoplasm cytoplasm                          |
| 1192 | ENSG00000076706 | MCAM     | Enhanced Distinct cytoplasm                           |
| 1193 | ENSG00000076716 | GPC4     | Approved Cytoplasm cytoplasm                          |
| 1194 | ENSG00000076770 | MBNL3    | Enhanced Nuclear nucleus                              |
| 1195 | ENSG00000076826 | CAMSAP3  | Enhanced Cytoplasm cytoplasm; plasma membrane         |
| 1196 | ENSG00000076864 | RAP1GAP  | Enhanced Cytoplasm cytoplasm                          |
| 1197 | ENSG00000076928 | ARHGEF1  | Enhanced Cytoplasm cytoplasm                          |
| 1198 | ENSG00000076944 | STXBP2   | Approved Cytoplasm cytoplasm; plasma membrane         |
| 1199 | ENSG00000076984 | MAP2K7   | Supported Cytoplasm cytoplasm                         |
| 1200 | ENSG00000077009 | NMRK2    | Approved Cytoplasm cytoplasm                          |
| 1201 | ENSG00000077044 | DGKD     | Approved Ubiquitous cytoplasm                         |
| 1202 | ENSG00000077063 | CTTNBP2  | Enhanced General cytoplasm                            |
| 1203 | ENSG00000077080 | ACTL6B   | Uncertain Estimation of protein expression could not  |
| 1204 | ENSG00000077092 | RARB     | Enhanced Ubiquitous cytoplasm; nucleus                |
| 1205 | ENSG00000077097 | TOP2B    | Supported Ubiquitous nucleus                          |
| 1206 | ENSG00000077147 | TM9SF3   | Approved Cytoplasm cytoplasm                          |
| 1207 | ENSG00000077150 | NFKB2    | Enhanced Cytoplasm cytoplasm                          |
| 1208 | ENSG00000077157 | PPP1R12B | Enhanced Selective expression in skeletal, cardiac &  |

|      |                 |           |                                                      |
|------|-----------------|-----------|------------------------------------------------------|
| 1209 | ENSG00000077232 | DNAJC10   | Approved Ubiquitous cytoplasm                        |
| 1210 | ENSG00000077235 | GTF3C1    | Approved General cytoplasm;nucleus                   |
| 1211 | ENSG00000077238 | IL4R      | Enhanced Cytoplasm cytoplasm                         |
| 1212 | ENSG00000077254 | USP33     | Uncertain Cytoplasm cytoplasm                        |
| 1213 | ENSG00000077264 | PAK3      | Approved Cytoplasm cytoplasm                         |
| 1214 | ENSG00000077279 | DCX       | Enhanced Cytoplasm cytoplasm                         |
| 1215 | ENSG00000077312 | SNRPA     | Supported Ubiquitous nucleus                         |
| 1216 | ENSG00000077327 | SPAG6     | Enhanced Selective expression in cilia in several t: |
| 1217 | ENSG00000077348 | EXOSC5    | Approved Cytoplasm cytoplasm                         |
| 1218 | ENSG00000077380 | DYNC1I2   | Supported General cytoplasm                          |
| 1219 | ENSG00000077420 | APBB1IP   | Enhanced Cytoplasm cytoplasm                         |
| 1220 | ENSG00000077454 | LRCH4     | Enhanced Cytoplasm cytoplasm;plasma membrane         |
| 1221 | ENSG00000077458 | FAM76B    | Approved Nuclear enucleus                            |
| 1222 | ENSG00000077463 | SIRT6     | Supported Ubiquitous nucleus                         |
| 1223 | ENSG00000077498 | TYR       | Enhanced Selective cytoplasm                         |
| 1224 | ENSG00000077514 | POLD3     | Enhanced Ubiquitous nucleus                          |
| 1225 | ENSG00000077522 | ACTN2     | Enhanced Cytoplasm cytoplasm                         |
| 1226 | ENSG00000077549 | CAPZB     | Approved Cytoplasm cytoplasm                         |
| 1227 | ENSG00000077585 | GPR137B   | Approved Cytoplasm cytoplasm;nucleus                 |
| 1228 | ENSG00000077616 | NAALAD2   | Approved Expression mainly in testis, the CNS and in |
| 1229 | ENSG00000077684 | JADE1     | Approved Ubiquitous cytoplasm                        |
| 1230 | ENSG00000077713 | SLC25A43  | Uncertain Cytoplasm cytoplasm                        |
| 1231 | ENSG00000077782 | FGFR1     | Approved General cytoplasm;nucleus;plasma membrane   |
| 1232 | ENSG00000077800 | FKBP6     | Enhanced Granular cytoplasm                          |
| 1233 | ENSG00000077935 | SMC1B     | Enhanced Selective cytoplasm;nucleus                 |
| 1234 | ENSG00000077942 | FBLN1     | Enhanced Positive cytoplasm;plasma membrane          |
| 1235 | ENSG00000077943 | ITGA8     | Approved Cytoplasm cytoplasm                         |
| 1236 | ENSG00000077984 | CST7      | Enhanced Selective cytoplasm                         |
| 1237 | ENSG00000078018 | MAP2      | Enhanced Selective cytoplasm                         |
| 1238 | ENSG00000078043 | PIAS2     | Enhanced Nuclear enucleus                            |
| 1239 | ENSG00000078053 | AMPH      | Enhanced Selective and high expression in CNS and p  |
| 1240 | ENSG00000078061 | ARAF      | Approved Ubiquitous cytoplasm                        |
| 1241 | ENSG00000078070 | MCCC1     | Approved Cytoplasm cytoplasm                         |
| 1242 | ENSG00000078081 | LAMP3     | Enhanced Selective cytoplasm                         |
| 1243 | ENSG00000078098 | FAP       | Uncertain Cytoplasm cytoplasm                        |
| 1244 | ENSG00000078114 | NEBL      | Approved Cytoplasm cytoplasm                         |
| 1245 | ENSG00000078124 | ACER3     | Approved Expressed in endothelial cells.             |
| 1246 | ENSG00000078140 | UBE2K     | Supported General cytoplasm                          |
| 1247 | ENSG00000078142 | PIK3C3    | Approved Ubiquitous cytoplasm                        |
| 1248 | ENSG00000078177 | N4BP2     | Approved General cytoplasm                           |
| 1249 | ENSG00000078237 | TIGAR     | Approved Cytoplasm cytoplasm                         |
| 1250 | ENSG00000078246 | TULP3     | Uncertain Cytoplasm cytoplasm                        |
| 1251 | ENSG00000078269 | SYNJ2     | Approved General cytoplasm                           |
| 1252 | ENSG00000078295 | ADCY2     | Approved Cytoplasm cytoplasm                         |
| 1253 | ENSG00000078304 | PPP2R5C   | Approved Nuclear cytoplasm;nucleus                   |
| 1254 | ENSG00000078328 | RBF31     | Enhanced Nuclear enucleus                            |
| 1255 | ENSG00000078369 | GNB1      | Supported Cytoplasm cytoplasm;plasma membrane        |
| 1256 | ENSG00000078399 | HOXA9     | Uncertain General nucleus                            |
| 1257 | ENSG00000078401 | EDN1      | Approved Plasma cytoplasm;plasma membrane            |
| 1258 | ENSG00000078403 | MLLT10    | Enhanced Distinct nucleus                            |
| 1259 | ENSG00000078549 | ADCYAP1R1 | Enhanced Cytoplasm cytoplasm                         |
| 1260 | ENSG00000078589 | P2RY10    | Enhanced Cytoplasm cytoplasm                         |
| 1261 | ENSG00000078668 | VDAC3     | Uncertain Granular cytoplasm                         |
| 1262 | ENSG00000078674 | PCM1      | Enhanced Cytoplasm cytoplasm                         |
| 1263 | ENSG00000078687 | TNRC6C    | Uncertain Cytoplasm cytoplasm;nucleus                |

|      |                 |          |                                                      |
|------|-----------------|----------|------------------------------------------------------|
| 1264 | ENSG00000078699 | CBFA2T2  | SupportedNuclear enucleus                            |
| 1265 | ENSG00000078725 | BRINP1   | Approved Cytoplasmcytoplasm                          |
| 1266 | ENSG00000078747 | ITCH     | SupportedUbiquitouscytoplasm                         |
| 1267 | ENSG00000078795 | PKD2L2   | Approved General ccytoplasm                          |
| 1268 | ENSG00000078808 | SDF4     | SupportedGranular cytoplasm                          |
| 1269 | ENSG00000078898 | BPIFB2   | Enhanced Selectivecytoplasm                          |
| 1270 | ENSG00000078900 | TP73     | Enhanced Nuclear enucleus                            |
| 1271 | ENSG00000078902 | TOLLIP   | Enhanced General ccytoplasm                          |
| 1272 | ENSG00000078967 | UBE2D4   | Approved Cytoplasmcytoplasm;nucleus;plasma membrane  |
| 1273 | ENSG00000079101 | CLUL1    | Enhanced Cytoplasmcytoplasm                          |
| 1274 | ENSG00000079102 | RUNX1T1  | Approved Low nuclenucleus                            |
| 1275 | ENSG00000079112 | CDH17    | Enhanced Distinct cytoplasm;plasma membrane          |
| 1276 | ENSG00000079134 | THOC1    | Enhanced Nuclear ecytoplasm;nucleus                  |
| 1277 | ENSG00000079150 | FKBP7    | Approved Ubiquitouscytoplasm                         |
| 1278 | ENSG00000079156 | OSBPL6   | Enhanced Cytoplasmcytoplasm                          |
| 1279 | ENSG00000079215 | SLC1A3   | Enhanced Selective expression in neuropil and subset |
| 1280 | ENSG00000079246 | XRCC5    | SupportedUbiquitousnucleus                           |
| 1281 | ENSG00000079257 | LXN      | Approved Ubiquitouscytoplasm;nucleus                 |
| 1282 | ENSG00000079263 | SP140    | Enhanced Selectivenucleus                            |
| 1283 | ENSG00000079277 | MKNK1    | Approved General ccytoplasm                          |
| 1284 | ENSG00000079308 | TNS1     | Approved General ccytoplasm                          |
| 1285 | ENSG00000079313 | REX01    | Approved Nuclear acytoplasm;nucleus                  |
| 1286 | ENSG00000079332 | SAR1A    | SupportedUbiquitouscytoplasm                         |
| 1287 | ENSG00000079335 | CDC14A   | Approved General ncytoplasm;nucleus                  |
| 1288 | ENSG00000079337 | RAPGEF3  | Approved General ccytoplasm                          |
| 1289 | ENSG00000079385 | CEACAM1  | Enhanced Membranouplasma membrane                    |
| 1290 | ENSG00000079432 | CIC      | Approved General nnucleus                            |
| 1291 | ENSG00000079435 | LIPE     | Enhanced High expression in adipocytes.              |
| 1292 | ENSG00000079459 | FDFT1    | Approved General ccytoplasm                          |
| 1293 | ENSG00000079462 | PAFAH1B3 | UncertainCytoplasmcytoplasm;plasma membrane          |
| 1294 | ENSG00000079482 | OPHN1    | Approved General ctyoplasmic expression.             |
| 1295 | ENSG00000079557 | AFM      | Enhanced Distinct plasma membrane                    |
| 1296 | ENSG00000079616 | KIF22    | Approved General ccytoplasm                          |
| 1297 | ENSG00000079689 | SCGN     | Enhanced Distinct cytoplasm;nucleus                  |
| 1298 | ENSG00000079691 | CARMIL1  | Enhanced Mainly ccytoplasm                           |
| 1299 | ENSG00000079739 | PGM1     | Enhanced Cytoplasmcytoplasm;nucleus                  |
| 1300 | ENSG00000079785 | DDX1     | Enhanced Ubiquitousnucleus                           |
| 1301 | ENSG00000079805 | DNM2     | SupportedUbiquitouscytoplasm;plasma membrane         |
| 1302 | ENSG00000079819 | EPB41L2  | SupportedCytoplasmcytoplasm;plasma membrane          |
| 1303 | ENSG00000079841 | RIMS1    | Enhanced Expression in projections in CNS and peripl |
| 1304 | ENSG00000079931 | MOXD1    | Approved Expression in several different tissue type |
| 1305 | ENSG00000079950 | STX7     | Enhanced Granular cytoplasm                          |
| 1306 | ENSG00000079974 | RABL2B   | Approved Cytoplasmcytoplasm                          |
| 1307 | ENSG00000079999 | KEAP1    | Approved General ccytoplasm;nucleus                  |
| 1308 | ENSG00000080007 | DDX43    | Enhanced Cytoplasmcytoplasm                          |
| 1309 | ENSG00000080166 | DCT      | Enhanced Selectivecytoplasm                          |
| 1310 | ENSG00000080189 | SLC35C2  | Approved General nnucleus                            |
| 1311 | ENSG00000080224 | EPHA6    | UncertainEstimation of protein expression could not  |
| 1312 | ENSG00000080293 | SCTR     | UncertainMembranouplasma membrane                    |
| 1313 | ENSG00000080298 | RFX3     | Enhanced Nuclear enucleus                            |
| 1314 | ENSG00000080345 | RIF1     | SupportedMainly nnucleus                             |
| 1315 | ENSG00000080371 | RAB21    | Approved General ccytoplasm                          |
| 1316 | ENSG00000080493 | SLC4A4   | Enhanced Membranoucytoplasm;plasma membrane          |
| 1317 | ENSG00000080503 | SMARCA2  | Enhanced Ubiquitousnucleus                           |
| 1318 | ENSG00000080572 | PIH1D3   | Enhanced Cytoplasmcytoplasm                          |



|      |                 |          |                                                      |
|------|-----------------|----------|------------------------------------------------------|
| 1319 | ENSG00000080573 | COL5A3   | Approved General ccytoplasm                          |
| 1320 | ENSG00000080603 | SRCAP    | Approved Nuclear enucleus                            |
| 1321 | ENSG00000080608 | PUM3     | Approved Ubiquitounucleus                            |
| 1322 | ENSG00000080618 | CPB2     | Approved Distinct plasma membrane                    |
| 1323 | ENSG00000080644 | CHRNA3   | Approved Cytoplasmcytoplasm                          |
| 1324 | ENSG00000080709 | KCNN2    | UncertainEstimation of protein expression could not  |
| 1325 | ENSG00000080802 | CNOT4    | Approved Ubiquitoucytoplasm                          |
| 1326 | ENSG00000080815 | PSEN1    | Approved Granular cytoplasm                          |
| 1327 | ENSG00000080822 | CLDND1   | Approved Cytoplasmcytoplasm                          |
| 1328 | ENSG00000080824 | HSP90AA1 | Approved Cytoplasmcytoplasm                          |
| 1329 | ENSG00000080839 | RBL1     | Enhanced Nuclear a cytoplasm;nucleus                 |
| 1330 | ENSG00000080845 | DLGAP4   | Approved Cytoplasmcytoplasm;plasma membrane          |
| 1331 | ENSG00000080854 | IGSF9B   | UncertainEstimation of protein expression could not  |
| 1332 | ENSG00000080910 | CFHR2    | SupportedDistinct plasma membrane                    |
| 1333 | ENSG00000081014 | AP4E1    | Approved Granular cytoplasm                          |
| 1334 | ENSG00000081019 | RSBN1    | Approved Ubiquitoucytoplasm;nucleus                  |
| 1335 | ENSG00000081026 | MAGI3    | Approved Cytoplasmcytoplasm                          |
| 1336 | ENSG00000081051 | AFP      | Approved Plasma poplasma membrane                    |
| 1337 | ENSG00000081059 | TCF7     | Enhanced Nuclear enucleus                            |
| 1338 | ENSG00000081087 | OSTM1    | UncertainGeneral ccytoplasm                          |
| 1339 | ENSG00000081138 | CDH7     | Approved Cytoplasmcytoplasm                          |
| 1340 | ENSG00000081148 | IMPG2    | Enhanced Expression in photoreceptor cells.          |
| 1341 | ENSG00000081154 | PCNP     | SupportedUbiquitounucleus                            |
| 1342 | ENSG00000081177 | EXD2     | UncertainUbiquitoucytoplasm                          |
| 1343 | ENSG00000081181 | ARG2     | Enhanced Granular cytoplasm                          |
| 1344 | ENSG00000081189 | MEF2C    | Enhanced Nuclear enucleus                            |
| 1345 | ENSG00000081237 | PTPRC    | Enhanced Selectivecytoplasm                          |
| 1346 | ENSG00000081248 | CACNA1S  | Enhanced Selectivecytoplasm                          |
| 1347 | ENSG00000081277 | PKP1     | Enhanced Cytoplasmcytoplasm;nucleus                  |
| 1348 | ENSG00000081307 | UBA5     | UncertainCytoplasmcytoplasm;plasma membrane          |
| 1349 | ENSG00000081320 | STK17B   | Enhanced Cytoplasmcytoplasm                          |
| 1350 | ENSG00000081377 | CDC14B   | Approved Nuclear enucleus                            |
| 1351 | ENSG00000081386 | ZNF510   | UncertainCytoplasmcytoplasm                          |
| 1352 | ENSG00000081479 | LRP2     | Enhanced Membranouplasma membrane                    |
| 1353 | ENSG00000081692 | JMJD4    | UncertainCytoplasmcytoplasm                          |
| 1354 | ENSG00000081721 | DUSP12   | UncertainEstimation of protein expression could not  |
| 1355 | ENSG00000081760 | AACS     | Approved General ccytoplasm                          |
| 1356 | ENSG00000081791 | KIAA0141 | UncertainGeneral nnucleus                            |
| 1357 | ENSG00000081800 | SLC13A1  | Enhanced Membranouplasma membrane                    |
| 1358 | ENSG00000081818 | PCDHB4   | Approved General ccytoplasm;plasma membrane          |
| 1359 | ENSG00000081842 | PCDHA6   | Enhanced Expression mainly in CNS.                   |
| 1360 | ENSG00000081853 | PCDHGA2  | Approved General ccytoplasm                          |
| 1361 | ENSG00000081870 | HSPB11   | UncertainCytoplasmcytoplasm                          |
| 1362 | ENSG00000081913 | PHLPP1   | UncertainCytoplasmcytoplasm                          |
| 1363 | ENSG00000081923 | ATP8B1   | Enhanced Cytoplasmcytoplasm;plasma membrane          |
| 1364 | ENSG00000081985 | IL12RB2  | UncertainEstimation of protein expression could not  |
| 1365 | ENSG00000082014 | SMARCD3  | UncertainNuclear enucleus                            |
| 1366 | ENSG00000082068 | WDR70    | UncertainEstimation of protein expression could not  |
| 1367 | ENSG00000082074 | FYB1     | Enhanced Distinct cytoplasm                          |
| 1368 | ENSG00000082146 | STRADB   | Approved Cytoplasmcytoplasm                          |
| 1369 | ENSG00000082153 | BZW1     | UncertainNucleolarnucleus                            |
| 1370 | ENSG00000082175 | PGR      | Enhanced Selectivenucleus                            |
| 1371 | ENSG00000082196 | C1QTNF3  | UncertainRNA-based expert annotation gave inconclus: |
| 1372 | ENSG00000082212 | ME2      | Enhanced Granular cytoplasm                          |
| 1373 | ENSG00000082213 | C5orf22  | Approved General ccytoplasm                          |

|      |                 |          |                                                     |
|------|-----------------|----------|-----------------------------------------------------|
| 1374 | ENSG00000082258 | CCNT2    | SupportedUbiquitousnucleus                          |
| 1375 | ENSG00000082269 | FAM135A  | Approved Ubiquitouscytoplasm                        |
| 1376 | ENSG00000082293 | COL19A1  | UncertainEstimation of protein expression could not |
| 1377 | ENSG00000082397 | EPB41L3  | Enhanced Cytoplasmcytoplasm;plasma membrane         |
| 1378 | ENSG00000082438 | COBLL1   | Enhanced Cytoplasmcytoplasm;plasma membrane         |
| 1379 | ENSG00000082458 | DLG3     | Approved Cytoplasmcytoplasm;nucleus                 |
| 1380 | ENSG00000082497 | SERTAD4  | UncertainCytoplasmcytoplasm                         |
| 1381 | ENSG00000082512 | TRAF5    | Enhanced Distinct cytoplasm;nucleus                 |
| 1382 | ENSG00000082515 | MRPL22   | UncertainGeneral ccytoplasm                         |
| 1383 | ENSG00000082516 | GEMIN5   | UncertainGeneral ccytoplasm;nucleus                 |
| 1384 | ENSG00000082556 | OPRK1    | Enhanced Cytoplasmcytoplasm                         |
| 1385 | ENSG00000082641 | NFE2L1   | Approved Ubiquitouscytoplasm;nucleus                |
| 1386 | ENSG00000082684 | SEMA5B   | Enhanced Cytoplasmcytoplasm                         |
| 1387 | ENSG00000082701 | GSK3B    | Approved Cytoplasmcytoplasm                         |
| 1388 | ENSG00000082781 | ITGB5    | Approved General ccytoplasm                         |
| 1389 | ENSG00000082805 | ERC1     | Approved Cytoplasmcytoplasm;plasma membrane         |
| 1390 | ENSG00000082898 | XP01     | SupportedGeneral nnucleus                           |
| 1391 | ENSG00000082996 | RNF13    | Approved Cytoplasmcytoplasm                         |
| 1392 | ENSG00000083067 | TRPM3    | Enhanced Cytoplasmcytoplasm                         |
| 1393 | ENSG00000083093 | PALB2    | Approved General ncytoplasm;nucleus;plasma membrane |
| 1394 | ENSG00000083097 | DOPEY1   | Approved Cytoplasmcytoplasm                         |
| 1395 | ENSG00000083099 | LYRM2    | UncertainCytoplasmcytoplasm                         |
| 1396 | ENSG00000083123 | BCKDHB   | Approved Ubiquitouscytoplasm                        |
| 1397 | ENSG00000083168 | KAT6A    | SupportedNuclear enucleus                           |
| 1398 | ENSG00000083223 | ZCCHC6   | Approved General ccytoplasm                         |
| 1399 | ENSG00000083290 | ULK2     | Approved General ccytoplasm                         |
| 1400 | ENSG00000083307 | GRHL2    | UncertainGranular cytoplasm;nucleus                 |
| 1401 | ENSG00000083312 | TNP01    | Approved Ubiquitouscytoplasm;nucleus                |
| 1402 | ENSG00000083444 | PLOD1    | UncertainMembranouplasma membrane                   |
| 1403 | ENSG00000083454 | P2RX5    | SupportedDistinct cytoplasm                         |
| 1404 | ENSG00000083457 | ITGAE    | Approved Distinct cytoplasm                         |
| 1405 | ENSG00000083520 | DIS3     | Approved Ubiquitousnucleus                          |
| 1406 | ENSG00000083535 | PIBF1    | Approved Cytoplasmcytoplasm                         |
| 1407 | ENSG00000083544 | TDRD3    | Approved Nuclear acytoplasm;nucleus                 |
| 1408 | ENSG00000083635 | NUFIP1   | Approved Nuclear acytoplasm;nucleus                 |
| 1409 | ENSG00000083642 | PDS5B    | SupportedUbiquitousnucleus                          |
| 1410 | ENSG00000083720 | OXCT1    | Enhanced Ubiquitouscytoplasm                        |
| 1411 | ENSG00000083750 | RRAGB    | Approved General ccytoplasm                         |
| 1412 | ENSG00000083782 | EPYC     | Approved High expression in extracellular matrix.   |
| 1413 | ENSG00000083799 | CYLD     | Approved General ccytoplasm                         |
| 1414 | ENSG00000083807 | SLC27A5  | Enhanced Selectivecytoplasm                         |
| 1415 | ENSG00000083812 | ZNF324   | UncertainEstimation of protein expression could not |
| 1416 | ENSG00000083814 | ZNF671   | UncertainEstimation of protein expression could not |
| 1417 | ENSG00000083828 | ZNF586   | Approved Nuclear enucleus                           |
| 1418 | ENSG00000083838 | ZNF446   | UncertainNucleoli nucleus                           |
| 1419 | ENSG00000083845 | RPS5     | Enhanced Ubiquitouscytoplasm                        |
| 1420 | ENSG00000083857 | FAT1     | Enhanced Cytoplasmcytoplasm;plasma membrane         |
| 1421 | ENSG00000083896 | YTHDC1   | SupportedGeneral nnucleus                           |
| 1422 | ENSG00000083937 | CHMP2B   | UncertainCytoplasmcytoplasm                         |
| 1423 | ENSG00000084070 | SMAP2    | Approved Mainly ccytoplasm                          |
| 1424 | ENSG00000084072 | PPIE     | Approved Ubiquitousnucleus                          |
| 1425 | ENSG00000084073 | ZMPSTE24 | Approved Ubiquitouscytoplasm                        |
| 1426 | ENSG00000084090 | STARD7   | SupportedCytoplasmcytoplasm                         |
| 1427 | ENSG00000084092 | NOA1     | Approved General ccytoplasm                         |
| 1428 | ENSG00000084093 | REST     | SupportedGeneral nnucleus                           |

|      |                 |          |                                                     |
|------|-----------------|----------|-----------------------------------------------------|
| 1429 | ENSG00000084110 | HAL      | Enhanced General ccytoplasm                         |
| 1430 | ENSG00000084112 | SSH1     | UncertainCytoplasmcytoplasm                         |
| 1431 | ENSG00000084207 | GSTP1    | Enhanced Cytoplasmcytoplasm                         |
| 1432 | ENSG00000084234 | APLP2    | Approved Granular cytoplasm                         |
| 1433 | ENSG00000084444 | FAM234B  | Approved Several tcytoplasm                         |
| 1434 | ENSG00000084463 | WBP11    | Approved Mainly nunucleus                           |
| 1435 | ENSG00000084623 | EIF3I    | Enhanced Ubiquitouscytoplasm                        |
| 1436 | ENSG00000084628 | NKAIN1   | UncertainEstimation of protein expression could not |
| 1437 | ENSG00000084652 | TXLNA    | SupportedUbiquitouscytoplasm                        |
| 1438 | ENSG00000084674 | APOB     | SupportedDistinct plasma membrane                   |
| 1439 | ENSG00000084676 | NCOA1    | SupportedUbiquitousnucleus                          |
| 1440 | ENSG00000084693 | AGBL5    | UncertainGeneral ccytoplasm                         |
| 1441 | ENSG00000084710 | EFR3B    | UncertainEstimation of protein expression could not |
| 1442 | ENSG00000084733 | RAB10    | Approved Ubiquitouscytoplasm                        |
| 1443 | ENSG00000084734 | GCKR     | Enhanced Selectivenucleus                           |
| 1444 | ENSG00000084754 | HADHA    | Approved Ubiquitouscytoplasm                        |
| 1445 | ENSG00000084764 | MAPRE3   | UncertainExpression in CNS and ciliated cells.      |
| 1446 | ENSG00000084774 | CAD      | SupportedCytoplasmcytoplasm                         |
| 1447 | ENSG00000085063 | CD59     | SupportedMembranoucytoplasm;plasma membrane         |
| 1448 | ENSG00000085117 | CD82     | SupportedCytoplasmcytoplasm;plasma membrane         |
| 1449 | ENSG00000085185 | BCORL1   | UncertainEstimation of protein expression could not |
| 1450 | ENSG00000085224 | ATRX     | SupportedGeneral nnucleus                           |
| 1451 | ENSG00000085231 | AK6      | SupportedUbiquitousnucleus                          |
| 1452 | ENSG00000085265 | FCN1     | Enhanced Distinct cytoplasm                         |
| 1453 | ENSG00000085274 | MYNN     | Approved Nuclear enucleus;plasma membrane           |
| 1454 | ENSG00000085276 | MECOM    | SupportedGeneral nnucleus                           |
| 1455 | ENSG00000085377 | PREP     | SupportedGeneral ccytoplasm                         |
| 1456 | ENSG00000085415 | SEH1L    | UncertainEstimation of protein expression could not |
| 1457 | ENSG00000085433 | WDR47    | Approved Granular cytoplasm                         |
| 1458 | ENSG00000085449 | WDFY1    | Approved General ccytoplasm                         |
| 1459 | ENSG00000085465 | OVGP1    | Enhanced Selective expression in fallopian tube.    |
| 1460 | ENSG00000085491 | SLC25A24 | Enhanced General ccytoplasm                         |
| 1461 | ENSG00000085511 | MAP3K4   | UncertainGeneral ncytoplasm;nucleus                 |
| 1462 | ENSG00000085514 | PILRA    | Approved Cytoplasmcytoplasm                         |
| 1463 | ENSG00000085552 | IGSF9    | UncertainEstimation of protein expression could not |
| 1464 | ENSG00000085563 | ABCB1    | Enhanced Membranouplasma membrane                   |
| 1465 | ENSG00000085644 | ZNF213   | UncertainGeneral ccytoplasm;nucleus                 |
| 1466 | ENSG00000085662 | AKR1B1   | Enhanced Distinct expression in adrenal gland.      |
| 1467 | ENSG00000085719 | CPNE3    | UncertainCytoplasmcytoplasm                         |
| 1468 | ENSG00000085721 | RRN3     | SupportedUbiquitousnucleus                          |
| 1469 | ENSG00000085733 | CTTN     | SupportedGeneral ccytoplasm;plasma membrane         |
| 1470 | ENSG00000085741 | WNT11    | UncertainEstimation of protein expression could not |
| 1471 | ENSG00000085760 | MTIF2    | UncertainCytoplasmcytoplasm                         |
| 1472 | ENSG00000085788 | DDHD2    | SupportedGeneral ccytoplasm                         |
| 1473 | ENSG00000085831 | TTC39A   | UncertainNucleolarcytoplasm;nucleus                 |
| 1474 | ENSG00000085832 | EPS15    | Approved General ccytoplasm;plasma membrane         |
| 1475 | ENSG00000085840 | ORC1     | Approved Low nucleocytoplasm;nucleus                |
| 1476 | ENSG00000085871 | MGST2    | Approved Cytoplasmcytoplasm                         |
| 1477 | ENSG00000085872 | CHERP    | UncertainGeneral nnucleus                           |
| 1478 | ENSG00000085978 | ATG16L1  | SupportedMembranoucytoplasm;plasma membrane         |
| 1479 | ENSG00000085982 | USP40    | UncertainGeneral ccytoplasm                         |
| 1480 | ENSG00000085998 | POMGNT1  | Approved Cytoplasmcytoplasm                         |
| 1481 | ENSG00000085999 | RAD54L   | Approved General ncytoplasm;nucleus                 |
| 1482 | ENSG00000086015 | MAST2    | Approved General ccytoplasm                         |
| 1483 | ENSG00000086061 | DNAJA1   | Approved General ccytoplasm                         |

|      |                 |           |                                                         |
|------|-----------------|-----------|---------------------------------------------------------|
| 1484 | ENSG00000086062 | B4GALT1   | Enhanced Distinct expression with a granular pattern    |
| 1485 | ENSG00000086065 | CHMP5     | Enhanced Granular cytoplasm                             |
| 1486 | ENSG00000086102 | NFX1      | Approved General ncytoplasm;nucleus                     |
| 1487 | ENSG00000086159 | AQP6      | Enhanced Selective cytoplasm                            |
| 1488 | ENSG00000086189 | DIMT1     | Approved General ccytoplasm                             |
| 1489 | ENSG00000086200 | IP011     | Approved Cytoplasm cytoplasm                            |
| 1490 | ENSG00000086205 | FOLH1     | Enhanced Selective cytoplasm                            |
| 1491 | ENSG00000086232 | EIF2AK1   | Approved Mainly ccytoplasm                              |
| 1492 | ENSG00000086288 | NME8      | Enhanced Cytoplasm cytoplasm                            |
| 1493 | ENSG00000086289 | EPDR1     | Approved Cytoplasm cytoplasm                            |
| 1494 | ENSG00000086300 | SNX10     | Approved Nuclear a cytoplasm;nucleus                    |
| 1495 | ENSG00000086475 | SEPHS1    | Enhanced General nnucleus                               |
| 1496 | ENSG00000086504 | MRPL28    | Supported General ccytoplasm                            |
| 1497 | ENSG00000086506 | HBQ1      | Enhanced Cytoplasm cytoplasm                            |
| 1498 | ENSG00000086544 | ITPKC     | Approved General ccytoplasm;nucleus                     |
| 1499 | ENSG00000086548 | CEACAM6   | Enhanced Cytoplasm cytoplasm                            |
| 1500 | ENSG00000086570 | FAT2      | Enhanced Selective expression in squamous epithelia     |
| 1501 | ENSG00000086589 | RBM22     | Supported Ubiquitous nucleus                            |
| 1502 | ENSG00000086598 | TMED2     | Approved General ccytoplasm                             |
| 1503 | ENSG00000086619 | ER01B     | Enhanced General ccytoplasm                             |
| 1504 | ENSG00000086666 | ZFAND6    | Uncertain Mainly ccytoplasm                             |
| 1505 | ENSG00000086696 | HSD17B2   | Enhanced Cytoplasm cytoplasm; plasma membrane           |
| 1506 | ENSG00000086712 | TXLNG     | Approved Cytoplasm cytoplasm; plasma membrane           |
| 1507 | ENSG00000086730 | LAT2      | Enhanced Cytoplasm cytoplasm                            |
| 1508 | ENSG00000086758 | HUWE1     | Approved Ubiquitous cytoplasm;nucleus                   |
| 1509 | ENSG00000086827 | ZW10      | Enhanced Cytoplasm cytoplasm                            |
| 1510 | ENSG00000086848 | ALG9      | Approved General ccytoplasm                             |
| 1511 | ENSG00000086967 | MYBPC2    | Enhanced Cytoplasm cytoplasm                            |
| 1512 | ENSG00000087008 | ACOX3     | Uncertain Cytoplasm cytoplasm; plasma membrane          |
| 1513 | ENSG00000087053 | MTMR2     | Approved Distinct cytoplasm                             |
| 1514 | ENSG00000087074 | PPP1R15A  | Approved Granular cytoplasm                             |
| 1515 | ENSG00000087076 | HSD17B14  | Approved Cytoplasm cytoplasm                            |
| 1516 | ENSG00000087077 | TRIP6     | Approved General ncytoplasm;nucleus                     |
| 1517 | ENSG00000087086 | FTL       | Enhanced Cytoplasm cytoplasm                            |
| 1518 | ENSG00000087087 | SRRT      | Supported Ubiquitous nucleus                            |
| 1519 | ENSG00000087088 | BAX       | Approved Widely dicytoplasm                             |
| 1520 | ENSG00000087095 | NLK       | Approved General ccytoplasm                             |
| 1521 | ENSG00000087111 | PIGS      | Approved Cytoplasm cytoplasm                            |
| 1522 | ENSG00000087116 | ADAMTS2   | Uncertain Mainly ccytoplasm                             |
| 1523 | ENSG00000087128 | TMPRSS11E | Enhanced Low expression in squamous tissue.             |
| 1524 | ENSG00000087152 | ATXN7L3   | Supported Nuclear anucleus                              |
| 1525 | ENSG00000087157 | PGS1      | Approved Cytoplasm cytoplasm                            |
| 1526 | ENSG00000087191 | PSMC5     | Enhanced Nuclear a cytoplasm;nucleus                    |
| 1527 | ENSG00000087206 | UIMC1     | Enhanced Selective nucleus                              |
| 1528 | ENSG00000087245 | MMP2      | Approved Cytoplasm cytoplasm                            |
| 1529 | ENSG00000087250 | MT3       | Enhanced Selective expression in the CNS, most abundant |
| 1530 | ENSG00000087253 | LPCAT2    | Enhanced Cytoplasm cytoplasm                            |
| 1531 | ENSG00000087258 | GNA01     | Enhanced Cytoplasm cytoplasm                            |
| 1532 | ENSG00000087263 | OGFOD1    | Approved Nuclear enucleus                               |
| 1533 | ENSG00000087266 | SH3BP2    | Approved Cytoplasm cytoplasm                            |
| 1534 | ENSG00000087269 | NOP14     | Approved Nucleolar nucleus                              |
| 1535 | ENSG00000087274 | ADD1      | Enhanced Cytoplasm cytoplasm; plasma membrane           |
| 1536 | ENSG00000087299 | L2HGDH    | Approved Cytoplasm cytoplasm                            |
| 1537 | ENSG00000087301 | TXNDC16   | Approved General ccytoplasm                             |
| 1538 | ENSG00000087302 | RTRAF     | Supported Ubiquitous cytoplasm;nucleus                  |

|      |                 |           |                                                      |
|------|-----------------|-----------|------------------------------------------------------|
| 1539 | ENSG00000087303 | NID2      | Enhanced Distinct expression in connective tissue, r |
| 1540 | ENSG00000087338 | GMCL1     | Approved General ccytoplasm                          |
| 1541 | ENSG00000087365 | SF3B2     | SupportedUbiquitousnucleus                           |
| 1542 | ENSG00000087448 | KLHL42    | UncertainCytoplasmcytoplasm                          |
| 1543 | ENSG00000087460 | GNAS      | UncertainMembranoucytoplasm;plasma membrane          |
| 1544 | ENSG00000087470 | DNM1L     | SupportedGranular cytoplasm;plasma membrane          |
| 1545 | ENSG00000087494 | PTHLH     | Approved Mainly ccytoplasm                           |
| 1546 | ENSG00000087502 | ERGIC2    | Approved Cytoplasmcytoplasm                          |
| 1547 | ENSG00000087510 | TFAP2C    | Enhanced Nuclear enucleus                            |
| 1548 | ENSG00000087586 | AURKA     | Enhanced Cytoplasmcytoplasm;nucleus                  |
| 1549 | ENSG00000087589 | CASS4     | Approved Cytoplasmcytoplasm;plasma membrane          |
| 1550 | ENSG00000087842 | PIR       | Approved Mainly ccytoplasm                           |
| 1551 | ENSG00000087884 | AAMDC     | Enhanced Cytoplasmcytoplasm                          |
| 1552 | ENSG00000087903 | RFX2      | Enhanced Selectivenucleus                            |
| 1553 | ENSG00000088002 | SULT2B1   | Approved Cytoplasmcytoplasm                          |
| 1554 | ENSG00000088038 | CNOT3     | Approved Ubiquitouscytoplasm                         |
| 1555 | ENSG00000088053 | GP6       | Approved Cytoplasmcytoplasm                          |
| 1556 | ENSG00000088179 | PTPN4     | UncertainEstimation of protein expression could not  |
| 1557 | ENSG00000088205 | DDX18     | Approved Nucleolarnucleus                            |
| 1558 | ENSG00000088247 | KHSRP     | SupportedUbiquitousnucleus                           |
| 1559 | ENSG00000088256 | GNA11     | Approved Membranoucytoplasm;plasma membrane          |
| 1560 | ENSG00000088280 | ASAP3     | Approved Cytoplasmcytoplasm                          |
| 1561 | ENSG00000088298 | EDEM2     | Approved General ccytoplasm                          |
| 1562 | ENSG00000088305 | DNMT3B    | Enhanced General ccytoplasm;nucleus                  |
| 1563 | ENSG00000088320 | REM1      | Approved Cytoplasmcytoplasm                          |
| 1564 | ENSG00000088325 | TPX2      | Enhanced Nuclear ocytoplasm;nucleus                  |
| 1565 | ENSG00000088356 | PDRG1     | Approved Cytoplasmcytoplasm                          |
| 1566 | ENSG00000088367 | EPB41L1   | Enhanced Cytoplasmcytoplasm;plasma membrane          |
| 1567 | ENSG00000088386 | SLC15A1   | UncertainHigh luminal expression in small intestine  |
| 1568 | ENSG00000088387 | DOCK9     | UncertainUbiquitouscytoplasm                         |
| 1569 | ENSG00000088448 | ANKRD10   | UncertainUbiquitouscytoplasm                         |
| 1570 | ENSG00000088451 | TGDS      | Approved Nuclear acytoplasm;nucleus                  |
| 1571 | ENSG00000088538 | DOCK3     | Enhanced Cytoplasmcytoplasm                          |
| 1572 | ENSG00000088543 | C3orf18   | Approved General ccytoplasm                          |
| 1573 | ENSG00000088682 | COQ9      | SupportedUbiquitouscytoplasm                         |
| 1574 | ENSG00000088726 | TMEM40    | Enhanced Distinct cytoplasm                          |
| 1575 | ENSG00000088727 | KIF9      | Approved General ccytoplasm                          |
| 1576 | ENSG00000088756 | ARHGAP28  | Enhanced Selectivecytoplasm;nucleus                  |
| 1577 | ENSG00000088808 | PPP1R13B  | Approved Ubiquitouscytoplasm;nucleus                 |
| 1578 | ENSG00000088812 | ATRN      | Approved Cytoplasmcytoplasm;plasma membrane          |
| 1579 | ENSG00000088826 | SMOX      | Approved Cytoplasmcytoplasm;nucleus                  |
| 1580 | ENSG00000088827 | SIGLEC1   | SupportedMembranouplasma membrane                    |
| 1581 | ENSG00000088832 | FKBP1A    | UncertainCytoplasmcytoplasm                          |
| 1582 | ENSG00000088833 | NSFL1C    | Enhanced Nuclear acytoplasm;nucleus                  |
| 1583 | ENSG00000088836 | SLC4A11   | UncertainGeneral ccytoplasm                          |
| 1584 | ENSG00000088854 | C20orf194 | Approved Cytoplasmcytoplasm                          |
| 1585 | ENSG00000088876 | ZNF343    | Approved General ccytoplasm;plasma membrane          |
| 1586 | ENSG00000088888 | MAVS      | Enhanced Granular cytoplasm                          |
| 1587 | ENSG00000088899 | LZTS3     | Approved Cytoplasmcytoplasm;plasma membrane          |
| 1588 | ENSG00000088930 | XRN2      | SupportedGeneral ncytoplasm;nucleus                  |
| 1589 | ENSG00000088992 | TESC      | Enhanced Cytoplasmcytoplasm                          |
| 1590 | ENSG00000089006 | SNX5      | Approved Cytoplasmcytoplasm                          |
| 1591 | ENSG00000089009 | RPL6      | Approved Cytoplasmcytoplasm                          |
| 1592 | ENSG00000089022 | MAPKAPK5  | SupportedGeneral ncytoplasm;nucleus                  |
| 1593 | ENSG00000089041 | P2RX7     | Approved Cytoplasmcytoplasm                          |

|      |                 |          |                                                     |
|------|-----------------|----------|-----------------------------------------------------|
| 1594 | ENSG00000089048 | ESF1     | SupportedGeneral n nucleus                          |
| 1595 | ENSG00000089050 | RBBP9    | Approved Cytoplasm cytoplasm                        |
| 1596 | ENSG00000089053 | ANAPC5   | SupportedNuclear m nucleus;plasma membrane          |
| 1597 | ENSG00000089057 | SLC23A2  | Approved Cytoplasm cytoplasm                        |
| 1598 | ENSG00000089060 | SLC8B1   | Approved Granular cytoplasm                         |
| 1599 | ENSG00000089063 | TMEM230  | UncertainUbiquitous cytoplasm                       |
| 1600 | ENSG00000089091 | DZANK1   | UncertainCytoplasm cytoplasm                        |
| 1601 | ENSG00000089101 | CFAP61   | Approved Expressio cytoplasm                        |
| 1602 | ENSG00000089123 | TASP1    | UncertainCytoplasm cytoplasm;plasma membrane        |
| 1603 | ENSG00000089127 | OAS1     | UncertainUbiquitous cytoplasm                       |
| 1604 | ENSG00000089154 | GCN1     | Enhanced Cytoplasm cytoplasm                        |
| 1605 | ENSG00000089157 | RPLP0    | Approved General c cytoplasm                        |
| 1606 | ENSG00000089159 | PXN      | SupportedUbiquitous cytoplasm                       |
| 1607 | ENSG00000089163 | SIRT4    | Enhanced Cytoplasm cytoplasm                        |
| 1608 | ENSG00000089169 | RPH3A    | Enhanced Cytoplasm cytoplasm                        |
| 1609 | ENSG00000089177 | KIF16B   | Approved General c cytoplasm                        |
| 1610 | ENSG00000089195 | TRMT6    | Approved Ubiquitous nucleus                         |
| 1611 | ENSG00000089199 | CHGB     | Enhanced Cytoplasm cytoplasm                        |
| 1612 | ENSG00000089220 | PEBP1    | Enhanced Cytoplasm cytoplasm                        |
| 1613 | ENSG00000089225 | TBX5     | UncertainGeneral n nucleus                          |
| 1614 | ENSG00000089234 | BRAP     | Approved Ubiquitous cytoplasm                       |
| 1615 | ENSG00000089248 | ERP29    | Enhanced Ubiquitous cytoplasm                       |
| 1616 | ENSG00000089250 | NOS1     | Enhanced Cytoplasm cytoplasm                        |
| 1617 | ENSG00000089280 | FUS      | SupportedUbiquitous nucleus                         |
| 1618 | ENSG00000089289 | IGBP1    | Approved General c cytoplasm                        |
| 1619 | ENSG00000089327 | FXYD5    | UncertainGeneral c cytoplasm;plasma membrane        |
| 1620 | ENSG00000089351 | GRAMD1A  | Approved Cytoplasm cytoplasm                        |
| 1621 | ENSG00000089356 | FXYD3    | Enhanced Membranous cytoplasm;plasma membrane       |
| 1622 | ENSG00000089472 | HEPH     | Approved Cytoplasm cytoplasm;plasma membrane        |
| 1623 | ENSG00000089486 | CDIP1    | Approved General c cytoplasm;nucleus                |
| 1624 | ENSG00000089505 | CMTM1    | UncertainEstimation of protein expression could not |
| 1625 | ENSG00000089597 | GANAB    | Enhanced Ubiquitous cytoplasm                       |
| 1626 | ENSG00000089639 | GMIP     | Enhanced General c cytoplasm                        |
| 1627 | ENSG00000089682 | RBM41    | Approved Cytoplasm cytoplasm;plasma membrane        |
| 1628 | ENSG00000089685 | BIRC5    | Enhanced Distinct nucleus                           |
| 1629 | ENSG00000089692 | LAG3     | Enhanced Cytoplasm cytoplasm                        |
| 1630 | ENSG00000089693 | MLF2     | Enhanced General c cytoplasm;nucleus                |
| 1631 | ENSG00000089723 | OTUB2    | Enhanced Distinct nucleus                           |
| 1632 | ENSG00000089737 | DDX24    | UncertainGeneral n cytoplasm;nucleus                |
| 1633 | ENSG00000089775 | ZBTB25   | UncertainLow nuclenucleus                           |
| 1634 | ENSG00000089818 | NECAP1   | UncertainCytoplasm cytoplasm                        |
| 1635 | ENSG00000089820 | ARHGAP4  | Enhanced Cytoplasm cytoplasm                        |
| 1636 | ENSG00000089847 | ANKRD24  | UncertainEstimation of protein expression could not |
| 1637 | ENSG00000089876 | DHX32    | Approved Nuclear e nucleus                          |
| 1638 | ENSG00000089902 | RCOR1    | SupportedGeneral n nucleus                          |
| 1639 | ENSG00000089916 | GPATCH2L | Approved General c cytoplasm                        |
| 1640 | ENSG00000090006 | LTBP4    | Approved Extracell cytoplasm                        |
| 1641 | ENSG00000090013 | BLVRB    | Enhanced General c cytoplasm                        |
| 1642 | ENSG00000090020 | SLC9A1   | Enhanced Membranous plasma membrane                 |
| 1643 | ENSG00000090054 | SPTLC1   | SupportedGeneral c cytoplasm;plasma membrane        |
| 1644 | ENSG00000090060 | PAPOLA   | SupportedGeneral n nucleus                          |
| 1645 | ENSG00000090061 | CCNK     | SupportedUbiquitous nucleus                         |
| 1646 | ENSG00000090104 | RGS1     | Approved Cytoplasm cytoplasm;plasma membrane        |
| 1647 | ENSG00000090238 | YPEL3    | UncertainGeneral c cytoplasm                        |
| 1648 | ENSG00000090263 | MRPS33   | UncertainEstimation of protein expression could not |

|      |                 |           |                                                       |
|------|-----------------|-----------|-------------------------------------------------------|
| 1649 | ENSG00000090266 | NDUFB2    | Approved General c cytoplasm;nucleus                  |
| 1650 | ENSG00000090273 | NUDC      | Enhanced Cytoplasm cytoplasm;nucleus                  |
| 1651 | ENSG00000090316 | MAEA      | Approved General n cytoplasm;nucleus                  |
| 1652 | ENSG00000090339 | ICAM1     | Enhanced Distinct plasma membrane                     |
| 1653 | ENSG00000090372 | STRN4     | Supported Ubiquitous cytoplasm;plasma membrane        |
| 1654 | ENSG00000090376 | IRAK3     | Approved Cytoplasm cytoplasm                          |
| 1655 | ENSG00000090382 | LYZ       | Enhanced High cyto cytoplasm                          |
| 1656 | ENSG00000090402 | SI        | Enhanced Luminal m plasma membrane                    |
| 1657 | ENSG00000090447 | TFAP4     | Supported Ubiquitous nucleus                          |
| 1658 | ENSG00000090470 | PDCD7     | Approved Granular cytoplasm                           |
| 1659 | ENSG00000090487 | SPG21     | Approved Cytoplasm cytoplasm                          |
| 1660 | ENSG00000090512 | FETUB     | Supported Positive plasma membrane                    |
| 1661 | ENSG00000090520 | DNAJB11   | Supported Ubiquitous cytoplasm                        |
| 1662 | ENSG00000090530 | P3H2      | Approved Ubiquitous cytoplasm                         |
| 1663 | ENSG00000090539 | CHRD      | Approved Distinct plasma membrane                     |
| 1664 | ENSG00000090565 | RAB11FIP3 | Approved Cytoplasm cytoplasm                          |
| 1665 | ENSG00000090581 | GNPTG     | Approved Ubiquitous cytoplasm                         |
| 1666 | ENSG00000090612 | ZNF268    | Approved General c cytoplasm                          |
| 1667 | ENSG00000090615 | GOLGA3    | Enhanced Granular cytoplasm                           |
| 1668 | ENSG00000090621 | PABPC4    | Approved Cytoplasm cytoplasm                          |
| 1669 | ENSG00000090659 | CD209     | Supported Selective expression in subsets of monocyte |
| 1670 | ENSG00000090661 | CERS4     | Uncertain Cytoplasm cytoplasm                         |
| 1671 | ENSG00000090674 | MCOLN1    | Uncertain General c cytoplasm                         |
| 1672 | ENSG00000090686 | USP48     | Approved General c cytoplasm                          |
| 1673 | ENSG00000090776 | EFNB1     | Uncertain Mainly c cytoplasm                          |
| 1674 | ENSG00000090857 | PDPR      | Uncertain Cytoplasm cytoplasm;nucleus                 |
| 1675 | ENSG00000090861 | AARS      | Supported Ubiquitous cytoplasm                        |
| 1676 | ENSG00000090863 | GLG1      | Supported Ubiquitous cytoplasm                        |
| 1677 | ENSG00000090889 | KIF4A     | Approved Nuclear e cytoplasm;nucleus                  |
| 1678 | ENSG00000090905 | TNRC6A    | Approved Cytoplasm cytoplasm                          |
| 1679 | ENSG00000090924 | PLEKHG2   | Uncertain General c cytoplasm                         |
| 1680 | ENSG00000090975 | PITPNM2   | Approved Cytoplasm cytoplasm                          |
| 1681 | ENSG00000090989 | EXOC1     | Uncertain Cytoplasm cytoplasm                         |
| 1682 | ENSG00000091009 | RBM27     | Approved Mainly n cytoplasm                           |
| 1683 | ENSG00000091010 | POU4F3    | Uncertain Estimation of protein expression could not  |
| 1684 | ENSG00000091039 | OSBPL8    | Uncertain Cytoplasm cytoplasm;plasma membrane         |
| 1685 | ENSG00000091073 | DTX2      | Approved Cytoplasm cytoplasm;nucleus                  |
| 1686 | ENSG00000091106 | NLRC4     | Uncertain Estimation of protein expression could not  |
| 1687 | ENSG00000091127 | PUS7      | Approved Mainly n nucleus                             |
| 1688 | ENSG00000091128 | LAMB4     | Approved Extracellular positivity in several tissue   |
| 1689 | ENSG00000091129 | NRCAM     | Approved High expr cytoplasm                          |
| 1690 | ENSG00000091136 | LAMB1     | Enhanced Expressio plasma membrane                    |
| 1691 | ENSG00000091137 | SLC26A4   | Approved Cytoplasm cytoplasm                          |
| 1692 | ENSG00000091138 | SLC26A3   | Approved Luminal expression mainly in gastrointesti   |
| 1693 | ENSG00000091140 | DLD       | Supported Granular cytoplasm                          |
| 1694 | ENSG00000091157 | WDR7      | Approved Membranou plasma membrane                    |
| 1695 | ENSG00000091164 | TXNL1     | Supported Cytoplasm cytoplasm;nucleus                 |
| 1696 | ENSG00000091317 | CMTM6     | Approved Cytoplasm cytoplasm                          |
| 1697 | ENSG00000091409 | ITGA6     | Enhanced Membranou plasma membrane                    |
| 1698 | ENSG00000091428 | RAPGEF4   | Approved Highly expressed in CNS and adrenal gland.   |
| 1699 | ENSG00000091436 | MAP3K20   | Approved Cytoplasm cytoplasm                          |
| 1700 | ENSG00000091483 | FH        | Enhanced Ubiquitous cytoplasm                         |
| 1701 | ENSG00000091490 | SEL1L3    | Approved Granular cytoplasm                           |
| 1702 | ENSG00000091513 | TF        | Enhanced Distinct plasma membrane                     |
| 1703 | ENSG00000091527 | CDV3      | Enhanced Cytoplasm cytoplasm                          |

|      |                 |          |                                                       |
|------|-----------------|----------|-------------------------------------------------------|
| 1704 | ENSG00000091536 | MYO15A   | Enhanced Cytoplasm cytoplasm                          |
| 1705 | ENSG00000091542 | ALKBH5   | Approved Ubiquitous cytoplasm;nucleus                 |
| 1706 | ENSG00000091583 | APOH     | Enhanced Selective plasma membrane                    |
| 1707 | ENSG00000091592 | NLRP1    | Enhanced Cytoplasm cytoplasm;nucleus                  |
| 1708 | ENSG00000091622 | PITPNM3  | Enhanced Selective expression in spleen sinusoids a   |
| 1709 | ENSG00000091640 | SPAG7    | Uncertain Nuclear acytoplasm;nucleus                  |
| 1710 | ENSG00000091651 | ORC6     | Enhanced Nuclear enucleus                             |
| 1711 | ENSG00000091656 | ZFHX4    | Uncertain Ubiquitous nucleus                          |
| 1712 | ENSG00000091664 | SLC17A6  | Supported Expression in CNS and islets of Langerhans. |
| 1713 | ENSG00000091704 | CPA1     | Enhanced Selective cytoplasm                          |
| 1714 | ENSG00000091732 | ZC3HC1   | Enhanced Ubiquitous nucleus;plasma membrane           |
| 1715 | ENSG00000091831 | ESR1     | Enhanced Selective nucleus                            |
| 1716 | ENSG00000091844 | RGS17    | Approved Nuclear enucleus                             |
| 1717 | ENSG00000091879 | ANGPT2   | Approved Cytoplasm cytoplasm;plasma membrane          |
| 1718 | ENSG00000091972 | CD200    | Approved Cytoplasm cytoplasm                          |
| 1719 | ENSG00000091986 | CCDC80   | Approved Cytoplasm cytoplasm                          |
| 1720 | ENSG00000092009 | CMA1     | Enhanced Highly secytoplasm                           |
| 1721 | ENSG00000092010 | PSME1    | Approved Cytoplasm cytoplasm;nucleus                  |
| 1722 | ENSG00000092020 | PPP2R3C  | Approved General ccytoplasm                           |
| 1723 | ENSG00000092036 | HAUS4    | Approved Membranous cytoplasm;plasma membrane         |
| 1724 | ENSG00000092054 | MYH7     | Enhanced Selective cytoplasm                          |
| 1725 | ENSG00000092067 | CEBPE    | Enhanced Nuclear enucleus                             |
| 1726 | ENSG00000092068 | SLC7A8   | Enhanced Cytoplasm cytoplasm;plasma membrane          |
| 1727 | ENSG00000092094 | OSGEP    | Uncertain General ccytoplasm;plasma membrane          |
| 1728 | ENSG00000092096 | SLC22A17 | Uncertain Cytoplasm cytoplasm                         |
| 1729 | ENSG00000092098 | RNF31    | Approved Cytoplasm cytoplasm                          |
| 1730 | ENSG00000092108 | SCFD1    | Approved General ccytoplasm                           |
| 1731 | ENSG00000092140 | G2E3     | Approved Cytoplasm cytoplasm                          |
| 1732 | ENSG00000092148 | HECTD1   | Approved Cytoplasm cytoplasm                          |
| 1733 | ENSG00000092199 | HNRNPC   | Supported General nucleus                             |
| 1734 | ENSG00000092200 | RPGRIPI  | Supported Cytoplasm cytoplasm                         |
| 1735 | ENSG00000092201 | SUPT16H  | Enhanced Nuclear onucleus                             |
| 1736 | ENSG00000092203 | TOX4     | Approved Nuclear enucleus                             |
| 1737 | ENSG00000092208 | GEMIN2   | Enhanced Cytoplasm cytoplasm;nucleus                  |
| 1738 | ENSG00000092295 | TGM1     | Enhanced Selective plasma membrane                    |
| 1739 | ENSG00000092345 | DAZL     | Enhanced Selective cytoplasm                          |
| 1740 | ENSG00000092377 | TBL1Y    | Uncertain Estimation of protein expression could not  |
| 1741 | ENSG00000092421 | SEMA6A   | Approved General ccytoplasm                           |
| 1742 | ENSG00000092439 | TRPM7    | Enhanced Membranous plasma membrane                   |
| 1743 | ENSG00000092445 | TYRO3    | Approved Cytoplasm cytoplasm                          |
| 1744 | ENSG00000092470 | WDR76    | Uncertain Estimation of protein expression could not  |
| 1745 | ENSG00000092529 | CAPN3    | Enhanced Cytoplasm cytoplasm                          |
| 1746 | ENSG00000092531 | SNAP23   | Approved Membranous plasma membrane                   |
| 1747 | ENSG00000092607 | TBX15    | Uncertain Nuclear enucleus                            |
| 1748 | ENSG00000092621 | PHGDH    | Enhanced General ccytoplasm;nucleus                   |
| 1749 | ENSG00000092758 | COL9A3   | Supported Expression in hyaline cartilage and vitreou |
| 1750 | ENSG00000092820 | EZR      | Enhanced Cytoplasm cytoplasm;plasma membrane          |
| 1751 | ENSG00000092841 | MYL6     | Approved Cytoplasm cytoplasm                          |
| 1752 | ENSG00000092850 | TEKT2    | Approved Expression in cilia of cells in fallopian 1  |
| 1753 | ENSG00000092871 | RFFL     | Approved Cytoplasm cytoplasm;plasma membrane          |
| 1754 | ENSG00000092929 | UNC13D   | Enhanced Cytoplasm cytoplasm                          |
| 1755 | ENSG00000092931 | MFS11    | Uncertain Cytoplasm cytoplasm                         |
| 1756 | ENSG00000092964 | DPYSL2   | Supported Ubiquitous cytoplasm;plasma membrane        |
| 1757 | ENSG00000092978 | GPATCH2  | Uncertain Ubiquitous cytoplasm;nucleus                |
| 1758 | ENSG00000093000 | NUP50    | Enhanced Ubiquitous nucleus                           |



|      |                 |          |                                                       |
|------|-----------------|----------|-------------------------------------------------------|
| 1759 | ENSG00000093009 | CDC45    | Enhanced Nuclear enucleus                             |
| 1760 | ENSG00000093010 | COMT     | Enhanced Cytoplasm cytoplasm                          |
| 1761 | ENSG00000093072 | ADA2     | Uncertain RNA-based expert annotation gave inconclus: |
| 1762 | ENSG00000093144 | ECHDC1   | Uncertain General, cytoplasm                          |
| 1763 | ENSG00000093167 | LRRFIP2  | Uncertain Nuclear enucleus                            |
| 1764 | ENSG00000093217 | XYLB     | Uncertain Estimation of protein expression could not  |
| 1765 | ENSG00000094631 | HDAC6    | Supported Cytoplasm cytoplasm                         |
| 1766 | ENSG00000094755 | GABRP    | Uncertain General c cytoplasm; plasma membrane        |
| 1767 | ENSG00000094796 | KRT31    | Enhanced Highly expressed in hair follicle cortex.    |
| 1768 | ENSG00000094804 | CDC6     | Approved General c cytoplasm; nucleus                 |
| 1769 | ENSG00000094841 | UPRT     | Uncertain Estimation of protein expression could not  |
| 1770 | ENSG00000094880 | CDC23    | Approved Cytoplasm cytoplasm; nucleus                 |
| 1771 | ENSG00000094914 | AAAS     | Approved Membranou cytoplasm; plasma membrane         |
| 1772 | ENSG00000094916 | CBX5     | Enhanced Nuclear enucleus                             |
| 1773 | ENSG00000094963 | FM02     | Approved Cytoplasm cytoplasm                          |
| 1774 | ENSG00000094975 | SUC0     | Approved General c cytoplasm; plasma membrane         |
| 1775 | ENSG00000095002 | MSH2     | Approved Ubiquitou nucleus                            |
| 1776 | ENSG00000095015 | MAP3K1   | Approved General c cytoplasm                          |
| 1777 | ENSG00000095059 | DHPS     | Approved Cytoplasm cytoplasm; plasma membrane         |
| 1778 | ENSG00000095066 | HOOK2    | Approved Ubiquitou cytoplasm                          |
| 1779 | ENSG00000095110 | NXPE1    | Enhanced Distinct cytoplasm                           |
| 1780 | ENSG00000095139 | ARCN1    | Approved General c cytoplasm                          |
| 1781 | ENSG00000095203 | EPB41L4B | Approved Cytoplasm cytoplasm                          |
| 1782 | ENSG00000095209 | TMEM38B  | Uncertain Cytoplasm cytoplasm; nucleus                |
| 1783 | ENSG00000095261 | PSMD5    | Uncertain Ubiquitou cytoplasm; nucleus                |
| 1784 | ENSG00000095303 | PTGS1    | Enhanced Cytoplasm cytoplasm                          |
| 1785 | ENSG00000095319 | NUP188   | Approved Nuclear enucleus                             |
| 1786 | ENSG00000095321 | CRAT     | Enhanced Cytoplasm cytoplasm                          |
| 1787 | ENSG00000095370 | SH2D3C   | Enhanced Cytoplasm cytoplasm                          |
| 1788 | ENSG00000095380 | NANS     | Approved Nuclear a cytoplasm; nucleus                 |
| 1789 | ENSG00000095383 | TBC1D2   | Uncertain Mainly n nucleus                            |
| 1790 | ENSG00000095485 | CWF19L1  | Uncertain Ubiquitou cytoplasm                         |
| 1791 | ENSG00000095539 | SEMA4G   | Uncertain Cytoplasm cytoplasm; plasma membrane        |
| 1792 | ENSG00000095585 | BLNK     | Enhanced Distinct cytoplasm                           |
| 1793 | ENSG00000095627 | TDRD1    | Enhanced Cytoplasm cytoplasm                          |
| 1794 | ENSG00000095637 | SORBS1   | Enhanced Granular cytoplasm; plasma membrane          |
| 1795 | ENSG00000095713 | CRTAC1   | Enhanced Cytoplasm cytoplasm                          |
| 1796 | ENSG00000095739 | BAMBI    | Approved Cytoplasm cytoplasm                          |
| 1797 | ENSG00000095777 | MYO3A    | Approved Cytoplasm cytoplasm                          |
| 1798 | ENSG00000095787 | WAC      | Approved Nuclear a cytoplasm; nucleus                 |
| 1799 | ENSG00000095794 | CREM     | Enhanced Nuclear enucleus                             |
| 1800 | ENSG00000095906 | NUBP2    | Uncertain Ubiquitou cytoplasm                         |
| 1801 | ENSG00000095917 | TPSD1    | Supported Distinct cytoplasm                          |
| 1802 | ENSG00000095932 | SMIM24   | Enhanced Membranou plasma membrane                    |
| 1803 | ENSG00000095951 | HIVEP1   | Approved General c cytoplasm                          |
| 1804 | ENSG00000095970 | TREM2    | Approved Cytoplasm cytoplasm; plasma membrane         |
| 1805 | ENSG00000096006 | CRISP3   | Supported Cytoplasm cytoplasm                         |
| 1806 | ENSG00000096060 | FKBP5    | Enhanced General n cytoplasm; nucleus                 |
| 1807 | ENSG00000096063 | SRPK1    | Approved Ubiquitou cytoplasm                          |
| 1808 | ENSG00000096070 | BRPF3    | Uncertain General c cytoplasm; nucleus                |
| 1809 | ENSG00000096080 | MRPS18A  | Approved Cytoplasm cytoplasm                          |
| 1810 | ENSG00000096088 | PGC      | Enhanced Distinct cytoplasm                           |
| 1811 | ENSG00000096092 | TMEM14A  | Approved Granular cytoplasm                           |
| 1812 | ENSG00000096093 | EFHC1    | Approved General c cytoplasm                          |
| 1813 | ENSG00000096264 | NCR2     | Uncertain Estimation of protein expression could not  |

|      |                 |          |                                                      |
|------|-----------------|----------|------------------------------------------------------|
| 1814 | ENSG00000096384 | HSP90AB1 | Enhanced Cytoplasm cytoplasm                         |
| 1815 | ENSG00000096395 | MLN      | Enhanced Selective cytoplasm                         |
| 1816 | ENSG00000096401 | CDC5L    | Supported Ubiquitous nucleus                         |
| 1817 | ENSG00000096433 | ITPR3    | Approved Cytoplasm cytoplasm                         |
| 1818 | ENSG00000096654 | ZNF184   | Uncertain Cytoplasm cytoplasm                        |
| 1819 | ENSG00000096696 | DSP      | Enhanced Cytoplasm cytoplasm; plasma membrane        |
| 1820 | ENSG00000096717 | SIRT1    | Approved Nuclear enucleus                            |
| 1821 | ENSG00000096872 | IFT74    | Approved Membranous cytoplasm; plasma membrane       |
| 1822 | ENSG00000096968 | JAK2     | Approved Cytoplasm cytoplasm                         |
| 1823 | ENSG00000097007 | ABL1     | Supported Cytoplasm cytoplasm; nucleus               |
| 1824 | ENSG00000097021 | ACOT7    | Enhanced Cytoplasm cytoplasm                         |
| 1825 | ENSG00000097033 | SH3GLB1  | Enhanced Cytoplasm cytoplasm                         |
| 1826 | ENSG00000097046 | CDC7     | Enhanced Nuclear enucleus                            |
| 1827 | ENSG00000097096 | SYDE2    | Uncertain Estimation of protein expression could not |
| 1828 | ENSG00000099139 | PCSK5    | Approved Granular cytoplasm                          |
| 1829 | ENSG00000099194 | SCD      | Approved General c cytoplasm                         |
| 1830 | ENSG00000099203 | TMED1    | Uncertain Ubiquitous cytoplasm                       |
| 1831 | ENSG00000099204 | ABLIM1   | Approved General c cytoplasm; plasma membrane        |
| 1832 | ENSG00000099219 | ERMP1    | Approved Cytoplasm cytoplasm                         |
| 1833 | ENSG00000099246 | RAB18    | Uncertain Ubiquitous cytoplasm                       |
| 1834 | ENSG00000099250 | NRP1     | Approved Extracellular staining in most tissues.     |
| 1835 | ENSG00000099256 | PRTFDC1  | Approved Cytoplasm cytoplasm                         |
| 1836 | ENSG00000099260 | PALMD    | Supported Membranous cytoplasm; plasma membrane      |
| 1837 | ENSG00000099282 | TSPAN15  | Approved General c cytoplasm; plasma membrane        |
| 1838 | ENSG00000099284 | H2AFY2   | Enhanced Ubiquitous nucleus                          |
| 1839 | ENSG00000099290 | WASHC2A  | Supported General c cytoplasm                        |
| 1840 | ENSG00000099308 | MAST3    | Uncertain Expression in most tissues.                |
| 1841 | ENSG00000099326 | MZF1     | Approved Nuclear enucleus                            |
| 1842 | ENSG00000099330 | OCEL1    | Uncertain General c cytoplasm                        |
| 1843 | ENSG00000099331 | MYO9B    | Approved General c cytoplasm                         |
| 1844 | ENSG00000099337 | KCNK6    | Uncertain Mainly c cytoplasm                         |
| 1845 | ENSG00000099341 | PSMD8    | Supported Mainly c cytoplasm                         |
| 1846 | ENSG00000099365 | STX1B    | Supported Cytoplasm cytoplasm                        |
| 1847 | ENSG00000099377 | HSD3B7   | Uncertain Cytoplasm cytoplasm                        |
| 1848 | ENSG00000099381 | SETD1A   | Enhanced General n nucleus                           |
| 1849 | ENSG00000099385 | BCL7C    | Uncertain Mainly c cytoplasm                         |
| 1850 | ENSG00000099399 | MAGEB2   | Enhanced Selective expression in spermatogonia.      |
| 1851 | ENSG00000099624 | ATP5F1D  | Approved Granular cytoplasm                          |
| 1852 | ENSG00000099769 | IGFALS   | Supported Cytoplasm cytoplasm; plasma membrane       |
| 1853 | ENSG00000099783 | HNRNPM   | Supported Ubiquitous nucleus                         |
| 1854 | ENSG00000099785 | 3/2/2019 | Approved General c cytoplasm                         |
| 1855 | ENSG00000099795 | NDUFB7   | Approved Ubiquitous cytoplasm                        |
| 1856 | ENSG00000099797 | TECR     | Supported Cytoplasm cytoplasm                        |
| 1857 | ENSG00000099800 | TIMM13   | Uncertain Mainly c cytoplasm                         |
| 1858 | ENSG00000099804 | CDC34    | Approved Mainly c cytoplasm                          |
| 1859 | ENSG00000099812 | MISP     | Enhanced Membranous plasma membrane                  |
| 1860 | ENSG00000099814 | CEP170B  | Enhanced Cytoplasm cytoplasm                         |
| 1861 | ENSG00000099817 | POLR2E   | Supported Ubiquitous nucleus                         |
| 1862 | ENSG00000099821 | POLRMT   | Uncertain General c cytoplasm                        |
| 1863 | ENSG00000099834 | CDHR5    | Enhanced Selective plasma membrane                   |
| 1864 | ENSG00000099840 | IZUM04   | Enhanced Cytoplasm cytoplasm                         |
| 1865 | ENSG00000099860 | GADD45B  | Approved General c cytoplasm                         |
| 1866 | ENSG00000099864 | PALM     | Approved High expression of renal tubules and neuro  |
| 1867 | ENSG00000099866 | MADCAM1  | Enhanced Distinct expression in spleen, and in endo  |
| 1868 | ENSG00000099875 | MKNK2    | Supported General c cytoplasm; nucleus               |

|      |                 |          |                                                     |
|------|-----------------|----------|-----------------------------------------------------|
| 1869 | ENSG00000099889 | ARVCF    | Enhanced Cytoplasm cytoplasm;plasma membrane        |
| 1870 | ENSG00000099899 | TRMT2A   | Approved Nuclear enucleus                           |
| 1871 | ENSG00000099901 | RANBP1   | SupportedCytoplasm cytoplasm                        |
| 1872 | ENSG00000099904 | ZDHHC8   | UncertainCytoplasm cytoplasm                        |
| 1873 | ENSG00000099917 | MED15    | Approved Ubiquitou cytoplasm;nucleus                |
| 1874 | ENSG00000099937 | SERPIND1 | SupportedDistinct plasma membrane                   |
| 1875 | ENSG00000099940 | SNAP29   | SupportedUbiquitou cytoplasm                        |
| 1876 | ENSG00000099942 | CRKL     | UncertainCytoplasm cytoplasm                        |
| 1877 | ENSG00000099949 | LZTR1    | Approved Granular cytoplasm                         |
| 1878 | ENSG00000099953 | MMP11    | Approved Cytoplasm cytoplasm                        |
| 1879 | ENSG00000099954 | CECR2    | Approved General n cytoplasm;nucleus                |
| 1880 | ENSG00000099956 | SMARCB1  | SupportedUbiquitounucleus                           |
| 1881 | ENSG00000099957 | P2RX6    | Approved Cytoplasm cytoplasm                        |
| 1882 | ENSG00000099958 | DERL3    | Approved Cytoplasm cytoplasm                        |
| 1883 | ENSG00000099960 | SLC7A4   | Enhanced Cytoplasm cytoplasm                        |
| 1884 | ENSG00000099968 | BCL2L13  | UncertainSelective cytoplasm                        |
| 1885 | ENSG00000099977 | DDT      | Approved Cytoplasm cytoplasm                        |
| 1886 | ENSG00000099991 | CABIN1   | Approved Nuclear a cytoplasm;nucleus                |
| 1887 | ENSG00000099992 | TBC1D10A | Approved General c cytoplasm                        |
| 1888 | ENSG00000099994 | SUSD2    | Enhanced General c cytoplasm;plasma membrane        |
| 1889 | ENSG00000099995 | SF3A1    | Enhanced Ubiquitounucleus                           |
| 1890 | ENSG00000099998 | GGT5     | UncertainCytoplasm cytoplasm;plasma membrane        |
| 1891 | ENSG00000099999 | RNF215   | Approved General c cytoplasm                        |
| 1892 | ENSG00000100003 | SEC14L2  | Approved Mainly c cytoplasm                         |
| 1893 | ENSG00000100012 | SEC14L3  | UncertainEstimation of protein expression could not |
| 1894 | ENSG00000100014 | SPECC1L  | UncertainCytoplasm cytoplasm                        |
| 1895 | ENSG00000100023 | PPIL2    | SupportedGeneral n nucleus                          |
| 1896 | ENSG00000100024 | UPB1     | Enhanced Cytoplasm cytoplasm                        |
| 1897 | ENSG00000100027 | YPEL1    | UncertainGeneral c cytoplasm                        |
| 1898 | ENSG00000100028 | SNRPD3   | SupportedUbiquitounucleus                           |
| 1899 | ENSG00000100029 | PES1     | SupportedNucleolar nucleus                          |
| 1900 | ENSG00000100030 | MAPK1    | Approved Cytoplasm cytoplasm                        |
| 1901 | ENSG00000100031 | GGT1     | SupportedSelective cytoplasm                        |
| 1902 | ENSG00000100033 | PRODH    | Approved General c cytoplasm                        |
| 1903 | ENSG00000100034 | PPM1F    | Approved General c cytoplasm                        |
| 1904 | ENSG00000100036 | SLC35E4  | Approved Cytoplasm cytoplasm                        |
| 1905 | ENSG00000100053 | CRYBB3   | SupportedExpression in eye lens.                    |
| 1906 | ENSG00000100055 | CYTH4    | Approved Cytoplasm cytoplasm                        |
| 1907 | ENSG00000100056 | ESS2     | Enhanced Nuclear enucleus                           |
| 1908 | ENSG00000100060 | MFNG     | Approved General c cytoplasm                        |
| 1909 | ENSG00000100065 | CARD10   | Approved General c cytoplasm                        |
| 1910 | ENSG00000100068 | LRP5L    | UncertainGeneral c cytoplasm                        |
| 1911 | ENSG00000100077 | GRK3     | UncertainGeneral n nucleus                          |
| 1912 | ENSG00000100078 | PLA2G3   | UncertainGeneral c cytoplasm                        |
| 1913 | ENSG00000100079 | LGALS2   | Enhanced Cytoplasm cytoplasm                        |
| 1914 | ENSG00000100083 | GGA1     | SupportedCytoplasm cytoplasm;plasma membrane        |
| 1915 | ENSG00000100084 | HIRA     | Enhanced Ubiquitounucleus                           |
| 1916 | ENSG00000100092 | SH3BP1   | SupportedCytoplasm cytoplasm                        |
| 1917 | ENSG00000100097 | LGALS1   | Enhanced Cytoplasm cytoplasm;nucleus                |
| 1918 | ENSG00000100099 | HPS4     | Approved Cytoplasm cytoplasm                        |
| 1919 | ENSG00000100104 | SRRD     | UncertainGeneral c cytoplasm                        |
| 1920 | ENSG00000100105 | PATZ1    | Approved Ubiquitounucleus                           |
| 1921 | ENSG00000100106 | TRIOBP   | Enhanced Cytoplasm cytoplasm                        |
| 1922 | ENSG00000100116 | GCAT     | UncertainCytoplasm cytoplasm                        |
| 1923 | ENSG00000100121 | GGTLC2   | UncertainEstimation of protein expression could not |

|      |                 |          |                                                      |
|------|-----------------|----------|------------------------------------------------------|
| 1924 | ENSG00000100122 | CRYBB1   | SupportedExpression in lens.                         |
| 1925 | ENSG00000100124 | ANKRD54  | Approved Cytoplasmcytoplasm;nucleus                  |
| 1926 | ENSG00000100129 | EIF3L    | Approved Cytoplasmcytoplasm                          |
| 1927 | ENSG00000100138 | SNU13    | UncertainNucleolar cytoplasm;nucleus                 |
| 1928 | ENSG00000100139 | MICALL1  | UncertainCytoplasmcytoplasm;nucleus                  |
| 1929 | ENSG00000100142 | POLR2F   | SupportedUbiquitousnucleus                           |
| 1930 | ENSG00000100146 | SOX10    | Enhanced Nuclear enucleus                            |
| 1931 | ENSG00000100147 | CCDC134  | Approved Cytoplasmcytoplasm                          |
| 1932 | ENSG00000100150 | DEPDC5   | UncertainLow cytopcytoplasm                          |
| 1933 | ENSG00000100151 | PICK1    | Approved General ccytoplasm                          |
| 1934 | ENSG00000100156 | SLC16A8  | Enhanced Membranouplasma membrane                    |
| 1935 | ENSG00000100162 | CENPM    | Enhanced Cytoplasmcytoplasm                          |
| 1936 | ENSG00000100167 | 9/3/2019 | Enhanced Selectivecytoplasm                          |
| 1937 | ENSG00000100170 | SLC5A1   | Enhanced Selectiveplasma membrane                    |
| 1938 | ENSG00000100196 | KDEL3    | UncertainCytoplasmcytoplasm                          |
| 1939 | ENSG00000100197 | CYP2D6   | Enhanced High cytoctoplasm                           |
| 1940 | ENSG00000100201 | DDX17    | SupportedNuclear enucleus                            |
| 1941 | ENSG00000100206 | DMC1     | Enhanced High nuclnucleus                            |
| 1942 | ENSG00000100207 | TCF20    | Approved Nuclear enucleus                            |
| 1943 | ENSG00000100209 | HSCB     | UncertainGeneral ccytoplasm                          |
| 1944 | ENSG00000100216 | TOMM22   | SupportedUbiquitouscytoplasm                         |
| 1945 | ENSG00000100218 | RSPH14   | Approved Expressed mainly in cilia in fallopian tube |
| 1946 | ENSG00000100220 | RTCB     | SupportedGeneral ncytoplasm;nucleus                  |
| 1947 | ENSG00000100221 | JOSD1    | UncertainCytoplasmcytoplasm                          |
| 1948 | ENSG00000100225 | FBX07    | UncertainNuclear acytoplasm;nucleus                  |
| 1949 | ENSG00000100226 | GTPBP1   | Approved Ubiquitouscytoplasm                         |
| 1950 | ENSG00000100227 | POLDIP3  | Approved Nuclear enucleus                            |
| 1951 | ENSG00000100239 | PPP6R2   | UncertainCytoplasmcytoplasm                          |
| 1952 | ENSG00000100242 | SUN2     | SupportedUbiquitousnucleus;plasma membrane           |
| 1953 | ENSG00000100243 | CYB5R3   | Approved Ubiquitouscytoplasm                         |
| 1954 | ENSG00000100246 | DNAL4    | Approved Expressiocytoplasm                          |
| 1955 | ENSG00000100249 | C22orf31 | UncertainEstimation of protein expression could not  |
| 1956 | ENSG00000100253 | MIOX     | Enhanced Selectivecytoplasm                          |
| 1957 | ENSG00000100258 | LMF2     | Approved Cytoplasmcytoplasm                          |
| 1958 | ENSG00000100263 | RHBDD3   | Approved General ccytoplasm                          |
| 1959 | ENSG00000100266 | PACSIN2  | Enhanced Cytoplasmcytoplasm                          |
| 1960 | ENSG00000100271 | TTL1     | Approved General ccytoplasm                          |
| 1961 | ENSG00000100276 | RASL10A  | Approved Cytoplasmcytoplasm                          |
| 1962 | ENSG00000100280 | AP1B1    | Approved General ccytoplasm                          |
| 1963 | ENSG00000100281 | HMGXB4   | Approved Nuclear enucleus                            |
| 1964 | ENSG00000100284 | TOM1     | Approved General ccytoplasm                          |
| 1965 | ENSG00000100285 | NEFH     | Enhanced Selective expression in CNS, peripheral nei |
| 1966 | ENSG00000100288 | CHKB     | Approved General ccytoplasm                          |
| 1967 | ENSG00000100290 | BIK      | Approved Cytoplasmcytoplasm                          |
| 1968 | ENSG00000100292 | HMOX1    | Enhanced Selectivecytoplasm                          |
| 1969 | ENSG00000100294 | MCAT     | Approved General ccytoplasm                          |
| 1970 | ENSG00000100297 | MCM5     | Enhanced Nuclear enucleus                            |
| 1971 | ENSG00000100298 | APOBEC3H | Approved Cytoplasmcytoplasm                          |
| 1972 | ENSG00000100299 | ARSA     | Enhanced Ubiquitouscytoplasm                         |
| 1973 | ENSG00000100300 | TSPO     | UncertainCytoplasmcytoplasm                          |
| 1974 | ENSG00000100302 | RASD2    | Enhanced Cytoplasmcytoplasm                          |
| 1975 | ENSG00000100304 | TTL12    | Approved Cytoplasmcytoplasm;nucleus                  |
| 1976 | ENSG00000100307 | CBX7     | Enhanced General nnucleus                            |
| 1977 | ENSG00000100311 | PDGFB    | SupportedUbiquitouscytoplasm                         |
| 1978 | ENSG00000100312 | ACR      | Enhanced Cytoplasmcytoplasm                          |

|      |                 |          |           |                                            |
|------|-----------------|----------|-----------|--------------------------------------------|
| 1979 | ENSG00000100314 | CABP7    | Uncertain | Estimation of protein expression could not |
| 1980 | ENSG00000100316 | RPL3     | Uncertain | General ncytoplasm;nucleus                 |
| 1981 | ENSG00000100319 | ZMAT5    | Approved  | General ccytoplasm                         |
| 1982 | ENSG00000100320 | RBFOX2   | Approved  | General ncytoplasm;nucleus                 |
| 1983 | ENSG00000100321 | SYNGR1   | Enhanced  | Selective expression in neuropil.          |
| 1984 | ENSG00000100324 | TAB1     | Approved  | Nuclear acytoplasm;nucleus                 |
| 1985 | ENSG00000100325 | ASCC2    | Approved  | General ccytoplasm                         |
| 1986 | ENSG00000100330 | MTMR3    | Uncertain | Cytoplasmcytoplasm                         |
| 1987 | ENSG00000100336 | APOL4    | Uncertain | plasma prplasma membrane                   |
| 1988 | ENSG00000100341 | PNPLA5   | Uncertain | Estimation of protein expression could not |
| 1989 | ENSG00000100342 | APOL1    | Supported | Distinct plasma membrane                   |
| 1990 | ENSG00000100344 | PNPLA3   | Approved  | Expression in kidney and liver.            |
| 1991 | ENSG00000100345 | MYH9     | Enhanced  | Cytoplasmcytoplasm;plasma membrane         |
| 1992 | ENSG00000100347 | SAMM50   | Enhanced  | Granular cytoplasm                         |
| 1993 | ENSG00000100348 | TXN2     | Approved  | Granular cytoplasm                         |
| 1994 | ENSG00000100350 | FOXRED2  | Approved  | General ccytoplasm                         |
| 1995 | ENSG00000100351 | GRAP2    | Enhanced  | Selectivecytoplasm                         |
| 1996 | ENSG00000100353 | EIF3D    | Approved  | General ccytoplasm                         |
| 1997 | ENSG00000100354 | TNRC6B   | Approved  | General ccytoplasm                         |
| 1998 | ENSG00000100359 | SGSM3    | Approved  | General ccytoplasm                         |
| 1999 | ENSG00000100360 | IFT27    | Uncertain | Cytoplasmcytoplasm                         |
| 2000 | ENSG00000100362 | PVALB    | Enhanced  | Selectivecytoplasm;nucleus                 |
| 2001 | ENSG00000100364 | KIAA0930 | Uncertain | General nnucleus;plasma membrane           |
| 2002 | ENSG00000100365 | NCF4     | Enhanced  | Selectivecytoplasm                         |
| 2003 | ENSG00000100372 | SLC25A17 | Approved  | Cytoplasmcytoplasm;plasma membrane         |
| 2004 | ENSG00000100373 | UPK3A    | Enhanced  | Selectivecytoplasm;plasma membrane         |
| 2005 | ENSG00000100376 | FAM118A  | Uncertain | General ccytoplasm                         |
| 2006 | ENSG00000100379 | KCTD17   | Uncertain | General ccytoplasm                         |
| 2007 | ENSG00000100380 | ST13     | Enhanced  | Ubiquitouscytoplasm                        |
| 2008 | ENSG00000100385 | IL2RB    | Enhanced  | Selectivecytoplasm                         |
| 2009 | ENSG00000100393 | EP300    | Supported | Nuclear acytoplasm;nucleus                 |
| 2010 | ENSG00000100399 | CHADL    | Uncertain | General ccytoplasm                         |
| 2011 | ENSG00000100401 | RANGAP1  | Supported | Distinct cytoplasm;nucleus;plasma membrane |
| 2012 | ENSG00000100403 | ZC3H7B   | Uncertain | Estimation of protein expression could not |
| 2013 | ENSG00000100410 | PHF5A    | Supported | Ubiquitousnucleus                          |
| 2014 | ENSG00000100412 | ACO2     | Enhanced  | Ubiquitouscytoplasm                        |
| 2015 | ENSG00000100413 | POLR3H   | Approved  | General ncytoplasm;nucleus                 |
| 2016 | ENSG00000100416 | TRMU     | Uncertain | Cytoplasmcytoplasm                         |
| 2017 | ENSG00000100417 | PMM1     | Uncertain | Nuclear enucleus                           |
| 2018 | ENSG00000100418 | DESI1    | Approved  | Ubiquitouscytoplasm                        |
| 2019 | ENSG00000100425 | BRD1     | Enhanced  | Nuclear anucleus                           |
| 2020 | ENSG00000100426 | ZBED4    | Approved  | Ubiquitousnucleus                          |
| 2021 | ENSG00000100427 | MLC1     | Enhanced  | Expression in astrocytes in CNS.           |
| 2022 | ENSG00000100429 | HDAC10   | Supported | General ncytoplasm;nucleus                 |
| 2023 | ENSG00000100433 | KCNK10   | Approved  | Cytoplasmcytoplasm                         |
| 2024 | ENSG00000100439 | ABHD4    | Uncertain | Cytoplasmcytoplasm                         |
| 2025 | ENSG00000100441 | KHNYN    | Uncertain | Cytoplasmcytoplasm                         |
| 2026 | ENSG00000100442 | FKBP3    | Supported | Ubiquitouscytoplasm                        |
| 2027 | ENSG00000100445 | SDR39U1  | Approved  | General ccytoplasm                         |
| 2028 | ENSG00000100448 | CTSG     | Enhanced  | Selectivecytoplasm                         |
| 2029 | ENSG00000100450 | GZMH     | Enhanced  | Expression in a subset of immune cells.    |
| 2030 | ENSG00000100453 | GZMB     | Enhanced  | Selectivecytoplasm                         |
| 2031 | ENSG00000100461 | RBM23    | Uncertain | General ccytoplasm                         |
| 2032 | ENSG00000100462 | PRMT5    | Approved  | General ccytoplasm;nucleus                 |
| 2033 | ENSG00000100478 | AP4S1    | Approved  | General ccytoplasm                         |

|      |                 |          |                                                     |
|------|-----------------|----------|-----------------------------------------------------|
| 2034 | ENSG00000100479 | POLE2    | UncertainNuclear enucleus                           |
| 2035 | ENSG00000100483 | VCPKMT   | UncertainUbiquitouscytoplasm                        |
| 2036 | ENSG00000100485 | SOS2     | Approved Cytoplasmcytoplasm                         |
| 2037 | ENSG00000100490 | CDKL1    | UncertainCytoplasmcytoplasm                         |
| 2038 | ENSG00000100503 | NIN      | Approved Cytoplasmcytoplasm;nucleus                 |
| 2039 | ENSG00000100504 | PYGL     | Enhanced Cytoplasmcytoplasm                         |
| 2040 | ENSG00000100519 | PSMC6    | Approved General ncytoplasm;nucleus                 |
| 2041 | ENSG00000100522 | GNPNAT1  | Approved Cytoplasmcytoplasm                         |
| 2042 | ENSG00000100523 | DDHD1    | Enhanced Cytoplasmcytoplasm;plasma membrane         |
| 2043 | ENSG00000100528 | CNIH1    | Approved General ccytoplasm                         |
| 2044 | ENSG00000100532 | CGRRF1   | UncertainCytoplasmcytoplasm                         |
| 2045 | ENSG00000100554 | ATP6V1D  | Enhanced High cytoctoplasm;plasma membrane          |
| 2046 | ENSG00000100558 | PLEK2    | Enhanced Cytoplasmcytoplasm                         |
| 2047 | ENSG00000100564 | PIGH     | Approved General ccytoplasm                         |
| 2048 | ENSG00000100565 | LRRC74A  | UncertainEstimation of protein expression could not |
| 2049 | ENSG00000100567 | PSMA3    | Approved Cytoplasmcytoplasm                         |
| 2050 | ENSG00000100568 | VTI1B    | Approved General gcytoplasm                         |
| 2051 | ENSG00000100575 | TIMM9    | Approved Granular cytoplasm                         |
| 2052 | ENSG00000100577 | GSTZ1    | Approved General ccytoplasm                         |
| 2053 | ENSG00000100578 | KIAA0586 | UncertainUbiquitousnucleus                          |
| 2054 | ENSG00000100580 | TMED8    | Approved Cytoplasmcytoplasm                         |
| 2055 | ENSG00000100583 | SAMD15   | Enhanced Nuclear enucleus                           |
| 2056 | ENSG00000100591 | AHSA1    | SupportedCytoplasmcytoplasm                         |
| 2057 | ENSG00000100592 | DAAM1    | UncertainGeneral ccytoplasm                         |
| 2058 | ENSG00000100593 | ISM2     | SupportedCytoplasmcytoplasm                         |
| 2059 | ENSG00000100599 | RIN3     | UncertainCytoplasmcytoplasm                         |
| 2060 | ENSG00000100600 | LGMN     | Enhanced General gcytoplasm                         |
| 2061 | ENSG00000100601 | ALKBH1   | Approved General ccytoplasm;nucleus                 |
| 2062 | ENSG00000100603 | SNW1     | SupportedGeneral nnucleus                           |
| 2063 | ENSG00000100604 | CHGA     | Enhanced Selectivecytoplasm                         |
| 2064 | ENSG00000100605 | ITPK1    | Approved Cytoplasmcytoplasm                         |
| 2065 | ENSG00000100612 | DHRS7    | Approved General ccytoplasm;plasma membrane         |
| 2066 | ENSG00000100614 | PPM1A    | Approved General ccytoplasm                         |
| 2067 | ENSG00000100625 | SIX4     | UncertainEstimation of protein expression could not |
| 2068 | ENSG00000100626 | GALNT16  | Approved Cytoplasmcytoplasm;nucleus                 |
| 2069 | ENSG00000100629 | CEP128   | UncertainCytoplasmcytoplasm                         |
| 2070 | ENSG00000100632 | ERH      | Approved Nuclear enucleus                           |
| 2071 | ENSG00000100644 | HIF1A    | SupportedMainly nocytoplasm;nucleus                 |
| 2072 | ENSG00000100647 | SUSD6    | UncertainCytoplasmcytoplasm                         |
| 2073 | ENSG00000100650 | SRSF5    | Approved Nuclear enucleus                           |
| 2074 | ENSG00000100652 | SLC10A1  | Approved Membranouplasma membrane                   |
| 2075 | ENSG00000100664 | EIF5     | SupportedUbiquitouscytoplasm                        |
| 2076 | ENSG00000100665 | SERPINA4 | Approved Extracellcytoplasm                         |
| 2077 | ENSG00000100697 | DICER1   | Approved General ccytoplasm                         |
| 2078 | ENSG00000100711 | ZFYVE21  | UncertainCytoplasmcytoplasm;plasma membrane         |
| 2079 | ENSG00000100714 | MTHFD1   | Approved General ccytoplasm                         |
| 2080 | ENSG00000100721 | TCL1A    | Enhanced Distinct cytoplasm;nucleus                 |
| 2081 | ENSG00000100722 | ZC3H14   | Enhanced Ubiquitousnucleus                          |
| 2082 | ENSG00000100726 | TEL02    | Approved Cytoplasmcytoplasm                         |
| 2083 | ENSG00000100739 | BDKRB1   | Approved Cytoplasmcytoplasm                         |
| 2084 | ENSG00000100744 | GSKIP    | Approved General ccytoplasm                         |
| 2085 | ENSG00000100749 | VRK1     | Enhanced Nuclear enucleus                           |
| 2086 | ENSG00000100764 | PSMC1    | Approved Nuclear acytoplasm;nucleus                 |
| 2087 | ENSG00000100767 | PAPLN    | UncertainGeneral ccytoplasm                         |
| 2088 | ENSG00000100784 | RPS6KA5  | Approved Ubiquitousnucleus                          |

|      |                 |          |                                                      |
|------|-----------------|----------|------------------------------------------------------|
| 2089 | ENSG00000100796 | PPP4R3A  | Approved General nnucleus                            |
| 2090 | ENSG00000100802 | C14orf93 | Approved General nnucleus                            |
| 2091 | ENSG00000100804 | PSMB5    | Approved Nuclear enucleus                            |
| 2092 | ENSG00000100811 | YY1      | SupportedUbiquitousnucleus                           |
| 2093 | ENSG00000100813 | ACIN1    | SupportedUbiquitousnucleus                           |
| 2094 | ENSG00000100815 | TRIP11   | SupportedGeneral ccytoplasm                          |
| 2095 | ENSG00000100823 | APEX1    | SupportedUbiquitousnucleus                           |
| 2096 | ENSG00000100836 | PABPN1   | SupportedUbiquitousnucleus                           |
| 2097 | ENSG00000100842 | EFS      | Approved Cytoplasmcytoplasm;nucleus                  |
| 2098 | ENSG00000100852 | ARHGAP5  | Approved Cytoplasmcytoplasm                          |
| 2099 | ENSG00000100867 | DHRS2    | Enhanced Selectivecytoplasm                          |
| 2100 | ENSG00000100883 | SRP54    | Approved Cytoplasmcytoplasm                          |
| 2101 | ENSG00000100884 | CPNE6    | Enhanced Expression in brain, kidney, seminal vesic. |
| 2102 | ENSG00000100889 | PCK2     | Enhanced Distinct cytoplasm                          |
| 2103 | ENSG00000100890 | KIAA0391 | Approved General ccytoplasm                          |
| 2104 | ENSG00000100897 | DCAF11   | Approved General ccytoplasm                          |
| 2105 | ENSG00000100902 | PSMA6    | Approved General ncytoplasm;nucleus                  |
| 2106 | ENSG00000100906 | NFKBIA   | Approved Cytoplasmcytoplasm                          |
| 2107 | ENSG00000100908 | EMC9     | Approved General ccytoplasm;plasma membrane          |
| 2108 | ENSG00000100916 | BRMS1L   | UncertainCytoplasmcytoplasm;plasma membrane          |
| 2109 | ENSG00000100918 | REC8     | Approved Nuclear ecytoplasm;nucleus                  |
| 2110 | ENSG00000100926 | TM9SF1   | SupportedGeneral ccytoplasm                          |
| 2111 | ENSG00000100934 | SEC23A   | UncertainCytoplasmcytoplasm                          |
| 2112 | ENSG00000100938 | GMPR2    | UncertainCytoplasmcytoplasm;nucleus                  |
| 2113 | ENSG00000100941 | PNN      | SupportedUbiquitousnucleus                           |
| 2114 | ENSG00000100949 | RABGGTA  | Approved Ubiquitouscytoplasm;nucleus                 |
| 2115 | ENSG00000100968 | NFATC4   | UncertainNuclear acytoplasm;nucleus                  |
| 2116 | ENSG00000100979 | PLTP     | Approved Cytoplasmcytoplasm;plasma membrane          |
| 2117 | ENSG00000100982 | PCIF1    | Enhanced Ubiquitousnucleus                           |
| 2118 | ENSG00000100983 | GSS      | Enhanced General ccytoplasm;nucleus                  |
| 2119 | ENSG00000100985 | MMP9     | Enhanced Selectivecytoplasm;nucleus                  |
| 2120 | ENSG00000100991 | TRPC4AP  | UncertainGeneral ccytoplasm                          |
| 2121 | ENSG00000100994 | PYGB     | Approved Cytoplasmcytoplasm                          |
| 2122 | ENSG00000100997 | ABHD12   | UncertainCytoplasmcytoplasm                          |
| 2123 | ENSG00000101000 | PROCR    | Enhanced Cytoplasmcytoplasm                          |
| 2124 | ENSG00000101003 | GINS1    | UncertainNuclear enucleus                            |
| 2125 | ENSG00000101004 | NINL     | UncertainNuclear acytoplasm;nucleus                  |
| 2126 | ENSG00000101017 | CD40     | Enhanced Cytoplasmcytoplasm                          |
| 2127 | ENSG00000101019 | UQCC1    | Approved Ubiquitouscytoplasm                         |
| 2128 | ENSG00000101040 | ZMYND8   | Approved Cytoplasmcytoplasm;nucleus                  |
| 2129 | ENSG00000101049 | SGK2     | UncertainCytoplasmcytoplasm                          |
| 2130 | ENSG00000101052 | IFT52    | Enhanced Cytoplasmcytoplasm                          |
| 2131 | ENSG00000101057 | MYBL2    | UncertainGeneral ncytoplasm;nucleus                  |
| 2132 | ENSG00000101074 | R3HDML   | Enhanced Cytoplasmcytoplasm                          |
| 2133 | ENSG00000101076 | HNF4A    | Enhanced Nuclear enucleus                            |
| 2134 | ENSG00000101079 | NDRG3    | Approved Cytoplasmcytoplasm                          |
| 2135 | ENSG00000101084 | C20orf24 | UncertainLow cytopcytoplasm                          |
| 2136 | ENSG00000101096 | NFATC2   | Enhanced Cytoplasmcytoplasm                          |
| 2137 | ENSG00000101098 | RIMS4    | Approved Nuclear enucleus                            |
| 2138 | ENSG00000101109 | STK4     | Approved Cytoplasmcytoplasm                          |
| 2139 | ENSG00000101115 | SALL4    | Enhanced Nuclear enucleus                            |
| 2140 | ENSG00000101126 | ADNP     | SupportedGeneral nnucleus                            |
| 2141 | ENSG00000101132 | PFDN4    | Approved General ccytoplasm                          |
| 2142 | ENSG00000101134 | DOK5     | UncertainEstimation of protein expression could not  |
| 2143 | ENSG00000101138 | CSTF1    | SupportedUbiquitousnucleus                           |

|      |                 |          |                                                            |
|------|-----------------|----------|------------------------------------------------------------|
| 2144 | ENSG00000101150 | TPD52L2  | Approved General ccytoplasm                                |
| 2145 | ENSG00000101152 | DNAJC5   | Approved General ccytoplasm                                |
| 2146 | ENSG00000101160 | CTSZ     | SupportedGranular cytoplasm                                |
| 2147 | ENSG00000101161 | PRPF6    | SupportedGeneral nnucleus                                  |
| 2148 | ENSG00000101162 | TUBB1    | Approved Ubiquitoucytoplasm                                |
| 2149 | ENSG00000101166 | PRELID3B | UncertainUbiquitoucytoplasm                                |
| 2150 | ENSG00000101181 | MTG2     | Approved Cytoplasmcytoplasm                                |
| 2151 | ENSG00000101182 | PSMA7    | Approved Nuclear acytoplasm;nucleus                        |
| 2152 | ENSG00000101187 | SLC04A1  | UncertainGranular cytoplasm                                |
| 2153 | ENSG00000101189 | MRGBP    | Enhanced Nuclear enucleus                                  |
| 2154 | ENSG00000101190 | TCFL5    | Enhanced General nnucleus                                  |
| 2155 | ENSG00000101191 | DID01    | SupportedMainly nunucleus                                  |
| 2156 | ENSG00000101193 | GID8     | Approved General ccytoplasm                                |
| 2157 | ENSG00000101198 | NKAIN4   | Approved Cytoplasmcytoplasm                                |
| 2158 | ENSG00000101199 | ARFGAP1  | Approved Ubiquitoucytoplasm                                |
| 2159 | ENSG00000101200 | AVP      | Enhanced Cytoplasmcytoplasm                                |
| 2160 | ENSG00000101203 | COL20A1  | UncertainEstimation of protein expression could not        |
| 2161 | ENSG00000101204 | CHRNA4   | UncertainEstimation of protein expression could not        |
| 2162 | ENSG00000101210 | EEF1A2   | Approved Cytoplasmcytoplasm                                |
| 2163 | ENSG00000101213 | PTK6     | Approved Cytoplasmcytoplasm;nucleus                        |
| 2164 | ENSG00000101216 | GMEB2    | Approved Ubiquitoucytoplasm;nucleus                        |
| 2165 | ENSG00000101220 | C20orf27 | Approved Cytoplasmcytoplasm                                |
| 2166 | ENSG00000101222 | SPEF1    | Enhanced Expression in cilia in fallopian tube, testis     |
| 2167 | ENSG00000101224 | CDC25B   | Enhanced Nuclear acytoplasm;nucleus                        |
| 2168 | ENSG00000101236 | RNF24    | Approved General ccytoplasm                                |
| 2169 | ENSG00000101246 | ARFRP1   | Approved General ccytoplasm                                |
| 2170 | ENSG00000101247 | NDUFAF5  | UncertainLow cytopcytoplasm;plasma membrane                |
| 2171 | ENSG00000101251 | SEL1L2   | Approved Nucleolarnucleus                                  |
| 2172 | ENSG00000101255 | TRIB3    | Approved Nuclear enucleus                                  |
| 2173 | ENSG00000101265 | RASSF2   | UncertainUbiquitoucytoplasm                                |
| 2174 | ENSG00000101266 | CSNK2A1  | SupportedNuclear acytoplasm;nucleus                        |
| 2175 | ENSG00000101276 | SLC52A3  | Approved Cytoplasmcytoplasm                                |
| 2176 | ENSG00000101280 | ANGPT4   | UncertainEstimation of protein expression could not        |
| 2177 | ENSG00000101282 | RSP04    | UncertainEstimation of protein expression could not        |
| 2178 | ENSG00000101290 | CDS2     | Approved Ubiquitoucytoplasm                                |
| 2179 | ENSG00000101292 | PROKR2   | UncertainEstimation of protein expression could not        |
| 2180 | ENSG00000101294 | HM13     | Enhanced Cytoplasmcytoplasm                                |
| 2181 | ENSG00000101298 | SNPH     | Approved Expression in several tissues, including placenta |
| 2182 | ENSG00000101306 | MYLK2    | Enhanced Cytoplasmcytoplasm                                |
| 2183 | ENSG00000101307 | SIRPB1   | UncertainCytoplasmcytoplasm                                |
| 2184 | ENSG00000101310 | SEC23B   | UncertainCytoplasmcytoplasm                                |
| 2185 | ENSG00000101311 | FERMT1   | Approved Cytoplasmcytoplasm                                |
| 2186 | ENSG00000101323 | HA01     | Enhanced Cytoplasmcytoplasm                                |
| 2187 | ENSG00000101327 | PDYN     | Enhanced Selective expression in neuronal cells. Pro       |
| 2188 | ENSG00000101331 | CCM2L    | UncertainEstimation of protein expression could not        |
| 2189 | ENSG00000101333 | PLCB4    | Approved Cytoplasmcytoplasm                                |
| 2190 | ENSG00000101335 | MYL9     | SupportedCytoplasmcytoplasm                                |
| 2191 | ENSG00000101336 | HCK      | Approved Cytoplasmcytoplasm                                |
| 2192 | ENSG00000101337 | TM9SF4   | Approved General ccytoplasm                                |
| 2193 | ENSG00000101342 | TLDC2    | Enhanced Membranouplasma membrane                          |
| 2194 | ENSG00000101346 | POFUT1   | Approved Cytoplasmcytoplasm                                |
| 2195 | ENSG00000101347 | SAMHD1   | Enhanced Ubiquitounucleus                                  |
| 2196 | ENSG00000101349 | PAK5     | Approved Cytoplasmcytoplasm                                |
| 2197 | ENSG00000101350 | KIF3B    | Approved Cytoplasmcytoplasm;plasma membrane                |
| 2198 | ENSG00000101353 | MROH8    | UncertainCytoplasmcytoplasm                                |



|      |                 |          |                                                     |
|------|-----------------|----------|-----------------------------------------------------|
| 2199 | ENSG00000101361 | NOP56    | SupportedGeneral nnucleus                           |
| 2200 | ENSG00000101363 | MANBAL   | UncertainCytoplasmcytoplasm                         |
| 2201 | ENSG00000101365 | IDH3B    | SupportedUbiquitouscytoplasm                        |
| 2202 | ENSG00000101367 | MAPRE1   | SupportedUbiquitouscytoplasm                        |
| 2203 | ENSG00000101384 | JAG1     | SupportedUbiquitouscytoplasm;plasma membrane        |
| 2204 | ENSG00000101400 | SNTA1    | Approved Mainly ccytoplasm                          |
| 2205 | ENSG00000101405 | OXT      | SupportedCytoplasmcytoplasm                         |
| 2206 | ENSG00000101407 | TTI1     | UncertainCytoplasmcytoplasm                         |
| 2207 | ENSG00000101412 | E2F1     | Enhanced Nuclear enucleus                           |
| 2208 | ENSG00000101413 | RPRD1B   | Approved Nuclear enucleus                           |
| 2209 | ENSG00000101417 | PXMP4    | Approved Granular cytoplasm                         |
| 2210 | ENSG00000101421 | CHMP4B   | Enhanced Ubiquitouscytoplasm                        |
| 2211 | ENSG00000101425 | BPI      | Enhanced Selectivecytoplasm                         |
| 2212 | ENSG00000101438 | SLC32A1  | Enhanced Cytoplasmcytoplasm                         |
| 2213 | ENSG00000101439 | CST3     | Enhanced Cytoplasmcytoplasm                         |
| 2214 | ENSG00000101440 | ASIP     | UncertainEstimation of protein expression could not |
| 2215 | ENSG00000101441 | CST4     | SupportedCytoplasmcytoplasm                         |
| 2216 | ENSG00000101442 | ACTR5    | Approved General ccytoplasm                         |
| 2217 | ENSG00000101443 | WFDC2    | Enhanced Cytoplasmcytoplasm                         |
| 2218 | ENSG00000101444 | AHCY     | Approved Ubiquitouscytoplasm;nucleus                |
| 2219 | ENSG00000101446 | SPINT3   | Enhanced Membranouplasma membrane                   |
| 2220 | ENSG00000101448 | EPPIN    | SupportedCytoplasmcytoplasm                         |
| 2221 | ENSG00000101452 | DHX35    | UncertainCytoplasmcytoplasm;nucleus                 |
| 2222 | ENSG00000101460 | MAP1LC3A | Enhanced Cytoplasmcytoplasm                         |
| 2223 | ENSG00000101464 | PIGU     | UncertainCytoplasmcytoplasm                         |
| 2224 | ENSG00000101470 | TNNC2    | Enhanced Selectivecytoplasm                         |
| 2225 | ENSG00000101473 | ACOT8    | Approved Ubiquitouscytoplasm                        |
| 2226 | ENSG00000101474 | APMAP    | UncertainUbiquitouscytoplasm;nucleus                |
| 2227 | ENSG00000101489 | CELF4    | Enhanced Cytoplasmcytoplasm                         |
| 2228 | ENSG00000101493 | ZNF516   | UncertainMainly ccytoplasm                          |
| 2229 | ENSG00000101542 | CDH20    | UncertainCytoplasmcytoplasm                         |
| 2230 | ENSG00000101544 | ADNP2    | UncertainCytoplasmcytoplasm                         |
| 2231 | ENSG00000101546 | RBFA     | Approved General ccytoplasm                         |
| 2232 | ENSG00000101557 | USP14    | Approved Ubiquitouscytoplasm                        |
| 2233 | ENSG00000101558 | VAPA     | Approved Ubiquitouscytoplasm                        |
| 2234 | ENSG00000101574 | METTL4   | Approved Ubiquitouscytoplasm                        |
| 2235 | ENSG00000101577 | LPIN2    | Enhanced Cytoplasmcytoplasm                         |
| 2236 | ENSG00000101596 | SMCHD1   | Approved Nuclear enucleus                           |
| 2237 | ENSG00000101605 | MYOM1    | Enhanced Selectivecytoplasm                         |
| 2238 | ENSG00000101608 | MYL12A   | SupportedCytoplasmcytoplasm                         |
| 2239 | ENSG00000101624 | CEP76    | Approved Granular cytoplasm                         |
| 2240 | ENSG00000101638 | ST8SIA5  | Approved Cytoplasmcytoplasm                         |
| 2241 | ENSG00000101639 | CEP192   | UncertainCytoplasmcytoplasm                         |
| 2242 | ENSG00000101654 | RNMT     | Approved Nuclear acytoplasm;nucleus                 |
| 2243 | ENSG00000101665 | SMAD7    | Approved General ncytoplasm;nucleus                 |
| 2244 | ENSG00000101670 | LIPG     | UncertainSecreted to blood.                         |
| 2245 | ENSG00000101680 | LAMA1    | Enhanced Distinct plasma membrane                   |
| 2246 | ENSG00000101695 | RNF125   | UncertainCytoplasmcytoplasm;nucleus                 |
| 2247 | ENSG00000101745 | ANKRD12  | Approved Cytoplasmcytoplasm;nucleus                 |
| 2248 | ENSG00000101751 | POLI     | Enhanced Nuclear enucleus                           |
| 2249 | ENSG00000101752 | MIB1     | Approved Cytoplasmcytoplasm                         |
| 2250 | ENSG00000101773 | RBBP8    | Approved Nuclear acytoplasm;nucleus                 |
| 2251 | ENSG00000101782 | RIOK3    | Approved Cytoplasmcytoplasm                         |
| 2252 | ENSG00000101811 | CSTF2    | SupportedGeneral nnucleus                           |
| 2253 | ENSG00000101825 | MXRA5    | UncertainSecreted expression.                       |

|      |                 |         |                                                      |
|------|-----------------|---------|------------------------------------------------------|
| 2254 | ENSG00000101842 | VSIG1   | Enhanced Distinct cytoplasm;plasma membrane          |
| 2255 | ENSG00000101843 | PSMD10  | Approved General ccytoplasm;nucleus                  |
| 2256 | ENSG00000101844 | ATG4A   | UncertainGeneral ccytoplasm                          |
| 2257 | ENSG00000101846 | STS     | Enhanced Cytoplasmcytoplasm                          |
| 2258 | ENSG00000101849 | TBL1X   | Approved Ubiquitousnucleus;plasma membrane           |
| 2259 | ENSG00000101850 | GPR143  | Enhanced Cytoplasmcytoplasm                          |
| 2260 | ENSG00000101856 | PGRMC1  | Enhanced Ubiquitouscytoplasm                         |
| 2261 | ENSG00000101868 | POLA1   | SupportedGeneral nnucleus                            |
| 2262 | ENSG00000101871 | MID1    | Approved Cytoplasmcytoplasm                          |
| 2263 | ENSG00000101882 | NKAP    | SupportedGeneral nnucleus                            |
| 2264 | ENSG00000101883 | RHOXF1  | Approved Nuclear enucleus                            |
| 2265 | ENSG00000101888 | NXT2    | Approved Cytoplasmcytoplasm                          |
| 2266 | ENSG00000101901 | ALG13   | Approved General ccytoplasm                          |
| 2267 | ENSG00000101911 | PRPS2   | Enhanced Granular cytoplasm                          |
| 2268 | ENSG00000101916 | TLR8    | Enhanced Cytoplasmcytoplasm                          |
| 2269 | ENSG00000101928 | MOSPD1  | Approved General ccytoplasm                          |
| 2270 | ENSG00000101935 | AMMECR1 | UncertainMainly ccytoplasm                           |
| 2271 | ENSG00000101938 | CHRDL1  | Approved Cytoplasmcytoplasm                          |
| 2272 | ENSG00000101940 | WDR13   | SupportedGeneral nnucleus                            |
| 2273 | ENSG00000101951 | PAGE4   | Enhanced Cytoplasmcytoplasm                          |
| 2274 | ENSG00000101958 | GLRA2   | Approved Cytoplasmcytoplasm                          |
| 2275 | ENSG00000101966 | XIAP    | Approved Cytoplasmcytoplasm                          |
| 2276 | ENSG00000101972 | STAG2   | SupportedUbiquitousnucleus                           |
| 2277 | ENSG00000101974 | ATP11C  | Approved Membranoucytoplasm;plasma membrane          |
| 2278 | ENSG00000101997 | CCDC22  | UncertainCytoplasmcytoplasm                          |
| 2279 | ENSG00000102001 | CACNA1F | Enhanced Expression in photoreceptor cells in retina |
| 2280 | ENSG00000102003 | SYP     | Enhanced Selectivecytoplasm                          |
| 2281 | ENSG00000102007 | PLP2    | Approved General ccytoplasm                          |
| 2282 | ENSG00000102010 | BMX     | Enhanced Distinct cytoplasm                          |
| 2283 | ENSG00000102021 | LUZP4   | Enhanced Nuclear enucleus                            |
| 2284 | ENSG00000102024 | PLS3    | Approved Ubiquitouscytoplasm                         |
| 2285 | ENSG00000102030 | NAA10   | SupportedCytoplasmcytoplasm                          |
| 2286 | ENSG00000102032 | RENBP   | Enhanced Distinct cytoplasm;nucleus                  |
| 2287 | ENSG00000102034 | ELF4    | Enhanced Nuclear enucleus                            |
| 2288 | ENSG00000102038 | SMARCA1 | UncertainNuclear acytoplasm;nucleus                  |
| 2289 | ENSG00000102048 | ASB9    | Enhanced Cytoplasmcytoplasm;nucleus                  |
| 2290 | ENSG00000102053 | ZC3H12B | UncertainEstimation of protein expression could not  |
| 2291 | ENSG00000102054 | RBBP7   | SupportedUbiquitousnucleus                           |
| 2292 | ENSG00000102057 | KCND1   | Approved Membranoucytoplasm;plasma membrane          |
| 2293 | ENSG00000102081 | FMR1    | Approved Cytoplasmcytoplasm                          |
| 2294 | ENSG00000102098 | SCML2   | Enhanced Nuclear enucleus                            |
| 2295 | ENSG00000102100 | SLC35A2 | Approved Mainly ccytoplasm                           |
| 2296 | ENSG00000102103 | PQBP1   | SupportedUbiquitousnucleus                           |
| 2297 | ENSG00000102104 | RS1     | Enhanced Cytoplasmcytoplasm                          |
| 2298 | ENSG00000102109 | PCSK1N  | Enhanced Specifically expressed in neuroendocrine t: |
| 2299 | ENSG00000102119 | EMD     | SupportedUbiquitousnucleus;plasma membrane           |
| 2300 | ENSG00000102125 | TAZ     | Approved General mcytoplasm;plasma membrane          |
| 2301 | ENSG00000102144 | PGK1    | Approved Ubiquitouscytoplasm;nucleus                 |
| 2302 | ENSG00000102145 | GATA1   | Enhanced Selectivenucleus                            |
| 2303 | ENSG00000102158 | MAGT1   | Approved Ubiquitouscytoplasm                         |
| 2304 | ENSG00000102172 | SMS     | Approved Distinct expression of ovarian follicles. / |
| 2305 | ENSG00000102178 | UBL4A   | Approved Cytoplasmcytoplasm                          |
| 2306 | ENSG00000102181 | CD99L2  | Enhanced Cytoplasmcytoplasm;plasma membrane          |
| 2307 | ENSG00000102189 | EEA1    | SupportedCytoplasmcytoplasm                          |
| 2308 | ENSG00000102195 | GPR50   | Enhanced Highly expressed in the anterior pituitary  |

|      |                 |          |                                                      |
|------|-----------------|----------|------------------------------------------------------|
| 2309 | ENSG00000102218 | RP2      | UncertainCytoplasmcytoplasm                          |
| 2310 | ENSG00000102221 | JADE3    | UncertainEstimation of protein expression could not  |
| 2311 | ENSG00000102225 | CDK16    | Approved General ccytoplasm                          |
| 2312 | ENSG00000102226 | USP11    | Enhanced Cytoplasmcytoplasm;nucleus                  |
| 2313 | ENSG00000102230 | PCYT1B   | UncertainCytoplasmcytoplasm                          |
| 2314 | ENSG00000102241 | HTATSF1  | SupportedUbiquitounucleus                            |
| 2315 | ENSG00000102243 | VGLL1    | SupportedNuclear enucleus                            |
| 2316 | ENSG00000102245 | CD40LG   | Enhanced Cytoplasmcytoplasm                          |
| 2317 | ENSG00000102265 | TIMP1    | Approved Selective protein expression in glandular c |
| 2318 | ENSG00000102271 | KLHL4    | Approved Cytoplasmcytoplasm                          |
| 2319 | ENSG00000102287 | GABRE    | UncertainEstimation of protein expression could not  |
| 2320 | ENSG00000102290 | PCDH11X  | Approved Membranoucytoplasm;plasma membrane          |
| 2321 | ENSG00000102302 | FGD1     | UncertainEstimation of protein expression could not  |
| 2322 | ENSG00000102309 | PIN4     | Approved General ccytoplasm;nucleus                  |
| 2323 | ENSG00000102312 | PORCN    | Enhanced Cytoplasmcytoplasm                          |
| 2324 | ENSG00000102313 | ITIH6    | UncertainEstimation of protein expression could not  |
| 2325 | ENSG00000102316 | MAGED2   | SupportedUbiquitoucytoplasm                          |
| 2326 | ENSG00000102317 | RBM3     | Enhanced Nuclear enucleus                            |
| 2327 | ENSG00000102359 | SRPX2    | Approved Mainly ccytoplasm;plasma membrane           |
| 2328 | ENSG00000102362 | SYTL4    | Approved Mainly ccytoplasm                           |
| 2329 | ENSG00000102383 | ZDHHC15  | UncertainEstimation of protein expression could not  |
| 2330 | ENSG00000102387 | TAF7L    | Approved Cytoplasmcytoplasm                          |
| 2331 | ENSG00000102390 | PBDC1    | UncertainLow, gene cytoplasm                         |
| 2332 | ENSG00000102393 | GLA      | Enhanced Granular cytoplasm                          |
| 2333 | ENSG00000102401 | ARMCX3   | UncertainEstimation of protein expression could not  |
| 2334 | ENSG00000102409 | BEX4     | UncertainCytoplasmcytoplasm                          |
| 2335 | ENSG00000102445 | RUBCNL   | Approved General ccytoplasm                          |
| 2336 | ENSG00000102452 | NALCN    | Approved Cytoplasmcytoplasm                          |
| 2337 | ENSG00000102468 | HTR2A    | Enhanced Cytoplasmcytoplasm                          |
| 2338 | ENSG00000102471 | NDFIP2   | UncertainCytoplasmcytoplasm                          |
| 2339 | ENSG00000102524 | TNFSF13B | Enhanced General ccytoplasm                          |
| 2340 | ENSG00000102531 | FNDC3A   | Approved Cytoplasmcytoplasm                          |
| 2341 | ENSG00000102543 | CDADC1   | UncertainCytoplasmcytoplasm                          |
| 2342 | ENSG00000102547 | CAB39L   | UncertainCytoplasmcytoplasm                          |
| 2343 | ENSG00000102554 | KLF5     | Approved Mainly nunucleus                            |
| 2344 | ENSG00000102572 | STK24    | Enhanced Ubiquitoucytoplasm                          |
| 2345 | ENSG00000102575 | ACP5     | Enhanced Cytoplasmcytoplasm                          |
| 2346 | ENSG00000102580 | DNAJC3   | UncertainGeneral ccytoplasm                          |
| 2347 | ENSG00000102595 | UGGT2    | UncertainEstimation of protein expression could not  |
| 2348 | ENSG00000102606 | ARHGEF7  | Approved Ubiquitoucytoplasm                          |
| 2349 | ENSG00000102678 | FGF9     | Enhanced Cytoplasmcytoplasm                          |
| 2350 | ENSG00000102683 | SGCG     | Enhanced Membranoucytoplasm;plasma membrane          |
| 2351 | ENSG00000102699 | PARP4    | Approved General ccytoplasm                          |
| 2352 | ENSG00000102710 | SUPT20H  | UncertainCytoplasmcytoplasm                          |
| 2353 | ENSG00000102738 | MRPS31   | UncertainGeneral ccytoplasm                          |
| 2354 | ENSG00000102743 | SLC25A15 | Approved Ubiquitoucytoplasm                          |
| 2355 | ENSG00000102753 | KPNA3    | Approved Nuclear enucleus                            |
| 2356 | ENSG00000102755 | FLT1     | Enhanced Cytoplasmcytoplasm                          |
| 2357 | ENSG00000102760 | RGCC     | Enhanced Ubiquitoucytoplasm;plasma membrane          |
| 2358 | ENSG00000102763 | VWA8     | UncertainGeneral ccytoplasm                          |
| 2359 | ENSG00000102780 | DGKH     | UncertainUbiquitoucytoplasm                          |
| 2360 | ENSG00000102786 | INTS6    | SupportedNuclear enucleus                            |
| 2361 | ENSG00000102794 | ACOD1    | UncertainEstimation of protein expression could not  |
| 2362 | ENSG00000102796 | DHRS12   | UncertainCytoplasmcytoplasm                          |
| 2363 | ENSG00000102805 | CLN5     | Approved Cytoplasmcytoplasm                          |

|      |                 |          |                                                      |
|------|-----------------|----------|------------------------------------------------------|
| 2364 | ENSG00000102837 | OLFM4    | Enhanced Cytoplasm cytoplasm;plasma membrane         |
| 2365 | ENSG00000102854 | MSLN     | Enhanced Cytoplasm cytoplasm;plasma membrane         |
| 2366 | ENSG00000102858 | MGRN1    | Approved General c cytoplasm                         |
| 2367 | ENSG00000102870 | ZNF629   | Uncertain Cytoplasm cytoplasm                        |
| 2368 | ENSG00000102871 | TRADD    | Enhanced General c cytoplasm                         |
| 2369 | ENSG00000102879 | COR01A   | Enhanced Cytoplasm cytoplasm                         |
| 2370 | ENSG00000102882 | MAPK3    | Approved Cytoplasm cytoplasm                         |
| 2371 | ENSG00000102886 | GDPD3    | Uncertain Estimation of protein expression could not |
| 2372 | ENSG00000102890 | ELM03    | Approved Cytoplasm cytoplasm                         |
| 2373 | ENSG00000102898 | NUTF2    | Supported Cytoplasm cytoplasm                        |
| 2374 | ENSG00000102900 | NUP93    | Uncertain General c cytoplasm;nucleus                |
| 2375 | ENSG00000102901 | CENPT    | Approved Nuclear a cytoplasm;nucleus                 |
| 2376 | ENSG00000102908 | NFAT5    | Approved General n cytoplasm;nucleus                 |
| 2377 | ENSG00000102910 | LONP2    | Uncertain Nuclear e nucleus                          |
| 2378 | ENSG00000102921 | N4BP1    | Approved Nuclear a cytoplasm;nucleus                 |
| 2379 | ENSG00000102931 | ARL2BP   | Approved Ubiquitou cytoplasm                         |
| 2380 | ENSG00000102934 | PLLP     | Enhanced Cytoplasm cytoplasm;plasma membrane         |
| 2381 | ENSG00000102967 | DHODH    | Approved General c cytoplasm                         |
| 2382 | ENSG00000102970 | CCL17    | Uncertain Cytoplasm cytoplasm                        |
| 2383 | ENSG00000102974 | CTCF     | Supported Ubiquitou nucleus                          |
| 2384 | ENSG00000102977 | ACD      | Approved Nuclear e nucleus                           |
| 2385 | ENSG00000102978 | POLR2C   | Enhanced General n cytoplasm;nucleus                 |
| 2386 | ENSG00000102981 | PARD6A   | Approved Cytoplasm cytoplasm                         |
| 2387 | ENSG00000102984 | ZNF821   | Enhanced Cytoplasm cytoplasm                         |
| 2388 | ENSG00000102996 | MMP15    | Uncertain General c cytoplasm;nucleus                |
| 2389 | ENSG00000103005 | USB1     | Approved Cytoplasm cytoplasm                         |
| 2390 | ENSG00000103018 | CYB5B    | Approved General c cytoplasm                         |
| 2391 | ENSG00000103021 | CCDC113  | Uncertain Estimation of protein expression could not |
| 2392 | ENSG00000103023 | PRSS54   | Enhanced Cytoplasm cytoplasm                         |
| 2393 | ENSG00000103024 | NME3     | Approved General c cytoplasm                         |
| 2394 | ENSG00000103034 | NDRG4    | Enhanced Cytoplasm cytoplasm                         |
| 2395 | ENSG00000103035 | PSMD7    | Enhanced General n cytoplasm;nucleus                 |
| 2396 | ENSG00000103037 | SETD6    | Uncertain General c cytoplasm                        |
| 2397 | ENSG00000103042 | SLC38A7  | Uncertain Expression in most tissues.                |
| 2398 | ENSG00000103043 | VAC14    | Approved General c cytoplasm                         |
| 2399 | ENSG00000103044 | HAS3     | Supported Cytoplasm cytoplasm                        |
| 2400 | ENSG00000103047 | TANG06   | Approved General c cytoplasm                         |
| 2401 | ENSG00000103051 | COG4     | Approved Ubiquitou cytoplasm                         |
| 2402 | ENSG00000103056 | SMPD3    | Approved Cytoplasm cytoplasm;plasma membrane         |
| 2403 | ENSG00000103061 | SLC7A60S | Approved General n cytoplasm;nucleus                 |
| 2404 | ENSG00000103064 | SLC7A6   | Uncertain Cytoplasm cytoplasm                        |
| 2405 | ENSG00000103066 | PLA2G15  | Enhanced Mainly c cytoplasm;plasma membrane          |
| 2406 | ENSG00000103067 | ESRP2    | Uncertain Cytoplasm cytoplasm                        |
| 2407 | ENSG00000103089 | FA2H     | Approved Cytoplasm cytoplasm                         |
| 2408 | ENSG00000103091 | WDR59    | Approved Mainly c cytoplasm;plasma membrane          |
| 2409 | ENSG00000103111 | MON1B    | Approved General c cytoplasm                         |
| 2410 | ENSG00000103121 | CMC2     | Approved General c cytoplasm                         |
| 2411 | ENSG00000103126 | AXIN1    | Approved General c cytoplasm                         |
| 2412 | ENSG00000103145 | HCFC1R1  | Approved General c cytoplasm                         |
| 2413 | ENSG00000103148 | NPRL3    | Uncertain General c cytoplasm;plasma membrane        |
| 2414 | ENSG00000103150 | MLYCD    | Enhanced General c cytoplasm                         |
| 2415 | ENSG00000103152 | MPG      | Approved Mainly n nucleus                            |
| 2416 | ENSG00000103154 | NECAB2   | Enhanced Selective expression in CNS and islets of I |
| 2417 | ENSG00000103174 | NAGPA    | Approved Cytoplasm cytoplasm                         |
| 2418 | ENSG00000103175 | WFDC1    | Uncertain Granular cytoplasm                         |

|      |                 |           |                                                      |
|------|-----------------|-----------|------------------------------------------------------|
| 2419 | ENSG00000103187 | COTL1     | Enhanced Cytoplasm cytoplasm;nucleus                 |
| 2420 | ENSG00000103194 | USP10     | Enhanced Ubiquitous cytoplasm;plasma membrane        |
| 2421 | ENSG00000103196 | CRISPLD2  | Approved Granular cytoplasm;plasma membrane          |
| 2422 | ENSG00000103197 | TSC2      | Approved Cytoplasm cytoplasm                         |
| 2423 | ENSG00000103199 | ZNF500    | Supported Nuclear enucleus                           |
| 2424 | ENSG00000103202 | NME4      | Approved General c cytoplasm                         |
| 2425 | ENSG00000103222 | ABCC1     | Uncertain Cytoplasm cytoplasm;plasma membrane        |
| 2426 | ENSG00000103226 | NOM03     | Approved Cytoplasm cytoplasm                         |
| 2427 | ENSG00000103245 | NARFL     | Approved General c cytoplasm                         |
| 2428 | ENSG00000103248 | MTHFSD    | Uncertain General c cytoplasm;nucleus                |
| 2429 | ENSG00000103249 | CLCN7     | Supported General c cytoplasm                        |
| 2430 | ENSG00000103253 | HAGHL     | Approved Cytoplasm cytoplasm                         |
| 2431 | ENSG00000103254 | FAM173A   | Approved Cytoplasm cytoplasm                         |
| 2432 | ENSG00000103257 | SLC7A5    | Approved Cytoplasm cytoplasm                         |
| 2433 | ENSG00000103260 | METRNL    | Approved General c cytoplasm                         |
| 2434 | ENSG00000103264 | FBX031    | Approved General c cytoplasm                         |
| 2435 | ENSG00000103266 | STUB1     | Enhanced Ubiquitous cytoplasm                        |
| 2436 | ENSG00000103269 | RHBDL1    | Uncertain Estimation of protein expression could not |
| 2437 | ENSG00000103274 | NUBP1     | Enhanced Cytoplasm cytoplasm                         |
| 2438 | ENSG00000103275 | UBE2I     | Approved Nuclear a cytoplasm;nucleus                 |
| 2439 | ENSG00000103310 | ZP2       | Approved Cytoplasm cytoplasm                         |
| 2440 | ENSG00000103316 | CRYM      | Enhanced Cytoplasm cytoplasm                         |
| 2441 | ENSG00000103319 | EEF2K     | Approved Cytoplasm cytoplasm                         |
| 2442 | ENSG00000103326 | CAPN15    | Uncertain High cyto cytoplasm                        |
| 2443 | ENSG00000103335 | PIEZ01    | Uncertain Cytoplasm cytoplasm                        |
| 2444 | ENSG00000103342 | GSPT1     | Approved Ubiquitous cytoplasm                        |
| 2445 | ENSG00000103343 | ZNF174    | Approved Mainly n nucleus                            |
| 2446 | ENSG00000103351 | CLUAP1    | Uncertain General c cytoplasm                        |
| 2447 | ENSG00000103356 | EARS2     | Approved Mainly c cytoplasm                          |
| 2448 | ENSG00000103363 | ELOB      | Approved Nuclear a cytoplasm;nucleus                 |
| 2449 | ENSG00000103365 | GGA2      | Approved Cytoplasm cytoplasm;plasma membrane         |
| 2450 | ENSG00000103375 | AQP8      | Enhanced Cytoplasm cytoplasm;plasma membrane         |
| 2451 | ENSG00000103381 | CPPED1    | Uncertain Cytoplasm cytoplasm                        |
| 2452 | ENSG00000103404 | USP31     | Uncertain General c cytoplasm                        |
| 2453 | ENSG00000103415 | HMOX2     | Supported Ubiquitous cytoplasm                       |
| 2454 | ENSG00000103423 | DNAJA3    | Approved General c cytoplasm                         |
| 2455 | ENSG00000103426 | COR07-PAM | Uncertain Estimation of protein expression could not |
| 2456 | ENSG00000103449 | SALL1     | Enhanced General c cytoplasm                         |
| 2457 | ENSG00000103460 | TOX3      | Enhanced Nuclear a cytoplasm;nucleus                 |
| 2458 | ENSG00000103479 | RBL2      | Supported Ubiquitous nucleus                         |
| 2459 | ENSG00000103485 | QPRT      | Approved Cytoplasm cytoplasm                         |
| 2460 | ENSG00000103489 | XYLT1     | Approved Ubiquitous cytoplasm                        |
| 2461 | ENSG00000103490 | PYCARD    | Enhanced Nuclear a cytoplasm;nucleus                 |
| 2462 | ENSG00000103494 | RPGRIP1L  | Uncertain Cytoplasm cytoplasm                        |
| 2463 | ENSG00000103495 | MAZ       | Approved Nuclear a cytoplasm;nucleus                 |
| 2464 | ENSG00000103496 | STX4      | Approved Cytoplasm cytoplasm;plasma membrane         |
| 2465 | ENSG00000103502 | CDIPT     | Approved Cytoplasm cytoplasm                         |
| 2466 | ENSG00000103507 | BCKDK     | Supported General c cytoplasm                        |
| 2467 | ENSG00000103512 | NOM01     | Approved Cytoplasm cytoplasm;plasma membrane         |
| 2468 | ENSG00000103522 | IL21R     | Uncertain Cytoplasm cytoplasm                        |
| 2469 | ENSG00000103534 | TMC5      | Enhanced Membranous cytoplasm;plasma membrane        |
| 2470 | ENSG00000103540 | CCP110    | Approved Granular cytoplasm                          |
| 2471 | ENSG00000103544 | VPS35L    | Uncertain Cytoplasm cytoplasm;plasma membrane        |
| 2472 | ENSG00000103546 | SLC6A2    | Enhanced Distinct expression in ganglion cells in a  |
| 2473 | ENSG00000103549 | RNF40     | Approved Mainly n nucleus                            |

|      |                 |          |                                                     |
|------|-----------------|----------|-----------------------------------------------------|
| 2474 | ENSG00000103550 | KNOP1    | UncertainNucleolarnucleus                           |
| 2475 | ENSG00000103569 | AQP9     | Enhanced Membranouplasma membrane                   |
| 2476 | ENSG00000103591 | AAGAB    | SupportedUbiquitoucytoplasm                         |
| 2477 | ENSG00000103599 | IQCH     | UncertainEstimation of protein expression could not |
| 2478 | ENSG00000103642 | LACTB    | SupportedUbiquitoucytoplasm                         |
| 2479 | ENSG00000103647 | COR02B   | Enhanced General ccytoplasm                         |
| 2480 | ENSG00000103653 | CSK      | Approved Cytoplasmcytoplasm                         |
| 2481 | ENSG00000103657 | HERC1    | UncertainExpression in a subset of immune cells.    |
| 2482 | ENSG00000103671 | TRIP4    | Approved Cytoplasmcytoplasm                         |
| 2483 | ENSG00000103707 | MTFMT    | UncertainGeneral ccytoplasm                         |
| 2484 | ENSG00000103723 | AP3B2    | Enhanced Cytoplasmcytoplasm                         |
| 2485 | ENSG00000103740 | ACSBG1   | Approved Cytoplasmcytoplasm                         |
| 2486 | ENSG00000103742 | IGDCC4   | Approved Cytoplasmcytoplasm                         |
| 2487 | ENSG00000103769 | RAB11A   | Approved Ubiquitoucytoplasm;plasma membrane         |
| 2488 | ENSG00000103811 | CTSH     | Enhanced Granular cytoplasm                         |
| 2489 | ENSG00000103852 | TTC23    | UncertainUbiquitoucytoplasm                         |
| 2490 | ENSG00000103855 | CD276    | Enhanced Ubiquitoucytoplasm;plasma membrane         |
| 2491 | ENSG00000103876 | FAH      | Enhanced Cytoplasmcytoplasm                         |
| 2492 | ENSG00000103932 | RPAP1    | Approved General nnucleus                           |
| 2493 | ENSG00000103942 | HOMER2   | UncertainGeneral ccytoplasm;plasma membrane         |
| 2494 | ENSG00000103966 | EHD4     | Approved Cytoplasmcytoplasm                         |
| 2495 | ENSG00000103978 | TMEM87A  | Enhanced General ccytoplasm                         |
| 2496 | ENSG00000103994 | ZNF106   | Approved Cytoplasmcytoplasm                         |
| 2497 | ENSG00000103995 | CEP152   | Approved Cytoplasmcytoplasm                         |
| 2498 | ENSG00000104043 | ATP8B4   | Approved General ccytoplasm                         |
| 2499 | ENSG00000104047 | DTWD1    | UncertainGeneral ccytoplasm                         |
| 2500 | ENSG00000104059 | FAM189A1 | UncertainEstimation of protein expression could not |
| 2501 | ENSG00000104064 | GABPB1   | SupportedUbiquitounucleus                           |
| 2502 | ENSG00000104067 | TJP1     | Enhanced Expressedplasma membrane                   |
| 2503 | ENSG00000104081 | BMF      | Approved Cytoplasmcytoplasm                         |
| 2504 | ENSG00000104093 | DMXL2    | Approved Granular cytoplasm                         |
| 2505 | ENSG00000104112 | SCG3     | Enhanced Selectivecytoplasm                         |
| 2506 | ENSG00000104129 | DNAJC17  | Approved Cytoplasmcytoplasm;nucleus                 |
| 2507 | ENSG00000104131 | EIF3J    | Approved General ccytoplasm                         |
| 2508 | ENSG00000104133 | SPG11    | Approved General ccytoplasm                         |
| 2509 | ENSG00000104140 | RHOV     | Enhanced Cytoplasmcytoplasm                         |
| 2510 | ENSG00000104142 | VPS18    | Approved General ccytoplasm;plasma membrane         |
| 2511 | ENSG00000104147 | OIP5     | Enhanced Nuclear enucleus                           |
| 2512 | ENSG00000104154 | SLC30A4  | UncertainCytoplasmcytoplasm                         |
| 2513 | ENSG00000104164 | BLOC1S6  | Approved Cytoplasmcytoplasm                         |
| 2514 | ENSG00000104177 | MYEF2    | SupportedGeneral nnucleus                           |
| 2515 | ENSG00000104205 | SGK3     | SupportedUbiquitoucytoplasm                         |
| 2516 | ENSG00000104219 | ZDHHC2   | UncertainCytoplasmcytoplasm                         |
| 2517 | ENSG00000104221 | BRF2     | SupportedUbiquitounucleus                           |
| 2518 | ENSG00000104228 | TRIM35   | Approved Ubiquitoucytoplasm;nucleus                 |
| 2519 | ENSG00000104231 | ZFAND1   | Approved Ubiquitoucytoplasm                         |
| 2520 | ENSG00000104237 | RP1      | Enhanced Cytoplasmcytoplasm                         |
| 2521 | ENSG00000104267 | CA2      | Enhanced Cytoplasmcytoplasm;nucleus                 |
| 2522 | ENSG00000104290 | FZD3     | Approved General ccytoplasm                         |
| 2523 | ENSG00000104312 | RIPK2    | Approved Cytoplasmcytoplasm                         |
| 2524 | ENSG00000104320 | NBN      | SupportedUbiquitounucleus                           |
| 2525 | ENSG00000104324 | CPQ      | Enhanced Granular cytoplasm                         |
| 2526 | ENSG00000104325 | DECR1    | Enhanced Cytoplasmcytoplasm                         |
| 2527 | ENSG00000104327 | CALB1    | Enhanced Selectivecytoplasm                         |
| 2528 | ENSG00000104331 | IMPAD1   | SupportedUbiquitoucytoplasm                         |

|      |                 |           |                                                      |
|------|-----------------|-----------|------------------------------------------------------|
| 2529 | ENSG00000104332 | SFRP1     | Approved extracellular positivity in several tissues |
| 2530 | ENSG00000104341 | LAPTM4B   | UncertainGeneral cytoplasm                           |
| 2531 | ENSG00000104343 | UBE2W     | UncertainGeneral cytoplasm                           |
| 2532 | ENSG00000104361 | NIPAL2    | UncertainCytoplasm cytoplasm;nucleus                 |
| 2533 | ENSG00000104365 | IKBKB     | Enhanced Cytoplasm cytoplasm                         |
| 2534 | ENSG00000104368 | PLAT      | SupportedCytoplasm cytoplasm;plasma membrane         |
| 2535 | ENSG00000104369 | JPH1      | Enhanced Selective cytoplasm                         |
| 2536 | ENSG00000104371 | DKK4      | Uncertainplasma prplasma membrane                    |
| 2537 | ENSG00000104375 | STK3      | UncertainCytoplasm cytoplasm;plasma membrane         |
| 2538 | ENSG00000104381 | GDAP1     | Enhanced Cytoplasm cytoplasm                         |
| 2539 | ENSG00000104388 | RAB2A     | Approved General cytoplasm                           |
| 2540 | ENSG00000104408 | EIF3E     | Approved General cytoplasm;nucleus                   |
| 2541 | ENSG00000104412 | EMC2      | Approved General cytoplasm;nucleus                   |
| 2542 | ENSG00000104413 | ESRP1     | Enhanced Nuclear enucleus                            |
| 2543 | ENSG00000104415 | WISP1     | UncertainUbiquitous cytoplasm                        |
| 2544 | ENSG00000104419 | NDRG1     | Approved General cytoplasm;nucleus                   |
| 2545 | ENSG00000104427 | ZC2HC1A   | Approved Ubiquitous cytoplasm                        |
| 2546 | ENSG00000104432 | IL7       | Approved Mainly cytoplasm;plasma membrane            |
| 2547 | ENSG00000104442 | ARMC1     | Approved Ubiquitous cytoplasm                        |
| 2548 | ENSG00000104447 | TRPS1     | Enhanced Nuclear enucleus                            |
| 2549 | ENSG00000104450 | SPAG1     | Enhanced Cytoplasm cytoplasm                         |
| 2550 | ENSG00000104490 | NCALD     | Approved Cytoplasm cytoplasm                         |
| 2551 | ENSG00000104497 | SNX16     | Approved General cytoplasm;nucleus                   |
| 2552 | ENSG00000104518 | GSDMD     | UncertainCytoplasm cytoplasm;plasma membrane         |
| 2553 | ENSG00000104522 | TSTA3     | Approved Low gener cytoplasm                         |
| 2554 | ENSG00000104524 | PYCR3     | UncertainGranular cytoplasm                          |
| 2555 | ENSG00000104529 | EEF1D     | SupportedUbiquitous cytoplasm                        |
| 2556 | ENSG00000104537 | ANXA13    | Enhanced Cytoplasm cytoplasm                         |
| 2557 | ENSG00000104549 | SQLE      | Enhanced General cytoplasm                           |
| 2558 | ENSG00000104611 | SH2D4A    | Enhanced Cytoplasm cytoplasm                         |
| 2559 | ENSG00000104613 | INTS10    | UncertainCytoplasm cytoplasm                         |
| 2560 | ENSG00000104626 | ERI1      | UncertainMainly cytoplasm                            |
| 2561 | ENSG00000104635 | SLC39A14  | Approved Cytoplasm cytoplasm                         |
| 2562 | ENSG00000104660 | LEPROTL1  | UncertainCytoplasm cytoplasm                         |
| 2563 | ENSG00000104671 | DCTN6     | Approved Cytoplasm cytoplasm                         |
| 2564 | ENSG00000104679 | R3HCC1    | UncertainCytoplasm cytoplasm                         |
| 2565 | ENSG00000104687 | GSR       | Approved Ubiquitous cytoplasm;nucleus                |
| 2566 | ENSG00000104689 | TNFRSF10A | Approved Cytoplasm cytoplasm                         |
| 2567 | ENSG00000104691 | UBXN8     | Enhanced Granular cytoplasm                          |
| 2568 | ENSG00000104695 | PPP2CB    | Approved Ubiquitous cytoplasm;nucleus                |
| 2569 | ENSG00000104714 | ERICH1    | Approved Nuclear cytoplasm;nucleus                   |
| 2570 | ENSG00000104722 | NEFM      | Enhanced Distinct cytoplasm                          |
| 2571 | ENSG00000104723 | TUSC3     | Approved Cytoplasm cytoplasm;plasma membrane         |
| 2572 | ENSG00000104728 | ARHGEF10  | Approved Cytoplasm cytoplasm;nucleus                 |
| 2573 | ENSG00000104731 | KLHDC4    | Approved General cytoplasm;plasma membrane           |
| 2574 | ENSG00000104738 | MCM4      | Enhanced Nuclear enucleus                            |
| 2575 | ENSG00000104755 | ADAM2     | Enhanced Selective cytoplasm                         |
| 2576 | ENSG00000104763 | ASAH1     | SupportedHigh expression in lysosomes.               |
| 2577 | ENSG00000104765 | BNIP3L    | Enhanced Ubiquitous cytoplasm                        |
| 2578 | ENSG00000104774 | MAN2B1    | SupportedGeneral cytoplasm                           |
| 2579 | ENSG00000104783 | KCNN4     | Approved Cytoplasm cytoplasm                         |
| 2580 | ENSG00000104805 | NUCB1     | SupportedGeneral cytoplasm                           |
| 2581 | ENSG00000104808 | DHDH      | Approved High cytoplasm                              |
| 2582 | ENSG00000104812 | GYS1      | Enhanced Cytoplasm cytoplasm                         |
| 2583 | ENSG00000104814 | MAP4K1    | Enhanced Cytoplasm cytoplasm                         |

|      |                 |          |                                                      |
|------|-----------------|----------|------------------------------------------------------|
| 2584 | ENSG00000104818 | CGB2     | SupportedSelective cytoplasm                         |
| 2585 | ENSG00000104823 | ECH1     | SupportedGranular cytoplasm                          |
| 2586 | ENSG00000104824 | HNRNPL   | SupportedUbiquitounucleus                            |
| 2587 | ENSG00000104826 | LHB      | Enhanced Highly expressed in the pituitary gland.    |
| 2588 | ENSG00000104827 | CGB3     | Enhanced Selective cytoplasm                         |
| 2589 | ENSG00000104833 | TUBB4A   | Approved Cytoplasmcytoplasm                          |
| 2590 | ENSG00000104835 | SARS2    | Approved General gcytoplasm                          |
| 2591 | ENSG00000104852 | SNRNP70  | SupportedUbiquitounucleus                            |
| 2592 | ENSG00000104853 | CLPTM1   | Approved Cytoplasmcytoplasm                          |
| 2593 | ENSG00000104856 | RELB     | Approved Cytoplasmcytoplasm;nucleus                  |
| 2594 | ENSG00000104859 | CLASRP   | Approved Nuclear enucleus                            |
| 2595 | ENSG00000104866 | PPP1R37  | Approved Ubiquitoucytoplasm                          |
| 2596 | ENSG00000104870 | FCGRT    | Enhanced Distinct cytoplasm                          |
| 2597 | ENSG00000104872 | PIH1D1   | Approved General ccytoplasm                          |
| 2598 | ENSG00000104879 | CKM      | Enhanced Cytoplasmcytoplasm                          |
| 2599 | ENSG00000104880 | ARHGEF18 | Approved General ccytoplasm                          |
| 2600 | ENSG00000104881 | PPP1R13L | Approved Cytoplasmcytoplasm                          |
| 2601 | ENSG00000104883 | PEX11G   | UncertainCytoplasmcytoplasm                          |
| 2602 | ENSG00000104884 | ERCC2    | Approved Nuclear acytoplasm;nucleus                  |
| 2603 | ENSG00000104885 | DOT1L    | Approved Nuclear enucleus                            |
| 2604 | ENSG00000104886 | PLEKHJ1  | Approved General ccytoplasm                          |
| 2605 | ENSG00000104888 | SLC17A7  | Enhanced Selective expression in CNS.                |
| 2606 | ENSG00000104892 | KLC3     | Approved Cytoplasmcytoplasm                          |
| 2607 | ENSG00000104894 | CD37     | Enhanced Selectivecytoplasm;plasma membrane          |
| 2608 | ENSG00000104897 | SF3A2    | Enhanced Ubiquitounucleus                            |
| 2609 | ENSG00000104901 | DKKL1    | Enhanced Highly secytoplasm                          |
| 2610 | ENSG00000104904 | OAZ1     | UncertainGeneral ccytoplasm;plasma membrane          |
| 2611 | ENSG00000104907 | TRMT1    | Approved Cytoplasmcytoplasm                          |
| 2612 | ENSG00000104915 | STX10    | Approved Cytoplasmcytoplasm;nucleus                  |
| 2613 | ENSG00000104921 | FCER2    | Enhanced Selectivecytoplasm;plasma membrane          |
| 2614 | ENSG00000104936 | DMPK     | Enhanced Cytoplasmcytoplasm                          |
| 2615 | ENSG00000104938 | CLEC4M   | SupportedHigh expression in endothelial cells.       |
| 2616 | ENSG00000104941 | RSPH6A   | Enhanced Cytoplasmcytoplasm                          |
| 2617 | ENSG00000104946 | TBC1D17  | UncertainNuclear acytoplasm;nucleus                  |
| 2618 | ENSG00000104951 | IL4I1    | Enhanced High expression of inflammatory cells in se |
| 2619 | ENSG00000104957 | CCDC130  | Approved General ccytoplasm;plasma membrane          |
| 2620 | ENSG00000104960 | PTOV1    | Approved Expression of varying intensities in all t: |
| 2621 | ENSG00000104967 | NOVA2    | Enhanced Nuclear enucleus                            |
| 2622 | ENSG00000104969 | SGTA     | Approved Nuclear acytoplasm;nucleus                  |
| 2623 | ENSG00000104970 | KIR3DX1  | UncertainEstimation of protein expression could not  |
| 2624 | ENSG00000104973 | MED25    | Approved General nnucleus                            |
| 2625 | ENSG00000104976 | SNAPC2   | SupportedNuclear enucleus                            |
| 2626 | ENSG00000104979 | C19orf53 | Approved Nuclear anucleus                            |
| 2627 | ENSG00000104980 | TIMM44   | SupportedUbiquitoucytoplasm                          |
| 2628 | ENSG00000104983 | CCDC61   | UncertainMainly ccytoplasm                           |
| 2629 | ENSG00000105011 | ASF1B    | Enhanced Nuclear enucleus                            |
| 2630 | ENSG00000105048 | TNNT1    | Enhanced Selectivecytoplasm                          |
| 2631 | ENSG00000105053 | VRK3     | Approved Nuclear enucleus                            |
| 2632 | ENSG00000105058 | FAM32A   | Approved Nuclear anucleus                            |
| 2633 | ENSG00000105063 | PPP6R1   | Approved Cytoplasmcytoplasm                          |
| 2634 | ENSG00000105072 | C19orf44 | UncertainEstimation of protein expression could not  |
| 2635 | ENSG00000105085 | MED26    | Enhanced Nuclear enucleus                            |
| 2636 | ENSG00000105088 | OLFM2    | UncertainCytoplasmcytoplasm                          |
| 2637 | ENSG00000105122 | RASAL3   | Enhanced Cytoplasmcytoplasm                          |
| 2638 | ENSG00000105127 | AKAP8    | SupportedUbiquitounucleus                            |



|      |                 |          |           |                                             |
|------|-----------------|----------|-----------|---------------------------------------------|
| 2639 | ENSG00000105131 | EPHX3    | Uncertain | Estimation of protein expression could not  |
| 2640 | ENSG00000105135 | ILVBL    | Approved  | General c cytoplasm                         |
| 2641 | ENSG00000105136 | ZNF419   | Uncertain | Nuclear a cytoplasm;nucleus                 |
| 2642 | ENSG00000105137 | SYDE1    | Uncertain | General c cytoplasm;nucleus                 |
| 2643 | ENSG00000105141 | CASP14   | Enhanced  | Selective cytoplasm;nucleus                 |
| 2644 | ENSG00000105143 | SLC1A6   | Enhanced  | Expression in CNS and testis.               |
| 2645 | ENSG00000105146 | AURKC    | Uncertain | Estimation of protein expression could not  |
| 2646 | ENSG00000105171 | POP4     | Approved  | Nuclear enucleus                            |
| 2647 | ENSG00000105173 | CCNE1    | Approved  | Nuclear a cytoplasm;nucleus                 |
| 2648 | ENSG00000105176 | URI1     | Approved  | Cytoplasm cytoplasm                         |
| 2649 | ENSG00000105185 | PDCD5    | Enhanced  | Ubiquitou cytoplasm                         |
| 2650 | ENSG00000105186 | ANKRD27  | Approved  | Cytoplasm cytoplasm;plasma membrane         |
| 2651 | ENSG00000105193 | RPS16    | Approved  | General c cytoplasm                         |
| 2652 | ENSG00000105197 | TIMM50   | Enhanced  | Ubiquitou cytoplasm                         |
| 2653 | ENSG00000105202 | FBL      | Supported | General n nucleus                           |
| 2654 | ENSG00000105204 | DYRK1B   | Uncertain | Cytoplasm cytoplasm                         |
| 2655 | ENSG00000105205 | CLC      | Enhanced  | Cytoplasm cytoplasm                         |
| 2656 | ENSG00000105219 | CNTD2    | Uncertain | Estimation of protein expression could not  |
| 2657 | ENSG00000105220 | GPI      | Enhanced  | Cytoplasm cytoplasm                         |
| 2658 | ENSG00000105221 | AKT2     | Uncertain | General c cytoplasm                         |
| 2659 | ENSG00000105223 | PLD3     | Approved  | Cytoplasm cytoplasm                         |
| 2660 | ENSG00000105227 | PRX      | Enhanced  | Nuclear a nucleus;plasma membrane           |
| 2661 | ENSG00000105229 | PIAS4    | Enhanced  | Cytoplasm cytoplasm                         |
| 2662 | ENSG00000105245 | NUMBL    | Approved  | Low cytop cytoplasm                         |
| 2663 | ENSG00000105246 | EBI3     | Enhanced  | Cytoplasm cytoplasm                         |
| 2664 | ENSG00000105248 | CCDC94   | Approved  | Nuclear, cytoplasm;nucleus;plasma membrane  |
| 2665 | ENSG00000105251 | SHD      | Uncertain | High cyto cytoplasm                         |
| 2666 | ENSG00000105254 | TBCB     | Approved  | Cytoplasm cytoplasm                         |
| 2667 | ENSG00000105255 | FSD1     | Supported | Cytoplasm cytoplasm                         |
| 2668 | ENSG00000105258 | POLR2I   | Uncertain | Cytoplasm cytoplasm;nucleus                 |
| 2669 | ENSG00000105278 | ZFR2     | Uncertain | General n nucleus                           |
| 2670 | ENSG00000105281 | SLC1A5   | Enhanced  | Membranou cytoplasm;plasma membrane         |
| 2671 | ENSG00000105287 | PRKD2    | Enhanced  | Cytoplasm cytoplasm;plasma membrane         |
| 2672 | ENSG00000105289 | TJP3     | Enhanced  | Distinct plasma membrane                    |
| 2673 | ENSG00000105290 | APLP1    | Enhanced  | Cytoplasm cytoplasm                         |
| 2674 | ENSG00000105298 | CACTIN   | Approved  | Ubiquitou cytoplasm;nucleus                 |
| 2675 | ENSG00000105321 | CCDC9    | Approved  | Cytoplasm cytoplasm;nucleus                 |
| 2676 | ENSG00000105323 | HNRNPUL1 | Enhanced  | Ubiquitounucleus                            |
| 2677 | ENSG00000105325 | FZR1     | Approved  | Cytoplasm cytoplasm;plasma membrane         |
| 2678 | ENSG00000105327 | BBC3     | Approved  | Cytoplasm cytoplasm                         |
| 2679 | ENSG00000105329 | TGFB1    | Approved  | Extracell cytoplasm;plasma membrane         |
| 2680 | ENSG00000105341 | DMAC2    | Approved  | General c cytoplasm;plasma membrane         |
| 2681 | ENSG00000105355 | PLIN3    | Uncertain | Cytoplasm cytoplasm                         |
| 2682 | ENSG00000105357 | MYH14    | Enhanced  | General c cytoplasm;plasma membrane         |
| 2683 | ENSG00000105364 | MRPL4    | Approved  | General c cytoplasm                         |
| 2684 | ENSG00000105366 | SIGLEC8  | Uncertain | Cytoplasm cytoplasm                         |
| 2685 | ENSG00000105369 | CD79A    | Enhanced  | Distinct cytoplasm                          |
| 2686 | ENSG00000105373 | NOP53    | Approved  | Nucleolar nucleus                           |
| 2687 | ENSG00000105376 | ICAM5    | Enhanced  | Selective expression in neuronal processes. |
| 2688 | ENSG00000105379 | ETFB     | Supported | Ubiquitou cytoplasm                         |
| 2689 | ENSG00000105383 | CD33     | Approved  | Membranou cytoplasm;plasma membrane         |
| 2690 | ENSG00000105388 | CEACAM5  | Enhanced  | Selective cytoplasm;plasma membrane         |
| 2691 | ENSG00000105392 | CRX      | Enhanced  | Nuclear enucleus                            |
| 2692 | ENSG00000105393 | BABAM1   | Approved  | Cytoplasm cytoplasm;nucleus                 |
| 2693 | ENSG00000105397 | TYK2     | Uncertain | Cytoplasm cytoplasm;plasma membrane         |

|      |                 |         |                                                        |
|------|-----------------|---------|--------------------------------------------------------|
| 2694 | ENSG00000105398 | SULT2A1 | Enhanced Selective cytoplasm                           |
| 2695 | ENSG00000105401 | CDC37   | Supported General c cytoplasm                          |
| 2696 | ENSG00000105402 | NAPA    | Approved Ubiquitous cytoplasm                          |
| 2697 | ENSG00000105404 | RABAC1  | Supported Cytoplasm cytoplasm                          |
| 2698 | ENSG00000105409 | ATP1A3  | Enhanced Expression in brain and cardiac myocytes.     |
| 2699 | ENSG00000105419 | MEIS3   | Uncertain Cytoplasm cytoplasm; plasma membrane         |
| 2700 | ENSG00000105427 | CNFN    | Enhanced Selective plasma membrane                     |
| 2701 | ENSG00000105429 | MEGF8   | Approved Cytoplasm cytoplasm                           |
| 2702 | ENSG00000105438 | KDELRL1 | Approved General c cytoplasm                           |
| 2703 | ENSG00000105443 | CYTH2   | Uncertain Cytoplasm cytoplasm                          |
| 2704 | ENSG00000105447 | GRWD1   | Approved Nuclear a cytoplasm; nucleus                  |
| 2705 | ENSG00000105464 | GRIN2D  | Approved Expressed at low levels in brain tissue.      |
| 2706 | ENSG00000105467 | SYNGR4  | Enhanced Cytoplasm cytoplasm                           |
| 2707 | ENSG00000105472 | CLEC11A | Approved Cytoplasm cytoplasm                           |
| 2708 | ENSG00000105479 | CCDC114 | Approved Membranous plasma membrane                    |
| 2709 | ENSG00000105483 | CARD8   | Supported Ubiquitous cytoplasm; nucleus                |
| 2710 | ENSG00000105486 | LIG1    | Approved General n nucleus                             |
| 2711 | ENSG00000105492 | SIGLEC6 | Enhanced Membranous plasma membrane                    |
| 2712 | ENSG00000105497 | ZNF175  | Uncertain Estimation of protein expression could not   |
| 2713 | ENSG00000105499 | PLA2G4C | Approved General c cytoplasm                           |
| 2714 | ENSG00000105501 | SIGLEC5 | Supported Cytoplasm cytoplasm                          |
| 2715 | ENSG00000105507 | CABP5   | Enhanced Cytoplasm cytoplasm; nucleus                  |
| 2716 | ENSG00000105509 | HAS1    | Approved Cytoplasm cytoplasm                           |
| 2717 | ENSG00000105514 | RAB3D   | Approved Cytoplasm cytoplasm                           |
| 2718 | ENSG00000105518 | TMEM205 | Approved Cytoplasm cytoplasm; nucleus; plasma membrane |
| 2719 | ENSG00000105519 | CAPS    | Enhanced Cytoplasm cytoplasm                           |
| 2720 | ENSG00000105520 | PLPPR2  | Uncertain Nuclear e nucleus                            |
| 2721 | ENSG00000105523 | FAM83E  | Uncertain Estimation of protein expression could not   |
| 2722 | ENSG00000105538 | RASIP1  | Approved Distinct expression in endothelial cells, s   |
| 2723 | ENSG00000105550 | FGF21   | Supported Distinct plasma membrane                     |
| 2724 | ENSG00000105552 | BCAT2   | Enhanced Ubiquitous cytoplasm                          |
| 2725 | ENSG00000105556 | MIER2   | Uncertain General c cytoplasm                          |
| 2726 | ENSG00000105559 | PLEKHA4 | Uncertain Cytoplasm cytoplasm                          |
| 2727 | ENSG00000105576 | TNPO2   | Approved Cytoplasm cytoplasm                           |
| 2728 | ENSG00000105583 | WDR83OS | Approved General c cytoplasm                           |
| 2729 | ENSG00000105607 | GCDH    | Enhanced Cytoplasm cytoplasm                           |
| 2730 | ENSG00000105609 | LILRB5  | Approved Distinct expression in subsets of immune c    |
| 2731 | ENSG00000105610 | KLF1    | Enhanced Cytoplasm cytoplasm                           |
| 2732 | ENSG00000105612 | DNASE2  | Enhanced Granular expression in several tissues.       |
| 2733 | ENSG00000105613 | MAST1   | Enhanced Cytoplasm cytoplasm                           |
| 2734 | ENSG00000105617 | LENG1   | Approved Cytoplasm cytoplasm                           |
| 2735 | ENSG00000105618 | PRPF31  | Supported Ubiquitous nucleus                           |
| 2736 | ENSG00000105619 | TFPT    | Approved General n cytoplasm; nucleus                  |
| 2737 | ENSG00000105639 | JAK3    | Enhanced Cytoplasm cytoplasm                           |
| 2738 | ENSG00000105640 | RPL18A  | Approved General c cytoplasm                           |
| 2739 | ENSG00000105641 | SLC5A5  | Enhanced Selective cytoplasm; plasma membrane          |
| 2740 | ENSG00000105643 | ARRDC2  | Uncertain Cytoplasm cytoplasm                          |
| 2741 | ENSG00000105647 | PIK3R2  | Approved General c cytoplasm                           |
| 2742 | ENSG00000105649 | RAB3A   | Enhanced Selective expression in CNS, islets of Lang   |
| 2743 | ENSG00000105650 | PDE4C   | Approved Cytoplasm cytoplasm                           |
| 2744 | ENSG00000105655 | ISYNA1  | Enhanced Cytoplasm cytoplasm                           |
| 2745 | ENSG00000105656 | ELL     | Uncertain Mainly n nucleus                             |
| 2746 | ENSG00000105662 | CRTC1   | Enhanced Cytplasm nucleus                              |
| 2747 | ENSG00000105668 | UPK1A   | Enhanced Cytoplasm cytoplasm                           |
| 2748 | ENSG00000105669 | COPE    | Supported General c cytoplasm                          |

|      |                 |          |                                                        |
|------|-----------------|----------|--------------------------------------------------------|
| 2749 | ENSG00000105671 | DDX49    | Enhanced Ubiquitous cytoplasm                          |
| 2750 | ENSG00000105675 | ATP4A    | Enhanced Cytoplasm cytoplasm                           |
| 2751 | ENSG00000105676 | ARMC6    | Supported Cytoplasm cytoplasm                          |
| 2752 | ENSG00000105679 | GAPDHS   | Enhanced Cytoplasm cytoplasm                           |
| 2753 | ENSG00000105695 | MAG      | Enhanced Selective expression in the CNS and in per:   |
| 2754 | ENSG00000105696 | TMEM59L  | Approved Cytoplasm cytoplasm                           |
| 2755 | ENSG00000105699 | LSR      | Approved Cytoplasm cytoplasm;nucleus                   |
| 2756 | ENSG00000105700 | KXD1     | Approved General c cytoplasm                           |
| 2757 | ENSG00000105701 | FKBP8    | Supported Cytoplasm cytoplasm                          |
| 2758 | ENSG00000105705 | SUGP1    | Approved General n nucleus                             |
| 2759 | ENSG00000105707 | HPN      | Approved General c cytoplasm                           |
| 2760 | ENSG00000105708 | ZNF14    | Uncertain Estimation of protein expression could not   |
| 2761 | ENSG00000105717 | PBX4     | Enhanced Membrane plasma membrane                      |
| 2762 | ENSG00000105722 | ERF      | Approved Nuclear e nucleus                             |
| 2763 | ENSG00000105723 | GSK3A    | Approved Ubiquitous cytoplasm                          |
| 2764 | ENSG00000105726 | ATP13A1  | Approved Cytoplasm cytoplasm;plasma membrane           |
| 2765 | ENSG00000105732 | ZNF574   | Approved Cytoplasm cytoplasm;nucleus                   |
| 2766 | ENSG00000105738 | SIPA1L3  | Uncertain General c cytoplasm                          |
| 2767 | ENSG00000105750 | ZNF85    | Approved Cytoplasm cytoplasm;nucleus                   |
| 2768 | ENSG00000105755 | ETHE1    | Enhanced Cytoplasm cytoplasm                           |
| 2769 | ENSG00000105767 | CADM4    | Enhanced Cytoplasm cytoplasm                           |
| 2770 | ENSG00000105771 | SMG9     | Uncertain General c cytoplasm                          |
| 2771 | ENSG00000105778 | AVL9     | Approved Cytoplasm cytoplasm                           |
| 2772 | ENSG00000105784 | RUNDC3B  | Uncertain Estimation of protein expression could not   |
| 2773 | ENSG00000105792 | CFAP69   | Uncertain Luminal m plasma membrane                    |
| 2774 | ENSG00000105793 | GTPBP10  | Approved Mainly n nucleus                              |
| 2775 | ENSG00000105808 | RASA4    | Uncertain Cytoplasm cytoplasm;plasma membrane          |
| 2776 | ENSG00000105810 | CDK6     | Enhanced Cytoplasm cytoplasm;nucleus                   |
| 2777 | ENSG00000105819 | PMPCB    | Approved Cytoplasm cytoplasm                           |
| 2778 | ENSG00000105821 | DNAJC2   | Approved General c cytoplasm                           |
| 2779 | ENSG00000105825 | TFPI2    | Enhanced Selective cytoplasm                           |
| 2780 | ENSG00000105835 | NAMPT    | Approved General c cytoplasm;plasma membrane           |
| 2781 | ENSG00000105849 | TWISTNB  | Approved Ubiquitous cytoplasm;nucleus                  |
| 2782 | ENSG00000105851 | PIK3CG   | Enhanced Cytoplasm cytoplasm;plasma membrane           |
| 2783 | ENSG00000105852 | PON3     | Enhanced Cytoplasm cytoplasm                           |
| 2784 | ENSG00000105854 | PON2     | Enhanced General c cytoplasm                           |
| 2785 | ENSG00000105855 | ITGB8    | Enhanced Membrane plasma membrane                      |
| 2786 | ENSG00000105856 | HBP1     | Approved Nuclear e nucleus                             |
| 2787 | ENSG00000105865 | DUS4L    | Approved Cytoplasm cytoplasm                           |
| 2788 | ENSG00000105866 | SP4      | Uncertain Cytoplasm cytoplasm;nucleus                  |
| 2789 | ENSG00000105875 | WDR91    | Uncertain RNA data suggests expression in all tissues: |
| 2790 | ENSG00000105877 | DNAH11   | Approved Expression in ciliated cells in fallopian t   |
| 2791 | ENSG00000105879 | CBL1     | Enhanced Mainly n nucleus                              |
| 2792 | ENSG00000105880 | DLX5     | Approved Nuclear e nucleus                             |
| 2793 | ENSG00000105887 | MTPN     | Approved Cytoplasm cytoplasm                           |
| 2794 | ENSG00000105894 | PTN      | Enhanced Cytoplasm cytoplasm                           |
| 2795 | ENSG00000105926 | MPP6     | Enhanced Cytoplasm cytoplasm                           |
| 2796 | ENSG00000105928 | GSDME    | Approved Ubiquitous cytoplasm                          |
| 2797 | ENSG00000105929 | ATP6V0A4 | Enhanced Cytoplasm cytoplasm                           |
| 2798 | ENSG00000105939 | ZC3HAV1  | Approved General c cytoplasm                           |
| 2799 | ENSG00000105948 | TTC26    | Enhanced Cytoplasm cytoplasm                           |
| 2800 | ENSG00000105953 | OGDH     | Supported Granular cytoplasm                           |
| 2801 | ENSG00000105954 | NPVF     | Enhanced Cytoplasm cytoplasm                           |
| 2802 | ENSG00000105963 | ADAP1    | Enhanced High cyto cytoplasm                           |
| 2803 | ENSG00000105967 | TFEC     | Approved Nuclear e nucleus                             |

|      |                 |          |                                                      |
|------|-----------------|----------|------------------------------------------------------|
| 2804 | ENSG00000105968 | H2AFV    | SupportedUbiquitousnucleus                           |
| 2805 | ENSG00000105971 | CAV2     | Enhanced Distinct expression in adipocytes, endothel |
| 2806 | ENSG00000105974 | CAV1     | Enhanced Distinct expression in endothelial cells, a |
| 2807 | ENSG00000105976 | MET      | Approved Cytoplasmcytoplasm;plasma membrane          |
| 2808 | ENSG00000105982 | RNF32    | Enhanced Selective expression in testis.             |
| 2809 | ENSG00000105983 | LMBR1    | Approved Cytoplasmcytoplasm                          |
| 2810 | ENSG00000105993 | DNAJB6   | SupportedUbiquitouscytoplasm;nucleus                 |
| 2811 | ENSG00000105997 | HOXA3    | UncertainEstimation of protein expression could not  |
| 2812 | ENSG00000106003 | LFNG     | Approved Cytoplasmcytoplasm                          |
| 2813 | ENSG00000106006 | HOXA6    | Approved Nuclear enucleus                            |
| 2814 | ENSG00000106009 | BRAT1    | Approved Cytoplasmcytoplasm                          |
| 2815 | ENSG00000106012 | IQCE     | Approved General ccytoplasm                          |
| 2816 | ENSG00000106018 | VIPR2    | Approved Membranouplasma membrane                    |
| 2817 | ENSG00000106025 | TSPAN12  | UncertainUbiquitouscytoplasm;plasma membrane         |
| 2818 | ENSG00000106028 | SSBP1    | SupportedGeneral ccytoplasm                          |
| 2819 | ENSG00000106034 | CPED1    | UncertainCytoplasmcytoplasm                          |
| 2820 | ENSG00000106049 | HIBADH   | Enhanced Cytoplasmcytoplasm                          |
| 2821 | ENSG00000106052 | TAX1BP1  | UncertainNuclear acytoplasm;nucleus                  |
| 2822 | ENSG00000106066 | CPVL     | Enhanced Cytoplasmcytoplasm                          |
| 2823 | ENSG00000106069 | CHN2     | Approved Cytoplasmcytoplasm                          |
| 2824 | ENSG00000106070 | GRB10    | Approved Cytoplasmcytoplasm                          |
| 2825 | ENSG00000106077 | ABHD11   | Approved Ubiquitouscytoplasm                         |
| 2826 | ENSG00000106078 | COBL     | Enhanced Cytoplasmcytoplasm                          |
| 2827 | ENSG00000106080 | FKBP14   | UncertainGeneral ccytoplasm                          |
| 2828 | ENSG00000106089 | STX1A    | Enhanced Selectivecytoplasm                          |
| 2829 | ENSG00000106105 | GARS     | Enhanced General ccytoplasm                          |
| 2830 | ENSG00000106125 | MINDY4   | Approved Cytoplasmcytoplasm;plasma membrane          |
| 2831 | ENSG00000106144 | CASP2    | Approved Cytoplasmcytoplasm                          |
| 2832 | ENSG00000106153 | CHCHD2   | UncertainGeneral ccytoplasm                          |
| 2833 | ENSG00000106211 | HSPB1    | Enhanced Cytoplasmcytoplasm                          |
| 2834 | ENSG00000106236 | NPTX2    | Enhanced Cytoplasmcytoplasm                          |
| 2835 | ENSG00000106244 | PDAP1    | Approved Mainly ccytoplasm                           |
| 2836 | ENSG00000106245 | BUD31    | Approved Cytoplasmcytoplasm;nucleus                  |
| 2837 | ENSG00000106246 | PTCD1    | UncertainGeneral ccytoplasm                          |
| 2838 | ENSG00000106261 | ZKSCAN1  | UncertainNuclear enucleus                            |
| 2839 | ENSG00000106263 | EIF3B    | Approved General ccytoplasm                          |
| 2840 | ENSG00000106266 | SNX8     | Approved Cytoplasmcytoplasm                          |
| 2841 | ENSG00000106268 | NUDT1    | Approved Ubiquitouscytoplasm                         |
| 2842 | ENSG00000106278 | PTPRZ1   | Enhanced Distinct expression in brain, both in subse |
| 2843 | ENSG00000106290 | TAF6     | UncertainNuclear enucleus                            |
| 2844 | ENSG00000106299 | WASL     | SupportedUbiquitouscytoplasm                         |
| 2845 | ENSG00000106302 | HYAL4    | UncertainEstimation of protein expression could not  |
| 2846 | ENSG00000106304 | SPAM1    | Enhanced Cytoplasmcytoplasm                          |
| 2847 | ENSG00000106305 | AIMP2    | SupportedCytoplasmcytoplasm                          |
| 2848 | ENSG00000106327 | TFR2     | Enhanced Cytoplasmcytoplasm                          |
| 2849 | ENSG00000106328 | FSCN3    | Enhanced Cytoplasmcytoplasm                          |
| 2850 | ENSG00000106330 | MOSPD3   | UncertainEstimation of protein expression could not  |
| 2851 | ENSG00000106333 | PCOLCE   | Approved Extracellcytoplasm                          |
| 2852 | ENSG00000106336 | FBX024   | Enhanced Expression in a subset of cells in testis.  |
| 2853 | ENSG00000106341 | PPP1R17  | Enhanced Cytoplasmcytoplasm;nucleus                  |
| 2854 | ENSG00000106344 | RBM28    | Enhanced Expressionnucleus                           |
| 2855 | ENSG00000106348 | IMPDH1   | Approved Cytoplasmcytoplasm;nucleus                  |
| 2856 | ENSG00000106351 | AGFG2    | Enhanced Cytoplasmcytoplasm                          |
| 2857 | ENSG00000106355 | LSM5     | UncertainNuclear acytoplasm;nucleus                  |
| 2858 | ENSG00000106366 | SERPINE1 | UncertainExpressedplasma membrane                    |

|      |                 |          |                                                     |
|------|-----------------|----------|-----------------------------------------------------|
| 2859 | ENSG00000106367 | AP1S1    | SupportedCytoplasm cytoplasm                        |
| 2860 | ENSG00000106384 | MOGAT3   | Approved Cytoplasm cytoplasm                        |
| 2861 | ENSG00000106392 | C1GALT1  | Enhanced General c cytoplasm                        |
| 2862 | ENSG00000106397 | PLOD3    | UncertainCytoplasm cytoplasm                        |
| 2863 | ENSG00000106399 | RPA3     | Approved General n cytoplasm;nucleus                |
| 2864 | ENSG00000106400 | ZNHIT1   | UncertainNuclear a cytoplasm;nucleus                |
| 2865 | ENSG00000106415 | GLCCI1   | Approved General c cytoplasm                        |
| 2866 | ENSG00000106436 | MYL10    | UncertainEstimation of protein expression could not |
| 2867 | ENSG00000106443 | PHF14    | SupportedUbiquitounucleus                           |
| 2868 | ENSG00000106459 | NRF1     | Approved Nuclear enucleus                           |
| 2869 | ENSG00000106460 | TMEM106B | Approved Cytoplasm cytoplasm                        |
| 2870 | ENSG00000106462 | EZH2     | Enhanced Nuclear enucleus                           |
| 2871 | ENSG00000106477 | CEP41    | UncertainCytoplasm cytoplasm                        |
| 2872 | ENSG00000106479 | ZNF862   | UncertainCytoplasm cytoplasm;plasma membrane        |
| 2873 | ENSG00000106483 | SFRP4    | Enhanced Selective cytoplasm                        |
| 2874 | ENSG00000106511 | MEOX2    | Enhanced Nuclear enucleus                           |
| 2875 | ENSG00000106537 | TSPAN13  | UncertainMainly c cytoplasm                         |
| 2876 | ENSG00000106541 | AGR2     | Enhanced Cytoplasm cytoplasm                        |
| 2877 | ENSG00000106546 | AHR      | Enhanced Ubiquitou cytoplasm;nucleus                |
| 2878 | ENSG00000106554 | CHCHD3   | Enhanced General c cytoplasm                        |
| 2879 | ENSG00000106560 | GIMAP2   | Approved Cytoplasm cytoplasm                        |
| 2880 | ENSG00000106565 | TMEM176B | UncertainCytoplasm cytoplasm                        |
| 2881 | ENSG00000106571 | GLI3     | Approved Nuclear enucleus                           |
| 2882 | ENSG00000106588 | PSMA2    | UncertainCytoplasm cytoplasm;nucleus                |
| 2883 | ENSG00000106591 | MRPL32   | UncertainCytoplasm cytoplasm                        |
| 2884 | ENSG00000106603 | COA1     | Approved Cytoplasm cytoplasm                        |
| 2885 | ENSG00000106605 | BLVRA    | Approved Cytoplasm cytoplasm                        |
| 2886 | ENSG00000106608 | URGCP    | Approved General c cytoplasm                        |
| 2887 | ENSG00000106609 | TMEM248  | UncertainCytoplasm cytoplasm                        |
| 2888 | ENSG00000106615 | RHEB     | UncertainCytoplasm cytoplasm                        |
| 2889 | ENSG00000106617 | PRKAG2   | UncertainUbiquitounucleus;plasma membrane           |
| 2890 | ENSG00000106624 | AEBP1    | SupportedSmooth muscle and vessel expression.       |
| 2891 | ENSG00000106628 | POLD2    | Approved Nuclear enucleus                           |
| 2892 | ENSG00000106631 | MYL7     | Enhanced Selective cytoplasm                        |
| 2893 | ENSG00000106633 | GCK      | Approved Cytoplasm cytoplasm                        |
| 2894 | ENSG00000106635 | BCL7B    | Approved Nuclear enucleus                           |
| 2895 | ENSG00000106636 | YKT6     | Approved Ubiquitou cytoplasm;nucleus                |
| 2896 | ENSG00000106648 | GALNTL5  | Enhanced Cytoplasm cytoplasm                        |
| 2897 | ENSG00000106665 | CLIP2    | Enhanced Cytoplasm cytoplasm                        |
| 2898 | ENSG00000106682 | EIF4H    | Approved Cytoplasm cytoplasm;nucleus                |
| 2899 | ENSG00000106683 | LIMK1    | Approved Cytoplasm cytoplasm                        |
| 2900 | ENSG00000106686 | SPATA6L  | Enhanced Nuclear a cytoplasm;nucleus                |
| 2901 | ENSG00000106688 | SLC1A1   | Approved Cytoplasm cytoplasm;plasma membrane        |
| 2902 | ENSG00000106692 | FKTN     | Approved Granular cytoplasm                         |
| 2903 | ENSG00000106701 | FSD1L    | Approved Cytoplasm cytoplasm;plasma membrane        |
| 2904 | ENSG00000106714 | CNTNAP3  | UncertainCytoplasm cytoplasm                        |
| 2905 | ENSG00000106723 | SPIN1    | UncertainNuclear a cytoplasm;nucleus                |
| 2906 | ENSG00000106733 | NMRK1    | Approved Cytoplasm cytoplasm                        |
| 2907 | ENSG00000106771 | TMEM245  | Approved Cytoplasm cytoplasm;plasma membrane        |
| 2908 | ENSG00000106772 | PRUNE2   | UncertainGeneral n nucleus                          |
| 2909 | ENSG00000106780 | MEGF9    | Approved General c cytoplasm;plasma membrane        |
| 2910 | ENSG00000106785 | TRIM14   | UncertainCytoplasm cytoplasm                        |
| 2911 | ENSG00000106789 | CORO2A   | Enhanced Cytoplasm cytoplasm;plasma membrane        |
| 2912 | ENSG00000106799 | TGFBR1   | UncertainCytoplasm cytoplasm                        |
| 2913 | ENSG00000106803 | SEC61B   | Approved Mainly c cytoplasm                         |

|      |                 |           |           |                                               |
|------|-----------------|-----------|-----------|-----------------------------------------------|
| 2914 | ENSG00000106804 | C5        | Supported | Mainly plasma membrane                        |
| 2915 | ENSG00000106809 | OGN       | Approved  | Expression in smooth muscle and staining in   |
| 2916 | ENSG00000106819 | ASPN      | Approved  | Distinct positivity in extracellular matrix   |
| 2917 | ENSG00000106823 | ECM2      | Approved  | Cytoplasm cytoplasm                           |
| 2918 | ENSG00000106852 | LHX6      | Approved  | Cytoplasm cytoplasm                           |
| 2919 | ENSG00000106853 | PTGR1     | Enhanced  | Cytoplasm cytoplasm                           |
| 2920 | ENSG00000106868 | SUSD1     | Approved  | Cytoplasm cytoplasm                           |
| 2921 | ENSG00000106927 | AMBP      | Approved  | Distinct cytoplasm; plasma membrane           |
| 2922 | ENSG00000106976 | DNM1      | Enhanced  | Selective cytoplasm                           |
| 2923 | ENSG00000106991 | ENG       | Enhanced  | Selective expression in endothelial cells     |
| 2924 | ENSG00000106992 | AK1       | Enhanced  | Cytoplasm cytoplasm                           |
| 2925 | ENSG00000106993 | CDC37L1   | Approved  | Cytoplasm cytoplasm                           |
| 2926 | ENSG00000107020 | PLGRKT    | Supported | Granular cytoplasm                            |
| 2927 | ENSG00000107021 | TBC1D13   | Approved  | Cytoplasm cytoplasm; nucleus                  |
| 2928 | ENSG00000107036 | RIC1      | Supported | Ubiquitous plasma membrane                    |
| 2929 | ENSG00000107099 | DOCK8     | Enhanced  | Cytoplasm cytoplasm; nucleus                  |
| 2930 | ENSG00000107104 | KANK1     | Approved  | General cytoplasm                             |
| 2931 | ENSG00000107105 | ELAVL2    | Enhanced  | Cytoplasm cytoplasm                           |
| 2932 | ENSG00000107130 | NCS1      | Enhanced  | Cytoplasm cytoplasm                           |
| 2933 | ENSG00000107147 | KCNT1     | Uncertain | Estimation of protein expression could not    |
| 2934 | ENSG00000107159 | CA9       | Enhanced  | Highly specific plasma membrane               |
| 2935 | ENSG00000107164 | FUBP3     | Uncertain | General cytoplasm; nucleus                    |
| 2936 | ENSG00000107165 | TYRP1     | Enhanced  | Selective expression in melanocytes.          |
| 2937 | ENSG00000107185 | RGP1      | Approved  | Cytoplasm cytoplasm                           |
| 2938 | ENSG00000107186 | MPDZ      | Uncertain | Membranous cytoplasm; plasma membrane         |
| 2939 | ENSG00000107201 | DDX58     | Uncertain | General cytoplasm                             |
| 2940 | ENSG00000107223 | EDF1      | Approved  | Cytoplasm cytoplasm; nucleus                  |
| 2941 | ENSG00000107242 | PIP5K1B   | Uncertain | Cytoplasm cytoplasm                           |
| 2942 | ENSG00000107249 | GLIS3     | Approved  | General nucleus                               |
| 2943 | ENSG00000107262 | BAG1      | Supported | Nuclear envelope                              |
| 2944 | ENSG00000107263 | RAPGEF1   | Approved  | Cytoplasm cytoplasm                           |
| 2945 | ENSG00000107281 | NPDC1     | Approved  | Cytoplasmic expression at variable levels     |
| 2946 | ENSG00000107290 | SETX      | Approved  | Cytoplasm cytoplasm                           |
| 2947 | ENSG00000107295 | SH3GL2    | Enhanced  | Selective cytoplasm                           |
| 2948 | ENSG00000107317 | PTGDS     | Approved  | Ubiquitous cytoplasm                          |
| 2949 | ENSG00000107331 | ABCA2     | Approved  | Ubiquitous cytoplasm; nucleus                 |
| 2950 | ENSG00000107338 | SHB       | Uncertain | Cytoplasm cytoplasm                           |
| 2951 | ENSG00000107362 | ABHD17B   | Uncertain | Estimation of protein expression could not    |
| 2952 | ENSG00000107371 | EXOSC3    | Supported | General nucleus                               |
| 2953 | ENSG00000107372 | ZFAND5    | Approved  | General cytoplasm; nucleus                    |
| 2954 | ENSG00000107404 | DVL1      | Approved  | General cytoplasm                             |
| 2955 | ENSG00000107438 | PDLIM1    | Approved  | Cytoplasm cytoplasm                           |
| 2956 | ENSG00000107443 | CCNJ      | Approved  | Cytoplasm cytoplasm; plasma membrane          |
| 2957 | ENSG00000107485 | GATA3     | Enhanced  | Nuclear envelope                              |
| 2958 | ENSG00000107518 | ATRNL1    | Uncertain | Estimation of protein expression could not    |
| 2959 | ENSG00000107521 | HPS1      | Approved  | General cytoplasm                             |
| 2960 | ENSG00000107537 | PHYH      | Enhanced  | Ubiquitous cytoplasm                          |
| 2961 | ENSG00000107551 | RASSF4    | Approved  | General cytoplasm; nucleus                    |
| 2962 | ENSG00000107554 | DNMBP     | Uncertain | Cytoplasm cytoplasm                           |
| 2963 | ENSG00000107560 | RAB11FIP2 | Approved  | Mainly cytoplasm                              |
| 2964 | ENSG00000107562 | CXCL12    | Approved  | Cytoplasm cytoplasm; nucleus; plasma membrane |
| 2965 | ENSG00000107566 | ERLIN1    | Approved  | General cytoplasm                             |
| 2966 | ENSG00000107581 | EIF3A     | Enhanced  | Ubiquitous cytoplasm                          |
| 2967 | ENSG00000107593 | PKD2L1    | Uncertain | Estimation of protein expression could not    |
| 2968 | ENSG00000107611 | CUBN      | Enhanced  | Cytoplasm cytoplasm; plasma membrane          |

|      |                 |          |                                                      |
|------|-----------------|----------|------------------------------------------------------|
| 2969 | ENSG00000107614 | TRDMT1   | Approved Mainly nocytoplasm;nucleus                  |
| 2970 | ENSG00000107625 | DDX50    | Approved Mainly nunucleus                            |
| 2971 | ENSG00000107643 | MAPK8    | Approved Mainly ccytoplasm                           |
| 2972 | ENSG00000107651 | SEC23IP  | Approved General ccytoplasm                          |
| 2973 | ENSG00000107669 | ATE1     | Approved Cytoplasmcytoplasm                          |
| 2974 | ENSG00000107672 | NSMCE4A  | Approved Mainly nocytoplasm;nucleus                  |
| 2975 | ENSG00000107679 | PLEKHA1  | Approved General ccytoplasm                          |
| 2976 | ENSG00000107719 | PALD1    | UncertainCytoplasmcytoplasm;nucleus                  |
| 2977 | ENSG00000107731 | UNC5B    | Approved Expression in several tissues, mainly inte: |
| 2978 | ENSG00000107736 | CDH23    | Approved Cytoplasmcytoplasm                          |
| 2979 | ENSG00000107742 | SPOCK2   | Enhanced Cytoplasmcytoplasm                          |
| 2980 | ENSG00000107745 | MICU1    | UncertainMainly ccytoplasm                           |
| 2981 | ENSG00000107758 | PPP3CB   | UncertainGeneral ccytoplasm                          |
| 2982 | ENSG00000107771 | CCSER2   | Approved General ncytoplasm;nucleus                  |
| 2983 | ENSG00000107779 | BMPR1A   | Approved Cytoplasmcytoplasm                          |
| 2984 | ENSG00000107789 | MINPP1   | Approved Cytoplasmcytoplasm                          |
| 2985 | ENSG00000107796 | ACTA2    | Enhanced Selective expression in smooth muscle cell: |
| 2986 | ENSG00000107798 | LIPA     | Enhanced Cytoplasmcytoplasm                          |
| 2987 | ENSG00000107815 | TWNK     | UncertainCytoplasmcytoplasm                          |
| 2988 | ENSG00000107816 | LZTS2    | Approved Cytoplasmcytoplasm                          |
| 2989 | ENSG00000107819 | SFXN3    | Approved Cytoplasmcytoplasm;nucleus                  |
| 2990 | ENSG00000107821 | KAZALD1  | UncertainEstimation of protein expression could not  |
| 2991 | ENSG00000107829 | FBXW4    | Approved Smooth muscle expression in several tissue: |
| 2992 | ENSG00000107833 | NPM3     | Approved Mainly nunucleus                            |
| 2993 | ENSG00000107862 | GBF1     | UncertainGranular cytoplasm                          |
| 2994 | ENSG00000107863 | ARHGAP21 | Approved Mainly ccytoplasm                           |
| 2995 | ENSG00000107874 | CUEDC2   | UncertainCytoplasmcytoplasm                          |
| 2996 | ENSG00000107882 | SUFU     | SupportedUbiquitousnucleus                           |
| 2997 | ENSG00000107890 | ANKRD26  | Approved General ccytoplasm                          |
| 2998 | ENSG00000107897 | ACBD5    | Enhanced Ubiquitouscytoplasm                         |
| 2999 | ENSG00000107902 | LHPP     | Enhanced Cytoplasmcytoplasm;nucleus                  |
| 3000 | ENSG00000107929 | LARP4B   | Approved Cytoplasmcytoplasm;plasma membrane          |
| 3001 | ENSG00000107937 | GTPBP4   | UncertainCytoplasmcytoplasm;nucleus                  |
| 3002 | ENSG00000107951 | MTPAP    | Approved Ubiquitouscytoplasm                         |
| 3003 | ENSG00000107954 | NEURL1   | Enhanced Cytoplasmcytoplasm                          |
| 3004 | ENSG00000107957 | SH3PXD2A | Approved Cytoplasmcytoplasm;plasma membrane          |
| 3005 | ENSG00000107959 | PITRM1   | Enhanced Ubiquitouscytoplasm                         |
| 3006 | ENSG00000107968 | MAP3K8   | SupportedCytoplasmcytoplasm                          |
| 3007 | ENSG00000108010 | GLRX3    | Approved Cytoplasmcytoplasm                          |
| 3008 | ENSG00000108018 | SORCS1   | Approved Membranoucytoplasm;plasma membrane          |
| 3009 | ENSG00000108021 | FAM208B  | UncertainGeneral ccytoplasm                          |
| 3010 | ENSG00000108039 | XPNPEP1  | SupportedCytoplasmcytoplasm                          |
| 3011 | ENSG00000108055 | SMC3     | UncertainGeneral ccytoplasm;nucleus                  |
| 3012 | ENSG00000108061 | SHOC2    | Approved Cytoplasmcytoplasm                          |
| 3013 | ENSG00000108064 | TFAM     | SupportedUbiquitouscytoplasm                         |
| 3014 | ENSG00000108091 | CCDC6    | Enhanced Mainly ccytoplasm                           |
| 3015 | ENSG00000108094 | CUL2     | Approved Nuclear acytoplasm;nucleus                  |
| 3016 | ENSG00000108100 | CCNY     | Approved General mcytoplasm;plasma membrane          |
| 3017 | ENSG00000108106 | UBE2S    | Approved Cytoplasmcytoplasm;nucleus                  |
| 3018 | ENSG00000108107 | RPL28    | Approved General ccytoplasm                          |
| 3019 | ENSG00000108175 | ZMIZ1    | Approved Cytoplasmcytoplasm;nucleus                  |
| 3020 | ENSG00000108176 | DNAJC12  | Enhanced Cytoplasmcytoplasm                          |
| 3021 | ENSG00000108187 | PBLD     | Enhanced High expression in gastrointestinal tract,  |
| 3022 | ENSG00000108219 | TSPAN14  | UncertainEstimation of protein expression could not  |
| 3023 | ENSG00000108239 | TBC1D12  | UncertainGeneral nnucleus                            |

|      |                 |          |                                                      |
|------|-----------------|----------|------------------------------------------------------|
| 3024 | ENSG00000108244 | KRT23    | Approved Cytoplasm cytoplasm                         |
| 3025 | ENSG00000108255 | CRYBA1   | Supported Cytoplasm cytoplasm                        |
| 3026 | ENSG00000108262 | GIT1     | Enhanced General c cytoplasm                         |
| 3027 | ENSG00000108298 | RPL19    | Approved Cytoplasm cytoplasm                         |
| 3028 | ENSG00000108306 | FBXL20   | Uncertain Cytoplasm cytoplasm                        |
| 3029 | ENSG00000108309 | RUNDC3A  | Enhanced Distinct extracellular positivity and expr  |
| 3030 | ENSG00000108312 | UBTF     | Supported Ubiquitounucleus                           |
| 3031 | ENSG00000108344 | PSMD3    | Approved Nuclear a cytoplasm;nucleus                 |
| 3032 | ENSG00000108349 | CASC3    | Approved Cytoplasm cytoplasm                         |
| 3033 | ENSG00000108370 | RGS9     | Enhanced Cytoplasm cytoplasm                         |
| 3034 | ENSG00000108375 | RNF43    | Uncertain General nnucleus                           |
| 3035 | ENSG00000108381 | ASPA     | Enhanced Distinct expression mainly in renal tubules |
| 3036 | ENSG00000108387 | 9/4/2019 | Enhanced Cytoplasm cytoplasm                         |
| 3037 | ENSG00000108395 | TRIM37   | Uncertain Cytoplasm cytoplasm;nucleus                |
| 3038 | ENSG00000108406 | DHX40    | Uncertain Nuclear enucleus                           |
| 3039 | ENSG00000108423 | TUBD1    | Approved Ubiquitou cytoplasm                         |
| 3040 | ENSG00000108424 | KPNB1    | Supported Ubiquitou cytoplasm;nucleus                |
| 3041 | ENSG00000108433 | GOSR2    | Uncertain Ubiquitou cytoplasm                        |
| 3042 | ENSG00000108439 | PNPO     | Enhanced Cytoplasm cytoplasm                         |
| 3043 | ENSG00000108443 | RPS6KB1  | Approved Ubiquitou cytoplasm;nucleus                 |
| 3044 | ENSG00000108448 | TRIM16L  | Uncertain Expressed mainly in squamous epithelial ti |
| 3045 | ENSG00000108465 | CDK5RAP3 | Supported General c cytoplasm                        |
| 3046 | ENSG00000108468 | CBX1     | Supported Ubiquitounucleus                           |
| 3047 | ENSG00000108474 | PIGL     | Approved Cytoplasm cytoplasm                         |
| 3048 | ENSG00000108479 | GALK1    | Approved General c cytoplasm                         |
| 3049 | ENSG00000108506 | INTS2    | Uncertain Cytoplasm cytoplasm                        |
| 3050 | ENSG00000108515 | ENO3     | Enhanced Cytoplasm cytoplasm;nucleus                 |
| 3051 | ENSG00000108518 | PFN1     | Enhanced Ubiquitou cytoplasm                         |
| 3052 | ENSG00000108523 | RNF167   | Approved General c cytoplasm                         |
| 3053 | ENSG00000108528 | SLC25A11 | Approved General c cytoplasm                         |
| 3054 | ENSG00000108551 | RASD1    | Uncertain Cytoplasm cytoplasm;nucleus                |
| 3055 | ENSG00000108557 | RAI1     | Approved General n cytoplasm;nucleus                 |
| 3056 | ENSG00000108559 | NUP88    | Approved Nuclear enucleus                            |
| 3057 | ENSG00000108561 | C1QBP    | Supported Ubiquitou cytoplasm                        |
| 3058 | ENSG00000108576 | SLC6A4   | Supported Highly expressed in dorsal raphe.          |
| 3059 | ENSG00000108578 | BLMH     | Enhanced Cytoplasm cytoplasm                         |
| 3060 | ENSG00000108582 | CPD      | Approved Granular cytoplasm                          |
| 3061 | ENSG00000108587 | GOSR1    | Uncertain Cytoplasm cytoplasm;nucleus                |
| 3062 | ENSG00000108588 | CCDC47   | Approved Cytoplasm cytoplasm                         |
| 3063 | ENSG00000108590 | MED31    | Uncertain Cytoplasm cytoplasm                        |
| 3064 | ENSG00000108591 | DRG2     | Approved Mainly c cytoplasm                          |
| 3065 | ENSG00000108592 | FTSJ3    | Supported General nnucleus                           |
| 3066 | ENSG00000108599 | AKAP10   | Approved General c cytoplasm                         |
| 3067 | ENSG00000108602 | ALDH3A1  | Enhanced Mainly c cytoplasm                          |
| 3068 | ENSG00000108639 | SYNGR2   | Approved Cytoplasm cytoplasm                         |
| 3069 | ENSG00000108641 | B9D1     | Approved General c cytoplasm                         |
| 3070 | ENSG00000108651 | UTP6     | Supported General nnucleus                           |
| 3071 | ENSG00000108654 | DDX5     | Supported Ubiquitou cytoplasm;nucleus                |
| 3072 | ENSG00000108666 | C17orf75 | Approved Cytoplasm cytoplasm                         |
| 3073 | ENSG00000108671 | PSMD11   | Approved Cytoplasm cytoplasm                         |
| 3074 | ENSG00000108679 | LGALS3BP | Uncertain Secreted cytoplasm                         |
| 3075 | ENSG00000108684 | ASIC2    | Enhanced Cytoplasm cytoplasm                         |
| 3076 | ENSG00000108691 | CCL2     | Approved Extracell cytoplasm;plasma membrane         |
| 3077 | ENSG00000108702 | CCL1     | Uncertain Estimation of protein expression could not |
| 3078 | ENSG00000108733 | PEX12    | Enhanced Ubiquitou cytoplasm;plasma membrane         |



|      |                 |           |                                                      |
|------|-----------------|-----------|------------------------------------------------------|
| 3079 | ENSG00000108771 | DHX58     | Approved Cytoplasm cytoplasm                         |
| 3080 | ENSG00000108773 | KAT2A     | Uncertain Estimation of protein expression could not |
| 3081 | ENSG00000108774 | RAB5C     | Approved Cytoplasm cytoplasm                         |
| 3082 | ENSG00000108784 | NAGLU     | Supported Granular cytoplasm                         |
| 3083 | ENSG00000108786 | HSD17B1   | Enhanced Cytoplasm cytoplasm                         |
| 3084 | ENSG00000108788 | MLX       | Approved Cytoplasm cytoplasm;nucleus                 |
| 3085 | ENSG00000108797 | CNTNAP1   | Approved Several tissues show expression in neuronal |
| 3086 | ENSG00000108798 | ABI3      | Enhanced Cytoplasm cytoplasm                         |
| 3087 | ENSG00000108799 | EZH1      | Supported Nuclear enucleus                           |
| 3088 | ENSG00000108813 | DLX4      | Uncertain Estimation of protein expression could not |
| 3089 | ENSG00000108819 | PPP1R9B   | Approved Cytoplasm cytoplasm                         |
| 3090 | ENSG00000108821 | COL1A1    | Approved Staining cytoplasm                          |
| 3091 | ENSG00000108823 | SGCA      | Uncertain Cytoplasm cytoplasm                        |
| 3092 | ENSG00000108825 | PTGES3L-A | Approved Cytoplasm cytoplasm                         |
| 3093 | ENSG00000108826 | MRPL27    | Approved Granular cytoplasm                          |
| 3094 | ENSG00000108828 | VAT1      | Uncertain Cytoplasm cytoplasm                        |
| 3095 | ENSG00000108829 | LRRC59    | Enhanced Cytoplasm cytoplasm                         |
| 3096 | ENSG00000108830 | RND2      | Approved Cytoplasm cytoplasm                         |
| 3097 | ENSG00000108839 | ALOX12    | Enhanced Cytoplasm cytoplasm                         |
| 3098 | ENSG00000108840 | HDAC5     | Approved Cytoplasm cytoplasm;nucleus                 |
| 3099 | ENSG00000108846 | ABCC3     | Enhanced Membranous cytoplasm;plasma membrane        |
| 3100 | ENSG00000108848 | LUC7L3    | Enhanced Ubiquitous nucleus                          |
| 3101 | ENSG00000108849 | PPY       | Enhanced Selective expression in a subset of cells : |
| 3102 | ENSG00000108852 | MPP2      | Approved Cytoplasm cytoplasm                         |
| 3103 | ENSG00000108854 | SMURF2    | Enhanced Cytoplasm cytoplasm                         |
| 3104 | ENSG00000108883 | EFTUD2    | Supported General c cytoplasm                        |
| 3105 | ENSG00000108932 | SLC16A6   | Uncertain Membranous plasma membrane                 |
| 3106 | ENSG00000108946 | PRKAR1A   | Approved Membranous cytoplasm;plasma membrane        |
| 3107 | ENSG00000108947 | EFNB3     | Approved Cytoplasm cytoplasm                         |
| 3108 | ENSG00000108950 | FAM20A    | Supported Cytoplasm cytoplasm                        |
| 3109 | ENSG00000108953 | YWHAE     | Approved General c cytoplasm;nucleus                 |
| 3110 | ENSG00000108961 | RANGRF    | Approved Cytoplasm cytoplasm;nucleus                 |
| 3111 | ENSG00000108963 | DPH1      | Approved General c cytoplasm                         |
| 3112 | ENSG00000108984 | MAP2K6    | Enhanced Cytoplasm cytoplasm                         |
| 3113 | ENSG00000109016 | DHRS7B    | Uncertain Cytoplasm cytoplasm                        |
| 3114 | ENSG00000109046 | WSB1      | Approved Cytoplasm cytoplasm;plasma membrane         |
| 3115 | ENSG00000109047 | RCVRN     | Enhanced Strong c cytoplasm;nucleus                  |
| 3116 | ENSG00000109061 | MYH1      | Enhanced Selective cytoplasm                         |
| 3117 | ENSG00000109062 | SLC9A3R1  | Enhanced Cytoplasm cytoplasm;plasma membrane         |
| 3118 | ENSG00000109063 | MYH3      | Enhanced Expression in skeletal and heart muscle.    |
| 3119 | ENSG00000109065 | NAT9      | Approved Expression in inflammatory cells, most abu  |
| 3120 | ENSG00000109066 | TMEM104   | Approved Nuclear a cytoplasm;nucleus                 |
| 3121 | ENSG00000109072 | VTN       | Supported Positive plasma membrane                   |
| 3122 | ENSG00000109079 | TNFAIP1   | Uncertain Cytoplasm cytoplasm                        |
| 3123 | ENSG00000109083 | IFT20     | Approved Cytoplasm cytoplasm                         |
| 3124 | ENSG00000109084 | TMEM97    | Enhanced Cytoplasm cytoplasm                         |
| 3125 | ENSG00000109089 | CDR2L     | Enhanced Cytoplasm cytoplasm                         |
| 3126 | ENSG00000109103 | UNC119    | Enhanced Cytoplasm cytoplasm                         |
| 3127 | ENSG00000109107 | ALDOC     | Enhanced Selective cytoplasm                         |
| 3128 | ENSG00000109111 | SUPT6H    | Approved General n nucleus                           |
| 3129 | ENSG00000109113 | RAB34     | Approved General c cytoplasm                         |
| 3130 | ENSG00000109118 | PHF12     | Approved Nuclear enucleus                            |
| 3131 | ENSG00000109132 | PHOX2B    | Enhanced Nuclear enucleus                            |
| 3132 | ENSG00000109163 | GNRHR     | Enhanced Cytoplasm cytoplasm                         |
| 3133 | ENSG00000109171 | SLAIN2    | Approved Cytoplasm cytoplasm                         |

|      |                 |          |                                                      |
|------|-----------------|----------|------------------------------------------------------|
| 3134 | ENSG00000109180 | OCIAD1   | Approved General ccytoplasm                          |
| 3135 | ENSG00000109181 | UGT2B10  | UncertainEstimation of protein expression could not  |
| 3136 | ENSG00000109182 | CWH43    | UncertainEstimation of protein expression could not  |
| 3137 | ENSG00000109184 | DCUN1D4  | UncertainUbiquitouscytoplasm;nucleus                 |
| 3138 | ENSG00000109189 | USP46    | UncertainCytoplasmcytoplasm                          |
| 3139 | ENSG00000109193 | SULT1E1  | Enhanced Cytoplasmcytoplasm                          |
| 3140 | ENSG00000109208 | SMR3A    | Enhanced Cytoplasmcytoplasm                          |
| 3141 | ENSG00000109220 | CHIC2    | UncertainCytoplasmcytoplasm                          |
| 3142 | ENSG00000109255 | NMU      | UncertainEstimation of protein expression could not  |
| 3143 | ENSG00000109265 | KIAA1211 | UncertainCytoplasmcytoplasm;plasma membrane          |
| 3144 | ENSG00000109270 | LAMTOR3  | SupportedGeneral ccytoplasm                          |
| 3145 | ENSG00000109272 | PF4V1    | SupportedExpression in megakaryocytes and platelets. |
| 3146 | ENSG00000109320 | NFKB1    | Enhanced General ccytoplasm;nucleus                  |
| 3147 | ENSG00000109321 | AREG     | Approved Cytoplasmcytoplasm                          |
| 3148 | ENSG00000109323 | MANBA    | Approved Cytoplasmcytoplasm                          |
| 3149 | ENSG00000109332 | UBE2D3   | UncertainCytoplasmcytoplasm;nucleus;plasma membrane  |
| 3150 | ENSG00000109339 | MAPK10   | Approved Neuronal expression in cerebral cortex.     |
| 3151 | ENSG00000109381 | ELF2     | Enhanced Ubiquitousnucleus                           |
| 3152 | ENSG00000109390 | NDUFC1   | Approved Ubiquitouscytoplasm                         |
| 3153 | ENSG00000109436 | TBC1D9   | UncertainCytoplasmcytoplasm                          |
| 3154 | ENSG00000109445 | ZNF330   | UncertainCytoplasmcytoplasm;nucleus                  |
| 3155 | ENSG00000109452 | INPP4B   | Approved Cytoplasmcytoplasm                          |
| 3156 | ENSG00000109458 | GAB1     | Approved Expressed in several tissues, including bra |
| 3157 | ENSG00000109471 | IL2      | UncertainEstimation of protein expression could not  |
| 3158 | ENSG00000109472 | CPE      | SupportedDistinct cytoplasm                          |
| 3159 | ENSG00000109475 | RPL34    | UncertainCytoplasmcytoplasm                          |
| 3160 | ENSG00000109501 | WFS1     | Approved Cytoplasmcytoplasm                          |
| 3161 | ENSG00000109511 | ANXA10   | Enhanced Distinct nucleus                            |
| 3162 | ENSG00000109519 | GRPEL1   | SupportedGeneral ccytoplasm                          |
| 3163 | ENSG00000109534 | GAR1     | SupportedUbiquitousnucleus                           |
| 3164 | ENSG00000109536 | FRG1     | Approved General ccytoplasm                          |
| 3165 | ENSG00000109572 | CLCN3    | Approved Cytoplasmcytoplasm;plasma membrane          |
| 3166 | ENSG00000109576 | AADAT    | Enhanced Cytoplasmcytoplasm                          |
| 3167 | ENSG00000109586 | GALNT7   | Enhanced Granular cytoplasm                          |
| 3168 | ENSG00000109606 | DHX15    | Approved Nuclear anucleus                            |
| 3169 | ENSG00000109610 | SOD3     | SupportedCytoplasmcytoplasm;plasma membrane          |
| 3170 | ENSG00000109654 | TRIM2    | Enhanced Cytoplasmcytoplasm                          |
| 3171 | ENSG00000109667 | SLC2A9   | Enhanced Cytoplasmcytoplasm                          |
| 3172 | ENSG00000109670 | FBXW7    | SupportedUbiquitousnucleus                           |
| 3173 | ENSG00000109680 | TBC1D19  | Approved General ccytoplasm                          |
| 3174 | ENSG00000109684 | CLNK     | UncertainCytoplasmcytoplasm                          |
| 3175 | ENSG00000109685 | NSD2     | Enhanced General nnucleus                            |
| 3176 | ENSG00000109686 | SH3D19   | Enhanced Ubiquitouscytoplasm                         |
| 3177 | ENSG00000109689 | STIM2    | SupportedGeneral ccytoplasm                          |
| 3178 | ENSG00000109705 | NKX3-2   | Approved Nuclear enucleus                            |
| 3179 | ENSG00000109736 | MFSD10   | UncertainNuclear enucleus                            |
| 3180 | ENSG00000109738 | GLRB     | Approved Expression in neuronal processes of CNS.    |
| 3181 | ENSG00000109743 | BST1     | UncertainCytoplasmcytoplasm                          |
| 3182 | ENSG00000109758 | HGFAC    | Enhanced Distinct plasma membrane                    |
| 3183 | ENSG00000109771 | LRP2BP   | Approved Distinct cytoplasm                          |
| 3184 | ENSG00000109775 | UFSP2    | Approved Ubiquitouscytoplasm;nucleus                 |
| 3185 | ENSG00000109787 | KLF3     | SupportedUbiquitousnucleus                           |
| 3186 | ENSG00000109790 | KLHL5    | Approved Cytoplasmcytoplasm                          |
| 3187 | ENSG00000109794 | FAM149A  | UncertainCytoplasmcytoplasm                          |
| 3188 | ENSG00000109805 | NCAPG    | UncertainCytoplasmcytoplasm                          |

|      |                 |          |                                                        |
|------|-----------------|----------|--------------------------------------------------------|
| 3189 | ENSG00000109814 | UGDH     | Enhanced Cytoplasm cytoplasm;nucleus                   |
| 3190 | ENSG00000109832 | DDX25    | Enhanced Cytoplasm cytoplasm                           |
| 3191 | ENSG00000109846 | CRYAB    | Enhanced Cytoplasm cytoplasm                           |
| 3192 | ENSG00000109851 | DBX1     | Uncertain Estimation of protein expression could not   |
| 3193 | ENSG00000109854 | HTATIP2  | Approved General c cytoplasm                           |
| 3194 | ENSG00000109861 | CTSC     | Enhanced General c cytoplasm                           |
| 3195 | ENSG00000109881 | CCDC34   | Uncertain Estimation of protein expression could not   |
| 3196 | ENSG00000109906 | ZBTB16   | Uncertain Nuclear enucleus                             |
| 3197 | ENSG00000109911 | ELP4     | Approved Cytoplasm cytoplasm;nucleus                   |
| 3198 | ENSG00000109917 | ZPR1     | Uncertain Ubiquitous cytoplasm                         |
| 3199 | ENSG00000109919 | MTCH2    | Approved Cytoplasm cytoplasm                           |
| 3200 | ENSG00000109920 | FNBP4    | Supported Nuclear enucleus                             |
| 3201 | ENSG00000109927 | TECTA    | Approved Low extracellular positivity in several tis   |
| 3202 | ENSG00000109929 | SC5D     | Approved General c cytoplasm                           |
| 3203 | ENSG00000109944 | JHY      | Enhanced Selective expression in cells of seminiferous |
| 3204 | ENSG00000109956 | B3GAT1   | Enhanced Cytoplasm cytoplasm                           |
| 3205 | ENSG00000109971 | HSPA8    | Uncertain Cytoplasm cytoplasm;nucleus                  |
| 3206 | ENSG00000109991 | P2RX3    | Uncertain Estimation of protein expression could not   |
| 3207 | ENSG00000110002 | VWA5A    | Uncertain Nuclear enucleus                             |
| 3208 | ENSG00000110011 | DNAJC4   | Uncertain Cytoplasm cytoplasm                          |
| 3209 | ENSG00000110013 | SIAE     | Approved Cytoplasm cytoplasm                           |
| 3210 | ENSG00000110025 | SNX15    | Approved Cytoplasm cytoplasm                           |
| 3211 | ENSG00000110031 | LPXN     | Enhanced Cytoplasm cytoplasm                           |
| 3212 | ENSG00000110042 | DTX4     | Approved Cytoplasm cytoplasm                           |
| 3213 | ENSG00000110046 | ATG2A    | Uncertain Cytoplasm cytoplasm                          |
| 3214 | ENSG00000110047 | EHD1     | Approved Cytoplasm cytoplasm                           |
| 3215 | ENSG00000110048 | OSBP     | Enhanced General c cytoplasm                           |
| 3216 | ENSG00000110057 | UNC93B1  | Approved General c cytoplasm                           |
| 3217 | ENSG00000110060 | PUS3     | Uncertain Estimation of protein expression could not   |
| 3218 | ENSG00000110063 | DCPS     | Supported Ubiquitous nucleus                           |
| 3219 | ENSG00000110074 | FOXRED1  | Uncertain Estimation of protein expression could not   |
| 3220 | ENSG00000110075 | PPP6R3   | Supported Cytoplasm cytoplasm;nucleus                  |
| 3221 | ENSG00000110077 | MS4A6A   | Approved General n nucleus                             |
| 3222 | ENSG00000110079 | MS4A4A   | Approved Cytoplasm cytoplasm                           |
| 3223 | ENSG00000110080 | ST3GAL4  | Approved Cytoplasm cytoplasm                           |
| 3224 | ENSG00000110090 | CPT1A    | Supported Cytoplasm cytoplasm                          |
| 3225 | ENSG00000110092 | CCND1    | Uncertain Cytoplasm cytoplasm;nucleus                  |
| 3226 | ENSG00000110104 | CCDC86   | Enhanced General n nucleus                             |
| 3227 | ENSG00000110107 | PRPF19   | Supported General n nucleus                            |
| 3228 | ENSG00000110108 | TMEM109  | Approved General c cytoplasm;nucleus;plasma membrane   |
| 3229 | ENSG00000110169 | HPX      | Supported Positive plasma membrane                     |
| 3230 | ENSG00000110171 | TRIM3    | Enhanced Cytoplasm cytoplasm                           |
| 3231 | ENSG00000110172 | CHORDC1  | Approved Mainly c cytoplasm                            |
| 3232 | ENSG00000110200 | ANAPC15  | Approved Cytoplasm cytoplasm;nucleus                   |
| 3233 | ENSG00000110218 | PANX1    | Uncertain Cytoplasm cytoplasm                          |
| 3234 | ENSG00000110237 | ARHGEF17 | Uncertain Cytoplasm cytoplasm                          |
| 3235 | ENSG00000110244 | APOA4    | Enhanced High expr plasma membrane                     |
| 3236 | ENSG00000110245 | APOC3    | Supported Plasma plasma membrane                       |
| 3237 | ENSG00000110274 | CEP164   | Uncertain Cytoplasm cytoplasm;plasma membrane          |
| 3238 | ENSG00000110315 | RNF141   | Approved Mainly c cytoplasm                            |
| 3239 | ENSG00000110321 | EIF4G2   | Approved General c cytoplasm                           |
| 3240 | ENSG00000110328 | GALNT18  | Approved Cytoplasm cytoplasm                           |
| 3241 | ENSG00000110330 | BIRC2    | Supported Cytoplasm cytoplasm;nucleus                  |
| 3242 | ENSG00000110344 | UBE4A    | Approved Granular cytoplasm                            |
| 3243 | ENSG00000110367 | DDX6     | Approved General c cytoplasm                           |

|      |                 |          |                                                      |
|------|-----------------|----------|------------------------------------------------------|
| 3244 | ENSG00000110375 | UPK2     | Enhanced Membranouplasma membrane                    |
| 3245 | ENSG00000110395 | CBL      | Enhanced Cytoplasmcytoplasm                          |
| 3246 | ENSG00000110400 | NECTIN1  | Approved Cytoplasmcytoplasm;plasma membrane          |
| 3247 | ENSG00000110422 | HIPK3    | Approved Cytoplasmcytoplasm;nucleus                  |
| 3248 | ENSG00000110435 | PDHX     | Enhanced Ubiquitoucytoplasm                          |
| 3249 | ENSG00000110436 | SLC1A2   | Enhanced Distinct expression in astrocytes.          |
| 3250 | ENSG00000110442 | COMMD9   | UncertainGeneral ccytoplasm;nucleus                  |
| 3251 | ENSG00000110446 | SLC15A3  | Approved Cytoplasmcytoplasm;plasma membrane          |
| 3252 | ENSG00000110448 | CD5      | Enhanced Highly seplasma membrane                    |
| 3253 | ENSG00000110455 | ACCS     | Approved Ubiquitoucytoplasm                          |
| 3254 | ENSG00000110484 | SCGB2A2  | Enhanced Cytoplasmcytoplasm;plasma membrane          |
| 3255 | ENSG00000110492 | MDK      | UncertainExtracellcytoplasm                          |
| 3256 | ENSG00000110497 | AMBRA1   | Approved Cytoplasmcytoplasm;nucleus                  |
| 3257 | ENSG00000110514 | MADD     | UncertainMainly ccytoplasm                           |
| 3258 | ENSG00000110536 | PTPMT1   | Approved General ccytoplasm                          |
| 3259 | ENSG00000110583 | NAA40    | UncertainEstimation of protein expression could not  |
| 3260 | ENSG00000110619 | CARS     | Enhanced Cytoplasmcytoplasm                          |
| 3261 | ENSG00000110628 | SLC22A18 | Enhanced Luminal mplasma membrane                    |
| 3262 | ENSG00000110651 | CD81     | SupportedCytoplasmcytoplasm;plasma membrane          |
| 3263 | ENSG00000110660 | SLC35F2  | Approved Membranoucytoplasm;plasma membrane          |
| 3264 | ENSG00000110665 | C11orf21 | Approved Low cytopcytoplasm                          |
| 3265 | ENSG00000110693 | SOX6     | Enhanced Nuclear enucleus                            |
| 3266 | ENSG00000110696 | C11orf58 | UncertainCytoplasmcytoplasm                          |
| 3267 | ENSG00000110697 | PITPNM1  | Approved Cytoplasmcytoplasm                          |
| 3268 | ENSG00000110700 | RPS13    | UncertainCytoplasmcytoplasm                          |
| 3269 | ENSG00000110711 | AIP      | Approved Cytoplasmcytoplasm                          |
| 3270 | ENSG00000110717 | NDUFS8   | Approved Cytoplasmcytoplasm                          |
| 3271 | ENSG00000110719 | TCIRG1   | Approved Cytoplasmcytoplasm                          |
| 3272 | ENSG00000110721 | CHKA     | Approved Mainly ccytoplasm                           |
| 3273 | ENSG00000110756 | HPS5     | Approved Cytoplasmcytoplasm                          |
| 3274 | ENSG00000110768 | GTF2H1   | Enhanced General n nucleus                           |
| 3275 | ENSG00000110777 | POU2AF1  | Enhanced Nuclear acytoplasm;nucleus                  |
| 3276 | ENSG00000110786 | PTPN5    | SupportedExpression in neuronal cells and processes. |
| 3277 | ENSG00000110799 | VWF      | SupportedPlasma pocytoplasm;plasma membrane          |
| 3278 | ENSG00000110801 | PSMD9    | Enhanced Ubiquitoucytoplasm                          |
| 3279 | ENSG00000110811 | P3H3     | Approved Cytoplasmcytoplasm                          |
| 3280 | ENSG00000110841 | PPFIBP1  | UncertainGeneral ccytoplasm                          |
| 3281 | ENSG00000110844 | PRPF40B  | Enhanced Cytoplasmcytoplasm;nucleus                  |
| 3282 | ENSG00000110848 | CD69     | Enhanced Cytoplasmcytoplasm                          |
| 3283 | ENSG00000110851 | PRDM4    | Approved Cytoplasmcytoplasm;nucleus                  |
| 3284 | ENSG00000110852 | CLEC2B   | Enhanced Cytoplasmcytoplasm                          |
| 3285 | ENSG00000110871 | COQ5     | Approved Cytoplasmcytoplasm                          |
| 3286 | ENSG00000110876 | SELPLG   | Enhanced Cytoplasmcytoplasm                          |
| 3287 | ENSG00000110880 | CORO1C   | Approved Ubiquitoucytoplasm                          |
| 3288 | ENSG00000110887 | DAO      | Enhanced Selective expression in hepatocytes and rei |
| 3289 | ENSG00000110888 | CAPRIN2  | SupportedCytoplasmcytoplasm                          |
| 3290 | ENSG00000110906 | KCTD10   | Approved Cytoplasmcytoplasm                          |
| 3291 | ENSG00000110911 | SLC11A2  | UncertainCytoplasmcytoplasm;plasma membrane          |
| 3292 | ENSG00000110921 | MVK      | Approved Granular cytoplasm                          |
| 3293 | ENSG00000110925 | CSRNP2   | Approved General ccytoplasm                          |
| 3294 | ENSG00000110931 | CAMKK2   | Approved General ccytoplasm                          |
| 3295 | ENSG00000110934 | BIN2     | Enhanced Cytoplasmcytoplasm                          |
| 3296 | ENSG00000110944 | IL23A    | Approved Cytoplasmcytoplasm                          |
| 3297 | ENSG00000110955 | ATP5F1B  | Enhanced General gcytoplasm                          |
| 3298 | ENSG00000110958 | PTGES3   | Enhanced General ccytoplasm;nucleus                  |

|      |                 |          |           |                                             |
|------|-----------------|----------|-----------|---------------------------------------------|
| 3299 | ENSG00000110975 | SYT10    | Uncertain | Estimation of protein expression could not  |
| 3300 | ENSG00000110987 | BCL7A    | Approved  | Nuclear enucleus                            |
| 3301 | ENSG00000111011 | RSRC2    | Uncertain | Nuclear enucleus                            |
| 3302 | ENSG00000111052 | LIN7A    | Approved  | Membranouplasma membrane                    |
| 3303 | ENSG00000111057 | KRT18    | Enhanced  | Cytoplasmcytoplasm                          |
| 3304 | ENSG00000111058 | ACSS3    | Approved  | Cytoplasmcytoplasm                          |
| 3305 | ENSG00000111077 | TNS2     | Approved  | Cytoplasmcytoplasm;plasma membrane          |
| 3306 | ENSG00000111087 | GLI1     | Uncertain | Cytoplasmcytoplasm                          |
| 3307 | ENSG00000111110 | PPM1H    | Approved  | Mainly ccytoplasm                           |
| 3308 | ENSG00000111142 | METAP2   | Enhanced  | Ubiquitoucytoplasm                          |
| 3309 | ENSG00000111144 | LTA4H    | Supported | Nuclear acytoplasm;nucleus                  |
| 3310 | ENSG00000111145 | ELK3     | Approved  | Mainly nunucleus                            |
| 3311 | ENSG00000111181 | SLC6A12  | Approved  | Cytoplasmcytoplasm;plasma membrane          |
| 3312 | ENSG00000111196 | MAGOHB   | Uncertain | High ubiqcytoplasm;nucleus                  |
| 3313 | ENSG00000111199 | TRPV4    | Uncertain | Cytoplasmcytoplasm;plasma membrane          |
| 3314 | ENSG00000111203 | ITFG2    | Uncertain | Ubiquitoucytoplasm                          |
| 3315 | ENSG00000111206 | FOXM1    | Uncertain | Mainly nunucleus                            |
| 3316 | ENSG00000111215 | PRR4     | Supported | Distinct cytoplasm                          |
| 3317 | ENSG00000111218 | PRMT8    | Enhanced  | Nuclear enucleus                            |
| 3318 | ENSG00000111224 | PARP11   | Uncertain | Estimation of protein expression could not  |
| 3319 | ENSG00000111229 | ARPC3    | Approved  | Nuclear acytoplasm;nucleus                  |
| 3320 | ENSG00000111231 | GPN3     | Uncertain | Cytoplasmcytoplasm                          |
| 3321 | ENSG00000111237 | VPS29    | Uncertain | General ccytoplasm                          |
| 3322 | ENSG00000111245 | MYL2     | Supported | Selectivecytoplasm                          |
| 3323 | ENSG00000111252 | SH2B3    | Approved  | Ubiquitounucleus                            |
| 3324 | ENSG00000111254 | AKAP3    | Enhanced  | Cytoplasmcytoplasm                          |
| 3325 | ENSG00000111261 | MANSC1   | Approved  | Cytoplasmcytoplasm                          |
| 3326 | ENSG00000111262 | KCNA1    | Approved  | Cytoplasmcytoplasm                          |
| 3327 | ENSG00000111266 | DUSP16   | Approved  | General ccytoplasm                          |
| 3328 | ENSG00000111269 | CREBL2   | Uncertain | Ubiquitoucytoplasm                          |
| 3329 | ENSG00000111271 | ACAD10   | Uncertain | Estimation of protein expression could not  |
| 3330 | ENSG00000111275 | ALDH2    | Approved  | Cytoplasmcytoplasm                          |
| 3331 | ENSG00000111276 | CDKN1B   | Approved  | Cytoplasmcytoplasm;nucleus                  |
| 3332 | ENSG00000111291 | GPRC5D   | Approved  | Ubiquitoucytoplasm;plasma membrane          |
| 3333 | ENSG00000111300 | NAA25    | Approved  | General ccytoplasm                          |
| 3334 | ENSG00000111319 | SCNN1A   | Enhanced  | Membranoucytoplasm;plasma membrane          |
| 3335 | ENSG00000111321 | LTBR     | Uncertain | Cytoplasmcytoplasm                          |
| 3336 | ENSG00000111325 | OGFOD2   | Approved  | General ccytoplasm                          |
| 3337 | ENSG00000111328 | CDK2AP1  | Approved  | Cytoplasmcytoplasm                          |
| 3338 | ENSG00000111331 | OAS3     | Uncertain | Cytoplasmcytoplasm                          |
| 3339 | ENSG00000111335 | OAS2     | Approved  | General ncytoplasm;nucleus                  |
| 3340 | ENSG00000111341 | MGP      | Approved  | Expressed in chondrocytes and breast glands |
| 3341 | ENSG00000111344 | RASAL1   | Approved  | Membranoucytoplasm;plasma membrane          |
| 3342 | ENSG00000111348 | ARHGDI3  | Enhanced  | Cytoplasmcytoplasm;nucleus                  |
| 3343 | ENSG00000111358 | GTF2H3   | Uncertain | Cytoplasmcytoplasm;nucleus;plasma membrane  |
| 3344 | ENSG00000111361 | EIF2B1   | Approved  | General ccytoplasm;nucleus                  |
| 3345 | ENSG00000111364 | DDX55    | Approved  | Mainly nunucleus                            |
| 3346 | ENSG00000111371 | SLC38A1  | Uncertain | Cytoplasmcytoplasm                          |
| 3347 | ENSG00000111404 | RERGL    | Uncertain | Cytoplasmcytoplasm                          |
| 3348 | ENSG00000111405 | ENDOU    | Enhanced  | Cytoplasmcytoplasm                          |
| 3349 | ENSG00000111412 | C12orf49 | Uncertain | Cytoplasmcytoplasm                          |
| 3350 | ENSG00000111432 | FZD10    | Uncertain | Estimation of protein expression could not  |
| 3351 | ENSG00000111445 | RFC5     | Supported | General nnucleus                            |
| 3352 | ENSG00000111450 | STX2     | Uncertain | Estimation of protein expression could not  |
| 3353 | ENSG00000111452 | ADGRD1   | Uncertain | Cytoplasmcytoplasm                          |

|      |                 |           |                                                      |
|------|-----------------|-----------|------------------------------------------------------|
| 3354 | ENSG00000111490 | TBC1D30   | Approved General ccytoplasm                          |
| 3355 | ENSG00000111530 | CAND1     | Approved Mainly nunucleus                            |
| 3356 | ENSG00000111537 | IFNG      | Approved Distinct plasma membrane                    |
| 3357 | ENSG00000111540 | RAB5B     | Approved Ubiquitouscytoplasm                         |
| 3358 | ENSG00000111554 | MDM1      | UncertainUbiquitouscytoplasm                         |
| 3359 | ENSG00000111596 | CNOT2     | Approved General ccytoplasm                          |
| 3360 | ENSG00000111602 | TIMELESS  | Enhanced Nuclear enucleus                            |
| 3361 | ENSG00000111605 | CPSF6     | SupportedUbiquitousnucleus                           |
| 3362 | ENSG00000111615 | KRR1      | Approved Granular cytoplasm                          |
| 3363 | ENSG00000111639 | MRPL51    | Approved Cytoplasmcytoplasm                          |
| 3364 | ENSG00000111640 | GAPDH     | SupportedUbiquitouscytoplasm;nucleus                 |
| 3365 | ENSG00000111641 | NOP2      | SupportedGeneral nnucleus                            |
| 3366 | ENSG00000111642 | CHD4      | SupportedUbiquitouscytoplasm;nucleus                 |
| 3367 | ENSG00000111644 | ACRBP     | Enhanced Selective expression in subsets of cells in |
| 3368 | ENSG00000111647 | UHRF1BP1L | UncertainCytoplasmcytoplasm;nucleus                  |
| 3369 | ENSG00000111652 | COPS7A    | SupportedGeneral nnucleus                            |
| 3370 | ENSG00000111653 | ING4      | Approved Nuclear enucleus                            |
| 3371 | ENSG00000111664 | GNB3      | UncertainMembranouscytoplasm;plasma membrane         |
| 3372 | ENSG00000111666 | CHPT1     | Approved Cytoplasmcytoplasm                          |
| 3373 | ENSG00000111667 | USP5      | UncertainCytoplasmcytoplasm;nucleus                  |
| 3374 | ENSG00000111669 | TPI1      | UncertainGeneral ncytoplasm;nucleus                  |
| 3375 | ENSG00000111670 | GNPTAB    | Approved Cytoplasmcytoplasm                          |
| 3376 | ENSG00000111671 | SPSB2     | Approved General ccytoplasm                          |
| 3377 | ENSG00000111674 | ENO2      | Enhanced Distinct cytoplasm                          |
| 3378 | ENSG00000111676 | ATN1      | Enhanced General nnucleus                            |
| 3379 | ENSG00000111678 | C12orf57  | Approved Cytoplasmcytoplasm;nucleus                  |
| 3380 | ENSG00000111679 | PTPN6     | Enhanced Distinct cytoplasm                          |
| 3381 | ENSG00000111700 | SLC01B3   | Enhanced Selectiveplasma membrane                    |
| 3382 | ENSG00000111704 | NANOG     | SupportedNot expressed in normal tissues. View Path  |
| 3383 | ENSG00000111707 | SUDS3     | Approved Nuclear acytoplasm;nucleus                  |
| 3384 | ENSG00000111711 | GOLT1B    | Approved Cytoplasmcytoplasm                          |
| 3385 | ENSG00000111713 | GYS2      | Approved Cytoplasmcytoplasm                          |
| 3386 | ENSG00000111716 | LDHB      | Enhanced Cytoplasmcytoplasm                          |
| 3387 | ENSG00000111725 | PRKAB1    | Enhanced Ubiquitouscytoplasm                         |
| 3388 | ENSG00000111726 | CMAS      | SupportedUbiquitousnucleus                           |
| 3389 | ENSG00000111727 | HCFC2     | Approved Cytoplasmcytoplasm;nucleus                  |
| 3390 | ENSG00000111728 | ST8SIA1   | Approved General ccytoplasm                          |
| 3391 | ENSG00000111729 | CLEC4A    | UncertainExpression in lymphoid cells.               |
| 3392 | ENSG00000111731 | C2CD5     | Approved General ccytoplasm                          |
| 3393 | ENSG00000111737 | RAB35     | Approved Cytoplasmcytoplasm                          |
| 3394 | ENSG00000111752 | PHC1      | Approved General ncytoplasm;nucleus                  |
| 3395 | ENSG00000111775 | COX6A1    | Approved Cytoplasmcytoplasm                          |
| 3396 | ENSG00000111780 | AL021546. | UncertainCytoplasmcytoplasm                          |
| 3397 | ENSG00000111783 | RFX4      | Enhanced Nuclear ecytoplasm;nucleus                  |
| 3398 | ENSG00000111785 | RIC8B     | Approved Cytoplasmcytoplasm                          |
| 3399 | ENSG00000111786 | SRSF9     | SupportedGeneral nnucleus                            |
| 3400 | ENSG00000111790 | FGFR10P2  | SupportedGeneral ccytoplasm                          |
| 3401 | ENSG00000111796 | KLRB1     | Approved Cytoplasmcytoplasm                          |
| 3402 | ENSG00000111799 | COL12A1   | UncertainLow cytopcytoplasm;plasma membrane          |
| 3403 | ENSG00000111801 | BTN3A3    | Enhanced Cytoplasmcytoplasm;plasma membrane          |
| 3404 | ENSG00000111802 | TDP2      | Enhanced Cytoplasmcytoplasm;nucleus                  |
| 3405 | ENSG00000111816 | FRK       | Approved Cytoplasmcytoplasm                          |
| 3406 | ENSG00000111817 | DSE       | UncertainCytoplasmcytoplasm;nucleus                  |
| 3407 | ENSG00000111832 | RWDD1     | Approved General ccytoplasm                          |
| 3408 | ENSG00000111834 | RSPH4A    | Enhanced Selective expression in ciliated cells.     |

|      |                 |         |                                                     |
|------|-----------------|---------|-----------------------------------------------------|
| 3409 | ENSG00000111845 | PAK1IP1 | SupportedUbiquitousnucleus                          |
| 3410 | ENSG00000111846 | GCNT2   | Approved Granular cytoplasm                         |
| 3411 | ENSG00000111850 | SMIM8   | Approved Cytoplasmcytoplasm                         |
| 3412 | ENSG00000111859 | NEDD9   | UncertainCytoplasmcytoplasm;nucleus                 |
| 3413 | ENSG00000111860 | CEP85L  | UncertainGeneral ccytoplasm                         |
| 3414 | ENSG00000111863 | ADTRP   | UncertainEstimation of protein expression could not |
| 3415 | ENSG00000111877 | MCM9    | Approved Nuclear enucleus                           |
| 3416 | ENSG00000111879 | FAM184A | UncertainEstimation of protein expression could not |
| 3417 | ENSG00000111880 | RNGTT   | Approved Cytoplasmcytoplasm;nucleus                 |
| 3418 | ENSG00000111885 | MAN1A1  | UncertainGeneral ccytoplasm                         |
| 3419 | ENSG00000111897 | SERINC1 | UncertainMainly ccytoplasm                          |
| 3420 | ENSG00000111906 | HDDC2   | Approved Cytoplasmcytoplasm;plasma membrane         |
| 3421 | ENSG00000111907 | TPD52L1 | Enhanced Cytoplasmcytoplasm                         |
| 3422 | ENSG00000111911 | HINT3   | Approved General ccytoplasm                         |
| 3423 | ENSG00000111912 | NCOA7   | Approved Nuclear acytoplasm;nucleus                 |
| 3424 | ENSG00000111961 | SASH1   | UncertainUbiquitousnucleus                          |
| 3425 | ENSG00000111962 | UST     | Approved Cytoplasmcytoplasm                         |
| 3426 | ENSG00000111981 | ULBP1   | Enhanced Cytoplasmcytoplasm;plasma membrane         |
| 3427 | ENSG00000112029 | FBX05   | Approved General ncytoplasm;nucleus                 |
| 3428 | ENSG00000112031 | MTRF1L  | UncertainCytoplasmcytoplasm                         |
| 3429 | ENSG00000112033 | PPARD   | Approved Nuclear enucleus                           |
| 3430 | ENSG00000112038 | OPRM1   | Enhanced Membranouplasma membrane                   |
| 3431 | ENSG00000112039 | FANCE   | Enhanced Ubiquitousnucleus                          |
| 3432 | ENSG00000112053 | SLC26A8 | Enhanced Expressed in spermatozoa.                  |
| 3433 | ENSG00000112062 | MAPK14  | Approved General ccytoplasm;nucleus                 |
| 3434 | ENSG00000112077 | RHAG    | Approved Positivity in erythrocytes.                |
| 3435 | ENSG00000112078 | KCTD20  | Approved Cytoplasmcytoplasm                         |
| 3436 | ENSG00000112079 | STK38   | UncertainGeneral nnucleus                           |
| 3437 | ENSG00000112081 | SRSF3   | SupportedGeneral nnucleus                           |
| 3438 | ENSG00000112096 | SOD2    | SupportedGeneral ccytoplasm                         |
| 3439 | ENSG00000112110 | MRPL18  | Enhanced Cytoplasmcytoplasm                         |
| 3440 | ENSG00000112115 | IL17A   | UncertainSecreted blood proiten.                    |
| 3441 | ENSG00000112118 | MCM3    | SupportedNuclear enucleus                           |
| 3442 | ENSG00000112130 | RNF8    | Approved Nucleolarnucleus                           |
| 3443 | ENSG00000112137 | PHACTR1 | Enhanced Cytoplasmcytoplasm                         |
| 3444 | ENSG00000112139 | MDGA1   | Approved Cytoplasmcytoplasm                         |
| 3445 | ENSG00000112144 | ICK     | Approved Cytoplasmcytoplasm                         |
| 3446 | ENSG00000112149 | CD83    | Enhanced Cytoplasmcytoplasm                         |
| 3447 | ENSG00000112159 | MDN1    | UncertainCytoplasmcytoplasm;plasma membrane         |
| 3448 | ENSG00000112182 | BACH2   | Enhanced Cytoplasmcytoplasm                         |
| 3449 | ENSG00000112183 | RBM24   | Enhanced Nuclear enucleus                           |
| 3450 | ENSG00000112186 | CAP2    | Enhanced Cytoplasmcytoplasm                         |
| 3451 | ENSG00000112208 | BAG2    | Enhanced Cytoplasmcytoplasm                         |
| 3452 | ENSG00000112210 | RAB23   | Enhanced General ccytoplasm;plasma membrane         |
| 3453 | ENSG00000112218 | GPR63   | Approved Cytoplasmcytoplasm                         |
| 3454 | ENSG00000112232 | KHDRBS2 | SupportedNuclear enucleus                           |
| 3455 | ENSG00000112234 | FBXL4   | Approved Nuclear acytoplasm;nucleus                 |
| 3456 | ENSG00000112237 | CCNC    | UncertainCytoplasmcytoplasm                         |
| 3457 | ENSG00000112238 | PRDM13  | UncertainEstimation of protein expression could not |
| 3458 | ENSG00000112245 | PTP4A1  | Approved Cytoplasmcytoplasm;nucleus                 |
| 3459 | ENSG00000112249 | ASCC3   | Enhanced Ubiquitouscytoplasm                        |
| 3460 | ENSG00000112273 | HDGFL1  | Enhanced Nuclear enucleus                           |
| 3461 | ENSG00000112276 | BVES    | Enhanced Distinct cytoplasm;plasma membrane         |
| 3462 | ENSG00000112280 | COL9A1  | Enhanced Cytoplasmcytoplasm                         |
| 3463 | ENSG00000112290 | WASF1   | Approved Ubiquitouscytoplasm                        |

|      |                 |          |           |                                             |
|------|-----------------|----------|-----------|---------------------------------------------|
| 3464 | ENSG00000112293 | GPLD1    | Uncertain | Estimation of protein expression could not  |
| 3465 | ENSG00000112294 | ALDH5A1  | Enhanced  | Granular cytoplasm                          |
| 3466 | ENSG00000112297 | CRYBG1   | Approved  | Cytoplasm cytoplasm                         |
| 3467 | ENSG00000112299 | VNN1     | Uncertain | Membranou cytoplasm; plasma membrane        |
| 3468 | ENSG00000112304 | ACOT13   | Approved  | General c cytoplasm                         |
| 3469 | ENSG00000112305 | SMAP1    | Approved  | General c cytoplasm                         |
| 3470 | ENSG00000112306 | RPS12    | Approved  | General c cytoplasm                         |
| 3471 | ENSG00000112308 | C6orf62  | Supported | Granular cytoplasm                          |
| 3472 | ENSG00000112309 | B3GAT2   | Uncertain | Estimation of protein expression could not  |
| 3473 | ENSG00000112312 | GMNN     | Enhanced  | Nuclear enucleus                            |
| 3474 | ENSG00000112319 | EYA4     | Enhanced  | Cytoplasm cytoplasm; nucleus                |
| 3475 | ENSG00000112320 | SOBP     | Uncertain | Cytoplasm cytoplasm; plasma membrane        |
| 3476 | ENSG00000112333 | NR2E1    | Uncertain | Selective expression in CNS.                |
| 3477 | ENSG00000112337 | SLC17A2  | Uncertain | Estimation of protein expression could not  |
| 3478 | ENSG00000112339 | HBS1L    | Approved  | General c cytoplasm                         |
| 3479 | ENSG00000112343 | TRIM38   | Approved  | Ubiquitou cytoplasm                         |
| 3480 | ENSG00000112357 | PEX7     | Uncertain | Mainly c cytoplasm                          |
| 3481 | ENSG00000112365 | ZBTB24   | Uncertain | Estimation of protein expression could not  |
| 3482 | ENSG00000112367 | FIG4     | Approved  | Cytoplasm cytoplasm                         |
| 3483 | ENSG00000112378 | PERP     | Enhanced  | Cytoplasm cytoplasm                         |
| 3484 | ENSG00000112379 | ARFGEF3  | Uncertain | Cytoplasm cytoplasm                         |
| 3485 | ENSG00000112394 | SLC16A10 | Approved  | Cytoplasm cytoplasm                         |
| 3486 | ENSG00000112406 | HECA     | Uncertain | Cytoplasm cytoplasm                         |
| 3487 | ENSG00000112414 | ADGRG6   | Approved  | Highly expressed in endothelial cells.      |
| 3488 | ENSG00000112419 | PHACTR2  | Approved  | General c cytoplasm                         |
| 3489 | ENSG00000112473 | SLC39A7  | Approved  | Cytoplasm cytoplasm                         |
| 3490 | ENSG00000112486 | CCR6     | Approved  | Cytoplasm cytoplasm                         |
| 3491 | ENSG00000112494 | UNC93A   | Uncertain | Estimation of protein expression could not  |
| 3492 | ENSG00000112499 | SLC22A2  | Approved  | Distinct cytoplasm; plasma membrane         |
| 3493 | ENSG00000112511 | PHF1     | Approved  | General c cytoplasm                         |
| 3494 | ENSG00000112514 | CUTA     | Uncertain | Cytoplasm cytoplasm; nucleus                |
| 3495 | ENSG00000112530 | PACRG    | Enhanced  | Distinct expression in cilia in fallopian t |
| 3496 | ENSG00000112531 | QKI      | Enhanced  | Nuclear enucleus                            |
| 3497 | ENSG00000112539 | C6orf118 | Approved  | Expression in several tissues including fal |
| 3498 | ENSG00000112541 | PDE10A   | Supported | Positivity in processes in caudate.         |
| 3499 | ENSG00000112559 | MDFI     | Approved  | Cytoplasm cytoplasm                         |
| 3500 | ENSG00000112576 | CCND3    | Approved  | Nuclear enucleus                            |
| 3501 | ENSG00000112578 | BYSL     | Enhanced  | Ubiquitounucleus                            |
| 3502 | ENSG00000112584 | FAM120B  | Uncertain | Nuclear a cytoplasm; nucleus                |
| 3503 | ENSG00000112592 | TBP      | Enhanced  | General n nucleus                           |
| 3504 | ENSG00000112599 | GUCA1B   | Enhanced  | Expression in cones and outer plexiform lay |
| 3505 | ENSG00000112619 | PRPH2    | Enhanced  | Cytoplasm cytoplasm                         |
| 3506 | ENSG00000112624 | BICRAL   | Approved  | General n cytoplasm; nucleus                |
| 3507 | ENSG00000112640 | PPP2R5D  | Approved  | Cytoplasm cytoplasm                         |
| 3508 | ENSG00000112651 | MRPL2    | Approved  | Cytoplasm cytoplasm                         |
| 3509 | ENSG00000112655 | PTK7     | Approved  | Cytoplasm cytoplasm                         |
| 3510 | ENSG00000112658 | SRF      | Supported | General n nucleus                           |
| 3511 | ENSG00000112659 | CUL9     | Approved  | Cytoplasm cytoplasm; nucleus                |
| 3512 | ENSG00000112667 | DNPH1    | Enhanced  | Cytoplasm cytoplasm                         |
| 3513 | ENSG00000112679 | DUSP22   | Approved  | Ubiquitou cytoplasm; nucleus                |
| 3514 | ENSG00000112697 | TMEM30A  | Approved  | Granular cytoplasm                          |
| 3515 | ENSG00000112699 | GMDS     | Enhanced  | Cytplasminucleus                            |
| 3516 | ENSG00000112701 | SENP6    | Approved  | General n nucleus                           |
| 3517 | ENSG00000112706 | IMPG1    | Enhanced  | Cytoplasm cytoplasm                         |
| 3518 | ENSG00000112715 | VEGFA    | Supported | Ubiquitou cytoplasm                         |



|      |                 |          |                                                      |
|------|-----------------|----------|------------------------------------------------------|
| 3519 | ENSG00000112739 | PRPF4B   | Approved Nuclear cytoplasm;nucleus                   |
| 3520 | ENSG00000112742 | TTK      | Enhanced Cytoplasmcytoplasm                          |
| 3521 | ENSG00000112759 | SLC29A1  | Approved General ccytoplasm                          |
| 3522 | ENSG00000112763 | BTN2A1   | Approved General ccytoplasm;plasma membrane          |
| 3523 | ENSG00000112769 | LAMA4    | Enhanced Distinct plasma membrane                    |
| 3524 | ENSG00000112773 | FAM46A   | UncertainMembranoucytoplasm;plasma membrane          |
| 3525 | ENSG00000112787 | FBRSL1   | Enhanced Cytoplasmcytoplasm                          |
| 3526 | ENSG00000112796 | ENPP5    | Enhanced Cytoplasmcytoplasm                          |
| 3527 | ENSG00000112799 | LY86     | Approved Cytoplasmcytoplasm                          |
| 3528 | ENSG00000112818 | MEP1A    | Enhanced Selective expression in the gastrointestin  |
| 3529 | ENSG00000112851 | ERBIN    | Approved Cytoplasmcytoplasm                          |
| 3530 | ENSG00000112852 | PCDHB2   | Enhanced Cytoplasmcytoplasm                          |
| 3531 | ENSG00000112855 | HARS2    | Approved General ccytoplasm                          |
| 3532 | ENSG00000112874 | NUDT12   | SupportedUbiquitoucytoplasm                          |
| 3533 | ENSG00000112877 | CEP72    | Approved Mainly nunucleus                            |
| 3534 | ENSG00000112893 | MAN2A1   | Enhanced Cytoplasmcytoplasm                          |
| 3535 | ENSG00000112902 | SEMA5A   | Approved Cytoplasmcytoplasm                          |
| 3536 | ENSG00000112936 | C7       | Approved Secreted positivity in a majority of tissu  |
| 3537 | ENSG00000112941 | PAPD7    | Enhanced Ubiquitounucleus                            |
| 3538 | ENSG00000112964 | GHR      | Enhanced Highly abcytoplasm;plasma membrane          |
| 3539 | ENSG00000112972 | HMGCS1   | Approved Cytoplasmcytoplasm;nucleus                  |
| 3540 | ENSG00000112977 | DAP      | UncertainCytoplasmcytoplasm                          |
| 3541 | ENSG00000112981 | NME5     | Approved Mainly ccytoplasm                           |
| 3542 | ENSG00000112983 | BRD8     | SupportedGeneral nnucleus                            |
| 3543 | ENSG00000112984 | KIF20A   | Approved Nuclear enucleus                            |
| 3544 | ENSG00000112992 | NNT      | Enhanced Cytoplasmcytoplasm                          |
| 3545 | ENSG00000112996 | MRPS30   | Approved General ccytoplasm                          |
| 3546 | ENSG00000113013 | HSPA9    | SupportedUbiquitoucytoplasm                          |
| 3547 | ENSG00000113048 | MRPS27   | Approved Mitochondrial expression in most cell type  |
| 3548 | ENSG00000113068 | PFDN1    | Approved Mainly ccytoplasm                           |
| 3549 | ENSG00000113070 | HBEGF    | UncertainRNA-based expert annotation gave inconclus  |
| 3550 | ENSG00000113073 | SLC4A9   | UncertainEstimation of protein expression could not  |
| 3551 | ENSG00000113088 | GZMK     | Enhanced Cytoplasmcytoplasm                          |
| 3552 | ENSG00000113100 | CDH9     | Approved Membranoucytoplasm;plasma membrane          |
| 3553 | ENSG00000113108 | APBB3    | Approved Expression in most tissues, including brain |
| 3554 | ENSG00000113119 | TMC06    | UncertainGranular cytoplasm                          |
| 3555 | ENSG00000113140 | SPARC    | SupportedCytoplasmcytoplasm                          |
| 3556 | ENSG00000113141 | IK       | SupportedUbiquitounucleus                            |
| 3557 | ENSG00000113161 | HMGCR    | Approved Ubiquitoucytoplasm                          |
| 3558 | ENSG00000113163 | COL4A3BP | UncertainGeneral ccytoplasm                          |
| 3559 | ENSG00000113194 | FAF2     | Approved General ccytoplasm                          |
| 3560 | ENSG00000113196 | HAND1    | Approved Nuclear nnucleus;plasma membrane            |
| 3561 | ENSG00000113205 | PCDHB3   | UncertainEstimation of protein expression could not  |
| 3562 | ENSG00000113209 | PCDHB5   | Approved Cytoplasmcytoplasm                          |
| 3563 | ENSG00000113211 | PCDHB6   | UncertainEstimation of protein expression could not  |
| 3564 | ENSG00000113212 | PCDHB7   | Approved Cytoplasmcytoplasm;plasma membrane          |
| 3565 | ENSG00000113231 | PDE8B    | SupportedCytoplasmcytoplasm                          |
| 3566 | ENSG00000113240 | CLK4     | Approved Mainly nunucleus                            |
| 3567 | ENSG00000113248 | PCDHB15  | UncertainCytoplasmcytoplasm                          |
| 3568 | ENSG00000113249 | HAVCR1   | UncertainCytoplasmcytoplasm;plasma membrane          |
| 3569 | ENSG00000113262 | GRM6     | Enhanced Expression in nerve fibers in retina and i  |
| 3570 | ENSG00000113269 | RNF130   | Approved Granular cytoplasm;nucleus                  |
| 3571 | ENSG00000113272 | THG1L    | Approved Ubiquitoucytoplasm                          |
| 3572 | ENSG00000113273 | ARSB     | Approved Ubiquitoucytoplasm                          |
| 3573 | ENSG00000113282 | CLINT1   | SupportedUbiquitoucytoplasm;plasma membrane          |

|      |                 |          |                                                       |
|------|-----------------|----------|-------------------------------------------------------|
| 3574 | ENSG00000113296 | THBS4    | Approved Extracell cytoplasm                          |
| 3575 | ENSG00000113300 | CNOT6    | Approved Cytoplasm cytoplasm                          |
| 3576 | ENSG00000113302 | IL12B    | Supported Selective cytoplasm                         |
| 3577 | ENSG00000113303 | BTNL8    | Enhanced Cytoplasm cytoplasm; plasma membrane         |
| 3578 | ENSG00000113312 | TTC1     | Approved Cytoplasm cytoplasm                          |
| 3579 | ENSG00000113319 | RASGRF2  | Uncertain General c cytoplasm                         |
| 3580 | ENSG00000113328 | CCNG1    | Supported Ubiquitous nucleus                          |
| 3581 | ENSG00000113356 | POLR3G   | Enhanced Nuclear enucleus                             |
| 3582 | ENSG00000113361 | CDH6     | Enhanced Membranous cytoplasm; plasma membrane        |
| 3583 | ENSG00000113368 | LMNB1    | Supported Ubiquitous nucleus; plasma membrane         |
| 3584 | ENSG00000113384 | GOLPH3   | Approved Golgi-lik cytoplasm                          |
| 3585 | ENSG00000113387 | SUB1     | Supported Ubiquitous nucleus                          |
| 3586 | ENSG00000113389 | NPR3     | Supported Membranous cytoplasm; plasma membrane       |
| 3587 | ENSG00000113391 | FAM172A  | Approved General cytoplasm; nucleus                   |
| 3588 | ENSG00000113396 | SLC27A6  | Approved Cytoplasm cytoplasm                          |
| 3589 | ENSG00000113407 | TARS     | Approved Ubiquitous cytoplasm                         |
| 3590 | ENSG00000113441 | LNPEP    | Approved Cytoplasm cytoplasm; plasma membrane         |
| 3591 | ENSG00000113448 | PDE4D    | Approved Ubiquitous cytoplasm                         |
| 3592 | ENSG00000113456 | RAD1     | Approved Mainly nucleus                               |
| 3593 | ENSG00000113492 | AGXT2    | Enhanced Cytoplasm cytoplasm                          |
| 3594 | ENSG00000113504 | SLC12A7  | Approved General c cytoplasm                          |
| 3595 | ENSG00000113520 | IL4      | Approved Cytoplasm cytoplasm                          |
| 3596 | ENSG00000113522 | RAD50    | Supported Ubiquitous nucleus                          |
| 3597 | ENSG00000113525 | IL5      | Approved Secreted plasma membrane                     |
| 3598 | ENSG00000113532 | ST8SIA4  | Approved Cytoplasm cytoplasm                          |
| 3599 | ENSG00000113552 | GNPDA1   | Uncertain General c cytoplasm                         |
| 3600 | ENSG00000113555 | PCDH12   | Uncertain RNA-based expert annotation gave inconclus: |
| 3601 | ENSG00000113558 | SKP1     | Approved Cytoplasm cytoplasm; nucleus                 |
| 3602 | ENSG00000113569 | NUP155   | Enhanced Nuclear enucleus; plasma membrane            |
| 3603 | ENSG00000113575 | PPP2CA   | Approved Ubiquitous cytoplasm; nucleus                |
| 3604 | ENSG00000113578 | FGF1     | Enhanced Highly se cytoplasm                          |
| 3605 | ENSG00000113580 | NR3C1    | Supported General nucleus                             |
| 3606 | ENSG00000113583 | C5orf15  | Uncertain General c cytoplasm; nucleus                |
| 3607 | ENSG00000113593 | PPWD1    | Enhanced General c cytoplasm                          |
| 3608 | ENSG00000113595 | TRIM23   | Approved Cytoplasm cytoplasm; nucleus                 |
| 3609 | ENSG00000113597 | TRAPPC13 | Approved General c cytoplasm                          |
| 3610 | ENSG00000113600 | C9       | Uncertain Distinct plasma membrane                    |
| 3611 | ENSG00000113615 | SEC24A   | Approved Cytoplasm cytoplasm                          |
| 3612 | ENSG00000113621 | TXNDC15  | Approved Cytoplasm cytoplasm                          |
| 3613 | ENSG00000113638 | TTC33    | Approved Ubiquitous nucleus                           |
| 3614 | ENSG00000113643 | RARS     | Approved General c cytoplasm                          |
| 3615 | ENSG00000113645 | WWC1     | Approved Cytoplasm cytoplasm                          |
| 3616 | ENSG00000113648 | H2AFY    | Supported Ubiquitous nucleus                          |
| 3617 | ENSG00000113649 | TCERG1   | Supported General nucleus                             |
| 3618 | ENSG00000113657 | DPYSL3   | Approved Cytoplasm cytoplasm                          |
| 3619 | ENSG00000113658 | SMAD5    | Approved Cytoplasm cytoplasm; plasma membrane         |
| 3620 | ENSG00000113712 | CSNK1A1  | Uncertain Cytoplasm cytoplasm                         |
| 3621 | ENSG00000113719 | ERGIC1   | Enhanced General c cytoplasm                          |
| 3622 | ENSG00000113721 | PDGFRB   | Enhanced High expression in endothelial cells, decic  |
| 3623 | ENSG00000113722 | CDX1     | Enhanced Nuclear enucleus                             |
| 3624 | ENSG00000113734 | BNIP1    | Supported Cytoplasm cytoplasm                         |
| 3625 | ENSG00000113739 | STC2     | Uncertain Cytoplasm cytoplasm; plasma membrane        |
| 3626 | ENSG00000113749 | HRH2     | Approved Cytoplasm cytoplasm                          |
| 3627 | ENSG00000113758 | DBN1     | Enhanced Cytoplasm cytoplasm; plasma membrane         |
| 3628 | ENSG00000113761 | ZNF346   | Approved General nucleus                              |

|      |                 |          |                                                       |
|------|-----------------|----------|-------------------------------------------------------|
| 3629 | ENSG00000113790 | EHHADH   | Enhanced Cytoplasm cytoplasm                          |
| 3630 | ENSG00000113805 | CNTN3    | Approved Mainly cytoplasm                             |
| 3631 | ENSG00000113810 | SMC4     | Approved Cytoplasm cytoplasm                          |
| 3632 | ENSG00000113811 | SELENOK  | Uncertain Cytoplasm cytoplasm                         |
| 3633 | ENSG00000113845 | TIMMDC1  | Uncertain Ubiquitous cytoplasm                        |
| 3634 | ENSG00000113851 | CRBN     | Approved Cytoplasm cytoplasm;nucleus                  |
| 3635 | ENSG00000113889 | KNG1     | Enhanced Distinct cytoplasm;plasma membrane           |
| 3636 | ENSG00000113905 | HRG      | Supported Distinct plasma membrane                    |
| 3637 | ENSG00000113916 | BCL6     | Enhanced Nuclear enucleus                             |
| 3638 | ENSG00000113924 | HGD      | Enhanced Cytoplasm cytoplasm                          |
| 3639 | ENSG00000113946 | CLDN16   | Enhanced Cytoplasm cytoplasm                          |
| 3640 | ENSG00000113966 | ARL6     | Approved Mainly cytoplasm                             |
| 3641 | ENSG00000113971 | NPHP3    | Uncertain Cytoplasm cytoplasm                         |
| 3642 | ENSG00000114013 | CD86     | Approved Cytoplasm cytoplasm;plasma membrane          |
| 3643 | ENSG00000114021 | NIT2     | Approved Cytoplasm cytoplasm                          |
| 3644 | ENSG00000114023 | FAM162A  | Approved Cytoplasm cytoplasm                          |
| 3645 | ENSG00000114026 | OGG1     | Approved Mainly nucleus                               |
| 3646 | ENSG00000114030 | KPNA1    | Supported General cytoplasm;nucleus                   |
| 3647 | ENSG00000114054 | PCCB     | Enhanced Granular cytoplasm                           |
| 3648 | ENSG00000114062 | UBE3A    | Approved Mainly cytoplasm;nucleus                     |
| 3649 | ENSG00000114098 | ARMC8    | Approved General cytoplasm                            |
| 3650 | ENSG00000114107 | CEP70    | Enhanced Ubiquitous cytoplasm                         |
| 3651 | ENSG00000114113 | RBP2     | Enhanced Cytoplasm cytoplasm                          |
| 3652 | ENSG00000114115 | RBP1     | Enhanced Cytoplasm cytoplasm                          |
| 3653 | ENSG00000114120 | SLC25A36 | Approved Cytoplasm cytoplasm                          |
| 3654 | ENSG00000114125 | RNF7     | Approved Cytoplasm cytoplasm                          |
| 3655 | ENSG00000114126 | TFDP2    | Supported General nucleus                             |
| 3656 | ENSG00000114127 | XRN1     | Approved Cytoplasm cytoplasm                          |
| 3657 | ENSG00000114166 | KAT2B    | Supported General nucleus                             |
| 3658 | ENSG00000114200 | BCHE     | Approved Secreted cytoplasm                           |
| 3659 | ENSG00000114209 | PDCD10   | Approved Ubiquitous cytoplasm                         |
| 3660 | ENSG00000114268 | PFKFB4   | Uncertain Estimation of protein expression could not  |
| 3661 | ENSG00000114270 | COL7A1   | Enhanced Expression plasma membrane                   |
| 3662 | ENSG00000114302 | PRKAR2A  | Uncertain General cytoplasm                           |
| 3663 | ENSG00000114316 | USP4     | Approved Cytoplasm cytoplasm                          |
| 3664 | ENSG00000114331 | ACAP2    | Supported Ubiquitous cytoplasm                        |
| 3665 | ENSG00000114349 | GNAT1    | Enhanced Cytoplasm cytoplasm                          |
| 3666 | ENSG00000114353 | GNAI2    | Approved Cytoplasm cytoplasm                          |
| 3667 | ENSG00000114354 | TFG      | Approved Cytoplasm cytoplasm                          |
| 3668 | ENSG00000114378 | HYAL1    | Uncertain RNA-based expert annotation gave inconclus: |
| 3669 | ENSG00000114388 | NPRL2    | Approved Ubiquitous cytoplasm;nucleus                 |
| 3670 | ENSG00000114391 | RPL24    | Approved Cytoplasm cytoplasm                          |
| 3671 | ENSG00000114395 | CYB561D2 | Uncertain Estimation of protein expression could not  |
| 3672 | ENSG00000114405 | C3orf14  | Approved Cytoplasm cytoplasm                          |
| 3673 | ENSG00000114416 | FXR1     | Approved General cytoplasm                            |
| 3674 | ENSG00000114423 | CBLB     | Approved Cytoplasm cytoplasm                          |
| 3675 | ENSG00000114439 | BBX      | Enhanced Nuclear enucleus                             |
| 3676 | ENSG00000114446 | IFT57    | Supported General cytoplasm                           |
| 3677 | ENSG00000114450 | GNB4     | Supported General cytoplasm;plasma membrane           |
| 3678 | ENSG00000114455 | HHLA2    | Enhanced High cytoplasm                               |
| 3679 | ENSG00000114473 | IQCG     | Enhanced Expressed in the cilia in fallopian tube at  |
| 3680 | ENSG00000114480 | GBE1     | Enhanced General cytoplasm                            |
| 3681 | ENSG00000114487 | MORC1    | Enhanced Selective nucleus                            |
| 3682 | ENSG00000114491 | UMPS     | Uncertain Estimation of protein expression could not  |
| 3683 | ENSG00000114503 | NCBP2    | Supported General nucleus                             |

|      |                 |           |                                                      |
|------|-----------------|-----------|------------------------------------------------------|
| 3684 | ENSG00000114520 | SNX4      | UncertainCytoplasmcytoplasm;nucleus                  |
| 3685 | ENSG00000114529 | C3orf52   | UncertainGeneral ccytoplasm                          |
| 3686 | ENSG00000114541 | FRMD4B    | UncertainCytoplasmcytoplasm                          |
| 3687 | ENSG00000114544 | SLC41A3   | Approved General ccytoplasm                          |
| 3688 | ENSG00000114547 | ROPN1B    | SupportedExpressed in sperm flagella.                |
| 3689 | ENSG00000114554 | PLXNA1    | UncertainMainly ccytoplasm                           |
| 3690 | ENSG00000114573 | ATP6V1A   | Approved Ubiquitouscytoplasm;nucleus                 |
| 3691 | ENSG00000114626 | ABTB1     | UncertainCytoplasmcytoplasm                          |
| 3692 | ENSG00000114631 | PODXL2    | Approved Cytoplasmcytoplasm                          |
| 3693 | ENSG00000114638 | UPK1B     | Enhanced Membranouplasma membrane                    |
| 3694 | ENSG00000114646 | CSPG5     | Enhanced Selective expression in brain.              |
| 3695 | ENSG00000114648 | KLHL18    | Approved Cytoplasmcytoplasm                          |
| 3696 | ENSG00000114650 | SCAP      | Approved Cytoplasmcytoplasm                          |
| 3697 | ENSG00000114654 | EFCC1     | UncertainEstimation of protein expression could not  |
| 3698 | ENSG00000114656 | KIAA1257  | UncertainEstimation of protein expression could not  |
| 3699 | ENSG00000114670 | NEK11     | Approved Nuclear enucleus                            |
| 3700 | ENSG00000114686 | MRPL3     | Approved Cytoplasmcytoplasm                          |
| 3701 | ENSG00000114698 | PLSCR4    | UncertainCytoplasmcytoplasm;plasma membrane          |
| 3702 | ENSG00000114735 | HEMK1     | UncertainGeneral ccytoplasm                          |
| 3703 | ENSG00000114737 | CISH      | Approved General ccytoplasm                          |
| 3704 | ENSG00000114739 | ACVR2B    | Approved Cytoplasmcytoplasm                          |
| 3705 | ENSG00000114742 | WDR48     | Approved General ccytoplasm                          |
| 3706 | ENSG00000114744 | COMMD2    | UncertainCytoplasmcytoplasm;nucleus                  |
| 3707 | ENSG00000114745 | GORASP1   | SupportedCytoplasmcytoplasm                          |
| 3708 | ENSG00000114757 | PEX5L     | Enhanced Cytoplasmcytoplasm                          |
| 3709 | ENSG00000114767 | RRP9      | UncertainCytoplasmcytoplasm;nucleus                  |
| 3710 | ENSG00000114770 | ABCC5     | UncertainCytoplasmcytoplasm                          |
| 3711 | ENSG00000114771 | AADAC     | Approved Cytoplasmcytoplasm                          |
| 3712 | ENSG00000114779 | ABHD14B   | SupportedUbiquitouscytoplasm;nucleus                 |
| 3713 | ENSG00000114786 | ABHD14A-A | Approved Cytoplasmcytoplasm                          |
| 3714 | ENSG00000114790 | ARHGEF26  | Approved Cytoplasmcytoplasm                          |
| 3715 | ENSG00000114796 | KLHL24    | UncertainEstimation of protein expression could not  |
| 3716 | ENSG00000114805 | PLCH1     | UncertainEstimation of protein expression could not  |
| 3717 | ENSG00000114812 | VIPR1     | Approved Cytoplasmcytoplasm                          |
| 3718 | ENSG00000114841 | DNAH1     | UncertainDistinct expression in cilia of respiratory |
| 3719 | ENSG00000114850 | SSR3      | Approved General ccytoplasm                          |
| 3720 | ENSG00000114853 | ZBTB47    | Enhanced Nuclear enucleus                            |
| 3721 | ENSG00000114854 | TNNC1     | Enhanced Selectivecytoplasm                          |
| 3722 | ENSG00000114857 | NKTR      | Approved Cytoplasmcytoplasm                          |
| 3723 | ENSG00000114859 | CLCN2     | Approved General ccytoplasm                          |
| 3724 | ENSG00000114861 | FOXP1     | SupportedNuclear enucleus                            |
| 3725 | ENSG00000114867 | EIF4G1    | Approved Mainly ccytoplasm                           |
| 3726 | ENSG00000114902 | SPCS1     | SupportedCytoplasmcytoplasm;plasma membrane          |
| 3727 | ENSG00000114904 | NEK4      | Enhanced Cytoplasmcytoplasm;nucleus                  |
| 3728 | ENSG00000114933 | INO80D    | Approved Cytoplasmcytoplasm                          |
| 3729 | ENSG00000114942 | EEF1B2    | SupportedUbiquitouscytoplasm                         |
| 3730 | ENSG00000114948 | ADAM23    | Approved General ccytoplasm;plasma membrane          |
| 3731 | ENSG00000114956 | DGUOK     | Approved Cytoplasmcytoplasm                          |
| 3732 | ENSG00000114978 | MOB1A     | SupportedUbiquitouscytoplasm                         |
| 3733 | ENSG00000114982 | KANSL3    | Approved General ccytoplasm                          |
| 3734 | ENSG00000114988 | LMAN2L    | Approved General ccytoplasm                          |
| 3735 | ENSG00000114993 | RTKN      | Approved Cytoplasmcytoplasm                          |
| 3736 | ENSG00000115020 | PIKFYVE   | UncertainEstimation of protein expression could not  |
| 3737 | ENSG00000115041 | KCNIP3    | Enhanced Highly explasma membrane                    |
| 3738 | ENSG00000115042 | FAHD2A    | Enhanced Cytoplasmcytoplasm                          |

|      |                 |         |                                                      |
|------|-----------------|---------|------------------------------------------------------|
| 3739 | ENSG00000115053 | NCL     | SupportedNuclear enucleus                            |
| 3740 | ENSG00000115084 | SLC35F5 | UncertainCytoplasmcytoplasm                          |
| 3741 | ENSG00000115085 | ZAP70   | Enhanced Selectivecytoplasm                          |
| 3742 | ENSG00000115091 | ACTR3   | Approved Cytoplasmcytoplasm                          |
| 3743 | ENSG00000115107 | STEAP3  | Approved Mainly ccytoplasm                           |
| 3744 | ENSG00000115109 | EPB41L5 | UncertainCytoplasmcytoplasm                          |
| 3745 | ENSG00000115112 | TFCP2L1 | UncertainNucleolarnucleus                            |
| 3746 | ENSG00000115128 | SF3B6   | Enhanced Ubiquitounucleus                            |
| 3747 | ENSG00000115129 | TP53I3  | Enhanced Nuclear acytoplasm;nucleus                  |
| 3748 | ENSG00000115137 | DNAJC27 | UncertainCytoplasmcytoplasm;nucleus;plasma membrane  |
| 3749 | ENSG00000115138 | POMC    | Enhanced Highly expressed in the anterior lobe of tl |
| 3750 | ENSG00000115145 | STAM2   | Enhanced Ubiquitoucytoplasm;plasma membrane          |
| 3751 | ENSG00000115155 | OTOF    | Approved Expression in CNS.                          |
| 3752 | ENSG00000115159 | GPD2    | Enhanced Cytoplasmcytoplasm                          |
| 3753 | ENSG00000115163 | CENPA   | Enhanced Nuclear enucleus                            |
| 3754 | ENSG00000115165 | CYTIP   | Approved Cytoplasmcytoplasm;nucleus                  |
| 3755 | ENSG00000115170 | ACVR1   | Approved Cytoplasmcytoplasm                          |
| 3756 | ENSG00000115183 | TANC1   | Approved Cytoplasmcytoplasm                          |
| 3757 | ENSG00000115194 | SLC30A3 | Enhanced Cytoplasmcytoplasm                          |
| 3758 | ENSG00000115207 | GTF3C2  | UncertainCytoplasmcytoplasm                          |
| 3759 | ENSG00000115211 | EIF2B4  | UncertainCytoplasmcytoplasm                          |
| 3760 | ENSG00000115216 | NRBP1   | SupportedCytoplasmcytoplasm                          |
| 3761 | ENSG00000115221 | ITGB6   | Approved Cytoplasmcytoplasm;plasma membrane          |
| 3762 | ENSG00000115226 | FNDC4   | UncertainCytoplasmcytoplasm;nucleus                  |
| 3763 | ENSG00000115233 | PSMD14  | Approved Cytoplasmcytoplasm;nucleus                  |
| 3764 | ENSG00000115234 | SNX17   | SupportedGranular cytoplasm                          |
| 3765 | ENSG00000115239 | ASB3    | UncertainGranular cytoplasm                          |
| 3766 | ENSG00000115241 | PPM1G   | Enhanced Nuclear enucleus                            |
| 3767 | ENSG00000115252 | PDE1A   | Approved Cytoplasmcytoplasm                          |
| 3768 | ENSG00000115255 | REEP6   | Enhanced Cytoplasmcytoplasm;plasma membrane          |
| 3769 | ENSG00000115257 | PCSK4   | UncertainEstimation of protein expression could not  |
| 3770 | ENSG00000115263 | GCG     | Enhanced Selectivecytoplasm                          |
| 3771 | ENSG00000115267 | IFIH1   | Approved Cytoplasmcytoplasm                          |
| 3772 | ENSG00000115268 | RPS15   | Enhanced General ccytoplasm                          |
| 3773 | ENSG00000115271 | GCA     | Enhanced Selective expression in subsets of cells i  |
| 3774 | ENSG00000115275 | MOGS    | Approved General ccytoplasm                          |
| 3775 | ENSG00000115282 | TTC31   | UncertainMainly ccytoplasm;plasma membrane           |
| 3776 | ENSG00000115289 | PCGF1   | SupportedGeneral ncytoplasm;nucleus                  |
| 3777 | ENSG00000115290 | GRB14   | UncertainCytoplasmcytoplasm;plasma membrane          |
| 3778 | ENSG00000115295 | CLIP4   | UncertainCytoplasmcytoplasm                          |
| 3779 | ENSG00000115297 | TLX2    | UncertainEstimation of protein expression could not  |
| 3780 | ENSG00000115306 | SPTBN1  | SupportedGeneral ccytoplasm;plasma membrane          |
| 3781 | ENSG00000115307 | AUP1    | Approved Cytoplasmcytoplasm;nucleus                  |
| 3782 | ENSG00000115310 | RTN4    | SupportedSelective expression in the CNS, periphera  |
| 3783 | ENSG00000115317 | HTRA2   | UncertainCytoplasmcytoplasm                          |
| 3784 | ENSG00000115318 | LOXL3   | Approved Cytoplasmcytoplasm                          |
| 3785 | ENSG00000115325 | DOK1    | Approved General nnucleus                            |
| 3786 | ENSG00000115339 | GALNT3  | Enhanced Granular cytoplasm                          |
| 3787 | ENSG00000115350 | POLE4   | Approved Nuclear enucleus                            |
| 3788 | ENSG00000115353 | TACR1   | Enhanced Cytoplasmcytoplasm                          |
| 3789 | ENSG00000115355 | CCDC88A | Enhanced Abundant cytoplasm                          |
| 3790 | ENSG00000115361 | ACADL   | Enhanced Cytoplasmcytoplasm                          |
| 3791 | ENSG00000115363 | EVA1A   | Approved Cytoplasmcytoplasm                          |
| 3792 | ENSG00000115364 | MRPL19  | Approved Cytoplasmcytoplasm                          |
| 3793 | ENSG00000115365 | LANCL1  | Approved Cytoplasmcytoplasm                          |

|      |                 |         |                                                        |
|------|-----------------|---------|--------------------------------------------------------|
| 3794 | ENSG00000115368 | WDR75   | Approved Cytoplasm cytoplasm;nucleus                   |
| 3795 | ENSG00000115380 | EFEMP1  | Supported Cytoplasm cytoplasm                          |
| 3796 | ENSG00000115386 | REG1A   | Enhanced Selective cytoplasm                           |
| 3797 | ENSG00000115392 | FANCL   | Supported Cytoplasm cytoplasm                          |
| 3798 | ENSG00000115414 | FN1     | Enhanced Positivity in extracellular matrix and str    |
| 3799 | ENSG00000115415 | STAT1   | Approved Cytoplasm cytoplasm;nucleus                   |
| 3800 | ENSG00000115419 | GLS     | Enhanced High granc cytoplasm                          |
| 3801 | ENSG00000115421 | PAPOLG  | Approved Mainly nunucleus                              |
| 3802 | ENSG00000115423 | DNAH6   | Enhanced Selective expression in cilia in fallopian    |
| 3803 | ENSG00000115425 | PECR    | Enhanced Mainly c cytoplasm                            |
| 3804 | ENSG00000115446 | UNC50   | Approved Nuclear enucleus                              |
| 3805 | ENSG00000115459 | ELMOD3  | Approved General c cytoplasm                           |
| 3806 | ENSG00000115464 | USP34   | Uncertain Cytoplasm cytoplasm                          |
| 3807 | ENSG00000115468 | EFHD1   | Enhanced Cytoplasm cytoplasm;plasma membrane           |
| 3808 | ENSG00000115484 | CCT4    | Supported Cytoplasm cytoplasm                          |
| 3809 | ENSG00000115486 | GGCX    | Approved Cytoplasm cytoplasm                           |
| 3810 | ENSG00000115488 | NEU2    | Uncertain Estimation of protein expression could not   |
| 3811 | ENSG00000115504 | EHBP1   | Enhanced Cytoplasm cytoplasm                           |
| 3812 | ENSG00000115507 | OTX1    | Uncertain Expression in skin and in processes in CNS.  |
| 3813 | ENSG00000115514 | TXNDC9  | Approved Cytoplasm cytoplasm                           |
| 3814 | ENSG00000115520 | COQ10B  | Approved Cytoplasm cytoplasm                           |
| 3815 | ENSG00000115523 | GNLY    | Enhanced Selective expression in a subset of immune    |
| 3816 | ENSG00000115524 | SF3B1   | Approved Cytoplasm cytoplasm;nucleus                   |
| 3817 | ENSG00000115525 | ST3GAL5 | Uncertain Cytoplasm cytoplasm                          |
| 3818 | ENSG00000115526 | CHST10  | Approved Cytoplasm cytoplasm                           |
| 3819 | ENSG00000115539 | PDCL3   | Approved Cytoplasm cytoplasm                           |
| 3820 | ENSG00000115540 | MOB4    | Approved General c cytoplasm                           |
| 3821 | ENSG00000115541 | HSPE1   | Supported General c cytoplasm                          |
| 3822 | ENSG00000115556 | PLCD4   | Enhanced Cytoplasm cytoplasm                           |
| 3823 | ENSG00000115561 | CHMP3   | Supported Ubiquitou cytoplasm                          |
| 3824 | ENSG00000115568 | ZNF142  | Uncertain Estimation of protein expression could not   |
| 3825 | ENSG00000115590 | IL1R2   | Uncertain Cytoplasm cytoplasm;plasma membrane;plasma r |
| 3826 | ENSG00000115593 | SMYD1   | Enhanced Selective cytoplasm                           |
| 3827 | ENSG00000115594 | IL1R1   | Approved Positivit plasma membrane;plasma membrane     |
| 3828 | ENSG00000115596 | WNT6    | Approved Secreted cytoplasm                            |
| 3829 | ENSG00000115598 | IL1RL2  | Uncertain Cytoplasm cytoplasm                          |
| 3830 | ENSG00000115602 | IL1RL1  | Uncertain Estimation of protein expression could not   |
| 3831 | ENSG00000115604 | IL18R1  | Approved General c cytoplasm                           |
| 3832 | ENSG00000115607 | IL18RAP | Enhanced Cytoplasm cytoplasm                           |
| 3833 | ENSG00000115616 | SLC9A2  | Approved Membranou plasma membrane                     |
| 3834 | ENSG00000115641 | FHL2    | Enhanced General c cytoplasm                           |
| 3835 | ENSG00000115648 | MLPH    | Approved Cytoplasm cytoplasm                           |
| 3836 | ENSG00000115649 | CNPPD1  | Uncertain Cytoplasm cytoplasm;plasma membrane          |
| 3837 | ENSG00000115652 | UXS1    | Uncertain Cytoplasm cytoplasm                          |
| 3838 | ENSG00000115657 | ABCB6   | Approved Cytoplasm cytoplasm                           |
| 3839 | ENSG00000115661 | STK16   | Approved Cytoplasm cytoplasm;plasma membrane           |
| 3840 | ENSG00000115677 | HDLBP   | Enhanced Mainly c cytoplasm                            |
| 3841 | ENSG00000115685 | PPP1R7  | Supported Abundant cytoplasm;nucleus                   |
| 3842 | ENSG00000115687 | PASK    | Uncertain General c cytoplasm                          |
| 3843 | ENSG00000115694 | STK25   | Uncertain Cytoplasm cytoplasm                          |
| 3844 | ENSG00000115705 | TPO     | Enhanced Distinct cytoplasm                            |
| 3845 | ENSG00000115718 | PROC    | Supported Positivit plasma membrane                    |
| 3846 | ENSG00000115756 | HPCAL1  | Approved Cytoplasm cytoplasm                           |
| 3847 | ENSG00000115758 | ODC1    | Approved Cytoplasm cytoplasm                           |
| 3848 | ENSG00000115761 | NOL10   | Approved Granular cytoplasm                            |

|      |                 |          |                                                      |
|------|-----------------|----------|------------------------------------------------------|
| 3849 | ENSG00000115762 | PLEKHB2  | Approved Cytoplasm cytoplasm                         |
| 3850 | ENSG00000115806 | GORASP2  | Enhanced Cytoplasm cytoplasm; plasma membrane        |
| 3851 | ENSG00000115808 | STRN     | Approved Cytoplasm cytoplasm                         |
| 3852 | ENSG00000115816 | CEBPZ    | Uncertain Estimation of protein expression could not |
| 3853 | ENSG00000115825 | PRKD3    | Uncertain Cytoplasm cytoplasm                        |
| 3854 | ENSG00000115827 | DCAF17   | Uncertain Estimation of protein expression could not |
| 3855 | ENSG00000115828 | QPCT     | Enhanced Cytoplasm cytoplasm; plasma membrane        |
| 3856 | ENSG00000115839 | RAB3GAP1 | Approved Cytoplasm cytoplasm                         |
| 3857 | ENSG00000115840 | SLC25A12 | Enhanced General c cytoplasm                         |
| 3858 | ENSG00000115841 | RMDN2    | Enhanced Cytoplasm cytoplasm                         |
| 3859 | ENSG00000115866 | DARS     | Enhanced Ubiquitous cytoplasm                        |
| 3860 | ENSG00000115875 | SRSF7    | Supported Nuclear enucleus                           |
| 3861 | ENSG00000115884 | SDC1     | Enhanced Membrane plasma membrane; plasma membrane   |
| 3862 | ENSG00000115896 | PLCL1    | Enhanced Granular cytoplasm                          |
| 3863 | ENSG00000115902 | SLC1A4   | Approved General c cytoplasm; plasma membrane        |
| 3864 | ENSG00000115904 | SOS1     | Uncertain Cytoplasm cytoplasm                        |
| 3865 | ENSG00000115919 | KYNU     | Enhanced Cytoplasm cytoplasm                         |
| 3866 | ENSG00000115935 | WIPF1    | Enhanced Selective cytoplasm                         |
| 3867 | ENSG00000115942 | ORC2     | Enhanced High nucl nucleus                           |
| 3868 | ENSG00000115947 | ORC4     | Approved Nuclear enucleus                            |
| 3869 | ENSG00000115956 | PLEK     | Enhanced Cytoplasm cytoplasm                         |
| 3870 | ENSG00000115963 | RND3     | Uncertain Cytoplasm cytoplasm                        |
| 3871 | ENSG00000115966 | ATF2     | Supported Ubiquitous nucleus                         |
| 3872 | ENSG00000115970 | THADA    | Uncertain Cytoplasm cytoplasm                        |
| 3873 | ENSG00000115977 | AAK1     | Enhanced Cytoplasm cytoplasm; plasma membrane        |
| 3874 | ENSG00000115993 | TRAK2    | Uncertain Cytoplasm cytoplasm                        |
| 3875 | ENSG00000115998 | C2orf42  | Enhanced Selective nucleus                           |
| 3876 | ENSG00000116005 | PCYOX1   | Approved Cytoplasm cytoplasm                         |
| 3877 | ENSG00000116014 | KISS1R   | Approved Cytoplasm cytoplasm                         |
| 3878 | ENSG00000116017 | ARID3A   | Enhanced Nuclear enucleus                            |
| 3879 | ENSG00000116030 | SUMO1    | Supported General nucleus                            |
| 3880 | ENSG00000116031 | CD207    | Enhanced Selective expression in Langerhans cells.   |
| 3881 | ENSG00000116039 | ATP6V1B1 | Enhanced Cytoplasm cytoplasm                         |
| 3882 | ENSG00000116044 | NFE2L2   | Supported Ubiquitous cytoplasm; nucleus              |
| 3883 | ENSG00000116062 | MSH6     | Enhanced Ubiquitous nucleus                          |
| 3884 | ENSG00000116095 | PLEKHA3  | Approved Cytoplasm cytoplasm                         |
| 3885 | ENSG00000116096 | SPR      | Uncertain Mainly c cytoplasm                         |
| 3886 | ENSG00000116106 | EPHA4    | Enhanced Cytoplasm cytoplasm                         |
| 3887 | ENSG00000116117 | PARD3B   | Approved Cytoplasm cytoplasm; plasma membrane        |
| 3888 | ENSG00000116120 | FARSB    | Enhanced Cytoplasm cytoplasm                         |
| 3889 | ENSG00000116127 | ALMS1    | Enhanced Cytoplasm cytoplasm                         |
| 3890 | ENSG00000116128 | BCL9     | Approved Mainly nucleus                              |
| 3891 | ENSG00000116132 | PRRX1    | Uncertain Nuclear a cytoplasm; nucleus               |
| 3892 | ENSG00000116133 | DHCR24   | Enhanced Cytoplasm cytoplasm                         |
| 3893 | ENSG00000116138 | DNAJC16  | Approved Granular cytoplasm                          |
| 3894 | ENSG00000116141 | MARK1    | Uncertain Estimation of protein expression could not |
| 3895 | ENSG00000116147 | TNR      | Enhanced Distinct expression in neuropil.            |
| 3896 | ENSG00000116151 | MORN1    | Uncertain General c cytoplasm                        |
| 3897 | ENSG00000116161 | CACYBP   | Approved General c cytoplasm                         |
| 3898 | ENSG00000116171 | SCP2     | Supported General c cytoplasm                        |
| 3899 | ENSG00000116176 | TPSG1    | Enhanced Cytoplasm cytoplasm                         |
| 3900 | ENSG00000116183 | PAPPA2   | Enhanced Highly se cytoplasm                         |
| 3901 | ENSG00000116191 | RALGPS2  | Enhanced Cytoplasm cytoplasm                         |
| 3902 | ENSG00000116194 | ANGPTL1  | Approved Granular cytoplasm; plasma membrane         |
| 3903 | ENSG00000116198 | CEP104   | Approved Cytoplasm cytoplasm                         |

|      |                 |          |                                                      |
|------|-----------------|----------|------------------------------------------------------|
| 3904 | ENSG00000116199 | FAM20B   | Approved General ccytoplasm                          |
| 3905 | ENSG00000116205 | TCEANC2  | UncertainEstimation of protein expression could not  |
| 3906 | ENSG00000116212 | LRRC42   | UncertainCytoplasmcytoplasm                          |
| 3907 | ENSG00000116213 | WRAP73   | UncertainNuclear enucleus                            |
| 3908 | ENSG00000116218 | NPHS2    | Enhanced Selective expression in renal glomeruli.    |
| 3909 | ENSG00000116221 | MRPL37   | SupportedUbiquitouscytoplasm                         |
| 3910 | ENSG00000116237 | ICMT     | UncertainCytoplasmcytoplasm                          |
| 3911 | ENSG00000116260 | QSOX1    | UncertainCytoplasmcytoplasm                          |
| 3912 | ENSG00000116266 | STXBP3   | Approved Cytoplasmcytoplasm                          |
| 3913 | ENSG00000116273 | PHF13    | UncertainCytoplasmcytoplasm                          |
| 3914 | ENSG00000116288 | PARK7    | SupportedCytoplasmcytoplasm;nucleus                  |
| 3915 | ENSG00000116299 | KIAA1324 | Enhanced Granular expression in several tissues, mo: |
| 3916 | ENSG00000116329 | OPRD1    | Approved Cytoplasmcytoplasm                          |
| 3917 | ENSG00000116337 | AMPD2    | Approved Cytoplasmcytoplasm                          |
| 3918 | ENSG00000116350 | SRSF4    | SupportedGeneral nnucleus                            |
| 3919 | ENSG00000116353 | MECR     | Enhanced Cytoplasmcytoplasm                          |
| 3920 | ENSG00000116406 | EDEM3    | Approved Cytoplasmcytoplasm                          |
| 3921 | ENSG00000116455 | WDR77    | Enhanced Ubiquitouscytoplasm                         |
| 3922 | ENSG00000116459 | ATP5PB   | Enhanced Ubiquitouscytoplasm                         |
| 3923 | ENSG00000116478 | HDAC1    | Enhanced Ubiquitousnucleus                           |
| 3924 | ENSG00000116489 | CAPZA1   | Approved General ccytoplasm                          |
| 3925 | ENSG00000116497 | S100PBP  | Approved Cytoplasmcytoplasm;nucleus                  |
| 3926 | ENSG00000116514 | RNF19B   | Approved Cytoplasmcytoplasm                          |
| 3927 | ENSG00000116539 | ASH1L    | Approved General nnucleus                            |
| 3928 | ENSG00000116544 | DLGAP3   | Enhanced Expression in processes in CNS.             |
| 3929 | ENSG00000116560 | SFPQ     | Enhanced Ubiquitousnucleus                           |
| 3930 | ENSG00000116574 | RHOU     | Approved General ccytoplasm                          |
| 3931 | ENSG00000116580 | GON4L    | UncertainCytoplasmcytoplasm                          |
| 3932 | ENSG00000116584 | ARHGEF2  | Approved Cytoplasmcytoplasm                          |
| 3933 | ENSG00000116586 | LAMTOR2  | Approved General ccytoplasm                          |
| 3934 | ENSG00000116604 | MEF2D    | Enhanced General nnucleus                            |
| 3935 | ENSG00000116649 | SRM      | Approved General ccytoplasm                          |
| 3936 | ENSG00000116661 | FBX02    | Enhanced Cytoplasmcytoplasm                          |
| 3937 | ENSG00000116663 | FBX06    | Approved Mainly ccytoplasm                           |
| 3938 | ENSG00000116667 | Clorf21  | UncertainGeneral ncytoplasm;nucleus                  |
| 3939 | ENSG00000116668 | SWT1     | Enhanced Ubiquitouscytoplasm                         |
| 3940 | ENSG00000116670 | MAD2L2   | Approved Cytoplasmcytoplasm                          |
| 3941 | ENSG00000116675 | DNAJC6   | Enhanced Cytoplasmcytoplasm                          |
| 3942 | ENSG00000116678 | LEPR     | Approved Distinct plasma membrane                    |
| 3943 | ENSG00000116679 | IVNS1ABP | Approved Cytoplasmcytoplasm                          |
| 3944 | ENSG00000116685 | KIAA2013 | UncertainLow cytopcytoplasm                          |
| 3945 | ENSG00000116688 | MFN2     | UncertainMainly ccytoplasm                           |
| 3946 | ENSG00000116690 | PRG4     | UncertainRNA-based expert annotation gave inconclus: |
| 3947 | ENSG00000116691 | MIIP     | UncertainCytoplasmcytoplasm                          |
| 3948 | ENSG00000116698 | SMG7     | Supportedubiquitouscytoplasm                         |
| 3949 | ENSG00000116701 | NCF2     | Enhanced High expression in neutrophils and macroph: |
| 3950 | ENSG00000116703 | PDC      | Enhanced Cytoplasmcytoplasm;nucleus                  |
| 3951 | ENSG00000116711 | PLA2G4A  | Approved General ccytoplasm                          |
| 3952 | ENSG00000116726 | PRAMEF12 | UncertainCytoplasmcytoplasm                          |
| 3953 | ENSG00000116729 | WLS      | Approved General ccytoplasm                          |
| 3954 | ENSG00000116731 | PRDM2    | Approved Nuclear acytoplasm;nucleus                  |
| 3955 | ENSG00000116747 | TROVE2   | UncertainCytoplasmcytoplasm                          |
| 3956 | ENSG00000116748 | AMPD1    | Enhanced Cytoplasmcytoplasm                          |
| 3957 | ENSG00000116750 | UCHL5    | Approved Mainly ccytoplasm                           |
| 3958 | ENSG00000116752 | BCAS2    | SupportedGeneral nnucleus                            |



|      |                 |           |                                                     |
|------|-----------------|-----------|-----------------------------------------------------|
| 3959 | ENSG00000116754 | SRSF11    | SupportedGeneral nnucleus                           |
| 3960 | ENSG00000116761 | CTH       | Enhanced Cytoplasmcytoplasm                         |
| 3961 | ENSG00000116771 | AGMAT     | Enhanced High cytocytoplasm                         |
| 3962 | ENSG00000116786 | PLEKHM2   | Approved Cytoplasmcytoplasm;nucleus                 |
| 3963 | ENSG00000116791 | CRYZ      | Approved General ccytoplasm                         |
| 3964 | ENSG00000116809 | ZBTB17    | Approved Mainly nunucleus                           |
| 3965 | ENSG00000116824 | CD2       | Enhanced Selectivecytoplasm                         |
| 3966 | ENSG00000116830 | TTF2      | Approved Cytoplasmcytoplasm                         |
| 3967 | ENSG00000116833 | NR5A2     | Approved Ubiquitounucleus                           |
| 3968 | ENSG00000116852 | KIF21B    | Approved Ubiquitoucytoplasm                         |
| 3969 | ENSG00000116863 | ADPRHL2   | Approved Ubiquitoucytoplasm                         |
| 3970 | ENSG00000116871 | MAP7D1    | Approved Cytoplasmcytoplasm                         |
| 3971 | ENSG00000116874 | WARS2     | Enhanced Mitochondrial expression in most tissues.  |
| 3972 | ENSG00000116885 | OSCP1     | Approved Cytoplasmcytoplasm                         |
| 3973 | ENSG00000116898 | MRPS15    | SupportedUbiquitoucytoplasm                         |
| 3974 | ENSG00000116903 | EXOC8     | Approved General ccytoplasm                         |
| 3975 | ENSG00000116918 | TSNAX     | Approved Cytoplasmcytoplasm                         |
| 3976 | ENSG00000116922 | Clorf109  | SupportedCytoplasmcytoplasm                         |
| 3977 | ENSG00000116954 | RRAGC     | SupportedGeneral nnucleus                           |
| 3978 | ENSG00000116962 | NID1      | Approved Strong poplasma membrane                   |
| 3979 | ENSG00000116977 | LGALS8    | Approved General ccytoplasm                         |
| 3980 | ENSG00000116981 | NT5C1A    | SupportedCytoplasmcytoplasm                         |
| 3981 | ENSG00000116984 | MTR       | Approved Cytoplasmcytoplasm;plasma membrane         |
| 3982 | ENSG00000116991 | SIPA1L2   | Approved General ccytoplasm                         |
| 3983 | ENSG00000116996 | ZP4       | SupportedOocyte-specific expression.                |
| 3984 | ENSG00000117000 | RLF       | UncertainEstimation of protein expression could not |
| 3985 | ENSG00000117009 | KMO       | Enhanced Cytoplasmcytoplasm                         |
| 3986 | ENSG00000117010 | ZNF684    | UncertainEstimation of protein expression could not |
| 3987 | ENSG00000117013 | KCNQ4     | UncertainCytoplasmcytoplasm                         |
| 3988 | ENSG00000117020 | AKT3      | Approved General ccytoplasm;nucleus                 |
| 3989 | ENSG00000117036 | ETV3      | SupportedUbiquitounucleus                           |
| 3990 | ENSG00000117054 | ACADM     | Enhanced Ubiquitoucytoplasm                         |
| 3991 | ENSG00000117069 | ST6GALNAC | UncertainEstimation of protein expression could not |
| 3992 | ENSG00000117090 | SLAMF1    | Enhanced Cytoplasmcytoplasm                         |
| 3993 | ENSG00000117091 | CD48      | Enhanced Selectivecytoplasm                         |
| 3994 | ENSG00000117115 | PADI2     | Enhanced Cytoplasmcytoplasm                         |
| 3995 | ENSG00000117118 | SDHB      | Enhanced Granular cytoplasm                         |
| 3996 | ENSG00000117122 | MFAP2     | Enhanced Expression in extracellular matrix in most |
| 3997 | ENSG00000117133 | RPF1      | SupportedHigh nuclnucleus                           |
| 3998 | ENSG00000117139 | KDM5B     | Enhanced Ubiquitounucleus                           |
| 3999 | ENSG00000117143 | UAP1      | Approved Cytoplasmcytoplasm                         |
| 4000 | ENSG00000117151 | CTBS      | Approved Cytoplasmcytoplasm                         |
| 4001 | ENSG00000117155 | SSX2IP    | Approved General ccytoplasm;plasma membrane         |
| 4002 | ENSG00000117174 | ZNHIT6    | UncertainGeneral ccytoplasm;nucleus                 |
| 4003 | ENSG00000117222 | RBBP5     | UncertainNuclear acytoplasm;nucleus                 |
| 4004 | ENSG00000117226 | GBP3      | Approved Nuclear enucleus                           |
| 4005 | ENSG00000117228 | GBP1      | Approved Cytoplasmcytoplasm                         |
| 4006 | ENSG00000117245 | KIF17     | Enhanced Cytoplasmcytoplasm                         |
| 4007 | ENSG00000117266 | CDK18     | Approved Cytoplasmcytoplasm;plasma membrane         |
| 4008 | ENSG00000117280 | RAB29     | Approved Cytoplasmcytoplasm                         |
| 4009 | ENSG00000117298 | ECE1      | Enhanced Cytoplasmcytoplasm                         |
| 4010 | ENSG00000117305 | HMGCL     | Enhanced Granular cytoplasm                         |
| 4011 | ENSG00000117318 | ID3       | Approved Mainly nunucleus                           |
| 4012 | ENSG00000117322 | CR2       | Enhanced Cytoplasmcytoplasm                         |
| 4013 | ENSG00000117335 | CD46      | Enhanced Membranoucytoplasm;plasma membrane         |

|      |                 |          |                                                      |
|------|-----------------|----------|------------------------------------------------------|
| 4014 | ENSG00000117360 | PRPF3    | Approved Mainly nunucleus                            |
| 4015 | ENSG00000117362 | APH1A    | Approved Cytoplasmcytoplasm                          |
| 4016 | ENSG00000117385 | P3H1     | Approved Cytoplasmcytoplasm                          |
| 4017 | ENSG00000117394 | SLC2A1   | Enhanced Cytoplasmcytoplasm                          |
| 4018 | ENSG00000117395 | EBNA1BP2 | Approved General nnucleus                            |
| 4019 | ENSG00000117399 | CDC20    | Enhanced Cytoplasmcytoplasm                          |
| 4020 | ENSG00000117408 | IP013    | UncertainCytoplasmcytoplasm                          |
| 4021 | ENSG00000117411 | B4GALT2  | SupportedGranular expression in several tissues.     |
| 4022 | ENSG00000117419 | ERI3     | Approved Ubiquitouscytoplasm;nucleus                 |
| 4023 | ENSG00000117448 | AKR1A1   | Approved Ubiquitouscytoplasm;nucleus                 |
| 4024 | ENSG00000117450 | PRDX1    | Approved Cytoplasmcytoplasm                          |
| 4025 | ENSG00000117461 | PIK3R3   | Approved General ccytoplasm                          |
| 4026 | ENSG00000117472 | TSPAN1   | Approved Membranoucytoplasm;plasma membrane          |
| 4027 | ENSG00000117475 | BLZF1    | SupportedGeneral ncytoplasm;nucleus                  |
| 4028 | ENSG00000117477 | CCDC181  | Enhanced Highly selective expression in cilia.       |
| 4029 | ENSG00000117479 | SLC19A2  | UncertainGeneral ccytoplasm                          |
| 4030 | ENSG00000117480 | FAAH     | Approved General ccytoplasm                          |
| 4031 | ENSG00000117481 | NSUN4    | Approved Cytoplasmcytoplasm                          |
| 4032 | ENSG00000117500 | TMED5    | Approved Mainly nunucleus                            |
| 4033 | ENSG00000117505 | DR1      | Enhanced General nnucleus                            |
| 4034 | ENSG00000117519 | CNN3     | Enhanced Cytoplasmcytoplasm                          |
| 4035 | ENSG00000117523 | PRRC2C   | Approved Mainly ccytoplasm                           |
| 4036 | ENSG00000117525 | F3       | UncertainRNA-based expert annotation gave inconclus: |
| 4037 | ENSG00000117528 | ABCD3    | Enhanced General ccytoplasm                          |
| 4038 | ENSG00000117533 | VAMP4    | Enhanced Cytoplasmcytoplasm                          |
| 4039 | ENSG00000117543 | DPH5     | Approved Cytoplasmcytoplasm                          |
| 4040 | ENSG00000117560 | FASLG    | Approved Cytoplasmcytoplasm                          |
| 4041 | ENSG00000117569 | PTBP2    | UncertainCytoplasmcytoplasm                          |
| 4042 | ENSG00000117586 | TNFSF4   | Approved Cytoplasmcytoplasm                          |
| 4043 | ENSG00000117592 | PRDX6    | SupportedUbiquitouscytoplasm                         |
| 4044 | ENSG00000117593 | DARS2    | Enhanced Granular cytoplasm                          |
| 4045 | ENSG00000117594 | HSD11B1  | Enhanced Cytoplasmcytoplasm                          |
| 4046 | ENSG00000117595 | IRF6     | Enhanced Nuclear acytoplasm;nucleus                  |
| 4047 | ENSG00000117597 | DIEXF    | Approved Cytoplasmcytoplasm                          |
| 4048 | ENSG00000117598 | PLPPR5   | UncertainExpression in CNS and Leydig cells of test: |
| 4049 | ENSG00000117601 | SERPINC1 | SupportedDistinct cytoplasm;plasma membrane          |
| 4050 | ENSG00000117602 | RCAN3    | Enhanced Cytoplasmcytoplasm                          |
| 4051 | ENSG00000117614 | SYF2     | Approved Mainly nunucleus                            |
| 4052 | ENSG00000117616 | RSRP1    | UncertainEstimation of protein expression could not  |
| 4053 | ENSG00000117620 | SLC35A3  | UncertainCytoplasmcytoplasm                          |
| 4054 | ENSG00000117625 | RCOR3    | Enhanced General nnucleus                            |
| 4055 | ENSG00000117632 | STMN1    | Enhanced General ccytoplasm                          |
| 4056 | ENSG00000117640 | MTFR1L   | Approved Cytoplasmcytoplasm                          |
| 4057 | ENSG00000117643 | MAN1C1   | UncertainCytoplasmcytoplasm                          |
| 4058 | ENSG00000117650 | NEK2     | Enhanced Nuclear enucleus                            |
| 4059 | ENSG00000117676 | RPS6KA1  | Enhanced Ubiquitouscytoplasm                         |
| 4060 | ENSG00000117682 | DHDDS    | UncertainCytoplasmcytoplasm                          |
| 4061 | ENSG00000117691 | NENF     | UncertainGeneral ccytoplasm;plasma membrane          |
| 4062 | ENSG00000117697 | NSL1     | Enhanced Nuclear enucleus                            |
| 4063 | ENSG00000117713 | ARID1A   | SupportedUbiquitousnucleus                           |
| 4064 | ENSG00000117724 | CENPF    | Enhanced Nuclear enucleus                            |
| 4065 | ENSG00000117748 | RPA2     | SupportedUbiquitousnucleus                           |
| 4066 | ENSG00000117751 | PPP1R8   | Enhanced Ubiquitousnucleus                           |
| 4067 | ENSG00000117758 | STX12    | Approved General ccytoplasm                          |
| 4068 | ENSG00000117791 | 3/2/2019 | Enhanced Granular cytoplasm                          |

|      |                 |         |                                                      |
|------|-----------------|---------|------------------------------------------------------|
| 4069 | ENSG00000117859 | OSBPL9  | SupportedUbiquitouscytoplasm                         |
| 4070 | ENSG00000117868 | ESYT2   | Approved Cytoplasmcytoplasm                          |
| 4071 | ENSG00000117877 | CD3EAP  | SupportedNucleolarnucleus                            |
| 4072 | ENSG00000117899 | MESD    | Approved Cytoplasmcytoplasm;nucleus                  |
| 4073 | ENSG00000117906 | RCN2    | Enhanced Cytoplasmcytoplasm                          |
| 4074 | ENSG00000117983 | MUC5B   | Enhanced Selective expression in mucus producing ce. |
| 4075 | ENSG00000117984 | CTSD    | SupportedCytoplasmcytoplasm                          |
| 4076 | ENSG00000118004 | COLEC11 | UncertainCytoplasmcytoplasm                          |
| 4077 | ENSG00000118007 | STAG1   | SupportedUbiquitousnucleus                           |
| 4078 | ENSG00000118017 | A4GNT   | Enhanced Granular cytoplasm                          |
| 4079 | ENSG00000118046 | STK11   | Approved Ubiquitouscytoplasm                         |
| 4080 | ENSG00000118058 | KMT2A   | Enhanced Ubiquitousnucleus                           |
| 4081 | ENSG00000118094 | TREH    | Enhanced Membranouplasma membrane                    |
| 4082 | ENSG00000118096 | IFT46   | Approved Cytoplasmcytoplasm                          |
| 4083 | ENSG00000118113 | MMP8    | Enhanced Selectivecytoplasm                          |
| 4084 | ENSG00000118137 | APOA1   | SupportedDistinct plasma membrane                    |
| 4085 | ENSG00000118156 | ZNF541  | Enhanced Expression in seminiferous ducts.           |
| 4086 | ENSG00000118160 | SLC8A2  | Enhanced Selectivecytoplasm                          |
| 4087 | ENSG00000118162 | KPTN    | Approved General ccytoplasm                          |
| 4088 | ENSG00000118181 | RPS25   | Approved Ubiquitouscytoplasm                         |
| 4089 | ENSG00000118193 | KIF14   | UncertainEstimation of protein expression could not  |
| 4090 | ENSG00000118194 | TNNT2   | Enhanced Selectivecytoplasm                          |
| 4091 | ENSG00000118197 | DDX59   | Approved Granular cytoplasm                          |
| 4092 | ENSG00000118200 | CAMSAP2 | Enhanced Ubiquitouscytoplasm                         |
| 4093 | ENSG00000118217 | ATF6    | Approved Cytoplasmcytoplasm                          |
| 4094 | ENSG00000118231 | CRYGD   | SupportedExpression in lens.                         |
| 4095 | ENSG00000118245 | TNP1    | Enhanced Expression in spermatids, testis.           |
| 4096 | ENSG00000118257 | NRP2    | Enhanced Cytoplasmcytoplasm                          |
| 4097 | ENSG00000118260 | CREB1   | SupportedUbiquitousnucleus                           |
| 4098 | ENSG00000118263 | KLF7    | Approved Nuclear acytoplasm;nucleus                  |
| 4099 | ENSG00000118271 | TTR     | SupportedPositivitplasma membrane                    |
| 4100 | ENSG00000118276 | B4GALT6 | Approved Cytoplasmcytoplasm                          |
| 4101 | ENSG00000118292 | C1orf54 | Approved Nuclear enucleus                            |
| 4102 | ENSG00000118298 | CA14    | Approved Cytoplasmcytoplasm;plasma membrane          |
| 4103 | ENSG00000118307 | CASC1   | Enhanced Cytoplasmcytoplasm                          |
| 4104 | ENSG00000118308 | LRMP    | Enhanced Distinct cytoplasm                          |
| 4105 | ENSG00000118322 | ATP10B  | UncertainSelectivecytoplasm                          |
| 4106 | ENSG00000118363 | SPCS2   | Approved Cytoplasmcytoplasm;nucleus                  |
| 4107 | ENSG00000118369 | USP35   | UncertainNuclear acytoplasm;nucleus                  |
| 4108 | ENSG00000118407 | FILIP1  | Enhanced Cytoplasmcytoplasm                          |
| 4109 | ENSG00000118418 | HMGN3   | Enhanced General nnucleus                            |
| 4110 | ENSG00000118420 | UBE3D   | UncertainCytoplasmcytoplasm                          |
| 4111 | ENSG00000118432 | CNR1    | Enhanced Cytoplasmcytoplasm;plasma membrane          |
| 4112 | ENSG00000118434 | SPACA1  | Enhanced Selectivecytoplasm                          |
| 4113 | ENSG00000118473 | SGIP1   | Approved Cytoplasmcytoplasm                          |
| 4114 | ENSG00000118482 | PHF3    | Approved Nuclear enucleus                            |
| 4115 | ENSG00000118492 | ADGB    | Enhanced Expression in cilia in fallopian tube, endo |
| 4116 | ENSG00000118503 | TNFAIP3 | Approved Cytoplasmcytoplasm                          |
| 4117 | ENSG00000118507 | AKAP7   | Approved Ubiquitouscytoplasm                         |
| 4118 | ENSG00000118508 | RAB32   | Approved Cytoplasmcytoplasm                          |
| 4119 | ENSG00000118513 | MYB     | Approved Mainly nnucleus                             |
| 4120 | ENSG00000118514 | ALDH8A1 | Enhanced Cytoplasmcytoplasm                          |
| 4121 | ENSG00000118515 | SGK1    | Approved General ccytoplasm                          |
| 4122 | ENSG00000118518 | RNF146  | Approved Nuclear acytoplasm;nucleus                  |
| 4123 | ENSG00000118520 | ARG1    | Enhanced Selective expression liver and subsets of l |

|      |                 |          |                                                      |
|------|-----------------|----------|------------------------------------------------------|
| 4124 | ENSG00000118523 | CTGF     | Approved Distinct cytoplasm                          |
| 4125 | ENSG00000118526 | TCF21    | UncertainUbiquitouscytoplasm;nucleus                 |
| 4126 | ENSG00000118557 | PMFBP1   | Approved Expressed in mainly in epididymis, brain a  |
| 4127 | ENSG00000118579 | MED28    | UncertainLow nucleocytoplasm;nucleus                 |
| 4128 | ENSG00000118596 | SLC16A7  | Approved Cytoplasmcytoplasm                          |
| 4129 | ENSG00000118620 | ZNF430   | UncertainEstimation of protein expression could not  |
| 4130 | ENSG00000118640 | VAMP8    | Enhanced Ubiquitouscytoplasm                         |
| 4131 | ENSG00000118680 | MYL12B   | SupportedCytoplasmcytoplasm                          |
| 4132 | ENSG00000118689 | FOXO3    | SupportedGeneral nnucleus                            |
| 4133 | ENSG00000118690 | ARMC2    | Enhanced Distinct cytoplasm                          |
| 4134 | ENSG00000118705 | RPN2     | Enhanced Ubiquitouscytoplasm                         |
| 4135 | ENSG00000118729 | CASQ2    | Enhanced Selectivecytoplasm                          |
| 4136 | ENSG00000118762 | PKD2     | Approved Cytoplasmcytoplasm                          |
| 4137 | ENSG00000118777 | ABCG2    | Enhanced Distinct plasma membrane                    |
| 4138 | ENSG00000118785 | SPP1     | Enhanced Cytoplasmcytoplasm;plasma membrane          |
| 4139 | ENSG00000118804 | STBD1    | Enhanced Cytoplasmcytoplasm                          |
| 4140 | ENSG00000118816 | CCNI     | UncertainGranular cytoplasm                          |
| 4141 | ENSG00000118849 | RARRES1  | UncertainMainly ccytoplasm                           |
| 4142 | ENSG00000118855 | MFSD1    | Approved Cytoplasmcytoplasm                          |
| 4143 | ENSG00000118873 | RAB3GAP2 | Approved General ccytoplasm                          |
| 4144 | ENSG00000118894 | EEF2KMT  | Approved Cytoplasmcytoplasm                          |
| 4145 | ENSG00000118898 | PPL      | Enhanced Membranouplasma membrane                    |
| 4146 | ENSG00000118900 | UBN1     | SupportedGeneral nnucleus                            |
| 4147 | ENSG00000118922 | KLF12    | Approved Nuclear enucleus                            |
| 4148 | ENSG00000118939 | UCHL3    | Approved Ubiquitouscytoplasm;nucleus                 |
| 4149 | ENSG00000118946 | PCDH17   | UncertainCytoplasmcytoplasm;plasma membrane          |
| 4150 | ENSG00000118960 | HS1BP3   | Approved Cytoplasmcytoplasm                          |
| 4151 | ENSG00000118961 | LDAH     | Approved General ccytoplasm                          |
| 4152 | ENSG00000118965 | WDR35    | Approved Cytoplasmcytoplasm                          |
| 4153 | ENSG00000118971 | CCND2    | Approved Cytoplasmcytoplasm;nucleus                  |
| 4154 | ENSG00000118997 | DNAH7    | Approved Expression in cilia of fallopian tube and 1 |
| 4155 | ENSG00000119004 | CYP20A1  | UncertainCytoplasmcytoplasm                          |
| 4156 | ENSG00000119013 | NDUFB3   | Approved Cytoplasmcytoplasm                          |
| 4157 | ENSG00000119042 | SATB2    | Enhanced Selectivenucleus                            |
| 4158 | ENSG00000119125 | GDA      | Enhanced Cytoplasmcytoplasm                          |
| 4159 | ENSG00000119139 | TJP2     | SupportedCytoplasmcytoplasm;plasma membrane          |
| 4160 | ENSG00000119147 | C2orf40  | UncertainPlasma poplasma membrane                    |
| 4161 | ENSG00000119203 | CPSF3    | UncertainMainly nunucleus                            |
| 4162 | ENSG00000119227 | PIGZ     | Approved Membranouplasma membrane                    |
| 4163 | ENSG00000119242 | CCDC92   | Approved Cytoplasmcytoplasm                          |
| 4164 | ENSG00000119280 | C1orf198 | Approved Cytoplasmcytoplasm                          |
| 4165 | ENSG00000119283 | TRIM67   | UncertainEstimation of protein expression could not  |
| 4166 | ENSG00000119285 | HEATR1   | Approved Cytoplasmcytoplasm                          |
| 4167 | ENSG00000119318 | RAD23B   | Enhanced Nuclear acytoplasm;nucleus                  |
| 4168 | ENSG00000119321 | FKBP15   | Approved Cytoplasmcytoplasm                          |
| 4169 | ENSG00000119328 | FAM206A  | UncertainCytoplasmcytoplasm;nucleus                  |
| 4170 | ENSG00000119333 | WDR34    | Approved General ccytoplasm                          |
| 4171 | ENSG00000119335 | SET      | SupportedUbiquitousnucleus                           |
| 4172 | ENSG00000119383 | PTPA     | Approved Cytoplasmcytoplasm;nucleus                  |
| 4173 | ENSG00000119392 | GLE1     | SupportedCytoplasmcytoplasm;nucleus;plasma membrane  |
| 4174 | ENSG00000119396 | RAB14    | Approved General ccytoplasm                          |
| 4175 | ENSG00000119397 | CNTRL    | Approved Mainly ccytoplasm                           |
| 4176 | ENSG00000119401 | TRIM32   | Approved Nuclear acytoplasm;nucleus                  |
| 4177 | ENSG00000119402 | FBXW2    | Approved Cytoplasmcytoplasm                          |
| 4178 | ENSG00000119408 | NEK6     | Approved Cytoplasmcytoplasm                          |

|      |                 |          |                                                         |
|------|-----------------|----------|---------------------------------------------------------|
| 4179 | ENSG00000119411 | BSPRY    | Approved Cytoplasm cytoplasm; plasma membrane           |
| 4180 | ENSG00000119414 | PPP6C    | Uncertain Cytoplasm cytoplasm                           |
| 4181 | ENSG00000119421 | NDUFA8   | Enhanced Cytoplasm cytoplasm                            |
| 4182 | ENSG00000119431 | HDHD3    | Enhanced Granular cytoplasm                             |
| 4183 | ENSG00000119446 | RBM18    | Uncertain Estimation of protein expression could not    |
| 4184 | ENSG00000119457 | SLC46A2  | Approved Membrane plasma membrane                       |
| 4185 | ENSG00000119471 | HSDL2    | Enhanced Granular cytoplasm                             |
| 4186 | ENSG00000119487 | MAPKAP1  | Supported General c cytoplasm                           |
| 4187 | ENSG00000119508 | NR4A3    | Uncertain Nuclear a cytoplasm; nucleus                  |
| 4188 | ENSG00000119514 | GALNT12  | Enhanced Cytoplasm cytoplasm                            |
| 4189 | ENSG00000119523 | ALG2     | Approved Cytoplasm cytoplasm                            |
| 4190 | ENSG00000119535 | CSF3R    | Enhanced Cytoplasm cytoplasm                            |
| 4191 | ENSG00000119537 | KDSR     | Approved General c cytoplasm                            |
| 4192 | ENSG00000119541 | VPS4B    | Approved Cytoplasm cytoplasm                            |
| 4193 | ENSG00000119547 | ONECUT2  | Enhanced Nuclear enucleus                               |
| 4194 | ENSG00000119559 | C19orf25 | Approved Nuclear a cytoplasm; nucleus                   |
| 4195 | ENSG00000119574 | ZBTB45   | Uncertain Cytoplasm cytoplasm                           |
| 4196 | ENSG00000119596 | YLPM1    | Uncertain Cytoplasm cytoplasm; nucleus; plasma membrane |
| 4197 | ENSG00000119599 | DCAF4    | Approved Cytoplasm cytoplasm; plasma membrane           |
| 4198 | ENSG00000119608 | PROX2    | Uncertain Estimation of protein expression could not    |
| 4199 | ENSG00000119614 | VSX2     | Enhanced Nuclear enucleus                               |
| 4200 | ENSG00000119616 | FCF1     | Approved Nuclear enucleus                               |
| 4201 | ENSG00000119636 | BBOF1    | Approved Expression in several tissues, including to    |
| 4202 | ENSG00000119638 | NEK9     | Approved Cytoplasm cytoplasm                            |
| 4203 | ENSG00000119640 | ACYP1    | Approved Cytoplasm cytoplasm                            |
| 4204 | ENSG00000119650 | IFT43    | Approved Cytoplasm cytoplasm                            |
| 4205 | ENSG00000119655 | NPC2     | Enhanced Cytoplasm cytoplasm                            |
| 4206 | ENSG00000119661 | DNAL1    | Approved Cytoplasm cytoplasm                            |
| 4207 | ENSG00000119669 | IRF2BPL  | Approved General n nucleus                              |
| 4208 | ENSG00000119673 | ACOT2    | Enhanced Cytoplasm cytoplasm                            |
| 4209 | ENSG00000119681 | LTBP2    | Approved Extracellular positivity in several tissues    |
| 4210 | ENSG00000119682 | AREL1    | Uncertain Membrane cytoplasm; plasma membrane           |
| 4211 | ENSG00000119685 | TLL5     | Uncertain Cytoplasm cytoplasm                           |
| 4212 | ENSG00000119686 | FLVCR2   | Enhanced Cytoplasm cytoplasm; plasma membrane           |
| 4213 | ENSG00000119688 | ABCD4    | Approved General c cytoplasm; plasma membrane           |
| 4214 | ENSG00000119689 | DLST     | Supported Ubiquitous cytoplasm                          |
| 4215 | ENSG00000119698 | PPP4R4   | Approved Cytoplasm cytoplasm                            |
| 4216 | ENSG00000119703 | ZC2HC1C  | Enhanced Expressed in spermatids and in brain.          |
| 4217 | ENSG00000119705 | SLIRP    | Approved General c cytoplasm                            |
| 4218 | ENSG00000119707 | RBM25    | Supported General n cytoplasm; nucleus                  |
| 4219 | ENSG00000119711 | ALDH6A1  | Enhanced Granular cytoplasm                             |
| 4220 | ENSG00000119718 | EIF2B2   | Enhanced General c cytoplasm                            |
| 4221 | ENSG00000119720 | NRDE2    | Uncertain Cytoplasm cytoplasm                           |
| 4222 | ENSG00000119723 | COQ6     | Uncertain Mainly c cytoplasm                            |
| 4223 | ENSG00000119760 | SUPT7L   | Uncertain Nuclear a cytoplasm; nucleus                  |
| 4224 | ENSG00000119771 | KLHL29   | Approved Cytoplasm cytoplasm                            |
| 4225 | ENSG00000119772 | DNMT3A   | Approved Ubiquitous nucleus                             |
| 4226 | ENSG00000119778 | ATAD2B   | Uncertain Cytoplasm cytoplasm                           |
| 4227 | ENSG00000119782 | FKBP1B   | Uncertain Cytoplasm cytoplasm                           |
| 4228 | ENSG00000119787 | ATL2     | Approved Cytoplasm cytoplasm                            |
| 4229 | ENSG00000119801 | YPEL5    | Approved Cytoplasm cytoplasm                            |
| 4230 | ENSG00000119812 | FAM98A   | Uncertain Estimation of protein expression could not    |
| 4231 | ENSG00000119820 | YIPF4    | Supported General c cytoplasm                           |
| 4232 | ENSG00000119844 | AFTPH    | Approved Granular cytoplasm                             |
| 4233 | ENSG00000119862 | LGALS1   | Approved Nuclear enucleus                               |

|      |                 |          |                                                      |
|------|-----------------|----------|------------------------------------------------------|
| 4234 | ENSG00000119866 | BCL11A   | Enhanced Nuclear enucleus                            |
| 4235 | ENSG00000119878 | CRIP1    | Approved Cytoplasmcytoplasm                          |
| 4236 | ENSG00000119888 | EPCAM    | Enhanced Selectivecytoplasm;plasma membrane          |
| 4237 | ENSG00000119906 | SLF2     | Approved General ccytoplasm                          |
| 4238 | ENSG00000119912 | IDE      | Approved Cytoplasmcytoplasm;plasma membrane          |
| 4239 | ENSG00000119915 | ELOVL3   | Enhanced Highly expressed in sebaceous glands.       |
| 4240 | ENSG00000119917 | IFIT3    | Approved Cytoplasmcytoplasm                          |
| 4241 | ENSG00000119919 | NKX2-3   | UncertainEstimation of protein expression could not  |
| 4242 | ENSG00000119922 | IFIT2    | Approved Cytoplasmcytoplasm                          |
| 4243 | ENSG00000119927 | GPAM     | Approved Cytoplasmcytoplasm                          |
| 4244 | ENSG00000119929 | CUTC     | Enhanced Cytoplasmcytoplasm;nucleus                  |
| 4245 | ENSG00000119938 | PPP1R3C  | UncertainCytoplasmcytoplasm                          |
| 4246 | ENSG00000119943 | PYROXD2  | UncertainMainly ccytoplasm                           |
| 4247 | ENSG00000119946 | CNNM1    | Approved Cytoplasmcytoplasm                          |
| 4248 | ENSG00000119950 | MXI1     | Approved Mainly nunucleus                            |
| 4249 | ENSG00000119965 | C10orf88 | Approved Cytoplasmcytoplasm                          |
| 4250 | ENSG00000119969 | HELLS    | Enhanced Nuclear enucleus                            |
| 4251 | ENSG00000119973 | PRLHR    | Enhanced Selectivecytoplasm                          |
| 4252 | ENSG00000119977 | TCTN3    | Approved Cytoplasmcytoplasm                          |
| 4253 | ENSG00000119986 | AVPI1    | Approved Ubiquitoucytoplasm                          |
| 4254 | ENSG00000120008 | WDR11    | Approved Ubiquitoucytoplasm                          |
| 4255 | ENSG00000120029 | C10orf76 | Approved Cytoplasmcytoplasm;plasma membrane          |
| 4256 | ENSG00000120051 | CFAP58   | UncertainExpression in cilia of fallopian tube and 1 |
| 4257 | ENSG00000120053 | GOT1     | Enhanced General ccytoplasm                          |
| 4258 | ENSG00000120063 | GNA13    | Approved Cytoplasmcytoplasm                          |
| 4259 | ENSG00000120071 | KANSL1   | Approved Cytoplasmcytoplasm;nucleus                  |
| 4260 | ENSG00000120088 | CRHR1    | Enhanced Cytoplasmcytoplasm                          |
| 4261 | ENSG00000120093 | HOXB3    | Approved Nuclear enucleus                            |
| 4262 | ENSG00000120094 | HOXB1    | UncertainEstimation of protein expression could not  |
| 4263 | ENSG00000120149 | MSX2     | UncertainNuclear enucleus                            |
| 4264 | ENSG00000120156 | TEK      | Approved Cytoplasmcytoplasm                          |
| 4265 | ENSG00000120159 | CAAP1    | UncertainGeneral ccytoplasm;nucleus                  |
| 4266 | ENSG00000120160 | EQTN     | Enhanced Highly selective acrosome expression in sp  |
| 4267 | ENSG00000120210 | INSL6    | Enhanced Selective expression in spermatid acrosomes |
| 4268 | ENSG00000120215 | MLANA    | Enhanced Selective expression in melanocytes in skin |
| 4269 | ENSG00000120217 | CD274    | Enhanced High expression in placental trophoblasts a |
| 4270 | ENSG00000120235 | IFNA6    | UncertainEstimation of protein expression could not  |
| 4271 | ENSG00000120242 | IFNA8    | UncertainEstimation of protein expression could not  |
| 4272 | ENSG00000120251 | GRIA2    | Enhanced Cytoplasmcytoplasm                          |
| 4273 | ENSG00000120253 | NUP43    | Enhanced General ccytoplasm;nucleus                  |
| 4274 | ENSG00000120254 | MTHFD1L  | Approved General ccytoplasm                          |
| 4275 | ENSG00000120262 | CCDC170  | Enhanced Distinct expression in ciliated cells in fa |
| 4276 | ENSG00000120265 | PCMT1    | Approved General ccytoplasm                          |
| 4277 | ENSG00000120278 | PLEKHG1  | Approved Cytoplasmcytoplasm;nucleus                  |
| 4278 | ENSG00000120280 | CXorf21  | UncertainNuclear acytoplasm;nucleus                  |
| 4279 | ENSG00000120289 | MAGEB4   | Enhanced Cytoplasmcytoplasm                          |
| 4280 | ENSG00000120306 | CYSTM1   | Enhanced Membranouplasma membrane                    |
| 4281 | ENSG00000120314 | WDR55    | UncertainGeneral ccytoplasm;nucleus                  |
| 4282 | ENSG00000120318 | ARAP3    | UncertainEstimation of protein expression could not  |
| 4283 | ENSG00000120322 | PCDHB8   | UncertainEstimation of protein expression could not  |
| 4284 | ENSG00000120324 | PCDHB10  | UncertainGeneral ccytoplasm                          |
| 4285 | ENSG00000120327 | PCDHB14  | UncertainEstimation of protein expression could not  |
| 4286 | ENSG00000120328 | PCDHB12  | UncertainEstimation of protein expression could not  |
| 4287 | ENSG00000120329 | SLC25A2  | UncertainEstimation of protein expression could not  |
| 4288 | ENSG00000120332 | TNN      | UncertainDistinct staining in brain, connective tis  |

|      |                 |          |                                                      |
|------|-----------------|----------|------------------------------------------------------|
| 4289 | ENSG00000120333 | MRPS14   | UncertainCytoplasmcytoplasm                          |
| 4290 | ENSG00000120334 | CENPL    | UncertainCytoplasmcytoplasm                          |
| 4291 | ENSG00000120341 | SEC16B   | Enhanced Cytoplasmcytoplasm                          |
| 4292 | ENSG00000120370 | GORAB    | Approved General ccytoplasm                          |
| 4293 | ENSG00000120436 | GPR31    | UncertainEstimation of protein expression could not  |
| 4294 | ENSG00000120437 | ACAT2    | Enhanced General ccytoplasm                          |
| 4295 | ENSG00000120438 | TCP1     | Approved Cytoplasmcytoplasm                          |
| 4296 | ENSG00000120451 | SNX19    | UncertainCytoplasmcytoplasm                          |
| 4297 | ENSG00000120457 | KCNJ5    | Enhanced Cytoplasmcytoplasm                          |
| 4298 | ENSG00000120458 | MSANTD2  | Approved Ubiquitoucytoplasm                          |
| 4299 | ENSG00000120471 | TP53AIP1 | UncertainCytoplasmcytoplasm                          |
| 4300 | ENSG00000120498 | TEX11    | Approved Nuclear enucleus                            |
| 4301 | ENSG00000120500 | ARR3     | Enhanced Cytoplasmcytoplasm                          |
| 4302 | ENSG00000120509 | PDZD11   | Approved General ccytoplasm;plasma membrane          |
| 4303 | ENSG00000120519 | SLC10A7  | UncertainEstimation of protein expression could not  |
| 4304 | ENSG00000120526 | NUDCD1   | UncertainCytoplasmcytoplasm;nucleus                  |
| 4305 | ENSG00000120533 | ENY2     | Approved Nuclear acytoplasm;nucleus                  |
| 4306 | ENSG00000120539 | MASTL    | Approved Cytoplasmcytoplasm                          |
| 4307 | ENSG00000120549 | KIAA1217 | Approved Cytoplasmcytoplasm;plasma membrane          |
| 4308 | ENSG00000120594 | PLXDC2   | Approved Cytoplasmcytoplasm                          |
| 4309 | ENSG00000120647 | CCDC77   | Approved Nuclear acytoplasm;nucleus                  |
| 4310 | ENSG00000120656 | TAF12    | Approved Cytoplasmcytoplasm;nucleus                  |
| 4311 | ENSG00000120658 | ENOX1    | Approved Membranoucytoplasm;plasma membrane          |
| 4312 | ENSG00000120659 | TNFSF11  | Enhanced Cytoplasmcytoplasm                          |
| 4313 | ENSG00000120662 | MTRF1    | UncertainCytoplasmcytoplasm                          |
| 4314 | ENSG00000120685 | PROSER1  | UncertainCytoplasmcytoplasm                          |
| 4315 | ENSG00000120686 | UFM1     | Approved Cytoplasmcytoplasm                          |
| 4316 | ENSG00000120688 | WBP4     | Approved Mainly nunucleus                            |
| 4317 | ENSG00000120690 | ELF1     | Approved General nnucleus                            |
| 4318 | ENSG00000120693 | SMAD9    | Approved Cytoplasmcytoplasm;nucleus                  |
| 4319 | ENSG00000120694 | HSPH1    | UncertainCytoplasmcytoplasm                          |
| 4320 | ENSG00000120696 | KBTBD7   | UncertainCytoplasmcytoplasm;nucleus                  |
| 4321 | ENSG00000120697 | ALG5     | Approved General ccytoplasm                          |
| 4322 | ENSG00000120699 | EXOSC8   | UncertainUbiquitoucytoplasm;nucleus                  |
| 4323 | ENSG00000120705 | ETF1     | Approved Cytoplasmcytoplasm                          |
| 4324 | ENSG00000120708 | TGFBI    | Enhanced Distinct positivity in extracellular matri: |
| 4325 | ENSG00000120709 | FAM53C   | Approved Cytoplasmcytoplasm;nucleus                  |
| 4326 | ENSG00000120725 | SIL1     | Enhanced Ubiquitoucytoplasm                          |
| 4327 | ENSG00000120727 | PAIP2    | Approved General ccytoplasm                          |
| 4328 | ENSG00000120729 | MYOT     | Enhanced Selectivecytoplasm                          |
| 4329 | ENSG00000120733 | KDM3B    | SupportedNuclear enucleus                            |
| 4330 | ENSG00000120738 | EGR1     | SupportedGeneral nnucleus                            |
| 4331 | ENSG00000120742 | SERP1    | Approved Cytoplasmcytoplasm;nucleus                  |
| 4332 | ENSG00000120756 | PLS1     | Enhanced Membranoucytoplasm;plasma membrane          |
| 4333 | ENSG00000120784 | ZFP30    | UncertainEstimation of protein expression could not  |
| 4334 | ENSG00000120798 | NR2C1    | SupportedGeneral nnucleus                            |
| 4335 | ENSG00000120802 | TMP0     | Enhanced Highly abnucleus;plasma membrane            |
| 4336 | ENSG00000120805 | ARL1     | Approved General ccytoplasm                          |
| 4337 | ENSG00000120820 | GLT8D2   | Approved Cytoplasmcytoplasm;plasma membrane          |
| 4338 | ENSG00000120832 | MTERF2   | Approved Cytoplasmcytoplasm                          |
| 4339 | ENSG00000120833 | SOCS2    | Approved Cytoplasmcytoplasm                          |
| 4340 | ENSG00000120837 | NFYB     | SupportedUbiquitounucleus                            |
| 4341 | ENSG00000120860 | WASHC3   | UncertainExpression in smooth muscle and epithelial  |
| 4342 | ENSG00000120868 | APAF1    | Enhanced General ccytoplasm                          |
| 4343 | ENSG00000120885 | CLU      | Enhanced Selectivecytoplasm                          |

|      |                 |           |                                                      |
|------|-----------------|-----------|------------------------------------------------------|
| 4344 | ENSG00000120889 | TNFRSF10B | Approved Ubiquitous cytoplasm                        |
| 4345 | ENSG00000120896 | SORBS3    | Approved Cytoplasm cytoplasm                         |
| 4346 | ENSG00000120899 | PTK2B     | Approved Cytoplasm cytoplasm;nucleus                 |
| 4347 | ENSG00000120907 | ADRA1A    | Approved Cytoplasm cytoplasm                         |
| 4348 | ENSG00000120910 | PPP3CC    | Approved Cytoplasm cytoplasm;plasma membrane         |
| 4349 | ENSG00000120913 | PDLIM2    | Approved Cytoplasm cytoplasm                         |
| 4350 | ENSG00000120915 | EPHX2     | Approved Cytoplasm cytoplasm                         |
| 4351 | ENSG00000120925 | RNF170    | Uncertain Cytoplasm cytoplasm                        |
| 4352 | ENSG00000120948 | TARDBP    | Supported Ubiquitous nucleus                         |
| 4353 | ENSG00000120949 | TNFRSF8   | Approved Cytoplasm cytoplasm;plasma membrane         |
| 4354 | ENSG00000120992 | LYPLA1    | Enhanced Cytoplasm cytoplasm                         |
| 4355 | ENSG00000121005 | CRISPLD1  | Uncertain Cytoplasm cytoplasm                        |
| 4356 | ENSG00000121022 | COPS5     | Supported Cytoplasm cytoplasm;nucleus                |
| 4357 | ENSG00000121053 | EPX       | Enhanced Cytoplasm cytoplasm                         |
| 4358 | ENSG00000121057 | AKAP1     | Supported Granular cytoplasm                         |
| 4359 | ENSG00000121058 | COIL      | Enhanced General nucleus                             |
| 4360 | ENSG00000121060 | TRIM25    | Approved General cytoplasm                           |
| 4361 | ENSG00000121064 | SCPEP1    | Enhanced Ubiquitous cytoplasm;plasma membrane        |
| 4362 | ENSG00000121068 | TBX2      | Approved Nuclear nucleus                             |
| 4363 | ENSG00000121073 | SLC35B1   | Approved Distinct plasma membrane                    |
| 4364 | ENSG00000121075 | TBX4      | Uncertain Estimation of protein expression could not |
| 4365 | ENSG00000121101 | TEX14     | Enhanced Expression in spermatids.                   |
| 4366 | ENSG00000121104 | FAM117A   | Approved Cytoplasm cytoplasm                         |
| 4367 | ENSG00000121152 | NCAPH     | Enhanced Cytoplasm cytoplasm;nucleus                 |
| 4368 | ENSG00000121210 | TMEM131L  | Uncertain Ubiquitous cytoplasm;plasma membrane       |
| 4369 | ENSG00000121211 | MND1      | Enhanced Membrane plasma membrane                    |
| 4370 | ENSG00000121236 | TRIM6     | Uncertain Estimation of protein expression could not |
| 4371 | ENSG00000121270 | ABCC11    | Approved Cytoplasm cytoplasm                         |
| 4372 | ENSG00000121274 | PAPD5     | Uncertain Cytoplasm cytoplasm                        |
| 4373 | ENSG00000121281 | ADCY7     | Uncertain Cytoplasm cytoplasm                        |
| 4374 | ENSG00000121297 | TSHZ3     | Approved Ubiquitous nucleus                          |
| 4375 | ENSG00000121310 | ECHDC2    | Enhanced Cytoplasm cytoplasm                         |
| 4376 | ENSG00000121316 | PLBD1     | Enhanced Selective expression in alveolar macrophage |
| 4377 | ENSG00000121350 | PYROXD1   | Uncertain Ubiquitous cytoplasm;nucleus               |
| 4378 | ENSG00000121351 | IAPP      | Enhanced Distinct cytoplasm                          |
| 4379 | ENSG00000121361 | KCNJ8     | Uncertain Cytoplasm cytoplasm                        |
| 4380 | ENSG00000121380 | BCL2L14   | Enhanced Cytoplasm cytoplasm                         |
| 4381 | ENSG00000121390 | PSPC1     | Supported Nuclear nucleus                            |
| 4382 | ENSG00000121406 | ZNF549    | Uncertain Estimation of protein expression could not |
| 4383 | ENSG00000121410 | A1BG      | Supported Positive plasma membrane                   |
| 4384 | ENSG00000121413 | ZSCAN18   | Supported Ubiquitous nucleus                         |
| 4385 | ENSG00000121417 | ZNF211    | Approved Ubiquitous cytoplasm                        |
| 4386 | ENSG00000121440 | PDZRN3    | Approved Cytoplasm cytoplasm                         |
| 4387 | ENSG00000121481 | RNF2      | Uncertain Cytoplasm cytoplasm;nucleus                |
| 4388 | ENSG00000121486 | TRMT1L    | Uncertain Cytoplasm cytoplasm;nucleus                |
| 4389 | ENSG00000121552 | CSTA      | Enhanced Selective cytoplasm;nucleus                 |
| 4390 | ENSG00000121570 | DPPA4     | Enhanced Nuclear nucleus                             |
| 4391 | ENSG00000121577 | POPDC2    | Enhanced Selective cytoplasm                         |
| 4392 | ENSG00000121578 | B4GALT4   | Approved Granular cytoplasm                          |
| 4393 | ENSG00000121579 | NAA50     | Approved Cytoplasm cytoplasm                         |
| 4394 | ENSG00000121594 | CD80      | Enhanced Cytoplasm cytoplasm                         |
| 4395 | ENSG00000121621 | KIF18A    | Approved Nuclear cytoplasm;nucleus                   |
| 4396 | ENSG00000121634 | GJA8      | Enhanced Expression in lens in eye.                  |
| 4397 | ENSG00000121671 | CRY2      | Supported Granular cytoplasm                         |
| 4398 | ENSG00000121680 | PEX16     | Approved Cytoplasm cytoplasm;nucleus                 |



|      |                 |          |                                                       |
|------|-----------------|----------|-------------------------------------------------------|
| 4399 | ENSG00000121691 | CAT      | Enhanced Cytoplasm cytoplasm                          |
| 4400 | ENSG00000121716 | PILRB    | Approved Cytoplasm cytoplasm                          |
| 4401 | ENSG00000121741 | ZMYM2    | Approved Nuclear enucleus                             |
| 4402 | ENSG00000121743 | GJA3     | Supported Expression in lens.                         |
| 4403 | ENSG00000121749 | TBC1D15  | Supported Ubiquitous cytoplasm                        |
| 4404 | ENSG00000121764 | HCRTR1   | Approved Expression in several tissues, staining in   |
| 4405 | ENSG00000121766 | ZCCHC17  | Approved General n nucleus                            |
| 4406 | ENSG00000121769 | FABP3    | Enhanced Cytoplasm cytoplasm                          |
| 4407 | ENSG00000121774 | KHDRBS1  | Supported Ubiquitous nucleus                          |
| 4408 | ENSG00000121775 | TMEM39B  | Approved Ubiquitous cytoplasm                         |
| 4409 | ENSG00000121797 | CCRL2    | Approved Cytoplasm cytoplasm                          |
| 4410 | ENSG00000121807 | CCR2     | Approved Cytoplasm cytoplasm                          |
| 4411 | ENSG00000121851 | POLR3GL  | Uncertain Cytoplasm cytoplasm                         |
| 4412 | ENSG00000121858 | TNFSF10  | Uncertain RNA-based expert annotation gave inconclus: |
| 4413 | ENSG00000121864 | ZNF639   | Uncertain Ubiquitous cytoplasm;nucleus                |
| 4414 | ENSG00000121871 | SLITRK3  | Enhanced Expression in glial cells, smooth muscle c   |
| 4415 | ENSG00000121879 | PIK3CA   | Approved General c cytoplasm                          |
| 4416 | ENSG00000121892 | PDS5A    | Enhanced General n nucleus                            |
| 4417 | ENSG00000121897 | LIAS     | Approved Cytoplasm cytoplasm                          |
| 4418 | ENSG00000121898 | CPXM2    | Uncertain Cytoplasm cytoplasm;plasma membrane         |
| 4419 | ENSG00000121903 | ZSCAN20  | Uncertain Ubiquitous nucleus                          |
| 4420 | ENSG00000121904 | CSMD2    | Uncertain Estimation of protein expression could not  |
| 4421 | ENSG00000121905 | HPCA     | Enhanced Cytoplasm cytoplasm                          |
| 4422 | ENSG00000121931 | LRIF1    | Uncertain Cytoplasm cytoplasm                         |
| 4423 | ENSG00000121940 | CLCC1    | Enhanced General c cytoplasm                          |
| 4424 | ENSG00000121957 | GPSM2    | Uncertain General c cytoplasm                         |
| 4425 | ENSG00000121964 | GTDC1    | Uncertain General c cytoplasm;plasma membrane         |
| 4426 | ENSG00000121989 | ACVR2A   | Approved Ubiquitous cytoplasm;plasma membrane         |
| 4427 | ENSG00000122012 | SV2C     | Supported Distinct cytoplasm;nucleus                  |
| 4428 | ENSG00000122026 | RPL21    | Approved Cytoplasm cytoplasm                          |
| 4429 | ENSG00000122033 | MTIF3    | Approved General c cytoplasm                          |
| 4430 | ENSG00000122034 | GTF3A    | Supported General n nucleus                           |
| 4431 | ENSG00000122035 | RASL11A  | Supported General n nucleus                           |
| 4432 | ENSG00000122042 | UBL3     | Uncertain Cytoplasm cytoplasm                         |
| 4433 | ENSG00000122085 | MTERF4   | Uncertain Cytoplasm cytoplasm                         |
| 4434 | ENSG00000122121 | XPNPEP2  | Enhanced Luminal m plasma membrane                    |
| 4435 | ENSG00000122122 | SASH3    | Enhanced Cytoplasm cytoplasm                          |
| 4436 | ENSG00000122126 | OCRL     | Approved General c cytoplasm                          |
| 4437 | ENSG00000122133 | PAEP     | Enhanced Selective cytoplasm                          |
| 4438 | ENSG00000122136 | OBP2A    | Uncertain Estimation of protein expression could not  |
| 4439 | ENSG00000122140 | MRPS2    | Approved Cytoplasm cytoplasm                          |
| 4440 | ENSG00000122188 | LAX1     | Enhanced Cytoplasm cytoplasm                          |
| 4441 | ENSG00000122194 | PLG      | Supported Selective plasma membrane                   |
| 4442 | ENSG00000122203 | KIAA1191 | Uncertain Nuclear enucleus                            |
| 4443 | ENSG00000122218 | COPA     | Supported Ubiquitous cytoplasm                        |
| 4444 | ENSG00000122224 | LY9      | Approved Cytoplasm cytoplasm                          |
| 4445 | ENSG00000122254 | HS3ST2   | Approved Cytoplasm cytoplasm                          |
| 4446 | ENSG00000122257 | RBBP6    | Approved Low nucle nucleus                            |
| 4447 | ENSG00000122299 | ZC3H7A   | Uncertain General c cytoplasm                         |
| 4448 | ENSG00000122304 | PRM2     | Enhanced Selective expression in spermatids and spei  |
| 4449 | ENSG00000122335 | SERAC1   | Enhanced Cytoplasm cytoplasm                          |
| 4450 | ENSG00000122359 | ANXA11   | Supported Ubiquitous cytoplasm                        |
| 4451 | ENSG00000122367 | LDB3     | Enhanced Selective cytoplasm                          |
| 4452 | ENSG00000122375 | OPN4     | Approved Strong c cytoplasm                           |
| 4453 | ENSG00000122376 | FAM35A   | Uncertain Cytoplasm cytoplasm                         |

|      |                 |           |                                                     |
|------|-----------------|-----------|-----------------------------------------------------|
| 4454 | ENSG00000122378 | FAM213A   | Approved General ccytoplasm                         |
| 4455 | ENSG00000122386 | ZNF205    | UncertainEstimation of protein expression could not |
| 4456 | ENSG00000122390 | NAA60     | Approved Cytoplasmcytoplasm                         |
| 4457 | ENSG00000122406 | RPL5      | Approved Cytoplasmcytoplasm                         |
| 4458 | ENSG00000122417 | ODF2L     | UncertainGeneral ccytoplasm                         |
| 4459 | ENSG00000122435 | TRMT13    | Approved Mainly ccytoplasm                          |
| 4460 | ENSG00000122477 | LRRC39    | Enhanced Cytoplasmcytoplasm                         |
| 4461 | ENSG00000122482 | ZNF644    | UncertainEstimation of protein expression could not |
| 4462 | ENSG00000122483 | CCDC18    | UncertainCytoplasmcytoplasm                         |
| 4463 | ENSG00000122484 | RPAP2     | Approved Mainly ccytoplasm                          |
| 4464 | ENSG00000122490 | PQLC1     | UncertainCytoplasmcytoplasm                         |
| 4465 | ENSG00000122507 | BBS9      | UncertainCytoplasmcytoplasm                         |
| 4466 | ENSG00000122512 | PMS2      | Approved Nuclear enucleus                           |
| 4467 | ENSG00000122515 | ZMIZ2     | SupportedGeneral n nucleus                          |
| 4468 | ENSG00000122543 | OCM       | UncertainEstimation of protein expression could not |
| 4469 | ENSG00000122545 | 9/7/2019  | Enhanced Cytoplasmcytoplasm                         |
| 4470 | ENSG00000122550 | KLHL7     | UncertainCytoplasmcytoplasm                         |
| 4471 | ENSG00000122557 | HERPUD2   | Approved Cytoplasmcytoplasm                         |
| 4472 | ENSG00000122565 | CBX3      | SupportedUbiquitounucleus                           |
| 4473 | ENSG00000122566 | HNRNPA2B1 | SupportedUbiquitounucleus                           |
| 4474 | ENSG00000122574 | WIPF3     | UncertainCytoplasmcytoplasm                         |
| 4475 | ENSG00000122585 | NPY       | SupportedCytoplasmcytoplasm                         |
| 4476 | ENSG00000122591 | FAM126A   | Approved General ccytoplasm;plasma membrane         |
| 4477 | ENSG00000122642 | FKBP9     | Approved General ccytoplasm                         |
| 4478 | ENSG00000122643 | NT5C3A    | UncertainUbiquitoucytoplasm                         |
| 4479 | ENSG00000122674 | CCZ1      | UncertainUbiquitoucytoplasm                         |
| 4480 | ENSG00000122687 | MRM2      | UncertainCytoplasmcytoplasm                         |
| 4481 | ENSG00000122692 | SMU1      | SupportedCytoplasmcytoplasm                         |
| 4482 | ENSG00000122694 | GLIPR2    | Approved General ccytoplasm                         |
| 4483 | ENSG00000122696 | SLC25A51  | UncertainEstimation of protein expression could not |
| 4484 | ENSG00000122705 | CLTA      | Enhanced Ubiquitoucytoplasm                         |
| 4485 | ENSG00000122707 | RECK      | SupportedDistinct cytoplasm                         |
| 4486 | ENSG00000122711 | SPINK4    | Enhanced Selectivecytoplasm                         |
| 4487 | ENSG00000122728 | TAF1L     | UncertainEstimation of protein expression could not |
| 4488 | ENSG00000122729 | ACO1      | Enhanced Cytoplasmcytoplasm                         |
| 4489 | ENSG00000122733 | PHF24     | Approved Expression in CNS and testis.              |
| 4490 | ENSG00000122735 | DNAI1     | Enhanced Selectivecytoplasm                         |
| 4491 | ENSG00000122741 | DCAF10    | UncertainEstimation of protein expression could not |
| 4492 | ENSG00000122756 | CNTFR     | Approved Cytoplasmcytoplasm                         |
| 4493 | ENSG00000122778 | KIAA1549  | UncertainCytoplasmcytoplasm                         |
| 4494 | ENSG00000122779 | TRIM24    | Approved General ncytoplasm;nucleus                 |
| 4495 | ENSG00000122783 | C7orf49   | Approved General ccytoplasm                         |
| 4496 | ENSG00000122786 | CALD1     | Enhanced Cytoplasmcytoplasm                         |
| 4497 | ENSG00000122787 | AKR1D1    | Enhanced Selectivecytoplasm                         |
| 4498 | ENSG00000122824 | NUDT10    | Approved Cytoplasmcytoplasm                         |
| 4499 | ENSG00000122852 | SFTPA1    | SupportedHighly spcytoplasm                         |
| 4500 | ENSG00000122859 | NEUROG3   | UncertainEstimation of protein expression could not |
| 4501 | ENSG00000122861 | PLAU      | Approved Cytoplasmcytoplasm;plasma membrane         |
| 4502 | ENSG00000122862 | SRGN      | Enhanced Distinct expression in immune cells, most  |
| 4503 | ENSG00000122863 | CHST3     | Enhanced Cytoplasmcytoplasm                         |
| 4504 | ENSG00000122882 | ECD       | Approved Nuclear acytoplasm;nucleus                 |
| 4505 | ENSG00000122884 | P4HA1     | Enhanced Cytoplasmcytoplasm                         |
| 4506 | ENSG00000122912 | SLC25A16  | UncertainEstimation of protein expression could not |
| 4507 | ENSG00000122958 | VPS26A    | SupportedGeneral ccytoplasm                         |
| 4508 | ENSG00000122965 | RBM19     | SupportedGeneral ncytoplasm;nucleus                 |

|      |                 |           |                                                     |
|------|-----------------|-----------|-----------------------------------------------------|
| 4509 | ENSG00000122966 | CIT       | UncertainCytoplasmcytoplasm                         |
| 4510 | ENSG00000122970 | IFT81     | Enhanced Cytoplasmcytoplasm                         |
| 4511 | ENSG00000122971 | ACADS     | Enhanced General ccytoplasm                         |
| 4512 | ENSG00000122986 | HVCN1     | Enhanced Cytoplasmcytoplasm                         |
| 4513 | ENSG00000123064 | DDX54     | Approved Nuclear enucleus                           |
| 4514 | ENSG00000123066 | MED13L    | UncertainExpressedcytoplasm                         |
| 4515 | ENSG00000123080 | CDKN2C    | Approved General ccytoplasm                         |
| 4516 | ENSG00000123091 | RNF11     | UncertainCytoplasmcytoplasm;nucleus                 |
| 4517 | ENSG00000123094 | RASSF8    | UncertainCytoplasmcytoplasm                         |
| 4518 | ENSG00000123104 | ITPR2     | UncertainCytoplasmcytoplasm                         |
| 4519 | ENSG00000123106 | CCDC91    | Approved Cytoplasmcytoplasm;plasma membrane         |
| 4520 | ENSG00000123119 | NECAB1    | Enhanced Selective expression in CNS, peripheral ne |
| 4521 | ENSG00000123124 | WWP1      | Approved Cytoplasmcytoplasm;nucleus                 |
| 4522 | ENSG00000123130 | ACOT9     | SupportedCytoplasmcytoplasm                         |
| 4523 | ENSG00000123131 | PRDX4     | Enhanced Ubiquitoucytoplasm                         |
| 4524 | ENSG00000123136 | DDX39A    | Approved General nnucleus                           |
| 4525 | ENSG00000123143 | PKN1      | Approved General ccytoplasm                         |
| 4526 | ENSG00000123144 | TRIR      | Approved Nuclear acytoplasm;nucleus                 |
| 4527 | ENSG00000123146 | ADGRE5    | Enhanced High cytocytoplasm                         |
| 4528 | ENSG00000123154 | WDR83     | UncertainUbiquitoucytoplasm                         |
| 4529 | ENSG00000123159 | GIPC1     | Approved Cytoplasmcytoplasm                         |
| 4530 | ENSG00000123165 | ACTRT1    | SupportedCytoplasmcytoplasm                         |
| 4531 | ENSG00000123178 | SPRYD7    | Approved Cytoplasmcytoplasm                         |
| 4532 | ENSG00000123179 | EBPL      | Approved Cytoplasmcytoplasm                         |
| 4533 | ENSG00000123191 | ATP7B     | SupportedGranular cytoplasm                         |
| 4534 | ENSG00000123200 | ZC3H13    | UncertainGeneral nnucleus                           |
| 4535 | ENSG00000123213 | NLN       | Approved Granular cytoplasm                         |
| 4536 | ENSG00000123240 | OPTN      | Approved General ccytoplasm                         |
| 4537 | ENSG00000123243 | ITIH5     | Approved Cytoplasmcytoplasm                         |
| 4538 | ENSG00000123268 | ATF1      | SupportedGeneral nnucleus                           |
| 4539 | ENSG00000123307 | NEUROD4   | Enhanced Highly expressed in the pituitary gland.   |
| 4540 | ENSG00000123338 | NCKAP1L   | Approved Cytoplasmcytoplasm                         |
| 4541 | ENSG00000123349 | PFDN5     | Approved Cytoplasmcytoplasm                         |
| 4542 | ENSG00000123352 | SPATS2    | UncertainUbiquitoucytoplasm                         |
| 4543 | ENSG00000123358 | NR4A1     | Approved Nuclear enucleus                           |
| 4544 | ENSG00000123360 | PDE1B     | Enhanced Cytoplasmcytoplasm                         |
| 4545 | ENSG00000123364 | HOXC13    | Enhanced Selectivenucleus                           |
| 4546 | ENSG00000123374 | CDK2      | Enhanced Nuclear enucleus                           |
| 4547 | ENSG00000123384 | LRP1      | SupportedCytoplasmcytoplasm                         |
| 4548 | ENSG00000123388 | HOXC11    | UncertainEstimation of protein expression could not |
| 4549 | ENSG00000123395 | ATG101    | Approved Cytoplasmcytoplasm;nucleus                 |
| 4550 | ENSG00000123405 | NFE2      | Enhanced Nuclear enucleus                           |
| 4551 | ENSG00000123407 | HOXC12    | UncertainEstimation of protein expression could not |
| 4552 | ENSG00000123411 | IKZF4     | Approved Cytoplasmcytoplasm                         |
| 4553 | ENSG00000123416 | TUBA1B    | Enhanced General ccytoplasm                         |
| 4554 | ENSG00000123427 | EEF1AKMT3 | UncertainEstimation of protein expression could not |
| 4555 | ENSG00000123444 | KBTBD4    | UncertainCytoplasmcytoplasm                         |
| 4556 | ENSG00000123453 | SARDH     | Approved Cytoplasmcytoplasm                         |
| 4557 | ENSG00000123454 | DBH       | Enhanced Cytoplasmcytoplasm;plasma membrane         |
| 4558 | ENSG00000123472 | ATPAF1    | Approved A granulacytoplasm                         |
| 4559 | ENSG00000123485 | HJURP     | UncertainCytoplasmcytoplasm                         |
| 4560 | ENSG00000123505 | AMD1      | Approved Mainly ccytoplasm                          |
| 4561 | ENSG00000123545 | NDUFAF4   | UncertainCytoplasmcytoplasm;plasma membrane         |
| 4562 | ENSG00000123552 | USP45     | UncertainCytoplasmcytoplasm                         |
| 4563 | ENSG00000123560 | PLP1      | Enhanced Distinct expression in oligodendrocytes in |

|      |                 |          |           |                                            |                           |
|------|-----------------|----------|-----------|--------------------------------------------|---------------------------|
| 4564 | ENSG00000123561 | SERPINA7 | Approved  | Positivit                                  | plasma membrane           |
| 4565 | ENSG00000123562 | MORF4L2  | Supported | General                                    | nucleus                   |
| 4566 | ENSG00000123569 | H2BFWT   | Uncertain | Estimation of protein expression could not |                           |
| 4567 | ENSG00000123570 | RAB9B    | Approved  | Membranou                                  | cytoplasm;plasma membrane |
| 4568 | ENSG00000123572 | NRK      | Uncertain | Cytoplasm                                  | cytoplasm                 |
| 4569 | ENSG00000123575 | FAM199X  | Approved  | Cytoplasm                                  | cytoplasm;nucleus         |
| 4570 | ENSG00000123576 | ESX1     | Enhanced  | Nuclear                                    | nucleus                   |
| 4571 | ENSG00000123594 | ATXN3L   | Uncertain | Estimation of protein expression could not |                           |
| 4572 | ENSG00000123595 | RAB9A    | Supported | Ubiquitou                                  | cytoplasm                 |
| 4573 | ENSG00000123600 | METTL8   | Uncertain | Estimation of protein expression could not |                           |
| 4574 | ENSG00000123607 | TTC21B   | Supported | Cytoplasm                                  | cytoplasm                 |
| 4575 | ENSG00000123609 | NMI      | Approved  | Cytoplasm                                  | cytoplasm                 |
| 4576 | ENSG00000123610 | TNFAIP6  | Approved  | Extracellular deposits in most tissues and |                           |
| 4577 | ENSG00000123612 | ACVR1C   | Approved  | General                                    | cytoplasm                 |
| 4578 | ENSG00000123636 | BAZ2B    | Uncertain | Cytoplasm                                  | cytoplasm;nucleus         |
| 4579 | ENSG00000123643 | SLC36A1  | Approved  | Cytoplasm                                  | cytoplasm                 |
| 4580 | ENSG00000123684 | LPGAT1   | Approved  | Cytoplasm                                  | cytoplasm                 |
| 4581 | ENSG00000123700 | KCNJ2    | Approved  | Cytoplasm                                  | cytoplasm                 |
| 4582 | ENSG00000123737 | EXOSC9   | Approved  | General                                    | cytoplasm;nucleus         |
| 4583 | ENSG00000123739 | PLA2G12A | Approved  | Cytoplasm                                  | cytoplasm                 |
| 4584 | ENSG00000123810 | B9D2     | Enhanced  | Cytoplasm                                  | cytoplasm                 |
| 4585 | ENSG00000123815 | COQ8B    | Supported | Ubiquitou                                  | cytoplasm                 |
| 4586 | ENSG00000123836 | PFKFB2   | Uncertain | Cytoplasm                                  | cytoplasm                 |
| 4587 | ENSG00000123838 | C4BPA    | Enhanced  | Selective                                  | plasma membrane           |
| 4588 | ENSG00000123843 | C4BPB    | Approved  | Extracell                                  | cytoplasm;plasma membrane |
| 4589 | ENSG00000123908 | AGO2     | Approved  | General                                    | cytoplasm                 |
| 4590 | ENSG00000123975 | CKS2     | Approved  | Nuclear                                    | nucleus                   |
| 4591 | ENSG00000123977 | DAW1     | Approved  | Ciliary expression in fallopian tube and r |                           |
| 4592 | ENSG00000123983 | ACSL3    | Approved  | Ubiquitou                                  | cytoplasm                 |
| 4593 | ENSG00000123989 | CHPF     | Approved  | Granular                                   | cytoplasm;plasma membrane |
| 4594 | ENSG00000123992 | DNPEP    | Enhanced  | General                                    | nucleus                   |
| 4595 | ENSG00000123999 | INHA     | Enhanced  | Distinct                                   | cytoplasm                 |
| 4596 | ENSG00000124003 | MOGAT1   | Uncertain | Estimation of protein expression could not |                           |
| 4597 | ENSG00000124006 | OBSL1    | Approved  | Cytoplasm                                  | cytoplasm                 |
| 4598 | ENSG00000124019 | FAM124B  | Approved  | Low nucl                                   | nucleus                   |
| 4599 | ENSG00000124067 | SLC12A4  | Approved  | Ubiquitou                                  | cytoplasm                 |
| 4600 | ENSG00000124074 | ENKD1    | Approved  | Cytoplasm                                  | cytoplasm                 |
| 4601 | ENSG00000124089 | MC3R     | Uncertain | Expressed in several tissues, including hy |                           |
| 4602 | ENSG00000124091 | GCNT7    | Uncertain | Estimation of protein expression could not |                           |
| 4603 | ENSG00000124092 | CTCFL    | Enhanced  | Nuclear                                    | nucleus                   |
| 4604 | ENSG00000124098 | FAM210B  | Approved  | General                                    | cytoplasm                 |
| 4605 | ENSG00000124102 | PI3      | Enhanced  | Cytoplasm                                  | cytoplasm;plasma membrane |
| 4606 | ENSG00000124104 | SNX21    | Approved  | Cytoplasm                                  | cytoplasm                 |
| 4607 | ENSG00000124107 | SLPI     | Enhanced  | Selective                                  | cytoplasm                 |
| 4608 | ENSG00000124120 | TTPAL    | Uncertain | Cytoplasm                                  | cytoplasm                 |
| 4609 | ENSG00000124126 | PREX1    | Supported | Cytoplasm                                  | cytoplasm                 |
| 4610 | ENSG00000124140 | SLC12A5  | Enhanced  | Selective                                  | cytoplasm                 |
| 4611 | ENSG00000124143 | ARHGAP40 | Uncertain | RNA data suggests high expression in squam |                           |
| 4612 | ENSG00000124145 | SDC4     | Enhanced  | Cytoplasm                                  | cytoplasm                 |
| 4613 | ENSG00000124151 | NCOA3    | Supported | Ubiquitou                                  | cytoplasm;nucleus         |
| 4614 | ENSG00000124157 | SEMG2    | Enhanced  | Cytoplasm                                  | cytoplasm                 |
| 4615 | ENSG00000124160 | NCOA5    | Uncertain | General                                    | nucleus                   |
| 4616 | ENSG00000124164 | VAPB     | Supported | Ubiquitou                                  | cytoplasm                 |
| 4617 | ENSG00000124171 | PARD6B   | Uncertain | Estimation of protein expression could not |                           |
| 4618 | ENSG00000124181 | PLCG1    | Approved  | General                                    | cytoplasm                 |

|      |                 |           |                                                      |
|------|-----------------|-----------|------------------------------------------------------|
| 4619 | ENSG00000124191 | TOX2      | Approved Nuclear enucleus                            |
| 4620 | ENSG00000124193 | SRSF6     | SupportedGeneral n nucleus                           |
| 4621 | ENSG00000124194 | GDAP1L1   | Approved Cytoplasmcytoplasm                          |
| 4622 | ENSG00000124196 | GTSF1L    | Enhanced Selective expression in subset of cells in  |
| 4623 | ENSG00000124198 | ARFGEF2   | SupportedUbiquitouscytoplasm                         |
| 4624 | ENSG00000124201 | ZNFX1     | Approved Cytoplasmcytoplasm                          |
| 4625 | ENSG00000124203 | ZNF831    | UncertainEstimation of protein expression could not  |
| 4626 | ENSG00000124207 | CSE1L     | Enhanced Nuclear acytoplasm;nucleus                  |
| 4627 | ENSG00000124209 | RAB22A    | Approved Cytoplasmcytoplasm                          |
| 4628 | ENSG00000124212 | PTGIS     | Enhanced Cytoplasmcytoplasm                          |
| 4629 | ENSG00000124214 | STAU1     | Approved General ccytoplasm                          |
| 4630 | ENSG00000124215 | CDH26     | UncertainCytoplasmcytoplasm                          |
| 4631 | ENSG00000124216 | SNAI1     | SupportedUbiquitousnucleus                           |
| 4632 | ENSG00000124217 | MOCS3     | UncertainCytoplasmcytoplasm                          |
| 4633 | ENSG00000124222 | STX16     | UncertainUbiquitouscytoplasm                         |
| 4634 | ENSG00000124226 | RNF114    | Enhanced General ncytoplasm;nucleus                  |
| 4635 | ENSG00000124227 | ANKRD60   | UncertainEstimation of protein expression could not  |
| 4636 | ENSG00000124228 | DDX27     | UncertainNucleolarnucleus                            |
| 4637 | ENSG00000124232 | RBPJL     | Enhanced Cytoplasmcytoplasm                          |
| 4638 | ENSG00000124233 | SEMG1     | Enhanced Cytoplasmcytoplasm                          |
| 4639 | ENSG00000124237 | C20orf85  | Enhanced Selective expression in cilia.              |
| 4640 | ENSG00000124243 | BCAS4     | UncertainGeneral ccytoplasm                          |
| 4641 | ENSG00000124249 | KCNK15    | UncertainEstimation of protein expression could not  |
| 4642 | ENSG00000124251 | TP53TG5   | Enhanced Cytoplasmcytoplasm                          |
| 4643 | ENSG00000124253 | PCK1      | Approved Cytoplasmcytoplasm                          |
| 4644 | ENSG00000124256 | ZBP1      | Enhanced Cytoplasmcytoplasm                          |
| 4645 | ENSG00000124257 | NEURL2    | Approved Cytoplasmcytoplasm                          |
| 4646 | ENSG00000124260 | MAGEA10   | Approved Nuclear acytoplasm;nucleus                  |
| 4647 | ENSG00000124275 | MTRR      | SupportedUbiquitouscytoplasm                         |
| 4648 | ENSG00000124279 | FASTKD3   | Approved Mainly ccytoplasm                           |
| 4649 | ENSG00000124299 | PEPD      | Enhanced Cytoplasmcytoplasm                          |
| 4650 | ENSG00000124302 | CHST8     | Enhanced Granular cytoplasm                          |
| 4651 | ENSG00000124333 | VAMP7     | Approved General ccytoplasm                          |
| 4652 | ENSG00000124334 | IL9R      | Approved Expression in a subset of immune cells.     |
| 4653 | ENSG00000124356 | STAMBP    | UncertainGeneral ncytoplasm;nucleus                  |
| 4654 | ENSG00000124357 | NAGK      | Enhanced Cytoplasmcytoplasm                          |
| 4655 | ENSG00000124374 | PAIP2B    | Approved Cytoplasmcytoplasm                          |
| 4656 | ENSG00000124380 | SNRNP27   | Approved Nuclear acytoplasm;nucleus                  |
| 4657 | ENSG00000124383 | MPHOSPH10 | Enhanced General n nucleus                           |
| 4658 | ENSG00000124391 | IL17C     | SupportedSecreted positivity in several tissues.     |
| 4659 | ENSG00000124406 | ATP8A1    | Enhanced Cytoplasmcytoplasm;plasma membrane          |
| 4660 | ENSG00000124422 | USP22     | SupportedUbiquitousnucleus                           |
| 4661 | ENSG00000124429 | POF1B     | Approved Cytoplasmcytoplasm                          |
| 4662 | ENSG00000124440 | HIF3A     | Approved Ubiquitouscytoplasm;nucleus                 |
| 4663 | ENSG00000124444 | ZNF576    | UncertainEstimation of protein expression could not  |
| 4664 | ENSG00000124449 | IRGC      | Enhanced Cytoplasmcytoplasm                          |
| 4665 | ENSG00000124459 | ZNF45     | UncertainEstimation of protein expression could not  |
| 4666 | ENSG00000124466 | LYPD3     | Enhanced Selective expression in squamous epithelia. |
| 4667 | ENSG00000124467 | PSG8      | SupportedCytoplasmcytoplasm                          |
| 4668 | ENSG00000124469 | CEACAM8   | Approved Cytoplasmcytoplasm                          |
| 4669 | ENSG00000124486 | USP9X     | Approved Granular cytoplasm                          |
| 4670 | ENSG00000124490 | CRISP2    | Enhanced Selectivenucleus                            |
| 4671 | ENSG00000124491 | F13A1     | Enhanced Selectivecytoplasm                          |
| 4672 | ENSG00000124493 | GRM4      | Enhanced Cytoplasmcytoplasm                          |
| 4673 | ENSG00000124496 | TRERF1    | Enhanced Ubiquitousnucleus                           |

|      |                 |           |                                                      |
|------|-----------------|-----------|------------------------------------------------------|
| 4674 | ENSG00000124507 | PACSIN1   | Enhanced Distinct cytoplasm                          |
| 4675 | ENSG00000124508 | BTN2A2    | UncertainCytoplasmcytoplasm                          |
| 4676 | ENSG00000124523 | SIRT5     | Approved Granular cytoplasm                          |
| 4677 | ENSG00000124532 | MRS2      | UncertainEstimation of protein expression could not  |
| 4678 | ENSG00000124535 | WRNIP1    | Enhanced General n nucleus                           |
| 4679 | ENSG00000124541 | RRP36     | UncertainCytoplasmcytoplasm                          |
| 4680 | ENSG00000124557 | BTN1A1    | SupportedMembranouplasma membrane                    |
| 4681 | ENSG00000124562 | SNRPC     | SupportedUbiquitounucleus                            |
| 4682 | ENSG00000124570 | SERPINB6  | Enhanced Ubiquitoucytoplasm                          |
| 4683 | ENSG00000124571 | XPO5      | Enhanced Nuclear a cytoplasm;nucleus                 |
| 4684 | ENSG00000124574 | ABCC10    | Approved General c cytoplasm;plasma membrane         |
| 4685 | ENSG00000124575 | HIST1H1D  | SupportedGeneral n nucleus                           |
| 4686 | ENSG00000124587 | PEX6      | SupportedGeneral c cytoplasm                         |
| 4687 | ENSG00000124588 | NQO2      | Enhanced Cytoplasmcytoplasm                          |
| 4688 | ENSG00000124596 | OARD1     | Approved Cytoplasmcytoplasm                          |
| 4689 | ENSG00000124602 | UNC5CL    | Enhanced Several t cytoplasm;plasma membrane         |
| 4690 | ENSG00000124608 | AARS2     | Approved General c cytoplasm                         |
| 4691 | ENSG00000124610 | HIST1H1A  | Enhanced Nuclear enucleus                            |
| 4692 | ENSG00000124613 | ZNF391    | UncertainEstimation of protein expression could not  |
| 4693 | ENSG00000124614 | RPS10     | Approved Cytoplasmcytoplasm                          |
| 4694 | ENSG00000124615 | MOCS1     | UncertainCytoplasmcytoplasm                          |
| 4695 | ENSG00000124635 | HIST1H2BJ | SupportedUbiquitounucleus                            |
| 4696 | ENSG00000124641 | MED20     | UncertainEstimation of protein expression could not  |
| 4697 | ENSG00000124659 | TBCC      | Approved General c cytoplasm;nucleus                 |
| 4698 | ENSG00000124678 | TCP11     | SupportedCytoplasmcytoplasm                          |
| 4699 | ENSG00000124701 | APOBEC2   | Enhanced Selective cytoplasm                         |
| 4700 | ENSG00000124702 | KLHDC3    | UncertainCytoplasmcytoplasm                          |
| 4701 | ENSG00000124713 | GNMT      | Enhanced Cytoplasmcytoplasm                          |
| 4702 | ENSG00000124721 | DNAH8     | UncertainEstimation of protein expression could not  |
| 4703 | ENSG00000124731 | TREM1     | UncertainCytoplasmcytoplasm;plasma membrane          |
| 4704 | ENSG00000124733 | MEA1      | Approved Cytoplasmcytoplasm                          |
| 4705 | ENSG00000124762 | CDKN1A    | SupportedNuclear enucleus                            |
| 4706 | ENSG00000124766 | SOX4      | Approved Mainly n nucleus                            |
| 4707 | ENSG00000124767 | GL01      | Enhanced Cytoplasmcytoplasm                          |
| 4708 | ENSG00000124772 | CPNE5     | Enhanced Cytoplasmcytoplasm                          |
| 4709 | ENSG00000124780 | KCNK17    | UncertainEstimation of protein expression could not  |
| 4710 | ENSG00000124782 | RREB1     | Approved Nuclear enucleus                            |
| 4711 | ENSG00000124783 | SSR1      | Enhanced Cytoplasmcytoplasm                          |
| 4712 | ENSG00000124784 | RIOK1     | Enhanced Cytoplasmcytoplasm                          |
| 4713 | ENSG00000124786 | SLC35B3   | Approved Cytoplasmcytoplasm                          |
| 4714 | ENSG00000124787 | RPP40     | UncertainEstimation of protein expression could not  |
| 4715 | ENSG00000124788 | ATXN1     | Approved Cytoplasmcytoplasm;nucleus                  |
| 4716 | ENSG00000124789 | NUP153    | SupportedNuclear a nucleus;plasma membrane           |
| 4717 | ENSG00000124795 | DEK       | SupportedUbiquitounucleus                            |
| 4718 | ENSG00000124802 | EEF1E1    | Approved Ubiquitoucytoplasm                          |
| 4719 | ENSG00000124812 | CRISP1    | Enhanced Expression in sperms and glandular cells in |
| 4720 | ENSG00000124813 | RUNX2     | Enhanced Nuclear enucleus                            |
| 4721 | ENSG00000124818 | OPN5      | SupportedExpression in photoreceptor cells in retina |
| 4722 | ENSG00000124831 | LRRFIP1   | Approved General c cytoplasm                         |
| 4723 | ENSG00000124839 | RAB17     | Approved Cytoplasmcytoplasm;plasma membrane          |
| 4724 | ENSG00000124900 | TRIM51    | UncertainEstimation of protein expression could not  |
| 4725 | ENSG00000124935 | SCGB1D2   | Approved Cytoplasmcytoplasm;plasma membrane          |
| 4726 | ENSG00000124939 | SCGB2A1   | Enhanced Cytoplasmcytoplasm                          |
| 4727 | ENSG00000124942 | AHNAK     | UncertainUbiquitoucytoplasm                          |
| 4728 | ENSG00000125037 | EMC3      | Approved Cytoplasmcytoplasm                          |

|      |                 |          |                                                      |
|------|-----------------|----------|------------------------------------------------------|
| 4729 | ENSG00000125046 | SSUH2    | Approved Cytoplasmcytoplasm                          |
| 4730 | ENSG00000125089 | SH3TC1   | UncertainEstimation of protein expression could not  |
| 4731 | ENSG00000125107 | CNOT1    | Approved General ccytoplasm                          |
| 4732 | ENSG00000125122 | LRRC29   | UncertainEstimation of protein expression could not  |
| 4733 | ENSG00000125124 | BBS2     | Approved Cytoplasmcytoplasm                          |
| 4734 | ENSG00000125149 | C16orf70 | Approved General ccytoplasm                          |
| 4735 | ENSG00000125166 | GOT2     | Enhanced General ccytoplasm                          |
| 4736 | ENSG00000125170 | DOK4     | SupportedGeneral ccytoplasm                          |
| 4737 | ENSG00000125207 | PIWIL1   | Enhanced Cytoplasmcytoplasm                          |
| 4738 | ENSG00000125245 | GPR18    | Enhanced Cytoplasmcytoplasm                          |
| 4739 | ENSG00000125246 | CLYBL    | Enhanced Ubiquitoucytoplasm                          |
| 4740 | ENSG00000125247 | TMTC4    | UncertainUbiquitoucytoplasm                          |
| 4741 | ENSG00000125249 | RAP2A    | UncertainCytoplasmcytoplasm                          |
| 4742 | ENSG00000125255 | SLC10A2  | Approved High membplasma membrane                    |
| 4743 | ENSG00000125257 | ABCC4    | Enhanced Membranouplasma membrane                    |
| 4744 | ENSG00000125266 | EFNB2    | SupportedGeneral ccytoplasm                          |
| 4745 | ENSG00000125285 | SOX21    | Approved Nuclear enucleus                            |
| 4746 | ENSG00000125304 | TM9SF2   | SupportedGeneral ccytoplasm                          |
| 4747 | ENSG00000125319 | C17orf53 | UncertainGeneral ccytoplasm                          |
| 4748 | ENSG00000125337 | KIF25    | UncertainEstimation of protein expression could not  |
| 4749 | ENSG00000125347 | IRF1     | SupportedNuclear anucleus                            |
| 4750 | ENSG00000125351 | UPF3B    | Approved Cytoplasmcytoplasm                          |
| 4751 | ENSG00000125352 | RNF113A  | Approved General ncytoplasm;nucleus                  |
| 4752 | ENSG00000125354 | 9/6/2019 | SupportedCytoplasmcytoplasm                          |
| 4753 | ENSG00000125355 | TMEM255A | Approved Expressed in hippocampus and ovary.         |
| 4754 | ENSG00000125356 | NDUFA1   | Enhanced General ccytoplasm                          |
| 4755 | ENSG00000125375 | ATP5S    | Approved Cytoplasmcytoplasm                          |
| 4756 | ENSG00000125378 | BMP4     | Enhanced Smooth muscle expression.                   |
| 4757 | ENSG00000125386 | FAM193A  | Approved Cytoplasmcytoplasm;plasma membrane          |
| 4758 | ENSG00000125388 | GRK4     | Approved Cytoplasmcytoplasm;plasma membrane          |
| 4759 | ENSG00000125398 | SOX9     | Enhanced General nnucleus                            |
| 4760 | ENSG00000125409 | TEKT3    | Enhanced Expression in cilia in respiratory epithel: |
| 4761 | ENSG00000125414 | MYH2     | Enhanced Selectivecytoplasm                          |
| 4762 | ENSG00000125434 | SLC25A35 | UncertainEstimation of protein expression could not  |
| 4763 | ENSG00000125445 | MRPS7    | SupportedUbiquitoucytoplasm                          |
| 4764 | ENSG00000125447 | GGA3     | Approved General ccytoplasm                          |
| 4765 | ENSG00000125449 | ARMC7    | UncertainCytoplasmcytoplasm                          |
| 4766 | ENSG00000125450 | NUP85    | SupportedDistinct nucleus                            |
| 4767 | ENSG00000125457 | MIF4GD   | Approved Cytoplasmcytoplasm                          |
| 4768 | ENSG00000125458 | NT5C     | Approved Cytoplasmcytoplasm                          |
| 4769 | ENSG00000125459 | MST01    | Approved General ccytoplasm                          |
| 4770 | ENSG00000125482 | TTF1     | SupportedGeneral nnucleus                            |
| 4771 | ENSG00000125492 | BARHL1   | Enhanced Low nuclenucleus                            |
| 4772 | ENSG00000125503 | PPP1R12C | Approved Cytoplasmcytoplasm;plasma membrane          |
| 4773 | ENSG00000125505 | MBOAT7   | Approved Low cytopcytoplasm                          |
| 4774 | ENSG00000125508 | SRMS     | UncertainEstimation of protein expression could not  |
| 4775 | ENSG00000125533 | BHLHE23  | UncertainEstimation of protein expression could not  |
| 4776 | ENSG00000125571 | IL37     | UncertainCytoplasmcytoplasm                          |
| 4777 | ENSG00000125611 | CHCHD5   | Approved Granular cytoplasm                          |
| 4778 | ENSG00000125618 | PAX8     | Enhanced Nuclear enucleus                            |
| 4779 | ENSG00000125629 | INSIG2   | UncertainCytoplasmcytoplasm                          |
| 4780 | ENSG00000125633 | CCDC93   | Approved General mcytoplasm;plasma membrane          |
| 4781 | ENSG00000125637 | PSD4     | Approved Membranoucytoplasm;plasma membrane          |
| 4782 | ENSG00000125648 | SLC25A23 | Approved Granular cytoplasm                          |
| 4783 | ENSG00000125650 | PSPN     | UncertainCytoplasmcytoplasm                          |

|      |                 |         |                                                      |
|------|-----------------|---------|------------------------------------------------------|
| 4784 | ENSG00000125651 | GTF2F1  | SupportedNuclear enucleus                            |
| 4785 | ENSG00000125652 | ALKBH7  | Approved Mainly ccytoplasm                           |
| 4786 | ENSG00000125656 | CLPP    | SupportedGeneral ccytoplasm                          |
| 4787 | ENSG00000125675 | GRIA3   | Enhanced Expression in brain and in ovarian follicle |
| 4788 | ENSG00000125676 | THOC2   | SupportedUbiquitousnucleus                           |
| 4789 | ENSG00000125686 | MED1    | Approved Nuclear enucleus                            |
| 4790 | ENSG00000125691 | RPL23   | Approved Cytoplasmcytoplasm                          |
| 4791 | ENSG00000125703 | ATG4C   | Approved General ccytoplasm                          |
| 4792 | ENSG00000125730 | C3      | Enhanced Distinct plasma membrane                    |
| 4793 | ENSG00000125731 | SH2D3A  | UncertainCytoplasmcytoplasm                          |
| 4794 | ENSG00000125733 | TRIP10  | Approved Cytoplasmcytoplasm                          |
| 4795 | ENSG00000125734 | GPR108  | UncertainGranular cytoplasm                          |
| 4796 | ENSG00000125735 | TNFSF14 | Approved Cytoplasmcytoplasm;plasma membrane          |
| 4797 | ENSG00000125740 | FOSB    | Approved Nuclear enucleus                            |
| 4798 | ENSG00000125741 | OPA3    | UncertainMainly ccytoplasm                           |
| 4799 | ENSG00000125743 | SNRPD2  | SupportedUbiquitousnucleus                           |
| 4800 | ENSG00000125744 | RTN2    | Approved Cytoplasmcytoplasm                          |
| 4801 | ENSG00000125746 | EML2    | Approved Cytoplasmcytoplasm                          |
| 4802 | ENSG00000125753 | VASP    | Enhanced Cytoplasmcytoplasm                          |
| 4803 | ENSG00000125755 | SYMPK   | Approved Cytoplasmcytoplasm;nucleus                  |
| 4804 | ENSG00000125775 | SDCBP2  | Enhanced Cytoplasmcytoplasm                          |
| 4805 | ENSG00000125779 | PANK2   | Approved Cytoplasmcytoplasm                          |
| 4806 | ENSG00000125780 | TGM3    | Enhanced Nuclear acytoplasm;nucleus                  |
| 4807 | ENSG00000125787 | GNRH2   | UncertainEstimation of protein expression could not  |
| 4808 | ENSG00000125798 | FOXA2   | Enhanced Nuclear enucleus                            |
| 4809 | ENSG00000125810 | CD93    | Enhanced Distinct expression in endothelial cells, r |
| 4810 | ENSG00000125812 | GZF1    | UncertainCytoplasmcytoplasm                          |
| 4811 | ENSG00000125814 | NAPB    | SupportedGeneral ccytoplasm                          |
| 4812 | ENSG00000125817 | CENPB   | Approved Mainly nunucleus                            |
| 4813 | ENSG00000125818 | PSMF1   | Approved Cytoplasmcytoplasm                          |
| 4814 | ENSG00000125820 | NKX2-2  | Approved Nuclear acytoplasm;nucleus                  |
| 4815 | ENSG00000125821 | DTD1    | UncertainCytoplasmcytoplasm                          |
| 4816 | ENSG00000125827 | TMX4    | Enhanced Ubiquitousnucleus;plasma membrane           |
| 4817 | ENSG00000125831 | CST11   | Enhanced Expression in cilia of epididymis.          |
| 4818 | ENSG00000125834 | STK35   | UncertainEstimation of protein expression could not  |
| 4819 | ENSG00000125835 | SNRPB   | Approved General nnucleus                            |
| 4820 | ENSG00000125841 | NRSN2   | Approved Cytoplasmcytoplasm;plasma membrane          |
| 4821 | ENSG00000125843 | AP5S1   | UncertainMainly ccytoplasm                           |
| 4822 | ENSG00000125844 | RRBP1   | Enhanced Cytoplasmcytoplasm                          |
| 4823 | ENSG00000125846 | ZNF133  | SupportedGeneral nnucleus                            |
| 4824 | ENSG00000125848 | FLRT3   | Enhanced Membranouplasma membrane                    |
| 4825 | ENSG00000125850 | OVOL2   | UncertainEstimation of protein expression could not  |
| 4826 | ENSG00000125851 | PCSK2   | Approved Cytoplasmcytoplasm                          |
| 4827 | ENSG00000125863 | MKKS    | Enhanced Mainly ccytoplasm                           |
| 4828 | ENSG00000125864 | BFSP1   | Enhanced Expression in lens.                         |
| 4829 | ENSG00000125868 | DSTN    | Approved General ccytoplasm                          |
| 4830 | ENSG00000125869 | LAMP5   | Enhanced Expressed in caudate.                       |
| 4831 | ENSG00000125870 | SNRPB2  | SupportedNuclear enucleus                            |
| 4832 | ENSG00000125871 | MGME1   | Approved Cytoplasmcytoplasm                          |
| 4833 | ENSG00000125875 | TBC1D20 | Approved Ubiquitouscytoplasm                         |
| 4834 | ENSG00000125877 | ITPA    | Approved General ccytoplasm                          |
| 4835 | ENSG00000125878 | TCF15   | Approved Cytoplasmcytoplasm                          |
| 4836 | ENSG00000125879 | OTOR    | UncertainEstimation of protein expression could not  |
| 4837 | ENSG00000125888 | BANF2   | Approved Cytoplasmcytoplasm;nucleus                  |
| 4838 | ENSG00000125895 | TMEM74B | Approved Cytoplasmcytoplasm;plasma membrane          |



|      |                 |           |                                                     |
|------|-----------------|-----------|-----------------------------------------------------|
| 4839 | ENSG00000125898 | FAM110A   | UncertainCytoplasmcytoplasm;nucleus                 |
| 4840 | ENSG00000125900 | SIRPD     | Enhanced Nuclear/nucleus;cytoplasm;nucleus          |
| 4841 | ENSG00000125901 | MRPS26    | SupportedGeneral ccytoplasm                         |
| 4842 | ENSG00000125903 | DEFB129   | SupportedExpression in stereocilia in epididymis.   |
| 4843 | ENSG00000125912 | NCLN      | Approved Cytoplasmcytoplasm                         |
| 4844 | ENSG00000125931 | CITED1    | Enhanced Membranouplasma membrane                   |
| 4845 | ENSG00000125944 | HNRNPR    | SupportedUbiquitousnucleus                          |
| 4846 | ENSG00000125945 | ZNF436    | Approved Cytoplasmcytoplasm;nucleus                 |
| 4847 | ENSG00000125952 | MAX       | SupportedNuclear enucleus                           |
| 4848 | ENSG00000125954 | CHURC1-FN | UncertainEstimation of protein expression could not |
| 4849 | ENSG00000125962 | ARMCX5    | Approved Nuclear enucleus                           |
| 4850 | ENSG00000125965 | GDF5      | UncertainEstimation of protein expression could not |
| 4851 | ENSG00000125966 | MMP24     | Approved Cytoplasmcytoplasm                         |
| 4852 | ENSG00000125967 | NECAB3    | SupportedCytoplasmcytoplasm                         |
| 4853 | ENSG00000125968 | ID1       | Approved Cytoplasmcytoplasm;nucleus                 |
| 4854 | ENSG00000125970 | RALY      | Enhanced Ubiquitousnucleus                          |
| 4855 | ENSG00000125971 | DYNLRB1   | Approved General ccytoplasm                         |
| 4856 | ENSG00000125977 | EIF2S2    | Approved General ccytoplasm                         |
| 4857 | ENSG00000125991 | ERGIC3    | Approved Ubiquitouscytoplasm                        |
| 4858 | ENSG00000125995 | ROMO1     | UncertainUbiquitousnucleus                          |
| 4859 | ENSG00000125998 | FAM83C    | UncertainEstimation of protein expression could not |
| 4860 | ENSG00000125999 | BPIFB1    | Enhanced Cytoplasmcytoplasm                         |
| 4861 | ENSG00000126003 | PLAGL2    | UncertainEstimation of protein expression could not |
| 4862 | ENSG00000126016 | AMOT      | Enhanced Cytoplasmcytoplasm                         |
| 4863 | ENSG00000126062 | TMEM115   | SupportedUbiquitouscytoplasm                        |
| 4864 | ENSG00000126067 | PSMB2     | Approved Cytoplasmcytoplasm;nucleus                 |
| 4865 | ENSG00000126070 | AGO3      | UncertainHigh cytocytoplasm                         |
| 4866 | ENSG00000126088 | UROD      | UncertainCytoplasmcytoplasm;nucleus                 |
| 4867 | ENSG00000126091 | ST3GAL3   | UncertainCytoplasmcytoplasm                         |
| 4868 | ENSG00000126106 | TMEM53    | Approved Cytoplasmcytoplasm                         |
| 4869 | ENSG00000126107 | HECTD3    | Approved Cytoplasmcytoplasm                         |
| 4870 | ENSG00000126214 | KLC1      | Approved General ccytoplasm                         |
| 4871 | ENSG00000126216 | TUBGCP3   | Approved Ubiquitouscytoplasm                        |
| 4872 | ENSG00000126226 | PCID2     | UncertainGranular cytoplasm                         |
| 4873 | ENSG00000126231 | PROZ      | SupportedPlasma pocytoplasm;plasma membrane         |
| 4874 | ENSG00000126233 | SLURP1    | Approved Membranoucytoplasm;plasma membrane         |
| 4875 | ENSG00000126243 | LRFN3     | Approved Cytoplasmcytoplasm                         |
| 4876 | ENSG00000126246 | IGFLR1    | UncertainCytoplasmcytoplasm                         |
| 4877 | ENSG00000126247 | CAPNS1    | Approved General ccytoplasm                         |
| 4878 | ENSG00000126249 | PDCD2L    | Approved Cytoplasmcytoplasm                         |
| 4879 | ENSG00000126251 | GPR42     | UncertainEstimation of protein expression could not |
| 4880 | ENSG00000126254 | RBM42     | SupportedGeneral nnucleus                           |
| 4881 | ENSG00000126259 | KIRREL2   | Enhanced Cytoplasmcytoplasm                         |
| 4882 | ENSG00000126261 | UBA2      | SupportedNuclear enucleus                           |
| 4883 | ENSG00000126262 | FFAR2     | Approved Cytoplasmcytoplasm                         |
| 4884 | ENSG00000126264 | HCST      | Enhanced Cytoplasmcytoplasm                         |
| 4885 | ENSG00000126267 | COX6B1    | SupportedUbiquitouscytoplasm                        |
| 4886 | ENSG00000126351 | THRA      | Approved Ubiquitouscytoplasm;nucleus                |
| 4887 | ENSG00000126353 | CCR7      | Enhanced Cytoplasmcytoplasm                         |
| 4888 | ENSG00000126368 | NR1D1     | UncertainCytoplasmcytoplasm                         |
| 4889 | ENSG00000126391 | FRMD8     | Approved Cytoplasmcytoplasm                         |
| 4890 | ENSG00000126432 | PRDX5     | Enhanced General ccytoplasm                         |
| 4891 | ENSG00000126453 | BCL2L12   | Approved Cytoplasmcytoplasm                         |
| 4892 | ENSG00000126456 | IRF3      | Approved Low cytopcytoplasm                         |
| 4893 | ENSG00000126457 | PRMT1     | SupportedNuclear enucleus                           |

|      |                 |         |                                                      |
|------|-----------------|---------|------------------------------------------------------|
| 4894 | ENSG00000126458 | RRAS    | UncertainCytoplasmcytoplasm                          |
| 4895 | ENSG00000126460 | PRRG2   | Approved Cytoplasmcytoplasm                          |
| 4896 | ENSG00000126461 | SCAF1   | Approved Nuclear acytoplasm;nucleus                  |
| 4897 | ENSG00000126464 | PRR12   | Approved Cytoplasmcytoplasm                          |
| 4898 | ENSG00000126467 | TSKS    | Enhanced Cytoplasmcytoplasm                          |
| 4899 | ENSG00000126500 | FLRT1   | UncertainCytoplasmcytoplasm                          |
| 4900 | ENSG00000126522 | ASL     | Enhanced Distinct cytoplasm                          |
| 4901 | ENSG00000126524 | SBDS    | Approved General ccytoplasm                          |
| 4902 | ENSG00000126545 | CSN1S1  | Enhanced Cytoplasmcytoplasm;plasma membrane;plasma r |
| 4903 | ENSG00000126549 | STATH   | Enhanced Cytoplasmcytoplasm                          |
| 4904 | ENSG00000126550 | HTN1    | Approved Expressed in salivary gland.                |
| 4905 | ENSG00000126561 | STAT5A  | Approved Cytoplasmcytoplasm;nucleus                  |
| 4906 | ENSG00000126562 | WNK4    | Approved Cytoplasmcytoplasm                          |
| 4907 | ENSG00000126581 | BECN1   | SupportedGeneral ccytoplasm                          |
| 4908 | ENSG00000126583 | PRKCG   | Enhanced Selectivecytoplasm                          |
| 4909 | ENSG00000126602 | TRAP1   | Enhanced Granular cytoplasm                          |
| 4910 | ENSG00000126653 | NSRP1   | Enhanced Ubiquitounucleus                            |
| 4911 | ENSG00000126698 | DNAJC8  | Approved General ccytoplasm;plasma membrane          |
| 4912 | ENSG00000126705 | AHDC1   | Approved Ubiquitocytoplasm;nucleus                   |
| 4913 | ENSG00000126709 | IFI6    | Approved General ccytoplasm                          |
| 4914 | ENSG00000126733 | DACH2   | Approved Nuclear enucleus                            |
| 4915 | ENSG00000126746 | ZNF384  | SupportedGeneral nnucleus                            |
| 4916 | ENSG00000126749 | EMG1    | SupportedGeneral nnucleus                            |
| 4917 | ENSG00000126752 | SSX1    | SupportedNuclear enucleus                            |
| 4918 | ENSG00000126756 | UXT     | Approved Cytoplasmcytoplasm;nucleus                  |
| 4919 | ENSG00000126767 | ELK1    | Enhanced Nuclear enucleus                            |
| 4920 | ENSG00000126768 | TIMM17B | Approved Cytoplasmcytoplasm                          |
| 4921 | ENSG00000126773 | PCNX4   | UncertainGeneral ccytoplasm                          |
| 4922 | ENSG00000126775 | ATG14   | UncertainCytoplasmcytoplasm;nucleus                  |
| 4923 | ENSG00000126777 | KTN1    | Enhanced Ubiquitocytoplasm                           |
| 4924 | ENSG00000126778 | SIX1    | Enhanced Nuclear enucleus                            |
| 4925 | ENSG00000126785 | RHOJ    | UncertainCytoplasmcytoplasm                          |
| 4926 | ENSG00000126787 | DLGAP5  | Enhanced Cytoplasmcytoplasm                          |
| 4927 | ENSG00000126790 | L3HYPDH | Approved Cytoplasmcytoplasm                          |
| 4928 | ENSG00000126803 | HSPA2   | Enhanced Cytoplasmcytoplasm;nucleus                  |
| 4929 | ENSG00000126804 | ZBTB1   | Approved Ubiquitounucleus                            |
| 4930 | ENSG00000126814 | TRMT5   | SupportedNuclear ecytoplasm;nucleus                  |
| 4931 | ENSG00000126821 | SGPP1   | Approved General ccytoplasm                          |
| 4932 | ENSG00000126822 | PLEKHG3 | Enhanced Membranouplasma membrane                    |
| 4933 | ENSG00000126838 | PZP     | SupportedDistinct plasma membrane                    |
| 4934 | ENSG00000126856 | PRDM7   | Approved Expression in acrosomes in testis.          |
| 4935 | ENSG00000126858 | RHOT1   | SupportedGeneral ccytoplasm                          |
| 4936 | ENSG00000126860 | EVI2A   | UncertainExpression in brain, cilia and in endothel: |
| 4937 | ENSG00000126861 | OMG     | Enhanced Distinct cytoplasm;nucleus                  |
| 4938 | ENSG00000126870 | WDR60   | Approved General ccytoplasm                          |
| 4939 | ENSG00000126878 | AIF1L   | Enhanced Cytoplasmcytoplasm;plasma membrane          |
| 4940 | ENSG00000126882 | FAM78A  | UncertainGeneral ccytoplasm;nucleus                  |
| 4941 | ENSG00000126890 | CTAG2   | Enhanced Cytoplasmcytoplasm                          |
| 4942 | ENSG00000126903 | SLC10A3 | Approved Cytoplasmcytoplasm                          |
| 4943 | ENSG00000126934 | MAP2K2  | SupportedGeneral ccytoplasm                          |
| 4944 | ENSG00000126945 | HNRNPH2 | SupportedUbiquitounucleus                            |
| 4945 | ENSG00000126947 | ARMCX1  | SupportedCytoplasmcytoplasm                          |
| 4946 | ENSG00000126950 | TMEM35A | Enhanced Mainly ccytoplasm;nucleus;plasma membrane   |
| 4947 | ENSG00000126952 | NXF5    | UncertainEstimation of protein expression could not  |
| 4948 | ENSG00000126953 | TIMM8A  | SupportedGranular cytoplasm                          |

|      |                 |         |                                                      |
|------|-----------------|---------|------------------------------------------------------|
| 4949 | ENSG00000126970 | ZC4H2   | Approved Cytoplasm cytoplasm                         |
| 4950 | ENSG00000127022 | CANX    | Enhanced General c cytoplasm                         |
| 4951 | ENSG00000127054 | INTS11  | Approved Mainly c cytoplasm                          |
| 4952 | ENSG00000127074 | RGS13   | Uncertain Cytoplasm cytoplasm                        |
| 4953 | ENSG00000127080 | IPPK    | Uncertain Cytoplasm cytoplasm                        |
| 4954 | ENSG00000127081 | ZNF484  | Uncertain Estimation of protein expression could not |
| 4955 | ENSG00000127084 | FGD3    | Approved Cytoplasm cytoplasm                         |
| 4956 | ENSG00000127124 | HIVEP3  | Approved Ubiquitous cytoplasm                        |
| 4957 | ENSG00000127125 | PPCS    | Approved Cytoplasm cytoplasm;nucleus                 |
| 4958 | ENSG00000127129 | EDN2    | Uncertain Estimation of protein expression could not |
| 4959 | ENSG00000127152 | BCL11B  | Enhanced Nuclear enucleus                            |
| 4960 | ENSG00000127184 | COX7C   | Approved General c cytoplasm                         |
| 4961 | ENSG00000127191 | TRAF2   | Uncertain Ubiquitous cytoplasm                       |
| 4962 | ENSG00000127220 | ABHD8   | Approved cytoplasm cytoplasm;plasma membrane         |
| 4963 | ENSG00000127241 | MASP1   | Supported Extracellular plasma membrane              |
| 4964 | ENSG00000127252 | HRASLS  | Uncertain Estimation of protein expression could not |
| 4965 | ENSG00000127324 | TSPAN8  | Enhanced Membrane plasma membrane                    |
| 4966 | ENSG00000127325 | BEST3   | Approved Cytoplasm cytoplasm                         |
| 4967 | ENSG00000127328 | RAB3IP  | Uncertain Cytoplasm cytoplasm                        |
| 4968 | ENSG00000127329 | PTPRB   | Uncertain Cytoplasm cytoplasm                        |
| 4969 | ENSG00000127334 | DYRK2   | Approved Cytoplasm cytoplasm                         |
| 4970 | ENSG00000127377 | CRYGN   | Uncertain Estimation of protein expression could not |
| 4971 | ENSG00000127399 | LRR61   | Approved Ubiquitous nucleus                          |
| 4972 | ENSG00000127412 | TRPV5   | Uncertain Cytoplasm cytoplasm                        |
| 4973 | ENSG00000127415 | IDUA    | Enhanced Cytoplasm cytoplasm                         |
| 4974 | ENSG00000127418 | FGFRL1  | Approved Cytoplasm cytoplasm                         |
| 4975 | ENSG00000127419 | TMEM175 | Approved General nucleus;plasma membrane             |
| 4976 | ENSG00000127423 | AUNIP   | Uncertain Estimation of protein expression could not |
| 4977 | ENSG00000127445 | PIN1    | Approved Nuclear a cytoplasm;nucleus                 |
| 4978 | ENSG00000127463 | EMC1    | Approved Cytoplasm cytoplasm                         |
| 4979 | ENSG00000127472 | PLA2G5  | Approved Cytoplasm cytoplasm                         |
| 4980 | ENSG00000127481 | UBR4    | Approved Cytoplasm cytoplasm                         |
| 4981 | ENSG00000127483 | HP1BP3  | Supported Ubiquitous nucleus                         |
| 4982 | ENSG00000127511 | SIN3B   | Uncertain Nuclear enucleus                           |
| 4983 | ENSG00000127526 | SLC35E1 | Approved Cytoplasm cytoplasm                         |
| 4984 | ENSG00000127527 | EPS15L1 | Uncertain Ubiquitous cytoplasm                       |
| 4985 | ENSG00000127528 | KLF2    | Approved Mainly nucleus                              |
| 4986 | ENSG00000127529 | OR7C2   | Uncertain Estimation of protein expression could not |
| 4987 | ENSG00000127530 | OR7C1   | Uncertain Estimation of protein expression could not |
| 4988 | ENSG00000127554 | GFER    | Approved Ubiquitous cytoplasm                        |
| 4989 | ENSG00000127561 | SYNGR3  | Enhanced Distinct expression in the CNS.             |
| 4990 | ENSG00000127580 | WDR24   | Approved Ubiquitous cytoplasm                        |
| 4991 | ENSG00000127585 | FBXL16  | Enhanced Cytoplasm cytoplasm;nucleus                 |
| 4992 | ENSG00000127588 | GNG13   | Enhanced Membrane nucleus;plasma membrane            |
| 4993 | ENSG00000127603 | MACF1   | Approved Granular cytoplasm                          |
| 4994 | ENSG00000127616 | SMARCA4 | Supported Ubiquitous nucleus                         |
| 4995 | ENSG00000127666 | TICAM1  | Uncertain General c cytoplasm                        |
| 4996 | ENSG00000127720 | METTL25 | Uncertain Estimation of protein expression could not |
| 4997 | ENSG00000127743 | IL17B   | Uncertain Estimation of protein expression could not |
| 4998 | ENSG00000127774 | EMC6    | Uncertain Cytoplasm cytoplasm;plasma membrane        |
| 4999 | ENSG00000127804 | METTL16 | Uncertain Estimation of protein expression could not |
| 5000 | ENSG00000127824 | TUBA4A  | Approved Ubiquitous cytoplasm                        |
| 5001 | ENSG00000127831 | VIL1    | Enhanced Selective cytoplasm;plasma membrane         |
| 5002 | ENSG00000127837 | AAMP    | Approved General c cytoplasm                         |
| 5003 | ENSG00000127838 | PNKD    | Approved Cytoplasm cytoplasm                         |

|      |                 |          |                                                      |
|------|-----------------|----------|------------------------------------------------------|
| 5004 | ENSG00000127870 | RNF6     | Approved Nuclear acytoplasm;nucleus                  |
| 5005 | ENSG00000127884 | ECHS1    | Enhanced Ubiquitouscytoplasm                         |
| 5006 | ENSG00000127903 | ZNF835   | UncertainEstimation of protein expression could not  |
| 5007 | ENSG00000127914 | AKAP9    | SupportedUbiquitouscytoplasm                         |
| 5008 | ENSG00000127920 | GNG11    | UncertainCytoplasmcytoplasm;plasma membrane          |
| 5009 | ENSG00000127922 | SEM1     | UncertainCytoplasmcytoplasm                          |
| 5010 | ENSG00000127928 | GNGT1    | Enhanced Cytoplasmcytoplasm                          |
| 5011 | ENSG00000127946 | HIP1     | Enhanced Ubiquitouscytoplasm                         |
| 5012 | ENSG00000127947 | PTPN12   | Approved Cytoplasmcytoplasm                          |
| 5013 | ENSG00000127948 | POR      | Enhanced General ccytoplasm                          |
| 5014 | ENSG00000127951 | FGL2     | Enhanced Cytoplasmcytoplasm                          |
| 5015 | ENSG00000127952 | STYXL1   | UncertainMainly ccytoplasm                           |
| 5016 | ENSG00000127955 | GNAI1    | Approved Cytoplasmcytoplasm                          |
| 5017 | ENSG00000127980 | PEX1     | Approved Cytoplasmcytoplasm                          |
| 5018 | ENSG00000127989 | MTERF1   | UncertainCytoplasmcytoplasm                          |
| 5019 | ENSG00000127993 | RBM48    | UncertainCytoplasmcytoplasm;nucleus                  |
| 5020 | ENSG00000127995 | CASD1    | UncertainCytoplasmcytoplasm                          |
| 5021 | ENSG00000128000 | ZNF780B  | UncertainEstimation of protein expression could not  |
| 5022 | ENSG00000128016 | ZFP36    | Approved Mainly ccytoplasm                           |
| 5023 | ENSG00000128039 | SRD5A3   | UncertainGeneral ccytoplasm                          |
| 5024 | ENSG00000128040 | SPINK2   | Enhanced Distinct cytoplasm                          |
| 5025 | ENSG00000128045 | RASL11B  | UncertainRNA-based expert annotation gave inconclus: |
| 5026 | ENSG00000128050 | PAICS    | UncertainHigh cytoccytoplasm                         |
| 5027 | ENSG00000128052 | KDR      | Enhanced Cytoplasmcytoplasm                          |
| 5028 | ENSG00000128059 | PPAT     | Approved General ccytoplasm                          |
| 5029 | ENSG00000128159 | TUBGCP6  | Approved General ccytoplasm                          |
| 5030 | ENSG00000128203 | ASPHD2   | UncertainCytoplasmcytoplasm                          |
| 5031 | ENSG00000128218 | VPREB3   | SupportedCytoplasmcytoplasm                          |
| 5032 | ENSG00000128228 | SDF2L1   | Approved General ccytoplasm                          |
| 5033 | ENSG00000128242 | GAL3ST1  | Approved Cytoplasmcytoplasm                          |
| 5034 | ENSG00000128245 | YWHAH    | UncertainCytoplasmcytoplasm                          |
| 5035 | ENSG00000128253 | RFPL2    | Approved Expressed mainly in prostate epithelium.    |
| 5036 | ENSG00000128266 | GNAZ     | Enhanced Cytoplasmcytoplasm                          |
| 5037 | ENSG00000128268 | MGAT3    | Approved Cytoplasmcytoplasm                          |
| 5038 | ENSG00000128271 | ADORA2A  | Enhanced Expressionnucleus                           |
| 5039 | ENSG00000128272 | ATF4     | Approved Mainly nunucleus                            |
| 5040 | ENSG00000128283 | CDC42EP1 | Approved Cytoplasmcytoplasm                          |
| 5041 | ENSG00000128294 | TPST2    | Enhanced General ccytoplasm                          |
| 5042 | ENSG00000128298 | BAIAP2L2 | Approved Cytoplasmcytoplasm                          |
| 5043 | ENSG00000128309 | MPST     | Enhanced Cytoplasmcytoplasm                          |
| 5044 | ENSG00000128311 | TST      | Enhanced Ubiquitouscytoplasm                         |
| 5045 | ENSG00000128313 | APOL5    | UncertainEstimation of protein expression could not  |
| 5046 | ENSG00000128322 | IGLL1    | Enhanced Expression in seminiferous ducts and in sul |
| 5047 | ENSG00000128335 | APOL2    | UncertainGeneral ccytoplasm                          |
| 5048 | ENSG00000128340 | RAC2     | Enhanced Cytoplasmcytoplasm                          |
| 5049 | ENSG00000128342 | LIF      | UncertainCytoplasmcytoplasm                          |
| 5050 | ENSG00000128383 | APOBEC3A | Approved Nuclear enucleus                            |
| 5051 | ENSG00000128408 | RIBC2    | Approved Mainly lucytoplasm                          |
| 5052 | ENSG00000128422 | KRT17    | Enhanced Selectivecytoplasm;plasma membrane          |
| 5053 | ENSG00000128463 | EMC4     | Approved Cytoplasmcytoplasm                          |
| 5054 | ENSG00000128482 | RNF112   | SupportedCytoplasmcytoplasm                          |
| 5055 | ENSG00000128487 | SPECC1   | Enhanced Cytoplasmcytoplasm                          |
| 5056 | ENSG00000128524 | ATP6V1F  | SupportedCytoplasmcytoplasm;plasma membrane          |
| 5057 | ENSG00000128534 | LSM8     | UncertainGeneral nnucleus                            |
| 5058 | ENSG00000128536 | CDHR3    | Approved Cytoplasmcytoplasm                          |

|      |                 |          |                                                                   |
|------|-----------------|----------|-------------------------------------------------------------------|
| 5059 | ENSG00000128563 | PRKRIP1  | UncertainCytoplasmcytoplasm                                       |
| 5060 | ENSG00000128564 | VGF      | Enhanced Cytoplasmcytoplasm                                       |
| 5061 | ENSG00000128567 | PODXL    | Enhanced Distinct expression in glomerular podocytes              |
| 5062 | ENSG00000128573 | FOXP2    | Enhanced Nuclear enucleus                                         |
| 5063 | ENSG00000128578 | STRIP2   | Approved Cytoplasmcytoplasm                                       |
| 5064 | ENSG00000128581 | IFT22    | Approved General ccytoplasm                                       |
| 5065 | ENSG00000128585 | MKLN1    | Approved Cytoplasmcytoplasm                                       |
| 5066 | ENSG00000128590 | DNAJB9   | SupportedGeneral ccytoplasm                                       |
| 5067 | ENSG00000128591 | FLNC     | Enhanced Cytoplasmcytoplasm                                       |
| 5068 | ENSG00000128595 | CALU     | SupportedUbiquitouscytoplasm                                      |
| 5069 | ENSG00000128596 | CCDC136  | Enhanced Cytoplasmcytoplasm                                       |
| 5070 | ENSG00000128602 | SMO      | Approved Membranoucytoplasm;plasma membrane                       |
| 5071 | ENSG00000128604 | IRF5     | Enhanced Cytoplasmcytoplasm                                       |
| 5072 | ENSG00000128607 | KLHDC10  | Approved Cytoplasmcytoplasm                                       |
| 5073 | ENSG00000128609 | NDUFA5   | SupportedUbiquitouscytoplasm                                      |
| 5074 | ENSG00000128610 | FEZF1    | Approved Expression in subsets of hypothalamic neurons            |
| 5075 | ENSG00000128617 | OPN1SW   | Enhanced Cytoplasmcytoplasm                                       |
| 5076 | ENSG00000128626 | MRPS12   | UncertainUbiquitouscytoplasm                                      |
| 5077 | ENSG00000128641 | MYO1B    | Approved Membranouplasma membrane                                 |
| 5078 | ENSG00000128654 | MTX2     | Approved Ubiquitouscytoplasm                                      |
| 5079 | ENSG00000128655 | PDE11A   | Approved General ccytoplasm                                       |
| 5080 | ENSG00000128683 | GAD1     | Enhanced Selectivecytoplasm                                       |
| 5081 | ENSG00000128694 | OSGEPL1  | UncertainCytoplasmcytoplasm                                       |
| 5082 | ENSG00000128708 | HAT1     | SupportedNuclear enucleus                                         |
| 5083 | ENSG00000128731 | HERC2    | Approved Mainly ccytoplasm                                        |
| 5084 | ENSG00000128739 | SNRPN    | Approved Nuclear enucleus                                         |
| 5085 | ENSG00000128789 | PSMG2    | UncertainUbiquitouscytoplasm                                      |
| 5086 | ENSG00000128791 | TWSG1    | UncertainCytoplasmcytoplasm;nucleus                               |
| 5087 | ENSG00000128805 | ARHGAP22 | UncertainNuclear acytoplasm;nucleus                               |
| 5088 | ENSG00000128815 | WDFY4    | UncertainCytoplasmcytoplasm                                       |
| 5089 | ENSG00000128829 | EIF2AK4  | Approved Cytoplasmcytoplasm                                       |
| 5090 | ENSG00000128833 | MYO5C    | Enhanced Membranouplasma membrane                                 |
| 5091 | ENSG00000128849 | CGNL1    | Enhanced Luminal mplasma membrane                                 |
| 5092 | ENSG00000128872 | TMOD2    | Enhanced Cytoplasmcytoplasm                                       |
| 5093 | ENSG00000128881 | TTBK2    | Approved Cytoplasmcytoplasm                                       |
| 5094 | ENSG00000128886 | ELL3     | Approved Nuclear enucleus                                         |
| 5095 | ENSG00000128891 | CCDC32   | UncertainCytoplasmcytoplasm                                       |
| 5096 | ENSG00000128917 | DLL4     | UncertainCytoplasmcytoplasm;plasma membrane                       |
| 5097 | ENSG00000128918 | ALDH1A2  | Approved Cytoplasmcytoplasm                                       |
| 5098 | ENSG00000128923 | MINDY2   | Approved General ccytoplasm;nucleus                               |
| 5099 | ENSG00000128928 | IVD      | Enhanced Granular cytoplasm                                       |
| 5100 | ENSG00000128944 | KNSTRN   | Enhanced Cytoplasmcytoplasm                                       |
| 5101 | ENSG00000128951 | DUT      | Enhanced General ncytoplasm;nucleus                               |
| 5102 | ENSG00000128965 | CHAC1    | Approved General ccytoplasm                                       |
| 5103 | ENSG00000128973 | CLN6     | Approved Cytoplasmcytoplasm                                       |
| 5104 | ENSG00000128989 | ARPP19   | Approved Cytoplasmcytoplasm                                       |
| 5105 | ENSG00000129003 | VPS13C   | UncertainCytoplasmcytoplasm                                       |
| 5106 | ENSG00000129007 | CALML4   | Enhanced Luminal mplasma membrane                                 |
| 5107 | ENSG00000129009 | ISLR     | Approved Cytoplasmcytoplasm;plasma membrane                       |
| 5108 | ENSG00000129028 | THAP10   | UncertainEstimation of protein expression could not be determined |
| 5109 | ENSG00000129038 | LOXL1    | Approved Extracellcytoplasm;plasma membrane                       |
| 5110 | ENSG00000129055 | ANAPC13  | UncertainEstimation of protein expression could not be determined |
| 5111 | ENSG00000129071 | MBD4     | SupportedGeneral nnucleus                                         |
| 5112 | ENSG00000129083 | COPB1    | SupportedUbiquitouscytoplasm                                      |
| 5113 | ENSG00000129084 | PSMA1    | SupportedGeneral ccytoplasm;nucleus                               |

|      |                 |          |                                                      |
|------|-----------------|----------|------------------------------------------------------|
| 5114 | ENSG00000129103 | SUMF2    | Enhanced General c cytoplasm                         |
| 5115 | ENSG00000129116 | PALLD    | Enhanced Membranou cytoplasm; plasma membrane        |
| 5116 | ENSG00000129128 | SPCS3    | Approved Cytoplasm cytoplasm                         |
| 5117 | ENSG00000129151 | BBOX1    | Enhanced Selective cytoplasm                         |
| 5118 | ENSG00000129158 | SERGEF   | Supported Cytoplasm cytoplasm; nucleus               |
| 5119 | ENSG00000129159 | KCNC1    | Enhanced Cytoplasm cytoplasm                         |
| 5120 | ENSG00000129167 | TPH1     | Approved General c cytoplasm                         |
| 5121 | ENSG00000129170 | CSRP3    | Enhanced Selective cytoplasm                         |
| 5122 | ENSG00000129173 | E2F8     | Enhanced Cytoplasm cytoplasm; nucleus                |
| 5123 | ENSG00000129187 | DCTD     | Approved General c cytoplasm                         |
| 5124 | ENSG00000129194 | SOX15    | Enhanced Nuclear a nucleus                           |
| 5125 | ENSG00000129195 | PIMREG   | Uncertain Estimation of protein expression could not |
| 5126 | ENSG00000129197 | RPAIN    | Approved Nuclear a cytoplasm; nucleus                |
| 5127 | ENSG00000129219 | PLD2     | Approved General c cytoplasm                         |
| 5128 | ENSG00000129221 | AIPL1    | Enhanced Cytoplasm cytoplasm; nucleus                |
| 5129 | ENSG00000129226 | CD68     | Enhanced Selective cytoplasm                         |
| 5130 | ENSG00000129235 | TXNDC17  | Approved General c cytoplasm                         |
| 5131 | ENSG00000129244 | ATP1B2   | Enhanced Selective expression in CNS.                |
| 5132 | ENSG00000129245 | FXR2     | Supported General c cytoplasm                        |
| 5133 | ENSG00000129250 | KIF1C    | Approved Cytoplasm cytoplasm                         |
| 5134 | ENSG00000129255 | MPDU1    | Uncertain Cytoplasm cytoplasm                        |
| 5135 | ENSG00000129292 | PHF20L1  | Uncertain Cytoplasm cytoplasm; nucleus               |
| 5136 | ENSG00000129295 | LRRC6    | Approved Cytoplasm cytoplasm                         |
| 5137 | ENSG00000129315 | CCNT1    | Supported Ubiquitou nucleus                          |
| 5138 | ENSG00000129317 | PUS7L    | Uncertain Ubiquitou cytoplasm                        |
| 5139 | ENSG00000129347 | KRI1     | Approved Expressed cytoplasm; nucleus                |
| 5140 | ENSG00000129351 | ILF3     | Supported General n nucleus                          |
| 5141 | ENSG00000129353 | SLC44A2  | Approved Luminal m plasma membrane                   |
| 5142 | ENSG00000129355 | CDKN2D   | Enhanced Nuclear a cytoplasm; nucleus                |
| 5143 | ENSG00000129437 | KLK14    | Uncertain Extracell cytoplasm                        |
| 5144 | ENSG00000129450 | SIGLEC9  | Uncertain Cytoplasm cytoplasm                        |
| 5145 | ENSG00000129455 | KLK8     | Enhanced Selective expression in squamous epitheliu  |
| 5146 | ENSG00000129460 | NGDN     | Approved Nuclear a cytoplasm; nucleus                |
| 5147 | ENSG00000129467 | ADCY4    | Approved General c cytoplasm; plasma membrane        |
| 5148 | ENSG00000129472 | RAB2B    | Uncertain Estimation of protein expression could not |
| 5149 | ENSG00000129473 | BCL2L2   | Approved Ubiquitou cytoplasm                         |
| 5150 | ENSG00000129474 | AJUBA    | Approved Nuclear e nucleus                           |
| 5151 | ENSG00000129480 | DTD2     | Approved Cytoplasm cytoplasm                         |
| 5152 | ENSG00000129484 | PARP2    | Approved Cytoplasm cytoplasm; nucleus                |
| 5153 | ENSG00000129493 | HEATR5A  | Uncertain Estimation of protein expression could not |
| 5154 | ENSG00000129514 | FOXA1    | Enhanced Nuclear e nucleus                           |
| 5155 | ENSG00000129515 | SNX6     | Approved Cytoplasm cytoplasm                         |
| 5156 | ENSG00000129518 | EAPP     | Approved General c cytoplasm; nucleus                |
| 5157 | ENSG00000129534 | MIS18BP1 | Approved Nuclear e nucleus                           |
| 5158 | ENSG00000129535 | NRL      | Enhanced Nuclear e nucleus                           |
| 5159 | ENSG00000129538 | RNASE1   | Enhanced Cytoplasm cytoplasm                         |
| 5160 | ENSG00000129559 | NEDD8    | Uncertain Cytoplasm cytoplasm; nucleus               |
| 5161 | ENSG00000129562 | DAD1     | Uncertain General c cytoplasm                        |
| 5162 | ENSG00000129595 | EPB41L4A | Uncertain General c cytoplasm; nucleus               |
| 5163 | ENSG00000129596 | CD01     | Enhanced Selective cytoplasm                         |
| 5164 | ENSG00000129625 | REEP5    | Approved General c cytoplasm                         |
| 5165 | ENSG00000129636 | ITFG1    | Approved Ubiquitou cytoplasm                         |
| 5166 | ENSG00000129646 | QRICH2   | Enhanced Expression in sperm flagella.               |
| 5167 | ENSG00000129654 | FOXJ1    | Enhanced Nuclear e nucleus                           |
| 5168 | ENSG00000129657 | SEC14L1  | Approved Ubiquitou cytoplasm                         |

|      |                 |          |                                                       |
|------|-----------------|----------|-------------------------------------------------------|
| 5169 | ENSG00000129667 | RHBDF2   | UncertainCytoplasmcytoplasm                           |
| 5170 | ENSG00000129675 | ARHGEF6  | Approved Cytoplasmcytoplasm;nucleus                   |
| 5171 | ENSG00000129680 | MAP7D3   | Approved Cytoplasmcytoplasm                           |
| 5172 | ENSG00000129691 | ASH2L    | Approved Mainly nnucleus                              |
| 5173 | ENSG00000129696 | TTI2     | Approved Ubiquitouscytoplasm                          |
| 5174 | ENSG00000129744 | ART1     | UncertainEstimation of protein expression could not   |
| 5175 | ENSG00000129757 | CDKN1C   | Enhanced Nuclear enucleus                             |
| 5176 | ENSG00000129810 | SG01     | Enhanced Nuclear enucleus                             |
| 5177 | ENSG00000129824 | RPS4Y1   | Approved General ccytoplasm                           |
| 5178 | ENSG00000129862 | VCY1B    | SupportedSelectivenucleus                             |
| 5179 | ENSG00000129864 | VCY      | SupportedSelectivenucleus                             |
| 5180 | ENSG00000129873 | CDY2B    | SupportedNuclear enucleus                             |
| 5181 | ENSG00000129910 | CDH15    | Enhanced Cytoplasmcytoplasm                           |
| 5182 | ENSG00000129911 | KLF16    | Approved Mainly nnucleus                              |
| 5183 | ENSG00000129925 | TMEM8A   | Approved Cytoplasmcytoplasm                           |
| 5184 | ENSG00000129932 | DOHH     | Approved Cytoplasmcytoplasm                           |
| 5185 | ENSG00000129946 | SHC2     | Approved Cytoplasmcytoplasm                           |
| 5186 | ENSG00000129951 | PLPPR3   | UncertainEstimation of protein expression could not   |
| 5187 | ENSG00000129965 | INS-IGF2 | Enhanced Tissue specific expression in islets of Lai  |
| 5188 | ENSG00000129968 | ABHD17A  | UncertainGeneral nnucleus                             |
| 5189 | ENSG00000129988 | LBP      | Approved Positivitycytoplasm;plasma membrane;plasma m |
| 5190 | ENSG00000129990 | SYT5     | Enhanced Expressed in the brain.                      |
| 5191 | ENSG00000129991 | TNNI3    | Enhanced Cytoplasmcytoplasm                           |
| 5192 | ENSG00000129993 | CBFA2T3  | Approved General nnucleus                             |
| 5193 | ENSG00000130005 | GAMT     | Approved Cytoplasmcytoplasm;plasma membrane           |
| 5194 | ENSG00000130021 | PUDP     | Approved Cytoplasmcytoplasm                           |
| 5195 | ENSG00000130023 | ERMARD   | Approved General ccytoplasm                           |
| 5196 | ENSG00000130024 | PHF10    | SupportedGeneral nnucleus                             |
| 5197 | ENSG00000130032 | PRRG3    | UncertainEstimation of protein expression could not   |
| 5198 | ENSG00000130035 | GALNT8   | Enhanced General ccytoplasm                           |
| 5199 | ENSG00000130037 | KCNA5    | Approved Membranouplasma membrane                     |
| 5200 | ENSG00000130038 | CRACR2A  | Enhanced Cytoplasmcytoplasm;plasma membrane           |
| 5201 | ENSG00000130045 | NXNL2    | UncertainEstimation of protein expression could not   |
| 5202 | ENSG00000130052 | STARD8   | UncertainUbiquitouscytoplasm                          |
| 5203 | ENSG00000130054 | FAM155B  | UncertainEstimation of protein expression could not   |
| 5204 | ENSG00000130066 | SAT1     | SupportedGeneral ccytoplasm                           |
| 5205 | ENSG00000130119 | GNL3L    | SupportedUbiquitouscytoplasm;nucleus                  |
| 5206 | ENSG00000130147 | SH3BP4   | UncertainMainly ccytoplasm                            |
| 5207 | ENSG00000130150 | MOSPD2   | UncertainCytoplasmcytoplasm                           |
| 5208 | ENSG00000130158 | DOCK6    | Approved General gcytoplasm                           |
| 5209 | ENSG00000130159 | ECSIT    | Approved General ccytoplasm                           |
| 5210 | ENSG00000130164 | LDLR     | Approved Cytoplasmcytoplasm                           |
| 5211 | ENSG00000130165 | ELOF1    | UncertainCytoplasmcytoplasm                           |
| 5212 | ENSG00000130167 | TSPAN16  | Approved Cytoplasmcytoplasm                           |
| 5213 | ENSG00000130175 | PRKCSH   | SupportedGeneral ccytoplasm                           |
| 5214 | ENSG00000130176 | CNN1     | Enhanced Highly secytoplasm                           |
| 5215 | ENSG00000130177 | CDC16    | Approved General ccytoplasm                           |
| 5216 | ENSG00000130193 | THEM6    | UncertainEstimation of protein expression could not   |
| 5217 | ENSG00000130202 | NECTIN2  | Enhanced Cytoplasmcytoplasm;plasma membrane           |
| 5218 | ENSG00000130203 | APOE     | Enhanced Distinct cytoplasm;plasma membrane           |
| 5219 | ENSG00000130204 | TOMM40   | SupportedGeneral ccytoplasm                           |
| 5220 | ENSG00000130208 | APOC1    | SupportedPositivityplasma membrane                    |
| 5221 | ENSG00000130222 | GADD45G  | Approved Cytoplasmcytoplasm                           |
| 5222 | ENSG00000130224 | LRCH2    | Approved Cytoplasmcytoplasm;plasma membrane           |
| 5223 | ENSG00000130226 | DPP6     | Enhanced Cytoplasmcytoplasm                           |

|      |                 |          |                                                      |
|------|-----------------|----------|------------------------------------------------------|
| 5224 | ENSG00000130227 | XP07     | UncertainCytoplasmcytoplasm                          |
| 5225 | ENSG00000130234 | ACE2     | Enhanced Selectiveplasma membrane                    |
| 5226 | ENSG00000130244 | FAM98C   | Approved Cytoplasmcytoplasm;nucleus                  |
| 5227 | ENSG00000130254 | SAFB2    | Approved General nnucleus                            |
| 5228 | ENSG00000130255 | RPL36    | SupportedGeneral ccytoplasm                          |
| 5229 | ENSG00000130287 | NCAN     | Enhanced Expression in processes in CNS.             |
| 5230 | ENSG00000130299 | GTPBP3   | Approved General ccytoplasm                          |
| 5231 | ENSG00000130300 | PLVAP    | SupportedCytoplasmcytoplasm                          |
| 5232 | ENSG00000130303 | BST2     | Enhanced General ccytoplasm                          |
| 5233 | ENSG00000130305 | NSUN5    | Approved Cytoplasmcytoplasm;nucleus                  |
| 5234 | ENSG00000130307 | USHBP1   | UncertainEstimation of protein expression could not  |
| 5235 | ENSG00000130309 | COLGALT1 | Approved Cytoplasmcytoplasm                          |
| 5236 | ENSG00000130311 | DDA1     | Approved Granular cytoplasm                          |
| 5237 | ENSG00000130312 | MRPL34   | UncertainCytoplasmcytoplasm;nucleus                  |
| 5238 | ENSG00000130313 | PGLS     | Approved General ccytoplasm                          |
| 5239 | ENSG00000130332 | LSM7     | UncertainCytoplasmcytoplasm                          |
| 5240 | ENSG00000130338 | TULP4    | Approved General ccytoplasm                          |
| 5241 | ENSG00000130340 | SNX9     | Approved Cytoplasmcytoplasm                          |
| 5242 | ENSG00000130347 | RTN4IP1  | Approved General ccytoplasm                          |
| 5243 | ENSG00000130348 | QRSL1    | Approved Cytoplasmcytoplasm                          |
| 5244 | ENSG00000130349 | C6orf203 | Approved Ubiquitoucytoplasm;nucleus                  |
| 5245 | ENSG00000130363 | RSPH3    | Approved Cytoplasmcytoplasm;nucleus                  |
| 5246 | ENSG00000130377 | ACSBG2   | Enhanced Cytoplasmcytoplasm                          |
| 5247 | ENSG00000130382 | MLLT1    | Approved Mainly nunucleus                            |
| 5248 | ENSG00000130383 | FUT5     | UncertainEstimation of protein expression could not  |
| 5249 | ENSG00000130396 | AFDN     | Approved General ccytoplasm;plasma membrane          |
| 5250 | ENSG00000130402 | ACTN4    | SupportedUbiquitoucytoplasm                          |
| 5251 | ENSG00000130413 | STK33    | UncertainCytoplasmcytoplasm                          |
| 5252 | ENSG00000130414 | NDUFA10  | Approved Cytoplasmcytoplasm                          |
| 5253 | ENSG00000130427 | EPO      | SupportedLow cytopcytoplasm                          |
| 5254 | ENSG00000130429 | ARPC1B   | Approved Cytoplasmcytoplasm                          |
| 5255 | ENSG00000130449 | ZSWIM6   | UncertainEstimation of protein expression could not  |
| 5256 | ENSG00000130475 | FCH01    | Approved Cytoplasmcytoplasm;nucleus                  |
| 5257 | ENSG00000130479 | MAP1S    | Approved Cytoplasmcytoplasm                          |
| 5258 | ENSG00000130487 | KLHDC7B  | UncertainEstimation of protein expression could not  |
| 5259 | ENSG00000130489 | SCO2     | Approved Mainly ccytoplasm                           |
| 5260 | ENSG00000130508 | PXDN     | Approved Selective expression in fibroblasts and ext |
| 5261 | ENSG00000130513 | GDF15    | Enhanced Cytoplasmcytoplasm                          |
| 5262 | ENSG00000130517 | PGPEP1   | Approved General ccytoplasm                          |
| 5263 | ENSG00000130518 | IQCN     | Enhanced Expression in spermatozoa in testis.        |
| 5264 | ENSG00000130520 | LSM4     | UncertainGeneral ccytoplasm                          |
| 5265 | ENSG00000130522 | JUND     | SupportedGeneral nnucleus                            |
| 5266 | ENSG00000130528 | HRC      | Enhanced High cytocytoplasm                          |
| 5267 | ENSG00000130529 | TRPM4    | Enhanced Cytoplasmcytoplasm;plasma membrane          |
| 5268 | ENSG00000130538 | OR11H1   | UncertainEstimation of protein expression could not  |
| 5269 | ENSG00000130540 | SULT4A1  | Enhanced Cytoplasmcytoplasm                          |
| 5270 | ENSG00000130544 | ZNF557   | UncertainEstimation of protein expression could not  |
| 5271 | ENSG00000130545 | CRB3     | Enhanced Expressiocytoplasm;plasma membrane          |
| 5272 | ENSG00000130559 | CAMSAP1  | Approved Cytoplasmcytoplasm                          |
| 5273 | ENSG00000130560 | UBAC1    | Approved General ccytoplasm                          |
| 5274 | ENSG00000130561 | SAG      | Enhanced Cytoplasmcytoplasm                          |
| 5275 | ENSG00000130584 | ZBTB46   | UncertainEstimation of protein expression could not  |
| 5276 | ENSG00000130589 | HELZ2    | UncertainEstimation of protein expression could not  |
| 5277 | ENSG00000130590 | SAMD10   | Approved Nuclear enucleus                            |
| 5278 | ENSG00000130592 | LSP1     | Enhanced Cytoplasmcytoplasm                          |



|      |                 |          |                                                      |
|------|-----------------|----------|------------------------------------------------------|
| 5279 | ENSG00000130595 | TNNT3    | Enhanced Selective cytoplasm                         |
| 5280 | ENSG00000130598 | TNNI2    | Enhanced Cytoplasm cytoplasm                         |
| 5281 | ENSG00000130635 | COL5A1   | Approved Expression in connective tissue and extrac  |
| 5282 | ENSG00000130638 | ATXN10   | Approved Cytoplasm cytoplasm                         |
| 5283 | ENSG00000130640 | TUBGCP2  | Approved Cytoplasm cytoplasm;nucleus                 |
| 5284 | ENSG00000130643 | CALY     | Enhanced Cytoplasm cytoplasm;nucleus                 |
| 5285 | ENSG00000130649 | CYP2E1   | Enhanced Selective cytoplasm                         |
| 5286 | ENSG00000130653 | PNPLA7   | Uncertain Mainly cytoplasm                           |
| 5287 | ENSG00000130656 | HBZ      | Approved Expression in bone marrow and spleen        |
| 5288 | ENSG00000130669 | PAK4     | Uncertain General cytoplasm                          |
| 5289 | ENSG00000130684 | ZNF337   | Approved Expression in cerebellum.                   |
| 5290 | ENSG00000130695 | CEP85    | Approved Perinuclear nucleus                         |
| 5291 | ENSG00000130699 | TAF4     | Supported General nucleus                            |
| 5292 | ENSG00000130702 | LAMA5    | Enhanced Distinct plasma membrane                    |
| 5293 | ENSG00000130703 | OSBPL2   | Uncertain Cytoplasm cytoplasm                        |
| 5294 | ENSG00000130706 | ADRM1    | Supported General cytoplasm;nucleus                  |
| 5295 | ENSG00000130707 | ASS1     | Enhanced Cytoplasm cytoplasm                         |
| 5296 | ENSG00000130711 | PRDM12   | Uncertain Estimation of protein expression could not |
| 5297 | ENSG00000130713 | EXOSC2   | Approved General cytoplasm                           |
| 5298 | ENSG00000130717 | UCK1     | Approved Nuclear nucleus                             |
| 5299 | ENSG00000130720 | FIBCD1   | Approved Cytoplasm cytoplasm                         |
| 5300 | ENSG00000130723 | PRRC2B   | Uncertain Nuclear nucleus                            |
| 5301 | ENSG00000130724 | CHMP2A   | Enhanced General cytoplasm                           |
| 5302 | ENSG00000130725 | UBE2M    | Approved General cytoplasm                           |
| 5303 | ENSG00000130726 | TRIM28   | Supported Ubiquitous nucleus                         |
| 5304 | ENSG00000130731 | METTL26  | Uncertain Cytoplasm cytoplasm                        |
| 5305 | ENSG00000130733 | YIPF2    | Approved Cytoplasm cytoplasm                         |
| 5306 | ENSG00000130734 | ATG4D    | Approved Mainly cytoplasm                            |
| 5307 | ENSG00000130741 | EIF2S3   | Approved General cytoplasm                           |
| 5308 | ENSG00000130748 | TMEM160  | Uncertain Estimation of protein expression could not |
| 5309 | ENSG00000130749 | ZC3H4    | Supported Predominant cytoplasm;nucleus              |
| 5310 | ENSG00000130755 | GMFG     | Uncertain Estimation of protein expression could not |
| 5311 | ENSG00000130758 | MAP3K10  | Approved General cytoplasm                           |
| 5312 | ENSG00000130762 | ARHGEF16 | Approved Cytoplasm cytoplasm                         |
| 5313 | ENSG00000130764 | LRRC47   | Enhanced Ubiquitous cytoplasm                        |
| 5314 | ENSG00000130766 | SESN2    | Uncertain Estimation of protein expression could not |
| 5315 | ENSG00000130770 | ATP5IF1  | Supported Granular cytoplasm                         |
| 5316 | ENSG00000130772 | MED18    | Uncertain Nuclear cytoplasm;nucleus                  |
| 5317 | ENSG00000130775 | THEMIS2  | Uncertain Cytoplasm cytoplasm;nucleus                |
| 5318 | ENSG00000130779 | CLIP1    | Approved Ubiquitous cytoplasm                        |
| 5319 | ENSG00000130783 | CCDC62   | Approved Nuclear nucleus                             |
| 5320 | ENSG00000130787 | HIP1R    | Enhanced General cytoplasm;plasma membrane           |
| 5321 | ENSG00000130803 | ZNF317   | Approved Nuclear cytoplasm;nucleus                   |
| 5322 | ENSG00000130810 | PPAN     | Approved Nucleolar nucleus                           |
| 5323 | ENSG00000130811 | EIF3G    | Approved General cytoplasm                           |
| 5324 | ENSG00000130813 | C19orf66 | Approved Nuclear nucleus                             |
| 5325 | ENSG00000130816 | DNMT1    | Enhanced Distinct nucleus                            |
| 5326 | ENSG00000130818 | ZNF426   | Approved Mainly nucleus                              |
| 5327 | ENSG00000130822 | PNCK     | Approved General cytoplasm;nucleus                   |
| 5328 | ENSG00000130826 | DKC1     | Supported Ubiquitous nucleus                         |
| 5329 | ENSG00000130829 | DUSP9    | Enhanced Cytoplasm cytoplasm                         |
| 5330 | ENSG00000130830 | MPP1     | Enhanced Cytoplasm cytoplasm                         |
| 5331 | ENSG00000130856 | ZNF236   | Uncertain Estimation of protein expression could not |
| 5332 | ENSG00000130876 | SLC7A10  | Uncertain Estimation of protein expression could not |
| 5333 | ENSG00000130921 | C12orf65 | Approved Cytoplasm cytoplasm                         |

|      |                 |           |                                                      |
|------|-----------------|-----------|------------------------------------------------------|
| 5334 | ENSG00000130935 | NOL11     | SupportedNucleolar nucleus                           |
| 5335 | ENSG00000130939 | UBE4B     | Approved Mainly cytoplasm                            |
| 5336 | ENSG00000130940 | CASZ1     | Approved Mainly nucleus                              |
| 5337 | ENSG00000130943 | PKDREJ    | Enhanced Cytoplasm cytoplasm                         |
| 5338 | ENSG00000130948 | HSD17B3   | Enhanced Cytoplasm cytoplasm                         |
| 5339 | ENSG00000130956 | HABP4     | Enhanced Cytoplasm cytoplasm                         |
| 5340 | ENSG00000130957 | FBP2      | Enhanced Cytoplasm cytoplasm                         |
| 5341 | ENSG00000130958 | SLC35D2   | Approved General cytoplasm                           |
| 5342 | ENSG00000130985 | UBA1      | Approved Nuclear nucleus                             |
| 5343 | ENSG00000130988 | RGN       | Enhanced Cytoplasm cytoplasm;nucleus                 |
| 5344 | ENSG00000131013 | PPIL4     | Approved Nuclear nucleus                             |
| 5345 | ENSG00000131015 | ULBP2     | Approved Cytoplasm cytoplasm;plasma membrane         |
| 5346 | ENSG00000131016 | AKAP12    | Enhanced Cytoplasm cytoplasm                         |
| 5347 | ENSG00000131018 | SYNE1     | Approved Cytoplasm cytoplasm;nucleus                 |
| 5348 | ENSG00000131019 | ULBP3     | Approved Cytoplasm cytoplasm                         |
| 5349 | ENSG00000131023 | LATS1     | Approved Mainly cytoplasm                            |
| 5350 | ENSG00000131037 | EPS8L1    | UncertainExpression in several tissues, including s  |
| 5351 | ENSG00000131043 | AAR2      | UncertainEstimation of protein expression could not  |
| 5352 | ENSG00000131044 | TLL9      | UncertainEstimation of protein expression could not  |
| 5353 | ENSG00000131050 | BPIFA2    | Enhanced Cytoplasm cytoplasm                         |
| 5354 | ENSG00000131051 | RBM39     | SupportedGeneral nucleus                             |
| 5355 | ENSG00000131059 | BPIFA3    | Enhanced Selective expression in sperms.             |
| 5356 | ENSG00000131061 | ZNF341    | UncertainEstimation of protein expression could not  |
| 5357 | ENSG00000131067 | GGT7      | Approved Cytoplasm cytoplasm                         |
| 5358 | ENSG00000131068 | DEFB118   | Enhanced Cytoplasm cytoplasm                         |
| 5359 | ENSG00000131069 | ACSS2     | Approved Cytoplasm cytoplasm;nucleus                 |
| 5360 | ENSG00000131089 | ARHGEF9   | Approved Cytoplasm cytoplasm                         |
| 5361 | ENSG00000131095 | GFAP      | Enhanced Selective cytoplasm                         |
| 5362 | ENSG00000131096 | PYY       | Enhanced Selective expression of enteroendocrine ce. |
| 5363 | ENSG00000131100 | ATP6V1E1  | Enhanced Cytoplasm cytoplasm                         |
| 5364 | ENSG00000131115 | ZNF227    | UncertainExpression in immune cells.                 |
| 5365 | ENSG00000131116 | ZNF428    | UncertainUbiquitous cytoplasm;nucleus                |
| 5366 | ENSG00000131126 | TEX101    | Enhanced Selective cytoplasm                         |
| 5367 | ENSG00000131142 | CCL25     | Approved Cytoplasm cytoplasm                         |
| 5368 | ENSG00000131143 | COX4I1    | SupportedCytoplasm cytoplasm                         |
| 5369 | ENSG00000131148 | EMC8      | Approved General cytoplasm                           |
| 5370 | ENSG00000131149 | GSE1      | UncertainEstimation of protein expression could not  |
| 5371 | ENSG00000131152 | AC010531. | Approved Cytoplasm cytoplasm;nucleus                 |
| 5372 | ENSG00000131153 | GINS2     | UncertainEstimation of protein expression could not  |
| 5373 | ENSG00000131171 | SH3BGRL   | Approved Cytoplasm cytoplasm                         |
| 5374 | ENSG00000131174 | COX7B     | UncertainCytoplasm cytoplasm                         |
| 5375 | ENSG00000131183 | SLC34A1   | Approved Membranous plasma membrane                  |
| 5376 | ENSG00000131187 | F12       | Approved Positive plasma membrane                    |
| 5377 | ENSG00000131188 | PRR7      | UncertainEstimation of protein expression could not  |
| 5378 | ENSG00000131196 | NFATC1    | Enhanced Cytoplasm cytoplasm;nucleus                 |
| 5379 | ENSG00000131203 | ID01      | Enhanced High cytoplasm                              |
| 5380 | ENSG00000131233 | GJA9      | UncertainEstimation of protein expression could not  |
| 5381 | ENSG00000131236 | CAP1      | Approved Cytoplasm cytoplasm;plasma membrane         |
| 5382 | ENSG00000131238 | PPT1      | SupportedGeneral lysosomal expression.               |
| 5383 | ENSG00000131242 | RAB11FIP4 | Approved Cytoplasm cytoplasm                         |
| 5384 | ENSG00000131263 | RLIM      | Approved Cytoplasm cytoplasm;nucleus                 |
| 5385 | ENSG00000131264 | CDX4      | UncertainEstimation of protein expression could not  |
| 5386 | ENSG00000131269 | ABCB7     | Approved Distinct cytoplasm;plasma membrane          |
| 5387 | ENSG00000131323 | TRAF3     | UncertainCytoplasm cytoplasm                         |
| 5388 | ENSG00000131351 | HAUS8     | UncertainGranular cytoplasm                          |

|      |                 |          |           |                                             |
|------|-----------------|----------|-----------|---------------------------------------------|
| 5389 | ENSG00000131355 | ADGRE3   | Uncertain | Estimation of protein expression could not  |
| 5390 | ENSG00000131368 | MRPS25   | Approved  | Cytoplasm cytoplasm                         |
| 5391 | ENSG00000131370 | SH3BP5   | Uncertain | Cytoplasm cytoplasm                         |
| 5392 | ENSG00000131373 | HACL1    | Approved  | General c cytoplasm                         |
| 5393 | ENSG00000131374 | TBC1D5   | Uncertain | General c cytoplasm                         |
| 5394 | ENSG00000131375 | CAPN7    | Uncertain | Cytoplasm cytoplasm;nucleus;plasma membrane |
| 5395 | ENSG00000131378 | RFTN1    | Approved  | Cytoplasm cytoplasm                         |
| 5396 | ENSG00000131379 | C3orf20  | Uncertain | Estimation of protein expression could not  |
| 5397 | ENSG00000131381 | RBSN     | Approved  | General c cytoplasm                         |
| 5398 | ENSG00000131386 | GALNT15  | Uncertain | Estimation of protein expression could not  |
| 5399 | ENSG00000131389 | SLC6A6   | Enhanced  | Membranou plasma membrane                   |
| 5400 | ENSG00000131398 | KCNC3    | Approved  | Cytoplasm cytoplasm;plasma membrane         |
| 5401 | ENSG00000131400 | NAPSA    | Enhanced  | Selective cytoplasm                         |
| 5402 | ENSG00000131408 | NR1H2    | Uncertain | Nucleolar nucleus                           |
| 5403 | ENSG00000131409 | LRRC4B   | Uncertain | Estimation of protein expression could not  |
| 5404 | ENSG00000131435 | PDLIM4   | Uncertain | Cytoplasm cytoplasm                         |
| 5405 | ENSG00000131437 | KIF3A    | Approved  | Cytoplasm cytoplasm                         |
| 5406 | ENSG00000131446 | MGAT1    | Approved  | Cytoplasm cytoplasm                         |
| 5407 | ENSG00000131459 | GFPT2    | Uncertain | Cytoplasm cytoplasm                         |
| 5408 | ENSG00000131462 | TUBG1    | Enhanced  | General c cytoplasm                         |
| 5409 | ENSG00000131467 | PSME3    | Supported | Ubiquitou nucleus                           |
| 5410 | ENSG00000131469 | RPL27    | Approved  | General c cytoplasm                         |
| 5411 | ENSG00000131470 | PSMC3IP  | Enhanced  | Nuclear enucleus                            |
| 5412 | ENSG00000131471 | AOC3     | Enhanced  | Selective cytoplasm                         |
| 5413 | ENSG00000131473 | ACLY     | Enhanced  | Cytoplasm cytoplasm;nucleus                 |
| 5414 | ENSG00000131475 | VPS25    | Uncertain | Ubiquitou cytoplasm;nucleus                 |
| 5415 | ENSG00000131480 | AOC2     | Uncertain | Estimation of protein expression could not  |
| 5416 | ENSG00000131482 | G6PC     | Enhanced  | Cytoplasm cytoplasm                         |
| 5417 | ENSG00000131495 | NDUFA2   | Uncertain | General g cytoplasm                         |
| 5418 | ENSG00000131503 | ANKHD1   | Approved  | Ubiquitou cytoplasm;plasma membrane         |
| 5419 | ENSG00000131504 | DIAPH1   | Approved  | Cytoplasm cytoplasm                         |
| 5420 | ENSG00000131507 | NDFIP1   | Approved  | General c cytoplasm                         |
| 5421 | ENSG00000131508 | UBE2D2   | Approved  | Cytoplasm cytoplasm;nucleus;plasma membrane |
| 5422 | ENSG00000131558 | EXOC4    | Approved  | General c cytoplasm                         |
| 5423 | ENSG00000131584 | ACAP3    | Approved  | Cytoplasm cytoplasm;plasma membrane         |
| 5424 | ENSG00000131591 | C1orf159 | Approved  | Cytoplasm cytoplasm                         |
| 5425 | ENSG00000131620 | ANO1     | Enhanced  | Cytoplasm cytoplasm;plasma membrane         |
| 5426 | ENSG00000131626 | PPFIA1   | Uncertain | General c cytoplasm                         |
| 5427 | ENSG00000131634 | TMEM204  | Approved  | Cytoplasm cytoplasm                         |
| 5428 | ENSG00000131650 | KREMEN2  | Uncertain | Estimation of protein expression could not  |
| 5429 | ENSG00000131652 | THOC6    | Uncertain | Mainly nunucleus                            |
| 5430 | ENSG00000131653 | TRAF7    | Approved  | Cytoplasm cytoplasm                         |
| 5431 | ENSG00000131669 | NINJ1    | Uncertain | Expressed in endothelial cells and liver.   |
| 5432 | ENSG00000131686 | CA6      | Enhanced  | Highly sp cytoplasm                         |
| 5433 | ENSG00000131697 | NPHP4    | Approved  | Cytoplasm cytoplasm                         |
| 5434 | ENSG00000131711 | MAP1B    | Enhanced  | Cytoplasm cytoplasm                         |
| 5435 | ENSG00000131721 | RHOXF2   | Enhanced  | Cytoplasm cytoplasm                         |
| 5436 | ENSG00000131725 | WDR44    | Approved  | General c cytoplasm;nucleus                 |
| 5437 | ENSG00000131730 | CKMT2    | Enhanced  | Cytoplasm cytoplasm                         |
| 5438 | ENSG00000131732 | ZCCHC9   | Uncertain | Cytoplasm cytoplasm                         |
| 5439 | ENSG00000131737 | KRT34    | Enhanced  | Highly expressed in hair follicle cortex.   |
| 5440 | ENSG00000131738 | KRT33B   | Supported | Highly expressed in hair follicle cortex.   |
| 5441 | ENSG00000131747 | TOP2A    | Enhanced  | Nuclear enucleus                            |
| 5442 | ENSG00000131748 | STARD3   | Uncertain | General c cytoplasm                         |
| 5443 | ENSG00000131771 | PPP1R1B  | Approved  | Cytoplasm cytoplasm;nucleus                 |

|      |                 |          |                                                      |
|------|-----------------|----------|------------------------------------------------------|
| 5444 | ENSG00000131773 | KHDRBS3  | Enhanced Nuclear enucleus                            |
| 5445 | ENSG00000131778 | CHD1L    | Enhanced Ubiquitousnucleus                           |
| 5446 | ENSG00000131779 | PEX11B   | SupportedCytoplasmcytoplasm                          |
| 5447 | ENSG00000131781 | FM05     | Enhanced Cytoplasmcytoplasm                          |
| 5448 | ENSG00000131788 | PIAS3    | Approved Cytoplasmcytoplasm                          |
| 5449 | ENSG00000131791 | PRKAB2   | Approved General ccytoplasm                          |
| 5450 | ENSG00000131808 | FSHB     | Enhanced Highly expressed in anterior pituitary glai |
| 5451 | ENSG00000131828 | PDHA1    | Approved Granular cytoplasm                          |
| 5452 | ENSG00000131831 | RAI2     | UncertainEstimation of protein expression could not  |
| 5453 | ENSG00000131844 | MCCC2    | Enhanced Cytoplasmcytoplasm                          |
| 5454 | ENSG00000131845 | ZNF304   | Approved Ubiquitouscytoplasm                         |
| 5455 | ENSG00000131848 | ZSCAN5A  | UncertainCytoplasmcytoplasm                          |
| 5456 | ENSG00000131849 | ZNF132   | UncertainEstimation of protein expression could not  |
| 5457 | ENSG00000131864 | USP29    | Enhanced Nuclear enucleus                            |
| 5458 | ENSG00000131871 | SELENOS  | Approved General ccytoplasm                          |
| 5459 | ENSG00000131873 | CHSY1    | UncertainCytoplasmcytoplasm                          |
| 5460 | ENSG00000131876 | SNRPA1   | SupportedUbiquitousnucleus                           |
| 5461 | ENSG00000131899 | LLGL1    | Enhanced Ubiquitouscytoplasm                         |
| 5462 | ENSG00000131914 | LIN28A   | Enhanced Nuclear enucleus                            |
| 5463 | ENSG00000131941 | RHPN2    | UncertainCytoplasmcytoplasm;nucleus                  |
| 5464 | ENSG00000131943 | C19orf12 | Approved Cytoplasmcytoplasm                          |
| 5465 | ENSG00000131944 | FAAP24   | UncertainCytoplasmcytoplasm;nucleus                  |
| 5466 | ENSG00000131951 | LRRC9    | UncertainEstimation of protein expression could not  |
| 5467 | ENSG00000131969 | ABHD12B  | UncertainEstimation of protein expression could not  |
| 5468 | ENSG00000131979 | GCH1     | Approved Cytoplasmcytoplasm;nucleus                  |
| 5469 | ENSG00000131981 | LGALS3   | Enhanced Cytoplasmcytoplasm                          |
| 5470 | ENSG00000132000 | PODNL1   | Approved Ubiquitouscytoplasm                         |
| 5471 | ENSG00000132002 | DNAJB1   | Enhanced General ncytoplasm;nucleus                  |
| 5472 | ENSG00000132003 | ZSWIM4   | UncertainEstimation of protein expression could not  |
| 5473 | ENSG00000132004 | FBXW9    | Approved Cytoplasmcytoplasm                          |
| 5474 | ENSG00000132005 | RFX1     | Approved Nuclear enucleus                            |
| 5475 | ENSG00000132010 | ZNF20    | UncertainEstimation of protein expression could not  |
| 5476 | ENSG00000132016 | C19orf57 | Enhanced Nuclear ecytoplasm;nucleus;plasma membrane  |
| 5477 | ENSG00000132024 | CC2D1A   | SupportedUbiquitouscytoplasm                         |
| 5478 | ENSG00000132109 | TRIM21   | Approved Cytoplasmcytoplasm                          |
| 5479 | ENSG00000132128 | LRRC41   | UncertainCytoplasmcytoplasm                          |
| 5480 | ENSG00000132141 | CCT6B    | UncertainEstimation of protein expression could not  |
| 5481 | ENSG00000132153 | DHX30    | SupportedGeneral ccytoplasm                          |
| 5482 | ENSG00000132155 | RAF1     | Approved Mainly nunucleus                            |
| 5483 | ENSG00000132164 | SLC6A11  | SupportedDistinct expression in brain.               |
| 5484 | ENSG00000132170 | PPARG    | Approved Cytoplasmcytoplasm;nucleus                  |
| 5485 | ENSG00000132182 | NUP210   | Approved General nnucleus                            |
| 5486 | ENSG00000132185 | FCRLA    | Enhanced High membplasma membrane                    |
| 5487 | ENSG00000132196 | HSD17B7  | Approved Cytoplasmcytoplasm                          |
| 5488 | ENSG00000132199 | ENOSF1   | Enhanced Cytoplasmcytoplasm                          |
| 5489 | ENSG00000132205 | EMILIN2  | SupportedPositivitcytoplasm                          |
| 5490 | ENSG00000132207 | SLX1A    | UncertainCytoplasmcytoplasm                          |
| 5491 | ENSG00000132254 | ARFIP2   | Approved Cytoplasmcytoplasm                          |
| 5492 | ENSG00000132256 | TRIM5    | Approved General ccytoplasm                          |
| 5493 | ENSG00000132274 | TRIM22   | Approved Nuclear acytoplasm;nucleus                  |
| 5494 | ENSG00000132275 | RRP8     | SupportedGeneral nnucleus                            |
| 5495 | ENSG00000132286 | TIMM10B  | Approved Cytoplasmcytoplasm                          |
| 5496 | ENSG00000132294 | EFR3A    | Enhanced Cytoplasmcytoplasm                          |
| 5497 | ENSG00000132300 | PTCD3    | SupportedGeneral gcytoplasm                          |
| 5498 | ENSG00000132305 | IMMT     | SupportedGeneral ccytoplasm                          |

|      |                 |          |                                                      |
|------|-----------------|----------|------------------------------------------------------|
| 5499 | ENSG00000132313 | MRPL35   | UncertainCytoplasmcytoplasm                          |
| 5500 | ENSG00000132323 | ILKAP    | UncertainGeneral nnucleus                            |
| 5501 | ENSG00000132326 | PER2     | Enhanced General nnucleus                            |
| 5502 | ENSG00000132330 | SCLY     | UncertainCytoplasmcytoplasm;nucleus                  |
| 5503 | ENSG00000132334 | PTPRE    | SupportedUbiquitouscytoplasm                         |
| 5504 | ENSG00000132356 | PRKAA1   | SupportedCytoplasmcytoplasm                          |
| 5505 | ENSG00000132357 | CARD6    | UncertainCytoplasmcytoplasm                          |
| 5506 | ENSG00000132359 | RAP1GAP2 | Approved General ccytoplasm                          |
| 5507 | ENSG00000132361 | CLUH     | UncertainCytoplasmcytoplasm                          |
| 5508 | ENSG00000132382 | MYBBP1A  | SupportedGeneral nnucleus                            |
| 5509 | ENSG00000132383 | RPA1     | SupportedGeneral nnucleus                            |
| 5510 | ENSG00000132386 | SERPINF1 | UncertainRNA-based expert annotation gave inconclus: |
| 5511 | ENSG00000132388 | UBE2G1   | Approved General ccytoplasm                          |
| 5512 | ENSG00000132394 | EEFSEC   | Approved Mainly ccytoplasm                           |
| 5513 | ENSG00000132405 | TBC1D14  | Approved Granular cytoplasm                          |
| 5514 | ENSG00000132406 | TMEM128  | UncertainCytoplasmcytoplasm                          |
| 5515 | ENSG00000132423 | COQ3     | Enhanced General ccytoplasm                          |
| 5516 | ENSG00000132424 | PNISR    | Approved General nnucleus                            |
| 5517 | ENSG00000132432 | SEC61G   | UncertainCytoplasmcytoplasm                          |
| 5518 | ENSG00000132434 | LANCL2   | UncertainCytoplasmcytoplasm                          |
| 5519 | ENSG00000132436 | FIGNL1   | Approved Cytoplasmcytoplasm;nucleus                  |
| 5520 | ENSG00000132437 | DDC      | Enhanced Cytoplasmcytoplasm                          |
| 5521 | ENSG00000132463 | GRSF1    | Enhanced General ccytoplasm                          |
| 5522 | ENSG00000132465 | JCHAIN   | Enhanced Cytoplasmcytoplasm;plasma membrane          |
| 5523 | ENSG00000132466 | ANKRD17  | Approved Ubiquitouscytoplasm                         |
| 5524 | ENSG00000132467 | UTP3     | Approved Mainly nnucleus                             |
| 5525 | ENSG00000132470 | ITGB4    | Enhanced Membranouplasma membrane                    |
| 5526 | ENSG00000132471 | WBP2     | Approved Cytoplasmcytoplasm                          |
| 5527 | ENSG00000132475 | H3F3B    | SupportedUbiquitousnucleus                           |
| 5528 | ENSG00000132478 | UNK      | UncertainCytoplasmcytoplasm                          |
| 5529 | ENSG00000132481 | TRIM47   | UncertainCytoplasmcytoplasm                          |
| 5530 | ENSG00000132485 | ZRANB2   | SupportedUbiquitousnucleus                           |
| 5531 | ENSG00000132507 | EIF5A    | Approved Cytoplasmcytoplasm                          |
| 5532 | ENSG00000132510 | KDM6B    | SupportedGeneral nnucleus                            |
| 5533 | ENSG00000132514 | CLEC10A  | Approved Cytoplasmcytoplasm                          |
| 5534 | ENSG00000132522 | GPS2     | Approved Nuclear acytoplasm;nucleus                  |
| 5535 | ENSG00000132530 | XAF1     | Approved Cytoplasmcytoplasm                          |
| 5536 | ENSG00000132535 | DLG4     | Enhanced Distinct cytoplasm                          |
| 5537 | ENSG00000132541 | RIDA     | Enhanced Selective expression in a few cell types, r |
| 5538 | ENSG00000132561 | MATN2    | Approved General ccytoplasm;plasma membrane          |
| 5539 | ENSG00000132563 | REEP2    | Enhanced Cytoplasmcytoplasm                          |
| 5540 | ENSG00000132570 | PCBD2    | UncertainCytoplasmcytoplasm                          |
| 5541 | ENSG00000132589 | FLOT2    | SupportedUbiquitouscytoplasm;plasma membrane         |
| 5542 | ENSG00000132591 | ERAL1    | SupportedUbiquitouscytoplasm                         |
| 5543 | ENSG00000132600 | PRMT7    | SupportedUbiquitouscytoplasm                         |
| 5544 | ENSG00000132603 | NIP7     | SupportedGeneral nnucleus                            |
| 5545 | ENSG00000132604 | TERF2    | Enhanced Ubiquitousnucleus                           |
| 5546 | ENSG00000132612 | VPS4A    | Approved Ubiquitouscytoplasm                         |
| 5547 | ENSG00000132613 | MTSS1L   | Approved Cytoplasmcytoplasm                          |
| 5548 | ENSG00000132622 | HSPA12B  | UncertainCytoplasmcytoplasm                          |
| 5549 | ENSG00000132623 | ANKEF1   | Approved General ccytoplasm                          |
| 5550 | ENSG00000132635 | PCED1A   | Approved Cytoplasmcytoplasm                          |
| 5551 | ENSG00000132639 | SNAP25   | Enhanced Distinct expression CNS.                    |
| 5552 | ENSG00000132640 | BTBD3    | UncertainUbiquitousnucleus                           |
| 5553 | ENSG00000132646 | PCNA     | Enhanced Nuclear enucleus                            |

|      |                 |          |                                                      |
|------|-----------------|----------|------------------------------------------------------|
| 5554 | ENSG00000132664 | POLR3F   | UncertainUbiquitouscytoplasm                         |
| 5555 | ENSG00000132669 | RIN2     | Approved Cytoplasmcytoplasm                          |
| 5556 | ENSG00000132670 | PTPRA    | Approved General ccytoplasm                          |
| 5557 | ENSG00000132671 | SSTR4    | UncertainEstimation of protein expression could not  |
| 5558 | ENSG00000132676 | DAP3     | Approved Cytoplasmcytoplasm                          |
| 5559 | ENSG00000132677 | RHBG     | Enhanced Membranoucytoplasm;plasma membrane          |
| 5560 | ENSG00000132680 | KHDC4    | Approved Ubiquitouscytoplasm                         |
| 5561 | ENSG00000132688 | NES      | Enhanced Selective expression in endothelial cells,  |
| 5562 | ENSG00000132692 | BCAN     | Enhanced High and selective expression in neuropil ( |
| 5563 | ENSG00000132693 | CRP      | SupportedExtracellcytoplasm                          |
| 5564 | ENSG00000132694 | ARHGEF11 | Enhanced General ccytoplasm;plasma membrane          |
| 5565 | ENSG00000132698 | RAB25    | Enhanced Membranouplasma membrane                    |
| 5566 | ENSG00000132702 | HAPLN2   | Enhanced Distinct expression in processes in CNS     |
| 5567 | ENSG00000132703 | APCS     | SupportedDistinct plasma membrane                    |
| 5568 | ENSG00000132716 | DCAF8    | Approved Cytoplasmcytoplasm;nucleus                  |
| 5569 | ENSG00000132718 | SYT11    | Enhanced Cytoplasmcytoplasm                          |
| 5570 | ENSG00000132744 | ACY3     | Enhanced Cytoplasmcytoplasm;plasma membrane          |
| 5571 | ENSG00000132746 | ALDH3B2  | Approved Cytoplasmcytoplasm                          |
| 5572 | ENSG00000132763 | MMACHC   | UncertainCytoplasmcytoplasm                          |
| 5573 | ENSG00000132768 | DPH2     | UncertainEstimation of protein expression could not  |
| 5574 | ENSG00000132773 | TOE1     | SupportedGeneral nnucleus                            |
| 5575 | ENSG00000132780 | NASP     | Enhanced Nuclear enucleus                            |
| 5576 | ENSG00000132781 | MUTYH    | UncertainCytoplasmcytoplasm;nucleus                  |
| 5577 | ENSG00000132792 | CTNBL1   | Approved Nuclear acytoplasm;nucleus                  |
| 5578 | ENSG00000132793 | LPIN3    | Approved Cytoplasmcytoplasm                          |
| 5579 | ENSG00000132801 | ZSWIM3   | UncertainEstimation of protein expression could not  |
| 5580 | ENSG00000132819 | RBM38    | Approved Cytoplasmcytoplasm                          |
| 5581 | ENSG00000132821 | VSTM2L   | UncertainEstimation of protein expression could not  |
| 5582 | ENSG00000132823 | OSER1    | Approved Cytoplasmcytoplasm                          |
| 5583 | ENSG00000132824 | SERINC3  | UncertainCytoplasmcytoplasm                          |
| 5584 | ENSG00000132825 | PPP1R3D  | Approved Ubiquitouscytoplasm                         |
| 5585 | ENSG00000132837 | DMGDH    | Enhanced Selectivecytoplasm                          |
| 5586 | ENSG00000132840 | BHMT2    | Enhanced Distinct expression in kidney and liver.    |
| 5587 | ENSG00000132842 | AP3B1    | Approved Cytoplasmcytoplasm;nucleus                  |
| 5588 | ENSG00000132846 | ZBED3    | Approved Membranoucytoplasm;plasma membrane          |
| 5589 | ENSG00000132849 | PATJ     | Approved Cytoplasmcytoplasm                          |
| 5590 | ENSG00000132854 | KANK4    | UncertainEstimation of protein expression could not  |
| 5591 | ENSG00000132855 | ANGPTL3  | Approved High cytocytoplasm                          |
| 5592 | ENSG00000132872 | SYT4     | Approved Cytoplasmcytoplasm                          |
| 5593 | ENSG00000132879 | FBX044   | Approved Nuclear acytoplasm;nucleus                  |
| 5594 | ENSG00000132881 | RSG1     | Approved General ccytoplasm                          |
| 5595 | ENSG00000132906 | CASP9    | Approved General ccytoplasm                          |
| 5596 | ENSG00000132911 | NMUR2    | Enhanced Cytoplasmcytoplasm                          |
| 5597 | ENSG00000132912 | DCTN4    | UncertainGeneral ccytoplasm                          |
| 5598 | ENSG00000132915 | PDE6A    | Enhanced Expression in rods segments.                |
| 5599 | ENSG00000132932 | ATP8A2   | Enhanced Cytoplasmcytoplasm                          |
| 5600 | ENSG00000132938 | MTUS2    | Enhanced Ubiquitouscytoplasm                         |
| 5601 | ENSG00000132950 | ZMYM5    | UncertainGeneral ccytoplasm                          |
| 5602 | ENSG00000132952 | USPL1    | UncertainUbiquitouscytoplasm                         |
| 5603 | ENSG00000132963 | POMP     | Approved Nucleolarcytoplasm;nucleus                  |
| 5604 | ENSG00000132965 | ALOX5AP  | Enhanced Cytoplasmcytoplasm;nucleus;plasma membrane  |
| 5605 | ENSG00000132970 | WASF3    | Enhanced Cytoplasmcytoplasm                          |
| 5606 | ENSG00000132972 | RNF17    | Approved General ccytoplasm                          |
| 5607 | ENSG00000132975 | GPR12    | UncertainEstimation of protein expression could not  |
| 5608 | ENSG00000133019 | CHRM3    | Approved General ccytoplasm                          |

|      |                 |         |                                                       |
|------|-----------------|---------|-------------------------------------------------------|
| 5609 | ENSG00000133020 | MYH8    | Enhanced Selective cytoplasm                          |
| 5610 | ENSG00000133026 | MYH10   | Enhanced Cytoplasm cytoplasm; plasma membrane         |
| 5611 | ENSG00000133027 | PEMT    | Approved General c cytoplasm                          |
| 5612 | ENSG00000133028 | SCO1    | Enhanced General c cytoplasm                          |
| 5613 | ENSG00000133030 | MPRIP   | Enhanced Ubiquitous cytoplasm; plasma membrane        |
| 5614 | ENSG00000133055 | MYBPH   | Enhanced Cytoplasm cytoplasm                          |
| 5615 | ENSG00000133056 | PIK3C2B | Approved Cytoplasm cytoplasm; plasma membrane         |
| 5616 | ENSG00000133059 | DSTYK   | Uncertain General g cytoplasm                         |
| 5617 | ENSG00000133063 | CHIT1   | Supported Cytoplasm cytoplasm                         |
| 5618 | ENSG00000133065 | SLC41A1 | Uncertain Cytoplasm cytoplasm                         |
| 5619 | ENSG00000133067 | LGR6    | Approved Membranous cytoplasm; plasma membrane        |
| 5620 | ENSG00000133069 | TMCC2   | Approved Cytoplasm cytoplasm                          |
| 5621 | ENSG00000133083 | DCLK1   | Enhanced Cytoplasm cytoplasm                          |
| 5622 | ENSG00000133101 | CCNA1   | Enhanced Expression in mainly in testis.              |
| 5623 | ENSG00000133103 | COG6    | Uncertain general c cytoplasm; nucleus                |
| 5624 | ENSG00000133104 | SPART   | Approved Cytoplasm cytoplasm                          |
| 5625 | ENSG00000133106 | EPSTI1  | Approved Cytoplasm cytoplasm                          |
| 5626 | ENSG00000133110 | POSTN   | Enhanced Distinct expression in extracellular matrix  |
| 5627 | ENSG00000133112 | TPT1    | Approved Mainly c cytoplasm                           |
| 5628 | ENSG00000133114 | GPALPP1 | Uncertain Nuclear enucleus                            |
| 5629 | ENSG00000133115 | STOML3  | Enhanced Expressed in cilia in female tissues and re  |
| 5630 | ENSG00000133119 | RFC3    | Approved Nuclear o cytoplasm; nucleus                 |
| 5631 | ENSG00000133121 | STARD13 | Supported Ubiquitous cytoplasm                        |
| 5632 | ENSG00000133124 | IRS4    | Uncertain Estimation of protein expression could not  |
| 5633 | ENSG00000133131 | MORC4   | Enhanced Nuclear enucleus                             |
| 5634 | ENSG00000133134 | BEX2    | Uncertain Cytoplasm cytoplasm                         |
| 5635 | ENSG00000133135 | RNF128  | Uncertain Cytoplasm cytoplasm                         |
| 5636 | ENSG00000133138 | TBC1D8B | Enhanced Cytoplasm cytoplasm                          |
| 5637 | ENSG00000133169 | BEX1    | Approved Cytoplasm cytoplasm                          |
| 5638 | ENSG00000133216 | EPHB2   | Approved Cytoplasm cytoplasm                          |
| 5639 | ENSG00000133226 | SRRM1   | Supported ubiquitous nucleus                          |
| 5640 | ENSG00000133246 | PRAM1   | Approved Cytoplasm cytoplasm                          |
| 5641 | ENSG00000133247 | KMT5C   | Uncertain Estimation of protein expression could not  |
| 5642 | ENSG00000133250 | ZNF414  | Approved Nuclear enucleus                             |
| 5643 | ENSG00000133256 | PDE6B   | Enhanced Cytoplasm cytoplasm                          |
| 5644 | ENSG00000133265 | HSPBP1  | Supported Ubiquitous cytoplasm                        |
| 5645 | ENSG00000133275 | CSNK1G2 | Uncertain Cytoplasm cytoplasm                         |
| 5646 | ENSG00000133302 | SLF1    | Uncertain Cytoplasm cytoplasm; plasma membrane        |
| 5647 | ENSG00000133313 | CNDP2   | Enhanced General c cytoplasm                          |
| 5648 | ENSG00000133315 | MACROD1 | Uncertain Estimation of protein expression could not  |
| 5649 | ENSG00000133316 | WDR74   | Uncertain Selective expression in muscle cells and m  |
| 5650 | ENSG00000133318 | RTN3    | Enhanced Selective cytoplasm                          |
| 5651 | ENSG00000133328 | HRASLS2 | Approved Granular cytoplasm                           |
| 5652 | ENSG00000133392 | MYH11   | Enhanced Distinct expression in myoepithelial and sr  |
| 5653 | ENSG00000133393 | FOPNL   | Supported Expressed cytoplasm                         |
| 5654 | ENSG00000133401 | PDZD2   | Uncertain Mainly ex cytoplasm                         |
| 5655 | ENSG00000133422 | MORC2   | Enhanced Mainly nu nucleus                            |
| 5656 | ENSG00000133433 | GSTT2B  | Uncertain Estimation of protein expression could not  |
| 5657 | ENSG00000133454 | MYO18B  | Uncertain Cytoplasm cytoplasm                         |
| 5658 | ENSG00000133460 | SLC2A11 | Uncertain Cytoplasm cytoplasm                         |
| 5659 | ENSG00000133466 | C1QTNF6 | Enhanced Cytoplasm cytoplasm                          |
| 5660 | ENSG00000133475 | GGT2    | Supported Selective expression in renal tubules, epic |
| 5661 | ENSG00000133477 | FAM83F  | Enhanced Cytoplasm cytoplasm; plasma membrane         |
| 5662 | ENSG00000133561 | GIMAP6  | Uncertain Cytoplasm cytoplasm; nucleus                |
| 5663 | ENSG00000133574 | GIMAP4  | Enhanced Nuclear a cytoplasm; nucleus                 |

|      |                 |          |                                                      |
|------|-----------------|----------|------------------------------------------------------|
| 5664 | ENSG00000133597 | ADCK2    | Approved Membranou cytoplasm;plasma membrane         |
| 5665 | ENSG00000133612 | AGAP3    | Approved General c cytoplasm                         |
| 5666 | ENSG00000133619 | KRBA1    | Approved Cytoplasm cytoplasm                         |
| 5667 | ENSG00000133627 | ACTR3B   | Uncertain General c cytoplasm                        |
| 5668 | ENSG00000133636 | NTS      | Enhanced Cytoplasm cytoplasm                         |
| 5669 | ENSG00000133640 | LRRIQ1   | Uncertain Estimation of protein expression could not |
| 5670 | ENSG00000133641 | C12orf29 | Uncertain Cytoplasm cytoplasm                        |
| 5671 | ENSG00000133657 | ATP13A3  | Approved Cytoplasm cytoplasm;nucleus                 |
| 5672 | ENSG00000133661 | SFTPD    | Enhanced Selective cytoplasm                         |
| 5673 | ENSG00000133665 | DYDC2    | Enhanced Selective expression in ciliated cells of 1 |
| 5674 | ENSG00000133678 | TMEM254  | Approved Granular cytoplasm                          |
| 5675 | ENSG00000133687 | TMTC1    | Approved Cytoplasm cytoplasm                         |
| 5676 | ENSG00000133703 | KRAS     | Approved Cytoplasm cytoplasm;plasma membrane         |
| 5677 | ENSG00000133704 | IPO8     | Uncertain Nuclear a cytoplasm;nucleus                |
| 5678 | ENSG00000133706 | LARS     | Supported General c cytoplasm                        |
| 5679 | ENSG00000133710 | SPINK5   | Enhanced Highly se cytoplasm                         |
| 5680 | ENSG00000133731 | IMPA1    | Approved Mainly c cytoplasm                          |
| 5681 | ENSG00000133739 | LRRCC1   | Uncertain General c cytoplasm                        |
| 5682 | ENSG00000133742 | CA1      | Enhanced Selective cytoplasm;nucleus                 |
| 5683 | ENSG00000133773 | CCDC59   | Approved Nucleolar cytoplasm;nucleus                 |
| 5684 | ENSG00000133789 | SWAP70   | Supported High cyto cytoplasm                        |
| 5685 | ENSG00000133794 | ARNTL    | Supported Ubiquitou nucleus                          |
| 5686 | ENSG00000133800 | LYVE1    | Supported Selective expression in lymphatic vessels. |
| 5687 | ENSG00000133805 | AMPD3    | Uncertain Cytoplasm cytoplasm                        |
| 5688 | ENSG00000133812 | SBF2     | Uncertain Cytoplasm cytoplasm;nucleus                |
| 5689 | ENSG00000133816 | MICAL2   | Approved Cytoplasm cytoplasm                         |
| 5690 | ENSG00000133818 | RRAS2    | Approved General c cytoplasm                         |
| 5691 | ENSG00000133835 | HSD17B4  | Enhanced Granular cytoplasm                          |
| 5692 | ENSG00000133858 | ZFC3H1   | Enhanced Ubiquitou cytoplasm;nucleus                 |
| 5693 | ENSG00000133863 | TEX15    | Enhanced Expression in a subset of cells in seminife |
| 5694 | ENSG00000133874 | RNF122   | Uncertain Nuclear enucleus                           |
| 5695 | ENSG00000133878 | DUSP26   | Approved Cytoplasm cytoplasm                         |
| 5696 | ENSG00000133884 | DPF2     | Approved Cytoplasm cytoplasm;nucleus                 |
| 5697 | ENSG00000133895 | MEN1     | Uncertain Nuclear enucleus                           |
| 5698 | ENSG00000133935 | ERG28    | Approved General c cytoplasm                         |
| 5699 | ENSG00000133943 | DGLUCY   | Approved Cytoplasm cytoplasm                         |
| 5700 | ENSG00000133961 | NUMB     | Approved Membranou cytoplasm;plasma membrane         |
| 5701 | ENSG00000133962 | CATSPERB | Uncertain Estimation of protein expression could not |
| 5702 | ENSG00000133980 | VRTN     | Uncertain Estimation of protein expression could not |
| 5703 | ENSG00000133983 | COX16    | Uncertain Estimation of protein expression could not |
| 5704 | ENSG00000133997 | MED6     | Approved Mainly nunucleus                            |
| 5705 | ENSG00000134001 | EIF2S1   | Supported Ubiquitou cytoplasm                        |
| 5706 | ENSG00000134007 | ADAM20   | Enhanced Distinct expression in sperms.              |
| 5707 | ENSG00000134013 | LOXL2    | Approved Cytoplasm cytoplasm;plasma membrane         |
| 5708 | ENSG00000134014 | ELP3     | Uncertain Cytoplasm cytoplasm                        |
| 5709 | ENSG00000134020 | PEBP4    | Uncertain plasma pr plasma membrane                  |
| 5710 | ENSG00000134030 | CTIF     | Uncertain Cytoplasm cytoplasm;nucleus                |
| 5711 | ENSG00000134042 | MRO      | Approved Cytoplasm cytoplasm                         |
| 5712 | ENSG00000134046 | MBD2     | Approved Nuclear enucleus                            |
| 5713 | ENSG00000134049 | IER3IP1  | Supported Ubiquitou cytoplasm                        |
| 5714 | ENSG00000134056 | MRPS36   | Supported General c cytoplasm                        |
| 5715 | ENSG00000134057 | CCNB1    | Enhanced Cytoplasm cytoplasm                         |
| 5716 | ENSG00000134058 | CDK7     | Enhanced General n cytoplasm;nucleus                 |
| 5717 | ENSG00000134061 | CD180    | Enhanced Selective cytoplasm                         |
| 5718 | ENSG00000134070 | IRAK2    | Uncertain Cytoplasm cytoplasm;plasma membrane        |



|      |                 |           |                                                      |
|------|-----------------|-----------|------------------------------------------------------|
| 5719 | ENSG00000134072 | CAMK1     | Approved General c cytoplasm                         |
| 5720 | ENSG00000134077 | THUMPD3   | Approved General c cytoplasm                         |
| 5721 | ENSG00000134086 | VHL       | UncertainCytoplasm cytoplasm                         |
| 5722 | ENSG00000134107 | BHLHE40   | UncertainCytoplasm cytoplasm;nucleus                 |
| 5723 | ENSG00000134108 | ARL8B     | Approved Cytoplasm cytoplasm                         |
| 5724 | ENSG00000134109 | EDEM1     | UncertainCytoplasm cytoplasm                         |
| 5725 | ENSG00000134115 | CNTN6     | UncertainCytoplasm cytoplasm                         |
| 5726 | ENSG00000134121 | CHL1      | Enhanced Cytoplasm cytoplasm                         |
| 5727 | ENSG00000134138 | MEIS2     | Enhanced Ubiquitousnucleus                           |
| 5728 | ENSG00000134146 | DPH6      | Approved Cytoplasm cytoplasm                         |
| 5729 | ENSG00000134152 | KATNBL1   | Approved Cytoplasm cytoplasm;plasma membrane         |
| 5730 | ENSG00000134153 | EMC7      | Approved General c cytoplasm                         |
| 5731 | ENSG00000134160 | TRPM1     | Enhanced Cytoplasm cytoplasm;nucleus                 |
| 5732 | ENSG00000134184 | GSTM1     | Approved General c cytoplasm                         |
| 5733 | ENSG00000134186 | PRPF38B   | Approved Cytoplasm cytoplasm                         |
| 5734 | ENSG00000134193 | REG4      | Enhanced Selective expression in goblet cells.       |
| 5735 | ENSG00000134198 | TSPAN2    | UncertainCytoplasm cytoplasm                         |
| 5736 | ENSG00000134200 | TSHB      | Enhanced Cytoplasm cytoplasm                         |
| 5737 | ENSG00000134201 | GSTM5     | Approved Cytoplasm cytoplasm                         |
| 5738 | ENSG00000134202 | GSTM3     | Enhanced Selective cytoplasm                         |
| 5739 | ENSG00000134215 | VAV3      | UncertainNuclear a cytoplasm;nucleus                 |
| 5740 | ENSG00000134216 | CHIA      | Approved Cytoplasm cytoplasm                         |
| 5741 | ENSG00000134222 | PSRC1     | Approved Cytoplasm cytoplasm                         |
| 5742 | ENSG00000134240 | HMGCS2    | Enhanced Cytoplasm cytoplasm                         |
| 5743 | ENSG00000134242 | PTPN22    | Approved General c cytoplasm                         |
| 5744 | ENSG00000134243 | SORT1     | Enhanced Cytoplasm cytoplasm                         |
| 5745 | ENSG00000134247 | PTGFRN    | Approved Membranou cytoplasm;plasma membrane         |
| 5746 | ENSG00000134248 | LAMTOR5   | Approved General c cytoplasm                         |
| 5747 | ENSG00000134249 | ADAM30    | UncertainCytoplasm cytoplasm                         |
| 5748 | ENSG00000134250 | NOTCH2    | Approved General n nucleus                           |
| 5749 | ENSG00000134253 | TRIM45    | UncertainEstimation of protein expression could not  |
| 5750 | ENSG00000134256 | CD101     | Approved Cytoplasm cytoplasm                         |
| 5751 | ENSG00000134258 | VTCN1     | Approved Membranou cytoplasm;plasma membrane         |
| 5752 | ENSG00000134262 | AP4B1     | Approved General c cytoplasm                         |
| 5753 | ENSG00000134265 | NAPG      | Enhanced General c cytoplasm                         |
| 5754 | ENSG00000134278 | SPIRE1    | UncertainCytoplasm cytoplasm                         |
| 5755 | ENSG00000134283 | PPHLN1    | Enhanced Nuclear a cytoplasm;nucleus                 |
| 5756 | ENSG00000134285 | FKBP11    | Enhanced Cytoplasm cytoplasm                         |
| 5757 | ENSG00000134291 | TMEM106C  | Enhanced Cytoplasm cytoplasm                         |
| 5758 | ENSG00000134294 | SLC38A2   | Approved Cytoplasm cytoplasm                         |
| 5759 | ENSG00000134308 | YWHAQ     | Approved Mainly c cytoplasm                          |
| 5760 | ENSG00000134313 | KIDINS220 | SupportedCytoplasm cytoplasm                         |
| 5761 | ENSG00000134317 | GRHL1     | Enhanced Nuclear a cytoplasm;nucleus                 |
| 5762 | ENSG00000134318 | ROCK2     | Approved Cytoplasm cytoplasm                         |
| 5763 | ENSG00000134321 | RSAD2     | Approved Cytoplasm cytoplasm                         |
| 5764 | ENSG00000134324 | LPIN1     | Approved Cytoplasm cytoplasm                         |
| 5765 | ENSG00000134326 | CMPK2     | Approved Cytoplasm cytoplasm                         |
| 5766 | ENSG00000134330 | IAH1      | Approved Cytoplasm cytoplasm;plasma membrane         |
| 5767 | ENSG00000134333 | LDHA      | UncertainCytoplasm cytoplasm;nucleus                 |
| 5768 | ENSG00000134343 | ANO3      | UncertainExpressed in several tissues, mainly in the |
| 5769 | ENSG00000134352 | IL6ST     | Approved Plasma poplasma membrane                    |
| 5770 | ENSG00000134363 | FST       | Approved Cytoplasm cytoplasm                         |
| 5771 | ENSG00000134369 | NAV1      | Enhanced Cytoplasm cytoplasm                         |
| 5772 | ENSG00000134371 | CDC73     | SupportedUbiquitousnucleus                           |
| 5773 | ENSG00000134375 | TIMM17A   | Approved General c cytoplasm                         |

|      |                 |          |                                                         |
|------|-----------------|----------|---------------------------------------------------------|
| 5774 | ENSG00000134376 | CRB1     | Approved Cytoplasm cytoplasm                            |
| 5775 | ENSG00000134389 | CFHR5    | Supported Distinct plasma membrane                      |
| 5776 | ENSG00000134398 | ERN2     | Approved Granular cytoplasm                             |
| 5777 | ENSG00000134419 | RPS15A   | Supported General c cytoplasm                           |
| 5778 | ENSG00000134440 | NARS     | Enhanced General c cytoplasm                            |
| 5779 | ENSG00000134444 | KIAA1468 | Approved Ubiquitous cytoplasm                           |
| 5780 | ENSG00000134452 | FBX018   | Supported Ubiquitous nucleus                            |
| 5781 | ENSG00000134453 | RBM17    | Supported General nucleus                               |
| 5782 | ENSG00000134460 | IL2RA    | Enhanced Cytoplasm cytoplasm                            |
| 5783 | ENSG00000134461 | ANKRD16  | Uncertain Cytoplasm cytoplasm                           |
| 5784 | ENSG00000134463 | ECHDC3   | Enhanced Cytoplasm cytoplasm                            |
| 5785 | ENSG00000134470 | IL15RA   | Approved Cytoplasm cytoplasm; plasma membrane; plasma r |
| 5786 | ENSG00000134480 | CCNH     | Approved Nuclear enucleus                               |
| 5787 | ENSG00000134489 | HRH4     | Uncertain Estimation of protein expression could not    |
| 5788 | ENSG00000134490 | TMEM241  | Uncertain Estimation of protein expression could not    |
| 5789 | ENSG00000134516 | DOCK2    | Enhanced Cytoplasm cytoplasm                            |
| 5790 | ENSG00000134533 | RERG     | Approved Cytoplasm cytoplasm                            |
| 5791 | ENSG00000134538 | SLC01B1  | Supported Selective plasma membrane                     |
| 5792 | ENSG00000134539 | KLRD1    | Uncertain Estimation of protein expression could not    |
| 5793 | ENSG00000134569 | LRP4     | Approved Cytoplasm cytoplasm                            |
| 5794 | ENSG00000134571 | MYBPC3   | Enhanced Highly secytoplasm                             |
| 5795 | ENSG00000134574 | DDB2     | Enhanced General nucleus                                |
| 5796 | ENSG00000134594 | RAB33A   | Uncertain Estimation of protein expression could not    |
| 5797 | ENSG00000134597 | RBMX2    | Approved General nucleus; plasma membrane               |
| 5798 | ENSG00000134602 | STK26    | Approved Cytoplasm cytoplasm                            |
| 5799 | ENSG00000134627 | PIWIL4   | Enhanced Nuclear a cytoplasm; nucleus                   |
| 5800 | ENSG00000134640 | MTNR1B   | Supported Cytoplasm cytoplasm                           |
| 5801 | ENSG00000134644 | PUM1     | Approved General c cytoplasm                            |
| 5802 | ENSG00000134668 | SPOCD1   | Enhanced Nuclear enucleus                               |
| 5803 | ENSG00000134684 | YARS     | Enhanced General c cytoplasm                            |
| 5804 | ENSG00000134686 | PHC2     | Supported General nucleus                               |
| 5805 | ENSG00000134690 | CDCA8    | Enhanced Nuclear enucleus                               |
| 5806 | ENSG00000134697 | GNL2     | Approved Nucleolar nucleus                              |
| 5807 | ENSG00000134698 | AGO4     | Approved Mainly c cytoplasm                             |
| 5808 | ENSG00000134709 | HOKK1    | Enhanced Selective cytoplasm                            |
| 5809 | ENSG00000134717 | BTF3L4   | Approved General c cytoplasm                            |
| 5810 | ENSG00000134744 | ZCCHC11  | Supported Distinct expression in smooth muscle and e    |
| 5811 | ENSG00000134748 | PRPF38A  | Uncertain Estimation of protein expression could not    |
| 5812 | ENSG00000134755 | DSC2     | Enhanced Distinct plasma membrane                       |
| 5813 | ENSG00000134757 | DSG3     | Enhanced Selective plasma membrane                      |
| 5814 | ENSG00000134759 | ELP2     | Approved Cytoplasm cytoplasm; nucleus                   |
| 5815 | ENSG00000134760 | DSG1     | Enhanced Distinct cytoplasm; plasma membrane            |
| 5816 | ENSG00000134762 | DSC3     | Enhanced Membranou plasma membrane                      |
| 5817 | ENSG00000134765 | DSC1     | Enhanced Membranou plasma membrane                      |
| 5818 | ENSG00000134769 | DTNA     | Enhanced Cytoplasm cytoplasm                            |
| 5819 | ENSG00000134775 | FHOD3    | Uncertain Cytoplasm cytoplasm                           |
| 5820 | ENSG00000134779 | TPGS2    | Uncertain Ubiquitous cytoplasm                          |
| 5821 | ENSG00000134780 | DAGLA    | Approved Cytoplasm cytoplasm                            |
| 5822 | ENSG00000134802 | SLC43A3  | Approved Cytoplasm cytoplasm; plasma membrane           |
| 5823 | ENSG00000134809 | TIMM10   | Supported General c cytoplasm                           |
| 5824 | ENSG00000134812 | GIF      | Enhanced Highly secytoplasm                             |
| 5825 | ENSG00000134815 | DHX34    | Uncertain Estimation of protein expression could not    |
| 5826 | ENSG00000134817 | APLNR    | Approved Cytoplasm cytoplasm                            |
| 5827 | ENSG00000134824 | FADS2    | Approved Cytoplasm cytoplasm                            |
| 5828 | ENSG00000134825 | TMEM258  | Approved Cytoplasm cytoplasm                            |

|      |                 |          |                                                                   |
|------|-----------------|----------|-------------------------------------------------------------------|
| 5829 | ENSG00000134830 | C5AR2    | UncertainCytoplasmcytoplasm                                       |
| 5830 | ENSG00000134851 | TMEM165  | SupportedGranular, cytoplasm                                      |
| 5831 | ENSG00000134852 | CLOCK    | SupportedUbiquitousnucleus                                        |
| 5832 | ENSG00000134853 | PDGFRA   | SupportedCytoplasmcytoplasm                                       |
| 5833 | ENSG00000134864 | GGACT    | Enhanced Cytoplasmcytoplasm                                       |
| 5834 | ENSG00000134871 | COL4A2   | Enhanced Distinct plasma membrane                                 |
| 5835 | ENSG00000134873 | CLDN10   | Enhanced Membranouplasma membrane                                 |
| 5836 | ENSG00000134874 | DZIP1    | UncertainCytoplasmcytoplasm;nucleus                               |
| 5837 | ENSG00000134882 | UBAC2    | Approved Cytoplasmcytoplasm                                       |
| 5838 | ENSG00000134884 | ARGLU1   | SupportedNuclear enucleus                                         |
| 5839 | ENSG00000134897 | BIVM     | Approved Nuclear enucleus                                         |
| 5840 | ENSG00000134899 | ERCC5    | SupportedUbiquitouscytoplasm;nucleus                              |
| 5841 | ENSG00000134900 | TPP2     | Approved General ccytoplasm                                       |
| 5842 | ENSG00000134901 | KDELC1   | Approved Cytoplasmcytoplasm;nucleus;plasma membrane               |
| 5843 | ENSG00000134905 | CARS2    | UncertainGranular cytoplasm;nucleus                               |
| 5844 | ENSG00000134909 | ARHGAP32 | Approved Ubiquitouscytoplasm                                      |
| 5845 | ENSG00000134910 | STT3A    | Approved General ccytoplasm                                       |
| 5846 | ENSG00000134917 | ADAMTS8  | Approved Plasma poplasma membrane                                 |
| 5847 | ENSG00000134940 | ACRV1    | Enhanced Selective expression in acrosomes in testis              |
| 5848 | ENSG00000134954 | ETS1     | Enhanced Nuclear enucleus                                         |
| 5849 | ENSG00000134955 | SLC37A2  | UncertainRNA-data suggests expression in several tissues          |
| 5850 | ENSG00000134962 | KLB      | UncertainGeneral ccytoplasm                                       |
| 5851 | ENSG00000134970 | TMED7    | SupportedCytoplasmcytoplasm                                       |
| 5852 | ENSG00000134982 | APC      | SupportedGeneral ccytoplasm;plasma membrane                       |
| 5853 | ENSG00000134986 | NREP     | Approved Cytoplasmcytoplasm                                       |
| 5854 | ENSG00000134987 | WDR36    | SupportedUbiquitouscytoplasm;nucleus                              |
| 5855 | ENSG00000134996 | OSTF1    | Approved General ccytoplasm                                       |
| 5856 | ENSG00000135002 | RFK      | Approved Ubiquitouscytoplasm                                      |
| 5857 | ENSG00000135018 | UBQLN1   | SupportedGeneral ccytoplasm;nucleus                               |
| 5858 | ENSG00000135040 | NAA35    | Approved Cytoplasmcytoplasm                                       |
| 5859 | ENSG00000135045 | C9orf40  | Enhanced Cytoplasmcytoplasm;nucleus                               |
| 5860 | ENSG00000135046 | ANXA1    | Enhanced Cytoplasmcytoplasm;nucleus;plasma membrane               |
| 5861 | ENSG00000135047 | CTSL     | Enhanced Lysosomal expression in several tissues.                 |
| 5862 | ENSG00000135048 | TMEM2    | Approved Cytoplasmcytoplasm                                       |
| 5863 | ENSG00000135049 | AGTPBP1  | Approved Cytoplasmcytoplasm                                       |
| 5864 | ENSG00000135052 | GOLM1    | Enhanced Cytoplasmcytoplasm                                       |
| 5865 | ENSG00000135063 | FAM189A2 | Approved General ccytoplasm                                       |
| 5866 | ENSG00000135069 | PSAT1    | Enhanced Cytoplasmcytoplasm                                       |
| 5867 | ENSG00000135070 | ISCA1    | UncertainCytoplasmcytoplasm                                       |
| 5868 | ENSG00000135077 | HAVCR2   | Enhanced Cytoplasmcytoplasm                                       |
| 5869 | ENSG00000135083 | CCNJL    | Approved Cytoplasmcytoplasm;nucleus                               |
| 5870 | ENSG00000135090 | TAOK3    | Approved Cytoplasmcytoplasm                                       |
| 5871 | ENSG00000135093 | USP30    | Approved Cytoplasmcytoplasm                                       |
| 5872 | ENSG00000135094 | SDS      | UncertainGeneral ccytoplasm                                       |
| 5873 | ENSG00000135097 | MSI1     | Enhanced Cytoplasmcytoplasm;nucleus                               |
| 5874 | ENSG00000135100 | HNF1A    | Enhanced Nuclear enucleus                                         |
| 5875 | ENSG00000135108 | FBX021   | Approved General ccytoplasm                                       |
| 5876 | ENSG00000135114 | OASL     | Approved Cytoplasmcytoplasm;nucleus                               |
| 5877 | ENSG00000135116 | HRK      | UncertainEstimation of protein expression could not be determined |
| 5878 | ENSG00000135119 | RNFT2    | Enhanced Cytoplasmcytoplasm                                       |
| 5879 | ENSG00000135124 | P2RX4    | Enhanced Cytoplasmcytoplasm;plasma membrane                       |
| 5880 | ENSG00000135127 | BICDL1   | Enhanced Membranouplasma membrane                                 |
| 5881 | ENSG00000135144 | DTX1     | Approved Nuclear acytoplasm;nucleus                               |
| 5882 | ENSG00000135148 | TRAFD1   | Enhanced Selectivecytoplasm                                       |
| 5883 | ENSG00000135164 | DMTF1    | SupportedGeneral nnucleus                                         |

|      |                 |          |           |                                             |
|------|-----------------|----------|-----------|---------------------------------------------|
| 5884 | ENSG00000135175 | OCM2     | Uncertain | Estimation of protein expression could not  |
| 5885 | ENSG00000135185 | TMEM243  | Uncertain | Cytoplasm cytoplasm                         |
| 5886 | ENSG00000135205 | CCDC146  | Uncertain | Cytoplasm cytoplasm                         |
| 5887 | ENSG00000135211 | TMEM60   | Approved  | Cytoplasm cytoplasm                         |
| 5888 | ENSG00000135218 | CD36     | Enhanced  | Distinct cytoplasm                          |
| 5889 | ENSG00000135220 | UGT2A3   | Supported | Selective cytoplasm                         |
| 5890 | ENSG00000135222 | CSN2     | Supported | Cytoplasm cytoplasm; plasma membrane        |
| 5891 | ENSG00000135226 | UGT2B28  | Uncertain | Cytoplasm cytoplasm                         |
| 5892 | ENSG00000135241 | PNPLA8   | Approved  | General c cytoplasm                         |
| 5893 | ENSG00000135245 | HILPDA   | Approved  | Cytoplasm cytoplasm                         |
| 5894 | ENSG00000135249 | RINT1    | Approved  | Cytoplasm cytoplasm                         |
| 5895 | ENSG00000135250 | SRPK2    | Enhanced  | Mainly c cytoplasm                          |
| 5896 | ENSG00000135269 | TES      | Approved  | Cytoplasm cytoplasm                         |
| 5897 | ENSG00000135272 | MDFIC    | Approved  | Nuclear a cytoplasm; nucleus                |
| 5898 | ENSG00000135297 | MT01     | Approved  | Ubiquitous cytoplasm                        |
| 5899 | ENSG00000135299 | ANKRD6   | Approved  | Nuclear e cytoplasm; nucleus                |
| 5900 | ENSG00000135312 | HTR1B    | Enhanced  | Cytoplasm cytoplasm                         |
| 5901 | ENSG00000135315 | CEP162   | Supported | General c cytoplasm                         |
| 5902 | ENSG00000135316 | SYNCRIP  | Supported | Cytoplasm cytoplasm; nucleus                |
| 5903 | ENSG00000135317 | SNX14    | Approved  | Cytoplasm cytoplasm                         |
| 5904 | ENSG00000135318 | NT5E     | Approved  | Cytoplasm cytoplasm; plasma membrane        |
| 5905 | ENSG00000135333 | EPHA7    | Approved  | Membrane cytoplasm; plasma membrane         |
| 5906 | ENSG00000135336 | ORC3     | Enhanced  | General n nucleus                           |
| 5907 | ENSG00000135338 | LCA5     | Supported | Distinct expression of cilia in fallopian t |
| 5908 | ENSG00000135341 | MAP3K7   | Approved  | Cytoplasm cytoplasm                         |
| 5909 | ENSG00000135346 | CGA      | Enhanced  | Distinct cytoplasm                          |
| 5910 | ENSG00000135355 | GJA10    | Uncertain | Estimation of protein expression could not  |
| 5911 | ENSG00000135363 | LM02     | Approved  | Nuclear e cytoplasm; nucleus                |
| 5912 | ENSG00000135365 | PHF21A   | Uncertain | Cytoplasm cytoplasm                         |
| 5913 | ENSG00000135372 | NAT10    | Approved  | Nuclear o nucleus                           |
| 5914 | ENSG00000135373 | EHF      | Enhanced  | Cytoplasm cytoplasm; nucleus                |
| 5915 | ENSG00000135378 | PRRG4    | Uncertain | Cytoplasm cytoplasm                         |
| 5916 | ENSG00000135387 | CAPRIN1  | Approved  | Ubiquitous cytoplasm                        |
| 5917 | ENSG00000135390 | ATP5MC2  | Approved  | General c cytoplasm                         |
| 5918 | ENSG00000135392 | DNAJC14  | Approved  | Cytoplasm cytoplasm                         |
| 5919 | ENSG00000135404 | CD63     | Supported | Cytoplasm cytoplasm                         |
| 5920 | ENSG00000135406 | PRPH     | Enhanced  | Distinct cytoplasm                          |
| 5921 | ENSG00000135407 | AVIL     | Approved  | Cytoplasm cytoplasm                         |
| 5922 | ENSG00000135414 | GDF11    | Enhanced  | Cytoplasm cytoplasm; plasma membrane        |
| 5923 | ENSG00000135423 | GLS2     | Uncertain | Cytoplasm cytoplasm                         |
| 5924 | ENSG00000135424 | ITGA7    | Uncertain | Cytoplasm cytoplasm                         |
| 5925 | ENSG00000135426 | TESPA1   | Approved  | Expression in brain.                        |
| 5926 | ENSG00000135436 | FAM186B  | Uncertain | RNA data suggests expression in testis.     |
| 5927 | ENSG00000135439 | AGAP2    | Enhanced  | Cytoplasm cytoplasm                         |
| 5928 | ENSG00000135441 | BLOC1S1  | Approved  | Cytoplasm cytoplasm                         |
| 5929 | ENSG00000135443 | KRT85    | Supported | Distinct cytoplasm                          |
| 5930 | ENSG00000135446 | CDK4     | Supported | Mainly n cytoplasm; nucleus                 |
| 5931 | ENSG00000135447 | PPP1R1A  | Approved  | Nuclear a cytoplasm; nucleus                |
| 5932 | ENSG00000135451 | TROAP    | Uncertain | General c cytoplasm; nucleus                |
| 5933 | ENSG00000135452 | TSPAN31  | Approved  | Cytoplasm cytoplasm                         |
| 5934 | ENSG00000135454 | B4GALNT1 | Enhanced  | Selective Golgi expression of cells in the  |
| 5935 | ENSG00000135472 | FAIM2    | Enhanced  | Expression mainly in testis and CNS.        |
| 5936 | ENSG00000135476 | ESPL1    | Approved  | Nuclear e nucleus                           |
| 5937 | ENSG00000135480 | KRT7     | Enhanced  | Cytoplasm cytoplasm; plasma membrane        |
| 5938 | ENSG00000135482 | ZC3H10   | Uncertain | Cytoplasm cytoplasm                         |

|      |                 |           |                                                      |
|------|-----------------|-----------|------------------------------------------------------|
| 5939 | ENSG00000135486 | HNRNPA1   | SupportedUbiquitousnucleus                           |
| 5940 | ENSG00000135502 | SLC26A10  | UncertainEstimation of protein expression could not  |
| 5941 | ENSG00000135503 | ACVR1B    | Approved Cytoplasmcytoplasm                          |
| 5942 | ENSG00000135506 | OS9       | SupportedUbiquitouscytoplasm                         |
| 5943 | ENSG00000135517 | MIP       | SupportedHighly expressed in the lens.               |
| 5944 | ENSG00000135521 | LTV1      | Approved General ccytoplasm                          |
| 5945 | ENSG00000135525 | MAP7      | Enhanced Cytoplasmcytoplasm;plasma membrane          |
| 5946 | ENSG00000135535 | CD164     | UncertainGranular cytoplasm                          |
| 5947 | ENSG00000135537 | AFG1L     | Approved Mainly ccytoplasm                           |
| 5948 | ENSG00000135540 | NHSL1     | UncertainNuclear acytoplasm;nucleus                  |
| 5949 | ENSG00000135541 | AHI1      | Approved Cytoplasmcytoplasm                          |
| 5950 | ENSG00000135547 | HEY2      | Approved General nnucleus                            |
| 5951 | ENSG00000135549 | PKIB      | Approved Ubiquitouscytoplasm                         |
| 5952 | ENSG00000135569 | TAAR5     | UncertainEstimation of protein expression could not  |
| 5953 | ENSG00000135587 | SMPD2     | UncertainGeneral ccytoplasm                          |
| 5954 | ENSG00000135596 | MICAL1    | Approved General ccytoplasm                          |
| 5955 | ENSG00000135597 | REPS1     | Approved General ccytoplasm                          |
| 5956 | ENSG00000135604 | STX11     | Approved Cytoplasmcytoplasm                          |
| 5957 | ENSG00000135605 | TEC       | Approved Cytoplasmcytoplasm                          |
| 5958 | ENSG00000135617 | PRADC1    | Approved Cytoplasmcytoplasm                          |
| 5959 | ENSG00000135622 | SEMA4F    | Approved Expression in nerve fibers in retina.       |
| 5960 | ENSG00000135624 | CCT7      | Approved General ccytoplasm                          |
| 5961 | ENSG00000135625 | EGR4      | Enhanced Cytoplasmcytoplasm;nucleus                  |
| 5962 | ENSG00000135631 | RAB11FIP5 | Enhanced Cytoplasmcytoplasm                          |
| 5963 | ENSG00000135632 | SMYD5     | UncertainMembranoucytoplasm;plasma membrane          |
| 5964 | ENSG00000135636 | DYSF      | Enhanced Cytoplasmcytoplasm                          |
| 5965 | ENSG00000135637 | CCDC142   | Approved Cytoplasmcytoplasm;nucleus;plasma membrane  |
| 5966 | ENSG00000135638 | EMX1      | Approved Nuclear acytoplasm;nucleus                  |
| 5967 | ENSG00000135643 | KCNMB4    | Enhanced Expression mainly in CNS.                   |
| 5968 | ENSG00000135655 | USP15     | Approved Cytoplasmcytoplasm                          |
| 5969 | ENSG00000135677 | GNS       | Enhanced Cytoplasmcytoplasm                          |
| 5970 | ENSG00000135678 | CPM       | Enhanced Expression in several tissues, including ei |
| 5971 | ENSG00000135679 | MDM2      | SupportedUbiquitousnucleus                           |
| 5972 | ENSG00000135686 | KLHL36    | Approved Cytoplasmcytoplasm;nucleus                  |
| 5973 | ENSG00000135698 | MPHOSPH6  | Approved Mainly nnucleus                             |
| 5974 | ENSG00000135702 | CHST5     | Enhanced Cytoplasmcytoplasm                          |
| 5975 | ENSG00000135709 | KIAA0513  | Enhanced Cytoplasmcytoplasm                          |
| 5976 | ENSG00000135722 | FBXL8     | UncertainCytoplasmcytoplasm                          |
| 5977 | ENSG00000135723 | FHOD1     | Approved Low cytopcytoplasm                          |
| 5978 | ENSG00000135736 | CCDC102A  | SupportedGeneral ccytoplasm                          |
| 5979 | ENSG00000135740 | SLC9A5    | UncertainEstimation of protein expression could not  |
| 5980 | ENSG00000135744 | AGT       | SupportedPositivitplasma membrane                    |
| 5981 | ENSG00000135749 | PCNX2     | UncertainCytoplasmcytoplasm                          |
| 5982 | ENSG00000135750 | KCNK1     | Approved General ccytoplasm                          |
| 5983 | ENSG00000135763 | URB2      | UncertainEstimation of protein expression could not  |
| 5984 | ENSG00000135766 | EGLN1     | Approved General ccytoplasm                          |
| 5985 | ENSG00000135773 | CAPN9     | Enhanced Membranouplasma membrane                    |
| 5986 | ENSG00000135776 | ABCB10    | UncertainCytoplasmcytoplasm                          |
| 5987 | ENSG00000135778 | NTPCR     | UncertainUbiquitouscytoplasm                         |
| 5988 | ENSG00000135821 | GLUL      | Approved Cytoplasmcytoplasm                          |
| 5989 | ENSG00000135823 | STX6      | Approved Ubiquitouscytoplasm                         |
| 5990 | ENSG00000135824 | RGS8      | Enhanced Cytoplasmcytoplasm;nucleus                  |
| 5991 | ENSG00000135828 | RNASEL    | Approved Cytoplasmcytoplasm                          |
| 5992 | ENSG00000135829 | DHX9      | SupportedUbiquitousnucleus                           |
| 5993 | ENSG00000135835 | KIAA1614  | Approved Cytoplasmcytoplasm;nucleus                  |

|      |                 |          |                                                       |
|------|-----------------|----------|-------------------------------------------------------|
| 5994 | ENSG00000135837 | CEP350   | Enhanced Ubiquitous cytoplasm; plasma membrane        |
| 5995 | ENSG00000135838 | NPL      | Enhanced Cytoplasm cytoplasm                          |
| 5996 | ENSG00000135842 | FAM129A  | Approved Cytoplasm cytoplasm; plasma membrane         |
| 5997 | ENSG00000135845 | PIGC     | Uncertain Membrane cytoplasm; plasma membrane         |
| 5998 | ENSG00000135862 | LAMC1    | Enhanced Expression plasma membrane                   |
| 5999 | ENSG00000135870 | RC3H1    | Approved General cytoplasm                            |
| 6000 | ENSG00000135899 | SP110    | Approved General nucleus                              |
| 6001 | ENSG00000135900 | MRPL44   | Approved Ubiquitous cytoplasm                         |
| 6002 | ENSG00000135903 | PAX3     | Uncertain Nucleolar nucleus                           |
| 6003 | ENSG00000135905 | DOCK10   | Enhanced Cytoplasm cytoplasm                          |
| 6004 | ENSG00000135912 | TTL4     | Approved General cytoplasm                            |
| 6005 | ENSG00000135913 | USP37    | Approved General cytoplasm                            |
| 6006 | ENSG00000135914 | HTR2B    | Enhanced Cytoplasm cytoplasm; plasma membrane         |
| 6007 | ENSG00000135917 | SLC19A3  | Approved Membrane plasma membrane                     |
| 6008 | ENSG00000135924 | DNAJB2   | Approved Cytoplasm cytoplasm; nucleus                 |
| 6009 | ENSG00000135925 | WNT10A   | Uncertain Estimation of protein expression could not  |
| 6010 | ENSG00000135926 | TMBIM1   | Approved Cytoplasm cytoplasm                          |
| 6011 | ENSG00000135929 | CYP27A1  | Enhanced Cytoplasm cytoplasm                          |
| 6012 | ENSG00000135931 | ARMC9    | Approved Cytoplasm cytoplasm                          |
| 6013 | ENSG00000135932 | CAB39    | Supported Cytoplasm cytoplasm; nucleus                |
| 6014 | ENSG00000135940 | COX5B    | Supported Ubiquitous mitochondrial expression.        |
| 6015 | ENSG00000135945 | REV1     | Uncertain Cytoplasm cytoplasm                         |
| 6016 | ENSG00000135953 | MFS9     | Approved General cytoplasm                            |
| 6017 | ENSG00000135960 | EDAR     | Approved General cytoplasm                            |
| 6018 | ENSG00000135966 | TGFBRAP1 | Approved Cytoplasm cytoplasm                          |
| 6019 | ENSG00000135968 | GCC2     | Enhanced Ubiquitous cytoplasm                         |
| 6020 | ENSG00000135972 | MRPS9    | Supported Granular cytoplasm                          |
| 6021 | ENSG00000135973 | GPR45    | Uncertain Estimation of protein expression could not  |
| 6022 | ENSG00000135974 | C2orf49  | Approved Nuclear cytoplasm; nucleus                   |
| 6023 | ENSG00000135999 | EPC2     | Uncertain Cytoplasm cytoplasm                         |
| 6024 | ENSG00000136002 | ARHGEF4  | Approved Cytoplasm cytoplasm                          |
| 6025 | ENSG00000136003 | ISCU     | Approved Cytoplasm cytoplasm                          |
| 6026 | ENSG00000136010 | ALDH1L2  | Approved Expression in several tissues, most abundant |
| 6027 | ENSG00000136011 | STAB2    | Enhanced Cytoplasm cytoplasm                          |
| 6028 | ENSG00000136021 | SCYL2    | Approved General cytoplasm                            |
| 6029 | ENSG00000136026 | CKAP4    | Enhanced General cytoplasm                            |
| 6030 | ENSG00000136040 | PLXNC1   | Uncertain Low cytoplasm                               |
| 6031 | ENSG00000136044 | APPL2    | Approved Mainly cytoplasm                             |
| 6032 | ENSG00000136051 | WASHC4   | Uncertain Ubiquitous nucleus                          |
| 6033 | ENSG00000136052 | SLC41A2  | Approved Cytoplasm cytoplasm                          |
| 6034 | ENSG00000136059 | VILL     | Enhanced Luminal plasma membrane                      |
| 6035 | ENSG00000136068 | FLNB     | Enhanced Cytoplasm cytoplasm; plasma membrane         |
| 6036 | ENSG00000136098 | NEK3     | Enhanced Cytoplasm cytoplasm                          |
| 6037 | ENSG00000136099 | PCDH8    | Uncertain Estimation of protein expression could not  |
| 6038 | ENSG00000136100 | VPS36    | Approved Cytoplasm cytoplasm                          |
| 6039 | ENSG00000136104 | RNASEH2B | Approved Nuclear nucleus                              |
| 6040 | ENSG00000136108 | CKAP2    | Enhanced Cytoplasm cytoplasm                          |
| 6041 | ENSG00000136110 | CNMD     | Uncertain Estimation of protein expression could not  |
| 6042 | ENSG00000136111 | TBC1D4   | Approved Cytoplasm cytoplasm                          |
| 6043 | ENSG00000136114 | THSD1    | Uncertain Estimation of protein expression could not  |
| 6044 | ENSG00000136122 | BORA     | Approved Cytoplasm cytoplasm                          |
| 6045 | ENSG00000136141 | LRCH1    | Approved Expression in several tissues, including c   |
| 6046 | ENSG00000136143 | SUCLA2   | Enhanced General cytoplasm                            |
| 6047 | ENSG00000136146 | MED4     | Approved General nucleus                              |
| 6048 | ENSG00000136147 | PHF11    | Uncertain Ubiquitous cytoplasm                        |

|      |                 |          |                                                       |
|------|-----------------|----------|-------------------------------------------------------|
| 6049 | ENSG00000136152 | COG3     | Approved General c cytoplasm                          |
| 6050 | ENSG00000136153 | LM07     | Approved Cytoplasm cytoplasm; plasma membrane         |
| 6051 | ENSG00000136155 | SCEL     | Enhanced Selective cytoplasm; plasma membrane         |
| 6052 | ENSG00000136156 | ITM2B    | Approved Cytoplasm cytoplasm                          |
| 6053 | ENSG00000136158 | SPRY2    | Approved General c cytoplasm                          |
| 6054 | ENSG00000136159 | NUDT15   | Approved General c cytoplasm                          |
| 6055 | ENSG00000136160 | EDNRB    | Approved Cytoplasm cytoplasm                          |
| 6056 | ENSG00000136161 | RCBTB2   | Approved Cytoplasm cytoplasm                          |
| 6057 | ENSG00000136167 | LCP1     | Enhanced Selective cytoplasm                          |
| 6058 | ENSG00000136169 | SETDB2   | Approved General n nucleus                            |
| 6059 | ENSG00000136193 | SCRN1    | Enhanced Cytoplasm cytoplasm                          |
| 6060 | ENSG00000136197 | C7orf25  | Approved Nuclear e nucleus                            |
| 6061 | ENSG00000136205 | TNS3     | Approved Membranou cytoplasm; plasma membrane         |
| 6062 | ENSG00000136206 | SPDYE1   | Supported Distinct expression in acrosomes in spermat |
| 6063 | ENSG00000136213 | CHST12   | Approved Cytoplasm cytoplasm; nucleus                 |
| 6064 | ENSG00000136231 | IGF2BP3  | Enhanced Cytoplasm cytoplasm                          |
| 6065 | ENSG00000136237 | RAPGEF5  | Uncertain General n nucleus                           |
| 6066 | ENSG00000136238 | RAC1     | Approved Cytoplasm cytoplasm                          |
| 6067 | ENSG00000136240 | KDELRL2  | Approved General c cytoplasm                          |
| 6068 | ENSG00000136244 | IL6      | Supported Extracell cytoplasm                         |
| 6069 | ENSG00000136247 | ZDHHC4   | Approved Cytoplasm cytoplasm                          |
| 6070 | ENSG00000136250 | AOAH     | Approved Cytoplasm cytoplasm                          |
| 6071 | ENSG00000136261 | BZW2     | Approved Cytoplasm cytoplasm                          |
| 6072 | ENSG00000136270 | TBRG4    | Approved Cytoplasm cytoplasm                          |
| 6073 | ENSG00000136271 | DDX56    | Uncertain Nucleolar nucleus                           |
| 6074 | ENSG00000136273 | HUS1     | Approved General c cytoplasm; nucleus                 |
| 6075 | ENSG00000136274 | NACAD    | Enhanced Cytoplasm cytoplasm                          |
| 6076 | ENSG00000136279 | DBNL     | Enhanced Cytoplasm cytoplasm                          |
| 6077 | ENSG00000136280 | CCM2     | Supported General c cytoplasm                         |
| 6078 | ENSG00000136286 | MYO1G    | Enhanced Selective cytoplasm                          |
| 6079 | ENSG00000136295 | TTYH3    | Uncertain Cytoplasm cytoplasm                         |
| 6080 | ENSG00000136305 | CIDEB    | Approved Cytoplasm cytoplasm                          |
| 6081 | ENSG00000136319 | TTC5     | Approved Cytoplasm cytoplasm                          |
| 6082 | ENSG00000136327 | NKX2-8   | Uncertain Estimation of protein expression could not  |
| 6083 | ENSG00000136352 | NKX2-1   | Enhanced Selective nucleus                            |
| 6084 | ENSG00000136367 | ZFHX2    | Uncertain Estimation of protein expression could not  |
| 6085 | ENSG00000136371 | MTHFS    | Approved General c cytoplasm                          |
| 6086 | ENSG00000136378 | ADAMTS7  | Uncertain Estimation of protein expression could not  |
| 6087 | ENSG00000136379 | ABHD17C  | Uncertain Cytoplasm cytoplasm                         |
| 6088 | ENSG00000136381 | IREB2    | Uncertain Ubiquitou cytoplasm                         |
| 6089 | ENSG00000136383 | ALPK3    | Uncertain Nuclear e nucleus                           |
| 6090 | ENSG00000136404 | TM6SF1   | Uncertain Estimation of protein expression could not  |
| 6091 | ENSG00000136425 | CIB2     | Approved Cytoplasm cytoplasm                          |
| 6092 | ENSG00000136436 | CALCOCO2 | Enhanced Cytoplasm cytoplasm                          |
| 6093 | ENSG00000136444 | RSAD1    | Approved Cytoplasm cytoplasm                          |
| 6094 | ENSG00000136448 | NMT1     | Supported Ubiquitou cytoplasm                         |
| 6095 | ENSG00000136449 | MYCBPAP  | Enhanced Cytoplasm cytoplasm                          |
| 6096 | ENSG00000136450 | SRSF1    | Supported Ubiquitou nucleus                           |
| 6097 | ENSG00000136451 | VEZF1    | Uncertain Ubiquitou nucleus                           |
| 6098 | ENSG00000136457 | CHAD     | Enhanced Cytoplasm cytoplasm                          |
| 6099 | ENSG00000136463 | TAC01    | Enhanced Ubiquitou cytoplasm                          |
| 6100 | ENSG00000136478 | TEX2     | Approved Cytoplasm cytoplasm                          |
| 6101 | ENSG00000136485 | DCAF7    | Enhanced Cytoplasm cytoplasm                          |
| 6102 | ENSG00000136487 | GH2      | Supported Cytoplasm cytoplasm                         |
| 6103 | ENSG00000136488 | CSH1     | Enhanced Selective cytoplasm                          |

|      |                 |           |                     |                                             |
|------|-----------------|-----------|---------------------|---------------------------------------------|
| 6104 | ENSG00000136490 | LIMD2     | Enhanced Nuclear    | acytoplasm;nucleus                          |
| 6105 | ENSG00000136492 | BRIP1     | Approved General    | nnucleus                                    |
| 6106 | ENSG00000136504 | KAT7      | Approved Nuclear    | enucleus                                    |
| 6107 | ENSG00000136514 | RTP4      | Uncertain           | Estimation of protein expression could not  |
| 6108 | ENSG00000136518 | ACTL6A    | Supported           | General ncytoplasm;nucleus                  |
| 6109 | ENSG00000136521 | NDUFB5    | Enhanced General    | ccytoplasm                                  |
| 6110 | ENSG00000136522 | MRPL47    | Approved General    | ccytoplasm                                  |
| 6111 | ENSG00000136527 | TRA2B     | Supported           | Ubiquitousnucleus                           |
| 6112 | ENSG00000136531 | SCN2A     | Enhanced Granular   | cytoplasm                                   |
| 6113 | ENSG00000136535 | TBR1      | Enhanced Nuclear    | enucleus                                    |
| 6114 | ENSG00000136536 | 3/7/2019  | Enhanced Ubiquitous | cytoplasm                                   |
| 6115 | ENSG00000136541 | ERMN      | Enhanced Selective  | expression in subsets of glial c            |
| 6116 | ENSG00000136542 | GALNT5    | Approved            | Cytoplasmcytoplasm                          |
| 6117 | ENSG00000136546 | SCN7A     | Approved            | Membranoucytoplasm;plasma membrane          |
| 6118 | ENSG00000136560 | TANK      | Approved            | Ubiquitouscytoplasm                         |
| 6119 | ENSG00000136573 | BLK       | Approved            | Expression in lymphatic tissues.            |
| 6120 | ENSG00000136574 | GATA4     | Uncertain           | Nuclear enucleus                            |
| 6121 | ENSG00000136603 | SKIL      | Uncertain           | General ccytoplasm;plasma membrane          |
| 6122 | ENSG00000136628 | EPRS      | Enhanced            | Cytoplasmcytoplasm                          |
| 6123 | ENSG00000136630 | HLX       | Uncertain           | General ccytoplasm;nucleus                  |
| 6124 | ENSG00000136631 | VPS45     | Uncertain           | Ubiquitouscytoplasm                         |
| 6125 | ENSG00000136634 | IL10      | Approved            | Mainly plcytoplasm;plasma membrane          |
| 6126 | ENSG00000136636 | KCTD3     | Approved            | Cytoplasmcytoplasm                          |
| 6127 | ENSG00000136643 | RPS6KC1   | Approved            | Cytoplasmcytoplasm                          |
| 6128 | ENSG00000136682 | CBWD2     | Approved            | Cytoplasmcytoplasm                          |
| 6129 | ENSG00000136689 | IL1RN     | Enhanced            | Cytoplasmcytoplasm;nucleus                  |
| 6130 | ENSG00000136696 | IL36B     | Uncertain           | Estimation of protein expression could not  |
| 6131 | ENSG00000136698 | CFC1      | Uncertain           | Cytoplasmcytoplasm;plasma membrane          |
| 6132 | ENSG00000136699 | SMPD4     | Approved            | Cytoplasmcytoplasm                          |
| 6133 | ENSG00000136709 | WDR33     | Supported           | General nnucleus                            |
| 6134 | ENSG00000136710 | CCDC115   | Approved            | Cytoplasmcytoplasm                          |
| 6135 | ENSG00000136717 | BIN1      | Enhanced High       | cyto                                        |
| 6136 | ENSG00000136731 | UGGT1     | Enhanced            | Cytoplasmcytoplasm                          |
| 6137 | ENSG00000136732 | GYPC      | Enhanced            | Cytoplasmcytoplasm                          |
| 6138 | ENSG00000136738 | STAM      | Supported           | General ccytoplasm                          |
| 6139 | ENSG00000136750 | GAD2      | Enhanced Distinct   | expression in CNS and islets of L           |
| 6140 | ENSG00000136754 | ABI1      | Approved            | Ubiquitouscytoplasm                         |
| 6141 | ENSG00000136758 | YME1L1    | Approved            | Cytoplasmcytoplasm                          |
| 6142 | ENSG00000136770 | DNAJC1    | Approved            | Cytoplasmcytoplasm                          |
| 6143 | ENSG00000136783 | NIPSNAP3A | Approved            | Cytoplasmcytoplasm                          |
| 6144 | ENSG00000136807 | CDK9      | Supported           | Ubiquitousnucleus                           |
| 6145 | ENSG00000136810 | TXN       | Enhanced General    | ccytoplasm;nucleus                          |
| 6146 | ENSG00000136811 | ODF2      | Enhanced            | Cytoplasmcytoplasm                          |
| 6147 | ENSG00000136813 | ECPAS     | Uncertain           | General ccytoplasm                          |
| 6148 | ENSG00000136816 | TOR1B     | Approved            | Cytoplasmcytoplasm                          |
| 6149 | ENSG00000136819 | C9orf78   | Enhanced            | Ubiquitousnucleus                           |
| 6150 | ENSG00000136824 | SMC2      | Approved            | Cytoplasmcytoplasm;nucleus                  |
| 6151 | ENSG00000136826 | KLF4      | Enhanced Nuclear    | enucleus                                    |
| 6152 | ENSG00000136827 | TOR1A     | Approved General    | ccytoplasm                                  |
| 6153 | ENSG00000136830 | FAM129B   | Enhanced            | Cytoplasmcytoplasm;plasma membrane          |
| 6154 | ENSG00000136842 | TMOD1     | Enhanced            | Expression in smooth and heart muscle and : |
| 6155 | ENSG00000136854 | STXBP1    | Enhanced Selective  | expression in CNS, peripheral nei           |
| 6156 | ENSG00000136856 | SLC2A8    | Uncertain           | Low cytopcytoplasm                          |
| 6157 | ENSG00000136859 | ANGPTL2   | Approved            | Plasma pocytoplasm;plasma membrane          |
| 6158 | ENSG00000136861 | CDK5RAP2  | Approved            | Cytoplasmcytoplasm                          |



|      |                 |          |           |                                            |
|------|-----------------|----------|-----------|--------------------------------------------|
| 6159 | ENSG00000136866 | ZFP37    | Uncertain | Estimation of protein expression could not |
| 6160 | ENSG00000136867 | SLC31A2  | Approved  | Cytoplasm cytoplasm                        |
| 6161 | ENSG00000136868 | SLC31A1  | Approved  | Cytoplasm cytoplasm                        |
| 6162 | ENSG00000136869 | TLR4     | Approved  | Selective cytoplasm                        |
| 6163 | ENSG00000136870 | ZNF189   | Uncertain | Ubiquitous cytoplasm                       |
| 6164 | ENSG00000136872 | ALDOB    | Enhanced  | Selective cytoplasm                        |
| 6165 | ENSG00000136874 | STX17    | Approved  | Cytoplasm cytoplasm                        |
| 6166 | ENSG00000136875 | PRPF4    | Enhanced  | General nucleus                            |
| 6167 | ENSG00000136877 | FPGS     | Approved  | Cytoplasm cytoplasm                        |
| 6168 | ENSG00000136878 | USP20    | Uncertain | Cytoplasm cytoplasm;nucleus                |
| 6169 | ENSG00000136881 | BAAT     | Enhanced  | Granular cytoplasm                         |
| 6170 | ENSG00000136883 | KIF12    | Uncertain | Estimation of protein expression could not |
| 6171 | ENSG00000136888 | ATP6V1G1 | Supported | Cytoplasm cytoplasm                        |
| 6172 | ENSG00000136895 | GARNL3   | Enhanced  | Cytoplasm cytoplasm                        |
| 6173 | ENSG00000136897 | MRPL50   | Approved  | Mainly cytoplasm                           |
| 6174 | ENSG00000136908 | DPM2     | Approved  | General cytoplasm;nucleus                  |
| 6175 | ENSG00000136918 | WDR38    | Uncertain | Estimation of protein expression could not |
| 6176 | ENSG00000136925 | TSTD2    | Uncertain | Cytoplasm cytoplasm;nucleus                |
| 6177 | ENSG00000136928 | GABBR2   | Enhanced  | Selective expression in CNS.               |
| 6178 | ENSG00000136929 | HEMGN    | Enhanced  | Distinct nucleus                           |
| 6179 | ENSG00000136930 | PSMB7    | Supported | General cytoplasm;nucleus                  |
| 6180 | ENSG00000136932 | TRMO     | Approved  | Cytoplasm cytoplasm                        |
| 6181 | ENSG00000136933 | RABEPK   | Supported | General cytoplasm                          |
| 6182 | ENSG00000136935 | GOLGA1   | Supported | General cytoplasm                          |
| 6183 | ENSG00000136936 | XPA      | Supported | Nuclear enucleus                           |
| 6184 | ENSG00000136937 | NCBP1    | Enhanced  | General nucleus                            |
| 6185 | ENSG00000136938 | ANP32B   | Supported | Ubiquitous nucleus                         |
| 6186 | ENSG00000136940 | PDCL     | Uncertain | General cytoplasm                          |
| 6187 | ENSG00000136942 | RPL35    | Approved  | General cytoplasm                          |
| 6188 | ENSG00000136943 | CTSV     | Uncertain | Cytoplasm cytoplasm                        |
| 6189 | ENSG00000136950 | ARPC5L   | Approved  | Cytoplasm cytoplasm                        |
| 6190 | ENSG00000136960 | ENPP2    | Approved  | Cytoplasm cytoplasm;plasma membrane        |
| 6191 | ENSG00000136982 | DSCC1    | Uncertain | General cytoplasm;nucleus                  |
| 6192 | ENSG00000136986 | DERL1    | Supported | General cytoplasm                          |
| 6193 | ENSG00000136997 | MYC      | Approved  | Ubiquitous nucleus                         |
| 6194 | ENSG00000136999 | NOV      | Enhanced  | Selective cytoplasm                        |
| 6195 | ENSG00000137033 | IL33     | Supported | High selenucleus                           |
| 6196 | ENSG00000137038 | DMAC1    | Approved  | Cytoplasm cytoplasm                        |
| 6197 | ENSG00000137040 | RANBP6   | Approved  | General cytoplasm                          |
| 6198 | ENSG00000137054 | POLR1E   | Supported | General nucleus                            |
| 6199 | ENSG00000137055 | PLAA     | Approved  | Cytoplasm cytoplasm                        |
| 6200 | ENSG00000137070 | IL11RA   | Supported | Ubiquitous cytoplasm                       |
| 6201 | ENSG00000137073 | UBAP2    | Approved  | General cytoplasm                          |
| 6202 | ENSG00000137074 | APTX     | Supported | Ubiquitous nucleus                         |
| 6203 | ENSG00000137075 | RNF38    | Approved  | Nuclear enucleus                           |
| 6204 | ENSG00000137076 | TLN1     | Supported | General cytoplasm                          |
| 6205 | ENSG00000137077 | CCL21    | Enhanced  | Expression in subsets of cells in lymphoid |
| 6206 | ENSG00000137078 | SIT1     | Enhanced  | Cytoplasm cytoplasm                        |
| 6207 | ENSG00000137080 | IFNA21   | Uncertain | Estimation of protein expression could not |
| 6208 | ENSG00000137090 | DMRT1    | Enhanced  | Nuclear enucleus                           |
| 6209 | ENSG00000137094 | DNAJB5   | Approved  | General cytoplasm;nucleus                  |
| 6210 | ENSG00000137098 | SPAG8    | Enhanced  | Cytoplasm cytoplasm                        |
| 6211 | ENSG00000137100 | DCTN3    | Approved  | General cytoplasm                          |
| 6212 | ENSG00000137101 | CD72     | Enhanced  | Selective plasma membrane                  |
| 6213 | ENSG00000137103 | TMEM8B   | Approved  | Cytoplasm cytoplasm;nucleus                |

|      |                 |          |                                                      |
|------|-----------------|----------|------------------------------------------------------|
| 6214 | ENSG00000137106 | GRHPR    | UncertainGeneral ccytoplasm                          |
| 6215 | ENSG00000137124 | ALDH1B1  | Approved General ccytoplasm                          |
| 6216 | ENSG00000137133 | HINT2    | SupportedCytoplasmcytoplasm                          |
| 6217 | ENSG00000137135 | ARHGEF39 | UncertainCytoplasmcytoplasm                          |
| 6218 | ENSG00000137142 | IGFBPL1  | UncertainEstimation of protein expression could not  |
| 6219 | ENSG00000137145 | DENND4C  | Approved Cytoplasmcytoplasm                          |
| 6220 | ENSG00000137154 | RPS6     | Approved General ccytoplasm                          |
| 6221 | ENSG00000137161 | CNPY3    | UncertainGranular cytoplasm                          |
| 6222 | ENSG00000137166 | FOXP4    | Approved General nnucleus                            |
| 6223 | ENSG00000137171 | KLC4     | Enhanced Cytoplasmcytoplasm                          |
| 6224 | ENSG00000137177 | KIF13A   | UncertainCytoplasmcytoplasm                          |
| 6225 | ENSG00000137185 | ZSCAN9   | UncertainCytoplasmcytoplasm;nucleus                  |
| 6226 | ENSG00000137193 | PIM1     | UncertainCytoplasmcytoplasm                          |
| 6227 | ENSG00000137198 | GMPR     | UncertainCytoplasmcytoplasm                          |
| 6228 | ENSG00000137200 | CMTR1    | Enhanced Ubiquitousnucleus                           |
| 6229 | ENSG00000137203 | TFAP2A   | Enhanced Selectivenucleus                            |
| 6230 | ENSG00000137204 | SLC22A7  | Approved Cytoplasmcytoplasm                          |
| 6231 | ENSG00000137207 | YIPF3    | SupportedUbiquitouscytoplasm                         |
| 6232 | ENSG00000137216 | TMEM63B  | UncertainDistinct plasma membrane                    |
| 6233 | ENSG00000137218 | FRS3     | Enhanced Selectivecytoplasm;plasma membrane          |
| 6234 | ENSG00000137221 | TJAP1    | SupportedUbiquitouscytoplasm                         |
| 6235 | ENSG00000137225 | CAPN11   | Enhanced Selectivecytoplasm                          |
| 6236 | ENSG00000137251 | TINAG    | Approved Expression in renal tubules and in other t: |
| 6237 | ENSG00000137252 | HCRT2    | Enhanced Selective expression in CNS.                |
| 6238 | ENSG00000137261 | KIAA0319 | Enhanced Cytoplasmcytoplasm                          |
| 6239 | ENSG00000137265 | IRF4     | Enhanced Selectivenucleus                            |
| 6240 | ENSG00000137266 | SLC22A23 | Approved General ccytoplasm                          |
| 6241 | ENSG00000137267 | TUBB2A   | SupportedGeneral ccytoplasm                          |
| 6242 | ENSG00000137269 | LRRC1    | Enhanced Membranouplasma membrane                    |
| 6243 | ENSG00000137270 | GCM1     | Enhanced Nuclear enucleus                            |
| 6244 | ENSG00000137274 | BPHL     | Enhanced Selectivecytoplasm                          |
| 6245 | ENSG00000137275 | RIPK1    | SupportedUbiquitouscytoplasm                         |
| 6246 | ENSG00000137285 | TUBB2B   | SupportedCytoplasmcytoplasm                          |
| 6247 | ENSG00000137288 | UQC2     | UncertainCytoplasmcytoplasm                          |
| 6248 | ENSG00000137309 | HMG1     | Enhanced Nuclear enucleus                            |
| 6249 | ENSG00000137312 | FLOT1    | Enhanced Cytoplasmcytoplasm;plasma membrane          |
| 6250 | ENSG00000137331 | IER3     | Approved General ccytoplasm                          |
| 6251 | ENSG00000137337 | MDC1     | Enhanced General nnucleus                            |
| 6252 | ENSG00000137338 | PGBD1    | UncertainEstimation of protein expression could not  |
| 6253 | ENSG00000137343 | ATAT1    | Approved Ubiquitouscytoplasm                         |
| 6254 | ENSG00000137364 | TPMT     | Enhanced General ccytoplasm                          |
| 6255 | ENSG00000137392 | CLPS     | Enhanced Cytoplasmcytoplasm                          |
| 6256 | ENSG00000137393 | RNF144B  | UncertainCytoplasmcytoplasm                          |
| 6257 | ENSG00000137409 | MTCH1    | Approved General gcytoplasm                          |
| 6258 | ENSG00000137411 | VAR2     | Approved General ccytoplasm                          |
| 6259 | ENSG00000137413 | TAF8     | SupportedGeneral ncytoplasm;nucleus                  |
| 6260 | ENSG00000137414 | FAM8A1   | Approved Cytoplasmcytoplasm                          |
| 6261 | ENSG00000137434 | C6orf52  | UncertainEstimation of protein expression could not  |
| 6262 | ENSG00000137440 | FGFBP1   | Enhanced Distinct cytoplasm;plasma membrane          |
| 6263 | ENSG00000137460 | FHDC1    | UncertainEstimation of protein expression could not  |
| 6264 | ENSG00000137463 | MGARP    | Enhanced Selective expression in adrenal gland, test |
| 6265 | ENSG00000137473 | TTC29    | UncertainExpression in a few tissues, including cil: |
| 6266 | ENSG00000137474 | MYO7A    | UncertainCytoplasmcytoplasm;plasma membrane          |
| 6267 | ENSG00000137478 | FCHSD2   | UncertainEstimation of protein expression could not  |
| 6268 | ENSG00000137486 | ARRB1    | Approved Cytoplasmcytoplasm;nucleus                  |

|      |                 |          |                                                      |
|------|-----------------|----------|------------------------------------------------------|
| 6269 | ENSG00000137491 | SLC02B1  | UncertainCytoplasmcytoplasm                          |
| 6270 | ENSG00000137492 | THAP12   | Approved General nnucleus                            |
| 6271 | ENSG00000137494 | ANKRD42  | Approved High expression mainly in ciliated cells.   |
| 6272 | ENSG00000137496 | IL18BP   | Enhanced High expression in a subset of lymphocytes. |
| 6273 | ENSG00000137497 | NUMA1    | Enhanced General nnucleus                            |
| 6274 | ENSG00000137500 | CCDC90B  | SupportedUbiquitouscytoplasm                         |
| 6275 | ENSG00000137501 | SYTL2    | Approved Membranoucytoplasm;plasma membrane          |
| 6276 | ENSG00000137502 | RAB30    | Approved Cytoplasmcytoplasm                          |
| 6277 | ENSG00000137504 | CREBZF   | UncertainCytoplasmcytoplasm                          |
| 6278 | ENSG00000137509 | PRCP     | Approved Cytoplasmcytoplasm                          |
| 6279 | ENSG00000137513 | NARS2    | SupportedGeneral ccytoplasm                          |
| 6280 | ENSG00000137522 | RNF121   | UncertainCytoplasmcytoplasm;nucleus                  |
| 6281 | ENSG00000137547 | MRPL15   | Enhanced General ccytoplasm                          |
| 6282 | ENSG00000137558 | PI15     | UncertainPositivitcytoplasm;plasma membrane          |
| 6283 | ENSG00000137563 | GGH      | Approved Granular cytoplasm                          |
| 6284 | ENSG00000137571 | SLC05A1  | UncertainEstimation of protein expression could not  |
| 6285 | ENSG00000137573 | SULF1    | SupportedCytoplasmcytoplasm                          |
| 6286 | ENSG00000137574 | TGS1     | SupportedGeneral nnucleus                            |
| 6287 | ENSG00000137575 | SDCBP    | Approved General ccytoplasm                          |
| 6288 | ENSG00000137601 | NEK1     | Approved General ccytoplasm                          |
| 6289 | ENSG00000137628 | DDX60    | Approved General ccytoplasm                          |
| 6290 | ENSG00000137634 | NXPE4    | Approved Cytoplasmcytoplasm                          |
| 6291 | ENSG00000137642 | SORL1    | Uncertainplasma prplasma membrane                    |
| 6292 | ENSG00000137648 | TMPRSS4  | UncertainUbiquitouscytoplasm                         |
| 6293 | ENSG00000137656 | BUD13    | Enhanced Ubiquitouscytoplasm;nucleus                 |
| 6294 | ENSG00000137672 | TRPC6    | Approved Cytoplasmcytoplasm                          |
| 6295 | ENSG00000137673 | MMP7     | SupportedMembranoucytoplasm;plasma membrane          |
| 6296 | ENSG00000137675 | MMP27    | Approved Cytoplasmcytoplasm                          |
| 6297 | ENSG00000137691 | C11orf70 | Enhanced Expressiocytoplasm                          |
| 6298 | ENSG00000137692 | DCUN1D5  | Approved General nnucleus                            |
| 6299 | ENSG00000137693 | YAP1     | Enhanced Cytoplasmcytoplasm;nucleus                  |
| 6300 | ENSG00000137699 | TRIM29   | Enhanced Cytoplasmcytoplasm                          |
| 6301 | ENSG00000137700 | SLC37A4  | Enhanced Cytoplasmcytoplasm                          |
| 6302 | ENSG00000137709 | POU2F3   | Enhanced Nuclear enucleus                            |
| 6303 | ENSG00000137710 | RDX      | Enhanced Cytoplasmcytoplasm;plasma membrane          |
| 6304 | ENSG00000137713 | PPP2R1B  | Approved Cytoplasmcytoplasm                          |
| 6305 | ENSG00000137714 | FDX1     | Enhanced Cytoplasmcytoplasm                          |
| 6306 | ENSG00000137720 | C11orf1  | UncertainCytoplasmcytoplasm                          |
| 6307 | ENSG00000137726 | FXVD6    | Enhanced Cytoplasmcytoplasm                          |
| 6308 | ENSG00000137727 | ARHGAP20 | UncertainEstimation of protein expression could not  |
| 6309 | ENSG00000137731 | FXVD2    | SupportedMembranouplasma membrane                    |
| 6310 | ENSG00000137745 | MMP13    | SupportedCytoplasmcytoplasm                          |
| 6311 | ENSG00000137752 | CASP1    | Approved Ubiquitouscytoplasm;nucleus                 |
| 6312 | ENSG00000137760 | ALKBH8   | Approved Cytoplasmcytoplasm                          |
| 6313 | ENSG00000137764 | MAP2K5   | SupportedCytoplasmcytoplasm                          |
| 6314 | ENSG00000137767 | SQOR     | Enhanced Cytoplasmcytoplasm                          |
| 6315 | ENSG00000137770 | CTDSPL2  | Approved Cytoplasmcytoplasm                          |
| 6316 | ENSG00000137776 | SLTM     | Enhanced Ubiquitousnucleus                           |
| 6317 | ENSG00000137801 | THBS1    | Approved General ccytoplasm;plasma membrane          |
| 6318 | ENSG00000137802 | MAPKBP1  | Approved Ubiquitouscytoplasm;nucleus                 |
| 6319 | ENSG00000137804 | NUSAP1   | Enhanced Cytoplasmcytoplasm;nucleus;plasma membrane  |
| 6320 | ENSG00000137806 | NDUFAF1  | SupportedUbiquitouscytoplasm                         |
| 6321 | ENSG00000137807 | KIF23    | UncertainGeneral ncytoplasm;nucleus                  |
| 6322 | ENSG00000137809 | ITGA11   | UncertainCytoplasmcytoplasm                          |
| 6323 | ENSG00000137812 | KNL1     | Enhanced Nuclear enucleus                            |

|      |                 |          |                                                       |
|------|-----------------|----------|-------------------------------------------------------|
| 6324 | ENSG00000137814 | HAUS2    | Approved Ubiquitous cytoplasm                         |
| 6325 | ENSG00000137815 | RTF1     | Approved General nucleus                              |
| 6326 | ENSG00000137817 | PARP6    | Approved General cytoplasm                            |
| 6327 | ENSG00000137821 | LRRC49   | Uncertain Estimation of protein expression could not  |
| 6328 | ENSG00000137822 | TUBGCP4  | Approved General cytoplasm                            |
| 6329 | ENSG00000137824 | RMDN3    | Supported Ubiquitous cytoplasm                        |
| 6330 | ENSG00000137825 | ITPKA    | Enhanced Distinct expression in astrocytes and proce  |
| 6331 | ENSG00000137831 | UACA     | Uncertain Cytoplasm cytoplasm;nucleus                 |
| 6332 | ENSG00000137841 | PLCB2    | Approved Cytoplasm cytoplasm                          |
| 6333 | ENSG00000137842 | TMEM62   | Approved Cytoplasm cytoplasm;plasma membrane          |
| 6334 | ENSG00000137843 | PAK6     | Approved Cytoplasm cytoplasm                          |
| 6335 | ENSG00000137845 | ADAM10   | Approved Mainly cytoplasm                             |
| 6336 | ENSG00000137857 | DUOX1    | Approved Cytoplasm cytoplasm                          |
| 6337 | ENSG00000137860 | SLC28A2  | Enhanced Luminal plasma membrane                      |
| 6338 | ENSG00000137868 | STRA6    | Approved Membrane plasma membrane                     |
| 6339 | ENSG00000137869 | CYP19A1  | Enhanced Selective cytoplasm                          |
| 6340 | ENSG00000137871 | ZNF280D  | Approved Nuclear cytoplasm;nucleus                    |
| 6341 | ENSG00000137875 | BCL2L10  | Approved Cytoplasm cytoplasm                          |
| 6342 | ENSG00000137876 | RSL24D1  | Enhanced Mainly nucleus                               |
| 6343 | ENSG00000137877 | SPTBN5   | Approved Cytoplasm cytoplasm;nucleus                  |
| 6344 | ENSG00000137878 | GCOM1    | Approved Cytoplasm cytoplasm                          |
| 6345 | ENSG00000137880 | GCHFR    | Enhanced Cytoplasm cytoplasm                          |
| 6346 | ENSG00000137936 | BCAR3    | Approved Cytoplasm cytoplasm                          |
| 6347 | ENSG00000137941 | TLL7     | Uncertain RNA-data suggests expression in CNS. RNA-ba |
| 6348 | ENSG00000137942 | FNBP1L   | Approved General cytoplasm                            |
| 6349 | ENSG00000137944 | KYAT3    | Enhanced Ubiquitous cytoplasm                         |
| 6350 | ENSG00000137947 | GTF2B    | Supported Ubiquitous nucleus                          |
| 6351 | ENSG00000137948 | BRDT     | Approved Mainly nucleus                               |
| 6352 | ENSG00000137955 | RABGGTB  | Approved Ubiquitous cytoplasm                         |
| 6353 | ENSG00000137959 | IFI44L   | Uncertain Cytoplasm cytoplasm                         |
| 6354 | ENSG00000137960 | GIPC2    | Approved High granule cytoplasm                       |
| 6355 | ENSG00000137962 | ARHGAP29 | Approved Cytoplasm cytoplasm                          |
| 6356 | ENSG00000137965 | IFI44    | Approved Nuclear nucleus                              |
| 6357 | ENSG00000137968 | SLC44A5  | Uncertain Estimation of protein expression could not  |
| 6358 | ENSG00000137975 | CLCA2    | Enhanced Cytoplasm cytoplasm;plasma membrane          |
| 6359 | ENSG00000137992 | DBT      | Enhanced Granular cytoplasm                           |
| 6360 | ENSG00000137996 | RTCA     | Uncertain Nuclear cytoplasm;nucleus                   |
| 6361 | ENSG00000138002 | IFT172   | Uncertain Estimation of protein expression could not  |
| 6362 | ENSG00000138018 | SELENO1  | Approved Cytoplasm cytoplasm                          |
| 6363 | ENSG00000138028 | CGREF1   | Uncertain Estimation of protein expression could not  |
| 6364 | ENSG00000138029 | HADHB    | Enhanced Mitochondrial expression in glandular cells  |
| 6365 | ENSG00000138030 | KHK      | Enhanced Cytoplasm cytoplasm;nucleus                  |
| 6366 | ENSG00000138031 | ADCY3    | Approved Cytoplasm cytoplasm                          |
| 6367 | ENSG00000138032 | PPM1B    | Approved Cytoplasm cytoplasm                          |
| 6368 | ENSG00000138035 | PNPT1    | Supported Ubiquitous cytoplasm                        |
| 6369 | ENSG00000138036 | DYNC2LI1 | Approved Cytoplasm cytoplasm                          |
| 6370 | ENSG00000138039 | LHCGR    | Uncertain Estimation of protein expression could not  |
| 6371 | ENSG00000138050 | THUMP2   | Approved Ubiquitous cytoplasm                         |
| 6372 | ENSG00000138061 | CYP11B1  | Approved Mainly cytoplasm                             |
| 6373 | ENSG00000138069 | RAB1A    | Approved General cytoplasm                            |
| 6374 | ENSG00000138071 | ACTR2    | Approved Cytoplasm cytoplasm                          |
| 6375 | ENSG00000138073 | PREB     | Uncertain General cytoplasm                           |
| 6376 | ENSG00000138074 | SLC5A6   | Approved Cytoplasm cytoplasm;plasma membrane          |
| 6377 | ENSG00000138078 | PREPL    | Approved General cytoplasm                            |
| 6378 | ENSG00000138079 | SLC3A1   | Enhanced Cytoplasm cytoplasm;plasma membrane          |

|      |                 |          |                                                      |
|------|-----------------|----------|------------------------------------------------------|
| 6379 | ENSG00000138080 | EMILIN1  | Supported Selective expression in connective tissue  |
| 6380 | ENSG00000138085 | ATRAID   | Uncertain Cytoplasm cytoplasm; plasma membrane       |
| 6381 | ENSG00000138095 | LRPPRC   | Enhanced Cytoplasm cytoplasm                         |
| 6382 | ENSG00000138100 | TRIM54   | Uncertain Cytoplasm cytoplasm                        |
| 6383 | ENSG00000138101 | DTNB     | Uncertain Cytoplasm cytoplasm; plasma membrane       |
| 6384 | ENSG00000138107 | ACTR1A   | Approved General c cytoplasm                         |
| 6385 | ENSG00000138109 | CYP2C9   | Enhanced Selective cytoplasm                         |
| 6386 | ENSG00000138111 | MFSD13A  | Uncertain Estimation of protein expression could not |
| 6387 | ENSG00000138115 | CYP2C8   | Enhanced Selective cytoplasm                         |
| 6388 | ENSG00000138119 | MYOF     | Enhanced Cytoplasm cytoplasm; plasma membrane        |
| 6389 | ENSG00000138131 | LOXL4    | Approved Extracellular positivity in several tissues |
| 6390 | ENSG00000138134 | STAMBPL1 | Uncertain Cytoplasm cytoplasm                        |
| 6391 | ENSG00000138136 | LBX1     | Uncertain Estimation of protein expression could not |
| 6392 | ENSG00000138138 | ATAD1    | Uncertain Cytoplasm cytoplasm; nucleus               |
| 6393 | ENSG00000138152 | BTBD16   | Uncertain Estimation of protein expression could not |
| 6394 | ENSG00000138160 | KIF11    | Enhanced Cytoplasm cytoplasm                         |
| 6395 | ENSG00000138161 | CUZD1    | Enhanced Selective cytoplasm                         |
| 6396 | ENSG00000138162 | TACC2    | Enhanced Ubiquitous cytoplasm                        |
| 6397 | ENSG00000138172 | CALHM2   | Approved Cytoplasm cytoplasm                         |
| 6398 | ENSG00000138175 | ARL3     | Approved Cytoplasm cytoplasm                         |
| 6399 | ENSG00000138180 | CEP55    | Approved Cytoplasm cytoplasm                         |
| 6400 | ENSG00000138182 | KIF20B   | Uncertain Cytoplasm cytoplasm                        |
| 6401 | ENSG00000138185 | ENTPD1   | Enhanced Cytoplasm cytoplasm                         |
| 6402 | ENSG00000138190 | EXOC6    | Approved Cytoplasm cytoplasm; plasma membrane        |
| 6403 | ENSG00000138193 | PLCE1    | Enhanced Ubiquitous cytoplasm                        |
| 6404 | ENSG00000138207 | RBP4     | Supported Cytoplasm cytoplasm; plasma membrane       |
| 6405 | ENSG00000138231 | DBR1     | Supported General n nucleus                          |
| 6406 | ENSG00000138246 | DNAJC13  | Approved General c cytoplasm                         |
| 6407 | ENSG00000138279 | ANXA7    | Approved Ubiquitous cytoplasm; plasma membrane       |
| 6408 | ENSG00000138286 | FAM149B1 | Uncertain General c cytoplasm                        |
| 6409 | ENSG00000138303 | ASCC1    | Approved Cytoplasm cytoplasm; nucleus                |
| 6410 | ENSG00000138308 | PLA2G12B | Approved Cytoplasm cytoplasm                         |
| 6411 | ENSG00000138311 | ZNF365   | Enhanced Distinct cytoplasm                          |
| 6412 | ENSG00000138326 | RPS24    | Approved Cytoplasm cytoplasm                         |
| 6413 | ENSG00000138346 | DNA2     | Approved Granular cytoplasm                          |
| 6414 | ENSG00000138347 | MYPN     | Enhanced Selective cytoplasm                         |
| 6415 | ENSG00000138356 | AOX1     | Enhanced Cytoplasm cytoplasm                         |
| 6416 | ENSG00000138363 | ATIC     | Supported Cytoplasm cytoplasm                        |
| 6417 | ENSG00000138375 | SMARCAL1 | Uncertain Nuclear enucleus                           |
| 6418 | ENSG00000138376 | BARD1    | Enhanced Nuclear enucleus                            |
| 6419 | ENSG00000138378 | STAT4    | Enhanced Mainly n nucleus                            |
| 6420 | ENSG00000138379 | MSTN     | Approved Distinct plasma membrane                    |
| 6421 | ENSG00000138380 | CARF     | Approved Nuclear a cytoplasm; nucleus                |
| 6422 | ENSG00000138381 | ASNSD1   | Uncertain Ubiquitous cytoplasm                       |
| 6423 | ENSG00000138382 | METTL5   | Uncertain Cytoplasm cytoplasm                        |
| 6424 | ENSG00000138385 | SSB      | Supported Ubiquitous nucleus                         |
| 6425 | ENSG00000138386 | NAB1     | Uncertain Cytoplasm cytoplasm                        |
| 6426 | ENSG00000138395 | CDK15    | Uncertain Estimation of protein expression could not |
| 6427 | ENSG00000138398 | PPIG     | Supported Ubiquitous nucleus                         |
| 6428 | ENSG00000138399 | FASTKD1  | Approved Ubiquitous cytoplasm                        |
| 6429 | ENSG00000138400 | MDH1B    | Approved Expression in sperm flagella and cilia in   |
| 6430 | ENSG00000138411 | HECW2    | Enhanced Cytoplasm cytoplasm                         |
| 6431 | ENSG00000138413 | IDH1     | Enhanced Cytoplasm cytoplasm                         |
| 6432 | ENSG00000138430 | OLA1     | Approved Ubiquitous cytoplasm                        |
| 6433 | ENSG00000138433 | CIR1     | Approved Nuclear enucleus                            |

|      |                 |           |                                                      |
|------|-----------------|-----------|------------------------------------------------------|
| 6434 | ENSG00000138434 | SSFA2     | UncertainCytoplasmcytoplasm                          |
| 6435 | ENSG00000138435 | CHRNA1    | Enhanced Distinct cytoplasm                          |
| 6436 | ENSG00000138439 | FAM117B   | UncertainEstimation of protein expression could not  |
| 6437 | ENSG00000138442 | WDR12     | UncertainGeneral ccytoplasm                          |
| 6438 | ENSG00000138443 | ABI2      | Enhanced Expression in most tissues, most abundant : |
| 6439 | ENSG00000138448 | ITGAV     | SupportedCytoplasmcytoplasm;plasma membrane          |
| 6440 | ENSG00000138449 | SLC40A1   | Approved Low cytopcytoplasm                          |
| 6441 | ENSG00000138459 | SLC35A5   | UncertainEstimation of protein expression could not  |
| 6442 | ENSG00000138468 | SENP7     | Approved Nuclear enucleus                            |
| 6443 | ENSG00000138472 | GUCA1C    | UncertainCytoplasmcytoplasm                          |
| 6444 | ENSG00000138495 | COX17     | SupportedCytoplasmcytoplasm                          |
| 6445 | ENSG00000138587 | MNS1      | UncertainEstimation of protein expression could not  |
| 6446 | ENSG00000138592 | USP8      | Approved Cytoplasmcytoplasm;plasma membrane          |
| 6447 | ENSG00000138593 | SECISBP2L | Approved Ubiquitocytoplasm                           |
| 6448 | ENSG00000138594 | TMOD3     | Approved Cytoplasmcytoplasm                          |
| 6449 | ENSG00000138600 | SPPL2A    | Enhanced General ccytoplasm                          |
| 6450 | ENSG00000138604 | GLCE      | UncertainCytoplasmcytoplasm                          |
| 6451 | ENSG00000138614 | INTS14    | Approved Nuclear enucleus                            |
| 6452 | ENSG00000138615 | CILP      | UncertainExtracellcytoplasm                          |
| 6453 | ENSG00000138617 | PARP16    | Approved Cytoplasmcytoplasm                          |
| 6454 | ENSG00000138621 | PPCDC     | Approved Ubiquitocytoplasm                           |
| 6455 | ENSG00000138622 | HCN4      | Approved Cytoplasmcytoplasm                          |
| 6456 | ENSG00000138623 | SEMA7A    | UncertainGranular cytoplasm;plasma membrane          |
| 6457 | ENSG00000138629 | UBL7      | Approved Nuclear acytoplasm;nucleus                  |
| 6458 | ENSG00000138639 | ARHGAP24  | Approved Cytoplasmcytoplasm                          |
| 6459 | ENSG00000138640 | FAM13A    | UncertainUbiquitocytoplasm;nucleus                   |
| 6460 | ENSG00000138641 | HERC3     | Approved General ccytoplasm                          |
| 6461 | ENSG00000138642 | HERC6     | UncertainCytoplasmcytoplasm                          |
| 6462 | ENSG00000138646 | HERC5     | SupportedCytoplasmcytoplasm                          |
| 6463 | ENSG00000138650 | PCDH10    | Approved Distinct cytoplasm                          |
| 6464 | ENSG00000138653 | NDST4     | UncertainEstimation of protein expression could not  |
| 6465 | ENSG00000138658 | ZGRF1     | UncertainCytoplasmcytoplasm;plasma membrane          |
| 6466 | ENSG00000138660 | AP1AR     | Approved Cytoplasmcytoplasm;nucleus                  |
| 6467 | ENSG00000138663 | COPS4     | UncertainGeneral ccytoplasm;nucleus                  |
| 6468 | ENSG00000138668 | HNRNPD    | SupportedGeneral nnucleus                            |
| 6469 | ENSG00000138669 | PRKG2     | Approved General ccytoplasm                          |
| 6470 | ENSG00000138670 | RASGEF1B  | UncertainCytoplasmcytoplasm                          |
| 6471 | ENSG00000138674 | SEC31A    | Approved General ccytoplasm                          |
| 6472 | ENSG00000138678 | GPAT3     | Approved General ccytoplasm                          |
| 6473 | ENSG00000138685 | FGF2      | Enhanced Nuclear enucleus                            |
| 6474 | ENSG00000138686 | BBS7      | Approved Cytoplasmcytoplasm;plasma membrane          |
| 6475 | ENSG00000138688 | KIAA1109  | Approved Cytoplasmcytoplasm                          |
| 6476 | ENSG00000138698 | RAP1GDS1  | Approved Cytoplasmcytoplasm                          |
| 6477 | ENSG00000138709 | LARP1B    | Approved Cytoplasmcytoplasm                          |
| 6478 | ENSG00000138722 | MMRN1     | Enhanced Distinct cytoplasm                          |
| 6479 | ENSG00000138735 | PDE5A     | Approved Cytoplasmcytoplasm                          |
| 6480 | ENSG00000138738 | PRDM5     | Enhanced Nuclear enucleus                            |
| 6481 | ENSG00000138744 | NAAA      | Approved General ccytoplasm                          |
| 6482 | ENSG00000138750 | NUP54     | Approved Nuclear enucleus                            |
| 6483 | ENSG00000138756 | BMP2K     | Approved Cytoplasmcytoplasm                          |
| 6484 | ENSG00000138757 | G3BP2     | Enhanced Cytoplasmcytoplasm                          |
| 6485 | ENSG00000138758 | #####     | Approved Cytoplasmcytoplasm                          |
| 6486 | ENSG00000138759 | FRAS1     | Approved General mcytoplasm;plasma membrane          |
| 6487 | ENSG00000138760 | SCARB2    | SupportedUbiquitocytoplasm                           |
| 6488 | ENSG00000138764 | CCNG2     | Approved General ccytoplasm                          |

|      |                 |           |                                                      |
|------|-----------------|-----------|------------------------------------------------------|
| 6489 | ENSG00000138767 | CNOT6L    | UncertainCytoplasmcytoplasm                          |
| 6490 | ENSG00000138768 | USO1      | SupportedGeneral ccytoplasm                          |
| 6491 | ENSG00000138771 | SHROOM3   | Enhanced Cytoplasmcytoplasm;plasma membrane          |
| 6492 | ENSG00000138772 | ANXA3     | Enhanced Cytoplasmcytoplasm                          |
| 6493 | ENSG00000138777 | PPA2      | SupportedCytoplasmcytoplasm                          |
| 6494 | ENSG00000138778 | CENPE     | Enhanced Nuclear enucleus                            |
| 6495 | ENSG00000138780 | GSTCD     | Approved General ccytoplasm                          |
| 6496 | ENSG00000138785 | INTS12    | Approved General ncytoplasm;nucleus                  |
| 6497 | ENSG00000138792 | ENPEP     | Enhanced Membranoucytoplasm;plasma membrane          |
| 6498 | ENSG00000138794 | CASP6     | Enhanced Cytoplasmcytoplasm                          |
| 6499 | ENSG00000138795 | LEF1      | Enhanced Nuclear enucleus                            |
| 6500 | ENSG00000138796 | HADH      | SupportedUbiquitoucytoplasm                          |
| 6501 | ENSG00000138801 | PAPSS1    | Approved Cytoplasmcytoplasm                          |
| 6502 | ENSG00000138802 | SEC24B    | Approved General ccytoplasm                          |
| 6503 | ENSG00000138813 | C4orf17   | UncertainEstimation of protein expression could not  |
| 6504 | ENSG00000138814 | PPP3CA    | Enhanced Cytoplasmcytoplasm                          |
| 6505 | ENSG00000138821 | SLC39A8   | Approved General ccytoplasm;plasma membrane          |
| 6506 | ENSG00000138823 | MTTP      | UncertainCytoplasmcytoplasm                          |
| 6507 | ENSG00000138829 | FBN2      | Enhanced Selectiveplasma membrane                    |
| 6508 | ENSG00000138834 | MAPK8IP3  | Approved Cytoplasmcytoplasm                          |
| 6509 | ENSG00000138892 | TLL8      | UncertainEstimation of protein expression could not  |
| 6510 | ENSG00000138944 | SHISAL1   | UncertainGeneral nnucleus                            |
| 6511 | ENSG00000138964 | PARVG     | UncertainMembranoucytoplasm;plasma membrane          |
| 6512 | ENSG00000139044 | B4GALNT3  | Enhanced Cytoplasmcytoplasm                          |
| 6513 | ENSG00000139053 | PDE6H     | SupportedExpression in rod outer segments of retina. |
| 6514 | ENSG00000139055 | ERP27     | Enhanced Selective expression of exocrine glandular  |
| 6515 | ENSG00000139083 | ETV6      | Enhanced Nuclear enucleus                            |
| 6516 | ENSG00000139112 | GABARAPL1 | Approved Cytoplasmcytoplasm                          |
| 6517 | ENSG00000139116 | KIF21A    | Enhanced Cytoplasmcytoplasm                          |
| 6518 | ENSG00000139117 | CPNE8     | Approved Cytoplasmcytoplasm;plasma membrane          |
| 6519 | ENSG00000139131 | YARS2     | UncertainUbiquitoucytoplasm                          |
| 6520 | ENSG00000139132 | FGD4      | Approved Cytoplasmcytoplasm                          |
| 6521 | ENSG00000139133 | ALG10     | Approved Nuclear enucleus                            |
| 6522 | ENSG00000139146 | SINHCAF   | Approved Nucleolarnucleus                            |
| 6523 | ENSG00000139154 | AEBP2     | UncertainCytoplasmcytoplasm                          |
| 6524 | ENSG00000139160 | ETFBKMT   | UncertainLow cytopcytoplasm                          |
| 6525 | ENSG00000139163 | ETNK1     | Approved Cytoplasmcytoplasm                          |
| 6526 | ENSG00000139173 | TMEM117   | UncertainEstimation of protein expression could not  |
| 6527 | ENSG00000139174 | PRICKLE1  | Approved Nuclear enucleus                            |
| 6528 | ENSG00000139178 | C1RL      | SupportedCytoplasmcytoplasm                          |
| 6529 | ENSG00000139180 | NDUFA9    | SupportedGeneral ccytoplasm                          |
| 6530 | ENSG00000139187 | KLRG1     | Approved Expressed in a subset of cells in several 1 |
| 6531 | ENSG00000139190 | VAMP1     | Approved Cytoplasmcytoplasm                          |
| 6532 | ENSG00000139192 | TAPBPL    | UncertainCytoplasmcytoplasm;plasma membrane          |
| 6533 | ENSG00000139193 | CD27      | Enhanced Selectivecytoplasm                          |
| 6534 | ENSG00000139194 | RBP5      | Enhanced Cytoplasmcytoplasm                          |
| 6535 | ENSG00000139197 | PEX5      | Enhanced Granular cytoplasm                          |
| 6536 | ENSG00000139200 | PIANP     | Enhanced Mainly nnucleus                             |
| 6537 | ENSG00000139211 | AMIG02    | UncertainLow cytopcytoplasm                          |
| 6538 | ENSG00000139218 | SCAF11    | SupportedGeneral nnucleus                            |
| 6539 | ENSG00000139219 | COL2A1    | SupportedPositivity in extracellular matrix.         |
| 6540 | ENSG00000139223 | ANP32D    | UncertainEstimation of protein expression could not  |
| 6541 | ENSG00000139263 | LRIG3     | Approved Cytoplasmcytoplasm;plasma membrane          |
| 6542 | ENSG00000139269 | INHBE     | Enhanced Selectiveplasma membrane                    |
| 6543 | ENSG00000139278 | GLIPR1    | Approved Cytoplasmcytoplasm                          |

|      |                 |          |                                                      |
|------|-----------------|----------|------------------------------------------------------|
| 6544 | ENSG00000139287 | TPH2     | Enhanced High expression in dorsal raphe, with stro  |
| 6545 | ENSG00000139289 | PHLDA1   | Enhanced General ccytoplasm;nucleus                  |
| 6546 | ENSG00000139291 | TMEM19   | Approved Cytoplasmcytoplasm                          |
| 6547 | ENSG00000139292 | LGR5     | Approved Cytoplasmcytoplasm;plasma membrane          |
| 6548 | ENSG00000139304 | PTPRQ    | UncertainEstimation of protein expression could not  |
| 6549 | ENSG00000139318 | DUSP6    | Approved Cytoplasmcytoplasm                          |
| 6550 | ENSG00000139324 | TMTC3    | Approved Cytoplasmcytoplasm;plasma membrane          |
| 6551 | ENSG00000139329 | LUM      | SupportedPositivitcytoplasm                          |
| 6552 | ENSG00000139330 | KERA     | UncertainEstimation of protein expression could not  |
| 6553 | ENSG00000139344 | AMDHD1   | UncertainCytoplasmcytoplasm                          |
| 6554 | ENSG00000139350 | NEDD1    | Approved General ccytoplasm                          |
| 6555 | ENSG00000139351 | SYCP3    | Enhanced Selectivenucleus                            |
| 6556 | ENSG00000139352 | ASCL1    | Enhanced Cytoplasmcytoplasm                          |
| 6557 | ENSG00000139354 | GAS2L3   | Approved Cytoplasmcytoplasm                          |
| 6558 | ENSG00000139364 | TMEM132B | UncertainEstimation of protein expression could not  |
| 6559 | ENSG00000139370 | SLC15A4  | Approved Mainly ccytoplasm                           |
| 6560 | ENSG00000139372 | TDG      | SupportedGeneral nnucleus                            |
| 6561 | ENSG00000139405 | RITA1    | SupportedMainly ccytoplasm;nucleus                   |
| 6562 | ENSG00000139410 | SDSL     | Approved General ccytoplasm                          |
| 6563 | ENSG00000139428 | MMAB     | Approved General ccytoplasm                          |
| 6564 | ENSG00000139433 | GLTP     | Approved General ccytoplasm                          |
| 6565 | ENSG00000139436 | GIT2     | Approved Cytoplasmcytoplasm                          |
| 6566 | ENSG00000139437 | TCHP     | SupportedHigh exprnucleus;plasma membrane            |
| 6567 | ENSG00000139438 | FAM222A  | UncertainEstimation of protein expression could not  |
| 6568 | ENSG00000139445 | FOXN4    | UncertainEstimation of protein expression could not  |
| 6569 | ENSG00000139496 | NUP58    | Approved Cytoplasmcytoplasm                          |
| 6570 | ENSG00000139508 | SLC46A3  | UncertainCytoplasmcytoplasm                          |
| 6571 | ENSG00000139514 | SLC7A1   | Approved Membranoucytoplasm;plasma membrane          |
| 6572 | ENSG00000139515 | PDX1     | Enhanced Selectivenucleus                            |
| 6573 | ENSG00000139517 | LNX2     | Approved Ubiquitoucytoplasm;plasma membrane          |
| 6574 | ENSG00000139531 | SUOX     | Approved Cytoplasmcytoplasm                          |
| 6575 | ENSG00000139537 | CCDC65   | UncertainEstimation of protein expression could not  |
| 6576 | ENSG00000139546 | TARBP2   | Approved General ncytoplasm;nucleus                  |
| 6577 | ENSG00000139547 | RDH16    | Enhanced Cytoplasmcytoplasm                          |
| 6578 | ENSG00000139567 | ACVRL1   | Approved Cytoplasmcytoplasm                          |
| 6579 | ENSG00000139572 | GPR84    | Enhanced Cytoplasmcytoplasm                          |
| 6580 | ENSG00000139579 | NABP2    | SupportedGeneral nnucleus                            |
| 6581 | ENSG00000139597 | N4BP2L1  | Approved Cytoplasmcytoplasm;nucleus                  |
| 6582 | ENSG00000139613 | SMARCC2  | SupportedUbiquitounucleus                            |
| 6583 | ENSG00000139618 | BRCA2    | UncertainEstimation of protein expression could not  |
| 6584 | ENSG00000139620 | KANSL2   | UncertainCytoplasmcytoplasm;nucleus                  |
| 6585 | ENSG00000139624 | CERS5    | Approved Cytoplasmcytoplasm;nucleus                  |
| 6586 | ENSG00000139625 | MAP3K12  | Enhanced Cytoplasmcytoplasm                          |
| 6587 | ENSG00000139629 | GALNT6   | Enhanced Cytoplasmcytoplasm                          |
| 6588 | ENSG00000139631 | CSAD     | Approved General ccytoplasm                          |
| 6589 | ENSG00000139637 | C12orf10 | Approved Nuclear acytoplasm;nucleus                  |
| 6590 | ENSG00000139641 | ESYT1    | Approved Cytoplasmcytoplasm                          |
| 6591 | ENSG00000139644 | TMBIM6   | Approved Cytoplasmcytoplasm                          |
| 6592 | ENSG00000139645 | ANKRD52  | UncertainNuclear acytoplasm;nucleus                  |
| 6593 | ENSG00000139648 | KRT71    | Enhanced Highly expressed in the inner root sheath ( |
| 6594 | ENSG00000139651 | ZNF740   | Approved Mainly nnucleus                             |
| 6595 | ENSG00000139656 | SMIM2    | Enhanced Cytoplasmcytoplasm                          |
| 6596 | ENSG00000139679 | LPAR6    | Approved Expressioplasmamembrane                     |
| 6597 | ENSG00000139684 | ESD      | Approved Granular cytoplasm                          |
| 6598 | ENSG00000139687 | RB1      | SupportedNuclear enucleus                            |



|      |                 |          |                                                      |
|------|-----------------|----------|------------------------------------------------------|
| 6599 | ENSG00000139697 | SBN01    | Approved Nuclear enucleus                            |
| 6600 | ENSG00000139714 | MORN3    | UncertainEstimation of protein expression could not  |
| 6601 | ENSG00000139718 | SETD1B   | Approved Mainly nunucleus                            |
| 6602 | ENSG00000139722 | VPS37B   | Enhanced Ubiquitocytoplasm                           |
| 6603 | ENSG00000139725 | RHOF     | Enhanced Membranocytoplasm;plasma membrane           |
| 6604 | ENSG00000139726 | DENR     | Approved Cytoplasmcytoplasm                          |
| 6605 | ENSG00000139746 | RBM26    | Approved Ubiquitounucleus                            |
| 6606 | ENSG00000139767 | SRRM4    | UncertainEstimation of protein expression could not  |
| 6607 | ENSG00000139826 | ABHD13   | Approved Cytoplasmcytoplasm                          |
| 6608 | ENSG00000139832 | RAB20    | UncertainCytoplasmcytoplasm                          |
| 6609 | ENSG00000139835 | GRTP1    | Approved General ccytoplasm                          |
| 6610 | ENSG00000139874 | SSTR1    | Approved Membranocytoplasm;plasma membrane           |
| 6611 | ENSG00000139899 | CBLN3    | Enhanced Selective expression in cerebellum.         |
| 6612 | ENSG00000139908 | TSSK4    | Approved Expression in several tissues, highly abund |
| 6613 | ENSG00000139910 | NOVA1    | UncertainCytoplasmcytoplasm;nucleus                  |
| 6614 | ENSG00000139914 | FITM1    | UncertainGeneral ccytoplasm                          |
| 6615 | ENSG00000139915 | MDGA2    | UncertainCytoplasmcytoplasm                          |
| 6616 | ENSG00000139921 | TMX1     | Approved Cytoplasmcytoplasm;plasma membrane          |
| 6617 | ENSG00000139926 | FRMD6    | UncertainCytoplasmcytoplasm                          |
| 6618 | ENSG00000139946 | PELI2    | UncertainGeneral ncytoplasm;nucleus                  |
| 6619 | ENSG00000139970 | RTN1     | Enhanced Selectivecytoplasm                          |
| 6620 | ENSG00000139971 | C14orf37 | Enhanced Cytoplasmcytoplasm                          |
| 6621 | ENSG00000139973 | SYT16    | Enhanced Expression in brain and testis, also expres |
| 6622 | ENSG00000139974 | SLC38A6  | Approved Cytoplasmcytoplasm                          |
| 6623 | ENSG00000139977 | NAA30    | UncertainEstimation of protein expression could not  |
| 6624 | ENSG00000139985 | ADAM21   | UncertainCytoplasmcytoplasm                          |
| 6625 | ENSG00000139990 | DCAF5    | UncertainGranular cytoplasm                          |
| 6626 | ENSG00000139998 | RAB15    | UncertainCytoplasmcytoplasm                          |
| 6627 | ENSG00000140006 | WDR89    | UncertainCytoplasmcytoplasm                          |
| 6628 | ENSG00000140009 | ESR2     | Enhanced Low nuclenucleus                            |
| 6629 | ENSG00000140015 | KCNH5    | UncertainEstimation of protein expression could not  |
| 6630 | ENSG00000140022 | STON2    | Enhanced Mainly ccytoplasm                           |
| 6631 | ENSG00000140030 | GPR65    | Enhanced Membranouplasma membrane                    |
| 6632 | ENSG00000140043 | PTGR2    | Approved Cytoplasmcytoplasm;nucleus                  |
| 6633 | ENSG00000140044 | JDP2     | SupportedGeneral nnucleus                            |
| 6634 | ENSG00000140057 | AK7      | Enhanced Distinct cytoplasm                          |
| 6635 | ENSG00000140067 | FAM181A  | Enhanced Selectivecytoplasm                          |
| 6636 | ENSG00000140092 | FBLN5    | SupportedDistinct positivity in extracellular matri: |
| 6637 | ENSG00000140104 | CLBA1    | Approved Cytoplasmcytoplasm;plasma membrane          |
| 6638 | ENSG00000140105 | WARS     | Enhanced Expressed mainly in endothelial cells.      |
| 6639 | ENSG00000140157 | NIPA2    | Approved Cytoplasmcytoplasm;plasma membrane          |
| 6640 | ENSG00000140199 | SLC12A6  | UncertainCytoplasmcytoplasm                          |
| 6641 | ENSG00000140254 | DUOXA1   | Approved Cytoplasmcytoplasm                          |
| 6642 | ENSG00000140259 | MFAP1    | UncertainUbiquitounucleus                            |
| 6643 | ENSG00000140262 | TCF12    | Approved General nnucleus                            |
| 6644 | ENSG00000140263 | SORD     | Enhanced Cytoplasmcytoplasm                          |
| 6645 | ENSG00000140265 | ZSCAN29  | Enhanced Cytoplasmcytoplasm;nucleus                  |
| 6646 | ENSG00000140274 | DUOXA2   | Enhanced Luminal mcytoplasm;plasma membrane          |
| 6647 | ENSG00000140280 | LYSMD2   | Approved General ccytoplasm                          |
| 6648 | ENSG00000140284 | SLC27A2  | Enhanced Cytoplasmcytoplasm                          |
| 6649 | ENSG00000140285 | FGF7     | UncertainCytoplasmcytoplasm                          |
| 6650 | ENSG00000140287 | HDC      | Enhanced Cytoplasmcytoplasm                          |
| 6651 | ENSG00000140297 | GCNT3    | Enhanced Granular cytoplasm                          |
| 6652 | ENSG00000140299 | BNIP2    | Approved General ccytoplasm                          |
| 6653 | ENSG00000140323 | DISP2    | UncertainEstimation of protein expression could not  |

|      |                 |          |                                                     |
|------|-----------------|----------|-----------------------------------------------------|
| 6654 | ENSG00000140326 | CDAN1    | SupportedUbiquitouscytoplasm;plasma membrane        |
| 6655 | ENSG00000140332 | TLE3     | Approved Nuclear enucleus                           |
| 6656 | ENSG00000140350 | ANP32A   | SupportedUbiquitousnucleus                          |
| 6657 | ENSG00000140365 | COMMD4   | UncertainMainly ccytoplasm                          |
| 6658 | ENSG00000140368 | PSTPIP1  | Enhanced High and cytoplasm                         |
| 6659 | ENSG00000140374 | ETFA     | Enhanced Cytoplasmcytoplasm                         |
| 6660 | ENSG00000140382 | HMG20A   | SupportedUbiquitousnucleus                          |
| 6661 | ENSG00000140386 | SCAPER   | Approved Cytoplasmcytoplasm                         |
| 6662 | ENSG00000140391 | TSPAN3   | UncertainCytoplasmcytoplasm                         |
| 6663 | ENSG00000140395 | WDR61    | Enhanced Ubiquitouscytoplasm;nucleus                |
| 6664 | ENSG00000140398 | NEIL1    | Approved Nuclear enucleus                           |
| 6665 | ENSG00000140400 | MAN2C1   | UncertainEstimation of protein expression could not |
| 6666 | ENSG00000140403 | DNAJA4   | UncertainCytoplasmcytoplasm                         |
| 6667 | ENSG00000140416 | TPM1     | SupportedCytoplasmcytoplasm                         |
| 6668 | ENSG00000140443 | IGF1R    | Approved Ubiquitouscytoplasm                        |
| 6669 | ENSG00000140450 | ARRDC4   | Approved Cytoplasmcytoplasm                         |
| 6670 | ENSG00000140451 | PIF1     | SupportedUbiquitousnucleus                          |
| 6671 | ENSG00000140459 | CYP11A1  | Enhanced Granular cytoplasm                         |
| 6672 | ENSG00000140463 | BBS4     | Approved General ccytoplasm                         |
| 6673 | ENSG00000140464 | PML      | SupportedNuclear enucleus                           |
| 6674 | ENSG00000140465 | CYP1A1   | UncertainGeneral ccytoplasm                         |
| 6675 | ENSG00000140471 | LINS1    | Approved Cytoplasmcytoplasm                         |
| 6676 | ENSG00000140474 | ULK3     | Approved General ccytoplasm                         |
| 6677 | ENSG00000140478 | GOLGA6D  | SupportedDistinct expression in round and elongated |
| 6678 | ENSG00000140479 | PCSK6    | UncertainCytoplasmcytoplasm                         |
| 6679 | ENSG00000140488 | CELF6    | UncertainCytoplasmcytoplasm                         |
| 6680 | ENSG00000140497 | SCAMP2   | Approved General ccytoplasm                         |
| 6681 | ENSG00000140505 | CYP1A2   | Enhanced High cytocytoplasm                         |
| 6682 | ENSG00000140511 | HAPLN3   | UncertainCytoplasmcytoplasm                         |
| 6683 | ENSG00000140519 | RHCG     | Enhanced Selectivecytoplasm;plasma membrane         |
| 6684 | ENSG00000140521 | POLG     | Approved Cytoplasmcytoplasm                         |
| 6685 | ENSG00000140522 | RLBP1    | Enhanced Expressionnucleus                          |
| 6686 | ENSG00000140525 | FANCI    | Approved Nuclear acytoplasm;nucleus                 |
| 6687 | ENSG00000140526 | ABHD2    | Approved General ccytoplasm;nucleus                 |
| 6688 | ENSG00000140527 | WDR93    | UncertainEstimation of protein expression could not |
| 6689 | ENSG00000140538 | NTRK3    | Approved High nuclcytoplasm;nucleus                 |
| 6690 | ENSG00000140543 | DET1     | UncertainEstimation of protein expression could not |
| 6691 | ENSG00000140545 | MFGE8    | SupportedCytoplasmcytoplasm;plasma membrane         |
| 6692 | ENSG00000140548 | ZNF710   | UncertainUbiquitouscytoplasm;nucleus                |
| 6693 | ENSG00000140553 | UNC45A   | Approved General ccytoplasm                         |
| 6694 | ENSG00000140557 | ST8SIA2  | Approved Cytoplasmcytoplasm                         |
| 6695 | ENSG00000140563 | MCTP2    | UncertainGeneral ccytoplasm                         |
| 6696 | ENSG00000140564 | FURIN    | Enhanced Cytoplasmcytoplasm                         |
| 6697 | ENSG00000140575 | IQGAP1   | Enhanced Cytoplasmcytoplasm;plasma membrane         |
| 6698 | ENSG00000140577 | CRTC3    | UncertainCytoplasmcytoplasm;nucleus                 |
| 6699 | ENSG00000140598 | EFL1     | UncertainCytoplasmcytoplasm                         |
| 6700 | ENSG00000140600 | SH3GL3   | Enhanced Selective expression in brain and testis   |
| 6701 | ENSG00000140632 | GLYR1    | Enhanced Nuclear enucleus                           |
| 6702 | ENSG00000140650 | PMM2     | Approved Mainly ccytoplasm                          |
| 6703 | ENSG00000140675 | SLC5A2   | Enhanced Membranouplasma membrane                   |
| 6704 | ENSG00000140678 | ITGAX    | Enhanced Cytoplasmcytoplasm                         |
| 6705 | ENSG00000140682 | TGFB1I1  | Enhanced Cytoplasmcytoplasm                         |
| 6706 | ENSG00000140688 | C16orf58 | UncertainCytoplasmcytoplasm                         |
| 6707 | ENSG00000140691 | ARMC5    | Approved Cytoplasmcytoplasm                         |
| 6708 | ENSG00000140694 | PARN     | SupportedCytoplasmcytoplasm;nucleus                 |

|      |                 |          |                                                       |
|------|-----------------|----------|-------------------------------------------------------|
| 6709 | ENSG00000140718 | FTO      | Enhanced General n nucleus                            |
| 6710 | ENSG00000140740 | UQCRC2   | Enhanced General c cytoplasm                          |
| 6711 | ENSG00000140743 | CDR2     | UncertainGeneral n nucleus                            |
| 6712 | ENSG00000140749 | IGSF6    | UncertainCytoplasm cytoplasm                          |
| 6713 | ENSG00000140750 | ARHGAP17 | Approved Cytoplasm cytoplasm;nucleus                  |
| 6714 | ENSG00000140795 | MYLK3    | Enhanced Cytoplasm cytoplasm                          |
| 6715 | ENSG00000140798 | ABCC12   | UncertainEstimation of protein expression could not   |
| 6716 | ENSG00000140807 | NKD1     | UncertainCytoplasm cytoplasm                          |
| 6717 | ENSG00000140829 | DHX38    | UncertainCytoplasm cytoplasm;nucleus                  |
| 6718 | ENSG00000140835 | CHST4    | Enhanced Granular expression primarily in gallbladder |
| 6719 | ENSG00000140836 | ZFHX3    | UncertainNuclear a cytoplasm;nucleus                  |
| 6720 | ENSG00000140839 | CLEC18B  | UncertainRNA-based expert annotation gave inconclus:  |
| 6721 | ENSG00000140848 | CPNE2    | Approved Cytoplasm cytoplasm                          |
| 6722 | ENSG00000140854 | KATNB1   | Enhanced Cytoplasm cytoplasm                          |
| 6723 | ENSG00000140859 | KIFC3    | UncertainCytoplasm cytoplasm                          |
| 6724 | ENSG00000140873 | ADAMTS18 | UncertainUbiquitou cytoplasm                          |
| 6725 | ENSG00000140876 | NUDT7    | SupportedUbiquitou cytoplasm                          |
| 6726 | ENSG00000140905 | GCSH     | Approved Cytoplasm cytoplasm                          |
| 6727 | ENSG00000140931 | CMTM3    | Approved Cytoplasm cytoplasm                          |
| 6728 | ENSG00000140937 | CDH11    | Enhanced Cytoplasm cytoplasm                          |
| 6729 | ENSG00000140939 | NOL3     | Enhanced Cytoplasm cytoplasm;nucleus                  |
| 6730 | ENSG00000140941 | MAP1LC3B | UncertainCytoplasm cytoplasm                          |
| 6731 | ENSG00000140943 | MBTPS1   | SupportedCytoplasm cytoplasm                          |
| 6732 | ENSG00000140945 | CDH13    | Enhanced Distinct cytoplasm;plasma membrane           |
| 6733 | ENSG00000140950 | TLDC1    | Approved Cytoplasm cytoplasm                          |
| 6734 | ENSG00000140968 | IRF8     | Enhanced Selective nucleus                            |
| 6735 | ENSG00000140983 | RHOT2    | Approved Cytoplasm cytoplasm                          |
| 6736 | ENSG00000140986 | RPL3L    | Enhanced Cytoplasm cytoplasm                          |
| 6737 | ENSG00000140987 | ZSCAN32  | UncertainEstimation of protein expression could not   |
| 6738 | ENSG00000140988 | RPS2     | Approved Cytoplasm cytoplasm                          |
| 6739 | ENSG00000140990 | NDUFB10  | SupportedCytoplasm cytoplasm                          |
| 6740 | ENSG00000140992 | PDPK1    | SupportedGeneral c cytoplasm                          |
| 6741 | ENSG00000140993 | TIGD7    | UncertainGeneral n cytoplasm;nucleus                  |
| 6742 | ENSG00000140995 | DEF8     | Approved General c cytoplasm                          |
| 6743 | ENSG00000141002 | TCF25    | Enhanced General c cytoplasm                          |
| 6744 | ENSG00000141012 | GALNS    | SupportedGranular cytoplasm                           |
| 6745 | ENSG00000141013 | GAS8     | Approved Cytoplasm cytoplasm;plasma membrane          |
| 6746 | ENSG00000141026 | MED9     | UncertainEstimation of protein expression could not   |
| 6747 | ENSG00000141027 | NCOR1    | SupportedUbiquitounucleus                             |
| 6748 | ENSG00000141030 | COPS3    | Approved Nuclear a cytoplasm;nucleus                  |
| 6749 | ENSG00000141034 | GID4     | UncertainCytoplasm cytoplasm                          |
| 6750 | ENSG00000141040 | ZNF287   | UncertainEstimation of protein expression could not   |
| 6751 | ENSG00000141052 | MYOCD    | Approved Nuclear enucleus                             |
| 6752 | ENSG00000141068 | KSR1     | UncertainGeneral c cytoplasm                          |
| 6753 | ENSG00000141076 | UTP4     | Approved Nucleolar nucleus                            |
| 6754 | ENSG00000141086 | CTRL     | Enhanced Highly se cytoplasm                          |
| 6755 | ENSG00000141096 | DPEP3    | Enhanced Selective cytoplasm                          |
| 6756 | ENSG00000141098 | GFOD2    | UncertainCytoplasm cytoplasm                          |
| 6757 | ENSG00000141101 | NOB1     | Approved Mainly n nucleus                             |
| 6758 | ENSG00000141127 | PRPSAP2  | Approved Cytoplasm cytoplasm                          |
| 6759 | ENSG00000141179 | PCTP     | Approved Cytoplasm cytoplasm                          |
| 6760 | ENSG00000141198 | TOM1L1   | UncertainCytoplasm cytoplasm                          |
| 6761 | ENSG00000141200 | KIF2B    | UncertainMainly c cytoplasm                           |
| 6762 | ENSG00000141219 | C17orf80 | UncertainCytoplasm cytoplasm                          |
| 6763 | ENSG00000141232 | TOB1     | Approved Nuclear enucleus                             |

|      |                 |          |                                                           |
|------|-----------------|----------|-----------------------------------------------------------|
| 6764 | ENSG00000141252 | VPS53    | Approved Cytoplasm cytoplasm                              |
| 6765 | ENSG00000141258 | SGSM2    | Approved Ubiquitous cytoplasm                             |
| 6766 | ENSG00000141279 | NPEPPS   | Uncertain Cytoplasm cytoplasm                             |
| 6767 | ENSG00000141293 | SKAP1    | Enhanced Selective cytoplasm                              |
| 6768 | ENSG00000141294 | LRRC46   | Enhanced Expression in ciliated cells and seminiferous    |
| 6769 | ENSG00000141295 | SCRN2    | Enhanced Ubiquitous cytoplasm                             |
| 6770 | ENSG00000141298 | SSH2     | Uncertain Cytoplasm cytoplasm                             |
| 6771 | ENSG00000141314 | RHBDL3   | Uncertain Estimation of protein expression could not      |
| 6772 | ENSG00000141316 | SPACA3   | Enhanced Expression in mature spermatocytes, testis       |
| 6773 | ENSG00000141337 | ARSG     | Enhanced Cytoplasm cytoplasm                              |
| 6774 | ENSG00000141338 | ABCA8    | Enhanced Cytoplasm cytoplasm; plasma membrane             |
| 6775 | ENSG00000141367 | CLTC     | Approved General cytoplasm; plasma membrane               |
| 6776 | ENSG00000141371 | C17orf64 | Enhanced Nuclear nucleus                                  |
| 6777 | ENSG00000141376 | BCAS3    | Approved Nuclear nucleus                                  |
| 6778 | ENSG00000141378 | PTRH2    | Supported Ubiquitous cytoplasm                            |
| 6779 | ENSG00000141380 | SS18     | Supported General nucleus                                 |
| 6780 | ENSG00000141384 | TAF4B    | Uncertain Cytoplasm cytoplasm                             |
| 6781 | ENSG00000141385 | AFG3L2   | Enhanced Ubiquitous cytoplasm                             |
| 6782 | ENSG00000141401 | IMPA2    | Approved Cytoplasm cytoplasm                              |
| 6783 | ENSG00000141404 | GNAL     | Enhanced Protein expression in several tissues, including |
| 6784 | ENSG00000141424 | SLC39A6  | Approved General cytoplasm; nucleus                       |
| 6785 | ENSG00000141425 | RPRD1A   | Supported General nucleus                                 |
| 6786 | ENSG00000141428 | C18orf21 | Uncertain Cytoplasm cytoplasm; nucleus                    |
| 6787 | ENSG00000141429 | GALNT1   | Uncertain General cytoplasm; nucleus; plasma membrane     |
| 6788 | ENSG00000141431 | ASXL3    | Uncertain Estimation of protein expression could not      |
| 6789 | ENSG00000141433 | ADCYAP1  | Supported Cytoplasm cytoplasm                             |
| 6790 | ENSG00000141434 | MEP1B    | Enhanced Selective plasma membrane                        |
| 6791 | ENSG00000141437 | SLC25A52 | Uncertain Estimation of protein expression could not      |
| 6792 | ENSG00000141441 | GAREM1   | Approved Cytoplasm cytoplasm                              |
| 6793 | ENSG00000141446 | ESC01    | Approved Cytoplasm cytoplasm; nucleus                     |
| 6794 | ENSG00000141447 | OSBPL1A  | Supported General cytoplasm; nucleus                      |
| 6795 | ENSG00000141448 | GATA6    | Uncertain Nuclear nucleus                                 |
| 6796 | ENSG00000141449 | GREB1L   | Uncertain Estimation of protein expression could not      |
| 6797 | ENSG00000141452 | RMC1     | Uncertain Cytoplasm cytoplasm; plasma membrane            |
| 6798 | ENSG00000141456 | PELP1    | Supported Ubiquitous nucleus                              |
| 6799 | ENSG00000141458 | NPC1     | Approved General cytoplasm                                |
| 6800 | ENSG00000141469 | SLC14A1  | Supported Cytoplasm cytoplasm                             |
| 6801 | ENSG00000141485 | SLC13A5  | Approved Membrane plasma membrane                         |
| 6802 | ENSG00000141499 | WRAP53   | Enhanced Ubiquitous nucleus                               |
| 6803 | ENSG00000141503 | MINK1    | Approved Cytoplasm cytoplasm                              |
| 6804 | ENSG00000141504 | SAT2     | Enhanced High cytoplasm                                   |
| 6805 | ENSG00000141505 | ASGR1    | Enhanced Distinct cytoplasm                               |
| 6806 | ENSG00000141506 | PIK3R5   | Uncertain Cytoplasm cytoplasm                             |
| 6807 | ENSG00000141510 | TP53     | Enhanced Fractions cytoplasm; nucleus                     |
| 6808 | ENSG00000141519 | CCDC40   | Enhanced Expressed mainly in cilia.                       |
| 6809 | ENSG00000141522 | ARHGDI1A | Approved Ubiquitous cytoplasm                             |
| 6810 | ENSG00000141524 | TMC6     | Uncertain Mainly nucleus                                  |
| 6811 | ENSG00000141526 | SLC16A3  | Approved Cytoplasm cytoplasm                              |
| 6812 | ENSG00000141543 | EIF4A3   | Supported Ubiquitous nucleus                              |
| 6813 | ENSG00000141551 | CSNK1D   | Approved Nuclear cytoplasm; nucleus                       |
| 6814 | ENSG00000141552 | ANAPC11  | Approved Nuclear cytoplasm; nucleus                       |
| 6815 | ENSG00000141556 | TBCD     | Approved Cytoplasm cytoplasm                              |
| 6816 | ENSG00000141560 | FN3KRP   | Approved General nucleus; nucleus                         |
| 6817 | ENSG00000141564 | RPTOR    | Approved General cytoplasm                                |
| 6818 | ENSG00000141568 | FOXK2    | Approved Nuclear nucleus                                  |

|      |                 |           |                                                      |
|------|-----------------|-----------|------------------------------------------------------|
| 6819 | ENSG00000141569 | TRIM65    | Approved Granular cytoplasm                          |
| 6820 | ENSG00000141570 | CBX8      | Approved General ccytoplasm;nucleus                  |
| 6821 | ENSG00000141574 | SECTM1    | Approved Cytoplasmcytoplasm                          |
| 6822 | ENSG00000141576 | RNF157    | UncertainEstimation of protein expression could not  |
| 6823 | ENSG00000141577 | CEP131    | Approved Membranouplasma membrane                    |
| 6824 | ENSG00000141579 | ZNF750    | Enhanced General ccytoplasm                          |
| 6825 | ENSG00000141582 | CBX4      | Approved General ncytoplasm;nucleus                  |
| 6826 | ENSG00000141622 | RNF165    | UncertainEstimation of protein expression could not  |
| 6827 | ENSG00000141627 | DYM       | Approved General gcytoplasm                          |
| 6828 | ENSG00000141642 | ELAC1     | Approved Cytoplasmcytoplasm                          |
| 6829 | ENSG00000141644 | MBD1      | Approved General nnucleus                            |
| 6830 | ENSG00000141646 | SMAD4     | Approved Cytoplasmcytoplasm;nucleus                  |
| 6831 | ENSG00000141655 | TNFRSF11A | Approved Cytoplasmcytoplasm                          |
| 6832 | ENSG00000141664 | ZCCHC2    | UncertainCytoplasmcytoplasm                          |
| 6833 | ENSG00000141682 | PMAIP1    | UncertainCytoplasmcytoplasm                          |
| 6834 | ENSG00000141698 | NT5C3B    | Approved Nuclear enucleus                            |
| 6835 | ENSG00000141699 | RETREG3   | UncertainNuclear acytoplasm;nucleus                  |
| 6836 | ENSG00000141736 | ERBB2     | Enhanced Cytoplasmcytoplasm;plasma membrane          |
| 6837 | ENSG00000141738 | GRB7      | Approved Cytoplasmcytoplasm                          |
| 6838 | ENSG00000141741 | MIEN1     | Approved Cytoplasmcytoplasm                          |
| 6839 | ENSG00000141744 | PNMT      | Enhanced Selectivecytoplasm                          |
| 6840 | ENSG00000141748 | ARL5C     | UncertainEstimation of protein expression could not  |
| 6841 | ENSG00000141753 | IGFBP4    | SupportedDistinct plasma membrane                    |
| 6842 | ENSG00000141756 | FKBP10    | Enhanced Cytoplasmcytoplasm                          |
| 6843 | ENSG00000141837 | CACNA1A   | Enhanced Distinct expression in oligodendrocytes.    |
| 6844 | ENSG00000141854 | MISP3     | UncertainEstimation of protein expression could not  |
| 6845 | ENSG00000141858 | SAMD1     | UncertainEstimation of protein expression could not  |
| 6846 | ENSG00000141867 | BRD4      | SupportedUbiquitouucleus                             |
| 6847 | ENSG00000141873 | SLC39A3   | UncertainUbiquitoucytoplasm                          |
| 6848 | ENSG00000141905 | NFIC      | SupportedNuclear enucleus                            |
| 6849 | ENSG00000141934 | PLPP2     | UncertainCytoplasmcytoplasm                          |
| 6850 | ENSG00000141946 | ZIM3      | UncertainEstimation of protein expression could not  |
| 6851 | ENSG00000141956 | PRDM15    | UncertainEstimation of protein expression could not  |
| 6852 | ENSG00000141959 | PFKL      | Approved Cytoplasmcytoplasm                          |
| 6853 | ENSG00000141968 | VAV1      | Enhanced Cytoplasmcytoplasm                          |
| 6854 | ENSG00000141971 | MVB12A    | Approved Cytoplasmcytoplasm;plasma membrane          |
| 6855 | ENSG00000141977 | CIB3      | UncertainEstimation of protein expression could not  |
| 6856 | ENSG00000141985 | SH3GL1    | Approved Cytoplasmcytoplasm                          |
| 6857 | ENSG00000141994 | DUS3L     | UncertainGeneral ccytoplasm                          |
| 6858 | ENSG00000142002 | DPP9      | Approved Cytoplasmcytoplasm;nucleus                  |
| 6859 | ENSG00000142025 | DMRTC2    | UncertainNucleolarnucleus                            |
| 6860 | ENSG00000142039 | CCDC97    | Enhanced Nuclear anucleus;plasma membrane            |
| 6861 | ENSG00000142046 | TMEM91    | UncertainEstimation of protein expression could not  |
| 6862 | ENSG00000142065 | ZFP14     | UncertainEstimation of protein expression could not  |
| 6863 | ENSG00000142082 | SIRT3     | Approved Cytoplasmcytoplasm                          |
| 6864 | ENSG00000142089 | IFITM3    | UncertainCytoplasmcytoplasm                          |
| 6865 | ENSG00000142102 | PGGHG     | UncertainCytoplasmcytoplasm                          |
| 6866 | ENSG00000142149 | HUNK      | Approved General ccytoplasm                          |
| 6867 | ENSG00000142156 | COL6A1    | Enhanced Distinct positivity in connective tissue at |
| 6868 | ENSG00000142166 | IFNAR1    | UncertainCytoplasmcytoplasm                          |
| 6869 | ENSG00000142168 | SOD1      | Enhanced General ccytoplasm;nucleus                  |
| 6870 | ENSG00000142173 | COL6A2    | Enhanced Distinct cytoplasm                          |
| 6871 | ENSG00000142178 | SIK1      | Approved General ncytoplasm;nucleus                  |
| 6872 | ENSG00000142182 | DNMT3L    | Approved Nuclear enucleus                            |
| 6873 | ENSG00000142185 | TRPM2     | Enhanced Cytoplasmcytoplasm                          |

|      |                 |           |                                                                   |
|------|-----------------|-----------|-------------------------------------------------------------------|
| 6874 | ENSG00000142186 | SCYL1     | UncertainExpression in several tissues including smc              |
| 6875 | ENSG00000142188 | TMEM50B   | Approved Cytoplasmcytoplasm;nucleus                               |
| 6876 | ENSG00000142192 | APP       | Enhanced Cytoplasmcytoplasm                                       |
| 6877 | ENSG00000142197 | DOPEY2    | Approved Cytoplasmcytoplasm;nucleus                               |
| 6878 | ENSG00000142207 | URB1      | SupportedGeneral nnucleus                                         |
| 6879 | ENSG00000142208 | AKT1      | SupportedUbiquitousnucleus                                        |
| 6880 | ENSG00000142230 | SAE1      | SupportedGeneral nnucleus                                         |
| 6881 | ENSG00000142235 | LMTK3     | Enhanced Cytoplasmcytoplasm                                       |
| 6882 | ENSG00000142273 | CBLC      | Approved Cytoplasmcytoplasm;nucleus                               |
| 6883 | ENSG00000142303 | ADAMTS10  | UncertainCytoplasmcytoplasm                                       |
| 6884 | ENSG00000142319 | SLC6A3    | Enhanced Highly expressed in neurons in substantia nigra          |
| 6885 | ENSG00000142327 | RNPEPL1   | UncertainCytoplasmcytoplasm;nucleus                               |
| 6886 | ENSG00000142330 | CAPN10    | Approved Cytoplasmcytoplasm                                       |
| 6887 | ENSG00000142347 | MYO1F     | Enhanced Cytoplasmcytoplasm                                       |
| 6888 | ENSG00000142405 | NLRP12    | Approved Cytoplasmcytoplasm                                       |
| 6889 | ENSG00000142408 | CACNG8    | Enhanced Selective expression in CNS.                             |
| 6890 | ENSG00000142409 | ZNF787    | SupportedGeneral nnucleus                                         |
| 6891 | ENSG00000142444 | TIMM29    | Approved General nnucleus                                         |
| 6892 | ENSG00000142449 | FBN3      | UncertainEstimation of protein expression could not be determined |
| 6893 | ENSG00000142453 | CARM1     | SupportedGeneral c cytoplasm;nucleus                              |
| 6894 | ENSG00000142459 | EVI5L     | Approved Cytoplasmcytoplasm                                       |
| 6895 | ENSG00000142494 | SLC47A1   | Enhanced Cytoplasmcytoplasm;plasma membrane                       |
| 6896 | ENSG00000142507 | PSMB6     | SupportedUbiquitouscytoplasm;nucleus                              |
| 6897 | ENSG00000142512 | SIGLEC10  | Enhanced High cytocytoplasm                                       |
| 6898 | ENSG00000142515 | KLK3      | Enhanced Selectivecytoplasm                                       |
| 6899 | ENSG00000142528 | ZNF473    | UncertainEstimation of protein expression could not be determined |
| 6900 | ENSG00000142534 | RPS11     | UncertainCytoplasmcytoplasm                                       |
| 6901 | ENSG00000142539 | AC020909  | UncertainEstimation of protein expression could not be determined |
| 6902 | ENSG00000142541 | RPL13A    | Approved Cytoplasmcytoplasm                                       |
| 6903 | ENSG00000142544 | CTU1      | UncertainCytoplasmcytoplasm                                       |
| 6904 | ENSG00000142546 | NOSIP     | Approved Cytoplasmcytoplasm;nucleus                               |
| 6905 | ENSG00000142549 | IGLON5    | Approved Cytoplasmcytoplasm                                       |
| 6906 | ENSG00000142552 | RCN3      | UncertainUbiquitouscytoplasm                                      |
| 6907 | ENSG00000142556 | ZNF614    | UncertainEstimation of protein expression could not be determined |
| 6908 | ENSG00000142583 | SLC2A5    | Enhanced Expressiocytoplasm;plasma membrane                       |
| 6909 | ENSG00000142599 | RERE      | UncertainCytoplasmcytoplasm                                       |
| 6910 | ENSG00000142606 | MMEL1     | UncertainEstimation of protein expression could not be determined |
| 6911 | ENSG00000142609 | CFAP74    | Enhanced Expression in ciliated cells in fallopian tube           |
| 6912 | ENSG00000142619 | PADI3     | UncertainEstimation of protein expression could not be determined |
| 6913 | ENSG00000142621 | FHAD1     | Enhanced Cytoplasmcytoplasm                                       |
| 6914 | ENSG00000142623 | PADI1     | Enhanced Cytoplasmcytoplasm;nucleus                               |
| 6915 | ENSG00000142634 | EFHD2     | Enhanced Cytoplasmcytoplasm;plasma membrane                       |
| 6916 | ENSG00000142655 | PEX14     | SupportedUbiquitouscytoplasm                                      |
| 6917 | ENSG00000142657 | PGD       | Enhanced Cytoplasmcytoplasm                                       |
| 6918 | ENSG00000142669 | SH3BGRL3  | Approved Cytoplasmcytoplasm                                       |
| 6919 | ENSG00000142675 | CNKSR1    | UncertainEstimation of protein expression could not be determined |
| 6920 | ENSG00000142676 | RPL11     | Approved Cytoplasmcytoplasm                                       |
| 6921 | ENSG00000142684 | ZNF593    | SupportedUbiquitousnucleus                                        |
| 6922 | ENSG00000142686 | C1orf216  | UncertainCytoplasmcytoplasm;plasma membrane                       |
| 6923 | ENSG00000142687 | KIAA0319L | SupportedCytoplasmcytoplasm                                       |
| 6924 | ENSG00000142694 | EVA1B     | Approved Cytoplasmcytoplasm                                       |
| 6925 | ENSG00000142700 | DMRTA2    | UncertainEstimation of protein expression could not be determined |
| 6926 | ENSG00000142731 | PLK4      | Approved Cytoplasmcytoplasm                                       |
| 6927 | ENSG00000142733 | MAP3K6    | Approved Ubiquitouscytoplasm                                      |
| 6928 | ENSG00000142748 | FCN3      | Approved Plasma pocytoplasm;plasma membrane                       |

|      |                 |           |           |                                            |
|------|-----------------|-----------|-----------|--------------------------------------------|
| 6929 | ENSG00000142751 | GPN2      | Uncertain | Estimation of protein expression could not |
| 6930 | ENSG00000142765 | SYTL1     | Enhanced  | Cytoplasm cytoplasm; plasma membrane       |
| 6931 | ENSG00000142784 | WDC1      | Uncertain | Cytoplasm cytoplasm                        |
| 6932 | ENSG00000142789 | CELA3A    | Supported | Selective cytoplasm                        |
| 6933 | ENSG00000142794 | NBPF3     | Supported | Cytoplasm cytoplasm                        |
| 6934 | ENSG00000142798 | HSPG2     | Approved  | Cytoplasm cytoplasm                        |
| 6935 | ENSG00000142856 | ITGB3BP   | Approved  | Nuclear acytoplasm; nucleus                |
| 6936 | ENSG00000142864 | SERBP1    | Supported | Ubiquitous cytoplasm                       |
| 6937 | ENSG00000142867 | BCL10     | Approved  | Cytoplasm cytoplasm                        |
| 6938 | ENSG00000142871 | CYR61     | Uncertain | Cytoplasm cytoplasm                        |
| 6939 | ENSG00000142875 | PRKACB    | Approved  | General c cytoplasm                        |
| 6940 | ENSG00000142892 | PIGK      | Uncertain | Estimation of protein expression could not |
| 6941 | ENSG00000142910 | TINAGL1   | Approved  | High expression in endothelial cells and s |
| 6942 | ENSG00000142949 | PTPRF     | Uncertain | Cytoplasm cytoplasm                        |
| 6943 | ENSG00000142959 | BEST4     | Uncertain | Estimation of protein expression could not |
| 6944 | ENSG00000142973 | CYP4B1    | Approved  | Cytoplasm cytoplasm                        |
| 6945 | ENSG00000143001 | TMEM61    | Uncertain | Estimation of protein expression could not |
| 6946 | ENSG00000143006 | DMRTB1    | Enhanced  | Selective nucleus                          |
| 6947 | ENSG00000143013 | LMO4      | Approved  | Cytoplasm cytoplasm; nucleus               |
| 6948 | ENSG00000143036 | SLC44A3   | Enhanced  | Cytoplasm cytoplasm; plasma membrane       |
| 6949 | ENSG00000143061 | IGSF3     | Approved  | Luminal m plasma membrane                  |
| 6950 | ENSG00000143067 | ZNF697    | Uncertain | Estimation of protein expression could not |
| 6951 | ENSG00000143079 | CTTNBP2NL | Approved  | Cytoplasm cytoplasm                        |
| 6952 | ENSG00000143093 | STRIP1    | Approved  | Cytoplasm cytoplasm                        |
| 6953 | ENSG00000143106 | PSMA5     | Approved  | General c cytoplasm; nucleus               |
| 6954 | ENSG00000143107 | FND7      | Enhanced  | Expression in seminiferous ducts.          |
| 6955 | ENSG00000143110 | C1orf162  | Approved  | Nuclear enucleus                           |
| 6956 | ENSG00000143119 | CD53      | Enhanced  | Mainly c cytoplasm                         |
| 6957 | ENSG00000143126 | CELSR2    | Uncertain | Estimation of protein expression could not |
| 6958 | ENSG00000143147 | GPR161    | Uncertain | Ubiquitous cytoplasm                       |
| 6959 | ENSG00000143149 | ALDH9A1   | Approved  | General c cytoplasm                        |
| 6960 | ENSG00000143153 | ATP1B1    | Enhanced  | Membranous plasma membrane                 |
| 6961 | ENSG00000143155 | TIPRL     | Approved  | Cytoplasm cytoplasm; nucleus               |
| 6962 | ENSG00000143156 | NME7      | Uncertain | Expression in several tissues.             |
| 6963 | ENSG00000143157 | POGK      | Approved  | Mainly n nucleus                           |
| 6964 | ENSG00000143158 | MPC2      | Uncertain | Cytoplasm cytoplasm                        |
| 6965 | ENSG00000143167 | GPA33     | Enhanced  | Highly s plasma membrane                   |
| 6966 | ENSG00000143171 | RXRG      | Uncertain | Estimation of protein expression could not |
| 6967 | ENSG00000143178 | TBX19     | Enhanced  | Nuclear enucleus                           |
| 6968 | ENSG00000143184 | XCL1      | Approved  | Cytoplasm cytoplasm                        |
| 6969 | ENSG00000143185 | XCL2      | Approved  | Cytoplasm cytoplasm                        |
| 6970 | ENSG00000143190 | POU2F1    | Supported | Nuclear enucleus                           |
| 6971 | ENSG00000143194 | MAEL      | Approved  | Cytoplasm cytoplasm                        |
| 6972 | ENSG00000143195 | ILDR2     | Uncertain | Nuclear enucleus                           |
| 6973 | ENSG00000143199 | ADCY10    | Approved  | Cytoplasm cytoplasm; plasma membrane       |
| 6974 | ENSG00000143217 | NECTIN4   | Enhanced  | Membranous cytoplasm; plasma membrane      |
| 6975 | ENSG00000143222 | UFC1      | Enhanced  | Cytoplasm cytoplasm                        |
| 6976 | ENSG00000143224 | PPOX      | Uncertain | Cytoplasm cytoplasm; nucleus               |
| 6977 | ENSG00000143226 | FCGR2A    | Enhanced  | Cytoplasm cytoplasm                        |
| 6978 | ENSG00000143256 | PFDN2     | Approved  | Ubiquitous cytoplasm; nucleus              |
| 6979 | ENSG00000143258 | USP21     | Uncertain | Cytoplasm cytoplasm                        |
| 6980 | ENSG00000143278 | F13B      | Supported | Positive plasma membrane                   |
| 6981 | ENSG00000143294 | PRCC      | Supported | General n nucleus                          |
| 6982 | ENSG00000143303 | RRNAD1    | Approved  | Mainly n nucleus                           |
| 6983 | ENSG00000143314 | MRPL24    | Approved  | General c cytoplasm                        |

|      |                 |          |           |                                             |
|------|-----------------|----------|-----------|---------------------------------------------|
| 6984 | ENSG00000143315 | PIGM     | Uncertain | Estimation of protein expression could not  |
| 6985 | ENSG00000143318 | CASQ1    | Enhanced  | Selective cytoplasm                         |
| 6986 | ENSG00000143319 | ISG20L2  | Approved  | Nuclear enucleus                            |
| 6987 | ENSG00000143320 | CRABP2   | Supported | Cytoplasm cytoplasm;nucleus                 |
| 6988 | ENSG00000143321 | HDGF     | Enhanced  | Distinct nucleus                            |
| 6989 | ENSG00000143322 | ABL2     | Uncertain | General n nucleus                           |
| 6990 | ENSG00000143324 | XPR1     | Supported | General m cytoplasm;plasma membrane         |
| 6991 | ENSG00000143333 | RGS16    | Uncertain | Cytoplasm cytoplasm                         |
| 6992 | ENSG00000143337 | TOR1AIP1 | Enhanced  | Ubiquitous nucleus;plasma membrane          |
| 6993 | ENSG00000143341 | HMCN1    | Uncertain | Cytoplasm cytoplasm                         |
| 6994 | ENSG00000143344 | RGL1     | Approved  | Cytoplasm cytoplasm                         |
| 6995 | ENSG00000143353 | LYPLAL1  | Approved  | Ubiquitous cytoplasm                        |
| 6996 | ENSG00000143355 | LHX9     | Uncertain | Estimation of protein expression could not  |
| 6997 | ENSG00000143363 | PRUNE1   | Uncertain | Cytoplasm cytoplasm;plasma membrane         |
| 6998 | ENSG00000143367 | TUFT1    | Approved  | Cytoplasm cytoplasm                         |
| 6999 | ENSG00000143368 | SF3B4    | Approved  | Nuclear enucleus                            |
| 7000 | ENSG00000143369 | ECM1     | Enhanced  | Cytoplasm cytoplasm                         |
| 7001 | ENSG00000143373 | ZNF687   | Approved  | Nuclear a cytoplasm;nucleus                 |
| 7002 | ENSG00000143374 | TARS2    | Approved  | Ubiquitous cytoplasm;nucleus                |
| 7003 | ENSG00000143375 | CGN      | Enhanced  | Cytoplasm cytoplasm;plasma membrane         |
| 7004 | ENSG00000143379 | SETDB1   | Uncertain | Mainly n nucleus                            |
| 7005 | ENSG00000143382 | ADAMTSL4 | Approved  | Cytoplasm cytoplasm                         |
| 7006 | ENSG00000143384 | MCL1     | Approved  | Granular cytoplasm                          |
| 7007 | ENSG00000143390 | RFX5     | Supported | Ubiquitous nucleus                          |
| 7008 | ENSG00000143393 | PI4KB    | Approved  | Cytoplasm cytoplasm                         |
| 7009 | ENSG00000143398 | PIP5K1A  | Approved  | Cytoplasm cytoplasm                         |
| 7010 | ENSG00000143401 | ANP32E   | Supported | Ubiquitous nucleus                          |
| 7011 | ENSG00000143409 | MINDY1   | Approved  | Mainly c cytoplasm                          |
| 7012 | ENSG00000143412 | ANXA9    | Enhanced  | Membranous cytoplasm;plasma membrane        |
| 7013 | ENSG00000143416 | SELENBP1 | Enhanced  | Cytoplasm cytoplasm;nucleus                 |
| 7014 | ENSG00000143418 | CERS2    | Approved  | Cytoplasm cytoplasm                         |
| 7015 | ENSG00000143420 | ENSA     | Uncertain | General c cytoplasm;nucleus                 |
| 7016 | ENSG00000143436 | MRPL9    | Approved  | Cytoplasm cytoplasm                         |
| 7017 | ENSG00000143437 | ARNT     | Supported | Nuclear enucleus                            |
| 7018 | ENSG00000143442 | POGZ     | Enhanced  | General n nucleus                           |
| 7019 | ENSG00000143443 | Clorf56  | Enhanced  | Distinct expression in acrosomes in seminif |
| 7020 | ENSG00000143452 | HORMAD1  | Enhanced  | Nuclear enucleus                            |
| 7021 | ENSG00000143458 | GABPB2   | Uncertain | Cytoplasm cytoplasm;nucleus                 |
| 7022 | ENSG00000143473 | KCNH1    | Enhanced  | Cytoplasm cytoplasm                         |
| 7023 | ENSG00000143476 | DTL      | Uncertain | General c cytoplasm                         |
| 7024 | ENSG00000143486 | EIF2D    | Approved  | Cytoplasm cytoplasm                         |
| 7025 | ENSG00000143498 | TAF1A    | Approved  | Mainly n nucleus                            |
| 7026 | ENSG00000143499 | SMYD2    | Uncertain | Cytoplasm cytoplasm                         |
| 7027 | ENSG00000143502 | SUSD4    | Uncertain | Cytoplasm cytoplasm                         |
| 7028 | ENSG00000143507 | DUSP10   | Approved  | General c cytoplasm                         |
| 7029 | ENSG00000143512 | HHIPL2   | Enhanced  | Cytoplasm cytoplasm                         |
| 7030 | ENSG00000143514 | TP53BP2  | Supported | General c cytoplasm;nucleus                 |
| 7031 | ENSG00000143515 | ATP8B2   | Approved  | Cytoplasm cytoplasm                         |
| 7032 | ENSG00000143520 | FLG2     | Approved  | Cytoplasm cytoplasm                         |
| 7033 | ENSG00000143536 | CRNN     | Enhanced  | Highly sp cytoplasm                         |
| 7034 | ENSG00000143537 | ADAM15   | Uncertain | Cytoplasm cytoplasm                         |
| 7035 | ENSG00000143543 | JTB      | Approved  | General c cytoplasm                         |
| 7036 | ENSG00000143545 | RAB13    | Approved  | Cytoplasm cytoplasm                         |
| 7037 | ENSG00000143546 | S100A8   | Enhanced  | Selective cytoplasm;nucleus                 |
| 7038 | ENSG00000143549 | TPM3     | Approved  | Cytoplasm cytoplasm                         |



|      |                 |          |                                                      |
|------|-----------------|----------|------------------------------------------------------|
| 7039 | ENSG00000143552 | NUP210L  | Enhanced Selective cytoplasm                         |
| 7040 | ENSG00000143553 | SNAPIN   | Approved General c cytoplasm                         |
| 7041 | ENSG00000143554 | SLC27A3  | Enhanced Cytoplasm cytoplasm                         |
| 7042 | ENSG00000143556 | S100A7   | Enhanced Expression in squamous epithelia.           |
| 7043 | ENSG00000143569 | UBAP2L   | Approved Cytoplasm cytoplasm                         |
| 7044 | ENSG00000143575 | HAX1     | Approved Cytoplasm cytoplasm                         |
| 7045 | ENSG00000143578 | CREB3L4  | Enhanced Cytoplasm cytoplasm                         |
| 7046 | ENSG00000143590 | EFNA3    | Uncertain Cytoplasm cytoplasm                        |
| 7047 | ENSG00000143595 | AQP10    | Enhanced Luminal m plasma membrane                   |
| 7048 | ENSG00000143603 | KCNN3    | Enhanced Expression in brain.                        |
| 7049 | ENSG00000143612 | C1orf43  | Approved Ubiquitous cytoplasm                        |
| 7050 | ENSG00000143614 | GATAD2B  | Approved Nuclear enucleus                            |
| 7051 | ENSG00000143621 | ILF2     | Supported Ubiquitous nucleus                         |
| 7052 | ENSG00000143622 | RIT1     | Approved Cytoplasm cytoplasm                         |
| 7053 | ENSG00000143624 | INTS3    | Approved Nuclear enucleus                            |
| 7054 | ENSG00000143627 | PKLR     | Enhanced Cytoplasm cytoplasm                         |
| 7055 | ENSG00000143630 | HCN3     | Approved Cytoplasm cytoplasm                         |
| 7056 | ENSG00000143631 | FLG      | Enhanced Highly se cytoplasm                         |
| 7057 | ENSG00000143632 | ACTA1    | Enhanced Selective cytoplasm                         |
| 7058 | ENSG00000143633 | C1orf131 | Enhanced Cytoplasm cytoplasm;nucleus                 |
| 7059 | ENSG00000143641 | GALNT2   | Supported General c cytoplasm                        |
| 7060 | ENSG00000143643 | TTC13    | Uncertain Estimation of protein expression could not |
| 7061 | ENSG00000143653 | SCCPDH   | Enhanced Cytoplasm cytoplasm                         |
| 7062 | ENSG00000143674 | MAP3K21  | Uncertain Cytoplasm cytoplasm                        |
| 7063 | ENSG00000143702 | CEP170   | Uncertain Expression in several tissues, mainly in s |
| 7064 | ENSG00000143727 | ACP1     | Approved Ubiquitous cytoplasm                        |
| 7065 | ENSG00000143740 | SNAP47   | Supported General c cytoplasm; plasma membrane       |
| 7066 | ENSG00000143748 | NVL      | Supported Nucleolar cytoplasm;nucleus                |
| 7067 | ENSG00000143751 | SDE2     | Approved Nuclear enucleus                            |
| 7068 | ENSG00000143761 | ARF1     | Uncertain General c cytoplasm                        |
| 7069 | ENSG00000143768 | LEFTY2   | Approved Cytoplasm cytoplasm                         |
| 7070 | ENSG00000143771 | CNIH4    | Approved Granular cytoplasm                          |
| 7071 | ENSG00000143772 | ITPKB    | Enhanced Cytoplasm cytoplasm                         |
| 7072 | ENSG00000143774 | GUK1     | Approved Ubiquitous cytoplasm                        |
| 7073 | ENSG00000143776 | CDC42BPA | Approved General c cytoplasm                         |
| 7074 | ENSG00000143793 | C1orf35  | Approved Nuclear a cytoplasm;nucleus                 |
| 7075 | ENSG00000143797 | MBOAT2   | Uncertain Cytoplasm cytoplasm                        |
| 7076 | ENSG00000143799 | PARP1    | Supported Nuclear enucleus                           |
| 7077 | ENSG00000143811 | PYCR2    | Approved Cytoplasm cytoplasm                         |
| 7078 | ENSG00000143815 | LBR      | Enhanced Nuclear m nucleus; plasma membrane          |
| 7079 | ENSG00000143819 | EPHX1    | Enhanced Selective cytoplasm                         |
| 7080 | ENSG00000143839 | REN      | Approved Granular cytoplasm; plasma membrane         |
| 7081 | ENSG00000143845 | ETNK2    | Enhanced Cytoplasm cytoplasm                         |
| 7082 | ENSG00000143847 | PPFIA4   | Enhanced Cytoplasm cytoplasm                         |
| 7083 | ENSG00000143850 | PLEKHA6  | Enhanced Cytoplasm cytoplasm; plasma membrane        |
| 7084 | ENSG00000143851 | PTPN7    | Approved Cytoplasm cytoplasm                         |
| 7085 | ENSG00000143858 | SYT2     | Enhanced Cytoplasm cytoplasm                         |
| 7086 | ENSG00000143862 | ARL8A    | Approved Cytoplasm cytoplasm                         |
| 7087 | ENSG00000143867 | OSR1     | Uncertain Estimation of protein expression could not |
| 7088 | ENSG00000143870 | PDIA6    | Enhanced Cytoplasm cytoplasm                         |
| 7089 | ENSG00000143882 | ATP6V1C2 | Approved Cytoplasm cytoplasm                         |
| 7090 | ENSG00000143889 | HNRNPLL  | Approved Ubiquitous nucleus                          |
| 7091 | ENSG00000143891 | GALM     | Enhanced Cytoplasm cytoplasm;nucleus                 |
| 7092 | ENSG00000143921 | ABCG8    | Uncertain General c cytoplasm                        |
| 7093 | ENSG00000143924 | EML4     | Enhanced General c cytoplasm                         |

|      |                 |          |                                                      |
|------|-----------------|----------|------------------------------------------------------|
| 7094 | ENSG00000143933 | CALM2    | Approved Ubiquitous cytoplasm                        |
| 7095 | ENSG00000143942 | CHAC2    | Approved Cytoplasm cytoplasm                         |
| 7096 | ENSG00000143947 | RPS27A   | Supported General n cytoplasm;nucleus                |
| 7097 | ENSG00000143951 | WDPCP    | Uncertain Cytoplasm cytoplasm                        |
| 7098 | ENSG00000143954 | REG3G    | Uncertain Plasma pr plasma membrane                  |
| 7099 | ENSG00000143971 | ETAA1    | Uncertain Neuroglia cytoplasm                        |
| 7100 | ENSG00000143977 | SNRPG    | Supported General n nucleus                          |
| 7101 | ENSG00000143994 | ABHD1    | Uncertain General m cytoplasm;plasma membrane        |
| 7102 | ENSG00000143995 | MEIS1    | Approved cytoplasm cytoplasm;nucleus                 |
| 7103 | ENSG00000144010 | TRIM43B  | Uncertain Estimation of protein expression could not |
| 7104 | ENSG00000144015 | TRIM43   | Uncertain Estimation of protein expression could not |
| 7105 | ENSG00000144021 | CIAO1    | Uncertain Nuclear a cytoplasm;nucleus                |
| 7106 | ENSG00000144026 | ZNF514   | Approved Ubiquitous nucleus                          |
| 7107 | ENSG00000144028 | SNRNP200 | Approved Nuclear e nucleus                           |
| 7108 | ENSG00000144029 | MRPS5    | Approved Ubiquitous cytoplasm                        |
| 7109 | ENSG00000144031 | ANKRD53  | Approved Cytoplasm cytoplasm                         |
| 7110 | ENSG00000144034 | TPRKB    | Approved Cytoplasm cytoplasm;nucleus                 |
| 7111 | ENSG00000144035 | NAT8     | Enhanced Cytoplasm cytoplasm                         |
| 7112 | ENSG00000144036 | EXOC6B   | Approved Nuclear a cytoplasm;nucleus                 |
| 7113 | ENSG00000144040 | SFXN5    | Approved Cytoplasm cytoplasm                         |
| 7114 | ENSG00000144043 | TEX261   | Approved Cytoplasm cytoplasm                         |
| 7115 | ENSG00000144045 | DQX1     | Enhanced Granular cytoplasm                          |
| 7116 | ENSG00000144057 | ST6GAL2  | Uncertain Estimation of protein expression could not |
| 7117 | ENSG00000144061 | NPHP1    | Approved Cytoplasm cytoplasm                         |
| 7118 | ENSG00000144063 | MALL     | Uncertain Nuclear e nucleus                          |
| 7119 | ENSG00000144115 | THNSL2   | Approved Cytoplasm cytoplasm                         |
| 7120 | ENSG00000144118 | RALB     | Enhanced Cytoplasm cytoplasm;plasma membrane         |
| 7121 | ENSG00000144119 | C1QL2    | Uncertain Estimation of protein expression could not |
| 7122 | ENSG00000144120 | TMEM177  | Uncertain Estimation of protein expression could not |
| 7123 | ENSG00000144130 | NT5DC4   | Uncertain Estimation of protein expression could not |
| 7124 | ENSG00000144134 | RABL2A   | Approved Cytoplasm cytoplasm                         |
| 7125 | ENSG00000144136 | SLC20A1  | Approved Cytoplasm cytoplasm                         |
| 7126 | ENSG00000144161 | ZC3H8    | Approved Nuclear e nucleus                           |
| 7127 | ENSG00000144182 | LIPT1    | Approved Cytoplasm cytoplasm                         |
| 7128 | ENSG00000144191 | CNGA3    | Approved Expressed in neuronal projections and axons |
| 7129 | ENSG00000144199 | FAHD2B   | Approved Cytoplasm cytoplasm                         |
| 7130 | ENSG00000144218 | AFF3     | Approved Mainly n nucleus                            |
| 7131 | ENSG00000144224 | UBXN4    | Approved General c cytoplasm                         |
| 7132 | ENSG00000144227 | NXPH2    | Approved Cytoplasm cytoplasm                         |
| 7133 | ENSG00000144228 | SPOPL    | Uncertain Cytoplasm cytoplasm                        |
| 7134 | ENSG00000144229 | THSD7B   | Uncertain Estimation of protein expression could not |
| 7135 | ENSG00000144230 | GPR17    | Enhanced Expression in astrocytes and a subset of i  |
| 7136 | ENSG00000144231 | POLR2D   | Approved Nuclear e nucleus                           |
| 7137 | ENSG00000144233 | AMMECR1L | Uncertain Mainly c cytoplasm                         |
| 7138 | ENSG00000144278 | GALNT13  | Approved Cytoplasm cytoplasm                         |
| 7139 | ENSG00000144283 | PKP4     | Approved Cytoplasm cytoplasm;plasma membrane         |
| 7140 | ENSG00000144290 | SLC4A10  | Supported Distinct expression in brain.              |
| 7141 | ENSG00000144306 | SCRN3    | Approved Cytoplasm cytoplasm                         |
| 7142 | ENSG00000144320 | LNPK     | Approved General c cytoplasm                         |
| 7143 | ENSG00000144339 | TMEFF2   | Approved Cytoplasm cytoplasm                         |
| 7144 | ENSG00000144355 | DLX1     | Approved Expression in a selected set of tissues, w  |
| 7145 | ENSG00000144357 | UBR3     | Approved Mainly c cytoplasm                          |
| 7146 | ENSG00000144362 | PHOSPHO2 | Uncertain Ubiquitous cytoplasm                       |
| 7147 | ENSG00000144366 | GULP1    | Enhanced General c cytoplasm                         |
| 7148 | ENSG00000144369 | FAM171B  | Approved Cytoplasm cytoplasm                         |

|      |                 |           |                                                      |
|------|-----------------|-----------|------------------------------------------------------|
| 7149 | ENSG00000144381 | HSPD1     | SupportedGranular cytoplasm                          |
| 7150 | ENSG00000144395 | CCDC150   | UncertainEstimation of protein expression could not  |
| 7151 | ENSG00000144401 | METTL21A  | UncertainCytoplasmcytoplasm                          |
| 7152 | ENSG00000144406 | UNC80     | Enhanced Cytoplasmcytoplasm                          |
| 7153 | ENSG00000144407 | PTH2R     | Approved Cytoplasmcytoplasm                          |
| 7154 | ENSG00000144426 | NBEAL1    | UncertainCytoplasmcytoplasm                          |
| 7155 | ENSG00000144445 | KANSL1L   | UncertainGeneral ccytoplasm                          |
| 7156 | ENSG00000144451 | SPAG16    | UncertainExpressedcytoplasm                          |
| 7157 | ENSG00000144455 | SUMF1     | UncertainCytoplasmcytoplasm                          |
| 7158 | ENSG00000144460 | NYAP2     | UncertainEstimation of protein expression could not  |
| 7159 | ENSG00000144468 | RHBDD1    | Approved Cytoplasmcytoplasm                          |
| 7160 | ENSG00000144476 | ACKR3     | Approved Cytoplasmcytoplasm                          |
| 7161 | ENSG00000144488 | ESPNL     | UncertainEstimation of protein expression could not  |
| 7162 | ENSG00000144504 | ANKMY1    | Approved Cytoplasmcytoplasm                          |
| 7163 | ENSG00000144524 | COPS7B    | UncertainCytoplasmcytoplasm;nucleus                  |
| 7164 | ENSG00000144535 | DIS3L2    | Approved Ubiquitocytoplasm                           |
| 7165 | ENSG00000144554 | FANCD2    | Approved Nuclear enucleus                            |
| 7166 | ENSG00000144559 | TAMM41    | UncertainEstimation of protein expression could not  |
| 7167 | ENSG00000144560 | VGLL4     | Approved Low nuclenucleus                            |
| 7168 | ENSG00000144566 | RAB5A     | Approved Cytoplasmcytoplasm                          |
| 7169 | ENSG00000144567 | RETREG2   | Approved Highly expressed in a subset of cells in s  |
| 7170 | ENSG00000144580 | CNOT9     | Approved Cytoplasmcytoplasm                          |
| 7171 | ENSG00000144583 | 3/4/2019  | Approved Cytoplasmcytoplasm                          |
| 7172 | ENSG00000144589 | STK11IP   | Approved Cytoplasmcytoplasm                          |
| 7173 | ENSG00000144591 | GMPPA     | Approved Cytoplasmcytoplasm                          |
| 7174 | ENSG00000144597 | EAF1      | SupportedGeneral nnucleus                            |
| 7175 | ENSG00000144635 | DYNC1LI1  | Approved General ccytoplasm                          |
| 7176 | ENSG00000144642 | RBMS3     | UncertainCytoplasmcytoplasm                          |
| 7177 | ENSG00000144644 | GADL1     | UncertainEstimation of protein expression could not  |
| 7178 | ENSG00000144647 | POMGNT2   | UncertainCytoplasmcytoplasm                          |
| 7179 | ENSG00000144648 | ACKR2     | Enhanced Cytoplasmcytoplasm                          |
| 7180 | ENSG00000144649 | FAM198A   | Approved Cytoplasmcytoplasm                          |
| 7181 | ENSG00000144659 | SLC25A38  | Approved Cytoplasmcytoplasm                          |
| 7182 | ENSG00000144668 | ITGA9     | Approved Selectiveplasma membrane                    |
| 7183 | ENSG00000144674 | GOLGA4    | SupportedGeneral ccytoplasm                          |
| 7184 | ENSG00000144677 | CTDSPL    | Approved Mainly ccytoplasm                           |
| 7185 | ENSG00000144681 | STAC      | UncertainGeneral ccytoplasm                          |
| 7186 | ENSG00000144711 | IQSEC1    | UncertainCytoplasmcytoplasm;plasma membrane          |
| 7187 | ENSG00000144712 | CAND2     | Approved Cytoplasmcytoplasm                          |
| 7188 | ENSG00000144713 | RPL32     | Enhanced General ccytoplasm                          |
| 7189 | ENSG00000144724 | PTPRG     | UncertainMembranoucytoplasm;plasma membrane          |
| 7190 | ENSG00000144730 | IL17RD    | Approved Cytoplasmcytoplasm                          |
| 7191 | ENSG00000144736 | SHQ1      | UncertainCytoplasmcytoplasm                          |
| 7192 | ENSG00000144741 | SLC25A26  | SupportedGeneral ccytoplasm                          |
| 7193 | ENSG00000144744 | UBA3      | SupportedUbiquitocytoplasm;nucleus                   |
| 7194 | ENSG00000144746 | ARL6IP5   | SupportedUbiquitocytoplasm                           |
| 7195 | ENSG00000144747 | TMF1      | Approved Cytoplasmcytoplasm                          |
| 7196 | ENSG00000144749 | LRIG1     | Approved Cytoplasmcytoplasm                          |
| 7197 | ENSG00000144785 | AC073896. | UncertainEstimation of protein expression could not  |
| 7198 | ENSG00000144792 | ZNF660    | UncertainEstimation of protein expression could not  |
| 7199 | ENSG00000144802 | NFKBIZ    | Enhanced Expression in subset of immune cells, most  |
| 7200 | ENSG00000144810 | COL8A1    | Enhanced Expression in endothelial cells and positiv |
| 7201 | ENSG00000144815 | NXPE3     | UncertainEstimation of protein expression could not  |
| 7202 | ENSG00000144821 | MYH15     | UncertainExpressed in heart and skeletal muscle, and |
| 7203 | ENSG00000144824 | PHLDB2    | Approved Ubiquitocytoplasm                           |

|      |                 |         |                                                      |
|------|-----------------|---------|------------------------------------------------------|
| 7204 | ENSG00000144827 | ABHD10  | SupportedGeneral cytoplasm                           |
| 7205 | ENSG00000144834 | TAGLN3  | Enhanced Distinct expression in neuropil of CNS.     |
| 7206 | ENSG00000144840 | RABL3   | UncertainCytoplasmcytoplasm;nucleus                  |
| 7207 | ENSG00000144843 | ADPRH   | Approved Ubiquitouscytoplasm                         |
| 7208 | ENSG00000144847 | IGSF11  | UncertainCytoplasmcytoplasm                          |
| 7209 | ENSG00000144848 | ATG3    | Enhanced Cytoplasmcytoplasm                          |
| 7210 | ENSG00000144857 | BOC     | UncertainMainly cytoplasm                            |
| 7211 | ENSG00000144867 | SRPRB   | Approved Cytoplasmcytoplasm                          |
| 7212 | ENSG00000144868 | TMEM108 | Enhanced Cytoplasmcytoplasm                          |
| 7213 | ENSG00000144891 | AGTR1   | Enhanced Cytoplasmcytoplasm                          |
| 7214 | ENSG00000144893 | MED12L  | Enhanced Expressed in testis and brain.              |
| 7215 | ENSG00000144895 | EIF2A   | Approved General ccytoplasm                          |
| 7216 | ENSG00000144908 | ALDH1L1 | Enhanced General ccytoplasm                          |
| 7217 | ENSG00000144935 | TRPC1   | SupportedUbiquitouscytoplasm                         |
| 7218 | ENSG00000144959 | NCEH1   | Enhanced Cytoplasmcytoplasm                          |
| 7219 | ENSG00000144962 | SPATA16 | Enhanced Selectivenucleus                            |
| 7220 | ENSG00000145002 | FAM86B2 | UncertainCytoplasmcytoplasm                          |
| 7221 | ENSG00000145012 | LPP     | Enhanced Cytoplasmcytoplasm                          |
| 7222 | ENSG00000145014 | TMEM44  | UncertainEstimation of protein expression could not  |
| 7223 | ENSG00000145016 | RUBCN   | Approved Cytoplasmcytoplasm                          |
| 7224 | ENSG00000145020 | AMT     | SupportedUbiquitouscytoplasm                         |
| 7225 | ENSG00000145022 | TCTA    | Approved Ubiquitouscytoplasm;plasma membrane         |
| 7226 | ENSG00000145040 | UCN2    | UncertainRNA-based expert annotation gave inconclus: |
| 7227 | ENSG00000145041 | DCAF1   | Approved Ubiquitouscytoplasm                         |
| 7228 | ENSG00000145050 | MANF    | Approved Cytoplasmcytoplasm                          |
| 7229 | ENSG00000145088 | EAF2    | Enhanced Nuclear enucleus                            |
| 7230 | ENSG00000145103 | ILDR1   | Approved Cytoplasmcytoplasm                          |
| 7231 | ENSG00000145113 | MUC4    | Approved Cytoplasmcytoplasm;plasma membrane          |
| 7232 | ENSG00000145147 | SLIT2   | UncertainPlasma prplasma membrane                    |
| 7233 | ENSG00000145191 | EIF2B5  | UncertainCytoplasmcytoplasm                          |
| 7234 | ENSG00000145192 | AHSG    | Enhanced Distinct plasma membrane                    |
| 7235 | ENSG00000145194 | ECE2    | UncertainCytoplasmcytoplasm                          |
| 7236 | ENSG00000145198 | VWA5B2  | Enhanced General ccytoplasm                          |
| 7237 | ENSG00000145214 | DGKQ    | UncertainCytoplasmcytoplasm                          |
| 7238 | ENSG00000145216 | FIP1L1  | SupportedUbiquitousnucleus                           |
| 7239 | ENSG00000145217 | SLC26A1 | UncertainCytoplasmcytoplasm                          |
| 7240 | ENSG00000145220 | LYAR    | Enhanced Nuclear enucleus                            |
| 7241 | ENSG00000145246 | ATP10D  | Approved Cytoplasmcytoplasm                          |
| 7242 | ENSG00000145247 | OCIAD2  | Enhanced Granular cytoplasm                          |
| 7243 | ENSG00000145248 | SLC10A4 | UncertainEstimation of protein expression could not  |
| 7244 | ENSG00000145283 | SLC10A6 | Enhanced Distinct cytoplasm                          |
| 7245 | ENSG00000145284 | SCD5    | UncertainCytoplasmcytoplasm                          |
| 7246 | ENSG00000145287 | PLAC8   | Enhanced Cytoplasmcytoplasm                          |
| 7247 | ENSG00000145293 | ENOPH1  | Enhanced Cytoplasmcytoplasm                          |
| 7248 | ENSG00000145309 | CABS1   | Enhanced Cytoplasmcytoplasm                          |
| 7249 | ENSG00000145321 | GC      | SupportedDistinct staining of extracellular deposit: |
| 7250 | ENSG00000145331 | TRMT10A | UncertainEstimation of protein expression could not  |
| 7251 | ENSG00000145332 | KLHL8   | Approved Cytoplasmcytoplasm                          |
| 7252 | ENSG00000145335 | SNCA    | Enhanced High expression in CNS and peripheral nerve |
| 7253 | ENSG00000145337 | PYURF   | UncertainCytoplasmcytoplasm;nucleus                  |
| 7254 | ENSG00000145348 | TBCK    | UncertainCytoplasmcytoplasm                          |
| 7255 | ENSG00000145349 | CAMK2D  | Approved Cytoplasmcytoplasm                          |
| 7256 | ENSG00000145354 | CISD2   | Approved Granular cytoplasm                          |
| 7257 | ENSG00000145362 | ANK2    | Enhanced Cytoplasmcytoplasm;plasma membrane          |
| 7258 | ENSG00000145365 | TIFA    | Approved Nuclear enucleus                            |

|      |                 |          |                                                      |
|------|-----------------|----------|------------------------------------------------------|
| 7259 | ENSG00000145375 | SPATA5   | Approved Cytoplasm cytoplasm                         |
| 7260 | ENSG00000145384 | FABP2    | Enhanced Selective cytoplasm                         |
| 7261 | ENSG00000145386 | CCNA2    | Enhanced Nuclear enucleus                            |
| 7262 | ENSG00000145388 | METTL14  | Supported Ubiquitous nucleus                         |
| 7263 | ENSG00000145390 | USP53    | Uncertain Mainly cytoplasm                           |
| 7264 | ENSG00000145391 | SETD7    | Enhanced Nuclear enucleus                            |
| 7265 | ENSG00000145414 | NAF1     | Approved Cytoplasm cytoplasm;nucleus                 |
| 7266 | ENSG00000145416 | 3/1/2019 | Uncertain Cytoplasm cytoplasm                        |
| 7267 | ENSG00000145425 | RPS3A    | Approved General cytoplasm                           |
| 7268 | ENSG00000145428 | RNF175   | Uncertain Estimation of protein expression could not |
| 7269 | ENSG00000145431 | PDGFC    | Approved Positive plasma membrane                    |
| 7270 | ENSG00000145439 | CBR4     | Supported General cytoplasm                          |
| 7271 | ENSG00000145476 | CYP4V2   | Approved Cytoplasm cytoplasm                         |
| 7272 | ENSG00000145491 | ROPN1L   | Enhanced Expression in cells of seminiferous ducts   |
| 7273 | ENSG00000145494 | NDUFS6   | Supported General cytoplasm                          |
| 7274 | ENSG00000145495 | 3/6/2019 | Approved Cytoplasm cytoplasm                         |
| 7275 | ENSG00000145506 | NKD2     | Uncertain Estimation of protein expression could not |
| 7276 | ENSG00000145526 | CDH18    | Uncertain Cytoplasm cytoplasm                        |
| 7277 | ENSG00000145545 | SRD5A1   | Approved Cytoplasm cytoplasm                         |
| 7278 | ENSG00000145555 | MYO10    | Enhanced Ubiquitous cytoplasm                        |
| 7279 | ENSG00000145569 | FAM105A  | Uncertain Estimation of protein expression could not |
| 7280 | ENSG00000145604 | SKP2     | Approved Nuclear cytoplasm;nucleus                   |
| 7281 | ENSG00000145623 | OSMR     | Approved Cytoplasm cytoplasm                         |
| 7282 | ENSG00000145626 | UGT3A1   | Uncertain Cytoplasm cytoplasm                        |
| 7283 | ENSG00000145632 | PLK2     | Approved Cytoplasm cytoplasm                         |
| 7284 | ENSG00000145642 | SHISAL2B | Enhanced Cytoplasm cytoplasm                         |
| 7285 | ENSG00000145649 | GZMA     | Approved Mainly cytoplasm                            |
| 7286 | ENSG00000145675 | PIK3R1   | Approved General cytoplasm                           |
| 7287 | ENSG00000145681 | HAPLN1   | Enhanced Selective cytoplasm                         |
| 7288 | ENSG00000145685 | LHFPL2   | Uncertain Cytoplasm cytoplasm                        |
| 7289 | ENSG00000145687 | SSBP2    | Approved General nucleus                             |
| 7290 | ENSG00000145692 | BHMT     | Enhanced Selective cytoplasm                         |
| 7291 | ENSG00000145700 | ANKRD31  | Enhanced Selective cytoplasm                         |
| 7292 | ENSG00000145703 | IQGAP2   | Uncertain Cytoplasm cytoplasm;plasma membrane        |
| 7293 | ENSG00000145708 | CRHBP    | Approved Cytoplasm cytoplasm;plasma membrane         |
| 7294 | ENSG00000145715 | RASA1    | Enhanced Cytoplasm cytoplasm                         |
| 7295 | ENSG00000145721 | LIX1     | Uncertain Estimation of protein expression could not |
| 7296 | ENSG00000145723 | GIN1     | Approved Cytoplasm cytoplasm;nucleus                 |
| 7297 | ENSG00000145725 | PPIP5K2  | Approved Cytoplasm cytoplasm                         |
| 7298 | ENSG00000145730 | PAM      | Enhanced Cytoplasm cytoplasm                         |
| 7299 | ENSG00000145740 | SLC30A5  | Approved Cytoplasm cytoplasm                         |
| 7300 | ENSG00000145741 | BTF3     | Approved Cytoplasm cytoplasm                         |
| 7301 | ENSG00000145743 | FBXL17   | Uncertain General cytoplasm                          |
| 7302 | ENSG00000145757 | SPATA9   | Approved Cytoplasm cytoplasm                         |
| 7303 | ENSG00000145779 | TNFAIP8  | Uncertain Cytoplasm cytoplasm                        |
| 7304 | ENSG00000145780 | FEM1C    | Approved Cytoplasm cytoplasm                         |
| 7305 | ENSG00000145781 | COMMD10  | Approved Cytoplasm cytoplasm                         |
| 7306 | ENSG00000145782 | ATG12    | Uncertain Ubiquitous cytoplasm;nucleus               |
| 7307 | ENSG00000145808 | ADAMTS19 | Uncertain Estimation of protein expression could not |
| 7308 | ENSG00000145817 | YIPF5    | Supported Cytoplasm cytoplasm                        |
| 7309 | ENSG00000145819 | ARHGAP26 | Enhanced Cytoplasm cytoplasm;plasma membrane         |
| 7310 | ENSG00000145824 | CXCL14   | Uncertain Cytoplasm cytoplasm                        |
| 7311 | ENSG00000145826 | LECT2    | Enhanced Secreted positivity in several cell types.  |
| 7312 | ENSG00000145832 | SLC25A48 | Uncertain Estimation of protein expression could not |
| 7313 | ENSG00000145833 | DDX46    | Supported Ubiquitous nucleus                         |

|      |                 |           |                                                      |
|------|-----------------|-----------|------------------------------------------------------|
| 7314 | ENSG00000145850 | TIMD4     | Approved Cytoplasmcytoplasm                          |
| 7315 | ENSG00000145860 | RNF145    | UncertainCytoplasmcytoplasm                          |
| 7316 | ENSG00000145861 | C1QTNF2   | UncertainCytoplasmcytoplasm;plasma membrane          |
| 7317 | ENSG00000145863 | GABRA6    | Approved Expression in neuropil and neuronal cells ( |
| 7318 | ENSG00000145864 | GABRB2    | Enhanced Selective expression in neuropil and cells  |
| 7319 | ENSG00000145868 | FBX038    | Approved Cytoplasmcytoplasm                          |
| 7320 | ENSG00000145879 | SPINK7    | Enhanced Cytoplasmcytoplasm                          |
| 7321 | ENSG00000145882 | PCYOX1L   | Approved Cytoplasmcytoplasm                          |
| 7322 | ENSG00000145888 | GLRA1     | UncertainEstimation of protein expression could not  |
| 7323 | ENSG00000145901 | TNIP1     | Approved General ccytoplasm                          |
| 7324 | ENSG00000145907 | G3BP1     | SupportedUbiquitoucytoplasm                          |
| 7325 | ENSG00000145908 | ZNF300    | UncertainEstimation of protein expression could not  |
| 7326 | ENSG00000145911 | N4BP3     | Approved Granular cytoplasm                          |
| 7327 | ENSG00000145912 | NHP2      | Enhanced Nucleolarnucleus                            |
| 7328 | ENSG00000145916 | RMND5B    | UncertainUbiquitounucleus                            |
| 7329 | ENSG00000145919 | BOD1      | UncertainGeneral ccytoplasm;plasma membrane          |
| 7330 | ENSG00000145920 | CPLX2     | SupportedCytoplasmcytoplasm                          |
| 7331 | ENSG00000145934 | TENM2     | UncertainEstimation of protein expression could not  |
| 7332 | ENSG00000145945 | FAM50B    | Approved Cytoplasmcytoplasm;nucleus                  |
| 7333 | ENSG00000145949 | MYLK4     | UncertainEstimation of protein expression could not  |
| 7334 | ENSG00000145975 | FAM217A   | UncertainEstimation of protein expression could not  |
| 7335 | ENSG00000145979 | TBC1D7    | Approved Cytoplasmcytoplasm                          |
| 7336 | ENSG00000145982 | FARS2     | Approved Cytoplasmcytoplasm                          |
| 7337 | ENSG00000145990 | GFOD1     | UncertainMainly ccytoplasm                           |
| 7338 | ENSG00000146007 | ZMAT2     | Approved Mainly nunucleus                            |
| 7339 | ENSG00000146013 | GFRA3     | Approved Cytoplasmcytoplasm                          |
| 7340 | ENSG00000146021 | KLHL3     | Approved Cytoplasmcytoplasm                          |
| 7341 | ENSG00000146038 | DCDC2     | Enhanced Cytoplasmcytoplasm                          |
| 7342 | ENSG00000146039 | SLC17A4   | Approved Membranouplasma membrane                    |
| 7343 | ENSG00000146047 | HIST1H2BA | Enhanced Distinct nucleus                            |
| 7344 | ENSG00000146049 | KAAG1     | Approved Expression mainly in seminiferous ducts in  |
| 7345 | ENSG00000146054 | TRIM7     | Approved Ubiquitoucytoplasm                          |
| 7346 | ENSG00000146063 | TRIM41    | Approved Cytoplasmcytoplasm                          |
| 7347 | ENSG00000146066 | HIGD2A    | UncertainGranular cytoplasm                          |
| 7348 | ENSG00000146067 | FAM193B   | Approved Ubiquitounucleus                            |
| 7349 | ENSG00000146072 | TNFRSF21  | Approved Cytoplasmcytoplasm                          |
| 7350 | ENSG00000146083 | RNF44     | UncertainNuclear acytoplasm;nucleus                  |
| 7351 | ENSG00000146085 | MUT       | Enhanced General gcytoplasm                          |
| 7352 | ENSG00000146090 | RASGEF1C  | UncertainGeneral ccytoplasm                          |
| 7353 | ENSG00000146094 | DOK3      | Enhanced Cytoplasmcytoplasm                          |
| 7354 | ENSG00000146112 | PPP1R18   | Enhanced Selectivecytoplasm                          |
| 7355 | ENSG00000146122 | DAAM2     | Approved General ccytoplasm                          |
| 7356 | ENSG00000146147 | MLIP      | Approved Cytoplasmcytoplasm                          |
| 7357 | ENSG00000146166 | LGSN      | Enhanced Selective expression in lens.               |
| 7358 | ENSG00000146192 | FGD2      | Approved High expression of immune cells.            |
| 7359 | ENSG00000146197 | SCUBE3    | UncertainEstimation of protein expression could not  |
| 7360 | ENSG00000146205 | ANO7      | Enhanced Cytoplasmcytoplasm                          |
| 7361 | ENSG00000146215 | CRIP3     | UncertainEstimation of protein expression could not  |
| 7362 | ENSG00000146216 | TTBK1     | Enhanced Cytoplasmcytoplasm                          |
| 7363 | ENSG00000146232 | NFKBIE    | SupportedUbiquitoucytoplasm                          |
| 7364 | ENSG00000146242 | TPBG      | Enhanced Cytoplasmcytoplasm;plasma membrane          |
| 7365 | ENSG00000146243 | IRAK1BP1  | UncertainEstimation of protein expression could not  |
| 7366 | ENSG00000146247 | PHIP      | Approved Ubiquitounucleus                            |
| 7367 | ENSG00000146250 | PRSS35    | UncertainEstimation of protein expression could not  |
| 7368 | ENSG00000146267 | FAXC      | UncertainEstimation of protein expression could not  |

|      |                 |          |                                                     |
|------|-----------------|----------|-----------------------------------------------------|
| 7369 | ENSG00000146278 | PNRC1    | Approved Cytoplasm cytoplasm                        |
| 7370 | ENSG00000146281 | PM20D2   | Approved Nuclear acytoplasm;nucleus                 |
| 7371 | ENSG00000146282 | RARS2    | UncertainCytoplasm cytoplasm                        |
| 7372 | ENSG00000146285 | SCML4    | Approved Low nucleocytoplasm;nucleus                |
| 7373 | ENSG00000146350 | TBC1D32  | UncertainEstimation of protein expression could not |
| 7374 | ENSG00000146352 | CLVS2    | UncertainEstimation of protein expression could not |
| 7375 | ENSG00000146373 | RNF217   | UncertainEstimation of protein expression could not |
| 7376 | ENSG00000146374 | RSP03    | UncertainCytoplasm cytoplasm                        |
| 7377 | ENSG00000146376 | ARHGAP18 | Approved General ccytoplasm;plasma membrane         |
| 7378 | ENSG00000146386 | ABRACL   | Enhanced Cytoplasm cytoplasm                        |
| 7379 | ENSG00000146399 | TAAR1    | Approved Membranouplasma membrane                   |
| 7380 | ENSG00000146409 | SLC18B1  | Approved Cytoplasm cytoplasm;nucleus                |
| 7381 | ENSG00000146410 | MTFR2    | Approved Cytoplasm cytoplasm                        |
| 7382 | ENSG00000146411 | SLC2A12  | Approved Cytoplasm cytoplasm                        |
| 7383 | ENSG00000146414 | SHPRH    | Approved Ubiquitoucytoplasm;nucleus                 |
| 7384 | ENSG00000146416 | AIG1     | Approved Cytoplasm cytoplasm                        |
| 7385 | ENSG00000146426 | TIAM2    | Approved General ccytoplasm                         |
| 7386 | ENSG00000146433 | TMEM181  | Approved Cytoplasm cytoplasm                        |
| 7387 | ENSG00000146453 | PNLDC1   | UncertainCytoplasm cytoplasm;plasma membrane        |
| 7388 | ENSG00000146457 | WTAP     | SupportedUbiquitounucleus                           |
| 7389 | ENSG00000146463 | ZMYM4    | Approved Ubiquitoucytoplasm;nucleus                 |
| 7390 | ENSG00000146469 | VIP      | SupportedCytoplasm cytoplasm                        |
| 7391 | ENSG00000146476 | ARMT1    | UncertainUbiquitoucytoplasm                         |
| 7392 | ENSG00000146477 | SLC22A3  | Approved Cytoplasm cytoplasm                        |
| 7393 | ENSG00000146530 | VWDE     | UncertainEstimation of protein expression could not |
| 7394 | ENSG00000146535 | GNA12    | Approved Cytoplasm cytoplasm                        |
| 7395 | ENSG00000146540 | C7orf50  | Approved Cytoplasm cytoplasm;nucleus                |
| 7396 | ENSG00000146555 | SDK1     | Approved Cytoplasm cytoplasm                        |
| 7397 | ENSG00000146574 | CCZ1B    | UncertainUbiquitoucytoplasm                         |
| 7398 | ENSG00000146576 | C7orf26  | UncertainCytoplasm cytoplasm;nucleus                |
| 7399 | ENSG00000146618 | FERD3L   | UncertainEstimation of protein expression could not |
| 7400 | ENSG00000146648 | EGFR     | Enhanced Cytoplasm cytoplasm;plasma membrane        |
| 7401 | ENSG00000146670 | CDCA5    | Approved Cytoplasm cytoplasm;nucleus                |
| 7402 | ENSG00000146678 | IGFBP1   | Enhanced Selectivecytoplasm                         |
| 7403 | ENSG00000146700 | SSC4D    | UncertainEstimation of protein expression could not |
| 7404 | ENSG00000146701 | MDH2     | Enhanced Granular cytoplasm                         |
| 7405 | ENSG00000146707 | POMZP3   | UncertainEstimation of protein expression could not |
| 7406 | ENSG00000146729 | NIPSNAP2 | Enhanced General ccytoplasm                         |
| 7407 | ENSG00000146731 | CCT6A    | SupportedGeneral ccytoplasm                         |
| 7408 | ENSG00000146733 | PSPH     | Approved Cytoplasm cytoplasm                        |
| 7409 | ENSG00000146755 | TRIM50   | UncertainEstimation of protein expression could not |
| 7410 | ENSG00000146776 | ATXN7L1  | Approved Cytoplasm cytoplasm;nucleus                |
| 7411 | ENSG00000146802 | TMEM168  | Approved Ubiquitoucytoplasm                         |
| 7412 | ENSG00000146826 | C7orf43  | Approved Cytoplasm cytoplasm                        |
| 7413 | ENSG00000146828 | SLC12A9  | Approved General gcytoplasm                         |
| 7414 | ENSG00000146830 | GIGYF1   | Enhanced Ubiquitoucytoplasm                         |
| 7415 | ENSG00000146833 | TRIM4    | Approved General ccytoplasm                         |
| 7416 | ENSG00000146834 | MEPCE    | SupportedGeneral nnucleus                           |
| 7417 | ENSG00000146842 | TMEM209  | UncertainEstimation of protein expression could not |
| 7418 | ENSG00000146856 | AGBL3    | UncertainEstimation of protein expression could not |
| 7419 | ENSG00000146858 | ZC3HAV1L | UncertainEstimation of protein expression could not |
| 7420 | ENSG00000146904 | EPHA1    | UncertainCytoplasm cytoplasm;plasma membrane        |
| 7421 | ENSG00000146909 | NOM1     | Approved Nuclear acytoplasm;nucleus                 |
| 7422 | ENSG00000146910 | CNPY1    | UncertainEstimation of protein expression could not |
| 7423 | ENSG00000146918 | NCAPG2   | Approved Nuclear acytoplasm;nucleus                 |

|      |                 |          |                                                     |
|------|-----------------|----------|-----------------------------------------------------|
| 7424 | ENSG00000146938 | NLGN4X   | Approved Cytoplasmcytoplasm                         |
| 7425 | ENSG00000146950 | SHROOM2  | Approved Cytoplasmcytoplasm                         |
| 7426 | ENSG00000146955 | RAB19    | UncertainEstimation of protein expression could not |
| 7427 | ENSG00000146963 | LUC7L2   | Approved Ubiquitounucleus                           |
| 7428 | ENSG00000147003 | CLTRN    | Enhanced Low cytopcytoplasm;plasma membrane         |
| 7429 | ENSG00000147010 | SH3KBP1  | Enhanced Selectivecytoplasm                         |
| 7430 | ENSG00000147027 | TMEM47   | Approved General nnucleus;plasma membrane           |
| 7431 | ENSG00000147036 | LANCL3   | Approved Cytoplasmcytoplasm                         |
| 7432 | ENSG00000147041 | SYTL5    | UncertainEstimation of protein expression could not |
| 7433 | ENSG00000147044 | CASK     | Enhanced Ubiquitoucytoplasm                         |
| 7434 | ENSG00000147050 | KDM6A    | Enhanced Nuclear enucleus                           |
| 7435 | ENSG00000147059 | SPIN2A   | UncertainEstimation of protein expression could not |
| 7436 | ENSG00000147065 | MSN      | Enhanced Cytoplasmcytoplasm;plasma membrane         |
| 7437 | ENSG00000147081 | AKAP4    | Enhanced Selective expression in spermatids of semi |
| 7438 | ENSG00000147099 | HDAC8    | SupportedGeneral nnucleus                           |
| 7439 | ENSG00000147113 | CXorf36  | UncertainCytoplasmcytoplasm                         |
| 7440 | ENSG00000147117 | ZNF157   | UncertainEstimation of protein expression could not |
| 7441 | ENSG00000147118 | ZNF182   | UncertainEstimation of protein expression could not |
| 7442 | ENSG00000147119 | CHST7    | Approved Cytoplasmcytoplasm                         |
| 7443 | ENSG00000147123 | NDUFB11  | SupportedUbiquitoucytoplasm                         |
| 7444 | ENSG00000147124 | ZNF41    | SupportedGeneral nnucleus                           |
| 7445 | ENSG00000147127 | RAB41    | UncertainEstimation of protein expression could not |
| 7446 | ENSG00000147130 | ZMYM3    | Approved Ubiquitounucleus                           |
| 7447 | ENSG00000147133 | TAF1     | SupportedUbiquitounucleus                           |
| 7448 | ENSG00000147138 | GPR174   | Enhanced Cytoplasmcytoplasm                         |
| 7449 | ENSG00000147140 | NONO     | Enhanced Ubiquitounucleus                           |
| 7450 | ENSG00000147145 | LPAR4    | UncertainEstimation of protein expression could not |
| 7451 | ENSG00000147155 | EBP      | Approved Cytoplasmcytoplasm                         |
| 7452 | ENSG00000147160 | AWAT2    | Approved Cytoplasmcytoplasm                         |
| 7453 | ENSG00000147162 | OGT      | Approved Cytoplasmcytoplasm;nucleus                 |
| 7454 | ENSG00000147164 | SNX12    | Approved Cytoplasmcytoplasm                         |
| 7455 | ENSG00000147168 | IL2RG    | Enhanced High cytopcytoplasm                        |
| 7456 | ENSG00000147174 | GCNA     | Enhanced Nuclear enucleus                           |
| 7457 | ENSG00000147180 | ZNF711   | Enhanced Nuclear enucleus                           |
| 7458 | ENSG00000147202 | DIAPH2   | Enhanced Cytoplasmcytoplasm                         |
| 7459 | ENSG00000147206 | NXF3     | Approved Nuclear acytoplasm;nucleus                 |
| 7460 | ENSG00000147223 | RIPPLY1  | UncertainEstimation of protein expression could not |
| 7461 | ENSG00000147224 | PRPS1    | UncertainNuclear enucleus                           |
| 7462 | ENSG00000147231 | CXorf57  | UncertainCytoplasmcytoplasm;plasma membrane         |
| 7463 | ENSG00000147234 | FRMPD3   | UncertainEstimation of protein expression could not |
| 7464 | ENSG00000147251 | DOCK11   | UncertainNuclear enucleus                           |
| 7465 | ENSG00000147255 | IGSF1    | Enhanced Membranoucytoplasm;plasma membrane         |
| 7466 | ENSG00000147256 | ARHGAP36 | Enhanced Highly expressed in pituitary, hypothalamu |
| 7467 | ENSG00000147274 | RBMX     | SupportedUbiquitounucleus                           |
| 7468 | ENSG00000147316 | MCPH1    | SupportedMainly nunucleus                           |
| 7469 | ENSG00000147324 | MFHAS1   | UncertainCytoplasmcytoplasm;nucleus                 |
| 7470 | ENSG00000147378 | FATE1    | Enhanced Cytoplasmcytoplasm                         |
| 7471 | ENSG00000147381 | MAGEA4   | Enhanced Expression in spermatogonia in seminiferou |
| 7472 | ENSG00000147383 | NSDHL    | Enhanced Cytoplasmcytoplasm                         |
| 7473 | ENSG00000147394 | ZNF185   | Enhanced Membranoucytoplasm;plasma membrane         |
| 7474 | ENSG00000147400 | CETN2    | Approved Cytoplasmcytoplasm                         |
| 7475 | ENSG00000147403 | RPL10    | Enhanced Ubiquitoucytoplasm                         |
| 7476 | ENSG00000147416 | ATP6V1B2 | Enhanced General ccytoplasm                         |
| 7477 | ENSG00000147419 | CCDC25   | Approved General ccytoplasm                         |
| 7478 | ENSG00000147421 | HMBX1    | Approved Low nuclenucleus                           |



|      |                 |          |                                                        |
|------|-----------------|----------|--------------------------------------------------------|
| 7479 | ENSG00000147432 | CHRN3    | Enhanced Cytoplasm cytoplasm                           |
| 7480 | ENSG00000147437 | GNRH1    | Supported Cytoplasm cytoplasm                          |
| 7481 | ENSG00000147439 | BIN3     | Approved Granular cytoplasm                            |
| 7482 | ENSG00000147443 | DOK2     | Enhanced Cytoplasm cytoplasm;nucleus                   |
| 7483 | ENSG00000147454 | SLC25A37 | Uncertain Cytoplasm cytoplasm;nucleus                  |
| 7484 | ENSG00000147457 | CHMP7    | Uncertain Nuclear enucleus                             |
| 7485 | ENSG00000147459 | DOCK5    | Approved Cytoplasm cytoplasm                           |
| 7486 | ENSG00000147465 | STAR     | Enhanced Cytoplasm cytoplasm                           |
| 7487 | ENSG00000147471 | PLPBP    | Approved Cytoplasm cytoplasm                           |
| 7488 | ENSG00000147475 | ERLIN2   | Supported Ubiquitous cytoplasm                         |
| 7489 | ENSG00000147481 | SNTG1    | Enhanced Distinct expression in brain.                 |
| 7490 | ENSG00000147488 | ST18     | Uncertain General n cytoplasm;nucleus                  |
| 7491 | ENSG00000147509 | RGS20    | Enhanced Cytoplasm cytoplasm                           |
| 7492 | ENSG00000147526 | TACC1    | Approved Ubiquitous cytoplasm;nucleus                  |
| 7493 | ENSG00000147533 | GOLGA7   | Uncertain Ubiquitous cytoplasm;nucleus                 |
| 7494 | ENSG00000147536 | GINS4    | Uncertain Nuclear a cytoplasm;nucleus                  |
| 7495 | ENSG00000147548 | NSD3     | Uncertain Cytoplasm cytoplasm                          |
| 7496 | ENSG00000147571 | CRH      | Uncertain Estimation of protein expression could not   |
| 7497 | ENSG00000147573 | TRIM55   | Approved Cytoplasm cytoplasm                           |
| 7498 | ENSG00000147576 | ADHFE1   | Enhanced Cytoplasm cytoplasm                           |
| 7499 | ENSG00000147586 | MRPS28   | Approved General g cytoplasm                           |
| 7500 | ENSG00000147592 | LACTB2   | Approved Cytoplasm cytoplasm                           |
| 7501 | ENSG00000147596 | PRDM14   | Uncertain Estimation of protein expression could not   |
| 7502 | ENSG00000147604 | RPL7     | Approved General c cytoplasm                           |
| 7503 | ENSG00000147613 | PSKH2    | Uncertain Estimation of protein expression could not   |
| 7504 | ENSG00000147614 | ATP6V0D2 | Enhanced Cytoplasm cytoplasm                           |
| 7505 | ENSG00000147642 | SYBU     | Uncertain Cytoplasm cytoplasm                          |
| 7506 | ENSG00000147647 | DPYS     | Enhanced Cytoplasm cytoplasm                           |
| 7507 | ENSG00000147649 | MTDH     | Supported Ubiquitous cytoplasm;nucleus;plasma membrane |
| 7508 | ENSG00000147650 | LRP12    | Uncertain Nuclear a cytoplasm;nucleus                  |
| 7509 | ENSG00000147654 | EBAG9    | Enhanced Ubiquitous cytoplasm                          |
| 7510 | ENSG00000147655 | RSP02    | Uncertain secreted protein.                            |
| 7511 | ENSG00000147676 | MAL2     | Uncertain Granular cytoplasm                           |
| 7512 | ENSG00000147677 | EIF3H    | Approved General c cytoplasm                           |
| 7513 | ENSG00000147679 | UTP23    | Uncertain Estimation of protein expression could not   |
| 7514 | ENSG00000147684 | NDUFB9   | Approved Cytoplasm cytoplasm                           |
| 7515 | ENSG00000147687 | TATDN1   | Uncertain Cytoplasm cytoplasm                          |
| 7516 | ENSG00000147697 | GSDMC    | Supported Cytoplasm cytoplasm                          |
| 7517 | ENSG00000147724 | FAM135B  | Uncertain Estimation of protein expression could not   |
| 7518 | ENSG00000147789 | ZNF7     | Uncertain Estimation of protein expression could not   |
| 7519 | ENSG00000147813 | NAPRT    | Enhanced Cytoplasm cytoplasm;nucleus                   |
| 7520 | ENSG00000147852 | VLDLR    | Uncertain Cytoplasm cytoplasm                          |
| 7521 | ENSG00000147853 | AK3      | Enhanced General g cytoplasm                           |
| 7522 | ENSG00000147862 | NFIB     | Supported General n nucleus                            |
| 7523 | ENSG00000147869 | CER1     | Uncertain Estimation of protein expression could not   |
| 7524 | ENSG00000147872 | PLIN2    | Supported Cytoplasm cytoplasm;plasma membrane;plasma r |
| 7525 | ENSG00000147873 | IFNA5    | Uncertain Estimation of protein expression could not   |
| 7526 | ENSG00000147874 | HAUS6    | Approved Cytoplasm cytoplasm;nucleus                   |
| 7527 | ENSG00000147883 | CDKN2B   | Uncertain Selective cytoplasm                          |
| 7528 | ENSG00000147885 | IFNA16   | Uncertain Estimation of protein expression could not   |
| 7529 | ENSG00000147889 | CDKN2A   | Enhanced Mainly n nucleus                              |
| 7530 | ENSG00000147894 | C9orf72  | Uncertain Cytoplasm cytoplasm                          |
| 7531 | ENSG00000147905 | ZCCHC7   | Uncertain General c cytoplasm                          |
| 7532 | ENSG00000147912 | FBX010   | Uncertain Cytoplasm cytoplasm                          |
| 7533 | ENSG00000147955 | SIGMAR1  | Approved Cytoplasm cytoplasm                           |

|      |                 |          |                                                      |
|------|-----------------|----------|------------------------------------------------------|
| 7534 | ENSG00000147996 | CBWD5    | Approved Cytoplasm cytoplasm                         |
| 7535 | ENSG00000148019 | CEP78    | Approved Cytoplasm cytoplasm                         |
| 7536 | ENSG00000148053 | NTRK2    | Enhanced Cytoplasm cytoplasm                         |
| 7537 | ENSG00000148057 | IDNK     | Approved Cytoplasm cytoplasm                         |
| 7538 | ENSG00000148082 | SHC3     | Uncertain General c cytoplasm;nucleus                |
| 7539 | ENSG00000148090 | AUH      | Enhanced Cytoplasm cytoplasm                         |
| 7540 | ENSG00000148120 | C9orf3   | Approved Cytoplasm cytoplasm                         |
| 7541 | ENSG00000148123 | PLPPR1   | Supported Cytoplasm cytoplasm                        |
| 7542 | ENSG00000148143 | ZNF462   | Uncertain Estimation of protein expression could not |
| 7543 | ENSG00000148153 | INIP     | Approved General n nucleus                           |
| 7544 | ENSG00000148154 | UGCG     | Approved Cytoplasm cytoplasm                         |
| 7545 | ENSG00000148156 | ACTL7B   | Enhanced Nuclear enucleus                            |
| 7546 | ENSG00000148158 | SNX30    | Uncertain Estimation of protein expression could not |
| 7547 | ENSG00000148175 | STOM     | Approved Ubiquitous cytoplasm                        |
| 7548 | ENSG00000148180 | GSN      | Supported Cytoplasm cytoplasm                        |
| 7549 | ENSG00000148187 | MRRF     | Supported General c cytoplasm                        |
| 7550 | ENSG00000148204 | CRB2     | Approved Expressioplasma membrane                    |
| 7551 | ENSG00000148218 | ALAD     | Enhanced Cytoplasm cytoplasm                         |
| 7552 | ENSG00000148219 | ASTN2    | Uncertain Estimation of protein expression could not |
| 7553 | ENSG00000148225 | WDR31    | Approved Cytoplasm cytoplasm                         |
| 7554 | ENSG00000148229 | POLE3    | Uncertain Nuclear a cytoplasm;nucleus                |
| 7555 | ENSG00000148248 | SURF4    | Approved Cytoplasm cytoplasm;plasma membrane         |
| 7556 | ENSG00000148288 | GBGT1    | Approved General c cytoplasm                         |
| 7557 | ENSG00000148290 | SURF1    | Uncertain Cytoplasm cytoplasm                        |
| 7558 | ENSG00000148291 | SURF2    | Approved Cytoplasm cytoplasm                         |
| 7559 | ENSG00000148296 | SURF6    | Approved Ubiquitous nucleus                          |
| 7560 | ENSG00000148297 | MED22    | Uncertain Estimation of protein expression could not |
| 7561 | ENSG00000148300 | REXO4    | Uncertain Nuclear enucleus                           |
| 7562 | ENSG00000148308 | GTF3C5   | Supported Nuclear enucleus                           |
| 7563 | ENSG00000148331 | ASB6     | Approved General c cytoplasm                         |
| 7564 | ENSG00000148334 | PTGES2   | Approved General c cytoplasm                         |
| 7565 | ENSG00000148335 | NTMT1    | Uncertain Cytoplasm cytoplasm                        |
| 7566 | ENSG00000148337 | CIZ1     | Uncertain Mainly n nucleus                           |
| 7567 | ENSG00000148339 | SLC25A25 | Uncertain Cytoplasm cytoplasm                        |
| 7568 | ENSG00000148341 | SH3GLB2  | Approved Cytoplasm cytoplasm                         |
| 7569 | ENSG00000148343 | MIGA2    | Approved General c cytoplasm                         |
| 7570 | ENSG00000148344 | PTGES    | Enhanced Cytoplasm cytoplasm                         |
| 7571 | ENSG00000148346 | LCN2     | Enhanced High cyto cytoplasm                         |
| 7572 | ENSG00000148356 | LRSAM1   | Supported Ubiquitous cytoplasm                       |
| 7573 | ENSG00000148357 | HMCN2    | Enhanced Cytoplasm cytoplasm                         |
| 7574 | ENSG00000148358 | GPR107   | Supported General expression with a Golgi pattern.   |
| 7575 | ENSG00000148362 | PAXX     | Uncertain Nuclear enucleus                           |
| 7576 | ENSG00000148384 | INPP5E   | Approved Cytoplasm cytoplasm                         |
| 7577 | ENSG00000148386 | LCN9     | Enhanced Expression in epididymis.                   |
| 7578 | ENSG00000148396 | SEC16A   | Supported Cytoplasm cytoplasm                        |
| 7579 | ENSG00000148399 | DPH7     | Uncertain Estimation of protein expression could not |
| 7580 | ENSG00000148400 | NOTCH1   | Supported Cytoplasm cytoplasm;nucleus                |
| 7581 | ENSG00000148408 | CACNA1B  | Uncertain General c cytoplasm                        |
| 7582 | ENSG00000148411 | NACC2    | Approved Nuclear a cytoplasm;nucleus                 |
| 7583 | ENSG00000148426 | PROSER2  | Uncertain Cytoplasm cytoplasm                        |
| 7584 | ENSG00000148429 | USP6NL   | Approved Cytoplasm cytoplasm                         |
| 7585 | ENSG00000148444 | COMMD3   | Approved General c cytoplasm                         |
| 7586 | ENSG00000148450 | MSRB2    | Enhanced General c cytoplasm                         |
| 7587 | ENSG00000148459 | PDSS1    | Uncertain Cytoplasm cytoplasm                        |
| 7588 | ENSG00000148468 | FAM171A1 | Approved Cytoplasm cytoplasm;nucleus;plasma membrane |

|      |                 |          |                                                      |
|------|-----------------|----------|------------------------------------------------------|
| 7589 | ENSG00000148481 | MINDY3   | UncertainGeneral ccytoplasm                          |
| 7590 | ENSG00000148483 | TMEM236  | Enhanced Membranouplasma membrane                    |
| 7591 | ENSG00000148484 | RSU1     | UncertainCytoplasmcytoplasm                          |
| 7592 | ENSG00000148488 | ST8SIA6  | UncertainEstimation of protein expression could not  |
| 7593 | ENSG00000148498 | PARD3    | Approved Membranouplasma membrane                    |
| 7594 | ENSG00000148516 | ZEB1     | Enhanced Nuclear enucleus                            |
| 7595 | ENSG00000148541 | FAM13C   | Approved Nuclear acytoplasm;nucleus;plasma membrane  |
| 7596 | ENSG00000148572 | NRBF2    | UncertainGeneral ccytoplasm;nucleus                  |
| 7597 | ENSG00000148584 | A1CF     | Enhanced Cytoplasmcytoplasm;nucleus                  |
| 7598 | ENSG00000148600 | CDHR1    | Enhanced Cytoplasmcytoplasm;plasma membrane          |
| 7599 | ENSG00000148606 | POLR3A   | UncertainEstimation of protein expression could not  |
| 7600 | ENSG00000148634 | HERC4    | UncertainEstimation of protein expression could not  |
| 7601 | ENSG00000148655 | LRMDA    | Approved General ncytoplasm;nucleus                  |
| 7602 | ENSG00000148660 | CAMK2G   | Approved Cytoplasmcytoplasm                          |
| 7603 | ENSG00000148671 | ADIRF    | Approved Cytoplasmcytoplasm                          |
| 7604 | ENSG00000148672 | GLUD1    | Approved General ccytoplasm                          |
| 7605 | ENSG00000148677 | ANKRD1   | Enhanced Cytoplasmcytoplasm                          |
| 7606 | ENSG00000148680 | HTR7     | Approved Cytoplasmcytoplasm                          |
| 7607 | ENSG00000148688 | RPP30    | Approved Nuclear enucleus                            |
| 7608 | ENSG00000148690 | FRA10AC1 | Approved Cytoplasmcytoplasm                          |
| 7609 | ENSG00000148700 | ADD3     | SupportedDistinct plasma membrane                    |
| 7610 | ENSG00000148702 | HABP2    | UncertainRNA-based expert annotation gave inconclus: |
| 7611 | ENSG00000148704 | VAX1     | UncertainEstimation of protein expression could not  |
| 7612 | ENSG00000148719 | DNAJB12  | Approved Cytoplasmcytoplasm                          |
| 7613 | ENSG00000148730 | EIF4EBP2 | Approved General ccytoplasm                          |
| 7614 | ENSG00000148734 | NPFFR1   | UncertainEstimation of protein expression could not  |
| 7615 | ENSG00000148737 | TCF7L2   | SupportedUbiquitouucleus                             |
| 7616 | ENSG00000148773 | MKI67    | Enhanced Nuclear enucleus                            |
| 7617 | ENSG00000148795 | CYP17A1  | Enhanced High expression in Leydig cells and adrena: |
| 7618 | ENSG00000148798 | INA      | Enhanced Distinct expression in the CNS and in a sul |
| 7619 | ENSG00000148803 | FUOM     | UncertainCytoplasmcytoplasm                          |
| 7620 | ENSG00000148814 | LRRC27   | Enhanced Cytoplasmcytoplasm                          |
| 7621 | ENSG00000148824 | MTG1     | Approved Cytoplasmcytoplasm                          |
| 7622 | ENSG00000148834 | GSTO1    | Enhanced Cytoplasmcytoplasm                          |
| 7623 | ENSG00000148835 | TAF5     | SupportedGeneral nnucleus                            |
| 7624 | ENSG00000148840 | PPRC1    | Approved Cytoplasmcytoplasm;nucleus                  |
| 7625 | ENSG00000148843 | PDCD11   | Approved Nucleolarcytoplasm;nucleus                  |
| 7626 | ENSG00000148848 | ADAM12   | Enhanced Cytoplasmcytoplasm;plasma membrane          |
| 7627 | ENSG00000148908 | RGS10    | Enhanced General ccytoplasm;nucleus                  |
| 7628 | ENSG00000148925 | BTBD10   | Approved Nuclear enucleus                            |
| 7629 | ENSG00000148926 | ADM      | Approved Cytoplasmcytoplasm                          |
| 7630 | ENSG00000148935 | GAS2     | Enhanced Cytoplasmcytoplasm                          |
| 7631 | ENSG00000148942 | SLC5A12  | Enhanced Luminal mplasma membrane                    |
| 7632 | ENSG00000148943 | LIN7C    | Approved Ubiquitoucytoplasm                          |
| 7633 | ENSG00000148948 | LRRC4C   | Approved Cytoplasmcytoplasm                          |
| 7634 | ENSG00000148950 | IMMP1L   | Approved Cytoplasmcytoplasm                          |
| 7635 | ENSG00000148965 | SAA4     | SupportedDistinct plasma membrane                    |
| 7636 | ENSG00000148985 | PGAP2    | Approved General ccytoplasm;plasma membrane          |
| 7637 | ENSG00000149021 | SCGB1A1  | Enhanced Selectivecytoplasm                          |
| 7638 | ENSG00000149043 | SYT8     | UncertainExpression in peripheral nerves.            |
| 7639 | ENSG00000149050 | ZNF214   | UncertainEstimation of protein expression could not  |
| 7640 | ENSG00000149054 | ZNF215   | Enhanced Cytoplasmcytoplasm                          |
| 7641 | ENSG00000149084 | HSD17B12 | Approved General ccytoplasm                          |
| 7642 | ENSG00000149089 | APIP     | Approved Nuclear acytoplasm;nucleus                  |
| 7643 | ENSG00000149091 | DGKZ     | Enhanced Cytoplasmcytoplasm                          |

|      |                 |          |                                                         |
|------|-----------------|----------|---------------------------------------------------------|
| 7644 | ENSG00000149100 | EIF3M    | Approved General c cytoplasm                            |
| 7645 | ENSG00000149115 | TNKS1BP1 | Enhanced Cytoplasm cytoplasm; plasma membrane           |
| 7646 | ENSG00000149124 | GLYAT    | Enhanced Selective cytoplasm                            |
| 7647 | ENSG00000149131 | SERPING1 | Supported Distinct plasma membrane                      |
| 7648 | ENSG00000149133 | OR5F1    | Uncertain Estimation of protein expression could not    |
| 7649 | ENSG00000149136 | SSRP1    | Approved Nuclear enucleus                               |
| 7650 | ENSG00000149150 | SLC43A1  | Enhanced Cytoplasm cytoplasm; plasma membrane           |
| 7651 | ENSG00000149177 | PTPRJ    | Approved Cytoplasm cytoplasm; plasma membrane           |
| 7652 | ENSG00000149179 | C11orf49 | Uncertain Cytoplasm cytoplasm                           |
| 7653 | ENSG00000149182 | ARFGAP2  | Enhanced Ubiquitous cytoplasm                           |
| 7654 | ENSG00000149187 | CELF1    | Supported Mainly nucleus                                |
| 7655 | ENSG00000149196 | HIKESHI  | Approved Cytoplasm cytoplasm; nucleus                   |
| 7656 | ENSG00000149218 | ENDOD1   | Enhanced Cytoplasm cytoplasm                            |
| 7657 | ENSG00000149231 | CCDC82   | Uncertain Cytoplasm cytoplasm; nucleus; plasma membrane |
| 7658 | ENSG00000149243 | KLHL35   | Enhanced Cytoplasm cytoplasm                            |
| 7659 | ENSG00000149256 | TENM4    | Approved Cytoplasm cytoplasm                            |
| 7660 | ENSG00000149257 | SERPINH1 | Supported Cytoplasm cytoplasm                           |
| 7661 | ENSG00000149260 | CAPN5    | Uncertain Granular cytoplasm                            |
| 7662 | ENSG00000149262 | INTS4    | Uncertain Cytoplasm cytoplasm; nucleus                  |
| 7663 | ENSG00000149269 | PAK1     | Enhanced Cytoplasm cytoplasm                            |
| 7664 | ENSG00000149273 | RPS3     | Uncertain General c cytoplasm                           |
| 7665 | ENSG00000149289 | ZC3H12C  | Approved Ubiquitous cytoplasm                           |
| 7666 | ENSG00000149292 | TTC12    | Enhanced General c cytoplasm                            |
| 7667 | ENSG00000149294 | NCAM1    | Enhanced Cytoplasm cytoplasm                            |
| 7668 | ENSG00000149295 | DRD2     | Supported Distinct expression in the brain.             |
| 7669 | ENSG00000149300 | C11orf52 | Uncertain Estimation of protein expression could not    |
| 7670 | ENSG00000149305 | HTR3B    | Approved Granular cytoplasm                             |
| 7671 | ENSG00000149311 | ATM      | Supported General nucleus                               |
| 7672 | ENSG00000149313 | AASDHPPT | Approved General c cytoplasm                            |
| 7673 | ENSG00000149328 | GLB1L2   | Uncertain Membrane plasma membrane                      |
| 7674 | ENSG00000149346 | SLX4IP   | Approved Cytoplasm cytoplasm                            |
| 7675 | ENSG00000149357 | LAMTOR1  | Approved General c cytoplasm                            |
| 7676 | ENSG00000149380 | P4HA3    | Approved Strong cytoplasm                               |
| 7677 | ENSG00000149403 | GRIK4    | Enhanced Expressed in axons, mainly in caudate and l    |
| 7678 | ENSG00000149428 | HYOU1    | Approved Mainly nucleus                                 |
| 7679 | ENSG00000149435 | GGTLC1   | Uncertain Estimation of protein expression could not    |
| 7680 | ENSG00000149451 | ADAM33   | Approved Cytoplasm cytoplasm                            |
| 7681 | ENSG00000149452 | SLC22A8  | Enhanced Selective cytoplasm                            |
| 7682 | ENSG00000149474 | KAT14    | Uncertain Estimation of protein expression could not    |
| 7683 | ENSG00000149476 | TKFC     | Enhanced Cytoplasm cytoplasm; nucleus                   |
| 7684 | ENSG00000149480 | MTA2     | Supported Ubiquitous nucleus                            |
| 7685 | ENSG00000149483 | TMEM138  | Approved Cytoplasm cytoplasm                            |
| 7686 | ENSG00000149485 | FADS1    | Approved General c cytoplasm                            |
| 7687 | ENSG00000149489 | ROM1     | Enhanced Cytoplasm cytoplasm                            |
| 7688 | ENSG00000149503 | INCENP   | Enhanced Nuclear enucleus                               |
| 7689 | ENSG00000149507 | OOSP2    | Enhanced Cytoplasm cytoplasm                            |
| 7690 | ENSG00000149516 | MS4A3    | Supported Distinct cytoplasm                            |
| 7691 | ENSG00000149527 | PLCH2    | Enhanced Cytoplasm cytoplasm                            |
| 7692 | ENSG00000149532 | CPSF7    | Supported Ubiquitous nucleus                            |
| 7693 | ENSG00000149534 | MS4A2    | Enhanced Distinct cytoplasm                             |
| 7694 | ENSG00000149541 | B3GAT3   | Approved Cytoplasm cytoplasm                            |
| 7695 | ENSG00000149547 | EI24     | Approved Cytoplasm cytoplasm; plasma membrane           |
| 7696 | ENSG00000149548 | CCDC15   | Uncertain Estimation of protein expression could not    |
| 7697 | ENSG00000149557 | FEZ1     | Approved Cytoplasm cytoplasm                            |
| 7698 | ENSG00000149564 | ESAM     | Uncertain Cytoplasm cytoplasm                           |

|      |                 |           |                                                      |
|------|-----------------|-----------|------------------------------------------------------|
| 7699 | ENSG00000149571 | KIRREL3   | Enhanced Cytoplasm cytoplasm                         |
| 7700 | ENSG00000149573 | MPZL2     | Approved Cytoplasm cytoplasm                         |
| 7701 | ENSG00000149577 | SIDT2     | Approved Mainly nucleus                              |
| 7702 | ENSG00000149582 | TMEM25    | Approved Cytoplasm cytoplasm                         |
| 7703 | ENSG00000149591 | TAGLN     | Enhanced Selective cytoplasm                         |
| 7704 | ENSG00000149596 | JPH2      | Approved Cytoplasm cytoplasm                         |
| 7705 | ENSG00000149599 | DUSP15    | Enhanced Cytoplasm cytoplasm                         |
| 7706 | ENSG00000149609 | C20orf144 | Enhanced Spermatid expression in seminiferous ducts. |
| 7707 | ENSG00000149633 | KIAA1755  | Approved Cytoplasm cytoplasm;nucleus;plasma membrane |
| 7708 | ENSG00000149635 | OCSTAMP   | Uncertain Estimation of protein expression could not |
| 7709 | ENSG00000149636 | DSN1      | Enhanced General nucleus                             |
| 7710 | ENSG00000149639 | SOGA1     | Approved Cytoplasm cytoplasm;plasma membrane         |
| 7711 | ENSG00000149646 | CNBD2     | Uncertain General cytoplasm;plasma membrane          |
| 7712 | ENSG00000149651 | SPINT4    | Enhanced Cytoplasm cytoplasm                         |
| 7713 | ENSG00000149654 | CDH22     | Uncertain Estimation of protein expression could not |
| 7714 | ENSG00000149657 | LSM14B    | Approved Cytoplasm cytoplasm                         |
| 7715 | ENSG00000149743 | TRPT1     | Uncertain Granular cytoplasm                         |
| 7716 | ENSG00000149761 | NUDT22    | Approved Cytoplasm cytoplasm                         |
| 7717 | ENSG00000149782 | PLCB3     | Enhanced Selective cytoplasm                         |
| 7718 | ENSG00000149792 | MRPL49    | Approved Cytoplasm cytoplasm                         |
| 7719 | ENSG00000149798 | CDC42EP2  | Approved Cytoplasm cytoplasm                         |
| 7720 | ENSG00000149806 | FAU       | Supported Ubiquitous cytoplasm                       |
| 7721 | ENSG00000149809 | TM7SF2    | Enhanced Granular cytoplasm                          |
| 7722 | ENSG00000149823 | VPS51     | Uncertain Ubiquitous cytoplasm                       |
| 7723 | ENSG00000149923 | PPP4C     | Supported General cytoplasm;nucleus                  |
| 7724 | ENSG00000149925 | ALDOA     | Enhanced Cytoplasm cytoplasm                         |
| 7725 | ENSG00000149929 | HIRIP3    | Approved Nuclear nucleus                             |
| 7726 | ENSG00000149930 | TAOK2     | Approved Low cytoplasm                               |
| 7727 | ENSG00000149932 | TMEM219   | Approved Cytoplasm cytoplasm                         |
| 7728 | ENSG00000149948 | HMG2      | Approved Nuclear nucleus                             |
| 7729 | ENSG00000149968 | MMP3      | Uncertain Estimation of protein expression could not |
| 7730 | ENSG00000149972 | CNTN5     | Approved Ubiquitous cytoplasm                        |
| 7731 | ENSG00000150051 | MKX       | Uncertain Expression in several different tissues.   |
| 7732 | ENSG00000150054 | MPP7      | Enhanced General cytoplasm;plasma membrane           |
| 7733 | ENSG00000150093 | ITGB1     | Enhanced Expression plasma membrane                  |
| 7734 | ENSG00000150201 | FXRD4     | Enhanced Selective cytoplasm                         |
| 7735 | ENSG00000150261 | OR8K1     | Uncertain Estimation of protein expression could not |
| 7736 | ENSG00000150281 | CTF1      | Uncertain Estimation of protein expression could not |
| 7737 | ENSG00000150316 | CWC15     | Supported General nucleus                            |
| 7738 | ENSG00000150347 | ARID5B    | Uncertain Cytoplasm cytoplasm;nucleus                |
| 7739 | ENSG00000150361 | KLHL1     | Uncertain Estimation of protein expression could not |
| 7740 | ENSG00000150394 | CDH8      | Approved Cytoplasm cytoplasm                         |
| 7741 | ENSG00000150401 | DCUN1D2   | Uncertain General cytoplasm                          |
| 7742 | ENSG00000150403 | TMC03     | Uncertain General cytoplasm                          |
| 7743 | ENSG00000150433 | TMEM218   | Uncertain Estimation of protein expression could not |
| 7744 | ENSG00000150455 | TIRAP     | Uncertain Estimation of protein expression could not |
| 7745 | ENSG00000150456 | EEF1AKMT1 | Uncertain Cytoplasm cytoplasm;plasma membrane        |
| 7746 | ENSG00000150457 | LATS2     | Approved Cytoplasm cytoplasm;nucleus                 |
| 7747 | ENSG00000150459 | SAP18     | Supported Ubiquitous nucleus                         |
| 7748 | ENSG00000150471 | ADGRL3    | Uncertain Ubiquitous cytoplasm                       |
| 7749 | ENSG00000150477 | KIAA1328  | Approved Cytoplasm cytoplasm;nucleus                 |
| 7750 | ENSG00000150510 | FAM124A   | Uncertain Cytoplasm cytoplasm;plasma membrane        |
| 7751 | ENSG00000150527 | CTAGE5    | Approved Cytoplasm cytoplasm                         |
| 7752 | ENSG00000150540 | HNMT      | Approved Cytoplasm cytoplasm                         |
| 7753 | ENSG00000150556 | LYPD6B    | Uncertain Estimation of protein expression could not |

|      |                 |          |                                                                   |
|------|-----------------|----------|-------------------------------------------------------------------|
| 7754 | ENSG00000150593 | PDCD4    | Enhanced Nuclear cytoplasm;nucleus                                |
| 7755 | ENSG00000150625 | GPM6A    | SupportedCytoplasmcytoplasm                                       |
| 7756 | ENSG00000150627 | WDR17    | Approved Cytoplasmcytoplasm                                       |
| 7757 | ENSG00000150628 | SPATA4   | Enhanced Expression in a subset of cells in seminiferous tubules  |
| 7758 | ENSG00000150636 | CCDC102B | Approved Cytoplasmcytoplasm                                       |
| 7759 | ENSG00000150637 | CD226    | SupportedSelectivecytoplasm                                       |
| 7760 | ENSG00000150656 | CNDP1    | Enhanced Distinct plasma membrane                                 |
| 7761 | ENSG00000150667 | FSIP1    | UncertainEstimation of protein expression could not be determined |
| 7762 | ENSG00000150672 | DLG2     | Enhanced Cytoplasmcytoplasm                                       |
| 7763 | ENSG00000150681 | RGS18    | UncertainGeneral ccytoplasm;nucleus                               |
| 7764 | ENSG00000150687 | PRSS23   | UncertainExtracellcytoplasm                                       |
| 7765 | ENSG00000150712 | MTMR12   | SupportedGeneral ccytoplasm                                       |
| 7766 | ENSG00000150750 | C11orf53 | UncertainEstimation of protein expression could not be determined |
| 7767 | ENSG00000150753 | CCT5     | Enhanced General ccytoplasm                                       |
| 7768 | ENSG00000150760 | DOCK1    | Approved Cytoplasmcytoplasm                                       |
| 7769 | ENSG00000150768 | DLAT     | SupportedUbiquitocytoplasm                                        |
| 7770 | ENSG00000150776 | NKAPD1   | Approved Ubiquitocytoplasm                                        |
| 7771 | ENSG00000150779 | TIMM8B   | Approved General ccytoplasm                                       |
| 7772 | ENSG00000150782 | IL18     | Enhanced Cytoplasmcytoplasm;nucleus                               |
| 7773 | ENSG00000150783 | TEX12    | Enhanced Selectivenucleus                                         |
| 7774 | ENSG00000150787 | PTS      | UncertainCytoplasmcytoplasm                                       |
| 7775 | ENSG00000150867 | PIP4K2A  | SupportedGeneral nnucleus                                         |
| 7776 | ENSG00000150873 | C2orf50  | Enhanced Selective expression in cilium.                          |
| 7777 | ENSG00000150893 | FREM2    | UncertainEstimation of protein expression could not be determined |
| 7778 | ENSG00000150907 | FOXO1    | Approved Cytoplasmcytoplasm;nucleus                               |
| 7779 | ENSG00000150938 | CRIM1    | Enhanced General ccytoplasm                                       |
| 7780 | ENSG00000150961 | SEC24D   | Approved Ubiquitocytoplasm                                        |
| 7781 | ENSG00000150967 | ABCB9    | Approved Cytoplasmcytoplasm                                       |
| 7782 | ENSG00000150977 | RILPL2   | UncertainMainly ccytoplasm                                        |
| 7783 | ENSG00000150990 | DHX37    | Approved Expressionnucleus;plasma membrane                        |
| 7784 | ENSG00000150991 | UBC      | SupportedGeneral ncytoplasm;nucleus                               |
| 7785 | ENSG00000150995 | ITPR1    | Approved Cytoplasmcytoplasm                                       |
| 7786 | ENSG00000151006 | PRSS53   | UncertainEstimation of protein expression could not be determined |
| 7787 | ENSG00000151014 | NOCT     | UncertainEstimation of protein expression could not be determined |
| 7788 | ENSG00000151023 | ENKUR    | Enhanced Distinct expression in cilia of fallopian tube           |
| 7789 | ENSG00000151025 | GPR158   | UncertainNuclear acytoplasm;nucleus                               |
| 7790 | ENSG00000151062 | CACNA2D4 | UncertainEstimation of protein expression could not be determined |
| 7791 | ENSG00000151065 | DCP1B    | Approved Ubiquitocytoplasm                                        |
| 7792 | ENSG00000151067 | CACNA1C  | Enhanced Membranouplasma membrane                                 |
| 7793 | ENSG00000151090 | THRB     | Approved Nuclear enucleus                                         |
| 7794 | ENSG00000151092 | NGLY1    | Approved Ubiquitocytoplasm                                        |
| 7795 | ENSG00000151093 | OXSM     | Enhanced Cytoplasmcytoplasm                                       |
| 7796 | ENSG00000151116 | UEVLD    | Approved Cytoplasmcytoplasm                                       |
| 7797 | ENSG00000151117 | TMEM86A  | UncertainCytoplasmcytoplasm                                       |
| 7798 | ENSG00000151131 | C12orf45 | UncertainCytoplasmcytoplasm;nucleus                               |
| 7799 | ENSG00000151135 | TMEM263  | UncertainCytoplasmcytoplasm;nucleus                               |
| 7800 | ENSG00000151148 | UBE3B    | Approved Granular cytoplasm                                       |
| 7801 | ENSG00000151150 | ANK3     | Enhanced Membranouplasma membrane                                 |
| 7802 | ENSG00000151151 | IPMK     | UncertainCytoplasmcytoplasm                                       |
| 7803 | ENSG00000151164 | RAD9B    | Approved Expression in testis and skeletal muscle.                |
| 7804 | ENSG00000151176 | PLBD2    | Approved Cytoplasmcytoplasm                                       |
| 7805 | ENSG00000151224 | MAT1A    | SupportedCytoplasmcytoplasm                                       |
| 7806 | ENSG00000151229 | SLC2A13  | Approved Cytoplasmcytoplasm                                       |
| 7807 | ENSG00000151239 | TWF1     | Approved Cytoplasmcytoplasm                                       |
| 7808 | ENSG00000151240 | DIP2C    | Enhanced Cytoplasmcytoplasm                                       |

|      |                 |          |                                                      |
|------|-----------------|----------|------------------------------------------------------|
| 7809 | ENSG00000151247 | EIF4E    | SupportedGeneral c cytoplasm                         |
| 7810 | ENSG00000151276 | MAGI1    | SupportedCytoplasmcytoplasm;plasma membrane          |
| 7811 | ENSG00000151287 | TEX30    | Enhanced Nuclear enucleus                            |
| 7812 | ENSG00000151292 | CSNK1G3  | Approved Nuclear a cytoplasm;nucleus                 |
| 7813 | ENSG00000151304 | SRFBP1   | Approved Cytoplasmcytoplasm;plasma membrane          |
| 7814 | ENSG00000151320 | AKAP6    | Enhanced Selectivenucleus;plasma membrane            |
| 7815 | ENSG00000151322 | NPAS3    | Enhanced Nuclear enucleus                            |
| 7816 | ENSG00000151327 | FAM177A1 | UncertainCytoplasmcytoplasm                          |
| 7817 | ENSG00000151332 | MBIP     | SupportedGeneral n cytoplasm;nucleus                 |
| 7818 | ENSG00000151338 | MIPOL1   | Enhanced General c cytoplasm                         |
| 7819 | ENSG00000151353 | TMEM18   | Approved Cytoplasmcytoplasm                          |
| 7820 | ENSG00000151364 | KCTD14   | Enhanced Cytoplasmcytoplasm                          |
| 7821 | ENSG00000151365 | THRSP    | Approved Cytoplasmcytoplasm                          |
| 7822 | ENSG00000151366 | NDUFC2   | Approved Ubiquitouscytoplasm                         |
| 7823 | ENSG00000151376 | ME3      | Approved Cytoplasmcytoplasm                          |
| 7824 | ENSG00000151388 | ADAMTS12 | UncertainEstimation of protein expression could not  |
| 7825 | ENSG00000151413 | NUBPL    | Approved Cytoplasmcytoplasm                          |
| 7826 | ENSG00000151414 | NEK7     | Approved Cytoplasmcytoplasm                          |
| 7827 | ENSG00000151418 | ATP6V1G3 | Enhanced Expression in a subset of cells in distal 1 |
| 7828 | ENSG00000151422 | FER      | Approved General c cytoplasm                         |
| 7829 | ENSG00000151445 | VIPAS39  | Approved Cytoplasmcytoplasm                          |
| 7830 | ENSG00000151458 | ANKRD50  | Approved Cytoplasmcytoplasm                          |
| 7831 | ENSG00000151465 | CDC123   | Approved General c cytoplasm                         |
| 7832 | ENSG00000151466 | SCLT1    | Approved Granular cytoplasm                          |
| 7833 | ENSG00000151470 | C4orf33  | UncertainCytoplasmcytoplasm                          |
| 7834 | ENSG00000151474 | FRMD4A   | UncertainNuclear enucleus                            |
| 7835 | ENSG00000151475 | SLC25A31 | UncertainGranular cytoplasm                          |
| 7836 | ENSG00000151490 | PTPRO    | Enhanced Selectivecytoplasm                          |
| 7837 | ENSG00000151491 | EPS8     | Approved General c cytoplasm                         |
| 7838 | ENSG00000151498 | ACAD8    | Enhanced General g cytoplasm                         |
| 7839 | ENSG00000151500 | THYN1    | SupportedNuclear enucleus                            |
| 7840 | ENSG00000151502 | VPS26B   | UncertainCytoplasmcytoplasm;plasma membrane          |
| 7841 | ENSG00000151532 | VTI1A    | SupportedGeneral c cytoplasm                         |
| 7842 | ENSG00000151552 | QDPR     | Enhanced Nuclear enucleus                            |
| 7843 | ENSG00000151553 | FAM160B1 | UncertainNuclear a cytoplasm;nucleus                 |
| 7844 | ENSG00000151572 | ANO4     | UncertainEstimation of protein expression could not  |
| 7845 | ENSG00000151575 | TEX9     | UncertainEstimation of protein expression could not  |
| 7846 | ENSG00000151576 | QTRT2    | UncertainCytoplasmcytoplasm;nucleus                  |
| 7847 | ENSG00000151611 | MMAA     | Approved Ubiquitouscytoplasm                         |
| 7848 | ENSG00000151612 | ZNF827   | UncertainCytoplasmcytoplasm                          |
| 7849 | ENSG00000151617 | EDNRA    | UncertainGeneral c cytoplasm                         |
| 7850 | ENSG00000151623 | NR3C2    | Enhanced Cytoplasmcytoplasm                          |
| 7851 | ENSG00000151632 | AKR1C2   | Enhanced Cytoplasmcytoplasm                          |
| 7852 | ENSG00000151640 | DPYSL4   | Approved Cytoplasmcytoplasm                          |
| 7853 | ENSG00000151650 | VENTX    | UncertainEstimation of protein expression could not  |
| 7854 | ENSG00000151651 | ADAM8    | Approved Cytoplasmcytoplasm                          |
| 7855 | ENSG00000151655 | ITIH2    | SupportedDistinct plasma membrane                    |
| 7856 | ENSG00000151665 | PIGF     | UncertainEstimation of protein expression could not  |
| 7857 | ENSG00000151687 | ANKAR    | UncertainEstimation of protein expression could not  |
| 7858 | ENSG00000151689 | INPP1    | SupportedUbiquitouscytoplasm;nucleus                 |
| 7859 | ENSG00000151690 | MFS6     | Approved Mainly c cytoplasm;plasma membrane          |
| 7860 | ENSG00000151692 | RNF144A  | Approved Membranouplasma membrane                    |
| 7861 | ENSG00000151693 | ASAP2    | Approved Cytoplasmcytoplasm;nucleus                  |
| 7862 | ENSG00000151694 | ADAM17   | Approved Membranoucytoplasm;plasma membrane          |
| 7863 | ENSG00000151704 | KCNJ1    | Enhanced Membranouplasma membrane                    |

|      |                 |          |                                                      |
|------|-----------------|----------|------------------------------------------------------|
| 7864 | ENSG00000151715 | TMEM45B  | Approved Cytoplasm cytoplasm                         |
| 7865 | ENSG00000151718 | WWC2     | Uncertain General c cytoplasm                        |
| 7866 | ENSG00000151726 | ACSL1    | Enhanced Cytoplasm cytoplasm                         |
| 7867 | ENSG00000151729 | SLC25A4  | Approved Granular cytoplasm                          |
| 7868 | ENSG00000151743 | AMN1     | Approved Cytoplasm cytoplasm                         |
| 7869 | ENSG00000151746 | BICD1    | Approved General c cytoplasm                         |
| 7870 | ENSG00000151748 | SAV1     | Approved Cytoplasm cytoplasm                         |
| 7871 | ENSG00000151773 | CCDC122  | Approved Ubiquitous cytoplasm                        |
| 7872 | ENSG00000151778 | SERP2    | Uncertain Cytoplasm cytoplasm;nucleus                |
| 7873 | ENSG00000151779 | NBAS     | Approved General c cytoplasm                         |
| 7874 | ENSG00000151789 | ZNF385D  | Uncertain Estimation of protein expression could not |
| 7875 | ENSG00000151790 | TD02     | Uncertain Cytoplasm cytoplasm                        |
| 7876 | ENSG00000151806 | GUF1     | Approved Cytoplasm cytoplasm;plasma membrane         |
| 7877 | ENSG00000151812 | SLC35F4  | Uncertain Estimation of protein expression could not |
| 7878 | ENSG00000151835 | SACS     | Uncertain Cytoplasm cytoplasm                        |
| 7879 | ENSG00000151838 | CCDC175  | Uncertain Estimation of protein expression could not |
| 7880 | ENSG00000151846 | PABPC3   | Approved Cytoplasm cytoplasm                         |
| 7881 | ENSG00000151882 | CCL28    | Supported Expression mainly in subsets of mucin prod |
| 7882 | ENSG00000151883 | PARP8    | Approved Membrane plasma membrane                    |
| 7883 | ENSG00000151892 | GFRA1    | Uncertain Cytoplasm cytoplasm                        |
| 7884 | ENSG00000151914 | DST      | Uncertain Cytoplasm cytoplasm                        |
| 7885 | ENSG00000151917 | BEND6    | Enhanced Cytoplasm cytoplasm                         |
| 7886 | ENSG00000151929 | BAG3     | Enhanced Ubiquitous cytoplasm;nucleus                |
| 7887 | ENSG00000151952 | TMEM132D | Approved Cytoplasm cytoplasm                         |
| 7888 | ENSG00000151967 | SCHIP1   | Uncertain Mainly c cytoplasm                         |
| 7889 | ENSG00000152049 | KCNE4    | Approved Cytoplasm cytoplasm;plasma membrane         |
| 7890 | ENSG00000152056 | AP1S3    | Approved Cytoplasm cytoplasm                         |
| 7891 | ENSG00000152061 | RABGAP1L | Uncertain Cytoplasm cytoplasm                        |
| 7892 | ENSG00000152082 | MZT2B    | Approved Cytoplasm cytoplasm                         |
| 7893 | ENSG00000152086 | TUBA3E   | Uncertain Estimation of protein expression could not |
| 7894 | ENSG00000152093 | CFC1B    | Approved Cytoplasm cytoplasm;plasma membrane         |
| 7895 | ENSG00000152102 | FAM168B  | Enhanced Selective cytoplasm                         |
| 7896 | ENSG00000152104 | PTPN14   | Uncertain Mainly c cytoplasm                         |
| 7897 | ENSG00000152127 | MGAT5    | Approved Cytoplasm cytoplasm                         |
| 7898 | ENSG00000152128 | TMEM163  | Uncertain Estimation of protein expression could not |
| 7899 | ENSG00000152133 | GPATCH11 | Enhanced Nuclear a cytoplasm;nucleus                 |
| 7900 | ENSG00000152137 | HSPB8    | Approved Cytoplasm cytoplasm                         |
| 7901 | ENSG00000152147 | GEMIN6   | Approved General c cytoplasm                         |
| 7902 | ENSG00000152154 | TMEM178A | Uncertain Estimation of protein expression could not |
| 7903 | ENSG00000152192 | POU4F1   | Enhanced Cytoplasm cytoplasm                         |
| 7904 | ENSG00000152193 | RNF219   | Enhanced Ubiquitous cytoplasm                        |
| 7905 | ENSG00000152207 | CYSLTR2  | Uncertain Cytoplasm cytoplasm;plasma membrane        |
| 7906 | ENSG00000152208 | GRID2    | Enhanced Expression in neuropil of cerebellum and su |
| 7907 | ENSG00000152213 | ARL11    | Uncertain Estimation of protein expression could not |
| 7908 | ENSG00000152214 | RIT2     | Enhanced Distinct expression in projections in brain |
| 7909 | ENSG00000152217 | SETBP1   | Uncertain Nuclear a cytoplasm;nucleus                |
| 7910 | ENSG00000152219 | ARL14EP  | Approved Ubiquitous nucleus                          |
| 7911 | ENSG00000152223 | EPG5     | Uncertain General c cytoplasm;nucleus                |
| 7912 | ENSG00000152229 | PSTPIP2  | Enhanced Cytoplasm cytoplasm                         |
| 7913 | ENSG00000152234 | ATP5F1A  | Enhanced Cytoplasm cytoplasm                         |
| 7914 | ENSG00000152240 | HAUS1    | Supported Cytoplasm cytoplasm                        |
| 7915 | ENSG00000152242 | C18orf25 | Approved Cytoplasm cytoplasm                         |
| 7916 | ENSG00000152253 | SPC25    | Enhanced Cytoplasm cytoplasm                         |
| 7917 | ENSG00000152256 | PDK1     | Approved General c cytoplasm                         |
| 7918 | ENSG00000152266 | PTH      | Enhanced Highly specific expression in parathyroid { |



|      |                 |          |                                                       |
|------|-----------------|----------|-------------------------------------------------------|
| 7919 | ENSG00000152291 | TGOLN2   | Enhanced Ubiquitous cytoplasm                         |
| 7920 | ENSG00000152292 | SH2D6    | Uncertain Estimation of protein expression could not  |
| 7921 | ENSG00000152315 | KCNK13   | Approved Expression in the brain.                     |
| 7922 | ENSG00000152348 | ATG10    | Approved Cytoplasm cytoplasm                          |
| 7923 | ENSG00000152359 | POC5     | Approved Ubiquitous cytoplasm                         |
| 7924 | ENSG00000152377 | SPOCK1   | Uncertain RNA-based expert annotation gave inconclus: |
| 7925 | ENSG00000152380 | FAM151B  | Uncertain Cytoplasm cytoplasm                         |
| 7926 | ENSG00000152382 | TADA1    | Approved Mainly nucleus                               |
| 7927 | ENSG00000152402 | GUCY1A2  | Uncertain Cytoplasm cytoplasm;nucleus                 |
| 7928 | ENSG00000152404 | CWF19L2  | Uncertain Mainly cytoplasm                            |
| 7929 | ENSG00000152409 | JMY      | Uncertain Cytoplasm cytoplasm                         |
| 7930 | ENSG00000152413 | HOMER1   | Enhanced Selective expression in the CNS and cardiac  |
| 7931 | ENSG00000152422 | XRCC4    | Supported Ubiquitous nucleus                          |
| 7932 | ENSG00000152430 | BOLL     | Enhanced Selective cytoplasm                          |
| 7933 | ENSG00000152433 | ZNF547   | Uncertain Estimation of protein expression could not  |
| 7934 | ENSG00000152439 | ZNF773   | Uncertain Estimation of protein expression could not  |
| 7935 | ENSG00000152443 | ZNF776   | Uncertain Estimation of protein expression could not  |
| 7936 | ENSG00000152454 | ZNF256   | Uncertain Estimation of protein expression could not  |
| 7937 | ENSG00000152455 | SUV39H2  | Enhanced Selective cytoplasm;nucleus                  |
| 7938 | ENSG00000152463 | OLAH     | Enhanced Cytoplasm cytoplasm;nucleus                  |
| 7939 | ENSG00000152464 | RPP38    | Approved Nuclear enucleus                             |
| 7940 | ENSG00000152465 | NMT2     | Approved Cytoplasm cytoplasm                          |
| 7941 | ENSG00000152467 | ZSCAN1   | Uncertain Nucleolar nucleus                           |
| 7942 | ENSG00000152475 | ZNF837   | Uncertain Estimation of protein expression could not  |
| 7943 | ENSG00000152484 | USP12    | Uncertain Cytoplasm cytoplasm                         |
| 7944 | ENSG00000152492 | CCDC50   | Approved Cytoplasm cytoplasm                          |
| 7945 | ENSG00000152495 | CAMK4    | Approved Nuclear cytoplasm;nucleus                    |
| 7946 | ENSG00000152518 | ZFP36L2  | Approved Cytoplasm cytoplasm                          |
| 7947 | ENSG00000152520 | PAN3     | Approved Cytoplasm cytoplasm                          |
| 7948 | ENSG00000152556 | PFKM     | Approved General cytoplasm                            |
| 7949 | ENSG00000152580 | IGSF10   | Uncertain Estimation of protein expression could not  |
| 7950 | ENSG00000152582 | SPEF2    | Enhanced Expression in cilia of fallopian tube and    |
| 7951 | ENSG00000152583 | SPARCL1  | Enhanced plasma proplasma membrane                    |
| 7952 | ENSG00000152591 | DSPP     | Uncertain Estimation of protein expression could not  |
| 7953 | ENSG00000152592 | DMP1     | Approved Cytoplasm cytoplasm;nucleus                  |
| 7954 | ENSG00000152595 | MEPE     | Uncertain Estimation of protein expression could not  |
| 7955 | ENSG00000152601 | MBNL1    | Enhanced Nuclear enucleus                             |
| 7956 | ENSG00000152611 | CAPSL    | Enhanced Selective expression in cilia.               |
| 7957 | ENSG00000152620 | NADK2    | Enhanced Ubiquitous cytoplasm                         |
| 7958 | ENSG00000152661 | GJA1     | Enhanced Cytoplasm cytoplasm;plasma membrane          |
| 7959 | ENSG00000152669 | CCNO     | Uncertain Estimation of protein expression could not  |
| 7960 | ENSG00000152670 | DDX4     | Enhanced Selective cytoplasm                          |
| 7961 | ENSG00000152683 | SLC30A6  | Uncertain Cytoplasm cytoplasm                         |
| 7962 | ENSG00000152684 | PELO     | Approved Cytoplasm cytoplasm;nucleus                  |
| 7963 | ENSG00000152700 | SAR1B    | Supported General cytoplasm                           |
| 7964 | ENSG00000152749 | GPR180   | Approved Cytoplasm cytoplasm                          |
| 7965 | ENSG00000152760 | TCTEX1D1 | Uncertain Estimation of protein expression could not  |
| 7966 | ENSG00000152766 | ANKRD22  | Approved Cytoplasm cytoplasm                          |
| 7967 | ENSG00000152778 | IFIT5    | Uncertain Estimation of protein expression could not  |
| 7968 | ENSG00000152795 | HNRNPDL  | Supported Nuclear enucleus                            |
| 7969 | ENSG00000152804 | HHEX     | Approved Cytoplasm cytoplasm                          |
| 7970 | ENSG00000152818 | UTRN     | Enhanced Cytoplasm cytoplasm;plasma membrane          |
| 7971 | ENSG00000152822 | GRM1     | Approved Expression in CNS.                           |
| 7972 | ENSG00000152894 | PTPRK    | Uncertain Cytoplasm cytoplasm                         |
| 7973 | ENSG00000152904 | GGPS1    | Enhanced Cytoplasm cytoplasm                          |

|      |                 |          |                                                        |
|------|-----------------|----------|--------------------------------------------------------|
| 7974 | ENSG00000152910 | CNTNAP4  | Enhanced Cytoplasm cytoplasm                           |
| 7975 | ENSG00000152932 | RAB3C    | Enhanced Cytoplasm cytoplasm                           |
| 7976 | ENSG00000152939 | MARVELD2 | Uncertain General c cytoplasm; plasma membrane         |
| 7977 | ENSG00000152942 | RAD17    | Approved Nuclear enucleus                              |
| 7978 | ENSG00000152944 | MED21    | Uncertain Nuclear enucleus                             |
| 7979 | ENSG00000152952 | PLOD2    | Approved Cytoplasm cytoplasm                           |
| 7980 | ENSG00000152954 | NRSN1    | Uncertain Granular cytoplasm                           |
| 7981 | ENSG00000152969 | JAKMIP1  | Uncertain Cytoplasm cytoplasm                          |
| 7982 | ENSG00000152977 | ZIC1     | Supported Nuclear enucleus                             |
| 7983 | ENSG00000152990 | ADGRA3   | Uncertain Cytoplasm cytoplasm; plasma membrane         |
| 7984 | ENSG00000153002 | CPB1     | Enhanced Selective cytoplasm                           |
| 7985 | ENSG00000153006 | SREK1IP1 | Approved Mainly c cytoplasm                            |
| 7986 | ENSG00000153012 | LGI2     | Approved Cytoplasm cytoplasm                           |
| 7987 | ENSG00000153015 | CWC27    | Approved General n nucleus                             |
| 7988 | ENSG00000153037 | SRP19    | Approved Nuclear enucleus                              |
| 7989 | ENSG00000153044 | CENPH    | Approved Nuclear a cytoplasm; nucleus                  |
| 7990 | ENSG00000153046 | CDYL     | Enhanced Ubiquitous nucleus                            |
| 7991 | ENSG00000153048 | CARHSP1  | Enhanced Mainly c cytoplasm                            |
| 7992 | ENSG00000153064 | BANK1    | Enhanced Cytoplasm cytoplasm                           |
| 7993 | ENSG00000153066 | TXNDC11  | Supported Ubiquitous cytoplasm                         |
| 7994 | ENSG00000153071 | DAB2     | Enhanced Cytoplasm cytoplasm                           |
| 7995 | ENSG00000153086 | ACMSD    | Enhanced Cytoplasm cytoplasm; plasma membrane          |
| 7996 | ENSG00000153094 | BCL2L11  | Approved General c cytoplasm                           |
| 7997 | ENSG00000153107 | ANAPC1   | Approved Cytoplasm cytoplasm                           |
| 7998 | ENSG00000153113 | CAST     | Approved General c cytoplasm                           |
| 7999 | ENSG00000153130 | SCOC     | Approved Cytoplasm cytoplasm                           |
| 8000 | ENSG00000153132 | CLGN     | Enhanced Cytoplasm cytoplasm                           |
| 8001 | ENSG00000153140 | CETN3    | Enhanced Cytoplasm cytoplasm; nucleus; plasma membrane |
| 8002 | ENSG00000153147 | SMARCA5  | Supported General n nucleus                            |
| 8003 | ENSG00000153162 | BMP6     | Approved Cytoplasm cytoplasm; plasma membrane          |
| 8004 | ENSG00000153165 | RGPD3    | Uncertain Estimation of protein expression could not   |
| 8005 | ENSG00000153179 | RASSF3   | Supported Granular cytoplasm                           |
| 8006 | ENSG00000153187 | HNRNPU   | Supported Ubiquitous nucleus                           |
| 8007 | ENSG00000153201 | RANBP2   | Supported Ubiquitous nucleus; plasma membrane          |
| 8008 | ENSG00000153207 | AHCTF1   | Uncertain Ubiquitous cytoplasm                         |
| 8009 | ENSG00000153208 | MERTK    | Approved Cytoplasm cytoplasm                           |
| 8010 | ENSG00000153214 | TMEM87B  | Approved Cytoplasm cytoplasm                           |
| 8011 | ENSG00000153230 | OR14K1   | Uncertain Estimation of protein expression could not   |
| 8012 | ENSG00000153233 | PTPRR    | Uncertain Cytoplasm cytoplasm                          |
| 8013 | ENSG00000153234 | NR4A2    | Uncertain General n cytoplasm; nucleus                 |
| 8014 | ENSG00000153237 | CCDC148  | Uncertain Estimation of protein expression could not   |
| 8015 | ENSG00000153246 | PLA2R1   | Approved Expression in renal glomeruli.                |
| 8016 | ENSG00000153253 | SCN3A    | Approved Cytoplasm cytoplasm                           |
| 8017 | ENSG00000153283 | CD96     | Enhanced Mainly c cytoplasm                            |
| 8018 | ENSG00000153292 | ADGRF1   | Approved Luminal m plasma membrane                     |
| 8019 | ENSG00000153294 | ADGRF4   | Enhanced Cytoplasm cytoplasm                           |
| 8020 | ENSG00000153303 | FRMD1    | Enhanced High expression in a subset of cells in th    |
| 8021 | ENSG00000153310 | FAM49B   | Approved General c cytoplasm                           |
| 8022 | ENSG00000153317 | ASAP1    | Approved Cytoplasm cytoplasm; plasma membrane          |
| 8023 | ENSG00000153339 | TRAPPC8  | Approved General c cytoplasm                           |
| 8024 | ENSG00000153347 | FAM81B   | Approved Cytoplasm cytoplasm                           |
| 8025 | ENSG00000153391 | INO80C   | Approved Nuclear a cytoplasm; nucleus                  |
| 8026 | ENSG00000153395 | LPCAT1   | Enhanced General c cytoplasm                           |
| 8027 | ENSG00000153404 | PLEKHG4B | Uncertain Granular cytoplasm                           |
| 8028 | ENSG00000153406 | NMRAL1   | Uncertain Cytoplasm cytoplasm                          |

|      |                 |           |                                                     |
|------|-----------------|-----------|-----------------------------------------------------|
| 8029 | ENSG00000153443 | UBALD1    | Approved General ccytoplasm;nucleus                 |
| 8030 | ENSG00000153446 | C16orf89  | Enhanced Expression in several tissues, distinct in |
| 8031 | ENSG00000153485 | TMEM251   | UncertainCytoplasmcytoplasm                         |
| 8032 | ENSG00000153487 | ING1      | Approved General nnucleus                           |
| 8033 | ENSG00000153498 | SPACA7    | Enhanced Expressed in acrosomes in sperm.           |
| 8034 | ENSG00000153531 | ADPRHL1   | Enhanced Cytoplasmcytoplasm                         |
| 8035 | ENSG00000153561 | RMND5A    | UncertainCytoplasmcytoplasm                         |
| 8036 | ENSG00000153563 | CD8A      | Enhanced Cytoplasmcytoplasm                         |
| 8037 | ENSG00000153574 | RPIA      | Approved Cytoplasmcytoplasm                         |
| 8038 | ENSG00000153707 | PTPRD     | UncertainCytoplasmcytoplasm                         |
| 8039 | ENSG00000153714 | LURAP1L   | UncertainEstimation of protein expression could not |
| 8040 | ENSG00000153721 | CNKSR3    | Approved Ubiquitousnucleus                          |
| 8041 | ENSG00000153767 | GTF2E1    | SupportedGeneral nnucleus                           |
| 8042 | ENSG00000153774 | CFDP1     | Approved ubiquitouscytoplasm;nucleus                |
| 8043 | ENSG00000153779 | TGIF2LX   | SupportedNuclear enucleus                           |
| 8044 | ENSG00000153786 | ZDHHC7    | UncertainCytoplasmcytoplasm;plasma membrane         |
| 8045 | ENSG00000153789 | FAM92B    | Enhanced Selective expression in ciliary rootlets i |
| 8046 | ENSG00000153802 | TMPRSS11D | UncertainGranular cytoplasm;plasma membrane         |
| 8047 | ENSG00000153814 | JAZF1     | Approved General nnucleus                           |
| 8048 | ENSG00000153815 | CMIP      | Approved General ccytoplasm                         |
| 8049 | ENSG00000153820 | SPHKAP    | Enhanced Cytoplasmcytoplasm                         |
| 8050 | ENSG00000153822 | KCNJ16    | Approved Cytoplasmcytoplasm                         |
| 8051 | ENSG00000153823 | PID1      | Approved Cytoplasmcytoplasm                         |
| 8052 | ENSG00000153827 | TRIP12    | Enhanced General nnucleus                           |
| 8053 | ENSG00000153879 | CEBPG     | Enhanced General nnucleus                           |
| 8054 | ENSG00000153896 | ZNF599    | UncertainEstimation of protein expression could not |
| 8055 | ENSG00000153898 | MCOLN2    | UncertainEstimation of protein expression could not |
| 8056 | ENSG00000153902 | LGI4      | Approved Cytoplasmcytoplasm                         |
| 8057 | ENSG00000153904 | DDAH1     | Enhanced Cytoplasmcytoplasm                         |
| 8058 | ENSG00000153914 | SREK1     | Enhanced General nnucleus                           |
| 8059 | ENSG00000153922 | CHD1      | Approved General ccytoplasm;nucleus                 |
| 8060 | ENSG00000153930 | ANKFN1    | UncertainEstimation of protein expression could not |
| 8061 | ENSG00000153933 | DGKE      | Approved Cytoplasmcytoplasm                         |
| 8062 | ENSG00000153936 | HS2ST1    | SupportedGranular cytoplasm                         |
| 8063 | ENSG00000153944 | MSI2      | Approved Ubiquitouscytoplasm                        |
| 8064 | ENSG00000153956 | CACNA2D1  | Enhanced Cytoplasmcytoplasm                         |
| 8065 | ENSG00000153975 | ZUFSP     | UncertainNuclear enucleus                           |
| 8066 | ENSG00000153976 | HS3ST3A1  | UncertainGranular cytoplasm                         |
| 8067 | ENSG00000153989 | NUS1      | SupportedExpression mainly in endothelial cells and |
| 8068 | ENSG00000153993 | SEMA3D    | UncertainEstimation of protein expression could not |
| 8069 | ENSG00000154001 | PPP2R5E   | Approved General ccytoplasm                         |
| 8070 | ENSG00000154016 | GRAP      | UncertainGeneral ccytoplasm                         |
| 8071 | ENSG00000154025 | SLC5A10   | UncertainEstimation of protein expression could not |
| 8072 | ENSG00000154027 | AK5       | Enhanced Cytoplasmcytoplasm                         |
| 8073 | ENSG00000154040 | CABYR     | Enhanced Selectivecytoplasm                         |
| 8074 | ENSG00000154059 | IMPACT    | Approved General ccytoplasm;nucleus                 |
| 8075 | ENSG00000154065 | ANKRD29   | UncertainEstimation of protein expression could not |
| 8076 | ENSG00000154079 | SDHAF4    | SupportedUbiquitouscytoplasm                        |
| 8077 | ENSG00000154080 | CHST9     | UncertainGeneral ccytoplasm                         |
| 8078 | ENSG00000154096 | THY1      | Enhanced Cytoplasmcytoplasm                         |
| 8079 | ENSG00000154099 | DNAAF1    | Enhanced Cytoplasmcytoplasm                         |
| 8080 | ENSG00000154102 | C16orf74  | UncertainEstimation of protein expression could not |
| 8081 | ENSG00000154114 | TBCEL     | Approved Membranoucytoplasm;plasma membrane         |
| 8082 | ENSG00000154124 | OTULIN    | UncertainCytoplasmcytoplasm                         |
| 8083 | ENSG00000154127 | UBASH3B   | Approved Cytoplasmcytoplasm                         |

|      |                 |          |                                                       |
|------|-----------------|----------|-------------------------------------------------------|
| 8084 | ENSG00000154146 | NRGN     | Enhanced Cytoplasm cytoplasm;nucleus                  |
| 8085 | ENSG00000154162 | CDH12    | Uncertain Estimation of protein expression could not  |
| 8086 | ENSG00000154165 | GPR15    | Approved Most abundant in a subset of immune cells :  |
| 8087 | ENSG00000154174 | TOMM70   | Enhanced General c cytoplasm                          |
| 8088 | ENSG00000154175 | ABI3BP   | Uncertain RNA-based expert annotation gave inconclus: |
| 8089 | ENSG00000154188 | ANGPT1   | Approved Positivit plasma membrane                    |
| 8090 | ENSG00000154217 | PITPNC1  | Uncertain Ubiquitou cytoplasm                         |
| 8091 | ENSG00000154222 | CC2D1B   | Uncertain Nuclear enucleus                            |
| 8092 | ENSG00000154227 | CERS3    | Approved Cytoplasm cytoplasm                          |
| 8093 | ENSG00000154229 | PRKCA    | Enhanced Cytoplasm cytoplasm                          |
| 8094 | ENSG00000154237 | LRRK1    | Uncertain Cytoplasm cytoplasm                         |
| 8095 | ENSG00000154252 | GAL3ST2  | Enhanced Selective cytoplasm                          |
| 8096 | ENSG00000154258 | ABCA9    | Uncertain Ubiquitou nucleus                           |
| 8097 | ENSG00000154263 | ABCA10   | Uncertain General c cytoplasm                         |
| 8098 | ENSG00000154265 | ABCA5    | Approved Cytoplasm cytoplasm                          |
| 8099 | ENSG00000154269 | ENPP3    | Enhanced Membranou plasma membrane                    |
| 8100 | ENSG00000154274 | C4orf19  | Enhanced Membranou cytoplasm; plasma membrane         |
| 8101 | ENSG00000154277 | UCHL1    | Enhanced Selective expression in CNS, distal renal 1  |
| 8102 | ENSG00000154305 | MIA3     | Supported Cytoplasm cytoplasm                         |
| 8103 | ENSG00000154309 | DISP1    | Uncertain Estimation of protein expression could not  |
| 8104 | ENSG00000154310 | TNIK     | Approved Cytoplasm cytoplasm                          |
| 8105 | ENSG00000154319 | FAM167A  | Approved Cytoplasm cytoplasm                          |
| 8106 | ENSG00000154330 | PGM5     | Enhanced Selective cytoplasm                          |
| 8107 | ENSG00000154358 | OBSCN    | Enhanced Cytoplasm cytoplasm                          |
| 8108 | ENSG00000154359 | LONRF1   | Uncertain Cytoplasm cytoplasm                         |
| 8109 | ENSG00000154370 | TRIM11   | Approved General c cytoplasm                          |
| 8110 | ENSG00000154380 | ENAH     | Enhanced Cytoplasm cytoplasm; plasma membrane         |
| 8111 | ENSG00000154415 | PPP1R3A  | Enhanced Cytoplasm cytoplasm                          |
| 8112 | ENSG00000154429 | CCSAP    | Enhanced Cytoplasm cytoplasm                          |
| 8113 | ENSG00000154438 | ASZ1     | Enhanced Cytoplasm cytoplasm                          |
| 8114 | ENSG00000154447 | SH3RF1   | Approved General c cytoplasm                          |
| 8115 | ENSG00000154451 | GBP5     | Supported Cytoplasm cytoplasm                         |
| 8116 | ENSG00000154473 | BUB3     | Supported Ubiquitou nucleus                           |
| 8117 | ENSG00000154478 | GPR26    | Enhanced Distinct cytoplasm                           |
| 8118 | ENSG00000154479 | CCDC173  | Uncertain Expressiocytoplasm                          |
| 8119 | ENSG00000154493 | C10orf90 | Approved Expressed in elongated spermatids.           |
| 8120 | ENSG00000154511 | FAM69A   | Approved Cytoplasm cytoplasm                          |
| 8121 | ENSG00000154529 | CNTNAP3B | Uncertain Estimation of protein expression could not  |
| 8122 | ENSG00000154545 | MAGED4   | Uncertain Estimation of protein expression could not  |
| 8123 | ENSG00000154548 | SRSF12   | Approved Expression in spermatozoa.                   |
| 8124 | ENSG00000154553 | PDLIM3   | Enhanced Cytoplasm cytoplasm                          |
| 8125 | ENSG00000154639 | CXADR    | Enhanced Membranou cytoplasm; plasma membrane         |
| 8126 | ENSG00000154640 | BTG3     | Approved Cytoplasm cytoplasm                          |
| 8127 | ENSG00000154642 | C21orf91 | Approved Cytoplasm cytoplasm                          |
| 8128 | ENSG00000154645 | CHODL    | Enhanced Cytoplasm cytoplasm; plasma membrane         |
| 8129 | ENSG00000154646 | TMPRSS15 | Enhanced Distinct expression in brush border.         |
| 8130 | ENSG00000154654 | NCAM2    | Enhanced Membranou plasma membrane                    |
| 8131 | ENSG00000154655 | L3MBTL4  | Approved Nuclear e cytoplasm;nucleus                  |
| 8132 | ENSG00000154719 | MRPL39   | Approved Cytoplasm cytoplasm; plasma membrane         |
| 8133 | ENSG00000154723 | ATP5PF   | Supported Ubiquitou cytoplasm                         |
| 8134 | ENSG00000154727 | GABPA    | Supported Nuclear enucleus                            |
| 8135 | ENSG00000154734 | ADAMTS1  | Uncertain Cytoplasm cytoplasm                         |
| 8136 | ENSG00000154736 | ADAMTS5  | Approved Cytoplasm cytoplasm                          |
| 8137 | ENSG00000154743 | TSEN2    | Approved Cytoplasm cytoplasm;nucleus                  |
| 8138 | ENSG00000154760 | SLFN13   | Uncertain Selective cytoplasm                         |

|      |                 |          |                                                     |
|------|-----------------|----------|-----------------------------------------------------|
| 8139 | ENSG00000154764 | WNT7A    | Approved plasma prplasma membrane                   |
| 8140 | ENSG00000154767 | XPC      | SupportedUbiquitouucleus                            |
| 8141 | ENSG00000154781 | CCDC174  | Approved Cytoplasmcytoplasm                         |
| 8142 | ENSG00000154783 | FGD5     | UncertainCytoplasmcytoplasm                         |
| 8143 | ENSG00000154803 | FLCN     | SupportedUbiquitocytoplasm                          |
| 8144 | ENSG00000154813 | DPH3     | UncertainCytoplasmcytoplasm                         |
| 8145 | ENSG00000154814 | OXNAD1   | Approved General ccytoplasm;plasma membrane         |
| 8146 | ENSG00000154822 | PLCL2    | Enhanced Expression in several tissues, mainly in b |
| 8147 | ENSG00000154832 | CXXC1    | SupportedGeneral n nucleus                          |
| 8148 | ENSG00000154839 | SKA1     | Approved General ccytoplasm;plasma membrane         |
| 8149 | ENSG00000154845 | PPP4R1   | UncertainNuclear acytoplasm;nucleus                 |
| 8150 | ENSG00000154864 | PIEZ02   | Enhanced Membranoucytoplasm;plasma membrane         |
| 8151 | ENSG00000154889 | MPPE1    | UncertainCytoplasmcytoplasm                         |
| 8152 | ENSG00000154914 | USP43    | UncertainCytoplasmcytoplasm                         |
| 8153 | ENSG00000154917 | RAB6B    | UncertainGeneral ccytoplasm                         |
| 8154 | ENSG00000154920 | EME1     | SupportedUbiquitouucleus                            |
| 8155 | ENSG00000154928 | EPHB1    | Enhanced Cytoplasmcytoplasm                         |
| 8156 | ENSG00000154930 | ACSS1    | Enhanced Cytoplasmcytoplasm                         |
| 8157 | ENSG00000154945 | ANKRD40  | UncertainUbiquitouucleus                            |
| 8158 | ENSG00000154957 | ZNF18    | UncertainNuclear acytoplasm;nucleus                 |
| 8159 | ENSG00000154975 | CA10     | SupportedCytoplasmcytoplasm                         |
| 8160 | ENSG00000154997 | #####    | Enhanced Distinct plasma membrane                   |
| 8161 | ENSG00000155008 | APOOL    | Approved Cytoplasmcytoplasm                         |
| 8162 | ENSG00000155011 | DKK2     | Uncertainplasma prplasma membrane                   |
| 8163 | ENSG00000155016 | CYP2U1   | UncertainCytoplasmcytoplasm;plasma membrane         |
| 8164 | ENSG00000155026 | RSPH10B  | SupportedCiliary expression in fallopian tube and r |
| 8165 | ENSG00000155066 | PROM2    | Enhanced Membranouplasma membrane                   |
| 8166 | ENSG00000155085 | AK9      | Enhanced Mainly nocytoplasm;nucleus                 |
| 8167 | ENSG00000155087 | ODF1     | Approved Distinct expression in spermatozoa.        |
| 8168 | ENSG00000155093 | PTPRN2   | Enhanced Cytoplasmcytoplasm                         |
| 8169 | ENSG00000155096 | AZIN1    | Approved General ccytoplasm;nucleus                 |
| 8170 | ENSG00000155097 | ATP6V1C1 | Approved General ccytoplasm                         |
| 8171 | ENSG00000155099 | PIP4P2   | Approved Nuclear enucleus                           |
| 8172 | ENSG00000155100 | OTUD6B   | Approved General ccytoplasm                         |
| 8173 | ENSG00000155111 | CDK19    | Approved General ncytoplasm;nucleus                 |
| 8174 | ENSG00000155115 | GTF3C6   | Approved Mainly nunucleus                           |
| 8175 | ENSG00000155189 | AGPAT5   | Approved Cytoplasmcytoplasm                         |
| 8176 | ENSG00000155229 | MMS19    | Approved General ccytoplasm                         |
| 8177 | ENSG00000155249 | OR4K1    | UncertainEstimation of protein expression could not |
| 8178 | ENSG00000155252 | PI4K2A   | Approved Cytoplasmcytoplasm                         |
| 8179 | ENSG00000155256 | ZFYVE27  | Approved Granular cytoplasm;nucleus                 |
| 8180 | ENSG00000155265 | GOLGA7B  | UncertainCytoplasmcytoplasm;nucleus                 |
| 8181 | ENSG00000155269 | GPR78    | UncertainEstimation of protein expression could not |
| 8182 | ENSG00000155275 | TRMT44   | UncertainEstimation of protein expression could not |
| 8183 | ENSG00000155304 | HSPA13   | Approved Cytoplasmcytoplasm                         |
| 8184 | ENSG00000155307 | SAMSN1   | Approved Cytoplasmcytoplasm                         |
| 8185 | ENSG00000155313 | USP25    | Approved Cytoplasmcytoplasm                         |
| 8186 | ENSG00000155324 | GRAMD2B  | Enhanced Cytoplasmcytoplasm                         |
| 8187 | ENSG00000155329 | ZCCHC10  | Approved Nuclear enucleus                           |
| 8188 | ENSG00000155330 | C16orf87 | UncertainCytoplasmcytoplasm                         |
| 8189 | ENSG00000155366 | RHOC     | UncertainLuminal mcytoplasm;plasma membrane         |
| 8190 | ENSG00000155367 | PPM1J    | UncertainCytoplasmcytoplasm                         |
| 8191 | ENSG00000155368 | DBI      | Approved General ccytoplasm                         |
| 8192 | ENSG00000155380 | SLC16A1  | Enhanced Cytoplasmcytoplasm;plasma membrane         |
| 8193 | ENSG00000155393 | HEATR3   | UncertainCytoplasmcytoplasm                         |

|      |                 |         |                                                      |
|------|-----------------|---------|------------------------------------------------------|
| 8194 | ENSG00000155438 | NIFK    | SupportedUbiquitousnucleus                           |
| 8195 | ENSG00000155463 | OXA1L   | Approved Cytoplasmcytoplasm;plasma membrane          |
| 8196 | ENSG00000155465 | SLC7A7  | Enhanced Cytoplasmcytoplasm;plasma membrane          |
| 8197 | ENSG00000155495 | MAGEC1  | Enhanced Highly specific expression in spermatogonia |
| 8198 | ENSG00000155506 | LARP1   | Approved General ccytoplasm                          |
| 8199 | ENSG00000155508 | CNOT8   | Approved Granular cytoplasm                          |
| 8200 | ENSG00000155511 | GRIA1   | Enhanced Cytoplasmcytoplasm                          |
| 8201 | ENSG00000155530 | LRGUK   | UncertainEstimation of protein expression could not  |
| 8202 | ENSG00000155545 | MIER3   | UncertainCytoplasmcytoplasm                          |
| 8203 | ENSG00000155592 | ZKSCAN2 | UncertainEstimation of protein expression could not  |
| 8204 | ENSG00000155621 | C9orf85 | Approved General ccytoplasm                          |
| 8205 | ENSG00000155622 | XAGE2   | SupportedCytoplasmcytoplasm                          |
| 8206 | ENSG00000155629 | PIK3AP1 | Enhanced Cytoplasmcytoplasm                          |
| 8207 | ENSG00000155636 | RBM45   | Approved Nuclear ocytoplasm;nucleus                  |
| 8208 | ENSG00000155657 | TTN     | Enhanced Cytoplasmcytoplasm                          |
| 8209 | ENSG00000155659 | VSIG4   | Enhanced Selectivecytoplasm                          |
| 8210 | ENSG00000155660 | PDIA4   | SupportedCytoplasmcytoplasm                          |
| 8211 | ENSG00000155666 | KDM8    | UncertainEstimation of protein expression could not  |
| 8212 | ENSG00000155719 | OTOA    | Approved High expression in a subset of immune cells |
| 8213 | ENSG00000155729 | KCTD18  | Approved Cytoplasmcytoplasm;nucleus                  |
| 8214 | ENSG00000155744 | FAM126B | UncertainCytoplasmcytoplasm                          |
| 8215 | ENSG00000155755 | TMEM237 | Enhanced Cytoplasmcytoplasm                          |
| 8216 | ENSG00000155760 | FZD7    | Approved General ccytoplasm                          |
| 8217 | ENSG00000155761 | SPAG17  | Enhanced Distinct expression in cilia in fallopian t |
| 8218 | ENSG00000155792 | DEPTOR  | Enhanced Cytoplasmcytoplasm                          |
| 8219 | ENSG00000155827 | RNF20   | SupportedUbiquitousnucleus                           |
| 8220 | ENSG00000155850 | SLC26A2 | Enhanced Membranouplasma membrane                    |
| 8221 | ENSG00000155858 | LSM11   | UncertainCytoplasmcytoplasm;nucleus                  |
| 8222 | ENSG00000155875 | SAXO1   | Enhanced Distinct expression in spermatozoa and in c |
| 8223 | ENSG00000155876 | RRAGA   | SupportedGeneral ccytoplasm                          |
| 8224 | ENSG00000155893 | PXYLP1  | UncertainUbiquitouscytoplasm;plasma membrane         |
| 8225 | ENSG00000155897 | ADCY8   | SupportedUbiquitouscytoplasm                         |
| 8226 | ENSG00000155903 | RASA2   | Approved Cytoplasmcytoplasm                          |
| 8227 | ENSG00000155906 | RMND1   | Approved Granular cytoplasm                          |
| 8228 | ENSG00000155926 | SLA     | Approved Cytoplasmcytoplasm                          |
| 8229 | ENSG00000155959 | VBP1    | Approved Ubiquitouscytoplasm                         |
| 8230 | ENSG00000155961 | RAB39B  | Approved Cytoplasmcytoplasm;plasma membrane          |
| 8231 | ENSG00000155962 | CLIC2   | UncertainCytoplasmcytoplasm                          |
| 8232 | ENSG00000155966 | AFF2    | Approved Cytoplasmcytoplasm                          |
| 8233 | ENSG00000155970 | MICU3   | UncertainEstimation of protein expression could not  |
| 8234 | ENSG00000155974 | GRIP1   | UncertainUbiquitouscytoplasm                         |
| 8235 | ENSG00000155975 | VPS37A  | SupportedGeneral ccytoplasm                          |
| 8236 | ENSG00000155980 | KIF5A   | Enhanced Cytoplasmcytoplasm                          |
| 8237 | ENSG00000156006 | NAT2    | UncertainCytoplasmcytoplasm                          |
| 8238 | ENSG00000156009 | MAGEA8  | Enhanced Cytoplasmcytoplasm;nucleus                  |
| 8239 | ENSG00000156011 | PSD3    | Enhanced Highly expressed in neuronal cells.         |
| 8240 | ENSG00000156017 | CARNMT1 | UncertainUbiquitouscytoplasm;nucleus                 |
| 8241 | ENSG00000156026 | MCU     | Approved Cytoplasmcytoplasm                          |
| 8242 | ENSG00000156030 | ELMSAN1 | Approved Nuclear enucleus                            |
| 8243 | ENSG00000156042 | CFAP70  | Enhanced Distinct expression in sperm flagella and : |
| 8244 | ENSG00000156049 | GNA14   | Approved Membranoucytoplasm;plasma membrane          |
| 8245 | ENSG00000156050 | FAM161B | Approved Cytoplasmcytoplasm;nucleus                  |
| 8246 | ENSG00000156052 | GNAQ    | UncertainCytoplasmcytoplasm;plasma membrane          |
| 8247 | ENSG00000156096 | UGT2B4  | Enhanced Cytoplasmcytoplasm                          |
| 8248 | ENSG00000156097 | GPR61   | Approved Cytoplasmcytoplasm                          |

|      |                 |          |                                                     |
|------|-----------------|----------|-----------------------------------------------------|
| 8249 | ENSG00000156103 | MMP16    | UncertainCytoplasmcytoplasm                         |
| 8250 | ENSG00000156110 | ADK      | Approved General ccytoplasm;nucleus                 |
| 8251 | ENSG00000156113 | KCNMA1   | Approved Cytoplasmcytoplasm;plasma membrane         |
| 8252 | ENSG00000156127 | BATF     | Approved Cytoplasmcytoplasm                         |
| 8253 | ENSG00000156136 | DCK      | Enhanced Nuclear acytoplasm;nucleus                 |
| 8254 | ENSG00000156140 | ADAMTS3  | UncertainEstimation of protein expression could not |
| 8255 | ENSG00000156162 | DPY19L4  | Approved Cytoplasmcytoplasm                         |
| 8256 | ENSG00000156170 | NDUFAF6  | Approved Mainly ccytoplasm                          |
| 8257 | ENSG00000156171 | DRAM2    | SupportedExpression in lysosomes                    |
| 8258 | ENSG00000156172 | C8orf37  | Approved Cytoplasmcytoplasm                         |
| 8259 | ENSG00000156206 | CFAP161  | SupportedCytoplasmcytoplasm                         |
| 8260 | ENSG00000156218 | ADAMTSL3 | UncertainEstimation of protein expression could not |
| 8261 | ENSG00000156219 | ART3     | Enhanced Expression in subsets of cells in seminife |
| 8262 | ENSG00000156222 | SLC28A1  | Enhanced Luminal mplasma membrane                   |
| 8263 | ENSG00000156232 | WHAMM    | SupportedGeneral ccytoplasm                         |
| 8264 | ENSG00000156234 | CXCL13   | UncertainExtracellcytoplasm                         |
| 8265 | ENSG00000156239 | N6AMT1   | Approved General ccytoplasm;nucleus                 |
| 8266 | ENSG00000156253 | RWDD2B   | UncertainEstimation of protein expression could not |
| 8267 | ENSG00000156256 | USP16    | SupportedGeneral nnucleus                           |
| 8268 | ENSG00000156261 | CCT8     | Enhanced General ccytoplasm                         |
| 8269 | ENSG00000156265 | MAP3K7CL | UncertainGeneral ccytoplasm                         |
| 8270 | ENSG00000156269 | NAA11    | Approved Cytoplasmcytoplasm                         |
| 8271 | ENSG00000156273 | BACH1    | Approved Nuclear acytoplasm;nucleus                 |
| 8272 | ENSG00000156282 | CLDN17   | Enhanced Cytoplasmcytoplasm                         |
| 8273 | ENSG00000156284 | CLDN8    | SupportedMembranoucytoplasm;plasma membrane         |
| 8274 | ENSG00000156298 | TSPAN7   | Enhanced Cytoplasmcytoplasm                         |
| 8275 | ENSG00000156299 | TIAM1    | Enhanced Cytoplasmcytoplasm                         |
| 8276 | ENSG00000156304 | SCAF4    | Enhanced Ubiquitouucleus                            |
| 8277 | ENSG00000156313 | RPGR     | Approved General ccytoplasm;plasma membrane         |
| 8278 | ENSG00000156345 | CDK20    | Enhanced Cytoplasmcytoplasm;nucleus                 |
| 8279 | ENSG00000156381 | ANKRD9   | UncertainCytoplasmcytoplasm                         |
| 8280 | ENSG00000156384 | SFR1     | UncertainEstimation of protein expression could not |
| 8281 | ENSG00000156398 | SFXN2    | Enhanced Cytoplasmcytoplasm                         |
| 8282 | ENSG00000156411 | ATP5MPL  | Approved Ubiquitoucytoplasm                         |
| 8283 | ENSG00000156413 | FUT6     | Approved Granular cytoplasm                         |
| 8284 | ENSG00000156427 | FGF18    | UncertainEstimation of protein expression could not |
| 8285 | ENSG00000156453 | PCDH1    | Enhanced Cytoplasmcytoplasm;plasma membrane         |
| 8286 | ENSG00000156463 | SH3RF2   | UncertainCytoplasmcytoplasm                         |
| 8287 | ENSG00000156466 | GDF6     | UncertainEstimation of protein expression could not |
| 8288 | ENSG00000156467 | UQCRB    | Approved General ccytoplasm                         |
| 8289 | ENSG00000156471 | PTDSS1   | UncertainEstimation of protein expression could not |
| 8290 | ENSG00000156475 | PPP2R2B  | Approved Cytoplasmcytoplasm                         |
| 8291 | ENSG00000156482 | RPL30    | Approved General ccytoplasm                         |
| 8292 | ENSG00000156486 | KCNS2    | UncertainEstimation of protein expression could not |
| 8293 | ENSG00000156500 | FAM122C  | Approved Cytoplasmcytoplasm                         |
| 8294 | ENSG00000156502 | SUPV3L1  | SupportedGeneral gcytoplasm                         |
| 8295 | ENSG00000156504 | FAM122B  | Enhanced Mainly nnucleus                            |
| 8296 | ENSG00000156508 | EEF1A1   | SupportedGeneral ccytoplasm                         |
| 8297 | ENSG00000156509 | FBX043   | UncertainEstimation of protein expression could not |
| 8298 | ENSG00000156510 | HKDC1    | Approved Cytoplasmcytoplasm                         |
| 8299 | ENSG00000156515 | HK1      | SupportedUbiquitoucytoplasm                         |
| 8300 | ENSG00000156521 | TYSND1   | Approved Cytoplasmcytoplasm                         |
| 8301 | ENSG00000156531 | PHF6     | Enhanced Ubiquitouucleus                            |
| 8302 | ENSG00000156535 | CD109    | Enhanced Membranouplasma membrane                   |
| 8303 | ENSG00000156564 | LRFN2    | Enhanced Cytoplasmcytoplasm                         |

|      |                 |           |                                                      |
|------|-----------------|-----------|------------------------------------------------------|
| 8304 | ENSG00000156574 | NODAL     | UncertainRNA-based expert annotation gave inconclus: |
| 8305 | ENSG00000156575 | PRG3      | Enhanced Expression in a subset of hematopoietic ce: |
| 8306 | ENSG00000156587 | UBE2L6    | Enhanced Cytoplasmcytoplasm;nucleus                  |
| 8307 | ENSG00000156599 | ZDHHC5    | Approved Ubiquitocytoplasm;plasma membrane           |
| 8308 | ENSG00000156603 | MED19     | UncertainCytoplasmcytoplasm                          |
| 8309 | ENSG00000156639 | ZFAND3    | Approved Cytoplasmcytoplasm                          |
| 8310 | ENSG00000156642 | NPTN      | Approved Cytoplasmcytoplasm;plasma membrane          |
| 8311 | ENSG00000156650 | KAT6B     | SupportedGeneral nnucleus                            |
| 8312 | ENSG00000156675 | RAB11FIP1 | Enhanced General ccytoplasm;plasma membrane          |
| 8313 | ENSG00000156687 | UNC5D     | UncertainEstimation of protein expression could not  |
| 8314 | ENSG00000156689 | GLYATL2   | UncertainCytoplasmcytoplasm                          |
| 8315 | ENSG00000156697 | UTP14A    | UncertainCytoplasmcytoplasm;plasma membrane          |
| 8316 | ENSG00000156709 | AIFM1     | Enhanced General gcytoplasm                          |
| 8317 | ENSG00000156711 | MAPK13    | Enhanced General ncytoplasm;nucleus                  |
| 8318 | ENSG00000156735 | BAG4      | Approved General ccytoplasm                          |
| 8319 | ENSG00000156738 | MS4A1     | Enhanced Membranoucytoplasm;plasma membrane          |
| 8320 | ENSG00000156787 | TBC1D31   | Approved Cytoplasmcytoplasm                          |
| 8321 | ENSG00000156795 | WDYHV1    | Approved Cytoplasmcytoplasm;nucleus                  |
| 8322 | ENSG00000156802 | ATAD2     | Enhanced Nuclear enucleus                            |
| 8323 | ENSG00000156831 | NSMCE2    | SupportedUbiquitounucleus                            |
| 8324 | ENSG00000156853 | ZNF689    | Approved Nuclear acytoplasm;nucleus                  |
| 8325 | ENSG00000156858 | PRR14     | UncertainEstimation of protein expression could not  |
| 8326 | ENSG00000156860 | FBRS      | Approved Cytoplasmcytoplasm                          |
| 8327 | ENSG00000156869 | FRRS1     | Approved Cytoplasmcytoplasm                          |
| 8328 | ENSG00000156876 | SASS6     | UncertainCytoplasmcytoplasm                          |
| 8329 | ENSG00000156886 | ITGAD     | UncertainEstimation of protein expression could not  |
| 8330 | ENSG00000156920 | ADGRG4    | UncertainEstimation of protein expression could not  |
| 8331 | ENSG00000156925 | ZIC3      | UncertainEstimation of protein expression could not  |
| 8332 | ENSG00000156928 | MALSU1    | Approved General ccytoplasm                          |
| 8333 | ENSG00000156931 | VPS8      | UncertainCytoplasmcytoplasm                          |
| 8334 | ENSG00000156958 | GALK2     | UncertainCytoplasmcytoplasm;nucleus                  |
| 8335 | ENSG00000156959 | LHFPL4    | UncertainEstimation of protein expression could not  |
| 8336 | ENSG00000156966 | B3GNT7    | Enhanced Granular cytoplasm                          |
| 8337 | ENSG00000156968 | MPV17L    | UncertainCytoplasmcytoplasm                          |
| 8338 | ENSG00000156973 | PDE6D     | UncertainCytoplasmcytoplasm                          |
| 8339 | ENSG00000156976 | EIF4A2    | UncertainUbiquitocytoplasm                           |
| 8340 | ENSG00000156983 | BRPF1     | Enhanced General ncytoplasm;nucleus                  |
| 8341 | ENSG00000156990 | RPUSD3    | UncertainCytoplasmcytoplasm                          |
| 8342 | ENSG00000157005 | SST       | Enhanced Distinct expression in hypothalamus, adren: |
| 8343 | ENSG00000157014 | TATDN2    | Approved Nuclear enucleus                            |
| 8344 | ENSG00000157017 | GHRL      | Enhanced High cytocytoplasm                          |
| 8345 | ENSG00000157020 | SEC13     | Approved Cytoplasmcytoplasm                          |
| 8346 | ENSG00000157036 | EXOG      | Enhanced General ccytoplasm                          |
| 8347 | ENSG00000157060 | SHCBP1L   | Enhanced Selectivecytoplasm                          |
| 8348 | ENSG00000157064 | NMNAT2    | Enhanced Cytoplasmcytoplasm                          |
| 8349 | ENSG00000157077 | ZFYVE9    | Approved Cytoplasmcytoplasm                          |
| 8350 | ENSG00000157087 | ATP2B2    | Enhanced Highly expressed in CNS.                    |
| 8351 | ENSG00000157093 | LYZL4     | Approved Cytoplasmcytoplasm                          |
| 8352 | ENSG00000157103 | SLC6A1    | Enhanced Selective expression in CNS.                |
| 8353 | ENSG00000157106 | SMG1      | Approved Cytoplasmcytoplasm                          |
| 8354 | ENSG00000157107 | FCH02     | Enhanced General ccytoplasm                          |
| 8355 | ENSG00000157110 | RBPM5     | Enhanced Nuclear acytoplasm;nucleus                  |
| 8356 | ENSG00000157111 | TMEM171   | Approved Cytoplasmcytoplasm                          |
| 8357 | ENSG00000157119 | KLHL40    | Enhanced Cytoplasmcytoplasm                          |
| 8358 | ENSG00000157168 | NRG1      | UncertainCytoplasmcytoplasm                          |



|      |                 |           |                                                      |
|------|-----------------|-----------|------------------------------------------------------|
| 8359 | ENSG00000157181 | ODR4      | UncertainCytoplasmcytoplasm                          |
| 8360 | ENSG00000157184 | CPT2      | Enhanced Cytoplasmcytoplasm                          |
| 8361 | ENSG00000157191 | NECAP2    | Approved General ccytoplasm                          |
| 8362 | ENSG00000157193 | LRP8      | Enhanced secreted protein.                           |
| 8363 | ENSG00000157211 | CDCP2     | UncertainEstimation of protein expression could not  |
| 8364 | ENSG00000157212 | PAXIP1    | Enhanced Nuclear enucleus                            |
| 8365 | ENSG00000157214 | STEAP2    | UncertainGeneral ccytoplasm                          |
| 8366 | ENSG00000157219 | HTR5A     | Approved General ccytoplasm                          |
| 8367 | ENSG00000157224 | CLDN12    | Approved General ccytoplasm;plasma membrane          |
| 8368 | ENSG00000157227 | MMP14     | Approved Cytoplasmcytoplasm                          |
| 8369 | ENSG00000157240 | FZD1      | Approved Cytoplasmcytoplasm                          |
| 8370 | ENSG00000157303 | SUSD3     | UncertainCytoplasmcytoplasm                          |
| 8371 | ENSG00000157315 | TMED6     | Approved Cytoplasmcytoplasm                          |
| 8372 | ENSG00000157322 | CLEC18A   | UncertainRNA-based expert annotation gave inconclus: |
| 8373 | ENSG00000157326 | DHRS4     | UncertainGranular cytoplasm                          |
| 8374 | ENSG00000157335 | CLEC18C   | UncertainEstimation of protein expression could not  |
| 8375 | ENSG00000157343 | ARMC12    | Enhanced Highly expressed in spermatids.             |
| 8376 | ENSG00000157349 | DDX19B    | Approved General ccytoplasm;nucleus;plasma membrane  |
| 8377 | ENSG00000157350 | ST3GAL2   | Approved Cytoplasmcytoplasm                          |
| 8378 | ENSG00000157353 | FUK       | Approved Cytoplasmcytoplasm;nucleus                  |
| 8379 | ENSG00000157379 | DHRS1     | Approved Granular cytoplasm                          |
| 8380 | ENSG00000157388 | CACNA1D   | UncertainCytoplasmcytoplasm                          |
| 8381 | ENSG00000157399 | ARSE      | Approved Membranouplasma membrane                    |
| 8382 | ENSG00000157404 | KIT       | Enhanced Selectivecytoplasm;plasma membrane          |
| 8383 | ENSG00000157423 | HYDIN     | Enhanced Expression in cilia in fallopian tube, res  |
| 8384 | ENSG00000157426 | AASDH     | Approved General ccytoplasm                          |
| 8385 | ENSG00000157429 | ZNF19     | Approved Nuclear enucleus                            |
| 8386 | ENSG00000157450 | RNF111    | Enhanced Cytoplasmcytoplasm;nucleus                  |
| 8387 | ENSG00000157456 | CCNB2     | Enhanced Cytoplasmcytoplasm                          |
| 8388 | ENSG00000157470 | FAM81A    | Enhanced Nuclear enucleus                            |
| 8389 | ENSG00000157483 | MYO1E     | Approved Mainly ccytoplasm                           |
| 8390 | ENSG00000157500 | APPL1     | Approved Cytoplasmcytoplasm                          |
| 8391 | ENSG00000157502 | MUM1L1    | Enhanced Nuclear enucleus                            |
| 8392 | ENSG00000157514 | TSC22D3   | Approved Cytoplasmcytoplasm                          |
| 8393 | ENSG00000157538 | VPS26C    | UncertainUbiquitoucytoplasm                          |
| 8394 | ENSG00000157540 | DYRK1A    | Approved Cytoplasmcytoplasm                          |
| 8395 | ENSG00000157551 | KCNJ15    | Approved General ccytoplasm                          |
| 8396 | ENSG00000157554 | ERG       | Approved Nuclear acytoplasm;nucleus                  |
| 8397 | ENSG00000157578 | LCA5L     | Enhanced High expression in cilia and subset of cel: |
| 8398 | ENSG00000157593 | SLC35B2   | Approved Cytoplasmcytoplasm                          |
| 8399 | ENSG00000157600 | TMEM164   | Approved General ccytoplasm                          |
| 8400 | ENSG00000157601 | MX1       | Approved General ccytoplasm                          |
| 8401 | ENSG00000157613 | CREB3L1   | Enhanced Cytoplasmcytoplasm;nucleus                  |
| 8402 | ENSG00000157617 | C2CD2     | Enhanced Cytoplasmcytoplasm                          |
| 8403 | ENSG00000157625 | TAB3      | Approved Cytoplasmcytoplasm;nucleus                  |
| 8404 | ENSG00000157637 | SLC38A10  | Enhanced Granular cytoplasm                          |
| 8405 | ENSG00000157654 | PALM2-AKA | UncertainEstimation of protein expression could not  |
| 8406 | ENSG00000157657 | ZNF618    | UncertainEstimation of protein expression could not  |
| 8407 | ENSG00000157693 | TMEM268   | Approved General ccytoplasm                          |
| 8408 | ENSG00000157703 | SVOPL     | UncertainEstimation of protein expression could not  |
| 8409 | ENSG00000157734 | SNX22     | Approved Cytoplasmcytoplasm                          |
| 8410 | ENSG00000157741 | UBN2      | UncertainCytoplasmcytoplasm;nucleus                  |
| 8411 | ENSG00000157764 | BRAF      | Approved Ubiquitoucytoplasm                          |
| 8412 | ENSG00000157765 | SLC34A2   | Enhanced Membranouplasma membrane                    |
| 8413 | ENSG00000157766 | ACAN      | Enhanced High expression in chondrocytes.            |

|      |                 |          |                                                      |
|------|-----------------|----------|------------------------------------------------------|
| 8414 | ENSG00000157778 | PSMG3    | Approved Cytoplasm cytoplasm                         |
| 8415 | ENSG00000157782 | CABP1    | Uncertain Mainly cytoplasm                           |
| 8416 | ENSG00000157796 | WDR19    | Approved Cytoplasm cytoplasm                         |
| 8417 | ENSG00000157823 | AP3S2    | Uncertain Cytoplasm cytoplasm                        |
| 8418 | ENSG00000157827 | FMNL2    | Enhanced Cytoplasm cytoplasm                         |
| 8419 | ENSG00000157837 | SPPL3    | Uncertain Cytoplasm cytoplasm                        |
| 8420 | ENSG00000157851 | DPYSL5   | Enhanced Cytoplasm cytoplasm                         |
| 8421 | ENSG00000157869 | RAB28    | Approved Cytoplasm cytoplasm                         |
| 8422 | ENSG00000157870 | FAM213B  | Approved General cytoplasm                           |
| 8423 | ENSG00000157873 | TNFRSF14 | Approved Cytoplasm cytoplasm; plasma membrane        |
| 8424 | ENSG00000157881 | PANK4    | Uncertain Estimation of protein expression could not |
| 8425 | ENSG00000157884 | CIB4     | Uncertain Estimation of protein expression could not |
| 8426 | ENSG00000157895 | C12orf43 | Uncertain Cytoplasm cytoplasm                        |
| 8427 | ENSG00000157911 | PEX10    | Approved Mainly cytoplasm                            |
| 8428 | ENSG00000157916 | RER1     | Supported Granular cytoplasm                         |
| 8429 | ENSG00000157927 | RADIL    | Approved Cytoplasm cytoplasm                         |
| 8430 | ENSG00000157933 | SKI      | Approved Nuclear acytoplasm; nucleus                 |
| 8431 | ENSG00000157954 | WIPI2    | Uncertain Selective cytoplasm                        |
| 8432 | ENSG00000157978 | LDLRAP1  | Uncertain Cytoplasm cytoplasm                        |
| 8433 | ENSG00000157985 | AGAP1    | Uncertain Cytoplasm cytoplasm                        |
| 8434 | ENSG00000157992 | KRTCAP3  | Enhanced Membranou cytoplasm; plasma membrane        |
| 8435 | ENSG00000157999 | ANKRD61  | Uncertain Estimation of protein expression could not |
| 8436 | ENSG00000158006 | PAFAH2   | Approved General cytoplasm                           |
| 8437 | ENSG00000158008 | EXTL1    | Approved Cytoplasm cytoplasm                         |
| 8438 | ENSG00000158019 | BABAM2   | Approved Cytoplasm cytoplasm; nucleus                |
| 8439 | ENSG00000158023 | WDR66    | Supported General cytoplasm                          |
| 8440 | ENSG00000158042 | MRPL17   | Uncertain General cytoplasm                          |
| 8441 | ENSG00000158055 | GRHL3    | Enhanced General nucleus                             |
| 8442 | ENSG00000158062 | UBXN11   | Approved Cytoplasm cytoplasm                         |
| 8443 | ENSG00000158077 | NLRP14   | Approved Expressed in testis and in ovarian follicle |
| 8444 | ENSG00000158079 | PTPDC1   | Uncertain Cytoplasm cytoplasm                        |
| 8445 | ENSG00000158092 | NCK1     | Supported General cytoplasm                          |
| 8446 | ENSG00000158104 | HPD      | Enhanced Selective cytoplasm                         |
| 8447 | ENSG00000158106 | RHPN1    | Approved Cytoplasm cytoplasm; plasma membrane        |
| 8448 | ENSG00000158122 | AAED1    | Approved Cytoplasm cytoplasm                         |
| 8449 | ENSG00000158125 | XDH      | Supported Cytoplasm cytoplasm; plasma membrane       |
| 8450 | ENSG00000158156 | XKR8     | Uncertain Estimation of protein expression could not |
| 8451 | ENSG00000158158 | CNNM4    | Enhanced Membranou cytoplasm; plasma membrane        |
| 8452 | ENSG00000158161 | EYA3     | Uncertain Estimation of protein expression could not |
| 8453 | ENSG00000158163 | DZIP1L   | Approved Nuclear acytoplasm; nucleus                 |
| 8454 | ENSG00000158169 | FANCC    | Approved Nuclear acytoplasm; nucleus                 |
| 8455 | ENSG00000158186 | MRAS     | Approved Cytoplasm cytoplasm                         |
| 8456 | ENSG00000158195 | WASF2    | Enhanced General cytoplasm                           |
| 8457 | ENSG00000158201 | ABHD3    | Approved Cytoplasm cytoplasm                         |
| 8458 | ENSG00000158220 | ESYT3    | Approved Cytoplasm cytoplasm                         |
| 8459 | ENSG00000158234 | FAIM     | Approved Cytoplasm cytoplasm; nucleus                |
| 8460 | ENSG00000158258 | CLSTN2   | Approved Expression in cerebellum and adipose tissue |
| 8461 | ENSG00000158270 | COLEC12  | Enhanced Cytoplasm cytoplasm                         |
| 8462 | ENSG00000158286 | RNF207   | Uncertain Estimation of protein expression could not |
| 8463 | ENSG00000158290 | CUL4B    | Enhanced General nucleus                             |
| 8464 | ENSG00000158292 | GPR153   | Approved Cytoplasm cytoplasm                         |
| 8465 | ENSG00000158296 | SLC13A3  | Enhanced Distinct plasma membrane                    |
| 8466 | ENSG00000158301 | GPRASP2  | Enhanced Mainly cytoplasm                            |
| 8467 | ENSG00000158315 | RHBDL2   | Approved Cytoplasm cytoplasm; plasma membrane        |
| 8468 | ENSG00000158321 | AUTS2    | Approved Nuclear nucleus                             |

|      |                 |           |                                                      |
|------|-----------------|-----------|------------------------------------------------------|
| 8469 | ENSG00000158352 | SHROOM4   | UncertainCytoplasmcytoplasm                          |
| 8470 | ENSG00000158373 | HIST1H2BD | SupportedUbiquitousnucleus                           |
| 8471 | ENSG00000158402 | CDC25C    | Approved General nnucleus                            |
| 8472 | ENSG00000158406 | HIST1H4H  | SupportedGeneral nnucleus                            |
| 8473 | ENSG00000158411 | MITD1     | Approved Cytoplasmcytoplasm;plasma membrane          |
| 8474 | ENSG00000158417 | EIF5B     | Approved Ubiquitouscytoplasm                         |
| 8475 | ENSG00000158427 | TMSB15B   | UncertainEstimation of protein expression could not  |
| 8476 | ENSG00000158428 | CATIP     | SupportedExpression in cilia in fallopian tube and 1 |
| 8477 | ENSG00000158435 | CNOT11    | Enhanced Cytoplasmcytoplasm;nucleus                  |
| 8478 | ENSG00000158445 | KCNB1     | Enhanced Membranouplasma membrane                    |
| 8479 | ENSG00000158457 | TSPAN33   | Enhanced Cytoplasmcytoplasm                          |
| 8480 | ENSG00000158458 | NRG2      | Approved Expression in several tissues, including in |
| 8481 | ENSG00000158467 | AHCYL2    | UncertainCytoplasmcytoplasm;plasma membrane          |
| 8482 | ENSG00000158473 | CD1D      | Enhanced Cytoplasmcytoplasm                          |
| 8483 | ENSG00000158477 | CD1A      | Enhanced Selectivecytoplasm                          |
| 8484 | ENSG00000158480 | SPATA2    | UncertainExpression in most tissues.                 |
| 8485 | ENSG00000158485 | CD1B      | Approved Lysosomal expression in several tissues.    |
| 8486 | ENSG00000158488 | CD1E      | UncertainCytoplasmcytoplasm;plasma membrane          |
| 8487 | ENSG00000158516 | CPA2      | Enhanced Selectivecytoplasm                          |
| 8488 | ENSG00000158517 | NCF1      | Enhanced Distinct expression in a subset of immune c |
| 8489 | ENSG00000158526 | TSR2      | Approved Cytoplasmcytoplasm                          |
| 8490 | ENSG00000158528 | PPP1R9A   | Approved Cytoplasmcytoplasm                          |
| 8491 | ENSG00000158545 | ZC3H18    | Enhanced Ubiquitousnucleus                           |
| 8492 | ENSG00000158552 | ZFAND2B   | UncertainCytoplasmcytoplasm;nucleus                  |
| 8493 | ENSG00000158553 | POM121L2  | UncertainEstimation of protein expression could not  |
| 8494 | ENSG00000158555 | GDPD5     | UncertainGranular cytoplasm                          |
| 8495 | ENSG00000158560 | DYNC1I1   | Enhanced Cytoplasmcytoplasm                          |
| 8496 | ENSG00000158604 | TMED4     | Approved General ccytoplasm                          |
| 8497 | ENSG00000158623 | COPG2     | Approved Cytoplasmcytoplasm                          |
| 8498 | ENSG00000158636 | EMSY      | SupportedNuclear enucleus                            |
| 8499 | ENSG00000158639 | PAGE5     | SupportedSelective expression in spermatogonia.      |
| 8500 | ENSG00000158669 | GPAT4     | Approved Ubiquitouscytoplasm                         |
| 8501 | ENSG00000158683 | PKD1L1    | UncertainEstimation of protein expression could not  |
| 8502 | ENSG00000158691 | ZSCAN12   | Approved Mainly nnucleus                             |
| 8503 | ENSG00000158710 | TAGLN2    | Approved Cytoplasmcytoplasm                          |
| 8504 | ENSG00000158711 | ELK4      | UncertainGeneral ncytoplasm;nucleus                  |
| 8505 | ENSG00000158714 | SLAMF8    | Enhanced Cytoplasmcytoplasm                          |
| 8506 | ENSG00000158715 | SLC45A3   | Enhanced Selective expression in prostate.           |
| 8507 | ENSG00000158716 | DUSP23    | Approved General ccytoplasm                          |
| 8508 | ENSG00000158747 | NBL1      | UncertainRNA-based expert annotation gave inconclus: |
| 8509 | ENSG00000158748 | HTR6      | UncertainExpressed in caudate.                       |
| 8510 | ENSG00000158764 | ITLN2     | Enhanced Cytoplasmcytoplasm                          |
| 8511 | ENSG00000158769 | F11R      | Enhanced Membranouplasma membrane                    |
| 8512 | ENSG00000158773 | USF1      | SupportedGeneral nnucleus                            |
| 8513 | ENSG00000158792 | SPATA2L   | UncertainUbiquitouscytoplasm                         |
| 8514 | ENSG00000158793 | NIT1      | Approved Cytoplasmcytoplasm                          |
| 8515 | ENSG00000158796 | DEDD      | Approved Cytoplasmcytoplasm;nucleus                  |
| 8516 | ENSG00000158805 | ZNF276    | UncertainNuclear acytoplasm;nucleus                  |
| 8517 | ENSG00000158806 | NPM2      | Enhanced Nuclear enucleus                            |
| 8518 | ENSG00000158815 | FGF17     | Uncertainplasma prplasma membrane                    |
| 8519 | ENSG00000158816 | VWA5B1    | Enhanced Cytoplasmcytoplasm                          |
| 8520 | ENSG00000158825 | CDA       | Enhanced Expression in a subset of immune cells.     |
| 8521 | ENSG00000158828 | PINK1     | UncertainGeneral ccytoplasm                          |
| 8522 | ENSG00000158850 | B4GALT3   | Approved Cytoplasmcytoplasm                          |
| 8523 | ENSG00000158856 | DMTN      | UncertainCytoplasmcytoplasm                          |

|      |                 |          |                                                     |
|------|-----------------|----------|-----------------------------------------------------|
| 8524 | ENSG00000158859 | ADAMTS4  | UncertainCytoplasmcytoplasm                         |
| 8525 | ENSG00000158863 | FAM160B2 | Approved General ccytoplasm                         |
| 8526 | ENSG00000158864 | NDUFS2   | Enhanced Ubiquitouscytoplasm                        |
| 8527 | ENSG00000158865 | SLC5A11  | UncertainEstimation of protein expression could not |
| 8528 | ENSG00000158869 | FCER1G   | SupportedCytoplasmcytoplasm                         |
| 8529 | ENSG00000158874 | APOA2    | SupportedExtracellplasma membrane                   |
| 8530 | ENSG00000158882 | TOMM40L  | Approved Cytoplasmcytoplasm                         |
| 8531 | ENSG00000158887 | MPZ      | Enhanced Expressed in peripheral nerves.            |
| 8532 | ENSG00000158901 | WFDC8    | Enhanced Cytoplasmcytoplasm                         |
| 8533 | ENSG00000158941 | CCAR2    | Enhanced Ubiquitousnucleus                          |
| 8534 | ENSG00000158955 | WNT9B    | Approved plasma prplasma membrane                   |
| 8535 | ENSG00000158966 | CACHD1   | UncertainCytoplasmcytoplasm                         |
| 8536 | ENSG00000158985 | CDC42SE2 | Enhanced General ccytoplasm                         |
| 8537 | ENSG00000158987 | RAPGEF6  | Approved Ubiquitouscytoplasm                        |
| 8538 | ENSG00000159023 | EPB41    | SupportedSelective expression in erythrocytes.      |
| 8539 | ENSG00000159055 | MIS18A   | Enhanced Expressionnucleus                          |
| 8540 | ENSG00000159063 | ALG8     | Approved Cytoplasmcytoplasm                         |
| 8541 | ENSG00000159069 | FBXW5    | Approved Cytoplasmcytoplasm                         |
| 8542 | ENSG00000159079 | C21orf59 | Enhanced Cytoplasmcytoplasm                         |
| 8543 | ENSG00000159082 | SYNJ1    | Enhanced Cytoplasmcytoplasm                         |
| 8544 | ENSG00000159086 | PAXBP1   | Approved General ncytoplasm;nucleus                 |
| 8545 | ENSG00000159111 | MRPL10   | Enhanced Ubiquitouscytoplasm                        |
| 8546 | ENSG00000159128 | IFNGR2   | Approved Cytoplasmcytoplasm;plasma membrane         |
| 8547 | ENSG00000159131 | GART     | Approved Ubiquitouscytoplasm                        |
| 8548 | ENSG00000159140 | SON      | SupportedUbiquitousnucleus                          |
| 8549 | ENSG00000159147 | DONSON   | UncertainCytoplasmcytoplasm                         |
| 8550 | ENSG00000159164 | SV2A     | Enhanced Cytoplasmcytoplasm                         |
| 8551 | ENSG00000159166 | LAD1     | Enhanced Cytoplasmcytoplasm;plasma membrane         |
| 8552 | ENSG00000159167 | STC1     | Approved Positivitcytoplasm;plasma membrane         |
| 8553 | ENSG00000159173 | TNNI1    | Approved Cytoplasmcytoplasm                         |
| 8554 | ENSG00000159176 | CSRP1    | UncertainCytoplasmcytoplasm;plasma membrane         |
| 8555 | ENSG00000159182 | PRAC1    | UncertainCytoplasmcytoplasm                         |
| 8556 | ENSG00000159184 | HOXB13   | Enhanced Nuclear enucleus                           |
| 8557 | ENSG00000159189 | C1QC     | SupportedMainly plplasma membrane                   |
| 8558 | ENSG00000159197 | KCNE2    | Enhanced Cytoplasmcytoplasm                         |
| 8559 | ENSG00000159200 | RCAN1    | Enhanced Cytoplasmcytoplasm;plasma membrane         |
| 8560 | ENSG00000159202 | UBE2Z    | Approved Cytoplasmcytoplasm;nucleus                 |
| 8561 | ENSG00000159208 | CIART    | Enhanced Cytoplasmcytoplasm;nucleus                 |
| 8562 | ENSG00000159210 | SNF8     | Approved Cytoplasmcytoplasm                         |
| 8563 | ENSG00000159212 | CLIC6    | Enhanced Cytoplasmcytoplasm;plasma membrane         |
| 8564 | ENSG00000159214 | CCDC24   | UncertainEstimation of protein expression could not |
| 8565 | ENSG00000159216 | RUNX1    | Enhanced Nuclear enucleus                           |
| 8566 | ENSG00000159217 | IGF2BP1  | Enhanced Cytoplasmcytoplasm                         |
| 8567 | ENSG00000159224 | GIP      | Enhanced Selectivecytoplasm                         |
| 8568 | ENSG00000159228 | CBR1     | Enhanced Cytoplasmcytoplasm                         |
| 8569 | ENSG00000159231 | CBR3     | UncertainCytoplasmcytoplasm;nucleus                 |
| 8570 | ENSG00000159251 | ACTC1    | Enhanced Selectivecytoplasm                         |
| 8571 | ENSG00000159256 | MORC3    | Approved Nuclear acytoplasm;nucleus                 |
| 8572 | ENSG00000159259 | CHAF1B   | Enhanced Nuclear enucleus                           |
| 8573 | ENSG00000159263 | SIM2     | Approved General nnucleus                           |
| 8574 | ENSG00000159267 | HLCS     | Approved General ccytoplasm                         |
| 8575 | ENSG00000159289 | GOLGA6A  | SupportedDistinct expression in round and elongated |
| 8576 | ENSG00000159307 | SCUBE1   | Approved Cytoplasmcytoplasm                         |
| 8577 | ENSG00000159314 | ARHGAP27 | Approved Cytoplasmcytoplasm                         |
| 8578 | ENSG00000159322 | ADPGK    | Approved Ubiquitouscytoplasm                        |

|      |                 |           |                                                      |
|------|-----------------|-----------|------------------------------------------------------|
| 8579 | ENSG00000159335 | PTMS      | Approved General nnucleus                            |
| 8580 | ENSG00000159339 | PADI4     | Enhanced Nuclear enucleus                            |
| 8581 | ENSG00000159348 | CYB5R1    | Enhanced Ubiquitouscytoplasm                         |
| 8582 | ENSG00000159352 | PSMD4     | Enhanced Nuclear acytoplasm;nucleus                  |
| 8583 | ENSG00000159363 | ATP13A2   | Enhanced Cytoplasmcytoplasm                          |
| 8584 | ENSG00000159374 | M1AP      | UncertainEstimation of protein expression could not  |
| 8585 | ENSG00000159377 | PSMB4     | Approved General ccytoplasm                          |
| 8586 | ENSG00000159387 | IRX6      | UncertainEstimation of protein expression could not  |
| 8587 | ENSG00000159388 | BTG2      | UncertainCytoplasmcytoplasm                          |
| 8588 | ENSG00000159399 | HK2       | Enhanced Cytoplasmcytoplasm                          |
| 8589 | ENSG00000159403 | C1R       | UncertainMainly ccytoplasm;plasma membrane           |
| 8590 | ENSG00000159409 | CELF3     | UncertainCytoplasmcytoplasm                          |
| 8591 | ENSG00000159423 | ALDH4A1   | Enhanced General ccytoplasm                          |
| 8592 | ENSG00000159433 | STARD9    | UncertainMainly ccytoplasm                           |
| 8593 | ENSG00000159445 | THEM4     | Approved Expressed in several different tissues, in  |
| 8594 | ENSG00000159450 | TCHH      | UncertainEstimation of protein expression could not  |
| 8595 | ENSG00000159459 | UBR1      | Approved General ccytoplasm                          |
| 8596 | ENSG00000159461 | AMFR      | Approved General ccytoplasm;plasma membrane          |
| 8597 | ENSG00000159479 | MED8      | Approved Nuclear acytoplasm;nucleus                  |
| 8598 | ENSG00000159496 | RGL4      | UncertainCytoplasmcytoplasm                          |
| 8599 | ENSG00000159527 | PGLYRP3   | UncertainEstimation of protein expression could not  |
| 8600 | ENSG00000159579 | RSPRY1    | Approved General ccytoplasm                          |
| 8601 | ENSG00000159588 | CCDC17    | Enhanced Cytoplasmcytoplasm;plasma membrane          |
| 8602 | ENSG00000159592 | GPBP1L1   | Approved General nnucleus                            |
| 8603 | ENSG00000159593 | NAE1      | Enhanced Ubiquitouscytoplasm;nucleus                 |
| 8604 | ENSG00000159596 | TMEM69    | Approved Cytoplasmcytoplasm                          |
| 8605 | ENSG00000159618 | ADGRG5    | Enhanced Cytoplasmcytoplasm                          |
| 8606 | ENSG00000159640 | ACE       | Enhanced Cytoplasmcytoplasm;plasma membrane          |
| 8607 | ENSG00000159648 | TEPP      | Enhanced Nuclear enucleus                            |
| 8608 | ENSG00000159650 | UROC1     | Enhanced Cytoplasmcytoplasm                          |
| 8609 | ENSG00000159658 | EFCAB14   | Approved Cytoplasmcytoplasm;plasma membrane          |
| 8610 | ENSG00000159674 | SPON2     | Approved Cytoplasmcytoplasm                          |
| 8611 | ENSG00000159685 | CHCHD6    | Approved Granular cytoplasm                          |
| 8612 | ENSG00000159692 | CTBP1     | Approved General nnucleus                            |
| 8613 | ENSG00000159708 | LRRC36    | Enhanced Selective expression in subset of cells in  |
| 8614 | ENSG00000159713 | TPPP3     | Enhanced Cytoplasmcytoplasm;nucleus                  |
| 8615 | ENSG00000159714 | ZDHHC1    | UncertainCytoplasmcytoplasm                          |
| 8616 | ENSG00000159720 | ATP6VOD1  | UncertainCytoplasmcytoplasm                          |
| 8617 | ENSG00000159723 | AGRP      | Enhanced Cytoplasmcytoplasm                          |
| 8618 | ENSG00000159733 | ZFYVE28   | Approved Mainly ccytoplasm                           |
| 8619 | ENSG00000159753 | CARMIL2   | Approved General ccytoplasm                          |
| 8620 | ENSG00000159761 | C16orf86  | Enhanced Nuclear enucleus                            |
| 8621 | ENSG00000159763 | PIP       | Enhanced Selectivecytoplasm                          |
| 8622 | ENSG00000159792 | PSKH1     | Approved General ncytoplasm;nucleus                  |
| 8623 | ENSG00000159840 | ZYX       | Approved Expression in subsets of immune cells as w  |
| 8624 | ENSG00000159842 | ABR       | Enhanced General ccytoplasm                          |
| 8625 | ENSG00000159871 | LYPD5     | Approved Weak cytocytoplasm                          |
| 8626 | ENSG00000159873 | CCDC117   | UncertainNuclear enucleus                            |
| 8627 | ENSG00000159885 | ZNF222    | Approved Nuclear acytoplasm;nucleus                  |
| 8628 | ENSG00000159905 | ZNF221    | UncertainEstimation of protein expression could not  |
| 8629 | ENSG00000159915 | ZNF233    | UncertainEstimation of protein expression could not  |
| 8630 | ENSG00000159917 | ZNF235    | UncertainCytoplasmcytoplasm                          |
| 8631 | ENSG00000159921 | GNE       | Approved Cytoplasmcytoplasm                          |
| 8632 | ENSG00000159958 | TNFRSF13C | Enhanced Selective expression in subsets of lymphoid |
| 8633 | ENSG00000160007 | ARHGAP35  | Approved Cytoplasmcytoplasm                          |

|      |                 |          |                                                      |
|------|-----------------|----------|------------------------------------------------------|
| 8634 | ENSG00000160014 | CALM3    | Approved Ubiquitous cytoplasm                        |
| 8635 | ENSG00000160049 | DFFA     | Supported Ubiquitous cytoplasm;nucleus               |
| 8636 | ENSG00000160050 | CCDC28B  | Uncertain Cytoplasm cytoplasm                        |
| 8637 | ENSG00000160051 | IQCC     | Approved Cytoplasm cytoplasm                         |
| 8638 | ENSG00000160055 | TMEM234  | Uncertain Cytoplasm cytoplasm                        |
| 8639 | ENSG00000160058 | BSDC1    | Approved Mainly gr cytoplasm                         |
| 8640 | ENSG00000160062 | ZBTB8A   | Approved Ubiquitous cytoplasm;plasma membrane        |
| 8641 | ENSG00000160072 | ATAD3B   | Approved Granular cytoplasm                          |
| 8642 | ENSG00000160075 | SSU72    | Supported General n cytoplasm;nucleus                |
| 8643 | ENSG00000160094 | ZNF362   | Uncertain Estimation of protein expression could not |
| 8644 | ENSG00000160097 | FNDC5    | Enhanced Cytoplasm cytoplasm                         |
| 8645 | ENSG00000160111 | CPAMD8   | Uncertain Cytoplasm cytoplasm;plasma membrane        |
| 8646 | ENSG00000160117 | ANKLE1   | Approved Cytoplasm cytoplasm                         |
| 8647 | ENSG00000160124 | CCDC58   | Approved Cytoplasm cytoplasm                         |
| 8648 | ENSG00000160131 | VMA21    | Uncertain Estimation of protein expression could not |
| 8649 | ENSG00000160145 | KALRN    | Approved Cytoplasm cytoplasm                         |
| 8650 | ENSG00000160161 | CILP2    | Uncertain Estimation of protein expression could not |
| 8651 | ENSG00000160179 | ABCG1    | Approved General c cytoplasm                         |
| 8652 | ENSG00000160180 | TFF3     | Enhanced Distinct expression in mucus secreting cell |
| 8653 | ENSG00000160181 | TFF2     | Enhanced Cytoplasm cytoplasm                         |
| 8654 | ENSG00000160182 | TFF1     | Enhanced Selective cytoplasm                         |
| 8655 | ENSG00000160188 | RSPH1    | Enhanced Cytoplasm cytoplasm                         |
| 8656 | ENSG00000160190 | SLC37A1  | Approved Cytoplasm cytoplasm                         |
| 8657 | ENSG00000160191 | PDE9A    | Enhanced Cytoplasm cytoplasm                         |
| 8658 | ENSG00000160193 | WDR4     | Uncertain Estimation of protein expression could not |
| 8659 | ENSG00000160194 | NDUFV3   | Enhanced Ubiquitous cytoplasm                        |
| 8660 | ENSG00000160199 | PKNOX1   | Approved Nuclear enucleus                            |
| 8661 | ENSG00000160200 | CBS      | Supported Selective expression in liver, hepatocytes |
| 8662 | ENSG00000160201 | U2AF1    | Supported Ubiquitous nucleus                         |
| 8663 | ENSG00000160202 | CRYAA    | Supported Cytoplasm cytoplasm                        |
| 8664 | ENSG00000160207 | HSF2BP   | Enhanced Nuclear enucleus                            |
| 8665 | ENSG00000160208 | RRP1B    | Supported Ubiquitous nucleus                         |
| 8666 | ENSG00000160209 | PDXK     | Enhanced Mainly c cytoplasm                          |
| 8667 | ENSG00000160211 | G6PD     | Enhanced Cytoplasm cytoplasm                         |
| 8668 | ENSG00000160213 | CSTB     | Enhanced Selective cytoplasm;nucleus                 |
| 8669 | ENSG00000160214 | RRP1     | Approved Nucleolar nucleus                           |
| 8670 | ENSG00000160218 | TRAPPC10 | Supported Cytoplasm cytoplasm                        |
| 8671 | ENSG00000160219 | GAB3     | Approved Cytoplasm cytoplasm                         |
| 8672 | ENSG00000160221 | C21orf33 | Supported General c cytoplasm                        |
| 8673 | ENSG00000160223 | ICOSLG   | Uncertain General c cytoplasm                        |
| 8674 | ENSG00000160224 | AIRE     | Uncertain Cytoplasm cytoplasm                        |
| 8675 | ENSG00000160226 | C21orf2  | Supported Ubiquitous cytoplasm                       |
| 8676 | ENSG00000160233 | LRRC3    | Uncertain Estimation of protein expression could not |
| 8677 | ENSG00000160255 | ITGB2    | Enhanced Selective cytoplasm;plasma membrane         |
| 8678 | ENSG00000160256 | FAM207A  | Approved General c cytoplasm                         |
| 8679 | ENSG00000160271 | RALGDS   | Approved Cytoplasm cytoplasm                         |
| 8680 | ENSG00000160282 | FTCD     | Enhanced Selective cytoplasm                         |
| 8681 | ENSG00000160284 | SPATC1L  | Approved Cytoplasm cytoplasm                         |
| 8682 | ENSG00000160285 | LSS      | Supported General c cytoplasm                        |
| 8683 | ENSG00000160293 | VAV2     | Uncertain General c cytoplasm                        |
| 8684 | ENSG00000160294 | MCM3AP   | Approved General c cytoplasm                         |
| 8685 | ENSG00000160298 | C21orf58 | Uncertain Estimation of protein expression could not |
| 8686 | ENSG00000160299 | PCNT     | Enhanced Cytoplasm cytoplasm                         |
| 8687 | ENSG00000160305 | DIP2A    | Uncertain Cytoplasm cytoplasm                        |
| 8688 | ENSG00000160307 | S100B    | Enhanced Nuclear a cytoplasm;nucleus                 |

|      |                 |           |                                                     |
|------|-----------------|-----------|-----------------------------------------------------|
| 8689 | ENSG00000160310 | PRMT2     | UncertainCytoplasmcytoplasm                         |
| 8690 | ENSG00000160318 | CLDND2    | UncertainEstimation of protein expression could not |
| 8691 | ENSG00000160323 | ADAMTS13  | Approved Cytoplasmcytoplasm                         |
| 8692 | ENSG00000160326 | SLC2A6    | UncertainMembranouplasma membrane                   |
| 8693 | ENSG00000160345 | C9orf116  | Approved Expression in cilia. Also expressed in oth |
| 8694 | ENSG00000160360 | GPSM1     | Approved General ccytoplasm                         |
| 8695 | ENSG00000160392 | C19orf47  | Enhanced Nuclear acytoplasm;nucleus                 |
| 8696 | ENSG00000160396 | HIPK4     | UncertainEstimation of protein expression could not |
| 8697 | ENSG00000160401 | CFAP157   | Enhanced Selective expression in cilia in fallopian |
| 8698 | ENSG00000160404 | TOR2A     | Approved Cytoplasmcytoplasm                         |
| 8699 | ENSG00000160408 | ST6GALNAC | Approved Cytoplasmcytoplasm                         |
| 8700 | ENSG00000160410 | SHKBP1    | UncertainNuclear enucleus                           |
| 8701 | ENSG00000160439 | RDH13     | Approved Cytoplasmcytoplasm                         |
| 8702 | ENSG00000160446 | ZDHHC12   | UncertainUbiquitounucleus                           |
| 8703 | ENSG00000160447 | PKN3      | UncertainCytoplasmcytoplasm                         |
| 8704 | ENSG00000160460 | SPTBN4    | Enhanced Expression in adrenal medulla and neuronal |
| 8705 | ENSG00000160469 | BRSK1     | Enhanced Cytoplasmcytoplasm                         |
| 8706 | ENSG00000160539 | PLPP7     | UncertainCytoplasmcytoplasm                         |
| 8707 | ENSG00000160551 | TAOK1     | Approved General ccytoplasm;plasma membrane         |
| 8708 | ENSG00000160563 | MED27     | Approved General ncytoplasm;nucleus                 |
| 8709 | ENSG00000160584 | SIK3      | Enhanced General nnucleus                           |
| 8710 | ENSG00000160593 | JAML      | Approved Cytoplasmcytoplasm;nucleus                 |
| 8711 | ENSG00000160602 | NEK8      | Approved Mainly ccytoplasm                          |
| 8712 | ENSG00000160606 | TLCD1     | Enhanced Cytoplasmcytoplasm                         |
| 8713 | ENSG00000160633 | SAFB      | SupportedUbiquitounucleus                           |
| 8714 | ENSG00000160654 | CD3G      | Enhanced Cytoplasmcytoplasm                         |
| 8715 | ENSG00000160678 | S100A1    | Enhanced Cytoplasmcytoplasm;nucleus                 |
| 8716 | ENSG00000160679 | CHTOP     | Approved Nuclear enucleus                           |
| 8717 | ENSG00000160683 | CXCR5     | Enhanced Cytoplasmcytoplasm                         |
| 8718 | ENSG00000160685 | ZBTB7B    | Enhanced Nuclear enucleus                           |
| 8719 | ENSG00000160688 | FLAD1     | Approved Ubiquitoucytoplasm                         |
| 8720 | ENSG00000160691 | SHC1      | SupportedGeneral ccytoplasm                         |
| 8721 | ENSG00000160695 | VPS11     | Approved General ccytoplasm;plasma membrane         |
| 8722 | ENSG00000160703 | NLRX1     | SupportedGeneral ccytoplasm                         |
| 8723 | ENSG00000160710 | ADAR      | Enhanced Ubiquitounucleus                           |
| 8724 | ENSG00000160714 | UBE2Q1    | Approved Mainly nnucleus                            |
| 8725 | ENSG00000160741 | CRTC2     | SupportedUbiquitoucytoplasm;nucleus                 |
| 8726 | ENSG00000160746 | ANO10     | Approved Cytoplasmcytoplasm;plasma membrane         |
| 8727 | ENSG00000160752 | FDPS      | Approved Cytoplasmcytoplasm                         |
| 8728 | ENSG00000160753 | RUSC1     | Approved Granular cytoplasm                         |
| 8729 | ENSG00000160767 | FAM189B   | UncertainEstimation of protein expression could not |
| 8730 | ENSG00000160789 | LMNA      | SupportedDistinct nucleus;plasma membrane           |
| 8731 | ENSG00000160796 | NBEAL2    | Approved Cytoplasmcytoplasm                         |
| 8732 | ENSG00000160799 | CCDC12    | Approved Ubiquitounucleus                           |
| 8733 | ENSG00000160801 | PTH1R     | Approved Cytoplasmcytoplasm;plasma membrane         |
| 8734 | ENSG00000160803 | UBQLN4    | Approved General nnucleus                           |
| 8735 | ENSG00000160808 | MYL3      | Enhanced Selectivecytoplasm                         |
| 8736 | ENSG00000160813 | PPP1R35   | Approved Cytoplasmcytoplasm                         |
| 8737 | ENSG00000160818 | GPATCH4   | Approved Cytoplasmcytoplasm                         |
| 8738 | ENSG00000160856 | FCRL3     | Enhanced Cytoplasmcytoplasm                         |
| 8739 | ENSG00000160862 | AZGP1     | Enhanced Selectivecytoplasm                         |
| 8740 | ENSG00000160867 | FGFR4     | Approved Cytoplasmcytoplasm                         |
| 8741 | ENSG00000160868 | CYP3A4    | Enhanced Selectivecytoplasm                         |
| 8742 | ENSG00000160877 | NACC1     | Enhanced Ubiquitounucleus                           |
| 8743 | ENSG00000160882 | CYP11B1   | SupportedSelectivecytoplasm                         |

|      |                 |          |                                                      |
|------|-----------------|----------|------------------------------------------------------|
| 8744 | ENSG00000160883 | HK3      | Enhanced Selective cytoplasm                         |
| 8745 | ENSG00000160886 | LY6K     | Enhanced Cytoplasm cytoplasm                         |
| 8746 | ENSG00000160908 | ZNF394   | Uncertain Cytoplasm cytoplasm;nucleus                |
| 8747 | ENSG00000160917 | CPSF4    | Uncertain Cytoplasm cytoplasm;nucleus                |
| 8748 | ENSG00000160948 | VPS28    | Supported Ubiquitous cytoplasm                       |
| 8749 | ENSG00000160949 | TONSL    | Uncertain Estimation of protein expression could not |
| 8750 | ENSG00000160953 | MUM1     | Uncertain Ubiquitous cytoplasm                       |
| 8751 | ENSG00000160957 | RECQL4   | Supported Nuclear enucleus                           |
| 8752 | ENSG00000160959 | LRRC14   | Uncertain Estimation of protein expression could not |
| 8753 | ENSG00000160961 | ZNF333   | Uncertain Estimation of protein expression could not |
| 8754 | ENSG00000160963 | COL26A1  | Approved Expression in endothelial cells with posit  |
| 8755 | ENSG00000160972 | PPP1R16A | Uncertain Cytoplasm cytoplasm                        |
| 8756 | ENSG00000160991 | ORAI2    | Uncertain Granular cytoplasm                         |
| 8757 | ENSG00000160993 | ALKBH4   | Approved High cyto cytoplasm                         |
| 8758 | ENSG00000160994 | CCDC105  | Approved Nuclear enucleus                            |
| 8759 | ENSG00000160999 | SH2B2    | Uncertain Cytoplasm cytoplasm                        |
| 8760 | ENSG00000161010 | MRNIP    | Uncertain Cytoplasm cytoplasm                        |
| 8761 | ENSG00000161011 | SQSTM1   | Supported General c cytoplasm;nucleus                |
| 8762 | ENSG00000161013 | MGAT4B   | Uncertain Cytoplasm cytoplasm                        |
| 8763 | ENSG00000161016 | RPL8     | Enhanced Ubiquitous cytoplasm                        |
| 8764 | ENSG00000161021 | MAML1    | Approved Mainly n nucleus                            |
| 8765 | ENSG00000161031 | PGLYRP2  | Supported Positiv it plasma membrane                 |
| 8766 | ENSG00000161036 | LRWD1    | Enhanced Nuclear enucleus                            |
| 8767 | ENSG00000161040 | FBXL13   | Uncertain Cytoplasm cytoplasm                        |
| 8768 | ENSG00000161048 | NAPEPLD  | Approved Cytoplasm cytoplasm                         |
| 8769 | ENSG00000161057 | PSMC2    | Supported Cytoplasm cytoplasm;nucleus                |
| 8770 | ENSG00000161082 | CELF5    | Enhanced Selective expression in neuronal cells.     |
| 8771 | ENSG00000161091 | MFS12    | Uncertain General c cytoplasm                        |
| 8772 | ENSG00000161202 | DVL3     | Approved General c cytoplasm                         |
| 8773 | ENSG00000161203 | AP2M1    | Uncertain Cytoplasm cytoplasm                        |
| 8774 | ENSG00000161204 | ABCF3    | Approved Cytoplasm cytoplasm                         |
| 8775 | ENSG00000161217 | PCYT1A   | Approved Nuclear enucleus                            |
| 8776 | ENSG00000161243 | FBX027   | Approved Cytoplasm cytoplasm;nucleus                 |
| 8777 | ENSG00000161249 | DMKN     | Enhanced Expression in squamous epithelium.          |
| 8778 | ENSG00000161265 | U2AF1L4  | Supported Ubiquitous nucleus                         |
| 8779 | ENSG00000161267 | BDH1     | Enhanced Cytoplasm cytoplasm                         |
| 8780 | ENSG00000161270 | NPHS1    | Enhanced Distinct cytoplasm                          |
| 8781 | ENSG00000161277 | THAP8    | Approved Mainly n cytoplasm;nucleus                  |
| 8782 | ENSG00000161298 | ZNF382   | Approved General n nucleus                           |
| 8783 | ENSG00000161328 | LRRC56   | Uncertain Cytoplasm cytoplasm                        |
| 8784 | ENSG00000161381 | PLXDC1   | Approved General c cytoplasm; plasma membrane        |
| 8785 | ENSG00000161395 | PGAP3    | Approved Cytoplasm cytoplasm                         |
| 8786 | ENSG00000161405 | IKZF3    | Enhanced Nuclear enucleus                            |
| 8787 | ENSG00000161513 | FDXR     | Enhanced Cytoplasm cytoplasm                         |
| 8788 | ENSG00000161526 | SAP30BP  | Supported Ubiquitous nucleus; plasma membrane        |
| 8789 | ENSG00000161533 | ACOX1    | Approved General c cytoplasm                         |
| 8790 | ENSG00000161544 | CYGB     | Approved General c cytoplasm                         |
| 8791 | ENSG00000161547 | SRSF2    | Supported General n nucleus                          |
| 8792 | ENSG00000161551 | ZNF577   | Uncertain Cytoplasm cytoplasm                        |
| 8793 | ENSG00000161558 | TMEM143  | Approved Cytoplasm cytoplasm                         |
| 8794 | ENSG00000161594 | KLHL10   | Enhanced High cyto cytoplasm;nucleus                 |
| 8795 | ENSG00000161609 | CCDC155  | Enhanced General c cytoplasm                         |
| 8796 | ENSG00000161610 | HCRT     | Enhanced Hypothalamus-specific expression.           |
| 8797 | ENSG00000161618 | ALDH16A1 | Approved Cytoplasm cytoplasm                         |
| 8798 | ENSG00000161634 | DCD      | Enhanced Highly expressed in secretory cells of ecci |



|      |                 |           |                                                      |
|------|-----------------|-----------|------------------------------------------------------|
| 8799 | ENSG00000161638 | ITGA5     | Enhanced Selectiveplasma membrane                    |
| 8800 | ENSG00000161640 | SIGLEC11  | Approved Cytoplasmcytoplasm                          |
| 8801 | ENSG00000161647 | MPP3      | UncertainCytoplasmcytoplasm                          |
| 8802 | ENSG00000161652 | IZUM02    | UncertainEstimation of protein expression could not  |
| 8803 | ENSG00000161654 | LSM12     | Approved General ccytoplasm                          |
| 8804 | ENSG00000161664 | ASB16     | Approved Cytoplasmcytoplasm                          |
| 8805 | ENSG00000161671 | EMC10     | UncertainCytoplasmcytoplasm                          |
| 8806 | ENSG00000161681 | SHANK1    | UncertainCytoplasmcytoplasm                          |
| 8807 | ENSG00000161682 | FAM171A2  | UncertainEstimation of protein expression could not  |
| 8808 | ENSG00000161692 | DBF4B     | UncertainEstimation of protein expression could not  |
| 8809 | ENSG00000161714 | PLCD3     | Approved Cytoplasmcytoplasm                          |
| 8810 | ENSG00000161791 | FMNL3     | UncertainCytoplasmcytoplasm                          |
| 8811 | ENSG00000161798 | AQP5      | Enhanced Membranouplasma membrane                    |
| 8812 | ENSG00000161800 | RACGAP1   | Enhanced Nuclear enucleus                            |
| 8813 | ENSG00000161813 | LARP4     | Approved General ccytoplasm                          |
| 8814 | ENSG00000161835 | GRASP     | Approved General ccytoplasm                          |
| 8815 | ENSG00000161847 | RAVER1    | Enhanced Nuclear enucleus                            |
| 8816 | ENSG00000161849 | KRT84     | SupportedCytoplasmcytoplasm                          |
| 8817 | ENSG00000161850 | KRT82     | Enhanced Highly expressed in hair cuticle.           |
| 8818 | ENSG00000161860 | SYCE2     | Enhanced Nuclear enucleus                            |
| 8819 | ENSG00000161888 | SPC24     | Approved Nuclear enucleus                            |
| 8820 | ENSG00000161896 | IP6K3     | Approved Cytoplasmcytoplasm                          |
| 8821 | ENSG00000161904 | LEMD2     | SupportedGeneral ncytoplasm;nucleus                  |
| 8822 | ENSG00000161905 | ALOX15    | Approved Cytoplasmcytoplasm                          |
| 8823 | ENSG00000161911 | TREML1    | Enhanced Cytoplasmcytoplasm                          |
| 8824 | ENSG00000161914 | ZNF653    | UncertainCytoplasmcytoplasm                          |
| 8825 | ENSG00000161920 | MED11     | UncertainExpression in several tissues.              |
| 8826 | ENSG00000161921 | CXCL16    | Approved Cytoplasmcytoplasm                          |
| 8827 | ENSG00000161929 | SCIMP     | Enhanced Cytoplasmcytoplasm                          |
| 8828 | ENSG00000161939 | RNASEK-C1 | Uncertain RNA-based expert annotation gave inconclu: |
| 8829 | ENSG00000161940 | BCL6B     | UncertainEstimation of protein expression could not  |
| 8830 | ENSG00000161944 | ASGR2     | Enhanced Cytoplasmcytoplasm                          |
| 8831 | ENSG00000161955 | TNFSF13   | UncertainGeneral ccytoplasm;plasma membrane          |
| 8832 | ENSG00000161956 | SEN3      | SupportedNuclear acytoplasm;nucleus                  |
| 8833 | ENSG00000161958 | FGF11     | Enhanced Mainly exnucleus                            |
| 8834 | ENSG00000161960 | EIF4A1    | UncertainCytoplasmcytoplasm                          |
| 8835 | ENSG00000161970 | RPL26     | SupportedGeneral ccytoplasm                          |
| 8836 | ENSG00000161980 | POLR3K    | Approved Ubiquitoucytoplasm;nucleus                  |
| 8837 | ENSG00000161981 | SNRNP25   | UncertainMainly ccytoplasm                           |
| 8838 | ENSG00000161992 | PRR35     | UncertainEstimation of protein expression could not  |
| 8839 | ENSG00000161996 | WDR90     | Approved Cytoplasmcytoplasm                          |
| 8840 | ENSG00000162032 | SPSB3     | UncertainCytoplasmcytoplasm                          |
| 8841 | ENSG00000162062 | TEDC2     | Approved Nuclear enucleus                            |
| 8842 | ENSG00000162063 | CCNF      | Enhanced Cytoplasmcytoplasm                          |
| 8843 | ENSG00000162065 | TBC1D24   | UncertainGeneral ccytoplasm                          |
| 8844 | ENSG00000162066 | AMDHD2    | Enhanced Cytoplasmcytoplasm                          |
| 8845 | ENSG00000162068 | NTN3      | UncertainEstimation of protein expression could not  |
| 8846 | ENSG00000162069 | BICDL2    | Approved Cytoplasmcytoplasm;plasma membrane          |
| 8847 | ENSG00000162076 | FLYWCH2   | UncertainEstimation of protein expression could not  |
| 8848 | ENSG00000162078 | ZG16B     | Enhanced Selectivecytoplasm                          |
| 8849 | ENSG00000162086 | ZNF75A    | UncertainGeneral ncytoplasm;nucleus                  |
| 8850 | ENSG00000162104 | ADCY9     | Approved Cytoplasmcytoplasm                          |
| 8851 | ENSG00000162105 | SHANK2    | Approved Cytoplasmcytoplasm                          |
| 8852 | ENSG00000162129 | CLPB      | Enhanced General ccytoplasm                          |
| 8853 | ENSG00000162139 | NEU3      | Approved Cytoplasmcytoplasm;plasma membrane          |

|      |                 |          |                                                      |
|------|-----------------|----------|------------------------------------------------------|
| 8854 | ENSG00000162144 | CYB561A3 | Approved Cytoplasm cytoplasm; plasma membrane        |
| 8855 | ENSG00000162148 | PPP1R32  | Enhanced Distinct ciliary expression in testis, fal. |
| 8856 | ENSG00000162174 | ASRGL1   | Enhanced Cytoplasm cytoplasm                         |
| 8857 | ENSG00000162191 | UBXN1    | Approved Cytoplasm cytoplasm; nucleus                |
| 8858 | ENSG00000162194 | LBHD1    | Uncertain General c cytoplasm                        |
| 8859 | ENSG00000162222 | TTC9C    | Approved Cytoplasm cytoplasm                         |
| 8860 | ENSG00000162227 | TAF6L    | Approved Nuclear enucleus                            |
| 8861 | ENSG00000162231 | NXF1     | Supported Ubiquitous nucleus                         |
| 8862 | ENSG00000162236 | STX5     | Uncertain Mainly cytoplasm                           |
| 8863 | ENSG00000162241 | SLC25A45 | Uncertain Estimation of protein expression could not |
| 8864 | ENSG00000162244 | RPL29    | Approved Cytoplasm cytoplasm                         |
| 8865 | ENSG00000162267 | ITIH3    | Approved Plasma cytoplasm; plasma membrane           |
| 8866 | ENSG00000162298 | SYVN1    | Enhanced Cytoplasm cytoplasm                         |
| 8867 | ENSG00000162300 | ZFPL1    | Enhanced Ubiquitous cytoplasm                        |
| 8868 | ENSG00000162302 | RPS6KA4  | Approved Ubiquitous nucleus                          |
| 8869 | ENSG00000162337 | LRP5     | Approved Mainly cytoplasm                            |
| 8870 | ENSG00000162341 | TPCN2    | Supported General cytoplasm; plasma membrane         |
| 8871 | ENSG00000162344 | FGF19    | Approved Extracellular cytoplasm                     |
| 8872 | ENSG00000162366 | PDZK1IP1 | Enhanced Cytoplasm cytoplasm; plasma membrane        |
| 8873 | ENSG00000162367 | TAL1     | Approved Nuclear enucleus                            |
| 8874 | ENSG00000162368 | CMPK1    | Approved Cytoplasm cytoplasm; nucleus                |
| 8875 | ENSG00000162373 | BEND5    | Uncertain Estimation of protein expression could not |
| 8876 | ENSG00000162374 | ELAVL4   | Enhanced Cytoplasm cytoplasm                         |
| 8877 | ENSG00000162377 | COA7     | Approved Granular cytoplasm                          |
| 8878 | ENSG00000162378 | ZYG11B   | Uncertain Cytoplasm cytoplasm                        |
| 8879 | ENSG00000162383 | SLC1A7   | Enhanced Expression in nerve fibers in plexiform lay |
| 8880 | ENSG00000162384 | C1orf123 | Uncertain Cytoplasm cytoplasm                        |
| 8881 | ENSG00000162385 | MAGOH    | Approved General nucleus                             |
| 8882 | ENSG00000162390 | ACOT11   | Enhanced Cytoplasm cytoplasm                         |
| 8883 | ENSG00000162391 | FAM151A  | Approved Cytoplasm cytoplasm                         |
| 8884 | ENSG00000162396 | PARS2    | Uncertain Cytoplasm cytoplasm                        |
| 8885 | ENSG00000162398 | LEXM     | Uncertain Estimation of protein expression could not |
| 8886 | ENSG00000162399 | BSND     | Enhanced High cytoplasm                              |
| 8887 | ENSG00000162402 | USP24    | Approved Cytoplasm cytoplasm                         |
| 8888 | ENSG00000162407 | PLPP3    | Uncertain Mainly cytoplasm                           |
| 8889 | ENSG00000162409 | PRKAA2   | Approved Cytoplasm cytoplasm                         |
| 8890 | ENSG00000162413 | KLHL21   | Uncertain Cytoplasm cytoplasm                        |
| 8891 | ENSG00000162415 | ZSWIM5   | Uncertain Estimation of protein expression could not |
| 8892 | ENSG00000162419 | GMEB1    | Supported General cytoplasm; nucleus                 |
| 8893 | ENSG00000162426 | SLC45A1  | Enhanced Cytoplasm cytoplasm                         |
| 8894 | ENSG00000162430 | SELENON  | Approved General cytoplasm                           |
| 8895 | ENSG00000162433 | AK4      | Enhanced Cytoplasm cytoplasm                         |
| 8896 | ENSG00000162434 | JAK1     | Approved General cytoplasm                           |
| 8897 | ENSG00000162437 | RAVER2   | Approved Ubiquitous nucleus                          |
| 8898 | ENSG00000162438 | CTRC     | Enhanced Distinct cytoplasm                          |
| 8899 | ENSG00000162441 | LZIC     | Approved Nuclear enucleus                            |
| 8900 | ENSG00000162444 | RBP7     | Enhanced Nuclear enucleus                            |
| 8901 | ENSG00000162456 | KNCN     | Uncertain Estimation of protein expression could not |
| 8902 | ENSG00000162458 | FBLIM1   | Approved Cytoplasm cytoplasm                         |
| 8903 | ENSG00000162460 | TMEM82   | Uncertain Estimation of protein expression could not |
| 8904 | ENSG00000162490 | DRAXIN   | Uncertain Estimation of protein expression could not |
| 8905 | ENSG00000162493 | PDPN     | Enhanced Distinct expression in alveoli, lymphatic v |
| 8906 | ENSG00000162494 | LRRC38   | Approved Cytoplasm cytoplasm                         |
| 8907 | ENSG00000162496 | DHRS3    | Supported Ubiquitous cytoplasm                       |
| 8908 | ENSG00000162510 | MATN1    | Supported Distinct expression in chondrocytes.       |

|      |                 |          |                                                      |
|------|-----------------|----------|------------------------------------------------------|
| 8909 | ENSG00000162511 | LAPTM5   | Approved Granular cytoplasm                          |
| 8910 | ENSG00000162512 | SDC3     | Approved Cytoplasmcytoplasm                          |
| 8911 | ENSG00000162520 | SYNC     | Approved Cytoplasmcytoplasm                          |
| 8912 | ENSG00000162521 | RBBP4    | SupportedUbiquitounucleus                            |
| 8913 | ENSG00000162522 | KIAA1522 | Approved General ccytoplasm;plasma membrane          |
| 8914 | ENSG00000162542 | TMC04    | UncertainEstimation of protein expression could not  |
| 8915 | ENSG00000162543 | UBXN10   | UncertainGeneral ccytoplasm                          |
| 8916 | ENSG00000162545 | CAMK2N1  | Approved Expression in brain and testis and also in  |
| 8917 | ENSG00000162551 | ALPL     | Enhanced Cytoplasmcytoplasm                          |
| 8918 | ENSG00000162552 | WNT4     | UncertainEstimation of protein expression could not  |
| 8919 | ENSG00000162571 | TTL10    | UncertainEstimation of protein expression could not  |
| 8920 | ENSG00000162572 | SCNN1D   | Enhanced Cytoplasmcytoplasm                          |
| 8921 | ENSG00000162576 | MXRA8    | UncertainEstimation of protein expression could not  |
| 8922 | ENSG00000162585 | FAAP20   | UncertainCytoplasmcytoplasm;plasma membrane          |
| 8923 | ENSG00000162591 | MEGF6    | UncertainCytoplasmcytoplasm                          |
| 8924 | ENSG00000162594 | IL23R    | UncertainLow cytopcytoplasm                          |
| 8925 | ENSG00000162595 | DIRAS3   | Approved Cytoplasmcytoplasm                          |
| 8926 | ENSG00000162598 | Clorf87  | Enhanced Selective expression in cilia of fallopian  |
| 8927 | ENSG00000162599 | NFIA     | Enhanced Nuclear enucleus                            |
| 8928 | ENSG00000162600 | OMA1     | Approved Cytoplasmcytoplasm                          |
| 8929 | ENSG00000162601 | MYSM1    | Approved General ncytoplasm;nucleus                  |
| 8930 | ENSG00000162604 | TM2D1    | Approved Cytoplasmcytoplasm                          |
| 8931 | ENSG00000162607 | USP1     | Approved Nuclear enucleus                            |
| 8932 | ENSG00000162613 | FUBP1    | SupportedUbiquitounucleus                            |
| 8933 | ENSG00000162614 | NEXN     | Approved Cytoplasmcytoplasm                          |
| 8934 | ENSG00000162616 | DNAJB4   | Approved General ccytoplasm                          |
| 8935 | ENSG00000162618 | ADGRL4   | SupportedDistinct cytoplasm                          |
| 8936 | ENSG00000162620 | LRRIQ3   | Approved Distinct expression in sperm cells in test: |
| 8937 | ENSG00000162621 | LRRC53   | UncertainEstimation of protein expression could not  |
| 8938 | ENSG00000162623 | TYW3     | Approved Cytoplasmcytoplasm;nucleus                  |
| 8939 | ENSG00000162627 | SNX7     | Enhanced Ubiquitoucytoplasm                          |
| 8940 | ENSG00000162636 | FAM102B  | UncertainCytoplasmcytoplasm;nucleus;plasma membrane  |
| 8941 | ENSG00000162639 | HENMT1   | UncertainCytoplasmcytoplasm                          |
| 8942 | ENSG00000162641 | AKNAD1   | UncertainEstimation of protein expression could not  |
| 8943 | ENSG00000162642 | Clorf52  | Approved Cytoplasmcytoplasm;nucleus                  |
| 8944 | ENSG00000162643 | WDR63    | Enhanced Cytoplasmcytoplasm                          |
| 8945 | ENSG00000162645 | GBP2     | SupportedNuclear acytoplasm;nucleus                  |
| 8946 | ENSG00000162650 | ATXN7L2  | UncertainNuclear acytoplasm;nucleus                  |
| 8947 | ENSG00000162654 | GBP4     | Enhanced Cytoplasmcytoplasm                          |
| 8948 | ENSG00000162664 | ZNF326   | SupportedNuclear enucleus                            |
| 8949 | ENSG00000162670 | BRINP3   | UncertainCytoplasmcytoplasm                          |
| 8950 | ENSG00000162676 | GFI1     | UncertainGeneral nnucleus                            |
| 8951 | ENSG00000162687 | KCNT2    | UncertainEstimation of protein expression could not  |
| 8952 | ENSG00000162688 | AGL      | Approved General ccytoplasm                          |
| 8953 | ENSG00000162692 | VCAM1    | Enhanced Cytoplasmcytoplasm                          |
| 8954 | ENSG00000162694 | EXTL2    | Approved General gcytoplasm                          |
| 8955 | ENSG00000162695 | SLC30A7  | UncertainCytoplasmcytoplasm;plasma membrane          |
| 8956 | ENSG00000162702 | ZNF281   | UncertainCytoplasmcytoplasm                          |
| 8957 | ENSG00000162704 | ARPC5    | Approved General ccytoplasm                          |
| 8958 | ENSG00000162706 | CADM3    | Enhanced High expression in neuropil, peripheral nei |
| 8959 | ENSG00000162711 | NLRP3    | UncertainCytoplasmcytoplasm                          |
| 8960 | ENSG00000162722 | TRIM58   | UncertainEstimation of protein expression could not  |
| 8961 | ENSG00000162723 | SLAMF9   | UncertainGeneral ccytoplasm                          |
| 8962 | ENSG00000162728 | KCNJ9    | Enhanced Cytoplasmcytoplasm                          |
| 8963 | ENSG00000162729 | IGSF8    | Approved Highly expressed in neuronal processes.     |

|      |                 |          |                                                        |
|------|-----------------|----------|--------------------------------------------------------|
| 8964 | ENSG00000162734 | PEA15    | Enhanced Cytoplasm cytoplasm                           |
| 8965 | ENSG00000162735 | PEX19    | Supported Ubiquitous cytoplasm                         |
| 8966 | ENSG00000162736 | NCSTN    | Approved Cytoplasm cytoplasm                           |
| 8967 | ENSG00000162738 | VANGL2   | Uncertain Estimation of protein expression could not   |
| 8968 | ENSG00000162739 | SLAMF6   | Uncertain Cytoplasm cytoplasm                          |
| 8969 | ENSG00000162745 | OLFML2B  | Approved Cytoplasm cytoplasm                           |
| 8970 | ENSG00000162746 | FCRLB    | Uncertain Estimation of protein expression could not   |
| 8971 | ENSG00000162755 | KLHDC9   | Uncertain Estimation of protein expression could not   |
| 8972 | ENSG00000162757 | Clorf74  | Uncertain Cytoplasm cytoplasm; plasma membrane         |
| 8973 | ENSG00000162769 | FLVCR1   | Approved Cytoplasm cytoplasm; plasma membrane          |
| 8974 | ENSG00000162771 | FAM71A   | Enhanced Nuclear enucleus                              |
| 8975 | ENSG00000162772 | ATF3     | Approved Nuclear enucleus                              |
| 8976 | ENSG00000162775 | RBM15    | Supported Nuclear enucleus                             |
| 8977 | ENSG00000162777 | DENND2D  | Approved Granular cytoplasm                            |
| 8978 | ENSG00000162779 | AXDND1   | Enhanced Selective expression in seminiferous ducts    |
| 8979 | ENSG00000162782 | TDRD5    | Enhanced Cytoplasm cytoplasm                           |
| 8980 | ENSG00000162783 | IER5     | Uncertain General c cytoplasm                          |
| 8981 | ENSG00000162804 | SNED1    | Uncertain General c cytoplasm; plasma membrane         |
| 8982 | ENSG00000162813 | BPNT1    | Approved Cytoplasm cytoplasm; nucleus                  |
| 8983 | ENSG00000162814 | SPATA17  | Enhanced Cytoplasm cytoplasm                           |
| 8984 | ENSG00000162819 | BROX     | Uncertain Cytoplasm cytoplasm; nucleus                 |
| 8985 | ENSG00000162825 | NBPF20   | Uncertain Estimation of protein expression could not   |
| 8986 | ENSG00000162836 | ACP6     | Uncertain Estimation of protein expression could not   |
| 8987 | ENSG00000162843 | WDR64    | Uncertain Estimation of protein expression could not   |
| 8988 | ENSG00000162849 | KIF26B   | Enhanced Cytoplasm cytoplasm                           |
| 8989 | ENSG00000162851 | TFB2M    | Approved Cytoplasm cytoplasm                           |
| 8990 | ENSG00000162852 | CNST     | Approved Cytoplasm cytoplasm                           |
| 8991 | ENSG00000162869 | PPP1R21  | Approved General c cytoplasm                           |
| 8992 | ENSG00000162878 | PKDCC    | Approved Plasma poplasma membrane                      |
| 8993 | ENSG00000162881 | OXER1    | Uncertain Cytoplasm cytoplasm                          |
| 8994 | ENSG00000162882 | HAAO     | Enhanced Selective cytoplasm                           |
| 8995 | ENSG00000162885 | B3GALNT2 | Approved Cytoplasm cytoplasm                           |
| 8996 | ENSG00000162889 | MAPKAPK2 | Approved Cytoplasm cytoplasm; plasma membrane          |
| 8997 | ENSG00000162891 | IL20     | Uncertain Estimation of protein expression could not   |
| 8998 | ENSG00000162892 | IL24     | Uncertain RNA-based expert annotation gave inconclus:  |
| 8999 | ENSG00000162894 | FCMR     | Approved Cytoplasm cytoplasm                           |
| 9000 | ENSG00000162896 | PIGR     | Enhanced Cytoplasm cytoplasm; plasma membrane          |
| 9001 | ENSG00000162897 | FCAMR    | Enhanced Membranou plasma membrane                     |
| 9002 | ENSG00000162909 | CAPN2    | Approved Cytoplasm cytoplasm                           |
| 9003 | ENSG00000162910 | MRPL55   | Supported General c cytoplasm                          |
| 9004 | ENSG00000162923 | WDR26    | Enhanced General c cytoplasm                           |
| 9005 | ENSG00000162924 | REL      | Uncertain Cytoplasm cytoplasm                          |
| 9006 | ENSG00000162927 | PUS10    | Approved Nuclear a cytoplasm; nucleus                  |
| 9007 | ENSG00000162928 | PEX13    | Enhanced General c cytoplasm                           |
| 9008 | ENSG00000162929 | KIAA1841 | Approved Cytoplasm cytoplasm; nucleus; plasma membrane |
| 9009 | ENSG00000162931 | TRIM17   | Uncertain Cytoplasm cytoplasm                          |
| 9010 | ENSG00000162944 | RFTN2    | Approved Cytoplasm cytoplasm                           |
| 9011 | ENSG00000162949 | CAPN13   | Uncertain General c cytoplasm                          |
| 9012 | ENSG00000162951 | LRRTM1   | Approved Cytoplasm cytoplasm                           |
| 9013 | ENSG00000162959 | MEMO1    | Approved Cytoplasm cytoplasm                           |
| 9014 | ENSG00000162961 | DPY30    | Supported General n nucleus                            |
| 9015 | ENSG00000162971 | TYW5     | Uncertain Estimation of protein expression could not   |
| 9016 | ENSG00000162972 | MAIP1    | Approved Cytoplasm cytoplasm                           |
| 9017 | ENSG00000162975 | KCNF1    | Enhanced Expressed in axons in the CNS.                |
| 9018 | ENSG00000162980 | ARL5A    | Approved Cytoplasm cytoplasm                           |

|      |                 |          |                                                      |
|------|-----------------|----------|------------------------------------------------------|
| 9019 | ENSG00000162981 | FAM84A   | UncertainCytoplasmcytoplasm                          |
| 9020 | ENSG00000162989 | KCNJ3    | UncertainCytoplasmcytoplasm                          |
| 9021 | ENSG00000162992 | NEUROD1  | Approved High nuclnucleus                            |
| 9022 | ENSG00000162994 | CLHC1    | UncertainEstimation of protein expression could not  |
| 9023 | ENSG00000162999 | DUSP19   | Approved Nuclear enucleus                            |
| 9024 | ENSG00000163001 | CFAP36   | Approved Cytoplasmcytoplasm;nucleus                  |
| 9025 | ENSG00000163002 | NUP35    | Enhanced Nuclear anucleus;plasma membrane            |
| 9026 | ENSG00000163006 | CCDC138  | Enhanced Nuclear enucleus                            |
| 9027 | ENSG00000163017 | ACTG2    | SupportedCytoplasmcytoplasm                          |
| 9028 | ENSG00000163026 | WDCP     | Approved Cytoplasmcytoplasm                          |
| 9029 | ENSG00000163029 | SMC6     | UncertainCytoplasmcytoplasm;nucleus                  |
| 9030 | ENSG00000163041 | H3F3A    | SupportedUbiquitounucleus                            |
| 9031 | ENSG00000163053 | SLC16A14 | UncertainMainly ccytoplasm                           |
| 9032 | ENSG00000163060 | TEKT4    | Approved Expressed in cilia in fallopian tube and re |
| 9033 | ENSG00000163064 | EN1      | Enhanced Distinct nucleus                            |
| 9034 | ENSG00000163069 | SGCB     | Enhanced Cytoplasmcytoplasm                          |
| 9035 | ENSG00000163071 | SPATA18  | Enhanced Expressiocytoplasm                          |
| 9036 | ENSG00000163072 | NOSTRIN  | Approved Ubiquitoucytoplasm;plasma membrane          |
| 9037 | ENSG00000163081 | CCDC140  | UncertainEstimation of protein expression could not  |
| 9038 | ENSG00000163092 | XIRP2    | Enhanced Cytoplasmcytoplasm                          |
| 9039 | ENSG00000163093 | BBS5     | UncertainCytoplasmcytoplasm;nucleus                  |
| 9040 | ENSG00000163104 | SMARCAD1 | Approved General nnucleus                            |
| 9041 | ENSG00000163106 | HPGDS    | Enhanced Selectivecytoplasm                          |
| 9042 | ENSG00000163110 | PDLIM5   | Enhanced Cytoplasmcytoplasm;plasma membrane          |
| 9043 | ENSG00000163114 | PDHA2    | Approved Cytoplasmcytoplasm                          |
| 9044 | ENSG00000163125 | RPRD2    | Approved Nuclear enucleus                            |
| 9045 | ENSG00000163126 | ANKRD23  | Approved Cytoplasmcytoplasm                          |
| 9046 | ENSG00000163131 | CTSS     | SupportedCytoplasmcytoplasm                          |
| 9047 | ENSG00000163132 | MSX1     | Enhanced Distinct nucleus                            |
| 9048 | ENSG00000163145 | C1QTNF7  | UncertainEstimation of protein expression could not  |
| 9049 | ENSG00000163155 | LYSMD1   | UncertainEstimation of protein expression could not  |
| 9050 | ENSG00000163156 | SCNM1    | UncertainGeneral ccytoplasm                          |
| 9051 | ENSG00000163157 | TMOD4    | Enhanced Selectivecytoplasm                          |
| 9052 | ENSG00000163161 | ERCC3    | Approved Ubiquitounucleus                            |
| 9053 | ENSG00000163162 | RNF149   | Approved Cytoplasmcytoplasm;plasma membrane          |
| 9054 | ENSG00000163166 | IWS1     | SupportedUbiquitounucleus                            |
| 9055 | ENSG00000163170 | BOLA3    | UncertainGeneral ccytoplasm;plasma membrane          |
| 9056 | ENSG00000163171 | CDC42EP3 | Approved General ccytoplasm;plasma membrane          |
| 9057 | ENSG00000163191 | S100A11  | Enhanced Cytoplasmcytoplasm;nucleus                  |
| 9058 | ENSG00000163206 | SMCP     | SupportedHigh and distinct expression in spermatids  |
| 9059 | ENSG00000163207 | IVL      | Enhanced Selective expression in squamous epithelia. |
| 9060 | ENSG00000163209 | SPRR3    | Enhanced Nuclear acytoplasm;nucleus                  |
| 9061 | ENSG00000163214 | DHX57    | UncertainRNA-based expert annotation gave inconclus: |
| 9062 | ENSG00000163219 | ARHGAP25 | Enhanced Cytoplasmcytoplasm                          |
| 9063 | ENSG00000163220 | S100A9   | Enhanced Selective expression in immune cells and sc |
| 9064 | ENSG00000163221 | S100A12  | Enhanced Selectivecytoplasm                          |
| 9065 | ENSG00000163235 | TGFA     | Approved Cytoplasmcytoplasm;plasma membrane          |
| 9066 | ENSG00000163249 | CCNYL1   | Approved Cytoplasmcytoplasm                          |
| 9067 | ENSG00000163251 | FZD5     | Approved Cytoplasmcytoplasm                          |
| 9068 | ENSG00000163254 | CRYGC    | SupportedExpression in lens.                         |
| 9069 | ENSG00000163257 | DCAF16   | UncertainEstimation of protein expression could not  |
| 9070 | ENSG00000163263 | C1orf189 | UncertainLuminal mplasma membrane                    |
| 9071 | ENSG00000163273 | NPPC     | UncertainRNA-based expert annotation gave inconclus: |
| 9072 | ENSG00000163281 | GNPDA2   | UncertainGeneral ccytoplasm                          |
| 9073 | ENSG00000163283 | ALPP     | Enhanced Cytoplasmcytoplasm;plasma membrane          |

|      |                 |          |                                                        |
|------|-----------------|----------|--------------------------------------------------------|
| 9074 | ENSG00000163285 | GABRG1   | Approved Cytoplasm cytoplasm                           |
| 9075 | ENSG00000163286 | ALPPL2   | Supported Cytoplasm cytoplasm; plasma membrane         |
| 9076 | ENSG00000163288 | GABRB1   | Uncertain Cytoplasm cytoplasm                          |
| 9077 | ENSG00000163291 | PAQR3    | Uncertain Estimation of protein expression could not   |
| 9078 | ENSG00000163293 | NIPAL1   | Uncertain Cytoplasm cytoplasm                          |
| 9079 | ENSG00000163295 | ALPI     | Supported Membrane plasma membrane                     |
| 9080 | ENSG00000163312 | HELQ     | Approved Nuclear enucleus                              |
| 9081 | ENSG00000163319 | MRPS18C  | Approved Cytoplasm cytoplasm                           |
| 9082 | ENSG00000163320 | CGGBP1   | Supported Mainly nucleus                               |
| 9083 | ENSG00000163322 | ABRAXAS1 | Uncertain Cytoplasm cytoplasm; nucleus                 |
| 9084 | ENSG00000163328 | GPR155   | Approved Cytoplasm cytoplasm                           |
| 9085 | ENSG00000163331 | DAPL1    | Enhanced Cytoplasm cytoplasm; plasma membrane          |
| 9086 | ENSG00000163344 | PMVK     | Approved General cytoplasm; nucleus                    |
| 9087 | ENSG00000163346 | PBXIP1   | Approved Cytoplasm cytoplasm                           |
| 9088 | ENSG00000163347 | CLDN1    | Enhanced Membrane plasma membrane                      |
| 9089 | ENSG00000163348 | PYG02    | Supported General nucleus                              |
| 9090 | ENSG00000163349 | HIPK1    | Approved Nuclear enucleus                              |
| 9091 | ENSG00000163357 | DCST1    | Uncertain Estimation of protein expression could not   |
| 9092 | ENSG00000163359 | COL6A3   | Supported Cytoplasm cytoplasm                          |
| 9093 | ENSG00000163362 | INAVA    | Uncertain General cytoplasm                            |
| 9094 | ENSG00000163374 | YY1AP1   | Uncertain Cytoplasm cytoplasm                          |
| 9095 | ENSG00000163376 | KBTBD8   | Approved Cytoplasm cytoplasm                           |
| 9096 | ENSG00000163378 | EOGT     | Approved Cytoplasm cytoplasm                           |
| 9097 | ENSG00000163380 | LMOD3    | Uncertain Cytoplasm cytoplasm                          |
| 9098 | ENSG00000163382 | NAXE     | Enhanced Ubiquitous cytoplasm; plasma membrane         |
| 9099 | ENSG00000163389 | POGLUT1  | Approved General cytoplasm                             |
| 9100 | ENSG00000163393 | SLC22A15 | Approved Expression mainly in endothelial cells.       |
| 9101 | ENSG00000163395 | IGFN1    | Enhanced Cytoplasm cytoplasm                           |
| 9102 | ENSG00000163399 | ATP1A1   | Enhanced Membrane plasma membrane                      |
| 9103 | ENSG00000163412 | EIF4E3   | Approved Cytoplasm cytoplasm; plasma membrane          |
| 9104 | ENSG00000163421 | PROK2    | Approved Plasma plasma membrane                        |
| 9105 | ENSG00000163424 | C3orf30  | Enhanced Cytoplasm cytoplasm                           |
| 9106 | ENSG00000163428 | LRRC58   | Uncertain Estimation of protein expression could not   |
| 9107 | ENSG00000163430 | FSTL1    | Uncertain Cytoplasm cytoplasm                          |
| 9108 | ENSG00000163431 | LMOD1    | Enhanced Highly specific cytoplasm                     |
| 9109 | ENSG00000163435 | ELF3     | Enhanced Selective nucleus                             |
| 9110 | ENSG00000163440 | PDCL2    | Enhanced Selective cytoplasm                           |
| 9111 | ENSG00000163449 | TMEM169  | Enhanced Expressed in kidney glomeruli and glial cells |
| 9112 | ENSG00000163453 | IGFBP7   | Approved Plasma cytoplasm; plasma membrane             |
| 9113 | ENSG00000163462 | TRIM46   | Enhanced Distinct positivity in neuronal projections   |
| 9114 | ENSG00000163464 | CXCR1    | Uncertain Cytoplasm cytoplasm                          |
| 9115 | ENSG00000163466 | ARPC2    | Approved Mainly cytoplasm; plasma membrane             |
| 9116 | ENSG00000163468 | CCT3     | Approved Mainly cytoplasm                              |
| 9117 | ENSG00000163472 | TMEM79   | Enhanced Membrane plasma membrane                      |
| 9118 | ENSG00000163481 | RNF25    | Uncertain Estimation of protein expression could not   |
| 9119 | ENSG00000163482 | STK36    | Approved Ubiquitous cytoplasm                          |
| 9120 | ENSG00000163491 | NEK10    | Uncertain Estimation of protein expression could not   |
| 9121 | ENSG00000163499 | CRYBA2   | Supported Selective expression in lens.                |
| 9122 | ENSG00000163507 | CIP2A    | Approved Cytoplasm cytoplasm; plasma membrane          |
| 9123 | ENSG00000163508 | EOMES    | Uncertain Cytoplasm cytoplasm                          |
| 9124 | ENSG00000163510 | CWC22    | Approved General cytoplasm; nucleus                    |
| 9125 | ENSG00000163512 | AZI2     | Approved Cytoplasm cytoplasm                           |
| 9126 | ENSG00000163515 | RETNLB   | Approved Cytoplasm cytoplasm                           |
| 9127 | ENSG00000163516 | ANKZF1   | Approved Cytoplasm cytoplasm                           |
| 9128 | ENSG00000163518 | FCRL4    | Approved Cytoplasm cytoplasm; plasma membrane          |

|      |                 |          |                                                        |
|------|-----------------|----------|--------------------------------------------------------|
| 9129 | ENSG00000163519 | TRAT1    | Enhanced Selective cytoplasm                           |
| 9130 | ENSG00000163520 | FBLN2    | Enhanced Cytoplasm cytoplasm                           |
| 9131 | ENSG00000163521 | GLB1L    | Enhanced Cytoplasm cytoplasm;nucleus                   |
| 9132 | ENSG00000163527 | STT3B    | Approved General c cytoplasm                           |
| 9133 | ENSG00000163528 | CHCHD4   | Uncertain Expression in several different cell types,  |
| 9134 | ENSG00000163530 | DPPA2    | Uncertain Estimation of protein expression could not   |
| 9135 | ENSG00000163531 | NFASC    | Enhanced High expression in neuronal processes.        |
| 9136 | ENSG00000163534 | FCRL1    | Enhanced Cytoplasm cytoplasm                           |
| 9137 | ENSG00000163535 | SGO2     | Enhanced Nuclear enucleus                              |
| 9138 | ENSG00000163536 | SERPINI1 | Enhanced Cytoplasm cytoplasm                           |
| 9139 | ENSG00000163541 | SUCLG1   | Enhanced Ubiquitous cytoplasm                          |
| 9140 | ENSG00000163545 | NUAK2    | Uncertain Nuclear a cytoplasm;nucleus                  |
| 9141 | ENSG00000163554 | SPTA1    | Enhanced Cytoplasm cytoplasm                           |
| 9142 | ENSG00000163558 | PRKCI    | Approved Cytoplasm cytoplasm                           |
| 9143 | ENSG00000163563 | MNDA     | Enhanced Nuclear enucleus                              |
| 9144 | ENSG00000163564 | PYHIN1   | Enhanced Mainly nu nucleus                             |
| 9145 | ENSG00000163565 | IFI16    | Enhanced Selective nucleus                             |
| 9146 | ENSG00000163568 | AIM2     | Uncertain Estimation of protein expression could not   |
| 9147 | ENSG00000163577 | EIF5A2   | Approved Distinct nucleus; plasma membrane             |
| 9148 | ENSG00000163581 | SLC2A2   | Enhanced Selective plasma membrane                     |
| 9149 | ENSG00000163584 | RPL22L1  | Uncertain Low cytop cytoplasm                          |
| 9150 | ENSG00000163586 | FABP1    | Enhanced Cytoplasm cytoplasm;nucleus                   |
| 9151 | ENSG00000163590 | PPM1L    | Approved Cytoplasm cytoplasm                           |
| 9152 | ENSG00000163596 | ICA1L    | Approved Cytoplasm cytoplasm                           |
| 9153 | ENSG00000163600 | ICOS     | Approved Cytoplasm cytoplasm                           |
| 9154 | ENSG00000163602 | RYBP     | Approved Nuclear a cytoplasm;nucleus                   |
| 9155 | ENSG00000163605 | PPP4R2   | Approved Mainly nu nucleus                             |
| 9156 | ENSG00000163607 | GTPBP8   | Approved General c cytoplasm                           |
| 9157 | ENSG00000163611 | SPICE1   | Approved General c cytoplasm                           |
| 9158 | ENSG00000163617 | CCDC191  | Approved Cytoplasm cytoplasm                           |
| 9159 | ENSG00000163618 | CADPS    | Enhanced Cytoplasm cytoplasm                           |
| 9160 | ENSG00000163623 | NKX6-1   | Enhanced Selective nucleus                             |
| 9161 | ENSG00000163624 | CDS1     | Enhanced Cytoplasm cytoplasm                           |
| 9162 | ENSG00000163625 | WDFY3    | Approved General c cytoplasm                           |
| 9163 | ENSG00000163626 | COX18    | Approved Cytoplasm cytoplasm                           |
| 9164 | ENSG00000163629 | PTPN13   | Approved General c cytoplasm                           |
| 9165 | ENSG00000163630 | SYNPR    | Enhanced Selective expression in neuropil.             |
| 9166 | ENSG00000163631 | ALB      | Enhanced Positive plasma membrane                      |
| 9167 | ENSG00000163632 | C3orf49  | Uncertain Estimation of protein expression could not   |
| 9168 | ENSG00000163633 | C4orf36  | Uncertain Estimation of protein expression could not   |
| 9169 | ENSG00000163634 | THOC7    | Approved General n nucleus                             |
| 9170 | ENSG00000163636 | PSMD6    | Uncertain Granular cytoplasm                           |
| 9171 | ENSG00000163638 | ADAMTS9  | Approved Cytoplasm cytoplasm                           |
| 9172 | ENSG00000163644 | PPM1K    | Approved General c cytoplasm                           |
| 9173 | ENSG00000163645 | ERICH6   | Enhanced Selective cytoplasm                           |
| 9174 | ENSG00000163646 | CLRN1    | Uncertain General c cytoplasm                          |
| 9175 | ENSG00000163661 | PTX3     | Approved Extracell cytoplasm                           |
| 9176 | ENSG00000163666 | HESX1    | Approved Nuclear enucleus                              |
| 9177 | ENSG00000163673 | DCLK3    | Approved Expressed in several tissues, mainly expres   |
| 9178 | ENSG00000163681 | SLMAP    | Enhanced Cytoplasm cytoplasm                           |
| 9179 | ENSG00000163682 | RPL9     | Approved General c cytoplasm                           |
| 9180 | ENSG00000163683 | SMIM14   | Uncertain Cytoplasm cytoplasm                          |
| 9181 | ENSG00000163684 | RPP14    | Uncertain Estimation of protein expression could not   |
| 9182 | ENSG00000163686 | ABHD6    | Uncertain Nuclear m cytoplasm;nucleus; plasma membrane |
| 9183 | ENSG00000163687 | DNASE1L3 | Approved Nuclear enucleus                              |

|      |                 |          |                                                      |
|------|-----------------|----------|------------------------------------------------------|
| 9184 | ENSG00000163694 | RBM47    | Enhanced Nuclear acytoplasm;nucleus                  |
| 9185 | ENSG00000163697 | APBB2    | Approved Cytoplasmcytoplasm                          |
| 9186 | ENSG00000163701 | IL17RE   | UncertainCytoplasmcytoplasm;nucleus                  |
| 9187 | ENSG00000163702 | IL17RC   | Approved Cytoplasmcytoplasm;plasma membrane          |
| 9188 | ENSG00000163703 | CRELD1   | UncertainGranular cytoplasm                          |
| 9189 | ENSG00000163704 | PRRT3    | Approved Cytoplasmcytoplasm                          |
| 9190 | ENSG00000163710 | PCOLCE2  | UncertainCytoplasmcytoplasm                          |
| 9191 | ENSG00000163714 | U2SURP   | Enhanced Nuclear enucleus                            |
| 9192 | ENSG00000163719 | MTMR14   | Approved Cytoplasmcytoplasm                          |
| 9193 | ENSG00000163728 | TTC14    | UncertainCytoplasmcytoplasm                          |
| 9194 | ENSG00000163735 | CXCL5    | Approved Cytoplasmcytoplasm                          |
| 9195 | ENSG00000163736 | PPBP     | SupportedDistinct expression in megakaryocytes and i |
| 9196 | ENSG00000163737 | PF4      | Enhanced Selective expression in thrombocytes and m  |
| 9197 | ENSG00000163738 | MTHFD2L  | UncertainEstimation of protein expression could not  |
| 9198 | ENSG00000163743 | RCHY1    | Approved Cytoplasmcytoplasm                          |
| 9199 | ENSG00000163751 | CPA3     | Enhanced Distinct cytoplasm                          |
| 9200 | ENSG00000163754 | GYG1     | Approved Cytoplasmcytoplasm                          |
| 9201 | ENSG00000163755 | HPS3     | Approved General ccytoplasm                          |
| 9202 | ENSG00000163762 | TM4SF18  | Approved Cytoplasmcytoplasm                          |
| 9203 | ENSG00000163781 | TOPBP1   | Approved General ncytoplasm;nucleus                  |
| 9204 | ENSG00000163785 | RYK      | UncertainCytoplasmcytoplasm;plasma membrane          |
| 9205 | ENSG00000163788 | SNRK     | UncertainCytoplasmcytoplasm;nucleus                  |
| 9206 | ENSG00000163793 | DNAJC5G  | Approved Cytoplasmcytoplasm                          |
| 9207 | ENSG00000163794 | UCN      | Approved Ubiquitouscytoplasm;plasma membrane         |
| 9208 | ENSG00000163795 | ZNF513   | UncertainGeneral ccytoplasm                          |
| 9209 | ENSG00000163798 | SLC4A1AP | Approved Nuclear acytoplasm;nucleus                  |
| 9210 | ENSG00000163806 | SPDYA    | Enhanced Cytoplasmcytoplasm                          |
| 9211 | ENSG00000163807 | KIAA1143 | Approved Cytoplasmcytoplasm                          |
| 9212 | ENSG00000163808 | KIF15    | Approved Cytoplasmcytoplasm;nucleus                  |
| 9213 | ENSG00000163810 | TGM4     | Enhanced Selectivecytoplasm                          |
| 9214 | ENSG00000163811 | WDR43    | UncertainCytoplasmcytoplasm                          |
| 9215 | ENSG00000163812 | ZDHHC3   | Approved Cytoplasmcytoplasm                          |
| 9216 | ENSG00000163814 | CDCP1    | Enhanced High cytocytoplasm                          |
| 9217 | ENSG00000163815 | CLEC3B   | Approved Plasma poplasma membrane                    |
| 9218 | ENSG00000163817 | SLC6A20  | UncertainCytoplasmcytoplasm                          |
| 9219 | ENSG00000163818 | LZTFL1   | Enhanced Cytoplasmcytoplasm                          |
| 9220 | ENSG00000163820 | FYC01    | UncertainGeneral ccytoplasm                          |
| 9221 | ENSG00000163832 | ELP6     | UncertainEstimation of protein expression could not  |
| 9222 | ENSG00000163840 | DTX3L    | UncertainUbiquitous expression.                      |
| 9223 | ENSG00000163848 | ZNF148   | SupportedUbiquitousnucleus                           |
| 9224 | ENSG00000163864 | NMNAT3   | Approved Cytoplasmcytoplasm                          |
| 9225 | ENSG00000163866 | SMIM12   | Approved Ubiquitousnucleus                           |
| 9226 | ENSG00000163867 | ZMYM6    | Approved General nnucleus                            |
| 9227 | ENSG00000163870 | TPRA1    | Approved Cytoplasmcytoplasm                          |
| 9228 | ENSG00000163872 | YEATS2   | UncertainEstimation of protein expression could not  |
| 9229 | ENSG00000163874 | ZC3H12A  | UncertainCytoplasmcytoplasm                          |
| 9230 | ENSG00000163877 | SNIP1    | Approved Nuclear acytoplasm;nucleus                  |
| 9231 | ENSG00000163879 | DNALI1   | Approved Cytoplasmcytoplasm                          |
| 9232 | ENSG00000163882 | POLR2H   | SupportedGeneral nnucleus                            |
| 9233 | ENSG00000163884 | KLF15    | UncertainGranular cytoplasm                          |
| 9234 | ENSG00000163885 | CFAP100  | Enhanced Cytoplasmcytoplasm                          |
| 9235 | ENSG00000163888 | CAMK2N2  | Approved Expression in neurons and neuronal project: |
| 9236 | ENSG00000163898 | LIPH     | Approved Cytoplasmcytoplasm;plasma membrane          |
| 9237 | ENSG00000163900 | TMEM41A  | Approved Low cytopcytoplasm;plasma membrane          |
| 9238 | ENSG00000163902 | RPN1     | Enhanced Cytoplasmcytoplasm                          |



|      |                 |         |                                                      |
|------|-----------------|---------|------------------------------------------------------|
| 9239 | ENSG00000163904 | SENP2   | Approved Cytoplasm cytoplasm                         |
| 9240 | ENSG00000163909 | HEYL    | Approved Nuclear enucleus                            |
| 9241 | ENSG00000163913 | IFT122  | UncertainGeneral c cytoplasm                         |
| 9242 | ENSG00000163914 | RHO     | Enhanced Cytoplasm cytoplasm                         |
| 9243 | ENSG00000163918 | RFC4    | Enhanced Ubiquitous nucleus                          |
| 9244 | ENSG00000163923 | RPL39L  | Approved Cytoplasm cytoplasm                         |
| 9245 | ENSG00000163930 | BAP1    | Approved General nucleus                             |
| 9246 | ENSG00000163931 | TKT     | Enhanced Ubiquitous nucleus                          |
| 9247 | ENSG00000163932 | PRKCD   | Enhanced General c cytoplasm; plasma membrane        |
| 9248 | ENSG00000163933 | RFT1    | Approved Nuclear a cytoplasm; nucleus                |
| 9249 | ENSG00000163938 | GNL3    | Enhanced Nucleolar nucleus                           |
| 9250 | ENSG00000163939 | PBRM1   | Uncertain Cytoplasm cytoplasm; nucleus               |
| 9251 | ENSG00000163945 | UVSSA   | Approved Nuclear enucleus                            |
| 9252 | ENSG00000163946 | FAM208A | Uncertain Cytoplasm cytoplasm                        |
| 9253 | ENSG00000163947 | ARHGEF3 | Uncertain Nuclear enucleus                           |
| 9254 | ENSG00000163950 | SLBP    | Supported General c cytoplasm; nucleus               |
| 9255 | ENSG00000163956 | LRPAP1  | Enhanced General c cytoplasm                         |
| 9256 | ENSG00000163959 | SLC51A  | Enhanced Cytoplasm cytoplasm                         |
| 9257 | ENSG00000163960 | UBXN7   | Supported Nuclear enucleus                           |
| 9258 | ENSG00000163964 | PIGX    | Uncertain Cytoplasm cytoplasm                        |
| 9259 | ENSG00000163975 | MELTF   | Approved Cytoplasm cytoplasm; plasma membrane        |
| 9260 | ENSG00000163982 | OTOP1   | Uncertain Estimation of protein expression could not |
| 9261 | ENSG00000163993 | S100P   | Enhanced Cytoplasm cytoplasm; nucleus                |
| 9262 | ENSG00000163995 | ABLIM2  | Uncertain Distinct cytoplasm; plasma membrane        |
| 9263 | ENSG00000164008 | Clorf50 | Uncertain General n cytoplasm; nucleus               |
| 9264 | ENSG00000164010 | ERMAP   | Uncertain Cytoplasm cytoplasm                        |
| 9265 | ENSG00000164011 | ZNF691  | Approved Nuclear enucleus                            |
| 9266 | ENSG00000164022 | AIMP1   | Supported Ubiquitous cytoplasm                       |
| 9267 | ENSG00000164023 | SGMS2   | Supported General m plasma membrane                  |
| 9268 | ENSG00000164024 | METAP1  | Approved Cytoplasm cytoplasm                         |
| 9269 | ENSG00000164031 | DNAJB14 | Approved General c cytoplasm                         |
| 9270 | ENSG00000164032 | H2AFZ   | Supported Ubiquitous nucleus                         |
| 9271 | ENSG00000164035 | EMCN    | Approved Cytoplasm cytoplasm                         |
| 9272 | ENSG00000164038 | SLC9B2  | Uncertain Membranous cytoplasm; plasma membrane      |
| 9273 | ENSG00000164039 | BDH2    | Enhanced Cytoplasm cytoplasm; nucleus                |
| 9274 | ENSG00000164040 | PGRMC2  | Approved Cytoplasm cytoplasm; plasma membrane        |
| 9275 | ENSG00000164047 | CAMP    | Enhanced Selective cytoplasm                         |
| 9276 | ENSG00000164048 | ZNF589  | Uncertain Nuclear enucleus                           |
| 9277 | ENSG00000164049 | FBXW12  | Uncertain Estimation of protein expression could not |
| 9278 | ENSG00000164050 | PLXNB1  | Enhanced Cytoplasm cytoplasm; plasma membrane        |
| 9279 | ENSG00000164051 | CCDC51  | Supported Ubiquitous cytoplasm                       |
| 9280 | ENSG00000164053 | ATRIP   | Approved Nuclear enucleus                            |
| 9281 | ENSG00000164054 | SHISA5  | Approved General c cytoplasm                         |
| 9282 | ENSG00000164056 | SPRY1   | Approved Cytoplasm cytoplasm                         |
| 9283 | ENSG00000164061 | BSN     | Enhanced Cytoplasm cytoplasm                         |
| 9284 | ENSG00000164062 | APEH    | Enhanced Cytoplasm cytoplasm                         |
| 9285 | ENSG00000164066 | INTU    | Approved Ubiquitous cytoplasm                        |
| 9286 | ENSG00000164068 | RNF123  | Approved General c cytoplasm                         |
| 9287 | ENSG00000164070 | HSPA4L  | Enhanced Cytoplasm cytoplasm; nucleus                |
| 9288 | ENSG00000164073 | MFSD8   | Approved Cytoplasm cytoplasm                         |
| 9289 | ENSG00000164074 | ABHD18  | Approved General c cytoplasm                         |
| 9290 | ENSG00000164076 | CAMKV   | Enhanced Selective expression in CNS.                |
| 9291 | ENSG00000164077 | MON1A   | Uncertain Estimation of protein expression could not |
| 9292 | ENSG00000164078 | MST1R   | Enhanced General c cytoplasm                         |
| 9293 | ENSG00000164080 | RAD54L2 | Approved Nuclear enucleus                            |

|      |                 |          |                    |                                            |
|------|-----------------|----------|--------------------|--------------------------------------------|
| 9294 | ENSG00000164081 | TEX264   | Enhanced High cyto | cytoplasm                                  |
| 9295 | ENSG00000164082 | GRM2     | Approved           | Cytoplasm cytoplasm                        |
| 9296 | ENSG00000164086 | DUSP7    | Approved           | Cytoplasm cytoplasm                        |
| 9297 | ENSG00000164087 | POC1A    | Approved           | General g cytoplasm                        |
| 9298 | ENSG00000164088 | PPM1M    | Uncertain          | Cytoplasm cytoplasm                        |
| 9299 | ENSG00000164089 | ETNPPL   | Approved           | Expression in several tissues including CN |
| 9300 | ENSG00000164096 | C4orf3   | Approved           | Ubiquitou cytoplasm                        |
| 9301 | ENSG00000164099 | PRSS12   | Uncertain          | Cytoplasm cytoplasm                        |
| 9302 | ENSG00000164100 | NDST3    | Uncertain          | Cytoplasm cytoplasm                        |
| 9303 | ENSG00000164104 | HMGB2    | Enhanced           | Ubiquitou nucleus                          |
| 9304 | ENSG00000164105 | SAP30    | Enhanced           | Nuclear enucleus                           |
| 9305 | ENSG00000164106 | SCRG1    | Approved           | General c cytoplasm                        |
| 9306 | ENSG00000164107 | HAND2    | Approved           | Nuclear enucleus                           |
| 9307 | ENSG00000164109 | MAD2L1   | Uncertain          | Estimation of protein expression could not |
| 9308 | ENSG00000164111 | ANXA5    | Approved           | Cytoplasm cytoplasm; plasma membrane       |
| 9309 | ENSG00000164112 | TMEM155  | Approved           | Expressed plasma membrane                  |
| 9310 | ENSG00000164116 | GUCY1A1  | Uncertain          | Ubiquitou cytoplasm                        |
| 9311 | ENSG00000164117 | FBX08    | Uncertain          | Cytoplasm cytoplasm                        |
| 9312 | ENSG00000164118 | CEP44    | Approved           | Cytoplasm cytoplasm                        |
| 9313 | ENSG00000164120 | HPGD     | Enhanced           | Cytoplasm cytoplasm                        |
| 9314 | ENSG00000164125 | FAM198B  | Uncertain          | Cytoplasm cytoplasm                        |
| 9315 | ENSG00000164134 | NAA15    | Approved           | General c cytoplasm                        |
| 9316 | ENSG00000164136 | IL15     | Approved           | Cytoplasm cytoplasm; nucleus               |
| 9317 | ENSG00000164142 | FAM160A1 | Enhanced           | Cytoplasm cytoplasm                        |
| 9318 | ENSG00000164144 | ARFIP1   | Enhanced           | Cytoplasm cytoplasm                        |
| 9319 | ENSG00000164151 | ICE1     | Uncertain          | Mainly nunucleus                           |
| 9320 | ENSG00000164161 | HHIP     | Uncertain          | Estimation of protein expression could not |
| 9321 | ENSG00000164162 | ANAPC10  | Approved           | Cytoplasm cytoplasm; nucleus               |
| 9322 | ENSG00000164163 | ABCE1    | Approved           | General c cytoplasm                        |
| 9323 | ENSG00000164164 | OTUD4    | Uncertain          | Ubiquitou cytoplasm                        |
| 9324 | ENSG00000164167 | LSM6     | Approved           | General c cytoplasm                        |
| 9325 | ENSG00000164168 | TMEM184C | Uncertain          | General nnucleus                           |
| 9326 | ENSG00000164169 | PRMT9    | Uncertain          | Estimation of protein expression could not |
| 9327 | ENSG00000164171 | ITGA2    | Enhanced           | Membranou plasma membrane                  |
| 9328 | ENSG00000164172 | MOCS2    | Approved           | Cytoplasm cytoplasm                        |
| 9329 | ENSG00000164176 | EDIL3    | Approved           | Cytoplasm cytoplasm                        |
| 9330 | ENSG00000164180 | TMEM161B | Uncertain          | Estimation of protein expression could not |
| 9331 | ENSG00000164181 | ELOVL7   | Approved           | General c cytoplasm                        |
| 9332 | ENSG00000164182 | NDUFAF2  | Supported          | General c cytoplasm                        |
| 9333 | ENSG00000164187 | LMBRD2   | Approved           | Cytoplasm cytoplasm                        |
| 9334 | ENSG00000164188 | RANBP3L  | Approved           | Cytoplasm cytoplasm                        |
| 9335 | ENSG00000164190 | NIPBL    | Approved           | Nuclear enucleus                           |
| 9336 | ENSG00000164197 | RNF180   | Approved           | Mainly c cytoplasm; plasma membrane        |
| 9337 | ENSG00000164199 | ADGRV1   | Approved           | Cytoplasm cytoplasm                        |
| 9338 | ENSG00000164209 | SLC25A46 | Approved           | Cytoplasm cytoplasm                        |
| 9339 | ENSG00000164211 | STARD4   | Approved           | Ubiquitou cytoplasm                        |
| 9340 | ENSG00000164219 | PGGT1B   | Uncertain          | Estimation of protein expression could not |
| 9341 | ENSG00000164221 | CCDC112  | Uncertain          | Cytoplasm cytoplasm                        |
| 9342 | ENSG00000164236 | ANKRD33B | Uncertain          | Estimation of protein expression could not |
| 9343 | ENSG00000164237 | CMBL     | Uncertain          | Cytoplasm cytoplasm                        |
| 9344 | ENSG00000164241 | C5orf63  | Approved           | Cytoplasm cytoplasm                        |
| 9345 | ENSG00000164244 | PRRC1    | Supported          | Granular cytoplasm                         |
| 9346 | ENSG00000164251 | F2RL1    | Approved           | General c cytoplasm                        |
| 9347 | ENSG00000164253 | WDR41    | Approved           | General c cytoplasm                        |
| 9348 | ENSG00000164256 | PRDM9    | Uncertain          | Estimation of protein expression could not |

|      |                 |           |                                                      |
|------|-----------------|-----------|------------------------------------------------------|
| 9349 | ENSG00000164258 | NDUFS4    | SupportedUbiquitous mitochondrial expression.        |
| 9350 | ENSG00000164266 | SPINK1    | Enhanced Distinct cytoplasm                          |
| 9351 | ENSG00000164270 | HTR4      | Enhanced Cytoplasmcytoplasm                          |
| 9352 | ENSG00000164284 | GRPEL2    | UncertainGeneral ccytoplasm                          |
| 9353 | ENSG00000164287 | CDC20B    | UncertainEstimation of protein expression could not  |
| 9354 | ENSG00000164291 | ARSK      | Approved Cytoplasmcytoplasm;plasma membrane          |
| 9355 | ENSG00000164294 | GPX8      | Enhanced Cytoplasmcytoplasm                          |
| 9356 | ENSG00000164296 | TIGD6     | UncertainEstimation of protein expression could not  |
| 9357 | ENSG00000164300 | SERINC5   | SupportedUbiquitouscytoplasm                         |
| 9358 | ENSG00000164303 | ENPP6     | Approved High membcytoplasm;plasma membrane          |
| 9359 | ENSG00000164304 | CAGE1     | UncertainEstimation of protein expression could not  |
| 9360 | ENSG00000164305 | CASP3     | Enhanced Selectivecytoplasm                          |
| 9361 | ENSG00000164306 | PRIMPOL   | UncertainEstimation of protein expression could not  |
| 9362 | ENSG00000164307 | ERAP1     | Approved General ccytoplasm                          |
| 9363 | ENSG00000164308 | ERAP2     | Enhanced Cytoplasmcytoplasm                          |
| 9364 | ENSG00000164309 | CMYA5     | Enhanced Cytoplasmcytoplasm                          |
| 9365 | ENSG00000164318 | EGFLAM    | Approved Expression in synapses in outer plexiform : |
| 9366 | ENSG00000164323 | CFAP97    | Approved Ubiquitouscytoplasm;plasma membrane         |
| 9367 | ENSG00000164325 | TMEM174   | Enhanced Luminal mplasma membrane                    |
| 9368 | ENSG00000164326 | CARTPT    | Enhanced Selectivecytoplasm                          |
| 9369 | ENSG00000164327 | RICTOR    | Approved Ubiquitouscytoplasm                         |
| 9370 | ENSG00000164331 | ANKRA2    | Approved General ccytoplasm;plasma membrane          |
| 9371 | ENSG00000164332 | UBLCP1    | Approved Ubiquitousnucleus                           |
| 9372 | ENSG00000164334 | FAM170A   | Enhanced Nuclear acytoplasm;nucleus                  |
| 9373 | ENSG00000164342 | TLR3      | Enhanced Granular cytoplasm                          |
| 9374 | ENSG00000164346 | NSA2      | Approved General nnucleus                            |
| 9375 | ENSG00000164347 | GFM2      | UncertainGeneral ccytoplasm;nucleus                  |
| 9376 | ENSG00000164362 | TERT      | SupportedNot detected in any tissue.                 |
| 9377 | ENSG00000164363 | SLC6A18   | Enhanced Expressiocytoplasm;plasma membrane          |
| 9378 | ENSG00000164366 | CCDC127   | Approved Cytoplasmcytoplasm                          |
| 9379 | ENSG00000164393 | ADGRF2    | UncertainEstimation of protein expression could not  |
| 9380 | ENSG00000164398 | ACSL6     | Enhanced Cytoplasmcytoplasm                          |
| 9381 | ENSG00000164402 | 9/8/2019  | Approved Cytoplasmcytoplasm                          |
| 9382 | ENSG00000164403 | SHROOM1   | UncertainEstimation of protein expression could not  |
| 9383 | ENSG00000164404 | GDF9      | SupportedExpression in ovarian follicles.            |
| 9384 | ENSG00000164405 | UQCRQ     | Approved Cytoplasmcytoplasm                          |
| 9385 | ENSG00000164418 | GRIK2     | Approved General ccytoplasm                          |
| 9386 | ENSG00000164430 | CGAS      | Enhanced Cytoplasmcytoplasm;plasma membrane          |
| 9387 | ENSG00000164434 | FABP7     | Enhanced Cytoplasmcytoplasm                          |
| 9388 | ENSG00000164438 | TLX3      | Enhanced Expression in processes in cerebellum.      |
| 9389 | ENSG00000164440 | TXLNB     | Enhanced Selectivecytoplasm                          |
| 9390 | ENSG00000164442 | CITED2    | SupportedGeneral nnucleus                            |
| 9391 | ENSG00000164458 | TBXT      | UncertainEstimation of protein expression could not  |
| 9392 | ENSG00000164465 | DCBLD1    | Approved Cytoplasmcytoplasm                          |
| 9393 | ENSG00000164466 | SFXN1     | UncertainGeneral ccytoplasm                          |
| 9394 | ENSG00000164483 | SAMD3     | UncertainEstimation of protein expression could not  |
| 9395 | ENSG00000164484 | TMEM200A  | UncertainCytoplasmcytoplasm                          |
| 9396 | ENSG00000164485 | IL22RA2   | UncertainRNA-based expert annotation gave inconclus: |
| 9397 | ENSG00000164488 | DACT2     | Approved Ubiquitouscytoplasm                         |
| 9398 | ENSG00000164494 | PDSS2     | Approved Cytoplasmcytoplasm                          |
| 9399 | ENSG00000164500 | SPATA48   | UncertainEstimation of protein expression could not  |
| 9400 | ENSG00000164506 | STXBP5    | Enhanced Cytoplasmcytoplasm                          |
| 9401 | ENSG00000164508 | HIST1H2AA | SupportedUbiquitousnucleus                           |
| 9402 | ENSG00000164509 | IL31RA    | Approved Cytoplasmcytoplasm                          |
| 9403 | ENSG00000164512 | ANKRD55   | UncertainCytoplasmcytoplasm                          |

|      |                 |           |                                                      |
|------|-----------------|-----------|------------------------------------------------------|
| 9404 | ENSG00000164530 | PI16      | Approved Extracell cytoplasm;plasma membrane         |
| 9405 | ENSG00000164542 | KIAA0895  | Uncertain Estimation of protein expression could not |
| 9406 | ENSG00000164543 | STK17A    | Uncertain Cytoplasm cytoplasm                        |
| 9407 | ENSG00000164548 | TRA2A     | Uncertain Cytoplasm cytoplasm                        |
| 9408 | ENSG00000164574 | GALNT10   | Approved Cytoplasm cytoplasm                         |
| 9409 | ENSG00000164576 | SAP30L    | Approved Nuclear enucleus                            |
| 9410 | ENSG00000164587 | RPS14     | Approved General c cytoplasm                         |
| 9411 | ENSG00000164588 | HCN1      | Enhanced Cytoplasm cytoplasm                         |
| 9412 | ENSG00000164591 | MYOZ3     | Enhanced Cytoplasm cytoplasm                         |
| 9413 | ENSG00000164597 | COG5      | Uncertain General c cytoplasm                        |
| 9414 | ENSG00000164600 | NEUROD6   | Enhanced Nuclear enucleus                            |
| 9415 | ENSG00000164603 | BMT2      | Uncertain Cytoplasm cytoplasm                        |
| 9416 | ENSG00000164609 | SLU7      | Uncertain Cytoplasm cytoplasm;nucleus                |
| 9417 | ENSG00000164610 | RP9       | Uncertain Mainly n nucleus                           |
| 9418 | ENSG00000164611 | PTTG1     | Enhanced Cytoplasm cytoplasm;nucleus                 |
| 9419 | ENSG00000164615 | CAMLG     | Approved General c cytoplasm                         |
| 9420 | ENSG00000164626 | KCNK5     | Uncertain Low expre cytoplasm                        |
| 9421 | ENSG00000164627 | KIF6      | Enhanced Cytoplasm cytoplasm                         |
| 9422 | ENSG00000164647 | STEAP1    | Uncertain Cytoplasm cytoplasm                        |
| 9423 | ENSG00000164649 | CDC47L    | Approved Cytoplasm cytoplasm                         |
| 9424 | ENSG00000164651 | SP8       | Uncertain Estimation of protein expression could not |
| 9425 | ENSG00000164654 | MIOS      | Approved General c cytoplasm                         |
| 9426 | ENSG00000164659 | KIAA1324L | Uncertain Estimation of protein expression could not |
| 9427 | ENSG00000164663 | USP49     | Uncertain Cytoplasm cytoplasm                        |
| 9428 | ENSG00000164674 | SYTL3     | Approved Cytoplasm cytoplasm;plasma membrane         |
| 9429 | ENSG00000164683 | HEY1      | Enhanced Cytoplasm cytoplasm                         |
| 9430 | ENSG00000164684 | ZNF704    | Uncertain General n cytoplasm;nucleus                |
| 9431 | ENSG00000164687 | FABP5     | Enhanced Cytoplasm cytoplasm;nucleus                 |
| 9432 | ENSG00000164691 | TAGAP     | Uncertain Cytoplasm cytoplasm                        |
| 9433 | ENSG00000164692 | COL1A2    | Approved General c cytoplasm                         |
| 9434 | ENSG00000164694 | FNDC1     | Approved Cytoplasm cytoplasm                         |
| 9435 | ENSG00000164695 | CHMP4C    | Enhanced General c cytoplasm                         |
| 9436 | ENSG00000164707 | SLC13A4   | Approved Cytoplasm cytoplasm                         |
| 9437 | ENSG00000164708 | PGAM2     | Enhanced Cytoplasm cytoplasm                         |
| 9438 | ENSG00000164713 | BRI3      | Uncertain Cytoplasm cytoplasm                        |
| 9439 | ENSG00000164715 | LMTK2     | Uncertain Cytoplasm cytoplasm                        |
| 9440 | ENSG00000164733 | CTSB      | Enhanced General g cytoplasm                         |
| 9441 | ENSG00000164736 | SOX17     | Enhanced Abundant nucleus                            |
| 9442 | ENSG00000164741 | DLC1      | Uncertain Membranou plasma membrane                  |
| 9443 | ENSG00000164742 | ADCY1     | Uncertain Estimation of protein expression could not |
| 9444 | ENSG00000164743 | C8orf48   | Enhanced Expression in several tissues, including to |
| 9445 | ENSG00000164744 | SUN3      | Enhanced Expressed in spermatids.                    |
| 9446 | ENSG00000164746 | C7orf57   | Enhanced Distinct luminal expression of ciliated cel |
| 9447 | ENSG00000164749 | HNF4G     | Enhanced Small intr nucleus                          |
| 9448 | ENSG00000164751 | PEX2      | Approved Ubiquitou cytoplasm                         |
| 9449 | ENSG00000164754 | RAD21     | Supported General n nucleus                          |
| 9450 | ENSG00000164756 | SLC30A8   | Enhanced Strong c cytoplasm                          |
| 9451 | ENSG00000164761 | TNFRSF11B | Approved Cytoplasm cytoplasm                         |
| 9452 | ENSG00000164764 | SBSPON    | Approved Cytoplasm cytoplasm;plasma membrane         |
| 9453 | ENSG00000164776 | PHKG1     | Enhanced Cytoplasm cytoplasm                         |
| 9454 | ENSG00000164796 | CSMD3     | Uncertain Estimation of protein expression could not |
| 9455 | ENSG00000164808 | SPIDR     | Approved Nuclear enucleus                            |
| 9456 | ENSG00000164815 | ORC5      | Approved Nuclear enucleus                            |
| 9457 | ENSG00000164816 | DEFA5     | Enhanced Selective expression in intestinal Paneth c |
| 9458 | ENSG00000164818 | DNAAF5    | Uncertain Estimation of protein expression could not |

|      |                 |           |                                                      |
|------|-----------------|-----------|------------------------------------------------------|
| 9459 | ENSG00000164821 | DEFA4     | Enhanced Cytoplasm cytoplasm                         |
| 9460 | ENSG00000164822 | DEFA6     | Enhanced Expression of paneth cells in intestinal t  |
| 9461 | ENSG00000164823 | OSGIN2    | Approved Ubiquitous cytoplasm                        |
| 9462 | ENSG00000164828 | SUN1      | Enhanced General nucleus; plasma membrane            |
| 9463 | ENSG00000164830 | OXR1      | Enhanced Cytoplasm cytoplasm                         |
| 9464 | ENSG00000164841 | TMEM74    | Uncertain Estimation of protein expression could not |
| 9465 | ENSG00000164850 | GPER1     | Approved Cytoplasm cytoplasm; plasma membrane        |
| 9466 | ENSG00000164855 | TMEM184A  | Uncertain Cytoplasm cytoplasm                        |
| 9467 | ENSG00000164867 | NOS3      | Enhanced Cytoplasm cytoplasm                         |
| 9468 | ENSG00000164871 | SPAG11B   | Supported Epididymis-specific expression.            |
| 9469 | ENSG00000164877 | MICALL2   | Enhanced Cytoplasm cytoplasm; plasma membrane        |
| 9470 | ENSG00000164879 | CA3       | Enhanced Selective cytoplasm                         |
| 9471 | ENSG00000164880 | INTS1     | Approved Cytoplasm cytoplasm; nucleus                |
| 9472 | ENSG00000164885 | CDK5      | Enhanced Ubiquitous cytoplasm; nucleus               |
| 9473 | ENSG00000164889 | SLC4A2    | Enhanced General cytoplasm; plasma membrane          |
| 9474 | ENSG00000164896 | FASTK     | Approved Cytoplasm cytoplasm                         |
| 9475 | ENSG00000164897 | TMUB1     | Approved Cytoplasm cytoplasm                         |
| 9476 | ENSG00000164898 | FMC1      | Approved Cytoplasm cytoplasm                         |
| 9477 | ENSG00000164900 | GBX1      | Uncertain Cytoplasm cytoplasm                        |
| 9478 | ENSG00000164902 | PHAX      | Supported Ubiquitous nucleus                         |
| 9479 | ENSG00000164904 | ALDH7A1   | Enhanced Cytoplasm cytoplasm                         |
| 9480 | ENSG00000164916 | FOXK1     | Enhanced Mainly nucleus                              |
| 9481 | ENSG00000164919 | COX6C     | Enhanced General cytoplasm                           |
| 9482 | ENSG00000164920 | OSR2      | Uncertain Cytoplasm cytoplasm                        |
| 9483 | ENSG00000164924 | YWHAZ     | Approved Ubiquitous cytoplasm; nucleus               |
| 9484 | ENSG00000164929 | BAALC     | Approved Cytoplasm cytoplasm                         |
| 9485 | ENSG00000164930 | FZD6      | Approved Cytoplasm cytoplasm                         |
| 9486 | ENSG00000164932 | CTHRC1    | Approved Cytoplasm cytoplasm                         |
| 9487 | ENSG00000164933 | SLC25A32  | Uncertain Cytoplasm cytoplasm; nucleus               |
| 9488 | ENSG00000164934 | DCAF13    | Uncertain Mainly cytoplasm                           |
| 9489 | ENSG00000164938 | TP53INP1  | Uncertain Cytoplasm cytoplasm; nucleus               |
| 9490 | ENSG00000164941 | INTS8     | Approved Nuclear nucleus                             |
| 9491 | ENSG00000164944 | VIRMA     | Approved General nucleus; nucleus                    |
| 9492 | ENSG00000164946 | FREM1     | Enhanced Cytoplasm cytoplasm                         |
| 9493 | ENSG00000164949 | GEM       | Approved Cytoplasm cytoplasm                         |
| 9494 | ENSG00000164951 | PDP1      | Uncertain Cytoplasm cytoplasm                        |
| 9495 | ENSG00000164961 | WASHC5    | Supported Ubiquitous cytoplasm                       |
| 9496 | ENSG00000164967 | RPP25L    | Uncertain Cytoplasm cytoplasm; plasma membrane       |
| 9497 | ENSG00000164970 | FAM219A   | Enhanced Cytoplasm cytoplasm                         |
| 9498 | ENSG00000164972 | C9orf24   | Enhanced Cytoplasm cytoplasm                         |
| 9499 | ENSG00000164976 | MYORG     | Approved Cytoplasm cytoplasm                         |
| 9500 | ENSG00000164978 | NUDT2     | Uncertain Cytoplasm cytoplasm                        |
| 9501 | ENSG00000164983 | TMEM65    | Uncertain Estimation of protein expression could not |
| 9502 | ENSG00000164985 | PSIP1     | Enhanced General nucleus                             |
| 9503 | ENSG00000164989 | CCDC171   | Uncertain Cytoplasm cytoplasm                        |
| 9504 | ENSG00000165006 | UBAP1     | Approved General cytoplasm                           |
| 9505 | ENSG00000165025 | SYK       | Enhanced Distinct cytoplasm                          |
| 9506 | ENSG00000165028 | NIPSNAP3B | Uncertain Cytoplasm cytoplasm                        |
| 9507 | ENSG00000165029 | ABCA1     | Approved General cytoplasm; plasma membrane          |
| 9508 | ENSG00000165030 | NFIL3     | Approved Nuclear nucleus                             |
| 9509 | ENSG00000165046 | LETM2     | Approved Cytoplasm cytoplasm                         |
| 9510 | ENSG00000165059 | PRKACG    | Supported Cytoplasm cytoplasm                        |
| 9511 | ENSG00000165060 | FXN       | Supported General cytoplasm                          |
| 9512 | ENSG00000165061 | ZMAT4     | Enhanced Nuclear nucleus                             |
| 9513 | ENSG00000165071 | TMEM71    | Uncertain Cytoplasm cytoplasm                        |

|      |                 |          |                                                      |
|------|-----------------|----------|------------------------------------------------------|
| 9514 | ENSG00000165072 | MAMDC2   | UncertainCytoplasmcytoplasm;plasma membrane          |
| 9515 | ENSG00000165076 | PRSS37   | Enhanced Highly expressed in spermatids.             |
| 9516 | ENSG00000165084 | C8orf34  | UncertainEstimation of protein expression could not  |
| 9517 | ENSG00000165092 | ALDH1A1  | Approved Cytoplasmcytoplasm                          |
| 9518 | ENSG00000165097 | KDM1B    | UncertainCytoplasmcytoplasm;nucleus                  |
| 9519 | ENSG00000165102 | HGSNAT   | Approved Ubiquitoucytoplasm                          |
| 9520 | ENSG00000165105 | RASEF    | Approved General ccytoplasm                          |
| 9521 | ENSG00000165113 | GKAP1    | Enhanced Cytoplasmcytoplasm                          |
| 9522 | ENSG00000165118 | C9orf64  | UncertainCytoplasmcytoplasm;nucleus                  |
| 9523 | ENSG00000165119 | HNRNPK   | SupportedUbiquitounucleus                            |
| 9524 | ENSG00000165124 | SVEP1    | Enhanced Cytoplasmcytoplasm                          |
| 9525 | ENSG00000165125 | TRPV6    | Approved Cytoplasmcytoplasm;plasma membrane          |
| 9526 | ENSG00000165138 | ANKS6    | Approved Cytoplasmcytoplasm                          |
| 9527 | ENSG00000165140 | FBP1     | Enhanced Cytoplasmcytoplasm                          |
| 9528 | ENSG00000165152 | TMEM246  | UncertainCytopplasmic expression in several differer |
| 9529 | ENSG00000165164 | CFAP47   | UncertainEstimation of protein expression could not  |
| 9530 | ENSG00000165168 | CYBB     | Enhanced Cytoplasmcytoplasm                          |
| 9531 | ENSG00000165169 | DYNLT3   | Approved Ubiquitoucytoplasm                          |
| 9532 | ENSG00000165171 | METTL27  | UncertainEstimation of protein expression could not  |
| 9533 | ENSG00000165175 | MID1IP1  | UncertainCytoplasmcytoplasm;plasma membrane          |
| 9534 | ENSG00000165182 | CXorf58  | UncertainEstimation of protein expression could not  |
| 9535 | ENSG00000165185 | KIAA1958 | Approved Cytoplasmcytoplasm                          |
| 9536 | ENSG00000165186 | PTCHD1   | UncertainEstimation of protein expression could not  |
| 9537 | ENSG00000165188 | RNF183   | UncertainEstimation of protein expression could not  |
| 9538 | ENSG00000165194 | PCDH19   | Approved Cytoplasmcytoplasm                          |
| 9539 | ENSG00000165195 | PIGA     | Approved Granulated expression in most tissues.      |
| 9540 | ENSG00000165197 | VEGFD    | UncertainRNA-based expert annotation gave inconclus: |
| 9541 | ENSG00000165202 | OR1Q1    | UncertainEstimation of protein expression could not  |
| 9542 | ENSG00000165209 | STRBP    | Approved Nuclear acytoplasm;nucleus                  |
| 9543 | ENSG00000165215 | CLDN3    | Enhanced Membranouplasma membrane                    |
| 9544 | ENSG00000165219 | GAPVD1   | UncertainCytoplasmcytoplasm                          |
| 9545 | ENSG00000165233 | CARD19   | Approved General ccytoplasm                          |
| 9546 | ENSG00000165238 | WNK2     | Enhanced Cytoplasmcytoplasm                          |
| 9547 | ENSG00000165240 | ATP7A    | Approved General ccytoplasm;nucleus                  |
| 9548 | ENSG00000165244 | ZNF367   | UncertainCytoplasmcytoplasm;plasma membrane          |
| 9549 | ENSG00000165246 | NLGN4Y   | Approved Cytoplasmcytoplasm                          |
| 9550 | ENSG00000165259 | HDX      | UncertainCytoplasmcytoplasm                          |
| 9551 | ENSG00000165264 | NDUFB6   | SupportedUbiquitoucytoplasm                          |
| 9552 | ENSG00000165271 | NOL6     | SupportedGeneral nnucleus                            |
| 9553 | ENSG00000165272 | AQP3     | Enhanced Cytoplasmcytoplasm;plasma membrane          |
| 9554 | ENSG00000165275 | TRMT10B  | UncertainEstimation of protein expression could not  |
| 9555 | ENSG00000165280 | VCP      | SupportedNuclear acytoplasm;nucleus                  |
| 9556 | ENSG00000165283 | STOML2   | SupportedCytoplasmcytoplasm                          |
| 9557 | ENSG00000165288 | BRWD3    | Approved Cytoplasmcytoplasm                          |
| 9558 | ENSG00000165300 | SLITRK5  | UncertainEstimation of protein expression could not  |
| 9559 | ENSG00000165304 | MELK     | UncertainCytoplasmcytoplasm;nucleus                  |
| 9560 | ENSG00000165309 | ARMC3    | Enhanced High expression in cilia of fallopian tube  |
| 9561 | ENSG00000165312 | OTUD1    | UncertainUbiquitoucytoplasm                          |
| 9562 | ENSG00000165322 | ARHGAP12 | Enhanced General ccytoplasm                          |
| 9563 | ENSG00000165323 | FAT3     | UncertainEstimation of protein expression could not  |
| 9564 | ENSG00000165338 | HECTD2   | Approved Cytoplasmcytoplasm                          |
| 9565 | ENSG00000165349 | SLC7A3   | Approved Membranoucytoplasm;plasma membrane          |
| 9566 | ENSG00000165355 | FBX033   | Approved Ubiquitoucytoplasm                          |
| 9567 | ENSG00000165359 | INTS6L   | UncertainCytoplasmcytoplasm                          |
| 9568 | ENSG00000165370 | GPR101   | UncertainEstimation of protein expression could not  |

|      |                 |          |                                                     |
|------|-----------------|----------|-----------------------------------------------------|
| 9569 | ENSG00000165376 | CLDN2    | Enhanced Membranouplasma membrane                   |
| 9570 | ENSG00000165379 | LRFN5    | UncertainCytoplasmcytoplasm                         |
| 9571 | ENSG00000165383 | LRRC18   | Enhanced Expression in testis and fallopian tube.   |
| 9572 | ENSG00000165392 | WRN      | Approved Nuclear enucleus                           |
| 9573 | ENSG00000165406 | 3/8/2019 | Approved Cytoplasmcytoplasm;plasma membrane         |
| 9574 | ENSG00000165409 | TSHR     | Approved Cytoplasmcytoplasm                         |
| 9575 | ENSG00000165410 | CFL2     | Enhanced Cytoplasmcytoplasm                         |
| 9576 | ENSG00000165416 | SUGT1    | UncertainCytoplasmcytoplasm                         |
| 9577 | ENSG00000165417 | GTF2A1   | UncertainNuclear enucleus                           |
| 9578 | ENSG00000165424 | ZCCHC24  | Approved Cytoplasmcytoplasm;nucleus                 |
| 9579 | ENSG00000165434 | PGM2L1   | Enhanced Cytoplasmcytoplasm;nucleus                 |
| 9580 | ENSG00000165443 | PHYHIPL  | UncertainCytoplasmcytoplasm                         |
| 9581 | ENSG00000165449 | SLC16A9  | Approved Membranouplasma membrane                   |
| 9582 | ENSG00000165458 | INPPL1   | Approved Ubiquitoucytoplasm                         |
| 9583 | ENSG00000165462 | PHOX2A   | Enhanced Expression in adrenal medulla.             |
| 9584 | ENSG00000165471 | MBL2     | Enhanced Highly spcytoplasm;plasma membrane         |
| 9585 | ENSG00000165474 | GJB2     | UncertainCytoplasmcytoplasm                         |
| 9586 | ENSG00000165475 | CRYL1    | Enhanced Cytoplasmcytoplasm                         |
| 9587 | ENSG00000165478 | HEPACAM  | Enhanced Expression in CNS and liver.               |
| 9588 | ENSG00000165480 | SKA3     | Approved Cytoplasmcytoplasm                         |
| 9589 | ENSG00000165487 | MICU2    | Approved General ccytoplasm                         |
| 9590 | ENSG00000165490 | DDIAS    | Approved Cytoplasmcytoplasm                         |
| 9591 | ENSG00000165495 | PKNOX2   | SupportedUbiquitounucleus                           |
| 9592 | ENSG00000165496 | RPL10L   | UncertainEstimation of protein expression could not |
| 9593 | ENSG00000165501 | LRR1     | Approved Cytoplasmcytoplasm                         |
| 9594 | ENSG00000165506 | DNAAF2   | Enhanced Ubiquitoucytoplasm                         |
| 9595 | ENSG00000165507 | DEPP1    | UncertainCytoplasmcytoplasm                         |
| 9596 | ENSG00000165509 | MAGEC3   | Approved Cytoplasmcytoplasm                         |
| 9597 | ENSG00000165512 | ZNF22    | Approved Ubiquitounucleus                           |
| 9598 | ENSG00000165516 | KLHDC2   | Approved Mainly nunucleus                           |
| 9599 | ENSG00000165521 | EML5     | UncertainEstimation of protein expression could not |
| 9600 | ENSG00000165525 | NEMF     | UncertainNuclear acytoplasm;nucleus                 |
| 9601 | ENSG00000165526 | RPUSD4   | Approved Nuclear enucleus                           |
| 9602 | ENSG00000165527 | ARF6     | Approved Cytoplasmcytoplasm;plasma membrane         |
| 9603 | ENSG00000165548 | TMEM63C  | UncertainEstimation of protein expression could not |
| 9604 | ENSG00000165553 | NGB      | Enhanced Cytoplasmcytoplasm                         |
| 9605 | ENSG00000165555 | NOXRED1  | Approved Nuclear enucleus                           |
| 9606 | ENSG00000165556 | CDX2     | Enhanced Nuclear enucleus                           |
| 9607 | ENSG00000165566 | AMER2    | Enhanced Cytoplasmcytoplasm;nucleus                 |
| 9608 | ENSG00000165568 | AKR1E2   | Enhanced Nuclear acytoplasm;nucleus                 |
| 9609 | ENSG00000165572 | KBTBD6   | UncertainCytoplasmcytoplasm                         |
| 9610 | ENSG00000165583 | SSX5     | UncertainEstimation of protein expression could not |
| 9611 | ENSG00000165584 | SSX3     | Approved Nuclear enucleus                           |
| 9612 | ENSG00000165588 | OTX2     | UncertainNuclear enucleus                           |
| 9613 | ENSG00000165606 | DRGX     | UncertainEstimation of protein expression could not |
| 9614 | ENSG00000165609 | NUDT5    | Approved Cytoplasmcytoplasm                         |
| 9615 | ENSG00000165617 | DACT1    | Enhanced Cytoplasmcytoplasm                         |
| 9616 | ENSG00000165623 | UCMA     | UncertainEstimation of protein expression could not |
| 9617 | ENSG00000165626 | BEND7    | UncertainCytoplasmcytoplasm                         |
| 9618 | ENSG00000165629 | ATP5F1C  | Approved Cytoplasmcytoplasm                         |
| 9619 | ENSG00000165630 | PRPF18   | SupportedGeneral nucleus                            |
| 9620 | ENSG00000165633 | VSTM4    | UncertainGeneral ccytoplasm;nucleus                 |
| 9621 | ENSG00000165637 | VDAC2    | Enhanced Ubiquitoucytoplasm                         |
| 9622 | ENSG00000165644 | COMTD1   | Approved Cytoplasmcytoplasm                         |
| 9623 | ENSG00000165646 | SLC18A2  | Enhanced Cytoplasmcytoplasm;nucleus                 |

|      |                 |          |                                                      |
|------|-----------------|----------|------------------------------------------------------|
| 9624 | ENSG00000165650 | PDZD8    | UncertainGeneral ccytoplasm                          |
| 9625 | ENSG00000165655 | ZNF503   | Approved Nuclear enucleus                            |
| 9626 | ENSG00000165660 | ABRAXAS2 | Approved General ccytoplasm                          |
| 9627 | ENSG00000165661 | QSOX2    | UncertainCytoplasmcytoplasm                          |
| 9628 | ENSG00000165669 | FAM204A  | Approved Nuclear acytoplasm;nucleus                  |
| 9629 | ENSG00000165671 | NSD1     | SupportedUbiquitousnucleus                           |
| 9630 | ENSG00000165672 | PRDX3    | Enhanced General ccytoplasm                          |
| 9631 | ENSG00000165675 | ENOX2    | UncertainCytoplasmcytoplasm                          |
| 9632 | ENSG00000165678 | GHITM    | Approved Granular cytoplasm                          |
| 9633 | ENSG00000165684 | SNAPC4   | UncertainEstimation of protein expression could not  |
| 9634 | ENSG00000165685 | TMEM52B  | Enhanced Selectiveplasma membrane                    |
| 9635 | ENSG00000165688 | PMPCA    | SupportedUbiquitouscytoplasm                         |
| 9636 | ENSG00000165689 | SDCCAG3  | Approved General ccytoplasm                          |
| 9637 | ENSG00000165694 | FRMD7    | UncertainEstimation of protein expression could not  |
| 9638 | ENSG00000165695 | AK8      | Enhanced Expression in cilia in epithelial cells and |
| 9639 | ENSG00000165698 | SPACA9   | Enhanced Distinct expression in flagella and cilia.  |
| 9640 | ENSG00000165699 | TSC1     | SupportedUbiquitouscytoplasm                         |
| 9641 | ENSG00000165702 | GFI1B    | Enhanced Nuclear enucleus                            |
| 9642 | ENSG00000165704 | HPRT1    | Enhanced General ccytoplasm                          |
| 9643 | ENSG00000165714 | BORCS5   | Approved General ccytoplasm                          |
| 9644 | ENSG00000165716 | FAM69B   | UncertainEstimation of protein expression could not  |
| 9645 | ENSG00000165724 | ZMYND19  | SupportedAbundant cytoplasm;plasma membrane          |
| 9646 | ENSG00000165730 | STOX1    | UncertainNuclear acytoplasm;nucleus                  |
| 9647 | ENSG00000165731 | RET      | Approved Cytoplasmcytoplasm                          |
| 9648 | ENSG00000165732 | DDX21    | Enhanced Nuclear anucleus                            |
| 9649 | ENSG00000165733 | BMS1     | UncertainMainly nucytoplasm;nucleus                  |
| 9650 | ENSG00000165752 | STK32C   | UncertainGeneral ccytoplasm                          |
| 9651 | ENSG00000165757 | JCAD     | Enhanced Cytoplasmcytoplasm                          |
| 9652 | ENSG00000165775 | FUNDC2   | Approved Cytoplasmcytoplasm                          |
| 9653 | ENSG00000165782 | PIP4P1   | Approved Nuclear acytoplasm;nucleus                  |
| 9654 | ENSG00000165792 | METTL17  | UncertainCytoplasmcytoplasm                          |
| 9655 | ENSG00000165794 | SLC39A2  | UncertainGeneral ccytoplasm                          |
| 9656 | ENSG00000165795 | NDRG2    | Enhanced Cytoplasmcytoplasm                          |
| 9657 | ENSG00000165799 | RNASE7   | Enhanced Selective expression in superficial cells ( |
| 9658 | ENSG00000165801 | ARHGEF40 | UncertainEstimation of protein expression could not  |
| 9659 | ENSG00000165802 | NSMF     | Enhanced General ccytoplasm                          |
| 9660 | ENSG00000165804 | ZNF219   | Approved Ubiquitouscytoplasm                         |
| 9661 | ENSG00000165806 | CASP7    | Approved General ccytoplasm;nucleus                  |
| 9662 | ENSG00000165807 | PPP1R36  | Enhanced Cytoplasmcytoplasm;nucleus                  |
| 9663 | ENSG00000165813 | CCDC186  | Approved Ubiquitouscytoplasm                         |
| 9664 | ENSG00000165816 | VWA2     | UncertainEstimation of protein expression could not  |
| 9665 | ENSG00000165821 | SALL2    | Approved Nuclear enucleus                            |
| 9666 | ENSG00000165828 | PRAP1    | SupportedCytoplasmcytoplasm                          |
| 9667 | ENSG00000165832 | TRUB1    | Approved Cytoplasmcytoplasm                          |
| 9668 | ENSG00000165837 | ERICH6B  | UncertainEstimation of protein expression could not  |
| 9669 | ENSG00000165841 | CYP2C19  | SupportedCytoplasmcytoplasm                          |
| 9670 | ENSG00000165861 | ZFYVE1   | Approved Cytoplasmcytoplasm                          |
| 9671 | ENSG00000165868 | HSPA12A  | Approved Cytoplasmcytoplasm                          |
| 9672 | ENSG00000165879 | FRAT1    | Approved General ccytoplasm                          |
| 9673 | ENSG00000165886 | UBTD1    | UncertainMainly ccytoplasm                           |
| 9674 | ENSG00000165887 | ANKRD2   | Enhanced Selectivecytoplasm                          |
| 9675 | ENSG00000165895 | ARHGAP42 | UncertainCytoplasmcytoplasm                          |
| 9676 | ENSG00000165898 | ISCA2    | Approved General ccytoplasm                          |
| 9677 | ENSG00000165899 | OTOGL    | UncertainEstimation of protein expression could not  |
| 9678 | ENSG00000165905 | LARGE2   | Approved Distinct plasma membrane                    |



|      |                 |          |                                                         |
|------|-----------------|----------|---------------------------------------------------------|
| 9679 | ENSG00000165912 | PACSIN3  | Approved Cytoplasm cytoplasm; plasma membrane           |
| 9680 | ENSG00000165914 | TTC7B    | Enhanced Distinct plasma membrane                       |
| 9681 | ENSG00000165915 | SLC39A13 | Approved Cytoplasm cytoplasm                            |
| 9682 | ENSG00000165916 | PSMC3    | Approved General c cytoplasm; nucleus                   |
| 9683 | ENSG00000165917 | RAPSN    | Approved Cytoplasm cytoplasm                            |
| 9684 | ENSG00000165923 | AGBL2    | Uncertain General c cytoplasm                           |
| 9685 | ENSG00000165929 | TC2N     | Approved Cytoplasm cytoplasm                            |
| 9686 | ENSG00000165934 | CPSF2    | Supported General n nucleus                             |
| 9687 | ENSG00000165935 | SMC02    | Uncertain Estimation of protein expression could not    |
| 9688 | ENSG00000165943 | MOAP1    | Enhanced Expression in neuronal cells.                  |
| 9689 | ENSG00000165949 | IFI27    | Uncertain Cytoplasm cytoplasm                           |
| 9690 | ENSG00000165959 | CLMN     | Enhanced Cytoplasm cytoplasm; plasma membrane           |
| 9691 | ENSG00000165966 | PDZRN4   | Enhanced Expressed in smooth muscle.                    |
| 9692 | ENSG00000165973 | NELL1    | Approved Cytoplasm cytoplasm                            |
| 9693 | ENSG00000165983 | PTER     | Approved Cytoplasm cytoplasm                            |
| 9694 | ENSG00000165995 | CACNB2   | Enhanced Membranou plasma membrane                      |
| 9695 | ENSG00000165997 | ARL5B    | Approved Cytoplasm cytoplasm                            |
| 9696 | ENSG00000166002 | SMC04    | Uncertain Cytoplasm cytoplasm                           |
| 9697 | ENSG00000166004 | CEP295   | Approved General c cytoplasm                            |
| 9698 | ENSG00000166006 | KCNC2    | Uncertain Estimation of protein expression could not    |
| 9699 | ENSG00000166012 | TAF1D    | Uncertain Cytoplasm cytoplasm; plasma membrane          |
| 9700 | ENSG00000166016 | ABTB2    | Approved Cytoplasm cytoplasm                            |
| 9701 | ENSG00000166024 | R3HCC1L  | Enhanced Nuclear a cytoplasm; nucleus                   |
| 9702 | ENSG00000166025 | AMOTL1   | Approved Cytoplasm cytoplasm                            |
| 9703 | ENSG00000166033 | HTRA1    | Approved Cytoplasm cytoplasm                            |
| 9704 | ENSG00000166037 | CEP57    | Approved Cytoplasm cytoplasm                            |
| 9705 | ENSG00000166046 | TCP11L2  | Uncertain General n nucleus                             |
| 9706 | ENSG00000166049 | PASD1    | Enhanced Selective nucleus                              |
| 9707 | ENSG00000166068 | SPRED1   | Approved Mainly c cytoplasm                             |
| 9708 | ENSG00000166069 | TMC05A   | Enhanced High cyto cytoplasm                            |
| 9709 | ENSG00000166073 | GPR176   | Approved Ubiquitou cytoplasm; plasma membrane           |
| 9710 | ENSG00000166086 | JAM3     | Approved Cytoplasm cytoplasm; plasma membrane; plasma m |
| 9711 | ENSG00000166090 | IL25     | Uncertain RNA-based expert annotation gave inconclus:   |
| 9712 | ENSG00000166091 | CMTM5    | Enhanced Selective expression in CNS and peripheral     |
| 9713 | ENSG00000166105 | GLB1L3   | Uncertain Estimation of protein expression could not    |
| 9714 | ENSG00000166106 | ADAMTS15 | Uncertain Cytoplasm cytoplasm; plasma membrane          |
| 9715 | ENSG00000166111 | SVOP     | Uncertain Estimation of protein expression could not    |
| 9716 | ENSG00000166118 | SPATA19  | Enhanced Expression in spermatids, testis.              |
| 9717 | ENSG00000166123 | GPT2     | Approved Mainly c cytoplasm                             |
| 9718 | ENSG00000166126 | AMN      | Approved Cytoplasm cytoplasm                            |
| 9719 | ENSG00000166130 | IKBIP    | Enhanced Cytoplasm cytoplasm                            |
| 9720 | ENSG00000166133 | RPUSD2   | Approved Cytoplasm cytoplasm; nucleus                   |
| 9721 | ENSG00000166135 | HIF1AN   | Supported Ubiquitou cytoplasm; nucleus                  |
| 9722 | ENSG00000166136 | NDUFB8   | Supported Ubiquitou cytoplasm                           |
| 9723 | ENSG00000166140 | ZFYVE19  | Uncertain Mainly c cytoplasm                            |
| 9724 | ENSG00000166143 | PPP1R14D | Uncertain Cytoplasm cytoplasm                           |
| 9725 | ENSG00000166145 | SPINT1   | Uncertain Cytoplasm cytoplasm                           |
| 9726 | ENSG00000166147 | FBN1     | Enhanced Membranou cytoplasm; plasma membrane           |
| 9727 | ENSG00000166153 | DEPDC4   | Uncertain Estimation of protein expression could not    |
| 9728 | ENSG00000166159 | LRTM2    | Uncertain Estimation of protein expression could not    |
| 9729 | ENSG00000166164 | BRD7     | Enhanced Ubiquitou nucleus                              |
| 9730 | ENSG00000166165 | CKB      | Enhanced Cytoplasm cytoplasm                            |
| 9731 | ENSG00000166167 | BTRC     | Approved General c cytoplasm                            |
| 9732 | ENSG00000166170 | BAG5     | Enhanced Nuclear e nucleus                              |
| 9733 | ENSG00000166171 | DPCD     | Enhanced Cytoplasm cytoplasm                            |

|      |                 |          |                                                      |
|------|-----------------|----------|------------------------------------------------------|
| 9734 | ENSG00000166173 | LARP6    | Approved General c cytoplasm;nucleus                 |
| 9735 | ENSG00000166181 | API5     | Approved General nnucleus                            |
| 9736 | ENSG00000166183 | ASPG     | Enhanced Cytoplasmcytoplasm                          |
| 9737 | ENSG00000166188 | ZNF319   | UncertainEstimation of protein expression could not  |
| 9738 | ENSG00000166189 | HPS6     | Approved Cytoplasmcytoplasm;plasma membrane          |
| 9739 | ENSG00000166192 | SENP8    | Approved General c cytoplasm                         |
| 9740 | ENSG00000166197 | NOLC1    | SupportedLow nucleocytoplasm;nucleus                 |
| 9741 | ENSG00000166199 | ALKBH3   | Approved Cytoplasmcytoplasm                          |
| 9742 | ENSG00000166200 | COPS2    | Approved Ubiquitouscytoplasm;plasma membrane         |
| 9743 | ENSG00000166224 | SGPL1    | Enhanced General c cytoplasm                         |
| 9744 | ENSG00000166226 | CCT2     | Enhanced Cytoplasmcytoplasm                          |
| 9745 | ENSG00000166228 | PCBD1    | Approved Cytoplasmcytoplasm                          |
| 9746 | ENSG00000166233 | ARIH1    | Approved Cytoplasmcytoplasm                          |
| 9747 | ENSG00000166246 | C16orf71 | Enhanced Cytoplasmcytoplasm                          |
| 9748 | ENSG00000166260 | COX11    | Approved General c cytoplasm                         |
| 9749 | ENSG00000166262 | FAM227B  | UncertainCytoplasmcytoplasm                          |
| 9750 | ENSG00000166263 | STXBP4   | Approved Ubiquitouscytoplasm                         |
| 9751 | ENSG00000166265 | CYR1     | UncertainUbiquitouscytoplasm                         |
| 9752 | ENSG00000166266 | CUL5     | Approved Mainly c cytoplasm                          |
| 9753 | ENSG00000166268 | MYRFL    | Approved Cytoplasmcytoplasm                          |
| 9754 | ENSG00000166272 | WBP1L    | UncertainCytoplasmcytoplasm;plasma membrane          |
| 9755 | ENSG00000166275 | BORCS7   | Approved Nuclear a cytoplasm;nucleus                 |
| 9756 | ENSG00000166278 | C2       | SupportedPositivitplasma membrane                    |
| 9757 | ENSG00000166289 | PLEKHF1  | UncertainCytoplasmcytoplasm;nucleus                  |
| 9758 | ENSG00000166292 | TMEM100  | Approved Cytoplasmcytoplasm                          |
| 9759 | ENSG00000166295 | ANAPC16  | Approved Ubiquitouscytoplasm                         |
| 9760 | ENSG00000166313 | APBB1    | Approved Ubiquitouscytoplasm                         |
| 9761 | ENSG00000166317 | SYNP02L  | Enhanced Cytoplasmcytoplasm                          |
| 9762 | ENSG00000166321 | NUDT13   | Approved Nuclear enucleus                            |
| 9763 | ENSG00000166326 | TRIM44   | Approved Ubiquitouscytoplasm                         |
| 9764 | ENSG00000166329 | CCDC182  | UncertainEstimation of protein expression could not  |
| 9765 | ENSG00000166333 | ILK      | Enhanced Cytoplasmcytoplasm                          |
| 9766 | ENSG00000166337 | TAF10    | SupportedUbiquitousnucleus                           |
| 9767 | ENSG00000166340 | TPP1     | Enhanced Ubiquitous expression in lysosomes.         |
| 9768 | ENSG00000166341 | DCHS1    | Approved Cytoplasmcytoplasm                          |
| 9769 | ENSG00000166347 | CYB5A    | Enhanced Cytoplasmcytoplasm                          |
| 9770 | ENSG00000166348 | USP54    | Approved Cytoplasmcytoplasm                          |
| 9771 | ENSG00000166352 | C11orf74 | UncertainCytoplasmcytoplasm                          |
| 9772 | ENSG00000166359 | WDR88    | UncertainEstimation of protein expression could not  |
| 9773 | ENSG00000166377 | ATP9B    | Approved Cytoplasmcytoplasm                          |
| 9774 | ENSG00000166387 | PPFIBP2  | Enhanced Cytoplasmcytoplasm                          |
| 9775 | ENSG00000166391 | MOGAT2   | UncertainGeneral c cytoplasm                         |
| 9776 | ENSG00000166394 | CYB5R2   | Enhanced Cytoplasmcytoplasm                          |
| 9777 | ENSG00000166396 | SERPINB7 | Enhanced Cytoplasmcytoplasm;nucleus                  |
| 9778 | ENSG00000166398 | KIAA0355 | UncertainEstimation of protein expression could not  |
| 9779 | ENSG00000166401 | SERPINB8 | Enhanced Cytoplasmcytoplasm;nucleus                  |
| 9780 | ENSG00000166402 | TUB      | UncertainCytoplasmcytoplasm;nucleus                  |
| 9781 | ENSG00000166405 | RIC3     | Approved General g cytoplasm                         |
| 9782 | ENSG00000166411 | IDH3A    | SupportedCytoplasmcytoplasm                          |
| 9783 | ENSG00000166415 | WDR72    | UncertainCytoplasmcytoplasm;nucleus                  |
| 9784 | ENSG00000166426 | CRABP1   | Enhanced Expression in retina, hypothalamus, caudate |
| 9785 | ENSG00000166428 | PLD4     | UncertainCytoplasmcytoplasm;plasma membrane;plasma r |
| 9786 | ENSG00000166432 | ZMAT1    | Enhanced Cytoplasmcytoplasm                          |
| 9787 | ENSG00000166436 | TRIM66   | Approved Mainly nnucleus                             |
| 9788 | ENSG00000166439 | RNF169   | UncertainEstimation of protein expression could not  |

|      |                 |          |                                                      |
|------|-----------------|----------|------------------------------------------------------|
| 9789 | ENSG00000166441 | RPL27A   | SupportedCytoplasmcytoplasm                          |
| 9790 | ENSG00000166444 | ST5      | Approved Cytoplasmcytoplasm;nucleus                  |
| 9791 | ENSG00000166446 | CDYL2    | Approved General nnucleus                            |
| 9792 | ENSG00000166448 | TMEM130  | Approved RNA characterization data suggests express: |
| 9793 | ENSG00000166454 | ATMIN    | Approved General nnucleus                            |
| 9794 | ENSG00000166455 | C16orf46 | Approved Nuclear enucleus                            |
| 9795 | ENSG00000166471 | TMEM41B  | UncertainCytoplasmcytoplasm                          |
| 9796 | ENSG00000166477 | LE01     | Enhanced Cytoplasmcytoplasm;nucleus                  |
| 9797 | ENSG00000166478 | ZNF143   | SupportedNuclear enucleus                            |
| 9798 | ENSG00000166479 | TMX3     | UncertainGeneral ccytoplasm                          |
| 9799 | ENSG00000166482 | MFAP4    | SupportedStaining in extracellular matrix.           |
| 9800 | ENSG00000166483 | WEE1     | Approved Nuclear enucleus                            |
| 9801 | ENSG00000166484 | MAPK7    | UncertainGeneral ccytoplasm                          |
| 9802 | ENSG00000166501 | PRKCB    | Approved Cytoplasmcytoplasm;nucleus                  |
| 9803 | ENSG00000166503 | HDGFL3   | Approved Cytoplasmcytoplasm;nucleus                  |
| 9804 | ENSG00000166507 | NDST2    | Approved Cytoplasmcytoplasm                          |
| 9805 | ENSG00000166508 | MCM7     | Enhanced Nuclear enucleus                            |
| 9806 | ENSG00000166509 | CLEC3A   | UncertainEstimation of protein expression could not  |
| 9807 | ENSG00000166510 | CCDC68   | SupportedGranular cytoplasm                          |
| 9808 | ENSG00000166523 | CLEC4E   | UncertainEstimation of protein expression could not  |
| 9809 | ENSG00000166526 | ZNF3     | Supportedgeneral nnucleus                            |
| 9810 | ENSG00000166527 | CLEC4D   | Approved Cytoplasmcytoplasm                          |
| 9811 | ENSG00000166529 | ZSCAN21  | UncertainNuclear enucleus                            |
| 9812 | ENSG00000166535 | A2ML1    | Enhanced Selective expression in squamous epithelia. |
| 9813 | ENSG00000166546 | BEAN1    | UncertainEstimation of protein expression could not  |
| 9814 | ENSG00000166548 | TK2      | UncertainCytoplasmcytoplasm                          |
| 9815 | ENSG00000166557 | TMED3    | Approved General ncytoplasm;nucleus                  |
| 9816 | ENSG00000166562 | SEC11C   | Approved Cytoplasmcytoplasm                          |
| 9817 | ENSG00000166569 | CPLX4    | Enhanced Expression in nerve fibers in outer and in  |
| 9818 | ENSG00000166575 | TMEM135  | UncertainGeneral ccytoplasm                          |
| 9819 | ENSG00000166578 | IQCD     | SupportedExpression in seminiferous ducts.           |
| 9820 | ENSG00000166579 | NDEL1    | Approved Cytoplasmcytoplasm                          |
| 9821 | ENSG00000166582 | CENPV    | Enhanced Mainly nnucleus                             |
| 9822 | ENSG00000166589 | CDH16    | Enhanced Selectivecytoplasm;plasma membrane          |
| 9823 | ENSG00000166592 | RRAD     | UncertainGeneral ccytoplasm;nucleus                  |
| 9824 | ENSG00000166595 | FAM96B   | SupportedMainly ccytoplasm                           |
| 9825 | ENSG00000166596 | CFAP52   | Enhanced Selective cilia expression.                 |
| 9826 | ENSG00000166598 | HSP90B1  | Enhanced Widely dicytoplasm                          |
| 9827 | ENSG00000166603 | MC4R     | UncertainCytoplasmcytoplasm;plasma membrane          |
| 9828 | ENSG00000166669 | ATF7IP2  | Enhanced Mainly nnucleus                             |
| 9829 | ENSG00000166670 | MMP10    | UncertainEstimation of protein expression could not  |
| 9830 | ENSG00000166676 | TVP23A   | UncertainEstimation of protein expression could not  |
| 9831 | ENSG00000166681 | BEX3     | Approved General ccytoplasm                          |
| 9832 | ENSG00000166685 | COG1     | SupportedUbiquitouscytoplasm                         |
| 9833 | ENSG00000166689 | PLEKHA7  | Approved Membranoucytoplasm;plasma membrane          |
| 9834 | ENSG00000166704 | ZNF606   | UncertainCytoplasmcytoplasm                          |
| 9835 | ENSG00000166707 | ZCCHC18  | UncertainEstimation of protein expression could not  |
| 9836 | ENSG00000166710 | B2M      | Enhanced Cytoplasmcytoplasm;plasma membrane          |
| 9837 | ENSG00000166716 | ZNF592   | Approved Ubiquitouscytoplasm;nucleus                 |
| 9838 | ENSG00000166734 | CASC4    | Enhanced Ubiquitouscytoplasm                         |
| 9839 | ENSG00000166736 | HTR3A    | SupportedCytoplasmcytoplasm;plasma membrane          |
| 9840 | ENSG00000166741 | NNMT     | Approved Cytoplasmcytoplasm                          |
| 9841 | ENSG00000166743 | ACSM1    | UncertainEstimation of protein expression could not  |
| 9842 | ENSG00000166747 | AP1G1    | Approved General ccytoplasm                          |
| 9843 | ENSG00000166750 | SLFN5    | Approved Ubiquitousnucleus                           |

|      |                 |          |                                                         |
|------|-----------------|----------|---------------------------------------------------------|
| 9844 | ENSG00000166780 | C16orf45 | Enhanced Cytoplasm cytoplasm                            |
| 9845 | ENSG00000166783 | MARF1    | Uncertain Mainly cytoplasm                              |
| 9846 | ENSG00000166788 | SAAL1    | Approved Cytoplasm cytoplasm                            |
| 9847 | ENSG00000166793 | YPEL4    | Uncertain General cytoplasm                             |
| 9848 | ENSG00000166794 | PPIB     | Enhanced Cytoplasm cytoplasm                            |
| 9849 | ENSG00000166796 | LDHC     | Enhanced Cytoplasm cytoplasm                            |
| 9850 | ENSG00000166797 | FAM96A   | Approved Cytoplasm cytoplasm                            |
| 9851 | ENSG00000166801 | FAM111A  | Approved Cytoplasm cytoplasm;nucleus                    |
| 9852 | ENSG00000166813 | KIF7     | Approved Cytoplasm cytoplasm                            |
| 9853 | ENSG00000166816 | LDHD     | Enhanced Cytoplasm cytoplasm                            |
| 9854 | ENSG00000166819 | PLIN1    | Enhanced Selective expression in adipocytes.            |
| 9855 | ENSG00000166825 | ANPEP    | Enhanced Membranous cytoplasm;plasma membrane           |
| 9856 | ENSG00000166833 | NAV2     | Approved Cytoplasm cytoplasm                            |
| 9857 | ENSG00000166839 | ANKDD1A  | Approved Cytoplasm cytoplasm;plasma membrane            |
| 9858 | ENSG00000166840 | GLYATL1  | Supported Granular cytoplasm                            |
| 9859 | ENSG00000166847 | DCTN5    | Approved Cytoplasm cytoplasm;nucleus                    |
| 9860 | ENSG00000166848 | TERF2IP  | Supported General nucleus                               |
| 9861 | ENSG00000166851 | PLK1     | Approved Mainly nucleus                                 |
| 9862 | ENSG00000166855 | CLPX     | Approved Cytoplasm cytoplasm;nucleus                    |
| 9863 | ENSG00000166856 | GPR182   | Enhanced Distinct expression in splenic sinusoids and   |
| 9864 | ENSG00000166860 | ZBTB39   | Uncertain Ubiquitous cytoplasm                          |
| 9865 | ENSG00000166863 | TAC3     | Supported Positive cytoplasm                            |
| 9866 | ENSG00000166866 | MYO1A    | Enhanced Luminal plasma membrane                        |
| 9867 | ENSG00000166869 | CHP2     | Approved Nuclear cytoplasm;nucleus                      |
| 9868 | ENSG00000166881 | NEMP1    | Uncertain Estimation of protein expression could not    |
| 9869 | ENSG00000166886 | NAB2     | Approved Ubiquitous cytoplasm;nucleus                   |
| 9870 | ENSG00000166888 | STAT6    | Approved Cytoplasm cytoplasm;nucleus                    |
| 9871 | ENSG00000166889 | PATL1    | Uncertain General cytoplasm                             |
| 9872 | ENSG00000166896 | ATP23    | Uncertain Cytoplasm cytoplasm                           |
| 9873 | ENSG00000166897 | ELFN2    | Approved Cytoplasm cytoplasm                            |
| 9874 | ENSG00000166900 | STX3     | Approved Membranous cytoplasm;plasma membrane           |
| 9875 | ENSG00000166902 | MRPL16   | Supported General cytoplasm                             |
| 9876 | ENSG00000166908 | PIP4K2C  | Approved Mainly cytoplasm                               |
| 9877 | ENSG00000166912 | MTMR10   | Approved Nuclear nucleus                                |
| 9878 | ENSG00000166913 | YWHAB    | Enhanced Ubiquitous cytoplasm                           |
| 9879 | ENSG00000166920 | C15orf48 | Enhanced Granular cytoplasm                             |
| 9880 | ENSG00000166922 | SCG5     | Enhanced Cytoplasm cytoplasm                            |
| 9881 | ENSG00000166923 | GREM1    | Uncertain RNA-based expert annotation gave inconclusive |
| 9882 | ENSG00000166924 | NYAP1    | Uncertain Cytoplasm cytoplasm                           |
| 9883 | ENSG00000166925 | TSC22D4  | Uncertain Cytoplasm cytoplasm                           |
| 9884 | ENSG00000166927 | MS4A7    | Approved Cytoplasm cytoplasm                            |
| 9885 | ENSG00000166930 | MS4A5    | Uncertain Cytoplasm cytoplasm                           |
| 9886 | ENSG00000166938 | DIS3L    | Approved General cytoplasm                              |
| 9887 | ENSG00000166946 | CCNDBP1  | Supported Ubiquitous cytoplasm;nucleus                  |
| 9888 | ENSG00000166947 | EPB42    | Supported Positivity in erythrocytes.                   |
| 9889 | ENSG00000166948 | TGM6     | Uncertain Estimation of protein expression could not    |
| 9890 | ENSG00000166949 | SMAD3    | Approved Cytoplasm cytoplasm                            |
| 9891 | ENSG00000166959 | MS4A8    | Enhanced Membranous cytoplasm;plasma membrane           |
| 9892 | ENSG00000166963 | MAP1A    | Enhanced Cytoplasm cytoplasm                            |
| 9893 | ENSG00000166965 | RCCD1    | Enhanced Ubiquitous cytoplasm                           |
| 9894 | ENSG00000166971 | AKTIP    | Approved General, cytoplasm                             |
| 9895 | ENSG00000166974 | MAPRE2   | Enhanced Cytoplasm cytoplasm                            |
| 9896 | ENSG00000166979 | EVA1C    | Enhanced Cytoplasm cytoplasm;plasma membrane            |
| 9897 | ENSG00000166984 | TCP10L2  | Uncertain Estimation of protein expression could not    |
| 9898 | ENSG00000166986 | MARS     | Supported General cytoplasm                             |

|      |                 |          |                                                     |
|------|-----------------|----------|-----------------------------------------------------|
| 9899 | ENSG00000166987 | MBD6     | UncertainUbiquitouscytoplasm;nucleus                |
| 9900 | ENSG00000166997 | CNPY4    | UncertainCytoplasmcytoplasm                         |
| 9901 | ENSG00000167004 | PDIA3    | Enhanced Cytoplasmcytoplasm                         |
| 9902 | ENSG00000167005 | NUDT21   | UncertainUbiquitouscytoplasm                        |
| 9903 | ENSG00000167011 | NAT16    | UncertainEstimation of protein expression could not |
| 9904 | ENSG00000167034 | NKX3-1   | Enhanced Nuclear enucleus                           |
| 9905 | ENSG00000167037 | SGSM1    | Approved General ccytoplasm                         |
| 9906 | ENSG00000167065 | DUSP18   | UncertainNuclear acytoplasm;nucleus                 |
| 9907 | ENSG00000167077 | MEI1     | Approved Cytoplasmcytoplasm;nucleus                 |
| 9908 | ENSG00000167080 | B4GALNT2 | Approved Cytoplasmcytoplasm                         |
| 9909 | ENSG00000167081 | PBX3     | SupportedNuclear enucleus                           |
| 9910 | ENSG00000167083 | GNGT2    | Enhanced Cytoplasmcytoplasm                         |
| 9911 | ENSG00000167085 | PHB      | SupportedGeneral ccytoplasm                         |
| 9912 | ENSG00000167088 | SNRPD1   | SupportedGeneral nnucleus                           |
| 9913 | ENSG00000167098 | SUN5     | Enhanced Distinct cytoplasm                         |
| 9914 | ENSG00000167100 | SAMD14   | UncertainEstimation of protein expression could not |
| 9915 | ENSG00000167103 | PIP5KL1  | UncertainEstimation of protein expression could not |
| 9916 | ENSG00000167104 | BPIFB6   | UncertainEstimation of protein expression could not |
| 9917 | ENSG00000167105 | TMEM92   | Approved Cytoplasmcytoplasm;plasma membrane         |
| 9918 | ENSG00000167107 | ACSF2    | Enhanced Cytoplasmcytoplasm                         |
| 9919 | ENSG00000167110 | GOLGA2   | Enhanced Cytoplasmcytoplasm                         |
| 9920 | ENSG00000167112 | TRUB2    | UncertainGeneral ccytoplasm                         |
| 9921 | ENSG00000167113 | COQ4     | SupportedGeneral ccytoplasm                         |
| 9922 | ENSG00000167114 | SLC27A4  | Approved General ccytoplasm                         |
| 9923 | ENSG00000167118 | URM1     | Approved Ubiquitouscytoplasm                        |
| 9924 | ENSG00000167123 | CERCAM   | UncertainCytoplasmcytoplasm                         |
| 9925 | ENSG00000167130 | DOLPP1   | Approved Granular cytoplasm                         |
| 9926 | ENSG00000167136 | ENDOG    | Approved General ccytoplasm                         |
| 9927 | ENSG00000167139 | TBC1D21  | Enhanced Cytoplasmcytoplasm                         |
| 9928 | ENSG00000167157 | PRRX2    | Approved Nuclear acytoplasm;nucleus                 |
| 9929 | ENSG00000167165 | UGT1A6   | Enhanced Granular cytoplasm                         |
| 9930 | ENSG00000167173 | C15orf39 | Enhanced Cytoplasmcytoplasm                         |
| 9931 | ENSG00000167178 | ISLR2    | UncertainEstimation of protein expression could not |
| 9932 | ENSG00000167182 | SP2      | SupportedGeneral nnucleus                           |
| 9933 | ENSG00000167183 | PRR15L   | Approved General ccytoplasm                         |
| 9934 | ENSG00000167186 | COQ7     | Approved Cytoplasmcytoplasm                         |
| 9935 | ENSG00000167191 | GPRC5B   | Enhanced Membranoucytoplasm;plasma membrane         |
| 9936 | ENSG00000167193 | CRK      | Approved Membranoucytoplasm;plasma membrane         |
| 9937 | ENSG00000167195 | GOLGA6C  | SupportedDistinct expression in round and elongated |
| 9938 | ENSG00000167202 | TBC1D2B  | Approved Ubiquitouscytoplasm                        |
| 9939 | ENSG00000167207 | NOD2     | Enhanced Cytoplasmcytoplasm                         |
| 9940 | ENSG00000167208 | SNX20    | UncertainEstimation of protein expression could not |
| 9941 | ENSG00000167216 | KATNAL2  | Approved General ccytoplasm                         |
| 9942 | ENSG00000167220 | HDHD2    | Approved Cytoplasmcytoplasm                         |
| 9943 | ENSG00000167244 | IGF2     | Enhanced Cytoplasmcytoplasm                         |
| 9944 | ENSG00000167257 | RNF214   | Approved General ccytoplasm                         |
| 9945 | ENSG00000167258 | CDK12    | SupportedGeneral nnucleus                           |
| 9946 | ENSG00000167261 | DPEP2    | Approved Cytoplasmcytoplasm;plasma membrane         |
| 9947 | ENSG00000167264 | DUS2     | Enhanced Cytoplasmcytoplasm                         |
| 9948 | ENSG00000167272 | POP5     | Approved Nuclear enucleus                           |
| 9949 | ENSG00000167280 | ENGASE   | Approved General ccytoplasm                         |
| 9950 | ENSG00000167281 | RBFOX3   | Enhanced Distinct expression in CNS.                |
| 9951 | ENSG00000167283 | ATP5MG   | Approved Ubiquitouscytoplasm                        |
| 9952 | ENSG00000167286 | CD3D     | Enhanced High cytocytoplasm                         |
| 9953 | ENSG00000167291 | TBC1D16  | Approved Cytoplasmcytoplasm                         |

|       |                 |          |                                                      |
|-------|-----------------|----------|------------------------------------------------------|
| 9954  | ENSG00000167306 | MYO5B    | Enhanced Distinct cytoplasm;plasma membrane          |
| 9955  | ENSG00000167311 | ART5     | UncertainEstimation of protein expression could not  |
| 9956  | ENSG00000167315 | ACAA2    | Approved Cytoplasmcytoplasm                          |
| 9957  | ENSG00000167323 | STIM1    | Enhanced Cytoplasmcytoplasm                          |
| 9958  | ENSG00000167325 | RRM1     | Enhanced Cytoplasmcytoplasm                          |
| 9959  | ENSG00000167333 | TRIM68   | UncertainGeneral ccytoplasm                          |
| 9960  | ENSG00000167355 | OR51B5   | UncertainEstimation of protein expression could not  |
| 9961  | ENSG00000167360 | OR51Q1   | UncertainEstimation of protein expression could not  |
| 9962  | ENSG00000167363 | FN3K     | SupportedCytoplasmcytoplasm                          |
| 9963  | ENSG00000167371 | PRRT2    | Enhanced Cytoplasmcytoplasm                          |
| 9964  | ENSG00000167377 | ZNF23    | UncertainEstimation of protein expression could not  |
| 9965  | ENSG00000167378 | IRGQ     | Approved Cytoplasmcytoplasm;nucleus                  |
| 9966  | ENSG00000167380 | ZNF226   | UncertainUbiquitouscytoplasm;nucleus                 |
| 9967  | ENSG00000167384 | ZNF180   | UncertainEstimation of protein expression could not  |
| 9968  | ENSG00000167394 | ZNF668   | UncertainNuclear enucleus                            |
| 9969  | ENSG00000167395 | ZNF646   | UncertainCytoplasmcytoplasm                          |
| 9970  | ENSG00000167397 | VKORC1   | Approved Cytoplasmcytoplasm                          |
| 9971  | ENSG00000167419 | LPO      | Enhanced Cytoplasmcytoplasm                          |
| 9972  | ENSG00000167434 | CA4      | Enhanced Membranouplasma membrane                    |
| 9973  | ENSG00000167447 | SMG8     | Approved Cytoplasmcytoplasm                          |
| 9974  | ENSG00000167460 | TPM4     | Approved General ccytoplasm                          |
| 9975  | ENSG00000167468 | GPX4     | Enhanced Cytoplasmcytoplasm                          |
| 9976  | ENSG00000167470 | MIDN     | UncertainCytoplasmcytoplasm;nucleus;plasma membrane  |
| 9977  | ENSG00000167476 | JSRP1    | Enhanced Cytoplasmcytoplasm                          |
| 9978  | ENSG00000167483 | FAM129C  | Approved Cytoplasmcytoplasm                          |
| 9979  | ENSG00000167487 | KLHL26   | UncertainEstimation of protein expression could not  |
| 9980  | ENSG00000167491 | GATAD2A  | Enhanced Ubiquitousnucleus                           |
| 9981  | ENSG00000167508 | MVD      | UncertainMainly ccytoplasm                           |
| 9982  | ENSG00000167513 | CDT1     | Approved General nnucleus                            |
| 9983  | ENSG00000167515 | TRAPPC2L | Approved General ccytoplasm                          |
| 9984  | ENSG00000167522 | ANKRD11  | Approved General ncytoplasm;nucleus                  |
| 9985  | ENSG00000167523 | SPATA33  | Enhanced Cytoplasmcytoplasm                          |
| 9986  | ENSG00000167524 | SGK494   | UncertainEstimation of protein expression could not  |
| 9987  | ENSG00000167525 | PROCA1   | Approved Membranouplasma membrane                    |
| 9988  | ENSG00000167526 | RPL13    | Approved Cytoplasmcytoplasm                          |
| 9989  | ENSG00000167528 | ZNF641   | UncertainCytoplasmcytoplasm                          |
| 9990  | ENSG00000167531 | LALBA    | Enhanced Cytoplasmcytoplasm;plasma membrane          |
| 9991  | ENSG00000167536 | DHRS13   | UncertainCytoplasmcytoplasm                          |
| 9992  | ENSG00000167548 | KMT2D    | Approved Nuclear enucleus                            |
| 9993  | ENSG00000167550 | RHEBL1   | UncertainCytoplasmcytoplasm                          |
| 9994  | ENSG00000167552 | TUBA1A   | Enhanced General ccytoplasm                          |
| 9995  | ENSG00000167553 | TUBA1C   | SupportedGeneral ccytoplasm                          |
| 9996  | ENSG00000167554 | ZNF610   | Enhanced Nuclear anucleus;plasma membrane            |
| 9997  | ENSG00000167562 | ZNF701   | UncertainEstimation of protein expression could not  |
| 9998  | ENSG00000167566 | NCKAP5L  | Approved Cytoplasmcytoplasm                          |
| 9999  | ENSG00000167580 | AQP2     | Enhanced Selectiveplasma membrane                    |
| 10000 | ENSG00000167588 | GPD1     | Enhanced General ccytoplasm                          |
| 10001 | ENSG00000167595 | PROSER3  | Approved Cytoplasmcytoplasm                          |
| 10002 | ENSG00000167600 | CYP2S1   | Approved Cytoplasmcytoplasm                          |
| 10003 | ENSG00000167601 | AXL      | UncertainCytoplasmcytoplasm                          |
| 10004 | ENSG00000167608 | TMC4     | Approved Cytoplasmcytoplasm                          |
| 10005 | ENSG00000167612 | ANKRD33  | Enhanced Cytoplasmcytoplasm                          |
| 10006 | ENSG00000167613 | LAIR1    | Enhanced Expression in immune cells in several tissu |
| 10007 | ENSG00000167614 | TTYH1    | Approved Cytoplasmcytoplasm                          |
| 10008 | ENSG00000167615 | LENG8    | UncertainCytoplasmcytoplasm                          |

|       |                 |          |                                                      |
|-------|-----------------|----------|------------------------------------------------------|
| 10009 | ENSG00000167617 | CDC42EP5 | Approved Cytoplasm cytoplasm                         |
| 10010 | ENSG00000167619 | TMEM145  | Enhanced Distinct cytoplasm                          |
| 10011 | ENSG00000167625 | ZNF526   | Uncertain Ubiquitous cytoplasm                       |
| 10012 | ENSG00000167634 | NLRP7    | Uncertain Estimation of protein expression could not |
| 10013 | ENSG00000167635 | ZNF146   | Supported General nucleus                            |
| 10014 | ENSG00000167641 | PPP1R14A | Enhanced Cytoplasm cytoplasm;nucleus                 |
| 10015 | ENSG00000167642 | SPINT2   | Approved Ubiquitous cytoplasm                        |
| 10016 | ENSG00000167644 | C19orf33 | Uncertain Cytoplasm cytoplasm                        |
| 10017 | ENSG00000167645 | YIF1B    | Approved Cytoplasm cytoplasm;plasma membrane         |
| 10018 | ENSG00000167653 | PSCA     | Approved Cytoplasm cytoplasm                         |
| 10019 | ENSG00000167654 | ATCAY    | Enhanced Selective expression in CNS.                |
| 10020 | ENSG00000167656 | LY6D     | Enhanced Membranous cytoplasm;plasma membrane        |
| 10021 | ENSG00000167657 | DAPK3    | Approved Cytoplasm cytoplasm;plasma membrane         |
| 10022 | ENSG00000167658 | EEF2     | Enhanced Cytoplasm cytoplasm;plasma membrane         |
| 10023 | ENSG00000167664 | TMIGD2   | Approved Membranous plasma membrane                  |
| 10024 | ENSG00000167670 | CHAF1A   | Enhanced Nuclear nucleus                             |
| 10025 | ENSG00000167671 | UBXN6    | Approved Cytoplasm cytoplasm;nucleus                 |
| 10026 | ENSG00000167674 | HDGFL2   | Enhanced Ubiquitous nucleus                          |
| 10027 | ENSG00000167676 | PLIN4    | Enhanced Selective cytoplasm                         |
| 10028 | ENSG00000167680 | SEMA6B   | Enhanced Expression nucleus;plasma membrane          |
| 10029 | ENSG00000167685 | ZNF444   | Approved Nuclear nucleus                             |
| 10030 | ENSG00000167693 | NXN      | Approved Cytoplasm cytoplasm                         |
| 10031 | ENSG00000167699 | GLOD4    | Enhanced Ubiquitous cytoplasm                        |
| 10032 | ENSG00000167700 | MFS3     | Uncertain Estimation of protein expression could not |
| 10033 | ENSG00000167701 | GPT      | Enhanced Distinct expression in liver, kidney tubule |
| 10034 | ENSG00000167702 | KIFC2    | Approved Cytoplasm cytoplasm                         |
| 10035 | ENSG00000167703 | SLC43A2  | Enhanced Cytoplasm cytoplasm;plasma membrane         |
| 10036 | ENSG00000167711 | SERPINF2 | Approved Positive cytoplasm;plasma membrane;plasma m |
| 10037 | ENSG00000167716 | WDR81    | Uncertain Estimation of protein expression could not |
| 10038 | ENSG00000167720 | SRR      | Approved Cytoplasm cytoplasm;nucleus                 |
| 10039 | ENSG00000167721 | TSR1     | Approved Cytoplasm cytoplasm;nucleus                 |
| 10040 | ENSG00000167740 | CYB5D2   | Approved Mainly cytoplasm                            |
| 10041 | ENSG00000167741 | GGT6     | Approved Ubiquitous cytoplasm                        |
| 10042 | ENSG00000167747 | C19orf48 | Uncertain Cytoplasm cytoplasm                        |
| 10043 | ENSG00000167749 | KLK4     | Enhanced Granular expression in prostate             |
| 10044 | ENSG00000167751 | KLK2     | Supported Selective cytoplasm                        |
| 10045 | ENSG00000167754 | KLK5     | Enhanced Distinct cytoplasm                          |
| 10046 | ENSG00000167757 | KLK11    | Approved Cytoplasm cytoplasm                         |
| 10047 | ENSG00000167759 | KLK13    | Enhanced Cytoplasm cytoplasm                         |
| 10048 | ENSG00000167766 | ZNF83    | Approved Cytoplasm cytoplasm;nucleus                 |
| 10049 | ENSG00000167768 | KRT1     | Enhanced Selective cytoplasm                         |
| 10050 | ENSG00000167770 | OTUB1    | Approved General cytoplasm                           |
| 10051 | ENSG00000167771 | RCOR2    | Uncertain Estimation of protein expression could not |
| 10052 | ENSG00000167772 | ANGPTL4  | Approved Secreted plasma membrane                    |
| 10053 | ENSG00000167775 | CD320    | Approved Expression in several different cell types, |
| 10054 | ENSG00000167778 | SPRYD3   | Enhanced Cytoplasm cytoplasm                         |
| 10055 | ENSG00000167779 | IGFBP6   | Uncertain Cytoplasm cytoplasm;plasma membrane        |
| 10056 | ENSG00000167785 | ZNF558   | Uncertain Estimation of protein expression could not |
| 10057 | ENSG00000167792 | NDUFV1   | Approved Cytoplasm cytoplasm                         |
| 10058 | ENSG00000167797 | CDK2AP2  | Uncertain Cytoplasm cytoplasm;plasma membrane        |
| 10059 | ENSG00000167799 | NUDT8    | Enhanced General cytoplasm                           |
| 10060 | ENSG00000167800 | TBX10    | Uncertain Estimation of protein expression could not |
| 10061 | ENSG00000167815 | PRDX2    | Approved General cytoplasm                           |
| 10062 | ENSG00000167840 | ZNF232   | Uncertain Estimation of protein expression could not |
| 10063 | ENSG00000167842 | MIS12    | Approved Mainly nucleus                              |

|       |                 |          |                                                      |
|-------|-----------------|----------|------------------------------------------------------|
| 10064 | ENSG00000167850 | CD300C   | Approved Cytoplasm cytoplasm                         |
| 10065 | ENSG00000167851 | CD300A   | Approved General c cytoplasm                         |
| 10066 | ENSG00000167858 | TEKT1    | Approved Ciliary acytoplasm                          |
| 10067 | ENSG00000167861 | HID1     | Approved Cytoplasm cytoplasm                         |
| 10068 | ENSG00000167862 | MRPL58   | Approved Cytoplasm cytoplasm                         |
| 10069 | ENSG00000167863 | ATP5PD   | Enhanced Ubiquitou cytoplasm                         |
| 10070 | ENSG00000167874 | TMEM88   | Approved General c cytoplasm                         |
| 10071 | ENSG00000167880 | EVPL     | Enhanced Cytoplasm cytoplasm                         |
| 10072 | ENSG00000167881 | SRP68    | Approved General c cytoplasm                         |
| 10073 | ENSG00000167895 | TMC8     | Uncertain Cytoplasm cytoplasm                        |
| 10074 | ENSG00000167900 | TK1      | Enhanced Cytoplasm cytoplasm                         |
| 10075 | ENSG00000167904 | TMEM68   | Uncertain Cytoplasm cytoplasm                        |
| 10076 | ENSG00000167914 | GSDMA    | Enhanced Highly expressed in sebaceous glands, hair  |
| 10077 | ENSG00000167916 | KRT24    | Uncertain Cytoplasm cytoplasm; plasma membrane       |
| 10078 | ENSG00000167925 | GHDC     | Uncertain Cytoplasm cytoplasm; plasma membrane       |
| 10079 | ENSG00000167930 | FAM234A  | Uncertain Cytoplasm cytoplasm; plasma membrane       |
| 10080 | ENSG00000167941 | SOST     | Approved Cytoplasm cytoplasm                         |
| 10081 | ENSG00000167945 | PRR25    | Uncertain Estimation of protein expression could not |
| 10082 | ENSG00000167962 | ZNF598   | Approved General c cytoplasm; nucleus                |
| 10083 | ENSG00000167965 | MLST8    | Approved Cytoplasm cytoplasm                         |
| 10084 | ENSG00000167967 | E4F1     | Enhanced General n cytoplasm; nucleus                |
| 10085 | ENSG00000167969 | ECI1     | Enhanced General c cytoplasm                         |
| 10086 | ENSG00000167971 | CASKIN1  | Enhanced Cytoplasm cytoplasm                         |
| 10087 | ENSG00000167972 | ABCA3    | Enhanced High cyto cytoplasm                         |
| 10088 | ENSG00000167978 | SRRM2    | Supported Ubiquitou nucleus                          |
| 10089 | ENSG00000167981 | ZNF597   | Approved Low nucl nucleus                            |
| 10090 | ENSG00000167985 | SDHAF2   | Supported Ubiquitou cytoplasm                        |
| 10091 | ENSG00000167986 | DDB1     | Approved Ubiquitou cytoplasm                         |
| 10092 | ENSG00000167987 | VPS37C   | Approved General c cytoplasm                         |
| 10093 | ENSG00000167992 | VWCE     | Uncertain Estimation of protein expression could not |
| 10094 | ENSG00000167994 | RAB3IL1  | Uncertain Cytoplasm cytoplasm                        |
| 10095 | ENSG00000167995 | BEST1    | Enhanced Expression in retina pigment epithelium.    |
| 10096 | ENSG00000167996 | FTH1     | Approved General c cytoplasm                         |
| 10097 | ENSG00000168000 | BSCL2    | Approved General c cytoplasm                         |
| 10098 | ENSG00000168002 | POLR2G   | Approved Nuclear enucleus                            |
| 10099 | ENSG00000168003 | SLC3A2   | Enhanced Membranou plasma membrane                   |
| 10100 | ENSG00000168005 | SPINDOC  | Uncertain Nuclear acytoplasm; nucleus                |
| 10101 | ENSG00000168010 | ATG16L2  | Approved Cytoplasm cytoplasm                         |
| 10102 | ENSG00000168014 | C2CD3    | Approved Granular cytoplasm                          |
| 10103 | ENSG00000168016 | TRANK1   | Approved Distinct cytoplasm                          |
| 10104 | ENSG00000168026 | TTC21A   | Enhanced Cytoplasm cytoplasm                         |
| 10105 | ENSG00000168028 | RPSA     | Approved Cytoplasm cytoplasm                         |
| 10106 | ENSG00000168036 | CTNNB1   | Supported Membranou plasma membrane                  |
| 10107 | ENSG00000168038 | ULK4     | Uncertain Cytoplasm cytoplasm                        |
| 10108 | ENSG00000168040 | FADD     | Supported Low cytop cytoplasm; nucleus               |
| 10109 | ENSG00000168060 | NAALADL1 | Enhanced Cytoplasm cytoplasm; plasma membrane        |
| 10110 | ENSG00000168061 | SAC3D1   | Uncertain General c cytoplasm                        |
| 10111 | ENSG00000168062 | BATF2    | Approved Nuclear anucleus                            |
| 10112 | ENSG00000168065 | SLC22A11 | Enhanced Membranou plasma membrane                   |
| 10113 | ENSG00000168066 | SF1      | Supported General n nucleus                          |
| 10114 | ENSG00000168067 | MAP4K2   | Enhanced Ubiquitou cytoplasm                         |
| 10115 | ENSG00000168071 | CCDC88B  | Approved Cytoplasm cytoplasm                         |
| 10116 | ENSG00000168077 | SCARA3   | Uncertain General c cytoplasm                        |
| 10117 | ENSG00000168078 | PBK      | Enhanced High nucl nucleus                           |
| 10118 | ENSG00000168079 | SCARA5   | Approved Cytoplasm cytoplasm                         |



|       |                 |           |                                                      |
|-------|-----------------|-----------|------------------------------------------------------|
| 10119 | ENSG00000168081 | PNO3      | Enhanced Distinct cytoplasm                          |
| 10120 | ENSG00000168090 | COPS6     | Approved General ncytoplasm;nucleus                  |
| 10121 | ENSG00000168092 | PAFAH1B2  | Approved Cytoplasmcytoplasm                          |
| 10122 | ENSG00000168096 | ANKS3     | UncertainMainly nunucleus                            |
| 10123 | ENSG00000168101 | NUDT16L1  | Approved General ccytoplasm                          |
| 10124 | ENSG00000168116 | KIAA1586  | Approved Cytoplasmcytoplasm                          |
| 10125 | ENSG00000168137 | SETD5     | Approved Nuclear enucleus                            |
| 10126 | ENSG00000168140 | VASN      | UncertainCytoplasmcytoplasm                          |
| 10127 | ENSG00000168143 | FAM83B    | Enhanced Cytoplasmcytoplasm;plasma membrane          |
| 10128 | ENSG00000168148 | HIST3H3   | Approved Ubiquitousnucleus                           |
| 10129 | ENSG00000168152 | THAP9     | UncertainGeneral ccytoplasm                          |
| 10130 | ENSG00000168159 | RNF187    | Approved General ccytoplasm                          |
| 10131 | ENSG00000168172 | HOOK3     | Approved General ccytoplasm                          |
| 10132 | ENSG00000168175 | MAPK1IP1L | UncertainGeneral ccytoplasm;nucleus                  |
| 10133 | ENSG00000168209 | DDIT4     | Approved General ccytoplasm                          |
| 10134 | ENSG00000168214 | RBPJ      | UncertainExpression in processes in brain.           |
| 10135 | ENSG00000168216 | LMBRD1    | UncertainCytoplasmcytoplasm                          |
| 10136 | ENSG00000168228 | ZCCHC4    | UncertainEstimation of protein expression could not  |
| 10137 | ENSG00000168229 | PTGDR     | Enhanced Membranouplasma membrane                    |
| 10138 | ENSG00000168234 | TTC39C    | Approved General nnucleus                            |
| 10139 | ENSG00000168237 | GLYCTK    | Approved General ccytoplasm                          |
| 10140 | ENSG00000168246 | UBTD2     | UncertainCytoplasmcytoplasm                          |
| 10141 | ENSG00000168255 | POLR2J3   | UncertainEstimation of protein expression could not  |
| 10142 | ENSG00000168259 | DNAJC7    | Approved Ubiquitouscytoplasm                         |
| 10143 | ENSG00000168263 | KCNV2     | Enhanced Expression in photoreceptor cells in retina |
| 10144 | ENSG00000168264 | IRF2BP2   | Approved General nnucleus                            |
| 10145 | ENSG00000168268 | NT5DC2    | Approved General ccytoplasm                          |
| 10146 | ENSG00000168269 | FOXI1     | Enhanced Distinct nucleus                            |
| 10147 | ENSG00000168273 | SMIM4     | UncertainCytoplasmcytoplasm                          |
| 10148 | ENSG00000168275 | COA6      | Approved Granular cytoplasm                          |
| 10149 | ENSG00000168280 | KIF5C     | Enhanced Cytoplasmcytoplasm                          |
| 10150 | ENSG00000168282 | MGAT2     | Approved Granular cytoplasm                          |
| 10151 | ENSG00000168283 | BMI1      | SupportedGeneral nnucleus                            |
| 10152 | ENSG00000168286 | THAP11    | SupportedUbiquitousnucleus                           |
| 10153 | ENSG00000168288 | MMADHC    | SupportedCytoplasmcytoplasm                          |
| 10154 | ENSG00000168291 | PDHB      | Enhanced Cytoplasmcytoplasm                          |
| 10155 | ENSG00000168297 | PXK       | Approved General ccytoplasm                          |
| 10156 | ENSG00000168298 | HIST1H1E  | SupportedUbiquitousnucleus                           |
| 10157 | ENSG00000168300 | PCMTD1    | Approved Cytoplasmcytoplasm;nucleus                  |
| 10158 | ENSG00000168301 | KCTD6     | UncertainCytoplasmcytoplasm                          |
| 10159 | ENSG00000168303 | MPLKIP    | UncertainEstimation of protein expression could not  |
| 10160 | ENSG00000168306 | ACOX2     | Enhanced Cytoplasmcytoplasm                          |
| 10161 | ENSG00000168309 | FAM107A   | Enhanced Expression mainly in the CNS.               |
| 10162 | ENSG00000168310 | IRF2      | SupportedGeneral nnucleus                            |
| 10163 | ENSG00000168314 | MOBP      | SupportedDot-like expression in CNS.                 |
| 10164 | ENSG00000168329 | CX3CR1    | Approved Cytoplasmcytoplasm                          |
| 10165 | ENSG00000168333 | PPDPFL    | UncertainEstimation of protein expression could not  |
| 10166 | ENSG00000168334 | XIRP1     | Enhanced Highly selective expression in intercalate  |
| 10167 | ENSG00000168348 | INSM2     | UncertainEstimation of protein expression could not  |
| 10168 | ENSG00000168356 | SCN11A    | UncertainEstimation of protein expression could not  |
| 10169 | ENSG00000168385 | 9/2/2019  | SupportedUbiquitouscytoplasm                         |
| 10170 | ENSG00000168386 | FILIP1L   | Approved Cytoplasmcytoplasm                          |
| 10171 | ENSG00000168389 | MFSD2A    | UncertainCytoplasmcytoplasm                          |
| 10172 | ENSG00000168393 | DTYMK     | Approved General ccytoplasm                          |
| 10173 | ENSG00000168394 | TAP1      | Approved General ccytoplasm                          |

|       |                 |          |                                                      |
|-------|-----------------|----------|------------------------------------------------------|
| 10174 | ENSG00000168395 | ING5     | Approved Nuclear a cytoplasm;nucleus                 |
| 10175 | ENSG00000168397 | ATG4B    | Approved General n cytoplasm;nucleus                 |
| 10176 | ENSG00000168398 | BDKRB2   | Approved Cytoplasm cytoplasm                         |
| 10177 | ENSG00000168411 | RFWD3    | Approved Cytoplasm cytoplasm;nucleus                 |
| 10178 | ENSG00000168421 | RHOH     | UncertainCytoplasm cytoplasm                         |
| 10179 | ENSG00000168434 | COG7     | UncertainCytoplasm cytoplasm                         |
| 10180 | ENSG00000168439 | STIP1    | Enhanced Ubiquitou cytoplasm                         |
| 10181 | ENSG00000168447 | SCNN1B   | UncertainCytoplasm cytoplasm                         |
| 10182 | ENSG00000168454 | TXNDC2   | Enhanced Distinct cytoplasm;nucleus                  |
| 10183 | ENSG00000168461 | RAB31    | Approved Cytoplasm cytoplasm                         |
| 10184 | ENSG00000168476 | REEP4    | Approved Cytoplasm cytoplasm                         |
| 10185 | ENSG00000168484 | SFTPC    | Enhanced Selective cytoplasm                         |
| 10186 | ENSG00000168487 | BMP1     | Enhanced Cytoplasm cytoplasm                         |
| 10187 | ENSG00000168488 | ATXN2L   | Approved Cytoplasm cytoplasm;plasma membrane         |
| 10188 | ENSG00000168490 | PHYHIP   | Approved Cytoplasm cytoplasm                         |
| 10189 | ENSG00000168495 | POLR3D   | SupportedUbiquitounucleus                            |
| 10190 | ENSG00000168496 | FEN1     | Enhanced Nuclear enucleus                            |
| 10191 | ENSG00000168497 | CAVIN2   | Enhanced High expression in adipocytes and endothel: |
| 10192 | ENSG00000168502 | MTCL1    | UncertainCytoplasm cytoplasm;nucleus                 |
| 10193 | ENSG00000168517 | HEXIM2   | Enhanced General n nucleus                           |
| 10194 | ENSG00000168522 | FNTA     | Approved Ubiquitou cytoplasm;nucleus                 |
| 10195 | ENSG00000168528 | SERINC2  | Enhanced General c cytoplasm                         |
| 10196 | ENSG00000168530 | MYL1     | Enhanced Cytoplasm cytoplasm                         |
| 10197 | ENSG00000168539 | CHRM1    | Enhanced Cytoplasm cytoplasm                         |
| 10198 | ENSG00000168542 | COL3A1   | Approved Secreted and extracellular positivity in m  |
| 10199 | ENSG00000168546 | GFRA2    | UncertainCytoplasm cytoplasm                         |
| 10200 | ENSG00000168556 | ING2     | SupportedNuclear a cytoplasm;nucleus                 |
| 10201 | ENSG00000168564 | CDKN2AIP | Approved General n cytoplasm;nucleus                 |
| 10202 | ENSG00000168566 | SNRNP48  | Approved Ubiquitounucleus                            |
| 10203 | ENSG00000168569 | TMEM223  | Approved Cytoplasm cytoplasm                         |
| 10204 | ENSG00000168575 | SLC20A2  | Approved Cytoplasm cytoplasm;plasma membrane         |
| 10205 | ENSG00000168582 | CRYGA    | SupportedExpression in lens.                         |
| 10206 | ENSG00000168591 | TMUB2    | Approved General c cytoplasm                         |
| 10207 | ENSG00000168610 | STAT3    | SupportedGeneral c cytoplasm;nucleus                 |
| 10208 | ENSG00000168612 | ZSWIM1   | UncertainUbiquitou cytoplasm                         |
| 10209 | ENSG00000168621 | GDNF     | SupportedCytoplasm cytoplasm                         |
| 10210 | ENSG00000168631 | DPCR1    | Enhanced Glandular cytoplasm                         |
| 10211 | ENSG00000168646 | AXIN2    | Approved General c cytoplasm;nucleus                 |
| 10212 | ENSG00000168653 | NDUFS5   | SupportedGeneral c cytoplasm                         |
| 10213 | ENSG00000168658 | VWA3B    | Approved Expression in fallopian tube, respirator e  |
| 10214 | ENSG00000168661 | ZNF30    | UncertainEstimation of protein expression could not  |
| 10215 | ENSG00000168671 | UGT3A2   | UncertainEstimation of protein expression could not  |
| 10216 | ENSG00000168672 | FAM84B   | Approved Cytoplasm cytoplasm                         |
| 10217 | ENSG00000168675 | LDLRAD4  | Approved Nuclear enucleus                            |
| 10218 | ENSG00000168676 | KCTD19   | UncertainEstimation of protein expression could not  |
| 10219 | ENSG00000168679 | SLC16A4  | Approved Cytoplasm cytoplasm;plasma membrane         |
| 10220 | ENSG00000168701 | TMEM208  | SupportedUbiquitou cytoplasm                         |
| 10221 | ENSG00000168702 | LRP1B    | Approved Cytoplasm cytoplasm                         |
| 10222 | ENSG00000168710 | AHCYL1   | Approved Cytoplasm cytoplasm                         |
| 10223 | ENSG00000168724 | DNAJC21  | Approved General c cytoplasm                         |
| 10224 | ENSG00000168734 | PKIG     | UncertainCytoplasm cytoplasm;nucleus                 |
| 10225 | ENSG00000168743 | NPNT     | SupportedHigh expr cytoplasm                         |
| 10226 | ENSG00000168748 | CA7      | UncertainEstimation of protein expression could not  |
| 10227 | ENSG00000168754 | FAM178B  | UncertainEstimation of protein expression could not  |
| 10228 | ENSG00000168757 | TSPY2    | SupportedCytoplasm cytoplasm                         |

|       |                 |           |                                                      |
|-------|-----------------|-----------|------------------------------------------------------|
| 10229 | ENSG00000168758 | SEMA4C    | Approved Cytoplasm cytoplasm                         |
| 10230 | ENSG00000168763 | CNNM3     | Supported Ubiquitous cytoplasm; plasma membrane      |
| 10231 | ENSG00000168765 | GSTM4     | Approved General c cytoplasm                         |
| 10232 | ENSG00000168769 | TET2      | Supported Ubiquitous nucleus                         |
| 10233 | ENSG00000168772 | CXXC4     | Uncertain Cytoplasm cytoplasm                        |
| 10234 | ENSG00000168778 | TCTN2     | Enhanced Cytoplasm cytoplasm                         |
| 10235 | ENSG00000168781 | PPIP5K1   | Approved Cytoplasm cytoplasm                         |
| 10236 | ENSG00000168792 | ABHD15    | Approved Cytoplasm cytoplasm                         |
| 10237 | ENSG00000168795 | ZBTB5     | Approved General n cytoplasm; nucleus                |
| 10238 | ENSG00000168802 | CHTF8     | Approved Nuclear a cytoplasm; nucleus                |
| 10239 | ENSG00000168803 | ADAL      | Approved Moderate cytoplasm                          |
| 10240 | ENSG00000168806 | LCMT2     | Approved Cytoplasm cytoplasm; nucleus                |
| 10241 | ENSG00000168811 | IL12A     | Uncertain Cytoplasm cytoplasm; plasma membrane       |
| 10242 | ENSG00000168813 | ZNF507    | Uncertain Estimation of protein expression could not |
| 10243 | ENSG00000168818 | STX18     | Approved General c cytoplasm                         |
| 10244 | ENSG00000168826 | ZBTB49    | Approved Mainly n nucleus                            |
| 10245 | ENSG00000168827 | GFM1      | Enhanced Ubiquitous cytoplasm                        |
| 10246 | ENSG00000168830 | HTR1E     | Approved Nuclear e nucleus                           |
| 10247 | ENSG00000168872 | DDX19A    | Approved Cytoplasm cytoplasm; nucleus                |
| 10248 | ENSG00000168876 | ANKRD49   | Approved Nuclear e cytoplasm; nucleus                |
| 10249 | ENSG00000168878 | SFTP8     | Enhanced Selective cytoplasm                         |
| 10250 | ENSG00000168883 | USP39     | Supported General n nucleus                          |
| 10251 | ENSG00000168884 | TNIP2     | Supported Ubiquitous cytoplasm; nucleus              |
| 10252 | ENSG00000168887 | C2orf68   | Uncertain Cytoplasm cytoplasm                        |
| 10253 | ENSG00000168890 | TMEM150A  | Uncertain Ubiquitous cytoplasm                       |
| 10254 | ENSG00000168894 | RNF181    | Approved Ubiquitous cytoplasm                        |
| 10255 | ENSG00000168899 | VAMP5     | Supported Granular cytoplasm                         |
| 10256 | ENSG00000168904 | LRRC28    | Approved General c cytoplasm                         |
| 10257 | ENSG00000168906 | MAT2A     | Approved Nuclear a cytoplasm; nucleus                |
| 10258 | ENSG00000168907 | PLA2G4F   | Enhanced Cytoplasm cytoplasm; plasma membrane        |
| 10259 | ENSG00000168913 | ENHO      | Approved Positive plasma membrane                    |
| 10260 | ENSG00000168916 | ZNF608    | Approved Cytoplasm cytoplasm                         |
| 10261 | ENSG00000168917 | SLC35G2   | Approved Cytoplasm cytoplasm                         |
| 10262 | ENSG00000168918 | INPP5D    | Enhanced High cyto cytoplasm                         |
| 10263 | ENSG00000168924 | LETM1     | Supported Cytoplasm cytoplasm                        |
| 10264 | ENSG00000168938 | PPIC      | Approved General c cytoplasm                         |
| 10265 | ENSG00000168939 | SPRY3     | Uncertain Estimation of protein expression could not |
| 10266 | ENSG00000168944 | CEP120    | Uncertain Estimation of protein expression could not |
| 10267 | ENSG00000168952 | STXBP6    | Approved Cytoplasm cytoplasm                         |
| 10268 | ENSG00000168955 | TM4SF20   | Uncertain Luminal m plasma membrane                  |
| 10269 | ENSG00000168958 | MFF       | Enhanced Cytoplasm cytoplasm                         |
| 10270 | ENSG00000168961 | LGALS9    | Approved Cytoplasm cytoplasm                         |
| 10271 | ENSG00000168970 | JMJD7-PLA | Approved Cytoplasm cytoplasm                         |
| 10272 | ENSG00000168993 | CPLX1     | Supported Cytoplasm cytoplasm                        |
| 10273 | ENSG00000169018 | FEM1B     | Approved Cytoplasm cytoplasm; nucleus                |
| 10274 | ENSG00000169019 | COMMD8    | Approved General c cytoplasm                         |
| 10275 | ENSG00000169020 | ATP5ME    | Enhanced Ubiquitous cytoplasm                        |
| 10276 | ENSG00000169021 | UQCRFS1   | Enhanced Granular cytoplasm                          |
| 10277 | ENSG00000169026 | SLC49A3   | Uncertain Estimation of protein expression could not |
| 10278 | ENSG00000169031 | COL4A3    | Approved Cytoplasm cytoplasm                         |
| 10279 | ENSG00000169032 | MAP2K1    | Approved General c cytoplasm                         |
| 10280 | ENSG00000169035 | KLK7      | Enhanced Cytoplasm cytoplasm                         |
| 10281 | ENSG00000169045 | HNRNPH1   | Supported Ubiquitous nucleus                         |
| 10282 | ENSG00000169047 | IRS1      | Uncertain Cytoplasm cytoplasm; nucleus               |
| 10283 | ENSG00000169057 | MECP2     | Enhanced Nuclear e nucleus                           |

|       |                 |          |                    |                                             |
|-------|-----------------|----------|--------------------|---------------------------------------------|
| 10284 | ENSG00000169059 | VCX3A    | SupportedSelective | nucleus                                     |
| 10285 | ENSG00000169062 | UPF3A    | Approved           | General c cytoplasm;nucleus                 |
| 10286 | ENSG00000169064 | ZBBX     | Enhanced           | Selective expression in subset of cells in  |
| 10287 | ENSG00000169067 | ACTBL2   | Uncertain          | Cytoplasm cytoplasm                         |
| 10288 | ENSG00000169071 | ROR2     | Uncertain          | Cytoplasm cytoplasm                         |
| 10289 | ENSG00000169083 | AR       | Enhanced           | Nuclear enucleus                            |
| 10290 | ENSG00000169084 | DHRX     | Approved           | Cytoplasm cytoplasm                         |
| 10291 | ENSG00000169087 | HSPBAP1  | Approved           | General c cytoplasm                         |
| 10292 | ENSG00000169093 | ASMTL    | Supported          | Ubiquitous cytoplasm                        |
| 10293 | ENSG00000169100 | SLC25A6  | Approved           | Granular cytoplasm                          |
| 10294 | ENSG00000169105 | CHST14   | Enhanced           | Cytoplasm cytoplasm;plasma membrane         |
| 10295 | ENSG00000169116 | PARM1    | Approved           | Cytoplasm cytoplasm;nucleus                 |
| 10296 | ENSG00000169122 | FAM110B  | Uncertain          | General c cytoplasm                         |
| 10297 | ENSG00000169126 | ARMC4    | Enhanced           | Expression in cilia in fallopian tube and 1 |
| 10298 | ENSG00000169129 | AFAP1L2  | Approved           | Cytoplasm cytoplasm                         |
| 10299 | ENSG00000169131 | ZNF354A  | Approved           | Nuclear enucleus                            |
| 10300 | ENSG00000169136 | ATF5     | Uncertain          | General n nucleus                           |
| 10301 | ENSG00000169154 | GOT1L1   | Uncertain          | Estimation of protein expression could not  |
| 10302 | ENSG00000169155 | ZBTB43   | Approved           | Cytoplasm cytoplasm                         |
| 10303 | ENSG00000169169 | CPT1C    | Approved           | Cytoplasm cytoplasm                         |
| 10304 | ENSG00000169180 | XP06     | Uncertain          | Cytoplasm cytoplasm                         |
| 10305 | ENSG00000169181 | GSG1L    | Enhanced           | Synaptic expression in brain with expressio |
| 10306 | ENSG00000169184 | MN1      | Approved           | General n nucleus                           |
| 10307 | ENSG00000169189 | NSMCE1   | Supported          | Mainly n nucleus                            |
| 10308 | ENSG00000169193 | CCDC126  | Uncertain          | Cytoplasm cytoplasm                         |
| 10309 | ENSG00000169203 | NPIP12   | Approved           | Ubiquitous nucleus                          |
| 10310 | ENSG00000169208 | OR10G3   | Uncertain          | Estimation of protein expression could not  |
| 10311 | ENSG00000169213 | RAB3B    | Enhanced           | Cytoplasm cytoplasm                         |
| 10312 | ENSG00000169217 | CD2BP2   | Enhanced           | Ubiquitous nucleus                          |
| 10313 | ENSG00000169218 | RSP01    | Uncertain          | Cytoplasm cytoplasm                         |
| 10314 | ENSG00000169220 | RGS14    | Approved           | Nuclear a cytoplasm;nucleus                 |
| 10315 | ENSG00000169221 | TBC1D10B | Uncertain          | Estimation of protein expression could not  |
| 10316 | ENSG00000169223 | LMAN2    | Approved           | Low cytop cytoplasm                         |
| 10317 | ENSG00000169224 | GCSAML   | Uncertain          | Cytoplasm cytoplasm;nucleus                 |
| 10318 | ENSG00000169230 | PRELID1  | Approved           | Cytoplasm cytoplasm                         |
| 10319 | ENSG00000169231 | THBS3    | Approved           | Cytoplasm cytoplasm                         |
| 10320 | ENSG00000169239 | CA5B     | Uncertain          | Mainly c cytoplasm                          |
| 10321 | ENSG00000169241 | SLC50A1  | Approved           | Cytoplasm cytoplasm                         |
| 10322 | ENSG00000169242 | EFNA1    | Uncertain          | Cytoplasm cytoplasm                         |
| 10323 | ENSG00000169246 | NPIP3    | Approved           | Ubiquitous nucleus                          |
| 10324 | ENSG00000169247 | SH3TC2   | Uncertain          | Estimation of protein expression could not  |
| 10325 | ENSG00000169248 | CXCL11   | Uncertain          | Cytoplasm cytoplasm;plasma membrane         |
| 10326 | ENSG00000169252 | ADRB2    | Uncertain          | Estimation of protein expression could not  |
| 10327 | ENSG00000169258 | GPRIN1   | Enhanced           | Cytoplasm cytoplasm;plasma membrane         |
| 10328 | ENSG00000169282 | KCNAB1   | Approved           | Cytoplasm cytoplasm                         |
| 10329 | ENSG00000169288 | MRPL1    | Supported          | General c cytoplasm                         |
| 10330 | ENSG00000169291 | SHE      | Approved           | General c cytoplasm                         |
| 10331 | ENSG00000169299 | PGM2     | Uncertain          | Cytoplasm cytoplasm                         |
| 10332 | ENSG00000169302 | STK32A   | Uncertain          | Estimation of protein expression could not  |
| 10333 | ENSG00000169313 | P2RY12   | Enhanced           | Selective cytoplasm;nucleus                 |
| 10334 | ENSG00000169330 | KIAA1024 | Uncertain          | Estimation of protein expression could not  |
| 10335 | ENSG00000169340 | PDILT    | Approved           | Cytoplasm cytoplasm                         |
| 10336 | ENSG00000169344 | UMOD     | Enhanced           | Selective cytoplasm                         |
| 10337 | ENSG00000169347 | GP2      | Enhanced           | Selective cytoplasm                         |
| 10338 | ENSG00000169359 | SLC33A1  | Uncertain          | Cytoplasm cytoplasm                         |

|       |                 |          |                                                      |
|-------|-----------------|----------|------------------------------------------------------|
| 10339 | ENSG00000169371 | SNUPN    | Approved Nuclear mcytoplasm;nucleus;plasma membrane  |
| 10340 | ENSG00000169372 | CRADD    | UncertainCytoplasmcytoplasm                          |
| 10341 | ENSG00000169375 | SIN3A    | Enhanced Ubiquitousnucleus                           |
| 10342 | ENSG00000169379 | ARL13B   | Approved Cytoplasmcytoplasm                          |
| 10343 | ENSG00000169385 | RNASE2   | Enhanced Cytoplasmcytoplasm                          |
| 10344 | ENSG00000169393 | ELSPBP1  | Enhanced Luminal mplasma membrane                    |
| 10345 | ENSG00000169397 | RNASE3   | Enhanced Expression in a subset of hematopoietic ce  |
| 10346 | ENSG00000169398 | PTK2     | Approved Cytoplasmcytoplasm                          |
| 10347 | ENSG00000169402 | RSPH10B2 | SupportedExpressed in the cilia of fallopian tube ar |
| 10348 | ENSG00000169403 | PTAFR    | Approved Cytoplasmcytoplasm                          |
| 10349 | ENSG00000169410 | PTPN9    | Approved General ccytoplasm;plasma membrane          |
| 10350 | ENSG00000169413 | RNASE6   | Approved Cytoplasmcytoplasm                          |
| 10351 | ENSG00000169429 | CXCL8    | SupportedCytoplasmcytoplasm                          |
| 10352 | ENSG00000169432 | SCN9A    | UncertainCytoplasmcytoplasm                          |
| 10353 | ENSG00000169435 | RASSF6   | Approved Cytoplasmcytoplasm                          |
| 10354 | ENSG00000169436 | COL22A1  | Enhanced Cytoplasmcytoplasm                          |
| 10355 | ENSG00000169439 | SDC2     | UncertainCytoplasmcytoplasm                          |
| 10356 | ENSG00000169446 | MMGT1    | Approved General ccytoplasm                          |
| 10357 | ENSG00000169474 | SPRR1A   | Enhanced Cytoplasmcytoplasm                          |
| 10358 | ENSG00000169488 | OR4K15   | UncertainEstimation of protein expression could not  |
| 10359 | ENSG00000169490 | TM2D2    | Approved Ubiquitouscytoplasm;plasma membrane         |
| 10360 | ENSG00000169495 | HTRA4    | Enhanced Cytoplasmcytoplasm                          |
| 10361 | ENSG00000169499 | PLEKHA2  | Approved Mainly ccytoplasm                           |
| 10362 | ENSG00000169504 | CLIC4    | Enhanced Cytoplasmcytoplasm;plasma membrane          |
| 10363 | ENSG00000169507 | SLC38A11 | UncertainCytoplasmcytoplasm                          |
| 10364 | ENSG00000169508 | GPR183   | UncertainCytoplasmcytoplasm                          |
| 10365 | ENSG00000169515 | CCDC8    | UncertainUbiquitous cytoplsmic expression.           |
| 10366 | ENSG00000169550 | MUC15    | Enhanced Membranouplasma membrane                    |
| 10367 | ENSG00000169554 | ZEB2     | Approved Nuclear enucleus                            |
| 10368 | ENSG00000169562 | GJB1     | UncertainCytoplasmcytoplasm;plasma membrane          |
| 10369 | ENSG00000169564 | PCBP1    | SupportedUbiquitouscytoplasm;nucleus                 |
| 10370 | ENSG00000169567 | HINT1    | Approved General ccytoplasm;nucleus                  |
| 10371 | ENSG00000169570 | DTWD2    | Approved Cytoplasmcytoplasm;plasma membrane          |
| 10372 | ENSG00000169575 | VPREB1   | UncertainNuclear mnucleus;plasma membrane            |
| 10373 | ENSG00000169583 | CLIC3    | Enhanced Nuclear acytoplasm;nucleus                  |
| 10374 | ENSG00000169592 | INO80E   | Approved General nnucleus                            |
| 10375 | ENSG00000169598 | DFFB     | Approved Cytoplasmcytoplasm;nucleus                  |
| 10376 | ENSG00000169599 | NFU1     | UncertainCytoplasmcytoplasm;nucleus                  |
| 10377 | ENSG00000169605 | GKN1     | Enhanced Selectivecytoplasm                          |
| 10378 | ENSG00000169607 | CKAP2L   | UncertainMainly ccytoplasm                           |
| 10379 | ENSG00000169609 | C15orf40 | Approved Cytoplasmcytoplasm                          |
| 10380 | ENSG00000169612 | FAM103A1 | Enhanced Ubiquitousnucleus                           |
| 10381 | ENSG00000169618 | PROKR1   | UncertainEstimation of protein expression could not  |
| 10382 | ENSG00000169621 | APLF     | UncertainEstimation of protein expression could not  |
| 10383 | ENSG00000169627 | BOLA2B   | SupportedCytoplasmcytoplasm                          |
| 10384 | ENSG00000169629 | RGPD8    | UncertainExpression in several tissues, including t  |
| 10385 | ENSG00000169635 | HIC2     | UncertainCytoplasmcytoplasm                          |
| 10386 | ENSG00000169641 | LUZP1    | Enhanced General ccytoplasm                          |
| 10387 | ENSG00000169660 | HEXDC    | UncertainMainly ccytoplasm                           |
| 10388 | ENSG00000169676 | DRD5     | SupportedExpression in CNS.                          |
| 10389 | ENSG00000169682 | SPNS1    | Enhanced General ccytoplasm                          |
| 10390 | ENSG00000169683 | LRRC45   | Enhanced General ccytoplasm                          |
| 10391 | ENSG00000169684 | CHRNA5   | Approved Expression in astrocytes and smooth muscle  |
| 10392 | ENSG00000169692 | AGPAT2   | UncertainGeneral ccytoplasm;plasma membrane          |
| 10393 | ENSG00000169696 | ASPSCR1  | Approved Cytoplasmcytoplasm;nucleus                  |

|       |                 |           |                                                      |
|-------|-----------------|-----------|------------------------------------------------------|
| 10394 | ENSG00000169704 | GP9       | Enhanced Cytoplasm cytoplasm                         |
| 10395 | ENSG00000169710 | FASN      | Enhanced Cytoplasm cytoplasm                         |
| 10396 | ENSG00000169715 | MT1E      | Approved General n nucleus                           |
| 10397 | ENSG00000169717 | ACTRT2    | Enhanced Cytoplasm cytoplasm                         |
| 10398 | ENSG00000169718 | DUS1L     | Uncertain General c cytoplasm                        |
| 10399 | ENSG00000169733 | RFNG      | Uncertain Cytoplasm cytoplasm;nucleus                |
| 10400 | ENSG00000169738 | DCXR      | Enhanced Cytoplasm cytoplasm                         |
| 10401 | ENSG00000169744 | LDB2      | Supported General n nucleus                          |
| 10402 | ENSG00000169750 | RAC3      | Uncertain Cytoplasm cytoplasm                        |
| 10403 | ENSG00000169752 | NRG4      | Uncertain Cytoplasm cytoplasm;plasma membrane        |
| 10404 | ENSG00000169756 | LIMS1     | Approved Cytoplasm cytoplasm                         |
| 10405 | ENSG00000169758 | TMEM266   | Enhanced Expression in granular layer of cerebellum. |
| 10406 | ENSG00000169760 | NLGN1     | Approved Cytoplasm cytoplasm                         |
| 10407 | ENSG00000169762 | TAPT1     | Approved Cytoplasm cytoplasm                         |
| 10408 | ENSG00000169764 | UGP2      | Enhanced Cytoplasm cytoplasm                         |
| 10409 | ENSG00000169777 | TAS2R1    | Uncertain Estimation of protein expression could not |
| 10410 | ENSG00000169783 | LINGO1    | Enhanced Cytoplasm cytoplasm                         |
| 10411 | ENSG00000169789 | PRY       | Uncertain Estimation of protein expression could not |
| 10412 | ENSG00000169800 | RBM1F     | Supported Selective nucleus                          |
| 10413 | ENSG00000169807 | PRY2      | Uncertain Estimation of protein expression could not |
| 10414 | ENSG00000169813 | HNRNPF    | Supported Ubiquitous nucleus                         |
| 10415 | ENSG00000169814 | BTD       | Uncertain Membrane plasma membrane                   |
| 10416 | ENSG00000169826 | CSGALNACT | Approved Granular cytoplasm                          |
| 10417 | ENSG00000169836 | TACR3     | Uncertain Estimation of protein expression could not |
| 10418 | ENSG00000169851 | PCDH7     | Uncertain Granular cytoplasm                         |
| 10419 | ENSG00000169855 | ROB1      | Uncertain Cytoplasm cytoplasm                        |
| 10420 | ENSG00000169856 | ONECUT1   | Enhanced Nuclear a cytoplasm;nucleus                 |
| 10421 | ENSG00000169857 | AVEN      | Approved General c cytoplasm                         |
| 10422 | ENSG00000169860 | P2RY1     | Enhanced Cytoplasm cytoplasm                         |
| 10423 | ENSG00000169862 | CTNND2    | Enhanced Cytoplasm cytoplasm;nucleus                 |
| 10424 | ENSG00000169871 | TRIM56    | Approved Ubiquitous cytoplasm                        |
| 10425 | ENSG00000169876 | MUC17     | Enhanced Luminal m plasma membrane                   |
| 10426 | ENSG00000169877 | AHSP      | Enhanced Cytoplasm cytoplasm;nucleus                 |
| 10427 | ENSG00000169884 | WNT10B    | Enhanced Expression in neuronal processes and in muc |
| 10428 | ENSG00000169891 | REPS2     | Uncertain Cytoplasm cytoplasm                        |
| 10429 | ENSG00000169894 | MUC3A     | Uncertain Estimation of protein expression could not |
| 10430 | ENSG00000169895 | SYAP1     | Approved Cytoplasm cytoplasm                         |
| 10431 | ENSG00000169896 | ITGAM     | Enhanced Selective cytoplasm                         |
| 10432 | ENSG00000169902 | TPST1     | Approved Cytoplasm cytoplasm                         |
| 10433 | ENSG00000169903 | TM4SF4    | Enhanced Membrane plasma membrane                    |
| 10434 | ENSG00000169905 | TOR1AIP2  | Uncertain Estimation of protein expression could not |
| 10435 | ENSG00000169906 | S100G     | Enhanced Selective expression in the small intestine |
| 10436 | ENSG00000169908 | TM4SF1    | Uncertain Cytoplasm cytoplasm;plasma membrane        |
| 10437 | ENSG00000169914 | OTUD3     | Approved Cytoplasm cytoplasm                         |
| 10438 | ENSG00000169918 | OTUD7A    | Uncertain Estimation of protein expression could not |
| 10439 | ENSG00000169919 | GUSB      | Approved Cytoplasm cytoplasm                         |
| 10440 | ENSG00000169925 | BRD3      | Approved Cytoplasm cytoplasm;nucleus                 |
| 10441 | ENSG00000169946 | ZFPM2     | Approved General n nucleus                           |
| 10442 | ENSG00000169951 | ZNF764    | Uncertain Estimation of protein expression could not |
| 10443 | ENSG00000169955 | ZNF747    | Uncertain Estimation of protein expression could not |
| 10444 | ENSG00000169957 | ZNF768    | Supported General n nucleus                          |
| 10445 | ENSG00000169962 | TAS1R3    | Uncertain Membrane plasma membrane                   |
| 10446 | ENSG00000169964 | TMEM42    | Uncertain Estimation of protein expression could not |
| 10447 | ENSG00000169967 | MAP3K2    | Approved Cytoplasm cytoplasm                         |
| 10448 | ENSG00000169972 | PUSL1     | Uncertain Cytoplasm cytoplasm;nucleus                |

|       |                 |          |                                                      |
|-------|-----------------|----------|------------------------------------------------------|
| 10449 | ENSG00000169976 | SF3B5    | Approved Nuclear enucleus                            |
| 10450 | ENSG00000169981 | ZNF35    | UncertainEstimation of protein expression could not  |
| 10451 | ENSG00000169989 | TIGD4    | Approved Nuclear enucleus                            |
| 10452 | ENSG00000169991 | IFFO2    | Approved Ubiquitouscytoplasm                         |
| 10453 | ENSG00000169992 | NLGN2    | Enhanced Selective expression in CNS.                |
| 10454 | ENSG00000169994 | MYO7B    | Enhanced Membranouplasma membrane                    |
| 10455 | ENSG00000170004 | CHD3     | SupportedGeneral ncytoplasm;nucleus                  |
| 10456 | ENSG00000170006 | TMEM154  | UncertainCytoplasmcytoplasm;plasma membrane          |
| 10457 | ENSG00000170017 | ALCAM    | Enhanced Membranouplasma membrane                    |
| 10458 | ENSG00000170027 | YWHAG    | Approved Ubiquitouscytoplasm;nucleus                 |
| 10459 | ENSG00000170035 | UBE2E3   | Approved Cytoplasmcytoplasm;nucleus                  |
| 10460 | ENSG00000170037 | CNTR0B   | Approved Cytoplasmcytoplasm                          |
| 10461 | ENSG00000170043 | TRAPPC1  | Approved Cytoplasmcytoplasm                          |
| 10462 | ENSG00000170074 | FAM153A  | UncertainEstimation of protein expression could not  |
| 10463 | ENSG00000170075 | GPR37L1  | Enhanced Selectivecytoplasm                          |
| 10464 | ENSG00000170085 | SIMC1    | UncertainCytoplasmcytoplasm;nucleus                  |
| 10465 | ENSG00000170088 | TMEM192  | Enhanced Granular cytoplasm                          |
| 10466 | ENSG00000170091 | NSG2     | Enhanced Selectivecytoplasm                          |
| 10467 | ENSG00000170092 | SPDYE5   | Approved Distinct expression in acrosomes in sperma  |
| 10468 | ENSG00000170099 | SERPINA6 | Approved Positivitcytoplasm;plasma membrane          |
| 10469 | ENSG00000170100 | ZNF778   | UncertainUbiquitouscytoplasm;nucleus                 |
| 10470 | ENSG00000170113 | NIPA1    | UncertainCytoplasmcytoplasm;plasma membrane          |
| 10471 | ENSG00000170122 | FOXD4    | UncertainEstimation of protein expression could not  |
| 10472 | ENSG00000170142 | UBE2E1   | Approved Nuclear acytoplasm;nucleus                  |
| 10473 | ENSG00000170144 | HNRNPA3  | SupportedUbiquitousnucleus                           |
| 10474 | ENSG00000170145 | SIK2     | Approved Cytoplasmcytoplasm                          |
| 10475 | ENSG00000170153 | RNF150   | UncertainCytoplasmcytoplasm                          |
| 10476 | ENSG00000170160 | CCDC144A | Approved Ubiquitouscytoplasm                         |
| 10477 | ENSG00000170166 | HOXD4    | Approved Nuclear enucleus                            |
| 10478 | ENSG00000170175 | CHRNB1   | Approved Cytoplasmcytoplasm                          |
| 10479 | ENSG00000170178 | HOXD12   | UncertainEstimation of protein expression could not  |
| 10480 | ENSG00000170180 | GYP A    | Enhanced Selective expression in erythrocytes.       |
| 10481 | ENSG00000170185 | USP38    | UncertainEstimation of protein expression could not  |
| 10482 | ENSG00000170191 | NANP     | UncertainEstimation of protein expression could not  |
| 10483 | ENSG00000170209 | ANKK1    | UncertainEstimation of protein expression could not  |
| 10484 | ENSG00000170222 | ADPRM    | Approved Distinct expression in thyroid gland.       |
| 10485 | ENSG00000170231 | FABP6    | Enhanced Distinct cytoplasm;plasma membrane          |
| 10486 | ENSG00000170236 | USP50    | UncertainEstimation of protein expression could not  |
| 10487 | ENSG00000170242 | USP47    | SupportedUbiquitouscytoplasm                         |
| 10488 | ENSG00000170248 | PDCD6IP  | Approved Cytoplasmcytoplasm                          |
| 10489 | ENSG00000170260 | ZNF212   | UncertainEstimation of protein expression could not  |
| 10490 | ENSG00000170262 | MRAP     | UncertainCytoplasmcytoplasm                          |
| 10491 | ENSG00000170264 | FAM161A  | Approved Expression mainly in cilia of fallopian tul |
| 10492 | ENSG00000170265 | ZNF282   | SupportedGeneral nnucleus                            |
| 10493 | ENSG00000170266 | GLB1     | Enhanced Ubiquitouscytoplasm                         |
| 10494 | ENSG00000170270 | GON7     | Approved Nuclear enucleus                            |
| 10495 | ENSG00000170275 | CRTAP    | Approved Ubiquitouscytoplasm                         |
| 10496 | ENSG00000170289 | CNGB3    | Enhanced Expressioplasma membrane                    |
| 10497 | ENSG00000170291 | ELP5     | UncertainCytoplasmcytoplasm                          |
| 10498 | ENSG00000170293 | CMTM8    | Approved Cytoplasmcytoplasm                          |
| 10499 | ENSG00000170298 | LGALS9B  | Approved Cytoplasmcytoplasm                          |
| 10500 | ENSG00000170310 | STX8     | Approved General ccytoplasm;nucleus                  |
| 10501 | ENSG00000170312 | CDK1     | Enhanced Nuclear acytoplasm;nucleus                  |
| 10502 | ENSG00000170315 | UBB      | SupportedMainly nnucleus                             |
| 10503 | ENSG00000170322 | NFRKB    | Approved Cytoplasmcytoplasm;nucleus                  |

|       |                 |          |                                                      |
|-------|-----------------|----------|------------------------------------------------------|
| 10504 | ENSG00000170323 | FABP4    | Enhanced Selective cytoplasm                         |
| 10505 | ENSG00000170325 | PRDM10   | Approved Ubiquitous nucleus                          |
| 10506 | ENSG00000170340 | B3GNT2   | Approved Cytoplasm cytoplasm                         |
| 10507 | ENSG00000170345 | FOS      | Approved Nuclear acytoplasm;nucleus                  |
| 10508 | ENSG00000170348 | TMED10   | Enhanced Ubiquitous cytoplasm                        |
| 10509 | ENSG00000170365 | SMAD1    | Approved Cytoplasm cytoplasm;nucleus                 |
| 10510 | ENSG00000170367 | CST5     | Enhanced Selective cytoplasm                         |
| 10511 | ENSG00000170369 | CST2     | Enhanced Cytoplasm cytoplasm                         |
| 10512 | ENSG00000170370 | EMX2     | Enhanced Mainly nucleus                              |
| 10513 | ENSG00000170373 | CST1     | Enhanced Cytoplasm cytoplasm                         |
| 10514 | ENSG00000170374 | SP7      | Enhanced Nuclear enucleus                            |
| 10515 | ENSG00000170379 | TCAF2    | Uncertain Estimation of protein expression could not |
| 10516 | ENSG00000170381 | SEMA3E   | Uncertain Estimation of protein expression could not |
| 10517 | ENSG00000170382 | LRRN2    | Uncertain Granular cytoplasm                         |
| 10518 | ENSG00000170385 | SLC30A1  | Uncertain Cytoplasm cytoplasm                        |
| 10519 | ENSG00000170390 | DCLK2    | Enhanced Cytoplasm cytoplasm                         |
| 10520 | ENSG00000170396 | ZNF804A  | Uncertain Estimation of protein expression could not |
| 10521 | ENSG00000170412 | GPRC5C   | Enhanced Cytoplasm cytoplasm;plasma membrane         |
| 10522 | ENSG00000170421 | KRT8     | Enhanced Cytoplasm cytoplasm;plasma membrane         |
| 10523 | ENSG00000170423 | KRT78    | Enhanced Cytoplasm cytoplasm                         |
| 10524 | ENSG00000170430 | MGMT     | Supported Nuclear enucleus                           |
| 10525 | ENSG00000170439 | METTL7B  | Enhanced Cytoplasm cytoplasm                         |
| 10526 | ENSG00000170442 | KRT86    | Supported Distinct cytoplasm                         |
| 10527 | ENSG00000170445 | HARS     | Approved General ccytoplasm                          |
| 10528 | ENSG00000170448 | NFXL1    | Approved Cytoplasm cytoplasm                         |
| 10529 | ENSG00000170454 | KRT75    | Enhanced Distinct cytoplasm                          |
| 10530 | ENSG00000170456 | DENND5B  | Approved Granular cytoplasm                          |
| 10531 | ENSG00000170458 | CD14     | Enhanced Selective expression in subsets of immune c |
| 10532 | ENSG00000170464 | DNAJC18  | Approved Cytoplasm cytoplasm;plasma membrane         |
| 10533 | ENSG00000170465 | KRT6C    | Supported Distinct cytoplasm                         |
| 10534 | ENSG00000170469 | SPATA24  | Enhanced Distinct expression in spermatozoa.         |
| 10535 | ENSG00000170471 | RALGAPB  | Approved Cytoplasm cytoplasm                         |
| 10536 | ENSG00000170473 | PYM1     | Supported Nuclear enucleus                           |
| 10537 | ENSG00000170476 | MZB1     | Enhanced Cytoplasm cytoplasm                         |
| 10538 | ENSG00000170477 | KRT4     | Enhanced Cytoplasm cytoplasm                         |
| 10539 | ENSG00000170482 | SLC23A1  | Enhanced Luminal expression in small intestine and l |
| 10540 | ENSG00000170484 | KRT74    | Enhanced Highly expressed in internal root sheath of |
| 10541 | ENSG00000170485 | NPAS2    | Uncertain Nuclear acytoplasm;nucleus                 |
| 10542 | ENSG00000170486 | KRT72    | Enhanced Highly expressed in the hair follicle cutic |
| 10543 | ENSG00000170498 | KISS1    | Enhanced Selective cytoplasm                         |
| 10544 | ENSG00000170500 | LONRF2   | Approved Cytoplasm cytoplasm                         |
| 10545 | ENSG00000170502 | NUDT9    | Approved General ccytoplasm                          |
| 10546 | ENSG00000170509 | HSD17B13 | Uncertain Cytoplasm cytoplasm;plasma membrane        |
| 10547 | ENSG00000170515 | PA2G4    | Supported Ubiquitous cytoplasm                       |
| 10548 | ENSG00000170522 | ELOVL6   | Uncertain Cytoplasm cytoplasm                        |
| 10549 | ENSG00000170523 | KRT83    | Supported Distinct cytoplasm                         |
| 10550 | ENSG00000170525 | PFKFB3   | Uncertain Cytoplasm cytoplasm                        |
| 10551 | ENSG00000170537 | TMC7     | Uncertain General ccytoplasm;plasma membrane         |
| 10552 | ENSG00000170540 | ARL6IP1  | Uncertain Cytoplasm cytoplasm                        |
| 10553 | ENSG00000170542 | SERPINB9 | Uncertain Cytoplasm cytoplasm                        |
| 10554 | ENSG00000170545 | SMAGP    | Enhanced Cytoplasm cytoplasm;plasma membrane         |
| 10555 | ENSG00000170549 | IRX1     | Uncertain Estimation of protein expression could not |
| 10556 | ENSG00000170558 | CDH2     | Enhanced Membranous plasma membrane                  |
| 10557 | ENSG00000170561 | IRX2     | Approved Membranous plasma membrane                  |
| 10558 | ENSG00000170581 | STAT2    | Approved Cytoplasm cytoplasm                         |



|       |                 |          |                                                      |
|-------|-----------------|----------|------------------------------------------------------|
| 10559 | ENSG00000170584 | NUDCD2   | UncertainCytoplasmcytoplasm                          |
| 10560 | ENSG00000170604 | IRF2BP1  | Approved General nnucleus                            |
| 10561 | ENSG00000170605 | OR9K2    | UncertainEstimation of protein expression could not  |
| 10562 | ENSG00000170606 | HSPA4    | UncertainCytoplasmcytoplasm;nucleus                  |
| 10563 | ENSG00000170608 | FOXA3    | UncertainGeneral nnucleus                            |
| 10564 | ENSG00000170613 | FAM71B   | Enhanced Selective expression in spermatids in test: |
| 10565 | ENSG00000170627 | GTSF1    | Approved Cytoplasmcytoplasm;nucleus                  |
| 10566 | ENSG00000170631 | ZNF16    | UncertainEstimation of protein expression could not  |
| 10567 | ENSG00000170632 | ARMC10   | Enhanced Granular cytoplasm                          |
| 10568 | ENSG00000170634 | ACYP2    | UncertainRNA data suggest expression in most tissue: |
| 10569 | ENSG00000170638 | TRABD    | Approved General ccytoplasm                          |
| 10570 | ENSG00000170653 | ATF7     | Approved Nuclear enucleus                            |
| 10571 | ENSG00000170667 | RASA4B   | UncertainEstimation of protein expression could not  |
| 10572 | ENSG00000170677 | SOCS6    | UncertainCytoplasmcytoplasm                          |
| 10573 | ENSG00000170681 | CAVIN4   | Enhanced Highly spplasma membrane                    |
| 10574 | ENSG00000170684 | ZNF296   | UncertainEstimation of protein expression could not  |
| 10575 | ENSG00000170703 | TLL6     | Enhanced Expression in ciliated cells of respiratory |
| 10576 | ENSG00000170734 | POLH     | Approved Cytoplasmcytoplasm;nucleus                  |
| 10577 | ENSG00000170745 | KCNS3    | Approved Membranoucytoplasm;plasma membrane          |
| 10578 | ENSG00000170748 | RBMXL2   | Enhanced Highly spnucleus                            |
| 10579 | ENSG00000170759 | KIF5B    | Approved Cytoplasmcytoplasm                          |
| 10580 | ENSG00000170775 | GPR37    | Approved Expressed in neuronal processes.            |
| 10581 | ENSG00000170776 | AKAP13   | Approved Cytoplasmcytoplasm                          |
| 10582 | ENSG00000170779 | CDCA4    | Approved Mainly ccytoplasm                           |
| 10583 | ENSG00000170786 | SDR16C5  | Enhanced Cytoplasmcytoplasm                          |
| 10584 | ENSG00000170788 | DYDC1    | UncertainEstimation of protein expression could not  |
| 10585 | ENSG00000170791 | CHCHD7   | Approved Granular cytoplasm                          |
| 10586 | ENSG00000170801 | HTRA3    | Approved Cytoplasmcytoplasm                          |
| 10587 | ENSG00000170802 | FOXN2    | SupportedNuclear enucleus                            |
| 10588 | ENSG00000170807 | LMOD2    | Enhanced Cytoplasmcytoplasm                          |
| 10589 | ENSG00000170819 | BFSP2    | Enhanced Expression in lens.                         |
| 10590 | ENSG00000170832 | USP32    | Approved Cytoplasmcytoplasm                          |
| 10591 | ENSG00000170835 | CEL      | Enhanced Selective expression in exocrine glandular  |
| 10592 | ENSG00000170836 | PPM1D    | Approved Nuclear acytoplasm;nucleus                  |
| 10593 | ENSG00000170837 | GPR27    | Approved Cytoplasmcytoplasm                          |
| 10594 | ENSG00000170848 | PSG6     | SupportedCytoplasmcytoplasm                          |
| 10595 | ENSG00000170852 | KBTBD2   | UncertainCytoplasmcytoplasm                          |
| 10596 | ENSG00000170854 | RIOX2    | SupportedUbiquitounucleus                            |
| 10597 | ENSG00000170855 | TRIAP1   | Approved Cytoplasmcytoplasm                          |
| 10598 | ENSG00000170860 | LSM3     | Approved Nuclear enucleus                            |
| 10599 | ENSG00000170871 | KIAA0232 | Approved Ubiquitoucytoplasm;plasma membrane          |
| 10600 | ENSG00000170873 | MTSS1    | Approved Cytoplasmcytoplasm                          |
| 10601 | ENSG00000170876 | TMEM43   | Approved General ccytoplasm                          |
| 10602 | ENSG00000170881 | RNF139   | Approved Ubiquitoucytoplasm                          |
| 10603 | ENSG00000170889 | RPS9     | Approved Cytoplasmcytoplasm                          |
| 10604 | ENSG00000170890 | PLA2G1B  | Enhanced Selectivecytoplasm                          |
| 10605 | ENSG00000170892 | TSEN34   | Approved Ubiquitounucleus                            |
| 10606 | ENSG00000170893 | TRH      | Enhanced Expressed in the hypothalamus and glandular |
| 10607 | ENSG00000170899 | GSTA4    | Approved Cytoplasmcytoplasm                          |
| 10608 | ENSG00000170903 | MSANTD4  | Approved Cytoplasmcytoplasm                          |
| 10609 | ENSG00000170906 | NDUFA3   | SupportedCytoplasmcytoplasm                          |
| 10610 | ENSG00000170917 | NUDT6    | UncertainGeneral ccytoplasm                          |
| 10611 | ENSG00000170921 | TANC2    | UncertainCytoplasmcytoplasm;nucleus                  |
| 10612 | ENSG00000170927 | PKHD1    | Enhanced High cytocytoplasm                          |
| 10613 | ENSG00000170935 | NCBP2L   | UncertainEstimation of protein expression could not  |

|       |                 |           |                                                          |
|-------|-----------------|-----------|----------------------------------------------------------|
| 10614 | ENSG00000170946 | DNAJC24   | Approved Cytoplasm cytoplasm                             |
| 10615 | ENSG00000170948 | MBD3L1    | Supported Nuclear enucleus                               |
| 10616 | ENSG00000170949 | ZNF160    | Uncertain Cytoplasm cytoplasm                            |
| 10617 | ENSG00000170950 | PGK2      | Supported Highly expressed in spermatids and oocytes.    |
| 10618 | ENSG00000170954 | ZNF415    | Approved Cytoplasm cytoplasm                             |
| 10619 | ENSG00000170955 | CAVIN3    | Approved Cytoplasm cytoplasm                             |
| 10620 | ENSG00000170956 | CEACAM3   | Approved Cytoplasm cytoplasm                             |
| 10621 | ENSG00000170962 | PDGFD     | Approved Cytoplasm cytoplasm; plasma membrane            |
| 10622 | ENSG00000170965 | PLAC1     | Enhanced Selective cytoplasm                             |
| 10623 | ENSG00000170989 | S1PR1     | Supported General c cytoplasm; plasma membrane           |
| 10624 | ENSG00000171004 | HS6ST2    | Uncertain Estimation of protein expression could not     |
| 10625 | ENSG00000171014 | OR4D5     | Uncertain Estimation of protein expression could not     |
| 10626 | ENSG00000171016 | PYG01     | Uncertain Estimation of protein expression could not     |
| 10627 | ENSG00000171017 | LRRRC8E   | Uncertain Estimation of protein expression could not     |
| 10628 | ENSG00000171033 | PKIA      | Uncertain Cytoplasm cytoplasm; plasma membrane           |
| 10629 | ENSG00000171044 | XKR6      | Uncertain Estimation of protein expression could not     |
| 10630 | ENSG00000171045 | TSNARE1   | Approved Cytoplasm cytoplasm; plasma membrane            |
| 10631 | ENSG00000171049 | FPR2      | Approved Cytoplasm cytoplasm; plasma membrane            |
| 10632 | ENSG00000171051 | FPR1      | Approved Cytoplasm cytoplasm                             |
| 10633 | ENSG00000171053 | PATE1     | Approved Expression in glandular cells of epididymis     |
| 10634 | ENSG00000171055 | FEZ2      | Uncertain Cytoplasm cytoplasm                            |
| 10635 | ENSG00000171056 | SOX7      | Approved General n nucleus                               |
| 10636 | ENSG00000171060 | C8orf74   | Uncertain Estimation of protein expression could not     |
| 10637 | ENSG00000171067 | C11orf24  | Uncertain Cytoplasm cytoplasm                            |
| 10638 | ENSG00000171094 | ALK       | Approved Cytoplasm cytoplasm; nucleus                    |
| 10639 | ENSG00000171097 | KYAT1     | Approved Ubiquitous cytoplasm                            |
| 10640 | ENSG00000171100 | MTM1      | Approved Cytoplasm cytoplasm                             |
| 10641 | ENSG00000171103 | TRMT61B   | Enhanced Ubiquitous cytoplasm                            |
| 10642 | ENSG00000171105 | INSR      | Uncertain Ubiquitous cytoplasm                           |
| 10643 | ENSG00000171109 | MFN1      | Approved General c cytoplasm                             |
| 10644 | ENSG00000171115 | GIMAP8    | Supported Cytoplasm cytoplasm                            |
| 10645 | ENSG00000171116 | HSFX1     | Approved Expression in testis.                           |
| 10646 | ENSG00000171121 | KCNMB3    | Approved Cytoplasm cytoplasm                             |
| 10647 | ENSG00000171124 | FUT3      | Supported Granular cytoplasm                             |
| 10648 | ENSG00000171132 | PRKCE     | Enhanced Cytoplasm cytoplasm; plasma membrane            |
| 10649 | ENSG00000171133 | OR2K2     | Uncertain Estimation of protein expression could not     |
| 10650 | ENSG00000171148 | TADA3     | Approved Nuclear enucleus                                |
| 10651 | ENSG00000171150 | SOCS5     | Approved Ubiquitous cytoplasm                            |
| 10652 | ENSG00000171155 | C1GALT1C1 | Approved Granular cytoplasm                              |
| 10653 | ENSG00000171159 | C9orf16   | Uncertain Cytoplasm cytoplasm                            |
| 10654 | ENSG00000171160 | MORN4     | Uncertain Cytoplasm cytoplasm                            |
| 10655 | ENSG00000171161 | ZNF672    | Approved Nuclear enucleus                                |
| 10656 | ENSG00000171163 | ZNF692    | Uncertain Estimation of protein expression could not     |
| 10657 | ENSG00000171174 | RBKS      | Enhanced Selective cytoplasm                             |
| 10658 | ENSG00000171180 | OR2M4     | Uncertain Estimation of protein expression could not     |
| 10659 | ENSG00000171189 | GRIK1     | Uncertain General c cytoplasm                            |
| 10660 | ENSG00000171195 | MUC7      | Enhanced High and selective expression in salivary gland |
| 10661 | ENSG00000171199 | OPRPN     | Approved Membrane plasma membrane                        |
| 10662 | ENSG00000171202 | TMEM126A  | Approved General c cytoplasm                             |
| 10663 | ENSG00000171204 | TMEM126B  | Uncertain Ubiquitous cytoplasm                           |
| 10664 | ENSG00000171206 | TRIM8     | Approved Cytoplasm cytoplasm                             |
| 10665 | ENSG00000171208 | NETO2     | Uncertain Cytoplasm cytoplasm                            |
| 10666 | ENSG00000171209 | CSN3      | Enhanced Cytoplasm cytoplasm; plasma membrane            |
| 10667 | ENSG00000171219 | CDC42BPG  | Enhanced Cytoplasm cytoplasm                             |
| 10668 | ENSG00000171223 | JUNB      | Approved Nuclear enucleus                                |

|       |                 |         |                                                      |
|-------|-----------------|---------|------------------------------------------------------|
| 10669 | ENSG00000171224 | FAM241B | Enhanced Cytoplasmcytoplasm                          |
| 10670 | ENSG00000171227 | TMEM37  | Enhanced Selectiveplasma membrane                    |
| 10671 | ENSG00000171234 | UGT2B7  | UncertainEstimation of protein expression could not  |
| 10672 | ENSG00000171236 | LRG1    | Enhanced Distinct plasma membrane                    |
| 10673 | ENSG00000171241 | SHCBP1  | UncertainEstimation of protein expression could not  |
| 10674 | ENSG00000171246 | NPTX1   | Enhanced Highly expressed in the brain. Distinct exp |
| 10675 | ENSG00000171262 | FAM98B  | Enhanced General nnucleus                            |
| 10676 | ENSG00000171291 | ZNF439  | Approved Nuclear acytoplasm;nucleus                  |
| 10677 | ENSG00000171295 | ZNF440  | Approved Nuclear acytoplasm;nucleus                  |
| 10678 | ENSG00000171298 | GAA     | Enhanced Cytoplasmcytoplasm                          |
| 10679 | ENSG00000171302 | CANT1   | Enhanced General ccytoplasm                          |
| 10680 | ENSG00000171307 | ZDHHC16 | UncertainCytoplasmcytoplasm                          |
| 10681 | ENSG00000171310 | CHST11  | Approved Granular cytoplasm                          |
| 10682 | ENSG00000171311 | EXOSC1  | Approved Nuclear acytoplasm;nucleus                  |
| 10683 | ENSG00000171314 | PGAM1   | Approved Cytoplasmcytoplasm                          |
| 10684 | ENSG00000171345 | KRT19   | Enhanced Cytoplasmcytoplasm;plasma membrane          |
| 10685 | ENSG00000171346 | KRT15   | Enhanced Cytoplasmcytoplasm;plasma membrane          |
| 10686 | ENSG00000171357 | LURAP1  | UncertainCytoplasmcytoplasm                          |
| 10687 | ENSG00000171365 | CLCN5   | UncertainCytoplasmcytoplasm                          |
| 10688 | ENSG00000171368 | TPPP    | Enhanced High cytocytoplasm;nucleus                  |
| 10689 | ENSG00000171385 | KCND3   | Approved Cytoplasmcytoplasm                          |
| 10690 | ENSG00000171401 | KRT13   | Enhanced Selectivecytoplasm                          |
| 10691 | ENSG00000171402 | XAGE3   | SupportedCytoplasmcytoplasm                          |
| 10692 | ENSG00000171403 | KRT9    | SupportedExclusively expressed in sole of foot.      |
| 10693 | ENSG00000171405 | XAGE5   | UncertainEstimation of protein expression could not  |
| 10694 | ENSG00000171408 | PDE7B   | UncertainCytoplasmcytoplasm                          |
| 10695 | ENSG00000171421 | MRPL36  | Approved General ccytoplasm                          |
| 10696 | ENSG00000171425 | ZNF581  | UncertainEstimation of protein expression could not  |
| 10697 | ENSG00000171428 | NAT1    | Approved Mainly ccytoplasm                           |
| 10698 | ENSG00000171431 | KRT20   | Enhanced Selectivecytoplasm                          |
| 10699 | ENSG00000171433 | GLOD5   | Enhanced Cytoplasmcytoplasm                          |
| 10700 | ENSG00000171435 | KSR2    | Enhanced Cytoplasmcytoplasm                          |
| 10701 | ENSG00000171443 | ZNF524  | UncertainEstimation of protein expression could not  |
| 10702 | ENSG00000171444 | MCC     | Approved Cytoplasmcytoplasm                          |
| 10703 | ENSG00000171446 | KRT27   | Enhanced Highly expressed in the internal root sheat |
| 10704 | ENSG00000171448 | ZBTB26  | UncertainEstimation of protein expression could not  |
| 10705 | ENSG00000171462 | DLK2    | UncertainEstimation of protein expression could not  |
| 10706 | ENSG00000171466 | ZNF562  | UncertainCytoplasmcytoplasm                          |
| 10707 | ENSG00000171467 | ZNF318  | Approved Nuclear acytoplasm;nucleus                  |
| 10708 | ENSG00000171469 | ZNF561  | UncertainCytoplasmcytoplasm                          |
| 10709 | ENSG00000171475 | WIPF2   | Enhanced Cytoplasmcytoplasm                          |
| 10710 | ENSG00000171476 | HOPX    | Enhanced Nuclear acytoplasm;nucleus                  |
| 10711 | ENSG00000171478 | SPACA5B | SupportedExpression in the acrosomal cap of sperm ce |
| 10712 | ENSG00000171481 | OR1L3   | UncertainEstimation of protein expression could not  |
| 10713 | ENSG00000171487 | NLRP5   | UncertainEstimation of protein expression could not  |
| 10714 | ENSG00000171488 | LRRRC8C | UncertainNuclear nnucleus;plasma membrane            |
| 10715 | ENSG00000171489 | SPACA5  | SupportedExpression in the acrosomal cap of sperm ce |
| 10716 | ENSG00000171490 | RSL1D1  | SupportedGeneral nnucleus                            |
| 10717 | ENSG00000171495 | MROH2B  | Enhanced Cytoplasmcytoplasm                          |
| 10718 | ENSG00000171497 | PPID    | Approved Cytoplasmcytoplasm                          |
| 10719 | ENSG00000171503 | ETFDH   | Enhanced Cytoplasmcytoplasm                          |
| 10720 | ENSG00000171509 | RXFP1   | Approved Cytoplasmcytoplasm                          |
| 10721 | ENSG00000171522 | PTGER4  | Approved Cytoplasmcytoplasm                          |
| 10722 | ENSG00000171530 | TBCA    | Approved General ccytoplasm;nucleus                  |
| 10723 | ENSG00000171533 | MAP6    | Enhanced Selectivecytoplasm                          |

|       |                 |          |                                                      |
|-------|-----------------|----------|------------------------------------------------------|
| 10724 | ENSG00000171540 | OTP      | Enhanced Nuclear enucleus                            |
| 10725 | ENSG00000171551 | ECEL1    | Approved Expressed in a subset of neurons in hypoth  |
| 10726 | ENSG00000171552 | BCL2L1   | Approved Cytoplasmcytoplasm                          |
| 10727 | ENSG00000171557 | FGG      | SupportedSelectiveplasma membrane                    |
| 10728 | ENSG00000171560 | FGA      | SupportedDistinct plasma membrane                    |
| 10729 | ENSG00000171564 | FGB      | Enhanced Strong poplasma membrane                    |
| 10730 | ENSG00000171566 | PLRG1    | SupportedUbiquitounucleus                            |
| 10731 | ENSG00000171574 | ZNF584   | UncertainEstimation of protein expression could not  |
| 10732 | ENSG00000171587 | DSCAM    | Enhanced Distinct cytoplasm                          |
| 10733 | ENSG00000171595 | DNAI2    | Enhanced Selective expression in cilia including sp  |
| 10734 | ENSG00000171596 | NMUR1    | UncertainEstimation of protein expression could not  |
| 10735 | ENSG00000171603 | CLSTN1   | Enhanced Cytoplasmcytoplasm                          |
| 10736 | ENSG00000171604 | CXXC5    | Approved Cytoplasmcytoplasm                          |
| 10737 | ENSG00000171606 | ZNF274   | UncertainNuclear acytoplasm;nucleus                  |
| 10738 | ENSG00000171608 | PIK3CD   | Enhanced Cytoplasmcytoplasm                          |
| 10739 | ENSG00000171612 | SLC25A33 | UncertainGranular cytoplasm                          |
| 10740 | ENSG00000171631 | P2RY6    | Enhanced Expressed in a subset of immune cells and : |
| 10741 | ENSG00000171634 | BPTF     | Approved Cytoplasmcytoplasm                          |
| 10742 | ENSG00000171643 | S100Z    | Approved Cytoplasmcytoplasm                          |
| 10743 | ENSG00000171649 | ZIK1     | UncertainEstimation of protein expression could not  |
| 10744 | ENSG00000171657 | GPR82    | Approved Cytoplasmcytoplasm;plasma membrane          |
| 10745 | ENSG00000171659 | GPR34    | UncertainUbiquitoucytoplasm                          |
| 10746 | ENSG00000171680 | PLEKHG5  | UncertainNuclear, cytoplasm;nucleus;plasma membrane  |
| 10747 | ENSG00000171681 | ATF7IP   | SupportedUbiquitounucleus                            |
| 10748 | ENSG00000171700 | RGS19    | Enhanced Cytoplasmcytoplasm                          |
| 10749 | ENSG00000171703 | TCEA2    | Approved Nuclear enucleus                            |
| 10750 | ENSG00000171714 | ANO5     | UncertainCytoplasmcytoplasm                          |
| 10751 | ENSG00000171720 | HDAC3    | SupportedGeneral nnucleus                            |
| 10752 | ENSG00000171723 | GPHN     | Enhanced Cytoplasmcytoplasm                          |
| 10753 | ENSG00000171724 | VAT1L    | Enhanced Cytoplasmcytoplasm                          |
| 10754 | ENSG00000171729 | TMEM51   | Approved Cytoplasmcytoplasm                          |
| 10755 | ENSG00000171735 | CAMTA1   | Approved Nuclear acytoplasm;nucleus                  |
| 10756 | ENSG00000171747 | LGALS4   | Enhanced Distinct cytoplasm                          |
| 10757 | ENSG00000171757 | LRRC34   | Approved Cytoplasmcytoplasm;plasma membrane          |
| 10758 | ENSG00000171759 | PAH      | Enhanced Selectivecytoplasm                          |
| 10759 | ENSG00000171763 | SPATA5L1 | UncertainCytoplasmcytoplasm                          |
| 10760 | ENSG00000171766 | GATM     | Enhanced Granular cytoplasm                          |
| 10761 | ENSG00000171772 | SYCE1    | Enhanced Cytoplasmcytoplasm                          |
| 10762 | ENSG00000171791 | BCL2     | Enhanced Cytoplasmcytoplasm                          |
| 10763 | ENSG00000171793 | CTPS1    | Enhanced Cytoplasmcytoplasm                          |
| 10764 | ENSG00000171798 | KNDC1    | UncertainEstimation of protein expression could not  |
| 10765 | ENSG00000171806 | METTL18  | Approved Cytoplasmcytoplasm                          |
| 10766 | ENSG00000171811 | CFAP46   | UncertainEstimation of protein expression could not  |
| 10767 | ENSG00000171812 | COL8A2   | UncertainRNA-based expert annotation gave inconclus: |
| 10768 | ENSG00000171813 | PWWP2B   | Approved Nuclear acytoplasm;nucleus                  |
| 10769 | ENSG00000171815 | PCDHB1   | UncertainEstimation of protein expression could not  |
| 10770 | ENSG00000171817 | ZNF540   | SupportedUbiquitounucleus                            |
| 10771 | ENSG00000171823 | FBXL14   | Approved Cytoplasmcytoplasm                          |
| 10772 | ENSG00000171824 | EXOSC10  | SupportedGeneral nnucleus                            |
| 10773 | ENSG00000171827 | ZNF570   | UncertainNuclear acytoplasm;nucleus                  |
| 10774 | ENSG00000171843 | MLLT3    | Approved General nnucleus                            |
| 10775 | ENSG00000171848 | RRM2     | Enhanced Membranoucytoplasm;plasma membrane          |
| 10776 | ENSG00000171853 | TRAPPC12 | UncertainNuclear enucleus                            |
| 10777 | ENSG00000171855 | IFNB1    | UncertainEstimation of protein expression could not  |
| 10778 | ENSG00000171858 | RPS21    | Approved Ubiquitoucytoplasm                          |

|       |                 |           |                                                                        |
|-------|-----------------|-----------|------------------------------------------------------------------------|
| 10779 | ENSG00000171860 | C3AR1     | Enhanced Mainly cytoplasm                                              |
| 10780 | ENSG00000171861 | MRM3      | Enhanced Ubiquitous cytoplasm                                          |
| 10781 | ENSG00000171862 | PTEN      | Approved Cytoplasm cytoplasm                                           |
| 10782 | ENSG00000171863 | RPS7      | Approved General cytoplasm                                             |
| 10783 | ENSG00000171864 | PRND      | Enhanced Selective cytoplasm                                           |
| 10784 | ENSG00000171865 | RNASEH1   | Uncertain Low expression in several tissues.                           |
| 10785 | ENSG00000171867 | PRNP      | Enhanced Cytoplasm cytoplasm                                           |
| 10786 | ENSG00000171872 | KLF17     | Enhanced Expression in testis.                                         |
| 10787 | ENSG00000171873 | ADRA1D    | Uncertain Estimation of protein expression could not                   |
| 10788 | ENSG00000171885 | AQP4      | Enhanced Selective expression in CNS, lung, thyroid                    |
| 10789 | ENSG00000171903 | CYP4F11   | Enhanced Cytoplasm cytoplasm                                           |
| 10790 | ENSG00000171914 | TLN2      | Enhanced Cytoplasm cytoplasm                                           |
| 10791 | ENSG00000171916 | LGALS9C   | Approved Cytoplasm cytoplasm                                           |
| 10792 | ENSG00000171928 | TVP23B    | Uncertain Cytoplasm cytoplasm                                          |
| 10793 | ENSG00000171940 | ZNF217    | Approved Ubiquitous cytoplasm;nucleus                                  |
| 10794 | ENSG00000171951 | SCG2      | Enhanced Cytoplasm cytoplasm                                           |
| 10795 | ENSG00000171953 | ATPAF2    | Supported General cytoplasm                                            |
| 10796 | ENSG00000171954 | CYP4F22   | Uncertain Estimation of protein expression could not                   |
| 10797 | ENSG00000171960 | PPIH      | Approved General cytoplasm                                             |
| 10798 | ENSG00000171962 | DRC3      | Approved Expression mainly in ciliated cells of fallopian tube         |
| 10799 | ENSG00000171984 | C20orf196 | Approved Cytoplasm cytoplasm                                           |
| 10800 | ENSG00000171988 | JMJD1C    | Approved Ubiquitous nucleus                                            |
| 10801 | ENSG00000171989 | LDHAL6B   | Enhanced Selective cytoplasm                                           |
| 10802 | ENSG00000171992 | SYNP0     | Enhanced Cytoplasm cytoplasm                                           |
| 10803 | ENSG00000172006 | ZNF554    | Uncertain Estimation of protein expression could not                   |
| 10804 | ENSG00000172007 | RAB33B    | Uncertain Estimation of protein expression could not                   |
| 10805 | ENSG00000172009 | THOP1     | Uncertain General cytoplasm                                            |
| 10806 | ENSG00000172014 | ANKRD20A4 | Uncertain Estimation of protein expression could not                   |
| 10807 | ENSG00000172016 | REG3A     | Supported Expression in a subset of cells in gastrointestinal tract    |
| 10808 | ENSG00000172020 | GAP43     | Enhanced Selective expression in the CNS and peripheral nervous system |
| 10809 | ENSG00000172023 | REG1B     | Supported Selective cytoplasm                                          |
| 10810 | ENSG00000172031 | EPHX4     | Uncertain Cytoplasm cytoplasm                                          |
| 10811 | ENSG00000172037 | LAMB2     | Supported Cytoplasm cytoplasm                                          |
| 10812 | ENSG00000172053 | QARS      | Enhanced General cytoplasm                                             |
| 10813 | ENSG00000172061 | LRRC15    | Uncertain Estimation of protein expression could not                   |
| 10814 | ENSG00000172062 | SMN1      | Supported Ubiquitous cytoplasm;nucleus                                 |
| 10815 | ENSG00000172071 | EIF2AK3   | Approved Cytoplasm cytoplasm;nucleus                                   |
| 10816 | ENSG00000172073 | TEX37     | Enhanced Distinct expression in seminiferous ducts                     |
| 10817 | ENSG00000172086 | KRCC1     | Approved Cytoplasm cytoplasm                                           |
| 10818 | ENSG00000172113 | NME6      | Approved Ubiquitous cytoplasm                                          |
| 10819 | ENSG00000172115 | CYCS      | Enhanced Ubiquitous cytoplasm                                          |
| 10820 | ENSG00000172116 | CD8B      | Enhanced High membrane                                                 |
| 10821 | ENSG00000172123 | SLFN12    | Uncertain Estimation of protein expression could not                   |
| 10822 | ENSG00000172137 | CALB2     | Enhanced Cytoplasm cytoplasm                                           |
| 10823 | ENSG00000172159 | FRMD3     | Approved Cytoplasm cytoplasm                                           |
| 10824 | ENSG00000172164 | SNTB1     | Uncertain Mainly cytoplasm                                             |
| 10825 | ENSG00000172167 | MTBP      | Uncertain Estimation of protein expression could not                   |
| 10826 | ENSG00000172171 | TEFM      | Approved Low cytoplasm                                                 |
| 10827 | ENSG00000172172 | MRPL13    | Approved Cytoplasm cytoplasm                                           |
| 10828 | ENSG00000172175 | MALT1     | Enhanced Cytoplasm cytoplasm                                           |
| 10829 | ENSG00000172179 | PRL       | Enhanced Selective expression in pituitary gland.                      |
| 10830 | ENSG00000172216 | CEBPB     | Supported General nucleus                                              |
| 10831 | ENSG00000172232 | AZU1      | Enhanced Cytoplasm cytoplasm                                           |
| 10832 | ENSG00000172236 | TPSAB1    | Supported Selective cytoplasm                                          |
| 10833 | ENSG00000172239 | PAIP1     | Approved General cytoplasm                                             |

|       |                 |         |                                                       |
|-------|-----------------|---------|-------------------------------------------------------|
| 10834 | ENSG00000172244 | C5orf34 | Approved Cytoplasm cytoplasm                          |
| 10835 | ENSG00000172247 | C1QTNF4 | Approved Secreted cytoplasm                           |
| 10836 | ENSG00000172260 | NEGR1   | Uncertain Cytoplasm cytoplasm                         |
| 10837 | ENSG00000172262 | ZNF131  | Approved Ubiquitous nucleus                           |
| 10838 | ENSG00000172264 | MACROD2 | Enhanced Mainly nucleus                               |
| 10839 | ENSG00000172269 | DPAGT1  | Approved General cytoplasm                            |
| 10840 | ENSG00000172270 | BSG     | Enhanced Membrane plasma membrane                     |
| 10841 | ENSG00000172273 | HINFP   | Uncertain Nuclear nucleus                             |
| 10842 | ENSG00000172288 | CDY1    | Supported Nuclear nucleus                             |
| 10843 | ENSG00000172289 | OR10V1  | Uncertain Estimation of protein expression could not  |
| 10844 | ENSG00000172292 | CERS6   | Approved Nuclear nucleus                              |
| 10845 | ENSG00000172296 | SPTLC3  | Enhanced Cytoplasm cytoplasm                          |
| 10846 | ENSG00000172301 | COPRS   | Approved Mainly nucleus; plasma membrane              |
| 10847 | ENSG00000172315 | TP53RK  | Approved Ubiquitous nucleus                           |
| 10848 | ENSG00000172322 | CLEC12A | Enhanced Cytoplasm cytoplasm                          |
| 10849 | ENSG00000172324 | OR5A2   | Uncertain RNA-based expert annotation gave inconclus: |
| 10850 | ENSG00000172331 | BPGM    | Enhanced Highest expression in placental trophoblast  |
| 10851 | ENSG00000172336 | POP7    | Uncertain Cytoplasm cytoplasm                         |
| 10852 | ENSG00000172339 | ALG14   | Approved Cytoplasm cytoplasm                          |
| 10853 | ENSG00000172340 | SUCLG2  | Enhanced Ubiquitous cytoplasm                         |
| 10854 | ENSG00000172345 | STARD5  | Approved Ubiquitous cytoplasm                         |
| 10855 | ENSG00000172346 | CSDC2   | Uncertain General nucleus                             |
| 10856 | ENSG00000172348 | RCAN2   | Uncertain Cytoplasm cytoplasm                         |
| 10857 | ENSG00000172349 | IL16    | Enhanced Cytoplasm cytoplasm                          |
| 10858 | ENSG00000172350 | ABCG4   | Enhanced Expression mainly in neuronal projections :  |
| 10859 | ENSG00000172352 | CDY1B   | Supported Nuclear nucleus                             |
| 10860 | ENSG00000172354 | GNB2    | Approved Membrane cytoplasm; plasma membrane          |
| 10861 | ENSG00000172361 | CFAP53  | Enhanced Cytoplasm cytoplasm                          |
| 10862 | ENSG00000172366 | MCRIP2  | Uncertain Cytoplasm cytoplasm                         |
| 10863 | ENSG00000172367 | PDZD3   | Enhanced Membrane cytoplasm; plasma membrane          |
| 10864 | ENSG00000172375 | C2CD2L  | Approved Cytoplasm cytoplasm; nucleus                 |
| 10865 | ENSG00000172379 | ARNT2   | Enhanced Nuclear nucleus                              |
| 10866 | ENSG00000172380 | GNG12   | Enhanced Membrane cytoplasm; plasma membrane          |
| 10867 | ENSG00000172382 | PRSS27  | Approved Cytoplasm cytoplasm; plasma membrane         |
| 10868 | ENSG00000172399 | MYOZ2   | Enhanced Selective cytoplasm                          |
| 10869 | ENSG00000172403 | SYNP02  | Enhanced Cytoplasm cytoplasm                          |
| 10870 | ENSG00000172404 | DNAJB7  | Approved Cytoplasm cytoplasm                          |
| 10871 | ENSG00000172409 | CLP1    | Supported General nucleus                             |
| 10872 | ENSG00000172410 | INSL5   | Enhanced Selective cytoplasm                          |
| 10873 | ENSG00000172421 | EFCAB3  | Uncertain Cytoplasm cytoplasm; nucleus                |
| 10874 | ENSG00000172425 | TTC36   | Enhanced Distinct expression in hepatocytes.          |
| 10875 | ENSG00000172426 | RSPH9   | Enhanced Expression in cilia in fallopian tube and 1  |
| 10876 | ENSG00000172428 | COPS9   | Uncertain Nuclear cytoplasm; nucleus                  |
| 10877 | ENSG00000172432 | GTPBP2  | Approved Cytoplasm cytoplasm                          |
| 10878 | ENSG00000172466 | ZNF24   | Supported General nucleus                             |
| 10879 | ENSG00000172469 | MANEA   | Enhanced Cytoplasm cytoplasm                          |
| 10880 | ENSG00000172482 | AGXT    | Enhanced Cytoplasm cytoplasm                          |
| 10881 | ENSG00000172489 | OR5T3   | Uncertain Estimation of protein expression could not  |
| 10882 | ENSG00000172500 | FIBP    | Approved Cytoplasm cytoplasm                          |
| 10883 | ENSG00000172508 | CARNS1  | Enhanced Nuclear nucleus                              |
| 10884 | ENSG00000172530 | BANP    | Approved Nuclear cytoplasm; nucleus                   |
| 10885 | ENSG00000172531 | PPP1CA  | Approved Cytoplasm cytoplasm; nucleus                 |
| 10886 | ENSG00000172538 | FAM170B | Uncertain Estimation of protein expression could not  |
| 10887 | ENSG00000172543 | CTSW    | Enhanced High cytoplasm                               |
| 10888 | ENSG00000172548 | NIPAL4  | Approved High expression of leukocytes.               |

|       |                 |         |                                                     |
|-------|-----------------|---------|-----------------------------------------------------|
| 10889 | ENSG00000172551 | MUCL1   | Enhanced Cytoplasmcytoplasm;plasma membrane         |
| 10890 | ENSG00000172554 | SNTG2   | Approved Cytoplasmcytoplasm                         |
| 10891 | ENSG00000172568 | FNDC9   | UncertainEstimation of protein expression could not |
| 10892 | ENSG00000172572 | PDE3A   | UncertainCytoplasmcytoplasm                         |
| 10893 | ENSG00000172578 | KLHL6   | UncertainEstimation of protein expression could not |
| 10894 | ENSG00000172586 | CHCHD1  | Approved Granular cytoplasm                         |
| 10895 | ENSG00000172590 | MRPL52  | Approved General ccytoplasm                         |
| 10896 | ENSG00000172594 | SMPDL3A | UncertainUbiquitoucytoplasm                         |
| 10897 | ENSG00000172613 | RAD9A   | Enhanced Ubiquitounucleus                           |
| 10898 | ENSG00000172638 | EFEMP2  | Approved Cytoplasmcytoplasm                         |
| 10899 | ENSG00000172640 | OR10AD1 | UncertainEstimation of protein expression could not |
| 10900 | ENSG00000172650 | AGAP5   | UncertainEstimation of protein expression could not |
| 10901 | ENSG00000172661 | WASHC2C | SupportedGeneral ccytoplasm                         |
| 10902 | ENSG00000172663 | TMEM134 | Approved Cytoplasmcytoplasm                         |
| 10903 | ENSG00000172667 | ZMAT3   | Enhanced General ncytoplasm;nucleus                 |
| 10904 | ENSG00000172671 | ZFAND4  | Enhanced Cytoplasmcytoplasm                         |
| 10905 | ENSG00000172673 | THEMIS  | Enhanced Cytoplasmcytoplasm                         |
| 10906 | ENSG00000172687 | ZNF738  | UncertainEstimation of protein expression could not |
| 10907 | ENSG00000172689 | MS4A10  | UncertainEstimation of protein expression could not |
| 10908 | ENSG00000172716 | SLFN11  | UncertainCytoplasmcytoplasm                         |
| 10909 | ENSG00000172724 | CCL19   | Enhanced Cytoplasmcytoplasm                         |
| 10910 | ENSG00000172725 | COR01B  | Enhanced Ubiquitoucytoplasm;plasma membrane         |
| 10911 | ENSG00000172728 | FUT10   | UncertainCytoplasmcytoplasm                         |
| 10912 | ENSG00000172732 | MUS81   | Approved Nucleolarnucleus                           |
| 10913 | ENSG00000172733 | PURG    | Enhanced Nuclear enucleus                           |
| 10914 | ENSG00000172748 | ZNF596  | UncertainEstimation of protein expression could not |
| 10915 | ENSG00000172752 | COL6A5  | UncertainEstimation of protein expression could not |
| 10916 | ENSG00000172757 | CFL1    | Approved Cytoplasmcytoplasm;plasma membrane         |
| 10917 | ENSG00000172765 | TMCC1   | UncertainMembranouplasma membrane                   |
| 10918 | ENSG00000172766 | NAA16   | Approved General wcytoplasm                         |
| 10919 | ENSG00000172771 | EFCAB12 | UncertainEstimation of protein expression could not |
| 10920 | ENSG00000172775 | FAM192A | UncertainCytoplasmcytoplasm;nucleus                 |
| 10921 | ENSG00000172780 | RAB43   | Enhanced Cytoplasmcytoplasm                         |
| 10922 | ENSG00000172782 | FADS6   | UncertainEstimation of protein expression could not |
| 10923 | ENSG00000172785 | CBWD1   | Approved Cytoplasmcytoplasm                         |
| 10924 | ENSG00000172789 | HOXC5   | UncertainEstimation of protein expression could not |
| 10925 | ENSG00000172795 | DCP2    | Approved Ubiquitoucytoplasm                         |
| 10926 | ENSG00000172803 | SNX32   | UncertainEstimation of protein expression could not |
| 10927 | ENSG00000172809 | RPL38   | Approved Cytoplasmcytoplasm                         |
| 10928 | ENSG00000172817 | CYP7B1  | UncertainCytoplasmcytoplasm;nucleus                 |
| 10929 | ENSG00000172818 | OVOL1   | UncertainCytoplasmcytoplasm                         |
| 10930 | ENSG00000172819 | RARG    | SupportedUbiquitounucleus                           |
| 10931 | ENSG00000172824 | CES4A   | Approved Cytoplasmcytoplasm                         |
| 10932 | ENSG00000172828 | CES3    | Approved Cytoplasmcytoplasm                         |
| 10933 | ENSG00000172830 | SSH3    | Approved Ubiquitoucytoplasm                         |
| 10934 | ENSG00000172831 | CES2    | Enhanced Granular cytoplasm                         |
| 10935 | ENSG00000172840 | PDP2    | Approved Cytoplasmcytoplasm                         |
| 10936 | ENSG00000172845 | SP3     | SupportedGeneral nnucleus                           |
| 10937 | ENSG00000172867 | KRT2    | Enhanced Selectivecytoplasm                         |
| 10938 | ENSG00000172869 | DMXL1   | Approved Mainly ccytoplasm                          |
| 10939 | ENSG00000172878 | METAP1D | UncertainEstimation of protein expression could not |
| 10940 | ENSG00000172889 | EGFL7   | Approved Cytoplasmcytoplasm                         |
| 10941 | ENSG00000172890 | NADSYN1 | Approved Cytoplasmcytoplasm                         |
| 10942 | ENSG00000172893 | DHCR7   | Approved General ccytoplasm                         |
| 10943 | ENSG00000172901 | LVRN    | Enhanced Membranouplasma membrane                   |

|       |                 |          |                    |                                             |
|-------|-----------------|----------|--------------------|---------------------------------------------|
| 10944 | ENSG00000172915 | NBEA     | Enhanced Cytoplasm | cytoplasm                                   |
| 10945 | ENSG00000172922 | RNASEH2C | Supported          | General n nucleus                           |
| 10946 | ENSG00000172927 | MYEOV    | Uncertain          | Estimation of protein expression could not  |
| 10947 | ENSG00000172932 | ANKRD13D | Approved           | Nuclear a cytoplasm;nucleus                 |
| 10948 | ENSG00000172935 | MRGPRF   | Approved           | Cytoplasm cytoplasm                         |
| 10949 | ENSG00000172936 | MYD88    | Approved           | Ubiquitou cytoplasm                         |
| 10950 | ENSG00000172938 | MRGPRD   | Uncertain          | Estimation of protein expression could not  |
| 10951 | ENSG00000172939 | OXSRI    | Supported          | Ubiquitou cytoplasm                         |
| 10952 | ENSG00000172940 | SLC22A13 | Enhanced           | Selective plasma membrane                   |
| 10953 | ENSG00000172943 | PHF8     | Approved           | General n cytoplasm;nucleus                 |
| 10954 | ENSG00000172954 | LCLAT1   | Uncertain          | Estimation of protein expression could not  |
| 10955 | ENSG00000172955 | ADH6     | Enhanced           | Expression in liver, gastrointestinal tract |
| 10956 | ENSG00000172967 | XKR3     | Uncertain          | Estimation of protein expression could not  |
| 10957 | ENSG00000172969 | FRG2C    | Uncertain          | Estimation of protein expression could not  |
| 10958 | ENSG00000172977 | KAT5     | Approved           | Nuclear e nucleus                           |
| 10959 | ENSG00000172985 | SH3RF3   | Approved           | General n nucleus                           |
| 10960 | ENSG00000172986 | GXYLT2   | Uncertain          | Estimation of protein expression could not  |
| 10961 | ENSG00000172987 | HPSE2    | Uncertain          | Mainly c cytoplasm                          |
| 10962 | ENSG00000172995 | ARPP21   | Enhanced           | Cytoplasm cytoplasm                         |
| 10963 | ENSG00000173011 | TADA2B   | Approved           | Mainly n nucleus                            |
| 10964 | ENSG00000173013 | CCDC96   | Enhanced           | Cytoplasm cytoplasm                         |
| 10965 | ENSG00000173020 | GRK2     | Approved           | Cytoplasm cytoplasm                         |
| 10966 | ENSG00000173039 | RELA     | Supported          | Ubiquitou cytoplasm                         |
| 10967 | ENSG00000173040 | EVC2     | Uncertain          | General c cytoplasm                         |
| 10968 | ENSG00000173064 | HECTD4   | Uncertain          | Ubiquitou cytoplasm                         |
| 10969 | ENSG00000173065 | FAM222B  | Approved           | Cytoplasm cytoplasm                         |
| 10970 | ENSG00000173068 | BNC2     | Approved           | Nuclear a cytoplasm;nucleus                 |
| 10971 | ENSG00000173085 | COQ2     | Approved           | Cytoplasm cytoplasm                         |
| 10972 | ENSG00000173110 | HSPA6    | Approved           | Cytoplasm cytoplasm;nucleus                 |
| 10973 | ENSG00000173113 | TRMT112  | Uncertain          | Cytoplasm cytoplasm;nucleus                 |
| 10974 | ENSG00000173114 | LRRN3    | Approved           | Cytoplasm cytoplasm;plasma membrane         |
| 10975 | ENSG00000173120 | KDM2A    | Supported          | Ubiquitou cytoplasm                         |
| 10976 | ENSG00000173124 | ACSM6    | Uncertain          | Estimation of protein expression could not  |
| 10977 | ENSG00000173137 | ADCK5    | Approved           | General c cytoplasm                         |
| 10978 | ENSG00000173141 | MRPL57   | Supported          | General c cytoplasm                         |
| 10979 | ENSG00000173157 | ADAMTS20 | Uncertain          | Estimation of protein expression could not  |
| 10980 | ENSG00000173163 | COMMD1   | Approved           | Cytoplasm cytoplasm                         |
| 10981 | ENSG00000173166 | RAPH1    | Approved           | Cytoplasm cytoplasm                         |
| 10982 | ENSG00000173171 | MTX1     | Uncertain          | General c cytoplasm                         |
| 10983 | ENSG00000173175 | ADCY5    | Uncertain          | Estimation of protein expression could not  |
| 10984 | ENSG00000173193 | PARP14   | Supported          | Ubiquitou cytoplasm                         |
| 10985 | ENSG00000173198 | CYSLTR1  | Approved           | Selective cytoplasm                         |
| 10986 | ENSG00000173207 | CKS1B    | Approved           | Ubiquitou nucleus                           |
| 10987 | ENSG00000173210 | ABLIM3   | Approved           | General c cytoplasm                         |
| 10988 | ENSG00000173212 | MAB21L3  | Uncertain          | Estimation of protein expression could not  |
| 10989 | ENSG00000173213 | TUBB8P12 | Uncertain          | Estimation of protein expression could not  |
| 10990 | ENSG00000173214 | MFS4B    | Approved           | Cytoplasm cytoplasm                         |
| 10991 | ENSG00000173218 | VANGL1   | Approved           | Membranou cytoplasm;plasma membrane         |
| 10992 | ENSG00000173221 | GLRX     | Approved           | Cytoplasm cytoplasm                         |
| 10993 | ENSG00000173226 | IQCB1    | Approved           | Cytoplasm cytoplasm                         |
| 10994 | ENSG00000173227 | SYT12    | Enhanced           | Expression in neuronal cells and processes  |
| 10995 | ENSG00000173230 | GOLGB1   | Enhanced           | Cytoplasm cytoplasm                         |
| 10996 | ENSG00000173237 | C11orf86 | Uncertain          | Estimation of protein expression could not  |
| 10997 | ENSG00000173253 | DMRT2    | Uncertain          | Estimation of protein expression could not  |
| 10998 | ENSG00000173262 | SLC2A14  | Supported          | Membranou cytoplasm;plasma membrane         |



|       |                 |           |                                                     |
|-------|-----------------|-----------|-----------------------------------------------------|
| 10999 | ENSG00000173264 | GPR137    | UncertainEstimation of protein expression could not |
| 11000 | ENSG00000173267 | SNCG      | Enhanced Distinct expression in the CNS, peripheral |
| 11001 | ENSG00000173269 | MMRN2     | Approved Cytoplasmcytoplasm;plasma membrane         |
| 11002 | ENSG00000173272 | MZT2A     | Approved Cytoplasmcytoplasm                         |
| 11003 | ENSG00000173273 | TNKS      | Approved General ncytoplasm;nucleus                 |
| 11004 | ENSG00000173275 | ZNF449    | UncertainEstimation of protein expression could not |
| 11005 | ENSG00000173276 | ZBTB21    | Enhanced Nuclear enucleus                           |
| 11006 | ENSG00000173281 | PPP1R3B   | Enhanced General ccytoplasm                         |
| 11007 | ENSG00000173285 | OR10K1    | UncertainEstimation of protein expression could not |
| 11008 | ENSG00000173302 | GPR148    | UncertainEstimation of protein expression could not |
| 11009 | ENSG00000173320 | STOX2     | UncertainEstimation of protein expression could not |
| 11010 | ENSG00000173327 | MAP3K11   | Approved General ccytoplasm                         |
| 11011 | ENSG00000173335 | CST9      | UncertainEstimation of protein expression could not |
| 11012 | ENSG00000173369 | C1QB      | Approved Low cytopcytoplasm;plasma membrane         |
| 11013 | ENSG00000173372 | C1QA      | SupportedCytoplasmcytoplasm;plasma membrane         |
| 11014 | ENSG00000173401 | GLIPR1L1  | Enhanced Cytoplasmcytoplasm                         |
| 11015 | ENSG00000173402 | DAG1      | Enhanced Cytoplasmcytoplasm;plasma membrane         |
| 11016 | ENSG00000173406 | DAB1      | Enhanced Cytoplasmcytoplasm;plasma membrane         |
| 11017 | ENSG00000173409 | ARV1      | Approved General ccytoplasm                         |
| 11018 | ENSG00000173421 | CCDC36    | Approved Granular cytoplasm                         |
| 11019 | ENSG00000173436 | MINOS1    | Enhanced Ubiquitoucytoplasm                         |
| 11020 | ENSG00000173442 | EHBP1L1   | Approved General ccytoplasm                         |
| 11021 | ENSG00000173451 | THAP2     | Approved Cytoplasmcytoplasm                         |
| 11022 | ENSG00000173452 | TMEM196   | UncertainEstimation of protein expression could not |
| 11023 | ENSG00000173456 | RNF26     | UncertainNuclear enucleus                           |
| 11024 | ENSG00000173457 | PPP1R14B  | Approved General ccytoplasm                         |
| 11025 | ENSG00000173464 | RNASE11   | UncertainEstimation of protein expression could not |
| 11026 | ENSG00000173465 | SSSCA1    | UncertainCytoplasmcytoplasm                         |
| 11027 | ENSG00000173467 | AGR3      | Enhanced Distinct cytoplasm;plasma membrane         |
| 11028 | ENSG00000173473 | SMARCC1   | SupportedGeneral nnucleus                           |
| 11029 | ENSG00000173480 | ZNF417    | UncertainCytoplasmcytoplasm                         |
| 11030 | ENSG00000173482 | PTPRM     | SupportedCytoplasmcytoplasm                         |
| 11031 | ENSG00000173486 | FKBP2     | Enhanced Cytoplasmcytoplasm                         |
| 11032 | ENSG00000173517 | PEAK1     | Approved Cytoplasmcytoplasm                         |
| 11033 | ENSG00000173531 | MST1      | Approved Cytoplasmcytoplasm;plasma membrane         |
| 11034 | ENSG00000173535 | TNFRSF10C | Enhanced Cytoplasmcytoplasm                         |
| 11035 | ENSG00000173540 | GMPPB     | UncertainCytoplasmcytoplasm                         |
| 11036 | ENSG00000173542 | MOB1B     | SupportedUbiquitoucytoplasm                         |
| 11037 | ENSG00000173545 | ZNF622    | UncertainUbiquitoucytoplasm                         |
| 11038 | ENSG00000173546 | CSPG4     | Approved Ubiquitoucytoplasm                         |
| 11039 | ENSG00000173548 | SNX33     | Approved General ccytoplasm                         |
| 11040 | ENSG00000173557 | C2orf70   | Enhanced Expression in acrosomes of spermatids.     |
| 11041 | ENSG00000173567 | ADGRF3    | UncertainEstimation of protein expression could not |
| 11042 | ENSG00000173572 | NLRP13    | UncertainEstimation of protein expression could not |
| 11043 | ENSG00000173575 | CHD2      | Enhanced Nuclear enucleus                           |
| 11044 | ENSG00000173578 | XCR1      | UncertainEstimation of protein expression could not |
| 11045 | ENSG00000173581 | CCDC106   | UncertainEstimation of protein expression could not |
| 11046 | ENSG00000173585 | CCR9      | UncertainCytoplasmcytoplasm                         |
| 11047 | ENSG00000173588 | CEP83     | Approved Cytoplasmcytoplasm;nucleus                 |
| 11048 | ENSG00000173597 | SULT1B1   | Enhanced Cytoplasmcytoplasm                         |
| 11049 | ENSG00000173598 | NUDT4     | Approved General ccytoplasm                         |
| 11050 | ENSG00000173599 | PC        | Enhanced Granular cytoplasm                         |
| 11051 | ENSG00000173610 | UGT2A1    | UncertainEstimation of protein expression could not |
| 11052 | ENSG00000173611 | SCAI      | Approved Cytoplasmcytoplasm;nucleus;plasma membrane |
| 11053 | ENSG00000173614 | NMNAT1    | Approved Nuclear enucleus                           |

|       |                 |          |                                                      |
|-------|-----------------|----------|------------------------------------------------------|
| 11054 | ENSG00000173621 | LRFN4    | Enhanced Nuclear nucleus;plasma membrane             |
| 11055 | ENSG00000173627 | APOBEC4  | Approved Cytoplasmcytoplasm                          |
| 11056 | ENSG00000173638 | SLC19A1  | Approved Cytoplasmcytoplasm                          |
| 11057 | ENSG00000173641 | HSPB7    | Approved Cytoplasmcytoplasm                          |
| 11058 | ENSG00000173653 | RCE1     | Approved General ccytoplasm                          |
| 11059 | ENSG00000173660 | UQCRH    | SupportedGranular cytoplasm                          |
| 11060 | ENSG00000173662 | TAS1R1   | Approved Ubiquitouscytoplasm                         |
| 11061 | ENSG00000173673 | HES3     | UncertainEstimation of protein expression could not  |
| 11062 | ENSG00000173674 | EIF1AX   | UncertainGeneral ccytoplasm;nucleus                  |
| 11063 | ENSG00000173678 | SPDYE2B  | SupportedDistinct expression in acrosomes in spermat |
| 11064 | ENSG00000173681 | BCLAF3   | Approved General nnucleus                            |
| 11065 | ENSG00000173692 | PSMD1    | Enhanced Cytoplasmcytoplasm;nucleus                  |
| 11066 | ENSG00000173698 | ADGRG2   | Enhanced Membranouplasma membrane                    |
| 11067 | ENSG00000173699 | SPATA3   | Enhanced Selectivecytoplasm                          |
| 11068 | ENSG00000173702 | MUC13    | Enhanced Selectivecytoplasm                          |
| 11069 | ENSG00000173705 | SUSD5    | UncertainEstimation of protein expression could not  |
| 11070 | ENSG00000173706 | HEG1     | Approved Cytoplasmcytoplasm                          |
| 11071 | ENSG00000173715 | C11orf80 | Approved Cytoplasmcytoplasm                          |
| 11072 | ENSG00000173726 | TOMM20   | SupportedCytoplasmcytoplasm                          |
| 11073 | ENSG00000173744 | AGFG1    | Approved Cytoplasmcytoplasm;plasma membrane          |
| 11074 | ENSG00000173757 | STAT5B   | Approved General ccytoplasm;nucleus                  |
| 11075 | ENSG00000173762 | CD7      | Enhanced Cytoplasmcytoplasm                          |
| 11076 | ENSG00000173769 | TOPAZ1   | UncertainEstimation of protein expression could not  |
| 11077 | ENSG00000173786 | CNP      | Enhanced Highly specific expression in oligodendrocy |
| 11078 | ENSG00000173801 | JUP      | SupportedCytoplasmcytoplasm;plasma membrane          |
| 11079 | ENSG00000173805 | HAP1     | Enhanced Cytoplasmcytoplasm                          |
| 11080 | ENSG00000173821 | RNF213   | Approved General ccytoplasm                          |
| 11081 | ENSG00000173826 | KCNH6    | Approved Expression mainly in processes in brain.    |
| 11082 | ENSG00000173838 | #####    | Enhanced Nuclear enucleus                            |
| 11083 | ENSG00000173846 | PLK3     | Enhanced Nuclear enucleus                            |
| 11084 | ENSG00000173848 | NET1     | UncertainCytoplasmcytoplasm                          |
| 11085 | ENSG00000173852 | DPY19L1  | UncertainMainly ccytoplasm                           |
| 11086 | ENSG00000173875 | ZNF791   | UncertainCytoplasmcytoplasm                          |
| 11087 | ENSG00000173889 | PHC3     | Approved Ubiquitouscytoplasm;nucleus                 |
| 11088 | ENSG00000173890 | GPR160   | Approved Cytoplasmcytoplasm;plasma membrane          |
| 11089 | ENSG00000173894 | CBX2     | Approved Nuclear enucleus                            |
| 11090 | ENSG00000173898 | SPTBN2   | Enhanced Cytoplasmcytoplasm;plasma membrane          |
| 11091 | ENSG00000173905 | GOLIM4   | Enhanced Cytoplasmcytoplasm                          |
| 11092 | ENSG00000173908 | KRT28    | Enhanced Highly expressed in the internal root shea  |
| 11093 | ENSG00000173914 | RBM4B    | UncertainGeneral ccytoplasm;nucleus;plasma membrane  |
| 11094 | ENSG00000173918 | C1QTNF1  | UncertainCytoplasmcytoplasm                          |
| 11095 | ENSG00000173926 | 3/3/2019 | UncertainRNA-based expert annotation gave inconclus  |
| 11096 | ENSG00000173928 | SWSAP1   | UncertainEstimation of protein expression could not  |
| 11097 | ENSG00000173933 | RBM4     | Approved General ccytoplasm;nucleus;plasma membrane  |
| 11098 | ENSG00000173960 | UBXN2A   | SupportedUbiquitouscytoplasm                         |
| 11099 | ENSG00000173976 | RAX2     | UncertainEstimation of protein expression could not  |
| 11100 | ENSG00000173988 | LRRC63   | UncertainEstimation of protein expression could not  |
| 11101 | ENSG00000173991 | TCAP     | Enhanced Selectivecytoplasm                          |
| 11102 | ENSG00000173992 | CCS      | Approved Cytoplasmcytoplasm                          |
| 11103 | ENSG00000174004 | NRROS    | UncertainCytoplasmcytoplasm                          |
| 11104 | ENSG00000174007 | CEP19    | Enhanced Cytoplasmcytoplasm                          |
| 11105 | ENSG00000174010 | KLHL15   | UncertainCytoplasmcytoplasm;nucleus                  |
| 11106 | ENSG00000174013 | FBX045   | UncertainEstimation of protein expression could not  |
| 11107 | ENSG00000174015 | SPERT    | Enhanced Selective expression in spermatids.         |
| 11108 | ENSG00000174016 | FAM46D   | UncertainEstimation of protein expression could not  |

|       |                 |          |                                                       |
|-------|-----------------|----------|-------------------------------------------------------|
| 11109 | ENSG00000174021 | GNG5     | Approved Ubiquitous cytoplasm                         |
| 11110 | ENSG00000174059 | CD34     | Enhanced Selective cytoplasm                          |
| 11111 | ENSG00000174080 | CTSF     | Approved Cytoplasm cytoplasm                          |
| 11112 | ENSG00000174099 | MSRB3    | Uncertain General c cytoplasm                         |
| 11113 | ENSG00000174106 | LEMD3    | Uncertain Nuclear a cytoplasm;nucleus                 |
| 11114 | ENSG00000174132 | FAM174A  | Approved Cytoplasm cytoplasm                          |
| 11115 | ENSG00000174137 | FAM53A   | Enhanced Ubiquitous nucleus                           |
| 11116 | ENSG00000174145 | NWD2     | Uncertain Estimation of protein expression could not  |
| 11117 | ENSG00000174151 | CYB561D1 | Uncertain Cytoplasm cytoplasm;nucleus                 |
| 11118 | ENSG00000174156 | GSTA3    | Approved Cytoplasm cytoplasm                          |
| 11119 | ENSG00000174165 | ZDHHC24  | Approved Cytoplasm cytoplasm                          |
| 11120 | ENSG00000174173 | TRMT10C  | Approved General n cytoplasm;nucleus                  |
| 11121 | ENSG00000174175 | SELP     | Enhanced Highly selective expression in megakaryocyte |
| 11122 | ENSG00000174177 | CTU2     | Uncertain Cytoplasm cytoplasm                         |
| 11123 | ENSG00000174197 | MGA      | Approved Nuclear enucleus                             |
| 11124 | ENSG00000174206 | C12orf66 | Uncertain Cytoplasm cytoplasm                         |
| 11125 | ENSG00000174225 | ARL13A   | Uncertain Estimation of protein expression could not  |
| 11126 | ENSG00000174226 | SNX31    | Uncertain Estimation of protein expression could not  |
| 11127 | ENSG00000174227 | PIGG     | Uncertain Cytoplasm cytoplasm                         |
| 11128 | ENSG00000174231 | PRPF8    | Supported Ubiquitous nucleus                          |
| 11129 | ENSG00000174233 | ADCY6    | Approved Cytoplasm cytoplasm                          |
| 11130 | ENSG00000174236 | REP15    | Approved Cytoplasm cytoplasm                          |
| 11131 | ENSG00000174238 | PITPNA   | Uncertain Cytoplasm cytoplasm                         |
| 11132 | ENSG00000174243 | DDX23    | Approved Nuclear enucleus                             |
| 11133 | ENSG00000174255 | ZNF80    | Uncertain Estimation of protein expression could not  |
| 11134 | ENSG00000174276 | ZNHIT2   | Uncertain Estimation of protein expression could not  |
| 11135 | ENSG00000174279 | EVX2     | Uncertain Estimation of protein expression could not  |
| 11136 | ENSG00000174282 | ZBTB4    | Supported Nuclear a cytoplasm;nucleus                 |
| 11137 | ENSG00000174292 | TNK1     | Uncertain Cytoplasm cytoplasm                         |
| 11138 | ENSG00000174307 | PHLDA3   | Approved Cytoplasm cytoplasm                          |
| 11139 | ENSG00000174332 | GLIS1    | Uncertain Estimation of protein expression could not  |
| 11140 | ENSG00000174358 | SLC6A19  | Enhanced Selective plasma membrane                    |
| 11141 | ENSG00000174370 | C11orf45 | Approved Cytoplasm cytoplasm                          |
| 11142 | ENSG00000174373 | RALGAP1  | Approved Cytoplasm cytoplasm                          |
| 11143 | ENSG00000174405 | LIG4     | Supported Mainly n nucleus                            |
| 11144 | ENSG00000174417 | TRHR     | Approved Cytoplasm cytoplasm                          |
| 11145 | ENSG00000174437 | ATP2A2   | Enhanced Cytoplasm cytoplasm                          |
| 11146 | ENSG00000174444 | RPL4     | Uncertain Cytoplasm cytoplasm                         |
| 11147 | ENSG00000174446 | SNAPC5   | Uncertain Cytoplasm cytoplasm                         |
| 11148 | ENSG00000174453 | VWC2L    | Uncertain Estimation of protein expression could not  |
| 11149 | ENSG00000174456 | C12orf76 | Uncertain General c cytoplasm                         |
| 11150 | ENSG00000174460 | ZCCHC12  | Uncertain Nuclear a nucleus                           |
| 11151 | ENSG00000174469 | CNTNAP2  | Enhanced Distinct expression in CNS.                  |
| 11152 | ENSG00000174473 | GALNTL6  | Uncertain Estimation of protein expression could not  |
| 11153 | ENSG00000174482 | LINGO2   | Approved Cytoplasm cytoplasm                          |
| 11154 | ENSG00000174483 | BBS1     | Uncertain Granular cytoplasm                          |
| 11155 | ENSG00000174485 | DENND4A  | Uncertain Cytoplasm cytoplasm;nucleus                 |
| 11156 | ENSG00000174500 | GCSAM    | Approved Cytoplasm cytoplasm                          |
| 11157 | ENSG00000174502 | SLC26A9  | Enhanced Luminal m cytoplasm;plasma membrane          |
| 11158 | ENSG00000174516 | PELI3    | Uncertain Cytoplasm cytoplasm                         |
| 11159 | ENSG00000174521 | TTC9B    | Approved Cytoplasm cytoplasm                          |
| 11160 | ENSG00000174527 | MYO1H    | Uncertain Estimation of protein expression could not  |
| 11161 | ENSG00000174547 | MRPL11   | Approved General c cytoplasm                          |
| 11162 | ENSG00000174562 | KLK15    | Uncertain Cytoplasm cytoplasm;plasma membrane         |
| 11163 | ENSG00000174574 | AKIRIN1  | Approved Cytoplasm cytoplasm                          |

|       |                 |          |                                                     |
|-------|-----------------|----------|-----------------------------------------------------|
| 11164 | ENSG00000174576 | NPAS4    | UncertainCytoplasmcytoplasm                         |
| 11165 | ENSG00000174579 | MSL2     | UncertainCytoplasmcytoplasm                         |
| 11166 | ENSG00000174586 | ZNF497   | UncertainEstimation of protein expression could not |
| 11167 | ENSG00000174599 | TRAM1L1  | UncertainEstimation of protein expression could not |
| 11168 | ENSG00000174600 | CMKLR1   | UncertainCytoplasmcytoplasm                         |
| 11169 | ENSG00000174606 | ANGEL2   | UncertainMembranoucytoplasm;plasma membrane         |
| 11170 | ENSG00000174607 | UGT8     | Enhanced Membranoucytoplasm;plasma membrane         |
| 11171 | ENSG00000174611 | KY       | UncertainCytoplasmcytoplasm                         |
| 11172 | ENSG00000174628 | IQCK     | Approved Cytoplasmcytoplasm                         |
| 11173 | ENSG00000174640 | SLC02A1  | Enhanced Cytoplasmcytoplasm;plasma membrane         |
| 11174 | ENSG00000174652 | ZNF266   | UncertainCytoplasmcytoplasm                         |
| 11175 | ENSG00000174669 | SLC29A2  | Approved Nuclear acytoplasm;nucleus                 |
| 11176 | ENSG00000174684 | B4GAT1   | UncertainCytoplasmcytoplasm                         |
| 11177 | ENSG00000174697 | LEP      | Approved Positivitplasma membrane                   |
| 11178 | ENSG00000174705 | SH3PXD2B | Approved Cytoplasmcytoplasm                         |
| 11179 | ENSG00000174718 | KIAA1551 | Approved Cytoplasmcytoplasm                         |
| 11180 | ENSG00000174720 | LARP7    | Approved Nuclear anucleus                           |
| 11181 | ENSG00000174721 | FGFBP3   | UncertainEstimation of protein expression could not |
| 11182 | ENSG00000174738 | NR1D2    | Approved Nuclear enucleus                           |
| 11183 | ENSG00000174740 | PABPC5   | Approved Cytoplasmcytoplasm                         |
| 11184 | ENSG00000174744 | BRMS1    | Approved Nuclear acytoplasm;nucleus                 |
| 11185 | ENSG00000174749 | FAM241A  | Approved Cytoplasmcytoplasm                         |
| 11186 | ENSG00000174775 | HRAS     | Approved Cytoplasmcytoplasm;plasma membrane         |
| 11187 | ENSG00000174776 | WDR49    | UncertainEstimation of protein expression could not |
| 11188 | ENSG00000174780 | SRP72    | Approved General ccytoplasm                         |
| 11189 | ENSG00000174791 | RIN1     | UncertainGeneral ccytoplasm                         |
| 11190 | ENSG00000174796 | THAP6    | UncertainEstimation of protein expression could not |
| 11191 | ENSG00000174804 | FZD4     | Approved Granular cytoplasm                         |
| 11192 | ENSG00000174807 | CD248    | Enhanced Low cytopcytoplasm                         |
| 11193 | ENSG00000174827 | PDZK1    | Enhanced Cytoplasmcytoplasm                         |
| 11194 | ENSG00000174837 | ADGRE1   | UncertainCytoplasmcytoplasm                         |
| 11195 | ENSG00000174839 | DENND6A  | Approved Ubiquitoucytoplasm                         |
| 11196 | ENSG00000174840 | PDE12    | Approved General ncytoplasm;nucleus                 |
| 11197 | ENSG00000174842 | GLMN     | Approved Mainly ccytoplasm                          |
| 11198 | ENSG00000174844 | DNAH12   | Enhanced Selective expression in cilia in fallopian |
| 11199 | ENSG00000174851 | YIF1A    | Approved Cytoplasmcytoplasm                         |
| 11200 | ENSG00000174876 | AMY1B    | SupportedSelectivecytoplasm                         |
| 11201 | ENSG00000174885 | NLRP6    | SupportedCytoplasmcytoplasm                         |
| 11202 | ENSG00000174891 | RSRC1    | SupportedNuclear acytoplasm;nucleus                 |
| 11203 | ENSG00000174898 | CATSPERD | Enhanced Cytoplasmcytoplasm                         |
| 11204 | ENSG00000174899 | PQLC2L   | UncertainEstimation of protein expression could not |
| 11205 | ENSG00000174903 | RAB1B    | Approved General ccytoplasm                         |
| 11206 | ENSG00000174915 | PTDSS2   | Approved Cytoplasmcytoplasm                         |
| 11207 | ENSG00000174917 | C19orf70 | Approved Nuclear acytoplasm;nucleus                 |
| 11208 | ENSG00000174928 | C3orf33  | UncertainNuclear acytoplasm;nucleus                 |
| 11209 | ENSG00000174938 | SEZ6L2   | Enhanced Cytoplasmcytoplasm                         |
| 11210 | ENSG00000174939 | ASPHD1   | UncertainCytoplasmcytoplasm;plasma membrane         |
| 11211 | ENSG00000174943 | KCTD13   | Enhanced General nnucleus                           |
| 11212 | ENSG00000174944 | P2RY14   | UncertainCytoplasmcytoplasm;plasma membrane         |
| 11213 | ENSG00000174945 | AMZ1     | UncertainEstimation of protein expression could not |
| 11214 | ENSG00000174946 | GPR171   | Approved Cytoplasmcytoplasm;nucleus                 |
| 11215 | ENSG00000174948 | GPR149   | UncertainEstimation of protein expression could not |
| 11216 | ENSG00000174950 | CD164L2  | Enhanced Cytoplasmcytoplasm                         |
| 11217 | ENSG00000174953 | DHX36    | Approved General ccytoplasm                         |
| 11218 | ENSG00000174957 | OR5J2    | UncertainEstimation of protein expression could not |

|       |                 |          |                                                      |
|-------|-----------------|----------|------------------------------------------------------|
| 11219 | ENSG00000174963 | ZIC4     | UncertainNucleolar nucleus                           |
| 11220 | ENSG00000174989 | FBXW8    | SupportedUbiquitous cytoplasm                        |
| 11221 | ENSG00000174992 | ZG16     | Enhanced Highly secytoplasm                          |
| 11222 | ENSG00000174996 | KLC2     | Approved Ubiquitous cytoplasm                        |
| 11223 | ENSG00000175003 | SLC22A1  | Approved Cytoplasm cytoplasm                         |
| 11224 | ENSG00000175029 | CTBP2    | Approved Mainly nunucleus                            |
| 11225 | ENSG00000175048 | ZDHHC14  | Approved Granular cytopamsci expression in selected  |
| 11226 | ENSG00000175063 | UBE2C    | Approved General ccytoplasm                          |
| 11227 | ENSG00000175065 | DSG4     | Enhanced Distinct plasma membrane                    |
| 11228 | ENSG00000175066 | GK5      | Approved Cytoplasm cytoplasm; plasma membrane        |
| 11229 | ENSG00000175073 | VCPIP1   | UncertainEstimation of protein expression could not  |
| 11230 | ENSG00000175084 | DES      | Enhanced Selective cytoplasm                         |
| 11231 | ENSG00000175104 | TRAF6    | Approved Cytoplasm cytoplasm                         |
| 11232 | ENSG00000175105 | ZNF654   | UncertainCytoplasm cytoplasm; nucleus                |
| 11233 | ENSG00000175106 | TVP23C   | UncertainCytoplasm cytoplasm                         |
| 11234 | ENSG00000175110 | MRPS22   | Enhanced General ccytoplasm                          |
| 11235 | ENSG00000175115 | PACS1    | Approved General ccytoplasm                          |
| 11236 | ENSG00000175130 | MARCKSL1 | Enhanced Cytoplasm cytoplasm; plasma membrane        |
| 11237 | ENSG00000175137 | SH3BP5L  | Approved Cytoplasm cytoplasm; plasma membrane        |
| 11238 | ENSG00000175143 | OR2T1    | UncertainEstimation of protein expression could not  |
| 11239 | ENSG00000175155 | YPEL2    | UncertainGeneral ccytoplasm                          |
| 11240 | ENSG00000175161 | CADM2    | Enhanced Distinct expression in CNS and peripheral   |
| 11241 | ENSG00000175166 | PSMD2    | Approved General ccytoplasm                          |
| 11242 | ENSG00000175170 | FAM182B  | UncertainEstimation of protein expression could not  |
| 11243 | ENSG00000175175 | PPM1E    | Approved Cytoplasm cytoplasm; nucleus                |
| 11244 | ENSG00000175182 | FAM131A  | UncertainGeneral nnucleus                            |
| 11245 | ENSG00000175183 | CSRP2    | UncertainCytoplasm cytoplasm; plasma membrane        |
| 11246 | ENSG00000175193 | PARL     | Approved Cytoplasm cytoplasm                         |
| 11247 | ENSG00000175197 | DDIT3    | UncertainCytoplasm cytoplasm; nucleus                |
| 11248 | ENSG00000175198 | PCCA     | Enhanced Granular cytoplasm                          |
| 11249 | ENSG00000175202 | HIGD2B   | UncertainEstimation of protein expression could not  |
| 11250 | ENSG00000175203 | DCTN2    | Enhanced Ubiquitous cytoplasm                        |
| 11251 | ENSG00000175206 | NPPA     | Enhanced Distinct expression in heart.               |
| 11252 | ENSG00000175213 | ZNF408   | UncertainCytoplasm cytoplasm                         |
| 11253 | ENSG00000175215 | CTDSP2   | UncertainCytoplasm cytoplasm; plasma membrane        |
| 11254 | ENSG00000175216 | CKAP5    | SupportedUbiquitous cytoplasm                        |
| 11255 | ENSG00000175220 | ARHGAP1  | Approved Cytoplasm cytoplasm                         |
| 11256 | ENSG00000175221 | MED16    | UncertainCytoplasm cytoplasm                         |
| 11257 | ENSG00000175262 | Clorf127 | UncertainEstimation of protein expression could not  |
| 11258 | ENSG00000175265 | GOLGA8A  | Approved Cytoplasm cytoplasm                         |
| 11259 | ENSG00000175267 | VWA3A    | UncertainEstimation of protein expression could not  |
| 11260 | ENSG00000175274 | TP53I11  | UncertainCytoplasm cytoplasm                         |
| 11261 | ENSG00000175305 | CCNE2    | Enhanced Nuclear enucleus                            |
| 11262 | ENSG00000175309 | PHYKPL   | Approved Cytoplasm cytoplasm                         |
| 11263 | ENSG00000175311 | ANKS4B   | Approved Cytoplasm cytoplasm; plasma membrane        |
| 11264 | ENSG00000175315 | CST6     | Enhanced Selective cytoplasm                         |
| 11265 | ENSG00000175318 | GRAMD2A  | UncertainEstimation of protein expression could not  |
| 11266 | ENSG00000175322 | ZNF519   | UncertainEstimation of protein expression could not  |
| 11267 | ENSG00000175325 | PROP1    | Enhanced Nuclear enucleus                            |
| 11268 | ENSG00000175334 | BANF1    | Enhanced Ubiquitous nucleus; plasma membrane         |
| 11269 | ENSG00000175344 | CHRNA7   | Enhanced General ccytoplasm                          |
| 11270 | ENSG00000175348 | TMEM9B   | UncertainGeneral ccytoplasm                          |
| 11271 | ENSG00000175352 | NRIP3    | Approved Expression in Leydig cells, ovarian follic. |
| 11272 | ENSG00000175354 | PTPN2    | Enhanced General nnucleus                            |
| 11273 | ENSG00000175356 | SCUBE2   | UncertainCytoplasm cytoplasm; plasma membrane        |

|       |                 |          |                                                        |
|-------|-----------------|----------|--------------------------------------------------------|
| 11274 | ENSG00000175376 | EIF1AD   | UncertainCytoplasmcytoplasm                            |
| 11275 | ENSG00000175387 | SMAD2    | Approved Nuclear acytoplasm;nucleus                    |
| 11276 | ENSG00000175390 | EIF3F    | Approved Cytoplasmcytoplasm                            |
| 11277 | ENSG00000175395 | ZNF25    | UncertainEstimation of protein expression could not    |
| 11278 | ENSG00000175414 | ARL10    | Approved Cytoplasmcytoplasm;plasma membrane            |
| 11279 | ENSG00000175416 | CLTB     | Approved General ccytoplasm                            |
| 11280 | ENSG00000175426 | PCSK1    | Approved Cytoplasmcytoplasm                            |
| 11281 | ENSG00000175449 | RFESD    | UncertainCytoplasmcytoplasm                            |
| 11282 | ENSG00000175455 | CCDC14   | UncertainCytoplasmcytoplasm                            |
| 11283 | ENSG00000175463 | TBC1D10C | Enhanced Expression in inflammatory cells, mainly in   |
| 11284 | ENSG00000175467 | SART1    | SupportedNuclear enucleus                              |
| 11285 | ENSG00000175470 | PPP2R2D  | Approved Cytoplasmcytoplasm                            |
| 11286 | ENSG00000175489 | LRRC25   | Approved Cytoplasmcytoplasm                            |
| 11287 | ENSG00000175497 | DPP10    | UncertainCytoplasmcytoplasm                            |
| 11288 | ENSG00000175505 | CLCF1    | UncertainCytoplasmcytoplasm;plasma membrane            |
| 11289 | ENSG00000175514 | GPR152   | UncertainEstimation of protein expression could not    |
| 11290 | ENSG00000175520 | UBQLN3   | Enhanced Selective expression in cells of seminiferous |
| 11291 | ENSG00000175535 | PNLIP    | Enhanced Cytoplasmcytoplasm                            |
| 11292 | ENSG00000175536 | LIPT2    | Approved Cytoplasmcytoplasm                            |
| 11293 | ENSG00000175538 | KCNE3    | Approved Cytoplasmcytoplasm                            |
| 11294 | ENSG00000175548 | ALG10B   | Approved Nuclear enucleus                              |
| 11295 | ENSG00000175550 | DRAP1    | UncertainNuclear acytoplasm;nucleus                    |
| 11296 | ENSG00000175556 | LONRF3   | UncertainCytoplasmcytoplasm                            |
| 11297 | ENSG00000175564 | UCP3     | Enhanced Cytoplasmcytoplasm                            |
| 11298 | ENSG00000175567 | UCP2     | Approved Ubiquitouscytoplasm                           |
| 11299 | ENSG00000175573 | C11orf68 | UncertainNuclear acytoplasm;nucleus                    |
| 11300 | ENSG00000175575 | PAAF1    | UncertainCytoplasmcytoplasm;nucleus                    |
| 11301 | ENSG00000175581 | MRPL48   | Approved Cytoplasmcytoplasm                            |
| 11302 | ENSG00000175582 | RAB6A    | Approved Granular cytoplasm                            |
| 11303 | ENSG00000175591 | P2RY2    | UncertainCytoplasmcytoplasm                            |
| 11304 | ENSG00000175592 | FOSL1    | SupportedNuclear acytoplasm;nucleus                    |
| 11305 | ENSG00000175595 | ERCC4    | Approved Nuclear enucleus                              |
| 11306 | ENSG00000175600 | SUGCT    | Enhanced Cytoplasmcytoplasm                            |
| 11307 | ENSG00000175602 | CCDC85B  | UncertainGranular cytoplasm                            |
| 11308 | ENSG00000175606 | TMEM70   | UncertainCytoplasmcytoplasm                            |
| 11309 | ENSG00000175619 | OR4B1    | UncertainEstimation of protein expression could not    |
| 11310 | ENSG00000175634 | RPS6KB2  | Approved Cytoplasmcytoplasm                            |
| 11311 | ENSG00000175643 | RMI2     | UncertainCytoplasmcytoplasm;nucleus                    |
| 11312 | ENSG00000175646 | PRM1     | Enhanced Distinct expression in sperms of testis.      |
| 11313 | ENSG00000175662 | TOM1L2   | Enhanced Cytoplasmcytoplasm                            |
| 11314 | ENSG00000175691 | ZNF77    | UncertainEstimation of protein expression could not    |
| 11315 | ENSG00000175697 | GPR156   | UncertainEstimation of protein expression could not    |
| 11316 | ENSG00000175707 | KDF1     | UncertainCytoplasmcytoplasm                            |
| 11317 | ENSG00000175711 | B3GNTL1  | SupportedCytoplasmcytoplasm                            |
| 11318 | ENSG00000175718 | RBMXL3   | SupportedNuclear enucleus                              |
| 11319 | ENSG00000175727 | MLXIP    | Approved General ccytoplasm                            |
| 11320 | ENSG00000175756 | AURKAIP1 | Approved Nuclear acytoplasm;nucleus                    |
| 11321 | ENSG00000175764 | TTL11    | Approved Cytoplasmcytoplasm                            |
| 11322 | ENSG00000175766 | EIF4E1B  | Approved Cytoplasmcytoplasm                            |
| 11323 | ENSG00000175768 | TOMM5    | Approved Cytoplasmcytoplasm                            |
| 11324 | ENSG00000175779 | C15orf53 | UncertainEstimation of protein expression could not    |
| 11325 | ENSG00000175782 | SLC35E3  | UncertainEstimation of protein expression could not    |
| 11326 | ENSG00000175785 | PRIMA1   | Approved Cytoplasmcytoplasm;plasma membrane            |
| 11327 | ENSG00000175787 | ZNF169   | UncertainNuclear acytoplasm;nucleus                    |
| 11328 | ENSG00000175792 | RUVBL1   | Enhanced Cytoplasmcytoplasm                            |

|       |                 |         |                    |                                            |
|-------|-----------------|---------|--------------------|--------------------------------------------|
| 11329 | ENSG00000175793 | SFN     | Enhanced High cyto | cytoplasm                                  |
| 11330 | ENSG00000175806 | MSRA    | Approved           | Cytoplasm cytoplasm                        |
| 11331 | ENSG00000175820 | CCDC168 | Uncertain          | Estimation of protein expression could not |
| 11332 | ENSG00000175826 | CTDNEP1 | Uncertain          | Cytoplasm cytoplasm                        |
| 11333 | ENSG00000175832 | ETV4    | Approved           | Nuclear a nucleus                          |
| 11334 | ENSG00000175854 | SWI5    | Approved           | Ubiquitou cytoplasm;nucleus                |
| 11335 | ENSG00000175857 | GAPT    | Uncertain          | Cytoplasm cytoplasm                        |
| 11336 | ENSG00000175866 | BAIAP2  | Enhanced           | Ubiquitou cytoplasm                        |
| 11337 | ENSG00000175874 | CREG2   | Enhanced           | Selective expression in brain              |
| 11338 | ENSG00000175893 | ZDHHC21 | Approved           | General c cytoplasm                        |
| 11339 | ENSG00000175894 | TSPEAR  | Uncertain          | Cytoplasm cytoplasm                        |
| 11340 | ENSG00000175895 | PLEKHF2 | Uncertain          | Cytoplasm cytoplasm                        |
| 11341 | ENSG00000175899 | A2M     | Supported          | Extracell plasma membrane                  |
| 11342 | ENSG00000175906 | ARL4D   | Uncertain          | Cytoplasm cytoplasm;plasma membrane        |
| 11343 | ENSG00000175920 | DOK7    | Approved           | Cytoplasm cytoplasm                        |
| 11344 | ENSG00000175928 | LRRN1   | Enhanced           | General c cytoplasm                        |
| 11345 | ENSG00000175931 | UBE20   | Uncertain          | Cytoplasm cytoplasm                        |
| 11346 | ENSG00000175938 | ORAI3   | Uncertain          | General n cytoplasm;nucleus                |
| 11347 | ENSG00000175946 | KLHL38  | Uncertain          | Cytoplasm cytoplasm                        |
| 11348 | ENSG00000175970 | UNC119B | Enhanced           | Mainly expressed in fallopian tube and res |
| 11349 | ENSG00000175984 | DENND2C | Uncertain          | Cytoplasm cytoplasm                        |
| 11350 | ENSG00000175985 | PLEKHD1 | Uncertain          | Estimation of protein expression could not |
| 11351 | ENSG00000176009 | ASCL3   | Uncertain          | General c cytoplasm                        |
| 11352 | ENSG00000176014 | TUBB6   | Approved           | Cytoplasm cytoplasm                        |
| 11353 | ENSG00000176018 | LYSMD3  | Approved           | General c cytoplasm                        |
| 11354 | ENSG00000176024 | ZNF613  | Uncertain          | Mainly n nucleus                           |
| 11355 | ENSG00000176040 | TMPRSS7 | Uncertain          | Estimation of protein expression could not |
| 11356 | ENSG00000176049 | JAKMIP2 | Approved           | Cytoplasm cytoplasm;plasma membrane        |
| 11357 | ENSG00000176055 | MBLAC2  | Uncertain          | Cytoplasm cytoplasm                        |
| 11358 | ENSG00000176058 | TPRN    | Approved           | Cytoplasm cytoplasm;plasma membrane        |
| 11359 | ENSG00000176083 | ZNF683  | Uncertain          | General n nucleus                          |
| 11360 | ENSG00000176095 | IP6K1   | Approved           | Cytoplasm cytoplasm;nucleus                |
| 11361 | ENSG00000176102 | CSTF3   | Enhanced           | Nuclear e nucleus                          |
| 11362 | ENSG00000176105 | YES1    | Approved           | Ubiquitou cytoplasm                        |
| 11363 | ENSG00000176108 | CHMP6   | Approved           | Cytoplasm cytoplasm;plasma membrane        |
| 11364 | ENSG00000176125 | UFSP1   | Uncertain          | Cytoplasm cytoplasm;plasma membrane        |
| 11365 | ENSG00000176136 | MC5R    | Approved           | Cytoplasm cytoplasm                        |
| 11366 | ENSG00000176142 | TMEM39A | Approved           | Cytoplasm cytoplasm                        |
| 11367 | ENSG00000176148 | TCP11L1 | Approved           | General c cytoplasm                        |
| 11368 | ENSG00000176153 | GPX2    | Enhanced           | Cytoplasm cytoplasm                        |
| 11369 | ENSG00000176155 | CCDC57  | Approved           | Ubiquitou cytoplasm                        |
| 11370 | ENSG00000176160 | HSF5    | Enhanced           | Nuclear e nucleus                          |
| 11371 | ENSG00000176170 | SPHK1   | Uncertain          | Cytoplasm cytoplasm                        |
| 11372 | ENSG00000176171 | BNIP3   | Supported          | Cytoplasm cytoplasm                        |
| 11373 | ENSG00000176177 | ENTHD1  | Uncertain          | Estimation of protein expression could not |
| 11374 | ENSG00000176198 | OR11H4  | Uncertain          | Estimation of protein expression could not |
| 11375 | ENSG00000176209 | SMIM19  | Uncertain          | Cytoplasm cytoplasm                        |
| 11376 | ENSG00000176222 | ZNF404  | Uncertain          | Estimation of protein expression could not |
| 11377 | ENSG00000176225 | RTTN    | Uncertain          | Cytoplasm cytoplasm                        |
| 11378 | ENSG00000176248 | ANAPC2  | Enhanced           | Nuclear e nucleus                          |
| 11379 | ENSG00000176256 | HMGB4   | Enhanced           | Nuclear e nucleus                          |
| 11380 | ENSG00000176261 | ZBTB80S | Approved           | Cytoplasm cytoplasm                        |
| 11381 | ENSG00000176269 | OR4F21  | Uncertain          | Estimation of protein expression could not |
| 11382 | ENSG00000176293 | ZNF135  | Approved           | Nuclear a cytoplasm;nucleus                |
| 11383 | ENSG00000176299 | OR4M1   | Uncertain          | Estimation of protein expression could not |

|       |                 |           |                                                      |
|-------|-----------------|-----------|------------------------------------------------------|
| 11384 | ENSG00000176340 | COX8A     | SupportedUbiquitouscytoplasm                         |
| 11385 | ENSG00000176371 | ZSCAN2    | SupportedGeneral nucleus                             |
| 11386 | ENSG00000176381 | PRR18     | Enhanced Nuclear nucleus                             |
| 11387 | ENSG00000176383 | B3GNT4    | UncertainCytoplasmcytoplasm                          |
| 11388 | ENSG00000176386 | CDC26     | Approved General nucleus                             |
| 11389 | ENSG00000176387 | HSD11B2   | Enhanced Cytoplasmcytoplasm                          |
| 11390 | ENSG00000176390 | CRLF3     | Enhanced Cytoplasmcytoplasm                          |
| 11391 | ENSG00000176393 | RNPEP     | Approved Cytoplasmcytoplasm                          |
| 11392 | ENSG00000176396 | EID2      | UncertainCytoplasmcytoplasm                          |
| 11393 | ENSG00000176399 | DMRTA1    | UncertainEstimation of protein expression could not  |
| 11394 | ENSG00000176401 | EID2B     | Approved Cytoplasmcytoplasm;plasma membrane          |
| 11395 | ENSG00000176402 | GJC3      | UncertainCytoplasmcytoplasm;plasma membrane          |
| 11396 | ENSG00000176406 | RIMS2     | Enhanced Cytoplasmcytoplasm                          |
| 11397 | ENSG00000176407 | KCMF1     | Enhanced Cytoplasmcytoplasm                          |
| 11398 | ENSG00000176410 | DNAJC30   | UncertainEstimation of protein expression could not  |
| 11399 | ENSG00000176422 | SPRYD4    | UncertainNuclear acytoplasm;nucleus                  |
| 11400 | ENSG00000176428 | VPS37D    | UncertainEstimation of protein expression could not  |
| 11401 | ENSG00000176435 | CLEC14A   | UncertainGranular cytoplasm;plasma membrane          |
| 11402 | ENSG00000176438 | SYNE3     | Approved Nuclear nucleus                             |
| 11403 | ENSG00000176444 | CLK2      | Approved Nuclear nucleus                             |
| 11404 | ENSG00000176454 | LPCAT4    | SupportedExpression in most tissues.                 |
| 11405 | ENSG00000176463 | SLC03A1   | Approved Expressed mainly in cerebral cortex and mo. |
| 11406 | ENSG00000176472 | ZNF575    | Approved Nuclear nucleus                             |
| 11407 | ENSG00000176473 | WDR25     | UncertainUbiquitouscytoplasm;nucleus                 |
| 11408 | ENSG00000176476 | SGF29     | Enhanced Nuclear nucleus                             |
| 11409 | ENSG00000176485 | PLA2G16   | UncertainEstimation of protein expression could not  |
| 11410 | ENSG00000176531 | PHLDB3    | Approved Ubiquitouscytoplasm                         |
| 11411 | ENSG00000176532 | PRR15     | Enhanced Cytoplasmcytoplasm;nucleus                  |
| 11412 | ENSG00000176533 | GNG7      | SupportedExpressednucleus                            |
| 11413 | ENSG00000176540 | OR4C5     | UncertainEstimation of protein expression could not  |
| 11414 | ENSG00000176542 | USF3      | UncertainCytoplasmcytoplasm;nucleus                  |
| 11415 | ENSG00000176547 | OR4C3     | UncertainEstimation of protein expression could not  |
| 11416 | ENSG00000176566 | DCAF4L2   | UncertainCytoplasmcytoplasm                          |
| 11417 | ENSG00000176571 | CNBD1     | UncertainEstimation of protein expression could not  |
| 11418 | ENSG00000176595 | KBTBD11   | UncertainEstimation of protein expression could not  |
| 11419 | ENSG00000176597 | B3GNT5    | UncertainCytoplasmcytoplasm                          |
| 11420 | ENSG00000176605 | C14orf177 | UncertainEstimation of protein expression could not  |
| 11421 | ENSG00000176619 | LMNB2     | Enhanced Nuclear nucleus;plasma membrane             |
| 11422 | ENSG00000176623 | RMDN1     | Approved Cytoplasmcytoplasm                          |
| 11423 | ENSG00000176624 | MEX3C     | UncertainCytoplasmcytoplasm                          |
| 11424 | ENSG00000176635 | HORMAD2   | Enhanced Cytoplasmcytoplasm                          |
| 11425 | ENSG00000176658 | MYO1D     | UncertainCytoplasmcytoplasm                          |
| 11426 | ENSG00000176681 | LRRC37A   | SupportedCytoplasmcytoplasm                          |
| 11427 | ENSG00000176697 | BDNF      | Enhanced Cytoplasmcytoplasm                          |
| 11428 | ENSG00000176714 | CCDC121   | UncertainEstimation of protein expression could not  |
| 11429 | ENSG00000176723 | ZNF843    | UncertainCytoplasmcytoplasm                          |
| 11430 | ENSG00000176746 | MAGEB6    | Enhanced Cytoplasmcytoplasm                          |
| 11431 | ENSG00000176771 | NCKAP5    | UncertainEstimation of protein expression could not  |
| 11432 | ENSG00000176774 | MAGEB18   | Enhanced Nuclear nucleus                             |
| 11433 | ENSG00000176782 | DEFB104A  | SupportedSelective extracellular positivity in epid. |
| 11434 | ENSG00000176783 | RUFY1     | Approved General cytoplasm                           |
| 11435 | ENSG00000176787 | OR52E2    | UncertainEstimation of protein expression could not  |
| 11436 | ENSG00000176788 | BASP1     | Enhanced Cytoplasmcytoplasm                          |
| 11437 | ENSG00000176809 | LRRC37A3  | SupportedCytoplasmcytoplasm                          |
| 11438 | ENSG00000176834 | VSIG10    | Enhanced Cytoplasmcytoplasm                          |



|       |                 |          |                                                      |
|-------|-----------------|----------|------------------------------------------------------|
| 11439 | ENSG00000176845 | METRNL   | UncertainRNA-based expert annotation gave inconclus: |
| 11440 | ENSG00000176853 | FAM91A1  | Approved Cytoplasmcytoplasm                          |
| 11441 | ENSG00000176871 | WSB2     | UncertainCytoplasmcytoplasm                          |
| 11442 | ENSG00000176884 | GRIN1    | Enhanced Synaptic expression in brain.               |
| 11443 | ENSG00000176887 | SOX11    | Approved Nuclear enucleus                            |
| 11444 | ENSG00000176890 | TYMS     | Enhanced General ccytoplasm                          |
| 11445 | ENSG00000176895 | OR51A7   | UncertainEstimation of protein expression could not  |
| 11446 | ENSG00000176896 | TCEANC   | UncertainEstimation of protein expression could not  |
| 11447 | ENSG00000176900 | OR51T1   | UncertainEstimation of protein expression could not  |
| 11448 | ENSG00000176903 | PNMA1    | Enhanced Nuclear acytoplasm;nucleus                  |
| 11449 | ENSG00000176907 | TCIM     | Approved Nuclear enucleus                            |
| 11450 | ENSG00000176915 | ANKLE2   | UncertainNuclear enucleus                            |
| 11451 | ENSG00000176919 | C8G      | Approved Extracellcytoplasm;plasma membrane          |
| 11452 | ENSG00000176920 | FUT2     | UncertainCytoplasmcytoplasm                          |
| 11453 | ENSG00000176928 | GCNT4    | Approved Granular cytoplasm                          |
| 11454 | ENSG00000176946 | THAP4    | UncertainCytoplasmcytoplasm;nucleus                  |
| 11455 | ENSG00000176956 | LY6H     | Enhanced Expression in brain and small intestine.    |
| 11456 | ENSG00000176971 | FIBIN    | UncertainCytoplasmcytoplasm                          |
| 11457 | ENSG00000176973 | FAM89B   | Approved Cytoplasmcytoplasm                          |
| 11458 | ENSG00000176974 | SHMT1    | Enhanced Cytoplasmcytoplasm                          |
| 11459 | ENSG00000176978 | DPP7     | SupportedCytoplasmcytoplasm                          |
| 11460 | ENSG00000176979 | TRIM60   | UncertainCytoplasmcytoplasm                          |
| 11461 | ENSG00000176986 | SEC24C   | SupportedUbiquitoucytoplasm                          |
| 11462 | ENSG00000176988 | FMR1NB   | Enhanced Cytoplasmcytoplasm                          |
| 11463 | ENSG00000176994 | SMCR8    | UncertainUbiquitounucleus                            |
| 11464 | ENSG00000177000 | MTHFR    | Enhanced Cytoplasmcytoplasm                          |
| 11465 | ENSG00000177023 | DEFB104B | SupportedSelective extracellular positivity in epid: |
| 11466 | ENSG00000177025 | C19orf18 | UncertainEstimation of protein expression could not  |
| 11467 | ENSG00000177030 | DEAF1    | Approved Nuclear acytoplasm;nucleus                  |
| 11468 | ENSG00000177034 | MTX3     | Approved General ccytoplasm                          |
| 11469 | ENSG00000177042 | TMEM80   | UncertainCytoplasmcytoplasm;plasma membrane          |
| 11470 | ENSG00000177045 | SIX5     | Approved Cytoplasmcytoplasm                          |
| 11471 | ENSG00000177051 | FBX046   | UncertainEstimation of protein expression could not  |
| 11472 | ENSG00000177054 | ZDHHC13  | UncertainCytoplasmcytoplasm                          |
| 11473 | ENSG00000177058 | SLC38A9  | UncertainCytoplasmcytoplasm                          |
| 11474 | ENSG00000177082 | WDR73    | UncertainCytoplasmcytoplasm                          |
| 11475 | ENSG00000177096 | FAM109B  | UncertainCytoplasmcytoplasm                          |
| 11476 | ENSG00000177098 | SCN4B    | Approved Cytoplasmcytoplasm                          |
| 11477 | ENSG00000177103 | DSCAML1  | UncertainNuclear enucleus                            |
| 11478 | ENSG00000177105 | RHOG     | Enhanced Cytoplasmcytoplasm                          |
| 11479 | ENSG00000177106 | EPS8L2   | Approved Cytoplasmcytoplasm                          |
| 11480 | ENSG00000177119 | ANO6     | Approved Cytoplasmcytoplasm;plasma membrane          |
| 11481 | ENSG00000177125 | ZBTB34   | Approved Nuclear acytoplasm;nucleus                  |
| 11482 | ENSG00000177138 | FAM9B    | UncertainEstimation of protein expression could not  |
| 11483 | ENSG00000177143 | CETN1    | Enhanced Cytoplasmcytoplasm                          |
| 11484 | ENSG00000177144 | NUDT4B   | Approved Cytoplasmcytoplasm                          |
| 11485 | ENSG00000177150 | FAM210A  | UncertainCytoplasmcytoplasm                          |
| 11486 | ENSG00000177181 | RIMKLA   | UncertainEstimation of protein expression could not  |
| 11487 | ENSG00000177182 | CLVS1    | Approved Granular expression in brain.               |
| 11488 | ENSG00000177189 | RPS6KA3  | Approved Ubiquitoucytoplasm;nucleus                  |
| 11489 | ENSG00000177191 | B3GNT8   | Enhanced Granular cytoplasm                          |
| 11490 | ENSG00000177192 | PUS1     | Approved Cytoplasmcytoplasm;nucleus                  |
| 11491 | ENSG00000177200 | CHD9     | Approved Cytoplasmcytoplasm;nucleus                  |
| 11492 | ENSG00000177202 | SPACA4   | Enhanced Distinct expression of spermatozoa in test: |
| 11493 | ENSG00000177225 | GATD1    | UncertainCytoplasmcytoplasm                          |

|       |                 |          |                                                      |
|-------|-----------------|----------|------------------------------------------------------|
| 11494 | ENSG00000177238 | TRIM72   | Enhanced Selective expression in skeletal muscle.    |
| 11495 | ENSG00000177239 | MAN1B1   | Approved Cytoplasmcytoplasm                          |
| 11496 | ENSG00000177272 | KCNA3    | Approved Selective expression in astrocytes.         |
| 11497 | ENSG00000177283 | FZD8     | Approved Cytoplasmcytoplasm                          |
| 11498 | ENSG00000177291 | GJD4     | UncertainNuclear mnucleus;plasma membrane            |
| 11499 | ENSG00000177301 | KCNA2    | Enhanced Cytoplasmcytoplasm                          |
| 11500 | ENSG00000177302 | TOP3A    | Approved General, nucleus                            |
| 11501 | ENSG00000177303 | CASKIN2  | Enhanced General ccytoplasm                          |
| 11502 | ENSG00000177324 | BEND2    | Enhanced Distinct nucleus                            |
| 11503 | ENSG00000177352 | CCDC71   | UncertainCytoplasmcytoplasm;plasma membrane          |
| 11504 | ENSG00000177363 | LRRN4CL  | Enhanced Cytoplasmcytoplasm;plasma membrane          |
| 11505 | ENSG00000177370 | TIMM22   | UncertainEstimation of protein expression could not  |
| 11506 | ENSG00000177374 | HIC1     | UncertainCytoplasmcytoplasm;nucleus                  |
| 11507 | ENSG00000177380 | PPFIA3   | Enhanced Cytoplasmcytoplasm                          |
| 11508 | ENSG00000177383 | MAGEF1   | UncertainCytoplasmcytoplasm;nucleus                  |
| 11509 | ENSG00000177398 | UMODL1   | UncertainEstimation of protein expression could not  |
| 11510 | ENSG00000177409 | SAMD9L   | Enhanced Ubiquitoucytoplasm;plasma membrane          |
| 11511 | ENSG00000177425 | PAWR     | Approved Ubiquitoucytoplasm                          |
| 11512 | ENSG00000177427 | MIEF2    | UncertainCytoplasmcytoplasm                          |
| 11513 | ENSG00000177432 | NAP1L5   | Approved Mainly nunucleus                            |
| 11514 | ENSG00000177453 | NIM1K    | UncertainEstimation of protein expression could not  |
| 11515 | ENSG00000177455 | CD19     | Enhanced Distinct cytoplasm                          |
| 11516 | ENSG00000177459 | ERICH5   | Enhanced Cytoplasmcytoplasm                          |
| 11517 | ENSG00000177463 | NR2C2    | Approved Ubiquitounucleus                            |
| 11518 | ENSG00000177464 | GPR4     | UncertainCytoplasmcytoplasm                          |
| 11519 | ENSG00000177465 | ACOT4    | Enhanced Cytoplasmcytoplasm                          |
| 11520 | ENSG00000177468 | OLIG3    | UncertainNuclear enucleus                            |
| 11521 | ENSG00000177469 | CAVIN1   | SupportedExpression mainly in blood vessels and adip |
| 11522 | ENSG00000177483 | RBM44    | Enhanced Cytoplasmcytoplasm                          |
| 11523 | ENSG00000177485 | ZBTB33   | Approved Ubiquitoucytoplasm;nucleus                  |
| 11524 | ENSG00000177504 | VCX2     | Enhanced Selectivenucleus                            |
| 11525 | ENSG00000177511 | ST8SIA3  | Enhanced Cytoplasmcytoplasm                          |
| 11526 | ENSG00000177535 | OR2B11   | UncertainEstimation of protein expression could not  |
| 11527 | ENSG00000177542 | SLC25A22 | Approved Cytoplasmcytoplasm                          |
| 11528 | ENSG00000177548 | RABEP2   | Approved General ccytoplasm                          |
| 11529 | ENSG00000177551 | NHLH2    | UncertainEstimation of protein expression could not  |
| 11530 | ENSG00000177565 | TBL1XR1  | SupportedGeneral nnucleus                            |
| 11531 | ENSG00000177570 | SAMD12   | UncertainCytoplasmcytoplasm                          |
| 11532 | ENSG00000177575 | CD163    | Enhanced Selectivecytoplasm                          |
| 11533 | ENSG00000177576 | C18orf32 | Approved Cytoplasmcytoplasm;plasma membrane          |
| 11534 | ENSG00000177595 | PIDD1    | SupportedUbiquitoucytoplasm;nucleus                  |
| 11535 | ENSG00000177600 | RPLP2    | Approved General ccytoplasm                          |
| 11536 | ENSG00000177602 | HASPIN   | Approved Nuclear acytoplasm;nucleus                  |
| 11537 | ENSG00000177606 | JUN      | Enhanced Nuclear enucleus                            |
| 11538 | ENSG00000177613 | CSTF2T   | Approved General nnucleus                            |
| 11539 | ENSG00000177628 | GBA      | SupportedCytoplasmcytoplasm                          |
| 11540 | ENSG00000177646 | ACAD9    | SupportedGeneral ccytoplasm                          |
| 11541 | ENSG00000177663 | IL17RA   | Enhanced Distinct cytoplasm                          |
| 11542 | ENSG00000177666 | PNPLA2   | Approved Expressed in many tissues.                  |
| 11543 | ENSG00000177673 | TEX44    | Enhanced Selective expression in elongated spermatio |
| 11544 | ENSG00000177674 | AGTRAP   | Approved Cytoplasmcytoplasm                          |
| 11545 | ENSG00000177675 | CD163L1  | Enhanced High cytocytoplasm                          |
| 11546 | ENSG00000177683 | THAP5    | Approved Cytoplasmcytoplasm                          |
| 11547 | ENSG00000177685 | CRACR2B  | Approved Cytoplasmcytoplasm                          |
| 11548 | ENSG00000177688 | SUM04    | UncertainEstimation of protein expression could not  |

|       |                 |           |           |                                             |
|-------|-----------------|-----------|-----------|---------------------------------------------|
| 11549 | ENSG00000177689 | MAGEB10   | Uncertain | Estimation of protein expression could not  |
| 11550 | ENSG00000177692 | DNAJC28   | Approved  | General ccytoplasm                          |
| 11551 | ENSG00000177694 | NAALADL2  | Approved  | Membranouplasma membrane                    |
| 11552 | ENSG00000177697 | CD151     | Supported | Membranoucytoplasm;plasma membrane          |
| 11553 | ENSG00000177707 | NECTIN3   | Approved  | Cytoplasmcytoplasm;plasma membrane          |
| 11554 | ENSG00000177721 | ANXA2R    | Uncertain | Estimation of protein expression could not  |
| 11555 | ENSG00000177728 | TMEM94    | Approved  | Cytoplasmcytoplasm;plasma membrane          |
| 11556 | ENSG00000177731 | FLII      | Approved  | General ccytoplasm;nucleus                  |
| 11557 | ENSG00000177733 | HNRNPA0   | Enhanced  | General nucleus                             |
| 11558 | ENSG00000177752 | YIPF7     | Uncertain | RNA data suggests selective expression in : |
| 11559 | ENSG00000177791 | MYOZ1     | Enhanced  | Selectivecytoplasm                          |
| 11560 | ENSG00000177800 | TMEM78    | Uncertain | Estimation of protein expression could not  |
| 11561 | ENSG00000177807 | KCNJ10    | Enhanced  | Cytoplasmcytoplasm                          |
| 11562 | ENSG00000177830 | CHID1     | Uncertain | Granular cytoplasm                          |
| 11563 | ENSG00000177839 | PCDHB9    | Uncertain | General ccytoplasm                          |
| 11564 | ENSG00000177842 | ZNF620    | Uncertain | Estimation of protein expression could not  |
| 11565 | ENSG00000177854 | TMEM187   | Uncertain | Estimation of protein expression could not  |
| 11566 | ENSG00000177868 | SVBP      | Approved  | Cytoplasmcytoplasm                          |
| 11567 | ENSG00000177873 | ZNF619    | Uncertain | Mainly ccytoplasm                           |
| 11568 | ENSG00000177875 | CCDC184   | Uncertain | Estimation of protein expression could not  |
| 11569 | ENSG00000177879 | AP3S1     | Uncertain | Cytoplasmcytoplasm                          |
| 11570 | ENSG00000177885 | GRB2      | Approved  | Nuclear acytoplasm;nucleus                  |
| 11571 | ENSG00000177888 | ZBTB41    | Uncertain | Cytoplasmcytoplasm;nucleus                  |
| 11572 | ENSG00000177889 | UBE2N     | Enhanced  | General ccytoplasm;nucleus                  |
| 11573 | ENSG00000177917 | ARL6IP6   | Approved  | Nuclear enucleus                            |
| 11574 | ENSG00000177932 | ZNF354C   | Uncertain | Estimation of protein expression could not  |
| 11575 | ENSG00000177938 | CAPZA3    | Enhanced  | Cytoplasmcytoplasm                          |
| 11576 | ENSG00000177946 | CENPBD1   | Uncertain | Cytoplasmcytoplasm;plasma membrane          |
| 11577 | ENSG00000177947 | ODF3      | Enhanced  | Cytoplasmcytoplasm                          |
| 11578 | ENSG00000177951 | BET1L     | Approved  | Cytoplasmcytoplasm                          |
| 11579 | ENSG00000177963 | RIC8A     | Approved  | Ubiquitoucytoplasm                          |
| 11580 | ENSG00000177981 | ASB8      | Approved  | General ccytoplasm                          |
| 11581 | ENSG00000177984 | LCN15     | Enhanced  | Cytoplasmcytoplasm                          |
| 11582 | ENSG00000177989 | ODF3B     | Enhanced  | Expression in cilia in fallopian tube and 1 |
| 11583 | ENSG00000177990 | DPY19L2   | Enhanced  | Expressed in acrosomes of spermatids.       |
| 11584 | ENSG00000177992 | SPATA31E1 | Enhanced  | Nuclear enucleus                            |
| 11585 | ENSG00000177994 | C2orf73   | Uncertain | Estimation of protein expression could not  |
| 11586 | ENSG00000178015 | GPR150    | Uncertain | Estimation of protein expression could not  |
| 11587 | ENSG00000178021 | TSPYL6    | Enhanced  | Highly senucleus                            |
| 11588 | ENSG00000178026 | LRRC75B   | Uncertain | Estimation of protein expression could not  |
| 11589 | ENSG00000178028 | DMAP1     | Uncertain | Nuclear acytoplasm;nucleus                  |
| 11590 | ENSG00000178031 | ADAMTSL1  | Uncertain | Cytoplasmcytoplasm                          |
| 11591 | ENSG00000178033 | CALHM5    | Uncertain | Cytoplasmcytoplasm                          |
| 11592 | ENSG00000178035 | IMPDH2    | Approved  | Cytoplasmcytoplasm;nucleus                  |
| 11593 | ENSG00000178038 | ALS2CL    | Uncertain | Cytoplasmcytoplasm                          |
| 11594 | ENSG00000178055 | PRSS42    | Uncertain | Estimation of protein expression could not  |
| 11595 | ENSG00000178057 | NDUFAF3   | Enhanced  | Ubiquitoucytoplasm                          |
| 11596 | ENSG00000178074 | C2orf69   | Approved  | Cytoplasmcytoplasm                          |
| 11597 | ENSG00000178075 | GRAMD1C   | Approved  | Mainly mecytoplasm;plasma membrane          |
| 11598 | ENSG00000178078 | STAP2     | Approved  | General ccytoplasm                          |
| 11599 | ENSG00000178096 | BOLA1     | Approved  | Nuclear acytoplasm;nucleus                  |
| 11600 | ENSG00000178105 | DDX10     | Approved  | Cytoplasmcytoplasm;nucleus                  |
| 11601 | ENSG00000178125 | PPP1R42   | Uncertain | Estimation of protein expression could not  |
| 11602 | ENSG00000178127 | NDUFV2    | Supported | General ccytoplasm                          |
| 11603 | ENSG00000178149 | DALRD3    | Approved  | Cytoplasmcytoplasm                          |

|       |                 |          |                                                      |
|-------|-----------------|----------|------------------------------------------------------|
| 11604 | ENSG00000178150 | ZNF114   | UncertainEstimation of protein expression could not  |
| 11605 | ENSG00000178163 | ZNF518B  | Approved Nuclear enucleus                            |
| 11606 | ENSG00000178171 | AMER3    | UncertainEstimation of protein expression could not  |
| 11607 | ENSG00000178172 | SPINK6   | UncertainEstimation of protein expression could not  |
| 11608 | ENSG00000178175 | ZNF366   | UncertainCytoplasmcytoplasm;nucleus                  |
| 11609 | ENSG00000178177 | LCORL    | UncertainNuclear acytoplasm;nucleus                  |
| 11610 | ENSG00000178184 | PARD6G   | UncertainEstimation of protein expression could not  |
| 11611 | ENSG00000178187 | ZNF454   | UncertainEstimation of protein expression could not  |
| 11612 | ENSG00000178199 | ZC3H12D  | UncertainCytoplasmcytoplasm;nucleus                  |
| 11613 | ENSG00000178202 | KDELC2   | UncertainCytoplasmcytoplasm                          |
| 11614 | ENSG00000178209 | PLEC     | Enhanced Membranoucytoplasm;plasma membrane          |
| 11615 | ENSG00000178217 | SH2D4B   | UncertainEstimation of protein expression could not  |
| 11616 | ENSG00000178222 | RNF212   | UncertainGeneral nnucleus                            |
| 11617 | ENSG00000178226 | PRSS36   | UncertainEstimation of protein expression could not  |
| 11618 | ENSG00000178233 | TMEM151B | UncertainEstimation of protein expression could not  |
| 11619 | ENSG00000178234 | GALNT11  | UncertainNuclear enucleus                            |
| 11620 | ENSG00000178235 | SLITRK1  | Enhanced Selectivecytoplasm                          |
| 11621 | ENSG00000178252 | WDR6     | Approved Cytoplasmcytoplasm                          |
| 11622 | ENSG00000178287 | SPAG11A  | SupportedEpididymis-specific expression.             |
| 11623 | ENSG00000178295 | GEN1     | UncertainNuclear acytoplasm;nucleus                  |
| 11624 | ENSG00000178297 | TMPRSS9  | UncertainEstimation of protein expression could not  |
| 11625 | ENSG00000178307 | TMEM11   | UncertainEstimation of protein expression could not  |
| 11626 | ENSG00000178338 | ZNF354B  | Approved General nnucleus                            |
| 11627 | ENSG00000178342 | KCNG2    | Enhanced Expression in astrocyte end-feet in hippoc  |
| 11628 | ENSG00000178358 | OR2D3    | UncertainEstimation of protein expression could not  |
| 11629 | ENSG00000178363 | CALML3   | Approved Ubiquitoucytoplasm                          |
| 11630 | ENSG00000178372 | CALML5   | Enhanced Cytoplasmcytoplasm;nucleus                  |
| 11631 | ENSG00000178381 | ZFAND2A  | Approved Ubiquitoucytoplasm;nucleus                  |
| 11632 | ENSG00000178385 | PLEKHM3  | UncertainUbiquitoucytoplasm                          |
| 11633 | ENSG00000178394 | HTR1A    | UncertainCytoplasmcytoplasm                          |
| 11634 | ENSG00000178403 | NEUROG2  | UncertainEstimation of protein expression could not  |
| 11635 | ENSG00000178404 | CEP295NL | UncertainEstimation of protein expression could not  |
| 11636 | ENSG00000178409 | BEND3    | UncertainCytoplasmcytoplasm                          |
| 11637 | ENSG00000178425 | NT5DC1   | UncertainEstimation of protein expression could not  |
| 11638 | ENSG00000178445 | GLDC     | Enhanced Cytoplasmcytoplasm                          |
| 11639 | ENSG00000178449 | COX14    | Approved Granular cytoplasm                          |
| 11640 | ENSG00000178462 | TUBAL3   | UncertainEstimation of protein expression could not  |
| 11641 | ENSG00000178467 | P4HTM    | SupportedCytoplasmcytoplasm                          |
| 11642 | ENSG00000178473 | UCN3     | UncertainEstimation of protein expression could not  |
| 11643 | ENSG00000178498 | DTX3     | Approved Cytoplasmcytoplasm                          |
| 11644 | ENSG00000178502 | KLHL11   | UncertainCytoplasmcytoplasm                          |
| 11645 | ENSG00000178531 | CTXN1    | UncertainCytoplasmcytoplasm                          |
| 11646 | ENSG00000178537 | SLC25A20 | Approved Cytoplasmcytoplasm                          |
| 11647 | ENSG00000178538 | CA8      | Enhanced Selective expression in Purkinje cells.     |
| 11648 | ENSG00000178562 | CD28     | Enhanced Selectivecytoplasm                          |
| 11649 | ENSG00000178568 | ERBB4    | Enhanced Ubiquitoucytoplasm;nucleus                  |
| 11650 | ENSG00000178573 | MAF      | Approved Nuclear enucleus                            |
| 11651 | ENSG00000178585 | CTNNBIP1 | Enhanced Cytoplasmcytoplasm                          |
| 11652 | ENSG00000178586 | OR6B3    | UncertainEstimation of protein expression could not  |
| 11653 | ENSG00000178597 | PSAPL1   | Approved Cytoplasmcytoplasm                          |
| 11654 | ENSG00000178605 | GTPBP6   | Approved Smooth and skeletal muscle expression of va |
| 11655 | ENSG00000178607 | ERN1     | SupportedUbiquitoucytoplasm                          |
| 11656 | ENSG00000178645 | C10orf53 | Enhanced Selective expression in a subset of cells : |
| 11657 | ENSG00000178662 | CSRNP3   | SupportedUbiquitounucleus                            |
| 11658 | ENSG00000178665 | ZNF713   | UncertainEstimation of protein expression could not  |

|       |                 |          |                                                      |
|-------|-----------------|----------|------------------------------------------------------|
| 11659 | ENSG00000178685 | PARP10   | Approved Cytoplasmcytoplasm                          |
| 11660 | ENSG00000178690 | DYNAP    | UncertainEstimation of protein expression could not  |
| 11661 | ENSG00000178691 | SUZ12    | Approved Low nuclenucleus                            |
| 11662 | ENSG00000178694 | NSUN3    | UncertainEstimation of protein expression could not  |
| 11663 | ENSG00000178700 | DHFR2    | UncertainCytoplasmcytoplasm;plasma membrane          |
| 11664 | ENSG00000178718 | RPP25    | Approved General nnucleus                            |
| 11665 | ENSG00000178719 | GRINA    | Approved General ccytoplasm                          |
| 11666 | ENSG00000178726 | THBD     | SupportedCytoplasmcytoplasm                          |
| 11667 | ENSG00000178734 | LM07DN   | UncertainEstimation of protein expression could not  |
| 11668 | ENSG00000178741 | COX5A    | SupportedGeneral ccytoplasm                          |
| 11669 | ENSG00000178750 | STX19    | UncertainCytoplasmcytoplasm;plasma membrane          |
| 11670 | ENSG00000178761 | FAM219B  | Approved Cytoplasmcytoplasm                          |
| 11671 | ENSG00000178764 | ZHX2     | Enhanced Mainly nunucleus                            |
| 11672 | ENSG00000178772 | CPN2     | UncertainRNA-based expert annotation gave inconclus: |
| 11673 | ENSG00000178773 | CPNE7    | UncertainEstimation of protein expression could not  |
| 11674 | ENSG00000178796 | RIIAD1   | Enhanced Distinct expression in cilia of fallopian 1 |
| 11675 | ENSG00000178802 | MPI      | Approved General ccytoplasm                          |
| 11676 | ENSG00000178804 | H1F00    | Enhanced Nuclear enucleus                            |
| 11677 | ENSG00000178809 | TRIM73   | UncertainEstimation of protein expression could not  |
| 11678 | ENSG00000178814 | OPLAH    | UncertainEstimation of protein expression could not  |
| 11679 | ENSG00000178826 | TMEM139  | Approved Membranoucytoplasm;plasma membrane          |
| 11680 | ENSG00000178828 | RNF186   | Enhanced Cytoplasmcytoplasm                          |
| 11681 | ENSG00000178852 | EFCAB13  | UncertainEstimation of protein expression could not  |
| 11682 | ENSG00000178878 | APOLD1   | Approved Mainly ccytoplasm                           |
| 11683 | ENSG00000178882 | RFLNA    | Enhanced Membranouplasma membrane                    |
| 11684 | ENSG00000178896 | EXOSC4   | Approved Cytoplasmcytoplasm;nucleus                  |
| 11685 | ENSG00000178904 | DPY19L3  | Approved Cytoplasmcytoplasm                          |
| 11686 | ENSG00000178913 | TAF7     | Approved General nnucleus                            |
| 11687 | ENSG00000178917 | ZNF852   | UncertainSelective expression in prostate and a sub: |
| 11688 | ENSG00000178921 | PFAS     | Enhanced Mainly ccytoplasm                           |
| 11689 | ENSG00000178922 | HYI      | UncertainUbiquitoucytoplasm                          |
| 11690 | ENSG00000178927 | C17orf62 | UncertainCytoplasmcytoplasm                          |
| 11691 | ENSG00000178928 | TPRX1    | UncertainEstimation of protein expression could not  |
| 11692 | ENSG00000178934 | LGALS7B  | SupportedNuclear acytoplasm;nucleus                  |
| 11693 | ENSG00000178935 | ZNF552   | UncertainEstimation of protein expression could not  |
| 11694 | ENSG00000178950 | GAK      | Approved Cytoplasmcytoplasm                          |
| 11695 | ENSG00000178951 | ZBTB7A   | SupportedUbiquitounucleus                            |
| 11696 | ENSG00000178952 | TUFM     | Enhanced Ubiquitoucytoplasm                          |
| 11697 | ENSG00000178965 | ERICH3   | Approved Expression in cilia of fallopian tube and 1 |
| 11698 | ENSG00000178974 | FBX034   | UncertainCytoplasmcytoplasm                          |
| 11699 | ENSG00000178982 | EIF3K    | UncertainCytoplasmcytoplasm                          |
| 11700 | ENSG00000178996 | SNX18    | Approved Cytoplasmcytoplasm                          |
| 11701 | ENSG00000178999 | AURKB    | Enhanced Nuclear enucleus                            |
| 11702 | ENSG00000179008 | C14orf39 | UncertainEstimation of protein expression could not  |
| 11703 | ENSG00000179010 | MRFAP1   | Approved Expression in the brain.                    |
| 11704 | ENSG00000179021 | C3orf38  | Approved Cytoplasmcytoplasm;nucleus                  |
| 11705 | ENSG00000179023 | KLHDC7A  | UncertainEstimation of protein expression could not  |
| 11706 | ENSG00000179029 | TMEM107  | Approved Cytoplasmcytoplasm                          |
| 11707 | ENSG00000179041 | RRS1     | Approved Cytoplasmcytoplasm;nucleus                  |
| 11708 | ENSG00000179044 | EXOC3L1  | UncertainCytoplasmcytoplasm                          |
| 11709 | ENSG00000179046 | TRIML2   | UncertainEstimation of protein expression could not  |
| 11710 | ENSG00000179051 | RCC2     | Approved General nnucleus                            |
| 11711 | ENSG00000179055 | OR13D1   | UncertainEstimation of protein expression could not  |
| 11712 | ENSG00000179057 | IGSF22   | UncertainEstimation of protein expression could not  |
| 11713 | ENSG00000179058 | C9orf50  | Enhanced Cytoplasmcytoplasm                          |

|       |                 |           |           |                                             |
|-------|-----------------|-----------|-----------|---------------------------------------------|
| 11714 | ENSG00000179059 | ZFP42     | Uncertain | Estimation of protein expression could not  |
| 11715 | ENSG00000179071 | CCDC89    | Enhanced  | Cytoplasm cytoplasm                         |
| 11716 | ENSG00000179085 | DPM3      | Approved  | Cytoplasm cytoplasm                         |
| 11717 | ENSG00000179091 | CYC1      | Supported | General c cytoplasm                         |
| 11718 | ENSG00000179097 | HTR1F     | Uncertain | Estimation of protein expression could not  |
| 11719 | ENSG00000179104 | TMTC2     | Uncertain | Cytoplasm cytoplasm                         |
| 11720 | ENSG00000179111 | HES7      | Uncertain | Estimation of protein expression could not  |
| 11721 | ENSG00000179115 | FARSA     | Approved  | General c cytoplasm                         |
| 11722 | ENSG00000179119 | SPTY2D1   | Approved  | Ubiquitous cytoplasm                        |
| 11723 | ENSG00000179133 | C10orf67  | Approved  | Cytoplasm cytoplasm;nucleus                 |
| 11724 | ENSG00000179134 | SAMD4B    | Approved  | Cytoplasm cytoplasm                         |
| 11725 | ENSG00000179142 | CYP11B2   | Supported | Selective cytoplasm                         |
| 11726 | ENSG00000179144 | GIMAP7    | Enhanced  | Cytoplasm cytoplasm                         |
| 11727 | ENSG00000179148 | ALOXE3    | Enhanced  | Expressed in cornified layer of skin.       |
| 11728 | ENSG00000179151 | EDC3      | Uncertain | Mainly c cytoplasm                          |
| 11729 | ENSG00000179163 | FUCA1     | Enhanced  | Cytoplasm cytoplasm                         |
| 11730 | ENSG00000179218 | CALR      | Enhanced  | Distinct expression in thyroid, weaker exp  |
| 11731 | ENSG00000179240 | GVQW3     | Uncertain | Estimation of protein expression could not  |
| 11732 | ENSG00000179241 | LDLRAD3   | Approved  | Membrane cytoplasm;plasma membrane          |
| 11733 | ENSG00000179256 | SMC03     | Uncertain | Estimation of protein expression could not  |
| 11734 | ENSG00000179262 | RAD23A    | Approved  | General nucleus                             |
| 11735 | ENSG00000179271 | GADD45GIP | Supported | General c cytoplasm                         |
| 11736 | ENSG00000179284 | DAND5     | Uncertain | Estimation of protein expression could not  |
| 11737 | ENSG00000179292 | TMEM151A  | Uncertain | Estimation of protein expression could not  |
| 11738 | ENSG00000179295 | PTPN11    | Approved  | General c cytoplasm                         |
| 11739 | ENSG00000179299 | NSUN7     | Uncertain | Cytoplasm cytoplasm                         |
| 11740 | ENSG00000179300 | RTL3      | Uncertain | Ubiquitous cytoplasm                        |
| 11741 | ENSG00000179304 | FAM156B   | Uncertain | Cytoplasm cytoplasm;plasma membrane         |
| 11742 | ENSG00000179314 | WSCD1     | Uncertain | Cytoplasm cytoplasm                         |
| 11743 | ENSG00000179331 | RAB39A    | Uncertain | Estimation of protein expression could not  |
| 11744 | ENSG00000179335 | CLK3      | Approved  | General n cytoplasm;nucleus                 |
| 11745 | ENSG00000179344 | HLA-DQB1  | Enhanced  | Cytoplasm cytoplasm                         |
| 11746 | ENSG00000179348 | GATA2     | Enhanced  | Nuclear enucleus                            |
| 11747 | ENSG00000179361 | ARID3B    | Enhanced  | Nuclear a cytoplasm;nucleus                 |
| 11748 | ENSG00000179387 | ELMOD2    | Approved  | Cytoplasm cytoplasm                         |
| 11749 | ENSG00000179388 | EGR3      | Uncertain | General c cytoplasm;nucleus                 |
| 11750 | ENSG00000179399 | GPC5      | Enhanced  | Cytoplasm cytoplasm                         |
| 11751 | ENSG00000179409 | GEMIN4    | Uncertain | Cytoplasm cytoplasm                         |
| 11752 | ENSG00000179431 | FJX1      | Uncertain | Estimation of protein expression could not  |
| 11753 | ENSG00000179455 | MKRN3     | Uncertain | Cytoplasm cytoplasm                         |
| 11754 | ENSG00000179477 | ALOX12B   | Supported | Distinct expression in keratinized layer of |
| 11755 | ENSG00000179526 | SHARPIN   | Approved  | General c cytoplasm                         |
| 11756 | ENSG00000179528 | LBX2      | Uncertain | Estimation of protein expression could not  |
| 11757 | ENSG00000179532 | DNHD1     | Uncertain | Estimation of protein expression could not  |
| 11758 | ENSG00000179542 | SLITRK4   | Enhanced  | Cytoplasm cytoplasm                         |
| 11759 | ENSG00000179562 | GCC1      | Enhanced  | Ubiquitous cytoplasm                        |
| 11760 | ENSG00000179583 | CIITA     | Enhanced  | Cytoplasm cytoplasm                         |
| 11761 | ENSG00000179588 | ZFPM1     | Enhanced  | Nuclear a cytoplasm;nucleus                 |
| 11762 | ENSG00000179593 | ALOX15B   | Enhanced  | Cytoplasm cytoplasm                         |
| 11763 | ENSG00000179598 | PLD6      | Approved  | General c cytoplasm                         |
| 11764 | ENSG00000179603 | GRM8      | Uncertain | Estimation of protein expression could not  |
| 11765 | ENSG00000179604 | CDC42EP4  | Approved  | Ubiquitous cytoplasm                        |
| 11766 | ENSG00000179627 | ZBTB42    | Uncertain | Estimation of protein expression could not  |
| 11767 | ENSG00000179630 | LACC1     | Uncertain | Ubiquitous cytoplasm                        |
| 11768 | ENSG00000179632 | MAF1      | Uncertain | Cytoplasm cytoplasm;nucleus                 |

|       |                 |           |                                                      |
|-------|-----------------|-----------|------------------------------------------------------|
| 11769 | ENSG00000179636 | TPPP2     | Enhanced Distinct expression mainly in spermatids of |
| 11770 | ENSG00000179639 | FCER1A    | Approved Cytoplasmcytoplasm                          |
| 11771 | ENSG00000179673 | RPRML     | UncertainEstimation of protein expression could not  |
| 11772 | ENSG00000179698 | WDR97     | UncertainEstimation of protein expression could not  |
| 11773 | ENSG00000179709 | NLRP8     | UncertainEstimation of protein expression could not  |
| 11774 | ENSG00000179715 | PCED1B    | Approved Cytoplasmcytoplasm;plasma membrane          |
| 11775 | ENSG00000179751 | SYCN      | Enhanced Selectivecytoplasm                          |
| 11776 | ENSG00000179772 | FOXS1     | Approved Cytoplasmcytoplasm                          |
| 11777 | ENSG00000179774 | ATOH7     | UncertainEstimation of protein expression could not  |
| 11778 | ENSG00000179776 | CDH5      | Approved Cytoplasmcytoplasm                          |
| 11779 | ENSG00000179796 | LRRC3B    | Approved Cytoplasmcytoplasm                          |
| 11780 | ENSG00000179813 | FAM216B   | UncertainEstimation of protein expression could not  |
| 11781 | ENSG00000179832 | MROH1     | Approved Cytoplasmcytoplasm                          |
| 11782 | ENSG00000179833 | SERTAD2   | Enhanced Ubiquitoucytoplasm;nucleus                  |
| 11783 | ENSG00000179841 | AKAP5     | Enhanced Selective expression in CNS.                |
| 11784 | ENSG00000179846 | NKPD1     | UncertainEstimation of protein expression could not  |
| 11785 | ENSG00000179862 | CITED4    | Approved Mainly ccytoplasm                           |
| 11786 | ENSG00000179873 | NLRP11    | UncertainEstimation of protein expression could not  |
| 11787 | ENSG00000179889 | PDXDC1    | Approved Cytoplasmcytoplasm                          |
| 11788 | ENSG00000179902 | C1orf194  | Enhanced Distinct expression in sperm and in cilia ( |
| 11789 | ENSG00000179909 | ZNF154    | Approved Nuclear enucleus                            |
| 11790 | ENSG00000179912 | R3HDM2    | Approved Cytoplasmcytoplasm;nucleus                  |
| 11791 | ENSG00000179913 | B3GNT3    | Enhanced Cytoplasmcytoplasm                          |
| 11792 | ENSG00000179914 | ITLN1     | Enhanced Cytoplasmcytoplasm                          |
| 11793 | ENSG00000179918 | SEPHS2    | Approved Cytoplasmcytoplasm;nucleus                  |
| 11794 | ENSG00000179919 | OR10A7    | UncertainEstimation of protein expression could not  |
| 11795 | ENSG00000179921 | GPBAR1    | Enhanced Cytoplasmcytoplasm                          |
| 11796 | ENSG00000179922 | ZNF784    | UncertainEstimation of protein expression could not  |
| 11797 | ENSG00000179930 | ZNF648    | UncertainEstimation of protein expression could not  |
| 11798 | ENSG00000179933 | C14orf119 | UncertainCytoplasmcytoplasm                          |
| 11799 | ENSG00000179934 | CCR8      | Enhanced Expression in thymus.                       |
| 11800 | ENSG00000179941 | BBS10     | Approved Ciliary expression in fallopian tube, endor |
| 11801 | ENSG00000179950 | PUF60     | Enhanced Ubiquitounucleus                            |
| 11802 | ENSG00000179954 | SSC5D     | Approved Cytoplasmcytoplasm                          |
| 11803 | ENSG00000179958 | DCTPP1    | UncertainCytoplasmcytoplasm;nucleus                  |
| 11804 | ENSG00000179965 | ZNF771    | UncertainEstimation of protein expression could not  |
| 11805 | ENSG00000179981 | TSHZ1     | Approved General ncytoplasm;nucleus                  |
| 11806 | ENSG00000179988 | PSTK      | Approved Ubiquitoucytoplasm                          |
| 11807 | ENSG00000180008 | SOCS4     | Approved Cytoplasmcytoplasm                          |
| 11808 | ENSG00000180011 | ZADH2     | UncertainCytoplasmcytoplasm                          |
| 11809 | ENSG00000180035 | ZNF48     | UncertainEstimation of protein expression could not  |
| 11810 | ENSG00000180044 | C3orf80   | UncertainEstimation of protein expression could not  |
| 11811 | ENSG00000180071 | ANKRD18A  | UncertainEstimation of protein expression could not  |
| 11812 | ENSG00000180089 | TMEM86B   | UncertainEstimation of protein expression could not  |
| 11813 | ENSG00000180096 | 9/1/2019  | Enhanced Cytoplasmcytoplasm                          |
| 11814 | ENSG00000180098 | TRNAU1AP  | UncertainEstimation of protein expression could not  |
| 11815 | ENSG00000180113 | TDRD6     | Enhanced Cytoplasmcytoplasm                          |
| 11816 | ENSG00000180176 | TH        | Enhanced Cytoplasmcytoplasm;nucleus                  |
| 11817 | ENSG00000180185 | FAHD1     | Enhanced Cytoplasmcytoplasm                          |
| 11818 | ENSG00000180190 | TDRP      | Approved General ccytoplasm                          |
| 11819 | ENSG00000180198 | RCC1      | Enhanced General n nucleus                           |
| 11820 | ENSG00000180209 | MYLPF     | Enhanced Cytoplasmcytoplasm                          |
| 11821 | ENSG00000180210 | F2        | Enhanced Positivitplasma membrane                    |
| 11822 | ENSG00000180228 | PRKRA     | Approved Cytoplasmcytoplasm                          |
| 11823 | ENSG00000180233 | ZNRF2     | Approved General ccytoplasm                          |

|       |                 |           |                                                     |
|-------|-----------------|-----------|-----------------------------------------------------|
| 11824 | ENSG00000180251 | SLC9A4    | SupportedMembranouplasma membrane                   |
| 11825 | ENSG00000180257 | ZNF816    | UncertainGeneral ccytoplasm                         |
| 11826 | ENSG00000180263 | FGD6      | Approved General ccytoplasm                         |
| 11827 | ENSG00000180269 | GPR139    | UncertainEstimation of protein expression could not |
| 11828 | ENSG00000180304 | OAZ2      | UncertainCytoplasmcytoplasm                         |
| 11829 | ENSG00000180318 | ALX1      | UncertainNuclear enucleus                           |
| 11830 | ENSG00000180329 | CCDC43    | Approved Cytoplasmcytoplasm                         |
| 11831 | ENSG00000180332 | KCTD4     | UncertainEstimation of protein expression could not |
| 11832 | ENSG00000180336 | MEIOC     | Enhanced Cytoplasmcytoplasm                         |
| 11833 | ENSG00000180340 | FZD2      | UncertainCytoplasmcytoplasm;plasma membrane         |
| 11834 | ENSG00000180346 | TIGD2     | UncertainEstimation of protein expression could not |
| 11835 | ENSG00000180347 | CCDC129   | UncertainEstimation of protein expression could not |
| 11836 | ENSG00000180353 | HCLS1     | Enhanced Expression in immune cells in several tiss |
| 11837 | ENSG00000180354 | MTURN     | Enhanced Cytoplasmcytoplasm                         |
| 11838 | ENSG00000180357 | ZNF609    | Approved Nuclear acytoplasm;nucleus                 |
| 11839 | ENSG00000180370 | PAK2      | Approved General ccytoplasm                         |
| 11840 | ENSG00000180376 | CCDC66    | Approved Cytoplasmcytoplasm                         |
| 11841 | ENSG00000180398 | MCFD2     | SupportedCytoplasmcytoplasm                         |
| 11842 | ENSG00000180423 | HARBI1    | Approved Expressed mainly in spermatids.            |
| 11843 | ENSG00000180440 | SERTM1    | UncertainEstimation of protein expression could not |
| 11844 | ENSG00000180447 | GAS1      | Approved Abundant cytoplasm;plasma membrane         |
| 11845 | ENSG00000180448 | ARHGAP45  | Enhanced High expression in immune cells.           |
| 11846 | ENSG00000180475 | OR10Q1    | UncertainEstimation of protein expression could not |
| 11847 | ENSG00000180481 | GLIPR1L2  | Enhanced Selective expression in testis.            |
| 11848 | ENSG00000180483 | DEFB119   | SupportedCytoplasmcytoplasm                         |
| 11849 | ENSG00000180488 | MIGA1     | Approved Cytoplasmcytoplasm                         |
| 11850 | ENSG00000180525 | PRR26     | UncertainEstimation of protein expression could not |
| 11851 | ENSG00000180530 | NRIP1     | Approved General nnucleus                           |
| 11852 | ENSG00000180532 | ZSCAN4    | UncertainEstimation of protein expression could not |
| 11853 | ENSG00000180535 | BHLHA15   | Enhanced Nuclear enucleus                           |
| 11854 | ENSG00000180537 | RNF182    | Approved Cytoplasmcytoplasm                         |
| 11855 | ENSG00000180543 | TSPYL5    | Enhanced Cytoplasmcytoplasm                         |
| 11856 | ENSG00000180573 | HIST1H2AC | SupportedUbiquitounucleus                           |
| 11857 | ENSG00000180592 | SKIDA1    | UncertainEstimation of protein expression could not |
| 11858 | ENSG00000180596 | HIST1H2BC | SupportedUbiquitounucleus                           |
| 11859 | ENSG00000180611 | MB21D2    | UncertainEstimation of protein expression could not |
| 11860 | ENSG00000180616 | SSTR2     | UncertainCytoplasmcytoplasm;plasma membrane         |
| 11861 | ENSG00000180626 | ZNF594    | Approved Nuclear acytoplasm;nucleus                 |
| 11862 | ENSG00000180628 | PCGF5     | Approved Distinct nucleus                           |
| 11863 | ENSG00000180644 | PRF1      | Approved Cytoplasmcytoplasm                         |
| 11864 | ENSG00000180658 | OR2A4     | UncertainEstimation of protein expression could not |
| 11865 | ENSG00000180667 | YOD1      | UncertainUbiquitoucytoplasm                         |
| 11866 | ENSG00000180694 | TMEM64    | Enhanced Cytoplasmcytoplasm                         |
| 11867 | ENSG00000180697 | C3orf22   | Enhanced Cytoplasmcytoplasm                         |
| 11868 | ENSG00000180708 | OR10K2    | UncertainEstimation of protein expression could not |
| 11869 | ENSG00000180720 | CHRM4     | Enhanced Cytoplasmcytoplasm;plasma membrane         |
| 11870 | ENSG00000180730 | SHISA2    | UncertainEstimation of protein expression could not |
| 11871 | ENSG00000180739 | S1PR5     | Enhanced Cytoplasmcytoplasm                         |
| 11872 | ENSG00000180745 | CLRN3     | Approved Cytoplasmcytoplasm                         |
| 11873 | ENSG00000180758 | GPR157    | UncertainEstimation of protein expression could not |
| 11874 | ENSG00000180773 | SLC36A4   | Enhanced Cytoplasmcytoplasm                         |
| 11875 | ENSG00000180776 | ZDHHC20   | Approved Ubiquitoucytoplasm                         |
| 11876 | ENSG00000180777 | ANKRD30B  | UncertainEstimation of protein expression could not |
| 11877 | ENSG00000180785 | OR51E1    | Approved Membranouplasma membrane                   |
| 11878 | ENSG00000180787 | ZFP3      | Approved Nuclear enucleus                           |



|       |                 |          |                                                      |
|-------|-----------------|----------|------------------------------------------------------|
| 11879 | ENSG00000180801 | ARSJ     | UncertainCytoplasmcytoplasm                          |
| 11880 | ENSG00000180817 | PPA1     | SupportedCytoplasmcytoplasm;nucleus                  |
| 11881 | ENSG00000180818 | HOXC10   | UncertainMainly nunucleus                            |
| 11882 | ENSG00000180828 | BHLHE22  | Enhanced Selectivenucleus                            |
| 11883 | ENSG00000180834 | MAP6D1   | Enhanced Highly expressed in glial cells.            |
| 11884 | ENSG00000180855 | ZNF443   | Approved General ncytoplasm;nucleus                  |
| 11885 | ENSG00000180871 | CXCR2    | Enhanced Selectivecytoplasm                          |
| 11886 | ENSG00000180875 | GREM2    | Approved Cytoplasmcytoplasm;plasma membrane          |
| 11887 | ENSG00000180878 | C11orf42 | Enhanced Cytoplasmcytoplasm                          |
| 11888 | ENSG00000180879 | SSR4     | Enhanced General ccytoplasm                          |
| 11889 | ENSG00000180881 | CAPS2    | UncertainGeneral ccytoplasm                          |
| 11890 | ENSG00000180884 | ZNF792   | SupportedUbiquitounucleus                            |
| 11891 | ENSG00000180891 | CUEDC1   | Approved General ccytoplasm                          |
| 11892 | ENSG00000180900 | SCRIB    | SupportedMembranouplasma membrane                    |
| 11893 | ENSG00000180902 | D2HGDH   | UncertainEstimation of protein expression could not  |
| 11894 | ENSG00000180917 | CMTR2    | UncertainCytoplasmcytoplasm                          |
| 11895 | ENSG00000180921 | FAM83H   | Enhanced Cytoplasmcytoplasm                          |
| 11896 | ENSG00000180938 | ZNF572   | Approved Low nuclenucleus                            |
| 11897 | ENSG00000180957 | PITPNB   | UncertainCytoplasmcytoplasm                          |
| 11898 | ENSG00000180964 | TCEAL8   | UncertainCytoplasmcytoplasm                          |
| 11899 | ENSG00000180979 | LRRC57   | Approved Membranoucytoplasm;plasma membrane          |
| 11900 | ENSG00000180992 | MRPL14   | UncertainGeneral ccytoplasm                          |
| 11901 | ENSG00000180998 | GPR137C  | UncertainEstimation of protein expression could not  |
| 11902 | ENSG00000181001 | OR52N1   | UncertainEstimation of protein expression could not  |
| 11903 | ENSG00000181004 | BBS12    | Approved Cytoplasmcytoplasm;plasma membrane          |
| 11904 | ENSG00000181007 | ZFP82    | UncertainEstimation of protein expression could not  |
| 11905 | ENSG00000181013 | C17orf47 | UncertainEstimation of protein expression could not  |
| 11906 | ENSG00000181016 | LSMEM1   | UncertainEstimation of protein expression could not  |
| 11907 | ENSG00000181019 | NQ01     | Enhanced Cytoplasmcytoplasm                          |
| 11908 | ENSG00000181023 | OR56B1   | UncertainEstimation of protein expression could not  |
| 11909 | ENSG00000181027 | FKRP     | Approved Cytoplasmcytoplasm                          |
| 11910 | ENSG00000181029 | TRAPPC5  | UncertainCytoplasmcytoplasm                          |
| 11911 | ENSG00000181031 | RPH3AL   | Approved Cytoplasmcytoplasm                          |
| 11912 | ENSG00000181035 | SLC25A42 | Approved General ccytoplasm                          |
| 11913 | ENSG00000181045 | SLC26A11 | Approved Cytoplasmcytoplasm                          |
| 11914 | ENSG00000181061 | HIGD1A   | Approved Cytoplasmcytoplasm                          |
| 11915 | ENSG00000181072 | CHRM2    | Approved Ubiquitoucytoplasm                          |
| 11916 | ENSG00000181092 | ADIPOQ   | UncertainRNA-based expert annotation gave inconclus: |
| 11917 | ENSG00000181104 | F2R      | Approved Expression in several tissues and in blood  |
| 11918 | ENSG00000181135 | ZNF707   | Approved General nnucleus                            |
| 11919 | ENSG00000181143 | MUC16    | Enhanced Strong meplasma membrane                    |
| 11920 | ENSG00000181163 | NPM1     | SupportedUbiquitounucleus                            |
| 11921 | ENSG00000181191 | PJA1     | Approved Ubiquitounucleus                            |
| 11922 | ENSG00000181192 | DHTKD1   | Approved Cytoplasmcytoplasm                          |
| 11923 | ENSG00000181195 | PENK     | Enhanced Distinct cytoplasm                          |
| 11924 | ENSG00000181218 | HIST3H2A | SupportedUbiquitounucleus                            |
| 11925 | ENSG00000181220 | ZNF746   | Approved Cytoplasmcytoplasm                          |
| 11926 | ENSG00000181222 | POLR2A   | Enhanced Ubiquitounucleus                            |
| 11927 | ENSG00000181240 | SLC25A41 | UncertainEstimation of protein expression could not  |
| 11928 | ENSG00000181274 | FRAT2    | UncertainEstimation of protein expression could not  |
| 11929 | ENSG00000181284 | TMEM102  | UncertainEstimation of protein expression could not  |
| 11930 | ENSG00000181291 | TMEM132E | Approved Cytoplasmcytoplasm                          |
| 11931 | ENSG00000181315 | ZNF322   | Approved Ubiquitoucytoplasm                          |
| 11932 | ENSG00000181322 | NME9     | Enhanced Selective expression in cilia.              |
| 11933 | ENSG00000181333 | HEPHL1   | UncertainEstimation of protein expression could not  |

|       |                 |          |           |                                             |
|-------|-----------------|----------|-----------|---------------------------------------------|
| 11934 | ENSG00000181350 | LRRC75A  | Uncertain | Estimation of protein expression could not  |
| 11935 | ENSG00000181378 | CFAP65   | Uncertain | Estimation of protein expression could not  |
| 11936 | ENSG00000181381 | DDX60L   | Approved  | Cytoplasm cytoplasm                         |
| 11937 | ENSG00000181392 | SYNE4    | Uncertain | General n nucleus                           |
| 11938 | ENSG00000181396 | OGFOD3   | Uncertain | Estimation of protein expression could not  |
| 11939 | ENSG00000181404 | WASHC1   | Uncertain | Nuclear acytoplasm;nucleus                  |
| 11940 | ENSG00000181409 | AATK     | Enhanced  | Cytoplasm cytoplasm                         |
| 11941 | ENSG00000181418 | DDN      | Uncertain | Estimation of protein expression could not  |
| 11942 | ENSG00000181433 | SAGE1    | Enhanced  | Selective nucleus                           |
| 11943 | ENSG00000181444 | ZNF467   | Uncertain | Estimation of protein expression could not  |
| 11944 | ENSG00000181449 | SOX2     | Enhanced  | Nuclear enucleus                            |
| 11945 | ENSG00000181450 | ZNF678   | Uncertain | Estimation of protein expression could not  |
| 11946 | ENSG00000181458 | TMEM45A  | Uncertain | Cytoplasm cytoplasm;plasma membrane         |
| 11947 | ENSG00000181472 | ZBTB2    | Approved  | Ubiquitous cytoplasm;nucleus                |
| 11948 | ENSG00000181481 | RNF135   | Approved  | Cytoplasm cytoplasm                         |
| 11949 | ENSG00000181499 | OR6T1    | Uncertain | Estimation of protein expression could not  |
| 11950 | ENSG00000181513 | ACBD4    | Approved  | Cytoplasm cytoplasm                         |
| 11951 | ENSG00000181523 | SGSH     | Enhanced  | Granular cytoplasm                          |
| 11952 | ENSG00000181544 | FANCB    | Uncertain | Estimation of protein expression could not  |
| 11953 | ENSG00000181552 | EDDM3B   | Enhanced  | Secreted plasma membrane                    |
| 11954 | ENSG00000181555 | SETD2    | Approved  | General n nucleus                           |
| 11955 | ENSG00000181562 | EDDM3A   | Approved  | Cytoplasm cytoplasm                         |
| 11956 | ENSG00000181577 | C6orf223 | Uncertain | Estimation of protein expression could not  |
| 11957 | ENSG00000181585 | TMIE     | Uncertain | Cytoplasm cytoplasm                         |
| 11958 | ENSG00000181588 | MEX3D    | Approved  | Cytoplasm cytoplasm;nucleus                 |
| 11959 | ENSG00000181609 | OR52D1   | Uncertain | Estimation of protein expression could not  |
| 11960 | ENSG00000181610 | MRPS23   | Supported | General c cytoplasm                         |
| 11961 | ENSG00000181617 | FDCSP    | Enhanced  | Distinct expression was observed in the sq  |
| 11962 | ENSG00000181619 | GPR135   | Uncertain | Estimation of protein expression could not  |
| 11963 | ENSG00000181625 | SLX1B    | Uncertain | Cytoplasm cytoplasm                         |
| 11964 | ENSG00000181626 | ANKRD62  | Enhanced  | Nucleolar nucleus                           |
| 11965 | ENSG00000181631 | P2RY13   | Enhanced  | Cytoplasm cytoplasm                         |
| 11966 | ENSG00000181634 | TNFSF15  | Uncertain | RNA-based expert annotation gave inconclus: |
| 11967 | ENSG00000181638 | ZFP41    | Uncertain | Estimation of protein expression could not  |
| 11968 | ENSG00000181666 | HKR1     | Approved  | Nuclear enucleus                            |
| 11969 | ENSG00000181698 | OR5T1    | Uncertain | Estimation of protein expression could not  |
| 11970 | ENSG00000181704 | YIPF6    | Uncertain | Cytoplasm cytoplasm                         |
| 11971 | ENSG00000181722 | ZBTB20   | Approved  | Nuclear enucleus                            |
| 11972 | ENSG00000181733 | OR2Z1    | Uncertain | Estimation of protein expression could not  |
| 11973 | ENSG00000181744 | C3orf58  | Approved  | Cytoplasm cytoplasm                         |
| 11974 | ENSG00000181751 | C5orf30  | Uncertain | Cytoplasm cytoplasm                         |
| 11975 | ENSG00000181754 | AMIG01   | Approved  | Nuclear acytoplasm;nucleus                  |
| 11976 | ENSG00000181773 | GPR3     | Uncertain | Estimation of protein expression could not  |
| 11977 | ENSG00000181781 | ODF3L2   | Uncertain | Estimation of protein expression could not  |
| 11978 | ENSG00000181786 | ACTL9    | Uncertain | Estimation of protein expression could not  |
| 11979 | ENSG00000181788 | SIAH2    | Approved  | Nuclear enucleus                            |
| 11980 | ENSG00000181789 | COPG1    | Supported | Ubiquitous cytoplasm                        |
| 11981 | ENSG00000181804 | SLC9A9   | Approved  | Granular cytoplasm;plasma membrane          |
| 11982 | ENSG00000181826 | RELL1    | Approved  | Cytoplasm cytoplasm;plasma membrane         |
| 11983 | ENSG00000181827 | RFX7     | Supported | General n nucleus                           |
| 11984 | ENSG00000181830 | SLC35C1  | Enhanced  | Cytoplasm cytoplasm                         |
| 11985 | ENSG00000181852 | RNF41    | Approved  | Cytoplasm cytoplasm                         |
| 11986 | ENSG00000181856 | SLC2A4   | Enhanced  | Cytoplasm cytoplasm                         |
| 11987 | ENSG00000181873 | IBA57    | Approved  | Cytoplasm cytoplasm;plasma membrane         |
| 11988 | ENSG00000181885 | CLDN7    | Enhanced  | Distinct plasma membrane                    |

|       |                 |          |                                                     |
|-------|-----------------|----------|-----------------------------------------------------|
| 11989 | ENSG00000181894 | ZNF329   | UncertainEstimation of protein expression could not |
| 11990 | ENSG00000181896 | ZNF101   | UncertainEstimation of protein expression could not |
| 11991 | ENSG00000181904 | C5orf24  | UncertainCytoplasmcytoplasm                         |
| 11992 | ENSG00000181915 | ADO      | Approved Extracellcytoplasm                         |
| 11993 | ENSG00000181924 | COA4     | Approved Granular cytoplasm                         |
| 11994 | ENSG00000181927 | OR4P4    | UncertainEstimation of protein expression could not |
| 11995 | ENSG00000181938 | GINS3    | UncertainCytoplasmcytoplasm                         |
| 11996 | ENSG00000181939 | OR4C15   | UncertainEstimation of protein expression could not |
| 11997 | ENSG00000181982 | CCDC149  | UncertainCytoplasmcytoplasm;plasma membrane         |
| 11998 | ENSG00000181991 | MRPS11   | Enhanced Ubiquitoucytoplasm                         |
| 11999 | ENSG00000182010 | RTKN2    | Enhanced Cytoplasmcytoplasm                         |
| 12000 | ENSG00000182013 | PNMA8A   | Approved Nuclear acytoplasm;nucleus                 |
| 12001 | ENSG00000182022 | CHST15   | Approved Cytoplasmcytoplasm                         |
| 12002 | ENSG00000182035 | ADIG     | UncertainEstimation of protein expression could not |
| 12003 | ENSG00000182040 | USH1G    | UncertainEstimation of protein expression could not |
| 12004 | ENSG00000182050 | MGAT4C   | Approved Cytoplasmcytoplasm                         |
| 12005 | ENSG00000182054 | IDH2     | Enhanced General ccytoplasm                         |
| 12006 | ENSG00000182083 | OR6B2    | UncertainEstimation of protein expression could not |
| 12007 | ENSG00000182087 | TMEM259  | Approved Cytoplasmcytoplasm                         |
| 12008 | ENSG00000182093 | WRB      | Approved Cytoplasmcytoplasm;nucleus                 |
| 12009 | ENSG00000182095 | TNRC18   | UncertainUbiquitoucytoplasm;nucleus                 |
| 12010 | ENSG00000182103 | FAM181B  | Approved Selectivecytoplasm;nucleus                 |
| 12011 | ENSG00000182107 | TMEM30B  | UncertainCytoplasmcytoplasm                         |
| 12012 | ENSG00000182108 | DEXI     | Approved General ccytoplasm                         |
| 12013 | ENSG00000182117 | NOP10    | SupportedGeneral nnucleus                           |
| 12014 | ENSG00000182118 | FAM89A   | Approved General ccytoplasm                         |
| 12015 | ENSG00000182132 | KCNIP1   | UncertainCytoplasmcytoplasm                         |
| 12016 | ENSG00000182134 | TDRKH    | Approved Cytoplasmcytoplasm                         |
| 12017 | ENSG00000182149 | IST1     | Approved Cytoplasmcytoplasm;nucleus                 |
| 12018 | ENSG00000182150 | ERCC6L2  | UncertainEstimation of protein expression could not |
| 12019 | ENSG00000182154 | MRPL41   | SupportedUbiquitoucytoplasm                         |
| 12020 | ENSG00000182156 | ENPP7    | Approved Expression in microvilli in the intestinal |
| 12021 | ENSG00000182158 | CREB3L2  | UncertainMainly ccytoplasm;plasma membrane          |
| 12022 | ENSG00000182162 | P2RY8    | Enhanced Cytoplasmcytoplasm                         |
| 12023 | ENSG00000182170 | MRGPRG   | UncertainEstimation of protein expression could not |
| 12024 | ENSG00000182173 | TSEN54   | UncertainCytoplasmcytoplasm                         |
| 12025 | ENSG00000182175 | RGMA     | Approved Cytoplasmcytoplasm                         |
| 12026 | ENSG00000182179 | UBA7     | Approved Nuclear enucleus                           |
| 12027 | ENSG00000182180 | MRPS16   | SupportedGeneral ccytoplasm                         |
| 12028 | ENSG00000182183 | SHISAL2A | UncertainEstimation of protein expression could not |
| 12029 | ENSG00000182185 | RAD51B   | Enhanced General nnucleus                           |
| 12030 | ENSG00000182187 | CRYGB    | SupportedExpression in lens.                        |
| 12031 | ENSG00000182195 | LDOC1    | Approved Membranoucytoplasm;plasma membrane         |
| 12032 | ENSG00000182196 | ARL6IP4  | Approved Ubiquitoucytoplasm;nucleus                 |
| 12033 | ENSG00000182197 | EXT1     | UncertainCytoplasmcytoplasm;plasma membrane         |
| 12034 | ENSG00000182199 | SHMT2    | Enhanced Cytoplasmcytoplasm                         |
| 12035 | ENSG00000182208 | MOB2     | UncertainEstimation of protein expression could not |
| 12036 | ENSG00000182220 | ATP6AP2  | Approved Cytoplasmcytoplasm                         |
| 12037 | ENSG00000182224 | CYB5D1   | UncertainCytoplasmcytoplasm                         |
| 12038 | ENSG00000182230 | FAM153B  | UncertainEstimation of protein expression could not |
| 12039 | ENSG00000182240 | BACE2    | Approved Cytoplasmcytoplasm                         |
| 12040 | ENSG00000182247 | UBE2E2   | Approved Cytoplasmcytoplasm;nucleus                 |
| 12041 | ENSG00000182253 | SYNM     | Enhanced Cytoplasmcytoplasm                         |
| 12042 | ENSG00000182255 | KCNA4    | Approved Cytoplasmcytoplasm                         |
| 12043 | ENSG00000182256 | GABRG3   | SupportedCytoplasmcytoplasm                         |

|       |                 |           |                                                      |
|-------|-----------------|-----------|------------------------------------------------------|
| 12044 | ENSG00000182261 | NLRP10    | UncertainGeneral ccytoplasm                          |
| 12045 | ENSG00000182263 | FIGN      | Approved General ncytoplasm;nucleus                  |
| 12046 | ENSG00000182264 | IZUM01    | Enhanced Distinct cytoplasm                          |
| 12047 | ENSG00000182272 | B4GALNT4  | UncertainCytoplasmcytoplasm                          |
| 12048 | ENSG00000182287 | AP1S2     | Enhanced Cytoplasmcytoplasm                          |
| 12049 | ENSG00000182307 | C8orf33   | Approved Nuclear acytoplasm;nucleus                  |
| 12050 | ENSG00000182308 | DCAF4L1   | Enhanced Cytoplasmcytoplasm;nucleus                  |
| 12051 | ENSG00000182315 | MBD3L3    | UncertainEstimation of protein expression could not  |
| 12052 | ENSG00000182318 | ZSCAN22   | UncertainEstimation of protein expression could not  |
| 12053 | ENSG00000182326 | C1S       | SupportedPositivitplasma membrane                    |
| 12054 | ENSG00000182327 | GLTPD2    | UncertainEstimation of protein expression could not  |
| 12055 | ENSG00000182329 | KIAA2012  | Enhanced Expression in cilia of fallopian tube and 1 |
| 12056 | ENSG00000182330 | PRAMEF8   | UncertainCytoplasmcytoplasm                          |
| 12057 | ENSG00000182333 | LIPF      | Enhanced Selectivecytoplasm                          |
| 12058 | ENSG00000182334 | OR5P3     | UncertainEstimation of protein expression could not  |
| 12059 | ENSG00000182346 | DAOA      | UncertainDistinct expression in CNS.                 |
| 12060 | ENSG00000182348 | ZNF804B   | UncertainEstimation of protein expression could not  |
| 12061 | ENSG00000182359 | KBTBD3    | UncertainEstimation of protein expression could not  |
| 12062 | ENSG00000182362 | YBEY      | UncertainCytoplasmcytoplasm                          |
| 12063 | ENSG00000182378 | PLCXD1    | Approved Cytoplasmcytoplasm                          |
| 12064 | ENSG00000182389 | CACNB4    | Approved Nuclear acytoplasm;nucleus                  |
| 12065 | ENSG00000182400 | TRAPPC6B  | UncertainCytoplasmcytoplasm                          |
| 12066 | ENSG00000182405 | PGBD4     | UncertainEstimation of protein expression could not  |
| 12067 | ENSG00000182415 | CDY2A     | SupportedNuclear enucleus                            |
| 12068 | ENSG00000182446 | NPL0C4    | Enhanced General ccytoplasm;nucleus                  |
| 12069 | ENSG00000182447 | OTOL1     | UncertainRNA-based expert annotation gave inconclus: |
| 12070 | ENSG00000182459 | TEX19     | Enhanced Selective expression in seminiferous ducts  |
| 12071 | ENSG00000182463 | TSHZ2     | UncertainUbiquitouscytoplasm;nucleus                 |
| 12072 | ENSG00000182473 | EXO7      | SupportedCytoplasmcytoplasm                          |
| 12073 | ENSG00000182481 | KPNA2     | Enhanced Nuclear enucleus                            |
| 12074 | ENSG00000182492 | BGN       | Enhanced Cytoplasmcytoplasm                          |
| 12075 | ENSG00000182504 | CEP97     | UncertainCytoplasmcytoplasm                          |
| 12076 | ENSG00000182508 | LHFPL1    | UncertainEstimation of protein expression could not  |
| 12077 | ENSG00000182511 | FES       | Approved General ccytoplasm;nucleus                  |
| 12078 | ENSG00000182512 | GLRX5     | Approved General ccytoplasm                          |
| 12079 | ENSG00000182518 | FAM104B   | Approved Nuclear enucleus                            |
| 12080 | ENSG00000182521 | TBPL2     | UncertainEstimation of protein expression could not  |
| 12081 | ENSG00000182533 | CAV3      | Enhanced High cytocytoplasm;plasma membrane          |
| 12082 | ENSG00000182534 | MXRA7     | UncertainCytoplasmcytoplasm                          |
| 12083 | ENSG00000182541 | LIMK2     | Approved General ccytoplasm;nucleus                  |
| 12084 | ENSG00000182544 | MFS5      | UncertainNuclear ecytoplasm;nucleus                  |
| 12085 | ENSG00000182545 | RNASE10   | UncertainEstimation of protein expression could not  |
| 12086 | ENSG00000182551 | ADI1      | Approved Nuclear acytoplasm;nucleus                  |
| 12087 | ENSG00000182552 | RWDD4     | Approved Cytoplasmcytoplasm                          |
| 12088 | ENSG00000182557 | SPNS3     | UncertainEstimation of protein expression could not  |
| 12089 | ENSG00000182566 | CLEC4G    | Enhanced High expression in liver sinusoids and endo |
| 12090 | ENSG00000182568 | SATB1     | Enhanced Nuclear enucleus                            |
| 12091 | ENSG00000182578 | CSF1R     | UncertainCytoplasmcytoplasm                          |
| 12092 | ENSG00000182580 | EPHB3     | Enhanced Cytoplasmcytoplasm                          |
| 12093 | ENSG00000182583 | VCX       | SupportedNuclear enucleus                            |
| 12094 | ENSG00000182591 | KRTAP11-1 | Enhanced Distinct expression in the hair cortex and  |
| 12095 | ENSG00000182600 | SNORC     | UncertainEstimation of protein expression could not  |
| 12096 | ENSG00000182606 | TRAK1     | Approved Ubiquitouscytoplasm                         |
| 12097 | ENSG00000182613 | OR2V2     | UncertainEstimation of protein expression could not  |
| 12098 | ENSG00000182621 | PLCB1     | Enhanced Cytoplasmcytoplasm;nucleus                  |

|       |                 |           |                                                      |
|-------|-----------------|-----------|------------------------------------------------------|
| 12099 | ENSG00000182628 | SKA2      | UncertainCytoplasmcytoplasm                          |
| 12100 | ENSG00000182631 | RXFP3     | UncertainEstimation of protein expression could not  |
| 12101 | ENSG00000182652 | OR4Q3     | UncertainEstimation of protein expression could not  |
| 12102 | ENSG00000182667 | NTM       | Enhanced High expression in CNS.                     |
| 12103 | ENSG00000182670 | TTC3      | UncertainCytoplasmcytoplasm                          |
| 12104 | ENSG00000182676 | PPP1R27   | UncertainEstimation of protein expression could not  |
| 12105 | ENSG00000182687 | GALR2     | Approved Cytoplasmcytoplasm;plasma membrane          |
| 12106 | ENSG00000182700 | IGIP      | UncertainWeak extrcytoplasm                          |
| 12107 | ENSG00000182704 | TSKU      | Approved Cytoplasmcytoplasm                          |
| 12108 | ENSG00000182712 | CMC4      | Approved General ccytoplasm                          |
| 12109 | ENSG00000182718 | ANXA2     | Enhanced Ubiquitouplasma membrane                    |
| 12110 | ENSG00000182732 | RGS6      | UncertainEstimation of protein expression could not  |
| 12111 | ENSG00000182742 | HOXB4     | UncertainMainly expressed in hematopoetic cells.     |
| 12112 | ENSG00000182747 | SLC35D3   | UncertainEstimation of protein expression could not  |
| 12113 | ENSG00000182749 | PAQR7     | Approved Cytoplasmcytoplasm                          |
| 12114 | ENSG00000182752 | PAPPA     | Enhanced Cytoplasmcytoplasm                          |
| 12115 | ENSG00000182768 | NGRN      | Approved Cytoplasmcytoplasm                          |
| 12116 | ENSG00000182774 | RPS17     | Approved Ubiquitoucytoplasm                          |
| 12117 | ENSG00000182782 | HCAR2     | Approved Cytoplasmcytoplasm                          |
| 12118 | ENSG00000182793 | GSTA5     | UncertainEstimation of protein expression could not  |
| 12119 | ENSG00000182795 | C1orf116  | Enhanced Cytoplasmcytoplasm                          |
| 12120 | ENSG00000182798 | MAGEB17   | UncertainEstimation of protein expression could not  |
| 12121 | ENSG00000182809 | CRIP2     | Approved Cytoplasmcytoplasm                          |
| 12122 | ENSG00000182810 | DDX28     | Approved General ccytoplasm                          |
| 12123 | ENSG00000182827 | ACBD3     | UncertainGranular expression in several tissues.     |
| 12124 | ENSG00000182831 | C16orf72  | UncertainCytoplasmcytoplasm                          |
| 12125 | ENSG00000182836 | PLCXD3    | UncertainNuclear acytoplasm;nucleus                  |
| 12126 | ENSG00000182853 | VM01      | UncertainEstimation of protein expression could not  |
| 12127 | ENSG00000182858 | ALG12     | Approved Cytoplasmcytoplasm                          |
| 12128 | ENSG00000182866 | LCK       | Enhanced Distinct cytoplasm                          |
| 12129 | ENSG00000182871 | COL18A1   | Approved Cytoplasmcytoplasm;nucleus                  |
| 12130 | ENSG00000182872 | RBM10     | Approved General nnucleus                            |
| 12131 | ENSG00000182885 | ADGRG3    | UncertainEstimation of protein expression could not  |
| 12132 | ENSG00000182890 | GLUD2     | UncertainGeneral ccytoplasm                          |
| 12133 | ENSG00000182898 | TCHHL1    | Enhanced High expression in inner root sheath of ha: |
| 12134 | ENSG00000182901 | RGS7      | Enhanced Brain-specific expression.                  |
| 12135 | ENSG00000182916 | TCEAL7    | Enhanced Nuclear enucleus                            |
| 12136 | ENSG00000182919 | C11orf54  | Approved Selectivecytoplasm;nucleus                  |
| 12137 | ENSG00000182923 | CEP63     | Approved Cytoplasmcytoplasm                          |
| 12138 | ENSG00000182944 | EWSR1     | Enhanced Ubiquitounucleus                            |
| 12139 | ENSG00000182957 | SPATA13   | Approved Cytoplasmcytoplasm                          |
| 12140 | ENSG00000182973 | CNOT10    | Approved Granular cytoplasm                          |
| 12141 | ENSG00000182974 | AC135068. | UncertainEstimation of protein expression could not  |
| 12142 | ENSG00000182979 | MTA1      | SupportedNuclear acytoplasm;nucleus                  |
| 12143 | ENSG00000182983 | ZNF662    | UncertainEstimation of protein expression could not  |
| 12144 | ENSG00000182985 | CADM1     | Enhanced Membranouplasma membrane                    |
| 12145 | ENSG00000182986 | ZNF320    | UncertainEstimation of protein expression could not  |
| 12146 | ENSG00000183010 | PYCR1     | Approved Cytoplasmcytoplasm                          |
| 12147 | ENSG00000183018 | SPNS2     | UncertainMembranouplasma membrane                    |
| 12148 | ENSG00000183019 | MCEMP1    | Enhanced Cytoplasmcytoplasm                          |
| 12149 | ENSG00000183020 | AP2A2     | SupportedCytoplasmcytoplasm                          |
| 12150 | ENSG00000183023 | SLC8A1    | UncertainGeneral ccytoplasm                          |
| 12151 | ENSG00000183032 | SLC25A21  | UncertainEstimation of protein expression could not  |
| 12152 | ENSG00000183034 | OTOP2     | UncertainEstimation of protein expression could not  |
| 12153 | ENSG00000183035 | CYLC1     | Enhanced Cytoplasmcytoplasm                          |

|       |                 |           |                                                       |
|-------|-----------------|-----------|-------------------------------------------------------|
| 12154 | ENSG00000183036 | PCP4      | Enhanced Cytoplasm cytoplasm;nucleus                  |
| 12155 | ENSG00000183044 | ABAT      | Enhanced Granular cytoplasm                           |
| 12156 | ENSG00000183048 | SLC25A10  | Supported General c cytoplasm                         |
| 12157 | ENSG00000183049 | CAMK1D    | Approved Cytoplasm cytoplasm;nucleus;plasma membrane  |
| 12158 | ENSG00000183054 | RGPD6     | Uncertain Expression in several different tissue type |
| 12159 | ENSG00000183060 | LYSMD4    | Approved Mainly c cytoplasm;plasma membrane           |
| 12160 | ENSG00000183066 | WBP2NL    | Enhanced Distinct cytoplasm                           |
| 12161 | ENSG00000183067 | IGSF5     | Uncertain Estimation of protein expression could not  |
| 12162 | ENSG00000183077 | AFMID     | Uncertain Cytoplasm cytoplasm                         |
| 12163 | ENSG00000183087 | GAS6      | Approved Plasma p plasma membrane                     |
| 12164 | ENSG00000183090 | FREM3     | Uncertain Estimation of protein expression could not  |
| 12165 | ENSG00000183091 | NEB       | Enhanced Cytoplasm cytoplasm                          |
| 12166 | ENSG00000183098 | GPC6      | Approved Granular cytoplasm                           |
| 12167 | ENSG00000183111 | ARHGEF37  | Uncertain Cytoplasm cytoplasm;nucleus                 |
| 12168 | ENSG00000183114 | FAM43B    | Approved Cytoplasm cytoplasm                          |
| 12169 | ENSG00000183128 | CALHM3    | Uncertain Estimation of protein expression could not  |
| 12170 | ENSG00000183134 | PTGDR2    | Uncertain Membranou plasma membrane                   |
| 12171 | ENSG00000183137 | CEP57L1   | Approved General c cytoplasm;nucleus                  |
| 12172 | ENSG00000183145 | RIPPLY3   | Uncertain Estimation of protein expression could not  |
| 12173 | ENSG00000183148 | ANKRD20A2 | Uncertain Estimation of protein expression could not  |
| 12174 | ENSG00000183150 | GPR19     | Uncertain Estimation of protein expression could not  |
| 12175 | ENSG00000183155 | RAB1F     | Approved Cytoplasm cytoplasm;nucleus                  |
| 12176 | ENSG00000183160 | TMEM119   | Enhanced Cytoplasm cytoplasm                          |
| 12177 | ENSG00000183166 | CALN1     | Approved Mainly c cytoplasm                           |
| 12178 | ENSG00000183172 | SMDT1     | Uncertain Cytoplasm cytoplasm                         |
| 12179 | ENSG00000183186 | C2CD4C    | Uncertain Estimation of protein expression could not  |
| 12180 | ENSG00000183207 | RUVBL2    | Enhanced Nuclear a cytoplasm;nucleus                  |
| 12181 | ENSG00000183208 | GDPGP1    | Approved Cytoplasm cytoplasm                          |
| 12182 | ENSG00000183230 | CTNNA3    | Enhanced Expression in intercalated discs of heart r  |
| 12183 | ENSG00000183246 | RIMBP3C   | Supported Selective cytoplasm                         |
| 12184 | ENSG00000183248 | PRR36     | Uncertain Estimation of protein expression could not  |
| 12185 | ENSG00000183255 | PTTG1IP   | Uncertain General c cytoplasm                         |
| 12186 | ENSG00000183258 | DDX41     | Supported Ubiquitou nucleus                           |
| 12187 | ENSG00000183260 | ABHD16B   | Uncertain Estimation of protein expression could not  |
| 12188 | ENSG00000183287 | CCBE1     | Uncertain Estimation of protein expression could not  |
| 12189 | ENSG00000183292 | PRSS40A   | Uncertain Estimation of protein expression could not  |
| 12190 | ENSG00000183304 | FAM9A     | Uncertain Estimation of protein expression could not  |
| 12191 | ENSG00000183307 | TMEM121B  | Approved Expressed in several tissues, including br   |
| 12192 | ENSG00000183309 | ZNF623    | Uncertain Estimation of protein expression could not  |
| 12193 | ENSG00000183317 | EPHA10    | Uncertain Cytoplasm cytoplasm                         |
| 12194 | ENSG00000183318 | SPDYE4    | Enhanced Distinct cytoplasm                           |
| 12195 | ENSG00000183323 | CCDC125   | Approved General c cytoplasm                          |
| 12196 | ENSG00000183336 | BOLA2     | Supported Cytoplasm cytoplasm                         |
| 12197 | ENSG00000183340 | JRKL      | Uncertain Cytoplasm cytoplasm                         |
| 12198 | ENSG00000183346 | CABCOC01  | Enhanced Selective expression in cilia in fallopian   |
| 12199 | ENSG00000183347 | GBP6      | Enhanced Granular cytoplasm;nucleus                   |
| 12200 | ENSG00000183354 | KIAA2026  | Uncertain Cytoplasm cytoplasm                         |
| 12201 | ENSG00000183379 | SYNDIG1L  | Uncertain Estimation of protein expression could not  |
| 12202 | ENSG00000183395 | PMCH      | Enhanced Highly expressed in neurons and neural pro   |
| 12203 | ENSG00000183396 | TMEM89    | Uncertain Estimation of protein expression could not  |
| 12204 | ENSG00000183397 | C19orf71  | Uncertain General c cytoplasm                         |
| 12205 | ENSG00000183401 | CCDC159   | Approved General c cytoplasm                          |
| 12206 | ENSG00000183421 | RIPK4     | Enhanced Membranou plasma membrane                    |
| 12207 | ENSG00000183423 | LRIT3     | Enhanced Cytoplasm cytoplasm                          |
| 12208 | ENSG00000183426 | NPIPA1    | Supported General n nucleus                           |

|       |                 |           |                                                      |
|-------|-----------------|-----------|------------------------------------------------------|
| 12209 | ENSG00000183431 | SF3A3     | SupportedUbiquitounucleus                            |
| 12210 | ENSG00000183439 | TRIM61    | UncertainEstimation of protein expression could not  |
| 12211 | ENSG00000183454 | GRIN2A    | Enhanced Cytoplasmcytoplasm                          |
| 12212 | ENSG00000183463 | URAD      | UncertainEstimation of protein expression could not  |
| 12213 | ENSG00000183475 | ASB7      | Approved General ccytoplasm                          |
| 12214 | ENSG00000183476 | SH2D7     | Enhanced Expression in testis and intestine.         |
| 12215 | ENSG00000183479 | TREX2     | UncertainNuclear enucleus                            |
| 12216 | ENSG00000183484 | GPR132    | SupportedUbiquitoucytoplasm                          |
| 12217 | ENSG00000183486 | MX2       | UncertainMainly ccytoplasm                           |
| 12218 | ENSG00000183495 | EP400     | SupportedGeneral nnucleus                            |
| 12219 | ENSG00000183496 | MEX3B     | Enhanced Cytoplasmcytoplasm                          |
| 12220 | ENSG00000183508 | FAM46C    | UncertainMembranoucytoplasm;plasma membrane          |
| 12221 | ENSG00000183513 | COA5      | UncertainCytoplasmcytoplasm                          |
| 12222 | ENSG00000183520 | UTP11     | Approved Nucleolarnucleus                            |
| 12223 | ENSG00000183527 | PSMG1     | Approved Cytoplasmcytoplasm                          |
| 12224 | ENSG00000183530 | PRR14L    | UncertainEstimation of protein expression could not  |
| 12225 | ENSG00000183549 | ACSM5     | UncertainCytoplasmcytoplasm                          |
| 12226 | ENSG00000183570 | PCBP3     | Approved General ccytoplasm                          |
| 12227 | ENSG00000183571 | PGPEP1L   | UncertainEstimation of protein expression could not  |
| 12228 | ENSG00000183576 | SETD3     | Approved Cytoplasmcytoplasm                          |
| 12229 | ENSG00000183578 | TNFAIP8L3 | Approved Membrane cytoplasm;plasma membrane          |
| 12230 | ENSG00000183579 | ZNRF3     | UncertainEstimation of protein expression could not  |
| 12231 | ENSG00000183580 | FBXL7     | UncertainCytoplasmcytoplasm;plasma membrane          |
| 12232 | ENSG00000183597 | TANG02    | Approved Cytoplasmcytoplasm                          |
| 12233 | ENSG00000183598 | HIST2H3D  | Approved Ubiquitounucleus                            |
| 12234 | ENSG00000183605 | SFXN4     | Approved General ccytoplasm                          |
| 12235 | ENSG00000183607 | GKN2      | Enhanced Cytoplasmcytoplasm                          |
| 12236 | ENSG00000183615 | FAM167B   | UncertainCytoplasmcytoplasm;plasma membrane          |
| 12237 | ENSG00000183617 | MRPL54    | UncertainCytoplasmcytoplasm                          |
| 12238 | ENSG00000183621 | ZNF438    | UncertainEstimation of protein expression could not  |
| 12239 | ENSG00000183624 | HMCES     | Enhanced General nnucleus                            |
| 12240 | ENSG00000183625 | CCR3      | UncertainMainly meplasma membrane                    |
| 12241 | ENSG00000183631 | PRR32     | UncertainEstimation of protein expression could not  |
| 12242 | ENSG00000183638 | RP1L1     | Enhanced Expression in outer segment of photorecepto |
| 12243 | ENSG00000183647 | ZNF530    | UncertainEstimation of protein expression could not  |
| 12244 | ENSG00000183648 | NDUFB1    | SupportedGeneral ccytoplasm                          |
| 12245 | ENSG00000183655 | KLHL25    | Approved Cytoplasmcytoplasm                          |
| 12246 | ENSG00000183662 | FAM19A1   | Approved Cytoplasmcytoplasm                          |
| 12247 | ENSG00000183665 | TRMT12    | Approved General nnucleus                            |
| 12248 | ENSG00000183668 | PSG9      | SupportedCytoplasmcytoplasm                          |
| 12249 | ENSG00000183671 | GPR1      | UncertainEstimation of protein expression could not  |
| 12250 | ENSG00000183684 | ALYREF    | SupportedUbiquitounucleus                            |
| 12251 | ENSG00000183688 | RFLNB     | Enhanced Cytoplasmcytoplasm                          |
| 12252 | ENSG00000183690 | EFHC2     | Approved Cytoplasmcytoplasm                          |
| 12253 | ENSG00000183691 | NOG       | Approved Extracellcytoplasm                          |
| 12254 | ENSG00000183695 | MRGPRX2   | Approved Cytoplasmcytoplasm                          |
| 12255 | ENSG00000183696 | UPP1      | Enhanced Cytoplasmcytoplasm                          |
| 12256 | ENSG00000183706 | OR4N4     | UncertainEstimation of protein expression could not  |
| 12257 | ENSG00000183709 | IFNL2     | UncertainEstimation of protein expression could not  |
| 12258 | ENSG00000183718 | TRIM52    | Approved Cytoplasmcytoplasm                          |
| 12259 | ENSG00000183722 | LHFPL6    | Approved Widely distributed positivity in connective |
| 12260 | ENSG00000183723 | CMTM4     | Enhanced Cytoplasmcytoplasm;plasma membrane          |
| 12261 | ENSG00000183733 | FIGLA     | SupportedExpression in oocytes.                      |
| 12262 | ENSG00000183735 | TBK1      | UncertainCytoplasmcytoplasm;nucleus                  |
| 12263 | ENSG00000183741 | CBX6      | UncertainNuclear acytoplasm;nucleus                  |

|       |                 |           |                                                      |
|-------|-----------------|-----------|------------------------------------------------------|
| 12264 | ENSG00000183742 | MACC1     | SupportedUbiquitous cytoplasm                        |
| 12265 | ENSG00000183747 | ACSM2A    | SupportedGranular cytoplasm                          |
| 12266 | ENSG00000183751 | TBL3      | Enhanced General nucleus                             |
| 12267 | ENSG00000183760 | ACP7      | UncertainPositivitplasma membrane                    |
| 12268 | ENSG00000183763 | TRAIP     | Enhanced Cytoplasmcytoplasm;nucleus                  |
| 12269 | ENSG00000183765 | CHEK2     | Enhanced Nuclear enucleus                            |
| 12270 | ENSG00000183770 | FOXL2     | Enhanced Nuclear enucleus                            |
| 12271 | ENSG00000183775 | KCTD16    | Approved Cytoplasmcytoplasm                          |
| 12272 | ENSG00000183778 | B3GALT5   | Approved Membranouplasma membrane                    |
| 12273 | ENSG00000183779 | ZNF703    | SupportedUbiquitousnucleus                           |
| 12274 | ENSG00000183780 | SLC35F3   | UncertainEstimation of protein expression could not  |
| 12275 | ENSG00000183783 | KCTD8     | Enhanced Cytoplasmcytoplasm                          |
| 12276 | ENSG00000183784 | C9orf66   | UncertainEstimation of protein expression could not  |
| 12277 | ENSG00000183785 | TUBA8     | Approved General ccytoplasm                          |
| 12278 | ENSG00000183791 | ELOA3     | UncertainEstimation of protein expression could not  |
| 12279 | ENSG00000183793 | NPIPA5    | Approved General nucleus                             |
| 12280 | ENSG00000183798 | EMILIN3   | Enhanced Highly expressed in connective tissue in fo |
| 12281 | ENSG00000183801 | OLFML1    | UncertainEstimation of protein expression could not  |
| 12282 | ENSG00000183807 | FAM162B   | Enhanced Distinct expression in stromal cells of pla |
| 12283 | ENSG00000183808 | RBM12B    | UncertainCytoplasmcytoplasm                          |
| 12284 | ENSG00000183813 | CCR4      | Approved Cytoplasmcytoplasm                          |
| 12285 | ENSG00000183814 | LIN9      | UncertainMainly nunucleus                            |
| 12286 | ENSG00000183826 | BTBD9     | UncertainNuclear acytoplasm;nucleus                  |
| 12287 | ENSG00000183828 | NUDT14    | Approved General ccytoplasm                          |
| 12288 | ENSG00000183831 | ANKRD45   | Enhanced Expressiocytoplasm                          |
| 12289 | ENSG00000183833 | MAATS1    | Enhanced Ciliary expression in fallopian tube and re |
| 12290 | ENSG00000183837 | PNMA3     | Approved Expressionnucleus                           |
| 12291 | ENSG00000183840 | GPR39     | Approved Cytoplasmcytoplasm                          |
| 12292 | ENSG00000183844 | FAM3B     | Approved Positivitplasma membrane                    |
| 12293 | ENSG00000183853 | KIRREL1   | Approved Cytoplasmcytoplasm                          |
| 12294 | ENSG00000183856 | IQGAP3    | UncertainEstimation of protein expression could not  |
| 12295 | ENSG00000183862 | CNGA2     | UncertainEstimation of protein expression could not  |
| 12296 | ENSG00000183864 | TOB2      | Approved Cytoplasmcytoplasm                          |
| 12297 | ENSG00000183876 | ARSI      | UncertainEstimation of protein expression could not  |
| 12298 | ENSG00000183878 | UTY       | SupportedMainly a nucleus                            |
| 12299 | ENSG00000183888 | SRARP     | UncertainEstimation of protein expression could not  |
| 12300 | ENSG00000183889 | AC138969. | Approved General nucleus                             |
| 12301 | ENSG00000183891 | TTC32     | Approved Cytoplasmcytoplasm                          |
| 12302 | ENSG00000183908 | LRRC55    | UncertainCytoplasmcytoplasm                          |
| 12303 | ENSG00000183914 | DNAH2     | Enhanced Selective expression in cilia               |
| 12304 | ENSG00000183943 | PRKX      | SupportedNuclear enucleus                            |
| 12305 | ENSG00000183960 | KCNH8     | Approved Expression in several tissues and cell type |
| 12306 | ENSG00000183963 | SMTN      | Enhanced Highly excytoplasm                          |
| 12307 | ENSG00000183971 | NPW       | Approved Cytoplasmcytoplasm                          |
| 12308 | ENSG00000183977 | PP2D1     | Enhanced Highly organized and distinct dot-like exp  |
| 12309 | ENSG00000183978 | COA3      | Approved Cytoplasmcytoplasm                          |
| 12310 | ENSG00000184005 | ST6GALNAC | UncertainEstimation of protein expression could not  |
| 12311 | ENSG00000184007 | PTP4A2    | UncertainCytoplasmcytoplasm                          |
| 12312 | ENSG00000184009 | ACTG1     | Approved Cytoplasmcytoplasm                          |
| 12313 | ENSG00000184012 | TMPRSS2   | Enhanced Membranouplasma membrane                    |
| 12314 | ENSG00000184014 | DENND5A   | UncertainCytoplasmcytoplasm                          |
| 12315 | ENSG00000184022 | OR2T10    | UncertainEstimation of protein expression could not  |
| 12316 | ENSG00000184033 | CTAG1B    | Enhanced Selectivenucleus                            |
| 12317 | ENSG00000184047 | DIABLO    | SupportedGeneral ccytoplasm                          |
| 12318 | ENSG00000184056 | VPS33B    | Approved Expression in several tissues, most abunda  |



|       |                 |           |                                                      |
|-------|-----------------|-----------|------------------------------------------------------|
| 12319 | ENSG00000184083 | FAM120C   | UncertainCytoplasmcytoplasm;nucleus                  |
| 12320 | ENSG00000184110 | EIF3C     | SupportedGeneral ccytoplasm                          |
| 12321 | ENSG00000184113 | CLDN5     | Approved Membranoucytoplasm;plasma membrane          |
| 12322 | ENSG00000184117 | NIPSNAP1  | UncertainGeneral ccytoplasm                          |
| 12323 | ENSG00000184144 | CNTN2     | Approved Cytoplasmcytoplasm                          |
| 12324 | ENSG00000184148 | SPRR4     | Enhanced Cytoplasmcytoplasm;nucleus                  |
| 12325 | ENSG00000184154 | LRTOMT    | Approved Cytoplasmcytoplasm;plasma membrane          |
| 12326 | ENSG00000184160 | ADRA2C    | UncertainEstimation of protein expression could not  |
| 12327 | ENSG00000184162 | NR2C2AP   | Approved Nuclear enucleus                            |
| 12328 | ENSG00000184163 | C1QTNF12  | UncertainCytoplasmcytoplasm;plasma membrane          |
| 12329 | ENSG00000184164 | CRELD2    | Approved Cytoplasmcytoplasm                          |
| 12330 | ENSG00000184178 | SCFD2     | Enhanced Cytoplasmcytoplasm                          |
| 12331 | ENSG00000184182 | UBE2F     | Approved General ncytoplasm;nucleus                  |
| 12332 | ENSG00000184185 | KCNJ12    | Approved Cytoplasmcytoplasm                          |
| 12333 | ENSG00000184205 | TSPYL2    | Approved Nuclear acytoplasm;nucleus                  |
| 12334 | ENSG00000184207 | PGP       | Approved Cytoplasmcytoplasm                          |
| 12335 | ENSG00000184208 | C22orf46  | UncertainUbiquitounucleus                            |
| 12336 | ENSG00000184209 | SNRNP35   | SupportedMainly nunucleus                            |
| 12337 | ENSG00000184216 | IRAK1     | SupportedUbiquitoucytoplasm                          |
| 12338 | ENSG00000184220 | CMSS1     | UncertainCytoplasmcytoplasm;nucleus                  |
| 12339 | ENSG00000184227 | ACOT1     | Approved Cytoplasmcytoplasm                          |
| 12340 | ENSG00000184232 | OAF       | UncertainCytoplasmcytoplasm                          |
| 12341 | ENSG00000184254 | ALDH1A3   | Enhanced Cytoplasmcytoplasm                          |
| 12342 | ENSG00000184260 | HIST2H2AC | SupportedUbiquitounucleus                            |
| 12343 | ENSG00000184270 | HIST2H2AB | SupportedUbiquitounucleus                            |
| 12344 | ENSG00000184271 | POU6F1    | Enhanced General nnucleus;plasma membrane            |
| 12345 | ENSG00000184276 | DEFB108B  | UncertainEstimation of protein expression could not  |
| 12346 | ENSG00000184277 | TM2D3     | UncertainUbiquitoucytoplasm                          |
| 12347 | ENSG00000184281 | TSSC4     | Approved Nuclear enucleus                            |
| 12348 | ENSG00000184292 | TACSTD2   | Enhanced Abundant cytoplasm;plasma membrane          |
| 12349 | ENSG00000184302 | SIX6      | Approved Nuclear enucleus                            |
| 12350 | ENSG00000184304 | PRKD1     | UncertainCytoplasmcytoplasm                          |
| 12351 | ENSG00000184305 | CCSER1    | UncertainUbiquitoucytoplasm;nucleus                  |
| 12352 | ENSG00000184307 | ZDHHC23   | UncertainEstimation of protein expression could not  |
| 12353 | ENSG00000184313 | MROH7     | Enhanced Cytoplasmcytoplasm                          |
| 12354 | ENSG00000184330 | S100A7A   | SupportedCytoplasmcytoplasm;nucleus                  |
| 12355 | ENSG00000184344 | GDF3      | UncertainEstimation of protein expression could not  |
| 12356 | ENSG00000184347 | SLIT3     | Approved Cytoplasmcytoplasm                          |
| 12357 | ENSG00000184349 | EFNA5     | Approved Membranoucytoplasm;plasma membrane          |
| 12358 | ENSG00000184350 | MRGPRE    | UncertainEstimation of protein expression could not  |
| 12359 | ENSG00000184357 | HIST1H1B  | Approved Nuclear enucleus                            |
| 12360 | ENSG00000184361 | SPATA32   | Approved Distinct expression in spermatozoa.         |
| 12361 | ENSG00000184363 | PKP3      | Enhanced Cytoplasmcytoplasm                          |
| 12362 | ENSG00000184368 | MAP7D2    | Enhanced Cytoplasmcytoplasm                          |
| 12363 | ENSG00000184378 | ACTRT3    | Approved Expression in testis.                       |
| 12364 | ENSG00000184381 | PLA2G6    | Approved Cytoplasmcytoplasm                          |
| 12365 | ENSG00000184384 | MAML2     | Approved General ncytoplasm;nucleus                  |
| 12366 | ENSG00000184388 | PABPC1L2B | Approved Expression in testis, processes of cerebra. |
| 12367 | ENSG00000184402 | SS18L1    | Approved Nuclear enucleus                            |
| 12368 | ENSG00000184408 | KCND2     | Enhanced Cytoplasmcytoplasm                          |
| 12369 | ENSG00000184428 | TOP1MT    | Approved Cytoplasmcytoplasm                          |
| 12370 | ENSG00000184432 | COPB2     | Approved General ccytoplasm                          |
| 12371 | ENSG00000184436 | THAP7     | Approved Nuclear enucleus                            |
| 12372 | ENSG00000184445 | KNTC1     | Approved Cytoplasmcytoplasm                          |
| 12373 | ENSG00000184451 | CCR10     | UncertainCytoplasmcytoplasm                          |

|       |                 |           |                                                      |
|-------|-----------------|-----------|------------------------------------------------------|
| 12374 | ENSG00000184454 | NCMAP     | UncertainEstimation of protein expression could not  |
| 12375 | ENSG00000184465 | WDR27     | UncertainCytoplasmcytoplasm;nucleus                  |
| 12376 | ENSG00000184470 | TXNRD2    | SupportedGeneral ccytoplasm                          |
| 12377 | ENSG00000184471 | CIQTNF8   | UncertainRNA-based expert annotation gave inconclus: |
| 12378 | ENSG00000184481 | FOXO4     | Enhanced Expression in several tissues, including p: |
| 12379 | ENSG00000184489 | PTP4A3    | UncertainEstimation of protein expression could not  |
| 12380 | ENSG00000184492 | FOXD4L1   | UncertainEstimation of protein expression could not  |
| 12381 | ENSG00000184497 | TMEM255B  | Approved General mcytoplasm;plasma membrane          |
| 12382 | ENSG00000184500 | PROS1     | Approved Positivitplasma membrane                    |
| 12383 | ENSG00000184502 | GAST      | Enhanced Selectivecytoplasm                          |
| 12384 | ENSG00000184507 | NUTM1     | Enhanced Nuclear acytoplasm;nucleus                  |
| 12385 | ENSG00000184508 | HDDC3     | Approved General ccytoplasm;nucleus                  |
| 12386 | ENSG00000184515 | BEX5      | Enhanced Mainly ccytoplasm;nucleus                   |
| 12387 | ENSG00000184517 | ZFP1      | UncertainEstimation of protein expression could not  |
| 12388 | ENSG00000184524 | CEND1     | Enhanced Selective expression in CNS                 |
| 12389 | ENSG00000184530 | C6orf58   | Enhanced Distinct cytoplasm                          |
| 12390 | ENSG00000184545 | DUSP8     | Approved Cytoplasmcytoplasm                          |
| 12391 | ENSG00000184557 | SOCS3     | Approved Cytoplasmcytoplasm                          |
| 12392 | ENSG00000184560 | SPEM2     | UncertainEstimation of protein expression could not  |
| 12393 | ENSG00000184564 | SLITRK6   | UncertainCytoplasmcytoplasm                          |
| 12394 | ENSG00000184571 | PIWIL3    | UncertainEstimation of protein expression could not  |
| 12395 | ENSG00000184574 | LPAR5     | Approved Cytoplasmcytoplasm                          |
| 12396 | ENSG00000184584 | TMEM173   | Enhanced Cytoplasmcytoplasm                          |
| 12397 | ENSG00000184588 | PDE4B     | UncertainGeneral ccytoplasm                          |
| 12398 | ENSG00000184599 | FAM19A3   | Approved Nuclear acytoplasm;nucleus                  |
| 12399 | ENSG00000184602 | SNN       | Approved Cytoplasmcytoplasm                          |
| 12400 | ENSG00000184611 | KCNH7     | UncertainEstimation of protein expression could not  |
| 12401 | ENSG00000184613 | NELL2     | UncertainRNA-based expert annotation gave inconclus: |
| 12402 | ENSG00000184619 | KRBA2     | Approved Cytoplasmcytoplasm;plasma membrane          |
| 12403 | ENSG00000184634 | MED12     | Enhanced Ubiquitounucleus                            |
| 12404 | ENSG00000184640 | 9/9/2019  | Approved General ccytoplasm;plasma membrane          |
| 12405 | ENSG00000184650 | ODF4      | Enhanced Expression in spermatids in testis.         |
| 12406 | ENSG00000184659 | FOXD4L4   | UncertainEstimation of protein expression could not  |
| 12407 | ENSG00000184661 | CDCA2     | Enhanced Nuclear enucleus                            |
| 12408 | ENSG00000184672 | RALYL     | Enhanced Distinct nucleus                            |
| 12409 | ENSG00000184675 | AMER1     | Approved General nnucleus                            |
| 12410 | ENSG00000184678 | HIST2H2BE | SupportedUbiquitounucleus                            |
| 12411 | ENSG00000184698 | OR51M1    | UncertainEstimation of protein expression could not  |
| 12412 | ENSG00000184702 | 9/5/2019  | Enhanced Selective expression in neuropil and Purkin |
| 12413 | ENSG00000184708 | EIF4ENIF1 | Enhanced Ubiquitoucytoplasm                          |
| 12414 | ENSG00000184709 | LRRC26    | Approved Cytoplasmcytoplasm;plasma membrane          |
| 12415 | ENSG00000184730 | APOBR     | Enhanced Selectivecytoplasm                          |
| 12416 | ENSG00000184731 | FAM110C   | UncertainCytoplasmcytoplasm                          |
| 12417 | ENSG00000184752 | NDUFA12   | SupportedUbiquitoucytoplasm                          |
| 12418 | ENSG00000184787 | UBE2G2    | Approved Cytoplasmcytoplasm                          |
| 12419 | ENSG00000184788 | SATL1     | UncertainEstimation of protein expression could not  |
| 12420 | ENSG00000184792 | OSBP2     | UncertainGeneral ccytoplasm                          |
| 12421 | ENSG00000184811 | TUSC5     | Approved Cytoplasmcytoplasm                          |
| 12422 | ENSG00000184814 | PRR23B    | UncertainEstimation of protein expression could not  |
| 12423 | ENSG00000184831 | APOO      | SupportedCytoplasmcytoplasm                          |
| 12424 | ENSG00000184838 | PRR16     | Approved Cytoplasmcytoplasm                          |
| 12425 | ENSG00000184840 | TMED9     | Approved General ccytoplasm                          |
| 12426 | ENSG00000184857 | TMEM186   | UncertainEstimation of protein expression could not  |
| 12427 | ENSG00000184860 | SDR42E1   | UncertainEstimation of protein expression could not  |
| 12428 | ENSG00000184863 | RBM33     | Approved General ncytoplasm;nucleus                  |

|       |                 |           |                                                      |
|-------|-----------------|-----------|------------------------------------------------------|
| 12429 | ENSG00000184867 | ARMCX2    | Enhanced Cytoplasmcytoplasm                          |
| 12430 | ENSG00000184887 | BTBD6     | Approved Cytoplasmcytoplasm                          |
| 12431 | ENSG00000184897 | H1FX      | SupportedGeneral n nucleus                           |
| 12432 | ENSG00000184898 | RBM43     | UncertainEstimation of protein expression could not  |
| 12433 | ENSG00000184900 | SUM03     | SupportedNuclear enucleus                            |
| 12434 | ENSG00000184903 | IMMP2L    | Approved Ubiquitoucytoplasm                          |
| 12435 | ENSG00000184908 | CLCNKB    | Approved Cytoplasmcytoplasm                          |
| 12436 | ENSG00000184911 | DMRTC1B   | UncertainEstimation of protein expression could not  |
| 12437 | ENSG00000184916 | JAG2      | Approved Ubiquitoucytoplasm                          |
| 12438 | ENSG00000184922 | FMNL1     | Enhanced Cytoplasmcytoplasm                          |
| 12439 | ENSG00000184924 | PTRHD1    | Approved Nuclear enucleus                            |
| 12440 | ENSG00000184937 | WT1       | Enhanced Nuclear enucleus                            |
| 12441 | ENSG00000184939 | ZFP90     | UncertainEstimation of protein expression could not  |
| 12442 | ENSG00000184945 | AQP12A    | SupportedCytoplasmcytoplasm                          |
| 12443 | ENSG00000184949 | FAM227A   | UncertainEstimation of protein expression could not  |
| 12444 | ENSG00000184956 | MUC6      | Enhanced Distinct cytoplasm                          |
| 12445 | ENSG00000184979 | USP18     | UncertainCytoplasmcytoplasm                          |
| 12446 | ENSG00000184984 | CHRM5     | UncertainEstimation of protein expression could not  |
| 12447 | ENSG00000184986 | TMEM121   | UncertainEstimation of protein expression could not  |
| 12448 | ENSG00000184992 | BRI3BP    | Approved Granular cytoplasm                          |
| 12449 | ENSG00000185000 | DGAT1     | Enhanced General ccytoplasm                          |
| 12450 | ENSG00000185002 | RFX6      | Approved Cytoplasmcytoplasm                          |
| 12451 | ENSG00000185008 | ROB02     | Approved Cytoplasmcytoplasm                          |
| 12452 | ENSG00000185009 | AP3M1     | UncertainCytoplasmcytoplasm                          |
| 12453 | ENSG00000185010 | F8        | Enhanced Extracellcytoplasm                          |
| 12454 | ENSG00000185013 | NT5C1B    | UncertainEstimation of protein expression could not  |
| 12455 | ENSG00000185015 | CA13      | Enhanced General ccytoplasm                          |
| 12456 | ENSG00000185019 | UBOX5     | Approved Cytoplasmcytoplasm                          |
| 12457 | ENSG00000185022 | MAFF      | Approved Nuclear enucleus                            |
| 12458 | ENSG00000185024 | BRF1      | Approved Nuclear enucleus                            |
| 12459 | ENSG00000185028 | LRRC14B   | UncertainCytoplasmcytoplasm                          |
| 12460 | ENSG00000185033 | SEMA4B    | Approved Cytoplasmcytoplasm                          |
| 12461 | ENSG00000185038 | MROH2A    | UncertainEstimation of protein expression could not  |
| 12462 | ENSG00000185040 | SPDYE16   | SupportedDistinct expression in acrosomes in spermat |
| 12463 | ENSG00000185043 | CIB1      | Approved Cytoplasmcytoplasm                          |
| 12464 | ENSG00000185046 | ANKS1B    | Enhanced Expression in cerebral cortex, caudate and  |
| 12465 | ENSG00000185049 | NELFA     | SupportedUbiquitounucleus                            |
| 12466 | ENSG00000185052 | SLC24A3   | UncertainGranular cytoplasm                          |
| 12467 | ENSG00000185053 | SGCZ      | UncertainEstimation of protein expression could not  |
| 12468 | ENSG00000185055 | EFCAB10   | UncertainEstimation of protein expression could not  |
| 12469 | ENSG00000185069 | KRT76     | Approved Cytoplasmcytoplasm                          |
| 12470 | ENSG00000185085 | INTS5     | UncertainEstimation of protein expression could not  |
| 12471 | ENSG00000185101 | ANO9      | Approved Cytoplasmcytoplasm                          |
| 12472 | ENSG00000185104 | FAF1      | Approved General ccytoplasm;nucleus                  |
| 12473 | ENSG00000185105 | MYADML2   | UncertainEstimation of protein expression could not  |
| 12474 | ENSG00000185112 | FAM43A    | UncertainEstimation of protein expression could not  |
| 12475 | ENSG00000185122 | HSF1      | SupportedGeneral n nucleus                           |
| 12476 | ENSG00000185127 | C6orf120  | UncertainRNA-based expert annotation gave inconclus: |
| 12477 | ENSG00000185130 | HIST1H2BL | SupportedUbiquitounucleus                            |
| 12478 | ENSG00000185156 | MFSD6L    | UncertainEstimation of protein expression could not  |
| 12479 | ENSG00000185158 | LRRC37B   | Approved Cytoplasmcytoplasm                          |
| 12480 | ENSG00000185163 | DDX51     | UncertainEstimation of protein expression could not  |
| 12481 | ENSG00000185164 | NOM02     | Approved General ccytoplasm                          |
| 12482 | ENSG00000185176 | AQP12B    | SupportedCytoplasmcytoplasm                          |
| 12483 | ENSG00000185187 | SIGIRR    | Approved Cytoplasmcytoplasm                          |

|       |                 |          |                                                       |
|-------|-----------------|----------|-------------------------------------------------------|
| 12484 | ENSG00000185189 | NRBP2    | Approved General c cytoplasm;nucleus                  |
| 12485 | ENSG00000185201 | IFITM2   | UncertainCytoplasmcytoplasm                           |
| 12486 | ENSG00000185215 | TNFAIP2  | Enhanced Cytoplasmcytoplasm;nucleus                   |
| 12487 | ENSG00000185219 | ZNF445   | UncertainEstimation of protein expression could not   |
| 12488 | ENSG00000185220 | PGBD2    | UncertainEstimation of protein expression could not   |
| 12489 | ENSG00000185222 | TCEAL9   | UncertainCytoplasmcytoplasm                           |
| 12490 | ENSG00000185231 | MC2R     | Enhanced Cytoplasmcytoplasm                           |
| 12491 | ENSG00000185238 | PRMT3    | UncertainUbiquitouscytoplasm                          |
| 12492 | ENSG00000185245 | GP1BA    | SupportedSelectivecytoplasm                           |
| 12493 | ENSG00000185246 | PRPF39   | Approved Nuclear enucleus                             |
| 12494 | ENSG00000185250 | PPIL6    | Approved Distinct expression mainly in cilia of fallo |
| 12495 | ENSG00000185252 | ZNF74    | Approved Nuclear enucleus                             |
| 12496 | ENSG00000185261 | KIAA0825 | UncertainUbiquitouscytoplasm                          |
| 12497 | ENSG00000185262 | UBALD2   | UncertainCytoplasmcytoplasm                           |
| 12498 | ENSG00000185264 | TEX33    | Enhanced Distinct expression in spermatids in semin:  |
| 12499 | ENSG00000185267 | CDNF     | UncertainCytoplasmcytoplasm;nucleus                   |
| 12500 | ENSG00000185271 | KLHL33   | Enhanced Cytoplasmcytoplasm                           |
| 12501 | ENSG00000185274 | GALNT17  | Approved Cytoplasmcytoplasm                           |
| 12502 | ENSG00000185278 | ZBTB37   | Approved Cytoplasmcytoplasm;nucleus                   |
| 12503 | ENSG00000185291 | IL3RA    | UncertainUbiquitouscytoplasm                          |
| 12504 | ENSG00000185298 | CCDC137  | UncertainCytoplasmcytoplasm;nucleus                   |
| 12505 | ENSG00000185303 | SFTPA2   | Enhanced Highly spcytoplasm                           |
| 12506 | ENSG00000185304 | RGPD2    | UncertainEstimation of protein expression could not   |
| 12507 | ENSG00000185305 | ARL15    | UncertainCytoplasmcytoplasm                           |
| 12508 | ENSG00000185306 | C12orf56 | Enhanced Nucleolarnucleus                             |
| 12509 | ENSG00000185324 | CDK10    | UncertainGeneral c cytoplasm                          |
| 12510 | ENSG00000185338 | SOCS1    | Approved Nuclear a cytoplasm;nucleus                  |
| 12511 | ENSG00000185340 | GAS2L1   | Approved Cytoplasmcytoplasm                           |
| 12512 | ENSG00000185344 | ATP6V0A2 | Approved Cytoplasmcytoplasm                           |
| 12513 | ENSG00000185345 | PRKN     | Enhanced Cytoplasmcytoplasm;nucleus                   |
| 12514 | ENSG00000185347 | TEDC1    | UncertainEstimation of protein expression could not   |
| 12515 | ENSG00000185359 | HGS      | UncertainCytoplasmcytoplasm                           |
| 12516 | ENSG00000185372 | OR2V1    | UncertainEstimation of protein expression could not   |
| 12517 | ENSG00000185386 | MAPK11   | Approved Ubiquitouscytoplasm                          |
| 12518 | ENSG00000185404 | SP140L   | UncertainEstimation of protein expression could not   |
| 12519 | ENSG00000185414 | MRPL30   | Approved Cytoplasmcytoplasm                           |
| 12520 | ENSG00000185418 | TARSL2   | Approved Cytoplasmcytoplasm                           |
| 12521 | ENSG00000185420 | SMYD3    | Approved Cytoplasmcytoplasm                           |
| 12522 | ENSG00000185436 | IFNLR1   | UncertainEstimation of protein expression could not   |
| 12523 | ENSG00000185437 | SH3BGR   | Enhanced Cytoplasmcytoplasm                           |
| 12524 | ENSG00000185442 | FAM174B  | Approved Cytoplasmcytoplasm;plasma membrane           |
| 12525 | ENSG00000185448 | FAM47A   | UncertainEstimation of protein expression could not   |
| 12526 | ENSG00000185453 | ZSWIM9   | UncertainCytoplasmcytoplasm                           |
| 12527 | ENSG00000185467 | KPNA7    | UncertainEstimation of protein expression could not   |
| 12528 | ENSG00000185477 | GPRIN3   | Enhanced Membranoucytoplasm;plasma membrane           |
| 12529 | ENSG00000185479 | KRT6B    | SupportedDistinct cytoplasm                           |
| 12530 | ENSG00000185480 | PARPBP   | Approved Nuclear enucleus                             |
| 12531 | ENSG00000185499 | MUC1     | Enhanced Cytoplasmcytoplasm;plasma membrane           |
| 12532 | ENSG00000185504 | FAAP100  | UncertainGeneral c cytoplasm                          |
| 12533 | ENSG00000185507 | IRF7     | Approved Nuclear enucleus                             |
| 12534 | ENSG00000185518 | SV2B     | Approved Distinct expression in neuropil.             |
| 12535 | ENSG00000185519 | FAM131C  | UncertainEstimation of protein expression could not   |
| 12536 | ENSG00000185522 | LMNTD2   | UncertainEstimation of protein expression could not   |
| 12537 | ENSG00000185523 | SPATA45  | UncertainEstimation of protein expression could not   |
| 12538 | ENSG00000185527 | PDE6G    | SupportedExpression in rod outer segments of retina.  |

|       |                 |          |                                                      |
|-------|-----------------|----------|------------------------------------------------------|
| 12539 | ENSG00000185532 | PRKG1    | Enhanced General ccytoplasm                          |
| 12540 | ENSG00000185559 | DLK1     | Enhanced Membranoucytoplasm;plasma membrane          |
| 12541 | ENSG00000185561 | TLCD2    | UncertainEstimation of protein expression could not  |
| 12542 | ENSG00000185567 | AHNAK2   | Enhanced Distinct cytoplasm                          |
| 12543 | ENSG00000185585 | OLFML2A  | Approved Cytoplasmcytoplasm                          |
| 12544 | ENSG00000185591 | SP1      | SupportedUbiquitouucleus                             |
| 12545 | ENSG00000185608 | MRPL40   | UncertainUbiquitoucytoplasm;nucleus                  |
| 12546 | ENSG00000185610 | DBX2     | UncertainEstimation of protein expression could not  |
| 12547 | ENSG00000185614 | FAM212A  | UncertainEstimation of protein expression could not  |
| 12548 | ENSG00000185615 | PDIA2    | Enhanced Selectivecytoplasm                          |
| 12549 | ENSG00000185619 | PCGF3    | Approved General nnucleus                            |
| 12550 | ENSG00000185621 | LMLN     | UncertainEstimation of protein expression could not  |
| 12551 | ENSG00000185624 | P4HB     | Enhanced Cytoplasmcytoplasm                          |
| 12552 | ENSG00000185627 | PSMD13   | Approved Cytoplasmcytoplasm;nucleus                  |
| 12553 | ENSG00000185630 | PBX1     | SupportedNuclear enucleus                            |
| 12554 | ENSG00000185640 | KRT79    | Enhanced Cytoplasmcytoplasm                          |
| 12555 | ENSG00000185650 | ZFP36L1  | UncertainCytoplasmcytoplasm                          |
| 12556 | ENSG00000185651 | UBE2L3   | Approved General ncytoplasm;nucleus                  |
| 12557 | ENSG00000185652 | NTF3     | UncertainCytoplasmcytoplasm                          |
| 12558 | ENSG00000185658 | BRWD1    | Approved General ccytoplasm                          |
| 12559 | ENSG00000185664 | PMEL     | Enhanced Selectivecytoplasm                          |
| 12560 | ENSG00000185666 | SYN3     | UncertainExpression in CNS and testis.               |
| 12561 | ENSG00000185670 | ZBTB3    | Approved Ubiquitoucytoplasm                          |
| 12562 | ENSG00000185674 | LYG2     | UncertainEstimation of protein expression could not  |
| 12563 | ENSG00000185686 | PRAME    | Enhanced Granular cytoplasm                          |
| 12564 | ENSG00000185697 | MYBL1    | UncertainGeneral ccytoplasm;nucleus                  |
| 12565 | ENSG00000185721 | DRG1     | Enhanced Cytoplasmcytoplasm                          |
| 12566 | ENSG00000185722 | ANKFY1   | Approved Cytoplasmcytoplasm                          |
| 12567 | ENSG00000185730 | ZNF696   | UncertainEstimation of protein expression could not  |
| 12568 | ENSG00000185739 | SRL      | Enhanced Cytoplasmcytoplasm                          |
| 12569 | ENSG00000185742 | C11orf87 | Approved Cytoplasmcytoplasm                          |
| 12570 | ENSG00000185745 | IFIT1    | Approved Cytoplasmcytoplasm                          |
| 12571 | ENSG00000185753 | CXorf38  | Approved Nuclear anucleus                            |
| 12572 | ENSG00000185760 | KCNQ5    | Enhanced Cytoplasmcytoplasm                          |
| 12573 | ENSG00000185787 | MORF4L1  | Approved Mainly nnucleus                             |
| 12574 | ENSG00000185792 | NLRP9    | UncertainEstimation of protein expression could not  |
| 12575 | ENSG00000185798 | WDR53    | Approved Expression in several tissues, most abunda  |
| 12576 | ENSG00000185800 | DMWD     | Approved Mainly meplasma membrane                    |
| 12577 | ENSG00000185803 | SLC52A2  | Approved Cytoplasmcytoplasm                          |
| 12578 | ENSG00000185808 | PIGP     | UncertainCytoplasmcytoplasm                          |
| 12579 | ENSG00000185811 | IKZF1    | Enhanced Nuclear enucleus                            |
| 12580 | ENSG00000185813 | PCYT2    | Enhanced Mainly ccytoplasm                           |
| 12581 | ENSG00000185823 | NPAP1    | UncertainEstimation of protein expression could not  |
| 12582 | ENSG00000185825 | BCAP31   | SupportedUbiquitoucytoplasm                          |
| 12583 | ENSG00000185829 | ARL17A   | UncertainGeneral ccytoplasm;nucleus                  |
| 12584 | ENSG00000185838 | GNB1L    | Approved General ccytoplasm                          |
| 12585 | ENSG00000185842 | DNAH14   | UncertainExpression mainly in ciliated cells in fal. |
| 12586 | ENSG00000185860 | CCDC190  | UncertainEstimation of protein expression could not  |
| 12587 | ENSG00000185862 | EVI2B    | Enhanced Cytoplasmcytoplasm                          |
| 12588 | ENSG00000185863 | TMEM210  | Enhanced Specific cytoplasm                          |
| 12589 | ENSG00000185864 | NPIP4    | Approved Nuclear enucleus                            |
| 12590 | ENSG00000185875 | THNSL1   | UncertainEstimation of protein expression could not  |
| 12591 | ENSG00000185880 | TRIM69   | Enhanced Cytoplasmcytoplasm                          |
| 12592 | ENSG00000185885 | IFITM1   | Enhanced Distinct plasma membrane                    |
| 12593 | ENSG00000185888 | PRSS38   | Enhanced Cytoplasmcytoplasm;plasma membrane          |

|       |                 |          |                                                      |
|-------|-----------------|----------|------------------------------------------------------|
| 12594 | ENSG00000185896 | LAMP1    | SupportedUbiquitouscytoplasm                         |
| 12595 | ENSG00000185897 | FFAR3    | UncertainLow membrcytoplasm;plasma membrane          |
| 12596 | ENSG00000185899 | TAS2R60  | UncertainEstimation of protein expression could not  |
| 12597 | ENSG00000185900 | POMK     | UncertainCytoplasmcytoplasm                          |
| 12598 | ENSG00000185905 | C16orf54 | UncertainEstimation of protein expression could not  |
| 12599 | ENSG00000185909 | KLHDC8B  | Approved Cytoplasmcytoplasm                          |
| 12600 | ENSG00000185915 | KLHL34   | UncertainEstimation of protein expression could not  |
| 12601 | ENSG00000185917 | SETD4    | Approved Cytoplasmcytoplasm;nucleus                  |
| 12602 | ENSG00000185920 | PTCH1    | UncertainCytoplasmcytoplasm                          |
| 12603 | ENSG00000185924 | RTN4RL1  | UncertainEstimation of protein expression could not  |
| 12604 | ENSG00000185933 | CALHM1   | Enhanced Cytoplasmcytoplasm                          |
| 12605 | ENSG00000185942 | NKAIN3   | Enhanced Cytoplasmcytoplasm                          |
| 12606 | ENSG00000185947 | ZNF267   | Approved Ubiquitouscytoplasm                         |
| 12607 | ENSG00000185950 | IRS2     | Approved General ccytoplasm                          |
| 12608 | ENSG00000185955 | C7orf61  | Enhanced Expression in acrosomes of spermatids in t  |
| 12609 | ENSG00000185958 | FAM186A  | UncertainEstimation of protein expression could not  |
| 12610 | ENSG00000185963 | BICD2    | Enhanced Selectivecytoplasm                          |
| 12611 | ENSG00000185973 | TMLHE    | Approved General ccytoplasm                          |
| 12612 | ENSG00000185974 | GRK1     | Enhanced Cytoplasmcytoplasm                          |
| 12613 | ENSG00000185988 | PLK5     | Enhanced Selectiveplasma membrane                    |
| 12614 | ENSG00000185989 | RASA3    | UncertainExpression in most tissues.                 |
| 12615 | ENSG00000186001 | LRCH3    | UncertainGeneral ccytoplasm                          |
| 12616 | ENSG00000186009 | ATP4B    | Enhanced Selectivecytoplasm                          |
| 12617 | ENSG00000186010 | NDUFA13  | SupportedUbiquitouscytoplasm                         |
| 12618 | ENSG00000186017 | ZNF566   | UncertainEstimation of protein expression could not  |
| 12619 | ENSG00000186020 | ZNF529   | UncertainCytoplasmcytoplasm;nucleus                  |
| 12620 | ENSG00000186038 | HTR3E    | Enhanced Cytoplasmcytoplasm                          |
| 12621 | ENSG00000186047 | DLEU7    | UncertainEstimation of protein expression could not  |
| 12622 | ENSG00000186049 | KRT73    | Enhanced Highly expressed in the inner root sheath ( |
| 12623 | ENSG00000186051 | TAL2     | UncertainEstimation of protein expression could not  |
| 12624 | ENSG00000186063 | AIDA     | Approved Cytoplasmcytoplasm                          |
| 12625 | ENSG00000186073 | C15orf41 | UncertainNuclear enucleus                            |
| 12626 | ENSG00000186074 | CD300LF  | SupportedCytoplasmcytoplasm                          |
| 12627 | ENSG00000186075 | ZBP2     | Enhanced Cytoplasmcytoplasm                          |
| 12628 | ENSG00000186081 | KRT5     | Enhanced Specific cytoplasm;plasma membrane          |
| 12629 | ENSG00000186086 | NBPF6    | UncertainEstimation of protein expression could not  |
| 12630 | ENSG00000186094 | AGBL4    | Approved Cytoplasmcytoplasm                          |
| 12631 | ENSG00000186103 | ARGFX    | UncertainEstimation of protein expression could not  |
| 12632 | ENSG00000186104 | CYP2R1   | Approved Mainly ccytoplasm                           |
| 12633 | ENSG00000186105 | LRRC70   | UncertainEstimation of protein expression could not  |
| 12634 | ENSG00000186106 | ANKRD46  | Approved Cytoplasmcytoplasm;plasma membrane          |
| 12635 | ENSG00000186111 | PIP5K1C  | Approved Cytoplasmcytoplasm                          |
| 12636 | ENSG00000186115 | CYP4F2   | SupportedCytoplasmcytoplasm                          |
| 12637 | ENSG00000186130 | ZBTB6    | Approved Nuclear acytoplasm;nucleus                  |
| 12638 | ENSG00000186132 | C2orf76  | UncertainCytoplasmcytoplasm                          |
| 12639 | ENSG00000186136 | TAS2R42  | UncertainEstimation of protein expression could not  |
| 12640 | ENSG00000186141 | POLR3C   | UncertainNuclear acytoplasm;nucleus                  |
| 12641 | ENSG00000186150 | UBL4B    | Enhanced Granular cytoplasm                          |
| 12642 | ENSG00000186153 | WWOX     | Approved General ccytoplasm                          |
| 12643 | ENSG00000186166 | CCDC84   | UncertainCytoplasmcytoplasm                          |
| 12644 | ENSG00000186174 | BCL9L    | UncertainNuclear acytoplasm;nucleus                  |
| 12645 | ENSG00000186184 | POLR1D   | UncertainEstimation of protein expression could not  |
| 12646 | ENSG00000186185 | KIF18B   | Enhanced Nuclear enucleus                            |
| 12647 | ENSG00000186187 | ZNRF1    | Approved General ccytoplasm                          |
| 12648 | ENSG00000186190 | BPIFB3   | UncertainEstimation of protein expression could not  |

|       |                 |           |                                                      |
|-------|-----------------|-----------|------------------------------------------------------|
| 12649 | ENSG00000186193 | SAPCD2    | Approved Cytoplasm cytoplasm;nucleus                 |
| 12650 | ENSG00000186197 | EDARADD   | Uncertain General c cytoplasm                        |
| 12651 | ENSG00000186198 | SLC51B    | Enhanced Cytoplasm cytoplasm;plasma membrane         |
| 12652 | ENSG00000186204 | CYP4F12   | Approved Cytoplasm cytoplasm                         |
| 12653 | ENSG00000186205 | 3/1/2019  | Approved Cytoplasm cytoplasm                         |
| 12654 | ENSG00000186212 | SOWAHB    | Approved Cytoplasm cytoplasm;nucleus                 |
| 12655 | ENSG00000186222 | BLOC1S4   | Approved Cytoplasm cytoplasm                         |
| 12656 | ENSG00000186230 | ZNF749    | Uncertain Estimation of protein expression could not |
| 12657 | ENSG00000186231 | KLHL32    | Enhanced Cytoplasm cytoplasm                         |
| 12658 | ENSG00000186260 | MKL2      | Enhanced General n nucleus                           |
| 12659 | ENSG00000186265 | BTLA      | Enhanced Cytoplasm cytoplasm                         |
| 12660 | ENSG00000186280 | KDM4D     | Approved Nuclear enucleus                            |
| 12661 | ENSG00000186281 | GPAT2     | Uncertain Membranou cytoplasm;plasma membrane        |
| 12662 | ENSG00000186283 | TOR3A     | Approved Cytoplasm cytoplasm                         |
| 12663 | ENSG00000186288 | PABPC1L2A | Approved Axonal expression, distinct in hypothalamus |
| 12664 | ENSG00000186298 | PPP1CC    | Uncertain Cytoplasm cytoplasm                        |
| 12665 | ENSG00000186300 | ZNF555    | Uncertain Estimation of protein expression could not |
| 12666 | ENSG00000186314 | PRELID2   | Uncertain Estimation of protein expression could not |
| 12667 | ENSG00000186318 | BACE1     | Approved Granular cytoplasm                          |
| 12668 | ENSG00000186326 | RGS9BP    | Enhanced Cytoplasm cytoplasm                         |
| 12669 | ENSG00000186335 | SLC36A2   | Enhanced Luminal expression in kidney.               |
| 12670 | ENSG00000186340 | THBS2     | Approved Granular cytoplasm                          |
| 12671 | ENSG00000186350 | RXRA      | Supported Ubiquitou nucleus                          |
| 12672 | ENSG00000186352 | ANKRD37   | Uncertain Estimation of protein expression could not |
| 12673 | ENSG00000186354 | C9orf47   | Approved Cytoplasm cytoplasm;plasma membrane         |
| 12674 | ENSG00000186364 | NUDT17    | Approved Ubiquitou cytoplasm                         |
| 12675 | ENSG00000186367 | KIAA1024L | Uncertain Estimation of protein expression could not |
| 12676 | ENSG00000186376 | ZNF75D    | Supported General n nucleus                          |
| 12677 | ENSG00000186377 | CYP4X1    | Approved Cytoplasm cytoplasm;nucleus                 |
| 12678 | ENSG00000186393 | KRT26     | Enhanced Highly expressed in the inner root sheath c |
| 12679 | ENSG00000186395 | KRT10     | Enhanced Selective cytoplasm                         |
| 12680 | ENSG00000186407 | CD300E    | Uncertain Estimation of protein expression could not |
| 12681 | ENSG00000186409 | CCDC30    | Approved Granular cytoplasm                          |
| 12682 | ENSG00000186417 | GLDN      | Uncertain Expression in peripheral nerves.           |
| 12683 | ENSG00000186431 | FCAR      | Approved Cytoplasm cytoplasm;plasma membrane         |
| 12684 | ENSG00000186432 | KPNA4     | Enhanced Mainly n nucleus                            |
| 12685 | ENSG00000186439 | TRDN      | Enhanced Cytoplasm cytoplasm                         |
| 12686 | ENSG00000186440 | OR6P1     | Uncertain Estimation of protein expression could not |
| 12687 | ENSG00000186446 | ZNF501    | Uncertain Estimation of protein expression could not |
| 12688 | ENSG00000186448 | ZNF197    | Uncertain Estimation of protein expression could not |
| 12689 | ENSG00000186451 | SPATA12   | Enhanced Cytoplasm cytoplasm                         |
| 12690 | ENSG00000186458 | DEFB132   | Approved Cytoplasm cytoplasm                         |
| 12691 | ENSG00000186468 | RPS23     | Approved General c cytoplasm                         |
| 12692 | ENSG00000186469 | GNG2      | Uncertain Ubiquitou cytoplasm;plasma membrane        |
| 12693 | ENSG00000186470 | BTN3A2    | Uncertain Cytoplasm cytoplasm                        |
| 12694 | ENSG00000186471 | AKAP14    | Enhanced Ciliary e cytoplasm;plasma membrane         |
| 12695 | ENSG00000186472 | PCL0      | Approved Cytoplasm cytoplasm                         |
| 12696 | ENSG00000186474 | KLK12     | Uncertain Estimation of protein expression could not |
| 12697 | ENSG00000186479 | RGS7BP    | Approved Cytoplasm cytoplasm                         |
| 12698 | ENSG00000186496 | ZNF396    | Uncertain Nuclear enucleus                           |
| 12699 | ENSG00000186501 | TMEM222   | Approved Cytoplasm cytoplasm;plasma membrane         |
| 12700 | ENSG00000186510 | CLCNKA    | Approved Cytoplasm cytoplasm                         |
| 12701 | ENSG00000186517 | ARHGAP30  | Enhanced Cytoplasm cytoplasm                         |
| 12702 | ENSG00000186522 | #####     | Enhanced Cytoplasm cytoplasm                         |
| 12703 | ENSG00000186523 | FAM86B1   | Uncertain Estimation of protein expression could not |

|       |                 |          |                                                      |
|-------|-----------------|----------|------------------------------------------------------|
| 12704 | ENSG00000186526 | CYP4F8   | Approved Cytoplasmcytoplasm                          |
| 12705 | ENSG00000186529 | CYP4F3   | Approved Cytoplasmcytoplasm                          |
| 12706 | ENSG00000186532 | SMYD4    | UncertainCytoplasmcytoplasm                          |
| 12707 | ENSG00000186566 | GPATCH8  | Approved Ubiquitouscytoplasm;nucleus                 |
| 12708 | ENSG00000186567 | CEACAM19 | UncertainEstimation of protein expression could not  |
| 12709 | ENSG00000186572 | DEFB107A | Approved Cytoplasmcytoplasm                          |
| 12710 | ENSG00000186575 | NF2      | SupportedCytoplasmcytoplasm;nucleus                  |
| 12711 | ENSG00000186577 | SMIM29   | UncertainNuclear acytoplasm;nucleus                  |
| 12712 | ENSG00000186579 | DEFB106A | SupportedHighly expressed in epididymis.             |
| 12713 | ENSG00000186591 | UBE2H    | Approved Cytoplasmcytoplasm                          |
| 12714 | ENSG00000186625 | KATNA1   | Approved General ccytoplasm                          |
| 12715 | ENSG00000186635 | ARAP1    | Approved General ccytoplasm                          |
| 12716 | ENSG00000186638 | KIF24    | UncertainEstimation of protein expression could not  |
| 12717 | ENSG00000186642 | PDE2A    | Enhanced Abundant expression in cerebral cortex and  |
| 12718 | ENSG00000186648 | CARMIL3  | UncertainEstimation of protein expression could not  |
| 12719 | ENSG00000186652 | PRG2     | SupportedSelectivecytoplasm                          |
| 12720 | ENSG00000186654 | PRR5     | Approved Cytoplasmcytoplasm;plasma membrane          |
| 12721 | ENSG00000186660 | ZFP91    | Approved Ubiquitousnucleus                           |
| 12722 | ENSG00000186665 | C17orf58 | UncertainNuclear enucleus                            |
| 12723 | ENSG00000186666 | BCDIN3D  | Approved Cytoplasmcytoplasm                          |
| 12724 | ENSG00000186675 | MAGEE2   | UncertainEstimation of protein expression could not  |
| 12725 | ENSG00000186687 | LYRM7    | Approved General ccytoplasm                          |
| 12726 | ENSG00000186710 | CFAP73   | Enhanced Distinct expression in cilia of fallopian { |
| 12727 | ENSG00000186714 | CCDC73   | UncertainEstimation of protein expression could not  |
| 12728 | ENSG00000186716 | BCR      | Approved Cytoplasmcytoplasm;plasma membrane          |
| 12729 | ENSG00000186767 | SPIN4    | UncertainEstimation of protein expression could not  |
| 12730 | ENSG00000186787 | SPIN2B   | UncertainNuclear acytoplasm;nucleus                  |
| 12731 | ENSG00000186792 | HYAL3    | UncertainEstimation of protein expression could not  |
| 12732 | ENSG00000186795 | KCNK18   | UncertainEstimation of protein expression could not  |
| 12733 | ENSG00000186803 | IFNA10   | UncertainEstimation of protein expression could not  |
| 12734 | ENSG00000186806 | VSIG10L  | UncertainEstimation of protein expression could not  |
| 12735 | ENSG00000186810 | CXCR3    | Enhanced Expression in a subset of leukocytes.       |
| 12736 | ENSG00000186812 | ZNF397   | UncertainCytoplasmcytoplasm                          |
| 12737 | ENSG00000186814 | ZSCAN30  | Approved Ubiquitouscytoplasm;nucleus                 |
| 12738 | ENSG00000186815 | TPCN1    | Approved Cytoplasmcytoplasm                          |
| 12739 | ENSG00000186818 | LILRB4   | Approved Expression in immune cells in several tissu |
| 12740 | ENSG00000186827 | TNFRSF4  | Enhanced Cytoplasmcytoplasm                          |
| 12741 | ENSG00000186832 | KRT16    | Approved Cytoplasmcytoplasm                          |
| 12742 | ENSG00000186834 | HEXIM1   | SupportedUbiquitousnucleus                           |
| 12743 | ENSG00000186838 | SELENOV  | UncertainEstimation of protein expression could not  |
| 12744 | ENSG00000186847 | KRT14    | Enhanced Cytoplasmcytoplasm                          |
| 12745 | ENSG00000186854 | TRABD2A  | Approved Ubiquitouscytoplasm                         |
| 12746 | ENSG00000186866 | POFUT2   | UncertainEstimation of protein expression could not  |
| 12747 | ENSG00000186867 | QRFPR    | Approved Membranoucytoplasm;plasma membrane          |
| 12748 | ENSG00000186868 | MAPT     | Enhanced Cytoplasmcytoplasm                          |
| 12749 | ENSG00000186871 | ERCC6L   | Approved Nuclear enucleus                            |
| 12750 | ENSG00000186889 | TMEM17   | UncertainCytoplasmcytoplasm                          |
| 12751 | ENSG00000186891 | TNFRSF18 | Approved positivitplasma membrane                    |
| 12752 | ENSG00000186895 | FGF3     | Enhanced Expressed in cerebellum.                    |
| 12753 | ENSG00000186908 | ZDHHC17  | Approved General ccytoplasm                          |
| 12754 | ENSG00000186912 | P2RY4    | UncertainEstimation of protein expression could not  |
| 12755 | ENSG00000186918 | ZNF395   | UncertainGeneral ccytoplasm                          |
| 12756 | ENSG00000186951 | PPARA    | SupportedGeneral nnucleus                            |
| 12757 | ENSG00000186952 | TMEM232  | UncertainEstimation of protein expression could not  |
| 12758 | ENSG00000186973 | FAM183A  | Approved Cytoplasmcytoplasm                          |



|       |                 |           |                                                       |
|-------|-----------------|-----------|-------------------------------------------------------|
| 12759 | ENSG00000186994 | KANK3     | Approved Selective cytoplasm                          |
| 12760 | ENSG00000186998 | EMID1     | Uncertain Cytoplasm cytoplasm                         |
| 12761 | ENSG00000187003 | ACTL7A    | Enhanced Expression in acrosomes in spermatids and s  |
| 12762 | ENSG00000187010 | RHD       | Supported Expression in erythrocytes and subset of ce |
| 12763 | ENSG00000187017 | ESPN      | Enhanced Distinct microvilli expression in several t  |
| 12764 | ENSG00000187024 | PTRH1     | Uncertain General c cytoplasm                         |
| 12765 | ENSG00000187051 | RPS19BP1  | Uncertain Nucleolar cytoplasm;nucleus                 |
| 12766 | ENSG00000187068 | C3orf70   | Uncertain Estimation of protein expression could not  |
| 12767 | ENSG00000187080 | OR2AK2    | Uncertain Estimation of protein expression could not  |
| 12768 | ENSG00000187082 | DEFB106B  | Supported Highly expressed in epididymis.             |
| 12769 | ENSG00000187091 | PLCD1     | Approved Cytoplasm cytoplasm;plasma membrane          |
| 12770 | ENSG00000187094 | CCK       | Enhanced Expressed in hypothalamus and neuroendocri   |
| 12771 | ENSG00000187097 | ENTPD5    | Enhanced Cytoplasm cytoplasm                          |
| 12772 | ENSG00000187098 | MITF      | Enhanced Nuclear enucleus                             |
| 12773 | ENSG00000187105 | HEATR4    | Enhanced Cytoplasm cytoplasm                          |
| 12774 | ENSG00000187109 | NAP1L1    | Approved Ubiquitou cytoplasm                          |
| 12775 | ENSG00000187118 | CMC1      | Approved General c cytoplasm                          |
| 12776 | ENSG00000187123 | LYPD6     | Enhanced Cytoplasm cytoplasm;plasma membrane          |
| 12777 | ENSG00000187134 | AKR1C1    | Enhanced Cytoplasm cytoplasm                          |
| 12778 | ENSG00000187140 | FOXD3     | Uncertain Estimation of protein expression could not  |
| 12779 | ENSG00000187147 | RNF220    | Uncertain Cytoplasm cytoplasm                         |
| 12780 | ENSG00000187151 | ANGPTL5   | Uncertain Estimation of protein expression could not  |
| 12781 | ENSG00000187164 | SHTN1     | Enhanced Cytoplasm cytoplasm                          |
| 12782 | ENSG00000187166 | H1FNT     | Approved Nuclear e cytoplasm;nucleus                  |
| 12783 | ENSG00000187186 | AL162231. | Enhanced Distinct nucleus                             |
| 12784 | ENSG00000187189 | TSPYL4    | Approved Mainly c cytoplasm                           |
| 12785 | ENSG00000187191 | DAZ3      | Approved Cytoplasm cytoplasm                          |
| 12786 | ENSG00000187210 | GCNT1     | Uncertain Cytoplasm cytoplasm                         |
| 12787 | ENSG00000187231 | SESTD1    | Approved Cytoplasm cytoplasm                          |
| 12788 | ENSG00000187239 | FNBP1     | Enhanced Cytoplasm cytoplasm                          |
| 12789 | ENSG00000187240 | DYNC2H1   | Approved Cytoplasm cytoplasm                          |
| 12790 | ENSG00000187242 | KRT12     | Enhanced Highly expressed in the cornea.              |
| 12791 | ENSG00000187243 | MAGED4B   | Approved Cytoplasm cytoplasm                          |
| 12792 | ENSG00000187244 | BCAM      | Uncertain Cytoplasm cytoplasm;plasma membrane         |
| 12793 | ENSG00000187257 | RSBN1L    | Approved Cytoplasm cytoplasm                          |
| 12794 | ENSG00000187288 | CIDEC     | Approved Cytoplasm cytoplasm                          |
| 12795 | ENSG00000187323 | DCC       | Enhanced Cytoplasm cytoplasm                          |
| 12796 | ENSG00000187325 | TAF9B     | Approved Nuclear enucleus                             |
| 12797 | ENSG00000187391 | MAGI2     | Approved Cytoplasm cytoplasm;nucleus                  |
| 12798 | ENSG00000187398 | LUZP2     | Enhanced Distinct expression in neuronal and glial i  |
| 12799 | ENSG00000187446 | CHP1      | Approved General n cytoplasm;nucleus                  |
| 12800 | ENSG00000187475 | HIST1H1T  | Enhanced Distinct nucleus                             |
| 12801 | ENSG00000187479 | C11orf96  | Uncertain Cytoplasm cytoplasm                         |
| 12802 | ENSG00000187486 | KCNJ11    | Approved Cytoplasm cytoplasm                          |
| 12803 | ENSG00000187492 | CDHR4     | Enhanced Expressed in ciliated cells in fallopian tu  |
| 12804 | ENSG00000187498 | COL4A1    | Approved Distinct plasma membrane                     |
| 12805 | ENSG00000187510 | PLEKHG7   | Uncertain Estimation of protein expression could not  |
| 12806 | ENSG00000187513 | GJA4      | Approved Mainly meplasma membrane                     |
| 12807 | ENSG00000187514 | PTMA      | Approved Cytoplasm cytoplasm                          |
| 12808 | ENSG00000187516 | HYPM      | Enhanced Cytoplasm cytoplasm                          |
| 12809 | ENSG00000187522 | HSPA14    | Approved General c cytoplasm                          |
| 12810 | ENSG00000187527 | ATP13A5   | Uncertain Estimation of protein expression could not  |
| 12811 | ENSG00000187531 | SIRT7     | Approved Ubiquitounucleus                             |
| 12812 | ENSG00000187533 | PRR27     | Enhanced Selective cytoplasm                          |
| 12813 | ENSG00000187535 | IFT140    | Approved Cytoplasm cytoplasm;plasma membrane          |

|       |                 |          |                                                      |
|-------|-----------------|----------|------------------------------------------------------|
| 12814 | ENSG00000187550 | SBK2     | Enhanced Cytoplasmcytoplasm                          |
| 12815 | ENSG00000187555 | USP7     | Approved Mainly nunucleus                            |
| 12816 | ENSG00000187556 | NANOS3   | Enhanced Expression in spermatogonia in testis and c |
| 12817 | ENSG00000187559 | FOXD4L3  | UncertainEstimation of protein expression could not  |
| 12818 | ENSG00000187581 | COX8C    | Approved Granular cytoplasm                          |
| 12819 | ENSG00000187583 | PLEKHN1  | UncertainNuclear enucleus                            |
| 12820 | ENSG00000187601 | MAGEH1   | UncertainMainly nunucleus                            |
| 12821 | ENSG00000187605 | TET3     | UncertainCytoplasmcytoplasm                          |
| 12822 | ENSG00000187608 | ISG15    | Approved Ubiquitoucytoplasm                          |
| 12823 | ENSG00000187609 | EXD3     | Approved Cytoplasmcytoplasm                          |
| 12824 | ENSG00000187616 | MYMK     | UncertainEstimation of protein expression could not  |
| 12825 | ENSG00000187624 | C17orf97 | Approved Cytoplasmcytoplasm                          |
| 12826 | ENSG00000187626 | ZKSCAN4  | Approved Nuclear enucleus                            |
| 12827 | ENSG00000187627 | RGPD1    | UncertainExpression in several tissues, including te |
| 12828 | ENSG00000187630 | DHRS4L2  | UncertainEstimation of protein expression could not  |
| 12829 | ENSG00000187642 | PERM1    | Enhanced Cytoplasmcytoplasm                          |
| 12830 | ENSG00000187664 | HAPLN4   | Enhanced Cytoplasmcytoplasm                          |
| 12831 | ENSG00000187672 | ERC2     | Enhanced Expressed in brain.                         |
| 12832 | ENSG00000187678 | SPRY4    | Enhanced General ccytoplasm                          |
| 12833 | ENSG00000187688 | TRPV2    | UncertainCytoplasmcytoplasm                          |
| 12834 | ENSG00000187689 | AMTN     | UncertainEstimation of protein expression could not  |
| 12835 | ENSG00000187690 | CXorf67  | Enhanced Nuclear enucleus                            |
| 12836 | ENSG00000187699 | C2orf88  | Approved Cytoplasmcytoplasm;plasma membrane          |
| 12837 | ENSG00000187726 | DNAJB13  | Enhanced Expression mainly in spermatozoa and in ci. |
| 12838 | ENSG00000187730 | GABRD    | Enhanced Cytoplasmcytoplasm                          |
| 12839 | ENSG00000187733 | AMY1C    | SupportedSelectivecytoplasm                          |
| 12840 | ENSG00000187735 | TCEA1    | Approved General ncytoplasm;nucleus                  |
| 12841 | ENSG00000187736 | NHEJ1    | Approved General nnucleus                            |
| 12842 | ENSG00000187742 | SECISBP2 | Approved Cytoplasmcytoplasm;nucleus                  |
| 12843 | ENSG00000187754 | SSX7     | UncertainEstimation of protein expression could not  |
| 12844 | ENSG00000187758 | ADH1A    | Enhanced Selectivecytoplasm                          |
| 12845 | ENSG00000187764 | SEMA4D   | Approved General ccytoplasm                          |
| 12846 | ENSG00000187772 | LIN28B   | Enhanced Nuclear enucleus                            |
| 12847 | ENSG00000187773 | FAM69C   | Enhanced Cytoplasmcytoplasm                          |
| 12848 | ENSG00000187775 | DNAH17   | Enhanced Cytoplasmcytoplasm                          |
| 12849 | ENSG00000187778 | MCRS1    | SupportedGeneral nnucleus                            |
| 12850 | ENSG00000187783 | TMEM72   | Enhanced Distinct cytoplasm                          |
| 12851 | ENSG00000187792 | ZNF70    | UncertainEstimation of protein expression could not  |
| 12852 | ENSG00000187796 | CARD9    | Enhanced Cytoplasmcytoplasm                          |
| 12853 | ENSG00000187800 | PEAR1    | Approved Low cytopcytoplasm                          |
| 12854 | ENSG00000187801 | ZFP69B   | UncertainCytoplasmcytoplasm                          |
| 12855 | ENSG00000187808 | SOWAHD   | UncertainEstimation of protein expression could not  |
| 12856 | ENSG00000187815 | ZFP69    | UncertainEstimation of protein expression could not  |
| 12857 | ENSG00000187821 | HELT     | UncertainMainly ccytoplasm                           |
| 12858 | ENSG00000187823 | RTL4     | UncertainEstimation of protein expression could not  |
| 12859 | ENSG00000187837 | HIST1H1C | SupportedUbiquitounucleus                            |
| 12860 | ENSG00000187838 | PLSCR3   | SupportedGeneral ccytoplasm                          |
| 12861 | ENSG00000187840 | EIF4EBP1 | SupportedCytoplasmcytoplasm                          |
| 12862 | ENSG00000187855 | ASCL4    | UncertainEstimation of protein expression could not  |
| 12863 | ENSG00000187860 | CCDC157  | UncertainEstimation of protein expression could not  |
| 12864 | ENSG00000187866 | FAM122A  | Approved General nnucleus                            |
| 12865 | ENSG00000187867 | PALM3    | Enhanced Membranouplasma membrane                    |
| 12866 | ENSG00000187871 | GFRAL    | UncertainEstimation of protein expression could not  |
| 12867 | ENSG00000187902 | SHISA7   | UncertainEstimation of protein expression could not  |
| 12868 | ENSG00000187905 | LRRC74B  | UncertainEstimation of protein expression could not  |

|       |                 |          |                                                      |
|-------|-----------------|----------|------------------------------------------------------|
| 12869 | ENSG00000187908 | DMBT1    | Enhanced Cytoplasmcytoplasm                          |
| 12870 | ENSG00000187922 | LCN10    | Approved Granular cytoplasm                          |
| 12871 | ENSG00000187942 | LDLRAD2  | Approved General ccytoplasm                          |
| 12872 | ENSG00000187944 | C2orf66  | UncertainEstimation of protein expression could not  |
| 12873 | ENSG00000187954 | CYHR1    | Approved General nnucleus                            |
| 12874 | ENSG00000187955 | COL14A1  | UncertainCytoplasmcytoplasm                          |
| 12875 | ENSG00000187957 | DNER     | Enhanced Cytoplasmcytoplasm                          |
| 12876 | ENSG00000187959 | CPSF4L   | UncertainEstimation of protein expression could not  |
| 12877 | ENSG00000187961 | KLHL17   | Approved Cytoplasmcytoplasm                          |
| 12878 | ENSG00000187969 | ZCCHC13  | Enhanced Cytoplasmcytoplasm                          |
| 12879 | ENSG00000187987 | ZSCAN23  | UncertainCytoplasmcytoplasm;nucleus                  |
| 12880 | ENSG00000187994 | RINL     | UncertainEstimation of protein expression could not  |
| 12881 | ENSG00000187997 | C17orf99 | UncertainEstimation of protein expression could not  |
| 12882 | ENSG00000188001 | TPRG1    | UncertainGranular cytoplasm;plasma membrane          |
| 12883 | ENSG00000188011 | RTP5     | Enhanced Mainly expressed in brain.                  |
| 12884 | ENSG00000188015 | S100A3   | Enhanced Cytoplasmcytoplasm                          |
| 12885 | ENSG00000188021 | UBQLN2   | Enhanced Cytoplasmcytoplasm;nucleus                  |
| 12886 | ENSG00000188026 | RILPL1   | Approved General ccytoplasm;plasma membrane          |
| 12887 | ENSG00000188033 | ZNF490   | UncertainEstimation of protein expression could not  |
| 12888 | ENSG00000188038 | NRN1L    | UncertainEstimation of protein expression could not  |
| 12889 | ENSG00000188042 | ARL4C    | UncertainCytoplasmcytoplasm                          |
| 12890 | ENSG00000188051 | TMEM221  | SupportedExpressioplasma membrane                    |
| 12891 | ENSG00000188056 | TREML4   | UncertainEstimation of protein expression could not  |
| 12892 | ENSG00000188086 | PRSS45   | UncertainEstimation of protein expression could not  |
| 12893 | ENSG00000188089 | PLA2G4E  | Enhanced Cytoplasmcytoplasm                          |
| 12894 | ENSG00000188100 | FAM25A   | UncertainEstimation of protein expression could not  |
| 12895 | ENSG00000188112 | C6orf132 | Enhanced Cytoplasmcytoplasm;plasma membrane          |
| 12896 | ENSG00000188120 | DAZ1     | SupportedCytoplasmcytoplasm                          |
| 12897 | ENSG00000188130 | MAPK12   | Enhanced Cytoplasmcytoplasm;nucleus                  |
| 12898 | ENSG00000188133 | TMEM215  | UncertainEstimation of protein expression could not  |
| 12899 | ENSG00000188157 | AGRN     | Approved Cytoplasmcytoplasm                          |
| 12900 | ENSG00000188158 | NHS      | UncertainCytoplasmcytoplasm                          |
| 12901 | ENSG00000188163 | FAM166A  | Enhanced Selectivecytoplasm                          |
| 12902 | ENSG00000188167 | TMPPE    | Approved Cytoplasmcytoplasm                          |
| 12903 | ENSG00000188171 | ZNF626   | UncertainCytoplasmcytoplasm                          |
| 12904 | ENSG00000188177 | ZC3H6    | UncertainCytoplasmcytoplasm                          |
| 12905 | ENSG00000188186 | LAMTOR4  | Enhanced Cytoplasmcytoplasm                          |
| 12906 | ENSG00000188191 | PRKAR1B  | Approved Cytoplasmcytoplasm                          |
| 12907 | ENSG00000188211 | NCR3LG1  | UncertainEstimation of protein expression could not  |
| 12908 | ENSG00000188215 | DCUN1D3  | Approved Cytoplasmcytoplasm;plasma membrane          |
| 12909 | ENSG00000188219 | POTEE    | UncertainRNA-based expert annotation gave inconclus: |
| 12910 | ENSG00000188227 | ZNF793   | UncertainEstimation of protein expression could not  |
| 12911 | ENSG00000188229 | TUBB4B   | Enhanced Cytoplasmcytoplasm                          |
| 12912 | ENSG00000188234 | AGAP4    | UncertainEstimation of protein expression could not  |
| 12913 | ENSG00000188257 | PLA2G2A  | Enhanced Cytoplasmcytoplasm                          |
| 12914 | ENSG00000188263 | IL17REL  | SupportedCytoplasmcytoplasm                          |
| 12915 | ENSG00000188266 | HYKK     | Approved Cytoplasmcytoplasm                          |
| 12916 | ENSG00000188269 | OR7A5    | UncertainEstimation of protein expression could not  |
| 12917 | ENSG00000188277 | C15orf62 | Approved Cytoplasmcytoplasm                          |
| 12918 | ENSG00000188282 | RUFY4    | UncertainEstimation of protein expression could not  |
| 12919 | ENSG00000188283 | ZNF383   | Approved General ccytoplasm                          |
| 12920 | ENSG00000188293 | IGFL1    | UncertainGeneral ccytoplasm                          |
| 12921 | ENSG00000188295 | ZNF669   | UncertainEstimation of protein expression could not  |
| 12922 | ENSG00000188305 | PEAK3    | UncertainEstimation of protein expression could not  |
| 12923 | ENSG00000188306 | LRRIQ4   | UncertainEstimation of protein expression could not  |

|       |                 |          |                                                      |
|-------|-----------------|----------|------------------------------------------------------|
| 12924 | ENSG00000188312 | CENPP    | UncertainWidely dinucleus                            |
| 12925 | ENSG00000188313 | PLSCR1   | Approved Cytoplasmcytoplasm                          |
| 12926 | ENSG00000188316 | ENO4     | Enhanced Cytoplasmcytoplasm                          |
| 12927 | ENSG00000188321 | ZNF559   | Approved Ubiquitousnucleus                           |
| 12928 | ENSG00000188324 | OR6C6    | UncertainEstimation of protein expression could not  |
| 12929 | ENSG00000188334 | BSPH1    | Enhanced Cytoplasmcytoplasm;plasma membrane          |
| 12930 | ENSG00000188340 | OR6N2    | UncertainEstimation of protein expression could not  |
| 12931 | ENSG00000188342 | GTF2F2   | SupportedCytoplasmcytoplasm;nucleus                  |
| 12932 | ENSG00000188343 | FAM92A   | Enhanced Cytoplasmcytoplasm                          |
| 12933 | ENSG00000188352 | FOCAD    | UncertainCytoplasmcytoplasm                          |
| 12934 | ENSG00000188372 | ZP3      | SupportedCytoplasmcytoplasm                          |
| 12935 | ENSG00000188373 | C10orf99 | Enhanced Cytoplasmcytoplasm                          |
| 12936 | ENSG00000188375 | H3F3C    | Approved Ubiquitousnucleus                           |
| 12937 | ENSG00000188379 | IFNA2    | UncertainEstimation of protein expression could not  |
| 12938 | ENSG00000188385 | JAKMIP3  | UncertainEstimation of protein expression could not  |
| 12939 | ENSG00000188386 | PPP3R2   | UncertainEstimation of protein expression could not  |
| 12940 | ENSG00000188389 | PDCD1    | Enhanced Cytoplasmcytoplasm                          |
| 12941 | ENSG00000188393 | CLEC2A   | Approved Cytoplasmcytoplasm                          |
| 12942 | ENSG00000188394 | GPR21    | UncertainEstimation of protein expression could not  |
| 12943 | ENSG00000188396 | TCTEX1D4 | Enhanced Distinct expression in cilia in fallopian 1 |
| 12944 | ENSG00000188404 | SELL     | Enhanced Distinct cytoplasm                          |
| 12945 | ENSG00000188408 | MAGEB5   | UncertainEstimation of protein expression could not  |
| 12946 | ENSG00000188419 | CHM      | Approved Cytoplasmcytoplasm                          |
| 12947 | ENSG00000188425 | NANOS2   | Approved Cytoplasmcytoplasm                          |
| 12948 | ENSG00000188428 | BLOC1S5  | UncertainCytoplasmcytoplasm                          |
| 12949 | ENSG00000188452 | CERKL    | UncertainCytoplasmcytoplasm                          |
| 12950 | ENSG00000188486 | H2AFX    | SupportedUbiquitousnucleus                           |
| 12951 | ENSG00000188487 | INSC     | Enhanced Mainly ccytoplasm                           |
| 12952 | ENSG00000188493 | C19orf54 | Approved Mainly ccytoplasm                           |
| 12953 | ENSG00000188505 | NCCRP1   | Approved Cytoplasmcytoplasm                          |
| 12954 | ENSG00000188508 | KRTDAP   | Enhanced Cytoplasmcytoplasm                          |
| 12955 | ENSG00000188522 | FAM83G   | Enhanced Cytoplasmcytoplasm                          |
| 12956 | ENSG00000188523 | CFAP77   | Enhanced Expression in mainly in cilia of fallopian  |
| 12957 | ENSG00000188529 | SRSF10   | UncertainGeneral nnucleus                            |
| 12958 | ENSG00000188536 | HBA2     | Enhanced Selective expression in bone marrow with d: |
| 12959 | ENSG00000188542 | DUSP28   | UncertainGeneral ccytoplasm;plasma membrane          |
| 12960 | ENSG00000188549 | CCDC9B   | Approved General ccytoplasm                          |
| 12961 | ENSG00000188554 | NBR1     | Approved Cytoplasmcytoplasm                          |
| 12962 | ENSG00000188559 | RALGAPA2 | UncertainUbiquitouscytoplasm                         |
| 12963 | ENSG00000188566 | NDOR1    | Approved Cytoplasmcytoplasm                          |
| 12964 | ENSG00000188582 | PAQR9    | UncertainEstimation of protein expression could not  |
| 12965 | ENSG00000188596 | CFAP54   | Enhanced Selective expression in cilia in fallopian  |
| 12966 | ENSG00000188603 | CLN3     | UncertainCytoplasmcytoplasm                          |
| 12967 | ENSG00000188610 | FAM72B   | UncertainEstimation of protein expression could not  |
| 12968 | ENSG00000188611 | ASAH2    | SupportedDistinct plasma membrane                    |
| 12969 | ENSG00000188612 | SUM02    | SupportedGeneral nnucleus                            |
| 12970 | ENSG00000188613 | NANOS1   | Approved Cytoplasmcytoplasm;plasma membrane          |
| 12971 | ENSG00000188624 | IGFL3    | UncertainEstimation of protein expression could not  |
| 12972 | ENSG00000188629 | ZNF177   | UncertainEstimation of protein expression could not  |
| 12973 | ENSG00000188636 | RTL6     | Approved Cytoplasmcytoplasm                          |
| 12974 | ENSG00000188641 | DPYD     | UncertainCytoplasmcytoplasm                          |
| 12975 | ENSG00000188643 | S100A16  | Enhanced Cytoplasmcytoplasm;plasma membrane          |
| 12976 | ENSG00000188647 | PTAR1    | UncertainGeneral ccytoplasm                          |
| 12977 | ENSG00000188649 | CC2D2B   | Enhanced Cytoplasmcytoplasm                          |
| 12978 | ENSG00000188659 | SAX02    | Enhanced Distinct expression of cilia in respiratory |

|       |                 |           |           |                                             |
|-------|-----------------|-----------|-----------|---------------------------------------------|
| 12979 | ENSG00000188672 | RHCE      | Supported | Expression in erythrocytes and subset of c  |
| 12980 | ENSG00000188677 | PARVB     | Enhanced  | Cytoplasm cytoplasm                         |
| 12981 | ENSG00000188687 | SLC4A5    | Uncertain | Cytoplasm cytoplasm                         |
| 12982 | ENSG00000188690 | UROS      | Approved  | General c cytoplasm                         |
| 12983 | ENSG00000188694 | KRTAP24-1 | Enhanced  | Distinct expression in the cuticle layer of |
| 12984 | ENSG00000188706 | ZDHHC9    | Uncertain | Cytoplasm cytoplasm                         |
| 12985 | ENSG00000188707 | ZBED6CL   | Approved  | Cytoplasm cytoplasm                         |
| 12986 | ENSG00000188710 | QRFP      | Uncertain | Estimation of protein expression could not  |
| 12987 | ENSG00000188716 | DUPD1     | Uncertain | Cytoplasm cytoplasm                         |
| 12988 | ENSG00000188729 | OSTN      | Uncertain | Estimation of protein expression could not  |
| 12989 | ENSG00000188730 | VWC2      | Approved  | Extracell cytoplasm                         |
| 12990 | ENSG00000188732 | FAM221A   | Enhanced  | Ubiquitou cytoplasm                         |
| 12991 | ENSG00000188735 | TMEM120B  | Uncertain | Cytoplasm cytoplasm                         |
| 12992 | ENSG00000188739 | RBM34     | Approved  | Cytoplasm cytoplasm;nucleus                 |
| 12993 | ENSG00000188747 | NOXA1     | Uncertain | Granular cytoplasm                          |
| 12994 | ENSG00000188760 | TMEM198   | Enhanced  | Membrane cytoplasm;plasma membrane          |
| 12995 | ENSG00000188761 | BCL2L15   | Enhanced  | Cytoplasm cytoplasm                         |
| 12996 | ENSG00000188770 | OPTC      | Enhanced  | Expression in vitreous of the eye.          |
| 12997 | ENSG00000188771 | PLET1     | Uncertain | Estimation of protein expression could not  |
| 12998 | ENSG00000188778 | ADRB3     | Uncertain | Expressed in caudate and adipose tissue.    |
| 12999 | ENSG00000188779 | SKOR1     | Enhanced  | Nuclear enucleus                            |
| 13000 | ENSG00000188782 | CATSPER4  | Enhanced  | Expression in spermatids in testis.         |
| 13001 | ENSG00000188784 | PLA2G2E   | Uncertain | Estimation of protein expression could not  |
| 13002 | ENSG00000188785 | ZNF548    | Uncertain | Cytoplasm cytoplasm                         |
| 13003 | ENSG00000188786 | MTF1      | Uncertain | Estimation of protein expression could not  |
| 13004 | ENSG00000188803 | SHISA6    | Uncertain | Estimation of protein expression could not  |
| 13005 | ENSG00000188807 | TMEM201   | Approved  | Cytoplasm cytoplasm;nucleus;plasma membrane |
| 13006 | ENSG00000188811 | NHLRC3    | Uncertain | General c cytoplasm                         |
| 13007 | ENSG00000188816 | HMX2      | Approved  | Expressed in several tissues, including kid |
| 13008 | ENSG00000188817 | SNTN      | Enhanced  | Selective expression in cilia.              |
| 13009 | ENSG00000188818 | ZDHHC11   | Uncertain | Estimation of protein expression could not  |
| 13010 | ENSG00000188822 | CNR2      | Uncertain | Cytoplasm cytoplasm                         |
| 13011 | ENSG00000188827 | SLX4      | Approved  | Nuclear enucleus                            |
| 13012 | ENSG00000188828 | GLRA4     | Uncertain | Cytoplasm cytoplasm                         |
| 13013 | ENSG00000188833 | ENTPD8    | Enhanced  | Membranou plasma membrane                   |
| 13014 | ENSG00000188846 | RPL14     | Approved  | General c cytoplasm                         |
| 13015 | ENSG00000188848 | BEND4     | Uncertain | Estimation of protein expression could not  |
| 13016 | ENSG00000188859 | FAM78B    | Uncertain | Estimation of protein expression could not  |
| 13017 | ENSG00000188868 | ZNF563    | Uncertain | Estimation of protein expression could not  |
| 13018 | ENSG00000188869 | TMC3      | Enhanced  | Cytoplasm cytoplasm;plasma membrane         |
| 13019 | ENSG00000188883 | KLRG2     | Uncertain | Estimation of protein expression could not  |
| 13020 | ENSG00000188886 | ASTL      | Uncertain | Estimation of protein expression could not  |
| 13021 | ENSG00000188895 | MSL1      | Uncertain | Cytoplasm cytoplasm;nucleus                 |
| 13022 | ENSG00000188897 | AC099489. | Uncertain | Estimation of protein expression could not  |
| 13023 | ENSG00000188906 | LRRK2     | Approved  | Cytoplasm cytoplasm                         |
| 13024 | ENSG00000188909 | BSX       | Uncertain | Estimation of protein expression could not  |
| 13025 | ENSG00000188916 | FAM196A   | Uncertain | Estimation of protein expression could not  |
| 13026 | ENSG00000188917 | TRMT2B    | Uncertain | Cytoplasm cytoplasm                         |
| 13027 | ENSG00000188921 | HACD4     | Uncertain | Cytoplasm cytoplasm                         |
| 13028 | ENSG00000188931 | CFAP126   | Enhanced  | Distinct expression in cilia in fallopian 1 |
| 13029 | ENSG00000188938 | FAM120AOS | Approved  | Nuclear a cytoplasm;nucleus                 |
| 13030 | ENSG00000188958 | UTS2B     | Uncertain | Estimation of protein expression could not  |
| 13031 | ENSG00000188959 | C9orf152  | Approved  | Cytoplasm cytoplasm                         |
| 13032 | ENSG00000188976 | NOC2L     | Approved  | Nucleolar cytoplasm;nucleus                 |
| 13033 | ENSG00000188986 | NELFB     | Supported | General n nucleus                           |

|       |                 |          |           |                                            |
|-------|-----------------|----------|-----------|--------------------------------------------|
| 13034 | ENSG00000188991 | SLC15A5  | Uncertain | Estimation of protein expression could not |
| 13035 | ENSG00000188993 | LRRRC66  | Uncertain | Estimation of protein expression could not |
| 13036 | ENSG00000188994 | ZNF292   | Uncertain | General ccytoplasm                         |
| 13037 | ENSG00000188997 | KCTD21   | Uncertain | Nuclear acytoplasm;nucleus                 |
| 13038 | ENSG00000189001 | SBSN     | Enhanced  | Selectiveplasma membrane                   |
| 13039 | ENSG00000189007 | ADAT2    | Approved  | Ubiquitoucytoplasm                         |
| 13040 | ENSG00000189023 | MAGEB16  | Uncertain | Estimation of protein expression could not |
| 13041 | ENSG00000189042 | ZNF567   | Uncertain | General ccytoplasm;nucleus                 |
| 13042 | ENSG00000189045 | ANKDD1B  | Uncertain | Estimation of protein expression could not |
| 13043 | ENSG00000189046 | ALKBH2   | Approved  | General nnucleus                           |
| 13044 | ENSG00000189051 | RNF222   | Uncertain | Estimation of protein expression could not |
| 13045 | ENSG00000189052 | CGB5     | Supported | Selectivecytoplasm                         |
| 13046 | ENSG00000189057 | FAM111B  | Uncertain | Mainly ccytoplasm                          |
| 13047 | ENSG00000189058 | APOD     | Enhanced  | Cytoplasmcytoplasm                         |
| 13048 | ENSG00000189060 | H1FO     | Supported | Distinct nucleus                           |
| 13049 | ENSG00000189064 | GAGE2A   | Supported | Selective expression in spermatogonia.     |
| 13050 | ENSG00000189067 | LITAF    | Approved  | General ccytoplasm                         |
| 13051 | ENSG00000189090 | FAM25G   | Uncertain | Estimation of protein expression could not |
| 13052 | ENSG00000189091 | SF3B3    | Supported | General nnucleus                           |
| 13053 | ENSG00000189099 | PRSS48   | Uncertain | Estimation of protein expression could not |
| 13054 | ENSG00000189108 | IL1RAPL2 | Uncertain | Estimation of protein expression could not |
| 13055 | ENSG00000189114 | BLOC1S3  | Approved  | Cytoplasmcytoplasm                         |
| 13056 | ENSG00000189127 | ANKRD34B | Uncertain | Estimation of protein expression could not |
| 13057 | ENSG00000189129 | PLAC9    | Uncertain | Cytoplasmcytoplasm                         |
| 13058 | ENSG00000189132 | FAM47B   | Uncertain | Estimation of protein expression could not |
| 13059 | ENSG00000189139 | FSCB     | Supported | Cytoplasmcytoplasm                         |
| 13060 | ENSG00000189143 | CLDN4    | Enhanced  | Membranouplasma membrane                   |
| 13061 | ENSG00000189144 | ZNF573   | Uncertain | General ccytoplasm                         |
| 13062 | ENSG00000189152 | GRAPL    | Uncertain | Estimation of protein expression could not |
| 13063 | ENSG00000189157 | FAM47E   | Uncertain | Cytoplasmcytoplasm                         |
| 13064 | ENSG00000189159 | JPT1     | Approved  | General nnucleus                           |
| 13065 | ENSG00000189164 | ZNF527   | Uncertain | Estimation of protein expression could not |
| 13066 | ENSG00000189167 | ZAR1L    | Uncertain | Estimation of protein expression could not |
| 13067 | ENSG00000189171 | S100A13  | Approved  | Nuclear acytoplasm;nucleus                 |
| 13068 | ENSG00000189180 | ZNF33A   | Approved  | Cytoplasmcytoplasm                         |
| 13069 | ENSG00000189182 | KRT77    | Enhanced  | Cytoplasmcytoplasm                         |
| 13070 | ENSG00000189184 | PCDH18   | Approved  | General ccytoplasm                         |
| 13071 | ENSG00000189195 | BTBD8    | Enhanced  | Cytoplasmcytoplasm                         |
| 13072 | ENSG00000189221 | MAOA     | Enhanced  | Cytoplasmcytoplasm                         |
| 13073 | ENSG00000189241 | TSPYL1   | Approved  | Ubiquitounucleus                           |
| 13074 | ENSG00000189253 | TRIM64B  | Approved  | Cytoplasmcytoplasm                         |
| 13075 | ENSG00000189266 | PNRC2    | Uncertain | General nnucleus                           |
| 13076 | ENSG00000189280 | GJB5     | Uncertain | Estimation of protein expression could not |
| 13077 | ENSG00000189283 | FHIT     | Enhanced  | General ccytoplasm                         |
| 13078 | ENSG00000189298 | ZKSCAN3  | Approved  | Nuclear enucleus                           |
| 13079 | ENSG00000189299 | FOXR2    | Uncertain | Estimation of protein expression could not |
| 13080 | ENSG00000189306 | RRP7A    | Approved  | Nuclear enucleus                           |
| 13081 | ENSG00000189308 | LIN54    | Approved  | Nuclear enucleus                           |
| 13082 | ENSG00000189319 | FAM53B   | Approved  | Mainly ccytoplasm                          |
| 13083 | ENSG00000189320 | FAM180A  | Uncertain | Nuclear enucleus                           |
| 13084 | ENSG00000189325 | C6orf222 | Uncertain | Estimation of protein expression could not |
| 13085 | ENSG00000189326 | SPANXN4  | Uncertain | Estimation of protein expression could not |
| 13086 | ENSG00000189334 | S100A14  | Enhanced  | Expressioplasma membrane                   |
| 13087 | ENSG00000189337 | KAZN     | Approved  | General ccytoplasm                         |
| 13088 | ENSG00000189339 | SLC35E2B | Uncertain | Cytoplasmcytoplasm                         |

|       |                 |           |           |                                             |
|-------|-----------------|-----------|-----------|---------------------------------------------|
| 13089 | ENSG00000189350 | TOGARAM2  | Uncertain | Estimation of protein expression could not  |
| 13090 | ENSG00000189366 | ALG1L     | Uncertain | Estimation of protein expression could not  |
| 13091 | ENSG00000189367 | KIAA0408  | Uncertain | Estimation of protein expression could not  |
| 13092 | ENSG00000189369 | GSPT2     | Approved  | General ccytoplasm                          |
| 13093 | ENSG00000189376 | C8orf76   | Uncertain | Cytoplasm cytoplasm;nucleus                 |
| 13094 | ENSG00000189401 | OTUD6A    | Enhanced  | Cytoplasm cytoplasm                         |
| 13095 | ENSG00000189403 | HMGB1     | Supported | Ubiquitous nucleus                          |
| 13096 | ENSG00000189420 | ZFP92     | Uncertain | Nuclear enucleus                            |
| 13097 | ENSG00000189433 | GJB4      | Enhanced  | Cytoplasm cytoplasm;plasma membrane         |
| 13098 | ENSG00000196072 | BLOC1S2   | Approved  | Cytoplasm cytoplasm                         |
| 13099 | ENSG00000196083 | IL1RAP    | Uncertain | Cytoplasm cytoplasm                         |
| 13100 | ENSG00000196090 | PTPRT     | Approved  | General ccytoplasm                          |
| 13101 | ENSG00000196091 | MYBPC1    | Enhanced  | Selective expression in skeletal muscle.    |
| 13102 | ENSG00000196092 | PAX5      | Enhanced  | Highly spnucleus                            |
| 13103 | ENSG00000196099 | OR6M1     | Uncertain | Estimation of protein expression could not  |
| 13104 | ENSG00000196110 | ZNF699    | Uncertain | Estimation of protein expression could not  |
| 13105 | ENSG00000196116 | TDRD7     | Enhanced  | Cytoplasm cytoplasm;nucleus                 |
| 13106 | ENSG00000196118 | CCDC189   | Approved  | Cytoplasm cytoplasm                         |
| 13107 | ENSG00000196123 | KIAA0895L | Approved  | General ccytoplasm                          |
| 13108 | ENSG00000196126 | HLA-DRB1  | Enhanced  | Membranous cytoplasm;plasma membrane        |
| 13109 | ENSG00000196131 | VN1R2     | Uncertain | Estimation of protein expression could not  |
| 13110 | ENSG00000196132 | MYT1      | Uncertain | Nuclear ecytoplasm;nucleus                  |
| 13111 | ENSG00000196136 | SERPINA3  | Enhanced  | Positivit cytoplasm                         |
| 13112 | ENSG00000196139 | AKR1C3    | Enhanced  | Expression in most tissues.                 |
| 13113 | ENSG00000196141 | SPATS2L   | Uncertain | Cytoplasm cytoplasm                         |
| 13114 | ENSG00000196150 | ZNF250    | Uncertain | Cytoplasm cytoplasm;nucleus                 |
| 13115 | ENSG00000196151 | WDSUB1    | Uncertain | Estimation of protein expression could not  |
| 13116 | ENSG00000196152 | ZNF79     | Uncertain | General ccytoplasm;nucleus                  |
| 13117 | ENSG00000196154 | S100A4    | Enhanced  | Distinct expression in infiltrating immune  |
| 13118 | ENSG00000196159 | FAT4      | Approved  | General ccytoplasm                          |
| 13119 | ENSG00000196166 | C8orf86   | Uncertain | Estimation of protein expression could not  |
| 13120 | ENSG00000196169 | KIF19     | Enhanced  | Expression mainly in the cilium of epithel: |
| 13121 | ENSG00000196177 | ACADSB    | Enhanced  | Granular cytoplasm                          |
| 13122 | ENSG00000196182 | STK40     | Uncertain | Cytoplasm cytoplasm                         |
| 13123 | ENSG00000196188 | CTSE      | Enhanced  | Cytoplasm cytoplasm;plasma membrane         |
| 13124 | ENSG00000196189 | SEMA4A    | Supported | Membranous plasma membrane                  |
| 13125 | ENSG00000196199 | MPHOSPH8  | Enhanced  | General nnucleus                            |
| 13126 | ENSG00000196208 | GREB1     | Uncertain | Cytoplasm cytoplasm                         |
| 13127 | ENSG00000196209 | SIRPB2    | Uncertain | Estimation of protein expression could not  |
| 13128 | ENSG00000196214 | ZNF766    | Uncertain | Cytoplasm cytoplasm;nucleus                 |
| 13129 | ENSG00000196218 | RYR1      | Enhanced  | Cytoplasm cytoplasm                         |
| 13130 | ENSG00000196220 | SRGAP3    | Enhanced  | Cytoplasm cytoplasm                         |
| 13131 | ENSG00000196227 | FAM217B   | Approved  | Ubiquitous nucleus                          |
| 13132 | ENSG00000196230 | TUBB      | Enhanced  | Cytoplasm cytoplasm                         |
| 13133 | ENSG00000196233 | LCOR      | Approved  | Nuclear acytoplasm;nucleus                  |
| 13134 | ENSG00000196235 | SUPT5H    | Supported | Ubiquitous nucleus                          |
| 13135 | ENSG00000196236 | XPNPEP3   | Approved  | Cytoplasm cytoplasm;plasma membrane         |
| 13136 | ENSG00000196248 | OR10S1    | Uncertain | Estimation of protein expression could not  |
| 13137 | ENSG00000196262 | PPIA      | Uncertain | Cytoplasm cytoplasm                         |
| 13138 | ENSG00000196263 | ZNF471    | Uncertain | Nuclear acytoplasm;nucleus                  |
| 13139 | ENSG00000196266 | OR10J3    | Uncertain | Estimation of protein expression could not  |
| 13140 | ENSG00000196284 | SUPT3H    | Enhanced  | General nnucleus                            |
| 13141 | ENSG00000196290 | NIF3L1    | Supported | Cytoplasm cytoplasm;nucleus                 |
| 13142 | ENSG00000196296 | ATP2A1    | Enhanced  | Cytoplasm cytoplasm                         |
| 13143 | ENSG00000196305 | IARS      | Approved  | Cytoplasm cytoplasm                         |

|       |                 |          |                                                      |
|-------|-----------------|----------|------------------------------------------------------|
| 13144 | ENSG00000196313 | POM121   | Approved Ubiquitous cytoplasm;nucleus                |
| 13145 | ENSG00000196323 | ZBTB44   | Approved Ubiquitous nucleus                          |
| 13146 | ENSG00000196335 | STK31    | Enhanced Distinct expression in a subset of cells in |
| 13147 | ENSG00000196337 | CGB7     | Supported Selective cytoplasm                        |
| 13148 | ENSG00000196338 | NLGN3    | Enhanced Cytoplasm cytoplasm                         |
| 13149 | ENSG00000196341 | OR8D1    | Uncertain Estimation of protein expression could not |
| 13150 | ENSG00000196344 | ADH7     | Enhanced Cytoplasm cytoplasm                         |
| 13151 | ENSG00000196345 | ZKSCAN7  | Uncertain Cytoplasm cytoplasm                        |
| 13152 | ENSG00000196352 | CD55     | Enhanced High membrane membrane                      |
| 13153 | ENSG00000196353 | CPNE4    | Enhanced Cytoplasm cytoplasm                         |
| 13154 | ENSG00000196357 | ZNF565   | Uncertain Estimation of protein expression could not |
| 13155 | ENSG00000196358 | NTNG2    | Approved Cytoplasm cytoplasm                         |
| 13156 | ENSG00000196361 | ELAVL3   | Enhanced Cytoplasm cytoplasm;nucleus                 |
| 13157 | ENSG00000196365 | LONP1    | Supported Granular cytoplasm                         |
| 13158 | ENSG00000196368 | NUDT11   | Approved Cytoplasm cytoplasm                         |
| 13159 | ENSG00000196371 | FUT4     | Enhanced Cytoplasm cytoplasm;plasma membrane         |
| 13160 | ENSG00000196372 | ASB13    | Approved Cytoplasm cytoplasm                         |
| 13161 | ENSG00000196376 | SLC35F1  | Enhanced Cytoplasm cytoplasm                         |
| 13162 | ENSG00000196378 | ZNF34    | Uncertain Estimation of protein expression could not |
| 13163 | ENSG00000196381 | ZNF781   | Uncertain Estimation of protein expression could not |
| 13164 | ENSG00000196387 | ZNF140   | Uncertain Cytoplasm cytoplasm                        |
| 13165 | ENSG00000196388 | INCA1    | Uncertain Estimation of protein expression could not |
| 13166 | ENSG00000196391 | ZNF774   | Uncertain Estimation of protein expression could not |
| 13167 | ENSG00000196396 | PTPN1    | Approved Cytoplasm cytoplasm                         |
| 13168 | ENSG00000196405 | EVL      | Enhanced Cytoplasm cytoplasm                         |
| 13169 | ENSG00000196406 | SPANXD   | Supported Expressed in sperm.                        |
| 13170 | ENSG00000196408 | NOXO1    | Enhanced Cytoplasm cytoplasm                         |
| 13171 | ENSG00000196411 | EPHB4    | Uncertain Cytoplasm cytoplasm                        |
| 13172 | ENSG00000196415 | PRTN3    | Enhanced Cytoplasm cytoplasm                         |
| 13173 | ENSG00000196418 | ZNF124   | Uncertain Estimation of protein expression could not |
| 13174 | ENSG00000196419 | XRCC6    | Enhanced Ubiquitous nucleus                          |
| 13175 | ENSG00000196422 | PPP1R26  | Uncertain Cytoplasm cytoplasm;nucleus                |
| 13176 | ENSG00000196427 | NBPF4    | Uncertain Expression in cells in seminiferous ducts. |
| 13177 | ENSG00000196428 | TSC22D2  | Approved Cytoplasm cytoplasm                         |
| 13178 | ENSG00000196431 | CRYBA4   | Supported Selective expression in lens.              |
| 13179 | ENSG00000196436 | NPIP15   | Supported Ubiquitous nucleus                         |
| 13180 | ENSG00000196437 | ZNF569   | Uncertain Estimation of protein expression could not |
| 13181 | ENSG00000196440 | ARMCX4   | Uncertain Cytoplasm cytoplasm                        |
| 13182 | ENSG00000196449 | YRDC     | Approved Cytoplasm cytoplasm                         |
| 13183 | ENSG00000196453 | ZNF777   | Approved Nuclear nucleus                             |
| 13184 | ENSG00000196455 | PIK3R4   | Approved General cytoplasm                           |
| 13185 | ENSG00000196458 | ZNF605   | Uncertain Estimation of protein expression could not |
| 13186 | ENSG00000196459 | TRAPPC2  | Approved Cytoplasm cytoplasm                         |
| 13187 | ENSG00000196465 | MYL6B    | Enhanced Cytoplasm cytoplasm                         |
| 13188 | ENSG00000196466 | ZNF799   | Approved General nucleus;nucleus                     |
| 13189 | ENSG00000196470 | SIAH1    | Enhanced General nucleus;nucleus                     |
| 13190 | ENSG00000196475 | GK2      | Uncertain Estimation of protein expression could not |
| 13191 | ENSG00000196476 | C20orf96 | Uncertain Cytoplasm cytoplasm                        |
| 13192 | ENSG00000196482 | ESRRG    | Uncertain Mainly cytoplasm                           |
| 13193 | ENSG00000196497 | IPO4     | Uncertain Estimation of protein expression could not |
| 13194 | ENSG00000196498 | NCOR2    | Approved General nucleus                             |
| 13195 | ENSG00000196502 | SULT1A1  | Supported Cytoplasm cytoplasm                        |
| 13196 | ENSG00000196503 | ARL9     | Enhanced Selective expression in spermatids.         |
| 13197 | ENSG00000196504 | PRPF40A  | Approved Ubiquitous nucleus                          |
| 13198 | ENSG00000196505 | GDAP2    | Approved Cytoplasm cytoplasm                         |



|       |                 |           |                                                      |
|-------|-----------------|-----------|------------------------------------------------------|
| 13199 | ENSG00000196507 | TCEAL3    | UncertainCytoplasmcytoplasm                          |
| 13200 | ENSG00000196510 | ANAPC7    | Approved Nuclear acytoplasm;nucleus                  |
| 13201 | ENSG00000196511 | TPK1      | Approved Ubiquitouscytoplasm                         |
| 13202 | ENSG00000196517 | SLC6A9    | UncertainCytoplasmcytoplasm                          |
| 13203 | ENSG00000196526 | AFAP1     | Enhanced Ubiquitouscytoplasm                         |
| 13204 | ENSG00000196535 | MYO18A    | SupportedUbiquitouscytoplasm;plasma membrane         |
| 13205 | ENSG00000196544 | BORCS6    | UncertainCytoplasmcytoplasm                          |
| 13206 | ENSG00000196549 | MME       | Enhanced Distinct plasma membrane                    |
| 13207 | ENSG00000196550 | FAM72A    | UncertainEstimation of protein expression could not  |
| 13208 | ENSG00000196557 | CACNA1H   | Approved Cytoplasmcytoplasm;nucleus                  |
| 13209 | ENSG00000196562 | SULF2     | Approved Cytoplasmcytoplasm                          |
| 13210 | ENSG00000196565 | HBG2      | Approved Expression in erythrocytes.                 |
| 13211 | ENSG00000196569 | LAMA2     | Enhanced Distinct plasma membrane                    |
| 13212 | ENSG00000196576 | PLXNB2    | UncertainGeneral ccytoplasm                          |
| 13213 | ENSG00000196586 | MYO6      | Enhanced Cytoplasmcytoplasm;plasma membrane          |
| 13214 | ENSG00000196588 | MKL1      | Approved Cytoplasmcytoplasm;nucleus                  |
| 13215 | ENSG00000196589 | MBD3L2B   | UncertainEstimation of protein expression could not  |
| 13216 | ENSG00000196591 | HDAC2     | SupportedGeneral ncytoplasm;nucleus                  |
| 13217 | ENSG00000196597 | ZNF782    | Approved General ncytoplasm;nucleus                  |
| 13218 | ENSG00000196600 | SLC22A25  | UncertainEstimation of protein expression could not  |
| 13219 | ENSG00000196604 | POTEF     | UncertainEstimation of protein expression could not  |
| 13220 | ENSG00000196605 | ZNF846    | Approved Selectivecytoplasm                          |
| 13221 | ENSG00000196616 | ADH1B     | SupportedSelectivecytoplasm                          |
| 13222 | ENSG00000196620 | UGT2B15   | Approved Cytoplasmcytoplasm                          |
| 13223 | ENSG00000196628 | TCF4      | Approved Nuclear acytoplasm;nucleus                  |
| 13224 | ENSG00000196632 | WNK3      | Approved Cytoplasmcytoplasm                          |
| 13225 | ENSG00000196636 | SDHAF3    | Approved Mainly ccytoplasm                           |
| 13226 | ENSG00000196639 | HRH1      | UncertainCytoplasmcytoplasm                          |
| 13227 | ENSG00000196642 | RABL6     | UncertainGeneral ncytoplasm;nucleus                  |
| 13228 | ENSG00000196652 | ZKSCAN5   | UncertainCytoplasmcytoplasm;nucleus;plasma membrane  |
| 13229 | ENSG00000196653 | ZNF502    | UncertainEstimation of protein expression could not  |
| 13230 | ENSG00000196655 | TRAPPC4   | Approved Cytoplasmcytoplasm                          |
| 13231 | ENSG00000196659 | TTC30B    | SupportedSelectivecytoplasm                          |
| 13232 | ENSG00000196660 | SLC30A10  | Enhanced Membranouplasma membrane                    |
| 13233 | ENSG00000196663 | TECPR2    | Enhanced Cytoplasmcytoplasm;nucleus                  |
| 13234 | ENSG00000196664 | TLR7      | SupportedCytoplasmcytoplasm                          |
| 13235 | ENSG00000196666 | FAM180B   | UncertainEstimation of protein expression could not  |
| 13236 | ENSG00000196670 | ZFP62     | Approved Cytoplasmcytoplasm                          |
| 13237 | ENSG00000196678 | ERI2      | UncertainGeneral ccytoplasm                          |
| 13238 | ENSG00000196693 | ZNF33B    | Approved Cytoplasmcytoplasm                          |
| 13239 | ENSG00000196700 | ZNF512B   | Approved Cytoplasmcytoplasm;nucleus                  |
| 13240 | ENSG00000196704 | AMZ2      | Enhanced Nuclear acytoplasm;nucleus                  |
| 13241 | ENSG00000196705 | ZNF431    | UncertainEstimation of protein expression could not  |
| 13242 | ENSG00000196711 | ALKAL1    | UncertainEstimation of protein expression could not  |
| 13243 | ENSG00000196712 | NF1       | UncertainGeneral ccytoplasm                          |
| 13244 | ENSG00000196715 | VKORC1L1  | Approved Cytoplasmcytoplasm                          |
| 13245 | ENSG00000196724 | ZNF418    | Approved Cytoplasmcytoplasm                          |
| 13246 | ENSG00000196730 | DAPK1     | Approved Cytoplasmcytoplasm                          |
| 13247 | ENSG00000196735 | HLA-DQA1  | Enhanced Cytoplasmcytoplasm                          |
| 13248 | ENSG00000196739 | COL27A1   | UncertainCytoplasmcytoplasm                          |
| 13249 | ENSG00000196743 | GM2A      | Enhanced Granular cytoplasm                          |
| 13250 | ENSG00000196747 | HIST1H2AI | SupportedUbiquitousnucleus                           |
| 13251 | ENSG00000196748 | CLPSL2    | Approved Expression in several tissues, including ei |
| 13252 | ENSG00000196754 | S100A2    | Enhanced Cytoplasmcytoplasm;nucleus                  |
| 13253 | ENSG00000196757 | ZNF700    | UncertainNuclear acytoplasm;nucleus                  |

|       |                 |           |                                                     |
|-------|-----------------|-----------|-----------------------------------------------------|
| 13254 | ENSG00000196776 | CD47      | Approved Cytoplasmcytoplasm;plasma membrane         |
| 13255 | ENSG00000196781 | TLE1      | SupportedGeneral nnucleus                           |
| 13256 | ENSG00000196782 | MAML3     | Approved General ccytoplasm;nucleus                 |
| 13257 | ENSG00000196787 | HIST1H2AG | SupportedUbiquitounucleus                           |
| 13258 | ENSG00000196792 | STRN3     | Approved General ccytoplasm                         |
| 13259 | ENSG00000196793 | ZNF239    | UncertainEstimation of protein expression could not |
| 13260 | ENSG00000196812 | ZSCAN16   | SupportedGeneral nnucleus                           |
| 13261 | ENSG00000196821 | C6orf106  | Approved General ccytoplasm;plasma membrane         |
| 13262 | ENSG00000196834 | POTEI     | UncertainEstimation of protein expression could not |
| 13263 | ENSG00000196839 | ADA       | Enhanced Membranoucytoplasm;plasma membrane         |
| 13264 | ENSG00000196843 | ARID5A    | Approved Nuclear enucleus                           |
| 13265 | ENSG00000196850 | PPTC7     | Approved Cytoplasmcytoplasm                         |
| 13266 | ENSG00000196860 | TOMM20L   | Enhanced Expressed in spermatids.                   |
| 13267 | ENSG00000196862 | RGPD4     | UncertainEstimation of protein expression could not |
| 13268 | ENSG00000196865 | NHLRC2    | Approved Ubiquitoucytoplasm                         |
| 13269 | ENSG00000196866 | HIST1H2AD | SupportedUbiquitounucleus                           |
| 13270 | ENSG00000196867 | ZFP28     | UncertainEstimation of protein expression could not |
| 13271 | ENSG00000196872 | KIAA1211L | Enhanced Cytoplasmcytoplasm                         |
| 13272 | ENSG00000196873 | CBWD3     | UncertainCytoplasmcytoplasm                         |
| 13273 | ENSG00000196878 | LAMB3     | Enhanced Cytoplasmcytoplasm;plasma membrane         |
| 13274 | ENSG00000196890 | HIST3H2BB | SupportedUbiquitounucleus                           |
| 13275 | ENSG00000196911 | KPNA5     | Enhanced Cytoplasmcytoplasm;nucleus                 |
| 13276 | ENSG00000196914 | ARHGEF12  | Approved Mainly ccytoplasm;nucleus                  |
| 13277 | ENSG00000196923 | PDLIM7    | Approved Cytoplasmcytoplasm                         |
| 13278 | ENSG00000196924 | FLNA      | Enhanced Selectivecytoplasm                         |
| 13279 | ENSG00000196935 | SRGAP1    | UncertainEstimation of protein expression could not |
| 13280 | ENSG00000196937 | FAM3C     | Enhanced Granular cytoplasm                         |
| 13281 | ENSG00000196950 | SLC39A10  | Approved Cytoplasmcytoplasm;plasma membrane         |
| 13282 | ENSG00000196954 | CASP4     | Approved Most tisscytoplasm;plasma membrane         |
| 13283 | ENSG00000196961 | AP2A1     | Approved General ccytoplasm;plasma membrane         |
| 13284 | ENSG00000196968 | FUT11     | Approved General ccytoplasm                         |
| 13285 | ENSG00000196975 | ANXA4     | Enhanced Cytoplasmcytoplasm;plasma membrane         |
| 13286 | ENSG00000196976 | LAGE3     | Approved Nuclear acytoplasm;nucleus                 |
| 13287 | ENSG00000196981 | WDR5B     | Approved Cytoplasmcytoplasm                         |
| 13288 | ENSG00000196990 | FAM163B   | SupportedCytoplasmcytoplasm                         |
| 13289 | ENSG00000196993 | NPIP9     | Approved Ubiquitounucleus                           |
| 13290 | ENSG00000196998 | WDR45     | UncertainEstimation of protein expression could not |
| 13291 | ENSG00000197006 | METTL9    | UncertainCytoplasmcytoplasm                         |
| 13292 | ENSG00000197016 | ZNF470    | UncertainNuclear enucleus                           |
| 13293 | ENSG00000197020 | ZNF100    | UncertainEstimation of protein expression could not |
| 13294 | ENSG00000197021 | CXorf40B  | Approved Cytoplasmcytoplasm;plasma membrane         |
| 13295 | ENSG00000197037 | ZSCAN25   | UncertainEstimation of protein expression could not |
| 13296 | ENSG00000197043 | ANXA6     | Enhanced Ubiquitoucytoplasm                         |
| 13297 | ENSG00000197045 | GMFB      | Approved Cytoplasmcytoplasm                         |
| 13298 | ENSG00000197050 | ZNF420    | Approved General nnucleus                           |
| 13299 | ENSG00000197054 | ZNF763    | Approved Nuclear acytoplasm;nucleus                 |
| 13300 | ENSG00000197061 | HIST1H4C  | SupportedGeneral nnucleus                           |
| 13301 | ENSG00000197063 | MAFG      | Approved Nuclear acytoplasm;nucleus                 |
| 13302 | ENSG00000197070 | ARRDC1    | UncertainCytoplasmcytoplasm                         |
| 13303 | ENSG00000197077 | KIAA1671  | Approved Cytoplasmcytoplasm;plasma membrane         |
| 13304 | ENSG00000197081 | IGF2R     | SupportedCytoplasmcytoplasm                         |
| 13305 | ENSG00000197093 | GAL3ST4   | UncertainGeneral ccytoplasm;nucleus                 |
| 13306 | ENSG00000197102 | DYNC1H1   | Enhanced General ccytoplasm                         |
| 13307 | ENSG00000197106 | SLC6A17   | Enhanced Cytoplasmcytoplasm                         |
| 13308 | ENSG00000197111 | PCBP2     | UncertainGeneral ccytoplasm                         |

|       |                 |          |           |                                                 |
|-------|-----------------|----------|-----------|-------------------------------------------------|
| 13309 | ENSG00000197119 | SLC25A29 | Uncertain | Estimation of protein expression could not      |
| 13310 | ENSG00000197122 | SRC      | Approved  | Cytoplasm cytoplasm; plasma membrane            |
| 13311 | ENSG00000197124 | ZNF682   | Uncertain | Estimation of protein expression could not      |
| 13312 | ENSG00000197128 | ZNF772   | Uncertain | Estimation of protein expression could not      |
| 13313 | ENSG00000197136 | PCNX3    | Uncertain | Cytoplasm cytoplasm; nucleus                    |
| 13314 | ENSG00000197140 | ADAM32   | Enhanced  | Cytoplasm cytoplasm                             |
| 13315 | ENSG00000197142 | ACSL5    | Enhanced  | Cytoplasm cytoplasm; plasma membrane            |
| 13316 | ENSG00000197147 | LRRC8B   | Uncertain | Nuclear enucleus                                |
| 13317 | ENSG00000197150 | ABC8     | Approved  | General c cytoplasm; nucleus                    |
| 13318 | ENSG00000197153 | HIST1H3J | Approved  | Ubiquitous nucleus                              |
| 13319 | ENSG00000197157 | SND1     | Enhanced  | Ubiquitous cytoplasm                            |
| 13320 | ENSG00000197165 | SULT1A2  | Supported | High cyto cytoplasm                             |
| 13321 | ENSG00000197168 | NEK5     | Enhanced  | Expression in cilia in fallopian tube and c     |
| 13322 | ENSG00000197170 | PSMD12   | Approved  | Cytoplasm cytoplasm; nucleus                    |
| 13323 | ENSG00000197177 | ADGRA1   | Approved  | Low cyto cytoplasm                              |
| 13324 | ENSG00000197183 | NOL4L    | Enhanced  | Nuclear enucleus                                |
| 13325 | ENSG00000197191 | CYSRT1   | Approved  | Cytoplasm cytoplasm                             |
| 13326 | ENSG00000197208 | SLC22A4  | Approved  | Cytoplasm cytoplasm; plasma membrane            |
| 13327 | ENSG00000197213 | ZSCAN5B  | Uncertain | Cytoplasm cytoplasm                             |
| 13328 | ENSG00000197217 | ENTPD4   | Supported | Cytoplasm cytoplasm                             |
| 13329 | ENSG00000197223 | C1D      | Approved  | Nuclear/n cytoplasm; nucleus                    |
| 13330 | ENSG00000197226 | TBC1D9B  | Approved  | Cytoplasm cytoplasm                             |
| 13331 | ENSG00000197238 | HIST1H4J | Supported | General n nucleus                               |
| 13332 | ENSG00000197241 | SLC2A7   | Uncertain | Estimation of protein expression could not      |
| 13333 | ENSG00000197245 | FAM110D  | Approved  | Cytoplasm cytoplasm; plasma membrane            |
| 13334 | ENSG00000197249 | SERPINA1 | Enhanced  | Distinct plasma membrane                        |
| 13335 | ENSG00000197253 | TPSB2    | Supported | High cyto cytoplasm                             |
| 13336 | ENSG00000197256 | KANK2    | Approved  | Cytoplasm cytoplasm                             |
| 13337 | ENSG00000197261 | C6orf141 | Uncertain | Estimation of protein expression could not      |
| 13338 | ENSG00000197265 | GTF2E2   | Approved  | Mainly n nucleus                                |
| 13339 | ENSG00000197272 | IL27     | Approved  | Membranous cytoplasm; plasma membrane; plasma m |
| 13340 | ENSG00000197273 | GUCA2A   | Enhanced  | Granular, cytoplasm                             |
| 13341 | ENSG00000197275 | RAD54B   | Uncertain | Cytoplasm cytoplasm                             |
| 13342 | ENSG00000197283 | SYNGAP1  | Enhanced  | Mainly s cytoplasm                              |
| 13343 | ENSG00000197299 | BLM      | Approved  | Nuclear enucleus                                |
| 13344 | ENSG00000197302 | ZNF720   | Uncertain | Estimation of protein expression could not      |
| 13345 | ENSG00000197312 | DDI2     | Approved  | Cytoplasm cytoplasm; nucleus                    |
| 13346 | ENSG00000197321 | SVIL     | Approved  | Ubiquitous cytoplasm                            |
| 13347 | ENSG00000197323 | TRIM33   | Supported | General n nucleus                               |
| 13348 | ENSG00000197329 | PELI1    | Uncertain | General n cytoplasm; nucleus                    |
| 13349 | ENSG00000197343 | ZNF655   | Uncertain | Cytoplasm cytoplasm; nucleus                    |
| 13350 | ENSG00000197345 | MRPL21   | Approved  | Granular cytoplasm; plasma membrane             |
| 13351 | ENSG00000197353 | LYPD2    | Uncertain | Cytoplasm cytoplasm                             |
| 13352 | ENSG00000197355 | UAP1L1   | Approved  | General c cytoplasm                             |
| 13353 | ENSG00000197361 | FBXL22   | Uncertain | Estimation of protein expression could not      |
| 13354 | ENSG00000197362 | ZNF786   | Uncertain | Estimation of protein expression could not      |
| 13355 | ENSG00000197364 | S100A7L2 | Uncertain | Estimation of protein expression could not      |
| 13356 | ENSG00000197380 | DACT3    | Approved  | Cytoplasm cytoplasm                             |
| 13357 | ENSG00000197385 | ZNF860   | Uncertain | Mainly n nucleus                                |
| 13358 | ENSG00000197386 | HTT      | Uncertain | Mainly c cytoplasm                              |
| 13359 | ENSG00000197405 | C5AR1    | Approved  | Cytoplasm cytoplasm; plasma membrane            |
| 13360 | ENSG00000197408 | CYP2B6   | Enhanced  | Cytoplasm cytoplasm                             |
| 13361 | ENSG00000197409 | HIST1H3D | Approved  | Ubiquitous nucleus                              |
| 13362 | ENSG00000197410 | DCHS2    | Uncertain | Estimation of protein expression could not      |
| 13363 | ENSG00000197415 | VEPH1    | Uncertain | Ubiquitous cytoplasm                            |

|       |                 |           |                                                      |
|-------|-----------------|-----------|------------------------------------------------------|
| 13364 | ENSG00000197416 | FABP12    | Enhanced Cytoplasmcytoplasm                          |
| 13365 | ENSG00000197417 | SHPK      | Enhanced Cytoplasmcytoplasm                          |
| 13366 | ENSG00000197428 | OR51D1    | UncertainEstimation of protein expression could not  |
| 13367 | ENSG00000197429 | IPP       | Approved Cytoplasmcytoplasm                          |
| 13368 | ENSG00000197430 | OPALIN    | SupportedSelective expression in CNS.                |
| 13369 | ENSG00000197442 | MAP3K5    | SupportedCytoplasmcytoplasm                          |
| 13370 | ENSG00000197444 | OGDHL     | Enhanced Granular cytoplasm                          |
| 13371 | ENSG00000197448 | GSTK1     | SupportedUbiquitoucytoplasm                          |
| 13372 | ENSG00000197451 | HNRNPAB   | Approved Nuclear acytoplasm;nucleus                  |
| 13373 | ENSG00000197457 | STMN3     | Enhanced Cytoplasmcytoplasm                          |
| 13374 | ENSG00000197461 | PDGFA     | Approved Distinct cytoplasm                          |
| 13375 | ENSG00000197467 | COL13A1   | Approved Cytoplasmcytoplasm;plasma membrane          |
| 13376 | ENSG00000197471 | SPN       | Enhanced Selectiveplasma membrane                    |
| 13377 | ENSG00000197472 | ZNF695    | UncertainEstimation of protein expression could not  |
| 13378 | ENSG00000197479 | PCDHB11   | UncertainEstimation of protein expression could not  |
| 13379 | ENSG00000197483 | ZNF628    | UncertainEstimation of protein expression could not  |
| 13380 | ENSG00000197487 | GALP      | UncertainEstimation of protein expression could not  |
| 13381 | ENSG00000197496 | SLC2A10   | Approved Cytoplasmcytoplasm;plasma membrane          |
| 13382 | ENSG00000197497 | ZNF665    | UncertainEstimation of protein expression could not  |
| 13383 | ENSG00000197498 | RPF2      | SupportedNucleolarnucleus                            |
| 13384 | ENSG00000197506 | SLC28A3   | Approved Membranoucytoplasm;plasma membrane          |
| 13385 | ENSG00000197520 | FAM177B   | UncertainEstimation of protein expression could not  |
| 13386 | ENSG00000197530 | MIB2      | Enhanced Cytoplasmcytoplasm                          |
| 13387 | ENSG00000197535 | MYO5A     | Enhanced Cytoplasmcytoplasm                          |
| 13388 | ENSG00000197540 | GZMM      | Enhanced High expression in subset of immune cells.  |
| 13389 | ENSG00000197548 | ATG7      | SupportedUbiquitoucytoplasm                          |
| 13390 | ENSG00000197555 | SIPA1L1   | Approved General ccytoplasm;nucleus                  |
| 13391 | ENSG00000197557 | TTC30A    | SupportedExpressiocytoplasm                          |
| 13392 | ENSG00000197561 | ELANE     | Enhanced Cytoplasmcytoplasm                          |
| 13393 | ENSG00000197563 | PIGN      | Approved Ubiquitoucytoplasm;nucleus                  |
| 13394 | ENSG00000197566 | ZNF624    | UncertainGeneral ccytoplasm                          |
| 13395 | ENSG00000197568 | HHLA3     | Approved Cytoplasmcytoplasm                          |
| 13396 | ENSG00000197576 | HOXA4     | Approved General nnucleus                            |
| 13397 | ENSG00000197579 | TOPORS    | SupportedGeneral nnucleus                            |
| 13398 | ENSG00000197580 | BCO2      | SupportedCytoplasmcytoplasm                          |
| 13399 | ENSG00000197584 | KCNMB2    | UncertainCytoplasmcytoplasm                          |
| 13400 | ENSG00000197586 | ENTPD6    | Approved Cytoplasmcytoplasm                          |
| 13401 | ENSG00000197587 | DMBX1     | UncertainEstimation of protein expression could not  |
| 13402 | ENSG00000197594 | ENPP1     | Enhanced Membranouplasma membrane                    |
| 13403 | ENSG00000197599 | CCDC154   | UncertainEstimation of protein expression could not  |
| 13404 | ENSG00000197601 | FAR1      | Approved Mainly grcytoplasm                          |
| 13405 | ENSG00000197603 | C5orf42   | Approved Cytoplasmcytoplasm;plasma membrane          |
| 13406 | ENSG00000197614 | MFAP5     | Enhanced Distinct stromal and extracellular matrix e |
| 13407 | ENSG00000197616 | MYH6      | Enhanced Selectivecytoplasm                          |
| 13408 | ENSG00000197619 | ZNF615    | UncertainEstimation of protein expression could not  |
| 13409 | ENSG00000197620 | CXorf40A  | Approved Cytoplasmcytoplasm;plasma membrane          |
| 13410 | ENSG00000197622 | CDC42SE1  | Approved Cytoplasmcytoplasm;plasma membrane;plasma r |
| 13411 | ENSG00000197629 | MPEG1     | Approved Cytoplasmcytoplasm                          |
| 13412 | ENSG00000197632 | SERPINB2  | SupportedCytoplasmcytoplasm                          |
| 13413 | ENSG00000197635 | DPP4      | Enhanced Luminal expression in several tissues, most |
| 13414 | ENSG00000197641 | SERPINB13 | Enhanced Cytoplasmcytoplasm;nucleus                  |
| 13415 | ENSG00000197646 | PDCD1LG2  | Approved Cytoplasmcytoplasm                          |
| 13416 | ENSG00000197647 | ZNF433    | Enhanced Nuclear acytoplasm;nucleus                  |
| 13417 | ENSG00000197653 | DNAH10    | Enhanced Expressed in flagella of spermatids and ci  |
| 13418 | ENSG00000197658 | SLC22A24  | UncertainEstimation of protein expression could not  |

|       |                 |           |                                                      |
|-------|-----------------|-----------|------------------------------------------------------|
| 13419 | ENSG00000197694 | SPTAN1    | Enhanced General ccytoplasm;plasma membrane          |
| 13420 | ENSG00000197696 | NMB       | Approved Plasma poplasma membrane                    |
| 13421 | ENSG00000197702 | PARVA     | Approved Ubiquitouscytoplasm                         |
| 13422 | ENSG00000197705 | KLHL14    | UncertainGeneral ccytoplasm                          |
| 13423 | ENSG00000197712 | FAM114A1  | UncertainCytoplasmcytoplasm                          |
| 13424 | ENSG00000197713 | RPE       | Approved Ubiquitouscytoplasm                         |
| 13425 | ENSG00000197714 | ZNF460    | UncertainEstimation of protein expression could not  |
| 13426 | ENSG00000197721 | CR1L      | Approved Cytoplasmcytoplasm                          |
| 13427 | ENSG00000197724 | PHF2      | Approved Ubiquitousnucleus                           |
| 13428 | ENSG00000197728 | RPS26     | UncertainCytoplasmcytoplasm                          |
| 13429 | ENSG00000197734 | C14orf178 | UncertainEstimation of protein expression could not  |
| 13430 | ENSG00000197746 | PSAP      | SupportedGranular cytoplasm                          |
| 13431 | ENSG00000197747 | S100A10   | Enhanced Membranoucytoplasm;plasma membrane          |
| 13432 | ENSG00000197753 | LHFPL5    | UncertainEstimation of protein expression could not  |
| 13433 | ENSG00000197756 | RPL37A    | Approved General ccytoplasm                          |
| 13434 | ENSG00000197763 | TXNRD3    | UncertainCytoplasmcytoplasm                          |
| 13435 | ENSG00000197771 | MCMBP     | UncertainNuclear acytoplasm;nucleus                  |
| 13436 | ENSG00000197774 | EME2      | UncertainEstimation of protein expression could not  |
| 13437 | ENSG00000197776 | KLHDC1    | Approved Cytoplasmcytoplasm                          |
| 13438 | ENSG00000197779 | ZNF81     | Approved General ccytoplasm                          |
| 13439 | ENSG00000197780 | TAF13     | Approved Mainly nunucleus                            |
| 13440 | ENSG00000197782 | ZNF780A   | UncertainEstimation of protein expression could not  |
| 13441 | ENSG00000197785 | ATAD3A    | Approved Granular cytoplasm                          |
| 13442 | ENSG00000197798 | FAM118B   | Approved Cytoplasmcytoplasm;nucleus                  |
| 13443 | ENSG00000197808 | ZNF461    | UncertainEstimation of protein expression could not  |
| 13444 | ENSG00000197818 | SLC9A8    | Approved Cytoplasmcytoplasm;plasma membrane          |
| 13445 | ENSG00000197822 | OCLN      | Enhanced Cytoplasmcytoplasm;plasma membrane          |
| 13446 | ENSG00000197826 | C4orf22   | Approved Expression in fallopian tube and testis.    |
| 13447 | ENSG00000197837 | HIST4H4   | SupportedUbiquitousnucleus                           |
| 13448 | ENSG00000197838 | CYP2A13   | SupportedSelectivecytoplasm                          |
| 13449 | ENSG00000197841 | ZNF181    | UncertainCytoplasmcytoplasm                          |
| 13450 | ENSG00000197852 | FAM212B   | Approved Cytoplasmcytoplasm                          |
| 13451 | ENSG00000197857 | ZNF44     | SupportedNuclear enucleus                            |
| 13452 | ENSG00000197858 | GPAA1     | Approved Cytoplasmcytoplasm                          |
| 13453 | ENSG00000197859 | ADAMTSL2  | Approved Cytoplasmcytoplasm;plasma membrane          |
| 13454 | ENSG00000197860 | SGTB      | Enhanced Cytoplasmcytoplasm;nucleus                  |
| 13455 | ENSG00000197863 | ZNF790    | UncertainCytoplasmcytoplasm                          |
| 13456 | ENSG00000197872 | FAM49A    | Approved Ubiquitouscytoplasm                         |
| 13457 | ENSG00000197879 | MYO1C     | Enhanced Cytoplasmcytoplasm;plasma membrane          |
| 13458 | ENSG00000197887 | OR1S2     | UncertainEstimation of protein expression could not  |
| 13459 | ENSG00000197888 | UGT2B17   | SupportedSelectivecytoplasm                          |
| 13460 | ENSG00000197891 | SLC22A12  | Enhanced Distinct plasma membrane                    |
| 13461 | ENSG00000197892 | KIF13B    | Enhanced Cytoplasmcytoplasm;plasma membrane          |
| 13462 | ENSG00000197893 | NRAP      | Enhanced Cytoplasmcytoplasm                          |
| 13463 | ENSG00000197894 | ADH5      | Approved General ccytoplasm                          |
| 13464 | ENSG00000197901 | SLC22A6   | Enhanced Expression in proximal renal tubules.       |
| 13465 | ENSG00000197903 | HIST1H2BK | SupportedUbiquitousnucleus                           |
| 13466 | ENSG00000197905 | TEAD4     | UncertainNuclear enucleus                            |
| 13467 | ENSG00000197915 | HRNR      | UncertainEstimation of protein expression could not  |
| 13468 | ENSG00000197919 | IFNA1     | UncertainEstimation of protein expression could not  |
| 13469 | ENSG00000197921 | HES5      | Enhanced Nuclear enucleus                            |
| 13470 | ENSG00000197928 | ZNF677    | Approved General ccytoplasm;nucleus                  |
| 13471 | ENSG00000197930 | ER01A     | Enhanced Cytoplasmcytoplasm                          |
| 13472 | ENSG00000197935 | ZNF311    | Approved Expression in processes in CNS, flagella in |
| 13473 | ENSG00000197937 | ZNF347    | UncertainEstimation of protein expression could not  |

|       |                 |           |                                                      |
|-------|-----------------|-----------|------------------------------------------------------|
| 13474 | ENSG00000197943 | PLCG2     | Enhanced Cytoplasmcytoplasm                          |
| 13475 | ENSG00000197948 | FCHSD1    | Approved Cytoplasmcytoplasm;plasma membrane          |
| 13476 | ENSG00000197951 | ZNF71     | UncertainEstimation of protein expression could not  |
| 13477 | ENSG00000197956 | S100A6    | Enhanced Cytoplasmcytoplasm;nucleus                  |
| 13478 | ENSG00000197958 | RPL12     | Approved Cytoplasmcytoplasm                          |
| 13479 | ENSG00000197961 | ZNF121    | UncertainEstimation of protein expression could not  |
| 13480 | ENSG00000197965 | MPZL1     | Approved Ubiquitouscytoplasm                         |
| 13481 | ENSG00000197969 | VPS13A    | SupportedCytoplasmcytoplasm                          |
| 13482 | ENSG00000197971 | MBP       | Enhanced Selective expression in oligodendrocytes in |
| 13483 | ENSG00000197976 | AKAP17A   | SupportedUbiquitousnucleus                           |
| 13484 | ENSG00000197980 | LEKR1     | UncertainEstimation of protein expression could not  |
| 13485 | ENSG00000198000 | NOL8      | UncertainNucleolarcytoplasm;nucleus                  |
| 13486 | ENSG00000198001 | IRAK4     | UncertainGeneral ccytoplasm                          |
| 13487 | ENSG00000198003 | CCDC151   | Enhanced Expression in cilia in fallopian tube and 1 |
| 13488 | ENSG00000198010 | DLGAP2    | UncertainEstimation of protein expression could not  |
| 13489 | ENSG00000198015 | MRPL42    | Approved General ccytoplasm                          |
| 13490 | ENSG00000198018 | ENTPD7    | UncertainCytoplasmcytoplasm;plasma membrane          |
| 13491 | ENSG00000198021 | SPANXA1   | SupportedExpressed in sperm.                         |
| 13492 | ENSG00000198033 | TUBA3C    | UncertainEstimation of protein expression could not  |
| 13493 | ENSG00000198034 | RPS4X     | SupportedGeneral ccytoplasm                          |
| 13494 | ENSG00000198040 | ZNF84     | Approved Cytoplasmcytoplasm                          |
| 13495 | ENSG00000198042 | MAK16     | UncertainUbiquitouscytoplasm;nucleus                 |
| 13496 | ENSG00000198046 | ZNF667    | UncertainEstimation of protein expression could not  |
| 13497 | ENSG00000198049 | AVPR1B    | Enhanced Membranouplasma membrane                    |
| 13498 | ENSG00000198053 | SIRPA     | Enhanced Cytoplasmcytoplasm                          |
| 13499 | ENSG00000198055 | GRK6      | Approved Ubiquitouscytoplasm                         |
| 13500 | ENSG00000198056 | PRIM1     | UncertainCytoplasmcytoplasm                          |
| 13501 | ENSG00000198064 | NPIP13    | Approved Nuclear enucleus                            |
| 13502 | ENSG00000198074 | AKR1B10   | Enhanced Cytoplasmcytoplasm                          |
| 13503 | ENSG00000198077 | CYP2A7    | Enhanced Selectivecytoplasm                          |
| 13504 | ENSG00000198081 | ZBTB14    | UncertainCytoplasmcytoplasm;nucleus                  |
| 13505 | ENSG00000198087 | CD2AP     | Enhanced Cytoplasmcytoplasm                          |
| 13506 | ENSG00000198088 | NUP62CL   | Approved Cytoplasmcytoplasm                          |
| 13507 | ENSG00000198092 | TMPRSS11F | UncertainEstimation of protein expression could not  |
| 13508 | ENSG00000198093 | ZNF649    | UncertainCytoplasmcytoplasm;nucleus                  |
| 13509 | ENSG00000198099 | ADH4      | Enhanced Selective expression in liver and small in  |
| 13510 | ENSG00000198105 | ZNF248    | UncertainCytoplasmcytoplasm                          |
| 13511 | ENSG00000198108 | CHSY3     | UncertainEstimation of protein expression could not  |
| 13512 | ENSG00000198113 | TOR4A     | Enhanced Cytoplasmcytoplasm                          |
| 13513 | ENSG00000198125 | MB        | Enhanced Highly spcytoplasm                          |
| 13514 | ENSG00000198129 | DEFB107B  | Approved Cytoplasmcytoplasm                          |
| 13515 | ENSG00000198130 | HIBCH     | Enhanced General ccytoplasm                          |
| 13516 | ENSG00000198131 | ZNF544    | Approved General nnucleus                            |
| 13517 | ENSG00000198133 | TMEM229B  | Approved General ccytoplasm                          |
| 13518 | ENSG00000198142 | SOWAHC    | Enhanced High expression in squamous epithelial cel. |
| 13519 | ENSG00000198146 | ZNF770    | Approved General nnucleus;plasma membrane            |
| 13520 | ENSG00000198156 | NPIP6     | Approved Ubiquitousnucleus                           |
| 13521 | ENSG00000198157 | HMG5      | Approved Nuclear enucleus                            |
| 13522 | ENSG00000198160 | MIER1     | Enhanced General ncytoplasm;nucleus                  |
| 13523 | ENSG00000198162 | MAN1A2    | Enhanced General ccytoplasm                          |
| 13524 | ENSG00000198168 | SVIP      | Approved Ubiquitouscytoplasm;plasma membrane         |
| 13525 | ENSG00000198169 | ZNF251    | Approved Cytoplasmcytoplasm;nucleus                  |
| 13526 | ENSG00000198171 | DDR1      | Approved General ccytoplasm                          |
| 13527 | ENSG00000198176 | TFDP1     | Enhanced General nnucleus                            |
| 13528 | ENSG00000198178 | CLEC4C    | Approved Cytoplasmcytoplasm                          |

|       |                 |          |                                                      |
|-------|-----------------|----------|------------------------------------------------------|
| 13529 | ENSG00000198182 | ZNF607   | UncertainEstimation of protein expression could not  |
| 13530 | ENSG00000198183 | BPIFA1   | SupportedSelectivecytoplasm                          |
| 13531 | ENSG00000198185 | ZNF334   | UncertainEstimation of protein expression could not  |
| 13532 | ENSG00000198189 | HSD17B11 | Enhanced Cytoplasmcytoplasm                          |
| 13533 | ENSG00000198198 | SZT2     | Approved Cytoplasmcytoplasm                          |
| 13534 | ENSG00000198203 | SULT1C2  | Approved Cytoplasmcytoplasm                          |
| 13535 | ENSG00000198205 | ZXDA     | Approved Granular cytoplasm                          |
| 13536 | ENSG00000198208 | RPS6KL1  | Approved Cytoplasmcytoplasm                          |
| 13537 | ENSG00000198211 | AC092143 | UncertainEstimation of protein expression could not  |
| 13538 | ENSG00000198218 | QRICH1   | Approved Ubiquitousnucleus                           |
| 13539 | ENSG00000198223 | CSF2RA   | UncertainEstimation of protein expression could not  |
| 13540 | ENSG00000198225 | FKBP1C   | UncertainCytoplasmcytoplasm                          |
| 13541 | ENSG00000198231 | DDX42    | Approved Mainly nunucleus                            |
| 13542 | ENSG00000198242 | RPL23A   | Approved Cytoplasmcytoplasm                          |
| 13543 | ENSG00000198246 | SLC29A3  | Approved Cytoplasmcytoplasm                          |
| 13544 | ENSG00000198252 | STYX     | UncertainCytoplasmcytoplasm                          |
| 13545 | ENSG00000198265 | HELZ     | Approved Nucleolarcytoplasm;nucleus                  |
| 13546 | ENSG00000198270 | TMEM116  | Approved Cytoplasmcytoplasm                          |
| 13547 | ENSG00000198276 | UCKL1    | Approved Cytoplasmcytoplasm                          |
| 13548 | ENSG00000198286 | CARD11   | Approved Cytoplasmcytoplasm                          |
| 13549 | ENSG00000198298 | ZNF485   | UncertainEstimation of protein expression could not  |
| 13550 | ENSG00000198300 | PEG3     | Approved General ccytoplasm;nucleus                  |
| 13551 | ENSG00000198301 | SDAD1    | UncertainExpressednucleus                            |
| 13552 | ENSG00000198315 | ZKSCAN8  | Approved Nuclear enucleus                            |
| 13553 | ENSG00000198331 | HYLS1    | Enhanced Cytoplasmcytoplasm                          |
| 13554 | ENSG00000198336 | MYL4     | Enhanced Selectivecytoplasm                          |
| 13555 | ENSG00000198342 | ZNF442   | UncertainEstimation of protein expression could not  |
| 13556 | ENSG00000198346 | ZNF813   | UncertainEstimation of protein expression could not  |
| 13557 | ENSG00000198354 | DCAF12L2 | Approved Expression in several tissues, including c: |
| 13558 | ENSG00000198356 | ASNA1    | Approved General ccytoplasm                          |
| 13559 | ENSG00000198363 | ASPH     | UncertainGeneral ccytoplasm                          |
| 13560 | ENSG00000198369 | SPRED2   | Approved General ccytoplasm                          |
| 13561 | ENSG00000198382 | UVRAG    | UncertainCytoplasmcytoplasm;nucleus                  |
| 13562 | ENSG00000198393 | ZNF26    | UncertainUbiquitouscytoplasm                         |
| 13563 | ENSG00000198398 | TMEM207  | UncertainEstimation of protein expression could not  |
| 13564 | ENSG00000198399 | ITSN2    | Approved Cytoplasmcytoplasm                          |
| 13565 | ENSG00000198400 | NTRK1    | Approved Cytoplasmcytoplasm                          |
| 13566 | ENSG00000198408 | MGEA5    | Approved Cytoplasmcytoplasm;nucleus                  |
| 13567 | ENSG00000198420 | TCAF1    | Approved Cytoplasmcytoplasm                          |
| 13568 | ENSG00000198429 | ZNF69    | Approved Nuclear acytoplasm;nucleus                  |
| 13569 | ENSG00000198431 | TXNRD1   | Approved Ubiquitouscytoplasm                         |
| 13570 | ENSG00000198435 | NRARP    | Approved Cytoplasmcytoplasm                          |
| 13571 | ENSG00000198440 | ZNF583   | UncertainRNA-based expert annotation gave inconclus: |
| 13572 | ENSG00000198453 | ZNF568   | UncertainEstimation of protein expression could not  |
| 13573 | ENSG00000198455 | ZXDB     | Approved Granular cytoplasm                          |
| 13574 | ENSG00000198464 | ZNF480   | UncertainNuclear acytoplasm;nucleus                  |
| 13575 | ENSG00000198466 | ZNF587   | UncertainCytoplasmcytoplasm                          |
| 13576 | ENSG00000198467 | TPM2     | Approved Expression in several tissues, most abunda  |
| 13577 | ENSG00000198478 | SH3BGRL2 | Approved Nuclear enucleus                            |
| 13578 | ENSG00000198483 | ANKRD35  | Enhanced Cytoplasmcytoplasm;plasma membrane          |
| 13579 | ENSG00000198488 | B3GNT6   | Enhanced Cytoplasmcytoplasm                          |
| 13580 | ENSG00000198492 | YTHDF2   | Approved Nuclear enucleus                            |
| 13581 | ENSG00000198498 | TMA16    | UncertainGeneral ccytoplasm;nucleus                  |
| 13582 | ENSG00000198502 | HLA-DRB5 | SupportedCytoplasmcytoplasm                          |
| 13583 | ENSG00000198513 | ATL1     | Enhanced General ccytoplasm                          |

|       |                 |          |                                                      |
|-------|-----------------|----------|------------------------------------------------------|
| 13584 | ENSG00000198517 | MAFK     | Approved Nuclear enucleus                            |
| 13585 | ENSG00000198520 | Clorf228 | UncertainEstimation of protein expression could not  |
| 13586 | ENSG00000198521 | ZNF43    | UncertainEstimation of protein expression could not  |
| 13587 | ENSG00000198522 | GPN1     | UncertainCytoplasmcytoplasm;nucleus                  |
| 13588 | ENSG00000198523 | PLN      | Enhanced High and cytoplasm;nucleus;plasma membrane  |
| 13589 | ENSG00000198546 | ZNF511   | UncertainGeneral ccytoplasm                          |
| 13590 | ENSG00000198551 | ZNF627   | UncertainEstimation of protein expression could not  |
| 13591 | ENSG00000198554 | WDHD1    | Enhanced Ubiquitouucleus                             |
| 13592 | ENSG00000198556 | ZNF789   | UncertainEstimation of protein expression could not  |
| 13593 | ENSG00000198561 | CTNND1   | Enhanced Cytoplasmcytoplasm;plasma membrane          |
| 13594 | ENSG00000198563 | DDX39B   | Enhanced General nnucleus                            |
| 13595 | ENSG00000198569 | SLC34A3  | Enhanced Membranouplasma membrane                    |
| 13596 | ENSG00000198570 | RD3      | Approved Expression in photoreceptor cells in retina |
| 13597 | ENSG00000198573 | SPANXC   | SupportedExpressed in sperm.                         |
| 13598 | ENSG00000198574 | SH2D1B   | UncertainEstimation of protein expression could not  |
| 13599 | ENSG00000198585 | NUDT16   | UncertainUbiquitouucleus                             |
| 13600 | ENSG00000198586 | TLK1     | Approved General ncytoplasm;nucleus                  |
| 13601 | ENSG00000198589 | LRBA     | Approved Cytoplasmcytoplasm                          |
| 13602 | ENSG00000198604 | BAZ1A    | SupportedGeneral nnucleus                            |
| 13603 | ENSG00000198610 | AKR1C4   | UncertainCytoplasmcytoplasm                          |
| 13604 | ENSG00000198612 | COPS8    | UncertainMainly ccytoplasm                           |
| 13605 | ENSG00000198624 | CCDC69   | UncertainCytoplasmcytoplasm                          |
| 13606 | ENSG00000198625 | MDM4     | Approved Mainly nnucleus                             |
| 13607 | ENSG00000198626 | RYR2     | Approved Cytoplasmcytoplasm                          |
| 13608 | ENSG00000198642 | KLHL9    | Approved Cytoplasmcytoplasm;nucleus                  |
| 13609 | ENSG00000198643 | FAM3D    | Approved Cytoplasmcytoplasm                          |
| 13610 | ENSG00000198646 | NCOA6    | SupportedGeneral nnucleus                            |
| 13611 | ENSG00000198648 | STK39    | Enhanced Ubiquitoucytoplasm;nucleus                  |
| 13612 | ENSG00000198663 | C6orf89  | UncertainCytoplasmcytoplasm                          |
| 13613 | ENSG00000198668 | CALM1    | SupportedCytoplasmcytoplasm;plasma membrane          |
| 13614 | ENSG00000198670 | LPA      | SupportedDistinct cytoplasm;plasma membrane;plasma r |
| 13615 | ENSG00000198677 | TTC37    | Approved Cytoplasmcytoplasm                          |
| 13616 | ENSG00000198680 | TUSC1    | Approved Nuclear enucleus                            |
| 13617 | ENSG00000198681 | MAGEA1   | Enhanced Nuclear acytoplasm;nucleus                  |
| 13618 | ENSG00000198682 | PAPSS2   | Enhanced Nuclear enucleus                            |
| 13619 | ENSG00000198689 | SLC9A6   | Enhanced Cytoplasmcytoplasm                          |
| 13620 | ENSG00000198691 | ABCA4    | Enhanced Expression in photoreceptor cells in retina |
| 13621 | ENSG00000198692 | EIF1AY   | UncertainGeneral ccytoplasm;nucleus                  |
| 13622 | ENSG00000198707 | CEP290   | Approved Cytoplasmcytoplasm;nucleus                  |
| 13623 | ENSG00000198712 | MT-CO2   | Enhanced Ubiquitoucytoplasm                          |
| 13624 | ENSG00000198715 | GLMP     | UncertainCytoplasmcytoplasm                          |
| 13625 | ENSG00000198718 | TOGARAM1 | UncertainCytoplasmcytoplasm                          |
| 13626 | ENSG00000198720 | ANKRD13B | UncertainExpression of endothelial cells             |
| 13627 | ENSG00000198721 | ECI2     | Enhanced Granular cytoplasm                          |
| 13628 | ENSG00000198722 | UNC13B   | Approved Ubiquitoucytoplasm                          |
| 13629 | ENSG00000198727 | MT-CYB   | Enhanced General ccytoplasm                          |
| 13630 | ENSG00000198728 | LDB1     | Approved Mainly nnucleus                             |
| 13631 | ENSG00000198730 | CTR9     | SupportedGeneral nnucleus                            |
| 13632 | ENSG00000198732 | SMOC1    | Approved Cytoplasmcytoplasm                          |
| 13633 | ENSG00000198736 | MSRB1    | Approved Cytoplasmcytoplasm;nucleus                  |
| 13634 | ENSG00000198740 | ZNF652   | UncertainCytoplasmcytoplasm                          |
| 13635 | ENSG00000198742 | SMURF1   | Approved Cytoplasmcytoplasm;plasma membrane          |
| 13636 | ENSG00000198746 | GPATCH3  | Approved Granular cytoplasm                          |
| 13637 | ENSG00000198752 | CDC42BPB | Approved Cytoplasmcytoplasm                          |
| 13638 | ENSG00000198753 | PLXNB3   | Enhanced Cytoplasmcytoplasm                          |



|       |                 |           |                                                      |
|-------|-----------------|-----------|------------------------------------------------------|
| 13639 | ENSG00000198754 | OXCT2     | Enhanced Expression in elongated spermatids.         |
| 13640 | ENSG00000198755 | RPL10A    | Approved General ccytoplasm                          |
| 13641 | ENSG00000198756 | COLGALT2  | Approved Cytoplasmcytoplasm                          |
| 13642 | ENSG00000198758 | EPS8L3    | Approved Membranouplasma membrane                    |
| 13643 | ENSG00000198759 | EGFL6     | Enhanced Distinct expression in endothelial cells a  |
| 13644 | ENSG00000198765 | SYCP1     | Enhanced Nucleolarnucleus                            |
| 13645 | ENSG00000198768 | APCDD1L   | UncertainEstimation of protein expression could not  |
| 13646 | ENSG00000198771 | RCS1      | Enhanced Distinct cytoplasm                          |
| 13647 | ENSG00000198774 | RASSF9    | Approved Cytoplasmcytoplasm                          |
| 13648 | ENSG00000198780 | FAM169A   | Enhanced Expressionnucleus;plasma membrane           |
| 13649 | ENSG00000198783 | ZNF830    | Enhanced Ubiquitounucleus                            |
| 13650 | ENSG00000198788 | MUC2      | Enhanced Selective expression in mucus producing cel |
| 13651 | ENSG00000198792 | TMEM184B  | Approved General ccytoplasm                          |
| 13652 | ENSG00000198793 | MTOR      | Approved Cytoplasmcytoplasm                          |
| 13653 | ENSG00000198794 | SCAMP5    | Enhanced Low generccytoplasm                         |
| 13654 | ENSG00000198795 | ZNF521    | Enhanced Nuclear enucleus                            |
| 13655 | ENSG00000198796 | ALPK2     | UncertainEstimation of protein expression could not  |
| 13656 | ENSG00000198797 | BRINP2    | UncertainEstimation of protein expression could not  |
| 13657 | ENSG00000198798 | MAGEB3    | Approved Nuclear enucleus                            |
| 13658 | ENSG00000198799 | LRIG2     | UncertainUbiquitoucytoplasm                          |
| 13659 | ENSG00000198804 | MT-C01    | Enhanced Ubiquitoucytoplasm                          |
| 13660 | ENSG00000198805 | PNP       | Enhanced Cytoplasmcytoplasm                          |
| 13661 | ENSG00000198807 | PAX9      | Enhanced Nuclear enucleus                            |
| 13662 | ENSG00000198814 | GK        | SupportedGranular cytoplasm                          |
| 13663 | ENSG00000198816 | ZNF358    | Approved Mainly ccytoplasm                           |
| 13664 | ENSG00000198818 | SFT2D1    | Approved General ccytoplasm                          |
| 13665 | ENSG00000198821 | CD247     | Enhanced Selective expression in immune cells.       |
| 13666 | ENSG00000198824 | CHAMP1    | Enhanced General nnucleus                            |
| 13667 | ENSG00000198826 | ARHGAP11A | Enhanced Cytoplasmcytoplasm                          |
| 13668 | ENSG00000198829 | SUCNR1    | UncertainEstimation of protein expression could not  |
| 13669 | ENSG00000198830 | HMG2      | SupportedGeneral nnucleus                            |
| 13670 | ENSG00000198832 | SELENOM   | Approved General ccytoplasm                          |
| 13671 | ENSG00000198833 | UBE2J1    | Enhanced Cytoplasmcytoplasm                          |
| 13672 | ENSG00000198836 | OPA1      | SupportedCytoplasmcytoplasm                          |
| 13673 | ENSG00000198837 | DENND4B   | Approved Membranoucytoplasm;plasma membrane          |
| 13674 | ENSG00000198839 | ZNF277    | UncertainEstimation of protein expression could not  |
| 13675 | ENSG00000198840 | MT-ND3    | Enhanced General ccytoplasm                          |
| 13676 | ENSG00000198841 | KTI12     | Approved Ubiquitoucytoplasm                          |
| 13677 | ENSG00000198843 | SELENOT   | Approved Cytoplasmcytoplasm                          |
| 13678 | ENSG00000198846 | TOX       | Enhanced Nuclear enucleus                            |
| 13679 | ENSG00000198848 | CES1      | Enhanced Distinct cytoplasm                          |
| 13680 | ENSG00000198851 | CD3E      | Enhanced Selectivecytoplasm                          |
| 13681 | ENSG00000198853 | RUSC2     | UncertainCytoplasmcytoplasm;nucleus                  |
| 13682 | ENSG00000198855 | FICD      | Approved Cytoplasmcytoplasm;plasma membrane          |
| 13683 | ENSG00000198858 | R3HDM4    | UncertainCytoplasmcytoplasm;plasma membrane          |
| 13684 | ENSG00000198860 | TSEN15    | Approved Nuclear acytoplasm;nucleus                  |
| 13685 | ENSG00000198862 | LTN1      | UncertainUbiquitoucytoplasm                          |
| 13686 | ENSG00000198863 | RUNDC1    | UncertainCytoplasmcytoplasm                          |
| 13687 | ENSG00000198865 | CCDC152   | Approved Nuclear acytoplasm;nucleus                  |
| 13688 | ENSG00000198870 | STKLD1    | UncertainEstimation of protein expression could not  |
| 13689 | ENSG00000198873 | GRK5      | Approved Cytoplasmcytoplasm                          |
| 13690 | ENSG00000198874 | TYW1      | Approved General ccytoplasm                          |
| 13691 | ENSG00000198876 | DCAF12    | UncertainGeneral nnucleus;plasma membrane            |
| 13692 | ENSG00000198879 | SFMBT2    | UncertainCytoplasmcytoplasm                          |
| 13693 | ENSG00000198881 | ASB12     | UncertainEstimation of protein expression could not  |

|       |                 |           |                                                      |
|-------|-----------------|-----------|------------------------------------------------------|
| 13694 | ENSG00000198883 | PNMA5     | Enhanced Distinct nucleus                            |
| 13695 | ENSG00000198886 | MT-ND4    | Approved Cytoplasm cytoplasm                         |
| 13696 | ENSG00000198887 | SMC5      | Supported General nucleus                            |
| 13697 | ENSG00000198888 | MT-ND1    | Approved Cytoplasm cytoplasm                         |
| 13698 | ENSG00000198889 | DCAF12L1  | Approved Expression mainly in ciliated cells of fal  |
| 13699 | ENSG00000198890 | PRMT6     | Approved Nuclear acytoplasm;nucleus                  |
| 13700 | ENSG00000198892 | SHISA4    | Uncertain Cytoplasm cytoplasm                        |
| 13701 | ENSG00000198898 | CAPZA2    | Uncertain Cytoplasm cytoplasm                        |
| 13702 | ENSG00000198900 | TOP1      | Supported Ubiquitous nucleus                         |
| 13703 | ENSG00000198901 | PRC1      | Enhanced Nuclear acytoplasm;nucleus                  |
| 13704 | ENSG00000198909 | MAP3K3    | Uncertain Cytoplasm cytoplasm                        |
| 13705 | ENSG00000198910 | L1CAM     | Enhanced Cytoplasm cytoplasm                         |
| 13706 | ENSG00000198911 | SREBF2    | Approved Nuclear enucleus                            |
| 13707 | ENSG00000198912 | Clorf174  | Approved Nuclear enucleus                            |
| 13708 | ENSG00000198914 | POU3F3    | Enhanced Nuclear enucleus                            |
| 13709 | ENSG00000198915 | RASGEF1A  | Enhanced General c cytoplasm                         |
| 13710 | ENSG00000198917 | SPOUT1    | Approved Nuclear enucleus                            |
| 13711 | ENSG00000198918 | RPL39     | Uncertain Cytoplasm cytoplasm                        |
| 13712 | ENSG00000198919 | DZIP3     | Approved Cytoplasm cytoplasm                         |
| 13713 | ENSG00000198920 | KIAA0753  | Enhanced Ubiquitous cytoplasm                        |
| 13714 | ENSG00000198924 | DCLRE1A   | Approved Nuclear enucleus                            |
| 13715 | ENSG00000198925 | ATG9A     | Uncertain Cytoplasm cytoplasm                        |
| 13716 | ENSG00000198929 | NOS1AP    | Approved Cytoplasm cytoplasm                         |
| 13717 | ENSG00000198931 | APRT      | Approved Cytoplasm cytoplasm                         |
| 13718 | ENSG00000198932 | GPRASP1   | Uncertain Cytoplasm cytoplasm;nucleus                |
| 13719 | ENSG00000198933 | TBKBP1    | Approved Cytoplasm cytoplasm                         |
| 13720 | ENSG00000198934 | MAGEE1    | Approved Cytoplasm cytoplasm                         |
| 13721 | ENSG00000198937 | CCDC167   | Uncertain Cytoplasm cytoplasm;plasma membrane        |
| 13722 | ENSG00000198938 | MT-CO3    | Approved Nuclear acytoplasm;nucleus                  |
| 13723 | ENSG00000198939 | ZFP2      | Uncertain Estimation of protein expression could not |
| 13724 | ENSG00000198944 | SOWAHA    | Approved Cytoplasm cytoplasm                         |
| 13725 | ENSG00000198945 | L3MBTL3   | Approved General c cytoplasm                         |
| 13726 | ENSG00000198947 | DMD       | Enhanced Distinct plasma membrane                    |
| 13727 | ENSG00000198948 | MFAP3L    | Approved Cytoplasm cytoplasm                         |
| 13728 | ENSG00000198951 | NAGA      | Enhanced General c cytoplasm                         |
| 13729 | ENSG00000198954 | KIF1BP    | Uncertain Cytoplasm cytoplasm                        |
| 13730 | ENSG00000198959 | TGM2      | Enhanced Cytoplasm cytoplasm                         |
| 13731 | ENSG00000198960 | ARMCX6    | Approved Cytoplasm cytoplasm                         |
| 13732 | ENSG00000198961 | PJA2      | Supported General c cytoplasm                        |
| 13733 | ENSG00000198963 | RORB      | Uncertain Cytoplasm cytoplasm                        |
| 13734 | ENSG00000198964 | SGMS1     | Approved General c cytoplasm                         |
| 13735 | ENSG00000198965 | OR10R2    | Uncertain Ubiquitous cytoplasm                       |
| 13736 | ENSG00000198967 | OR10Z1    | Uncertain Estimation of protein expression could not |
| 13737 | ENSG00000203485 | INF2      | Approved Cytoplasm cytoplasm                         |
| 13738 | ENSG00000203666 | EFCAB2    | Approved General c cytoplasm                         |
| 13739 | ENSG00000203667 | COX20     | Approved Cytoplasm cytoplasm                         |
| 13740 | ENSG00000203668 | CHML      | Supported Cytoplasm cytoplasm;nucleus                |
| 13741 | ENSG00000203690 | TCP10     | Enhanced Expression in acrosomes in testis.          |
| 13742 | ENSG00000203705 | TATDN3    | Approved Cytoplasm cytoplasm;nucleus                 |
| 13743 | ENSG00000203710 | CR1       | Enhanced Highly selective expression in renal glome  |
| 13744 | ENSG00000203727 | SAMD5     | Uncertain Estimation of protein expression could not |
| 13745 | ENSG00000203733 | GJE1      | Uncertain Estimation of protein expression could not |
| 13746 | ENSG00000203734 | ECT2L     | Uncertain Estimation of protein expression could not |
| 13747 | ENSG00000203740 | METTTL11B | Uncertain Estimation of protein expression could not |
| 13748 | ENSG00000203747 | FCGR3A    | Supported Cytoplasm cytoplasm                        |

|       |                 |           |           |                                            |
|-------|-----------------|-----------|-----------|--------------------------------------------|
| 13749 | ENSG00000203757 | OR6K3     | Uncertain | Estimation of protein expression could not |
| 13750 | ENSG00000203782 | LOR       | Enhanced  | Cytoplasm cytoplasm;nucleus                |
| 13751 | ENSG00000203783 | PRR9      | Approved  | Expressed mainly in hair follicles. Also e |
| 13752 | ENSG00000203784 | LELP1     | Enhanced  | Specific cytoplasm;nucleus                 |
| 13753 | ENSG00000203786 | KPRP      | Enhanced  | Cytoplasm cytoplasm                        |
| 13754 | ENSG00000203791 | EEF1AKMT2 | Approved  | Cytoplasm cytoplasm                        |
| 13755 | ENSG00000203795 | FAM24A    | Supported | Nuclear enucleus                           |
| 13756 | ENSG00000203797 | DDO       | Enhanced  | General c cytoplasm                        |
| 13757 | ENSG00000203805 | PLPP4     | Approved  | Cytoplasm cytoplasm;plasma membrane        |
| 13758 | ENSG00000203811 | HIST2H3C  | Approved  | Ubiquitous nucleus                         |
| 13759 | ENSG00000203812 | HIST2H2AA | Supported | Ubiquitous nucleus                         |
| 13760 | ENSG00000203814 | HIST2H2BF | Supported | Ubiquitous nucleus                         |
| 13761 | ENSG00000203818 | HIST2H3PS | Approved  | Ubiquitous nucleus                         |
| 13762 | ENSG00000203837 | PNLIPRP3  | Uncertain | Estimation of protein expression could not |
| 13763 | ENSG00000203852 | HIST2H3A  | Approved  | Ubiquitous nucleus                         |
| 13764 | ENSG00000203857 | HSD3B1    | Supported | Cytoplasm cytoplasm                        |
| 13765 | ENSG00000203859 | HSD3B2    | Supported | Cytoplasm cytoplasm                        |
| 13766 | ENSG00000203867 | RBM20     | Approved  | Nuclear enucleus                           |
| 13767 | ENSG00000203870 | SMIM9     | Uncertain | Estimation of protein expression could not |
| 13768 | ENSG00000203872 | C6orf163  | Uncertain | Ubiquitous cytoplasm                       |
| 13769 | ENSG00000203877 | RIPPLY2   | Uncertain | Estimation of protein expression could not |
| 13770 | ENSG00000203879 | GDI1      | Enhanced  | General c cytoplasm                        |
| 13771 | ENSG00000203880 | PCMTD2    | Approved  | Granular cytoplasm                         |
| 13772 | ENSG00000203896 | LIME1     | Approved  | Cytoplasm cytoplasm;plasma membrane        |
| 13773 | ENSG00000203907 | OOEP      | Approved  | Cytoplasm cytoplasm                        |
| 13774 | ENSG00000203908 | KHDC3L    | Uncertain | Estimation of protein expression could not |
| 13775 | ENSG00000203909 | DPPA5     | Uncertain | Estimation of protein expression could not |
| 13776 | ENSG00000203926 | SPANXA2   | Supported | Expressed in sperm.                        |
| 13777 | ENSG00000203942 | C10orf62  | Enhanced  | Cytoplasm cytoplasm                        |
| 13778 | ENSG00000203943 | SAMD13    | Enhanced  | Granular cytoplasm                         |
| 13779 | ENSG00000203952 | CCDC160   | Uncertain | Estimation of protein expression could not |
| 13780 | ENSG00000203965 | EFCAB7    | Enhanced  | Cytoplasm cytoplasm                        |
| 13781 | ENSG00000203972 | GLYATL3   | Uncertain | Estimation of protein expression could not |
| 13782 | ENSG00000203985 | LDLRAD1   | Enhanced  | Selective expression in cilia in fallopian |
| 13783 | ENSG00000203989 | RHOXF2B   | Supported | Cytoplasm cytoplasm                        |
| 13784 | ENSG00000203995 | ZYG11A    | Uncertain | Estimation of protein expression could not |
| 13785 | ENSG00000204007 | GLT6D1    | Uncertain | Estimation of protein expression could not |
| 13786 | ENSG00000204010 | IFIT1B    | Approved  | Selective cytoplasm                        |
| 13787 | ENSG00000204022 | LIPJ      | Uncertain | Estimation of protein expression could not |
| 13788 | ENSG00000204033 | LRIT2     | Enhanced  | Expression mainly in rods and nerve fibers |
| 13789 | ENSG00000204052 | LRRC73    | Enhanced  | Expression nucleus                         |
| 13790 | ENSG00000204065 | TCEAL5    | Supported | Distinct expression in round and elongated |
| 13791 | ENSG00000204070 | SYS1      | Approved  | Cytoplasm cytoplasm;nucleus                |
| 13792 | ENSG00000204071 | TCEAL6    | Supported | Distinct expression in round and elongated |
| 13793 | ENSG00000204084 | INPP5B    | Approved  | Cytoplasm cytoplasm                        |
| 13794 | ENSG00000204086 | RPA4      | Approved  | General n nucleus                          |
| 13795 | ENSG00000204099 | NEU4      | Enhanced  | Cytoplasm cytoplasm;plasma membrane        |
| 13796 | ENSG00000204103 | MAFB      | Approved  | Nuclear enucleus                           |
| 13797 | ENSG00000204104 | TRAF3IP1  | Approved  | Cytoplasm cytoplasm                        |
| 13798 | ENSG00000204116 | CHIC1     | Uncertain | Cytoplasm cytoplasm                        |
| 13799 | ENSG00000204120 | GIGYF2    | Approved  | Granular cytoplasm                         |
| 13800 | ENSG00000204128 | C2orf72   | Approved  | Membranous cytoplasm;plasma membrane       |
| 13801 | ENSG00000204130 | RUFY2     | Approved  | Nuclear enucleus                           |
| 13802 | ENSG00000204131 | NHSL2     | Uncertain | Cytoplasm cytoplasm                        |
| 13803 | ENSG00000204138 | PHACTR4   | Approved  | Ubiquitous cytoplasm                       |

|       |                 |           |                                                      |
|-------|-----------------|-----------|------------------------------------------------------|
| 13804 | ENSG00000204140 | CLPSL1    | Enhanced Cytoplasm cytoplasm                         |
| 13805 | ENSG00000204147 | ASAH2B    | Supported Distinct plasma membrane                   |
| 13806 | ENSG00000204149 | AGAP6     | Uncertain Estimation of protein expression could not |
| 13807 | ENSG00000204160 | ZDHC18    | Approved Cytoplasm cytoplasm                         |
| 13808 | ENSG00000204161 | C10orf128 | Approved Ubiquitous cytoplasm                        |
| 13809 | ENSG00000204165 | CXorf65   | Uncertain Estimation of protein expression could not |
| 13810 | ENSG00000204172 | AGAP9     | Uncertain Estimation of protein expression could not |
| 13811 | ENSG00000204174 | NPY4R     | Approved Low cytop cytoplasm; plasma membrane        |
| 13812 | ENSG00000204175 | GPRIN2    | Approved Nuclear enucleus                            |
| 13813 | ENSG00000204176 | SYT15     | Uncertain Distinct cytoplasm; nucleus                |
| 13814 | ENSG00000204179 | PTPN20    | Enhanced Cytoplasm cytoplasm                         |
| 13815 | ENSG00000204183 | GDF50S    | Uncertain Estimation of protein expression could not |
| 13816 | ENSG00000204186 | ZDBF2     | Uncertain General c cytoplasm                        |
| 13817 | ENSG00000204195 | AWAT1     | Enhanced Cytoplasm cytoplasm                         |
| 13818 | ENSG00000204209 | DAXX      | Enhanced General n nucleus                           |
| 13819 | ENSG00000204217 | BMPR2     | Approved Cytoplasm cytoplasm                         |
| 13820 | ENSG00000204219 | TCEA3     | Approved Nuclear a cytoplasm; nucleus                |
| 13821 | ENSG00000204220 | PFDN6     | Enhanced Ubiquitous cytoplasm                        |
| 13822 | ENSG00000204227 | RING1     | Supported General n cytoplasm; nucleus               |
| 13823 | ENSG00000204228 | HSD17B8   | Enhanced General c cytoplasm                         |
| 13824 | ENSG00000204231 | RXR8      | Supported General n nucleus                          |
| 13825 | ENSG00000204237 | OXLD1     | Uncertain Estimation of protein expression could not |
| 13826 | ENSG00000204246 | OR13C3    | Uncertain Estimation of protein expression could not |
| 13827 | ENSG00000204252 | HLA-DOA   | Enhanced Cytoplasm cytoplasm                         |
| 13828 | ENSG00000204256 | BRD2      | Approved Nuclear enucleus                            |
| 13829 | ENSG00000204257 | HLA-DMA   | Enhanced High cyto cytoplasm                         |
| 13830 | ENSG00000204264 | PSMB8     | Enhanced General c cytoplasm; nucleus                |
| 13831 | ENSG00000204267 | TAP2      | Approved Cytoplasm cytoplasm                         |
| 13832 | ENSG00000204271 | SPIN3     | Uncertain Nuclear a cytoplasm; nucleus               |
| 13833 | ENSG00000204278 | TMEM235   | Uncertain Estimation of protein expression could not |
| 13834 | ENSG00000204279 | PAGE3     | Uncertain Estimation of protein expression could not |
| 13835 | ENSG00000204287 | HLA-DRA   | Enhanced Abundant cytoplasm                          |
| 13836 | ENSG00000204291 | COL15A1   | Enhanced Cytoplasm cytoplasm                         |
| 13837 | ENSG00000204304 | PBX2      | Supported General n nucleus                          |
| 13838 | ENSG00000204305 | AGER      | Enhanced Membranou plasma membrane                   |
| 13839 | ENSG00000204308 | RNF5      | Uncertain Cytoplasm cytoplasm                        |
| 13840 | ENSG00000204310 | AGPAT1    | Approved General c cytoplasm                         |
| 13841 | ENSG00000204314 | PRRT1     | Enhanced Cytoplasm cytoplasm                         |
| 13842 | ENSG00000204315 | FKBP1     | Approved Cytoplasm cytoplasm; nucleus                |
| 13843 | ENSG00000204316 | MRPL38    | Approved Ubiquitous cytoplasm                        |
| 13844 | ENSG00000204323 | SMIM5     | Approved General n nucleus                           |
| 13845 | ENSG00000204344 | STK19     | Uncertain Estimation of protein expression could not |
| 13846 | ENSG00000204345 | CD300LD   | Uncertain Estimation of protein expression could not |
| 13847 | ENSG00000204347 | BTBD17    | Approved Cytoplasm cytoplasm; plasma membrane        |
| 13848 | ENSG00000204348 | DXO       | Enhanced High cyto cytoplasm                         |
| 13849 | ENSG00000204351 | SKIV2L    | Uncertain Cytoplasm cytoplasm; nucleus               |
| 13850 | ENSG00000204356 | NELFE     | Enhanced Mainly n nucleus                            |
| 13851 | ENSG00000204361 | NXPE2     | Enhanced Cytoplasm cytoplasm                         |
| 13852 | ENSG00000204366 | ZBTB12    | Approved General m nucleus                           |
| 13853 | ENSG00000204370 | SDHD      | Approved Cytoplasm cytoplasm                         |
| 13854 | ENSG00000204371 | EHMT2     | Supported Nuclear enucleus                           |
| 13855 | ENSG00000204381 | LAYN      | Approved Cytoplasm cytoplasm                         |
| 13856 | ENSG00000204385 | SLC44A4   | Enhanced Membranou plasma membrane                   |
| 13857 | ENSG00000204386 | NEU1      | Approved General c cytoplasm                         |
| 13858 | ENSG00000204388 | HSPA1B    | Approved Cytoplasm cytoplasm; nucleus                |

|       |                 |          |                                                      |
|-------|-----------------|----------|------------------------------------------------------|
| 13859 | ENSG00000204389 | HSPA1A   | SupportedUbiquitouscytoplasm;nucleus                 |
| 13860 | ENSG00000204390 | HSPA1L   | Enhanced Selectivecytoplasm;nucleus                  |
| 13861 | ENSG00000204392 | LSM2     | SupportedUbiquitousnucleus                           |
| 13862 | ENSG00000204394 | VARS     | Approved General ccytoplasm                          |
| 13863 | ENSG00000204396 | VWA7     | Approved Distinct cytoplasm                          |
| 13864 | ENSG00000204397 | CARD16   | UncertainCytoplasmcytoplasm                          |
| 13865 | ENSG00000204414 | CSHL1    | Enhanced Selectivecytoplasm                          |
| 13866 | ENSG00000204424 | LY6G6F   | UncertainEstimation of protein expression could not  |
| 13867 | ENSG00000204427 | ABHD16A  | Approved Cytoplasmcytoplasm                          |
| 13868 | ENSG00000204428 | LY6G5C   | Approved Cytoplasmcytoplasm                          |
| 13869 | ENSG00000204435 | CSNK2B   | Approved General ccytoplasm;nucleus                  |
| 13870 | ENSG00000204438 | GPANK1   | Approved Cytoplasmcytoplasm                          |
| 13871 | ENSG00000204439 | C6orf47  | UncertainCytoplasmcytoplasm;nucleus                  |
| 13872 | ENSG00000204442 | FAM155A  | Enhanced Distinct expression in neuropil in CNS.     |
| 13873 | ENSG00000204444 | APOM     | Approved Positivitplasma membrane                    |
| 13874 | ENSG00000204450 | TRIM64   | Approved Cytoplasmcytoplasm                          |
| 13875 | ENSG00000204463 | BAG6     | Enhanced Cytoplasmcytoplasm;nucleus                  |
| 13876 | ENSG00000204469 | PRRC2A   | UncertainCytoplasmcytoplasm                          |
| 13877 | ENSG00000204472 | AIF1     | Enhanced Distinct expression in immune cells in seve |
| 13878 | ENSG00000204480 | PRAMEF19 | UncertainEstimation of protein expression could not  |
| 13879 | ENSG00000204510 | PRAMEF7  | UncertainCytoplasmcytoplasm                          |
| 13880 | ENSG00000204514 | ZNF814   | Approved Cytoplasmcytoplasm                          |
| 13881 | ENSG00000204524 | ZNF805   | UncertainCytoplasmcytoplasm                          |
| 13882 | ENSG00000204531 | POU5F1   | Approved Ubiquitouscytoplasm;nucleus                 |
| 13883 | ENSG00000204532 | ZSCAN5C  | UncertainCytoplasmcytoplasm                          |
| 13884 | ENSG00000204538 | PSORS1C2 | Enhanced Cytoplasmcytoplasm                          |
| 13885 | ENSG00000204539 | CDSN     | Enhanced Cytoplasmcytoplasm;plasma membrane          |
| 13886 | ENSG00000204542 | C6orf15  | UncertainEstimation of protein expression could not  |
| 13887 | ENSG00000204544 | MUC21    | Enhanced Membranouplasma membrane                    |
| 13888 | ENSG00000204560 | DHX16    | SupportedUbiquitousnucleus                           |
| 13889 | ENSG00000204564 | C6orf136 | UncertainCytoplasmcytoplasm                          |
| 13890 | ENSG00000204568 | MRPS18B  | SupportedUbiquitouscytoplasm                         |
| 13891 | ENSG00000204569 | PPP1R10  | Enhanced Nuclear enucleus                            |
| 13892 | ENSG00000204574 | ABCF1    | Approved Cytoplasmcytoplasm                          |
| 13893 | ENSG00000204580 | DDR1     | Approved General ccytoplasm                          |
| 13894 | ENSG00000204590 | GNL1     | UncertainMainly ccytoplasm                           |
| 13895 | ENSG00000204592 | HLA-E    | Enhanced Cytoplasmcytoplasm;plasma membrane          |
| 13896 | ENSG00000204595 | DPRX     | UncertainEstimation of protein expression could not  |
| 13897 | ENSG00000204599 | TRIM39   | UncertainCytoplasmcytoplasm                          |
| 13898 | ENSG00000204604 | ZNF468   | UncertainCytoplasmcytoplasm                          |
| 13899 | ENSG00000204610 | TRIM15   | UncertainEstimation of protein expression could not  |
| 13900 | ENSG00000204611 | ZNF616   | Approved Cytoplasmcytoplasm                          |
| 13901 | ENSG00000204612 | FOXB2    | UncertainEstimation of protein expression could not  |
| 13902 | ENSG00000204613 | TRIM10   | UncertainEstimation of protein expression could not  |
| 13903 | ENSG00000204614 | TRIM40   | UncertainEstimation of protein expression could not  |
| 13904 | ENSG00000204616 | TRIM31   | UncertainMainly ccytoplasm                           |
| 13905 | ENSG00000204618 | RNF39    | UncertainEstimation of protein expression could not  |
| 13906 | ENSG00000204619 | PPP1R11  | Approved General ccytoplasm                          |
| 13907 | ENSG00000204624 | DISP3    | UncertainEstimation of protein expression could not  |
| 13908 | ENSG00000204628 | RACK1    | UncertainCytoplasmcytoplasm                          |
| 13909 | ENSG00000204632 | HLA-G    | Enhanced Distinct cytoplasm                          |
| 13910 | ENSG00000204634 | TBC1D8   | UncertainCytoplasmcytoplasm;plasma membrane          |
| 13911 | ENSG00000204644 | ZFP57    | UncertainEstimation of protein expression could not  |
| 13912 | ENSG00000204653 | ASPDH    | Approved Cytoplasmcytoplasm;nucleus                  |
| 13913 | ENSG00000204655 | MOG      | Enhanced Selective expression in oligodendrocytes in |

|       |                 |           |           |                                             |
|-------|-----------------|-----------|-----------|---------------------------------------------|
| 13914 | ENSG00000204659 | CBY3      | Uncertain | Estimation of protein expression could not  |
| 13915 | ENSG00000204661 | C5orf60   | Enhanced  | Nuclear enucleus                            |
| 13916 | ENSG00000204671 | IL31      | Uncertain | RNA-based expert annotation gave inconclus: |
| 13917 | ENSG00000204673 | AKT1S1    | Uncertain | General ccytoplasm;nucleus                  |
| 13918 | ENSG00000204677 | FAM153C   | Uncertain | Estimation of protein expression could not  |
| 13919 | ENSG00000204681 | GABBR1    | Uncertain | Cytoplasmcytoplasm                          |
| 13920 | ENSG00000204682 | CASC10    | Uncertain | Cytoplasmcytoplasm                          |
| 13921 | ENSG00000204683 | C10orf113 | Uncertain | Estimation of protein expression could not  |
| 13922 | ENSG00000204687 | MAS1L     | Uncertain | Estimation of protein expression could not  |
| 13923 | ENSG00000204710 | SPDYC     | Uncertain | Cytoplasmcytoplasm                          |
| 13924 | ENSG00000204711 | C9orf135  | Uncertain | Estimation of protein expression could not  |
| 13925 | ENSG00000204713 | TRIM27    | Approved  | Granular cytoplasm;nucleus                  |
| 13926 | ENSG00000204740 | MALRD1    | Uncertain | General ccytoplasm                          |
| 13927 | ENSG00000204764 | RANBP17   | Uncertain | Estimation of protein expression could not  |
| 13928 | ENSG00000204767 | FAM196B   | Uncertain | Estimation of protein expression could not  |
| 13929 | ENSG00000204779 | FOXD4L5   | Uncertain | RNA-based expert annotation gave inconclus: |
| 13930 | ENSG00000204815 | TTC25     | Enhanced  | Cytoplasmcytoplasm                          |
| 13931 | ENSG00000204822 | MRPL53    | Uncertain | Mainly excytoplasm                          |
| 13932 | ENSG00000204839 | MROH6     | Uncertain | Estimation of protein expression could not  |
| 13933 | ENSG00000204842 | ATXN2     | Enhanced  | Cytoplasmcytoplasm                          |
| 13934 | ENSG00000204843 | DCTN1     | Approved  | Cytoplasmcytoplasm                          |
| 13935 | ENSG00000204851 | PNMA8B    | Enhanced  | Mainly ccytoplasm                           |
| 13936 | ENSG00000204852 | TCTN1     | Approved  | General ccytoplasm                          |
| 13937 | ENSG00000204856 | FAM216A   | Enhanced  | Membranoucytoplasm;plasma membrane          |
| 13938 | ENSG00000204859 | ZBTB48    | Uncertain | Estimation of protein expression could not  |
| 13939 | ENSG00000204866 | IGFL2     | Uncertain | Estimation of protein expression could not  |
| 13940 | ENSG00000204869 | IGFL4     | Approved  | Expression in molecular layer in cerebellu  |
| 13941 | ENSG00000204889 | KRT40     | Supported | Expressed in hair cuticle.                  |
| 13942 | ENSG00000204897 | KRT25     | Enhanced  | Highly expressed in the internal root shea  |
| 13943 | ENSG00000204899 | MZT1      | Approved  | General ccytoplasm                          |
| 13944 | ENSG00000204909 | SPINK9    | Uncertain | Estimation of protein expression could not  |
| 13945 | ENSG00000204913 | LRRC3C    | Uncertain | Estimation of protein expression could not  |
| 13946 | ENSG00000204918 | PRR20B    | Uncertain | Estimation of protein expression could not  |
| 13947 | ENSG00000204919 | PRR20A    | Uncertain | Estimation of protein expression could not  |
| 13948 | ENSG00000204920 | ZNF155    | Uncertain | Estimation of protein expression could not  |
| 13949 | ENSG00000204922 | UQCC3     | Approved  | Granular cytoplasm                          |
| 13950 | ENSG00000204923 | FBX048    | Uncertain | Cytoplasmcytoplasm                          |
| 13951 | ENSG00000204928 | GRXCR2    | Uncertain | Estimation of protein expression could not  |
| 13952 | ENSG00000204930 | FAM221B   | Enhanced  | Cytoplasmcytoplasm                          |
| 13953 | ENSG00000204936 | CD177     | Enhanced  | Cytoplasmcytoplasm;plasma membrane          |
| 13954 | ENSG00000204941 | PSG5      | Supported | Cytoplasmcytoplasm                          |
| 13955 | ENSG00000204946 | ZNF783    | Uncertain | Estimation of protein expression could not  |
| 13956 | ENSG00000204947 | ZNF425    | Uncertain | Estimation of protein expression could not  |
| 13957 | ENSG00000204950 | LRRC10B   | Uncertain | Estimation of protein expression could not  |
| 13958 | ENSG00000204952 | FBX047    | Uncertain | Estimation of protein expression could not  |
| 13959 | ENSG00000204954 | C12orf73  | Uncertain | Cytoplasmcytoplasm                          |
| 13960 | ENSG00000204956 | PCDHGA1   | Uncertain | Estimation of protein expression could not  |
| 13961 | ENSG00000204962 | PCDHA8    | Uncertain | Estimation of protein expression could not  |
| 13962 | ENSG00000204965 | PCDHA5    | Approved  | Cytoplasmcytoplasm                          |
| 13963 | ENSG00000204967 | PCDHA4    | Approved  | Cytoplasmcytoplasm                          |
| 13964 | ENSG00000204969 | PCDHA2    | Uncertain | Estimation of protein expression could not  |
| 13965 | ENSG00000204970 | PCDHA1    | Enhanced  | Cytoplasmcytoplasm                          |
| 13966 | ENSG00000204977 | TRIM13    | Enhanced  | Cytoplasmcytoplasm                          |
| 13967 | ENSG00000204978 | ERICH4    | Uncertain | Estimation of protein expression could not  |
| 13968 | ENSG00000204979 | MS4A13    | Uncertain | Estimation of protein expression could not  |

|       |                 |           |                                                      |
|-------|-----------------|-----------|------------------------------------------------------|
| 13969 | ENSG00000204983 | PRSS1     | Enhanced Selective cytoplasm                         |
| 13970 | ENSG00000204991 | SPIRE2    | Uncertain Cytoplasm cytoplasm; plasma membrane       |
| 13971 | ENSG00000205022 | PABPN1L   | Uncertain Estimation of protein expression could not |
| 13972 | ENSG00000205029 | OR5D16    | Uncertain Estimation of protein expression could not |
| 13973 | ENSG00000205030 | OR5L2     | Uncertain Estimation of protein expression could not |
| 13974 | ENSG00000205038 | PKHD1L1   | Uncertain Cytoplasm cytoplasm                        |
| 13975 | ENSG00000205045 | SLFN12L   | Uncertain Estimation of protein expression could not |
| 13976 | ENSG00000205060 | SLC35B4   | Approved Cytoplasm cytoplasm                         |
| 13977 | ENSG00000205076 | LGALS7    | Enhanced Nuclear cytoplasm; nucleus                  |
| 13978 | ENSG00000205084 | TMEM231   | Enhanced Expression in ciliated cells in fallopian t |
| 13979 | ENSG00000205085 | FAM71F2   | Enhanced Cytoplasm cytoplasm                         |
| 13980 | ENSG00000205086 | C2orf91   | Uncertain Estimation of protein expression could not |
| 13981 | ENSG00000205089 | CCNI2     | Approved Cytoplasm cytoplasm; plasma membrane        |
| 13982 | ENSG00000205090 | TMEM240   | Supported Membrane plasma membrane                   |
| 13983 | ENSG00000205097 | FRG2      | Uncertain RNA-based expert annotation gave inconclus |
| 13984 | ENSG00000205108 | FAM205A   | Enhanced Distinct expression in spermatid acrosomes. |
| 13985 | ENSG00000205111 | CDKL4     | Uncertain Estimation of protein expression could not |
| 13986 | ENSG00000205116 | TMEM88B   | Enhanced Selective expression in CNS.                |
| 13987 | ENSG00000205129 | C4orf47   | Enhanced Expression in spermatid flagella and cilia  |
| 13988 | ENSG00000205155 | PSENE1    | Enhanced Cytoplasm cytoplasm                         |
| 13989 | ENSG00000205177 | C11orf91  | Uncertain Estimation of protein expression could not |
| 13990 | ENSG00000205186 | FABP9     | Enhanced Highly expressed in internal root sheath of |
| 13991 | ENSG00000205189 | ZBTB10    | Enhanced General nucleus                             |
| 13992 | ENSG00000205208 | C4orf46   | Uncertain Cytoplasm cytoplasm                        |
| 13993 | ENSG00000205209 | SCGB2B2   | Uncertain Estimation of protein expression could not |
| 13994 | ENSG00000205212 | CCDC144NL | Uncertain Estimation of protein expression could not |
| 13995 | ENSG00000205213 | LGR4      | Uncertain Cytoplasm cytoplasm; nucleus               |
| 13996 | ENSG00000205220 | PSMB10    | Enhanced Distinct cytoplasm                          |
| 13997 | ENSG00000205238 | SPDYE2    | Approved Distinct expression in acrosomes in spermat |
| 13998 | ENSG00000205268 | PDE7A     | Approved Cytoplasm cytoplasm                         |
| 13999 | ENSG00000205269 | TMEM170B  | Uncertain Estimation of protein expression could not |
| 14000 | ENSG00000205277 | MUC12     | Enhanced Luminal expression in colon and rectum.     |
| 14001 | ENSG00000205301 | MGAT4D    | Enhanced Expression in Leydig cells in testis.       |
| 14002 | ENSG00000205302 | SNX2      | Approved General cytoplasm                           |
| 14003 | ENSG00000205309 | NT5M      | Uncertain Mainly cytoplasm                           |
| 14004 | ENSG00000205323 | SARNP     | Supported Ubiquitous nucleus                         |
| 14005 | ENSG00000205336 | ADGRG1    | Uncertain Cytoplasm cytoplasm; nucleus               |
| 14006 | ENSG00000205339 | IPO7      | Approved Cytoplasm cytoplasm; nucleus                |
| 14007 | ENSG00000205352 | PRR13     | Uncertain Cytoplasm cytoplasm                        |
| 14008 | ENSG00000205356 | TECPR1    | Approved Cytoplasm cytoplasm                         |
| 14009 | ENSG00000205359 | SLC06A1   | Enhanced Distinct plasma membrane                    |
| 14010 | ENSG00000205362 | MT1A      | Approved Cytoplasm cytoplasm; nucleus                |
| 14011 | ENSG00000205363 | C15orf59  | Approved Mainly cytoplasm                            |
| 14012 | ENSG00000205403 | CFI       | Supported Plasma an plasma membrane                  |
| 14013 | ENSG00000205413 | SAMD9     | Approved Cytoplasm cytoplasm                         |
| 14014 | ENSG00000205420 | KRT6A     | Supported Distinct cytoplasm                         |
| 14015 | ENSG00000205423 | CNEP1R1   | Uncertain Cytoplasm cytoplasm                        |
| 14016 | ENSG00000205426 | KRT81     | Supported Distinct cytoplasm                         |
| 14017 | ENSG00000205436 | EXOC3L4   | Approved Cytoplasm cytoplasm                         |
| 14018 | ENSG00000205464 | ATP6AP1L  | Approved Cytoplasm cytoplasm                         |
| 14019 | ENSG00000205476 | CCDC85C   | Uncertain Cytoplasm cytoplasm                        |
| 14020 | ENSG00000205502 | C2CD4B    | Uncertain Estimation of protein expression could not |
| 14021 | ENSG00000205517 | RGL3      | Uncertain Mainly cytoplasm                           |
| 14022 | ENSG00000205531 | NAP1L4    | Approved Nuclear enucleus                            |
| 14023 | ENSG00000205542 | TMSB4X    | Approved Cytoplasm cytoplasm                         |

|       |                 |           |                                                      |
|-------|-----------------|-----------|------------------------------------------------------|
| 14024 | ENSG00000205560 | CPT1B     | Approved Cytoplasmcytoplasm                          |
| 14025 | ENSG00000205571 | SMN2      | SupportedUbiquitoucytoplasm;nucleus                  |
| 14026 | ENSG00000205581 | HMG1      | SupportedGeneral nnucleus                            |
| 14027 | ENSG00000205593 | DENND6B   | UncertainEstimation of protein expression could not  |
| 14028 | ENSG00000205609 | EIF3CL    | SupportedGeneral ccytoplasm                          |
| 14029 | ENSG00000205629 | LCMT1     | UncertainMainly ccytoplasm                           |
| 14030 | ENSG00000205639 | MFSD2B    | Enhanced Cytoplasmcytoplasm;nucleus                  |
| 14031 | ENSG00000205642 | VCX3B     | SupportedNuclear enucleus                            |
| 14032 | ENSG00000205643 | CDPF1     | UncertainEstimation of protein expression could not  |
| 14033 | ENSG00000205649 | HTN3      | Enhanced Cytoplasmcytoplasm                          |
| 14034 | ENSG00000205659 | LIN52     | UncertainEstimation of protein expression could not  |
| 14035 | ENSG00000205669 | ACOT6     | UncertainEstimation of protein expression could not  |
| 14036 | ENSG00000205670 | SMIM11A   | UncertainEstimation of protein expression could not  |
| 14037 | ENSG00000205683 | DPF3      | Enhanced Nuclear enucleus                            |
| 14038 | ENSG00000205693 | MANSC4    | UncertainEstimation of protein expression could not  |
| 14039 | ENSG00000205707 | ETFRF1    | Approved Cytoplasmcytoplasm                          |
| 14040 | ENSG00000205710 | C17orf107 | UncertainEstimation of protein expression could not  |
| 14041 | ENSG00000205718 | MBD3L4    | UncertainEstimation of protein expression could not  |
| 14042 | ENSG00000205726 | ITSN1     | Approved General ccytoplasm                          |
| 14043 | ENSG00000205744 | DENND1C   | Enhanced Selectivecytoplasm                          |
| 14044 | ENSG00000205754 | SLC01B7   | UncertainEstimation of protein expression could not  |
| 14045 | ENSG00000205758 | CRYZL1    | Approved Ubiquitoucytoplasm                          |
| 14046 | ENSG00000205765 | C5orf51   | UncertainGranular cytoplasm                          |
| 14047 | ENSG00000205777 | GAGE1     | SupportedSelective expression in spermatogonia.      |
| 14048 | ENSG00000205808 | PLPP6     | Approved Cytoplasmcytoplasm;plasma membrane          |
| 14049 | ENSG00000205810 | KLRC3     | Approved Expression in a rare subset of immune cells |
| 14050 | ENSG00000205835 | GMNC      | UncertainEstimation of protein expression could not  |
| 14051 | ENSG00000205838 | TTC23L    | Enhanced Nuclear enucleus                            |
| 14052 | ENSG00000205856 | C22orf42  | Enhanced Cytoplasmcytoplasm                          |
| 14053 | ENSG00000205857 | NANOGNB   | UncertainEstimation of protein expression could not  |
| 14054 | ENSG00000205858 | LRRC72    | UncertainEstimation of protein expression could not  |
| 14055 | ENSG00000205863 | C1QTNF9B  | UncertainEstimation of protein expression could not  |
| 14056 | ENSG00000205884 | DEFB136   | Enhanced Cytoplasmcytoplasm                          |
| 14057 | ENSG00000205916 | DAZ4      | Approved Cytoplasmcytoplasm                          |
| 14058 | ENSG00000205923 | CEMP1     | Approved Cytoplasmcytoplasm                          |
| 14059 | ENSG00000205927 | OLIG2     | Enhanced Selectivenucleus                            |
| 14060 | ENSG00000205929 | C21orf62  | Enhanced Cytoplasmcytoplasm;plasma membrane          |
| 14061 | ENSG00000205937 | RNPS1     | Approved Nuclear enucleus                            |
| 14062 | ENSG00000205944 | DAZ2      | Approved Cytoplasmcytoplasm                          |
| 14063 | ENSG00000205978 | NYNRIN    | Approved Cytoplasmcytoplasm;plasma membrane          |
| 14064 | ENSG00000205981 | DNAJC19   | Approved Cytoplasmcytoplasm                          |
| 14065 | ENSG00000206026 | SMIM21    | Enhanced Cytoplasmcytoplasm;nucleus                  |
| 14066 | ENSG00000206047 | DEFA1     | Enhanced Selectivecytoplasm                          |
| 14067 | ENSG00000206052 | DOK6      | Approved Cytoplasmcytoplasm                          |
| 14068 | ENSG00000206053 | JPT2      | Approved Cytoplasmcytoplasm;nucleus                  |
| 14069 | ENSG00000206069 | TMEM211   | UncertainEstimation of protein expression could not  |
| 14070 | ENSG00000206073 | SERPINB4  | SupportedSelectivecytoplasm;nucleus                  |
| 14071 | ENSG00000206075 | SERPINB5  | Enhanced Cytoplasmcytoplasm                          |
| 14072 | ENSG00000206077 | ZDHHC11B  | UncertainCytoplasmcytoplasm                          |
| 14073 | ENSG00000206104 | KRTAP20-3 | UncertainEstimation of protein expression could not  |
| 14074 | ENSG00000206107 | KRTAP27-1 | Approved Cytoplasmcytoplasm                          |
| 14075 | ENSG00000206172 | HBA1      | Enhanced Selective expression in bone marrow with d: |
| 14076 | ENSG00000206181 | ELOA2     | Approved Nuclear enucleus                            |
| 14077 | ENSG00000206190 | ATP10A    | UncertainEstimation of protein expression could not  |
| 14078 | ENSG00000206199 | ANKUB1    | UncertainEstimation of protein expression could not  |



|       |                 |           |                                                      |
|-------|-----------------|-----------|------------------------------------------------------|
| 14079 | ENSG00000206260 | PRR23A    | UncertainEstimation of protein expression could not  |
| 14080 | ENSG00000206384 | COL6A6    | UncertainEstimation of protein expression could not  |
| 14081 | ENSG00000206418 | RAB12     | Approved Ubiquitouscytoplasm                         |
| 14082 | ENSG00000206422 | LRRC30    | UncertainEstimation of protein expression could not  |
| 14083 | ENSG00000206432 | TMEM200C  | UncertainEstimation of protein expression could not  |
| 14084 | ENSG00000206474 | OR10C1    | UncertainRNA-based expert annotation gave inconclus: |
| 14085 | ENSG00000206483 | TXNRD3NB  | UncertainEstimation of protein expression could not  |
| 14086 | ENSG00000206527 | HACD2     | Approved General ccytoplasm                          |
| 14087 | ENSG00000206530 | CFAP44    | UncertainCytoplasmcytoplasm                          |
| 14088 | ENSG00000206538 | VGLL3     | Approved Nuclear enucleus                            |
| 14089 | ENSG00000206549 | PRSS50    | SupportedSelectivecytoplasm                          |
| 14090 | ENSG00000206557 | TRIM71    | UncertainEstimation of protein expression could not  |
| 14091 | ENSG00000206559 | ZCWPW2    | UncertainNuclear enucleus                            |
| 14092 | ENSG00000206562 | METTL6    | UncertainCytoplasmcytoplasm                          |
| 14093 | ENSG00000206579 | XKR4      | UncertainEstimation of protein expression could not  |
| 14094 | ENSG00000211445 | GPX3      | Approved Plasma poplasma membrane                    |
| 14095 | ENSG00000211450 | SELENOH   | UncertainNuclear enucleus                            |
| 14096 | ENSG00000211455 | STK38L    | Approved Cytoplasmcytoplasm;plasma membrane          |
| 14097 | ENSG00000211456 | SACM1L    | Approved Cytoplasmcytoplasm;plasma membrane          |
| 14098 | ENSG00000211460 | TSN       | UncertainCytoplasmcytoplasm;nucleus                  |
| 14099 | ENSG00000211584 | SLC48A1   | Approved Granular cytoplasm                          |
| 14100 | ENSG00000212122 | TSSK1B    | Enhanced Cytoplasmcytoplasm                          |
| 14101 | ENSG00000212123 | PRR22     | Enhanced Selectivenucleus                            |
| 14102 | ENSG00000212657 | KRTAP16-1 | Enhanced High expression in hair cuticle layer.      |
| 14103 | ENSG00000212710 | CTAGE1    | UncertainEstimation of protein expression could not  |
| 14104 | ENSG00000212719 | C17orf51  | Enhanced Cytoplasmcytoplasm                          |
| 14105 | ENSG00000212724 | KRTAP2-3  | SupportedDistinct expression in hair cortex.         |
| 14106 | ENSG00000212725 | KRTAP2-1  | SupportedDistinct expression in hair cortex.         |
| 14107 | ENSG00000212807 | OR2A42    | UncertainEstimation of protein expression could not  |
| 14108 | ENSG00000212864 | RNF208    | UncertainEstimation of protein expression could not  |
| 14109 | ENSG00000212899 | KRTAP3-3  | SupportedExpressed in the internal root sheath of h  |
| 14110 | ENSG00000212900 | KRTAP3-2  | Approved Expressed in the internal root sheath of h  |
| 14111 | ENSG00000212916 | MAP10     | Approved Cytoplasmcytoplasm                          |
| 14112 | ENSG00000213015 | ZNF580    | Approved Cytoplasmcytoplasm                          |
| 14113 | ENSG00000213022 | KLK9      | Enhanced Cytoplasmcytoplasm                          |
| 14114 | ENSG00000213024 | NUP62     | SupportedExpressiocytoplasm;nucleus;plasma membrane  |
| 14115 | ENSG00000213030 | CGB8      | SupportedSelectivecytoplasm                          |
| 14116 | ENSG00000213047 | DENND1B   | UncertainGeneral ccytoplasm;plasma membrane          |
| 14117 | ENSG00000213064 | SFT2D2    | Approved Cytoplasmcytoplasm                          |
| 14118 | ENSG00000213079 | SCAF8     | Enhanced Ubiquitousnucleus                           |
| 14119 | ENSG00000213085 | CFAP45    | Enhanced Selective expression in cilia.              |
| 14120 | ENSG00000213088 | ACKR1     | Enhanced Selective expression in endothelial cells.  |
| 14121 | ENSG00000213139 | CRYGS     | SupportedCytoplasmcytoplasm                          |
| 14122 | ENSG00000213145 | CRIP1     | Approved Cytoplasmcytoplasm                          |
| 14123 | ENSG00000213171 | LING04    | UncertainEstimation of protein expression could not  |
| 14124 | ENSG00000213185 | FAM24B    | SupportedNuclear enucleus                            |
| 14125 | ENSG00000213186 | TRIM59    | UncertainEstimation of protein expression could not  |
| 14126 | ENSG00000213190 | MLLT11    | UncertainGeneral ccytoplasm                          |
| 14127 | ENSG00000213199 | ASIC3     | Enhanced Expression in testis and processes in CNS.  |
| 14128 | ENSG00000213203 | GIMAP1    | UncertainCytoplasmcytoplasm                          |
| 14129 | ENSG00000213213 | CCDC183   | UncertainEstimation of protein expression could not  |
| 14130 | ENSG00000213214 | ARHGEF35  | SupportedGeneral ccytoplasm                          |
| 14131 | ENSG00000213218 | CSH2      | SupportedCytoplasmcytoplasm                          |
| 14132 | ENSG00000213231 | TCL1B     | UncertainEstimation of protein expression could not  |
| 14133 | ENSG00000213265 | TSGA13    | UncertainEstimation of protein expression could not  |

|       |                 |          |                                                     |
|-------|-----------------|----------|-----------------------------------------------------|
| 14134 | ENSG00000213281 | NRAS     | UncertainCytoplasmcytoplasm;plasma membrane         |
| 14135 | ENSG00000213337 | ANKRD39  | Approved Cytoplasmcytoplasm;nucleus;plasma membrane |
| 14136 | ENSG00000213339 | QTRT1    | Approved Cytoplasmcytoplasm                         |
| 14137 | ENSG00000213341 | CHUK     | Approved Cytoplasmcytoplasm                         |
| 14138 | ENSG00000213366 | GSTM2    | Approved Cytoplasmcytoplasm                         |
| 14139 | ENSG00000213380 | COG8     | Approved Cytoplasmcytoplasm                         |
| 14140 | ENSG00000213390 | ARHGAP19 | UncertainCytoplasmcytoplasm                         |
| 14141 | ENSG00000213402 | PTPRCAP  | Enhanced Selectivecytoplasm                         |
| 14142 | ENSG00000213413 | PVRIG    | UncertainCytoplasmcytoplasm                         |
| 14143 | ENSG00000213417 | KRTAP2-4 | SupportedDistinct expression in hair cortex.        |
| 14144 | ENSG00000213420 | GPC2     | UncertainEstimation of protein expression could not |
| 14145 | ENSG00000213424 | KRT222   | Enhanced Expression in cellular projections in caud |
| 14146 | ENSG00000213445 | SIPA1    | Enhanced Cytoplasmcytoplasm                         |
| 14147 | ENSG00000213462 | ERV3-1   | Enhanced Expressiocytoplasm                         |
| 14148 | ENSG00000213463 | SYNJ2BP  | Approved Granular cytoplasm                         |
| 14149 | ENSG00000213465 | ARL2     | SupportedGeneral ncytoplasm;nucleus                 |
| 14150 | ENSG00000213471 | TLL13P   | Enhanced Cytoplasmcytoplasm                         |
| 14151 | ENSG00000213512 | GBP7     | UncertainEstimation of protein expression could not |
| 14152 | ENSG00000213516 | RBMXL1   | SupportedUbiquitounucleus                           |
| 14153 | ENSG00000213523 | SRA1     | Approved Ubiquitoucytoplasm;nucleus                 |
| 14154 | ENSG00000213533 | STIMATE  | UncertainCytoplasmcytoplasm                         |
| 14155 | ENSG00000213551 | DNAJC9   | SupportedNuclear acytoplasm;nucleus                 |
| 14156 | ENSG00000213563 | C8orf82  | UncertainCytoplasmcytoplasm                         |
| 14157 | ENSG00000213585 | VDAC1    | SupportedUbiquitoucytoplasm                         |
| 14158 | ENSG00000213588 | ZBTB9    | UncertainEstimation of protein expression could not |
| 14159 | ENSG00000213593 | TMX2     | Approved Cytoplasmcytoplasm                         |
| 14160 | ENSG00000213614 | HEXA     | SupportedLysosomal expression in several tissues, m |
| 14161 | ENSG00000213619 | NDUFS3   | Approved General ccytoplasm                         |
| 14162 | ENSG00000213626 | LBH      | Approved General ncytoplasm;nucleus                 |
| 14163 | ENSG00000213638 | ADAT3    | UncertainGeneral ccytoplasm                         |
| 14164 | ENSG00000213639 | PPP1CB   | SupportedUbiquitoucytoplasm;nucleus                 |
| 14165 | ENSG00000213648 | SULT1A4  | SupportedCytoplasmcytoplasm                         |
| 14166 | ENSG00000213658 | LAT      | Enhanced Distinct cytoplasm                         |
| 14167 | ENSG00000213676 | ATF6B    | UncertainCytoplasmcytoplasm;nucleus                 |
| 14168 | ENSG00000213689 | TREX1    | SupportedUbiquitounucleus                           |
| 14169 | ENSG00000213699 | SLC35F6  | Approved Granular cytoplasm                         |
| 14170 | ENSG00000213714 | FAM209B  | Enhanced Cytoplasmcytoplasm                         |
| 14171 | ENSG00000213719 | CLIC1    | Enhanced Mainly ccytoplasm;plasma membrane          |
| 14172 | ENSG00000213722 | DDAH2    | UncertainCytoplasmcytoplasm                         |
| 14173 | ENSG00000213741 | RPS29    | Approved Cytoplasmcytoplasm                         |
| 14174 | ENSG00000213759 | UGT2B11  | UncertainEstimation of protein expression could not |
| 14175 | ENSG00000213760 | ATP6V1G2 | Enhanced High expression in synapses in brain and e |
| 14176 | ENSG00000213762 | ZNF134   | SupportedGeneral nnucleus                           |
| 14177 | ENSG00000213782 | DDX47    | Approved Nucleolarnucleus                           |
| 14178 | ENSG00000213809 | KLRK1    | Enhanced Cytoplasmcytoplasm                         |
| 14179 | ENSG00000213822 | CEACAM18 | UncertainEstimation of protein expression could not |
| 14180 | ENSG00000213853 | EMP2     | Approved Cytoplasmcytoplasm;plasma membrane         |
| 14181 | ENSG00000213859 | KCTD11   | Approved Cytoplasmcytoplasm;nucleus                 |
| 14182 | ENSG00000213865 | C8orf44  | UncertainCytoplasmcytoplasm                         |
| 14183 | ENSG00000213892 | CEACAM16 | UncertainEstimation of protein expression could not |
| 14184 | ENSG00000213903 | LTB4R    | Approved Membranoucytoplasm;plasma membrane         |
| 14185 | ENSG00000213906 | LTB4R2   | UncertainEstimation of protein expression could not |
| 14186 | ENSG00000213918 | DNASE1   | Enhanced Expression mainly in goblet cells in gastr |
| 14187 | ENSG00000213920 | MDP1     | UncertainGeneral ccytoplasm                         |
| 14188 | ENSG00000213921 | LEUTX    | UncertainEstimation of protein expression could not |

|       |                 |          |                                                      |
|-------|-----------------|----------|------------------------------------------------------|
| 14189 | ENSG00000213923 | CSNK1E   | Approved Mainly cytoplasm;nucleus                    |
| 14190 | ENSG00000213927 | CCL27    | Enhanced Cytoplasmcytoplasm                          |
| 14191 | ENSG00000213928 | IRF9     | Approved Nuclear enucleus                            |
| 14192 | ENSG00000213930 | GALT     | Enhanced General ccytoplasm;nucleus                  |
| 14193 | ENSG00000213931 | HBE1     | Approved Expression in erythrocytes.                 |
| 14194 | ENSG00000213934 | HBG1     | Approved Expression in erythrocytes.                 |
| 14195 | ENSG00000213949 | ITGA1    | UncertainCytoplasmcytoplasm                          |
| 14196 | ENSG00000213977 | TAX1BP3  | Approved Cytoplasmcytoplasm;nucleus                  |
| 14197 | ENSG00000213983 | APIG2    | Approved Cytoplasmcytoplasm                          |
| 14198 | ENSG00000213988 | ZNF90    | UncertainEstimation of protein expression could not  |
| 14199 | ENSG00000213995 | NAXD     | UncertainUbiquitoucytoplasm                          |
| 14200 | ENSG00000213996 | TM6SF2   | UncertainEstimation of protein expression could not  |
| 14201 | ENSG00000213999 | MEF2B    | SupportedSelectivenucleus                            |
| 14202 | ENSG00000214013 | GANC     | Approved Ubiquitounucleus                            |
| 14203 | ENSG00000214021 | TTL3     | Approved Cytoplasmcytoplasm                          |
| 14204 | ENSG00000214022 | REPIN1   | Approved Nuclear anucleus                            |
| 14205 | ENSG00000214026 | MRPL23   | Approved Granular cytoplasm                          |
| 14206 | ENSG00000214029 | ZNF891   | UncertainEstimation of protein expression could not  |
| 14207 | ENSG00000214042 | IFNA7    | UncertainEstimation of protein expression could not  |
| 14208 | ENSG00000214046 | SMIM7    | UncertainUbiquitoucytoplasm;nucleus                  |
| 14209 | ENSG00000214050 | FBX016   | Approved Nuclear enucleus                            |
| 14210 | ENSG00000214078 | CPNE1    | Approved Cytoplasmcytoplasm                          |
| 14211 | ENSG00000214087 | ARL16    | UncertainCytoplasmcytoplasm                          |
| 14212 | ENSG00000214102 | WEE2     | UncertainEstimation of protein expression could not  |
| 14213 | ENSG00000214107 | MAGEB1   | Enhanced Cytoplasmcytoplasm                          |
| 14214 | ENSG00000214113 | LYRM4    | Approved General ccytoplasm                          |
| 14215 | ENSG00000214114 | MYCBP    | SupportedGeneral ccytoplasm                          |
| 14216 | ENSG00000214128 | TMEM213  | Enhanced Expression in kidney and salivary gland.    |
| 14217 | ENSG00000214160 | ALG3     | Approved Cytoplasmcytoplasm                          |
| 14218 | ENSG00000214193 | SH3D21   | Approved Mainly nunucleus                            |
| 14219 | ENSG00000214216 | IQCJ     | UncertainEstimation of protein expression could not  |
| 14220 | ENSG00000214226 | C17orf67 | UncertainCytoplasmcytoplasm                          |
| 14221 | ENSG00000214253 | FIS1     | Approved General ccytoplasm                          |
| 14222 | ENSG00000214279 | SCART1   | SupportedMembranoucytoplasm;plasma membrane          |
| 14223 | ENSG00000214285 | NPS      | UncertainEstimation of protein expression could not  |
| 14224 | ENSG00000214300 | SPDYE3   | SupportedDistinct expression in acrosomes in spermat |
| 14225 | ENSG00000214309 | MBLAC1   | UncertainEstimation of protein expression could not  |
| 14226 | ENSG00000214338 | SOGA3    | UncertainEstimation of protein expression could not  |
| 14227 | ENSG00000214357 | NEURL1B  | Approved Cytoplasmcytoplasm                          |
| 14228 | ENSG00000214367 | HAUS3    | Approved General ccytoplasm                          |
| 14229 | ENSG00000214376 | VSTM5    | UncertainCytoplasmcytoplasm                          |
| 14230 | ENSG00000214413 | BBIP1    | Approved Cytoplasmcytoplasm                          |
| 14231 | ENSG00000214414 | TRIM77   | UncertainEstimation of protein expression could not  |
| 14232 | ENSG00000214435 | AS3MT    | Enhanced Expression in several different tissue type |
| 14233 | ENSG00000214447 | FAM187A  | Approved Cytoplasmcytoplasm;nucleus                  |
| 14234 | ENSG00000214510 | SPINK13  | UncertainNuclear mcytoplasm;nucleus;plasma membrane  |
| 14235 | ENSG00000214513 | NOTO     | UncertainEstimation of protein expression could not  |
| 14236 | ENSG00000214517 | PPME1    | Enhanced Cytoplasmcytoplasm;nucleus                  |
| 14237 | ENSG00000214518 | KRTAP2-2 | SupportedDistinct expression in hair cortex.         |
| 14238 | ENSG00000214530 | STARD10  | UncertainCytoplasmcytoplasm                          |
| 14239 | ENSG00000214595 | EML6     | UncertainEstimation of protein expression could not  |
| 14240 | ENSG00000214652 | ZNF727   | UncertainCytoplasmcytoplasm                          |
| 14241 | ENSG00000214655 | ZSWIM8   | Approved Cytoplasmcytoplasm                          |
| 14242 | ENSG00000214694 | ARHGEF33 | Enhanced Distinct cytoplasm                          |
| 14243 | ENSG00000214700 | C12orf71 | UncertainEstimation of protein expression could not  |

|       |                 |           |                                                      |
|-------|-----------------|-----------|------------------------------------------------------|
| 14244 | ENSG00000214706 | IFRD2     | Approved Cytoplasmcytoplasm;plasma membrane          |
| 14245 | ENSG00000214736 | TOMM6     | Approved Cytoplasmcytoplasm                          |
| 14246 | ENSG00000214753 | HNRNPUL2  | SupportedUbiquitounucleus                            |
| 14247 | ENSG00000214756 | CSKMT     | Approved Cytoplasmcytoplasm                          |
| 14248 | ENSG00000214782 | MS4A18    | Approved Cytoplasmcytoplasm                          |
| 14249 | ENSG00000214787 | MS4A4E    | UncertainEstimation of protein expression could not  |
| 14250 | ENSG00000214814 | FER1L6    | Enhanced Membranoucytoplasm;plasma membrane          |
| 14251 | ENSG00000214860 | EVPLL     | UncertainEstimation of protein expression could not  |
| 14252 | ENSG00000214866 | DCDC2C    | UncertainEstimation of protein expression could not  |
| 14253 | ENSG00000214891 | TRIM64C   | UncertainEstimation of protein expression could not  |
| 14254 | ENSG00000214929 | SPATA31D1 | UncertainEstimation of protein expression could not  |
| 14255 | ENSG00000214940 | NPIPA8    | Approved General nnucleus                            |
| 14256 | ENSG00000214941 | ZSWIM7    | UncertainEstimation of protein expression could not  |
| 14257 | ENSG00000214944 | ARHGEF28  | Enhanced Cytoplasmcytoplasm                          |
| 14258 | ENSG00000214946 | TBC1D26   | UncertainEstimation of protein expression could not  |
| 14259 | ENSG00000214954 | LRRC69    | UncertainEstimation of protein expression could not  |
| 14260 | ENSG00000214960 | ISPD      | Approved Cytoplasmcytoplasm;nucleus                  |
| 14261 | ENSG00000214967 | NPIPA7    | Approved General nnucleus                            |
| 14262 | ENSG00000215009 | ACSM4     | UncertainEstimation of protein expression could not  |
| 14263 | ENSG00000215012 | RTL10     | UncertainCytoplasmcytoplasm                          |
| 14264 | ENSG00000215018 | COL28A1   | UncertainEstimation of protein expression could not  |
| 14265 | ENSG00000215021 | PHB2      | SupportedUbiquitoucytoplasm                          |
| 14266 | ENSG00000215029 | TCP11X2   | SupportedCytoplasmcytoplasm                          |
| 14267 | ENSG00000215041 | NEURL4    | UncertainMainly ccytoplasm                           |
| 14268 | ENSG00000215114 | UBXN2B    | UncertainEstimation of protein expression could not  |
| 14269 | ENSG00000215126 | CBWD6     | Approved Cytoplasmcytoplasm                          |
| 14270 | ENSG00000215182 | MUC5AC    | Enhanced Selective expression in mucus-producing ce. |
| 14271 | ENSG00000215183 | MSMP      | UncertainEstimation of protein expression could not  |
| 14272 | ENSG00000215186 | GOLGA6B   | SupportedDistinct expression in round and elongated  |
| 14273 | ENSG00000215187 | FAM166B   | Enhanced Cytoplasmcytoplasm                          |
| 14274 | ENSG00000215193 | PEX26     | Approved General ccytoplasm                          |
| 14275 | ENSG00000215203 | GRXCR1    | UncertainEstimation of protein expression could not  |
| 14276 | ENSG00000215217 | C5orf49   | Enhanced Expression in cilia and and spermatid flag  |
| 14277 | ENSG00000215251 | FASTKD5   | Approved Cytoplasmcytoplasm;nucleus                  |
| 14278 | ENSG00000215252 | GOLGA8B   | Approved Cytoplasmcytoplasm                          |
| 14279 | ENSG00000215269 | GAGE12G   | SupportedSelective expression in spermatogonia.      |
| 14280 | ENSG00000215271 | HOMEZ     | Approved Nuclear enucleus                            |
| 14281 | ENSG00000215274 | GAGE10    | SupportedSelective expression in spermatogonia.      |
| 14282 | ENSG00000215277 | RNF212B   | UncertainEstimation of protein expression could not  |
| 14283 | ENSG00000215301 | DDX3X     | SupportedGeneral nnucleus                            |
| 14284 | ENSG00000215305 | VPS16     | Approved Cytoplasmcytoplasm                          |
| 14285 | ENSG00000215375 | MYL5      | UncertainEstimation of protein expression could not  |
| 14286 | ENSG00000215421 | ZNF407    | UncertainCytoplasmcytoplasm;nucleus                  |
| 14287 | ENSG00000215440 | NPEPL1    | Approved General nnucleus                            |
| 14288 | ENSG00000215472 | RPL17-C18 | Approved Ubiquitoucytoplasm                          |
| 14289 | ENSG00000215474 | SKOR2     | UncertainEstimation of protein expression could not  |
| 14290 | ENSG00000215475 | SIAH3     | UncertainEstimation of protein expression could not  |
| 14291 | ENSG00000215529 | EFCAB8    | UncertainEstimation of protein expression could not  |
| 14292 | ENSG00000215545 | DEFB116   | UncertainEstimation of protein expression could not  |
| 14293 | ENSG00000215547 | DEFB115   | UncertainEstimation of protein expression could not  |
| 14294 | ENSG00000215568 | GAB4      | UncertainEstimation of protein expression could not  |
| 14295 | ENSG00000215595 | C20orf202 | UncertainEstimation of protein expression could not  |
| 14296 | ENSG00000215695 | RSC1A1    | Approved Mainly ccytoplasm                           |
| 14297 | ENSG00000215712 | TMEM242   | Approved Cytoplasmcytoplasm                          |
| 14298 | ENSG00000215784 | FAM72D    | UncertainEstimation of protein expression could not  |

|       |                 |           |           |                                             |
|-------|-----------------|-----------|-----------|---------------------------------------------|
| 14299 | ENSG00000215790 | SLC35E2   | Uncertain | Estimation of protein expression could not  |
| 14300 | ENSG00000215817 | ZC3H11B   | Uncertain | Estimation of protein expression could not  |
| 14301 | ENSG00000215845 | TSTD1     | Approved  | Cytoplasm cytoplasm;nucleus                 |
| 14302 | ENSG00000215853 | RPTN      | Enhanced  | Distinct cytoplasm                          |
| 14303 | ENSG00000215883 | CYB5RL    | Approved  | Nuclear acytoplasm;nucleus                  |
| 14304 | ENSG00000215910 | C1orf167  | Enhanced  | Membranouplasma membrane                    |
| 14305 | ENSG00000215912 | TTC34     | Uncertain | Estimation of protein expression could not  |
| 14306 | ENSG00000216490 | IFI30     | Enhanced  | General ccytoplasm                          |
| 14307 | ENSG00000216588 | IGSF23    | Uncertain | Estimation of protein expression could not  |
| 14308 | ENSG00000216649 | GAGE12E   | Supported | Selective expression in spermatogonia.      |
| 14309 | ENSG00000217128 | FNIP1     | Approved  | Mainly ccytoplasm                           |
| 14310 | ENSG00000217236 | SP9       | Uncertain | Estimation of protein expression could not  |
| 14311 | ENSG00000218336 | TENM3     | Approved  | Cytoplasm cytoplasm                         |
| 14312 | ENSG00000218739 | CEBPZOS   | Uncertain | Mainly ccytoplasm                           |
| 14313 | ENSG00000218819 | TDRD15    | Uncertain | Estimation of protein expression could not  |
| 14314 | ENSG00000218891 | ZNF579    | Approved  | General nnucleus                            |
| 14315 | ENSG00000219073 | CELA3B    | Supported | Extracellular positivity in pancreas.       |
| 14316 | ENSG00000219200 | RNASEK    | Uncertain | General ccytoplasm                          |
| 14317 | ENSG00000219438 | FAM19A5   | Approved  | Cytoplasm cytoplasm                         |
| 14318 | ENSG00000219481 | NBPF1     | Approved  | Cytoplasm cytoplasm                         |
| 14319 | ENSG00000219545 | UMAD1     | Approved  | General ccytoplasm;nucleus;plasma membrane  |
| 14320 | ENSG00000219607 | PPP1R3G   | Uncertain | Estimation of protein expression could not  |
| 14321 | ENSG00000219626 | FAM228B   | Uncertain | Cytoplasm cytoplasm                         |
| 14322 | ENSG00000220008 | LINGO3    | Enhanced  | Cytoplasm cytoplasm                         |
| 14323 | ENSG00000220201 | ZGLP1     | Uncertain | Low nuclenucleus;plasma membrane            |
| 14324 | ENSG00000221813 | OR6B1     | Uncertain | Estimation of protein expression could not  |
| 14325 | ENSG00000221821 | C6orf226  | Approved  | Ubiquitounucleus                            |
| 14326 | ENSG00000221823 | PPP3R1    | Approved  | Cytoplasm cytoplasm                         |
| 14327 | ENSG00000221826 | PSG3      | Supported | Cytoplasm cytoplasm                         |
| 14328 | ENSG00000221829 | FANCG     | Approved  | General nnucleus                            |
| 14329 | ENSG00000221838 | AP4M1     | Approved  | Cytoplasm cytoplasm                         |
| 14330 | ENSG00000221843 | C2orf16   | Uncertain | Estimation of protein expression could not  |
| 14331 | ENSG00000221855 | TAS2R41   | Uncertain | Estimation of protein expression could not  |
| 14332 | ENSG00000221866 | PLXNA4    | Approved  | Cytoplasm cytoplasm                         |
| 14333 | ENSG00000221874 | ZNF816-ZN | Uncertain | Estimation of protein expression could not  |
| 14334 | ENSG00000221878 | PSG7      | Supported | Cytoplasm cytoplasm                         |
| 14335 | ENSG00000221886 | ZBED8     | Approved  | General ccytoplasm                          |
| 14336 | ENSG00000221890 | NPTXR     | Enhanced  | Cytoplasm cytoplasm                         |
| 14337 | ENSG00000221900 | POM121L12 | Enhanced  | Nuclear enucleus                            |
| 14338 | ENSG00000221909 | FAM200A   | Uncertain | Estimation of protein expression could not  |
| 14339 | ENSG00000221914 | PPP2R2A   | Approved  | Cytoplasm cytoplasm                         |
| 14340 | ENSG00000221916 | C19orf73  | Uncertain | Cytoplasm cytoplasm                         |
| 14341 | ENSG00000221926 | TRIM16    | Uncertain | General ccytoplasm                          |
| 14342 | ENSG00000221932 | HEPN1     | Uncertain | Expression in CNS and liver.                |
| 14343 | ENSG00000221933 | OR2A25    | Uncertain | Estimation of protein expression could not  |
| 14344 | ENSG00000221944 | TIGD1     | Approved  | Nuclear enucleus                            |
| 14345 | ENSG00000221946 | FXYD7     | Approved  | Expression in intercalated discs in heart r |
| 14346 | ENSG00000221947 | XKR9      | Enhanced  | Nuclear enucleus                            |
| 14347 | ENSG00000221955 | SLC12A8   | Uncertain | General ccytoplasm;nucleus                  |
| 14348 | ENSG00000221963 | APOL6     | Approved  | Cytoplasm cytoplasm                         |
| 14349 | ENSG00000221968 | FADS3     | Approved  | Expressed in several tissues, including smc |
| 14350 | ENSG00000221970 | OR2A1     | Uncertain | Estimation of protein expression could not  |
| 14351 | ENSG00000221972 | C3orf36   | Uncertain | Estimation of protein expression could not  |
| 14352 | ENSG00000221978 | CCNL2     | Supported | General nnucleus                            |
| 14353 | ENSG00000221983 | UBA52     | Supported | General ncytoplasm;nucleus                  |

|       |                 |           |                                                      |
|-------|-----------------|-----------|------------------------------------------------------|
| 14354 | ENSG00000221994 | ZNF630    | SupportedGeneral nnuceus                             |
| 14355 | ENSG00000222009 | BTBD19    | UncertainCytoplasmcytoplasm;nucleus                  |
| 14356 | ENSG00000222011 | FAM185A   | UncertainEstimation of protein expression could not  |
| 14357 | ENSG00000222014 | RAB6C     | UncertainEstimation of protein expression could not  |
| 14358 | ENSG00000222018 | C21orf140 | UncertainCytoplasmcytoplasm                          |
| 14359 | ENSG00000222028 | PSMB11    | Enhanced Selective expression in thymus.             |
| 14360 | ENSG00000222038 | POTEJ     | UncertainRNA-based expert annotation gave inconclus: |
| 14361 | ENSG00000222046 | DCDC2B    | UncertainEstimation of protein expression could not  |
| 14362 | ENSG00000222047 | C10orf55  | Approved Cytoplasmcytoplasm                          |
| 14363 | ENSG00000223443 | USP17L2   | UncertainCytoplasmcytoplasm;plasma membrane          |
| 14364 | ENSG00000223501 | VPS52     | Approved Cytoplasmcytoplasm                          |
| 14365 | ENSG00000223510 | CDRT15    | UncertainEstimation of protein expression could not  |
| 14366 | ENSG00000223547 | ZNF844    | UncertainEstimation of protein expression could not  |
| 14367 | ENSG00000223569 | USP17L15  | UncertainEstimation of protein expression could not  |
| 14368 | ENSG00000223572 | CKMT1A    | UncertainGranular cytoplasm                          |
| 14369 | ENSG00000223609 | HBD       | SupportedExpression in erythrocytes.                 |
| 14370 | ENSG00000223638 | RFPL4A    | UncertainEstimation of protein expression could not  |
| 14371 | ENSG00000223802 | CERS1     | Enhanced Cytoplasmcytoplasm                          |
| 14372 | ENSG00000223865 | HLA-DPB1  | Approved General ccytoplasm                          |
| 14373 | ENSG00000223953 | C1QTNF5   | UncertainRNA-based expert annotation gave inconclus: |
| 14374 | ENSG00000224051 | CPTP      | Approved Cytoplasmcytoplasm                          |
| 14375 | ENSG00000224089 | CT47A10   | SupportedCytoplasmcytoplasm                          |
| 14376 | ENSG00000224389 | C4B       | Approved Cytoplasmcytoplasm;plasma membrane          |
| 14377 | ENSG00000224531 | SMIM13    | Enhanced Cytoplasmcytoplasm                          |
| 14378 | ENSG00000224578 | HNRNPA1P4 | UncertainEstimation of protein expression could not  |
| 14379 | ENSG00000224659 | GAGE12J   | SupportedSelective expression in spermatogonia.      |
| 14380 | ENSG00000224712 | NPIPA3    | Approved General nnuceus                             |
| 14381 | ENSG00000224877 | NDUFAF8   | UncertainCytoplasmcytoplasm                          |
| 14382 | ENSG00000224902 | GAGE12H   | SupportedSelective expression in spermatogonia.      |
| 14383 | ENSG00000224916 | APOC4-APO | SupportedStrong pocytoplasm;plasma membrane          |
| 14384 | ENSG00000224940 | PRRT4     | UncertainEstimation of protein expression could not  |
| 14385 | ENSG00000224982 | TMEM233   | UncertainEstimation of protein expression could not  |
| 14386 | ENSG00000225190 | PLEKHM1   | Approved General ccytoplasm                          |
| 14387 | ENSG00000225327 | USP17L3   | UncertainEstimation of protein expression could not  |
| 14388 | ENSG00000225362 | CT62      | UncertainEstimation of protein expression could not  |
| 14389 | ENSG00000225526 | MKRN20S   | UncertainCytoplasmcytoplasm                          |
| 14390 | ENSG00000225663 | MCRIP1    | Approved Cytoplasmcytoplasm                          |
| 14391 | ENSG00000225697 | SLC26A6   | Approved General ccytoplasm                          |
| 14392 | ENSG00000225899 | FRG2B     | Uncertainn/a RNA-based expert annotation gave inconc |
| 14393 | ENSG00000225921 | NOL7      | SupportedGeneral nnuceus                             |
| 14394 | ENSG00000225932 | CTAGE4    | UncertainEstimation of protein expression could not  |
| 14395 | ENSG00000226023 | CT47A6    | SupportedCytoplasmcytoplasm                          |
| 14396 | ENSG00000226174 | TEX22     | Enhanced Cytoplasmcytoplasm                          |
| 14397 | ENSG00000226288 | OR52I2    | UncertainEstimation of protein expression could not  |
| 14398 | ENSG00000226321 | CROCC2    | Enhanced Expression in ciliary rootlets.             |
| 14399 | ENSG00000226372 | DCAF8L1   | Enhanced Expression in cilia in seminiferous ducts,  |
| 14400 | ENSG00000226430 | USP17L7   | UncertainEstimation of protein expression could not  |
| 14401 | ENSG00000226479 | TMEM185B  | UncertainEstimation of protein expression could not  |
| 14402 | ENSG00000226600 | CT47A9    | SupportedCytoplasmcytoplasm                          |
| 14403 | ENSG00000226650 | KIF4B     | UncertainEstimation of protein expression could not  |
| 14404 | ENSG00000226685 | CT47A12   | SupportedCytoplasmcytoplasm                          |
| 14405 | ENSG00000226742 | HSBP1L1   | Approved Cytoplasmcytoplasm;plasma membrane          |
| 14406 | ENSG00000226763 | SRRM5     | UncertainEstimation of protein expression could not  |
| 14407 | ENSG00000226784 | PGAM4     | UncertainEstimation of protein expression could not  |
| 14408 | ENSG00000226887 | ERVMER34- | Approved Positivity in blood.                        |

|       |                 |           |                                                      |
|-------|-----------------|-----------|------------------------------------------------------|
| 14409 | ENSG00000226929 | CT47A11   | SupportedCytoplasmcytoplasm                          |
| 14410 | ENSG00000226941 | RBM11     | SupportedNuclear enucleus                            |
| 14411 | ENSG00000226979 | LTA       | UncertainRNA-based expert annotation gave inconclus: |
| 14412 | ENSG00000227057 | WDR46     | UncertainNuclear acytoplasm;nucleus                  |
| 14413 | ENSG00000227124 | ZNF717    | UncertainEstimation of protein expression could not  |
| 14414 | ENSG00000227140 | USP17L5   | UncertainEstimation of protein expression could not  |
| 14415 | ENSG00000227151 | PRR20D    | UncertainEstimation of protein expression could not  |
| 14416 | ENSG00000227234 | SPANXB1   | SupportedExpressed in sperm.                         |
| 14417 | ENSG00000227345 | PARG      | Enhanced General ccytoplasm                          |
| 14418 | ENSG00000227471 | AKR1B15   | UncertainEstimation of protein expression could not  |
| 14419 | ENSG00000227488 | GAGE12D   | SupportedSelective expression in spermatogonia.      |
| 14420 | ENSG00000227500 | SCAMP4    | Approved General ccytoplasm;plasma membrane          |
| 14421 | ENSG00000227507 | LTB       | Approved Cytoplasmcytoplasm                          |
| 14422 | ENSG00000227551 | USP17L12  | UncertainEstimation of protein expression could not  |
| 14423 | ENSG00000227729 | RD3L      | Enhanced Expression in intercalated discs of heart r |
| 14424 | ENSG00000228075 | BOD1L2    | UncertainEstimation of protein expression could not  |
| 14425 | ENSG00000228083 | IFNA14    | UncertainEstimation of protein expression could not  |
| 14426 | ENSG00000228278 | ORM2      | Approved Cytoplasmcytoplasm;plasma membrane          |
| 14427 | ENSG00000228300 | C19orf24  | UncertainCytoplasmcytoplasm                          |
| 14428 | ENSG00000228517 | CT47A7    | SupportedCytoplasmcytoplasm                          |
| 14429 | ENSG00000228567 | VN1R4     | UncertainEstimation of protein expression could not  |
| 14430 | ENSG00000228607 | CLDN25    | UncertainEstimation of protein expression could not  |
| 14431 | ENSG00000228672 | PROB1     | Enhanced Cytoplasmcytoplasm                          |
| 14432 | ENSG00000228696 | ARL17B    | UncertainGeneral ccytoplasm;nucleus                  |
| 14433 | ENSG00000228716 | DHFR      | UncertainGeneral ccytoplasm                          |
| 14434 | ENSG00000228836 | CT45A5    | SupportedSelectivenucleus                            |
| 14435 | ENSG00000228856 | USP17L30  | UncertainEstimation of protein expression could not  |
| 14436 | ENSG00000228927 | TSPY3     | SupportedCytoplasmcytoplasm                          |
| 14437 | ENSG00000229089 | ANKRD20A8 | UncertainRNA-based expert annotation gave inconclus: |
| 14438 | ENSG00000229117 | RPL41     | Approved General gcytoplasm                          |
| 14439 | ENSG00000229183 | PGA4      | SupportedSelectivecytoplasm                          |
| 14440 | ENSG00000229292 | RFPL4AL1  | UncertainEstimation of protein expression could not  |
| 14441 | ENSG00000229314 | ORM1      | Approved Positivitplasma membrane                    |
| 14442 | ENSG00000229453 | SPINK8    | UncertainEstimation of protein expression could not  |
| 14443 | ENSG00000229544 | NKX1-2    | UncertainEstimation of protein expression could not  |
| 14444 | ENSG00000229549 | TSPY8     | SupportedCytoplasmcytoplasm                          |
| 14445 | ENSG00000229579 | USP17L26  | UncertainEstimation of protein expression could not  |
| 14446 | ENSG00000229665 | PRR20C    | UncertainEstimation of protein expression could not  |
| 14447 | ENSG00000229809 | ZNF688    | UncertainNuclear acytoplasm;nucleus;plasma membrane  |
| 14448 | ENSG00000229859 | PGA3      | Enhanced Selectivecytoplasm                          |
| 14449 | ENSG00000229894 | GK3P      | UncertainEstimation of protein expression could not  |
| 14450 | ENSG00000230124 | ACBD6     | Approved Ubiquitoucytoplasm                          |
| 14451 | ENSG00000230178 | OR4F3     | UncertainEstimation of protein expression could not  |
| 14452 | ENSG00000230347 | CT47A8    | SupportedCytoplasmcytoplasm                          |
| 14453 | ENSG00000230430 | USP17L25  | UncertainEstimation of protein expression could not  |
| 14454 | ENSG00000230453 | ANKRD18B  | UncertainEstimation of protein expression could not  |
| 14455 | ENSG00000230510 | PPP5D1    | UncertainCytoplasmcytoplasm                          |
| 14456 | ENSG00000230522 | MBD3L2    | UncertainEstimation of protein expression could not  |
| 14457 | ENSG00000230549 | USP17L1   | UncertainEstimation of protein expression could not  |
| 14458 | ENSG00000230594 | CT47A4    | SupportedCytoplasmcytoplasm                          |
| 14459 | ENSG00000230626 | AC011005. | UncertainEstimation of protein expression could not  |
| 14460 | ENSG00000230667 | SETSIP    | Approved General nnucleus                            |
| 14461 | ENSG00000230797 | YY2       | Enhanced Nuclear enucleus                            |
| 14462 | ENSG00000230873 | STMND1    | Enhanced Highly expressed in ciliated cells in fallc |
| 14463 | ENSG00000231051 | USP17L28  | UncertainEstimation of protein expression could not  |

14464 ENSG00000231068 KRTAP21-3UncertainEstimation of protein expression could not  
 14465 ENSG00000231213 PLSCR5 UncertainEstimation of protein expression could not  
 14466 ENSG00000231256 CFAP97D1 Approved Cytoplasmcytoplasm  
 14467 ENSG00000231389 HLA-DPA1 Enhanced Cytoplasmcytoplasm  
 14468 ENSG00000231396 USP17L10 UncertainEstimation of protein expression could not  
 14469 ENSG00000231500 RPS18 Approved Mainly ccytoplasm  
 14470 ENSG00000231637 USP17L29 UncertainEstimation of protein expression could not  
 14471 ENSG00000231738 TSPAN19 UncertainEstimation of protein expression could not  
 14472 ENSG00000231767 AL136454.Uncertainnuclear acytoplasm;nucleus  
 14473 ENSG00000231824 AKAIN1 UncertainEstimation of protein expression could not  
 14474 ENSG00000231852 CYP21A2 Enhanced Selectivecytoplasm  
 14475 ENSG00000231924 PSG1 SupportedCytoplasmcytoplasm  
 14476 ENSG00000231925 TAPBP Approved General ccytoplasm  
 14477 ENSG00000232040 ZBED9 UncertainEstimation of protein expression could not  
 14478 ENSG00000232070 TMEM253 Enhanced Granular cytoplasm  
 14479 ENSG00000232263 KRTAP25-1UncertainEstimation of protein expression could not  
 14480 ENSG00000232264 USP17L24 UncertainEstimation of protein expression could not  
 14481 ENSG00000232399 USP17L13 UncertainEstimation of protein expression could not  
 14482 ENSG00000232434 AJM1 UncertainEstimation of protein expression could not  
 14483 ENSG00000232629 HLA-DQB2 Enhanced Cytoplasmcytoplasm  
 14484 ENSG00000232838 PET117 Approved Cytoplasmcytoplasm  
 14485 ENSG00000232859 LYRM9 UncertainCytoplasmcytoplasm  
 14486 ENSG00000233024 AC126755.Approved General nnucleus  
 14487 ENSG00000233041 PHGR1 Enhanced Distinct cytoplasm;nucleus  
 14488 ENSG00000233087 RAB6D UncertainEstimation of protein expression could not  
 14489 ENSG00000233136 USP17L11 UncertainEstimation of protein expression could not  
 14490 ENSG00000233232 NPIP7 Approved Ubiquitounucleus  
 14491 ENSG00000233436 BTBD18 UncertainEstimation of protein expression could not  
 14492 ENSG00000233670 PIRT UncertainLow expression in CNS, renal tubules and h  
 14493 ENSG00000233701 PRR23C UncertainEstimation of protein expression could not  
 14494 ENSG00000233803 TSPY4 SupportedCytoplasmcytoplasm  
 14495 ENSG00000233816 IFNA13 UncertainEstimation of protein expression could not  
 14496 ENSG00000233822 HIST1H2BNSupportedUbiquitounucleus  
 14497 ENSG00000233927 RPS28 Approved Cytoplasmcytoplasm  
 14498 ENSG00000233932 CTXN2 UncertainExtracellcytoplasm  
 14499 ENSG00000233954 UQCRHL Approved Granular cytoplasm  
 14500 ENSG00000234068 PAGE2 SupportedSelective expression in spermatogonia.  
 14501 ENSG00000234127 TRIM26 Approved General ccytoplasm  
 14502 ENSG00000234224 TMEM229A UncertainEstimation of protein expression could not  
 14503 ENSG00000234278 PRR20E UncertainEstimation of protein expression could not  
 14504 ENSG00000234284 ZNF879 UncertainCytoplasmcytoplasm  
 14505 ENSG00000234289 H2BFS SupportedUbiquitounucleus  
 14506 ENSG00000234414 RBMY1A1 SupportedSelectivenucleus  
 14507 ENSG00000234438 KBTBD13 UncertainCytoplasmcytoplasm  
 14508 ENSG00000234444 ZNF736 UncertainCytoplasmcytoplasm  
 14509 ENSG00000234465 PINLYP UncertainEstimation of protein expression could not  
 14510 ENSG00000234602 MCIDAS UncertainEstimation of protein expression could not  
 14511 ENSG00000234719 NPIP2 SupportedUbiquitounucleus  
 14512 ENSG00000234745 HLA-B Enhanced Membranouplasma membrane  
 14513 ENSG00000234829 IFNA17 UncertainEstimation of protein expression could not  
 14514 ENSG00000234906 APOC2 SupportedStrong poplasma membrane  
 14515 ENSG00000234965 SHISA8 UncertainEstimation of protein expression could not  
 14516 ENSG00000235034 C19orf81 Enhanced Cytoplasmcytoplasm  
 14517 ENSG00000235098 ANKRD65 Enhanced Selective expression in ciliated cells of t  
 14518 ENSG00000235109 ZSCAN31 Approved General ncytoplasm;nucleus



|       |                 |           |                                                      |
|-------|-----------------|-----------|------------------------------------------------------|
| 14519 | ENSG00000235162 | C12orf75  | UncertainCytoplasmcytoplasm                          |
| 14520 | ENSG00000235169 | SMIM1     | Enhanced Cytoplasmcytoplasm;plasma membrane          |
| 14521 | ENSG00000235173 | HGH1      | Approved Cytoplasmcytoplasm;nucleus                  |
| 14522 | ENSG00000235194 | PPP1R3E   | Approved Membranoucytoplasm;plasma membrane          |
| 14523 | ENSG00000235268 | KDM4E     | UncertainMainly ccytoplasm                           |
| 14524 | ENSG00000235376 | RPEL1     | Approved Cytoplasmcytoplasm                          |
| 14525 | ENSG00000235568 | NFAM1     | UncertainCytoplasmcytoplasm                          |
| 14526 | ENSG00000235608 | NKX1-1    | UncertainEstimation of protein expression could not  |
| 14527 | ENSG00000235711 | ANKRD34C  | UncertainEstimation of protein expression could not  |
| 14528 | ENSG00000235750 | KIAA0040  | Approved Cytoplasmcytoplasm;plasma membrane          |
| 14529 | ENSG00000235780 | USP17L27  | UncertainEstimation of protein expression could not  |
| 14530 | ENSG00000235863 | B3GALT4   | Approved Cytoplasmcytoplasm;plasma membrane          |
| 14531 | ENSG00000235942 | LCE6A     | Enhanced Cytoplasmcytoplasm                          |
| 14532 | ENSG00000235961 | PNMA6A    | UncertainEstimation of protein expression could not  |
| 14533 | ENSG00000236125 | USP17L4   | UncertainEstimation of protein expression could not  |
| 14534 | ENSG00000236126 | CT47A3    | SupportedCytoplasmcytoplasm                          |
| 14535 | ENSG00000236279 | CLEC2L    | Enhanced Selective expression in CNS.                |
| 14536 | ENSG00000236287 | ZBED5     | UncertainGeneral nnucleus                            |
| 14537 | ENSG00000236320 | SLFN14    | UncertainEstimation of protein expression could not  |
| 14538 | ENSG00000236334 | PPIAL4G   | UncertainEstimation of protein expression could not  |
| 14539 | ENSG00000236362 | GAGE12F   | SupportedSelective expression in spermatogonia.      |
| 14540 | ENSG00000236371 | CT47A1    | SupportedCytoplasmcytoplasm                          |
| 14541 | ENSG00000236398 | TAS2R39   | UncertainCytoplasmcytoplasm                          |
| 14542 | ENSG00000236424 | TSPY10    | SupportedCytoplasmcytoplasm                          |
| 14543 | ENSG00000236444 | UBE2L5    | Approved Highly expressed in a subset of cells in se |
| 14544 | ENSG00000236446 | CT47B1    | SupportedCytoplasmcytoplasm                          |
| 14545 | ENSG00000236609 | ZNF853    | Approved Distinct nucleus                            |
| 14546 | ENSG00000236637 | IFNA4     | UncertainEstimation of protein expression could not  |
| 14547 | ENSG00000236699 | ARHGEF38  | UncertainEstimation of protein expression could not  |
| 14548 | ENSG00000236761 | CTAGE9    | UncertainEstimation of protein expression could not  |
| 14549 | ENSG00000237038 | USP17L8   | UncertainEstimation of protein expression could not  |
| 14550 | ENSG00000237172 | B3GNT9    | Approved Cytoplasmcytoplasm                          |
| 14551 | ENSG00000237190 | CDKN2AIPN | Approved General ccytoplasm;nucleus                  |
| 14552 | ENSG00000237247 | MBD3L5    | UncertainEstimation of protein expression could not  |
| 14553 | ENSG00000237289 | CKMT1B    | UncertainGranular cytoplasm                          |
| 14554 | ENSG00000237353 | PATE4     | Approved Distinct expression in sperm acrosomes in 1 |
| 14555 | ENSG00000237388 | OR4A47    | UncertainEstimation of protein expression could not  |
| 14556 | ENSG00000237441 | RGL2      | Approved General ccytoplasm                          |
| 14557 | ENSG00000237452 | BHMG1     | UncertainEstimation of protein expression could not  |
| 14558 | ENSG00000237649 | KIFC1     | Enhanced Mainly nunucleus                            |
| 14559 | ENSG00000237651 | C2orf74   | Approved Cytoplasmcytoplasm                          |
| 14560 | ENSG00000237671 | GAGE12C   | SupportedSelective expression in spermatogonia.      |
| 14561 | ENSG00000237763 | AMY1A     | Enhanced Selectivecytoplasm                          |
| 14562 | ENSG00000237765 | FAM200B   | UncertainEstimation of protein expression could not  |
| 14563 | ENSG00000237957 | CT47A5    | SupportedCytoplasmcytoplasm                          |
| 14564 | ENSG00000238083 | LRRC37A2  | SupportedSelective expression in spermatids of semir |
| 14565 | ENSG00000238227 | TMEM250   | SupportedUbiquitounucleus                            |
| 14566 | ENSG00000238243 | OR2W3     | UncertainEstimation of protein expression could not  |
| 14567 | ENSG00000238269 | PAGE2B    | SupportedSelective expression in spermatogonia.      |
| 14568 | ENSG00000239264 | TXNDC5    | Enhanced cytoplasmcytoplasm                          |
| 14569 | ENSG00000239282 | CASTOR1   | Approved General ccytoplasm                          |
| 14570 | ENSG00000239305 | RNF103    | Approved Cytoplasmcytoplasm                          |
| 14571 | ENSG00000239306 | RBM14     | SupportedUbiquitounucleus                            |
| 14572 | ENSG00000239382 | ALKBH6    | Approved Cytoplasmcytoplasm                          |
| 14573 | ENSG00000239474 | KLHL41    | Enhanced Distinct cytoplasm                          |

|       |                 |           |           |                                            |
|-------|-----------------|-----------|-----------|--------------------------------------------|
| 14574 | ENSG00000239521 | CASTOR3   | Uncertain | Estimation of protein expression could not |
| 14575 | ENSG00000239605 | STPG4     | Approved  | Membranouplasma membrane                   |
| 14576 | ENSG00000239672 | NME1      | Supported | Cytoplasmcytoplasm                         |
| 14577 | ENSG00000239697 | TNFSF12   | Uncertain | Cytoplasmcytoplasm;plasma membrane         |
| 14578 | ENSG00000239704 | CDRT4     | Uncertain | Cytoplasmcytoplasm                         |
| 14579 | ENSG00000239713 | APOBEC3G  | Enhanced  | Cytoplasmcytoplasm                         |
| 14580 | ENSG00000239779 | WBP1      | Approved  | Ubiquitoucytoplasm                         |
| 14581 | ENSG00000239789 | MRPS17    | Approved  | General ccytoplasm                         |
| 14582 | ENSG00000239839 | DEFA3     | Supported | Selectivecytoplasm                         |
| 14583 | ENSG00000239857 | GET4      | Uncertain | Cytoplasmcytoplasm                         |
| 14584 | ENSG00000239887 | C1orf226  | Approved  | Cytoplasmcytoplasm                         |
| 14585 | ENSG00000239900 | ADSL      | Enhanced  | Ubiquitoucytoplasm                         |
| 14586 | ENSG00000239961 | LILRA4    | Approved  | Cytoplasmcytoplasm                         |
| 14587 | ENSG00000240021 | TEX35     | Approved  | Cytoplasmcytoplasm                         |
| 14588 | ENSG00000240038 | AMY2B     | Supported | Selectivecytoplasm                         |
| 14589 | ENSG00000240053 | LY6G5B    | Approved  | Cytoplasmcytoplasm                         |
| 14590 | ENSG00000240065 | PSMB9     | Enhanced  | Nuclear acytoplasm;nucleus                 |
| 14591 | ENSG00000240184 | PCDHGC3   | Approved  | General ccytoplasm                         |
| 14592 | ENSG00000240230 | COX19     | Approved  | Cytoplasmcytoplasm                         |
| 14593 | ENSG00000240247 | DEFA1B    | Supported | Selectivecytoplasm                         |
| 14594 | ENSG00000240303 | ACAD11    | Enhanced  | Granular cytoplasm                         |
| 14595 | ENSG00000240344 | PPIL3     | Approved  | General ccytoplasm                         |
| 14596 | ENSG00000240505 | TNFRSF13B | Uncertain | Ubiquitoucytoplasm                         |
| 14597 | ENSG00000240583 | AQP1      | Enhanced  | Selectiveplasma membrane                   |
| 14598 | ENSG00000240654 | C1QTNF9   | Uncertain | Estimation of protein expression could not |
| 14599 | ENSG00000240682 | ISY1      | Supported | Ubiquitounucleus;plasma membrane           |
| 14600 | ENSG00000240694 | PNMA2     | Enhanced  | Cytoplasmcytoplasm;nucleus                 |
| 14601 | ENSG00000240764 | PCDHGC5   | Supported | Cytoplasmcytoplasm                         |
| 14602 | ENSG00000240771 | ARHGEF25  | Approved  | Cytoplasmcytoplasm                         |
| 14603 | ENSG00000240849 | TMEM189   | Approved  | Cytoplasmcytoplasm                         |
| 14604 | ENSG00000240857 | RDH14     | Approved  | General ccytoplasm                         |
| 14605 | ENSG00000240891 | PLCXD2    | Uncertain | Estimation of protein expression could not |
| 14606 | ENSG00000240972 | MIF       | Approved  | Mainly ccytoplasm                          |
| 14607 | ENSG00000241058 | NSUN6     | Approved  | Granular cytoplasm                         |
| 14608 | ENSG00000241106 | HLA-DOB   | Enhanced  | Cytoplasmcytoplasm                         |
| 14609 | ENSG00000241127 | YAE1D1    | Uncertain | Cytoplasmcytoplasm                         |
| 14610 | ENSG00000241128 | OR14A2    | Uncertain | Estimation of protein expression could not |
| 14611 | ENSG00000241258 | CRCP      | Approved  | Cytoplasmcytoplasm                         |
| 14612 | ENSG00000241343 | RPL36A    | Uncertain | Cytoplasmcytoplasm                         |
| 14613 | ENSG00000241360 | PDXP      | Approved  | Cytoplasmcytoplasm                         |
| 14614 | ENSG00000241404 | EGFL8     | Uncertain | Expression in connective tissue.           |
| 14615 | ENSG00000241468 | ATP5MF    | Approved  | Cytoplasmcytoplasm                         |
| 14616 | ENSG00000241476 | SSX2      | Enhanced  | Distinct nucleus                           |
| 14617 | ENSG00000241484 | ARHGAP8   | Approved  | Cytoplasmcytoplasm                         |
| 14618 | ENSG00000241685 | ARPC1A    | Approved  | General ccytoplasm;plasma membrane         |
| 14619 | ENSG00000241697 | TMEFF1    | Uncertain | Estimation of protein expression could not |
| 14620 | ENSG00000241837 | ATP5P0    | Enhanced  | Ubiquitoucytoplasm                         |
| 14621 | ENSG00000241839 | PLEKH02   | Approved  | Cytoplasmcytoplasm                         |
| 14622 | ENSG00000241852 | C8orf58   | Uncertain | Mainly nunucleus                           |
| 14623 | ENSG00000241878 | PISD      | Approved  | Ubiquitoucytoplasm;plasma membrane         |
| 14624 | ENSG00000241935 | HOGA1     | Approved  | Cytoplasmcytoplasm                         |
| 14625 | ENSG00000241945 | PWP2      | Uncertain | Estimation of protein expression could not |
| 14626 | ENSG00000241973 | PI4KA     | Approved  | Cytoplasmcytoplasm                         |
| 14627 | ENSG00000242028 | HYPK      | Uncertain | Estimation of protein expression could not |
| 14628 | ENSG00000242110 | AMACR     | Enhanced  | Granular cytoplasm                         |

|       |                 |           |                  |                                            |
|-------|-----------------|-----------|------------------|--------------------------------------------|
| 14629 | ENSG00000242220 | TCP10L    | Approved Nuclear | acytoplasm;nucleus                         |
| 14630 | ENSG00000242247 | ARFGAP3   | Approved         | Cytoplasmcytoplasm                         |
| 14631 | ENSG00000242265 | PEG10     | Enhanced         | Cytoplasmcytoplasm                         |
| 14632 | ENSG00000242362 | CT47A2    | Supported        | Cytoplasmcytoplasm                         |
| 14633 | ENSG00000242372 | EIF6      | Enhanced         | Cytoplasmcytoplasm;nucleus                 |
| 14634 | ENSG00000242389 | RBM1E     | Supported        | Selectivenucleus                           |
| 14635 | ENSG00000242419 | PCDHGC4   | Uncertain        | Estimation of protein expression could not |
| 14636 | ENSG00000242485 | MRPL20    | Supported        | General ccytoplasm                         |
| 14637 | ENSG00000242498 | ARPIN     | Uncertain        | Cytoplasmcytoplasm                         |
| 14638 | ENSG00000242550 | SERPINB10 | Uncertain        | Cytoplasmcytoplasm                         |
| 14639 | ENSG00000242574 | HLA-DMB   | Supported        | Cytoplasmcytoplasm                         |
| 14640 | ENSG00000242689 | CNTF      | Approved         | Expression mainly in CNS.                  |
| 14641 | ENSG00000242732 | RTL5      | Approved         | Nuclear enucleus                           |
| 14642 | ENSG00000242802 | AP5Z1     | Supported        | Nuclear acytoplasm;nucleus                 |
| 14643 | ENSG00000242852 | ZNF709    | Uncertain        | Estimation of protein expression could not |
| 14644 | ENSG00000242866 | STRC      | Enhanced         | Cytoplasmcytoplasm                         |
| 14645 | ENSG00000242875 | RBM1B     | Supported        | Selectivenucleus                           |
| 14646 | ENSG00000243056 | EIF4EBP3  | Uncertain        | Cytoplasmcytoplasm                         |
| 14647 | ENSG00000243130 | PSG11     | Enhanced         | Cytoplasmcytoplasm                         |
| 14648 | ENSG00000243137 | PSG4      | Supported        | Cytoplasmcytoplasm                         |
| 14649 | ENSG00000243147 | MRPL33    | Approved         | Cytoplasmcytoplasm                         |
| 14650 | ENSG00000243156 | MICAL3    | Approved         | Cytoplasmcytoplasm                         |
| 14651 | ENSG00000243207 | PPAN-P2RY | Uncertain        | Estimation of protein expression could not |
| 14652 | ENSG00000243244 | STON1     | Uncertain        | Cytoplasmcytoplasm                         |
| 14653 | ENSG00000243279 | PRAF2     | Enhanced         | Ubiquitouscytoplasm                        |
| 14654 | ENSG00000243284 | VSIG8     | Uncertain        | Estimation of protein expression could not |
| 14655 | ENSG00000243364 | EFNA4     | Uncertain        | Cytoplasmcytoplasm;plasma membrane         |
| 14656 | ENSG00000243449 | C4orf48   | Uncertain        | Cytoplasmcytoplasm;plasma membrane         |
| 14657 | ENSG00000243477 | NAT6      | Approved         | Cytoplasmcytoplasm                         |
| 14658 | ENSG00000243480 | AMY2A     | Enhanced         | Selectivecytoplasm                         |
| 14659 | ENSG00000243509 | TNFRSF6B  | Approved         | Cytoplasmcytoplasm                         |
| 14660 | ENSG00000243566 | UPK3B     | Approved         | High membplasma membrane                   |
| 14661 | ENSG00000243627 | SMIM34A   | Uncertain        | Estimation of protein expression could not |
| 14662 | ENSG00000243646 | IL10RB    | Approved         | Cytoplasmcytoplasm                         |
| 14663 | ENSG00000243649 | CFB       | Supported        | Distinct plasma membrane                   |
| 14664 | ENSG00000243667 | WDR92     | Approved         | Cytoplasmcytoplasm                         |
| 14665 | ENSG00000243678 | NME2      | Approved         | General ccytoplasm                         |
| 14666 | ENSG00000243709 | LEFTY1    | Approved         | Cytoplasmcytoplasm;plasma membrane         |
| 14667 | ENSG00000243710 | CFAP57    | Enhanced         | Selective expression in cilia in fallopian |
| 14668 | ENSG00000243716 | NPIP5     | Approved         | Nuclear enucleus                           |
| 14669 | ENSG00000243725 | TTC4      | Approved         | General ccytoplasm                         |
| 14670 | ENSG00000243729 | OR5V1     | Uncertain        | Estimation of protein expression could not |
| 14671 | ENSG00000243749 | TMEM35B   | Uncertain        | Nuclear enucleus                           |
| 14672 | ENSG00000243789 | JMJD7     | Approved         | Cytoplasmcytoplasm                         |
| 14673 | ENSG00000243811 | APOBEC3D  | Approved         | Cytoplasmcytoplasm                         |
| 14674 | ENSG00000243896 | OR2A7     | Uncertain        | Estimation of protein expression could not |
| 14675 | ENSG00000243927 | MRPS6     | Supported        | Ubiquitouscytoplasm                        |
| 14676 | ENSG00000243943 | ZNF512    | Approved         | Nuclear enucleus                           |
| 14677 | ENSG00000243955 | GSTA1     | Supported        | Distinct cytoplasm                         |
| 14678 | ENSG00000243978 | RTL9      | Enhanced         | Nuclear enucleus                           |
| 14679 | ENSG00000243989 | ACY1      | Enhanced         | Mainly ccytoplasm                          |
| 14680 | ENSG00000244005 | NFS1      | Enhanced         | Granular cytoplasm                         |
| 14681 | ENSG00000244038 | DDOST     | Supported        | General ccytoplasm                         |
| 14682 | ENSG00000244045 | TMEM199   | Uncertain        | Cytoplasmcytoplasm                         |
| 14683 | ENSG00000244067 | GSTA2     | Supported        | Cytoplasmcytoplasm                         |

14684 ENSG00000244165 P2RY11 Approved Cytoplasm cytoplasm  
14685 ENSG00000244187 TMEM141 Approved General c cytoplasm  
14686 ENSG00000244255 AL645922. Approved Positivit cytoplasm; plasma membrane  
14687 ENSG00000244274 DBNDD2 Enhanced Cytoplasm cytoplasm  
14688 ENSG00000244355 LY6G6D Uncertain Estimation of protein expression could not  
14689 ENSG00000244395 RBMY1D Supported Selective nucleus  
14690 ENSG00000244405 ETV5 Approved General n nucleus  
14691 ENSG00000244414 CFHR1 Supported Distinct plasma membrane  
14692 ENSG00000244462 RBM12 Enhanced General n nucleus  
14693 ENSG00000244486 SCARF2 Approved General c cytoplasm  
14694 ENSG00000244509 APOBEC3C Approved Cytoplasm cytoplasm; plasma membrane  
14695 ENSG00000244588 RAD21L1 Approved Nuclear enucleus  
14696 ENSG00000244607 CCDC13 Approved Expression in fallopian tube and testis.  
14697 ENSG00000244617 ASPRV1 Enhanced Cytoplasm cytoplasm; nucleus  
14698 ENSG00000244623 OR2AE1 Uncertain Estimation of protein expression could not  
14699 ENSG00000244693 CTAGE8 Uncertain Estimation of protein expression could not  
14700 ENSG00000244694 PTCHD4 Uncertain Expression in most tissues, including CNS.  
14701 ENSG00000244731 C4A Supported Positive plasma membrane  
14702 ENSG00000244734 HBB Enhanced Expression in erythrocytes.  
14703 ENSG00000244752 CRYBB2 Supported Selective expression in the lens.  
14704 ENSG00000244754 N4BP2L2 Approved Granular cytoplasm  
14705 ENSG00000245848 CEBPA Approved Nuclear enucleus  
14706 ENSG00000246705 H2AFJ Supported Ubiquitous nucleus  
14707 ENSG00000247077 PGAM5 Enhanced General c cytoplasm  
14708 ENSG00000247596 TWF2 Uncertain Cytoplasm cytoplasm  
14709 ENSG00000247626 MARS2 Uncertain Cytoplasm cytoplasm  
14710 ENSG00000247746 USP51 Uncertain General c cytoplasm  
14711 ENSG00000248098 BCKDHA Supported Ubiquitous cytoplasm  
14712 ENSG00000248099 INSL3 Enhanced Selective cytoplasm  
14713 ENSG00000248144 ADH1C Supported Cytoplasm cytoplasm  
14714 ENSG00000248167 TRIM39-RP Uncertain Estimation of protein expression could not  
14715 ENSG00000248235 AC037459. Uncertain Estimation of protein expression could not  
14716 ENSG00000248333 CDK11B Approved Nuclear enucleus  
14717 ENSG00000248385 TARM1 Uncertain Estimation of protein expression could not  
14718 ENSG00000248483 POU5F2 Enhanced Mainly n nucleus  
14719 ENSG00000248485 PCP4L1 Enhanced Cytoplasm cytoplasm  
14720 ENSG00000248487 ABHD14A Approved Cytoplasm cytoplasm; nucleus  
14721 ENSG00000248592 TMEM110-M Uncertain Estimation of protein expression could not  
14722 ENSG00000248643 RBM14-RB Uncertain Cytoplasm cytoplasm  
14723 ENSG00000248672 LY75-CD30 Uncertain Estimation of protein expression could not  
14724 ENSG00000248712 CCDC153 Uncertain Estimation of protein expression could not  
14725 ENSG00000248746 ACTN3 Uncertain Estimation of protein expression could not  
14726 ENSG00000248751 AC004997. Uncertain General c cytoplasm  
14727 ENSG00000248871 TNFSF12-T Uncertain Estimation of protein expression could not  
14728 ENSG00000248905 FMN1 Supported Cytoplasm cytoplasm; plasma membrane  
14729 ENSG00000248919 ATP5MF-PT Uncertain General c cytoplasm  
14730 ENSG00000248920 USP17L19 Uncertain Estimation of protein expression could not  
14731 ENSG00000248933 USP17L22 Uncertain Estimation of protein expression could not  
14732 ENSG00000248993 AL645941. Uncertain Estimation of protein expression could not  
14733 ENSG00000249104 USP17L17 Uncertain Estimation of protein expression could not  
14734 ENSG00000249115 HAUS5 Approved Cytoplasm cytoplasm  
14735 ENSG00000249139 EPPIN-WF Supported Cytoplasm cytoplasm  
14736 ENSG00000249209 AP000311. Uncertain Estimation of protein expression could not  
14737 ENSG00000249222 ATP5MGL Uncertain Estimation of protein expression could not  
14738 ENSG00000249242 TMEM150C Enhanced Membrane plasma membrane

14739 ENSG00000249437 NAIP Approved Cytoplasm cytoplasm  
 14740 ENSG00000249459 ZNF286B Uncertain Estimation of protein expression could not  
 14741 ENSG00000249471 ZNF324B Uncertain Estimation of protein expression could not  
 14742 ENSG00000249481 SPATS1 Approved Expression in testis and fallopian tube.  
 14743 ENSG00000249581 CLRN2 Uncertain Estimation of protein expression could not  
 14744 ENSG00000249693 THEGL Uncertain Estimation of protein expression could not  
 14745 ENSG00000249709 ZNF564 Uncertain Estimation of protein expression could not  
 14746 ENSG00000249773 AC092647. Uncertain Estimation of protein expression could not  
 14747 ENSG00000249811 USP17L21 Uncertain Estimation of protein expression could not  
 14748 ENSG00000249853 HS3ST5 Approved Cytoplasm cytoplasm  
 14749 ENSG00000249884 RNF103-CH Uncertain Estimation of protein expression could not  
 14750 ENSG00000249992 TMEM158 Approved Expression in several cell types, mainly in  
 14751 ENSG00000250021 C15orf38- Uncertain General cytoplasm  
 14752 ENSG00000250067 YJEFN3 Enhanced Strong cytoplasm  
 14753 ENSG00000250091 DNAH100S Enhanced Nuclear nucleus  
 14754 ENSG00000250254 PTTG2 Uncertain Estimation of protein expression could not  
 14755 ENSG00000250264 AL669918. Approved Cytoplasm cytoplasm  
 14756 ENSG00000250305 TRMT9B Approved Cytoplasm cytoplasm  
 14757 ENSG00000250317 SMIM20 Approved Cytoplasm cytoplasm  
 14758 ENSG00000250349 AF241726. Uncertain Estimation of protein expression could not  
 14759 ENSG00000250423 KIAA1210 Enhanced Cytoplasm cytoplasm  
 14760 ENSG00000250424 AC004691. Approved High cytoplasm  
 14761 ENSG00000250479 CHCHD10 Enhanced Granular cytoplasm  
 14762 ENSG00000250506 CDK3 Uncertain Cytoplasm cytoplasm;nucleus  
 14763 ENSG00000250510 GPR162 Enhanced Distinct cytoplasm  
 14764 ENSG00000250565 ATP6V1E2 Enhanced Expressed primarily in elongated spermatid  
 14765 ENSG00000250571 GLI4 Uncertain Estimation of protein expression could not  
 14766 ENSG00000250641 LY6G6F-LY Uncertain Estimation of protein expression could not  
 14767 ENSG00000250644 AC068580. Uncertain Cytoplasm cytoplasm  
 14768 ENSG00000250722 SELENOP Approved General cytoplasm; plasma membrane  
 14769 ENSG00000250741 NT5C1B-RD Uncertain Estimation of protein expression could not  
 14770 ENSG00000250745 USP17L20 Uncertain Estimation of protein expression could not  
 14771 ENSG00000250799 PRODH2 Approved Cytoplasm cytoplasm  
 14772 ENSG00000250844 USP17L18 Uncertain Estimation of protein expression could not  
 14773 ENSG00000251192 ZNF674 Uncertain Nuclear nucleus  
 14774 ENSG00000251201 TMED7-TIC Uncertain Estimation of protein expression could not  
 14775 ENSG00000251247 ZNF345 Uncertain Ubiquitous cytoplasm  
 14776 ENSG00000251258 RFPL4B Uncertain Estimation of protein expression could not  
 14777 ENSG00000251287 ALG1L2 Uncertain Estimation of protein expression could not  
 14778 ENSG00000251322 SHANK3 Enhanced High expression in neurons and endothelial  
 14779 ENSG00000251357 AP000350. Uncertain Estimation of protein expression could not  
 14780 ENSG00000251369 ZNF550 Uncertain Cytoplasm cytoplasm  
 14781 ENSG00000251380 DCANP1 Uncertain Estimation of protein expression could not  
 14782 ENSG00000251537 AC005324. Uncertain Expression in squamous epithelia.  
 14783 ENSG00000251569 AC093899. Uncertain Estimation of protein expression could not  
 14784 ENSG00000251664 PCDHA12 Approved Cytoplasm cytoplasm  
 14785 ENSG00000251692 PTX4 Supported Expressed in immune cells and secreted sta  
 14786 ENSG00000253148 RGS21 Uncertain Cytoplasm cytoplasm  
 14787 ENSG00000253159 PCDHGA12 Uncertain Cytoplasm cytoplasm; plasma membrane  
 14788 ENSG00000253250 C8orf88 Enhanced Cytoplasm cytoplasm  
 14789 ENSG00000253251 AC008560. Approved Cytoplasm cytoplasm;nucleus; plasma membrane  
 14790 ENSG00000253276 CCDC71L Approved Cytoplasm cytoplasm  
 14791 ENSG00000253293 HOXA10 Approved Nuclear nucleus  
 14792 ENSG00000253304 TMEM200B Uncertain Estimation of protein expression could not  
 14793 ENSG00000253305 PCDHGB6 Uncertain Estimation of protein expression could not

14794 ENSG00000253309 SERPINE3 UncertainRNA-based expert annotation gave inconclus:  
14795 ENSG00000253313 Clorf210 UncertainCytoplasmcytoplasm;nucleus  
14796 ENSG00000253457 SMIM18 SupportedDistinct projections in CNS, mainly in cere  
14797 ENSG00000253485 PCDHGA5 UncertainCytoplasmcytoplasm;plasma membrane  
14798 ENSG00000253537 PCDHGA7 UncertainEstimation of protein expression could not  
14799 ENSG00000253548 PYDC2 UncertainEstimation of protein expression could not  
14800 ENSG00000253598 SLC10A5 UncertainEstimation of protein expression could not  
14801 ENSG00000253710 ALG11 Approved Ubiquitouscytoplasm  
14802 ENSG00000253729 PRKDC SupportedUbiquitousnucleus  
14803 ENSG00000253731 PCDHGA6 UncertainCytoplasmcytoplasm;plasma membrane  
14804 ENSG00000253767 PCDHGA8 UncertainEstimation of protein expression could not  
14805 ENSG00000253797 UTP14C UncertainCytoplasmcytoplasm;plasma membrane  
14806 ENSG00000253846 PCDHGA10 Approved Membrane cytoplasm;plasma membrane  
14807 ENSG00000253873 PCDHGA11 UncertainCytoplasmcytoplasm;plasma membrane  
14808 ENSG00000253910 PCDHGB2 UncertainEstimation of protein expression could not  
14809 ENSG00000253953 PCDHGB4 UncertainEstimation of protein expression could not  
14810 ENSG00000254004 ZNF260 Approved Nuclear enucleus  
14811 ENSG00000254087 LYN Enhanced Distinct cytoplasm;plasma membrane  
14812 ENSG00000254093 PINX1 UncertainGeneral ncytoplasm;nucleus  
14813 ENSG00000254122 PCDHGB7 UncertainUbiquitouscytoplasm  
14814 ENSG00000254206 NPIP11 Approved Nuclear enucleus  
14815 ENSG00000254221 PCDHGB1 UncertainEstimation of protein expression could not  
14816 ENSG00000254245 PCDHGA3 UncertainEstimation of protein expression could not  
14817 ENSG00000254402 LRRC24 Enhanced Cytoplasmcytoplasm  
14818 ENSG00000254415 SIGLEC14 UncertainCytoplasmcytoplasm  
14819 ENSG00000254440 PBOV1 UncertainEstimation of protein expression could not  
14820 ENSG00000254469 AP002495. UncertainEstimation of protein expression could not  
14821 ENSG00000254470 AP5B1 UncertainUbiquitouscytoplasm;plasma membrane  
14822 ENSG00000254505 CHMP4A Approved General ccytoplasm;plasma membrane  
14823 ENSG00000254536 AL360181. UncertainEstimation of protein expression could not  
14824 ENSG00000254598 CSNK2A3 UncertainRNA-based expert annotation gave inconclus:  
14825 ENSG00000254636 ARMS2 Enhanced Cytoplasmcytoplasm  
14826 ENSG00000254647 INS Enhanced Highly secytoplasm  
14827 ENSG00000254656 RTL1 Enhanced Membranouplasma membrane  
14828 ENSG00000254692 AL136295. Approved General ccytoplasm  
14829 ENSG00000254772 EEF1G Enhanced Cytoplasmcytoplasm  
14830 ENSG00000254788 CKLF-CMTMAApproved Expression in a subset of lymphoid and pro:  
14831 ENSG00000254827 SLC22A18AEnhanced Selectivecytoplasm  
14832 ENSG00000254852 NPIPA2 Approved General nnucleus  
14833 ENSG00000254858 MPV17L2 UncertainEstimation of protein expression could not  
14834 ENSG00000254901 BORCS8 Approved Cytoplasmcytoplasm  
14835 ENSG00000254979 AP000781. SupportedCytoplasmcytoplasm  
14836 ENSG00000254986 DPP3 Approved Cytoplasmcytoplasm  
14837 ENSG00000254996 ANKHD1-EIApproved Ubiquitouscytoplasm  
14838 ENSG00000255071 SAA2-SAA4UncertainRNA data suggests expression in a selected  
14839 ENSG00000255072 PIGY UncertainEstimation of protein expression could not  
14840 ENSG00000255112 CHMP1B SupportedGeneral ccytoplasm  
14841 ENSG00000255150 EID3 UncertainNuclear anucleus  
14842 ENSG00000255151 GLYATL1B UncertainEstimation of protein expression could not  
14843 ENSG00000255181 CCDC166 UncertainEstimation of protein expression could not  
14844 ENSG00000255245 FXYD6-FXYApproved Membranouplasma membrane  
14845 ENSG00000255302 EID1 Approved General ccytoplasm;nucleus  
14846 ENSG00000255398 HCAR3 Approved Cytoplasmcytoplasm  
14847 ENSG00000255423 EBLN2 UncertainEstimation of protein expression could not  
14848 ENSG00000255439 AC135050. Approved Cytoplasmcytoplasm

14849 ENSG00000255501 CARD18 Approved Cytoplasm cytoplasm  
14850 ENSG00000255524 NPIP8 Uncertain Estimation of protein expression could not  
14851 ENSG00000255526 NEDD8-MDP Uncertain Estimation of protein expression could not  
14852 ENSG00000255561 FDXACB1 Uncertain RNA-based expert annotation gave inconclus:  
14853 ENSG00000255641 AC068775. Uncertain Estimation of protein expression could not  
14854 ENSG00000255730 AC011462. Approved Ubiquitous cytoplasm  
14855 ENSG00000255833 TIFAB Uncertain Estimation of protein expression could not  
14856 ENSG00000255974 CYP2A6 Supported Selective cytoplasm  
14857 ENSG00000256043 CTSO Approved Cytoplasm cytoplasm  
14858 ENSG00000256061 DNAAF4 Uncertain General c cytoplasm  
14859 ENSG00000256087 ZNF432 Uncertain Cytoplasm cytoplasm  
14860 ENSG00000256100 AP000721. Uncertain Estimation of protein expression could not  
14861 ENSG00000256162 SMLR1 Uncertain Estimation of protein expression could not  
14862 ENSG00000256223 ZNF10 Uncertain Estimation of protein expression could not  
14863 ENSG00000256269 HMBS Supported General c cytoplasm;nucleus  
14864 ENSG00000256349 AP002748. Uncertain Estimation of protein expression could not  
14865 ENSG00000256374 PPIAL4D Uncertain Estimation of protein expression could not  
14866 ENSG00000256394 ASIC5 Approved Selective plasma membrane  
14867 ENSG00000256463 SALL3 Uncertain Estimation of protein expression could not  
14868 ENSG00000256500 AL139300. Uncertain Estimation of protein expression could not  
14869 ENSG00000256525 POLG2 Approved General c cytoplasm  
14870 ENSG00000256574 OR13A1 Uncertain Estimation of protein expression could not  
14871 ENSG00000256591 AP003108. Uncertain Estimation of protein expression could not  
14872 ENSG00000256671 LIMS4 Uncertain Estimation of protein expression could not  
14873 ENSG00000256683 ZNF350 Uncertain Nuclear a cytoplasm;nucleus  
14874 ENSG00000256713 PGA5 Supported Selective cytoplasm  
14875 ENSG00000256812 CAPNS2 Enhanced Cytoplasm cytoplasm  
14876 ENSG00000256977 LIMS3 Uncertain Estimation of protein expression could not  
14877 ENSG00000257008 GPR142 Uncertain Estimation of protein expression could not  
14878 ENSG00000257017 HP Enhanced Selective cytoplasm;plasma membrane  
14879 ENSG00000257046 AC011604. Uncertain Estimation of protein expression could not  
14880 ENSG00000257093 KIAA1147 Approved General c cytoplasm  
14881 ENSG00000257103 LSM14A Approved Cytoplasm cytoplasm  
14882 ENSG00000257115 OR11H12 Uncertain Estimation of protein expression could not  
14883 ENSG00000257138 TAS2R38 Uncertain Mainly c cytoplasm;plasma membrane  
14884 ENSG00000257315 ZBED6 Approved Nuclear enucleus  
14885 ENSG00000257335 MGAM Enhanced Distinct cytoplasm;plasma membrane  
14886 ENSG00000257365 FNTB Uncertain Cytoplasm cytoplasm  
14887 ENSG00000257390 AC023055. Uncertain Estimation of protein expression could not  
14888 ENSG00000257446 ZNF878 Uncertain Estimation of protein expression could not  
14889 ENSG00000257704 INAFM1 Uncertain Estimation of protein expression could not  
14890 ENSG00000257727 CNPY2 Supported Ubiquitous cytoplasm  
14891 ENSG00000257743 MGAM2 Enhanced Luminal m plasma membrane  
14892 ENSG00000257923 CUX1 Approved General n nucleus  
14893 ENSG00000258102 MAP1LC3B2 Uncertain Cytoplasm cytoplasm;plasma membrane  
14894 ENSG00000258130 AC106782. Uncertain Estimation of protein expression could not  
14895 ENSG00000258150 AC133555. Uncertain Estimation of protein expression could not  
14896 ENSG00000258289 CHURC1 Approved Nuclear a cytoplasm;nucleus  
14897 ENSG00000258315 C17orf49 Supported Ubiquitous nucleus  
14898 ENSG00000258429 PDF Approved General c cytoplasm  
14899 ENSG00000258436 RNASE12 Enhanced Cytoplasm cytoplasm  
14900 ENSG00000258453 OR11H2 Uncertain Estimation of protein expression could not  
14901 ENSG00000258465 AL139011. Approved Ubiquitous cytoplasm;nucleus  
14902 ENSG00000258472 AC005726. Uncertain Estimation of protein expression could not  
14903 ENSG00000258484 SPESP1 Enhanced Selective expression in acrosomes of sperm

14904 ENSG00000258529 AP001781.UncertainEstimation of protein expression could not  
14905 ENSG00000258643 BCL2L2-PAApproved Ubiquitounucleus  
14906 ENSG00000258644 SYNJ2BP-CApproved Granular cytoplasm  
14907 ENSG00000258724 AC105001.UncertainNuclear enucleus  
14908 ENSG00000258873 DUXA UncertainEstimation of protein expression could not  
14909 ENSG00000258890 CEP95 Approved Ubiquitoucytoplasm;plasma membrane  
14910 ENSG00000258947 TUBB3 Approved Cytoplasmcytoplasm  
14911 ENSG00000258992 TSPY1 SupportedCytoplasmcytoplasm  
14912 ENSG00000259112 NDUFC2-KCApproved Ubiquitoucytoplasm  
14913 ENSG00000259120 SMIM6 UncertainNuclear enucleus  
14914 ENSG00000259132 AL132780. Approved Membranoucytoplasm;plasma membrane  
14915 ENSG00000259207 ITGB3 Approved Cytoplasmcytoplasm  
14916 ENSG00000259288 BUB1B-PAKUncertainEstimation of protein expression could not  
14917 ENSG00000259305 ZHX1-C8orUncertainCytoplasmcytoplasm;nucleus  
14918 ENSG00000259332 ST20-MTHFUncertainEstimation of protein expression could not  
14919 ENSG00000259384 GH1 SupportedCytoplasmcytoplasm  
14920 ENSG00000259431 THTPA Approved Cytoplasmcytoplasm  
14921 ENSG00000259494 MRPL46 UncertainCytoplasmcytoplasm  
14922 ENSG00000259956 RBM15B Approved Nuclear enucleus  
14923 ENSG00000260001 TGFBR3L Enhanced Cytoplasmcytoplasm;plasma membrane  
14924 ENSG00000260027 HOXB7 UncertainCytoplasmcytoplasm;nucleus  
14925 ENSG00000260097 SPDYE6 Approved Distinct expression in acrosomes in spermat  
14926 ENSG00000260170 AC090527. Approved Cytoplasmcytoplasm  
14927 ENSG00000260230 FRRS1L Enhanced Cytoplasmcytoplasm  
14928 ENSG00000260272 AC093525.UncertainEstimation of protein expression could not  
14929 ENSG00000260287 TBC1D3G SupportedCytoplasmcytoplasm  
14930 ENSG00000260314 MRC1 Enhanced Cytoplasmcytoplasm;plasma membrane  
14931 ENSG00000260342 AC138811.UncertainEstimation of protein expression could not  
14932 ENSG00000260428 SCX UncertainEstimation of protein expression could not  
14933 ENSG00000260456 C16orf95 SupportedNuclear anucleus  
14934 ENSG00000260458 KCNJ18 UncertainEstimation of protein expression could not  
14935 ENSG00000260537 AC012184. Approved Cytoplasmcytoplasm;plasma membrane  
14936 ENSG00000260643 AC092718. Approved Expressed in several tissues.  
14937 ENSG00000260691 ANKRD20A1UncertainEstimation of protein expression could not  
14938 ENSG00000260836 AC245033.UncertainEstimation of protein expression could not  
14939 ENSG00000260903 XKR7 UncertainEstimation of protein expression could not  
14940 ENSG00000260916 CCPG1 Approved General ccytoplasm  
14941 ENSG00000261052 SUL1A3 SupportedCytoplasmcytoplasm  
14942 ENSG00000261115 TMEM178B UncertainSelectivecytoplasm  
14943 ENSG00000261150 EPPK1 Approved Cytoplasmcytoplasm  
14944 ENSG00000261221 ZNF865 Approved Low nuclenucleus  
14945 ENSG00000261236 BOP1 Approved Nuclear enucleus  
14946 ENSG00000261371 PECAM1 Enhanced Distinct expression in endothelial cells a  
14947 ENSG00000261456 TUBB8 UncertainEstimation of protein expression could not  
14948 ENSG00000261587 TMEM249 Approved Expression in spermatids.  
14949 ENSG00000261609 GAN Approved Cytoplasmcytoplasm  
14950 ENSG00000261652 C15orf65 Approved Cytoplasmcytoplasm  
14951 ENSG00000261678 SCRT1 UncertainEstimation of protein expression could not  
14952 ENSG00000261701 HPR SupportedGranular cytoplasm;plasma membrane  
14953 ENSG00000261717 AC009163.UncertainEstimation of protein expression could not  
14954 ENSG00000261796 ISY1-RAB4Approved Ubiquitounucleus;plasma membrane  
14955 ENSG00000261832 AC138894.UncertainEstimation of protein expression could not  
14956 ENSG00000261857 MIA Approved Cytoplasmcytoplasm  
14957 ENSG00000261934 PCDHGA9 UncertainEstimation of protein expression could not  
14958 ENSG00000262179 MYMX Approved Expressed in skeletal muscle fibers.



|       |                 |           |           |                                             |
|-------|-----------------|-----------|-----------|---------------------------------------------|
| 14959 | ENSG00000262209 | PCDHGB3   | Uncertain | Estimation of protein expression could not  |
| 14960 | ENSG00000262246 | COR07     | Uncertain | Cytoplasm cytoplasm                         |
| 14961 | ENSG00000262484 | CCER2     | Uncertain | Estimation of protein expression could not  |
| 14962 | ENSG00000262576 | PCDHGA4   | Uncertain | Estimation of protein expression could not  |
| 14963 | ENSG00000262655 | SPON1     | Uncertain | Expressed in some tissues, mainly expressed |
| 14964 | ENSG00000262660 | AC139530. | Approved  | Ubiquitous cytoplasm                        |
| 14965 | ENSG00000262814 | MRPL12    | Supported | Ubiquitous cytoplasm                        |
| 14966 | ENSG00000262874 | C19orf84  | Uncertain | Granular cytoplasm                          |
| 14967 | ENSG00000262919 | CCNQ      | Uncertain | Cytoplasm cytoplasm                         |
| 14968 | ENSG00000263001 | GTF2I     | Supported | Ubiquitous cytoplasm;nucleus                |
| 14969 | ENSG00000263002 | ZNF234    | Approved  | Nuclear enucleus                            |
| 14970 | ENSG00000263020 | AL662899. | Uncertain | Cytoplasm cytoplasm                         |
| 14971 | ENSG00000263155 | MYZAP     | Approved  | Most abundant expression in intercalated d: |
| 14972 | ENSG00000263264 | AC119396. | Uncertain | Estimation of protein expression could not  |
| 14973 | ENSG00000263353 | PPIAL4A   | Uncertain | Estimation of protein expression could not  |
| 14974 | ENSG00000263464 | PPIAL4C   | Uncertain | Estimation of protein expression could not  |
| 14975 | ENSG00000263465 | SRSF8     | Supported | General nucleus                             |
| 14976 | ENSG00000263513 | FAM72C    | Uncertain | Estimation of protein expression could not  |
| 14977 | ENSG00000263528 | IKBKE     | Approved  | Cytoplasm cytoplasm                         |
| 14978 | ENSG00000263639 | MSMB      | Enhanced  | Cytoplasm cytoplasm                         |
| 14979 | ENSG00000263761 | GDF2      | Uncertain | Estimation of protein expression could not  |
| 14980 | ENSG00000263956 | NBPF11    | Uncertain | Cytoplasm cytoplasm                         |
| 14981 | ENSG00000264343 | NOTCH2NL  | Uncertain | General cytoplasm                           |
| 14982 | ENSG00000264424 | MYH4      | Supported | Cytoplasm cytoplasm                         |
| 14983 | ENSG00000264522 | OTUD7B    | Supported | General nucleus cytoplasm;nucleus           |
| 14984 | ENSG00000264668 | AC138696. | Uncertain | Estimation of protein expression could not  |
| 14985 | ENSG00000264717 | NPY4R2    | Uncertain | Estimation of protein expression could not  |
| 14986 | ENSG00000265107 | GJA5      | Enhanced  | Cytoplasm cytoplasm                         |
| 14987 | ENSG00000265118 | AC134669. | Uncertain | Estimation of protein expression could not  |
| 14988 | ENSG00000265203 | RBP3      | Enhanced  | Cytoplasm cytoplasm                         |
| 14989 | ENSG00000265241 | RBM8A     | Supported | Ubiquitous nucleus                          |
| 14990 | ENSG00000265354 | TIMM23    | Approved  | Ubiquitous cytoplasm                        |
| 14991 | ENSG00000265491 | RNF115    | Approved  | General cytoplasm                           |
| 14992 | ENSG00000265590 | AP000275. | Approved  | Cytoplasm cytoplasm                         |
| 14993 | ENSG00000265681 | RPL17     | Supported | Ubiquitous cytoplasm                        |
| 14994 | ENSG00000265817 | FSBP      | Approved  | Nuclear cytoplasm;nucleus                   |
| 14995 | ENSG00000265972 | TXNIP     | Approved  | Cytoplasm cytoplasm                         |
| 14996 | ENSG00000266028 | SRGAP2    | Approved  | Nuclear cytoplasm;nucleus                   |
| 14997 | ENSG00000266074 | BAHCC1    | Uncertain | Estimation of protein expression could not  |
| 14998 | ENSG00000266094 | RASSF5    | Approved  | Cytoplasm cytoplasm;plasma membrane         |
| 14999 | ENSG00000266173 | STRADA    | Approved  | General cytoplasm                           |
| 15000 | ENSG00000266202 | AC005697. | Uncertain | Estimation of protein expression could not  |
| 15001 | ENSG00000266265 | KLF14     | Uncertain | Estimation of protein expression could not  |
| 15002 | ENSG00000266338 | NBPF15    | Approved  | Cytoplasm cytoplasm                         |
| 15003 | ENSG00000266412 | NCOA4     | Uncertain | Cytoplasm cytoplasm                         |
| 15004 | ENSG00000266524 | GDF10     | Uncertain | General cytoplasm;nucleus                   |
| 15005 | ENSG00000266733 | TBC1D29   | Uncertain | Estimation of protein expression could not  |
| 15006 | ENSG00000266826 | AC011195. | Uncertain | Estimation of protein expression could not  |
| 15007 | ENSG00000266967 | AARSD1    | Supported | Cytoplasm cytoplasm                         |
| 15008 | ENSG00000267001 | AC006538. | Uncertain | Mainly nucleus                              |
| 15009 | ENSG00000267041 | ZNF850    | Uncertain | Estimation of protein expression could not  |
| 15010 | ENSG00000267179 | AC008770. | Uncertain | Nuclear cytoplasm;nucleus                   |
| 15011 | ENSG00000267281 | AC023509. | Uncertain | Estimation of protein expression could not  |
| 15012 | ENSG00000267335 | AC008687. | Uncertain | Estimation of protein expression could not  |
| 15013 | ENSG00000267368 | UPK3BL1   | Supported | Membrane plasma membrane                    |

|       |                 |           |           |                                            |
|-------|-----------------|-----------|-----------|--------------------------------------------|
| 15014 | ENSG00000267467 | APOC4     | Approved  | Plasma membrane                            |
| 15015 | ENSG00000267508 | ZNF285    | Uncertain | Cytoplasm; nucleus                         |
| 15016 | ENSG00000267534 | S1PR2     | Approved  | Distinct expression in erythrocytes and in |
| 15017 | ENSG00000267561 | AC093155  | Approved  | Granular cytoplasm                         |
| 15018 | ENSG00000267631 | CGB1      | Uncertain | RNA-based expert annotation gave inconclus |
| 15019 | ENSG00000267673 | FDX2      | Approved  | Nuclear enucleus                           |
| 15020 | ENSG00000267680 | ZNF224    | Approved  | Ubiquitous; plasma membrane                |
| 15021 | ENSG00000267796 | LIN37     | Uncertain | Ubiquitous cytoplasm                       |
| 15022 | ENSG00000267855 | NDUFA7    | Enhanced  | Granular cytoplasm                         |
| 15023 | ENSG00000267881 | AC243967  | Approved  | Cytoplasm                                  |
| 15024 | ENSG00000268009 | SSX4      | Approved  | Nuclear enucleus                           |
| 15025 | ENSG00000268043 | NBPF12    | Approved  | Cytoplasm                                  |
| 15026 | ENSG00000268083 | AC008982  | Uncertain | Estimation of protein expression could not |
| 15027 | ENSG00000268104 | SLC6A14   | Uncertain | Mainly cytoplasm                           |
| 15028 | ENSG00000268182 | SMIM17    | Enhanced  | Distinct expression in the CNS.            |
| 15029 | ENSG00000268235 | TCP11X1   | Uncertain | Estimation of protein expression could not |
| 15030 | ENSG00000268350 | FAM156A   | Approved  | Cytoplasm                                  |
| 15031 | ENSG00000268447 | SSX2B     | Supported | Nuclear enucleus                           |
| 15032 | ENSG00000268500 | AC018755  | Approved  | Cytoplasm                                  |
| 15033 | ENSG00000268629 | TEX13A    | Enhanced  | Cytoplasm                                  |
| 15034 | ENSG00000268651 | CTAG1A    | Enhanced  | Distinct cytoplasm                         |
| 15035 | ENSG00000268674 | FAM231C   | Uncertain | Estimation of protein expression could not |
| 15036 | ENSG00000268738 | HSFX2     | Supported | Expression in testis.                      |
| 15037 | ENSG00000268750 | AC010522  | Uncertain | Estimation of protein expression could not |
| 15038 | ENSG00000268861 | AC008878  | Supported | Cytoplasm                                  |
| 15039 | ENSG00000268870 | AC008758  | Uncertain | General nucleus                            |
| 15040 | ENSG00000268940 | CT45A1    | Supported | Selective nucleus                          |
| 15041 | ENSG00000269035 | AC010319  | Approved  | Expression plasma membrane                 |
| 15042 | ENSG00000269058 | CALR3     | Enhanced  | Selective cytoplasm                        |
| 15043 | ENSG00000269096 | CT45A3    | Supported | Selective nucleus                          |
| 15044 | ENSG00000269113 | TRABD2B   | Approved  | Ubiquitous cytoplasm                       |
| 15045 | ENSG00000269313 | MAGIX     | Uncertain | Estimation of protein expression could not |
| 15046 | ENSG00000269335 | IKBKG     | Uncertain | General cytoplasm                          |
| 15047 | ENSG00000269343 | ZNF587B   | Uncertain | Estimation of protein expression could not |
| 15048 | ENSG00000269404 | SPIB      | Uncertain | Cytoplasm                                  |
| 15049 | ENSG00000269405 | NXF2      | Uncertain | Estimation of protein expression could not |
| 15050 | ENSG00000269437 | NXF2B     | Uncertain | Estimation of protein expression could not |
| 15051 | ENSG00000269466 | H3.Y      | Uncertain | RNA-based expert annotation gave inconclus |
| 15052 | ENSG00000269502 | DMRTC1    | Uncertain | Estimation of protein expression could not |
| 15053 | ENSG00000269547 | AC011455  | Uncertain | Estimation of protein expression could not |
| 15054 | ENSG00000269556 | TMEM185A  | Uncertain | Estimation of protein expression could not |
| 15055 | ENSG00000269586 | CT45A10   | Supported | Selective nucleus                          |
| 15056 | ENSG00000269590 | AC010422  | Uncertain | Estimation of protein expression could not |
| 15057 | ENSG00000269713 | NBPF9     | Approved  | Cytoplasm                                  |
| 15058 | ENSG00000269743 | SLC25A53  | Uncertain | Estimation of protein expression could not |
| 15059 | ENSG00000269791 | SSX4B     | Approved  | Nuclear enucleus                           |
| 15060 | ENSG00000269881 | AC004754  | Uncertain | Estimation of protein expression could not |
| 15061 | ENSG00000269897 | COMMD3-BM | Uncertain | Expression in a few tissues, including tes |
| 15062 | ENSG00000269955 | C7orf55-L | Approved  | Cytoplasm                                  |
| 15063 | ENSG00000270011 | ZNF559-ZN | Approved  | Expression in several tissues, most abunda |
| 15064 | ENSG00000270181 | BIVM-ERCC | Uncertain | Nuclear enucleus                           |
| 15065 | ENSG00000270276 | HIST2H4B  | Supported | General nucleus                            |
| 15066 | ENSG00000270339 | AC243756  | Uncertain | Estimation of protein expression could not |
| 15067 | ENSG00000270379 | HEATR9    | Uncertain | Estimation of protein expression could not |
| 15068 | ENSG00000270629 | NBPF14    | Uncertain | Cytoplasm                                  |

15069 ENSG00000270647 TAF15 Supported Ubiquitous nucleus  
15070 ENSG00000270757 HSPE1-MOB Approved General cytoplasm  
15071 ENSG00000270765 GAS2L2 Enhanced Distinct plasma membrane  
15072 ENSG00000270800 RPS10-NUD Uncertain Cytoplasm cytoplasm  
15073 ENSG00000270882 HIST2H4A Approved General nucleus  
15074 ENSG00000270885 RASL10B Enhanced High expression in skeletal muscle and bone  
15075 ENSG00000270898 GPR75-ASB Uncertain Estimation of protein expression could not  
15076 ENSG00000270946 CT45A9 Supported Selective nucleus  
15077 ENSG00000271079 CTAGE15 Uncertain Estimation of protein expression could not  
15078 ENSG00000271254 AC240274. Uncertain Cytoplasm cytoplasm  
15079 ENSG00000271271 UGT2A2 Uncertain Estimation of protein expression could not  
15080 ENSG00000271321 CTAGE6 Uncertain Estimation of protein expression could not  
15081 ENSG00000271383 NBPF19 Uncertain Estimation of protein expression could not  
15082 ENSG00000271425 NBPF10 Approved Cytoplasm cytoplasm  
15083 ENSG00000271449 CT45A2 Supported Selective nucleus  
15084 ENSG00000271567 PPIAL4E Uncertain Estimation of protein expression could not  
15085 ENSG00000271605 MILR1 Enhanced Expression in subset of immune cells in mouse  
15086 ENSG00000272031 ANKRD34A Uncertain Estimation of protein expression could not  
15087 ENSG00000272104 Z84492.2 Uncertain Estimation of protein expression could not  
15088 ENSG00000272196 HIST2H2AA Supported Ubiquitous nucleus  
15089 ENSG00000272325 NUDT3 Uncertain Cytoplasm cytoplasm;nucleus  
15090 ENSG00000272391 POM121C Approved Cytoplasm cytoplasm  
15091 ENSG00000272414 FAM47E-ST Approved Cytoplasm cytoplasm;plasma membrane  
15092 ENSG00000272514 CFAP206 Approved Membrane cytoplasm;plasma membrane  
15093 ENSG00000272617 COG8 Approved Cytoplasm cytoplasm  
15094 ENSG00000272636 DOC2B Uncertain Cytoplasm cytoplasm  
15095 ENSG00000272886 DCP1A Approved Cytoplasm cytoplasm  
15096 ENSG00000273079 GRIN2B Approved Selective cytoplasm  
15097 ENSG00000273136 NBPF26 Uncertain Cytoplasm cytoplasm  
15098 ENSG00000273217 AC008695. Uncertain Estimation of protein expression could not  
15099 ENSG00000273274 ZBTB8B Enhanced Strong cytoplasm  
15100 ENSG00000273513 TBC1D3K Approved Cytoplasm cytoplasm  
15101 ENSG00000273514 FOXD4L6 Uncertain Estimation of protein expression could not  
15102 ENSG00000273542 HIST1H4K Supported General nucleus  
15103 ENSG00000273559 CWC25 Supported Nuclear nucleus  
15104 ENSG00000273590 SMIM11B Uncertain RNA-data suggests a general expression pattern  
15105 ENSG00000273604 EPOP Enhanced Membrane plasma membrane  
15106 ENSG00000273611 ZNHIT3 Approved Mainly nucleus  
15107 ENSG00000273696 CT45A7 Supported Selective nucleus  
15108 ENSG00000273703 HIST1H2BM Supported Ubiquitous nucleus  
15109 ENSG00000273706 LHX1 Enhanced Nuclear nucleus  
15110 ENSG00000273748 AL592183. Approved Expression in endothelial cells and fibroblasts  
15111 ENSG00000273749 CYFIP1 Approved Cytoplasm cytoplasm  
15112 ENSG00000273802 HIST1H2BG Supported Ubiquitous nucleus  
15113 ENSG00000273841 TAF9 Approved Nuclear nucleus  
15114 ENSG00000273899 NOL12 Uncertain General cytoplasm;nucleus  
15115 ENSG00000273976 GOLGA6L1 Uncertain Estimation of protein expression could not  
15116 ENSG00000273983 HIST1H3G Approved Ubiquitous nucleus  
15117 ENSG00000274070 CASTOR2 Uncertain Estimation of protein expression could not  
15118 ENSG00000274102 OR4M2 Uncertain Estimation of protein expression could not  
15119 ENSG00000274211 SOCS7 Approved Nuclear nucleus;plasma membrane  
15120 ENSG00000274226 TBC1D3H Approved Cytoplasm cytoplasm  
15121 ENSG00000274252 GGTLC3 Uncertain Estimation of protein expression could not  
15122 ENSG00000274267 HIST1H3B Approved Ubiquitous nucleus  
15123 ENSG00000274274 GAGE13 Supported Selective expression in spermatogonia.

|       |                 |           |           |                                             |
|-------|-----------------|-----------|-----------|---------------------------------------------|
| 15124 | ENSG00000274276 | CBSL      | Supported | Selective expression in liver, hepatocytes  |
| 15125 | ENSG00000274286 | ADRA2B    | Approved  | Cytoplasm cytoplasm                         |
| 15126 | ENSG00000274290 | HIST1H2BE | Supported | Ubiquitous nucleus                          |
| 15127 | ENSG00000274349 | ZNF658    | Uncertain | Estimation of protein expression could not  |
| 15128 | ENSG00000274391 | TPTE      | Enhanced  | Distinct cytoplasm                          |
| 15129 | ENSG00000274419 | TBC1D3D   | Approved  | Cytoplasm cytoplasm                         |
| 15130 | ENSG00000274512 | TBC1D3L   | Approved  | Cytoplasm cytoplasm                         |
| 15131 | ENSG00000274523 | RCC1L     | Approved  | General cytoplasm                           |
| 15132 | ENSG00000274529 | SEBOX     | Uncertain | Estimation of protein expression could not  |
| 15133 | ENSG00000274559 | H2BFS     | Uncertain | Estimation of protein expression could not  |
| 15134 | ENSG00000274600 | RIMBP3B   | Supported | Selective cytoplasm                         |
| 15135 | ENSG00000274611 | TBC1D3    | Approved  | Cytoplasm cytoplasm                         |
| 15136 | ENSG00000274618 | HIST1H4F  | Supported | General nucleus                             |
| 15137 | ENSG00000274641 | HIST1H2B0 | Supported | Ubiquitous nucleus                          |
| 15138 | ENSG00000274736 | CCL23     | Uncertain | RNA-based expert annotation gave inconclus: |
| 15139 | ENSG00000274744 | ELOA3D    | Uncertain | Estimation of protein expression could not  |
| 15140 | ENSG00000274750 | HIST1H3E  | Approved  | Ubiquitous nucleus                          |
| 15141 | ENSG00000274791 | F8A2      | Uncertain | Cytoplasm cytoplasm                         |
| 15142 | ENSG00000274792 | AC171558. | Uncertain | Estimation of protein expression could not  |
| 15143 | ENSG00000274808 | TBC1D3B   | Approved  | Cytoplasm cytoplasm                         |
| 15144 | ENSG00000274933 | TBC1D3I   | Approved  | Cytoplasm cytoplasm                         |
| 15145 | ENSG00000274944 | AL139260. | Uncertain | Estimation of protein expression could not  |
| 15146 | ENSG00000274997 | HIST1H2AH | Supported | Ubiquitous nucleus                          |
| 15147 | ENSG00000275004 | ZNF280B   | Uncertain | Estimation of protein expression could not  |
| 15148 | ENSG00000275023 | MLLT6     | Approved  | Mainly nucleus                              |
| 15149 | ENSG00000275052 | PPP4R3B   | Approved  | Ubiquitous nucleus                          |
| 15150 | ENSG00000275066 | SYNRG     | Approved  | Ubiquitous cytoplasm                        |
| 15151 | ENSG00000275074 | NUDT18    | Approved  | Cytoplasm cytoplasm                         |
| 15152 | ENSG00000275111 | ZNF2      | Uncertain | Estimation of protein expression could not  |
| 15153 | ENSG00000275113 | GAGE2E    | Approved  | Selective expression in spermatogonia.      |
| 15154 | ENSG00000275126 | HIST1H4L  | Approved  | General nucleus                             |
| 15155 | ENSG00000275183 | LENG9     | Enhanced  | Nucleolar nucleus                           |
| 15156 | ENSG00000275221 | HIST1H2AK | Supported | Ubiquitous nucleus                          |
| 15157 | ENSG00000275249 | AC171558. | Uncertain | Estimation of protein expression could not  |
| 15158 | ENSG00000275302 | CCL4      | Approved  | Plasma plasma membrane                      |
| 15159 | ENSG00000275342 | PRAG1     | Uncertain | Cytoplasm cytoplasm                         |
| 15160 | ENSG00000275379 | HIST1H3I  | Approved  | Ubiquitous nucleus                          |
| 15161 | ENSG00000275395 | FCGBP     | Enhanced  | Expression in goblet cells.                 |
| 15162 | ENSG00000275410 | HNF1B     | Enhanced  | Nuclear nucleus                             |
| 15163 | ENSG00000275464 | FP565260. | Uncertain | Estimation of protein expression could not  |
| 15164 | ENSG00000275489 | C17orf98  | Uncertain | Estimation of protein expression could not  |
| 15165 | ENSG00000275553 | ELOA3C    | Uncertain | Estimation of protein expression could not  |
| 15166 | ENSG00000275663 | HIST1H4G  | Supported | General nucleus                             |
| 15167 | ENSG00000275700 | AATF      | Uncertain | Ubiquitous cytoplasm                        |
| 15168 | ENSG00000275713 | HIST1H2BH | Supported | Ubiquitous nucleus                          |
| 15169 | ENSG00000275714 | HIST1H3A  | Approved  | Ubiquitous nucleus                          |
| 15170 | ENSG00000275722 | LYZL6     | Enhanced  | Selective cytoplasm; plasma membrane        |
| 15171 | ENSG00000275740 | AC091959. | Approved  | Nuclear nucleus                             |
| 15172 | ENSG00000275778 | AC018630. | Uncertain | Estimation of protein expression could not  |
| 15173 | ENSG00000275793 | RIMBP3    | Supported | Selective cytoplasm                         |
| 15174 | ENSG00000275832 | ARHGAP23  | Approved  | General cytoplasm; nucleus                  |
| 15175 | ENSG00000275835 | TUBGCP5   | Supported | Cytoplasm cytoplasm                         |
| 15176 | ENSG00000275895 | U2AF1L5   | Supported | Ubiquitous nucleus                          |
| 15177 | ENSG00000275896 | PRSS2     | Supported | Selective cytoplasm                         |
| 15178 | ENSG00000275993 | SIK1B     | Uncertain | Estimation of protein expression could not  |

|       |                 |           |                                                      |
|-------|-----------------|-----------|------------------------------------------------------|
| 15179 | ENSG00000276023 | DUSP14    | Approved General ccytoplasm                          |
| 15180 | ENSG00000276043 | UHRF1     | Enhanced Strong nunucleus                            |
| 15181 | ENSG00000276045 | ORAI1     | Approved Cytoplasmcytoplasm                          |
| 15182 | ENSG00000276076 | CRYAA2    | Approved Cytoplasmcytoplasm                          |
| 15183 | ENSG00000276180 | HIST1H4I  | Approved General nnucleus                            |
| 15184 | ENSG00000276203 | ANKRD20A3 | UncertainEstimation of protein expression could not  |
| 15185 | ENSG00000276231 | PIK3R6    | Approved Cytoplasmcytoplasm                          |
| 15186 | ENSG00000276293 | PIP4K2B   | Approved Selectivecytoplasm                          |
| 15187 | ENSG00000276345 | AC004556. | UncertainGranular cytoplasm                          |
| 15188 | ENSG00000276368 | HIST1H2AJ | SupportedUbiquitousnucleus                           |
| 15189 | ENSG00000276409 | CCL14     | UncertainCytoplasmcytoplasm;plasma membrane          |
| 15190 | ENSG00000276410 | HIST1H2BB | SupportedUbiquitousnucleus                           |
| 15191 | ENSG00000276430 | FAM25C    | UncertainEstimation of protein expression could not  |
| 15192 | ENSG00000276547 | PCDHGB5   | UncertainEstimation of protein expression could not  |
| 15193 | ENSG00000276644 | DACH1     | Approved Nuclear enucleus                            |
| 15194 | ENSG00000276903 | HIST1H2AL | SupportedUbiquitousnucleus                           |
| 15195 | ENSG00000276911 | BX248415. | SupportedDistinct plasma membrane                    |
| 15196 | ENSG00000276966 | HIST1H4E  | SupportedGeneral nnucleus                            |
| 15197 | ENSG00000277075 | HIST1H2AE | SupportedUbiquitousnucleus                           |
| 15198 | ENSG00000277149 | TYW1B     | Approved Cytoplasmcytoplasm                          |
| 15199 | ENSG00000277150 | F8A3      | UncertainCytoplasmcytoplasm                          |
| 15200 | ENSG00000277157 | HIST1H4D  | SupportedGeneral nnucleus                            |
| 15201 | ENSG00000277196 | AC007325. | UncertainGeneral ccytoplasm                          |
| 15202 | ENSG00000277203 | F8A1      | UncertainCytoplasmcytoplasm                          |
| 15203 | ENSG00000277224 | HIST1H2BF | SupportedUbiquitousnucleus                           |
| 15204 | ENSG00000277258 | PCGF2     | UncertainEstimation of protein expression could not  |
| 15205 | ENSG00000277277 | CU633980. | UncertainEstimation of protein expression could not  |
| 15206 | ENSG00000277322 | GOLGA6L6  | UncertainEstimation of protein expression could not  |
| 15207 | ENSG00000277363 | SRCIN1    | Enhanced Cytoplasmcytoplasm                          |
| 15208 | ENSG00000277399 | GPR179    | UncertainEstimation of protein expression could not  |
| 15209 | ENSG00000277443 | MARCKS    | Enhanced Cytoplasmcytoplasm;plasma membrane          |
| 15210 | ENSG00000277462 | ZNF670    | UncertainNuclear enucleus                            |
| 15211 | ENSG00000277494 | GPIHBP1   | Enhanced Cytoplasmcytoplasm                          |
| 15212 | ENSG00000277535 | AL772284. | SupportedCytoplasmcytoplasm                          |
| 15213 | ENSG00000277586 | NEFL      | Enhanced Distinct expression of axons in the CNS and |
| 15214 | ENSG00000277666 | AC136352. | UncertainEstimation of protein expression could not  |
| 15215 | ENSG00000277669 | AC009086. | UncertainEstimation of protein expression could not  |
| 15216 | ENSG00000277758 | F0681492. | Approved Mainly nunucleus                            |
| 15217 | ENSG00000277775 | HIST1H3F  | Approved Ubiquitousnucleus                           |
| 15218 | ENSG00000277791 | PSMB3     | Approved General ccytoplasm;nucleus                  |
| 15219 | ENSG00000277865 | GOLGA6L22 | UncertainEstimation of protein expression could not  |
| 15220 | ENSG00000277972 | CISD3     | Approved Cytoplasmcytoplasm                          |
| 15221 | ENSG00000278023 | RDM1      | Enhanced Cytoplasmcytoplasm                          |
| 15222 | ENSG00000278053 | DDX52     | UncertainEstimation of protein expression could not  |
| 15223 | ENSG00000278085 | CT45A8    | SupportedSelectivenucleus                            |
| 15224 | ENSG00000278129 | ZNF8      | UncertainUbiquitouscytoplasm;nucleus                 |
| 15225 | ENSG00000278139 | AL358075. | UncertainEstimation of protein expression could not  |
| 15226 | ENSG00000278195 | SSTR3     | Approved High cytocytoplasm                          |
| 15227 | ENSG00000278224 | PRICKLE4  | Approved General ccytoplasm;nucleus                  |
| 15228 | ENSG00000278259 | MYO19     | Approved General ccytoplasm                          |
| 15229 | ENSG00000278272 | HIST1H3C  | Approved Ubiquitousnucleus                           |
| 15230 | ENSG00000278289 | CT45A6    | SupportedSelectivenucleus                            |
| 15231 | ENSG00000278299 | TBC1D3C   | Approved Cytoplasmcytoplasm                          |
| 15232 | ENSG00000278311 | GGNBP2    | Approved Nuclear enucleus                            |
| 15233 | ENSG00000278318 | ZNF229    | UncertainEstimation of protein expression could not  |

15234 ENSG00000278463 HIST1H2AB Supported Ubiquitous nucleus  
 15235 ENSG00000278535 DHRS11 Enhanced Secreted positivity in gastrointestinal tra  
 15236 ENSG00000278540 ACACA Approved Cytoplasm cytoplasm  
 15237 ENSG00000278588 HIST1H2BI Supported Ubiquitous nucleus  
 15238 ENSG00000278599 TBC1D3E Approved Cytoplasm cytoplasm  
 15239 ENSG00000278619 MRM1 Supported Granular cytoplasm  
 15240 ENSG00000278637 HIST1H4A Supported Ubiquitous nucleus  
 15241 ENSG00000278646 AC008162. Supported Cytoplasm cytoplasm  
 15242 ENSG00000278674 ELOA3B Uncertain Estimation of protein expression could not  
 15243 ENSG00000278677 HIST1H2AM Supported Ubiquitous nucleus  
 15244 ENSG00000278705 HIST1H4B Supported General nucleus  
 15245 ENSG00000278828 HIST1H3H Approved Ubiquitous nucleus  
 15246 ENSG00000278845 MRPL45 Enhanced Ubiquitous mitochondrial expression  
 15247 ENSG00000278961 SMIM34B Uncertain Estimation of protein expression could not  
 15248 ENSG00000279395 OR5L1 Uncertain Estimation of protein expression could not  
 15249 ENSG00000279408 AC135068. Uncertain Estimation of protein expression could not  
 15250 ENSG00000279782 PPIAL4F Uncertain Estimation of protein expression could not  
 15251 ENSG00000279804 PRAMEF18 Uncertain Estimation of protein expression could not  
 15252 ENSG00000280071 FP565260. Uncertain General cytoplasm  
 15253 ENSG00000280204 OR1S1 Uncertain Estimation of protein expression could not  
 15254 ENSG00000280709 LINC02203 Uncertain RNA-based expert annotation gave inconclus  
 15255 ENSG00000280789 PAGR1 Uncertain Cytoplasm cytoplasm;nucleus  
 15256 ENSG00000280969 RPS4Y2 Uncertain Estimation of protein expression could not  
 15257 ENSG00000280987 MATR3 Supported Ubiquitous nucleus  
 15258 ENSG00000281028 AC104662. Uncertain Estimation of protein expression could not  
 15259 ENSG00000281039 AC005154. Uncertain Estimation of protein expression could not  
 15260 ENSG00000281613 AL365214. Uncertain Estimation of protein expression could not  
 15261 ENSG00000282218 AL132671. Uncertain Estimation of protein expression could not  
 15262 ENSG00000282246 AL157392. Uncertain Estimation of protein expression could not  
 15263 ENSG00000282988 AL031777. Uncertain Estimation of protein expression could not  
 15264 ENSG00000283149 AC068631. Uncertain Expressed in most tissues.  
 15265 ENSG00000283154 IQCJ-SCHI Approved Cytoplasm cytoplasm  
 15266 ENSG00000283321 AC019117. Uncertain Estimation of protein expression could not  
 15267 ENSG00000283374 TXNRD3NB Uncertain Estimation of protein expression could not  
 15268 ENSG00000283496 ZNF511-PR Supported Cytoplasm cytoplasm  
 15269 ENSG00000283528 TCAF2C Uncertain Estimation of protein expression could not  
 15270 ENSG00000283632 EXOC3L2 Approved Cytoplasm cytoplasm  
 15271 ENSG00000283706 PRSS50 Supported Selective cytoplasm  
 15272 ENSG00000283765 AC131160. Uncertain Estimation of protein expression could not  
 15273 ENSG00000283782 AC116366. Approved General nucleus  
 15274 ENSG00000283900 Z98749.3 Uncertain Expressed in several tissues.  
 15275 ENSG00000284057 AP001273. Approved Expressed in kidney, liver, thyroid gland,  
 15276 ENSG00000284194 SC02 Uncertain Expressed in several tissues.  
 15277 ENSG00000284292 AC004922. Uncertain Membranous cytoplasm;plasma membrane  
 15278 ENSG00000284308 C2orf81 Enhanced Cytoplasm cytoplasm;plasma membrane  
 15279 ENSG00000284512 AC092718. Uncertain Estimation of protein expression could not  
 15280 ENSG00000284554 AL022318. Uncertain Expressed in most organs, including lymphoi  
 15281 ENSG00000284662 OR4F16 Uncertain RNA-based expert annotation gave inconclus  
 15282 ENSG00000284723 OR8S1 Uncertain RNA-based expert annotation gave inconclus  
 15283 ENSG00000284733 OR4F29 Uncertain RNA-based expert annotation gave inconclus  
 15284 ENSG00000284741 PDE11A Uncertain Estimation of protein expression could not  
 15285 ENSG00000284755 FAM212B Uncertain RNA-based expert annotation gave inconclus  
 15286 ENSG00000284762 AC022414. Supported Cytoplasm cytoplasm  
 15287 ENSG00000284770 TBCE Approved General cytoplasm  
 15288 ENSG00000284776 AL121900. Uncertain Cytoplasm cytoplasm

15289 ENSG00000284849 AC079341. Approved Expressed in the brain.  
15290 ENSG00000284862 CCDC39 Enhanced Expression in cilia and flagella.  
15291 ENSG00000284906 AC091057. Uncertain Estimation of protein expression could not  
15292 ENSG00000284917 EEF1AKMT4 Uncertain Mainly cytoplasm  
15293 ENSG00000284922 AP000812. Approved General cytoplasm  
15294 ENSG00000284931 AC104389. Uncertain Positive staining in erythrocytes and expro  
15295 ENSG00000284934 DIABLO Uncertain Expressed in several tissues.  
15296 ENSG00000284969 AL049629. Uncertain Estimation of protein expression could not  
15297 ENSG00000284981 UPK3BL2 Approved Cytoplasm cytoplasm  
15298 ENSG00000285043 ALDOA Uncertain Cytoplasm cytoplasm  
15299 ENSG00000285053 TBCE Approved General cytoplasm  
15300 ENSG00000285077 ARHGAP11B Uncertain Estimation of protein expression could not  
15301 ENSG00000285130 AL358113. Uncertain Cytoplasm cytoplasm; plasma membrane  
15302 ENSG00000285188 AC008397. Uncertain Estimation of protein expression could not  
15303 ENSG00000285245 AL162417. Uncertain General cytoplasm  
15304 ENSG00000285283 AL035078. Uncertain Granular cytoplasm  
15305 ENSG00000285292 ABCF2 Approved Cytoplasm cytoplasm  
15306 ENSG00000285304 Z83844.3 Approved Cytoplasm cytoplasm  
15307 ENSG00000285330 AC126283. Uncertain Estimation of protein expression could not  
15308 ENSG00000285396 AC012476. Approved Expression in several different tissue type  
15309 ENSG00000285404 Z82190.2 Uncertain RNA-based expert annotation gave inconclus  
15310 ENSG00000285458 AC093827. Uncertain General cytoplasm; plasma membrane  
15311 ENSG00000285472 AC134980. Uncertain Estimation of protein expression could not  
15312 ENSG00000285480 AC021097. Uncertain Estimation of protein expression could not  
15313 ENSG00000285509 AP000646. Uncertain Cytoplasm cytoplasm

| UniProt ID | SwissProt annotations                    | High quality dataset? |
|------------|------------------------------------------|-----------------------|
| O43657     | Membrane; Multi-pass membrane protein.   | 0                     |
| Q9H2S6     | Isoform 1: Membrane {ECO:0000305}; Sing  | 0                     |
| O60762     | Endoplasmic reticulum.                   | 0                     |
| Q8IZE3     | Cytoplasm {ECO:0000269 PubMed:12651155}  | 0                     |
| Q9NSG2     |                                          | 0                     |
| P09769     | Cell membrane {ECO:0000305}; Lipid-anch  | 0                     |
| P08603     | Secreted.                                | 0                     |
| Q9BTY2     | Secreted {ECO:0000305}.                  | 0                     |
| P48506     |                                          | 0                     |
| P23511     | Nucleus.                                 | 1                     |
| Q6P499     | Membrane {ECO:0000305}; Multi-pass mem   | 0                     |
| Q9Y4W2     | Nucleus, nucleolus {ECO:0000269 PubMed:  | 0                     |
| Q9Y6X5     | Cell membrane {ECO:0000269 PubMed:2299   | 0                     |
| Q13275     | Secreted {ECO:0000250}.                  | 0                     |
| P13569     | Apical cell membrane {ECO:0000269 PubMe  | 0                     |
| Q9P2G1     |                                          | 0                     |
| Q16850     | Endoplasmic reticulum membrane {ECO:00   | 1                     |
| O00522     | Cytoplasm, cytoskeleton. Cell membrane;  | 0                     |
| Q92934     | Mitochondrion outer membrane. Cytoplasm  | 0                     |
| P28838     | Cytoplasm.                               | 1                     |
| P14209     | Membrane {ECO:0000305}; Single-pass typ  | 1                     |
| O14792     | Golgi apparatus lumen {ECO:0000305}.     | 0                     |
| P19801     | Secreted, extracellular space.           | 0                     |
| Q76N89     | Cytoplasm {ECO:0000269 PubMed:14684739}  | 0                     |
| Q9Y6D9     | Nucleus. Chromosome, centromere, kinet   | 0                     |
| Q14847     | Cytoplasm, cell cortex {ECO:0000250}. (  | 1                     |
| Q9Y5W9     | Membrane {ECO:0000305}; Peripheral mem   | 0                     |
| Q96HP8     | Membrane {ECO:0000305}; Multi-pass mem   | 0                     |
| P20645     | Lysosome membrane; Single-pass type I n  | 0                     |
| Q9P2N7     |                                          | 0                     |
| Q9NR63     | Endoplasmic reticulum membrane {ECO:00   | 0                     |
| Q05084     | Cytoplasm, cytosol {ECO:0000269 PubMed:  | 0                     |
| Q9H9R9     |                                          | 0                     |
| Q96Q42     |                                          | 0                     |
| Q92851     |                                          | 0                     |
| O15519     |                                          | 0                     |
| P10646     | Isoform Alpha: Secreted. ; Isoform Beta: | 0                     |
| Q7L592     | Mitochondrion {ECO:0000269 PubMed:2040   | 0                     |
| P52756     | Nucleus {ECO:0000269 PubMed:18851835}.   | 0                     |
| Q6SZW1     | Cytoplasm. Cell projection, axon {ECO:(  | 0                     |
| Q9Y4D7     | Cell membrane {ECO:0000250 UniProtKB:Q   | 0                     |
| P54819     | Mitochondrion intermembrane space {ECO:  | 0                     |
| P28907     | Membrane; Single-pass type II membrane   | 0                     |
| Q02790     | Cytoplasm, cytosol {ECO:0000269 PubMed:  | 0                     |
| O60341     | Nucleus {ECO:0000269 PubMed:11102443, F  | 1                     |
| P78332     | Nucleus {ECO:0000305}.                   | 1                     |
| Q8N5S9     | Cytoplasm {ECO:0000250}. Nucleus {ECO:(  | 0                     |
| P46063     | Nucleus {ECO:0000269 PubMed:7961977}.    | 1                     |
| Q96JG6     | Recycling endosome {ECO:0000269 PubMed:  | 0                     |
| O14558     | Cytoplasm {ECO:0000269 PubMed:19464326}  | 0                     |
| O14559     |                                          | 0                     |
| O14561     | Mitochondrion {ECO:0000269 PubMed:12611  | 0                     |
| Q16654     | Mitochondrion matrix.                    | 0                     |



|        |                                         |   |
|--------|-----------------------------------------|---|
| Q86VW1 | Membrane {ECO:0000305}; Multi-pass mem  | 0 |
| Q9UJS0 | Mitochondrion inner membrane {ECO:0000  | 0 |
| Q9NRC1 | Membrane {ECO:0000305}; Multi-pass mem  | 0 |
| P30260 | Nucleus.                                | 1 |
| P02730 | Cell membrane {ECO:0000269 PubMed:1092  | 0 |
|        | Cell membrane; Multi-pass membrane prot | 0 |
| P53701 | Mitochondrion inner membrane {ECO:0000  | 0 |
| 014641 | Cell membrane {ECO:0000250 UniProtKB:Q  | 0 |
| Q9GZN4 | Secreted {ECO:0000269 PubMed:11602603}. | 0 |
| Q92900 | Cytoplasm. Cytoplasm, P-body. Nucleus.  | 0 |
| 075563 | Cytoplasm {ECO:0000269 PubMed:12893833} | 1 |
| P05141 | Mitochondrion inner membrane; Multi-pas | 0 |
| Q9NWR8 | Mitochondrion inner membrane {ECO:0000  | 1 |
| P31270 | Nucleus.                                | 1 |
| Q9H6R0 | Nucleus, nucleolus {ECO:0000269 PubMed: | 0 |
| P50221 | Nucleus {ECO:0000250 UniProtKB:P32442}. | 0 |
| Q9UPZ6 | Thrombospondin type-1 domain-containing | 0 |
| P49916 | Isoform 1: Mitochondrion {ECO:0000269 E | 0 |
| Q9H6T3 |                                         | 0 |
| Q53FZ2 | Mitochondrion matrix {ECO:0000250 UniPr | 0 |
| Q96IC2 |                                         | 0 |
| Q6FI81 | Cytoplasm {ECO:0000255 HAMAP-Rule:MF_0  | 1 |
| Q8TCT7 | Cell membrane {ECO:0000269 PubMed:1682  | 0 |
| Q7L5A3 |                                         | 0 |
| Q9P299 | Cytoplasm {ECO:0000250}. Endoplasmic re | 0 |
| P31323 | Cytoplasm {ECO:0000269 PubMed:21423175} | 0 |
| Q8N5Y2 | Nucleus {ECO:0000305}.                  | 0 |
| Q92793 | Cytoplasm. Nucleus. Note=Recruited to r | 0 |
| 095153 | Cytoplasm {ECO:0000269 PubMed:9915832}. | 1 |
| P05164 | Lysosome.                               | 1 |
| P27169 | Secreted, extracellular space.          | 0 |
| Q9H977 |                                         | 0 |
| Q9UKG9 | Peroxisome {ECO:0000305}.               | 1 |
| P21439 | Cell membrane {ECO:0000269 PubMed:2346  | 0 |
| Q8IZD2 | Chromosome {ECO:0000269 PubMed:2379840  | 0 |
| Q6NTF9 | Golgi apparatus, cis-Golgi network mem  | 0 |
| Q9P2D0 | Cytoplasm. Membrane; Peripheral membrar | 0 |
| 014628 | Nucleus {ECO:0000305}.                  | 0 |
| P20701 | Cell membrane {ECO:0000269 PubMed:1630  | 0 |
| Q15119 | Mitochondrion matrix.                   | 1 |
| P26006 | Cell membrane {ECO:0000269 PubMed:1561  | 1 |
| P17010 | Nucleus.                                | 1 |
| P13473 | Cell membrane {ECO:0000269 PubMed:1789  | 0 |
| P08514 | Membrane; Single-pass type I membrane p | 0 |
| Q9Y574 |                                         | 0 |
| Q96EN9 |                                         | 0 |
| 075462 | Secreted {ECO:0000269 PubMed:9686600}.  | 0 |
| Q9BZF2 | Cytoplasm, cytosol {ECO:0000269 PubMed: | 0 |
| Q9Y2Y6 | Cell membrane {ECO:0000269 PubMed:2594  | 0 |
| Q9Y2T7 | Cytoplasm {ECO:0000269 PubMed:16479255} | 0 |
| 076009 |                                         | 0 |
| Q99558 | Cytoplasm.                              | 0 |
| Q09428 | Cell membrane {ECO:0000269 PubMed:2481  | 0 |
| 060359 | Membrane {ECO:0000255}; Multi-pass mem  | 0 |
| Q24JP5 | Golgi apparatus membrane {ECO:0000250}; | 1 |

|        |                                         |   |
|--------|-----------------------------------------|---|
| P63010 | Cell membrane {ECO:0000269 PubMed:14530 | 0 |
| P20366 | Secreted.                               | 0 |
| O14978 | Nucleus {ECO:0000255 PROSITE-ProRule:PF | 0 |
| P78423 | Cell membrane {ECO:0000269 PubMed:90246 | 0 |
| Q8TB22 | Secreted {ECO:0000305}.                 | 0 |
| O43497 | Cell membrane {ECO:0000269 PubMed:26715 | 0 |
| Q9NP84 | Membrane; Single-pass type I membrane p | 0 |
| P56179 | Nucleus {ECO:0000255 PROSITE-ProRule:PF | 0 |
| P80192 |                                         | 0 |
| P11233 | Cell membrane {ECO:0000269 PubMed:17875 | 0 |
| Q9UHR4 | Cytoplasm, cytoskeleton {ECO:0000269 Pu | 1 |
| Q6ZMT4 | Nucleus.                                | 0 |
| Q53H12 | Mitochondrion inner membrane {ECO:00002 | 1 |
| P43353 | Cell membrane {ECO:0000269 PubMed:23721 | 0 |
| Q5TAA0 |                                         | 0 |
| Q8N3S3 | Nucleus {ECO:0000305}.                  | 0 |
| O94887 |                                         | 0 |
| Q9Y6N9 | Cytoplasm, cytosol {ECO:0000269 PubMed: | 1 |
| O75223 |                                         | 0 |
| O00458 |                                         | 0 |
| Q12887 | Mitochondrion membrane; Multi-pass mem  | 1 |
| Q9UHL9 | Nucleus.                                | 0 |
| Q8N7H5 | Nucleus {ECO:0000269 PubMed:16491129}.  | 0 |
| P49754 | Endosome membrane {ECO:0000269 PubMed:2 | 0 |
| Q17R89 | Cell projection, dendritic spine {ECO:( | 0 |
| Q9BQ52 | Mitochondrion {ECO:0000269 PubMed:21593 | 0 |
| Q9Y6U3 | Cytoplasm, cytoskeleton {ECO:0000305}.  | 0 |
| P51689 | Lysosome {ECO:0000305}.                 | 0 |
| P41247 | Mitochondrion {ECO:0000269 PubMed:26741 | 0 |
| Q86V24 | Cell membrane {ECO:0000269 PubMed:12802 | 0 |
| Q9Y6M0 | Cell membrane {ECO:0000305}; Lipid-anch | 0 |
| Q96L34 | Cytoplasm, cytoskeleton, microtubule or | 0 |
| O43490 | Apical cell membrane {ECO:0000250}; Mu  | 1 |
| Q96CT7 | Cytoplasm, cytoskeleton, microtubule or | 1 |
| Q3KPI0 | Membrane {ECO:0000305}; Single-pass typ | 0 |
| P43034 | Cytoplasm, cytoskeleton. Cytoplasm, cyt | 0 |
| P35228 | Cytoplasm, cytosol {ECO:0000269 PubMed: | 0 |
| Q9NYC9 | Cytoplasm, cytoskeleton, cilium axoneme | 0 |
| Q14667 | Secreted {ECO:0000305}.                 | 0 |
| Q13183 | Membrane {ECO:0000305}; Multi-pass mem  | 1 |
| O60861 | Cytoplasm {ECO:0000250}.                | 1 |
| O75865 | Golgi apparatus, cis-Golgi network {ECO | 0 |
| P42679 | Cytoplasm {ECO:0000269 PubMed:9171348}. | 0 |
| Q14002 | Cell membrane {ECO:0000305}; Lipid-anch | 1 |
| P40259 | Cell membrane; Single-pass type I mem   | 0 |
| Q8TDW4 | Membrane {ECO:0000305}; Multi-pass mem  | 0 |
| P51854 | Cytoplasm {ECO:0000269 PubMed:16465194, | 0 |
| P26367 | Nucleus.                                | 1 |
| Q9UJJ7 |                                         | 0 |
| Q9NQ29 |                                         | 0 |
| Q9NY47 | Membrane {ECO:0000305}; Single-pass typ | 0 |
| O94812 | Cytoplasm, cytosol {ECO:0000269 PubMed: | 0 |
| Q9UJK0 |                                         | 0 |
| Q9BRB3 | Membrane {ECO:0000305}; Multi-pass mem  | 0 |
| Q96RY5 | Nucleus {ECO:0000255 PROSITE-ProRule:PF | 0 |

|        |                                          |   |
|--------|------------------------------------------|---|
| Q99594 | Nucleus.                                 | 0 |
| P16581 | Cell membrane {ECO:0000269 PubMed:12649} | 0 |
| Q9NVH1 | Mitochondrion {ECO:0000269 PubMed:25997} | 0 |
| P31513 | Microsome membrane {ECO:0000250 UniProt} | 1 |
| Q14209 | Nucleus.                                 | 0 |
| P20618 | Cytoplasm {ECO:0000269 PubMed:12181345}  | 1 |
| P17600 | Cell junction, synapse. Golgi apparatus  | 0 |
| Q92833 | Nucleus {ECO:0000255 PROSITE-ProRule:PF} | 0 |
| 076039 | Nucleus {ECO:0000269 PubMed:16935860}.   | 0 |
| Q9UQ88 | Cytoplasm. Nucleus.                      | 1 |
| 095544 |                                          | 0 |
| Q92481 | Nucleus {ECO:0000305}.                   | 1 |
| Q9Y238 | Cytoplasm {ECO:0000269 PubMed:10213508}  | 1 |
| 043739 | Cytoplasm, cytosol. Cell membrane {ECO:  | 0 |
| Q16563 | Cytoplasmic vesicle membrane {ECO:00002} | 0 |
| P49447 | Cytoplasmic vesicle, secretory vesicle   | 0 |
| 060271 | Cytoplasm {ECO:0000250 UniProtKB:Q58A65} | 1 |
| Q9NYQ7 | Cell membrane; Multi-pass membrane prot  | 0 |
| Q9UDR5 | Mitochondrion {ECO:0000250}.             | 1 |
| Q3KR16 | Cell projection, microvillus {ECO:00002} | 0 |
| Q9UHA2 |                                          | 0 |
| Q8N594 |                                          | 0 |
| P10620 | Microsome {ECO:0000250}. Mitochondrion   | 1 |
| Q16526 | Cytoplasm. Nucleus {ECO:0000269 PubMed:  | 0 |
| 075594 | Secreted {ECO:0000269 PubMed:16354652}.  | 0 |
| Q14938 | Nucleus.                                 | 1 |
| Q11201 | Golgi apparatus, Golgi stack membrane;   | 0 |
| Q9NPA2 | Cell membrane; Lipid-anchor, GPI-anchor  | 0 |
| P24001 | Secreted {ECO:0000269 PubMed:15664165}.  | 0 |
| P98161 | Cell membrane {ECO:0000269 PubMed:10339} | 0 |
| Q13387 | Cytoplasm {ECO:0000269 PubMed:10490659}  | 0 |
| Q9BYZ6 |                                          | 0 |
| Q9P2D3 |                                          | 0 |
| Q99442 | Endoplasmic reticulum membrane {ECO:000} | 0 |
| P60866 | Cytoplasm {ECO:0000250}.                 | 0 |
| 075534 | Cytoplasm.                               | 1 |
| Q15386 | Nucleus {ECO:0000305}.                   | 0 |
| 060673 | Nucleus {ECO:0000305}.                   | 0 |
| Q9UKZ4 | Cell membrane {ECO:0000250}; Single-pass | 0 |
| 000187 | Secreted.                                | 0 |
| Q6PHW0 | Cell membrane {ECO:0000269 PubMed:15289} | 0 |
| Q8TAV0 |                                          | 0 |
| Q9Y228 | Membrane {ECO:0000305}; Single-pass typ  | 0 |
| Q9UKY4 | Endoplasmic reticulum membrane {ECO:000} | 0 |
| Q9NP79 | Cytoplasm {ECO:0000269 PubMed:15644320}  | 0 |
| Q9UIG0 | Nucleus {ECO:0000255 PROSITE-ProRule:PF} | 1 |
| Q96S59 | Cytoplasm {ECO:0000269 PubMed:11470507,  | 0 |
| Q9Y603 | Nucleus.                                 | 0 |
| Q9H040 | Nucleus. Chromosome. Note=Localizes to   | 0 |
| Q8N6R0 |                                          | 0 |
| Q9NR20 | Isoform 1: Cytoplasm {ECO:0000269 PubMe  | 0 |
| 043670 | Nucleus {ECO:0000269 PubMed:24462186, I  | 0 |
| P31930 | Mitochondrion inner membrane.            | 1 |
| 095772 | Late endosome membrane {ECO:0000269 Pub  | 1 |
| P21926 | Cell membrane {ECO:0000269 PubMed:19640} | 0 |

|        |                                         |   |
|--------|-----------------------------------------|---|
| Q9HCP6 | Endoplasmic reticulum membrane {ECO:000 | 1 |
| Q15021 | Nucleus {ECO:0000269 PubMed:10958694}.  | 0 |
| Q0D2I5 |                                         | 0 |
| P48546 | Cell membrane; Multi-pass membrane prot | 0 |
| Q9BWX1 | Nucleus {ECO:0000269 PubMed:11829468}.  | 0 |
| Q9NS98 | Secreted {ECO:0000250}.                 | 0 |
| Q9Y2I1 | Cell membrane. Cytoplasm. Early endosom | 0 |
| Q9NY15 | Membrane {ECO:0000305}; Single-pass typ | 0 |
| Q9BT04 | Cytoplasm {ECO:0000250 UniProtKB:Q2HZX7 | 0 |
| P22304 | Lysosome.                               | 0 |
| P35030 | Secreted {ECO:0000269 PubMed:6698368}.  | 0 |
| P98182 | Nucleus {ECO:0000305}.                  | 0 |
| P01730 | Cell membrane {ECO:0000269 PubMed:12089 | 0 |
| Q53EV4 |                                         | 0 |
| Q06187 | Cytoplasm. Cell membrane; Peripheral me | 0 |
| Q30201 | Cell membrane {ECO:0000269 PubMed:94650 | 0 |
| P06241 | Cytoplasm. Nucleus. Cell membrane. Note | 0 |
| Q01740 | Microsome membrane {ECO:0000250 UniProt | 0 |
| Q14241 | Nucleus {ECO:0000305}.                  | 0 |
| P51797 | Endosome membrane {ECO:0000269 PubMed:1 | 0 |
| Q9UBG0 | Membrane; Single-pass type I membrane p | 0 |
|        |                                         | 0 |
| Q99884 | Membrane; Multi-pass membrane protein.  | 0 |
| 075954 | Membrane {ECO:0000250}; Multi-pass memt | 0 |
| Q9P203 | Nucleus {ECO:0000250}.                  | 0 |
| 096018 | Cytoplasm, perinuclear region {ECO:0000 | 0 |
| Q9NXB0 | Cytoplasm, cytoskeleton, cilium basal b | 0 |
| Q8WTS1 | Cytoplasm {ECO:0000269 PubMed:18832586} | 0 |
| Q9ULX6 | Nucleus {ECO:0000269 PubMed:10748171, E | 0 |
| Q05BQ5 | Nucleus {ECO:0000305}.                  | 0 |
| Q9Y5J1 | Nucleus, nucleolus {ECO:0000269 PubMed: | 0 |
| Q9NWF9 | Cytoplasm.                              | 1 |
| Q6DKK2 | Mitochondrion inner membrane {ECO:00002 | 1 |
| P26599 | Nucleus.                                | 1 |
| Q92782 | Cytoplasm {ECO:0000305}. Nucleus {ECO:( | 0 |
| 043581 | Cell membrane {ECO:0000250 UniProtKB:Q6 | 0 |
| Q15031 | Mitochondrion matrix {ECO:0000250}.     | 0 |
| 000443 | Cell membrane {ECO:0000269 PubMed:10766 | 0 |
| Q03405 | Cell membrane {ECO:0000269 PubMed:12376 | 0 |
| Q9NQW6 | Nucleus. Cytoplasm, cytoskeleton. Cytop | 0 |
| 095785 | Nucleus {ECO:0000250}.                  | 1 |
| Q9Y3P9 | Cytoplasm, cytosol {ECO:0000269 PubMed: | 1 |
| P07585 | Secreted, extracellular space, extracel | 0 |
| Q9NXS2 | Golgi apparatus membrane {ECO:0000269 E | 0 |
| P53041 | Nucleus {ECO:0000269 PubMed:15383005}.  | 0 |
| Q76N32 | Cytoplasm, cytoskeleton, microtubule or | 1 |
| Q8IVH8 |                                         | 0 |
| Q9Y2Y4 | Nucleus {ECO:0000269 PubMed:10572087}.  | 0 |
| 043914 | Cell membrane {ECO:0000269 PubMed:96554 | 0 |
| Q96B96 | Membrane {ECO:0000305}; Multi-pass memt | 0 |
| P34903 | Cell junction, synapse, postsynaptic ce | 0 |
| P38398 | Nucleus {ECO:0000269 PubMed:15133502, E | 0 |
| P07992 | Isoform 1: Nucleus.; Isoform 2: Cytopl  | 0 |
| P20273 | Cell membrane; Single-pass type I membr | 0 |
| Q13214 | Secreted {ECO:0000250}. Endoplasmic ret | 0 |

|        |                                                                  |   |
|--------|------------------------------------------------------------------|---|
| 043462 | Membrane {ECO:0000305 PubMed:19361614};                          | 0 |
| 043900 | Cytoplasm {ECO:0000250 UniProtKB:A8WH69}                         | 0 |
| P02788 | Isoform 1: Secreted. Cytoplasmic granule                         | 0 |
| 043909 | Endoplasmic reticulum membrane {ECO:0000269 PubMed:15133037};    | 0 |
| Q9NYP7 | Endoplasmic reticulum membrane {ECO:0000269 PubMed:15133037};    | 0 |
| P09917 | Cytoplasm. Nucleus matrix. Nucleus membrane                      | 0 |
| Q9P1Z2 | Cytoplasm. Nucleus. Note=Shuttles between                        | 0 |
| Q8N806 |                                                                  | 0 |
|        | Cytoplasm {ECO:0000269 PubMed:9038372}.                          | 0 |
| Q9NZN3 | Recycling endosome membrane {ECO:0000269 PubMed:15133037};       | 0 |
| P43686 | Cytoplasm. Nucleus.                                              | 0 |
| Q8TBB6 | Lysosome membrane {ECO:0000269 PubMed:15133037};                 | 0 |
| 075508 | Cell junction, tight junction. Cell membrane                     | 1 |
| Q9BZJ4 | Mitochondrion inner membrane {ECO:0000269 PubMed:15133037};      | 0 |
| Q14764 | Cytoplasm {ECO:0000269 PubMed:15133037};                         | 0 |
| Q9Y5A7 | Nucleus {ECO:0000269 PubMed:11259415}.                           | 0 |
| 095394 |                                                                  | 0 |
| Q9UIY3 |                                                                  | 0 |
| P49759 | Nucleus.                                                         | 0 |
| Q9NW08 | Nucleus {ECO:0000250}.                                           | 1 |
| Q9UNK9 |                                                                  | 0 |
| Q9UBS8 | Cytoplasm {ECO:0000269 PubMed:9853615}.                          | 0 |
| P49184 | Endoplasmic reticulum {ECO:0000269 PubMed:15133037};             | 0 |
| Q96FC9 | Nucleus {ECO:0000269 PubMed:17105772}.                           | 0 |
| Q9NRV9 | Cytoplasm {ECO:0000269 PubMed:12413491}                          | 0 |
| Q8NFJ5 | Cell membrane {ECO:0000269 PubMed:9857000}                       | 0 |
| Q13495 | Nucleus {ECO:0000269 PubMed:18162467}.                           | 0 |
| P30203 | Cell membrane {ECO:0000269 PubMed:15048000}                      | 0 |
| Q9Y6A5 | Cytoplasm {ECO:0000250}. Cytoplasm, cytoskeleton                 | 1 |
| 094874 | Endoplasmic reticulum {ECO:0000269 PubMed:15133037};             | 1 |
| Q14181 | Nucleus.                                                         | 1 |
| Q8IXZ2 | Nucleus {ECO:0000250 UniProtKB:Q8CHP0}.                          | 0 |
| P07384 | Cytoplasm {ECO:0000269 PubMed:21531719};                         | 0 |
| P15309 | Isoform 1: Secreted {ECO:0000305 PubMed:19361614};               | 0 |
| P40925 | Cytoplasm.                                                       | 0 |
| Q6PML9 | Membrane {ECO:0000305}; Multi-pass membrane protein              | 0 |
| A4FU01 |                                                                  | 0 |
| Q7KZN9 | Mitochondrion membrane {ECO:0000269 PubMed:15133037};            | 0 |
| Q9P219 | Cytoplasm {ECO:0000269 PubMed:25062847}                          | 0 |
| Q8IY57 | Nucleus {ECO:0000269 PubMed:11593398}.                           | 1 |
| P42768 | Cytoplasm, cytoskeleton {ECO:0000269 PubMed:15133037};           | 0 |
| P16444 | Apical cell membrane; Lipid-anchor, GPI-anchored                 | 0 |
| P55957 | Cytoplasm {ECO:0000269 PubMed:14583606}                          | 1 |
| P43243 | Nucleus matrix.                                                  | 1 |
| Q9UHC9 | Apical cell membrane {ECO:0000269 PubMed:15133037};              | 0 |
| Q99666 | Cytoplasm {ECO:0000269 PubMed:15710750}                          | 0 |
| Q8IVD9 |                                                                  | 0 |
| P61371 | Nucleus {ECO:0000250 UniProtKB:P61372}.                          | 0 |
| Q8NE62 | Mitochondrion inner membrane {ECO:0000269 PubMed:15133037};      | 1 |
| Q9UHF4 | Membrane {ECO:0000250}; Single-pass type I membrane protein      | 0 |
| A8K7I4 | Secreted, extracellular space {ECO:0000269 PubMed:15133037};     | 0 |
| Q14CN2 | Cell membrane {ECO:0000250}; Single-pass type I membrane protein | 0 |
| Q68CQ7 | Membrane {ECO:0000305}; Single-pass type I membrane protein      | 0 |
| P98194 | Golgi apparatus membrane {ECO:0000269 PubMed:15133037};          | 1 |
| P05019 | Secreted {ECO:0000250 UniProtKB:P05017}                          | 0 |

|        |                                          |   |
|--------|------------------------------------------|---|
| Q8WUX1 | Cell membrane {ECO:0000250}; Multi-pass  | 0 |
| Q15311 | Membrane {ECO:0000269 PubMed:11437348};  | 0 |
| Q7L099 | Cytoplasm {ECO:0000269 PubMed:25766321}  | 0 |
| Q12860 | Isoform 1: Cell membrane; Lipid-anchor,  | 0 |
| P49279 | Membrane {ECO:0000305}; Multi-pass mem   | 0 |
| Q9GZV5 | Nucleus. Cytoplasm. Note=Concentrates a  | 0 |
| 000116 | Peroxisome membrane {ECO:0000250 UniPro  | 1 |
| Q9H5V9 | Nucleus {ECO:0000269 PubMed:29374277}.   | 0 |
| P50993 | Membrane {ECO:0000269 PubMed:7711835};   | 0 |
| Q6P3X3 |                                          | 0 |
| Q96NG8 | Nucleus {ECO:0000305}.                   | 0 |
| Q96IQ7 | Membrane {ECO:0000305}; Single-pass typ  | 0 |
| Q86UU1 |                                          | 0 |
| Q9UEW3 | Cell membrane {ECO:0000269 PubMed:94685  | 0 |
| Q07973 | Mitochondrion.                           | 1 |
| Q9NQV5 | Nucleus {ECO:0000269 PubMed:25499759}.   | 0 |
| Q7L8C5 | Membrane {ECO:0000250}; Single-pass mem  | 0 |
| 043623 | Nucleus {ECO:0000269 PubMed:25893292}.   | 0 |
| P04233 | Cell membrane {ECO:0000305}; Single-pas  | 1 |
| P14210 |                                          | 0 |
| Q9UGI0 | Cytoplasm. Nucleus. Note=Enriched in pu  | 0 |
| Q9UBB6 | Cytoplasm, cytosol. Cell projection, de  | 0 |
| Q96PE1 | Cell membrane {ECO:0000269 PubMed:16985  | 0 |
| Q9NTW7 | Nucleus {ECO:0000305}.                   | 0 |
| P51948 | Nucleus.                                 | 0 |
| Q9UPU9 | Cytoplasm {ECO:0000269 PubMed:16221671}  | 0 |
| Q13761 | Nucleus {ECO:0000255 PROSITE-ProRule:PF  | 0 |
| P49959 | Nucleus {ECO:0000269 PubMed:10783165, I  | 1 |
| P30740 | Secreted {ECO:0000269 PubMed:26701651}.  | 0 |
| Q9HB55 | Endoplasmic reticulum membrane; Periphe  | 1 |
| P82251 | Apical cell membrane {ECO:0000269 PubMe  | 1 |
| Q9UBP0 | Membrane {ECO:0000255 HAMAP-Rule:MF_030  | 0 |
| Q9HDB5 | Membrane {ECO:0000305}; Single-pass typ  | 0 |
| Q9H0X9 | Endoplasmic reticulum membrane {ECO:000  | 0 |
| P31327 | Mitochondrion {ECO:0000269 PubMed:22002  | 0 |
| P07358 | Secreted.                                | 0 |
| Q13642 | Isoform 1: Cytoplasm.; Isoform 3: Cytop  | 0 |
| Q9BY42 | Chromosome {ECO:0000269 PubMed:29290612} | 0 |
| P14867 | Cell junction, synapse, postsynaptic ce  | 0 |
| Q5BKX6 | Membrane {ECO:0000305}; Multi-pass mem   | 0 |
| Q8N5U6 | Cytoplasm {ECO:0000269 PubMed:16335786}  | 0 |
| A8KOR7 |                                          | 0 |
| Q9H6R6 | Endoplasmic reticulum membrane {ECO:000  | 0 |
| Q3KR37 | Endoplasmic reticulum membrane {ECO:000  | 0 |
| P13489 | Cytoplasm.                               | 1 |
| P28331 | Mitochondrion inner membrane.            | 0 |
| Q8TDY2 | Nucleus {ECO:0000269 PubMed:11850849}.   | 0 |
| Q9BS26 | Endoplasmic reticulum lumen {ECO:000026  | 1 |
| P13196 | Mitochondrion matrix.                    | 1 |
| Q13489 | Cytoplasm {ECO:0000269 PubMed:15665297}  | 0 |
| Q9UKA4 | Cytoplasm. Cytoplasm, cytoskeleton, mic  | 1 |
| Q9NS18 | Isoform 1: Mitochondrion.; Isoform 2: M  | 0 |
| Q9Y3F4 | Cytoplasm. Nucleus. Note=Localized prec  | 0 |
| Q92887 | Apical cell membrane {ECO:0000269 PubMe  | 1 |
| Q9H4E7 | Cytoplasm {ECO:0000269 PubMed:15023524}  | 0 |

|         |                                         |   |
|---------|-----------------------------------------|---|
| P48507  |                                         | 0 |
| Q8I WV8 | Nucleus {ECO:0000250}. Note=Associated  | 0 |
| Q9NZN4  | Cell membrane {ECO:0000269 PubMed:1723} | 0 |
| Q5TB30  | Nucleus {ECO:0000269 PubMed:17452976, I | 0 |
| Q8I WP9 |                                         | 0 |
| Q9NQL2  | Cytoplasm {ECO:0000269 PubMed:11073942} | 0 |
| Q03933  | Cytoplasm {ECO:0000269 PubMed:8339932}. | 0 |
| Q9BVI0  | Nucleus {ECO:0000269 PubMed:20018852}.  | 0 |
| O14756  | Microsome membrane {ECO:0000269 PubMed: | 0 |
| Q13133  | Nucleus {ECO:0000255 PROSITE-ProRule:PF | 0 |
| P19971  |                                         | 0 |
| Q6IBW4  | Nucleus {ECO:0000269 PubMed:14532007}.  | 1 |
| Q15785  | Cytoplasm {ECO:0000269 PubMed:10101285} | 1 |
| Q9UGP8  | Endoplasmic reticulum membrane; Multi-p | 1 |
| O60684  |                                         | 0 |
| P08670  | Cytoplasm {ECO:0000269 PubMed:21465480, | 0 |
| P25445  | Isoform 1: Cell membrane {ECO:0000269 F | 0 |
| O00584  | Secreted. Lysosome lumen. Endoplasmic r | 0 |
| P16070  | Cell membrane {ECO:0000269 PubMed:22726 | 0 |
| Q9UIX4  | Cell membrane {ECO:0000269 PubMed:19074 | 0 |
| Q9NRZ5  | Endoplasmic reticulum membrane {ECO:000 | 0 |
| Q9NQ25  | Membrane; Single-pass type I membrane p | 0 |
| O00481  | Cell membrane {ECO:0000269 PubMed:21113 | 0 |
| Q99797  | Mitochondrion matrix.                   | 0 |
| P24723  | Cytoplasm {ECO:0000250}.                | 0 |
| P14616  | Membrane; Single-pass type I membrane p | 0 |
| P15260  | Cell membrane {ECO:0000269 PubMed:10811 | 0 |
| Q9UBV7  | Golgi apparatus, Golgi stack membrane;  | 1 |
| Q86Y07  | Isoform 1: Cytoplasm. Endoplasmic retic | 0 |
| P20333  | Isoform 1: Cell membrane; Single-pass t | 0 |
| Q9HBM0  | Cell membrane {ECO:0000269 PubMed:15090 | 0 |
| P09086  | Cytoplasm {ECO:0000250}. Nucleus.       | 1 |
| Q9H8M2  |                                         | 0 |
| Q13596  | Endosome membrane {ECO:0000269 PubMed:1 | 0 |
| P62380  | Cytoplasm {ECO:0000250}. Nucleus {ECO:( | 0 |
| Q8WYA1  | Nucleus {ECO:0000255 PROSITE-ProRule:PF | 0 |
| Q9NYF8  | Cytoplasm. Nucleus. Nucleus speckle {EC | 0 |
| Q9NUM3  | Membrane {ECO:0000305}; Multi-pass memt | 0 |
| P16157  | Isoform Erl: Cytoplasm, cytoskeleton. P | 0 |
| Q8WVM0  | Mitochondrion {ECO:0000269 PubMed:11809 | 0 |
| Q15276  | Cytoplasm. Early endosome. Recycling er | 1 |
| O15347  | Nucleus {ECO:0000250 UniProtKB:P40618,  | 0 |
| Q16611  | Mitochondrion outer membrane {ECO:00002 | 1 |
| Q9UKS7  | Nucleus {ECO:0000250}.                  | 0 |
| P28799  | Secreted {ECO:0000269 PubMed:21092856,  | 0 |
| Q9NYF5  |                                         | 0 |
| Q2M1Z3  | Cell projection, lamellipodium. Cell ju | 0 |
| Q7L2Z9  | Nucleus {ECO:0000269 PubMed:16622420}.  | 0 |
| P49591  | Cytoplasm {ECO:0000269 PubMed:22353712, | 0 |
| Q9H6Z4  | Cytoplasm {ECO:0000269 PubMed:19289081} | 1 |
| Q53HC9  | Golgi apparatus, trans-Golgi network {F | 0 |
| Q8IY17  | Endoplasmic reticulum membrane {ECO:000 | 0 |
| Q9BT22  | Endoplasmic reticulum membrane {ECO:000 | 0 |
| Q6NZY4  | Nucleus, nucleoplasm {ECO:0000269 PubMe | 1 |
| Q9UG63  |                                         | 0 |

|        |                                          |   |
|--------|------------------------------------------|---|
| Q9P2E5 | Golgi apparatus, Golgi stack membrane    | 0 |
| Q9BYC5 | Golgi apparatus, Golgi stack membrane    | 1 |
| A0AVT1 |                                          | 0 |
| Q9UQC2 | Cytoplasm {ECO:0000269 PubMed:19172738}  | 0 |
| Q93050 | Cytoplasmic vesicle membrane; Multi-pass | 1 |
| 075925 | Nucleus speckle {ECO:0000269 PubMed:123} | 1 |
| Q9Y6M7 | Basolateral cell membrane; Multi-pass m  | 1 |
| Q99767 |                                          | 0 |
| P46734 |                                          | 0 |
| Q9HAE3 |                                          | 0 |
| Q2TB18 |                                          | 0 |
| Q9NV58 | Membrane {ECO:0000305}; Multi-pass mem   | 0 |
| P56589 | Peroxisome membrane {ECO:0000269 PubMec  | 1 |
| P60520 | Golgi apparatus {ECO:0000250}. Cytoplas  | 0 |
| Q99972 | Secreted {ECO:0000269 PubMed:11431441,   | 0 |
| Q96HL8 |                                          | 0 |
| Q96C01 |                                          | 0 |
| P18206 | Cell membrane {ECO:0000250 UniProtKB:P1  | 0 |
| Q8WUY9 |                                          | 0 |
| Q92636 |                                          | 0 |
| P30520 | Cytoplasm. Note=Partially associated wi  | 0 |
| Q9ULZ2 | Nucleus {ECO:0000269 PubMed:17936702}.   | 0 |
| P16035 | Secreted.                                | 0 |
| P35251 | Nucleus.                                 | 1 |
| Q9NUY8 | Golgi apparatus, trans-Golgi network {F  | 0 |
| Q13618 | Nucleus {ECO:0000269 PubMed:10500095, F  | 0 |
| P54296 | Cytoplasm, myofibril, sarcomere, M line  | 1 |
| P00480 | Mitochondrion matrix.                    | 1 |
| Q8IYH5 | Nucleus {ECO:0000255 PROSITE-ProRule:PF  | 0 |
| P54219 | Isoform 1: Cytoplasmic vesicle membrane  | 0 |
| 075604 | Cytoplasm {ECO:0000250 UniProtKB:O88623} | 0 |
| P41180 | Cell membrane {ECO:0000269 PubMed:15572} | 0 |
| Q9NRH3 | Cytoplasm, cytoskeleton, microtubule or  | 0 |
| Q9UNX3 |                                          | 0 |
| P35916 | Cell membrane {ECO:0000269 PubMed:20445} | 0 |
| Q08J23 | Nucleus, nucleolus. Cytoplasm, cytoskel  | 0 |
| Q6P3S6 |                                          | 0 |
| P55082 | Cell membrane {ECO:0000305}; Single-pas  | 0 |
| Q9BV20 | Nucleus {ECO:0000255 HAMAP-Rule:MF_0311} | 0 |
| Q9UBP6 | Nucleus {ECO:0000269 PubMed:15861136, F  | 0 |
| P31273 | Nucleus.                                 | 0 |
| P20933 | Lysosome.                                | 1 |
| Q8TCG2 | Cytoplasm. Membrane. Note=Mostly cytopl  | 0 |
| Q8NFC6 | Chromosome {ECO:0000269 Ref.2}. Note=Lc  | 0 |
| Q9NZL9 |                                          | 0 |
| Q6P2E9 | Cytoplasm, P-body {ECO:0000269 PubMed:1  | 0 |
| 075962 | Cytoplasm {ECO:0000305 PubMed:22155786}  | 0 |
| P13611 | Secreted, extracellular space, extracel  | 0 |
| Q2KHT3 | Endosome membrane {ECO:0000250 UniProtF  | 1 |
| P21757 | Membrane; Single-pass type II membrane   | 0 |
| P12830 | Cell junction, adherens junction {ECO:(  | 1 |
| P42285 | Nucleus, nucleoplasm. Nucleus, nucleol   | 1 |
| Q8TE73 | Cytoplasm, cytoskeleton, cilium axoneme  | 0 |
| Q7Z3T8 | Cytoplasm {ECO:0000269 PubMed:11546807}  | 1 |
| Q6ZS17 | Cytoplasm {ECO:0000269 PubMed:27807006}  | 0 |



|        |                                         |   |
|--------|-----------------------------------------|---|
| P13671 | Secreted.                               | 0 |
| Q9P0K7 | Cytoplasm, cytoskeleton {ECO:0000305 P  | 0 |
| 094993 | Nucleus {ECO:0000255 PROSITE-ProRule:PF | 1 |
| Q96T60 | Nucleus {ECO:0000269 PubMed:10446193}.  | 1 |
| Q8NFU1 | Cell membrane; Multi-pass membrane prot | 0 |
| Q6ZVD8 | Cytoplasm. Membrane; Peripheral membrar | 0 |
| Q96EA4 | Cytoplasm, cytoskeleton, microtubule or | 0 |
| Q9NUL3 | Cytoplasm. Nucleus. Nucleus, nucleolus. | 0 |
| Q6ZP29 | Lysosome membrane {ECO:0000269 PubMed:2 | 0 |
| Q9BUL5 | Nucleus {ECO:0000269 PubMed:25484098}.  | 0 |
| Q9Y6N8 | Cell membrane {ECO:0000305}; Single-pas | 0 |
| Q96PE3 | Early endosome membrane {ECO:0000269 P  | 0 |
| 000194 | Membrane; Lipid-anchor.                 | 0 |
| P25789 | Cytoplasm {ECO:0000269 PubMed:12181345} | 1 |
| Q9Y6X6 | Cytoplasm {ECO:0000250 UniProtKB:Q9ERC1 | 0 |
| Q9H089 | Cytoplasm {ECO:0000269 PubMed:16209721} | 0 |
| Q9Y6F1 | Nucleus {ECO:0000269 PubMed:16924674}.  | 0 |
| P24821 | Secreted, extracellular space, extracel | 0 |
| Q8WTV1 |                                         | 0 |
| Q96MK2 |                                         | 0 |
| Q9NUW8 | Nucleus {ECO:0000269 PubMed:15647511}.  | 0 |
| Q9BRQ8 | Cytoplasm. Mitochondrion outer membrane | 0 |
| Q53S99 |                                         | 0 |
| Q9P0W8 | Cytoplasm, cytoskeleton, cilium axoneme | 0 |
| Q6NUM9 | Endoplasmic reticulum membrane {ECO:00  | 0 |
| P40121 | Nucleus {ECO:0000269 PubMed:17081065, F | 0 |
| Q9BS86 | Cytoplasmic vesicle, secretory vesicle, | 0 |
| P01266 | Secreted.                               | 0 |
| Q9UKQ2 | Isoform 1: Cell membrane; Single-pass t | 0 |
| Q9UMQ3 | Nucleus.                                | 1 |
| Q96GG9 | Nucleus {ECO:0000269 PubMed:25349211}.  | 0 |
| Q9NQC1 |                                         | 0 |
| Q13094 | Cytoplasm {ECO:0000305}.                | 1 |
| Q9H3H1 | Isoform 1: Mitochondrion {ECO:0000269 F | 0 |
| P08588 | Cell membrane; Multi-pass membrane prot | 0 |
| Q14999 | Cytoplasm. Cytoplasm, cytoskeleton, mic | 0 |
| P35221 | Isoform 1: Cytoplasm, cytoskeleton. Cel | 0 |
| P46019 | Cell membrane {ECO:0000305}; Lipid-anch | 0 |
| Q9NXG0 | Cytoplasm, cytoskeleton, microtubule or | 0 |
| P29320 | Isoform 1: Cell membrane {ECO:0000269 F | 0 |
| P11021 | Endoplasmic reticulum lumen {ECO:000026 | 1 |
| Q14126 | Cell membrane; Single-pass type I membr | 0 |
| Q9NWZ8 | Nucleus, gem {ECO:0000269 PubMed:164344 | 0 |
| 075665 | Cytoplasm, cytoskeleton, microtubule or | 0 |
| Q13491 | Cell membrane {ECO:0000250}; Multi-pass | 0 |
| Q9UBF1 | Cytoplasm {ECO:0000269 PubMed:12920247} | 0 |
| Q70Z35 |                                         | 0 |
| Q9Y2I8 |                                         | 0 |
| Q9H6S0 | Cytoplasm {ECO:0000250 UniProtKB:B2RR83 | 0 |
| Q9NRF8 |                                         | 0 |
| Q9UII2 |                                         | 0 |
| P30876 | Nucleus {ECO:0000269 PubMed:9852112}.   | 1 |
| Q32MH5 |                                         | 0 |
| Q8WZ64 | Cytoplasm {ECO:0000250}.                | 0 |
| P12270 | Nucleus {ECO:0000269 PubMed:12802065}.  | 0 |

|        |                                           |   |
|--------|-------------------------------------------|---|
| P00450 | Secreted. Note=Colocalizes with GCP1 in   | 0 |
| O60303 | Cytoplasm, cytoskeleton, cilium axoneme   | 1 |
| Q96EV8 | Isoform 1: Cytoplasm {ECO:0000269 PubMed: | 0 |
| P51811 | Membrane {ECO:0000305}; Multi-pass mem    | 0 |
| Q9NQ90 | Cell membrane {ECO:0000269 PubMed:20056   | 0 |
| Q9NQ89 | Cytoplasm {ECO:0000250 UniProtKB:D4A77C   | 0 |
| Q9UN30 | Nucleus {ECO:0000305}.                    | 1 |
| Q9ULE0 |                                           | 0 |
| O43182 | Cytoplasm {ECO:0000269 PubMed:10699171}   | 1 |
| Q9ULE4 |                                           | 0 |
| P27816 | Cytoplasm, cytoskeleton.                  | 1 |
| Q9HD26 | Cytoplasm. Golgi apparatus membrane; Pe   | 0 |
| P08922 | Cell membrane {ECO:0000305}; Single-pas   | 0 |
| Q96RU2 | Nucleus, nucleoplasm {ECO:0000269 PubMe   | 1 |
| Q9UKV0 | Nucleus {ECO:0000250}.                    | 0 |
| Q9Y3C1 | Nucleus, nucleolus {ECO:0000269 PubMed:   | 0 |
| Q9P2K1 | Cytoplasm. Cytoplasm, cytoskeleton, cil   | 0 |
| Q7LG56 | Cytoplasm. Nucleus. Note=Translocates f   | 0 |
| Q2TB10 | Nucleus {ECO:0000305}.                    | 0 |
| Q8TEQ0 |                                           | 0 |
| P82664 | Mitochondrion {ECO:0000269 PubMed:25838   | 1 |
| P43080 | Membrane; Lipid-anchor.                   | 0 |
| Q96T23 | Nucleus {ECO:0000269 PubMed:11788598, F   | 1 |
| Q5THJ4 |                                           | 0 |
| O95319 | Nucleus. Cytoplasm. Note=Accumulates in   | 0 |
| Q9NZB2 | Cytoplasm {ECO:0000269 PubMed:19015244}   | 0 |
| Q14055 | Secreted, extracellular space, extracel   | 0 |
| P21583 | Isoform 1: Cell membrane; Single-pass t   | 0 |
| Q9UKP5 | Secreted, extracellular space, extracel   | 0 |
| O95479 | Endoplasmic reticulum lumen. Note=Micro   | 0 |
| P56645 | Cytoplasm {ECO:0000269 PubMed:26903630}   | 0 |
| O95399 | Secreted.                                 | 0 |
| Q9H201 | Cytoplasm {ECO:0000269 PubMed:11359770}   | 0 |
| Q14766 | Secreted {ECO:0000269 PubMed:16157329}.   | 0 |
| Q15293 | Endoplasmic reticulum lumen.              | 0 |
| P15502 | Secreted, extracellular space, extracel   | 0 |
| P35250 | Nucleus {ECO:0000305}.                    | 0 |
| Q8NFD5 | Nucleus {ECO:0000255 PROSITE-ProRule:PF   | 0 |
| Q96KA5 | Membrane {ECO:0000305}; Multi-pass mem    | 0 |
| Q96PU5 | Cytoplasm {ECO:0000269 PubMed:15496141,   | 0 |
| Q9BZS1 | Nucleus {ECO:0000255 PROSITE-ProRule:PF   | 0 |
| Q6ZSY5 | Membrane {ECO:0000250}; Single-pass mem   | 0 |
| P07686 | Lysosome.                                 | 1 |
| Q8WV60 | Mitochondrion {ECO:0000269 PubMed:18729   | 0 |
| Q5QGS0 | Nucleus {ECO:0000269 PubMed:24071057}.    | 0 |
| Q9P055 | Endoplasmic reticulum membrane {ECO:000   | 1 |
| Q9UBP4 | Secreted.                                 | 0 |
| Q12774 | Cytoplasm {ECO:0000269 PubMed:14662653,   | 0 |
| Q9Y4A8 | Nucleus {ECO:0000255 PROSITE-ProRule:PF   | 0 |
| Q9UHB6 | Cytoplasm. Cell junction, focal adhesio   | 0 |
| Q9Y6N6 | Secreted, extracellular space, extracel   | 0 |
| P43115 | Cell membrane {ECO:0000269 PubMed:7883C   | 0 |
| Q96KP6 |                                           | 0 |
| P45984 | Cytoplasm {ECO:0000269 PubMed:19675674}   | 0 |
| Q86Y22 | Cell membrane {ECO:0000250}; Single-pas   | 0 |

|        |                                         |   |
|--------|-----------------------------------------|---|
| P56945 | Cell junction, focal adhesion {ECO:0000 | 0 |
| Q8N612 |                                         | 0 |
| Q15011 | Endoplasmic reticulum membrane {ECO:000 | 0 |
| Q9NSC5 | Cytoplasm {ECO:0000250}. Cell junction, | 0 |
| Q06609 | Nucleus {ECO:0000269 PubMed:12442171, F | 0 |
| P42338 | Cytoplasm {ECO:0000269 PubMed:21383062} | 0 |
| P13498 | Cell membrane {ECO:0000269 PubMed:15588 | 0 |
| Q96J01 | Nucleus {ECO:0000305}. Nucleus speckle  | 0 |
| Q9Y5Z4 | Cytoplasm {ECO:0000269 PubMed:17098234} | 0 |
| Q99550 | Cytoplasm, cytoskeleton, microtubule or | 0 |
| Q9HAU0 | Cytoplasm {ECO:0000269 PubMed:22037487} | 0 |
| Q16651 | Prostasin: Cell membrane; Single-pass m | 0 |
| Q9BRV8 | Cytoplasm {ECO:0000269 PubMed:16281057} | 1 |
| Q9P278 | Cytoplasm {ECO:0000269 PubMed:18403135, | 0 |
| Q15800 | Endoplasmic reticulum membrane {ECO:000 | 1 |
| Q96AE7 | Cytoplasm {ECO:0000269 PubMed:24475127} | 0 |
| Q6MZW2 | Secreted {ECO:0000305}.                 | 0 |
| 000409 | Nucleus {ECO:0000305}.                  | 0 |
| Q5JXM2 | Secreted {ECO:0000305}.                 | 0 |
| 043488 | Golgi apparatus {ECO:0000250}. Cytoplas | 1 |
| Q9UKD2 | Nucleus, nucleolus {ECO:0000269 PubMed: | 0 |
| Q9NZ43 | Endoplasmic reticulum membrane {ECO:000 | 0 |
| Q86YR7 |                                         | 0 |
| Q9BQI9 | Nucleus {ECO:0000250}.                  | 0 |
| Q16787 | Secreted, extracellular space, extracel | 0 |
| Q9HOR1 | Cytoplasm, cytosol {ECO:0000269 PubMed: | 0 |
| Q9UJX5 |                                         | 0 |
| P51787 | Cell membrane {ECO:0000269 PubMed:10646 | 1 |
| 043617 | Golgi apparatus, cis-Golgi network {ECO | 0 |
| Q9Y2W1 | Nucleus {ECO:0000269 PubMed:20123736, F | 1 |
| Q9NRX4 | Cytoplasm {ECO:0000250}.                | 0 |
| Q9Y5L3 | Isoform Long: Cell membrane; Multi-pass | 0 |
| 060449 | Membrane {ECO:0000250}; Single-pass typ | 0 |
| Q4LE39 | Nucleus {ECO:0000255 PROSITE-ProRule:PF | 0 |
| Q9H1Y3 | Membrane; Multi-pass membrane protein.  | 0 |
| Q86SQ7 | Cytoplasm, cytoskeleton, microtubule or | 0 |
| Q16849 | Membrane {ECO:0000250 UniProtKB:Q63259} | 0 |
| Q5VTY9 | Endoplasmic reticulum membrane {ECO:000 | 0 |
| 060333 | Cytoplasmic vesicle {ECO:0000250}. Cyt  | 0 |
| Q12948 | Nucleus {ECO:0000269 PubMed:11782474, F | 0 |
| Q8WUA7 |                                         | 0 |
| Q8WXH0 | Nucleus outer membrane {ECO:0000305}; S | 0 |
| Q9ULM0 |                                         | 0 |
| 075110 | Early endosome membrane {ECO:0000269 Pu | 1 |
| Q6WN34 | Isoform 1: Secreted {ECO:0000305}.; Iso | 0 |
| Q92567 |                                         | 0 |
| P54803 | Lysosome.                               | 0 |
| Q9Y2X3 | Nucleus, nucleolus. Nucleus, nucleoplas | 1 |
| Q7Z422 |                                         | 0 |
| Q13616 |                                         | 0 |
| Q9NRY5 |                                         | 0 |
| Q96F07 | Cytoplasm {ECO:0000269 PubMed:10449408, | 0 |
| Q9NYJ8 | Membrane {ECO:0000269 PubMed:10882101}; | 0 |
| Q9NU53 | Membrane {ECO:0000305}; Single-pass typ | 0 |
| P19525 | Cytoplasm. Nucleus. Cytoplasm, perinucl | 0 |

|        |                                         |   |
|--------|-----------------------------------------|---|
| Q9P275 | Nucleus, nucleolus {ECO:0000269 PubMed: | 0 |
| Q8TDD5 | Cell membrane {ECO:0000269 PubMed:1952  | 0 |
| Q96PX6 |                                         | 0 |
| Q8TB72 | Cytoplasm {ECO:0000305 PubMed:19168546} | 0 |
| Q14624 | Secreted.                               | 0 |
| P19827 | Secreted.                               | 0 |
| Q9NWX4 |                                         | 0 |
| Q96KR1 | Nucleus {ECO:0000250}. Cytoplasm {ECO:( | 0 |
| Q8ND82 | Nucleus {ECO:0000305}.                  | 1 |
| Q96EK2 |                                         | 0 |
| Q13077 |                                         | 0 |
| Q9HBD1 | Cytoplasm, P-body {ECO:0000250}. Note=I | 0 |
| Q9NRM6 | Isoform 1: Cell membrane; Single-pass t | 0 |
| O43734 |                                         | 0 |
| O15488 |                                         | 0 |
| Q96PD2 | Membrane {ECO:0000269 PubMed:11973641}; | 0 |
| P29508 | Cytoplasm {ECO:0000269 PubMed:10956412, | 1 |
| P35610 | Endoplasmic reticulum membrane {ECO:000 | 1 |
| Q99959 | Nucleus {ECO:0000269 PubMed:22781308}.  | 0 |
| P50395 | Cytoplasm {ECO:0000250}. Membrane {ECO: | 0 |
| O75626 | Nucleus {ECO:0000250 UniProtKB:Q60636}. | 0 |
| Q9H1Y0 | Cytoplasm {ECO:0000269 PubMed:17709747} | 0 |
| Q9ULS5 | Endoplasmic reticulum membrane {ECO:000 | 0 |
| Q9GZP4 |                                         | 0 |
| Q9BTC8 | Nucleus {ECO:0000255 PROSITE-ProRule:PF | 0 |
| Q92995 |                                         | 0 |
| Q9Y2G3 | Recycling endosome membrane {ECO:000026 | 0 |
| Q13753 | Secreted, extracellular space, extracel | 0 |
| O94921 | Cell membrane; Peripheral membrane prot | 0 |
| O14974 | Cytoplasm {ECO:0000269 PubMed:12923170, | 0 |
| Q13972 |                                         | 0 |
| Q13554 | Cytoplasm, cytoskeleton {ECO:0000269 P  | 0 |
| Q5TZA2 | Cytoplasm, cytoskeleton, microtubule or | 0 |
| Q9NVU0 | Nucleus.                                | 0 |
| P23634 | Cell membrane {ECO:0000269 PubMed:21374 | 1 |
| O75152 |                                         | 0 |
| Q9BVS4 | Cytoplasm {ECO:0000269 PubMed:16037817, | 0 |
| Q9Y548 | Golgi apparatus, cis-Golgi network memt | 0 |
| Q9BTX1 | Nucleus, nuclear pore complex. Nucleus  | 0 |
| P49619 | Cytoplasm. Membrane. Note=Can be loose  | 0 |
| Q4VC44 | Nucleus {ECO:0000305}.                  | 0 |
| Q9H9P5 | Isoform 4: Cytoplasm. Nucleus. Note=Is  | 0 |
| P24557 | Endoplasmic reticulum membrane {ECO:000 | 1 |
| Q9H0J9 | Nucleus {ECO:0000305}.                  | 0 |
| P54886 | Mitochondrion inner membrane {ECO:00002 | 0 |
| Q13395 |                                         | 0 |
| O75879 | Mitochondrion {ECO:0000255 HAMAP-Rule:M | 0 |
| Q05195 | Nucleus.                                | 1 |
| Q00537 |                                         | 0 |
| Q9H1X3 | Membrane {ECO:0000305}; Multi-pass memt | 0 |
| P11169 | Cell membrane {ECO:0000269 PubMed:94779 | 0 |
| A5PKW4 | Cell membrane {ECO:0000269 PubMed:23603 | 0 |
| Q9Y5B0 | Nucleus {ECO:0000269 PubMed:22692537}.  | 0 |
| P16989 | Cytoplasm. Nucleus.                     | 0 |
| Q6J9G0 | Membrane {ECO:0000305}; Single-pass men | 0 |

|        |                                                                |   |
|--------|----------------------------------------------------------------|---|
| Q9H4A3 | Cytoplasm {ECO:0000269 PubMed:10660600}                        | 1 |
| Q8IX12 | Cytoplasm, perinuclear region {ECO:0000269 PubMed:10660600}    | 0 |
| Q9NZT2 | Cytoplasm {ECO:0000250}. Nucleus {ECO:0000269 PubMed:10660600} | 0 |
| P30679 |                                                                | 0 |
| Q68CJ9 | Endoplasmic reticulum membrane {ECO:0000269 PubMed:10660600}   | 0 |
| Q92729 | Cell junction {ECO:0000269 PubMed:8700561}                     | 0 |
| Q96DI7 | Nucleus {ECO:0000269 PubMed:26912367, F                        | 1 |
| Q2KHR3 |                                                                | 0 |
| Q9Y5U8 | Mitochondrion inner membrane {ECO:0000269 PubMed:26912367, F   | 1 |
| P09110 | Peroxisome.                                                    | 1 |
| P54687 | Cytoplasm.                                                     | 0 |
| Q9Y250 | Cytoplasm {ECO:0000250}. Cell membrane                         | 0 |
| Q9NQX0 | Nucleus {ECO:0000250 UniProtKB:Q3UZD5}.                        | 0 |
| Q9HIJ5 | Secreted, extracellular space, extracel                        | 0 |
| Q9NPE6 | Membrane {ECO:0000305}; Multi-pass mem                         | 0 |
| Q9Y2A7 | Cell membrane {ECO:0000250 UniProtKB:P2                        | 0 |
| P82673 | Mitochondrion {ECO:0000269 PubMed:25838                        | 1 |
| Q02153 | Cytoplasm {ECO:0000250 UniProtKB:P16068                        | 0 |
| Q12872 | Nucleus {ECO:0000305}.                                         | 0 |
| Q07912 | Cell membrane. Nucleus. Endosome. Cell                         | 0 |
| Q7Z3U7 |                                                                | 0 |
| P22223 | Cell membrane; Single-pass type I membr                        | 1 |
| Q86WP2 | Nucleus {ECO:0000269 PubMed:14612417}.                         | 0 |
| Q9UJU3 | Nucleus {ECO:0000305}.                                         | 0 |
| 075390 | Mitochondrion matrix.                                          | 1 |
| P29376 | Membrane; Single-pass type I membrane p                        | 0 |
| Q96EL2 | Mitochondrion {ECO:0000269 PubMed:25838                        | 0 |
| Q96JJ3 | Cytoplasm {ECO:0000269 PubMed:20679435}                        | 0 |
| Q7Z5K2 | Isoform 2: Nucleus.; Nucleus. Chromosom                        | 1 |
| Q96GC9 | Endoplasmic reticulum-Golgi intermediat                        | 0 |
| P28340 | Nucleus {ECO:0000269 PubMed:11595739, F                        | 1 |
| Q53EL9 | Cell membrane {ECO:0000250}; Single-pas                        | 0 |
| P23588 |                                                                | 0 |
| Q9NZM4 |                                                                | 0 |
| Q07020 | Cytoplasm, cytosol {ECO:0000269 PubMed:                        | 0 |
| Q96AB3 | Cytoplasm {ECO:0000269 PubMed:17658461}                        | 0 |
| P26368 | Nucleus.                                                       | 1 |
| Q9Y6I3 | Cytoplasm {ECO:0000250}. Cell membrane                         | 0 |
| 015499 | Nucleus {ECO:0000255 PROSITE-ProRule:PF                        | 0 |
| Q9NSD4 | Nucleus {ECO:0000305}.                                         | 0 |
| Q13613 | Cell membrane {ECO:0000250 UniProtKB:Q9                        | 0 |
| P35052 | Cell membrane; Lipid-anchor, GPI-anchor                        | 0 |
| Q86TW2 | Secreted {ECO:0000305}.                                        | 0 |
| Q16775 | Isoform 1: Mitochondrion matrix {ECO:00                        | 0 |
| P78317 | Cytoplasm. Nucleus. Nucleus, PML body.                         | 0 |
| Q14790 | Cytoplasm.                                                     | 0 |
| Q9UPQ0 | Cytoplasm, cytoskeleton, stress fiber                          | 0 |
| Q9NVM9 | Nucleus {ECO:0000269 PubMed:23904267}.                         | 0 |
| Q15506 | Membrane {ECO:0000305}; Peripheral mem                         | 0 |
| Q96QS1 | Membrane {ECO:0000305}; Multi-pass mem                         | 0 |
| 076076 | Secreted {ECO:0000305}.                                        | 0 |
| Q9NQL9 | Nucleus {ECO:0000255 PROSITE-ProRule:PF                        | 0 |
| Q9Y274 | Golgi apparatus membrane {ECO:0000305};                        | 0 |
| 075185 | Membrane {ECO:0000305}; Multi-pass mem                         | 0 |
| P08138 | Cell membrane {ECO:0000269 PubMed:30229                        | 0 |

|        |                                          |   |
|--------|------------------------------------------|---|
| Q4KMG0 | Cell membrane {ECO:0000250}; Single-pass | 0 |
| Q9H2X6 | Nucleus, PML body {ECO:0000269 PubMed:2  | 0 |
| Q9Y5L0 | Cytoplasm {ECO:0000269 PubMed:10713112}  | 0 |
|        | be performed. View primary data.         | 0 |
| O14593 | Cytoplasm {ECO:0000250 UniProtKB:Q9Z205  | 0 |
| Q9NX61 | Membrane {ECO:0000305}; Multi-pass mem   | 0 |
| Q9HBW0 | Cell surface {ECO:0000269 PubMed:193069  | 0 |
| P10619 | Lysosome.                                | 1 |
| Q8IX01 | Nucleus {ECO:0000305}.                   | 1 |
| P55011 | Membrane; Multi-pass membrane protein.   | 0 |
| Q9Y343 | Cytoplasmic vesicle membrane {ECO:00002  | 0 |
| 000167 | Cytoplasm {ECO:0000269 PubMed:10906137,  | 0 |
| Q99439 |                                          | 0 |
| Q8IZY2 | Cell membrane {ECO:0000269 PubMed:12917  | 0 |
| Q9Y6H5 | Cytoplasm {ECO:0000269 PubMed:10319874,  | 0 |
| Q9UHI6 | Cytoplasm. Nucleus, gem. Note=Localized  | 0 |
| Q9H0C5 | Cytoplasm {ECO:0000269 PubMed:11818025,  | 1 |
| Q96K12 | Peroxisome membrane {ECO:0000269 PubMec  | 0 |
| 075363 | Cytoplasm {ECO:0000269 PubMed:14567997}  | 1 |
| P28069 | Nucleus {ECO:0000269 PubMed:26612202}.   | 1 |
| Q15782 | Secreted {ECO:0000305}.                  | 0 |
| Q9Y2G9 |                                          | 0 |
| Q9P0W2 | Nucleus. Chromosome. Note=Localized to   | 0 |
| Q16602 | Cell membrane; Multi-pass membrane prot  | 0 |
| Q92625 | Cytoplasm. Cell projection {ECO:0000250  | 0 |
| P36508 | Nucleus {ECO:0000305}.                   | 0 |
| Q15599 | Endomembrane system {ECO:0000269 PubMec  | 0 |
| P78549 | Nucleus {ECO:0000255 HAMAP-Rule:MF_0318  | 0 |
| Q6BDS2 |                                          | 0 |
| P08754 | Cytoplasm {ECO:0000269 PubMed:17635935}  | 0 |
| 000410 | Cytoplasm. Nucleus. Nucleus, nucleolus.  | 0 |
| P04181 | Mitochondrion matrix {ECO:0000269 PubMe  | 1 |
| Q16513 | Cytoplasm {ECO:0000269 PubMed:11356191,  | 0 |
| Q9BV38 | Nucleus, nucleolus {ECO:0000269 PubMed:  | 0 |
| Q15035 | Membrane {ECO:0000305}; Multi-pass mem   | 0 |
| 095631 | Secreted, extracellular space, extracel  | 0 |
| 095838 | Cell membrane; Multi-pass membrane prot  | 0 |
| Q7L590 | Nucleus {ECO:0000269 PubMed:11095689, I  | 0 |
| P23743 |                                          | 0 |
| P21860 | Isoform 1: Cell membrane; Single-pass t  | 0 |
| Q9HAT0 | Cell projection, cilium, flagellum {ECO  | 0 |
| Q8N8A2 |                                          | 0 |
| Q15046 | Isoform Cytoplasmic: Cytoplasm, cytosol  | 0 |
| Q9BUB4 |                                          | 0 |
| Q14554 | Endoplasmic reticulum lumen {ECO:000025  | 1 |
| Q9NU19 |                                          | 0 |
| 095168 | Mitochondrion inner membrane {ECO:00002  | 1 |
| Q96T58 | Nucleus {ECO:0000269 PubMed:11331609}.   | 1 |
| Q15746 | Cytoplasm {ECO:0000269 PubMed:20053363}  | 0 |
| Q8WU90 | Cytoplasm {ECO:0000269 PubMed:15676025,  | 0 |
| P45985 | Cytoplasm {ECO:0000250}. Nucleus {ECO:(  | 1 |
| Q9H813 | Cell membrane {ECO:0000269 PubMed:31025  | 0 |
| 060641 | Cell membrane {ECO:0000250}. Membrane,   | 0 |
| Q9H2G2 | Cytoplasm {ECO:0000250}.                 | 0 |
| Q7L1T6 | Endoplasmic reticulum {ECO:0000269 PubM  | 0 |

|        |                                         |   |
|--------|-----------------------------------------|---|
| Q9UMD9 | Cell junction, hemidesmosome. Membrane; | 0 |
| Q9H4Y5 |                                         | 0 |
| Q04725 | Nucleus.                                | 1 |
| Q9Y576 |                                         | 0 |
| Q9H098 |                                         | 0 |
| P48163 | Cytoplasm {ECO:0000269 PubMed:8187880}. | 1 |
| Q86TI0 | Nucleus {ECO:0000250}.                  | 0 |
| Q14004 | Nucleus speckle {ECO:0000269 PubMed:167 | 0 |
| P13995 | Mitochondrion.                          | 0 |
| Q96T83 | Golgi apparatus, trans-Golgi network me | 0 |
| Q9POK8 | Nucleus.                                | 0 |
| P67809 | Cytoplasm. Nucleus. Cytoplasmic granule | 0 |
| P27815 | Isoform 1: Cytoplasm, perinuclear regio | 0 |
| P26232 | Cell membrane {ECO:0000250 UniProtKB:Q6 | 0 |
| Q15717 | Cytoplasm {ECO:0000269 PubMed:14517288, | 0 |
| Q9P265 |                                         | 0 |
| Q96GM5 | Nucleus {ECO:0000269 PubMed:8804307, EC | 1 |
| 075164 | Nucleus {ECO:0000255 PROSITE-ProRule:PF | 0 |
| P48764 | Apical cell membrane {ECO:0000269 PubMe | 0 |
| Q8N5V2 | Cytoplasm {ECO:0000250}. Membrane {ECO: | 0 |
| Q9UIB8 | Cell membrane {ECO:0000269 PubMed:11389 | 0 |
| Q9BW60 | Endoplasmic reticulum membrane {ECO:000 | 0 |
| P17947 | Nucleus {ECO:0000255 PROSITE-ProRule:PF | 1 |
| Q9P1U0 | Nucleus, nucleolus {ECO:0000250 UniProt | 1 |
| P56856 | Cell junction, tight junction {ECO:0000 | 1 |
| 095625 | Nucleus {ECO:0000305}.                  | 0 |
| P54252 | Nucleus matrix {ECO:0000269 PubMed:9580 | 0 |
| Q8TBA6 | Golgi apparatus membrane {ECO:0000269 F | 1 |
| P21802 | Cell membrane; Single-pass type I membr | 0 |
| Q9H9A6 |                                         | 0 |
| 000423 | Cytoplasm {ECO:0000250 UniProtKB:Q05BC5 | 0 |
| Q9NXG2 |                                         | 0 |
| Q9ULI4 | Cytoplasm, cytoskeleton {ECO:0000305}.  | 0 |
| Q96BY7 | Preautophagosomal structure membrane {E | 0 |
| Q9Y6D6 | Cytoplasm. Cytoplasm, perinuclear regio | 0 |
| Q68CK6 | Mitochondrion {ECO:0000269 PubMed:10434 | 1 |
| Q9P243 | Nucleus {ECO:0000250}. Cytoplasm, cytos | 0 |
| Q15390 | Mitochondrion {ECO:0000250}. Note=May b | 0 |
| Q9UJ98 | Nucleus {ECO:0000255 PROSITE-ProRule:PF | 1 |
| P22830 | Mitochondrion inner membrane; Periphera | 0 |
| B2RTY4 | Membrane {ECO:0000255}; Single-pass mem | 0 |
| 015523 | Cytoplasm {ECO:0000269 PubMed:15383328} | 0 |
| Q01813 | Cytoplasm {ECO:0000255 HAMAP-Rule:MF_03 | 0 |
| Q13907 | Peroxisome {ECO:0000250 UniProtKB:03558 | 0 |
| P23497 | Nucleus. Nucleus, PML body {ECO:0000269 | 0 |
| Q99612 | Nucleus.                                | 1 |
| 014494 | Cell membrane; Multi-pass membrane prot | 0 |
| Q92859 | Cell membrane; Single-pass type I membr | 0 |
| Q15629 | Endoplasmic reticulum membrane {ECO:000 | 0 |
| P46020 | Cell membrane {ECO:0000305}; Lipid-anch | 0 |
| P19438 | Cell membrane {ECO:0000269 PubMed:22801 | 0 |
| Q02641 | Cell membrane, sarcolemma {ECO:0000305  | 0 |
| 060447 | Nucleus. Cytoplasm, cytoskeleton, micro | 0 |
| Q9UBI4 | Membrane {ECO:0000305}; Single-pass typ | 0 |
| P14618 | Cytoplasm {ECO:0000269 PubMed:25263439} | 0 |

|        |                                          |   |
|--------|------------------------------------------|---|
| Q7Z478 | Cytoplasm {ECO:0000255 HAMAP-Rule:MF_03  | 0 |
| Q5QJE6 | Nucleus {ECO:0000269 PubMed:12786946, F  | 1 |
| Q9BUU2 | Nucleus {ECO:0000269 PubMed:23349634}.   | 0 |
| Q12888 | Nucleus {ECO:0000269 PubMed:11331310, F  | 1 |
| Q9Y3B9 |                                          | 0 |
| P61586 | Cell membrane; Lipid-anchor; Cytoplasmic | 0 |
| Q14562 | Nucleus {ECO:0000269 PubMed:11991638, F  | 0 |
| Q05513 | Cytoplasm {ECO:0000269 PubMed:17313651,  | 1 |
| P08048 | Nucleus.                                 | 0 |
| Q9NSE4 | Mitochondrion matrix {ECO:0000250}.      | 1 |
| P21579 | Cytoplasmic vesicle, secretory vesicle   | 0 |
| Q8IVL0 | Nucleus outer membrane {ECO:0000250}.    | 0 |
| P51553 | Mitochondrion {ECO:0000269 PubMed:11256  | 1 |
| Q9GZN7 | Nucleus envelope {ECO:0000269 PubMed:22  | 0 |
| Q76G19 | Cytoplasm, cell cortex {ECO:0000269 Pub  | 0 |
| Q16720 | Cell membrane; Multi-pass membrane prot  | 0 |
| Q13464 | Cytoplasm. Cytoplasm, cytoskeleton, mic  | 0 |
| Q13951 | Nucleus {ECO:0000305}.                   | 0 |
| Q15120 | Mitochondrion matrix.                    | 0 |
| Q12891 | Cell membrane {ECO:0000269 PubMed:11296  | 0 |
| P56524 | Nucleus. Cytoplasm. Note=Shuttles betwe  | 0 |
| Q9NS23 | Isoform A: Cytoplasm, cytoskeleton. Cyt  | 0 |
| P22607 | Isoform 1: Cell membrane; Single-pass t  | 0 |
| P80217 | Nucleus. Note=Nuclear following IFN tre  | 0 |
| Q6AI08 |                                          | 0 |
| Q13057 | Cytoplasm {ECO:0000250}. Mitochondrion   | 0 |
| Q7Z736 |                                          | 0 |
| Q02078 | Nucleus {ECO:0000255 PROSITE-ProRule:PF  | 0 |
| Q96G74 |                                          | 0 |
| P19532 | Nucleus.                                 | 0 |
| Q3MII6 | Cytoplasm {ECO:0000269 PubMed:21383079}  | 0 |
| O60488 | Mitochondrion outer membrane {ECO:00002  | 0 |
| Q14642 | Cell membrane {ECO:0000305 PubMed:80060  | 0 |
| Q92917 | Nucleus {ECO:0000269 PubMed:21880142, F  | 1 |
| Q4V328 | Early endosome membrane {ECO:0000269 Pu  | 0 |
| Q9UET6 | Cytoplasm {ECO:0000255 HAMAP-Rule:MF_03  | 0 |
| Q96HE9 | Cytoplasm {ECO:0000269 PubMed:23242552,  | 0 |
| Q9H902 | Membrane {ECO:0000255}. Mitochondrion n  | 0 |
| P98196 | Cell membrane {ECO:0000269 PubMed:21914  | 0 |
| O95602 | Nucleus, nucleolus {ECO:0000250}.        | 1 |
| Q15012 | Endomembrane system {ECO:0000305}; Mult  | 0 |
| Q9ULT0 | Cytoplasm {ECO:0000269 PubMed:25546680}  | 0 |
| Q9UHH9 | Nucleus {ECO:0000269 PubMed:11502751}.   | 0 |
|        | be performed. View primary data.         | 0 |
| Q8N5C6 |                                          | 0 |
| O00139 | Cytoplasm {ECO:0000250}. Cytoplasm, cyt  | 0 |
| Q7LDG7 | Cytoplasm, cytosol. Cell membrane; Peri  | 0 |
| Q14997 | Cytoplasm, cytosol {ECO:0000250}. Nucle  | 0 |
| Q9P2H3 | Cytoplasm. Cytoplasm, cytoskeleton, cil  | 0 |
| Q8IXJ6 | Nucleus. Cytoplasm, perinuclear region.  | 0 |
| Q96DZ1 | Endoplasmic reticulum lumen {ECO:000026  | 0 |
| Q15173 | Cytoplasm {ECO:0000269 PubMed:8703017}.  | 0 |
| P11217 |                                          | 0 |
| O75459 |                                          | 0 |
| P78337 | Nucleus.                                 | 0 |



|        |                                         |   |
|--------|-----------------------------------------|---|
| Q9HCX4 | Cell membrane {ECO:0000269 PubMed:21402 | 0 |
| O15021 | Cytoplasm {ECO:0000305}.                | 0 |
| Q9H2U9 | Membrane; Single-pass type I membrane p | 0 |
| Q8WUM0 | Nucleus, nuclear pore complex {ECO:0000 | 0 |
| Q9H1E3 | Nucleus.                                | 1 |
| Q96QK1 | Cytoplasm. Membrane; Peripheral membrar | 0 |
| O60884 | Membrane {ECO:0000305}; Lipid-anchor {E | 0 |
| P20749 | Nucleus. Cytoplasm {ECO:0000250}. Cytop | 0 |
| Q13303 | Cytoplasm {ECO:0000250 UniProtKB:P62483 | 0 |
| O60706 | Membrane {ECO:0000255 PROSITE-ProRule:F | 0 |
| P22466 | Secreted {ECO:0000269 PubMed:1370155, F | 0 |
| Q9UHP7 | Cell membrane {ECO:0000269 PubMed:15104 | 0 |
| Q8IVP5 | Mitochondrion outer membrane {ECO:00002 | 0 |
| P27338 | Mitochondrion outer membrane; Single-pa | 1 |
| P35398 | Nucleus {ECO:0000255 PROSITE-ProRule:PF | 0 |
| Q03167 | Secreted. Secreted, extracellular space | 0 |
| O15496 | Secreted {ECO:0000269 PubMed:9188469}.  | 0 |
| Q9Y543 | Nucleus {ECO:0000255 PROSITE-ProRule:PF | 0 |
| P54709 | Cell membrane {ECO:0000269 PubMed:17081 | 1 |
| P46934 | Cytoplasm {ECO:0000250}. Cell membrane  | 0 |
| Q92521 | Endoplasmic reticulum membrane {ECO:000 | 0 |
| Q16659 | Cytoplasm {ECO:0000250}. Nucleus {ECO:( | 0 |
| O14775 | Membrane {ECO:0000250 UniProtKB:P62881} | 0 |
| P51159 | Membrane {ECO:0000305}; Lipid-anchor {E | 0 |
| Q9BXW7 |                                         | 0 |
| Q92890 | Nucleus {ECO:0000250 UniProtKB:Q9ES53}. | 0 |
| O75581 | Cell membrane {ECO:0000269 PubMed:26387 | 1 |
| P25092 | Cell membrane {ECO:0000269 PubMed:23269 | 0 |
| P09683 | Secreted {ECO:0000269 Ref. 2}.          | 0 |
| Q9P1Y6 |                                         | 0 |
| O95163 | Cytoplasm {ECO:0000269 PubMed:11714725, | 0 |
|        | Golgi apparatus {ECO:0000269 PubMed:117 | 0 |
| P35080 | Cytoplasm, cytoskeleton.                | 1 |
| P26045 | Cell membrane; Peripheral membrane prot | 0 |
| P11277 | Cytoplasm, cytoskeleton. Cytoplasm, cel | 0 |
| Q9UN19 | Cytoplasm {ECO:0000269 PubMed:10770799} | 0 |
| O15520 | Secreted {ECO:0000305}.                 | 0 |
| Q9NX78 | Membrane {ECO:0000305}; Multi-pass memt | 0 |
| Q86US8 | Nucleus, nucleolus. Chromosome, telomer | 0 |
| O00471 | Cytoplasm {ECO:0000269 PubMed:9119050}. | 0 |
| P53675 | Cytoplasmic vesicle membrane {ECO:00002 | 0 |
| O95633 | Isoform 1: Secreted.; Isoform 2: Nucleu | 0 |
| P98153 | Membrane; Single-pass type I membrane p | 0 |
| Q9BV68 | Cytoplasm {ECO:0000269 PubMed:23026136} | 0 |
| Q6NYC1 | Nucleus, nucleoplasm {ECO:0000269 PubMe | 0 |
| P06746 | Nucleus. Cytoplasm. Note=Cytoplasmic ir | 0 |
| Q9NSC7 | Golgi apparatus membrane {ECO:0000305}; | 1 |
| Q5MNZ9 | Golgi apparatus, trans-Golgi network. F | 1 |
| Q5SYB0 | Cytoplasm, cytosol {ECO:0000269 PubMed: | 0 |
| Q9HCG7 | Endoplasmic reticulum membrane {ECO:000 | 0 |
| P52848 | Golgi apparatus membrane {ECO:0000269 F | 0 |
| P08243 |                                         | 0 |
| P53677 | Golgi apparatus. Cytoplasmic vesicle me | 0 |
| Q9UJ37 | Golgi apparatus membrane {ECO:0000305}; | 0 |
| P28329 |                                         | 0 |

|        |                                         |   |
|--------|-----------------------------------------|---|
| P11940 | Cytoplasm {ECO:0000269 PubMed:20573744, | 0 |
| Q96S53 | Nucleus {ECO:0000269 PubMed:11418599}.  | 0 |
| Q9Y6A4 | Nucleus. Cytoplasm, cytoskeleton, micro | 0 |
| Q16825 | Cytoplasm, cytoskeleton {ECO:0000250}.  | 0 |
| Q9NR50 |                                         | 0 |
| Q9UQM7 | Cell junction, synapse {ECO:0000250 Uni | 0 |
| Q13428 | Nucleus, nucleolus {ECO:0000269 PubMed: | 1 |
| P60953 | Cell membrane {ECO:0000305}; Lipid-anch | 0 |
| Q9H4L5 | Endoplasmic reticulum membrane {ECO:000 | 0 |
| P29322 | Cell membrane {ECO:0000250 UniProtKB:OC | 0 |
| P55017 | Cell membrane {ECO:0000269 PubMed:22009 | 0 |
| Q9NS91 | Nucleus {ECO:0000269 PubMed:15632077, I | 0 |
| P20020 | Cell membrane {ECO:0000269 PubMed:18029 | 0 |
| Q9NZQ8 | Cell membrane {ECO:0000255}; Multi-pass | 0 |
| 043639 | Cytoplasm {ECO:0000269 PubMed:16835242} | 0 |
| 095819 | Cytoplasm {ECO:0000269 PubMed:14966141} | 0 |
| Q9UM21 | Alpha-1,3-mannosyl-glycoprotein 4-beta- | 0 |
| P62899 |                                         | 0 |
| 075083 | Cytoplasm, cytoskeleton {ECO:0000250 Ur | 0 |
| Q9NXJ0 | Membrane; Multi-pass membrane protein.  | 1 |
| Q15349 | Nucleus {ECO:0000269 PubMed:7623830}. ( | 0 |
| Q9NXR8 | Nucleus.                                | 0 |
| Q7L8A9 | Cytoplasm {ECO:0000269 PubMed:15467828, | 0 |
| Q9NZU5 | Cytoplasm {ECO:0000250}. Nucleus {ECO:( | 0 |
| 043709 | Nucleus {ECO:0000269 PubMed:24086612, I | 0 |
| Q9UBV2 | Endoplasmic reticulum membrane {ECO:000 | 1 |
| Q15645 |                                         | 0 |
| Q15904 | Endoplasmic reticulum membrane {ECO:000 | 0 |
| P15923 | Nucleus.                                | 0 |
| Q92519 | Cytoplasm {ECO:0000250}. Cytoplasm, cyt | 0 |
| Q96EP5 | Cytoplasm {ECO:0000269 PubMed:22001406} | 0 |
| 095983 | Nucleus. Chromosome. Note=Nuclear, in c | 1 |
| P81277 | Secreted.                               | 0 |
| Q14527 | Cytoplasm {ECO:0000250}. Nucleus {ECO:( | 0 |
| Q14320 | Nucleus {ECO:0000305}.                  | 1 |
| P98173 | Secreted {ECO:0000305}.                 | 0 |
| Q8WXR4 | Cytoplasm, cytoskeleton. Cell projectio | 0 |
| Q53TN4 | Membrane {ECO:0000269 PubMed:12949720}; | 0 |
| Q9H159 | Cell membrane; Single-pass type I membr | 0 |
| Q16342 | Nucleus {ECO:0000305}.                  | 0 |
| Q9H2J7 | Membrane {ECO:0000305}; Multi-pass mem  | 0 |
| Q8TC12 | Endoplasmic reticulum membrane {ECO:000 | 1 |
| P17612 | Cytoplasm. Cell membrane. Nucleus {ECO: | 0 |
| 094910 | Cell membrane; Multi-pass membrane prot | 0 |
| P12814 | Cytoplasm, cytoskeleton {ECO:0000269 Pu | 0 |
| Q68DK2 | Cytoplasm, cytoskeleton, microtubule or | 0 |
| Q9UK32 | Cytoplasm, cytosol {ECO:0000269 PubMed: | 0 |
| 095208 | Cytoplasm {ECO:0000269 PubMed:10567358} | 0 |
| Q99952 | Nucleus {ECO:0000250}. Cytoplasm {ECO:( | 0 |
| Q7Z4I7 | Nucleus {ECO:0000305}. Cell junction, f | 0 |
| Q15772 | Isoform 3: Nucleus.                     | 0 |
| Q8TBB1 | Cytoplasm {ECO:0000250}.                | 0 |
| P51648 | Microsome membrane {ECO:0000269 PubMed: | 0 |
| P02786 | Cell membrane {ECO:0000269 PubMed:17081 | 0 |
| P36956 | Endoplasmic reticulum membrane {ECO:000 | 0 |

|        |                                         |   |
|--------|-----------------------------------------|---|
| Q9UHB7 | Nucleus {ECO:0000269 PubMed:12065898}.  | 0 |
| P51668 | Cytoplasm {ECO:0000269 PubMed:18845142} | 0 |
| Q8N3R9 | Golgi apparatus {ECO:0000269 PubMed:214 | 0 |
| 094844 |                                         | 0 |
| Q14683 | Nucleus {ECO:0000269 PubMed:12199140}.  | 1 |
| Q99714 | Mitochondrion {ECO:0000269 PubMed:12917 | 0 |
| Q7KZI7 | Cell membrane; Peripheral membrane prot | 0 |
| 075330 | Cell surface {ECO:0000250 UniProtKB:Q00 | 0 |
| Q96EP1 | Nucleus, PML body {ECO:0000269 PubMed:1 | 0 |
| 015460 | Endoplasmic reticulum lumen.            | 1 |
| P31994 | Cell membrane; Single-pass type I membr | 0 |
| Q96Q11 | Mitochondrion {ECO:0000269 PubMed:11256 | 0 |
| P49748 | Mitochondrion inner membrane.           | 1 |
| 094804 | Cell membrane {ECO:0000269 PubMed:19255 | 0 |
| Q9UKB1 | Cytoplasm {ECO:0000250}. Nucleus {ECO:( | 0 |
| Q15027 | Recycling endosome membrane {ECO:000026 | 0 |
| Q14194 | Cytoplasm {ECO:0000269 PubMed:11562390} | 0 |
| P57679 | Cell membrane {ECO:0000250 UniProtKB:P5 | 0 |
| Q9GZP9 | Endoplasmic reticulum membrane {ECO:000 | 1 |
| Q9NXL6 | Membrane {ECO:0000305}; Multi-pass mem  | 0 |
| Q9NXR1 | Cytoplasm, cytoskeleton. Cytoplasm, cyt | 0 |
| Q9Y6F6 | Cytoplasm, perinuclear region. Sarcopl  | 0 |
| Q9H6F2 | Sarcoplasmic reticulum membrane {ECO:00 | 0 |
| Q9BXS5 | Golgi apparatus. Cytoplasmic vesicle, c | 0 |
| P15151 | Isoform Alpha: Cell membrane; Single-pa | 0 |
| P18887 | Nucleus {ECO:0000269 PubMed:17353262, F | 1 |
| Q8WTV0 | Cell membrane {ECO:0000269 PubMed:26965 | 1 |
| Q8TAV3 | Endoplasmic reticulum lumen {ECO:000026 | 0 |
| P49736 | Nucleus {ECO:0000269 PubMed:8175912}.   | 1 |
| Q9BXT6 | Cytoplasm {ECO:0000250 UniProtKB:Q99MV5 | 0 |
| Q96RD6 | Cell membrane {ECO:0000305}; Multi-pass | 0 |
| Q9H3D4 | Nucleus {ECO:0000269 PubMed:12446779, F | 1 |
| Q96QP1 | Cytoplasm, cytosol {ECO:0000269 PubMed: | 0 |
| Q6P1M3 | Cytoplasm {ECO:0000269 PubMed:15632202} | 0 |
| 060658 |                                         | 0 |
| P51793 | Early endosome membrane {ECO:0000250 Ur | 1 |
| Q9NVX2 | Nucleus, nucleolus {ECO:0000269 PubMed: | 0 |
| P31040 | Mitochondrion inner membrane {ECO:00002 | 1 |
| Q969G3 | Nucleus {ECO:0000255 PROSITE-ProRule:PF | 1 |
| Q8TC99 |                                         | 0 |
| Q8TAX9 | Cytoplasm {ECO:0000269 PubMed:18038310} | 0 |
| 075078 | Membrane; Single-pass type I membrane p | 0 |
| Q06190 |                                         | 0 |
| Q96AC1 | Cytoplasm. Cytoplasm, cell cortex. Cyt  | 0 |
| 095342 | Membrane; Multi-pass membrane protein.  | 0 |
| Q9BPW9 | Microsome membrane {ECO:0000269 PubMed: | 0 |
| 043866 | Secreted {ECO:0000269 PubMed:24223991,  | 0 |
| P35354 | Microsome membrane; Peripheral membrane | 0 |
| Q9Y6M1 | Nucleus. Cytoplasm. Note=Localized in c | 0 |
| 043283 | Cytoplasm {ECO:0000269 PubMed:9353328}. | 0 |
| P15907 | Golgi apparatus, Golgi stack membrane   | 0 |
| Q9UL17 | Nucleus {ECO:0000269 PubMed:24845384}.  | 1 |
| Q5TBA9 | Cytoplasm {ECO:0000269 PubMed:22753416} | 0 |
| Q13492 | Cell membrane {ECO:0000269 PubMed:16262 | 0 |
| P46459 | Cytoplasm.                              | 1 |

|        |                                         |   |
|--------|-----------------------------------------|---|
| P10070 | Nucleus {ECO:0000269 PubMed:26565916}.  | 0 |
| Q7Z460 | Cytoplasm, cytoskeleton. Cytoplasm, cyt | 0 |
| P82930 | Mitochondrion {ECO:0000269 PubMed:11279 | 1 |
| Q9UM47 | Cell membrane {ECO:0000269 PubMed:15350 | 0 |
| P54105 | Cytoplasm, cytosol {ECO:0000269 PubMed: | 0 |
| Q9Y2T4 |                                         | 0 |
| 075530 | Nucleus. Chromosome. Note=Transiently c | 1 |
| Q9BYE9 | Apical cell membrane {ECO:0000269 PubMe | 1 |
| Q16143 | Cytoplasm.                              | 0 |
| Q99816 | Cytoplasm {ECO:0000269 PubMed:17853893} | 0 |
| Q53F19 | Nucleus {ECO:0000269 PubMed:26382858}.  | 0 |
| Q93084 | Nucleus membrane {ECO:0000269 PubMed:15 | 0 |
| 043570 | Membrane; Single-pass type I membrane p | 1 |
| Q99685 | Cytoplasm, cytosol {ECO:0000250 UniProt | 0 |
| Q9HB63 | Secreted, extracellular space, extracel | 0 |
| Q9Y276 | Mitochondrion inner membrane {ECO:00002 | 1 |
| Q6V1X1 | Cytoplasm {ECO:0000269 PubMed:11012666, | 0 |
| 060721 | Membrane; Multi-pass membrane protein.  | 0 |
| Q9HCE3 | Nucleus {ECO:0000305}.                  | 0 |
| Q14162 | Membrane {ECO:0000305}; Single-pass typ | 1 |
| P49257 | Endoplasmic reticulum-Golgi intermediat | 1 |
| Q9P035 | Endoplasmic reticulum membrane {ECO:000 | 1 |
| Q8WWN9 | Cytoplasm {ECO:0000250}. Cell membrane  | 0 |
| 043149 |                                         | 0 |
| P06733 | Cytoplasm {ECO:0000269 PubMed:10802057} | 0 |
| Q13621 | Membrane; Multi-pass membrane protein.  | 0 |
| Q969H8 | Secreted {ECO:0000269 PubMed:17362502,  | 0 |
| Q9HCE9 | Cell membrane {ECO:0000269 PubMed:20056 | 0 |
| Q9UJT0 | Cytoplasm, cytoskeleton, microtubule or | 0 |
| Q9HCE6 | Cytoplasm {ECO:0000269 PubMed:16112081} | 0 |
| Q2TBF2 | Membrane {ECO:0000305}; Single-pass men | 0 |
| 043526 | Cell membrane {ECO:0000269 PubMed:10788 | 0 |
| Q9GZN1 | Cytoplasm, cytoskeleton {ECO:0000250}.  | 0 |
| Q9BVW5 | Cytoplasm {ECO:0000269 PubMed:17102137, | 0 |
| P30626 | Cytoplasm. Sarcoplasmic reticulum membr | 0 |
| 043432 |                                         | 0 |
| Q8NFB4 | Chromosome, centromere, kinetochore. Nu | 0 |
| Q14563 | Secreted {ECO:0000250}.                 | 0 |
| Q5R3I4 |                                         | 0 |
| P24752 | Mitochondrion {ECO:0000269 PubMed:19793 | 1 |
| Q93098 | Secreted, extracellular space, extracel | 0 |
| Q14966 | Nucleus speckle {ECO:0000255 PROSITE-P1 | 1 |
| Q8TBP6 | Mitochondrion inner membrane {ECO:00002 | 0 |
| Q9BVV7 | Mitochondrion membrane {ECO:0000305}; S | 0 |
| P35612 | Cytoplasm, cytoskeleton. Cell membrane; | 0 |
| P08620 | Secreted {ECO:0000305}.                 | 0 |
| Q9UJF2 |                                         | 0 |
| Q9Y2B5 |                                         | 0 |
| P17032 | Nucleus {ECO:0000269 PubMed:23922231}.  | 0 |
| P27448 | Cell membrane {ECO:0000269 PubMed:21145 | 0 |
| Q53EP0 | Membrane {ECO:0000250}; Single-pass men | 0 |
| P15408 | Nucleus.                                | 1 |
| Q9UF02 | Membrane {ECO:0000250}; Multi-pass memt | 0 |
| Q9UBN1 | Cell membrane {ECO:0000305 PubMed:21127 | 0 |
| 094915 |                                         | 0 |

|        |                                         |   |
|--------|-----------------------------------------|---|
| Q92545 | Membrane {ECO:0000305}; Multi-pass mem  | 0 |
| Q16658 | Cytoplasm, cytosol {ECO:0000269 PubMed: | 0 |
| P60709 | Cytoplasm, cytoskeleton {ECO:0000269 Pu | 0 |
| Q96EN8 |                                         | 0 |
| Q13393 | Cytoplasm, perinuclear region {ECO:0000 | 0 |
| P54707 | Membrane; Multi-pass membrane protein.  | 0 |
| 043379 | Nucleus {ECO:0000269 PubMed:20729831, F | 0 |
| Q12959 | Membrane {ECO:0000269 PubMed:10859302,  | 1 |
| P51149 | Cytoplasmic vesicle, phagosome membrane | 1 |
| Q9UHQ4 | Endoplasmic reticulum membrane {ECO:000 | 1 |
| Q9NQW1 | Cytoplasm {ECO:0000269 PubMed:16495487} | 0 |
| Q15020 | Nucleus, nucleoplasm {ECO:0000269 PubMe | 0 |
| P0DPH8 | Cytoplasm, cytoskeleton.                | 0 |
| Q02962 | Nucleus.                                | 1 |
| Q15024 | Nucleus, nucleolus {ECO:0000269 PubMed: | 0 |
| Q92845 |                                         | 0 |
| Q9H000 |                                         | 0 |
| Q14566 | Nucleus. Note=Binds to chromatin during | 1 |
| Q9Y3B8 | Isoform 1: Mitochondrion intermembrane  | 0 |
| Q9Y580 | Nucleus {ECO:0000269 PubMed:21855801}.  | 1 |
| Q15434 | Nucleus {ECO:0000305}.                  | 0 |
| Q9H3S7 | Nucleus. Cytoplasm. Cytoplasmic vesicle | 0 |
| P40692 | Nucleus {ECO:0000269 PubMed:11429708, F | 1 |
| P13051 | Isoform 1: Mitochondrion.; Isoform 2: M | 0 |
| P31512 | Microsome membrane {ECO:0000250 UniProt | 0 |
| Q9Y2M5 | Cytoplasm, perinuclear region. Nucleus. | 0 |
| 094810 |                                         | 0 |
| Q96NT5 | Apical cell membrane; Multi-pass membra | 0 |
| 075051 | Cell membrane {ECO:0000250}; Single-pas | 0 |
| Q96R06 | Cytoplasm {ECO:0000269 PubMed:27462074} | 0 |
| Q8IZ07 | Cell membrane {ECO:0000269 PubMed:22298 | 0 |
| P55327 |                                         | 0 |
| 000763 | Mitochondrion {ECO:0000269 PubMed:10677 | 1 |
| Q9BUZ4 | Cytoplasm. Nucleus. Cytoplasm, perinucl | 0 |
| Q9NWQ8 | Cell membrane {ECO:0000269 PubMed:10790 | 0 |
| Q9BRR8 |                                         | 0 |
| P32942 | Membrane; Single-pass type I membrane p | 0 |
| P49902 | Cytoplasm.                              | 0 |
| P43121 | Membrane; Single-pass type I membrane p | 0 |
| 075487 | Cell membrane {ECO:0000250}; Lipid-anch | 0 |
| Q9NUK0 | Nucleus {ECO:0000269 PubMed:11929853}.  | 0 |
| Q9P1Y5 | Cytoplasm, cytoskeleton {ECO:0000269 Pu | 1 |
| P47736 | Golgi apparatus membrane; Peripheral me | 1 |
| Q92888 | Cytoplasm {ECO:0000269 PubMed:10747909} | 0 |
| Q15833 |                                         | 0 |
| 014733 | Nucleus. Cytoplasm {ECO:0000250}.       | 0 |
| Q9NPI5 |                                         | 0 |
| Q16760 | Isoform 2: Cytoplasm {ECO:0000269 PubMe | 0 |
| Q8WZ74 | Cytoplasm, cell cortex {ECO:0000250}. ( | 0 |
| 094805 | Nucleus {ECO:0000303 PubMed:26601204}.  | 0 |
| P10826 | Nucleus {ECO:0000269 PubMed:28167758}.  | 1 |
| Q02880 | Cytoplasm. Nucleus, nucleolus.          | 0 |
| Q9HD45 | Membrane {ECO:0000305}; Multi-pass mem  | 0 |
| Q00653 | Nucleus. Cytoplasm. Note=Nuclear, but a | 0 |
| 060237 | Cytoplasm, cytoskeleton {ECO:0000269 Pu | 0 |

|        |                                          |   |
|--------|------------------------------------------|---|
| Q8IXB1 | Endoplasmic reticulum lumen {ECO:000025} | 0 |
| Q12789 | Nucleus.                                 | 0 |
| P24394 | Cell membrane; Single-pass type I membr  | 0 |
| Q8TEY7 | Cytoplasm, perinuclear region {ECO:0000  | 0 |
| 075914 | Cytoplasm {ECO:0000250}.                 | 0 |
| 043602 | Cytoplasm {ECO:0000305}. Cell projectio  | 0 |
| P09012 | Nucleus.                                 | 1 |
| 075602 | Cytoplasm, cytoskeleton {ECO:0000269 Pu  | 0 |
| Q9NQT4 | Nucleus, nucleolus {ECO:0000269 PubMed:  | 0 |
| Q13409 | Cytoplasm, cytoskeleton {ECO:0000250 Ur  | 1 |
| Q7Z5R6 | Cell membrane {ECO:0000250}; Peripheral  | 0 |
| 075427 |                                          | 0 |
| Q5HYJ3 | Nucleus speckle {ECO:0000269 PubMed:192  | 0 |
| Q8N6T7 | Nucleus, nucleoplasm {ECO:0000269 PubMe  | 1 |
| P14679 | Melanosome membrane {ECO:0000269 PubMec  | 1 |
| Q15054 | Cytoplasm {ECO:0000250 UniProtKB:Q9EQ28  | 0 |
| P35609 | Cytoplasm, myofibril, sarcomere, Z line  | 1 |
| P47756 | Cytoplasm, cytoskeleton {ECO:0000250}.   | 0 |
| 060478 | Lysosome membrane {ECO:0000269 PubMed:2  | 0 |
| Q9Y3Q0 | Cell membrane {ECO:0000250 UniProtKB:QC  | 0 |
| Q6IE81 | Cytoplasm {ECO:0000269 PubMed:12169691,  | 0 |
| Q8WUT9 | Mitochondrion inner membrane {ECO:00002  | 0 |
| P11362 | Cell membrane; Single-pass type I membr  | 0 |
| 075344 | Cytoplasm, cytosol {ECO:0000250}. Nucle  | 0 |
| Q8NDV3 | Nucleus {ECO:0000250 UniProtKB:Q920F6}.  | 0 |
| P23142 | Secreted, extracellular space, extracel  | 0 |
| P53708 | Membrane {ECO:0000269 PubMed:24439109};  | 0 |
| 076096 | Secreted {ECO:0000269 PubMed:12423348}.  | 0 |
| P11137 | Cytoplasm, cytoskeleton {ECO:0000305}.   | 0 |
| 075928 | Nucleus speckle {ECO:0000250 UniProtKB:  | 1 |
| P49418 | Cytoplasmic vesicle, secretory vesicle,  | 0 |
| P10398 |                                          | 0 |
| Q96RQ3 | Mitochondrion matrix {ECO:0000269 PubMe  | 0 |
| Q9UQV4 | Lysosome membrane {ECO:0000269 PubMed:2  | 1 |
| Q12884 | Prolyl endopeptidase FAP: Cell surface   | 0 |
| 076041 | Isoform 2: Cytoplasm {ECO:0000269 PubMe  | 0 |
| Q9NUN7 | Endoplasmic reticulum membrane {ECO:000  | 0 |
| P61086 | Cytoplasm {ECO:0000250 UniProtKB:P61085  | 1 |
| Q8NEB9 | Midbody {ECO:0000269 PubMed:20208530}.   | 0 |
| Q86UW6 | Cytoplasm {ECO:0000250}.                 | 0 |
| Q9NQ88 | Cytoplasm {ECO:0000269 PubMed:23185017,  | 0 |
| 075386 | Nucleus. Cell membrane. Cell projectio   | 0 |
| 015056 | Cytoplasm {ECO:0000269 PubMed:11084340}  | 0 |
| Q08462 | Membrane {ECO:0000269 PubMed:15385642};  | 0 |
| Q13362 | Nucleus. Chromosome, centromere.         | 0 |
| Q9NWB1 | Nucleus {ECO:0000250}. Cytoplasm {ECO:(  | 0 |
| P62873 |                                          | 0 |
| P31269 | Nucleus.                                 | 0 |
| P05305 | Secreted.                                | 0 |
| P55197 | Nucleus {ECO:0000269 PubMed:10860745}.   | 1 |
| P41586 | Cell membrane; Multi-pass membrane prot  | 0 |
| 000398 | Cell membrane; Multi-pass membrane prot  | 0 |
| Q9Y277 | Mitochondrion outer membrane.            | 0 |
| Q15154 | Cytoplasm, cytoskeleton. Cytoplasm, cyt  | 1 |
| Q9HCJ0 |                                          | 0 |

|        |                                          |   |
|--------|------------------------------------------|---|
| 043439 | Nucleus {ECO:0000305}.                   | 1 |
| 060477 | Cytoplasm {ECO:0000269 PubMed:11420708}  | 0 |
| Q96J02 | Cell membrane {ECO:0000269 PubMed:14602} | 0 |
| Q9NZM6 | Membrane {ECO:0000305}; Multi-pass mem   | 0 |
| Q9BRK5 | Isoform 1: Golgi apparatus lumen {ECO:(  | 0 |
| Q8N4F0 | Secreted {ECO:0000250}.                  | 0 |
| 015350 | Nucleus {ECO:0000269 PubMed:24314664}.   | 0 |
| Q9H0E2 | Cytoplasm {ECO:0000305}.                 | 1 |
| Q9Y2X8 |                                          | 0 |
| Q15846 | Secreted {ECO:0000305}.                  | 0 |
| Q06455 | Nucleus {ECO:0000255 PROSITE-ProRule:PF  | 0 |
| Q12864 | Cell membrane {ECO:0000305}; Single-pas  | 0 |
| Q96FV9 | Isoform 1: Nucleus speckle. Nucleus, nu  | 1 |
| Q9Y680 | Endoplasmic reticulum lumen {ECO:000025  | 0 |
| Q9BZF3 | Cytoplasm, cytosol {ECO:0000269 PubMed:  | 0 |
| P43003 | Cell membrane {ECO:0000269 PubMed:20477  | 0 |
| P13010 | Nucleus {ECO:0000269 PubMed:22442688}.   | 1 |
| Q9BS40 | Cytoplasm {ECO:0000305}.                 | 0 |
| Q13342 | Nucleus {ECO:0000269 PubMed:8695863, EC  | 0 |
| Q9BUB5 | Isoform 2: Cytoplasm.; Isoform 3: Cytop  | 0 |
| Q9HBL0 | Cell surface {ECO:0000269 PubMed:217682} | 0 |
| Q8N1G1 | Nucleus {ECO:0000269 PubMed:12943681}.   | 0 |
| Q9NR31 | Endoplasmic reticulum {ECO:0000250}. Gc  | 1 |
| Q9UNH5 | Nucleus {ECO:0000269 PubMed:9367992}. (  | 0 |
| 095398 | Endomembrane system {ECO:0000269 PubMec  | 0 |
| P13688 | Isoform 1: Cell membrane {ECO:0000250 U  | 0 |
| Q96RK0 | Nucleus {ECO:0000255 PROSITE-ProRule:PF  | 0 |
| Q05469 | Cell membrane. Membrane, caveola. Cytop  | 0 |
| P37268 | Endoplasmic reticulum membrane; Multi-p  | 0 |
| Q15102 | Cytoplasm.                               | 0 |
| 060890 | Cell junction, synapse. Cell projection  | 0 |
| P43652 | Secreted {ECO:0000269 PubMed:12463752},  | 0 |
| Q14807 | Nucleus {ECO:0000269 PubMed:8599929}. (  | 0 |
| 076038 | Cytoplasm. Secreted {ECO:0000250}. Cyt   | 0 |
| Q5VZK9 | Cytoplasm {ECO:0000269 PubMed:19846667}  | 0 |
| P36871 | Isoform 1: Cytoplasm.                    | 0 |
| Q92499 | Nucleus. Cytoplasm. Cytoplasmic granule  | 0 |
| P50570 | Cytoplasm. Cytoplasm, cytoskeleton. Cel  | 1 |
| 043491 | Cytoplasm, cytoskeleton {ECO:0000250}.   | 1 |
| Q86UR5 | Cell membrane {ECO:0000250}; Peripheral  | 0 |
| Q6UVY6 | Endoplasmic reticulum membrane {ECO:00   | 0 |
| 015400 | Early endosome membrane {ECO:0000250};   | 1 |
| Q9UNT1 | Cytoplasm, cytoskeleton, microtubule or  | 0 |
| Q14145 | Cytoplasm. Nucleus. Note=Shuttles betwe  | 0 |
| Q9NXZ2 |                                          | 0 |
| P40126 | Melanosome membrane {ECO:0000269 PubMec  | 1 |
| Q9NQQ7 | Membrane {ECO:0000305}; Multi-pass mem   | 0 |
| Q9UF33 | Membrane {ECO:0000250}; Single-pass typ  | 0 |
| P47872 | Cell membrane {ECO:0000250 UniProtKB:P2  | 0 |
| P48380 | Nucleus {ECO:0000305}.                   | 1 |
| Q5UIP0 | Nucleus {ECO:0000269 PubMed:15583028}.   | 0 |
| Q9UL25 | Endoplasmic reticulum membrane {ECO:00   | 0 |
| Q9Y6R1 | Basolateral cell membrane {ECO:0000269   | 0 |
| P51531 | Nucleus.                                 | 1 |
| Q9NQM4 | Cytoplasm {ECO:0000250 UniProtKB:Q3KNI6  | 1 |

|        |                                         |   |
|--------|-----------------------------------------|---|
| P25940 | Secreted, extracellular space, extracel | 0 |
| Q6ZRS2 | Nucleus {ECO:0000255 PROSITE-ProRule:PF | 0 |
| Q15397 | Nucleus, nucleolus {ECO:0000269 PubMed: | 0 |
| Q96IY4 | Secreted.                               | 0 |
| P32297 | Cell junction, synapse, postsynaptic ce | 0 |
| Q9H2S1 | Membrane; Multi-pass membrane protein.  | 0 |
| 095628 | Cytoplasm {ECO:0000305}. Nucleus {ECO:( | 0 |
| P49768 | Endoplasmic reticulum {ECO:0000269 PubM | 0 |
| Q9NY35 | Membrane {ECO:0000305}; Multi-pass memt | 0 |
| P07900 | Nucleus {ECO:0000250 UniProtKB:P07901}. | 0 |
| P28749 | Nucleus {ECO:0000305}.                  | 0 |
| Q9Y2H0 | Membrane {ECO:0000250}; Peripheral memt | 0 |
| Q9UPX0 | Cell junction, synapse, postsynaptic ce | 0 |
| P36980 | Secreted.                               | 0 |
| Q9UPM8 | Golgi apparatus, trans-Golgi network me | 0 |
| Q5VWQ0 | Nucleus {ECO:0000250}.                  | 0 |
| Q5TCQ9 | Cell membrane; Peripheral membrane prot | 0 |
| P02771 | Secreted.                               | 0 |
| P36402 | Nucleus.                                | 1 |
| Q86WC4 | Lysosome membrane {ECO:0000269 PubMed:2 | 0 |
| Q9ULB5 | Cell membrane; Single-pass type I membr | 0 |
| Q9BZV3 | Membrane {ECO:0000305}; Single-pass tyf | 0 |
| Q8WW12 | Nucleus {ECO:0000269 PubMed:12176013}.  | 1 |
| Q9NVH0 | Nucleus {ECO:0000269 PubMed:26807646}.  | 0 |
| P78540 | Mitochondrion {ECO:0000269 PubMed:8898( | 1 |
| Q06413 | Nucleus {ECO:0000250 UniProtKB:A0A096M} | 0 |
|        | Cell membrane {ECO:0000269 PubMed:1267( | 0 |
| Q13698 | Cell membrane, sarcolemma, T-tubule {EC | 0 |
| Q13835 | Isoform 1: Nucleus. Cell junction, desm | 0 |
| Q9GZZ9 | Cytoplasm {ECO:0000269 PubMed:18442052, | 0 |
| 094768 | Nucleus {ECO:0000269 PubMed:9786912}. ( | 0 |
| 060729 | Nucleus, nucleolus. Nucleus, nucleoplas | 0 |
| Q9Y2H8 | Nucleus {ECO:0000305}.                  | 0 |
| P98164 | Apical cell membrane {ECO:0000269 PubMe | 0 |
| Q9H9V9 | Cytoplasm {ECO:0000269 PubMed:24486019} | 0 |
| Q9UNI6 | Nucleus {ECO:0000269 PubMed:10446167}.  | 0 |
| Q86V21 | Cytoplasm, cytosol {ECO:0000250}.       | 0 |
| Q14154 | Mitochondrion {ECO:0000269 PubMed:2056( | 0 |
| Q9BZW2 | Membrane; Multi-pass membrane protein.  | 1 |
| Q9Y5E5 | Cell membrane {ECO:0000250}; Single-pas | 0 |
| Q9UN73 | Isoform 1: Cell membrane {ECO:0000250}; | 0 |
| Q9Y5H1 | Cell membrane {ECO:0000250}; Single-pas | 0 |
| Q9Y547 | Cell projection, cilium {ECO:0000250 Ur | 0 |
| 060346 | Cytoplasm. Membrane; Peripheral membrar | 0 |
| 043520 | Cell membrane {ECO:0000269 PubMed:1794( | 1 |
| Q99665 | Membrane; Single-pass type I membrane p | 0 |
| Q6STE5 | Nucleus {ECO:0000269 PubMed:14701856}.  | 0 |
| Q9NW82 |                                         | 0 |
| 015117 | Cytoplasm {ECO:0000269 PubMed:9671755}. | 0 |
| Q9C0K7 | Nucleus {ECO:0000269 PubMed:14517248}.  | 0 |
| Q7L1Q6 |                                         | 0 |
| P06401 | Nucleus. Cytoplasm. Note=Nucleoplasmic  | 0 |
| Q9BXJ4 | Secreted {ECO:0000305}.                 | 0 |
| P23368 | Mitochondrion matrix.                   | 1 |
| Q49AR2 |                                         | 0 |



|        |                                         |   |
|--------|-----------------------------------------|---|
| 060583 | Cytoplasm, perinuclear region {ECO:0000 | 0 |
| Q9P2D6 |                                         | 0 |
| Q14993 | Secreted, extracellular space, extracel | 0 |
| Q9Y2J2 | Cytoplasm, cytoskeleton {ECO:0000250}.  | 1 |
| Q53SF7 |                                         | 0 |
| Q92796 |                                         | 0 |
| Q9NUC0 |                                         | 0 |
| 000463 | Cytoplasm {ECO:0000305 PubMed:15121867} | 0 |
| Q9NWU5 | Mitochondrion {ECO:0000269 PubMed:25278 | 0 |
| Q8TEQ6 | Nucleus, nucleoplasm {ECO:0000269 PubMe | 0 |
| P41145 | Cell membrane {ECO:0000269 PubMed:12004 | 0 |
| Q14494 | Endoplasmic reticulum membrane sensor 1 | 0 |
| Q9P283 | Membrane; Single-pass type III membrane | 0 |
| P49841 | Cytoplasm {ECO:0000269 PubMed:25169422} | 0 |
| P18084 | Membrane; Single-pass type I membrane p | 0 |
| Q8IUD2 | Cytoplasm, cytoskeleton, microtubule or | 0 |
| 014980 | Cytoplasm. Nucleus, nucleoplasm. Nucleu | 0 |
| 043567 | Endoplasmic reticulum membrane. Golgi a | 0 |
| Q9HCF6 | Membrane {ECO:0000269 PubMed:12672827}; | 0 |
| Q86YC2 | Nucleus {ECO:0000269 PubMed:16793542, F | 0 |
| Q5JWR5 | Golgi apparatus membrane {ECO:0000250 U | 0 |
| Q9NU23 |                                         | 0 |
| P21953 | Mitochondrion matrix.                   | 0 |
| Q92794 | Nucleus. Nucleus, nucleolus. Nucleus, r | 1 |
| Q5VYS8 | Cytoplasm {ECO:0000269 PubMed:25480299, | 0 |
| Q8IYT8 | Cytoplasmic vesicle membrane {ECO:00002 | 0 |
| Q6ISB3 | Nucleus {ECO:0000269 PubMed:20938050, F | 0 |
| Q92973 | Cytoplasm. Nucleus.                     | 0 |
| Q02809 | Rough endoplasmic reticulum membrane; F | 0 |
| Q93086 | Membrane; Multi-pass membrane protein.  | 0 |
| P38570 | Membrane; Single-pass type I membrane p | 0 |
| Q9Y2L1 | Cytoplasm {ECO:0000269 PubMed:20531386} | 0 |
| Q8WXW3 | Cytoplasm, cytoskeleton, microtubule or | 0 |
| Q9H7E2 | Cytoplasm {ECO:0000269 PubMed:18632687} | 0 |
| Q9UHK0 | Nucleus {ECO:0000269 PubMed:10556305}.  | 0 |
| Q9NTI5 | Nucleus {ECO:0000250 UniProtKB:Q6TRW4}. | 1 |
| P55809 | Mitochondrion matrix.                   | 1 |
| Q5VZM2 | Cytoplasm {ECO:0000269 PubMed:9394008}. | 0 |
| Q99645 | Secreted, extracellular space, extracel | 0 |
| Q9NQC7 | Cytoplasm {ECO:0000269 PubMed:18313383} | 0 |
| Q9Y2P5 | Endoplasmic reticulum membrane {ECO:000 | 1 |
| 075467 | Nucleus {ECO:0000305}.                  | 0 |
| Q8TAW3 | Nucleus {ECO:0000305}.                  | 0 |
| Q9NXT0 | Nucleus {ECO:0000305}.                  | 0 |
| Q9NWS9 | Nucleus {ECO:0000255 PROSITE-ProRule:PF | 0 |
| P46782 |                                         | 0 |
| Q14517 | Cell membrane {ECO:0000269 PubMed:15922 | 0 |
| Q96MU7 | Nucleus {ECO:0000269 PubMed:20167602}.  | 1 |
| Q9UQN3 | Cytoplasm, cytosol {ECO:0000269 PubMed: | 0 |
| Q8WU79 | Cytoplasm. Note=Detected in multiple fo | 0 |
| Q9UNP9 | Nucleus {ECO:0000269 PubMed:11991638, F | 0 |
| 075844 | Endoplasmic reticulum membrane {ECO:000 | 0 |
| Q9NQZ5 | Mitochondrion {ECO:0000305}.            | 1 |
| Q8NC60 | Mitochondrion inner membrane {ECO:00002 | 0 |
| Q13127 | Nucleus {ECO:0000269 PubMed:16442230, F | 0 |

|        |                                         |   |
|--------|-----------------------------------------|---|
| P42357 |                                         | 0 |
| Q8WYL5 | Cytoplasm, cytoskeleton. Cell projectio | 0 |
| P09211 | Cytoplasm {ECO:0000269 PubMed:19269317} | 0 |
| Q06481 | Cell membrane {ECO:0000305}; Single-pas | 0 |
| A2RU67 | Membrane {ECO:0000305}; Single-pass men | 0 |
| Q9Y2W2 | Nucleus. Cytoplasm. Note=Predominantly  | 0 |
| Q13347 | Cytoplasm {ECO:0000255 HAMAP-Rule:MF_03 | 1 |
| Q4KMZ8 | Cell membrane {ECO:0000305}; Multi-pas  | 0 |
| P40222 |                                         | 0 |
| P04114 | Cytoplasm {ECO:0000269 PubMed:22580899} | 0 |
| Q15788 | Nucleus {ECO:0000255 PROSITE-ProRule:PF | 1 |
| Q8NDL9 | Cytoplasm, cytosol {ECO:0000250 UniProt | 0 |
| Q9Y2G0 | Cell membrane {ECO:0000269 PubMed:23229 | 0 |
| P61026 | Cytoplasmic vesicle membrane {ECO:00003 | 0 |
|        | Cytoplasm {ECO:0000269 PubMed:10456334} | 0 |
| P40939 | Mitochondrion {ECO:0000269 PubMed:29915 | 0 |
| Q9UPY8 | Cytoplasm, cytoskeleton {ECO:0000269 Pu | 0 |
| P27708 | Cytoplasm {ECO:0000269 PubMed:15890648} | 0 |
| P13987 | Cell membrane; Lipid-anchor, GPI-anchoi | 0 |
| P27701 | Cell membrane {ECO:0000269 PubMed:30463 | 0 |
| Q5H9F3 | Nucleus {ECO:0000269 PubMed:17379597}.  | 0 |
| P46100 | Nucleus. Chromosome, telomere. Nucleus, | 1 |
| Q9Y3D8 | Nucleus, nucleoplasm. Nucleus, Cajal bo | 1 |
| 000602 | Secreted {ECO:0000269 PubMed:20400674,  | 0 |
| Q9NPC7 | Nucleus {ECO:0000269 PubMed:14694499}.  | 0 |
| Q03112 | Nucleus {ECO:0000269 PubMed:11568182, F | 0 |
| P48147 | Cytoplasm.                              | 1 |
| Q96EE3 | Chromosome, centromere, kinetochore {EC | 0 |
| 094967 | Cytoplasm, cytoskeleton {ECO:0000250}.  | 0 |
| Q8IWB7 | Early endosome {ECO:0000269 PubMed:1173 | 0 |
| Q12889 | Cytoplasmic vesicle, secretory vesicle. | 0 |
| Q6NUK1 | Mitochondrion inner membrane {ECO:00002 | 1 |
| Q9Y6R4 | Cytoplasm, perinuclear region {ECO:0000 | 0 |
| Q9UKJ1 | Isoform 1: Cell membrane {ECO:0000305}; | 0 |
| Q9P2J2 | Cell membrane {ECO:0000250}; Single-pas | 0 |
| P08183 | Cell membrane {ECO:0000250}; Multi-pas  | 1 |
| 014771 | Nucleus {ECO:0000255 PROSITE-ProRule:PF | 0 |
| P15121 | Cytoplasm.                              | 0 |
| 075131 | Nucleus {ECO:0000269 PubMed:20010870, F | 0 |
| Q9NYV6 | Nucleus, nucleolus {ECO:0000269 PubMed: | 1 |
| Q14247 | Cytoplasm, cytoskeleton {ECO:0000269 Pu | 1 |
| 096014 | Secreted, extracellular space, extracel | 0 |
| P46199 | Mitochondrion.                          | 0 |
| 094830 | Cytoplasm, cytosol. Endoplasmic reticul | 1 |
| Q5SRH9 |                                         | 0 |
| P42566 | Cytoplasm. Cell membrane; Peripheral me | 0 |
| Q13415 | Nucleus.                                | 0 |
| Q99735 | Endoplasmic reticulum membrane {ECO:000 | 0 |
| Q8IWX8 | Cytoplasm {ECO:0000269 PubMed:10794731, | 0 |
| Q676U5 | Cytoplasm {ECO:0000269 PubMed:23392225} | 0 |
| Q9NVE5 |                                         | 0 |
| Q8WZA1 | Golgi apparatus membrane {ECO:0000269 F | 0 |
| Q92698 | Nucleus {ECO:0000269 PubMed:8805304}.   | 0 |
| Q6POQ8 | Cytoplasm, cytoskeleton {ECO:0000269 Pu | 0 |
| P31689 | Membrane {ECO:0000305 PubMed:10816573}; | 0 |

|        |                                          |   |
|--------|------------------------------------------|---|
| P15291 | Isoform Long: Golgi apparatus, Golgi st  | 0 |
| Q9NZZ3 | Cytoplasm, cytosol. Endosome membrane    | 1 |
| Q12986 | Nucleus.                                 | 0 |
| Q13520 | Cytoplasmic vesicle membrane {ECO:00002  | 1 |
| Q9UNQ2 | Nucleus, nucleoplasm {ECO:0000269 PubMe  | 0 |
| Q9UI26 | Cytoplasm {ECO:0000269 PubMed:11032817}  | 0 |
| Q04609 | Cell membrane {ECO:0000269 PubMed:98099  | 0 |
| Q9BQI3 | Cytoplasm {ECO:0000250}.                 | 0 |
| Q8N427 | Cytoplasm {ECO:0000269 PubMed:11737268}  | 1 |
| Q9UM22 | Lysosome lumen {ECO:0000269 PubMed:3072  | 0 |
| Q9Y5X0 | Cytoplasm. Endosome membrane; Periphera  | 0 |
| P49903 | Isoform 1: Cell membrane. Nucleus membr  | 0 |
| Q13084 | Mitochondrion {ECO:0000269 PubMed:25278  | 1 |
| P09105 |                                          | 0 |
| Q96DU7 | Nucleus {ECO:0000269 PubMed:12747803}.   | 0 |
| P40199 | Cell membrane; Lipid-anchor, GPI-anchor  | 0 |
| Q9NYQ8 | Cell membrane {ECO:0000305}; Single-pass | 0 |
| Q9NW64 | Nucleus {ECO:0000269 PubMed:17045351, F  | 0 |
| Q15363 | Cytoplasmic vesicle membrane {ECO:00003  | 0 |
| Q86YB8 | Endoplasmic reticulum membrane {ECO:000  | 1 |
| Q6FIF0 | Cytoplasm {ECO:0000250}.                 | 0 |
| P37059 | Membrane {ECO:0000305}; Single-pass typ  | 0 |
| Q9NUQ3 | Nucleus membrane {ECO:0000269 PubMed:15  | 0 |
| Q9GZY6 | Cell membrane {ECO:0000269 PubMed:12486  | 0 |
| Q7Z6Z7 | Cytoplasm {ECO:0000269 PubMed:19713937}  | 0 |
| 043264 | Cytoplasm {ECO:0000269 PubMed:15029241}  | 0 |
| Q9H6U8 | Endoplasmic reticulum membrane {ECO:000  | 0 |
| Q14324 |                                          | 0 |
| 015254 | Peroxisome {ECO:0000305}.                | 0 |
| Q13614 | Cytoplasm {ECO:0000269 PubMed:11733541,  | 0 |
| 075807 | Endoplasmic reticulum membrane; Periphe  | 0 |
| Q9BPX1 | Cytoplasm {ECO:0000269 PubMed:17067289}  | 0 |
| Q15654 | Cytoplasm, cytoskeleton {ECO:0000269 Pu  | 0 |
| P02792 |                                          | 0 |
| Q9BXP5 | Nucleus, nucleoplasm {ECO:0000250}. Cyt  | 0 |
| Q07812 | Isoform Alpha: Mitochondrion outer mem   | 0 |
| Q9UBE8 | Nucleus {ECO:0000250}. Cytoplasm {ECO:(  | 0 |
| Q96S52 | Endoplasmic reticulum membrane {ECO:000  | 0 |
| 095450 | Secreted, extracellular space, extracel  | 0 |
| Q9UL52 | Cell membrane {ECO:0000250 UniProtKB:Q5  | 0 |
| Q14CW9 | Nucleus {ECO:0000255 HAMAP-Rule:MF_0304  | 1 |
| Q32NB8 | Mitochondrion {ECO:0000250}.             | 0 |
| P62195 | Cytoplasm {ECO:0000305}. Nucleus {ECO:(  | 1 |
| Q96RL1 | Nucleus {ECO:0000269 PubMed:12080054, F  | 1 |
| P08253 | Isoform 1: Secreted, extracellular spac  | 0 |
| P25713 |                                          | 0 |
| Q7L5N7 | Endoplasmic reticulum membrane {ECO:000  | 1 |
| P09471 | Cell membrane {ECO:0000250 UniProtKB:P1  | 0 |
| Q8N543 | Isoform 1: Cytoplasm. Nucleus. Note=Mai  | 0 |
| P78314 |                                          | 0 |
| P78316 | Nucleus, nucleolus {ECO:0000250}.        | 0 |
| P35611 | Cytoplasm, cytoskeleton. Cell membrane;  | 1 |
| Q9H9P8 | Mitochondrion {ECO:0000269 PubMed:16005  | 0 |
| Q9P2K2 | Secreted {ECO:0000269 PubMed:25122923}.  | 0 |
| Q9Y224 | Nucleus {ECO:0000269 PubMed:15147888, F  | 1 |

|        |                                         |   |
|--------|-----------------------------------------|---|
| Q14112 | Secreted, extracellular space, extracel | 0 |
| Q96IK5 | Nucleus matrix {ECO:0000250}.           | 0 |
| Q13435 | Nucleus {ECO:0000269 PubMed:27720643, F | 1 |
| Q9P2K6 | Cytoplasm {ECO:0000269 PubMed:19261606} | 0 |
| O95467 | Cytoplasmic vesicle, secretory vesicle  | 0 |
| 000429 | Cytoplasm, cytosol. Golgi apparatus. Er | 1 |
| P12272 | Cytoplasm. Nucleus. Secreted.           | 0 |
| Q96RQ1 | Endoplasmic reticulum-Golgi intermediat | 0 |
| Q92754 | Nucleus {ECO:0000269 PubMed:24413532}.  | 1 |
| O14965 | Cytoplasm, cytoskeleton, microtubule or | 0 |
| Q9NQ75 | Cytoplasm, cytoskeleton {ECO:0000269 Pu | 0 |
| 000625 | Nucleus {ECO:0000269 PubMed:20089166, F | 0 |
| Q9H7C9 | Cytoplasm {ECO:0000250}. Note=Diffuse c | 1 |
| P48378 | Nucleus {ECO:0000250 UniProtKB:B2GV50,  | 0 |
| 000204 | Cytoplasm, cytosol {ECO:0000269 PubMed: | 0 |
| O75175 | Cytoplasm {ECO:0000305}. Nucleus {ECO:( | 0 |
| Q9HCN6 | Isoform 1: Cell membrane; Single-pass m | 0 |
| P29074 | Cell membrane {ECO:0000269 PubMed:89103 | 0 |
| Q9NVP1 | Nucleus, nucleolus {ECO:0000269 PubMed: | 0 |
| Q92945 | Nucleus {ECO:0000269 PubMed:19198587}.  | 0 |
| P29992 | Cell membrane {ECO:0000305 PubMed:18703 | 0 |
| Q8TDY4 | Cytoplasm {ECO:0000269 PubMed:14654939} | 0 |
| Q9BV94 | Endoplasmic reticulum lumen {ECO:000026 | 0 |
| Q9UBC3 | Nucleus {ECO:0000269 PubMed:11735126, F | 0 |
| O75628 |                                         | 0 |
| Q9ULW0 | Nucleus {ECO:0000269 PubMed:19208764}.  | 1 |
| Q9NUG6 | Cytoplasm {ECO:0000305}.                | 0 |
| Q9H4G0 | Cytoplasm, cytoskeleton.                | 0 |
| P46059 | Membrane; Multi-pass membrane protein.  | 0 |
| Q9BZ29 | Endomembrane system {ECO:0000305}. Note | 0 |
| Q9NXR5 |                                         | 0 |
| O95455 |                                         | 0 |
| Q8IZD9 | Cytoplasm {ECO:0000250}.                | 1 |
| Q9UK00 | Membrane {ECO:0000305}; Single-pass men | 0 |
| O75208 | Mitochondrion {ECO:0000250 UniProtKB:Q8 | 1 |
| Q8WWA1 | Membrane {ECO:0000269 Ref.6}; Multi-pas | 0 |
| Q9HAQ2 | Cytoplasm, cytoskeleton {ECO:0000305}.  | 0 |
| Q9P2N2 |                                         | 0 |
| Q96KQ4 | Cytoplasm {ECO:0000269 PubMed:11684014} | 0 |
| O75882 | Isoform 1: Cell membrane {ECO:0000269 F | 0 |
| Q9NWM0 | Isoform 1: Cytoplasm. Nucleus.; Isoform | 0 |
| Q9BZZ2 | Isoform 1: Cell membrane; Single-pass t | 0 |
| P62942 | Cytoplasm, cytosol {ECO:0000269 PubMed: | 0 |
| Q9UNZ2 | Nucleus {ECO:0000250 UniProtKB:035987}. | 1 |
| Q8NBS3 | Cell membrane {ECO:0000269 PubMed:18024 | 0 |
| Q5TEA3 |                                         | 0 |
| Q6P1L6 | Nucleus {ECO:0000305}.                  | 0 |
| Q7Z434 | Mitochondrion outer membrane {ECO:00002 | 1 |
| O60299 | Cell junction, synapse {ECO:0000250 Uni | 0 |
| Q9H0D6 | Nucleus, nucleolus {ECO:0000269 PubMed: | 0 |
| Q96BS2 | Nucleus {ECO:0000269 PubMed:18321853}.  | 0 |
| Q9Y5X3 | Endosome {ECO:0000269 PubMed:11485546}. | 0 |
| Q02878 | Cytoplasm, cytosol {ECO:0000269 PubMed: | 0 |
| Q8IW41 | Cytoplasm. Nucleus. Note=Translocates t | 1 |
| Q99572 | Cell membrane {ECO:0000269 PubMed:12107 | 0 |

|        |                                         |   |
|--------|-----------------------------------------|---|
| Q9H501 | Nucleus, nucleolus {ECO:0000250}. Nucle | 1 |
| 075884 | Cytoplasm {ECO:0000269 PubMed:12296629} | 0 |
| Q9UJX4 |                                         | 0 |
| Q9UGH3 | Cell membrane {ECO:0000269 PubMed:19379 | 0 |
| Q6J4K2 | Mitochondrion inner membrane {ECO:00002 | 0 |
| Q96A57 | Membrane {ECO:0000305}; Multi-pass mem  | 0 |
| Q9NVP4 |                                         | 0 |
| Q8NHU2 | Cytoplasm, cytoskeleton, cilium axoneme | 0 |
| Q9H6P5 |                                         | 0 |
| P00973 | Cytoplasm {ECO:0000269 PubMed:19923450, | 0 |
| Q92616 | Cytoplasm {ECO:0000250 UniProtKB:E9PVA8 | 1 |
| P05388 | Nucleus {ECO:0000269 PubMed:19188445}.  | 0 |
| P49023 | Cytoplasm, cytoskeleton {ECO:0000269 Pu | 0 |
| Q9Y6E7 | Mitochondrion matrix {ECO:0000255 HAMA  | 1 |
| Q9Y2J0 | Cytoplasmic vesicle, secretory vesicle, | 0 |
| Q96L93 | Cytoplasm, cytoskeleton {ECO:0000305}.  | 0 |
| Q9UJA5 | Nucleus {ECO:0000250 UniProtKB:P41814}. | 0 |
| P05060 | Secreted. Note=Neuroendocrine and endoc | 0 |
| P30086 | Cytoplasm {ECO:0000250}.                | 1 |
| Q99593 | Nucleus {ECO:0000255 PROSITE-ProRule:PF | 0 |
| Q7Z569 | Cytoplasm {ECO:0000269 PubMed:9497340}. | 0 |
| P30040 | Endoplasmic reticulum lumen. Melanosome | 1 |
| P29475 | Cell membrane, sarcolemma; Peripheral m | 0 |
| P35637 | Nucleus {ECO:0000269 PubMed:19251627, F | 1 |
| P78318 | Cytoplasm {ECO:0000305}.                | 0 |
| Q96DB9 | Membrane {ECO:0000305}; Single-pass typ | 0 |
| Q96CP6 | Endoplasmic reticulum membrane {ECO:000 | 0 |
| Q14802 | Cell membrane {ECO:0000305}; Single-pas | 0 |
| Q9BQS7 | Membrane {ECO:0000305}; Single-pass typ | 0 |
| Q9H305 | Late endosome membrane {ECO:0000269 Pu  | 0 |
| Q8IZ96 | Membrane; Multi-pass membrane protein.  | 0 |
| Q14697 | Endoplasmic reticulum {ECO:0000305 PubM | 1 |
| Q9P107 |                                         | 0 |
| Q96IZ5 |                                         | 0 |
| 015392 | Cytoplasm {ECO:0000269 PubMed:20627126, | 0 |
| P18627 | Lymphocyte activation gene 3 protein: ( | 0 |
| Q15773 | Cytoplasm {ECO:0000250}. Nucleus {ECO:( | 1 |
| Q96DC9 |                                         | 0 |
| Q9GZR7 |                                         | 0 |
| P24278 | Nucleus.                                | 0 |
| Q8NC96 | Cytoplasmic vesicle, clathrin-coated ve | 0 |
| P98171 | Cytoplasm. Note=Just below the plasma m | 1 |
| Q8TF21 |                                         | 0 |
| Q7L7V1 | Nucleus {ECO:0000269 PubMed:16959245}.  | 0 |
| Q9UKL0 | Nucleus {ECO:0000255 PROSITE-ProRule:PF | 1 |
| Q9NWQ4 |                                         | 0 |
| Q8N2S1 | Secreted, extracellular space, extracel | 0 |
| P30043 | Cytoplasm {ECO:0000269 PubMed:7929092}. | 1 |
| P19634 | Membrane; Multi-pass membrane protein.  | 0 |
| 015269 | Endoplasmic reticulum membrane {ECO:000 | 0 |
| P51003 | Cytoplasm. Nucleus. Note=The 90 kDa fo  | 0 |
| 075909 | Nucleus {ECO:0000269 PubMed:22012619}.  | 1 |
| Q08116 | Cell membrane {ECO:0000269 PubMed:10480 | 0 |
| P61236 | Nucleus, nucleolus {ECO:0000269 PubMed: | 0 |
| Q9Y291 | Mitochondrion {ECO:0000269 PubMed:11279 | 0 |

|        |                                            |   |
|--------|--------------------------------------------|---|
| 095178 | Mitochondrion inner membrane {ECO:0000305} | 0 |
| Q9Y266 | Cytoplasm, cytoskeleton. Nucleus. Note=    | 1 |
| Q7L5Y9 | Cytoplasm {ECO:0000250 UniProtKB:Q4VC3}    | 0 |
| P05362 | Membrane; Single-pass type I membrane p    | 1 |
| Q9NRL3 | Cytoplasm {ECO:0000250}. Membrane {ECO:    | 1 |
| Q9Y616 |                                            | 0 |
| P61626 | Secreted.                                  | 0 |
| P14410 | Apical cell membrane; Single-pass type     | 1 |
| Q01664 | Nucleus.                                   | 1 |
| Q8N8D1 | Nucleus {ECO:0000305}.                     | 0 |
| Q9NZD8 | Cytoplasm, cytosol {ECO:0000269 PubMed:    | 0 |
| Q9UGM5 | Secreted {ECO:0000250}.                    | 0 |
| Q9UBS4 | Endoplasmic reticulum lumen {ECO:000026}   | 1 |
| Q8IVL5 | Endoplasmic reticulum {ECO:0000255 PRO     | 0 |
| Q9H2X0 | Secreted {ECO:0000250}.                    | 0 |
| 075154 | Recycling endosome membrane {ECO:000026}   | 0 |
| Q9UJJ9 | Secreted {ECO:0000269 PubMed:15532026}.    | 0 |
| Q14587 | Isoform 1: Nucleus {ECO:0000269 PubMed:    | 0 |
| Q08378 | Cytoplasm. Golgi apparatus, Golgi stack    | 1 |
| Q13310 | Cytoplasm {ECO:0000269 PubMed:17289661}    | 0 |
| Q9NNX6 | Isoform 1: Cell membrane {ECO:0000305};    | 0 |
| Q9HA82 | Endoplasmic reticulum membrane {ECO:000    | 0 |
| Q9GZU1 | Late endosome membrane {ECO:0000269 Pub    | 0 |
| Q86UV5 | Cytoplasm {ECO:0000269 PubMed:16214042}    | 0 |
| P98172 | Cell membrane {ECO:0000269 PubMed:10197    | 0 |
| Q8NCN5 | Mitochondrion matrix {ECO:0000250}.        | 0 |
| P49588 | Cytoplasm {ECO:0000255 HAMAP-Rule:MF_0}    | 1 |
| Q92896 | Golgi apparatus membrane {ECO:0000269 E    | 1 |
| 095239 | Nucleus matrix. Cytoplasm, cytoskeleton    | 0 |
| Q8NDV7 | Cytoplasm, P-body {ECO:0000269 PubMed:1    | 0 |
| Q9H7P9 |                                            | 0 |
| Q9BZ72 | Endomembrane system {ECO:0000269 PubMed    | 0 |
| Q9NV70 | Midbody, Midbody ring {ECO:0000269 PubM    | 0 |
| Q9P2N5 | Cytoplasm. Nucleus speckle. Note=Incorp    | 0 |
| Q15319 | Nucleus {ECO:0000269 PubMed:18228599, F    | 0 |
| Q9BZF1 | Isoform 1: Endoplasmic reticulum membra    | 0 |
| Q86UW9 | Cytoplasm {ECO:0000269 PubMed:11564735}    | 0 |
| Q9NPP4 | Cytoplasm {ECO:0000269 PubMed:11390368}    | 0 |
| Q96PZ0 | Nucleus {ECO:0000269 PubMed:29628141}.     | 0 |
| A4DOS4 | Secreted, extracellular space, extracel    | 0 |
| Q92823 | Cell membrane {ECO:0000250 UniProtKB:Q8    | 0 |
| P07942 | Secreted, extracellular space, extracel    | 0 |
| 043511 | Membrane {ECO:0000305}; Multi-pass mem     | 0 |
| P40879 | Apical cell membrane {ECO:0000269 PubMe    | 0 |
| P09622 | Mitochondrion matrix {ECO:0000305 PubMe    | 0 |
| Q9Y4E6 |                                            | 0 |
| 043396 | Cytoplasm {ECO:0000269 PubMed:19349277}    | 1 |
| Q9NX76 | Cell membrane {ECO:0000269 PubMed:2881}    | 0 |
| P23229 | Cell membrane {ECO:0000269 PubMed:2231}    | 1 |
| Q8WZA2 | Cytoplasm. Membrane {ECO:0000250}; Peri    | 0 |
| Q9NYL2 | Cytoplasm {ECO:0000269 PubMed:15684425}    | 0 |
| P07954 | Isoform Mitochondrial: Mitochondrion {E    | 0 |
| Q68CR1 | Membrane {ECO:0000305}; Single-pass men    | 0 |
| P02787 | Secreted.                                  | 0 |
| Q9UKY7 | Cytoplasm {ECO:0000250}.                   | 1 |

|        |                                         |   |
|--------|-----------------------------------------|---|
| Q9UKN7 | Cell projection, stereocilium {ECO:0000 | 0 |
| Q6P6C2 | Nucleus speckle {ECO:0000269 PubMed:212 | 0 |
| P02749 | Secreted.                               | 0 |
| Q9C000 | Cytoplasm, cytosol {ECO:0000269 PubMed: | 1 |
| Q9BZ71 | Endomembrane system {ECO:0000305}; Peri | 0 |
| 075391 | Nucleus {ECO:0000305}.                  | 0 |
| Q9Y5N6 | Nucleus.                                | 1 |
| Q86UP3 | Nucleus {ECO:0000305}.                  | 0 |
| Q9P2U8 | Cytoplasmic vesicle, secretory vesicle, | 0 |
| P15085 | Secreted.                               | 0 |
| Q86WB0 | Nucleus {ECO:0000269 PubMed:12748172}.  | 0 |
| P03372 | Isoform 1: Nucleus {ECO:0000255 PROSITE | 0 |
| Q9UGC6 | Membrane {ECO:0000250 UniProtKB:Q9QZB0} | 0 |
| 015123 | Secreted.                               | 0 |
| P41217 | Cell membrane; Single-pass type I membr | 0 |
| Q76M96 | Secreted, extracellular space, extracel | 0 |
| P23946 | Secreted. Cytoplasmic granule. Note=Mas | 0 |
| Q06323 |                                         | 0 |
| Q969Q6 | Nucleus {ECO:0000269 PubMed:15820313}.  | 0 |
| Q9H6D7 | Cytoplasm, cytoskeleton, microtubule or | 0 |
| P12883 | Cytoplasm, myofibril {ECO:0000250 UniPr | 1 |
| Q15744 | Nucleus {ECO:0000269 PubMed:11313242, F | 1 |
| Q9UHI5 | Cytoplasm. Basolateral cell membrane; M | 1 |
| Q9NPF4 | Cytoplasm {ECO:0000255 HAMAP-Rule:MF_03 | 0 |
| Q8WUG5 | Cell membrane {ECO:0000269 PubMed:17253 | 0 |
| Q96EPO | Cytoplasm {ECO:0000250 UniProtKB:Q924T7 | 0 |
| Q8WVM8 | Cytoplasm {ECO:0000250}. Endoplasmic re | 0 |
| Q7L622 | Nucleus, nucleolus {ECO:0000269 PubMed: | 0 |
| Q9ULT8 |                                         | 0 |
| P07910 | Nucleus. Note=Component of ribonucleosc | 1 |
| Q96KN7 | Cell projection, cilium {ECO:0000269 Pu | 0 |
| Q9Y5B9 | Nucleus {ECO:0000269 PubMed:10421373}.  | 1 |
| 094842 | Nucleus {ECO:0000305 PubMed:20516061}.  | 0 |
| 014893 | Nucleus, gem. Cytoplasm. Note=Localizec | 1 |
| P22735 | Membrane {ECO:0000269 PubMed:17762858}; | 1 |
| Q92904 | Cytoplasm {ECO:0000250}. Nucleus {ECO:( | 0 |
| Q9BQ87 | Nucleus {ECO:0000250}.                  | 0 |
| Q9H2E6 | Cell membrane; Single-pass type I membr | 0 |
| Q96QT4 | Membrane {ECO:0000305}; Multi-pass memt | 1 |
| Q06418 | Cell membrane; Single-pass type I membr | 0 |
| Q9H967 |                                         | 0 |
| P20807 | Cytoplasm.                              | 1 |
| 000161 | Cell membrane; Peripheral membrane prot | 0 |
| Q96SF7 | Nucleus {ECO:0000255 PROSITE-ProRule:PF | 0 |
| 043175 |                                         | 0 |
| Q14050 | Secreted, extracellular space, extracel | 0 |
| P15311 | Apical cell membrane {ECO:0000269 PubMe | 1 |
| P60660 |                                         | 0 |
| Q9UIF3 | Cytoplasm, cytoskeleton, cilium axoneme | 0 |
| Q8WZ73 | Cytoplasm, cytosol. Cell membrane; Peri | 0 |
| Q70J99 | Cytoplasm. Membrane; Peripheral membrar | 0 |
| 043934 | Membrane {ECO:0000305}; Multi-pass memt | 0 |
| Q16555 | Cytoplasm, cytosol {ECO:0000269 PubMed: | 1 |
| Q9NW75 | Nucleus speckle {ECO:0000269 PubMed:192 | 0 |
| Q9UKX7 | Nucleus, nuclear pore complex {ECO:0000 | 1 |

|        |                                          |   |
|--------|------------------------------------------|---|
| 075419 | Cytoplasm. Nucleus.                      | 0 |
| P21964 | Isoform Soluble: Cytoplasm.; Isoform Me  | 0 |
| Q9NZK5 | Secreted {ECO:0000269 PubMed:15926889,   | 0 |
| Q9NTX5 | Cytoplasm, cytosol {ECO:0000250}.        | 0 |
| Q9Y608 |                                          | 0 |
| 075191 |                                          | 0 |
| Q9UBN7 | Nucleus. Cytoplasm. Perikaryon {ECO:000  | 0 |
| 000591 | Cell junction, synapse, postsynaptic ce  | 0 |
| Q15323 |                                          | 0 |
| Q99741 | Nucleus {ECO:0000269 PubMed:9566895}. (  | 0 |
| Q96BW1 | Cytoplasm {ECO:0000269 PubMed:17384901}  | 0 |
| Q9UJX2 |                                          | 0 |
| Q9NRG9 | Nucleus, nuclear pore complex {ECO:0000  | 0 |
| P45973 | Nucleus {ECO:0000269 PubMed:10460410, F  | 1 |
| Q99518 | Microsome membrane {ECO:0000250 UniProt  | 0 |
| Q9UBS9 | Rough endoplasmic reticulum membrane {E  | 0 |
| P43246 | Nucleus {ECO:0000269 PubMed:26300262}.   | 0 |
| Q13233 |                                          | 0 |
| P49366 |                                          | 0 |
| Q96ED9 | Cytoplasm, cytoskeleton, microtubule or  | 0 |
| Q8N323 | Secreted.                                | 0 |
| P48444 | Cytoplasm {ECO:0000250}. Golgi apparatus | 0 |
| Q9H329 | Cytoplasm {ECO:0000269 PubMed:22006950}  | 0 |
| Q9NVV0 | Endoplasmic reticulum membrane {ECO:000  | 0 |
| Q16401 |                                          | 0 |
| P23219 | Microsome membrane; Peripheral membrane  | 1 |
| Q5SRE5 | Nucleus, nuclear pore complex {ECO:0000  | 0 |
| P43155 | Endoplasmic reticulum {ECO:0000305}. Pe  | 1 |
| Q8N5H7 | Cytoplasm {ECO:0000250}. Membrane {ECO:  | 0 |
| Q9NR45 |                                          | 0 |
| Q9BYX2 | Cytoplasm {ECO:0000269 PubMed:20116244}  | 0 |
| Q69YN2 |                                          | 0 |
| Q9NTN9 | Cell membrane; Single-pass type I membr  | 0 |
| Q8WV28 | Cytoplasm {ECO:0000269 PubMed:9697839}.  | 0 |
| Q9BXT4 | Cytoplasm {ECO:0000250}. Note=Component  | 1 |
| Q9BX66 | Cell junction, adherens junction. Cell   | 0 |
| Q9NQ79 | Secreted, extracellular space, extracel  | 0 |
| Q13145 | Membrane {ECO:0000305}; Single-pass ty   | 0 |
| Q8NEV4 | Cytoplasm, cytoskeleton. Cytoplasm {ECO  | 0 |
| Q9BTA9 | Nucleus speckle {ECO:0000250 UniProtKB:  | 0 |
| Q03060 | Nucleus.; Isoform 6: Cytoplasm {ECO:000  | 0 |
| Q9Y5Y2 | Nucleus {ECO:0000255 HAMAP-Rule:MF_030   | 0 |
| Q9BZJ3 | Secreted {ECO:0000250}. Note=Released f  | 0 |
| 075264 | Membrane {ECO:0000305}; Single-pass men  | 1 |
| P15822 | Isoform 1: Nucleus.; Isoform 2: Cytopla  | 0 |
| Q9NZC2 | Isoform 1: Cell membrane {ECO:0000269 F  | 0 |
| P54108 | Secreted. Note=In neutrophils, localize  | 0 |
| Q13451 | Cytoplasm. Nucleus.                      | 1 |
| Q96SB4 | Isoform 2: Cytoplasm. Nucleus. Nucleus   | 0 |
| Q9ULD4 |                                          | 0 |
| Q9NVS2 | Mitochondrion {ECO:0000269 PubMed:25278  | 0 |
| P20142 | Secreted.                                | 0 |
| Q9Y6G1 | Mitochondrion membrane {ECO:0000269 Pub  | 0 |
| Q5JVL4 | Cytoplasm, cytoskeleton, microtubule or  | 0 |
| 095944 | Cell membrane {ECO:0000305}; Single-pas  | 0 |



|        |                                         |   |
|--------|-----------------------------------------|---|
| P08238 | Cytoplasm {ECO:0000269 PubMed:16580629, | 0 |
| P12872 | Secreted.                               | 0 |
| Q99459 | Nucleus {ECO:0000269 PubMed:10570151, F | 0 |
| Q14573 | Endoplasmic reticulum membrane; Multi-p | 0 |
| Q99676 | Nucleus {ECO:0000305}.                  | 0 |
| P15924 | Cell junction, desmosome {ECO:0000269 F | 1 |
| Q96EB6 | Nucleus, PML body {ECO:0000269 PubMed:J | 0 |
| Q96LB3 | Cell projection, cilium. Cytoplasmic ve | 0 |
| O60674 | Endomembrane system {ECO:0000250}; Peri | 0 |
| P00519 | Cytoplasm, cytoskeleton. Nucleus. Mitoc | 1 |
| O00154 | Isoform 4: Cytoplasm, cytosol {ECO:0000 | 1 |
| Q9Y371 | Cytoplasm {ECO:0000269 PubMed:15452144} | 1 |
| O00311 | Nucleus.                                | 1 |
| Q5VT97 |                                         | 0 |
| Q92824 | Isoform PC6A: Secreted. Note=Secreted t | 0 |
| O00767 | Endoplasmic reticulum membrane {ECO:000 | 0 |
| Q13445 | Cell membrane {ECO:0000305 PubMed:86214 | 0 |
| O14639 | Cytoplasm {ECO:0000250}. Cytoplasm, cyt | 0 |
| Q7Z2K6 | Endoplasmic reticulum membrane {ECO:000 | 0 |
| Q9NP72 | Cell membrane {ECO:0000305}; Lipid-anch | 0 |
| O14786 | Cell membrane; Single-pass type I membr | 0 |
| Q9NRG1 |                                         | 0 |
| Q9NP74 | Cytoplasm {ECO:0000269 PubMed:11707320} | 1 |
| O95858 | Cell membrane {ECO:0000269 PubMed:26686 | 0 |
| Q9POM6 | Nucleus {ECO:0000269 PubMed:11262398, F | 1 |
| Q641Q2 | Early endosome membrane {ECO:0000269 P  | 0 |
| O60307 |                                         | 0 |
| P28698 | Nucleus.                                | 0 |
| Q9H607 |                                         | 0 |
| Q13459 | Cytoplasm, cell cortex {ECO:0000269 Pub | 0 |
| Q9Y257 | Membrane {ECO:0000305}; Multi-pass memt | 0 |
| P48556 |                                         | 0 |
| P61266 | Isoform 1: Membrane {ECO:0000305}; Sing | 0 |
| Q9H2F3 | Endoplasmic reticulum membrane; Multi-p | 0 |
| O15047 | Nucleus speckle {ECO:0000269 PubMed:173 | 1 |
| Q8WUZ0 |                                         | 0 |
| O15479 |                                         | 0 |
| P30049 | Mitochondrion. Mitochondrion inner memt | 0 |
| P35858 | Secreted, extracellular space.          | 0 |
| P52272 | Nucleus, nucleolus {ECO:0000269 Ref.5}. | 1 |
| Q9PON8 | Endoplasmic reticulum membrane {ECO:000 | 0 |
| P17568 | Mitochondrion inner membrane {ECO:00002 | 0 |
| Q9NZ01 | Endoplasmic reticulum membrane {ECO:000 | 1 |
| Q9Y5L4 | Mitochondrion inner membrane {ECO:00002 | 0 |
| P49427 | Cytoplasm. Nucleus. Note=The phosphoryl | 0 |
| Q8IVT2 | Cell junction, focal adhesion. Cytoplas | 0 |
| Q9Y4F5 | Cytoplasm, cytoskeleton {ECO:0000250 Ur | 1 |
| P19388 | Nucleus {ECO:0000269 PubMed:9852112}.   | 1 |
| O00411 | Mitochondrion {ECO:0000269 PubMed:23283 | 0 |
| Q9HBB8 | Apical cell membrane {ECO:0000269 PubMe | 1 |
| Q1ZYL8 | Secreted {ECO:0000305}.                 | 0 |
| O75293 |                                         | 0 |
| O75781 | Cell membrane {ECO:0000269 PubMed:14978 | 0 |
| Q13477 | Membrane; Single-pass type I membrane p | 0 |
| Q9HBB9 | Isoform 2: Nucleus, PML body.; Isoform  | 1 |

|        |                                         |   |
|--------|-----------------------------------------|---|
| 000192 |                                         | 0 |
| Q8IZ69 |                                         | 0 |
| P43487 |                                         | 0 |
| Q9ULC8 | Cytoplasmic vesicle membrane {ECO:00003 | 0 |
| Q96RN5 | Cytoplasm. Nucleus.                     | 0 |
| P05546 |                                         | 0 |
| 095721 | Cytoplasm {ECO:0000269 PubMed:23217709} | 0 |
| P46109 |                                         | 0 |
| Q8N653 | Endomembrane system {ECO:0000269 PubMed | 0 |
| P24347 | Secreted, extracellular space, extracel | 0 |
| Q9BXF3 |                                         | 0 |
| Q12824 | Nucleus.                                | 1 |
| 015547 | Membrane; Multi-pass membrane protein.  | 0 |
| Q96Q80 | Endoplasmic reticulum membrane {ECO:000 | 0 |
| 043246 | Membrane {ECO:0000305}; Multi-pass memt | 0 |
| Q9BXK5 | Isoform 2: Mitochondrion membrane {ECO: | 0 |
| P30046 | Cytoplasm {ECO:0000250}.                | 0 |
| Q9Y6J0 | Nucleus {ECO:0000269 PubMed:9655484}.   | 0 |
| Q9BXI6 | Cell projection, microvillus {ECO:00002 | 0 |
| Q9UGT4 | Cell membrane {ECO:0000269 PubMed:23131 | 0 |
| Q15459 | Nucleus {ECO:0000269 PubMed:10882114, F | 1 |
| P36269 | Membrane {ECO:0000250}; Single-pass ty  | 0 |
| Q9Y6U7 | Membrane {ECO:0000305}; Multi-pass memt | 0 |
| 076054 | Cytoplasm. Nucleus. Note=Cytoplasmic ir | 0 |
| Q9UDX4 |                                         | 0 |
| Q69YQ0 | Cytoplasm, cytoskeleton {ECO:0000269 Pu | 0 |
| Q13356 | Nucleus {ECO:0000269 PubMed:11435423, F | 1 |
| Q9UBR1 | Cytoplasm.                              | 1 |
| 060688 | Nucleus {ECO:0000250}.                  | 0 |
| P62318 | Cytoplasm, cytosol {ECO:0000269 PubMed: | 0 |
| 000541 | Nucleus, nucleolus. Nucleus, nucleoplas | 1 |
| P28482 | Cytoplasm, cytoskeleton, spindle {ECO:( | 0 |
| P19440 | Cell membrane {ECO:0000269 PubMed:23682 | 0 |
| 043272 | Mitochondrion matrix.                   | 0 |
| P49593 |                                         | 0 |
| Q6ICL7 | Membrane {ECO:0000305}; Multi-pass memt | 0 |
| P26998 |                                         | 0 |
| Q9UIA0 | Cell membrane {ECO:0000269 PubMed:17398 | 0 |
| Q96DF8 | Nucleus {ECO:0000250 UniProtKB:P34420}. | 1 |
| 000587 | Golgi apparatus membrane {ECO:0000250}; | 0 |
| Q9BWT7 | Cytoplasm {ECO:0000250}.                | 0 |
| A4QPB2 |                                         | 0 |
| P35626 |                                         | 0 |
| Q9NZ20 | Secreted. Cell membrane. Cytoplasm, cyt | 0 |
| P05162 |                                         | 0 |
| Q9UJY5 | Golgi apparatus, trans-Golgi network me | 0 |
| P54198 | Nucleus. Nucleus, PML body. Note=Primar | 1 |
| Q9Y3L3 | Cell projection {ECO:0000269 PubMed:216 | 0 |
| P09382 | Secreted, extracellular space, extracel | 0 |
| Q9NQG7 |                                         | 0 |
| Q9UH36 | Cytoplasm {ECO:0000250 UniProtKB:Q8K2M6 | 0 |
| Q9HBE1 | Nucleus {ECO:0000269 PubMed:10713105}.  | 0 |
| Q9H2D6 | Nucleus {ECO:0000269 PubMed:9853615}. ( | 0 |
| 075600 | Mitochondrion {ECO:0000250}. Nucleus {F | 0 |
| Q14390 |                                         | 0 |

|        |                                                |   |
|--------|------------------------------------------------|---|
| P53674 |                                                | 0 |
| Q6NXT1 | Nucleus {ECO:0000250}. Cytoplasm {ECO:0000250} | 0 |
| Q9Y262 | Cytoplasm {ECO:0000255 HAMAP-Rule:MF_03}       | 0 |
| P55769 | Nucleus {ECO:0000269 PubMed:26912367, F        | 0 |
| Q8N3F8 | Recycling endosome membrane; Peripheral        | 0 |
| P61218 | Nucleus {ECO:0000269 PubMed:9852112}.          | 1 |
| P56693 | Cytoplasm {ECO:0000269 PubMed:12138193}        | 0 |
| Q9H6E4 | Nucleus {ECO:0000269 PubMed:22644376}.         | 0 |
| O75140 | Cytoplasm, cytosol {ECO:0000250 UniProt        | 0 |
| Q9NRD5 | Cytoplasm, perinuclear region. Membrane        | 0 |
| O95907 | Cell membrane; Multi-pass membrane prot        | 1 |
| Q9NSP4 | Nucleus. Cytoplasm. Chromosome, centrom        | 0 |
| Q9UH03 | Cytoplasm. Cytoplasm, cytoskeleton {ECO        | 0 |
| P13866 | Membrane; Multi-pass membrane protein.         | 1 |
| O43731 | Endoplasmic reticulum membrane {ECO:000        | 0 |
| P10635 | Endoplasmic reticulum membrane; Periphe        | 1 |
| Q92841 | Nucleus {ECO:0000269 PubMed:12138182, F        | 0 |
| Q14565 | Nucleus {ECO:0000305}. Chromosome {ECO:        | 1 |
| Q9UGU0 | Nucleus.                                       | 0 |
| Q8IWL3 | Iron-sulfur cluster co-chaperone protei        | 0 |
| Q9NS69 | Mitochondrion outer membrane {ECO:00002        | 1 |
| Q9UHP6 |                                                | 0 |
| Q9Y3I0 | Nucleus {ECO:0000269 PubMed:24608264}.         | 1 |
| Q15040 | Cell membrane {ECO:0000269 PubMed:23625        | 0 |
| Q9Y3I1 | Cytoplasm. Nucleus. Mitochondrion. Cyt         | 0 |
| O00178 | Cytoplasm {ECO:0000250}.                       | 0 |
| Q9BY77 | Nucleus. Nucleus speckle. Cytoplasm. N         | 0 |
| O75170 | Cytoplasm {ECO:0000269 PubMed:16769727}        | 0 |
| Q9UH99 | Nucleus inner membrane {ECO:0000269 Pub        | 0 |
| P00387 | Isoform 1: Endoplasmic reticulum membra        | 0 |
| O96015 | Cytoplasm, cytoskeleton, cilium axoneme        | 0 |
| O95567 |                                                | 0 |
| Q9UGB7 | Cytoplasm {ECO:0000250}.                       | 1 |
| Q9BU23 | Endoplasmic reticulum membrane {ECO:000        | 0 |
| Q9Y3P4 | Membrane {ECO:0000305}; Multi-pass mem         | 0 |
| Q9UNF0 | Cytoplasm {ECO:0000250}. Cytoplasm, cyt        | 0 |
| O95922 | Cytoplasm, cytoskeleton {ECO:0000305}.         | 0 |
| Q92737 | Cell membrane {ECO:0000305}; Lipid-anch        | 0 |
| Q10567 | Golgi apparatus. Cytoplasmic vesicle, c        | 0 |
| Q9UGU5 | Nucleus {ECO:0000255 PROSITE-ProRule:PF        | 0 |
| O60784 | Cytoplasm {ECO:0000305}. Membrane {ECO:        | 0 |
| P12036 | Cytoplasm {ECO:0000269 PubMed:27040688}        | 0 |
| Q9Y259 |                                                | 0 |
| Q13323 | Endomembrane system; Single-pass membra        | 0 |
| P09601 | Microsome {ECO:0000269 PubMed:22419571}        | 1 |
| Q8IVS2 | Mitochondrion {ECO:0000269 PubMed:12882        | 0 |
| P33992 | Nucleus {ECO:0000269 PubMed:28198391}.         | 0 |
| Q6NTF7 | Nucleus. Cytoplasm. Cytoplasm, P-body.         | 0 |
| P15289 | Endoplasmic reticulum {ECO:0000269 PubM        | 1 |
| B1AH88 |                                                | 0 |
| Q96D21 | Cell membrane {ECO:0000250}; Lipid-anch        | 0 |
| Q14166 |                                                | 0 |
| O95931 | Nucleus {ECO:0000269 PubMed:14647293, F        | 1 |
| P01127 | Secreted. Note=Released by platelets up        | 0 |
| P10323 |                                                | 0 |

|        |                                         |   |
|--------|-----------------------------------------|---|
| Q86V35 | Golgi apparatus, trans-Golgi network me | 0 |
| P39023 | Nucleus, nucleolus {ECO:0000269 PubMed: | 0 |
| Q9UDW3 | Nucleus {ECO:0000269 PubMed:15146077}.  | 0 |
| 043251 | Nucleus. Cytoplasm {ECO:0000250}.       | 0 |
| 043759 | Cytoplasmic vesicle, secretory vesicle, | 0 |
| Q15750 |                                         | 0 |
| Q9H1I8 | Nucleus {ECO:0000269 PubMed:12077347, F | 0 |
| Q13615 | Cytoplasm {ECO:0000269 PubMed:11676921} | 0 |
| Q9BPW4 | Secreted {ECO:0000305}.                 | 0 |
| Q7Z6Z6 |                                         | 0 |
| 014791 | Secreted.                               | 0 |
| Q9NST1 | Membrane {ECO:0000269 PubMed:15364929,  | 0 |
| P35579 | Cytoplasm, cytoskeleton {ECO:0000250 Ur | 0 |
| Q9Y512 | Mitochondrion outer membrane {ECO:00002 | 1 |
| Q99757 | Mitochondrion {ECO:0000269 PubMed:12032 | 0 |
| Q8IWF2 | Endoplasmic reticulum lumen {ECO:000025 | 0 |
| 075791 | Nucleus {ECO:0000269 PubMed:21179510}.  | 0 |
| 015371 | Cytoplasm {ECO:0000255 HAMAP-Rule:MF_03 | 0 |
| Q9UPQ9 | Cytoplasm, P-body {ECO:0000269 PubMed:1 | 0 |
| Q96HU1 | Cytoplasm {ECO:0000269 PubMed:15849434} | 0 |
| Q9BW83 | Cell projection, cilium {ECO:0000269 Pt | 0 |
| P20472 |                                         | 0 |
| Q6ICG6 |                                         | 0 |
| Q15080 | Cytoplasm, cytosol {ECO:0000269 PubMed: | 0 |
| 043808 | Cytoplasm. Peroxisome membrane; Multi-p | 0 |
| 075631 | Endoplasmic reticulum membrane {ECO:000 | 0 |
| Q9NWS6 | Membrane {ECO:0000305}; Single-pass mem | 0 |
| Q8N5Z5 | Cytoplasm {ECO:0000269 PubMed:25983243} | 0 |
| P50502 | Cytoplasm {ECO:0000250}.                | 1 |
| P14784 | Cell membrane {ECO:0000269 PubMed:15123 | 0 |
| Q09472 | Cytoplasm {ECO:0000269 PubMed:12929931} | 1 |
| Q6NUI6 | Secreted {ECO:0000269 PubMed:25451920}. | 0 |
| P46060 | Cytoplasm {ECO:0000269 PubMed:15037602, | 0 |
| Q9UGR2 | Nucleus {ECO:0000269 PubMed:18799579}.  | 0 |
| Q7RTV0 | Nucleus {ECO:0000269 PubMed:27720643, F | 1 |
| Q99798 | Mitochondrion {ECO:0000250 UniProtKB:P1 | 1 |
| Q9Y535 | Nucleus.                                | 0 |
| 075648 | Mitochondrion {ECO:0000269 PubMed:15509 | 0 |
| Q92871 | Cytoplasm.                              | 0 |
| Q6ICB0 | Cytoplasm {ECO:0000269 PubMed:29666234} | 0 |
| 095696 | Nucleus {ECO:0000269 PubMed:21880731}.  | 1 |
| 075132 | Nucleus. Cytoplasm.                     | 0 |
| Q15049 | Membrane {ECO:0000305}; Multi-pass memt | 0 |
| Q969S8 | Cytoplasm {ECO:0000269 PubMed:11677242, | 1 |
| P57789 | Membrane {ECO:0000305}; Multi-pass memt | 0 |
| Q8TB40 |                                         | 0 |
| 015037 |                                         | 0 |
| Q00688 | Nucleus.                                | 0 |
| Q9NRG7 |                                         | 0 |
| P08311 | Cell surface {ECO:0000269 PubMed:819460 | 0 |
| P20718 | Cytoplasmic granule. Note=Cytoplasmic g | 0 |
| P10144 | Cytoplasmic granule {ECO:0000269 PubMec | 1 |
| Q86U06 | Nucleus {ECO:0000305}.                  | 0 |
| 014744 | Cytoplasm {ECO:0000269 PubMed:21081503, | 0 |
| Q9Y587 | Golgi apparatus, trans-Golgi network me | 0 |

|        |                                         |   |
|--------|-----------------------------------------|---|
| P56282 | Nucleus.                                | 0 |
| Q9H867 | Cytoplasm {ECO:0000269 PubMed:23349634} | 0 |
| Q07890 |                                         | 0 |
| Q00532 | Cytoplasm {ECO:0000269 PubMed:9000130}. | 0 |
| Q8N4C6 | Cytoplasm, cytoskeleton, microtubule or | 0 |
| P06737 |                                         | 0 |
| P62333 | Cytoplasm {ECO:0000250}. Nucleus {ECO:( | 0 |
| Q96EK6 | Golgi apparatus membrane; Peripheral me | 0 |
| Q8NEL9 | Cytoplasm {ECO:0000269 PubMed:15623529} | 0 |
| Q95406 | Endoplasmic reticulum membrane {ECO:000 | 0 |
| Q99675 | Nucleus {ECO:0000269 PubMed:22361696}.  | 0 |
| Q9Y5K8 | Membrane {ECO:0000305 PubMed:21844891}; | 0 |
| Q9NYT0 | Cell projection, lamellipodium membrane | 0 |
| Q14442 | Cytoplasm.                              | 0 |
| Q0VAA2 |                                         | 0 |
| P25788 | Cytoplasm {ECO:0000269 PubMed:12181345} | 0 |
| Q9UEU0 | Early endosome membrane {ECO:0000269 Pu | 0 |
| Q9Y5J7 | Mitochondrion inner membrane {ECO:00002 | 0 |
| Q43708 | Cytoplasm {ECO:0000250}.                | 0 |
| Q9BVV6 | Cytoplasm, cytoskeleton, microtubule or | 0 |
| Q6PL24 |                                         | 0 |
| Q9P1V8 |                                         | 0 |
| Q95433 | Cytoplasm, cytosol {ECO:0000269 PubMed: | 1 |
| Q9Y4D1 | Cytoplasm {ECO:0000269 PubMed:16630611} | 0 |
| Q6H9L7 | Secreted {ECO:0000305}.                 | 0 |
| Q8TB24 | Cytoplasm {ECO:0000269 PubMed:18486601, | 0 |
| Q99538 | Lysosome {ECO:0000250}.                 | 1 |
| Q13686 | Nucleus {ECO:0000269 PubMed:22961808}.  | 0 |
| Q13573 | Nucleus {ECO:0000269 PubMed:11991638, E | 1 |
| P10645 | Cytoplasmic vesicle, secretory vesicle  | 0 |
| Q13572 |                                         | 0 |
| Q9Y394 |                                         | 0 |
| P35813 | Nucleus {ECO:0000269 PubMed:16751101}.  | 0 |
| Q9UIU6 | Nucleus {ECO:0000250 UniProtKB:Q61321}. | 0 |
| Q8N428 | Golgi apparatus membrane {ECO:0000250}; | 0 |
| Q6ZU80 | Cytoplasm, cytoskeleton, microtubule or | 0 |
| P84090 |                                         | 0 |
| Q16665 | Cytoplasm {ECO:0000269 PubMed:9822602}. | 1 |
| Q92537 | Membrane {ECO:0000305}; Single-pass typ | 0 |
| Q13243 | Nucleus.                                | 0 |
| Q14973 | Membrane; Multi-pass membrane protein.  | 0 |
| P55010 |                                         | 0 |
| P29622 | Secreted.                               | 0 |
| Q9UPY3 | Cytoplasm {ECO:0000269 PubMed:16424907} | 0 |
| Q9BQ24 | Cell junction, focal adhesion. Cytoplas | 0 |
| P11586 | Cytoplasm.                              | 0 |
| P56279 | Cytoplasm {ECO:0000250}. Nucleus {ECO:( | 1 |
| Q6PJT7 | Nucleus speckle {ECO:0000269 PubMed:176 | 0 |
| Q9Y4R8 | Cytoplasm. Membrane. Nucleus. Chromosom | 0 |
| P46663 | Cell membrane; Multi-pass membrane prot | 0 |
| Q9P0R6 | Cytoplasm {ECO:0000269 PubMed:16981698, | 0 |
| Q99986 | Cytoplasm. Nucleus. Cytoplasm, cytoskel | 0 |
| P62191 | Cytoplasm. Nucleus. Membrane {ECO:00003 | 0 |
| Q95428 | Secreted {ECO:0000305}.                 | 0 |
| Q75582 | Nucleus. Cytoplasm. Note=Predominantly  | 0 |

|        |                                         |   |
|--------|-----------------------------------------|---|
| Q6IN85 | Cytoplasm {ECO:0000269 PubMed:18487071} | 0 |
| Q9H972 | Secreted {ECO:0000305}.                 | 0 |
| P28074 | Cytoplasm {ECO:0000269 PubMed:12181345} | 0 |
| P25490 | Nucleus matrix {ECO:0000269 PubMed:1802 | 1 |
| Q9UKV3 | Nucleus. Nucleus speckle. Nucleus, nucl | 1 |
| Q15643 | Golgi apparatus, cis-Golgi network mem  | 1 |
| P27695 | Nucleus. Nucleus, nucleolus. Nucleus sp | 0 |
| Q86U42 | Nucleus {ECO:0000269 PubMed:10688363, E | 0 |
| 043281 |                                         | 0 |
| Q13017 | Cytoplasm {ECO:0000269 PubMed:8537347}. | 0 |
| Q13268 | Mitochondrion matrix. Nucleus. Note=A n | 0 |
| P61011 | Nucleus speckle {ECO:0000269 PubMed:147 | 0 |
| 095741 | Cytoplasm {ECO:0000250 UniProtKB:Q9Z14C | 0 |
| Q16822 | Mitochondrion.                          | 1 |
| 015091 | Mitochondrion {ECO:0000269 PubMed:18984 | 0 |
| Q8TEB1 |                                         | 0 |
| P60900 | Cytoplasm {ECO:0000269 PubMed:12181345} | 0 |
| P25963 | Cytoplasm. Nucleus. Note=Shuttles betwe | 0 |
| Q9Y3B6 | Cytoplasm {ECO:0000269 PubMed:22119785} | 0 |
| Q5PSV4 | Nucleus {ECO:0000305}.                  | 0 |
| 095072 | Nucleus {ECO:0000250 UniProtKB:Q6AYJ4}. | 0 |
| 015321 | Lysosome membrane {ECO:0000269 PubMed:1 | 1 |
| Q15436 | Cytoplasmic vesicle, COPII-coated vesic | 0 |
| Q9P2T1 |                                         | 0 |
| Q9H307 | Nucleus speckle. Cell junction, desmosc | 0 |
| Q92696 |                                         | 0 |
| Q14934 | Cytoplasm, cytosol {ECO:0000269 PubMed: | 0 |
| P55058 | Secreted.                               | 0 |
| Q9H4Z3 | Nucleus {ECO:0000269 PubMed:12565871, E | 1 |
| P48637 |                                         | 0 |
| P14780 | Secreted, extracellular space, extracel | 0 |
| Q8TEL6 |                                         | 0 |
| P11216 |                                         | 0 |
| Q8N2K0 | Endoplasmic reticulum membrane {ECO:000 | 0 |
| Q9UNN8 | Membrane; Single-pass type I membrane p | 0 |
| Q14691 | Nucleus {ECO:0000250}.                  | 0 |
| Q9Y2I6 | Cytoplasm, cytoskeleton, microtubule or | 0 |
| P25942 | Isoform I: Cell membrane; Single-pass t | 0 |
| Q9NVA1 | Mitochondrion inner membrane {ECO:00002 | 0 |
| Q9ULU4 | Nucleus {ECO:0000269 PubMed:27477906, E | 0 |
| Q9HBY8 | Cytoplasm {ECO:0000269 PubMed:21865597} | 0 |
| Q9Y366 | Cell projection, cilium {ECO:0000250 Ur | 0 |
| P10244 | Nucleus.                                | 0 |
| Q9H3Y0 | Secreted {ECO:0000305}.                 | 0 |
| P41235 | Nucleus.                                | 1 |
| Q9UGV2 |                                         | 0 |
| Q9BUV8 |                                         | 0 |
| Q13469 | Cytoplasm. Nucleus. Note=Cytoplasmic fo | 0 |
| Q9H426 | Cell junction, synapse {ECO:0000250}.   | 0 |
| Q13043 | Cytoplasm. Nucleus. Note=The caspase-cl | 0 |
| Q9UJQ4 | Cytoplasm. Nucleus.                     | 0 |
| Q9H2P0 | Nucleus {ECO:0000255 PROSITE-ProRule:PF | 1 |
| Q9NQP4 | Nucleus {ECO:0000269 PubMed:17936702}.  | 0 |
| Q9P104 |                                         | 0 |
| Q05048 | Nucleus.                                | 1 |

|        |                                                                 |   |
|--------|-----------------------------------------------------------------|---|
| 043399 |                                                                 | 0 |
| Q9H3Z4 | Membrane {ECO:0000250 UniProtKB:P60904}                         | 0 |
| Q9UBR2 | Lysosome.                                                       | 1 |
| 094906 | Nucleus, nucleoplasm {ECO:0000269 PubMed:12181345}              | 1 |
| Q9H4B7 | Cytoplasm, cytoskeleton {ECO:0000269 PubMed:12181345}           | 0 |
| Q9Y3B1 |                                                                 | 0 |
| Q9H4K7 | Mitochondrion. Mitochondrion inner membrane                     | 0 |
| 014818 | Cytoplasm {ECO:0000269 PubMed:12181345}                         | 0 |
| Q96BD0 | Cell membrane; Multi-pass membrane protein                      | 0 |
| Q9NV56 | Nucleus.                                                        | 1 |
| Q9UL49 | Nucleus {ECO:0000255 PROSITE-ProRule:PF00001}                   | 1 |
| Q9BTC0 | Cytoplasm {ECO:0000250}. Nucleus {ECO:0000269 PubMed:17467196}  | 0 |
| Q9NWU2 | Cytoplasm {ECO:0000269 PubMed:17467196}                         | 0 |
| Q8IVV8 | Cell membrane {ECO:0000305}; Multi-pass membrane protein        | 0 |
| Q8N6T3 | Cytoplasm {ECO:0000250}. Golgi apparatus                        | 0 |
| P01185 | Secreted.                                                       | 0 |
| Q9P218 | Secreted, extracellular space {ECO:0000250}                     | 0 |
| P43681 | Cell junction, synapse, postsynaptic cell membrane              | 0 |
| Q05639 | Nucleus {ECO:0000250}.                                          | 0 |
| Q13882 | Cytoplasm. Nucleus. Cell projection, ruffle                     | 0 |
| Q9UKD1 | Nucleus. Cytoplasm. Note=May be also cytoplasmic                | 0 |
| Q9GZN8 |                                                                 | 0 |
| Q9Y4P9 | Cytoplasm {ECO:0000250 UniProtKB:Q99JL1}                        | 0 |
| P30305 | Cytoplasm, cytoskeleton, microtubule organizing center          | 0 |
| Q9Y225 | Golgi apparatus membrane {ECO:0000269 PubMed:15052000}          | 0 |
| Q13795 | Golgi apparatus {ECO:0000269 PubMed:15052000}                   | 0 |
| Q5TEU4 | Mitochondrion inner membrane {ECO:0000269 PubMed:15052000}      | 0 |
| Q5TEA6 | Membrane; Single-pass type I membrane protein                   | 0 |
| Q96RU7 | Nucleus {ECO:0000269 PubMed:22977230}.                          | 0 |
| P50749 | Nucleus. Cytoplasm. Chromosome, centromere                      | 0 |
| P68400 | Nucleus {ECO:0000269 PubMed:24962073}.                          | 0 |
| Q9NQ40 | Apical cell membrane {ECO:0000269 PubMed:24962073}              | 0 |
| Q9Y264 | Secreted {ECO:0000305}.                                         | 0 |
| Q2I0M5 | Secreted {ECO:0000250}.                                         | 0 |
| 095674 | Mitochondrion inner membrane {ECO:0000269 PubMed:24962073}      | 0 |
| Q8NFJ6 | Cell membrane {ECO:0000269 PubMed:18826000}                     | 0 |
| Q8TCT9 | Endoplasmic reticulum membrane {ECO:0000269 PubMed:18826000}    | 0 |
| 015079 | Membrane {ECO:0000305}; Single-pass membrane protein            | 0 |
| Q9H1R3 | Cytoplasm. Note=Colocalizes with phospholipase C                | 1 |
| 000241 | Cell membrane {ECO:0000269 PubMed:10604000}                     | 0 |
| Q15437 | Cytoplasmic vesicle, COPII-coated vesicle                       | 0 |
| Q9BQL6 | Cytoplasm, cytoskeleton. Cell junction, adherens junction       | 0 |
| Q9UJM8 | Peroxisome.                                                     | 1 |
| P01213 | Secreted.                                                       | 0 |
| Q9NUG4 |                                                                 | 0 |
| Q15147 |                                                                 | 0 |
| P24844 |                                                                 | 0 |
| P08631 | Isoform 1: Lysosome. Membrane; Lipid-anchored                   | 0 |
| Q92544 | Membrane {ECO:0000255}; Multi-pass membrane protein             | 0 |
| A0PJX2 |                                                                 | 0 |
| Q9H488 | Endoplasmic reticulum {ECO:0000250 UniProtKB:P08631}            | 0 |
| Q9Y3Z3 | Nucleus {ECO:0000269 PubMed:19525956}, Inner nuclear membrane   | 1 |
| Q9P286 | Mitochondrion. Cytoplasm. Nucleus. Note=May be also cytoplasmic | 0 |
| 015066 | Cytoplasm, cytoskeleton {ECO:0000305}.                          | 0 |
| Q9H579 |                                                                 | 0 |

|        |                                          |   |
|--------|------------------------------------------|---|
| 000567 | Nucleus, nucleolus {ECO:0000269 PubMed:  | 0 |
| Q9NQG1 | Membrane {ECO:0000305}; Single-pass men  | 0 |
| 043837 | Mitochondrion.                           | 1 |
| Q15691 | Cytoplasm, cytoskeleton {ECO:0000269 Pu  | 1 |
| P78504 | Membrane; Single-pass type I membrane p  | 0 |
| Q13424 | Cell membrane, sarcolemma {ECO:0000250}  | 0 |
| P01178 | Secreted.                                | 0 |
| 043156 | Cytoplasm {ECO:0000269 PubMed:23263282}  | 0 |
| Q01094 | Nucleus {ECO:0000269 PubMed:20040599}.   | 1 |
| Q9NQG5 | Nucleus {ECO:0000269 PubMed:22264791}.   | 0 |
| Q9Y6I8 | Peroxisome membrane {ECO:0000250}; Mult  | 0 |
| Q9H444 | Cytoplasm, cytosol {ECO:0000269 PubMed:  | 0 |
| P17213 | Secreted {ECO:0000269 PubMed:8812832}.   | 0 |
| Q9H598 | Cytoplasmic vesicle membrane {ECO:00002  | 1 |
| P01034 | Secreted {ECO:0000269 PubMed:20189825}.  | 0 |
| P42127 | Secreted.                                | 0 |
| P01036 | Secreted {ECO:0000269 PubMed:20189825}.  | 0 |
| Q9H9F9 | Nucleus {ECO:0000269 PubMed:18026119, F  | 0 |
| Q14508 | Secreted {ECO:0000269 PubMed:15781627,   | 0 |
| P23526 | Cytoplasm {ECO:0000269 PubMed:17081065}  | 0 |
| P49223 | Secreted {ECO:0000305}.                  | 0 |
| 095925 | Isoform 1: Secreted. Cell surface. Note  | 0 |
| Q9H5Z1 |                                          | 0 |
| Q9H492 | Cytoplasm, cytoskeleton. Endomembrane s  | 1 |
| Q9H490 | Endoplasmic reticulum membrane {ECO:000  | 0 |
| P02585 |                                          | 0 |
| 014734 | Peroxisome matrix {ECO:0000269 PubMed:1  | 0 |
| Q9HDC9 | Membrane {ECO:0000269 PubMed:18513186};  | 0 |
| Q9BZC1 | Nucleus {ECO:0000269 PubMed:14973222}.   | 0 |
| Q92618 | Nucleus {ECO:0000250 UniProtKB:Q7TSH3}.  | 0 |
| Q9HBT6 | Cell membrane; Single-pass type I membr  | 0 |
| Q6IQ32 | Nucleus {ECO:0000305}.                   | 0 |
| Q8NOV3 | Mitochondrion {ECO:0000305}.             | 0 |
| P54578 | Cytoplasm {ECO:0000269 PubMed:19106094}  | 0 |
| Q9P0L0 | Endoplasmic reticulum membrane {ECO:000  | 0 |
| Q8N3J2 |                                          | 0 |
| Q92539 | Nucleus {ECO:0000250}. Cytoplasm, cytos  | 0 |
| A6NHR9 | Chromosome {ECO:0000269 PubMed:24790221} | 0 |
| P52179 | Cytoplasm, myofibril, sarcomere, M line  | 1 |
| P19105 |                                          | 0 |
| Q8TAP6 | Cytoplasm, cytoskeleton, microtubule or  | 0 |
| 015466 | Golgi apparatus membrane {ECO:0000305};  | 0 |
| Q8TEP8 | Cytoplasm, cytoskeleton, microtubule or  | 0 |
| 043148 | Nucleus {ECO:0000269 PubMed:11114884, F  | 0 |
| 015105 | Nucleus {ECO:0000269 PubMed:14657019, F  | 0 |
| Q9Y5X9 | Secreted.                                | 0 |
| P25391 | Secreted, extracellular space, extracel  | 0 |
| Q96EQ8 | Golgi apparatus membrane {ECO:0000269 F  | 0 |
| Q6UB98 | Nucleus {ECO:0000269 PubMed:15184363, F  | 0 |
| Q9UNA4 | Nucleus {ECO:0000269 PubMed:12606586}.   | 1 |
| Q86YT6 | Cytoplasm {ECO:0000269 PubMed:24121310}  | 0 |
| Q99708 | Nucleus {ECO:0000269 PubMed:10764811, F  | 0 |
| 014730 | Cytoplasm {ECO:0000269 PubMed:22418843}  | 0 |
| P33240 | Nucleus {ECO:0000269 PubMed:11598190}.   | 1 |
| Q9NR99 | Secreted {ECO:0000269 PubMed:27599751}.  | 0 |



|        |                                         |   |
|--------|-----------------------------------------|---|
| Q86XK7 | Membrane {ECO:0000305}; Single-pass ty  | 0 |
| 075832 | Cytoplasm {ECO:0000269 PubMed:18040287} | 0 |
| Q8WYN0 | Cytoplasm {ECO:0000250}.                | 0 |
| P08842 | Cytoplasmic vesicle, secretory vesicle, | 1 |
| 060907 | Nucleus {ECO:0000250}. Note=Colocalized | 0 |
| P51810 | Melanosome membrane {ECO:0000269 PubMec | 0 |
| 000264 | Microsome membrane {ECO:0000250 UniProt | 1 |
| P09884 | Nucleus {ECO:0000269 PubMed:27019227}.  | 0 |
| 015344 | Cytoplasm {ECO:0000269 PubMed:10077590} | 0 |
| Q8N5F7 | Nucleus {ECO:0000269 PubMed:14550261}.  | 1 |
| Q8NHV9 | Nucleus {ECO:0000255 PROSITE-ProRule:PF | 0 |
| Q9NPJ8 | Nucleus. Cytoplasm. Note=Shuttles betwe | 0 |
| Q9NP73 | Isoform 2: Endoplasmic reticulum {ECO:( | 0 |
| P11908 |                                         | 0 |
| Q9NR97 | Membrane {ECO:0000250}; Single-pass ty  | 0 |
| Q9UJG1 | Endoplasmic reticulum membrane {ECO:000 | 0 |
| Q9Y4X0 | Nucleus {ECO:0000269 PubMed:27811305}.  | 0 |
| Q9BU40 | Secreted {ECO:0000305}.                 | 0 |
| Q9H1Z4 | Nucleus {ECO:0000269 PubMed:12659815}.  | 1 |
| 060829 |                                         | 0 |
| P23416 | Cell junction, synapse, postsynaptic ce | 0 |
| P98170 | Cytoplasm. Nucleus. Note=TLE3 promotes  | 0 |
| Q8N3U4 | Nucleus. Chromosome. Chromosome, centro | 1 |
| Q8NB49 | Cell membrane {ECO:0000269 PubMed:21914 | 0 |
| 060826 | Endosome {ECO:0000305 PubMed:28892079}. | 0 |
| 060840 | Membrane; Multi-pass membrane protein.  | 0 |
| P08247 | Cytoplasmic vesicle, secretory vesicle, | 0 |
| Q04941 | Membrane; Multi-pass membrane protein.  | 0 |
| P51813 | Cytoplasm {ECO:0000269 PubMed:12832404} | 1 |
| Q9P127 | Nucleus {ECO:0000269 PubMed:12032826, F | 0 |
| P13797 | Cytoplasm.                              | 0 |
| P41227 | Cytoplasm {ECO:0000269 PubMed:12464182, | 0 |
| P51606 |                                         | 0 |
| Q99607 | Nucleus, PML body {ECO:0000269 PubMed:1 | 1 |
| P28370 | Nucleus.                                | 0 |
| Q96DX5 | Mitochondrion {ECO:0000269 PubMed:20302 | 0 |
| Q5HYM0 |                                         | 0 |
| Q16576 | Nucleus.                                | 1 |
| Q9NSA2 | Membrane; Multi-pass membrane protein.  | 0 |
| Q06787 | Nucleus {ECO:0000269 PubMed:10196376, F | 0 |
| Q9UQR0 | Nucleus {ECO:0000305}.                  | 1 |
| P78381 | Golgi apparatus membrane; Multi-pass me | 0 |
| 060828 | Nucleus {ECO:0000269 PubMed:10198427, F | 0 |
| 015537 | Secreted {ECO:0000269 PubMed:10915776,  | 0 |
| Q9UHG2 | Secreted {ECO:0000250 UniProtKB:Q9QXV0} | 0 |
| P50402 | Nucleus inner membrane {ECO:0000269 Pub | 0 |
| Q16635 | Isoform 1: Membrane; Single-pass membra | 0 |
| P00558 | Cytoplasm.                              | 0 |
| P15976 | Nucleus.                                | 1 |
| Q9H0U3 | Cell membrane {ECO:0000269 PubMed:19717 | 0 |
| P52788 |                                         | 0 |
| P11441 | Cytoplasm, cytosol {ECO:0000269 PubMed: | 0 |
| Q8TCZ2 | Cell membrane {ECO:0000250}; Single-pas | 0 |
| Q15075 | Cytoplasm. Early endosome membrane; Per | 1 |
| Q13585 | Cell membrane; Multi-pass membrane prot | 0 |

|        |                                         |   |
|--------|-----------------------------------------|---|
| 075695 | Cell membrane {ECO:0000269 PubMed:10942 | 0 |
| Q92613 |                                         | 0 |
| Q00536 | Cytoplasm. Cytoplasmic vesicle, secret  | 0 |
| P51784 | Nucleus {ECO:0000269 PubMed:12084015, F | 1 |
| Q9Y5K3 | Endoplasmic reticulum.                  | 0 |
| 043719 | Nucleus {ECO:0000269 PubMed:15485897, F | 1 |
| Q99990 | Nucleus.                                | 1 |
| P29965 | Cell membrane {ECO:0000269 PubMed:86263 | 0 |
| P01033 | Secreted {ECO:0000269 PubMed:1730286, F | 0 |
| Q9COH6 | Cytoplasm, cytoskeleton.                | 0 |
| P78334 | Cell junction, synapse, postsynaptic ce | 0 |
| Q9BZA7 | Cell membrane {ECO:0000305}; Single-pas | 0 |
| P98174 | Cytoplasm {ECO:0000250}. Cell projectio | 0 |
| Q9Y237 | Isoform 1: Nucleus, nucleolus. Cytoplas | 0 |
| Q9H237 | Endoplasmic reticulum membrane {ECO:000 | 1 |
| Q6UXX5 | Secreted {ECO:0000250}.                 | 0 |
| Q9UNF1 |                                         | 0 |
| P98179 | Nucleus {ECO:0000250}. Cytoplasm {ECO:( | 0 |
| 060687 | Secreted. Cytoplasm. Cell surface. Cell | 0 |
| Q96C24 | Membrane {ECO:0000250}; Peripheral mem  | 0 |
| Q96MV8 | Golgi apparatus membrane {ECO:0000250 U | 0 |
| Q5H9L4 | Nucleus {ECO:0000250}. Cytoplasm {ECO:( | 0 |
| Q9BVG4 |                                         | 0 |
| P06280 | Lysosome.                               | 1 |
| Q9UH62 | Mitochondrion outer membrane {ECO:00002 | 0 |
| Q9NWD9 | Cytoplasm, cytoskeleton, spindle pole   | 0 |
| Q9H714 | Cytoplasmic vesicle, autophagosome mem  | 0 |
| Q8IZF0 | Membrane {ECO:0000305}; Multi-pass mem  | 0 |
| P28223 | Cell membrane {ECO:0000269 PubMed:28129 | 0 |
| Q9NV92 | Endosome membrane {ECO:0000269 PubMed:1 | 0 |
| Q9Y275 | Cell membrane; Single-pass type II mem  | 0 |
| Q9Y2H6 | Golgi apparatus membrane {ECO:0000305}; | 0 |
| Q9BWW3 |                                         | 0 |
| Q9H9S4 |                                         | 0 |
| Q13887 | Nucleus {ECO:0000269 PubMed:15735697}.  | 0 |
| Q9Y6E0 | Cytoplasm. Nucleus. Membrane. Note=The  | 0 |
| P13686 | Lysosome.                               | 1 |
| Q13217 | Endoplasmic reticulum {ECO:0000250}.    | 0 |
| Q9NYU1 | Endoplasmic reticulum lumen {ECO:000025 | 0 |
| Q14155 | Cell junction, focal adhesion {ECO:0000 | 0 |
| P31371 | Secreted.                               | 0 |
| Q13326 | Cell membrane, sarcolemma {ECO:0000250} | 1 |
| Q9UKK3 | Cytoplasm {ECO:0000269 PubMed:10477748} | 0 |
| Q8NEM7 | Nucleus {ECO:0000269 PubMed:19893488}.  | 0 |
| Q92665 | Mitochondrion {ECO:0000269 PubMed:11279 | 0 |
| Q9Y619 | Mitochondrion inner membrane; Multi-pas | 0 |
| 000505 | Cytoplasm {ECO:0000250}. Nucleus {ECO:( | 0 |
| P17948 | Isoform 1: Cell membrane; Single-pass t | 0 |
| Q9H4X1 | Cytoplasm. Nucleus. Cytoplasm, cytoskel | 0 |
| A3KMH1 | Isoform 1: Mitochondrion {ECO:0000269 F | 0 |
| Q86XP1 | Cytoplasm {ECO:0000269 PubMed:12810723, | 0 |
| Q9UL03 | Nucleus {ECO:0000269 PubMed:11939413, F | 1 |
| A6NK06 | Mitochondrion {ECO:0000250}.            | 0 |
| A0PJE2 |                                         | 0 |
| 075503 | Ceroid-lipofuscinosis neuronal protein  | 0 |

|        |                                         |   |
|--------|-----------------------------------------|---|
| Q6UX06 | Secreted, extracellular space. Mitochor | 0 |
| Q13421 | Cell membrane; Lipid-anchor, GPI-anch   | 0 |
| O60291 | Early endosome {ECO:0000269 PubMed:172  | 0 |
| Q9UEG4 | Nucleus {ECO:0000305}.                  | 0 |
| Q15628 | Nucleus {ECO:0000250}. Cytoplasm {ECO:( | 0 |
| P31146 | Cytoplasm, cytoskeleton {ECO:0000250}.  | 1 |
| P27361 | Cytoplasm. Nucleus. Membrane, caveola   | 0 |
| Q7L5L3 | Membrane {ECO:0000250 UniProtKB:Q99LY2} | 0 |
| Q96BJ8 | Cytoplasm {ECO:0000250}.                | 0 |
| P61970 | Cytoplasm, cytosol {ECO:0000269 PubMed: | 0 |
| Q8N1F7 | Nucleus membrane {ECO:0000250 UniProtKB | 0 |
| Q96BT3 | Nucleus. Chromosome, centromere {ECO:00 | 0 |
| O94916 | Nucleus {ECO:0000269 PubMed:10377394}.  | 0 |
| Q86WA8 | Peroxisome matrix {ECO:0000255 HAMAP-Ru | 0 |
| O75113 | Nucleus, nucleolus {ECO:0000250}. Nucle | 0 |
| Q9Y2Y0 | Cytoplasm. Mitochondrion intermembrane  | 0 |
| Q9Y342 | Membrane; Multi-pass membrane protein.  | 0 |
| Q02127 | Mitochondrion inner membrane {ECO:0000  | 0 |
| Q92583 | Secreted.                               | 0 |
| P49711 | Nucleus, nucleoplasm {ECO:0000269 PubMe | 1 |
| Q96AP0 | Nucleus {ECO:0000269 PubMed:15181449, F | 0 |
| P19387 | Nucleus {ECO:0000269 PubMed:9852112}.   | 0 |
| Q9NPB6 | Cytoplasm. Cell membrane. Cell projecti | 0 |
| O75541 | Nucleus {ECO:0000305}.                  | 0 |
| P51511 | Membrane {ECO:0000305}; Single-pass typ | 0 |
| Q9BQ65 | Nucleus {ECO:0000255 HAMAP-Rule:MF_030  | 0 |
| O43169 | Mitochondrion outer membrane {ECO:0000  | 0 |
| Q9H0I3 | Cytoplasm, cytoskeleton, microtubule or | 0 |
| Q6PEW0 | Secreted {ECO:0000305}.                 | 0 |
| Q13232 |                                         | 0 |
| Q9ULP0 | Cytoplasm, cytosol {ECO:0000269 PubMed: | 1 |
| P51665 |                                         | 0 |
| Q8TBK2 | Nucleus {ECO:0000269 PubMed:21131967}.  | 0 |
| Q9NVC3 | Membrane {ECO:0000250}; Multi-pass mem  | 0 |
| Q08AM6 | Endosome membrane {ECO:0000269 PubMed:1 | 0 |
| O00219 | Membrane {ECO:0000305}; Multi-pass mem  | 0 |
| Q9C0B7 | Membrane {ECO:0000305}; Single-pass men | 0 |
|        | Cytoplasm, cytosol {ECO:0000269 PubMed: | 0 |
| Q9NY59 | Golgi apparatus membrane {ECO:0000269 F | 0 |
| Q96CW6 | Cytoplasm {ECO:0000250}. Nucleus {ECO:( | 0 |
| Q92536 | Basolateral cell membrane {ECO:0000269  | 0 |
| Q8NCC3 | Lysosome {ECO:0000269 PubMed:23958596}. | 0 |
| Q9H6T0 | Nucleus {ECO:0000269 PubMed:19285943}.  | 0 |
| Q7L5A8 | Endoplasmic reticulum membrane {ECO:00  | 0 |
| Q6PJI9 | Lysosome membrane {ECO:0000269 PubMed:2 | 0 |
| Q7L1V2 |                                         | 0 |
| Q9NRP2 | Mitochondrion {ECO:0000269 PubMed:2022  | 0 |
| O15169 | Cytoplasm {ECO:0000269 PubMed:16601693} | 0 |
| Q9NWW0 | Cytoplasm {ECO:0000269 PubMed:12235138} | 0 |
| Q12980 | Lysosome membrane {ECO:0000269 PubMed:2 | 0 |
| O95822 | Cytoplasm {ECO:0000269 PubMed:10417274} | 1 |
| P29372 | Cytoplasm {ECO:0000269 PubMed:23290262} | 0 |
| Q7Z6G3 | Cytoplasm {ECO:0000250 UniProtKB:F1LQY6 | 0 |
| Q9UK23 | Golgi apparatus, Golgi stack membrane   | 0 |
| Q9HC57 | Secreted {ECO:0000305}.                 | 0 |

|        |                                         |   |
|--------|-----------------------------------------|---|
| Q14019 | Cytoplasm {ECO:0000269 PubMed:11583571} | 1 |
| Q14694 | Cytoplasm {ECO:0000269 PubMed:20096447} | 0 |
| Q9H0B8 | Secreted {ECO:0000250}.                 | 0 |
| P49815 | Cytoplasm. Membrane; Peripheral membrar | 0 |
| O60304 | Nucleus {ECO:0000255 PROSITE-ProRule:PF | 1 |
| O00746 | Mitochondrion intermembrane space {ECO: | 0 |
| P33527 | Cell membrane {ECO:0000269 PubMed:16230 | 0 |
| P69849 | Membrane {ECO:0000305}; Single-pass ty  | 0 |
| Q9H6Q4 |                                         | 0 |
| Q2M296 |                                         | 0 |
| P51798 | Lysosome membrane {ECO:0000269 PubMed:1 | 1 |
| Q6PII5 |                                         | 0 |
| Q9BQD7 | Membrane {ECO:0000305}; Single-pass men | 0 |
| Q01650 | Apical cell membrane {ECO:0000269 PubMe | 0 |
| Q9UJH8 | Secreted {ECO:0000250}.                 | 0 |
| Q5XUX0 |                                         | 0 |
| Q9UNE7 | Cytoplasm {ECO:0000269 PubMed:10330192, | 0 |
| O75783 | Membrane; Multi-pass membrane protein.  | 0 |
| P53384 | Cytoplasm {ECO:0000255 HAMAP-Rule:MF_03 | 0 |
| P63279 | Nucleus. Cytoplasm. Note=Mainly nuclear | 0 |
| Q05996 | Processed zona pellucida sperm-binding  | 0 |
| Q14894 | Cytoplasm.                              | 1 |
| O00418 |                                         | 0 |
| O75808 |                                         | 0 |
| Q92508 | Endoplasmic reticulum membrane {ECO:000 | 0 |
| P15170 |                                         | 0 |
| Q15697 | Nucleus.                                | 0 |
| Q96AJ1 | Cell projection, cilium {ECO:0000269 Pu | 0 |
| Q5JPH6 | Mitochondrion matrix {ECO:0000250}.     | 0 |
| Q15370 | Nucleus {ECO:0000305}.                  | 0 |
| Q9UJY4 | Golgi apparatus, trans-Golgi network me | 0 |
| O94778 | Mitochondrion membrane {ECO:0000305 Pu  | 0 |
| Q9BRF8 | Cytoplasm {ECO:0000269 PubMed:23799035} | 0 |
| Q70CQ4 |                                         | 0 |
| P30519 | Microsome. Endoplasmic reticulum.       | 1 |
| Q96EY1 | Mitochondrion matrix. Cytoplasm, cytos  | 0 |
|        | be performed. View primary data.        | 0 |
| Q9NSC2 | Nucleus {ECO:0000250}.                  | 0 |
| O15405 | Nucleus {ECO:0000305}.                  | 0 |
| Q08999 | Nucleus.                                | 1 |
| Q15274 |                                         | 0 |
| Q86Y38 | Golgi apparatus membrane {ECO:0000269 P | 0 |
| Q9ULZ3 | Cytoplasm. Endoplasmic reticulum. Mitoc | 1 |
| Q68CZ1 | Cytoplasm. Cytoplasm, cytoskeleton, cil | 0 |
| P56270 | Nucleus {ECO:0000305 PubMed:10727212}.  | 0 |
| Q12846 | Cell membrane {ECO:0000305}; Single-pas | 0 |
| O14735 | Endoplasmic reticulum membrane {ECO:000 | 0 |
| O14874 | Mitochondrion matrix. Mitochondrion {EC | 1 |
| Q15155 | Membrane {ECO:0000305}; Single-pass ty  | 0 |
| Q9HBE5 | Membrane; Single-pass type I membrane p | 0 |
| Q6UXY8 | Membrane {ECO:0000305}; Multi-pass mem  | 0 |
| O43303 | Cytoplasm, cytoskeleton, microtubule or | 0 |
| Q7Z3J2 | Membrane {ECO:0000255}; Single-pass men | 0 |
| P23975 | Cell membrane {ECO:0000269 PubMed:20082 | 0 |
| O75150 | Nucleus {ECO:0000269 PubMed:10944455}.  | 0 |

|        |                                         |   |
|--------|-----------------------------------------|---|
| Q1ED39 | Nucleus, nucleolus {ECO:0000250}.       | 0 |
| O43315 | Cell membrane {ECO:0000269 PubMed:10564 | 1 |
| Q6PD74 | Cytoplasm, cytosol {ECO:0000269 PubMed: | 1 |
| Q86VS3 |                                         | 0 |
| P83111 | Mitochondrion {ECO:0000269 PubMed:11551 | 1 |
| Q9UQ03 | Cytoplasm, cytoskeleton {ECO:0000305}.  | 1 |
| P41240 | Cytoplasm {ECO:0000250}. Cell membrane  | 0 |
| Q15751 | Membrane; Peripheral membrane protein.  | 0 |
| Q15650 | Nucleus {ECO:0000269 PubMed:10454579, F | 0 |
| Q96DP5 | Mitochondrion {ECO:0000250}.            | 0 |
| Q13367 | Cytoplasmic vesicle, clathrin-coated ve | 1 |
| Q96GR2 | Cytoplasm {ECO:0000269 PubMed:10954726} | 0 |
| Q8TDY8 | Cell membrane {ECO:0000305}; Single-pas | 0 |
| P62491 | Cell membrane {ECO:0000269 PubMed:15304 | 0 |
| P09668 | Lysosome.                               | 1 |
| Q5W5X9 |                                         | 0 |
| Q5ZPR3 | Membrane {ECO:0000305}; Single-pass typ | 0 |
| P16930 |                                         | 0 |
| Q9BWH6 | Nucleus {ECO:0000250}.                  | 0 |
| Q9NSB8 | Cytoplasm {ECO:0000269 PubMed:25816005} | 0 |
| Q9H223 | Early endosome membrane {ECO:0000269 Pu | 0 |
| Q8NBN3 | Golgi apparatus membrane {ECO:0000269 F | 1 |
| Q9H2Y7 | Nucleus, nucleolus {ECO:0000250 UniProt | 0 |
| O94986 | Cytoplasm, cytoskeleton, microtubule or | 0 |
| Q8TF62 | Cell membrane {ECO:0000269 PubMed:20947 | 0 |
| Q8N5C7 |                                         | 0 |
| O60320 | Membrane {ECO:0000305}; Multi-pass memt | 0 |
| Q06547 | Nucleus.                                | 1 |
| Q07157 | Cell membrane {ECO:0000269 PubMed:77983 | 1 |
| Q96LC9 |                                         | 0 |
| Q8TDJ6 | Cytoplasmic vesicle, secretory vesicle, | 0 |
| Q8WXD2 | Cytoplasmic vesicle, secretory vesicle  | 0 |
| Q9NVM6 | Cytoplasm {ECO:0000250 UniProtKB:D3ZSC8 | 0 |
| O75822 | Cytoplasm {ECO:0000255 HAMAP-Rule:MF_03 | 0 |
| Q96JI7 | Cytoplasm, cytosol {ECO:0000269 PubMed: | 0 |
| Q96L33 | Cell membrane {ECO:0000250 UniProtKB:Q9 | 0 |
| Q9P253 | Late endosome membrane {ECO:0000269 Pub | 0 |
| O43482 | Nucleus {ECO:0000269 PubMed:17199038}.  | 1 |
| O14863 | Endosome membrane {ECO:0000305}; Multi- | 0 |
| Q9UL45 | Cytoplasm {ECO:0000269 PubMed:12019270, | 0 |
|        | Nucleus.                                | 1 |
| Q96BR1 | Cytoplasmic vesicle {ECO:0000250}. Earl | 1 |
| Q9UIJ5 | Membrane {ECO:0000305}; Multi-pass memt | 0 |
| Q9HAWO | Nucleus {ECO:0000269 PubMed:17505538}.  | 1 |
| Q9UPQ4 | Cytoplasm {ECO:0000269 PubMed:25263439} | 0 |
| Q8TCF1 | Cytoplasm, Stress granule {ECO:0000269  | 0 |
| P56715 | Cytoplasm, cytoskeleton, cilium axoneme | 0 |
| P00918 | Cytoplasm {ECO:0000269 PubMed:15990874} | 0 |
| Q9NPG1 | Membrane; Multi-pass membrane protein.  | 0 |
| O43353 | Cytoplasm {ECO:0000305}.                | 0 |
| O60934 | Nucleus {ECO:0000269 PubMed:10783165, F | 1 |
| Q9Y646 | Endoplasmic reticulum {ECO:0000269 PubM | 0 |
| Q16698 | Mitochondrion {ECO:0000269 PubMed:78184 | 1 |
| P05937 |                                         | 0 |
| Q9NX62 | Golgi apparatus, trans-Golgi network me | 1 |

|        |                                         |   |
|--------|-----------------------------------------|---|
| Q8N474 | Secreted. Note=Cell membrane or extrace | 0 |
| Q86VI4 | Endomembrane system {ECO:0000269 PubMed | 0 |
| Q96B02 | Nucleus {ECO:0000269 PubMed:16368532, F | 0 |
| Q9H841 | Membrane {ECO:0000305}; Multi-pass mem  | 0 |
| O14920 | Cytoplasm {ECO:0000269 PubMed:20797629} | 0 |
| P00750 | Secreted, extracellular space.          | 0 |
| Q9HDC5 | Cell membrane {ECO:0000250}; Peripheral | 0 |
| Q9UBT3 | Secreted.                               | 0 |
| Q13188 | Cytoplasm {ECO:0000250}. Nucleus {ECO:( | 0 |
| Q8TB36 | Mitochondrion outer membrane {ECO:00002 | 1 |
| P61019 | Endoplasmic reticulum-Golgi intermediat | 0 |
| P60228 | Cytoplasm. Nucleus, PML body.           | 0 |
| Q15006 | Nucleus {ECO:0000250}. Cytoplasm {ECO:( | 0 |
| Q6NXG1 | Nucleus {ECO:0000269 PubMed:19285943}.  | 1 |
| O95388 | Secreted.                               | 0 |
| Q92597 | Cytoplasm, cytosol. Cytoplasm, cytoskel | 0 |
| Q96GY0 |                                         | 0 |
| P13232 | Secreted.                               | 0 |
| Q9NVT9 |                                         | 0 |
| Q9UHF7 | Nucleus {ECO:0000269 PubMed:12885770}.  | 1 |
| Q07617 | Cytoplasm {ECO:0000269 PubMed:11517287, | 1 |
| P61601 |                                         | 0 |
| P57768 | Early endosome membrane; Peripheral men | 0 |
| P57764 | Gasdermin-D: Cytoplasm, cytosol {ECO:00 | 0 |
| Q13630 |                                         | 0 |
| Q53H96 | Cytoplasm {ECO:0000269 PubMed:23024808} | 0 |
| P29692 | Isoform 2: Nucleus {ECO:0000269 PubMed: | 0 |
| P27216 | Apical cell membrane {ECO:0000269 PubMe | 0 |
| Q14534 | Microsome membrane {ECO:0000269 PubMed: | 1 |
| Q9H788 | Cytoplasm {ECO:0000269 PubMed:18641339} | 1 |
| Q9NVR2 | Nucleus {ECO:0000269 PubMed:16239144, F | 0 |
| Q8IV48 | Cytoplasm {ECO:0000269 PubMed:16912046} | 0 |
| Q15043 | Cell membrane {ECO:0000269 PubMed:27231 | 0 |
| O95214 | Membrane {ECO:0000305}; Multi-pass mem  | 0 |
| O00399 | Cytoplasm, cytoskeleton {ECO:0000250}.  | 0 |
| Q9Y3T6 |                                         | 0 |
| P00390 | Isoform Mitochondrial: Mitochondrion. ; | 0 |
| O00220 | Membrane; Single-pass type I membrane p | 0 |
| O00124 | Endoplasmic reticulum membrane {ECO:00  | 1 |
| P62714 | Cytoplasm {ECO:0000269 PubMed:16541025} | 0 |
| Q86X53 |                                         | 0 |
| P07197 |                                         | 0 |
| Q13454 | Endoplasmic reticulum membrane {ECO:00  | 0 |
| O15013 |                                         | 0 |
| Q8TBB5 |                                         | 0 |
| P33991 | Nucleus {ECO:0000250}.                  | 1 |
| Q99965 | Membrane; Single-pass type I membrane p | 0 |
| Q13510 | Lysosome {ECO:0000269 PubMed:12764132}. | 0 |
| O60238 | Nucleus envelope. Endoplasmic reticulum | 0 |
| O00754 | Lysosome.                               | 1 |
| O15554 | Cell membrane {ECO:0000269 PubMed:26148 | 0 |
| Q02818 | Golgi apparatus, cis-Golgi network mem  | 0 |
| Q9UQ10 |                                         | 0 |
| P13807 |                                         | 0 |
| Q92918 |                                         | 0 |

|                       |                                          |   |
|-----------------------|------------------------------------------|---|
|                       | Secreted.                                | 0 |
| Q13011                | Mitochondrion {ECO:0000250}. Peroxisome  | 1 |
| P14866                | Nucleus, nucleoplasm {ECO:0000269 PubMed | 0 |
| P01229                | Secreted.                                | 0 |
| PODN86                | Secreted {ECO:0000269 PubMed:16123088}.  | 0 |
| P04350                | Cytoplasm, cytoskeleton.                 | 0 |
| Q9NP81                | Mitochondrion matrix {ECO:0000250 UniPr  | 0 |
| P08621                | Nucleus speckle {ECO:0000269 PubMed:176  | 1 |
| 096005                | Membrane {ECO:0000305}; Multi-pass mem   | 0 |
| Q01201                | Nucleus {ECO:0000269 PubMed:20873783}.   | 0 |
| Q8N2M8                | Nucleus {ECO:0000250}.                   | 0 |
| 075864                |                                          | 0 |
| P55899                | Cell membrane {ECO:0000250 UniProtKB:P1  | 0 |
| Q9NWS0                |                                          | 0 |
| P06732                | Cytoplasm.                               | 1 |
| Q6ZSZ5                | Cytoplasm {ECO:0000269 PubMed:15558029}  | 0 |
| Q8WUF5                | Cytoplasm {ECO:0000269 PubMed:15489900}  | 0 |
| Q96HA9                | Peroxisome membrane {ECO:0000269 PubMec  | 0 |
| P18074                | Nucleus {ECO:0000269 PubMed:20797633, F  | 0 |
| Q8TEK3                | Nucleus {ECO:0000269 PubMed:15851025}.   | 0 |
| Q9NW61                |                                          | 0 |
| Q9P2U7                | Cytoplasmic vesicle, secretory vesicle,  | 0 |
| Q6P597                | Cytoplasm, cytoskeleton {ECO:0000250 Ur  | 0 |
| P11049                | Membrane; Multi-pass membrane protein.   | 0 |
| Q15428                | Nucleus {ECO:0000255 PROSITE-ProRule:PF  | 1 |
| Q9UK85                | Secreted {ECO:0000250 UniProtKB:Q9QZL9}  | 0 |
| P54368                |                                          | 0 |
| Q9NXH9                |                                          | 0 |
| 060499                | Golgi apparatus membrane {ECO:0000305};  | 0 |
| P06734                | Cell membrane; Single-pass type II mem   | 0 |
| Q09013                | Endoplasmic reticulum membrane {ECO:000  | 0 |
| Q9H2X3                | Isoform 1: Cell membrane {ECO:0000305};  | 0 |
| Q9H0K4                |                                          | 0 |
| Q9HA65                | Cytoplasmic vesicle, autophagosome {ECO  | 0 |
| Q96RQ9                | Isoform 1: Lysosome {ECO:0000250}.; Iso  | 0 |
| P13994                |                                          | 0 |
| Q86YD1                | Cell membrane. Cytoplasm, perinuclear r  | 0 |
| Q9UNW9                | Nucleus {ECO:0000250}.                   | 1 |
| 043765                | Cytoplasm {ECO:0000269 PubMed:16580629}  | 0 |
| be performed. View pr | Secreted {ECO:0000305}.                  | 0 |
| Q71SY5                | Nucleus {ECO:0000269 PubMed:14657022}.   | 0 |
| Q13487                | Nucleus.                                 | 1 |
| Q9UNZ5                |                                          | 0 |
| 043615                | Mitochondrion inner membrane {ECO:00002  | 1 |
| Q9Y6R9                |                                          | 0 |
| Q9NVP2                | Nucleus {ECO:0000269 PubMed:12842904}.   | 1 |
| P13805                |                                          | 0 |
| Q8IV63                | Nucleus {ECO:0000269 PubMed:14645249}.   | 0 |
| Q9Y421                | Isoform 1: Nucleus.; Isoform 2: Nucleus  | 0 |
| Q9UPN7                | Cytoplasm {ECO:0000269 PubMed:16769727,  | 0 |
| Q9H6X5                |                                          | 0 |
| 095402                | Nucleus {ECO:0000305}.                   | 1 |
| 095897                | Secreted {ECO:0000269 PubMed:21228389}.  | 0 |
| Q86YV0                | Cytoplasm {ECO:0000269 PubMed:25652366}  | 1 |
| 043823                | Nucleus {ECO:0000269 PubMed:19277197}.   | 0 |

|        |                                         |   |
|--------|-----------------------------------------|---|
| Q9H6B9 | Microsome membrane {ECO:0000305 PubMed: | 0 |
| A1L0T0 | Membrane; Single-pass membrane protein. | 0 |
| Q96HQ0 | Nucleus {ECO:0000305}.                  | 0 |
| Q6ZW31 |                                         | 0 |
| P31944 | Cytoplasm {ECO:0000269 PubMed:11175259, | 1 |
| P48664 | Cell membrane {ECO:0000269 PubMed:77918 | 0 |
| Q9UQB9 | Nucleus. Chromosome. Chromosome, centro | 0 |
| 095707 | Nucleus, nucleolus {ECO:0000269 PubMed: | 0 |
| P24864 | Nucleus {ECO:0000269 PubMed:7739542}.   | 0 |
| 094763 | Nucleus. Cytoplasm. Mitochondrion. Cell | 0 |
| 014737 |                                         | 0 |
| Q96NW4 | Early endosome {ECO:0000269 PubMed:1652 | 0 |
| P62249 |                                         | 0 |
| Q3ZCQ8 | Mitochondrion inner membrane {ECO:00002 | 0 |
| P22087 | Nucleus, nucleolus {ECO:0000269 PubMed: | 1 |
| Q9Y463 | Nucleus.                                | 0 |
| Q05315 | Cytoplasm, cytosol {ECO:0000269 PubMed: | 1 |
| Q9H8S5 |                                         | 0 |
| P06744 | Cytoplasm {ECO:0000269 PubMed:11437381} | 0 |
| P31751 | Cytoplasm. Nucleus. Cell membrane; Peri | 0 |
| Q8IV08 | Endoplasmic reticulum membrane {ECO:000 | 0 |
| Q9BXM0 | Isoform 1: Cell membrane {ECO:0000250 U | 0 |
| Q8N2W9 | Nucleus, PML body {ECO:0000269 PubMed:1 | 0 |
| Q9Y6R0 | Cytoplasm {ECO:0000250}. Note=Symmetric | 0 |
| Q14213 | Secreted {ECO:0000269 PubMed:9342359}.  | 0 |
| Q9BW85 | Nucleus {ECO:0000255 HAMAP-Rule:MF_0322 | 0 |
| Q96IW2 |                                         | 0 |
| Q99426 | Cytoplasm {ECO:0000269 PubMed:15831477, | 0 |
| Q9BTV5 | Cytoplasm, cytoskeleton, microtubule or | 0 |
| P36954 | Nucleus, nucleolus {ECO:0000269 PubMed: | 0 |
| Q9UPR6 |                                         | 0 |
| Q15758 | Cell membrane {ECO:0000269 PubMed:87025 | 1 |
| Q9BZL6 | Cytoplasm {ECO:0000269 PubMed:17962809} | 0 |
| 095049 | Cell membrane {ECO:0000269 PubMed:21411 | 0 |
| P51693 | Cell membrane; Single-pass type I membr | 0 |
| Q8WUQ7 | Nucleus {ECO:0000269 PubMed:20829348}.  | 0 |
| Q9Y3X0 |                                         | 0 |
| Q9BUJ2 | Nucleus {ECO:0000269 PubMed:11513728, F | 1 |
| Q9UM11 | Isoform 2: Nucleus.; Isoform 3: Cytopla | 0 |
| Q96PG8 | Note=Contrary to isoforms 1 and 2, iso  | 0 |
| P01137 | Latency-associated peptide: Secreted, e | 0 |
| Q9NW81 | Mitochondrion {ECO:0000250 UniProtKB:Q9 | 0 |
| 060664 | Cytoplasm {ECO:0000269 PubMed:15545278, | 0 |
| Q7Z406 |                                         | 0 |
| Q9BYD3 | Mitochondrion {ECO:0000269 PubMed:25278 | 0 |
| Q9NYZ4 | Membrane; Single-pass type I membrane p | 0 |
| P11912 | Cell membrane; Single-pass type I membr | 0 |
| Q9NZM5 | Nucleus, nucleolus {ECO:0000269 PubMed: | 0 |
| Q9UMF0 | Membrane; Single-pass type I membrane p | 0 |
| P38117 | Mitochondrion matrix {ECO:0000305 PubMe | 1 |
| P20138 | Isoform CD33M: Cell membrane {ECO:00002 | 0 |
| P06731 | Cell membrane {ECO:0000269 PubMed:10864 | 0 |
| 043186 | Nucleus {ECO:0000255 PROSITE-ProRule:PF | 1 |
| Q9NWX8 | Cytoplasm {ECO:0000269 PubMed:19261749, | 0 |
| P29597 |                                         | 0 |



|        |                                         |   |
|--------|-----------------------------------------|---|
| Q06520 | Cytoplasm.                              | 1 |
| Q16543 | Cytoplasm {ECO:0000269 PubMed:9482106}. | 1 |
| P54920 | Cell membrane {ECO:0000269 PubMed:15980 | 0 |
| Q9UI14 | Cell membrane {ECO:0000250 UniProtKB:O3 | 0 |
| P13637 | Cell membrane {ECO:0000269 PubMed:77118 | 0 |
| Q99687 | Nucleus {ECO:0000250 UniProtKB:P97368}. | 0 |
| Q9BYD5 | Cytoplasm. Note=Constituent of the scaf | 0 |
| Q7Z7M0 | Membrane {ECO:0000305}; Single-pass typ | 0 |
| P24390 | Golgi apparatus membrane {ECO:0000269 F | 0 |
| Q99418 | Cell membrane {ECO:0000269 PubMed:17398 | 0 |
| Q9BQ67 | Nucleus, nucleolus {ECO:0000269 PubMed: | 0 |
| 015399 | Cell membrane {ECO:0000269 PubMed:26878 | 0 |
| 095473 | Membrane; Multi-pass membrane protein.  | 0 |
| Q9Y240 | Cytoplasm {ECO:0000269 PubMed:11803813} | 0 |
| Q96M63 | Cell projection, cilium {ECO:0000269 Pt | 0 |
| Q9Y2G2 | Cytoplasm {ECO:0000269 PubMed:15030775} | 1 |
| P18858 | Nucleus.                                | 0 |
| 043699 | Isoform 1: Cell membrane; Single-pass t | 0 |
| Q9Y473 | Cytoplasm. Nucleus.                     | 0 |
| Q9UP65 | Membrane {ECO:0000269 PubMed:10085124,  | 0 |
| 015389 | Membrane; Single-pass type I membrane p | 0 |
| Q9NP86 | Cytoplasm {ECO:0000269 PubMed:19338761} | 0 |
| Q92839 | Membrane {ECO:0000305}; Multi-pass memt | 0 |
| 095716 | Cell membrane {ECO:0000305}; Lipid-anch | 0 |
| Q6UW68 | Membrane {ECO:0000269 PubMed:20589834}; | 0 |
| Q96GM1 | Membrane {ECO:0000305}; Multi-pass memt | 0 |
| Q2M2I3 |                                         | 0 |
| Q5U651 | Cytoplasm, perinuclear region {ECO:0000 | 0 |
| Q9NSA1 | Secreted {ECO:0000305}.                 | 0 |
| 015382 | Isoform A: Mitochondrion.; Isoform B: ( | 1 |
| Q8N344 | Nucleus {ECO:0000255 PROSITE-ProRule:PF | 0 |
| Q9H4M7 | Cytoplasm {ECO:0000305}. Membrane {ECO: | 0 |
| 014787 | Cytoplasm {ECO:0000250}. Nucleus {ECO:( | 0 |
| Q9Y284 | Membrane {ECO:0000305}; Multi-pass memt | 0 |
| Q92947 | Mitochondrion matrix.                   | 1 |
| 075023 | Membrane; Single-pass type I membrane p | 0 |
| Q13351 | Nucleus {ECO:0000269 PubMed:21055716, F | 0 |
| 000115 | Lysosome.                               | 0 |
| Q9Y2H9 | Cell membrane {ECO:0000250 UniProtKB:Q9 | 0 |
| Q96BZ8 |                                         | 0 |
| Q8WWY3 | Nucleus {ECO:0000269 PubMed:12444105, F | 1 |
| P0C1Z6 | Nucleus {ECO:0000269 PubMed:18922472}.  | 0 |
| P52333 | Endomembrane system {ECO:0000250}; Peri | 1 |
| Q02543 |                                         | 0 |
| Q92911 | Membrane; Multi-pass membrane protein.  | 0 |
| Q8TBH0 |                                         | 0 |
| 000459 |                                         | 0 |
| P20336 | Cytoplasm, cytosol {ECO:0000250 UniProt | 0 |
| Q08493 | Cell projection, cilium {ECO:0000250}.  | 0 |
| Q9NPH2 | Cytoplasm {ECO:0000250}.                | 1 |
| P55199 | Nucleus {ECO:0000269 PubMed:11418481, F | 0 |
| Q6UUV9 | Cytoplasm {ECO:0000269 PubMed:15589160} | 0 |
| 000322 | Membrane; Multi-pass membrane protein.  | 0 |
| 014579 | Cytoplasm {ECO:0000250}. Golgi apparatu | 1 |

|        |                                         |   |
|--------|-----------------------------------------|---|
| Q9Y6V7 |                                         | 0 |
| P20648 | Cell membrane; Multi-pass membrane prot | 0 |
| Q6NXE6 |                                         | 0 |
| O14556 | Cytoplasm {ECO:0000250}.                | 1 |
| P20916 | Cell membrane {ECO:0000269 PubMed:26179 | 0 |
| Q9UK28 | Golgi apparatus membrane {ECO:0000305 F | 0 |
| Q86X29 | Cell membrane {ECO:0000305}; Single-pas | 0 |
| Q9BQD3 | Lysosome membrane {ECO:0000305 PubMed:2 | 0 |
| Q14318 | Mitochondrion {ECO:0000269 PubMed:16176 | 1 |
| Q8IWZ8 | Nucleus {ECO:0000305}.                  | 0 |
| P05981 | Cell membrane {ECO:0000269 PubMed:18856 | 0 |
| P17017 | Nucleus {ECO:0000305}.                  | 0 |
| Q9BYU1 | Nucleus {ECO:0000255 PROSITE-ProRule:PF | 0 |
| P50548 | Nucleus.                                | 0 |
| P49840 |                                         | 0 |
| Q9HD20 | Endoplasmic reticulum membrane {ECO:000 | 0 |
| Q6ZN55 | Nucleus {ECO:0000305}.                  | 0 |
| O60292 | Apical cell membrane {ECO:0000269 PubMe | 0 |
| Q03923 | Nucleus {ECO:0000269 PubMed:9839802}.   | 0 |
| O95571 | Cytoplasm {ECO:0000269 PubMed:12398897} | 0 |
| Q8NFZ8 | Membrane {ECO:0000305}; Single-pass typ | 0 |
| Q9HOW8 |                                         | 0 |
| Q8NBF6 | Recycling endosome {ECO:0000269 PubMed: | 0 |
| Q96NLO |                                         | 0 |
| A5D8W1 | Cell projection, cilium {ECO:0000250 Ur | 0 |
| A4D1E9 | Nucleus, nucleolus {ECO:0000269 PubMed: | 0 |
| O43374 | Cytoplasm, cytosol {ECO:0000269 PubMed: | 0 |
| Q00534 | Cytoplasm. Nucleus. Cell projection, ru | 0 |
| O75439 | Mitochondrion matrix {ECO:0000250}.     | 0 |
| Q99543 | Nucleus {ECO:0000269 PubMed:21179169}.  | 0 |
| P48307 | Secreted.                               | 0 |
| P43490 | Nucleus {ECO:0000269 PubMed:24130902}.  | 0 |
| Q3B726 | Nucleus, nucleolus {ECO:0000250}.       | 0 |
| P48736 | Cytoplasm {ECO:0000269 PubMed:12163475} | 1 |
| Q15166 | Secreted, extracellular space {ECO:0000 | 0 |
| Q15165 | Membrane {ECO:0000269 PubMed:11579088}; | 0 |
| P26012 | Cell membrane {ECO:0000269 PubMed:19180 | 1 |
| O60381 | Nucleus {ECO:0000255 PROSITE-ProRule:PF | 0 |
| O95620 |                                         | 0 |
| Q02446 | Nucleus.                                | 0 |
| A4D1P6 | Early endosome membrane {ECO:0000269 Pt | 0 |
| Q96DT5 | Cytoplasm, cytoskeleton, cilium axoneme | 0 |
| Q75N03 | Nucleus speckle {ECO:0000269 PubMed:241 | 0 |
| P56178 | Nucleus {ECO:0000255 PROSITE-ProRule:PF | 0 |
| P58546 | Cytoplasm {ECO:0000305}. Nucleus {ECO:( | 0 |
| P21246 | Secreted {ECO:0000269 PubMed:1733956, F | 0 |
| Q9NZW5 | Membrane {ECO:0000250}; Peripheral memt | 0 |
| O60443 | Gasdermin-E, N-terminal: Cell membrane  | 0 |
| Q9HBG4 | Apical cell membrane; Multi-pass membra | 0 |
| Q7Z2W4 | Isoform 1: Cytoplasm {ECO:0000250 UniPr | 0 |
| A0AVF1 | Cell projection, cilium {ECO:0000250 Ur | 0 |
| Q02218 | Mitochondrion matrix {ECO:0000305 PubMe | 0 |
| Q9HCQ7 | Secreted.                               | 0 |
| O75689 | Nucleus. Cytoplasm. Note=Recruited to t | 0 |
| O14948 | Nucleus {ECO:0000255 PROSITE-ProRule:PF | 0 |

|        |                                         |   |
|--------|-----------------------------------------|---|
| Q71UI9 | Nucleus {ECO:0000250}. Chromosome {ECO: | 1 |
| P51636 | Nucleus. Cytoplasm. Golgi apparatus men | 0 |
| Q03135 | Golgi apparatus membrane; Peripheral me | 0 |
| P08581 | Membrane; Single-pass type I membrane p | 0 |
| Q9H0A6 | Cytoplasm {ECO:0000269 PubMed:11890671} | 0 |
| Q8WVP7 | Membrane {ECO:0000250}; Multi-pass memt | 0 |
| 075190 | Cytoplasm, perinuclear region {ECO:0000 | 1 |
| 043365 | Nucleus.                                | 0 |
| Q8NES3 | Golgi apparatus membrane {ECO:0000250}; | 0 |
| P31267 | Nucleus.                                | 0 |
| Q6PJG6 | Nucleus {ECO:0000269 PubMed:16452482, F | 0 |
| Q6IPM2 | Cell projection, cilium membrane {ECO:( | 0 |
| P41587 | Cell membrane; Multi-pass membrane prot | 0 |
| 095859 | Cell membrane {ECO:0000250}; Multi-pas  | 0 |
| Q04837 | Mitochondrion {ECO:0000269 PubMed:1806  | 1 |
| A4DOV7 |                                         | 0 |
| P31937 | Mitochondrion.                          | 1 |
| Q86VP1 |                                         | 0 |
| Q9H3G5 |                                         | 0 |
| P52757 | Membrane {ECO:0000305}; Peripheral memt | 0 |
| Q13322 | Cytoplasm {ECO:0000250}. Note=When com  | 0 |
| Q8NFV4 |                                         | 0 |
| 075128 | Cell membrane {ECO:0000250}; Peripheral | 0 |
| Q9NWM8 | Endoplasmic reticulum lumen {ECO:00002  | 0 |
| Q16623 | Cytoplasmic vesicle, secretory vesicle, | 0 |
| P41250 | Cytoplasm {ECO:0000269 PubMed:17035524} | 0 |
| Q4G0A6 |                                         | 0 |
| P42575 |                                         | 0 |
| Q9Y6H1 | Nucleus {ECO:0000269 PubMed:23303788}.  | 0 |
| P04792 | Cytoplasm {ECO:0000269 PubMed:10777697, | 0 |
| P47972 | Secreted {ECO:0000250}.                 | 0 |
| Q13442 |                                         | 0 |
| P41223 | Nucleus {ECO:0000269 PubMed:25091737, F | 0 |
| 075127 | Mitochondrion {ECO:0000269 PubMed:19651 | 0 |
| P17029 | Nucleus {ECO:0000255 PROSITE-ProRule:PF | 0 |
| P55884 | Cytoplasm {ECO:0000255 HAMAP-Rule:MF_0  | 0 |
| Q9Y5X2 | Early endosome membrane {ECO:0000269 P  | 0 |
| P36639 | Isoform p18: Cytoplasm, cytosol {ECO:00 | 0 |
| P23471 | Isoform 1: Cell membrane; Single-pass t | 0 |
| P49848 | Nucleus.; Isoform 4: Nucleus {ECO:0000  | 0 |
| 000401 | Cytoplasm, cytoskeleton {ECO:0000269 P  | 0 |
| Q2M3T9 | Membrane {ECO:0000305}; Multi-pass memt | 0 |
| P38567 | Cell membrane; Lipid-anchor, GPI-anch   | 0 |
| Q13155 | Cytoplasm, cytosol {ECO:0000269 PubMed: | 0 |
| Q9UP52 | Cell membrane; Single-pass type II memt | 0 |
| Q9NQT6 | Cytoplasm, cytoskeleton {ECO:0000250}.  | 1 |
| 075425 | Membrane {ECO:0000305}; Multi-pass memt | 0 |
| Q15113 | Secreted.                               | 0 |
| 075426 |                                         | 0 |
| 096001 |                                         | 0 |
| Q9NW13 | Nucleus, nucleolus {ECO:0000269 PubMed: | 1 |
| P20839 | Cytoplasm {ECO:0000255 HAMAP-Rule:MF_0  | 0 |
| 095081 |                                         | 0 |
| Q9Y4Y9 | Nucleus {ECO:0000269 PubMed:10523320, F | 0 |
| P05121 | Secreted {ECO:0000269 PubMed:2430793}.  | 0 |

|        |                                         |   |
|--------|-----------------------------------------|---|
| P61966 | Golgi apparatus {ECO:0000269 PubMed:973 | 0 |
| Q86VF5 | Endoplasmic reticulum membrane {ECO:000 | 0 |
| Q9NS00 | Membrane {ECO:0000250}; Single-pass typ | 0 |
| O60568 | Rough endoplasmic reticulum {ECO:000026 | 0 |
| P35244 | Nucleus.                                | 0 |
| O43257 | Nucleus {ECO:0000269 PubMed:17892483}.  | 0 |
| Q86VQ1 |                                         | 0 |
| Q9BUA6 |                                         | 0 |
| O94880 |                                         | 0 |
| Q16656 | Nucleus.                                | 0 |
| Q9NUM4 | Late endosome membrane; Single-pass typ | 0 |
| Q15910 | Nucleus {ECO:0000269 PubMed:12101246, F | 1 |
| Q9BYV8 | Cytoplasm, cytoskeleton, microtubule or | 0 |
| O60290 | Nucleus {ECO:0000305}.                  | 0 |
| Q6FHJ7 | Secreted {ECO:0000269 PubMed:19480240}. | 0 |
| P50222 | Nucleus {ECO:0000269 PubMed:19266028, F | 1 |
| O95857 | Membrane {ECO:0000305}; Multi-pass memt | 0 |
| O95994 | Secreted {ECO:0000269 PubMed:15834940}. | 0 |
| P35869 | Cytoplasm {ECO:0000250 UniProtKB:P30561 | 1 |
| Q9NX63 | Mitochondrion inner membrane {ECO:00002 | 0 |
| Q9UG22 | Lipid droplet {ECO:0000269 PubMed:23454 | 0 |
| Q3YBM2 | Nucleus membrane {ECO:0000250}; Multi-p | 0 |
| P10071 | Nucleus. Cytoplasm. Cell projection, ci | 0 |
| P25787 | Cytoplasm {ECO:0000269 PubMed:12181345} | 0 |
| Q9BYC8 | Mitochondrion {ECO:0000269 PubMed:25278 | 0 |
| Q9GZY4 | Mitochondrion inner membrane {ECO:00002 | 0 |
| P53004 | Cytoplasm.                              | 0 |
| Q8TCY9 | Cytoplasm {ECO:0000269 PubMed:12082552, | 0 |
| Q9NWD8 | Membrane {ECO:0000305}; Multi-pass memt | 0 |
| Q15382 | Endomembrane system {ECO:0000269 PubMec | 0 |
| Q9UGJ0 |                                         | 0 |
| Q8IUX7 | Isoform 1: Secreted {ECO:0000250 UniPro | 0 |
| P49005 | Nucleus {ECO:0000269 PubMed:22801543}.  | 0 |
| Q01449 |                                         | 0 |
| P35557 | Cytoplasm {ECO:0000269 PubMed:10456334, | 0 |
| Q9BQE9 |                                         | 0 |
| O15498 | Cytoplasm, cytosol. Cytoplasmic vesicle | 0 |
| Q7Z4T8 | Late endosome membrane {ECO:0000305}; S | 1 |
| Q9UDT6 | Cytoplasm {ECO:0000250 UniProtKB:055156 | 1 |
| Q15056 | Cytoplasm, perinuclear region {ECO:0000 | 0 |
| P53667 | Cytoplasm. Nucleus. Cell projection, la | 0 |
| Q8N4H0 |                                         | 0 |
| P43005 | Cell membrane {ECO:0000269 PubMed:21123 | 0 |
| O75072 | Golgi apparatus membrane {ECO:0000269 F | 0 |
| Q9BXM9 |                                         | 0 |
| Q9BZ76 | Isoform 1: Cell membrane {ECO:0000305}; | 0 |
| Q9Y657 | Nucleus {ECO:0000269 PubMed:16098913, F | 0 |
| Q9NWW6 |                                         | 0 |
| Q9H330 | Membrane {ECO:0000305}; Multi-pass memt | 0 |
| Q8WUY3 | Cytoplasm {ECO:0000269 PubMed:16288218} | 0 |
| Q9H1U4 | Membrane {ECO:0000305}; Single-pass typ | 0 |
| Q14142 | Mitochondrion outer membrane {ECO:00002 | 0 |
| Q92828 |                                         | 0 |
| P36897 | Cell membrane {ECO:0000269 PubMed:25893 | 0 |
| P60468 | Endoplasmic reticulum membrane; Single- | 0 |

|        |                                         |   |
|--------|-----------------------------------------|---|
| P01031 | Secreted.                               | 0 |
| P20774 | Secreted, extracellular space, extracel | 0 |
| Q9BXN1 | Secreted, extracellular space, extracel | 0 |
| O94769 | Secreted, extracellular space, extracel | 0 |
| Q9UPM6 | Nucleus {ECO:0000305}.                  | 0 |
| Q14914 | Cytoplasm.                              | 1 |
| Q6UWL2 | Membrane {ECO:0000305}; Single-pass typ | 0 |
| P02760 | Secreted.                               | 0 |
| Q05193 | Cytoplasm {ECO:0000269 PubMed:15703209} | 1 |
| P17813 | Cell membrane {ECO:0000269 PubMed:10545 | 0 |
| P00568 | Cytoplasm.                              | 1 |
| Q7L3B6 | Cytoplasm {ECO:0000269 PubMed:11413142} | 0 |
| Q9HBL7 | Cell membrane {ECO:0000269 PubMed:21940 | 0 |
| Q9NVG8 | Membrane {ECO:0000250 UniProtKB:Q8R3D1} | 0 |
| Q4ADV7 | Cytoplasm, cytosol {ECO:0000269 PubMed: | 0 |
| Q8NF50 | Cytoplasm {ECO:0000269 PubMed:28028151} | 0 |
| Q14678 | Cell projection, ruffle membrane {ECO:( | 0 |
| Q12926 |                                         | 0 |
| P62166 | Golgi apparatus {ECO:0000269 PubMed:175 | 0 |
| Q5JUK3 | Cell membrane {ECO:0000250}; Multi-pass | 0 |
| Q16790 | Nucleus {ECO:0000269 PubMed:8486430}. N | 0 |
| Q96I24 | Nucleus {ECO:0000305}.                  | 0 |
| P17643 | Melanosome membrane {ECO:0000250 UniPro | 0 |
| Q92546 | Cytoplasm, cytosol {ECO:0000269 PubMed: | 0 |
| O75970 | Cell membrane; Peripheral membrane prot | 0 |
| O95786 | Cytoplasm. Cell projection, ruffle memk | 0 |
| O60869 | Cytoplasm. Nucleus. Note=Also nuclear u | 0 |
| O14986 | Endomembrane system {ECO:0000250}. Note | 0 |
| Q8NEA6 | Nucleus {ECO:0000250}.                  | 0 |
| Q99933 | Isoform 1: Nucleus. Cytoplasm. Note=Is  | 0 |
| Q13905 | Early endosome {ECO:0000269 PubMed:1772 | 0 |
| Q9NQX5 | Membrane {ECO:0000305}; Single-pass men | 0 |
| Q7Z333 | Nucleus {ECO:0000269 PubMed:17562789, F | 0 |
| Q99962 | Cytoplasm {ECO:0000250 UniProtKB:035179 | 0 |
| P41222 | Rough endoplasmic reticulum {ECO:000026 | 0 |
| Q9BZC7 | Endosome membrane {ECO:0000269 PubMed:1 | 0 |
| Q15464 | Cytoplasm. Cell membrane; Peripheral me | 0 |
| Q5VST6 | Cell membrane {ECO:0000250 UniProtKB:Q7 | 0 |
| Q9NQT5 | Cytoplasm {ECO:0000269 PubMed:17545563} | 0 |
| O76080 | Cytoplasm {ECO:0000250}.                | 0 |
| O14640 | Cell membrane {ECO:0000250}; Peripheral | 0 |
| O00151 | Cytoplasm {ECO:0000269 PubMed:10861853, | 0 |
| Q5T5M9 |                                         | 0 |
| P23771 | Nucleus.                                | 1 |
| Q5VV63 | Membrane {ECO:0000305}; Single-pass typ | 0 |
| Q92902 |                                         | 0 |
| O14832 | Peroxisome.                             | 1 |
| Q9H2L5 |                                         | 0 |
| Q6XZF7 | Cytoplasm {ECO:0000269 PubMed:17015620} | 0 |
| Q7L804 | Cell projection, phagocytic cup {ECO:00 | 0 |
| P48061 | Secreted.                               | 0 |
| O75477 | Endoplasmic reticulum membrane {ECO:00  | 0 |
| Q14152 | Cytoplasm {ECO:0000255 HAMAP-Rule:MF_03 | 1 |
| Q9POL9 | Cell projection, cilium membrane {ECO:( | 0 |
| O60494 | Apical cell membrane {ECO:0000250 UniPr | 1 |

|        |                                         |   |
|--------|-----------------------------------------|---|
| 014717 | Nucleus {ECO:0000305}.                  | 0 |
| Q9BQ39 | Nucleus, nucleolus {ECO:0000269 PubMed: | 0 |
| P45983 | Cytoplasm {ECO:0000269 PubMed:21148294} | 0 |
| Q9Y6Y8 | Cytoplasmic vesicle, COPII-coated vesic | 0 |
| 095260 | Isoform ATE1-1: Nucleus {ECO:0000250 Ur | 0 |
| Q9NXX6 | Nucleus {ECO:0000269 PubMed:18086888}.  | 0 |
| Q9HB21 | Cytoplasm {ECO:0000269 PubMed:11802782, | 0 |
| Q9ULE6 | Cytoplasm, cytosol {ECO:0000269 PubMed: | 0 |
| Q8IZJ1 | Cell membrane {ECO:0000269 PubMed:25374 | 0 |
| Q9H251 | Cell membrane {ECO:0000305}; Single-pas | 0 |
| Q92563 | Secreted, extracellular space, extracel | 0 |
| Q9BPX6 | Mitochondrion inner membrane {ECO:00002 | 0 |
| P16298 | Cytoplasm {ECO:0000269 PubMed:19154138} | 0 |
| Q9H7U1 | Cytoplasm, cytoskeleton {ECO:0000250 Ur | 0 |
| P36894 | Cell membrane {ECO:0000250 UniProtKB:P  | 0 |
| Q9UNW1 | Endoplasmic reticulum lumen {ECO:00002  | 0 |
| P62736 | Cytoplasm, cytoskeleton.                | 0 |
| P38571 | Lysosome.                               | 1 |
| Q96RR1 | Mitochondrion matrix, mitochondrion nuc | 0 |
| Q9BRK4 | Cytoplasm. Cytoplasm, cytoskeleton, mic | 0 |
| Q9BWM7 | Mitochondrion membrane {ECO:0000269 Pub | 0 |
| Q96I82 | Secreted, extracellular space, extracel | 0 |
| P57775 |                                         | 0 |
| 075607 | Nucleus {ECO:0000269 PubMed:11722795}.  | 0 |
| Q92538 | Golgi apparatus, cis-Golgi network {ECO | 0 |
| Q5T5U3 | Golgi apparatus membrane; Peripheral me | 0 |
| Q9H467 | Cytoplasm {ECO:0000269 PubMed:17347654} | 0 |
| Q9UMX1 | Cytoplasm {ECO:0000269 PubMed:10559945, | 0 |
| Q9UPS8 |                                         | 0 |
| Q5T8D3 | Peroxisome membrane {ECO:0000250}; Sing | 1 |
| Q9H008 | Cytoplasm {ECO:0000269 PubMed:16430861} | 1 |
| Q92615 | Cytoplasm, cytosol {ECO:0000269 PubMed: | 0 |
| Q9BZE4 | Nucleus, nucleolus {ECO:0000269 PubMed: | 0 |
| Q9NVV4 | Cytoplasm {ECO:0000269 PubMed:18172165} | 0 |
| 076050 | Cytoplasm, perinuclear region {ECO:0000 | 0 |
| Q5TCZ1 | Cytoplasm. Cell projection, podosome. N | 0 |
| Q5JRX3 | Mitochondrion matrix {ECO:0000269 PubMe | 1 |
| P41279 | Cytoplasm {ECO:0000269 PubMed:1833717,  | 1 |
| 076003 | Cytoplasm, cytosol {ECO:0000305 PubMed: | 0 |
| Q8WY21 | Membrane; Single-pass type I membrane p | 0 |
| Q5VWN6 |                                         | 0 |
| Q9NQW7 | Cytoplasm {ECO:0000250}.                | 1 |
| Q9UQE7 | Nucleus {ECO:0000250 UniProtKB:Q9CW03}. | 0 |
| Q9UQ13 | Cytoplasm {ECO:0000269 PubMed:19684605, | 0 |
| Q00059 | Mitochondrion {ECO:0000269 PubMed:17377 | 1 |
| Q16204 | Cytoplasm. Cytoplasm, cytoskeleton {ECO | 1 |
| Q13617 |                                         | 0 |
| Q8ND76 | Cell membrane {ECO:0000269 PubMed:18060 | 0 |
| Q16763 |                                         | 0 |
| P46779 |                                         | 0 |
| Q9ULJ6 | Nucleus speckle {ECO:0000269 PubMed:146 | 0 |
| Q9UKB3 | Isoform a: Cytoplasm {ECO:0000269 PubMe | 1 |
| P30039 |                                         | 0 |
| Q8NG11 | Cell membrane {ECO:0000269 PubMed:26686 | 0 |
| 060347 |                                         | 0 |

|        |                                          |   |
|--------|------------------------------------------|---|
| Q9C075 |                                          | 0 |
| P05813 |                                          | 0 |
| Q9Y2X7 | Cytoplasm {ECO:0000269 PubMed:11896197}  | 1 |
| P84098 |                                          | 0 |
| Q96IG2 | Cytoplasm {ECO:0000250}.                 | 0 |
| Q59EK9 |                                          | 0 |
| P17480 | Nucleus, nucleolus {ECO:0000250 UniProt  | 1 |
| 043242 |                                          | 0 |
| 015234 | Cytoplasm {ECO:0000269 PubMed:12080473}  | 0 |
| 075916 | Isoform 3: Membrane; Peripheral membrar  | 0 |
| Q68DV7 | Cell membrane; Single-pass type I membr  | 0 |
| P45381 | Cytoplasm. Nucleus {ECO:0000250}.        | 0 |
| 043236 | Cytoplasm {ECO:0000250}. Cytoplasm, cyt  | 0 |
| 094972 | Cytoplasm, perinuclear region {ECO:0000  | 0 |
| Q8IX18 |                                          | 0 |
| Q9UJT1 | Nucleus {ECO:0000250 UniProtKB:Q9R1K7}.  | 0 |
| Q14974 | Cytoplasm {ECO:0000269 PubMed:11891849}  | 1 |
| 014653 | Golgi apparatus, cis-Golgi network membr | 0 |
| Q9NVS9 |                                          | 0 |
| P23443 | Cell junction, synapse, synaptosome {EC  | 0 |
| Q309B1 | Cytoplasm {ECO:0000250}.                 | 0 |
| Q96JB5 | Nucleus {ECO:0000269 PubMed:16173922}.   | 0 |
| P83916 | Nucleus {ECO:0000269 PubMed:10460410, F  | 1 |
| Q9Y2B2 | Endoplasmic reticulum membrane {ECO:000  | 0 |
| P51570 |                                          | 0 |
| Q9HOH0 | Nucleus membrane {ECO:0000269 PubMed:16  | 0 |
| P13929 | Cytoplasm. Note=Localized to the Z line  | 0 |
| P07737 | Cytoplasm, cytoskeleton.                 | 1 |
| Q9H6Y7 | Endomembrane system {ECO:0000269 PubMec  | 0 |
| Q02978 | Mitochondrion inner membrane {ECO:00002  | 0 |
| Q9Y272 | Cell membrane {ECO:0000305}; Lipid-anch  | 0 |
| Q7Z5J4 | Cytoplasm. Nucleus. Note=In neurons, lo  | 0 |
| Q99567 | Nucleus, nuclear pore complex.           | 0 |
| Q07021 | Mitochondrion matrix {ECO:0000269 PubMe  | 0 |
| P31645 | Cell membrane {ECO:0000269 PubMed:16870  | 0 |
| Q13867 | Cytoplasm.                               | 1 |
| 075976 | Cell membrane {ECO:0000250 UniProtKB:Q9  | 0 |
| 095249 | Golgi apparatus membrane {ECO:0000269 F  | 0 |
| Q96A33 | Endoplasmic reticulum membrane {ECO:000  | 0 |
| Q9Y3C7 | Nucleus {ECO:0000305}.                   | 0 |
| P55039 | Nucleus {ECO:0000269 PubMed:29915238}.   | 0 |
| Q8IY81 | Nucleus, nucleolus {ECO:0000255 HAMAP-F  | 1 |
| 043572 | Mitochondrion {ECO:0000269 PubMed:11248  | 0 |
| P30838 | Cytoplasm {ECO:0000250 UniProtKB:P47739} | 1 |
| 043760 | Cytoplasmic vesicle membrane {ECO:00002  | 0 |
| Q9UPM9 | Cytoplasm, cytoskeleton, cilium basal b  | 0 |
| Q9NYH9 | Nucleus, nucleolus {ECO:0000269 PubMed:  | 1 |
| P17844 | Nucleus, nucleolus {ECO:0000269 PubMed:  | 0 |
| Q9HAS0 | Golgi apparatus, trans-Golgi network {F  | 0 |
| 000231 | Nucleus {ECO:0000250}. Cytoplasm, cytos  | 0 |
| Q08380 | Secreted {ECO:0000269 PubMed:8390986}.   | 0 |
| Q16515 | Cell membrane {ECO:0000250}; Multi-pass  | 0 |
| P13500 | Secreted {ECO:0000269 PubMed:23955712,   | 0 |
| P22362 | Secreted.                                | 0 |
| 000623 | Peroxisome membrane {ECO:0000269 PubMec  | 0 |

|        |                                         |   |
|--------|-----------------------------------------|---|
| Q96C10 | Cytoplasm {ECO:0000269 PubMed:19380577} | 0 |
| Q92830 | Nucleus {ECO:0000269 PubMed:11564863, F | 0 |
| P51148 | Cell membrane {ECO:0000250}; Lipid-anch | 0 |
| P54802 | Lysosome.                               | 1 |
| P14061 | Cytoplasm.                              | 1 |
| Q9UH92 | Isoform Alpha: Cytoplasm {ECO:0000269 F | 0 |
| P78357 | Membrane {ECO:0000305}; Single-pass ty  | 0 |
| Q9P2A4 | Cytoplasm {ECO:0000269 PubMed:11956071} | 1 |
| Q92800 | Nucleus {ECO:0000269 PubMed:19026781}.  | 1 |
| Q92988 | Nucleus {ECO:0000269 PubMed:25954033}.  | 0 |
|        | Cytoplasm, cytoskeleton {ECO:0000250}.  | 0 |
| P02452 | Secreted, extracellular space, extracel | 0 |
| Q16586 | Cell membrane, sarcolemma {ECO:0000250} | 0 |
| Q9BTE6 | Cytoplasm {ECO:0000250}.                | 0 |
| Q9POM9 | Mitochondrion {ECO:0000269 PubMed:11279 | 0 |
| Q99536 | Cytoplasm. Mitochondrion outer membrane | 0 |
| Q96AG4 | Microsome membrane {ECO:0000250}; Singl | 0 |
| P52198 | Cytoplasmic vesicle, secretory vesicle, | 0 |
| P18054 | Cytoplasm, cytosol. Membrane. Note=Memt | 0 |
| Q9UQL6 | Nucleus. Cytoplasm. Note=Shuttles betwe | 0 |
| O15438 | Membrane; Multi-pass membrane protein.  | 0 |
| O95232 | Nucleus speckle {ECO:0000269 PubMed:106 | 1 |
| P01298 | Secreted.                               | 0 |
| Q14168 | Cytoplasm, cytoskeleton {ECO:0000269 Pu | 0 |
| Q9HAU4 | Nucleus {ECO:0000269 PubMed:12717440}.  | 0 |
| Q15029 | Nucleus {ECO:0000269 PubMed:20858735, F | 0 |
| O15403 | Cell membrane; Multi-pass membrane prot | 0 |
| P10644 | Cell membrane {ECO:0000269 PubMed:23115 | 0 |
| Q15768 | Membrane; Single-pass type I membrane p | 0 |
| Q96MK3 | Secreted {ECO:0000250 UniProtKB:Q8CID3} | 0 |
| P62258 | Nucleus {ECO:0000269 PubMed:12917326}.  | 0 |
| Q9HD47 | Nucleus {ECO:0000269 PubMed:11290418}.  | 0 |
| Q9BZG8 | Nucleus {ECO:0000269 PubMed:10519411}.  | 0 |
| P52564 | Nucleus {ECO:0000269 PubMed:9768359}. ( | 0 |
| Q6IAN0 | Endoplasmic reticulum membrane {ECO:000 | 0 |
| Q9Y6I7 |                                         | 0 |
| P35243 |                                         | 0 |
| P12882 | Cytoplasm, myofibril. Note=Thick filame | 1 |
| O14745 | Cytoplasm {ECO:0000250}. Apical cell me | 1 |
| P11055 | Cytoplasm, myofibril. Note=Thick filame | 0 |
| Q9BTE0 |                                         | 0 |
| Q8NE00 | Membrane {ECO:0000305}; Multi-pass memt | 0 |
| P04004 | Secreted, extracellular space.          | 0 |
| Q13829 | Cytoplasm. Nucleus. Endosome. Note=Colo | 0 |
| Q8IY31 | Golgi apparatus, cis-Golgi network {ECO | 0 |
| Q5BJF2 | Nucleus membrane {ECO:0000269 PubMed:19 | 0 |
| Q86X02 |                                         | 0 |
| Q13432 | Cytoplasm, cytoskeleton, microtubule or | 1 |
| P09972 |                                         | 0 |
| Q7KZ85 | Nucleus {ECO:0000305}.                  | 0 |
| P0DI83 | Nucleus {ECO:0000269 PubMed:21586586}.  | 0 |
| Q96QT6 | Nucleus {ECO:0000269 PubMed:11390640}.  | 0 |
| Q99453 | Nucleus {ECO:0000255 PROSITE-ProRule:PF | 1 |
| P30968 | Cell membrane; Multi-pass membrane prot | 0 |
| Q9P270 | Cytoplasm, cytoskeleton. Note=Colocaliz | 0 |



|        |                                         |   |
|--------|-----------------------------------------|---|
| Q9NX40 | Endosome {ECO:0000250 UniProtKB:Q9CRD0} | 0 |
| P36537 | Microsome membrane {ECO:0000305}; Singl | 0 |
| Q9H720 | Membrane {ECO:0000305}; Multi-pass mem  | 0 |
| Q92564 |                                         | 0 |
| P62068 |                                         | 0 |
| P49888 | Cytoplasm.                              | 1 |
| Q99954 | Secreted {ECO:0000305}.                 | 0 |
| Q9UKJ5 | Cell membrane {ECO:0000269 PubMed:11257 | 0 |
| P48645 | Secreted.                               | 0 |
| Q6ZU35 | Cytoplasm, cytosol {ECO:0000305 PubMed: | 0 |
| Q9UHA4 | Late endosome membrane {ECO:0000250}; F | 1 |
| P10720 | Secreted.                               | 0 |
| P19838 | Nucleus. Cytoplasm. Note=Nuclear, but a | 1 |
| P15514 | Membrane; Single-pass membrane protein. | 0 |
| 000462 | Lysosome {ECO:0000305}.                 | 0 |
| P61077 | Cell membrane {ECO:0000269 PubMed:18508 | 0 |
| P53779 | Cytoplasm {ECO:0000269 PubMed:16737965} | 0 |
| Q15723 | Nucleus.                                | 1 |
| 043677 | Mitochondrion inner membrane {ECO:00002 | 0 |
| Q6ZT07 |                                         | 0 |
| Q9Y3S2 | Nucleus {ECO:0000269 PubMed:10593942}.  | 0 |
| 015327 |                                         | 0 |
| Q13480 |                                         | 0 |
| P60568 | Secreted.                               | 0 |
| P16870 | Isoform 1: Cytoplasmic vesicle, secret  | 0 |
| P49207 | Cytoplasm, cytosol {ECO:0000269 PubMed: | 0 |
| 076024 | Endoplasmic reticulum membrane; Multi-p | 0 |
| Q9UJ72 |                                         | 0 |
| Q9HAV7 | Mitochondrion matrix {ECO:0000269 PubMe | 1 |
| Q9NY12 | Nucleus, nucleolus. Nucleus, Cajal body | 1 |
| Q14331 | Nucleus, Cajal body {ECO:0000269 PubMec | 0 |
| P51790 | Isoform 1: Early endosome membrane {ECO | 0 |
| Q8N5Z0 | Mitochondrion {ECO:0000305}.            | 1 |
| Q86SF2 | Golgi apparatus membrane {ECO:0000250}; | 1 |
| 043143 | Nucleus. Nucleus, nucleolus.            | 0 |
| P08294 | Secreted, extracellular space. Note=999 | 0 |
| Q9C040 | Cytoplasm {ECO:0000250 UniProtKB:Q9ESN6 | 1 |
| Q9NRM0 | Isoform 1: Basolateral cell membrane {E | 0 |
| Q969H0 | Isoform 1: Nucleus, nucleoplasm {ECO:00 | 0 |
| Q8N5T2 |                                         | 0 |
| Q7Z7G1 |                                         | 0 |
| 096028 | Nucleus {ECO:0000255 PROSITE-ProRule:PF | 0 |
| Q5HYK7 | Cytoplasm {ECO:0000269 PubMed:14551139} | 0 |
| Q9P246 | Endoplasmic reticulum membrane {ECO:000 | 1 |
| P78367 | Nucleus {ECO:0000305}.                  | 0 |
| Q14728 | Membrane {ECO:0000255}; Multi-pass mem  | 0 |
| P48167 | Cell junction, synapse, postsynaptic ce | 0 |
| Q10588 | Cell membrane; Lipid-anchor, GPI-anch   | 0 |
| Q04756 | Secreted. Note=Secreted as an inactive  | 0 |
| Q9P2M1 | Cytoplasm {ECO:0000269 PubMed:12508107} | 0 |
| Q9NUQ7 | Cytoplasm {ECO:0000250}. Endoplasmic re | 0 |
| P57682 | Nucleus {ECO:0000305}.                  | 1 |
| Q96PQ7 | Cytoplasm, cytoskeleton.                | 0 |
| A5PLN7 |                                         | 0 |
| Q9BPX3 | Nucleus. Cytoplasm. Chromosome. Note=Ir | 0 |

|        |                                         |   |
|--------|-----------------------------------------|---|
| 060701 |                                         | 0 |
| Q9UHL0 | Cytoplasm {ECO:0000269 PubMed:10608860} | 0 |
| P02511 | Cytoplasm {ECO:0000269 PubMed:19464326, | 0 |
| A6NMT0 | Nucleus {ECO:0000255 PROSITE-ProRule:PF | 0 |
| Q9BUP3 | Cytoplasm {ECO:0000269 PubMed:15282309} | 0 |
| P53634 | Lysosome.                               | 1 |
| Q96HJ3 |                                         | 0 |
| Q05516 | Nucleus {ECO:0000269 PubMed:24359566}.  | 0 |
| Q96EB1 | Cytoplasm. Nucleus.                     | 0 |
| 075312 | Nucleus. Nucleus, nucleolus. Nucleus, § | 0 |
| Q9Y6C9 | Mitochondrion inner membrane {ECO:00003 | 0 |
| Q8N3X1 |                                         | 0 |
| 075443 | Cell membrane {ECO:0000305}; Lipid-anch | 0 |
| 075845 | Endoplasmic reticulum membrane {ECO:000 | 0 |
| Q6NUN7 |                                         | 0 |
| Q9P2W7 | Isoform 1: Golgi apparatus membrane {EC | 0 |
| P11142 | Cytoplasm. Melanosome. Nucleus, nucleol | 0 |
| P56373 | Cell membrane {ECO:0000269 PubMed:27626 | 0 |
| 000534 |                                         | 0 |
| Q9NNZ3 | Membrane {ECO:0000305}; Single-pass mem | 0 |
| Q9HAT2 | Lysosome {ECO:0000305}. Secreted.       | 0 |
| Q9NRS6 | Cytoplasm {ECO:0000269 PubMed:11085978} | 0 |
| 060711 | Cytoplasm. Cell junction, focal adhesio | 0 |
| Q9Y2E6 | Cytoplasm {ECO:0000250}.                | 0 |
| Q2TAZ0 | Preautophagosomal structure membrane; F | 0 |
| Q9H4M9 | Recycling endosome membrane {ECO:000026 | 0 |
| P22059 | Cytoplasm, cytosol {ECO:0000269 PubMed: | 1 |
| Q9H1C4 | Endoplasmic reticulum membrane {ECO:000 | 0 |
| Q9BZE2 | Nucleus {ECO:0000305}.                  | 0 |
| Q96C86 | Cytoplasm. Nucleus. Note=Predominantly  | 0 |
| Q96CU9 | Mitochondrion inner membrane {ECO:00002 | 0 |
| Q5H9R7 | Cytoplasm. Nucleus.                     | 1 |
| Q9H2W1 | Membrane; Multi-pass membrane protein.  | 0 |
| Q96JQ5 | Membrane; Multi-pass membrane protein.  | 0 |
| Q11206 | Golgi apparatus, Golgi stack membrane;  | 0 |
| P50416 | Mitochondrion outer membrane {ECO:00002 | 1 |
| P24385 | Nucleus {ECO:0000269 PubMed:9106657}. ( | 0 |
| Q9H6F5 | Nucleus {ECO:0000250}.                  | 1 |
| Q9UMS4 | Nucleus {ECO:0000269 PubMed:11082287, F | 0 |
| Q9BVC6 | Nucleus outer membrane {ECO:0000250 Uni | 0 |
| P02790 | Secreted.                               | 0 |
| 075382 | Cytoplasm {ECO:0000250}. Early endosome | 0 |
| Q9UHD1 |                                         | 0 |
| P60006 |                                         | 0 |
| Q96RD7 | Cell membrane {ECO:0000305}; Multi-pass | 0 |
| Q96PE2 |                                         | 0 |
| P06727 | Secreted.                               | 0 |
| P02656 | Secreted {ECO:0000303 PubMed:18201179,  | 0 |
| Q9UPV0 | Cytoplasm, cytoskeleton, microtubule or | 0 |
| Q8WVD5 | Membrane {ECO:0000305}; Lipid-anchor {E | 0 |
| P78344 |                                         | 0 |
| Q6P9A2 | Golgi apparatus membrane {ECO:0000250}; | 0 |
| Q13490 | Cytoplasm. Nucleus. Note=Agents that ir | 1 |
| Q14139 | Cytoplasm {ECO:0000250 UniProtKB:E9Q735 | 0 |
| P26196 | Cytoplasm, P-body {ECO:0000269 PubMed:1 | 0 |

|        |                                          |   |
|--------|------------------------------------------|---|
| 000526 | Cell membrane {ECO:0000305}; Single-pass | 1 |
| P22681 | Cytoplasm. Cell membrane. Cell projecti  | 0 |
| Q15223 | Isoform Alpha: Cell membrane; Single-pa  | 0 |
| Q9H422 | Cytoplasm {ECO:0000269 PubMed:11034606}  | 0 |
| 000330 | Mitochondrion matrix.                    | 1 |
| P43004 | Cell membrane {ECO:0000269 PubMed:14506  | 0 |
| Q9P000 | Nucleus {ECO:0000269 PubMed:21778237}.   | 0 |
| Q8IY34 | Lysosome membrane {ECO:0000269 PubMed:1  | 0 |
| P06127 | Cell membrane; Single-pass type I membr  | 1 |
| Q96QU6 |                                          | 0 |
| Q13296 | Secreted {ECO:0000305}.                  | 0 |
| P21741 | Secreted.                                | 0 |
| Q9C0C7 | Cytoplasmic vesicle, autophagosome {ECO  | 0 |
| Q8WXG6 | Membrane {ECO:0000269 PubMed:8988362}.   | 0 |
| Q8WUK0 | Mitochondrion inner membrane {ECO:00002  | 0 |
| Q86UY6 | Cytoplasm {ECO:0000269 PubMed:25732826}  | 0 |
| P49589 | Cytoplasm.                               | 1 |
| Q96BI1 | Apical cell membrane {ECO:0000305}; Mu   | 1 |
| P60033 | Cell membrane {ECO:0000269 PubMed:13832  | 0 |
| Q8IXU6 | Membrane {ECO:0000305}; Multi-pass mem   | 0 |
| Q9P2W6 | Cytoplasm.                               | 0 |
| P35712 | Nucleus {ECO:0000255 PROSITE-ProRule:PF  | 1 |
| 000193 |                                          | 0 |
| 000562 | Cytoplasm. Golgi apparatus, Golgi stack  | 0 |
| P62277 |                                          | 0 |
| 000170 | Cytoplasm.                               | 0 |
| 000217 | Mitochondrion {ECO:0000305}.             | 0 |
| Q13488 | Membrane {ECO:0000250}; Multi-pass mem   | 0 |
| P35790 | Cytoplasm.                               | 0 |
| Q9UPZ3 | Cytoplasm, cytosol {ECO:0000269 PubMed:  | 0 |
| P32780 | Nucleus.                                 | 1 |
| Q16633 | Nucleus.                                 | 0 |
| P54829 | Endoplasmic reticulum membrane {ECO:000  | 0 |
| P04275 | Secreted {ECO:0000269 PubMed:10961880}.  | 0 |
| 000233 |                                          | 0 |
| Q8IVL6 | Endoplasmic reticulum {ECO:0000255 PRO   | 0 |
| Q86W92 |                                          | 0 |
| Q6NWX9 | Nucleus speckle {ECO:0000269 PubMed:109  | 0 |
| Q07108 | Membrane; Single-pass type II membrane   | 0 |
| Q9UKN5 | Nucleus {ECO:0000305}.                   | 0 |
| Q92478 | Membrane {ECO:0000305}; Single-pass typ  | 0 |
| Q5HYK3 | Mitochondrion inner membrane {ECO:00002  | 0 |
| Q14242 | Membrane; Single-pass type I membrane p  | 0 |
| Q9ULV4 | Cell membrane {ECO:0000269 PubMed:12377  | 0 |
| P14920 | Peroxisome.                              | 0 |
| Q6IMN6 | Isoform 1: Cytoplasm.; Isoform 2: Mitoc  | 0 |
| Q9H3F6 | Nucleus {ECO:0000269 PubMed:19125419}.   | 0 |
| P49281 | Isoform 2: Cell membrane {ECO:0000269 F  | 0 |
| Q03426 | Cytoplasm {ECO:0000269 PubMed:14730012}  | 0 |
| Q9H175 | Nucleus {ECO:0000250}.                   | 0 |
| Q96RR4 | Nucleus {ECO:0000250}. Cytoplasm {ECO:(  | 0 |
|        | Cytoplasm {ECO:0000269 PubMed:23285027}  | 0 |
| Q9NPF7 | Secreted {ECO:0000269 PubMed:11114383}.  | 0 |
| P06576 | Mitochondrion inner membrane {ECO:00002  | 1 |
| Q15185 | Cytoplasm {ECO:0000250 UniProtKB:Q3ZBF7  | 0 |

|        |                                         |   |
|--------|-----------------------------------------|---|
| Q6XYQ8 | Cytoplasmic vesicle, secretory vesicle  | 0 |
| Q4VC05 |                                         | 0 |
| Q7L4I2 |                                         | 0 |
| O14910 | Cell membrane {ECO:0000269 PubMed:12967 | 0 |
| P05783 | Cytoplasm, perinuclear region. Nucleus, | 0 |
| Q9H6R3 | Mitochondrion matrix {ECO:0000269 PubMe | 0 |
| Q63HR2 | Cell junction, focal adhesion {ECO:0000 | 0 |
| P08151 | Cytoplasm {ECO:0000269 PubMed:10806483, | 0 |
| Q9ULR3 | Nucleus {ECO:0000269 PubMed:22586611}.  | 0 |
| P50579 | Cytoplasm {ECO:0000255 HAMAP-Rule:MF_03 | 1 |
| P09960 | Cytoplasm.                              | 0 |
| P41970 | Nucleus.                                | 0 |
| P48065 | Membrane; Multi-pass membrane protein.  | 0 |
| Q96A72 | Nucleus {ECO:0000269 PubMed:28502770, F | 0 |
| Q9HBA0 | Apical cell membrane {ECO:0000269 PubMe | 0 |
| Q969R8 | Lysosome membrane {ECO:0000269 PubMed:2 | 0 |
| Q08050 | Nucleus.                                | 0 |
| Q16378 | Secreted.                               | 0 |
| Q9NR22 | Cell membrane {ECO:0000269 PubMed:16051 | 0 |
| Q9NR21 | Nucleus, nuclear pore complex {ECO:0000 | 0 |
| O15145 | Cytoplasm, cytoskeleton {ECO:0000269 Pu | 0 |
| Q9UHW5 |                                         | 0 |
| Q9UBQ0 | Cytoplasm. Membrane; Peripheral membran | 0 |
| P10916 | Cytoplasm, myofibril, sarcomere, A band | 1 |
| Q9UQQ2 |                                         | 0 |
| O75969 | Cytoplasmic vesicle, secretory vesicle, | 1 |
| Q9H8J5 | Membrane {ECO:0000305}; Single-pass typ | 0 |
| Q09470 | Cell membrane {ECO:0000269 PubMed:12077 | 0 |
| Q9BY84 | Cytoplasm. Nucleus. Cytoplasmic vesicle | 0 |
| O60519 | Nucleus {ECO:0000250}.                  | 0 |
| Q6JQN1 |                                         | 0 |
| P05091 | Mitochondrion matrix.                   | 0 |
| P46527 | Nucleus. Cytoplasm. Endosome {ECO:00002 | 0 |
| Q9NZD1 | Cell membrane {ECO:0000269 PubMed:11311 | 0 |
| Q14CX7 | Cytoplasm {ECO:0000269 PubMed:18570629} | 0 |
| P37088 | Apical cell membrane {ECO:0000269 PubMe | 1 |
| P36941 | Membrane; Single-pass type I membrane p | 0 |
| Q6N063 |                                         | 0 |
| O14519 |                                         | 0 |
| Q9Y6K5 | Cytoplasm. Nucleus.                     | 0 |
| P29728 | Cytoplasm {ECO:0000269 PubMed:19923450} | 0 |
| P08493 | Secreted.                               | 0 |
| O95294 |                                         | 0 |
| P52566 | Cytoplasm, cytosol {ECO:0000269 PubMed: | 0 |
| Q13889 | Nucleus {ECO:0000269 PubMed:27193682, F | 0 |
| Q14232 |                                         | 0 |
| Q8NHQ9 |                                         | 0 |
| Q9H2H9 | Cell membrane {ECO:0000269 PubMed:15054 | 0 |
| Q9H628 |                                         | 0 |
| P21128 | Secreted {ECO:0000305}.                 | 0 |
| Q9H741 | Secreted {ECO:0000305}.                 | 0 |
| Q9ULW2 | Cell membrane {ECO:0000305 PubMed:19188 | 0 |
| P40937 | Nucleus {ECO:0000305}.                  | 1 |
| P32856 | Membrane; Single-pass type IV membrane  | 0 |
| Q6QNK2 | Cell membrane {ECO:0000269 PubMed:22025 | 0 |

|        |                                          |   |
|--------|------------------------------------------|---|
| Q9Y2I9 | Cell membrane {ECO:0000269 PubMed:19077} | 0 |
| Q86VP6 | Cytoplasm {ECO:0000269 PubMed:21249194}  | 0 |
| P01579 | Secreted.                                | 0 |
| P61020 | Cell membrane {ECO:0000269 PubMed:17081} | 0 |
| Q8TC05 | Nucleus {ECO:0000269 PubMed:26337392}.   | 0 |
| Q9NZN8 | Cytoplasm {ECO:0000269 PubMed:21299754}  | 0 |
| Q9UNS1 | Nucleus {ECO:0000269 PubMed:17141802}.   | 1 |
| Q16630 | Nucleus {ECO:0000269 PubMed:15169763, I} | 0 |
| Q13601 | Cytoplasm {ECO:0000269 Ref.6}. Nucleus   | 0 |
| Q4U2R6 | Mitochondrion {ECO:0000269 PubMed:25278} | 0 |
| P04406 | Cytoplasm, cytosol {ECO:0000269 PubMed:  | 0 |
| P46087 | Nucleus, nucleolus {ECO:0000269 PubMed:  | 1 |
| Q14839 | Nucleus {ECO:0000269 PubMed:17626165, I} | 1 |
| Q8NEB7 | Secreted {ECO:0000250 UniProtKB:Q29016}  | 0 |
| A0JNW5 | Cytoplasm, cytosol {ECO:0000269 PubMed:  | 0 |
| Q9UBW8 | Cytoplasm {ECO:0000269 PubMed:9535219}.  | 0 |
| Q9UNL4 | Nucleus {ECO:0000269 PubMed:15029197, I} | 0 |
| P16520 |                                          | 0 |
| Q8WUD6 | Golgi apparatus membrane {ECO:0000269 I} | 0 |
| P45974 |                                          | 0 |
| P60174 | Cytoplasm {ECO:0000255 PROSITE-ProRule:  | 0 |
| Q3T906 | N-acetylglucosamine-1-phosphotransferase | 0 |
| Q99619 | Cytoplasm {ECO:0000305}. Cytoplasm, cyt  | 0 |
| P09104 | Cytoplasm {ECO:0000250}. Cell membrane   | 0 |
| P54259 | Nucleus. Cytoplasm, perinuclear region.  | 0 |
| Q99622 | Cytoplasm {ECO:0000269 PubMed:23453666}  | 0 |
| P29350 | Cytoplasm. Nucleus. Note=In neurons, tr  | 0 |
| Q9NPD5 | Basolateral cell membrane; Multi-pass m  | 1 |
| Q9H9S0 | Nucleus {ECO:0000255 PROSITE-ProRule:PF  | 0 |
| Q9H7L9 | Nucleus {ECO:0000269 PubMed:21239494}.   | 0 |
| Q9Y3E0 | Golgi apparatus membrane {ECO:0000269 I} | 0 |
| P54840 |                                          | 0 |
| P07195 | Cytoplasm.                               | 1 |
| Q9Y478 |                                          | 0 |
| Q8NFW8 | Nucleus {ECO:0000269 PubMed:11602804}.   | 1 |
| Q9Y5Z7 | Cytoplasm {ECO:0000269 PubMed:10196288}  | 0 |
| Q92185 | Golgi apparatus membrane {ECO:0000305};  | 0 |
| Q9UMR7 | Cell membrane {ECO:0000269 PubMed:18258} | 0 |
| Q86YS7 | Cytoplasmic vesicle membrane {ECO:00002} | 0 |
| Q15286 | Cell membrane {ECO:0000269 PubMed:16950} | 0 |
| P78364 | Nucleus {ECO:0000269 PubMed:21282530, I} | 0 |
| P12074 | Mitochondrion inner membrane.            | 0 |
|        |                                          | 0 |
| Q33E94 | Nucleus {ECO:0000255 PROSITE-ProRule:PF  | 0 |
| Q9NVN3 | Cytoplasm, cell cortex {ECO:0000269 Pub  | 0 |
| Q13242 | Nucleus {ECO:0000269 PubMed:10196175, I} | 1 |
| Q9NVK5 | Cytoplasm {ECO:0000250}.                 | 1 |
| Q12918 | Membrane {ECO:0000305}; Single-pass typ  | 0 |
| Q99715 | Secreted, extracellular space, extracel  | 0 |
| 000478 | Cell membrane {ECO:0000269 PubMed:21918} | 0 |
| 095551 | Nucleus {ECO:0000269 PubMed:12743594}.   | 1 |
| P42685 | Cytoplasm {ECO:0000269 PubMed:7696183}.  | 0 |
| Q9UL01 | Membrane {ECO:0000305}; Multi-pass memt  | 0 |
| Q9H446 |                                          | 0 |
| Q5TD94 | Cytoplasm, cytoskeleton, cilium axoneme  | 0 |

|        |                                         |   |
|--------|-----------------------------------------|---|
| Q9NWT1 | Nucleus, nucleolus {ECO:0000269 PubMed: | 1 |
| Q8NOV5 | Golgi apparatus membrane {ECO:0000250}; | 0 |
| Q96KF7 | Membrane {ECO:0000305}; Single-pass men | 0 |
| Q14511 | Cytoplasm, cell cortex. Nucleus. Golgi  | 0 |
| Q5SZL2 | Cytoplasm, cytoskeleton, microtubule or | 0 |
| Q96IZ2 | Cell membrane {ECO:0000269 PubMed:21868 | 0 |
| Q9NXL9 | Nucleus {ECO:0000269 PubMed:23401855, F | 0 |
| Q8NB25 |                                         | 0 |
| O60942 | Nucleus {ECO:0000250}.                  | 0 |
| P33908 | Golgi apparatus membrane; Single-pass t | 0 |
| Q9NRX5 | Endoplasmic reticulum membrane {ECO:000 | 0 |
| Q7Z4H3 |                                         | 0 |
| Q16890 |                                         | 0 |
| Q9NQE9 | Cytoplasm {ECO:0000269 PubMed:17870088} | 0 |
| Q8NI08 | Nucleus {ECO:0000305}.                  | 0 |
| O94885 |                                         | 0 |
| Q9Y2C2 | Golgi apparatus membrane {ECO:0000250}; | 0 |
| Q9BZM6 | Cell membrane {ECO:0000269 PubMed:12782 | 1 |
| Q9UKT4 | Nucleus {ECO:0000269 PubMed:11988738}.  | 0 |
| Q9UGC7 | Mitochondrion {ECO:0000269 PubMed:17803 | 0 |
| Q03181 | Nucleus.                                | 0 |
| P35372 | Cell membrane {ECO:0000269 PubMed:10529 | 0 |
| Q9HB96 | Nucleus {ECO:0000269 PubMed:12093742, F | 1 |
| Q96RN1 | Membrane {ECO:0000269 PubMed:11278976,  | 0 |
| Q16539 | Cytoplasm {ECO:0000269 PubMed:7535770}. | 0 |
| Q02094 | Membrane {ECO:0000269 PubMed:18931342,  | 0 |
| Q7Z5Y7 | Cytoplasm {ECO:0000250 UniProtKB:Q8CDD8 | 0 |
| Q15208 | Nucleus. Cytoplasm.                     | 0 |
| P84103 | Nucleus {ECO:0000269 PubMed:11336712}.  | 0 |
|        | Mitochondrion matrix.                   | 1 |
| Q9HOU6 | Mitochondrion {ECO:0000269 PubMed:25278 | 1 |
| Q16552 | Secreted.                               | 0 |
| P25205 | Nucleus.                                | 1 |
| O76064 | Nucleus {ECO:0000255 HAMAP-Rule:MF_0306 | 0 |
| Q9C0D0 | Cytoplasm {ECO:0000250}. Cell junction, | 0 |
| Q8NFP4 | Cell membrane {ECO:0000269 PubMed:15922 | 0 |
| Q9UPZ9 | Nucleus {ECO:0000269 PubMed:12103360, F | 0 |
| Q01151 | Membrane; Single-pass type I membrane p | 0 |
| Q9NU22 | Nucleus, nucleolus {ECO:0000269 PubMed: | 0 |
| Q9BYV9 | Cytoplasm {ECO:0000269 PubMed:17018862} | 0 |
| Q9BX46 | Nucleus {ECO:0000250 UniProtKB:Q6GQD3}. | 0 |
| P40123 | Cell membrane {ECO:0000250}; Peripheral | 0 |
| O95816 |                                         | 0 |
| Q9ULC3 | Cell membrane {ECO:0000250 UniProtKB:P3 | 1 |
| Q9BZJ6 | Cell membrane; Multi-pass membrane prot | 0 |
| Q5VWX1 | Nucleus {ECO:0000250 UniProtKB:Q9WU01}. | 1 |
| Q9UKA2 | Cytoplasm. Nucleus. Mitochondrion.      | 0 |
| P24863 | Nucleus {ECO:0000305}.                  | 0 |
| Q9H4Q3 | Nucleus {ECO:0000305}.                  | 0 |
| Q93096 | Cell membrane. Early endosome. Endoplas | 0 |
| Q8N3C0 | Nucleus {ECO:0000269 PubMed:12077347, F | 0 |
| Q5TGJ6 |                                         | 0 |
| Q8NE79 | Lateral cell membrane {ECO:0000269 PubM | 0 |
| P20849 | Secreted, extracellular space, extracel | 0 |
| Q92558 | Cytoplasm, cytoskeleton {ECO:0000269 Pu | 0 |

|        |                                           |   |
|--------|-------------------------------------------|---|
| P80108 | Secreted.                                 | 0 |
| P51649 | Mitochondrion.                            | 1 |
| Q9Y4K1 |                                           | 0 |
| O95497 | Cell membrane {ECO:0000305 PubMed:11491   | 0 |
| Q9NPJ3 | Cytoplasm, cytosol {ECO:0000250 UniProt   | 0 |
| Q8IYB5 | Cell membrane {ECO:0000250}; Peripheral   | 0 |
| P25398 | Cytoplasm.                                | 0 |
| Q9GZU0 |                                           | 0 |
| Q9NPZ5 | Golgi apparatus membrane; Single-pass t   | 0 |
| O75496 | Cytoplasm. Nucleus. Note=Mainly cytoplasm | 0 |
| O95677 | Cytoplasm {ECO:0000250 UniProtKB:Q99502   | 1 |
| A7XYQ1 |                                           | 0 |
| Q9Y466 | Nucleus {ECO:0000255 PROSITE-ProRule:PF   | 0 |
| O00624 | Membrane; Multi-pass membrane protein.    | 0 |
| Q9Y450 |                                           | 0 |
| O00635 |                                           | 0 |
| O00628 | Peroxisome {ECO:0000250 UniProtKB:Q8R55   | 0 |
| O43167 | Nucleus {ECO:0000305}.                    | 0 |
| Q92562 | Endosome membrane {ECO:0000269 PubMed:1   | 0 |
| Q96FX8 | Cell junction, desmosome {ECO:0000250 U   | 0 |
| Q5TH69 | Cytoplasm {ECO:0000269 PubMed:19496786}   | 0 |
| Q8TF71 | Cell membrane {ECO:0000269 PubMed:11827   | 0 |
| Q9UBI9 |                                           | 0 |
| Q86SQ4 | Cell membrane {ECO:0000269 PubMed:15189   | 0 |
| O75167 | Isoform 2: Membrane {ECO:0000305}; Lipi   | 0 |
| Q92504 | Endoplasmic reticulum membrane; Multi-p   | 0 |
| P51684 | Cell membrane {ECO:0000269 PubMed:23765   | 0 |
| Q86WB7 | Cell membrane {ECO:0000269 PubMed:12381   | 0 |
| O15244 | Membrane {ECO:0000305}; Multi-pass mem    | 0 |
| O43189 | Nucleus. Cytoplasm, cytoskeleton, micr    | 0 |
| O60888 |                                           | 0 |
| Q96M98 |                                           | 0 |
| Q96PU8 | Nucleus {ECO:0000250}. Cytoplasm {ECO:(   | 0 |
| Q5T5N4 |                                           | 0 |
| Q9Y233 | Cytoplasm. Note=Located mostly to solub   | 0 |
| Q99750 | Nucleus {ECO:0000250}. Cytoplasm {ECO:(   | 0 |
| P30281 | Nucleus {ECO:0000269 PubMed:15358120}.    | 0 |
| Q13895 | Cytoplasm {ECO:0000269 PubMed:17381424}   | 0 |
| Q96EK7 | Nucleus {ECO:0000250}.                    | 0 |
| P20226 | Nucleus {ECO:0000269 PubMed:27007846}.    | 1 |
| Q9UMX6 | Cell membrane. Note=Membranes of outer    | 0 |
| P23942 | Membrane; Multi-pass membrane protein.    | 0 |
| Q6AI39 |                                           | 0 |
| Q14738 | Cytoplasm. Nucleus. Note=Nuclear in int   | 0 |
| Q5T653 | Mitochondrion {ECO:0000269 PubMed:25278   | 0 |
| Q13308 | Membrane {ECO:0000269 PubMed:20837484};   | 0 |
| P11831 | Nucleus {ECO:0000255 PROSITE-ProRule:PF   | 1 |
| Q8IWT3 | Cytoplasm {ECO:0000269 PubMed:12526791}   | 0 |
| O43598 | Cytoplasm {ECO:0000255 HAMAP-Rule:MF_03   | 0 |
| Q9NRW4 | Cytoplasm {ECO:0000250}. Nucleus {ECO:(   | 0 |
| Q9NV96 | Membrane {ECO:0000250}; Multi-pass mem    | 0 |
| O60547 |                                           | 0 |
| Q9GZR1 | Nucleus {ECO:0000269 PubMed:16912044, F   | 0 |
| Q17R60 | Secreted {ECO:0000305}.                   | 0 |
| P15692 | Secreted {ECO:0000269 PubMed:11563986,    | 0 |

|        |                                         |   |
|--------|-----------------------------------------|---|
| Q13523 | Nucleus.                                | 0 |
| P33981 |                                         | 0 |
| Q99808 | Basolateral cell membrane; Multi-pass m | 0 |
| Q7KYR7 | Membrane {ECO:0000250}; Single-pass typ | 0 |
| Q16363 | Secreted, extracellular space, extracel | 0 |
| Q96IP4 |                                         | 0 |
| Q9HCM7 |                                         | 0 |
| Q9UJA9 | Secreted {ECO:0000305}. Membrane {ECO:( | 0 |
| O95711 | Secreted, extracellular space. Note=Ass | 0 |
| Q16819 | Membrane; Single-pass type I membrane p | 0 |
| Q96RT1 | Cell junction, hemidesmosome {ECO:00002 | 0 |
| Q9Y5E7 | Cell membrane {ECO:0000250}; Single-pas | 0 |
| P49590 | Mitochondrion matrix {ECO:0000250}.     | 0 |
| Q9BQG2 | Peroxisome {ECO:0000269 PubMed:12790796 | 1 |
| Q9P209 | Cytoplasm, cytoskeleton, microtubule or | 0 |
| Q16706 | Golgi apparatus membrane {ECO:0000250 U | 1 |
| Q13591 | Membrane; Single-pass type I membrane p | 0 |
| P10643 | Secreted.                               | 0 |
| Q5XG87 | Cytoplasm {ECO:0000269 PubMed:23376078} | 0 |
| P10912 | Cell membrane; Single-pass type I memb  | 0 |
| Q01581 | Cytoplasm.                              | 0 |
| P51397 |                                         | 0 |
| P56597 |                                         | 0 |
| Q9H0E9 | Nucleus.                                | 1 |
| O95235 | Golgi apparatus {ECO:0000250}. Cytoplas | 0 |
| Q13423 | Mitochondrion inner membrane {ECO:00002 | 1 |
| Q9NP92 | Mitochondrion {ECO:0000269 PubMed:11279 | 0 |
| P38646 | Mitochondrion {ECO:0000269 PubMed:22002 | 0 |
| Q92552 | Cytoplasm {ECO:0000269 PubMed:28714366} | 0 |
| O60925 |                                         | 0 |
| Q99075 | Heparin-binding EGF-like growth factor: | 0 |
| Q96Q91 | Membrane; Multi-pass membrane protein.  | 0 |
| P49863 | Secreted. Cytoplasmic granule.          | 0 |
| Q9ULB4 | Cell membrane {ECO:0000305}; Single-pas | 0 |
| O95704 | Cytoplasm {ECO:0000269 PubMed:12153398} | 0 |
| Q96DC7 | Membrane {ECO:0000305}; Multi-pass memt | 0 |
| P09486 | Secreted, extracellular space, extracel | 0 |
| Q13123 | Nucleus {ECO:0000269 PubMed:24945353, F | 0 |
| P04035 | Endoplasmic reticulum membrane; Multi-p | 0 |
| Q9Y5P4 | Cytoplasm {ECO:0000269 PubMed:16895911, | 0 |
| Q96CS3 | Cytoplasm {ECO:0000269 PubMed:12372427} | 0 |
| O96004 | Nucleus, nucleoplasm {ECO:0000250}. Nuc | 0 |
| Q9Y5E6 | Cell membrane {ECO:0000250}; Single-pas | 0 |
| Q9Y5E4 | Cell membrane {ECO:0000250}; Single-pas | 0 |
| Q9Y5E3 | Cell membrane {ECO:0000250 UniProtKB:Q9 | 0 |
| Q9Y5E2 | Cell membrane {ECO:0000250}; Single-pas | 0 |
| O95263 |                                         | 0 |
| Q9HAZ1 | Nucleus {ECO:0000250}.                  | 0 |
| Q9Y5E8 | Cell membrane {ECO:0000250}; Single-pas | 0 |
| Q96D42 | Membrane {ECO:0000305}; Single-pass typ | 0 |
| O15303 | Cell membrane {ECO:0000269 PubMed:17402 | 0 |
| Q86XS8 | Membrane {ECO:0000305}; Single-pass typ | 0 |
| Q9NWX6 | Cytoplasm {ECO:0000269 PubMed:15459185} | 0 |
| P15848 | Lysosome {ECO:0000250 UniProtKB:P50429} | 0 |
| Q14677 | Cytoplasm. Cytoplasm, perinuclear regio | 1 |



|        |                                                                     |   |
|--------|---------------------------------------------------------------------|---|
| P35443 | Endoplasmic reticulum {ECO:0000250 UniProtKB:Q96LI8}                | 0 |
| Q9ULM6 | Cytoplasm {ECO:0000250 UniProtKB:Q96LI8}                            | 0 |
| P29460 | Secreted.                                                           | 0 |
| Q6UX41 | Membrane {ECO:0000250}; Single-pass type I membrane protein         | 0 |
| Q99614 |                                                                     | 0 |
| O14827 | Cytoplasm. Cell membrane; Peripheral membrane protein               | 0 |
| P51959 | Nucleus {ECO:0000269 PubMed:10196184}.                              | 1 |
| O15318 | Nucleus {ECO:0000269 PubMed:20154270, PMID:10196184}                | 0 |
| P55285 | Cell membrane; Single-pass type I membrane protein                  | 0 |
| P20700 | Nucleus inner membrane; Lipid-anchor; Nuclear pore complex          | 0 |
| Q9H4A6 | Golgi apparatus, Golgi stack membrane; Nuclear pore complex         | 0 |
| P53999 | Nucleus.                                                            | 1 |
| P17342 | Membrane; Single-pass type I membrane protein                       | 0 |
| Q8WUF8 | Nucleus {ECO:0000250 UniProtKB:Q3TNH5}.                             | 0 |
| Q9Y2P4 | Membrane {ECO:0000305}; Multi-pass membrane protein                 | 0 |
| P26639 | Cytoplasm {ECO:0000250 UniProtKB:Q9DOR2}                            | 0 |
| Q9UIQ6 | Cell membrane {ECO:0000269 PubMed:11389532}                         | 0 |
| Q08499 | Apical cell membrane {ECO:0000269 PubMed:11389532}                  | 0 |
| O60671 | Nucleus {ECO:0000269 PubMed:9716408}.                               | 0 |
| Q9BYV1 | Mitochondrion {ECO:0000269 PubMed:20018318}                         | 1 |
| Q9Y666 | Cell membrane; Multi-pass membrane protein                          | 0 |
| P05112 | Secreted.                                                           | 0 |
| Q92878 | Nucleus {ECO:0000269 PubMed:10783165, PMID:10783165}                | 1 |
| P05113 | Secreted.                                                           | 0 |
| Q92187 | Golgi apparatus membrane {ECO:0000305}; Multi-pass membrane protein | 0 |
| P46926 | Cytoplasm {ECO:0000250}.                                            | 0 |
| Q9NPG4 | Protocadherin-12: Cell membrane {ECO:0000305}                       | 0 |
| P63208 |                                                                     | 0 |
| O75694 | Nucleus, nuclear pore complex {ECO:0000269 PubMed:16541025}         | 0 |
| P67775 | Cytoplasm {ECO:0000269 PubMed:16541025}                             | 0 |
| P05230 | Secreted. Cytoplasm. Cytoplasm, cell cortex                         | 0 |
| P04150 | Isoform Alpha: Cytoplasm {ECO:0000269 PubMed:16541025}              | 0 |
| Q8NC54 | Membrane {ECO:0000305}; Single-pass type I membrane protein         | 0 |
| Q96BP3 | Nucleus {ECO:0000269 PubMed:18397323}.                              | 0 |
| P36406 | Cytoplasm {ECO:0000269 PubMed:28871090}                             | 0 |
| A5PLN9 |                                                                     | 0 |
| P02748 | Secreted {ECO:0000269 PubMed:22832194, PMID:22832194}               | 0 |
| O95486 | Cytoplasmic vesicle, COPII-coated vesicle                           | 0 |
| Q96J42 | Membrane {ECO:0000305}; Single-pass type I membrane protein         | 0 |
| Q6PID6 |                                                                     | 0 |
| P54136 | Cytoplasm {ECO:0000269 PubMed:10791971, PMID:10791971}              | 0 |
| Q8IX03 | Cytoplasm. Cytoplasm, perinuclear region                            | 0 |
| O75367 | Nucleus {ECO:0000269 PubMed:15621527, PMID:15621527}                | 1 |
| O14776 | Nucleus {ECO:0000269 PubMed:10908677, PMID:10908677}                | 1 |
| Q14195 | Cytoplasm {ECO:0000250}. Cell projection                            | 0 |
| Q99717 | Cytoplasm. Nucleus. Note=Cytoplasmic inner membrane                 | 0 |
| P48729 | Cytoplasm {ECO:0000269 PubMed:1409656}.                             | 0 |
| Q969X5 | Endoplasmic reticulum membrane {ECO:0000269 PubMed:1409656}         | 1 |
| P09619 | Cell membrane; Single-pass type I membrane protein                  | 0 |
| P47902 | Nucleus.                                                            | 1 |
| Q12981 | Endoplasmic reticulum membrane {ECO:0000269 PubMed:1409656}         | 1 |
| O76061 | Secreted {ECO:0000305}.                                             | 0 |
| P25021 | Cell membrane; Multi-pass membrane protein                          | 0 |
| Q16643 | Cytoplasm {ECO:0000269 PubMed:20215400, PMID:20215400}              | 1 |
| Q9UL40 | Nucleus, nucleolus {ECO:0000269 PubMed:20215400}                    | 0 |

|        |                                          |   |
|--------|------------------------------------------|---|
| Q08426 | Peroxisome.                              | 1 |
| Q9P232 | Cell membrane {ECO:0000250}; Lipid-anch  | 0 |
| Q9NTJ3 | Nucleus {ECO:0000269 PubMed:10958694}.   | 0 |
| Q9Y6D0 | Endoplasmic reticulum membrane {ECO:000  | 0 |
| Q9NPL8 | Mitochondrion membrane {ECO:0000269 Pub  | 0 |
| Q96SW2 | Cytoplasm {ECO:0000269 PubMed:20223979}  | 0 |
| P01042 | Secreted, extracellular space.           | 0 |
| P04196 | Secreted {ECO:0000269 PubMed:21215706}.  | 0 |
| P41182 | Nucleus {ECO:0000269 PubMed:12504096, I  | 1 |
| Q93099 |                                          | 0 |
| Q9Y5I7 | Cell junction, tight junction. Cell men  | 0 |
| Q9H0F7 | Cell projection, cilium membrane; Peripl | 0 |
| Q7Z494 | Cell projection, cilium {ECO:0000269 Pu  | 0 |
| P42081 | Cell membrane; Single-pass type I membr  | 0 |
| Q9NQR4 | Cytoplasm {ECO:0000269 PubMed:17488281}  | 0 |
| Q96A26 | Membrane {ECO:0000305}; Single-pass men  | 0 |
| O15527 | Nucleus, nucleoplasm {ECO:0000269 PubMe  | 0 |
| P52294 | Cytoplasm {ECO:0000269 PubMed:7604027}.  | 1 |
| P05166 | Mitochondrion matrix {ECO:0000269 PubMe  | 1 |
| Q05086 | Cytoplasm {ECO:0000250 UniProtKB:008759  | 0 |
| Q8IUR7 | Nucleus {ECO:0000269 PubMed:17467196}.   | 0 |
| Q8NHQ1 | Cytoplasm, cytoskeleton, microtubule or  | 1 |
| P50120 | Cytoplasm.                               | 1 |
| P09455 | Cytoplasm {ECO:0000305 PubMed:22665496}  | 1 |
| Q96CQ1 | Mitochondrion inner membrane {ECO:00003  | 0 |
| Q9UBF6 | Cytoplasm {ECO:0000269 PubMed:10082581}  | 0 |
| Q14188 | Nucleus.                                 | 1 |
| Q8IZH2 | Cytoplasm {ECO:0000269 PubMed:12515382,  | 0 |
| Q92831 | Nucleus {ECO:0000269 PubMed:29174768}.   | 0 |
| P06276 | Secreted {ECO:0000269 PubMed:19368529,   | 0 |
| Q9BUL8 | Cytoplasm. Golgi apparatus membrane; Pe  | 0 |
| Q16877 |                                          | 0 |
| Q02388 | Secreted, extracellular space, extracel  | 0 |
| P13861 | Cytoplasm {ECO:0000269 PubMed:21423175}  | 0 |
| Q13107 | Cytoplasm {ECO:0000269 PubMed:16316627,  | 0 |
| Q15057 | Endosome membrane {ECO:0000250}; Peripl  | 1 |
| P11488 | Cell projection, cilium, photoreceptor   | 0 |
| P04899 | Cytoplasm {ECO:0000269 PubMed:17635935}  | 0 |
| Q92734 | Endoplasmic reticulum {ECO:0000269 PubM  | 0 |
| Q12794 | Secreted {ECO:0000269 PubMed:9223416}.   | 0 |
| Q8WTW4 | Lysosome membrane {ECO:0000269 PubMed:2  | 0 |
| P83731 |                                          | 0 |
| O14569 | Cytoplasmic vesicle membrane {ECO:00002  | 0 |
| Q9HBI5 |                                          | 0 |
| P51114 | Cytoplasm {ECO:0000269 PubMed:7781595}.  | 0 |
| Q13191 | Cytoplasm {ECO:0000269 PubMed:12177062}  | 0 |
| Q8WY36 | Nucleus {ECO:0000305}.                   | 1 |
| Q9NWB7 | Cytoplasm, cytoskeleton, cilium basal b  | 1 |
| Q9HAV0 |                                          | 0 |
| Q9UM44 | Membrane {ECO:0000250}; Single-pass typ  | 0 |
| Q9H095 | Cytoplasm {ECO:0000269 PubMed:24787902}  | 0 |
| Q04446 |                                          | 0 |
| Q86VD1 | Nucleus {ECO:0000250}.                   | 1 |
| P11172 |                                          | 0 |
| P52298 | Nucleus {ECO:0000269 PubMed:8601613}. (  | 0 |

|        |                                         |   |
|--------|-----------------------------------------|---|
| 095219 | Early endosome {ECO:0000269 PubMed:1266 | 0 |
| Q5BVD1 | Endoplasmic reticulum membrane {ECO:000 | 0 |
| Q9Y2L6 | Cytoplasm, cytoskeleton {ECO:0000250 Ur | 0 |
| Q96GZ6 | Cell membrane; Multi-pass membrane prot | 0 |
| Q9BZX4 | Cell projection, cilium, flagellum {EC  | 0 |
| Q9UIW2 | Cell membrane {ECO:0000305}; Single-pas | 0 |
| P38606 | Cytoplasm {ECO:0000269 PubMed:29668857} | 0 |
| Q969K4 | Cytoplasm {ECO:0000269 PubMed:11494141} | 0 |
| Q9NZ53 | Membrane {ECO:0000305}; Single-pass typ | 0 |
| 075841 | Membrane; Multi-pass membrane protein.  | 1 |
| 095196 | Cell membrane {ECO:0000250 UniProtKB:Q9 | 0 |
| 094889 |                                         | 0 |
| Q12770 | Endoplasmic reticulum membrane {ECO:000 | 0 |
| Q9HA90 |                                         | 0 |
| Q9ULG3 |                                         | 0 |
| Q8NG66 | Nucleus {ECO:0000269 PubMed:12154088}.  | 0 |
| P09001 | Mitochondrion {ECO:0000269 PubMed:25278 | 0 |
| Q9NRQ2 | Membrane {ECO:0000250}; Single-pass typ | 0 |
| Q9Y5R4 | Mitochondrion {ECO:0000269 PubMed:18541 | 0 |
| Q9NSE2 |                                         | 0 |
| Q13705 | Cell membrane {ECO:0000250}; Single-pas | 0 |
| Q8TAF3 | Nucleus {ECO:0000269 PubMed:18032488}.  | 0 |
| Q86X83 | Cytoplasm {ECO:0000269 PubMed:21778237} | 0 |
| Q9BQQ3 | Golgi apparatus, cis-Golgi network mem  | 1 |
| Q8IYB4 | Cytoplasm {ECO:0000250}. Membrane {ECO: | 0 |
| 043818 | Nucleus, nucleolus {ECO:0000269 PubMed: | 0 |
| 015440 | Membrane; Multi-pass membrane protein.  | 0 |
| P22760 | Endoplasmic reticulum membrane; Single- | 0 |
| Q96IU4 | Cytoplasm. Nucleus. Note=Predominantly  | 1 |
|        |                                         | 0 |
| Q96DR7 | Cell projection, ruffle {ECO:0000269 Pt | 0 |
| Q6TFL4 | Perikaryon. Cell projection, axon {ECO: | 0 |
| Q4KWH8 | Cytoplasm {ECO:0000269 PubMed:15702972} | 0 |
| P32241 | Cell membrane; Multi-pass membrane prot | 0 |
| Q9P2D7 | Cytoplasm, cytoskeleton, cilium axoneme | 0 |
| Q9UNL2 | Endoplasmic reticulum membrane; Multi-p | 0 |
| Q9UFB7 | Nucleus {ECO:0000305}.                  | 1 |
| P63316 |                                         | 0 |
| P30414 | Cell membrane {ECO:0000269 PubMed:84216 | 0 |
| P51788 | Cell membrane {ECO:0000269 PubMed:29403 | 0 |
| Q9H334 | Nucleus {ECO:0000269 PubMed:25027557, I | 1 |
| Q04637 |                                         | 0 |
| Q9Y6A9 | Microsome membrane {ECO:0000250}; Multi | 0 |
| P51957 | Cell projection, cilium {ECO:0000269 Pt | 0 |
| Q53TQ3 | Nucleus {ECO:0000269 PubMed:18922472}.  | 0 |
| P24534 |                                         | 0 |
| 075077 | Cell membrane {ECO:0000305}; Single-pas | 0 |
| Q16854 | Mitochondrion.                          | 0 |
| Q9H8S9 |                                         | 0 |
| Q9P2N6 | Nucleus {ECO:0000269 PubMed:20018852}.  | 0 |
| Q9H0V9 | Endoplasmic reticulum membrane; Single- | 0 |
| Q9BST9 |                                         | 0 |
| Q9Y2I7 | Endosome membrane {ECO:0000269 PubMed:1 | 0 |
| Q9Y2W7 | Cytoplasm {ECO:0000269 PubMed:18957440} | 0 |
| Q96GK7 |                                         | 0 |

|        |                                         |   |
|--------|-----------------------------------------|---|
| P19338 | Nucleus, nucleolus. Cytoplasm. Note=Loc | 0 |
| Q8WV83 | Membrane {ECO:0000305}; Multi-pass mem  | 0 |
| P43403 | Cytoplasm {ECO:0000269 PubMed:9813084}. | 0 |
| P61158 | Cytoplasm, cytoskeleton {ECO:0000269 Pu | 0 |
| Q658P3 | Endosome membrane {ECO:0000250}; Multi- | 0 |
| Q9HCM4 | Cytoplasm. Cell junction, adherens junc | 0 |
| Q9NZI6 | Nucleus {ECO:0000269 PubMed:10644752}.  | 0 |
| Q9Y3B4 | Nucleus {ECO:0000269 PubMed:27720643, F | 1 |
| Q53FA7 |                                         | 0 |
| Q9NZQ0 | Nucleus {ECO:0000250 UniProtKB:Q8CFP6}. | 0 |
| P01189 | Secreted {ECO:0000250 UniProtKB:P01193} | 0 |
| 075886 | Cytoplasm {ECO:0000250}. Early endosome | 0 |
| Q9HC10 | Cytoplasmic vesicle, secretory vesicle, | 0 |
| P43304 | Mitochondrion.                          | 1 |
| P49450 | Nucleus {ECO:0000269 PubMed:14667408, F | 1 |
| 060759 | Cytoplasm. Early endosome. Note=Recruit | 0 |
| Q04771 | Membrane; Single-pass type I membrane p | 0 |
| Q9C0D5 | Cell junction, synapse, postsynaptic ce | 0 |
| Q99726 | Cytoplasmic vesicle, secretory vesicle, | 0 |
| Q8WUA4 | Nucleus.                                | 0 |
| Q9UI10 |                                         | 0 |
| Q9UHY1 | Cytoplasm, cell cortex {ECO:0000269 Put | 0 |
| P18564 | Membrane; Single-pass type I membrane p | 0 |
| Q9H6D8 | Membrane {ECO:0000305}; Single-pass ty  | 0 |
| 000487 |                                         | 0 |
| Q15036 | Cytoplasm {ECO:0000269 PubMed:11237770, | 1 |
| Q9Y575 |                                         | 0 |
| 015355 | Cytoplasm {ECO:0000305}. Membrane {ECO: | 0 |
| P54750 |                                         | 0 |
| Q96HR9 | Endoplasmic reticulum membrane {ECO:000 | 0 |
| Q6UW60 | Membrane {ECO:0000255}; Single-pass men | 0 |
| P01275 | Secreted.                               | 0 |
| Q9BYX4 | Cytoplasm {ECO:0000269 PubMed:11805321, | 0 |
| P62841 |                                         | 0 |
| P28676 | Cytoplasm {ECO:0000269 PubMed:1530588,  | 0 |
| Q13724 | Endoplasmic reticulum membrane; Single- | 0 |
| Q49AM3 |                                         | 0 |
| Q9BSM1 | Nucleus {ECO:0000269 PubMed:15620699, F | 0 |
| Q14449 | Cytoplasm {ECO:0000269 PubMed:15210700, | 0 |
| Q8N3C7 |                                         | 0 |
| 043763 | Nucleus {ECO:0000305}.                  | 0 |
| Q01082 | Cytoplasm, cytoskeleton {ECO:0000250}.  | 1 |
| Q9Y679 | Endoplasmic reticulum membrane {ECO:000 | 0 |
| Q9NQC3 | Isoform A: Endoplasmic reticulum membra | 0 |
| 043464 | Mitochondrion intermembrane space. Mitc | 0 |
| P58215 | Secreted, extracellular space {ECO:0000 | 0 |
| Q99704 | Isoform 1: Cytoplasm. Nucleus.; Isoform | 0 |
| Q14435 | Golgi apparatus, Golgi stack membrane   | 1 |
| Q9NR33 | Nucleus {ECO:0000305}.                  | 0 |
| P25103 | Cell membrane; Multi-pass membrane prot | 0 |
| Q3V6T2 | Membrane {ECO:0000269 PubMed:15882442,  | 0 |
| P28330 | Mitochondrion matrix.                   | 1 |
| Q9H8M9 | Endoplasmic reticulum membrane {ECO:000 | 0 |
| P49406 | Mitochondrion {ECO:0000269 PubMed:10600 | 0 |
| 043813 | Cytoplasm {ECO:0000269 PubMed:15811525} | 0 |

|        |                                         |   |
|--------|-----------------------------------------|---|
| Q8IWA0 | Nucleus, nucleolus {ECO:0000269 PubMed: | 0 |
| Q12805 | Secreted, extracellular space {ECO:0000 | 0 |
| P05451 | Secreted.                               | 0 |
| Q9NW38 | Cytoplasm. Nucleus.                     | 0 |
| P02751 | Secreted, extracellular space, extracel | 0 |
| P42224 | Cytoplasm {ECO:0000269 PubMed:15322115, | 0 |
| 094925 | Isoform 1: Mitochondrion {ECO:0000250 U | 1 |
| Q9BWT3 | Nucleus {ECO:0000269 PubMed:11287430, E | 0 |
| Q9C0G6 | Cytoplasm, cytoskeleton, cilium axoneme | 0 |
| Q9BY49 | Peroxisome {ECO:0000269 PubMed:11669066 | 1 |
| Q53HI1 | Nucleus inner membrane {ECO:0000250}; M | 0 |
| Q96FG2 | Cell projection, stereocilium {ECO:0000 | 0 |
| Q70CQ2 |                                         | 0 |
| Q9BUP0 | Mitochondrion inner membrane {ECO:00002 | 0 |
| P50991 | Cytoplasm {ECO:0000269 PubMed:17081065, | 1 |
| P38435 | Endoplasmic reticulum membrane {ECO:000 | 0 |
| Q9Y3R4 | Cytoplasm {ECO:0000250}.                | 0 |
| Q8NDI1 | Cytoplasm {ECO:0000269 PubMed:14676205} | 0 |
| P32242 | Nucleus {ECO:0000305}.                  | 0 |
| O14530 | Cytoplasm {ECO:0000250 UniProtKB:Q9CQ79 | 0 |
| Q9H8M1 | Mitochondrion inner membrane {ECO:00002 | 0 |
| P22749 | Secreted. Note=Located in the cytotoxic | 0 |
| 075533 | Nucleus {ECO:0000269 PubMed:27720643, E | 0 |
| Q9UNP4 | Golgi apparatus membrane {ECO:0000305}; | 0 |
| O43529 | Golgi apparatus membrane {ECO:0000250}; | 0 |
| Q9H2J4 | Cytoplasm {ECO:0000269 PubMed:15371430} | 0 |
| Q9Y3A3 | Cytoplasm, perinuclear region {ECO:0000 | 0 |
| P61604 | Mitochondrion matrix.                   | 1 |
| Q9BRC7 | Membrane {ECO:0000250}; Peripheral mem  | 0 |
| Q9Y3E7 | Cytoplasm, cytosol. Membrane; Lipid-anc | 0 |
| P52746 | Nucleus {ECO:0000305}.                  | 0 |
| P27930 | Isoform Short: Secreted {ECO:0000269 Pu | 0 |
| Q8NB12 | Cytoplasm {ECO:0000250}. Nucleus {ECO:( | 0 |
| P14778 | Membrane {ECO:0000269 PubMed:8142597};  | 0 |
| Q9Y6F9 | Secreted, extracellular space, extracel | 0 |
| Q9HB29 | Membrane; Single-pass type I membrane p | 0 |
| Q01638 | Isoform C: Cell membrane.; Isoform B: S | 0 |
| Q13478 | Membrane {ECO:0000269 PubMed:14528293}; | 0 |
| 095256 | Cell membrane {ECO:0000269 PubMed:14528 | 0 |
| Q9UBY0 | Membrane; Multi-pass membrane protein.  | 0 |
| Q14192 | Cytoplasm {ECO:0000269 PubMed:11813260, | 0 |
| Q9BV36 | Cytoplasm.                              | 0 |
| Q9BV87 | Membrane {ECO:0000305}; Single-pass men | 0 |
| Q8NBZ7 | Golgi apparatus, Golgi stack membrane   | 0 |
| Q9NP58 | Cell membrane {ECO:0000269 PubMed:17661 | 0 |
| 075716 | Cytoplasm, perinuclear region. Membrane | 0 |
| Q00341 | Cytoplasm {ECO:0000269 PubMed:8605996}. | 0 |
| Q15435 | Nucleus {ECO:0000250}.                  | 0 |
| Q96RG2 | Cytoplasm {ECO:0000269 PubMed:17595531} | 0 |
| 000506 | Cytoplasm {ECO:0000269 PubMed:15037601} | 0 |
| P07202 | Membrane; Single-pass type I membrane p | 0 |
| P04070 | Secreted {ECO:0000269 PubMed:25618265}. | 0 |
| P37235 | Membrane {ECO:0000305}; Lipid-anchor {E | 0 |
| P11926 |                                         | 0 |
| Q9BSC4 | Nucleus, nucleolus {ECO:0000269 PubMed: | 0 |

|        |                                                                      |   |
|--------|----------------------------------------------------------------------|---|
| Q96CS7 | Recycling endosome membrane {ECO:0000269 PubMed:18076381}.           | 0 |
| Q9H8Y8 | Golgi apparatus membrane {ECO:0000269 PubMed:18486145}.              | 0 |
| 043815 | Cytoplasm {ECO:0000250}. Membrane {ECO:0000269 PubMed:18076381}.     | 0 |
| Q03701 | Nucleus.                                                             | 0 |
| 094806 | Cytoplasm {ECO:0000269 PubMed:18076381}.                             | 0 |
| Q5H9S7 | Membrane {ECO:0000305}; Multi-pass membrane protein.                 | 0 |
| Q16769 | Secreted {ECO:0000269 PubMed:18486145}.                              | 0 |
| Q15042 | Cytoplasm {ECO:0000269 PubMed:9852129}.                              | 0 |
| 075746 | Mitochondrion inner membrane {ECO:0000269 PubMed:18486145}.          | 1 |
| Q96LZ7 | Membrane {ECO:0000305}; Single-pass membrane protein.                | 0 |
| P14868 | Cytoplasm, cytosol {ECO:0000269 PubMed:18486145}.                    | 1 |
| Q16629 | Nucleus {ECO:0000269 PubMed:11336712}.                               | 0 |
| P18827 | Membrane {ECO:0000255}; Single-pass transmembrane protein.           | 0 |
| Q15111 | Cytoplasm {ECO:0000250}.                                             | 1 |
| P43007 | Membrane {ECO:0000269 PubMed:17081065}; Multi-pass membrane protein. | 0 |
| Q07889 |                                                                      | 0 |
| Q16719 | Cytoplasm, cytosol {ECO:0000255 HAMAP-F00001}.                       | 1 |
| 043516 | Cytoplasmic vesicle {ECO:0000250}. Cytoplasm.                        | 0 |
| Q13416 | Nucleus.                                                             | 1 |
| 043929 | Nucleus.                                                             | 0 |
| P08567 |                                                                      | 0 |
| P61587 | Golgi apparatus membrane; Peripheral membrane protein.               | 0 |
| P15336 | Nucleus. Cytoplasm. Mitochondrion outer membrane.                    | 0 |
| Q6YHU6 |                                                                      | 0 |
| Q2M2I8 | Cell membrane {ECO:0000250}; Peripheral membrane protein.            | 0 |
| 060296 | Cytoplasm {ECO:0000250}. Early endosome.                             | 0 |
| Q9NWW7 |                                                                      | 0 |
| Q9UHG3 | Lysosome.                                                            | 0 |
| Q969F8 | Cell membrane; Multi-pass membrane protein.                          | 0 |
| Q99856 | Nucleus {ECO:0000255 PROSITE-ProRule:PF00001}.                       | 0 |
| P63165 | Nucleus membrane. Nucleus speckle. Cytoplasm.                        | 0 |
| Q9UJ71 | Membrane {ECO:0000269 PubMed:10661407}; Multi-pass membrane protein. | 0 |
| P15313 | Endomembrane system; Peripheral membrane protein.                    | 1 |
| Q16236 | Cytoplasm, cytosol {ECO:0000269 PubMed:18486145}.                    | 1 |
| P52701 | Nucleus {ECO:0000269 PubMed:23622243}.                               | 1 |
| Q9HB20 | Golgi apparatus, trans-Golgi network membrane.                       | 0 |
| P35270 | Cytoplasm.                                                           | 0 |
| P54764 | Cell membrane {ECO:0000250}; Single-pass transmembrane protein.      | 0 |
| Q8TEW8 | Endomembrane system. Cell junction. Cell membrane.                   | 0 |
| Q9NSD9 | Cytoplasm {ECO:0000305 PubMed:29573043}.                             | 1 |
|        | Cytoplasm. Cytoplasm, cytoskeleton, microtubule cytoskeleton.        | 1 |
| 000512 | Nucleus {ECO:0000250}.                                               | 0 |
| P54821 | Nucleus.                                                             | 0 |
| Q15392 | Endoplasmic reticulum membrane {ECO:0000269 PubMed:18486145}.        | 1 |
| Q9Y2G8 | Membrane {ECO:0000305}; Single-pass transmembrane protein.           | 0 |
| Q9POL2 | Cell membrane {ECO:0000269 PubMed:21145145}.                         | 0 |
| Q92752 | Secreted, extracellular space, extracellular matrix.                 | 0 |
| Q5T089 |                                                                      | 0 |
| Q9HB71 | Nucleus {ECO:0000269 PubMed:12895292}.                               | 0 |
| P22307 | Cytoplasm {ECO:0000269 PubMed:17157249}.                             | 1 |
| Q9NRR2 | Membrane {ECO:0000305}; Single-pass transmembrane protein.           | 0 |
| Q9BXP8 | Secreted {ECO:0000250}.                                              | 0 |
| Q86X27 | Cytoplasm {ECO:0000250}. Cell membrane.                              | 0 |
| 095841 | Secreted {ECO:0000269 PubMed:10025962}.                              | 0 |
| 060308 | Cell projection, cilium {ECO:0000269 PubMed:18486145}.               | 0 |

|        |                                         |   |
|--------|-----------------------------------------|---|
| 075063 | Golgi apparatus membrane {ECO:0000269 F | 0 |
| Q96MN5 | Nucleus {ECO:0000255 PROSITE-ProRule:PF | 0 |
| Q9Y546 |                                         | 0 |
| Q9P2S5 | Cytoplasm {ECO:0000305}. Cytoplasm, cyt | 0 |
| Q9NP85 | Isoform 1: Cell membrane {ECO:0000305}; | 0 |
| Q9BZE1 | Mitochondrion {ECO:0000269 PubMed:25278 | 1 |
| 060725 | Endoplasmic reticulum membrane {ECO:000 | 0 |
| 000391 | Isoform 1: Golgi apparatus membrane {EC | 0 |
| 000186 | Cytoplasm, cytosol {ECO:0000269 PubMed: | 0 |
| Q86YI8 | Nucleus {ECO:0000269 PubMed:19638409}.  | 0 |
| Q99497 | Cell membrane {ECO:0000250 UniProtKB:Q9 | 0 |
| Q6UXG2 | Cell membrane {ECO:0000269 PubMed:21072 | 0 |
| P41143 | Cell membrane {ECO:0000269 PubMed:22184 | 0 |
| Q01433 |                                         | 0 |
| Q08170 | Nucleus speckle {ECO:0000269 PubMed:145 | 1 |
| Q9BV79 | Isoform 1: Mitochondrion {ECO:0000269 F | 0 |
| Q9BZQ6 | Endoplasmic reticulum lumen {ECO:000025 | 0 |
| Q9BQA1 | Nucleus {ECO:0000269 PubMed:17437848, F | 0 |
| P24539 | Mitochondrion. Mitochondrion inner mem  | 1 |
| Q13547 | Nucleus {ECO:0000269 PubMed:10846170}.  | 1 |
| P52907 | Cytoplasm, cytoskeleton {ECO:0000250}.  | 0 |
| Q96BU1 | Nucleus {ECO:0000269 PubMed:15632002}.  | 0 |
| Q6ZMZ0 | Cytoplasmic granule membrane {ECO:00002 | 0 |
| Q9NR48 | Nucleus {ECO:0000269 PubMed:10860993}.  | 0 |
| 095886 | Cell membrane {ECO:0000250}; Peripheral | 0 |
| P23246 | Nucleus speckle {ECO:0000269 PubMed:257 | 0 |
| Q7L0Q8 | Cell membrane {ECO:0000269 PubMed:16046 | 0 |
| Q3T8J9 | Nucleus {ECO:0000255 PROSITE-ProRule:PF | 0 |
| Q92974 | Cytoplasm, cytoskeleton {ECO:0000269 Pu | 0 |
| Q9Y2Q5 | Late endosome membrane {ECO:0000250}; F | 0 |
| Q14814 | Nucleus {ECO:0000255 PROSITE-ProRule:PF | 1 |
| P19623 |                                         | 0 |
| Q9UK22 | Cytoplasm {ECO:0000250}. Microsome mem  | 1 |
| Q9NRD1 | Cytoplasm {ECO:0000269 PubMed:19716789} | 0 |
| Q9H246 |                                         | 0 |
| Q5T5J6 |                                         | 0 |
| Q9UI95 | Nucleus {ECO:0000269 PubMed:11717438, F | 0 |
| 075061 |                                         | 0 |
| P48357 | Cell membrane {ECO:0000269 PubMed:19159 | 0 |
| Q9Y6Y0 | Cytoplasm {ECO:0000269 PubMed:9696811}. | 0 |
| Q8IYS2 | Membrane {ECO:0000305}; Single-pass typ | 0 |
| 095140 | Mitochondrion outer membrane {ECO:00002 | 0 |
| Q92954 | Secreted {ECO:0000269 PubMed:14976050}. | 0 |
| Q5JXC2 |                                         | 0 |
| Q92540 | Cytoplasm. Nucleus. Note=Predominantly  | 0 |
| P19878 | Cytoplasm.                              | 0 |
| P20941 | Cytoplasm, cytosol {ECO:0000269 PubMed: | 0 |
| P47712 | Cytoplasm. Cytoplasmic vesicle. Note=Tr | 0 |
| 095522 |                                         | 0 |
| Q5T9L3 | Golgi apparatus membrane {ECO:0000269 F | 0 |
| Q13029 | Nucleus {ECO:0000269 PubMed:14633678, F | 0 |
| P10155 | Cytoplasm {ECO:0000269 PubMed:17289661} | 0 |
| P23109 |                                         | 0 |
| Q9Y5K5 | Cytoplasm {ECO:0000269 PubMed:18922472} | 0 |
| 075934 | Nucleus {ECO:0000269 PubMed:12169396, F | 1 |

|        |                                         |   |
|--------|-----------------------------------------|---|
| Q05519 | Nucleus. Note=Colocalizes with spliceos | 1 |
| P32929 | Cytoplasm.                              | 1 |
| Q9BSE5 | Mitochondrion.                          | 1 |
| Q8IWE5 | Cytoplasm {ECO:0000269 PubMed:15905402} | 0 |
| Q08257 | Cytoplasm {ECO:0000269 PubMed:20103721} | 0 |
| Q13105 | Nucleus {ECO:0000269 PubMed:14739298, F | 0 |
| P06729 | Cell membrane {ECO:0000269 PubMed:24375 | 0 |
| Q9UNY4 | Cytoplasm {ECO:0000269 PubMed:15125840} | 0 |
| 000482 | Nucleus {ECO:0000305}.                  | 0 |
| 075037 | Cytoplasm, cytoskeleton {ECO:0000250 Ur | 0 |
| Q9NX46 | Nucleus {ECO:0000269 PubMed:17991898}.  | 0 |
| Q3KQU3 | Cytoplasm, cytoskeleton, spindle {ECO:( | 0 |
| Q9UGM6 | Mitochondrion matrix {ECO:0000269 PubMe | 0 |
| Q8WVF1 | Basal cell membrane. Note=Syncytiotroph | 0 |
| P82914 | Mitochondrion {ECO:0000269 PubMed:25838 | 1 |
| Q8IYI6 | Cytoplasm {ECO:0000250 UniProtKB:054924 | 0 |
| Q99598 | Cytoplasm, perinuclear region. Golgi ap | 0 |
| Q9NX04 | Nucleus {ECO:0000269 PubMed:22548824}.  | 0 |
| Q9HB90 | Cytoplasm {ECO:0000269 PubMed:11073942} | 0 |
| P14543 | Secreted, extracellular space, extracel | 0 |
| 000214 | Cytoplasmic vesicle {ECO:0000269 PubMec | 0 |
| Q9BXI3 | Cytoplasm.                              | 1 |
| Q99707 | Cytoplasm.                              | 0 |
| Q9P2F8 |                                         | 0 |
| Q12836 | Processed zona pellucida sperm-binding  | 0 |
| Q13129 | Nucleus {ECO:0000305}.                  | 0 |
| 015229 | Mitochondrion outer membrane {ECO:00002 | 1 |
| Q5T5D7 | Nucleus {ECO:0000305}.                  | 0 |
| P56696 | Basal cell membrane; Multi-pass membrar | 0 |
| Q9Y243 | Nucleus {ECO:0000269 PubMed:20018949}.  | 0 |
| P41162 | Nucleus {ECO:0000255 PROSITE-ProRule:PF | 1 |
| P11310 | Mitochondrion matrix.                   | 1 |
| Q9BVH7 | Golgi apparatus membrane {ECO:0000250}; | 0 |
| Q13291 | Cell membrane {ECO:0000269 PubMed:11806 | 0 |
| P09326 | Cell membrane {ECO:0000269 PubMed:19993 | 0 |
| Q9Y2J8 | Cytoplasm {ECO:0000269 PubMed:12392711} | 1 |
| P21912 | Mitochondrion inner membrane; Periphera | 1 |
| P55001 | Secreted, extracellular space, extracel | 0 |
| Q9H9Y2 | Nucleus, nucleolus {ECO:0000269 PubMed: | 1 |
| Q9UGL1 | Nucleus {ECO:0000255 PROSITE-ProRule:PF | 1 |
| Q16222 | Cytoplasm. Note=In spermatozoa, localiz | 0 |
| Q01459 | Lysosome.                               | 0 |
| Q9Y2D8 | Cell junction, adherens junction {ECO:( | 0 |
| Q9NWK9 |                                         | 0 |
| Q15291 | Nucleus {ECO:0000269 PubMed:17355966}.  | 0 |
| Q9HOR5 | Cytoplasm {ECO:0000269 PubMed:17266443} | 0 |
| P32455 | Cytoplasm {ECO:0000269 PubMed:21151871} | 0 |
| Q9P2E2 | Cytoplasm, cytoskeleton {ECO:0000305}.  | 0 |
| Q07002 |                                         | 0 |
| 014966 | Cell membrane {ECO:0000305}; Lipid-anch | 0 |
| P42892 | Cell membrane; Single-pass type II memk | 0 |
| P35914 | Mitochondrion matrix {ECO:0000250 UniPr | 1 |
| Q02535 | Nucleus.                                | 0 |
| P20023 | Cell membrane {ECO:0000269 PubMed:13835 | 0 |
| P15529 | Cytoplasmic vesicle, secretory vesicle, | 0 |



|        |                                         |   |
|--------|-----------------------------------------|---|
| 043395 | Nucleus {ECO:0000269 PubMed:17932117, I | 0 |
| Q96BI3 | Endoplasmic reticulum membrane {ECO:000 | 0 |
| Q32P28 | Isoform 1: Endoplasmic reticulum.; Sec  | 0 |
| P11166 | Cell membrane {ECO:0000269 PubMed:1824  | 0 |
| Q99848 | Nucleus, nucleolus {ECO:0000269 PubMed: | 0 |
| Q12834 | Cytoplasm, cytoskeleton, microtubule or | 1 |
| 094829 | Cytoplasm. Nucleus.                     | 0 |
| 060909 | Golgi apparatus, Golgi stack membrane;  | 0 |
| 043414 |                                         | 0 |
| P14550 | Cytoplasm, cytosol {ECO:0000250 UniProt | 0 |
| Q06830 | Cytoplasm {ECO:0000269 PubMed:17081065, | 0 |
| Q92569 |                                         | 0 |
| 060635 | Lysosome membrane {ECO:0000269 PubMed:1 | 0 |
| Q9H2G9 | Golgi apparatus membrane {ECO:0000269 F | 1 |
| Q5TID7 | Cytoplasm, cytoskeleton {ECO:0000250 Ur | 0 |
| 060779 | Cell membrane {ECO:0000305 PubMed:10391 | 0 |
| 000519 | Endomembrane system {ECO:0000269 PubMec | 0 |
| Q96CB9 | Mitochondrion {ECO:0000269 PubMed:21531 | 0 |
| Q9Y3A6 | Endoplasmic reticulum membrane {ECO:000 | 0 |
| Q01658 | Nucleus.                                | 1 |
| Q15417 |                                         | 0 |
| Q9Y520 |                                         | 0 |
| P13726 | Isoform 1: Membrane {ECO:0000269 PubMec | 0 |
| P28288 | Peroxisome membrane {ECO:0000269 PubMec | 1 |
| 075379 | Golgi apparatus, trans-Golgi network me | 1 |
| Q9H2P9 |                                         | 0 |
| P48023 | Cell membrane {ECO:0000269 PubMed:17557 | 0 |
| Q9UKA9 | Nucleus {ECO:0000250}.                  | 0 |
| P23510 | Membrane; Single-pass type II membrane  | 0 |
| P30041 | Cytoplasm {ECO:0000269 PubMed:16186110, | 1 |
| Q6PI48 | Mitochondrion matrix {ECO:0000269 PubMe | 1 |
| P28845 | Endoplasmic reticulum membrane {ECO:000 | 1 |
| 014896 | Nucleus {ECO:0000305}. Cytoplasm {ECO:( | 1 |
| Q68CQ4 | Nucleus {ECO:0000250}. Nucleus, nucleol | 0 |
| Q32ZL2 | Cell membrane {ECO:0000250 UniProtKB:Q  | 0 |
| P01008 | Secreted, extracellular space.          | 0 |
| Q9UKA8 |                                         | 0 |
| 095926 | Nucleus {ECO:0000269 PubMed:11118353, I | 0 |
| Q9BUV0 |                                         | 0 |
| Q9Y2D2 | Golgi apparatus membrane {ECO:0000269 F | 0 |
| Q9P2K3 | Nucleus {ECO:0000255 PROSITE-ProRule:PF | 1 |
| P16949 | Cytoplasm, cytoskeleton.                | 1 |
| Q9H019 |                                         | 0 |
| Q9NR34 | Golgi apparatus membrane; Single-pass t | 0 |
| P51955 | Isoform 1: Nucleus. Nucleus, nucleolus  | 0 |
| Q15418 | Nucleus. Cytoplasm.                     | 0 |
| Q86SQ9 | Endoplasmic reticulum membrane {ECO:000 | 0 |
| Q9UMX5 | Secreted, extracellular space {ECO:0000 | 0 |
| Q96IY1 | Nucleus {ECO:0000269 PubMed:15502821, I | 1 |
| 014497 | Nucleus {ECO:0000255 PROSITE-ProRule:PF | 1 |
| P49454 | Cytoplasm, perinuclear region. Nucleus  | 0 |
| P15927 | Nucleus {ECO:0000269 PubMed:10982866, I | 1 |
| Q12972 | Nucleus. Nucleus speckle. Note=Primari  | 0 |
| Q86Y82 | Endosome membrane; Single-pass type IV  | 0 |
| Q969Z3 | Mitochondrion outer membrane; Periphera | 1 |

|        |                                         |   |
|--------|-----------------------------------------|---|
| Q96SU4 | Late endosome membrane {ECO:0000269 Pub | 1 |
| A0FGR8 | Cell membrane {ECO:0000269 PubMed:17360 | 0 |
| O15446 | Nucleus, nucleolus {ECO:0000269 PubMed: | 1 |
| Q14696 | Endoplasmic reticulum {ECO:0000269 PubM | 0 |
| Q14257 | Endoplasmic reticulum lumen.            | 1 |
| Q9HC84 | Secreted.                               | 0 |
| P07339 | Lysosome. Melanosome. Secreted, extrace | 0 |
| Q9BWP8 | Secreted {ECO:0000269 PubMed:25912189}. | 0 |
| Q8WVM7 | Nucleus. Chromosome. Chromosome, centro | 1 |
| Q9UNA3 | Golgi apparatus membrane {ECO:0000305}; | 1 |
| Q15831 | Nucleus. Cytoplasm. Membrane {ECO:00002 | 0 |
| Q03164 | Nucleus {ECO:0000269 PubMed:12482972}.  | 1 |
| O43280 | Cell membrane {ECO:0000250 UniProtKB:P1 | 1 |
| Q9NQC8 | Cytoplasm, cytoskeleton, cilium basal b | 0 |
| P22894 | Cytoplasmic granule. Secreted, extracel | 0 |
| P02647 | Secreted.                               | 0 |
| Q9H0D2 | Nucleus {ECO:0000250 UniProtKB:Q0GGX2,  | 0 |
| Q9UPR5 | Cell membrane {ECO:0000250 UniProtKB:P4 | 0 |
| Q9Y664 | Lysosome membrane {ECO:0000269 PubMed:2 | 0 |
| P62851 |                                         | 0 |
| Q15058 | Nucleus {ECO:0000269 PubMed:16431929}.  | 0 |
| P45379 |                                         | 0 |
| Q5T1V6 | Cytoplasm {ECO:0000269 PubMed:23972372} | 0 |
| Q08AD1 | Cytoplasm, cytoskeleton {ECO:0000269 Pu | 1 |
| P18850 | Endoplasmic reticulum membrane; Single- | 0 |
| P07320 |                                         | 0 |
| P09430 | Nucleus {ECO:0000250 UniProtKB:P10856}. | 0 |
| O60462 | Membrane {ECO:0000269 PubMed:11112349}; | 0 |
| P16220 | Nucleus {ECO:0000255 PROSITE-ProRule:PF | 1 |
| O75840 | Nucleus {ECO:0000269 PubMed:9774444}.   | 0 |
| P02766 | Secreted. Cytoplasm.                    | 0 |
| Q9UBX8 | Golgi apparatus, Golgi stack membrane   | 0 |
| Q8WWF1 | Secreted {ECO:0000305}.                 | 0 |
| Q9ULX7 | Membrane {ECO:0000305}; Single-pass typ | 0 |
| Q6TDU7 |                                         | 0 |
| Q12912 | Processed lymphoid-restricted membrane  | 0 |
| O94823 | Cytoplasmic vesicle membrane; Multi-pas | 0 |
| Q15005 | Microsome membrane {ECO:0000250}; Multi | 0 |
| Q9P2H5 |                                         | 0 |
| Q7Z7B0 | Cytoplasm, cytoskeleton {ECO:0000269 Pu | 1 |
| Q15651 | Nucleus.                                | 1 |
| Q7Z6J8 | Cytoplasm {ECO:0000305}.                | 0 |
| P21554 | Cell membrane {ECO:0000269 PubMed:21895 | 1 |
| Q9HBV2 | Cytoplasmic vesicle, secretory vesicle, | 1 |
| Q9BQI5 | Membrane, clathrin-coated pit {ECO:0000 | 0 |
| Q92576 |                                         | 0 |
| Q8N7X0 |                                         | 0 |
| P21580 | Cytoplasm. Nucleus. Lysosome.; A20p50:  | 0 |
| O43687 | Isoform Alpha: Lateral cell membrane; I | 0 |
| Q13637 | Mitochondrion {ECO:0000269 PubMed:12186 | 0 |
| P10242 | Nucleus {ECO:0000255 PROSITE-ProRule:PF | 0 |
| Q9H2A2 | Cytoplasm {ECO:0000250}.                | 1 |
| O00141 | Cytoplasm. Nucleus. Endoplasmic reticul | 0 |
| Q9NTX7 | Cytoplasm, cytosol. Nucleus. Note=Trans | 0 |
| P05089 | Cytoplasm {ECO:0000269 PubMed:16141327} | 0 |

|        |                                          |   |
|--------|------------------------------------------|---|
| P29279 | Secreted, extracellular space, extracel  | 0 |
| 043680 | Nucleus.                                 | 0 |
| Q8TBY8 | Cell projection, cilium, flagellum {ECO  | 0 |
| Q9H204 | Nucleus {ECO:0000269 PubMed:15467741}.   | 0 |
| 060669 | Cell membrane {ECO:0000269 PubMed:15505  | 0 |
| Q9H8G1 | Nucleus {ECO:0000305}.                   | 0 |
| Q9BV40 | Lysosome membrane {ECO:0000269 PubMed:2  | 0 |
| 014950 |                                          | 0 |
| 043524 | Cytoplasm, cytosol {ECO:0000269 PubMed:  | 0 |
| Q8NENO |                                          | 0 |
| P04844 | Endoplasmic reticulum {ECO:0000250 UniF  | 1 |
| 014958 | Sarcoplasmic reticulum lumen {ECO:00002  | 1 |
| Q13563 | Cell projection, cilium membrane {ECO:(  | 0 |
| Q9UNQ0 | Cell membrane {ECO:0000269 PubMed:15001  | 0 |
| P10451 | Secreted.                                | 0 |
| 095210 | Preautophagosomal structure membrane {F  | 0 |
| Q14094 |                                          | 0 |
| P49788 | Membrane {ECO:0000269 PubMed:21303978};  | 0 |
| Q9H3U5 | Membrane {ECO:0000305}; Multi-pass mem   | 0 |
| Q9H2M9 | Cytoplasm. Note=In neurons, it is enric  | 0 |
| Q96G04 | Cytoplasm {ECO:0000269 PubMed:23349634}  | 0 |
| 060437 | Cell junction, desmosome {ECO:0000269 F  | 0 |
| Q9NPG3 | Nucleus, nucleoplasm. Nucleus, PML body  | 0 |
| Q9Y4X4 | Nucleus.                                 | 0 |
| P15374 | Cytoplasm.                               | 0 |
| 014917 | Cell membrane {ECO:0000250}; Single-pas  | 0 |
| Q53T59 |                                          | 0 |
| Q9H6V9 | Lipid droplet {ECO:0000269 PubMed:17135  | 0 |
| Q9P2L0 | Cytoplasm, cytoskeleton, microtubule or  | 0 |
| P30279 | Nucleus {ECO:0000269 PubMed:18827403}.   | 0 |
| Q8WXX0 | Cytoplasm, cytoskeleton, cilium axoneme  | 0 |
| Q6UW02 | Membrane {ECO:0000305}; Single-pass men  | 0 |
| 043676 | Mitochondrion inner membrane {ECO:00003  | 0 |
| Q9UPW6 | Nucleus matrix {ECO:0000255 PROSITE-Pro  | 1 |
| Q9Y2T3 |                                          | 0 |
| Q9UDY2 | Cell junction, adherens junction. Cell   | 0 |
| Q9H1Z8 | Secreted {ECO:0000269 PubMed:21349154}.  | 0 |
| Q9UKF6 | Nucleus {ECO:0000269 PubMed:15037765}.   | 0 |
| Q86VD9 | Endoplasmic reticulum membrane {ECO:000  | 0 |
| Q53HC0 | Cytoplasm, cytoskeleton, microtubule or  | 0 |
| Q9H425 | Cytoplasm {ECO:0000269 PubMed:22361696}  | 0 |
| Q6ZTA4 | Cytoplasm {ECO:0000250}. Cytoplasm, cyt  | 0 |
| Q9H583 | Nucleus, nucleolus {ECO:0000269 PubMed:  | 0 |
| P54727 | Nucleus. Cytoplasm. Note=The intracellu  | 1 |
| Q5T1M5 | Cytoplasm {ECO:0000250 UniProtKB:Q6P9Q6  | 0 |
| Q9NX38 | Nucleus speckle {ECO:0000250 UniProtKB:  | 0 |
| Q96EX3 | Cytoplasm {ECO:0000269 PubMed:19521662}  | 0 |
| Q01105 | Cytoplasm, cytosol. Endoplasmic reticul  | 0 |
| Q15257 | Cytoplasm {ECO:0000269 PubMed:17333320}  | 0 |
| Q53GS7 | Nucleus {ECO:0000269 PubMed:12668658}.   | 0 |
| P61106 | Recycling endosome {ECO:0000269 PubMed:  | 0 |
| Q7Z7A1 | Cytoplasm, cytoskeleton, microtubule or  | 0 |
| Q13049 | Cytoplasm. Note=Localized in cytoplasmic | 0 |
| Q9UKT8 |                                          | 0 |
| Q9HC98 | Cytoplasm. Nucleus. Nucleus speckle. Cy  | 0 |

|        |                                         |   |
|--------|-----------------------------------------|---|
| Q5W0U4 | Cytoplasm. Membrane {ECO:0000250}; Peri | 0 |
| 000743 | Mitochondrion {ECO:0000269 PubMed:29053 | 0 |
| P51970 | Mitochondrion inner membrane {ECO:00002 | 1 |
| Q9BSH5 |                                         | 0 |
| Q96H35 |                                         | 0 |
| Q9BY10 | Cell membrane {ECO:0000250}; Multi-pass | 0 |
| Q6YN16 | Peroxisome {ECO:0000269 PubMed:19703561 | 1 |
| Q9BPZ7 | Cell membrane; Peripheral membrane prot | 0 |
| Q92570 | Nucleus {ECO:0000255 PROSITE-ProRule:PF | 0 |
| Q8IXK2 | Golgi apparatus membrane {ECO:0000250}; | 1 |
| Q9H553 | Membrane {ECO:0000305}; Single-pass men | 0 |
| Q99062 | Isoform 2: Secreted {ECO:0000305}.; Cel | 0 |
| Q06136 | Endoplasmic reticulum membrane {ECO:000 | 0 |
| 075351 | Prevacuolar compartment membrane; Perip | 0 |
| 095948 | Nucleus.                                | 1 |
| Q9UFG5 |                                         | 0 |
| Q96K62 | Nucleus {ECO:0000305}.                  | 0 |
| P49750 | Nucleus {ECO:0000269 PubMed:17890166}.  | 0 |
| Q8WV16 |                                         | 0 |
| Q3B8N5 | Nucleus {ECO:0000305}.                  | 0 |
| P58304 | Nucleus {ECO:0000250 UniProtKB:Q61412}. | 1 |
| Q9Y324 | Nucleus, nucleolus {ECO:0000250}.       | 0 |
| Q8ND07 | Cytoplasm, cytoskeleton, cilium basal b | 0 |
| Q8TD19 | Cytoplasm {ECO:0000269 PubMed:14660563} | 0 |
| P07311 |                                         | 0 |
| Q96FT9 | Cytoplasm, cytoskeleton {ECO:0000269 Pt | 0 |
| P61916 | Secreted {ECO:0000269 PubMed:11125141,  | 0 |
| Q4LDG9 | Cytoplasm, cytoskeleton, cilium axoneme | 0 |
| Q9H1B7 | Nucleus {ECO:0000250 UniProtKB:Q5EIC4}. | 0 |
| P49753 | Mitochondrion {ECO:0000269 PubMed:16940 | 1 |
| Q14767 | Secreted, extracellular space, extracel | 0 |
| 015033 | Cytoplasm, cytosol {ECO:0000269 PubMed: | 0 |
| Q6EMB2 | Cell projection, cilium {ECO:0000269 Pt | 0 |
| Q9UPI3 | Cell membrane; Multi-pass membrane prot | 0 |
| 014678 | Peroxisome membrane; Multi-pass membrar | 0 |
| P36957 | Mitochondrion matrix {ECO:0000305 PubMe | 0 |
| Q6NUP7 | Cytoplasm {ECO:0000269 PubMed:18715871} | 0 |
| Q53FD0 |                                         | 0 |
| Q9GZT3 | Mitochondrion {ECO:0000269 PubMed:16762 | 0 |
| P49756 | Nucleus speckle. Cytoplasm. Note=Coloca | 1 |
| Q02252 | Mitochondrion.                          | 1 |
| P49770 |                                         | 0 |
| Q9H7Z3 |                                         | 0 |
| Q9Y2Z9 | Mitochondrion inner membrane {ECO:00002 | 0 |
| 094864 | Nucleus {ECO:0000269 PubMed:11564863}.  | 0 |
| Q96CT2 |                                         | 0 |
| Q9Y6K1 | Nucleus {ECO:0000269 PubMed:12145218}.  | 0 |
| Q9ULI0 | Nucleus {ECO:0000269 PubMed:24561620}.  | 0 |
| P68106 | Cytoplasm {ECO:0000250}. Sarcoplasmic r | 0 |
| Q8NHH9 | Endoplasmic reticulum membrane {ECO:000 | 0 |
| P62699 | Nucleus {ECO:0000250 UniProtKB:Q65Z55}. | 0 |
| Q8NCA5 |                                         | 0 |
| Q9BSR8 | Golgi apparatus, cis-Golgi network memt | 1 |
| Q6ULP2 | Cytoplasm {ECO:0000269 PubMed:14665628} | 0 |
| Q3ZCW2 |                                         | 0 |

|        |                                         |   |
|--------|-----------------------------------------|---|
| Q9H165 | Cytoplasm {ECO:0000269 PubMed:11161790} | 0 |
| Q9P021 | Cytoplasm {ECO:0000250}. Cell junction, | 0 |
| P16422 | Lateral cell membrane {ECO:0000269 PubM | 0 |
| Q8IX21 | Nucleus {ECO:0000269 PubMed:24561620, I | 0 |
| P14735 | Cytoplasm, cytosol {ECO:0000269 PubMed: | 0 |
| Q9HB03 | Endoplasmic reticulum membrane {ECO:000 | 0 |
| O14879 | Cytoplasm. Mitochondrion.               | 0 |
| Q8TAU0 | Nucleus {ECO:0000255 PROSITE-ProRule:PF | 0 |
| P09913 | Cytoplasm {ECO:0000269 PubMed:21190939} | 0 |
| Q9HCL2 | Mitochondrion outer membrane {ECO:00002 | 0 |
| Q9NTM9 | Cytoplasm {ECO:0000269 PubMed:16182249} | 1 |
| Q9UQK1 |                                         | 0 |
| Q8N2H3 |                                         | 0 |
| Q9NRU3 | Cell membrane {ECO:0000250}; Multi-pass | 0 |
| P50539 | Nucleus.                                | 0 |
| Q9H8K7 |                                         | 0 |
| Q9NRZ9 | Nucleus {ECO:0000250}. Note=Closely ass | 1 |
| P49683 | Cell membrane; Multi-pass membrane prot | 0 |
| Q6NUS6 | Membrane {ECO:0000305}; Single-pass typ | 0 |
| Q5T686 |                                         | 0 |
| Q9BZH6 | Cytoplasm, cytoskeleton, cilium basal b | 0 |
| Q5T2E6 | Membrane {ECO:0000305}; Single-pass men | 0 |
| Q5T655 | Cell projection, cilium {ECO:0000250 Ur | 0 |
| P17174 | Cytoplasm {ECO:0000269 PubMed:1974457}. | 1 |
| Q14344 | Cell membrane {ECO:0000269 PubMed:10747 | 0 |
| Q7Z3B3 | Nucleus {ECO:0000269 PubMed:20018852}.  | 0 |
| P34998 | Cell membrane; Multi-pass membrane prot | 0 |
| P14651 | Nucleus.                                | 0 |
| P14653 | Nucleus.                                | 0 |
| P35548 | Nucleus.                                | 0 |
| Q02763 | Cell membrane {ECO:0000269 PubMed:18425 | 0 |
| Q9H8G2 |                                         | 0 |
| Q9NQ60 | Cytoplasmic vesicle, secretory vesicle, | 0 |
| Q9Y581 | Secreted {ECO:0000250}.                 | 0 |
| Q16655 | Endoplasmic reticulum membrane; Single- | 0 |
| Q9NZQ7 | Cell membrane {ECO:0000269 PubMed:28815 | 0 |
| P05013 | Secreted.                               | 0 |
| P32881 | Secreted.                               | 0 |
| P42262 | Cell membrane {ECO:0000269 PubMed:23735 | 0 |
| Q8NFB3 | Chromosome, centromere, kinetochore. Nu | 0 |
| Q6UB35 | Mitochondrion {ECO:0000269 PubMed:12937 | 0 |
| Q8IYT3 |                                         | 0 |
| P22061 | Cytoplasm.                              | 0 |
| Q9ULL1 |                                         | 0 |
| Q9HAI6 |                                         | 0 |
| O15481 | Cytoplasm {ECO:0000250 UniProtKB:A2A9R5 | 1 |
| Q9H1C7 | Membrane {ECO:0000305}; Single-pass men | 1 |
| Q9H6Y2 | Nucleus, nucleolus {ECO:0000250}. Cytop | 0 |
| Q8WWN8 | Cytoplasm {ECO:0000250}. Cytoplasm, cyt | 0 |
| Q9UN66 | Cell membrane {ECO:0000250 UniProtKB:Q5 | 0 |
| Q9UN67 | Cell membrane {ECO:0000250}; Single-pas | 0 |
| Q9Y5E9 | Cell membrane {ECO:0000250}; Single-pas | 0 |
| Q9Y5F1 | Cell membrane {ECO:0000250}; Single-pas | 0 |
| Q9BXI2 | Mitochondrion inner membrane; Multi-pas | 0 |
| Q9UQP3 | Secreted, extracellular space, extracel | 0 |

|        |                                         |   |
|--------|-----------------------------------------|---|
| 060783 | Mitochondrion {ECO:0000269 PubMed:25838 | 0 |
| Q8N0S6 | Nucleus {ECO:0000269 PubMed:16716197}.  | 0 |
| Q96JE7 | Endoplasmic reticulum membrane {ECO:000 | 1 |
| Q5T7V8 | Cytoplasm {ECO:0000269 PubMed:15781263} | 0 |
| 000270 | Cell membrane {ECO:0000269 PubMed:21712 | 0 |
| Q9BWD1 | Cytoplasm, cytosol {ECO:0000305 PubMed: | 1 |
| P17987 | Cytoplasm, cytosol {ECO:0000269 PubMed: | 0 |
| Q92543 | Early endosome membrane {ECO:0000250 Ur | 0 |
| P48544 | Membrane {ECO:0000269 PubMed:22315453,  | 0 |
| Q6P1R3 |                                         | 0 |
| Q9HCN2 | Mitochondrion {ECO:0000269 PubMed:11030 | 0 |
| Q8IYF3 | Chromosome {ECO:0000250 UniProtKB:Q14A1 | 0 |
| P36575 |                                         | 0 |
| Q5EBL8 | Isoform 2: Secreted {ECO:0000305}.; Iso | 0 |
| Q0GE19 | Cell membrane {ECO:0000269 PubMed:17628 | 0 |
| Q96RS6 | Isoform 1: Cytoplasm. Nucleus.; Isoform | 0 |
| Q9NPA8 | Nucleus, nucleoplasm {ECO:0000255 HAMA  | 0 |
| Q96GX5 | Cytoplasm, cytoskeleton, microtubule or | 0 |
| Q5T5P2 | Cytoplasm {ECO:0000250 UniProtKB:A2AQ25 | 0 |
| Q6UX71 | Membrane {ECO:0000305}; Single-pass ty  | 0 |
| Q9BR77 |                                         | 0 |
| Q16514 | Nucleus {ECO:0000269 PubMed:11564863, I | 0 |
| Q8TC92 | Cell membrane {ECO:0000269 PubMed:11360 | 0 |
| 014788 | Isoform 1: Cell membrane; Single-pass t | 0 |
| 075570 | Mitochondrion {ECO:0000269 PubMed:17803 | 0 |
| Q86XN7 |                                         | 0 |
| P61960 | Nucleus {ECO:0000269 PubMed:15071506}.  | 0 |
| 075554 | Nucleus {ECO:0000269 PubMed:28781166}.  | 0 |
| P32519 | Nucleus.                                | 0 |
| 015198 | Cytoplasm {ECO:0000250}. Nucleus {ECO:( | 0 |
| Q92598 | Cytoplasm {ECO:0000269 PubMed:9931472}. | 0 |
| Q8WVZ9 |                                         | 0 |
| Q9Y673 | Endoplasmic reticulum membrane {ECO:000 | 0 |
| Q96B26 | Cytoplasm {ECO:0000269 PubMed:17545563} | 0 |
| P62495 | Cytoplasm {ECO:0000269 PubMed:24486019} | 0 |
| Q15582 | Secreted {ECO:0000269 PubMed:18450759,  | 0 |
| Q9NYF3 |                                         | 0 |
| Q9H173 | Endoplasmic reticulum lumen {ECO:000026 | 1 |
| Q9BPZ3 | Cytoplasm {ECO:0000269 PubMed:11172725} | 0 |
| Q9UBF9 | Cell membrane, sarcolemma {ECO:0000269  | 0 |
| Q7LBC6 | Nucleus {ECO:0000250}.                  | 1 |
| P18146 | Nucleus {ECO:0000269 PubMed:20363028}.  | 0 |
| Q9Y6X1 | Membrane; Single-pass type IV membrane  | 0 |
| Q14651 | Cytoplasm.                              | 0 |
| Q9Y2G7 | Nucleus {ECO:0000305}.                  | 0 |
| P13056 | Nucleus {ECO:0000255 PROSITE-ProRule:PF | 1 |
| P42166 | Nucleus. Chromosome. Note=Expressed dif | 0 |
| P40616 | Golgi apparatus membrane {ECO:0000269 F | 0 |
| Q9H1C3 | Membrane {ECO:0000305}; Single-pass ty  | 0 |
| Q49AM1 | Mitochondrion {ECO:0000269 PubMed:16226 | 0 |
| 014508 |                                         | 0 |
| P25208 | Nucleus.                                | 1 |
| Q9Y3C0 | Early endosome {ECO:0000305}.           | 0 |
| 014727 | Cytoplasm {ECO:0000269 PubMed:12804598} | 1 |
| P10909 | Isoform 1: Secreted {ECO:0000269 PubMec | 0 |

|        |                                         |   |
|--------|-----------------------------------------|---|
| 014763 | Membrane; Single-pass type I membrane p | 0 |
| 060504 | Isoform Alpha: Cell junction {ECO:00002 | 0 |
| Q14289 | Cytoplasm. Cytoplasm, perinuclear regio | 0 |
| P35348 | Nucleus membrane; Multi-pass membrane p | 0 |
| P48454 |                                         | 0 |
| Q96JY6 | Cytoplasm {ECO:0000269 PubMed:15659642} | 0 |
| P34913 | Cytoplasm. Peroxisome.                  | 0 |
| Q96K19 | Endoplasmic reticulum membrane {ECO:000 | 0 |
| Q13148 | Nucleus {ECO:0000269 PubMed:17023659, F | 0 |
| P28908 | Isoform 1: Cell membrane {ECO:0000269 F | 0 |
| 075608 | Cytoplasm {ECO:0000250}.                | 1 |
| Q9H336 | Secreted {ECO:0000305}.                 | 0 |
| Q92905 | Cytoplasm, cytosol {ECO:0000269 PubMed: | 1 |
| P11678 | Cytoplasmic granule. Note=Cytoplasmic g | 1 |
| Q92667 | Mitochondrion outer membrane {ECO:00002 | 1 |
| P38432 | Nucleus {ECO:0000269 PubMed:7679389}. N | 1 |
| Q14258 | Cytoplasm {ECO:0000269 PubMed:17392790} | 0 |
| Q9HB40 | Secreted {ECO:0000305}.                 | 0 |
| Q13207 | Nucleus {ECO:0000269 PubMed:29726930}.  | 0 |
| P78383 | Endoplasmic reticulum membrane {ECO:000 | 0 |
| P57082 | Nucleus {ECO:0000255 PROSITE-ProRule:PF | 0 |
| Q8IWB6 | Cytoplasm {ECO:0000250}. Midbody {ECO:( | 0 |
| Q9C073 |                                         | 0 |
| Q15003 | Nucleus {ECO:0000269 PubMed:11694586}.  | 1 |
| A2VDJ0 | Cell membrane {ECO:0000269 PubMed:23690 | 0 |
| Q9BWT6 | Nucleus {ECO:0000305}.                  | 0 |
| Q9C030 | Cytoplasm {ECO:0000269 PubMed:17156811, | 0 |
| Q96J66 | Cell membrane {ECO:0000269 PubMed:19383 | 0 |
| Q8NDF8 | Nucleus {ECO:0000269 PubMed:18172165, F | 0 |
| P51828 | Membrane; Multi-pass membrane protein.  | 0 |
| Q63HK5 | Nucleus {ECO:0000255 PROSITE-ProRule:PF | 0 |
| Q86YB7 | Mitochondrion {ECO:0000305}.            | 1 |
| Q6P4A8 | Lysosome {ECO:0000250}.                 | 0 |
| Q8WU10 | Nucleus {ECO:0000269 PubMed:27745833}.  | 0 |
| P10997 | Secreted {ECO:0000269 PubMed:17374526}. | 0 |
| Q15842 | Membrane; Multi-pass membrane protein   | 0 |
| Q9BZR8 | Cytoplasm {ECO:0000269 PubMed:11054413} | 1 |
| Q8WXF1 | Nucleus, nucleolus. Nucleus matrix {ECO | 0 |
| Q6P9A3 | Nucleus {ECO:0000305}.                  | 0 |
| P04217 | Secreted.                               | 0 |
| Q8TBC5 | Nucleus {ECO:0000255 PROSITE-ProRule:PF | 1 |
| Q13398 | Nucleus {ECO:0000305}.                  | 0 |
| Q9UPQ7 | Cell junction, synapse {ECO:0000250 Uni | 0 |
| Q99496 | Nucleus {ECO:0000269 PubMed:21282530}.  | 0 |
| Q7Z2T5 |                                         | 0 |
| P01040 | Cytoplasm {ECO:0000269 PubMed:21944047} | 0 |
| Q7L190 | Nucleus {ECO:0000250 UniProtKB:Q8CCG4}. | 1 |
| Q9HBU9 | Membrane {ECO:0000269 PubMed:26642364}; | 0 |
| 060513 | Golgi apparatus, Golgi stack membrane;  | 0 |
| Q9GZZ1 | Cytoplasm {ECO:0000269 PubMed:16507339, | 0 |
| P33681 | Membrane; Single-pass type I membrane p | 0 |
| Q8NI77 | Cell projection, ruffle. Cytoplasm. Nuc | 0 |
| P48165 | Cell membrane {ECO:0000269 PubMed:18006 | 0 |
| Q49AN0 | Cytoplasm {ECO:0000269 PubMed:9801304}. | 0 |
| Q9Y5Y5 | Peroxisome membrane {ECO:0000269 PubMec | 0 |

|         |                                         |   |
|---------|-----------------------------------------|---|
| P04040  | Peroxisome.                             | 1 |
| Q9UKJ0  | Membrane {ECO:0000305}; Single-pass ty  | 0 |
| Q9UBW7  | Nucleus {ECO:0000305}.                  | 0 |
| Q9Y6H8  | Cell membrane {ECO:0000269 PubMed:3004  | 0 |
| Q8TC07  | Cytoplasm {ECO:0000250}.                | 1 |
| 043613  | Cell membrane {ECO:0000269 PubMed:2695( | 0 |
| Q9NP64  | Nucleus, nucleolus {ECO:0000269 PubMed: | 0 |
| P05413  | Cytoplasm.                              | 1 |
| Q07666  | Nucleus {ECO:0000269 PubMed:1374686, EC | 0 |
| Q9GZU3  | Membrane {ECO:0000305}; Multi-pass mem  | 0 |
| 000421  | Cell membrane {ECO:0000269 PubMed:18397 | 0 |
| P41597  | Cell membrane {ECO:0000269 PubMed:1599  | 0 |
| Q9BT43  | Nucleus {ECO:0000269 PubMed:20154270}.  | 0 |
| P50591  | Cell membrane {ECO:0000269 PubMed:1460  | 0 |
| Q9UID6  | Nucleus {ECO:0000269 PubMed:14522885, F | 0 |
| 094933  | Membrane {ECO:0000305}; Single-pass ty  | 0 |
| P42336  |                                         | 0 |
| Q29RF7  | Nucleus {ECO:0000269 PubMed:11076961, F | 1 |
| 043766  | Mitochondrion {ECO:0000255 HAMAP-Rule:M | 0 |
| Q8N436  | Secreted {ECO:0000305}.                 | 0 |
| P17040  | Nucleus {ECO:0000255 PROSITE-ProRule:PF | 0 |
| Q7Z408  | Cell membrane {ECO:0000305}; Single-pas | 0 |
| P84074  | Cytoplasm, cytosol {ECO:0000250 UniProt | 0 |
| Q5T3J3  | Chromosome {ECO:0000269 PubMed:2354215  | 0 |
| Q96S66  | Membrane {ECO:0000305}; Multi-pass mem  | 0 |
| P81274  | Cytoplasm {ECO:0000269 PubMed:11781568, | 0 |
| Q4AE62  |                                         | 0 |
| P27037  | Membrane; Single-pass type I membrane p | 0 |
| Q496J9  | Cytoplasmic vesicle, secretory vesicle, | 0 |
| P46778  | Cytoplasm, cytosol {ECO:0000269 PubMed: | 0 |
| Q9H2K0  | Mitochondrion {ECO:0000305}.            | 0 |
| Q92664  | Nucleus.                                | 1 |
| Q6T310  | Nucleus, nucleolus {ECO:0000250}. Note= | 1 |
| 095164  | Cell membrane {ECO:0000250}; Lipid-anch | 0 |
| Q7Z6M4  | Mitochondrion {ECO:0000269 PubMed:21531 | 0 |
| 043895  | Cell membrane {ECO:0000250 UniProtKB:Q  | 1 |
| 075995  |                                         | 0 |
| Q01968  | Cytoplasmic vesicle, phagosome membrane | 0 |
| P09466  | Secreted {ECO:0000269 PubMed:12672671,  | 0 |
| Q9NY56  | Secreted {ECO:0000305}.                 | 0 |
| Q9Y399  | Mitochondrion {ECO:0000269 PubMed:2583  | 0 |
| Q8I WV1 | Cell membrane {ECO:0000269 PubMed:1235  | 0 |
| P00747  | Secreted {ECO:0000269 PubMed:10077593,  | 0 |
| Q96A73  | Cytoplasm {ECO:0000250}.                | 0 |
| P53621  | Cytoplasm {ECO:0000250}. Golgi apparatu | 0 |
| Q9HBG7  | Membrane; Single-pass type I membrane p | 0 |
| Q9Y278  | Golgi apparatus membrane {ECO:0000305}; | 0 |
| Q7Z6E9  | Nucleus, nucleolus. Chromosome. Cytopl  | 0 |
| Q8IWR0  | Nucleus {ECO:0000305}.                  | 0 |
| P04554  | Nucleus {ECO:0000250 UniProtKB:P07978}. | 0 |
| Q96JX3  | Membrane {ECO:0000305}; Single-pass men | 0 |
| P50995  | Cytoplasm {ECO:0000269 PubMed:28469040} | 0 |
| 075112  | Cytoplasm, perinuclear region {ECO:0000 | 0 |
| Q9UHM6  | Cell membrane {ECO:0000250}; Multi-pass | 0 |
| Q86V20  | Nucleus {ECO:0000269 PubMed:29656893, F | 0 |



|        |                                         |   |
|--------|-----------------------------------------|---|
| Q9BRX8 | Cytoplasm {ECO:0000269 PubMed:19951071} | 0 |
| 095201 | Nucleus {ECO:0000305}.                  | 0 |
| Q9H7X0 | Golgi apparatus membrane {ECO:0000269 F | 0 |
| P46777 | Cytoplasm {ECO:0000269 PubMed:15469983, | 0 |
| Q9ULJ1 | Cytoplasm, cytoskeleton, microtubule or | 0 |
| Q9NUP7 |                                         | 0 |
| Q96DD0 | Cytoplasm, myofibril, sarcomere, M line | 1 |
| Q9H582 | Nucleus.                                | 0 |
| Q5T9S5 |                                         | 0 |
| Q8IXW5 | Cytoplasm {ECO:0000269 PubMed:22137580} | 0 |
| Q8N2U9 | Membrane {ECO:0000305}; Multi-pass mem  | 0 |
| Q3SYG4 | Cytoplasm, cytoskeleton, microtubule or | 0 |
| P54278 | Nucleus {ECO:0000269 PubMed:23709753}.  | 0 |
| Q8NF64 | Nucleus {ECO:0000269 PubMed:16051670, F | 1 |
| POCE72 |                                         | 0 |
| Q16181 | Cytoplasm {ECO:0000269 PubMed:18460473} | 0 |
| Q8IXQ5 | Nucleus {ECO:0000269 PubMed:16918702}.  | 0 |
| Q9BSE4 | Membrane {ECO:0000305}; Single-pass men | 0 |
| Q13185 | Nucleus {ECO:0000305}. Note=Associates  | 1 |
| P22626 | Nucleus, nucleoplasm {ECO:0000269 PubMe | 0 |
| A6NGB9 | Cytoplasm. Note=In hippocampal neurons  | 0 |
| P01303 | Secreted.                               | 0 |
| Q9BYI3 | Cytoplasm, cytosol {ECO:0000269 PubMed: | 0 |
| 095302 | Endoplasmic reticulum {ECO:0000255 PROS | 0 |
| Q9H0P0 | Cytoplasm {ECO:0000305}.; Isoform 2: Er | 0 |
| P86791 | Lysosome membrane {ECO:0000269 PubMed:1 | 0 |
| Q9UI43 | Mitochondrion {ECO:0000269 PubMed:24036 | 0 |
| Q2TAY7 | Cytoplasm {ECO:0000250 UniProtKB:Q99M63 | 0 |
| Q9H4G4 | Golgi apparatus membrane {ECO:0000269 F | 0 |
| Q9H1U9 | Mitochondrion inner membrane {ECO:00003 | 0 |
| P09496 | Cytoplasmic vesicle membrane; Periphera | 0 |
| 095980 | Cell membrane {ECO:0000269 PubMed:30026 | 0 |
| 060575 | Secreted {ECO:0000250}.                 | 0 |
| Q8IZX4 | Nucleus {ECO:0000250}.                  | 0 |
| P21399 | Cytoplasm.                              | 1 |
| Q9UPV7 |                                         | 0 |
| Q9UI46 | Cytoplasm, cytoskeleton, cilium axoneme | 0 |
| Q5QP82 |                                         | 0 |
| P26992 | Cell membrane; Lipid-anchor, GPI-anchor | 0 |
| Q9HCM3 | Membrane {ECO:0000305}; Multi-pass mem  | 0 |
| 015164 | Nucleus {ECO:0000269 PubMed:21164480}.  | 0 |
| Q9BWK5 | Isoform 1: Cytoplasm {ECO:0000269 PubMe | 0 |
| Q05682 | Cytoplasm, cytoskeleton {ECO:0000250 Ur | 1 |
| P51857 | Cytoplasm {ECO:0000269 PubMed:7508385}. | 1 |
| Q8NFP7 | Cytoplasm {ECO:0000305 PubMed:12121577} | 0 |
| Q8IWL2 | Secreted, extracellular space, extracel | 0 |
| Q9Y4Z2 | Nucleus {ECO:0000255 PROSITE-ProRule:PF | 0 |
| P00749 | Secreted.                               | 0 |
| P10124 | Cytoplasmic granule {ECO:0000269 PubMec | 0 |
| Q7LGC8 | Golgi apparatus membrane {ECO:0000250}; | 1 |
| 095905 | Cytoplasm {ECO:0000269 PubMed:16849563, | 0 |
| P13674 | Endoplasmic reticulum lumen.            | 1 |
| P16260 | Mitochondrion inner membrane {ECO:00003 | 0 |
| 075436 | Cytoplasm {ECO:0000269 PubMed:15078903} | 1 |
| Q9Y4C8 | Nucleus, nucleolus {ECO:0000269 PubMed: | 1 |

|        |                                           |   |
|--------|-------------------------------------------|---|
| O14578 | Cytoplasm {ECO:0000250}.                  | 0 |
| Q8WYA0 | Cell projection, cilium {ECO:0000305 P    | 0 |
| P16219 | Mitochondrion matrix.                     | 1 |
| Q96D96 | Membrane; Multi-pass membrane protein.    | 0 |
| Q8TDD1 | Nucleus, nucleolus {ECO:0000269 PubMed:   | 0 |
| Q71F56 | Nucleus {ECO:0000305}.                    | 0 |
| P42773 |                                           | 0 |
| Q9Y3C5 | Early endosome. Recycling endosome. Cyt   | 0 |
| Q8NHQ8 |                                           | 0 |
| Q14571 | Endoplasmic reticulum membrane; Multi-p   | 0 |
| Q7Z6B0 | Membrane {ECO:0000269 PubMed:12808037};   | 0 |
| Q8N987 | Cytoplasm {ECO:0000250}.                  | 0 |
| Q9H0M0 | Cytoplasm {ECO:0000250}. Cell membrane    | 0 |
| Q9Y305 | Mitochondrion {ECO:0000250}.              | 1 |
| Q13162 | Cytoplasm {ECO:0000269 PubMed:18052930,   | 1 |
| 000148 | Nucleus {ECO:0000269 PubMed:21859714}.    | 0 |
| Q16512 | Cytoplasm {ECO:0000269 PubMed:17332740,   | 0 |
| Q9BQ61 |                                           | 0 |
| P48960 | Cell membrane; Multi-pass membrane prot   | 0 |
| Q9BRX9 | Cytoplasm {ECO:0000250}. Nucleus {ECO:(   | 0 |
| O14908 | Cytoplasm. Membrane; Peripheral membrar   | 0 |
| Q8TDG2 | Cytoplasm, cytoskeleton {ECO:0000305 P    | 0 |
| Q5W111 |                                           | 0 |
| Q9BY08 | Endoplasmic reticulum membrane {ECO:00    | 0 |
| P35670 | Golgi apparatus, trans-Golgi network me   | 1 |
| Q5T200 | Nucleus speckle {ECO:0000269 PubMed:241   | 0 |
| Q9BYT8 | Mitochondrion intermembrane space {ECO:   | 0 |
| Q96CV9 | Cytoplasm, perinuclear region. Golgi ap   | 0 |
|        | Secreted {ECO:0000250}.                   | 0 |
| P18846 | Nucleus.                                  | 1 |
| Q9HD90 | Nucleus {ECO:0000255 PROSITE-ProRule:PF   | 0 |
| P55160 | Cell membrane {ECO:0000269 PubMed:16417   | 0 |
| Q99471 | Isoform 1: Nucleus.; Isoform 2: Cytoplasm | 0 |
| Q86XZ4 | Cytoplasm {ECO:0000250}.                  | 0 |
| P22736 | Nucleus {ECO:0000269 PubMed:15509776, F   | 0 |
| Q01064 | Cytoplasm.                                | 1 |
| P31276 | Nucleus.                                  | 1 |
| P24941 | Cytoplasm, cytoskeleton, microtubule or   | 0 |
| Q07954 | Low-density lipoprotein receptor-relate   | 0 |
| 043248 | Nucleus.                                  | 0 |
| Q9BSB4 | Cytoplasm {ECO:0000269 PubMed:19597335}   | 0 |
| Q16621 | Nucleus, PML body. Cytoplasm. Note=The    | 0 |
| P31275 | Nucleus.                                  | 0 |
| Q9H2S9 | Nucleus {ECO:0000269 PubMed:12444977}.    | 0 |
| P68363 | Cytoplasm, cytoskeleton.                  | 1 |
| Q96AZ1 | Cytoplasm {ECO:0000269 PubMed:23349634,   | 0 |
| Q9NVX7 |                                           | 0 |
| Q9UL12 | Mitochondrion matrix {ECO:0000250}.       | 0 |
| P09172 | Soluble dopamine beta-hydroxylase: Cyt    | 0 |
| Q5TC12 | Mitochondrion {ECO:0000250}.              | 0 |
| Q8NCD3 | Nucleus, nucleolus. Chromosome, centrom   | 0 |
| P17707 |                                           | 0 |
| Q9P032 | Mitochondrion {ECO:0000269 PubMed:18179   | 0 |
| Q70EL2 |                                           | 0 |
| P60201 | Cell membrane {ECO:0000269 PubMed:24103   | 0 |

|        |                                         |   |
|--------|-----------------------------------------|---|
| P05543 | Secreted.                               | 0 |
| Q15014 | Nucleus.                                | 1 |
| Q7Z2G1 | Nucleus membrane {ECO:0000269 PubMed:15 | 0 |
| Q9NP90 | Cell membrane {ECO:0000305}; Lipid-anch | 0 |
| Q7Z2Y5 |                                         | 0 |
| Q6PEV8 |                                         | 0 |
| Q8N693 | Cytoplasm {ECO:0000269 PubMed:15235584} | 0 |
| Q9H3M9 | Nucleus {ECO:0000250}.                  | 0 |
| P51151 | Cell membrane {ECO:0000305}; Lipid-anch | 0 |
| Q9H825 | Cytoplasm {ECO:0000250}. Nucleus {ECO:( | 0 |
| Q7Z4L5 | Cytoplasm, cytoskeleton, cilium axoneme | 1 |
| Q13287 | Cytoplasm.                              | 0 |
| P98066 |                                         | 0 |
| Q8NER5 | Membrane {ECO:0000269 PubMed:12606401}; | 0 |
| Q9UIF8 | Nucleus {ECO:0000255 PROSITE-ProRule:PF | 0 |
| Q7Z2H8 | Cell membrane {ECO:0000250 UniProtKB:Q5 | 0 |
| Q92604 | Endoplasmic reticulum membrane {ECO:000 | 0 |
| P63252 | Membrane; Multi-pass membrane protein.  | 0 |
| Q06265 | Cytoplasm {ECO:0000269 PubMed:11782436} | 0 |
| Q9BZM1 | Secreted {ECO:0000269 PubMed:12522102}. | 0 |
| Q9BPU9 | Cytoplasm, cytoskeleton, cilium basal b | 0 |
| Q96D53 | Mitochondrion membrane {ECO:0000269 Put | 0 |
| 060825 |                                         | 0 |
| P04003 | Secreted.                               | 0 |
| P20851 | Secreted.                               | 0 |
| Q9UKV8 | Cytoplasm, P-body {ECO:0000269 PubMed:2 | 0 |
| P33552 |                                         | 0 |
| Q8N136 | Cell projection, cilium {ECO:0000305}.  | 0 |
| 095573 | Mitochondrion outer membrane {ECO:00002 | 0 |
| Q8IZ52 | Isoform 1: Golgi apparatus, Golgi stack | 0 |
| Q9ULA0 | Cytoplasm {ECO:0000269 PubMed:9632644}. | 0 |
| P05111 | Secreted.                               | 0 |
| Q96PD6 | Endoplasmic reticulum membrane {ECO:000 | 0 |
| 075147 | Cytoplasm {ECO:0000269 PubMed:24793695} | 0 |
| Q9H5Z6 | Nucleus {ECO:0000269 PubMed:23285124}.  | 0 |
| Q9UP95 | Membrane; Multi-pass membrane protein.  | 0 |
| Q9H0I2 |                                         | 0 |
| P41968 | Cell membrane; Multi-pass membrane prot | 0 |
| Q6ZNI0 | Golgi apparatus membrane {ECO:0000250}; | 0 |
| Q8NI51 | Cytoplasm. Nucleus.                     | 0 |
| Q96KR6 | Mitochondrion {ECO:0000269 PubMed:26968 | 0 |
| P19957 | Secreted.                               | 0 |
| Q969T3 | Cytoplasmic vesicle membrane {ECO:00002 | 0 |
| P03973 | Secreted {ECO:0000269 PubMed:2039600, F | 0 |
| Q9BTX7 |                                         | 0 |
| Q8TCU6 | Cytoplasm, cytosol. Cell membrane. Note | 0 |
| Q9H2X9 | Membrane; Multi-pass membrane protein.  | 0 |
| Q5TG30 |                                         | 0 |
| P31431 | Isoform 1: Membrane {ECO:0000255}; Sing | 0 |
| Q9Y6Q9 | Cytoplasm. Nucleus. Note=Mainly cytopla | 1 |
| Q02383 | Secreted.                               | 0 |
| Q9HCD5 | Nucleus.                                | 0 |
| 095292 | Endoplasmic reticulum membrane {ECO:000 | 1 |
| Q9BYG5 | Cytoplasm. Cell membrane {ECO:0000250}. | 0 |
| P19174 | Cell projection, lamellipodium. Cell pr | 0 |

|        |                                          |   |
|--------|------------------------------------------|---|
| Q96NM4 | Nucleus {ECO:0000255 PROSITE-ProRule:PF  | 0 |
| Q13247 | Nucleus {ECO:0000269 PubMed:12549914, I  | 1 |
| Q96MZ0 |                                          | 0 |
| Q9H1H1 |                                          | 0 |
| Q9Y6D5 | Cytoplasm. Membrane. Golgi apparatus. (  | 0 |
| Q9P2E3 |                                          | 0 |
| Q5JPB2 |                                          | 0 |
| P55060 | Cytoplasm {ECO:0000269 PubMed:9323134}.  | 1 |
| Q9UL26 | Endosome membrane {ECO:0000250 UniProtF  | 0 |
| Q16647 | Endoplasmic reticulum membrane {ECO:000  | 1 |
| Q95793 | Cytoplasm {ECO:0000269 PubMed:19029303}  | 0 |
| Q8IXH8 | Cell membrane {ECO:0000269 PubMed:28051  | 0 |
| Q95863 | Nucleus {ECO:0000269 PubMed:15448698, I  | 0 |
| Q95396 | Cytoplasm {ECO:0000255 HAMAP-Rule:MF_03  | 0 |
| Q14662 | Golgi apparatus membrane; Single-pass t  | 0 |
| Q9Y508 | Cytoplasm {ECO:0000269 PubMed:23645206}  | 1 |
| Q9BZ19 |                                          | 0 |
| Q96GQ7 | Nucleus, nucleolus {ECO:0000269 PubMed:  | 0 |
| Q9UBG7 | Nucleus {ECO:0000305}.                   | 0 |
| P04279 | Secreted.                                | 0 |
| Q9H1P6 |                                          | 0 |
| Q8TDM0 | Cytoplasm {ECO:0000305}.                 | 0 |
| Q9H427 | Membrane; Multi-pass membrane protein.   | 0 |
| Q9Y2B4 | Cytoplasm {ECO:0000269 PubMed:10719363}  | 0 |
| P35558 | Cytoplasm.                               | 0 |
| Q9H171 |                                          | 0 |
| Q9BR09 | Cytoplasm {ECO:0000250}.                 | 0 |
| P43363 | Nucleus {ECO:0000269 PubMed:21710496}.   | 0 |
| Q9UBK8 | Isoform B: Cytoplasm. ; Isoform A: Cytop | 1 |
| Q14CZ7 | Mitochondrion {ECO:0000269 PubMed:20869  | 0 |
| P12955 |                                          | 0 |
| Q9H2A9 | Golgi apparatus membrane {ECO:0000250};  | 1 |
| P51809 | Cytoplasmic vesicle, secretory vesicle   | 0 |
| Q01113 | Cell membrane; Single-pass type I membr  | 0 |
| Q95630 | Nucleus. Membrane; Peripheral membrane   | 0 |
| Q9UJ70 |                                          | 0 |
| Q9ULR5 |                                          | 0 |
| Q8WVK2 | Nucleus {ECO:0000305}.                   | 0 |
| Q00566 | Nucleus, nucleolus {ECO:0000269 PubMed:  | 1 |
| Q9P0M4 | Secreted.                                | 0 |
| Q9Y2Q0 | Cytoplasmic vesicle, secretory vesicle,  | 1 |
| Q9UPT9 | Nucleus {ECO:0000250 UniProtKB:Q5DU02}.  | 1 |
| Q8WVV4 | Cell junction, tight junction {ECO:0000  | 0 |
| Q9Y2N7 | Nucleus {ECO:0000269 PubMed:16775626, I  | 0 |
| Q9H609 | Nucleus {ECO:0000305}.                   | 0 |
| Q6NXR0 |                                          | 0 |
| Q02386 | Nucleus.                                 | 0 |
| Q95274 | Cell membrane; Lipid-anchor, GPI-anchoi  | 0 |
| Q9UQ74 | Secreted {ECO:0000305}.                  | 0 |
| P31997 | Cell membrane {ECO:0000269 PubMed:22081  | 0 |
| Q93008 | Cytoplasm {ECO:0000269 PubMed:19135894}  | 0 |
| P16562 | Secreted {ECO:0000305}.                  | 0 |
| P00488 | Cytoplasm. Secreted {ECO:0000269 PubMec  | 0 |
| Q14833 | Cell membrane {ECO:0000269 PubMed:76171  | 0 |
| Q96PN7 | Nucleus {ECO:0000255 PROSITE-ProRule:PF  | 1 |

|        |                                         |   |
|--------|-----------------------------------------|---|
| Q9BY11 | Cytoplasm {ECO:0000250}. Cell projectio | 0 |
| Q8WVV5 | Membrane {ECO:0000305}; Single-pass typ | 0 |
| Q9NXA8 | Mitochondrion matrix. Mitochondrion int | 0 |
| Q9HD23 | Mitochondrion inner membrane {ECO:00002 | 0 |
| Q96S55 | Nucleus {ECO:0000269 PubMed:18842586}.  | 0 |
| Q96EU6 | Nucleus, nucleolus {ECO:0000269 PubMed: | 0 |
| Q13410 | Membrane; Single-pass type I membrane p | 0 |
| P09234 | Nucleus {ECO:0000255 HAMAP-Rule:MF_0315 | 1 |
| P35237 | Cytoplasm {ECO:0000269 PubMed:14670919, | 1 |
| Q9HAV4 | Nucleus {ECO:0000269 PubMed:11777942}.  | 1 |
| Q5T3U5 | Cell membrane {ECO:0000269 PubMed:12566 | 0 |
| P16402 | Nucleus. Chromosome. Note=According to  | 1 |
| Q13608 | Cytoplasm. Peroxisome membrane {ECO:000 | 0 |
| P16083 | Cytoplasm.                              | 1 |
| Q9Y530 | Nucleus, nucleoplasm {ECO:0000269 PubMe | 0 |
| Q8IV45 | Membrane {ECO:0000305}; Single-pass typ | 1 |
| Q5JTZ9 | Mitochondrion {ECO:0000255 HAMAP-Rule:M | 0 |
| Q02539 | Nucleus {ECO:0000255 PROSITE-ProRule:PF | 1 |
| Q9UJN7 | Nucleus {ECO:0000305}.                  | 0 |
| P46783 | Cytoplasm {ECO:0000269 PubMed:20159986} | 0 |
| Q9NZB8 |                                         | 0 |
| P06899 | Nucleus. Chromosome.                    | 1 |
| Q9H944 | Nucleus {ECO:0000305}.                  | 0 |
| Q15814 | Cytoplasm {ECO:0000269 PubMed:12417528} | 0 |
| Q8WWU5 | Membrane {ECO:0000305}; Single-pass men | 0 |
| Q9Y235 |                                         | 0 |
| Q9BQ90 | Cytoplasm. Note=Also found in meiotic c | 0 |
| Q14749 | Cytoplasm.                              | 1 |
| Q96JB1 | Cytoplasm, cytoskeleton, cilium axoneme | 0 |
| Q9NP99 | Isoform 1: Cell membrane {ECO:0000305}; | 0 |
| Q16626 |                                         | 0 |
| P38936 | Cytoplasm. Nucleus.                     | 0 |
| Q06945 | Nucleus {ECO:0000255 PROSITE-ProRule:PF | 0 |
| Q04760 |                                         | 0 |
| Q9HCH3 | Perikaryon {ECO:0000250 UniProtKB:Q8JZV | 0 |
| Q96T54 | Membrane; Multi-pass membrane protein.  | 0 |
| Q92766 | Nucleus speckle {ECO:0000269 PubMed:150 | 0 |
| P43307 | Endoplasmic reticulum membrane; Single- | 1 |
| Q9BRS2 | Cytoplasm, cytosol {ECO:0000269 PubMed: | 1 |
| Q9H1N7 | Golgi apparatus membrane {ECO:0000269 F | 0 |
| O75818 | Nucleus, nucleolus {ECO:0000305}.       | 0 |
| P54253 | Cytoplasm {ECO:0000269 PubMed:7647801}. | 0 |
| P49790 | Nucleus. Nucleus membrane. Nucleus, nuc | 0 |
| P35659 | Nucleus {ECO:0000269 PubMed:17524367, F | 1 |
| O43324 | Cytoplasm {ECO:0000269 PubMed:15680327} | 0 |
| P54107 | Note=Located in the lumen and epitheliu | 0 |
| Q13950 | Nucleus {ECO:0000269 PubMed:28505335, F | 1 |
| Q6U736 | Membrane; Multi-pass membrane protein.  | 0 |
| Q32MZ4 | Nucleus. Cytoplasm.                     | 0 |
| Q9H0T7 | Recycling endosome membrane {ECO:000025 | 0 |
| Q9BSJ1 |                                         | 0 |
| O95969 | Secreted {ECO:0000305}.                 | 0 |
| O75556 | Secreted {ECO:0000305}.                 | 0 |
| Q09666 | Nucleus.                                | 0 |
| Q9P0I2 | Membrane {ECO:0000269 PubMed:22119785}; | 0 |

|        |                                         |   |
|--------|-----------------------------------------|---|
| Q9Y2M2 | Cytoplasm {ECO:0000269 PubMed:20205943} | 0 |
| Q8TE82 |                                         | 0 |
| A5YKK6 | Cytoplasm, P-body {ECO:0000269 PubMed:2 | 0 |
| Q8WV35 |                                         | 0 |
| Q9BXC9 | Cell projection, cilium membrane. Cytop | 0 |
| Q9BSU1 |                                         | 0 |
| P00505 | Mitochondrion matrix {ECO:0000269 PubMe | 0 |
| Q8TEW6 |                                         | 0 |
| Q96J94 | Cytoplasm {ECO:0000250 UniProtKB:Q9JMB7 | 1 |
| Q14330 | Cell membrane {ECO:0000269 PubMed:24762 | 0 |
| Q8NOX4 | Mitochondrion {ECO:0000250 UniProtKB:Q8 | 1 |
| Q5T4D3 | Membrane {ECO:0000305}; Multi-pass mem  | 0 |
| P10114 | Recycling endosome membrane; Lipid-anch | 0 |
| Q12908 | Membrane; Multi-pass membrane protein.  | 0 |
| O15439 | Membrane; Multi-pass membrane protein.  | 1 |
| P52799 | Cell membrane {ECO:0000269 PubMed:28931 | 0 |
| Q9Y651 | Nucleus {ECO:0000255 PROSITE-ProRule:PF | 0 |
| Q99805 | Endosome membrane {ECO:0000305}; Multi- | 1 |
| Q8N3J3 |                                         | 0 |
| Q9UIL4 | Cytoplasm, cytoskeleton, microtubule or | 0 |
| P10914 | Nucleus. Cytoplasm. Note=MYD88-associat | 0 |
| Q9BZI7 | Nucleus. Cytoplasm. Note=Shuttling betw | 0 |
| O15541 | Nucleus {ECO:0000269 PubMed:29360106, F | 0 |
| Q14141 | Cytoplasm {ECO:0000269 PubMed:15774761} | 0 |
| Q5JRV8 | Membrane {ECO:0000305}; Multi-pass mem  | 0 |
| O15239 | Mitochondrion inner membrane {ECO:00003 | 1 |
| Q99766 | Mitochondrion {ECO:0000250 UniProtKB:P2 | 0 |
| P12644 | Secreted, extracellular space, extracel | 0 |
| P78312 |                                         | 0 |
| P32298 | Cytoplasm. Cytoplasm, cell cortex. Note | 0 |
| P48436 | Nucleus {ECO:0000255 PROSITE-ProRule:PF | 1 |
| Q9BXF9 | Cell projection, cilium, flagellum {ECO | 0 |
| Q9UKX2 | Cytoplasm, myofibril. Note=Thick filame | 1 |
| Q3KQZ1 | Mitochondrion inner membrane {ECO:00002 | 0 |
| Q9Y2R9 | Mitochondrion {ECO:0000269 PubMed:25838 | 1 |
| Q9NZ52 | Golgi apparatus, trans-Golgi network me | 0 |
| Q9H6L4 |                                         | 0 |
| Q9BW27 | Nucleus, nuclear pore complex {ECO:0000 | 0 |
| A9UHW6 | Cytoplasm {ECO:0000269 PubMed:18025107} | 0 |
| Q8TCD5 | Cytoplasm.                              | 0 |
| Q9BUK6 | Mitochondrion outer membrane {ECO:00002 | 0 |
| Q15361 | Nucleus. Nucleus, nucleolus {ECO:000025 | 1 |
| Q9BZE3 | Nucleus {ECO:0000305}.                  | 1 |
| Q9BZL4 | Cytoplasm {ECO:0000269 PubMed:11399775, | 0 |
| Q96N66 | Endoplasmic reticulum membrane {ECO:000 | 0 |
| Q9H3Y6 | Cytoplasm {ECO:0000269 PubMed:23822091, | 0 |
| Q8NDY6 | Nucleus {ECO:0000305}.                  | 0 |
| Q9NZH6 | Cytoplasm, cytosol {ECO:0000269 PubMed: | 0 |
| Q9BSY4 | Mitochondrion intermembrane space {ECO: | 0 |
| Q06710 | Nucleus.                                | 1 |
| Q9Y5U4 | Endoplasmic reticulum membrane {ECO:000 | 0 |
| Q567U6 | Early endosome {ECO:0000305 PubMed:2538 | 0 |
| Q8NDX1 | Cell membrane {ECO:0000269 PubMed:12082 | 0 |
| Q9BV35 | Mitochondrion inner membrane {ECO:00002 | 0 |
| O60542 | Secreted.                               | 0 |

|        |                                          |   |
|--------|------------------------------------------|---|
| P35269 | Nucleus.                                 | 1 |
| Q9BT30 | Mitochondrion matrix {ECO:0000269 PubMed | 0 |
| Q16740 | Mitochondrion matrix {ECO:0000269 PubMed | 1 |
| P42263 | Cell membrane; Multi-pass membrane prot  | 0 |
| Q8NI27 | Nucleus {ECO:0000305}. Nucleus speckle   | 1 |
| Q15648 | Nucleus {ECO:0000269 PubMed:15471764, I  | 0 |
| P62829 |                                          | 0 |
| Q96DT6 | Cytoplasm {ECO:0000250}.                 | 0 |
| P01024 | Secreted.                                | 0 |
| Q9BRG2 |                                          | 0 |
| Q15642 | Cytoplasm, cytoskeleton. Cytoplasm, cel  | 0 |
| Q9NPR9 | Membrane {ECO:0000305}; Multi-pass mem   | 0 |
| 043557 | Tumor necrosis factor ligand superfamil  | 0 |
| P53539 | Nucleus.                                 | 0 |
| Q9H6K4 | Mitochondrion {ECO:0000305}.             | 0 |
| P62316 | Cytoplasm, cytosol {ECO:0000269 PubMed:  | 0 |
| 075298 | Endoplasmic reticulum membrane {ECO:00   | 0 |
| 095834 | Cytoplasm, cytoskeleton {ECO:0000269 Pt  | 0 |
| P50552 | Cytoplasm. Cytoplasm, cytoskeleton. Cel  | 0 |
| Q92797 | Cytoplasm, cytoskeleton. Cell junction,  | 0 |
| Q9H190 | Cytoplasm {ECO:0000269 PubMed:15961997}  | 0 |
| Q9BZ23 | Isoform 1: Mitochondrion.; Isoform 2: (  | 0 |
| Q08188 | Cytoplasm {ECO:0000269 PubMed:27866708}  | 0 |
| 043555 | Secreted.                                | 0 |
| Q9Y261 | Nucleus {ECO:0000255 PROSITE-ProRule:PF  | 0 |
| Q9NPY3 | Membrane; Single-pass type I membrane p  | 0 |
| Q9H116 | Cytoplasm {ECO:0000269 PubMed:14522971}  | 0 |
| Q9H115 | Membrane {ECO:0000250}; Peripheral mem   | 0 |
| P07199 | Nucleus {ECO:0000255 PROSITE-ProRule:PF  | 0 |
| Q92530 | Cytoplasm {ECO:0000269 PubMed:18495667}  | 0 |
| 095096 | Nucleus {ECO:0000255 PROSITE-ProRule:PF  | 0 |
| Q8TEA8 | Nucleus {ECO:0000269 PubMed:15653697, I  | 0 |
| Q9H1E5 | Membrane {ECO:0000305}; Single-pass ty   | 0 |
| Q9H112 | Secreted {ECO:0000305 PubMed:12072414}.  | 0 |
| Q8TDR2 | Nucleus. Nucleus, nucleolus. Cytoplasm.  | 0 |
| P14678 | Cytoplasm, cytosol {ECO:0000269 PubMed:  | 0 |
| Q9GZP1 | Membrane {ECO:0000305}; Multi-pass mem   | 0 |
| Q9NUS5 | Cytoplasm, cytosol {ECO:0000269 PubMed:  | 0 |
| Q9P2E9 | Endoplasmic reticulum membrane {ECO:00   | 1 |
| P52736 | Nucleus {ECO:0000305}.                   | 1 |
| Q9NZU0 | Cell membrane {ECO:0000269 PubMed:1470   | 0 |
| Q9BRP0 | Nucleus {ECO:0000250 UniProtKB:Q8CIV7}.  | 0 |
| P16519 | Cytoplasmic vesicle, secretory vesicle.  | 0 |
| Q9NPJ1 | Cytoplasm, cytoskeleton, microtubule or  | 0 |
| Q12934 | Cell membrane {ECO:0000250 UniProtKB:QC  | 0 |
| P60981 |                                          | 0 |
| Q9UJQ1 | Cell membrane {ECO:0000269 PubMed:2164   | 0 |
| P08579 | Nucleus {ECO:0000269 PubMed:28076346, I  | 1 |
| Q9BQP7 | Mitochondrion {ECO:0000255 HAMAP-Rule:M  | 0 |
| Q96BZ9 | Membrane {ECO:0000305}; Multi-pass mem   | 0 |
| Q9BY32 | Cytoplasm {ECO:0000255 HAMAP-Rule:MF_0   | 0 |
| Q12870 | Nucleus {ECO:0000255 PROSITE-ProRule:PF  | 0 |
| Q9NRC9 | Secreted {ECO:0000305}.                  | 0 |
| Q9H503 | Nucleus. Cytoplasm.                      | 0 |
| Q9NUR3 | Membrane {ECO:0000305}; Multi-pass mem   | 0 |

|        |                                          |   |
|--------|------------------------------------------|---|
| Q9BQ89 | Cytoplasm {ECO:0000269 PubMed:17499476}  | 0 |
| Q9H106 | Secreted {ECO:0000305}.                  | 0 |
| Q9BYN8 | Mitochondrion {ECO:0000269 PubMed:25838} | 1 |
| Q9H1M3 | Secreted {ECO:0000305}.                  | 0 |
| Q969V3 | Endoplasmic reticulum membrane {ECO:000} | 0 |
| Q99966 | Nucleus {ECO:0000269 PubMed:16864582}.   | 0 |
| O43390 | Nucleus {ECO:0000250 UniProtKB:Q7TMK9}.  | 0 |
| Q9C0F3 | Nucleus {ECO:0000269 PubMed:17089209}.   | 0 |
| P61244 | Nucleus. Cell projection, dendrite {ECO} | 0 |
|        | be performed. View primary data.         | 0 |
| Q6P1M9 |                                          | 0 |
| P43026 | Secreted {ECO:0000269 PubMed:11276205}.  | 0 |
| Q9Y5R2 | Matrix metalloproteinase-24: Cell membr  | 0 |
| Q96P71 | Golgi apparatus {ECO:0000269 PubMed:108} | 1 |
| P41134 | Cytoplasm {ECO:0000250}. Nucleus.        | 0 |
| Q9UKM9 | Nucleus {ECO:0000250 UniProtKB:Q64012}.  | 1 |
| Q9NP97 | Cytoplasm, cytoskeleton.                 | 0 |
| P20042 |                                          | 0 |
| Q9Y282 | Endoplasmic reticulum-Golgi intermediat  | 0 |
| P60602 | Mitochondrion inner membrane {ECO:00002} | 0 |
| Q9BQN1 |                                          | 0 |
| Q8TDL5 | Secreted {ECO:0000250}.                  | 0 |
| Q9UPG8 | Nucleus {ECO:0000305}.                   | 0 |
| Q4VCS5 | Cell junction, tight junction {ECO:0000} | 0 |
| Q12893 | Golgi apparatus, Golgi stack membrane    | 1 |
| P49721 | Cytoplasm {ECO:0000269 PubMed:12181345}  | 0 |
| Q9H9G7 | Cytoplasm, P-body {ECO:0000255 HAMAP-Rt} | 0 |
| P06132 | Cytoplasm.                               | 0 |
| Q11203 | Golgi apparatus, Golgi stack membrane;   | 0 |
| Q6P2H8 | Membrane {ECO:0000305}; Single-pass mem  | 0 |
| Q5T447 | Cytoplasm, perinuclear region {ECO:0000} | 0 |
| Q07866 | Cell projection, growth cone {ECO:00002} | 0 |
| Q96CW5 | Cytoplasm, cytoskeleton, microtubule or  | 0 |
| Q5JVF3 | Cytoplasm {ECO:0000269 PubMed:23591820}  | 0 |
| P22891 | Secreted.                                | 0 |
| P55000 | Secreted {ECO:0000269 PubMed:14506129},  | 0 |
| Q9BTN0 | Cell membrane {ECO:0000250}; Single-pas  | 0 |
| Q9H665 | Cell membrane {ECO:0000269 PubMed:21454} | 0 |
| P04632 | Cytoplasm {ECO:0000250}. Cell membrane   | 0 |
| Q9BRP1 |                                          | 0 |
| O15529 | Cell membrane {ECO:0000250}; Multi-pass  | 0 |
| Q9BTD8 | Nucleus {ECO:0000250}. Cytoplasm {ECO:(  | 0 |
| Q6UWL6 | Cell membrane {ECO:0000250 UniProtKB:Q7} | 0 |
| Q9UBT2 | Cytoplasm. Nucleus. Note=Shuttles betwe  | 0 |
| O15552 | Cell membrane {ECO:0000269 PubMed:18801} | 0 |
| Q9UBK5 | Membrane {ECO:0000269 PubMed:10426994};  | 0 |
| P14854 | Mitochondrion intermembrane space {ECO:  | 1 |
| P10827 | Nucleus.; Isoform Alpha-2: Cytoplasm {F  | 0 |
| P32248 | Cell membrane; Multi-pass membrane prot  | 0 |
| P20393 | Nucleus {ECO:0000250 UniProtKB:Q3UV55}.  | 0 |
| Q9BZ67 | Cytoplasm, cytosol {ECO:0000269 PubMed:  | 0 |
| P30044 | Isoform Mitochondrial: Mitochondrion {F  | 1 |
| Q9HB09 |                                          | 0 |
| Q14653 | Cytoplasm {ECO:0000269 PubMed:10805757}, | 0 |
| Q99873 | Nucleus {ECO:0000269 PubMed:10749851}, F | 0 |



|        |                                          |   |
|--------|------------------------------------------|---|
| P10301 | Cell membrane {ECO:0000250}; Lipid-anch  | 0 |
| O14669 | Membrane; Single-pass type I membrane p  | 0 |
| Q9H7N4 | Nucleus {ECO:0000305}.                   | 0 |
| Q9ULL5 | Nucleus {ECO:0000250 UniProtKB:E9PYL2}.  | 0 |
| Q9UJT2 | Cytoplasm, cytoskeleton, microtubule or  | 1 |
| Q9NZU1 | Cell membrane {ECO:0000250 UniProtKB:Q6  | 0 |
| P04424 |                                          | 0 |
| Q9Y3A5 | Cytoplasm. Nucleus, nucleolus. Nucleus,  | 0 |
| P47710 | Secreted.                                | 0 |
| P02808 | Secreted.                                | 0 |
| P15515 | Secreted.                                | 0 |
| P42229 | Cytoplasm {ECO:0000269 PubMed:15534001}  | 0 |
| Q96J92 | Cell junction, tight junction {ECO:0000  | 0 |
| Q14457 | Cytoplasm {ECO:0000250 UniProtKB:O88597} | 0 |
| P05129 | Cytoplasm {ECO:0000250 UniProtKB:P63318} | 0 |
| Q12931 | Mitochondrion {ECO:0000269 PubMed:23564  | 1 |
| Q9H0G5 | Nucleus {ECO:0000269 PubMed:21296756}.   | 1 |
| O75937 | Nucleus {ECO:0000269 PubMed:27133716}.   | 0 |
| Q5TGY3 |                                          | 0 |
| P09912 | Mitochondrion inner membrane {ECO:00002  | 0 |
| Q96NX9 | Nucleus {ECO:0000305}.                   | 0 |
| Q8TF68 | Nucleus {ECO:0000250}.                   | 1 |
| Q92979 | Nucleus, nucleolus {ECO:0000269 PubMed:  | 1 |
| Q16384 |                                          | 0 |
| Q9UBK9 | Isoform 1: Cytoplasm {ECO:0000269 PubMe  | 0 |
| P19419 | Nucleus.                                 | 1 |
| O60830 | Mitochondrion inner membrane; Multi-pas  | 0 |
| Q63HM2 | Membrane {ECO:0000305}; Multi-pass memt  | 0 |
| Q6ZNE5 | Cytoplasm {ECO:0000269 PubMed:19050071}  | 0 |
| Q86UP2 | Endoplasmic reticulum membrane; Single-  | 1 |
| Q15475 | Nucleus {ECO:0000269 PubMed:10801845, I  | 0 |
| Q9H4E5 | Cell membrane {ECO:0000269 PubMed:27660  | 0 |
| Q15398 | Nucleus. Cytoplasm. Cytoplasm, cytoskel  | 0 |
| Q96EM0 |                                          | 0 |
| P54652 | Cytoplasm, cytoskeleton, spindle {ECO:(  | 0 |
| Q9Y2K1 | Nucleus {ECO:0000269 PubMed:21706167}.   | 0 |
| Q32P41 | Mitochondrion matrix {ECO:0000255 HAMAF  | 1 |
| Q9BX95 | Endoplasmic reticulum membrane {ECO:000  | 0 |
| A1L390 |                                          | 0 |
| P20742 | Secreted.                                | 0 |
| Q9NQW5 | Nucleus {ECO:0000305}. Chromosome {ECO:  | 0 |
| Q8IXI2 | Mitochondrion outer membrane {ECO:00002  | 1 |
| P22794 | Membrane; Single-pass type I membrane p  | 0 |
| P23515 | Cell membrane; Lipid-anchor, GPI-anchor  | 0 |
| Q8WVS4 | Cell projection, cilium {ECO:0000269 Pu  | 0 |
| Q9BQI0 | Cytoplasm, cytoskeleton {ECO:0000269 Pu  | 1 |
| Q5JUQ0 |                                          | 0 |
| O75638 |                                          | 0 |
| P09131 | Membrane {ECO:0000305}; Multi-pass memt  | 0 |
| P36507 | Cytoplasm {ECO:0000269 PubMed:10409742}  | 0 |
| P55795 | Nucleus, nucleoplasm.                    | 1 |
| Q9P291 | Mitochondrion {ECO:0000250 UniProtKB:Q9  | 1 |
| Q53FP2 | Peroxisome membrane {ECO:0000250}; Mult  | 0 |
| Q9H1B4 | Cytoplasm. Nucleus. Note=Mainly localiz  | 0 |
| O60220 | Mitochondrion inner membrane {ECO:00002  | 1 |

|                       |                                         |   |
|-----------------------|-----------------------------------------|---|
| Q9NQZ6                | Cytoplasm {ECO:0000269 PubMed:23623388} | 0 |
| P27824                | Endoplasmic reticulum membrane {ECO:000 | 1 |
| Q5TA45                | Nucleus {ECO:0000269 PubMed:15684398, F | 0 |
| O14921                |                                         | 0 |
| Q9H8X2                | Cytoplasm {ECO:0000250}. Nucleus {ECO:( | 0 |
| Q5JVG2                | Nucleus {ECO:0000305}.                  | 0 |
| Q5JSP0                | Cytoplasm {ECO:0000305}. Cytoplasm, cyt | 0 |
| Q5T1R4                | Cytoplasm {ECO:0000250}. Nucleus {ECO:( | 0 |
| Q9HAB8                |                                         | 0 |
| P20800                | Secreted.                               | 0 |
| Q9COK0                | Nucleus {ECO:0000305}.                  | 1 |
| P15954                | Mitochondrion inner membrane {ECO:00002 | 0 |
| Q12933                | Cytoplasm {ECO:0000269 PubMed:15383523, | 0 |
| Q96I13                |                                         | 0 |
| P48740                | Secreted {ECO:0000269 PubMed:11485744}. | 0 |
| be performed. View pr | Isoform 1: Cytoplasm {ECO:0000269 PubMe | 0 |
| P19075                | Membrane; Multi-pass membrane protein.  | 1 |
| Q8N1M1                | Cell membrane; Multi-pass membrane prot | 0 |
| Q96QF0                | Cytoplasm. Nucleus. Cytoplasm, cytoskel | 0 |
| P23467                | Membrane {ECO:0000305}; Single-pass typ | 0 |
| Q92630                | Cytoplasm. Nucleus. Note=Translocates i | 0 |
| Q8WXF5                |                                         | 0 |
| Q9BV99                |                                         | 0 |
| Q9NQA5                | Apical cell membrane {ECO:0000269 PubMe | 0 |
| P35475                | Lysosome.                               | 1 |
| Q8N441                | Membrane {ECO:0000269 PubMed:12813049}; | 0 |
| Q9BSA9                | Endosome membrane {ECO:0000269 PubMed:2 | 0 |
| Q9H7T9                | Nucleus {ECO:0000269 PubMed:29042561}.  | 0 |
| Q13526                | Nucleus {ECO:0000269 PubMed:16476580, F | 0 |
| Q8N766                | Membrane {ECO:0000269 PubMed:22119785}; | 0 |
| P39877                | Secreted.                               | 0 |
| Q5T4S7                | Membrane {ECO:0000305}; Multi-pass memt | 0 |
| Q5SSJ5                | Nucleus {ECO:0000269 PubMed:24830416}.  | 1 |
| 075182                | Nucleus {ECO:0000255 PROSITE-ProRule:PF | 0 |
| Q96K37                | Membrane {ECO:0000305}; Multi-pass memt | 0 |
| Q9UBC2                | Cell membrane {ECO:0000250}; Peripheral | 0 |
| Q9Y5W3                | Nucleus {ECO:0000250}.                  | 0 |
| 060412                | Cell membrane; Multi-pass membrane prot | 0 |
| 076099                | Cell membrane; Multi-pass membrane prot | 0 |
| P55789                | Isoform 1: Mitochondrion intermembrane  | 0 |
| 043761                | Cytoplasmic vesicle, secretory vesicle, | 0 |
| Q96S15                | Lysosome membrane {ECO:0000269 PubMed:2 | 0 |
| Q8N461                |                                         | 0 |
| Q9P2W3                | Cell membrane {ECO:0000305}; Lipid-anch | 0 |
| Q9UPN3                | Isoform 2: Cytoplasm, cytoskeleton {ECO | 0 |
| P51532                | Nucleus {ECO:0000255 PROSITE-ProRule:PF | 1 |
| Q8IUC6                | Cytoplasmic vesicle, autophagosome {ECO | 0 |
| Q8N6Q8                |                                         | 0 |
| Q9UHF5                | Secreted.                               | 0 |
| Q9BV81                | Membrane {ECO:0000269 PubMed:22119785}; | 0 |
| Q86W50                | Nucleus {ECO:0000269 PubMed:27872311}.  | 0 |
| P68366                | Cytoplasm, cytoskeleton.                | 0 |
| P09327                | Cytoplasm, cytoskeleton. Cell projectio | 1 |
| Q13685                | Cell membrane. Cytoplasm.               | 0 |
| Q8N490                | Isoform 1: Membrane; Peripheral membrar | 0 |

|        |                                          |   |
|--------|------------------------------------------|---|
| Q9Y252 | Nucleus {ECO:0000269 PubMed:19345326}.   | 0 |
| P30084 | Mitochondrion matrix.                    | 1 |
| Q9Y2P0 | Nucleus {ECO:0000305}.                   | 0 |
| Q99996 | Golgi apparatus {ECO:0000269 PubMed:150  | 1 |
| P61952 | Cell membrane {ECO:0000305}; Lipid-anch  | 0 |
| P60896 |                                          | 0 |
| P63211 | Cell membrane {ECO:0000305}; Lipid-anch  | 0 |
| 000291 | Cytoplasm. Nucleus. Endomembrane system  | 0 |
| Q05209 | Cytoplasm {ECO:0000250 UniProtKB:P35831  | 0 |
| P16435 | Endoplasmic reticulum membrane {ECO:000  | 1 |
| Q14314 | Secreted.                                | 0 |
| Q9Y6J8 | Mitochondrion matrix {ECO:0000269 PubMe  | 0 |
| P63096 | Nucleus {ECO:0000250 UniProtKB:P10824}.  | 0 |
| 043933 | Cytoplasm. Peroxisome membrane. Note=As  | 0 |
| Q99551 | Mitochondrion.                           | 0 |
| Q5RL73 |                                          | 0 |
| Q96PB1 | Golgi apparatus membrane {ECO:0000269 F  | 0 |
| Q9Y6R6 | Nucleus {ECO:0000305}.                   | 0 |
|        |                                          | 0 |
| Q9H8P0 | Endoplasmic reticulum membrane {ECO:000  | 0 |
| P20155 | Secreted {ECO:0000305}. Cytoplasmic ves  | 0 |
| Q9BPW5 |                                          | 0 |
| P22234 |                                          | 0 |
| P35968 | Cell junction {ECO:0000250}. Endoplasmic | 0 |
| Q06203 |                                          | 0 |
| Q96RT7 | Cytoplasm, cytoskeleton, microtubule or  | 0 |
| Q6ICH7 | Membrane {ECO:0000305}; Single-pass typ  | 0 |
| Q9UKI3 |                                          | 0 |
| Q9HCN8 | Endoplasmic reticulum lumen {ECO:000025  | 0 |
| Q99999 | Golgi apparatus membrane {ECO:0000250};  | 0 |
| Q04917 |                                          | 0 |
| 075678 |                                          | 0 |
| P19086 | Membrane; Lipid-anchor.                  | 0 |
| Q09327 | Golgi apparatus membrane; Single-pass t  | 0 |
| P29274 | Cell membrane; Multi-pass membrane prot  | 0 |
| P18848 | Cytoplasm {ECO:0000250 UniProtKB:Q9ES19  | 0 |
| Q00587 | Endomembrane system {ECO:0000269 PubMe   | 0 |
| 060704 | Golgi apparatus membrane {ECO:0000269 F  | 1 |
| Q6UXY1 | Cell membrane {ECO:0000269 PubMed:21743  | 0 |
| P25325 | Cytoplasm {ECO:0000250 UniProtKB:P97532  | 0 |
| Q16762 | Mitochondrion matrix.                    | 1 |
| Q9BWW9 | Cytoplasm {ECO:0000305}.                 | 0 |
| P15814 | Secreted {ECO:0000269 PubMed:9419212}.   | 0 |
| Q9BQE5 | Cytoplasm {ECO:0000305}.                 | 0 |
| P15153 | Cytoplasm. Note=Membrane-associated whe  | 1 |
| P15018 | Secreted.                                | 0 |
| P31941 | Nucleus. Cytoplasm.                      | 0 |
|        |                                          | 0 |
| Q04695 | Cytoplasm {ECO:0000250 UniProtKB:Q9QWL7  | 0 |
| Q5J8M3 | Membrane {ECO:0000269 PubMed:22119785};  | 0 |
| Q9ULX5 | Membrane {ECO:0000250 UniProtKB:Q96DY5}  | 0 |
| Q5M775 | Nucleus {ECO:0000269 PubMed:15602574}.;  | 0 |
| Q16864 |                                          | 0 |
| 095777 | Nucleus {ECO:0000269 PubMed:10523320, F  | 0 |
| Q6ZTQ4 | Cell membrane {ECO:0000269 PubMed:24241  | 0 |

|        |                                         |   |
|--------|-----------------------------------------|---|
| Q9H875 | Nucleus {ECO:0000269 PubMed:28502770, I | 0 |
| 015240 | Neurosecretory protein VGF: Secreted {E | 0 |
| 000592 | Apical cell membrane. Cell projection,  | 0 |
| 015409 | Nucleus {ECO:0000305}.                  | 1 |
| Q9ULQ0 | Cytoplasm {ECO:0000269 PubMed:21834987} | 0 |
| Q9H7X7 | Cell projection, cilium {ECO:0000250}.  | 0 |
| Q9UL63 | Cytoplasm {ECO:0000269 PubMed:17467196} | 0 |
| Q9UBS3 | Endoplasmic reticulum lumen {ECO:000025 | 1 |
| Q14315 | Cytoplasm {ECO:0000269 PubMed:11038172, | 0 |
| 043852 | Endoplasmic reticulum membrane {ECO:000 | 0 |
| Q96JN2 | Cytoplasmic vesicle, secretory vesicle, | 1 |
| Q99835 | Membrane {ECO:0000269 PubMed:22072986}; | 0 |
| Q13568 | Cytoplasm. Nucleus. Note=Shuttles betwe | 0 |
| Q6PID8 | Nucleus {ECO:0000269 PubMed:23102700}.  | 0 |
| Q16718 | Mitochondrion inner membrane {ECO:00002 | 1 |
| A0PJY2 | Nucleus {ECO:0000269 PubMed:19318583}.  | 0 |
| P03999 | Membrane {ECO:0000269 PubMed:2937147};  | 0 |
| 015235 | Mitochondrion {ECO:0000269 PubMed:25838 | 0 |
| 043795 |                                         | 0 |
| 075431 | Mitochondrion outer membrane {ECO:00002 | 0 |
| Q9HCR9 | Cytoplasm, cytosol {ECO:0000269 PubMed: | 0 |
| Q99259 |                                         | 0 |
| Q9H4B0 | Mitochondrion {ECO:0000255 HAMAP-Rule:M | 0 |
| 014929 | Isoform A: Nucleus matrix.; Isoform B:  | 0 |
| 095714 | Cytoplasm. Cytoplasm, cytoskeleton, mic | 0 |
| P63162 | Nucleus.                                | 0 |
| Q969U7 | Nucleus {ECO:0000250 UniProtKB:Q9EST4}. | 0 |
| Q9GZX9 | Secreted {ECO:0000250}.                 | 0 |
| Q7Z5H3 | Cytoplasm {ECO:0000250}. Nucleus {ECO:( | 0 |
| Q6ZS81 | Membrane {ECO:0000305}; Multi-pass mem  | 0 |
| Q9P2K8 | Cytoplasm {ECO:0000250 UniProtKB:Q9QZ05 | 0 |
| Q9NQX4 |                                         | 0 |
| Q0VF96 | Cell junction, tight junction {ECO:0000 | 1 |
| Q9NZR1 | Cytoplasm, cytoskeleton {ECO:0000250}.  | 1 |
| Q6IQ55 | Cell projection, cilium {ECO:0000250}.  | 0 |
| Q9HB65 | Nucleus {ECO:0000269 PubMed:10882741}.  | 0 |
| Q9BV29 |                                         | 0 |
| Q9NR61 | Cell membrane {ECO:0000305}; Single-pas | 0 |
| 094788 | Cytoplasm.                              | 0 |
| Q8NBR6 |                                         | 0 |
| P26440 | Mitochondrion matrix.                   | 1 |
| Q9Y448 | Nucleus {ECO:0000269 PubMed:24718257}.  | 0 |
| P33316 | Isoform 2: Nucleus {ECO:0000269 PubMed: | 1 |
| Q9BUX1 | Cytoplasm, cytosol {ECO:0000269 PubMed: | 0 |
| Q9NWW5 | Endoplasmic reticulum membrane {ECO:000 | 0 |
| P56211 | Cytoplasm {ECO:0000250}.                | 0 |
| Q709C8 | Mitochondrion outer membrane {ECO:00002 | 0 |
| Q96GE6 |                                         | 0 |
| 014498 | Secreted {ECO:0000305}.                 | 0 |
| Q9P2Z0 |                                         | 0 |
| Q08397 | Secreted, extracellular space {ECO:0000 | 0 |
| Q9BS18 | Nucleus {ECO:0000305}.                  | 0 |
| 095243 | Nucleus.                                | 1 |
| P53618 | Cytoplasm. Golgi apparatus membrane {E  | 0 |
| P25786 | Cytoplasm {ECO:0000269 PubMed:12181345} | 1 |

|        |                                                                    |   |
|--------|--------------------------------------------------------------------|---|
| Q8NBJ7 | Endoplasmic reticulum lumen {ECO:0000269 UniProtKB:P50463}.        | 1 |
| Q8WX93 | Cytoplasm, cytoskeleton {ECO:0000269 PubMed:10571079}.             | 1 |
| P61009 | Microsome membrane {ECO:0000250 UniProtKB:P50463}.                 | 0 |
| 075936 | Cytoplasm.                                                         | 1 |
| Q9UGK8 | Cytoplasm {ECO:0000269 PubMed:10571079}.                           | 1 |
| P48547 | Cell membrane {ECO:0000269 PubMed:2540131}.                        | 0 |
| P17752 |                                                                    | 0 |
| P50461 | Nucleus {ECO:0000250 UniProtKB:P50463}.                            | 0 |
| A0AVK6 | Nucleus {ECO:0000269 PubMed:15897886}.                             | 0 |
| P32321 |                                                                    | 0 |
| 060248 | Nucleus {ECO:0000255 PROSITE-ProRule:PF00001}.                     | 1 |
| Q9BSJ6 | Nucleus {ECO:0000269 PubMed:16491119, PubMed:16491120}.            | 0 |
| Q86UA6 | Isoform 1: Cytoplasm. Nucleus.; Isoform 2: Cytoplasm.              | 0 |
| 014939 | Membrane {ECO:0000250}; Peripheral membrane protein.               | 0 |
| Q9NZN9 | Cytoplasm {ECO:0000269 PubMed:12374762}.                           | 1 |
| P34810 | Isoform Short: Cell membrane; Single-pass type I membrane protein. | 0 |
| Q9BRA2 | Cytoplasm {ECO:0000269 PubMed:14607844}.                           | 0 |
| P14415 | Cell membrane; Single-pass type II membrane protein.               | 0 |
| P51116 | Cytoplasm.                                                         | 1 |
| 043896 | Cytoplasm, cytoskeleton {ECO:0000305}.                             | 0 |
| 075352 | Membrane {ECO:0000305}; Multi-pass membrane protein.               | 0 |
| A8MW92 |                                                                    | 0 |
| Q86X45 | Cytoplasm {ECO:0000269 PubMed:23122589}.                           | 0 |
| 060563 | Nucleus {ECO:0000269 PubMed:12944466}.                             | 1 |
| Q9HOK6 |                                                                    | 0 |
| Q8N9T8 |                                                                    | 0 |
| Q12906 | Nucleus, nucleolus {ECO:0000269 PubMed:12944466}.                  | 0 |
| Q8IWA5 | Membrane {ECO:0000250}; Multi-pass membrane protein.               | 0 |
| P55273 | Nucleus {ECO:0000269 PubMed:9482106}. (Cytoplasm.)                 | 1 |
| Q9POG3 | Secreted, extracellular space {ECO:0000269 PubMed:17761692}.       | 0 |
| Q9Y336 | Membrane; Single-pass type I membrane protein.                     | 0 |
| 060259 | Secreted {ECO:0000269 PubMed:17761692}.                            | 0 |
| Q8NEJ9 | Nucleus {ECO:0000250}. Nucleus, nucleolus.                         | 0 |
| Q8NFM4 | Cell membrane {ECO:0000269 PubMed:21228111}.                       | 0 |
| Q8WUD1 | Cell membrane {ECO:0000305}; Lipid-anchored protein.               | 0 |
| Q92843 | Mitochondrion membrane {ECO:0000269 PubMed:10571079}.              | 0 |
| Q96IF1 | Cytoplasm, cytoskeleton. Cell membrane.                            | 0 |
| Q96FN9 | Cytoplasm {ECO:0000305}.                                           | 0 |
| Q9UGN5 | Nucleus {ECO:0000269 PubMed:10364231}.                             | 0 |
| Q86XA9 |                                                                    | 0 |
| P55317 | Nucleus {ECO:0000255 PROSITE-ProRule:PF00001}.                     | 1 |
| Q9UNH7 | Early endosome {ECO:0000269 PubMed:11481111}.                      | 0 |
| Q56P03 | Cytoplasm. Nucleus.                                                | 0 |
| Q6P0N0 | Nucleus. Chromosome. Chromosome, centromere.                       | 0 |
| P54845 | Cytoplasm {ECO:0000269 PubMed:11477108}.                           | 0 |
| P07998 | Secreted.                                                          | 0 |
| Q15843 | Nucleus {ECO:0000269 PubMed:9353319}. Nucleus, nucleolus.          | 0 |
| P61803 | Endoplasmic reticulum membrane; Multi-pass membrane protein.       | 0 |
| Q9HCS5 | Cytoplasm, cytoskeleton {ECO:0000250}.                             | 0 |
| Q16878 |                                                                    | 0 |
| Q00765 | Membrane {ECO:0000255}; Multi-pass membrane protein.               | 0 |
| Q8TB96 | Secreted {ECO:0000305}. Membrane {ECO:0000250}.                    | 0 |
| Q9H0J4 |                                                                    | 0 |
| Q92949 | Nucleus {ECO:0000250 UniProtKB:Q61660}.                            | 1 |
| Q92503 | Cytoplasm {ECO:0000269 PubMed:17092608, PubMed:17092609}.          | 0 |

|         |                                         |   |
|---------|-----------------------------------------|---|
| Q6PJF5  | Endoplasmic reticulum membrane {ECO:000 | 0 |
| Q15052  | Cell projection, lamellipodium {ECO:000 | 0 |
| Q8IWC1  | Cytoplasm, cytoskeleton, spindle {ECO:( | 0 |
| Q9UBL3  | Nucleus {ECO:0000305 PubMed:17355966}.  | 0 |
| Q6NXR4  |                                         | 0 |
| P52961  | Sarcoplasmic reticulum membrane; Lipid- | 0 |
| P49918  | Nucleus {ECO:0000250}.                  | 1 |
| Q5FBB7  | Nucleus {ECO:0000305 PubMed:16582621}.  | 0 |
| P22090  |                                         | 0 |
| O14598  |                                         | 0 |
| O14598  |                                         | 0 |
| Q9Y6F7  | Nucleus {ECO:0000250}.                  | 1 |
| P55291  | Cell membrane; Single-pass type I membr | 0 |
| Q9B XK1 | Nucleus {ECO:0000250}.                  | 0 |
| Q9HCN3  | Cell membrane {ECO:0000269 PubMed:27881 | 0 |
| Q9BU89  |                                         | 0 |
| P98077  |                                         | 0 |
| Q6T4P5  | Membrane {ECO:0000305}; Multi-pass mem  | 0 |
| F8WCM5  |                                         | 0 |
| Q96GS6  | Cell membrane {ECO:0000269 PubMed:26701 | 0 |
| P18428  | Secreted {ECO:0000269 PubMed:2402637, F | 0 |
| O00445  | Cytoplasmic vesicle, secretory vesicle, | 0 |
| P19429  |                                         | 0 |
| O75081  | Isoform 1: Nucleus, nucleolus. Note=The | 0 |
| Q14353  |                                         | 0 |
| Q08623  |                                         | 0 |
| Q5T6L9  | Endoplasmic reticulum membrane {ECO:000 | 0 |
| Q8WUB8  | Nucleus {ECO:0000250}.                  | 1 |
| Q9BZD7  | Membrane; Single-pass type I membrane p | 0 |
| Q9NY28  | Golgi apparatus membrane {ECO:0000250}; | 1 |
| P22460  | Cell membrane {ECO:0000269 PubMed:12130 | 0 |
| Q9BSW2  | Cytoplasm {ECO:0000269 PubMed:20418871} | 0 |
| Q5VZ03  |                                         | 0 |
| Q92502  | Cell junction, focal adhesion {ECO:0000 | 0 |
| O75949  | Membrane {ECO:0000305}; Multi-pass mem  | 0 |
| P21673  | Cytoplasm.                              | 1 |
| Q9NVN8  | Nucleus, nucleolus {ECO:0000269 PubMed: | 0 |
| Q9POV3  | Membrane, clathrin-coated pit. Cytoplas | 0 |
| Q8NHP6  | Cell membrane {ECO:0000269 PubMed:28137 | 0 |
| Q96HP0  | Cytoplasm {ECO:0000269 PubMed:17196961} | 0 |
| Q9BQ95  | Cytoplasm {ECO:0000269 PubMed:17344420} | 0 |
| P01130  | Cell membrane {ECO:0000269 PubMed:17461 | 0 |
| P60002  | Nucleus {ECO:0000250}.                  | 0 |
| Q9UKR8  | Membrane {ECO:0000305}; Multi-pass mem  | 0 |
| P14314  | Endoplasmic reticulum {ECO:0000255 PRO  | 1 |
| P51911  |                                         | 0 |
| Q13042  | Cytoplasm, cytoskeleton, microtubule or | 0 |
| Q8WUY1  | Secreted {ECO:0000305}.                 | 0 |
| Q92692  | Cell membrane; Single-pass type I membr | 0 |
| P02649  | Secreted {ECO:0000269 PubMed:2498325}.  | 0 |
| O96008  | Mitochondrion outer membrane {ECO:0000  | 1 |
| P02654  | Secreted {ECO:0000303 PubMed:2835369}.  | 0 |
| O95257  |                                         | 0 |
| Q5VUJ6  |                                         | 0 |
| P42658  | Cell membrane {ECO:0000269 PubMed:18364 | 0 |

|        |                                         |   |
|--------|-----------------------------------------|---|
| Q9UIA9 | Cytoplasm. Nucleus {ECO:0000305}. Nucle | 0 |
| Q9BYF1 | Processed angiotensin-converting enzyme | 0 |
| Q17RN3 |                                         | 0 |
| Q14151 | Cytoplasm. Nucleus.                     | 0 |
| Q9Y3U8 | Cytoplasm, cytosol {ECO:0000269 PubMed: | 1 |
| 014594 | Secreted {ECO:0000250}.                 | 0 |
| Q969Y2 | Mitochondrion {ECO:0000269 PubMed:12370 | 0 |
| Q9BX97 | Cell membrane {ECO:0000250 UniProtKB:Q9 | 0 |
| Q10589 | Golgi apparatus, trans-Golgi network. ( | 0 |
| Q96P11 |                                         | 0 |
| Q8N6Y0 |                                         | 0 |
| Q8NBJ5 | Endoplasmic reticulum lumen {ECO:000025 | 0 |
| Q9BW61 |                                         | 0 |
| Q9BQ48 | Mitochondrion {ECO:0000269 PubMed:25278 | 0 |
| 095336 | Cytoplasm {ECO:0000250}.                | 0 |
| Q9UK45 | Nucleus {ECO:0000269 PubMed:10523320, F | 0 |
| Q9NRJ4 | Cytoplasm.                              | 0 |
| Q9Y5X1 | Cytoplasmic vesicle membrane; Periphera | 0 |
| Q8WWV3 | Mitochondrion outer membrane {ECO:00002 | 0 |
| Q9HOR6 | Mitochondrion {ECO:0000255 HAMAP-Rule:M | 0 |
| Q9POP8 |                                         | 0 |
| Q86UC2 | Cytoplasm, cytoskeleton, cilium axoneme | 0 |
| Q5FVE4 | Cytoplasm. Membrane; Peripheral membran | 0 |
| Q03111 | Nucleus.                                | 0 |
| Q11128 | Golgi apparatus, Golgi stack membrane;  | 0 |
| P55196 | Cell junction, adherens junction {ECO:( | 0 |
| 043707 | Nucleus {ECO:0000269 PubMed:22351778, F | 0 |
| Q9BYT3 | Cytoplasm, perinuclear region {ECO:0000 | 0 |
| 095299 | Mitochondrion matrix {ECO:0000305 PubMe | 0 |
| P01588 | Secreted.                               | 0 |
| 015143 | Cytoplasm, cytoskeleton {ECO:0000269 Pu | 0 |
| Q9HCJ5 |                                         | 0 |
| 014526 | Membrane, clathrin-coated pit {ECO:0000 | 0 |
| Q66K74 | Nucleus. Cytoplasm, cytosol. Cytoplasm, | 0 |
| Q96G42 |                                         | 0 |
| 043819 | Mitochondrion inner membrane {ECO:00002 | 0 |
| Q92626 | Secreted, extracellular space, extracel | 0 |
| Q99988 | Secreted {ECO:0000269 PubMed:28572090,  | 0 |
| Q9NXJ5 | Cytoplasm {ECO:0000250}.                | 0 |
| Q9H0B3 |                                         | 0 |
| Q9Y4Z0 | Nucleus {ECO:0000269 PubMed:10523320, F | 0 |
| P17535 | Nucleus.                                | 1 |
| P23327 | Sarcoplasmic reticulum lumen.           | 1 |
| Q8TD43 | Isoform 1: Cell membrane {ECO:0000269 F | 1 |
| Q8NG94 | Cell membrane; Multi-pass membrane prot | 0 |
| Q9BR01 | Cytoplasm {ECO:0000250}.                | 1 |
| Q8N988 | Nucleus {ECO:0000305}.                  | 0 |
| Q9BUF7 | Apical cell membrane; Single-pass type  | 0 |
| Q5T5Y3 | Cytoplasm, cytoskeleton {ECO:0000269 Pu | 0 |
| Q9BSL1 | Cytoplasm {ECO:0000269 PubMed:10857748, | 0 |
| P10523 | Cell projection, cilium, photoreceptor  | 0 |
| Q86UZ6 | Nucleus {ECO:0000305}.                  | 0 |
| Q9BYK8 | Nucleus {ECO:0000269 PubMed:23525231}.  | 0 |
| Q9BYL1 |                                         | 0 |
| P33241 | Cell membrane; Peripheral membrane prot | 0 |

|        |                                         |   |
|--------|-----------------------------------------|---|
| P45378 |                                         | 0 |
| P48788 |                                         | 0 |
| P20908 | Secreted, extracellular space, extracel | 0 |
| Q9UBB4 | Cytoplasm, perinuclear region {ECO:0000 | 0 |
| Q9BSJ2 | Cytoplasm, cytoskeleton, microtubule or | 0 |
| Q9NYX4 | Cytoplasmic vesicle membrane; Single-pa | 0 |
| P05181 | Endoplasmic reticulum membrane {ECO:000 | 1 |
| Q6ZV29 | Membrane {ECO:0000305}; Single-pass mem | 0 |
| P02008 |                                         | 0 |
| O96013 | Cytoplasm {ECO:0000269 PubMed:12356872} | 0 |
| Q9Y3M9 | Nucleus {ECO:0000305}.                  | 0 |
| Q6P2H3 | Cytoplasm, cytoskeleton, microtubule or | 0 |
| 000268 | Nucleus.                                | 1 |
| O15230 | Secreted, extracellular space, extracel | 0 |
| Q9HIP3 | Cytoplasm, cytosol {ECO:0000269 PubMed: | 0 |
| Q16186 | Cytoplasm {ECO:0000269 PubMed:16990800} | 1 |
| P00966 | Cytoplasm, cytosol {ECO:0000269 PubMed: | 1 |
| Q9H4Q4 | Nucleus {ECO:0000269 PubMed:26005867}.  | 0 |
| Q13868 | Cytoplasm. Nucleus, nucleolus. Nucleus. | 0 |
| Q9HA47 |                                         | 0 |
| Q8N539 | Membrane {ECO:0000305}; Single-pass typ | 0 |
| Q5JSZ5 |                                         | 0 |
| O43633 | Late endosome membrane {ECO:0000269 Pub | 1 |
| P61081 |                                         | 0 |
| Q13263 | Nucleus {ECO:0000269 PubMed:10330177, I | 1 |
| Q96S19 |                                         | 0 |
| Q9BWQ6 | Golgi apparatus, cis-Golgi network memt | 0 |
| Q86TL0 | Cysteine protease ATG4D: Cytoplasm {ECO | 0 |
| P41091 |                                         | 0 |
| Q9NX00 | Membrane {ECO:0000305}; Multi-pass memt | 0 |
| Q9UPT8 |                                         | 0 |
| O60234 |                                         | 0 |
| Q02779 |                                         | 0 |
| Q5VV41 | Cytoplasm {ECO:0000305}.                | 0 |
| Q8N1G4 |                                         | 0 |
| P58004 | Cytoplasm {ECO:0000269 PubMed:15105503} | 0 |
| Q9UII2 | Mitochondrion {ECO:0000269 PubMed:12110 | 1 |
| Q9BUE0 | Nucleus {ECO:0000305}.                  | 0 |
| Q5TEJ8 |                                         | 0 |
| P30622 | Cytoplasm {ECO:0000305}. Cytoplasm, cyt | 0 |
| Q6P9F0 | Cytoplasm {ECO:0000269 PubMed:19126643} | 0 |
| O75146 | Cytoplasm, perinuclear region. Endoment | 0 |
| Q96PQ6 | Nucleus {ECO:0000305}.                  | 0 |
| Q9NQ55 | Nucleus, nucleolus {ECO:0000269 PubMed: | 0 |
| O75821 | Cytoplasm {ECO:0000255 HAMAP-Rule:MF_03 | 0 |
| Q9NUL5 | Cytoplasm {ECO:0000269 PubMed:26735137} | 0 |
| P26358 | Nucleus {ECO:0000269 PubMed:12145218}.  | 1 |
| Q9BUY5 | Nucleus {ECO:0000305}.                  | 0 |
| Q6P2M8 | Cytoplasm {ECO:0000250}. Nucleus {ECO:( | 0 |
| O60832 | Isoform 1: Nucleus, nucleolus {ECO:0000 | 0 |
| Q99956 | Cytoplasm.                              | 1 |
| Q00013 | Cell membrane {ECO:0000269 PubMed:19144 | 0 |
| Q9UL36 | Nucleus {ECO:0000305}.                  | 0 |
| Q9NS82 | Membrane {ECO:0000305}; Multi-pass memt | 0 |
| Q9H3J6 | Mitochondrion {ECO:0000269 PubMed:20186 | 0 |



|        |                                         |   |
|--------|-----------------------------------------|---|
| Q9H8H0 | Nucleus, nucleolus {ECO:0000269 PubMed: | 1 |
| 095155 | Cytoplasm {ECO:0000269 PubMed:17369820} | 0 |
| Q86V15 | Nucleus {ECO:0000269 PubMed:16631614}.  | 0 |
| Q9NTG1 | Membrane {ECO:0000305}; Multi-pass mem  | 0 |
| P37058 | Endoplasmic reticulum {ECO:0000269 PubM | 1 |
| Q5JVS0 | Nucleus {ECO:0000269 PubMed:14699138, F | 0 |
| 000757 | Cell junction {ECO:0000250}. Cytoplasm. | 0 |
| Q76EJ3 | Golgi apparatus membrane {ECO:0000269 F | 0 |
| P22314 | Cytoplasm {ECO:0000269 PubMed:1376922}. | 0 |
| Q15493 | Cytoplasm {ECO:0000250}.                | 0 |
| Q8WUA2 | Nucleus {ECO:0000305}.                  | 0 |
| Q9BZM5 | Cell membrane {ECO:0000269 PubMed:12782 | 0 |
| Q02952 | Cytoplasm, cell cortex {ECO:0000305}. ( | 0 |
| Q8NF91 | Nucleus outer membrane {ECO:0000305}; S | 0 |
| Q9BZM4 | Cell membrane {ECO:0000250 UniProtKB:Q9 | 0 |
| 095835 | Cytoplasm, cytoskeleton, microtubule or | 0 |
| Q8TE68 | Cytoplasm {ECO:0000269 PubMed:14565974} | 0 |
| Q9Y312 |                                         | 0 |
| Q3SXZ7 | Cytoplasm, cytoskeleton, cilium basal b | 0 |
| Q96DR5 | Secreted {ECO:0000250}.                 | 0 |
| Q14498 | Nucleus speckle. Note=Concentrated in r | 1 |
| Q9BQP9 | Secreted {ECO:0000305}.                 | 0 |
| Q9BYN7 | Nucleus {ECO:0000269 PubMed:29907690, F | 0 |
| Q9UJ14 | Membrane {ECO:0000250}; Single-pass ty  | 0 |
| Q96PH6 | Secreted.                               | 0 |
| Q9NR19 | Cytoplasm, cytosol {ECO:0000269 PubMed: | 0 |
| 043307 | Cytoplasm {ECO:0000269 PubMed:10559246} | 0 |
| P14136 | Cytoplasm {ECO:0000269 PubMed:12058025} | 1 |
| P10082 | Secreted.                               | 0 |
| P36543 |                                         | 0 |
| Q86WZ6 | Nucleus {ECO:0000305}.                  | 0 |
| Q96B54 |                                         | 0 |
| Q9BY14 | Cell membrane {ECO:0000250 UniProtKB:Q9 | 0 |
| 015444 | Secreted.                               | 0 |
| P13073 | Mitochondrion inner membrane {ECO:00002 | 1 |
| 043402 | Cytoplasm {ECO:0000269 PubMed:22119785} | 0 |
| Q14687 |                                         | 0 |
|        |                                         | 0 |
| Q9Y248 | Nucleus {ECO:0000250}.                  | 0 |
| 075368 |                                         | 0 |
| P24311 | Mitochondrion inner membrane {ECO:00002 | 0 |
| Q06495 | Apical cell membrane {ECO:0000269 PubMe | 0 |
| P00748 | Secreted.                               | 0 |
| Q8TB68 | Cell membrane {ECO:0000269 PubMed:21460 | 0 |
| 095644 | Cytoplasm {ECO:0000269 PubMed:16511445} | 1 |
| P14902 | Cytoplasm, cytosol {ECO:0000250 UniProt | 1 |
| P57773 | Cell membrane {ECO:0000250}; Multi-pass | 0 |
| Q01518 | Cell membrane {ECO:0000250}; Peripheral | 0 |
| P50897 | Lysosome {ECO:0000269 PubMed:19941651}. | 0 |
| Q86YS3 | Endosome {ECO:0000269 PubMed:20682791}. | 0 |
| Q9NVW2 | Nucleus {ECO:0000269 PubMed:19117995, F | 0 |
| 014627 | Nucleus {ECO:0000255 PROSITE-ProRule:PF | 0 |
| 075027 | Mitochondrion inner membrane {ECO:00002 | 0 |
| Q13114 | Cytoplasm {ECO:0000305}. Endosome {ECO: | 0 |
| Q9BT25 | Cytoplasm {ECO:0000305}. Cytoplasm, cyt | 0 |

|        |                                          |   |
|--------|------------------------------------------|---|
| Q9BY15 | Cell membrane; Multi-pass membrane prot  | 0 |
| P82663 | Mitochondrion {ECO:0000269 PubMed:25838  | 0 |
| 060239 | Cytoplasmic vesicle membrane {ECO:00002  | 0 |
| Q9UJ83 | Peroxisome.                              | 0 |
| Q92609 | Endosome membrane {ECO:0000269 PubMed:2  | 0 |
| Q9Y6W3 | Nucleus.                                 | 0 |
| Q14699 | Cell membrane {ECO:0000269 PubMed:12805  | 0 |
| Q8ND61 | Membrane {ECO:0000305}; Single-pass men  | 0 |
| Q9H1K0 | Cell membrane; Lipid-anchor; Cytoplasmic | 0 |
| Q8N3T1 | Golgi apparatus membrane {ECO:0000250};  | 0 |
| P31641 | Cell membrane; Multi-pass membrane prot  | 1 |
| Q14003 | Cell membrane {ECO:0000269 PubMed:10712  | 0 |
| 096009 | Secreted {ECO:0000305}.                  | 0 |
| P55055 | Nucleus {ECO:0000255 PROSITE-ProRule:PF  | 0 |
| Q9NT99 | Membrane; Single-pass membrane protein.  | 0 |
| P50479 | Isoform 1: Cytoplasm, cytoskeleton {ECO: | 0 |
| Q9Y496 | Cytoplasm, cytoskeleton {ECO:0000305}.   | 0 |
| P26572 | Golgi apparatus membrane {ECO:0000269 F  | 0 |
| 094808 |                                          | 0 |
| P23258 | Cytoplasm, cytoskeleton, microtubule or  | 1 |
| P61289 | Nucleus {ECO:0000269 PubMed:10657252, F  | 0 |
| P61353 | Cytoplasm, cytosol {ECO:0000269 PubMed:  | 0 |
| Q9P2W1 | Nucleus {ECO:0000269 PubMed:11739747}.   | 1 |
| Q16853 | Cell membrane {ECO:0000269 PubMed:96530  | 0 |
| P53396 | Cytoplasm, cytosol {ECO:0000269 PubMed:  | 0 |
| Q9BRG1 | Cytoplasm. Endosome membrane. Nucleus,   | 0 |
| 075106 | Isoform 1: Cell membrane {ECO:0000269 F  | 0 |
| P35575 | Endoplasmic reticulum membrane; Multi-p  | 1 |
| 043678 | Mitochondrion inner membrane {ECO:00003  | 0 |
| Q81WZ3 | Cytoplasm {ECO:0000269 PubMed:16098192,  | 0 |
| 060610 | Cell membrane {ECO:0000250 UniProtKB:OC  | 0 |
| Q9BT67 | Endosome membrane {ECO:0000269 PubMed:2  | 0 |
| P62837 |                                          | 0 |
| Q96A65 | Midbody, Midbody ring {ECO:0000269 PubM  | 0 |
| Q96P50 |                                          | 0 |
| Q96HA4 | Membrane {ECO:0000305}; Single-pass men  | 0 |
| Q5XXA6 | Cell membrane {ECO:0000269 PubMed:15215  | 1 |
| Q13136 | Cytoplasm {ECO:0000269 PubMed:7796809}.  | 0 |
| Q9BSN7 | Cell junction, adherens junction {ECO:(  | 0 |
| Q8NCW0 | Membrane {ECO:0000305}; Single-pass typ  | 0 |
| Q86W42 | Nucleus {ECO:0000269 PubMed:23621916}.   | 0 |
| Q6Q0C0 | Cytoplasmic vesicle {ECO:0000269 PubMec  | 0 |
| Q92982 | Membrane; Multi-pass membrane protein.   | 0 |
| P23280 | Secreted.                                | 0 |
| 075161 | Cytoplasm, cytoskeleton, cilium basal b  | 0 |
| P46821 | Cytoplasm, cytoskeleton {ECO:0000269 Pu  | 0 |
| Q9BQY4 | Nucleus {ECO:0000255 PROSITE-ProRule:PF  | 0 |
| Q5JSH3 | Cytoplasm, cytosol. Cytoplasm, perinuc   | 0 |
| P17540 | Mitochondrion inner membrane; Periphera  | 1 |
| Q8N567 | Nucleus, nucleolus {ECO:0000269 PubMed:  | 0 |
| 076011 |                                          | 0 |
| Q14525 |                                          | 0 |
| P11388 | Cytoplasm {ECO:0000269 PubMed:22013166}  | 0 |
| Q14849 | Late endosome membrane {ECO:0000269 Put  | 0 |
| Q9UD71 | Cytoplasm.                               | 0 |

|        |                                         |   |
|--------|-----------------------------------------|---|
| 075525 | Nucleus {ECO:0000269 PubMed:10332027, F | 1 |
| Q86WJ1 | Nucleus {ECO:0000269 PubMed:19661379}.  | 1 |
| 096011 | Peroxisome membrane {ECO:0000269 PubMec | 1 |
| P49326 | Microsome membrane. Endoplasmic reticul | 1 |
| Q9Y6X2 | Cytoplasm {ECO:0000250 UniProtKB:054714 | 0 |
| 043741 |                                         | 0 |
| P01225 | Secreted {ECO:0000269 PubMed:2494176}.  | 0 |
| P08559 | Mitochondrion matrix.                   | 0 |
| Q9Y5P3 |                                         | 0 |
| Q9HCC0 | Mitochondrion matrix {ECO:0000269 PubMe | 1 |
| Q9HCX3 | Nucleus {ECO:0000305 PubMed:24623306}.  | 0 |
| Q9BUG6 | Nucleus {ECO:0000255 PROSITE-ProRule:PF | 0 |
| P52740 | Nucleus {ECO:0000305}.                  | 0 |
| Q9HBJ7 |                                         | 0 |
| Q9BQE4 | Endoplasmic reticulum membrane; Single- | 0 |
| Q86X52 | Golgi apparatus, Golgi stack membrane   | 0 |
| P09661 | Nucleus {ECO:0000269 PubMed:11991638, F | 1 |
| Q15334 | Early endosome membrane {ECO:0000250}.  | 0 |
| Q9H9Z2 | Cytoplasm {ECO:0000269 PubMed:18951094, | 0 |
| Q8IUC4 | Cytoplasm, perinuclear region {ECO:0000 | 0 |
| Q9NSK7 | Mitochondrion {ECO:0000269 PubMed:21981 | 0 |
| Q9BTP7 | Nucleus {ECO:0000269 PubMed:17289582}.  | 0 |
| Q6ZRR7 |                                         | 0 |
| Q7Z5M8 |                                         | 0 |
| P30793 | Cytoplasm {ECO:0000269 PubMed:12176133, | 0 |
| P17931 | Cytoplasm. Nucleus. Secreted. Note=Secr | 0 |
| Q6PEZ8 | Secreted, extracellular space, extracel | 0 |
| P25685 | Cytoplasm {ECO:0000269 PubMed:1586970}. | 1 |
| Q9H7M6 |                                         | 0 |
| Q5XUX1 |                                         | 0 |
| P22670 | Nucleus.                                | 0 |
| P17024 | Nucleus {ECO:0000305}.                  | 0 |
| Q0VDD7 |                                         | 0 |
| Q6P1N0 | Cytoplasm {ECO:0000269 PubMed:16033914} | 0 |
| P19474 | Cytoplasm {ECO:0000269 PubMed:17156811, | 0 |
| Q15345 |                                         | 0 |
| Q92526 | Cytoplasm {ECO:0000305 PubMed:8812458}. | 0 |
| Q7L2E3 | Cytoplasm {ECO:0000269 PubMed:29100085} | 1 |
| P04049 | Cytoplasm. Cell membrane. Mitochondrion | 0 |
| P48066 | Membrane; Multi-pass membrane protein.  | 0 |
| P37231 | Nucleus. Cytoplasm. Note=Redistributed  | 0 |
| Q8TEM1 | Nucleus, nuclear pore complex {ECO:0000 | 0 |
| Q7L513 | Cytoplasm {ECO:0000269 PubMed:11754007, | 0 |
| P56937 | Cell membrane; Single-pass membrane pro | 0 |
| Q7L5Y1 | Mitochondrion {ECO:0000269 PubMed:16162 | 1 |
| Q9BXX0 | Secreted, extracellular space, extracel | 0 |
| Q9BQ83 | Nucleus {ECO:0000255 HAMAP-Rule:MF_0310 | 0 |
| P53365 |                                         | 0 |
| Q9C035 | Cytoplasm {ECO:0000269 PubMed:25127057} | 0 |
| Q8IYM9 | Cytoplasm {ECO:0000269 PubMed:17156811} | 0 |
| 043159 | Nucleus, nucleolus {ECO:0000269 PubMed: | 1 |
| Q9Y5J6 | Mitochondrion inner membrane {ECO:00002 | 0 |
| Q14156 | Cell membrane {ECO:0000269 PubMed:23229 | 0 |
| Q96EY7 | Mitochondrion {ECO:0000269 PubMed:19427 | 1 |
| Q16891 | Mitochondrion inner membrane {ECO:00002 | 1 |

|        |                                                                                                     |   |
|--------|-----------------------------------------------------------------------------------------------------|---|
| Q9NZE8 | Mitochondrion {ECO:0000269 PubMed:25278}                                                            | 0 |
| Q9H0C8 | Cytoplasm {ECO:0000269 PubMed:11331582}                                                             | 0 |
| O15055 | Isoform 1: Nucleus. Cytoplasm {ECO:0000269 PubMed:11331582}                                         | 0 |
| Q96I15 | Cytoplasm, cytosol {ECO:0000250}.                                                                   | 0 |
| P23469 | Isoform 1: Cell membrane; Single-pass type I membrane {ECO:0000269 PubMed:15866171}                 | 0 |
| Q13131 | Cytoplasm {ECO:0000269 PubMed:15866171}                                                             | 0 |
| Q9BX69 |                                                                                                     | 0 |
| Q684P5 | Cytoplasm {ECO:0000269 PubMed:15632203}                                                             | 0 |
| O75153 | Cytoplasm {ECO:0000255 HAMAP-Rule:MF_0000269}                                                       | 0 |
| Q9BQG0 | Cytoplasm {ECO:0000269 PubMed:12429849}                                                             | 0 |
| P27694 | Nucleus {ECO:0000269 PubMed:17959650}.                                                              | 1 |
| P36955 | Secreted {ECO:0000269 PubMed:17081065}.                                                             | 0 |
| P62253 |                                                                                                     | 0 |
| P57772 | Cytoplasm {ECO:0000305}. Nucleus {ECO:0000269 PubMed:17959650}                                      | 0 |
| Q9P2M4 | Golgi apparatus, cis-Golgi network {ECO:0000269 PubMed:17959650}                                    | 0 |
| Q5BJH2 | Membrane {ECO:0000305}; Multi-pass membrane protein {ECO:0000269 PubMed:17959650}                   | 0 |
| Q9NZJ6 | Mitochondrion inner membrane {ECO:0000269 PubMed:17959650}                                          | 1 |
| Q8TF01 | Nucleus speckle {ECO:0000269 PubMed:14511111}                                                       | 0 |
| P60059 | Endoplasmic reticulum membrane {ECO:0000269 PubMed:14511111}                                        | 0 |
| Q9NS86 | Nucleus {ECO:0000269 PubMed:12566319}.                                                              | 0 |
| Q6PIW4 | Nucleus {ECO:0000269 PubMed:23754376}.                                                              | 0 |
| P20711 |                                                                                                     | 0 |
| Q12849 | Cytoplasm. Mitochondrion matrix, mitochondrial matrix {ECO:0000269 PubMed:23754376}                 | 1 |
| P01591 | Secreted {ECO:0000250 UniProtKB:P01592}                                                             | 0 |
| O75179 | Cytoplasm {ECO:0000269 PubMed:17276651}, Nucleus {ECO:0000250}.                                     | 0 |
| Q9NQZ2 | Nucleus {ECO:0000250}.                                                                              | 0 |
| P16144 | Cell membrane; Single-pass type I membrane {ECO:0000269 PubMed:21642474}                            | 1 |
| Q969T9 | Cytoplasm {ECO:0000269 PubMed:21642474}                                                             | 0 |
| P84243 | Nucleus. Chromosome.                                                                                | 1 |
| Q9C0B0 | Cytoplasm {ECO:0000269 PubMed:25737280}                                                             | 0 |
| Q96LD4 | Cytoplasm {ECO:0000269 PubMed:11511098}                                                             | 0 |
| O95218 | Nucleus {ECO:0000269 PubMed:11448987}.                                                              | 1 |
| P63241 | Cytoplasm. Nucleus. Endoplasmic reticulum membrane {ECO:0000269 PubMed:17825402}                    | 0 |
| O15054 | Nucleus {ECO:0000305 PubMed:17825402}.                                                              | 1 |
| Q8IUN9 | Membrane {ECO:0000305}; Single-pass type I membrane {ECO:0000269 PubMed:19858209}                   | 0 |
| Q13227 | Nucleus {ECO:0000269 PubMed:19858209}, Endoplasmic reticulum membrane {ECO:0000269 PubMed:19858209} | 0 |
| Q6GPH4 | Cytoplasm. Nucleus. Mitochondrion. Note: Mitochondrion inner membrane {ECO:0000269 PubMed:12151111} | 0 |
| P78352 | Cell membrane {ECO:0000269 PubMed:12151111}                                                         | 0 |
| P52758 | Cytoplasm {ECO:0000269 PubMed:8973653}.                                                             | 0 |
| O00339 | Secreted.                                                                                           | 0 |
| Q9BRK0 | Membrane {ECO:0000250}; Multi-pass membrane protein {ECO:0000269 PubMed:20682424}                   | 0 |
| Q9HON5 |                                                                                                     | 0 |
| Q14254 | Cell membrane {ECO:0000269 PubMed:20682424}                                                         | 1 |
| O75616 | Mitochondrion matrix. Mitochondrion inner membrane {ECO:0000269 PubMed:20682424}                    | 1 |
| Q9NVM4 | Cytoplasm, cytosol {ECO:0000269 PubMed:20682424}                                                    | 0 |
| Q9Y221 | Nucleus, nucleolus {ECO:0000269 PubMed:20682424}                                                    | 1 |
| Q15554 | Nucleus {ECO:0000255 PROSITE-ProRule:PF0000269}                                                     | 1 |
| Q9UN37 | Prevacuolar compartment membrane; Peripheral membrane protein {ECO:0000269 PubMed:20875796}         | 0 |
| Q765P7 | Cytoplasm {ECO:0000269 PubMed:20875796}                                                             | 0 |
| Q96MM6 |                                                                                                     | 0 |
| Q9NU02 |                                                                                                     | 0 |
| Q9HIQ7 |                                                                                                     | 0 |
| P60880 | Cytoplasm, perinuclear region {ECO:0000269 PubMed:24115439}                                         | 0 |
| Q9Y2F9 | Cytoplasm, cytosol {ECO:0000250}. Nucleus {ECO:0000269 PubMed:24115439}                             | 0 |
| P12004 | Nucleus {ECO:0000269 PubMed:24115439}, Endoplasmic reticulum membrane {ECO:0000269 PubMed:24115439} | 1 |

|        |                                         |   |
|--------|-----------------------------------------|---|
| Q9H1D9 | Nucleus {ECO:0000250}.                  | 0 |
| Q8WYP3 | Cytoplasm {ECO:0000305}.                | 0 |
| P18433 | Membrane; Single-pass type I membrane p | 0 |
| P31391 | Cell membrane; Multi-pass membrane prot | 0 |
| P51398 | Mitochondrion {ECO:0000269 PubMed:11162 | 0 |
| Q9H310 | Basolateral cell membrane; Multi-pass m | 1 |
| Q7Z7F0 | Nucleus {ECO:0000269 PubMed:19641227, E | 0 |
| P48681 |                                         | 0 |
| Q96GW7 | Isoform 1: Secreted, extracellular spac | 0 |
| P02741 | Secreted.                               | 0 |
| O15085 | Cytoplasm {ECO:0000269 PubMed:10900204} | 1 |
| P57735 | Cell membrane {ECO:0000305}; Lipid-anch | 0 |
| Q9GZV7 | Secreted, extracellular space, extracel | 0 |
| P02743 | Secreted.                               | 0 |
| Q5TAQ9 | Nucleus {ECO:0000269 PubMed:22500989}.  | 0 |
| Q9BT88 | Membrane {ECO:0000269 PubMed:12925569}; | 0 |
| Q96HD9 | Apical cell membrane {ECO:0000269 PubMe | 1 |
| P48448 | Lipid droplet {ECO:0000250 UniProtKB:ES | 0 |
| Q9Y4U1 | Cytoplasm {ECO:0000269 PubMed:23270877} | 0 |
| Q9BQC3 |                                         | 0 |
| Q96GM8 | Nucleus, nucleolus {ECO:0000269 PubMed: | 1 |
| P49321 | Cytoplasm {ECO:0000250 UniProtKB:Q99MD9 | 0 |
| Q9UIF7 | Nucleus {ECO:0000269 PubMed:25820570}.  | 0 |
| Q8WYA6 | Isoform 1: Nucleus.; Isoform 2: Cytopl  | 0 |
| Q9BQK8 | Nucleus {ECO:0000305}.                  | 0 |
| Q96MP5 |                                         | 0 |
| Q9H0Z9 | Cytoplasm, cytosol {ECO:0000269 PubMed: | 0 |
| Q96N03 |                                         | 0 |
| Q9NX31 |                                         | 0 |
| Q13530 | Cell membrane {ECO:0000250 UniProtKB:Q8 | 0 |
| O95685 |                                         | 0 |
| Q9UI17 | Mitochondrion.                          | 1 |
| Q9H2M3 |                                         | 0 |
| 000203 | Cytoplasmic vesicle, clathrin-coated ve | 0 |
| Q96IU2 | Cytoplasm {ECO:0000250}. Membrane {ECO: | 0 |
| Q8NI35 | Cell junction, tight junction {ECO:0000 | 0 |
| Q5T7N3 | Cytoplasm {ECO:0000269 PubMed:17996375, | 0 |
| Q9Y5C1 | Secreted {ECO:0000250, ECO:0000305 PubM | 0 |
| Q9H2B2 | Cytoplasmic vesicle, secretory vesicle, | 0 |
| Q9H4M3 |                                         | 0 |
| Q9BU20 | Cytoplasm, cytoskeleton, cilium basal b | 0 |
| P55211 |                                         | 0 |
| Q9GZQ4 | Cell membrane; Multi-pass membrane prot | 0 |
| Q9UJW0 | Cytoplasm, cytoskeleton {ECO:0000269 Pu | 0 |
| P16499 | Cell membrane {ECO:0000305}; Lipid-anch | 0 |
| Q9NTI2 | Membrane {ECO:0000305}; Multi-pass mem  | 0 |
| Q5JR59 | Cytoplasm, cytoskeleton {ECO:0000269 Pu | 1 |
| Q9UJ78 | Nucleus {ECO:0000305}.                  | 0 |
| Q5W0Q7 | Nucleus, Cajal body {ECO:0000269 PubMec | 0 |
| Q9Y244 | Cytoplasm, cytosol. Nucleus. Microsome  | 0 |
| P20292 | Nucleus membrane; Multi-pass membrane p | 0 |
| Q9UPY6 | Cytoplasm, cytoskeleton.                | 1 |
| Q9BXT8 | Cytoplasm {ECO:0000250}. Nucleus {ECO:( | 0 |
| P47775 | Cell membrane {ECO:0000305}; Multi-pass | 0 |
| P20309 | Cell membrane; Multi-pass membrane prot | 0 |

|        |                                         |   |
|--------|-----------------------------------------|---|
| P13535 | Cytoplasm, myofibril. Note=Thick filame | 1 |
| P35580 | Cell projection, lamellipodium {ECO:000 | 0 |
| Q9UBM1 | Isoform 1: Endoplasmic reticulum membra | 0 |
| 075880 | Mitochondrion {ECO:0000269 PubMed:98782 | 1 |
| Q6WCQ1 | Cytoplasm, cytoskeleton {ECO:0000269 Pu | 0 |
| Q13203 |                                         | 0 |
| 000750 | Microsome {ECO:0000269 PubMed:14563213} | 0 |
| Q6XUX3 | Cytoplasm {ECO:0000269 PubMed:17123648, | 0 |
| Q13231 | Secreted. Lysosome. Note=A small propor | 0 |
| Q8IVJ1 | Cell membrane; Multi-pass membrane prot | 0 |
| Q9HBX8 | Cell membrane {ECO:0000269 PubMed:22615 | 0 |
| 075069 | Endoplasmic reticulum membrane {ECO:000 | 0 |
| 015075 |                                         | 0 |
| P78396 | Nucleus {ECO:0000250}.                  | 0 |
| Q9Y2V7 | Golgi apparatus membrane {ECO:0000250}; | 0 |
| Q8NOX7 | Cytoplasm {ECO:0000269 PubMed:19580544} | 0 |
| Q96J88 |                                         | 0 |
| Q15063 | Golgi apparatus {ECO:0000250 UniProtKB: | 0 |
| P13693 | Cytoplasm {ECO:0000269 PubMed:9059837}. | 0 |
| Q8IXQ4 |                                         | 0 |
| Q8TAV4 | Cell membrane {ECO:0000250 UniProtKB:Q6 | 0 |
| P40938 | Nucleus {ECO:0000305}.                  | 0 |
| Q9Y3M8 | Cytoplasm. Membrane; Peripheral membrar | 0 |
| 014654 | Cell membrane {ECO:0000269 PubMed:95531 | 0 |
| Q8TE76 | Nucleus {ECO:0000305 PubMed:17608765}.  | 1 |
| Q9BXY8 | Cytoplasm {ECO:0000250}. Nucleus {ECO:( | 0 |
| Q8TEB7 | Endomembrane system {ECO:0000250}; Sing | 0 |
| Q0IIM8 |                                         | 0 |
| Q9HBH7 | Nucleus. Cytoplasm. Note=Shuttles betwe | 0 |
| P29323 | Cell membrane; Single-pass type I membr | 0 |
| Q8IYB3 | Nucleus matrix {ECO:0000269 PubMed:1262 | 1 |
| Q96QH2 |                                         | 0 |
| Q86Y97 | Nucleus. Chromosome {ECO:0000250}. Note | 0 |
| Q96IQ9 | Nucleus {ECO:0000305}.                  | 0 |
| P35913 | Membrane; Lipid-anchor.                 | 0 |
| Q9NZL4 |                                         | 0 |
| P78368 | Cytoplasm {ECO:0000269 PubMed:15077195} | 0 |
| Q9BQI6 | Nucleus {ECO:0000269 PubMed:25931565}.  | 0 |
| Q96KP4 | Cytoplasm {ECO:0000269 PubMed:12473676, | 1 |
| Q9BQ69 | Nucleus {ECO:0000269 PubMed:23474712}.  | 0 |
| Q6RFH5 | Nucleus, nucleolus {ECO:0000269 PubMed: | 0 |
| 095197 | Endoplasmic reticulum membrane {ECO:000 | 1 |
| Q9NWW9 | Cytoplasm {ECO:0000269 PubMed:18163183} | 0 |
| P35749 | Melanosome {ECO:0000269 PubMed:17081065 | 0 |
| Q96NB1 | Cytoplasm, cytoskeleton, microtubule or | 0 |
| 015018 | Nucleus {ECO:0000250 UniProtKB:Q9QZR8}. | 0 |
| Q9Y6X9 | Nucleus {ECO:0000269 PubMed:20225202, F | 0 |
| POCG30 | Cytoplasm.                              | 0 |
|        | Cytoplasm. Nucleus. Cytoplasm, myofibri | 0 |
| Q9BYW1 | Cell membrane {ECO:0000269 PubMed:12175 | 0 |
| Q9BXI9 | Secreted {ECO:0000305}.                 | 0 |
| P36268 | Cytoplasm, perinuclear region {ECO:0000 | 0 |
| Q8NEG4 |                                         | 0 |
| Q6P9H5 | Cytoplasm, cytosol {ECO:0000269 PubMed: | 0 |
| Q9NUV9 | Cytoplasm, cytosol {ECO:0000269 PubMed: | 0 |

|        |                                         |   |
|--------|-----------------------------------------|---|
| Q7Z695 | Membrane {ECO:0000305}; Single-pass mem | 0 |
| Q96P47 | Cytoplasm {ECO:0000269 PubMed:16461359} | 0 |
| A5PL33 |                                         | 0 |
| Q9PIU1 | Cytoplasm, cytoskeleton {ECO:0000250}.  | 0 |
| P30990 | Secreted. Cytoplasmic vesicle, secretor | 0 |
| Q96JM4 |                                         | 0 |
| Q8N999 |                                         | 0 |
| Q9H7F0 | Membrane {ECO:0000250}; Multi-pass mem  | 0 |
| P35247 | Secreted, extracellular space, extracel | 0 |
| Q96IM9 |                                         | 0 |
| Q8TBM7 | Membrane {ECO:0000305}; Multi-pass mem  | 0 |
| Q8IUR5 | Membrane {ECO:0000305}; Multi-pass mem  | 0 |
| P01116 | Cell membrane {ECO:0000269 PubMed:22431 | 0 |
| 015397 | Cytoplasm {ECO:0000250}. Nucleus {ECO:( | 0 |
| Q9P2J5 | Cytoplasm {ECO:0000250}.                | 1 |
| Q9NQ38 | Secreted.                               | 0 |
| P29218 | Cytoplasm {ECO:0000269 PubMed:17068342} | 0 |
| Q9C099 | Cytoplasm, cytoskeleton, microtubule or | 0 |
| P00915 | Cytoplasm.                              | 0 |
| Q9P031 | Nucleus {ECO:0000305}.                  | 0 |
| Q9UH65 | Cytoplasm {ECO:0000269 PubMed:10681448} | 0 |
| 000327 | Nucleus {ECO:0000255 PROSITE-ProRule:PF | 0 |
| Q9Y5Y7 | Membrane {ECO:0000269 PubMed:10037799}; | 0 |
| Q01432 |                                         | 0 |
| Q86WG5 | Cytoplasm {ECO:0000269 PubMed:15998640} | 0 |
| 094851 | Nucleus {ECO:0000269 PubMed:24440334}.  | 0 |
| P62070 | Cell membrane {ECO:0000250}; Lipid-anch | 0 |
| P51659 | Peroxisome.                             | 1 |
| 060293 | Nucleus {ECO:0000269 PubMed:27871484}.  | 0 |
| Q9BXT5 | Cytoplasm {ECO:0000250 UniProtKB:F8VPN2 | 0 |
| Q9H9V4 | Golgi apparatus {ECO:0000269 PubMed:167 | 0 |
| Q9BV47 | Cytoplasm. Nucleus. Golgi apparatus.    | 0 |
| Q92785 | Nucleus {ECO:0000269 PubMed:28533407, F | 0 |
| 000255 | Nucleus {ECO:0000269 PubMed:12874027}.  | 0 |
| Q9UKR5 | Endoplasmic reticulum membrane {ECO:000 | 0 |
| Q7Z3D6 | Mitochondrion matrix {ECO:0000250 UniPr | 0 |
| P49757 | Membrane; Peripheral membrane protein.  | 0 |
| Q9H7T0 | Membrane {ECO:0000250}; Multi-pass mem  | 0 |
| Q9H8Y1 |                                         | 0 |
| Q9POS2 | Mitochondrion inner membrane {ECO:00002 | 0 |
| 075586 | Nucleus.                                | 0 |
| P05198 | Cytoplasm, Stress granule {ECO:0000250  | 1 |
| 043506 | Membrane; Single-pass type I membrane p | 0 |
| Q9Y4K0 | Secreted, extracellular space, extracel | 0 |
| Q9H9T3 | Cytoplasm {ECO:0000269 PubMed:19185337} | 0 |
| Q96S96 | Lysosome {ECO:0000269 PubMed:15302887}. | 0 |
| 043310 | Cytoplasm, perinuclear region {ECO:0000 | 0 |
| Q9BYG7 | Nucleus, nucleolus {ECO:0000250}.       | 0 |
| Q9UBB5 | Nucleus {ECO:0000269 PubMed:12183469, F | 0 |
| Q9Y5U9 | Endoplasmic reticulum membrane {ECO:000 | 1 |
| P82909 | Mitochondrion.                          | 1 |
| P14635 | Cytoplasm. Nucleus. Cytoplasm, cytoskel | 0 |
| P50613 | Nucleus. Cytoplasm. Cytoplasm, perinuc  | 1 |
| Q99467 | Cell membrane; Single-pass type I mem   | 0 |
| 043187 |                                         | 0 |

|        |                                          |   |
|--------|------------------------------------------|---|
| Q14012 | Cytoplasm {ECO:0000250}. Nucleus {ECO:(  | 0 |
| Q9BV44 |                                          | 0 |
| P40337 | Isoform 1: Cytoplasm. Membrane; Periphe  | 0 |
| O14503 | Cytoplasm {ECO:0000269 PubMed:21829689}  | 0 |
| Q9NVJ2 | Late endosome membrane {ECO:0000269 Pub  | 0 |
| Q92611 | Endoplasmic reticulum membrane {ECO:000  | 0 |
| Q9UQ52 | Cell membrane {ECO:0000250}; Lipid-anch  | 0 |
| 000533 | Cell membrane {ECO:0000250}; Single-pass | 0 |
| O14770 | Nucleus {ECO:0000255 PROSITE-ProRule:PF  | 0 |
| Q7L8W6 |                                          | 0 |
| Q9H079 | Nucleus {ECO:0000269 PubMed:26929214}.   | 0 |
| Q9NPA0 | Membrane {ECO:0000269 PubMed:22119785};  | 0 |
| Q7Z4N2 | Cell membrane {ECO:0000255}; Multi-pass  | 0 |
| P09488 | Cytoplasm.                               | 0 |
| Q5VTL8 | Nucleus {ECO:0000305}.                   | 0 |
| Q9BYZ8 | Secreted {ECO:0000269 PubMed:12819006}.  | 0 |
| 060636 | Membrane {ECO:0000305}; Multi-pass memt  | 0 |
| P01222 | Secreted.                                | 0 |
| P46439 | Cytoplasm.                               | 0 |
| P21266 | Cytoplasm.                               | 1 |
| Q9UKW4 |                                          | 0 |
| Q9BZP6 | Isoform 1: Secreted. Note=Secretion dep  | 0 |
| Q6PGN9 | Cytoplasm. Cytoplasm, cytoskeleton, spi  | 0 |
| P54868 | Mitochondrion.                           | 1 |
| Q9Y2R2 | Cytoplasm {ECO:0000250}.                 | 0 |
| Q99523 | Membrane; Single-pass type I membrane p  | 0 |
| Q9P2B2 | Endoplasmic reticulum membrane {ECO:000  | 0 |
| 043504 | Cytoplasm. Lysosome.                     | 0 |
| Q9UKF2 | Late endosome membrane {ECO:0000269 Pub  | 0 |
| Q04721 | Notch 2 extracellular truncation: Cell   | 0 |
| Q9H8W5 | Cytoplasm {ECO:0000269 PubMed:15351693}  | 0 |
| Q93033 | Membrane {ECO:0000305}; Single-pass typ  | 0 |
| Q7Z7D3 | Cell membrane {ECO:0000255}; Single-pas  | 0 |
| Q9Y6B7 | Golgi apparatus, trans-Golgi network me  | 0 |
| Q99747 | Membrane {ECO:0000250}; Peripheral memt  | 0 |
| Q08AE8 | Cytoplasm, cytoskeleton {ECO:0000269 Pu  | 0 |
| Q8NEY8 | Nucleus {ECO:0000269 PubMed:12853457, F  | 1 |
| Q9NYL4 | Membrane {ECO:0000305}; Single-pass men  | 0 |
| Q9BVX2 | Endoplasmic reticulum membrane {ECO:000  | 0 |
| Q96QD8 | Cell membrane {ECO:0000269 PubMed:15561  | 0 |
| P27348 | Cytoplasm. Note=In neurons, axonally tr  | 0 |
| Q9ULH0 | Membrane {ECO:0000305}; Multi-pass memt  | 0 |
| Q9NZI5 | Nucleus {ECO:0000269 PubMed:18288204}.   | 0 |
| 075116 | Cytoplasm. Cell membrane {ECO:0000250};  | 0 |
| Q8WXG1 | Endoplasmic reticulum membrane; Periphe  | 0 |
| Q14693 | Nucleus membrane {ECO:0000250}. Cytopl   | 0 |
| Q5EBM0 | Mitochondrion {ECO:0000269 PubMed:1799   | 0 |
| Q2TAA2 |                                          | 0 |
| P00338 | Cytoplasm.                               | 0 |
| Q9BYT9 | Cell membrane {ECO:0000305}; Multi-pass  | 0 |
| P40189 | Isoform 1: Cell membrane {ECO:0000269 F  | 0 |
| P19883 | Secreted.                                | 0 |
| Q8NEY1 | Cytoplasm, cytoskeleton {ECO:0000250}.   | 1 |
| Q6P1J9 | Nucleus {ECO:0000269 PubMed:15580289, F  | 1 |
| Q99595 | Mitochondrion inner membrane; Multi-pas  | 0 |



|        |                                         |   |
|--------|-----------------------------------------|---|
| P82279 | Isoform 1: Apical cell membrane; Single | 0 |
| Q9BXR6 | Secreted.                               | 0 |
| Q76MJ5 | Endoplasmic reticulum membrane {ECO:000 | 0 |
| P62244 |                                         | 0 |
| O43776 | Cytoplasm.                              | 1 |
| Q9P260 | Recycling endosome {ECO:0000269 PubMed: | 0 |
| Q8NFZ0 | Nucleus {ECO:0000269 PubMed:19736316, F | 1 |
| Q96I25 | Nucleus {ECO:0000269 PubMed:9731529}.   | 1 |
| P01589 | Membrane; Single-pass type I membrane p | 0 |
| Q6P6B7 | Cytoplasm {ECO:0000250 UniProtKB:A2AS55 | 0 |
| Q96DC8 | Mitochondrion {ECO:0000305}.            | 1 |
| Q13261 | Membrane {ECO:0000269 PubMed:10480910}; | 0 |
| P51946 | Nucleus.                                | 0 |
| Q9H3N8 | Cell membrane; Multi-pass membrane prot | 0 |
| Q24JQ0 | Membrane {ECO:0000305}; Multi-pass memt | 0 |
| Q92608 | Endomembrane system {ECO:0000269 PubMec | 1 |
| Q96A58 | Cytoplasm {ECO:0000269 PubMed:11533059} | 0 |
| Q9Y6L6 | Basolateral cell membrane {ECO:0000269  | 1 |
| Q13241 | Cell membrane {ECO:0000305}; Single-pas | 0 |
| O75096 | Cell membrane {ECO:0000250 UniProtKB:Q8 | 0 |
| Q14896 |                                         | 0 |
| Q92466 | Nucleus {ECO:0000269 PubMed:10777490, F | 1 |
| Q14088 | Cell membrane {ECO:0000305}; Lipid-anch | 0 |
| Q9Y388 | Nucleus {ECO:0000269 PubMed:29360106, F | 0 |
| Q9P289 | Cytoplasm {ECO:0000269 PubMed:17360971, | 0 |
| Q7Z3Z4 | Nucleus {ECO:0000269 PubMed:25038252, F | 1 |
| P49286 | Cell membrane; Multi-pass membrane prot | 0 |
| Q14671 | Cytoplasm {ECO:0000305 PubMed:26724866} | 0 |
| Q6ZMY3 |                                         | 0 |
| P54577 | Cytoplasm {ECO:0000269 PubMed:16429158} | 1 |
| Q8IXK0 | Nucleus {ECO:0000269 PubMed:21282530}.  | 1 |
| Q53HL2 | Nucleus, nucleolus {ECO:0000269 PubMed: | 0 |
| Q13823 | Nucleus, nucleolus {ECO:0000269 PubMed: | 0 |
| Q9HCK5 | Cytoplasm, P-body {ECO:0000255 HAMAP-Ru | 0 |
| Q9UJC3 | Cytoplasm {ECO:0000250 UniProtKB:Q8BIL5 | 1 |
| Q96K17 |                                         | 0 |
| Q5TAX3 | Nucleus {ECO:0000269 PubMed:16643855}.  | 0 |
| Q8NAV1 | Nucleus {ECO:0000269 PubMed:28781166}.  | 0 |
| Q02487 | Cell membrane {ECO:0000269 PubMed:21062 | 1 |
| P32926 | Cell membrane {ECO:0000250}; Single-pas | 1 |
| Q6IA86 | Cytoplasm. Nucleus.                     | 0 |
| Q02413 | Cell membrane {ECO:0000250}; Single-pas | 0 |
| Q14574 | Cell membrane; Single-pass type I membr | 1 |
| Q08554 | Cell membrane; Single-pass type I membr | 1 |
| Q9Y4J8 | Cytoplasm. Cell junction, synapse. Cell | 0 |
| Q2V2M9 | Cytoplasm, cytoskeleton {ECO:0000269 Pu | 0 |
| Q68CL5 | Cytoplasm, cytoskeleton {ECO:0000250}.  | 0 |
| Q9Y4D2 | Cell membrane; Multi-pass membrane prot | 0 |
| Q8NBI5 | Membrane {ECO:0000305}; Multi-pass memt | 0 |
| P62072 | Mitochondrion inner membrane {ECO:00002 | 1 |
| P27352 | Secreted.                               | 0 |
| Q14147 |                                         | 0 |
| P35414 | Cell membrane {ECO:0000269 PubMed:25639 | 0 |
| O95864 | Endoplasmic reticulum membrane {ECO:000 | 0 |
| P61165 | Membrane {ECO:0000305}; Multi-pass memt | 0 |

|        |                                         |   |
|--------|-----------------------------------------|---|
| Q9P296 | Cell membrane {ECO:0000269 PubMed:19615 | 0 |
| Q9HC07 | Golgi apparatus membrane {ECO:0000305}; | 1 |
| O15516 | Nucleus {ECO:0000269 PubMed:14645221, F | 0 |
| P16234 | Cell membrane {ECO:0000269 PubMed:1464  | 0 |
| Q9BVM4 |                                         | 0 |
| P08572 | Secreted, extracellular space, extracel | 0 |
| P78369 | Cell junction, tight junction {ECO:000  | 1 |
| Q86YF9 | Nucleus {ECO:0000269 PubMed:15081113}.  | 0 |
| Q8NBM4 | Endoplasmic reticulum membrane {ECO:00  | 0 |
| Q9NWB6 | Nucleus {ECO:0000269 PubMed:21454576}.  | 1 |
| Q86UB2 | Cytoplasm {ECO:0000269 PubMed:12036287} | 0 |
| P28715 | Nucleus {ECO:0000269 PubMed:7651464}.   | 0 |
| P29144 | Cytoplasm {ECO:0000269 PubMed:19747897} | 0 |
| Q6UW63 | Endoplasmic reticulum lumen {ECO:00002  | 0 |
| Q9HA77 | Mitochondrion matrix {ECO:0000250}.     | 0 |
| A7KAX9 | Cell junction, synapse, postsynaptic ce | 0 |
| P46977 | Endoplasmic reticulum {ECO:0000269 PubM | 0 |
| Q9UP79 | Secreted, extracellular space, extracel | 0 |
| P26436 | Cytoplasmic vesicle, secretory vesicle, | 0 |
| P14921 | Cytoplasm {ECO:0000269 PubMed:19377509} | 0 |
| Q8TED4 | Endoplasmic reticulum membrane {ECO:00  | 0 |
| Q86Z14 | Cell membrane {ECO:0000305}; Single-pas | 0 |
| Q9Y3B3 | Endoplasmic reticulum membrane; Single- | 1 |
| P25054 | Cell junction, adherens junction {ECO:( | 1 |
| Q16612 | Cytoplasm {ECO:0000269 PubMed:11358844} | 0 |
| Q8NI36 | Nucleus, nucleolus {ECO:0000269 PubMed: | 0 |
| Q92882 | Cytoplasm {ECO:0000305}.                | 0 |
| Q969G6 | Cytoplasm {ECO:0000250}.                | 0 |
| Q9UMX0 | Cytoplasm {ECO:0000269 PubMed:16159959, | 0 |
| Q5VZE5 | Cytoplasm {ECO:0000269 PubMed:19398576} | 0 |
| Q8IXQ3 |                                         | 0 |
| P04083 | Nucleus {ECO:0000269 PubMed:10772777, F | 0 |
| P07711 | Lysosome.                               | 0 |
| Q9UHN6 | Cell membrane {ECO:0000269 PubMed:2824  | 0 |
| Q9UPW5 | Cytoplasm {ECO:0000269 PubMed:23085998} | 0 |
| Q8NBJ4 | Golgi apparatus, cis-Golgi network memt | 1 |
| Q15884 | Membrane {ECO:0000305}; Single-pass ty  | 0 |
| Q9Y617 |                                         | 0 |
| Q9BUE6 | Mitochondrion {ECO:0000269 PubMed:1526  | 0 |
| Q8TDQ0 | Membrane {ECO:0000305}; Single-pass ty  | 0 |
| Q8IV13 |                                         | 0 |
| Q9H2K8 | Cytoplasm {ECO:0000269 PubMed:13679851} | 0 |
| Q70CQ3 | Mitochondrion outer membrane {ECO:0000  | 0 |
| P20132 | Cytoplasm.                              | 0 |
| O43347 | Cytoplasm {ECO:0000250}. Nucleus {ECO:( | 1 |
|        | Nucleus {ECO:0000255 PROSITE-ProRule:PF | 1 |
| O94952 |                                         | 0 |
| Q15646 | Isoform p56: Nucleus, nucleolus. Cytopl | 0 |
| O00198 | Membrane; Single-pass membrane protein. | 0 |
| Q96EX2 | Membrane {ECO:0000305}; Multi-pass memt | 0 |
| Q99571 | Membrane {ECO:0000269 PubMed:10515189,  | 0 |
| Q6ZP65 | Cytoplasm, cytoskeleton, microtubule or | 0 |
| Q86Y01 | Cytoplasm. Nucleus. Note=Predominantly  | 0 |
| O14545 |                                         | 0 |
| Q9Y222 | Nucleus {ECO:0000255 PROSITE-ProRule:PF | 1 |

|        |                                         |   |
|--------|-----------------------------------------|---|
| P0CE71 |                                         | 0 |
| Q9BU79 | Membrane {ECO:0000305}; Multi-pass mem  | 0 |
| Q8IYE0 | Cytoplasm, cytoskeleton, microtubule or | 0 |
| Q9H2L4 | Membrane {ECO:0000305}; Multi-pass mem  | 0 |
| P16671 | Cell membrane {ECO:0000269 PubMed:16880 | 0 |
| Q6UWM9 | Membrane {ECO:0000305}; Single-pass ty  | 0 |
| P05814 | Secreted.                               | 0 |
| Q9BY64 | Microsome membrane {ECO:0000269 PubMed: | 0 |
| Q9NP80 | Endoplasmic reticulum membrane {ECO:000 | 0 |
| Q9Y5L2 | Lipid droplet. Secreted. Membrane {ECO: | 0 |
| Q6NUQ1 | Cytoplasm. Endoplasmic reticulum membra | 0 |
| P78362 | Cytoplasm. Nucleus. Note=Shuttles betwe | 0 |
| Q9UGI8 | Cytoplasm. Cell junction, focal adhesio | 0 |
| Q9P1T7 | Isoform 1: Nucleus, nucleolus. Note=Als | 0 |
| Q9Y2Z2 | Mitochondrion {ECO:0000250}.            | 0 |
| Q9Y2G4 |                                         | 0 |
| P28222 | Cell membrane {ECO:0000269 PubMed:10452 | 0 |
| Q5TB80 | Cytoplasm, cytoskeleton, microtubule or | 0 |
| 060506 | Cytoplasm {ECO:0000269 PubMed:11574476, | 1 |
| Q9Y5W7 | Lysosome membrane {ECO:0000269 PubMed:2 | 0 |
| P21589 | Cell membrane; Lipid-anchor, GPI-anchor | 0 |
| Q15375 | Cell membrane {ECO:0000305}; Single-pas | 0 |
| Q9UBD5 | Nucleus.                                | 1 |
| Q86VQ0 | Cytoplasm, cytoskeleton {ECO:0000269 Pu | 0 |
| O43318 | Cytoplasm {ECO:0000269 PubMed:12242293} | 0 |
| P01215 | Secreted {ECO:0000269 PubMed:24692546,  | 0 |
| Q969M2 | Cell membrane {ECO:0000250}; Multi-pass | 0 |
| P25791 | Nucleus {ECO:0000305}.                  | 0 |
| Q96BD5 | Nucleus {ECO:0000250}.                  | 0 |
| Q9H0A0 | Nucleus, nucleolus {ECO:0000255 HAMAP-F | 0 |
| Q9NZC4 | Nucleus {ECO:0000255 PROSITE-ProRule:PF | 0 |
| Q9BZD6 | Endoplasmic reticulum-Golgi intermediat | 0 |
| Q14444 | Cytoplasm, cytosol. Cell projection, de | 0 |
| Q06055 | Mitochondrion membrane; Multi-pass mem  | 0 |
| Q6Y2X3 | Endoplasmic reticulum membrane {ECO:000 | 0 |
| P08962 | Cell membrane {ECO:0000269 PubMed:15351 | 0 |
| P41219 |                                         | 0 |
| O75366 | Cytoplasm, cytoskeleton. Cell projectio | 0 |
| O95390 | Secreted {ECO:0000305}.                 | 0 |
| Q9UI32 | Mitochondrion {ECO:0000269 PubMed:20378 | 0 |
| Q13683 | Membrane; Single-pass type I membrane p | 0 |
| A2RU30 | Cytoplasm {ECO:0000269 PubMed:22561606, | 0 |
| Q8IYM0 |                                         | 0 |
| Q99490 | Isoform 1: Cytoplasm. Nucleus.; Isoform | 0 |
| P78537 | Mitochondrion intermembrane space {ECO: | 0 |
| P78386 |                                         | 0 |
| P11802 | Cytoplasm. Nucleus. Membrane. Note=Cytc | 0 |
| Q13522 |                                         | 0 |
| Q12815 | Cytoplasm.                              | 0 |
| Q12999 | Membrane; Multi-pass membrane protein.  | 0 |
| Q00973 | Golgi apparatus membrane; Single-pass t | 0 |
| Q9BWQ8 | Cell membrane {ECO:0000250}; Multi-pass | 0 |
| Q14674 | Cytoplasm. Nucleus.                     | 0 |
| P08729 | Cytoplasm {ECO:0000269 PubMed:2459129}. | 0 |
| Q96K80 | Nucleus {ECO:0000269 PubMed:28431233}.  | 0 |

|        |                                          |   |
|--------|------------------------------------------|---|
| P09651 | Nucleus {ECO:0000269 PubMed:17289661, I  | 0 |
| Q8NG04 | Membrane {ECO:0000305}; Multi-pass mem   | 0 |
| P36896 | Cell membrane {ECO:0000250}; Single-pas  | 0 |
| Q13438 | Endoplasmic reticulum lumen {ECO:000026  | 1 |
| P30301 | Cell membrane {ECO:0000269 PubMed:23116  | 0 |
| Q96GA3 |                                          | 0 |
| Q14244 | Cytoplasm, perinuclear region. Basolater | 1 |
| Q04900 | Lysosome membrane {ECO:0000269 PubMed:1  | 0 |
| Q8WV93 | Mitochondrion membrane {ECO:0000269 Pub  | 0 |
| Q5SYE7 |                                          | 0 |
| Q8N157 | Cytoplasm, cytoskeleton, cilium basal b  | 0 |
| Q9UBP5 | Nucleus {ECO:0000255 PROSITE-ProRule:PF  | 0 |
| Q9C010 |                                          | 0 |
| O14804 | Cell membrane {ECO:0000269 PubMed:23395  | 0 |
| O60906 | Membrane; Multi-pass membrane protein.   | 0 |
| Q8TDZ2 | Cytoplasm. Cytoplasm, cytoskeleton. Mic  | 0 |
| Q96D71 | Membrane, clathrin-coated pit {ECO:0000  | 0 |
| O75558 | Membrane {ECO:0000305}; Peripheral mem   | 0 |
| P42680 | Cytoplasm. Cell membrane; Peripheral me  | 0 |
| Q9BSG0 | Secreted {ECO:0000269 PubMed:15498570}.  | 0 |
| O95754 | Cell membrane {ECO:0000305}; Single-pas  | 0 |
| Q99832 | Cytoplasm {ECO:0000250 UniProtKB:P80315  | 0 |
| Q05215 | Nucleus {ECO:0000305}.                   | 0 |
| Q9BXF6 | Cytoplasm. Recycling endosome membrane;  | 1 |
| Q6GMV2 |                                          | 0 |
| O75923 | Cell membrane, sarcolemma; Single-pass   | 0 |
| Q17RM4 |                                          | 0 |
| Q04741 | Nucleus {ECO:0000255 PROSITE-ProRule:PF  | 0 |
| Q86W47 | Membrane; Multi-pass membrane protein.   | 0 |
| Q9Y4E8 | Cytoplasm {ECO:0000269 PubMed:21947082,  | 0 |
| P15586 | Lysosome.                                | 1 |
| P14384 | Cell membrane {ECO:0000269 PubMed:12457  | 0 |
| Q00987 | Nucleus, nucleoplasm. Cytoplasm. Nucleu  | 0 |
| Q8N4N3 |                                          | 0 |
| Q99547 | Nucleus, nucleolus. Cytoplasm. Note=Cyt  | 0 |
| Q9GZS9 | Golgi apparatus membrane {ECO:0000305 I  | 1 |
| O60268 | Cytoplasm {ECO:0000305 PubMed:17010949}  | 1 |
| Q96CD0 |                                          | 0 |
| Q9Y613 | Cytoplasm. Cytoplasm, cytoskeleton. Cel  | 0 |
| Q96A19 |                                          | 0 |
| Q14940 | Membrane; Multi-pass membrane protein.   | 0 |
| P01019 | Secreted.                                | 0 |
| A6NKB5 | Membrane {ECO:0000305}; Multi-pass mem   | 0 |
| O00180 | Cell membrane {ECO:0000269 PubMed:15820  | 0 |
| Q14146 | Nucleus, nucleolus {ECO:0000269 PubMed:  | 0 |
| Q9GZT9 | Cytoplasm {ECO:0000269 PubMed:12615973,  | 0 |
| O14815 |                                          | 0 |
| Q9NRK6 | Mitochondrion inner membrane; Multi-pas  | 0 |
| Q9BSD7 |                                          | 0 |
| P15104 | Cytoplasm, cytosol {ECO:0000269 PubMed:  | 0 |
| O43752 | Golgi apparatus membrane {ECO:0000305};  | 0 |
| P57771 | Cell membrane {ECO:0000250 UniProtKB:P4  | 0 |
| Q05823 | Cytoplasm {ECO:0000269 PubMed:11585831}  | 0 |
| Q08211 | Nucleus {ECO:0000269 PubMed:10198287, I  | 0 |
| Q5VZ46 |                                          | 0 |

|        |                                         |   |
|--------|-----------------------------------------|---|
| Q5VT06 | Cytoplasm, cytoskeleton, microtubule or | 0 |
| Q9BXD5 | Cytoplasm {ECO:0000250}.                | 1 |
| Q9BZQ8 | Cytoplasm {ECO:0000269 PubMed:16949643} | 0 |
| Q92535 | Endoplasmic reticulum membrane {ECO:000 | 0 |
| P11047 | Secreted, extracellular space, extracel | 0 |
| Q5TC82 | Cytoplasm, P-body {ECO:0000250 UniProtF | 0 |
| Q9HB58 | Nucleus {ECO:0000255 PROSITE-ProRule:PF | 0 |
| Q9H9J2 | Mitochondrion {ECO:0000269 PubMed:25278 | 0 |
| P23760 | Nucleus {ECO:0000269 PubMed:21965087}.  | 0 |
| Q96BY6 | Nucleus {ECO:0000269 PubMed:18499258}.  | 0 |
| Q14679 | Cell projection, cilium {ECO:0000250 Ur | 0 |
| Q86T82 |                                         | 0 |
| P41595 | Cell membrane {ECO:0000269 PubMed:12970 | 0 |
| Q9BZV2 | Membrane {ECO:0000305}; Multi-pass mem  | 0 |
| P25686 | Isoform 2: Cytoplasm {ECO:0000269 PubMe | 0 |
| Q9GZT5 | Secreted, extracellular space, extracel | 0 |
| Q969X1 | Membrane {ECO:0000250}; Multi-pass mem  | 0 |
| Q02318 | Mitochondrion inner membrane {ECO:00002 | 1 |
| Q7Z3E5 | Cytoplasm, cytoskeleton, cilium basal b | 0 |
| Q9Y376 | Cytoplasm {ECO:0000305}.                | 0 |
| P10606 | Mitochondrion inner membrane.           | 0 |
| Q9UBZ9 | Nucleus {ECO:0000305}.                  | 0 |
| Q8NBP5 | Membrane {ECO:0000305}; Multi-pass mem  | 0 |
| Q9UNE0 | Membrane {ECO:0000305}; Single-pass ty  | 0 |
| Q8WUH2 | Cytoplasm {ECO:0000269 PubMed:11278302} | 0 |
| Q8IWJ2 | Cytoplasm. Golgi apparatus, trans-Golgi | 1 |
| P82933 | Mitochondrion {ECO:0000269 PubMed:25838 | 1 |
| Q9Y5Y3 | Cell membrane; Multi-pass membrane prot | 0 |
| Q9BVC5 |                                         | 0 |
| Q52LR7 | Nucleus {ECO:0000250}.                  | 0 |
| Q9NR80 | Isoform 3: Cytoplasm. Cell projection,  | 0 |
| Q9HIK1 | Isoform 1: Mitochondrion {ECO:0000269 P | 0 |
| Q3SY69 | Mitochondrion {ECO:0000269 PubMed:20498 | 0 |
| Q8WWQ8 | Cell membrane {ECO:0000269 PubMed:17678 | 0 |
| Q6P3W7 | Cytoplasm, perinuclear region. Cytoplas | 0 |
| Q07065 | Endoplasmic reticulum membrane; Single- | 0 |
| O60486 | Membrane {ECO:0000305}; Single-pass ty  | 0 |
| Q8NEU8 | Early endosome membrane {ECO:0000269 P  | 0 |
| Q2M389 | Early endosome {ECO:0000269 PubMed:2367 | 0 |
| Q96JW4 | Cell membrane {ECO:0000269 PubMed:16984 | 0 |
| O15195 |                                         | 0 |
| O75369 | Isoform 1: Cytoplasm, cell cortex. Cyto | 0 |
| P51956 | Cytoplasm {ECO:0000250}. Cell projectio | 0 |
| O95206 | Cell membrane {ECO:0000250}; Single-pas | 0 |
| Q86VN1 | Cytoplasm. Endosome. Late endosome {ECO | 0 |
| Q5TBB1 | Nucleus {ECO:0000305}.                  | 0 |
| Q8WWK9 | Cytoplasm, cytoskeleton. Cytoplasm, cyt | 1 |
| O75829 | Chondromodulin-1: Secreted, extracellul | 0 |
| O60343 | Cytoplasm {ECO:0000269 PubMed:18771725} | 0 |
| Q9NS62 | Isoform 1: Membrane {ECO:0000305}; Sing | 0 |
| Q6PGQ7 |                                         | 0 |
| Q9Y2L9 | Cytoplasm {ECO:0000269 PubMed:28028151} | 0 |
| Q9P2R7 | Mitochondrion {ECO:0000255 HAMAP-Rule:M | 1 |
| Q9NPJ6 | Nucleus.                                | 0 |
| Q9UIL8 | Nucleus {ECO:0000269 PubMed:18405956}.  | 0 |

|        |                                         |   |
|--------|-----------------------------------------|---|
| Q96JB2 | Golgi apparatus, Golgi stack membrane   | 0 |
| Q8WWI1 |                                         | 0 |
| 095171 | Cytoplasm. Membrane. Note=May become c  | 1 |
| Q9Y287 | Integral membrane protein 2B: Golgi app | 0 |
| 043597 | Cytoplasm, cytoskeleton {ECO:0000269 P  | 0 |
| Q9NV35 |                                         | 0 |
| P24530 | Cell membrane {ECO:0000269 PubMed:28236 | 0 |
| 095199 | Cytoplasmic vesicle, secretory vesicle, | 0 |
| P13796 | Cytoplasm, cytoskeleton {ECO:0000269 P  | 0 |
| Q96T68 | Nucleus {ECO:0000269 PubMed:20404330}.  | 0 |
| Q12765 | Cytoplasm {ECO:0000250}.                | 1 |
| Q9BPX7 |                                         | 0 |
| Q68CZ2 | Cell junction, focal adhesion {ECO:0000 | 0 |
| Q8NFB5 |                                         | 0 |
| Q9NRB3 | Golgi apparatus membrane {ECO:0000250}; | 0 |
| 000425 | Nucleus. Cytoplasm. Note=Found in lame  | 0 |
| Q92565 | Nucleus.                                | 0 |
| P63000 | Cell membrane {ECO:0000269 PubMed:16436 | 0 |
| P33947 | Endoplasmic reticulum membrane {ECO:000 | 0 |
| P05231 | Secreted.                               | 0 |
| Q9NPG8 | Endoplasmic reticulum membrane {ECO:000 | 0 |
| P28039 | Secreted {ECO:0000269 PubMed:8089145, F | 0 |
| Q9Y6E2 |                                         | 0 |
| Q969Z0 | Mitochondrion matrix {ECO:0000269 PubMe | 0 |
| Q9NY93 | Nucleus, nucleolus {ECO:0000269 PubMed: | 0 |
| 060921 | Nucleus {ECO:0000269 PubMed:10846170, F | 0 |
| 015069 | Cytoplasm {ECO:0000250}. Nucleus {ECO:( | 0 |
| Q9UJU6 | Cytoplasm, cytoskeleton {ECO:0000250 Ur | 0 |
| Q9BSQ5 | Cytoplasm {ECO:0000250}.                | 1 |
| B0I1T2 | Cell membrane {ECO:0000269 PubMed:19968 | 0 |
| Q9COH2 | Cell membrane {ECO:0000269 PubMed:15010 | 0 |
| Q9UHD4 |                                         | 0 |
| Q8N0Z6 | Nucleus. Cytoplasm. Note=Phosphorylatic | 0 |
| 015522 | Nucleus {ECO:0000305}.                  | 0 |
| P43699 | Nucleus {ECO:0000250 UniProtKB:P50220}. | 1 |
| Q9COA1 | Nucleus {ECO:0000269 PubMed:29253101}.  | 0 |
| P49914 | Cytoplasm.                              | 0 |
| Q9UKP4 | Secreted, extracellular space, extracel | 0 |
| Q6PCB6 | Recycling endosome membrane {ECO:000025 | 0 |
| P48200 | Cytoplasm.                              | 0 |
| Q96L96 | Nucleus {ECO:0000250 UniProtKB:Q924C5}. | 0 |
| Q9BZW5 | Lysosome membrane {ECO:0000250 UniProtK | 0 |
| 075838 | Cytoplasm {ECO:0000250 UniProtKB:Q9Z309 | 0 |
| Q13137 | Cytoplasm, perinuclear region {ECO:0000 | 1 |
| Q9HA92 | Mitochondrion {ECO:0000305}.            | 0 |
| P30419 | Cytoplasm {ECO:0000269 PubMed:9353336,  | 0 |
| Q8TBZ2 | Cytoplasm {ECO:0000269 PubMed:12151104} | 0 |
| Q07955 | Cytoplasm {ECO:0000269 PubMed:12215544, | 0 |
| Q14119 | Nucleus {ECO:0000269 PubMed:8035792}.   | 0 |
| 015335 | Secreted, extracellular space, extracel | 0 |
| Q9BSH4 | Mitochondrion {ECO:0000269 PubMed:19503 | 1 |
| Q8IWB9 | Membrane {ECO:0000305}; Multi-pass mem  | 0 |
| P61962 | Cytoplasm. Nucleus. Note=Overexpressior | 0 |
| P01242 | Secreted.                               | 0 |
| PODML2 | Secreted.                               | 0 |

|        |                                         |   |
|--------|-----------------------------------------|---|
| Q9BT23 | Cytoplasm {ECO:0000269 PubMed:24590809} | 1 |
| Q9BX63 | Nucleus {ECO:0000269 PubMed:11301010, F | 0 |
| 095251 | Nucleus, nucleoplasm {ECO:0000269 PubMe | 0 |
| Q96DX8 | Membrane {ECO:0000305}; Single-pass typ | 0 |
| 096019 | Nucleus {ECO:0000269 PubMed:18026119}.  | 0 |
| 043674 | Mitochondrion inner membrane {ECO:00003 | 1 |
| Q9HD33 | Mitochondrion {ECO:0000269 PubMed:25278 | 0 |
| P62995 | Nucleus {ECO:0000269 PubMed:9212162, EC | 1 |
| Q99250 | Cell membrane {ECO:0000269 PubMed:13256 | 0 |
| Q16650 | Nucleus {ECO:0000269 PubMed:25232744, F | 1 |
| Q9H992 |                                         | 0 |
| Q8TAM6 | Cytoplasm, cytoskeleton {ECO:0000250}.  | 0 |
| Q7Z7M9 | Golgi apparatus membrane {ECO:0000250}; | 0 |
| Q01118 | Cell membrane {ECO:0000250 UniProtKB:DC | 0 |
| Q92844 | Cytoplasm.                              | 0 |
| P51451 | Cell membrane {ECO:0000250}; Lipid-anch | 0 |
| P43694 | Nucleus {ECO:0000269 PubMed:21220346, F | 0 |
| P12757 |                                         | 0 |
| P07814 | Cytoplasm, cytosol {ECO:0000269 PubMed: | 0 |
| Q14774 | Nucleus {ECO:0000255 PROSITE-ProRule:PF | 0 |
| Q9NRW7 | Golgi apparatus membrane {ECO:0000250}; | 0 |
| P22301 | Secreted.                               | 0 |
| Q9Y597 | Cell membrane {ECO:0000250 UniProtKB:Q8 | 0 |
| Q96S38 | Cytoplasm {ECO:0000269 PubMed:12077123, | 0 |
| Q8IUFI |                                         | 0 |
| P18510 | Isoform 1: Secreted.; Isoform 2: Cytopl | 0 |
| Q9NZH7 | Secreted {ECO:0000269 PubMed:16646978}. | 0 |
| POCG37 | Cell membrane {ECO:0000269 PubMed:18930 | 0 |
| Q9NXE4 | Endoplasmic reticulum membrane {ECO:000 | 0 |
| Q9C0J8 | Nucleus {ECO:0000269 PubMed:11162572, F | 1 |
| Q96NT0 | Endosome {ECO:0000250 UniProtKB:Q8VE99} | 0 |
| 000499 | Isoform BIN1: Nucleus {ECO:0000269 PubM | 0 |
| Q9NYU2 | Endoplasmic reticulum lumen {ECO:000025 | 1 |
| P04921 | Cell membrane; Single-pass type III mem | 0 |
| Q92783 | Cytoplasm {ECO:0000305}. Early endosome | 1 |
| Q05329 | Cytoplasm, cytosol {ECO:0000269 PubMed: | 0 |
| Q8IZP0 | Cytoplasm {ECO:0000250}. Nucleus {ECO:( | 0 |
| Q96TA2 | Mitochondrion inner membrane {ECO:00002 | 0 |
| Q96KC8 | Endoplasmic reticulum membrane {ECO:000 | 0 |
| Q9UFN0 | Cytoplasm, cytosol {ECO:0000269 PubMed: | 0 |
| P50750 | Nucleus. Cytoplasm. Nucleus, PML body.  | 0 |
| P10599 | Nucleus {ECO:0000269 PubMed:11118054, F | 0 |
| Q5BJF6 | Cytoplasm, cytoskeleton, microtubule or | 0 |
| Q5VYK3 | Endoplasmic reticulum {ECO:0000269 PubM | 0 |
| 014657 | Endoplasmic reticulum lumen {ECO:000026 | 0 |
| Q9NZ63 |                                         | 0 |
| 095347 | Nucleus {ECO:0000269 PubMed:10958694}.  | 0 |
| 043474 | Nucleus.                                | 1 |
| 014656 | Endoplasmic reticulum lumen. Nucleus me | 0 |
| Q96TA1 | Cytoplasm, cytosol. Cell junction, adhe | 1 |
| P28289 | Cytoplasm, cytoskeleton {ECO:0000269 Pu | 0 |
| P61764 | Cytoplasm, cytosol {ECO:0000269 PubMed: | 0 |
| Q9NY64 | Cell membrane {ECO:0000250 UniProtKB:Q8 | 0 |
| Q9UKU9 | Secreted.                               | 0 |
| Q96SN8 | Cytoplasm, cytoskeleton, microtubule or | 0 |

|        |                                         |   |
|--------|-----------------------------------------|---|
| Q9Y6Q3 | Nucleus {ECO:0000305}.                  | 0 |
| O15432 | Membrane {ECO:0000305}; Multi-pass mem  | 0 |
| O15431 | Cell membrane; Multi-pass membrane prot | 0 |
| O00206 | Cell membrane {ECO:0000269 PubMed:11274 | 0 |
| O75820 | Nucleus {ECO:0000305}.                  | 0 |
| P05062 | Cytoplasm, cytoskeleton, microtubule or | 1 |
| P56962 | Endoplasmic reticulum membrane {ECO:000 | 0 |
| O43172 | Nucleus {ECO:0000269 PubMed:25383878, F | 1 |
| Q05932 | Isoform 1: Mitochondrion inner membrane | 0 |
| Q9Y2K6 | Cytoplasm, perinuclear region {ECO:0000 | 0 |
| Q14032 | Cytoplasm {ECO:0000269 PubMed:12810727} | 1 |
| Q96FN5 | Cytoplasm, cytoskeleton {ECO:0000305}.  | 0 |
| O75348 |                                         | 0 |
| Q5VVW2 |                                         | 0 |
| Q8N5N7 | Mitochondrion {ECO:0000269 PubMed:25278 | 0 |
| O94777 | Endoplasmic reticulum membrane; Multi-p | 0 |
| Q5JTN6 |                                         | 0 |
| Q5T7W7 |                                         | 0 |
| O75899 | Cell membrane {ECO:0000269 PubMed:10328 | 0 |
| Q9BXL5 | Nucleus {ECO:0000269 PubMed:14730214}.  | 1 |
| Q99436 | Cytoplasm {ECO:0000269 PubMed:12181345, | 1 |
| Q9BU70 |                                         | 0 |
| Q7Z6M1 | Cytoplasm. Endosome membrane. Note=Inte | 1 |
| Q92805 | Golgi apparatus membrane {ECO:0000269 F | 1 |
| P23025 | Nucleus {ECO:0000269 PubMed:1918083, EC | 1 |
| Q09161 | Nucleus {ECO:0000269 PubMed:19648179}.  | 0 |
| Q92688 | Isoform 1: Nucleus. Note=Accumulates in | 0 |
| Q13371 | Cell projection, cilium {ECO:0000250 Ur | 0 |
| P42766 |                                         | 0 |
| O60911 | Lysosome {ECO:0000305}.                 | 0 |
| Q9BPX5 | Cytoplasm, cytoskeleton {ECO:0000250}.  | 0 |
| Q13822 | Secreted {ECO:0000269 PubMed:12176993,  | 0 |
| Q9BVC3 | Nucleus {ECO:0000250}.                  | 0 |
| Q9BUN8 | Endoplasmic reticulum membrane {ECO:000 | 1 |
| P01106 | Nucleus, nucleoplasm {ECO:0000269 PubMe | 0 |
| P48745 | Secreted. Cytoplasm {ECO:0000269 PubMec | 0 |
| O95760 | Nucleus {ECO:0000269 PubMed:12819012, F | 0 |
| Q96GE9 | Mitochondrion inner membrane {ECO:00002 | 0 |
| O60518 | Cytoplasm {ECO:0000250}. Nucleus {ECO:( | 0 |
| Q9GZS1 | Nucleus, nucleolus {ECO:0000269 PubMed: | 1 |
| Q9Y263 | Nucleus {ECO:0000269 PubMed:28007986}.  | 0 |
| Q14626 | Membrane; Single-pass type I membrane p | 0 |
| Q5T6F2 |                                         | 0 |
| Q7Z2E3 | Nucleus, nucleoplasm {ECO:0000269 PubMe | 0 |
| Q9H0F5 | Nucleus {ECO:0000269 PubMed:23973461}.  | 0 |
| Q9Y490 | Cell projection, ruffle membrane {ECO:( | 0 |
| O00585 | Secreted.                               | 0 |
| Q9Y3P8 | Cell membrane {ECO:0000269 PubMed:10209 | 0 |
| P01568 | Secreted.                               | 0 |
| Q9Y5R6 | Nucleus {ECO:0000255 PROSITE-ProRule:PF | 1 |
| O75953 |                                         | 0 |
| Q99932 | Cytoplasm {ECO:0000250 UniProtKB:Q3VOQ6 | 0 |
| O75935 | Cytoplasm {ECO:0000269 PubMed:9722614}. | 0 |
| P21854 | Membrane; Single-pass type II membrane  | 1 |
| A6NDV4 | Isoform 2: Cell membrane {ECO:0000269 F | 0 |



|        |                                         |   |
|--------|-----------------------------------------|---|
| Q9UBQ7 |                                         | 0 |
| P30837 | Mitochondrion matrix.                   | 0 |
| Q9BX68 | Mitochondrion {ECO:0000269 PubMed:16762 | 1 |
| Q8N4T4 | Cell membrane {ECO:0000269 PubMed:22327 | 0 |
| Q8WX77 | Secreted {ECO:0000269 PubMed:15845387}. | 0 |
| Q5VZ89 | Cytoplasmic vesicle membrane. Cell memt | 0 |
| P62753 |                                         | 0 |
| Q9BT09 | Endoplasmic reticulum {ECO:0000250}.    | 0 |
| Q8IVH2 | Nucleus {ECO:0000255 PROSITE-ProRule:PF | 0 |
| Q9NSK0 | Cytoplasm, cytoskeleton {ECO:0000305}.  | 1 |
| Q9HIH9 | Cytoplasm, cytoskeleton, microtubule or | 0 |
| O15535 | Nucleus {ECO:0000255 PROSITE-ProRule:PF | 0 |
| P11309 | Isoform 1: Cytoplasm. Nucleus.; Isoform | 0 |
| P36959 |                                         | 0 |
| Q8N1G2 | Nucleus {ECO:0000269 PubMed:18533109, F | 1 |
| P05549 | Nucleus {ECO:0000269 PubMed:12586840}.  | 1 |
| Q9Y694 | Basolateral cell membrane {ECO:0000269  | 0 |
| Q9GZM5 | Cell membrane; Multi-pass membrane prot | 0 |
| Q5T3F8 | Membrane {ECO:0000305}; Multi-pass memt | 0 |
| O43559 | Membrane; Lipid-anchor.                 | 0 |
| Q5JTD0 | Golgi apparatus {ECO:0000250}. Cell jur | 0 |
| Q9UMQ6 | Cytoplasmic vesicle, secretory vesicle, | 1 |
| Q9UJW2 | Secreted, extracellular space, extracel | 0 |
| O43614 | Cell membrane {ECO:0000269 PubMed:26950 | 0 |
| Q5VV43 | Cell membrane {ECO:0000269 PubMed:18063 | 0 |
| Q15306 | Nucleus.                                | 1 |
| A1A5C7 | Membrane {ECO:0000305}; Multi-pass memt | 0 |
| Q13885 | Cytoplasm, cytoskeleton {ECO:0000250}.  | 1 |
| Q9BTT6 | Cytoplasm {ECO:0000269 PubMed:11440998} | 0 |
| Q9NP62 | Nucleus {ECO:0000255 PROSITE-ProRule:PF | 1 |
| Q86WA6 |                                         | 0 |
| Q13546 | Cytoplasm. Cell membrane {ECO:0000250}. | 0 |
| Q9BVA1 | Cytoplasm, cytoskeleton {ECO:0000269 Pu | 1 |
| Q9BRT2 | Mitochondrion matrix, mitochondrion nuc | 0 |
| P17096 | Nucleus. Chromosome.                    | 1 |
| O75955 | Cell membrane; Peripheral membrane prot | 1 |
| P46695 | Membrane {ECO:0000269 PubMed:12356731}; | 0 |
| Q14676 | Nucleus {ECO:0000269 PubMed:12475977, F | 1 |
| Q96JS3 |                                         | 0 |
| Q5SQI0 | Cytoplasm {ECO:0000255 HAMAP-Rule:MF_03 | 0 |
| P51580 | Cytoplasm.                              | 1 |
| P04118 | Secreted.                               | 0 |
| Q7Z419 | Mitochondrion membrane {ECO:0000269 Pu  | 0 |
| Q9NZJ7 | Mitochondrion inner membrane {ECO:00003 | 0 |
| Q5ST30 | Mitochondrion {ECO:0000305}.            | 0 |
| Q7Z7C8 | Nucleus {ECO:0000269 PubMed:14580349}.  | 1 |
| Q9UBU6 | Membrane {ECO:0000305}; Multi-pass memt | 0 |
| Q5T4I8 |                                         | 0 |
| Q14512 | Secreted, extracellular space {ECO:0000 | 0 |
| Q9C0D6 | Cell projection, cilium {ECO:0000269 Pu | 0 |
| Q8TDB4 | Mitochondrion {ECO:0000269 PubMed:16563 | 0 |
| Q8NA56 |                                         | 0 |
| Q13402 | Cytoplasm {ECO:0000250 UniProtKB:P97479 | 0 |
| O94868 | Cytoplasm {ECO:0000250 UniProtKB:Q3USJ8 | 0 |
| P49407 | Cytoplasm. Nucleus. Cell membrane. Memt | 0 |

|        |                                         |   |
|--------|-----------------------------------------|---|
| 094956 | Cell membrane; Multi-pass membrane prot | 0 |
| 043422 |                                         | 0 |
| Q8N9B4 |                                         | 0 |
| 095998 | Secreted {ECO:0000305}.                 | 0 |
| Q14980 | Nucleus {ECO:0000269 PubMed:1541630, EC | 0 |
| Q9GZT6 | Mitochondrion membrane {ECO:0000269 Pub | 1 |
| Q9HCH5 | Isoform 1: Cytoplasm {ECO:0000269 PubMe | 0 |
| Q15771 | Membrane {ECO:0000250}; Lipid-anchor {E | 0 |
| Q9NS37 | Nucleus {ECO:0000269 PubMed:15705566}.  | 0 |
| P42785 | Lysosome.                               | 0 |
| Q96I59 | Mitochondrion matrix {ECO:0000250}. Mit | 1 |
| Q9H920 | Membrane {ECO:0000305}; Multi-pass mem  | 0 |
| Q9P015 | Mitochondrion {ECO:0000269 PubMed:25278 | 1 |
| 043692 | Secreted {ECO:0000269 PubMed:8882727}.  | 0 |
| Q92820 | Secreted, extracellular space {ECO:0000 | 0 |
| Q9H2Y9 | Cell membrane; Multi-pass membrane prot | 0 |
| Q8IWU6 | Endoplasmic reticulum {ECO:0000250}. Gc | 0 |
| Q96RS0 | Cytoplasm {ECO:0000269 PubMed:12943661} | 0 |
| 000560 | Cell junction, focal adhesion {ECO:0000 | 0 |
| Q96PY6 | Nucleus {ECO:0000269 PubMed:15604234, F | 0 |
| Q8IY21 | Cytoplasm {ECO:0000269 PubMed:21791617} | 0 |
| Q6UWF7 | Secreted {ECO:0000305}.                 | 0 |
| Q92673 | Golgi apparatus membrane {ECO:0000269 F | 0 |
| Q9NRS4 | Membrane {ECO:0000305}; Single-pass typ | 0 |
| Q9BRD0 | Nucleus {ECO:0000269 PubMed:29360106, F | 0 |
| Q9Y210 | Cell membrane {ECO:0000269 PubMed:23291 | 0 |
| P09237 | Secreted, extracellular space, extracel | 0 |
| Q9H306 | Endoplasmic reticulum membrane; Periphe | 0 |
| Q9BRQ4 | Cytoplasm {ECO:0000250 UniProtKB:A0CY51 | 1 |
| Q9BTE7 |                                         | 0 |
| P46937 | Cytoplasm {ECO:0000269 PubMed:18158288, | 1 |
| Q14134 | Cytoplasm {ECO:0000269 PubMed:7644499}. | 1 |
|        | Endoplasmic reticulum membrane {ECO:000 | 1 |
| Q9UKI9 | Nucleus.                                | 1 |
| P35241 | Cell membrane; Peripheral membrane prot | 1 |
| P30154 |                                         | 0 |
| P10109 | Mitochondrion matrix {ECO:0000269 PubMe | 1 |
| Q9H5F2 | Nucleus {ECO:0000269 PubMed:10873569}.  | 0 |
| Q9H0Q3 | Membrane {ECO:0000305}; Single-pass typ | 0 |
| Q9P2F6 |                                         | 0 |
| P54710 | Membrane {ECO:0000305}; Single-pass typ | 1 |
| P45452 | Secreted, extracellular space, extracel | 0 |
| P29466 | Cytoplasm {ECO:0000269 PubMed:20197547} | 0 |
| Q96BT7 | Cytoplasm {ECO:0000269 PubMed:17979886, | 0 |
| Q13163 |                                         | 0 |
| Q9Y6N5 | Mitochondrion {ECO:0000305}.            | 1 |
| Q05D32 |                                         | 0 |
| Q9NWH9 | Nucleus {ECO:0000250}. Note=Detected in | 1 |
| P07996 | Secreted {ECO:0000269 PubMed:6777381}.  | 0 |
| 060336 | Cytoplasm {ECO:0000269 PubMed:22700971, | 0 |
| Q9BXS6 | Cytoplasm {ECO:0000250}. Nucleus, nucle | 0 |
| Q9Y375 | Mitochondrion {ECO:0000269 PubMed:16218 | 1 |
| Q02241 | Nucleus. Cytoplasm, cytoskeleton, spinc | 0 |
| Q9UKX5 | Membrane; Single-pass type I membrane p | 0 |
| Q8NG31 | Nucleus. Chromosome, centromere, kinet  | 1 |

|        |                                         |   |
|--------|-----------------------------------------|---|
| Q9NVX0 | Cytoplasm, cytoskeleton, microtubule or | 0 |
| Q92541 | Nucleus, nucleoplasm {ECO:0000250}.     | 0 |
| Q2NL67 |                                         | 0 |
| Q8IUZ0 | Cytoplasm, cytoskeleton.                | 0 |
| Q9UGJ1 | Cytoplasm, cytoskeleton, microtubule or | 0 |
| Q96TC7 | Mitochondrion membrane; Single-pass mem | 0 |
| P23677 |                                         | 0 |
| Q9BZF9 | Nucleus {ECO:0000269 PubMed:15358194}.  | 0 |
| Q00722 |                                         | 0 |
| Q0P6H9 | Membrane {ECO:0000305}; Multi-pass mem  | 0 |
| Q9NQU5 | Cytoplasm. Nucleus. Note=Cotranslocates | 0 |
| 014672 | Cell membrane {ECO:0000269 PubMed:20624 | 0 |
| Q9NRD9 | Apical cell membrane {ECO:0000269 PubMe | 0 |
| 043868 | Membrane; Multi-pass membrane protein.  | 1 |
| Q9BX79 | Cell membrane {ECO:0000269 PubMed:18316 | 0 |
| P11511 | Membrane; Peripheral membrane protein.  | 0 |
| Q6N043 | Nucleus {ECO:0000305}.                  | 0 |
| Q9HD36 | Mitochondrion {ECO:0000269 PubMed:11593 | 0 |
| Q9UHA3 | Nucleus, nucleolus {ECO:0000269 PubMed: | 1 |
| Q9NRC6 | Cytoplasm, cytoskeleton. Note=Detected  | 0 |
|        |                                         | 0 |
| P30047 | Nucleus {ECO:0000269 PubMed:16778797}.  | 0 |
| 075815 |                                         | 0 |
| Q6ZT98 | Cell projection, cilium {ECO:0000250 Ur | 0 |
| Q5TON5 | Cytoplasm {ECO:0000269 PubMed:16757518} | 0 |
| Q6YP21 |                                         | 0 |
| Q00403 | Nucleus {ECO:0000269 PubMed:12931194}.  | 1 |
| Q58F21 | Nucleus {ECO:0000269 PubMed:20538714, I | 0 |
| P53611 |                                         | 0 |
| Q53G44 | Cytoplasm {ECO:0000305}.                | 0 |
| Q8TF65 | Cytoplasm {ECO:0000305}.                | 0 |
| Q52LW3 |                                         | 0 |
| Q8TCB0 | Cytoplasm {ECO:0000305}.                | 0 |
| Q8NCS7 | Membrane {ECO:0000250}; Multi-pass mem  | 0 |
| Q9UQC9 | Cell membrane; Single-pass type I mem   | 0 |
| P11182 | Mitochondrion matrix.                   | 1 |
| 000442 | Nucleus, nucleoplasm.                   | 0 |
| Q9UG01 | Cell projection, cilium {ECO:0000269 Pu | 0 |
| Q9C0D9 | Membrane {ECO:0000305}; Multi-pass mem  | 0 |
| Q99674 | Secreted {ECO:0000250}.                 | 0 |
| P55084 | Mitochondrion {ECO:0000269 PubMed:21527 | 0 |
| P50053 |                                         | 0 |
| 060266 | Cell membrane {ECO:0000269 PubMed:11549 | 0 |
| 075688 | Cytoplasm, cytosol {ECO:0000269 PubMed: | 0 |
| Q8TCS8 | Cytoplasm. Mitochondrion. Mitochondrion | 1 |
| Q8TCX1 | Cytoplasm {ECO:0000269 PubMed:26130459} | 0 |
| P22888 | Cell membrane {ECO:0000269 PubMed:11847 | 0 |
| Q9BTF0 |                                         | 0 |
| Q16678 | Endoplasmic reticulum membrane {ECO:000 | 0 |
| P62820 | Golgi apparatus {ECO:0000269 PubMed:229 | 0 |
| P61160 | Cytoplasm, cytoskeleton {ECO:0000269 Pu | 0 |
| Q9HCU5 | Endoplasmic reticulum membrane {ECO:000 | 0 |
| Q9Y289 | Membrane; Multi-pass membrane protein.  | 0 |
| Q4J6C6 | Cytoplasm, cytosol {ECO:0000269 PubMed: | 0 |
| Q07837 | Membrane {ECO:0000269 PubMed:12167606}; | 0 |

|        |                                         |   |
|--------|-----------------------------------------|---|
| Q9Y6C2 | Secreted, extracellular space, extracel | 0 |
| Q6UW56 | Nucleus envelope {ECO:0000269 PubMed:21 | 0 |
| P42704 | Mitochondrion. Nucleus, nucleoplasm. Nu | 0 |
| Q9BYV2 | Cytoplasm, cytoskeleton {ECO:0000250}.  | 0 |
| O60941 | Cytoplasm.                              | 0 |
| P61163 | Cytoplasm, cytoskeleton {ECO:0000250 Ur | 0 |
| P11712 | Endoplasmic reticulum membrane; Periphe | 1 |
| Q14CX5 | Membrane {ECO:0000305}; Multi-pass memk | 0 |
| P10632 | Endoplasmic reticulum membrane; Periphe | 1 |
| Q9NZM1 | Cell membrane; Single-pass type II memk | 0 |
| Q96JB6 | Secreted, extracellular space {ECO:0000 | 0 |
| Q96FJ0 |                                         | 0 |
| P52954 | Nucleus {ECO:0000305}.                  | 0 |
| Q8NBU5 | Peroxisome {ECO:0000250 UniProtKB:Q9D51 | 0 |
| Q32M84 |                                         | 0 |
| P52732 | Cytoplasm {ECO:0000269 PubMed:19001501, | 1 |
| Q86UP6 | Cytoplasmic vesicle, secretory vesicle  | 1 |
| 095359 | Cytoplasm {ECO:0000269 PubMed:10749935} | 0 |
| Q9HA72 | Membrane {ECO:0000305}; Multi-pass memk | 0 |
| P36405 | Golgi apparatus membrane; Peripheral me | 0 |
| Q53EZ4 | Cytoplasm {ECO:0000269 PubMed:28264986} | 0 |
| Q96Q89 | Nucleus {ECO:0000269 PubMed:12740395, F | 0 |
| P49961 | Membrane {ECO:0000305}; Multi-pass memk | 0 |
| Q8TAG9 | Cytoplasm {ECO:0000250 UniProtKB:054925 | 0 |
| Q9P212 | Cytoplasm, cytosol. Cell membrane. Golg | 0 |
| P02753 | Secreted {ECO:0000269 PubMed:12237133,  | 0 |
| Q9UK59 | Nucleus {ECO:0000305}.                  | 1 |
| 075165 | Early endosome {ECO:0000269 PubMed:1825 | 0 |
| P20073 |                                         | 0 |
| Q96BN6 |                                         | 0 |
| Q8N9N2 | Nucleus {ECO:0000269 PubMed:12077347, F | 0 |
| Q9BX93 | Secreted.                               | 0 |
| Q70YC4 |                                         | 0 |
| P62847 |                                         | 0 |
| P51530 | Nucleus. Mitochondrion. Note=Was initia | 0 |
| Q86TC9 | Cytoplasm {ECO:0000269 PubMed:11309420} | 0 |
| Q06278 | Cytoplasm {ECO:0000269 PubMed:18671973, | 1 |
| P31939 |                                         | 0 |
| Q9NZC9 | Nucleus {ECO:0000269 PubMed:19793862, F | 0 |
| Q99728 | Nucleus. Note=During S phase of the cel | 1 |
| Q14765 | Cytoplasm. Nucleus. Note=Translocated i | 0 |
| O14793 | Secreted {ECO:0000250 UniProtKB:008689} | 0 |
| Q8N187 | Nucleus {ECO:0000250}.                  | 0 |
| Q9NWL6 |                                         | 0 |
| Q9NRN9 |                                         | 0 |
| P05455 | Nucleus {ECO:0000305}.                  | 1 |
| Q13506 | Nucleus {ECO:0000250}.                  | 0 |
| Q96Q40 |                                         | 0 |
| Q13427 | Nucleus matrix {ECO:0000269 PubMed:1535 | 1 |
| Q53R41 | Mitochondrion {ECO:0000269 PubMed:20865 | 0 |
| Q5I0G3 |                                         | 0 |
| Q9P2P5 | Cytoplasm {ECO:0000250}. Cytoplasm, cyt | 1 |
| O75874 | Cytoplasm, cytosol {ECO:0000269 PubMed: | 1 |
| Q9NTK5 | Cytoplasm {ECO:0000255 HAMAP-Rule:MF_03 | 0 |
| Q86X95 | Nucleus speckle. Cytoplasm, cytoskeletc | 0 |

|        |                                         |   |
|--------|-----------------------------------------|---|
| P28290 | Cytoplasm {ECO:0000269 PubMed:14673706} | 0 |
| P02708 | Cell junction, synapse, postsynaptic ce | 0 |
| Q6P1L5 |                                         | 0 |
| Q9GZL7 | Nucleus, nucleolus {ECO:0000255 HAMAP-F | 0 |
| Q9NYB9 | Cytoplasm {ECO:0000269 PubMed:11516653, | 0 |
| P06756 | Cell membrane; Single-pass type I membr | 0 |
| Q9NP59 | Cell membrane {ECO:0000269 PubMed:1088% | 0 |
| Q9BS91 | Membrane {ECO:0000305}; Multi-pass memk | 0 |
| Q9BQF6 |                                         | 0 |
| O95843 |                                         | 0 |
| Q14061 | Mitochondrion intermembrane space {ECO: | 1 |
| Q8NEH6 | Nucleus {ECO:0000250}.                  | 0 |
| P40818 | Cytoplasm {ECO:0000269 PubMed:16520378, | 0 |
| Q93073 |                                         | 0 |
| Q9NYL9 | Cytoplasm, cytoskeleton {ECO:0000250}.  | 0 |
| Q8TCT8 | Late endosome membrane {ECO:0000269 Pub | 0 |
| O94923 | Golgi apparatus membrane {ECO:0000250 U | 0 |
| Q96SY0 | Nucleus {ECO:0000250 UniProtKB:Q9VPY0}. | 0 |
| O75339 | Secreted, extracellular space, extracel | 0 |
| Q8N5Y8 | Endoplasmic reticulum membrane {ECO:000 | 0 |
| Q96CD2 |                                         | 0 |
| Q9Y3Q4 | Cell membrane {ECO:0000269 PubMed:10228 | 0 |
| O75326 | Cell membrane {ECO:0000269 PubMed:10201 | 0 |
| Q96S82 |                                         | 0 |
| Q8N264 | Cytoplasm, cytoskeleton. Cell junction, | 0 |
| O94988 |                                         | 0 |
| Q15034 | Cytoplasm. Cytoplasmic vesicle. Note=Al | 0 |
| Q8IVU3 | Cytoplasm, cytosol {ECO:0000269 PubMed: | 0 |
| Q9UII4 | Cytoplasm, perinuclear region {ECO:0000 | 1 |
| Q9P2E7 | Cell membrane {ECO:0000250}; Single-pas | 0 |
| Q9H3R1 | Golgi apparatus membrane {ECO:0000250}; | 0 |
| Q86YA3 | Membrane {ECO:0000305}; Single-pass men | 0 |
| Q63HQ0 | Golgi apparatus, trans-Golgi network. I | 0 |
| Q9BT78 | Cytoplasm. Nucleus. Cytoplasmic vesicle | 0 |
| Q14103 | Nucleus. Cytoplasm. Note=Localized in c | 0 |
| Q13237 | Apical cell membrane {ECO:0000269 PubMe | 0 |
| Q0VAM2 | Early endosome {ECO:0000250}. Late endo | 0 |
| O94979 | Cytoplasm {ECO:0000250}. Cytoplasmic ve | 0 |
| Q53EU6 | Endoplasmic reticulum membrane {ECO:000 | 0 |
| P09038 | Secreted. Nucleus. Note=Exported from c | 0 |
| Q8IWZ6 | Cell projection, cilium membrane {ECO:( | 0 |
| Q2LD37 | Membrane {ECO:0000255}; Single-pass men | 0 |
| P52306 |                                         | 0 |
| Q659C4 |                                         | 0 |
| Q13201 | Secreted {ECO:0000305}.                 | 0 |
| O76074 |                                         | 0 |
| Q9NQX1 | Nucleus {ECO:0000269 PubMed:15077163, F | 1 |
| Q02083 | Lysosome {ECO:0000305 PubMed:10610717,  | 0 |
| Q7Z3B4 | Nucleus, nuclear pore complex {ECO:0000 | 0 |
| Q9NSY1 | Nucleus {ECO:0000269 PubMed:9853615}.   | 0 |
| Q9UN86 | Cytoplasm {ECO:0000269 PubMed:23279204, | 1 |
| Q9NVA2 | Cytoplasm, cytoskeleton. Cell junction, | 0 |
| Q86XX4 | Cell membrane {ECO:0000305}; Single-pas | 0 |
| Q14108 | Lysosome membrane {ECO:0000269 PubMed:1 | 1 |
| Q16589 | Cytoplasm {ECO:0000250}.                | 0 |

|        |                                         |   |
|--------|-----------------------------------------|---|
| Q96LI5 | Cytoplasm {ECO:0000269 PubMed:17452450, | 0 |
| 060763 | Cytoplasm, cytosol {ECO:0000269 PubMed: | 1 |
| Q8TF72 | Cell junction, adherens junction {ECO:( | 1 |
| P12429 |                                         | 0 |
| Q9H2U2 | Mitochondrion {ECO:0000305}.            | 1 |
| Q02224 | Chromosome, centromere, kinetochore {EC | 0 |
| Q8NEC7 | Cytoplasm {ECO:0000269 PubMed:24058608} | 0 |
| Q96CB8 | Nucleus {ECO:0000269 PubMed:23904267}.  | 0 |
| Q07075 | Cell membrane {ECO:0000269 PubMed:10692 | 0 |
| P55212 | Cytoplasm.                              | 1 |
| Q9UJU2 | Nucleus {ECO:0000255 PROSITE-ProRule:PF | 1 |
| Q16836 | Mitochondrion matrix.                   | 1 |
| 043252 |                                         | 0 |
| 095487 | Cytoplasmic vesicle, COPII-coated vesic | 0 |
| Q53FE4 |                                         | 0 |
| Q08209 | Cytoplasm {ECO:0000269 PubMed:19154138, | 0 |
| Q9COK1 | Membrane {ECO:0000305}; Multi-pass mem  | 0 |
| P55157 | Endoplasmic reticulum {ECO:0000269 PubM | 0 |
| P35556 | Secreted, extracellular space, extracel | 0 |
| Q9UPT6 | Cytoplasm {ECO:0000250 UniProtKB:Q9ESN9 | 0 |
| A6PVC2 | Cytoplasm, cytoskeleton {ECO:0000250}.  | 0 |
| Q3SXP7 | Membrane {ECO:0000305}; Single-pass ty  | 0 |
| Q9HBIO | Cell junction, focal adhesion. Cell men | 0 |
| Q6L9W6 | Golgi apparatus, Golgi stack membrane   | 1 |
| Q13956 |                                         | 0 |
| Q96DNO | Endoplasmic reticulum lumen {ECO:000026 | 0 |
| P41212 | Nucleus.                                | 1 |
| Q9HOR8 | Cytoplasm, cytoskeleton. Cytoplasmic ve | 0 |
| Q7Z4S6 | Cytoplasm, cytoskeleton {ECO:0000305}.  | 1 |
| Q86YQ8 |                                         | 0 |
| Q9Y2Z4 | Mitochondrion matrix {ECO:0000269 PubMe | 0 |
| Q96M96 | Cytoplasm, cytoskeleton {ECO:0000250}.  | 0 |
| Q5BKT4 | Endoplasmic reticulum membrane; Multi-p | 0 |
| Q9NP50 | Nucleus {ECO:0000250 UniProtKB:Q8C8M1}. | 0 |
| Q6ZN18 | Nucleus {ECO:0000305}.                  | 0 |
| Q8IXQ9 | Cytoplasm {ECO:0000269 PubMed:23349634} | 0 |
| Q9HBU6 | Cytoplasm.                              | 0 |
| Q9HOC3 | Cell membrane {ECO:0000269 PubMed:27391 | 0 |
| Q96MT3 | Nucleus membrane {ECO:0000269 PubMed:14 | 0 |
| Q9NZP8 | Secreted {ECO:0000269 PubMed:15358180}. | 0 |
| Q16795 | Mitochondrion matrix {ECO:0000305 PubMe | 1 |
| Q96E93 | Cell membrane {ECO:0000269 PubMed:19604 | 0 |
| P23763 | Isoform 1: Cytoplasmic vesicle, secret  | 0 |
| Q9BX59 | Cell membrane {ECO:0000305 PubMed:11920 | 0 |
| P26842 | Membrane; Single-pass type I membrane p | 0 |
| P82980 | Cytoplasm {ECO:0000250}.                | 1 |
| P50542 | Cytoplasm {ECO:0000269 PubMed:7719337}. | 1 |
| Q8IYJ0 | Membrane {ECO:0000305}; Single-pass ty  | 0 |
| Q86SJ2 | Cell membrane {ECO:0000250}; Single-pas | 0 |
| Q99590 | Nucleus {ECO:0000269 PubMed:9447963}.   | 1 |
| P02458 | Secreted, extracellular space, extracel | 0 |
| 095626 |                                         | 0 |
| Q6UXM1 | Cell membrane {ECO:0000250}; Single-pas | 0 |
| P58166 | Secreted {ECO:0000250}.                 | 0 |
| P48060 | Membrane {ECO:0000305}; Single-pass men | 0 |

|        |                                          |   |
|--------|------------------------------------------|---|
| Q8IWU9 |                                          | 0 |
| Q8WV24 | Cytoplasm {ECO:0000269 PubMed:11369516}  | 1 |
| Q96HH6 | Membrane {ECO:0000305}; Multi-pass mem   | 0 |
| 075473 | Cell membrane; Multi-pass membrane prot  | 0 |
|        | be performed. View primary data.         | 0 |
| Q16828 | Cytoplasm {ECO:0000269 PubMed:8670865}.  | 0 |
| Q6ZXV5 | Membrane {ECO:0000305}; Multi-pass mem   | 0 |
| P51884 | Secreted, extracellular space, extracel  | 0 |
| 060938 | Secreted, extracellular space, extracel  | 0 |
| Q96NU7 |                                          | 0 |
| Q8NHV4 | Cytoplasm, cytoskeleton, microtubule or  | 0 |
| Q8IZU3 | Nucleus {ECO:0000250 UniProtKB:Q60547}.  | 1 |
| P50553 | Nucleus {ECO:0000250 UniProtKB:Q02067}.  | 0 |
| Q86XJ1 | Cytoplasm {ECO:0000269 PubMed:21561867}  | 0 |
| Q14DG7 | Membrane {ECO:0000305}; Single-pass ty   | 0 |
| Q8N697 | Membrane {ECO:0000305}; Multi-pass mem   | 0 |
| Q13569 | Nucleus {ECO:0000269 PubMed:8662714}.    | 1 |
| Q96K30 | Cytoplasm {ECO:0000269 PubMed:21102556}  | 1 |
| Q96GA7 |                                          | 0 |
| Q96EY8 | Mitochondrion {ECO:0000305}.             | 0 |
| Q9NZD2 | Cytoplasm {ECO:0000269 PubMed:17980653}  | 0 |
| Q14161 |                                          | 0 |
| Q9BT92 | Cytoplasm, cytoskeleton {ECO:0000269 Pu  | 0 |
| Q5U5X8 |                                          | 0 |
| Q96NZ1 | Nucleus {ECO:0000255 PROSITE-ProRule:PF  | 0 |
| Q9BVL2 | Nucleus, nuclear pore complex {ECO:0000  | 0 |
| Q7Z3Q1 | Membrane {ECO:0000305}; Multi-pass mem   | 0 |
| P30825 | Cell membrane {ECO:0000250 UniProtKB:Q0  | 0 |
| P52945 | Nucleus. Cytoplasm, cytosol {ECO:000025  | 0 |
| Q8N448 |                                          | 0 |
| P51687 | Mitochondrion intermembrane space.       | 0 |
| Q8IXS2 | Cytoplasm, cytoskeleton, flagellum base  | 0 |
| Q15633 | Cytoplasm. Cytoplasm, perinuclear regio  | 0 |
| 075452 | Microsome membrane {ECO:0000269 PubMed:  | 1 |
| P37023 | Cell membrane {ECO:0000269 PubMed:26176  | 0 |
| Q9NQS5 | Cell membrane; Multi-pass membrane prot  | 0 |
| Q9BQ15 | Nucleus {ECO:0000269 PubMed:18449195, F  | 1 |
| Q5TBK1 |                                          | 0 |
| Q8TAQ2 | Nucleus.                                 | 1 |
| P51587 | Nucleus {ECO:0000269 PubMed:24013206, F  | 0 |
| Q9H9L4 | Nucleus {ECO:0000269 PubMed:20018852}.   | 0 |
| Q8N5B7 | Endoplasmic reticulum membrane {ECO:000  | 0 |
| Q12852 | Cytoplasm {ECO:0000250 UniProtKB:Q60700} | 0 |
| Q8NCL4 | Golgi apparatus membrane {ECO:0000250};  | 1 |
| Q9Y600 |                                          | 0 |
| Q9HB07 | Nucleus {ECO:0000269 PubMed:19014353}.   | 0 |
| Q9BSJ8 | Endoplasmic reticulum membrane {ECO:000  | 0 |
| P55061 | Endoplasmic reticulum membrane {ECO:000  | 0 |
| Q8NB46 |                                          | 0 |
| Q3SY84 | Cytoplasm, cytoskeleton {ECO:0000269 Pu  | 0 |
| Q8NDX6 | Nucleus {ECO:0000305}.                   | 0 |
| Q9BVW6 | Membrane {ECO:0000305}; Single-pass men  | 0 |
| P43657 | Cell membrane {ECO:0000269 PubMed:18297  | 0 |
| P10768 | Cytoplasm. Cytoplasmic vesicle.          | 0 |
| P06400 | Nucleus {ECO:0000269 PubMed:20940255}.   | 1 |

|        |                                         |   |
|--------|-----------------------------------------|---|
| A3KN83 |                                         | 0 |
| Q6PF18 |                                         | 0 |
| Q9UPS6 | Nucleus speckle {ECO:0000269 PubMed:173 | 0 |
| Q9H9H4 | Late endosome membrane {ECO:0000269 Pub | 1 |
| Q9HBH0 | Cell membrane {ECO:0000305}; Lipid-anch | 1 |
| O43583 |                                         | 0 |
| Q5T8P6 |                                         | 0 |
| A7MD48 | Nucleus {ECO:0000250 UniProtKB:Q8BKA3}. | 0 |
| Q7L211 | Membrane {ECO:0000305}; Single-pass ty  | 0 |
| Q9NX57 | Golgi apparatus {ECO:0000269 PubMed:166 | 0 |
| Q5TC63 |                                         | 0 |
| P30872 | Cell membrane; Multi-pass membrane prot | 0 |
| Q6UW01 | Endoplasmic reticulum {ECO:0000250}. Gc | 0 |
| Q6SA08 | Cytoplasmic vesicle, secretory vesicle, | 0 |
| P51513 | Nucleus.                                | 0 |
| A5D6W6 | Endoplasmic reticulum membrane {ECO:000 | 0 |
| Q7Z553 | Cell membrane {ECO:0000305}; Lipid-anch | 0 |
| Q9H3N1 | Membrane {ECO:0000305}; Single-pass ty  | 0 |
| Q96NE9 | Cytoplasm {ECO:0000269 PubMed:16137681} | 0 |
| Q9HAT8 |                                         | 0 |
| Q16799 | Endoplasmic reticulum membrane {ECO:000 | 1 |
| Q86TY3 | Membrane {ECO:0000305}; Single-pass ty  | 0 |
| Q17RD7 |                                         | 0 |
| Q8IZM9 | Cell membrane {ECO:0000250 UniProtKB:G  | 0 |
| Q147X3 | Cytoplasm {ECO:0000269 PubMed:19398576, | 0 |
| Q9UKJ8 | Membrane; Single-pass type I membrane p | 0 |
| Q96JK2 |                                         | 0 |
| P59190 | Cell membrane {ECO:0000305}; Lipid-anch | 0 |
| Q96FK6 |                                         | 0 |
| Q92731 | Nucleus {ECO:0000255 PROSITE-ProRule:PF | 1 |
| Q8NCM2 | Membrane; Multi-pass membrane protein.  | 0 |
| Q8WXE9 | Cytoplasm {ECO:0000269 PubMed:11381094} | 0 |
| Q8IYL9 | Cell membrane {ECO:0000250}; Multi-pass | 1 |
| Q8N8N7 | Cytoplasm {ECO:0000250}.                | 0 |
| Q8WYK2 | Nucleus {ECO:0000305}.                  | 1 |
| Q96M32 | Cytoplasm, cytosol {ECO:0000269 PubMed: | 0 |
| Q8N9Y4 |                                         | 0 |
| Q9UBX5 | Secreted {ECO:0000269 PubMed:16652333,  | 0 |
| Q96F83 |                                         | 0 |
| P23381 | Cytoplasm.                              | 0 |
| Q8N8Q9 | Cell membrane {ECO:0000305}; Multi-pass | 0 |
| Q9UHW9 | Basolateral cell membrane {ECO:0000250} | 0 |
| Q1HG43 | Membrane {ECO:0000305}; Multi-pass mem  | 0 |
| P55081 | Nucleus {ECO:0000269 PubMed:28781166}.  | 0 |
| Q99081 | Nucleus.                                | 0 |
| Q00796 | Mitochondrion membrane {ECO:0000250 Uni | 0 |
| Q8IWY8 | Nucleus {ECO:0000305}.                  | 0 |
| Q1HG44 | Endoplasmic reticulum membrane {ECO:000 | 0 |
| Q8IV50 |                                         | 0 |
| O14975 | Endoplasmic reticulum membrane; Multi-p | 1 |
| P21781 | Secreted.                               | 0 |
| P19113 |                                         | 0 |
| O95395 | Golgi apparatus membrane {ECO:0000250}; | 1 |
| Q12982 | Cytoplasm. Cytoplasm, perinuclear regio | 0 |
| A7MBM2 | Membrane {ECO:0000305}; Multi-pass mem  | 0 |



|         |                                                                     |   |
|---------|---------------------------------------------------------------------|---|
| Q8IWIY9 | Cytoplasm. Nucleus. Membrane {ECO:0000305};                         | 0 |
| Q04726  | Nucleus.                                                            | 0 |
| P39687  | Nucleus. Cytoplasm. Endoplasmic reticulum membrane                  | 0 |
| Q9H0A8  | Cytoplasm {ECO:0000269 PubMed:21778237}                             | 0 |
| 043586  | Cytoplasm {ECO:0000269 PubMed:9857189}.                             | 0 |
| P13804  | Mitochondrion matrix {ECO:0000305}.                                 | 1 |
| Q9NP66  | Nucleus {ECO:0000255 PROSITE-ProRule:PF00001}                       | 1 |
| Q9BY12  | Endoplasmic reticulum {ECO:0000269 PubMed:16024656}.                | 0 |
| 060637  | Membrane {ECO:0000305}; Multi-pass membrane protein                 | 0 |
| Q9GZS3  | Nucleus {ECO:0000269 PubMed:16024656}.                              | 1 |
| Q96FI4  | Cytoplasm, cytoskeleton, microtubule organizing center              | 0 |
| Q9NTJ4  | Cytoplasm {ECO:0000269 PubMed:16848760}                             | 0 |
| Q8WW22  | Membrane {ECO:0000305}; Lipid-anchor {ECO:0000269 UniProtKB:P09493} | 0 |
| P09493  | Cytoplasm, cytoskeleton {ECO:0000250 UniProtKB:P08069}              | 1 |
| P08069  | Cell membrane {ECO:0000269 PubMed:17524656}                         | 0 |
| Q8NCT1  | Early endosome {ECO:0000269 PubMed:23204656}                        | 0 |
| Q9H611  | Nucleus {ECO:0000255 HAMAP-Rule:MF_0317}                            | 0 |
| P05108  | Mitochondrion inner membrane {ECO:0000305}                          | 1 |
| Q96RK4  | Cytoplasm, cytoskeleton, microtubule organizing center              | 0 |
| P29590  | Nucleus. Nucleus, nucleoplasm. Cytoplasm                            | 0 |
| P04798  | Endoplasmic reticulum membrane {ECO:0000305}                        | 0 |
| Q8NG48  |                                                                     | 0 |
| Q6PHR2  | Cytoplasm {ECO:0000269 PubMed:19279323},                            | 0 |
| P0CG33  |                                                                     | 0 |
| P29122  | Isoform PACE4A-I: Secreted.; Isoform PACE4A-II: Secreted.           | 0 |
| Q96J87  | Nucleus {ECO:0000250}. Cytoplasm {ECO:0000269 PubMed:16848760}      | 0 |
| 015127  | Golgi apparatus, trans-Golgi network membrane                       | 0 |
| P05177  | Endoplasmic reticulum membrane; Peripheral membrane protein         | 1 |
| Q96S86  | Secreted, extracellular space, extracellular matrix                 | 0 |
| Q9UBD6  | Apical cell membrane {ECO:0000269 PubMed:16848760}                  | 0 |
| P54098  | Mitochondrion {ECO:0000269 PubMed:18064656}                         | 0 |
| P12271  | Cytoplasm.                                                          | 0 |
| Q9NVI1  | Nucleus {ECO:0000269 PubMed:17412408}, Endoplasmic reticulum        | 0 |
| P08910  | Cell projection, cilium, flagellum membrane                         | 0 |
| Q6P2C0  |                                                                     | 0 |
| Q16288  | Membrane; Single-pass type I membrane protein                       | 0 |
| Q7L5Y6  | Nucleus {ECO:0000305}.                                              | 0 |
| Q08431  | Membrane {ECO:0000269 PubMed:19204935};                             | 0 |
| Q8N1W2  | Nucleus {ECO:0000305}.                                              | 0 |
| Q9H3U1  | Cytoplasm {ECO:0000269 PubMed:16478993}                             | 0 |
| Q92186  | Golgi apparatus membrane {ECO:0000305};                             | 0 |
| Q6DN12  | Membrane {ECO:0000305}; Multi-pass membrane protein                 | 0 |
| P09958  | Golgi apparatus, trans-Golgi network membrane                       | 0 |
| P46940  | Cell membrane {ECO:0000269 PubMed:15354656}                         | 0 |
| Q6UUV7  | Nucleus {ECO:0000269 PubMed:15454081}, Endoplasmic reticulum        | 0 |
| Q7Z2Z2  |                                                                     | 0 |
| Q99963  | Cytoplasm {ECO:0000250 UniProtKB:O35180}                            | 0 |
| Q49A26  | Nucleus {ECO:0000269 PubMed:16352664}.                              | 1 |
| 015305  | Cytoplasm.                                                          | 0 |
| P31639  | Membrane; Multi-pass membrane protein.                              | 1 |
| P20702  | Membrane; Single-pass type I membrane protein                       | 0 |
| 043294  | Cell junction, focal adhesion. Nucleus                              | 0 |
| Q96GQ5  | Membrane {ECO:0000305}; Single-pass membrane protein                | 0 |
| Q96C12  | Cytoplasm {ECO:0000269 PubMed:24283224}                             | 0 |
| 095453  | Nucleus {ECO:0000269 PubMed:9736620}. (                             | 1 |

|        |                                          |   |
|--------|------------------------------------------|---|
| Q9C0B1 | Nucleus {ECO:0000269 PubMed:22002720, F  | 0 |
| P22695 | Mitochondrion inner membrane; Periphera  | 1 |
| Q01850 |                                          | 0 |
| 095976 | Membrane {ECO:0000305}; Single-pass typ  | 0 |
| Q68EM7 | Membrane; Peripheral membrane protein.   | 0 |
| Q32MK0 | Cytoplasm {ECO:0000250}.                 | 1 |
| Q96J65 | Membrane {ECO:0000255 PROSITE-ProRule:F  | 0 |
| Q969G9 | Cell membrane {ECO:0000250}. Cytoplasm   | 0 |
| Q92620 | Nucleus {ECO:0000269 PubMed:29301961}.   | 0 |
| Q8NCG5 | Golgi apparatus membrane {ECO:0000269 F  | 0 |
| Q15911 | Nucleus {ECO:0000269 PubMed:20599712, F  | 0 |
| Q6UXF7 | Secreted {ECO:0000250 UniProtKB:A5D8T8}  | 0 |
| Q96FN4 | Cytoplasm {ECO:0000250 UniProtKB:P59108} | 0 |
| Q9BVA0 | Cytoplasm {ECO:0000269 PubMed:26929214,  | 1 |
| Q9BVG8 | Cell junction, adherens junction {ECO:(  | 0 |
| Q8TE60 | Secreted, extracellular space, extracel  | 0 |
| POC024 | Peroxisome {ECO:0000250}.                | 1 |
| P23434 | Mitochondrion {ECO:0000250 UniProtKB:P2  | 0 |
| Q96MX0 | Membrane; Multi-pass membrane protein.   | 0 |
| P55287 | Cell membrane; Single-pass type I membr  | 0 |
| 060936 | Isoform 1: Nucleus, nucleolus {ECO:0000  | 0 |
| Q9GZQ8 | Cytoplasm, cytoskeleton. Endomembrane s  | 0 |
| Q14703 | Endoplasmic reticulum membrane {ECO:000  | 1 |
| P55290 | Cell membrane; Lipid-anchor, GPI-anchoi  | 0 |
| Q6P9B6 | Membrane {ECO:0000269 PubMed:24223779}.  | 0 |
| Q02556 | Nucleus {ECO:0000269 PubMed:23166356, F  | 0 |
| Q8IXI1 | Mitochondrion outer membrane {ECO:00002  | 0 |
| Q92901 |                                          | 0 |
| Q9NX65 | Nucleus {ECO:0000255 PROSITE-ProRule:PF  | 0 |
| P15880 |                                          | 0 |
| 096000 | Mitochondrion inner membrane {ECO:00002  | 1 |
| 015530 | Cytoplasm. Nucleus. Cell membrane; Peri  | 0 |
| Q6NT04 | Nucleus {ECO:0000305}.                   | 0 |
| Q6ZN54 |                                          | 0 |
| Q9BQ70 | Nucleus {ECO:0000269 PubMed:16574069, F  | 0 |
| P34059 | Lysosome.                                | 1 |
| 095995 | Cytoplasm {ECO:0000250 UniProtKB:Q60779} | 0 |
| Q9NWA0 | Nucleus {ECO:0000305}.                   | 0 |
| 075376 | Nucleus {ECO:0000255 PROSITE-ProRule:PF  | 1 |
| Q9UNS2 | Cytoplasm {ECO:0000269 PubMed:9535219}.  | 0 |
| Q8IVV7 |                                          | 0 |
| Q9HBT7 | Nucleus {ECO:0000305}.                   | 0 |
| Q8IZQ8 | Nucleus {ECO:0000250}.                   | 0 |
| Q8IVT5 | Cytoplasm {ECO:0000269 PubMed:20679487}  | 0 |
| Q969X6 | Nucleus, nucleolus {ECO:0000269 PubMed:  | 0 |
| P40313 |                                          | 0 |
| Q9H4B8 | Membrane {ECO:0000250}; Lipid-anchor, (  | 0 |
| Q3B7J2 | Secreted, extracellular space, extracel  | 0 |
| Q9ULX3 | Nucleus {ECO:0000269 PubMed:16172919}.   | 0 |
| 060256 |                                          | 0 |
| Q9UKL6 | Cytoplasm {ECO:0000250 UniProtKB:P53808} | 0 |
| 075674 | Golgi apparatus, Golgi stack. Endosome   | 0 |
| Q8N4N8 | Cytoplasm, cytoskeleton, microtubule or  | 0 |
| Q9BSJ5 | Membrane {ECO:0000305}; Single-pass men  | 0 |
| P50616 | Cytoplasm {ECO:0000250}. Nucleus {ECO:(  | 0 |

|                       |                                         |   |
|-----------------------|-----------------------------------------|---|
| Q5VIR6                | Golgi apparatus, trans-Golgi network me | 0 |
| O43147                | Cytoplasm {ECO:0000269 PubMed:26620560} | 0 |
| P55786                | Cytoplasm, cytosol {ECO:0000269 PubMed: | 0 |
| Q86WV1                | Cytoplasm. Nucleus. Cell membrane. Note | 0 |
| Q96FV0                |                                         | 0 |
| Q96FV2                |                                         | 0 |
| Q76I76                | Cytoplasm, cytoskeleton.                | 0 |
| P58872                | Membrane {ECO:0000305}; Multi-pass mem  | 0 |
| Q8IXA5                | Isoform 1: Cytoplasmic vesicle, secret  | 0 |
| Q96EG1                | Lysosome {ECO:0000269 PubMed:12461688,  | 1 |
| O94911                | Cell membrane {ECO:0000305}; Multi-pass | 0 |
| Q00610                | Cytoplasmic vesicle membrane {ECO:00002 | 0 |
| Q86WR6                |                                         | 0 |
| Q9H6U6                | Nucleus {ECO:0000269 PubMed:16617102, F | 0 |
| Q9Y3E5                | Mitochondrion.                          | 1 |
| Q15532                | Nucleus {ECO:0000305}.                  | 1 |
| Q92750                | Nucleus {ECO:0000269 PubMed:11567023, F | 0 |
| Q9Y4W6                | Mitochondrion {ECO:0000269 PubMed:10392 | 1 |
| O14732                |                                         | 0 |
| P38405                |                                         | 0 |
| Q13433                | Cell membrane {ECO:0000269 PubMed:12839 | 0 |
| Q96P16                |                                         | 0 |
| Q32NC0                |                                         | 0 |
| Q10472                | Polypeptide N-acetylgalactosaminyltrans | 0 |
| Q9C0F0                | Nucleus {ECO:0000305}.                  | 0 |
| P18509                | Secreted.                               | 0 |
| Q16820                | Cell membrane {ECO:0000269 PubMed:22988 | 0 |
| be performed. View pr | Mitochondrion inner membrane {ECO:00003 | 0 |
| Q9H706                |                                         | 0 |
| Q5FWF5                | Nucleus {ECO:0000269 PubMed:14576321, F | 0 |
| Q9BXW6                | Late endosome {ECO:0000269 PubMed:16176 | 0 |
| Q92908                | Nucleus {ECO:0000269 PubMed:19666519, F | 0 |
| Q9C091                | Membrane {ECO:0000305}; Single-pass men | 0 |
| Q96DM3                | Lysosome membrane {ECO:0000269 PubMed:1 | 0 |
| Q8IZL8                | Nucleus, nucleolus {ECO:0000269 PubMed: | 0 |
| O15118                | Late endosome membrane {ECO:0000269 Pub | 0 |
| Q13336                | Cell membrane {ECO:0000269 PubMed:23219 | 0 |
| Q86YT5                | Membrane; Multi-pass membrane protein.  | 0 |
| Q9BUR4                | Nucleus, Cajal body {ECO:0000269 PubMed | 1 |
| Q8N4C8                | Cytoplasm {ECO:0000269 PubMed:15469942, | 0 |
| Q96F10                | Cytoplasm. Note=Intracellular organelle | 1 |
| P07306                | Isoform H1a: Membrane; Single-pass type | 0 |
| Q8WYR1                | Nucleus {ECO:0000250 UniProtKB:002696}. | 0 |
| P04637                | Cytoplasm {ECO:0000269 PubMed:15340061, | 1 |
| Q4G0X9                | Cytoplasm {ECO:0000250 UniProtKB:Q8BI79 | 0 |
| P52565                | Cytoplasm {ECO:0000269 PubMed:23434736} | 0 |
| Q7Z403                | Endoplasmic reticulum membrane {ECO:00  | 0 |
| O15427                | Cell membrane; Multi-pass membrane prot | 0 |
| P38919                | Nucleus {ECO:0000269 PubMed:10623621, F | 0 |
| P48730                | Cytoplasm. Nucleus. Cytoplasm, cytoskel | 0 |
| Q9NYG5                | Cytoplasm {ECO:0000269 PubMed:11573242} | 0 |
| Q9BTW9                | Cell junction, tight junction {ECO:0000 | 0 |
| Q9HA64                |                                         | 0 |
| Q8N122                | Cytoplasm. Lysosome. Cytoplasmic granu  | 0 |
| Q01167                | Nucleus {ECO:0000269 PubMed:20810654, F | 0 |

|                       |                                          |   |
|-----------------------|------------------------------------------|---|
| Q6PJ69                |                                          | 0 |
| Q9HC52                | Nucleus {ECO:0000269 PubMed:21282530}.   | 0 |
| Q8WVN6                | Cell membrane {ECO:0000305}; Single-pass | 0 |
| Q96PX1                | Cytoplasm {ECO:0000250 UniProtKB:MOR5D6} | 0 |
| Q9UPN4                | Cytoplasm, cytoskeleton, microtubule or  | 0 |
| Q32MQ0                | Nucleus {ECO:0000269 PubMed:22364861}.   | 0 |
| 000257                | Nucleus {ECO:0000269 PubMed:12679040, F} | 0 |
| Q6ZSG1                | Nucleus {ECO:0000250 UniProtKB:E9QAU8}.  | 0 |
| Q7RTS9                | Cytoplasm. Golgi apparatus. Membrane {F} | 0 |
| Q9H777                | Cytoplasm, cytosol {ECO:0000269 PubMed:  | 0 |
| Q9UIS9                | Nucleus {ECO:0000250}. Nucleus matrix    | 0 |
| Q13485                | Cytoplasm {ECO:0000269 PubMed:15799969,  | 0 |
| Q9Y6Q6                | Isoform 1: Cell membrane {ECO:0000269 F} | 0 |
| Q9C0B9                |                                          | 0 |
| Q13794                | Mitochondrion {ECO:0000269 PubMed:15705} | 0 |
| Q969T7                | Cytoplasm {ECO:0000305}.                 | 0 |
| Q86VR2                | Membrane {ECO:0000305}; Multi-pass mem   | 0 |
| P04626                | Isoform 1: Cell membrane {ECO:0000269 F} | 0 |
| Q14451                | Cytoplasm {ECO:0000269 PubMed:10893408,  | 0 |
| Q9BRT3                | Cytoplasm, cytosol. Cell membrane; Lipi  | 0 |
| P11086                |                                          | 0 |
| A6NH57                |                                          | 0 |
| P22692                | Secreted.                                | 0 |
| Q96AY3                | Endoplasmic reticulum lumen {ECO:000025} | 1 |
| 000555                | Cell membrane {ECO:0000269 PubMed:10049} | 0 |
| Q96FF7                |                                          | 0 |
| be performed. View pr | Cytoplasm {ECO:0000269 PubMed:16159594}  | 0 |
| 060885                | Nucleus {ECO:0000269 PubMed:16109376}.   | 1 |
| Q9BRY0                | Membrane {ECO:0000305}; Multi-pass mem   | 0 |
| P08651                | Nucleus.                                 | 1 |
| 043688                | Membrane; Multi-pass membrane protein.   | 0 |
| Q96PE6                | Nucleus {ECO:0000305}.                   | 0 |
| P57071                | Nucleus {ECO:0000269 PubMed:15904895}.   | 0 |
| P17858                | Cytoplasm {ECO:0000255 HAMAP-Rule:MF_03} | 0 |
| P15498                |                                          | 0 |
| Q96EY5                | Cytoplasm. Nucleus. Endosome. Cytoplasm  | 0 |
| Q96Q77                |                                          | 0 |
| Q99961                | Cytoplasm {ECO:0000250}. Early endosome  | 0 |
| Q96G46                |                                          | 0 |
| Q86TI2                | Isoform 1: Cytoplasm, cytosol {ECO:0000} | 0 |
| Q8IXT2                | Nucleus {ECO:0000255 PROSITE-ProRule:PF} | 0 |
| Q96F63                |                                          | 0 |
| Q6ZNR0                | Membrane {ECO:0000305}; Multi-pass mem   | 0 |
| Q9HCL3                | Nucleus {ECO:0000305}.                   | 0 |
| Q9NTG7                | Mitochondrion matrix {ECO:0000269 PubMe} | 0 |
| Q01628                | Cell membrane; Single-pass type II mem   | 0 |
| Q32M88                |                                          | 0 |
| P57058                |                                          | 0 |
| P12109                | Secreted, extracellular space, extracel  | 0 |
| P17181                | Isoform 1: Cell membrane {ECO:0000269 F} | 0 |
| P00441                | Cytoplasm {ECO:0000269 PubMed:19741096}  | 1 |
| P12110                | Secreted, extracellular space, extracel  | 0 |
| P57059                | Cytoplasm {ECO:0000269 PubMed:16306228,  | 0 |
| Q9UJW3                | Nucleus {ECO:0000305}.                   | 0 |
| 094759                | Cell membrane {ECO:0000269 PubMed:11385} | 0 |

|        |                                         |   |
|--------|-----------------------------------------|---|
| Q96KG9 | Cytoplasm, cytoskeleton, microtubule or | 0 |
| P56557 | Endoplasmic reticulum membrane {ECO:000 | 0 |
| P05067 | Cell membrane {ECO:0000269 PubMed:1038  | 0 |
| Q9Y3R5 | Golgi apparatus membrane {ECO:0000250 U | 0 |
| O60287 | Nucleus, nucleolus {ECO:0000269 PubMed: | 1 |
| P31749 | Cytoplasm {ECO:0000250 UniProtKB:P31750 | 0 |
| Q9UBE0 | Nucleus {ECO:0000269 PubMed:11481243}.  | 1 |
| Q96Q04 | Membrane {ECO:0000250 UniProtKB:Q5XJV6} | 0 |
| Q9ULV8 |                                         | 0 |
| Q9H324 | Secreted, extracellular space, extracel | 0 |
| Q01959 | Cell membrane {ECO:0000269 PubMed:1406  | 0 |
| Q9HAU8 |                                         | 0 |
| Q9HC96 |                                         | 0 |
| O00160 |                                         | 0 |
| P59046 | Cytoplasm {ECO:0000269 PubMed:30902577} | 0 |
| Q8WXS5 | Cell membrane {ECO:0000250 UniProtKB:Q8 | 0 |
|        | Nucleus {ECO:0000305}.                  | 1 |
| Q9BSF4 | Mitochondrion inner membrane {ECO:0000  | 0 |
| Q75N90 | Secreted, extracellular space, extracel | 0 |
| Q86X55 | Nucleus. Cytoplasm. Note=Mainly nuclear | 1 |
| Q96CN4 |                                         | 0 |
| Q96FL8 | Cell membrane {ECO:0000269 PubMed:16330 | 0 |
| P28072 | Cytoplasm {ECO:0000269 PubMed:12181345} | 1 |
| Q96LC7 | Isoform 1: Cell membrane; Single-pass t | 0 |
| P07288 | Secreted.                               | 0 |
| Q8WTR7 | Nucleus {ECO:0000269 PubMed:16714279}.  | 0 |
| P62280 |                                         | 0 |
|        | be performed. View primary data.        | 0 |
| P40429 | Cytoplasm {ECO:0000305 PubMed:14567916} | 0 |
| Q7Z7A3 | Cytoplasm.                              | 0 |
| Q9Y314 | Cytoplasm {ECO:0000269 PubMed:15548660, | 0 |
| A6NGN9 | Secreted {ECO:0000305}.                 | 0 |
| Q96D15 | Endoplasmic reticulum lumen {ECO:000026 | 0 |
| Q8N883 | Nucleus {ECO:0000305}.                  | 0 |
| P22732 | Apical cell membrane {ECO:0000250 UniPr | 0 |
| Q9P2R6 | Nucleus {ECO:0000255 PROSITE-ProRule:PF | 0 |
| Q495T6 | Membrane; Single-pass type II membrane  | 0 |
| Q9C0B2 | Cytoplasm, cytoskeleton, cilium axoneme | 0 |
| Q9ULW8 | Cytoplasm {ECO:0000269 PubMed:27866708} | 0 |
| B1AJZ9 |                                         | 0 |
| Q9ULC6 | Cytoplasm {ECO:0000269 PubMed:12416996} | 0 |
| Q96C19 | Membrane raft {ECO:0000250}. Note=In a  | 0 |
| O75381 | Peroxisome membrane {ECO:0000269 PubMed | 1 |
| P52209 | Cytoplasm {ECO:0000250}.                | 1 |
| Q9H299 | Cytoplasm. Nucleus.                     | 0 |
| Q969H4 | Cytoplasm {ECO:0000250}. Membrane {ECO: | 0 |
| P62913 | Nucleus, nucleolus {ECO:0000269 PubMed: | 0 |
| O00488 | Nucleus, nucleolus {ECO:0000269 PubMed: | 1 |
| Q8TAB5 |                                         | 0 |
| Q8IZA0 | Cytoplasmic granule membrane {ECO:0000  | 0 |
| Q9NVM1 | Membrane {ECO:0000305}; Single-pass men | 0 |
| Q96SC8 | Nucleus {ECO:0000255 PROSITE-ProRule:PF | 0 |
| O00444 | Cytoplasm, cytoskeleton, microtubule or | 0 |
| O95382 |                                         | 0 |
| O75636 | Secreted. Note=Found in blood plasma, b | 0 |

|        |                                         |   |
|--------|-----------------------------------------|---|
| Q9H9Y4 |                                         | 0 |
| Q8IYJ3 | Cell membrane {ECO:0000269 PubMed:11278 | 0 |
| Q8N5D0 |                                         | 0 |
| P09093 |                                         | 0 |
| Q9H094 | Cytoplasm {ECO:0000305}.                | 1 |
| P98160 | Secreted, extracellular space, extracel | 0 |
| Q13352 | Isoform 1: Nucleus. Chromosome, centrom | 0 |
| Q8NC51 | Cytoplasm {ECO:0000269 PubMed:12505151, | 0 |
| 095999 | Cytoplasm, perinuclear region {ECO:0000 | 0 |
| 000622 | Secreted.                               | 0 |
| P22694 | Cytoplasm {ECO:0000269 PubMed:21423175} | 0 |
| Q92643 | Endoplasmic reticulum membrane {ECO:000 | 0 |
| Q9GZM7 | Secreted {ECO:0000269 PubMed:10799322,  | 0 |
| P10586 | Membrane; Single-pass type I membrane p | 0 |
| Q8NFX0 | Cell membrane; Multi-pass membrane prot | 0 |
| P13584 | Endoplasmic reticulum membrane; Periphe | 0 |
| Q8NOU2 | Membrane {ECO:0000305}; Multi-pass memt | 0 |
| Q96MA1 | Nucleus {ECO:0000255 PROSITE-ProRule:PF | 1 |
| P61968 |                                         | 0 |
| Q8N4M1 | Membrane {ECO:0000250}; Multi-pass memt | 0 |
| 075054 | Membrane {ECO:0000305}; Single-pass typ | 0 |
| Q5TEC3 | Nucleus {ECO:0000305}.                  | 0 |
| Q9P2B4 | Cytoplasm, cytoskeleton, stress fiber   | 0 |
| Q5VSL9 | Cytoplasm {ECO:0000269 PubMed:21834987} | 0 |
| P28066 | Cytoplasm {ECO:0000269 PubMed:12181345} | 0 |
| Q5VTL7 | Secreted {ECO:0000305}.                 | 0 |
| Q8NEQ5 | Membrane {ECO:0000305}; Single-pass men | 0 |
| P19397 | Cell membrane {ECO:0000250}. Cell junct | 0 |
| Q9HCU4 | Cell membrane; Multi-pass membrane prot | 0 |
| Q8N6U8 | Cell projection, cilium membrane {ECO:( | 0 |
| P49189 | Cytoplasm, cytosol {ECO:0000250 UniProt | 0 |
| P05026 | Cell membrane {ECO:0000255}; Single-pas | 1 |
| 075663 | Cytoplasm {ECO:0000269 PubMed:17944932} | 0 |
| Q9Y5B8 |                                         | 0 |
| Q9P215 | Nucleus {ECO:0000305}.                  | 0 |
| 095563 | Mitochondrion inner membrane {ECO:00002 | 0 |
| Q99795 | Membrane; Single-pass type I membrane p | 1 |
| P48443 | Nucleus {ECO:0000255 PROSITE-ProRule:PF | 0 |
| 060806 | Nucleus {ECO:0000255 PROSITE-ProRule:PF | 1 |
| P47992 | Secreted.                               | 0 |
| Q9UBD3 | Secreted.                               | 0 |
| P14859 | Nucleus.                                | 1 |
| Q96JY0 | Cytoplasm {ECO:0000250 UniProtKB:Q8BVN9 | 0 |
| Q71H61 | Endoplasmic reticulum membrane {ECO:000 | 0 |
| Q96PN6 | Cell membrane {ECO:0000269 PubMed:15659 | 0 |
| Q96NY8 | Cell membrane {ECO:0000305}; Single-pas | 0 |
| Q9Y3C8 |                                         | 0 |
| P50336 | Mitochondrion inner membrane {ECO:00002 | 0 |
| P12318 | Cell membrane {ECO:0000269 PubMed:19011 | 0 |
| Q9UHV9 | Nucleus {ECO:0000269 PubMed:17936702}.  | 0 |
| Q9UK80 | Cytoplasm {ECO:0000269 PubMed:21888622} | 0 |
| P05160 | Secreted {ECO:0000269 PubMed:26247044,  | 0 |
| Q92733 | Nucleus {ECO:0000269 PubMed:11717438}.  | 1 |
| Q96FB5 | Membrane {ECO:0000305}; Single-pass men | 0 |
| Q96A35 | Mitochondrion {ECO:0000269 PubMed:25278 | 0 |

|        |                                         |   |
|--------|-----------------------------------------|---|
| Q9H3S5 | Endoplasmic reticulum membrane {ECO:000 | 0 |
| P31415 | Endoplasmic reticulum {ECO:0000269 PubM | 1 |
| Q9H9L3 | Nucleus, nucleolus {ECO:0000269 PubMed: | 0 |
| P29373 | Cytoplasm. Endoplasmic reticulum. Nucle | 1 |
| P51858 | Isoform 1: Nucleus {ECO:0000269 PubMed: | 0 |
| P42684 | Cytoplasm, cytoskeleton.                | 0 |
| Q9UBH6 | Cell membrane {ECO:0000269 PubMed:23791 | 0 |
| O15492 | Membrane {ECO:0000250 UniProtKB:P97428} | 0 |
| Q5JTV8 | Nucleus inner membrane {ECO:0000269 Pub | 0 |
| Q96RW7 | Secreted, extracellular space, extracel | 0 |
| Q9NZL6 |                                         | 0 |
| Q5VWZ2 | Isoform 1: Cytoplasm, cytosol {ECO:0000 | 0 |
| Q9NQ69 | Nucleus {ECO:0000255 PROSITE-ProRule:PF | 0 |
| Q86TP1 | Cytoplasm. Nucleus. Cell junction, foca | 0 |
| Q9NNX1 | Secreted {ECO:0000250 UniProtKB:P27628} | 0 |
| Q15427 | Nucleus {ECO:0000269 PubMed:27720643, F | 0 |
| Q16610 | Secreted, extracellular space, extracel | 0 |
| Q8N1G0 | Cytoplasm {ECO:0000269 PubMed:26849110} | 0 |
| Q9BW92 | Mitochondrion matrix {ECO:0000250}.     | 0 |
| Q9P2M7 | Cell junction, tight junction {ECO:0000 | 0 |
| Q15047 | Nucleus {ECO:0000269 PubMed:27732843}.  | 0 |
| Q6UY14 | Secreted, extracellular space, extracel | 0 |
| Q07820 | Membrane {ECO:0000305}; Single-pass men | 0 |
| P48382 | Nucleus.                                | 1 |
| Q9UBF8 | Endomembrane system. Mitochondrion oute | 0 |
| Q99755 | Cell membrane. Cytoplasm {ECO:0000250}. | 0 |
| Q9BTT0 | Cytoplasm {ECO:0000250}. Nucleus {ECO:( | 0 |
| Q8N5J2 |                                         | 0 |
| O76027 |                                         | 0 |
| Q13228 | Nucleus {ECO:0000269 PubMed:14991897}.  | 0 |
| Q96G23 | Endoplasmic reticulum membrane {ECO:000 | 0 |
| O43768 | Cytoplasm {ECO:0000250}.                | 0 |
| Q9BYD2 | Mitochondrion {ECO:0000269 PubMed:25278 | 0 |
| P27540 | Nucleus.                                | 1 |
| Q7Z3K3 | Nucleus. Chromosome. Cytoplasm. Note=Ac | 0 |
| Q9BUN1 | Secreted {ECO:0000305}.                 | 0 |
| Q86X24 | Nucleus {ECO:0000250 UniProtKB:Q9D5T7}. | 1 |
| Q8TAK5 | Nucleus {ECO:0000250}.                  | 0 |
| O95259 | Cell membrane {ECO:0000269 PubMed:10880 | 0 |
| Q9NZJ0 | Nucleus {ECO:0000269 PubMed:26431207}.  | 0 |
| P41214 | Cytoplasm {ECO:0000269 PubMed:20566627} | 0 |
| Q15573 | Nucleus.                                | 0 |
| Q9NRG4 | Cytoplasm, cytosol {ECO:0000250}. Nucle | 0 |
| Q5VX71 | Isoform 1: Membrane {ECO:0000305}; Sing | 0 |
| Q9Y6W6 | Cytoplasm. Nucleus.                     | 0 |
| Q6UWX4 | Secreted {ECO:0000305}.                 | 0 |
| Q13625 | Cytoplasm, perinuclear region. Nucleus. | 1 |
| P98198 | Cell membrane {ECO:0000269 PubMed:20947 | 0 |
| Q5D862 | Cytoplasm {ECO:0000269 PubMed:19384417} | 0 |
| Q9UBG3 | Cytoplasm {ECO:0000269 PubMed:15854041, | 1 |
| Q13444 | Endomembrane system {ECO:0000269 PubMec | 0 |
| O76095 | Membrane {ECO:0000305}; Single-pass typ | 0 |
| P51153 | Cell membrane {ECO:0000269 PubMed:15528 | 0 |
| P05109 | Secreted. Cytoplasm. Cytoplasm, cytoske | 0 |
| P06753 | Cytoplasm, cytoskeleton {ECO:0000305}.  | 0 |

|        |                                         |   |
|--------|-----------------------------------------|---|
| Q5VU65 | Membrane {ECO:0000305}; Single-pass mem | 0 |
| O95295 | Membrane {ECO:0000250 UniProtKB:Q9Z266} | 0 |
| Q5K4L6 | Mitochondrion membrane {ECO:0000250 Uni | 1 |
| P31151 | Cytoplasm {ECO:0000269 PubMed:8618345}. | 0 |
| Q14157 |                                         | 0 |
| O00165 | Mitochondrion {ECO:0000269 PubMed:18971 | 0 |
| Q8TEY5 | Endoplasmic reticulum membrane; Single- | 0 |
| P52797 | Cell membrane; Lipid-anchor, GPI-anchoi | 0 |
| Q96PS8 | Apical cell membrane {ECO:0000269 PubMe | 0 |
| Q9UGI6 | Membrane; Multi-pass membrane protein.  | 0 |
| Q9BWL3 | Membrane {ECO:0000305}; Single-pass mem | 0 |
| Q8WXI9 | Nucleus speckle {ECO:0000269 PubMed:117 | 0 |
| Q12905 | Nucleus, nucleolus. Cytoplasm. Nucleus. | 0 |
| Q92963 | Cell membrane.                          | 0 |
| Q68E01 | Nucleus {ECO:0000269 PubMed:19605351, F | 0 |
| P30613 |                                         | 0 |
| Q9P1Z3 | Cell membrane {ECO:0000269 PubMed:16043 | 0 |
| P20930 | Cytoplasmic granule {ECO:0000269 PubMec | 1 |
| P68133 | Cytoplasm, cytoskeleton.                | 1 |
| Q8NDD1 | Chromosome {ECO:0000269 PubMed:20813266 | 0 |
| Q10471 | Golgi apparatus, Golgi stack membrane   | 0 |
| Q8NBPO |                                         | 0 |
| Q8NBX0 |                                         | 0 |
| Q5TCX8 |                                         | 0 |
| Q5SW79 | Cytoplasm, cytoskeleton, microtubule or | 0 |
| P24666 | Cytoplasm.                              | 0 |
| Q5SQN1 | Endomembrane system {ECO:0000250}. Cyt  | 0 |
| O15381 | Isoform 2: Nucleus, nucleoplasm {ECO:00 | 0 |
| Q6IQ49 | Nucleus {ECO:0000269 PubMed:27906959}.  | 0 |
| P84077 | Golgi apparatus {ECO:0000269 PubMed:175 | 0 |
| O00292 | Secreted.                               | 0 |
| Q9P003 | Membrane {ECO:0000305}; Multi-pass mem  | 0 |
| P27987 |                                         | 0 |
| Q16774 |                                         | 0 |
| Q5VT25 | Cytoplasm {ECO:0000250 UniProtKB:054874 | 0 |
| Q9BU76 |                                         | 0 |
| Q6ZWT7 | Membrane {ECO:0000305}; Multi-pass mem  | 0 |
| P09874 | Nucleus {ECO:0000269 PubMed:17177976, F | 1 |
| Q96C36 | Cytoplasm {ECO:0000269 PubMed:2722838}. | 0 |
| Q14739 | Nucleus inner membrane {ECO:0000269 Pub | 0 |
| P07099 | Microsome membrane {ECO:0000250 UniProt | 1 |
| P00797 | Secreted. Membrane. Note=Associated to  | 0 |
| Q9NVF9 |                                         | 0 |
| O75335 | Cytoplasm {ECO:0000250}. Cell surface   | 0 |
| Q9Y2H5 |                                         | 0 |
| P35236 | Cytoplasm {ECO:0000269 PubMed:14613483} | 0 |
| Q8N9I0 | Cytoplasmic vesicle, secretory vesicle, | 1 |
| Q96BM9 | Late endosome membrane {ECO:0000250 Uni | 0 |
| Q8TAX0 | Nucleus {ECO:0000305}.                  | 0 |
| Q15084 | Endoplasmic reticulum lumen {ECO:000026 | 0 |
| Q8NEY4 |                                         | 0 |
| Q8WVV9 |                                         | 0 |
| Q96C23 | Cytoplasm {ECO:0000305}.                | 0 |
| Q9H221 | Cell membrane {ECO:0000305 PubMed:16893 | 0 |
| Q9HC35 | Cytoplasm, cytoskeleton {ECO:0000305}.  | 1 |



|        |                                                                             |   |
|--------|-----------------------------------------------------------------------------|---|
| P0DP24 | Cytoplasm, cytoskeleton, spindle {ECO:0000269 UniProtKB:Q95876}             | 0 |
| Q8WUX2 | Cytoplasm, cytosol {ECO:0000269 PubMed:178751}                              | 0 |
| P62979 | Ubiquitin: Cytoplasm {ECO:0000250}. Nucleus {ECO:0000269 PubMed:27601467, F | 1 |
| Q95876 | Cell membrane {ECO:0000250 UniProtKB:Q95876}                                | 0 |
| Q6UW15 | Secreted. Cytoplasm {ECO:0000250}.                                          | 0 |
| Q9NY74 | Nucleus {ECO:0000269 PubMed:27601467, F                                     | 0 |
| P62308 | Cytoplasm, cytosol {ECO:0000269 PubMed:178751}                              | 0 |
| Q96SE0 | Membrane {ECO:0000305}; Single-pass type I membrane protein                 | 0 |
| O00470 | Nucleus {ECO:0000255 PROSITE-ProRule:PF00001}                               | 0 |
| A6NCK2 |                                                                             | 0 |
| Q96BQ3 |                                                                             | 0 |
| O76071 | Cytoplasm {ECO:0000269 PubMed:23585563}                                     | 0 |
| Q96K75 | Nucleus {ECO:0000305}.                                                      | 0 |
| O75643 | Nucleus {ECO:0000269 PubMed:28502770, F                                     | 0 |
| P82675 | Mitochondrion {ECO:0000269 PubMed:258381}                                   | 0 |
| Q8N9V6 | Cytoplasm, cytoskeleton, spindle {ECO:0000269 UniProtKB:Q95876}             | 0 |
| Q9Y3C4 | Cytoplasm, cytosol {ECO:0000269 PubMed:178751}                              | 0 |
| Q9UHE5 | Endoplasmic reticulum-Golgi intermediate compartment                        | 1 |
| Q9Y2D4 |                                                                             | 0 |
| Q8TD22 | Mitochondrion membrane {ECO:0000269 PubMed:178751}                          | 0 |
| Q6UWH6 | Membrane {ECO:0000305}; Multi-pass membrane protein                         | 0 |
| Q8TE96 | Nucleus {ECO:0000250}.                                                      | 0 |
| Q96JF0 | Golgi apparatus, Golgi stack membrane                                       | 0 |
| O15259 | Cell junction {ECO:0000250 UniProtKB:Q95876}                                | 0 |
| Q13021 | Membrane {ECO:0000305}; Multi-pass membrane protein                         | 0 |
| Q86YJ6 | Isoform SOFAT: Secreted. Note=Secreted                                      | 0 |
| P11234 | Cell membrane {ECO:0000269 PubMed:178751}                                   | 1 |
| Q7Z5L3 | Secreted {ECO:0000250}.                                                     | 0 |
| Q53S58 | Mitochondrion inner membrane {ECO:0000269 PubMed:178751}                    | 0 |
| Q86YG4 |                                                                             | 0 |
| Q9UBK7 |                                                                             | 0 |
| Q8WUM9 | Membrane; Multi-pass membrane protein.                                      | 0 |
| Q8N5P1 | Nucleus {ECO:0000269 PubMed:23932780}.                                      | 0 |
| Q9Y234 | Mitochondrion.                                                              | 0 |
| Q16281 | Membrane; Multi-pass membrane protein.                                      | 0 |
| Q6P2I3 |                                                                             | 0 |
| P51826 | Nucleus.                                                                    | 0 |
| Q92575 | Endoplasmic reticulum membrane {ECO:0000269 UniProtKB:Q95876}               | 0 |
| O95156 | Secreted {ECO:0000305}.                                                     | 0 |
| Q6IQ16 | Nucleus {ECO:0000250}.                                                      | 0 |
| Q9C0I4 | Membrane {ECO:0000305}; Single-pass type I membrane protein                 | 0 |
| Q13304 | Cell membrane; Multi-pass membrane protein                                  | 0 |
| O15514 | Nucleus {ECO:0000269 PubMed:9852112}.                                       | 0 |
| Q6DCA0 |                                                                             | 0 |
| Q8IUC8 | Golgi apparatus membrane {ECO:0000250};                                     | 0 |
| Q99569 | Cell junction, desmosome {ECO:0000269 PubMed:178751}                        | 0 |
| Q6U841 | Basolateral cell membrane {ECO:0000250 UniProtKB:Q95876}                    | 0 |
| Q0VDG4 |                                                                             | 0 |
| Q9C0E8 | Endoplasmic reticulum membrane {ECO:0000269 UniProtKB:Q95876}               | 0 |
| Q9UIK5 | Isoform 1: Membrane {ECO:0000305}; Single-pass type I membrane protein      | 0 |
| P56177 | Nucleus {ECO:0000269 PubMed:14671321}.                                      | 0 |
| Q6ZT12 | Membrane {ECO:0000305}; Multi-pass membrane protein                         | 0 |
| Q8TCD6 |                                                                             | 0 |
| Q9UBP9 | Cytoplasm {ECO:0000269 PubMed:16497666}                                     | 1 |
| Q6P995 | Membrane {ECO:0000305}; Single-pass type I membrane protein                 | 0 |

|        |                                                               |   |
|--------|---------------------------------------------------------------|---|
| P10809 | Mitochondrion matrix.                                         | 1 |
| Q8NCX0 |                                                               | 0 |
| Q8WXB1 | Cytoplasm {ECO:0000269 PubMed:23349634}                       | 0 |
| Q8N2C7 | Membrane {ECO:0000305}; Multi-pass mem                        | 0 |
| P49190 | Cell membrane; Multi-pass membrane prot                       | 0 |
| Q6ZS30 |                                                               | 0 |
| A0AUZ9 |                                                               | 0 |
| Q8N0X2 | Cytoplasm {ECO:0000250 UniProtKB:Q8K450}                      | 0 |
| Q8NBK3 | Endoplasmic reticulum lumen {ECO:0000269 UniProtKB:Q8K450}    | 0 |
| Q9P242 |                                                               | 0 |
| Q8TEB9 | Endoplasmic reticulum membrane {ECO:0000269 UniProtKB:Q8K450} | 0 |
| P25106 | Cell membrane; Multi-pass membrane prot                       | 0 |
| Q6ZVH7 | Cell projection, stereocilium {ECO:0000269 UniProtKB:Q8K450}  | 0 |
| Q9P2S6 |                                                               | 0 |
| Q9H9Q2 | Cytoplasm. Nucleus.                                           | 0 |
| Q8IYB7 | Cytoplasm {ECO:0000269 PubMed:24141620}                       | 0 |
| Q9BXW9 | Nucleus {ECO:0000269 PubMed:11239454, F                       | 0 |
| Q96BW9 | Mitochondrion inner membrane {ECO:0000269 UniProtKB:Q8K450}   | 0 |
| Q14135 | Nucleus {ECO:0000250}.                                        | 0 |
| P20339 | Cell membrane {ECO:0000269 PubMed:238151}                     | 0 |
| Q8NC44 | Membrane {ECO:0000305}; Multi-pass mem                        | 0 |
| Q92600 | Nucleus {ECO:0000250 UniProtKB:Q9JKY0}.                       | 0 |
| Q9P2E8 | Golgi apparatus membrane {ECO:0000269 UniProtKB:Q8K450}       | 0 |
|        | Cytoplasm {ECO:0000269 PubMed:11741830}                       | 0 |
| Q96IJ6 | Cytoplasm {ECO:0000269 PubMed:24035193}                       | 0 |
| Q96JC9 | Nucleus speckle {ECO:0000269 PubMed:11411620}                 | 1 |
| Q9Y6G9 | Cytoplasm {ECO:0000250}. Chromosome, ce                       | 0 |
| Q6XE24 | Cytoplasm {ECO:0000269 PubMed:10675610}                       | 0 |
| Q6ZQY3 |                                                               | 0 |
| Q8NAT1 | Endoplasmic reticulum membrane {ECO:0000269 UniProtKB:Q8K450} | 0 |
| O00590 | Early endosome. Recycling endosome. Cel                       | 0 |
| Q9UFP1 | Secreted {ECO:0000305}. Endoplasmic ret                       | 0 |
| Q96DW6 | Mitochondrion inner membrane {ECO:0000269 UniProtKB:Q8K450}   | 0 |
| Q13797 | Membrane {ECO:0000255}; Single-pass typ                       | 0 |
| Q13439 | Cytoplasm. Golgi apparatus membrane {EC                       | 1 |
| O15194 | Nucleus {ECO:0000250}.                                        | 0 |
| Q99469 | Cytoplasm, cytosol {ECO:0000250 UniProt                       | 0 |
| Q6DN90 | Cytoplasm {ECO:0000269 PubMed:11226253}                       | 0 |
| O75155 | Nucleus {ECO:0000250}.                                        | 0 |
| P62910 |                                                               | 0 |
| P23470 | Membrane {ECO:0000305}; Single-pass typ                       | 0 |
| Q8NFM7 | Golgi apparatus membrane {ECO:0000269 UniProtKB:Q8K450}       | 0 |
| Q6PI26 | Cytoplasm, cytosol {ECO:0000269 PubMed:11741830}              | 0 |
| Q70HW3 | Mitochondrion inner membrane {ECO:0000269 UniProtKB:Q8K450}   | 1 |
| Q8TBC4 |                                                               | 0 |
| O75915 | Endoplasmic reticulum membrane {ECO:0000269 UniProtKB:Q8K450} | 0 |
| P82094 | Cytoplasm. Nucleus. Golgi apparatus men                       | 0 |
| Q96JA1 | Cell membrane {ECO:0000269 PubMed:152821}                     | 0 |
|        | be performed. View primary data.                              | 0 |
| Q6AZW8 | Nucleus {ECO:0000305}.                                        | 0 |
| Q9BYH8 | Nucleus {ECO:0000269 PubMed:16513645}.                        | 0 |
| P27658 | Secreted, extracellular space, extracel                       | 0 |
| Q969Y0 | Secreted {ECO:0000305}.                                       | 0 |
| Q9Y2K3 | Cytoplasm, myofibril. Note=Thick filame                       | 0 |
| Q86SQ0 | Cytoplasm {ECO:0000269 PubMed:12376540}                       | 0 |

|        |                                          |   |
|--------|------------------------------------------|---|
| Q9NUJ1 | Mitochondrion {ECO:0000305}.             | 1 |
| Q9UI15 |                                          | 0 |
| Q5HYI8 |                                          | 0 |
| P54922 |                                          | 0 |
| Q5DX21 | Cell membrane {ECO:0000250}; Single-pass | 0 |
| Q9NT62 | Cytoplasm {ECO:0000269 PubMed:11825910}  | 1 |
| Q9BWW1 | Cell membrane {ECO:0000269 PubMed:12634  | 0 |
| Q9Y5M8 | Endoplasmic reticulum membrane {ECO:000  | 0 |
| Q6UXF1 | Membrane {ECO:0000250 UniProtKB:Q8BHE4}  | 0 |
| P30556 | Cell membrane; Multi-pass membrane prot  | 0 |
| Q86YW9 | Nucleus {ECO:0000305}.                   | 0 |
| Q9BY44 |                                          | 0 |
| 075891 | Cytoplasm.                               | 1 |
| P48995 | Membrane; Multi-pass membrane protein.   | 0 |
| Q6PIU2 | Membrane {ECO:0000305 PubMed:12149457};  | 0 |
| Q9BXB7 | Golgi apparatus {ECO:0000269 PubMed:125  | 0 |
| P0C5J1 |                                          | 0 |
| Q93052 | Nucleus. Cytoplasm. Cell junction. Cell  | 0 |
| Q2T9K0 | Membrane {ECO:0000305}; Multi-pass mem   | 0 |
| Q92622 | Late endosome {ECO:0000269 PubMed:19270  | 0 |
| P48728 | Mitochondrion {ECO:0000305 PubMed:16051  | 1 |
| P57738 | Membrane {ECO:0000305}; Multi-pass mem   | 0 |
| Q96RP3 | Secreted.                                | 0 |
| Q9Y4B6 | Cytoplasm. Nucleus. Note=Associated wit  | 0 |
|        | Secreted {ECO:0000269 PubMed:12794311,   | 0 |
| Q96CJ1 | Nucleus speckle {ECO:0000269 PubMed:124  | 1 |
| Q86SU0 | Cell membrane {ECO:0000269 PubMed:15381  | 0 |
| Q99102 | Membrane {ECO:0000305}; Single-pass mem  | 0 |
| 094813 | Secreted {ECO:0000269 PubMed:10102268}.  | 0 |
| Q13144 |                                          | 0 |
| P02765 | Secreted.                                | 0 |
| P0DPD6 | Golgi apparatus membrane {ECO:0000250 U  | 0 |
| Q8N398 |                                          | 0 |
| P52824 | Cytoplasm {ECO:0000269 PubMed:15632189}  | 0 |
| Q6UN15 | Nucleus.                                 | 1 |
| Q9H2B4 | Cell membrane {ECO:0000250 UniProtKB:Pe  | 0 |
| Q9NX58 | Nucleus {ECO:0000269 PubMed:25092918}.   | 0 |
| Q9P241 | Cell membrane {ECO:0000269 PubMed:21914  | 0 |
| Q56VL3 | Endosome {ECO:0000305}.                  | 1 |
| Q96EP9 | Cell membrane {ECO:0000269 PubMed:23589  | 0 |
| Q3KNW5 | Membrane {ECO:0000305}; Multi-pass mem   | 0 |
| Q86SK9 | Endoplasmic reticulum membrane {ECO:000  | 0 |
| Q9NZF1 |                                          | 0 |
| Q9UHY7 | Cytoplasm {ECO:0000255 HAMAP-Rule:MF_03  | 0 |
| Q96KC9 | Cytoplasm {ECO:0000250}. Mitochondrion   | 0 |
| P02774 | Secreted {ECO:0000269 PubMed:2423133}.   | 0 |
| Q8TBZ6 | Nucleus {ECO:0000269 PubMed:24204302}.   | 0 |
| Q9P2G9 |                                          | 0 |
| P37840 | Cytoplasm {ECO:0000269 PubMed:19762560,  | 0 |
| Q96I23 | Mitochondrion {ECO:0000305}.             | 0 |
| Q8TEA7 | Cytoplasm {ECO:0000269 PubMed:23977024,  | 0 |
| Q13557 | Cell membrane, sarcolemma {ECO:0000305}  | 0 |
| Q8N5K1 | Endoplasmic reticulum membrane; Single-  | 0 |
| Q01484 | Cytoplasm, cytoskeleton {ECO:0000269 P   | 1 |
| Q96CG3 | Cytoplasm {ECO:0000269 PubMed:22566686,  | 0 |

|        |                                         |   |
|--------|-----------------------------------------|---|
| Q8NB90 | Cytoplasm {ECO:0000250 UniProtKB:Q3UMC} | 0 |
| P12104 | Cytoplasm.                              | 1 |
| P20248 | Nucleus {ECO:0000269 PubMed:1312467, EC | 0 |
| Q9HCE5 | Nucleus {ECO:0000269 PubMed:24316715, I | 1 |
| Q70EK8 | Cell junction, tight junction {ECO:0000 | 0 |
| Q8WTS6 | Nucleus. Chromosome {ECO:0000305}.      | 1 |
| Q96HR8 | Cytoplasm. Nucleus. Note=Shuttles betwe | 0 |
| Q8TCQ1 | Golgi apparatus, trans-Golgi network me | 0 |
| P61247 | Cytoplasm {ECO:0000255 HAMAP-Rule:MF_03 | 0 |
| Q8N4F7 | Membrane {ECO:0000305}; Multi-pass mem  | 0 |
| Q9NRA1 | Cytoplasm, cytosol {ECO:0000269 PubMed: | 0 |
| Q8N4T8 | Mitochondrion matrix {ECO:0000269 PubMe | 1 |
| Q6ZWL3 | Endoplasmic reticulum membrane {ECO:000 | 0 |
| Q96C74 | Cell projection, cilium, flagellum {ECO | 0 |
| 075380 | Mitochondrion inner membrane {ECO:00003 | 1 |
| 060337 | Endoplasmic reticulum membrane {ECO:000 | 0 |
| Q969F2 | Cell membrane {ECO:0000269 PubMed:15064 | 0 |
| Q13634 | Cell membrane; Single-pass type I mem   | 0 |
| P18405 | Microsome membrane; Multi-pass membrane | 0 |
| Q9HD67 | Cytoplasm, cytosol {ECO:0000269 PubMed: | 0 |
| Q9NUU6 | Cytoplasm {ECO:0000269 PubMed:31056421} | 0 |
| Q13309 | Cytoplasm {ECO:0000269 PubMed:22770219} | 0 |
| Q99650 | Membrane {ECO:0000305}; Single-pass ty  | 0 |
| Q6NUS8 | Membrane {ECO:0000305}; Single-pass ty  | 0 |
| Q9NYY3 | Cytoplasm, cytoskeleton, microtubule or | 0 |
| A6NKW6 | Membrane {ECO:0000305}; Single-pass men | 0 |
| P12544 | Isoform alpha: Secreted. Cytoplasmic gr | 0 |
| P27986 |                                         | 0 |
| P10915 | Secreted, extracellular space, extracel | 0 |
| Q6ZUX7 | Membrane {ECO:0000305}; Multi-pass mem  | 0 |
| P81877 | Nucleus {ECO:0000250}.                  | 0 |
| Q93088 | Cytoplasm.                              | 1 |
| Q8N7Z5 | Nucleus {ECO:0000250 UniProtKB:A0A140L} | 0 |
| Q13576 |                                         | 0 |
| P24387 | Secreted.                               | 0 |
| P20936 | Cytoplasm {ECO:0000269 PubMed:8360177}. | 1 |
| Q8N485 |                                         | 0 |
| Q9NXP7 |                                         | 0 |
| 043314 | Cytoplasm, cytosol {ECO:0000269 PubMed: | 0 |
| P19021 | Cytoplasmic vesicle, secretory vesicle  | 0 |
| Q8TAD4 | Golgi apparatus, trans-Golgi network me | 0 |
| P20290 | Cytoplasm {ECO:0000269 PubMed:10982809} | 0 |
| Q9UF56 | Cytoplasm {ECO:0000269 PubMed:24035498} | 0 |
| Q9BWW2 | Membrane {ECO:0000305}; Single-pass men | 0 |
| 095379 | Cytoplasm {ECO:0000269 PubMed:14724590} | 0 |
| Q96JP0 | Cytoplasm {ECO:0000250}.                | 0 |
| Q9Y6G5 | Cytoplasm {ECO:0000269 PubMed:21778237} | 0 |
| 094817 | Cytoplasm {ECO:0000250}. Preautophagosc | 0 |
| Q8TE59 | Secreted, extracellular space, extracel | 0 |
| Q969M3 | Endoplasmic reticulum membrane {ECO:000 | 1 |
| Q9UNA1 | Cell junction, focal adhesion {ECO:0000 | 1 |
| 095715 | Secreted.                               | 0 |
| 014960 | Cytoplasm {ECO:0000269 PubMed:8877413}. | 0 |
| Q6ZT89 | Mitochondrion inner membrane {ECO:00003 | 0 |
| Q7L014 | Nucleus speckle {ECO:0000269 PubMed:122 | 0 |

|        |                                         |   |
|--------|-----------------------------------------|---|
| Q96H15 | Membrane {ECO:0000305}; Single-pass ty  | 0 |
| Q96MT1 | Endoplasmic reticulum membrane {ECO:00  | 0 |
| Q9BXJ5 | Secreted {ECO:0000305}.                 | 0 |
| Q16445 | Cell junction, synapse, postsynaptic ce | 0 |
| P47870 | Cell junction, synapse, postsynaptic ce | 0 |
| Q6PIJ6 | Cytoplasm, cytosol {ECO:0000250 UniProt | 0 |
| P58062 | Secreted {ECO:0000305}.                 | 0 |
| Q8NBM8 | Secreted.                               | 0 |
| P23415 | Cell junction, synapse, postsynaptic ce | 0 |
| Q15025 | Cytoplasm. Nucleus. Note=Shuttles betwe | 0 |
| Q13283 | Cytoplasm, cytosol {ECO:0000269 PubMed: | 0 |
| Q96RE9 | Nucleus {ECO:0000269 PubMed:14746915, F | 0 |
| 015049 | Cytoplasmic vesicle {ECO:0000269 PubMed | 0 |
| Q9NX24 | Nucleus, nucleolus. Nucleus, Cajal body | 1 |
| Q96G75 | Cytoplasm, cytosol {ECO:0000269 PubMed: | 0 |
| Q96IK1 | Cytoplasm, cytoskeleton, microtubule or | 0 |
| Q6PUV4 | Cytoplasm, cytosol. Note=Enriched at sy | 1 |
| Q9NT68 | Cell membrane {ECO:0000250}; Single-pas | 0 |
| Q9Y247 |                                         | 0 |
| Q86YV6 |                                         | 0 |
| Q8IXS0 |                                         | 0 |
| Q9PON9 | Cytoplasmic vesicle {ECO:0000269 PubMed | 0 |
| 095363 | Mitochondrion matrix {ECO:0000250 UniPr | 0 |
| Q9NXC2 | Secreted {ECO:0000305}.                 | 0 |
| Q96NCO | Nucleus {ECO:0000269 PubMed:28781166}.  | 0 |
| 060609 | Cell membrane; Lipid-anchor, GPI-anchor | 0 |
| Q9UH77 | Cytoplasm, cytoskeleton {ECO:0000269 Pu | 0 |
| Q9UHG0 | Cell projection, cilium {ECO:0000269 Pu | 0 |
| Q9Y2C5 | Apical cell membrane {ECO:0000269 PubMe | 0 |
| Q96A08 | Nucleus {ECO:0000250 UniProtKB:P70696}. | 1 |
| Q9UBP8 |                                         | 0 |
| Q9C029 |                                         | 0 |
| Q8WV44 | Cytoplasm {ECO:0000269 PubMed:16022281} | 0 |
| Q9BW72 | Mitochondrion membrane {ECO:0000255 PRC | 0 |
| Q96PV7 | Cytoplasm {ECO:0000269 PubMed:21177767} | 0 |
| 075509 | Cell membrane {ECO:0000269 PubMed:19654 | 0 |
| Q7LOR7 |                                         | 0 |
| P22033 | Mitochondrion matrix.                   | 1 |
| Q8N431 |                                         | 0 |
| Q7L591 | Cytoplasm {ECO:0000250}. Cell membrane  | 0 |
| Q6NYC8 | Isoform 1: Cytoplasm, cytoskeleton {ECO | 1 |
| Q86T65 |                                         | 0 |
| Q5VWP3 | Nucleus {ECO:0000250 UniProtKB:Q5FW52}. | 0 |
| Q5TDP6 |                                         | 0 |
| Q7Z6J4 | Cytoplasm, cytoskeleton {ECO:0000305}.  | 0 |
| Q8IX30 | Secreted {ECO:0000269 PubMed:15234972}. | 0 |
| Q6IWH7 | Isoform 1: Cell membrane {ECO:0000269 F | 0 |
| Q6Q6R5 | Cytoplasm {ECO:0000250}.                | 0 |
| Q5TCY1 | Cytoplasm {ECO:0000269 PubMed:16923168} | 1 |
| 000221 | Cytoplasm {ECO:0000250}.                | 1 |
| Q13641 | Cell membrane {ECO:0000269 PubMed:24582 | 0 |
| Q5VVH5 | Cytoplasm {ECO:0000250}. Nucleus {ECO:( | 0 |
| Q8WWQ0 | Nucleus {ECO:0000250}.                  | 0 |
| Q8N3Z0 | Secreted {ECO:0000305}.                 | 0 |
| Q5TGI0 | Membrane {ECO:0000305}; Single-pass men | 0 |

|        |                                         |   |
|--------|-----------------------------------------|---|
| Q12796 | Nucleus {ECO:0000305}.                  | 0 |
| Q8IYS1 |                                         | 0 |
| Q5T160 | Mitochondrion matrix {ECO:0000250}.     | 0 |
| Q8N228 | Nucleus {ECO:0000305}.                  | 0 |
| Q96NH3 | Cytoplasm {ECO:0000250}. Cell projectio | 0 |
| Q5SYC1 | Golgi apparatus, trans-Golgi network me | 0 |
| Q8TC41 | Membrane {ECO:0000305}; Single-pass men | 0 |
| Q9BXY4 | Secreted {ECO:0000250 UniProtKB:Q2TJ95} | 0 |
| Q8N392 | Cytoplasm {ECO:0000269 PubMed:21865595} | 0 |
| Q9P1F3 |                                         | 0 |
| Q96RJ0 | Cell membrane; Multi-pass membrane prot | 0 |
| Q6NT16 | Membrane {ECO:0000305}; Multi-pass mem  | 0 |
| Q6P444 | Mitochondrion {ECO:0000250}. Note=Assoc | 0 |
| Q8TD20 | Cell membrane {ECO:0000250 UniProtKB:Q8 | 0 |
| Q149N8 |                                         | 0 |
| Q9NVV5 | Cell membrane {ECO:0000269 PubMed:27018 | 0 |
| Q8IVF5 | Cytoplasm {ECO:0000250}. Cell projectio | 0 |
| Q9P2C4 | Membrane {ECO:0000305}; Multi-pass mem  | 0 |
| Q8NA58 | Endoplasmic reticulum membrane {ECO:00  | 0 |
| Q15007 | Nucleus speckle {ECO:0000269 PubMed:24  | 0 |
| Q5VZL5 |                                         | 0 |
| P01282 | Secreted.                               | 0 |
| Q9H993 |                                         | 0 |
| O75751 | Membrane; Multi-pass membrane protein.  | 0 |
| Q8N2E2 | Secreted {ECO:0000305}.                 | 0 |
| Q03113 | Cell membrane {ECO:0000269 PubMed:15240 | 0 |
| Q9BRJ6 |                                         | 0 |
| Q7Z5N4 | Cell membrane {ECO:0000250 UniProtKB:Q8 | 0 |
| P86790 | Lysosome membrane {ECO:0000269 PubMed:1 | 0 |
| Q96N11 |                                         | 0 |
| Q96RJ6 | Nucleus {ECO:0000255 PROSITE-ProRule:PF | 0 |
| P00533 | Cell membrane {ECO:0000269 PubMed:17182 | 0 |
| Q96FF9 | Nucleus {ECO:0000269 PubMed:15837422}.  | 0 |
| P08833 | Secreted.                               | 0 |
| Q8WTU2 | Secreted {ECO:0000305}.                 | 0 |
| P40926 | Mitochondrion matrix {ECO:0000250 UniPr | 1 |
| Q6PJE2 |                                         | 0 |
| O75323 | Cytoplasm {ECO:0000250 UniProtKB:055126 | 1 |
| P40227 | Cytoplasm {ECO:0000269 PubMed:8034610}. | 1 |
| P78330 |                                         | 0 |
| Q86XT4 | Cytoplasm {ECO:0000269 PubMed:22792322, | 0 |
| Q9ULK2 |                                         | 0 |
| Q9H0V1 | Membrane {ECO:0000305}; Multi-pass mem  | 0 |
| Q8WVR3 | Cytoplasm, cytoskeleton, spindle {ECO:( | 0 |
| Q9BXP2 | Cell membrane {ECO:0000269 PubMed:10871 | 0 |
| O75420 |                                         | 0 |
| Q9C037 | Cytoplasm {ECO:0000269 PubMed:17156811} | 0 |
| Q7L2J0 |                                         | 0 |
| Q96SK2 | Membrane {ECO:0000305}; Multi-pass mem  | 0 |
| Q8NEM8 | Cytoplasm, cytosol {ECO:0000250 UniProt | 0 |
| Q96H79 |                                         | 0 |
| P21709 | Cell membrane {ECO:0000269 PubMed:19118 | 0 |
| Q5C9Z4 | Nucleus, nucleolus {ECO:0000269 PubMed: | 0 |
| Q3B7I2 |                                         | 0 |
| Q86XI2 | Nucleus {ECO:0000269 PubMed:14532007}.  | 0 |

|        |                                          |   |
|--------|------------------------------------------|---|
| Q8NOW4 | Cell membrane; Single-pass type I membr  | 0 |
| Q13796 | Apical cell membrane {ECO:0000250}. Cel  | 0 |
| A4D1S5 | Cell membrane {ECO:0000305}; Lipid-anch  | 0 |
| Q9Y383 | Nucleus speckle {ECO:0000250 UniProtKB:  | 0 |
| Q9HBJ8 | Cell membrane {ECO:0000269 PubMed:22628  | 0 |
| Q96B97 | Cytoplasm {ECO:0000269 PubMed:20221403}  | 0 |
| Q9BQJ4 | Membrane {ECO:0000305}; Multi-pass memt  | 0 |
| Q6ZV70 |                                          | 0 |
| Q8TDW5 | Membrane {ECO:0000250}; Peripheral memt  | 0 |
| O14936 | Nucleus {ECO:0000250 UniProtKB:Q62915}.  | 0 |
| O15550 | Nucleus {ECO:0000305}.                   | 1 |
| Q99865 | Nucleus {ECO:0000250 UniProtKB:Q9BPZ2}.  | 0 |
| P26038 | Cell membrane {ECO:0000269 PubMed:11728  | 1 |
| Q5JQC9 | Cell projection, cilium, flagellum {ECO  | 0 |
| Q9BY41 | Nucleus. Cytoplasm. Note=Excluded from   | 0 |
| Q9H7Y0 | Secreted {ECO:0000305}.                  | 0 |
| P51786 | Nucleus {ECO:0000305}.                   | 0 |
| P17025 | Nucleus {ECO:0000305}.                   | 0 |
| Q9NS84 | Golgi apparatus membrane {ECO:0000250};  | 0 |
| Q9NX14 | Mitochondrion inner membrane {ECO:00003  | 1 |
| P51814 | Nucleus {ECO:0000305}.                   | 1 |
| Q5JT25 | Cytoplasm {ECO:0000269 PubMed:23936529}  | 0 |
| Q14202 | Nucleus {ECO:0000250}.                   | 0 |
| P21675 | Nucleus {ECO:0000269 PubMed:2038334, EC  | 1 |
| Q9BXC1 | Cell membrane; Multi-pass membrane prot  | 0 |
| Q15233 | Nucleus. Nucleus, nucleolus. Nucleus sp  | 1 |
| Q99677 | Cell membrane; Multi-pass membrane prot  | 0 |
| Q15125 | Endoplasmic reticulum membrane {ECO:000  | 0 |
| Q6E213 | Endoplasmic reticulum membrane {ECO:000  | 0 |
| O15294 | Nucleus {ECO:0000269 PubMed:26678539}.   | 0 |
| Q9UMY4 | Membrane {ECO:0000305}; Peripheral memt  | 0 |
| P31785 | Cell membrane {ECO:0000269 PubMed:15123  | 0 |
| Q96QF7 | Nucleus {ECO:0000269 PubMed:27718356, F  | 1 |
| Q9Y462 | Nucleus {ECO:0000305 PubMed:20346720}.   | 1 |
| O60879 | Isoform 3: Cytoplasm, cytosol. Early er  | 1 |
| Q9H4D5 | Nucleus. Cytoplasm. Note=Shuttles betwe  | 0 |
| Q0D2K3 | Nucleus {ECO:0000250 UniProtKB:Q2WG80}.  | 0 |
| P60891 |                                          | 0 |
| Q6NSI4 | Chromosome {ECO:0000269 PubMed:28735897} | 0 |
| Q5JV73 |                                          | 0 |
| Q5JSL3 |                                          | 0 |
| Q8N6C5 | Isoform 1: Membrane {ECO:0000305}; Mult  | 0 |
| Q6ZRI8 |                                          | 0 |
| P38159 | Nucleus {ECO:0000269 PubMed:19282290, F  | 1 |
| Q8NEM0 | Cytoplasm, cytoskeleton, microtubule or  | 0 |
| Q9Y4C4 | Cytoplasm {ECO:0000269 PubMed:24286120}  | 0 |
| Q969F0 | Mitochondrion {ECO:0000269 PubMed:26567  | 1 |
| P43358 |                                          | 0 |
| Q15738 | Endoplasmic reticulum membrane {ECO:000  | 1 |
| O15231 | Cytoplasm, cytoskeleton {ECO:0000269 Pu  | 1 |
| P41208 | Cytoplasm, cytoskeleton, microtubule or  | 0 |
| P27635 |                                          | 0 |
| P21281 | Endomembrane system; Peripheral membrar  | 1 |
| Q86WR0 |                                          | 0 |
| Q6NT76 | Nucleus {ECO:0000269 PubMed:16825764, F  | 0 |

|        |                                           |   |
|--------|-------------------------------------------|---|
| Q05901 | Cell junction, synapse, postsynaptic ce   | 0 |
| P01148 | Secreted.                                 | 0 |
| Q9NQY0 | Cytoplasm, cytoskeleton.                  | 0 |
| O60496 |                                           | 0 |
| Q9NYZ2 | Mitochondrion inner membrane {ECO:00002   | 0 |
| Q8WUX9 | Cytoplasm {ECO:0000269 PubMed:16856878}   | 0 |
| Q9H7D0 | Cytoplasm {ECO:0000269 PubMed:19004829}   | 0 |
| P49675 | Mitochondrion.                            | 1 |
| O94903 |                                           | 0 |
| O94905 | Endoplasmic reticulum membrane {ECO:000   | 1 |
| Q9NSN8 | Cytoplasm, cytoskeleton. Nucleus. Note=   | 0 |
| O60284 | Nucleus {ECO:0000269 PubMed:15489893}.    | 0 |
| O76081 | Membrane; Lipid-anchored. Nucleus. Cytopl | 0 |
| O75410 | Cytoplasm {ECO:0000269 PubMed:14767476}   | 0 |
| Q7Z5G4 | Golgi apparatus membrane {ECO:0000269 F   | 0 |
| Q9BRT9 | Cytoplasm {ECO:0000250}. Nucleus {ECO:(   | 0 |
| Q9BZ95 | Nucleus {ECO:0000250}. Chromosome {ECO:   | 0 |
| P06850 | Secreted {ECO:0000250 UniProtKB:P06296}   | 0 |
| Q9BYV6 | Cytoplasm {ECO:0000250}. Nucleus {ECO:(   | 0 |
| Q8IWW8 | Mitochondrion {ECO:0000250}.              | 1 |
| Q9Y2Q9 | Mitochondrion {ECO:0000269 PubMed:25838   | 0 |
| Q53H82 | Mitochondrion matrix {ECO:0000269 PubMe   | 0 |
| Q9GZV8 | Nucleus {ECO:0000269 PubMed:17942894}.    | 0 |
| P18124 |                                           | 0 |
| Q96QS6 |                                           | 0 |
| Q8N8Y2 |                                           | 0 |
| Q9NX95 | Isoform 1: Cytoplasm, cytoskeleton. Cyt   | 0 |
| Q14117 |                                           | 0 |
| Q86UE4 | Endoplasmic reticulum membrane; Single-   | 1 |
| Q9Y561 | Membrane {ECO:0000269 PubMed:12809483};   | 0 |
| O00559 | Golgi apparatus membrane {ECO:0000269 F   | 1 |
| Q6UXX9 | Secreted {ECO:0000250 UniProtKB:Q8BFU0}   | 0 |
| Q969L2 | Cell membrane; Multi-pass membrane prot   | 0 |
| O15372 | Cytoplasm {ECO:0000255 HAMAP-Rule:MF_03   | 0 |
| Q9BRU9 | Nucleus, nucleolus {ECO:0000250}.         | 0 |
| Q9Y6M9 | Mitochondrion inner membrane {ECO:00002   | 0 |
| Q6P1N9 | Nucleus {ECO:0000305}.                    | 0 |
| Q9BYG8 | Cytoplasm, cytosol {ECO:0000269 PubMed:   | 0 |
| Q49AJ0 |                                           | 0 |
| P17097 | Nucleus {ECO:0000305}.                    | 0 |
| Q6XQN6 | Cytoplasm, cytosol {ECO:0000269 PubMed:   | 0 |
| P98155 | Membrane; Single-pass type I membrane p   | 0 |
| Q9UIJ7 | Mitochondrion matrix {ECO:0000255 HAMAF   | 1 |
| O00712 | Nucleus.                                  | 1 |
| O95813 | Secreted {ECO:0000305}.                   | 0 |
| Q99541 | Membrane {ECO:0000305}; Peripheral membr  | 1 |
| P01569 | Secreted.                                 | 0 |
| Q7Z4H7 | Cytoplasm, cytoskeleton {ECO:0000269 Pu   | 0 |
| P42772 | Cytoplasm {ECO:0000269 PubMed:9230210}.   | 0 |
| P05015 | Secreted.                                 | 0 |
| P42771 | Cytoplasm {ECO:0000269 PubMed:17658461}   | 0 |
| Q96LT7 | Nucleus {ECO:0000269 PubMed:21944779, F   | 0 |
| Q8N3Z6 | Nucleus, nucleolus {ECO:0000269 PubMed:   | 0 |
| Q9UK96 | Cytoplasm {ECO:0000269 PubMed:23431138}   | 0 |
| Q99720 | Nucleus inner membrane {ECO:0000269 Pu    | 0 |



|        |                                         |   |
|--------|-----------------------------------------|---|
| Q5RIA9 |                                         | 0 |
| Q5JTW2 | Cytoplasm, cytoskeleton, microtubule or | 0 |
| Q16620 | Cell membrane {ECO:0000269 PubMed:15494 | 0 |
| Q5T6J7 |                                         | 0 |
| Q92529 |                                         | 0 |
| Q13825 | Mitochondrion {ECO:0000250 UniProtKB:Q5 | 1 |
| Q8N6M6 | Nucleus, nucleolus {ECO:0000250 UniProt | 0 |
| Q8TBJ4 | Membrane {ECO:0000305}; Multi-pass mem  | 0 |
| Q96JM2 | Nucleus {ECO:0000269 PubMed:20219459, F | 0 |
| Q9NRY2 | Nucleus {ECO:0000269 PubMed:19605351, F | 0 |
| Q16739 | Golgi apparatus membrane {ECO:0000269 F | 0 |
| Q9Y614 | Cytoplasm, cytoskeleton {ECO:0000250}.  | 0 |
| Q5VWJ9 |                                         | 0 |
| P27105 | Cell membrane {ECO:0000269 PubMed:92431 | 0 |
| P06396 | Isoform 2: Cytoplasm, cytoskeleton.; Is | 0 |
| Q96E11 | Mitochondrion {ECO:0000250}.            | 1 |
| Q5IJ48 | Isoform 1: Apical cell membrane {ECO:00 | 0 |
| P13716 |                                         | 0 |
| 075129 | Membrane {ECO:0000250 UniProtKB:Q80Z10} | 0 |
| Q8NA23 |                                         | 0 |
| Q9NRF9 | Nucleus {ECO:0000305}.                  | 0 |
| 015260 | Endoplasmic reticulum membrane {ECO:00  | 0 |
| Q8N5D6 | Golgi apparatus membrane {ECO:0000305}; | 0 |
| Q15526 | Mitochondrion inner membrane {ECO:00002 | 0 |
| Q15527 |                                         | 0 |
| 075683 | Nucleus, nucleoplasm {ECO:0000250}. Nuc | 0 |
| Q15528 | Nucleus {ECO:0000305}.                  | 0 |
| Q9GZR2 | Nucleus, nucleolus {ECO:0000269 PubMed: | 0 |
| Q9Y5Q8 | Nucleus.                                | 1 |
| Q9NWX5 | Cytoplasm {ECO:0000250}.                | 0 |
| Q9H7Z7 | Golgi apparatus membrane {ECO:0000269 F | 0 |
| Q9BV86 | Nucleus {ECO:0000269 PubMed:20668449, F | 0 |
| Q9ULV3 | Nucleus.                                | 0 |
| Q6KCM7 | Mitochondrion inner membrane {ECO:00002 | 0 |
| Q9NR46 | Cytoplasm {ECO:0000269 PubMed:11161816} | 0 |
| Q7L4E1 | Mitochondrion outer membrane {ECO:00002 | 0 |
| 014684 | Membrane {ECO:0000269 PubMed:18682561}; | 0 |
| P80188 | Secreted {ECO:0000269 PubMed:12453413,  | 0 |
| Q6UWE0 | Cytoplasm {ECO:0000269 PubMed:15256501, | 1 |
| Q8NDA2 | Secreted, extracellular space, extracel | 0 |
| Q5VW38 | Cell membrane {ECO:0000250 UniProtKB:D3 | 0 |
| Q9BUH6 | Nucleus {ECO:0000269 PubMed:25574025, F | 0 |
| Q9NRR6 | Cytoplasm, cytoskeleton, cilium axoneme | 0 |
| Q8WX39 | Secreted.                               | 0 |
| 015027 | Endoplasmic reticulum membrane {ECO:00  | 1 |
| Q9BTV6 |                                         | 0 |
| P46531 | Cell membrane {ECO:0000250 UniProtKB:Q0 | 0 |
| Q00975 | Membrane; Multi-pass membrane protein.  | 0 |
| Q96BF6 | Nucleus {ECO:0000269 PubMed:22926524}.  | 0 |
| Q86WR7 |                                         | 0 |
| Q92738 | Golgi apparatus. Cytoplasmic vesicle.   | 0 |
| Q9UBI1 | Cytoplasm {ECO:0000269 PubMed:21778237} | 0 |
| Q9Y3D2 | Mitochondrion {ECO:0000269 PubMed:18424 | 1 |
| Q5T2R2 | Mitochondrion {ECO:0000305}.            | 0 |
| Q5VUB5 | Cell membrane {ECO:0000269 PubMed:30312 | 0 |

|        |                                         |   |
|--------|-----------------------------------------|---|
| Q9H8M7 | Nucleus {ECO:0000269 PubMed:12054670}.  | 0 |
| Q5W0B7 | Membrane {ECO:0000305}; Multi-pass mem  | 1 |
| Q15404 |                                         | 0 |
| P61647 | Golgi apparatus membrane {ECO:0000305}; | 0 |
| Q8TEW0 | Cytoplasm {ECO:0000250}. Endomembrane s | 0 |
| P37275 | Nucleus {ECO:0000269 PubMed:20418909, F | 1 |
| Q8NE31 |                                         | 0 |
| Q96F24 | Nucleus {ECO:0000250 UniProtKB:Q9QYK3}. | 0 |
| Q9NQ94 | Nucleus {ECO:0000269 PubMed:12881431}.  | 1 |
| Q96JP9 | Cell membrane {ECO:0000250}; Single-pas | 0 |
| O14802 | Nucleus.                                | 0 |
| Q5GLZ8 | Cytoplasm, cytosol {ECO:0000269 PubMed: | 0 |
| Q9H2I8 |                                         | 0 |
| Q13555 | Sarcoplasmic reticulum membrane {ECO:00 | 0 |
| Q15847 | Nucleus {ECO:0000269 PubMed:23239344}.  | 0 |
| P00367 | Mitochondrion matrix.                   | 0 |
| Q15327 | Nucleus {ECO:0000269 PubMed:15805281, F | 0 |
| P34969 | Cell membrane; Multi-pass membrane prot | 0 |
| P78346 | Nucleus, nucleolus {ECO:0000305}.       | 0 |
| Q70Z53 | Nucleus {ECO:0000269 PubMed:15203205}.  | 0 |
| Q9UEY8 | Cytoplasm, cytoskeleton. Cell membrane; | 0 |
| Q14520 | Secreted {ECO:0000269 PubMed:8827452}.  | 0 |
| Q5SQQ9 | Nucleus {ECO:0000255 PROSITE-ProRule:PF | 0 |
| Q9NXW2 | Endoplasmic reticulum membrane {ECO:000 | 0 |
| Q13542 |                                         | 0 |
| Q9GZQ6 | Cell membrane; Multi-pass membrane prot | 0 |
| Q9NQB0 | Nucleus, PML body {ECO:0000269 PubMed:1 | 1 |
| P46013 | Chromosome {ECO:0000269 PubMed:15896774 | 1 |
| P05093 | Membrane {ECO:0000305}.                 | 0 |
| Q16352 |                                         | 0 |
| A2VDF0 |                                         | 0 |
| Q9C0I9 |                                         | 0 |
| Q9BT17 | Mitochondrion inner membrane {ECO:00002 | 0 |
| P78417 | Cytoplasm, cytosol {ECO:0000269 PubMed: | 1 |
| Q15542 | Nucleus.                                | 1 |
| Q5VV67 | Nucleus {ECO:0000269 PubMed:11340167}.  | 0 |
| Q14690 | Nucleus, nucleolus {ECO:0000269 PubMed: | 0 |
| O43184 | Isoform 1: Cell membrane; Single-pass t | 0 |
| O43665 | Isoform 1: Cytoplasm, cytosol {ECO:0000 | 1 |
| Q9BSF8 | Nucleus {ECO:0000269 PubMed:15556295}.  | 0 |
| P35318 | Secreted.                               | 0 |
| O43903 | Cytoplasm, cytoskeleton, stress fiber   | 0 |
| Q1EHB4 | Apical cell membrane {ECO:0000269 PubMe | 1 |
| Q9NUP9 | Cell membrane {ECO:0000269 PubMed:12967 | 0 |
| Q9HCJ2 | Cell junction, synapse, postsynaptic ce | 0 |
| Q96LU5 | Mitochondrion inner membrane {ECO:00002 | 0 |
| P35542 | Secreted.                               | 0 |
| Q9UHJ9 | Golgi apparatus membrane {ECO:0000250}; | 0 |
| P11684 | Secreted.                               | 0 |
| Q8NBV8 | Cell membrane {ECO:0000250}; Single-pas | 0 |
| Q9UL59 | Nucleus {ECO:0000305}.                  | 0 |
| Q9UL58 | Nucleus {ECO:0000305}.                  | 0 |
| Q53GQ0 | Endoplasmic reticulum membrane {ECO:000 | 0 |
| Q96GX9 | Cytoplasm {ECO:0000255 HAMAP-Rule:MF_03 | 0 |
| Q13574 | Cytoplasm {ECO:0000269 PubMed:11257115} | 0 |

|        |                                         |   |
|--------|-----------------------------------------|---|
| Q7L2H7 | Cytoplasm {ECO:0000255 HAMAP-Rule:MF_03 | 0 |
| Q9C0C2 | Nucleus. Cytoplasm, cytoskeleton. Chron | 0 |
| Q6IB77 | Mitochondrion {ECO:0000269 PubMed:22475 | 1 |
| P05155 | Secreted.                               | 0 |
| O95221 | Cell membrane; Multi-pass membrane prot | 0 |
| Q08945 | Nucleus {ECO:0000269 PubMed:10421373, F | 0 |
| 075387 | Membrane {ECO:0000305}; Multi-pass mem  | 0 |
| Q12913 | Cell membrane; Single-pass type I mem   | 0 |
| Q9H6J7 |                                         | 0 |
| Q8N6H7 | Cytoplasm {ECO:0000269 PubMed:17760859} | 1 |
| Q92879 | Nucleus {ECO:0000269 PubMed:8948631}. ( | 0 |
| Q53FT3 | Cytoplasm {ECO:0000250 UniProtKB:Q9DD02 | 0 |
| 094919 | Secreted {ECO:0000305}.                 | 0 |
| Q8N4S0 |                                         | 0 |
| Q6PF15 |                                         | 0 |
| Q6N022 | Cell membrane {ECO:0000269 PubMed:26188 | 0 |
| P50454 | Endoplasmic reticulum lumen.            | 1 |
| 015484 |                                         | 0 |
| Q96HW7 | Nucleus {ECO:0000269 PubMed:23904267}.  | 0 |
| Q13153 | Cytoplasm {ECO:0000269 PubMed:23260667, | 0 |
| P23396 | Cytoplasm {ECO:0000269 PubMed:16314389, | 0 |
| Q9C0D7 |                                         | 0 |
| Q9H892 |                                         | 0 |
| P13591 | Isoform 1: Cell membrane; Single-pass t | 0 |
| P14416 | Cell membrane {ECO:0000269 PubMed:21645 | 0 |
| Q96A22 |                                         | 0 |
| O95264 | Cell membrane {ECO:0000269 PubMed:21138 | 0 |
| Q13315 | Nucleus {ECO:0000269 PubMed:9050866, EC | 0 |
| Q9NRN7 | Cytoplasm {ECO:0000269 PubMed:12815048} | 0 |
| Q8IW92 | Secreted {ECO:0000305}.                 | 0 |
| Q5VYV7 |                                         | 0 |
| Q6IAA8 | Late endosome membrane; Lipid-anchor; ( | 0 |
| Q7Z4N8 | Endoplasmic reticulum lumen {ECO:000030 | 0 |
| Q16099 | Cell membrane; Multi-pass membrane prot | 0 |
| Q9Y4L1 | Endoplasmic reticulum lumen.            | 0 |
| Q9BX51 |                                         | 0 |
| Q9BZ11 | Membrane; Single-pass type I membrane p | 0 |
| Q8TCC7 | Basolateral cell membrane {ECO:0000305} | 0 |
| Q9H8E8 | Nucleus. Cytoplasm. Note=Mainly nuclear | 0 |
| Q3LXA3 |                                         | 0 |
| O94776 | Nucleus {ECO:0000255 PROSITE-ProRule:PF | 1 |
| Q9NP10 | Vacuole membrane {ECO:0000269 PubMed:22 | 0 |
| O60427 | Isoform 1: Endoplasmic reticulum membra | 0 |
| Q03395 | Membrane; Multi-pass membrane protein.  | 0 |
| Q9NQS7 | Nucleus {ECO:0000269 PubMed:11453556}.  | 0 |
| Q86WS3 | Secreted {ECO:0000305}.                 | 0 |
| Q96HJ5 | Endomembrane system {ECO:0000250}; Mult | 1 |
| 075038 | Cytoplasm. Cell membrane. Note=Localize | 0 |
| Q8N684 | Nucleus {ECO:0000269 PubMed:19864460, F | 0 |
| Q01362 | Membrane; Multi-pass membrane protein.  | 0 |
| O94766 | Golgi apparatus membrane {ECO:0000269 F | 0 |
| O14681 | Nucleus membrane {ECO:0000269 PubMed:21 | 0 |
| Q0P6D6 |                                         | 0 |
| Q99689 | Cytoplasm, cytoskeleton, microtubule or | 0 |
| Q96AP7 | Cell junction, adherens junction {ECO:( | 0 |

|        |                                         |   |
|--------|-----------------------------------------|---|
| Q8IZU9 | Cell membrane {ECO:0000269 PubMed:19012 | 0 |
| O60487 | Membrane {ECO:0000305}; Single-pass ty  | 0 |
| Q8NBJ9 | Lysosome membrane {ECO:0000269 PubMed:1 | 0 |
| Q86YD3 | Isoform 1: Cell membrane {ECO:0000305}; | 0 |
| Q01995 | Cytoplasm {ECO:0000305}.                | 1 |
| Q9BR39 | Junctophilin-2: Cell membrane {ECO:0000 | 0 |
| Q9H1R2 | Cytoplasm {ECO:0000305 PubMed:15138252} | 0 |
| Q9BQM9 |                                         | 0 |
| Q5JYT7 |                                         | 0 |
| Q9BR26 | Membrane {ECO:0000305}; Multi-pass mem  | 0 |
| Q9H410 | Nucleus {ECO:0000269 PubMed:15502821, F | 1 |
| O94964 | C-terminal 80 kDa form: Secreted {ECO:( | 0 |
| Q96M20 | Cytoplasm, cytosol {ECO:0000250 UniProt | 0 |
| Q6UDR6 | Secreted {ECO:0000305}.                 | 0 |
| Q9UJ99 | Cell membrane {ECO:0000250}; Single-pas | 0 |
| Q9BX40 |                                         | 0 |
| Q86TN4 |                                         | 0 |
| Q9BRQ3 |                                         | 0 |
| Q01970 | Membrane; Peripheral membrane protein.  | 0 |
| Q13405 | Mitochondrion {ECO:0000269 PubMed:25278 | 0 |
| O14613 | Endomembrane system {ECO:0000269 PubMec | 0 |
| P35544 |                                         | 0 |
| O76062 | Microsome membrane {ECO:0000250 UniProt | 1 |
| Q9UID3 | Golgi apparatus, trans-Golgi network {F | 0 |
| P60510 | Cytoplasm. Nucleus. Cytoplasm, cytoskel | 1 |
| P04075 | Cytoplasm, myofibril, sarcomere, I band | 1 |
| Q9BW71 | Nucleus {ECO:0000269 PubMed:17391060}.  | 0 |
| Q9UL54 | Cytoplasmic vesicle membrane {ECO:00003 | 0 |
| Q86XT9 | Cell membrane {ECO:0000269 PubMed:20353 | 0 |
| P52926 | Nucleus.                                | 0 |
| P08254 | Secreted, extracellular space, extracel | 0 |
| O94779 | Cell membrane {ECO:0000250}; Lipid-anch | 0 |
| Q8IYA7 | Nucleus {ECO:0000305}.                  | 0 |
| Q5T2T1 | Membrane; Peripheral membrane protein.  | 0 |
| P05556 | Cell membrane {ECO:0000303 PubMed:10455 | 0 |
| P59646 | Membrane {ECO:0000305}; Single-pass ty  | 0 |
| Q8NGG5 | Cell membrane; Multi-pass membrane prot | 0 |
| Q16619 | Secreted.                               | 0 |
| Q9P013 | Nucleus {ECO:0000269 PubMed:20176811, F | 1 |
| Q14865 | Nucleus {ECO:0000255 PROSITE-ProRule:PF | 0 |
| Q9NR64 | Cytoplasm, cytoskeleton.                | 0 |
| P55286 | Cell membrane; Single-pass type I membr | 0 |
| Q6PH85 |                                         | 0 |
| Q6UWJ1 | Membrane {ECO:0000305}; Multi-pass mem  | 0 |
| A2RU14 | Membrane {ECO:0000305}; Multi-pass mem  | 0 |
| P58753 | Cytoplasm {ECO:0000269 PubMed:19948740} | 0 |
| Q8WVE0 | Cytoplasm {ECO:0000255 HAMAP-Rule:MF_03 | 0 |
| Q9NRM7 | Cytoplasm, cytoskeleton, microtubule or | 0 |
| O00422 | Nucleus {ECO:0000269 PubMed:16314458}.  | 0 |
| Q9HAR2 | Cell membrane {ECO:0000269 PubMed:26233 | 0 |
| Q86T90 |                                         | 0 |
| Q86V42 |                                         | 0 |
| Q96PC5 | Endoplasmic reticulum membrane {ECO:000 | 0 |
| P50135 | Cytoplasm {ECO:0000269 PubMed:26206890} | 0 |
| Q8NI32 | Cell membrane {ECO:0000305}; Lipid-anch | 0 |

|        |                                           |   |
|--------|-------------------------------------------|---|
| Q53EL6 | Nucleus {ECO:0000250 UniProtKB:Q61823}.   | 1 |
| P51674 | Cell membrane {ECO:0000250}; Multi-pass   | 0 |
| Q8IZU2 |                                           | 0 |
| Q8NEY3 | Nucleus {ECO:0000269 PubMed:15158438}.    | 0 |
| Q68D86 |                                           | 0 |
| Q15762 | Cell membrane {ECO:0000305}; Single-pass  | 0 |
| Q96KN2 | Secreted.                                 | 0 |
| Q8NA03 |                                           | 0 |
| Q15700 | Cell membrane {ECO:0000250 UniProtKB:Q6   | 0 |
| Q9NS28 | Cytoplasm {ECO:0000250}.                  | 0 |
| O95084 | Secreted {ECO:0000305}.                   | 0 |
| Q9C0I1 | Cytoplasm {ECO:0000269 PubMed:12847286}   | 1 |
| Q8IXP5 |                                           | 0 |
| P48643 | Cytoplasm {ECO:0000269 PubMed:20080638}   | 1 |
| Q14185 | Cytoplasm {ECO:0000305}. Membrane {ECO:   | 0 |
| P10515 | Mitochondrion matrix.                     | 1 |
| Q6ZUT1 |                                           | 0 |
| Q9Y5J9 | Mitochondrion inner membrane {ECO:00002   | 0 |
| Q14116 | Secreted {ECO:0000269 PubMed:23955712}.   | 0 |
| Q9BXU0 |                                           | 0 |
| Q03393 |                                           | 0 |
| P48426 | Cell membrane {ECO:0000250}. Nucleus {E   | 0 |
| Q96LR7 |                                           | 0 |
| Q5SZK8 | Cell membrane {ECO:0000305}; Single-pass  | 0 |
| Q12778 | Cytoplasm {ECO:0000250 UniProtKB:Q9R1E0}  | 0 |
| Q9NZV1 | Processed cysteine-rich motor neuron 1    | 0 |
| O94855 | Cytoplasmic vesicle, COPII-coated vesicle | 0 |
| Q9NP78 | Lysosome membrane {ECO:0000269 PubMed:1   | 0 |
| Q969X0 | Cytoplasm, cytosol {ECO:0000269 PubMed:   | 0 |
| Q8IY37 |                                           | 0 |
| POCG48 | Ubiquitin: Cytoplasm {ECO:0000250}. Nuc   | 1 |
| Q14643 | Endoplasmic reticulum membrane {ECO:000   | 0 |
| Q2L4Q9 | Secreted {ECO:0000269 PubMed:16566820}.   | 0 |
| Q9UK39 | Cytoplasm {ECO:0000250 UniProtKB:035710}  | 0 |
| Q8TC29 | Cell projection, cilium, flagellum. Not   | 0 |
| Q5T848 | Cell membrane; Multi-pass membrane prot   | 0 |
| Q7Z3S7 | Membrane {ECO:0000305}; Single-pass type  | 0 |
| Q8IZD4 | Cytoplasm {ECO:0000269 PubMed:15067023}   | 0 |
| Q13936 | Cell membrane {ECO:0000269 PubMed:11741   | 0 |
| P10828 | Nucleus.                                  | 0 |
| Q96IV0 | Cytoplasm {ECO:0000269 PubMed:15358861}   | 0 |
| Q9NWU1 | Mitochondrion {ECO:0000269 PubMed:15668   | 1 |
| Q8IX04 |                                           | 0 |
| Q8N2M4 | Membrane {ECO:0000305}; Multi-pass mem    | 0 |
| Q8N5I9 |                                           | 0 |
| Q8WUH6 | Membrane {ECO:0000305}; Multi-pass mem    | 0 |
| Q7Z3V4 |                                           | 0 |
| Q12955 | Cytoplasm, cytoskeleton {ECO:0000269 P    | 0 |
| Q8NFU5 | Nucleus {ECO:0000269 PubMed:12027805}.    | 0 |
| Q6WBX8 |                                           | 0 |
| Q8NHP8 | Lysosome lumen {ECO:0000269 PubMed:1710   | 0 |
| Q00266 |                                           | 0 |
| Q96QE2 | Cell membrane {ECO:0000269 PubMed:11500   | 0 |
| Q12792 | Cytoplasm. Cytoplasm, cytoskeleton {ECO   | 0 |
| Q9Y2E4 |                                           | 0 |

|        |                                         |   |
|--------|-----------------------------------------|---|
| P06730 | Cytoplasm, P-body {ECO:0000269 PubMed:2 | 1 |
| Q96QZ7 | Cell junction, tight junction {ECO:000  | 0 |
| Q5JUR7 |                                         | 0 |
| Q9Y6M4 | Cytoplasm.                              | 0 |
| Q8NEF9 | Cytoplasm, perinuclear region {ECO:000  | 0 |
| Q13023 | Sarcoplasmic reticulum. Nucleus membrar | 0 |
| Q8IXF0 | Nucleus {ECO:0000255 PROSITE-ProRule:PF | 1 |
| Q8N128 |                                         | 0 |
| Q9NS73 | Nucleus. Cytoplasm. Note=Shows a cytopl | 1 |
| Q8TD10 |                                         | 0 |
| Q96B42 | Cytoplasm {ECO:0000269 PubMed:18559506, | 0 |
| Q9BQ13 |                                         | 0 |
| Q92748 | Nucleus {ECO:0000269 PubMed:18299245}.  | 0 |
| 095298 | Mitochondrion inner membrane {ECO:0000  | 0 |
| Q16798 | Mitochondrion matrix.                   | 0 |
| P58397 | Secreted, extracellular space, extracel | 0 |
| Q8TB37 | Mitochondrion {ECO:0000269 PubMed:1975  | 0 |
| Q8TDX7 | Nucleus. Cytoplasm. Cytoplasm, cytoskel | 0 |
| Q96LB4 |                                         | 0 |
| P16591 | Cytoplasm. Cytoplasm, cytoskeleton. Cel | 0 |
| Q9H9C1 | Cytoplasm {ECO:0000250}. Cytoplasmic ve | 0 |
| Q9ULJ7 | Endosome {ECO:0000305}.                 | 0 |
| 075794 | Cytoplasm {ECO:0000250}.                | 0 |
| Q96NL6 | Cytoplasm, cytoskeleton, microtubule or | 0 |
| Q8N1A6 |                                         | 0 |
| Q9P2Q2 | Cytoplasm, cytoskeleton {ECO:0000250}.  | 0 |
| Q9HOC2 | Mitochondrion inner membrane; Multi-pas | 0 |
| Q16827 | Membrane; Single-pass type I membrane p | 0 |
| Q12929 | Cytoplasm, cell cortex {ECO:0000250}. ( | 0 |
| Q9UKU7 | Mitochondrion {ECO:0000269 PubMed:1101  | 1 |
| Q9P016 | Nucleus {ECO:0000250}.                  | 1 |
| Q4G0F5 | Cytoplasm {ECO:0000250 UniProtKB:Q8COE  | 0 |
| Q96AJ9 | Cytoplasmic vesicle {ECO:0000269 PubMec | 1 |
| P09417 |                                         | 0 |
| Q5W0V3 |                                         | 0 |
| Q32M45 | Cell membrane {ECO:0000269 PubMed:2294  | 0 |
| Q8N6V9 |                                         | 0 |
| Q9H974 | Cytoplasm {ECO:0000255 HAMAP-Rule:MF_0  | 0 |
| Q8IVH4 | Mitochondrion {ECO:0000305}.            | 0 |
| Q17R98 | Nucleus {ECO:0000250}.                  | 0 |
| P25101 | Cell membrane; Multi-pass membrane prot | 0 |
| P08235 | Cytoplasm. Nucleus. Endoplasmic reticul | 0 |
| P52895 | Cytoplasm {ECO:0000305}.                | 1 |
| 014531 | Cytoplasm {ECO:0000250}.                | 0 |
| 095231 | Nucleus {ECO:0000305}.                  | 0 |
| P78325 | Membrane; Single-pass type I membrane p | 0 |
| P19823 | Secreted.                               | 0 |
| Q07326 | Endoplasmic reticulum membrane {ECO:00  | 0 |
| Q7Z5J8 | Membrane {ECO:0000305}; Single-pass men | 0 |
| P49441 |                                         | 0 |
| Q6ZSS7 | Membrane {ECO:0000305}; Multi-pass mem  | 0 |
| P50876 | Cell membrane {ECO:0000269 PubMed:2497  | 0 |
| 043150 | Cytoplasm. Golgi apparatus, Golgi stack | 0 |
| P78536 | Membrane; Single-pass type I membrane p | 0 |
| P48048 | Cell membrane {ECO:0000269 PubMed:1268  | 1 |

|        |                                         |   |
|--------|-----------------------------------------|---|
| Q96B21 | Membrane {ECO:0000305}; Multi-pass mem  | 0 |
| Q6AWC2 |                                         | 0 |
| P33121 | Mitochondrion outer membrane {ECO:00002 | 1 |
| P12235 | Mitochondrion inner membrane; Multi-pas | 0 |
| Q8IY45 |                                         | 0 |
| Q96G01 | Golgi apparatus.                        | 0 |
| Q9H4B6 | Nucleus {ECO:0000269 PubMed:19212654}.  | 0 |
| Q5T0U0 |                                         | 0 |
| Q8N6R1 | Membrane; Single-pass type IV membrane  | 0 |
| A2RRP1 | Cytoplasm {ECO:0000269 PubMed:20577004} | 0 |
| Q9H6B1 | Nucleus {ECO:0000305}.                  | 0 |
| P48775 |                                         | 0 |
| Q8N442 | Mitochondrion inner membrane {ECO:00002 | 0 |
| A4IF30 | Membrane {ECO:0000305}; Multi-pass mem  | 0 |
| Q9NZJ4 | Cytoplasm {ECO:0000269 PubMed:19208651} | 0 |
| POC221 |                                         | 0 |
| Q9H361 | Cytoplasm {ECO:0000250}.                | 0 |
| Q9NRJ3 | Secreted.                               | 0 |
| Q8N3A8 |                                         | 0 |
| P56159 | Cell membrane {ECO:0000250 UniProtKB:Q6 | 0 |
| Q03001 | Cytoplasm, cytoskeleton {ECO:0000269 Pt | 0 |
| Q5SZJ8 | Nucleus {ECO:0000250 UniProtKB:Q6PFX2}. | 0 |
| 095817 | Nucleus {ECO:0000269 PubMed:26159920}.  | 1 |
| Q14C87 | Membrane {ECO:0000305}; Single-pass ty  | 0 |
| PODPB3 | Cytoplasm {ECO:0000269 PubMed:10669747} | 0 |
| Q8WWG9 | Membrane {ECO:0000305}; Single-pass men | 0 |
| Q96PC3 | Golgi apparatus. Cytoplasmic vesicle me | 0 |
| B7ZAP0 |                                         | 0 |
| Q6NZ67 | Cytoplasm, cytoskeleton, microtubule or | 0 |
| Q6PEY2 | Cytoplasm, cytoskeleton {ECO:0000250}.  | 0 |
| POCG36 | Secreted {ECO:0000305}.                 | 0 |
| A1KXE4 | Cytoplasm, perinuclear region {ECO:0000 | 0 |
| Q15678 | Cytoplasm. Cytoplasm, cytoskeleton {ECO | 0 |
| Q09328 | Golgi apparatus membrane {ECO:0000250 U | 0 |
| Q8TC26 | Cytoplasmic vesicle, secretory vesicle, | 0 |
| Q8N954 | Chromosome, centromere, kinetochore {EC | 0 |
| Q9UJY1 | Cytoplasm {ECO:0000269 PubMed:19464326, | 0 |
| Q8WXD5 | Nucleus, nucleoplasm {ECO:0000269 PubMe | 0 |
| Q8NBL3 | Endoplasmic reticulum membrane {ECO:000 | 0 |
| Q01851 | Nucleus {ECO:0000269 PubMed:12934100}.  | 0 |
| Q5W0B1 |                                         | 0 |
| Q9NS75 | Cell membrane; Multi-pass membrane prot | 0 |
| O43424 | Cell membrane {ECO:0000250}; Multi-pass | 0 |
| Q969Q4 |                                         | 0 |
| Q99578 | Nucleus {ECO:0000269 PubMed:12934100, E | 0 |
| Q9Y6X0 | Nucleus {ECO:0000269 PubMed:11231286}.  | 0 |
| Q8N8R7 | Cytoplasm {ECO:0000269 PubMed:21458045} | 0 |
| Q9HCE0 | Cytoplasm, perinuclear region {ECO:0000 | 0 |
| Q9H939 | Cytoplasm {ECO:0000250}. Membrane {ECO: | 0 |
| P25705 | Mitochondrion {ECO:0000269 PubMed:30146 | 0 |
| Q96CS2 | Cytoplasm {ECO:0000305}. Cytoplasm, cyt | 1 |
| Q96B23 |                                         | 0 |
| Q9HBM1 | Nucleus. Chromosome, centromere, kinet  | 0 |
| Q15118 | Mitochondrion matrix {ECO:0000269 PubMe | 0 |
| P01270 | Secreted.                               | 0 |

|        |                                          |   |
|--------|------------------------------------------|---|
| 043493 | Cell membrane; Single-pass type I membr  | 0 |
| Q7Z4S9 |                                          | 0 |
| Q9HB14 | Membrane {ECO:0000305}; Multi-pass mem   | 0 |
| Q9HOY0 | Cytoplasm {ECO:0000305}.                 | 0 |
| Q8NA72 | Cytoplasm, cytoskeleton, microtubule or  | 0 |
| Q08629 | Secreted, extracellular space, extracel  | 0 |
| Q6UXP7 |                                          | 0 |
| Q96BN2 | Nucleus {ECO:0000269 PubMed:11564863}.   | 0 |
| P33402 | Cytoplasm.                               | 0 |
| Q2TBE0 |                                          | 0 |
| Q8N9B5 | Nucleus {ECO:0000250}. Cytoplasm, cytos  | 0 |
| Q86YM7 | Cytoplasm {ECO:0000250}. Cell junction,  | 0 |
| Q13426 | Nucleus {ECO:0000269 PubMed:16478998, E  | 1 |
| Q8N9W6 | Cytoplasm {ECO:0000269 PubMed:11390979,  | 1 |
| Q8IVP9 | Nucleus {ECO:0000305}.                   | 0 |
| Q6PK81 | Nucleus {ECO:0000305}.                   | 0 |
| Q68DI1 | Nucleus {ECO:0000305}.                   | 0 |
| Q9Y2P7 | Nucleus {ECO:0000269 PubMed:18060868}.   | 0 |
| Q9H5I1 | Nucleus {ECO:0000250}. Chromosome, cent  | 0 |
| Q9NV23 | Cytoplasm, cytosol {ECO:0000250 UniProt  | 0 |
| P78345 | Nucleus, nucleolus {ECO:0000269 PubMed:  | 0 |
| 060551 | Cytoplasm {ECO:0000269 PubMed:9506952}.  | 0 |
| Q8NBB4 | Nucleus {ECO:0000255 PROSITE-ProRule:PF  | 0 |
| Q96EG3 | Nucleus {ECO:0000305}.                   | 0 |
| 075317 |                                          | 0 |
| Q8IVM0 | Cytoplasm. Note=Associated with microtu  | 0 |
| Q16566 | Cytoplasm. Nucleus. Note=Localized in h  | 0 |
| P47974 | Nucleus {ECO:0000250 UniProtKB:P23949}.  | 0 |
| Q58A45 | Cytoplasm, P-body {ECO:0000255 HAMAP-Ru  | 0 |
| P08237 | Cytoplasm {ECO:0000255 HAMAP-Rule:MF_03  | 0 |
| Q6WRIO | Secreted {ECO:0000269 PubMed:27137492}.  | 0 |
| Q9C093 | Cytoplasm {ECO:0000250 UniProtKB:Q8C9J3} | 0 |
| Q14515 | Secreted, extracellular space, extracel  | 0 |
| Q9NZW4 | Secreted, extracellular space, extracel  | 0 |
| Q13316 | Nucleus {ECO:0000269 PubMed:12615915}.   | 0 |
| Q9NQ76 | Secreted, extracellular space, extracel  | 0 |
| Q9NR56 | Nucleus {ECO:0000269 PubMed:10970838, E  | 0 |
| Q8WWF8 | Cytoplasm {ECO:0000305}.                 | 0 |
| Q4G0N4 | Mitochondrion {ECO:0000269 PubMed:23212  | 1 |
| P17302 | Cell membrane {ECO:0000269 PubMed:22411  | 1 |
| P22674 | Cytoplasm {ECO:0000269 PubMed:24747639}  | 0 |
| Q9NQI0 | Cytoplasm {ECO:0000250 UniProtKB:Q61496} | 1 |
| Q6NXT4 | Golgi apparatus, trans-Golgi network me  | 0 |
| Q9BRX2 | Nucleus {ECO:0000305}. Cytoplasm {ECO:(  | 0 |
| Q9Y6B6 | Endoplasmic reticulum membrane {ECO:000  | 1 |
| Q86V85 | Membrane {ECO:0000305}; Multi-pass mem   | 0 |
| Q8N7M0 |                                          | 0 |
| Q5VYY1 |                                          | 0 |
| Q13325 | Cell projection, ruffle membrane {ECO:(  | 0 |
| 014979 | Nucleus {ECO:0000269 PubMed:11705999, E  | 0 |
| Q03014 | Nucleus {ECO:0000250 UniProtKB:P43120}.  | 0 |
| P46939 | Cell junction, synapse, postsynaptic ce  | 1 |
| Q13255 | Cell membrane {ECO:0000269 PubMed:24603  | 0 |
| Q15262 | Cell junction, adherens junction. Cell   | 0 |
| 095749 | Cytoplasm.                               | 1 |



|        |                                          |   |
|--------|------------------------------------------|---|
| Q9COA0 | Cell junction, synapse, presynaptic cel  | 0 |
| Q96E17 | Cell membrane {ECO:0000305}; Lipid-anch  | 0 |
| Q8N4S9 | Cell membrane {ECO:0000269 PubMed:28661  | 0 |
| 075943 | Nucleus {ECO:0000269 PubMed:10232579, F  | 0 |
| Q13503 | Nucleus {ECO:0000305}.                   | 0 |
| 000469 | Rough endoplasmic reticulum membrane; F  | 0 |
| Q8IZ57 | Membrane {ECO:0000305}; Multi-pass mem   | 0 |
| Q96N16 | Cytoplasm, cytoskeleton. Membrane; Peri  | 0 |
| Q15915 | Nucleus. Cytoplasm {ECO:0000250}. Note=  | 0 |
| Q8IWK6 | Membrane {ECO:0000250 UniProtKB:S4X0Q8}  | 0 |
| P15086 | Secreted {ECO:0000250 UniProtKB:P00732}  | 0 |
| Q8N9Q2 |                                          | 0 |
| Q8N0V4 | Secreted {ECO:0000305}.                  | 0 |
| Q6UX04 | Nucleus {ECO:0000305 PubMed:29360106}.   | 0 |
| P09132 | Cytoplasm.                               | 0 |
| Q9H3R5 | Nucleus. Chromosome, centromere, kineto  | 0 |
| Q9Y232 | Isoform 2: Nucleus {ECO:0000269 PubMed:  | 1 |
| Q9Y2V2 | Cytoplasm {ECO:0000269 PubMed:21177848}  | 1 |
| Q8NDB2 |                                          | 0 |
| Q6PKC3 | Endoplasmic reticulum membrane {ECO:000  | 1 |
| P98082 | Cytoplasm. Cytoplasmic vesicle, clathri  | 0 |
| Q8TDX5 |                                          | 0 |
| 043521 | Endomembrane system {ECO:0000250}; Peri  | 0 |
| Q9H1A4 |                                          | 0 |
| P20810 |                                          | 0 |
| Q9UIL1 | Golgi apparatus membrane {ECO:0000269 F  | 0 |
| 014967 | Endoplasmic reticulum membrane; Single-  | 1 |
| 015182 | Cytoplasm, cytoskeleton, microtubule or  | 0 |
| 060264 | Nucleus {ECO:0000255 PROSITE-ProRule:PF  | 1 |
| P22004 | Secreted {ECO:0000250}.                  | 0 |
| A6NKT7 |                                          | 0 |
| Q86WH2 | Cytoplasm {ECO:0000269 PubMed:15569673}  | 1 |
| Q00839 | Nucleus {ECO:0000269 PubMed:10671544, F  | 0 |
| P49792 | Nucleus {ECO:0000269 PubMed:7775481}. N  | 0 |
| Q8WYP5 | Cytoplasm {ECO:0000250 UniProtKB:Q8CJF7} | 0 |
| Q12866 | Membrane {ECO:0000250}; Single-pass typ  | 0 |
| Q96K49 | Golgi apparatus membrane {ECO:0000305 F  | 0 |
| Q8NGZ2 | Cell membrane; Multi-pass membrane prot  | 0 |
| Q15256 | Isoform Alpha: Cell membrane; Single-pa  | 0 |
| P43354 | Cytoplasm. Nucleus. Note=Mostly nuclear  | 0 |
| Q8NFR7 |                                          | 0 |
| Q13018 | Cell membrane {ECO:0000250}; Single-pas  | 0 |
| Q9NY46 | Cell membrane {ECO:0000269 PubMed:28235  | 0 |
| P40200 | Membrane; Single-pass type I membrane p  | 0 |
| Q5T601 | Cell membrane {ECO:0000269 PubMed:20149  | 0 |
| Q8IZF3 | Membrane {ECO:0000255}; Multi-pass mem   | 0 |
| Q8N878 |                                          | 0 |
| Q9NUQ9 | Membrane {ECO:0000305}; Lipid-anchor {F  | 0 |
| Q9ULH1 | Cytoplasm {ECO:0000250}. Membrane {ECO:  | 0 |
| Q9Y2L5 | Golgi apparatus, cis-Golgi network {ECO  | 0 |
| Q96LP2 |                                          | 0 |
| Q6PI98 | Nucleus {ECO:0000269 PubMed:18922472}.   | 0 |
| Q8NF37 | Endoplasmic reticulum membrane {ECO:000  | 1 |
| Q96PX9 |                                          | 0 |
| Q9HBL8 | Cytoplasm. Cytoplasm, perinuclear regio  | 0 |

|        |                                          |   |
|--------|------------------------------------------|---|
| Q8TB05 |                                          | 0 |
| Q6UX73 | Secreted {ECO:0000269 PubMed:20578903}.  | 0 |
| Q8N6I4 | Membrane {ECO:0000305}; Multi-pass mem   | 0 |
| Q9UK53 | Nucleus {ECO:0000305}.                   | 0 |
| Q96KW9 | Secreted {ECO:0000250 UniProtKB:Q9D2S4}  | 0 |
| Q8NDY3 |                                          | 0 |
| Q9H871 | Nucleus, nucleoplasm {ECO:0000269 PubMe  | 0 |
| P01732 | Isoform 1: Cell membrane {ECO:0000269 F  | 0 |
| P49247 |                                          | 0 |
| P23468 | Membrane; Single-pass type I membrane p  | 0 |
| Q8IV03 |                                          | 0 |
| Q6P9H4 | Cytoplasm {ECO:0000269 PubMed:22851176}  | 0 |
| P29083 | Nucleus {ECO:0000269 PubMed:1956398, EC  | 1 |
| Q9UEE9 | Chromosome, centromere, kinetochore {EC  | 0 |
| Q8IUE1 | Nucleus {ECO:0000255 PROSITE-ProRule:PF  | 1 |
| Q9NXF8 | Golgi apparatus membrane {ECO:0000269 F  | 0 |
| Q6ZTR7 | Cytoplasm, cytoskeleton, microtubule or  | 0 |
| 060235 | Cell membrane; Single-pass type II mem   | 0 |
| Q86VZ6 | Nucleus {ECO:0000269 PubMed:15302918}.   | 0 |
| Q8IY22 | Nucleus {ECO:0000269 PubMed:12939343}.   | 0 |
| Q2M3C7 | Cytoplasm {ECO:0000269 PubMed:12080051,  | 1 |
| Q9NPI9 | Membrane {ECO:0000269 PubMed:24561201};  | 0 |
| Q7Z2X4 | Cytoplasm {ECO:0000269 PubMed:16815647}  | 0 |
| Q14669 | Nucleus, nucleoplasm {ECO:0000269 PubMe  | 1 |
| P53567 | Nucleus {ECO:0000250 UniProtKB:P53568}.  | 1 |
| Q96NL3 | Nucleus {ECO:0000305}.                   | 0 |
| Q8IZK6 | Cell membrane {ECO:0000269 PubMed:17662  | 0 |
| Q8N135 | Secreted {ECO:0000305}.                  | 0 |
| 094760 |                                          | 0 |
| Q8WXA9 | Nucleus.                                 | 1 |
| 014646 | Nucleus {ECO:0000250 UniProtKB:P40201}.  | 0 |
| Q8N957 |                                          | 0 |
| P52429 | Membrane {ECO:0000305}; Multi-pass mem   | 0 |
| Q7LGA3 | Golgi apparatus membrane {ECO:0000250};  | 1 |
| Q96DH6 | Cytoplasm. Note=Associated with polysom  | 0 |
| P54289 | Membrane {ECO:0000305}; Single-pass ty   | 0 |
| Q96AP4 | Cytoplasm {ECO:0000269 PubMed:29476094}  | 0 |
| Q9Y663 | Golgi apparatus membrane {ECO:0000305};  | 0 |
| Q96E22 | Endoplasmic reticulum membrane {ECO:00   | 0 |
| 095025 | Secreted {ECO:0000250}.                  | 0 |
| Q16537 | Cytoplasm.                               | 0 |
| Q13588 |                                          | 0 |
| A0PJK1 | Cell membrane {ECO:0000269 PubMed:22212  | 0 |
| Q9Y6K8 | Cytoplasm {ECO:0000269 PubMed:19647735}  | 1 |
| 075952 | Cytoplasm, cytoskeleton. Cell projectio  | 0 |
| Q9P2X3 | Cytoplasm {ECO:0000250 UniProtKB:055091} | 0 |
| Q8N6D5 |                                          | 0 |
| Q5VUM1 | Mitochondrion matrix {ECO:0000250 UniPr  | 1 |
| Q7LIS5 | Isoform 1: Golgi apparatus membrane {EC  | 0 |
| P04216 | Cell membrane {ECO:0000250}; Lipid-anch  | 0 |
| Q8NEP3 | Cell projection, cilium {ECO:0000269 Pt  | 0 |
| Q96GX8 |                                          | 0 |
| Q5QJ74 | Cytoplasm, cytoskeleton {ECO:0000305}.   | 0 |
| Q96BN8 | Cytoplasm {ECO:0000269 PubMed:23746843}  | 0 |
| Q8TF42 | Cytoplasm {ECO:0000250}. Nucleus {ECO:(  | 0 |

|        |                                           |   |
|--------|-------------------------------------------|---|
| Q92686 |                                           | 0 |
| P55289 | Cell membrane; Single-pass type I membr   | 0 |
| P49685 | Cell membrane; Multi-pass membrane prot   | 0 |
| O94826 | Mitochondrion outer membrane {ECO:00002   | 1 |
| Q7Z7G0 | Secreted {ECO:0000305}.                   | 0 |
| Q15389 | Secreted.                                 | 0 |
| Q9UKF7 | Cytoplasm {ECO:0000269 PubMed:10531358}   | 0 |
| Q5T0F9 | Nucleus {ECO:0000269 PubMed:19423080}.    | 0 |
| Q8IU89 | Endoplasmic reticulum membrane {ECO:000   | 0 |
| P17252 | Cytoplasm {ECO:0000269 PubMed:23990668}   | 0 |
| Q38SD2 | Cytoplasm {ECO:0000269 PubMed:16243488}   | 0 |
| Q9H3Q3 | Golgi apparatus, Golgi stack membrane     | 1 |
| Q8IUA7 | Membrane {ECO:0000305}; Multi-pass mem    | 0 |
| Q8WWZ4 | Membrane {ECO:0000305}; Multi-pass mem    | 0 |
| Q8WWZ7 | Lysosome membrane; Multi-pass membrane    | 0 |
| O14638 | Cell membrane {ECO:0000269 PubMed:11342   | 0 |
| Q8IY42 |                                           | 0 |
| P09936 | Cytoplasm {ECO:0000269 PubMed:19261853}   | 0 |
| Q5JRA6 | Endoplasmic reticulum membrane {ECO:000   | 1 |
| Q96F81 | Membrane {ECO:0000305}; Multi-pass mem    | 0 |
| Q9UKE5 | Nucleus. Cytoplasm. Recycling endosome.   | 0 |
| Q96KS9 |                                           | 0 |
| Q15124 | Cell junction, adherens junction {ECO:000 | 0 |
| Q5VST9 | Isoform 3: Cytoplasm, myofibril, sarcom   | 0 |
| Q17RB8 |                                           | 0 |
| Q96F44 | Cytoplasm. Nucleus.                       | 0 |
| Q8N8S7 | Cytoplasm. Cytoplasm, cytoskeleton {ECO   | 1 |
| Q16821 | Membrane {ECO:0000250}; Single-pass mem   | 0 |
| Q6IQ19 | Cytoplasm, cytoskeleton, microtubule or   | 0 |
| Q8WWH4 | Cytoplasm {ECO:0000250}. Note=Component   | 1 |
| Q7Z6J0 | Cytoplasm, perinuclear region {ECO:0000   | 0 |
| Q96PP8 | Cytoplasm {ECO:0000269 PubMed:17266443},  | 1 |
| O43684 | Nucleus. Chromosome, centromere, kinet    | 1 |
| Q8NDV2 | Cell membrane; Multi-pass membrane prot   | 0 |
| Q0VFX6 |                                           | 0 |
| Q96M02 | Cytoplasm {ECO:0000269 PubMed:20844083}   | 0 |
| Q5T7M9 | Endoplasmic reticulum membrane {ECO:000   | 0 |
| Q96NU0 | Membrane {ECO:0000305}; Single-pass ty    | 0 |
| Q96JG8 |                                           | 0 |
| Q8WXF0 | Nucleus {ECO:0000305}.                    | 0 |
| Q53GG5 | Cytoplasm, myofibril, sarcomere, Z line   | 1 |
| P78310 | Isoform 1: Cell membrane {ECO:0000269 P   | 0 |
| Q14201 |                                           | 0 |
| Q9NYK6 |                                           | 0 |
| Q9H9P2 | Cytoplasm {ECO:0000269 PubMed:22042635}   | 1 |
| P98073 | Membrane {ECO:0000305}; Single-pass ty    | 0 |
| O15394 | Cell membrane; Single-pass type I membr   | 1 |
| Q8NA19 | Nucleus {ECO:0000305}.                    | 0 |
| Q9NYK5 | Mitochondrion {ECO:0000269 PubMed:25278   | 0 |
| P18859 | Mitochondrion. Mitochondrion inner mem    | 1 |
| Q06546 | Nucleus.                                  | 1 |
| Q9UHI8 | Secreted, extracellular space, extracel   | 0 |
| Q9UNA0 | Secreted, extracellular space, extracel   | 0 |
| Q8NCEO | Nucleus {ECO:0000269 PubMed:15109492}.    | 0 |
| Q68D06 | Cytoplasm {ECO:0000269 PubMed:29563550}   | 0 |

|        |                                         |   |
|--------|-----------------------------------------|---|
| 000755 | Secreted, extracellular space, extracel | 0 |
| Q01831 | Nucleus. Cytoplasm. Note=Omnipresent in | 0 |
| Q6PII3 | Nucleus {ECO:0000269 PubMed:26358778}.  | 0 |
| Q6ZNL6 | Cytoplasm, cytoskeleton {ECO:0000269 Pu | 0 |
| Q8NFG4 | Cytoplasm {ECO:0000269 PubMed:17028174, | 0 |
| Q96FX2 | Cytoplasm {ECO:0000269 PubMed:14980502} | 0 |
| Q96HP4 |                                         | 0 |
| Q9UPR0 | Cytoplasm. Note=Predominantly localized | 0 |
| Q9POU4 | Nucleus speckle {ECO:0000269 PubMed:122 | 1 |
| Q96BD8 | Cytoplasm, cytoskeleton, spindle {ECO:( | 0 |
| Q8TF05 |                                         | 0 |
| Q9H5I5 | Membrane {ECO:0000305}; Multi-pass mem  | 0 |
| Q53F39 | Endoplasmic reticulum-Golgi intermediat | 0 |
| Q70EL4 |                                         | 0 |
| Q9NRW1 | Golgi apparatus membrane {ECO:0000269 F | 0 |
| Q96AY2 | Nucleus, nucleolus {ECO:0000269 PubMed: | 1 |
| P54762 | Cell membrane {ECO:0000269 PubMed:18034 | 0 |
| Q9NUB1 | Mitochondrion matrix {ECO:0000269 PubMe | 1 |
| Q6AI12 |                                         | 0 |
| P17022 | Nucleus {ECO:0000255 PROSITE-ProRule:PF | 0 |
| Q9NS85 |                                         | 0 |
| Q6ZU15 | Cytoplasm {ECO:0000269 PubMed:17922164} | 0 |
| Q6UXV4 | Mitochondrion inner membrane {ECO:00002 | 0 |
| Q9UBU2 | Secreted.                               | 0 |
| Q7Z449 | Endoplasmic reticulum membrane {ECO:000 | 0 |
| POC881 |                                         | 0 |
| Q8N271 | Apical cell membrane {ECO:0000250}; Mu  | 1 |
| Q5TCS8 | Cytoplasm {ECO:0000269 PubMed:23416111} | 1 |
| Q14990 |                                         | 0 |
| Q92932 | Cytoplasmic vesicle, secretory vesicle  | 1 |
| O14977 | Nucleus {ECO:0000250 UniProtKB:035484}. | 0 |
| P21283 |                                         | 0 |
| Q8N4L2 | Late endosome membrane {ECO:0000269 Pu  | 0 |
| Q8N6M0 |                                         | 0 |
| Q9BWU1 |                                         | 0 |
| Q969F1 | Nucleus {ECO:0000269 PubMed:17409385}.  | 0 |
| Q9NUQ2 | Endoplasmic reticulum membrane {ECO:000 | 0 |
| Q96T76 | Nucleus {ECO:0000269 PubMed:20797633}.  | 0 |
| Q8NGD4 | Cell membrane; Multi-pass membrane prot | 0 |
| Q9BTU6 | Golgi apparatus, trans-Golgi network me | 0 |
| Q5T4F4 | Recycling endosome membrane {ECO:000025 | 0 |
| Q2TAP0 | Golgi apparatus membrane {ECO:0000250}; | 0 |
| Q96P69 | Cell membrane; Multi-pass membrane prot | 0 |
| Q8IYL2 | Cytoplasm {ECO:0000305}.                | 0 |
| P48723 | Microsome. Endoplasmic reticulum.       | 0 |
| Q9NSI8 | Nucleus {ECO:0000269 PubMed:11594764}.  | 0 |
| Q9UHP3 | Cytoplasm {ECO:0000269 PubMed:16501887, | 0 |
| Q96HH9 |                                         | 0 |
| Q8TBK6 |                                         | 0 |
| Q6PH81 |                                         | 0 |
| P08134 | Cell membrane {ECO:0000305}; Lipid-anch | 0 |
| Q5JR12 |                                         | 0 |
| P07108 | Endoplasmic reticulum {ECO:0000269 PubM | 0 |
| P53985 | Cell membrane {ECO:0000269 PubMed:15505 | 0 |
| Q7Z4Q2 |                                         | 0 |

|        |                                                                  |   |
|--------|------------------------------------------------------------------|---|
| Q9BYG3 | Nucleus, nucleolus. Chromosome. Note=Lc                          | 1 |
| Q15070 | Mitochondrion inner membrane {ECO:0000269 PubMed:12771185}       | 0 |
| Q9UM01 | Basolateral cell membrane {ECO:0000269 PubMed:23736}             | 0 |
| O60732 |                                                                  | 0 |
| Q6PKG0 | Cytoplasm {ECO:0000269 PubMed:20430826, PubMed:12771185}         | 0 |
| Q9UFF9 | Cytoplasm {ECO:0000269 PubMed:12771185}                          | 0 |
| P42261 | Cell membrane {ECO:0000269 PubMed:23736}                         | 0 |
| Q96M69 | Cytoplasmic vesicle, secretory vesicle, Golgi apparatus membrane | 0 |
| Q7Z3K6 | Nucleus {ECO:0000255 PROSITE-ProRule:PF00001}                    | 0 |
| Q63HK3 | Nucleus {ECO:0000305}.                                           | 0 |
| Q96MD7 |                                                                  | 0 |
| Q96GT9 |                                                                  | 0 |
| Q6ZUJ8 | Cytoplasm {ECO:0000250}. Cell membrane                           | 0 |
| Q8IUH3 | Cytoplasm {ECO:0000269 PubMed:12220514}                          | 0 |
| Q8WZ42 | Cytoplasm {ECO:0000305 PubMed:16410549}                          | 0 |
| Q9Y279 | Membrane {ECO:0000305}; Single-pass type I membrane              | 0 |
| P13667 | Endoplasmic reticulum lumen {ECO:0000269 PubMed:12771185}        | 1 |
| Q8N371 | Nucleus {ECO:0000269 PubMed:20457893, PubMed:12771185}           | 0 |
| Q7RTW8 | Apical cell membrane {ECO:0000305}; Lipid-anchored               | 0 |
| Q6PI47 |                                                                  | 0 |
| Q8IXS8 | Cytoplasm, cytosol {ECO:0000250 UniProtKB:Q5S003}                | 0 |
| Q96Q45 | Membrane {ECO:0000305}; Multi-pass membrane protein              | 0 |
| O75084 | Cell membrane {ECO:0000269 PubMed:27386}                         | 0 |
| Q6Q759 | Cytoplasm {ECO:0000250 UniProtKB:Q5S003}                         | 0 |
| Q8TB45 |                                                                  | 0 |
| Q5VTR2 | Nucleus {ECO:0000269 PubMed:19037095, PubMed:12771185}           | 1 |
| P50443 | Cell membrane {ECO:0000269 PubMed:79233}                         | 1 |
| P83369 | Nucleus {ECO:0000269 PubMed:12975319}.                           | 0 |
| Q8IYX7 | Cytoplasm, cytoskeleton, microtubule organizing center           | 0 |
| Q7L523 | Cytoplasm {ECO:0000269 PubMed:8995684, PubMed:12771185}          | 0 |
| Q8TE99 | Golgi apparatus membrane {ECO:0000269 PubMed:12771185}           | 0 |
| P40145 | Cell membrane {ECO:0000250 UniProtKB:P99999}                     | 0 |
| Q15283 | Cytoplasm. Cytoplasm, perinuclear region                         | 0 |
| Q9NWS8 | Mitochondrion {ECO:0000269 PubMed:23022}                         | 0 |
| Q13239 | Cytoplasm {ECO:0000250}. Endosome {ECO:0000269 PubMed:12771185}  | 0 |
| P61758 | Cytoplasm. Nucleus. Note=In complex with                         | 0 |
| Q96DA2 | Cell membrane {ECO:0000305}; Lipid-anchored                      | 0 |
| O15247 | Cytoplasm {ECO:0000269 PubMed:15916532}                          | 0 |
| P51816 | Nucleus speckle {ECO:0000269 PubMed:19111}                       | 0 |
| Q86XE3 | Mitochondrion {ECO:0000250}. Membrane                            | 0 |
| Q9Y3R0 | Cytoplasmic vesicle {ECO:0000269 PubMed:12771185}                | 0 |
| Q8NEZ2 | Late endosome membrane; Peripheral membrane protein              | 0 |
| Q12840 | Cytoplasm, perinuclear region {ECO:0000269 PubMed:12771185}      | 1 |
| P11245 | Cytoplasm.                                                       | 0 |
| P43361 |                                                                  | 0 |
| Q9NYI0 | Cell membrane {ECO:0000250 UniProtKB:Q9NYI0}                     | 0 |
| Q8N4J0 | Cytoplasm, cytosol {ECO:0000269 PubMed:12771185}                 | 0 |
| Q8NE86 | Mitochondrion inner membrane {ECO:0000269 PubMed:12771185}       | 0 |
| Q6PJG2 | Nucleus {ECO:0000255 PROSITE-ProRule:PF00001}                    | 0 |
| Q5TON1 | Cell projection, cilium {ECO:0000250 UniProtKB:Q5TON1}           | 0 |
| O95837 |                                                                  | 0 |
| Q96MY7 |                                                                  | 0 |
| P50148 | Nucleus {ECO:0000250}. Membrane {ECO:0000269 PubMed:12771185}    | 0 |
| P06133 | Microsome membrane {ECO:0000305}; Single-pass type I membrane    | 1 |
| Q9BZJ8 | Cell membrane {ECO:0000269 PubMed:28827}                         | 0 |

|        |                                          |   |
|--------|------------------------------------------|---|
| P51512 | Isoform Long: Cell membrane {ECO:000030} | 0 |
| P55263 | Isoform 1: Nucleus {ECO:0000269 PubMed:  | 0 |
| Q12791 | Cell membrane {ECO:0000269 PubMed:2069}  | 0 |
| Q16520 | Nucleus {ECO:0000255 PROSITE-ProRule:PF  | 0 |
| P27707 | Nucleus {ECO:0000269 PubMed:9342341}.    | 0 |
| O15072 | Secreted {ECO:0000269 PubMed:28985353}.  | 0 |
| Q7Z388 | Membrane {ECO:0000305}; Multi-pass mem   | 0 |
| Q330K2 | Isoform 1: Mitochondrion inner membrane  | 0 |
| Q6UX65 | Lysosome membrane {ECO:0000269 PubMed:1  | 0 |
| Q96NL8 | Cytoplasm {ECO:0000250 UniProtKB:Q3UJPF  | 0 |
| Q6P656 |                                          | 0 |
| P82987 | Secreted, extracellular space, extracel  | 0 |
| Q13508 | Cell membrane; Lipid-anchor, GPI-anch    | 0 |
| 000337 | Cell membrane; Multi-pass membrane prot  | 1 |
| Q8TF30 | Cytoplasm {ECO:0000269 PubMed:18614018}  | 1 |
| O43927 | Secreted.                                | 0 |
| Q9Y5N5 | Nucleus {ECO:0000250 UniProtKB:Q6SKR2}.  | 0 |
| P57060 |                                          | 0 |
| Q9Y5T5 | Nucleus {ECO:0000305 PubMed:17914355}.   | 1 |
| P50990 | Cytoplasm {ECO:0000269 PubMed:20080638}  | 1 |
| P57077 |                                          | 0 |
| Q9BSU3 | Cytoplasm {ECO:0000269 PubMed:16638120}  | 0 |
| O14867 | Nucleus {ECO:0000255 PROSITE-ProRule:PF  | 0 |
| P56750 | Cell junction, tight junction {ECO:0000  | 0 |
| P56748 | Cell junction, tight junction {ECO:0000  | 0 |
| P41732 | Membrane; Multi-pass membrane protein.   | 0 |
| Q13009 | Cell junction. Cell membrane; Periphera  | 0 |
| O95104 | Nucleus {ECO:0000269 PubMed:31104839}.   | 1 |
| Q92834 | Cytoplasm, cytoskeleton, flagellum axon  | 0 |
| Q8IZL9 | Nucleus {ECO:0000269 PubMed:14597612}.   | 0 |
| Q96BM1 |                                          | 0 |
| Q86XK3 | Nucleus {ECO:0000269 PubMed:23874500}.   | 0 |
| Q96NB2 | Mitochondrion membrane {ECO:0000269 Pub  | 1 |
| P56378 | Mitochondrion membrane {ECO:0000269 Pub  | 0 |
| P51993 | Golgi apparatus, Golgi stack membrane;   | 0 |
| O76093 | Secreted {ECO:0000250}.                  | 0 |
| Q08174 | Cell junction. Cell membrane {ECO:0000}  | 0 |
| Q8TEC5 | Nucleus {ECO:0000269 PubMed:24130170}.   | 0 |
| Q6KF10 | Secreted {ECO:0000269 PubMed:23307924}.  | 0 |
| P14927 | Mitochondrion inner membrane.            | 0 |
| P48651 | Endoplasmic reticulum membrane {ECO:00   | 0 |
| Q00005 | Isoform 1: Cytoplasm {ECO:0000250}. Cyt  | 0 |
| P62888 |                                          | 0 |
| Q9ULS6 | Cell membrane {ECO:0000250 UniProtKB:O}  | 0 |
| Q6P4D5 |                                          | 0 |
| Q8IYB8 | Nucleus {ECO:0000269 PubMed:17352692}.   | 0 |
| Q7Z309 |                                          | 0 |
| P68104 | Cytoplasm {ECO:0000269 PubMed:19158340,  | 0 |
| Q4G163 |                                          | 0 |
| Q2TB90 | Mitochondrion membrane {ECO:0000305 Pub  | 0 |
| P19367 | Mitochondrion outer membrane {ECO:0000}  | 1 |
| Q2T9J0 | Peroxisome {ECO:0000269 PubMed:2200206}  | 0 |
| Q8IWS0 | Nucleus. Nucleus, nucleolus. Chromosome  | 1 |
| Q6YHK3 | Cell membrane {ECO:0000269 PubMed:1186}  | 1 |
| Q9ULH4 | Membrane; Single-pass type I membrane p  | 0 |

|        |                                          |   |
|--------|------------------------------------------|---|
| Q96S42 | Secreted {ECO:0000250}.                  | 0 |
| Q9Y2Y8 | Cytoplasmic granule {ECO:0000269 PubMed  | 0 |
| 014933 |                                          | 0 |
| Q9COB5 | Cell membrane {ECO:0000250}; Multi-pass  | 0 |
| A0JLT2 | Nucleus {ECO:0000305}.                   | 0 |
| Q9H8U3 |                                          | 0 |
| Q9Y639 | Cell membrane {ECO:0000305}; Single-pass | 0 |
| Q8WYB5 | Nucleus {ECO:0000305}.                   | 1 |
| Q6WKZ4 | Recycling endosome {ECO:0000269 PubMed:  | 0 |
| Q6UXZ4 | Cell membrane {ECO:0000269 PubMed:26238  | 0 |
| Q8WU03 | Endoplasmic reticulum {ECO:0000269 PubM  | 0 |
| Q9BVJ6 | Nucleus, nucleolus {ECO:0000269 PubMed:  | 0 |
| 095831 | Mitochondrion intermembrane space. Mitc  | 0 |
| 015264 |                                          | 0 |
| 095429 | Cytoplasm.                               | 0 |
| P11836 | Cell membrane {ECO:0000269 PubMed:12920  | 0 |
| Q96DN5 |                                          | 0 |
| Q96HA8 | Cytoplasm, cytosol {ECO:0000250 UniProt  | 0 |
| Q6PL18 | Nucleus {ECO:0000269 PubMed:17998543}.   | 1 |
| Q96MF7 | Nucleus {ECO:0000269 PubMed:18086888}.   | 1 |
| Q96CS4 | Nucleus {ECO:0000305}.                   | 0 |
| Q9BWN1 | Chromosome {ECO:0000269 PubMed:24209742  | 0 |
| Q9HAH7 |                                          | 0 |
| Q6ZNA5 | Membrane {ECO:0000305}; Multi-pass mem   | 0 |
| Q6UVJ0 | Cytoplasm, cytoskeleton, microtubule or  | 0 |
| Q13349 | Membrane; Single-pass type I membrane p  | 0 |
| Q8IZF6 | Membrane {ECO:0000255}; Multi-pass mem   | 0 |
| 060481 | Nucleus. Cytoplasm {ECO:0000250}. Note=  | 0 |
| Q96EH3 | Mitochondrion matrix {ECO:0000269 PubMe  | 0 |
| Q8N3P4 | Early endosome {ECO:0000269 PubMed:2526  | 0 |
| Q01415 |                                          | 0 |
| Q7Z7J7 | Cell projection, dendrite {ECO:0000250   | 0 |
| Q8NFL0 | Golgi apparatus membrane {ECO:0000305};  | 1 |
| Q2QL34 | Isoform 1: Peroxisome membrane {ECO:000  | 0 |
| 043924 | Cytoplasm, cytosol {ECO:0000269 PubMed:  | 0 |
| Q14240 |                                          | 0 |
| P55201 | Nucleus {ECO:0000269 PubMed:18794358, F  | 1 |
| Q6P087 | Mitochondrion matrix {ECO:0000269 PubMe  | 0 |
| P61278 | Secreted {ECO:0000250 UniProtKB:P60042}  | 0 |
| Q93075 | Nucleus {ECO:0000305}.                   | 0 |
| Q9UBU3 | Secreted.                                | 0 |
| P55735 | Cytoplasmic vesicle, COPII-coated vesic  | 0 |
| Q9Y2C4 | Mitochondrion inner membrane {ECO:00002  | 1 |
| Q9BZQ2 | Cytoplasm, cytoskeleton, spindle {ECO:(  | 1 |
| Q9BZQ4 | Golgi apparatus membrane {ECO:0000269 F  | 0 |
| 095405 | Cytoplasm. Early endosome membrane.      | 0 |
| Q01814 | Cell junction, synapse {ECO:0000250 Uni  | 0 |
| Q96KX0 | Secreted {ECO:0000250 UniProtKB:Q9D925}  | 0 |
| P30531 | Cell membrane; Multi-pass membrane prot  | 0 |
| Q96Q15 | Nucleus {ECO:0000269 PubMed:15175154}.   | 0 |
| Q0JRZ9 | Membrane, clathrin-coated pit {ECO:0000  | 0 |
| Q93062 | Nucleus {ECO:0000269 PubMed:17099224}.   | 1 |
| Q8WVE6 | Membrane {ECO:0000305}; Multi-pass mem   | 0 |
| Q2TBA0 | Cytoplasm {ECO:0000250 UniProtKB:Q9D785  | 1 |
| Q02297 | Pro-neuregulin-1, membrane-bound isofo   | 0 |

|        |                                         |   |
|--------|-----------------------------------------|---|
| Q5SWX8 | Membrane {ECO:0000255}; Multi-pass mem  | 0 |
| P23786 | Mitochondrion inner membrane; Periphera | 1 |
| Q9NVZ3 | Cytoplasmic vesicle, clathrin-coated ve | 0 |
| Q14114 | Cell membrane {ECO:0000250}; Single-pas | 0 |
| Q5VXM1 | Secreted {ECO:0000305}.                 | 0 |
| Q6ZW49 | Nucleus matrix {ECO:0000250 UniProtKB:( | 1 |
| Q8NFT2 | Endosome membrane {ECO:0000250}; Multi- | 0 |
| P47898 | Cell membrane; Multi-pass membrane prot | 0 |
| P56749 | Cell junction, tight junction. Cell men | 0 |
| P50281 | Membrane {ECO:0000305}; Single-pass typ | 0 |
| Q9UP38 | Cell membrane {ECO:0000269 PubMed:10557 | 0 |
| Q96L08 | Cell membrane {ECO:0000269 PubMed:24413 | 0 |
| Q8WW62 | Endoplasmic reticulum membrane {ECO:000 | 0 |
| A5D8T8 | Secreted {ECO:0000269 PubMed:26170455}. | 0 |
| Q9BTZ2 | Peroxisome {ECO:0000269 PubMed:10333503 | 0 |
| Q8NCF0 | Secreted {ECO:0000250 UniProtKB:A5D8T8} | 0 |
| Q5T9G4 |                                         | 0 |
| Q9UMR2 | Cytoplasm. Nucleus, nuclear pore comple | 0 |
| Q16842 | Golgi apparatus, Golgi stack membrane   | 0 |
| Q8NOW3 |                                         | 0 |
| Q96LJ7 |                                         | 0 |
| Q01668 | Membrane {ECO:0000269 PubMed:18482979}; | 0 |
| P51690 | Golgi apparatus, Golgi stack.           | 0 |
| P10721 | Isoform 1: Cell membrane; Single-pass t | 1 |
| Q4G0P3 | Cell projection, cilium {ECO:0000305}.  | 0 |
| Q4L235 |                                         | 0 |
| P17023 | Nucleus {ECO:0000305}.                  | 0 |
| Q6ZNA4 | Nucleus {ECO:0000269 PubMed:16601693, F | 1 |
| 095067 |                                         | 0 |
| Q8TBF8 |                                         | 0 |
| Q12965 | Cytoplasm. Cytoplasm, cytoskeleton. Cyt | 0 |
| Q9UKG1 | Early endosome membrane {ECO:0000269 Pt | 0 |
| Q5H9M0 |                                         | 0 |
| Q99576 | Isoform 1: Cytoplasm {ECO:0000250}. Nuc | 0 |
| 014972 | Endosome {ECO:0000305 PubMed:28892079}. | 0 |
| Q13627 | Nucleus {ECO:0000269 PubMed:20167603, F | 0 |
| Q99712 | Membrane; Multi-pass membrane protein.  | 0 |
| P11308 | Nucleus {ECO:0000255 PROSITE-ProRule:PF | 0 |
| 095447 |                                         | 0 |
| Q8TB61 | Golgi apparatus membrane {ECO:0000269 F | 0 |
| Q5U3C3 | Membrane {ECO:0000305}; Multi-pass mem  | 0 |
| P20591 | Cytoplasm {ECO:0000269 PubMed:11880649, | 0 |
| Q96BA8 | Endoplasmic reticulum membrane {ECO:000 | 1 |
| Q9Y426 | Membrane {ECO:0000305}; Single-pass men | 0 |
| Q8N5C8 |                                         | 0 |
| Q9HBR0 | Membrane {ECO:0000305}; Multi-pass mem  | 0 |
|        | be performed. View primary data.        | 0 |
| Q5T7W0 | Nucleus {ECO:0000305}.                  | 0 |
| Q5VZI3 | Membrane {ECO:0000305}; Multi-pass mem  | 0 |
| Q8N434 | Membrane {ECO:0000305}; Multi-pass mem  | 0 |
| Q96L94 | Cytoplasmic vesicle membrane {ECO:00002 | 0 |
| Q6ZU65 |                                         | 0 |
| P15056 | Nucleus {ECO:0000250}. Cytoplasm. Cell  | 0 |
| 095436 | Membrane; Multi-pass membrane protein.  | 1 |
|        | Secreted, extracellular space, extracel | 0 |



|        |                                         |   |
|--------|-----------------------------------------|---|
| Q9BT73 |                                         | 0 |
| Q9NZU7 | Cytoplasm, cytoskeleton {ECO:0000269 Pu | 0 |
| Q8NEZ3 | Cell projection, cilium {ECO:0000250 Ur | 0 |
| P59780 | Golgi apparatus. Cytoplasmic vesicle me | 0 |
| Q96PY5 | Cytoplasm {ECO:0000250}.                | 1 |
| Q8TCT6 | Endoplasmic reticulum membrane {ECO:000 | 0 |
| Q9BPU6 | Cytoplasm {ECO:0000305}.                | 1 |
| P51157 | Cell membrane {ECO:0000305}; Lipid-anch | 0 |
| Q8TBF2 | Cytoplasm, cytosol {ECO:0000250 UniProt | 0 |
| Q92956 | Cell membrane {ECO:0000269 PubMed:19915 | 0 |
| Q9NVE7 | Cytoplasm {ECO:0000250 UniProtKB:Q923S8 | 0 |
| A0PJX0 |                                         | 0 |
| Q96C57 | Nucleus envelope {ECO:0000250 UniProtKE | 0 |
| 060683 | Peroxisome membrane {ECO:0000305}; Peri | 0 |
| 015258 | Golgi apparatus membrane; Multi-pass me | 1 |
| Q96JH8 |                                         | 0 |
| P12755 | Nucleus.                                | 0 |
| Q9Y4P8 | Preautophagosomal structure membrane {E | 0 |
| Q5SW96 | Cytoplasm {ECO:0000269 PubMed:12451172} | 0 |
| Q9UPQ3 | Cytoplasm {ECO:0000269 PubMed:12388557, | 0 |
| Q53RY4 | Membrane; Multi-pass membrane protein.  | 0 |
| A6NGH8 |                                         | 0 |
| Q99487 | Cytoplasm {ECO:0000269 PubMed:9494101}. | 0 |
| Q92935 | Endoplasmic reticulum membrane {ECO:000 | 0 |
| Q9NXR7 | Cytoplasm {ECO:0000269 PubMed:15465831, | 0 |
| Q8TBY9 | Cytoplasm, cytoskeleton, cilium axoneme | 0 |
| Q9NRX2 | Mitochondrion {ECO:0000269 PubMed:25278 | 0 |
| Q8TE85 | Nucleus {ECO:0000269 PubMed:21081122}.  | 1 |
| Q5T124 | Cytoplasm, cytoskeleton {ECO:0000250}.  | 0 |
| Q86W24 | Cytoplasm {ECO:0000250 UniProtKB:Q6B966 | 0 |
| A2A3K4 |                                         | 0 |
| P16333 | Cytoplasm. Endoplasmic reticulum. Nucle | 0 |
| P32754 |                                         | 0 |
| Q8TCX5 |                                         | 0 |
| Q7RTV5 |                                         | 0 |
| P47989 | Cytoplasm {ECO:0000250}. Peroxisome {EC | 0 |
| Q9H6D3 | Cell membrane {ECO:0000269 PubMed:23845 | 0 |
| Q6P4Q7 | Cell membrane {ECO:0000269 PubMed:22395 | 0 |
| Q99504 | Cytoplasm {ECO:0000250 UniProtKB:P97480 | 0 |
| Q8IYY4 | Cytoplasm, cytoskeleton, cilium basal b | 0 |
| Q00597 | Nucleus. Cytoplasm. Note=The major form | 0 |
| 014807 | Cell membrane {ECO:0000305}; Lipid-anch | 0 |
| Q9Y6W5 | Cytoplasm, cytoskeleton {ECO:0000250}.  | 0 |
| Q8WU67 | Membrane {ECO:0000305}; Single-pass typ | 0 |
| A0FGR9 | Cell membrane {ECO:0000269 PubMed:17360 | 0 |
| Q9NVQ4 | Cytoplasm {ECO:0000250}.                | 0 |
| Q9H4D0 | Cell membrane {ECO:0000305}; Single-pas | 0 |
| Q5KU26 | Membrane {ECO:0000269 PubMed:11162630}; | 0 |
| Q6ZRF8 | Cytoplasm {ECO:0000269 PubMed:25281747} | 0 |
| Q13620 | Nucleus {ECO:0000269 PubMed:18593899, E | 1 |
| Q6NV75 | Cell membrane; Multi-pass membrane prot | 0 |
| Q8WWT9 | Cell membrane {ECO:0000269 PubMed:17426 | 1 |
| Q96D09 |                                         | 0 |
| Q9NX52 | Rhomboid-related protein 2, C-terminal  | 0 |
| Q8WXX7 | Nucleus {ECO:0000269 PubMed:25519132}.  | 0 |

|        |                                         |   |
|--------|-----------------------------------------|---|
| Q9ULL8 | Cytoplasm, cytoskeleton {ECO:0000269 P  | 0 |
| P58876 | Nucleus. Chromosome.                    | 1 |
| P30307 | Nucleus {ECO:0000269 PubMed:14968113, F | 0 |
| P62805 | Nucleus. Chromosome.                    | 1 |
| Q8WV92 | Late endosome membrane; Peripheral mem  | 0 |
| 060841 | Cytoplasm {ECO:0000250 UniProtKB:Q05D44 | 0 |
| P0CG35 | Cytoplasm, cytoskeleton {ECO:0000250}.  | 0 |
| Q7Z7H3 | Nucleus {ECO:0000269 PubMed:24475127}.  | 0 |
| Q9UKZ1 | Cytoplasm {ECO:0000305}. Nucleus {ECO:( | 1 |
| Q14721 | Cell membrane {ECO:0000269 PubMed:10484 | 0 |
| Q86UF1 | Cell membrane {ECO:0000269 PubMed:26686 | 0 |
| 014511 | Pro-neuregulin-2, membrane-bound isofo  | 0 |
| Q96HN2 | Cytoplasm {ECO:0000250 UniProtKB:A6QLP2 | 0 |
| P15813 | Cell membrane {ECO:0000269 PubMed:11927 | 0 |
| P06126 | Cell membrane {ECO:0000269 PubMed:11231 | 0 |
| Q9UM82 | Cytoplasm {ECO:0000269 PubMed:10222154, | 0 |
| P29016 | Cell membrane {ECO:0000269 PubMed:10899 | 0 |
| P15812 | T-cell surface glycoprotein CD1e, membr | 0 |
| P48052 | Secreted.                               | 0 |
| P14598 | Cytoplasm, cytosol {ECO:0000269 PubMed: | 0 |
| Q969E8 |                                         | 0 |
| Q9ULJ8 | Cytoplasm, cytoskeleton {ECO:0000250}.  | 0 |
| Q86VM9 | Nucleus {ECO:0000250}.                  | 1 |
| Q8WV99 | Endoplasmic reticulum membrane {ECO:000 | 0 |
| Q96KW2 |                                         | 0 |
| Q8WTR4 | Endomembrane system {ECO:0000250 UniPro | 0 |
| 014576 | Cytoplasm {ECO:0000250}. Chromosome, ce | 0 |
| Q7Z7H5 | Endoplasmic reticulum membrane {ECO:000 | 0 |
| Q9UBF2 | Cytoplasm, cytosol {ECO:0000250}. Golgi | 0 |
| Q7Z589 | Nucleus {ECO:0000269 PubMed:14651845}.  | 1 |
| Q96GU1 |                                         | 0 |
| Q86UL3 | Endoplasmic reticulum membrane {ECO:000 | 0 |
| Q8TDX9 | Cell projection, cilium membrane {ECO:( | 0 |
| 043309 | Nucleus {ECO:0000255 PROSITE-ProRule:PF | 0 |
| P37802 |                                         | 0 |
| P28324 | Nucleus.                                | 0 |
| Q9POV8 | Membrane; Single-pass type I membrane p | 0 |
| Q96JT2 | Membrane {ECO:0000305}; Multi-pass mem  | 0 |
| Q9BVJ7 | Cytoplasm, cytosol. Nucleus. Note=Main] | 0 |
| P41271 | Secreted.                               | 0 |
| P50406 | Cell membrane; Multi-pass membrane prot | 0 |
| Q8WWU7 | Secreted {ECO:0000305}.                 | 0 |
| Q9Y624 | Cell junction, tight junction {ECO:0000 | 1 |
| P22415 | Nucleus.                                | 1 |
| Q8IUW3 |                                         | 0 |
| Q86X76 | Isoform 2: Mitochondrion {ECO:0000250 U | 0 |
| 075618 | Cytoplasm. Nucleus, nucleolus {ECO:0000 | 0 |
| Q8N554 | Nucleus {ECO:0000305}. Chromosome, cent | 0 |
| Q86SE8 | Nucleus {ECO:0000250}. Note=Found in th | 1 |
| 060258 | Secreted.                               | 0 |
| Q5TIE3 | Secreted {ECO:0000305}.                 | 0 |
| P32320 |                                         | 0 |
| Q9BXM7 | Mitochondrion outer membrane {ECO:00002 | 0 |
| 060512 | Golgi apparatus, Golgi stack membrane;  | 0 |
| Q08495 | Cytoplasm. Cytoplasm, cytosol. Cytoplas | 0 |

|        |                                         |   |
|--------|-----------------------------------------|---|
| 075173 | Secreted, extracellular space, extracel | 0 |
| Q86V87 |                                         | 0 |
| 075306 | Mitochondrion inner membrane {ECO:00002 | 1 |
| Q8WWX8 | Membrane {ECO:0000250 UniProtKB:Q28728} | 0 |
| P30273 | Cell membrane {ECO:0000269 PubMed:86116 | 0 |
| P02652 | Secreted {ECO:0000269 PubMed:24116940}. | 0 |
| Q969M1 | Mitochondrion outer membrane {ECO:00002 | 0 |
| P25189 | Cell membrane {ECO:0000269 PubMed:18337 | 0 |
| Q8IUA0 | Secreted {ECO:0000305}.                 | 0 |
| Q8N163 | Nucleus {ECO:0000269 PubMed:20074560, F | 0 |
| 014905 | Secreted, extracellular space, extracel | 0 |
|        | Membrane {ECO:0000305}; Single-pass typ | 0 |
| Q9NRR3 | Cytoplasm, cytoskeleton. Cell membrane; | 0 |
| Q8TEU7 | Cytoplasm {ECO:0000269 PubMed:11524421} | 0 |
| P11171 | Cytoplasm, cytoskeleton {ECO:0000269 Pu | 0 |
| Q9NYP9 | Nucleus {ECO:0000269 PubMed:17199038}.  | 1 |
| Q9BVK2 | Endoplasmic reticulum membrane {ECO:000 | 0 |
| Q969U6 | Cytoplasm {ECO:0000269 PubMed:21725316} | 0 |
| P57076 | Cytoplasm {ECO:0000269 PubMed:29601588} | 1 |
| 043426 | Cytoplasm, perinuclear region {ECO:0000 | 1 |
| Q9Y5B6 | Nucleus {ECO:0000250}.                  | 0 |
| Q7Z7H8 | Mitochondrion {ECO:0000269 PubMed:25278 | 1 |
| P38484 | Cell membrane {ECO:0000269 PubMed:15356 | 0 |
| P22102 |                                         | 0 |
| P18583 | Nucleus speckle {ECO:0000269 PubMed:142 | 1 |
| Q9NYP3 | Nucleus {ECO:0000269 PubMed:28191891}.  | 0 |
| Q7L0J3 | Cell junction, synapse {ECO:0000250 Uni | 0 |
| 000515 | Secreted, extracellular space, extracel | 0 |
| P52823 | Secreted.                               | 0 |
| P19237 |                                         | 0 |
| P21291 | Nucleus {ECO:0000269 PubMed:26924529}.  | 0 |
| Q96KF2 | Nucleus {ECO:0000269 PubMed:11340635}.  | 0 |
| Q92826 | Nucleus.                                | 1 |
| P02747 | Secreted.                               | 0 |
| Q9Y6J6 | Cell membrane {ECO:0000269 PubMed:20535 | 0 |
| P53805 |                                         | 0 |
| Q9H832 | Cytoplasm {ECO:0000269 PubMed:17160626} | 0 |
| Q8N365 | Nucleus {ECO:0000250}. Nucleus, PML bod | 0 |
| Q96H20 | Cytoplasm. Endosome membrane. Nucleus   | 0 |
| Q96NY7 | Cytoplasm {ECO:0000250}. Cell membrane  | 1 |
| Q8N4L8 |                                         | 0 |
| Q01196 | Nucleus.                                | 1 |
| Q9NZI8 | Nucleus. Cytoplasm. Cytoplasm, perinuel | 0 |
| P09681 | Secreted.                               | 0 |
| P16152 | Cytoplasm.                              | 1 |
| 075828 | Cytoplasm {ECO:0000269 PubMed:18493841} | 0 |
| P68032 | Cytoplasm, cytoskeleton.                | 1 |
| Q14149 | Nucleus, nucleoplasm {ECO:0000269 PubMe | 0 |
| Q13112 | Nucleus {ECO:0000269 PubMed:9614144}. ( | 0 |
| Q14190 | Nucleus {ECO:0000255 PROSITE-ProRule:PF | 0 |
| P50747 | Cytoplasm. Mitochondrion.               | 0 |
| Q9NYA3 |                                         | 0 |
| Q8IWY4 | Secreted {ECO:0000269 PubMed:12270931,  | 0 |
| Q6ZUM4 | Cytoplasm {ECO:0000250}. Membrane {ECO: | 0 |
| Q9BRR6 | Secreted {ECO:0000305}.                 | 0 |

|                       |                                         |   |
|-----------------------|-----------------------------------------|---|
| P20962                |                                         | 0 |
| Q9UM07                | Cytoplasm. Nucleus. Cytoplasmic granule | 0 |
| Q9UHQ9                | Membrane {ECO:0000305}; Single-pass mem | 0 |
| P55036                |                                         | 0 |
| Q9NQ11                | Membrane {ECO:0000250}; Multi-pass mem  | 0 |
| Q8TC57                | Cytoplasm {ECO:0000250}.                | 0 |
| P28070                | Cytoplasm {ECO:0000269 PubMed:12181345} | 0 |
| P78412                | Nucleus {ECO:0000305}.                  | 0 |
| P78543                |                                         | 0 |
| P52789                | Mitochondrion outer membrane {ECO:00002 | 1 |
| P00736                | Secreted {ECO:0000269 PubMed:27745832}. | 0 |
| Q5SZQ8                | Nucleus {ECO:0000250}. Cytoplasm {ECO:( | 0 |
| P30038                | Mitochondrion matrix.                   | 1 |
| Q9P2P6                | Cytoplasm, cytoskeleton, microtubule or | 0 |
| Q5T1C6                | Cell membrane {ECO:0000269 PubMed:11598 | 0 |
| Q07283                |                                         | 0 |
| Q8IYW7                | Cytoplasm, cytosol {ECO:0000269 PubMed: | 0 |
| Q9UKV5                | Endoplasmic reticulum membrane {ECO:000 | 0 |
| Q96G25                | Nucleus {ECO:0000305}.                  | 0 |
| Q8IZJ4                | Cytoplasmic vesicle {ECO:0000250}.      | 0 |
| Q96LB9                | Secreted {ECO:0000269 PubMed:16354652}. | 0 |
| Q96DX4                | Secreted {ECO:0000305}.                 | 0 |
| Q96LX7                |                                         | 0 |
| Q9HC44                | Nucleus {ECO:0000305}.                  | 0 |
| Q13564                | Cell membrane {ECO:0000269 PubMed:14557 | 0 |
| Q5SWH9                | Membrane {ECO:0000305}; Multi-pass mem  | 0 |
| Q8IZF4                | Cell membrane {ECO:0000250 UniProtKB:Q5 | 0 |
| P12821                | Angiotensin-converting enzyme, soluble  | 0 |
| Q6URK8                | Secreted {ECO:0000305}.                 | 0 |
| Q96N76                |                                         | 0 |
| 075071                |                                         | 0 |
| Q9BUD6                | Secreted, extracellular space, extracel | 0 |
| Q9BRQ6                | Mitochondrion inner membrane {ECO:00003 | 0 |
| Q13363                | Cytoplasm {ECO:0000269 PubMed:12679040} | 0 |
| Q1X8D7                |                                         | 0 |
| Q9BW30                | Cytoplasm, cytoskeleton {ECO:0000305 Pu | 0 |
| Q8WTX9                | Membrane {ECO:0000305}; Multi-pass mem  | 0 |
| P61421                | Membrane {ECO:0000305 PubMed:21844891}; | 0 |
| 000253                | Secreted {ECO:0000269 PubMed:15927146}. | 0 |
| Q9HCC9                | Cytoplasm, cytosol {ECO:0000269 PubMed: | 0 |
| Q6F5E8                | Isoform 2: Cytoplasm {ECO:0000269 PubMe | 0 |
| Q6ZW13                |                                         | 0 |
| P12273                | Secreted.                               | 0 |
| P11801                | Golgi apparatus. Cytoplasm, cytoskelet  | 0 |
| Q15942                | Cytoplasm. Cytoplasm, cytoskeleton. Nuc | 0 |
| Q12979                | Cell projection, dendritic spine {ECO:( | 0 |
| Q6UWN5                | Cell membrane {ECO:0000305}; Lipid-anch | 0 |
| Q8IWD4                |                                         | 0 |
| Q9UK12                | Nucleus {ECO:0000305}.                  | 0 |
| be performed. View pr | Nucleus {ECO:0000305}.                  | 0 |
| A6NK53                | Nucleus {ECO:0000305}.                  | 0 |
| Q14590                | Nucleus {ECO:0000305}.                  | 0 |
| Q9Y223                | Cytoplasm {ECO:0000250}.                | 0 |
| Q96RJ3                | Membrane {ECO:0000305}; Single-pass ty  | 0 |
| Q9NRY4                | Cytoplasm, cytoskeleton, cilium basal b | 0 |

|                        |                                                                                      |   |
|------------------------|--------------------------------------------------------------------------------------|---|
| P0DP25                 | Cytoplasm, cytoskeleton, spindle {ECO:0000269 PubMed:10023074}                       | 0 |
| 000273                 | Cytoplasm.                                                                           | 0 |
| Q9BUN5                 | Cytoplasm, cytoskeleton, microtubule organizing center {ECO:0000269 PubMed:10023074} | 0 |
| Q4KMZ1                 |                                                                                      | 0 |
| Q8WY98                 | Membrane {ECO:0000305}; Multi-pass membrane protein                                  | 0 |
| Q9NW68                 |                                                                                      | 0 |
| Q96BR9                 | Nucleus {ECO:0000305}.                                                               | 0 |
| Q5T9A4                 | Mitochondrion inner membrane {ECO:0000269 PubMed:15096518}                           | 0 |
| Q9NP77                 | Nucleus. Cytoplasm. Note=Predominantly nuclear                                       | 1 |
| Q5TOB9                 | Nucleus {ECO:0000305}.                                                               | 0 |
| Q8NAU1                 | Cell membrane {ECO:0000269 PubMed:222370}                                            | 0 |
| Q8IZJ3                 | Secreted {ECO:0000305 PubMed:15177561}.                                              | 0 |
| Q8NAG6                 | Cytoplasm {ECO:0000269 PubMed:22399800},                                             | 0 |
| Q4VC31                 |                                                                                      | 0 |
| Q3ZAA7                 | Endoplasmic reticulum membrane {ECO:0000269 PubMed:10023074}                         | 0 |
| 060229                 | Cytoplasm {ECO:0000269 PubMed:10023074}                                              | 0 |
| Q8IUL8                 | Secreted, extracellular space, extracellular matrix                                  | 0 |
| P45844                 | Endoplasmic reticulum membrane {ECO:0000269 PubMed:10023074}                         | 0 |
| ls in gastrointestinal | Secreted, extracellular space, extracellular matrix                                  | 0 |
| Q03403                 | Secreted.                                                                            | 0 |
| P04155                 | Secreted {ECO:0000269 PubMed:15924415},                                              | 0 |
| Q8WYR4                 | Cytoplasm {ECO:0000250}. Cell projection                                             | 0 |
| P57057                 | Endoplasmic reticulum membrane {ECO:0000269 PubMed:10023074}                         | 0 |
| 076083                 | Isoform PDE9A1: Cell projection, ruffle                                              | 0 |
| P57081                 | Nucleus {ECO:0000269 PubMed:15861136}, I                                             | 0 |
| P56181                 | Mitochondrion inner membrane {ECO:0000269 PubMed:15096518}                           | 1 |
| P55347                 | Nucleus {ECO:0000305}.                                                               | 0 |
| P35520                 | Cytoplasm {ECO:0000269 PubMed:17087506},                                             | 0 |
| Q01081                 | Nucleus {ECO:0000269 PubMed:15096518}.                                               | 1 |
| P02489                 | Cytoplasm {ECO:0000269 PubMed:19464326}                                              | 0 |
| 075031                 | Cytoplasm {ECO:0000250 UniProtKB:Q9D4G2}                                             | 0 |
| Q14684                 | Nucleus, nucleolus {ECO:0000269 PubMed:10023074}                                     | 1 |
| 000764                 | Cytoplasm.                                                                           | 1 |
| P11413                 |                                                                                      | 0 |
| P04080                 | Cytoplasm {ECO:0000269 PubMed:11139332}                                              | 1 |
| P56182                 | Nucleus, nucleolus {ECO:0000269 PubMed:10023074}                                     | 0 |
| P48553                 | Golgi apparatus, cis-Golgi network {ECO:0000269 PubMed:10023074}                     | 1 |
| Q8WWW8                 |                                                                                      | 0 |
| P0DPI2                 | Mitochondrion {ECO:0000305}.                                                         | 1 |
| 075144                 | Cell membrane {ECO:0000269 PubMed:110070}                                            | 0 |
| 043918                 | Nucleus {ECO:0000269 PubMed:14974083}, I                                             | 0 |
| 043822                 | Mitochondrion {ECO:0000269 PubMed:93251}                                             | 0 |
| Q9BY71                 | Membrane {ECO:0000305}; Single-pass membrane protein                                 | 0 |
| P05107                 | Cell membrane {ECO:0000269 PubMed:21193}                                             | 1 |
| Q9NSI2                 |                                                                                      | 0 |
| Q12967                 | Cytoplasm {ECO:0000250 UniProtKB:Q03385}                                             | 0 |
| 095954                 | Cytoplasm, cytoskeleton, microtubule organizing center {ECO:0000269 PubMed:10023074} | 1 |
| Q9H0A9                 |                                                                                      | 0 |
| P48449                 | Endoplasmic reticulum membrane {ECO:0000269 PubMed:10023074}                         | 1 |
| P52735                 |                                                                                      | 0 |
| 060318                 | Isoform GANP: Nucleus envelope {ECO:0000269 PubMed:10023074}                         | 0 |
| P58505                 |                                                                                      | 0 |
| 095613                 | Cytoplasm, cytoskeleton, microtubule organizing center {ECO:0000269 PubMed:10023074} | 1 |
| Q14689                 | Nucleus {ECO:0000305}.                                                               | 0 |
| P04271                 | Cytoplasm {ECO:0000269 PubMed:9925766}.                                              | 1 |

|        |                                         |   |
|--------|-----------------------------------------|---|
| P55345 | Isoform 1: Cytoplasm. Nucleus. Note=Tra | 0 |
| Q8NHS1 | Membrane {ECO:0000305}; Multi-pass mem  | 0 |
| Q76LX8 | Secreted {ECO:0000269 PubMed:12791682}. | 0 |
| Q9UGQ3 | Lysosome membrane {ECO:0000269 PubMed:3 | 0 |
| Q5BN46 |                                         | 0 |
| Q86YR5 | Cytoplasm, cytosol. Endoplasmic reticul | 0 |
| Q8N9M1 |                                         | 0 |
| Q8NE63 | Cytoplasm {ECO:0000250}.                | 0 |
| Q5JU67 | Cytoplasm, cytoskeleton, cilium basal b | 0 |
| Q5JU69 | Endoplasmic reticulum lumen {ECO:000025 | 0 |
| Q969X2 | Golgi apparatus membrane {ECO:0000250}; | 0 |
| Q8TBC3 | Lysosome {ECO:0000269 PubMed:16733801}. | 0 |
| Q8NBN7 | Mitochondrion inner membrane {ECO:00002 | 0 |
| Q96GR4 | Membrane {ECO:0000305}; Multi-pass mem  | 0 |
| Q6P5Z2 | Nucleus {ECO:0000269 PubMed:10441506}.  | 0 |
| Q9H254 | Cytoplasm, cytoskeleton {ECO:0000250}.  | 0 |
| Q8TDC3 | Cytoplasm {ECO:0000269 PubMed:15150265} | 0 |
| Q8NBV4 | Nucleus envelope. Endoplasmic reticulum | 0 |
| Q7L7X3 | Cytoplasm {ECO:0000269 PubMed:13679851} | 0 |
| Q6P2C8 | Nucleus {ECO:0000269 PubMed:10882111, I | 0 |
|        | Cytoplasm {ECO:0000269 PubMed:16306228} | 0 |
| Q86YT9 | Cell membrane {ECO:0000269 PubMed:12869 | 0 |
| Q86SG6 | Cytoplasm {ECO:0000250}. Cytoplasm, cyt | 0 |
| Q96CP7 | Cell membrane {ECO:0000305 PubMed:30509 | 0 |
| Q15424 | Nucleus {ECO:0000269 PubMed:19674106}.  | 1 |
| P09693 | Cell membrane {ECO:0000269 PubMed:86362 | 0 |
| P23297 | Cytoplasm {ECO:0000269 PubMed:15171681} | 0 |
| Q9Y3Y2 | Nucleus {ECO:0000269 PubMed:19254951}.  | 0 |
| P32302 | Cell membrane; Multi-pass membrane prot | 0 |
| O15156 | Nucleus {ECO:0000250 UniProtKB:Q64321}. | 1 |
| Q8NFF5 | Isoform 1: Mitochondrion matrix {ECO:00 | 0 |
| P29353 | Cytoplasm.; Isoform p46Shc: Mitochondri | 1 |
| Q9H270 | Endosome {ECO:0000269 PubMed:20682791}. | 0 |
| Q86UT6 | Mitochondrion outer membrane {ECO:00002 | 1 |
| P55265 | Isoform 1: Cytoplasm {ECO:0000269 PubMe | 0 |
| Q7Z7E8 | Nucleus {ECO:0000250 UniProtKB:Q7TSS2}. | 0 |
| Q53ET0 | Cytoplasm {ECO:0000269 PubMed:15589160} | 1 |
| Q9NW15 | Cell membrane {ECO:0000269 PubMed:20056 | 0 |
| P14324 | Cytoplasm.                              | 0 |
| Q9BVN2 | Cytoplasm. Nucleus. Cytoplasm, cytoskel | 0 |
| P81408 | Membrane {ECO:0000305}; Multi-pass mem  | 0 |
| P02545 | Nucleus {ECO:0000269 PubMed:15372542}.  | 0 |
| Q6ZNJ1 | Endoplasmic reticulum {ECO:0000269 PubM | 0 |
| Q8WUD4 |                                         | 0 |
| Q03431 | Cell membrane {ECO:0000269 PubMed:20172 | 0 |
| Q9NRR5 | Nucleus {ECO:0000269 PubMed:11001934, I | 0 |
| P08590 |                                         | 0 |
| Q8TAP8 |                                         | 0 |
|        |                                         | 0 |
| Q96P31 | Cell membrane {ECO:0000269 PubMed:16849 | 0 |
| P25311 | Secreted.                               | 0 |
| P22455 | Cell membrane; Single-pass type I membr | 0 |
| P08684 | Endoplasmic reticulum membrane; Single- | 1 |
| Q96RE7 | Nucleus. Cytoplasm. Note=Distribution i | 0 |
| P15538 | Mitochondrion membrane.                 | 1 |

|         |                                         |   |
|---------|-----------------------------------------|---|
| P52790  |                                         | 0 |
| Q17RY6  | Secreted {ECO:0000269 PubMed:18089789}. | 0 |
| Q53GI3  | Nucleus {ECO:0000255 PROSITE-ProRule:PF | 0 |
| 095639  | Nucleus.                                | 0 |
| Q9UK41  | Cell membrane {ECO:0000269 PubMed:11916 | 0 |
| Q96HA7  | Cytoplasm. Nucleus. Note=Mainly nuclear | 0 |
| Q2TAK8  | Nucleus {ECO:0000269 PubMed:20347427}.  | 0 |
|         | Cytoplasm {ECO:0000269 PubMed:15317757} | 0 |
| Q15048  | Cytoplasm {ECO:0000269 PubMed:27426725} | 0 |
| Q96JL9  | Nucleus {ECO:0000305}.                  | 0 |
| Q96A83  | Secreted, extracellular space, extracel | 0 |
| Q96I34  | Cell membrane {ECO:0000250}; Lipid-anch | 0 |
| Q96SN7  | Membrane {ECO:0000250}; Multi-pass mem  | 0 |
| Q9NXW9  | Cytoplasm. Nucleus. Midbody. Note=Assoc | 0 |
| Q8IYK2  |                                         | 0 |
|         | Cytoplasm {ECO:0000269 PubMed:9989826}. | 0 |
| Q6NTE8  | Nucleus {ECO:0000269 PubMed:27568553}.  | 0 |
| Q13501  | Cytoplasm, cytosol {ECO:0000269 PubMed: | 1 |
| Q9UQ53  | Golgi apparatus membrane {ECO:0000250}; | 0 |
| P62917  | Cytoplasm {ECO:0000303 PubMed:12962325} | 1 |
| Q92585  | Nucleus speckle {ECO:0000269 PubMed:111 | 0 |
| Q96PD5  | Secreted. Membrane.                     | 0 |
| Q9UFC0  | Nucleus. Chromosome, centromere. Chrom  | 0 |
| Q8NEE6  | Cytoplasm, cytoskeleton, flagellum axon | 0 |
| Q6IQ20  | Golgi apparatus membrane {ECO:0000269 F | 0 |
| P35998  | Cytoplasm {ECO:0000269 PubMed:22078707} | 0 |
| Q8N6W0  | Nucleus {ECO:0000250}. Cytoplasm {ECO:( | 0 |
| Q6NUT3  | Membrane {ECO:0000305}; Multi-pass mem  | 0 |
| Q92997  | Cytoplasm {ECO:0000250 UniProtKB:014641 | 0 |
| Q96CW1  | Cell membrane. Membrane, coated pit; Pe | 0 |
| Q9NUQ8  |                                         | 0 |
| P49585  | Cytoplasm, cytosol {ECO:0000250}. Membr | 0 |
| Q8NI29  |                                         | 0 |
| Q6E0U4  | Secreted {ECO:0000269 PubMed:15234001}. | 0 |
| Q8WU68  | Nucleus {ECO:0000250 UniProtKB:Q8BGJ9}. | 0 |
| Q02338  | Mitochondrion inner membrane {ECO:00002 | 1 |
| 060500  | Cell membrane {ECO:0000305}; Single-pas | 0 |
| Q8NA92  |                                         | 0 |
| Q96SR6  | Nucleus {ECO:0000250}.                  | 0 |
| Q8IYG6  | Cell projection, cilium {ECO:0000250 Ur | 0 |
| Q8IUUK5 | Isoform 1: Cell membrane; Single-pass t | 0 |
| Q96FM1  | Golgi apparatus membrane {ECO:0000305 F | 0 |
| Q9UKT9  | Nucleus. Cytoplasm.                     | 0 |
| P22570  | Mitochondrion inner membrane {ECO:00002 | 1 |
| Q9UHR5  | Nucleus {ECO:0000269 PubMed:15496587}.  | 0 |
| Q15067  | Peroxisome {ECO:0000250 UniProtKB:P0787 | 0 |
| Q8WWM9  | Cytoplasm {ECO:0000250}.                | 0 |
| Q01130  | Nucleus {ECO:0000269 PubMed:21157427}.  | 1 |
| Q9BSK1  | Nucleus {ECO:0000305}.                  | 0 |
| Q96AN5  | Membrane {ECO:0000305}; Multi-pass mem  | 0 |
| Q6JEL2  | Cytoplasm {ECO:0000250}.                | 0 |
| Q8N6L0  | Nucleus outer membrane {ECO:0000250 Uni | 0 |
| 043612  | Rough endoplasmic reticulum {ECO:000025 | 0 |
| Q8IZ83  |                                         | 0 |
| P81605  | Secreted.                               | 0 |

|               |                                         |   |
|---------------|-----------------------------------------|---|
| P08648        | Membrane; Single-pass type I membrane p | 1 |
| Q96RL6        | Membrane; Single-pass type I membrane p | 0 |
| Q13368        |                                         | 0 |
| Q6UXV1        | Membrane {ECO:0000305}; Single-pass typ | 0 |
| Q3MHD2        |                                         | 0 |
| Q96NS5        |                                         | 0 |
| Q5UCC4        | Isoform 1: Membrane {ECO:0000269 PubMed | 0 |
| Q9Y566        | Cytoplasm {ECO:0000250}. Cell junction, | 0 |
| A8MVW0        | Membrane {ECO:0000305}; Single-pass typ | 0 |
| Q8NFT6        | Nucleus {ECO:0000269 PubMed:12065429, F | 0 |
| Q8N3E9        | Membrane; Peripheral membrane protein.  | 0 |
| Q8IVF7        | Cytoplasm {ECO:0000269 PubMed:21834987} | 0 |
| P55064        | Apical cell membrane {ECO:0000269 PubMe | 0 |
| Q9H0H5        | Nucleus. Cytoplasm. Cytoplasm, cytoskel | 0 |
| Q71RC2        | Cytoplasm, Stress granule {ECO:0000269  | 0 |
| Q7Z6J2        | Cytoplasm, perinuclear region {ECO:0000 | 0 |
| Q8IY67        | Nucleus {ECO:0000250}. Cytoplasm {ECO:( | 0 |
| Q9NSB2        |                                         | 0 |
| Q9NSB4        |                                         | 0 |
| Q6PIF2        | Nucleus. Note=Associates with chromatin | 1 |
| Q8NBT2        | Nucleus {ECO:0000269 PubMed:14738735, F | 0 |
| Q96PC2        | Cytoplasm {ECO:0000269 PubMed:11502751} | 0 |
| Q8NC56        | Nucleus inner membrane {ECO:0000269 Pub | 0 |
| P16050        | Cytoplasm, cytosol. Cell membrane; Peri | 0 |
| Q86YW5        | Cell membrane {ECO:0000269 PubMed:15100 | 0 |
| Q96CK0        | Nucleus {ECO:0000305}.                  | 0 |
| Q9P086        | Nucleus {ECO:0000305}.                  | 0 |
| Q9H2A7        | Cell membrane {ECO:0000305}; Single-pas | 0 |
| Q6UWF3        | Membrane {ECO:0000305}; Single-pass men | 0 |
| sive results. |                                         | 0 |
| Q8N143        | Nucleus {ECO:0000250}.                  | 0 |
| P07307        | Membrane; Single-pass type II membrane  | 0 |
| 075888        | Secreted {ECO:0000269 PubMed:11571266}. | 0 |
| Q9H4L4        | Nucleus, nucleolus {ECO:0000269 PubMed: | 1 |
| Q92914        |                                         | 0 |
| P60842        |                                         | 0 |
| P61254        |                                         | 0 |
| Q9Y2Y1        | Nucleus, nucleolus {ECO:0000250 UniProt | 0 |
| Q9BV90        | Nucleus {ECO:0000269 PubMed:15146077}.  | 0 |
| P0CG20        |                                         | 0 |
| Q96KV7        | Cytoplasm, cytoskeleton, microtubule or | 0 |
| Q6PJ21        |                                         | 0 |
| Q7L2K0        |                                         | 0 |
| P41002        | Nucleus. Cytoplasm, cytoskeleton, micro | 0 |
| Q9ULP9        | Cell membrane {ECO:0000269 PubMed:20727 | 0 |
| Q9Y303        |                                         | 0 |
| 000634        | Secreted, extracellular space, extracel | 0 |
| A1A5D9        |                                         | 0 |
| Q96CP2        |                                         | 0 |
| Q96DA0        | Secreted {ECO:0000305}.                 | 0 |
| Q96N20        | Nucleus {ECO:0000305}.                  | 0 |
| 060503        | Cell membrane {ECO:0000269 PubMed:10987 | 0 |
| Q9UPX8        | Apical cell membrane {ECO:0000250}. Cyt | 0 |
| Q9H078        | Mitochondrion {ECO:0000269 PubMed:25597 | 1 |
| Q9UQ49        | Cell membrane {ECO:0000269 PubMed:10861 | 0 |



|        |                                         |   |
|--------|-----------------------------------------|---|
| Q8NBI2 | Late endosome membrane {ECO:0000250}; M | 0 |
| Q7Z5V6 |                                         | 0 |
| Q7L266 | Cytoplasm {ECO:0000269 PubMed:11984834, | 1 |
| Q04323 | Cytoplasm {ECO:0000269 PubMed:23545497} | 0 |
| Q9BQE6 |                                         | 0 |
| Q8N5M4 |                                         | 0 |
| Q9Y6J9 | Nucleus {ECO:0000269 PubMed:11564863, F | 0 |
| Q9UBU9 | Nucleus {ECO:0000269 PubMed:10924507, F | 0 |
| Q13190 | Endoplasmic reticulum-Golgi intermediat | 0 |
| Q8N413 | Mitochondrion inner membrane {ECO:00002 | 0 |
| P47914 |                                         | 0 |
| Q06033 | Secreted.                               | 0 |
| Q86TM6 | Endoplasmic reticulum membrane {ECO:000 | 1 |
| 095159 | Golgi apparatus, cis-Golgi network mem  | 1 |
| 075676 | Nucleus {ECO:0000269 PubMed:11035004, F | 0 |
| 075197 | Membrane {ECO:0000250 UniProtKB:Q91VNO} | 0 |
| Q8NHX9 | Lysosome membrane {ECO:0000250}; Multi- | 0 |
| 095750 | Secreted.                               | 0 |
| Q13113 | Membrane; Single-pass membrane protein. | 0 |
| P17542 | Nucleus {ECO:0000255 PROSITE-ProRule:PF | 0 |
| P30085 | Nucleus {ECO:0000255 HAMAP-Rule:MF_0317 | 0 |
| Q7L4P6 |                                         | 0 |
| P26378 |                                         | 0 |
| Q96BR5 | Mitochondrion intermembrane space {ECO: | 0 |
| Q9COD3 |                                         | 0 |
| 000341 | Membrane; Multi-pass membrane protein.  | 0 |
| Q9NWX4 |                                         | 0 |
| P61326 | Nucleus {ECO:0000269 PubMed:19324961}.  | 0 |
| Q8WXI4 | Mitochondrion matrix {ECO:0000269 PubMe | 1 |
| Q8WW52 | Membrane {ECO:0000305}; Single-pass mem | 0 |
| Q7L3T8 | Mitochondrion matrix {ECO:0000305}.     | 0 |
| Q3ZCV2 |                                         | 0 |
| Q8WZ55 | Cell membrane {ECO:0000250}; Multi-pass | 0 |
| Q9UPU5 |                                         | 0 |
| 014495 | Golgi apparatus, trans-Golgi network me | 0 |
| P54646 | Cytoplasm {ECO:0000250}. Nucleus {ECO:( | 0 |
| Q9UJP4 | Cytoplasm, cytoskeleton, spindle {ECO:( | 0 |
| Q9P217 |                                         | 0 |
| Q9Y692 | Nucleus. Cytoplasm. Note=May be also cy | 1 |
| Q9Y2W3 | Membrane {ECO:0000269 PubMed:28434495}; | 0 |
| Q9NZV5 | Isoform 2: Endoplasmic reticulum membra | 0 |
| P27144 | Mitochondrion matrix {ECO:0000255 HAMAF | 1 |
| P23458 | Endomembrane system; Peripheral membrar | 0 |
| Q9HCJ3 | Nucleus {ECO:0000250}. Cytoplasm {ECO:( | 0 |
| Q99895 |                                         | 0 |
| Q8WZA0 |                                         | 0 |
| Q96R05 | Cytoplasm {ECO:0000250}.                | 0 |
| A6PVL3 | Membrane {ECO:0000305}; Multi-pass mem  | 0 |
| Q8WUP2 | Cell junction, focal adhesion {ECO:0000 | 0 |
| A0PJX8 | Membrane {ECO:0000305}; Multi-pass mem  | 0 |
| Q8NBI3 | Secreted {ECO:0000305}.                 | 0 |
| Q86YL7 | Podoplanin: Membrane {ECO:0000269 PubMe | 0 |
| Q5VT99 | Cell membrane {ECO:0000250}; Single-pas | 0 |
| 075911 | Membrane {ECO:0000305}; Multi-pass mem  | 0 |
| P21941 | Secreted, extracellular space, extracel | 0 |

|        |                                         |   |
|--------|-----------------------------------------|---|
| Q13571 | Lysosome membrane {ECO:0000269 PubMed:8 | 0 |
| 075056 | Cell membrane; Single-pass type I membr | 0 |
| Q9H7C4 | Cytoplasm, perinuclear region {ECO:0000 | 0 |
| Q09028 | Nucleus.                                | 1 |
| Q9P206 |                                         | 0 |
| Q5TGY1 | Membrane {ECO:0000305}; Multi-pass mem  | 0 |
| Q96LJ8 | Cell projection, cilium {ECO:0000269 Pu | 0 |
| Q7Z7J9 | Cell junction, synapse, synaptosome. Ce | 0 |
| P05186 | Cell membrane {ECO:0000269 PubMed:23688 | 0 |
| P56705 | Secreted, extracellular space, extracel | 0 |
| Q6ZVT0 |                                         | 0 |
| P51172 | Cell membrane {ECO:0000269 PubMed:19520 | 0 |
| Q9BRK3 | Cell membrane {ECO:0000269 PubMed:23386 | 0 |
| Q6NZ36 | Nucleus {ECO:0000269 PubMed:22343915, F | 0 |
| 075095 | Secreted {ECO:0000305}.                 | 0 |
| Q5VWK5 | Cell membrane {ECO:0000269 PubMed:12023 | 0 |
| 095661 | Cell membrane {ECO:0000305}; Lipid-anch | 0 |
| Q8NOU7 |                                         | 0 |
| Q12857 | Nucleus.                                | 1 |
| Q96E52 | Mitochondrion inner membrane {ECO:00003 | 0 |
| Q5VVJ2 | Nucleus {ECO:0000255 PROSITE-ProRule:PF | 0 |
| Q9BX74 | Membrane {ECO:0000269 PubMed:11278849}; | 0 |
| 094782 | Nucleus {ECO:0000269 PubMed:15694335}.  | 0 |
| Q96AE4 | Nucleus {ECO:0000305}.                  | 1 |
| Q0ZGT2 | Cytoplasm, cytoskeleton {ECO:0000250 Ur | 0 |
| Q9UDY4 | Cytoplasm {ECO:0000269 PubMed:18837411} | 0 |
| Q9HBW9 | Cell membrane {ECO:0000269 PubMed:23871 | 0 |
| A6PVS8 |                                         | 0 |
| A6NM62 | Membrane {ECO:0000305}; Single-pass mem | 0 |
| Q6IPR3 |                                         | 0 |
| Q9UNH6 | Cytoplasmic vesicle membrane {ECO:00002 | 1 |
| Q5T8I3 |                                         | 0 |
| Q5T8I9 | Cytoplasm {ECO:0000250 UniProtKB:Q568P9 | 0 |
| Q5T1N1 |                                         | 0 |
| Q8N6N3 |                                         | 0 |
| Q8IWG1 |                                         | 0 |
| P32456 | Cytoplasm {ECO:0000269 PubMed:21151871} | 0 |
| Q5T6C5 |                                         | 0 |
| Q96PP9 | Cytoplasm {ECO:0000269 PubMed:17266443} | 0 |
| Q5BKZ1 | Nucleus matrix {ECO:0000250}.           | 1 |
| Q76B58 | Secreted {ECO:0000305}. Mitochondrion   | 0 |
| Q99684 | Nucleus {ECO:0000269 PubMed:11060035, F | 0 |
| Q6UVM3 | Cell membrane {ECO:0000269 PubMed:29069 | 0 |
| P35573 | Cytoplasm {ECO:0000269 PubMed:17908927} | 0 |
| P19320 | Membrane; Single-pass type I membrane p | 0 |
| Q9UBQ6 | Endoplasmic reticulum membrane {ECO:000 | 0 |
| Q8NEW0 | Golgi apparatus, trans-Golgi network me | 0 |
| Q9Y2X9 | Nucleus {ECO:0000269 PubMed:10448078}.  | 0 |
| 015511 | Cytoplasm, cytoskeleton {ECO:0000269 Pu | 0 |
| Q8N126 | Cell membrane {ECO:0000250 UniProtKB:Q9 | 0 |
| Q96P20 | Cytoplasm, cytosol {ECO:0000269 PubMed: | 0 |
| Q8NG06 |                                         | 0 |
| Q96A28 | Membrane; Single-pass type I membrane p | 0 |
| Q92806 | Membrane; Multi-pass membrane protein.  | 0 |
| Q969P0 | Cell membrane {ECO:0000250}; Single-pas | 0 |

|                       |                                         |   |
|-----------------------|-----------------------------------------|---|
| Q15121                | Cytoplasm. Note=Associated with microtu | 1 |
| P40855                | Cytoplasm {ECO:0000269 PubMed:10704444, | 1 |
| Q92542                | Membrane {ECO:0000269 PubMed:10993067,  | 0 |
| Q9ULK5                | Cell membrane {ECO:0000250}; Multi-pass | 0 |
| Q96DU3                | Cell membrane {ECO:0000305}; Single-pas | 0 |
| Q68BL8                | Secreted {ECO:0000250}.                 | 0 |
| Q6BAA4                | Cytoplasm {ECO:0000269 PubMed:15551350, | 0 |
| Q8NEP7                |                                         | 0 |
| Q96LT6                |                                         | 0 |
| Q9Y5Y0                | Isoform 1: Cell membrane {ECO:0000250}; | 0 |
| Q8IYT1                |                                         | 0 |
| P18847                | Nucleus {ECO:0000255 PROSITE-ProRule:PF | 0 |
| Q96T37                | Nucleus speckle {ECO:0000269 PubMed:198 | 1 |
| Q9H6A0                | Cytoplasm {ECO:0000269 PubMed:23182661} | 0 |
| Q5T1B0                |                                         | 0 |
| Q8NAT2                | Cytoplasm {ECO:0000250}. Note=Localizes | 1 |
| Q5VY09                | Nucleus {ECO:0000269 PubMed:25816751}.  | 0 |
| Q8TER0                | Secreted {ECO:0000305}.                 | 0 |
| O95861                |                                         | 0 |
| Q96L03                | Cytoplasm {ECO:0000250}.                | 1 |
| Q5VW32                | Membrane {ECO:0000305}; Lipid-anchor {E | 0 |
| be performed. View pr | Cytoplasm {ECO:0000305}.                | 0 |
| Q9NPH0                | Mitochondrion {ECO:0000269 PubMed:10506 | 0 |
| B1ANS9                |                                         | 0 |
| Q2KJY2                | Cytoplasm {ECO:0000250}. Cytoplasm, cyt | 1 |
| Q9H5Q4                | Mitochondrion.                          | 0 |
| Q6PJW8                | Cell membrane {ECO:0000269 PubMed:19864 | 0 |
| Q6ZMI0                |                                         | 0 |
| Q504Y2                | Secreted {ECO:0000269 PubMed:25171405}. | 0 |
| Q8TDS5                | Cell membrane; Multi-pass membrane prot | 0 |
| P46952                | Cytoplasm, cytosol {ECO:0000305 PubMed: | 1 |
| Q8NCR0                | Golgi apparatus membrane {ECO:0000250}; | 0 |
| P49137                | Cytoplasm {ECO:0000269 PubMed:20932473} | 0 |
| Q9NYY1                | Secreted.                               | 0 |
| Q13007                | Secreted {ECO:0000305}.                 | 0 |
| O60667                | Isoform 1: Membrane {ECO:0000269 PubMec | 0 |
| P01833                | Cell membrane; Single-pass type I membr | 0 |
| Q8WWV6                | Cell membrane {ECO:0000250}; Single-pas | 1 |
| P17655                | Cytoplasm. Cell membrane. Note=Transloc | 0 |
| Q7Z7F7                | Mitochondrion {ECO:0000269 PubMed:25838 | 1 |
| Q9H7D7                | Cytoplasm {ECO:0000269 PubMed:15378603} | 0 |
| Q04864                | Nucleus {ECO:0000250}.                  | 0 |
| Q3MIT2                |                                         | 0 |
| Q92968                | Peroxisome membrane {ECO:0000269 PubMec | 1 |
| Q6NSI8                |                                         | 0 |
| Q9Y577                |                                         | 0 |
| Q52LD8                | Cell membrane {ECO:0000250 UniProtKB:Q1 | 0 |
| Q6MZZ7                |                                         | 0 |
| Q86UE6                | Cell membrane {ECO:0000250}; Single-pas | 0 |
| Q9Y316                |                                         | 0 |
| Q9C005                | Nucleus {ECO:0000269 PubMed:19651892}.  | 0 |
| A2RUC4                |                                         | 0 |
| Q8WWC4                | Mitochondrion matrix {ECO:0000269 PubMe | 0 |
| Q9H3M0                | Membrane; Multi-pass membrane protein.  | 0 |
| Q9Y689                |                                         | 0 |

|        |                                         |   |
|--------|-----------------------------------------|---|
| Q96KN4 | Cytoplasm {ECO:0000269 PubMed:16820875} | 0 |
| P48549 | Membrane; Multi-pass membrane protein.  | 0 |
| Q13562 | Cytoplasm {ECO:0000250}. Nucleus {ECO:( | 0 |
| Q8NHS4 |                                         | 0 |
| Q8WTR2 |                                         | 0 |
| Q96G28 | Nucleus {ECO:0000303 PubMed:19680650}.  | 0 |
| Q8NFH5 | Nucleus, nuclear pore complex {ECO:0000 | 0 |
| Q96M89 |                                         | 0 |
| P63267 | Cytoplasm, cytoskeleton.                | 1 |
| Q9H6R7 |                                         | 0 |
| Q96SB8 | Nucleus {ECO:0000269 PubMed:11408570, F | 0 |
| P84243 | Nucleus. Chromosome.                    | 1 |
| Q7RTX9 | Cell membrane {ECO:0000250}; Multi-pass | 0 |
| Q8WW24 | Cell projection, cilium, flagellum {ECO | 0 |
| Q05925 | Nucleus.                                | 1 |
| Q16585 | Cell membrane, sarcolemma {ECO:0000250} | 0 |
| Q8TC71 | Cytoplasm {ECO:0000269 PubMed:21264228, | 1 |
| Q8IVI9 | Isoform 1: Cell membrane {ECO:0000269 F | 0 |
| Q96MF4 |                                         | 0 |
| A4UGR9 | Cell junction {ECO:0000269 PubMed:15454 | 0 |
| Q8N3I7 | Cell projection, cilium membrane. Cytop | 0 |
| Q9H4L7 | Nucleus. Chromosome. Note=Colocalizes v | 0 |
| 060760 | Cytoplasm {ECO:0000269 PubMed:9353279}. | 1 |
| Q96HC4 | Cell junction, synapse, postsynaptic ce | 1 |
| P29803 | Mitochondrion matrix.                   | 0 |
| Q5VT52 |                                         | 0 |
| Q86SG2 | Nucleus. Note=Sarcomeric I-band and son | 0 |
| P25774 | Lysosome.                               | 1 |
| P28360 | Nucleus.                                | 1 |
| Q9BXJ2 | Secreted {ECO:0000305}.                 | 0 |
| Q96S90 |                                         | 0 |
| Q9BWG6 | Nucleus, nucleoplasm {ECO:0000269 PubMe | 0 |
| Q9NZQ9 | Cytoplasm, cytoskeleton {ECO:0000269 Pu | 1 |
| P19447 | Nucleus.                                | 0 |
| Q8NC42 | Membrane {ECO:0000305}; Single-pass men | 0 |
| Q96ST2 | Nucleus {ECO:0000255 PROSITE-ProRule:PF | 1 |
| Q53S33 | Mitochondrion {ECO:0000269 PubMed:22746 | 0 |
| Q9UKI2 | Endomembrane system {ECO:0000269 PubMec | 0 |
| P31949 | Cytoplasm {ECO:0000269 PubMed:18618420} | 1 |
| P49901 | Cytoplasm. Mitochondrion membrane {ECO: | 0 |
| P07476 | Cytoplasm. Note=Constituent of the scaf | 0 |
| Q9UBC9 | Cytoplasm.                              | 0 |
| Q6P158 |                                         | 0 |
| P42331 |                                         | 0 |
| P06702 | Secreted. Cytoplasm. Cytoplasm, cytoske | 0 |
| P80511 | Secreted {ECO:0000269 PubMed:22811950}. | 0 |
| P01135 | Transforming growth factor alpha: Secre | 0 |
| Q8N7R7 |                                         | 0 |
| Q13467 | Cell membrane {ECO:0000250 UniProtKB:Q8 | 0 |
| P07315 |                                         | 0 |
| Q9NXF7 |                                         | 0 |
| Q5VU69 |                                         | 0 |
| P23582 | Secreted.                               | 0 |
| Q8TDQ7 | Cytoplasm {ECO:0000250}.                | 0 |
| P05187 | Cell membrane; Lipid-anchor, GPI-anchor | 0 |

|        |                                         |   |
|--------|-----------------------------------------|---|
| Q8N1C3 | Cell junction, synapse, postsynaptic ce | 0 |
| P10696 | Cell membrane; Lipid-anchor, GPI-anch   | 0 |
| P18505 | Cell junction, synapse, postsynaptic ce | 0 |
| Q6TCH7 | Golgi apparatus membrane {ECO:0000269 P | 0 |
| Q6NVV3 | Membrane {ECO:0000305}; Multi-pass mem  | 0 |
| P09923 | Cell membrane; Lipid-anchor, GPI-anch   | 1 |
| Q8TDG4 |                                         | 0 |
| Q9Y3D5 | Mitochondrion {ECO:0000269 PubMed:25838 | 0 |
| Q9UFW8 | Nucleus {ECO:0000269 PubMed:9201980}.   | 1 |
| Q6UWZ7 | Nucleus {ECO:0000269 PubMed:17525340, F | 0 |
| Q7Z3F1 | Membrane; Multi-pass membrane protein.  | 0 |
| A0PJW8 |                                         | 0 |
| Q15126 | Cytoplasm, cytosol {ECO:0000269 PubMed: | 0 |
| Q96AQ6 | Cytoplasm, cytoskeleton {ECO:0000269 Pu | 0 |
| O95832 | Cell junction, tight junction {ECO:0000 | 1 |
| Q9BRQ0 | Nucleus {ECO:0000305}.                  | 1 |
| Q86Z02 | Nucleus. Cytoplasm. Note=Predominantly  | 0 |
| Q5T197 | Cell membrane {ECO:0000269 PubMed:27782 | 0 |
| P12111 | Secreted, extracellular space, extracel | 0 |
| Q3KP66 | Nucleus {ECO:0000269 PubMed:28436939}.  | 0 |
| Q9H869 | Cytoplasm {ECO:0000269 PubMed:11710830, | 0 |
| Q8NFY9 | Cytoplasm, cytoskeleton, spindle {ECO:( | 0 |
| Q5NDL2 | Endoplasmic reticulum lumen {ECO:000026 | 0 |
| Q0VAK6 | Cytoplasm {ECO:0000269 PubMed:25250574} | 0 |
| Q8NCW5 | Mitochondrion {ECO:0000255 HAMAP-Rule:M | 0 |
| Q8NBL1 | Endoplasmic reticulum lumen {ECO:000026 | 0 |
| Q8IZD6 | Membrane {ECO:0000305}; Multi-pass mem  | 0 |
| Q86VF2 | Nucleus {ECO:0000250}. Cytoplasm, myofi | 0 |
| P05023 | Cell membrane, sarcolemma {ECO:0000269  | 0 |
| Q8N5X7 |                                         | 0 |
| Q9HC23 | Secreted.                               | 0 |
| Q96M34 | Nucleus {ECO:0000250 UniProtKB:A6X8Z9}. | 0 |
| Q96CX6 |                                         | 0 |
| Q12841 | Secreted {ECO:0000305}.                 | 0 |
| P29536 | Cytoplasm, myofibril, sarcomere {ECO:00 | 1 |
| P78545 | Cytoplasm {ECO:0000269 PubMed:10391676, | 0 |
| Q8N4E4 |                                         | 0 |
| Q96HH4 | Membrane {ECO:0000305}; Multi-pass mem  | 0 |
| Q16270 | Secreted.                               | 0 |
| Q7Z4K8 | Cell projection, axon {ECO:0000250 UniP | 0 |
| P25024 | Cell membrane; Multi-pass membrane prot | 0 |
| O15144 | Cytoplasm, cytoskeleton {ECO:0000269 Pu | 0 |
| P49368 | Cytoplasm {ECO:0000305}.                | 0 |
| Q9BSE2 | Lysosome {ECO:0000250}. Golgi apparatus | 0 |
| Q96BH1 |                                         | 0 |
| Q9NRP7 | Cytoplasm {ECO:0000269 PubMed:10806483} | 0 |
| Q6ZWH5 |                                         | 0 |
| P53672 |                                         | 0 |
| Q8TCG1 | Membrane {ECO:0000305}; Single-pass mem | 0 |
| O95936 | Nucleus {ECO:0000305}.                  | 0 |
| Q9HCG8 | Nucleus {ECO:0000269 PubMed:11991638, F | 0 |
| Q9H6S1 | Cytoplasm {ECO:0000269 PubMed:14560022} | 0 |
| Q9BQ08 | Secreted.                               | 0 |
| Q9H8Y5 | Cytoplasm {ECO:0000269 PubMed:28302725} | 0 |
| Q96PJ5 | Cell membrane {ECO:0000269 PubMed:16157 | 0 |

|        |                                         |   |
|--------|-----------------------------------------|---|
| Q6PIZ9 | Cell membrane {ECO:0000269 PubMed:96875 | 0 |
| P98095 | Secreted, extracellular space, extracel | 0 |
| Q6UWU2 | Secreted {ECO:0000305}.                 | 0 |
| Q8TCJ2 | Endoplasmic reticulum {ECO:0000269 PubM | 0 |
| Q8N4Q1 | Mitochondrion intermembrane space {ECO: | 0 |
| Q7Z7J5 | Nucleus {ECO:0000269 PubMed:15583978}.  | 0 |
| 094856 | Cell membrane; Single-pass type I membr | 0 |
| Q96LA6 | Cell membrane {ECO:0000269 PubMed:15479 | 0 |
| Q562F6 | Nucleus {ECO:0000305 PubMed:17485487}.  | 1 |
| Q99574 | Secreted {ECO:0000269 PubMed:17040209}. | 0 |
| P53597 | Mitochondrion {ECO:0000255 HAMAP-Rule:M | 1 |
| Q9H093 |                                         | 0 |
| P02549 | Cytoplasm, cytoskeleton. Cytoplasm, cel | 1 |
| P41743 | Cytoplasm {ECO:0000269 PubMed:11891849, | 0 |
| P41218 | Nucleus. Cytoplasm. Note=Uniformly dist | 0 |
| Q6K0P9 | Isoform 1: Nucleus, nucleoplasm.; Isofo | 1 |
| Q16666 | Nucleus. Cytoplasm. Note=Cellular distr | 0 |
| 014862 | Nucleus. Cytoplasm. Note=Activated infl | 0 |
| Q9GZV4 | Cytoplasm {ECO:0000250}. Nucleus {ECO:( | 0 |
| P11168 | Cell membrane {ECO:0000269 PubMed:28083 | 1 |
| Q6P5R6 |                                         | 0 |
| P07148 | Cytoplasm.                              | 0 |
| Q5SGD2 | Membrane {ECO:0000305}; Single-pass typ | 0 |
| Q8NDH6 |                                         | 0 |
| Q9Y6W8 | Isoform 1: Cell membrane {ECO:0000305}; | 0 |
| Q8N488 | Nucleus {ECO:0000269 PubMed:11395500, F | 0 |
| Q9NY27 | Cytoplasm, cytoskeleton, microtubule or | 0 |
| Q8N3Z3 |                                         | 0 |
| Q8N0Z3 | Cytoplasm, cytoskeleton, microtubule or | 0 |
| Q8NCU4 |                                         | 0 |
| Q9ULU8 | Cytoplasmic vesicle membrane {ECO:00002 | 0 |
| P78426 | Nucleus {ECO:0000305}.                  | 1 |
| Q92903 | Endoplasmic reticulum membrane {ECO:000 | 1 |
| Q8IZQ1 | Nucleus membrane {ECO:0000269 PubMed:15 | 0 |
| Q8N8Q8 | Mitochondrion inner membrane {ECO:00002 | 0 |
| Q12923 | Cytoplasm, cytoskeleton {ECO:0000269 Pu | 0 |
| Q8TBG9 | Cytoplasmic vesicle, secretory vesicle, | 0 |
| P02768 | Secreted.                               | 0 |
| Q96BT1 |                                         | 0 |
| Q96KX1 |                                         | 0 |
| Q6I9Y2 | Cytoplasm {ECO:0000269 PubMed:12951069} | 0 |
| Q15008 |                                         | 0 |
| Q9P2N4 | Secreted, extracellular space, extracel | 0 |
| Q8N3J5 | Mitochondrion matrix {ECO:0000269 PubMe | 0 |
| Q7LOX2 |                                         | 0 |
| P58418 | Cell membrane {ECO:0000269 PubMed:21310 | 0 |
| P26022 | Secreted.                               | 0 |
| Q9UBX0 | Nucleus {ECO:0000269 PubMed:26781211}.  | 0 |
| Q9C098 | Cytoplasm {ECO:0000250}. Nucleus {ECO:( | 0 |
| Q14BN4 | Cell membrane, sarcolemma {ECO:0000250} | 0 |
| P32969 |                                         | 0 |
| Q96QK8 | Endoplasmic reticulum membrane {ECO:000 | 0 |
| 095059 | Nucleus, nucleolus {ECO:0000269 PubMed: | 0 |
| Q9BV23 | Late endosome membrane {ECO:0000250 Uni | 0 |
| Q13609 | Nucleus {ECO:0000269 PubMed:11141064, F | 0 |

|        |                                          |   |
|--------|------------------------------------------|---|
| A0AV96 | Nucleus {ECO:0000250}.                   | 0 |
| Q92870 |                                          | 0 |
| Q8NFR9 | Isoform 1: Cell membrane {ECO:0000250};  | 0 |
| Q8NAC3 | Cell membrane {ECO:0000269 PubMed:17911} | 0 |
| Q96HD1 | Membrane {ECO:0000305}; Multi-pass mem   | 0 |
| Q5FWE3 | Membrane {ECO:0000305}; Multi-pass mem   | 0 |
| Q9UKZ9 | Secreted {ECO:0000305}.                  | 0 |
| O15042 | Nucleus {ECO:0000269 PubMed:20858735}.   | 1 |
| Q8NCE2 | Cytoplasm {ECO:0000269 PubMed:17008356}  | 0 |
| Q96N46 |                                          | 0 |
| P42830 | Secreted.                                | 0 |
| P02775 | Secreted.                                | 0 |
| P02776 | Secreted {ECO:0000269 PubMed:7644496}.   | 0 |
| Q9H903 | Mitochondrion inner membrane {ECO:00002} | 0 |
| Q96PM5 | Nucleus. Nucleus speckle. Cytoplasm.     | 0 |
| P15088 | Cytoplasmic vesicle, secretory vesicle.  | 1 |
| P46976 |                                          | 0 |
| Q969F9 | Cytoplasm {ECO:0000250 UniProtKB:Q91VB4} | 0 |
| Q96CE8 | Membrane {ECO:0000305}; Multi-pass mem   | 0 |
| Q92547 | Nucleus. Cytoplasm, cytoskeleton, micr   | 0 |
|        | Membrane {ECO:0000250}; Single-pass ty   | 0 |
| Q9NRH2 | Nucleus {ECO:0000250}.                   | 0 |
| Q8N7S2 | Membrane {ECO:0000250}; Lipid-anchor {E  | 0 |
| P55089 | Secreted.                                | 0 |
| Q8N8E2 | Nucleus {ECO:0000269 PubMed:20797688}.   | 0 |
| Q9BWU0 | Nucleus {ECO:0000269 PubMed:15764369}.   | 0 |
| Q5MJ70 | Nucleus {ECO:0000269 PubMed:11980914, F  | 0 |
| Q96AT1 |                                          | 0 |
| Q9NS87 | Cytoplasm. Cytoplasm, cytoskeleton, spi  | 0 |
| P49221 |                                          | 0 |
| Q15061 | Nucleus, nucleolus {ECO:0000269 PubMed:  | 0 |
| Q9NYG2 | Golgi apparatus membrane {ECO:0000269 F  | 0 |
| Q9H5V8 | Isoform 1: Cell membrane {ECO:0000305};  | 0 |
| P05452 | Secreted.                                | 0 |
| Q9NP91 | Apical cell membrane {ECO:0000250}; Mul  | 0 |
| Q9NQ48 | Cytoplasm {ECO:0000269 PubMed:20233871,  | 1 |
| Q9BQS8 | Cytoplasmic vesicle, autophagosome. Enc  | 0 |
| Q0PNE2 |                                          | 0 |
| Q8TDB6 | Cytoplasm {ECO:0000269 PubMed:23230272,  | 0 |
| Q9UQR1 | Nucleus.                                 | 1 |
| Q96T66 | Mitochondrion {ECO:0000269 PubMed:12574} | 0 |
| Q96EX1 | Membrane {ECO:0000305}; Single-pass men  | 0 |
| O95789 | Nucleus {ECO:0000305}.                   | 0 |
| Q86W33 | Membrane; Multi-pass membrane protein.   | 0 |
| Q9ULM3 | Nucleus {ECO:0000305 PubMed:18838386, F  | 0 |
| Q5D1E8 | Nucleus {ECO:0000269 PubMed:16574901}.   | 0 |
| Q8TAD8 | Nucleus {ECO:0000269 PubMed:10887155, F  | 0 |
| O14645 | Cell projection, cilium {ECO:0000269 Pu  | 0 |
| P52434 | Nucleus, nucleolus {ECO:0000269 PubMed:  | 1 |
| Q9UIH9 | Nucleus {ECO:0000269 PubMed:10982849, F  | 0 |
| Q494V2 | Cytoplasm, cytoskeleton, cilium axoneme  | 1 |
| Q96S95 | Nucleus. Cytoplasm, cytosol. Note=Exclu  | 0 |
| Q8WWY8 | Secreted. Membrane; Peripheral membrane  | 0 |
| Q96HV5 | Membrane {ECO:0000305}; Multi-pass mem   | 0 |
| P04843 | Endoplasmic reticulum {ECO:0000250 UniF  | 1 |

|        |                                         |   |
|--------|-----------------------------------------|---|
| Q9HC62 | Nucleus, nuclear pore complex {ECO:0000 | 0 |
| Q9NQ87 | Nucleus {ECO:0000255 PROSITE-ProRule:PF | 0 |
| Q9HBG6 | Cell projection, cilium {ECO:0000269 Pi | 0 |
| P08100 | Membrane {ECO:0000269 PubMed:12566452,  | 0 |
| P35249 | Nucleus {ECO:0000305}.                  | 1 |
| Q96EH5 |                                         | 0 |
| Q92560 | Cytoplasm {ECO:0000269 PubMed:18757409, | 0 |
| P29401 |                                         | 0 |
| Q05655 | Cytoplasm {ECO:0000269 PubMed:15774464, | 0 |
| Q96AA3 | Membrane {ECO:0000305}; Multi-pass mem  | 0 |
| Q9BVP2 | Nucleus {ECO:0000250 UniProtKB:Q811S9}. | 1 |
| Q86U86 | Nucleus {ECO:0000303 PubMed:22952240, F | 0 |
| Q2YD98 | Chromosome {ECO:0000269 PubMed:22466611 | 0 |
| Q9UK61 | Nucleus {ECO:0000269 PubMed:26022416, F | 0 |
| Q9NR81 | Cytoplasm {ECO:0000250}.                | 0 |
| Q14493 | Cytoplasm. Nucleus. Note=Polyribosome-e | 1 |
| P30533 | Rough endoplasmic reticulum lumen {ECO: | 0 |
| Q86UW1 | Cell membrane; Multi-pass membrane prot | 0 |
| 094888 | Nucleus {ECO:0000269 PubMed:22537386}.  | 1 |
| Q8TBF5 | Endoplasmic reticulum membrane {ECO:000 | 0 |
| P08582 | Isoform 1: Cell membrane; Lipid-anchor, | 0 |
| Q7RTM1 | Cell membrane {ECO:0000250 UniProtKB:Q8 | 0 |
| P25815 | Nucleus. Cytoplasm. Cell projection, mi | 0 |
| Q6H8Q1 | Cytoplasm. Note=In skeletal muscle, sar | 0 |
| Q9BV19 |                                         | 0 |
| Q96PL5 | Cell membrane {ECO:0000269 PubMed:11786 | 0 |
| Q5VV52 | Nucleus {ECO:0000305}.                  | 0 |
| Q12904 | Nucleus {ECO:0000269 PubMed:14500886}.  | 0 |
| Q8NHU3 | Cell membrane; Multi-pass membrane prot | 0 |
| P53582 | Cytoplasm {ECO:0000255 HAMAP-Rule:MF_03 | 0 |
| Q8TBM8 | Endoplasmic reticulum membrane {ECO:000 | 0 |
| POCOS5 | Nucleus. Chromosome.                    | 1 |
| Q9ULC0 | Isoform 1: Cell membrane; Single-pass t | 0 |
| Q86UD5 | Cell membrane {ECO:0000269 PubMed:18000 | 0 |
| Q9BUT1 | Cytoplasm {ECO:0000269 PubMed:16380372} | 0 |
| 015173 | Membrane {ECO:0000305}; Single-pass men | 0 |
|        |                                         | 0 |
| Q86UQ0 | Nucleus {ECO:0000269 PubMed:23665872}.  | 0 |
| Q6X9E4 |                                         | 0 |
| 043157 | Isoform 1: Cell membrane {ECO:0000269 F | 0 |
| Q96ER9 | Membrane {ECO:0000305}; Multi-pass mem  | 0 |
| Q8WXE1 | Nucleus {ECO:0000269 PubMed:11721054, F | 0 |
| Q8N114 | Endoplasmic reticulum membrane {ECO:000 | 0 |
| 043609 | Cytoplasm. Membrane; Peripheral membrar | 0 |
| Q9UPA5 | Cytoplasm {ECO:0000250 UniProtKB:088778 | 0 |
| P13798 | Cytoplasm.                              | 1 |
| Q9ULD6 | Cytoplasm {ECO:0000250 UniProtKB:Q059U7 | 0 |
| Q5XPI4 | Cytoplasm {ECO:0000269 PubMed:15531880} | 0 |
| 095757 | Cytoplasm {ECO:0000250}. Nucleus {ECO:( | 1 |
| Q8NHS3 | Lysosome membrane {ECO:0000269 PubMed:] | 0 |
| Q0P651 | Secreted {ECO:0000305}.                 | 0 |
| Q8NCB2 | Cell membrane {ECO:0000250}; Peripheral | 0 |
| Q86VX9 |                                         | 0 |
| Q04912 | Membrane; Single-pass type I membrane p | 0 |
| Q9Y4B4 | Nucleus {ECO:0000250}. Note=Localizes i | 0 |



|        |                                         |   |
|--------|-----------------------------------------|---|
| Q9Y6I9 | Secreted {ECO:0000305}.                 | 0 |
| Q14416 | Cell membrane; Multi-pass membrane prot | 0 |
| Q16829 | Cytoplasm {ECO:0000269 PubMed:9788880}. | 0 |
| Q8NBT0 | Cytoplasm, cytoskeleton, microtubule or | 0 |
| Q96MI6 | Nucleus {ECO:0000250}.                  | 0 |
| Q8TBG4 | Mitochondrion {ECO:0000305}.            | 0 |
| Q8WVX3 | Membrane {ECO:0000305}; Single-pass mem | 0 |
| P56730 | Secreted.                               | 0 |
| O95803 | Golgi apparatus membrane {ECO:0000250}; | 0 |
| P26583 | Nucleus {ECO:0000269 PubMed:11909973, F | 0 |
| O75446 | Nucleus.                                | 1 |
| O75711 | Secreted {ECO:0000305}.                 | 0 |
| P61296 | Nucleus {ECO:0000255 PROSITE-ProRule:PF | 0 |
| Q13257 | Nucleus. Chromosome, centromere, kinet  | 0 |
| P08758 |                                         | 0 |
| Q4W5P6 | Secreted {ECO:0000305}.                 | 0 |
| Q02108 | Cytoplasm {ECO:0000305}.                | 0 |
| Q9NRD0 |                                         | 0 |
| Q9C0F1 | Cytoplasm, cytoskeleton, microtubule or | 0 |
| P15428 | Cytoplasm.                              | 1 |
| Q6UWH4 | Golgi apparatus membrane {ECO:0000305 F | 0 |
| Q9BXJ9 | Cytoplasm. Nucleus. Note=Mainly cytopl  | 0 |
| P40933 | Isoform IL15-S48AA: Secreted.; Isoform  | 0 |
| Q05DH4 |                                         | 0 |
| P53367 |                                         | 0 |
| Q9Y2F5 | Nucleus {ECO:0000269 PubMed:22195968, F | 0 |
| Q96QV1 | Cell membrane {ECO:0000250}; Peripheral | 0 |
| Q9UM13 |                                         | 0 |
| P61221 | Cytoplasm {ECO:0000269 PubMed:11585831} | 0 |
| Q01804 | Cytoplasm {ECO:0000269 PubMed:25944111} | 0 |
| P62312 | Cytoplasm {ECO:0000269 PubMed:12515382} | 0 |
| Q9NVA4 | Membrane {ECO:0000305}; Multi-pass mem  | 0 |
| Q6P2P2 | Cytoplasm {ECO:0000269 PubMed:25737013, | 0 |
| P17301 | Membrane; Single-pass type I membrane p | 1 |
| O96007 | Cytoplasm, cytosol {ECO:0000255 HAMAP-F | 0 |
| O43854 | Secreted.                               | 0 |
| Q8NDZ6 | Membrane {ECO:0000305}; Multi-pass mem  | 0 |
| A1L3X0 | Endoplasmic reticulum membrane {ECO:00  | 0 |
| Q8N183 | Mitochondrion {ECO:0000269 PubMed:15774 | 1 |
| Q68DH5 | Membrane {ECO:0000305}; Multi-pass mem  | 0 |
| Q86VV4 | Nucleus {ECO:0000305 PubMed:25755279}.  | 0 |
| Q6KC79 | Nucleus {ECO:0000269 PubMed:28167679, F | 0 |
| Q86T96 | Endoplasmic reticulum membrane; Single- | 0 |
| Q8WVG9 | Cell membrane {ECO:0000250 UniProtKB:Q8 | 0 |
| Q96AG3 | Mitochondrion outer membrane {ECO:0000  | 0 |
| Q96DR4 |                                         | 0 |
| P53609 |                                         | 0 |
| Q8NEF3 |                                         | 0 |
| A6NCL7 |                                         | 0 |
| Q96DG6 | Cytoplasm, cytosol {ECO:0000269 PubMed: | 0 |
| A6NC05 |                                         | 0 |
| Q96M27 | Golgi apparatus {ECO:0000269 PubMed:155 | 1 |
| P55085 | Cell membrane; Multi-pass membrane prot | 0 |
| Q9HAD4 | Cytoplasm {ECO:0000269 PubMed:27193190} | 0 |
| Q9NQV7 | Nucleus {ECO:0000250}. Chromosome {ECO: | 0 |

|        |                                                              |   |
|--------|--------------------------------------------------------------|---|
| Q43181 | Mitochondrion inner membrane {ECO:0000255}.                  | 0 |
| P00995 | Secreted {ECO:0000269 PubMed:7142173}.                       | 0 |
| Q13639 | Cell membrane; Multi-pass membrane protein                   | 0 |
| Q8TAA5 | Mitochondrion matrix {ECO:0000250}.                          | 0 |
| Q86Y33 |                                                              | 0 |
| Q6UWY0 | Secreted {ECO:0000305}.                                      | 0 |
| Q8TED1 | Membrane {ECO:0000305}; Single-pass membrane protein         | 0 |
| Q17RP2 | Nucleus {ECO:0000305}.                                       | 0 |
| Q86VE9 | Cell membrane {ECO:0000269 PubMed:264160}                    | 0 |
| Q6UWR7 | Cell membrane {ECO:0000269 PubMed:157880}                    | 0 |
| Q8TC20 |                                                              | 0 |
| P42574 | Cytoplasm.                                                   | 1 |
| Q96LW4 | Nucleus. Mitochondrion matrix. Note=Protein                  | 0 |
| Q9NZ08 | Endoplasmic reticulum membrane {ECO:0000255}                 | 0 |
| Q6P179 | Endoplasmic reticulum membrane {ECO:0000255}                 | 1 |
| Q8N3K9 | Nucleus {ECO:0000250 UniProtKB:A0A286XF}                     | 0 |
| Q63HQ2 | Secreted, extracellular space, extracellular matrix          | 0 |
| Q9P2B7 |                                                              | 0 |
| Q8WUU8 | Endoplasmic reticulum membrane {ECO:0000255}                 | 0 |
| Q16568 | Secreted {ECO:0000305}.                                      | 0 |
| Q6R327 |                                                              | 0 |
| Q9H9E1 | Cytoplasm, cytoskeleton {ECO:0000250 UniProtKB:Q9H9E1}       | 0 |
| Q8WVY7 | Nucleus {ECO:0000269 PubMed:15883030, F}                     | 0 |
| A1A519 | Nucleus {ECO:0000269 PubMed:20162441}.                       | 0 |
| O15455 | Endoplasmic reticulum membrane; Single-pass membrane protein | 1 |
| O95478 | Nucleus, nucleolus {ECO:0000269 PubMed:15883030, F}          | 0 |
| Q969S9 | Mitochondrion {ECO:0000255 HAMAP-Rule:MF00001}               | 0 |
| O14746 | Nucleus, nucleolus {ECO:0000269 PubMed:15883030, F}          | 0 |
| Q96N87 | Membrane {ECO:0000305}; Multi-pass membrane protein          | 0 |
| Q96BQ5 |                                                              | 0 |
| Q8IZF7 | Membrane {ECO:0000255}; Multi-pass membrane protein          | 0 |
| Q9UKU0 | Mitochondrion outer membrane {ECO:0000255}                   | 1 |
| Q92599 | Cytoplasm {ECO:0000250 UniProtKB:BOBNF1}                     | 0 |
| Q2M3G4 | Cytoplasm, cytoskeleton {ECO:0000250}.                       | 0 |
| O60383 | Secreted {ECO:0000250}.                                      | 0 |
| O14949 | Mitochondrion inner membrane.                                | 0 |
| Q13002 | Cell membrane; Multi-pass membrane protein                   | 0 |
| Q8N884 | Cell membrane {ECO:0000269 PubMed:308270}                    | 0 |
| O15540 | Cytoplasm.                                                   | 1 |
| O43711 | Nucleus {ECO:0000305}.                                       | 0 |
| Q8N3L3 |                                                              | 0 |
| Q99967 | Nucleus {ECO:0000269 PubMed:12586840, F}                     | 1 |
| O15178 | Nucleus {ECO:0000269 PubMed:22611028, F}                     | 0 |
| Q8N8Z6 | Membrane {ECO:0000305}; Single-pass transmembrane protein    | 0 |
| Q9H9B4 | Mitochondrion inner membrane {ECO:0000255}                   | 0 |
| Q8N6K7 |                                                              | 0 |
| Q86VY9 | Membrane {ECO:0000305}; Multi-pass membrane protein          | 0 |
| Q969J5 | Secreted {ECO:0000269 PubMed:12700595}.                      | 0 |
| Q5SW24 |                                                              | 0 |
| Q86YH6 | Mitochondrion {ECO:0000305}.                                 | 0 |
| A4D263 |                                                              | 0 |
| Q5T5C0 | Cytoplasm {ECO:0000250}. Cell membrane                       | 0 |
| Q96QV6 | Nucleus. Chromosome.                                         | 1 |
| Q8NI17 | Cell membrane {ECO:0000305 PubMed:118770}                    | 0 |
| Q3KP44 |                                                              | 0 |

|        |                                         |   |
|--------|-----------------------------------------|---|
| Q6UXB8 | Secreted {ECO:0000269 PubMed:15344909,  | 0 |
| Q8NCT3 |                                         | 0 |
| Q9UEE5 | Nucleus {ECO:0000269 PubMed:9786912}.   | 0 |
| Q13595 | Nucleus {ECO:0000269 PubMed:9546399}.   | 0 |
| Q86SR1 | Golgi apparatus membrane {ECO:0000250}; | 0 |
| Q9HAJ7 | Isoform 1: Nucleus, nucleolus {ECO:0000 | 0 |
| P62263 |                                         | 0 |
| 060741 | Cell membrane {ECO:0000269 PubMed:15351 | 0 |
| Q8TDC0 | Cytoplasm, myofibril, sarcomere, Z line | 1 |
| Q9UP83 | Cytoplasm, cytosol {ECO:0000269 PubMed: | 0 |
| Q96NK8 | Nucleus {ECO:0000305}.                  | 1 |
| Q1RMZ1 |                                         | 0 |
| 095391 | Nucleus {ECO:0000269 PubMed:10197984, I | 0 |
| Q8TA86 | Nucleus {ECO:0000250}.                  | 0 |
| 095997 | Cytoplasm. Nucleus.                     | 1 |
| P49069 | Membrane; Multi-pass membrane protein.  | 0 |
| 095279 | Membrane {ECO:0000305}; Multi-pass mem  | 0 |
| Q6ZMV9 | Cytoplasm, cytoskeleton {ECO:0000305}.  | 1 |
| Q9UHE8 | Endosome membrane {ECO:0000250 UniProtK | 0 |
| Q96GN5 | Cytoplasm. Nucleus. Note=Associates wit | 0 |
| Q8IXZ3 | Nucleus {ECO:0000305}.                  | 0 |
| Q9NXC5 | Lysosome membrane {ECO:0000269 PubMed:2 | 0 |
| A8MWY0 | Membrane {ECO:0000305}; Single-pass typ | 0 |
| Q70CQ1 | Nucleus {ECO:0000305 PubMed:23824326}.  | 0 |
| Q4VX76 | Endomembrane system {ECO:0000250}; Peri | 0 |
| Q9Y5J3 | Nucleus {ECO:0000255 PROSITE-ProRule:PF | 0 |
| Q6ZNC4 | Nucleus {ECO:0000250 UniProtKB:Q9ERQ3}. | 0 |
| Q01469 | Cytoplasm {ECO:0000269 PubMed:24692551, | 0 |
| Q8N103 |                                         | 0 |
| P08123 | Secreted, extracellular space, extracel | 0 |
| Q4ZHG4 | Secreted {ECO:0000305}.                 | 0 |
| Q96CF2 | Cytoplasm, cytosol. Late endosome membr | 1 |
| Q9UKG4 | Membrane; Multi-pass membrane protein.  | 0 |
| P15259 |                                         | 0 |
| 095415 | Lysosome membrane {ECO:0000305 PubMed:1 | 0 |
| Q8IWU2 | Membrane {ECO:0000269 PubMed:23114966}; | 0 |
| P07858 | Lysosome {ECO:0000269 PubMed:16733801}. | 0 |
| Q9H6I2 | Nucleus {ECO:0000255 PROSITE-ProRule:PF | 1 |
| Q96QB1 | Cytoplasm. Cell junction, focal adhesio | 0 |
| Q08828 | Membrane {ECO:0000250 UniProtKB:P19754} | 0 |
| Q96LL4 |                                         | 0 |
| Q8TAQ9 | Membrane {ECO:0000305}; Single-pass men | 0 |
| Q8NEG2 |                                         | 0 |
| Q14541 | Nucleus {ECO:0000255 PROSITE-ProRule:PF | 1 |
| P28328 | Peroxisome membrane; Multi-pass membrar | 0 |
| 060216 | Double-strand-break repair protein rad2 | 0 |
| Q8IWU4 | Cell membrane {ECO:0000305}; Multi-pass | 0 |
| 000300 | Secreted.                               | 0 |
| Q8IVN8 | Secreted, extracellular space, extracel | 0 |
| Q16816 |                                         | 0 |
| Q7Z407 | Cell membrane {ECO:0000250 UniProtKB:Q8 | 0 |
| Q14159 | Nucleus {ECO:0000269 PubMed:23509288}.  | 0 |
| 043913 | Nucleus.                                | 0 |
| Q01523 | Secreted {ECO:0000269 PubMed:12021776}. | 0 |
| Q86Y56 | Cytoplasm {ECO:0000269 PubMed:23040496, | 0 |

|        |                                         |   |
|--------|-----------------------------------------|---|
| P12838 | Secreted.                               | 0 |
| Q01524 | Secreted.                               | 0 |
| Q9Y236 |                                         | 0 |
| O94901 | Nucleus inner membrane {ECO:0000269 Pub | 0 |
| Q8N573 | Mitochondrion {ECO:0000269 PubMed:1506  | 1 |
| Q96NL1 | Lysosome membrane {ECO:0000269 PubMed:1 | 0 |
| Q99527 | Nucleus. Cytoplasm {ECO:0000250}. Cyto  | 0 |
| Q6ZMB5 | Cell membrane {ECO:0000250 UniProtKB:Q  | 0 |
| P29474 | Cell membrane. Membrane, caveola. Cyto  | 0 |
| Q08648 | Secreted.                               | 0 |
| Q8IY33 | Cell membrane {ECO:0000250}; Peripheral | 1 |
| P07451 | Cytoplasm.                              | 1 |
| Q8N201 | Nucleus membrane {ECO:0000305}; Single- | 0 |
| Q00535 | Isoform 1: Cytoplasm. Cell membrane; Pe | 0 |
| P04920 | Membrane; Multi-pass membrane protein.  | 0 |
| Q14296 | Isoform 4: Mitochondrion matrix {ECO:00 | 0 |
| Q9BVT8 | Membrane {ECO:0000250 UniProtKB:Q9JMG3} | 0 |
| Q96HJ9 | Mitochondrion {ECO:0000269 PubMed:2871  | 0 |
| Q14549 | Nucleus {ECO:0000255 PROSITE-ProRule:PF | 0 |
| Q9H814 | Nucleus, nucleoplasm {ECO:0000269 PubMe | 0 |
| P49419 | Cytoplasm, cytosol {ECO:0000269 PubMed: | 0 |
| P85037 | Nucleus {ECO:0000269 PubMed:25805136, F | 0 |
| P09669 | Mitochondrion inner membrane.           | 1 |
| Q8N2R0 | Nucleus {ECO:0000305}.                  | 0 |
| P63104 | Cytoplasm {ECO:0000269 PubMed:17081065} | 0 |
| Q8WXS3 | Cytoplasm {ECO:0000269 PubMed:11707601} | 0 |
| O60353 | Membrane {ECO:0000250 UniProtKB:Q61089} | 0 |
| Q96CG8 | Secreted, extracellular space, extracel | 0 |
| Q9H2D1 | Mitochondrion inner membrane; Multi-pas | 0 |
| Q9NV06 | Nucleus, nucleolus {ECO:0000269 PubMed: | 0 |
| Q96A56 | Cytoplasm, cytosol. Nucleus. Nucleus, F | 0 |
| Q75QN2 | Nucleus {ECO:0000305}.                  | 0 |
| Q69YN4 | Nucleus speckle {ECO:0000269 PubMed:241 | 0 |
| Q5H8C1 | Secreted, extracellular space, extracel | 0 |
| P55040 | Cell membrane; Peripheral membrane prot | 0 |
| Q9POJ1 | Mitochondrion matrix {ECO:0000250}.     | 0 |
| Q12768 | Cytoplasm, cytosol {ECO:0000269 PubMed: | 1 |
| Q8N5L8 | Nucleus {ECO:0000305}.                  | 0 |
| Q8IW50 |                                         | 0 |
| Q8NCR6 | Cytoplasm, cytoskeleton {ECO:0000250}.  | 0 |
| Q6NSJ0 | Nucleus membrane {ECO:0000250 UniProtKB | 0 |
| P50583 |                                         | 0 |
| Q6PI78 | Cell membrane {ECO:0000269 PubMed:2640  | 0 |
| O75475 | Nucleus {ECO:0000269 PubMed:15642333, F | 1 |
| Q6TFL3 |                                         | 0 |
| Q9NZ09 | Cytoplasm, cytosol {ECO:0000269 PubMed: | 0 |
| P43405 | Cell membrane {ECO:0000305}. Cytoplasm, | 0 |
| Q9BS92 |                                         | 0 |
| O95477 | Membrane {ECO:0000269 PubMed:19258317,  | 0 |
| Q16649 | Nucleus {ECO:0000255 PROSITE-ProRule:PF | 0 |
| Q2VYF4 | Mitochondrion inner membrane {ECO:0000  | 0 |
| P22612 |                                         | 0 |
| Q16595 | Mitochondrion {ECO:0000269 PubMed:15581 | 1 |
| Q9H898 | Nucleus {ECO:0000305}.                  | 1 |
| Q6P5X7 | Membrane {ECO:0000305}; Multi-pass mem  | 0 |

|        |                                         |   |
|--------|-----------------------------------------|---|
| Q7Z304 | Secreted, extracellular space, extracel | 0 |
| A4D1T9 | Cytoplasmic vesicle, secretory vesicle, | 0 |
| Q49A92 |                                         | 0 |
| P00352 | Cytoplasm, cytosol {ECO:0000250 UniProt | 0 |
| Q8NB78 | Nucleus {ECO:0000250}.                  | 0 |
| Q68CP4 | Lysosome membrane {ECO:0000269 PubMed:1 | 0 |
| Q8IZ41 | Cytoplasm, perinuclear region {ECO:0000 | 0 |
| Q5VSY0 | Golgi apparatus {ECO:0000250 UniProtKB: | 1 |
| Q5T6V5 |                                         | 0 |
| P61978 | Cytoplasm {ECO:0000269 PubMed:1729596}. | 0 |
| Q4LDE5 | Secreted {ECO:0000305}. Cytoplasm {ECO: | 0 |
| Q9H1D0 | Cell membrane {ECO:0000269 PubMed:11097 | 0 |
| Q68DC2 | Cell projection, cilium {ECO:0000250 Ur | 0 |
| P09467 |                                         | 0 |
| Q9BRR3 | Membrane {ECO:0000305}; Multi-pass mem  | 0 |
| Q6ZTR5 |                                         | 0 |
| P04839 | Cell membrane; Multi-pass membrane prot | 0 |
| P51808 | Nucleus. Cytoplasm, cytoskeleton. Chron | 0 |
| Q8N6F8 |                                         | 0 |
| Q9NPA3 | Nucleus {ECO:0000250 UniProtKB:Q9CQ20}. | 0 |
| Q96LI9 |                                         | 0 |
| Q8N8K9 |                                         | 0 |
| Q96NR3 | Cell membrane {ECO:0000269 PubMed:20844 | 0 |
| Q96D59 | Endoplasmic reticulum membrane {ECO:000 | 0 |
| Q8TAB3 | Cell membrane {ECO:0000250}; Single-pas | 0 |
| P37287 | Endoplasmic reticulum membrane; Single- | 0 |
| 043915 | Secreted.                               | 0 |
| Q15612 | Cell membrane; Multi-pass membrane prot | 0 |
| Q96SI9 | Cytoplasm {ECO:0000250}. Note=Microtubu | 0 |
| 015551 | Cell junction, tight junction {ECO:0000 | 1 |
| Q14C86 | Membrane {ECO:0000269 PubMed:16410077}; | 0 |
| Q96LW7 | Isoform 1: Nucleus {ECO:0000269 PubMed: | 0 |
| Q9Y3S1 | Cytoplasm {ECO:0000269 PubMed:17667937, | 0 |
| Q04656 | Golgi apparatus, trans-Golgi network me | 0 |
| Q7RTV3 | Nucleus {ECO:0000269 PubMed:15344908}.  | 0 |
| Q8NFZ3 | Cell membrane; Single-pass type I membe | 0 |
| Q7Z353 | Nucleus {ECO:0000255 PROSITE-ProRule:PF | 0 |
| 095139 | Mitochondrion inner membrane {ECO:0000  | 1 |
| Q9H6R4 | Nucleus, nucleolus {ECO:0000269 PubMed: | 1 |
| Q92482 | Cell membrane {ECO:0000269 PubMed:12239 | 0 |
| Q6PF06 |                                         | 0 |
| P55072 | Cytoplasm, cytosol {ECO:0000269 PubMed: | 1 |
| Q9UJZ1 | Cell membrane {ECO:0000269 PubMed:10713 | 0 |
| Q6RI45 |                                         | 0 |
| 094991 | Membrane {ECO:0000305}; Single-pass typ | 0 |
| Q14680 | Cell membrane {ECO:0000269 PubMed:16159 | 0 |
| Q5W041 |                                         | 0 |
| Q5VV17 |                                         | 0 |
| Q8IWW6 |                                         | 0 |
| Q8TDW7 | Membrane {ECO:0000305}; Single-pass typ | 0 |
| Q5U5R9 |                                         | 0 |
| Q8WY07 | Cell membrane; Multi-pass membrane prot | 0 |
| Q7Z6M2 |                                         | 0 |
| Q5JSJ4 |                                         | 0 |
| Q96P66 | Cell membrane; Multi-pass membrane prot | 0 |

|        |                                         |   |
|--------|-----------------------------------------|---|
| P57739 | Cell junction, tight junction {ECO:0000 | 1 |
| Q96NI6 | Membrane {ECO:0000250}; Single-pass ty  | 0 |
| Q8N456 | Cytoplasm {ECO:0000250}.                | 0 |
| Q14191 | Nucleus, nucleolus {ECO:0000269 PubMed: | 0 |
| Q5T0T0 | Cytoplasmic vesicle membrane {ECO:00002 | 0 |
| P16473 | Cell membrane {ECO:0000269 PubMed:11847 | 0 |
| Q9Y281 | Nucleus matrix {ECO:0000250}. Cytoplasm | 0 |
| Q9Y2Z0 | Cytoplasm {ECO:0000269 PubMed:21864708} | 0 |
| P52655 | Nucleus.                                | 0 |
| Q8N2G6 |                                         | 0 |
| Q6PCE3 |                                         | 0 |
| Q96FC7 |                                         | 0 |
| Q7RTY1 | Cell membrane {ECO:0000250}; Multi-pass | 0 |
| O15357 | Cytoplasm, cytosol {ECO:0000269 PubMed: | 0 |
| O14813 | Nucleus {ECO:0000255 PROSITE-ProRule:PF | 0 |
| P11226 | Secreted {ECO:0000269 PubMed:7982896}.  | 0 |
| P29033 | Cell membrane {ECO:0000269 PubMed:16849 | 0 |
| Q9Y2S2 | Cytoplasm {ECO:0000250}.                | 1 |
| Q14CZ8 | Cytoplasm {ECO:0000269 PubMed:15885354, | 0 |
| Q8IX90 | Cytoplasm, cytoskeleton, spindle. Chron | 0 |
| Q8IYU8 | Mitochondrion intermembrane space {ECO: | 0 |
| Q8IXT1 | Cytoplasm {ECO:0000250}. Nucleus {ECO:( | 0 |
| Q96KN3 | Nucleus {ECO:0000255 PROSITE-ProRule:PF | 1 |
| Q96L21 |                                         | 0 |
| Q96L50 |                                         | 0 |
| Q9NVR5 | Cytoplasm {ECO:0000255 HAMAP-Rule:MF_03 | 1 |
| Q9NTK1 | Cytoplasm {ECO:0000269 PubMed:24530860, | 0 |
| Q8TD91 |                                         | 0 |
| P17026 | Nucleus {ECO:0000250}.                  | 0 |
| Q9Y2U9 | Nucleus {ECO:0000269 PubMed:11384994}.  | 0 |
| Q05BV3 | Cytoplasm, cytoskeleton {ECO:0000305}.  | 0 |
| O60524 | Nucleus {ECO:0000305}.                  | 0 |
| Q96CM3 | Mitochondrion matrix {ECO:0000269 PubMe | 0 |
| P62330 | Cytoplasm, cytosol {ECO:0000269 PubMed: | 0 |
| Q9P1W3 | Membrane {ECO:0000305}; Multi-pass mem  | 0 |
| Q9NPG2 | Perikaryon {ECO:0000250}. Cytoplasm. Mi | 1 |
| Q6NXP6 |                                         | 0 |
| Q99626 | Nucleus.                                | 1 |
| Q8N7J2 | Cell membrane {ECO:0000269 PubMed:22128 | 0 |
| Q96JD6 | Cytoplasm {ECO:0000305}.                | 0 |
| Q86V97 |                                         | 0 |
| O60225 |                                         | 0 |
| Q99909 |                                         | 0 |
| P32243 | Nucleus {ECO:0000269 PubMed:19414065}.  | 0 |
| A6NNA5 | Nucleus {ECO:0000255 PROSITE-ProRule:PF | 0 |
| Q9UKK9 | Nucleus {ECO:0000305 PubMed:27257257}.  | 0 |
| Q9NYF0 | Cytoplasm. Nucleus. Cell junction, syna | 0 |
| Q8WVF2 | Secreted, extracellular space, extracel | 0 |
| Q8N7W2 |                                         | 0 |
| P36542 | Mitochondrion inner membrane {ECO:00002 | 0 |
| Q99633 | Nucleus speckle {ECO:0000250}. Note=Col | 1 |
| Q8IW00 | Peptide Lv: Secreted {ECO:0000250 UniPr | 0 |
| P45880 | Mitochondrion outer membrane {ECO:00002 | 1 |
| Q86VU5 | Membrane {ECO:0000305}; Single-pass ty  | 0 |
| Q05940 | Cytoplasmic vesicle membrane; Multi-pas | 0 |

|        |                                         |   |
|--------|-----------------------------------------|---|
| Q8NEN9 | Endoplasmic reticulum membrane {ECO:000 | 0 |
| Q96F45 | Nucleus {ECO:0000250}.                  | 0 |
| Q15018 | Cytoplasm {ECO:0000269 PubMed:20656690, | 0 |
| Q6ZRP7 | Membrane {ECO:0000269 PubMed:14633699}; | 0 |
| Q9H8W3 |                                         | 0 |
| Q96L73 | Nucleus. Chromosome {ECO:0000305}.      | 1 |
| P30048 | Mitochondrion {ECO:0000250 UniProtKB:P  | 1 |
| Q16206 | Cell membrane. Secreted, extracellular  | 0 |
| Q9H3K2 | Mitochondrion inner membrane {ECO:00002 | 0 |
| Q5SXM2 | Nucleus {ECO:0000255 PROSITE-ProRule:PF | 0 |
| Q4KMG9 | Membrane {ECO:0000305}; Single-pass typ | 1 |
| Q10713 | Mitochondrion matrix {ECO:0000250 UniP  | 1 |
| Q96C92 | Cytoplasm {ECO:0000250 UniProtKB:A2AIW  | 0 |
| Q6ZUT3 | Cell projection {ECO:0000250 UniProtKB: | 0 |
| Q96MA6 | Cytoplasm, cytosol {ECO:0000269 PubMed: | 0 |
| Q96E40 | Cytoplasm {ECO:0000250 UniProtKB:Q7TPM  | 0 |
| Q92574 | Cytoplasm {ECO:0000269 PubMed:9809973}. | 0 |
| Q5VTD9 | Nucleus {ECO:0000269 PubMed:16688220}.  | 1 |
| P00492 | Cytoplasm.                              | 1 |
| Q969J3 | Lysosome membrane {ECO:0000269 PubMed:2 | 0 |
| Q5VUD6 | Endoplasmic reticulum membrane {ECO:000 | 0 |
| Q96E35 | Cytoplasm {ECO:0000269 PubMed:12208518} | 1 |
| Q6ZVD7 | Isoform A: Cytoplasm {ECO:0000269 PubMe | 0 |
| P07949 | Cell membrane {ECO:0000269 PubMed:1982  | 0 |
| Q9NR30 | Nucleus, nucleolus {ECO:0000269 PubMed: | 0 |
| Q14692 | Nucleus, nucleolus {ECO:0000250}.       | 0 |
| Q86UX6 |                                         | 0 |
| Q9P266 | Cell junction, adherens junction {ECO:( | 0 |
| Q9BWH2 |                                         | 0 |
| Q86T03 | Late endosome membrane {ECO:0000269 Pub | 0 |
| Q9H7H0 | Mitochondrion {ECO:0000250}.            | 0 |
| Q9NP94 | Cell membrane; Multi-pass membrane prot | 0 |
| Q9UN36 | Cytoplasm. Cytoplasm, perinuclear regio | 0 |
| Q9H1E1 | Secreted {ECO:0000269 PubMed:12244054,  | 0 |
| Q8TER5 | Cytoplasm {ECO:0000269 PubMed:16143467} | 0 |
| Q6X4W1 | Nucleus {ECO:0000269 PubMed:20025934}.  | 0 |
| Q9P2Y4 | Nucleus {ECO:0000269 PubMed:10819330, F | 0 |
| P55210 | Cytoplasm.                              | 0 |
| Q96LQ0 |                                         | 0 |
| Q7Z3E2 |                                         | 0 |
| Q5GFL6 | Secreted.                               | 0 |
| Q9Y467 | Nucleus {ECO:0000305}.                  | 0 |
| Q96NZ9 | Secreted {ECO:0000269 PubMed:14583459}. | 0 |
| Q8WWH5 | Nucleus {ECO:0000269 PubMed:28073919}.  | 0 |
| Q5W0A0 |                                         | 0 |
| P33261 | Endoplasmic reticulum membrane; Periphe | 1 |
| Q9HBF4 | Golgi apparatus, Golgi stack. Endoplasm | 0 |
| O43301 | Cytoplasm {ECO:0000250 UniProtKB:Q8KOU  | 0 |
| Q92837 | Cytoplasm.                              | 0 |
| Q9HAC8 |                                         | 0 |
| Q9GZV1 | Cytoplasm, myofibril, sarcomere, I band | 0 |
| A6NI28 |                                         | 0 |
| Q86U28 | Mitochondrion {ECO:0000269 PubMed:2232  | 0 |
| Q3ZCN5 | Secreted {ECO:0000305}.                 | 0 |
| Q8N3Y3 | Golgi apparatus membrane {ECO:0000269 F | 0 |

|        |                                         |   |
|--------|-----------------------------------------|---|
| Q9UKS6 | Cytoplasm {ECO:0000269 PubMed:11179684} | 0 |
| Q86TV6 | Cytoplasm, cytosol {ECO:0000269 PubMed: | 0 |
| Q96H72 | Golgi apparatus membrane {ECO:0000269 F | 0 |
| P17980 | Cytoplasm {ECO:0000305}. Nucleus {ECO:( | 0 |
| Q13702 | Cell membrane; Peripheral membrane prot | 0 |
| Q5U5Z8 | Cytoplasm, cytosol {ECO:0000250 UniProt | 0 |
| Q8N9U0 | Nucleus {ECO:0000250}.                  | 0 |
| Q9P2I0 | Nucleus {ECO:0000305}.                  | 1 |
| A6NFE2 | Membrane {ECO:0000305}; Single-pass men | 0 |
| Q96BY2 |                                         | 0 |
|        | Mitochondrion membrane {ECO:0000269 Put | 0 |
| Q96JQ2 | Membrane {ECO:0000305}; Single-pass tyf | 0 |
| Q6ZMN7 |                                         | 0 |
| Q92832 | Cytoplasm {ECO:0000269 PubMed:21723284} | 0 |
| Q96BW5 |                                         | 0 |
| Q08289 | Cell membrane, sarcolemma {ECO:0000250} | 1 |
| Q96KC2 |                                         | 0 |
| Q9NRQ5 | Membrane {ECO:0000305}; Single-pass men | 0 |
| Q9C0D2 | Cytoplasm, cytoskeleton, microtubule or | 0 |
| Q96PR1 | Cell membrane {ECO:0000269 PubMed:15709 | 0 |
| Q9H5J8 | Nucleus {ECO:0000269 PubMed:15520167, F | 0 |
| Q8N961 |                                         | 0 |
| Q7Z5L2 |                                         | 0 |
| Q8IY63 | Cell junction, tight junction {ECO:0000 | 0 |
| Q92743 | Cell membrane {ECO:0000269 PubMed:21297 | 0 |
| Q86XR8 | Nucleus {ECO:0000250}. Cytoplasm. Cytof | 0 |
| Q8N4U5 |                                         | 0 |
| Q8IV76 | Isoform 1: Nucleus {ECO:0000269 PubMed: | 1 |
| Q7Z699 | Cell membrane {ECO:0000269 PubMed:16115 | 0 |
| Q8N6Q1 | Membrane {ECO:0000305}; Single-pass men | 0 |
| Q14439 | Cell membrane {ECO:0000250 UniProtKB:Q8 | 0 |
| Q9BX67 | Cell membrane {ECO:0000269 PubMed:11590 | 0 |
| Q9H293 | Secreted.                               | 0 |
| Q96DZ9 | Membrane; Multi-pass membrane protein.  | 0 |
| Q8NCI6 |                                         | 0 |
| Q8TE58 | Secreted, extracellular space, extracel | 0 |
| Q8N4V2 | Cytoplasmic vesicle, secretory vesicle, | 0 |
| Q7Z5L4 | Mitochondrion outer membrane {ECO:00002 | 0 |
| Q8TD30 |                                         | 0 |
| Q9BXJ7 | Isoform 1: Apical cell membrane {ECO:00 | 0 |
| Q70UQ0 | Endoplasmic reticulum membrane {ECO:000 | 1 |
| Q8IZ73 |                                         | 0 |
| Q9NWT6 | Nucleus. Cytoplasm. Cytoplasm, perinuc  | 1 |
| O95169 | Mitochondrion inner membrane {ECO:00003 | 1 |
| Q96K21 | Cytoplasm, cytoskeleton, microtubule or | 0 |
| Q9NXH3 | Cytoplasm {ECO:0000305}.                | 0 |
| O43278 | Secreted.                               | 0 |
| P35555 | Secreted {ECO:0000269 PubMed:24982166}. | 0 |
| Q8N2C3 |                                         | 0 |
| Q8N967 | Membrane {ECO:0000305}; Single-pass tyf | 0 |
| Q9NPI1 | Isoform 2: Nucleus.                     | 1 |
| P12277 | Cytoplasm.                              | 1 |
| Q9Y297 | Cytoplasm {ECO:0000250 UniProtKB:Q3ULA2 | 0 |
| Q9UL15 |                                         | 0 |
| Q9BVM2 |                                         | 0 |



|        |                                         |   |
|--------|-----------------------------------------|---|
| Q9BRS8 | Cytoplasm {ECO:0000269 PubMed:17383118} | 0 |
| Q9BZZ5 | Nucleus {ECO:0000269 PubMed:11075807}.  | 0 |
| Q86U10 |                                         | 0 |
| Q9P2F9 | Nucleus {ECO:0000305}.                  | 0 |
| Q86YV9 | Microsome membrane {ECO:0000269 PubMed: | 0 |
| Q96LD8 |                                         | 0 |
| Q14978 | Nucleus, nucleolus {ECO:0000269 PubMed: | 1 |
| Q96Q83 | Nucleus {ECO:0000269 PubMed:12486230, I | 0 |
| P61201 | Cytoplasm {ECO:0000269 PubMed:9535219}. | 0 |
| O95470 | Endoplasmic reticulum membrane {ECO:000 | 1 |
| P78371 | Cytoplasm {ECO:0000269 PubMed:20080638} | 1 |
| P61457 | Cytoplasm. Nucleus. Note=Cytoplasmic ar | 0 |
| Q9Y4X5 | Cytoplasm {ECO:0000269 PubMed:11278816, | 0 |
| Q8IYS4 |                                         | 0 |
| Q9Y6N1 | Mitochondrion inner membrane {ECO:00002 | 0 |
| Q96M60 |                                         | 0 |
| Q6ZWJ1 | Cytoplasm {ECO:0000250}.                | 0 |
| Q96J86 | Membrane {ECO:0000305}; Single-pass typ | 0 |
| Q93034 |                                         | 0 |
| Q96LU7 | Membrane {ECO:0000305}; Single-pass mem | 0 |
| Q9NX94 | Membrane {ECO:0000305}; Single-pass mem | 0 |
| Q96B45 | Lysosome membrane {ECO:0000305 PubMed:2 | 0 |
| P06681 | Secreted.                               | 0 |
| Q96S99 | Nucleus {ECO:0000269 PubMed:16188880}.  | 0 |
| Q9NV29 | Cell membrane; Multi-pass membrane prot | 0 |
| Q96DE5 | Cytoplasm {ECO:0000269 PubMed:20360068} | 0 |
| 000213 | Cell membrane. Cytoplasm. Nucleus. Cell | 0 |
| Q9H987 | Cytoplasm, cytoskeleton {ECO:0000250}.  | 1 |
| Q86X67 |                                         | 0 |
| Q96DX7 |                                         | 0 |
| A6NF36 |                                         | 0 |
| Q13418 | Cell junction, focal adhesion {ECO:0000 | 0 |
| Q12962 | Nucleus {ECO:0000269 PubMed:11564863, I | 1 |
| 014773 | Lysosome {ECO:0000269 PubMed:19941651}. | 0 |
| Q96JQ0 | Cell membrane {ECO:0000250}; Single-pas | 0 |
| P00167 | Isoform 1: Endoplasmic reticulum membra | 1 |
| Q70EL1 |                                         | 0 |
| Q86VG3 |                                         | 0 |
| Q6ZMY6 |                                         | 0 |
| 043861 | Golgi apparatus, trans-Golgi network me | 0 |
| Q8ND30 |                                         | 0 |
| Q3SYC2 | Endoplasmic reticulum membrane {ECO:000 | 0 |
| Q6BCY4 |                                         | 0 |
| 075635 | Cytoplasm {ECO:0000250}.                | 0 |
| 015063 |                                         | 0 |
| P50452 | Cytoplasm.                              | 0 |
| P50607 | Cytoplasm {ECO:0000250}. Nucleus {ECO:( | 0 |
| Q7Z5B4 | Isoform 1: Endoplasmic reticulum membra | 0 |
| P50213 | Mitochondrion.                          | 1 |
| Q3MJ13 | Cytoplasmic vesicle {ECO:0000250 UniPro | 0 |
| P29762 | Cytoplasm {ECO:0000269 PubMed:11909957} | 0 |
| Q96BZ4 | Membrane {ECO:0000305}; Single-pass mem | 0 |
| Q5H9K5 | Nucleus {ECO:0000305}.                  | 0 |
| 015016 | Nucleus. Note=Forms discrete foci withi | 0 |
| Q8NCN4 | Nucleus, nucleoplasm {ECO:0000269 PubMe | 0 |

|                       |                                         |   |
|-----------------------|-----------------------------------------|---|
| P46776                |                                         | 0 |
| P78524                | Isoform 1: Cytoplasm, cell cortex {ECO: | 0 |
| Q8N8U2                | Nucleus {ECO:0000250}.                  | 0 |
| Q8N3G9                | Golgi apparatus membrane {ECO:0000269 F | 0 |
| O43313                | Nucleus {ECO:0000269 PubMed:15933716, F | 0 |
| Q6P387                |                                         | 0 |
| Q5BJD5                | Endoplasmic reticulum membrane {ECO:000 | 0 |
| Q8WVC0                | Nucleus {ECO:0000269 PubMed:15791002}.  | 0 |
| P52747                | Nucleus {ECO:0000305}.                  | 1 |
| Q96JJ7                | Endoplasmic reticulum membrane {ECO:000 | 0 |
| P55083                | Secreted, extracellular space, extracel | 0 |
| P30291                | Nucleus.                                | 0 |
| Q13164                | Cytoplasm. Nucleus. Nucleus, PML body.  | 0 |
| P05771                | Cytoplasm {ECO:0000250}. Nucleus {ECO:( | 0 |
| Q9Y3E1                | Nucleus {ECO:0000269 PubMed:10581169}.  | 0 |
| P52849                | Golgi apparatus membrane {ECO:0000250}; | 0 |
| P33993                | Nucleus {ECO:0000250}.                  | 1 |
| be performed. View pr | Secreted {ECO:0000269 PubMed:19173304}. | 0 |
| Q9H2F9                | Cytoplasm, cytoskeleton, microtubule or | 1 |
| Q9ULY5                | Membrane {ECO:0000305 PubMed:24101491}; | 0 |
| P17036                | Nucleus {ECO:0000305}.                  | 1 |
| Q8WXI8                | Membrane {ECO:0000250 UniProtKB:Q69FH1, | 0 |
| Q9Y5A6                | Nucleus {ECO:0000255 PROSITE-ProRule:PF | 0 |
| A8K2U0                | Secreted {ECO:0000269 PubMed:16298998}. | 0 |
| Q3B7T3                | Membrane {ECO:0000305}; Single-pass mem | 0 |
| O00142                | Mitochondrion.                          | 0 |
| Q9Y3Q3                | Endoplasmic reticulum-Golgi intermediat | 0 |
| Q9BY50                | Microsome membrane {ECO:0000250}; Singl | 0 |
| Q7Z7G2                | Cell junction, synapse {ECO:0000250 Uni | 0 |
| Q86UB9                | Mitochondrion membrane {ECO:0000250 Uni | 0 |
| Q96DY2                | Cytoplasm, cytoskeleton, flagellum axor | 0 |
| Q9GZM8                | Cytoplasm, cytoskeleton. Cytoplasm, cyt | 0 |
| Q7Z7K6                | Chromosome, centromere, kinetochore {EC | 0 |
| O75309                | Cell membrane {ECO:0000305}; Single-pas | 0 |
| P55042                | Cell membrane {ECO:0000250}.            | 0 |
| Q9Y3D0                | Nucleus {ECO:0000269 PubMed:20797633}.  | 0 |
| Q8N1V2                | Cytoplasm {ECO:0000269 PubMed:15967112} | 0 |
| P14625                | Endoplasmic reticulum lumen {ECO:000030 | 1 |
| P32245                | Cell membrane {ECO:0000269 PubMed:25165 | 0 |
| Q5U623                | Nucleus.                                | 1 |
| P09238                | Secreted, extracellular space, extracel | 0 |
| A6NH52                | Membrane {ECO:0000305}; Multi-pass memt | 0 |
| Q00994                | Nucleus. Cytoplasm. Note=Shuttles betwe | 0 |
| Q8WTW3                | Golgi apparatus membrane {ECO:0000305 F | 1 |
| Q6IQ23                | Cell junction, adherens junction {ECO:( | 0 |
| Q8WXB4                | Nucleus {ECO:0000269 PubMed:15964554}.  | 0 |
| POCG32                |                                         | 0 |
| P61769                | Secreted {ECO:0000269 PubMed:1336137, F | 0 |
| Q92610                | Nucleus {ECO:0000305}.                  | 0 |
| Q6P4E1                | Membrane {ECO:0000305}; Single-pass typ | 0 |
| P46098                | Cell junction, synapse, postsynaptic ce | 0 |
| P40261                | Cytoplasm.                              | 0 |
| Q08AH1                | Mitochondrion matrix {ECO:0000250 UniPr | 0 |
| O43747                | Golgi apparatus {ECO:0000269 PubMed:127 | 0 |
| Q08AF3                |                                         | 0 |

|        |                                          |   |
|--------|------------------------------------------|---|
| Q96MC5 |                                          | 0 |
| Q9Y4F3 | Peroxisome {ECO:0000269 PubMed:15932519} | 0 |
| Q96ER3 | Nucleus {ECO:0000269 PubMed:22127701}.   | 0 |
| Q96NS1 | Nucleus, nucleolus {ECO:0000269 PubMed:  | 0 |
| P23284 | Endoplasmic reticulum lumen {ECO:000026  | 1 |
| P07864 | Cytoplasm.                               | 1 |
| Q9H5X1 | Cytoplasm {ECO:0000269 PubMed:22683786}  | 0 |
| Q96PZ2 | Nucleus. Cytoplasm. Note=Mainly localiz  | 0 |
| Q2M1P5 | Cell projection, cilium {ECO:0000269 Pu  | 0 |
| Q86WU2 | Mitochondrion {ECO:0000250 UniProtKB:Q7  | 1 |
| O60240 | Endoplasmic reticulum {ECO:0000269 PubM  | 0 |
| P15144 | Cell membrane {ECO:0000269 PubMed:25648  | 0 |
| Q8IVL1 | Nucleus {ECO:0000269 PubMed:12214280}.   | 0 |
| Q495B1 |                                          | 0 |
| Q969I3 |                                          | 0 |
| Q9BTE1 | Cytoplasm, cytoskeleton {ECO:0000250}.   | 0 |
| Q9NYB0 | Nucleus {ECO:0000250 UniProtKB:Q91VL8}.  | 0 |
| P53350 | Nucleus. Chromosome, centromere, kineto  | 0 |
| O76031 | Mitochondrion. Mitochondrion matrix, mi  | 0 |
| O15218 | Cell membrane; Multi-pass membrane prot  | 0 |
| O15060 | Nucleus {ECO:0000305}.                   | 0 |
| Q9UHF0 | Secreted.                                | 0 |
| Q9UBC5 |                                          | 0 |
| O43745 | Nucleus {ECO:0000269 PubMed:21392185}.   | 0 |
| O14524 | Nucleus inner membrane {ECO:0000250 Uni  | 0 |
| Q15742 | Nucleus {ECO:0000250}. Note=Isoform 2 i  | 0 |
| P42226 | Cytoplasm. Nucleus. Note=Translocated i  | 0 |
| Q86TB9 | Cytoplasm, P-body. Nucleus. Nucleus, PM  | 0 |
| Q9Y6H3 |                                          | 0 |
| Q5R3F8 | Membrane {ECO:0000305}; Single-pass men  | 0 |
| Q13277 | Membrane {ECO:0000305}; Single-pass typ  | 0 |
| Q9NX20 | Mitochondrion {ECO:0000269 PubMed:25278  | 1 |
| Q8TBX8 | Cytoplasm. Membrane. Note=Mostly found   | 0 |
| Q9NXD2 |                                          | 0 |
| P31946 | Cytoplasm {ECO:0000269 PubMed:17081065}  | 1 |
| Q9C002 | Nucleus {ECO:0000269 PubMed:12209954}.   | 0 |
| P05408 | Secreted. Note=Neuroendocrine and endoc  | 0 |
| O60565 | Secreted {ECO:0000305}.                  | 0 |
| Q6ZVC0 |                                          | 0 |
| Q9Y3Q8 | Nucleus {ECO:0000305}.                   | 0 |
| Q9GZW8 | Membrane; Multi-pass membrane protein.   | 0 |
| Q9H3V2 | Membrane; Multi-pass membrane protein.   | 0 |
| Q8TF46 | Cytoplasm {ECO:0000269 PubMed:20531386,  | 0 |
| O95273 | Cytoplasm. Nucleus.                      | 1 |
| P16452 | Cell membrane; Lipid-anchor; Cytoplasmic | 0 |
| O95932 | Cytoplasm {ECO:0000269 PubMed:23206699,  | 0 |
| P84022 | Cytoplasm {ECO:0000269 PubMed:15799969,  | 0 |
| Q9BY19 | Membrane; Multi-pass membrane protein.   | 0 |
| P78559 | Cytoplasm, cytoskeleton {ECO:0000305}.   | 1 |
| A6NED2 | Chromosome {ECO:0000269 PubMed:24981860} | 0 |
| Q9H8T0 | Cytoplasm {ECO:0000269 PubMed:14749367}  | 0 |
| Q15555 | Cytoplasm, cytoskeleton {ECO:0000269 Pu  | 1 |
| P58658 | Membrane {ECO:0000305}; Single-pass typ  | 0 |
| B9ZVM9 |                                          | 0 |
| P56192 | Cytoplasm, cytosol {ECO:0000269 PubMed:  | 0 |

|        |                                                       |   |
|--------|-------------------------------------------------------|---|
| Q96DN6 | Nucleus {ECO:0000269 PubMed:20700456}.                | 0 |
| Q8N129 | Secreted {ECO:0000305}.                               | 0 |
| P30101 | Endoplasmic reticulum {ECO:0000269 PubMed:15169763, I | 1 |
| O43809 | Nucleus {ECO:0000269 PubMed:15169763, I               | 0 |
| Q8N8M0 |                                                       | 0 |
| Q99801 | Nucleus {ECO:0000255 PROSITE-ProRule:PF               | 1 |
| Q2NKQ1 | Golgi apparatus, trans-Golgi network {E               | 0 |
| Q8NEJ0 | Cytoplasm {ECO:0000269 PubMed:12408986}               | 0 |
| Q5TIA1 |                                                       | 0 |
| Q8NHY0 | Golgi apparatus membrane {ECO:0000305};               | 0 |
| P40426 | Nucleus {ECO:0000305}.                                | 1 |
| O14610 | Cell membrane {ECO:0000305}; Lipid-anch               | 0 |
| P35232 | Mitochondrion inner membrane {ECO:00002               | 0 |
| P62314 | Cytoplasm, cytosol {ECO:0000269 PubMed:               | 0 |
| Q8TC36 | Nucleus inner membrane {ECO:0000305 Pub               | 0 |
| Q8IZD0 |                                                       | 0 |
| Q5T9C9 | Cytoplasm. Membrane. Note=Localized to                | 0 |
| Q8NFK5 | Secreted {ECO:0000250}.                               | 0 |
| Q6UXU6 | Membrane {ECO:0000305}; Single-pass typ               | 0 |
| Q96CM8 | Mitochondrion {ECO:0000305}.                          | 1 |
| Q08379 | Golgi apparatus, cis-Golgi network mem                | 1 |
| O95900 | Mitochondrion matrix {ECO:0000269 PubMe               | 0 |
| Q9Y3A0 | Isoform 1: Mitochondrion inner membrane               | 1 |
| Q6P1M0 | Membrane {ECO:0000305}; Multi-pass mem                | 0 |
| Q9BTM9 | Cytoplasm.                                            | 0 |
| Q5T4B2 | Endoplasmic reticulum lumen {ECO:000025               | 0 |
| Q86YN1 | Endoplasmic reticulum membrane {ECO:000               | 0 |
| Q14249 | Mitochondrion.                                        | 0 |
| Q8IYX1 | Cytoplasmic vesicle, secretory vesicle,               | 1 |
| Q99811 | Nucleus {ECO:0000255 PROSITE-ProRule:PF               | 0 |
| P19224 | Microsome. Endoplasmic reticulum membra               | 1 |
| Q6ZRI6 |                                                       | 0 |
| Q6UXK2 | Cell membrane {ECO:0000250}; Single-pas               | 0 |
| Q02086 | Nucleus.                                              | 1 |
| Q9BU68 |                                                       | 0 |
| Q99807 | Mitochondrion inner membrane {ECO:00002               | 0 |
| Q9NZH0 | Cell membrane {ECO:0000269 PubMed:10945               | 1 |
| P46108 | Cytoplasm {ECO:0000250}. Cell membrane                | 0 |
| A6NDK9 |                                                       | 0 |
| Q9UPU7 |                                                       | 0 |
| Q9HC29 | Cytoplasm {ECO:0000269 PubMed:19701189,               | 0 |
| Q7Z614 | Early endosome membrane {ECO:0000269 Pu               | 0 |
| Q8IYT4 | Cytoplasm, cytoskeleton {ECO:0000255 H/               | 0 |
| Q9HOR4 |                                                       | 0 |
| P01344 | Secreted {ECO:0000269 PubMed:16040806}.               | 0 |
| Q8ND24 |                                                       | 0 |
| Q9NYV4 | Nucleus. Nucleus speckle. Note=Colocali               | 1 |
| Q9H4A9 | Membrane {ECO:0000250}; Lipid-anchor, (               | 0 |
| Q9NX74 | Cytoplasm {ECO:0000269 PubMed:15994936}               | 1 |
| Q969H6 | Nucleus, nucleolus {ECO:0000269 PubMed:               | 0 |
| Q8NFI3 | Cytoplasm, cytosol {ECO:0000250}.                     | 0 |
| A6NFN3 | Nucleus {ECO:0000269 PubMed:24215932}.                | 0 |
| O75964 | Mitochondrion. Mitochondrion inner mem                | 0 |
| P04234 | Cell membrane; Single-pass type I mem                 | 0 |
| Q8TBPO |                                                       | 0 |

|        |                                          |   |
|--------|------------------------------------------|---|
| Q9ULV0 | Cytoplasm {ECO:0000250 UniProtKB:P70569} | 0 |
| Q96L15 | Secreted {ECO:0000305}.                  | 0 |
| P42765 | Mitochondrion {ECO:0000269 PubMed:18371} | 0 |
| Q13586 | Cell membrane; Single-pass type I membr  | 0 |
| P23921 | Cytoplasm.                               | 1 |
| Q6AZZ1 | Cytoplasm, perinuclear region. Nucleus.  | 0 |
| Q9H339 | Cell membrane; Multi-pass membrane prot  | 0 |
| Q8NH59 | Cell membrane; Multi-pass membrane prot  | 0 |
| Q9H479 |                                          | 0 |
| Q7Z6L0 | Cell membrane {ECO:0000269 PubMed:22101} | 0 |
| P17027 | Nucleus {ECO:0000305}.                   | 0 |
| Q8WZA9 |                                          | 0 |
| Q9NYT6 | Nucleus {ECO:0000305}.                   | 0 |
| Q9UJW8 | Nucleus {ECO:0000305}.                   | 0 |
| Q96K58 | Nucleus {ECO:0000305}.                   | 0 |
| O15015 | Nucleus {ECO:0000305}.                   | 0 |
| Q9BQB6 | Endoplasmic reticulum membrane {ECO:000  | 0 |
| P22079 | Secreted {ECO:0000269 PubMed:12626341}.  | 0 |
| P22748 | Cell membrane; Lipid-anchor, GPI-anchoi  | 1 |
| Q8ND04 |                                          | 0 |
| P67936 | Cytoplasm, cytoskeleton {ECO:0000250 Ur  | 0 |
| P36969 | Isoform Mitochondrial: Mitochondrion {E  | 1 |
| Q504T8 | Nucleus, nucleolus {ECO:0000250 UniProt  | 0 |
| Q96MG2 | Sarcoplasmic reticulum membrane {ECO:00  | 1 |
| Q86XR2 |                                          | 0 |
| Q53HC5 |                                          | 0 |
| Q86YP4 | Nucleus speckle {ECO:0000269 PubMed:121  | 1 |
| P53602 |                                          | 0 |
| Q9H211 | Nucleus {ECO:0000269 PubMed:11125146, F  | 0 |
| Q9UL33 | Cytoplasm, perinuclear region {ECO:0000  | 0 |
| Q6UB99 | Nucleus {ECO:0000269 PubMed:15184363, F  | 0 |
| Q96N06 | Cytoplasm, cytosol {ECO:0000250}. Nucle  | 0 |
|        | be performed. View primary data.         | 0 |
| Q8NCQ7 |                                          | 0 |
| P26373 |                                          | 0 |
| Q96N77 | Nucleus {ECO:0000269 PubMed:16343441}.   | 0 |
| P00709 | Secreted.                                | 0 |
| Q6UX07 | Secreted {ECO:0000305}.                  | 0 |
| O14686 | Nucleus {ECO:0000305}.                   | 0 |
| Q8TAI7 | Endomembrane system {ECO:0000305 PubMec  | 0 |
| Q71U36 | Cytoplasm, cytoskeleton.                 | 1 |
| Q9BQE3 | Cytoplasm, cytoskeleton.                 | 1 |
| Q8N9Z0 | Nucleus {ECO:0000305}.                   | 0 |
| Q9NV72 | Nucleus {ECO:0000305}.                   | 0 |
| Q9HCHO | Cytoplasm, cytoskeleton, microtubule or  | 0 |
| P41181 | Apical cell membrane {ECO:0000269 PubMe  | 0 |
| P21695 | Cytoplasm.                               | 1 |
| Q2NL68 |                                          | 0 |
| Q96SQ9 | Endoplasmic reticulum membrane {ECO:000  | 0 |
| P30530 | Cell membrane {ECO:0000269 PubMed:78964  | 0 |
|        | Membrane {ECO:0000305}; Multi-pass mem   | 0 |
| Q7Z3H0 | Cytoplasm, cytosol {ECO:0000250 UniProt  | 0 |
| Q6GTX8 | Cell membrane {ECO:0000269 PubMed:10229  | 0 |
| Q9H313 | Cell membrane {ECO:0000250}; Multi-pass  | 0 |
| Q96PV6 |                                          | 0 |

|        |                                         |   |
|--------|-----------------------------------------|---|
| Q6NZY7 | Endomembrane system {ECO:0000250}; Peri | 0 |
| Q8NBT3 | Membrane {ECO:0000305}; Multi-pass mem  | 0 |
| Q8TF50 | Nucleus {ECO:0000305}.                  | 0 |
| Q8WX94 |                                         | 0 |
| Q15072 | Nucleus {ECO:0000269 PubMed:8665923}.   | 1 |
| Q96A00 | Cytoplasm {ECO:0000250}.                | 0 |
| 043291 | Membrane {ECO:0000305}; Single-pass typ | 0 |
| Q9GZP8 | Nucleus {ECO:0000269 PubMed:11080599}.  | 0 |
| Q5BJH7 | Membrane {ECO:0000305}; Multi-pass mem  | 0 |
| 043653 | Cell membrane {ECO:0000269 PubMed:94650 | 0 |
| Q86WG3 | Cell projection, axon {ECO:0000250}. Ce | 0 |
| Q14210 | Cell membrane; Lipid-anchor, GPI-anchor | 0 |
| 043293 | Nucleus {ECO:0000269 PubMed:15367680, I | 0 |
| P13639 | Cytoplasm {ECO:0000269 PubMed:25064856} | 0 |
| Q96BF3 | Cell membrane {ECO:0000269 PubMed:22419 | 0 |
| Q13111 | Nucleus {ECO:0000269 PubMed:10052459}.  | 1 |
| Q9BZV1 | Cytoplasm {ECO:0000269 PubMed:18656546} | 0 |
| Q7Z4V5 | Nucleus {ECO:0000250 UniProtKB:Q3UMU9}. | 1 |
| Q96Q06 | Cell membrane {ECO:0000250 UniProtKB:O8 | 0 |
| Q9H3T3 | Cell membrane; Single-pass type I membr | 0 |
| Q8NOY2 | Nucleus {ECO:0000255 PROSITE-ProRule:PF | 0 |
| Q6DKJ4 | Cytoplasm, cytosol {ECO:0000250 UniProt | 0 |
| Q9HC38 | Mitochondrion {ECO:0000305 PubMed:12897 | 1 |
| Q96ES6 | Membrane {ECO:0000305}; Multi-pass mem  | 0 |
| P24298 | Cytoplasm.                              | 0 |
| Q96AC6 | Cytoplasm, cytoskeleton {ECO:0000305}.  | 0 |
| Q8N370 | Membrane {ECO:0000250}; Multi-pass mem  | 0 |
| P08697 | Secreted.                               | 0 |
| Q562E7 | Early endosome membrane {ECO:0000269 Pu | 0 |
| Q9GZT4 |                                         | 0 |
| Q2NL82 | Nucleus, nucleolus {ECO:0000250}.       | 0 |
| Q8WUJ1 | Secreted {ECO:0000250}.                 | 0 |
| Q6P531 | Membrane {ECO:0000250}; Single-pass typ | 0 |
| Q6RUI8 |                                         | 0 |
| Q9Y5K2 | Secreted.                               | 0 |
| P20151 |                                         | 0 |
| Q9Y337 | Secreted.                               | 0 |
| Q9UBX7 | Isoform 1: Secreted.; Isoform 2: Golgi  | 0 |
| Q9UKR3 | Secreted {ECO:0000305}.                 | 0 |
| P51522 | Nucleus {ECO:0000305}.                  | 0 |
| P04264 | Cell membrane {ECO:0000269 PubMed:17956 | 0 |
| Q96FW1 | Cytoplasm {ECO:0000250}.                | 0 |
| Q8IZ40 | Nucleus {ECO:0000255 PROSITE-ProRule:PF | 0 |
| Q9BY76 | Secreted {ECO:0000269 PubMed:10698685}, | 0 |
| Q9NPF0 | Cell membrane {ECO:0000269 PubMed:10727 | 0 |
| Q8NCJ5 |                                         | 0 |
| P24592 | Secreted.                               | 0 |
| Q96NG5 | Nucleus {ECO:0000305}.                  | 0 |
| P49821 | Mitochondrion inner membrane; Periphera | 0 |
| 075956 | Cytoplasm {ECO:0000250 UniProtKB:Q9CPY4 | 0 |
| Q8WV74 |                                         | 0 |
| 075333 | Nucleus {ECO:0000255 PROSITE-ProRule:PF | 0 |
| P32119 | Cytoplasm {ECO:0000269 PubMed:9497357}. | 0 |
| Q9UNY5 | Nucleus.                                | 0 |
| Q9H081 | Chromosome, centromere, kinetochore {EC | 0 |

|        |                                          |   |
|--------|------------------------------------------|---|
| Q08708 | Cell membrane {ECO:0000305}; Single-pass | 0 |
| Q9UGN4 | Cell membrane {ECO:0000305}; Single-pass | 0 |
| Q969V4 | Cytoplasm, cytoskeleton, cilium axoneme  | 0 |
| Q8IV36 | Cytoplasm {ECO:0000269 PubMed:21337012}  | 0 |
| Q14197 | Mitochondrion {ECO:0000269 PubMed:20186} | 0 |
| 075947 | Mitochondrion. Mitochondrion inner memb  | 1 |
| Q6PEY1 | Cell membrane {ECO:0000269 PubMed:21044} | 0 |
| Q92817 | Cell junction, desmosome. Cornified env  | 0 |
| Q9UHB9 | Cytoplasm. Nucleus, nucleolus.           | 0 |
| Q8IU68 | Endoplasmic reticulum membrane {ECO:000} | 0 |
| P04183 | Cytoplasm.                               | 1 |
| Q96MH6 | Membrane {ECO:0000305}; Multi-pass memb  | 0 |
| Q96QA5 | Cytoplasm, perinuclear region {ECO:0000} | 0 |
| Q2M2I5 |                                          | 0 |
| Q8N2G8 | Endoplasmic reticulum {ECO:0000250 UniP  | 0 |
| Q9HOX4 | Membrane {ECO:0000305}; Single-pass typ  | 0 |
| Q9BQB4 | Secreted, extracellular space, extracel  | 0 |
| Q96S07 |                                          | 0 |
| Q9BVC4 | Cytoplasm {ECO:0000250 UniProtKB:Q9Z2K5} | 0 |
| Q66K89 | Nucleus, nucleoplasm. Cytoplasm. Note=   | 1 |
| P42126 | Mitochondrion matrix.                    | 1 |
| Q8WXD9 | Cytoplasm {ECO:0000250}.                 | 1 |
| Q99758 | Membrane {ECO:0000305}; Multi-pass memb  | 0 |
| Q9UQ35 | Nucleus {ECO:0000269 PubMed:28076346, I  | 1 |
| Q96LX8 | Nucleus {ECO:0000305}.                   | 0 |
| Q9NX18 | Mitochondrion matrix {ECO:0000255 HAMAF  | 1 |
| Q16531 | Cytoplasm. Nucleus. Note=Primarily cyto  | 0 |
| A5D8V6 | Late endosome membrane {ECO:0000305 Pub  | 0 |
| Q96DN2 | Secreted {ECO:0000305}. Note=According   | 0 |
| Q8TBN0 |                                          | 0 |
| 076090 | Cell membrane {ECO:0000269 PubMed:19853} | 0 |
| P02794 |                                          | 0 |
| Q96G97 | Endoplasmic reticulum membrane {ECO:000} | 0 |
| P62487 | Nucleus {ECO:0000269 PubMed:9852112}.    | 0 |
| P08195 | Apical cell membrane {ECO:0000269 PubMe  | 0 |
| Q9BUA3 |                                          | 0 |
| Q8NAA4 | Cytoplasm {ECO:0000250}. Note=Localizes  | 0 |
| Q4AC94 | Cytoplasm, cytoskeleton, cilium basal b  | 0 |
| 015050 |                                          | 0 |
| Q8NDW8 |                                          | 0 |
| P08865 | Cell membrane. Cytoplasm. Nucleus {ECO:  | 0 |
| P35222 | Cytoplasm {ECO:0000269 PubMed:25183871}  | 0 |
| Q96C45 |                                          | 0 |
| Q13158 |                                          | 0 |
| Q9UQQ1 | Apical cell membrane {ECO:0000250 UniPr  | 0 |
|        | Cytoplasm, cytoskeleton, microtubule or  | 0 |
| Q8N1L9 | Nucleus {ECO:0000255 PROSITE-ProRule:PF  | 0 |
| Q9NSA0 | Cell membrane {ECO:0000269 PubMed:15291} | 1 |
| Q15637 | Nucleus.                                 | 1 |
| Q12851 | Cytoplasm {ECO:0000250}. Basolateral ce  | 0 |
| A6NC98 | Membrane {ECO:0000250 UniProtKB:Q4QRL3}  | 0 |
| Q6AZY7 | Endoplasmic reticulum membrane {ECO:000} | 0 |
| Q96KB5 |                                          | 0 |
| Q6ZMJ2 | Cell membrane {ECO:0000255 HAMAP-Rule:M  | 0 |

|                       |                                          |   |
|-----------------------|------------------------------------------|---|
| Q13519                | Secreted.                                | 0 |
| Q7L5N1                | Nucleus. Cytoplasm. Note=The interactio  | 0 |
| P68402                | Cytoplasm.                               | 0 |
| Q6ZW76                |                                          | 0 |
| Q9BRJ7                | Nucleus {ECO:0000269 PubMed:28241136}.   | 0 |
| Q9HCI6                |                                          | 0 |
| Q9C0A6                | Nucleus {ECO:0000250 UniProtKB:Q5XJV7}.  | 0 |
| Q6EMK4                | Membrane {ECO:0000305 PubMed:15247411};  | 0 |
| Q5TOW9                | Cytoplasm {ECO:0000269 PubMed:22886302}  | 1 |
| Q16695                | Nucleus. Chromosome.                     | 0 |
| Q9H5L6                |                                          | 0 |
| Q5TA31                | Cytoplasm {ECO:0000269 PubMed:20852630}  | 0 |
| Q86VS8                | Cytoplasm, cytoskeleton {ECO:0000269 Pu  | 0 |
| Q8NDC0                |                                          | 0 |
| Q9NX09                | Mitochondrion {ECO:0000250}. Cytoplasm,  | 0 |
| Q06330                | Nucleus. Cytoplasm. Note=Mainly nuclear  | 0 |
| Q9NUN5                | Lysosome membrane {ECO:0000269 PubMed:1  | 0 |
| Q9H5U6                | Cytoplasm {ECO:0000269 PubMed:30531910}  | 0 |
| Q13258                | Cell membrane {ECO:0000305}; Multi-pass  | 1 |
| Q8N584                |                                          | 0 |
| Q8IVS8                | Isoform 1: Cytoplasm {ECO:0000269 PubMe  | 0 |
| Q8WUN7                | Cytoplasm {ECO:0000269 PubMed:12507522}  | 0 |
| be performed. View pr | Nucleus {ECO:0000250}.                   | 0 |
| Q99615                | Cytoplasm {ECO:0000269 PubMed:11573955,  | 0 |
| Q8TDN2                | Cell membrane; Multi-pass membrane prot  | 0 |
| Q7Z5L9                | Cytoplasm. Nucleus.                      | 0 |
| Q9H857                |                                          | 0 |
| Q12951                | Nucleus.                                 | 1 |
| Q8WV10                | Membrane {ECO:0000305}; Single-pass men  | 0 |
| Q5JTJ3                | Mitochondrion intermembrane space {ECO:  | 0 |
| O60282                | Cytoplasm, cytoskeleton {ECO:0000305}.   | 0 |
| Q10469                | Golgi apparatus membrane {ECO:0000269 F  | 0 |
| P35226                | Nucleus {ECO:0000269 PubMed:16882984, F  | 0 |
| Q96EK4                | Nucleus {ECO:0000269 PubMed:9853615}. (  | 0 |
| Q9H3L0                | Cytoplasm {ECO:0000269 PubMed:23270877}  | 1 |
| P11177                | Mitochondrion matrix.                    | 1 |
| Q7Z7A4                | Cytoplasm {ECO:0000269 PubMed:16142408}  | 0 |
| P10412                | Nucleus. Chromosome. Note=Mainly locali  | 1 |
| Q96MG8                | Cytoplasm {ECO:0000250}. Membrane {ECO:  | 0 |
| Q8NC69                | Cytoplasm, myofibril, sarcomere, M line  | 0 |
| Q8TAP9                | Nucleus. Cytoplasm. Cytoplasm, cytoskel  | 0 |
| Q99424                | Peroxisome {ECO:0000269 PubMed:27884765} | 1 |
| O95990                | Nucleus {ECO:0000269 PubMed:10564580, F  | 0 |
| P14316                | Nucleus.                                 | 1 |
| Q13875                | Cytoplasm, perinuclear region. Note=Pre  | 0 |
| P49238                | Cell membrane {ECO:0000269 PubMed:93905  | 0 |
| Q8WWR9                |                                          | 0 |
| Q702N8                | Cell junction {ECO:0000269 PubMed:15454  | 0 |
| Q96T92                | Cytoplasm {ECO:0000250}. Nucleus {ECO:(  | 0 |
| Q9UI33                | Cell membrane {ECO:0000250 UniProtKB:DC  | 0 |
| Q15019                | Cytoplasm {ECO:0000269 PubMed:15774761}  | 0 |
| Q4L180                | Cytoplasm {ECO:0000269 PubMed:18794120}  | 0 |
| Q8NA29                | Cell membrane {ECO:0000269 PubMed:26005  | 0 |
| P23919                |                                          | 0 |
| Q03518                | Endoplasmic reticulum membrane; Multi-p  | 0 |



|        |                                         |   |
|--------|-----------------------------------------|---|
| Q8WYH8 | Nucleus {ECO:0000269 PubMed:18794358}.  | 0 |
| Q9Y4P1 | Cytoplasm {ECO:0000250}.                | 0 |
| P30411 | Cell membrane; Multi-pass membrane prot | 0 |
| Q6PCD5 | Nucleus {ECO:0000269 PubMed:20173098, F | 0 |
| Q15669 | Cytoplasm {ECO:0000269 PubMed:11809807, | 0 |
| P83436 | Golgi apparatus membrane {ECO:0000269 F | 0 |
| P31948 | Cytoplasm {ECO:0000250 UniProtKB:Q60864 | 0 |
| P51168 | Apical cell membrane {ECO:0000305 PubMe | 0 |
| Q86VQ3 | Cytoplasm {ECO:0000269 PubMed:11399755} | 0 |
| Q13636 | Golgi apparatus, trans-Golgi network {F | 0 |
| Q9H6H4 | Endoplasmic reticulum membrane {ECO:000 | 0 |
| P11686 | Secreted, extracellular space, surface  | 0 |
| P13497 | Golgi apparatus, trans-Golgi network {F | 0 |
| Q8WWM7 | Membrane {ECO:0000269 PubMed:11784712}; | 0 |
| Q92561 |                                         | 0 |
| P05423 | Nucleus.                                | 1 |
| P39748 | Isoform 1: Nucleus, nucleolus. Nucleus, | 0 |
| 095810 | Cytoplasm, cytosol {ECO:0000269 PubMed: | 0 |
| Q9Y4B5 | Lateral cell membrane {ECO:0000250}. Ap | 0 |
| Q96MH2 | Nucleus {ECO:0000269 PubMed:15994294}.  | 1 |
| P49354 |                                         | 0 |
| Q96SA4 | Membrane {ECO:0000305}; Multi-pass memt | 0 |
| P05976 |                                         | 0 |
| P11229 | Cell membrane; Multi-pass membrane prot | 0 |
| P02461 | Secreted, extracellular space, extracel | 0 |
| 000451 | Cell membrane {ECO:0000250}; Lipid-anch | 0 |
| Q9H160 | Nucleus {ECO:0000269 PubMed:12859901}.  | 0 |
| Q9NXV6 | Nucleus, nucleoplasm {ECO:0000269 PubMe | 0 |
| Q6IEG0 | Nucleus {ECO:0000269 PubMed:15146077}.  | 0 |
| AOPJW6 | Membrane {ECO:0000305}; Multi-pass memt | 0 |
| Q08357 | Cell membrane {ECO:0000269 PubMed:91518 | 0 |
| P11844 |                                         | 0 |
| Q71RG4 | Membrane {ECO:0000305}; Multi-pass memt | 0 |
| P40763 | Cytoplasm. Nucleus {ECO:0000269 PubMed: | 1 |
| Q9BR11 |                                         | 0 |
| P39905 | Secreted {ECO:0000269 PubMed:21994944,  | 0 |
| Q3MIW9 | Cell membrane {ECO:0000269 PubMed:29244 | 0 |
| Q9Y2T1 | Cytoplasm {ECO:0000269 PubMed:21383061} | 0 |
| 043920 | Mitochondrion inner membrane {ECO:00003 | 1 |
| Q502W6 | Cytoplasm {ECO:0000269 PubMed:26157035} | 0 |
| P17039 | Nucleus {ECO:0000305}.                  | 0 |
| Q3SY77 | Membrane {ECO:0000305}; Single-pass typ | 0 |
| Q96KN1 |                                         | 0 |
| 015165 | Early endosome membrane {ECO:0000269 Pu | 0 |
| Q17RG1 |                                         | 0 |
| 015374 | Cell membrane; Multi-pass membrane prot | 0 |
| Q9BTX3 | Endoplasmic reticulum membrane {ECO:000 | 1 |
| Q9NZR2 | Membrane {ECO:0000305}; Single-pass typ | 0 |
| 043865 | Endoplasmic reticulum {ECO:0000250 UniF | 0 |
| Q5F1R6 | Cytoplasm {ECO:0000269 PubMed:27346687} | 0 |
| Q9Y2B9 |                                         | 0 |
| Q6UXI9 | Secreted, extracellular space, extracel | 0 |
| P43166 | Cytoplasm {ECO:0000305}.                | 0 |
| Q8IXR5 |                                         | 0 |
| A6NKD2 |                                         | 0 |

|        |                                         |   |
|--------|-----------------------------------------|---|
| Q9C0C4 | Cell junction, synapse, postsynaptic ce | 0 |
| Q8NE01 | Cell membrane {ECO:0000250}; Multi-pass | 0 |
| Q03013 | Cytoplasm.                              | 0 |
| Q6N021 |                                         | 0 |
|        | Cytoplasm {ECO:0000250}.                | 0 |
| Q96GX1 | Membrane {ECO:0000305}; Single-pass ty  | 0 |
| Q6PFW1 | Cytoplasm, cytosol {ECO:0000269 PubMed: | 0 |
| Q6UXT9 | Secreted {ECO:0000305}.                 | 0 |
| O15062 | Nucleus {ECO:0000305}.                  | 0 |
| POCG13 | Nucleus {ECO:0000269 PubMed:12766176}.  | 0 |
| Q6DHV7 |                                         | 0 |
| O60294 |                                         | 0 |
| P29459 | Secreted {ECO:0000269 PubMed:1674604, I | 0 |
| Q8TCN5 | Nucleus {ECO:0000305}.                  | 0 |
| Q9P2W9 | Endoplasmic reticulum membrane {ECO:000 | 0 |
| Q6ZSB9 | Isoform 1: Cytoplasm {ECO:0000269 PubMe | 0 |
| Q96RP9 | Mitochondrion {ECO:0000255 HAMAP-Rule:M | 1 |
| P28566 | Cell membrane {ECO:0000269 PubMed:14744 | 0 |
| Q9NUU7 | Cytoplasm {ECO:0000250}. Nucleus, nucle | 0 |
| Q8WVL7 | Nucleus {ECO:0000250 UniProtKB:Q8VE42}. | 0 |
| P07988 | Secreted, extracellular space, surface  | 0 |
| Q53GS9 | Nucleus {ECO:0000269 PubMed:11350945, I | 1 |
| Q8NFZ5 | Cytoplasm {ECO:0000269 PubMed:12595760} | 1 |
| Q2NKX9 |                                         | 0 |
| Q86TG1 | Cell membrane {ECO:0000269 PubMed:25608 | 0 |
| Q9POPO |                                         | 0 |
| O95183 | Cell membrane {ECO:0000305}; Single-pas | 0 |
| Q86X40 |                                         | 0 |
| P31153 |                                         | 0 |
| Q68DD2 | Cytoplasm, cytosol. Lysosome membrane   | 0 |
| Q6UWT2 | Secreted {ECO:0000269 PubMed:19041763}. | 0 |
| Q9ULD9 |                                         | 0 |
| Q8TBE7 | Cell membrane {ECO:0000269 PubMed:19148 | 0 |
| Q92835 | Cytoplasm {ECO:0000269 PubMed:10822173} | 0 |
| O95202 | Mitochondrion inner membrane {ECO:00002 | 1 |
| P45877 | Cytoplasm {ECO:0000250 UniProtKB:P30412 | 0 |
| O43610 | Cytoplasm. Membrane; Peripheral membrar | 0 |
| Q8N960 | Cytoplasm, cytoskeleton, microtubule or | 0 |
| Q8NFX7 | Cytoplasm {ECO:0000269 PubMed:12145319} | 0 |
| Q53R12 | Membrane {ECO:0000269 PubMed:23810381}; | 0 |
| Q9GZY8 | Mitochondrion outer membrane; Single-pa | 1 |
| O00182 | Cytoplasm {ECO:0000269 PubMed:23242525} | 0 |
|        |                                         | 0 |
| O14810 | Cytoplasm, cytosol {ECO:0000250 UniProt | 1 |
| Q9UK73 | Cytoplasm {ECO:0000269 PubMed:19330022} | 0 |
| Q9NX08 | Cytoplasm {ECO:0000269 PubMed:21778237} | 0 |
| P56385 | Mitochondrion. Mitochondrion inner memt | 1 |
| P47985 | Mitochondrion inner membrane {ECO:00002 | 1 |
| Q6UXD7 | Membrane {ECO:0000305}; Multi-pass memt | 0 |
| Q01955 | Secreted, extracellular space, extracel | 0 |
| Q02750 | Cytoplasm, cytoskeleton, microtubule or | 0 |
| P49862 | Secreted {ECO:0000269 PubMed:12738725}. | 0 |
| P31943 | Nucleus, nucleoplasm.                   | 1 |
| P35568 |                                         | 0 |
| P51608 | Nucleus {ECO:0000250 UniProtKB:Q9Z2D6}. | 1 |

|        |                                         |   |
|--------|-----------------------------------------|---|
| Q9NNX9 |                                         | 0 |
| Q9H1J1 | Nucleus. Cytoplasm. Note=Shuttling betw | 0 |
| A8MT70 |                                         | 0 |
| Q562R1 | Cytoplasm, cytoskeleton {ECO:0000250}.  | 0 |
| Q01974 | Cell membrane {ECO:0000250}; Single-pas | 0 |
| P10275 | Nucleus {ECO:0000269 PubMed:12958311, F | 0 |
| Q8N5I4 | Secreted {ECO:0000269 PubMed:25076851}. | 0 |
| Q96EW2 | Cytoplasm {ECO:0000250}.                | 0 |
| O95671 |                                         | 0 |
| P12236 | Mitochondrion inner membrane; Multi-pas | 0 |
| Q8NCH0 | Golgi apparatus membrane {ECO:0000250}; | 0 |
| Q6UWI2 | Cell membrane {ECO:0000269 PubMed:18027 | 0 |
| Q8TC76 | Cytoplasm {ECO:0000269 PubMed:17499476} | 0 |
| Q5T2S8 | Cytoplasm, cytoskeleton, cilium axoneme | 0 |
| Q8N4X5 | Cytoplasm {ECO:0000269 PubMed:17412687} | 0 |
| O60765 | Nucleus {ECO:0000269 PubMed:23665872}.  | 0 |
| Q9Y2D1 | Cytoplasm {ECO:0000269 PubMed:15358120} | 0 |
| Q8NHS2 | Cytoplasm {ECO:0000250}.                | 0 |
| O43298 | Nucleus {ECO:0000305}.                  | 0 |
| Q8TCG5 | Mitochondrion outer membrane {ECO:00002 | 0 |
| Q96QU8 | Nucleus {ECO:0000269 PubMed:14592989}.  | 0 |
| Q6UXU4 | Cell membrane {ECO:0000250}; Multi-pass | 0 |
| Q10571 |                                         | 0 |
| Q8WV22 | Nucleus {ECO:0000269 PubMed:18086888}.  | 1 |
| Q96EE4 | Secreted {ECO:0000305}.                 | 0 |
|        |                                         | 0 |
| Q8NGC4 | Cell membrane; Multi-pass membrane prot | 0 |
| P20337 | Cell membrane {ECO:0000305}; Lipid-anch | 0 |
| O95400 | Cytoplasm. Nucleus. Note=Predominantly  | 0 |
| Q2MKA7 | Secreted {ECO:0000250 UniProtKB:Q9Z132} | 0 |
| O43566 | Nucleus {ECO:0000250}. Nucleus, PML bod | 0 |
| Q4KMP7 | Cytoplasm {ECO:0000269 PubMed:16923811} | 0 |
| Q12907 | Endoplasmic reticulum-Golgi intermediat | 0 |
| Q5JQS6 |                                         | 0 |
| Q9Y255 | Mitochondrion. Mitochondrion intermembr | 0 |
| P49746 |                                         | 0 |
| Q9Y2D0 | Mitochondrion.                          | 0 |
| Q9BRV3 | Golgi apparatus membrane {ECO:0000269 F | 0 |
| P20827 | Cell membrane {ECO:0000269 PubMed:18794 | 0 |
| Q92617 | Membrane {ECO:0000305}; Single-pass men | 0 |
| Q8TF17 |                                         | 0 |
| O14625 | Secreted.                               | 0 |
| P07550 | Cell membrane {ECO:0000269 PubMed:19584 | 0 |
| Q7Z2K8 | Cell membrane {ECO:0000250}; Lipid-anch | 0 |
| Q14722 | Cytoplasm {ECO:0000269 PubMed:17540341} | 0 |
| Q9BYD6 | Mitochondrion {ECO:0000250 UniProtKB:A6 | 1 |
| Q5VZ18 |                                         | 0 |
| Q96G03 | Cytoplasm {ECO:0000250}.                | 0 |
| Q8WU08 | Cell membrane; Lipid-anchor {ECO:000026 | 0 |
| Q9H244 | Cell membrane {ECO:0000269 PubMed:11196 | 0 |
| Q9UPX6 | Cell membrane {ECO:0000269 PubMed:29329 | 0 |
| Q8N807 | Endoplasmic reticulum {ECO:0000255 PROS | 0 |
| P07911 | Apical cell membrane {ECO:0000269 PubMe | 0 |
| P55259 | Cell membrane {ECO:0000250}; Lipid-anch | 0 |
| O00400 | Endoplasmic reticulum membrane {ECO:000 | 0 |

|        |                                         |   |
|--------|-----------------------------------------|---|
| 095149 | Nucleus {ECO:0000269 PubMed:10209022, F | 0 |
| P78560 | Cytoplasm {ECO:0000250 UniProtKB:088845 | 0 |
| Q96ST3 | Nucleus {ECO:0000255 PROSITE-ProRule:PF | 1 |
| Q3SXY8 | Cell projection, cilium membrane {ECO:( | 0 |
| P10153 | Lysosome {ECO:0000305}. Cytoplasmic gra | 1 |
| Q96BH3 | Secreted {ECO:0000269 PubMed:11144225,  | 0 |
| P12724 | Secreted. Note=Located in the matrix of | 0 |
| Q05397 | Cell junction, focal adhesion. Cell men | 0 |
| B2RC85 |                                         | 0 |
| P25105 | Cell membrane {ECO:0000269 PubMed:13745 | 0 |
| P43378 | Cytoplasm {ECO:0000305}.                | 0 |
| Q93091 | Secreted {ECO:0000269 PubMed:25075772}. | 0 |
| P10145 | Secreted.                               | 0 |
| Q15858 | Cell membrane {ECO:0000269 PubMed:15385 | 0 |
| Q6ZTQ3 |                                         | 0 |
| Q8NFW1 | Secreted, extracellular space, extracel | 0 |
| P34741 | Membrane; Single-pass type I membrane p | 0 |
| Q8N4V1 | Endoplasmic reticulum membrane {ECO:00  | 0 |
| P35321 | Cytoplasm.                              | 1 |
| Q8NH41 | Cell membrane; Multi-pass membrane prot | 0 |
| Q9BX73 | Membrane {ECO:0000305}; Multi-pass mem  | 0 |
| P83105 | Secreted {ECO:0000250}.                 | 0 |
|        | Cytoplasm {ECO:0000250}. Cell membrane  | 0 |
| Q9Y696 | Cytoplasm, cytoskeleton, microtubule or | 0 |
| Q08AI6 | Membrane {ECO:0000255}; Multi-pass mem  | 0 |
| P32249 | Cell membrane {ECO:0000269 PubMed:1654  | 0 |
| Q9HOW5 | Cytoplasm {ECO:0000269 PubMed:24793695} | 0 |
| Q8N387 | Isoform 1: Cell membrane {ECO:0000305}; | 0 |
| 060315 | Nucleus {ECO:0000269 PubMed:16061479, F | 0 |
| P08034 | Cell membrane; Multi-pass membrane prot | 0 |
| Q15365 | Nucleus. Cytoplasm. Note=Loosely bound  | 1 |
| P49773 | Cytoplasm. Nucleus. Note=Interaction wi | 0 |
| Q8NBA8 |                                         | 0 |
| P12018 |                                         | 0 |
| 095833 | Nucleus. Membrane; Single-pass membrane | 0 |
| Q8NBZ0 | Nucleus {ECO:0000269 PubMed:18922472}.  | 0 |
| 076075 | Cytoplasm. Nucleus.                     | 0 |
| Q9UMS0 | Mitochondrion. Cytoplasm, cytosol.      | 0 |
| Q9NS71 | Secreted {ECO:0000250}.                 | 0 |
| Q8IYA6 | Cytoplasm, cytoskeleton, spindle pole   | 0 |
| Q8WUR7 |                                         | 0 |
| Q9BTL3 | Nucleus {ECO:0000269 PubMed:22099306}.  | 1 |
| Q8TCW9 | Cell membrane; Multi-pass membrane prot | 0 |
| Q8IW19 | Nucleus {ECO:0000269 PubMed:17353262, F | 0 |
| Q9H3K6 | Cytoplasm {ECO:0000269 PubMed:22746225} | 0 |
| 014715 |                                         | 0 |
| Q96JB3 | Nucleus.                                | 0 |
| Q86V48 | Nucleus. Note=Also detected in soma and | 0 |
| Q8WVB3 | Cytoplasm {ECO:0000250 UniProtKB:Q3U4H6 | 0 |
| P21918 | Cell membrane; Multi-pass membrane prot | 0 |
| Q9H2V7 | Mitochondrion inner membrane {ECO:00002 | 1 |
| Q96CN5 | Cytoplasm, cytoskeleton, microtubule or | 1 |
| P30532 | Cell junction, synapse, postsynaptic ce | 0 |
| 015120 | Endoplasmic reticulum membrane {ECO:00  | 0 |
| Q9BZE9 | Endomembrane system {ECO:0000250}; Peri | 0 |

|        |                                         |   |
|--------|-----------------------------------------|---|
| P14770 | Membrane; Single-pass type I membrane p | 0 |
| P49327 | Cytoplasm {ECO:0000269 PubMed:17081065} | 1 |
| P04732 |                                         | 0 |
| Q8TDY3 | Cytoplasm, cytoskeleton {ECO:0000250}.  | 1 |
| Q6P1R4 |                                         | 0 |
| Q9Y644 | Golgi apparatus membrane {ECO:0000305}; | 0 |
| Q7Z4W1 | Membrane {ECO:0000250}; Peripheral mem  | 0 |
| 043679 | Nucleus {ECO:0000269 PubMed:9853615}.   | 1 |
| P60763 | Cytoplasm. Endomembrane system. Cell pr | 0 |
| Q8WWG1 | Pro-neuregulin-4, membrane-bound isofor | 0 |
| P48059 | Cell junction, focal adhesion. Cell men | 0 |
| Q2M3C6 | Cell membrane {ECO:0000269 PubMed:22020 | 0 |
| Q8N2Q7 | Cell membrane {ECO:0000250}; Single-pas | 0 |
| Q6NXT6 | Cytoplasm, cytoskeleton, microtubule or | 0 |
| Q16851 | Cytoplasm {ECO:0000269 PubMed:8354390}. | 1 |
| Q9NYW7 | Membrane; Multi-pass membrane protein.  | 0 |
| Q96FE5 | Cell membrane {ECO:0000250 UniProtKB:Q9 | 0 |
| 014603 |                                         | 0 |
| Q15415 | Nucleus.                                | 1 |
| 014603 |                                         | 0 |
| P52597 | Nucleus, nucleoplasm.                   | 1 |
| P43251 | Secreted, extracellular space.          | 0 |
| Q8N6G5 | Golgi apparatus, Golgi stack membrane   | 0 |
| P29371 | Cell membrane; Multi-pass membrane prot | 0 |
| 060245 | Cell membrane; Single-pass type I membr | 0 |
| Q9Y6N7 | Cell membrane {ECO:0000269 PubMed:24560 | 0 |
| Q9UBCO | Nucleus.                                | 0 |
| Q9NQS1 | Endomembrane system; Peripheral membrar | 0 |
| P47900 | Cell membrane {ECO:0000269 PubMed:25822 | 0 |
| Q9UQB3 | Nucleus {ECO:0000250 UniProtKB:035927}. | 0 |
| Q9BRZ2 | Cytoplasm {ECO:0000269 PubMed:21289118} | 0 |
| Q685J3 | Isoform 1: Cell membrane; Single-pass m | 0 |
| Q9NZD4 | Cytoplasm {ECO:0000269 PubMed:12066189} | 0 |
| 000744 | Secreted, extracellular space, extracel | 0 |
| Q8NFB8 | Cytoplasm.                              | 0 |
| Q02505 | Isoform 1: Membrane; Single-pass membra | 0 |
| Q96A49 | Cytoplasm, perinuclear region {ECO:0000 | 0 |
| P11215 | Cell membrane {ECO:0000269 PubMed:21193 | 0 |
| 060507 | Golgi apparatus membrane {ECO:0000269 F | 0 |
| P48230 | Membrane; Multi-pass membrane protein.  | 1 |
| Q8NFB8 | Endoplasmic reticulum membrane; Single- | 0 |
| P29377 |                                         | 0 |
| P30408 | Membrane; Multi-pass membrane protein.  | 0 |
| Q5T2D3 |                                         | 0 |
| Q8TE49 | Cytoplasm {ECO:0000250}. Nucleus {ECO:( | 0 |
| P08236 | Lysosome.                               | 0 |
| Q15059 | Nucleus {ECO:0000250 UniProtKB:Q8K2F0}. | 0 |
| Q8WW38 | Nucleus {ECO:0000269 PubMed:23226341}.  | 0 |
| Q96H86 | Nucleus {ECO:0000305}.                  | 0 |
| Q9BV97 |                                         | 0 |
| Q9H5H4 | Nucleus {ECO:0000305}.                  | 1 |
| Q7RTX0 | Cell membrane; Multi-pass membrane prot | 0 |
| Q69YG0 | Membrane {ECO:0000305}; Multi-pass mem  | 0 |
| Q9Y2U5 | Cytoplasm {ECO:0000269 PubMed:15075238} | 0 |
| Q8N0Z8 |                                         | 0 |

|        |                                          |   |
|--------|------------------------------------------|---|
| Q9BWJ5 | Nucleus {ECO:0000269 PubMed:27720643, F  | 0 |
| P13682 | Nucleus {ECO:0000305}.                   | 0 |
| Q8IY51 | Nucleus {ECO:0000305}.                   | 0 |
| Q5TF58 |                                          | 0 |
| Q8NFZ4 | Cell membrane {ECO:0000250}; Single-pass | 0 |
| Q6PIF6 | Cytoplasm, cytoskeleton {ECO:0000305}.   | 0 |
| Q12873 | Nucleus {ECO:0000269 PubMed:17626165}.   | 1 |
| Q6P9G4 | Membrane {ECO:0000305}; Single-pass ty   | 0 |
| Q13740 | Cell membrane {ECO:0000269 PubMed:15048  | 0 |
| P61981 | Cytoplasm {ECO:0000250}.                 | 0 |
| Q969T4 | Nucleus {ECO:0000269 PubMed:15545318}.   | 0 |
| Q8N137 | Cytoplasm, cytoskeleton, microtubule or  | 0 |
| Q9Y5R8 | Golgi apparatus, cis-Golgi network {ECO  | 0 |
| Q9UHL3 |                                          | 0 |
| O60883 | Cell membrane {ECO:0000269 PubMed:28688  | 0 |
| Q8NDZ2 |                                          | 0 |
| Q8IY95 | Lysosome membrane {ECO:0000269 PubMed:1  | 1 |
| Q9Y328 | Membrane {ECO:0000250 UniProtKB:Q3KR51}  | 0 |
| tids.  |                                          | 0 |
| P08185 | Secreted.                                | 0 |
| Q96MU6 | Nucleus {ECO:0000305}.                   | 0 |
| Q7RTP0 | Cell membrane {ECO:0000305}; Multi-pass  | 0 |
| Q12950 | Nucleus.                                 | 0 |
| P51965 | Nucleus {ECO:0000269 PubMed:18845142}.   | 0 |
| P51991 | Nucleus {ECO:0000250}. Note=Component c  | 1 |
| Q9HOK1 | Cytoplasm {ECO:0000250}.                 | 0 |
| Q9ULK6 | Membrane {ECO:0000305}; Single-pass ty   | 0 |
| A2RUR9 |                                          | 0 |
| P09016 | Nucleus.                                 | 0 |
| P11230 | Cell junction, synapse, postsynaptic ce  | 0 |
| P35452 | Nucleus.                                 | 0 |
| P02724 | Cell membrane {ECO:0000269 PubMed:11402  | 0 |
| Q8NB14 |                                          | 0 |
| Q8TBE9 |                                          | 0 |
| Q8NFD2 |                                          | 0 |
| Q3LIE5 |                                          | 0 |
| P51161 | Isoform 1: Cytoplasm {ECO:0000250 UniPr  | 1 |
| Q70EL3 |                                          | 0 |
| Q96K76 | Cytoplasm {ECO:0000269 PubMed:21362556}  | 1 |
| Q8WUM4 | Cytoplasm, cytosol {ECO:0000250 UniProt  | 0 |
| Q9UDV6 | Nucleus {ECO:0000305}.                   | 0 |
| Q8TCY5 | Cell membrane {ECO:0000269 PubMed:15654  | 0 |
| Q3B820 | Cytoplasm, cytoskeleton, cilium basal b  | 0 |
| Q9UDV7 | Nucleus {ECO:0000305}.                   | 1 |
| P16278 | Isoform 1: Lysosome {ECO:0000269 PubMec  | 1 |
| Q9BXV9 | Nucleus {ECO:0000269 PubMed:27903914}.   | 0 |
| O75718 | Secreted, extracellular space, extracel  | 0 |
| Q9NQW8 | Membrane; Multi-pass membrane protein.   | 1 |
| Q8TE02 | Nucleus. Cytoplasm.                      | 0 |
| Q8IZV2 | Isoform 1: Membrane; Multi-pass membrar  | 0 |
| Q3B8N2 |                                          | 0 |
| Q9UNK0 | Membrane {ECO:0000250}; Single-pass ty   | 0 |
| P06493 | Nucleus. Cytoplasm. Mitochondrion. Cyt   | 1 |
| P0CG47 | Ubiquitin: Cytoplasm {ECO:0000250}. Nuc  | 0 |
| Q6P4R8 | Nucleus {ECO:0000269 PubMed:18922472}.   | 0 |

|        |                                                              |   |
|--------|--------------------------------------------------------------|---|
| P15090 | Cytoplasm {ECO:0000250 UniProtKB:P04117}                     | 0 |
| Q9NQV6 | Nucleus {ECO:0000250}.                                       | 0 |
| Q9NY97 | Golgi apparatus membrane {ECO:0000305};                      | 0 |
| P01100 | Nucleus. Endoplasmic reticulum. Cytoplasm                    | 0 |
| P49755 | Golgi apparatus, cis-Golgi network membrane                  | 0 |
| Q15797 | Cytoplasm {ECO:0000269 PubMed:15647271}                      | 0 |
| P28325 | Secreted {ECO:0000269 PubMed:20189825}.                      | 0 |
| P09228 | Secreted {ECO:0000269 PubMed:20189825}.                      | 0 |
| Q04743 | Nucleus {ECO:0000305}.                                       | 1 |
| P01037 | Secreted {ECO:0000269 PubMed:20189825}.                      | 0 |
| Q8TDD2 | Nucleus {ECO:0000250 UniProtKB:Q8VI67}.                      | 1 |
| A6NFQ2 | Isoform 2: Cell membrane {ECO:0000269 PubMed:10973561}       | 0 |
| O15041 | Secreted {ECO:0000250}.                                      | 0 |
| O75325 | Membrane {ECO:0000305}; Single-pass type I                   | 0 |
| Q9Y6M5 | Cell membrane {ECO:0000305}; Multi-pass membrane protein     | 0 |
| Q8N568 | Cytoplasm, cytoskeleton. Note=Colocalized with               | 1 |
| Q7Z570 |                                                              | 0 |
| Q9NQ84 | Cell membrane; Multi-pass membrane protein                   | 1 |
| P05787 | Cytoplasm {ECO:0000269 PubMed:10973561},                     | 0 |
| Q8N1N4 |                                                              | 0 |
| P16455 | Nucleus.                                                     | 1 |
| Q6UX53 |                                                              | 0 |
| O43790 |                                                              | 0 |
| P12081 | Cytoplasm.                                                   | 0 |
| Q6ZNB6 | Membrane {ECO:0000305}; Single-pass membrane protein         | 0 |
| O95678 |                                                              | 0 |
| Q6ZUT9 | Membrane {ECO:0000305}; Single-pass membrane protein         | 0 |
| P08571 | Cell membrane {ECO:0000269 PubMed:169832}                    | 0 |
| Q9H819 | Membrane {ECO:0000305}; Single-pass membrane protein         | 0 |
| P48668 |                                                              | 0 |
| Q86W54 | Cytoplasm {ECO:0000269 PubMed:19515240}                      | 0 |
| Q86X10 |                                                              | 0 |
| Q9BRP8 | Cytoplasm {ECO:0000269 PubMed:14968132},                     | 0 |
| Q8WU39 | Isoform 1: Endoplasmic reticulum lumen                       | 0 |
| P19013 |                                                              | 0 |
| Q9UHI7 | Cell membrane {ECO:0000269 PubMed:19379}                     | 0 |
| Q7RTS7 |                                                              | 0 |
| Q99743 | Nucleus {ECO:0000255 PROSITE-ProRule:PF00001}                | 0 |
| Q14CN4 |                                                              | 0 |
| Q15726 | Secreted.                                                    | 0 |
| Q1L5Z9 |                                                              | 0 |
| Q9BW91 | Isoform 1: Mitochondrion.                                    | 0 |
| Q7Z5P4 | Endoplasmic reticulum {ECO:0000250 UniProtKB:P04117}         | 0 |
| Q9UQ80 | Isoform 1: Cytoplasm {ECO:0000269 PubMed:15647271}           | 0 |
| Q9H5J4 | Endoplasmic reticulum membrane {ECO:0000269 PubMed:15647271} | 0 |
| P78385 |                                                              | 0 |
| Q16875 |                                                              | 0 |
| Q7Z402 | Membrane {ECO:0000305}; Multi-pass membrane protein          | 0 |
| Q15041 | Endomembrane system {ECO:0000269 PubMed:15647271}            | 0 |
| P50453 | Cytoplasm.                                                   | 0 |
| Q0VAQ4 | Cell membrane {ECO:0000269 PubMed:15021}                     | 1 |
| P78414 | Nucleus {ECO:0000305}.                                       | 0 |
| P19022 | Cell membrane {ECO:0000250 UniProtKB:P04117}                 | 1 |
| Q9BZII | Nucleus {ECO:0000255 PROSITE-ProRule:PF00001}                | 0 |
| P52630 | Cytoplasm {ECO:0000269 PubMed:11150296},                     | 0 |

|                       |                                         |   |
|-----------------------|-----------------------------------------|---|
| Q8WVJ2                | Chromosome, centromere, kinetochore {EC | 0 |
| Q8IU81                | Nucleus {ECO:0000269 PubMed:12799427}.  | 0 |
| Q8NGE7                | Cell membrane; Multi-pass membrane prot | 0 |
| P34932                | Cytoplasm {ECO:0000305}.                | 0 |
| P55318                | Nucleus {ECO:0000255 PROSITE-ProRule:PF | 0 |
| Q8TC56                | Nucleus {ECO:0000269 PubMed:17103222}.  | 0 |
| Q8WW33                | Cytoplasm {ECO:0000250 UniProtKB:Q9DAN6 | 0 |
| P17020                | Nucleus {ECO:0000269 PubMed:16628192}.  | 0 |
| Q8N2F6                | Endoplasmic reticulum membrane {ECO:000 | 1 |
| P14621                |                                         | 0 |
| Q9H4I3                |                                         | 0 |
| P17544                | Nucleus {ECO:0000255 PROSITE-ProRule:PF | 0 |
| C9J798                | Cytoplasm, cytosol {ECO:0000250 UniProt | 0 |
| O14544                |                                         | 0 |
| Q5BKX8                | Cytoplasm, myofibril, sarcomere {ECO:00 | 0 |
| Q8WUU4                | Nucleus {ECO:0000250 UniProtKB:E9Q6W4}. | 0 |
| Q8N841                | Cell projection, cilium {ECO:0000269 Pu | 0 |
| Q9Y253                | Nucleus {ECO:0000269 PubMed:12606586}.  | 0 |
| Q9BQ31                | Cell membrane {ECO:0000269 PubMed:10484 | 0 |
| O75526                | Nucleus {ECO:0000269 PubMed:10958650}.  | 1 |
| P33176                | Cytoplasm, cytoskeleton {ECO:0000250 Ur | 0 |
| O15354                | Cell membrane {ECO:0000269 PubMed:17059 | 0 |
| Q12802                | Cytoplasm, cytosol {ECO:0000269 PubMed: | 0 |
| Q9BXL8                | Nucleus {ECO:0000269 PubMed:16984923}.  | 0 |
| Q8N3Y7                | Endoplasmic reticulum membrane {ECO:000 | 1 |
| Q8WWB3                |                                         | 0 |
| Q9BUK0                | Mitochondrion intermembrane space {ECO: | 0 |
| P83110                | Secreted {ECO:0000269 PubMed:21321049}. | 0 |
| P32314                | Nucleus.                                | 1 |
| Q6P5Q4                | Cytoplasm, myofibril, sarcomere {ECO:00 | 1 |
| Q13515                | Cell membrane {ECO:0000250 UniProtKB:Q2 | 0 |
| Q8NFA0                | Membrane {ECO:0000305}; Lipid-anchor {F | 0 |
| cells of pancreas and | Secreted {ECO:0000269 PubMed:21784842}. | 0 |
| O15297                | Nucleus {ECO:0000269 PubMed:28343630, F | 0 |
| Q9NS67                | Cell membrane {ECO:0000250}; Multi-pass | 0 |
| Q00889                | Secreted {ECO:0000305}.                 | 0 |
| Q8IY47                |                                         | 0 |
| Q8IUF8                | Nucleus {ECO:0000269 PubMed:12091391, F | 1 |
| O43715                | Cytoplasm, perinuclear region {ECO:0000 | 0 |
| P62310                | Nucleus {ECO:0000269 PubMed:10523320, F | 0 |
| Q92628                |                                         | 0 |
| O43312                | Cytoplasm, cytoskeleton.                | 0 |
| Q9BTV4                | Endoplasmic reticulum {ECO:0000250}. Nu | 0 |
| Q8WU17                | Endoplasmic reticulum membrane {ECO:000 | 0 |
| P46781                | Cytoplasm {ECO:0000269 PubMed:17289661} | 0 |
| P04054                | Secreted {ECO:0000269 PubMed:19297324}. | 0 |
| Q9BSV6                | Nucleus {ECO:0000269 PubMed:15109492}.  | 0 |
| P20396                | Secreted.                               | 0 |
| O15217                | Cytoplasm.                              | 0 |
| Q8NCY6                |                                         | 0 |
| O95167                | Mitochondrion inner membrane {ECO:00003 | 1 |
| P53370                | Cytoplasm. Nucleus. Mitochondrion. Note | 0 |
| Q9HCD6                |                                         | 0 |
| P08F94                | Cell membrane {ECO:0000269 PubMed:15458 | 0 |
| A6PVI3                |                                         | 0 |



|        |                                                              |   |
|--------|--------------------------------------------------------------|---|
|        | Cytoplasm, cytoskeleton {ECO:0000250}.                       | 0 |
| Q8WWY6 | Nucleus {ECO:0000269 PubMed:12504854}.                       | 1 |
| Q9HCG1 | Nucleus {ECO:0000305}.                                       | 0 |
| P07205 | Cytoplasm {ECO:0000250}.                                     | 0 |
| Q09FC8 | Nucleus {ECO:0000269 PubMed:17055453}.                       | 0 |
| Q969G5 | Cytoplasm {ECO:0000250 UniProtKB:Q91VJ2}.                    | 0 |
| P40198 | Membrane; Single-pass type I membrane protein.               | 0 |
| Q9GZP0 | Secreted {ECO:0000269 PubMed:11331882}.                      | 0 |
| Q9HBJ0 | Secreted {ECO:0000305}.                                      | 0 |
| P21453 | Cell membrane; Multi-pass membrane protein.                  | 1 |
| Q96MM7 | Membrane {ECO:0000305}; Single-pass type I membrane protein. | 0 |
| Q8NGN0 | Cell membrane; Multi-pass membrane protein.                  | 0 |
| Q9Y3Y4 | Nucleus {ECO:0000305}.                                       | 0 |
| Q6NSJ5 | Cell membrane {ECO:0000269 PubMed:24790271}.                 | 0 |
| P61925 |                                                              | 0 |
| Q5GH73 | Membrane {ECO:0000305}; Multi-pass membrane protein.         | 0 |
| Q96NA8 | Membrane {ECO:0000250}; Single-pass membrane protein.        | 0 |
| P25090 | Cell membrane {ECO:0000269 PubMed:11689271}.                 | 0 |
| P21462 | Cell membrane {ECO:0000269 PubMed:15155271}.                 | 0 |
| Q8WXA2 | Secreted {ECO:0000305}.                                      | 0 |
| Q9UHY8 |                                                              | 0 |
| Q9BT81 | Nucleus {ECO:0000255 PROSITE-ProRule:PF00001}.               | 0 |
| Q6P047 |                                                              | 0 |
| Q96F05 | Cell membrane {ECO:0000269 PubMed:24311271}.                 | 0 |
| Q9UM73 | Cell membrane {ECO:0000269 PubMed:16311271}.                 | 0 |
| Q16773 | Cytoplasm.                                                   | 0 |
| Q13496 | Cytoplasm {ECO:0000269 PubMed:10900271}.                     | 0 |
| Q9BVS5 | Mitochondrion {ECO:0000269 PubMed:23097271}.                 | 1 |
| P06213 | Cell membrane {ECO:0000250 UniProtKB:P12112}.                | 0 |
|        | Mitochondrion outer membrane {ECO:0000250 UniProtKB:P12112}. | 0 |
| Q8ND71 | Endoplasmic reticulum {ECO:0000250 UniProtKB:P12112}.        | 1 |
| Q9UBD0 | Nucleus {ECO:0000305}. Cytoplasm {ECO:0000250}.              | 0 |
| Q9NPA1 | Membrane; Multi-pass membrane protein.                       | 0 |
| P21217 | Golgi apparatus, Golgi stack membrane; Membrane.             | 1 |
| Q02156 | Cytoplasm {ECO:0000269 PubMed:17603037}.                     | 0 |
| Q8NGT1 | Cell membrane; Multi-pass membrane protein.                  | 0 |
| 075528 | Nucleus {ECO:0000269 PubMed:11564863, F075528}.              | 0 |
| 075159 |                                                              | 0 |
| Q96EU7 | Membrane {ECO:0000305}; Single-pass type I membrane protein. | 0 |
| Q9BUW7 |                                                              | 0 |
| Q8NDC4 | Cytoplasm {ECO:0000269 PubMed:25822849}.                     | 0 |
| Q499Z4 | Nucleus {ECO:0000305}.                                       | 0 |
| Q9BU19 | Nucleus {ECO:0000305}.                                       | 0 |
| Q9H477 | Cytoplasm {ECO:0000250 UniProtKB:P25332}.                    | 0 |
| Q96R27 | Cell membrane; Multi-pass membrane protein.                  | 0 |
| P39086 | Cell membrane; Multi-pass membrane protein.                  | 0 |
| Q8TAX7 | Secreted {ECO:0000269 PubMed:7690757}.                       | 0 |
| Q99935 | Secreted {ECO:0000269 PubMed:17101991}.                      | 0 |
| Q9H061 | Mitochondrion inner membrane {ECO:0000250 UniProtKB:P12112}. | 0 |
| Q8IUX1 | Mitochondrion membrane {ECO:0000269 PubMed:17603037}.        | 0 |
| Q9BZR9 | Cytoplasm {ECO:0000269 PubMed:23152791}.                     | 0 |
| Q8NC67 | Membrane {ECO:0000305}; Single-pass type I membrane protein. | 0 |
| P07498 | Secreted.                                                    | 0 |
| Q6DT37 | Cytoplasm {ECO:0000269 PubMed:15194684}.                     | 1 |
| P17275 | Nucleus.                                                     | 0 |

|        |                                          |   |
|--------|------------------------------------------|---|
| Q96D05 | Membrane {ECO:0000250 UniProtKB:Q8N8J7}  | 0 |
| Q8WXS4 | Membrane {ECO:0000305}; Multi-pass mem   | 1 |
| P16662 | Microsome membrane {ECO:0000305}; Singl  | 0 |
| P02750 | Secreted.                                | 0 |
| Q8NEM2 | Midbody {ECO:0000269 PubMed:21187330}.   | 0 |
| Q15818 | Cytoplasmic vesicle, secretory vesicle   | 0 |
| Q52LJ0 | Nucleus {ECO:0000269 PubMed:24608264}.   | 0 |
| Q8NDP4 | Nucleus {ECO:0000305}.                   | 0 |
| Q8IYI8 | Nucleus {ECO:0000305}.                   | 0 |
| P10253 | Lysosome {ECO:0000269 PubMed:17897319}.  | 1 |
| Q8WVQ1 | Endoplasmic reticulum membrane {ECO:000  | 0 |
| Q969W1 | Endoplasmic reticulum membrane {ECO:000  | 0 |
| Q9NPF2 | Golgi apparatus membrane {ECO:0000250};  | 0 |
| Q9Y3B2 | Nucleus, nucleolus {ECO:0000269 PubMed:  | 0 |
| P18669 |                                          | 0 |
| P08727 |                                          | 0 |
| P19012 |                                          | 0 |
| Q96LR2 | Cytoplasm {ECO:0000269 PubMed:21048106}  | 0 |
| P51795 | Golgi apparatus membrane {ECO:0000269 P  | 0 |
| O94811 | Cytoplasm. Cytoplasm, cytoskeleton. Nuc  | 1 |
| Q9UK17 | Cell membrane {ECO:0000250 UniProtKB:Q6  | 0 |
| P13646 |                                          | 0 |
| Q8WTP9 |                                          | 0 |
| P35527 |                                          | 0 |
| Q8WWM1 |                                          | 0 |
| Q9NP56 |                                          | 0 |
| Q9P0J6 | Mitochondrion {ECO:0000269 PubMed:25278  | 0 |
| Q9P0T4 | Nucleus {ECO:0000305}.                   | 0 |
| P18440 | Cytoplasm.                               | 0 |
| P35900 | Cytoplasm {ECO:0000269 PubMed:10973561,  | 1 |
| A6NK44 |                                          | 0 |
| Q6VAB6 | Cytoplasm {ECO:0000250}. Membrane {ECO:  | 0 |
| Q96C55 | Nucleus {ECO:0000305}.                   | 0 |
| P23508 | Cell membrane. Cell projection, lamelli  | 0 |
| Q7Z3Y8 | Cytoplasm {ECO:0000250 UniProtKB:Q9Z32C} | 0 |
| Q9HCK0 | Nucleus {ECO:0000305}.                   | 0 |
| Q6UY11 | Membrane {ECO:0000305}; Single-pass ty   | 0 |
| Q6V9R5 | Nucleus {ECO:0000305}.                   | 0 |
| Q5VUA4 | Nucleus {ECO:0000269 PubMed:9853615}.    | 0 |
| Q8N587 | Nucleus {ECO:0000305}.                   | 0 |
| Q8TF74 | Cytoplasm, cytoskeleton {ECO:0000269 P   | 1 |
| Q9BPY8 | Nucleus {ECO:0000250 UniProtKB:Q8R1H0}.  | 1 |
| Q96QH8 | Secreted {ECO:0000305}.                  | 0 |
| Q8NH93 | Cell membrane; Multi-pass membrane prot  | 0 |
| P59047 | Mitochondrion {ECO:0000250}. Nucleus, r  | 0 |
| Q8TDW0 | Cell membrane {ECO:0000269 PubMed:2479C} | 0 |
| Q96QH8 | Secreted {ECO:0000305}.                  | 0 |
| O76021 | Nucleus, nucleolus {ECO:0000269 PubMed:  | 1 |
| Q7Z745 | Cytoplasm {ECO:0000250 UniProtKB:Q7M6Y6} | 0 |
| Q08752 | Cytoplasm {ECO:0000269 PubMed:11525244,  | 0 |
| Q16134 | Mitochondrion inner membrane.            | 1 |
| Q9HBX9 | Cell membrane {ECO:0000269 PubMed:1605}  | 0 |
| P35408 | Cell membrane; Multi-pass membrane prot  | 0 |
| O75347 | Cytoplasm, cytoskeleton.                 | 0 |
| Q96JE9 | Cytoplasm, cytoskeleton {ECO:0000269 P   | 0 |

|        |                                                |   |
|--------|------------------------------------------------|---|
| Q5XKR4 | Nucleus {ECO:0000255 PROSITE-ProRule:PF        | 1 |
| O95672 | Membrane {ECO:0000250}; Single-pass typ        | 0 |
| Q07817 | Isoform Bcl-X(L): Mitochondrion inner m        | 0 |
| P02679 | Secreted {ECO:0000269 PubMed:10074346,         | 0 |
| P02671 | Secreted {ECO:0000269 PubMed:19296670,         | 0 |
| P02675 | Secreted {ECO:0000269 PubMed:10074346,         | 0 |
| O43660 | Nucleus {ECO:0000269 PubMed:11101529, F        | 1 |
| Q8IVC4 | Nucleus {ECO:0000305}.                         | 0 |
| O60469 | Isoform Short: Secreted {ECO:0000305}..;       | 0 |
| Q9GZS0 | Cytoplasm, cytoskeleton, cilium axoneme        | 0 |
| Q9HB89 | Cell membrane; Multi-pass membrane prot        | 0 |
| O94985 | Endoplasmic reticulum membrane {ECO:000        | 0 |
| Q7LFL8 | Nucleus {ECO:0000269 PubMed:19182210, F        | 0 |
| Q96GC6 | Cytoplasm {ECO:0000250}. Nucleus, nucle        | 0 |
| O00329 | Cytoplasm {ECO:0000269 PubMed:22020336}        | 1 |
| Q9BSK2 | Mitochondrion inner membrane {ECO:00003        | 0 |
| Q15077 | Cell membrane; Multi-pass membrane prot        | 0 |
| Q12830 | Cytoplasm. Nucleus. Note=In brains of <i>A</i> | 0 |
| Q8WXG8 |                                                | 0 |
| Q3SY52 | Nucleus {ECO:0000305}.                         | 0 |
| Q96P67 | Cell membrane; Multi-pass membrane prot        | 0 |
| Q9UPC5 | Cell membrane {ECO:0000250}; Multi-pass        | 0 |
| O94827 | Cytoplasm {ECO:0000250 UniProtKB:Q66T02        | 0 |
| Q6VMQ6 | Nucleus {ECO:0000269 PubMed:19106100, F        | 1 |
| P49795 | Membrane; Lipid-anchor.                        | 0 |
| Q15560 | Nucleus.                                       | 0 |
| Q75V66 | Endoplasmic reticulum membrane {ECO:000        | 0 |
| O15379 | Nucleus {ECO:0000269 PubMed:21030595}.         | 0 |
| Q9NQX3 | Cell junction, synapse {ECO:0000250 Uni        | 0 |
| Q9HCJ6 |                                                | 0 |
| Q9NW97 | Membrane {ECO:0000305}; Multi-pass memt        | 0 |
| Q9Y6Y1 | Nucleus {ECO:0000305}. Cytoplasm.              | 0 |
| P56470 |                                                | 0 |
| Q8IZ02 | Nucleus {ECO:0000250 UniProtKB:Q9DAM1}.        | 0 |
| P00439 |                                                | 0 |
| Q9BVQ7 | Cytoplasm {ECO:0000305}.                       | 0 |
| P50440 | Isoform 1: Mitochondrion inner membrane        | 1 |
| Q8NOS2 | Nucleus {ECO:0000250 UniProtKB:Q9D495}.        | 0 |
| P10415 | Mitochondrion outer membrane {ECO:00002        | 0 |
| P17812 |                                                | 0 |
| Q76NI1 | Cell projection, dendrite {ECO:0000250         | 0 |
| O95568 |                                                | 0 |
| Q8IYW2 | Cytoplasm, cytoskeleton, cilium axoneme        | 0 |
| P25067 | Secreted, extracellular space, extracel        | 0 |
| Q6NUJ5 |                                                | 0 |
| Q9Y5F3 | Cell membrane {ECO:0000250}; Single-pas        | 0 |
| Q8NDQ6 | Nucleus {ECO:0000269 PubMed:16815308}.         | 0 |
| Q8N1E6 | Cytoplasm {ECO:0000269 PubMed:19955572}        | 0 |
| Q01780 | Cytoplasm. Nucleus, nucleolus. Nucleus.        | 0 |
| Q96NI8 | Nucleus {ECO:0000305}.                         | 0 |
| P42568 | Nucleus {ECO:0000255 PROSITE-ProRule:PF        | 0 |
| P31350 | Cytoplasm.                                     | 0 |
| Q8WVT3 | Endoplasmic reticulum-Golgi intermediat        | 0 |
| P01574 | Secreted.                                      | 0 |
| P63220 | Cytoplasm, cytosol {ECO:0000269 PubMed:        | 0 |

|        |                                          |   |
|--------|------------------------------------------|---|
| Q16581 | Cell membrane; Multi-pass membrane prot  | 0 |
| Q9HC36 | Mitochondrion {ECO:0000269 PubMed:24036  | 1 |
| P60484 | Cytoplasm {ECO:0000269 PubMed:15987703,  | 0 |
| P62081 | Cytoplasm, cytoskeleton, microtubule or  | 0 |
| Q9UKY0 | Cell membrane {ECO:0000269 PubMed:12200  | 0 |
| O60930 | Cytoplasm {ECO:0000305}.                 | 0 |
| P04156 | Cell membrane; Lipid-anchor, GPI-anchor  | 0 |
| Q5JT82 | Nucleus {ECO:0000305}.                   | 0 |
| P25100 | Cell membrane; Multi-pass membrane prot  | 0 |
| P55087 | Cell membrane {ECO:0000269 PubMed:75594  | 0 |
| Q9HBI6 | Endoplasmic reticulum membrane {ECO:000  | 1 |
| Q9Y4G6 | Cytoplasm {ECO:0000269 PubMed:27223613}  | 0 |
| Q6DKI2 |                                          | 0 |
| Q9NYZ1 | Membrane {ECO:0000305}; Multi-pass mem   | 0 |
| O75362 | Nucleus {ECO:0000305}.                   | 0 |
| P13521 | Secreted. Note=Neuroendocrine and endoc  | 0 |
| Q8N5M1 | Mitochondrion {ECO:0000305}.             | 1 |
| Q6NT55 | Endoplasmic reticulum membrane {ECO:000  | 0 |
| O43447 | Nucleus speckle {ECO:0000269 PubMed:957  | 0 |
| Q9H069 | Cytoplasm, cytoskeleton, cilium axoneme  | 0 |
| Q8IYI0 | Chromosome {ECO:0000269 PubMed:29656893} | 0 |
| Q15652 | Nucleus {ECO:0000250}.                   | 0 |
| Q9BYZ2 |                                          | 0 |
| Q8N3V7 | Cytoplasm, cytoskeleton {ECO:0000250 Ur  | 0 |
| Q86TJ5 | Nucleus {ECO:0000305}.                   | 0 |
| Q9H082 | Golgi apparatus membrane {ECO:0000250 U  | 0 |
| P52888 | Cytoplasm.                               | 0 |
| Q4UJ75 |                                          | 0 |
| Q06141 | Secreted. Note=Found in the apical regi  | 0 |
| P17677 | Cell membrane {ECO:0000269 PubMed:14978  | 0 |
| P48304 | Secreted.                                | 0 |
| Q8IUS5 | Membrane {ECO:0000305}; Single-pass typ  | 0 |
| P55268 | Secreted, extracellular space, extracel  | 0 |
| P47897 | Cytoplasm, cytosol {ECO:0000269 PubMed:  | 1 |
| Q8TF66 | Membrane {ECO:0000305}; Single-pass typ  | 0 |
| Q16637 | Nucleus, gem {ECO:0000269 PubMed:112836  | 0 |
| Q9NZJ5 | Endoplasmic reticulum membrane; Single-  | 0 |
| Q96LM6 | Nucleus {ECO:0000250 UniProtKB:Q9DAG4}.  | 0 |
| Q9NPI7 |                                          | 0 |
| O75414 |                                          | 0 |
| P99999 | Mitochondrion intermembrane space. Note  | 1 |
| P10966 | Isoform 1: Cell membrane {ECO:0000269 F  | 0 |
| Q8IYM2 |                                          | 0 |
| P22676 |                                          | 0 |
| A2A2Y4 | Membrane {ECO:0000305}; Single-pass men  | 0 |
| Q13884 | Cell membrane, sarcolemma {ECO:0000250}  | 0 |
| Q96DY7 |                                          | 0 |
| Q96QE5 | Mitochondrion matrix {ECO:0000269 PubMe  | 0 |
| Q9BYD1 | Mitochondrion {ECO:0000269 PubMed:25278  | 0 |
| Q9UDY8 | Cytoplasm, perinuclear region {ECO:0000  | 0 |
| P01236 | Secreted.                                | 0 |
| P17676 | Nucleus {ECO:0000269 PubMed:20829347}.   | 0 |
| P20160 | Cytoplasmic granule membrane {ECO:00002  | 1 |
| Q15661 | Secreted. Note=Released from the secret  | 0 |
| Q9H074 | Cytoplasm {ECO:0000305}.                 | 0 |

|        |                                         |   |
|--------|-----------------------------------------|---|
| Q96MH7 |                                         | 0 |
| Q9BXJ3 | Secreted {ECO:0000269 PubMed:21658842}. | 0 |
| Q7Z3B1 | Cell membrane {ECO:0000250}; Lipid-anch | 0 |
| P52739 | Nucleus {ECO:0000269 PubMed:17306895, I | 0 |
| A1Z1Q3 | Nucleus {ECO:0000269 PubMed:23474712}.  | 1 |
| Q9H3H5 | Endoplasmic reticulum membrane; Multi-p | 0 |
| P35613 | Cell membrane {ECO:0000269 PubMed:15946 | 0 |
| Q9BQA5 | Nucleus {ECO:0000269 PubMed:11553631, I | 0 |
| Q9Y6F8 | Nucleus {ECO:0000269 PubMed:18450745}.  | 1 |
| Q8NGI7 | Cell membrane; Multi-pass membrane prot | 0 |
| Q6ZMG9 | Endoplasmic reticulum membrane {ECO:000 | 0 |
| Q9NUV7 | Endoplasmic reticulum membrane {ECO:000 | 1 |
| Q9NQ92 | Nucleus {ECO:0000269 PubMed:18404153}.  | 0 |
| Q96S44 | Cytoplasm {ECO:0000269 PubMed:28805828} | 0 |
| Q5QGZ9 | Cell membrane {ECO:0000269 PubMed:14739 | 0 |
| Q8NGI9 | Cell membrane; Multi-pass membrane prot | 0 |
| P07738 |                                         | 0 |
| 075817 | Nucleus, nucleolus {ECO:0000269 PubMed: | 0 |
| Q96F25 | Endoplasmic reticulum membrane {ECO:000 | 0 |
| Q96I99 | Mitochondrion {ECO:0000255 HAMAP-Rule:M | 1 |
| Q9NSY2 |                                         | 0 |
| Q9Y534 | Nucleus {ECO:0000250}. Cytoplasm {ECO:( | 0 |
| Q14206 |                                         | 0 |
| Q14005 | Interleukin-16: Secreted.; Isoform 1: ( | 0 |
| Q9H172 | Membrane {ECO:0000305}; Multi-pass mem  | 0 |
| Q9Y6F8 | Nucleus {ECO:0000269 PubMed:18450745}.  | 1 |
| P62879 | Cytoplasm, perinuclear region {ECO:0000 | 0 |
| Q96M91 | Cell projection, cilium {ECO:0000303 Pu | 0 |
| Q9BUT9 | Cytoplasm, Stress granule {ECO:0000269  | 0 |
| Q86UT5 | Cell membrane {ECO:0000269 PubMed:11950 | 1 |
| O14523 | Endoplasmic reticulum membrane {ECO:000 | 0 |
| Q9HBZ2 | Nucleus {ECO:0000255 PROSITE-ProRule:PF | 1 |
| Q9UBI6 | Cell membrane {ECO:0000305}; Lipid-anch | 0 |
| Q9BQR3 | Secreted.                               | 0 |
| Q9NPC6 | Cytoplasm, myofibril, sarcomere, Z line | 1 |
| Q9UMS6 | Nucleus {ECO:0000250 UniProtKB:Q91YE8}. | 0 |
| Q7Z6W7 |                                         | 0 |
| Q92989 | Nucleus {ECO:0000255 HAMAP-Rule:MF_0303 | 1 |
| Q9Y5Q6 | Secreted.                               | 0 |
| Q8N7B9 |                                         | 0 |
| A6NLP5 |                                         | 0 |
| Q9H1X1 | Cytoplasm, cytoskeleton, cilium axoneme | 0 |
| Q8WXC6 | Isoform 1: Nucleus {ECO:0000269 PubMed: | 0 |
| Q9BX10 |                                         | 0 |
| P17028 | Nucleus {ECO:0000255 PROSITE-ProRule:PF | 1 |
| Q5SRI9 | Golgi apparatus membrane {ECO:0000269 F | 1 |
| P21549 | Peroxisome {ECO:0000269 PubMed:1703535, | 1 |
| Q8NGG3 | Cell membrane; Multi-pass membrane prot | 0 |
| O43427 | Nucleus. Endomembrane system; Periphera | 0 |
| A5YM72 |                                         | 0 |
| Q8N9N5 | Nucleus {ECO:0000269 PubMed:16166625}.  | 0 |
| P62136 | Cytoplasm {ECO:0000269 PubMed:11739654, | 0 |
| A6NMN3 | Cytoplasmic vesicle, secretory vesicle, | 0 |
| P56202 | Endoplasmic reticulum {ECO:0000269 PubM | 1 |
| Q0D2K0 | Membrane {ECO:0000305}; Multi-pass mem  | 0 |

|                       |                                         |   |
|-----------------------|-----------------------------------------|---|
| Q96DR8                | Secreted {ECO:0000305 PubMed:15880534}. | 0 |
| Q9NY99                | Cell membrane, sarcolemma; Peripheral n | 0 |
| Q8TBE3                | Membrane {ECO:0000305}; Single-pass men | 0 |
| Q14432                | Membrane {ECO:0000305}; Multi-pass memt | 0 |
| Q8WZ60                |                                         | 0 |
| Q96BP2                | Mitochondrion {ECO:0000269 PubMed:23908 | 0 |
| Q86TS9                | Mitochondrion {ECO:0000269 PubMed:25278 | 0 |
| Q92484                | Secreted {ECO:0000269 PubMed:25288789}. | 0 |
| Q99638                | Nucleus {ECO:0000269 PubMed:12628935}.  | 1 |
| O95967                | Secreted.                               | 0 |
| Q8NGE0                | Cell membrane; Multi-pass membrane prot | 0 |
| A6NIR3                |                                         | 0 |
| Q9Y4E1                | Early endosome membrane {ECO:0000269 Pu | 0 |
| Q9H6X4                | Membrane {ECO:0000305}; Multi-pass memt | 0 |
| Q9HA38                | Nucleus {ECO:0000269 PubMed:11571644}.  | 0 |
| Q86XD8                |                                         | 0 |
| Q8N1K5                | Cytoplasm {ECO:0000250 UniProtKB:Q8BGWC | 0 |
| Q8NE65                | Nucleus {ECO:0000305}.                  | 0 |
| Q96PG2                | Membrane {ECO:0000250}; Multi-pass memt | 0 |
| Q7Z7L1                | Nucleus {ECO:0000269 PubMed:22927417, I | 0 |
| Q99731                | Secreted.                               | 0 |
| Q9BR76                | Cytoplasm, cytoskeleton {ECO:0000269 Pu | 0 |
| Q6P4F1                | Golgi apparatus, Golgi stack membrane   | 0 |
| Q96NY9                | Nucleus, nucleolus {ECO:0000269 PubMed: | 0 |
| Q9UJV8                | Nucleus {ECO:0000250}.                  | 1 |
| Q8TC21                | Nucleus {ECO:0000305}.                  | 0 |
| be performed. View pr | Secreted, extracellular space, extracel | 0 |
| P23528                | Nucleus matrix {ECO:0000269 PubMed:1558 | 0 |
| O94876                | Endoplasmic reticulum membrane {ECO:000 | 0 |
| Q6N069                |                                         | 0 |
| Q6NXPO                |                                         | 0 |
| Q9GZU8                | Nucleus {ECO:0000269 PubMed:29934401}.  | 0 |
| Q86YS6                | Cytoplasmic vesicle, phagosome {ECO:000 | 1 |
| be performed. View pr | Membrane {ECO:0000305}; Multi-pass memt | 0 |
| Q9BRT8                |                                         | 0 |
| Q00444                | Nucleus.                                | 0 |
| Q8IU60                | Cytoplasm, P-body {ECO:0000269 PubMed:1 | 0 |
| Q86XE0                |                                         | 0 |
| P63173                |                                         | 0 |
| O75881                | Endoplasmic reticulum membrane {ECO:000 | 0 |
| O14753                | Nucleus {ECO:0000250}.                  | 0 |
| P13631                | Nucleus {ECO:0000269 PubMed:28167758}.  | 0 |
| Q5XG92                | Secreted {ECO:0000305}.                 | 0 |
| Q6UWW8                | Endoplasmic reticulum lumen {ECO:000025 | 0 |
| Q8TE77                | Cytoplasm, cytoskeleton {ECO:0000250}.  | 0 |
| O00748                | Endoplasmic reticulum lumen {ECO:000026 | 1 |
| Q9P2J9                | Mitochondrion matrix {ECO:0000250}.     | 0 |
| Q02447                | Nucleus. Nucleus, PML body. Note=Locali | 1 |
| P35908                |                                         | 0 |
| Q9Y485                |                                         | 0 |
| Q6UB28                | Mitochondrion {ECO:0000255 HAMAP-Rule:M | 0 |
| Q9UHF1                | Secreted, extracellular space {ECO:0000 | 0 |
| Q6IA69                |                                         | 0 |
| Q9UBM7                | Endoplasmic reticulum membrane {ECO:000 | 0 |
| Q6Q4G3                | Membrane {ECO:0000303 PubMed:17525158}; | 1 |

|        |                                         |   |
|--------|-----------------------------------------|---|
| Q8NFP9 | Cytoplasm {ECO:0000250}. Membrane {ECO: | 0 |
| Q8TDP1 | Nucleus {ECO:0000305}.                  | 1 |
| Q96EZ4 |                                         | 0 |
| Q6ZTN6 | Cell membrane {ECO:0000269 PubMed:22298 | 0 |
| Q96AM1 | Cell membrane; Multi-pass membrane prot | 0 |
| Q99836 | Cytoplasm {ECO:0000269 PubMed:15361868, | 0 |
| Q8TDS7 | Cell membrane {ECO:0000269 PubMed:15037 | 0 |
| 095747 | Cytoplasm {ECO:0000269 PubMed:22361696} | 1 |
| Q9Y226 | Membrane {ECO:0000305}; Multi-pass memt | 1 |
| Q9UPP1 | Nucleus. Nucleus, nucleolus. Note=Recru | 0 |
| Q6UWP7 | Endoplasmic reticulum membrane {ECO:000 | 0 |
| P28332 | Cytoplasm.                              | 0 |
| Q5GH77 | Cell membrane {ECO:0000269 PubMed:16431 | 0 |
| A6NGY1 | Nucleus {ECO:0000250}.                  | 0 |
| Q92993 | Nucleus {ECO:0000269 PubMed:17360565}.  | 0 |
| Q8TEJ3 |                                         | 0 |
| A0PJZ3 | Membrane {ECO:0000305}; Single-pass typ | 0 |
| Q8WWQ2 | Secreted, extracellular space, extracel | 0 |
| Q9UBL0 | Cytoplasm {ECO:0000250}.                | 1 |
| Q86TJ2 | Nucleus {ECO:0000305}.                  | 0 |
| Q2M329 | Cytoplasm, cytoskeleton, microtubule or | 1 |
| P25098 | Cytoplasm {ECO:0000250 UniProtKB:P21146 | 0 |
| Q04206 | Nucleus {ECO:0000269 PubMed:1493333, EC | 0 |
| Q86UK5 | Cell membrane {ECO:0000250 UniProtKB:Q8 | 0 |
|        | Membrane {ECO:0000305}; Single-pass men | 0 |
| Q8WU58 |                                         | 0 |
| Q6ZN30 | Nucleus {ECO:0000269 PubMed:15081112}.  | 0 |
| Q96H96 | Mitochondrion inner membrane {ECO:00002 | 0 |
| P17066 |                                         | 0 |
| Q9UI30 | Nucleus, nucleoplasm {ECO:0000269 PubMe | 0 |
| Q9H3W5 | Membrane {ECO:0000305}; Single-pass typ | 0 |
| Q9Y2K7 | Nucleus, nucleoplasm {ECO:0000269 PubMe | 0 |
| Q6P461 | Mitochondrion {ECO:0000305}.            | 0 |
| Q3MIX3 | Membrane {ECO:0000305}; Single-pass men | 0 |
| Q9BQC6 | Mitochondrion {ECO:0000269 PubMed:25278 | 1 |
| P59510 | Secreted, extracellular space, extracel | 0 |
| Q8N668 | Nucleus {ECO:0000269 PubMed:21778237, F | 0 |
| Q70E73 | Cell membrane {ECO:0000269 PubMed:15469 | 0 |
| Q13505 | Membrane {ECO:0000305}; Single-pass typ | 0 |
| 095622 | Cell membrane {ECO:0000305 PubMed:15385 | 0 |
| Q460N5 | Nucleus {ECO:0000250 UniProtKB:Q2EMV9}. | 0 |
| Q9Y271 | Cell membrane; Multi-pass membrane prot | 0 |
| P61024 |                                         | 0 |
| 094929 | Cytoplasm {ECO:0000250}.                | 0 |
| Q8N8X9 |                                         | 0 |
| A6NNZ2 | Cytoplasm, cytoskeleton {ECO:0000250}.  | 0 |
| Q5TF39 | Apical cell membrane {ECO:0000250 UniPr | 0 |
| Q8TAA9 | Cell membrane {ECO:0000250}; Multi-pass | 0 |
| P35754 | Cytoplasm.                              | 0 |
| Q15051 | Cytoplasm, cytoskeleton, microtubule or | 0 |
| Q8IV01 | Cytoplasmic vesicle, secretory vesicle, | 0 |
| Q14789 | Golgi apparatus membrane; Single-pass t | 1 |
| A6NJI1 |                                         | 0 |
| Q9Y5R5 | Nucleus {ECO:0000255 PROSITE-ProRule:PF | 0 |
| Q8TDB8 | Cell membrane {ECO:0000269 PubMed:27468 | 0 |

|        |                                         |   |
|--------|-----------------------------------------|---|
| Q96N19 | Membrane {ECO:0000305}; Multi-pass mem  | 0 |
| 076070 | Cytoplasm, perinuclear region {ECO:000  | 0 |
| Q9H8L6 | Secreted, extracellular space, extracel | 0 |
| Q6P582 | Cytoplasm, cytoskeleton, microtubule or | 0 |
| 095271 | Cytoplasm {ECO:0000269 PubMed:10523501, | 0 |
| Q6P9G9 | Nucleus {ECO:0000255 PROSITE-ProRule:PF | 0 |
| Q9ULJ3 | Nucleus {ECO:0000269 PubMed:15629158}.  | 1 |
| Q86XI6 |                                         | 0 |
| Q8NGX5 | Cell membrane; Multi-pass membrane prot | 0 |
| Q8TDV2 | Cell membrane; Multi-pass membrane prot | 0 |
| Q9P2F5 |                                         | 0 |
| Q16584 | Cytoplasm, cytoskeleton, microtubule or | 0 |
| Q5W186 | Secreted {ECO:0000269 PubMed:12535658}. | 0 |
| P02746 | Secreted.                               | 0 |
| P02745 | Secreted.                               | 0 |
| Q6UWM5 | Cytoplasmic vesicle, secretory vesicle, | 0 |
| Q14118 | Alpha-dystroglycan: Secreted, extracell | 0 |
| 075553 |                                         | 0 |
| Q9H2C2 | Endoplasmic reticulum membrane {ECO:000 | 0 |
| Q8IYA8 | Chromosome {ECO:0000250 UniProtKB:Q6PDM | 0 |
| Q5TGZ0 | Mitochondrion inner membrane {ECO:00002 | 1 |
| Q8N3D4 | Endosome {ECO:0000305 PubMed:27552051}. | 0 |
| Q9HOW7 |                                         | 0 |
| Q5HYL7 | Membrane {ECO:0000305}; Multi-pass mem  | 0 |
| Q9BY78 | Endoplasmic reticulum membrane {ECO:000 | 0 |
| Q96C90 | Cytoplasm {ECO:0000305}.                | 0 |
| Q8TAA1 | Secreted {ECO:0000305}.                 | 0 |
| 060232 |                                         | 0 |
| Q8TD06 | Endoplasmic reticulum {ECO:0000269 PubM | 0 |
| Q92922 | Nucleus {ECO:0000269 PubMed:28753627}.  | 0 |
| Q8TAU3 | Nucleus {ECO:0000305}.                  | 0 |
| P28827 | Membrane; Single-pass type I membrane p | 0 |
| P26885 | Endoplasmic reticulum membrane {ECO:000 | 1 |
| Q9H792 | Cytoplasm, cytoskeleton {ECO:0000269 Pu | 0 |
|        |                                         | 0 |
| 014798 | Cell membrane; Lipid-anchor, GPI-anchor | 0 |
| Q9Y5P6 | Cytoplasm {ECO:0000269 PubMed:23768512} | 0 |
| Q7L9L4 | Cytoplasm {ECO:0000269 PubMed:15067004} | 0 |
| Q969S3 | Cytoplasm {ECO:0000269 PubMed:11802789} | 0 |
| Q6UVK1 | Cell membrane {ECO:0000250 UniProtKB:QC | 0 |
| Q8WV41 | Cytoplasm, cytosol. Membrane; Periphera | 0 |
| A6NJV1 |                                         | 0 |
| Q8IZF5 | Membrane {ECO:0000255}; Multi-pass mem  | 0 |
| Q86W25 |                                         | 0 |
| 014647 | Nucleus {ECO:0000250}. Note=Binds to my | 1 |
| P46094 | Cell membrane; Multi-pass membrane prot | 0 |
| Q9BWC9 | Nucleus {ECO:0000269 PubMed:20159018}.  | 0 |
| P51686 | Cell membrane {ECO:0000305 PubMed:27926 | 0 |
|        | Cytoplasm, cytoskeleton, microtubule or | 0 |
| 043704 | Cytoplasm {ECO:0000250}.                | 1 |
| Q9NZJ9 | Cytoplasm {ECO:0000269 PubMed:12121577} | 0 |
| P11498 | Mitochondrion matrix.                   | 1 |
| Q9Y4X1 | Membrane {ECO:0000305}; Single-pass ty  | 0 |
| Q8N9R8 | Membrane {ECO:0000305}; Single-pass men | 0 |
| Q9HAN9 | Nucleus {ECO:0000269 PubMed:11248244, F | 0 |



|        |                                         |   |
|--------|-----------------------------------------|---|
| Q6PJG9 | Membrane {ECO:0000250}; Single-pass ty  | 0 |
| Q8WW27 |                                         | 0 |
| P41440 | Cell membrane {ECO:0000269 PubMed:10347 | 0 |
| Q9UBY9 | Cytoplasm {ECO:0000269 PubMed:19464326} | 0 |
| Q9Y256 | Endoplasmic reticulum membrane {ECO:000 | 0 |
| P07919 | Mitochondrion inner membrane {ECO:00002 | 1 |
| Q7RTX1 | Cell membrane; Multi-pass membrane prot | 0 |
| Q5TGS1 | Nucleus {ECO:0000255 PROSITE-ProRule:PF | 0 |
| P47813 |                                         | 0 |
| A6NHP3 |                                         | 0 |
| A2AJT9 | Mitochondrion {ECO:0000305}.            | 0 |
| Q99460 |                                         | 0 |
| Q8IZP9 | Apical cell membrane {ECO:0000269 PubMe | 1 |
| Q8NHX4 |                                         | 0 |
| Q9H3R2 | Cell membrane {ECO:0000269 PubMed:11278 | 0 |
| O60279 | Membrane; Single-pass type I membrane p | 0 |
| Q9ULI3 | Isoform 1: Cell membrane {ECO:0000305}; | 0 |
| Q8N6T0 | Chromosome {ECO:0000250 UniProtKB:J3QMY | 0 |
| Q15388 | Mitochondrion outer membrane {ECO:00002 | 1 |
| P52594 | Nucleus {ECO:0000269 PubMed:10613896, I | 0 |
| P51692 | Cytoplasm {ECO:0000250 UniProtKB:P42232 | 0 |
| P09564 | Membrane; Single-pass type I membrane p | 0 |
| Q8N9V7 | Cytoplasm, cytosol {ECO:0000250 UniProt | 0 |
| P09543 | Membrane; Lipid-anchor. Melanosome. Not | 0 |
| P14923 | Cell junction, adherens junction {ECO:( | 1 |
| P54257 | Cytoplasm {ECO:0000269 PubMed:9742138}. | 0 |
| Q63HN8 | Cytoplasm, cytosol {ECO:0000269 PubMed: | 0 |
| Q9H252 | Membrane; Multi-pass membrane protein.  | 0 |
| Q8NA82 |                                         | 0 |
| Q9H4B4 | Cytoplasm. Nucleus. Nucleus, nucleolus. | 0 |
| Q7Z628 | Cytoplasm {ECO:0000250}. Nucleus {ECO:( | 0 |
| Q2PZI1 | Membrane {ECO:0000305}; Multi-pass memt | 0 |
| Q3KP31 | Nucleus {ECO:0000305}.                  | 0 |
| Q8NDX5 | Nucleus {ECO:0000269 PubMed:12167701, I | 0 |
| Q9UJ42 | Cell membrane; Multi-pass membrane prot | 0 |
| Q14781 | Nucleus {ECO:0000269 PubMed:18927235, I | 0 |
| O15020 | Cytoplasm, cytoskeleton. Cytoplasm, cel | 0 |
| O00461 | Golgi apparatus, Golgi stack membrane;  | 0 |
| Q7Z3Y7 | Cytoplasm {ECO:0000250 UniProtKB:A6BLY7 | 0 |
| Q9BQ04 | Nucleus. Nucleus, nucleolus.            | 0 |
| Q9BXJ1 | Secreted {ECO:0000305}.                 | 0 |
| Q86UD3 | Cytoplasmic vesicle membrane {ECO:00002 | 0 |
| Q6NVH7 | Nucleus {ECO:0000305 PubMed:21965664}.  | 0 |
| Q9BWF3 | Nucleus. Nucleus, nucleolus. Nucleus sp | 0 |
| P68543 |                                         | 0 |
| Q96IS3 | Nucleus {ECO:0000255 PROSITE-ProRule:PF | 0 |
|        | be performed. View primary data.        | 0 |
| O15273 | Cytoplasm, myofibril, sarcomere {ECO:00 | 1 |
| O14618 | Cytoplasm {ECO:0000269 PubMed:9726962}. | 0 |
| Q86YC3 | Cell membrane {ECO:0000269 PubMed:23545 | 0 |
| Q96LK0 | Cytoplasm, cytoskeleton, microtubule or | 1 |
| Q96M94 | Nucleus {ECO:0000269 PubMed:27561354}.  | 0 |
| POC2W1 | Cell junction, synapse, postsynaptic ce | 0 |
| Q8NA61 |                                         | 0 |
| Q8NEK8 |                                         | 0 |

|        |                                         |   |
|--------|-----------------------------------------|---|
| P63218 | Cell membrane {ECO:0000305}; Lipid-anch | 0 |
| P28906 | Membrane; Single-pass type I membrane p | 0 |
| Q9UBX1 | Lysosome.                               | 0 |
| Q8IXL7 | Isoform 1: Endoplasmic reticulum.; Isof | 0 |
| Q9Y2U8 | Nucleus inner membrane {ECO:0000269 Pub | 0 |
| Q8TBP5 | Membrane {ECO:0000305}; Single-pass ty  | 0 |
| Q6NSI3 | Nucleus {ECO:0000250 UniProtKB:Q5ZKN5}. | 1 |
| Q9ULI1 |                                         | 0 |
| Q8N8Q1 | Membrane {ECO:0000305}; Multi-pass mem  | 0 |
| Q16772 | Cytoplasm.                              | 0 |
| Q6UX98 | Membrane {ECO:0000305}; Multi-pass mem  | 0 |
| Q7LOY3 | Mitochondrion matrix, mitochondrion nuc | 0 |
| P16109 | Cell membrane {ECO:0000269 PubMed:28011 | 0 |
| Q2VPK5 | Cytoplasm.                              | 0 |
| Q8IWI9 | Nucleus {ECO:0000305}.                  | 0 |
| Q96MD2 | Lysosome membrane {ECO:0000305 PubMed:2 | 0 |
| Q5H913 |                                         | 0 |
| Q8N9S9 |                                         | 0 |
| Q5H8A4 | Endoplasmic reticulum membrane {ECO:00  | 0 |
| Q6P2Q9 | Nucleus {ECO:0000269 PubMed:26912367, F | 1 |
| O43306 | Cell membrane {ECO:0000269 PubMed:17110 | 0 |
| Q6BDI9 | Early endosome membrane {ECO:0000269 Pu | 0 |
| Q00169 | Cytoplasm.                              | 0 |
| Q9BUQ8 | Nucleus {ECO:0000269 PubMed:20858735, F | 0 |
| P51504 | Nucleus {ECO:0000305}.                  | 0 |
| Q9UHR6 |                                         | 0 |
| Q03828 | Nucleus.                                | 0 |
| Q9P1Z0 | Nucleus {ECO:0000269 PubMed:16354688}.  | 0 |
| Q13470 | Cytoplasm {ECO:0000269 PubMed:10873601} | 0 |
| Q9Y5J5 | Cytoplasm {ECO:0000269 PubMed:19203586} | 0 |
| Q8NBF1 | Nucleus {ECO:0000250 UniProtKB:Q8K1M4}. | 0 |
| Q695T7 | Cell membrane {ECO:0000269 PubMed:19188 | 1 |
| Q8TAV5 | Secreted {ECO:0000305}.                 | 0 |
| Q6GYQ0 | Cytoplasm {ECO:0000250}. Nucleus {ECO:( | 0 |
| P49917 | Nucleus.                                | 1 |
| P34981 | Cell membrane; Multi-pass membrane prot | 0 |
| P16615 | Endoplasmic reticulum membrane {ECO:00  | 1 |
| P36578 |                                         | 0 |
| O75971 | Nucleus.                                | 0 |
| B2RUY7 | Secreted {ECO:0000250}. Cell junction,  | 0 |
| Q8N812 |                                         | 0 |
| Q6PEW1 |                                         | 0 |
| Q9UHC6 | Membrane {ECO:0000250 UniProtKB:Q9CPW0} | 0 |
| Q49A17 | Golgi apparatus membrane {ECO:0000250}; | 0 |
| Q7L985 | Membrane {ECO:0000305}; Single-pass ty  | 0 |
| Q8NFI9 | Cell projection, cilium membrane. Cyto  | 0 |
| Q7Z401 | Nucleus {ECO:0000305}.                  | 0 |
| Q8N6F7 | Cytoplasm. Cell membrane. Note=It reloc | 0 |
| Q7LBE3 | Membrane {ECO:0000305}; Multi-pass mem  | 0 |
| Q8N2H9 |                                         | 0 |
| Q8N6N2 |                                         | 0 |
| Q8N1T3 |                                         | 0 |
| Q9Y3B7 | Mitochondrion {ECO:0000269 PubMed:11279 | 0 |
| Q9H2R5 | Secreted {ECO:0000305}.                 | 0 |
| Q9H9L7 | Nucleus {ECO:0000269 PubMed:18066067}.  | 0 |

|        |                                          |   |
|--------|------------------------------------------|---|
| Q8IUM7 | Nucleus {ECO:0000250 UniProtKB:Q8BGD7,   | 0 |
| Q9HCI7 |                                          | 0 |
| Q6ZNH5 | Nucleus {ECO:0000305}.                   | 0 |
| Q8N609 | Endoplasmic reticulum membrane {ECO:000  | 0 |
| Q99788 | Cell membrane {ECO:0000269 PubMed:15728  | 0 |
| Q5VTE6 |                                          | 0 |
| Q16880 | Membrane {ECO:0000305}; Single-pass mem  | 0 |
| Q8NBH2 | Cytoplasm, cytoskeleton {ECO:0000250}.   | 0 |
| Q8NOW5 |                                          | 0 |
| Q92959 | Cell membrane; Multi-pass membrane prot  | 0 |
| Q14584 | Nucleus {ECO:0000305}.                   | 0 |
| Q14542 | Basolateral cell membrane {ECO:0000269   | 0 |
| 043505 | Golgi apparatus membrane {ECO:0000269 E  | 0 |
| P41159 | Secreted {ECO:0000305 PubMed:25232147}.  | 0 |
| A1X283 | Cytoplasm {ECO:0000250}. Cell projectio  | 0 |
| Q9HCM1 | Nucleus {ECO:0000250 UniProtKB:Q5DTW7}.  | 0 |
| Q4G0J3 | Nucleus, nucleoplasm {ECO:0000269 PubMe  | 0 |
| Q8TAT2 | Secreted {ECO:0000269 PubMed:18669637}.  | 0 |
| Q14995 | Nucleus {ECO:0000255 PROSITE-ProRule:PF  | 0 |
| Q96DU9 | Cytoplasm {ECO:0000250}.; Isoform 2: Mi  | 0 |
| Q9HCU9 | Nucleus. Cytoplasm. Note=Predominantly   | 0 |
| Q8N8J7 | Membrane {ECO:0000305}; Single-pass mem  | 0 |
| P01112 | Cell membrane; Lipid-anchor; Cytoplasmic | 0 |
| Q8IV35 |                                          | 0 |
| 076094 | Cytoplasm {ECO:0000269 PubMed:22541560}  | 0 |
| Q13671 | Cytoplasm {ECO:0000269 PubMed:11784866}  | 0 |
| Q8TBBO |                                          | 0 |
| Q9ULV1 | Membrane; Multi-pass membrane protein.   | 0 |
| Q9HCU0 | Membrane {ECO:0000305}; Single-pass typ  | 0 |
| Q5T2W1 | Membrane {ECO:0000250 UniProtKB:Q9JJ40}  | 0 |
| Q14246 | Cell membrane {ECO:0000269 PubMed:24530  | 0 |
| Q8IWF6 | Recycling endosome {ECO:0000269 PubMed:  | 0 |
| Q6L8Q7 | Mitochondrion matrix {ECO:0000269 PubMe  | 0 |
| Q92990 |                                          | 0 |
| Q6ZR08 | Cytoplasm, cytoskeleton, cilium axoneme  | 0 |
| 095070 | Endoplasmic reticulum membrane {ECO:000  | 0 |
| P04745 | Secreted.                                | 0 |
| P59044 | Cytoplasm {ECO:0000269 PubMed:12387869}  | 0 |
| Q96IZ7 | Nucleus {ECO:0000250}. Nucleus speckle   | 1 |
| Q86XM0 | Cell projection, cilium, flagellum mem   | 0 |
| A1A4F0 |                                          | 0 |
| Q9HOU4 | Cytoplasm {ECO:0000269 PubMed:11389151}  | 0 |
| Q9BVG9 | Endoplasmic reticulum membrane {ECO:000  | 0 |
| Q5XKP0 | Mitochondrion inner membrane {ECO:00002  | 0 |
| Q6P1S2 | Isoform 1: Membrane {ECO:0000305}; Sing  | 0 |
| Q6UXD5 | Cell membrane {ECO:0000269 PubMed:16863  | 0 |
| Q5U4P2 | Membrane {ECO:0000305}; Single-pass typ  | 0 |
| Q8WZ19 | Nucleus {ECO:0000269 PubMed:11593007}.   | 1 |
| Q15391 | Cell membrane; Multi-pass membrane prot  | 0 |
| Q400G9 |                                          | 0 |
| 014626 | Cell membrane; Multi-pass membrane prot  | 0 |
| Q86SP6 | Cell membrane; Multi-pass membrane prot  | 0 |
| Q6UWJ8 | Membrane {ECO:0000305}; Single-pass typ  | 0 |
| Q9H2U1 | Nucleus {ECO:0000269 PubMed:18279852, E  | 0 |
| Q8NH18 | Cell membrane; Multi-pass membrane prot  | 0 |

|        |                                                                     |   |
|--------|---------------------------------------------------------------------|---|
| Q8N9L1 | Nucleus {ECO:0000250}.                                              | 0 |
| Q8N3Y1 | Cytoplasm, perinuclear region {ECO:0000250}.                        | 1 |
| 060844 | Secreted, extracellular space, extracellular matrix.                | 0 |
| Q9HOB6 | Cytoplasm, cytoskeleton {ECO:0000305}.                              | 0 |
| 015245 | Basolateral cell membrane {ECO:0000269 PubMed:18093978}.            | 0 |
| P56545 | Nucleus {ECO:0000305}. Cell junction, cell-cell contact.            | 0 |
| Q8IZN3 | Membrane {ECO:0000305}; Multi-pass membrane protein.                | 0 |
| 000762 |                                                                     | 0 |
| Q86SJ6 | Cell membrane {ECO:0000250}; Single-pass membrane protein.          | 1 |
| Q6ZS86 |                                                                     | 0 |
| Q96JH7 | Endoplasmic reticulum {ECO:0000250}. Golgi apparatus.               | 0 |
| P17661 | Cytoplasm, myofibril, sarcomere, Z line.                            | 0 |
| Q9Y4K3 | Cytoplasm {ECO:0000269 PubMed:18093978}.                            | 0 |
| Q8IZM8 | Nucleus {ECO:0000305}.                                              | 0 |
| Q96ET8 | Membrane {ECO:0000305}; Multi-pass membrane protein.                | 0 |
| P82650 | Mitochondrion {ECO:0000269 PubMed:258384}.                          | 1 |
| Q6VY07 | Golgi apparatus, trans-Golgi network {ECO:0000269 PubMed:18093978}. | 0 |
| P49006 | Cytoplasm, cytoskeleton {ECO:0000250 UniProtKB:Q96JH7}.             | 1 |
| Q7L8J4 |                                                                     | 0 |
| 043869 | Cell membrane; Multi-pass membrane protein.                         | 0 |
| Q96QA6 | Nucleus, nucleolus {ECO:0000269 PubMed:18093978}.                   | 0 |
| Q8N3J6 | Cell membrane {ECO:0000269 PubMed:179671}.                          | 0 |
| Q13200 |                                                                     | 0 |
| Q5T319 |                                                                     | 0 |
| Q8WY54 | Nucleus {ECO:0000269 PubMed:15496589, PubMed:18093978}.             | 0 |
| Q6UXB0 |                                                                     | 0 |
| Q16527 | Nucleus {ECO:0000250}.                                              | 0 |
| Q9H300 | Mitochondrion inner membrane {ECO:0000269 PubMed:18093978}.         | 0 |
| P35638 | Cytoplasm {ECO:0000269 PubMed:29083303}.                            | 0 |
| P05165 | Mitochondrion matrix {ECO:0000269 PubMed:18093978}.                 | 1 |
| Q4VC39 | Membrane {ECO:0000255 PROSITE-ProRule:PF00001}.                     | 0 |
| Q13561 | Cytoplasm, cytoskeleton, microtubule organizing center.             | 0 |
| P01160 | Secreted.                                                           | 0 |
| Q9H9D4 | Nucleus {ECO:0000269 PubMed:23716654, PubMed:18093978}.             | 0 |
| 014595 | Nucleus {ECO:0000250}.                                              | 0 |
| Q14008 | Cytoplasm, cytoskeleton, microtubule organizing center.             | 0 |
| Q07960 | Cytoplasm.                                                          | 0 |
| Q9Y2X0 | Nucleus {ECO:0000305}.                                              | 0 |
|        | be performed. View primary data.                                    | 0 |
| A7E2F4 | Golgi apparatus, Golgi stack membrane.                              | 0 |
| A6NCI4 | Secreted {ECO:0000305}.                                             | 0 |
| 014683 | Membrane {ECO:0000305}; Multi-pass membrane protein.                | 0 |
| 096020 | Nucleus {ECO:0000269 PubMed:9840943}.                               | 1 |
| Q8IUZ5 | Mitochondrion {ECO:0000305}.                                        | 0 |
| Q8N8V4 | Cell projection, microvillus {ECO:0000269 PubMed:18093978}.         | 0 |
| Q15828 | Secreted.                                                           | 0 |
| Q8IU33 | Endoplasmic reticulum membrane {ECO:0000269 PubMed:18093978}.       | 0 |
| Q8TB69 | Nucleus {ECO:0000305}.                                              | 0 |
| 075360 | Nucleus {ECO:0000255 PROSITE-ProRule:PF00001}.                      | 1 |
| 075531 | Barrier-to-autointegration factor: Nuclear envelope.                | 0 |
| P36544 | Cell junction, synapse, postsynaptic cell membrane.                 | 0 |
| Q9NQ34 | Lysosome membrane {ECO:0000269 PubMed:18093978}.                    | 0 |
| Q9NQ35 |                                                                     | 0 |
| P17706 | Isoform 1: Endoplasmic reticulum {ECO:0000269 PubMed:18093978}.     | 0 |
| Q9NQ36 | Secreted. Cell surface {ECO:0000269 PubMed:18093978}.               | 0 |

|        |                                         |   |
|--------|-----------------------------------------|---|
| Q8N9N8 | Nucleus {ECO:0000269 PubMed:20644585, F | 0 |
| Q15796 | Cytoplasm {ECO:0000269 PubMed:16751101, | 0 |
| 000303 | Cytoplasm {ECO:0000255 HAMAP-Rule:MF_03 | 0 |
| P17030 | Nucleus {ECO:0000305}.                  | 0 |
| Q8N8L6 |                                         | 0 |
| P09497 | Cytoplasmic vesicle membrane; Periphera | 0 |
| P29120 | Cytoplasmic vesicle, secretory vesicle. | 0 |
| Q8TAC1 |                                         | 0 |
| Q49A88 | Cytoplasm, cytoskeleton, microtubule or | 0 |
| Q8IV04 |                                         | 0 |
| O43290 | Nucleus {ECO:0000269 PubMed:11350945, F | 1 |
| Q66LE6 | Cytoplasm {ECO:0000250}.                | 0 |
| Q8N386 | Membrane {ECO:0000305}; Single-pass typ | 0 |
| Q8N608 | Cell membrane {ECO:0000250 UniProtKB:Q6 | 0 |
| Q9UBD9 | Secreted {ECO:0000250}.                 | 0 |
| Q8TDT2 | Cell membrane; Multi-pass membrane prot | 0 |
| Q9H347 |                                         | 0 |
| P16233 | Secreted {ECO:0000269 PubMed:25862608}. | 0 |
| A6NK58 | Mitochondrion {ECO:0000269 PubMed:28628 | 0 |
| Q9Y6H6 | Cell membrane {ECO:0000269 PubMed:12954 | 0 |
| Q5I7T1 | Cell membrane {ECO:0000250 UniProtKB:O8 | 0 |
| Q14919 | Nucleus {ECO:0000305}.                  | 0 |
| Q496Y0 |                                         | 0 |
| P55916 | Mitochondrion inner membrane {ECO:00002 | 1 |
| P55851 | Mitochondrion inner membrane; Multi-pas | 0 |
| Q9H3H3 |                                         | 0 |
| Q9BRP4 |                                         | 0 |
| Q96GC5 | Mitochondrion {ECO:0000269 PubMed:25278 | 0 |
| P20340 | Golgi apparatus membrane {ECO:0000269 F | 0 |
| P41231 | Cell membrane; Multi-pass membrane prot | 0 |
| P15407 | Nucleus.                                | 0 |
| Q92889 | Nucleus {ECO:0000305}.                  | 0 |
| Q9HAC7 | Mitochondrion {ECO:0000269 PubMed:23893 | 1 |
| Q15834 | Nucleus {ECO:0000269 PubMed:17014843, F | 0 |
| Q9BUB7 | Mitochondrion inner membrane {ECO:00002 | 0 |
| Q8NGF8 | Cell membrane; Multi-pass membrane prot | 0 |
| Q9UBS0 | Cytoplasm. Nucleus.                     | 0 |
| Q96E14 | Nucleus {ECO:0000269 PubMed:18923082}.  | 0 |
| P04553 | Nucleus. Chromosome.                    | 0 |
| Q6ZVM7 |                                         | 0 |
| Q15935 | Nucleus {ECO:0000305}.                  | 0 |
| Q8NFN8 | Cell membrane; Multi-pass membrane prot | 0 |
| Q8NAX2 | Cytoplasm {ECO:0000250 UniProtKB:A2A9F4 | 0 |
| Q67FW5 |                                         | 0 |
| Q8N7X1 |                                         | 0 |
| Q9HAP2 | Cytoplasm {ECO:0000269 PubMed:12446771, | 0 |
| Q9NWT8 | Mitochondrion {ECO:0000269 PubMed:23908 | 0 |
| Q8NHH1 | Cytoplasm, cytoskeleton, cilium basal b | 0 |
| A6NMX2 |                                         | 0 |
| Q8N4H5 | Mitochondrion outer membrane {ECO:00002 | 0 |
| Q8NAA6 |                                         | 0 |
| Q7Z769 | Membrane {ECO:0000305}; Multi-pass mem  | 0 |
| Q86XR5 | Cell membrane {ECO:0000250}; Single-pas | 0 |
| Q14929 | Nucleus {ECO:0000305}.                  | 0 |
| Q9Y265 | Nucleus matrix. Nucleus, nucleoplasm. ( | 0 |

|         |                                                              |   |
|---------|--------------------------------------------------------------|---|
| P31947  | Cytoplasm. Nucleus {ECO:0000250}. Secreted                   | 0 |
| Q9UJ68  | Isoform 1: Mitochondrion.; Isoform 2: Cytoplasm.             | 0 |
| Q8NDH2  |                                                              | 0 |
| O95476  | Endoplasmic reticulum membrane; Single-pass transmembrane    | 0 |
| P43268  | Nucleus.                                                     | 0 |
| Q1ZZU3  | Nucleus {ECO:0000250}.                                       | 0 |
| Q8N292  | Cell membrane {ECO:0000269 PubMed:1855961}.                  | 0 |
| Q9UQB8  | Cytoplasm. Membrane; Peripheral membrane protein             | 0 |
| Q8IUH2  | Secreted {ECO:0000269 PubMed:12408961}.                      | 0 |
| Q8IVQ6  | Membrane {ECO:0000305}; Multi-pass membrane protein          | 0 |
| Q8WU66  | Secreted {ECO:0000250 UniProtKB:J3S6Y1}.                     | 0 |
| Q9H8W4  | Early endosome membrane {ECO:0000269 PubMed:1751175}.        | 0 |
| P01023  | Secreted {ECO:0000269 PubMed:6203908}.                       | 0 |
| P49703  | Nucleus, nucleolus {ECO:0000250}. Cell nucleus               | 0 |
| Q18PE1  | Cell membrane {ECO:0000250}; Peripheral membrane protein     | 0 |
| Q6UXK5  | Membrane {ECO:0000305}; Single-pass transmembrane            | 0 |
| Q9C0C9  | Cytoplasm {ECO:0000269 PubMed:24703950}.                     | 0 |
| Q9BRQ5  | Membrane {ECO:0000250}; Multi-pass membrane protein          | 0 |
| Q2WVGJ6 |                                                              | 0 |
| A6NIH7  | Cell projection, cilium {ECO:0000269 PubMed:1751175}.        | 0 |
| Q68D51  |                                                              | 0 |
| A6NEE1  |                                                              | 0 |
| Q9NQ33  | Nucleus.                                                     | 0 |
| Q9BUF5  | Cytoplasm, cytoskeleton {ECO:0000250}.                       | 0 |
| Q7Z3D4  | Membrane {ECO:0000305}; Single-pass transmembrane            | 0 |
| Q6PF04  | Nucleus {ECO:0000305}.                                       | 0 |
| Q7RTY8  | Cell membrane {ECO:0000250}; Single-pass transmembrane       | 0 |
| Q96AA8  | Golgi apparatus {ECO:0000269 PubMed:1751175}.                | 0 |
| Q68D91  |                                                              | 0 |
| Q4KMQ1  | Cell projection, stereocilium {ECO:0000269 PubMed:1751175}.  | 0 |
| Q8IZ20  | Nucleus {ECO:0000305}.                                       | 0 |
| Q92551  | Cytoplasm {ECO:0000269 PubMed:11502751}.                     | 0 |
| Q12996  | Nucleus.                                                     | 1 |
| P07947  | Cell membrane. Cytoplasm, cytoskeleton, endomembrane system. | 0 |
| Q96FZ7  | Endomembrane system. Endosome membrane; Golgi apparatus      | 0 |
| Q6NVU6  |                                                              | 0 |
| P33032  | Cell membrane; Multi-pass membrane protein                   | 0 |
| Q9NV64  | Membrane {ECO:0000305}; Multi-pass membrane protein          | 0 |
| Q9NUJ3  |                                                              | 0 |
| P18283  | Cytoplasm. Note=Mainly cytoplasmic.                          | 1 |
| Q2TAC2  |                                                              | 0 |
| Q4G112  | Nucleus {ECO:0000305}.                                       | 1 |
| Q9NYA1  | Cytoplasm {ECO:0000269 PubMed:14575709}.                     | 0 |
| Q12983  | Mitochondrion. Mitochondrion outer membrane                  | 1 |
| Q8IYW4  |                                                              | 0 |
| Q8NGC9  | Cell membrane; Multi-pass membrane protein                   | 0 |
| Q96E16  | Membrane {ECO:0000305}; Single-pass transmembrane            | 0 |
| Q494X3  | Nucleus {ECO:0000305}.                                       | 0 |
| Q86VV8  | Cytoplasm, cytoskeleton, cilium basal body                   | 0 |
| Q9UJX6  |                                                              | 0 |
| Q8WW32  | Nucleus {ECO:0000255 PROSITE-ProRule:PF00002}.               | 1 |
| Q8IWTO  |                                                              | 0 |
| O95013  | Cell membrane; Multi-pass membrane protein                   | 0 |
| P52742  | Nucleus {ECO:0000305}.                                       | 0 |
| Q8NGD0  | Cell membrane; Multi-pass membrane protein                   | 0 |

|        |                                          |   |
|--------|------------------------------------------|---|
| P10176 | Mitochondrion inner membrane.            | 1 |
| Q7Z7L9 | Nucleus {ECO:0000255 PROSITE-ProRule:PF  | 1 |
| Q8N4B5 |                                          | 0 |
| Q9C0J1 | Golgi apparatus membrane {ECO:0000250};  | 0 |
| Q8NHZ8 | Nucleus {ECO:0000250}.                   | 0 |
| P80365 | Microsome {ECO:0000269 PubMed:17314322}  | 1 |
| Q8IUI8 | Cytoplasm {ECO:0000269 PubMed:19427400}  | 1 |
| Q9H4A4 | Secreted {ECO:0000250}.                  | 0 |
| Q8N6I1 | Nucleus {ECO:0000269 PubMed:14585496}.   | 0 |
| Q5VZB9 | Nucleus {ECO:0000255 PROSITE-ProRule:PF  | 0 |
| Q96D98 | Nucleus {ECO:0000269 PubMed:15970276}.   | 0 |
| Q8NFK1 | Cell membrane {ECO:0000250}; Multi-pass  | 0 |
| Q9UQ26 | Cell membrane {ECO:0000250}; Peripheral  | 0 |
| Q9P0J7 |                                          | 0 |
| Q96LL9 | Mitochondrion inner membrane {ECO:00002  | 0 |
| Q8WW59 |                                          | 0 |
| Q86XT2 | Late endosome membrane {ECO:0000305}; F  | 0 |
| Q86T13 | Membrane {ECO:0000305}; Single-pass typ  | 0 |
| Q6ZMZ3 | Nucleus outer membrane {ECO:0000269 Pub  | 0 |
| P49760 | Isoform 1: Nucleus. Nucleus speckle. Nc  | 0 |
| Q643R3 | Endoplasmic reticulum membrane {ECO:000  | 0 |
| Q9UIG8 | Cell membrane; Multi-pass membrane prot  | 0 |
| Q86XF7 | Nucleus {ECO:0000305}.                   | 0 |
| Q64LD2 |                                          | 0 |
| Q96ES7 | Nucleus {ECO:0000250 UniProtKB:POC606}.  | 1 |
| P53816 | Cell membrane {ECO:0000250 UniProtKB:PF  | 0 |
| Q6NSJ2 |                                          | 0 |
| Q8IV56 |                                          | 0 |
| 060262 | Cell membrane {ECO:0000305}; Lipid-anch  | 0 |
| Q8NGB2 | Cell membrane; Multi-pass membrane prot  | 0 |
| Q68DE3 | Nucleus {ECO:0000255 PROSITE-ProRule:PF  | 0 |
| Q8NH37 | Cell membrane; Multi-pass membrane prot  | 0 |
| Q8NA75 |                                          | 0 |
| Q8NA66 |                                          | 0 |
| 094819 |                                          | 0 |
| Q9BYG0 | Golgi apparatus membrane {ECO:0000250};  | 0 |
| Q52M58 |                                          | 0 |
| Q03252 | Nucleus inner membrane; Lipid-anchor; M  | 0 |
| Q96DB5 | Cytoplasm {ECO:0000269 PubMed:18070910}  | 0 |
| Q5U5Q3 | Cytoplasm {ECO:0000269 PubMed:17267406}  | 0 |
| Q8N7B1 | Nucleus {ECO:0000269 PubMed:22893617}.   | 0 |
| 094832 | Cytoplasm {ECO:0000250 UniProtKB:Q63357} | 0 |
| A6NMS7 | Membrane {ECO:0000305}; Single-pass typ  | 0 |
| P23560 | Secreted {ECO:0000269 PubMed:11152678},  | 0 |
| Q6ZUS5 |                                          | 0 |
| Q8N446 |                                          | 0 |
| Q8N7X4 |                                          | 0 |
| 014513 |                                          | 0 |
| Q96M61 | Cytoplasm {ECO:0000250 UniProtKB:Q8BQR7} | 0 |
| Q8WTQ1 | Secreted.                                | 0 |
| Q96T51 | Cytoplasm. Early endosome membrane; Per  | 0 |
| Q8NGJ4 | Cell membrane; Multi-pass membrane prot  | 0 |
| P80723 | Cell membrane; Lipid-anchor. Cell proje  | 0 |
| 060309 | Membrane {ECO:0000305}; Single-pass typ  | 0 |
| Q8N0Z9 | Membrane {ECO:0000305}; Single-pass typ  | 0 |

|        |                                         |   |
|--------|-----------------------------------------|---|
| Q641Q3 | Secreted {ECO:0000250}.                 | 0 |
| Q658Y4 | Golgi apparatus, trans-Golgi network {E | 0 |
| Q9NYS7 |                                         | 0 |
| Q05586 | Cell membrane {ECO:0000269 PubMed:26878 | 0 |
| P35716 | Nucleus {ECO:0000255 PROSITE-ProRule:PF | 0 |
| P04818 | Nucleus {ECO:0000269 PubMed:21876188}.  | 0 |
| Q8NH64 | Cell membrane; Multi-pass membrane prot | 0 |
| Q8N8B7 |                                         | 0 |
| Q8NGJ9 | Cell membrane; Multi-pass membrane prot | 0 |
| Q8ND90 | Nucleus, nucleolus {ECO:0000269 PubMed: | 0 |
| Q9NR00 | Cytoplasm {ECO:0000269 PubMed:16424001, | 0 |
| Q86XL3 | Endoplasmic reticulum membrane {ECO:000 | 0 |
| P07360 | Secreted.                               | 0 |
| Q10981 | Golgi apparatus, Golgi stack membrane;  | 0 |
| Q9P109 | Golgi apparatus membrane {ECO:0000250}; | 0 |
| Q8WY91 |                                         | 0 |
| O94772 | Cell membrane {ECO:0000250}; Lipid-anch | 0 |
| Q8TAL6 | Secreted {ECO:0000250}. Golgi apparatus | 0 |
| Q8N5H3 | Isoform 3: Cytoplasm {ECO:0000250 UniPr | 0 |
| P34896 | Cytoplasm.                              | 1 |
| Q9UHL4 | Lysosome {ECO:0000269 PubMed:15487984}. | 0 |
| Q495X7 |                                         | 0 |
| P53992 | Cytoplasmic vesicle, COPII-coated vesic | 1 |
| Q8N0W7 | Membrane {ECO:0000305}; Multi-pass mem  | 0 |
| Q8TEV9 | Cytoplasm {ECO:0000269 PubMed:27193190, | 0 |
| P42898 |                                         | 0 |
| Q8WTQ1 | Secreted.                               | 0 |
| Q8NEA5 | Membrane {ECO:0000305}; Single-pass typ | 0 |
| O75398 | Isoform 1: Nucleus. Cytoplasm. Note=Cyt | 0 |
| Q5HYI7 | Mitochondrion {ECO:0000269 PubMed:26477 | 0 |
| Q96HE8 | Membrane {ECO:0000305}; Multi-pass mem  | 0 |
| Q8N196 | Cytoplasm {ECO:0000269 PubMed:12500905} | 0 |
| Q6PJ61 |                                         | 0 |
| Q8IUH4 | Golgi apparatus membrane {ECO:0000250 U | 0 |
| Q8NBW4 | Lysosome membrane {ECO:0000269 PubMed:2 | 0 |
| Q6P4I2 | Cytoplasm, cytosol. Cytoplasm, cytoskel | 0 |
| Q6ICB4 | Early endosome {ECO:0000269 PubMed:2123 | 0 |
| Q8IWT1 | Cell membrane {ECO:0000269 PubMed:24297 | 0 |
| Q8TD84 | Cell membrane {ECO:0000269 PubMed:11453 | 0 |
| P84095 | Cell membrane {ECO:0000305}; Lipid-anch | 0 |
| Q9H6S3 | Cytoplasm {ECO:0000269 PubMed:14565974} | 0 |
| Q4KMQ2 | Cell membrane {ECO:0000269 PubMed:20056 | 0 |
| Q8NCN2 | Nucleus {ECO:0000269 PubMed:16718364}.  | 0 |
| Q8IZU0 | Nucleus {ECO:0000269 PubMed:12213195}.  | 0 |
| Q12798 | Cytoplasm, cytoskeleton, microtubule or | 1 |
|        | Cytoplasm {ECO:0000250 UniProtKB:Q9NZJ9 | 0 |
| Q96NDO | Membrane {ECO:0000255, ECO:0000305}; Si | 0 |
| Q8IXN7 | Cytoplasm {ECO:0000305}.                | 0 |
| Q8IUQ0 | Golgi apparatus, trans-Golgi network me | 0 |
| P51812 | Nucleus {ECO:0000269 PubMed:17213202}.  | 0 |
| Q7Z7M8 | Golgi apparatus membrane {ECO:0000250 U | 1 |
| Q9Y606 | Isoform 1: Mitochondrion {ECO:0000269 F | 0 |
| Q3L8U1 | Cytoplasm {ECO:0000269 PubMed:16095617} | 0 |
| Q8TDM5 | Cell membrane {ECO:0000269 PubMed:12788 | 0 |
| Q8NB37 | Secreted {ECO:0000305}.                 | 0 |



|        |                                           |   |
|--------|-------------------------------------------|---|
| Q6ZMU5 | Cell membrane, sarcolemma {ECO:0000250}   | 0 |
| Q9UKM7 | Endoplasmic reticulum membrane {ECO:000   | 0 |
| P22001 | Cell membrane {ECO:0000250}; Multi-pass   | 0 |
| Q9H461 | Membrane; Multi-pass membrane protein.    | 0 |
| Q96KN9 | Cell membrane {ECO:0000250}; Multi-pass   | 0 |
| P16389 | Cell membrane {ECO:0000269 PubMed:11211   | 0 |
| Q13472 | Mitochondrion matrix {ECO:0000269 PubMe   | 0 |
| Q8WXE0 | Cytoplasm {ECO:0000250}.                  | 1 |
| Q8NDZ0 |                                           | 0 |
| Q8IV32 |                                           | 0 |
| Q8ND94 | Membrane {ECO:0000305}; Single-pass typ   | 0 |
| Q9Y584 | Mitochondrion inner membrane {ECO:00002   | 0 |
| Q14526 | Nucleus {ECO:0000269 PubMed:11554746}.    | 0 |
| 075145 | Cytoplasm {ECO:0000250 UniProtKB:Q91Z79   | 1 |
| Q9HAY2 |                                           | 0 |
| Q5DID0 | Cell membrane {ECO:0000269 PubMed:15194   | 0 |
| Q8IVG5 | Early endosome {ECO:0000250 UniProtKB:(   | 0 |
| Q96IZ0 | Cytoplasm. Nucleus. Note=Mainly cytoplasm | 0 |
| Q96C03 | Mitochondrion outer membrane {ECO:00002   | 0 |
| Q96NT1 | Nucleus {ECO:0000305}.                    | 0 |
| Q8IY84 |                                           | 0 |
| P15391 | Cell membrane {ECO:0000269 PubMed:13735   | 0 |
| Q6P6B1 |                                           | 0 |
| P49116 | Nucleus {ECO:0000255 PROSITE-ProRule:PF   | 0 |
| P46093 | Cell membrane; Multi-pass membrane prot   | 0 |
| Q8N9L9 | Peroxisome {ECO:0000269 PubMed:16940157   | 1 |
| Q7RTU3 | Nucleus {ECO:0000255 PROSITE-ProRule:PF   | 0 |
| Q6NZI2 | Membrane, caveola {ECO:0000269 PubMed:1   | 0 |
| Q6ZP01 | Cytoplasm {ECO:0000250}. Note=Detected    | 1 |
| Q86T24 | Nucleus {ECO:0000269 PubMed:15781635, F   | 0 |
| Q9H322 |                                           | 0 |
| 043173 | Golgi apparatus membrane {ECO:0000305};   | 1 |
| Q5JQS5 | Cell membrane; Multi-pass membrane prot   | 0 |
| Q9H936 | Mitochondrion inner membrane {ECO:00002   | 0 |
| Q9H5N1 | Cytoplasm {ECO:0000269 PubMed:29247183,   | 0 |
| Q02577 | Nucleus {ECO:0000255 PROSITE-ProRule:PF   | 0 |
| Q9BZK7 | Nucleus {ECO:0000305}.                    | 1 |
| Q8N8I0 |                                           | 0 |
| Q86VB7 | Soluble CD163: Secreted {ECO:0000269 Pu   | 0 |
| Q8TCD1 |                                           | 0 |
| Q9HB75 | Cytoplasm {ECO:0000269 PubMed:16360037,   | 1 |
| P05387 |                                           | 0 |
| Q8TF76 | Nucleus {ECO:0000269 PubMed:15681610}.    | 0 |
| P05412 | Nucleus.                                  | 1 |
| Q9H0L4 | Nucleus {ECO:0000250}.                    | 0 |
| P04062 | Lysosome membrane {ECO:0000269 PubMed:1   | 1 |
| Q9H845 | Mitochondrion {ECO:0000269 PubMed:20816   | 1 |
| Q96F46 | Isoform 1: Cell membrane {ECO:0000269 F   | 0 |
| Q96AD5 | Lipid droplet. Cell membrane; Single-pa   | 0 |
| Q53QW1 | Cytoplasm {ECO:0000269 PubMed:26168773}   | 0 |
| Q6RW13 | Endoplasmic reticulum membrane {ECO:000   | 0 |
| Q9NR16 | Isoform 1: Cell membrane {ECO:0000305};   | 0 |
| Q7Z6K1 | Nucleus {ECO:0000269 PubMed:19502560, F   | 0 |
| Q8N4Y2 |                                           | 0 |
| Q6EEV6 |                                           | 0 |

|        |                                         |   |
|--------|-----------------------------------------|---|
| Q96LZ2 |                                         | 0 |
| Q9NX36 |                                         | 0 |
| Q58DX5 | Membrane {ECO:0000305}; Single-pass ty  | 0 |
| P48509 | Membrane; Multi-pass membrane protein.  | 0 |
| Q9NQS3 | Cell membrane {ECO:0000305}; Single-pas | 0 |
| Q3ZCQ2 |                                         | 0 |
| Q12767 | Membrane {ECO:0000305}; Multi-pass mem  | 0 |
| Q13045 | Nucleus {ECO:0000250}. Cytoplasm, cytos | 0 |
| Q13151 | Nucleus {ECO:0000250}. Note=Component c | 1 |
| Q8N8F6 | Endoplasmic reticulum membrane {ECO:00  | 0 |
| Q9NP98 | Nucleus. Cell projection, pseudopodium. | 0 |
| Q5T7P6 | Membrane {ECO:0000305}; Multi-pass mem  | 0 |
| P78508 | Membrane {ECO:0000269 PubMed:24561201}; | 0 |
| Q9BWS9 | Secreted {ECO:0000269 PubMed:16357325}. | 0 |
| Q9Y5E1 | Cell membrane {ECO:0000250}; Single-pas | 0 |
| Q6ZNG0 | Nucleus {ECO:0000305}.                  | 0 |
| Q14656 | Membrane {ECO:0000305}; Multi-pass mem  | 0 |
| Q8N300 | Cytoplasm {ECO:0000250 UniProtKB:Q99LQ4 | 0 |
| Q8N2I2 | Nucleus {ECO:0000305}.                  | 0 |
| Q52MB2 |                                         | 0 |
| Q92572 | Golgi apparatus. Cytoplasmic vesicle me | 0 |
| P62993 | Nucleus {ECO:0000269 PubMed:21179510}.  | 0 |
| Q5SVQ8 | Nucleus {ECO:0000305}.                  | 0 |
| P61088 | Nucleus {ECO:0000269 PubMed:19340006}.  | 1 |
| Q8N6S5 | Membrane {ECO:0000305}; Multi-pass mem  | 0 |
| Q86Y25 | Nucleus {ECO:0000269 PubMed:15555547}.  | 0 |
| Q96KX2 |                                         | 0 |
| B2RD01 | Nucleus {ECO:0000255 PROSITE-ProRule:PF | 0 |
| Q96PU9 | Cytoplasm {ECO:0000250}. Note=Expressec | 1 |
| Q9NYM9 | Golgi apparatus membrane {ECO:0000250}; | 0 |
| Q9NPQ8 | Cytoplasm {ECO:0000250}. Cell membrane  | 0 |
| Q9H765 | Cytoplasm {ECO:0000269 PubMed:12559969} | 0 |
| Q6UWW0 | Secreted {ECO:0000305}.                 | 0 |
| A8MYP8 |                                         | 0 |
| Q6NUT2 | Membrane {ECO:0000305}; Multi-pass mem  | 0 |
| Q6ZUB1 | Membrane {ECO:0000305}; Single-pass men | 0 |
| Q8N5S3 |                                         | 0 |
| Q8NGU9 | Cell membrane; Multi-pass membrane prot | 0 |
| Q8N831 |                                         | 0 |
| Q2VPJ9 |                                         | 0 |
| Q9NPF5 | Nucleus. Cytoplasm. Note=Targeted to re | 0 |
| Q8N6G6 | Secreted, extracellular space, extracel | 0 |
| Q8N5C1 | Membrane {ECO:0000305}; Multi-pass mem  | 0 |
| P12268 | Cytoplasm {ECO:0000255 HAMAP-Rule:MF_03 | 0 |
| Q60I27 | Cytoplasm {ECO:0000269 PubMed:15388334, | 0 |
| Q7Z5A4 | Cytoplasm {ECO:0000250 UniProtKB:Q8VIF2 | 0 |
| Q9BU61 | Nucleus {ECO:0000250}. Mitochondrion ir | 0 |
| Q8N8R5 | Secreted {ECO:0000305}.                 | 0 |
| Q8IYS0 | Endoplasmic reticulum membrane {ECO:00  | 0 |
| Q9UGK3 | Cytoplasm {ECO:0000269 PubMed:10980601} | 0 |
| Q9Y3E2 | Mitochondrion {ECO:0000269 PubMed:22746 | 0 |
| Q13206 |                                         | 0 |
| Q7Z4L9 | Cytoplasm, cytoskeleton {ECO:0000250 Ur | 0 |
| P19404 | Mitochondrion inner membrane.           | 1 |
| Q5D0E6 |                                         | 0 |

|                                            |                                         |   |
|--------------------------------------------|-----------------------------------------|---|
| Q8NC26                                     | Nucleus {ECO:0000305}.                  | 0 |
| Q9C0D4                                     | Nucleus {ECO:0000305}.                  | 0 |
| Q8N944                                     | Cell membrane {ECO:0000250}; Peripheral | 0 |
| Q6UWN8                                     | Secreted {ECO:0000250 UniProtKB:Q8BT20} | 0 |
| Q8N895                                     | Nucleus {ECO:0000269 PubMed:16393996, F | 0 |
| Q8N3X6                                     | Nucleus {ECO:0000255 PROSITE-ProRule:PF | 0 |
| Q9BYG4                                     | Cytoplasm, Cell membrane {ECO:0000250}. | 0 |
| Q8N9F8                                     | Nucleus {ECO:0000305}.                  | 0 |
| A2A288                                     | Cytoplasm, P-body {ECO:0000269 PubMed:2 | 0 |
| Q7Z4H8                                     | Endoplasmic reticulum lumen {ECO:000025 | 0 |
| Q15149                                     | Cytoplasm, cytoskeleton {ECO:0000269 Pu | 1 |
| Q5SQS7                                     |                                         | 0 |
| Q495C1                                     | Nucleus {ECO:0000250}. Chromosome {ECO: | 0 |
| Q5K4E3                                     | Secreted, extracellular space, extracel | 0 |
| Q8IW70                                     | Membrane {ECO:0000305}; Multi-pass mem  | 0 |
| Q8NCW6                                     | Golgi apparatus membrane {ECO:0000269 F | 0 |
| Q96PX8                                     | Membrane {ECO:0000305}; Single-pass ty  | 0 |
| Q9NNW5                                     | Cytoplasm {ECO:0000269 PubMed:17216128} | 0 |
| Q6PDA7                                     | Secreted.                               | 0 |
| Q17RS7                                     | Nucleus {ECO:0000305 PubMed:26578604, F | 0 |
| Q7Z410                                     | Cell membrane {ECO:0000269 PubMed:12886 | 0 |
| P17152                                     | Mitochondrion inner membrane {ECO:00002 | 0 |
| Q96LW1                                     | Nucleus {ECO:0000305}.                  | 0 |
| Q9UJ96                                     | Membrane; Multi-pass membrane protein.  | 0 |
| Q8NGH3                                     | Cell membrane; Multi-pass membrane prot | 0 |
| P27482                                     |                                         | 0 |
| Q9NZT1                                     |                                         | 0 |
| Q8N6M9                                     | Cytoplasm {ECO:0000250}. Nucleus {ECO:( | 0 |
| Q6ZWE6                                     | Cytoplasm {ECO:0000250 UniProtKB:Q8BM47 | 0 |
| P08908                                     | Cell membrane {ECO:0000269 PubMed:22957 | 0 |
| Q9H2A3                                     | Nucleus {ECO:0000255 PROSITE-ProRule:PF | 0 |
| Q96MC4                                     | Cell projection, cilium {ECO:0000250}.  | 0 |
| Q5T5X7                                     | Nucleus {ECO:0000269 PubMed:21914818, F | 0 |
| Q5TFE4                                     |                                         | 0 |
| P23378                                     | Mitochondrion {ECO:0000269 PubMed:28244 | 1 |
| Q96I36                                     | Mitochondrion membrane {ECO:0000269 Pu  | 0 |
| A6NHL2                                     | Cytoplasm, cytoskeleton {ECO:0000250}.  | 0 |
| Q9NXG6                                     | Endoplasmic reticulum membrane {ECO:000 | 1 |
| Q969E3                                     | Secreted.                               | 0 |
| Q8N9I9                                     | Cytoplasm {ECO:0000305}.                | 0 |
| Q9NVR0                                     |                                         | 0 |
| P60606                                     | Membrane {ECO:0000305}; Single-pass mem | 0 |
| O43772                                     | Mitochondrion inner membrane; Multi-pas | 0 |
| P35219                                     |                                         | 0 |
| P10747                                     | Membrane; Single-pass type I membrane p | 0 |
| Q15303                                     | Cell membrane {ECO:0000269 PubMed:10348 | 0 |
| O75444                                     | Nucleus {ECO:0000255 PROSITE-ProRule:PF | 0 |
| Q9NSA3                                     | Cytoplasm {ECO:0000250}. Nucleus {ECO:( | 0 |
| Q8NGW1                                     | Cell membrane; Multi-pass membrane prot | 0 |
| Q6NUJ1                                     | Secreted {ECO:0000305}.                 | 0 |
| arying intensity in a majority of tissues. |                                         | 0 |
| O75460                                     | Endoplasmic reticulum membrane {ECO:000 | 1 |
| Q8N6V4                                     |                                         | 0 |
| Q8WYN3                                     | Nucleus {ECO:0000250}.                  | 1 |
| Q8N859                                     | Nucleus {ECO:0000305}.                  | 0 |

|        |                                         |   |
|--------|-----------------------------------------|---|
| Q53GL7 | Nucleus, nucleolus {ECO:0000269 PubMed: | 0 |
| Q8N1N2 | Golgi apparatus membrane {ECO:0000269 F | 0 |
| Q15022 | Nucleus {ECO:0000269 PubMed:15231737}.  | 0 |
| Q9H649 | Mitochondrion matrix {ECO:0000269 PubMe | 0 |
| Q86XF0 | Mitochondrion {ECO:0000269 PubMed:21876 | 0 |
| Q9BUL9 | Nucleus, nucleolus {ECO:0000269 PubMed: | 0 |
| Q7Z429 | Membrane {ECO:0000305}; Multi-pass mem  | 0 |
| P07204 | Membrane; Single-pass type I membrane p | 0 |
| F2Z398 |                                         | 0 |
| P20674 | Mitochondrion inner membrane.           | 1 |
| Q8N4C7 | Cell membrane {ECO:0000250 UniProtKB:Q8 | 0 |
| Q5XKK7 |                                         | 0 |
| Q9Y6X8 | Nucleus {ECO:0000255 PROSITE-ProRule:PF | 1 |
| P22792 | Secreted.                               | 0 |
| Q9UBL6 | Cytoplasm {ECO:0000269 PubMed:21087455} | 0 |
| A6NNX1 |                                         | 0 |
| P34949 | Cytoplasm {ECO:0000305}.                | 0 |
| Q8IZA3 | Cytoplasm {ECO:0000250}. Nucleus {ECO:( | 0 |
| Q86UV7 |                                         | 0 |
| O14841 |                                         | 0 |
| Q8IV31 | Membrane {ECO:0000305}; Single-pass ty  | 0 |
| Q9NXI6 | Endoplasmic reticulum membrane {ECO:000 | 1 |
| Q8IY85 |                                         | 0 |
| Q96LR9 | Cell membrane {ECO:0000305 PubMed:15102 | 0 |
| Q6ZTI6 | Cytoplasm, cytoskeleton {ECO:0000250 Ur | 0 |
| Q9NPD3 | Cytoplasm {ECO:0000269 PubMed:17545563} | 0 |
| Q6ZPD9 | Membrane {ECO:0000305}; Multi-pass mem  | 0 |
| Q15545 | Nucleus {ECO:0000250 UniProtKB:Q9R1C0}. | 0 |
| Q6ZMS4 | Nucleus {ECO:0000250}.                  | 0 |
| O15067 | Cytoplasm {ECO:0000250}.                | 1 |
| Q5T013 |                                         | 0 |
| Q9BQA9 | Endoplasmic reticulum membrane {ECO:000 | 0 |
| Q8N7U7 | Nucleus {ECO:0000255 PROSITE-ProRule:PF | 0 |
| P47929 | Cytoplasm {ECO:0000269 PubMed:11706006} | 0 |
| Q9H707 | Nucleus {ECO:0000305}.                  | 0 |
| O14976 | Cytoplasm, perinuclear region {ECO:0000 | 0 |
| O95365 | Nucleus {ECO:0000269 PubMed:17595526, F | 1 |
| P49411 | Mitochondrion {ECO:0000269 PubMed:22749 | 1 |
| Q5RHP9 |                                         | 0 |
| Q9NWN3 |                                         | 0 |
| Q9UBQ5 | Nucleus {ECO:0000255 HAMAP-Rule:MF_0301 | 0 |
| Q96RF0 | Endomembrane system; Peripheral membrar | 0 |
| Q96GD4 | Nucleus. Chromosome. Chromosome, centro | 0 |
| Q8N1H7 | Chromosome {ECO:0000250 UniProtKB:Q9CTY | 0 |
| Q9Y605 | Nucleus {ECO:0000269 PubMed:11500496, F | 0 |
| Q5JPI3 |                                         | 0 |
| Q5VTJ3 | Membrane {ECO:0000305}; Single-pass men | 0 |
| Q6UX40 | Membrane {ECO:0000305}; Multi-pass mem  | 0 |
| Q15050 | Nucleus, nucleolus {ECO:0000269 PubMed: | 0 |
| Q86VI1 | Cytoplasmic vesicle, secretory vesicle  | 0 |
| Q8N7C3 |                                         | 0 |
| Q9P258 | Nucleus, nucleolus {ECO:0000305 PubMed: | 0 |
| Q8NGV5 | Cell membrane; Multi-pass membrane prot | 0 |
| Q8N9C0 |                                         | 0 |
| Q5SZB4 |                                         | 0 |

|        |                                         |   |
|--------|-----------------------------------------|---|
| Q96MM3 | Nucleus {ECO:0000250}.                  | 0 |
| Q8N998 | Cytoplasm {ECO:0000250}. Nucleus {ECO:( | 0 |
| Q9P2X0 | Endoplasmic reticulum membrane; Multi-p | 0 |
| P08574 | Mitochondrion inner membrane; Single-pa | 1 |
| P30939 | Cell membrane {ECO:0000269 PubMed:83806 | 0 |
| Q8N394 | Membrane {ECO:0000305}; Multi-pass memt | 0 |
| Q9BYE0 | Nucleus {ECO:0000305}.                  | 0 |
| Q9Y285 | Cytoplasm {ECO:0000250 UniProtKB:Q505J8 | 0 |
| Q68D10 | Nucleus, nucleolus {ECO:0000250 UniProt | 0 |
| Q8IYJ2 | Mitochondrion {ECO:0000255}.            | 0 |
| Q5PRF9 | Cytoplasm {ECO:0000269 PubMed:20510020} | 0 |
| P19099 | Mitochondrion membrane.                 | 1 |
| Q8NHV1 | Lipid droplet {ECO:0000269 PubMed:23454 | 1 |
| Q9BYJ1 | Cytoplasm {ECO:0000255 PROSITE-ProRule: | 0 |
| Q96F86 | Cytoplasm, P-body {ECO:0000269 PubMed:1 | 0 |
| P04066 | Lysosome.                               | 1 |
| P27797 | Endoplasmic reticulum lumen {ECO:000026 | 0 |
| Q3ZCU0 |                                         | 0 |
| Q86YD5 | Cell membrane {ECO:0000250}; Single-pas | 0 |
| A2RU48 | Membrane {ECO:0000305}; Single-pass men | 0 |
| P54725 | Nucleus.                                | 0 |
| Q8TAE8 | Mitochondrion {ECO:0000269 PubMed:22455 | 0 |
| Q8N907 | Secreted {ECO:0000305}.                 | 0 |
| Q8N4L1 | Membrane {ECO:0000305}; Multi-pass memt | 0 |
| Q06124 | Cytoplasm {ECO:0000269 PubMed:26742426} | 0 |
| Q8NE18 |                                         | 0 |
| Q8N8U3 | Nucleus {ECO:0000250 UniProtKB:Q6P1Y1}. | 0 |
| Q8NDB6 | Membrane {ECO:0000305}; Single-pass men | 0 |
| Q658N2 | Membrane {ECO:0000305}; Single-pass men | 0 |
| Q14964 | Cell membrane {ECO:0000305}; Lipid-anch | 0 |
| P49761 | Isoform 1: Nucleus. Cytoplasm {ECO:0000 | 0 |
|        | Cell membrane; Single-pass type I membr | 0 |
| P23769 | Nucleus.                                | 1 |
| Q8IVW6 | Nucleus {ECO:0000255 PROSITE-ProRule:PF | 0 |
| Q8IZ81 |                                         | 0 |
| Q06889 | Nucleus {ECO:0000305}.                  | 0 |
| P78333 | Cell membrane {ECO:0000250}; Lipid-anch | 0 |
| P57678 | Cytoplasm. Nucleus. Nucleus, nucleolus. | 0 |
| Q86VR8 | Secreted {ECO:0000250}.                 | 0 |
| Q13064 |                                         | 0 |
| O75342 | Cytoplasm {ECO:0000255 PROSITE-ProRule: | 0 |
| Q9HOF6 | Cytoplasm, cytosol {ECO:0000269 PubMed: | 0 |
| Q6XYB7 | Nucleus {ECO:0000255 PROSITE-ProRule:PF | 0 |
| Q96M86 |                                         | 0 |
| Q8IW52 | Membrane {ECO:0000305}; Single-pass typ | 0 |
| Q96CN9 | Cytoplasm {ECO:0000269 PubMed:10209125} | 1 |
| P33076 | Nucleus {ECO:0000269 PubMed:23007646}.  | 0 |
| Q8IX07 | Nucleus {ECO:0000250}.                  | 0 |
| O15296 | Isoform A: Nucleus. Note=Other isoforms | 0 |
| Q8N2A8 | Mitochondrion outer membrane {ECO:00002 | 0 |
| O00222 | Cell membrane; Multi-pass membrane prot | 0 |
| Q9H3Q1 | Endomembrane system; Peripheral membrar | 0 |
| B2RXF5 | Cytoplasm {ECO:0000250 UniProtKB:Q811HC | 0 |
| Q8IV20 | Peroxisome {ECO:0000269 PubMed:27478935 | 0 |
| Q9H063 | Nucleus {ECO:0000269 PubMed:17505538, F | 0 |

|        |                                         |   |
|--------|-----------------------------------------|---|
| P59282 | Cytoplasm {ECO:0000305 PubMed:17105200} | 0 |
| P12319 | Cell membrane; Single-pass type I membr | 0 |
| Q8N4K4 | Membrane {ECO:0000305}; Single-pass men | 0 |
| A6NE52 |                                         | 0 |
| Q86W28 | Cytoplasm {ECO:0000250}.                | 0 |
| Q96HM7 |                                         | 0 |
| Q0VAF6 | Cytoplasmic vesicle, secretory vesicle  | 1 |
| 043638 | Nucleus {ECO:0000255 PROSITE-ProRule:PF | 0 |
| Q8N100 | Nucleus {ECO:0000305}.                  | 0 |
| P33151 | Cell junction {ECO:0000269 PubMed:20332 | 0 |
| Q96PB8 | Membrane {ECO:0000305}; Single-pass men | 0 |
| Q8N7L0 |                                         | 0 |
| Q8NDA8 |                                         | 0 |
| Q14140 | Nucleus {ECO:0000269 PubMed:18316374}.  | 1 |
| P24588 | Membrane {ECO:0000269 PubMed:21771783}; | 0 |
| Q17RQ9 | Membrane {ECO:0000305}; Multi-pass memt | 0 |
| Q96RK1 | Nucleus {ECO:0000269 PubMed:11744733, F | 0 |
| P59045 |                                         | 0 |
| Q6P996 |                                         | 0 |
| Q5T5A4 |                                         | 0 |
| Q13106 | Nucleus {ECO:0000305}.                  | 0 |
| Q9Y2K5 | Nucleus {ECO:0000305}.                  | 0 |
| Q9Y2A9 | Golgi apparatus membrane {ECO:0000305}; | 1 |
| Q8WWA0 | Cell membrane {ECO:0000305 PubMed:11747 | 0 |
| Q99611 |                                         | 0 |
| Q8NGE5 | Cell membrane; Multi-pass membrane prot | 0 |
| Q8TDU6 | Cell membrane {ECO:0000269 PubMed:12524 | 0 |
| Q8NCA9 | Nucleus {ECO:0000305}.                  | 0 |
| Q5T619 | Nucleus {ECO:0000305}.                  | 0 |
| Q9NWQ9 | Mitochondrion {ECO:0000269 PubMed:22361 | 0 |
| P51685 | Cell membrane; Multi-pass membrane prot | 0 |
| Q8TAM1 | Cell projection, cilium {ECO:0000269 Pt | 0 |
| Q9UHX1 | Nucleus {ECO:0000269 PubMed:10668799, F | 1 |
| A1L4H1 | Secreted {ECO:0000250}. Cytoplasm {ECO: | 0 |
| Q9H773 | Mitochondrion {ECO:0000269 PubMed:24467 | 0 |
| Q7L3S4 | Nucleus {ECO:0000305}.                  | 0 |
| Q6ZSZ6 | Nucleus {ECO:0000305}.                  | 0 |
| Q8IV42 |                                         | 0 |
| Q8WXH5 |                                         | 0 |
| Q8N4Q0 | Peroxisome {ECO:0000250 UniProtKB:Q8BG6 | 0 |
| Q96MX3 | Nucleus {ECO:0000305}.                  | 0 |
| F5H4A9 | Membrane {ECO:0000305}; Single-pass men | 0 |
| Q8IVF6 |                                         | 0 |
| Q8N661 | Membrane {ECO:0000305}; Multi-pass memt | 0 |
| Q9NX07 | Nucleus {ECO:0000250}. Cytoplasm {ECO:( | 0 |
| 060522 | Cytoplasm {ECO:0000250 UniProtKB:P61407 | 1 |
| P07101 |                                         | 0 |
| Q6P587 | Mitochondrion {ECO:0000269 PubMed:21878 | 1 |
| Q86YL5 | Nucleus {ECO:0000269 PubMed:20170638, F | 0 |
| P18754 | Nucleus {ECO:0000269 PubMed:12194828, F | 0 |
| Q96A32 |                                         | 0 |
| P00734 | Secreted, extracellular space.          | 0 |
| 075569 | Cytoplasm, perinuclear region. Cytoplas | 0 |
| Q8NHG8 | Endosome membrane {ECO:0000269 PubMed:1 | 0 |

|        |                                         |   |
|--------|-----------------------------------------|---|
| Q6AI14 | Apical cell membrane {ECO:0000250}; Mul | 0 |
| Q0VGE8 | Nucleus {ECO:0000305}.                  | 0 |
| Q6ZV73 | Cytoplasm {ECO:0000305}. Cytoplasm, cyt | 0 |
| Q6DWJ6 | Cell membrane; Multi-pass membrane prot | 0 |
| O95190 | Nucleus {ECO:0000250}.                  | 0 |
| Q15699 | Nucleus {ECO:0000269 PubMed:8756334, EC | 0 |
| Q96MW1 |                                         | 0 |
| Q8WVF5 |                                         | 0 |
| A2RUB1 | Cytoplasm {ECO:0000250 UniProtKB:A2AG06 | 0 |
| Q14332 | Membrane; Multi-pass membrane protein.  | 0 |
| Q4W5G0 | Nucleus {ECO:0000255 PROSITE-ProRule:PF | 0 |
| Q6ZRS4 |                                         | 0 |
| P14317 | Membrane {ECO:0000269 PubMed:7682714};  | 0 |
| Q8N3F0 |                                         | 0 |
| O15014 | Isoform 2: Nucleus {ECO:0000269 PubMed: | 0 |
| Q13177 | Serine/threonine-protein kinase PAK 2:  | 0 |
| A2RUB6 | Cytoplasm, cytoskeleton, microtubule or | 0 |
| Q8NI22 | Endoplasmic reticulum-Golgi intermediat | 1 |
| Q96MB7 | Nucleus {ECO:0000269 PubMed:18339812}.  | 0 |
| A2A2V5 | Membrane {ECO:0000305}; Single-pass men | 0 |
| P54826 | Cell membrane {ECO:0000250}; Lipid-anch | 0 |
| Q92619 | Cytoplasm {ECO:0000269 PubMed:24086303} | 0 |
| Q8NGQ4 | Cell membrane; Multi-pass membrane prot | 0 |
| Q4G1C9 | Membrane {ECO:0000305}; Single-pass men | 0 |
| Q8N690 | Secreted {ECO:0000305}.                 | 0 |
| Q8NAN2 | Mitochondrion outer membrane {ECO:00002 | 0 |
| Q8N8Z3 |                                         | 0 |
| P48552 | Nucleus {ECO:0000269 PubMed:11266503, F | 0 |
| Q8NAM6 | Nucleus {ECO:0000255 PROSITE-ProRule:PF | 0 |
| Q7RTS1 | Nucleus {ECO:0000305}.                  | 1 |
| Q8N6D2 | Membrane {ECO:0000305}; Multi-pass memt | 0 |
| Q86VY4 |                                         | 0 |
| Q93077 | Nucleus. Chromosome.                    | 1 |
|        | be performed. View primary data.        | 0 |
| P62807 | Nucleus. Chromosome.                    | 1 |
| Q8IYB1 |                                         | 0 |
| P30874 | Cell membrane; Multi-pass membrane prot | 0 |
| Q96JF6 | Nucleus {ECO:0000305}.                  | 0 |
| Q86SE9 | Nucleus {ECO:0000269 PubMed:21282530, F | 0 |
| P14222 | Cytoplasmic granule lumen. Secreted. Ce | 0 |
| O95047 | Cell membrane; Multi-pass membrane prot | 0 |
| Q5VVQ6 | Cytoplasm {ECO:0000269 PubMed:27753622} | 0 |
| Q6YI46 | Membrane {ECO:0000255}; Multi-pass memt | 0 |
| Q8N5N4 |                                         | 0 |
| Q6IF99 | Cell membrane; Multi-pass membrane prot | 0 |
| P08173 | Cell membrane; Multi-pass membrane prot | 0 |
| Q6UWI4 | Endoplasmic reticulum membrane {ECO:000 | 0 |
| Q9H228 | Cell membrane; Multi-pass membrane prot | 0 |
| Q8NCR9 | Membrane {ECO:0000305}; Multi-pass memt | 0 |
| Q5UAW9 | Cell projection, cilium membrane {ECO:( | 0 |
| Q6YBV0 | Membrane {ECO:0000305}; Multi-pass memt | 0 |
| Q5W0Z9 | Golgi apparatus membrane {ECO:0000269 F | 0 |
| Q9BXX2 |                                         | 0 |
| Q8TCB6 | Cell membrane {ECO:0000269 PubMed:15315 | 0 |
| Q96NJ6 | Nucleus {ECO:0000305}.                  | 0 |

|        |                                          |   |
|--------|------------------------------------------|---|
| Q5FYB0 | Secreted {ECO:0000305}.                  | 0 |
| Q15181 | Cytoplasm {ECO:0000250}.                 | 0 |
| Q9NYD6 | Nucleus.                                 | 0 |
| Q8NFJ8 | Nucleus {ECO:0000305}.                   | 1 |
| Q9H9H5 | Golgi apparatus. Cytoplasm, cytoskeleton | 0 |
| Q9Y2A4 | Nucleus {ECO:0000305}.                   | 0 |
| P25025 | Cell membrane; Multi-pass membrane prot  | 0 |
| Q9H772 | Secreted {ECO:0000305}.                  | 0 |
| Q8N5U0 |                                          | 0 |
| P51571 | Endoplasmic reticulum membrane; Single-  | 1 |
| Q9BXY5 |                                          | 0 |
| Q3KQV3 | Nucleus {ECO:0000305}.                   | 1 |
| Q9NWM3 |                                          | 0 |
| Q14160 | Cell membrane {ECO:0000269 PubMed:28169  | 0 |
| Q8N465 | Mitochondrion {ECO:0000305 PubMed:15070  | 0 |
| Q8IYT2 | Nucleus {ECO:0000269 PubMed:21310715}.   | 0 |
| Q6ZRV2 | Cytoplasm, cytoskeleton {ECO:0000269 Pu  | 1 |
| Q7Z3I7 | Nucleus {ECO:0000305}.                   | 0 |
| P48739 | Cytoplasm {ECO:0000250}. Golgi apparatu  | 0 |
| Q8IYN2 | Nucleus {ECO:0000305}.                   | 0 |
| Q8N9N7 | Membrane {ECO:0000305}; Lipid-anchor {E  | 0 |
| Q6PIL8 | Mitochondrion {ECO:0000269 PubMed:11543  | 0 |
| Q8N3F9 | Membrane {ECO:0000305}; Multi-pass mem   | 0 |
| Q8NH53 | Cell membrane; Multi-pass membrane prot  | 0 |
| Q6ZW61 | Cell projection, cilium {ECO:0000269 Pu  | 0 |
| Q8N141 | Nucleus {ECO:0000305}.                   | 0 |
| Q8NEP4 |                                          | 0 |
| Q8N8F7 | Membrane {ECO:0000305}; Single-pass mem  | 0 |
| P15559 | Cytoplasm.                               | 1 |
| Q8NGI3 | Cell membrane; Multi-pass membrane prot  | 0 |
| Q9H9S5 | Golgi apparatus membrane {ECO:0000269 E  | 0 |
| Q8IUR0 | Golgi apparatus, cis-Golgi network {ECO  | 0 |
| Q9UNE2 | Cytoplasm {ECO:0000269 PubMed:15003533}  | 0 |
| Q86VD7 | Mitochondrion inner membrane {ECO:00002  | 0 |
| Q86WA9 | Cell membrane {ECO:0000269 PubMed:12626  | 0 |
| Q9Y241 | Mitochondrion membrane {ECO:0000255 PR   | 0 |
| P08172 | Cell membrane {ECO:0000269 PubMed:22278  | 0 |
| Q15848 | Secreted {ECO:0000269 PubMed:8947845}.   | 0 |
| P25116 | Cell membrane; Multi-pass membrane prot  | 0 |
| Q96C28 | Nucleus {ECO:0000305}.                   | 0 |
| Q8WXI7 | Cell membrane; Single-pass type I membr  | 0 |
| P06748 | Nucleus, nucleolus {ECO:0000269 PubMed:  | 0 |
| Q8NG27 |                                          | 0 |
| Q96HY7 | Mitochondrion {ECO:0000269 PubMed:23141  | 0 |
| P01210 | Secreted.                                | 0 |
| Q7L7L0 | Nucleus. Chromosome.                     | 1 |
| Q6NUN9 | Cytoplasm {ECO:0000269 PubMed:21376232}  | 0 |
| P24928 | Nucleus {ECO:0000269 PubMed:26566685, E  | 0 |
| Q8N5S1 | Mitochondrion inner membrane {ECO:00002  | 0 |
| 075474 |                                          | 0 |
| Q8N9M5 | Cell membrane {ECO:0000269 PubMed:17828  | 0 |
| Q6IEE7 | Membrane {ECO:0000305}; Single-pass ty   | 0 |
| Q6U7Q0 | Cytoplasm {ECO:0000269 PubMed:15555580}  | 0 |
| Q86XW9 | Cytoplasm {ECO:0000250}. Cytoplasm, cyt  | 0 |
| Q6MZM0 | Membrane {ECO:0000305}; Single-pass ty   | 0 |



|                       |                                          |   |
|-----------------------|------------------------------------------|---|
| Q8NAA5                |                                          | 0 |
| Q6ZU64                | Cell projection, cilium, flagellum mem   | 0 |
| Q5H9U9                |                                          | 0 |
| Q8N205                | Nucleus outer membrane {ECO:0000269 Pub  | 0 |
| Q6PK18                | Membrane {ECO:0000305}; Single-pass ty   | 0 |
| A8K0Z3                | Early endosome membrane {ECO:0000269 Pu  | 0 |
| Q6ZMQ8                | Membrane {ECO:0000250}; Single-pass ty   | 0 |
| 094850                | Cell projection, dendritic spine membra  | 0 |
| Q9NXZ1                |                                          | 0 |
| Q7Z7K2                | Nucleus {ECO:0000250}.                   | 0 |
| P48431                | Nucleus.                                 | 1 |
| Q5SXM1                | Nucleus {ECO:0000305}.                   | 0 |
| Q9NWC5                | Membrane {ECO:0000305}; Multi-pass mem   | 0 |
| Q8N680                | Nucleus {ECO:0000305}.                   | 0 |
| Q8IUD6                | Cytoplasm {ECO:0000269 PubMed:19484123}  | 0 |
| Q8NGN1                | Cell membrane; Multi-pass membrane prot  | 0 |
| Q8NC06                |                                          | 0 |
| P51688                | Lysosome {ECO:0000269 PubMed:15146460}.  | 1 |
| Q8NB91                | Nucleus {ECO:0000269 PubMed:15502827}.   | 0 |
| P56851                | Secreted {ECO:0000305}.                  | 0 |
| Q9BYW2                | Nucleus {ECO:0000250 UniProtKB:E9Q5F9}.  | 0 |
| Q14507                | Secreted {ECO:0000305}.                  | 0 |
| Q8N319                |                                          | 0 |
| Q8NEW7                | Membrane {ECO:0000305}; Single-pass ty   | 0 |
| Q86XN8                | Cytoplasm {ECO:0000250}. Nucleus {ECO:(  | 0 |
| Q9H346                | Cell membrane; Multi-pass membrane prot  | 0 |
| Q9Y3D9                | Mitochondrion {ECO:0000269 PubMed:25838  | 1 |
| Q8NFM4                | Secreted.                                | 0 |
| Q8IZ08                | Cell membrane {ECO:0000269 PubMed:28827  | 0 |
| Q9BQ83                | Nucleus {ECO:0000255 HAMAP-Rule:MF_0310  | 0 |
| A6NC57                |                                          | 0 |
| Q9BPV8                | Cell membrane; Multi-pass membrane prot  | 0 |
| 095150                | Membrane {ECO:0000305 PubMed:11911831},  | 0 |
| be performed. View pr | Nucleus {ECO:0000250}.                   | 0 |
| P10072                | Nucleus {ECO:0000305}.                   | 0 |
| Q8NG75                | Cell membrane; Multi-pass membrane prot  | 0 |
| Q96EC8                | Golgi apparatus membrane {ECO:0000269 F  | 0 |
| Q9HC78                | Nucleus {ECO:0000250 UniProtKB:Q8K0L9}.  | 0 |
| Q8NG97                | Cell membrane; Multi-pass membrane prot  | 0 |
| Q8NDZ4                | Cytoplasmic vesicle, COPI-coated vesicl  | 0 |
| Q96GV9                | Cytoplasm {ECO:0000269 PubMed:22085962}  | 0 |
| Q86WK6                | Cell membrane {ECO:0000250 UniProtKB:Q8  | 0 |
| P46089                | Cell membrane; Multi-pass membrane prot  | 0 |
| Q3SX64                |                                          | 0 |
| Q8TC94                | Cytoplasm, cytoskeleton {ECO:0000250}.   | 0 |
| 043255                | Cytoplasm {ECO:0000269 PubMed:19224863}, | 0 |
| Q9Y678                | Cytoplasm {ECO:0000269 PubMed:11056392}  | 1 |
| Q8IVB4                | Late endosome membrane {ECO:0000269 Pub  | 0 |
| Q8IUW5                | Cell membrane {ECO:0000269 PubMed:16388  | 0 |
| Q2KHR2                | Nucleus {ECO:0000255 PROSITE-ProRule:PF  | 1 |
| Q96A29                | Golgi apparatus membrane; Multi-pass me  | 1 |
| Q9H4P4                |                                          | 0 |
| P14672                | Cell membrane {ECO:0000250 UniProtKB:P1  | 0 |
| Q5T440                | Mitochondrion {ECO:0000269 PubMed:22325  | 0 |
| 095471                | Cell membrane {ECO:0000269 PubMed:12675  | 1 |

|        |                                          |   |
|--------|------------------------------------------|---|
| Q86UD4 | Nucleus {ECO:0000305}.                   | 0 |
| Q8IZC7 | Nucleus {ECO:0000305}.                   | 0 |
| Q7Z6I8 |                                          | 0 |
| Q96SZ5 |                                          | 0 |
| Q9NYJ1 | Mitochondrion {ECO:0000269 PubMed:23676} | 0 |
| Q8NGL7 | Cell membrane; Multi-pass membrane prot  | 0 |
| Q9BRX5 | Nucleus {ECO:0000250}.                   | 0 |
| Q8NGM1 | Cell membrane; Multi-pass membrane prot  | 0 |
| Q6ZUS6 |                                          | 0 |
| P82912 | Mitochondrion {ECO:0000269 PubMed:25838} | 1 |
| Q8IZC4 |                                          | 0 |
| Q86V59 |                                          | 0 |
| Q7LFX5 | Golgi apparatus membrane {ECO:0000305 E  | 0 |
| Q0VDE8 | Membrane {ECO:0000255}; Single-pass men  | 0 |
| Q495M9 | Cytoplasm, cytosol. Cytoplasm, cytoskel  | 0 |
| Q9UBM8 | Golgi apparatus membrane {ECO:0000250};  | 0 |
| P48735 | Mitochondrion.                           | 1 |
| Q6IFH4 | Cell membrane; Multi-pass membrane prot  | 0 |
| Q4ZIN3 | Endoplasmic reticulum membrane {ECO:000  | 0 |
| 000258 | Endoplasmic reticulum membrane {ECO:000  | 0 |
| 015417 |                                          | 0 |
| A6NEQ2 |                                          | 0 |
| Q3MIR4 | Cell membrane {ECO:0000269 PubMed:20961} | 0 |
| 095424 |                                          | 0 |
| Q9NPE3 | Nucleus, nucleolus {ECO:0000269 PubMed:  | 1 |
| Q96GI7 |                                          | 0 |
| Q9NZI2 | Cell membrane {ECO:0000269 PubMed:10676} | 0 |
| Q9Y2W6 | Cytoplasm {ECO:0000250 UniProtKB:Q80VLI} | 0 |
| P53990 | Cytoplasmic vesicle {ECO:0000269 PubMed  | 0 |
| Q5T890 | Nucleus. Cytoplasm, cytoskeleton, micr   | 0 |
| Q8IXM3 | Mitochondrion {ECO:0000269 PubMed:16024} | 1 |
| Q6UWV6 | Cell membrane {ECO:0000269 PubMed:12671} | 0 |
| Q70SY1 | Endoplasmic reticulum membrane {ECO:000  | 0 |
| Q86VZ1 | Cell membrane; Multi-pass membrane prot  | 0 |
| Q86SM5 | Cell membrane; Multi-pass membrane prot  | 0 |
| Q7Z6J9 | Nucleus {ECO:0000305}. Nucleus, nucleol  | 0 |
| Q96B86 | Cell membrane {ECO:0000250}; Lipid-anch  | 0 |
| P41226 |                                          | 0 |
| Q9Y3D3 | Mitochondrion {ECO:0000269 PubMed:25838} | 1 |
| Q6UWV7 | Membrane {ECO:0000305}; Multi-pass mem   | 0 |
| 015315 | Nucleus {ECO:0000305}.                   | 1 |
| P07316 |                                          | 0 |
| 095751 | Nucleus {ECO:0000269 PubMed:10403563}.   | 0 |
| Q66PJ3 | Nucleus, nucleolus {ECO:0000269 PubMed:  | 0 |
| Q16394 | Endoplasmic reticulum membrane {ECO:000  | 0 |
| P34897 | Mitochondrion {ECO:0000269 PubMed:21876} | 0 |
| Q70IA6 | Nucleus {ECO:0000269 PubMed:15067004}.   | 0 |
| 075787 | Membrane {ECO:0000305}; Single-pass typ  | 0 |
| Q6P9G0 |                                          | 0 |
| P0C7A2 |                                          | 0 |
| Q9Y5Z0 | Cell membrane {ECO:0000269 PubMed:21907} | 0 |
| Q96LR5 |                                          | 0 |
| 015061 | Cytoplasm, cytoskeleton. Cell junction,  | 0 |
| P22459 | Cell membrane {ECO:0000269 PubMed:17156} | 0 |
| Q99928 | Cell junction, synapse, postsynaptic ce  | 0 |

|        |                                         |   |
|--------|-----------------------------------------|---|
| Q86W26 | Cytoplasm {ECO:0000269 PubMed:22672233} | 0 |
| Q5HY92 | Nucleus matrix {ECO:0000250}. Cytoplasm | 0 |
| Q8IYV9 | Cell membrane {ECO:0000269 PubMed:15756 | 0 |
| Q76KP1 | Golgi apparatus, Golgi stack membrane   | 0 |
| P56377 | Golgi apparatus. Cytoplasmic vesicle me | 0 |
| Q9H7E9 |                                         | 0 |
| Q3SXM0 |                                         | 0 |
| A6NE82 |                                         | 0 |
| P10073 | Nucleus {ECO:0000255 PROSITE-ProRule:PF | 0 |
| P09871 |                                         | 0 |
| A6NH11 |                                         | 0 |
| Q0VF49 |                                         | 0 |
| Q5VWM4 |                                         | 0 |
| P07098 | Secreted.                               | 0 |
| Q8WZ94 | Cell membrane; Multi-pass membrane prot | 0 |
| P59103 | Golgi apparatus.                        | 0 |
| A4D1E1 |                                         | 0 |
| Q8NAB2 |                                         | 0 |
| P58557 | Nucleus {ECO:0000269 PubMed:22042635}.  | 0 |
| Q9NUJ7 | Cytoplasm {ECO:0000269 PubMed:22732399} | 0 |
| O00305 |                                         | 0 |
| Q86SZ2 | Golgi apparatus, cis-Golgi network {ECO | 0 |
| Q96DM1 |                                         | 0 |
| Q9Y6F7 | Nucleus {ECO:0000250}.                  | 1 |
| Q8TAT6 | Cytoplasm, cytosol {ECO:0000250 UniProt | 1 |
| A6NHNO | Secreted, extracellular space, extracel | 0 |
| Q8NA77 | Cytoplasm {ECO:0000250 UniProtKB:Q99MV2 | 0 |
| Q9NRE2 | Nucleus {ECO:0000305}.                  | 0 |
| Q9UPT5 | Cytoplasm, cytosol {ECO:0000250 UniProt | 0 |
| P52292 | Cytoplasm {ECO:0000269 PubMed:7604027}. | 0 |
| P21810 | Secreted, extracellular space, extracel | 0 |
| Q8IW35 | Cytoplasm, cytoskeleton, microtubule or | 0 |
| Q86WI0 | Membrane {ECO:0000305}; Multi-pass mem  | 0 |
| P07332 | Cytoplasm, cytosol. Cytoplasm, cytoskel | 0 |
| Q86SX6 | Mitochondrion matrix {ECO:0000269 PubMe | 0 |
| Q5XKR9 |                                         | 0 |
| Q6SJ96 | Cytoplasm {ECO:0000269 PubMed:14634207} | 0 |
| P56539 | Golgi apparatus membrane {ECO:0000250}; | 1 |
| P84157 | Membrane {ECO:0000305}; Single-pass men | 0 |
| P53671 | Isoform LIMK2a: Cytoplasm. Nucleus. Not | 0 |
| Q6N075 | Cell membrane {ECO:0000305}; Multi-pass | 0 |
| Q5GAN6 | Secreted {ECO:0000250}.                 | 0 |
| Q9BV57 | Cytoplasm. Nucleus. Cell membrane; Peri | 0 |
| Q6NW29 |                                         | 0 |
| Q6ZMD2 | Membrane {ECO:0000305}; Multi-pass mem  | 0 |
| Q6UXB4 | Cell membrane; Single-pass type II mem  | 0 |
| Q01826 | Nucleus matrix. Nucleus, PML body. Note | 1 |
| P07333 | Cell membrane; Single-pass type I mem   | 0 |
| P54753 | Cell membrane {ECO:0000269 PubMed:15536 | 0 |
| Q9H320 |                                         | 0 |
| Q8IUC1 |                                         | 0 |
| Q6UX34 | Membrane {ECO:0000305}; Single-pass men | 0 |
| Q9UPV9 | Cytoplasm {ECO:0000269 PubMed:18986759} | 0 |
| Q96R30 | Cell membrane; Multi-pass membrane prot | 0 |
| Q9NQ66 | Nucleus membrane {ECO:0000250}. Cytopl  | 1 |

|        |                                                                 |   |
|--------|-----------------------------------------------------------------|---|
| Q8WVK7 | Cytoplasm, cytoskeleton, spindle {ECO:0000269 PubMed:20059950}. | 0 |
| Q9NSD7 | Cell membrane; Multi-pass membrane protein                      | 0 |
| Q8NH05 | Cell membrane; Multi-pass membrane protein                      | 0 |
| Q9P121 | Cell membrane; Lipid-anchor, GPI-anchor                         | 0 |
| P53804 | Nucleus {ECO:0000269 PubMed:20059950}.                          | 0 |
| Q86WC6 |                                                                 | 0 |
| O43603 | Cell membrane; Multi-pass membrane protein                      | 0 |
| A6NJ69 | Secreted {ECO:0000250}.                                         | 0 |
| Q8WUA8 | Secreted {ECO:0000305}.                                         | 0 |
| P56277 | Mitochondrion {ECO:0000269 PubMed:77840}                        | 0 |
| P07355 | Secreted, extracellular space, extracellular matrix             | 0 |
| P49758 | Cytoplasm {ECO:0000269 PubMed:12761221}                         | 0 |
| P17483 | Nucleus.                                                        | 0 |
| Q5M8T2 | Membrane {ECO:0000305}; Multi-pass membrane protein             | 0 |
| Q86WK9 | Cell membrane {ECO:0000303 PubMed:23766}                        | 0 |
| Q13219 | Secreted {ECO:0000269 PubMed:10077652}.                         | 0 |
| Q9NPE2 | Nucleus {ECO:0000269 PubMed:11118320}.                          | 0 |
| P08708 |                                                                 | 0 |
| Q8TDS4 | Cell membrane {ECO:0000269 PubMed:17932}                        | 0 |
| Q7RTV2 | Cytoplasm {ECO:0000250}.                                        | 0 |
| Q9BW04 | Cytoplasm {ECO:0000269 PubMed:15525603}                         | 1 |
| A8MXT2 |                                                                 | 0 |
| P52943 |                                                                 | 0 |
| Q9NUL7 | Nucleus {ECO:0000269 PubMed:11350955, F}                        | 0 |
| Q9H3P7 | Golgi apparatus membrane {ECO:0000269 F}                        | 0 |
| Q14CZ0 |                                                                 | 0 |
| Q63HM9 | Cytoplasm {ECO:0000269 PubMed:22732399}                         | 0 |
| Q7Z5L0 | Secreted {ECO:0000305}.                                         | 0 |
| Q9BV10 | Endoplasmic reticulum membrane {ECO:0000269 PubMed:12218089}    | 0 |
| P06239 | Cytoplasm {ECO:0000269 PubMed:12218089}                         | 0 |
| P39060 | Secreted, extracellular space, extracellular matrix             | 0 |
| P98175 | Nucleus {ECO:0000269 PubMed:18315527}.                          | 0 |
| Q86Y34 | Cell membrane {ECO:0000269 PubMed:22575}                        | 0 |
| P49448 | Mitochondrion matrix {ECO:0000269 PubMed:12218089}              | 0 |
| Q5QJ38 |                                                                 | 0 |
| P49802 | Cytoplasm, cytosol {ECO:0000269 PubMed:12218089}                | 0 |
| Q9BRU2 | Nucleus {ECO:0000269 PubMed:18806825}.                          | 1 |
| Q9HOW9 | Nucleus {ECO:0000269 PubMed:16522806}.                          | 0 |
| Q96MT8 | Cytoplasm, cytoskeleton, microtubule organizing center          | 0 |
| Q01844 | Nucleus {ECO:0000269 PubMed:16965792}.                          | 0 |
| Q96N96 | Cytoplasm. Cell projection, filopodium.                         | 0 |
| Q9H9A5 | Cytoplasm {ECO:0000305}. Nucleus {ECO:0000269 PubMed:12218089}  | 0 |
|        | be performed. View primary data.                                | 0 |
| Q13330 | Isoform Short: Cytoplasm.; Isoform Long: Nucleus {ECO:0000250}. | 1 |
| Q6ZS27 | Nucleus {ECO:0000250}.                                          | 0 |
| Q9BY67 | Cell membrane {ECO:0000269 PubMed:11279}                        | 1 |
| A2RRD8 | Nucleus {ECO:0000305}.                                          | 0 |
| P32322 | Mitochondrion {ECO:0000269 PubMed:19648}                        | 0 |
| Q8IVW8 | Membrane {ECO:0000305}; Multi-pass membrane protein             | 0 |
| Q8IX19 | Membrane; Single-pass type II membrane protein                  | 0 |
| O94973 | Cell membrane {ECO:0000250 UniProtKB:P1}                        | 0 |
| P32418 | Cell membrane {ECO:0000269 PubMed:11241}                        | 0 |
| Q9BQT8 | Mitochondrion inner membrane; Multi-pass membrane protein       | 0 |
| Q7RTS6 | Cell membrane {ECO:0000250 UniProtKB:Q8}                        | 0 |
| P35663 | Cytoplasm, cytoskeleton, perinuclear space                      | 1 |

|        |                                          |   |
|--------|------------------------------------------|---|
| P48539 |                                          | 0 |
| P80404 | Mitochondrion matrix.                    | 1 |
| Q9UBX3 | Mitochondrion inner membrane; Multi-pass | 1 |
| Q8IU85 | Cytoplasm {ECO:0000305}. Nucleus {ECO:(  | 0 |
| Q99666 | Cytoplasm {ECO:0000269 PubMed:15710750}  | 0 |
| Q5XG99 | Membrane {ECO:0000305}; Single-pass mem  | 0 |
| Q6ICG8 |                                          | 0 |
| Q9NSI5 | Apical cell membrane {ECO:0000250 UniPr  | 0 |
| Q63HM1 | Cytoplasm, cytosol {ECO:0000255 HAMAP-F  | 0 |
| Q14393 | Secreted {ECO:0000269 PubMed:9326369}.   | 0 |
| P0C091 | Secreted, extracellular space, extracel  | 0 |
| P20929 | Cytoplasm, myofibril, sarcomere. Cytopl  | 1 |
| Q9Y625 | Cell membrane {ECO:0000250}; Lipid-anch  | 0 |
| A1IGU5 |                                          | 0 |
| Q6ZT52 |                                          | 0 |
| Q86XJ0 | Membrane {ECO:0000305}; Multi-pass mem   | 0 |
| Q9Y5Y4 | Cell membrane {ECO:0000305}; Multi-pass  | 0 |
| Q8IYX8 | Cytoplasm, cytoskeleton, microtubule or  | 0 |
| P57055 | Nucleus {ECO:0000250}.                   | 0 |
| Q5SQ80 |                                          | 0 |
| Q15760 | Cell membrane; Multi-pass membrane prot  | 0 |
| P47224 |                                          | 0 |
| Q4V9L6 | Cell membrane {ECO:0000269 PubMed:2002   | 0 |
| Q9BXU9 | Golgi apparatus, trans-Golgi network me  | 0 |
| Q9H4I9 | Mitochondrion inner membrane {ECO:0000   | 0 |
| Q8TF44 |                                          | 0 |
| Q9Y230 | Nucleus matrix. Nucleus, nucleoplasm. (  | 0 |
| Q6ZNW5 | Cytoplasm {ECO:0000250}.                 | 0 |
| Q9UI47 | Cytoplasm, cytoskeleton {ECO:0000305}.   | 0 |
| A6NJZ7 | Cytoplasm, cytoskeleton {ECO:0000250 Ur  | 1 |
| Q9H6K5 |                                          | 0 |
| P53801 | Membrane {ECO:0000305}; Single-pass typ  | 0 |
| Q9UJV9 | Nucleus {ECO:0000269 PubMed:26712909}.   | 1 |
| Q9H3Z7 |                                          | 0 |
| Q6UXH8 | Secreted {ECO:0000305}.                  | 0 |
|        | be performed. View primary data.         | 0 |
| Q8IZU1 | Nucleus, nucleolus {ECO:0000269 PubMed:  | 0 |
| Q9BXQ6 |                                          | 0 |
| 075123 | Nucleus {ECO:0000305}.                   | 0 |
| Q5JZY3 | Isoform 1: Cell membrane {ECO:0000305};  | 0 |
| A6NLX3 |                                          | 0 |
| Q86Z20 | Cytoplasm {ECO:0000269 PubMed:19787194}  | 0 |
| Q9H3K6 | Cytoplasm {ECO:0000269 PubMed:22746225}  | 0 |
| Q9Y4A0 | Nucleus {ECO:0000255 PROSITE-ProRule:PF  | 0 |
| Q8IVU9 | Cytoplasm {ECO:0000250 UniProtKB:Q8CDT7  | 0 |
| Q6ZN66 |                                          | 0 |
| Q5HYC2 |                                          | 0 |
| A6NDD5 | Membrane {ECO:0000305}; Multi-pass mem   | 0 |
| P20382 | Secreted.                                | 0 |
| A2RUT3 | Membrane {ECO:0000305}; Single-pass typ  | 0 |
| A6NCJ1 |                                          | 0 |
| POC7I6 |                                          | 0 |
| P57078 | Cytoplasm. Membrane {ECO:0000250}; Peri  | 0 |
| Q3SXY7 | Cell projection, dendrite {ECO:0000269   | 0 |
| Q9UND3 | Nucleus, nuclear pore complex {ECO:0000  | 1 |

|           |                                          |   |
|-----------|------------------------------------------|---|
| Q12874    | Nucleus speckle {ECO:0000269 PubMed:802  | 1 |
| Q5EBN2    |                                          | 0 |
| Q12879    | Cell projection, dendritic spine {ECO:(  | 0 |
| A6NGE7    | Peroxisome {ECO:0000305}.                | 0 |
| Q9H672    |                                          | 0 |
| A6NKC9    |                                          | 0 |
| Q9BQ50    | Nucleus {ECO:0000305}.                   | 0 |
| Q9UNW8    | Cell membrane {ECO:0000305}; Multi-pass  | 0 |
| P20592    | Cytoplasm {ECO:0000269 PubMed:15184662}  | 0 |
| Q96L91    | Nucleus {ECO:0000255 PROSITE-ProRule:PF  | 1 |
| Q6ZN04    | Nucleus {ECO:0000269 PubMed:18779327}.   | 0 |
| Q5VWP2    | Nucleus {ECO:0000269 PubMed:28931820}.   | 0 |
| Q86WW8    |                                          | 0 |
| Q9Y3A2    | Nucleus, nucleolus {ECO:0000250}.        | 0 |
| O95456    | Cytoplasm. Endoplasmic reticulum.        | 0 |
| Q5THK1    |                                          | 0 |
| Q6NUN0    | Mitochondrion matrix {ECO:0000250 UniPr  | 0 |
| P57721    | Cytoplasm {ECO:0000269 PubMed:14612387}  | 0 |
| A6NFM8    |                                          | 0 |
| Q86TU7    | Cytoplasm {ECO:0000269 PubMed:28442573,  | 0 |
| Q5GJ75    | Cytoplasm {ECO:0000269 PubMed:25479791}  | 0 |
| Q9ULT6    | Cell membrane {ECO:0000269 PubMed:22575  | 0 |
| Q9UJT9    | Cytoplasm, cytoskeleton, microtubule or  | 0 |
| Q6ICL3    | Golgi apparatus {ECO:0000269 PubMed:268  | 0 |
| Q71DI3    | Nucleus. Chromosome.                     | 0 |
| Q6P4A7    | Mitochondrion inner membrane {ECO:00002  | 0 |
| Q86XP6    | Secreted.                                | 0 |
| Q9BTA0    |                                          | 0 |
| Q6P161    | Mitochondrion {ECO:0000269 PubMed:25838  | 0 |
| Q7Z4V0    | Nucleus {ECO:0000269 PubMed:17669267}.   | 0 |
| Q96FZ2    | Chromosome {ECO:0000269 PubMed:30554877} | 1 |
| P51677    | Cell membrane; Multi-pass membrane prot  | 0 |
| B1ATL7    |                                          | 0 |
| or cells. | Cytoplasm, cytoskeleton, cilium axoneme  | 0 |
| Q6P9A1    | Nucleus {ECO:0000305}.                   | 0 |
| O75438    | Mitochondrion inner membrane {ECO:00003  | 1 |
| Q9HOH3    |                                          | 0 |
| Q7Z5A9    | Secreted {ECO:0000269 PubMed:15028294}.  | 0 |
| Q53H54    |                                          | 0 |
| Q00887    | Secreted {ECO:0000305}.                  | 0 |
| P46091    | Cell membrane {ECO:0000250 UniProtKB:Q8  | 0 |
|           | Nucleus {ECO:0000269 PubMed:10488337, F  | 0 |
| Q8N5W9    | Cytoplasm, cytoskeleton {ECO:0000250 Ur  | 1 |
| Q5JST6    |                                          | 0 |
| Q13253    | Secreted.                                | 0 |
| Q96LB1    | Cell membrane; Multi-pass membrane prot  | 0 |
| Q16831    |                                          | 0 |
| Q8NOY3    | Cell membrane; Multi-pass membrane prot  | 0 |
| Q8IZJ0    | Secreted {ECO:0000269 PubMed:12483210}.  | 0 |
| Q96A61    |                                          | 0 |
| Q9Y693    | Membrane {ECO:0000305}; Multi-pass memt  | 0 |
| Q8IZR5    | Membrane {ECO:0000255}; Multi-pass memt  | 0 |
| Q6QHK4    | Nucleus {ECO:0000305}.                   | 0 |
| Q9UHD2    | Cytoplasm {ECO:0000269 PubMed:15485837,  | 0 |
| O95503    | Nucleus {ECO:0000269 PubMed:18927235}.   | 0 |

|        |                                         |   |
|--------|-----------------------------------------|---|
| Q6ZN28 | Cytoplasm {ECO:0000269 PubMed:19098908} | 0 |
| Q08AH3 | Mitochondrion {ECO:0000250 UniProtKB:Q6 | 1 |
| Q12788 | Nucleus, nucleolus {ECO:0000269 PubMed: | 1 |
| Q6ZNF0 | Secreted {ECO:0000305}.                 | 0 |
| Q9BWF2 | Cytoplasm. Cytoplasm, perinuclear regio | 1 |
| O96017 | Isoform 2: Nucleus. Note=Isoform 10 is  | 1 |
| P58012 | Nucleus {ECO:0000255 PROSITE-ProRule:PF | 1 |
| Q68DU8 | Cell junction, synapse, presynaptic cel | 0 |
| Q9Y2C3 | Golgi apparatus membrane {ECO:0000305}; | 0 |
| Q9H7S9 | Nucleus {ECO:0000269 PubMed:21328542, F | 0 |
| Q8IY50 | Membrane {ECO:0000305}; Multi-pass mem  | 0 |
| Q6ZWB6 | Cell junction, synapse, presynaptic cel | 0 |
| Q5T8R8 |                                         | 0 |
| Q9NY65 | Cytoplasm, cytoskeleton.                | 0 |
| Q8NG57 | Nucleus {ECO:0000269 PubMed:11994304}.  | 0 |
| E9PKD4 |                                         | 0 |
| Q9NT22 | Secreted, extracellular space, extracel | 0 |
| Q6UWY5 | Secreted {ECO:0000269 PubMed:18708057}. | 0 |
| Q5T6X4 | Membrane {ECO:0000305}; Single-pass men | 0 |
| Q8IXT5 |                                         | 0 |
| P51679 | Cell membrane; Multi-pass membrane prot | 0 |
| Q5TKA1 | Nucleus, nucleoplasm {ECO:0000269 PubMe | 0 |
| Q96Q07 |                                         | 0 |
| O95848 | Cytoplasm {ECO:0000269 PubMed:12429023} | 0 |
| Q5TZF3 |                                         | 0 |
| Q7Z4T9 | Mitochondrion {ECO:0000269 PubMed:12223 | 0 |
| Q9UL41 | Nucleus, nucleolus {ECO:0000250}.       | 0 |
| O43194 | Cell membrane; Multi-pass membrane prot | 0 |
| P58499 | Secreted. Note=Present in insulin secre | 0 |
| Q96J84 | Cell membrane {ECO:0000305}; Single-pas | 0 |
| Q86VI3 |                                         | 0 |
| Q16280 | Membrane; Multi-pass membrane protein.  | 0 |
| Q14106 | Cytoplasm.                              | 0 |
| Q5FYB1 | Secreted {ECO:0000269 PubMed:19262745}. | 0 |
| O14607 | Nucleus {ECO:0000305}.                  | 1 |
| Q8NEQ6 |                                         | 0 |
|        |                                         | 0 |
| Q5I0X7 |                                         | 0 |
| Q6ZSA7 | Cell membrane {ECO:0000250}; Single-pas | 0 |
| Q9P225 | Cytoplasm, cytoskeleton, cilium axoneme | 0 |
| P51817 | Cytoplasm. Nucleus. Note=cAMP induces r | 0 |
| Q96L42 | Membrane; Multi-pass membrane protein.  | 0 |
| P53814 | Cytoplasm, cytoskeleton. Note=Exhibits  | 1 |
| Q8N729 | Secreted.                               | 0 |
| A8MPX8 |                                         | 0 |
| Q9Y2R0 | Mitochondrion inner membrane {ECO:00002 | 0 |
| Q8NDV1 | Golgi apparatus membrane {ECO:0000305}; | 0 |
| Q12974 | Cell membrane. Early endosome. Cytoplas | 0 |
| P63261 | Cytoplasm, cytoskeleton {ECO:0000269 Pu | 0 |
| O15393 | Cell membrane {ECO:0000269 PubMed:20382 | 0 |
| Q6IQ26 | Golgi apparatus membrane {ECO:0000250 U | 0 |
| Q8NGZ9 | Cell membrane; Multi-pass membrane prot | 0 |
| P78358 | Cytoplasm {ECO:0000269 PubMed:12065688} | 0 |
| Q9NR28 | Mitochondrion {ECO:0000269 PubMed:14523 | 1 |
| Q9H267 | Late endosome membrane {ECO:0000269 Pu  | 0 |

|        |                                         |   |
|--------|-----------------------------------------|---|
| Q9NX05 |                                         | 0 |
| Q99613 | Cytoplasm {ECO:0000255 HAMAP-Rule:MF_03 | 1 |
| 000501 | Cell junction, tight junction. Cell men | 0 |
| Q9BPW8 |                                         | 0 |
| Q02246 | Cell membrane; Lipid-anchor, GPI-anchor | 0 |
| Q96PI1 | Cytoplasm. Cytoplasm, cell cortex. Note | 0 |
| Q8WZ04 | Isoform 1: Membrane {ECO:0000305}; Sing | 0 |
| P18825 | Cell membrane; Multi-pass membrane prot | 0 |
| Q86WQ0 | Nucleus {ECO:0000269 PubMed:12486131}.  | 0 |
| Q5T7M4 | Adipolin fC1QTNF12: Secreted {ECO:00002 | 0 |
| Q6UXH1 | Secreted {ECO:0000305}. Endoplasmic ret | 0 |
| Q8WU76 |                                         | 0 |
| Q969M7 |                                         | 0 |
| Q14500 | Membrane; Multi-pass membrane protein.  | 0 |
| Q9H2G4 | Nucleus {ECO:0000269 PubMed:11318608, F | 0 |
| A6NDG6 |                                         | 0 |
| C9J442 | Secreted {ECO:0000305}.                 | 0 |
| Q16560 | Nucleus {ECO:0000269 PubMed:15146077}.  | 1 |
| P51617 | Cytoplasm {ECO:0000269 PubMed:16690127} | 0 |
| Q9BQ75 |                                         | 0 |
| Q86TX2 | Cytoplasm, cytosol {ECO:0000269 PubMed: | 0 |
| Q86UD1 |                                         | 0 |
| P47895 | Cytoplasm {ECO:0000250 UniProtKB:Q9JHW9 | 1 |
| Q16777 | Nucleus. Chromosome.                    | 1 |
| Q8IUE6 | Nucleus. Chromosome.                    | 1 |
|        | Nucleus.                                | 0 |
| Q8NET1 | Secreted.                               | 0 |
| Q9BRN9 | Membrane {ECO:0000305}; Multi-pass mem  | 0 |
| Q9Y5U2 |                                         | 0 |
| P09758 | Membrane; Single-pass type I membrane p | 0 |
| O95475 | Nucleus {ECO:0000255 PROSITE-ProRule:PF | 0 |
| Q15139 | Cytoplasm {ECO:0000269 PubMed:18076381} | 0 |
| Q9C0I3 |                                         | 0 |
| Q8IYP9 | Membrane {ECO:0000305}; Multi-pass mem  | 0 |
| Q68CQ1 | Membrane {ECO:0000305}; Multi-pass mem  | 0 |
| Q86SG5 | Cytoplasm {ECO:0000250}.                | 0 |
| Q9NR23 | Secreted {ECO:0000269 PubMed:19864492,  | 0 |
| O75094 | Secreted {ECO:0000250}.                 | 0 |
| P52803 | Cell membrane {ECO:0000269 PubMed:11870 | 0 |
| Q86SM8 | Cell membrane; Multi-pass membrane prot | 0 |
| P16401 | Nucleus. Chromosome. Note=According to  | 0 |
| Q96LK8 |                                         | 0 |
| Q9Y446 | Nucleus. Cell junction, desmosome. Note | 0 |
| Q96T17 |                                         | 0 |
| Q9BYD9 | Cytoplasm, cytoskeleton {ECO:0000250}.  | 0 |
| O60733 | Isoform LH-iPLA2: Membrane; Peripheral  | 0 |
| Q8IZL2 | Nucleus speckle {ECO:0000269 PubMed:123 | 0 |
| Q5JQF8 |                                         | 0 |
| O75177 | Nucleus {ECO:0000250}. Chromosome, cent | 0 |
| Q9NZV8 | Cell membrane {ECO:0000269 PubMed:11102 | 0 |
| Q969P6 | Mitochondrion {ECO:0000269 PubMed:11526 | 0 |
| P35606 | Cytoplasm, cytosol {ECO:0000250}. Golgi | 0 |
| Q9BT49 | Nucleus. Chromosome.                    | 0 |
| P50748 | Cytoplasm. Nucleus. Chromosome, centron | 0 |
| P46092 | Cell membrane; Multi-pass membrane prot | 0 |



|        |                                          |   |
|--------|------------------------------------------|---|
| Q5T1S8 | Cell membrane {ECO:0000250}; Single-pass | 0 |
| A2RRH5 |                                          | 0 |
| Q9NNW7 | Mitochondrion {ECO:0000269 PubMed:10215  | 1 |
| P60827 | Secreted {ECO:0000269 PubMed:19666007,   | 0 |
| P98177 | Cytoplasm. Nucleus. Note=When phosphory  | 0 |
| 075365 | Cell membrane {ECO:0000269 PubMed:12782  | 0 |
| Q9NU39 | Nucleus {ECO:0000255 PROSITE-ProRule:PF  | 0 |
| Q8WV15 | Membrane {ECO:0000305}; Multi-pass mem   | 0 |
| P07225 | Secreted.                                | 0 |
| P01350 | Secreted.                                | 0 |
| Q86Y26 | Cytoplasm {ECO:0000269 PubMed:17934517}  | 1 |
| Q8N4P3 |                                          | 0 |
| Q5H9J7 | Cytoplasm {ECO:0000269 PubMed:15958283}  | 0 |
| Q6P2D0 | Nucleus {ECO:0000250 UniProtKB:P08042}.  | 0 |
| Q8N111 | Membrane {ECO:0000305}; Single-pass typ  | 0 |
| Q6P5S2 | Secreted {ECO:0000250 UniProtKB:A5PF61,  | 0 |
| Q13202 | Cytoplasm {ECO:0000250 UniProtKB:009112  | 0 |
| 014543 |                                          | 0 |
| Q0P670 | Membrane {ECO:0000305}; Single-pass men  | 0 |
| Q9H5Y7 | Cell membrane {ECO:0000269 PubMed:23543  | 0 |
| Q7Z3Z3 | Cytoplasm {ECO:0000305}. Note=Probable   | 0 |
| Q9H1C0 | Cell membrane; Multi-pass membrane prot  | 0 |
| Q86WV6 | Endoplasmic reticulum membrane {ECO:000  | 0 |
| Q07343 |                                          | 0 |
| Q7Z5A8 | Secreted {ECO:0000269 PubMed:15028294,   | 0 |
| 075324 | Mitochondrion outer membrane {ECO:00002  | 0 |
| Q9NS40 | Membrane; Multi-pass membrane protein.   | 0 |
| Q99435 | Secreted {ECO:0000250 UniProtKB:Q62918}  | 0 |
| Q6ZNG9 |                                          | 0 |
| Q93074 | Nucleus {ECO:0000305}.                   | 1 |
| Q9UHD8 | Cytoplasm, cytoskeleton {ECO:0000269 P   | 0 |
| Q2M2E3 | Membrane {ECO:0000305}; Multi-pass mem   | 0 |
| Q8WXT5 | Nucleus {ECO:0000255 PROSITE-ProRule:PF  | 0 |
| Q69YH5 | Nucleus {ECO:0000269 PubMed:16492807}.   | 1 |
| Q86SE5 |                                          | 0 |
| Q5JTC6 | Cytoplasm. Cell membrane; Peripheral me  | 0 |
| Q16778 | Nucleus. Chromosome.                     | 1 |
| Q9H341 | Cell membrane; Multi-pass membrane prot  | 0 |
| Q99719 | Cytoplasm {ECO:0000250}. Cytoplasm, cyt  | 0 |
| Q9NRA8 | Cytoplasm {ECO:0000269 PubMed:22090346}  | 0 |
| Q2IOM4 | Cell membrane; Single-pass type I mem    | 0 |
| Q0VD83 | Cell membrane {ECO:0000269 PubMed:10191  | 0 |
| Q1W6H9 | Cytoplasm, cytoskeleton {ECO:0000269 P   | 0 |
| Q9UI09 | Mitochondrion inner membrane {ECO:00003  | 1 |
| P60604 |                                          | 0 |
| Q86VE3 |                                          | 0 |
| Q969R2 | Membrane; Peripheral membrane protein.   | 0 |
| Q8IXB3 | Cell membrane {ECO:0000250 UniProtKB:Q8  | 0 |
| Q6ZRT6 |                                          | 0 |
| Q9BUR5 | Mitochondrion inner membrane {ECO:00003  | 0 |
| Q569H4 |                                          | 0 |
| Q9BVK6 | Endoplasmic reticulum membrane; Single-  | 0 |
| Q96B77 | Membrane {ECO:0000305}; Multi-pass mem   | 0 |
| Q8WUS8 | Membrane {ECO:0000305}; Multi-pass mem   | 0 |
| Q96EV2 |                                          | 0 |

|        |                                         |   |
|--------|-----------------------------------------|---|
| Q7L311 | Mitochondrion {ECO:0000250 UniProtKB:Q6 | 1 |
| Q96KE9 | Cytoplasm {ECO:0000250 UniProtKB:Q2LE78 | 0 |
| Q92522 | Nucleus. Chromosome.                    | 1 |
| Q6ZSC3 |                                         | 0 |
| P55854 | Cytoplasm. Nucleus. Nucleus, PML body   | 0 |
| Q96T52 | Mitochondrion inner membrane {ECO:00003 | 0 |
| P51801 | Cell membrane; Multi-pass membrane prot | 0 |
| Q5HYR2 |                                         | 0 |
| Q9Y219 | Membrane; Single-pass type I membrane p | 0 |
| O95466 | Cytoplasm {ECO:0000250}. Cell membrane  | 0 |
| Q6GMV3 |                                         | 0 |
| P19544 | Nucleus {ECO:0000269 PubMed:15520190}.  | 0 |
| Q8TF47 | Nucleus {ECO:0000250 UniProtKB:Q61967}. | 0 |
| Q8IXF9 | Membrane {ECO:0000305}; Multi-pass mem  | 0 |
| F5H4B4 |                                         | 0 |
| Q6W4X9 | Secreted.                               | 0 |
| Q9UMW8 | Isoform 1: Cytoplasm {ECO:0000269 PubMe | 0 |
| P08912 | Cell membrane; Multi-pass membrane prot | 0 |
| Q9BTD3 | Membrane {ECO:0000305}; Multi-pass mem  | 0 |
| Q8WY22 | Mitochondrion outer membrane {ECO:00003 | 0 |
| O75907 | Endoplasmic reticulum membrane {ECO:000 | 1 |
| Q8HWS3 | Nucleus {ECO:0000269 PubMed:25497100}.  | 0 |
| Q9HCK4 | Membrane {ECO:0000305}; Single-pass ty  | 0 |
| Q9Y2T2 | Golgi apparatus. Cytoplasmic vesicle me | 0 |
| P00451 | Secreted, extracellular space.          | 0 |
| Q96P26 | Cytoplasm {ECO:0000250}.                | 0 |
| Q8N1Q1 |                                         | 0 |
| O94941 | Nucleus {ECO:0000269 PubMed:11274149, I | 0 |
| Q9ULX9 | Nucleus.                                | 0 |
| Q92994 | Nucleus {ECO:0000250}.                  | 0 |
| A6NHZ5 |                                         | 0 |
|        | Membrane; Single-pass type I membrane p | 0 |
| A6NES4 |                                         | 0 |
| A6NNV3 |                                         | 0 |
| Q99828 | Membrane; Lipid-anchor. Cell membrane,  | 0 |
| Q7Z6G8 | Cytoplasm {ECO:0000269 PubMed:15004329, | 0 |
| Q9H3P2 | Nucleus {ECO:0000269 PubMed:11150502}.  | 1 |
| Q9HC58 | Membrane; Multi-pass membrane protein.  | 0 |
| Q96LD1 | Cell membrane, sarcolemma {ECO:0000250} | 0 |
| A6NFE3 |                                         | 0 |
| Q01546 |                                         | 0 |
| Q6P9B9 | Nucleus membrane {ECO:0000305}; Multi-p | 0 |
| A1A5B4 | Cell membrane {ECO:0000269 PubMed:20056 | 0 |
| Q9UNN5 | Nucleus {ECO:0000269 PubMed:26842564}.  | 0 |
| A6NDP7 | Membrane {ECO:0000305}; Multi-pass mem  | 0 |
| Q8N2R8 |                                         | 0 |
| Q00613 | Nucleus {ECO:0000269 PubMed:10413683, I | 0 |
| Q7Z4R8 | Secreted {ECO:0000269 PubMed:22340178}. | 0 |
| Q99880 | Nucleus. Chromosome.                    | 1 |
| Q8IWD5 | Membrane {ECO:0000305}; Multi-pass mem  | 0 |
| Q96QE4 | Membrane {ECO:0000305}; Single-pass ty  | 0 |
| Q8N8A6 | Nucleus, nucleolus {ECO:0000250}.       | 0 |
| Q5JPE7 | Endoplasmic reticulum membrane {ECO:000 | 0 |
| A6NM10 | Membrane {ECO:0000305}; Multi-pass mem  | 0 |
| Q6IA17 | Membrane {ECO:0000305}; Single-pass ty  | 0 |

|        |                                          |   |
|--------|------------------------------------------|---|
| Q9NSY0 | Cytoplasm {ECO:0000250}.                 | 0 |
| Q01629 | Cell membrane {ECO:0000305}; Single-pass | 0 |
| Q03169 |                                          | 0 |
| P59923 | Nucleus {ECO:0000255 PROSITE-ProRule:PF  | 0 |
| Q6P3X8 |                                          | 0 |
| Q9UHQ7 | Nucleus {ECO:0000305}.                   | 0 |
| Q01718 | Cell membrane; Multi-pass membrane prot  | 0 |
| 060678 | Cytoplasm.                               | 0 |
| P07359 | Membrane; Single-pass type I membrane p  | 0 |
| Q86UA1 | Nucleus {ECO:0000250}.                   | 0 |
| Q8IXY8 |                                          | 0 |
| Q16587 | Nucleus.                                 | 0 |
| Q8IV33 |                                          | 0 |
| Q8IYN6 |                                          | 0 |
| 043247 |                                          | 0 |
| Q49AH0 | Secreted {ECO:0000269 PubMed:17611540,   | 0 |
| A6NCF5 |                                          | 0 |
| Q6IS24 | Golgi apparatus membrane {ECO:0000250};  | 0 |
| Q5TC79 | Nucleus {ECO:0000305}.                   | 0 |
| P26951 | Membrane; Single-pass type I membrane p  | 0 |
| Q6PK04 | Chromosome {ECO:0000269 PubMed:20813266  | 0 |
| Q8IWL1 | Secreted, extracellular space, extracel  | 0 |
| P0DJD1 |                                          | 0 |
| Q9NXU5 |                                          | 0 |
| Q8IXR9 |                                          | 0 |
| Q15131 | Cytoplasm, cytoskeleton, cilium basal b  | 0 |
| 015524 | Nucleus {ECO:0000269 PubMed:16410555}.   | 0 |
| Q99501 | Cytoplasm, cytoskeleton {ECO:0000305}.   | 0 |
| Q9Y487 | Cell membrane; Multi-pass membrane prot  | 0 |
| 060260 | Cytoplasm, cytosol {ECO:0000269 PubMed:  | 1 |
| Q86SX3 |                                          | 0 |
| 014964 | Cytoplasm {ECO:0000250 UniProtKB:Q9JJ50  | 0 |
| Q8NHB1 | Cell membrane; Multi-pass membrane prot  | 0 |
| Q15759 | Cytoplasm {ECO:0000250}. Nucleus {ECO:(  | 0 |
| Q9H930 |                                          | 0 |
| Q8TCC3 | Mitochondrion {ECO:0000269 PubMed:25278  | 0 |
| A2RTX5 | Cytoplasm {ECO:0000250 UniProtKB:Q8BLY2  | 0 |
| Q9H7B4 | Cytoplasm {ECO:0000269 PubMed:15235609}  | 0 |
| Q8IU57 | Membrane {ECO:0000250}; Single-pass ty   | 0 |
| P55822 |                                          | 0 |
| Q3ZCQ3 | Membrane {ECO:0000305}; Single-pass ty   | 0 |
| Q5JRC9 |                                          | 0 |
| Q86XI8 |                                          | 0 |
| A9QM74 | Nucleus {ECO:0000269 PubMed:20701745}.   | 0 |
| Q6ZVF9 |                                          | 0 |
| P04259 |                                          | 0 |
| Q9NWS1 | Cytoplasm {ECO:0000250}. Nucleus {ECO:(  | 0 |
| P15941 | Apical cell membrane {ECO:0000269 PubMe  | 0 |
| Q0VG06 | Nucleus {ECO:0000269 PubMed:17396147}.   | 0 |
| Q92985 | Nucleus. Cytoplasm. Note=The phosphoryl  | 0 |
| Q7L1I2 | Cytoplasmic vesicle, secretory vesicle,  | 0 |
| Q96AQ9 |                                          | 0 |
| Q8IXW0 |                                          | 0 |
| Q537H7 |                                          | 0 |
| P18545 |                                          | 0 |

|        |                                         |   |
|--------|-----------------------------------------|---|
| Q13976 | Cytoplasm {ECO:0000250}. Note=Colocaliz | 1 |
| P80370 | Membrane; Single-pass type I membrane p | 1 |
| A6NGC4 | Cell membrane {ECO:0000305 PubMed:30509 | 0 |
| Q8IVF2 | Nucleus {ECO:0000250}.                  | 0 |
| Q68BL7 | Secreted {ECO:0000250 UniProtKB:Q8BHP7} | 0 |
| P08047 | Nucleus. Cytoplasm. Note=Nuclear locati | 0 |
| Q9NQ50 | Mitochondrion {ECO:0000269 PubMed:25278 | 0 |
| Q6ZNG2 | Nucleus {ECO:0000255 PROSITE-ProRule:PF | 0 |
| Q96EL1 | Nucleus {ECO:0000269 PubMed:26607847}.  | 0 |
| Q13087 | Endoplasmic reticulum lumen {ECO:000025 | 1 |
| Q3KNV8 | Nucleus {ECO:0000269 PubMed:21282530}.  | 0 |
| Q96KR4 | Cytoplasm {ECO:0000269 PubMed:15557119} | 0 |
| P07237 | Endoplasmic reticulum {ECO:0000269 PubM | 0 |
| Q9UNM6 |                                         | 0 |
| P40424 | Nucleus {ECO:0000269 PubMed:28270404}.  | 1 |
| Q5XKE5 |                                         | 0 |
| Q07352 | Nucleus {ECO:0000269 PubMed:12198173}.  | 0 |
| P68036 | Nucleus {ECO:0000269 PubMed:11278816, F | 0 |
| P20783 | Secreted.                               | 0 |
| Q9NSI6 | Cytoplasm. Nucleus {ECO:0000250}.       | 0 |
| P40967 | Endoplasmic reticulum membrane; Single- | 0 |
| O14994 | Cytoplasmic vesicle, secretory vesicle, | 0 |
| Q9H5J0 | Nucleus {ECO:0000305}.                  | 0 |
| Q86SG7 | Secreted {ECO:0000305}.                 | 0 |
| P78395 | Nucleus {ECO:0000305 PubMed:16620968}.  | 0 |
| P10243 | Nucleus {ECO:0000250 UniProtKB:P51960}. | 0 |
| Q9Y295 | Nucleus {ECO:0000269 PubMed:29915238}.  | 0 |
| Q9P2R3 | Cytoplasm {ECO:0000269 PubMed:10940552} | 0 |
| Q9H7X3 | Nucleus {ECO:0000305}.                  | 0 |
| Q86TD4 | Sarcoplasmic reticulum lumen {ECO:00002 | 1 |
| Q6NUJ2 | Membrane {ECO:0000305}; Single-pass typ | 0 |
| P09914 | Cytoplasm {ECO:0000269 PubMed:19008854, | 0 |
| Q8TB03 |                                         | 0 |
| Q9NR82 | Cell membrane {ECO:0000269 PubMed:10787 | 0 |
| Q9UBU8 | Nucleus.                                | 0 |
| Q7RTR0 | Cytoplasm {ECO:0000250 UniProtKB:Q66X22 | 0 |
| Q7Z5U6 |                                         | 0 |
| Q09019 | Perikaryon {ECO:0000250 UniProtKB:Q0827 | 0 |
| Q9HAB3 | Cell membrane {ECO:0000269 PubMed:17197 | 0 |
| P57054 | Membrane {ECO:0000305}; Multi-pass mem  | 0 |
| Q13422 | Nucleus {ECO:0000269 PubMed:17135265, F | 0 |
| Q99447 |                                         | 0 |
| Q9NZP6 | Nucleus, nucleoplasm {ECO:0000269 PubMe | 0 |
| P51572 | Endoplasmic reticulum membrane {ECO:000 | 1 |
| Q8IVW1 | Golgi apparatus {ECO:0000250}.          | 0 |
| Q9BYB4 |                                         | 0 |
| Q0VDD8 | Cytoplasm, cytoskeleton, cilium axoneme | 0 |
| Q86UF4 |                                         | 0 |
| P34910 | Membrane; Single-pass type I membrane p | 0 |
| A6NLX4 | Membrane {ECO:0000305}; Single-pass typ | 0 |
| C9JG80 | Membrane {ECO:0000305}; Single-pass men | 0 |
| Q8IYQ7 |                                         | 0 |
| Q86WT6 | Cytoplasm {ECO:0000269 PubMed:23131556} | 0 |
| P13164 | Cell membrane {ECO:0000269 PubMed:13835 | 1 |
| A1L453 | Secreted {ECO:0000305}.                 | 0 |

|        |                                         |   |
|--------|-----------------------------------------|---|
| P11279 | Cell membrane {ECO:0000250 UniProtKB:PC | 0 |
| O14843 | Cell membrane {ECO:0000269 PubMed:18801 | 0 |
| P59551 | Membrane; Multi-pass membrane protein.  | 0 |
| Q9H5K3 | Endoplasmic reticulum membrane {ECO:000 | 0 |
| Q6UWD8 | Membrane {ECO:0000305}; Single-pass men | 0 |
| Q8IXV7 | Cytoplasm {ECO:0000269 PubMed:19706467, | 0 |
| Q8N239 |                                         | 0 |
| Q9NVD3 | Cytoplasm, cytosol {ECO:0000269 PubMed: | 0 |
| Q13635 | Cell membrane {ECO:0000250 UniProtKB:Q6 | 0 |
| Q86UN2 | Cell membrane {ECO:0000269 PubMed:12694 | 0 |
| Q8IU99 | Cell membrane; Multi-pass membrane prot | 0 |
| Q8N8D7 | Cell membrane {ECO:0000305}; Multi-pass | 0 |
| Q14586 | Nucleus {ECO:0000305}.                  | 0 |
| Q9Y4H2 | Cytoplasm, cytosol {ECO:0000250}.       | 0 |
| Q8IZ16 |                                         | 0 |
| A6NE01 |                                         | 0 |
| Q8TD16 | Golgi apparatus {ECO:0000269 PubMed:236 | 0 |
| Q9NVH6 | Mitochondrion matrix {ECO:0000269 PubMe | 0 |
| Q15835 | Membrane {ECO:0000250 UniProtKB:P28327} | 0 |
| Q496M5 | Nucleus, nucleolus {ECO:0000250}. Cytop | 0 |
| Q14644 | Cell membrane.                          | 0 |
| Q96II8 | Secreted {ECO:0000305}.                 | 0 |
| P51164 | Cell membrane; Single-pass type II mem  | 0 |
| Q9P0J0 | Mitochondrion inner membrane {ECO:0000  | 0 |
| Q969W8 | Nucleus {ECO:0000305}.                  | 0 |
| Q6P280 | Nucleus {ECO:0000305}.                  | 0 |
| A5X5Y0 | Cell membrane {ECO:0000269 PubMed:17392 | 0 |
| Q6UYE1 |                                         | 0 |
| Q86Y46 |                                         | 0 |
| Q16559 |                                         | 0 |
| Q96BJ3 |                                         | 0 |
| Q9Y2V0 |                                         | 0 |
| Q8TDQ1 | Cell membrane {ECO:0000305}; Single-pas | 0 |
| Q6X784 | Cytoplasmic vesicle, secretory vesicle, | 0 |
| P13647 |                                         | 0 |
| Q5VWK0 | Cytoplasm {ECO:0000305}.                | 0 |
| Q5VU57 | Cytoplasm, cytosol {ECO:0000250 UniProt | 0 |
| A6NJG6 | Nucleus {ECO:0000255 PROSITE-ProRule:PF | 0 |
| Q6VVX0 | Endoplasmic reticulum membrane; Periphe | 0 |
| Q7Z2Q7 | Membrane {ECO:0000305}; Single-pass men | 0 |
| Q86W74 | Membrane {ECO:0000305}; Single-pass men | 0 |
| O60331 | Cell membrane; Peripheral membrane prot | 0 |
| P78329 | Microsome membrane {ECO:0000269 PubMed: | 1 |
| Q15916 | Nucleus {ECO:0000269 PubMed:7958847}.   | 0 |
| Q3KRA6 |                                         | 0 |
| Q7RTR8 | Membrane; Multi-pass membrane protein.  | 0 |
| Q9BUI4 | Nucleus {ECO:0000250}.                  | 0 |
| Q8N7F7 | Cytoplasm {ECO:0000250}.                | 1 |
| Q9NZC7 | Cytoplasm {ECO:0000269 PubMed:14695174, | 0 |
| Q86UT8 |                                         | 0 |
| Q86UU0 | Nucleus {ECO:0000269 PubMed:17129358, F | 0 |
| PODPB5 |                                         | 0 |
| Q86Y91 | Nucleus. Cytoplasm. Cytoplasm, cytoskel | 0 |
| Q8ND25 | Endosome. Lysosome. Membrane; Periphera | 0 |
| P59826 | Secreted {ECO:0000250}. Cytoplasm {ECO: | 0 |

|        |                                          |   |
|--------|------------------------------------------|---|
| Q86UD0 | Cytoplasm {ECO:0000269 PubMed:17525738}  | 0 |
| Q8WWZ3 | Cytoplasm {ECO:0000305}.                 | 0 |
| Q86UW2 | Cell membrane {ECO:0000269 PubMed:12719} | 0 |
|        | Endoplasmic reticulum membrane {ECO:000  | 0 |
| Q5VT66 | Mitochondrion outer membrane {ECO:00002  | 0 |
| A6NEL2 |                                          | 0 |
| Q9NUP1 | Cytoplasm {ECO:0000250}.                 | 0 |
| 043361 | Nucleus {ECO:0000305}.                   | 0 |
| Q96NJ5 |                                          | 0 |
| Q9ULH7 | Nucleus {ECO:0000250}.                   | 1 |
| Q7Z6A9 | Cell membrane {ECO:0000269 PubMed:12796  | 0 |
| Q6B0I6 | Nucleus {ECO:0000255 PROSITE-ProRule:PF  | 0 |
| Q6NUI2 | Mitochondrion outer membrane {ECO:00002  | 0 |
| Q9H497 | Cytoplasm. Endoplasmic reticulum lumen.  | 0 |
| Q5JQF8 |                                          | 0 |
| P36873 | Cytoplasm {ECO:0000269 PubMed:11739654}  | 0 |
| Q8NEP9 | Nucleus {ECO:0000305}.                   | 0 |
| Q8N945 |                                          | 0 |
| P56817 | Cell membrane {ECO:0000269 PubMed:11466  | 0 |
| Q6ZS82 | Membrane {ECO:0000250}; Single-pass typ  | 0 |
| Q495M3 | Cell membrane; Multi-pass membrane prot  | 0 |
| P35442 |                                          | 0 |
| P19793 | Nucleus {ECO:0000255 PROSITE-ProRule:PF  | 0 |
| Q7Z713 | Nucleus {ECO:0000269 PubMed:15809689}.   | 0 |
| Q6ZRZ4 | Secreted {ECO:0000305}.                  | 0 |
| POC025 |                                          | 0 |
| P59773 | Membrane {ECO:0000305}; Single-pass men  | 0 |
| P51815 | Nucleus {ECO:0000255 PROSITE-ProRule:PF  | 1 |
| Q8N118 | Endoplasmic reticulum membrane {ECO:000  | 0 |
| Q7Z3Y9 |                                          | 0 |
| P13645 | Secreted, extracellular space {ECO:0000  | 0 |
| Q496F6 | Cell membrane; Single-pass type I membr  | 0 |
| Q5VVM6 |                                          | 0 |
| Q6ZMI3 | Cell membrane {ECO:0000250 UniProtKB:Q8  | 0 |
| P24071 | Isoform A.1: Cell membrane; Single-pass  | 0 |
| 000629 | Cytoplasm {ECO:0000250}. Nucleus {ECO:(  | 0 |
| Q13061 | Cell membrane {ECO:0000269 PubMed:22422  | 0 |
| Q8NGX9 | Cell membrane; Multi-pass membrane prot  | 0 |
| Q96CX3 | Nucleus {ECO:0000305}.                   | 0 |
| 014709 | Nucleus {ECO:0000305}.                   | 0 |
| Q7Z6I5 |                                          | 0 |
| Q7Z7B7 | Secreted {ECO:0000305}.                  | 0 |
| P62266 | Cytoplasm, cytosol {ECO:0000269 PubMed:  | 0 |
| P59768 | Cell membrane {ECO:0000305}; Lipid-anch  | 0 |
| P78410 | Cell membrane {ECO:0000269 PubMed:21918  | 0 |
| Q86UN6 | Cytoplasm {ECO:0000305}.                 | 0 |
| Q9Y6V0 | Cell junction, synapse {ECO:0000250}. N  | 0 |
| Q9UKR0 | Secreted.                                | 0 |
| Q6MZT1 | Nucleus {ECO:0000250 UniProtKB:Q8BQP9}.  | 0 |
| Q96N95 | Isoform 1: Nucleus.; Isoform 2: Nucleus  | 0 |
| Q9HOR3 | Membrane {ECO:0000305}; Multi-pass memk  | 0 |
| P51800 | Membrane; Multi-pass membrane protein.   | 0 |
| Q7Z6I6 | Cytoplasmic vesicle {ECO:0000269 PubMed  | 1 |
| Q9P0V9 | Cytoplasm {ECO:0000269 PubMed:12711328}  | 1 |
| Q8N7N1 |                                          | 0 |

|        |                                         |   |
|--------|-----------------------------------------|---|
| P98187 | Endoplasmic reticulum membrane {ECO:000 | 0 |
| Q08477 | Endoplasmic reticulum membrane {ECO:000 | 0 |
| Q8IYR2 |                                         | 0 |
| Q9UKJ3 |                                         | 0 |
| Q7Z692 | Membrane {ECO:0000305}; Single-pass ty  | 0 |
| Q8IZN7 | Secreted.                               | 0 |
| P35240 | Isoform 1: Cell projection, filopodium  | 0 |
| Q86T20 | Membrane {ECO:0000255}; Single-pass men | 0 |
| Q8N104 | Secreted {ECO:0000305}. Membrane {ECO:( | 0 |
| P62256 |                                         | 0 |
| 075449 | Cytoplasm {ECO:0000269 PubMed:10751153, | 0 |
| Q96P48 | Cytoplasm. Golgi apparatus, Golgi stack | 0 |
| Q5T7B8 | Cytoplasm, cytoskeleton, microtubule or | 0 |
| 000408 | Isoform PDE2A3: Cell membrane {ECO:0000 | 0 |
| Q8ND23 | Cytoplasm {ECO:0000269 PubMed:21102520} | 0 |
| P13727 | Bone marrow proteoglycan: Secreted. Not | 0 |
| P85299 |                                         | 0 |
| Q96JP5 | Nucleus {ECO:0000269 PubMed:12738986}.  | 0 |
| Q2M2W7 |                                         | 0 |
| Q7Z5W3 | Cytoplasm {ECO:0000269 PubMed:23063121} | 0 |
| Q8TD90 |                                         | 0 |
| Q5U5X0 | Mitochondrion matrix {ECO:0000269 PubMe | 0 |
| A6NFT4 | Cytoplasm, cytoskeleton, cilium axoneme | 0 |
| Q6ZRK6 |                                         | 0 |
| P11274 | Cell junction, synapse, postsynaptic ce | 0 |
| Q56A73 |                                         | 0 |
| Q9BPZ2 | Nucleus {ECO:0000269 PubMed:12145692}.  | 0 |
| 043820 | Secreted {ECO:0000250 UniProtKB:Q8VEI3} | 0 |
| Q7Z418 | Cell membrane {ECO:0000269 PubMed:20000 | 0 |
| P01566 | Secreted.                               | 0 |
| Q86VR7 | Membrane {ECO:0000305}; Single-pass ty  | 0 |
| P49682 | Isoform 1: Cell membrane {ECO:0000269 F | 0 |
| Q8NF99 | Isoform 1: Nucleus.; Isoform 3: Nucleus | 0 |
| Q86W11 | Nucleus {ECO:0000305}.                  | 0 |
| Q9ULQ1 | Lysosome membrane {ECO:0000269 PubMed:1 | 0 |
| Q8NHJ6 | Cell membrane {ECO:0000269 PubMed:91510 | 0 |
| P43489 | Membrane; Single-pass type I membrane p | 0 |
| P08779 |                                         | 0 |
| 094992 | Nucleus {ECO:0000269 PubMed:12581153, F | 0 |
| P59797 |                                         | 0 |
| P02533 | Cytoplasm. Nucleus. Note=Expressed in k | 0 |
| Q86V40 | Cell membrane {ECO:0000269 PubMed:22720 | 0 |
| Q9Y2G5 | Endoplasmic reticulum {ECO:0000269 PubM | 0 |
| Q96P65 | Cell membrane; Multi-pass membrane prot | 0 |
| P10636 | Cytoplasm, cytosol {ECO:0000269 PubMed: | 0 |
| Q2NKX8 | Chromosome, centromere {ECO:0000269 Pub | 0 |
| Q86X19 | Cell projection, cilium membrane {ECO:( | 0 |
| Q9Y5U5 | Isoform 1: Cell membrane; Single-pass t | 0 |
| P11487 | Secreted {ECO:0000305}.                 | 0 |
| Q8IUH5 | Golgi apparatus membrane {ECO:0000269 F | 0 |
| P51582 | Cell membrane; Multi-pass membrane prot | 0 |
| Q9H8N7 | Cytoplasm. Nucleus. Note=May shuttle be | 0 |
| Q07869 | Nucleus.                                | 1 |
| C9JQI7 | Membrane {ECO:0000305}; Multi-pass memb | 0 |
| A6NL82 |                                         | 0 |

|        |                                         |   |
|--------|-----------------------------------------|---|
| Q6NY19 |                                         | 0 |
| Q96A84 | Secreted, extracellular space, extracel | 0 |
| Q9Y615 | Cytoplasm, cytoskeleton {ECO:0000250 Ur | 0 |
| Q02161 | Cell membrane {ECO:0000269 PubMed:15449 | 0 |
| B1AK53 | Cytoplasm, cytoskeleton {ECO:0000250 Ur | 0 |
| Q86Y79 |                                         | 0 |
| Q86WX3 | Nucleus, nucleolus {ECO:0000269 PubMed: | 0 |
| A6NLC5 |                                         | 0 |
| Q8NG84 | Cell membrane; Multi-pass membrane prot | 0 |
| Q8N104 | Secreted {ECO:0000305}. Membrane {ECO:( | 0 |
| P51178 |                                         | 0 |
| P06307 | Secreted.                               | 0 |
| 075356 | Endoplasmic reticulum {ECO:0000250}. Se | 0 |
| 075030 | Nucleus {ECO:0000269 PubMed:27889061}.  | 1 |
| Q86WZ0 |                                         | 0 |
| P55209 | Nucleus {ECO:0000269 PubMed:17081065}.  | 0 |
| Q7Z7K0 | Mitochondrion {ECO:0000269 PubMed:18443 | 0 |
| Q86Y78 | Secreted {ECO:0000305}. Cytoplasm {ECO: | 0 |
| Q04828 | Cytoplasm.                              | 1 |
| Q9UJU5 | Nucleus {ECO:0000305}.                  | 0 |
| Q5VTB9 | Cytoplasm {ECO:0000250 UniProtKB:Q6PDX6 | 0 |
| Q86XS5 | Secreted {ECO:0000305}.                 | 0 |
| A0MZ66 | Perikaryon {ECO:0000250 UniProtKB:Q8K26 | 0 |
| Q75WM6 | Nucleus {ECO:0000250 UniProtKB:Q8CJI4}. | 0 |
|        |                                         | 0 |
| Q9UJ04 |                                         | 0 |
| Q9NR90 | Cytoplasm {ECO:0000269 PubMed:11058556} | 0 |
| Q02742 | Golgi apparatus membrane {ECO:0000269 F | 0 |
| Q86VW0 |                                         | 0 |
| Q96RU3 | Cytoplasm. Cytoplasm, cytoskeleton. Cyt | 0 |
| Q8NCM8 | Cytoplasm, cytoskeleton, cilium axoneme | 0 |
| Q99456 |                                         | 0 |
| Q96JG8 |                                         | 0 |
| P50895 | Membrane; Single-pass type I membrane p | 0 |
| Q6PCB5 | Nucleus {ECO:0000250 UniProtKB:Q9GRZ3}. | 0 |
| Q96AQ7 | Nucleus {ECO:0000250}. Endoplasmic reti | 0 |
| P43146 | Membrane; Single-pass type I membrane p | 0 |
| Q9HBM6 | Nucleus {ECO:0000250}.                  | 0 |
| Q86UL8 | Cytoplasm {ECO:0000250}. Late endosome  | 0 |
| Q86TE4 | Secreted {ECO:0000305}.                 | 0 |
| Q99653 | Nucleus {ECO:0000250 UniProtKB:P61023}. | 0 |
| P22492 | Nucleus {ECO:0000305}. Chromosome {ECO: | 1 |
|        |                                         | 0 |
| Q14654 | Membrane; Multi-pass membrane protein.  | 0 |
| A6H8M9 | Membrane {ECO:0000305}; Single-pass typ | 0 |
| P02462 | Secreted, extracellular space, extracel | 0 |
| Q6ZR37 |                                         | 0 |
| P35212 | Cell membrane; Multi-pass membrane prot | 0 |
| P06454 | Nucleus.                                | 0 |
| 075409 |                                         | 0 |
| Q0VDF9 | Cytoplasm, cytosol {ECO:0000269 PubMed: | 0 |
| Q4VNCO | Membrane {ECO:0000305}; Multi-pass memt | 0 |
| Q9NRC8 | Cytoplasm. Nucleus, nucleolus. Note=Loc | 0 |
| Q6MZM9 | Secreted {ECO:0000305}.                 | 0 |
| Q96RY7 | Cytoplasm, cytoskeleton, cilium basal b | 0 |



|        |                                         |   |
|--------|-----------------------------------------|---|
| POC263 |                                         | 0 |
| Q93009 | Nucleus {ECO:0000269 PubMed:21258371, F | 0 |
| P60323 | Nucleus {ECO:0000269 PubMed:21421998}.  | 0 |
| Q6VB84 | Nucleus {ECO:0000255 PROSITE-ProRule:PF | 0 |
| Q7Z4L0 | Mitochondrion inner membrane.           | 0 |
| Q494U1 | Cell membrane {ECO:0000269 PubMed:25043 | 0 |
| Q9H213 |                                         | 0 |
| O43151 | Nucleus {ECO:0000250 UniProtKB:Q8BG87}. | 0 |
| P05161 | Cytoplasm {ECO:0000269 PubMed:22859821} | 0 |
| Q8N9H8 |                                         | 0 |
| A6NI61 | Cell membrane {ECO:0000250 UniProtKB:Q5 | 0 |
| Q6ZQX7 |                                         | 0 |
| Q969J2 | Nucleus {ECO:0000255 PROSITE-ProRule:PF | 0 |
| PODJDO |                                         | 0 |
| Q6PKH6 | Secreted {ECO:0000305}.                 | 0 |
| Q5SV97 | Cytoplasm {ECO:0000250 UniProtKB:Q149B8 | 0 |
| Q86UW8 | Secreted, extracellular space, extracel | 0 |
| O15083 | Cytoplasm {ECO:0000269 PubMed:12923177} | 0 |
| Q9C004 | Cytoplasm {ECO:0000269 PubMed:12027893} | 0 |
| Q9Y5S1 | Cell membrane {ECO:0000250}; Multi-pass | 0 |
| Q6UX39 | Secreted {ECO:0000250 UniProtKB:Q9D3J8} | 0 |
| Q86X51 | Nucleus {ECO:0000269 PubMed:29909548, F | 0 |
| Q9BSF0 | Cell membrane {ECO:0000269 PubMed:23115 | 0 |
| P59910 | Cell projection, cilium, flagellum {ECO | 0 |
| O14764 | Cell junction, synapse, postsynaptic ce | 0 |
| P04745 | Secreted.                               | 0 |
| P23193 | Nucleus.                                | 0 |
| Q9H9Q4 | Nucleus {ECO:0000269 PubMed:16439204, F | 0 |
| Q96T21 | Isoform 1: Nucleus {ECO:0000305}.; Isof | 0 |
| Q7RTT5 |                                         | 0 |
| P07327 | Cytoplasm.                              | 1 |
| Q92854 | Cell membrane {ECO:0000269 PubMed:20877 | 0 |
| Q6ZN17 | Nucleus. Nucleus, nucleolus {ECO:000026 | 0 |
| Q0P6D2 | Endoplasmic reticulum membrane {ECO:000 | 1 |
| Q9UFH2 | Cytoplasm, cytoskeleton, cilium axoneme | 1 |
| Q96EZ8 | Nucleus {ECO:0000269 PubMed:15044100, F | 0 |
| A0PK05 | Membrane {ECO:0000305}; Multi-pass mem  | 0 |
| Q9UC06 | Nucleus {ECO:0000305}.                  | 0 |
| Q9H257 | Cytoplasm {ECO:0000269 PubMed:11053425} | 1 |
| Q5VY43 | Cell membrane {ECO:0000305}; Single-pas | 0 |
| Q9UJL9 | Nucleus {ECO:0000305}.                  | 0 |
| A6NJG2 |                                         | 0 |
| Q49AA0 | Nucleus {ECO:0000250 UniProtKB:A2A761}. | 0 |
| A6NFD8 | Nucleus {ECO:0000255 PROSITE-ProRule:PF | 0 |
| Q6ZR62 |                                         | 0 |
| P16403 | Nucleus. Chromosome. Note=Mainly locali | 1 |
| Q9NRY6 | Mitochondrion membrane {ECO:0000269 Pub | 1 |
| Q13541 |                                         | 0 |
| Q6XD76 | Nucleus {ECO:0000255 PROSITE-ProRule:PF | 0 |
| Q569K6 |                                         | 0 |
| Q96E09 |                                         | 0 |
| A6NDB9 | Cytoplasm {ECO:0000250}. Cell membrane  | 0 |
| Q6UXV0 | Cell membrane {ECO:0000269 PubMed:28953 | 0 |
| A6NL88 | Cell junction, synapse, postsynaptic ce | 0 |
| Q6ZQY2 |                                         | 0 |

|        |                                         |   |
|--------|-----------------------------------------|---|
| Q9UGM3 | Secreted {ECO:0000250}. Note=Some isofo | 0 |
| Q6JVE6 | Secreted {ECO:0000305}.                 | 0 |
| Q5SZI1 | Membrane; Single-pass type I membrane p | 0 |
| Q6UXQ4 | Secreted {ECO:0000305}.                 | 0 |
| Q6ZMK1 | Cytoplasm {ECO:0000250}. Cytoplasm, per | 0 |
| Q05707 | Secreted, extracellular space, extracel | 0 |
| Q8NFT8 | Cell membrane; Single-pass type I membr | 0 |
| A6NMK7 |                                         | 0 |
| Q6TDP4 | Cell junction, synapse, postsynaptic ce | 0 |
| Q8WW36 |                                         | 0 |
| Q3MJ62 | Nucleus {ECO:0000255 PROSITE-ProRule:PF | 0 |
| Q6ZS11 | Cell projection, ruffle {ECO:0000250}.  | 0 |
| Q6UX52 | Secreted {ECO:0000269 PubMed:28978694}. | 0 |
| Q6ZUI0 | Cytoplasm {ECO:0000250 UniProtKB:Q8CB49 | 0 |
| Q14D33 | Membrane {ECO:0000305}; Single-pass men | 0 |
| P33764 | Cytoplasm {ECO:0000269 PubMed:18083705} | 1 |
| Q9UHD9 | Cytoplasm {ECO:0000269 PubMed:18199683} | 0 |
| Q5EBL4 | Cytoplasm, cytosol {ECO:0000269 PubMed: | 0 |
| Q9ULM2 | Nucleus {ECO:0000305}.                  | 0 |
| Q496H8 | Cell membrane {ECO:0000305}; Lipid-anch | 0 |
| P56559 | Cell projection, filopodium. Cell membr | 0 |
| A6NGB7 | Membrane {ECO:0000305}; Multi-pass memt | 1 |
| Q6UXN2 | Secreted {ECO:0000305 PubMed:24975946}. | 0 |
| Q7RTY3 |                                         | 0 |
| Q3MJ16 | Cytoplasm, cytosol. Lysosome membrane   | 1 |
| B3EWG3 |                                         | 0 |
| Q5T0Z8 |                                         | 0 |
| Q9NQZ3 | Cytoplasm {ECO:0000269 PubMed:11058556} | 0 |
| P53778 | Cytoplasm. Nucleus. Mitochondrion. Note | 1 |
| Q68D42 | Membrane {ECO:0000305}; Multi-pass memt | 0 |
| O00468 | Isoform 1: Secreted, extracellular spac | 0 |
| Q6T4R5 | Isoform 1: Apical cell membrane; Periph | 0 |
| Q6J272 |                                         | 0 |
| Q6ZT21 | Membrane {ECO:0000305}; Multi-pass memt | 0 |
| Q68DY1 | Nucleus {ECO:0000305}.                  | 0 |
| P61129 |                                         | 0 |
| Q0VGL1 | Lysosome {ECO:0000269 PubMed:22980980}. | 1 |
| P31321 | Cell membrane {ECO:0000269 PubMed:23115 | 0 |
| Q68D85 | Cell membrane {ECO:0000269 PubMed:19528 | 0 |
| Q8IWE4 | Cell membrane {ECO:0000269 PubMed:25349 | 0 |
| Q6S8J3 |                                         | 0 |
| Q6ZN11 | Nucleus {ECO:0000305}.                  | 0 |
| P68371 | Cytoplasm, cytoskeleton.                | 1 |
| Q96P64 |                                         | 0 |
| P14555 | Cell membrane {ECO:0000305}; Peripheral | 0 |
| Q6ZVW7 |                                         | 0 |
| A2RU49 | Cytoplasm {ECO:0000305}.                | 0 |
| Q15622 | Cell membrane; Multi-pass membrane prot | 0 |
| A8K5M9 | Mitochondrion {ECO:0000305}.            | 0 |
| Q6ZNE9 | Cytoplasmic vesicle, autophagosome {ECO | 0 |
| Q8NA42 | Nucleus {ECO:0000269 PubMed:15964543}.  | 0 |
| Q6UW32 | Secreted {ECO:0000269 PubMed:16890402}, | 0 |
| Q96BR6 | Nucleus {ECO:0000305}.                  | 0 |
| Q6ZS72 |                                         | 0 |
| A6NIV6 |                                         | 0 |

|        |                                          |   |
|--------|------------------------------------------|---|
| Q6IPU0 | Nucleus {ECO:0000269 PubMed:16622420}.   | 0 |
| O15162 | Cell membrane {ECO:0000269 PubMed:22052} | 0 |
| A6NNW6 |                                          | 0 |
| Q9BR84 | Nucleus {ECO:0000305}.                   | 0 |
| A6NF89 | Cell membrane; Multi-pass membrane prot  | 0 |
| Q075Z2 | Secreted {ECO:0000305}.                  | 0 |
| Q8NGY6 | Cell membrane; Multi-pass membrane prot  | 0 |
| P13984 | Nucleus {ECO:0000269 PubMed:10454543}.   | 0 |
| A1XBS5 | Cytoplasm {ECO:0000269 PubMed:27528616}  | 0 |
| Q5VW36 | Membrane {ECO:0000305}; Multi-pass memt  | 0 |
| P21754 | Processed zona pellucida sperm-binding   | 0 |
| Q6UWK7 | Secreted {ECO:0000269 PubMed:25351403},  | 0 |
| Q6NXT2 | Nucleus. Chromosome.                     | 0 |
| P01563 | Secreted.                                | 0 |
| Q5VZ66 | Golgi apparatus {ECO:0000250}.           | 0 |
| Q96LZ3 |                                          | 0 |
| Q15116 | Cell membrane {ECO:0000269 PubMed:30487} | 0 |
| Q6UVW9 | Cell membrane {ECO:0000269 PubMed:18046} | 0 |
| Q99679 | Cell membrane; Multi-pass membrane prot  | 0 |
| Q5JR98 |                                          | 0 |
| P14151 | Cell membrane {ECO:0000269 PubMed:25096} | 0 |
| Q9BZ81 |                                          | 0 |
| P24386 | Cytoplasm, cytosol {ECO:0000269 PubMed:} | 0 |
| P60321 | Cytoplasm {ECO:0000269 PubMed:19168545}  | 0 |
| Q8TDH9 |                                          | 0 |
| Q49MI3 | Cytoplasm. Nucleus, nucleolus. Note=Enr  | 0 |
| P16104 | Nucleus {ECO:0000269 PubMed:12419185, F  | 1 |
| Q1MX18 | Cytoplasm {ECO:0000269 PubMed:22074847}  | 1 |
| Q5BKK5 |                                          | 0 |
| Q6ZVX7 | Cytoplasm {ECO:0000269 PubMed:22087255}  | 0 |
| P60985 | Secreted {ECO:0000269 PubMed:15140226}.  | 0 |
| A6ND36 | Cytoplasm, cytosol {ECO:0000269 PubMed:} | 0 |
| Q6ZQR2 | Cell projection, cilium {ECO:0000250 Ur  | 0 |
| O75494 | Nucleus speckle {ECO:0000269 PubMed:116} | 0 |
| P69905 |                                          | 0 |
| Q4GOW2 |                                          | 0 |
| Q6ZUT6 |                                          | 0 |
| Q14596 | Cytoplasm {ECO:0000269 PubMed:19427866}  | 0 |
| Q2PPJ7 | Cytoplasm {ECO:0000269 PubMed:16490346}  | 0 |
| Q9UHB4 | Cytoplasm, perinuclear region {ECO:0000} | 0 |
| Q6ZVX9 | Cell membrane {ECO:0000269 PubMed:23161} | 0 |
| Q96N23 | Cytoplasm, cytoskeleton, cilium axoneme  | 0 |
| Q13286 | Lysosome membrane {ECO:0000269 PubMed:1} | 0 |
| Q86X60 |                                          | 0 |
| Q9NR71 | Neutral ceramidase: Cell membrane {ECO:} | 0 |
| P61956 | Nucleus. Nucleus, PML body.              | 1 |
| Q8WY41 | Cytoplasm, perinuclear region {ECO:0000} | 0 |
| Q6UXB1 | Secreted {ECO:0000305}.                  | 0 |
| Q13360 | Nucleus {ECO:0000305}.                   | 0 |
| Q6ICC9 |                                          | 0 |
| Q12882 | Cytoplasm.                               | 0 |
| Q96FQ6 | Nucleus, nucleolus {ECO:0000269 PubMed:} | 0 |
| Q7Z6K3 |                                          | 0 |
| Q6DHV5 |                                          | 0 |
| Q658L1 |                                          | 0 |

|         |                                         |   |
|---------|-----------------------------------------|---|
| P18577  | Membrane; Multi-pass membrane protein.  | 0 |
| Q9HBI1  | Cell junction, focal adhesion. Cell men | 0 |
| Q9BY07  | Apical cell membrane {ECO:0000269 PubMe | 0 |
| P10746  |                                         | 0 |
| Q3LI83  |                                         | 0 |
| Q9Y397  | Endoplasmic reticulum membrane {ECO:000 | 0 |
| Q96FA7  |                                         | 0 |
| P83859  | Secreted.                               | 0 |
| Q68J44  | Cytoplasm {ECO:0000269 PubMed:17498703} | 0 |
| P61366  | Secreted {ECO:0000269 PubMed:14523025}. | 0 |
| Q2TAL6  | Secreted, extracellular space, extracel | 0 |
| A4D161  |                                         | 0 |
| A0PK00  | Nucleus inner membrane {ECO:0000250 Uni | 0 |
| P42696  | Nucleus, nucleolus {ECO:0000269 PubMed: | 0 |
| Q86UR1  | Cytoplasm. Cell membrane. Note=Transloc | 0 |
| Q66K66  | Membrane {ECO:0000305}; Multi-pass memt | 1 |
| Q5TBC7  |                                         | 0 |
| Q9UBM4  | Secreted, extracellular space, extracel | 0 |
| Q6UQ28  | Apical cell membrane {ECO:0000250}; Lip | 0 |
| P13945  | Cell membrane; Multi-pass membrane prot | 0 |
| P84550  | Nucleus {ECO:0000250}.                  | 1 |
| Q7RTX7  | Cell projection, cilium, flagellum memt | 0 |
| Q9NZK7  | Secreted.                               | 0 |
| Q8NEK5  | Nucleus {ECO:0000305}.                  | 0 |
| Q14872  | Nucleus {ECO:0000305}.                  | 0 |
| Q6ZSJ9  | Membrane {ECO:0000305}; Single-pass typ | 0 |
| Q5SNT2  | Isoform 2: Nucleus inner membrane {ECO: | 0 |
| Q5JS37  | Secreted {ECO:0000305}.                 | 0 |
| A2RU54  | Nucleus {ECO:0000255 PROSITE-ProRule:PF | 0 |
| A6NMZ2  | Cell projection, cilium {ECO:0000250}.  | 0 |
| Q9H8X9  | Membrane {ECO:0000305}; Multi-pass memt | 0 |
| P34972  | Cell membrane; Multi-pass membrane prot | 0 |
| Q8IY92  | Nucleus {ECO:0000269 PubMed:19596235, F | 0 |
| Q5JXX5  | Cell junction, synapse, postsynaptic ce | 0 |
| Q5MY95  | Cell membrane {ECO:0000250}; Multi-pass | 1 |
| P50914  |                                         | 0 |
| Q6ZU67  |                                         | 0 |
| Q5VT40  |                                         | 0 |
| Q8TA94  | Nucleus {ECO:0000305}.                  | 0 |
| Q7Z5M5  | Membrane {ECO:0000255}; Multi-pass memt | 0 |
| A4DIS0  | Membrane {ECO:0000305}; Single-pass men | 0 |
| Q6HA08  | Cytoplasm {ECO:0000250}. Cell membrane  | 0 |
| Q68DK7  | Nucleus {ECO:0000269 PubMed:15561718}.  | 0 |
|         | be performed. View primary data.        | 0 |
| Q5S007  | Membrane; Peripheral membrane protein.  | 0 |
| Q3C1V8  | Nucleus {ECO:0000250 UniProtKB:Q810B3}. | 0 |
| Q6ZSG2  | Cell junction, synapse, postsynaptic ce | 0 |
| Q96GJ1  |                                         | 0 |
| Q5VWC8  | Endoplasmic reticulum membrane {ECO:000 | 0 |
| Q5VTH2  | Cytoplasm, cytoskeleton, cilium basal b | 0 |
| Q5T036  |                                         | 0 |
| Q765I0  | Secreted {ECO:0000250}.                 | 0 |
| Q5J TZ5 |                                         | 0 |
| Q9Y3T9  | Nucleus, nucleoplasm. Nucleus, nucleolt | 0 |
| Q8WX92  | Nucleus {ECO:0000269 PubMed:11739404}.  | 1 |

|        |                                         |   |
|--------|-----------------------------------------|---|
| A6NIM6 | Membrane {ECO:0000305}; Multi-pass mem  | 0 |
| Q68CR7 | Membrane {ECO:0000305}; Multi-pass mem  | 0 |
| O60281 | Nucleus {ECO:0000305}.                  | 0 |
| Q4GOX4 |                                         | 0 |
| Q6UWP8 | Secreted {ECO:0000250}.                 | 0 |
| Q7Z6V5 |                                         | 0 |
| A2A368 |                                         | 0 |
| Q8N184 | Nucleus {ECO:0000305}.                  | 0 |
| A6NHY2 |                                         | 0 |
| Q6NS38 | Nucleus {ECO:0000269 PubMed:12486230, F | 0 |
| A6NCQ9 | Membrane {ECO:0000305}; Single-pass mem | 0 |
| P0DN86 | Secreted {ECO:0000269 PubMed:16123088}. | 0 |
| Q6SJ93 |                                         | 0 |
| P05090 | Secreted.                               | 0 |
| P07305 | Nucleus {ECO:0000255 PROSITE-ProRule:PF | 1 |
| Q6NT46 |                                         | 0 |
| Q99732 | Cytoplasm {ECO:0000269 PubMed:15793005} | 0 |
| B3EWG6 |                                         | 0 |
| Q15393 | Nucleus {ECO:0000269 PubMed:10490618, F | 1 |
| Q7RTY5 | Secreted {ECO:0000305}.                 | 0 |
| Q9NP60 | Membrane; Single-pass type I membrane p | 0 |
| Q6QNY0 | Cytoplasm {ECO:0000250}.                | 0 |
| A5PLL1 | Cytoplasm. Nucleus {ECO:0000250}.       | 0 |
| Q5JTB6 | Secreted {ECO:0000305}.                 | 0 |
| Q8NA70 |                                         | 0 |
| Q5H9T9 | Cell projection, cilium, flagellum {ECO | 0 |
| O14493 | Cell junction, tight junction {ECO:0000 | 1 |
| Q86YE8 | Nucleus {ECO:0000305}.                  | 0 |
| Q8TC17 |                                         | 0 |
| Q6ZV65 |                                         | 0 |
| Q9UK76 | Nucleus {ECO:0000269 PubMed:21323578}.  | 0 |
| Q8NB42 | Nucleus {ECO:0000305}.                  | 0 |
| A6NP61 |                                         | 0 |
| Q99584 | Cytoplasm. Secreted. Note=Secretion is  | 0 |
| Q06730 | Nucleus {ECO:0000305}.                  | 0 |
| Q7Z794 |                                         | 0 |
| Q9HCL0 | Cell membrane {ECO:0000250}; Single-pas | 0 |
| Q5XKL5 | Nucleus {ECO:0000269 PubMed:14654994}.  | 0 |
| P21397 | Mitochondrion outer membrane; Single-pa | 1 |
| Q9H0U9 | Nucleus, nucleolus {ECO:0000269 PubMed: | 0 |
| A6NI03 |                                         | 0 |
| Q9NPJ4 | Nucleus {ECO:0000269 PubMed:19150429}.  | 0 |
| O95377 | Cell membrane; Multi-pass membrane prot | 0 |
| P49789 | Cytoplasm. Mitochondrion. Nucleus.      | 0 |
| Q9BRR0 | Nucleus. Cytoplasm. Note=Mainly localiz | 0 |
| Q6PJQ5 | Nucleus {ECO:0000255 PROSITE-ProRule:PF | 0 |
| Q9Y3A4 |                                         | 0 |
| Q6MZP7 | Nucleus {ECO:0000305}.                  | 0 |
| Q14153 | Nucleus {ECO:0000269 PubMed:25183871}.  | 0 |
| Q6UWF9 | Secreted {ECO:0000305}.                 | 0 |
| P0C671 |                                         | 0 |
| Q5MJ08 |                                         | 0 |
| Q9HCY8 | Cytoplasm {ECO:0000269 PubMed:11944983} | 0 |
| Q674X7 | Cytoplasm, cytoskeleton {ECO:0000250}.; | 0 |
| P0CK96 | Membrane {ECO:0000305}; Multi-pass mem  | 0 |

|        |                                         |   |
|--------|-----------------------------------------|---|
| Q6ZUX3 |                                         | 0 |
| Q6GMV1 |                                         | 0 |
| Q6ZU52 |                                         | 0 |
| Q8IYD1 | Cytoplasm {ECO:0000305}.                | 0 |
| Q96K31 |                                         | 0 |
| Q7L8S5 |                                         | 0 |
| P09429 | Nucleus {ECO:0000269 PubMed:12231511, F | 0 |
| A6NM28 | Nucleus {ECO:0000250}.                  | 0 |
| Q9NTQ9 | Cell membrane {ECO:0000250 UniProtKB:QC | 0 |
| Q6QNY1 | Cytoplasm, cytoskeleton, microtubule or | 0 |
| Q9NPH3 | Isoform 1: Cell membrane; Single-pass t | 0 |
| O14522 | Membrane; Single-pass type I membrane p | 0 |
| Q00872 |                                         | 0 |
| Q02548 | Nucleus.                                | 1 |
| Q8NGM8 | Cell membrane; Multi-pass membrane prot | 0 |
| Q32M78 | Nucleus {ECO:0000305}.                  | 0 |
| Q8NHU6 | Cytoplasm {ECO:0000269 PubMed:21436445} | 0 |
| A1A4V9 |                                         | 0 |
| Q68EN5 |                                         | 0 |
| P01911 | Cell membrane {ECO:0000269 PubMed:18305 | 1 |
| Q8NFZ6 | Cell membrane; Multi-pass membrane prot | 0 |
| Q01538 | Nucleus.                                | 0 |
| P01011 | Secreted.                               | 0 |
| P42330 | Cytoplasm.                              | 0 |
| Q9NUQ6 | Cytoplasm {ECO:0000269 PubMed:19005571} | 0 |
| P15622 | Nucleus {ECO:0000305}.                  | 0 |
| Q8N9V3 |                                         | 0 |
| Q15937 | Nucleus {ECO:0000305}.                  | 0 |
| P26447 |                                         | 0 |
| Q6V0I7 | Membrane {ECO:0000305}; Single-pass typ | 0 |
| Q6ZUL3 |                                         | 0 |
| Q2TAC6 | Cytoplasm, cytoskeleton {ECO:0000250}.  | 0 |
| P45954 | Mitochondrion matrix.                   | 1 |
| Q8N2I9 | Nucleus {ECO:0000269 PubMed:13679039}.  | 0 |
| P14091 | Endosome {ECO:0000269 PubMed:7983070}.  | 0 |
| Q9H3S1 | Cell membrane {ECO:0000269 PubMed:22956 | 1 |
| Q99549 | Nucleus {ECO:0000269 PubMed:20871592, F | 1 |
| Q4ZG55 | Membrane {ECO:0000305}; Single-pass men | 0 |
| Q5JXA9 | Membrane {ECO:0000305}; Single-pass typ | 0 |
| Q5HY98 | Nucleus {ECO:0000305}.                  | 0 |
| P21817 | Sarcoplasmic reticulum membrane {ECO:00 | 1 |
| O43295 |                                         | 0 |
| Q9NTX9 |                                         | 0 |
| P07437 | Cytoplasm, cytoskeleton {ECO:0000269 Pu | 1 |
| Q96JN0 | Nucleus {ECO:0000255 PROSITE-ProRule:PF | 0 |
| O00267 | Nucleus {ECO:0000269 PubMed:10075709}.  | 1 |
| Q9NQH7 | Isoform 1: Mitochondrion {ECO:0000269 F | 0 |
| Q8NGN2 | Cell membrane; Multi-pass membrane prot | 0 |
| P62937 | Cytoplasm {ECO:0000269 PubMed:16527992} | 0 |
| Q9BX82 | Nucleus {ECO:0000305}.                  | 0 |
| Q5JRS4 | Cell membrane; Multi-pass membrane prot | 0 |
| O75486 | Nucleus {ECO:0000269 PubMed:11564863, F | 1 |
| Q9GZT8 | Cytoplasm {ECO:0000269 PubMed:11124544, | 1 |
| O14983 | Endoplasmic reticulum membrane {ECO:000 | 1 |
| P41252 | Cytoplasm {ECO:0000269 PubMed:27426735, | 0 |

|        |                                          |   |
|--------|------------------------------------------|---|
| Q96HA1 | Nucleus, nuclear pore complex {ECO:000   | 0 |
| Q8NCP5 | Nucleus {ECO:0000250}.                   | 0 |
| Q9BXU1 |                                          | 0 |
| PODN87 | Secreted {ECO:0000269 PubMed:16123088}.  | 0 |
| Q9NZ94 | Cell membrane {ECO:0000250}; Single-pass | 0 |
| Q8WZ84 | Cell membrane; Multi-pass membrane prot  | 0 |
| P40394 | Cytoplasm.                               | 1 |
| Q9POL1 | Nucleus {ECO:0000255 PROSITE-ProRule:PF  | 0 |
| P08174 | Isoform 1: Cell membrane; Single-pass t  | 0 |
| Q96A23 |                                          | 0 |
| Q8N9K5 | Nucleus {ECO:0000305}.                   | 0 |
| Q96CW9 | Cell membrane {ECO:0000269 PubMed:21946  | 0 |
| Q14576 |                                          | 0 |
| P36776 | Mitochondrion matrix {ECO:0000255 HAMA   | 1 |
| Q96G61 | Cytoplasm {ECO:0000269 PubMed:12121577}  | 0 |
| P22083 | Golgi apparatus, Golgi stack membrane;   | 0 |
| Q8WVK3 |                                          | 0 |
| Q5T1Q4 | Membrane {ECO:0000305}; Multi-pass mem   | 0 |
| Q8IZ26 | Nucleus {ECO:0000305}.                   | 0 |
| Q8N8C0 | Nucleus {ECO:0000305}.                   | 0 |
| P52738 | Nucleus {ECO:0000305}.                   | 0 |
| Q0VD86 | Nucleus {ECO:0000269 PubMed:15159402, F  | 0 |
| Q6NX45 | Nucleus {ECO:0000305}.                   | 0 |
| P18031 | Endoplasmic reticulum membrane {ECO:000  | 0 |
| Q9UI08 | Cytoplasm, cytoskeleton {ECO:0000250 Ur  | 0 |
| Q9BXN6 | Cytoplasm {ECO:0000250}. Nucleus {ECO:(  | 0 |
| Q8NFA2 | Isoform 3: Cell membrane {ECO:0000269 F  | 0 |
| P54760 | Cell membrane {ECO:0000269 PubMed:28687  | 0 |
| P24158 | Cytoplasmic granule {ECO:0000269 PubMec  | 0 |
| Q15973 | Nucleus {ECO:0000305}.                   | 0 |
| P12956 | Nucleus {ECO:0000269 PubMed:22442688}.   | 1 |
| Q5T8A7 | Nucleus, nucleolus {ECO:0000269 PubMed:  | 0 |
| Q96M43 | Cytoplasm {ECO:0000305}.                 | 0 |
| 075157 |                                          | 0 |
| P53673 |                                          | 0 |
| A6NHN6 | Secreted {ECO:0000305}.                  | 0 |
| Q5MCW4 | Nucleus {ECO:0000250}.                   | 0 |
|        | Membrane {ECO:0000255}; Single-pass men  | 0 |
| Q86U90 | Mitochondrion {ECO:0000305}. Membrane;   | 0 |
| Q9ULD5 | Nucleus {ECO:0000305}.                   | 0 |
| Q99570 | Late endosome {ECO:0000269 PubMed:14617  | 0 |
| Q86T29 | Nucleus {ECO:0000305}.                   | 0 |
| PODI81 | Cytoplasm, perinuclear region {ECO:0000  | 0 |
| P14649 |                                          | 0 |
| Q96GE5 | Nucleus {ECO:0000305}.                   | 0 |
| Q8IUQ4 | Cytoplasm. Nucleus. Note=Predominantly   | 1 |
| Q14410 | Mitochondrion outer membrane {ECO:00002  | 0 |
| Q9NUD7 |                                          | 0 |
| P62508 | Nucleus {ECO:0000305}.                   | 0 |
| Q8TEX9 | Cytoplasm {ECO:0000250}. Nucleus {ECO:(  | 0 |
| Q9Y618 | Nucleus.                                 | 0 |
| P50225 | Cytoplasm.                               | 1 |
| Q6T311 |                                          | 0 |
| 075400 | Nucleus speckle {ECO:0000250}. Nucleus   | 0 |
| Q9NXN4 |                                          | 0 |

|                       |                                         |   |
|-----------------------|-----------------------------------------|---|
| Q969E4                | Nucleus {ECO:0000305}.                  | 0 |
| Q9UJX3                |                                         | 0 |
| Q9H3S4                |                                         | 0 |
| P48067                | Membrane; Multi-pass membrane protein.  | 0 |
| Q8N556                | Cytoplasm, cytoskeleton, stress fiber   | 1 |
| Q92614                | Isoform 1: Endoplasmic reticulum-Golgi  | 1 |
| Q96GS4                | Lysosome membrane {ECO:0000305 PubMed:2 | 0 |
| P08473                | Cell membrane; Single-pass type II mem  | 1 |
| Q5TYM5                | Cytoplasm. Mitochondrion. Note=A V5 epi | 0 |
| O95180                | Cell membrane {ECO:0000269 PubMed:25907 | 0 |
| Q8IWU5                | Endoplasmic reticulum {ECO:0000250}. Gc | 0 |
| P69892                |                                         | 0 |
| P24043                | Secreted, extracellular space, extracel | 0 |
| O15031                | Cell membrane {ECO:0000269 PubMed:12533 | 0 |
| Q9UM54                | Golgi apparatus, trans-Golgi network me | 0 |
| Q969V6                | Cytoplasm {ECO:0000269 PubMed:24440334} | 0 |
| AOA1B0GVZ6            |                                         | 0 |
| Q92769                | Nucleus {ECO:0000269 PubMed:24970816}.  | 1 |
| Q6ZMW2                | Nucleus {ECO:0000305}.                  | 0 |
| Q6T423                | Membrane {ECO:0000255}; Multi-pass mem  | 0 |
| A5A3E0                | Cytoplasm, cell cortex {ECO:0000269 Pub | 0 |
| Q147U1                | Nucleus {ECO:0000250}.                  | 0 |
| P00325                | Cytoplasm.                              | 1 |
| P54855                | Microsome membrane {ECO:0000305}; Singl | 0 |
| P15884                | Nucleus {ECO:0000255 PROSITE-ProRule:PF | 0 |
| Q9BYP7                | Cytoplasm {ECO:0000269 PubMed:16501604} | 0 |
| Q9NRP4                | Mitochondrion matrix {ECO:0000250 UniPr | 0 |
| P35367                | Cell membrane {ECO:0000269 PubMed:21697 | 0 |
| Q3YEC7                | Isoform 1: Cytoplasm {ECO:0000269 PubMe | 0 |
| Q9Y2L8                | Nucleus {ECO:0000255 PROSITE-ProRule:PF | 0 |
| Q8TBZ5                | Nucleus {ECO:0000305}.                  | 0 |
| Q9Y296                | Golgi apparatus, cis-Golgi network {ECO | 0 |
| Q8N4P2                | Cell projection, cilium {ECO:0000250}.  | 0 |
| Q6XR72                | Cell membrane {ECO:0000269 PubMed:22706 | 0 |
| O15040                |                                         | 0 |
| Q9NYK1                | Endoplasmic reticulum membrane {ECO:000 | 1 |
| be performed. View pr | Membrane {ECO:0000305}; Single-pass mem | 0 |
| Q8NB50                | Nucleus {ECO:0000305}.                  | 0 |
| A8K979                |                                         | 0 |
| Q06732                | Nucleus {ECO:0000305}.                  | 0 |
| Q96KM6                | Nucleus {ECO:0000305}.                  | 0 |
| Q86W34                |                                         | 0 |
| Q8TF32                | Nucleus {ECO:0000250}.                  | 0 |
| Q6UXT8                | Secreted {ECO:0000305}.                 | 0 |
| P21359                | Nucleus {ECO:0000269 PubMed:14988005}.  | 0 |
| Q8N0U8                | Endoplasmic reticulum membrane {ECO:000 | 0 |
| Q8TF45                | Nucleus {ECO:0000305}.                  | 0 |
| P53355                | Isoform 1: Cytoplasm. Cytoplasm, cytosk | 0 |
| P01909                | Cell membrane; Single-pass type I mem   | 0 |
| Q8IZC6                | Secreted, extracellular space, extracel | 0 |
| P17900                | Lysosome.                               | 1 |
| POCOS8                | Nucleus. Chromosome.                    | 1 |
| Q6UWE3                | Secreted {ECO:0000305}.                 | 0 |
| P29034                |                                         | 0 |
| Q9H0M5                | Nucleus {ECO:0000305}.                  | 0 |



|        |                                          |   |
|--------|------------------------------------------|---|
| Q08722 | Cell membrane {ECO:0000269 PubMed:76918} | 0 |
| Q04724 | Nucleus {ECO:0000269 PubMed:12397081}.   | 1 |
| Q96JK9 | Nucleus speckle {ECO:0000269 PubMed:123} | 0 |
| POC0S8 | Nucleus. Chromosome.                     | 1 |
| Q13033 | Cytoplasm {ECO:0000250}. Membrane {ECO:  | 0 |
| Q16600 | Nucleus {ECO:0000305}.                   | 0 |
| Q9H4T2 | Nucleus {ECO:0000305}.                   | 1 |
| Q9H6K1 | Cytoplasm {ECO:0000269 PubMed:25736925,  | 0 |
| POCG38 |                                          | 0 |
| P00813 | Cell membrane {ECO:0000269 PubMed:11772} | 1 |
| Q03989 | Nucleus {ECO:0000255 PROSITE-ProRule:PF} | 0 |
| Q8NI37 | Mitochondrion matrix {ECO:0000269 PubMe} | 0 |
| Q6UXN7 | Mitochondrion outer membrane {ECO:00003} | 0 |
| Q7Z3J3 |                                          | 0 |
| Q8NBF2 | Cytoplasm, cytosol {ECO:0000269 PubMed:  | 0 |
| P20671 | Nucleus. Chromosome.                     | 1 |
| Q8NHY6 | Nucleus {ECO:0000305}.                   | 0 |
| Q6NV74 |                                          | 0 |
| Q5JTY5 |                                          | 0 |
| Q13751 | Secreted, extracellular space, extracel  | 0 |
| Q8N257 | Nucleus. Chromosome.                     | 1 |
| O15131 | Cytoplasm.                               | 0 |
| Q9NZN5 | Cytoplasm {ECO:0000305}. Membrane {ECO:  | 0 |
| Q9NR12 | Cytoplasm {ECO:0000250}. Cytoplasm, cyt  | 0 |
| P21333 | Cytoplasm, cell cortex. Cytoplasm, cyto  | 1 |
| Q7Z6B7 |                                          | 0 |
| Q92520 | Secreted {ECO:0000250}. Cytoplasmic ves  | 0 |
| Q9ULF5 | Membrane {ECO:0000305}; Multi-pass mem   | 0 |
| P49662 | Cytoplasm, cytosol {ECO:0000269 PubMed:  | 0 |
| O95782 | Cell membrane {ECO:0000269 PubMed:16262} | 0 |
| Q495W5 | Golgi apparatus, Golgi stack membrane    | 0 |
| P09525 |                                          | 0 |
| Q14657 | Cytoplasm {ECO:0000269 PubMed:28805828}  | 0 |
| Q86VZ2 |                                          | 0 |
| POC2L3 | Membrane {ECO:0000305}; Single-pass men  | 0 |
| F8W1W9 |                                          | 0 |
| Q9Y484 | Preautophagosomal structure {ECO:000026} | 0 |
| Q9H1A3 |                                          | 0 |
| Q6ECI4 | Nucleus {ECO:0000269 PubMed:15302581}.   | 0 |
| Q8IYN0 | Nucleus {ECO:0000305}.                   | 0 |
| Q96DE9 |                                          | 0 |
| Q6NSZ9 | Nucleus {ECO:0000255 PROSITE-ProRule:PF} | 0 |
| P08133 | Cytoplasm {ECO:0000250}. Melanosome {EC  | 1 |
| P60983 |                                          | 0 |
| Q8TAQ5 | Nucleus {ECO:0000305}.                   | 0 |
| Q0D2J5 | Nucleus {ECO:0000305}.                   | 0 |
| P62805 | Nucleus. Chromosome.                     | 1 |
| O15525 | Nucleus {ECO:0000255 PROSITE-ProRule:PF} | 0 |
| Q8N5I2 | Cell membrane {ECO:0000269 PubMed:22315} | 0 |
| Q9BY89 |                                          | 0 |
| P11717 | Lysosome membrane {ECO:0000269 PubMed:1} | 1 |
| Q96RP7 | Golgi apparatus, Golgi stack membrane    | 0 |
| Q14204 | Cytoplasm, cytoskeleton.                 | 1 |
| Q9H1V8 | Cytoplasmic vesicle, secretory vesicle,  | 1 |
| Q15366 | Nucleus {ECO:0000269 PubMed:19029303}.   | 0 |

|        |                                                                            |   |
|--------|----------------------------------------------------------------------------|---|
| Q8N8R3 | Mitochondrion inner membrane {ECO:0000269 PubMed:75252}.                   | 0 |
| P12931 | Cell membrane {ECO:0000269 PubMed:75252}.                                  | 0 |
| O95780 | Nucleus {ECO:0000305}.                                                     | 0 |
| Q68DY9 | Nucleus {ECO:0000305}.                                                     | 0 |
| Q9H6A9 | Membrane {ECO:0000305}; Multi-pass membrane protein.                       | 0 |
| Q8TC27 | Membrane {ECO:0000305}; Single-pass membrane protein.                      | 0 |
| Q9ULC5 | Mitochondrion {ECO:0000269 PubMed:17681}.                                  | 1 |
| Q6P9F7 | Cell membrane {ECO:0000269 PubMed:24790}.                                  | 0 |
| Q9NUT2 | Mitochondrion inner membrane {ECO:0000269 PubMed:75252}.                   | 0 |
| P68431 | Nucleus. Chromosome.                                                       | 0 |
| Q7KZF4 | Cytoplasm {ECO:0000269 PubMed:14508492}.                                   | 0 |
| P50226 | Cytoplasm.                                                                 | 1 |
| Q6P3R8 |                                                                            | 0 |
| O00232 |                                                                            | 0 |
| Q86SQ6 | Membrane {ECO:0000255}; Multi-pass membrane protein.                       | 0 |
| Q96MY1 |                                                                            | 0 |
| Q9H015 | Membrane; Multi-pass membrane protein.                                     | 0 |
| A6NJL1 | Nucleus {ECO:0000255 PROSITE-ProRule:PF00001}.                             | 0 |
| Q9Y227 | Golgi apparatus membrane {ECO:0000305}; Single-pass membrane protein.      | 1 |
| Q13901 | Nucleus {ECO:0000269 PubMed:11801738}.                                     | 0 |
| Q66K14 | Membrane {ECO:0000305}; Single-pass membrane protein.                      | 0 |
| P62805 | Nucleus. Chromosome.                                                       | 1 |
| Q6PXP3 | Cell membrane {ECO:0000269 PubMed:16186}.                                  | 0 |
| Q8TAY7 |                                                                            | 0 |
| P01009 | Secreted. Endoplasmic reticulum. Note=Released from the secretory pathway. | 0 |
| P20231 | Secreted. Note=Released from the secretory pathway.                        | 0 |
| Q63ZY3 | Cytoplasm {ECO:0000269 PubMed:17476305}.                                   | 0 |
| Q5SZD1 |                                                                            | 0 |
| P29084 | Nucleus {ECO:0000269 PubMed:7651391}.                                      | 0 |
| Q8NEV9 | Secreted {ECO:0000269 PubMed:12121660}.                                    | 0 |
| Q02747 | Secreted.                                                                  | 0 |
| Q9Y620 | Nucleus {ECO:0000305}.                                                     | 0 |
| Q96PV0 |                                                                            | 0 |
| P54132 | Nucleus {ECO:0000269 PubMed:23509288}.                                     | 0 |
| Q7Z2F6 |                                                                            | 0 |
| Q5TDH0 | Cytoplasm, cytosol {ECO:0000305 PubMed:17476305}.                          | 0 |
| O95425 | Cell membrane; Peripheral membrane protein.                                | 0 |
| Q9UPN9 | Nucleus {ECO:0000269 PubMed:15820681, F00001}.                             | 1 |
| Q96FA3 |                                                                            | 0 |
| Q8N720 | Nucleus {ECO:0000305}.                                                     | 0 |
| Q7Z2W9 | Mitochondrion {ECO:0000269 PubMed:25278}.                                  | 0 |
| Q6UXB3 | Cell membrane {ECO:0000305}; Lipid-anchored.                               | 0 |
| Q3KQV9 |                                                                            | 0 |
| Q6P050 | Cytoplasm, myofibril, sarcomere, Z line.                                   | 0 |
| Q8N393 | Nucleus {ECO:0000305}.                                                     | 0 |
| Q5SY68 |                                                                            | 0 |
| Q96B18 |                                                                            | 0 |
| A6NHJ4 | Nucleus {ECO:0000250}.                                                     | 0 |
| P42858 | Huntingtin: Cytoplasm {ECO:0000269 PubMed:12464}.                          | 0 |
| P21730 | Cell membrane {ECO:0000269 PubMed:12464}.                                  | 0 |
| P20813 | Endoplasmic reticulum membrane; Peripheral membrane protein.               | 1 |
| P68431 | Nucleus. Chromosome.                                                       | 0 |
| Q14D04 | Cell membrane {ECO:0000269 PubMed:26039}.                                  | 0 |

|        |                                         |   |
|--------|-----------------------------------------|---|
| A6NFH5 |                                         | 0 |
| Q9UJH6 | Cytoplasm {ECO:0000250}.                | 1 |
| Q8NGF3 | Cell membrane; Multi-pass membrane prot | 0 |
| Q9Y573 | Cytoplasm, cytoskeleton.                | 0 |
| Q96PE5 | Cell membrane; Single-pass type I membr | 0 |
| Q99683 | Cytoplasm. Endoplasmic reticulum. Note= | 1 |
| Q9ULD0 | Mitochondrion matrix {ECO:0000250}.     | 1 |
| Q9Y2Q3 | Peroxisome {ECO:0000269 PubMed:14742434 | 1 |
| Q99729 | Nucleus {ECO:0000269 PubMed:17289661}.  | 0 |
| Q9NZ72 | Golgi apparatus {ECO:0000269 PubMed:214 | 0 |
| P04085 | Secreted. Note=Released by platelets up | 0 |
| Q5TAT6 | Cell membrane {ECO:0000269 PubMed:11013 | 0 |
| P16150 | Membrane {ECO:0000255}; Single-pass typ | 0 |
| Q8IW36 | Nucleus {ECO:0000305}.                  | 0 |
| Q9Y5F2 | Cell membrane {ECO:0000250}; Single-pas | 0 |
| Q5EBL2 | Nucleus {ECO:0000250}.                  | 0 |
| Q9UBC7 | Secreted.                               | 0 |
| O95528 | Endomembrane system {ECO:0000269 PubMec | 0 |
| Q9H7R5 | Nucleus {ECO:0000305}.                  | 0 |
| Q9H7B2 | Nucleus, nucleolus {ECO:0000269 PubMed: | 1 |
| Q9HAS3 | Isoform 1: Cell membrane; Multi-pass me | 0 |
| A6PVY3 |                                         | 0 |
| Q96AX9 | Cytoplasm {ECO:0000269 PubMed:14507647} | 1 |
| Q9Y4I1 |                                         | 0 |
| P51124 | Secreted. Cytoplasmic granule. Note=Gra | 0 |
| O95352 | Cytoplasm {ECO:0000250}. Preautophagosc | 1 |
| O43166 | Cytoplasm, cytoskeleton {ECO:0000250}.  | 0 |
| Q86WT1 | Cell projection, cilium {ECO:0000250}.  | 0 |
| P08246 | Cytoplasmic vesicle, phagosome {ECO:000 | 1 |
| O95427 | Endoplasmic reticulum membrane {ECO:000 | 0 |
| Q9P2J8 | Nucleus {ECO:0000305}.                  | 0 |
| Q9XRX5 |                                         | 0 |
| Q00056 | Nucleus.                                | 0 |
| Q9NS56 | Nucleus. Nucleus, PML body. Note=Locali | 1 |
| Q9BYV7 | Mitochondrion {ECO:0000269 PubMed:21106 | 1 |
| Q9Y691 | Membrane; Multi-pass membrane protein.  | 0 |
| O75354 | Golgi apparatus membrane; Single-pass t | 0 |
| Q8NFW5 | Nucleus {ECO:0000250 UniProtKB:035137,  | 0 |
| P22413 | Ectonucleotide pyrophosphatase/phosphoc | 0 |
| A6NI56 | Early endosome {ECO:0000269 PubMed:2289 | 0 |
| Q8WVX9 | Peroxisome membrane {ECO:0000269 PubMec | 0 |
| Q9H799 | Membrane {ECO:0000305}; Multi-pass memt | 0 |
| Q13361 | Secreted, extracellular space, extracel | 0 |
| P13533 | Cytoplasm, myofibril. Note=Thick filame | 1 |
| Q8N8J6 | Nucleus {ECO:0000305}.                  | 0 |
| Q8TE69 |                                         | 0 |
| Q9NRR8 | Cytoplasm, cytoskeleton. Cell membrane; | 0 |
| Q2M385 | Isoform 1: Cytoplasmic vesicle membrane | 0 |
| P05120 | Cytoplasm. Secreted, extracellular spac | 0 |
| P27487 | Dipeptidyl peptidase 4 soluble form: Se | 0 |
| Q9UIV8 | Cytoplasm.                              | 0 |
| Q9BQ51 | Isoform 3: Secreted {ECO:0000305 PubMec | 0 |
| Q8N7K0 | Nucleus {ECO:0000305}.                  | 0 |
| Q8IVF4 | Cytoplasm, cytoskeleton, cilium axoneme | 0 |
| Q8N4F4 | Membrane {ECO:0000305}; Multi-pass memt | 0 |

|        |                                         |   |
|--------|-----------------------------------------|---|
| Q13813 | Cytoplasm, cytoskeleton. Cytoplasm, cel | 0 |
| P08949 | Secreted.                               | 0 |
|        | Cell junction, focal adhesion. Cell men | 0 |
| Q9P2G3 | Cytoplasm, cytosol {ECO:0000269 PubMed: | 0 |
| Q8IWE2 | Cytoplasm {ECO:0000250}.                | 0 |
| Q96AT9 |                                         | 0 |
| Q14592 | Nucleus {ECO:0000305}.                  | 0 |
| Q2VPA4 | Cytoplasm {ECO:0000269 PubMed:14687939} | 0 |
| 075151 | Nucleus, nucleolus {ECO:0000269 PubMed: | 0 |
| P62854 | Cytoplasm, cytosol {ECO:0000269 PubMed: | 0 |
| Q8N769 |                                         | 0 |
| P07602 | Lysosome {ECO:0000269 PubMed:14657016,  | 0 |
| P60903 |                                         | 0 |
| Q8TAF8 | Cell membrane {ECO:0000250 UniProtKB:Q4 | 0 |
| P61513 |                                         | 0 |
| Q86VQ6 | Cytoplasm {ECO:0000250 UniProtKB:Q99MD6 | 0 |
| Q9BTE3 | Nucleus {ECO:0000269 PubMed:17296731}.  | 0 |
| A4GXA9 | Nucleus {ECO:0000305}.                  | 0 |
| Q8N7A1 | Cytoplasm {ECO:0000269 PubMed:16964437} | 0 |
| P51508 | Nucleus {ECO:0000305}.                  | 0 |
| Q15543 | Nucleus {ECO:0000269 PubMed:9695952}.   | 0 |
| 075290 | Nucleus {ECO:0000305}.                  | 0 |
| Q9NVI7 | Mitochondrion inner membrane {ECO:00002 | 0 |
| Q9BPY3 | Nucleus, Cajal body {ECO:0000269 PubMec | 0 |
| Q8TAF7 | Nucleus {ECO:0000305}.                  | 0 |
| Q9Y2E8 | Golgi apparatus membrane {ECO:0000269 P | 0 |
| Q16625 | Cell membrane {ECO:0000269 PubMed:19017 | 0 |
| Q6V702 | Cytoplasm {ECO:0000250 UniProtKB:Q810M1 | 0 |
| P62805 | Nucleus. Chromosome.                    | 1 |
| Q16696 | Endoplasmic reticulum membrane; Periphe | 1 |
| Q2M3W8 | Nucleus {ECO:0000305}.                  | 0 |
| Q9NTI7 | Nucleus {ECO:0000269 PubMed:26607847}.  | 0 |
| P15621 | Nucleus {ECO:0000305}.                  | 1 |
| 043292 | Endoplasmic reticulum membrane {ECO:000 | 0 |
| Q86TH1 | Secreted {ECO:0000305}.                 | 0 |
| Q96EQ0 |                                         | 0 |
| Q6PG37 | Nucleus {ECO:0000305}.                  | 0 |
| Q9HQ00 |                                         | 0 |
| 000159 | Isoform 1: Cytoplasm {ECO:0000269 PubMe | 0 |
| Q8NGQ3 | Cell membrane; Multi-pass membrane prot | 0 |
| 075795 | Microsome membrane {ECO:0000305}; Singl | 1 |
| Q96S37 | Cell membrane {ECO:0000269 PubMed:12024 | 1 |
| Q9NQT8 | Cytoplasm, cytoskeleton {ECO:0000269 Pu | 1 |
| Q86VF7 | Note=Localized at the myotendinous junc | 0 |
| P11766 | Cytoplasm {ECO:0000305}.                | 0 |
| Q4U2R8 | Cell membrane {ECO:0000305}; Multi-pass | 0 |
| 060814 | Nucleus. Chromosome.                    | 1 |
| Q15561 | Nucleus.                                | 0 |
| Q86YZ3 | Cytoplasmic granule {ECO:0000269 PubMec | 0 |
| P01562 | Secreted.                               | 0 |
| Q5TA89 | Nucleus {ECO:0000255 PROSITE-ProRule:PF | 1 |
| Q86XU0 | Nucleus {ECO:0000305}.                  | 0 |
| Q96HE7 | Endoplasmic reticulum membrane {ECO:000 | 1 |
| Q5JNZ3 | Nucleus {ECO:0000305}.                  | 0 |
| Q96SE7 | Nucleus {ECO:0000305}.                  | 0 |

|        |                                          |   |
|--------|------------------------------------------|---|
| P16885 |                                          | 0 |
| Q86WN1 | Cytoplasm {ECO:0000250 UniProtKB:Q6PFY1} | 0 |
| Q9NQZ8 | Nucleus {ECO:0000305}.                   | 0 |
| P06703 | Nucleus envelope. Cytoplasm. Cell membr  | 0 |
| P30050 |                                          | 0 |
| P58317 | Nucleus {ECO:0000305}.                   | 0 |
| 095297 | Membrane {ECO:0000305}; Single-pass typ  | 0 |
| Q96RL7 |                                          | 0 |
| P02686 | Myelin membrane; Peripheral membrane pr  | 0 |
| Q02040 | Nucleus speckle {ECO:0000269 PubMed:169  | 1 |
| Q6ZMV7 |                                          | 0 |
| Q76FK4 | Nucleus, nucleolus {ECO:0000269 PubMed:  | 0 |
| Q9NWZ3 | Cytoplasm {ECO:0000269 PubMed:21325272}  | 0 |
| A5D8V7 | Cell projection, cilium {ECO:0000250 Ur  | 0 |
| Q9PIA6 | Cell membrane {ECO:0000250}; Peripheral  | 0 |
| Q9Y6G3 | Mitochondrion {ECO:0000269 PubMed:11279  | 0 |
| Q9NQZ7 | Cytoplasmic vesicle membrane {ECO:00003  | 0 |
| Q9NS26 | Cytoplasm {ECO:0000269 PubMed:10906052}  | 0 |
| P0DPH7 | Cytoplasm, cytoskeleton.                 | 0 |
| P62701 | Cytoplasm {ECO:0000269 PubMed:17289661}  | 1 |
| P51523 | Nucleus {ECO:0000305}.                   | 0 |
| Q9BXY0 | Nucleus, nucleolus {ECO:0000269 PubMed:  | 0 |
| Q5HYK9 | Nucleus {ECO:0000305}.                   | 0 |
| P47901 | Cell membrane; Multi-pass membrane prot  | 1 |
| P78324 | Membrane; Single-pass type I membrane p  | 0 |
| P43250 | Membrane; Lipid-anchor.                  | 0 |
| P49642 |                                          | 0 |
| A6NJU9 | Membrane {ECO:0000255}; Single-pass men  | 0 |
| 060218 | Lysosome {ECO:0000269 PubMed:21585341}.  | 0 |
| P20853 | Endoplasmic reticulum membrane; Periphe  | 1 |
| 043829 | Nucleus {ECO:0000269 PubMed:15629158}.   | 0 |
| Q9Y5K6 | Cytoplasm, cytoskeleton {ECO:0000269 Pt  | 0 |
| Q9H1M0 |                                          | 0 |
| Q6ZWK6 | Membrane {ECO:0000305}; Single-pass typ  | 0 |
| Q9BS31 | Nucleus {ECO:0000269 PubMed:15950191}.   | 0 |
| P08319 | Cytoplasm.                               | 0 |
| Q8NDW4 | Nucleus {ECO:0000305}.                   | 0 |
| Q70JA7 | Golgi apparatus, Golgi stack membrane    | 0 |
| Q9NXH8 | Membrane {ECO:0000305}; Single-pass men  | 0 |
| P02144 |                                          | 0 |
| Q8IZN7 | Secreted.                                | 0 |
| Q6NVY1 | Mitochondrion {ECO:0000250}.             | 1 |
| Q6NX49 | Nucleus {ECO:0000305}.                   | 0 |
| Q8NBD8 | Membrane {ECO:0000305}; Multi-pass memt  | 0 |
| Q53LP3 |                                          | 0 |
| Q6IQ21 | Nucleus {ECO:0000305}.                   | 0 |
| E9PJ23 |                                          | 0 |
| P82970 | Nucleus {ECO:0000269 PubMed:11161810}.   | 0 |
| Q8N108 | Isoform 1: Nucleus.; Isoform 2: Nucleus  | 1 |
| 060476 | Golgi apparatus membrane; Single-pass t  | 1 |
| Q8NHG7 | Smooth endoplasmic reticulum membrane    | 0 |
| Q9BRH9 | Nucleus {ECO:0000305}.                   | 0 |
| Q96HY6 | Endoplasmic reticulum {ECO:0000269 PubM  | 0 |
| Q14186 | Nucleus {ECO:0000250 UniProtKB:Q08639}.  | 0 |
| Q8WTT0 | Cell membrane {ECO:0000269 PubMed:11748  | 0 |

|        |                                         |   |
|--------|-----------------------------------------|---|
| Q96SK3 | Nucleus {ECO:0000305}.                  | 0 |
| Q9NP55 | Secreted {ECO:0000269 PubMed:11425234,  | 0 |
| Q9HCZ1 | Nucleus {ECO:0000305}.                  | 0 |
| Q8NBQ5 | Endoplasmic reticulum {ECO:0000250 UniF | 1 |
| Q5T011 | Lysosome membrane {ECO:0000269 PubMed:2 | 0 |
| 000338 | Cytoplasm.                              | 0 |
| P98168 | Nucleus {ECO:0000305}.                  | 0 |
| Q9Y6S9 |                                         | 0 |
|        | be performed. View primary data.        | 0 |
| Q2TAL8 |                                         | 0 |
| P15509 | Cell membrane; Single-pass type I membr | 0 |
|        |                                         | 0 |
| Q86XP3 | Cytoplasm. Nucleus speckle. Nucleus, Ca | 0 |
| P62750 |                                         | 0 |
| Q9BZD2 | Membrane; Multi-pass membrane protein.  | 0 |
| Q8WUJ0 | Nucleus {ECO:0000269 PubMed:23847209, F | 0 |
| P42694 | Nucleus {ECO:0000305}.                  | 0 |
| Q8NCL8 | Membrane {ECO:0000305}; Multi-pass mem  | 0 |
| Q9NWZ5 | Cytoplasm {ECO:0000269 PubMed:12199906} | 0 |
| Q9BXL7 | Cytoplasm {ECO:0000269 PubMed:17287217} | 0 |
| Q8NCK3 | Nucleus {ECO:0000305}.                  | 0 |
| Q9GZU2 | Nucleus {ECO:0000255 PROSITE-ProRule:PF | 0 |
| Q9NVU7 | Nucleus, nucleolus {ECO:0000269 PubMed: | 0 |
| Q15776 | Nucleus {ECO:0000255 PROSITE-ProRule:PF | 0 |
| Q96M11 | Cytoplasm {ECO:0000269 PubMed:15843405} | 0 |
| P12829 |                                         | 0 |
| Q9H7R0 | Nucleus {ECO:0000305}.                  | 0 |
| Q6ZN06 | Nucleus {ECO:0000305}.                  | 0 |
| Q5VW00 |                                         | 0 |
| 043681 | Cytoplasm. Endoplasmic reticulum. Nucle | 0 |
| Q12797 | Isoform 1: Endoplasmic reticulum membra | 0 |
| Q7Z698 | Cell membrane {ECO:0000250 UniProtKB:Q9 | 0 |
| Q9P2Y5 | Late endosome {ECO:0000269 PubMed:18843 | 0 |
| P17031 | Nucleus {ECO:0000305}.                  | 0 |
| Q6UWW9 | Membrane {ECO:0000305}; Single-pass ty  | 0 |
| Q9NZM3 | Cytoplasm.                              | 0 |
| P04629 | Cell membrane {ECO:0000269 PubMed:12814 | 0 |
| 060502 | Isoform 3: Nucleus {ECO:0000269 PubMed: | 0 |
| Q9Y4C2 | Cell membrane {ECO:0000269 PubMed:25559 | 0 |
| Q9UC07 | Nucleus {ECO:0000305}.                  | 0 |
| Q16881 | Cytoplasm {ECO:0000250}.; Isoform 4: Cy | 0 |
| Q7Z6K4 |                                         | 0 |
| Q96ND8 | Nucleus {ECO:0000305}.                  | 0 |
| Q3ZCX4 | Nucleus {ECO:0000250 UniProtKB:E9PYI1}. | 0 |
| P98169 | Nucleus {ECO:0000305}.                  | 0 |
| Q8WV37 | Nucleus {ECO:0000269 PubMed:15219843}.  | 0 |
| Q96SQ5 | Nucleus {ECO:0000305}.                  | 0 |
| P07951 | Cytoplasm, cytoskeleton {ECO:0000250 Ur | 0 |
| Q9UJC5 | Nucleus {ECO:0000269 PubMed:12095696}.  | 0 |
| Q8N283 |                                         | 0 |
| Q6ZMBO | Golgi apparatus membrane {ECO:0000269 F | 1 |
| Q9Y5A9 | Cytoplasm, cytosol {ECO:0000269 PubMed: | 0 |
| Q96EY4 |                                         | 0 |
| Q30154 | Cell membrane {ECO:0000269 PubMed:18305 | 0 |
| Q8WXF7 | Endoplasmic reticulum membrane {ECO:000 | 0 |

|        |                                            |   |
|--------|--------------------------------------------|---|
| 060675 | Nucleus.                                   | 0 |
| Q6PIY5 |                                            | 0 |
| P17038 | Nucleus {ECO:0000305}.                     | 0 |
| Q9HCN4 | Cytoplasm {ECO:0000269 PubMed:11058119,    | 0 |
| P26678 | Endoplasmic reticulum membrane {ECO:000    | 0 |
| Q8NB15 | Nucleus {ECO:0000305}.                     | 0 |
| Q7L945 | Nucleus {ECO:0000305}.                     | 0 |
| 075717 | Nucleus, nucleoplasm {ECO:0000250}.        | 1 |
| Q5FWF6 | Nucleus {ECO:0000305}.                     | 0 |
| 060716 | Cytoplasm {ECO:0000269 PubMed:15240885,    | 0 |
| Q13838 | Nucleus. Nucleus speckle. Cytoplasm. Nucle | 0 |
| Q8N130 | Membrane; Multi-pass membrane protein.     | 1 |
| Q7Z3Z2 |                                            | 0 |
| Q9NY87 | Cytoplasm {ECO:0000269 PubMed:10626816}    | 0 |
| O14796 |                                            | 0 |
| Q96DE0 | Nucleus {ECO:0000269 PubMed:20385596, F    | 0 |
| Q9UKI8 | Nucleus {ECO:0000269 PubMed:10523312, F    | 0 |
| P50851 | Cell membrane {ECO:0000305}; Single-pass   | 0 |
| Q9NRL2 | Nucleus. Note=May target the CHRAC comp    | 1 |
| P17516 | Cytoplasm.                                 | 0 |
| Q99627 | Cytoplasm {ECO:0000269 PubMed:9535219}.    | 0 |
| A6NI79 | Cytoplasm, cytoskeleton, spindle {ECO:(    | 0 |
| O15151 | Nucleus.                                   | 0 |
| Q92736 | Sarcoplasmic reticulum membrane {ECO:00    | 0 |
| Q9P2J3 |                                            | 0 |
| Q96BQ1 | Secreted {ECO:0000305}.                    | 0 |
| Q14686 | Nucleus.                                   | 1 |
| Q9UEW8 | Cytoplasm {ECO:0000305}. Nucleus {ECO:(    | 1 |
| Q6UWU4 | Isoform 1: Golgi apparatus membrane {EC    | 0 |
| P0DP23 | Cytoplasm, cytoskeleton, spindle {ECO:(    | 0 |
| P08519 |                                            | 0 |
| Q6PGP7 | Cytoplasm {ECO:0000269 PubMed:16024656}    | 0 |
| Q2TAM9 |                                            | 0 |
| P43355 | Cytoplasm. Nucleus.                        | 1 |
| O95340 |                                            | 0 |
| Q92581 | Endosome membrane {ECO:0000269 PubMed:1    | 1 |
| P78363 | Membrane {ECO:0000269 PubMed:10075733};    | 0 |
| O14602 |                                            | 0 |
| O15078 | Cytoplasm, cytoskeleton, microtubule or    | 0 |
| P00403 | Mitochondrion inner membrane; Multi-pass   | 1 |
| Q8WWB7 | Lysosome membrane {ECO:0000269 PubMed:1    | 0 |
| Q9Y4F4 | Cell projection, cilium {ECO:0000250 Ur    | 0 |
| Q86YJ7 | Cell membrane {ECO:0000269 PubMed:22298    | 0 |
| 075521 | Isoform 1: Mitochondrion {ECO:0000250}.    | 1 |
| O14795 | Cytoplasm {ECO:0000250}. Membrane {ECO:    | 0 |
| P00156 | Mitochondrion inner membrane {ECO:00002    | 1 |
| Q86U70 | Nucleus {ECO:0000305}.                     | 0 |
| Q6PD62 | Nucleus speckle {ECO:0000250}. Note=Fou    | 1 |
| Q9H4F8 | Secreted, extracellular space, extracel    | 0 |
| Q9NZV6 | Cytoplasm {ECO:0000250 UniProtKB:Q9JLC3    | 0 |
| Q9Y2D9 | Nucleus {ECO:0000305}.                     | 0 |
| Q9HCE7 | Cytoplasm {ECO:0000269 PubMed:21572392}    | 0 |
| Q96I76 | Nucleus {ECO:0000269 PubMed:28397860}.     | 0 |
| Q9Y5S2 | Cytoplasm {ECO:0000250}. Cell membrane     | 0 |
| Q9ULL4 | Cell membrane {ECO:0000269 PubMed:15218    | 0 |

|                        |                                         |   |
|------------------------|-----------------------------------------|---|
| Q9BYC2                 | Mitochondrion {ECO:0000269 PubMed:11756 | 0 |
| P62906                 |                                         | 0 |
| Q8IYK4                 | Endoplasmic reticulum lumen {ECO:000026 | 0 |
| Q8TE67                 | Cytoplasm {ECO:0000269 PubMed:14565974} | 0 |
| Q8IUX8                 | Secreted, extracellular space, extracel | 0 |
| Q15431                 | Nucleus {ECO:0000250 UniProtKB:Q62209}. | 1 |
| Q8NCL9                 | Membrane {ECO:0000305}; Single-pass men | 0 |
| Q6JBY9                 |                                         | 0 |
| 075901                 | Endosome. Note=Accumulates on perinucle | 0 |
| Q9Y6X4                 | Nucleus envelope {ECO:0000269 PubMed:22 | 0 |
| Q96NB3                 | Nucleus {ECO:0000269 PubMed:25599396}.  | 1 |
| lls of the gastrointes | Secreted. Note=In the intestine, secret | 0 |
| Q9Y519                 | Membrane {ECO:0000305}; Multi-pass mem  | 0 |
| P42345                 | Endoplasmic reticulum membrane {ECO:000 | 0 |
| Q8TAC9                 | Cell membrane; Multi-pass membrane prot | 0 |
| Q96K83                 | Nucleus {ECO:0000250}.                  | 1 |
| Q86TB3                 |                                         | 0 |
| Q9C0B6                 | Secreted {ECO:0000305}.                 | 0 |
| 015480                 |                                         | 0 |
| 094898                 | Cell membrane {ECO:0000269 PubMed:15145 | 0 |
| P00395                 | Mitochondrion inner membrane; Multi-pas | 1 |
| P00491                 | Cytoplasm, cytoskeleton {ECO:0000250}.  | 1 |
| P55771                 | Nucleus.                                | 1 |
| P32189                 | Mitochondrion outer membrane; Periphera | 1 |
| Q9NW07                 | Nucleus {ECO:0000305}.                  | 0 |
| Q8WV19                 | Membrane {ECO:0000255}; Multi-pass mem  | 0 |
| P20963                 | Membrane; Single-pass type I membrane p | 0 |
| Q96JM3                 | Nucleus {ECO:0000269 PubMed:21063390}.  | 0 |
| Q6P4F7                 |                                         | 0 |
| Q9BXA5                 | Cell membrane {ECO:0000269 PubMed:15141 | 0 |
| P05204                 | Nucleus {ECO:0000269 PubMed:10739259}.  | 0 |
| Q8WWX9                 | Cytoplasm, perinuclear region {ECO:0000 | 0 |
| Q9Y385                 | Endoplasmic reticulum membrane {ECO:000 | 1 |
| 060313                 | Mitochondrion inner membrane {ECO:00002 | 1 |
| 075064                 | Golgi apparatus {ECO:0000269 PubMed:209 | 0 |
| Q9NRM2                 | Nucleus {ECO:0000305}.                  | 0 |
| P03897                 | Mitochondrion membrane {ECO:0000250}; M | 1 |
| Q96EK9                 |                                         | 0 |
| P62341                 | Endoplasmic reticulum membrane {ECO:000 | 0 |
| 094900                 | Nucleus {ECO:0000255 PROSITE-ProRule:PF | 1 |
| P23141                 | Endoplasmic reticulum lumen {ECO:000026 | 1 |
| P07766                 | Cell membrane {ECO:0000269 PubMed:10384 | 0 |
| Q8N2Y8                 | Cytoplasm, cytosol {ECO:0000269 PubMed: | 0 |
| Q9BVA6                 | Endoplasmic reticulum membrane {ECO:000 | 0 |
| Q96D70                 | Nucleus {ECO:0000305}.                  | 0 |
| Q8WW01                 | Nucleus {ECO:0000305}. Nucleus, nucleol | 0 |
| 094822                 |                                         | 0 |
| Q96C34                 |                                         | 0 |
| Q4G0S7                 |                                         | 0 |
| Q8NE28                 |                                         | 0 |
| P34947                 | Cytoplasm. Nucleus. Cell membrane; Peri | 0 |
| Q9NV66                 |                                         | 0 |
| Q5T6F0                 | Cytoplasm {ECO:0000269 PubMed:18957058} | 0 |
| Q5VUG0                 | Nucleus {ECO:0000269 PubMed:23385818}.  | 0 |
| Q8WXX4                 |                                         | 0 |



|        |                                         |   |
|--------|-----------------------------------------|---|
| Q96PV4 |                                         | 0 |
| P03905 | Mitochondrion membrane {ECO:0000250}; M | 0 |
| Q8IY18 | Nucleus {ECO:0000269 PubMed:11408570, F | 1 |
| P03886 | Mitochondrion inner membrane {ECO:00002 | 0 |
| Q5VU92 |                                         | 0 |
| Q96LA8 | Nucleus {ECO:0000269 PubMed:11724789}.  | 0 |
| Q96DD7 | Membrane {ECO:0000305}; Single-pass typ | 0 |
| P47755 |                                         | 0 |
| P11387 | Nucleus, nucleolus {ECO:0000269 PubMed: | 1 |
| O43663 | Nucleus {ECO:0000269 PubMed:17409436}.  | 1 |
| Q99759 |                                         | 0 |
| P32004 | Cell membrane {ECO:0000269 PubMed:12514 | 0 |
| Q12772 | Endoplasmic reticulum membrane; Multi-p | 0 |
| Q8IYL3 | Nucleus {ECO:0000269 PubMed:22361696}.  | 0 |
| P20264 | Nucleus.                                | 1 |
| Q8N9B8 |                                         | 0 |
| Q5T280 | Cytoplasm, cytoskeleton, spindle {ECO:( | 0 |
| P62891 |                                         | 0 |
| Q86Y13 | Cytoplasm {ECO:0000269 PubMed:12538761} | 0 |
| Q2KHM9 | Cytoplasm, cytoskeleton, microtubule or | 1 |
| Q6PJP8 | Nucleus {ECO:0000269 PubMed:10848582, F | 0 |
| Q7Z3C6 | Cytoplasmic vesicle, autophagosome memt | 0 |
| O75052 |                                         | 0 |
| P07741 | Cytoplasm.                              | 0 |
| Q5JY77 | Cytoplasm {ECO:0000269 PubMed:15452121} | 0 |
| A7MCY6 |                                         | 0 |
| Q9HCI5 | Cytoplasm, perinuclear region {ECO:0000 | 0 |
| Q9POB6 | Membrane {ECO:0000305}; Single-pass men | 0 |
| P00414 | Mitochondrion inner membrane {ECO:00002 | 0 |
| Q6ZN57 | Nucleus {ECO:0000305}.                  | 0 |
| Q2M3V2 |                                         | 0 |
| Q96JM7 | Nucleus {ECO:0000250}.                  | 0 |
| P11532 | Cell membrane, sarcolemma {ECO:0000250  | 0 |
| O75121 | Cell membrane {ECO:0000269 PubMed:2473  | 0 |
| P17050 | Lysosome.                               | 1 |
| Q96EK5 | Cytoplasm, cytoskeleton {ECO:0000269 Pt | 0 |
| P21980 |                                         | 0 |
| Q7LAS7 | Mitochondrion {ECO:0000250 UniProtKB:Q  | 0 |
| O43164 | Cytoplasm {ECO:0000269 PubMed:21423175} | 0 |
| Q92753 | Nucleus {ECO:0000255 PROSITE-ProRule:PF | 0 |
|        | Golgi apparatus membrane {ECO:0000269 F | 0 |
| Q8NGX6 | Cell membrane; Multi-pass membrane prot | 0 |
| Q8NGY1 | Cell membrane; Multi-pass membrane prot | 0 |
| Q27J81 | Cytoplasm, perinuclear region {ECO:0000 | 0 |
| Q5VUJ9 | Cytoplasm, cytoskeleton, flagellum axor | 0 |
| Q5RI15 | Mitochondrion inner membrane {ECO:00002 | 0 |
| P26374 | Cytoplasm, cytosol {ECO:0000269 PubMed: | 0 |
| Q12799 |                                         | 0 |
| Q17R31 | Nucleus {ECO:0000305}.                  | 0 |
| P17927 | Membrane {ECO:0000269 PubMed:1385479};  | 0 |
| Q5TGI4 | Cytoplasm {ECO:0000269 PubMed:28388653} | 0 |
| A6NN92 | Cell membrane {ECO:0000305}; Multi-pass | 0 |
| Q008S8 |                                         | 0 |
| Q5VVY1 | Nucleus {ECO:0000269 PubMed:24090352}.  | 0 |
| P08637 | Cell membrane {ECO:0000305}; Single-pas | 0 |

|        |                                         |   |
|--------|-----------------------------------------|---|
| Q8NGY3 | Cell membrane; Multi-pass membrane prot | 0 |
| P23490 | Cytoplasm. Nucleus, nucleoplasm.        | 1 |
| Q5T870 |                                         | 0 |
| Q5T871 |                                         | 0 |
| Q5T749 | Cytoplasm {ECO:0000250}.                | 1 |
| Q5JPI9 | Cytoplasm {ECO:0000255 HAMAP-Rule:MF_03 | 0 |
| A6NFZ4 | Secreted {ECO:0000305}.                 | 0 |
| Q99489 | Peroxisome.                             | 1 |
| Q5VZY2 | Membrane {ECO:0000305}; Multi-pass mem  | 0 |
| Q71DI3 | Nucleus. Chromosome.                    | 0 |
| Q6FI13 | Nucleus. Chromosome.                    | 1 |
| Q5QNW6 | Nucleus. Chromosome.                    | 1 |
|        |                                         | 0 |
| Q17RR3 | Secreted {ECO:0000305}.                 | 0 |
| Q71DI3 | Nucleus. Chromosome.                    | 0 |
| P14060 | Endoplasmic reticulum membrane; Single- | 1 |
| P26439 | Endoplasmic reticulum membrane; Single- | 1 |
| Q5T481 | Nucleus {ECO:0000255 PROSITE-ProRule:PF | 0 |
| A6NGZ8 | Cell membrane {ECO:0000305}; Single-pas | 0 |
| Q5TEZ5 |                                         | 0 |
| Q5TAB7 | Nucleus {ECO:0000250 UniProtKB:Q2WG80}. | 0 |
| P31150 | Cytoplasm {ECO:0000269 PubMed:19570034} | 1 |
| Q9NV79 | Cytoplasm {ECO:0000250}.                | 0 |
| Q9H400 | Cell membrane {ECO:0000269 PubMed:14610 | 0 |
| A6NGQ2 | Cytoplasm {ECO:0000250}. Note=In the su | 0 |
| Q587J8 |                                         | 0 |
| A6NC42 | Cytoplasm {ECO:0000250}.                | 0 |
| Q9NS26 | Cytoplasm {ECO:0000269 PubMed:10906052} | 0 |
| Q5T681 |                                         | 0 |
| Q5VXD3 |                                         | 0 |
| A6NGH7 |                                         | 0 |
| A8K855 | Cell projection, cilium membrane {ECO:( | 0 |
| Q5SZD4 |                                         | 0 |
| Q5T700 | Membrane {ECO:0000305}; Single-pass men | 0 |
| POC7M4 | Nucleus {ECO:0000255 PROSITE-ProRule:PF | 0 |
| Q6WRX3 |                                         | 0 |
| Q7Z4J2 | Membrane {ECO:0000305}; Single-pass typ | 0 |
| Q5T764 |                                         | 0 |
| Q5W064 |                                         | 0 |
| A6NDA9 | Membrane; Single-pass type I membrane p | 0 |
| Q5JTD7 |                                         | 0 |
| Q5H9L2 | Nucleus {ECO:0000305}.                  | 0 |
| Q8N2H4 | Golgi apparatus membrane {ECO:0000269 F | 0 |
| Q6IPX3 | Nucleus {ECO:0000305}.                  | 0 |
| P32019 | Cytoplasm, cytosol {ECO:0000269 PubMed: | 0 |
| Q13156 | Nucleus {ECO:0000269 PubMed:19942684}.  | 0 |
| Q8WWR8 | Isoform 1: Membrane; Peripheral membrar | 1 |
| Q9Y5Q3 | Nucleus {ECO:0000255 PROSITE-ProRule:PF | 0 |
| Q8TDR0 | Cytoplasm, cytoskeleton {ECO:0000269 Pu | 0 |
| Q5VXU3 | Cell membrane {ECO:0000250}. Cytoplasm  | 0 |
| Q6Y7W6 |                                         | 0 |
| A6NCS6 |                                         | 0 |
| Q8WXA3 | Nucleus {ECO:0000250}.                  | 0 |
| Q5HYW2 |                                         | 0 |
| Q8IZ21 | Cytoplasm {ECO:0000250}. Cell projectic | 0 |

|        |                                         |   |
|--------|-----------------------------------------|---|
| A2RUU4 | Secreted {ECO:0000255 PROSITE-ProRule:F | 0 |
| P0C7U1 |                                         | 0 |
| Q5VW22 |                                         | 0 |
| Q9NUE0 | Membrane {ECO:0000305}; Multi-pass mem  | 0 |
| Q5T292 | Membrane; Single-pass type I membrane p | 0 |
| A6NEN9 |                                         | 0 |
| Q5VTM2 |                                         | 0 |
| P50391 | Cell membrane {ECO:0000305 PubMed:75929 | 0 |
| O60269 |                                         | 0 |
| Q9BQS2 | Isoform 1: Cell membrane {ECO:0000250}; | 0 |
| Q4JDL3 | Nucleus {ECO:0000269 PubMed:15790311}.  | 0 |
| Q5U4N7 | Mitochondrion {ECO:0000305}.            | 0 |
| Q9HCK1 |                                         | 0 |
| Q58HT5 | Endoplasmic reticulum membrane {ECO:000 | 1 |
| Q9UER7 | Cytoplasm {ECO:0000269 PubMed:11495919, | 0 |
| Q13873 | Cell membrane {ECO:0000269 PubMed:25187 | 0 |
| 075764 | Nucleus {ECO:0000255 PROSITE-ProRule:PF | 0 |
| 015212 |                                         | 0 |
| Q06587 | Nucleus {ECO:0000269 PubMed:21282530}.  | 0 |
| Q92506 | Mitochondrion matrix {ECO:0000269 PubMe | 1 |
| P28702 | Nucleus {ECO:0000269 PubMed:1310259, EC | 0 |
| Q5BKU9 |                                         | 0 |
| Q8NGS6 | Cell membrane; Multi-pass membrane prot | 0 |
| P06340 | Endosome membrane; Single-pass type I m | 1 |
| P25440 | Nucleus {ECO:0000305}. Note=Detected or | 0 |
| P28067 | Late endosome membrane; Single-pass typ | 1 |
| P28062 | Cytoplasm {ECO:0000255 PROSITE-ProRule: | 1 |
| Q03519 | Endoplasmic reticulum membrane; Multi-p | 0 |
| Q5JUX0 |                                         | 0 |
| A6NFC5 | Membrane {ECO:0000305}; Multi-pass mem  | 0 |
| Q5JUK9 |                                         | 0 |
| P01903 | Cell membrane; Single-pass type I mem   | 0 |
| P39059 | Secreted, extracellular space, extracel | 0 |
| P40425 | Nucleus {ECO:0000305}.                  | 1 |
| Q15109 | Isoform 1: Cell membrane; Single-pass t | 0 |
| Q99942 | Membrane; Multi-pass membrane protein.  | 0 |
| Q99943 | Endoplasmic reticulum membrane {ECO:000 | 0 |
| Q99946 | Cell membrane {ECO:0000250}; Multi-pass | 0 |
| Q9UIM3 |                                         | 0 |
| Q96DV4 | Mitochondrion {ECO:0000269 PubMed:25278 | 0 |
| Q71RC9 | Membrane {ECO:0000305}; Single-pass mem | 0 |
| P49842 | Nucleus {ECO:0000269 PubMed:9812991}.   | 0 |
| Q6UXZ3 | Cell membrane {ECO:0000269 PubMed:22291 | 0 |
| A6NE02 | Secreted {ECO:0000305}.                 | 0 |
| 077932 | Nucleus {ECO:0000269 PubMed:21750099}.  | 0 |
| Q15477 | Nucleus {ECO:0000305}. Cytoplasm {ECO:( | 0 |
| P18615 | Nucleus.                                | 1 |
| Q96DL1 | Membrane {ECO:0000305}; Single-pass mem | 0 |
| Q9Y330 | Nucleus {ECO:0000305}.                  | 0 |
| 014521 | Mitochondrion inner membrane; Multi-pas | 0 |
| Q96KQ7 | Nucleus {ECO:0000269 PubMed:11316813}.  | 1 |
| Q6UX15 | Membrane {ECO:0000305}; Single-pass typ | 0 |
| Q53GD3 | Membrane {ECO:0000269 PubMed:24379411,  | 1 |
| Q99519 | Lysosome membrane; Peripheral membrane  | 0 |
| PODMV9 | Cytoplasm {ECO:0000269 PubMed:17289661} | 0 |

|        |                                         |   |
|--------|-----------------------------------------|---|
| P0DMV8 | Cytoplasm {ECO:0000269 PubMed:17289661} | 1 |
| P34931 |                                         | 0 |
| Q9Y333 | Nucleus {ECO:0000269 PubMed:10523320, F | 1 |
| P26640 |                                         | 0 |
| Q9Y334 | Secreted {ECO:0000305}.                 | 0 |
| Q5EG05 |                                         | 0 |
| Q14406 | Secreted {ECO:0000269 PubMed:8083227}.  | 0 |
| Q5SQ64 | Cell membrane {ECO:0000269 PubMed:12852 | 0 |
| 095870 | Membrane {ECO:0000250 UniProtKB:Q9Z1Q2} | 0 |
| Q5SRR4 | Secreted {ECO:0000305}.                 | 0 |
| P67870 |                                         | 0 |
| 095872 |                                         | 0 |
| 095873 |                                         | 0 |
| B1AL88 | Membrane {ECO:0000305}; Multi-pass mem  | 0 |
| 095445 | Secreted {ECO:0000269 PubMed:17525477,  | 0 |
| A6NGJ6 |                                         | 0 |
| P46379 | Cytoplasm, cytosol {ECO:0000269 PubMed: | 0 |
| P48634 | Cytoplasm {ECO:0000269 PubMed:15752841} | 0 |
| P55008 | Cytoplasm, cytoskeleton {ECO:0000250 Ur | 0 |
| Q5SWL8 |                                         | 0 |
| Q5VXH5 |                                         | 0 |
| B7Z6K7 |                                         | 0 |
| Q5CZA5 | Nucleus {ECO:0000305}.                  | 0 |
| Q01860 | Cytoplasm. Nucleus. Note=Expressed in a | 0 |
| A6NGD5 | Nucleus {ECO:0000255 PROSITE-ProRule:PF | 0 |
| Q9UIG4 | Secreted {ECO:0000305}.                 | 0 |
|        | Secreted. Note=Found in corneodesmosome | 0 |
| Q6UXA7 | Secreted, extracellular space, extracel | 0 |
| Q5SSG8 | Cell membrane {ECO:0000269 PubMed:17977 | 1 |
| 060231 | Nucleus {ECO:0000269 PubMed:20423332, F | 1 |
| Q5SQH8 |                                         | 0 |
| Q9Y676 | Mitochondrion {ECO:0000269 PubMed:25838 | 1 |
| Q96QC0 | Nucleus {ECO:0000255 PROSITE-ProRule:PF | 1 |
| Q8NE71 | Isoform 2: Cytoplasm {ECO:0000269 PubMe | 0 |
| Q08345 | Isoform 1: Cell membrane; Single-pass t | 0 |
| P36915 |                                         | 0 |
|        | Cell membrane {ECO:0000269 PubMed:17179 | 0 |
| A6NFQ7 | Nucleus {ECO:0000255 PROSITE-ProRule:PF | 0 |
| Q9HCM9 | Cytoplasm, cytosol {ECO:0000269 PubMed: | 0 |
| Q5VIY5 | Nucleus {ECO:0000305}.                  | 0 |
| Q9C019 |                                         | 0 |
| Q08AN1 | Nucleus {ECO:0000305}.                  | 0 |
| Q5VYV0 | Nucleus {ECO:0000305}.                  | 0 |
| Q9UDY6 | Cytoplasm {ECO:0000269 PubMed:11331580} | 0 |
| Q6P9F5 |                                         | 0 |
| Q9BZY9 | Cytoplasm {ECO:0000269 PubMed:18773414} | 0 |
| Q9H2S5 | Cytoplasm {ECO:0000250}.                | 0 |
| 060927 |                                         | 0 |
| Q9P2K9 | Endoplasmic reticulum membrane {ECO:000 | 0 |
| P63244 | Cell membrane {ECO:0000269 PubMed:11312 | 0 |
| P17693 | Isoform 1: Cell membrane {ECO:0000269 F | 0 |
| 095759 |                                         | 0 |
| Q9NU63 | Nucleus {ECO:0000250}. Note=Binds varic | 0 |
| A6ND91 |                                         | 0 |
| Q16653 | Isoform 1: Cell membrane {ECO:0000305}; | 0 |

|        |                                         |   |
|--------|-----------------------------------------|---|
| A6NI87 |                                         | 0 |
| A6NFR6 | Membrane {ECO:0000305}; Single-pass mem | 0 |
| Q6EBC2 | Secreted {ECO:0000305}.                 | 0 |
| Q96B36 | Cytoplasm, cytosol {ECO:0000250}. Note= | 0 |
| Q494X1 |                                         | 0 |
| Q9UBS5 | Cell membrane {ECO:0000269 PubMed:15617 | 0 |
| Q5T4H9 |                                         | 0 |
| Q5VZT2 |                                         | 0 |
| P35410 | Cell membrane; Multi-pass membrane prot | 0 |
| Q5MJ68 | Cytoplasm {ECO:0000269 PubMed:20605920} | 0 |
| Q5VTT2 | Cell membrane {ECO:0000269 PubMed:28345 | 0 |
| P14373 | Nucleus {ECO:0000269 PubMed:17156811}.  | 0 |
| Q5VYJ5 | Cytoplasmic vesicle membrane {ECO:00002 | 0 |
| Q9H2T7 | Cytoplasm {ECO:0000250}. Nucleus {ECO:( | 0 |
| A6NMK8 |                                         | 0 |
| Q5VV16 | Nucleus {ECO:0000255 PROSITE-ProRule:PF | 0 |
| Q96NG3 | Cytoplasm, cytoskeleton, cilium axoneme | 1 |
| Q96EL3 | Mitochondrion {ECO:0000269 PubMed:25278 | 0 |
| A6NGR9 |                                         | 0 |
| Q99700 | Cytoplasm {ECO:0000250}.                | 1 |
| Q14203 | Cytoplasm {ECO:0000269 PubMed:17828277} | 0 |
| Q9ULN7 |                                         | 0 |
| Q2MV58 | Cytoplasm, cytoskeleton, cilium basal b | 0 |
| Q8WUB2 |                                         | 0 |
| P10074 | Nucleus {ECO:0000305}. Chromosome, telc | 0 |
| Q6UWQ7 | Secreted {ECO:0000305}.                 | 0 |
| Q6B9Z1 | Secreted {ECO:0000305}.                 | 0 |
| Q6A162 |                                         | 0 |
| Q7Z3Z0 | Cytoplasm {ECO:0000250 UniProtKB:Q8VCW2 | 0 |
| Q08AG7 | Cytoplasm, cytoskeleton, microtubule or | 0 |
| Q5DT21 | Secreted {ECO:0000305}.                 | 0 |
| A6NJW4 | Membrane {ECO:0000305}; Single-pass mem | 0 |
| P86481 |                                         | 0 |
| P86496 |                                         | 0 |
| Q12901 | Nucleus {ECO:0000305}.                  | 0 |
| Q6UW78 | Mitochondrion inner membrane {ECO:00002 | 0 |
| Q5FWF7 |                                         | 0 |
| A6NFK2 | Cell projection, stereocilium {ECO:0000 | 0 |
| A6H8Z2 |                                         | 0 |
|        | Cell membrane {ECO:0000269 PubMed:12239 | 0 |
| Q15238 | Secreted {ECO:0000305}.                 | 0 |
| Q6ZMS7 | Nucleus {ECO:0000305}.                  | 0 |
| Q6IV72 | Nucleus {ECO:0000269 PubMed:21266108}.  | 0 |
| A6NIK2 |                                         | 0 |
| Q5MNV8 |                                         | 0 |
| Q69YU5 | Secreted {ECO:0000305}.                 | 0 |
| Q9Y5H4 | Cell membrane {ECO:0000250}; Single-pas | 0 |
| Q9Y5H6 | Cell membrane {ECO:0000250}; Single-pas | 0 |
| Q9Y5H7 | Cell membrane {ECO:0000250}; Single-pas | 0 |
| Q9UN74 | Cell membrane {ECO:0000250 UniProtKB:O8 | 0 |
| Q9Y5H9 | Cell membrane {ECO:0000250}; Single-pas | 0 |
| Q9Y5I3 | Isoform 1: Cell membrane {ECO:0000250}; | 0 |
| O60858 | Endoplasmic reticulum membrane {ECO:000 | 1 |
| A6NGS2 |                                         | 0 |
| Q5J8X5 | Membrane {ECO:0000305}; Multi-pass mem  | 0 |

|        |                                          |   |
|--------|------------------------------------------|---|
| P07477 | Secreted, extracellular space.           | 0 |
| Q8WWL2 | Cytoplasm, cytoskeleton {ECO:0000250 Uni | 0 |
| A6NDY0 | Cytoplasm {ECO:0000250}.                 | 0 |
| Q8NGK9 | Cell membrane; Multi-pass membrane prot  | 0 |
| Q8NGL0 | Cell membrane; Multi-pass membrane prot  | 0 |
| Q86WI1 | Membrane {ECO:0000305}; Single-pass men  | 0 |
| Q6IEE8 | Membrane; Single-pass membrane protein.  | 0 |
| Q969S0 | Golgi apparatus membrane {ECO:0000269 F  | 0 |
| P47929 | Cytoplasm {ECO:0000269 PubMed:11706006}  | 0 |
| Q9H6L2 | Cell projection, cilium membrane {ECO:(  | 0 |
| Q6NXP2 |                                          | 0 |
| Q6ZV80 |                                          | 0 |
| Q6ZMN8 |                                          | 0 |
| Q5SV17 | Cell junction, synapse {ECO:0000250 Uni  | 1 |
| Q64ET8 | Nucleus {ECO:0000269 PubMed:15520407}.   | 0 |
| Q6ZU69 | Membrane {ECO:0000305}; Single-pass men  | 0 |
| Q5MAI5 | Cytoplasm {ECO:0000305}.                 | 0 |
| A6NKF7 | Membrane {ECO:0000305}; Multi-pass mem   | 0 |
| A7E2U8 | Cytoplasm, cytoskeleton, microtubule or  | 0 |
| Q9NZ42 | Endoplasmic reticulum membrane {ECO:00   | 0 |
| Q3C1V1 |                                          | 0 |
| Q0Z7S8 | Cytoplasm {ECO:0000305}.                 | 0 |
| Q96DT7 | Nucleus {ECO:0000305}.                   | 1 |
| Q504U0 | Cytoplasm {ECO:0000269 PubMed:25059753}  | 0 |
| Q4G0G5 | Secreted {ECO:0000305}.                  | 0 |
| Q6NUI1 |                                          | 0 |
| Q9BXB1 | Cell membrane {ECO:0000269 PubMed:21693  | 0 |
| P40306 | Cytoplasm {ECO:0000255 PROSITE-ProRule:  | 0 |
| Q495Y8 |                                          | 0 |
| Q13946 | Isoform PDE7A1: Cytoplasm, cytosol. Not  | 0 |
| Q5T4T1 | Cell membrane {ECO:0000269 PubMed:29367  | 0 |
| Q9UKN1 | Membrane {ECO:0000305}; Single-pass typ  | 0 |
| A6NG13 | Golgi apparatus membrane {ECO:0000250 U  | 0 |
| 060749 | Early endosome membrane {ECO:0000269 Pu  | 0 |
| Q9NPB1 | Mitochondrion {ECO:0000269 PubMed:10899  | 0 |
| P82979 | Nucleus. Nucleus speckle.                | 1 |
| Q9Y653 | Cell membrane {ECO:0000269 PubMed:21349  | 0 |
| 095373 | Cytoplasm. Nucleus.                      | 0 |
| Q9NZ81 | Nucleus {ECO:0000269 PubMed:16847352}.   | 0 |
| Q7Z6L1 | Cytoplasmic vesicle, autophagosome mem   | 0 |
| Q86UG4 | Cell membrane; Multi-pass membrane prot  | 1 |
| P04731 |                                          | 0 |
| Q2T9L4 | Cell junction, synapse, postsynaptic ce  | 0 |
| P05156 | Secreted, extracellular space. Secreted  | 0 |
| Q5K651 | Cytoplasm {ECO:0000269 PubMed:16960814,  | 0 |
| P02538 |                                          | 0 |
| Q8N9A8 | Nucleus membrane {ECO:0000269 PubMed:22  | 0 |
| Q14533 |                                          | 0 |
| Q17RC7 |                                          | 0 |
| Q52LC2 | Membrane {ECO:0000305}; Single-pass men  | 0 |
| A6NKD9 | Cell junction, tight junction {ECO:0000  | 0 |
| A6NLJ0 | Nucleus {ECO:0000269 PubMed:15527968}.   | 0 |
| Q3MIN7 |                                          | 0 |
| Q99733 | Nucleus {ECO:0000269 PubMed:10764593, F  | 0 |
| P62328 | Cytoplasm, cytoskeleton.                 | 0 |

|        |                                          |   |
|--------|------------------------------------------|---|
| Q92523 | Mitochondrion outer membrane; Multi-pass | 0 |
| Q16637 | Nucleus, gem {ECO:0000269 PubMed:112836} | 0 |
| P05114 | Nucleus. Cytoplasm. Note=Cytoplasmic er  | 0 |
| Q8NEG7 | Recycling endosome {ECO:0000305}. Cyto   | 0 |
| B5ME19 | Cytoplasm {ECO:0000250 UniProtKB:Q99616} | 1 |
| Q9UIC8 |                                          | 0 |
| A6NFX1 | Cell membrane {ECO:0000269 PubMed:29045} | 0 |
| Q9H321 |                                          | 0 |
| Q6NVV7 |                                          | 0 |
| P15516 | Secreted {ECO:0000269 PubMed:14966203}.  | 0 |
| Q52LA3 |                                          | 0 |
| Q3I5F7 | Cytoplasm {ECO:0000269 PubMed:16940157}  | 0 |
| P58511 | Membrane {ECO:0000305}; Single-pass mem  | 0 |
| Q92784 | Nucleus {ECO:0000305}.                   | 1 |
| A6NHS7 | Membrane {ECO:0000305}; Single-pass typ  | 0 |
| Q6IPR1 | Mitochondrion {ECO:0000269 PubMed:27499} | 0 |
| Q6ZR85 |                                          | 0 |
| A6NDZ8 |                                          | 0 |
| Q15811 | Endomembrane system {ECO:0000269 PubMed  | 0 |
| Q8IV53 | Cytoplasm, cytosol {ECO:0000269 PubMed:  | 1 |
| G3VOH7 | Cell membrane {ECO:0000305}; Multi-pass  | 0 |
| O95825 |                                          | 0 |
| A6NDU8 |                                          | 0 |
| Q13065 |                                          | 0 |
| Q8IY26 | Membrane {ECO:0000305}; Multi-pass memt  | 0 |
| Q07444 | Membrane; Single-pass type II membrane   | 0 |
| A6NCL1 | Nucleus {ECO:0000250}. Note=Associates   | 0 |
| Q6PF05 | Cytoplasm, cytoskeleton, microtubule or  | 0 |
| Q6IC83 |                                          | 0 |
| Q7Z5D8 | Nucleus {ECO:0000255 PROSITE-ProRule:PF  | 0 |
| A6NJI9 |                                          | 0 |
| B2RNN3 | Secreted {ECO:0000269 PubMed:19666007}.  | 0 |
| Q30KP8 | Secreted {ECO:0000305}.                  | 0 |
| Q86SG3 | Cytoplasm {ECO:0000269 PubMed:11058556}  | 0 |
| Q6PRD7 | Cytoplasm {ECO:0000269 PubMed:16263347}, | 0 |
| Q13516 | Nucleus {ECO:0000255 PROSITE-ProRule:PF  | 0 |
| Q9NYP8 |                                          | 0 |
| Q15287 | Nucleus. Nucleus speckle. Cytoplasm. Nc  | 0 |
| Q13117 | Cytoplasm {ECO:0000269 PubMed:11058556}  | 0 |
| Q9P2P1 | Membrane {ECO:0000305}; Multi-pass memt  | 0 |
| Q96DA6 | Mitochondrion inner membrane {ECO:00003  | 0 |
| Q3B7S5 | Membrane {ECO:0000305}; Single-pass mem  | 0 |
| P59665 | Secreted.                                | 0 |
| Q6PKX4 |                                          | 0 |
| Q9H910 | Cytoplasm {ECO:0000269 PubMed:15094197}  | 0 |
| Q6IC10 | Membrane {ECO:0000305}; Multi-pass memt  | 0 |
| P48594 | Cytoplasm {ECO:0000269 PubMed:10956412}  | 0 |
| P36952 | Secreted, extracellular space.           | 0 |
| POC7U3 | Membrane {ECO:0000305}; Multi-pass memt  | 0 |
| Q3LI60 |                                          | 0 |
| Q3LI81 |                                          | 0 |
| P69905 |                                          | 0 |
| Q8IYF1 | Nucleus {ECO:0000305}.                   | 0 |
| O60312 | Cell membrane {ECO:0000269 PubMed:21914} | 0 |
| A6NFN9 |                                          | 0 |

|        |                                         |   |
|--------|-----------------------------------------|---|
| A6NEV1 |                                         | 0 |
| A6NMZ7 | Secreted, extracellular space, extracel | 0 |
| Q6IQ22 | Recycling endosome membrane {ECO:000025 | 0 |
| A6NM36 |                                         | 0 |
| A6NKL6 | Membrane {ECO:0000305}; Multi-pass mem  | 0 |
| Q96KK4 | Cell membrane; Multi-pass membrane prot | 0 |
| Q6F5E7 |                                         | 0 |
| Q6Y1H2 | Endoplasmic reticulum membrane {ECO:000 | 0 |
| Q96MT7 | Cell projection, cilium, flagellum {ECO | 0 |
| A8MV65 | Nucleus {ECO:0000250 UniProtKB:Q8N8G2}. | 0 |
| Q9UI38 | Endoplasmic reticulum {ECO:0000305 PubM | 1 |
| Q2Q1W2 | Cytoplasm, P-body {ECO:0000269 PubMed:2 | 0 |
| Q504Y3 |                                         | 0 |
| Q8TCB7 |                                         | 0 |
| Q5GH76 | Membrane {ECO:0000305}; Multi-pass mem  | 0 |
| P22352 | Secreted.                               | 0 |
| Q8IZQ5 |                                         | 0 |
| Q9Y2H1 | Cytoplasm. Cytoplasm, cytoskeleton. Men | 0 |
| Q9NTJ5 | Endoplasmic reticulum membrane {ECO:000 | 0 |
| Q15631 | Cytoplasm {ECO:0000269 PubMed:11801738} | 0 |
| Q6P1K1 | Endosome membrane {ECO:0000269 PubMed:1 | 0 |
| Q9BXA7 | Cytoplasm {ECO:0000250}. Cytoplasmic ve | 0 |
| Q8IZ63 |                                         | 0 |
| A8MUX0 |                                         | 0 |
| Q96RT6 | Membrane {ECO:0000305}; Single-pass men | 0 |
| A8MQB3 |                                         | 0 |
| POC7H8 |                                         | 0 |
| Q9BYU5 |                                         | 0 |
| Q8NGT9 | Cell membrane; Multi-pass membrane prot | 0 |
| Q9HOX6 |                                         | 0 |
| Q9BYR6 |                                         | 0 |
| Q9BYR7 |                                         | 0 |
| Q9P2G4 | Cytoplasm, cytoskeleton {ECO:0000269 Pu | 0 |
| Q9UK33 | Nucleus {ECO:0000269 PubMed:20382120, F | 0 |
| Q9UKQ9 | Secreted {ECO:0000305}.                 | 0 |
| P37198 | Nucleus, nuclear pore complex {ECO:0000 | 0 |
| PODN86 | Secreted {ECO:0000269 PubMed:16123088}. | 0 |
| Q6P3S1 | Cytoplasm, cytosol {ECO:0000269 PubMed: | 0 |
| 095562 | Membrane {ECO:0000255}; Multi-pass mem  | 0 |
| Q9UPN6 | Nucleus {ECO:0000269 PubMed:11101529, F | 1 |
| Q9UL16 | Cell projection, cilium {ECO:0000250 Ur | 0 |
| Q16570 | Early endosome. Recycling endosome. Men | 0 |
| P22914 |                                         | 0 |
| P50238 |                                         | 0 |
| Q6UY18 | Membrane {ECO:0000305}; Single-pass typ | 0 |
| Q8N5W8 | Secreted {ECO:0000305}.                 | 0 |
| Q8IWR1 | Endoplasmic reticulum membrane {ECO:000 | 0 |
| Q13015 | Nucleus {ECO:0000269 PubMed:21715312, F | 0 |
| Q9UHC3 | Cell membrane {ECO:0000250}; Multi-pass | 0 |
| Q8WWP7 | Endoplasmic reticulum membrane {ECO:000 | 0 |
| Q5T5S1 |                                         | 0 |
| A5YM69 |                                         | 0 |
| PODML3 | Secreted.                               | 0 |
| 095988 |                                         | 0 |
| Q96PP4 |                                         | 0 |



|        |                                          |   |
|--------|------------------------------------------|---|
| P01111 | Cell membrane {ECO:0000269 PubMed:15705} | 0 |
| Q53RE8 |                                          | 0 |
| Q9BXR0 | Cytoplasm {ECO:0000255 HAMAP-Rule:MF_0}  | 0 |
| O15111 | Cytoplasm {ECO:0000269 PubMed:12789342}  | 0 |
| P28161 | Cytoplasm.                               | 0 |
|        | Golgi apparatus membrane {ECO:0000269 F} | 0 |
| Q14CB8 | Nucleus {ECO:0000269 PubMed:17454002}.   | 0 |
| Q14761 | Membrane {ECO:0000305}; Single-pass men  | 0 |
| Q6DKI7 | Cell membrane {ECO:0000269 PubMed:26755} | 0 |
| Q9BYR9 |                                          | 0 |
| Q8N158 | Cell membrane {ECO:0000250}; Lipid-anch  | 0 |
| Q8N1A0 |                                          | 0 |
| Q96FS4 | Nucleus {ECO:0000269 PubMed:9346962}. (  | 0 |
| Q14264 | Virion.                                  | 0 |
| P57105 | Mitochondrion outer membrane {ECO:00002} | 0 |
| P36404 | Mitochondrion intermembrane space. Cyt   | 1 |
| A6NNM8 |                                          | 0 |
| Q8N8V2 | Membrane {ECO:0000305}.                  | 0 |
| Q96E39 | Nucleus {ECO:0000250}.                   | 1 |
| Q9HD15 | Nucleus {ECO:0000269 PubMed:12565891}.   | 0 |
| Q86TL2 | Endoplasmic reticulum membrane {ECO:000} | 0 |
| Q8WXX5 | Nucleus {ECO:0000269 PubMed:17182002}.   | 0 |
| Q6P1X6 |                                          | 0 |
| P21796 | Mitochondrion outer membrane {ECO:00002} | 0 |
| Q96C00 | Nucleus {ECO:0000305}.                   | 0 |
| Q9Y320 | Membrane {ECO:0000305}; Single-pass typ  | 0 |
| P06865 | Lysosome.                                | 0 |
| O75489 | Mitochondrion inner membrane.            | 0 |
| Q53QV2 | Nucleus {ECO:0000269 PubMed:17390236}.   | 0 |
|        |                                          | 0 |
| P62140 | Cytoplasm {ECO:0000269 PubMed:11739654}  | 1 |
| PODMN0 | Cytoplasm.                               | 1 |
| O43561 | Cell membrane {ECO:0000269 PubMed:94897} | 0 |
| Q99941 | Endoplasmic reticulum membrane; Single-  | 0 |
| Q9NSU2 | Nucleus. Cytoplasm, cytosol. Endoplasmic | 0 |
| Q8N357 | Mitochondrion. Lysosome membrane; Multi  | 0 |
| Q5JX69 | Membrane {ECO:0000305}; Single-pass typ  | 0 |
| O00299 | Nucleus {ECO:0000269 PubMed:12681486, F} | 0 |
| O95865 | Cytoplasm {ECO:0000269 PubMed:21898353}  | 0 |
| P62273 | Cytoplasm, cytosol {ECO:0000269 PubMed:} | 0 |
| O75310 | Microsome membrane {ECO:0000305}; Singl  | 0 |
| O95670 | Melanosome {ECO:0000269 PubMed:17081065} | 0 |
| P52741 | Nucleus {ECO:0000305}.                   | 1 |
| Q9H0S4 | Nucleus, nucleolus {ECO:0000269 PubMed:} | 0 |
| P26718 | Cell membrane {ECO:0000269 PubMed:10426} | 0 |
| A8MTB9 |                                          | 0 |
| P54851 | Golgi apparatus membrane {ECO:0000250 U} | 0 |
| Q693B1 |                                          | 0 |
| Q96CB5 |                                          | 0 |
| Q2WEN9 | Secreted {ECO:0000269 PubMed:25589040}.  | 0 |
| Q15722 | Cell membrane; Multi-pass membrane prot  | 0 |
| Q9NPC1 | Cell membrane; Multi-pass membrane prot  | 0 |
| P24855 | Secreted {ECO:0000269 PubMed:2277032}.   | 0 |
| Q86V88 |                                          | 0 |
| A8MZ59 | Nucleus {ECO:0000255 PROSITE-ProRule:PF} | 0 |

|        |                                                                    |   |
|--------|--------------------------------------------------------------------|---|
| P49674 | Cytoplasm {ECO:0000250}. Nucleus {ECO:0000250}.                    | 0 |
| Q9Y4X3 | Secreted {ECO:0000250 UniProtKB:Q9Z1X0}.                           | 0 |
| Q00978 | Cytoplasm {ECO:0000269 PubMed:11846981}.                           | 0 |
| P07902 |                                                                    | 0 |
| P02100 |                                                                    | 0 |
| P69891 |                                                                    | 0 |
| P56199 | Membrane; Single-pass type I membrane protein.                     | 0 |
| 014907 | Cytoplasm. Nucleus. Cell membrane; Periplasmic space.              | 0 |
| 075843 | Golgi apparatus membrane {ECO:0000269 PubMed:11846981}.            | 0 |
| Q03938 | Nucleus {ECO:0000305}.                                             | 0 |
| Q8IW45 | Mitochondrion {ECO:0000255 HAMAP-Rule:MA00001}.                    | 0 |
| Q9BZW4 | Endoplasmic reticulum membrane {ECO:0000269 PubMed:11846981}.      | 0 |
| Q02080 | Nucleus.                                                           | 1 |
| Q8TET4 |                                                                    | 0 |
| Q9Y4R7 | Cytoplasm, cytoskeleton {ECO:0000250}.                             | 0 |
| Q9BWE0 | Nucleus {ECO:0000269 PubMed:10606657}.                             | 0 |
| Q16540 | Mitochondrion {ECO:0000269 PubMed:252781}.                         | 0 |
| A8MT65 | Nucleus {ECO:0000250}.                                             | 0 |
| P01567 | Secreted.                                                          | 0 |
| Q9BQ49 | Membrane {ECO:0000305}; Single-pass type I membrane protein.       | 0 |
| Q8IX29 |                                                                    | 0 |
| Q99829 | Nucleus {ECO:0000269 PubMed:18212740, PubMed:11846981}.            | 0 |
| Q0P5N6 |                                                                    | 0 |
| P0C1S8 | Nucleus {ECO:0000269 PubMed:11029659, PubMed:11846981}.            | 0 |
| P43366 |                                                                    | 0 |
| Q9HD34 | Mitochondrion. Nucleus.                                            | 0 |
| Q99417 | Cytoplasm. Nucleus. Mitochondrion. Note=Secreted.                  | 0 |
| A2RRL7 | Membrane {ECO:0000305}; Single-pass type I membrane protein.       | 0 |
| Q92685 | Endoplasmic reticulum membrane {ECO:0000269 PubMed:11846981}.      | 0 |
| A4FU49 |                                                                    | 0 |
| Q1A5X6 |                                                                    | 0 |
| Q0P5P2 | Secreted {ECO:0000305}.                                            | 0 |
| Q9Y3D6 | Mitochondrion outer membrane; Single-pass type I membrane protein. | 0 |
| Q4G0T1 | Membrane {ECO:0000305}; Single-pass type I membrane protein.       | 0 |
| P0C0P6 | Secreted.                                                          | 0 |
| A6NKU9 |                                                                    | 0 |
| A4D2B0 |                                                                    | 0 |
| Q5TF21 | Membrane {ECO:0000305}; Single-pass type I membrane protein.       | 0 |
| A8MQ27 | Cytoplasm {ECO:0000269 PubMed:19723503}.                           | 0 |
| Q68CZ6 | Cytoplasm, cytoskeleton, microtubule organizing center.            | 0 |
| A8MXK1 | Cell membrane {ECO:0000250 UniProtKB:Q9Z1X0}.                      | 0 |
| A8MTZ0 | Cell projection, cilium {ECO:0000269 PubMed:11846981}.             | 0 |
| I1YAP6 |                                                                    | 0 |
| Q9HBK9 | Cytoplasm, cytosol {ECO:0000250 UniProtKB:Q9Z1X0}.                 | 0 |
| A6NFU0 | Membrane {ECO:0000305}; Single-pass type I membrane protein.       | 0 |
| Q1W4C9 | Secreted {ECO:0000250}. Note=Secreted in secretory granules.       | 0 |
| A8MTQ0 | Nucleus {ECO:0000255 PROSITE-ProRule:PR00001}.                     | 0 |
| Q9Y570 |                                                                    | 0 |
| Q9BYT5 |                                                                    | 0 |
| Q9Y365 | Cell projection, cilium, flagellum {ECO:0000269 PubMed:11846981}.  | 0 |
| Q6ZMW3 | Cytoplasm, cytoskeleton {ECO:0000305}.                             | 0 |
| A8MUV8 | Nucleus {ECO:0000250}.                                             | 0 |
| A7E2V4 |                                                                    | 0 |
| A8MVX0 |                                                                    | 0 |
| A8MTZ7 |                                                                    | 0 |

|        |                                                                    |   |
|--------|--------------------------------------------------------------------|---|
| Q12894 |                                                                    | 0 |
| Q96B49 | Mitochondrion outer membrane {ECO:0000250 UniProtKB:Q00PI9}.       | 0 |
| Q1KMD3 | Nucleus {ECO:0000250 UniProtKB:Q00PI9}.                            | 1 |
| A8MUP2 | Mitochondrion {ECO:0000269 PubMed:250269}.                         | 0 |
| Q3C1V0 | Membrane {ECO:0000255}; Multi-pass membrane protein                | 0 |
| Q96PG1 | Membrane {ECO:0000250}; Multi-pass membrane protein                | 0 |
| Q2WQJ9 | Membrane {ECO:0000305}; Single-pass membrane protein               | 0 |
| A8MZ36 |                                                                    | 0 |
| A8MYV0 | Cell projection, cilium, flagellum {ECO:0000250 UniProtKB:Q00PI9}. | 0 |
|        | be performed. View primary data.                                   | 0 |
| Q6ZQQ2 | Membrane {ECO:0000305}; Single-pass membrane protein               | 0 |
| PODM63 |                                                                    | 0 |
| Q19AV6 | Nucleus {ECO:0000305}.                                             | 0 |
| Q8N1W1 | Cytoplasm {ECO:0000250}. Cell membrane                             | 0 |
| Q86UD7 |                                                                    | 0 |
| Q6ZNR3 |                                                                    | 0 |
| A4D126 | Cytoplasm, cytosol {ECO:0000269 PubMed:230569}.                    | 0 |
| E9PJI5 |                                                                    | 0 |
| POC7M7 | Mitochondrion {ECO:0000250 UniProtKB:Q00PI9}.                      | 0 |
| Q7L3V2 | Mitochondrion {ECO:0000269 PubMed:230569}.                         | 0 |
| Q2UY09 | Secreted, extracellular space, extracellular matrix                | 0 |
| Q99623 | Mitochondrion inner membrane {ECO:0000250 UniProtKB:Q00PI9}.       | 0 |
| Q5H9J9 |                                                                    | 0 |
| Q96JN8 | Cytoplasm, cytoskeleton, microtubule organizing center             | 0 |
| Q14CS0 | Nucleus {ECO:0000250 UniProtKB:POC627}.                            | 0 |
| Q4V339 |                                                                    | 0 |
| P98088 | Secreted {ECO:0000269 PubMed:14718370}.                            | 0 |
| Q1L6U9 | Secreted {ECO:0000269 PubMed:17338636}.                            | 0 |
| A6NDN3 |                                                                    | 0 |
| A8MTA8 |                                                                    | 0 |
| Q7Z412 | Peroxisome membrane {ECO:0000269 PubMed:230569}.                   | 0 |
| A8MXD5 | Cell projection, stereocilium {ECO:0000250 UniProtKB:Q00PI9}.      | 0 |
| A4QMS7 |                                                                    | 0 |
| Q7L8L6 | Mitochondrion matrix, mitochondrion nucleoid                       | 0 |
| A8MQT2 | Golgi apparatus, Golgi stack membrane                              | 0 |
| POCL81 |                                                                    | 0 |
| Q8IX15 | Nucleus {ECO:0000255 PROSITE-ProRule:PF00001}.                     | 0 |
| A6NGK3 |                                                                    | 0 |
| A8MTL3 |                                                                    | 0 |
| 000571 | Nucleus speckle. Cytoplasm. Mitochondrion                          | 0 |
| Q9H269 | Late endosome membrane {ECO:0000269 PubMed:230569}.                | 0 |
| Q02045 |                                                                    | 0 |
| Q9COG0 | Nucleus {ECO:0000305}.                                             | 0 |
| Q8NDH3 |                                                                    | 0 |
| Q2VWA4 | Nucleus {ECO:0000269 PubMed:16200078}.                             | 0 |
| Q8IW03 | Mitochondrion {ECO:0000269 PubMed:242703}.                         | 0 |
| A8MWE9 |                                                                    | 0 |
| Q30KQ4 | Secreted {ECO:0000250}.                                            | 0 |
| Q30KQ5 | Secreted {ECO:0000250}.                                            | 0 |
| Q2WGN9 |                                                                    | 0 |
| A1L168 |                                                                    | 0 |
| Q92681 | Cell membrane {ECO:0000269 PubMed:167881}.                         | 0 |
| Q9NWH2 | Membrane {ECO:0000305}; Multi-pass membrane protein                | 0 |
| Q6L9T8 |                                                                    | 0 |

|        |                                         |   |
|--------|-----------------------------------------|---|
| P0CK97 | Membrane {ECO:0000305}; Multi-pass mem  | 0 |
|        | be performed. View primary data.        | 0 |
| Q8NFU3 | Cytoplasm, perinuclear region {ECO:000  | 0 |
| Q6XPR3 | Secreted, extracellular space, extracel | 0 |
| Q6IPT4 |                                         | 0 |
| Q5SNV9 |                                         | 0 |
| A8MYJ7 |                                         | 0 |
| P13284 | Secreted {ECO:0000269 PubMed:10639150,  | 0 |
| A1LIA6 | Membrane {ECO:0000305}; Single-pass men | 0 |
| A1L429 |                                         | 0 |
| Q8TF40 | Cytoplasm {ECO:0000269 PubMed:18663353} | 0 |
| P0CG40 | Nucleus {ECO:0000305}.                  | 0 |
| Q9P273 | Cell membrane {ECO:0000250 UniProtKB:Q9 | 0 |
| A8MTT3 | Mitochondrion membrane {ECO:0000269 Pub | 0 |
| B5MCY1 |                                         | 0 |
| Q8NAF0 | Nucleus {ECO:0000305}.                  | 0 |
| P08861 |                                         | 0 |
| Q6P5S7 | Membrane {ECO:0000305}; Multi-pass mem  | 0 |
| Q7Z5A7 | Secreted {ECO:0000269 PubMed:15028294,  | 0 |
|        | Cytoplasm {ECO:0000269 PubMed:16079250} | 0 |
|        |                                         | 0 |
| B7ZBB8 |                                         | 0 |
|        |                                         | 0 |
| P0C6S8 | Membrane {ECO:0000305}; Single-pass ty  | 0 |
| P0C6A0 | Nucleus {ECO:0000250}.                  | 0 |
| O95007 | Cell membrane; Multi-pass membrane prot | 0 |
| Q5IOX4 |                                         | 0 |
| P63098 | Cytoplasm, cytosol {ECO:0000250 UniProt | 0 |
| Q16557 | Secreted {ECO:0000305}.                 | 0 |
| O15287 | Nucleus {ECO:0000269 PubMed:18550849}.  | 0 |
| O00189 | Golgi apparatus, trans-Golgi network me | 0 |
| Q68DN1 |                                         | 0 |
| P59536 | Membrane; Multi-pass membrane protein.  | 0 |
| Q9HCM2 | Cell membrane {ECO:0000305}; Single-pas | 0 |
|        | be performed. View primary data.        | 0 |
|        | Secreted {ECO:0000305}.                 | 0 |
| Q8IZ13 |                                         | 0 |
| O95502 | Membrane {ECO:0000305}; Single-pass ty  | 0 |
| Q8N7R1 |                                         | 0 |
| Q8TCP9 | Membrane {ECO:0000305}; Single-pass men | 0 |
| P63151 |                                         | 0 |
| Q9NVV2 |                                         | 0 |
| O95361 | Cytoplasm {ECO:0000269 PubMed:27693506} | 0 |
| Q6WQI6 | Cytoplasm {ECO:0000269 PubMed:12971969} | 0 |
| A4D2G3 | Cell membrane; Multi-pass membrane prot | 0 |
| Q96MW7 | Nucleus {ECO:0000305}.                  | 0 |
| P58549 | Membrane {ECO:0000305}; Single-pass men | 0 |
| Q5GH70 | Membrane {ECO:0000305}; Multi-pass mem  | 0 |
| A0AV02 | Membrane {ECO:0000305}; Multi-pass mem  | 0 |
| Q9BWW8 | Cytoplasm {ECO:0000305}.                | 0 |
| Q9Y5Q0 | Endoplasmic reticulum membrane {ECO:000 | 0 |
| Q8NGT9 | Cell membrane; Multi-pass membrane prot | 0 |
| Q3SXR2 |                                         | 0 |
| Q96S94 | Nucleus speckle {ECO:0000269 PubMed:146 | 1 |
| P62987 | Ubiquitin: Cytoplasm {ECO:0000250}. Nuc | 1 |

|        |                                         |   |
|--------|-----------------------------------------|---|
| Q2M218 | Nucleus {ECO:0000305}.                  | 1 |
| C9JJ37 |                                         | 0 |
| Q8N0U4 |                                         | 0 |
| Q9HONO | Nucleus {ECO:0000269 PubMed:16103095}.  | 0 |
| B9A014 |                                         | 0 |
| A5LHX3 | Cytoplasm {ECO:0000255 PROSITE-ProRule: | 0 |
| P0CG39 |                                         | 0 |
| A2VCK2 |                                         | 0 |
| Q5SWW7 |                                         | 0 |
| Q6R6M4 | Nucleus {ECO:0000269 PubMed:21239494}.  | 0 |
| Q8N1B4 | Golgi apparatus, trans-Golgi network me | 0 |
| Q96T59 |                                         | 0 |
| Q08AG5 | Nucleus {ECO:0000250}.                  | 0 |
| C9J2P7 | Nucleus {ECO:0000250}. Endoplasmic reti | 0 |
| P12532 | Mitochondrion inner membrane; Periphera | 0 |
| P02042 |                                         | 0 |
| A6NLU0 | Cytoplasm {ECO:0000250 UniProtKB:Q8VH31 | 0 |
| P27544 | Endoplasmic reticulum membrane {ECO:000 | 1 |
| P04440 | Cell membrane; Single-pass type I membr | 0 |
| Q9BXJ0 | Secreted {ECO:0000305}.                 | 0 |
| Q5TA50 | Cytoplasm, cytosol {ECO:0000269 PubMed: | 0 |
| Q5JQC4 |                                         | 0 |
| P0C0L5 | Secreted. Cell junction, synapse {ECO:( | 0 |
| P0DJ93 | Membrane {ECO:0000305}; Single-pass men | 0 |
|        | be performed. View primary data.        | 0 |
| A6NER3 |                                         | 0 |
| F8WFD2 |                                         | 0 |
| A1L188 | Mitochondrion {ECO:0000269 PubMed:27496 | 0 |
| A6NDE8 |                                         | 0 |
|        |                                         | 0 |
| C9JH25 | Membrane {ECO:0000305}; Multi-pass mem  | 0 |
| B4DJY2 | Membrane {ECO:0000305}; Multi-pass mem  | 0 |
| Q9Y4G2 | Cytoplasm {ECO:0000305}. Endosome mem   | 0 |
| A6NCW0 | Nucleus {ECO:0000250}. Endoplasmic reti | 0 |
| P0C5K7 |                                         | 0 |
| H3BPM6 |                                         | 0 |
| C9JLW8 | Nucleus {ECO:0000269 PubMed:25728771, F | 0 |
| Q9BXS9 | Cell membrane; Multi-pass membrane prot | 0 |
| Q96QU4 | Nucleus {ECO:0000250}.                  | 0 |
| Q9UMY1 | Nucleus, nucleolus {ECO:0000269 PubMed: | 1 |
| Q8IX94 | Membrane {ECO:0000305}; Single-pass men | 0 |
| Q5JQC4 |                                         | 0 |
| C9J3V5 | Cytoplasm {ECO:0000250}. Cytoplasmic ve | 1 |
| Q8NH67 | Cell membrane; Multi-pass membrane prot | 0 |
| H7BZ55 |                                         | 0 |
| A6NGE4 |                                         | 0 |
| P0C7H9 | Nucleus {ECO:0000250}. Endoplasmic reti | 0 |
| Q9H7F4 | Membrane {ECO:0000305}; Multi-pass mem  | 0 |
| Q5JQC4 |                                         | 0 |
| Q2VIQ3 | Nucleus matrix {ECO:0000250}. Cytoplasm | 0 |
| Q5JQC4 |                                         | 0 |
| C9JCN9 |                                         | 0 |
| B3KS81 |                                         | 0 |
| Q8NOY7 |                                         | 0 |
| Q9H9K5 | Endogenous retroviral envelope protein  | 0 |

|                                  |                                         |   |
|----------------------------------|-----------------------------------------|---|
| Q5JQC4                           |                                         | 0 |
| Q15415                           | Nucleus.                                | 1 |
| P01374                           | Secreted. Membrane. Note=The homotrimer | 0 |
| O15213                           | Nucleus, nucleolus {ECO:0000269 PubMed: | 0 |
| be performed. View pr            | Nucleus {ECO:0000305}.                  | 0 |
| A8MUK1                           | Nucleus {ECO:0000250}. Endoplasmic reti | 0 |
| P86480                           |                                         | 0 |
| Q9NS25                           | Cytoplasm {ECO:0000269 PubMed:10906052} | 0 |
| Q86W56                           | Isoform 1: Nucleus {ECO:0000269 PubMed: | 0 |
| C9JRZ8                           | Isoform 1: Mitochondrion {ECO:0000269 F | 0 |
| A1L429                           |                                         | 0 |
| Q969E2                           | Membrane; Multi-pass membrane protein.  | 0 |
| Q06643                           | Membrane {ECO:0000305}; Single-pass typ | 0 |
| C9JPN9                           | Nucleus {ECO:0000250}. Endoplasmic reti | 0 |
| PODJH9                           |                                         | 0 |
| Q8IYS8                           | Cytoplasm, cytoskeleton, microtubule or | 0 |
| P01570                           | Secreted.                               | 0 |
| P19652                           | Secreted.                               | 0 |
| Q9BVV8                           | Membrane {ECO:0000305}; Single-pass typ | 0 |
| Q5JQC4                           |                                         | 0 |
| Q7Z5H5                           | Cell membrane; Multi-pass membrane prot | 0 |
| C9JDP6                           | Cell junction, tight junction {ECO:0000 | 0 |
| E7EW31                           |                                         | 0 |
| Q8IYW1                           | Golgi apparatus {ECO:0000250}.          | 0 |
| P00374                           | Mitochondrion {ECO:0000250 UniProtKB:PC | 0 |
| PODMU8                           |                                         | 0 |
| Q0WX57                           | Nucleus, nucleolus {ECO:0000269 PubMed: | 0 |
| P0CV98                           |                                         | 0 |
| Q5CZ79                           |                                         | 0 |
| P62945                           |                                         | 0 |
| POJD7                            | Secreted.                               | 0 |
| F8VTS6                           |                                         | 0 |
| P02763                           | Secreted.                               | 0 |
| P0C7L1                           | Secreted {ECO:0000305}.                 | 0 |
| Q9UD57                           | Nucleus {ECO:0000255 PROSITE-ProRule:PF | 0 |
| POCW00                           |                                         | 0 |
| Q0WX57                           | Nucleus, nucleolus {ECO:0000269 PubMed: | 0 |
| P86479                           |                                         | 0 |
| P0C7X2                           | Nucleus {ECO:0000305}.                  | 0 |
| POJD8                            | Secreted.                               | 0 |
| Q14409                           | Mitochondrion outer membrane {ECO:00002 | 0 |
| Q9BR61                           | Cytoplasm {ECO:0000269 PubMed:18268358} | 0 |
| Q6IEY1                           | Cell membrane; Multi-pass membrane prot | 0 |
| Q5JQC4                           |                                         | 0 |
| Q0WX57                           | Nucleus, nucleolus {ECO:0000269 PubMed: | 0 |
| A2A2Z9                           |                                         | 0 |
| E7EU14                           |                                         | 0 |
| Q8NHZ7                           |                                         | 0 |
| Q7RTZ2                           | Nucleus {ECO:0000250}. Endoplasmic reti | 0 |
| Q5JQC4                           |                                         | 0 |
| be performed. View primary data. |                                         | 0 |
| PODME0                           | Cytoplasm {ECO:0000269 PubMed:22869753} | 0 |
| O15391                           | Nucleus {ECO:0000305}.                  | 1 |
| H3BQB6                           |                                         | 0 |
| Q0WX57                           | Nucleus, nucleolus {ECO:0000269 PubMed: | 0 |

|            |                                         |   |
|------------|-----------------------------------------|---|
| Q3LHN1     |                                         | 0 |
| A0PG75     |                                         | 0 |
| B2RV13     |                                         | 0 |
| P20036     | Cell membrane; Single-pass type I membr | 0 |
| C9JJH3     | Nucleus {ECO:0000250}. Endoplasmic reti | 0 |
| P62269     | Cytoplasm.                              | 0 |
| Q0WX57     | Nucleus, nucleolus {ECO:0000269 PubMed: | 0 |
| POC672     | Membrane {ECO:0000305}; Multi-pass memk | 0 |
| POCW23     |                                         | 0 |
| P08686     | Endoplasmic reticulum membrane; Periphe | 1 |
| P11464     | Secreted {ECO:0000305}.                 | 0 |
| O15533     | Endoplasmic reticulum membrane {ECO:000 | 0 |
| Q6R2W3     |                                         | 0 |
| POC7T8     | Membrane {ECO:0000305}; Multi-pass memk | 0 |
| Q3LHNO     |                                         | 0 |
| Q0WX57     | Nucleus, nucleolus {ECO:0000269 PubMed: | 0 |
| C9JLJ4     | Nucleus {ECO:0000250}. Endoplasmic reti | 0 |
| C9J069     | Apical cell membrane {ECO:0000250 UniPr | 0 |
| P05538     | Cell membrane {ECO:0000269 PubMed:22407 | 0 |
| Q6UWS5     | Mitochondrion {ECO:0000269 PubMed:22356 | 0 |
| A8MSI8     |                                         | 0 |
| C9JFL3     |                                         | 0 |
|            | be performed. View primary data.        | 0 |
| C9JVIO     | Nucleus {ECO:0000250}. Endoplasmic reti | 0 |
| O75200     | Secreted {ECO:0000305}.                 | 0 |
| B2RXH4     | Nucleus {ECO:0000250 UniProtKB:A0A0A6Y} | 0 |
| POC851     | Membrane {ECO:0000305}; Multi-pass memk | 0 |
| Q6ZRP0     |                                         | 0 |
| POCV99     |                                         | 0 |
| P01562     | Secreted.                               | 0 |
| Q99877     | Nucleus. Chromosome.                    | 1 |
| P62857     | Cytoplasm, cytosol {ECO:0000269 PubMed: | 0 |
| POC2S0     | Membrane {ECO:0000305}; Single-pass men | 0 |
| A0A096LP55 | Mitochondrion inner membrane {ECO:00002 | 0 |
| Q7Z2X7     |                                         | 0 |
| Q12899     | Cytoplasm {ECO:0000269 PubMed:25763818} | 0 |
| B2RXF0     | Membrane {ECO:0000305}; Multi-pass memk | 0 |
| P86478     |                                         | 0 |
| B4DU55     | Nucleus {ECO:0000305}.                  | 0 |
| P57053     | Nucleus. Chromosome.                    | 1 |
| PODJD3     | Nucleus {ECO:0000269 PubMed:9108067}.   | 1 |
| C9JR72     | Cytoplasm {ECO:0000269 PubMed:21109227, | 0 |
| B4DX44     | Nucleus {ECO:0000250}.                  | 0 |
| A6NC86     | Secreted {ECO:0000305}.                 | 0 |
| D6RGH6     | Nucleus {ECO:0000269 PubMed:21543332}.  | 0 |
| A6NJ64     | Nucleus {ECO:0000250}.                  | 1 |
| P01889     | Membrane; Single-pass type I membrane p | 1 |
| P01571     | Secreted.                               | 0 |
| P02655     | Secreted {ECO:0000269 PubMed:3525527}.  | 0 |
| B8ZZ34     | Membrane {ECO:0000305}; Single-pass tyf | 0 |
| C9J6K1     |                                         | 0 |
| E5RJM6     |                                         | 0 |
| Q96LW9     | Nucleus {ECO:0000305}.                  | 0 |

|                    |                                         |   |
|--------------------|-----------------------------------------|---|
| Q8TAD7             |                                         | 0 |
| B2RUZ4             | Cell membrane {ECO:0000269 PubMed:26452 | 0 |
| Q9BTY7             |                                         | 0 |
| Q9H7J1             |                                         | 0 |
| B2RXH2             | Nucleus {ECO:0000255 PROSITE-ProRule:PF | 0 |
| Q2QD12             |                                         | 0 |
| Q8NET5             | Cell membrane {ECO:0000250}; Single-pas | 0 |
| Q15270             | Nucleus {ECO:0000255 PROSITE-ProRule:PF | 0 |
| POC6C1             |                                         | 0 |
| Q15053             | Membrane {ECO:0000255}; Single-pass men | 0 |
| Q0WX57             | Nucleus, nucleolus {ECO:0000269 PubMed: | 0 |
| 096024             | Golgi apparatus membrane; Single-pass t | 0 |
| A0A183             |                                         | 0 |
| POCW24             |                                         | 0 |
| A6NCW7             | Nucleus {ECO:0000250}. Endoplasmic reti | 0 |
| Q5JQC4             |                                         | 0 |
| POC7M8             | Membrane {ECO:0000305}; Single-pass men | 0 |
| Q49AG3             |                                         | 0 |
| POC7P3             | Protein SLFN14: Nucleus {ECO:0000269 Pu | 0 |
| P0DN37             | Cytoplasm {ECO:0000250 UniProtKB:P62937 | 0 |
| P0CL80             |                                         | 0 |
| Q5JQC4             |                                         | 0 |
| P59534             | Membrane; Multi-pass membrane protein.  | 0 |
|                    |                                         | 0 |
| eminiferous ducts. |                                         | 0 |
| POC2W7             |                                         | 0 |
| P0CG23             |                                         | 0 |
| P05014             | Secreted.                               | 0 |
| Q9NXL2             |                                         | 0 |
| A4FU28             | Membrane {ECO:0000305}; Single-pass men | 0 |
| POC7I0             | Nucleus {ECO:0000250}. Endoplasmic reti | 0 |
| Q6UX72             | Golgi apparatus membrane {ECO:0000255}; | 0 |
| Q96HQ2             |                                         | 0 |
| A6NJ08             |                                         | 0 |
| P12532             | Mitochondrion inner membrane; Periphera | 0 |
| POC8F1             | Secreted {ECO:0000250}. Cytoplasmic ves | 0 |
| Q6IF82             | Cell membrane; Multi-pass membrane prot | 0 |
| 015211             |                                         | 0 |
| C9JSJ3             | Nucleus {ECO:0000255 PROSITE-ProRule:PF | 0 |
| Q9BW19             | Nucleus {ECO:0000250 UniProtKB:Q9QWT9}. | 0 |
| A8MZ97             | Membrane {ECO:0000305}; Single-pass men | 0 |
| A1L429             |                                         | 0 |
| P04745             | Secreted.                               | 0 |
| P0CF97             |                                         | 0 |
| Q5JQC4             |                                         | 0 |
| A6NM11             | Membrane {ECO:0000305}; Single-pass typ | 0 |
| H0YL14             | Membrane {ECO:0000305}; Multi-pass memt | 0 |
| Q7Z3T1             | Cell membrane; Multi-pass membrane prot | 0 |
| Q5JRK9             |                                         | 0 |
| Q8NBS9             | Endoplasmic reticulum lumen {ECO:000025 | 1 |
| Q8WTX7             | Cytoplasm, cytosol {ECO:0000269 PubMed: | 0 |
| 000237             | Endoplasmic reticulum membrane {ECO:00  | 0 |
| Q96PK6             | Nucleus {ECO:0000269 PubMed:25385835}.  | 0 |
| Q3KRA9             | Cytoplasm {ECO:0000269 PubMed:17979886} | 0 |
| 060662             | Cytoplasm {ECO:0000269 PubMed:19424503} | 0 |



|        |                                          |   |
|--------|------------------------------------------|---|
| Q8NAP1 |                                          | 0 |
| Q8N801 | Cytoplasm {ECO:0000250 UniProtKB:Q9DAG5} | 0 |
| P15531 | Cytoplasm {ECO:0000269 PubMed:16442775}  | 0 |
| O43508 | Cell membrane {ECO:0000269 PubMed:12411} | 0 |
| Q9HC16 | Cytoplasm. Nucleus. Cytoplasm, P-body.   | 0 |
| Q96G27 |                                          | 0 |
| Q9Y2R5 | Mitochondrion {ECO:0000269 PubMed:25838} | 0 |
| P59666 | Secreted.                                | 0 |
| Q7L5D6 | Cytoplasm, cytosol {ECO:0000269 PubMed:} | 0 |
| A1L170 |                                          | 0 |
| P30566 |                                          | 0 |
| P59901 | Cell membrane {ECO:0000269 PubMed:16735} | 0 |
| Q5T0J7 |                                          | 0 |
| P19961 | Secreted {ECO:0000250}.                  | 0 |
| Q8NDX9 | Secreted {ECO:0000305}.                  | 0 |
| P28065 | Cytoplasm {ECO:0000255 PROSITE-ProRule:} | 1 |
| Q9UN70 | Cell membrane {ECO:0000250}; Single-pass | 0 |
| Q49B96 | Cytoplasm, cytosol {ECO:0000269 PubMed:} | 0 |
| P59665 | Secreted.                                | 0 |
| Q709F0 | Peroxisome {ECO:0000250 UniProtKB:Q80XI} | 1 |
| Q9H2H8 |                                          | 0 |
| O14836 | Membrane; Single-pass type III membrane  | 0 |
| P29972 | Cell membrane {ECO:0000269 PubMed:23219} | 1 |
| POC862 | Secreted {ECO:0000250}.                  | 0 |
| Q9ULR0 | Nucleus {ECO:0000269 PubMed:11991638, F} | 0 |
| Q9UL42 | Nucleus, nucleolus {ECO:0000269 PubMed:} | 0 |
| Q9Y5F6 | Cell membrane {ECO:0000250}; Single-pass | 0 |
| Q86VW2 | Cell membrane {ECO:0000250}. Cytoplasm,  | 0 |
| A5PLL7 | Endoplasmic reticulum membrane {ECO:000} | 0 |
| Q9HBH5 |                                          | 0 |
| Q0VAA5 | Nucleus {ECO:0000269 PubMed:22732399}.   | 0 |
| P14174 | Secreted {ECO:0000269 PubMed:15908412,}  | 0 |
| Q8TEA1 |                                          | 0 |
| P13765 | Endosome membrane; Single-pass type I n  | 1 |
| Q9NRH1 | Cytoplasm {ECO:0000250 UniProtKB:P47118} | 0 |
| Q96R54 | Cell membrane; Multi-pass membrane prot  | 0 |
| O75575 | Nucleus {ECO:0000250}. Cell membrane {E} | 0 |
| P83881 | Cytoplasm.                               | 0 |
| Q96GD0 | Cytoplasm, cytosol {ECO:0000269 PubMed:} | 0 |
| Q99944 | Secreted {ECO:0000305}.                  | 0 |
| P56134 | Mitochondrion. Mitochondrion inner mem   | 0 |
| Q16385 | Nucleus.                                 | 1 |
| P85298 |                                          | 0 |
| Q92747 | Cytoplasm, cytoskeleton {ECO:0000269 Pu} | 0 |
| Q8IYR6 | Cell membrane {ECO:0000269 PubMed:12745} | 0 |
| P48047 | Mitochondrion {ECO:0000250}. Mitochondr  | 1 |
| Q8TD55 |                                          | 0 |
| Q8NAV2 |                                          | 0 |
| Q9UG56 | Phosphatidylserine decarboxylase beta c  | 0 |
| Q86XE5 | Mitochondrion {ECO:0000250 UniProtKB:Q0} | 0 |
| Q15269 | Nucleus, nucleolus {ECO:0000269 PubMed:} | 0 |
| P42356 | Cytoplasm {ECO:0000269 PubMed:23229899,} | 0 |
| Q9NX55 | Nucleus. Cytoplasm.                      | 0 |
| Q9UHK6 | Peroxisome {ECO:0000269 PubMed:11060344} | 1 |

|        |                                         |   |
|--------|-----------------------------------------|---|
| Q8TDR4 | Nucleus {ECO:0000269 PubMed:14586771, I | 0 |
| Q9NP61 | Cytoplasm {ECO:0000269 PubMed:17760859} | 0 |
| Q86TG7 | Nucleus. Cytoplasm. Note=Detected pred  | 0 |
| Q5JQC4 |                                         | 0 |
| P56537 | Cytoplasm. Nucleus, nucleolus. Note=Shu | 1 |
| A6NEQ0 | Nucleus.                                | 1 |
| Q9Y5F7 | Cell membrane {ECO:0000250}; Single-pas | 0 |
| Q9BYC9 | Mitochondrion {ECO:0000269 PubMed:11279 | 1 |
| Q7Z6K5 | Cell projection, lamellipodium {ECO:000 | 0 |
| P48595 | Nucleus. Cytoplasm. Note=Mostly found i | 0 |
| P28068 | Late endosome membrane {ECO:0000269 Pub | 1 |
| P26441 | Cytoplasm.                              | 0 |
| Q5HYW3 |                                         | 0 |
| O43299 | Cytoplasm {ECO:0000269 PubMed:20613862} | 1 |
| Q8N972 | Nucleus {ECO:0000305}.                  | 0 |
| Q7RTU9 | Cell surface {ECO:0000250}. Cell projec | 0 |
| A6NDE4 | Nucleus.                                | 1 |
| O60516 |                                         | 0 |
| Q9UQ72 | Secreted {ECO:0000305}.                 | 0 |
| Q00888 | Secreted {ECO:0000305}.                 | 0 |
| O75394 | Mitochondrion {ECO:0000269 PubMed:25278 | 0 |
| Q7RTP6 | Cytoplasm {ECO:0000269 PubMed:15694364} | 0 |
|        | be performed. View primary data.        | 0 |
| Q9Y6Q2 | Cytoplasm {ECO:0000269 PubMed:11381094} | 0 |
| O60831 | Endosome membrane {ECO:0000305 PubMed:1 | 1 |
| PODPA2 | Membrane {ECO:0000305}; Single-pass typ | 0 |
| P52798 | Isoform 1: Cell membrane; Lipid-anchor, | 0 |
| Q5BLP8 | Secreted {ECO:0000305}.                 | 0 |
| Q93015 | Cytoplasm, cytosol {ECO:0000269 PubMed: | 0 |
| P04746 | Secreted, extracellular space.          | 0 |
| O95407 | Secreted.                               | 0 |
| Q9BT76 | Cell membrane {ECO:0000305}; Single-pas | 0 |
| A8MWV9 | Membrane {ECO:0000305}; Single-pass men | 0 |
| Q08334 | Membrane; Single-pass type I membrane p | 0 |
| P00751 | Secreted.                               | 0 |
| Q96MX6 |                                         | 0 |
| P22392 | Cytoplasm {ECO:0000269 PubMed:16442775} | 0 |
| O75610 | Secreted.                               | 0 |
| Q96MR6 |                                         | 0 |
| A8MRT5 | Membrane {ECO:0000305}; Single-pass men | 0 |
| O95801 |                                         | 0 |
| Q9UGF6 | Cell membrane; Multi-pass membrane prot | 0 |
| Q8NCS4 | Membrane {ECO:0000305}; Multi-pass memt | 0 |
| POC870 | Nucleus {ECO:0000269 PubMed:29915238}.  | 0 |
| Q96AK3 | Cytoplasm. Cytoplasm, P-body.           | 0 |
| Q96R45 | Cell membrane; Multi-pass membrane prot | 0 |
| P82932 | Mitochondrion {ECO:0000269 PubMed:25838 | 1 |
| Q96ME7 | Nucleus {ECO:0000305}.                  | 0 |
| P08263 | Cytoplasm.                              | 1 |
| Q8NET4 |                                         | 0 |
| Q03154 | Cytoplasm.                              | 1 |
| Q9Y697 | Isoform Mitochondrial: Mitochondrion {E | 0 |
| P39656 | Endoplasmic reticulum membrane {ECO:000 | 1 |
| Q8N511 | Cytoplasmic vesicle, COPI-coated vesicl | 0 |
| P09210 | Cytoplasm.                              | 1 |

|        |                                          |   |
|--------|------------------------------------------|---|
| Q96G91 | Cell membrane; Multi-pass membrane prot  | 0 |
| Q96I45 | Membrane {ECO:0000305}; Multi-pass mem   | 0 |
|        |                                          | 0 |
| Q9BQY9 |                                          | 0 |
| O95868 | Cell membrane {ECO:0000269 PubMed:17008  | 0 |
| P0C7P1 | Nucleus.                                 | 1 |
| P41161 | Nucleus.                                 | 0 |
| Q03591 | Secreted.                                | 0 |
| Q9NTZ6 | Nucleus {ECO:0000269 PubMed:9853615}.    | 1 |
| Q96GP6 | Membrane {ECO:0000305}; Single-pass ty   | 0 |
| Q9NRW3 | Nucleus. Cytoplasm.                      | 0 |
| Q9H4I0 | Nucleus {ECO:0000250 UniProtKB:A2AU37}.  | 0 |
| Q8IYE1 | Cytoplasm, cytoskeleton, microtubule or  | 0 |
| Q53RT3 | Membrane {ECO:0000255}; Single-pass men  | 0 |
| Q8NHA4 | Cell membrane; Multi-pass membrane prot  | 0 |
| P0CG41 | Membrane {ECO:0000305}; Single-pass men  | 0 |
| Q6ZW05 | Membrane {ECO:0000305}; Multi-pass mem   | 0 |
| P0C0L4 | Secreted. Cell junction, synapse {ECO:(  | 0 |
| P68871 |                                          | 0 |
| P43320 |                                          | 0 |
| Q92802 |                                          | 0 |
| P49715 | Nucleus {ECO:0000269 PubMed:11242107}. ; | 0 |
| Q9BTM1 | Nucleus {ECO:0000250}. Chromosome {ECO:  | 1 |
| Q96HS1 | Mitochondrion outer membrane {ECO:00002  | 1 |
| Q6IBS0 | Cytoplasm, cytoskeleton {ECO:0000269 Pt  | 0 |
| Q96GW9 | Mitochondrion matrix {ECO:0000305}.      | 0 |
| Q70EK9 | Chromosome {ECO:0000305 PubMed:27083998  | 0 |
| P12694 | Mitochondrion matrix.                    | 1 |
| P51460 | Secreted.                                | 0 |
| P00326 | Cytoplasm.                               | 1 |
|        | be performed. View primary data.         | 0 |
|        | be performed. View primary data.         | 0 |
|        | Cytoplasm. Nucleus.                      | 0 |
| B6A8C7 | Cell membrane {ECO:0000269 PubMed:26311  | 0 |
| Q8N7G0 | Nucleus {ECO:0000255 PROSITE-ProRule:PF  | 1 |
| A6NKN8 |                                          | 0 |
| Q9BUJ0 | Cytoplasm {ECO:0000250}. Membrane {ECO:  | 0 |
|        | be performed. View primary data.         | 0 |
|        |                                          | 0 |
|        | be performed. View primary data.         | 0 |
| Q494R4 |                                          | 0 |
| Q08043 |                                          | 0 |
|        |                                          | 0 |
|        | be performed. View primary data.         | 0 |
| Q68DA7 | Nucleus {ECO:0000250}. Cytoplasm {ECO:(  | 0 |
|        |                                          | 0 |
| D6RCP7 | Nucleus {ECO:0000250}. Endoplasmic reti  | 0 |
| D6RA61 | Nucleus {ECO:0000250}. Endoplasmic reti  | 0 |
|        | be performed. View primary data.         | 0 |
| D6RBQ6 | Nucleus {ECO:0000250}. Endoplasmic reti  | 0 |
| O94927 | Cytoplasm, cytoskeleton, microtubule or  | 0 |
| O95925 | Isoform 1: Secreted. Cell surface. Note  | 0 |
|        | be performed. View primary data.         | 0 |
| Q7Z4Y8 | Mitochondrion membrane {ECO:0000250}.    | 0 |
| B9EJG8 | Cell membrane {ECO:0000269 PubMed:25608  | 0 |

|        |                                                |   |
|--------|------------------------------------------------|---|
| Q13075 |                                                | 0 |
| P0CG31 | Nucleus {ECO:0000305}.                         | 0 |
| Q6AW86 | Nucleus {ECO:0000305}.                         | 0 |
| Q496A3 |                                                | 0 |
| A0PK11 | Membrane {ECO:0000305}; Multi-pass mem         | 0 |
| PODJG4 |                                                | 0 |
| Q8TBZ8 | Nucleus {ECO:0000305}.                         | 0 |
|        | be performed. View primary data.               | 0 |
| D6R901 | Nucleus {ECO:0000250}. Endoplasmic reti        | 0 |
| Q8IZT8 | Golgi apparatus membrane {ECO:0000305};        | 0 |
|        | be performed. View primary data.               | 0 |
| Q8WZ71 | Membrane {ECO:0000305}; Multi-pass mem         | 0 |
|        |                                                | 0 |
| A6XGLO |                                                | 0 |
| POCZ25 |                                                | 0 |
| Q9NZH5 | Cytoplasm {ECO:0000250}. Nucleus {ECO:(        | 0 |
|        |                                                | 0 |
| Q9P272 |                                                | 0 |
| Q8N5G0 | Mitochondrion inner membrane {ECO:0000         | 0 |
|        | be performed. View primary data.               | 0 |
| Q9ULL0 | Cytoplasmic vesicle, secretory vesicle,        | 1 |
|        |                                                | 0 |
| Q8WYQ3 | Mitochondrion intermembrane space {ECO:        | 1 |
| Q00526 |                                                | 0 |
| Q16538 | Cell membrane {ECO:0000250}; Multi-pass        | 0 |
| Q96A05 |                                                | 0 |
| P10075 | Nucleus {ECO:0000305}.                         | 0 |
|        | be performed. View primary data.               | 0 |
|        |                                                | 0 |
| P49908 | Secreted {ECO:0000269 PubMed:8142465}.         | 0 |
|        | be performed. View primary data.               | 0 |
| D6RJB6 | Nucleus {ECO:0000250}. Endoplasmic reti        | 0 |
| Q9UF12 |                                                | 0 |
| D6R9N7 | Nucleus {ECO:0000250}. Endoplasmic reti        | 0 |
| Q2M3X9 | Nucleus {ECO:0000305}.                         | 0 |
|        | be performed. View primary data.               | 0 |
| Q14585 | Nucleus {ECO:0000305}.                         | 0 |
| Q6ZWI9 |                                                | 0 |
| C9J202 |                                                | 0 |
|        | cells. Cytoplasm {ECO:0000269 PubMed:24132240} | 0 |
|        | be performed. View primary data.               | 0 |
| Q7Z398 | Nucleus {ECO:0000305}.                         | 0 |
| Q8TF63 | Nucleus {ECO:0000269 PubMed:11798177, F        | 0 |
|        |                                                | 0 |
|        | be performed. View primary data.               | 0 |
| Q9UN75 | Cell membrane {ECO:0000250}; Single-pas        | 0 |
| Q96A99 | Secreted {ECO:0000305}.                        | 0 |
| Q2M5E4 |                                                | 0 |
| O60330 | Cell membrane {ECO:0000250}; Single-pas        | 0 |
| PODMB2 |                                                | 0 |
| Q6ZNX1 | Chromosome {ECO:0000269 PubMed:2965689         | 0 |
| Q8N9Z2 |                                                | 0 |
| P31260 | Nucleus.                                       | 0 |
| Q69YZ2 | Membrane {ECO:0000305}; Multi-pass mem         | 0 |
| Q9Y5F9 | Cell membrane {ECO:0000250}; Single-pas        | 0 |

|        |                                                             |   |
|--------|-------------------------------------------------------------|---|
| A8MV23 | Secreted {ECO:0000305}.                                     | 0 |
| Q8IVY1 | Membrane {ECO:0000305}; Single-pass ty                      | 0 |
| P0DKX4 | Membrane {ECO:0000305}; Single-pass men                     | 0 |
| Q9Y5G8 | Cell membrane {ECO:0000250}; Single-pas                     | 0 |
| Q9Y5G6 | Cell membrane {ECO:0000250}; Single-pas                     | 0 |
| Q56P42 | Cytoplasm {ECO:0000269 PubMed:17178784,                     | 0 |
| Q5PT55 | Membrane {ECO:0000305}; Multi-pass mem                      | 0 |
| Q2TAA5 | Endoplasmic reticulum {ECO:0000269 PubM                     | 0 |
| P78527 | Nucleus {ECO:0000269 PubMed:12231622, I                     | 1 |
| Q9Y5G7 | Cell membrane {ECO:0000250}; Single-pas                     | 0 |
| Q9Y5G5 | Cell membrane {ECO:0000250}; Single-pas                     | 0 |
| Q5TAP6 | Nucleus, nucleolus {ECO:0000250}.                           | 0 |
| Q9Y5H3 | Cell membrane {ECO:0000250}; Single-pas                     | 0 |
| Q9Y5H2 | Cell membrane {ECO:0000250}; Single-pas                     | 0 |
| Q9Y5G2 | Cell membrane {ECO:0000250}; Single-pas                     | 0 |
| Q9UN71 | Cell membrane {ECO:0000250}; Single-pas                     | 0 |
| Q3ZCT1 | Nucleus {ECO:0000269 PubMed:16166646}.                      | 0 |
| P07948 | Cell membrane. Nucleus. Cytoplasm. Cyt                      | 0 |
| Q96BK5 | Nucleus. Nucleus, nucleolus. Chromosome                     | 0 |
| Q9Y5F8 | Cell membrane {ECO:0000250}; Single-pas                     | 0 |
| E5RHQ5 | Membrane {ECO:0000305}; Single-pass men                     | 0 |
| Q9Y5G3 | Cell membrane {ECO:0000250}; Single-pas                     | 0 |
| Q9Y5H0 | Cell membrane {ECO:0000250}; Single-pas                     | 0 |
| Q50LG9 | Membrane {ECO:0000305}; Single-pass men                     | 0 |
| Q08ET2 | Cell membrane {ECO:0000269 PubMed:17012                     | 0 |
| Q9GZY1 | Cytoplasm {ECO:0000269 PubMed:11156405}                     | 0 |
| Q6ZNB5 |                                                             | 0 |
| Q2VPB7 |                                                             | 0 |
| Q9BY43 | Cytoplasmic vesicle membrane. Late end                      | 0 |
|        | be performed. View primary data.                            | 0 |
| Q8NEV1 |                                                             | 0 |
| P0C7Q2 | Cytoplasm {ECO:0000269 PubMed:16174643,                     | 1 |
| P01308 | Secreted.                                                   | 0 |
| A6NKG5 | Membrane {ECO:0000305}; Multi-pass mem                      | 1 |
|        |                                                             | 0 |
| P26641 |                                                             | 0 |
|        | state gland cells.                                          | 0 |
| Q8N1D0 |                                                             | 0 |
| E9PIF3 |                                                             | 0 |
| Q567V2 | Membrane {ECO:0000305}; Multi-pass mem                      | 0 |
| Q96FH0 | Lysosome membrane {ECO:0000305 PubMed:2                     | 0 |
|        |                                                             | 0 |
| Q9NY33 | Cytoplasm, cytosol {ECO:0000269 PubMed:                     | 0 |
|        |                                                             | 0 |
|        | group of tissues, most abundant in adipose tissues. RNA-bas | 0 |
| Q3MUY2 | Endoplasmic reticulum membrane {ECO:00                      | 0 |
| Q7LBR1 | Cytoplasm, cytosol. Endosome. Late end                      | 1 |
| Q8N140 | Nucleus {ECO:0000269 PubMed:15987788}.                      | 0 |
|        | be performed. View primary data.                            | 0 |
| P0CW27 |                                                             | 0 |
|        |                                                             | 0 |
| Q9Y6B2 | Nucleus {ECO:0000269 PubMed:11223246}.                      | 0 |
| P49019 | Cell membrane; Multi-pass membrane prot                     | 0 |
| Q6P2I7 |                                                             | 0 |
|        |                                                             | 0 |

|               |                                          |   |
|---------------|------------------------------------------|---|
| P57730        |                                          | 0 |
| E9PQR5        |                                          | 0 |
| be performed. | View primary data.                       | 0 |
| Q9BRP7        |                                          | 0 |
| be performed. | View primary data.                       | 0 |
| Q6ZNK6        |                                          | 0 |
| P11509        | Endoplasmic reticulum membrane; Periph   | 1 |
| P43234        | Lysosome.                                | 0 |
| Q8WXU2        | Nucleus. Cytoplasm.                      | 0 |
| O94892        | Nucleus {ECO:0000305}.                   | 0 |
| be performed. | View primary data.                       | 0 |
| H3BR10        | Membrane {ECO:0000305}; Multi-pass mem   | 0 |
| P21506        | Nucleus {ECO:0000269 PubMed:23665872}.   | 0 |
| P08397        | Cytoplasm {ECO:0000305}.                 | 0 |
| be performed. | View primary data.                       | 0 |
| F5H284        | Cytoplasm {ECO:0000250 UniProtKB:P62937} | 0 |
| Q9NY37        | Cell membrane {ECO:0000269 PubMed:10767} | 0 |
| Q9BXA9        | Nucleus {ECO:0000305}.                   | 0 |
| be performed. | View primary data.                       | 0 |
| Q9UHN1        | Mitochondrion.                           | 0 |
| Q8NGR1        | Cell membrane; Multi-pass membrane prot  | 0 |
| be performed. | View primary data.                       | 0 |
| POCW20        |                                          | 0 |
| Q9GZX5        | Nucleus. Nucleus matrix. Note=Associat   | 0 |
| PODJD9        | Secreted.                                | 0 |
| Q96L46        | Cytoplasm {ECO:0000250}. Cell membrane   | 0 |
| POCW19        | Cytoplasm {ECO:0000305}.                 | 0 |
| Q7Z601        | Cell membrane; Multi-pass membrane prot  | 0 |
| P00738        | Secreted.                                | 0 |
| be performed. | View primary data.                       | 0 |
| A4DIU4        |                                          | 0 |
| Q8ND56        | Cytoplasm, P-body {ECO:0000269 PubMed:1} | 0 |
| B2RN74        | Cell membrane; Multi-pass membrane prot  | 0 |
| P59533        | Membrane; Multi-pass membrane protein.   | 0 |
| P86452        | Nucleus {ECO:0000250 UniProtKB:D2EAC2}.  | 0 |
| O43451        | Apical cell membrane; Single-pass type   | 0 |
| P49356        |                                          | 0 |
| be performed. | View primary data.                       | 0 |
| C9JN71        | Nucleus {ECO:0000305}.                   | 0 |
| C9JVW0        | Membrane {ECO:0000305}; Single-pass men  | 0 |
| Q9Y2B0        | Endoplasmic reticulum {ECO:0000255 PRO   | 1 |
| Q2M2H8        | Membrane {ECO:0000305}; Single-pass men  | 1 |
| P39880        | Nucleus.                                 | 0 |
| A6NCE7        | Cytoplasm, cytoskeleton {ECO:0000250}.   | 0 |
| be performed. | View primary data.                       | 0 |
| be performed. | View primary data.                       | 0 |
| Q8WUH1        |                                          | 0 |
| Q8IXM2        | Nucleus {ECO:0000305}.                   | 1 |
| Q9HBH1        | Mitochondrion {ECO:0000305}.             | 0 |
| Q5GAN4        | Secreted {ECO:0000305}.                  | 0 |
| Q8NH07        | Cell membrane {ECO:0000305}; Multi-pass  | 0 |
| be performed. | View primary data.                       | 0 |
| Q6UW49        | Cytoplasmic vesicle, secretory vesicle,  | 0 |

|                                  |                                         |   |
|----------------------------------|-----------------------------------------|---|
| be performed. View primary data. |                                         | 0 |
| Q92843                           | Mitochondrion membrane {ECO:0000269 Pub | 0 |
|                                  |                                         | 0 |
|                                  |                                         | 0 |
| A6NLW8                           | Nucleus {ECO:0000255 PROSITE-ProRule:PF | 0 |
| Q96GE4                           | Cytoplasm, cytoskeleton, microtubule or | 0 |
| Q13509                           | Cytoplasm, cytoskeleton {ECO:0000250 Ur | 0 |
| Q01534                           | Cytoplasm {ECO:0000269 PubMed:8923009}. | 0 |
| E9PQ53                           | Mitochondrion inner membrane {ECO:00002 | 0 |
| PODI80                           | Membrane {ECO:0000305}; Single-pass mem | 0 |
|                                  |                                         | 0 |
| P05106                           | Cell membrane {ECO:0000269 PubMed:20020 | 0 |
| be performed. View primary data. |                                         | 0 |
| Q96EF9                           |                                         | 0 |
| be performed. View primary data. |                                         | 0 |
| P01241                           | Secreted.                               | 0 |
| Q9BU02                           | Cytoplasm {ECO:0000269 PubMed:11827967} | 0 |
| Q9H2W6                           | Mitochondrion {ECO:0000269 PubMed:25278 | 0 |
| Q8NDT2                           | Nucleus, nucleoplasm {ECO:0000269 PubMe | 0 |
| H3BV60                           | Membrane {ECO:0000305}; Single-pass mem | 0 |
| P09629                           | Nucleus.                                | 0 |
| tids.                            |                                         | 0 |
|                                  |                                         | 0 |
| Q9P0K9                           | Cell membrane {ECO:0000250 UniProtKB:Bl | 0 |
| be performed. View primary data. |                                         | 0 |
| Q6DHY5                           | Cell membrane {ECO:0000250}; Lipid-anch | 0 |
| P22897                           | Endosome membrane {ECO:0000269 PubMed:2 | 1 |
| be performed. View primary data. |                                         | 0 |
| Q7RTU7                           | Nucleus {ECO:0000255 PROSITE-ProRule:PF | 0 |
| Q9H693                           |                                         | 0 |
| B7U540                           | Cell membrane {ECO:0000269 PubMed:21665 | 0 |
|                                  |                                         | 0 |
|                                  |                                         | 0 |
| Q5TYW2                           |                                         | 0 |
| be performed. View primary data. |                                         | 0 |
| Q5GH72                           | Membrane {ECO:0000305}; Multi-pass memt | 0 |
| Q9ULG6                           | Cytoplasmic granule membrane {ECO:00002 | 0 |
| PODMM9                           | Cytoplasm.                              | 1 |
| H3BS89                           | Membrane {ECO:0000305}; Multi-pass memt | 0 |
|                                  | Cytoplasm, cytoskeleton {ECO:0000269 Pt | 0 |
| POCJ78                           | Nucleus {ECO:0000250}.                  | 0 |
| Q14137                           | Nucleus, nucleolus {ECO:0000255 HAMAP-F | 0 |
| nd smooth muscle.                | Cell membrane {ECO:0000269 PubMed:17580 | 0 |
| Q3ZCM7                           | Cytoplasm, cytoskeleton {ECO:0000269 Pt | 0 |
| Q2WGJ8                           | Membrane {ECO:0000305}; Multi-pass memt | 0 |
| Q9H2C0                           | Cytoplasm. Cytoplasm, cytoskeleton.     | 0 |
| H3BRN8                           |                                         | 0 |
| Q9BWW7                           | Nucleus {ECO:0000269 PubMed:11274425}.  | 0 |
| P00739                           | Secreted {ECO:0000269 PubMed:16778136}. | 0 |
| be performed. View primary data. |                                         | 0 |
|                                  |                                         | 0 |
| be performed. View primary data. |                                         | 0 |
| Q16674                           | Secreted.                               | 0 |
| Q9Y5G4                           | Cell membrane {ECO:0000250}; Single-pas | 0 |
| A0A1B0GTQ4                       | Cell membrane {ECO:0000250 UniProtKB:Q2 | 0 |

|            |                                                                          |   |
|------------|--------------------------------------------------------------------------|---|
| Q9Y5G1     | Cell membrane {ECO:0000250}; Single-pass                                 | 0 |
| P57737     | Golgi apparatus membrane. Golgi apparatus                                | 0 |
| I3L3R5     | Secreted {ECO:0000305}.                                                  | 0 |
| Q9Y5G9     | Cell membrane {ECO:0000250}; Single-pass                                 | 0 |
| Q9HCB6     | Secreted, extracellular space, extracellular                             | 0 |
| P52815     | Mitochondrion {ECO:0000269 PubMed:86267}                                 | 1 |
| I3L1E1     |                                                                          | 0 |
| Q8N1B3     |                                                                          | 0 |
| P78347     | Cytoplasm {ECO:0000269 PubMed:10373551}                                  | 1 |
| Q14588     | Nucleus {ECO:0000305}.                                                   | 0 |
| P0CAP1     | Cytoplasm, cytoskeleton {ECO:0000250 UniProt                             | 0 |
| I3L1I5     |                                                                          | 0 |
| Q9Y536     | Cytoplasm {ECO:0000250 UniProtKB:P62937}                                 | 0 |
| A0A0B4J2A2 | Cytoplasm {ECO:0000250 UniProtKB:P62937}                                 | 0 |
| Q9BRL6     | Nucleus {ECO:0000269 PubMed:9671500}.                                    | 1 |
| H0Y354     |                                                                          | 0 |
| Q14164     | Cytoplasm {ECO:0000269 PubMed:24882218}                                  | 0 |
| P08118     | Secreted. Note=Sperm surface.                                            | 0 |
| Q9UK05     | Secreted {ECO:0000269 PubMed:18309101},                                  | 0 |
| Q86T75     | Cytoplasm {ECO:0000305}.                                                 | 0 |
| Q7Z3S9     | Secreted {ECO:0000269 PubMed:14673143},                                  | 0 |
| Q9Y623     | Cytoplasm, myofibril. Note=Thick filament                                | 1 |
| Q6GQQ9     | Cytoplasm {ECO:0000269 PubMed:11463333},                                 | 1 |
|            | be performed. View primary data.                                         | 0 |
|            | be performed. View primary data. Cell membrane {ECO:0000255}; Multi-pass | 0 |
| P36382     | Cell membrane; Multi-pass membrane protein                               | 0 |
|            | be performed. View primary data.                                         | 0 |
| P10745     | Secreted, extracellular space, extracellular                             | 0 |
| Q9Y5S9     | Nucleus {ECO:0000269 PubMed:11030346}, I                                 | 0 |
| O14925     | Mitochondrion inner membrane {ECO:0000269 PubMed:11030346}, I            | 0 |
| Q9Y4L5     | Cytoplasm, cytosol {ECO:0000250 UniProt                                  | 0 |
| P18621     |                                                                          | 0 |
| O95073     | Nucleus {ECO:0000269 PubMed:20531236}.                                   | 0 |
| Q9H3M7     | Cytoplasm {ECO:0000250}.                                                 | 0 |
| O75044     | Cell membrane. Cell projection, dendrite                                 | 0 |
|            | be performed. View primary data.                                         | 0 |
| Q8WWW0     | Cytoplasm. Cytoplasm, cytoskeleton. Note=Thick filament                  | 0 |
| Q7RTN6     | Nucleus {ECO:0000269 PubMed:12805220}, I                                 | 0 |
|            | be performed. View primary data.                                         | 0 |
|            | be performed. View primary data.                                         | 0 |
| Q8N660     | Cytoplasm {ECO:0000305}.                                                 | 0 |
| Q13772     |                                                                          | 0 |
| P55107     | Secreted {ECO:0000250 UniProtKB:P97737}                                  | 0 |
| Q9UFV1     |                                                                          | 0 |
|            | be performed. View primary data.                                         | 0 |
| Q9BTE6     | Cytoplasm {ECO:0000250}.                                                 | 1 |
| A8MQ14     | Nucleus {ECO:0000250}.                                                   | 0 |
|            | be performed. View primary data.                                         | 0 |
|            | be performed. View primary data.                                         | 0 |
| B0FP48     | Membrane {ECO:0000305}; Single-pass type                                 | 1 |



|        |                                         |   |
|--------|-----------------------------------------|---|
| P55056 | Secreted.                               | 0 |
| Q96NJ3 | Nucleus {ECO:0000305}.                  | 0 |
| 095136 | Cell membrane; Multi-pass membrane prot | 0 |
|        |                                         | 0 |
| A6NKQ9 | Secreted.                               | 0 |
| Q6P4F2 | Mitochondrion {ECO:0000269 PubMed:20547 | 0 |
| Q9NZL3 | Nucleus {ECO:0000269 PubMed:12239212, F | 0 |
| Q96GY3 |                                         | 0 |
| 095182 | Mitochondrion inner membrane {ECO:00003 | 1 |
|        |                                         | 0 |
| 060224 |                                         | 0 |
|        | Cytoplasm {ECO:0000305}.                | 0 |
|        | be performed. View primary data.        | 0 |
| Q9UN76 | Membrane; Multi-pass membrane protein.  | 0 |
| PODL12 | Membrane {ECO:0000305}; Single-pass mem | 0 |
|        | be performed. View primary data.        | 0 |
| Q8NDB6 | Membrane {ECO:0000305}; Single-pass mem | 0 |
| Q16385 | Nucleus.                                | 1 |
|        |                                         | 0 |
| Q9BXU3 |                                         | 0 |
| P78358 | Cytoplasm {ECO:0000269 PubMed:12065688} | 1 |
| PODMU3 |                                         | 0 |
| Q9UBD0 | Nucleus {ECO:0000305}. Cytoplasm {ECO:( | 0 |
|        | be performed. View primary data.        | 0 |
|        |                                         | 0 |
|        |                                         | 0 |
| Q5HYN5 |                                         | 0 |
|        |                                         | 0 |
| Q96L12 | Endoplasmic reticulum lumen {ECO:000026 | 1 |
| Q8NHU0 |                                         | 0 |
| A6NFA1 | Cell membrane {ECO:0000269 PubMed:22726 | 0 |
|        | be performed. View primary data.        | 0 |
| Q9Y6K9 | Cytoplasm {ECO:0000269 PubMed:14651848} | 0 |
| E7ETH6 | Nucleus {ECO:0000305}.                  | 0 |
| Q01892 | Isoform 1: Nucleus {ECO:0000269 PubMed: | 0 |
| Q9GZY0 | Nucleus, nucleoplasm. Cytoplasm. Note=I | 0 |
| Q9GZY0 | Nucleus, nucleoplasm. Cytoplasm. Note=I | 0 |
|        | ive results.                            | 0 |
| Q5HYR2 |                                         | 0 |
|        | be performed. View primary data.        | 0 |
| Q8NFB2 | Cell projection, dendrite {ECO:0000250} | 0 |
| PODMU9 |                                         | 0 |
|        | be performed. View primary data.        | 0 |
|        | Cytoplasm {ECO:0000305}.                | 0 |
| Q5H9E4 | Mitochondrion inner membrane {ECO:00003 | 0 |
| 060224 |                                         | 0 |
|        | be performed. View primary data.        | 0 |
|        | tis.                                    | 0 |
|        |                                         | 0 |
|        | nt in cerebellum.                       | 0 |
|        |                                         | 0 |
| P62805 | Nucleus. Chromosome.                    | 1 |
|        | be performed. View primary data.        | 0 |
| A2RTY3 |                                         | 0 |
|        | Cytoplasm {ECO:0000305}.                | 0 |

|            |                                          |   |
|------------|------------------------------------------|---|
| Q92804     | Nucleus {ECO:0000269 PubMed:19124016}.   | 0 |
|            |                                          | 0 |
| Q8NHY3     | Cytoplasm, cytoskeleton {ECO:0000305}.   | 0 |
|            |                                          | 0 |
| P62805     | Nucleus. Chromosome.                     | 0 |
| Q96S79     | Cell membrane {ECO:0000305}; Lipid-anch  | 0 |
|            | be performed. View primary data.         | 0 |
| PODMV2     |                                          | 0 |
| A4D2H0     | Membrane {ECO:0000305}; Single-pass mem  | 0 |
|            |                                          | 0 |
| Q9Y4X1     | Membrane {ECO:0000305}; Single-pass typ  | 0 |
| Q86UF2     | Membrane {ECO:0000305}; Single-pass mem  | 0 |
| AOA087WUL8 | Cytoplasm {ECO:0000305}.                 | 0 |
|            | Cytoplasm {ECO:0000305}.                 | 0 |
| Q5DJT8     |                                          | 0 |
| AOA075B759 | Cytoplasm {ECO:0000250 UniProtKB:P62937  | 0 |
| Q7Z6M3     | Cell membrane {ECO:0000269 PubMed:20526  | 0 |
| Q69YU3     |                                          | 0 |
|            | be performed. View primary data.         | 0 |
| Q6FI13     | Nucleus. Chromosome.                     | 1 |
| 095989     | Cytoplasm {ECO:0000305}.                 | 0 |
|            | Nucleus, nuclear pore complex {ECO:0000  | 0 |
|            |                                          | 0 |
| Q8IYR0     | Cytoplasm, cytoskeleton, cilium axoneme  | 0 |
| Q96MW5     | Golgi apparatus membrane {ECO:0000269 F  | 0 |
|            | Cytoplasm. Cytoplasmic granule {ECO:000  | 0 |
| Q9NPI6     | Cytoplasm, P-body {ECO:0000269 PubMed:1  | 0 |
| Q13224     | Cell membrane {ECO:0000269 PubMed:26876  | 0 |
|            | Cytoplasm {ECO:0000250}.                 | 0 |
|            | be performed. View primary data.         | 0 |
| Q8NAP8     | Nucleus {ECO:0000305}.                   | 0 |
| AOA087X1G2 | Cell membrane {ECO:0000250 UniProtKB:Q8  | 0 |
| Q3SYB3     | Nucleus {ECO:0000255 PROSITE-ProRule:PF  | 0 |
| P62805     | Nucleus. Chromosome.                     | 1 |
| Q9NXE8     | Nucleus {ECO:0000269 PubMed:29301961}.   | 1 |
| Q8TCY0     | Membrane {ECO:0000255}; Single-pass mem  | 0 |
| A6NHQ4     | Nucleus {ECO:0000250 UniProtKB:Q7TNS8}.  | 0 |
| Q15649     | Cytoplasm {ECO:0000269 PubMed:28335020}  | 0 |
| PODMV0     |                                          | 0 |
| Q99879     | Nucleus. Chromosome.                     | 1 |
| P48742     | Nucleus {ECO:0000305}.                   | 1 |
|            | lasts in several different tissue types. | 0 |
| Q7L576     | Cytoplasm {ECO:0000250 UniProtKB:Q7TMB8  | 0 |
| P62807     | Nucleus. Chromosome.                     | 1 |
| Q16594     | Nucleus {ECO:0000269 PubMed:11564863, F  | 0 |
| Q9UGY1     | Nucleus, nucleolus {ECO:0000250}.        | 0 |
|            | be performed. View primary data.         | 0 |
| P68431     | Nucleus. Chromosome.                     | 0 |
| A6NHX0     | Cytoplasm, cytosol {ECO:0000269 PubMed:  | 0 |
| Q8NGB6     | Cell membrane; Multi-pass membrane prot  | 0 |
| 014512     | Cytoplasm. Cell membrane; Peripheral me  | 0 |
| POC7X1     | Cell membrane {ECO:0000250}; Lipid-anch  | 0 |
| B5MD39     |                                          | 0 |
| P68431     | Nucleus. Chromosome.                     | 0 |
|            |                                          | 0 |

|                                  |                                          |   |
|----------------------------------|------------------------------------------|---|
| P0DN79                           | Cytoplasm {ECO:0000250 UniProtKB:P35520} | 0 |
| P18089                           | Cell membrane {ECO:0000269 PubMed:23105} | 0 |
| P62807                           | Nucleus. Chromosome.                     | 1 |
| Q5TYW1                           | Nucleus {ECO:0000305}.                   | 0 |
| P56180                           | Membrane; Multi-pass membrane protein.   | 0 |
| A0A087WVF3                       | Cell membrane {ECO:0000250 UniProtKB:Q8  | 0 |
| B9A6J9                           | Cell membrane {ECO:0000250 UniProtKB:Q8  | 0 |
| Q96I51                           | Mitochondrion membrane {ECO:0000269 Pub  | 0 |
| be performed. View primary data. | Nucleus {ECO:0000255 PROSITE-ProRule:PF  | 0 |
| be performed. View primary data. | Nucleus. Chromosome.                     | 0 |
| A6NNM3                           | Cytoplasm, cytoskeleton {ECO:0000250 Ur  | 1 |
| Q8IZP1                           | Cell membrane {ECO:0000269 PubMed:23578  | 0 |
| P62805                           | Nucleus. Chromosome.                     | 1 |
| P23527                           | Nucleus. Chromosome.                     | 1 |
| P55773                           | Secreted.                                | 0 |
| A6NLF2                           | Nucleus {ECO:0000255 PROSITE-ProRule:PF  | 0 |
| P68431                           | Nucleus. Chromosome.                     | 0 |
| P23610                           |                                          | 0 |
| be performed. View primary data. |                                          | 0 |
| A6NDS4                           | Cell membrane {ECO:0000250}; Lipid-anch  | 0 |
| A0A087WXS9                       | Cell membrane {ECO:0000250 UniProtKB:Q8  | 0 |
| be performed. View primary data. |                                          | 0 |
| Q96KK5                           | Nucleus. Chromosome.                     | 1 |
| Q86YH2                           | Nucleus {ECO:0000305}.                   | 0 |
|                                  | Nucleus {ECO:0000305}.                   | 0 |
| Q5MIZ7                           | Cytoplasm {ECO:0000269 PubMed:18487071}  | 0 |
| Q9UMZ2                           | Cytoplasm {ECO:0000250}. Golgi apparatus | 0 |
| Q6ZVK8                           |                                          | 0 |
| Q9BSG1                           | Nucleus {ECO:0000305}.                   | 0 |
|                                  |                                          | 0 |
| P62805                           | Nucleus. Chromosome.                     | 0 |
|                                  |                                          | 0 |
| P0C0S8                           | Nucleus. Chromosome.                     | 1 |
| be performed. View primary data. |                                          | 0 |
| P13236                           | Secreted.                                | 0 |
| Q86YV5                           | Cytoplasm {ECO:0000250 UniProtKB:D3ZMK9  | 0 |
| P68431                           | Nucleus. Chromosome.                     | 0 |
|                                  | Secreted {ECO:0000305}.                  | 0 |
| P35680                           | Nucleus.                                 | 1 |
| be performed. View primary data. |                                          | 0 |
| A8MV24                           |                                          | 0 |
| be performed. View primary data. | Nucleus {ECO:0000255 PROSITE-ProRule:PF  | 0 |
| Q99525                           | Nucleus {ECO:0000250}. Chromosome {ECO:  | 1 |
| Q9NY61                           | Nucleus, nucleolus {ECO:0000269 PubMed:  | 0 |
| Q93079                           | Nucleus. Chromosome.                     | 1 |
| P68431                           | Nucleus. Chromosome.                     | 0 |
| 075951                           | Secreted {ECO:0000269 PubMed:28182716}.  | 0 |
|                                  |                                          | 0 |
| be performed. View primary data. |                                          | 0 |
| Q9UFD9                           | Cytoplasm, cytoskeleton {ECO:0000250 Ur  | 1 |
| Q9P227                           |                                          | 0 |
| Q96RT8                           | Cytoplasm, cytoskeleton, microtubule or  | 1 |
| PODN76                           | Nucleus {ECO:0000250 UniProtKB:Q01081}.  | 1 |
| P07478                           | Secreted, extracellular space.           | 0 |
| be performed. View primary data. |                                          | 0 |

|        |                                          |   |
|--------|------------------------------------------|---|
| 095147 |                                          | 0 |
| Q96T88 | Nucleus {ECO:0000255 PROSITE-ProRule:PF  | 1 |
| Q96D31 | Cell membrane {ECO:0000269 PubMed:16582  | 0 |
|        | Cytoplasm {ECO:0000269 PubMed:19464326}  | 0 |
| P62805 | Nucleus. Chromosome.                     | 0 |
| Q5VUR7 |                                          | 0 |
| Q5UE93 | Cytoplasm {ECO:0000250 UniProtKB:Q3U6Q2  | 0 |
| P78356 | Endoplasmic reticulum membrane {ECO:000  | 0 |
|        |                                          | 0 |
| Q99878 | Nucleus. Chromosome.                     | 1 |
| Q16627 | Secreted.                                | 0 |
| P33778 | Nucleus. Chromosome.                     | 1 |
| B3EWG5 |                                          | 0 |
| Q9Y5G0 | Cell membrane {ECO:0000250}; Single-pass | 0 |
| Q9UI36 | Nucleus {ECO:0000269 PubMed:14525983}.   | 0 |
| POCOS8 | Nucleus. Chromosome.                     | 1 |
|        |                                          | 0 |
| P62805 | Nucleus. Chromosome.                     | 1 |
| P04908 | Nucleus. Chromosome.                     | 1 |
|        |                                          | 0 |
| P23610 |                                          | 0 |
| P62805 | Nucleus. Chromosome.                     | 1 |
|        |                                          | 0 |
| P23610 |                                          | 0 |
| P62807 | Nucleus. Chromosome.                     | 1 |
| P35227 | Nucleus {ECO:0000269 PubMed:21282530}.   | 0 |
|        | be performed. View primary data.         | 0 |
| A8MZA4 |                                          | 0 |
| Q9C0H9 | Cytoplasm. Cytoplasm, cytoskeleton. Cel  | 0 |
|        | be performed. View primary data.         | 0 |
| P29966 | Cell membrane; Multi-pass membrane prot  | 0 |
| Q9BS34 | Cytoplasm, cytoskeleton {ECO:0000305}.   | 1 |
| Q8IV16 | Nucleus {ECO:0000305}.                   | 0 |
|        | Apical cell membrane {ECO:0000250 UniPr  | 0 |
|        |                                          | 0 |
| P07196 |                                          | 0 |
|        | be performed. View primary data.         | 0 |
|        | be performed. View primary data.         | 0 |
|        |                                          | 0 |
| P68431 | Nucleus. Chromosome.                     | 0 |
| P49720 | Cytoplasm {ECO:0000269 PubMed:12181345}  | 0 |
|        | be performed. View primary data.         | 0 |
| POC7P0 | Mitochondrion {ECO:0000269 PubMed:17376  | 0 |
| Q8NG50 | Nucleus {ECO:0000269 PubMed:17905820}.   | 0 |
| Q9Y2R4 | Nucleus, nucleolus {ECO:0000269 PubMed:  | 0 |
| PODMV1 |                                          | 0 |
| P17098 | Nucleus {ECO:0000305}.                   | 0 |
|        | be performed. View primary data.         | 0 |
| P32745 | Cell membrane {ECO:0000250}; Multi-pass  | 0 |
| Q2TBC4 |                                          | 0 |
| Q96H55 | Mitochondrion outer membrane {ECO:00002  | 0 |
| P68431 | Nucleus. Chromosome.                     | 0 |
| PODMU7 |                                          | 0 |
| Q6IPX1 | Cell membrane {ECO:0000250}; Lipid-anch  | 0 |
| Q9H3C7 | Cytoplasmic vesicle {ECO:0000250}. Note  | 0 |
| Q9UJW7 | Nucleus {ECO:0000305}.                   | 0 |

|            |                                                              |   |
|------------|--------------------------------------------------------------|---|
| P04908     | Nucleus. Chromosome.                                         | 1 |
| Q6UWP2     | Secreted {ECO:0000305}.                                      | 0 |
| Q13085     | Cytoplasm.                                                   | 0 |
| P62807     | Nucleus. Chromosome.                                         | 1 |
| AOA087X179 | Cell membrane {ECO:0000250 UniProtKB:Q8                      | 0 |
| Q6IN84     | Mitochondrion {ECO:0000269 PubMed:24036                      | 1 |
| P62805     | Nucleus. Chromosome.                                         | 1 |
|            |                                                              | 0 |
| Q3SY89     | Nucleus {ECO:0000255 PROSITE-ProRule:PF                      | 0 |
| POCOS8     | Nucleus. Chromosome.                                         | 1 |
| P62805     | Nucleus. Chromosome.                                         | 1 |
| P68431     | Nucleus. Chromosome.                                         | 0 |
|            | Mitochondrion {ECO:0000269 PubMed:25278                      | 0 |
| PODPE8     | Membrane {ECO:0000305}; Single-pass mem                      | 0 |
| Q8NGL2     | Cell membrane; Multi-pass membrane prot                      | 0 |
|            | be performed. View primary data.                             | 0 |
| PODN26     | Cytoplasm {ECO:0000250 UniProtKB:P62937                      | 0 |
| Q5VWM3     |                                                              | 0 |
|            |                                                              | 0 |
| Q8NH92     | Cell membrane; Multi-pass membrane prot                      | 0 |
|            | ive results.                                                 | 0 |
| Q9BTK6     | Nucleus {ECO:0000269 PubMed:19039327}.                       | 0 |
| Q8TD47     |                                                              | 0 |
|            | Nucleus matrix.                                              | 1 |
|            | be performed. View primary data.                             | 0 |
|            | be performed. View primary data.                             | 0 |
|            | be performed. View primary data.                             | 0 |
|            | be performed. View primary data.                             | 0 |
|            | be performed. View primary data.                             | 0 |
|            | be performed. View primary data.                             | 0 |
|            |                                                              | 0 |
| B3KU38     | Cell projection, axon {ECO:0000250 UniF                      | 0 |
|            | be performed. View primary data.                             | 0 |
| Q6F5E7     |                                                              | 0 |
|            |                                                              | 0 |
|            | be performed. View primary data.                             | 0 |
| Q2M3D2     |                                                              | 0 |
| Q9UI38     | Endoplasmic reticulum {ECO:0000305 PubM                      | 1 |
|            | be performed. View primary data.                             | 0 |
|            |                                                              | 0 |
|            | stomach and gallbladder.                                     | 0 |
|            | Mitochondrion inner membrane {ECO:00002                      | 0 |
|            |                                                              | 0 |
|            |                                                              | 0 |
|            | be performed. View primary data.                             | 0 |
|            | id and hematopoietic tissues. RNA-based expert annotation ga | 0 |
| Q6IEY1     | Cell membrane; Multi-pass membrane prot                      | 0 |
| Q8NH09     | Cell membrane; Multi-pass membrane prot                      | 0 |
| Q6IEY1     | Cell membrane; Multi-pass membrane prot                      | 0 |
|            | be performed. View primary data.                             | 0 |
|            | ive results. Nucleus {ECO:0000269 PubMed:26607847}.          | 0 |
|            |                                                              | 0 |
| Q15813     | Cytoplasm {ECO:0000250}. Cytoplasm, cyt                      | 0 |
|            |                                                              | 0 |

|        |                                           |   |
|--------|-------------------------------------------|---|
| Q9UFE4 | Cytoplasm, cytoskeleton, cilium axoneme   | 0 |
| Q3KRB8 |                                           | 0 |
| PODPD8 | Golgi apparatus membrane {ECO:0000250 U   | 0 |
|        |                                           | 0 |
|        | ession in subset of cells in bone marrow. | 0 |
| Q9NR28 | Mitochondrion {ECO:0000269 PubMed:14523   | 0 |
|        | be performed. View primary data.          | 0 |
| E5RIL1 | Membrane {ECO:0000255}; Single-pass typ   | 0 |
| P04075 | Cytoplasm, myofibril, sarcomere, I band   | 0 |
|        | Cytoplasm {ECO:0000250}. Cytoplasm, cyt   | 0 |
| Q3KRB8 |                                           | 0 |
|        |                                           | 0 |
| Q08493 | Cell projection, cilium {ECO:0000250}.    | 0 |
|        |                                           | 0 |
| Q15293 | Endoplasmic reticulum lumen.              | 0 |
| Q9UG63 |                                           | 0 |
|        |                                           | 0 |
|        | be performed. View primary data.          | 0 |
|        | es, most abundant in thymus and testis.   | 0 |
|        | ive results.                              | 0 |
| Q96KX1 |                                           | 0 |
|        | be performed. View primary data.          | 0 |
|        | be performed. View primary data.          | 0 |
|        |                                           | 0 |

Table S-3. Subcellular locations of immunofluorescence cell line in

| NO. | Gene            | Antibody id | Cell line 1 |
|-----|-----------------|-------------|-------------|
| 1   | ENSG00000000003 | HPA004109   | CACO-2      |
| 2   | ENSG00000000457 | HPA005624   | U-2 OS      |
| 3   | ENSG00000000460 | HPA024451   | A-431       |
| 4   | ENSG00000000938 | HPA002024   | RT4         |
| 5   | ENSG00000000971 | HPA038922   | A-431       |
| 6   | ENSG00000001084 | CAB009569   | U-2 OS      |
| 7   | ENSG00000001084 | HPA036360   | U-2 OS      |
| 8   | ENSG00000001167 | HPA050779   | RT4         |
| 9   | ENSG00000001460 | HPA024301   | U-2 OS      |
| 10  | ENSG00000001461 | HPA039978   | U-2 OS      |
| 11  | ENSG00000001497 | HPA044431   | U-2 OS      |
| 12  | ENSG00000001629 | HPA019358   | U-2 OS      |
| 13  | ENSG00000001629 | HPA021780   | U-2 OS      |
| 14  | ENSG00000001630 | HPA041325   | U-2 OS      |
| 15  | ENSG00000001630 | HPA043508   | U-2 OS      |
| 16  | ENSG00000001631 | HPA049606   | U-2 OS      |
| 17  | ENSG00000002016 | HPA028957   | CACO-2      |
| 18  | ENSG00000002330 | CAB004205   | U-2 OS      |
| 19  | ENSG00000002330 | HPA028185   | A-431       |
| 20  | ENSG00000002549 | HPA029606   | U-2 OS      |
| 21  | ENSG00000002586 | CAB000020   | U-2 OS      |
| 22  | ENSG00000002587 | HPA002237   | RT4         |
| 23  | ENSG00000002746 | HPA007203   | A549        |
| 24  | ENSG00000002822 | CAB015338   | U-251 MG    |
| 25  | ENSG00000002834 | HPA012072   | U-2 OS      |
| 26  | ENSG00000002834 | CAB022049   | U-2 OS      |
| 27  | ENSG00000002919 | HPA044787   | U-2 OS      |
| 28  | ENSG00000002933 | HPA008770   | U-2 OS      |
| 29  | ENSG00000003096 | HPA059901   | U-2 OS      |
| 30  | ENSG00000003137 | HPA012567   | U-2 OS      |
| 31  | ENSG00000003147 | HPA061452   | RT4         |
| 32  | ENSG00000003249 | HPA043018   | U-2 OS      |
| 33  | ENSG00000003393 | HPA046588   | U-2 OS      |
| 34  | ENSG00000003400 | HPA017059   | U-2 OS      |
| 35  | ENSG00000003402 | HPA019044   | U-2 OS      |
| 36  | ENSG00000003402 | CAB022157   | U-2 OS      |
| 37  | ENSG00000003402 | CAB025216   | U-2 OS      |
| 38  | ENSG00000003436 | CAB020842   | U-2 OS      |
| 39  | ENSG00000003756 | HPA017335   | U-2 OS      |
| 40  | ENSG00000003756 | HPA018011   | U-2 OS      |
| 41  | ENSG00000003987 | HPA075682   | U-2 OS      |
| 42  | ENSG00000003989 | HPA009277   | U-2 OS      |
| 43  | ENSG00000004139 | HPA024759   | U-2 OS      |
| 44  | ENSG00000004142 | HPA007700   | CACO-2      |
| 45  | ENSG00000004468 | HPA022132   | A549        |
| 46  | ENSG00000004478 | HPA006148   | U-2 OS      |
| 47  | ENSG00000004478 | HPA062857   | U-2 OS      |
| 48  | ENSG00000004487 | CAB005884   | U-2 OS      |
| 49  | ENSG00000004487 | HPA053660   | U-2 OS      |
| 50  | ENSG00000004534 | HPA027164   | U-2 OS      |
| 51  | ENSG00000004660 | HPA028062   | U-2 OS      |
| 52  | ENSG00000004700 | CAB009743   | U-2 OS      |
| 53  | ENSG00000004700 | HPA030960   | U-2 OS      |

|     |                 |           |          |
|-----|-----------------|-----------|----------|
| 54  | ENSG00000004700 | HPA064259 | U-251 MG |
| 55  | ENSG00000004766 | HPA026679 | U-2 OS   |
| 56  | ENSG00000004776 | HPA054811 | U-2 OS   |
| 57  | ENSG00000004777 | HPA030117 | U-2 OS   |
| 58  | ENSG00000004779 | HPA054364 | U-2 OS   |
| 59  | ENSG00000004838 | HPA035255 | U-2 OS   |
| 60  | ENSG00000004864 | HPA018997 | U-2 OS   |
| 61  | ENSG00000004866 | HPA038325 | U-2 OS   |
| 62  | ENSG00000004866 | HPA038326 | U-2 OS   |
| 63  | ENSG00000004897 | CAB016315 | U-2 OS   |
| 64  | ENSG00000004897 | HPA028129 | U-2 OS   |
| 65  | ENSG00000004897 | HPA052399 | U-2 OS   |
| 66  | ENSG00000004897 | HPA065835 | U-2 OS   |
| 67  | ENSG00000004961 | HPA002946 | U-2 OS   |
| 68  | ENSG00000004975 | HPA021611 | U-2 OS   |
| 69  | ENSG00000004975 | HPA064732 | U-2 OS   |
| 70  | ENSG00000005001 | HPA049161 | CACO-2   |
| 71  | ENSG00000005007 | HPA019587 | U-2 OS   |
| 72  | ENSG00000005020 | HPA005560 | U-2 OS   |
| 73  | ENSG00000005020 | HPA024045 | A-431    |
| 74  | ENSG00000005022 | HPA046835 | U-2 OS   |
| 75  | ENSG00000005059 | HPA048776 | A-431    |
| 76  | ENSG00000005073 | HPA006770 | U-2 OS   |
| 77  | ENSG00000005075 | HPA046970 | A-431    |
| 78  | ENSG00000005100 | HPA073875 | U-2 OS   |
| 79  | ENSG00000005102 | HPA063788 | HeLa     |
| 80  | ENSG00000005156 | HPA006723 | U-2 OS   |
| 81  | ENSG00000005175 | HPA038311 | U-2 OS   |
| 82  | ENSG00000005189 | HPA040755 | U-2 OS   |
| 83  | ENSG00000005194 | HPA041350 | U-2 OS   |
| 84  | ENSG00000005206 | HPA039292 | U-2 OS   |
| 85  | ENSG00000005238 | HPA048831 | U-2 OS   |
| 86  | ENSG00000005249 | HPA063879 | U-2 OS   |
| 87  | ENSG00000005302 | HPA034536 | U-2 OS   |
| 88  | ENSG00000005339 | CAB004212 | U-2 OS   |
| 89  | ENSG00000005339 | HPA055861 | U-2 OS   |
| 90  | ENSG00000005381 | HPA061464 | U-2 OS   |
| 91  | ENSG00000005436 | HPA077882 | U-2 OS   |
| 92  | ENSG00000005448 | HPA053558 | U-2 OS   |
| 93  | ENSG00000005469 | HPA019365 | U-2 OS   |
| 94  | ENSG00000005471 | HPA049395 | U-2 OS   |
| 95  | ENSG00000005483 | HPA042866 | RT4      |
| 96  | ENSG00000005486 | HPA045074 | U-2 OS   |
| 97  | ENSG00000005486 | HPA051960 | U-2 OS   |
| 98  | ENSG00000005513 | HPA041640 | U-2 OS   |
| 99  | ENSG00000005513 | HPA058665 | U-2 OS   |
| 100 | ENSG00000005700 | HPA023826 | A-431    |
| 101 | ENSG00000005801 | HPA030605 | U-2 OS   |
| 102 | ENSG00000005810 | HPA058807 | U-2 OS   |
| 103 | ENSG00000005812 | HPA053283 | HeLa     |
| 104 | ENSG00000005812 | HPA065626 | U-2 OS   |
| 105 | ENSG00000005882 | HPA008287 | U-2 OS   |
| 106 | ENSG00000005884 | CAB018594 | U-2 OS   |
| 107 | ENSG00000005889 | HPA003877 | U-2 OS   |
| 108 | ENSG00000005889 | HPA071863 | U-2 OS   |



|     |                 |           |          |
|-----|-----------------|-----------|----------|
| 109 | ENSG00000005893 | HPA029100 | U-251 MG |
| 110 | ENSG00000005893 | HPA029101 | U-251 MG |
| 111 | ENSG00000005961 | HPA031169 | HEL      |
| 112 | ENSG00000006007 | HPA074747 | U-2 OS   |
| 113 | ENSG00000006015 | HPA043414 | U-2 OS   |
| 114 | ENSG00000006025 | HPA053083 | U-2 OS   |
| 115 | ENSG00000006042 | HPA040473 | CACO-2   |
| 116 | ENSG00000006042 | HPA053385 | U-2 OS   |
| 117 | ENSG00000006062 | HPA027270 | U-2 OS   |
| 118 | ENSG00000006071 | HPA042318 | U-2 OS   |
| 119 | ENSG00000006118 | HPA060492 | U-2 OS   |
| 120 | ENSG00000006125 | CAB017631 | U-2 OS   |
| 121 | ENSG00000006125 | HPA056733 | U-2 OS   |
| 122 | ENSG00000006194 | HPA035085 | U-2 OS   |
| 123 | ENSG00000006194 | HPA035086 | U-2 OS   |
| 124 | ENSG00000006210 | CAB026192 | U-2 OS   |
| 125 | ENSG00000006282 | HPA022023 | U-2 OS   |
| 126 | ENSG00000006327 | HPA007853 | U-2 OS   |
| 127 | ENSG00000006377 | HPA061460 | Hep G2   |
| 128 | ENSG00000006432 | HPA000942 | A-431    |
| 129 | ENSG00000006451 | HPA047037 | U-2 OS   |
| 130 | ENSG00000006453 | HPA019484 | U-2 OS   |
| 131 | ENSG00000006453 | HPA021257 | U-2 OS   |
| 132 | ENSG00000006453 | HPA023874 | U-2 OS   |
| 133 | ENSG00000006459 | HPA012114 | U-2 OS   |
| 134 | ENSG00000006468 | HPA077249 | RH-30    |
| 135 | ENSG00000006530 | HPA053471 | U-2 OS   |
| 136 | ENSG00000006576 | HPA012312 | U-2 OS   |
| 137 | ENSG00000006607 | HPA055592 | U-251 MG |
| 138 | ENSG00000006611 | HPA027398 | CACO-2   |
| 139 | ENSG00000006611 | HPA028033 | CACO-2   |
| 140 | ENSG00000006634 | HPA042923 | U-2 OS   |
| 141 | ENSG00000006638 | HPA077366 | U-2 OS   |
| 142 | ENSG00000006652 | HPA024122 | U-2 OS   |
| 143 | ENSG00000006659 | HPA065180 | U-2 OS   |
| 144 | ENSG00000006695 | HPA032006 | U-2 OS   |
| 145 | ENSG00000006704 | HPA044254 | U-2 OS   |
| 146 | ENSG00000006712 | HPA043637 | U-2 OS   |
| 147 | ENSG00000006744 | HPA019535 | U-2 OS   |
| 148 | ENSG00000006747 | HPA020518 | HEK 293  |
| 149 | ENSG00000006747 | HPA024264 | U-2 OS   |
| 150 | ENSG00000006756 | HPA063835 | U-2 OS   |
| 151 | ENSG00000006837 | HPA027751 | U-2 OS   |
| 152 | ENSG00000007001 | HPA035225 | U-2 OS   |
| 153 | ENSG00000007001 | HPA035226 | U-2 OS   |
| 154 | ENSG00000007038 | HPA008477 | U-2 OS   |
| 155 | ENSG00000007047 | HPA039186 | U-2 OS   |
| 156 | ENSG00000007080 | HPA041708 | U-2 OS   |
| 157 | ENSG00000007080 | HPA046765 | U-2 OS   |
| 158 | ENSG00000007168 | HPA020036 | A-431    |
| 159 | ENSG00000007202 | HPA042781 | U-2 OS   |
| 160 | ENSG00000007237 | HPA064678 | U-2 OS   |
| 161 | ENSG00000007264 | HPA066547 | U-2 OS   |
| 162 | ENSG00000007314 | HPA053992 | U-2 OS   |
| 163 | ENSG00000007341 | HPA075418 | AF22     |

|     |                 |           |         |
|-----|-----------------|-----------|---------|
| 164 | ENSG00000007350 | HPA000505 | THP-1   |
| 165 | ENSG00000007372 | HPA030775 | U-2 OS  |
| 166 | ENSG00000007376 | HPA041144 | U-2 OS  |
| 167 | ENSG00000007384 | HPA077399 | CACO-2  |
| 168 | ENSG00000007392 | HPA056424 | U-2 OS  |
| 169 | ENSG00000007392 | HPA069321 | U-2 OS  |
| 170 | ENSG00000007402 | HPA071829 | HEK 293 |
| 171 | ENSG00000007520 | HPA040760 | U-2 OS  |
| 172 | ENSG00000007541 | HPA039828 | U-2 OS  |
| 173 | ENSG00000007541 | HPA061414 | MCF7    |
| 174 | ENSG00000007545 | HPA041752 | U-2 OS  |
| 175 | ENSG00000007923 | HPA028705 | A-431   |
| 176 | ENSG00000008018 | HPA029635 | MCF7    |
| 177 | ENSG00000008083 | HPA063889 | U-2 OS  |
| 178 | ENSG00000008086 | CAB011577 | U-2 OS  |
| 179 | ENSG00000008128 | CAB010467 | U-2 OS  |
| 180 | ENSG00000008128 | HPA073626 | U-2 OS  |
| 181 | ENSG00000008130 | HPA053368 | A-431   |
| 182 | ENSG00000008196 | HPA062942 | U-2 OS  |
| 183 | ENSG00000008226 | HPA019077 | U-2 OS  |
| 184 | ENSG00000008256 | HPA013979 | U-2 OS  |
| 185 | ENSG00000008277 | HPA050325 | HEK 293 |
| 186 | ENSG00000008294 | HPA040446 | U-2 OS  |
| 187 | ENSG00000008294 | HPA061458 | U-2 OS  |
| 188 | ENSG00000008311 | HPA020637 | U-2 OS  |
| 189 | ENSG00000008311 | HPA020728 | U-2 OS  |
| 190 | ENSG00000008311 | HPA020734 | U-2 OS  |
| 191 | ENSG00000008323 | HPA058230 | CACO-2  |
| 192 | ENSG00000008324 | HPA047377 | U-2 OS  |
| 193 | ENSG00000008382 | HPA043274 | U-2 OS  |
| 194 | ENSG00000008394 | HPA044840 | U-2 OS  |
| 195 | ENSG00000008405 | CAB018762 | U-2 OS  |
| 196 | ENSG00000008441 | HPA007533 | U-2 OS  |
| 197 | ENSG00000008853 | HPA060938 | RT4     |
| 198 | ENSG00000008869 | HPA042025 | U-2 OS  |
| 199 | ENSG00000008869 | HPA055639 | A-431   |
| 200 | ENSG00000008952 | HPA014059 | U-2 OS  |
| 201 | ENSG00000008988 | HPA003570 | U-2 OS  |
| 202 | ENSG00000009307 | HPA018846 | A-431   |
| 203 | ENSG00000009307 | HPA052221 | U-2 OS  |
| 204 | ENSG00000009335 | HPA039915 | U-2 OS  |
| 205 | ENSG00000009413 | HPA069382 | U-2 OS  |
| 206 | ENSG00000009724 | HPA029313 | A-431   |
| 207 | ENSG00000009765 | HPA059627 | CACO-2  |
| 208 | ENSG00000009780 | HPA077897 | HaCaT   |
| 209 | ENSG00000009790 | HPA040796 | U-2 OS  |
| 210 | ENSG00000009844 | HPA030969 | U-2 OS  |
| 211 | ENSG00000009950 | HPA064640 | U-2 OS  |
| 212 | ENSG00000009954 | HPA067010 | U-2 OS  |
| 213 | ENSG00000010017 | CAB033767 | U-2 OS  |
| 214 | ENSG00000010030 | HPA029033 | A-431   |
| 215 | ENSG00000010030 | HPA049689 | HaCaT   |
| 216 | ENSG00000010072 | HPA025073 | U-2 OS  |
| 217 | ENSG00000010165 | HPA044498 | U-2 OS  |
| 218 | ENSG00000010219 | HPA028065 | A-431   |

|     |                 |           |          |
|-----|-----------------|-----------|----------|
| 219 | ENSG00000010219 | HPA056073 | U-2 OS   |
| 220 | ENSG00000010244 | HPA017013 | U-2 OS   |
| 221 | ENSG00000010244 | HPA063908 | U-2 OS   |
| 222 | ENSG00000010256 | HPA002815 | U-2 OS   |
| 223 | ENSG00000010270 | HPA019204 | U-2 OS   |
| 224 | ENSG00000010278 | CAB002490 | U-2 OS   |
| 225 | ENSG00000010292 | CAB012423 | U-2 OS   |
| 226 | ENSG00000010292 | HPA037363 | A-431    |
| 227 | ENSG00000010318 | HPA036283 | U-2 OS   |
| 228 | ENSG00000010318 | HPA070305 | U-2 OS   |
| 229 | ENSG00000010327 | HPA005434 | U-2 OS   |
| 230 | ENSG00000010361 | HPA041779 | HEK 293  |
| 231 | ENSG00000010379 | HPA036449 | U-2 OS   |
| 232 | ENSG00000010379 | HPA052726 | U-2 OS   |
| 233 | ENSG00000010438 | HPA062452 | U-2 OS   |
| 234 | ENSG00000010539 | HPA018981 | U-2 OS   |
| 235 | ENSG00000010610 | CAB000011 | U-251 MG |
| 236 | ENSG00000010626 | HPA037766 | U-2 OS   |
| 237 | ENSG00000010626 | HPA057533 | U-2 OS   |
| 238 | ENSG00000010671 | HPA002028 | HEL      |
| 239 | ENSG00000010704 | HPA053470 | A549     |
| 240 | ENSG00000010803 | HPA048898 | U-2 OS   |
| 241 | ENSG00000010803 | HPA053292 | U-2 OS   |
| 242 | ENSG00000010810 | HPA023887 | U-2 OS   |
| 243 | ENSG00000010810 | HPA063770 | U-2 OS   |
| 244 | ENSG00000010818 | HPA055954 | A-431    |
| 245 | ENSG00000011007 | HPA005910 | U-2 OS   |
| 246 | ENSG00000011009 | HPA063151 | A-431    |
| 247 | ENSG00000011021 | HPA032097 | U-2 OS   |
| 248 | ENSG00000011052 | HPA008467 | A-431    |
| 249 | ENSG00000011105 | HPA014002 | U-2 OS   |
| 250 | ENSG00000011114 | HPA049926 | RT4      |
| 251 | ENSG00000011132 | HPA045577 | U-2 OS   |
| 252 | ENSG00000011198 | HPA035851 | U-2 OS   |
| 253 | ENSG00000011243 | HPA042485 | U-2 OS   |
| 254 | ENSG00000011258 | HPA021876 | U-2 OS   |
| 255 | ENSG00000011260 | HPA052378 | U-2 OS   |
| 256 | ENSG00000011275 | HPA018955 | U-2 OS   |
| 257 | ENSG00000011295 | HPA023010 | U-2 OS   |
| 258 | ENSG00000011295 | HPA052380 | U-2 OS   |
| 259 | ENSG00000011304 | CAB013507 | U-2 OS   |
| 260 | ENSG00000011332 | HPA049148 | U-2 OS   |
| 261 | ENSG00000011376 | HPA066085 | U-2 OS   |
| 262 | ENSG00000011405 | HPA037641 | U-2 OS   |
| 263 | ENSG00000011422 | CAB073533 | U-2 OS   |
| 264 | ENSG00000011426 | HPA050556 | U-2 OS   |
| 265 | ENSG00000011426 | CAB068175 | U-2 OS   |
| 266 | ENSG00000011451 | HPA022923 | U-2 OS   |
| 267 | ENSG00000011451 | HPA023774 | U-2 OS   |
| 268 | ENSG00000011454 | HPA064860 | U-2 OS   |
| 269 | ENSG00000011454 | HPA072273 | U-2 OS   |
| 270 | ENSG00000011478 | HPA040797 | Hep G2   |
| 271 | ENSG00000011485 | HPA029065 | U-2 OS   |
| 272 | ENSG00000011523 | HPA040493 | HEK 293  |
| 273 | ENSG00000011566 | HPA030380 | U-2 OS   |

|     |                 |           |             |
|-----|-----------------|-----------|-------------|
| 274 | ENSG00000011638 | HPA063509 | RT4         |
| 275 | ENSG00000012048 | HPA004840 | HAP1        |
| 276 | ENSG00000012061 | CAB004390 | U-251 MG    |
| 277 | ENSG00000012061 | HPA050182 | U-2 OS      |
| 278 | ENSG00000012174 | CAB009486 | U-2 OS      |
| 279 | ENSG00000012504 | HPA047699 | U-2 OS      |
| 280 | ENSG00000012660 | CAB017042 | U-2 OS      |
| 281 | ENSG00000012660 | HPA047752 | U-2 OS      |
| 282 | ENSG00000012660 | HPA054197 | U-251 MG    |
| 283 | ENSG00000012779 | HPA071285 | RT4         |
| 284 | ENSG00000012817 | HPA049086 | U-2 OS      |
| 285 | ENSG00000012822 | HPA038313 | U-2 OS      |
| 286 | ENSG00000012822 | HPA038314 | U-2 OS      |
| 287 | ENSG00000012963 | HPA000861 | U-2 OS      |
| 288 | ENSG00000012983 | HPA036696 | U-2 OS      |
| 289 | ENSG00000013016 | HPA066751 | U-2 OS      |
| 290 | ENSG00000013275 | HPA002044 | U-2 OS      |
| 291 | ENSG00000013293 | HPA045929 | U-2 OS      |
| 292 | ENSG00000013297 | HPA013657 | HUVEC TERT2 |
| 293 | ENSG00000013364 | HPA002321 | U-2 OS      |
| 294 | ENSG00000013364 | CAB002752 | U-2 OS      |
| 295 | ENSG00000013364 | CAB022717 | U-2 OS      |
| 296 | ENSG00000013374 | HPA050722 | U-2 OS      |
| 297 | ENSG00000013374 | HPA053648 | MCF7        |
| 298 | ENSG00000013375 | HPA029760 | U-2 OS      |
| 299 | ENSG00000013392 | HPA030106 | SH-SY5Y     |
| 300 | ENSG00000013441 | HPA062405 | U-2 OS      |
| 301 | ENSG00000013503 | HPA036466 | U-2 OS      |
| 302 | ENSG00000013523 | HPA000948 | U-251 MG    |
| 303 | ENSG00000013561 | HPA008716 | U-2 OS      |
| 304 | ENSG00000013573 | HPA065197 | U-2 OS      |
| 305 | ENSG00000013583 | HPA056417 | U-2 OS      |
| 306 | ENSG00000013583 | HPA075277 | U-2 OS      |
| 307 | ENSG00000013588 | HPA007928 | U-2 OS      |
| 308 | ENSG00000013588 | HPA046526 | U-2 OS      |
| 309 | ENSG00000013619 | HPA003923 | U-2 OS      |
| 310 | ENSG00000013810 | HPA006050 | U-2 OS      |
| 311 | ENSG00000013810 | CAB010111 | U-2 OS      |
| 312 | ENSG00000013810 | HPA022039 | U-2 OS      |
| 313 | ENSG00000014123 | HPA030559 | U-2 OS      |
| 314 | ENSG00000014138 | HPA037570 | U-2 OS      |
| 315 | ENSG00000014164 | HPA050577 | U-2 OS      |
| 316 | ENSG00000014216 | HPA005992 | U-2 OS      |
| 317 | ENSG00000014641 | HPA027296 | U-2 OS      |
| 318 | ENSG00000014914 | HPA030351 | U-2 OS      |
| 319 | ENSG00000014919 | HPA066096 | CACO-2      |
| 320 | ENSG00000015133 | HPA005832 | U-2 OS      |
| 321 | ENSG00000015153 | HPA026867 | U-2 OS      |
| 322 | ENSG00000015171 | HPA015816 | U-2 OS      |
| 323 | ENSG00000015285 | HPA002022 | HEL         |
| 324 | ENSG00000015413 | HPA012783 | Hep G2      |
| 325 | ENSG00000015475 | HPA000722 | U-2 OS      |
| 326 | ENSG00000015479 | HPA036565 | U-2 OS      |
| 327 | ENSG00000015532 | HPA016456 | U-2 OS      |
| 328 | ENSG00000015568 | HPA067564 | CACO-2      |

|     |                 |           |           |
|-----|-----------------|-----------|-----------|
| 329 | ENSG00000015592 | HPA027765 | U-2 OS    |
| 330 | ENSG00000015676 | HPA019136 | U-2 OS    |
| 331 | ENSG00000016082 | HPA057416 | SH-SY5Y   |
| 332 | ENSG00000016402 | CAB024990 | U-2 OS    |
| 333 | ENSG00000016602 | HPA064770 | RT4       |
| 334 | ENSG00000016864 | HPA010588 | U-2 OS    |
| 335 | ENSG00000017260 | HPA069684 | U-2 OS    |
| 336 | ENSG00000017483 | HPA047411 | U-2 OS    |
| 337 | ENSG00000017797 | HPA046651 | U-2 OS    |
| 338 | ENSG00000018189 | HPA022970 | U-2 OS    |
| 339 | ENSG00000018408 | HPA007415 | U-2 OS    |
| 340 | ENSG00000018510 | HPA030209 | U-2 OS    |
| 341 | ENSG00000018510 | HPA030211 | U-2 OS    |
| 342 | ENSG00000018610 | HPA064831 | U-2 OS    |
| 343 | ENSG00000018699 | HPA031246 | U-2 OS    |
| 344 | ENSG00000018869 | HPA028858 | U-2 OS    |
| 345 | ENSG00000019102 | HPA035919 | RT4       |
| 346 | ENSG00000019144 | HPA061506 | U-2 OS    |
| 347 | ENSG00000019169 | HPA063793 | U-2 OS    |
| 348 | ENSG00000019186 | HPA022261 | A549      |
| 349 | ENSG00000019186 | HPA063771 | U-2 OS    |
| 350 | ENSG00000019505 | HPA056602 | U-2 OS    |
| 351 | ENSG00000019549 | CAB011671 | U-2 OS    |
| 352 | ENSG00000019582 | CAB002506 | U-2 OS    |
| 353 | ENSG00000019991 | HPA040360 | U-2 OS    |
| 354 | ENSG00000019995 | HPA029241 | U-2 OS    |
| 355 | ENSG00000020129 | HPA023676 | U-2 OS    |
| 356 | ENSG00000020256 | HPA058387 | U-2 OS    |
| 357 | ENSG00000020426 | HPA001154 | U-2 OS    |
| 358 | ENSG00000020577 | HPA065309 | CACO-2    |
| 359 | ENSG00000020633 | HPA004195 | U-2 OS    |
| 360 | ENSG00000020922 | HPA002691 | U-2 OS    |
| 361 | ENSG00000020922 | CAB004081 | A-431     |
| 362 | ENSG00000021355 | HPA018882 | SK-MEL-30 |
| 363 | ENSG00000021461 | HPA072245 | U-2 OS    |
| 364 | ENSG00000021574 | HPA017311 | U-2 OS    |
| 365 | ENSG00000021762 | HPA038335 | U-2 OS    |
| 366 | ENSG00000021762 | HPA038712 | U-2 OS    |
| 367 | ENSG00000021776 | HPA040624 | U-2 OS    |
| 368 | ENSG00000021776 | HPA055647 | U-2 OS    |
| 369 | ENSG00000021826 | HPA021400 | U-2 OS    |
| 370 | ENSG00000022267 | HPA001040 | U-2 OS    |
| 371 | ENSG00000022277 | HPA053986 | U-2 OS    |
| 372 | ENSG00000022556 | HPA021183 | U-2 OS    |
| 373 | ENSG00000022567 | HPA023154 | U-2 OS    |
| 374 | ENSG00000022840 | HPA052643 | U-2 OS    |
| 375 | ENSG00000022976 | HPA020434 | U-2 OS    |
| 376 | ENSG00000023171 | HPA008557 | U-2 OS    |
| 377 | ENSG00000023191 | HPA039223 | U-2 OS    |
| 378 | ENSG00000023191 | HPA040781 | U-2 OS    |
| 379 | ENSG00000023228 | HPA064605 | U-2 OS    |
| 380 | ENSG00000023287 | HPA053049 | U-2 OS    |
| 381 | ENSG00000023330 | CAB017498 | U-2 OS    |
| 382 | ENSG00000023330 | HPA035860 | U-2 OS    |
| 383 | ENSG00000023445 | HPA002317 | U-2 OS    |

|     |                 |           |           |
|-----|-----------------|-----------|-----------|
| 384 | ENSG00000023516 | HPA039089 | U-2 OS    |
| 385 | ENSG00000023572 | HPA023087 | U-2 OS    |
| 386 | ENSG00000023572 | HPA057224 | U-2 OS    |
| 387 | ENSG00000023608 | HPA067076 | U-2 OS    |
| 388 | ENSG00000023608 | HPA072276 | U-2 OS    |
| 389 | ENSG00000023697 | HPA055897 | CACO-2    |
| 390 | ENSG00000023734 | HPA055557 | U-2 OS    |
| 391 | ENSG00000023734 | HPA073876 | CACO-2    |
| 392 | ENSG00000023892 | HPA038975 | RT4       |
| 393 | ENSG00000023892 | HPA038976 | RT4       |
| 394 | ENSG00000023902 | HPA061018 | U-2 OS    |
| 395 | ENSG00000023909 | CAB009568 | U-2 OS    |
| 396 | ENSG00000023909 | HPA023696 | U-2 OS    |
| 397 | ENSG00000023909 | CAB040554 | U-2 OS    |
| 398 | ENSG00000024048 | HPA027880 | U-2 OS    |
| 399 | ENSG00000024422 | HPA047394 | U-2 OS    |
| 400 | ENSG00000024422 | HPA066751 | U-2 OS    |
| 401 | ENSG00000024526 | CAB017845 | U-2 OS    |
| 402 | ENSG00000024862 | HPA055125 | HEK 293   |
| 403 | ENSG00000025039 | HPA068664 | U-2 OS    |
| 404 | ENSG00000025156 | HPA031455 | U-2 OS    |
| 405 | ENSG00000025293 | HPA029620 | U-2 OS    |
| 406 | ENSG00000025293 | HPA029621 | U-2 OS    |
| 407 | ENSG00000025423 | HPA059141 | U-2 OS    |
| 408 | ENSG00000025708 | HPA000530 | U-2 OS    |
| 409 | ENSG00000025770 | HPA067932 | CACO-2    |
| 410 | ENSG00000025770 | HPA069056 | U-2 OS    |
| 411 | ENSG00000025796 | HPA053295 | U-2 OS    |
| 412 | ENSG00000025800 | HPA018863 | U-2 OS    |
| 413 | ENSG00000026025 | HPA001762 | U-2 OS    |
| 414 | ENSG00000026103 | HPA027444 | A-431     |
| 415 | ENSG00000026508 | CAB000112 | A-431     |
| 416 | ENSG00000026508 | CAB000316 | U-2 OS    |
| 417 | ENSG00000026508 | HPA005785 | U-2 OS    |
| 418 | ENSG00000026559 | HPA039530 | U-2 OS    |
| 419 | ENSG00000026652 | HPA053287 | U-2 OS    |
| 420 | ENSG00000026652 | HPA060525 | HEK 293   |
| 421 | ENSG00000026751 | HPA061654 | A-431     |
| 422 | ENSG00000026950 | HPA012565 | U-2 OS    |
| 423 | ENSG00000027001 | HPA030676 | U-2 OS    |
| 424 | ENSG00000027001 | HPA031670 | U-2 OS    |
| 425 | ENSG00000027075 | HPA026294 | U-2 OS    |
| 426 | ENSG00000027075 | HPA053709 | U-2 OS    |
| 427 | ENSG00000027697 | HPA029213 | U-2 OS    |
| 428 | ENSG00000028116 | HPA047503 | CACO-2    |
| 429 | ENSG00000028203 | HPA004811 | U-2 OS    |
| 430 | ENSG00000028277 | HPA049056 | CACO-2    |
| 431 | ENSG00000028277 | HPA062096 | CACO-2    |
| 432 | ENSG00000028310 | HPA021465 | U-2 OS    |
| 433 | ENSG00000028528 | HPA047373 | U-2 OS    |
| 434 | ENSG00000028528 | HPA052761 | U-2 OS    |
| 435 | ENSG00000028839 | HPA071810 | U-2 OS    |
| 436 | ENSG00000028839 | HPA071813 | SK-MEL-30 |
| 437 | ENSG00000029153 | HPA059074 | U-2 OS    |
| 438 | ENSG00000029363 | HPA006484 | U-2 OS    |

|     |                 |           |          |
|-----|-----------------|-----------|----------|
| 439 | ENSG00000029363 | HPA027770 | U-2 OS   |
| 440 | ENSG00000029364 | HPA075390 | U-2 OS   |
| 441 | ENSG00000029725 | HPA024235 | U-2 OS   |
| 442 | ENSG00000029993 | HPA062583 | U-2 OS   |
| 443 | ENSG00000030419 | HPA059142 | RT4      |
| 444 | ENSG00000030582 | HPA008763 | U-2 OS   |
| 445 | ENSG00000030582 | HPA028747 | U-2 OS   |
| 446 | ENSG00000031003 | HPA041819 | U-2 OS   |
| 447 | ENSG00000031691 | HPA029043 | U-2 OS   |
| 448 | ENSG00000031691 | HPA054965 | A-431    |
| 449 | ENSG00000031698 | HPA016939 | U-2 OS   |
| 450 | ENSG00000031698 | HPA064668 | U-2 OS   |
| 451 | ENSG00000031823 | HPA043375 | U-2 OS   |
| 452 | ENSG00000031823 | HPA043389 | U-2 OS   |
| 453 | ENSG00000032219 | HPA048899 | RT4      |
| 454 | ENSG00000032389 | HPA031231 | U-2 OS   |
| 455 | ENSG00000032389 | HPA031234 | U-2 OS   |
| 456 | ENSG00000033011 | HPA060392 | HEK 293  |
| 457 | ENSG00000033030 | HPA037483 | U-2 OS   |
| 458 | ENSG00000033030 | HPA037484 | U-2 OS   |
| 459 | ENSG00000033050 | HPA020091 | U-2 OS   |
| 460 | ENSG00000033050 | CAB020682 | U-2 OS   |
| 461 | ENSG00000033100 | HPA020992 | U-2 OS   |
| 462 | ENSG00000033122 | HPA005625 | HEL      |
| 463 | ENSG00000033170 | CAB017129 | U-2 OS   |
| 464 | ENSG00000033170 | HPA040863 | U-2 OS   |
| 465 | ENSG00000033178 | HPA037001 |          |
| 466 | ENSG00000033327 | HPA001368 | SH-SY5Y  |
| 467 | ENSG00000033627 | HPA022144 | A-431    |
| 468 | ENSG00000033800 | HPA005743 | U-2 OS   |
| 469 | ENSG00000033867 | CAB022494 | U-2 OS   |
| 470 | ENSG00000034053 | HPA058796 | SH-SY5Y  |
| 471 | ENSG00000034053 | HPA070376 | U-2 OS   |
| 472 | ENSG00000034152 | CAB018548 | U-251 MG |
| 473 | ENSG00000034239 | HPA069955 | A-431    |
| 474 | ENSG00000034533 | HPA037011 | U-2 OS   |
| 475 | ENSG00000034693 | HPA042830 | U-2 OS   |
| 476 | ENSG00000034713 | HPA036726 | U-2 OS   |
| 477 | ENSG00000035115 | HPA030927 | U-2 OS   |
| 478 | ENSG00000035141 | HPA030104 | U-2 OS   |
| 479 | ENSG00000035403 | HPA063777 | RT4      |
| 480 | ENSG00000035499 | HPA038255 | U-2 OS   |
| 481 | ENSG00000035664 | HPA071581 | MCF7     |
| 482 | ENSG00000035681 | HPA023151 | U-2 OS   |
| 483 | ENSG00000035687 | HPA024400 | U-2 OS   |
| 484 | ENSG00000035720 | HPA038529 | U-2 OS   |
| 485 | ENSG00000035928 | HPA046116 | U-2 OS   |
| 486 | ENSG00000035928 | HPA069306 | U-2 OS   |
| 487 | ENSG00000036054 | HPA038151 | U-2 OS   |
| 488 | ENSG00000036054 | HPA038152 | U-2 OS   |
| 489 | ENSG00000036448 | HPA001765 | HEK 293  |
| 490 | ENSG00000036473 | HPA000243 | U-2 OS   |
| 491 | ENSG00000036549 | HPA053663 | U-2 OS   |
| 492 | ENSG00000036549 | HPA054913 | U-2 OS   |
| 493 | ENSG00000036672 | HPA006777 | U-2 OS   |

|     |                 |           |          |
|-----|-----------------|-----------|----------|
| 494 | ENSG00000036672 | HPA007222 | U-2 OS   |
| 495 | ENSG00000037042 | CAB011495 | U-2 OS   |
| 496 | ENSG00000037241 | HPA030449 | U-2 OS   |
| 497 | ENSG00000037280 | CAB000099 | U-2 OS   |
| 498 | ENSG00000037280 | HPA046519 | MCF7     |
| 499 | ENSG00000037474 | HPA037896 | U-2 OS   |
| 500 | ENSG00000037637 | HPA025071 | A-431    |
| 501 | ENSG00000037749 | HPA049198 | U-2 OS   |
| 502 | ENSG00000037757 | HPA042744 | U-2 OS   |
| 503 | ENSG00000037897 | HPA020914 | U-2 OS   |
| 504 | ENSG00000037897 | HPA050450 | U-2 OS   |
| 505 | ENSG00000037965 | HPA028911 | U-2 OS   |
| 506 | ENSG00000038210 | HPA004099 | U-2 OS   |
| 507 | ENSG00000038219 | HPA037362 | U-2 OS   |
| 508 | ENSG00000038219 | HPA041290 | U-2 OS   |
| 509 | ENSG00000038274 | HPA037722 | U-2 OS   |
| 510 | ENSG00000038295 | HPA060767 | HeLa     |
| 511 | ENSG00000038358 | HPA041164 | U-2 OS   |
| 512 | ENSG00000038358 | HPA043038 | U-2 OS   |
| 513 | ENSG00000038382 | HPA064664 | U-2 OS   |
| 514 | ENSG00000038427 | HPA004726 | U-251 MG |
| 515 | ENSG00000038532 | HPA061385 | U-2 OS   |
| 516 | ENSG00000039068 | CAB028364 | A-431    |
| 517 | ENSG00000039123 | HPA037379 | U-2 OS   |
| 518 | ENSG00000039319 | HPA035935 | U-2 OS   |
| 519 | ENSG00000039319 | HPA035936 | U-2 OS   |
| 520 | ENSG00000039523 | HPA005923 | U-2 OS   |
| 521 | ENSG00000039560 | HPA036949 | U-2 OS   |
| 522 | ENSG00000039560 | HPA036950 | U-2 OS   |
| 523 | ENSG00000039650 | HPA006782 | U-2 OS   |
| 524 | ENSG00000040199 | HPA048598 | U-2 OS   |
| 525 | ENSG00000040275 | HPA044700 | U-2 OS   |
| 526 | ENSG00000040341 | CAB020836 | U-2 OS   |
| 527 | ENSG00000040487 | HPA057810 | HEK 293  |
| 528 | ENSG00000040531 | HPA046947 | U-2 OS   |
| 529 | ENSG00000040608 | CAB012443 | U-2 OS   |
| 530 | ENSG00000040633 | HPA052410 | U-2 OS   |
| 531 | ENSG00000040933 | HPA001628 | U-2 OS   |
| 532 | ENSG00000041353 | HPA019849 | U-2 OS   |
| 533 | ENSG00000041357 | HPA055466 | CACO-2   |
| 534 | ENSG00000041515 | HPA058769 | SH-SY5Y  |
| 535 | ENSG00000041515 | HPA071948 | SH-SY5Y  |
| 536 | ENSG00000041802 | HPA037704 | U-2 OS   |
| 537 | ENSG00000041880 | HPA020984 | SiHa     |
| 538 | ENSG00000041988 | HPA067114 | U-2 OS   |
| 539 | ENSG00000042062 | HPA051823 | U-2 OS   |
| 540 | ENSG00000042088 | HPA071317 | U-2 OS   |
| 541 | ENSG00000042286 | HPA028961 | Hep G2   |
| 542 | ENSG00000042286 | HPA075576 | U-2 OS   |
| 543 | ENSG00000042317 | HPA038082 | U-2 OS   |
| 544 | ENSG00000042317 | HPA038083 | U-2 OS   |
| 545 | ENSG00000042429 | HPA046619 | U-2 OS   |
| 546 | ENSG00000042445 | HPA046513 | U-2 OS   |
| 547 | ENSG00000042493 | HPA019080 | U-2 OS   |
| 548 | ENSG00000042980 | HPA074034 | U-2 OS   |



|     |                 |           |         |
|-----|-----------------|-----------|---------|
| 549 | ENSG00000043039 | HPA068414 | A-431   |
| 550 | ENSG00000043093 | HPA035911 | U-2 OS  |
| 551 | ENSG00000043143 | HPA025959 | U-2 OS  |
| 552 | ENSG00000043143 | HPA055789 | U-2 OS  |
| 553 | ENSG00000043355 | HPA055031 | U-2 OS  |
| 554 | ENSG00000043514 | HPA024174 | U-2 OS  |
| 555 | ENSG00000044115 | HPA046119 | CACO-2  |
| 556 | ENSG00000044115 | HPA063535 | CACO-2  |
| 557 | ENSG00000044446 | HPA002912 | U-2 OS  |
| 558 | ENSG00000044459 | HPA007201 | AF22    |
| 559 | ENSG00000044524 | HPA069390 | U-2 OS  |
| 560 | ENSG00000044574 | HPA038845 | U-2 OS  |
| 561 | ENSG00000046604 | HPA004896 | A-431   |
| 562 | ENSG00000046604 | CAB025122 | A-431   |
| 563 | ENSG00000046647 | HPA028613 | U-2 OS  |
| 564 | ENSG00000046651 | HPA031103 | U-2 OS  |
| 565 | ENSG00000046774 | HPA062230 | U-2 OS  |
| 566 | ENSG00000046889 | HPA075956 | HEK 293 |
| 567 | ENSG00000047056 | HPA037565 | U-2 OS  |
| 568 | ENSG00000047188 | HPA072678 | U-2 OS  |
| 569 | ENSG00000047230 | HPA017437 | U-2 OS  |
| 570 | ENSG00000047249 | HPA023421 | U-2 OS  |
| 571 | ENSG00000047315 | HPA037506 | U-2 OS  |
| 572 | ENSG00000047346 | HPA040180 | U-2 OS  |
| 573 | ENSG00000047365 | HPA035925 | U-2 OS  |
| 574 | ENSG00000047410 | HPA019661 | U-2 OS  |
| 575 | ENSG00000047410 | HPA019663 | U-2 OS  |
| 576 | ENSG00000047410 | HPA024336 | U-2 OS  |
| 577 | ENSG00000047578 | HPA035090 | U-2 OS  |
| 578 | ENSG00000047579 | HPA028053 | U-2 OS  |
| 579 | ENSG00000047579 | HPA029615 | U-2 OS  |
| 580 | ENSG00000047597 | HPA019036 | U-2 OS  |
| 581 | ENSG00000047617 | HPA036276 | U-2 OS  |
| 582 | ENSG00000047621 | HPA037871 | U-2 OS  |
| 583 | ENSG00000047634 | HPA035270 | U-2 OS  |
| 584 | ENSG00000047634 | HPA061397 | U-2 OS  |
| 585 | ENSG00000047644 | HPA039814 | U-2 OS  |
| 586 | ENSG00000047648 | HPA001798 | HEL     |
| 587 | ENSG00000047849 | HPA038149 | U-2 OS  |
| 588 | ENSG00000047849 | HPA038150 | U-2 OS  |
| 589 | ENSG00000047932 | HPA019477 | A-431   |
| 590 | ENSG00000047932 | HPA024018 | U-2 OS  |
| 591 | ENSG00000047936 | HPA072424 | U-2 OS  |
| 592 | ENSG00000048028 | HPA006778 | U-2 OS  |
| 593 | ENSG00000048052 | HPA028926 | U-2 OS  |
| 594 | ENSG00000048140 | HPA030447 | MCF7    |
| 595 | ENSG00000048162 | HPA036506 | U-2 OS  |
| 596 | ENSG00000048162 | HPA058147 | MCF7    |
| 597 | ENSG00000048392 | CAB006854 | A-431   |
| 598 | ENSG00000048392 | HPA028812 | U-2 OS  |
| 599 | ENSG00000048405 | HPA023090 | U-2 OS  |
| 600 | ENSG00000048405 | HPA052194 | U-2 OS  |
| 601 | ENSG00000048544 | HPA029133 | U-2 OS  |
| 602 | ENSG00000048544 | HPA029134 | U-2 OS  |
| 603 | ENSG00000048545 | HPA005561 | U-2 OS  |

|     |                 |           |         |
|-----|-----------------|-----------|---------|
| 604 | ENSG00000048649 | HPA046129 | U-2 OS  |
| 605 | ENSG00000048649 | HPA057547 | CACO-2  |
| 606 | ENSG00000048649 | HPA064567 | CACO-2  |
| 607 | ENSG00000048707 | HPA027332 | U-2 OS  |
| 608 | ENSG00000048740 | HPA035813 | U-2 OS  |
| 609 | ENSG00000048740 | HPA065098 | U-2 OS  |
| 610 | ENSG00000048828 | HPA019734 | U-2 OS  |
| 611 | ENSG00000048828 | HPA055800 | U-2 OS  |
| 612 | ENSG00000048991 | HPA030936 | U-2 OS  |
| 613 | ENSG00000049089 | HPA056316 | U-2 OS  |
| 614 | ENSG00000049130 | HPA070395 | CACO-2  |
| 615 | ENSG00000049167 | HPA029328 | MCF7    |
| 616 | ENSG00000049239 | HPA005440 | U-2 OS  |
| 617 | ENSG00000049246 | HPA019530 | U-2 OS  |
| 618 | ENSG00000049249 | HPA071425 | CACO-2  |
| 619 | ENSG00000049283 | HPA063224 | U-2 OS  |
| 620 | ENSG00000049323 | HPA005707 | U-2 OS  |
| 621 | ENSG00000049449 | HPA038474 | U-2 OS  |
| 622 | ENSG00000049540 | HPA056941 | BJ      |
| 623 | ENSG00000049541 | HPA029493 | U-2 OS  |
| 624 | ENSG00000049618 | HPA016511 | U-2 OS  |
| 625 | ENSG00000049618 | HPA075291 | RT4     |
| 626 | ENSG00000049656 | HPA014791 | U-2 OS  |
| 627 | ENSG00000049768 | HPA045943 | U-2 OS  |
| 628 | ENSG00000049769 | HPA000244 | U-2 OS  |
| 629 | ENSG00000050030 | HPA000407 | U-2 OS  |
| 630 | ENSG00000050130 | HPA071650 | U-2 OS  |
| 631 | ENSG00000050165 | HPA011868 | U-2 OS  |
| 632 | ENSG00000050327 | HPA020980 | U-2 OS  |
| 633 | ENSG00000050327 | HPA029504 | U-2 OS  |
| 634 | ENSG00000050344 | HPA055889 | CACO-2  |
| 635 | ENSG00000050405 | HPA023871 | U-2 OS  |
| 636 | ENSG00000050405 | HPA052645 | U-2 OS  |
| 637 | ENSG00000050426 | HPA074361 | U-2 OS  |
| 638 | ENSG00000050438 | HPA077895 | SH-SY5Y |
| 639 | ENSG00000050820 | CAB000443 | U-2 OS  |
| 640 | ENSG00000051009 | HPA063987 | U-2 OS  |
| 641 | ENSG00000051108 | HPA041219 | U-2 OS  |
| 642 | ENSG00000051128 | CAB032656 | U-2 OS  |
| 643 | ENSG00000051128 | HPA040999 | U-2 OS  |
| 644 | ENSG00000051180 | HPA039310 | U-2 OS  |
| 645 | ENSG00000051341 | HPA048931 | U-2 OS  |
| 646 | ENSG00000051341 | HPA053359 | U-2 OS  |
| 647 | ENSG00000051382 | HPA042288 | U-2 OS  |
| 648 | ENSG00000051382 | HPA064207 | U-2 OS  |
| 649 | ENSG00000051596 | HPA042764 | U-2 OS  |
| 650 | ENSG00000051825 | HPA037485 | U-2 OS  |
| 651 | ENSG00000052126 | HPA041455 | U-2 OS  |
| 652 | ENSG00000052723 | HPA024177 | U-2 OS  |
| 653 | ENSG00000052749 | HPA049945 | U-2 OS  |
| 654 | ENSG00000052749 | HPA074403 | U-2 OS  |
| 655 | ENSG00000052795 | HPA052758 | U-2 OS  |
| 656 | ENSG00000052841 | HPA038508 | U-2 OS  |
| 657 | ENSG00000052850 | HPA001903 | HEK 293 |
| 658 | ENSG00000053108 | HPA045920 | U-2 OS  |

|     |                 |           |          |
|-----|-----------------|-----------|----------|
| 659 | ENSG00000053254 | HPA059209 | RT4      |
| 660 | ENSG00000053371 | CAB032841 | U-2 OS   |
| 661 | ENSG00000053371 | HPA064638 | U-2 OS   |
| 662 | ENSG00000053372 | HPA026446 | U-2 OS   |
| 663 | ENSG00000053524 | HPA038947 | U-2 OS   |
| 664 | ENSG00000053702 | HPA039860 | U-2 OS   |
| 665 | ENSG00000053747 | HPA009309 | A-431    |
| 666 | ENSG00000053747 | CAB010757 | U-2 OS   |
| 667 | ENSG00000053900 | HPA038395 | U-2 OS   |
| 668 | ENSG00000054116 | HPA028408 | U-2 OS   |
| 669 | ENSG00000054118 | HPA012041 | U-2 OS   |
| 670 | ENSG00000054118 | CAB017472 | U-2 OS   |
| 671 | ENSG00000054118 | HPA063765 | U-2 OS   |
| 672 | ENSG00000054148 | HPA020952 | U-2 OS   |
| 673 | ENSG00000054219 | HPA054073 | CACO-2   |
| 674 | ENSG00000054267 | HPA053692 | U-2 OS   |
| 675 | ENSG00000054277 | HPA064443 | U-2 OS   |
| 676 | ENSG00000054282 | HPA025737 | A-431    |
| 677 | ENSG00000054282 | HPA072495 | A-431    |
| 678 | ENSG00000054356 | HPA007152 | BJ       |
| 679 | ENSG00000054392 | HPA016462 | U-2 OS   |
| 680 | ENSG00000054598 | HPA040670 | U-2 OS   |
| 681 | ENSG00000054611 | HPA001173 | U-2 OS   |
| 682 | ENSG00000054654 | HPA050204 | U-2 OS   |
| 683 | ENSG00000054690 | HPA047707 | U-251 MG |
| 684 | ENSG00000054965 | HPA037580 | RH-30    |
| 685 | ENSG00000054967 | HPA062824 | RH-30    |
| 686 | ENSG00000054967 | HPA071518 | RH-30    |
| 687 | ENSG00000055044 | HPA018472 | U-2 OS   |
| 688 | ENSG00000055044 | HPA021062 | U-2 OS   |
| 689 | ENSG00000055070 | HPA024221 | U-2 OS   |
| 690 | ENSG00000055130 | CAB002676 | A-431    |
| 691 | ENSG00000055130 | HPA064584 | U-2 OS   |
| 692 | ENSG00000055147 | HPA035870 | U-2 OS   |
| 693 | ENSG00000055163 | HPA071459 | U-2 OS   |
| 694 | ENSG00000055211 | HPA041679 | U-2 OS   |
| 695 | ENSG00000055332 | CAB003845 | U-2 OS   |
| 696 | ENSG00000055332 | HPA063893 | U-2 OS   |
| 697 | ENSG00000055483 | HPA012082 | U-2 OS   |
| 698 | ENSG00000055483 | HPA052860 | U-2 OS   |
| 699 | ENSG00000055609 | HPA074736 | U-2 OS   |
| 700 | ENSG00000055732 | HPA018106 | U-2 OS   |
| 701 | ENSG00000055917 | HPA030316 | U-2 OS   |
| 702 | ENSG00000055917 | HPA049670 | U-2 OS   |
| 703 | ENSG00000055950 | HPA073022 | U-2 OS   |
| 704 | ENSG00000055955 | HPA003948 | RT4      |
| 705 | ENSG00000055957 | HPA042049 | U-2 OS   |
| 706 | ENSG00000056050 | HPA043467 | U-2 OS   |
| 707 | ENSG00000056097 | HPA016666 | U-2 OS   |
| 708 | ENSG00000056277 | HPA051494 | U-2 OS   |
| 709 | ENSG00000056291 | HPA026825 | U-2 OS   |
| 710 | ENSG00000056487 | HPA053834 | RT4      |
| 711 | ENSG00000056558 | CAB009593 | A-431    |
| 712 | ENSG00000056586 | HPA042863 | HeLa     |
| 713 | ENSG00000056586 | HPA062144 | U-2 OS   |

|     |                 |           |          |
|-----|-----------------|-----------|----------|
| 714 | ENSG00000056972 | HPA036352 | U-2 OS   |
| 715 | ENSG00000056998 | HPA064686 | CACO-2   |
| 716 | ENSG00000057019 | HPA016909 | U-2 OS   |
| 717 | ENSG00000057149 | CAB036006 | A-431    |
| 718 | ENSG00000057252 | CAB009533 | U-2 OS   |
| 719 | ENSG00000057252 | HPA047171 | A-431    |
| 720 | ENSG00000057294 | HPA014314 | A-431    |
| 721 | ENSG00000057294 | HPA056908 | CACO-2   |
| 722 | ENSG00000057593 | HPA004826 | CACO-2   |
| 723 | ENSG00000057657 | HPA030033 | A-431    |
| 724 | ENSG00000057663 | HPA042973 | U-251 MG |
| 725 | ENSG00000057704 | HPA014272 | U-2 OS   |
| 726 | ENSG00000057935 | HPA039433 | U-2 OS   |
| 727 | ENSG00000058056 | HPA004827 | U-2 OS   |
| 728 | ENSG00000058063 | HPA036237 | U-2 OS   |
| 729 | ENSG00000058085 | HPA024638 | U-2 OS   |
| 730 | ENSG00000058091 | HPA015267 | U-2 OS   |
| 731 | ENSG00000058262 | CAB022076 | U-2 OS   |
| 732 | ENSG00000058272 | HPA041296 | U-2 OS   |
| 733 | ENSG00000058272 | HPA071956 | RT4      |
| 734 | ENSG00000058335 | CAB010413 | U-2 OS   |
| 735 | ENSG00000058335 | HPA041965 | U-2 OS   |
| 736 | ENSG00000058404 | HPA051783 | U-2 OS   |
| 737 | ENSG00000058404 | HPA051785 | U-2 OS   |
| 738 | ENSG00000058453 | HPA021191 | U-2 OS   |
| 739 | ENSG00000058600 | HPA041419 | U-2 OS   |
| 740 | ENSG00000058600 | HPA041477 | U-2 OS   |
| 741 | ENSG00000058668 | HPA040431 | U-2 OS   |
| 742 | ENSG00000058673 | HPA028490 | U-2 OS   |
| 743 | ENSG00000058729 | HPA005681 | U-2 OS   |
| 744 | ENSG00000058799 | HPA014716 | A-431    |
| 745 | ENSG00000058804 | HPA070882 | U-2 OS   |
| 746 | ENSG00000058866 | HPA036577 | U-2 OS   |
| 747 | ENSG00000059122 | HPA041001 | U-2 OS   |
| 748 | ENSG00000059145 | HPA073949 | U-2 OS   |
| 749 | ENSG00000059378 | HPA063872 | U-2 OS   |
| 750 | ENSG00000059573 | HPA012604 | U-2 OS   |
| 751 | ENSG00000059588 | HPA024632 | U-2 OS   |
| 752 | ENSG00000059691 | HPA042610 | U-2 OS   |
| 753 | ENSG00000059728 | HPA001599 | A-431    |
| 754 | ENSG00000059758 | HPA015325 | U-2 OS   |
| 755 | ENSG00000059769 | HPA019122 | U-2 OS   |
| 756 | ENSG00000059804 | HPA006539 | CACO-2   |
| 757 | ENSG00000059915 | HPA059237 | U-2 OS   |
| 758 | ENSG00000060069 | HPA070389 | RT4      |
| 759 | ENSG00000060138 | HPA034838 | U-2 OS   |
| 760 | ENSG00000060140 | HPA040468 | RT4      |
| 761 | ENSG00000060237 | HPA046541 | U-2 OS   |
| 762 | ENSG00000060339 | HPA007856 | U-2 OS   |
| 763 | ENSG00000060339 | HPA048513 | U-2 OS   |
| 764 | ENSG00000060491 | HPA017899 | U-2 OS   |
| 765 | ENSG00000060642 | HPA054181 | A-431    |
| 766 | ENSG00000060688 | HPA026527 | U-2 OS   |
| 767 | ENSG00000060709 | HPA041494 | U-2 OS   |
| 768 | ENSG00000060709 | HPA044114 | U-2 OS   |

|     |                 |           |          |
|-----|-----------------|-----------|----------|
| 769 | ENSG00000060718 | HPA058335 | U-2 OS   |
| 770 | ENSG00000060749 | HPA005682 | U-2 OS   |
| 771 | ENSG00000060762 | HPA045119 | U-2 OS   |
| 772 | ENSG00000060762 | HPA055790 | U-2 OS   |
| 773 | ENSG00000060971 | HPA006764 | A-431    |
| 774 | ENSG00000060971 | HPA007244 | U-2 OS   |
| 775 | ENSG00000061273 | HPA004775 | U-2 OS   |
| 776 | ENSG00000061337 | HPA006294 | U-2 OS   |
| 777 | ENSG00000061455 | HPA030324 | U-2 OS   |
| 778 | ENSG00000061676 | HPA020449 | U-2 OS   |
| 779 | ENSG00000061794 | HPA038513 | U-2 OS   |
| 780 | ENSG00000061918 | CAB010890 | U-2 OS   |
| 781 | ENSG00000061936 | HPA039362 | U-2 OS   |
| 782 | ENSG00000061936 | HPA040063 | U-2 OS   |
| 783 | ENSG00000061938 | HPA041954 | U-2 OS   |
| 784 | ENSG00000061987 | HPA038697 | U-2 OS   |
| 785 | ENSG00000062038 | HPA001767 | CACO-2   |
| 786 | ENSG00000062096 | HPA000549 | U-2 OS   |
| 787 | ENSG00000062194 | HPA037773 | U-2 OS   |
| 788 | ENSG00000062370 | HPA023856 | A-431    |
| 789 | ENSG00000062485 | HPA038460 | U-2 OS   |
| 790 | ENSG00000062485 | HPA038461 | U-2 OS   |
| 791 | ENSG00000062485 | CAB075750 | U-2 OS   |
| 792 | ENSG00000062485 | CAB075752 | U-2 OS   |
| 793 | ENSG00000062485 | CAB075754 | U-2 OS   |
| 794 | ENSG00000062524 | HPA059545 | U-2 OS   |
| 795 | ENSG00000062598 | HPA018811 | U-2 OS   |
| 796 | ENSG00000062716 | HPA064780 | U-2 OS   |
| 797 | ENSG00000062725 | HPA066777 | MCF7     |
| 798 | ENSG00000062822 | HPA046524 | U-2 OS   |
| 799 | ENSG00000063046 | HPA039072 | U-2 OS   |
| 800 | ENSG00000063046 | HPA046164 | U-2 OS   |
| 801 | ENSG00000063127 | HPA076812 | U-2 OS   |
| 802 | ENSG00000063169 | HPA056211 | U-2 OS   |
| 803 | ENSG00000063176 | HPA065508 | U-2 OS   |
| 804 | ENSG00000063177 | HPA046572 | U-2 OS   |
| 805 | ENSG00000063180 | HPA041778 | U-2 OS   |
| 806 | ENSG00000063241 | HPA043142 | A-431    |
| 807 | ENSG00000063244 | CAB010910 | U-2 OS   |
| 808 | ENSG00000063244 | HPA041943 | MCF7     |
| 809 | ENSG00000063245 | CAB009729 | U-2 OS   |
| 810 | ENSG00000063245 | HPA061136 | U-2 OS   |
| 811 | ENSG00000063322 | HPA055956 | U-2 OS   |
| 812 | ENSG00000063438 | HPA021483 | HeLa     |
| 813 | ENSG00000063587 | HPA000566 | U-2 OS   |
| 814 | ENSG00000063601 | HPA002977 | U-251 MG |
| 815 | ENSG00000063660 | HPA030571 | A-431    |
| 816 | ENSG00000063761 | HPA055014 | U-2 OS   |
| 817 | ENSG00000063978 | HPA022047 | U-2 OS   |
| 818 | ENSG00000064012 | HPA001302 | U-2 OS   |
| 819 | ENSG00000064012 | HPA006191 | U-2 OS   |
| 820 | ENSG00000064042 | HPA063840 | U-2 OS   |
| 821 | ENSG00000064102 | HPA039543 | U-2 OS   |
| 822 | ENSG00000064102 | HPA040109 | U-2 OS   |
| 823 | ENSG00000064102 | HPA073020 | U-2 OS   |

|     |                 |           |          |
|-----|-----------------|-----------|----------|
| 824 | ENSG00000064115 | HPA057640 | U-2 OS   |
| 825 | ENSG00000064199 | HPA037568 | U-2 OS   |
| 826 | ENSG00000064201 | HPA024135 | U-2 OS   |
| 827 | ENSG00000064270 | HPA075812 | HaCaT    |
| 828 | ENSG00000064300 | HPA004765 | U-2 OS   |
| 829 | ENSG00000064393 | HPA007611 | U-2 OS   |
| 830 | ENSG00000064419 | HPA039555 | U-2 OS   |
| 831 | ENSG00000064419 | HPA041537 | U-251 MG |
| 832 | ENSG00000064489 | HPA004734 | U-2 OS   |
| 833 | ENSG00000064490 | HPA049157 | U-2 OS   |
| 834 | ENSG00000064490 | HPA053330 | U-2 OS   |
| 835 | ENSG00000064545 | HPA043365 | U-2 OS   |
| 836 | ENSG00000064601 | CAB024930 | U-2 OS   |
| 837 | ENSG00000064601 | HPA031068 | U-2 OS   |
| 838 | ENSG00000064607 | HPA041557 | U-2 OS   |
| 839 | ENSG00000064607 | HPA061111 | U-2 OS   |
| 840 | ENSG00000064651 | HPA063697 | RT4      |
| 841 | ENSG00000064652 | HPA073934 | U-2 OS   |
| 842 | ENSG00000064655 | HPA059291 | MCF7     |
| 843 | ENSG00000064666 | HPA049095 | CACO-2   |
| 844 | ENSG00000064687 | HPA041564 | U-2 OS   |
| 845 | ENSG00000064692 | HPA064687 | RT4      |
| 846 | ENSG00000064703 | CAB015427 | U-251 MG |
| 847 | ENSG00000064726 | HPA024263 | U-2 OS   |
| 848 | ENSG00000064763 | HPA015884 | U-2 OS   |
| 849 | ENSG00000064787 | HPA054745 | RT4      |
| 850 | ENSG00000064933 | HPA031013 | CACO-2   |
| 851 | ENSG00000064961 | HPA050220 | MCF7     |
| 852 | ENSG00000064961 | HPA053157 | U-2 OS   |
| 853 | ENSG00000064989 | HPA046515 | U-2 OS   |
| 854 | ENSG00000064995 | HPA029326 | U-2 OS   |
| 855 | ENSG00000064995 | HPA049127 | U-2 OS   |
| 856 | ENSG00000064999 | HPA036768 | U-2 OS   |
| 857 | ENSG00000065000 | HPA074408 | RT4      |
| 858 | ENSG00000065029 | HPA030091 | U-2 OS   |
| 859 | ENSG00000065054 | HPA001672 | U-2 OS   |
| 860 | ENSG00000065060 | HPA032099 | U-2 OS   |
| 861 | ENSG00000065135 | HPA042141 | A-431    |
| 862 | ENSG00000065150 | CAB009110 | U-2 OS   |
| 863 | ENSG00000065154 | HPA064742 | U-2 OS   |
| 864 | ENSG00000065183 | HPA027509 | U-2 OS   |
| 865 | ENSG00000065183 | HPA054354 | U-2 OS   |
| 866 | ENSG00000065183 | HPA072915 | U-2 OS   |
| 867 | ENSG00000065243 | HPA034861 | U-2 OS   |
| 868 | ENSG00000065243 | HPA057913 | U-2 OS   |
| 869 | ENSG00000065268 | HPA050193 | MCF7     |
| 870 | ENSG00000065308 | HPA035092 | A-431    |
| 871 | ENSG00000065325 | CAB022690 | U-2 OS   |
| 872 | ENSG00000065328 | HPA071952 | U-2 OS   |
| 873 | ENSG00000065357 | HPA045462 | RT4      |
| 874 | ENSG00000065361 | CAB025331 | U-2 OS   |
| 875 | ENSG00000065413 | HPA056549 | U-251 MG |
| 876 | ENSG00000065427 | HPA041345 | U-2 OS   |
| 877 | ENSG00000065457 | HPA040713 | SiHa     |
| 878 | ENSG00000065457 | HPA040903 | U-2 OS   |

|     |                 |           |          |
|-----|-----------------|-----------|----------|
| 879 | ENSG00000065485 | HPA030355 | U-2 OS   |
| 880 | ENSG00000065491 | HPA027908 | U-2 OS   |
| 881 | ENSG00000065491 | HPA027910 | U-2 OS   |
| 882 | ENSG00000065518 | HPA051739 | U-2 OS   |
| 883 | ENSG00000065526 | HPA015825 | U-2 OS   |
| 884 | ENSG00000065526 | HPA050257 | U-2 OS   |
| 885 | ENSG00000065534 | HPA031677 | BJ       |
| 886 | ENSG00000065534 | HPA048055 | BJ       |
| 887 | ENSG00000065548 | HPA031099 | U-2 OS   |
| 888 | ENSG00000065548 | HPA031101 | U-2 OS   |
| 889 | ENSG00000065559 | HPA060074 | U-2 OS   |
| 890 | ENSG00000065609 | HPA029632 | A-431    |
| 891 | ENSG00000065613 | HPA015757 | U-2 OS   |
| 892 | ENSG00000065618 | HPA052963 | U-2 OS   |
| 893 | ENSG00000065675 | HPA065279 | U-2 OS   |
| 894 | ENSG00000065675 | HPA073098 | RT4      |
| 895 | ENSG00000065717 | HPA049103 | RT4      |
| 896 | ENSG00000065802 | HPA003508 | U-251 MG |
| 897 | ENSG00000065809 | HPA039661 | U-2 OS   |
| 898 | ENSG00000065809 | HPA058814 | U-2 OS   |
| 899 | ENSG00000065833 | HPA006493 | CACO-2   |
| 900 | ENSG00000065882 | HPA058158 | A549     |
| 901 | ENSG00000065883 | HPA059241 | HeLa     |
| 902 | ENSG00000065923 | HPA075385 | RT4      |
| 903 | ENSG00000065970 | HPA008723 | U-2 OS   |
| 904 | ENSG00000065978 | HPA040304 | U-2 OS   |
| 905 | ENSG00000065978 | HPA057159 | U-2 OS   |
| 906 | ENSG00000065989 | HPA076091 | CACO-2   |
| 907 | ENSG00000066027 | HPA059288 | PC-3     |
| 908 | ENSG00000066044 | CAB005256 | U-2 OS   |
| 909 | ENSG00000066084 | HPA038472 | U-2 OS   |
| 910 | ENSG00000066117 | HPA004101 | U-2 OS   |
| 911 | ENSG00000066135 | HPA007610 | U-2 OS   |
| 912 | ENSG00000066136 | HPA055011 | U-2 OS   |
| 913 | ENSG00000066230 | HPA036493 | U-2 OS   |
| 914 | ENSG00000066248 | HPA008160 | A-431    |
| 915 | ENSG00000066279 | CAB017816 | U-2 OS   |
| 916 | ENSG00000066294 | HPA063316 | U-2 OS   |
| 917 | ENSG00000066294 | HPA068020 | U-2 OS   |
| 918 | ENSG00000066322 | HPA056557 | U-2 OS   |
| 919 | ENSG00000066336 | HPA044653 | REH      |
| 920 | ENSG00000066379 | HPA055074 | U-2 OS   |
| 921 | ENSG00000066379 | HPA077979 | U-2 OS   |
| 922 | ENSG00000066382 | HPA062575 | RT4      |
| 923 | ENSG00000066422 | HPA015328 | U-2 OS   |
| 924 | ENSG00000066422 | HPA024138 | U-2 OS   |
| 925 | ENSG00000066427 | HPA069338 | U-2 OS   |
| 926 | ENSG00000066455 | HPA000992 | U-2 OS   |
| 927 | ENSG00000066468 | HPA035305 | CACO-2   |
| 928 | ENSG00000066557 | HPA026564 | U-2 OS   |
| 929 | ENSG00000066583 | HPA070307 | MCF7     |
| 930 | ENSG00000066651 | HPA030473 | U-2 OS   |
| 931 | ENSG00000066654 | HPA027851 | U-2 OS   |
| 932 | ENSG00000066697 | HPA062662 | U-2 OS   |
| 933 | ENSG00000066735 | HPA046882 | U-2 OS   |

|     |                 |           |          |
|-----|-----------------|-----------|----------|
| 934 | ENSG00000066739 | HPA000880 | A-431    |
| 935 | ENSG00000066739 | HPA001427 | A-431    |
| 936 | ENSG00000066739 | HPA019665 | A-431    |
| 937 | ENSG00000066777 | HPA023399 | U-2 OS   |
| 938 | ENSG00000066777 | HPA023822 | U-2 OS   |
| 939 | ENSG00000066827 | HPA063592 | U-2 OS   |
| 940 | ENSG00000066855 | HPA023152 | U-2 OS   |
| 941 | ENSG00000066855 | HPA056120 | U-2 OS   |
| 942 | ENSG00000066933 | HPA040071 | U-2 OS   |
| 943 | ENSG00000067048 | HPA001648 | U-2 OS   |
| 944 | ENSG00000067048 | HPA005631 | U-2 OS   |
| 945 | ENSG00000067057 | HPA056484 | U-2 OS   |
| 946 | ENSG00000067066 | HPA017384 | U-2 OS   |
| 947 | ENSG00000067082 | HPA069585 | U-2 OS   |
| 948 | ENSG00000067113 | CAB033331 | U-251 MG |
| 949 | ENSG00000067141 | HPA027806 | U-2 OS   |
| 950 | ENSG00000067177 | HPA001081 | U-2 OS   |
| 951 | ENSG00000067221 | HPA042353 | U-2 OS   |
| 952 | ENSG00000067225 | CAB019421 | U-2 OS   |
| 953 | ENSG00000067225 | HPA029501 | U-2 OS   |
| 954 | ENSG00000067248 | HPA038318 | A-431    |
| 955 | ENSG00000067334 | HPA044502 | U-2 OS   |
| 956 | ENSG00000067365 | HPA074173 | U-2 OS   |
| 957 | ENSG00000067369 | HPA008788 | U-2 OS   |
| 958 | ENSG00000067369 | HPA022133 | U-2 OS   |
| 959 | ENSG00000067445 | HPA053358 | U-2 OS   |
| 960 | ENSG00000067533 | HPA024639 | U-2 OS   |
| 961 | ENSG00000067560 | CAB005052 | U-2 OS   |
| 962 | ENSG00000067596 | HPA049285 | U-2 OS   |
| 963 | ENSG00000067606 | HPA021851 | U-2 OS   |
| 964 | ENSG00000067646 | HPA071863 | U-2 OS   |
| 965 | ENSG00000067704 | HPA024594 | U-2 OS   |
| 966 | ENSG00000067704 | HPA024596 | U-2 OS   |
| 967 | ENSG00000067798 | HPA032111 | U-2 OS   |
| 968 | ENSG00000067829 | HPA002017 | U-2 OS   |
| 969 | ENSG00000067955 | HPA038852 | U-2 OS   |
| 970 | ENSG00000067992 | HPA072492 | RT4      |
| 971 | ENSG00000068024 | HPA048723 | U-2 OS   |
| 972 | ENSG00000068078 | HPA067204 | RT4      |
| 973 | ENSG00000068079 | HPA045946 | U-2 OS   |
| 974 | ENSG00000068097 | HPA062157 | U-2 OS   |
| 975 | ENSG00000068137 | HPA046234 | U-2 OS   |
| 976 | ENSG00000068305 | HPA046597 | U-2 OS   |
| 977 | ENSG00000068308 | HPA017375 | U-2 OS   |
| 978 | ENSG00000068323 | HPA023881 | U-2 OS   |
| 979 | ENSG00000068366 | HPA000286 | U-2 OS   |
| 980 | ENSG00000068383 | HPA066549 | Hep G2   |
| 981 | ENSG00000068394 | HPA000287 | U-2 OS   |
| 982 | ENSG00000068394 | HPA001894 | U-2 OS   |
| 983 | ENSG00000068400 | HPA000615 | A-431    |
| 984 | ENSG00000068438 | HPA002718 | U-2 OS   |
| 985 | ENSG00000068489 | HPA052376 | U-2 OS   |
| 986 | ENSG00000068650 | HPA035583 | A-431    |
| 987 | ENSG00000068650 | HPA035584 | U-2 OS   |
| 988 | ENSG00000068654 | CAB010145 | U-2 OS   |



|      |                 |           |           |
|------|-----------------|-----------|-----------|
| 989  | ENSG00000068654 | HPA049700 | U-2 OS    |
| 990  | ENSG00000068697 | HPA068554 | U-2 OS    |
| 991  | ENSG00000068745 | HPA070811 | RT4       |
| 992  | ENSG00000068784 | HPA030567 | U-2 OS    |
| 993  | ENSG00000068796 | HPA004715 | U-2 OS    |
| 994  | ENSG00000068878 | HPA060922 | CACO-2    |
| 995  | ENSG00000068903 | CAB004573 | U-2 OS    |
| 996  | ENSG00000068903 | HPA011165 | U-2 OS    |
| 997  | ENSG00000068985 | HPA003473 | U-2 OS    |
| 998  | ENSG00000069011 | HPA008743 | U-2 OS    |
| 999  | ENSG00000069018 | HPA031126 | U-2 OS    |
| 1000 | ENSG00000069020 | HPA000544 | U-2 OS    |
| 1001 | ENSG00000069188 | HPA014725 | U-2 OS    |
| 1002 | ENSG00000069248 | HPA059767 | U-2 OS    |
| 1003 | ENSG00000069275 | HPA062351 | U-2 OS    |
| 1004 | ENSG00000069275 | HPA063843 | U-2 OS    |
| 1005 | ENSG00000069329 | HPA040802 | U-2 OS    |
| 1006 | ENSG00000069345 | HPA049789 | U-2 OS    |
| 1007 | ENSG00000069399 | CAB002051 | U-2 OS    |
| 1008 | ENSG00000069399 | HPA047514 | U-2 OS    |
| 1009 | ENSG00000069431 | HPA007279 | CACO-2    |
| 1010 | ENSG00000069482 | HPA049864 | U-2 OS    |
| 1011 | ENSG00000069493 | HPA047584 | U-2 OS    |
| 1012 | ENSG00000069702 | CAB018971 | U-2 OS    |
| 1013 | ENSG00000069849 | HPA048963 | A-431     |
| 1014 | ENSG00000069869 | CAB072833 | U-2 OS    |
| 1015 | ENSG00000069943 | HPA039929 | U-2 OS    |
| 1016 | ENSG00000069956 | CAB005184 | U-251 MG  |
| 1017 | ENSG00000069956 | HPA030262 | U-2 OS    |
| 1018 | ENSG00000069966 | HPA044198 | U-2 OS    |
| 1019 | ENSG00000069998 | HPA005548 | U-2 OS    |
| 1020 | ENSG00000070010 | HPA030286 | U-2 OS    |
| 1021 | ENSG00000070010 | HPA030287 | U-2 OS    |
| 1022 | ENSG00000070019 | HPA073759 | CACO-2    |
| 1023 | ENSG00000070061 | CAB021340 | U-2 OS    |
| 1024 | ENSG00000070061 | HPA049677 | U-2 OS    |
| 1025 | ENSG00000070081 | HPA008395 | U-2 OS    |
| 1026 | ENSG00000070081 | CAB015931 | U-2 OS    |
| 1027 | ENSG00000070182 | HPA003394 | U-2 OS    |
| 1028 | ENSG00000070214 | HPA064714 | RT4       |
| 1029 | ENSG00000070269 | HPA003502 | U-2 OS    |
| 1030 | ENSG00000070366 | HPA042932 | U-2 OS    |
| 1031 | ENSG00000070371 | HPA075795 | U-2 OS    |
| 1032 | ENSG00000070404 | HPA045378 | A549      |
| 1033 | ENSG00000070423 | HPA043050 | U-2 OS    |
| 1034 | ENSG00000070444 | HPA059532 | U-2 OS    |
| 1035 | ENSG00000070444 | HPA067578 | U-2 OS    |
| 1036 | ENSG00000070476 | HPA049593 | U-2 OS    |
| 1037 | ENSG00000070495 | HPA059156 | U-2 OS    |
| 1038 | ENSG00000070501 | HPA049104 | U-2 OS    |
| 1039 | ENSG00000070526 | HPA014767 | HEL       |
| 1040 | ENSG00000070540 | CAB037230 | SK-MEL-30 |
| 1041 | ENSG00000070610 | HPA024026 | U-2 OS    |
| 1042 | ENSG00000070669 | HPA004924 | U-2 OS    |
| 1043 | ENSG00000070669 | HPA064737 | U-2 OS    |

|      |                 |           |         |
|------|-----------------|-----------|---------|
| 1044 | ENSG00000070729 | HPA039159 | U-2 OS  |
| 1045 | ENSG00000070729 | HPA060355 | U-2 OS  |
| 1046 | ENSG00000070756 | CAB011536 | U-2 OS  |
| 1047 | ENSG00000070756 | HPA045423 | U-2 OS  |
| 1048 | ENSG00000070756 | HPA067156 | RT4     |
| 1049 | ENSG00000070759 | HPA027257 | U-2 OS  |
| 1050 | ENSG00000070759 | HPA063869 | U-2 OS  |
| 1051 | ENSG00000070761 | HPA018195 | U-2 OS  |
| 1052 | ENSG00000070778 | HPA073999 | U-2 OS  |
| 1053 | ENSG00000070785 | HPA024213 | U-2 OS  |
| 1054 | ENSG00000070785 | HPA024219 | U-2 OS  |
| 1055 | ENSG00000070808 | HPA051783 | U-2 OS  |
| 1056 | ENSG00000070808 | HPA051785 | U-2 OS  |
| 1057 | ENSG00000070814 | HPA038237 | U-2 OS  |
| 1058 | ENSG00000070814 | HPA038238 | U-2 OS  |
| 1059 | ENSG00000070831 | CAB004360 | U-2 OS  |
| 1060 | ENSG00000070882 | HPA000691 | A-431   |
| 1061 | ENSG00000070882 | HPA048401 | A-431   |
| 1062 | ENSG00000070950 | HPA006724 | U-2 OS  |
| 1063 | ENSG00000070950 | HPA008752 | U-2 OS  |
| 1064 | ENSG00000070961 | HPA011166 | RH-30   |
| 1065 | ENSG00000071073 | HPA007608 | MCF7    |
| 1066 | ENSG00000071127 | HPA070293 | U-2 OS  |
| 1067 | ENSG00000071203 | HPA048616 | U-2 OS  |
| 1068 | ENSG00000071205 | HPA039589 | U-2 OS  |
| 1069 | ENSG00000071242 | HPA045061 | U-2 OS  |
| 1070 | ENSG00000071243 | HPA004762 | HEK 293 |
| 1071 | ENSG00000071243 | HPA067575 | HEK 293 |
| 1072 | ENSG00000071282 | HPA024059 | U-2 OS  |
| 1073 | ENSG00000071462 | HPA052185 | MCF7    |
| 1074 | ENSG00000071539 | HPA005727 | U-2 OS  |
| 1075 | ENSG00000071553 | CAB015218 | U-2 OS  |
| 1076 | ENSG00000071564 | CAB018351 | U-2 OS  |
| 1077 | ENSG00000071564 | HPA062476 | U-2 OS  |
| 1078 | ENSG00000071575 | HPA001305 | U-2 OS  |
| 1079 | ENSG00000071626 | HPA004201 | U-2 OS  |
| 1080 | ENSG00000071626 | HPA004631 | U-2 OS  |
| 1081 | ENSG00000071655 | CAB013265 | U-2 OS  |
| 1082 | ENSG00000071794 | HPA015284 | A-431   |
| 1083 | ENSG00000071794 | HPA049001 | A-431   |
| 1084 | ENSG00000071859 | HPA003585 | U-2 OS  |
| 1085 | ENSG00000071889 | HPA035268 | U-2 OS  |
| 1086 | ENSG00000071889 | HPA056991 | U-2 OS  |
| 1087 | ENSG00000071894 | HPA065167 | U-2 OS  |
| 1088 | ENSG00000071894 | HPA068906 | MCF7    |
| 1089 | ENSG00000071967 | HPA056736 | U-2 OS  |
| 1090 | ENSG00000071994 | HPA075534 | HEK 293 |
| 1091 | ENSG00000072041 | HPA008609 | U-2 OS  |
| 1092 | ENSG00000072062 | HPA071185 | U-2 OS  |
| 1093 | ENSG00000072110 | CAB004303 | U-2 OS  |
| 1094 | ENSG00000072110 | HPA006035 | U-2 OS  |
| 1095 | ENSG00000072133 | HPA002852 | U-2 OS  |
| 1096 | ENSG00000072133 | HPA003904 | U-2 OS  |
| 1097 | ENSG00000072134 | HPA053360 | U-2 OS  |
| 1098 | ENSG00000072135 | HPA053367 | HeLa    |

|      |                 |           |        |
|------|-----------------|-----------|--------|
| 1099 | ENSG00000072163 | HPA058340 | HeLa   |
| 1100 | ENSG00000072182 | HPA036042 | U-2 OS |
| 1101 | ENSG00000072182 | HPA057078 | U-2 OS |
| 1102 | ENSG00000072195 | HPA018904 | U-2 OS |
| 1103 | ENSG00000072201 | HPA071091 | RT4    |
| 1104 | ENSG00000072274 | CAB000153 | U-2 OS |
| 1105 | ENSG00000072274 | HPA028598 | U-2 OS |
| 1106 | ENSG00000072310 | CAB005406 | U-2 OS |
| 1107 | ENSG00000072310 | HPA043878 | U-2 OS |
| 1108 | ENSG00000072364 | HPA029634 | CACO-2 |
| 1109 | ENSG00000072401 | HPA003920 | U-2 OS |
| 1110 | ENSG00000072415 | HPA000993 | U-2 OS |
| 1111 | ENSG00000072422 | HPA040205 | U-2 OS |
| 1112 | ENSG00000072501 | HPA005499 | U-2 OS |
| 1113 | ENSG00000072501 | CAB025404 | U-2 OS |
| 1114 | ENSG00000072518 | HPA074905 | A-431  |
| 1115 | ENSG00000072571 | CAB002433 | U-2 OS |
| 1116 | ENSG00000072571 | HPA043926 | U-2 OS |
| 1117 | ENSG00000072571 | HPA061524 | U-2 OS |
| 1118 | ENSG00000072609 | HPA045768 | U-2 OS |
| 1119 | ENSG00000072682 | HPA016997 | U-2 OS |
| 1120 | ENSG00000072682 | HPA027824 | U-2 OS |
| 1121 | ENSG00000072736 | HPA050665 | U-2 OS |
| 1122 | ENSG00000072756 | HPA036938 | U-2 OS |
| 1123 | ENSG00000072778 | HPA019006 | U-2 OS |
| 1124 | ENSG00000072786 | CAB020840 | U-2 OS |
| 1125 | ENSG00000072803 | HPA062578 | U-2 OS |
| 1126 | ENSG00000072818 | HPA075570 | U-2 OS |
| 1127 | ENSG00000072832 | HPA035640 | U-2 OS |
| 1128 | ENSG00000072840 | HPA016046 | U-2 OS |
| 1129 | ENSG00000072849 | CAB037287 | U-2 OS |
| 1130 | ENSG00000072952 | HPA008704 | U-2 OS |
| 1131 | ENSG00000072954 | HPA048100 | U-2 OS |
| 1132 | ENSG00000073008 | HPA012568 | U-2 OS |
| 1133 | ENSG00000073050 | CAB005427 | U-2 OS |
| 1134 | ENSG00000073050 | HPA006717 | U-2 OS |
| 1135 | ENSG00000073060 | HPA066285 | CACO-2 |
| 1136 | ENSG00000073111 | HPA031495 | U-2 OS |
| 1137 | ENSG00000073111 | HPA031496 | U-2 OS |
| 1138 | ENSG00000073150 | HPA004624 | U-2 OS |
| 1139 | ENSG00000073282 | HPA006289 | RT4    |
| 1140 | ENSG00000073282 | HPA007009 | RT4    |
| 1141 | ENSG00000073331 | HPA027435 | A-431  |
| 1142 | ENSG00000073350 | HPA022913 | U-2 OS |
| 1143 | ENSG00000073417 | HPA007722 | U-2 OS |
| 1144 | ENSG00000073464 | HPA063637 | U-2 OS |
| 1145 | ENSG00000073536 | HPA018807 | U-2 OS |
| 1146 | ENSG00000073578 | HPA041981 | U-2 OS |
| 1147 | ENSG00000073578 | HPA064582 | U-2 OS |
| 1148 | ENSG00000073584 | HPA003916 | U-2 OS |
| 1149 | ENSG00000073605 | CAB013681 | U-2 OS |
| 1150 | ENSG00000073614 | HPA006201 | U-2 OS |
| 1151 | ENSG00000073711 | HPA065338 | U-2 OS |
| 1152 | ENSG00000073712 | HPA040505 | U-2 OS |
| 1153 | ENSG00000073734 | HPA019035 | U-2 OS |

|      |                 |           |             |
|------|-----------------|-----------|-------------|
| 1154 | ENSG00000073756 | HPA001335 | A549        |
| 1155 | ENSG00000073792 | CAB017126 | U-2 OS      |
| 1156 | ENSG00000073792 | HPA035145 | U-2 OS      |
| 1157 | ENSG00000073803 | HPA016497 | U-2 OS      |
| 1158 | ENSG00000073921 | HPA019053 | U-2 OS      |
| 1159 | ENSG00000073921 | HPA019061 | U-2 OS      |
| 1160 | ENSG00000073969 | HPA003154 | U-2 OS      |
| 1161 | ENSG00000073969 | HPA071089 | RT4         |
| 1162 | ENSG00000074047 | HPA074275 | U-2 OS      |
| 1163 | ENSG00000074071 | HPA042112 | U-2 OS      |
| 1164 | ENSG00000074181 | HPA044392 | U-2 OS      |
| 1165 | ENSG00000074201 | CAB017840 | U-2 OS      |
| 1166 | ENSG00000074201 | HPA031707 | U-2 OS      |
| 1167 | ENSG00000074201 | HPA032045 | U-2 OS      |
| 1168 | ENSG00000074211 | HPA042122 | A-431       |
| 1169 | ENSG00000074211 | HPA060473 | U-2 OS      |
| 1170 | ENSG00000074219 | HPA066292 | SH-SY5Y     |
| 1171 | ENSG00000074219 | HPA069963 | U-2 OS      |
| 1172 | ENSG00000074266 | HPA060089 | CACO-2      |
| 1173 | ENSG00000074319 | HPA006161 | U-2 OS      |
| 1174 | ENSG00000074356 | HPA008959 | U-2 OS      |
| 1175 | ENSG00000074410 | HPA008773 | RT4         |
| 1176 | ENSG00000074410 | HPA073203 | A549        |
| 1177 | ENSG00000074416 | HPA011348 | U-2 OS      |
| 1178 | ENSG00000074416 | HPA011993 | A-431       |
| 1179 | ENSG00000074590 | HPA057143 | U-2 OS      |
| 1180 | ENSG00000074603 | HPA008706 | U-2 OS      |
| 1181 | ENSG00000074621 | HPA039370 | U-2 OS      |
| 1182 | ENSG00000074657 | HPA015322 | U-2 OS      |
| 1183 | ENSG00000074695 | HPA002320 | U-2 OS      |
| 1184 | ENSG00000074696 | HPA014837 | A-431       |
| 1185 | ENSG00000074696 | HPA060347 | U-2 OS      |
| 1186 | ENSG00000074706 | HPA028710 | CACO-2      |
| 1187 | ENSG00000074755 | HPA031778 | A-431       |
| 1188 | ENSG00000074771 | HPA073837 | MCF7        |
| 1189 | ENSG00000074800 | CAB018614 | U-2 OS      |
| 1190 | ENSG00000074800 | HPA068284 | U-2 OS      |
| 1191 | ENSG00000074800 | HPA068721 | U-2 OS      |
| 1192 | ENSG00000074803 | HPA014967 | RPTEC TERT1 |
| 1193 | ENSG00000074855 | HPA031787 | U-2 OS      |
| 1194 | ENSG00000074964 | HPA026440 | RT4         |
| 1195 | ENSG00000074964 | HPA028115 | Hep G2      |
| 1196 | ENSG00000074966 | HPA062482 | U-2 OS      |
| 1197 | ENSG00000075035 | HPA048133 | RT4         |
| 1198 | ENSG00000075043 | HPA057112 | U-2 OS      |
| 1199 | ENSG00000075073 | HPA076573 | U-2 OS      |
| 1200 | ENSG00000075089 | HPA038587 | U-2 OS      |
| 1201 | ENSG00000075142 | HPA019004 | U-2 OS      |
| 1202 | ENSG00000075151 | HPA025031 | U-2 OS      |
| 1203 | ENSG00000075188 | HPA056300 | U-2 OS      |
| 1204 | ENSG00000075213 | HPA052235 | U-2 OS      |
| 1205 | ENSG00000075218 | HPA029457 | U-2 OS      |
| 1206 | ENSG00000075223 | HPA042418 | U-2 OS      |
| 1207 | ENSG00000075234 | HPA029302 | U-2 OS      |
| 1208 | ENSG00000075239 | HPA004428 | U-2 OS      |

|      |                 |           |          |
|------|-----------------|-----------|----------|
| 1209 | ENSG00000075239 | HPA007569 | U-2 OS   |
| 1210 | ENSG00000075275 | HPA052976 | MCF7     |
| 1211 | ENSG00000075275 | HPA060521 | MCF7     |
| 1212 | ENSG00000075292 | HPA036784 | U-2 OS   |
| 1213 | ENSG00000075292 | HPA057395 | U-2 OS   |
| 1214 | ENSG00000075340 | HPA034510 | U-2 OS   |
| 1215 | ENSG00000075391 | HPA018805 | U-2 OS   |
| 1216 | ENSG00000075399 | HPA023620 | U-2 OS   |
| 1217 | ENSG00000075407 | HPA003172 | U-2 OS   |
| 1218 | ENSG00000075415 | HPA045709 | U-251 MG |
| 1219 | ENSG00000075420 | HPA007859 | U-2 OS   |
| 1220 | ENSG00000075426 | HPA004817 | U-2 OS   |
| 1221 | ENSG00000075426 | CAB013460 | A-431    |
| 1222 | ENSG00000075461 | HPA065370 | SH-SY5Y  |
| 1223 | ENSG00000075539 | HPA031106 | U-2 OS   |
| 1224 | ENSG00000075539 | HPA031107 | U-2 OS   |
| 1225 | ENSG00000075568 | HPA017678 | U-2 OS   |
| 1226 | ENSG00000075568 | HPA017682 | U-2 OS   |
| 1227 | ENSG00000075618 | HPA005723 | U-2 OS   |
| 1228 | ENSG00000075618 | CAB035991 | U-2 OS   |
| 1229 | ENSG00000075643 | HPA047958 | RT4      |
| 1230 | ENSG00000075702 | HPA043255 | U-2 OS   |
| 1231 | ENSG00000075711 | HPA069593 | U-2 OS   |
| 1232 | ENSG00000075785 | HPA006964 | U-2 OS   |
| 1233 | ENSG00000075790 | HPA049694 | U-2 OS   |
| 1234 | ENSG00000075826 | HPA060052 | U-2 OS   |
| 1235 | ENSG00000075856 | HPA028840 | HEL      |
| 1236 | ENSG00000075884 | HPA032125 | U-2 OS   |
| 1237 | ENSG00000075886 | HPA039247 | U-2 OS   |
| 1238 | ENSG00000075886 | HPA043684 | U-2 OS   |
| 1239 | ENSG00000075891 | HPA070751 | U-2 OS   |
| 1240 | ENSG00000075914 | HPA057980 | U-2 OS   |
| 1241 | ENSG00000075975 | HPA037559 | U-2 OS   |
| 1242 | ENSG00000075975 | HPA037560 | U-2 OS   |
| 1243 | ENSG00000076003 | HPA004818 | U-2 OS   |
| 1244 | ENSG00000076043 | HPA038450 | U-2 OS   |
| 1245 | ENSG00000076053 | HPA013993 | U-2 OS   |
| 1246 | ENSG00000076053 | HPA048003 | U-2 OS   |
| 1247 | ENSG00000076067 | HPA058784 | U-2 OS   |
| 1248 | ENSG00000076108 | HPA005782 | U-2 OS   |
| 1249 | ENSG00000076108 | HPA063806 | U-2 OS   |
| 1250 | ENSG00000076201 | HPA016845 | U-2 OS   |
| 1251 | ENSG00000076242 | HPA052707 | U-2 OS   |
| 1252 | ENSG00000076242 | HPA060714 | U-2 OS   |
| 1253 | ENSG00000076248 | CAB011605 | U-2 OS   |
| 1254 | ENSG00000076258 | HPA072438 | EFO-21   |
| 1255 | ENSG00000076321 | HPA025034 | A-431    |
| 1256 | ENSG00000076351 | CAB011614 | U-2 OS   |
| 1257 | ENSG00000076513 | HPA039488 | U-2 OS   |
| 1258 | ENSG00000076554 | HPA062167 | U-2 OS   |
| 1259 | ENSG00000076641 | HPA066527 | RT4      |
| 1260 | ENSG00000076650 | HPA043430 | U-2 OS   |
| 1261 | ENSG00000076650 | HPA043604 | U-2 OS   |
| 1262 | ENSG00000076662 | HPA049820 | U-2 OS   |
| 1263 | ENSG00000076706 | CAB002147 | U-2 OS   |

|      |                 |           |           |
|------|-----------------|-----------|-----------|
| 1264 | ENSG00000076716 | HPA030834 | U-2 OS    |
| 1265 | ENSG00000076770 | HPA001584 | U-2 OS    |
| 1266 | ENSG00000076826 | HPA062149 | Hep G2    |
| 1267 | ENSG00000076864 | CAB003851 | A-431     |
| 1268 | ENSG00000076924 | HPA048751 | U-2 OS    |
| 1269 | ENSG00000076928 | CAB009502 | U-2 OS    |
| 1270 | ENSG00000076928 | HPA012924 | U-2 OS    |
| 1271 | ENSG00000076928 | HPA060784 | A549      |
| 1272 | ENSG00000076944 | HPA015564 | RT4       |
| 1273 | ENSG00000076944 | HPA063868 | U-2 OS    |
| 1274 | ENSG00000076984 | HPA064711 | HEK 293   |
| 1275 | ENSG00000077009 | HPA049909 | CACO-2    |
| 1276 | ENSG00000077009 | HPA054792 | CACO-2    |
| 1277 | ENSG00000077044 | HPA027530 | CACO-2    |
| 1278 | ENSG00000077063 | HPA044654 | U-2 OS    |
| 1279 | ENSG00000077080 | HPA045126 | U-2 OS    |
| 1280 | ENSG00000077092 | CAB002617 | U-2 OS    |
| 1281 | ENSG00000077092 | HPA004174 | U-2 OS    |
| 1282 | ENSG00000077097 | CAB004601 | U-2 OS    |
| 1283 | ENSG00000077097 | HPA024120 | U-2 OS    |
| 1284 | ENSG00000077097 | HPA050441 | U-2 OS    |
| 1285 | ENSG00000077147 | HPA039609 | U-2 OS    |
| 1286 | ENSG00000077150 | HPA008422 | U-2 OS    |
| 1287 | ENSG00000077150 | CAB022098 | U-2 OS    |
| 1288 | ENSG00000077152 | HPA002831 | U-2 OS    |
| 1289 | ENSG00000077157 | HPA024640 | U-2 OS    |
| 1290 | ENSG00000077235 | HPA051617 | U-2 OS    |
| 1291 | ENSG00000077238 | HPA070380 | U-2 OS    |
| 1292 | ENSG00000077254 | HPA005719 | U-2 OS    |
| 1293 | ENSG00000077264 | HPA044791 | U-2 OS    |
| 1294 | ENSG00000077274 | HPA040259 | HAP1      |
| 1295 | ENSG00000077279 | HPA036121 | SH-SY5Y   |
| 1296 | ENSG00000077312 | CAB004652 | U-2 OS    |
| 1297 | ENSG00000077312 | HPA054834 | U-2 OS    |
| 1298 | ENSG00000077348 | HPA055677 | CACO-2    |
| 1299 | ENSG00000077380 | CAB033836 | U-2 OS    |
| 1300 | ENSG00000077380 | HPA040619 | HEK 293   |
| 1301 | ENSG00000077380 | HPA053987 | U-2 OS    |
| 1302 | ENSG00000077420 | HPA017009 | BJ        |
| 1303 | ENSG00000077420 | HPA063903 | BJ        |
| 1304 | ENSG00000077454 | HPA037667 | U-2 OS    |
| 1305 | ENSG00000077458 | HPA036608 | U-2 OS    |
| 1306 | ENSG00000077463 | HPA049729 | U-2 OS    |
| 1307 | ENSG00000077498 | HPA043241 | SK-MEL-30 |
| 1308 | ENSG00000077498 | HPA050889 | SK-MEL-30 |
| 1309 | ENSG00000077514 | HPA058846 | U-2 OS    |
| 1310 | ENSG00000077522 | HPA006035 | U-2 OS    |
| 1311 | ENSG00000077549 | HPA031531 | U-2 OS    |
| 1312 | ENSG00000077616 | HPA065419 | CACO-2    |
| 1313 | ENSG00000077684 | HPA020016 | U-2 OS    |
| 1314 | ENSG00000077713 | HPA035188 | A-431     |
| 1315 | ENSG00000077721 | HPA003875 | U-2 OS    |
| 1316 | ENSG00000077721 | HPA051765 | U-2 OS    |
| 1317 | ENSG00000077721 | HPA065898 | U-2 OS    |
| 1318 | ENSG00000077935 | HPA001500 | A-431     |

|      |                 |           |          |
|------|-----------------|-----------|----------|
| 1319 | ENSG00000077942 | CAB068187 | BJ       |
| 1320 | ENSG00000078043 | HPA068792 | U-2 OS   |
| 1321 | ENSG00000078053 | HPA019828 | U-2 OS   |
| 1322 | ENSG00000078053 | HPA019829 | U-2 OS   |
| 1323 | ENSG00000078061 | HPA046188 | U-2 OS   |
| 1324 | ENSG00000078070 | HPA008310 | U-2 OS   |
| 1325 | ENSG00000078081 | CAB025133 | U-251 MG |
| 1326 | ENSG00000078081 | HPA051467 | U-2 OS   |
| 1327 | ENSG00000078140 | HPA028869 | U-2 OS   |
| 1328 | ENSG00000078140 | CAB033212 | U-251 MG |
| 1329 | ENSG00000078177 | HPA042607 | U-2 OS   |
| 1330 | ENSG00000078177 | HPA072549 | U-2 OS   |
| 1331 | ENSG00000078237 | CAB034010 | U-251 MG |
| 1332 | ENSG00000078237 | HPA040354 | U-2 OS   |
| 1333 | ENSG00000078246 | HPA018496 | U-2 OS   |
| 1334 | ENSG00000078269 | HPA031575 | U-2 OS   |
| 1335 | ENSG00000078304 | HPA027553 | U-2 OS   |
| 1336 | ENSG00000078328 | HPA040809 | U-2 OS   |
| 1337 | ENSG00000078328 | HPA066746 | U-2 OS   |
| 1338 | ENSG00000078369 | HPA040736 | U-2 OS   |
| 1339 | ENSG00000078399 | HPA061982 | U-2 OS   |
| 1340 | ENSG00000078401 | HPA031976 | U-2 OS   |
| 1341 | ENSG00000078403 | HPA005747 | U-2 OS   |
| 1342 | ENSG00000078487 | HPA020911 | U-2 OS   |
| 1343 | ENSG00000078549 | HPA030739 | U-2 OS   |
| 1344 | ENSG00000078549 | HPA049877 | U-2 OS   |
| 1345 | ENSG00000078596 | HPA000296 | U-2 OS   |
| 1346 | ENSG00000078618 | HPA053661 | U-2 OS   |
| 1347 | ENSG00000078668 | HPA026864 | U-2 OS   |
| 1348 | ENSG00000078674 | HPA023370 | U-2 OS   |
| 1349 | ENSG00000078674 | HPA023374 | U-2 OS   |
| 1350 | ENSG00000078687 | HPA062051 | U-2 OS   |
| 1351 | ENSG00000078699 | HPA072433 | U-2 OS   |
| 1352 | ENSG00000078725 | HPA038828 | U-2 OS   |
| 1353 | ENSG00000078747 | HPA049032 | U-2 OS   |
| 1354 | ENSG00000078747 | CAB072824 | U-2 OS   |
| 1355 | ENSG00000078747 | CAB072825 | MCF7     |
| 1356 | ENSG00000078795 | HPA041903 | U-2 OS   |
| 1357 | ENSG00000078808 | HPA011249 | U-2 OS   |
| 1358 | ENSG00000078808 | CAB015227 | U-2 OS   |
| 1359 | ENSG00000078898 | HPA049491 | U-2 OS   |
| 1360 | ENSG00000078900 | HPA027314 | U-2 OS   |
| 1361 | ENSG00000078900 | HPA044516 | HEK 293  |
| 1362 | ENSG00000078902 | HPA038621 | U-2 OS   |
| 1363 | ENSG00000078967 | HPA003920 | U-2 OS   |
| 1364 | ENSG00000079101 | HPA075240 | U-2 OS   |
| 1365 | ENSG00000079102 | HPA049852 | U-2 OS   |
| 1366 | ENSG00000079112 | HPA023616 | CACO-2   |
| 1367 | ENSG00000079112 | HPA026556 | CACO-2   |
| 1368 | ENSG00000079134 | HPA019096 | U-2 OS   |
| 1369 | ENSG00000079134 | HPA019687 | U-2 OS   |
| 1370 | ENSG00000079150 | HPA008707 | U-2 OS   |
| 1371 | ENSG00000079156 | HPA032131 | RH-30    |
| 1372 | ENSG00000079215 | HPA037467 | U-2 OS   |
| 1373 | ENSG00000079246 | HPA025813 | U-2 OS   |

|      |                 |           |          |
|------|-----------------|-----------|----------|
| 1374 | ENSG00000079246 | HPA064685 | U-2 OS   |
| 1375 | ENSG00000079257 | HPA014179 | RT4      |
| 1376 | ENSG00000079263 | HPA067493 | U-2 OS   |
| 1377 | ENSG00000079277 | HPA071293 | RT4      |
| 1378 | ENSG00000079308 | HPA036089 | U-2 OS   |
| 1379 | ENSG00000079308 | HPA036090 | U-2 OS   |
| 1380 | ENSG00000079313 | HPA042552 | U-2 OS   |
| 1381 | ENSG00000079332 | HPA006923 | U-2 OS   |
| 1382 | ENSG00000079332 | CAB022545 | U-2 OS   |
| 1383 | ENSG00000079335 | HPA023783 | U-2 OS   |
| 1384 | ENSG00000079337 | CAB004386 | U-2 OS   |
| 1385 | ENSG00000079387 | HPA011765 | A-431    |
| 1386 | ENSG00000079387 | HPA046491 | U-2 OS   |
| 1387 | ENSG00000079432 | CAB026388 | U-2 OS   |
| 1388 | ENSG00000079432 | HPA044341 | U-2 OS   |
| 1389 | ENSG00000079432 | HPA064725 | U-2 OS   |
| 1390 | ENSG00000079435 | HPA006567 | U-2 OS   |
| 1391 | ENSG00000079459 | HPA008874 | U-2 OS   |
| 1392 | ENSG00000079462 | HPA035639 | A549     |
| 1393 | ENSG00000079482 | HPA002919 | U-2 OS   |
| 1394 | ENSG00000079616 | HPA048213 | U-2 OS   |
| 1395 | ENSG00000079689 | CAB004005 | U-2 OS   |
| 1396 | ENSG00000079691 | HPA029038 | U-2 OS   |
| 1397 | ENSG00000079691 | HPA029039 | U-2 OS   |
| 1398 | ENSG00000079739 | HPA046329 | PC-3     |
| 1399 | ENSG00000079785 | HPA034502 | U-2 OS   |
| 1400 | ENSG00000079785 | HPA034503 | U-2 OS   |
| 1401 | ENSG00000079805 | HPA054246 | U-251 MG |
| 1402 | ENSG00000079819 | HPA005730 | U-2 OS   |
| 1403 | ENSG00000079819 | HPA006642 | U-2 OS   |
| 1404 | ENSG00000079931 | HPA035740 | U-2 OS   |
| 1405 | ENSG00000079950 | HPA001467 | U-2 OS   |
| 1406 | ENSG00000079974 | HPA042642 | U-2 OS   |
| 1407 | ENSG00000079999 | HPA005558 | U-2 OS   |
| 1408 | ENSG00000080031 | HPA042300 | U-2 OS   |
| 1409 | ENSG00000080166 | HPA010742 | U-2 OS   |
| 1410 | ENSG00000080189 | HPA027011 | U-2 OS   |
| 1411 | ENSG00000080200 | HPA044122 | U-2 OS   |
| 1412 | ENSG00000080224 | HPA007397 | U-2 OS   |
| 1413 | ENSG00000080224 | HPA058047 | U-2 OS   |
| 1414 | ENSG00000080298 | HPA035689 | U-2 OS   |
| 1415 | ENSG00000080345 | HPA036887 | U-2 OS   |
| 1416 | ENSG00000080503 | HPA029981 | U-2 OS   |
| 1417 | ENSG00000080546 | HPA073659 | U-2 OS   |
| 1418 | ENSG00000080603 | HPA028929 | U-2 OS   |
| 1419 | ENSG00000080608 | HPA002353 | U-2 OS   |
| 1420 | ENSG00000080709 | HPA038221 | U-251 MG |
| 1421 | ENSG00000080815 | HPA067496 | RT4      |
| 1422 | ENSG00000080819 | HPA015736 | U-2 OS   |
| 1423 | ENSG00000080819 | HPA054448 | U-2 OS   |
| 1424 | ENSG00000080822 | HPA029841 | U-2 OS   |
| 1425 | ENSG00000080823 | HPA027292 | U-2 OS   |
| 1426 | ENSG00000080824 | CAB002058 | U-2 OS   |
| 1427 | ENSG00000080839 | HPA054962 | U-2 OS   |
| 1428 | ENSG00000080839 | HPA056525 | U-2 OS   |



|      |                 |           |          |
|------|-----------------|-----------|----------|
| 1429 | ENSG00000080845 | HPA056378 | U-2 OS   |
| 1430 | ENSG00000080854 | HPA010744 | SH-SY5Y  |
| 1431 | ENSG00000080986 | HPA066330 | U-2 OS   |
| 1432 | ENSG00000081019 | HPA042124 | U-2 OS   |
| 1433 | ENSG00000081019 | HPA049484 | U-2 OS   |
| 1434 | ENSG00000081026 | HPA008444 | U-2 OS   |
| 1435 | ENSG00000081051 | HPA010607 | Hep G2   |
| 1436 | ENSG00000081059 | HPA058863 | CACO-2   |
| 1437 | ENSG00000081059 | HPA070505 | CACO-2   |
| 1438 | ENSG00000081087 | HPA010851 | U-2 OS   |
| 1439 | ENSG00000081154 | HPA035011 | U-2 OS   |
| 1440 | ENSG00000081154 | HPA063861 | SH-SY5Y  |
| 1441 | ENSG00000081177 | HPA005848 | U-2 OS   |
| 1442 | ENSG00000081181 | CAB009435 | CACO-2   |
| 1443 | ENSG00000081189 | HPA005533 | U-2 OS   |
| 1444 | ENSG00000081237 | HPA000440 | U-2 OS   |
| 1445 | ENSG00000081277 | HPA027221 | U-2 OS   |
| 1446 | ENSG00000081307 | HPA017235 | U-2 OS   |
| 1447 | ENSG00000081320 | HPA034858 | U-2 OS   |
| 1448 | ENSG00000081377 | HPA064747 | CACO-2   |
| 1449 | ENSG00000081386 | HPA049139 | SiHa     |
| 1450 | ENSG00000081479 | HPA064792 | CACO-2   |
| 1451 | ENSG00000081692 | HPA027260 | U-2 OS   |
| 1452 | ENSG00000081721 | HPA008840 | U-251 MG |
| 1453 | ENSG00000081760 | HPA058815 | U-2 OS   |
| 1454 | ENSG00000081791 | HPA036548 | U-2 OS   |
| 1455 | ENSG00000081791 | HPA061490 | U-2 OS   |
| 1456 | ENSG00000081803 | HPA056398 | MCF7     |
| 1457 | ENSG00000081818 | HPA014466 | U-2 OS   |
| 1458 | ENSG00000081842 | HPA059326 | U-2 OS   |
| 1459 | ENSG00000081853 | HPA010580 | U-2 OS   |
| 1460 | ENSG00000081853 | HPA038625 | U-2 OS   |
| 1461 | ENSG00000081870 | HPA030140 | U-2 OS   |
| 1462 | ENSG00000081923 | HPA018673 | U-2 OS   |
| 1463 | ENSG00000081985 | HPA024168 | U-2 OS   |
| 1464 | ENSG00000082014 | HPA063955 | U-2 OS   |
| 1465 | ENSG00000082014 | HPA065517 | U-2 OS   |
| 1466 | ENSG00000082068 | HPA043064 | U-2 OS   |
| 1467 | ENSG00000082074 | HPA026796 | U-2 OS   |
| 1468 | ENSG00000082126 | HPA057393 | U-2 OS   |
| 1469 | ENSG00000082146 | HPA026549 | U-2 OS   |
| 1470 | ENSG00000082153 | HPA047288 | CACO-2   |
| 1471 | ENSG00000082196 | HPA066011 | SH-SY5Y  |
| 1472 | ENSG00000082212 | HPA008247 | U-2 OS   |
| 1473 | ENSG00000082212 | HPA008880 | U-2 OS   |
| 1474 | ENSG00000082213 | HPA043062 | U-2 OS   |
| 1475 | ENSG00000082258 | HPA005559 | U-2 OS   |
| 1476 | ENSG00000082269 | HPA031743 | U-2 OS   |
| 1477 | ENSG00000082269 | HPA031744 | U-2 OS   |
| 1478 | ENSG00000082397 | HPA028605 | U-2 OS   |
| 1479 | ENSG00000082438 | HPA044933 | RT4      |
| 1480 | ENSG00000082458 | HPA078130 | MCF7     |
| 1481 | ENSG00000082497 | HPA027344 | U-2 OS   |
| 1482 | ENSG00000082497 | HPA028514 | U-2 OS   |
| 1483 | ENSG00000082515 | HPA047063 | U-2 OS   |

|      |                 |           |          |
|------|-----------------|-----------|----------|
| 1484 | ENSG00000082516 | HPA037392 |          |
| 1485 | ENSG00000082516 | HPA037393 | U-2 OS   |
| 1486 | ENSG00000082556 | HPA067549 | RT4      |
| 1487 | ENSG00000082641 | HPA063384 | U-2 OS   |
| 1488 | ENSG00000082684 | HPA066548 | SH-SY5Y  |
| 1489 | ENSG00000082701 | HPA028017 | U-2 OS   |
| 1490 | ENSG00000082781 | CAB022050 | U-2 OS   |
| 1491 | ENSG00000082805 | HPA019513 | U-2 OS   |
| 1492 | ENSG00000082805 | HPA019523 | U-2 OS   |
| 1493 | ENSG00000082805 | HPA024130 | U-2 OS   |
| 1494 | ENSG00000082898 | CAB010184 | U-2 OS   |
| 1495 | ENSG00000082898 | HPA042933 | U-2 OS   |
| 1496 | ENSG00000082996 | HPA064784 | U-2 OS   |
| 1497 | ENSG00000083067 | HPA072650 | U-2 OS   |
| 1498 | ENSG00000083093 | HPA057000 | U-2 OS   |
| 1499 | ENSG00000083097 | HPA027902 | U-2 OS   |
| 1500 | ENSG00000083099 | HPA063932 | U-2 OS   |
| 1501 | ENSG00000083123 | HPA031956 | U-2 OS   |
| 1502 | ENSG00000083168 | CAB017023 | U-251 MG |
| 1503 | ENSG00000083168 | HPA065052 | U-2 OS   |
| 1504 | ENSG00000083223 | HPA020620 | U-2 OS   |
| 1505 | ENSG00000083307 | HPA062839 | RT4      |
| 1506 | ENSG00000083312 | CAB016325 | U-2 OS   |
| 1507 | ENSG00000083444 | HPA049137 | A-431    |
| 1508 | ENSG00000083454 | HPA021948 | U-2 OS   |
| 1509 | ENSG00000083454 | HPA067827 | U-2 OS   |
| 1510 | ENSG00000083520 | HPA039281 | U-2 OS   |
| 1511 | ENSG00000083520 | HPA058762 | U-2 OS   |
| 1512 | ENSG00000083535 | HPA052269 | U-2 OS   |
| 1513 | ENSG00000083544 | CAB034925 | U-2 OS   |
| 1514 | ENSG00000083544 | HPA067153 | U-2 OS   |
| 1515 | ENSG00000083635 | HPA029958 | U-2 OS   |
| 1516 | ENSG00000083635 | HPA029959 | U-2 OS   |
| 1517 | ENSG00000083642 | HPA039513 | U-2 OS   |
| 1518 | ENSG00000083642 | HPA040015 | U-2 OS   |
| 1519 | ENSG00000083720 | HPA012047 | U-2 OS   |
| 1520 | ENSG00000083720 | HPA061425 | U-2 OS   |
| 1521 | ENSG00000083750 | HPA003734 | U-2 OS   |
| 1522 | ENSG00000083799 | HPA050095 | U-2 OS   |
| 1523 | ENSG00000083812 | HPA039774 | U-2 OS   |
| 1524 | ENSG00000083814 | HPA046099 | RH-30    |
| 1525 | ENSG00000083817 | HPA063318 | HEK 293  |
| 1526 | ENSG00000083828 | HPA030306 | U-2 OS   |
| 1527 | ENSG00000083838 | HPA052786 | U-2 OS   |
| 1528 | ENSG00000083844 | HPA046330 | U-2 OS   |
| 1529 | ENSG00000083845 | HPA055878 | U-2 OS   |
| 1530 | ENSG00000083896 | HPA036462 | U-2 OS   |
| 1531 | ENSG00000083937 | HPA052754 | U-2 OS   |
| 1532 | ENSG00000084072 | HPA019357 | CACO-2   |
| 1533 | ENSG00000084073 | HPA006988 | U-2 OS   |
| 1534 | ENSG00000084090 | HPA064958 | U-2 OS   |
| 1535 | ENSG00000084092 | HPA035838 | U-2 OS   |
| 1536 | ENSG00000084093 | HPA006079 | U-2 OS   |
| 1537 | ENSG00000084110 | HPA038547 | U-2 OS   |
| 1538 | ENSG00000084112 | HPA019845 | U-2 OS   |

|      |                 |           |          |
|------|-----------------|-----------|----------|
| 1539 | ENSG00000084207 | HPA019869 | U-2 OS   |
| 1540 | ENSG00000084234 | HPA039319 | U-2 OS   |
| 1541 | ENSG00000084444 | HPA010803 | U-2 OS   |
| 1542 | ENSG00000084453 | HPA071152 | CACO-2   |
| 1543 | ENSG00000084463 | HPA039710 | U-2 OS   |
| 1544 | ENSG00000084463 | HPA049126 | U-2 OS   |
| 1545 | ENSG00000084623 | HPA029939 | U-2 OS   |
| 1546 | ENSG00000084636 | HPA027235 | U-2 OS   |
| 1547 | ENSG00000084636 | HPA027237 | U-2 OS   |
| 1548 | ENSG00000084652 | HPA045383 | U-2 OS   |
| 1549 | ENSG00000084674 | HPA049793 | CACO-2   |
| 1550 | ENSG00000084676 | HPA070213 | U-2 OS   |
| 1551 | ENSG00000084676 | HPA070520 | U-2 OS   |
| 1552 | ENSG00000084693 | HPA030981 | U-2 OS   |
| 1553 | ENSG00000084710 | HPA071831 | U-2 OS   |
| 1554 | ENSG00000084731 | HPA035755 | U-2 OS   |
| 1555 | ENSG00000084734 | HPA064305 | Hep G2   |
| 1556 | ENSG00000084754 | HPA015536 | U-2 OS   |
| 1557 | ENSG00000084754 | HPA056070 | U-2 OS   |
| 1558 | ENSG00000084764 | HPA009263 | U-2 OS   |
| 1559 | ENSG00000084774 | HPA057266 | U-2 OS   |
| 1560 | ENSG00000085063 | HPA026494 | U-2 OS   |
| 1561 | ENSG00000085117 | HPA061418 | U-251 MG |
| 1562 | ENSG00000085185 | HPA068568 | CACO-2   |
| 1563 | ENSG00000085224 | HPA064684 | SH-SY5Y  |
| 1564 | ENSG00000085231 | HPA070217 | CACO-2   |
| 1565 | ENSG00000085274 | HPA045149 | U-2 OS   |
| 1566 | ENSG00000085276 | HPA046537 | RT4      |
| 1567 | ENSG00000085365 | HPA044753 | U-2 OS   |
| 1568 | ENSG00000085377 | HPA031390 | U-2 OS   |
| 1569 | ENSG00000085382 | HPA046071 | U-2 OS   |
| 1570 | ENSG00000085433 | HPA027287 | U-2 OS   |
| 1571 | ENSG00000085491 | HPA028519 | U-2 OS   |
| 1572 | ENSG00000085491 | HPA063636 | U-2 OS   |
| 1573 | ENSG00000085511 | HPA007625 | A-431    |
| 1574 | ENSG00000085563 | CAB001716 | U-2 OS   |
| 1575 | ENSG00000085563 | HPA002199 | U-2 OS   |
| 1576 | ENSG00000085644 | HPA035000 | U-2 OS   |
| 1577 | ENSG00000085644 | HPA056750 | A-431    |
| 1578 | ENSG00000085662 | HPA026425 | U-2 OS   |
| 1579 | ENSG00000085662 | CAB027391 | U-2 OS   |
| 1580 | ENSG00000085662 | CAB047353 | A-431    |
| 1581 | ENSG00000085719 | HPA029552 | U-2 OS   |
| 1582 | ENSG00000085721 | HPA049837 | U-2 OS   |
| 1583 | ENSG00000085733 | HPA057242 | RT4      |
| 1584 | ENSG00000085741 | HPA063569 | CACO-2   |
| 1585 | ENSG00000085760 | HPA006021 | U-2 OS   |
| 1586 | ENSG00000085760 | HPA061422 | U-2 OS   |
| 1587 | ENSG00000085788 | CAB015202 | A-431    |
| 1588 | ENSG00000085788 | HPA023147 | U-2 OS   |
| 1589 | ENSG00000085831 | HPA043440 | U-2 OS   |
| 1590 | ENSG00000085832 | HPA008451 | U-2 OS   |
| 1591 | ENSG00000085832 | CAB010164 | U-2 OS   |
| 1592 | ENSG00000085832 | HPA061431 | RT4      |
| 1593 | ENSG00000085840 | HPA027439 | U-2 OS   |

|      |                 |           |             |
|------|-----------------|-----------|-------------|
| 1594 | ENSG00000085978 | HPA012577 | A-431       |
| 1595 | ENSG00000085982 | HPA005821 | U-2 OS      |
| 1596 | ENSG00000085999 | HPA028954 | U-2 OS      |
| 1597 | ENSG00000085999 | HPA051537 | U-2 OS      |
| 1598 | ENSG00000086015 | HPA039722 | U-2 OS      |
| 1599 | ENSG00000086061 | HPA001306 | U-2 OS      |
| 1600 | ENSG00000086062 | HPA010806 | HeLa        |
| 1601 | ENSG00000086062 | HPA010807 | U-2 OS      |
| 1602 | ENSG00000086065 | CAB033874 | U-2 OS      |
| 1603 | ENSG00000086102 | HPA056310 | HeLa        |
| 1604 | ENSG00000086102 | HPA061382 | U-2 OS      |
| 1605 | ENSG00000086189 | HPA042944 | U-2 OS      |
| 1606 | ENSG00000086200 | HPA065346 | CACO-2      |
| 1607 | ENSG00000086232 | HPA016496 | U-2 OS      |
| 1608 | ENSG00000086232 | HPA061675 | MCF7        |
| 1609 | ENSG00000086300 | HPA064782 | U-2 OS      |
| 1610 | ENSG00000086475 | HPA037645 | U-2 OS      |
| 1611 | ENSG00000086504 | HPA030594 | U-2 OS      |
| 1612 | ENSG00000086506 | HPA062473 | CACO-2      |
| 1613 | ENSG00000086544 | HPA053003 | RT4         |
| 1614 | ENSG00000086589 | HPA001634 | U-2 OS      |
| 1615 | ENSG00000086598 | HPA014060 | U-2 OS      |
| 1616 | ENSG00000086696 | HPA021826 | RT4         |
| 1617 | ENSG00000086712 | HPA000841 | U-2 OS      |
| 1618 | ENSG00000086717 | HPA034577 | U-2 OS      |
| 1619 | ENSG00000086730 | HPA003462 | U-2 OS      |
| 1620 | ENSG00000086758 | HPA002548 | U-2 OS      |
| 1621 | ENSG00000086758 | CAB022718 | U-2 OS      |
| 1622 | ENSG00000086827 | HPA051253 | U-2 OS      |
| 1623 | ENSG00000086848 | HPA038575 | U-2 OS      |
| 1624 | ENSG00000086991 | HPA015475 | HUVEC TERT2 |
| 1625 | ENSG00000087008 | HPA035840 | U-2 OS      |
| 1626 | ENSG00000087053 | HPA049831 | RT4         |
| 1627 | ENSG00000087074 | HPA020240 | A-431       |
| 1628 | ENSG00000087077 | HPA052813 | U-2 OS      |
| 1629 | ENSG00000087085 | HPA027098 | CACO-2      |
| 1630 | ENSG00000087086 | HPA041602 | A549        |
| 1631 | ENSG00000087087 | HPA042858 | U-2 OS      |
| 1632 | ENSG00000087087 | HPA058379 | U-2 OS      |
| 1633 | ENSG00000087095 | HPA018192 | U-2 OS      |
| 1634 | ENSG00000087095 | HPA056511 | U-2 OS      |
| 1635 | ENSG00000087116 | HPA028363 | ASC TERT1   |
| 1636 | ENSG00000087116 | HPA028444 | BJ          |
| 1637 | ENSG00000087152 | HPA064316 | CACO-2      |
| 1638 | ENSG00000087157 | HPA022526 | U-2 OS      |
| 1639 | ENSG00000087191 | HPA017871 | U-2 OS      |
| 1640 | ENSG00000087191 | HPA064293 | U-2 OS      |
| 1641 | ENSG00000087206 | HPA037503 | U-2 OS      |
| 1642 | ENSG00000087206 | HPA037504 | U-2 OS      |
| 1643 | ENSG00000087245 | HPA001939 | U-2 OS      |
| 1644 | ENSG00000087253 | HPA007891 | A-431       |
| 1645 | ENSG00000087263 | HPA003215 | U-2 OS      |
| 1646 | ENSG00000087263 | HPA003722 | U-2 OS      |
| 1647 | ENSG00000087266 | HPA036790 | A-431       |
| 1648 | ENSG00000087269 | HPA039596 | U-2 OS      |

|      |                 |           |          |
|------|-----------------|-----------|----------|
| 1649 | ENSG00000087269 | HPA055652 | U-251 MG |
| 1650 | ENSG00000087274 | CAB009794 | U-2 OS   |
| 1651 | ENSG00000087274 | HPA035873 | U-2 OS   |
| 1652 | ENSG00000087299 | HPA065409 | CACO-2   |
| 1653 | ENSG00000087299 | HPA069708 | RT4      |
| 1654 | ENSG00000087301 | HPA002543 | U-2 OS   |
| 1655 | ENSG00000087302 | HPA039824 | U-2 OS   |
| 1656 | ENSG00000087303 | HPA052460 | U-2 OS   |
| 1657 | ENSG00000087303 | HPA058772 | BJ       |
| 1658 | ENSG00000087365 | HPA045028 | U-2 OS   |
| 1659 | ENSG00000087460 | CAB010337 | U-2 OS   |
| 1660 | ENSG00000087470 | CAB009952 | U-2 OS   |
| 1661 | ENSG00000087470 | HPA039324 | U-2 OS   |
| 1662 | ENSG00000087494 | HPA035982 | U-2 OS   |
| 1663 | ENSG00000087495 | HPA051834 | PC-3     |
| 1664 | ENSG00000087495 | HPA054847 | U-2 OS   |
| 1665 | ENSG00000087502 | HPA049695 | U-2 OS   |
| 1666 | ENSG00000087510 | HPA055179 | MCF7     |
| 1667 | ENSG00000087510 | HPA057076 | U-2 OS   |
| 1668 | ENSG00000087586 | HPA002636 | A-431    |
| 1669 | ENSG00000087842 | HPA000697 | U-2 OS   |
| 1670 | ENSG00000087884 | HPA037918 | U-2 OS   |
| 1671 | ENSG00000087884 | HPA037919 | U-2 OS   |
| 1672 | ENSG00000087903 | HPA048969 | RT4      |
| 1673 | ENSG00000088002 | HPA041724 | U-2 OS   |
| 1674 | ENSG00000088035 | HPA062536 | SiHa     |
| 1675 | ENSG00000088038 | HPA006408 | U-2 OS   |
| 1676 | ENSG00000088053 | HPA066482 | RT4      |
| 1677 | ENSG00000088179 | HPA019351 | U-2 OS   |
| 1678 | ENSG00000088205 | HPA041056 | U-2 OS   |
| 1679 | ENSG00000088247 | HPA034739 | U-2 OS   |
| 1680 | ENSG00000088247 | HPA056518 | U-2 OS   |
| 1681 | ENSG00000088280 | HPA020546 | U-2 OS   |
| 1682 | ENSG00000088305 | HPA001803 | U-2 OS   |
| 1683 | ENSG00000088325 | HPA005487 | U-2 OS   |
| 1684 | ENSG00000088356 | HPA063542 | CACO-2   |
| 1685 | ENSG00000088367 | HPA054104 | A549     |
| 1686 | ENSG00000088367 | HPA056817 | A549     |
| 1687 | ENSG00000088386 | HPA002827 | CACO-2   |
| 1688 | ENSG00000088448 | HPA038879 | U-2 OS   |
| 1689 | ENSG00000088451 | HPA040857 | U-2 OS   |
| 1690 | ENSG00000088538 | HPA037543 | U-2 OS   |
| 1691 | ENSG00000088538 | HPA037544 | U-2 OS   |
| 1692 | ENSG00000088543 | HPA012105 | U-2 OS   |
| 1693 | ENSG00000088726 | HPA044165 | RT4      |
| 1694 | ENSG00000088756 | HPA030413 | CACO-2   |
| 1695 | ENSG00000088756 | HPA030414 | CACO-2   |
| 1696 | ENSG00000088808 | HPA006394 | U-2 OS   |
| 1697 | ENSG00000088812 | HPA008853 | U-2 OS   |
| 1698 | ENSG00000088826 | HPA060198 | U-2 OS   |
| 1699 | ENSG00000088833 | HPA047108 | U-2 OS   |
| 1700 | ENSG00000088833 | HPA050628 | U-2 OS   |
| 1701 | ENSG00000088836 | HPA018120 | U-2 OS   |
| 1702 | ENSG00000088836 | HPA058377 | U-2 OS   |
| 1703 | ENSG00000088854 | HPA067418 | U-2 OS   |

|      |                 |           |         |
|------|-----------------|-----------|---------|
| 1704 | ENSG00000088876 | HPA052438 | U-2 OS  |
| 1705 | ENSG00000088888 | CAB009187 | U-2 OS  |
| 1706 | ENSG00000088888 | HPA053524 | U-2 OS  |
| 1707 | ENSG00000088899 | HPA031008 | U-2 OS  |
| 1708 | ENSG00000088926 | HPA039808 | U-2 OS  |
| 1709 | ENSG00000088930 | HPA047118 | U-2 OS  |
| 1710 | ENSG00000088930 | HPA050485 | U-2 OS  |
| 1711 | ENSG00000088986 | HPA039954 | U-2 OS  |
| 1712 | ENSG00000088992 | HPA053200 | U-2 OS  |
| 1713 | ENSG00000089006 | HPA076450 | U-2 OS  |
| 1714 | ENSG00000089009 | HPA060903 | U-2 OS  |
| 1715 | ENSG00000089022 | HPA015515 | U-2 OS  |
| 1716 | ENSG00000089048 | HPA050396 | U-2 OS  |
| 1717 | ENSG00000089050 | HPA049005 | U-2 OS  |
| 1718 | ENSG00000089053 | HPA039801 | U-2 OS  |
| 1719 | ENSG00000089057 | HPA059314 | U-2 OS  |
| 1720 | ENSG00000089063 | HPA009078 | U-2 OS  |
| 1721 | ENSG00000089063 | HPA061421 | U-2 OS  |
| 1722 | ENSG00000089091 | HPA064255 | CAC0-2  |
| 1723 | ENSG00000089094 | HPA071257 | RT4     |
| 1724 | ENSG00000089123 | HPA030824 | U-2 OS  |
| 1725 | ENSG00000089127 | HPA003657 | A-431   |
| 1726 | ENSG00000089154 | HPA018799 | U-2 OS  |
| 1727 | ENSG00000089154 | HPA019648 | U-2 OS  |
| 1728 | ENSG00000089157 | HPA003512 | A-431   |
| 1729 | ENSG00000089159 | CAB003841 | U-2 OS  |
| 1730 | ENSG00000089159 | HPA051309 | U-2 OS  |
| 1731 | ENSG00000089177 | HPA051198 | U-2 OS  |
| 1732 | ENSG00000089195 | HPA047032 | U-2 OS  |
| 1733 | ENSG00000089195 | HPA050408 | U-2 OS  |
| 1734 | ENSG00000089199 | HPA008759 | SH-SY5Y |
| 1735 | ENSG00000089199 | HPA012602 | SH-SY5Y |
| 1736 | ENSG00000089220 | HPA063904 | U-2 OS  |
| 1737 | ENSG00000089225 | HPA064683 | RT4     |
| 1738 | ENSG00000089234 | HPA040357 | U-2 OS  |
| 1739 | ENSG00000089234 | HPA058820 | U-2 OS  |
| 1740 | ENSG00000089248 | HPA039456 | U-2 OS  |
| 1741 | ENSG00000089250 | HPA058312 | U-2 OS  |
| 1742 | ENSG00000089280 | HPA008784 | U-2 OS  |
| 1743 | ENSG00000089280 | CAB033036 | U-2 OS  |
| 1744 | ENSG00000089280 | CAB058691 | U-2 OS  |
| 1745 | ENSG00000089289 | HPA000634 | U-2 OS  |
| 1746 | ENSG00000089327 | HPA010817 | A-431   |
| 1747 | ENSG00000089335 | HPA059503 | U-2 OS  |
| 1748 | ENSG00000089351 | HPA008852 | U-2 OS  |
| 1749 | ENSG00000089356 | HPA010856 | RT4     |
| 1750 | ENSG00000089472 | HPA000553 | HEL     |
| 1751 | ENSG00000089486 | HPA049352 | U-2 OS  |
| 1752 | ENSG00000089505 | HPA013801 | U-2 OS  |
| 1753 | ENSG00000089597 | HPA061426 | U-2 OS  |
| 1754 | ENSG00000089639 | HPA042484 | A-431   |
| 1755 | ENSG00000089639 | HPA045481 | U-2 OS  |
| 1756 | ENSG00000089682 | HPA042881 | U-2 OS  |
| 1757 | ENSG00000089685 | CAB004270 | U-2 OS  |
| 1758 | ENSG00000089693 | HPA010811 | U-2 OS  |

|      |                 |           |          |
|------|-----------------|-----------|----------|
| 1759 | ENSG00000089693 | HPA010859 | U-2 OS   |
| 1760 | ENSG00000089737 | HPA002554 | U-2 OS   |
| 1761 | ENSG00000089775 | HPA054699 | U-2 OS   |
| 1762 | ENSG00000089818 | HPA053980 | U-2 OS   |
| 1763 | ENSG00000089820 | HPA001083 | U-2 OS   |
| 1764 | ENSG00000089847 | HPA041534 | U-2 OS   |
| 1765 | ENSG00000089902 | HPA049327 | U-2 OS   |
| 1766 | ENSG00000089902 | HPA054241 | A-431    |
| 1767 | ENSG00000089916 | HPA018856 | U-2 OS   |
| 1768 | ENSG00000090013 | HPA041698 | U-2 OS   |
| 1769 | ENSG00000090020 | HPA052891 | A-431    |
| 1770 | ENSG00000090054 | CAB018747 | U-2 OS   |
| 1771 | ENSG00000090054 | HPA063907 | U-2 OS   |
| 1772 | ENSG00000090060 | HPA001788 | U-2 OS   |
| 1773 | ENSG00000090061 | HPA000645 | MCF7     |
| 1774 | ENSG00000090097 | HPA057754 | U-2 OS   |
| 1775 | ENSG00000090266 | HPA051377 | MCF7     |
| 1776 | ENSG00000090273 | HPA027183 | U-2 OS   |
| 1777 | ENSG00000090273 | HPA028105 | U-2 OS   |
| 1778 | ENSG00000090316 | HPA036886 | U-2 OS   |
| 1779 | ENSG00000090316 | HPA058185 | A-431    |
| 1780 | ENSG00000090339 | CAB002142 | A-431    |
| 1781 | ENSG00000090372 | HPA043051 | U-2 OS   |
| 1782 | ENSG00000090376 | HPA043097 | SiHa     |
| 1783 | ENSG00000090382 | HPA066182 | Hep G2   |
| 1784 | ENSG00000090432 | HPA026827 | U-2 OS   |
| 1785 | ENSG00000090447 | HPA001912 | U-2 OS   |
| 1786 | ENSG00000090470 | HPA049388 | U-2 OS   |
| 1787 | ENSG00000090487 | HPA040407 | U-2 OS   |
| 1788 | ENSG00000090520 | HPA010814 | U-2 OS   |
| 1789 | ENSG00000090530 | HPA013611 | SiHa     |
| 1790 | ENSG00000090565 | HPA028631 | U-2 OS   |
| 1791 | ENSG00000090581 | HPA004055 | U-2 OS   |
| 1792 | ENSG00000090612 | HPA001794 | U-251 MG |
| 1793 | ENSG00000090615 | HPA039809 | U-2 OS   |
| 1794 | ENSG00000090615 | HPA040044 | U-2 OS   |
| 1795 | ENSG00000090621 | HPA027301 | U-2 OS   |
| 1796 | ENSG00000090621 | HPA056496 | U-2 OS   |
| 1797 | ENSG00000090661 | HPA054729 | U-2 OS   |
| 1798 | ENSG00000090674 | HPA069495 | U-2 OS   |
| 1799 | ENSG00000090686 | HPA030046 | A-431    |
| 1800 | ENSG00000090776 | HPA067188 | U-2 OS   |
| 1801 | ENSG00000090857 | HPA070386 | U-2 OS   |
| 1802 | ENSG00000090861 | CAB034261 | U-2 OS   |
| 1803 | ENSG00000090861 | HPA044223 | U-251 MG |
| 1804 | ENSG00000090863 | HPA010815 | U-2 OS   |
| 1805 | ENSG00000090889 | HPA034745 | U-2 OS   |
| 1806 | ENSG00000090889 | HPA034746 | U-2 OS   |
| 1807 | ENSG00000090889 | HPA061583 | SiHa     |
| 1808 | ENSG00000090905 | HPA015305 | U-2 OS   |
| 1809 | ENSG00000090924 | HPA048054 | U-2 OS   |
| 1810 | ENSG00000090932 | HPA056533 | U-2 OS   |
| 1811 | ENSG00000090971 | HPA047187 | U-2 OS   |
| 1812 | ENSG00000090975 | HPA003414 | U-2 OS   |
| 1813 | ENSG00000090989 | HPA044873 | U-2 OS   |

|      |                 |           |          |
|------|-----------------|-----------|----------|
| 1814 | ENSG00000091009 | HPA036422 | U-2 OS   |
| 1815 | ENSG00000091010 | HPA038215 | U-2 OS   |
| 1816 | ENSG00000091039 | HPA001309 | U-2 OS   |
| 1817 | ENSG00000091073 | HPA042931 | U-2 OS   |
| 1818 | ENSG00000091127 | HPA024116 | A-431    |
| 1819 | ENSG00000091129 | HPA012606 | U-2 OS   |
| 1820 | ENSG00000091140 | HPA044849 | U-2 OS   |
| 1821 | ENSG00000091157 | HPA042074 | U-2 OS   |
| 1822 | ENSG00000091164 | HPA002828 | U-2 OS   |
| 1823 | ENSG00000091164 | CAB016446 | U-2 OS   |
| 1824 | ENSG00000091262 | HPA038105 | CAC0-2   |
| 1825 | ENSG00000091317 | HPA063491 | RT4      |
| 1826 | ENSG00000091428 | HPA028968 | RT4      |
| 1827 | ENSG00000091436 | HPA017205 | U-2 OS   |
| 1828 | ENSG00000091482 | HPA077360 | U-2 OS   |
| 1829 | ENSG00000091483 | CAB017785 | U-251 MG |
| 1830 | ENSG00000091483 | HPA025770 | U-2 OS   |
| 1831 | ENSG00000091490 | HPA040045 | U-2 OS   |
| 1832 | ENSG00000091490 | HPA058792 | A-431    |
| 1833 | ENSG00000091527 | HPA029761 | U-2 OS   |
| 1834 | ENSG00000091527 | HPA029762 | U-2 OS   |
| 1835 | ENSG00000091527 | HPA029763 | U-2 OS   |
| 1836 | ENSG00000091542 | HPA007196 | U-2 OS   |
| 1837 | ENSG00000091583 | HPA001654 | Hep G2   |
| 1838 | ENSG00000091592 | HPA064431 | U-2 OS   |
| 1839 | ENSG00000091622 | HPA022432 | U-2 OS   |
| 1840 | ENSG00000091640 | HPA024032 | U-2 OS   |
| 1841 | ENSG00000091640 | HPA052394 | U-2 OS   |
| 1842 | ENSG00000091651 | HPA072587 | U-2 OS   |
| 1843 | ENSG00000091656 | HPA023837 | U-2 OS   |
| 1844 | ENSG00000091732 | HPA024023 | U-2 OS   |
| 1845 | ENSG00000091831 | HPA000449 | RT4      |
| 1846 | ENSG00000091844 | HPA056493 | U-2 OS   |
| 1847 | ENSG00000091947 | HPA039739 | U-2 OS   |
| 1848 | ENSG00000092010 | HPA006632 | U-2 OS   |
| 1849 | ENSG00000092020 | HPA058834 | U-2 OS   |
| 1850 | ENSG00000092036 | HPA029803 | U-2 OS   |
| 1851 | ENSG00000092036 | HPA071195 | U-2 OS   |
| 1852 | ENSG00000092051 | CAB013492 | U-2 OS   |
| 1853 | ENSG00000092067 | CAB005113 | U-2 OS   |
| 1854 | ENSG00000092094 | HPA039751 | PC-3     |
| 1855 | ENSG00000092098 | HPA048745 | U-2 OS   |
| 1856 | ENSG00000092108 | HPA003579 | A-431    |
| 1857 | ENSG00000092140 | HPA001601 | U-2 OS   |
| 1858 | ENSG00000092148 | HPA002929 | Hep G2   |
| 1859 | ENSG00000092148 | HPA054461 | U-2 OS   |
| 1860 | ENSG00000092199 | CAB005223 | U-2 OS   |
| 1861 | ENSG00000092199 | HPA051075 | U-2 OS   |
| 1862 | ENSG00000092199 | CAB075755 | U-2 OS   |
| 1863 | ENSG00000092199 | CAB075756 | U-2 OS   |
| 1864 | ENSG00000092201 | CAB022551 | U-2 OS   |
| 1865 | ENSG00000092201 | HPA049787 | U-2 OS   |
| 1866 | ENSG00000092203 | HPA017880 | U-2 OS   |
| 1867 | ENSG00000092203 | HPA027551 | U-2 OS   |
| 1868 | ENSG00000092208 | HPA057114 | U-2 OS   |



|      |                 |           |          |
|------|-----------------|-----------|----------|
| 1869 | ENSG00000092330 | HPA059061 | U-2 OS   |
| 1870 | ENSG00000092330 | HPA069807 | U-2 OS   |
| 1871 | ENSG00000092421 | HPA031264 | HAP1     |
| 1872 | ENSG00000092421 | HPA031265 | RT4      |
| 1873 | ENSG00000092421 | HPA031267 | RT4      |
| 1874 | ENSG00000092439 | HPA035522 | RT4      |
| 1875 | ENSG00000092470 | HPA039804 | U-2 OS   |
| 1876 | ENSG00000092531 | HPA001214 | U-2 OS   |
| 1877 | ENSG00000092607 | HPA053713 | RH-30    |
| 1878 | ENSG00000092621 | CAB003681 | U-2 OS   |
| 1879 | ENSG00000092621 | HPA021241 | U-2 OS   |
| 1880 | ENSG00000092621 | HPA024031 | U-2 OS   |
| 1881 | ENSG00000092758 | HPA058323 | U-2 OS   |
| 1882 | ENSG00000092820 | CAB004035 | U-2 OS   |
| 1883 | ENSG00000092820 | HPA021616 | U-2 OS   |
| 1884 | ENSG00000092820 | CAB047324 | U-2 OS   |
| 1885 | ENSG00000092820 | CAB075739 | U-2 OS   |
| 1886 | ENSG00000092850 | HPA027248 | U-2 OS   |
| 1887 | ENSG00000092853 | HPA026305 | U-2 OS   |
| 1888 | ENSG00000092853 | HPA026312 | U-2 OS   |
| 1889 | ENSG00000092871 | HPA017910 | U-2 OS   |
| 1890 | ENSG00000092929 | HPA067117 | U-2 OS   |
| 1891 | ENSG00000092929 | HPA073525 | U-2 OS   |
| 1892 | ENSG00000092931 | HPA022001 | U-2 OS   |
| 1893 | ENSG00000092964 | HPA002381 | U-2 OS   |
| 1894 | ENSG00000092978 | HPA027181 | U-2 OS   |
| 1895 | ENSG00000093000 | HPA047162 | U-2 OS   |
| 1896 | ENSG00000093000 | HPA048328 | U-2 OS   |
| 1897 | ENSG00000093009 | HPA000614 | U-2 OS   |
| 1898 | ENSG00000093009 | CAB009459 | U-2 OS   |
| 1899 | ENSG00000093010 | HPA001169 | U-2 OS   |
| 1900 | ENSG00000093144 | HPA035446 | U-251 MG |
| 1901 | ENSG00000093167 | HPA042023 | U-2 OS   |
| 1902 | ENSG00000093183 | HPA031242 | U-2 OS   |
| 1903 | ENSG00000093217 | HPA038415 | U-2 OS   |
| 1904 | ENSG00000094631 | HPA026321 | U-2 OS   |
| 1905 | ENSG00000094804 | HPA065070 | HaCaT    |
| 1906 | ENSG00000094841 | HPA000805 | U-2 OS   |
| 1907 | ENSG00000094914 | HPA040086 | U-2 OS   |
| 1908 | ENSG00000094916 | HPA016699 | U-2 OS   |
| 1909 | ENSG00000094916 | CAB017548 | U-2 OS   |
| 1910 | ENSG00000094975 | HPA047251 | U-2 OS   |
| 1911 | ENSG00000095002 | CAB009572 | U-2 OS   |
| 1912 | ENSG00000095002 | HPA066845 | U-2 OS   |
| 1913 | ENSG00000095015 | HPA046509 | U-2 OS   |
| 1914 | ENSG00000095059 | HPA014461 | U-2 OS   |
| 1915 | ENSG00000095059 | HPA029413 | U-2 OS   |
| 1916 | ENSG00000095066 | HPA050351 | U-2 OS   |
| 1917 | ENSG00000095139 | HPA037573 | U-2 OS   |
| 1918 | ENSG00000095139 | HPA044874 | U-2 OS   |
| 1919 | ENSG00000095203 | HPA042862 | A-431    |
| 1920 | ENSG00000095261 | HPA003216 | U-2 OS   |
| 1921 | ENSG00000095303 | HPA002834 | U-2 OS   |
| 1922 | ENSG00000095319 | HPA061750 | U-2 OS   |
| 1923 | ENSG00000095319 | HPA063942 | SiHa     |

|      |                 |           |         |
|------|-----------------|-----------|---------|
| 1924 | ENSG00000095321 | HPA022815 | A-431   |
| 1925 | ENSG00000095380 | HPA019223 | U-2 OS  |
| 1926 | ENSG00000095383 | HPA030871 | U-2 OS  |
| 1927 | ENSG00000095485 | HPA036890 | U-2 OS  |
| 1928 | ENSG00000095539 | HPA077752 | U-2 OS  |
| 1929 | ENSG00000095564 | HPA070682 | U-2 OS  |
| 1930 | ENSG00000095574 | HPA015297 | U-2 OS  |
| 1931 | ENSG00000095574 | HPA051574 | U-2 OS  |
| 1932 | ENSG00000095585 | HPA038309 | REH     |
| 1933 | ENSG00000095637 | HPA027559 | U-2 OS  |
| 1934 | ENSG00000095739 | HPA010819 | U-2 OS  |
| 1935 | ENSG00000095777 | HPA051893 | U-2 OS  |
| 1936 | ENSG00000095787 | HPA042609 | U-2 OS  |
| 1937 | ENSG00000095787 | HPA074604 | RH-30   |
| 1938 | ENSG00000095794 | CAB018352 | U-2 OS  |
| 1939 | ENSG00000095906 | HPA041704 | U-2 OS  |
| 1940 | ENSG00000095917 | HPA040182 | HEL     |
| 1941 | ENSG00000095932 | HPA056027 | Hep G2  |
| 1942 | ENSG00000095951 | HPA050724 | U-2 OS  |
| 1943 | ENSG00000096060 | CAB009315 | U-2 OS  |
| 1944 | ENSG00000096060 | HPA031093 | U-2 OS  |
| 1945 | ENSG00000096063 | HPA056486 | U-2 OS  |
| 1946 | ENSG00000096070 | HPA022787 | U-2 OS  |
| 1947 | ENSG00000096088 | HPA031717 | CAC0-2  |
| 1948 | ENSG00000096088 | HPA031718 | CAC0-2  |
| 1949 | ENSG00000096092 | HPA072536 | U-2 OS  |
| 1950 | ENSG00000096384 | HPA055729 | U-2 OS  |
| 1951 | ENSG00000096401 | HPA011361 | U-2 OS  |
| 1952 | ENSG00000096433 | HPA064704 | U-2 OS  |
| 1953 | ENSG00000096654 | HPA003226 | U-2 OS  |
| 1954 | ENSG00000096654 | HPA064793 | SH-SY5Y |
| 1955 | ENSG00000096696 | CAB037324 | A-431   |
| 1956 | ENSG00000096717 | HPA006295 | U-2 OS  |
| 1957 | ENSG00000096717 | HPA052351 | U-2 OS  |
| 1958 | ENSG00000096746 | HPA038264 | U-2 OS  |
| 1959 | ENSG00000096872 | HPA020247 | A-431   |
| 1960 | ENSG00000096968 | HPA043870 | U-2 OS  |
| 1961 | ENSG00000096996 | HPA074414 | U-2 OS  |
| 1962 | ENSG00000097007 | HPA027280 | U-2 OS  |
| 1963 | ENSG00000097007 | HPA028409 | U-2 OS  |
| 1964 | ENSG00000097021 | HPA025735 | A-431   |
| 1965 | ENSG00000097033 | HPA015608 | U-2 OS  |
| 1966 | ENSG00000097046 | HPA035831 | U-2 OS  |
| 1967 | ENSG00000097096 | HPA058378 | RT4     |
| 1968 | ENSG00000099139 | HPA031072 | CAC0-2  |
| 1969 | ENSG00000099194 | HPA012107 | U-2 OS  |
| 1970 | ENSG00000099194 | HPA063921 | U-2 OS  |
| 1971 | ENSG00000099204 | HPA038952 | U-2 OS  |
| 1972 | ENSG00000099256 | HPA021458 | U-2 OS  |
| 1973 | ENSG00000099260 | HPA017959 | Hep G2  |
| 1974 | ENSG00000099260 | HPA030549 | U-2 OS  |
| 1975 | ENSG00000099282 | HPA044657 | A-431   |
| 1976 | ENSG00000099284 | HPA035865 | U-2 OS  |
| 1977 | ENSG00000099290 | HPA047844 | U-2 OS  |
| 1978 | ENSG00000099290 | HPA060975 | RT4     |

|      |                 |           |          |
|------|-----------------|-----------|----------|
| 1979 | ENSG00000099308 | HPA035061 | U-2 OS   |
| 1980 | ENSG00000099326 | HPA001757 | A-431    |
| 1981 | ENSG00000099330 | HPA043223 | U-2 OS   |
| 1982 | ENSG00000099331 | HPA042043 | U-2 OS   |
| 1983 | ENSG00000099337 | CAB022637 | U-2 OS   |
| 1984 | ENSG00000099338 | HPA052777 | CACO-2   |
| 1985 | ENSG00000099341 | HPA006702 | U-2 OS   |
| 1986 | ENSG00000099364 | HPA035317 | U-2 OS   |
| 1987 | ENSG00000099377 | HPA050521 | Hep G2   |
| 1988 | ENSG00000099377 | HPA060847 | MCF7     |
| 1989 | ENSG00000099381 | HPA020646 | A-431    |
| 1990 | ENSG00000099385 | HPA052654 | U-2 OS   |
| 1991 | ENSG00000099399 | HPA065224 | U-2 OS   |
| 1992 | ENSG00000099617 | HPA067567 | Hep G2   |
| 1993 | ENSG00000099622 | HPA060537 | U-2 OS   |
| 1994 | ENSG00000099625 | HPA012777 | U-2 OS   |
| 1995 | ENSG00000099783 | CAB016113 | U-2 OS   |
| 1996 | ENSG00000099783 | HPA024344 | U-2 OS   |
| 1997 | ENSG00000099785 | HPA014063 | U-2 OS   |
| 1998 | ENSG00000099797 | HPA056488 | U-251 MG |
| 1999 | ENSG00000099800 | HPA048985 | U-2 OS   |
| 2000 | ENSG00000099804 | HPA002382 | U-2 OS   |
| 2001 | ENSG00000099810 | HPA046915 | U-251 MG |
| 2002 | ENSG00000099812 | HPA049511 | U-2 OS   |
| 2003 | ENSG00000099812 | HPA062232 | U-2 OS   |
| 2004 | ENSG00000099814 | HPA000871 | U-2 OS   |
| 2005 | ENSG00000099817 | HPA063030 | CACO-2   |
| 2006 | ENSG00000099821 | HPA006366 | U-2 OS   |
| 2007 | ENSG00000099849 | HPA078015 | A-431    |
| 2008 | ENSG00000099860 | HPA029816 | U-2 OS   |
| 2009 | ENSG00000099864 | HPA041713 | MCF7     |
| 2010 | ENSG00000099864 | HPA049578 | U-2 OS   |
| 2011 | ENSG00000099875 | HPA070499 | U-2 OS   |
| 2012 | ENSG00000099889 | HPA055264 | HEK 293  |
| 2013 | ENSG00000099889 | HPA063675 | U-2 OS   |
| 2014 | ENSG00000099899 | HPA001077 | U-2 OS   |
| 2015 | ENSG00000099901 | HPA065868 | HEK 293  |
| 2016 | ENSG00000099901 | HPA065931 | RH-30    |
| 2017 | ENSG00000099904 | HPA003422 | U-2 OS   |
| 2018 | ENSG00000099910 | HPA040766 | U-2 OS   |
| 2019 | ENSG00000099917 | HPA003179 | U-2 OS   |
| 2020 | ENSG00000099937 | HPA055767 | Hep G2   |
| 2021 | ENSG00000099940 | HPA031823 | U-2 OS   |
| 2022 | ENSG00000099940 | HPA056492 | U-2 OS   |
| 2023 | ENSG00000099942 | HPA000532 | U-2 OS   |
| 2024 | ENSG00000099949 | HPA067852 | U-2 OS   |
| 2025 | ENSG00000099949 | HPA071248 | U-2 OS   |
| 2026 | ENSG00000099954 | HPA002943 | U-2 OS   |
| 2027 | ENSG00000099956 | HPA018248 | U-2 OS   |
| 2028 | ENSG00000099957 | HPA028776 | U-2 OS   |
| 2029 | ENSG00000099958 | HPA049306 | U-2 OS   |
| 2030 | ENSG00000099968 | HPA030994 | A-431    |
| 2031 | ENSG00000099968 | HPA050377 | U-2 OS   |
| 2032 | ENSG00000099977 | HPA049871 | U-2 OS   |
| 2033 | ENSG00000099991 | HPA043296 | U-2 OS   |

|      |                 |           |         |
|------|-----------------|-----------|---------|
| 2034 | ENSG00000099992 | HPA007725 | RT4     |
| 2035 | ENSG00000099992 | HPA076041 | U-2 OS  |
| 2036 | ENSG00000099994 | HPA004117 | U-2 OS  |
| 2037 | ENSG00000099995 | HPA000690 | U-2 OS  |
| 2038 | ENSG00000099995 | HPA030083 | U-2 OS  |
| 2039 | ENSG00000099998 | HPA008121 | Hep G2  |
| 2040 | ENSG00000099999 | HPA056498 | U-2 OS  |
| 2041 | ENSG00000100003 | HPA064466 | U-2 OS  |
| 2042 | ENSG00000100014 | HPA070614 | U-2 OS  |
| 2043 | ENSG00000100023 | HPA035344 | U-2 OS  |
| 2044 | ENSG00000100023 | HPA055637 | U-2 OS  |
| 2045 | ENSG00000100028 | HPA001170 | U-2 OS  |
| 2046 | ENSG00000100029 | HPA040210 | U-2 OS  |
| 2047 | ENSG00000100029 | HPA062439 | U-2 OS  |
| 2048 | ENSG00000100029 | HPA066670 | U-2 OS  |
| 2049 | ENSG00000100031 | HPA065444 | A549    |
| 2050 | ENSG00000100034 | HPA030989 | U-2 OS  |
| 2051 | ENSG00000100036 | HPA049558 | PC-3    |
| 2052 | ENSG00000100038 | HPA072114 | U-2 OS  |
| 2053 | ENSG00000100056 | HPA001221 | U-2 OS  |
| 2054 | ENSG00000100060 | HPA056479 | U-2 OS  |
| 2055 | ENSG00000100065 | HPA055612 | U-2 OS  |
| 2056 | ENSG00000100068 | HPA028717 | U-2 OS  |
| 2057 | ENSG00000100077 | HPA000804 | U-2 OS  |
| 2058 | ENSG00000100079 | HPA003536 | CACO-2  |
| 2059 | ENSG00000100083 | HPA048280 | U-2 OS  |
| 2060 | ENSG00000100084 | CAB039243 | U-2 OS  |
| 2061 | ENSG00000100084 | HPA052902 | U-2 OS  |
| 2062 | ENSG00000100092 | HPA000757 | U-2 OS  |
| 2063 | ENSG00000100095 | HPA045135 | SH-SY5Y |
| 2064 | ENSG00000100097 | HPA000687 | U-2 OS  |
| 2065 | ENSG00000100097 | HPA001130 | U-2 OS  |
| 2066 | ENSG00000100099 | HPA050189 | A-431   |
| 2067 | ENSG00000100104 | HPA002945 | U-2 OS  |
| 2068 | ENSG00000100105 | HPA047893 | U-2 OS  |
| 2069 | ENSG00000100109 | HPA027085 | U-2 OS  |
| 2070 | ENSG00000100116 | HPA020460 | U-2 OS  |
| 2071 | ENSG00000100124 | HPA071287 | U-2 OS  |
| 2072 | ENSG00000100129 | HPA003028 | U-2 OS  |
| 2073 | ENSG00000100139 | HPA043480 | U-2 OS  |
| 2074 | ENSG00000100139 | HPA051956 | U-2 OS  |
| 2075 | ENSG00000100142 | HPA000827 | U-2 OS  |
| 2076 | ENSG00000100142 | CAB009882 | U-2 OS  |
| 2077 | ENSG00000100146 | HPA068898 | U-2 OS  |
| 2078 | ENSG00000100151 | HPA067384 | RT4     |
| 2079 | ENSG00000100154 | HPA003099 | U-2 OS  |
| 2080 | ENSG00000100156 | HPA075017 | U-2 OS  |
| 2081 | ENSG00000100162 | HPA042404 | U-2 OS  |
| 2082 | ENSG00000100162 | HPA056500 | U-2 OS  |
| 2083 | ENSG00000100167 | HPA003548 | U-2 OS  |
| 2084 | ENSG00000100170 | HPA055106 | CACO-2  |
| 2085 | ENSG00000100196 | HPA076405 | U-2 OS  |
| 2086 | ENSG00000100197 | HPA045223 | U-2 OS  |
| 2087 | ENSG00000100201 | HPA063142 | U-2 OS  |
| 2088 | ENSG00000100206 | CAB015397 | A-431   |

|      |                 |           |         |
|------|-----------------|-----------|---------|
| 2089 | ENSG00000100207 | HPA036786 | A-431   |
| 2090 | ENSG00000100209 | HPA031518 | U-2 OS  |
| 2091 | ENSG00000100216 | HPA003037 | U-2 OS  |
| 2092 | ENSG00000100218 | HPA050425 | U-2 OS  |
| 2093 | ENSG00000100220 | HPA000535 | U-2 OS  |
| 2094 | ENSG00000100225 | HPA032113 | A-431   |
| 2095 | ENSG00000100226 | HPA064702 | U-2 OS  |
| 2096 | ENSG00000100227 | HPA018419 | U-2 OS  |
| 2097 | ENSG00000100227 | HPA048790 | U-2 OS  |
| 2098 | ENSG00000100228 | HPA059631 | U-2 OS  |
| 2099 | ENSG00000100239 | HPA030656 | U-2 OS  |
| 2100 | ENSG00000100241 | HPA074004 | U-2 OS  |
| 2101 | ENSG00000100242 | HPA001209 | U-2 OS  |
| 2102 | ENSG00000100243 | HPA001566 | U-2 OS  |
| 2103 | ENSG00000100246 | HPA003647 | U-2 OS  |
| 2104 | ENSG00000100258 | HPA062626 | U-2 OS  |
| 2105 | ENSG00000100263 | HPA043979 | U-2 OS  |
| 2106 | ENSG00000100266 | HPA049854 | CACO-2  |
| 2107 | ENSG00000100271 | HPA048392 | U-2 OS  |
| 2108 | ENSG00000100280 | HPA065226 | RT4     |
| 2109 | ENSG00000100280 | HPA068520 | RT4     |
| 2110 | ENSG00000100284 | HPA000818 | U-2 OS  |
| 2111 | ENSG00000100288 | HPA018797 | U-2 OS  |
| 2112 | ENSG00000100292 | HPA000635 | U-2 OS  |
| 2113 | ENSG00000100294 | HPA003122 | HEK 293 |
| 2114 | ENSG00000100296 | HPA048402 | U-2 OS  |
| 2115 | ENSG00000100297 | HPA052880 | U-2 OS  |
| 2116 | ENSG00000100298 | HPA021492 | REH     |
| 2117 | ENSG00000100298 | HPA058565 | REH     |
| 2118 | ENSG00000100299 | HPA005554 | U-2 OS  |
| 2119 | ENSG00000100300 | HPA046260 | U-2 OS  |
| 2120 | ENSG00000100302 | HPA005839 | U-2 OS  |
| 2121 | ENSG00000100304 | HPA003054 | U-2 OS  |
| 2122 | ENSG00000100307 | HPA056480 | U-2 OS  |
| 2123 | ENSG00000100311 | HPA011972 | MCF7    |
| 2124 | ENSG00000100316 | HPA003365 | U-2 OS  |
| 2125 | ENSG00000100319 | HPA004858 | U-2 OS  |
| 2126 | ENSG00000100320 | HPA006240 | U-2 OS  |
| 2127 | ENSG00000100321 | HPA029673 | U-2 OS  |
| 2128 | ENSG00000100324 | CAB032328 | U-2 OS  |
| 2129 | ENSG00000100324 | HPA039988 | U-2 OS  |
| 2130 | ENSG00000100325 | HPA001439 | U-2 OS  |
| 2131 | ENSG00000100330 | HPA034516 | U-2 OS  |
| 2132 | ENSG00000100330 | HPA061399 | U-2 OS  |
| 2133 | ENSG00000100335 | HPA061059 | U-2 OS  |
| 2134 | ENSG00000100336 | HPA055435 | RT4     |
| 2135 | ENSG00000100344 | HPA058058 | U-2 OS  |
| 2136 | ENSG00000100345 | HPA001644 | U-2 OS  |
| 2137 | ENSG00000100345 | HPA064783 | A-431   |
| 2138 | ENSG00000100347 | HPA034537 | U-2 OS  |
| 2139 | ENSG00000100348 | HPA000994 | U-2 OS  |
| 2140 | ENSG00000100348 | CAB008681 | U-2 OS  |
| 2141 | ENSG00000100351 | HPA005788 | A-431   |
| 2142 | ENSG00000100353 | HPA045882 | U-2 OS  |
| 2143 | ENSG00000100353 | HPA066216 | U-2 OS  |

|      |                 |           |          |
|------|-----------------|-----------|----------|
| 2144 | ENSG00000100359 | HPA048980 | MCF7     |
| 2145 | ENSG00000100360 | HPA018418 | U-2 OS   |
| 2146 | ENSG00000100362 | HPA048536 | RT4      |
| 2147 | ENSG00000100364 | HPA038091 | U-2 OS   |
| 2148 | ENSG00000100365 | HPA036156 | U-2 OS   |
| 2149 | ENSG00000100365 | HPA057975 | REH      |
| 2150 | ENSG00000100368 | HPA078677 | U-2 OS   |
| 2151 | ENSG00000100372 | HPA060972 | U-2 OS   |
| 2152 | ENSG00000100373 | HPA018415 | RT4      |
| 2153 | ENSG00000100376 | HPA003902 | U-2 OS   |
| 2154 | ENSG00000100380 | HPA043233 | U-2 OS   |
| 2155 | ENSG00000100380 | HPA046412 | U-2 OS   |
| 2156 | ENSG00000100380 | HPA047114 | U-2 OS   |
| 2157 | ENSG00000100387 | HPA003038 | U-2 OS   |
| 2158 | ENSG00000100393 | HPA003128 | U-2 OS   |
| 2159 | ENSG00000100393 | HPA004112 | U-2 OS   |
| 2160 | ENSG00000100395 | HPA000815 | U-2 OS   |
| 2161 | ENSG00000100401 | CAB004293 | U-2 OS   |
| 2162 | ENSG00000100401 | HPA050110 | U-2 OS   |
| 2163 | ENSG00000100401 | HPA062034 | U-2 OS   |
| 2164 | ENSG00000100403 | HPA001784 | U-2 OS   |
| 2165 | ENSG00000100410 | HPA028885 | U-2 OS   |
| 2166 | ENSG00000100412 | HPA001097 | U-2 OS   |
| 2167 | ENSG00000100413 | HPA046787 | U-2 OS   |
| 2168 | ENSG00000100416 | HPA043300 | U-2 OS   |
| 2169 | ENSG00000100417 | HPA074950 | U-2 OS   |
| 2170 | ENSG00000100418 | HPA053415 | U-2 OS   |
| 2171 | ENSG00000100422 | HPA064699 | U-2 OS   |
| 2172 | ENSG00000100425 | HPA001063 | U-2 OS   |
| 2173 | ENSG00000100426 | HPA045341 | U-2 OS   |
| 2174 | ENSG00000100439 | HPA000600 | A-431    |
| 2175 | ENSG00000100441 | HPA003402 | RT4      |
| 2176 | ENSG00000100442 | HPA000864 | U-2 OS   |
| 2177 | ENSG00000100442 | CAB012232 | U-2 OS   |
| 2178 | ENSG00000100445 | HPA044294 | U-251 MG |
| 2179 | ENSG00000100461 | HPA004144 | U-2 OS   |
| 2180 | ENSG00000100462 | HPA005525 | U-2 OS   |
| 2181 | ENSG00000100473 | HPA065086 | U-2 OS   |
| 2182 | ENSG00000100478 | HPA039963 | U-2 OS   |
| 2183 | ENSG00000100479 | HPA027555 | U-2 OS   |
| 2184 | ENSG00000100483 | HPA076561 | U-2 OS   |
| 2185 | ENSG00000100485 | HPA052689 | U-2 OS   |
| 2186 | ENSG00000100490 | HPA059605 | A-431    |
| 2187 | ENSG00000100490 | HPA065919 | CACO-2   |
| 2188 | ENSG00000100503 | HPA005939 | U-2 OS   |
| 2189 | ENSG00000100503 | HPA070691 | RT4      |
| 2190 | ENSG00000100504 | HPA000962 | U-2 OS   |
| 2191 | ENSG00000100504 | HPA004119 | U-2 OS   |
| 2192 | ENSG00000100519 | HPA042823 | U-2 OS   |
| 2193 | ENSG00000100526 | CAB005285 | U-2 OS   |
| 2194 | ENSG00000100526 | HPA039311 | U-2 OS   |
| 2195 | ENSG00000100526 | HPA058874 | U-2 OS   |
| 2196 | ENSG00000100528 | HPA002544 | U-2 OS   |
| 2197 | ENSG00000100532 | HPA002930 | U-2 OS   |
| 2198 | ENSG00000100554 | HPA057316 | U-2 OS   |

|      |                 |           |          |
|------|-----------------|-----------|----------|
| 2199 | ENSG00000100557 | HPA029202 | U-2 OS   |
| 2200 | ENSG00000100558 | HPA001208 | U-2 OS   |
| 2201 | ENSG00000100568 | HPA044121 | U-2 OS   |
| 2202 | ENSG00000100568 | HPA048150 | MCF7     |
| 2203 | ENSG00000100575 | HPA002932 | U-2 OS   |
| 2204 | ENSG00000100577 | HPA004701 | U-2 OS   |
| 2205 | ENSG00000100578 | HPA000846 | U-2 OS   |
| 2206 | ENSG00000100578 | HPA050249 | U-2 OS   |
| 2207 | ENSG00000100583 | HPA030673 | U-2 OS   |
| 2208 | ENSG00000100583 | HPA030677 | U-2 OS   |
| 2209 | ENSG00000100591 | HPA000903 | U-2 OS   |
| 2210 | ENSG00000100592 | HPA026605 | U-2 OS   |
| 2211 | ENSG00000100592 | HPA064789 | HaCaT    |
| 2212 | ENSG00000100593 | HPA039314 | U-251 MG |
| 2213 | ENSG00000100593 | HPA039742 | U-2 OS   |
| 2214 | ENSG00000100596 | HPA027552 | U-2 OS   |
| 2215 | ENSG00000100600 | HPA001426 | RT4      |
| 2216 | ENSG00000100601 | HPA060061 | MCF7     |
| 2217 | ENSG00000100603 | HPA002457 | U-2 OS   |
| 2218 | ENSG00000100603 | CAB009931 | U-2 OS   |
| 2219 | ENSG00000100603 | HPA017370 | U-2 OS   |
| 2220 | ENSG00000100604 | HPA017369 | SH-SY5Y  |
| 2221 | ENSG00000100605 | HPA055230 | U-2 OS   |
| 2222 | ENSG00000100612 | HPA031121 | U-2 OS   |
| 2223 | ENSG00000100614 | HPA029209 | U-2 OS   |
| 2224 | ENSG00000100625 | HPA031794 | U-2 OS   |
| 2225 | ENSG00000100626 | HPA059136 | U-2 OS   |
| 2226 | ENSG00000100628 | HPA001546 | U-2 OS   |
| 2227 | ENSG00000100629 | HPA000602 | A-431    |
| 2228 | ENSG00000100632 | HPA002567 | U-2 OS   |
| 2229 | ENSG00000100644 | HPA000907 | A-431    |
| 2230 | ENSG00000100647 | HPA030464 | U-2 OS   |
| 2231 | ENSG00000100650 | HPA043484 | U-2 OS   |
| 2232 | ENSG00000100650 | HPA056523 | MCF7     |
| 2233 | ENSG00000100664 | HPA000867 | U-2 OS   |
| 2234 | ENSG00000100664 | CAB004226 | U-2 OS   |
| 2235 | ENSG00000100697 | CAB068185 | A-431    |
| 2236 | ENSG00000100714 | HPA000704 | U-2 OS   |
| 2237 | ENSG00000100714 | HPA001290 | U-2 OS   |
| 2238 | ENSG00000100721 | HPA016604 | REH      |
| 2239 | ENSG00000100722 | HPA049798 | U-2 OS   |
| 2240 | ENSG00000100722 | HPA053510 | U-2 OS   |
| 2241 | ENSG00000100726 | HPA041348 | U-2 OS   |
| 2242 | ENSG00000100726 | HPA041473 | U-2 OS   |
| 2243 | ENSG00000100731 | HPA053532 | MCF7     |
| 2244 | ENSG00000100744 | HPA043054 | U-2 OS   |
| 2245 | ENSG00000100749 | HPA000660 | U-2 OS   |
| 2246 | ENSG00000100749 | HPA017929 | U-2 OS   |
| 2247 | ENSG00000100764 | HPA000872 | U-2 OS   |
| 2248 | ENSG00000100767 | HPA053453 | U-2 OS   |
| 2249 | ENSG00000100784 | HPA001780 | U-251 MG |
| 2250 | ENSG00000100784 | CAB025458 | U-2 OS   |
| 2251 | ENSG00000100796 | HPA002568 | U-2 OS   |
| 2252 | ENSG00000100796 | HPA063917 | U-2 OS   |
| 2253 | ENSG00000100802 | HPA002569 | U-2 OS   |

|      |                 |           |          |
|------|-----------------|-----------|----------|
| 2254 | ENSG00000100804 | HPA049518 | PC-3     |
| 2255 | ENSG00000100804 | HPA061796 | U-2 OS   |
| 2256 | ENSG00000100811 | CAB009392 | U-2 OS   |
| 2257 | ENSG00000100813 | HPA000657 | U-2 OS   |
| 2258 | ENSG00000100815 | HPA002570 | U-2 OS   |
| 2259 | ENSG00000100815 | HPA070684 | U-2 OS   |
| 2260 | ENSG00000100823 | HPA000956 | U-2 OS   |
| 2261 | ENSG00000100823 | HPA002564 | U-2 OS   |
| 2262 | ENSG00000100823 | CAB004294 | U-2 OS   |
| 2263 | ENSG00000100823 | CAB047307 | U-2 OS   |
| 2264 | ENSG00000100836 | HPA000637 | U-2 OS   |
| 2265 | ENSG00000100842 | HPA001790 | RT4      |
| 2266 | ENSG00000100852 | HPA056507 | A-431    |
| 2267 | ENSG00000100867 | HPA053915 | RT4      |
| 2268 | ENSG00000100883 | HPA048977 | MCF7     |
| 2269 | ENSG00000100883 | HPA062044 | U-2 OS   |
| 2270 | ENSG00000100888 | HPA052186 | A-431    |
| 2271 | ENSG00000100888 | HPA076133 | RT4      |
| 2272 | ENSG00000100889 | CAB018734 | U-2 OS   |
| 2273 | ENSG00000100889 | HPA051162 | U-2 OS   |
| 2274 | ENSG00000100889 | HPA053502 | U-2 OS   |
| 2275 | ENSG00000100890 | HPA020459 | U-2 OS   |
| 2276 | ENSG00000100897 | HPA003583 | U-2 OS   |
| 2277 | ENSG00000100897 | HPA031157 | U-2 OS   |
| 2278 | ENSG00000100902 | HPA003049 | U-2 OS   |
| 2279 | ENSG00000100906 | CAB003815 | A-431    |
| 2280 | ENSG00000100906 | HPA029207 | U-2 OS   |
| 2281 | ENSG00000100908 | HPA054715 | U-2 OS   |
| 2282 | ENSG00000100911 | HPA062661 | U-2 OS   |
| 2283 | ENSG00000100916 | HPA046623 | U-2 OS   |
| 2284 | ENSG00000100918 | HPA031727 | U-2 OS   |
| 2285 | ENSG00000100926 | HPA059249 | U-2 OS   |
| 2286 | ENSG00000100934 | HPA043806 | U-2 OS   |
| 2287 | ENSG00000100938 | HPA067884 | U-2 OS   |
| 2288 | ENSG00000100938 | HPA068782 | U-2 OS   |
| 2289 | ENSG00000100941 | HPA001378 | U-2 OS   |
| 2290 | ENSG00000100949 | HPA043488 | U-2 OS   |
| 2291 | ENSG00000100968 | HPA076526 | U-2 OS   |
| 2292 | ENSG00000100982 | HPA049517 | CACO-2   |
| 2293 | ENSG00000100983 | HPA054508 | U-2 OS   |
| 2294 | ENSG00000100983 | HPA059315 | CACO-2   |
| 2295 | ENSG00000100985 | HPA001238 | U-2 OS   |
| 2296 | ENSG00000100991 | HPA065061 | CACO-2   |
| 2297 | ENSG00000100994 | HPA031067 | U-251 MG |
| 2298 | ENSG00000101003 | HPA051185 | U-2 OS   |
| 2299 | ENSG00000101004 | HPA000686 | U-2 OS   |
| 2300 | ENSG00000101019 | HPA034875 | U-2 OS   |
| 2301 | ENSG00000101040 | HPA020949 | U-2 OS   |
| 2302 | ENSG00000101049 | HPA008859 | RT4      |
| 2303 | ENSG00000101052 | HPA063367 | SH-SY5Y  |
| 2304 | ENSG00000101057 | CAB017114 | U-2 OS   |
| 2305 | ENSG00000101057 | HPA055416 | U-251 MG |
| 2306 | ENSG00000101076 | HPA004712 | CACO-2   |
| 2307 | ENSG00000101082 | HPA053746 | CACO-2   |
| 2308 | ENSG00000101082 | HPA058217 | CACO-2   |



|      |                 |           |        |
|------|-----------------|-----------|--------|
| 2309 | ENSG00000101084 | HPA057387 | CACO-2 |
| 2310 | ENSG00000101096 | HPA008789 | A-431  |
| 2311 | ENSG00000101098 | HPA060928 | U-2 OS |
| 2312 | ENSG00000101104 | HPA066650 | U-2 OS |
| 2313 | ENSG00000101109 | HPA015270 | CACO-2 |
| 2314 | ENSG00000101115 | HPA015291 | CACO-2 |
| 2315 | ENSG00000101115 | HPA015791 | CACO-2 |
| 2316 | ENSG00000101126 | HPA006371 | U-2 OS |
| 2317 | ENSG00000101134 | HPA054460 | U-2 OS |
| 2318 | ENSG00000101138 | CAB019270 | U-2 OS |
| 2319 | ENSG00000101138 | HPA065000 | U-2 OS |
| 2320 | ENSG00000101144 | HPA057757 | CACO-2 |
| 2321 | ENSG00000101146 | HPA048795 | CACO-2 |
| 2322 | ENSG00000101150 | HPA047489 | U-2 OS |
| 2323 | ENSG00000101152 | HPA012737 | A-431  |
| 2324 | ENSG00000101158 | HPA050641 | U-2 OS |
| 2325 | ENSG00000101158 | HPA066262 | U-2 OS |
| 2326 | ENSG00000101160 | HPA049876 | CACO-2 |
| 2327 | ENSG00000101161 | HPA047106 | CACO-2 |
| 2328 | ENSG00000101166 | HPA047721 | U-2 OS |
| 2329 | ENSG00000101187 | HPA030669 | A-431  |
| 2330 | ENSG00000101188 | HPA050299 | PC-3   |
| 2331 | ENSG00000101189 | HPA017012 | U-2 OS |
| 2332 | ENSG00000101190 | HPA055223 | U-2 OS |
| 2333 | ENSG00000101191 | CAB004374 | U-2 OS |
| 2334 | ENSG00000101191 | HPA049904 | U-2 OS |
| 2335 | ENSG00000101193 | HPA055047 | U-2 OS |
| 2336 | ENSG00000101194 | HPA047470 | CACO-2 |
| 2337 | ENSG00000101197 | HPA047850 | U-2 OS |
| 2338 | ENSG00000101197 | HPA061283 | U-2 OS |
| 2339 | ENSG00000101199 | HPA051019 | CACO-2 |
| 2340 | ENSG00000101199 | HPA056273 | CACO-2 |
| 2341 | ENSG00000101210 | CAB034019 | U-2 OS |
| 2342 | ENSG00000101210 | HPA051759 | U-2 OS |
| 2343 | ENSG00000101210 | HPA053862 | U-2 OS |
| 2344 | ENSG00000101210 | HPA056990 | U-2 OS |
| 2345 | ENSG00000101213 | HPA036071 | RT4    |
| 2346 | ENSG00000101216 | HPA009706 | A-431  |
| 2347 | ENSG00000101216 | HPA067455 | CACO-2 |
| 2348 | ENSG00000101220 | HPA047483 | U-2 OS |
| 2349 | ENSG00000101224 | HPA038893 | U-2 OS |
| 2350 | ENSG00000101224 | HPA075215 | U-2 OS |
| 2351 | ENSG00000101236 | HPA011900 | SiHa   |
| 2352 | ENSG00000101246 | HPA050634 | CACO-2 |
| 2353 | ENSG00000101255 | HPA015272 | A-431  |
| 2354 | ENSG00000101265 | HPA051200 | RT4    |
| 2355 | ENSG00000101266 | CAB020680 | A-431  |
| 2356 | ENSG00000101266 | HPA059206 | U-2 OS |
| 2357 | ENSG00000101290 | HPA019698 | U-2 OS |
| 2358 | ENSG00000101294 | HPA056062 | U-2 OS |
| 2359 | ENSG00000101298 | HPA049393 | U-2 OS |
| 2360 | ENSG00000101306 | HPA059704 | U-2 OS |
| 2361 | ENSG00000101307 | HPA047463 | U-2 OS |
| 2362 | ENSG00000101310 | HPA008216 | U-2 OS |
| 2363 | ENSG00000101331 | HPA071063 | U-2 OS |

|      |                 |           |          |
|------|-----------------|-----------|----------|
| 2364 | ENSG00000101333 | HPA007951 | U-2 OS   |
| 2365 | ENSG00000101335 | HPA045244 | CACO-2   |
| 2366 | ENSG00000101336 | HPA063768 | U-2 OS   |
| 2367 | ENSG00000101346 | HPA059935 | SiHa     |
| 2368 | ENSG00000101347 | HPA047072 | CACO-2   |
| 2369 | ENSG00000101349 | HPA020444 | U-2 OS   |
| 2370 | ENSG00000101350 | HPA007119 | U-2 OS   |
| 2371 | ENSG00000101353 | HPA060298 | A549     |
| 2372 | ENSG00000101361 | HPA049918 | U-2 OS   |
| 2373 | ENSG00000101361 | CAB075757 | U-2 OS   |
| 2374 | ENSG00000101363 | HPA052348 | CACO-2   |
| 2375 | ENSG00000101365 | HPA049387 | U-2 OS   |
| 2376 | ENSG00000101365 | HPA054180 | U-2 OS   |
| 2377 | ENSG00000101367 | HPA003600 | U-2 OS   |
| 2378 | ENSG00000101367 | CAB009337 | U-2 OS   |
| 2379 | ENSG00000101367 | CAB019391 | U-2 OS   |
| 2380 | ENSG00000101384 | CAB010343 | U-251 MG |
| 2381 | ENSG00000101391 | HPA066301 | CACO-2   |
| 2382 | ENSG00000101407 | HPA068338 | CACO-2   |
| 2383 | ENSG00000101412 | CAB000329 | A-431    |
| 2384 | ENSG00000101412 | HPA029735 | CACO-2   |
| 2385 | ENSG00000101413 | HPA072645 | CACO-2   |
| 2386 | ENSG00000101417 | HPA050077 | CACO-2   |
| 2387 | ENSG00000101439 | CAB000118 | U-2 OS   |
| 2388 | ENSG00000101439 | HPA013143 | U-2 OS   |
| 2389 | ENSG00000101440 | HPA048636 | CACO-2   |
| 2390 | ENSG00000101444 | HPA044675 | CACO-2   |
| 2391 | ENSG00000101445 | HPA049571 | U-2 OS   |
| 2392 | ENSG00000101447 | HPA049333 | SiHa     |
| 2393 | ENSG00000101447 | HPA060854 | U-2 OS   |
| 2394 | ENSG00000101452 | HPA062700 | CACO-2   |
| 2395 | ENSG00000101457 | HPA045496 | U-2 OS   |
| 2396 | ENSG00000101460 | HPA042824 | U-2 OS   |
| 2397 | ENSG00000101463 | HPA044271 | U-2 OS   |
| 2398 | ENSG00000101463 | HPA059267 | U-2 OS   |
| 2399 | ENSG00000101464 | HPA046766 | CACO-2   |
| 2400 | ENSG00000101470 | HPA058481 | U-2 OS   |
| 2401 | ENSG00000101473 | CAB010261 | U-2 OS   |
| 2402 | ENSG00000101474 | HPA064700 | U-2 OS   |
| 2403 | ENSG00000101489 | HPA013322 | SH-SY5Y  |
| 2404 | ENSG00000101493 | HPA015792 | U-2 OS   |
| 2405 | ENSG00000101544 | HPA007126 | U-2 OS   |
| 2406 | ENSG00000101546 | HPA041479 | U-2 OS   |
| 2407 | ENSG00000101557 | HPA001308 | U-2 OS   |
| 2408 | ENSG00000101558 | HPA009174 | U-2 OS   |
| 2409 | ENSG00000101574 | HPA040061 | U-2 OS   |
| 2410 | ENSG00000101577 | HPA017857 | U-2 OS   |
| 2411 | ENSG00000101577 | HPA030550 | U-2 OS   |
| 2412 | ENSG00000101596 | HPA039441 | U-2 OS   |
| 2413 | ENSG00000101608 | HPA045244 | CACO-2   |
| 2414 | ENSG00000101638 | HPA046771 | RH-30    |
| 2415 | ENSG00000101639 | HPA040503 | U-251 MG |
| 2416 | ENSG00000101654 | HPA039409 | U-2 OS   |
| 2417 | ENSG00000101665 | HPA028897 | U-2 OS   |
| 2418 | ENSG00000101695 | HPA041514 | U-2 OS   |

|      |                 |           |             |
|------|-----------------|-----------|-------------|
| 2419 | ENSG00000101745 | HPA040705 | U-2 OS      |
| 2420 | ENSG00000101746 | HPA046740 | SH-SY5Y     |
| 2421 | ENSG00000101751 | HPA012000 | U-2 OS      |
| 2422 | ENSG00000101752 | HPA019100 | U-2 OS      |
| 2423 | ENSG00000101773 | HPA052946 | U-2 OS      |
| 2424 | ENSG00000101782 | HPA024184 | U-2 OS      |
| 2425 | ENSG00000101811 | HPA000427 | U-2 OS      |
| 2426 | ENSG00000101842 | HPA036310 | PC-3        |
| 2427 | ENSG00000101843 | HPA002920 | U-2 OS      |
| 2428 | ENSG00000101844 | HPA064759 | U-2 OS      |
| 2429 | ENSG00000101849 | HPA067703 | U-2 OS      |
| 2430 | ENSG00000101856 | HPA002877 | U-2 OS      |
| 2431 | ENSG00000101856 | HPA064724 | U-2 OS      |
| 2432 | ENSG00000101868 | HPA002947 | U-2 OS      |
| 2433 | ENSG00000101871 | HPA002878 | U-2 OS      |
| 2434 | ENSG00000101882 | HPA000916 | U-2 OS      |
| 2435 | ENSG00000101888 | HPA072010 | SiHa        |
| 2436 | ENSG00000101911 | HPA067599 | A-431       |
| 2437 | ENSG00000101928 | HPA031158 | U-2 OS      |
| 2438 | ENSG00000101935 | HPA051762 | U-2 OS      |
| 2439 | ENSG00000101940 | HPA000913 | U-2 OS      |
| 2440 | ENSG00000101951 | HPA023880 | CACO-2      |
| 2441 | ENSG00000101966 | CAB009203 | U-2 OS      |
| 2442 | ENSG00000101997 | HPA000888 | U-2 OS      |
| 2443 | ENSG00000102010 | HPA001048 | HUVEC TERT2 |
| 2444 | ENSG00000102024 | HPA076083 | U-2 OS      |
| 2445 | ENSG00000102030 | HPA030711 | U-2 OS      |
| 2446 | ENSG00000102034 | HPA060277 | A-431       |
| 2447 | ENSG00000102038 | HPA064712 | U-2 OS      |
| 2448 | ENSG00000102053 | HPA000836 | U-2 OS      |
| 2449 | ENSG00000102054 | CAB037084 | U-2 OS      |
| 2450 | ENSG00000102054 | HPA060710 | U-2 OS      |
| 2451 | ENSG00000102054 | HPA060724 | U-2 OS      |
| 2452 | ENSG00000102057 | HPA000524 | U-2 OS      |
| 2453 | ENSG00000102078 | HPA060316 | U-2 OS      |
| 2454 | ENSG00000102081 | CAB012444 | A-431       |
| 2455 | ENSG00000102081 | HPA050118 | U-2 OS      |
| 2456 | ENSG00000102096 | HPA000285 | U-2 OS      |
| 2457 | ENSG00000102098 | HPA001662 | U-2 OS      |
| 2458 | ENSG00000102100 | HPA036087 | U-2 OS      |
| 2459 | ENSG00000102103 | HPA001880 | U-2 OS      |
| 2460 | ENSG00000102109 | HPA064734 | HEK 293     |
| 2461 | ENSG00000102119 | HPA000609 | U-2 OS      |
| 2462 | ENSG00000102119 | CAB001545 | U-2 OS      |
| 2463 | ENSG00000102119 | CAB002029 | U-2 OS      |
| 2464 | ENSG00000102119 | CAB058694 | U-2 OS      |
| 2465 | ENSG00000102125 | HPA039557 | A-431       |
| 2466 | ENSG00000102128 | HPA076172 | U-2 OS      |
| 2467 | ENSG00000102145 | HPA000233 | U-2 OS      |
| 2468 | ENSG00000102172 | HPA029852 | U-2 OS      |
| 2469 | ENSG00000102178 | HPA003617 | A-431       |
| 2470 | ENSG00000102181 | HPA038783 | U-2 OS      |
| 2471 | ENSG00000102181 | HPA061400 | A549        |
| 2472 | ENSG00000102189 | CAB018782 | U-2 OS      |
| 2473 | ENSG00000102195 | HPA054678 | U-2 OS      |

|      |                 |           |          |
|------|-----------------|-----------|----------|
| 2474 | ENSG00000102218 | HPA000909 | U-2 OS   |
| 2475 | ENSG00000102221 | HPA064697 | U-2 OS   |
| 2476 | ENSG00000102225 | HPA000974 | U-2 OS   |
| 2477 | ENSG00000102226 | HPA003103 | U-2 OS   |
| 2478 | ENSG00000102241 | HPA000504 | U-2 OS   |
| 2479 | ENSG00000102243 | HPA064616 | RT4      |
| 2480 | ENSG00000102265 | CAB022360 | U-2 OS   |
| 2481 | ENSG00000102271 | HPA029192 | U-2 OS   |
| 2482 | ENSG00000102302 | HPA000911 | U-2 OS   |
| 2483 | ENSG00000102309 | HPA054483 | U-2 OS   |
| 2484 | ENSG00000102309 | HPA064504 | U-2 OS   |
| 2485 | ENSG00000102312 | HPA049215 | U-2 OS   |
| 2486 | ENSG00000102316 | HPA031572 | U-2 OS   |
| 2487 | ENSG00000102316 | HPA031573 | U-2 OS   |
| 2488 | ENSG00000102317 | HPA003624 | U-2 OS   |
| 2489 | ENSG00000102317 | CAB062559 | U-2 OS   |
| 2490 | ENSG00000102349 | HPA071740 | RT4      |
| 2491 | ENSG00000102362 | HPA075138 | RT4      |
| 2492 | ENSG00000102383 | HPA003618 | U-2 OS   |
| 2493 | ENSG00000102384 | HPA061297 | U-2 OS   |
| 2494 | ENSG00000102385 | HPA002949 | RH-30    |
| 2495 | ENSG00000102387 | HPA001879 | SiHa     |
| 2496 | ENSG00000102390 | HPA003155 | U-2 OS   |
| 2497 | ENSG00000102401 | HPA000967 | U-2 OS   |
| 2498 | ENSG00000102401 | HPA001530 | U-2 OS   |
| 2499 | ENSG00000102409 | HPA051935 | U-2 OS   |
| 2500 | ENSG00000102445 | HPA026614 | U-251 MG |
| 2501 | ENSG00000102466 | HPA049828 | U-2 OS   |
| 2502 | ENSG00000102471 | HPA009160 | CACO-2   |
| 2503 | ENSG00000102531 | HPA008927 | U-2 OS   |
| 2504 | ENSG00000102543 | HPA047615 | U-2 OS   |
| 2505 | ENSG00000102547 | HPA045954 | CACO-2   |
| 2506 | ENSG00000102554 | HPA040398 | U-2 OS   |
| 2507 | ENSG00000102572 | HPA026502 | U-2 OS   |
| 2508 | ENSG00000102575 | CAB002584 | A-431    |
| 2509 | ENSG00000102580 | HPA039336 | U-2 OS   |
| 2510 | ENSG00000102699 | HPA011739 | U-2 OS   |
| 2511 | ENSG00000102710 | HPA038906 | U-2 OS   |
| 2512 | ENSG00000102738 | HPA046344 | U-2 OS   |
| 2513 | ENSG00000102753 | HPA046852 | CACO-2   |
| 2514 | ENSG00000102755 | HPA011740 | U-2 OS   |
| 2515 | ENSG00000102760 | HPA063701 | CACO-2   |
| 2516 | ENSG00000102763 | HPA039075 | U-2 OS   |
| 2517 | ENSG00000102781 | HPA046205 | A-431    |
| 2518 | ENSG00000102786 | HPA001846 | U-2 OS   |
| 2519 | ENSG00000102796 | HPA057028 | U-2 OS   |
| 2520 | ENSG00000102796 | HPA058315 | U-2 OS   |
| 2521 | ENSG00000102804 | HPA077414 | CACO-2   |
| 2522 | ENSG00000102837 | HPA077718 | U-2 OS   |
| 2523 | ENSG00000102854 | HPA017172 | U-2 OS   |
| 2524 | ENSG00000102858 | HPA008033 | SiHa     |
| 2525 | ENSG00000102870 | HPA019550 | A-431    |
| 2526 | ENSG00000102870 | HPA056051 | A-431    |
| 2527 | ENSG00000102871 | CAB004602 | U-2 OS   |
| 2528 | ENSG00000102878 | HPA048584 | U-2 OS   |

|      |                 |           |           |
|------|-----------------|-----------|-----------|
| 2529 | ENSG00000102879 | HPA051132 | MCF7      |
| 2530 | ENSG00000102882 | CAB002683 | U-2 OS    |
| 2531 | ENSG00000102886 | HPA041470 | MCF7      |
| 2532 | ENSG00000102890 | HPA021484 | A-431     |
| 2533 | ENSG00000102893 | HPA073380 | U-2 OS    |
| 2534 | ENSG00000102897 | HPA059840 | U-2 OS    |
| 2535 | ENSG00000102898 | HPA040956 | U-2 OS    |
| 2536 | ENSG00000102901 | HPA041220 | U-2 OS    |
| 2537 | ENSG00000102901 | HPA058036 | U-2 OS    |
| 2538 | ENSG00000102904 | HPA053516 | SiHa      |
| 2539 | ENSG00000102908 | HPA057304 | U-2 OS    |
| 2540 | ENSG00000102908 | HPA069711 | RT4       |
| 2541 | ENSG00000102921 | HPA040849 | U-2 OS    |
| 2542 | ENSG00000102935 | HPA015258 | U-2 OS    |
| 2543 | ENSG00000102935 | HPA065820 | U-2 OS    |
| 2544 | ENSG00000102967 | HPA010123 | U-2 OS    |
| 2545 | ENSG00000102967 | HPA011942 | U-2 OS    |
| 2546 | ENSG00000102974 | HPA004122 | U-2 OS    |
| 2547 | ENSG00000102977 | HPA049411 | U-2 OS    |
| 2548 | ENSG00000102977 | HPA057660 | U-2 OS    |
| 2549 | ENSG00000102978 | HPA040919 | U-2 OS    |
| 2550 | ENSG00000102978 | HPA041826 | U-2 OS    |
| 2551 | ENSG00000102981 | HPA041551 | U-2 OS    |
| 2552 | ENSG00000102984 | HPA036372 | U-2 OS    |
| 2553 | ENSG00000102984 | HPA042742 | U-2 OS    |
| 2554 | ENSG00000102996 | CAB002611 | U-2 OS    |
| 2555 | ENSG00000103005 | HPA059854 | A549      |
| 2556 | ENSG00000103018 | HPA007893 | U-2 OS    |
| 2557 | ENSG00000103024 | HPA052733 | U-2 OS    |
| 2558 | ENSG00000103034 | HPA015313 | U-2 OS    |
| 2559 | ENSG00000103034 | HPA017587 | U-2 OS    |
| 2560 | ENSG00000103035 | HPA049824 | MCF7      |
| 2561 | ENSG00000103035 | HPA056069 | MCF7      |
| 2562 | ENSG00000103037 | HPA053546 | U-2 OS    |
| 2563 | ENSG00000103042 | HPA041777 | U-2 OS    |
| 2564 | ENSG00000103043 | HPA027766 | U-2 OS    |
| 2565 | ENSG00000103043 | HPA075382 | SK-MEL-30 |
| 2566 | ENSG00000103044 | CAB033850 | U-2 OS    |
| 2567 | ENSG00000103047 | HPA041312 | U-2 OS    |
| 2568 | ENSG00000103051 | HPA040924 | U-2 OS    |
| 2569 | ENSG00000103056 | HPA065535 | CACO-2    |
| 2570 | ENSG00000103056 | HPA069383 | CACO-2    |
| 2571 | ENSG00000103061 | HPA041533 | U-2 OS    |
| 2572 | ENSG00000103064 | HPA050713 | CACO-2    |
| 2573 | ENSG00000103066 | HPA041702 | SiHa      |
| 2574 | ENSG00000103067 | HPA040751 | U-2 OS    |
| 2575 | ENSG00000103067 | HPA048618 | A-431     |
| 2576 | ENSG00000103089 | HPA077840 | A549      |
| 2577 | ENSG00000103091 | HPA041084 | U-2 OS    |
| 2578 | ENSG00000103111 | HPA046285 | U-2 OS    |
| 2579 | ENSG00000103121 | CAB026396 | U-2 OS    |
| 2580 | ENSG00000103126 | CAB012987 | U-2 OS    |
| 2581 | ENSG00000103145 | HPA059647 | A549      |
| 2582 | ENSG00000103148 | HPA011741 | A-431     |
| 2583 | ENSG00000103152 | HPA006531 | U-2 OS    |

|      |                 |           |          |
|------|-----------------|-----------|----------|
| 2584 | ENSG00000103160 | HPA045745 | U-2 OS   |
| 2585 | ENSG00000103168 | HPA072229 | U-2 OS   |
| 2586 | ENSG00000103184 | HPA041492 | U-2 OS   |
| 2587 | ENSG00000103184 | HPA041825 | A-431    |
| 2588 | ENSG00000103187 | HPA008918 | U-2 OS   |
| 2589 | ENSG00000103194 | HPA006731 | U-2 OS   |
| 2590 | ENSG00000103196 | HPA030054 | U-2 OS   |
| 2591 | ENSG00000103197 | CAB002225 | U-251 MG |
| 2592 | ENSG00000103197 | HPA030409 | U-2 OS   |
| 2593 | ENSG00000103197 | HPA049679 | U-2 OS   |
| 2594 | ENSG00000103199 | HPA035498 | U-2 OS   |
| 2595 | ENSG00000103199 | HPA057963 | HEK 293  |
| 2596 | ENSG00000103202 | HPA072588 | U-2 OS   |
| 2597 | ENSG00000103222 | HPA002380 | U-2 OS   |
| 2598 | ENSG00000103241 | HPA028886 | U-251 MG |
| 2599 | ENSG00000103245 | HPA040851 | U-2 OS   |
| 2600 | ENSG00000103248 | HPA041333 | U-2 OS   |
| 2601 | ENSG00000103249 | HPA043019 | U-2 OS   |
| 2602 | ENSG00000103249 | HPA043586 | U-2 OS   |
| 2603 | ENSG00000103254 | HPA046262 | U-2 OS   |
| 2604 | ENSG00000103257 | HPA056077 | U-2 OS   |
| 2605 | ENSG00000103260 | HPA051164 | U-2 OS   |
| 2606 | ENSG00000103264 | HPA030150 | A-431    |
| 2607 | ENSG00000103266 | HPA043531 | MCF7     |
| 2608 | ENSG00000103269 | HPA030359 | U-2 OS   |
| 2609 | ENSG00000103269 | HPA030360 | U-2 OS   |
| 2610 | ENSG00000103274 | HPA041799 | U-2 OS   |
| 2611 | ENSG00000103313 | HPA077497 | THP-1    |
| 2612 | ENSG00000103316 | HPA030619 | U-2 OS   |
| 2613 | ENSG00000103319 | HPA056061 | HeLa     |
| 2614 | ENSG00000103326 | HPA011960 | U-2 OS   |
| 2615 | ENSG00000103342 | HPA052488 | U-2 OS   |
| 2616 | ENSG00000103342 | HPA074588 | U-2 OS   |
| 2617 | ENSG00000103343 | HPA009656 | U-2 OS   |
| 2618 | ENSG00000103351 | HPA044191 | U-2 OS   |
| 2619 | ENSG00000103353 | HPA051746 | MCF7     |
| 2620 | ENSG00000103356 | HPA043289 | U-2 OS   |
| 2621 | ENSG00000103356 | HPA043633 | U-2 OS   |
| 2622 | ENSG00000103365 | CAB034422 | A-431    |
| 2623 | ENSG00000103365 | HPA043313 | Hep G2   |
| 2624 | ENSG00000103365 | HPA063634 | CACO-2   |
| 2625 | ENSG00000103381 | HPA041970 | U-2 OS   |
| 2626 | ENSG00000103404 | HPA006937 | U-2 OS   |
| 2627 | ENSG00000103415 | CAB025464 | U-2 OS   |
| 2628 | ENSG00000103423 | HPA040875 | U-2 OS   |
| 2629 | ENSG00000103423 | HPA044229 | U-2 OS   |
| 2630 | ENSG00000103426 | HPA062721 | CACO-2   |
| 2631 | ENSG00000103449 | HPA049829 | U-2 OS   |
| 2632 | ENSG00000103449 | HPA074673 | U-2 OS   |
| 2633 | ENSG00000103460 | HPA040240 | RT4      |
| 2634 | ENSG00000103460 | HPA040376 | RT4      |
| 2635 | ENSG00000103479 | HPA019703 | U-2 OS   |
| 2636 | ENSG00000103489 | HPA007966 | U-2 OS   |
| 2637 | ENSG00000103490 | HPA049074 | U-2 OS   |
| 2638 | ENSG00000103494 | HPA040530 | U-2 OS   |

|      |                 |           |          |
|------|-----------------|-----------|----------|
| 2639 | ENSG00000103495 | HPA059495 | U-2 OS   |
| 2640 | ENSG00000103495 | HPA065930 | U-2 OS   |
| 2641 | ENSG00000103496 | HPA001330 | U-2 OS   |
| 2642 | ENSG00000103502 | HPA056597 | A549     |
| 2643 | ENSG00000103507 | HPA056067 | U-2 OS   |
| 2644 | ENSG00000103510 | HPA066324 | U-2 OS   |
| 2645 | ENSG00000103512 | CAB025192 | U-2 OS   |
| 2646 | ENSG00000103522 | HPA042296 | A-431    |
| 2647 | ENSG00000103528 | HPA042059 | U-2 OS   |
| 2648 | ENSG00000103534 | HPA040810 | A-431    |
| 2649 | ENSG00000103540 | HPA039402 | U-251 MG |
| 2650 | ENSG00000103544 | HPA053547 | U-2 OS   |
| 2651 | ENSG00000103546 | HPA004057 | SH-SY5Y  |
| 2652 | ENSG00000103549 | HPA054227 | U-2 OS   |
| 2653 | ENSG00000103550 | HPA041079 | U-2 OS   |
| 2654 | ENSG00000103550 | HPA066169 | U-2 OS   |
| 2655 | ENSG00000103591 | HPA040174 | U-2 OS   |
| 2656 | ENSG00000103599 | HPA040845 | U-2 OS   |
| 2657 | ENSG00000103642 | HPA036362 | U-2 OS   |
| 2658 | ENSG00000103647 | HPA017960 | U-2 OS   |
| 2659 | ENSG00000103653 | HPA028425 | U-2 OS   |
| 2660 | ENSG00000103671 | HPA050666 | U-2 OS   |
| 2661 | ENSG00000103707 | HPA040710 | U-2 OS   |
| 2662 | ENSG00000103723 | HPA039818 | U-2 OS   |
| 2663 | ENSG00000103740 | HPA058869 | U-2 OS   |
| 2664 | ENSG00000103742 | HPA008576 | A549     |
| 2665 | ENSG00000103769 | CAB013097 | U-2 OS   |
| 2666 | ENSG00000103769 | HPA051697 | U-2 OS   |
| 2667 | ENSG00000103811 | HPA003524 | RT4      |
| 2668 | ENSG00000103852 | HPA039806 | U-2 OS   |
| 2669 | ENSG00000103855 | HPA017139 | U-2 OS   |
| 2670 | ENSG00000103876 | HPA041370 | Hep G2   |
| 2671 | ENSG00000103932 | HPA041739 | U-2 OS   |
| 2672 | ENSG00000103942 | HPA040134 | U-2 OS   |
| 2673 | ENSG00000103966 | HPA066751 | U-2 OS   |
| 2674 | ENSG00000103978 | HPA018104 | U-2 OS   |
| 2675 | ENSG00000103978 | HPA018189 | U-2 OS   |
| 2676 | ENSG00000103994 | HPA054267 | U-2 OS   |
| 2677 | ENSG00000103995 | HPA039408 | U-2 OS   |
| 2678 | ENSG00000104043 | HPA040254 | U-2 OS   |
| 2679 | ENSG00000104044 | HPA036402 | U-2 OS   |
| 2680 | ENSG00000104047 | HPA042214 | U-2 OS   |
| 2681 | ENSG00000104059 | HPA009410 | U-251 MG |
| 2682 | ENSG00000104059 | HPA010637 | U-2 OS   |
| 2683 | ENSG00000104064 | HPA067444 | CACO-2   |
| 2684 | ENSG00000104067 | HPA001636 | U-2 OS   |
| 2685 | ENSG00000104067 | HPA001637 | U-2 OS   |
| 2686 | ENSG00000104067 | CAB010822 | U-2 OS   |
| 2687 | ENSG00000104081 | HPA010120 | CACO-2   |
| 2688 | ENSG00000104112 | HPA053715 | SH-SY5Y  |
| 2689 | ENSG00000104129 | HPA040914 | U-2 OS   |
| 2690 | ENSG00000104131 | HPA050977 | U-2 OS   |
| 2691 | ENSG00000104133 | HPA040412 | U-2 OS   |
| 2692 | ENSG00000104147 | HPA059602 | U-2 OS   |
| 2693 | ENSG00000104177 | HPA004883 | U-2 OS   |

|      |                 |           |          |
|------|-----------------|-----------|----------|
| 2694 | ENSG00000104205 | HPA006699 | U-2 OS   |
| 2695 | ENSG00000104213 | HPA052801 | U-2 OS   |
| 2696 | ENSG00000104218 | HPA056174 | U-2 OS   |
| 2697 | ENSG00000104221 | CAB019269 | U-2 OS   |
| 2698 | ENSG00000104228 | HPA019647 | U-2 OS   |
| 2699 | ENSG00000104231 | HPA023383 | U-2 OS   |
| 2700 | ENSG00000104299 | HPA051615 | U-2 OS   |
| 2701 | ENSG00000104299 | HPA066822 | U-2 OS   |
| 2702 | ENSG00000104312 | HPA015273 | U-2 OS   |
| 2703 | ENSG00000104312 | HPA016499 | U-2 OS   |
| 2704 | ENSG00000104313 | HPA028917 | U-2 OS   |
| 2705 | ENSG00000104320 | HPA001429 | U-2 OS   |
| 2706 | ENSG00000104324 | HPA023235 | U-2 OS   |
| 2707 | ENSG00000104325 | HPA023162 | U-2 OS   |
| 2708 | ENSG00000104327 | HPA023099 | U-2 OS   |
| 2709 | ENSG00000104331 | HPA009411 | U-2 OS   |
| 2710 | ENSG00000104332 | HPA064870 | U-2 OS   |
| 2711 | ENSG00000104341 | HPA068830 | U-2 OS   |
| 2712 | ENSG00000104343 | HPA073181 | U-2 OS   |
| 2713 | ENSG00000104356 | HPA066194 | U-2 OS   |
| 2714 | ENSG00000104365 | HPA001249 | U-2 OS   |
| 2715 | ENSG00000104368 | HPA003412 | U-2 OS   |
| 2716 | ENSG00000104369 | HPA008996 | U-2 OS   |
| 2717 | ENSG00000104369 | HPA009413 | U-2 OS   |
| 2718 | ENSG00000104375 | HPA007120 | U-2 OS   |
| 2719 | ENSG00000104381 | HPA014266 | U-2 OS   |
| 2720 | ENSG00000104408 | HPA023973 | U-2 OS   |
| 2721 | ENSG00000104413 | HPA023720 | RT4      |
| 2722 | ENSG00000104413 | HPA067104 | RT4      |
| 2723 | ENSG00000104415 | HPA007121 | U-2 OS   |
| 2724 | ENSG00000104415 | CAB012205 | U-2 OS   |
| 2725 | ENSG00000104419 | HPA006881 | U-2 OS   |
| 2726 | ENSG00000104427 | HPA024726 | U-2 OS   |
| 2727 | ENSG00000104435 | HPA026922 | U-2 OS   |
| 2728 | ENSG00000104442 | HPA026085 | U-2 OS   |
| 2729 | ENSG00000104447 | HPA060380 | U-2 OS   |
| 2730 | ENSG00000104450 | HPA023748 | U-2 OS   |
| 2731 | ENSG00000104472 | HPA059008 | A-431    |
| 2732 | ENSG00000104497 | HPA024730 | U-2 OS   |
| 2733 | ENSG00000104517 | HPA053688 | U-2 OS   |
| 2734 | ENSG00000104518 | CAB004656 | A-431    |
| 2735 | ENSG00000104518 | HPA044487 | U-2 OS   |
| 2736 | ENSG00000104522 | HPA023361 | U-2 OS   |
| 2737 | ENSG00000104524 | HPA063416 | U-2 OS   |
| 2738 | ENSG00000104529 | HPA051002 | U-2 OS   |
| 2739 | ENSG00000104537 | HPA019650 | U-251 MG |
| 2740 | ENSG00000104549 | HPA018038 | U-2 OS   |
| 2741 | ENSG00000104549 | HPA020762 | U-2 OS   |
| 2742 | ENSG00000104611 | HPA001871 | U-2 OS   |
| 2743 | ENSG00000104611 | HPA001919 | U-2 OS   |
| 2744 | ENSG00000104613 | HPA039129 | U-2 OS   |
| 2745 | ENSG00000104626 | HPA055548 | RT4      |
| 2746 | ENSG00000104635 | HPA016508 | U-2 OS   |
| 2747 | ENSG00000104643 | HPA070944 | U-2 OS   |
| 2748 | ENSG00000104671 | HPA024049 | U-2 OS   |



|      |                 |           |          |
|------|-----------------|-----------|----------|
| 2749 | ENSG00000104671 | HPA024558 | U-2 OS   |
| 2750 | ENSG00000104679 | HPA023153 | U-2 OS   |
| 2751 | ENSG00000104687 | CAB008632 | U-2 OS   |
| 2752 | ENSG00000104689 | HPA050958 | U-2 OS   |
| 2753 | ENSG00000104689 | HPA054475 | A-431    |
| 2754 | ENSG00000104691 | HPA077538 | U-2 OS   |
| 2755 | ENSG00000104695 | CAB018600 | A-431    |
| 2756 | ENSG00000104714 | HPA003725 | U-2 OS   |
| 2757 | ENSG00000104722 | HPA022845 | HEK 293  |
| 2758 | ENSG00000104722 | HPA023138 | HEK 293  |
| 2759 | ENSG00000104728 | HPA024649 | U-2 OS   |
| 2760 | ENSG00000104731 | HPA041665 | U-2 OS   |
| 2761 | ENSG00000104738 | HPA004873 | U-2 OS   |
| 2762 | ENSG00000104738 | HPA031052 | U-2 OS   |
| 2763 | ENSG00000104756 | HPA042468 | U-2 OS   |
| 2764 | ENSG00000104756 | HPA047902 | A-431    |
| 2765 | ENSG00000104765 | HPA015652 | U-2 OS   |
| 2766 | ENSG00000104765 | CAB025371 | U-2 OS   |
| 2767 | ENSG00000104774 | HPA053404 | U-2 OS   |
| 2768 | ENSG00000104805 | HPA008176 | U-2 OS   |
| 2769 | ENSG00000104808 | HPA044131 | U-2 OS   |
| 2770 | ENSG00000104812 | HPA041598 | U-2 OS   |
| 2771 | ENSG00000104814 | HPA007419 | U-2 OS   |
| 2772 | ENSG00000104814 | CAB007754 | A-431    |
| 2773 | ENSG00000104818 | HPA038925 | U-2 OS   |
| 2774 | ENSG00000104818 | HPA038934 | U-2 OS   |
| 2775 | ENSG00000104823 | HPA002907 | U-2 OS   |
| 2776 | ENSG00000104823 | HPA005835 | U-2 OS   |
| 2777 | ENSG00000104824 | CAB016326 | U-2 OS   |
| 2778 | ENSG00000104824 | HPA052661 | CACO-2   |
| 2779 | ENSG00000104825 | HPA063734 | CACO-2   |
| 2780 | ENSG00000104826 | HPA038925 | U-2 OS   |
| 2781 | ENSG00000104827 | HPA038925 | U-2 OS   |
| 2782 | ENSG00000104827 | HPA038934 | U-2 OS   |
| 2783 | ENSG00000104833 | CAB010768 | U-2 OS   |
| 2784 | ENSG00000104835 | HPA056957 | U-2 OS   |
| 2785 | ENSG00000104852 | HPA042050 | A-431    |
| 2786 | ENSG00000104852 | HPA043516 | U-251 MG |
| 2787 | ENSG00000104853 | HPA068702 | U-2 OS   |
| 2788 | ENSG00000104856 | HPA040506 | U-2 OS   |
| 2789 | ENSG00000104859 | HPA060469 | Hep G2   |
| 2790 | ENSG00000104859 | HPA062455 | U-2 OS   |
| 2791 | ENSG00000104866 | HPA041500 | U-2 OS   |
| 2792 | ENSG00000104872 | HPA047258 | U-2 OS   |
| 2793 | ENSG00000104880 | HPA042689 | U-2 OS   |
| 2794 | ENSG00000104880 | HPA071867 | RT4      |
| 2795 | ENSG00000104881 | HPA041231 | U-2 OS   |
| 2796 | ENSG00000104884 | HPA069266 | U-2 OS   |
| 2797 | ENSG00000104885 | HPA011875 | U-2 OS   |
| 2798 | ENSG00000104885 | HPA071217 | U-2 OS   |
| 2799 | ENSG00000104886 | HPA048989 | U-2 OS   |
| 2800 | ENSG00000104889 | HPA042692 | U-2 OS   |
| 2801 | ENSG00000104892 | HPA056508 | U-2 OS   |
| 2802 | ENSG00000104897 | HPA049439 | U-2 OS   |
| 2803 | ENSG00000104899 | HPA066973 | HEK 293  |

|      |                 |           |          |
|------|-----------------|-----------|----------|
| 2804 | ENSG00000104901 | HPA047194 | U-2 OS   |
| 2805 | ENSG00000104903 | HPA075004 | U-2 OS   |
| 2806 | ENSG00000104904 | HPA009291 | U-2 OS   |
| 2807 | ENSG00000104907 | HPA041130 | U-2 OS   |
| 2808 | ENSG00000104915 | HPA056439 | HeLa     |
| 2809 | ENSG00000104936 | HPA007164 | U-2 OS   |
| 2810 | ENSG00000104936 | HPA008905 | U-2 OS   |
| 2811 | ENSG00000104951 | HPA045598 | RT4      |
| 2812 | ENSG00000104957 | HPA056977 | U-2 OS   |
| 2813 | ENSG00000104960 | HPA051812 | HEK 293  |
| 2814 | ENSG00000104964 | HPA049499 | U-2 OS   |
| 2815 | ENSG00000104967 | HPA045607 | U-2 OS   |
| 2816 | ENSG00000104969 | HPA056309 | U-2 OS   |
| 2817 | ENSG00000104973 | HPA068802 | U-2 OS   |
| 2818 | ENSG00000104976 | HPA049843 | HEK 293  |
| 2819 | ENSG00000104979 | HPA059928 | U-2 OS   |
| 2820 | ENSG00000104979 | HPA061291 | U-2 OS   |
| 2821 | ENSG00000104980 | HPA043052 | U-2 OS   |
| 2822 | ENSG00000104983 | HPA061548 | U-2 OS   |
| 2823 | ENSG00000104998 | HPA073441 | U-2 OS   |
| 2824 | ENSG00000105011 | HPA054036 | U-2 OS   |
| 2825 | ENSG00000105048 | CAB015168 | U-2 OS   |
| 2826 | ENSG00000105053 | HPA056489 | U-2 OS   |
| 2827 | ENSG00000105058 | HPA051712 | U-2 OS   |
| 2828 | ENSG00000105063 | HPA043989 | U-2 OS   |
| 2829 | ENSG00000105063 | HPA063681 | U-2 OS   |
| 2830 | ENSG00000105072 | HPA049414 | U-2 OS   |
| 2831 | ENSG00000105085 | HPA071835 | U-2 OS   |
| 2832 | ENSG00000105088 | HPA049961 | U-2 OS   |
| 2833 | ENSG00000105122 | HPA043417 | HEL      |
| 2834 | ENSG00000105127 | HPA004776 | U-2 OS   |
| 2835 | ENSG00000105131 | HPA012842 | EFO-21   |
| 2836 | ENSG00000105135 | HPA067682 | U-2 OS   |
| 2837 | ENSG00000105136 | HPA003152 | U-2 OS   |
| 2838 | ENSG00000105136 | HPA003274 | U-2 OS   |
| 2839 | ENSG00000105137 | HPA013328 | U-2 OS   |
| 2840 | ENSG00000105141 | HPA027062 | U-2 OS   |
| 2841 | ENSG00000105143 | HPA041505 | A-431    |
| 2842 | ENSG00000105173 | CAB000308 | U-2 OS   |
| 2843 | ENSG00000105173 | HPA018169 | U-2 OS   |
| 2844 | ENSG00000105176 | HPA071709 | U-2 OS   |
| 2845 | ENSG00000105185 | HPA018471 | U-2 OS   |
| 2846 | ENSG00000105186 | HPA042769 | U-2 OS   |
| 2847 | ENSG00000105193 | HPA064222 | U-2 OS   |
| 2848 | ENSG00000105197 | HPA048843 | U-2 OS   |
| 2849 | ENSG00000105197 | HPA056448 | U-2 OS   |
| 2850 | ENSG00000105202 | CAB001514 | U-2 OS   |
| 2851 | ENSG00000105202 | HPA049546 | U-2 OS   |
| 2852 | ENSG00000105204 | HPA028522 | SH-SY5Y  |
| 2853 | ENSG00000105220 | HPA024305 | U-2 OS   |
| 2854 | ENSG00000105220 | CAB040563 | U-2 OS   |
| 2855 | ENSG00000105221 | HPA064521 | RT4      |
| 2856 | ENSG00000105223 | CAB020812 | U-2 OS   |
| 2857 | ENSG00000105227 | HPA001868 | U-2 OS   |
| 2858 | ENSG00000105229 | HPA010598 | U-251 MG |

|      |                 |           |         |
|------|-----------------|-----------|---------|
| 2859 | ENSG00000105248 | HPA055675 | U-2 OS  |
| 2860 | ENSG00000105251 | HPA017955 | U-2 OS  |
| 2861 | ENSG00000105254 | HPA041722 | U-2 OS  |
| 2862 | ENSG00000105258 | HPA035632 | MCF7    |
| 2863 | ENSG00000105258 | HPA045156 | U-2 OS  |
| 2864 | ENSG00000105278 | HPA043275 | U-2 OS  |
| 2865 | ENSG00000105281 | HPA035239 | U-2 OS  |
| 2866 | ENSG00000105281 | HPA035240 | U-2 OS  |
| 2867 | ENSG00000105287 | HPA056727 | U-2 OS  |
| 2868 | ENSG00000105289 | HPA046863 | CACO-2  |
| 2869 | ENSG00000105289 | HPA053337 | CACO-2  |
| 2870 | ENSG00000105298 | HPA042548 | U-2 OS  |
| 2871 | ENSG00000105321 | HPA072007 | U-2 OS  |
| 2872 | ENSG00000105323 | HPA046290 | U-2 OS  |
| 2873 | ENSG00000105323 | HPA049475 | U-2 OS  |
| 2874 | ENSG00000105325 | HPA043536 | U-2 OS  |
| 2875 | ENSG00000105327 | HPA070403 | U-2 OS  |
| 2876 | ENSG00000105329 | HPA073356 | U-2 OS  |
| 2877 | ENSG00000105339 | HPA024491 | U-2 OS  |
| 2878 | ENSG00000105341 | HPA041427 | CACO-2  |
| 2879 | ENSG00000105355 | HPA006427 | U-2 OS  |
| 2880 | ENSG00000105355 | HPA066538 | U-2 OS  |
| 2881 | ENSG00000105357 | HPA062391 | RT4     |
| 2882 | ENSG00000105366 | HPA012556 | U-2 OS  |
| 2883 | ENSG00000105372 | HPA063217 | U-2 OS  |
| 2884 | ENSG00000105373 | HPA018999 | U-2 OS  |
| 2885 | ENSG00000105373 | HPA049600 | U-2 OS  |
| 2886 | ENSG00000105374 | HPA071454 | U-2 OS  |
| 2887 | ENSG00000105379 | HPA018910 | U-2 OS  |
| 2888 | ENSG00000105379 | HPA018923 | U-2 OS  |
| 2889 | ENSG00000105383 | HPA064807 | U-2 OS  |
| 2890 | ENSG00000105388 | HPA019758 | HaCaT   |
| 2891 | ENSG00000105393 | HPA054386 | U-2 OS  |
| 2892 | ENSG00000105393 | HPA077609 | U-2 OS  |
| 2893 | ENSG00000105397 | HPA005157 | U-2 OS  |
| 2894 | ENSG00000105398 | HPA041487 | RT4     |
| 2895 | ENSG00000105401 | HPA003928 | U-2 OS  |
| 2896 | ENSG00000105402 | HPA050196 | MCF7    |
| 2897 | ENSG00000105404 | HPA029171 | U-2 OS  |
| 2898 | ENSG00000105419 | HPA046699 | U-2 OS  |
| 2899 | ENSG00000105426 | HPA054747 | U-2 OS  |
| 2900 | ENSG00000105427 | HPA053997 | U-2 OS  |
| 2901 | ENSG00000105438 | CAB017455 | U-2 OS  |
| 2902 | ENSG00000105443 | CAB014872 | U-2 OS  |
| 2903 | ENSG00000105443 | HPA060662 | U-2 OS  |
| 2904 | ENSG00000105447 | HPA042643 | U-2 OS  |
| 2905 | ENSG00000105447 | HPA055680 | U-2 OS  |
| 2906 | ENSG00000105467 | HPA059286 | HEK 293 |
| 2907 | ENSG00000105472 | HPA042690 | U-2 OS  |
| 2908 | ENSG00000105483 | HPA043513 | U-2 OS  |
| 2909 | ENSG00000105486 | CAB037015 | U-2 OS  |
| 2910 | ENSG00000105486 | HPA041431 | U-2 OS  |
| 2911 | ENSG00000105486 | HPA048071 | U-2 OS  |
| 2912 | ENSG00000105497 | HPA002717 | U-2 OS  |
| 2913 | ENSG00000105499 | HPA043083 | U-2 OS  |

|      |                 |           |          |
|------|-----------------|-----------|----------|
| 2914 | ENSG00000105509 | HPA067602 | U-2 OS   |
| 2915 | ENSG00000105514 | HPA063283 | U-2 OS   |
| 2916 | ENSG00000105518 | HPA041504 | A-431    |
| 2917 | ENSG00000105519 | HPA043520 | U-251 MG |
| 2918 | ENSG00000105520 | HPA048973 | U-2 OS   |
| 2919 | ENSG00000105552 | HPA054091 | U-2 OS   |
| 2920 | ENSG00000105556 | HPA041439 | U-2 OS   |
| 2921 | ENSG00000105559 | HPA048473 | U-2 OS   |
| 2922 | ENSG00000105568 | CAB018599 | U-2 OS   |
| 2923 | ENSG00000105576 | HPA071498 | U-2 OS   |
| 2924 | ENSG00000105583 | HPA065685 | U-2 OS   |
| 2925 | ENSG00000105607 | HPA043252 | U-2 OS   |
| 2926 | ENSG00000105610 | HPA051850 | HEL      |
| 2927 | ENSG00000105613 | HPA028181 | U-2 OS   |
| 2928 | ENSG00000105617 | HPA043541 | U-2 OS   |
| 2929 | ENSG00000105618 | HPA061873 | HEK 293  |
| 2930 | ENSG00000105619 | HPA058534 | U-2 OS   |
| 2931 | ENSG00000105639 | HPA070314 | HEL      |
| 2932 | ENSG00000105640 | HPA055259 | CACO-2   |
| 2933 | ENSG00000105642 | HPA065938 | U-2 OS   |
| 2934 | ENSG00000105643 | HPA053788 | MCF7     |
| 2935 | ENSG00000105643 | HPA074216 | U-2 OS   |
| 2936 | ENSG00000105647 | HPA069291 | U-2 OS   |
| 2937 | ENSG00000105649 | CAB009949 | U-2 OS   |
| 2938 | ENSG00000105655 | HPA007931 | U-2 OS   |
| 2939 | ENSG00000105662 | HPA022035 | A-431    |
| 2940 | ENSG00000105664 | HPA077555 | Hep G2   |
| 2941 | ENSG00000105669 | HPA041605 | U-2 OS   |
| 2942 | ENSG00000105669 | HPA043576 | U-2 OS   |
| 2943 | ENSG00000105671 | HPA048093 | U-2 OS   |
| 2944 | ENSG00000105676 | HPA041420 | U-2 OS   |
| 2945 | ENSG00000105676 | HPA041681 | HEK 293  |
| 2946 | ENSG00000105677 | HPA067837 | U-2 OS   |
| 2947 | ENSG00000105679 | HPA042666 | U-2 OS   |
| 2948 | ENSG00000105696 | HPA070701 | U-2 OS   |
| 2949 | ENSG00000105698 | HPA029764 | U-2 OS   |
| 2950 | ENSG00000105698 | HPA046567 | U-2 OS   |
| 2951 | ENSG00000105699 | HPA007270 | U-2 OS   |
| 2952 | ENSG00000105700 | HPA041507 | U-2 OS   |
| 2953 | ENSG00000105701 | CAB025346 | U-2 OS   |
| 2954 | ENSG00000105701 | HPA045177 | U-2 OS   |
| 2955 | ENSG00000105705 | HPA004890 | U-2 OS   |
| 2956 | ENSG00000105708 | HPA049863 | U-2 OS   |
| 2957 | ENSG00000105717 | HPA049859 | RT4      |
| 2958 | ENSG00000105717 | HPA056469 | HeLa     |
| 2959 | ENSG00000105722 | HPA058532 | MCF7     |
| 2960 | ENSG00000105722 | HPA067952 | MCF7     |
| 2961 | ENSG00000105723 | CAB004422 | U-2 OS   |
| 2962 | ENSG00000105726 | HPA031798 | U-2 OS   |
| 2963 | ENSG00000105732 | HPA023196 | U-2 OS   |
| 2964 | ENSG00000105732 | HPA057274 | U-2 OS   |
| 2965 | ENSG00000105737 | HPA074001 | SH-SY5Y  |
| 2966 | ENSG00000105738 | HPA074988 | A549     |
| 2967 | ENSG00000105750 | HPA044760 | A-431    |
| 2968 | ENSG00000105755 | HPA028360 | U-2 OS   |

|      |                 |           |          |
|------|-----------------|-----------|----------|
| 2969 | ENSG00000105755 | HPA029028 | U-2 OS   |
| 2970 | ENSG00000105755 | HPA029029 | U-2 OS   |
| 2971 | ENSG00000105767 | HPA012612 | A-431    |
| 2972 | ENSG00000105771 | HPA041763 | U-2 OS   |
| 2973 | ENSG00000105778 | HPA050957 | PC-3     |
| 2974 | ENSG00000105808 | HPA043010 | U-2 OS   |
| 2975 | ENSG00000105810 | HPA002637 | U-2 OS   |
| 2976 | ENSG00000105819 | HPA040674 | U-2 OS   |
| 2977 | ENSG00000105819 | HPA074168 | U-2 OS   |
| 2978 | ENSG00000105821 | HPA020454 | U-2 OS   |
| 2979 | ENSG00000105835 | HPA057722 | U-2 OS   |
| 2980 | ENSG00000105849 | HPA019071 | U-2 OS   |
| 2981 | ENSG00000105849 | HPA022416 | U-2 OS   |
| 2982 | ENSG00000105851 | HPA069976 | HEL      |
| 2983 | ENSG00000105855 | HPA027796 | U-2 OS   |
| 2984 | ENSG00000105856 | HPA020225 | U-2 OS   |
| 2985 | ENSG00000105856 | CAB032824 | U-2 OS   |
| 2986 | ENSG00000105865 | HPA044301 | U-251 MG |
| 2987 | ENSG00000105866 | CAB010246 | U-2 OS   |
| 2988 | ENSG00000105866 | HPA040395 | U-2 OS   |
| 2989 | ENSG00000105879 | HPA026699 | U-2 OS   |
| 2990 | ENSG00000105880 | HPA005670 | U-2 OS   |
| 2991 | ENSG00000105887 | HPA019735 | U-2 OS   |
| 2992 | ENSG00000105894 | HPA073913 | AF22     |
| 2993 | ENSG00000105928 | HPA011326 | U-2 OS   |
| 2994 | ENSG00000105928 | CAB019306 | A-431    |
| 2995 | ENSG00000105929 | HPA018029 | U-2 OS   |
| 2996 | ENSG00000105939 | HPA047818 | U-2 OS   |
| 2997 | ENSG00000105939 | HPA059096 | U-2 OS   |
| 2998 | ENSG00000105948 | HPA036339 | U-2 OS   |
| 2999 | ENSG00000105953 | HPA019514 | U-2 OS   |
| 3000 | ENSG00000105953 | HPA020347 | U-2 OS   |
| 3001 | ENSG00000105963 | HPA007033 | U-2 OS   |
| 3002 | ENSG00000105967 | HPA063577 | CAC0-2   |
| 3003 | ENSG00000105971 | HPA044810 | U-2 OS   |
| 3004 | ENSG00000105974 | CAB003791 | U-2 OS   |
| 3005 | ENSG00000105976 | CAB005282 | U-2 OS   |
| 3006 | ENSG00000105976 | CAB018577 | U-2 OS   |
| 3007 | ENSG00000105976 | HPA055607 | U-251 MG |
| 3008 | ENSG00000105983 | HPA016592 | A-431    |
| 3009 | ENSG00000105989 | HPA020920 | U-2 OS   |
| 3010 | ENSG00000105993 | HPA024258 | U-2 OS   |
| 3011 | ENSG00000105993 | HPA058593 | U-2 OS   |
| 3012 | ENSG00000105996 | HPA078220 | U-2 OS   |
| 3013 | ENSG00000105997 | HPA029157 | U-2 OS   |
| 3014 | ENSG00000106006 | HPA077900 | HEK 293  |
| 3015 | ENSG00000106009 | HPA076508 | U-2 OS   |
| 3016 | ENSG00000106012 | HPA019515 | U-2 OS   |
| 3017 | ENSG00000106013 | HPA043489 | U-2 OS   |
| 3018 | ENSG00000106013 | HPA052941 | U-2 OS   |
| 3019 | ENSG00000106018 | HPA062707 | U-2 OS   |
| 3020 | ENSG00000106025 | HPA051570 | U-2 OS   |
| 3021 | ENSG00000106028 | HPA002866 | U-2 OS   |
| 3022 | ENSG00000106031 | HPA069061 | RT4      |
| 3023 | ENSG00000106034 | HPA012058 | A-431    |

|      |                 |           |          |
|------|-----------------|-----------|----------|
| 3024 | ENSG00000106038 | HPA055132 | RT4      |
| 3025 | ENSG00000106052 | HPA024432 | U-2 OS   |
| 3026 | ENSG00000106066 | HPA056466 | CACO-2   |
| 3027 | ENSG00000106069 | HPA018989 | CACO-2   |
| 3028 | ENSG00000106070 | HPA031818 | U-2 OS   |
| 3029 | ENSG00000106077 | HPA024042 | U-251 MG |
| 3030 | ENSG00000106077 | HPA049641 | MCF7     |
| 3031 | ENSG00000106078 | HPA019167 | CACO-2   |
| 3032 | ENSG00000106080 | HPA013329 | U-2 OS   |
| 3033 | ENSG00000106080 | HPA026829 | U-2 OS   |
| 3034 | ENSG00000106086 | HPA072314 | U-2 OS   |
| 3035 | ENSG00000106100 | HPA074367 | U-2 OS   |
| 3036 | ENSG00000106105 | HPA017896 | U-2 OS   |
| 3037 | ENSG00000106123 | HPA035784 | RT4      |
| 3038 | ENSG00000106125 | HPA019475 | U-2 OS   |
| 3039 | ENSG00000106125 | HPA030129 | U-2 OS   |
| 3040 | ENSG00000106144 | HPA050678 | U-2 OS   |
| 3041 | ENSG00000106153 | HPA027407 | U-2 OS   |
| 3042 | ENSG00000106153 | HPA052510 | A-431    |
| 3043 | ENSG00000106211 | CAB047330 | U-2 OS   |
| 3044 | ENSG00000106211 | CAB047331 | U-2 OS   |
| 3045 | ENSG00000106211 | CAB047332 | U-2 OS   |
| 3046 | ENSG00000106236 | HPA058320 | U-2 OS   |
| 3047 | ENSG00000106244 | HPA050294 | U-2 OS   |
| 3048 | ENSG00000106245 | HPA028943 | U-2 OS   |
| 3049 | ENSG00000106246 | HPA047679 | CACO-2   |
| 3050 | ENSG00000106258 | HPA072245 | U-2 OS   |
| 3051 | ENSG00000106261 | HPA006672 | U-2 OS   |
| 3052 | ENSG00000106263 | HPA048983 | U-2 OS   |
| 3053 | ENSG00000106266 | HPA057296 | U-2 OS   |
| 3054 | ENSG00000106268 | HPA012636 | U-2 OS   |
| 3055 | ENSG00000106278 | HPA015103 | U-2 OS   |
| 3056 | ENSG00000106290 | HPA006566 | U-2 OS   |
| 3057 | ENSG00000106299 | HPA005750 | U-2 OS   |
| 3058 | ENSG00000106305 | HPA019098 | U-2 OS   |
| 3059 | ENSG00000106330 | HPA041137 | A-431    |
| 3060 | ENSG00000106330 | HPA048240 | PC-3     |
| 3061 | ENSG00000106333 | HPA042927 | U-2 OS   |
| 3062 | ENSG00000106344 | HPA026672 | U-2 OS   |
| 3063 | ENSG00000106344 | HPA031519 | U-2 OS   |
| 3064 | ENSG00000106346 | HPA064800 | U-2 OS   |
| 3065 | ENSG00000106348 | HPA001400 | U-2 OS   |
| 3066 | ENSG00000106366 | HPA050039 | U-2 OS   |
| 3067 | ENSG00000106367 | HPA060945 | U-2 OS   |
| 3068 | ENSG00000106384 | HPA011940 | U-2 OS   |
| 3069 | ENSG00000106392 | HPA012819 | U-2 OS   |
| 3070 | ENSG00000106400 | HPA019043 | U-2 OS   |
| 3071 | ENSG00000106415 | HPA001674 | U-2 OS   |
| 3072 | ENSG00000106436 | HPA019763 | U-2 OS   |
| 3073 | ENSG00000106443 | HPA017376 | SH-SY5Y  |
| 3074 | ENSG00000106459 | HPA029329 | A-431    |
| 3075 | ENSG00000106460 | HPA058342 | U-2 OS   |
| 3076 | ENSG00000106462 | CAB009589 | U-2 OS   |
| 3077 | ENSG00000106479 | HPA024154 | U-2 OS   |
| 3078 | ENSG00000106484 | HPA005623 | U-2 OS   |

|      |                 |           |           |
|------|-----------------|-----------|-----------|
| 3079 | ENSG00000106524 | HPA050447 | A-431     |
| 3080 | ENSG00000106524 | HPA067100 | CACO-2    |
| 3081 | ENSG00000106537 | HPA007426 | U-2 OS    |
| 3082 | ENSG00000106541 | HPA007912 | RT4       |
| 3083 | ENSG00000106546 | CAB005072 | U-2 OS    |
| 3084 | ENSG00000106554 | HPA042935 | U-2 OS    |
| 3085 | ENSG00000106565 | HPA047509 | CACO-2    |
| 3086 | ENSG00000106603 | HPA011944 | U-2 OS    |
| 3087 | ENSG00000106605 | HPA019709 | U-2 OS    |
| 3088 | ENSG00000106608 | HPA020134 | U-2 OS    |
| 3089 | ENSG00000106609 | HPA016495 | U-2 OS    |
| 3090 | ENSG00000106617 | HPA004246 | U-2 OS    |
| 3091 | ENSG00000106624 | CAB009966 | U-2 OS    |
| 3092 | ENSG00000106624 | HPA047724 | U-2 OS    |
| 3093 | ENSG00000106628 | HPA026745 | U-2 OS    |
| 3094 | ENSG00000106633 | HPA007034 | U-2 OS    |
| 3095 | ENSG00000106633 | HPA007093 | U-2 OS    |
| 3096 | ENSG00000106635 | HPA049943 | U-2 OS    |
| 3097 | ENSG00000106636 | HPA030818 | U-2 OS    |
| 3098 | ENSG00000106638 | HPA007477 | U-2 OS    |
| 3099 | ENSG00000106638 | HPA051533 | U-2 OS    |
| 3100 | ENSG00000106682 | HPA030542 | U-2 OS    |
| 3101 | ENSG00000106683 | HPA028516 | U-2 OS    |
| 3102 | ENSG00000106689 | HPA000838 | U-2 OS    |
| 3103 | ENSG00000106701 | HPA035138 | U-2 OS    |
| 3104 | ENSG00000106723 | HPA068784 | U-2 OS    |
| 3105 | ENSG00000106733 | HPA049795 | A-431     |
| 3106 | ENSG00000106771 | HPA023892 | U-2 OS    |
| 3107 | ENSG00000106780 | HPA050238 | U-2 OS    |
| 3108 | ENSG00000106785 | HPA053217 | CACO-2    |
| 3109 | ENSG00000106789 | HPA041302 | U-2 OS    |
| 3110 | ENSG00000106799 | HPA056473 | U-2 OS    |
| 3111 | ENSG00000106803 | HPA049407 | U-2 OS    |
| 3112 | ENSG00000106809 | HPA013132 | ASC TERT1 |
| 3113 | ENSG00000106829 | HPA065357 | SH-SY5Y   |
| 3114 | ENSG00000106852 | HPA058319 | CACO-2    |
| 3115 | ENSG00000106868 | HPA048554 | CACO-2    |
| 3116 | ENSG00000106927 | HPA075585 | U-2 OS    |
| 3117 | ENSG00000106948 | HPA052367 | U-2 OS    |
| 3118 | ENSG00000106948 | HPA063993 | U-2 OS    |
| 3119 | ENSG00000106976 | HPA049910 | U-2 OS    |
| 3120 | ENSG00000106976 | HPA061801 | U-2 OS    |
| 3121 | ENSG00000106991 | HPA067440 | U-2 OS    |
| 3122 | ENSG00000106992 | HPA006456 | U-2 OS    |
| 3123 | ENSG00000106993 | HPA021175 | A549      |
| 3124 | ENSG00000107020 | HPA011144 | U-2 OS    |
| 3125 | ENSG00000107021 | HPA045865 | U-2 OS    |
| 3126 | ENSG00000107077 | HPA069357 | U-2 OS    |
| 3127 | ENSG00000107099 | HPA003218 | RT4       |
| 3128 | ENSG00000107104 | HPA056090 | CACO-2    |
| 3129 | ENSG00000107105 | HPA063001 | U-2 OS    |
| 3130 | ENSG00000107130 | CAB018587 | U-2 OS    |
| 3131 | ENSG00000107130 | HPA019713 | U-2 OS    |
| 3132 | ENSG00000107159 | CAB005100 | A-431     |
| 3133 | ENSG00000107159 | CAB017107 | A-431     |

|      |                 |           |           |
|------|-----------------|-----------|-----------|
| 3134 | ENSG00000107164 | HPA058392 | U-2 OS    |
| 3135 | ENSG00000107165 | HPA000937 | SK-MEL-30 |
| 3136 | ENSG00000107175 | HPA030978 | U-2 OS    |
| 3137 | ENSG00000107185 | HPA020414 | U-2 OS    |
| 3138 | ENSG00000107185 | HPA021085 | U-2 OS    |
| 3139 | ENSG00000107201 | HPA047193 | U-2 OS    |
| 3140 | ENSG00000107223 | HPA035642 | U-2 OS    |
| 3141 | ENSG00000107242 | HPA009687 | CACO-2    |
| 3142 | ENSG00000107249 | HPA056426 | U-2 OS    |
| 3143 | ENSG00000107262 | CAB002486 | A-431     |
| 3144 | ENSG00000107263 | HPA075984 | U-2 OS    |
| 3145 | ENSG00000107281 | HPA008189 | A-431     |
| 3146 | ENSG00000107282 | HPA061287 | SH-SY5Y   |
| 3147 | ENSG00000107290 | HPA024105 | U-2 OS    |
| 3148 | ENSG00000107290 | HPA057269 | A549      |
| 3149 | ENSG00000107295 | HPA026685 | RT4       |
| 3150 | ENSG00000107338 | CAB010161 | U-2 OS    |
| 3151 | ENSG00000107338 | HPA052108 | U-2 OS    |
| 3152 | ENSG00000107341 | HPA061000 | U-2 OS    |
| 3153 | ENSG00000107371 | HPA020485 | U-2 OS    |
| 3154 | ENSG00000107372 | HPA018129 | U-2 OS    |
| 3155 | ENSG00000107438 | CAB072838 | HeLa      |
| 3156 | ENSG00000107438 | CAB072840 | U-2 OS    |
| 3157 | ENSG00000107443 | HPA058151 | A-431     |
| 3158 | ENSG00000107447 | HPA036532 | REH       |
| 3159 | ENSG00000107447 | HPA044194 | A-431     |
| 3160 | ENSG00000107485 | HPA029730 | U-2 OS    |
| 3161 | ENSG00000107518 | HPA038070 | U-2 OS    |
| 3162 | ENSG00000107551 | HPA038834 | U-2 OS    |
| 3163 | ENSG00000107554 | HPA058216 | U-2 OS    |
| 3164 | ENSG00000107560 | HPA037726 | U-2 OS    |
| 3165 | ENSG00000107566 | HPA011252 | U-2 OS    |
| 3166 | ENSG00000107581 | HPA038316 | U-2 OS    |
| 3167 | ENSG00000107614 | HPA036946 | U-2 OS    |
| 3168 | ENSG00000107625 | HPA037388 | U-2 OS    |
| 3169 | ENSG00000107625 | HPA037389 | U-2 OS    |
| 3170 | ENSG00000107651 | HPA038403 | U-2 OS    |
| 3171 | ENSG00000107651 | HPA043305 | U-2 OS    |
| 3172 | ENSG00000107669 | HPA038444 | U-2 OS    |
| 3173 | ENSG00000107669 | HPA057549 | U-251 MG  |
| 3174 | ENSG00000107672 | HPA037459 | U-2 OS    |
| 3175 | ENSG00000107672 | HPA038412 | U-2 OS    |
| 3176 | ENSG00000107672 | HPA044872 | U-2 OS    |
| 3177 | ENSG00000107679 | HPA002043 | U-2 OS    |
| 3178 | ENSG00000107679 | HPA064795 | HaCaT     |
| 3179 | ENSG00000107738 | HPA007968 | U-2 OS    |
| 3180 | ENSG00000107745 | HPA037479 | A549      |
| 3181 | ENSG00000107758 | HPA008823 | U-2 OS    |
| 3182 | ENSG00000107771 | HPA037482 | U-2 OS    |
| 3183 | ENSG00000107779 | CAB019398 | U-2 OS    |
| 3184 | ENSG00000107796 | CAB003761 | U-2 OS    |
| 3185 | ENSG00000107798 | HPA057052 | A-431     |
| 3186 | ENSG00000107807 | HPA053185 | HEK 293   |
| 3187 | ENSG00000107816 | HPA044956 | U-2 OS    |
| 3188 | ENSG00000107819 | HPA008028 | U-2 OS    |



|      |                 |           |         |
|------|-----------------|-----------|---------|
| 3189 | ENSG00000107819 | HPA048105 | U-2 OS  |
| 3190 | ENSG00000107829 | HPA043496 | A-431   |
| 3191 | ENSG00000107833 | HPA036295 | U-2 OS  |
| 3192 | ENSG00000107854 | HPA036606 | U-2 OS  |
| 3193 | ENSG00000107862 | HPA037759 | A-431   |
| 3194 | ENSG00000107863 | HPA057861 | U-2 OS  |
| 3195 | ENSG00000107864 | HPA059056 | U-2 OS  |
| 3196 | ENSG00000107874 | HPA036544 | U-2 OS  |
| 3197 | ENSG00000107874 | HPA041829 | U-2 OS  |
| 3198 | ENSG00000107882 | HPA008700 | U-2 OS  |
| 3199 | ENSG00000107890 | HPA040654 | A-431   |
| 3200 | ENSG00000107897 | HPA011861 | U-2 OS  |
| 3201 | ENSG00000107897 | HPA012145 | U-2 OS  |
| 3202 | ENSG00000107902 | HPA009163 | U-2 OS  |
| 3203 | ENSG00000107929 | HPA036566 | A-431   |
| 3204 | ENSG00000107929 | HPA042738 | U-2 OS  |
| 3205 | ENSG00000107937 | HPA039618 | U-2 OS  |
| 3206 | ENSG00000107937 | HPA056468 | A-431   |
| 3207 | ENSG00000107938 | HPA031820 | U-2 OS  |
| 3208 | ENSG00000107949 | HPA038011 | HEK 293 |
| 3209 | ENSG00000107951 | HPA058232 | U-2 OS  |
| 3210 | ENSG00000107959 | HPA006753 | U-2 OS  |
| 3211 | ENSG00000107960 | HPA037924 | A-431   |
| 3212 | ENSG00000107960 | HPA037925 | U-2 OS  |
| 3213 | ENSG00000107968 | HPA017962 | U-2 OS  |
| 3214 | ENSG00000108001 | HPA061169 | U-2 OS  |
| 3215 | ENSG00000108018 | HPA011948 | U-2 OS  |
| 3216 | ENSG00000108021 | HPA038043 | U-2 OS  |
| 3217 | ENSG00000108021 | HPA061547 | U-2 OS  |
| 3218 | ENSG00000108039 | HPA030419 | U-2 OS  |
| 3219 | ENSG00000108039 | HPA030420 | U-2 OS  |
| 3220 | ENSG00000108055 | HPA043206 | U-2 OS  |
| 3221 | ENSG00000108061 | HPA009164 | U-2 OS  |
| 3222 | ENSG00000108064 | HPA040648 | U-2 OS  |
| 3223 | ENSG00000108064 | HPA063684 | CACO-2  |
| 3224 | ENSG00000108091 | HPA019051 | U-2 OS  |
| 3225 | ENSG00000108094 | CAB002677 | U-2 OS  |
| 3226 | ENSG00000108094 | HPA024578 | PC-3    |
| 3227 | ENSG00000108106 | HPA057150 | U-2 OS  |
| 3228 | ENSG00000108107 | HPA050459 | U-2 OS  |
| 3229 | ENSG00000108175 | HPA045144 | U-2 OS  |
| 3230 | ENSG00000108179 | HPA077416 | CACO-2  |
| 3231 | ENSG00000108187 | HPA038035 | U-2 OS  |
| 3232 | ENSG00000108219 | HPA014773 | A-431   |
| 3233 | ENSG00000108219 | HPA057174 | U-2 OS  |
| 3234 | ENSG00000108239 | HPA038277 | U-2 OS  |
| 3235 | ENSG00000108244 | CAB017091 | A-431   |
| 3236 | ENSG00000108256 | HPA067443 | CACO-2  |
| 3237 | ENSG00000108262 | HPA004059 | U-2 OS  |
| 3238 | ENSG00000108262 | HPA004186 | A-431   |
| 3239 | ENSG00000108298 | HPA043014 | U-2 OS  |
| 3240 | ENSG00000108298 | HPA051987 | U-2 OS  |
| 3241 | ENSG00000108306 | HPA050397 | U-2 OS  |
| 3242 | ENSG00000108309 | HPA023548 | U-2 OS  |
| 3243 | ENSG00000108312 | CAB004611 | U-2 OS  |

|      |                 |           |          |
|------|-----------------|-----------|----------|
| 3244 | ENSG00000108312 | HPA006385 | U-2 OS   |
| 3245 | ENSG00000108344 | CAB017038 | U-2 OS   |
| 3246 | ENSG00000108344 | HPA048972 | HEK 293  |
| 3247 | ENSG00000108349 | HPA050262 | U-2 OS   |
| 3248 | ENSG00000108352 | HPA022895 | U-2 OS   |
| 3249 | ENSG00000108370 | HPA014137 | A-431    |
| 3250 | ENSG00000108379 | HPA066281 | A-431    |
| 3251 | ENSG00000108381 | HPA022145 | U-2 OS   |
| 3252 | ENSG00000108384 | HPA045198 | U-2 OS   |
| 3253 | ENSG00000108387 | HPA022905 | U-2 OS   |
| 3254 | ENSG00000108406 | HPA044350 | U-2 OS   |
| 3255 | ENSG00000108423 | HPA023980 | A-431    |
| 3256 | ENSG00000108423 | HPA027090 | U-251 MG |
| 3257 | ENSG00000108424 | HPA029878 | U-2 OS   |
| 3258 | ENSG00000108424 | HPA050302 | CACO-2   |
| 3259 | ENSG00000108433 | HPA048956 | U-2 OS   |
| 3260 | ENSG00000108433 | HPA054472 | U-2 OS   |
| 3261 | ENSG00000108439 | HPA023204 | U-2 OS   |
| 3262 | ENSG00000108439 | HPA027776 | U-2 OS   |
| 3263 | ENSG00000108443 | HPA039442 | U-2 OS   |
| 3264 | ENSG00000108448 | HPA066431 | U-2 OS   |
| 3265 | ENSG00000108465 | HPA022141 | U-2 OS   |
| 3266 | ENSG00000108465 | HPA027883 | U-2 OS   |
| 3267 | ENSG00000108468 | CAB012265 | U-2 OS   |
| 3268 | ENSG00000108469 | HPA029971 | U-2 OS   |
| 3269 | ENSG00000108474 | HPA012739 | U-2 OS   |
| 3270 | ENSG00000108479 | HPA007094 | U-2 OS   |
| 3271 | ENSG00000108509 | HPA051147 | U-2 OS   |
| 3272 | ENSG00000108510 | HPA067939 | U-2 OS   |
| 3273 | ENSG00000108511 | HPA042063 | U-2 OS   |
| 3274 | ENSG00000108515 | HPA000793 | U-2 OS   |
| 3275 | ENSG00000108515 | HPA068284 | U-2 OS   |
| 3276 | ENSG00000108515 | HPA068721 | U-2 OS   |
| 3277 | ENSG00000108518 | CAB037140 | A-431    |
| 3278 | ENSG00000108551 | HPA047896 | MCF7     |
| 3279 | ENSG00000108557 | HPA023898 | A549     |
| 3280 | ENSG00000108557 | HPA054906 | MCF7     |
| 3281 | ENSG00000108559 | HPA021816 | U-2 OS   |
| 3282 | ENSG00000108561 | HPA026483 | U-2 OS   |
| 3283 | ENSG00000108576 | HPA074728 | RT4      |
| 3284 | ENSG00000108578 | HPA039548 | U-2 OS   |
| 3285 | ENSG00000108582 | HPA055465 | CACO-2   |
| 3286 | ENSG00000108588 | HPA029674 | U-2 OS   |
| 3287 | ENSG00000108588 | HPA072573 | RT4      |
| 3288 | ENSG00000108588 | HPA075958 | U-2 OS   |
| 3289 | ENSG00000108590 | HPA035947 | U-2 OS   |
| 3290 | ENSG00000108591 | HPA007716 | U-2 OS   |
| 3291 | ENSG00000108592 | HPA055544 | U-2 OS   |
| 3292 | ENSG00000108592 | HPA062628 | U-2 OS   |
| 3293 | ENSG00000108599 | HPA028901 | U-2 OS   |
| 3294 | ENSG00000108602 | HPA051150 | A549     |
| 3295 | ENSG00000108602 | HPA063783 | A549     |
| 3296 | ENSG00000108604 | HPA059934 | U-2 OS   |
| 3297 | ENSG00000108604 | HPA061348 | U-2 OS   |
| 3298 | ENSG00000108622 | HPA071155 | U-2 OS   |

|      |                 |           |          |
|------|-----------------|-----------|----------|
| 3299 | ENSG00000108639 | HPA014742 | U-2 OS   |
| 3300 | ENSG00000108651 | HPA025936 | U-2 OS   |
| 3301 | ENSG00000108651 | HPA055806 | U-2 OS   |
| 3302 | ENSG00000108654 | CAB005868 | U-2 OS   |
| 3303 | ENSG00000108654 | HPA020043 | U-2 OS   |
| 3304 | ENSG00000108666 | HPA004061 | U-2 OS   |
| 3305 | ENSG00000108669 | HPA047498 | U-2 OS   |
| 3306 | ENSG00000108671 | HPA067433 | CAC0-2   |
| 3307 | ENSG00000108691 | HPA019163 | U-2 OS   |
| 3308 | ENSG00000108771 | HPA018670 | RT4      |
| 3309 | ENSG00000108774 | HPA004167 | U-2 OS   |
| 3310 | ENSG00000108786 | HPA021032 | U-2 OS   |
| 3311 | ENSG00000108788 | HPA064438 | U-251 MG |
| 3312 | ENSG00000108797 | HPA011772 | U-251 MG |
| 3313 | ENSG00000108799 | HPA005478 | U-2 OS   |
| 3314 | ENSG00000108813 | HPA059933 | U-2 OS   |
| 3315 | ENSG00000108821 | HPA011795 | U-2 OS   |
| 3316 | ENSG00000108825 | HPA022869 | U-2 OS   |
| 3317 | ENSG00000108829 | HPA030827 | U-2 OS   |
| 3318 | ENSG00000108829 | HPA030829 | U-2 OS   |
| 3319 | ENSG00000108839 | CAB019287 | U-2 OS   |
| 3320 | ENSG00000108840 | HPA030991 | U-2 OS   |
| 3321 | ENSG00000108846 | HPA048483 | A549     |
| 3322 | ENSG00000108848 | HPA018475 | U-2 OS   |
| 3323 | ENSG00000108848 | HPA018484 | U-2 OS   |
| 3324 | ENSG00000108852 | HPA026486 | U-2 OS   |
| 3325 | ENSG00000108854 | HPA071508 | U-2 OS   |
| 3326 | ENSG00000108861 | HPA063616 | A549     |
| 3327 | ENSG00000108883 | HPA022021 | U-2 OS   |
| 3328 | ENSG00000108924 | HPA068156 | Hep G2   |
| 3329 | ENSG00000108924 | HPA071210 | Hep G2   |
| 3330 | ENSG00000108932 | HPA066328 | U-2 OS   |
| 3331 | ENSG00000108946 | CAB019378 | U-2 OS   |
| 3332 | ENSG00000108953 | HPA008445 | U-2 OS   |
| 3333 | ENSG00000108953 | HPA061603 | U-2 OS   |
| 3334 | ENSG00000108960 | HPA026978 | U-2 OS   |
| 3335 | ENSG00000108961 | HPA057280 | U-2 OS   |
| 3336 | ENSG00000108963 | HPA069750 | U-2 OS   |
| 3337 | ENSG00000108984 | HPA031134 | A549     |
| 3338 | ENSG00000109016 | HPA016873 | U-2 OS   |
| 3339 | ENSG00000109046 | HPA003293 | U-2 OS   |
| 3340 | ENSG00000109062 | HPA009672 | U-2 OS   |
| 3341 | ENSG00000109062 | HPA027247 | U-2 OS   |
| 3342 | ENSG00000109065 | HPA057149 | CAC0-2   |
| 3343 | ENSG00000109066 | HPA044330 | U-2 OS   |
| 3344 | ENSG00000109072 | HPA060933 | CAC0-2   |
| 3345 | ENSG00000109079 | HPA013333 | U-2 OS   |
| 3346 | ENSG00000109083 | HPA021376 | U-2 OS   |
| 3347 | ENSG00000109084 | HPA076689 | CAC0-2   |
| 3348 | ENSG00000109089 | HPA022015 | U-2 OS   |
| 3349 | ENSG00000109107 | HPA003282 | U-2 OS   |
| 3350 | ENSG00000109111 | CAB012416 | U-2 OS   |
| 3351 | ENSG00000109111 | HPA036382 | U-2 OS   |
| 3352 | ENSG00000109118 | HPA021410 | U-2 OS   |
| 3353 | ENSG00000109118 | HPA021452 | U-2 OS   |

|      |                 |           |          |
|------|-----------------|-----------|----------|
| 3354 | ENSG00000109132 | HPA074325 | SH-SY5Y  |
| 3355 | ENSG00000109132 | HPA074941 | SH-SY5Y  |
| 3356 | ENSG00000109171 | HPA035824 | U-2 OS   |
| 3357 | ENSG00000109171 | HPA063599 | U-2 OS   |
| 3358 | ENSG00000109180 | HPA044803 | U-2 OS   |
| 3359 | ENSG00000109184 | HPA036483 | U-251 MG |
| 3360 | ENSG00000109184 | HPA036484 | U-2 OS   |
| 3361 | ENSG00000109189 | CAB076369 | U-2 OS   |
| 3362 | ENSG00000109189 | CAB076370 | U-2 OS   |
| 3363 | ENSG00000109193 | HPA028213 | hTCEpi   |
| 3364 | ENSG00000109205 | HPA036279 | Hep G2   |
| 3365 | ENSG00000109205 | HPA036543 | Hep G2   |
| 3366 | ENSG00000109205 | HPA070297 | Hep G2   |
| 3367 | ENSG00000109220 | HPA026784 | BJ       |
| 3368 | ENSG00000109220 | HPA076603 | BJ       |
| 3369 | ENSG00000109265 | HPA048148 | U-2 OS   |
| 3370 | ENSG00000109320 | HPA027305 | U-2 OS   |
| 3371 | ENSG00000109321 | CAB023519 | U-2 OS   |
| 3372 | ENSG00000109323 | HPA053478 | U-2 OS   |
| 3373 | ENSG00000109332 | HPA003920 | U-2 OS   |
| 3374 | ENSG00000109381 | HPA006057 | U-2 OS   |
| 3375 | ENSG00000109381 | HPA071166 | RT4      |
| 3376 | ENSG00000109390 | HPA044556 | U-2 OS   |
| 3377 | ENSG00000109436 | HPA006503 | U-2 OS   |
| 3378 | ENSG00000109445 | HPA056325 | U-2 OS   |
| 3379 | ENSG00000109452 | HPA037682 | U-2 OS   |
| 3380 | ENSG00000109458 | HPA066404 | U-2 OS   |
| 3381 | ENSG00000109466 | HPA051637 | U-2 OS   |
| 3382 | ENSG00000109472 | HPA003819 | U-2 OS   |
| 3383 | ENSG00000109475 | HPA035139 | U-2 OS   |
| 3384 | ENSG00000109511 | HPA005469 | RT4      |
| 3385 | ENSG00000109519 | HPA036647 | U-2 OS   |
| 3386 | ENSG00000109534 | HPA059098 | U-2 OS   |
| 3387 | ENSG00000109572 | HPA044723 | U-2 OS   |
| 3388 | ENSG00000109576 | HPA037502 | U-2 OS   |
| 3389 | ENSG00000109586 | HPA064243 | HeLa     |
| 3390 | ENSG00000109586 | HPA065317 | U-2 OS   |
| 3391 | ENSG00000109606 | HPA047047 | U-2 OS   |
| 3392 | ENSG00000109618 | HPA070409 | U-2 OS   |
| 3393 | ENSG00000109625 | HPA078608 | U-2 OS   |
| 3394 | ENSG00000109654 | HPA035854 | A-431    |
| 3395 | ENSG00000109670 | CAB013793 | U-2 OS   |
| 3396 | ENSG00000109674 | HPA065761 | U-251 MG |
| 3397 | ENSG00000109680 | HPA039592 | U-2 OS   |
| 3398 | ENSG00000109684 | HPA035671 | U-2 OS   |
| 3399 | ENSG00000109685 | HPA015801 | U-2 OS   |
| 3400 | ENSG00000109686 | HPA058562 | U-251 MG |
| 3401 | ENSG00000109705 | HPA027564 | U-2 OS   |
| 3402 | ENSG00000109736 | HPA043209 | U-2 OS   |
| 3403 | ENSG00000109756 | HPA057169 | U-2 OS   |
| 3404 | ENSG00000109762 | HPA036928 | U-2 OS   |
| 3405 | ENSG00000109775 | HPA043298 | U-2 OS   |
| 3406 | ENSG00000109787 | HPA049512 | RT4      |
| 3407 | ENSG00000109787 | HPA065054 | RT4      |
| 3408 | ENSG00000109794 | HPA044019 | RT4      |

|      |                 |           |         |
|------|-----------------|-----------|---------|
| 3409 | ENSG00000109814 | CAB034444 | A-431   |
| 3410 | ENSG00000109814 | HPA036656 | U-2 OS  |
| 3411 | ENSG00000109819 | HPA063136 | U-2 OS  |
| 3412 | ENSG00000109846 | CAB002053 | U-2 OS  |
| 3413 | ENSG00000109846 | CAB040560 | U-2 OS  |
| 3414 | ENSG00000109854 | HPA006417 | U-2 OS  |
| 3415 | ENSG00000109861 | HPA066610 | U-2 OS  |
| 3416 | ENSG00000109861 | HPA068434 | U-2 OS  |
| 3417 | ENSG00000109881 | HPA037574 | U-2 OS  |
| 3418 | ENSG00000109911 | HPA038572 | U-2 OS  |
| 3419 | ENSG00000109917 | HPA030979 | CACO-2  |
| 3420 | ENSG00000109919 | HPA038390 | U-2 OS  |
| 3421 | ENSG00000109920 | HPA039485 | U-2 OS  |
| 3422 | ENSG00000109920 | HPA040029 | U-2 OS  |
| 3423 | ENSG00000109929 | HPA070248 | RT4     |
| 3424 | ENSG00000109944 | HPA039612 | U-2 OS  |
| 3425 | ENSG00000109944 | HPA040344 | U-2 OS  |
| 3426 | ENSG00000109956 | CAB010893 | U-2 OS  |
| 3427 | ENSG00000109956 | HPA069468 | SH-SY5Y |
| 3428 | ENSG00000109971 | HPA052504 | CACO-2  |
| 3429 | ENSG00000110002 | HPA037813 | U-2 OS  |
| 3430 | ENSG00000110002 | HPA037814 | U-2 OS  |
| 3431 | ENSG00000110002 | HPA061500 | U-2 OS  |
| 3432 | ENSG00000110025 | HPA038955 | U-2 OS  |
| 3433 | ENSG00000110031 | HPA061441 | RT4     |
| 3434 | ENSG00000110042 | HPA059294 | CACO-2  |
| 3435 | ENSG00000110046 | HPA038715 | A-431   |
| 3436 | ENSG00000110047 | HPA066751 | U-2 OS  |
| 3437 | ENSG00000110047 | HPA067747 | U-2 OS  |
| 3438 | ENSG00000110048 | HPA039227 | U-2 OS  |
| 3439 | ENSG00000110048 | HPA043625 | U-2 OS  |
| 3440 | ENSG00000110057 | HPA038716 | U-2 OS  |
| 3441 | ENSG00000110060 | HPA038040 | A-431   |
| 3442 | ENSG00000110060 | HPA063802 | PC-3    |
| 3443 | ENSG00000110063 | HPA039632 | U-2 OS  |
| 3444 | ENSG00000110063 | HPA058597 | U-2 OS  |
| 3445 | ENSG00000110066 | HPA063648 | CACO-2  |
| 3446 | ENSG00000110074 | HPA039620 | U-2 OS  |
| 3447 | ENSG00000110075 | CAB017183 | A-431   |
| 3448 | ENSG00000110075 | HPA038467 | CACO-2  |
| 3449 | ENSG00000110075 | HPA038468 | CACO-2  |
| 3450 | ENSG00000110090 | HPA008835 | A-431   |
| 3451 | ENSG00000110092 | HPA027802 | U-2 OS  |
| 3452 | ENSG00000110104 | HPA041117 | U-2 OS  |
| 3453 | ENSG00000110104 | HPA041540 | U-2 OS  |
| 3454 | ENSG00000110107 | CAB012448 | U-2 OS  |
| 3455 | ENSG00000110107 | HPA038051 | U-2 OS  |
| 3456 | ENSG00000110107 | HPA059070 | U-2 OS  |
| 3457 | ENSG00000110108 | HPA011785 | U-2 OS  |
| 3458 | ENSG00000110171 | HPA043396 | A-431   |
| 3459 | ENSG00000110171 | HPA048233 | U-2 OS  |
| 3460 | ENSG00000110172 | HPA041040 | U-2 OS  |
| 3461 | ENSG00000110195 | HPA077030 | HeLa    |
| 3462 | ENSG00000110200 | HPA036596 | U-2 OS  |
| 3463 | ENSG00000110218 | HPA016930 | U-2 OS  |

|      |                 |           |          |
|------|-----------------|-----------|----------|
| 3464 | ENSG00000110237 | HPA007991 | A-431    |
| 3465 | ENSG00000110244 | HPA001352 | CAC0-2   |
| 3466 | ENSG00000110245 | HPA065365 | CAC0-2   |
| 3467 | ENSG00000110274 | HPA037606 | U-2 OS   |
| 3468 | ENSG00000110274 | HPA061504 | U-251 MG |
| 3469 | ENSG00000110315 | HPA018133 | U-2 OS   |
| 3470 | ENSG00000110318 | HPA038381 | U-2 OS   |
| 3471 | ENSG00000110318 | HPA038399 | U-2 OS   |
| 3472 | ENSG00000110321 | HPA006773 | U-2 OS   |
| 3473 | ENSG00000110328 | HPA012955 | U-2 OS   |
| 3474 | ENSG00000110330 | CAB020661 | U-2 OS   |
| 3475 | ENSG00000110344 | HPA055035 | CAC0-2   |
| 3476 | ENSG00000110344 | HPA064010 | U-2 OS   |
| 3477 | ENSG00000110367 | HPA024201 | U-2 OS   |
| 3478 | ENSG00000110395 | HPA027956 | U-2 OS   |
| 3479 | ENSG00000110422 | HPA028069 | U-2 OS   |
| 3480 | ENSG00000110427 | HPA010132 | U-2 OS   |
| 3481 | ENSG00000110427 | HPA051594 | U-2 OS   |
| 3482 | ENSG00000110429 | HPA002467 | U-2 OS   |
| 3483 | ENSG00000110435 | HPA038484 | U-2 OS   |
| 3484 | ENSG00000110435 | HPA038485 | U-2 OS   |
| 3485 | ENSG00000110442 | HPA009142 | U-2 OS   |
| 3486 | ENSG00000110446 | HPA057642 | SiHa     |
| 3487 | ENSG00000110455 | HPA018873 | U-2 OS   |
| 3488 | ENSG00000110492 | HPA057126 | CAC0-2   |
| 3489 | ENSG00000110497 | HPA038535 | U-2 OS   |
| 3490 | ENSG00000110514 | HPA038568 | U-2 OS   |
| 3491 | ENSG00000110536 | HPA040348 | U-2 OS   |
| 3492 | ENSG00000110536 | HPA043932 | U-2 OS   |
| 3493 | ENSG00000110583 | HPA037816 | U-2 OS   |
| 3494 | ENSG00000110619 | HPA002383 | U-2 OS   |
| 3495 | ENSG00000110619 | HPA002384 | U-2 OS   |
| 3496 | ENSG00000110651 | CAB002507 | U-2 OS   |
| 3497 | ENSG00000110651 | HPA007234 | U-2 OS   |
| 3498 | ENSG00000110660 | HPA050695 | U-2 OS   |
| 3499 | ENSG00000110665 | HPA037607 | U-2 OS   |
| 3500 | ENSG00000110675 | HPA038435 | U-2 OS   |
| 3501 | ENSG00000110675 | HPA066479 | U-2 OS   |
| 3502 | ENSG00000110693 | HPA001923 | CAC0-2   |
| 3503 | ENSG00000110696 | HPA076406 | U-2 OS   |
| 3504 | ENSG00000110697 | HPA060227 | U-2 OS   |
| 3505 | ENSG00000110700 | HPA005985 | HEK 293  |
| 3506 | ENSG00000110711 | HPA050217 | U-2 OS   |
| 3507 | ENSG00000110713 | HPA074810 | U-2 OS   |
| 3508 | ENSG00000110717 | HPA018524 | U-2 OS   |
| 3509 | ENSG00000110719 | HPA038742 | U-2 OS   |
| 3510 | ENSG00000110721 | CAB072803 | U-2 OS   |
| 3511 | ENSG00000110768 | CAB004637 | U-2 OS   |
| 3512 | ENSG00000110768 | HPA046660 | U-2 OS   |
| 3513 | ENSG00000110786 | HPA072091 | U-2 OS   |
| 3514 | ENSG00000110801 | HPA040512 | U-2 OS   |
| 3515 | ENSG00000110801 | HPA044220 | U-2 OS   |
| 3516 | ENSG00000110811 | HPA043695 | U-2 OS   |
| 3517 | ENSG00000110841 | HPA001924 | U-2 OS   |
| 3518 | ENSG00000110844 | HPA038426 | U-2 OS   |

|      |                 |           |          |
|------|-----------------|-----------|----------|
| 3519 | ENSG00000110851 | HPA024322 | U-2 OS   |
| 3520 | ENSG00000110851 | HPA067437 | U-2 OS   |
| 3521 | ENSG00000110871 | HPA049487 | U-2 OS   |
| 3522 | ENSG00000110881 | HPA058870 | U-2 OS   |
| 3523 | ENSG00000110888 | HPA039746 | U-2 OS   |
| 3524 | ENSG00000110900 | HPA066789 | SH-SY5Y  |
| 3525 | ENSG00000110906 | HPA014273 | U-2 OS   |
| 3526 | ENSG00000110911 | HPA032140 | U-2 OS   |
| 3527 | ENSG00000110921 | HPA044110 | U-2 OS   |
| 3528 | ENSG00000110925 | HPA019914 | U-2 OS   |
| 3529 | ENSG00000110931 | HPA017389 | U-2 OS   |
| 3530 | ENSG00000110934 | HPA038666 | HEL      |
| 3531 | ENSG00000110944 | HPA001554 | U-2 OS   |
| 3532 | ENSG00000110955 | HPA001520 | U-2 OS   |
| 3533 | ENSG00000110955 | HPA001528 | U-2 OS   |
| 3534 | ENSG00000110958 | HPA038673 | U-2 OS   |
| 3535 | ENSG00000110975 | HPA055426 | RT4      |
| 3536 | ENSG00000110987 | HPA019762 | RT4      |
| 3537 | ENSG00000111011 | HPA040070 | U-2 OS   |
| 3538 | ENSG00000111011 | HPA048183 | A-431    |
| 3539 | ENSG00000111049 | HPA041691 | RH-30    |
| 3540 | ENSG00000111057 | HPA001605 | U-2 OS   |
| 3541 | ENSG00000111058 | HPA061517 | U-2 OS   |
| 3542 | ENSG00000111087 | CAB009460 | A549     |
| 3543 | ENSG00000111087 | HPA065172 | U-2 OS   |
| 3544 | ENSG00000111087 | HPA068903 | U-2 OS   |
| 3545 | ENSG00000111110 | HPA058777 | CACO-2   |
| 3546 | ENSG00000111142 | HPA019095 | U-2 OS   |
| 3547 | ENSG00000111144 | HPA008399 | A-431    |
| 3548 | ENSG00000111144 | HPA017017 | A-431    |
| 3549 | ENSG00000111145 | HPA001600 | U-2 OS   |
| 3550 | ENSG00000111181 | HPA034973 | CACO-2   |
| 3551 | ENSG00000111186 | HPA061991 | U-2 OS   |
| 3552 | ENSG00000111203 | HPA038664 | U-2 OS   |
| 3553 | ENSG00000111206 | CAB017832 | U-2 OS   |
| 3554 | ENSG00000111224 | HPA026895 | U-2 OS   |
| 3555 | ENSG00000111229 | HPA006550 | U-2 OS   |
| 3556 | ENSG00000111231 | HPA039764 | U-2 OS   |
| 3557 | ENSG00000111237 | HPA039748 | U-251 MG |
| 3558 | ENSG00000111245 | HPA019763 | U-2 OS   |
| 3559 | ENSG00000111247 | HPA051499 | U-2 OS   |
| 3560 | ENSG00000111252 | HPA005483 | U-2 OS   |
| 3561 | ENSG00000111261 | HPA007955 | U-2 OS   |
| 3562 | ENSG00000111261 | HPA007956 | U-2 OS   |
| 3563 | ENSG00000111266 | HPA020326 | U-2 OS   |
| 3564 | ENSG00000111269 | HPA043738 | U-2 OS   |
| 3565 | ENSG00000111276 | HPA059086 | A-431    |
| 3566 | ENSG00000111300 | HPA039322 | U-2 OS   |
| 3567 | ENSG00000111321 | CAB026202 | U-2 OS   |
| 3568 | ENSG00000111321 | HPA061617 | RT4      |
| 3569 | ENSG00000111325 | HPA040306 | U-2 OS   |
| 3570 | ENSG00000111328 | HPA057648 | MCF7     |
| 3571 | ENSG00000111328 | HPA068833 | U-2 OS   |
| 3572 | ENSG00000111331 | HPA041253 | U-2 OS   |
| 3573 | ENSG00000111331 | HPA041372 | U-2 OS   |

|      |                 |           |           |
|------|-----------------|-----------|-----------|
| 3574 | ENSG00000111335 | HPA003320 | SK-MEL-30 |
| 3575 | ENSG00000111339 | HPA075664 | Hep G2    |
| 3576 | ENSG00000111344 | HPA041650 | U-2 OS    |
| 3577 | ENSG00000111348 | CAB018584 | A-431     |
| 3578 | ENSG00000111358 | HPA004844 | U-2 OS    |
| 3579 | ENSG00000111361 | HPA049509 | U-2 OS    |
| 3580 | ENSG00000111364 | HPA039962 | U-2 OS    |
| 3581 | ENSG00000111364 | HPA044101 | U-2 OS    |
| 3582 | ENSG00000111404 | HPA041740 | U-2 OS    |
| 3583 | ENSG00000111424 | CAB004617 | U-2 OS    |
| 3584 | ENSG00000111424 | HPA047740 | U-2 OS    |
| 3585 | ENSG00000111424 | HPA072102 | PC-3      |
| 3586 | ENSG00000111432 | HPA014484 | U-2 OS    |
| 3587 | ENSG00000111432 | HPA014485 | U-2 OS    |
| 3588 | ENSG00000111445 | HPA041037 | U-2 OS    |
| 3589 | ENSG00000111450 | HPA038189 | U-2 OS    |
| 3590 | ENSG00000111452 | HPA042395 | A-431     |
| 3591 | ENSG00000111490 | HPA039772 | U-2 OS    |
| 3592 | ENSG00000111530 | HPA055748 | U-2 OS    |
| 3593 | ENSG00000111530 | HPA069053 | U-2 OS    |
| 3594 | ENSG00000111540 | HPA068337 | CACO-2    |
| 3595 | ENSG00000111554 | HPA041594 | A-431     |
| 3596 | ENSG00000111581 | HPA031679 | U-2 OS    |
| 3597 | ENSG00000111596 | HPA067711 | CACO-2    |
| 3598 | ENSG00000111602 | HPA060655 | U-2 OS    |
| 3599 | ENSG00000111605 | HPA039973 | U-2 OS    |
| 3600 | ENSG00000111615 | HPA043433 | U-2 OS    |
| 3601 | ENSG00000111615 | HPA051690 | U-2 OS    |
| 3602 | ENSG00000111639 | HPA039923 | A-431     |
| 3603 | ENSG00000111640 | HPA040067 | U-2 OS    |
| 3604 | ENSG00000111640 | HPA061280 | U-2 OS    |
| 3605 | ENSG00000111641 | HPA040119 | U-2 OS    |
| 3606 | ENSG00000111642 | HPA012008 | U-2 OS    |
| 3607 | ENSG00000111644 | HPA039082 | U-2 OS    |
| 3608 | ENSG00000111647 | HPA075150 | U-2 OS    |
| 3609 | ENSG00000111652 | HPA026915 | U-2 OS    |
| 3610 | ENSG00000111653 | HPA031817 | U-2 OS    |
| 3611 | ENSG00000111664 | HPA040736 | U-2 OS    |
| 3612 | ENSG00000111665 | HPA026587 | A-431     |
| 3613 | ENSG00000111666 | HPA067643 | U-2 OS    |
| 3614 | ENSG00000111667 | HPA006756 | U-2 OS    |
| 3615 | ENSG00000111669 | HPA050924 | MCF7      |
| 3616 | ENSG00000111669 | HPA053568 | U-2 OS    |
| 3617 | ENSG00000111670 | HPA014558 | SK-MEL-30 |
| 3618 | ENSG00000111674 | HPA068284 | U-2 OS    |
| 3619 | ENSG00000111674 | HPA068721 | U-2 OS    |
| 3620 | ENSG00000111676 | HPA031619 | U-2 OS    |
| 3621 | ENSG00000111678 | HPA046182 | U-2 OS    |
| 3622 | ENSG00000111678 | HPA066043 | U-2 OS    |
| 3623 | ENSG00000111679 | HPA001466 | U-2 OS    |
| 3624 | ENSG00000111696 | HPA041634 | U-2 OS    |
| 3625 | ENSG00000111700 | HPA004943 | U-2 OS    |
| 3626 | ENSG00000111707 | HPA040402 | U-2 OS    |
| 3627 | ENSG00000111711 | HPA055909 | U-251 MG  |
| 3628 | ENSG00000111716 | HPA019007 | U-2 OS    |



|      |                 |           |           |
|------|-----------------|-----------|-----------|
| 3629 | ENSG00000111725 | HPA004247 | U-2 OS    |
| 3630 | ENSG00000111725 | CAB005058 | U-2 OS    |
| 3631 | ENSG00000111726 | HPA039905 | U-2 OS    |
| 3632 | ENSG00000111727 | HPA006227 | U-2 OS    |
| 3633 | ENSG00000111731 | HPA046194 | RH-30     |
| 3634 | ENSG00000111752 | HPA006973 | U-2 OS    |
| 3635 | ENSG00000111775 | HPA062394 | U-2 OS    |
| 3636 | ENSG00000111780 | HPA062394 | U-2 OS    |
| 3637 | ENSG00000111783 | HPA050527 | AF22      |
| 3638 | ENSG00000111786 | HPA049849 | MCF7      |
| 3639 | ENSG00000111790 | HPA038696 | U-2 OS    |
| 3640 | ENSG00000111796 | HPA039113 | U-2 OS    |
| 3641 | ENSG00000111799 | HPA070695 | U-2 OS    |
| 3642 | ENSG00000111802 | HPA074011 | U-2 OS    |
| 3643 | ENSG00000111816 | HPA030479 | RT4       |
| 3644 | ENSG00000111817 | HPA014764 | U-2 OS    |
| 3645 | ENSG00000111817 | HPA052151 | U-2 OS    |
| 3646 | ENSG00000111834 | HPA031196 | U-2 OS    |
| 3647 | ENSG00000111834 | HPA031197 | A-431     |
| 3648 | ENSG00000111834 | HPA031198 | U-2 OS    |
| 3649 | ENSG00000111845 | HPA030111 | SK-MEL-30 |
| 3650 | ENSG00000111846 | HPA026776 | CACO-2    |
| 3651 | ENSG00000111850 | HPA067453 | U-2 OS    |
| 3652 | ENSG00000111859 | HPA039270 | U-2 OS    |
| 3653 | ENSG00000111863 | HPA048113 | CACO-2    |
| 3654 | ENSG00000111875 | HPA030502 | U-2 OS    |
| 3655 | ENSG00000111875 | HPA071495 | U-2 OS    |
| 3656 | ENSG00000111877 | HPA031137 | U-2 OS    |
| 3657 | ENSG00000111879 | HPA034572 | U-2 OS    |
| 3658 | ENSG00000111879 | HPA041955 | U-2 OS    |
| 3659 | ENSG00000111880 | HPA003750 | RH-30     |
| 3660 | ENSG00000111885 | HPA053198 | U-2 OS    |
| 3661 | ENSG00000111897 | HPA035738 | U-2 OS    |
| 3662 | ENSG00000111906 | HPA035677 | U-2 OS    |
| 3663 | ENSG00000111907 | HPA027916 | U-2 OS    |
| 3664 | ENSG00000111911 | HPA027914 | U-2 OS    |
| 3665 | ENSG00000111912 | HPA030292 | U-2 OS    |
| 3666 | ENSG00000111961 | HPA029947 | U-2 OS    |
| 3667 | ENSG00000111981 | HPA071005 | HEK 293   |
| 3668 | ENSG00000112029 | HPA029048 | U-2 OS    |
| 3669 | ENSG00000112039 | CAB014893 | U-2 OS    |
| 3670 | ENSG00000112062 | HPA051825 | U-2 OS    |
| 3671 | ENSG00000112077 | HPA046051 | HEL       |
| 3672 | ENSG00000112078 | HPA030092 | U-2 OS    |
| 3673 | ENSG00000112079 | HPA051324 | U-2 OS    |
| 3674 | ENSG00000112081 | CAB012986 | U-2 OS    |
| 3675 | ENSG00000112096 | HPA001814 | U-2 OS    |
| 3676 | ENSG00000112096 | CAB002013 | U-2 OS    |
| 3677 | ENSG00000112118 | CAB002162 | U-2 OS    |
| 3678 | ENSG00000112118 | HPA004790 | U-2 OS    |
| 3679 | ENSG00000112130 | HPA064925 | U-2 OS    |
| 3680 | ENSG00000112137 | HPA029756 | RH-30     |
| 3681 | ENSG00000112139 | HPA050382 | U-2 OS    |
| 3682 | ENSG00000112144 | HPA000791 | U-2 OS    |
| 3683 | ENSG00000112146 | HPA064246 | SiHa      |

|      |                 |           |          |
|------|-----------------|-----------|----------|
| 3684 | ENSG00000112159 | HPA029666 | U-2 OS   |
| 3685 | ENSG00000112167 | HPA007959 | U-2 OS   |
| 3686 | ENSG00000112182 | HPA058384 | U-2 OS   |
| 3687 | ENSG00000112183 | HPA066927 | U-2 OS   |
| 3688 | ENSG00000112183 | HPA067231 | RH-30    |
| 3689 | ENSG00000112186 | HPA050530 | U-2 OS   |
| 3690 | ENSG00000112200 | HPA028838 | U-2 OS   |
| 3691 | ENSG00000112208 | HPA019918 | A-431    |
| 3692 | ENSG00000112210 | HPA029135 | U-2 OS   |
| 3693 | ENSG00000112210 | HPA029136 | U-2 OS   |
| 3694 | ENSG00000112218 | HPA039103 | U-2 OS   |
| 3695 | ENSG00000112234 | HPA029140 | U-2 OS   |
| 3696 | ENSG00000112237 | CAB010499 | U-2 OS   |
| 3697 | ENSG00000112237 | HPA069322 | RT4      |
| 3698 | ENSG00000112242 | HPA029779 | U-2 OS   |
| 3699 | ENSG00000112242 | HPA065012 | U-2 OS   |
| 3700 | ENSG00000112246 | HPA024385 | HEK 293  |
| 3701 | ENSG00000112249 | HPA031608 | U-2 OS   |
| 3702 | ENSG00000112249 | HPA031609 | U-2 OS   |
| 3703 | ENSG00000112276 | HPA014788 | RH-30    |
| 3704 | ENSG00000112282 | HPA070341 | U-2 OS   |
| 3705 | ENSG00000112294 | HPA029716 | CACO-2   |
| 3706 | ENSG00000112297 | CAB026378 | U-2 OS   |
| 3707 | ENSG00000112297 | HPA030948 | U-2 OS   |
| 3708 | ENSG00000112304 | HPA019881 | A-431    |
| 3709 | ENSG00000112305 | HPA030574 | U-2 OS   |
| 3710 | ENSG00000112306 | HPA006365 | U-2 OS   |
| 3711 | ENSG00000112308 | HPA030566 | U-2 OS   |
| 3712 | ENSG00000112312 | CAB047328 | U-2 OS   |
| 3713 | ENSG00000112312 | HPA049977 | U-2 OS   |
| 3714 | ENSG00000112312 | HPA054597 | U-2 OS   |
| 3715 | ENSG00000112319 | HPA004805 | U-2 OS   |
| 3716 | ENSG00000112320 | HPA029242 | U-2 OS   |
| 3717 | ENSG00000112333 | HPA036954 | U-251 MG |
| 3718 | ENSG00000112339 | HPA029728 | U-2 OS   |
| 3719 | ENSG00000112339 | HPA029729 | U-2 OS   |
| 3720 | ENSG00000112343 | HPA031685 | U-2 OS   |
| 3721 | ENSG00000112357 | HPA049202 | U-2 OS   |
| 3722 | ENSG00000112365 | HPA017872 | U-2 OS   |
| 3723 | ENSG00000112365 | HPA049003 | MCF7     |
| 3724 | ENSG00000112367 | HPA068859 | U-2 OS   |
| 3725 | ENSG00000112394 | HPA016860 | CACO-2   |
| 3726 | ENSG00000112425 | HPA053643 | U-2 OS   |
| 3727 | ENSG00000112425 | HPA055468 | U-2 OS   |
| 3728 | ENSG00000112473 | HPA053999 | U-2 OS   |
| 3729 | ENSG00000112511 | HPA031038 | U-2 OS   |
| 3730 | ENSG00000112514 | CAB016787 | U-2 OS   |
| 3731 | ENSG00000112531 | HPA019123 | U-2 OS   |
| 3732 | ENSG00000112531 | CAB022602 | U-2 OS   |
| 3733 | ENSG00000112539 | HPA029789 | U-2 OS   |
| 3734 | ENSG00000112559 | HPA049973 | U-2 OS   |
| 3735 | ENSG00000112561 | HPA049532 | CACO-2   |
| 3736 | ENSG00000112576 | HPA071369 | U-2 OS   |
| 3737 | ENSG00000112578 | HPA031217 | U-2 OS   |
| 3738 | ENSG00000112578 | HPA031219 | U-2 OS   |

|      |                 |           |             |
|------|-----------------|-----------|-------------|
| 3739 | ENSG00000112584 | HPA037518 | U-2 OS      |
| 3740 | ENSG00000112592 | CAB009442 | U-2 OS      |
| 3741 | ENSG00000112592 | HPA049805 | MCF7        |
| 3742 | ENSG00000112624 | HPA029390 | U-2 OS      |
| 3743 | ENSG00000112624 | HPA029391 | U-2 OS      |
| 3744 | ENSG00000112640 | HPA029045 | U-2 OS      |
| 3745 | ENSG00000112640 | HPA029046 | U-2 OS      |
| 3746 | ENSG00000112651 | HPA064814 | CACO-2      |
| 3747 | ENSG00000112658 | CAB005416 | U-2 OS      |
| 3748 | ENSG00000112659 | HPA052004 | U-2 OS      |
| 3749 | ENSG00000112667 | HPA029675 | U-2 OS      |
| 3750 | ENSG00000112679 | HPA031394 | U-2 OS      |
| 3751 | ENSG00000112685 | HPA032093 | U-2 OS      |
| 3752 | ENSG00000112697 | HPA014561 | U-2 OS      |
| 3753 | ENSG00000112701 | HPA024376 | U-2 OS      |
| 3754 | ENSG00000112739 | HPA020638 | U-2 OS      |
| 3755 | ENSG00000112742 | CAB010166 | U-2 OS      |
| 3756 | ENSG00000112761 | HPA062438 | U-2 OS      |
| 3757 | ENSG00000112761 | HPA078340 | U-2 OS      |
| 3758 | ENSG00000112763 | HPA019208 | U-2 OS      |
| 3759 | ENSG00000112769 | HPA015693 | U-2 OS      |
| 3760 | ENSG00000112773 | HPA051067 | CACO-2      |
| 3761 | ENSG00000112782 | HPA074371 | U-2 OS      |
| 3762 | ENSG00000112787 | HPA049880 | U-2 OS      |
| 3763 | ENSG00000112796 | HPA016902 | RPTEC TERT1 |
| 3764 | ENSG00000112851 | HPA048606 | U-2 OS      |
| 3765 | ENSG00000112851 | HPA059863 | U-2 OS      |
| 3766 | ENSG00000112852 | HPA007548 | RH-30       |
| 3767 | ENSG00000112855 | HPA035941 | U-2 OS      |
| 3768 | ENSG00000112877 | HPA074879 | U-2 OS      |
| 3769 | ENSG00000112893 | CAB022377 | U-2 OS      |
| 3770 | ENSG00000112941 | HPA045487 | U-2 OS      |
| 3771 | ENSG00000112941 | HPA046742 | U-2 OS      |
| 3772 | ENSG00000112964 | HPA057705 | U-2 OS      |
| 3773 | ENSG00000112972 | HPA036913 | U-2 OS      |
| 3774 | ENSG00000112972 | HPA036914 | U-2 OS      |
| 3775 | ENSG00000112977 | HPA029456 | A-431       |
| 3776 | ENSG00000112981 | HPA035648 | U-2 OS      |
| 3777 | ENSG00000112983 | HPA001841 | U-2 OS      |
| 3778 | ENSG00000112984 | HPA036910 | U-2 OS      |
| 3779 | ENSG00000112992 | CAB004975 | U-2 OS      |
| 3780 | ENSG00000112992 | HPA066564 | U-2 OS      |
| 3781 | ENSG00000113013 | HPA000898 | U-2 OS      |
| 3782 | ENSG00000113013 | CAB005219 | U-2 OS      |
| 3783 | ENSG00000113048 | HPA071751 | U-2 OS      |
| 3784 | ENSG00000113068 | HPA006499 | U-2 OS      |
| 3785 | ENSG00000113083 | HPA043930 | U-2 OS      |
| 3786 | ENSG00000113108 | HPA005571 | U-2 OS      |
| 3787 | ENSG00000113119 | HPA037474 | U-2 OS      |
| 3788 | ENSG00000113140 | HPA002989 | RH-30       |
| 3789 | ENSG00000113141 | HPA048798 | U-2 OS      |
| 3790 | ENSG00000113163 | HPA035645 | U-2 OS      |
| 3791 | ENSG00000113163 | HPA042608 | A-431       |
| 3792 | ENSG00000113194 | HPA065968 | U-2 OS      |
| 3793 | ENSG00000113194 | HPA073828 | RT4         |

|      |                 |           |          |
|------|-----------------|-----------|----------|
| 3794 | ENSG00000113196 | HPA040925 | U-2 OS   |
| 3795 | ENSG00000113205 | HPA050296 | U-2 OS   |
| 3796 | ENSG00000113211 | HPA029566 | A-431    |
| 3797 | ENSG00000113231 | HPA036911 | U-2 OS   |
| 3798 | ENSG00000113240 | HPA043746 | U-2 OS   |
| 3799 | ENSG00000113248 | HPA074676 | AF22     |
| 3800 | ENSG00000113249 | HPA007173 | CACO-2   |
| 3801 | ENSG00000113273 | HPA037770 | U-2 OS   |
| 3802 | ENSG00000113282 | HPA043280 | U-2 OS   |
| 3803 | ENSG00000113296 | HPA042426 | U-2 OS   |
| 3804 | ENSG00000113300 | HPA044568 | U-2 OS   |
| 3805 | ENSG00000113312 | HPA036557 | U-2 OS   |
| 3806 | ENSG00000113312 | HPA057502 | U-2 OS   |
| 3807 | ENSG00000113318 | HPA036081 | U-2 OS   |
| 3808 | ENSG00000113319 | HPA018679 | CACO-2   |
| 3809 | ENSG00000113328 | CAB000350 | U-2 OS   |
| 3810 | ENSG00000113356 | CAB010109 | U-2 OS   |
| 3811 | ENSG00000113356 | HPA052658 | U-2 OS   |
| 3812 | ENSG00000113361 | HPA007403 | EF0-21   |
| 3813 | ENSG00000113368 | CAB005269 | U-251 MG |
| 3814 | ENSG00000113368 | HPA050524 | U-2 OS   |
| 3815 | ENSG00000113368 | CAB079757 | U-2 OS   |
| 3816 | ENSG00000113384 | HPA055841 | U-2 OS   |
| 3817 | ENSG00000113387 | HPA001311 | U-2 OS   |
| 3818 | ENSG00000113387 | CAB015351 | U-2 OS   |
| 3819 | ENSG00000113389 | HPA052702 | A-431    |
| 3820 | ENSG00000113391 | HPA012299 | U-2 OS   |
| 3821 | ENSG00000113391 | HPA045505 | A-431    |
| 3822 | ENSG00000113396 | HPA008987 | MCF7     |
| 3823 | ENSG00000113407 | HPA037425 | U-2 OS   |
| 3824 | ENSG00000113430 | HPA064094 | U-2 OS   |
| 3825 | ENSG00000113448 | HPA045895 | HeLa     |
| 3826 | ENSG00000113456 | HPA006692 | U-2 OS   |
| 3827 | ENSG00000113460 | HPA039614 | U-2 OS   |
| 3828 | ENSG00000113504 | HPA041652 | U-2 OS   |
| 3829 | ENSG00000113522 | CAB022103 | A-431    |
| 3830 | ENSG00000113522 | HPA052291 | A-431    |
| 3831 | ENSG00000113532 | HPA053995 | U-2 OS   |
| 3832 | ENSG00000113552 | HPA000499 | U-2 OS   |
| 3833 | ENSG00000113558 | HPA053745 | U-2 OS   |
| 3834 | ENSG00000113558 | HPA058134 | MCF7     |
| 3835 | ENSG00000113569 | HPA037775 | U-2 OS   |
| 3836 | ENSG00000113578 | HPA003265 | U-2 OS   |
| 3837 | ENSG00000113580 | HPA004248 | A-431    |
| 3838 | ENSG00000113580 | CAB010435 | U-2 OS   |
| 3839 | ENSG00000113583 | HPA011951 | U-2 OS   |
| 3840 | ENSG00000113593 | HPA019360 | U-2 OS   |
| 3841 | ENSG00000113594 | HPA004478 | U-2 OS   |
| 3842 | ENSG00000113594 | CAB010252 | U-2 OS   |
| 3843 | ENSG00000113597 | HPA037777 | U-2 OS   |
| 3844 | ENSG00000113615 | HPA056825 | U-2 OS   |
| 3845 | ENSG00000113621 | HPA015483 | U-2 OS   |
| 3846 | ENSG00000113638 | HPA038252 | U-2 OS   |
| 3847 | ENSG00000113638 | HPA038253 | U-2 OS   |
| 3848 | ENSG00000113643 | HPA003979 | U-2 OS   |

|      |                 |           |           |
|------|-----------------|-----------|-----------|
| 3849 | ENSG00000113643 | HPA004130 | U-2 OS    |
| 3850 | ENSG00000113645 | HPA038016 | U-2 OS    |
| 3851 | ENSG00000113648 | HPA050962 | U-2 OS    |
| 3852 | ENSG00000113649 | HPA069752 | U-2 OS    |
| 3853 | ENSG00000113649 | HPA069808 | U-2 OS    |
| 3854 | ENSG00000113657 | HPA010948 | U-2 OS    |
| 3855 | ENSG00000113658 | HPA058931 | U-2 OS    |
| 3856 | ENSG00000113712 | HPA051334 | CAC0-2    |
| 3857 | ENSG00000113716 | HPA005967 | U-2 OS    |
| 3858 | ENSG00000113719 | HPA018666 | U-2 OS    |
| 3859 | ENSG00000113719 | HPA018900 | U-2 OS    |
| 3860 | ENSG00000113721 | HPA028499 | U-2 OS    |
| 3861 | ENSG00000113734 | HPA008149 | U-2 OS    |
| 3862 | ENSG00000113739 | HPA045372 | U-2 OS    |
| 3863 | ENSG00000113742 | HPA038394 | U-2 OS    |
| 3864 | ENSG00000113758 | HPA051452 | U-2 OS    |
| 3865 | ENSG00000113763 | HPA071450 | U-2 OS    |
| 3866 | ENSG00000113810 | HPA029449 | U-2 OS    |
| 3867 | ENSG00000113811 | HPA008196 | A-431     |
| 3868 | ENSG00000113812 | HPA065236 | U-2 OS    |
| 3869 | ENSG00000113845 | HPA053214 | U-2 OS    |
| 3870 | ENSG00000113845 | HPA055846 | U-2 OS    |
| 3871 | ENSG00000113916 | HPA004899 | A-431     |
| 3872 | ENSG00000113916 | HPA050645 | RT4       |
| 3873 | ENSG00000113924 | HPA052359 | Hep G2    |
| 3874 | ENSG00000113966 | HPA019361 | U-2 OS    |
| 3875 | ENSG00000114019 | HPA063027 | CAC0-2    |
| 3876 | ENSG00000114021 | HPA036999 | U-2 OS    |
| 3877 | ENSG00000114023 | HPA035856 | A-431     |
| 3878 | ENSG00000114023 | HPA058113 | U-2 OS    |
| 3879 | ENSG00000114026 | HPA027514 | U-2 OS    |
| 3880 | ENSG00000114026 | CAB047301 | U-2 OS    |
| 3881 | ENSG00000114030 | HPA053627 | U-2 OS    |
| 3882 | ENSG00000114030 | HPA063426 | U-2 OS    |
| 3883 | ENSG00000114062 | HPA039410 | U-2 OS    |
| 3884 | ENSG00000114098 | HPA044869 | U-2 OS    |
| 3885 | ENSG00000114107 | HPA036941 | U-2 OS    |
| 3886 | ENSG00000114107 | HPA036942 | U-2 OS    |
| 3887 | ENSG00000114113 | HPA035866 | CAC0-2    |
| 3888 | ENSG00000114115 | HPA007338 | U-2 OS    |
| 3889 | ENSG00000114120 | HPA027036 | U-2 OS    |
| 3890 | ENSG00000114125 | HPA036995 | U-2 OS    |
| 3891 | ENSG00000114126 | CAB018396 | U-2 OS    |
| 3892 | ENSG00000114126 | HPA070399 | U-2 OS    |
| 3893 | ENSG00000114127 | HPA035006 | U-2 OS    |
| 3894 | ENSG00000114166 | HPA002470 | SK-MEL-30 |
| 3895 | ENSG00000114268 | HPA047719 | U-2 OS    |
| 3896 | ENSG00000114279 | HPA071557 | U-2 OS    |
| 3897 | ENSG00000114315 | HPA066929 | RT4       |
| 3898 | ENSG00000114316 | HPA018499 | U-2 OS    |
| 3899 | ENSG00000114331 | HPA034808 | U-2 OS    |
| 3900 | ENSG00000114346 | HPA036363 | U-2 OS    |
| 3901 | ENSG00000114346 | HPA053261 | U-2 OS    |
| 3902 | ENSG00000114353 | HPA007704 | A-431     |
| 3903 | ENSG00000114354 | HPA019473 | U-2 OS    |

|      |                 |           |        |
|------|-----------------|-----------|--------|
| 3904 | ENSG00000114354 | HPA052206 | U-2 OS |
| 3905 | ENSG00000114374 | HPA057687 | RT4    |
| 3906 | ENSG00000114383 | HPA030116 | U-2 OS |
| 3907 | ENSG00000114388 | HPA038196 | A-431  |
| 3908 | ENSG00000114388 | HPA038197 | A-431  |
| 3909 | ENSG00000114391 | HPA051653 | U-2 OS |
| 3910 | ENSG00000114405 | HPA048286 | U-2 OS |
| 3911 | ENSG00000114416 | HPA018246 | U-2 OS |
| 3912 | ENSG00000114416 | HPA055475 | U-2 OS |
| 3913 | ENSG00000114423 | HPA019880 | U-2 OS |
| 3914 | ENSG00000114439 | HPA006049 | U-2 OS |
| 3915 | ENSG00000114439 | HPA050646 | U-2 OS |
| 3916 | ENSG00000114446 | HPA035514 | U-2 OS |
| 3917 | ENSG00000114450 | CAB018383 | U-2 OS |
| 3918 | ENSG00000114450 | HPA040736 | U-2 OS |
| 3919 | ENSG00000114473 | HPA042787 | U-2 OS |
| 3920 | ENSG00000114480 | HPA038073 | U-2 OS |
| 3921 | ENSG00000114491 | HPA036178 | U-2 OS |
| 3922 | ENSG00000114503 | HPA044850 | U-2 OS |
| 3923 | ENSG00000114503 | HPA062483 | U-2 OS |
| 3924 | ENSG00000114544 | HPA045847 | U-2 OS |
| 3925 | ENSG00000114554 | HPA007499 | U-2 OS |
| 3926 | ENSG00000114554 | CAB012483 | U-2 OS |
| 3927 | ENSG00000114573 | HPA035083 | U-2 OS |
| 3928 | ENSG00000114573 | HPA035084 | U-2 OS |
| 3929 | ENSG00000114626 | HPA035022 | U-2 OS |
| 3930 | ENSG00000114626 | HPA035023 | U-2 OS |
| 3931 | ENSG00000114631 | HPA042265 | U-2 OS |
| 3932 | ENSG00000114646 | HPA049529 | U-2 OS |
| 3933 | ENSG00000114646 | HPA067818 | U-2 OS |
| 3934 | ENSG00000114648 | HPA035028 | U-2 OS |
| 3935 | ENSG00000114670 | HPA016908 | U-2 OS |
| 3936 | ENSG00000114698 | HPA002276 | U-2 OS |
| 3937 | ENSG00000114737 | HPA040812 | CACO-2 |
| 3938 | ENSG00000114738 | HPA058275 | U-2 OS |
| 3939 | ENSG00000114739 | HPA007398 | U-2 OS |
| 3940 | ENSG00000114742 | HPA038421 | U-2 OS |
| 3941 | ENSG00000114744 | HPA044190 | A-431  |
| 3942 | ENSG00000114745 | HPA056283 | U-2 OS |
| 3943 | ENSG00000114767 | HPA038798 | U-2 OS |
| 3944 | ENSG00000114770 | HPA044067 | RT4    |
| 3945 | ENSG00000114779 | HPA036444 | U-2 OS |
| 3946 | ENSG00000114786 | HPA038153 | Hep G2 |
| 3947 | ENSG00000114790 | HPA049195 | U-2 OS |
| 3948 | ENSG00000114805 | HPA036176 | U-2 OS |
| 3949 | ENSG00000114805 | HPA057978 | U-2 OS |
| 3950 | ENSG00000114853 | HPA074057 | U-2 OS |
| 3951 | ENSG00000114854 | HPA044848 | U-2 OS |
| 3952 | ENSG00000114857 | HPA022120 | U-2 OS |
| 3953 | ENSG00000114857 | HPA051576 | U-2 OS |
| 3954 | ENSG00000114859 | HPA014545 | CACO-2 |
| 3955 | ENSG00000114861 | HPA003876 | U-2 OS |
| 3956 | ENSG00000114861 | CAB011501 | U-2 OS |
| 3957 | ENSG00000114867 | HPA028487 | U-2 OS |
| 3958 | ENSG00000114867 | HPA043866 | U-2 OS |

|      |                 |           |          |
|------|-----------------|-----------|----------|
| 3959 | ENSG00000114902 | HPA055273 | U-2 OS   |
| 3960 | ENSG00000114904 | HPA058543 | RT4      |
| 3961 | ENSG00000114923 | HPA063498 | U-2 OS   |
| 3962 | ENSG00000114942 | HPA035029 | U-2 OS   |
| 3963 | ENSG00000114978 | HPA071690 | RT4      |
| 3964 | ENSG00000114982 | HPA035017 | U-2 OS   |
| 3965 | ENSG00000114993 | HPA030259 | U-2 OS   |
| 3966 | ENSG00000114999 | HPA066819 | U-2 OS   |
| 3967 | ENSG00000115020 | HPA042558 | SH-SY5Y  |
| 3968 | ENSG00000115041 | HPA066717 | U-2 OS   |
| 3969 | ENSG00000115053 | CAB004210 | U-2 OS   |
| 3970 | ENSG00000115053 | HPA023981 | U-2 OS   |
| 3971 | ENSG00000115053 | HPA071110 | U-2 OS   |
| 3972 | ENSG00000115073 | HPA047443 | U-2 OS   |
| 3973 | ENSG00000115084 | HPA034828 | A-431    |
| 3974 | ENSG00000115107 | HPA050510 | U-2 OS   |
| 3975 | ENSG00000115109 | HPA037563 | U-2 OS   |
| 3976 | ENSG00000115109 | HPA037564 | U-2 OS   |
| 3977 | ENSG00000115112 | HPA029708 | RT4      |
| 3978 | ENSG00000115128 | HPA034829 | U-2 OS   |
| 3979 | ENSG00000115129 | HPA022012 | U-251 MG |
| 3980 | ENSG00000115137 | HPA036815 | U-2 OS   |
| 3981 | ENSG00000115145 | HPA035529 | U-2 OS   |
| 3982 | ENSG00000115163 | HPA073086 | U-2 OS   |
| 3983 | ENSG00000115165 | HPA007191 | U-2 OS   |
| 3984 | ENSG00000115170 | HPA046514 | U-2 OS   |
| 3985 | ENSG00000115194 | HPA067637 | U-2 OS   |
| 3986 | ENSG00000115207 | HPA008274 | U-2 OS   |
| 3987 | ENSG00000115211 | HPA039993 | CACO-2   |
| 3988 | ENSG00000115216 | CAB033078 | U-251 MG |
| 3989 | ENSG00000115221 | HPA023626 | RT4      |
| 3990 | ENSG00000115226 | HPA063581 | U-2 OS   |
| 3991 | ENSG00000115232 | HPA074961 | BJ       |
| 3992 | ENSG00000115233 | HPA002114 | U-2 OS   |
| 3993 | ENSG00000115233 | HPA003828 | CACO-2   |
| 3994 | ENSG00000115234 | HPA043867 | U-2 OS   |
| 3995 | ENSG00000115241 | HPA035530 | U-2 OS   |
| 3996 | ENSG00000115241 | HPA035531 | U-2 OS   |
| 3997 | ENSG00000115252 | HPA022151 | U-2 OS   |
| 3998 | ENSG00000115255 | HPA048015 | Hep G2   |
| 3999 | ENSG00000115263 | HPA036760 | U-2 OS   |
| 4000 | ENSG00000115266 | HPA078002 | U-2 OS   |
| 4001 | ENSG00000115268 | HPA054510 | CACO-2   |
| 4002 | ENSG00000115271 | HPA035033 | U-2 OS   |
| 4003 | ENSG00000115271 | HPA035034 | U-2 OS   |
| 4004 | ENSG00000115274 | HPA070644 | U-2 OS   |
| 4005 | ENSG00000115275 | HPA011322 | U-2 OS   |
| 4006 | ENSG00000115282 | HPA041783 | U-2 OS   |
| 4007 | ENSG00000115289 | HPA011356 | U-2 OS   |
| 4008 | ENSG00000115289 | HPA069156 | U-2 OS   |
| 4009 | ENSG00000115290 | HPA035052 | A549     |
| 4010 | ENSG00000115295 | HPA043366 | U-2 OS   |
| 4011 | ENSG00000115295 | HPA056246 | HeLa     |
| 4012 | ENSG00000115297 | HPA062254 | U-2 OS   |
| 4013 | ENSG00000115306 | HPA012685 | A-431    |

|      |                 |           |         |
|------|-----------------|-----------|---------|
| 4014 | ENSG00000115307 | HPA007674 | U-2 OS  |
| 4015 | ENSG00000115310 | CAB005388 | U-2 OS  |
| 4016 | ENSG00000115310 | HPA023977 | U-2 OS  |
| 4017 | ENSG00000115317 | HPA006602 | U-2 OS  |
| 4018 | ENSG00000115325 | HPA048561 | U-2 OS  |
| 4019 | ENSG00000115339 | HPA007613 | RT4     |
| 4020 | ENSG00000115350 | HPA054979 | U-2 OS  |
| 4021 | ENSG00000115363 | HPA008055 | U-2 OS  |
| 4022 | ENSG00000115364 | HPA046805 | U-2 OS  |
| 4023 | ENSG00000115365 | HPA034994 | U-2 OS  |
| 4024 | ENSG00000115368 | HPA038199 | U-2 OS  |
| 4025 | ENSG00000115380 | HPA049806 | U-2 OS  |
| 4026 | ENSG00000115380 | HPA071588 | A-431   |
| 4027 | ENSG00000115392 | HPA036685 | U-2 OS  |
| 4028 | ENSG00000115415 | HPA000931 | U-2 OS  |
| 4029 | ENSG00000115415 | HPA000982 | A-431   |
| 4030 | ENSG00000115419 | HPA036223 | SiHa    |
| 4031 | ENSG00000115421 | HPA035349 | U-2 OS  |
| 4032 | ENSG00000115421 | HPA035350 | U-2 OS  |
| 4033 | ENSG00000115425 | HPA021593 | U-2 OS  |
| 4034 | ENSG00000115457 | HPA077723 | U-2 OS  |
| 4035 | ENSG00000115459 | HPA012126 | U-2 OS  |
| 4036 | ENSG00000115461 | HPA059827 | BJ      |
| 4037 | ENSG00000115464 | HPA070764 | U-2 OS  |
| 4038 | ENSG00000115468 | HPA049331 | U-2 OS  |
| 4039 | ENSG00000115468 | HPA056959 | HEK 293 |
| 4040 | ENSG00000115484 | HPA029349 | U-2 OS  |
| 4041 | ENSG00000115504 | HPA035468 | U-2 OS  |
| 4042 | ENSG00000115504 | HPA035469 | U-2 OS  |
| 4043 | ENSG00000115507 | CAB012341 | U-2 OS  |
| 4044 | ENSG00000115514 | HPA031846 | U-2 OS  |
| 4045 | ENSG00000115520 | HPA046057 | CACO-2  |
| 4046 | ENSG00000115524 | HPA050275 | U-2 OS  |
| 4047 | ENSG00000115525 | HPA068928 | RT4     |
| 4048 | ENSG00000115526 | HPA051545 | U-2 OS  |
| 4049 | ENSG00000115539 | HPA018469 | U-2 OS  |
| 4050 | ENSG00000115539 | HPA027094 | U-2 OS  |
| 4051 | ENSG00000115548 | HPA055543 | A-431   |
| 4052 | ENSG00000115548 | HPA065162 | U-2 OS  |
| 4053 | ENSG00000115556 | HPA038140 | U-2 OS  |
| 4054 | ENSG00000115568 | HPA049594 | U-2 OS  |
| 4055 | ENSG00000115594 | HPA001237 | A-431   |
| 4056 | ENSG00000115594 | CAB007779 | U-2 OS  |
| 4057 | ENSG00000115602 | HPA007406 | U-2 OS  |
| 4058 | ENSG00000115604 | HPA007615 | U-2 OS  |
| 4059 | ENSG00000115616 | HPA035121 | U-2 OS  |
| 4060 | ENSG00000115641 | HPA005922 | U-2 OS  |
| 4061 | ENSG00000115641 | HPA006028 | U-2 OS  |
| 4062 | ENSG00000115657 | HPA046723 | U-2 OS  |
| 4063 | ENSG00000115657 | HPA058011 | U-2 OS  |
| 4064 | ENSG00000115661 | HPA029450 | A-431   |
| 4065 | ENSG00000115665 | HPA046105 | RT4     |
| 4066 | ENSG00000115677 | HPA004189 | U-2 OS  |
| 4067 | ENSG00000115685 | HPA034500 | U-2 OS  |
| 4068 | ENSG00000115687 | HPA021079 | U-2 OS  |



|      |                 |           |        |
|------|-----------------|-----------|--------|
| 4069 | ENSG00000115738 | HPA027612 | U-2 OS |
| 4070 | ENSG00000115750 | HPA071254 | U-2 OS |
| 4071 | ENSG00000115758 | CAB035996 | U-2 OS |
| 4072 | ENSG00000115760 | HPA074409 | U-2 OS |
| 4073 | ENSG00000115760 | HPA074738 | U-2 OS |
| 4074 | ENSG00000115761 | HPA035286 | U-2 OS |
| 4075 | ENSG00000115806 | HPA035274 | U-2 OS |
| 4076 | ENSG00000115806 | HPA035275 | U-2 OS |
| 4077 | ENSG00000115806 | CAB075758 | U-2 OS |
| 4078 | ENSG00000115808 | HPA017286 | U-2 OS |
| 4079 | ENSG00000115816 | HPA052065 | U-2 OS |
| 4080 | ENSG00000115825 | HPA029529 | U-2 OS |
| 4081 | ENSG00000115827 | HPA055040 | U-2 OS |
| 4082 | ENSG00000115828 | HPA008406 | U-2 OS |
| 4083 | ENSG00000115839 | HPA034495 | U-2 OS |
| 4084 | ENSG00000115840 | HPA035333 | U-2 OS |
| 4085 | ENSG00000115841 | HPA034706 | U-2 OS |
| 4086 | ENSG00000115844 | HPA056965 | U-2 OS |
| 4087 | ENSG00000115866 | HPA020451 | U-2 OS |
| 4088 | ENSG00000115875 | HPA043850 | U-2 OS |
| 4089 | ENSG00000115875 | HPA056926 | U-2 OS |
| 4090 | ENSG00000115884 | HPA006185 | U-2 OS |
| 4091 | ENSG00000115902 | HPA034963 | U-2 OS |
| 4092 | ENSG00000115902 | HPA034964 | A-431  |
| 4093 | ENSG00000115904 | CAB005396 | U-2 OS |
| 4094 | ENSG00000115919 | HPA031686 | A549   |
| 4095 | ENSG00000115935 | HPA070706 | U-2 OS |
| 4096 | ENSG00000115942 | CAB003693 | U-2 OS |
| 4097 | ENSG00000115942 | HPA073881 | U-2 OS |
| 4098 | ENSG00000115944 | HPA059124 | CACO-2 |
| 4099 | ENSG00000115944 | CAB073545 | U-2 OS |
| 4100 | ENSG00000115946 | HPA056928 | U-2 OS |
| 4101 | ENSG00000115947 | HPA064562 | U-2 OS |
| 4102 | ENSG00000115956 | HPA057341 | U-2 OS |
| 4103 | ENSG00000115966 | CAB003769 | U-2 OS |
| 4104 | ENSG00000115966 | HPA022134 | U-2 OS |
| 4105 | ENSG00000115970 | HPA035191 | U-2 OS |
| 4106 | ENSG00000115977 | HPA017931 | U-2 OS |
| 4107 | ENSG00000115977 | HPA020289 | U-2 OS |
| 4108 | ENSG00000115993 | HPA062163 | U-2 OS |
| 4109 | ENSG00000115998 | HPA031840 | A549   |
| 4110 | ENSG00000115998 | HPA031841 | U-2 OS |
| 4111 | ENSG00000116001 | HPA056961 | U-2 OS |
| 4112 | ENSG00000116014 | HPA071913 | Hep G2 |
| 4113 | ENSG00000116016 | HPA031200 | RT4    |
| 4114 | ENSG00000116016 | HPA069697 | RT4    |
| 4115 | ENSG00000116017 | HPA076330 | CACO-2 |
| 4116 | ENSG00000116030 | HPA056956 | U-2 OS |
| 4117 | ENSG00000116031 | HPA011216 | U-2 OS |
| 4118 | ENSG00000116035 | HPA009708 | MCF7   |
| 4119 | ENSG00000116039 | HPA031847 | U-2 OS |
| 4120 | ENSG00000116044 | HPA002990 | U-2 OS |
| 4121 | ENSG00000116044 | HPA043438 | U-2 OS |
| 4122 | ENSG00000116062 | HPA028376 | U-2 OS |
| 4123 | ENSG00000116095 | HPA034496 | U-2 OS |

|      |                 |           |        |
|------|-----------------|-----------|--------|
| 4124 | ENSG00000116095 | HPA034497 | U-2 OS |
| 4125 | ENSG00000116096 | HPA039505 | U-2 OS |
| 4126 | ENSG00000116117 | HPA035283 | CAC0-2 |
| 4127 | ENSG00000116120 | HPA036678 | U-2 OS |
| 4128 | ENSG00000116127 | HPA035276 | RH-30  |
| 4129 | ENSG00000116127 | HPA035277 | U-2 OS |
| 4130 | ENSG00000116127 | HPA043200 | U-2 OS |
| 4131 | ENSG00000116128 | HPA020274 | U-2 OS |
| 4132 | ENSG00000116132 | HPA063566 | U-2 OS |
| 4133 | ENSG00000116138 | HPA043643 | U-2 OS |
| 4134 | ENSG00000116151 | HPA005858 | MCF7   |
| 4135 | ENSG00000116161 | HPA025753 | U-2 OS |
| 4136 | ENSG00000116161 | HPA057038 | U-2 OS |
| 4137 | ENSG00000116171 | HPA027135 | A-431  |
| 4138 | ENSG00000116171 | HPA027317 | U-2 OS |
| 4139 | ENSG00000116183 | HPA018430 | U-2 OS |
| 4140 | ENSG00000116191 | HPA027143 | U-2 OS |
| 4141 | ENSG00000116191 | HPA028328 | A-431  |
| 4142 | ENSG00000116199 | HPA007409 | U-2 OS |
| 4143 | ENSG00000116205 | HPA046918 | U-2 OS |
| 4144 | ENSG00000116212 | HPA047458 | U-2 OS |
| 4145 | ENSG00000116212 | HPA050537 | U-2 OS |
| 4146 | ENSG00000116212 | HPA064581 | SiHa   |
| 4147 | ENSG00000116221 | HPA025951 | U-2 OS |
| 4148 | ENSG00000116251 | HPA068294 | U-2 OS |
| 4149 | ENSG00000116254 | HPA015809 | U-2 OS |
| 4150 | ENSG00000116260 | HPA056243 | U-2 OS |
| 4151 | ENSG00000116266 | HPA027225 | U-2 OS |
| 4152 | ENSG00000116285 | HPA027206 | U-2 OS |
| 4153 | ENSG00000116285 | HPA076543 | RH-30  |
| 4154 | ENSG00000116288 | HPA004190 | U-2 OS |
| 4155 | ENSG00000116299 | HPA070749 | MCF7   |
| 4156 | ENSG00000116337 | HPA045760 | U-2 OS |
| 4157 | ENSG00000116350 | HPA050975 | U-2 OS |
| 4158 | ENSG00000116353 | HPA028740 | U-2 OS |
| 4159 | ENSG00000116396 | HPA014740 | U-2 OS |
| 4160 | ENSG00000116406 | HPA027297 | U-2 OS |
| 4161 | ENSG00000116455 | HPA027271 | U-2 OS |
| 4162 | ENSG00000116459 | HPA057347 | U-2 OS |
| 4163 | ENSG00000116478 | CAB005017 | U-2 OS |
| 4164 | ENSG00000116478 | HPA029693 | U-2 OS |
| 4165 | ENSG00000116497 | HPA027328 | U-2 OS |
| 4166 | ENSG00000116514 | HPA049587 | U-2 OS |
| 4167 | ENSG00000116521 | HPA071167 | U-2 OS |
| 4168 | ENSG00000116525 | HPA050061 | U-2 OS |
| 4169 | ENSG00000116539 | HPA004806 | U-2 OS |
| 4170 | ENSG00000116560 | HPA047513 | U-2 OS |
| 4171 | ENSG00000116560 | HPA054689 | U-2 OS |
| 4172 | ENSG00000116580 | HPA057305 | U-2 OS |
| 4173 | ENSG00000116580 | HPA074504 | U-2 OS |
| 4174 | ENSG00000116586 | HPA004126 | U-2 OS |
| 4175 | ENSG00000116604 | HPA004807 | U-2 OS |
| 4176 | ENSG00000116604 | HPA007114 | U-2 OS |
| 4177 | ENSG00000116649 | HPA015746 | A-431  |
| 4178 | ENSG00000116661 | HPA005472 | U-2 OS |

|      |                 |           |          |
|------|-----------------|-----------|----------|
| 4179 | ENSG00000116667 | HPA026831 | U-2 OS   |
| 4180 | ENSG00000116668 | HPA024214 | U-2 OS   |
| 4181 | ENSG00000116668 | HPA027334 | U-2 OS   |
| 4182 | ENSG00000116670 | HPA024176 | U-2 OS   |
| 4183 | ENSG00000116670 | HPA024612 | U-2 OS   |
| 4184 | ENSG00000116675 | HPA031182 | U-2 OS   |
| 4185 | ENSG00000116679 | HPA003405 | U-2 OS   |
| 4186 | ENSG00000116685 | HPA060536 | HEK 293  |
| 4187 | ENSG00000116691 | HPA044948 | U-2 OS   |
| 4188 | ENSG00000116698 | HPA029350 | U-2 OS   |
| 4189 | ENSG00000116701 | HPA006040 | U-2 OS   |
| 4190 | ENSG00000116701 | CAB022160 | A-431    |
| 4191 | ENSG00000116711 | HPA050062 | A549     |
| 4192 | ENSG00000116711 | HPA054206 | A549     |
| 4193 | ENSG00000116717 | HPA053420 | U-2 OS   |
| 4194 | ENSG00000116726 | HPA045286 | U-2 OS   |
| 4195 | ENSG00000116729 | HPA069520 | U-2 OS   |
| 4196 | ENSG00000116731 | HPA005809 | U-2 OS   |
| 4197 | ENSG00000116741 | HPA013385 | U-2 OS   |
| 4198 | ENSG00000116747 | HPA005142 | U-251 MG |
| 4199 | ENSG00000116750 | HPA075383 | U-2 OS   |
| 4200 | ENSG00000116752 | HPA067881 | U-2 OS   |
| 4201 | ENSG00000116754 | HPA008762 | U-2 OS   |
| 4202 | ENSG00000116774 | HPA027991 | LHCN-M2  |
| 4203 | ENSG00000116791 | HPA021921 | U-2 OS   |
| 4204 | ENSG00000116793 | HPA059486 | U-2 OS   |
| 4205 | ENSG00000116830 | HPA070762 | U-2 OS   |
| 4206 | ENSG00000116833 | HPA005455 | U-2 OS   |
| 4207 | ENSG00000116852 | HPA027249 | U-2 OS   |
| 4208 | ENSG00000116863 | HPA026641 | A-431    |
| 4209 | ENSG00000116863 | HPA026739 | SH-SY5Y  |
| 4210 | ENSG00000116863 | HPA027104 | U-2 OS   |
| 4211 | ENSG00000116863 | HPA027141 | U-2 OS   |
| 4212 | ENSG00000116871 | HPA028075 | U-2 OS   |
| 4213 | ENSG00000116874 | HPA069692 | RT4      |
| 4214 | ENSG00000116885 | HPA028436 | U-2 OS   |
| 4215 | ENSG00000116885 | HPA052655 | U-2 OS   |
| 4216 | ENSG00000116898 | HPA028100 | U-2 OS   |
| 4217 | ENSG00000116898 | HPA067137 | U-2 OS   |
| 4218 | ENSG00000116903 | HPA027438 | U-2 OS   |
| 4219 | ENSG00000116918 | HPA024613 | U-2 OS   |
| 4220 | ENSG00000116918 | CAB034263 | U-2 OS   |
| 4221 | ENSG00000116922 | HPA027127 | U-2 OS   |
| 4222 | ENSG00000116954 | HPA055489 | U-2 OS   |
| 4223 | ENSG00000116977 | HPA012734 | RT4      |
| 4224 | ENSG00000116983 | HPA053808 | Hep G2   |
| 4225 | ENSG00000116984 | HPA044474 | U-2 OS   |
| 4226 | ENSG00000116990 | HPA063132 | RH-30    |
| 4227 | ENSG00000116990 | HPA074515 | RT4      |
| 4228 | ENSG00000116991 | HPA027224 | U-2 OS   |
| 4229 | ENSG00000117000 | HPA054653 | CACO-2   |
| 4230 | ENSG00000117010 | HPA059153 | U-2 OS   |
| 4231 | ENSG00000117016 | HPA055285 | U-2 OS   |
| 4232 | ENSG00000117020 | CAB013090 | A-431    |
| 4233 | ENSG00000117036 | HPA004794 | U-2 OS   |

|      |                 |           |             |
|------|-----------------|-----------|-------------|
| 4234 | ENSG00000117054 | HPA006198 | U-2 OS      |
| 4235 | ENSG00000117054 | HPA026542 | U-251 MG    |
| 4236 | ENSG00000117069 | HPA065593 | U-2 OS      |
| 4237 | ENSG00000117091 | HPA055146 | U-2 OS      |
| 4238 | ENSG00000117114 | HPA043447 | HEK 293     |
| 4239 | ENSG00000117118 | HPA002868 | U-2 OS      |
| 4240 | ENSG00000117133 | HPA024642 | U-2 OS      |
| 4241 | ENSG00000117139 | HPA053723 | U-2 OS      |
| 4242 | ENSG00000117143 | HPA014659 | A-431       |
| 4243 | ENSG00000117148 | HPA027176 | U-2 OS      |
| 4244 | ENSG00000117151 | HPA048810 | U-2 OS      |
| 4245 | ENSG00000117152 | HPA030802 | HUVEC TERT2 |
| 4246 | ENSG00000117153 | HPA071324 | U-2 OS      |
| 4247 | ENSG00000117155 | HPA075946 | U-2 OS      |
| 4248 | ENSG00000117174 | HPA018132 | U-2 OS      |
| 4249 | ENSG00000117222 | HPA049042 | U-2 OS      |
| 4250 | ENSG00000117245 | HPA032085 | U-2 OS      |
| 4251 | ENSG00000117262 | HPA076096 | U-2 OS      |
| 4252 | ENSG00000117266 | HPA045429 | MCF7        |
| 4253 | ENSG00000117308 | HPA007340 | A-431       |
| 4254 | ENSG00000117318 | CAB021353 | U-2 OS      |
| 4255 | ENSG00000117335 | CAB010401 | U-2 OS      |
| 4256 | ENSG00000117360 | HPA027226 | U-2 OS      |
| 4257 | ENSG00000117360 | HPA067116 | U-2 OS      |
| 4258 | ENSG00000117385 | HPA012113 | U-2 OS      |
| 4259 | ENSG00000117394 | HPA031345 | U-251 MG    |
| 4260 | ENSG00000117394 | HPA058494 | Hep G2      |
| 4261 | ENSG00000117395 | HPA026512 | U-2 OS      |
| 4262 | ENSG00000117395 | HPA028277 | U-2 OS      |
| 4263 | ENSG00000117399 | CAB004525 | A-431       |
| 4264 | ENSG00000117399 | HPA045842 | CACO-2      |
| 4265 | ENSG00000117399 | HPA055288 | CACO-2      |
| 4266 | ENSG00000117400 | HPA007619 | U-2 OS      |
| 4267 | ENSG00000117410 | HPA044281 | U-2 OS      |
| 4268 | ENSG00000117411 | HPA007620 | U-2 OS      |
| 4269 | ENSG00000117419 | HPA029895 | U-2 OS      |
| 4270 | ENSG00000117448 | HPA017919 | U-2 OS      |
| 4271 | ENSG00000117448 | HPA019649 | U-2 OS      |
| 4272 | ENSG00000117450 | HPA007730 | U-2 OS      |
| 4273 | ENSG00000117461 | HPA071988 | RT4         |
| 4274 | ENSG00000117472 | HPA011909 | RT4         |
| 4275 | ENSG00000117475 | HPA067113 | U-2 OS      |
| 4276 | ENSG00000117477 | HPA027189 | U-2 OS      |
| 4277 | ENSG00000117479 | HPA006119 | U-2 OS      |
| 4278 | ENSG00000117480 | HPA007425 | U-2 OS      |
| 4279 | ENSG00000117505 | HPA055308 | U-2 OS      |
| 4280 | ENSG00000117519 | CAB009849 | CACO-2      |
| 4281 | ENSG00000117519 | HPA051237 | CACO-2      |
| 4282 | ENSG00000117523 | HPA025766 | U-2 OS      |
| 4283 | ENSG00000117525 | HPA049292 | A-431       |
| 4284 | ENSG00000117525 | HPA069132 | U-2 OS      |
| 4285 | ENSG00000117528 | HPA032026 | U-2 OS      |
| 4286 | ENSG00000117528 | HPA032027 | U-2 OS      |
| 4287 | ENSG00000117528 | CAB075749 | U-2 OS      |
| 4288 | ENSG00000117533 | HPA050418 | U-2 OS      |

|      |                 |           |        |
|------|-----------------|-----------|--------|
| 4289 | ENSG00000117543 | HPA076234 | U-2 OS |
| 4290 | ENSG00000117569 | HPA047420 | U-2 OS |
| 4291 | ENSG00000117586 | HPA059579 | U-2 OS |
| 4292 | ENSG00000117592 | CAB008663 | U-2 OS |
| 4293 | ENSG00000117593 | HPA026528 | U-2 OS |
| 4294 | ENSG00000117595 | HPA063121 | A-431  |
| 4295 | ENSG00000117595 | HPA076162 | RT4    |
| 4296 | ENSG00000117598 | HPA059085 | U-2 OS |
| 4297 | ENSG00000117602 | HPA064289 | U-2 OS |
| 4298 | ENSG00000117614 | HPA070710 | U-2 OS |
| 4299 | ENSG00000117616 | HPA067651 | U-2 OS |
| 4300 | ENSG00000117625 | HPA007621 | SiHa   |
| 4301 | ENSG00000117625 | HPA071997 | U-2 OS |
| 4302 | ENSG00000117632 | CAB010107 | U-2 OS |
| 4303 | ENSG00000117640 | HPA027130 | U-2 OS |
| 4304 | ENSG00000117643 | HPA048352 | U-2 OS |
| 4305 | ENSG00000117650 | CAB017530 | U-2 OS |
| 4306 | ENSG00000117650 | HPA064967 | U-2 OS |
| 4307 | ENSG00000117676 | HPA007981 | U-2 OS |
| 4308 | ENSG00000117682 | HPA026727 | U-2 OS |
| 4309 | ENSG00000117691 | HPA026763 | PC-3   |
| 4310 | ENSG00000117691 | HPA028488 | U-2 OS |
| 4311 | ENSG00000117697 | HPA053721 | U-2 OS |
| 4312 | ENSG00000117707 | HPA000842 | U-2 OS |
| 4313 | ENSG00000117707 | HPA001030 | Hep G2 |
| 4314 | ENSG00000117713 | HPA005456 | U-2 OS |
| 4315 | ENSG00000117713 | CAB016334 | U-2 OS |
| 4316 | ENSG00000117724 | HPA052382 | U-2 OS |
| 4317 | ENSG00000117748 | CAB016538 | U-2 OS |
| 4318 | ENSG00000117748 | HPA026306 | U-2 OS |
| 4319 | ENSG00000117748 | HPA026309 | U-2 OS |
| 4320 | ENSG00000117751 | HPA027406 | U-2 OS |
| 4321 | ENSG00000117751 | HPA027417 | U-2 OS |
| 4322 | ENSG00000117751 | HPA027452 | U-2 OS |
| 4323 | ENSG00000117758 | HPA055300 | U-2 OS |
| 4324 | ENSG00000117834 | HPA050263 | CACO-2 |
| 4325 | ENSG00000117859 | HPA027397 | U-2 OS |
| 4326 | ENSG00000117868 | HPA002132 | U-2 OS |
| 4327 | ENSG00000117877 | HPA041664 | U-2 OS |
| 4328 | ENSG00000117877 | HPA041734 | U-2 OS |
| 4329 | ENSG00000117899 | HPA039414 | U-2 OS |
| 4330 | ENSG00000117899 | HPA041721 | U-2 OS |
| 4331 | ENSG00000117906 | HPA030694 | U-2 OS |
| 4332 | ENSG00000117906 | HPA030695 | U-2 OS |
| 4333 | ENSG00000117971 | HPA059484 | MCF7   |
| 4334 | ENSG00000117983 | HPA008246 | A549   |
| 4335 | ENSG00000118007 | HPA035015 | U-2 OS |
| 4336 | ENSG00000118007 | HPA058653 | U-2 OS |
| 4337 | ENSG00000118046 | HPA067481 | U-2 OS |
| 4338 | ENSG00000118058 | HPA044910 | U-2 OS |
| 4339 | ENSG00000118096 | HPA057550 | MCF7   |
| 4340 | ENSG00000118137 | HPA046715 | CACO-2 |
| 4341 | ENSG00000118156 | HPA058541 | U-2 OS |
| 4342 | ENSG00000118162 | HPA041710 | U-2 OS |
| 4343 | ENSG00000118162 | HPA041796 | U-2 OS |

|      |                 |           |           |
|------|-----------------|-----------|-----------|
| 4344 | ENSG00000118181 | HPA031801 | U-2 OS    |
| 4345 | ENSG00000118193 | HPA058220 | U-2 OS    |
| 4346 | ENSG00000118194 | HPA017888 | U-2 OS    |
| 4347 | ENSG00000118197 | HPA047166 | U-2 OS    |
| 4348 | ENSG00000118200 | HPA026511 | U-2 OS    |
| 4349 | ENSG00000118231 | HPA041269 | HEL       |
| 4350 | ENSG00000118242 | HPA068583 | U-2 OS    |
| 4351 | ENSG00000118246 | HPA067191 | CACO-2    |
| 4352 | ENSG00000118257 | HPA054974 | U-251 MG  |
| 4353 | ENSG00000118260 | CAB003803 | U-2 OS    |
| 4354 | ENSG00000118260 | HPA019150 | U-2 OS    |
| 4355 | ENSG00000118263 | HPA030490 | U-2 OS    |
| 4356 | ENSG00000118271 | HPA002550 | CACO-2    |
| 4357 | ENSG00000118292 | HPA043874 | U-2 OS    |
| 4358 | ENSG00000118298 | HPA008482 | SK-MEL-30 |
| 4359 | ENSG00000118308 | HPA002967 | RT4       |
| 4360 | ENSG00000118363 | HPA013386 | U-2 OS    |
| 4361 | ENSG00000118369 | HPA055213 | CACO-2    |
| 4362 | ENSG00000118407 | HPA053564 | U-2 OS    |
| 4363 | ENSG00000118412 | HPA053573 | U-2 OS    |
| 4364 | ENSG00000118418 | HPA027971 | U-2 OS    |
| 4365 | ENSG00000118418 | HPA063572 | CACO-2    |
| 4366 | ENSG00000118420 | HPA027231 | HEK 293   |
| 4367 | ENSG00000118432 | HPA042256 | ASC TERT1 |
| 4368 | ENSG00000118473 | HPA017963 | U-2 OS    |
| 4369 | ENSG00000118482 | HPA025763 | U-2 OS    |
| 4370 | ENSG00000118492 | HPA036340 | U-2 OS    |
| 4371 | ENSG00000118492 | HPA036341 | U-2 OS    |
| 4372 | ENSG00000118495 | HPA055706 | U-2 OS    |
| 4373 | ENSG00000118496 | HPA012583 | U-2 OS    |
| 4374 | ENSG00000118503 | HPA067479 | REH       |
| 4375 | ENSG00000118507 | HPA027200 | RT4       |
| 4376 | ENSG00000118508 | HPA025731 | U-251 MG  |
| 4377 | ENSG00000118513 | HPA071605 | U-2 OS    |
| 4378 | ENSG00000118514 | HPA026292 | U-2 OS    |
| 4379 | ENSG00000118514 | HPA055414 | HEK 293   |
| 4380 | ENSG00000118515 | CAB022085 | U-2 OS    |
| 4381 | ENSG00000118515 | HPA051251 | U-2 OS    |
| 4382 | ENSG00000118518 | HPA027209 | U-2 OS    |
| 4383 | ENSG00000118523 | HPA031074 | U-2 OS    |
| 4384 | ENSG00000118557 | HPA056716 | U-2 OS    |
| 4385 | ENSG00000118579 | HPA035900 | U-2 OS    |
| 4386 | ENSG00000118596 | HPA005911 | HeLa      |
| 4387 | ENSG00000118600 | HPA064014 | A549      |
| 4388 | ENSG00000118640 | HPA007215 | HEL       |
| 4389 | ENSG00000118655 | HPA064934 | U-2 OS    |
| 4390 | ENSG00000118680 | HPA045244 | CACO-2    |
| 4391 | ENSG00000118689 | CAB004074 | U-2 OS    |
| 4392 | ENSG00000118689 | HPA063104 | U-2 OS    |
| 4393 | ENSG00000118690 | HPA053696 | SiHa      |
| 4394 | ENSG00000118705 | HPA025922 | A-431     |
| 4395 | ENSG00000118707 | HPA053786 | CACO-2    |
| 4396 | ENSG00000118707 | HPA064522 | U-2 OS    |
| 4397 | ENSG00000118733 | HPA050297 | SH-SY5Y   |
| 4398 | ENSG00000118762 | HPA015794 | BJ        |

|      |                 |           |          |
|------|-----------------|-----------|----------|
| 4399 | ENSG00000118777 | CAB037299 | U-2 OS   |
| 4400 | ENSG00000118777 | HPA054719 | U-2 OS   |
| 4401 | ENSG00000118785 | HPA027540 | Hep G2   |
| 4402 | ENSG00000118785 | HPA027541 | Hep G2   |
| 4403 | ENSG00000118804 | HPA011952 | A-431    |
| 4404 | ENSG00000118816 | HPA039853 | U-2 OS   |
| 4405 | ENSG00000118816 | HPA061470 | U-2 OS   |
| 4406 | ENSG00000118849 | HPA003892 | RT4      |
| 4407 | ENSG00000118855 | HPA057924 | U-2 OS   |
| 4408 | ENSG00000118873 | HPA026273 | A-431    |
| 4409 | ENSG00000118894 | HPA041610 | U-2 OS   |
| 4410 | ENSG00000118898 | HPA042550 | U-2 OS   |
| 4411 | ENSG00000118900 | HPA061029 | U-2 OS   |
| 4412 | ENSG00000118922 | HPA064146 | U-2 OS   |
| 4413 | ENSG00000118939 | HPA019678 | U-2 OS   |
| 4414 | ENSG00000118946 | HPA026817 | U-2 OS   |
| 4415 | ENSG00000118960 | HPA035050 | U-2 OS   |
| 4416 | ENSG00000118961 | HPA034729 | U-2 OS   |
| 4417 | ENSG00000118971 | HPA049138 | CACO-2   |
| 4418 | ENSG00000118971 | HPA054196 | CACO-2   |
| 4419 | ENSG00000118985 | HPA013569 | U-2 OS   |
| 4420 | ENSG00000118997 | HPA044070 | U-2 OS   |
| 4421 | ENSG00000119004 | HPA055872 | CACO-2   |
| 4422 | ENSG00000119041 | HPA069179 | U-2 OS   |
| 4423 | ENSG00000119042 | HPA029543 | U-2 OS   |
| 4424 | ENSG00000119048 | HPA003875 | U-2 OS   |
| 4425 | ENSG00000119048 | HPA051765 | U-2 OS   |
| 4426 | ENSG00000119048 | HPA065898 | U-2 OS   |
| 4427 | ENSG00000119125 | HPA024099 | A-431    |
| 4428 | ENSG00000119138 | HPA029308 | U-2 OS   |
| 4429 | ENSG00000119139 | HPA001813 | U-2 OS   |
| 4430 | ENSG00000119139 | CAB009228 | U-2 OS   |
| 4431 | ENSG00000119139 | HPA070714 | U-2 OS   |
| 4432 | ENSG00000119185 | HPA067348 | U-2 OS   |
| 4433 | ENSG00000119185 | HPA071538 | BJ       |
| 4434 | ENSG00000119227 | HPA058599 | U-2 OS   |
| 4435 | ENSG00000119231 | HPA006684 | U-251 MG |
| 4436 | ENSG00000119242 | HPA057580 | U-2 OS   |
| 4437 | ENSG00000119280 | HPA004798 | U-2 OS   |
| 4438 | ENSG00000119285 | HPA046917 | U-2 OS   |
| 4439 | ENSG00000119285 | HPA062200 | U-2 OS   |
| 4440 | ENSG00000119314 | HPA048374 | CACO-2   |
| 4441 | ENSG00000119318 | HPA029718 | U-2 OS   |
| 4442 | ENSG00000119318 | CAB033868 | U-2 OS   |
| 4443 | ENSG00000119321 | HPA007979 | U-2 OS   |
| 4444 | ENSG00000119328 | HPA035917 | U-251 MG |
| 4445 | ENSG00000119328 | HPA035918 | U-2 OS   |
| 4446 | ENSG00000119333 | HPA041091 | A-431    |
| 4447 | ENSG00000119335 | HPA063683 | U-2 OS   |
| 4448 | ENSG00000119383 | HPA005695 | U-2 OS   |
| 4449 | ENSG00000119392 | HPA061560 | U-2 OS   |
| 4450 | ENSG00000119396 | HPA026419 | U-2 OS   |
| 4451 | ENSG00000119397 | HPA020468 | A-431    |
| 4452 | ENSG00000119401 | HPA050060 | U-2 OS   |
| 4453 | ENSG00000119402 | HPA067878 | U-2 OS   |

|      |                 |           |         |
|------|-----------------|-----------|---------|
| 4454 | ENSG00000119408 | HPA056828 | U-2 OS  |
| 4455 | ENSG00000119411 | HPA042889 | A-431   |
| 4456 | ENSG00000119421 | HPA041600 | U-2 OS  |
| 4457 | ENSG00000119431 | HPA020427 | CACO-2  |
| 4458 | ENSG00000119431 | HPA024585 | CACO-2  |
| 4459 | ENSG00000119446 | HPA057281 | U-2 OS  |
| 4460 | ENSG00000119446 | HPA077955 | U-2 OS  |
| 4461 | ENSG00000119471 | HPA042890 | U-2 OS  |
| 4462 | ENSG00000119471 | HPA050453 | U-2 OS  |
| 4463 | ENSG00000119487 | HPA029091 | A-431   |
| 4464 | ENSG00000119509 | HPA049994 | U-2 OS  |
| 4465 | ENSG00000119522 | HPA020481 | U-2 OS  |
| 4466 | ENSG00000119523 | HPA041601 | U-2 OS  |
| 4467 | ENSG00000119541 | HPA040393 | RT4     |
| 4468 | ENSG00000119547 | HPA057058 | U-2 OS  |
| 4469 | ENSG00000119559 | HPA067491 | U-2 OS  |
| 4470 | ENSG00000119574 | HPA035754 | U-2 OS  |
| 4471 | ENSG00000119596 | HPA048070 | U-2 OS  |
| 4472 | ENSG00000119596 | HPA061123 | U-2 OS  |
| 4473 | ENSG00000119599 | HPA047276 | U-2 OS  |
| 4474 | ENSG00000119616 | HPA046681 | U-2 OS  |
| 4475 | ENSG00000119630 | HPA041624 | U-2 OS  |
| 4476 | ENSG00000119632 | HPA049588 | U-2 OS  |
| 4477 | ENSG00000119636 | HPA003136 | U-2 OS  |
| 4478 | ENSG00000119638 | HPA001405 | U-2 OS  |
| 4479 | ENSG00000119640 | HPA034944 | U-2 OS  |
| 4480 | ENSG00000119650 | HPA003438 | U-2 OS  |
| 4481 | ENSG00000119661 | HPA053129 | A-431   |
| 4482 | ENSG00000119669 | HPA050862 | U-2 OS  |
| 4483 | ENSG00000119669 | HPA061333 | U-2 OS  |
| 4484 | ENSG00000119673 | HPA043705 | U-2 OS  |
| 4485 | ENSG00000119681 | HPA003415 | U-2 OS  |
| 4486 | ENSG00000119684 | HPA060570 | U-2 OS  |
| 4487 | ENSG00000119685 | HPA032128 | U-2 OS  |
| 4488 | ENSG00000119698 | HPA041866 | U-2 OS  |
| 4489 | ENSG00000119699 | HPA063582 | SH-SY5Y |
| 4490 | ENSG00000119703 | HPA050928 | CACO-2  |
| 4491 | ENSG00000119705 | HPA020291 | U-2 OS  |
| 4492 | ENSG00000119707 | HPA003025 | U-2 OS  |
| 4493 | ENSG00000119707 | HPA070713 | U-2 OS  |
| 4494 | ENSG00000119711 | HPA029073 | U-2 OS  |
| 4495 | ENSG00000119711 | HPA029074 | MCF7    |
| 4496 | ENSG00000119711 | HPA029075 | U-2 OS  |
| 4497 | ENSG00000119718 | HPA048028 | U-2 OS  |
| 4498 | ENSG00000119720 | HPA047050 | MCF7    |
| 4499 | ENSG00000119720 | HPA050583 | U-2 OS  |
| 4500 | ENSG00000119725 | HPA002871 | MCF7    |
| 4501 | ENSG00000119729 | HPA044938 | U-2 OS  |
| 4502 | ENSG00000119760 | HPA063643 | SH-SY5Y |
| 4503 | ENSG00000119771 | HPA057379 | U-2 OS  |
| 4504 | ENSG00000119772 | HPA026588 | U-2 OS  |
| 4505 | ENSG00000119777 | HPA034551 | A-431   |
| 4506 | ENSG00000119778 | HPA034555 | U-2 OS  |
| 4507 | ENSG00000119782 | HPA045572 | U-2 OS  |
| 4508 | ENSG00000119787 | HPA075302 | U-2 OS  |



|      |                 |           |          |
|------|-----------------|-----------|----------|
| 4509 | ENSG00000119801 | HPA042809 | U-2 OS   |
| 4510 | ENSG00000119812 | HPA036250 | U-2 OS   |
| 4511 | ENSG00000119820 | HPA017884 | U-2 OS   |
| 4512 | ENSG00000119844 | HPA034990 | U-2 OS   |
| 4513 | ENSG00000119844 | HPA034991 | U-2 OS   |
| 4514 | ENSG00000119862 | HPA046079 | U-2 OS   |
| 4515 | ENSG00000119865 | HPA035337 | U-2 OS   |
| 4516 | ENSG00000119866 | CAB014891 | U-2 OS   |
| 4517 | ENSG00000119866 | HPA029003 | U-2 OS   |
| 4518 | ENSG00000119878 | HPA046080 | U-2 OS   |
| 4519 | ENSG00000119888 | HPA067463 | MCF7     |
| 4520 | ENSG00000119899 | HPA044479 | U-2 OS   |
| 4521 | ENSG00000119900 | HPA027122 | U-2 OS   |
| 4522 | ENSG00000119906 | HPA057568 | U-2 OS   |
| 4523 | ENSG00000119915 | HPA036236 | A-431    |
| 4524 | ENSG00000119917 | HPA059914 | A-431    |
| 4525 | ENSG00000119919 | HPA047561 | U-2 OS   |
| 4526 | ENSG00000119922 | HPA003408 | U-2 OS   |
| 4527 | ENSG00000119927 | HPA060090 | Hep G2   |
| 4528 | ENSG00000119929 | HPA038619 | U-2 OS   |
| 4529 | ENSG00000119943 | HPA067394 | U-2 OS   |
| 4530 | ENSG00000119946 | HPA040408 | U-2 OS   |
| 4531 | ENSG00000119950 | HPA035320 | U-2 OS   |
| 4532 | ENSG00000119950 | HPA056762 | U-2 OS   |
| 4533 | ENSG00000119953 | HPA061214 | U-2 OS   |
| 4534 | ENSG00000119953 | HPA070666 | U-2 OS   |
| 4535 | ENSG00000119969 | HPA063242 | MCF7     |
| 4536 | ENSG00000119977 | HPA026987 | U-2 OS   |
| 4537 | ENSG00000119979 | HPA041159 | U-2 OS   |
| 4538 | ENSG00000119986 | HPA037649 | HeLa     |
| 4539 | ENSG00000120008 | HPA038980 | U-2 OS   |
| 4540 | ENSG00000120029 | HPA053580 | U-2 OS   |
| 4541 | ENSG00000120049 | HPA066717 | U-2 OS   |
| 4542 | ENSG00000120051 | HPA071938 | U-2 OS   |
| 4543 | ENSG00000120053 | HPA064532 | U-2 OS   |
| 4544 | ENSG00000120053 | HPA072629 | U-2 OS   |
| 4545 | ENSG00000120063 | HPA010087 | SH-SY5Y  |
| 4546 | ENSG00000120068 | HPA075905 | U-2 OS   |
| 4547 | ENSG00000120071 | HPA007208 | U-2 OS   |
| 4548 | ENSG00000120075 | HPA043851 | A549     |
| 4549 | ENSG00000120075 | HPA074454 | U-2 OS   |
| 4550 | ENSG00000120093 | HPA064990 | U-2 OS   |
| 4551 | ENSG00000120129 | HPA069577 | U-2 OS   |
| 4552 | ENSG00000120137 | HPA062358 | U-251 MG |
| 4553 | ENSG00000120149 | HPA005652 | CACO-2   |
| 4554 | ENSG00000120156 | HPA073265 | U-2 OS   |
| 4555 | ENSG00000120158 | HPA071308 | U-2 OS   |
| 4556 | ENSG00000120159 | HPA024100 | U-2 OS   |
| 4557 | ENSG00000120162 | HPA057744 | U-2 OS   |
| 4558 | ENSG00000120254 | HPA074911 | U-2 OS   |
| 4559 | ENSG00000120256 | HPA064002 | U-2 OS   |
| 4560 | ENSG00000120262 | HPA027114 | U-2 OS   |
| 4561 | ENSG00000120265 | HPA003239 | U-2 OS   |
| 4562 | ENSG00000120278 | HPA027128 | CACO-2   |
| 4563 | ENSG00000120278 | HPA027319 | RT4      |

|      |                 |           |          |
|------|-----------------|-----------|----------|
| 4564 | ENSG00000120279 | HPA047992 | U-2 OS   |
| 4565 | ENSG00000120280 | HPA001185 | A-431    |
| 4566 | ENSG00000120314 | HPA048143 | U-2 OS   |
| 4567 | ENSG00000120314 | HPA075133 | CACO-2   |
| 4568 | ENSG00000120327 | HPA007692 | U-2 OS   |
| 4569 | ENSG00000120328 | HPA045042 | RH-30    |
| 4570 | ENSG00000120333 | HPA051087 | U-2 OS   |
| 4571 | ENSG00000120341 | HPA054292 | U-2 OS   |
| 4572 | ENSG00000120370 | HPA027208 | U-2 OS   |
| 4573 | ENSG00000120370 | HPA027250 | U-2 OS   |
| 4574 | ENSG00000120370 | HPA027746 | U-2 OS   |
| 4575 | ENSG00000120437 | HPA025736 | U-2 OS   |
| 4576 | ENSG00000120440 | HPA027985 | CACO-2   |
| 4577 | ENSG00000120451 | HPA013447 | U-2 OS   |
| 4578 | ENSG00000120458 | HPA038695 | U-251 MG |
| 4579 | ENSG00000120526 | HPA023183 | A-431    |
| 4580 | ENSG00000120533 | HPA024648 | U-2 OS   |
| 4581 | ENSG00000120539 | HPA027175 | U-2 OS   |
| 4582 | ENSG00000120539 | HPA054273 | U-2 OS   |
| 4583 | ENSG00000120549 | HPA004941 | U-2 OS   |
| 4584 | ENSG00000120594 | HPA017268 | U-2 OS   |
| 4585 | ENSG00000120594 | HPA070793 | U-2 OS   |
| 4586 | ENSG00000120616 | HPA005811 | SH-SY5Y  |
| 4587 | ENSG00000120645 | HPA039025 | U-2 OS   |
| 4588 | ENSG00000120647 | HPA038854 | U-2 OS   |
| 4589 | ENSG00000120658 | HPA038355 | U-2 OS   |
| 4590 | ENSG00000120669 | HPA029182 | U-2 OS   |
| 4591 | ENSG00000120685 | HPA055687 | CACO-2   |
| 4592 | ENSG00000120688 | HPA038965 | U-2 OS   |
| 4593 | ENSG00000120688 | HPA058738 | U-2 OS   |
| 4594 | ENSG00000120690 | CAB005172 | U-2 OS   |
| 4595 | ENSG00000120693 | CAB009119 | U-2 OS   |
| 4596 | ENSG00000120693 | HPA031162 | U-2 OS   |
| 4597 | ENSG00000120694 | CAB002060 | A-431    |
| 4598 | ENSG00000120694 | HPA028675 | U-2 OS   |
| 4599 | ENSG00000120694 | HPA031569 | U-2 OS   |
| 4600 | ENSG00000120697 | HPA007989 | U-2 OS   |
| 4601 | ENSG00000120699 | HPA075230 | U-2 OS   |
| 4602 | ENSG00000120727 | HPA056766 | U-2 OS   |
| 4603 | ENSG00000120733 | HPA016610 | U-2 OS   |
| 4604 | ENSG00000120733 | HPA057202 | U-2 OS   |
| 4605 | ENSG00000120738 | HPA029937 | U-2 OS   |
| 4606 | ENSG00000120738 | HPA029938 | U-2 OS   |
| 4607 | ENSG00000120742 | HPA038970 | A-431    |
| 4608 | ENSG00000120784 | HPA030606 | U-2 OS   |
| 4609 | ENSG00000120798 | HPA035040 | U-2 OS   |
| 4610 | ENSG00000120798 | HPA035041 | U-2 OS   |
| 4611 | ENSG00000120800 | HPA049341 | U-2 OS   |
| 4612 | ENSG00000120802 | HPA008150 | U-2 OS   |
| 4613 | ENSG00000120802 | CAB009847 | U-2 OS   |
| 4614 | ENSG00000120805 | HPA062656 | RT4      |
| 4615 | ENSG00000120820 | HPA012740 | SiHa     |
| 4616 | ENSG00000120820 | HPA070791 | U-2 OS   |
| 4617 | ENSG00000120833 | CAB010356 | CACO-2   |
| 4618 | ENSG00000120837 | CAB004211 | U-2 OS   |

|      |                 |           |          |
|------|-----------------|-----------|----------|
| 4619 | ENSG00000120860 | HPA038339 | U-2 OS   |
| 4620 | ENSG00000120868 | HPA031373 | U-2 OS   |
| 4621 | ENSG00000120875 | HPA061967 | A549     |
| 4622 | ENSG00000120896 | HPA015849 | U-2 OS   |
| 4623 | ENSG00000120899 | CAB003850 | A-431    |
| 4624 | ENSG00000120910 | HPA023396 | U-2 OS   |
| 4625 | ENSG00000120913 | HPA003880 | U-2 OS   |
| 4626 | ENSG00000120915 | HPA023094 | U-2 OS   |
| 4627 | ENSG00000120915 | HPA023660 | U-2 OS   |
| 4628 | ENSG00000120942 | HPA044862 | U-2 OS   |
| 4629 | ENSG00000120948 | CAB003703 | U-2 OS   |
| 4630 | ENSG00000120948 | HPA017284 | U-2 OS   |
| 4631 | ENSG00000120949 | HPA014823 | EF0-21   |
| 4632 | ENSG00000120963 | HPA042793 | U-251 MG |
| 4633 | ENSG00000120992 | HPA063151 | A-431    |
| 4634 | ENSG00000121022 | HPA004845 | A-431    |
| 4635 | ENSG00000121022 | HPA051531 | U-2 OS   |
| 4636 | ENSG00000121039 | HPA049199 | CAC0-2   |
| 4637 | ENSG00000121057 | HPA008620 | CAC0-2   |
| 4638 | ENSG00000121057 | CAB019286 | U-2 OS   |
| 4639 | ENSG00000121058 | CAB017524 | A-431    |
| 4640 | ENSG00000121058 | HPA027885 | U-2 OS   |
| 4641 | ENSG00000121058 | HPA068537 | U-2 OS   |
| 4642 | ENSG00000121060 | HPA005909 | U-2 OS   |
| 4643 | ENSG00000121064 | HPA039102 | U-2 OS   |
| 4644 | ENSG00000121068 | HPA008586 | U-251 MG |
| 4645 | ENSG00000121073 | HPA048655 | CAC0-2   |
| 4646 | ENSG00000121075 | HPA044457 | U-2 OS   |
| 4647 | ENSG00000121101 | HPA030620 | U-2 OS   |
| 4648 | ENSG00000121104 | HPA022531 | MCF7     |
| 4649 | ENSG00000121152 | HPA003008 | U-2 OS   |
| 4650 | ENSG00000121207 | HPA070726 | A-431    |
| 4651 | ENSG00000121210 | HPA043472 | U-2 OS   |
| 4652 | ENSG00000121281 | HPA041218 | U-2 OS   |
| 4653 | ENSG00000121289 | HPA039382 | A-431    |
| 4654 | ENSG00000121289 | HPA040056 | U-2 OS   |
| 4655 | ENSG00000121297 | HPA008834 | U-2 OS   |
| 4656 | ENSG00000121297 | HPA071010 | U-2 OS   |
| 4657 | ENSG00000121310 | HPA026731 | U-2 OS   |
| 4658 | ENSG00000121350 | HPA038320 | U-2 OS   |
| 4659 | ENSG00000121380 | HPA040665 | U-2 OS   |
| 4660 | ENSG00000121390 | HPA038904 | U-2 OS   |
| 4661 | ENSG00000121406 | HPA039511 | U-2 OS   |
| 4662 | ENSG00000121413 | HPA024318 | RT4      |
| 4663 | ENSG00000121417 | HPA049967 | U-2 OS   |
| 4664 | ENSG00000121454 | HPA055705 | U-2 OS   |
| 4665 | ENSG00000121481 | HPA026803 | U-2 OS   |
| 4666 | ENSG00000121486 | HPA026728 | U-2 OS   |
| 4667 | ENSG00000121552 | HPA001031 | U-2 OS   |
| 4668 | ENSG00000121570 | CAB020678 | U-2 OS   |
| 4669 | ENSG00000121570 | HPA035250 | U-2 OS   |
| 4670 | ENSG00000121578 | HPA063546 | A549     |
| 4671 | ENSG00000121621 | HPA039312 | U-2 OS   |
| 4672 | ENSG00000121644 | HPA049950 | A-431    |
| 4673 | ENSG00000121653 | HPA058921 | U-2 OS   |

|      |                 |           |           |
|------|-----------------|-----------|-----------|
| 4674 | ENSG00000121653 | HPA070332 | SH-SY5Y   |
| 4675 | ENSG00000121671 | HPA037577 | U-2 OS    |
| 4676 | ENSG00000121690 | HPA015800 | U-2 OS    |
| 4677 | ENSG00000121691 | CAB001515 | U-2 OS    |
| 4678 | ENSG00000121691 | HPA055838 | U-2 OS    |
| 4679 | ENSG00000121716 | HPA026750 | U-2 OS    |
| 4680 | ENSG00000121741 | HPA031765 | U-2 OS    |
| 4681 | ENSG00000121742 | HPA014846 | RT4       |
| 4682 | ENSG00000121749 | HPA013388 | U-2 OS    |
| 4683 | ENSG00000121753 | HPA052612 | U-2 OS    |
| 4684 | ENSG00000121753 | HPA054617 | U-2 OS    |
| 4685 | ENSG00000121769 | HPA055754 | U-2 OS    |
| 4686 | ENSG00000121774 | CAB005355 | U-2 OS    |
| 4687 | ENSG00000121774 | HPA051280 | U-2 OS    |
| 4688 | ENSG00000121774 | HPA056813 | U-2 OS    |
| 4689 | ENSG00000121775 | HPA040191 | U-2 OS    |
| 4690 | ENSG00000121858 | HPA054938 | RT4       |
| 4691 | ENSG00000121864 | HPA049023 | U-2 OS    |
| 4692 | ENSG00000121871 | HPA017636 | U-2 OS    |
| 4693 | ENSG00000121879 | HPA009985 | U-2 OS    |
| 4694 | ENSG00000121892 | HPA036661 | U-2 OS    |
| 4695 | ENSG00000121892 | HPA036662 | U-2 OS    |
| 4696 | ENSG00000121897 | HPA018842 | U-2 OS    |
| 4697 | ENSG00000121900 | HPA061992 | U-2 OS    |
| 4698 | ENSG00000121903 | HPA017933 | U-2 OS    |
| 4699 | ENSG00000121931 | HPA044515 | A-431     |
| 4700 | ENSG00000121940 | HPA009087 | U-2 OS    |
| 4701 | ENSG00000121940 | HPA013210 | U-2 OS    |
| 4702 | ENSG00000121957 | HPA007327 | U-2 OS    |
| 4703 | ENSG00000121964 | HPA036694 | U-2 OS    |
| 4704 | ENSG00000121988 | HPA035234 | U-2 OS    |
| 4705 | ENSG00000121989 | HPA046997 | RT4       |
| 4706 | ENSG00000122008 | HPA012035 | U-2 OS    |
| 4707 | ENSG00000122008 | HPA057303 | U-2 OS    |
| 4708 | ENSG00000122008 | HPA068117 | U-251 MG  |
| 4709 | ENSG00000122008 | HPA069375 | U-2 OS    |
| 4710 | ENSG00000122012 | HPA040722 | U-251 MG  |
| 4711 | ENSG00000122025 | HPA047539 | U-2 OS    |
| 4712 | ENSG00000122026 | HPA047252 | U-2 OS    |
| 4713 | ENSG00000122033 | HPA039791 | U-2 OS    |
| 4714 | ENSG00000122034 | HPA007990 | U-2 OS    |
| 4715 | ENSG00000122035 | HPA053296 | CACO-2    |
| 4716 | ENSG00000122042 | HPA053772 | U-2 OS    |
| 4717 | ENSG00000122068 | HPA054474 | MCF7      |
| 4718 | ENSG00000122085 | HPA027097 | U-2 OS    |
| 4719 | ENSG00000122121 | HPA064568 | ASC TERT1 |
| 4720 | ENSG00000122122 | HPA001085 | HEL       |
| 4721 | ENSG00000122126 | HPA012495 | U-2 OS    |
| 4722 | ENSG00000122140 | HPA029487 | CACO-2    |
| 4723 | ENSG00000122180 | HPA028336 | RH-30     |
| 4724 | ENSG00000122188 | HPA002461 | U-2 OS    |
| 4725 | ENSG00000122188 | HPA003887 | U-2 OS    |
| 4726 | ENSG00000122203 | HPA044701 | U-2 OS    |
| 4727 | ENSG00000122218 | HPA028024 | U-2 OS    |
| 4728 | ENSG00000122257 | HPA041725 | U-2 OS    |

|      |                 |           |           |
|------|-----------------|-----------|-----------|
| 4729 | ENSG00000122257 | HPA043544 | U-2 OS    |
| 4730 | ENSG00000122299 | HPA040808 | U-2 OS    |
| 4731 | ENSG00000122299 | HPA059849 | U-251 MG  |
| 4732 | ENSG00000122359 | HPA027545 | U-2 OS    |
| 4733 | ENSG00000122367 | HPA048955 | U-2 OS    |
| 4734 | ENSG00000122376 | HPA036582 | U-2 OS    |
| 4735 | ENSG00000122386 | HPA001791 | U-2 OS    |
| 4736 | ENSG00000122390 | HPA040916 | U-2 OS    |
| 4737 | ENSG00000122406 | HPA054444 | U-2 OS    |
| 4738 | ENSG00000122435 | HPA028494 | U-2 OS    |
| 4739 | ENSG00000122482 | HPA057795 | U-2 OS    |
| 4740 | ENSG00000122483 | HPA028035 | U-2 OS    |
| 4741 | ENSG00000122484 | HPA046443 | U-2 OS    |
| 4742 | ENSG00000122490 | HPA051666 | U-2 OS    |
| 4743 | ENSG00000122512 | CAB010235 | U-2 OS    |
| 4744 | ENSG00000122512 | HPA066490 | U-2 OS    |
| 4745 | ENSG00000122512 | HPA070310 | U-2 OS    |
| 4746 | ENSG00000122515 | HPA040716 | U-2 OS    |
| 4747 | ENSG00000122545 | HPA023309 | U-2 OS    |
| 4748 | ENSG00000122545 | HPA029524 | U-2 OS    |
| 4749 | ENSG00000122547 | HPA053668 | U-2 OS    |
| 4750 | ENSG00000122550 | HPA029491 | U-2 OS    |
| 4751 | ENSG00000122550 | HPA029492 | U-2 OS    |
| 4752 | ENSG00000122557 | HPA076087 | U-2 OS    |
| 4753 | ENSG00000122565 | HPA004902 | U-2 OS    |
| 4754 | ENSG00000122566 | HPA005812 | U-2 OS    |
| 4755 | ENSG00000122566 | CAB012403 | U-2 OS    |
| 4756 | ENSG00000122566 | HPA065537 | U-2 OS    |
| 4757 | ENSG00000122574 | HPA041145 | U-2 OS    |
| 4758 | ENSG00000122585 | HPA044572 | SH-SY5Y   |
| 4759 | ENSG00000122585 | HPA056798 | SH-SY5Y   |
| 4760 | ENSG00000122591 | HPA042873 | U-2 OS    |
| 4761 | ENSG00000122592 | HPA074048 | U-2 OS    |
| 4762 | ENSG00000122642 | HPA012595 | U-2 OS    |
| 4763 | ENSG00000122642 | HPA055256 | U-2 OS    |
| 4764 | ENSG00000122644 | HPA064513 | U-251 MG  |
| 4765 | ENSG00000122674 | HPA045114 | U-2 OS    |
| 4766 | ENSG00000122674 | HPA050006 | A-431     |
| 4767 | ENSG00000122678 | HPA058900 | U-2 OS    |
| 4768 | ENSG00000122678 | HPA066007 | U-251 MG  |
| 4769 | ENSG00000122692 | HPA019708 | U-2 OS    |
| 4770 | ENSG00000122694 | HPA029478 | U-2 OS    |
| 4771 | ENSG00000122696 | HPA046388 | U-2 OS    |
| 4772 | ENSG00000122705 | CAB002665 | U-2 OS    |
| 4773 | ENSG00000122705 | HPA050918 | U-2 OS    |
| 4774 | ENSG00000122707 | HPA071729 | ASC TERT1 |
| 4775 | ENSG00000122711 | HPA007286 | U-2 OS    |
| 4776 | ENSG00000122729 | HPA019371 | U-2 OS    |
| 4777 | ENSG00000122741 | HPA024160 | A-431     |
| 4778 | ENSG00000122778 | HPA019560 | A-431     |
| 4779 | ENSG00000122779 | HPA043495 | U-2 OS    |
| 4780 | ENSG00000122779 | HPA061717 | U-2 OS    |
| 4781 | ENSG00000122786 | HPA008066 | U-2 OS    |
| 4782 | ENSG00000122786 | HPA017330 | U-2 OS    |
| 4783 | ENSG00000122787 | HPA057002 | Hep G2    |

|      |                 |           |          |
|------|-----------------|-----------|----------|
| 4784 | ENSG00000122824 | HPA047027 | U-2 OS   |
| 4785 | ENSG00000122859 | HPA039785 | U-2 OS   |
| 4786 | ENSG00000122862 | HPA000759 | THP-1    |
| 4787 | ENSG00000122863 | HPA047523 | U-2 OS   |
| 4788 | ENSG00000122870 | HPA045212 | A-431    |
| 4789 | ENSG00000122873 | HPA074383 | U-2 OS   |
| 4790 | ENSG00000122877 | HPA031165 | U-2 OS   |
| 4791 | ENSG00000122882 | HPA006465 | U-2 OS   |
| 4792 | ENSG00000122884 | HPA007599 | U-2 OS   |
| 4793 | ENSG00000122884 | HPA026593 | U-2 OS   |
| 4794 | ENSG00000122912 | HPA036243 | PC-3     |
| 4795 | ENSG00000122952 | HPA005757 | U-2 OS   |
| 4796 | ENSG00000122952 | HPA022264 | U-2 OS   |
| 4797 | ENSG00000122958 | CAB011602 | U-2 OS   |
| 4798 | ENSG00000122958 | HPA057498 | U-2 OS   |
| 4799 | ENSG00000122965 | HPA058732 | CACO-2   |
| 4800 | ENSG00000122966 | HPA075506 | U-2 OS   |
| 4801 | ENSG00000122970 | HPA019087 | U-251 MG |
| 4802 | ENSG00000122970 | HPA020051 | U-2 OS   |
| 4803 | ENSG00000122971 | HPA004799 | Hep G2   |
| 4804 | ENSG00000122971 | HPA022271 | RT4      |
| 4805 | ENSG00000123064 | HPA070786 | MCF7     |
| 4806 | ENSG00000123066 | HPA039445 | U-2 OS   |
| 4807 | ENSG00000123080 | CAB018398 | U-2 OS   |
| 4808 | ENSG00000123094 | HPA038164 | U-2 OS   |
| 4809 | ENSG00000123095 | HPA056035 | RT4      |
| 4810 | ENSG00000123095 | HPA077617 | RT4      |
| 4811 | ENSG00000123096 | HPA066432 | U-2 OS   |
| 4812 | ENSG00000123104 | HPA062260 | U-2 OS   |
| 4813 | ENSG00000123106 | HPA038169 | U-2 OS   |
| 4814 | ENSG00000123119 | HPA023252 | U-2 OS   |
| 4815 | ENSG00000123119 | HPA025963 | U-2 OS   |
| 4816 | ENSG00000123124 | HPA023180 | U-2 OS   |
| 4817 | ENSG00000123130 | HPA035533 | U-2 OS   |
| 4818 | ENSG00000123131 | CAB027389 | U-2 OS   |
| 4819 | ENSG00000123131 | CAB047362 | U-2 OS   |
| 4820 | ENSG00000123136 | HPA055334 | U-2 OS   |
| 4821 | ENSG00000123143 | CAB010278 | U-2 OS   |
| 4822 | ENSG00000123144 | HPA059965 | U-2 OS   |
| 4823 | ENSG00000123146 | HPA013707 | U-2 OS   |
| 4824 | ENSG00000123154 | HPA042629 | U-2 OS   |
| 4825 | ENSG00000123154 | HPA042838 | U-2 OS   |
| 4826 | ENSG00000123159 | HPA061786 | MCF7     |
| 4827 | ENSG00000123178 | HPA043934 | U-2 OS   |
| 4828 | ENSG00000123179 | HPA049891 | HEK 293  |
| 4829 | ENSG00000123191 | HPA009137 | CACO-2   |
| 4830 | ENSG00000123200 | HPA040140 | U-2 OS   |
| 4831 | ENSG00000123213 | HPA031862 | U-2 OS   |
| 4832 | ENSG00000123240 | HPA003279 | A-431    |
| 4833 | ENSG00000123240 | HPA003360 | U-2 OS   |
| 4834 | ENSG00000123240 | CAB019303 | U-2 OS   |
| 4835 | ENSG00000123243 | HPA038305 | U-2 OS   |
| 4836 | ENSG00000123268 | CAB016222 | U-2 OS   |
| 4837 | ENSG00000123268 | HPA055069 | U-2 OS   |
| 4838 | ENSG00000123268 | HPA055406 | U-2 OS   |

|      |                 |           |           |
|------|-----------------|-----------|-----------|
| 4839 | ENSG00000123297 | HPA006204 | U-2 OS    |
| 4840 | ENSG00000123338 | HPA039490 | U-2 OS    |
| 4841 | ENSG00000123342 | HPA070804 | U-2 OS    |
| 4842 | ENSG00000123349 | HPA008587 | U-2 OS    |
| 4843 | ENSG00000123352 | HPA038643 | U-2 OS    |
| 4844 | ENSG00000123352 | HPA076823 | U-2 OS    |
| 4845 | ENSG00000123353 | HPA065643 | RT4       |
| 4846 | ENSG00000123358 | HPA059742 | U-2 OS    |
| 4847 | ENSG00000123374 | HPA066915 | U-2 OS    |
| 4848 | ENSG00000123384 | HPA004182 | RH-30     |
| 4849 | ENSG00000123388 | HPA038291 | A-431     |
| 4850 | ENSG00000123405 | HPA001914 | U-2 OS    |
| 4851 | ENSG00000123411 | HPA046270 | CACO-2    |
| 4852 | ENSG00000123415 | HPA026804 | U-2 OS    |
| 4853 | ENSG00000123415 | HPA065892 | MCF7      |
| 4854 | ENSG00000123416 | HPA039247 | U-2 OS    |
| 4855 | ENSG00000123416 | HPA043684 | U-2 OS    |
| 4856 | ENSG00000123427 | HPA045492 | U-2 OS    |
| 4857 | ENSG00000123444 | HPA037792 | U-2 OS    |
| 4858 | ENSG00000123453 | HPA058086 | U-2 OS    |
| 4859 | ENSG00000123454 | HPA005960 | SH-SY5Y   |
| 4860 | ENSG00000123454 | HPA070789 | U-2 OS    |
| 4861 | ENSG00000123472 | HPA028382 | SiHa      |
| 4862 | ENSG00000123473 | HPA046543 | U-2 OS    |
| 4863 | ENSG00000123485 | HPA008436 | U-2 OS    |
| 4864 | ENSG00000123485 | HPA027261 | U-2 OS    |
| 4865 | ENSG00000123496 | HPA045831 | U-251 MG  |
| 4866 | ENSG00000123496 | HPA067363 | U-2 OS    |
| 4867 | ENSG00000123500 | HPA053268 | ASC TERT1 |
| 4868 | ENSG00000123505 | HPA029281 | U-2 OS    |
| 4869 | ENSG00000123545 | HPA046560 | U-2 OS    |
| 4870 | ENSG00000123552 | HPA029604 | U-2 OS    |
| 4871 | ENSG00000123562 | HPA031872 | U-2 OS    |
| 4872 | ENSG00000123562 | HPA054102 | U-2 OS    |
| 4873 | ENSG00000123572 | HPA017238 | U-251 MG  |
| 4874 | ENSG00000123575 | HPA003093 | U-2 OS    |
| 4875 | ENSG00000123576 | HPA051992 | U-2 OS    |
| 4876 | ENSG00000123584 | HPA045401 | Hep G2    |
| 4877 | ENSG00000123584 | HPA051687 | RT4       |
| 4878 | ENSG00000123595 | CAB016411 | U-2 OS    |
| 4879 | ENSG00000123600 | HPA035421 | A-431     |
| 4880 | ENSG00000123607 | HPA035494 | U-2 OS    |
| 4881 | ENSG00000123607 | HPA035495 | U-2 OS    |
| 4882 | ENSG00000123609 | HPA008588 | A-431     |
| 4883 | ENSG00000123636 | HPA059292 | U-2 OS    |
| 4884 | ENSG00000123737 | HPA041838 | A-431     |
| 4885 | ENSG00000123815 | HPA027229 | U-2 OS    |
| 4886 | ENSG00000123815 | HPA028303 | U-2 OS    |
| 4887 | ENSG00000123836 | HPA049975 | U-2 OS    |
| 4888 | ENSG00000123836 | HPA063575 | SiHa      |
| 4889 | ENSG00000123892 | HPA071701 | U-2 OS    |
| 4890 | ENSG00000123908 | HPA058075 | U-2 OS    |
| 4891 | ENSG00000123933 | HPA053363 | U-2 OS    |
| 4892 | ENSG00000123975 | HPA003424 | U-2 OS    |
| 4893 | ENSG00000123977 | HPA046118 | CACO-2    |

|      |                 |           |         |
|------|-----------------|-----------|---------|
| 4894 | ENSG00000123983 | HPA071021 | RT4     |
| 4895 | ENSG00000123989 | HPA035123 | U-2 OS  |
| 4896 | ENSG00000123992 | HPA044860 | CACO-2  |
| 4897 | ENSG00000123999 | HPA019141 | U-2 OS  |
| 4898 | ENSG00000124006 | HPA036405 | U-2 OS  |
| 4899 | ENSG00000124019 | HPA070240 | U-2 OS  |
| 4900 | ENSG00000124067 | HPA041138 | U-2 OS  |
| 4901 | ENSG00000124074 | HPA041163 | U-2 OS  |
| 4902 | ENSG00000124074 | HPA041478 | U-2 OS  |
| 4903 | ENSG00000124092 | HPA001472 | U-2 OS  |
| 4904 | ENSG00000124098 | HPA042652 | U-2 OS  |
| 4905 | ENSG00000124102 | CAB009449 | U-2 OS  |
| 4906 | ENSG00000124104 | HPA046359 | U-2 OS  |
| 4907 | ENSG00000124107 | HPA027774 | U-2 OS  |
| 4908 | ENSG00000124120 | HPA066532 | CACO-2  |
| 4909 | ENSG00000124126 | HPA001927 | U-2 OS  |
| 4910 | ENSG00000124143 | HPA042636 | U-2 OS  |
| 4911 | ENSG00000124143 | HPA042840 | U-2 OS  |
| 4912 | ENSG00000124145 | HPA005716 | U-2 OS  |
| 4913 | ENSG00000124151 | HPA024210 | U-2 OS  |
| 4914 | ENSG00000124160 | HPA050231 | U-2 OS  |
| 4915 | ENSG00000124164 | HPA013144 | U-2 OS  |
| 4916 | ENSG00000124164 | CAB013722 | U-2 OS  |
| 4917 | ENSG00000124171 | HPA013376 | U-2 OS  |
| 4918 | ENSG00000124177 | HPA015543 | SiHa    |
| 4919 | ENSG00000124181 | CAB004277 | U-2 OS  |
| 4920 | ENSG00000124181 | HPA036681 | U-2 OS  |
| 4921 | ENSG00000124181 | HPA036682 | U-2 OS  |
| 4922 | ENSG00000124191 | HPA049900 | A-431   |
| 4923 | ENSG00000124191 | HPA058396 | A549    |
| 4924 | ENSG00000124193 | CAB034889 | U-2 OS  |
| 4925 | ENSG00000124194 | HPA054182 | U-2 OS  |
| 4926 | ENSG00000124196 | HPA054694 | REH     |
| 4927 | ENSG00000124198 | CAB026382 | U-2 OS  |
| 4928 | ENSG00000124201 | HPA046629 | CACO-2  |
| 4929 | ENSG00000124207 | CAB002140 | U-2 OS  |
| 4930 | ENSG00000124207 | HPA038059 | CACO-2  |
| 4931 | ENSG00000124207 | HPA038060 | CACO-2  |
| 4932 | ENSG00000124208 | HPA052535 | CACO-2  |
| 4933 | ENSG00000124208 | HPA053186 | Hep G2  |
| 4934 | ENSG00000124209 | HPA058894 | U-2 OS  |
| 4935 | ENSG00000124212 | HPA052244 | U-2 OS  |
| 4936 | ENSG00000124214 | HPA049892 | A-431   |
| 4937 | ENSG00000124215 | HPA047578 | U-2 OS  |
| 4938 | ENSG00000124216 | HPA056831 | U-2 OS  |
| 4939 | ENSG00000124222 | HPA041019 | U-2 OS  |
| 4940 | ENSG00000124222 | HPA042033 | U-2 OS  |
| 4941 | ENSG00000124225 | HPA072291 | U-2 OS  |
| 4942 | ENSG00000124226 | HPA021184 | U-2 OS  |
| 4943 | ENSG00000124228 | HPA047087 | U-2 OS  |
| 4944 | ENSG00000124243 | HPA038812 | U-2 OS  |
| 4945 | ENSG00000124257 | HPA059842 | U-2 OS  |
| 4946 | ENSG00000124260 | HPA070780 | SH-SY5Y |
| 4947 | ENSG00000124275 | HPA038113 | U-2 OS  |
| 4948 | ENSG00000124279 | HPA074462 | U-2 OS  |



|      |                 |           |          |
|------|-----------------|-----------|----------|
| 4949 | ENSG00000124299 | HPA015599 | RT4      |
| 4950 | ENSG00000124299 | HPA072045 | RT4      |
| 4951 | ENSG00000124313 | HPA003973 | U-2 OS   |
| 4952 | ENSG00000124333 | HPA036733 | U-2 OS   |
| 4953 | ENSG00000124356 | HPA035800 | U-2 OS   |
| 4954 | ENSG00000124356 | HPA035801 | LHCN-M2  |
| 4955 | ENSG00000124357 | HPA035206 | U-2 OS   |
| 4956 | ENSG00000124357 | HPA035207 | U-2 OS   |
| 4957 | ENSG00000124370 | HPA035196 | U-2 OS   |
| 4958 | ENSG00000124374 | HPA072371 | HEK 293  |
| 4959 | ENSG00000124380 | HPA034541 | U-2 OS   |
| 4960 | ENSG00000124383 | HPA035059 | U-2 OS   |
| 4961 | ENSG00000124383 | HPA035060 | U-2 OS   |
| 4962 | ENSG00000124383 | HPA049907 | U-2 OS   |
| 4963 | ENSG00000124406 | HPA052935 | RT4      |
| 4964 | ENSG00000124422 | HPA044980 | U-2 OS   |
| 4965 | ENSG00000124429 | HPA002033 | RT4      |
| 4966 | ENSG00000124429 | HPA050027 | RT4      |
| 4967 | ENSG00000124440 | HPA041141 | CACO-2   |
| 4968 | ENSG00000124444 | HPA050064 | U-2 OS   |
| 4969 | ENSG00000124459 | HPA075124 | RT4      |
| 4970 | ENSG00000124466 | HPA077859 | RT4      |
| 4971 | ENSG00000124479 | HPA003095 | U-251 MG |
| 4972 | ENSG00000124486 | HPA047417 | A-431    |
| 4973 | ENSG00000124496 | HPA027771 | RT4      |
| 4974 | ENSG00000124496 | HPA051273 | U-2 OS   |
| 4975 | ENSG00000124507 | HPA055491 | U-2 OS   |
| 4976 | ENSG00000124508 | HPA051504 | U-2 OS   |
| 4977 | ENSG00000124523 | HPA022002 | U-2 OS   |
| 4978 | ENSG00000124535 | HPA031753 | U-2 OS   |
| 4979 | ENSG00000124541 | HPA029905 | U-2 OS   |
| 4980 | ENSG00000124562 | HPA042419 | U-2 OS   |
| 4981 | ENSG00000124562 | HPA055490 | U-2 OS   |
| 4982 | ENSG00000124568 | HPA050513 | U-2 OS   |
| 4983 | ENSG00000124570 | HPA009668 | A-431    |
| 4984 | ENSG00000124571 | CAB012357 | U-2 OS   |
| 4985 | ENSG00000124571 | HPA018402 | U-2 OS   |
| 4986 | ENSG00000124571 | HPA023959 | U-2 OS   |
| 4987 | ENSG00000124571 | HPA029909 | U-2 OS   |
| 4988 | ENSG00000124587 | HPA074179 | U-2 OS   |
| 4989 | ENSG00000124588 | HPA021332 | U-2 OS   |
| 4990 | ENSG00000124596 | HPA029036 | U-2 OS   |
| 4991 | ENSG00000124602 | HPA015725 | U-2 OS   |
| 4992 | ENSG00000124608 | HPA035636 | U-2 OS   |
| 4993 | ENSG00000124608 | HPA061396 | U-2 OS   |
| 4994 | ENSG00000124614 | HPA048084 | U-2 OS   |
| 4995 | ENSG00000124615 | HPA045783 | CACO-2   |
| 4996 | ENSG00000124615 | HPA075505 | CACO-2   |
| 4997 | ENSG00000124635 | HPA048671 | U-2 OS   |
| 4998 | ENSG00000124641 | HPA040717 | A-431    |
| 4999 | ENSG00000124659 | HPA035073 | U-2 OS   |
| 5000 | ENSG00000124664 | HPA055707 | MCF7     |
| 5001 | ENSG00000124688 | HPA028729 | U-2 OS   |
| 5002 | ENSG00000124702 | HPA030131 | U-2 OS   |
| 5003 | ENSG00000124702 | HPA030132 | A-431    |

|      |                 |           |           |
|------|-----------------|-----------|-----------|
| 5004 | ENSG00000124702 | HPA030133 | U-2 OS    |
| 5005 | ENSG00000124713 | HPA027501 | U-2 OS    |
| 5006 | ENSG00000124733 | HPA017921 | A-431     |
| 5007 | ENSG00000124749 | HPA031212 | ASC TERT1 |
| 5008 | ENSG00000124762 | HPA005946 | RT4       |
| 5009 | ENSG00000124766 | HPA029901 | U-2 OS    |
| 5010 | ENSG00000124767 | CAB040541 | U-2 OS    |
| 5011 | ENSG00000124767 | CAB040542 | U-2 OS    |
| 5012 | ENSG00000124767 | HPA059791 | U-2 OS    |
| 5013 | ENSG00000124772 | HPA031369 | U-2 OS    |
| 5014 | ENSG00000124780 | HPA043892 | U-2 OS    |
| 5015 | ENSG00000124782 | HPA034843 | U-2 OS    |
| 5016 | ENSG00000124783 | HPA011276 | U-2 OS    |
| 5017 | ENSG00000124784 | HPA051446 | U-2 OS    |
| 5018 | ENSG00000124787 | HPA035686 | U-2 OS    |
| 5019 | ENSG00000124788 | HPA070756 | RT4       |
| 5020 | ENSG00000124789 | HPA027896 | U-2 OS    |
| 5021 | ENSG00000124789 | HPA027897 | U-2 OS    |
| 5022 | ENSG00000124789 | HPA027898 | U-2 OS    |
| 5023 | ENSG00000124795 | CAB015226 | U-2 OS    |
| 5024 | ENSG00000124795 | HPA057799 | U-2 OS    |
| 5025 | ENSG00000124802 | HPA027901 | U-2 OS    |
| 5026 | ENSG00000124802 | HPA057866 | U-2 OS    |
| 5027 | ENSG00000124813 | HPA022040 | U-2 OS    |
| 5028 | ENSG00000124813 | HPA070715 | U-2 OS    |
| 5029 | ENSG00000124831 | HPA006979 | U-2 OS    |
| 5030 | ENSG00000124882 | HPA054373 | A549      |
| 5031 | ENSG00000124900 | HPA077883 | U-2 OS    |
| 5032 | ENSG00000124920 | HPA018310 | U-2 OS    |
| 5033 | ENSG00000124939 | HPA034584 | U-2 OS    |
| 5034 | ENSG00000124942 | HPA019010 | U-2 OS    |
| 5035 | ENSG00000124942 | HPA019070 | U-2 OS    |
| 5036 | ENSG00000124942 | HPA026643 | U-2 OS    |
| 5037 | ENSG00000125037 | HPA042372 | U-2 OS    |
| 5038 | ENSG00000125089 | HPA056807 | U-2 OS    |
| 5039 | ENSG00000125107 | HPA049664 | SiHa      |
| 5040 | ENSG00000125122 | HPA034998 | A-431     |
| 5041 | ENSG00000125149 | HPA041214 | U-2 OS    |
| 5042 | ENSG00000125170 | HPA055849 | CACO-2    |
| 5043 | ENSG00000125246 | HPA039959 | U-2 OS    |
| 5044 | ENSG00000125247 | HPA016489 | U-2 OS    |
| 5045 | ENSG00000125257 | HPA002476 | A-431     |
| 5046 | ENSG00000125266 | HPA008999 | U-2 OS    |
| 5047 | ENSG00000125266 | CAB009368 | U-251 MG  |
| 5048 | ENSG00000125285 | HPA064084 | AF22      |
| 5049 | ENSG00000125319 | HPA023004 | U-2 OS    |
| 5050 | ENSG00000125347 | CAB011662 | A-431     |
| 5051 | ENSG00000125351 | HPA001592 | U-2 OS    |
| 5052 | ENSG00000125351 | HPA001882 | U-2 OS    |
| 5053 | ENSG00000125352 | HPA076658 | PC-3      |
| 5054 | ENSG00000125354 | HPA005665 | U-2 OS    |
| 5055 | ENSG00000125355 | HPA048470 | U-2 OS    |
| 5056 | ENSG00000125356 | HPA029768 | U-2 OS    |
| 5057 | ENSG00000125375 | HPA062690 | U-2 OS    |
| 5058 | ENSG00000125386 | HPA043116 | A-431     |

|      |                 |           |             |
|------|-----------------|-----------|-------------|
| 5059 | ENSG00000125388 | HPA028737 | U-2 OS      |
| 5060 | ENSG00000125398 | HPA001758 | U-2 OS      |
| 5061 | ENSG00000125398 | CAB022456 | U-2 OS      |
| 5062 | ENSG00000125430 | HPA064126 | U-2 OS      |
| 5063 | ENSG00000125434 | HPA051720 | A549        |
| 5064 | ENSG00000125445 | HPA022522 | U-2 OS      |
| 5065 | ENSG00000125447 | HPA024645 | U-2 OS      |
| 5066 | ENSG00000125449 | HPA024229 | U-2 OS      |
| 5067 | ENSG00000125449 | HPA053076 | U-2 OS      |
| 5068 | ENSG00000125450 | HPA061910 | U-2 OS      |
| 5069 | ENSG00000125457 | HPA051222 | U-2 OS      |
| 5070 | ENSG00000125458 | HPA023632 | U-2 OS      |
| 5071 | ENSG00000125482 | HPA054837 | U-2 OS      |
| 5072 | ENSG00000125484 | HPA069369 | U-2 OS      |
| 5073 | ENSG00000125485 | HPA020891 | U-2 OS      |
| 5074 | ENSG00000125505 | HPA055967 | RT4         |
| 5075 | ENSG00000125508 | HPA073987 | RT4         |
| 5076 | ENSG00000125520 | HPA063050 | U-2 OS      |
| 5077 | ENSG00000125531 | HPA041341 | U-2 OS      |
| 5078 | ENSG00000125534 | HPA040929 | U-2 OS      |
| 5079 | ENSG00000125571 | HPA057950 | A-431       |
| 5080 | ENSG00000125611 | HPA038263 | U-2 OS      |
| 5081 | ENSG00000125618 | HPA030062 | U-2 OS      |
| 5082 | ENSG00000125618 | HPA064554 | U-2 OS      |
| 5083 | ENSG00000125630 | HPA037528 | A-431       |
| 5084 | ENSG00000125633 | HPA054183 | U-2 OS      |
| 5085 | ENSG00000125648 | HPA009675 | U-2 OS      |
| 5086 | ENSG00000125651 | HPA022793 | U-2 OS      |
| 5087 | ENSG00000125651 | HPA028707 | U-2 OS      |
| 5088 | ENSG00000125652 | HPA008539 | U-2 OS      |
| 5089 | ENSG00000125656 | HPA010649 | U-2 OS      |
| 5090 | ENSG00000125657 | HPA059857 | U-2 OS      |
| 5091 | ENSG00000125676 | HPA047921 | U-2 OS      |
| 5092 | ENSG00000125686 | HPA052818 | U-2 OS      |
| 5093 | ENSG00000125691 | HPA003373 | U-2 OS      |
| 5094 | ENSG00000125703 | HPA007049 | U-2 OS      |
| 5095 | ENSG00000125726 | HPA046582 | U-251 MG    |
| 5096 | ENSG00000125731 | HPA064382 | U-2 OS      |
| 5097 | ENSG00000125733 | HPA041934 | U-2 OS      |
| 5098 | ENSG00000125734 | HPA041924 | U-2 OS      |
| 5099 | ENSG00000125734 | HPA063863 | A549        |
| 5100 | ENSG00000125740 | HPA054663 | SiHa        |
| 5101 | ENSG00000125741 | HPA044881 | U-2 OS      |
| 5102 | ENSG00000125743 | HPA041437 | U-2 OS      |
| 5103 | ENSG00000125744 | HPA034941 | U-2 OS      |
| 5104 | ENSG00000125746 | HPA012757 | U-2 OS      |
| 5105 | ENSG00000125753 | CAB004612 | U-2 OS      |
| 5106 | ENSG00000125753 | HPA005724 | U-2 OS      |
| 5107 | ENSG00000125755 | HPA041756 | U-2 OS      |
| 5108 | ENSG00000125755 | HPA042449 | U-2 OS      |
| 5109 | ENSG00000125772 | HPA042987 | U-2 OS      |
| 5110 | ENSG00000125775 | HPA054554 | RT4         |
| 5111 | ENSG00000125779 | HPA008440 | U-2 OS      |
| 5112 | ENSG00000125798 | HPA066846 | U-2 OS      |
| 5113 | ENSG00000125810 | HPA009300 | HUVEC TERT2 |

|      |                 |           |         |
|------|-----------------|-----------|---------|
| 5114 | ENSG00000125812 | HPA024520 | U-2 OS  |
| 5115 | ENSG00000125814 | HPA050196 | MCF7    |
| 5116 | ENSG00000125816 | HPA074996 | HEK 293 |
| 5117 | ENSG00000125817 | HPA053507 | A-431   |
| 5118 | ENSG00000125817 | HPA054405 | U-2 OS  |
| 5119 | ENSG00000125818 | HPA041122 | U-2 OS  |
| 5120 | ENSG00000125818 | HPA041300 | U-2 OS  |
| 5121 | ENSG00000125821 | HPA040981 | U-2 OS  |
| 5122 | ENSG00000125827 | HPA015752 | U-2 OS  |
| 5123 | ENSG00000125834 | HPA026452 | U-2 OS  |
| 5124 | ENSG00000125835 | CAB009610 | U-2 OS  |
| 5125 | ENSG00000125835 | HPA067842 | CACO-2  |
| 5126 | ENSG00000125841 | HPA015967 | U-2 OS  |
| 5127 | ENSG00000125843 | HPA043533 | MCF7    |
| 5128 | ENSG00000125843 | HPA048244 | U-2 OS  |
| 5129 | ENSG00000125844 | HPA009026 | U-2 OS  |
| 5130 | ENSG00000125844 | HPA011924 | U-2 OS  |
| 5131 | ENSG00000125845 | HPA058610 | RT4     |
| 5132 | ENSG00000125845 | CAB078457 | U-2 OS  |
| 5133 | ENSG00000125846 | HPA001493 | U-2 OS  |
| 5134 | ENSG00000125848 | HPA056033 | U-2 OS  |
| 5135 | ENSG00000125850 | HPA038531 | CACO-2  |
| 5136 | ENSG00000125851 | HPA049627 | U-2 OS  |
| 5137 | ENSG00000125863 | HPA044233 | U-2 OS  |
| 5138 | ENSG00000125864 | HPA040748 | U-2 OS  |
| 5139 | ENSG00000125864 | HPA042038 | U-2 OS  |
| 5140 | ENSG00000125869 | HPA070765 | SH-SY5Y |
| 5141 | ENSG00000125870 | HPA050814 | U-2 OS  |
| 5142 | ENSG00000125870 | HPA076104 | U-2 OS  |
| 5143 | ENSG00000125871 | HPA040913 | U-2 OS  |
| 5144 | ENSG00000125877 | HPA022824 | U-2 OS  |
| 5145 | ENSG00000125877 | HPA073963 | U-2 OS  |
| 5146 | ENSG00000125878 | HPA060221 | U-2 OS  |
| 5147 | ENSG00000125885 | HPA045141 | A-431   |
| 5148 | ENSG00000125885 | HPA066433 | U-2 OS  |
| 5149 | ENSG00000125895 | HPA045213 | CACO-2  |
| 5150 | ENSG00000125898 | HPA069240 | U-2 OS  |
| 5151 | ENSG00000125901 | HPA045472 | U-2 OS  |
| 5152 | ENSG00000125901 | HPA054610 | U-2 OS  |
| 5153 | ENSG00000125910 | HPA060601 | U-2 OS  |
| 5154 | ENSG00000125910 | HPA067232 | U-2 OS  |
| 5155 | ENSG00000125912 | HPA006625 | A-431   |
| 5156 | ENSG00000125931 | HPA049051 | U-2 OS  |
| 5157 | ENSG00000125944 | CAB011687 | U-2 OS  |
| 5158 | ENSG00000125944 | HPA026092 | U-2 OS  |
| 5159 | ENSG00000125945 | HPA043817 | U-2 OS  |
| 5160 | ENSG00000125952 | CAB000328 | U-2 OS  |
| 5161 | ENSG00000125962 | HPA000996 | U-2 OS  |
| 5162 | ENSG00000125966 | HPA049280 | CACO-2  |
| 5163 | ENSG00000125967 | HPA044785 | Hep G2  |
| 5164 | ENSG00000125968 | HPA051456 | U-2 OS  |
| 5165 | ENSG00000125968 | HPA058518 | A549    |
| 5166 | ENSG00000125970 | HPA040971 | U-2 OS  |
| 5167 | ENSG00000125970 | HPA043614 | U-2 OS  |
| 5168 | ENSG00000125977 | HPA041262 | U-2 OS  |

|      |                 |           |        |
|------|-----------------|-----------|--------|
| 5169 | ENSG00000125977 | HPA041332 | CACO-2 |
| 5170 | ENSG00000125991 | HPA015242 | CACO-2 |
| 5171 | ENSG00000125991 | HPA015968 | CACO-2 |
| 5172 | ENSG00000126001 | HPA064875 | U-2 OS |
| 5173 | ENSG00000126003 | HPA005900 | A-431  |
| 5174 | ENSG00000126010 | HPA069604 | PC-3   |
| 5175 | ENSG00000126012 | HPA038244 | U-2 OS |
| 5176 | ENSG00000126012 | HPA046147 | U-2 OS |
| 5177 | ENSG00000126016 | HPA067853 | U-2 OS |
| 5178 | ENSG00000126062 | CAB006319 | U-2 OS |
| 5179 | ENSG00000126067 | HPA026322 | A-431  |
| 5180 | ENSG00000126067 | HPA026324 | A-431  |
| 5181 | ENSG00000126070 | HPA075436 | U-2 OS |
| 5182 | ENSG00000126088 | HPA030350 | U-2 OS |
| 5183 | ENSG00000126106 | HPA021134 | U-2 OS |
| 5184 | ENSG00000126214 | HPA052450 | U-2 OS |
| 5185 | ENSG00000126215 | HPA062422 | U-2 OS |
| 5186 | ENSG00000126215 | HPA068953 | RH-30  |
| 5187 | ENSG00000126226 | HPA073074 | U-2 OS |
| 5188 | ENSG00000126246 | HPA012369 | A-431  |
| 5189 | ENSG00000126247 | HPA006872 | A-431  |
| 5190 | ENSG00000126249 | HPA052181 | U-2 OS |
| 5191 | ENSG00000126254 | HPA043671 | U-2 OS |
| 5192 | ENSG00000126259 | HPA071587 | REH    |
| 5193 | ENSG00000126259 | HPA074326 | REH    |
| 5194 | ENSG00000126261 | HPA041436 | U-2 OS |
| 5195 | ENSG00000126264 | HPA063026 | U-2 OS |
| 5196 | ENSG00000126267 | HPA004192 | U-2 OS |
| 5197 | ENSG00000126351 | HPA009654 | U-2 OS |
| 5198 | ENSG00000126351 | CAB023349 | U-2 OS |
| 5199 | ENSG00000126353 | HPA031383 | U-2 OS |
| 5200 | ENSG00000126353 | HPA074467 | U-2 OS |
| 5201 | ENSG00000126368 | HPA007935 | U-2 OS |
| 5202 | ENSG00000126391 | HPA005506 | U-2 OS |
| 5203 | ENSG00000126432 | CAB008661 | U-2 OS |
| 5204 | ENSG00000126432 | HPA037915 | U-2 OS |
| 5205 | ENSG00000126453 | HPA020856 | U-2 OS |
| 5206 | ENSG00000126456 | HPA004895 | U-2 OS |
| 5207 | ENSG00000126457 | HPA072136 | RT4    |
| 5208 | ENSG00000126458 | HPA060364 | U-2 OS |
| 5209 | ENSG00000126460 | HPA010702 | RT4    |
| 5210 | ENSG00000126461 | HPA054593 | A-431  |
| 5211 | ENSG00000126464 | HPA011959 | U-2 OS |
| 5212 | ENSG00000126522 | CAB003696 | U-2 OS |
| 5213 | ENSG00000126524 | HPA028891 | U-2 OS |
| 5214 | ENSG00000126561 | HPA027873 | U-2 OS |
| 5215 | ENSG00000126602 | HPA041082 | U-2 OS |
| 5216 | ENSG00000126602 | HPA044227 | U-2 OS |
| 5217 | ENSG00000126603 | HPA056976 | HeLa   |
| 5218 | ENSG00000126653 | HPA015593 | U-2 OS |
| 5219 | ENSG00000126698 | HPA026275 | U-2 OS |
| 5220 | ENSG00000126705 | HPA028685 | U-2 OS |
| 5221 | ENSG00000126705 | HPA028691 | U-2 OS |
| 5222 | ENSG00000126709 | HPA005543 | U-2 OS |
| 5223 | ENSG00000126733 | HPA001367 | HAP1   |

|      |                 |           |           |
|------|-----------------|-----------|-----------|
| 5224 | ENSG00000126746 | HPA004051 | U-2 OS    |
| 5225 | ENSG00000126749 | HPA039304 | CACO-2    |
| 5226 | ENSG00000126752 | HPA045683 | U-2 OS    |
| 5227 | ENSG00000126756 | HPA050499 | HEK 293   |
| 5228 | ENSG00000126756 | HPA058400 | U-2 OS    |
| 5229 | ENSG00000126767 | CAB003808 | U-2 OS    |
| 5230 | ENSG00000126767 | HPA036084 | U-2 OS    |
| 5231 | ENSG00000126767 | HPA064381 | U-2 OS    |
| 5232 | ENSG00000126768 | HPA029093 | U-2 OS    |
| 5233 | ENSG00000126773 | HPA003390 | U-2 OS    |
| 5234 | ENSG00000126777 | HPA003178 | U-2 OS    |
| 5235 | ENSG00000126777 | CAB015331 | U-2 OS    |
| 5236 | ENSG00000126778 | HPA001893 | U-2 OS    |
| 5237 | ENSG00000126785 | HPA003050 | AF22      |
| 5238 | ENSG00000126787 | HPA005546 | U-2 OS    |
| 5239 | ENSG00000126790 | HPA056694 | HeLa      |
| 5240 | ENSG00000126803 | HPA052504 | CACO-2    |
| 5241 | ENSG00000126804 | HPA050516 | U-2 OS    |
| 5242 | ENSG00000126814 | HPA000943 | U-2 OS    |
| 5243 | ENSG00000126821 | HPA053149 | U-2 OS    |
| 5244 | ENSG00000126821 | HPA064908 | U-2 OS    |
| 5245 | ENSG00000126822 | HPA063455 | U-2 OS    |
| 5246 | ENSG00000126822 | HPA065323 | U-2 OS    |
| 5247 | ENSG00000126856 | HPA059944 | CACO-2    |
| 5248 | ENSG00000126860 | HPA057051 | U-2 OS    |
| 5249 | ENSG00000126870 | HPA020607 | U-2 OS    |
| 5250 | ENSG00000126882 | HPA021472 | U-2 OS    |
| 5251 | ENSG00000126882 | HPA023914 | U-2 OS    |
| 5252 | ENSG00000126883 | HPA048789 | U-2 OS    |
| 5253 | ENSG00000126890 | HPA071467 | K-562     |
| 5254 | ENSG00000126890 | HPA076586 | K-562     |
| 5255 | ENSG00000126903 | HPA021656 | U-2 OS    |
| 5256 | ENSG00000126934 | CAB003835 | A-431     |
| 5257 | ENSG00000126934 | HPA051993 | U-2 OS    |
| 5258 | ENSG00000126945 | HPA000914 | U-2 OS    |
| 5259 | ENSG00000126945 | HPA016884 | U-2 OS    |
| 5260 | ENSG00000126947 | HPA005685 | U-2 OS    |
| 5261 | ENSG00000126950 | HPA048583 | U-2 OS    |
| 5262 | ENSG00000126953 | HPA003628 | U-2 OS    |
| 5263 | ENSG00000126970 | HPA049584 | U-2 OS    |
| 5264 | ENSG00000127022 | HPA009433 | U-2 OS    |
| 5265 | ENSG00000127022 | HPA009696 | U-2 OS    |
| 5266 | ENSG00000127054 | HPA028379 | U-2 OS    |
| 5267 | ENSG00000127080 | HPA020603 | U-2 OS    |
| 5268 | ENSG00000127081 | HPA028973 | A-431     |
| 5269 | ENSG00000127083 | HPA069948 | ASC TERT1 |
| 5270 | ENSG00000127084 | HPA021018 | U-2 OS    |
| 5271 | ENSG00000127124 | HPA005728 | U-2 OS    |
| 5272 | ENSG00000127125 | HPA031361 | U-2 OS    |
| 5273 | ENSG00000127125 | HPA031363 | U-2 OS    |
| 5274 | ENSG00000127129 | HPA028459 | U-2 OS    |
| 5275 | ENSG00000127152 | HPA049117 | RT4       |
| 5276 | ENSG00000127191 | HPA009972 | U-2 OS    |
| 5277 | ENSG00000127191 | HPA010634 | U-2 OS    |
| 5278 | ENSG00000127220 | HPA058209 | U-2 OS    |

|      |                 |           |          |
|------|-----------------|-----------|----------|
| 5279 | ENSG00000127241 | HPA001617 | BJ       |
| 5280 | ENSG00000127241 | HPA009641 | BJ       |
| 5281 | ENSG00000127249 | HPA051932 | U-2 OS   |
| 5282 | ENSG00000127252 | HPA051179 | U-2 OS   |
| 5283 | ENSG00000127324 | HPA044337 | U-2 OS   |
| 5284 | ENSG00000127328 | HPA039794 | U-2 OS   |
| 5285 | ENSG00000127329 | HPA067868 | U-2 OS   |
| 5286 | ENSG00000127334 | HPA027230 | U-2 OS   |
| 5287 | ENSG00000127334 | HPA056902 | U-2 OS   |
| 5288 | ENSG00000127337 | HPA072532 | RT4      |
| 5289 | ENSG00000127366 | HPA053742 | U-2 OS   |
| 5290 | ENSG00000127399 | HPA019355 | U-2 OS   |
| 5291 | ENSG00000127415 | CAB025901 | A-431    |
| 5292 | ENSG00000127418 | HPA068828 | U-251 MG |
| 5293 | ENSG00000127419 | HPA057160 | U-2 OS   |
| 5294 | ENSG00000127423 | HPA028730 | A-431    |
| 5295 | ENSG00000127445 | CAB004528 | U-2 OS   |
| 5296 | ENSG00000127445 | CAB009326 | A-431    |
| 5297 | ENSG00000127445 | HPA068650 | U-2 OS   |
| 5298 | ENSG00000127445 | HPA070887 | U-2 OS   |
| 5299 | ENSG00000127452 | HPA002843 | U-2 OS   |
| 5300 | ENSG00000127481 | HPA013394 | U-2 OS   |
| 5301 | ENSG00000127483 | HPA054295 | U-2 OS   |
| 5302 | ENSG00000127507 | HPA055200 | U-2 OS   |
| 5303 | ENSG00000127511 | HPA050329 | U-2 OS   |
| 5304 | ENSG00000127526 | HPA016570 | U-2 OS   |
| 5305 | ENSG00000127526 | HPA062214 | U-2 OS   |
| 5306 | ENSG00000127527 | HPA055309 | U-2 OS   |
| 5307 | ENSG00000127528 | HPA055964 | U-251 MG |
| 5308 | ENSG00000127533 | HPA031401 | U-2 OS   |
| 5309 | ENSG00000127533 | HPA042340 | HEL      |
| 5310 | ENSG00000127554 | HPA041227 | U-2 OS   |
| 5311 | ENSG00000127554 | HPA063553 | U-2 OS   |
| 5312 | ENSG00000127561 | HPA042842 | U-2 OS   |
| 5313 | ENSG00000127564 | HPA068860 | U-2 OS   |
| 5314 | ENSG00000127580 | HPA039506 | U-251 MG |
| 5315 | ENSG00000127586 | HPA040976 | U-2 OS   |
| 5316 | ENSG00000127586 | HPA056209 | U-2 OS   |
| 5317 | ENSG00000127603 | HPA068103 | U-2 OS   |
| 5318 | ENSG00000127616 | CAB004208 | U-2 OS   |
| 5319 | ENSG00000127663 | HPA062872 | SH-SY5Y  |
| 5320 | ENSG00000127666 | HPA042460 | PC-3     |
| 5321 | ENSG00000127720 | HPA039534 | U-2 OS   |
| 5322 | ENSG00000127774 | HPA062681 | U-2 OS   |
| 5323 | ENSG00000127804 | HPA020352 | U-2 OS   |
| 5324 | ENSG00000127804 | HPA059798 | U-2 OS   |
| 5325 | ENSG00000127824 | CAB004621 | U-2 OS   |
| 5326 | ENSG00000127824 | CAB005887 | U-2 OS   |
| 5327 | ENSG00000127824 | HPA039247 | U-2 OS   |
| 5328 | ENSG00000127824 | HPA043684 | U-2 OS   |
| 5329 | ENSG00000127831 | HPA006884 | CACO-2   |
| 5330 | ENSG00000127831 | HPA006885 | CACO-2   |
| 5331 | ENSG00000127837 | CAB017717 | U-2 OS   |
| 5332 | ENSG00000127837 | HPA031868 | U-2 OS   |
| 5333 | ENSG00000127838 | HPA010134 | U-2 OS   |

|      |                 |           |          |
|------|-----------------|-----------|----------|
| 5334 | ENSG00000127838 | HPA017068 | U-2 OS   |
| 5335 | ENSG00000127863 | HPA010135 | U-2 OS   |
| 5336 | ENSG00000127870 | HPA039343 | U-2 OS   |
| 5337 | ENSG00000127870 | HPA040048 | U-2 OS   |
| 5338 | ENSG00000127884 | CAB003783 | A-431    |
| 5339 | ENSG00000127884 | HPA021995 | U-2 OS   |
| 5340 | ENSG00000127884 | HPA022476 | U-2 OS   |
| 5341 | ENSG00000127903 | HPA051136 | U-2 OS   |
| 5342 | ENSG00000127914 | HPA008548 | U-2 OS   |
| 5343 | ENSG00000127914 | CAB012909 | U-2 OS   |
| 5344 | ENSG00000127914 | HPA026109 | U-2 OS   |
| 5345 | ENSG00000127922 | HPA072648 | SiHa     |
| 5346 | ENSG00000127946 | HPA013606 | U-2 OS   |
| 5347 | ENSG00000127946 | CAB015334 | U-2 OS   |
| 5348 | ENSG00000127947 | HPA007097 | U-2 OS   |
| 5349 | ENSG00000127948 | HPA010136 | U-2 OS   |
| 5350 | ENSG00000127952 | HPA050261 | U-2 OS   |
| 5351 | ENSG00000127954 | HPA065201 | SiHa     |
| 5352 | ENSG00000127955 | HPA042141 | A-431    |
| 5353 | ENSG00000127980 | HPA020235 | A-431    |
| 5354 | ENSG00000127989 | HPA069560 | U-2 OS   |
| 5355 | ENSG00000127990 | HPA074790 | U-2 OS   |
| 5356 | ENSG00000127993 | HPA021777 | U-2 OS   |
| 5357 | ENSG00000127993 | HPA025306 | U-2 OS   |
| 5358 | ENSG00000127995 | HPA044404 | U-2 OS   |
| 5359 | ENSG00000128000 | HPA003311 | RT4      |
| 5360 | ENSG00000128016 | HPA006009 | hTCEpi   |
| 5361 | ENSG00000128039 | HPA027006 | U-2 OS   |
| 5362 | ENSG00000128045 | HPA057803 | CACO-2   |
| 5363 | ENSG00000128050 | HPA041538 | U-2 OS   |
| 5364 | ENSG00000128052 | CAB004028 | U-251 MG |
| 5365 | ENSG00000128059 | HPA036091 | U-2 OS   |
| 5366 | ENSG00000128242 | HPA001220 | U-2 OS   |
| 5367 | ENSG00000128245 | HPA061603 | U-2 OS   |
| 5368 | ENSG00000128250 | HPA048320 | U-2 OS   |
| 5369 | ENSG00000128250 | HPA072380 | U-2 OS   |
| 5370 | ENSG00000128253 | HPA048320 | U-2 OS   |
| 5371 | ENSG00000128253 | HPA072380 | U-2 OS   |
| 5372 | ENSG00000128266 | HPA003011 | U-2 OS   |
| 5373 | ENSG00000128272 | CAB011596 | A-431    |
| 5374 | ENSG00000128274 | HPA001141 | MCF7     |
| 5375 | ENSG00000128276 | HPA048320 | U-2 OS   |
| 5376 | ENSG00000128276 | HPA072380 | U-2 OS   |
| 5377 | ENSG00000128283 | HPA006379 | U-2 OS   |
| 5378 | ENSG00000128309 | HPA001240 | U-2 OS   |
| 5379 | ENSG00000128311 | HPA003044 | A-431    |
| 5380 | ENSG00000128322 | HPA051134 | REH      |
| 5381 | ENSG00000128335 | HPA001078 | U-2 OS   |
| 5382 | ENSG00000128342 | HPA018844 | U-2 OS   |
| 5383 | ENSG00000128342 | CAB025985 | U-2 OS   |
| 5384 | ENSG00000128346 | HPA000650 | BJ       |
| 5385 | ENSG00000128383 | HPA056980 | A-431    |
| 5386 | ENSG00000128383 | HPA066719 | U-2 OS   |
| 5387 | ENSG00000128394 | HPA073637 | RT4      |
| 5388 | ENSG00000128422 | HPA000452 | HaCaT    |



|      |                 |           |             |
|------|-----------------|-----------|-------------|
| 5389 | ENSG00000128422 | HPA000453 | U-2 OS      |
| 5390 | ENSG00000128422 | HPA000539 | A-431       |
| 5391 | ENSG00000128422 | HPA045062 | U-2 OS      |
| 5392 | ENSG00000128463 | HPA026868 | CACO-2      |
| 5393 | ENSG00000128482 | HPA015970 | U-2 OS      |
| 5394 | ENSG00000128487 | HPA061073 | CACO-2      |
| 5395 | ENSG00000128510 | HPA021030 | U-2 OS      |
| 5396 | ENSG00000128512 | HPA071516 | U-2 OS      |
| 5397 | ENSG00000128513 | HPA068538 | U-2 OS      |
| 5398 | ENSG00000128534 | HPA020116 | A-431       |
| 5399 | ENSG00000128536 | HPA011218 | U-2 OS      |
| 5400 | ENSG00000128563 | HPA051146 | U-2 OS      |
| 5401 | ENSG00000128564 | HPA055177 | U-2 OS      |
| 5402 | ENSG00000128567 | HPA002110 | A-431       |
| 5403 | ENSG00000128573 | HPA000382 | U-2 OS      |
| 5404 | ENSG00000128573 | HPA001679 | U-2 OS      |
| 5405 | ENSG00000128578 | HPA019657 | A-431       |
| 5406 | ENSG00000128581 | HPA042930 | U-2 OS      |
| 5407 | ENSG00000128585 | HPA041810 | U-2 OS      |
| 5408 | ENSG00000128590 | HPA041553 | U-2 OS      |
| 5409 | ENSG00000128591 | HPA006135 | U-2 OS      |
| 5410 | ENSG00000128594 | HPA051100 | U-2 OS      |
| 5411 | ENSG00000128595 | HPA006018 | U-2 OS      |
| 5412 | ENSG00000128596 | HPA010647 | U-2 OS      |
| 5413 | ENSG00000128606 | HPA073458 | RH-30       |
| 5414 | ENSG00000128607 | HPA020119 | U-2 OS      |
| 5415 | ENSG00000128610 | HPA064639 | PC-3        |
| 5416 | ENSG00000128617 | HPA013562 | U-251 MG    |
| 5417 | ENSG00000128617 | HPA014083 | A-431       |
| 5418 | ENSG00000128641 | HPA013607 | U-2 OS      |
| 5419 | ENSG00000128641 | HPA060144 | U-2 OS      |
| 5420 | ENSG00000128645 | HPA040062 | RT4         |
| 5421 | ENSG00000128645 | HPA056900 | RT4         |
| 5422 | ENSG00000128652 | HPA051831 | U-2 OS      |
| 5423 | ENSG00000128652 | HPA063671 | U-2 OS      |
| 5424 | ENSG00000128654 | HPA031550 | A-431       |
| 5425 | ENSG00000128656 | HPA036111 | U-2 OS      |
| 5426 | ENSG00000128683 | HPA031949 | U-2 OS      |
| 5427 | ENSG00000128694 | HPA030693 | U-2 OS      |
| 5428 | ENSG00000128699 | HPA065643 | RT4         |
| 5429 | ENSG00000128708 | HPA036788 | U-2 OS      |
| 5430 | ENSG00000128709 | HPA068683 | U-2 OS      |
| 5431 | ENSG00000128710 | HPA065871 | U-2 OS      |
| 5432 | ENSG00000128713 | HPA055155 | HEK 293     |
| 5433 | ENSG00000128714 | HPA064064 | U-2 OS      |
| 5434 | ENSG00000128731 | HPA074166 | RH-30       |
| 5435 | ENSG00000128739 | HPA067842 | CACO-2      |
| 5436 | ENSG00000128789 | HPA046741 | U-2 OS      |
| 5437 | ENSG00000128791 | HPA014898 | U-2 OS      |
| 5438 | ENSG00000128805 | CAB020696 | U-2 OS      |
| 5439 | ENSG00000128815 | HPA040634 | HUVEC TERT2 |
| 5440 | ENSG00000128829 | HPA011811 | U-2 OS      |
| 5441 | ENSG00000128833 | CAB020790 | U-2 OS      |
| 5442 | ENSG00000128833 | HPA032116 | U-2 OS      |
| 5443 | ENSG00000128849 | HPA069214 | CACO-2      |

|      |                 |           |           |
|------|-----------------|-----------|-----------|
| 5444 | ENSG00000128872 | HPA041365 | U-2 OS    |
| 5445 | ENSG00000128881 | HPA049866 | CACO-2    |
| 5446 | ENSG00000128886 | HPA028938 | U-2 OS    |
| 5447 | ENSG00000128891 | HPA041688 | U-2 OS    |
| 5448 | ENSG00000128908 | HPA041417 | RT4       |
| 5449 | ENSG00000128908 | HPA041484 | RT4       |
| 5450 | ENSG00000128915 | HPA040058 | U-2 OS    |
| 5451 | ENSG00000128923 | HPA051103 | U-2 OS    |
| 5452 | ENSG00000128923 | HPA063669 | SK-MEL-30 |
| 5453 | ENSG00000128928 | HPA041391 | U-2 OS    |
| 5454 | ENSG00000128944 | HPA042027 | U-2 OS    |
| 5455 | ENSG00000128951 | HPA054422 | U-2 OS    |
| 5456 | ENSG00000128965 | HPA042708 | U-2 OS    |
| 5457 | ENSG00000128973 | HPA066759 | U-2 OS    |
| 5458 | ENSG00000129003 | HPA043507 | RT4       |
| 5459 | ENSG00000129007 | HPA051109 | CACO-2    |
| 5460 | ENSG00000129009 | HPA040326 | U-2 OS    |
| 5461 | ENSG00000129028 | HPA041416 | U-2 OS    |
| 5462 | ENSG00000129038 | HPA063583 | U-2 OS    |
| 5463 | ENSG00000129048 | HPA054926 | U-251 MG  |
| 5464 | ENSG00000129055 | HPA046114 | U-2 OS    |
| 5465 | ENSG00000129071 | HPA002031 | U-2 OS    |
| 5466 | ENSG00000129083 | HPA043954 | U-2 OS    |
| 5467 | ENSG00000129083 | HPA064403 | U-2 OS    |
| 5468 | ENSG00000129084 | HPA037646 | U-2 OS    |
| 5469 | ENSG00000129084 | HPA043891 | U-2 OS    |
| 5470 | ENSG00000129103 | HPA074892 | U-2 OS    |
| 5471 | ENSG00000129116 | HPA035905 | U-2 OS    |
| 5472 | ENSG00000129151 | HPA027823 | U-2 OS    |
| 5473 | ENSG00000129152 | HPA055436 | RH-30     |
| 5474 | ENSG00000129152 | HPA078647 | RH-30     |
| 5475 | ENSG00000129158 | HPA037812 | Hep G2    |
| 5476 | ENSG00000129158 | HPA074086 | U-2 OS    |
| 5477 | ENSG00000129159 | HPA047634 | U-2 OS    |
| 5478 | ENSG00000129159 | HPA048249 | U-2 OS    |
| 5479 | ENSG00000129167 | HPA022483 | U-2 OS    |
| 5480 | ENSG00000129173 | HPA064882 | CACO-2    |
| 5481 | ENSG00000129187 | HPA035894 | U-2 OS    |
| 5482 | ENSG00000129194 | HPA067196 | U-2 OS    |
| 5483 | ENSG00000129194 | HPA074049 | U-2 OS    |
| 5484 | ENSG00000129195 | HPA043783 | U-2 OS    |
| 5485 | ENSG00000129195 | HPA049934 | U-2 OS    |
| 5486 | ENSG00000129197 | HPA031526 | U-2 OS    |
| 5487 | ENSG00000129204 | HPA046969 | U-2 OS    |
| 5488 | ENSG00000129221 | HPA026578 | U-2 OS    |
| 5489 | ENSG00000129226 | CAB000051 | U-2 OS    |
| 5490 | ENSG00000129245 | HPA022997 | U-2 OS    |
| 5491 | ENSG00000129255 | HPA014845 | U-2 OS    |
| 5492 | ENSG00000129292 | HPA028417 | U-2 OS    |
| 5493 | ENSG00000129315 | HPA004892 | U-2 OS    |
| 5494 | ENSG00000129315 | CAB009016 | U-2 OS    |
| 5495 | ENSG00000129317 | HPA056203 | CACO-2    |
| 5496 | ENSG00000129347 | HPA043110 | U-2 OS    |
| 5497 | ENSG00000129347 | HPA043574 | U-2 OS    |
| 5498 | ENSG00000129351 | HPA001897 | U-2 OS    |

|      |                 |           |          |
|------|-----------------|-----------|----------|
| 5499 | ENSG00000129353 | HPA070799 | MCF7     |
| 5500 | ENSG00000129354 | HPA054999 | CACO-2   |
| 5501 | ENSG00000129355 | HPA043546 | U-2 OS   |
| 5502 | ENSG00000129422 | HPA067903 | U-2 OS   |
| 5503 | ENSG00000129422 | HPA069795 | U-2 OS   |
| 5504 | ENSG00000129455 | CAB019393 | A-431    |
| 5505 | ENSG00000129460 | HPA000944 | U-2 OS   |
| 5506 | ENSG00000129473 | HPA048740 | U-2 OS   |
| 5507 | ENSG00000129474 | HPA006171 | U-2 OS   |
| 5508 | ENSG00000129480 | HPA001117 | U-2 OS   |
| 5509 | ENSG00000129484 | HPA052003 | U-2 OS   |
| 5510 | ENSG00000129514 | HPA050505 | U-2 OS   |
| 5511 | ENSG00000129515 | HPA049374 | U-2 OS   |
| 5512 | ENSG00000129518 | HPA002916 | U-2 OS   |
| 5513 | ENSG00000129521 | HPA064895 | RT4      |
| 5514 | ENSG00000129534 | HPA006504 | U-2 OS   |
| 5515 | ENSG00000129535 | HPA064599 | MCF7     |
| 5516 | ENSG00000129538 | HPA001140 | CACO-2   |
| 5517 | ENSG00000129559 | CAB004082 | U-2 OS   |
| 5518 | ENSG00000129559 | HPA027583 | U-2 OS   |
| 5519 | ENSG00000129559 | HPA060254 | U-2 OS   |
| 5520 | ENSG00000129562 | HPA028882 | U-2 OS   |
| 5521 | ENSG00000129566 | HPA029206 | U-2 OS   |
| 5522 | ENSG00000129595 | HPA036580 | RT4      |
| 5523 | ENSG00000129596 | HPA036573 | U-2 OS   |
| 5524 | ENSG00000129625 | HPA069960 | RT4      |
| 5525 | ENSG00000129636 | HPA019728 | U-2 OS   |
| 5526 | ENSG00000129646 | HPA052219 | U-2 OS   |
| 5527 | ENSG00000129657 | HPA028703 | U-2 OS   |
| 5528 | ENSG00000129673 | HPA054321 | A549     |
| 5529 | ENSG00000129675 | HPA003578 | U-251 MG |
| 5530 | ENSG00000129680 | HPA035598 | U-2 OS   |
| 5531 | ENSG00000129680 | HPA058101 | U-2 OS   |
| 5532 | ENSG00000129682 | HPA002809 | U-2 OS   |
| 5533 | ENSG00000129691 | HPA042289 | U-2 OS   |
| 5534 | ENSG00000129696 | HPA023523 | U-2 OS   |
| 5535 | ENSG00000129696 | HPA029823 | U-2 OS   |
| 5536 | ENSG00000129757 | HPA002924 | U-2 OS   |
| 5537 | ENSG00000129810 | HPA035501 | U-2 OS   |
| 5538 | ENSG00000129810 | HPA069302 | U-2 OS   |
| 5539 | ENSG00000129810 | HPA069857 | U-2 OS   |
| 5540 | ENSG00000129910 | HPA009139 | RH-30    |
| 5541 | ENSG00000129910 | HPA070961 | RH-30    |
| 5542 | ENSG00000129911 | HPA052481 | MCF7     |
| 5543 | ENSG00000129925 | HPA051281 | CACO-2   |
| 5544 | ENSG00000129925 | HPA064673 | CACO-2   |
| 5545 | ENSG00000129932 | HPA041953 | U-2 OS   |
| 5546 | ENSG00000129932 | HPA076271 | U-2 OS   |
| 5547 | ENSG00000129933 | HPA059897 | U-2 OS   |
| 5548 | ENSG00000129946 | HPA006136 | U-2 OS   |
| 5549 | ENSG00000129951 | HPA057034 | U-2 OS   |
| 5550 | ENSG00000129968 | HPA047226 | U-2 OS   |
| 5551 | ENSG00000129991 | HPA046428 | U-2 OS   |
| 5552 | ENSG00000129993 | HPA059931 | MCF7     |
| 5553 | ENSG00000129993 | HPA062423 | MCF7     |

|      |                 |           |          |
|------|-----------------|-----------|----------|
| 5554 | ENSG00000130023 | HPA041741 | U-2 OS   |
| 5555 | ENSG00000130024 | HPA055649 | U-2 OS   |
| 5556 | ENSG00000130035 | HPA012638 | U-2 OS   |
| 5557 | ENSG00000130035 | HPA073461 | HEK 293  |
| 5558 | ENSG00000130045 | HPA045526 | U-2 OS   |
| 5559 | ENSG00000130119 | HPA036315 | U-2 OS   |
| 5560 | ENSG00000130150 | HPA003334 | U-2 OS   |
| 5561 | ENSG00000130158 | HPA049423 | U-2 OS   |
| 5562 | ENSG00000130159 | HPA042979 | U-2 OS   |
| 5563 | ENSG00000130165 | HPA045606 | U-2 OS   |
| 5564 | ENSG00000130173 | HPA042131 | Hep G2   |
| 5565 | ENSG00000130175 | CAB004465 | A-431    |
| 5566 | ENSG00000130175 | HPA041940 | U-2 OS   |
| 5567 | ENSG00000130176 | HPA014263 | U-2 OS   |
| 5568 | ENSG00000130193 | HPA023255 | A-431    |
| 5569 | ENSG00000130202 | HPA073459 | CACO-2   |
| 5570 | ENSG00000130203 | HPA065539 | U-2 OS   |
| 5571 | ENSG00000130204 | HPA036231 | CACO-2   |
| 5572 | ENSG00000130204 | HPA036232 | CACO-2   |
| 5573 | ENSG00000130224 | HPA003233 | U-2 OS   |
| 5574 | ENSG00000130244 | HPA040930 | A-431    |
| 5575 | ENSG00000130254 | HPA050894 | U-2 OS   |
| 5576 | ENSG00000130255 | HPA047153 | U-2 OS   |
| 5577 | ENSG00000130294 | HPA005442 | U-2 OS   |
| 5578 | ENSG00000130299 | HPA042158 | U-2 OS   |
| 5579 | ENSG00000130300 | HPA002279 | U-2 OS   |
| 5580 | ENSG00000130303 | HPA017060 | A-431    |
| 5581 | ENSG00000130304 | HPA076520 | U-2 OS   |
| 5582 | ENSG00000130305 | HPA020536 | U-2 OS   |
| 5583 | ENSG00000130305 | HPA045590 | U-2 OS   |
| 5584 | ENSG00000130305 | HPA046867 | U-2 OS   |
| 5585 | ENSG00000130309 | HPA047821 | U-2 OS   |
| 5586 | ENSG00000130311 | HPA055272 | U-2 OS   |
| 5587 | ENSG00000130313 | HPA040744 | U-2 OS   |
| 5588 | ENSG00000130313 | HPA042032 | U-2 OS   |
| 5589 | ENSG00000130332 | HPA041850 | U-2 OS   |
| 5590 | ENSG00000130340 | HPA031410 | U-2 OS   |
| 5591 | ENSG00000130340 | HPA057203 | U-2 OS   |
| 5592 | ENSG00000130348 | HPA029585 | U-2 OS   |
| 5593 | ENSG00000130348 | HPA029587 | U-251 MG |
| 5594 | ENSG00000130363 | HPA039109 | U-2 OS   |
| 5595 | ENSG00000130363 | HPA040230 | U-2 OS   |
| 5596 | ENSG00000130377 | HPA043421 | U-2 OS   |
| 5597 | ENSG00000130382 | HPA031166 | U-2 OS   |
| 5598 | ENSG00000130396 | CAB013496 | U-2 OS   |
| 5599 | ENSG00000130396 | HPA030212 | U-2 OS   |
| 5600 | ENSG00000130396 | HPA030213 | U-2 OS   |
| 5601 | ENSG00000130396 | HPA030215 | U-2 OS   |
| 5602 | ENSG00000130396 | HPA049868 | U-2 OS   |
| 5603 | ENSG00000130402 | HPA001873 | U-2 OS   |
| 5604 | ENSG00000130402 | HPA006035 | U-2 OS   |
| 5605 | ENSG00000130413 | HPA056855 | U-2 OS   |
| 5606 | ENSG00000130414 | HPA059529 | HEK 293  |
| 5607 | ENSG00000130429 | HPA004832 | U-2 OS   |
| 5608 | ENSG00000130433 | HPA056615 | U-2 OS   |

|      |                 |           |          |
|------|-----------------|-----------|----------|
| 5609 | ENSG00000130449 | HPA035938 | A-431    |
| 5610 | ENSG00000130475 | HPA041653 | U-2 OS   |
| 5611 | ENSG00000130475 | HPA062981 | MCF7     |
| 5612 | ENSG00000130479 | HPA050934 | U-2 OS   |
| 5613 | ENSG00000130479 | HPA054637 | U-2 OS   |
| 5614 | ENSG00000130487 | HPA076540 | hTCEpi   |
| 5615 | ENSG00000130489 | HPA046943 | U-2 OS   |
| 5616 | ENSG00000130513 | HPA011191 | Hep G2   |
| 5617 | ENSG00000130513 | HPA070957 | Hep G2   |
| 5618 | ENSG00000130517 | HPA055277 | Hep G2   |
| 5619 | ENSG00000130520 | HPA040932 | U-2 OS   |
| 5620 | ENSG00000130522 | HPA063029 | U-2 OS   |
| 5621 | ENSG00000130529 | HPA041169 | U-2 OS   |
| 5622 | ENSG00000130544 | HPA029291 | U-2 OS   |
| 5623 | ENSG00000130545 | HPA013835 | U-2 OS   |
| 5624 | ENSG00000130558 | HPA057444 | U-2 OS   |
| 5625 | ENSG00000130559 | HPA020527 | U-2 OS   |
| 5626 | ENSG00000130560 | HPA005651 | U-2 OS   |
| 5627 | ENSG00000130584 | HPA013997 | U-2 OS   |
| 5628 | ENSG00000130590 | HPA040973 | U-2 OS   |
| 5629 | ENSG00000130598 | HPA055938 | CACO-2   |
| 5630 | ENSG00000130635 | HPA030769 | U-2 OS   |
| 5631 | ENSG00000130638 | HPA049531 | U-2 OS   |
| 5632 | ENSG00000130640 | HPA037885 | U-2 OS   |
| 5633 | ENSG00000130653 | HPA009130 | U-2 OS   |
| 5634 | ENSG00000130656 | HPA063268 | HEL      |
| 5635 | ENSG00000130656 | HPA064073 | HEL      |
| 5636 | ENSG00000130669 | HPA070175 | U-2 OS   |
| 5637 | ENSG00000130669 | HPA072220 | U-2 OS   |
| 5638 | ENSG00000130675 | HPA071717 | U-2 OS   |
| 5639 | ENSG00000130684 | HPA044303 | U-2 OS   |
| 5640 | ENSG00000130695 | HPA028252 | U-2 OS   |
| 5641 | ENSG00000130699 | HPA008599 | U-2 OS   |
| 5642 | ENSG00000130699 | CAB031484 | U-251 MG |
| 5643 | ENSG00000130700 | HPA067583 | SiHa     |
| 5644 | ENSG00000130702 | HPA054609 | CACO-2   |
| 5645 | ENSG00000130703 | HPA041127 | U-2 OS   |
| 5646 | ENSG00000130706 | HPA042266 | U-2 OS   |
| 5647 | ENSG00000130707 | HPA020934 | U-2 OS   |
| 5648 | ENSG00000130711 | HPA043143 | A-431    |
| 5649 | ENSG00000130713 | HPA021756 | U-2 OS   |
| 5650 | ENSG00000130714 | HPA065252 | U-2 OS   |
| 5651 | ENSG00000130717 | HPA050969 | U-2 OS   |
| 5652 | ENSG00000130720 | HPA055353 | MCF7     |
| 5653 | ENSG00000130723 | HPA064301 | U-2 OS   |
| 5654 | ENSG00000130724 | HPA041153 | U-2 OS   |
| 5655 | ENSG00000130725 | HPA054551 | U-2 OS   |
| 5656 | ENSG00000130725 | HPA057800 | U-2 OS   |
| 5657 | ENSG00000130726 | CAB010066 | U-2 OS   |
| 5658 | ENSG00000130726 | HPA064033 | U-2 OS   |
| 5659 | ENSG00000130731 | HPA067414 | U-2 OS   |
| 5660 | ENSG00000130733 | HPA019902 | U-2 OS   |
| 5661 | ENSG00000130734 | HPA067683 | U-2 OS   |
| 5662 | ENSG00000130749 | HPA040934 | U-2 OS   |
| 5663 | ENSG00000130749 | HPA041068 | U-2 OS   |

|      |                 |           |           |
|------|-----------------|-----------|-----------|
| 5664 | ENSG00000130751 | HPA072259 | U-2 OS    |
| 5665 | ENSG00000130755 | HPA002954 | U-2 OS    |
| 5666 | ENSG00000130758 | HPA007039 | U-2 OS    |
| 5667 | ENSG00000130764 | HPA008512 | U-2 OS    |
| 5668 | ENSG00000130766 | HPA018191 | U-2 OS    |
| 5669 | ENSG00000130768 | HPA030561 | U-2 OS    |
| 5670 | ENSG00000130770 | HPA027999 | U-2 OS    |
| 5671 | ENSG00000130772 | HPA027429 | U-2 OS    |
| 5672 | ENSG00000130775 | HPA027513 | SK-MEL-30 |
| 5673 | ENSG00000130779 | HPA026678 | A-431     |
| 5674 | ENSG00000130783 | HPA039021 | U-2 OS    |
| 5675 | ENSG00000130787 | CAB017187 | U-2 OS    |
| 5676 | ENSG00000130787 | HPA038135 | U-2 OS    |
| 5677 | ENSG00000130787 | HPA038136 | U-2 OS    |
| 5678 | ENSG00000130803 | HPA042075 | U-2 OS    |
| 5679 | ENSG00000130803 | HPA048625 | U-2 OS    |
| 5680 | ENSG00000130811 | HPA041997 | U-2 OS    |
| 5681 | ENSG00000130813 | HPA042001 | U-2 OS    |
| 5682 | ENSG00000130816 | CAB005876 | U-2 OS    |
| 5683 | ENSG00000130818 | HPA029342 | U-2 OS    |
| 5684 | ENSG00000130822 | HPA007458 | U-2 OS    |
| 5685 | ENSG00000130826 | HPA001022 | U-2 OS    |
| 5686 | ENSG00000130827 | HPA058989 | U-2 OS    |
| 5687 | ENSG00000130829 | HPA003336 | U-2 OS    |
| 5688 | ENSG00000130830 | HPA076675 | U-2 OS    |
| 5689 | ENSG00000130844 | HPA063157 | U-2 OS    |
| 5690 | ENSG00000130856 | HPA008600 | U-2 OS    |
| 5691 | ENSG00000130876 | HPA041884 | U-2 OS    |
| 5692 | ENSG00000130881 | HPA041658 | A549      |
| 5693 | ENSG00000130921 | HPA057595 | U-2 OS    |
| 5694 | ENSG00000130935 | HPA022010 | U-2 OS    |
| 5695 | ENSG00000130940 | HPA028222 | U-2 OS    |
| 5696 | ENSG00000130940 | HPA029927 | U-2 OS    |
| 5697 | ENSG00000130948 | HPA056833 | U-2 OS    |
| 5698 | ENSG00000130950 | HPA064635 | U-2 OS    |
| 5699 | ENSG00000130956 | HPA055969 | A-431     |
| 5700 | ENSG00000130957 | HPA055286 | MCF7      |
| 5701 | ENSG00000130958 | HPA064047 | U-2 OS    |
| 5702 | ENSG00000130962 | HPA078129 | U-2 OS    |
| 5703 | ENSG00000130985 | HPA001506 | A-431     |
| 5704 | ENSG00000130985 | CAB019435 | U-2 OS    |
| 5705 | ENSG00000130988 | HPA029102 | CACO-2    |
| 5706 | ENSG00000130997 | HPA035939 | U-2 OS    |
| 5707 | ENSG00000130997 | HPA035940 | U-2 OS    |
| 5708 | ENSG00000131013 | HPA031599 | U-2 OS    |
| 5709 | ENSG00000131013 | HPA031600 | U-2 OS    |
| 5710 | ENSG00000131015 | CAB018974 | U-2 OS    |
| 5711 | ENSG00000131016 | HPA006344 | U-2 OS    |
| 5712 | ENSG00000131016 | HPA056230 | U-2 OS    |
| 5713 | ENSG00000131018 | HPA019113 | U-2 OS    |
| 5714 | ENSG00000131019 | HPA056541 | U-2 OS    |
| 5715 | ENSG00000131023 | HPA031804 | U-2 OS    |
| 5716 | ENSG00000131037 | HPA043545 | U-2 OS    |
| 5717 | ENSG00000131043 | HPA048645 | CACO-2    |
| 5718 | ENSG00000131044 | HPA041772 | U-2 OS    |

|      |                 |           |           |
|------|-----------------|-----------|-----------|
| 5719 | ENSG00000131051 | HPA001591 | U-2 OS    |
| 5720 | ENSG00000131061 | HPA067108 | U-2 OS    |
| 5721 | ENSG00000131067 | HPA013339 | U-2 OS    |
| 5722 | ENSG00000131069 | HPA004141 | U-2 OS    |
| 5723 | ENSG00000131080 | HPA054522 | U-2 OS    |
| 5724 | ENSG00000131089 | HPA055291 | A-431     |
| 5725 | ENSG00000131095 | HPA056030 | U-2 OS    |
| 5726 | ENSG00000131100 | HPA029196 | U-2 OS    |
| 5727 | ENSG00000131115 | HPA030573 | U-2 OS    |
| 5728 | ENSG00000131116 | HPA042596 | U-2 OS    |
| 5729 | ENSG00000131143 | HPA002485 | U-2 OS    |
| 5730 | ENSG00000131148 | HPA049476 | U-2 OS    |
| 5731 | ENSG00000131149 | HPA036365 | U-2 OS    |
| 5732 | ENSG00000131153 | HPA057285 | U-2 OS    |
| 5733 | ENSG00000131171 | HPA051248 | MCF7      |
| 5734 | ENSG00000131183 | HPA051255 | HEL       |
| 5735 | ENSG00000131188 | HPA046636 | U-2 OS    |
| 5736 | ENSG00000131196 | HPA071732 | U-2 OS    |
| 5737 | ENSG00000131203 | HPA023072 | A-431     |
| 5738 | ENSG00000131203 | HPA023149 | U-2 OS    |
| 5739 | ENSG00000131236 | HPA030124 | U-2 OS    |
| 5740 | ENSG00000131238 | HPA021546 | U-2 OS    |
| 5741 | ENSG00000131263 | HPA018895 | A-431     |
| 5742 | ENSG00000131269 | HPA034982 | U-2 OS    |
| 5743 | ENSG00000131368 | HPA043490 | U-2 OS    |
| 5744 | ENSG00000131370 | HPA036445 | U-2 OS    |
| 5745 | ENSG00000131370 | HPA057988 | U-2 OS    |
| 5746 | ENSG00000131373 | HPA073760 | MCF7      |
| 5747 | ENSG00000131374 | HPA035125 | U-2 OS    |
| 5748 | ENSG00000131379 | HPA039584 | HEL       |
| 5749 | ENSG00000131381 | HPA044878 | U-2 OS    |
| 5750 | ENSG00000131386 | HPA017076 | ASC TERT1 |
| 5751 | ENSG00000131389 | HPA015028 | A549      |
| 5752 | ENSG00000131408 | HPA005446 | U-2 OS    |
| 5753 | ENSG00000131408 | HPA070212 | U-2 OS    |
| 5754 | ENSG00000131435 | HPA011912 | U-2 OS    |
| 5755 | ENSG00000131437 | CAB037085 | A-431     |
| 5756 | ENSG00000131459 | HPA059910 | U-2 OS    |
| 5757 | ENSG00000131467 | HPA012510 | U-2 OS    |
| 5758 | ENSG00000131470 | HPA044439 | U-251 MG  |
| 5759 | ENSG00000131471 | HPA000980 | U-2 OS    |
| 5760 | ENSG00000131473 | HPA022434 | U-2 OS    |
| 5761 | ENSG00000131473 | HPA022953 | A-431     |
| 5762 | ENSG00000131475 | HPA052217 | U-2 OS    |
| 5763 | ENSG00000131477 | HPA052020 | SH-SY5Y   |
| 5764 | ENSG00000131504 | HPA076913 | U-2 OS    |
| 5765 | ENSG00000131508 | HPA003920 | U-2 OS    |
| 5766 | ENSG00000131558 | HPA031443 | U-2 OS    |
| 5767 | ENSG00000131558 | HPA031444 | U-2 OS    |
| 5768 | ENSG00000131584 | HPA058381 | U-2 OS    |
| 5769 | ENSG00000131620 | HPA032148 | A-431     |
| 5770 | ENSG00000131626 | HPA042271 | U-2 OS    |
| 5771 | ENSG00000131650 | HPA003223 | RH-30     |
| 5772 | ENSG00000131652 | HPA052953 | U-2 OS    |
| 5773 | ENSG00000131653 | HPA041229 | U-2 OS    |

|      |                 |           |        |
|------|-----------------|-----------|--------|
| 5774 | ENSG00000131668 | HPA055858 | A549   |
| 5775 | ENSG00000131697 | HPA063852 | U-2 OS |
| 5776 | ENSG00000131711 | CAB009792 | U-2 OS |
| 5777 | ENSG00000131711 | HPA022275 | U-2 OS |
| 5778 | ENSG00000131721 | HPA003314 | K-562  |
| 5779 | ENSG00000131724 | HPA001587 | U-2 OS |
| 5780 | ENSG00000131725 | HPA046719 | U-2 OS |
| 5781 | ENSG00000131732 | HPA038404 | U-2 OS |
| 5782 | ENSG00000131737 | HPA072208 | U-2 OS |
| 5783 | ENSG00000131747 | CAB002448 | U-2 OS |
| 5784 | ENSG00000131747 | HPA006458 | U-2 OS |
| 5785 | ENSG00000131748 | HPA024307 | U-2 OS |
| 5786 | ENSG00000131748 | HPA073948 | U-2 OS |
| 5787 | ENSG00000131759 | HPA058282 | U-2 OS |
| 5788 | ENSG00000131773 | HPA000981 | U-2 OS |
| 5789 | ENSG00000131778 | HPA027789 | U-2 OS |
| 5790 | ENSG00000131778 | HPA028670 | U-2 OS |
| 5791 | ENSG00000131779 | HPA017150 | A549   |
| 5792 | ENSG00000131781 | HPA012373 | A-431  |
| 5793 | ENSG00000131788 | HPA067383 | U-2 OS |
| 5794 | ENSG00000131791 | HPA044342 | U-2 OS |
| 5795 | ENSG00000131828 | HPA047864 | U-2 OS |
| 5796 | ENSG00000131831 | HPA051054 | U-2 OS |
| 5797 | ENSG00000131844 | HPA038300 | U-2 OS |
| 5798 | ENSG00000131844 | HPA061546 | U-2 OS |
| 5799 | ENSG00000131845 | HPA050531 | U-2 OS |
| 5800 | ENSG00000131848 | HPA060667 | U-2 OS |
| 5801 | ENSG00000131849 | HPA008726 | U-2 OS |
| 5802 | ENSG00000131871 | HPA010025 | U-2 OS |
| 5803 | ENSG00000131876 | HPA045622 | U-2 OS |
| 5804 | ENSG00000131876 | HPA048499 | RT4    |
| 5805 | ENSG00000131914 | HPA063074 | CACO-2 |
| 5806 | ENSG00000131914 | HPA068814 | AF22   |
| 5807 | ENSG00000131931 | HPA071310 | U-2 OS |
| 5808 | ENSG00000131943 | HPA046930 | U-2 OS |
| 5809 | ENSG00000131944 | HPA041168 | U-2 OS |
| 5810 | ENSG00000131966 | HPA071251 | U-2 OS |
| 5811 | ENSG00000131969 | HPA002873 | U-2 OS |
| 5812 | ENSG00000131979 | HPA028612 | U-2 OS |
| 5813 | ENSG00000131981 | CAB005191 | U-2 OS |
| 5814 | ENSG00000132002 | HPA063247 | U-2 OS |
| 5815 | ENSG00000132004 | HPA042087 | U-2 OS |
| 5816 | ENSG00000132005 | HPA048722 | U-2 OS |
| 5817 | ENSG00000132005 | HPA052966 | U-2 OS |
| 5818 | ENSG00000132010 | HPA020887 | U-2 OS |
| 5819 | ENSG00000132016 | HPA054615 | U-2 OS |
| 5820 | ENSG00000132017 | HPA068351 | U-2 OS |
| 5821 | ENSG00000132024 | HPA005436 | U-2 OS |
| 5822 | ENSG00000132026 | HPA052511 | U-2 OS |
| 5823 | ENSG00000132031 | HPA051250 | U-2 OS |
| 5824 | ENSG00000132109 | HPA005673 | U-2 OS |
| 5825 | ENSG00000132122 | HPA028234 | U-2 OS |
| 5826 | ENSG00000132128 | HPA051941 | U-2 OS |
| 5827 | ENSG00000132141 | HPA049949 | U-2 OS |
| 5828 | ENSG00000132153 | HPA034806 | U-2 OS |



|      |                 |           |         |
|------|-----------------|-----------|---------|
| 5829 | ENSG00000132155 | HPA002640 | U-2 OS  |
| 5830 | ENSG00000132164 | HPA037981 | A-431   |
| 5831 | ENSG00000132170 | HPA051239 | U-2 OS  |
| 5832 | ENSG00000132170 | HPA063663 | RT4     |
| 5833 | ENSG00000132207 | HPA047038 | U-2 OS  |
| 5834 | ENSG00000132254 | HPA038156 | U-2 OS  |
| 5835 | ENSG00000132256 | CAB013497 | U-2 OS  |
| 5836 | ENSG00000132274 | HPA003575 | U-2 OS  |
| 5837 | ENSG00000132275 | HPA038487 | U-2 OS  |
| 5838 | ENSG00000132275 | HPA057562 | U-2 OS  |
| 5839 | ENSG00000132294 | HPA023402 | U-2 OS  |
| 5840 | ENSG00000132300 | HPA041154 | U-2 OS  |
| 5841 | ENSG00000132300 | HPA041382 | U-2 OS  |
| 5842 | ENSG00000132305 | HPA036164 | U-2 OS  |
| 5843 | ENSG00000132305 | HPA036165 | U-2 OS  |
| 5844 | ENSG00000132321 | HPA057320 | RT4     |
| 5845 | ENSG00000132323 | HPA004752 | U-2 OS  |
| 5846 | ENSG00000132323 | HPA056099 | U-2 OS  |
| 5847 | ENSG00000132329 | HPA057814 | A-431   |
| 5848 | ENSG00000132330 | HPA055760 | HeLa    |
| 5849 | ENSG00000132334 | HPA015870 | U-2 OS  |
| 5850 | ENSG00000132341 | HPA063353 | RT4     |
| 5851 | ENSG00000132356 | HPA035409 | U-2 OS  |
| 5852 | ENSG00000132359 | HPA022896 | U-2 OS  |
| 5853 | ENSG00000132361 | HPA031505 | CACO-2  |
| 5854 | ENSG00000132382 | HPA005466 | U-2 OS  |
| 5855 | ENSG00000132383 | HPA046497 | U-2 OS  |
| 5856 | ENSG00000132388 | HPA050551 | U-2 OS  |
| 5857 | ENSG00000132394 | HPA035795 | U-2 OS  |
| 5858 | ENSG00000132405 | HPA067398 | U-2 OS  |
| 5859 | ENSG00000132423 | HPA031274 | U-2 OS  |
| 5860 | ENSG00000132424 | HPA038796 | HEK 293 |
| 5861 | ENSG00000132424 | HPA075076 | U-2 OS  |
| 5862 | ENSG00000132429 | HPA012514 | U-2 OS  |
| 5863 | ENSG00000132434 | HPA019711 | U-2 OS  |
| 5864 | ENSG00000132434 | HPA029535 | U-2 OS  |
| 5865 | ENSG00000132437 | HPA017742 | CACO-2  |
| 5866 | ENSG00000132463 | HPA036984 | U-2 OS  |
| 5867 | ENSG00000132463 | HPA036985 | U-2 OS  |
| 5868 | ENSG00000132466 | HPA063731 | CACO-2  |
| 5869 | ENSG00000132467 | HPA035655 | U-2 OS  |
| 5870 | ENSG00000132467 | HPA041453 | U-2 OS  |
| 5871 | ENSG00000132470 | HPA036348 | RT4     |
| 5872 | ENSG00000132471 | HPA068819 | U-2 OS  |
| 5873 | ENSG00000132475 | CAB037166 | U-2 OS  |
| 5874 | ENSG00000132475 | CAB037221 | U-2 OS  |
| 5875 | ENSG00000132478 | HPA027962 | U-2 OS  |
| 5876 | ENSG00000132481 | HPA014933 | A-431   |
| 5877 | ENSG00000132485 | HPA053960 | U-2 OS  |
| 5878 | ENSG00000132485 | HPA061949 | U-2 OS  |
| 5879 | ENSG00000132507 | CAB005042 | U-2 OS  |
| 5880 | ENSG00000132510 | HPA037988 | U-2 OS  |
| 5881 | ENSG00000132522 | HPA067540 | CACO-2  |
| 5882 | ENSG00000132530 | HPA057302 | U-2 OS  |
| 5883 | ENSG00000132549 | HPA043865 | U-2 OS  |

|      |                 |           |        |
|------|-----------------|-----------|--------|
| 5884 | ENSG00000132570 | HPA036428 | U-2 OS |
| 5885 | ENSG00000132581 | HPA042799 | A549   |
| 5886 | ENSG00000132589 | HPA071038 | RT4    |
| 5887 | ENSG00000132591 | HPA021425 | A-431  |
| 5888 | ENSG00000132591 | HPA024423 | A-431  |
| 5889 | ENSG00000132600 | HPA044241 | U-2 OS |
| 5890 | ENSG00000132603 | HPA040856 | CACO-2 |
| 5891 | ENSG00000132604 | HPA001907 | U-2 OS |
| 5892 | ENSG00000132612 | HPA060092 | SiHa   |
| 5893 | ENSG00000132613 | HPA066469 | U-2 OS |
| 5894 | ENSG00000132622 | HPA015639 | U-2 OS |
| 5895 | ENSG00000132623 | HPA041151 | U-2 OS |
| 5896 | ENSG00000132635 | HPA050816 | U-2 OS |
| 5897 | ENSG00000132639 | HPA071013 | U-2 OS |
| 5898 | ENSG00000132640 | HPA042048 | U-2 OS |
| 5899 | ENSG00000132646 | CAB000148 | A-431  |
| 5900 | ENSG00000132646 | HPA030522 | U-2 OS |
| 5901 | ENSG00000132661 | HPA047471 | U-2 OS |
| 5902 | ENSG00000132664 | HPA072298 | U-2 OS |
| 5903 | ENSG00000132669 | HPA034641 | U-2 OS |
| 5904 | ENSG00000132670 | HPA069480 | U-2 OS |
| 5905 | ENSG00000132676 | HPA023687 | U-2 OS |
| 5906 | ENSG00000132677 | HPA042726 | RT4    |
| 5907 | ENSG00000132680 | HPA008796 | U-2 OS |
| 5908 | ENSG00000132688 | CAB005889 | U-2 OS |
| 5909 | ENSG00000132688 | HPA006286 | U-2 OS |
| 5910 | ENSG00000132688 | HPA026111 | U-2 OS |
| 5911 | ENSG00000132693 | HPA027367 | U-2 OS |
| 5912 | ENSG00000132694 | HPA012037 | U-2 OS |
| 5913 | ENSG00000132698 | HPA010872 | U-2 OS |
| 5914 | ENSG00000132716 | HPA027218 | U-2 OS |
| 5915 | ENSG00000132740 | HPA004092 | SiHa   |
| 5916 | ENSG00000132740 | HPA060994 | CACO-2 |
| 5917 | ENSG00000132749 | HPA018539 | U-2 OS |
| 5918 | ENSG00000132763 | HPA027394 | U-2 OS |
| 5919 | ENSG00000132763 | HPA027399 | U-2 OS |
| 5920 | ENSG00000132768 | HPA045796 | U-2 OS |
| 5921 | ENSG00000132773 | HPA053775 | U-2 OS |
| 5922 | ENSG00000132773 | HPA069119 | CACO-2 |
| 5923 | ENSG00000132780 | HPA028136 | U-2 OS |
| 5924 | ENSG00000132780 | HPA030518 | U-2 OS |
| 5925 | ENSG00000132780 | HPA030520 | U-2 OS |
| 5926 | ENSG00000132781 | HPA008732 | A-431  |
| 5927 | ENSG00000132792 | HPA004742 | U-2 OS |
| 5928 | ENSG00000132792 | HPA027906 | CACO-2 |
| 5929 | ENSG00000132793 | HPA051466 | U-2 OS |
| 5930 | ENSG00000132793 | HPA070640 | U-2 OS |
| 5931 | ENSG00000132801 | HPA060508 | U-2 OS |
| 5932 | ENSG00000132819 | CAB017036 | U-2 OS |
| 5933 | ENSG00000132823 | HPA045125 | U-2 OS |
| 5934 | ENSG00000132825 | HPA041146 | U-2 OS |
| 5935 | ENSG00000132837 | HPA077849 | U-2 OS |
| 5936 | ENSG00000132842 | HPA038737 | U-2 OS |
| 5937 | ENSG00000132842 | HPA045458 | U-2 OS |
| 5938 | ENSG00000132846 | HPA055995 | CACO-2 |

|      |                 |           |           |
|------|-----------------|-----------|-----------|
| 5939 | ENSG00000132849 | HPA066960 | RT4       |
| 5940 | ENSG00000132849 | HPA069079 | RT4       |
| 5941 | ENSG00000132854 | HPA014030 | U-2 OS    |
| 5942 | ENSG00000132872 | HPA010574 | SH-SY5Y   |
| 5943 | ENSG00000132879 | HPA003363 | U-2 OS    |
| 5944 | ENSG00000132881 | HPA028453 | U-2 OS    |
| 5945 | ENSG00000132881 | HPA041672 | A-431     |
| 5946 | ENSG00000132906 | HPA001473 | A-431     |
| 5947 | ENSG00000132911 | HPA027800 | U-2 OS    |
| 5948 | ENSG00000132912 | CAB017532 | A-431     |
| 5949 | ENSG00000132932 | HPA040033 | U-2 OS    |
| 5950 | ENSG00000132938 | HPA031474 | HeLa      |
| 5951 | ENSG00000132950 | HPA015544 | U-2 OS    |
| 5952 | ENSG00000132953 | HPA053768 | CACO-2    |
| 5953 | ENSG00000132958 | HPA068342 | U-2 OS    |
| 5954 | ENSG00000132963 | HPA026995 | U-2 OS    |
| 5955 | ENSG00000132964 | HPA044721 | CACO-2    |
| 5956 | ENSG00000133019 | HPA048036 | SH-SY5Y   |
| 5957 | ENSG00000133026 | CAB017180 | A-431     |
| 5958 | ENSG00000133026 | HPA047541 | U-2 OS    |
| 5959 | ENSG00000133027 | HPA042375 | HEK 293   |
| 5960 | ENSG00000133030 | HPA022901 | U-2 OS    |
| 5961 | ENSG00000133048 | HPA077365 | ASC TERT1 |
| 5962 | ENSG00000133055 | HPA061383 | CACO-2    |
| 5963 | ENSG00000133056 | HPA050360 | RT4       |
| 5964 | ENSG00000133059 | HPA044140 | U-2 OS    |
| 5965 | ENSG00000133065 | HPA014721 | RT4       |
| 5966 | ENSG00000133065 | HPA015138 | U-2 OS    |
| 5967 | ENSG00000133067 | HPA008556 | U-2 OS    |
| 5968 | ENSG00000133083 | HPA015040 | U-2 OS    |
| 5969 | ENSG00000133101 | HPA060646 | U-2 OS    |
| 5970 | ENSG00000133103 | HPA040441 | U-2 OS    |
| 5971 | ENSG00000133104 | HPA039054 | U-2 OS    |
| 5972 | ENSG00000133110 | HPA012306 | U-251 MG  |
| 5973 | ENSG00000133111 | HPA032035 | U-2 OS    |
| 5974 | ENSG00000133112 | HPA039437 | HEK 293   |
| 5975 | ENSG00000133114 | HPA058739 | U-2 OS    |
| 5976 | ENSG00000133115 | HPA012892 | AF22      |
| 5977 | ENSG00000133119 | HPA030149 | U-2 OS    |
| 5978 | ENSG00000133131 | HPA000395 | CACO-2    |
| 5979 | ENSG00000133131 | HPA050250 | A549      |
| 5980 | ENSG00000133134 | HPA078630 | U-2 OS    |
| 5981 | ENSG00000133138 | HPA023883 | U-2 OS    |
| 5982 | ENSG00000133169 | HPA078630 | U-2 OS    |
| 5983 | ENSG00000133193 | HPA021459 | U-2 OS    |
| 5984 | ENSG00000133195 | HPA021455 | MCF7      |
| 5985 | ENSG00000133216 | HPA071200 | U-2 OS    |
| 5986 | ENSG00000133226 | HPA049941 | U-2 OS    |
| 5987 | ENSG00000133226 | HPA058612 | U-2 OS    |
| 5988 | ENSG00000133246 | HPA045236 | NB-4      |
| 5989 | ENSG00000133247 | HPA052294 | U-2 OS    |
| 5990 | ENSG00000133250 | HPA053769 | U-2 OS    |
| 5991 | ENSG00000133256 | HPA059929 | U-2 OS    |
| 5992 | ENSG00000133265 | CAB005865 | U-2 OS    |
| 5993 | ENSG00000133265 | HPA070398 | U-2 OS    |

|      |                 |           |             |
|------|-----------------|-----------|-------------|
| 5994 | ENSG00000133275 | HPA056572 | U-2 OS      |
| 5995 | ENSG00000133302 | HPA054213 | U-2 OS      |
| 5996 | ENSG00000133313 | HPA036898 | RT4         |
| 5997 | ENSG00000133313 | HPA036899 | RT4         |
| 5998 | ENSG00000133315 | HPA071075 | U-2 OS      |
| 5999 | ENSG00000133316 | HPA038419 | A-431       |
| 6000 | ENSG00000133318 | HPA015650 | U-2 OS      |
| 6001 | ENSG00000133328 | HPA058997 | U-2 OS      |
| 6002 | ENSG00000133392 | HPA015310 |             |
| 6003 | ENSG00000133393 | HPA040599 | U-2 OS      |
| 6004 | ENSG00000133398 | HPA042795 | PC-3        |
| 6005 | ENSG00000133398 | HPA054188 | HeLa        |
| 6006 | ENSG00000133401 | HPA036504 | U-2 OS      |
| 6007 | ENSG00000133422 | HPA000436 | U-2 OS      |
| 6008 | ENSG00000133433 | HPA000750 | U-2 OS      |
| 6009 | ENSG00000133454 | HPA000953 | RH-30       |
| 6010 | ENSG00000133460 | HPA071184 | U-2 OS      |
| 6011 | ENSG00000133466 | HPA002042 | U-2 OS      |
| 6012 | ENSG00000133475 | HPA065444 | A549        |
| 6013 | ENSG00000133477 | HPA064657 | CACO-2      |
| 6014 | ENSG00000133488 | HPA069748 | SiHa        |
| 6015 | ENSG00000133597 | HPA036036 | A-431       |
| 6016 | ENSG00000133606 | HPA000567 | U-2 OS      |
| 6017 | ENSG00000133619 | HPA050448 | HEK 293     |
| 6018 | ENSG00000133639 | HPA005972 | U-2 OS      |
| 6019 | ENSG00000133641 | HPA039663 | U-2 OS      |
| 6020 | ENSG00000133657 | HPA029471 | U-2 OS      |
| 6021 | ENSG00000133678 | HPA029105 | U-2 OS      |
| 6022 | ENSG00000133687 | HPA016720 | U-2 OS      |
| 6023 | ENSG00000133704 | HPA023765 | U-2 OS      |
| 6024 | ENSG00000133706 | HPA036424 | U-2 OS      |
| 6025 | ENSG00000133706 | HPA040881 | U-2 OS      |
| 6026 | ENSG00000133710 | HPA009067 | HeLa        |
| 6027 | ENSG00000133710 | HPA011351 | U-251 MG    |
| 6028 | ENSG00000133731 | HPA037489 | U-2 OS      |
| 6029 | ENSG00000133739 | HPA075880 | HEL         |
| 6030 | ENSG00000133740 | HPA055723 | U-2 OS      |
| 6031 | ENSG00000133740 | HPA065441 | U-2 OS      |
| 6032 | ENSG00000133773 | HPA038555 | U-2 OS      |
| 6033 | ENSG00000133789 | HPA006929 | HUVEC TERT2 |
| 6034 | ENSG00000133794 | HPA050938 | U-2 OS      |
| 6035 | ENSG00000133805 | HPA038662 | U-2 OS      |
| 6036 | ENSG00000133805 | HPA047408 | U-2 OS      |
| 6037 | ENSG00000133812 | HPA050933 | U-2 OS      |
| 6038 | ENSG00000133816 | HPA030437 | U-2 OS      |
| 6039 | ENSG00000133816 | HPA039895 | U-2 OS      |
| 6040 | ENSG00000133818 | CAB010420 | U-2 OS      |
| 6041 | ENSG00000133835 | HPA021302 | U-2 OS      |
| 6042 | ENSG00000133835 | HPA021311 | U-2 OS      |
| 6043 | ENSG00000133858 | HPA007151 | U-2 OS      |
| 6044 | ENSG00000133863 | HPA036800 | U-2 OS      |
| 6045 | ENSG00000133872 | HPA040400 | U-2 OS      |
| 6046 | ENSG00000133878 | HPA018221 | SH-SY5Y     |
| 6047 | ENSG00000133884 | HPA020880 | U-2 OS      |
| 6048 | ENSG00000133884 | HPA056786 | U-2 OS      |

|      |                 |           |         |
|------|-----------------|-----------|---------|
| 6049 | ENSG00000133895 | HPA030342 | U-2 OS  |
| 6050 | ENSG00000133935 | HPA063568 | U-2 OS  |
| 6051 | ENSG00000133943 | HPA041423 | U-2 OS  |
| 6052 | ENSG00000133943 | HPA052932 | U-2 OS  |
| 6053 | ENSG00000133958 | HPA071881 | U-2 OS  |
| 6054 | ENSG00000133961 | HPA002874 | RT4     |
| 6055 | ENSG00000133961 | CAB011478 | U-2 OS  |
| 6056 | ENSG00000133962 | HPA035134 | RT4     |
| 6057 | ENSG00000133980 | HPA001460 | CACO-2  |
| 6058 | ENSG00000133983 | HPA062659 | MCF7    |
| 6059 | ENSG00000133997 | HPA030764 | U-2 OS  |
| 6060 | ENSG00000133997 | HPA069039 | U-2 OS  |
| 6061 | ENSG00000134001 | CAB011663 | U-2 OS  |
| 6062 | ENSG00000134001 | HPA064885 | A-431   |
| 6063 | ENSG00000134013 | HPA036257 | U-2 OS  |
| 6064 | ENSG00000134013 | HPA056542 | U-2 OS  |
| 6065 | ENSG00000134014 | HPA025297 | Hep G2  |
| 6066 | ENSG00000134030 | HPA016865 | U-2 OS  |
| 6067 | ENSG00000134046 | HPA067582 | HaCaT   |
| 6068 | ENSG00000134046 | HPA067615 | U-2 OS  |
| 6069 | ENSG00000134049 | HPA010027 | U-2 OS  |
| 6070 | ENSG00000134056 | HPA035802 | U-2 OS  |
| 6071 | ENSG00000134056 | HPA056795 | U-2 OS  |
| 6072 | ENSG00000134057 | CAB000115 | U-2 OS  |
| 6073 | ENSG00000134057 | HPA030741 | U-2 OS  |
| 6074 | ENSG00000134057 | HPA061448 | U-2 OS  |
| 6075 | ENSG00000134070 | HPA050520 | RT4     |
| 6076 | ENSG00000134072 | HPA051409 | HEK 293 |
| 6077 | ENSG00000134077 | HPA036170 | U-2 OS  |
| 6078 | ENSG00000134077 | HPA036171 | U-2 OS  |
| 6079 | ENSG00000134086 | HPA031631 | MCF7    |
| 6080 | ENSG00000134086 | HPA031632 | U-2 OS  |
| 6081 | ENSG00000134107 | HPA028922 | A-431   |
| 6082 | ENSG00000134109 | HPA029565 | RT4     |
| 6083 | ENSG00000134138 | HPA003256 | U-2 OS  |
| 6084 | ENSG00000134146 | HPA042976 | U-2 OS  |
| 6085 | ENSG00000134146 | HPA055496 | U-2 OS  |
| 6086 | ENSG00000134152 | HPA062573 | U-2 OS  |
| 6087 | ENSG00000134153 | HPA047572 | U-2 OS  |
| 6088 | ENSG00000134160 | HPA071139 | U-2 OS  |
| 6089 | ENSG00000134184 | HPA055972 | HeLa    |
| 6090 | ENSG00000134184 | HPA055973 | HeLa    |
| 6091 | ENSG00000134198 | HPA015640 | U-2 OS  |
| 6092 | ENSG00000134198 | HPA073306 | U-2 OS  |
| 6093 | ENSG00000134201 | HPA055972 | HeLa    |
| 6094 | ENSG00000134201 | HPA055973 | HeLa    |
| 6095 | ENSG00000134202 | CAB040583 | U-2 OS  |
| 6096 | ENSG00000134202 | HPA055972 | HeLa    |
| 6097 | ENSG00000134207 | HPA058362 | U-2 OS  |
| 6098 | ENSG00000134222 | HPA056561 | U-2 OS  |
| 6099 | ENSG00000134240 | HPA027442 | RT4     |
| 6100 | ENSG00000134242 | HPA004912 | U-2 OS  |
| 6101 | ENSG00000134242 | HPA013350 | U-2 OS  |
| 6102 | ENSG00000134243 | HPA006889 | U-2 OS  |
| 6103 | ENSG00000134243 | CAB011498 | U-2 OS  |

|      |                 |           |           |
|------|-----------------|-----------|-----------|
| 6104 | ENSG00000134245 | HPA047274 | U-2 OS    |
| 6105 | ENSG00000134245 | HPA066368 | U-2 OS    |
| 6106 | ENSG00000134248 | HPA006812 | U-2 OS    |
| 6107 | ENSG00000134250 | HPA048743 | U-2 OS    |
| 6108 | ENSG00000134253 | HPA054308 | U-2 OS    |
| 6109 | ENSG00000134256 | HPA049527 | U-2 OS    |
| 6110 | ENSG00000134258 | HPA054200 | U-2 OS    |
| 6111 | ENSG00000134262 | HPA028162 | U-2 OS    |
| 6112 | ENSG00000134265 | HPA008208 | U-2 OS    |
| 6113 | ENSG00000134278 | HPA040737 | U-2 OS    |
| 6114 | ENSG00000134283 | HPA038902 | U-2 OS    |
| 6115 | ENSG00000134283 | HPA038903 | U-2 OS    |
| 6116 | ENSG00000134285 | HPA041709 | U-2 OS    |
| 6117 | ENSG00000134294 | HPA035180 | U-2 OS    |
| 6118 | ENSG00000134308 | CAB010286 | U-2 OS    |
| 6119 | ENSG00000134308 | HPA061603 | U-2 OS    |
| 6120 | ENSG00000134313 | HPA014790 | U-251 MG  |
| 6121 | ENSG00000134317 | HPA006420 | RT4       |
| 6122 | ENSG00000134318 | HPA044109 | HeLa      |
| 6123 | ENSG00000134321 | HPA049409 | RT4       |
| 6124 | ENSG00000134323 | HPA057420 | CACO-2    |
| 6125 | ENSG00000134324 | HPA024591 | ASC TERT1 |
| 6126 | ENSG00000134326 | HPA041430 | SK-MEL-30 |
| 6127 | ENSG00000134330 | HPA040523 | U-2 OS    |
| 6128 | ENSG00000134333 | CAB015336 | U-2 OS    |
| 6129 | ENSG00000134352 | CAB025784 | U-2 OS    |
| 6130 | ENSG00000134369 | HPA018127 | U-2 OS    |
| 6131 | ENSG00000134371 | CAB016359 | U-2 OS    |
| 6132 | ENSG00000134371 | HPA030772 | U-2 OS    |
| 6133 | ENSG00000134375 | HPA010083 | U-2 OS    |
| 6134 | ENSG00000134376 | HPA061250 | U-2 OS    |
| 6135 | ENSG00000134440 | HPA040017 | U-2 OS    |
| 6136 | ENSG00000134444 | HPA040038 | U-2 OS    |
| 6137 | ENSG00000134453 | HPA037478 | U-2 OS    |
| 6138 | ENSG00000134461 | HPA037920 | U-2 OS    |
| 6139 | ENSG00000134480 | HPA044138 | PC-3      |
| 6140 | ENSG00000134490 | HPA029489 | U-2 OS    |
| 6141 | ENSG00000134504 | HPA057808 | MCF7      |
| 6142 | ENSG00000134504 | HPA062486 | U-2 OS    |
| 6143 | ENSG00000134508 | HPA073649 | U-2 OS    |
| 6144 | ENSG00000134531 | HPA051931 | PC-3      |
| 6145 | ENSG00000134531 | HPA056250 | U-2 OS    |
| 6146 | ENSG00000134532 | HPA060499 | Hep G2    |
| 6147 | ENSG00000134545 | HPA058052 | U-2 OS    |
| 6148 | ENSG00000134569 | HPA011934 | U-2 OS    |
| 6149 | ENSG00000134569 | HPA012300 | U-2 OS    |
| 6150 | ENSG00000134574 | HPA058406 | U-2 OS    |
| 6151 | ENSG00000134594 | HPA059737 | U-2 OS    |
| 6152 | ENSG00000134595 | HPA054720 | U-2 OS    |
| 6153 | ENSG00000134595 | HPA075003 | U-2 OS    |
| 6154 | ENSG00000134597 | HPA026609 | U-2 OS    |
| 6155 | ENSG00000134602 | HPA059921 | U-2 OS    |
| 6156 | ENSG00000134627 | HPA036587 | U-2 OS    |
| 6157 | ENSG00000134644 | HPA027424 | U-2 OS    |
| 6158 | ENSG00000134644 | HPA027449 | U-2 OS    |

|      |                 |           |          |
|------|-----------------|-----------|----------|
| 6159 | ENSG00000134668 | HPA031713 | U-2 OS   |
| 6160 | ENSG00000134684 | HPA018950 | U-2 OS   |
| 6161 | ENSG00000134684 | HPA018954 | U-2 OS   |
| 6162 | ENSG00000134686 | HPA047403 | U-2 OS   |
| 6163 | ENSG00000134690 | HPA028120 | U-2 OS   |
| 6164 | ENSG00000134690 | CAB040294 | U-2 OS   |
| 6165 | ENSG00000134697 | HPA027163 | U-2 OS   |
| 6166 | ENSG00000134697 | HPA060026 | U-2 OS   |
| 6167 | ENSG00000134717 | HPA067026 | U-2 OS   |
| 6168 | ENSG00000134744 | HPA027973 | U-2 OS   |
| 6169 | ENSG00000134748 | HPA053099 | CACO-2   |
| 6170 | ENSG00000134748 | HPA058407 | MCF7     |
| 6171 | ENSG00000134758 | HPA041101 | U-2 OS   |
| 6172 | ENSG00000134759 | HPA002996 | U-2 OS   |
| 6173 | ENSG00000134759 | CAB020835 | U-2 OS   |
| 6174 | ENSG00000134762 | CAB037328 | A-431    |
| 6175 | ENSG00000134762 | HPA073937 | U-2 OS   |
| 6176 | ENSG00000134769 | HPA071177 | U-2 OS   |
| 6177 | ENSG00000134802 | HPA077244 | U-2 OS   |
| 6178 | ENSG00000134809 | HPA039946 | U-2 OS   |
| 6179 | ENSG00000134815 | HPA042159 | A-431    |
| 6180 | ENSG00000134815 | HPA043558 | U-2 OS   |
| 6181 | ENSG00000134825 | HPA044602 | U-2 OS   |
| 6182 | ENSG00000134851 | HPA038299 | U-2 OS   |
| 6183 | ENSG00000134851 | HPA062424 | RT4      |
| 6184 | ENSG00000134852 | HPA001867 | U-2 OS   |
| 6185 | ENSG00000134852 | HPA027565 | U-2 OS   |
| 6186 | ENSG00000134853 | HPA004947 | CACO-2   |
| 6187 | ENSG00000134871 | HPA029118 | U-2 OS   |
| 6188 | ENSG00000134874 | HPA070194 | U-2 OS   |
| 6189 | ENSG00000134882 | HPA013448 | A-431    |
| 6190 | ENSG00000134884 | HPA034962 | U-2 OS   |
| 6191 | ENSG00000134884 | HPA056792 | U-2 OS   |
| 6192 | ENSG00000134897 | HPA050126 | U-2 OS   |
| 6193 | ENSG00000134899 | HPA045845 | U-251 MG |
| 6194 | ENSG00000134899 | HPA050126 | U-2 OS   |
| 6195 | ENSG00000134899 | HPA050374 | U-2 OS   |
| 6196 | ENSG00000134900 | HPA049630 | U-2 OS   |
| 6197 | ENSG00000134901 | CAB020780 | A-431    |
| 6198 | ENSG00000134901 | HPA043946 | U-2 OS   |
| 6199 | ENSG00000134901 | HPA064398 | U-2 OS   |
| 6200 | ENSG00000134905 | HPA041776 | U-2 OS   |
| 6201 | ENSG00000134909 | HPA038389 | HaCaT    |
| 6202 | ENSG00000134910 | HPA030735 | U-2 OS   |
| 6203 | ENSG00000134954 | CAB002575 | U-2 OS   |
| 6204 | ENSG00000134954 | HPA063230 | U-2 OS   |
| 6205 | ENSG00000134986 | HPA000545 | SH-SY5Y  |
| 6206 | ENSG00000134987 | HPA037796 | U-2 OS   |
| 6207 | ENSG00000134996 | HPA020514 | U-2 OS   |
| 6208 | ENSG00000135002 | HPA057163 | U-2 OS   |
| 6209 | ENSG00000135018 | HPA054143 | U-2 OS   |
| 6210 | ENSG00000135040 | HPA051586 | U-2 OS   |
| 6211 | ENSG00000135045 | HPA042167 | U-2 OS   |
| 6212 | ENSG00000135046 | HPA011271 | U-2 OS   |
| 6213 | ENSG00000135046 | HPA011272 | A-431    |

|      |                 |           |         |
|------|-----------------|-----------|---------|
| 6214 | ENSG00000135046 | CAB013023 | U-2 OS  |
| 6215 | ENSG00000135046 | CAB035987 | U-2 OS  |
| 6216 | ENSG00000135047 | HPA070413 | A549    |
| 6217 | ENSG00000135048 | HPA044889 | U-2 OS  |
| 6218 | ENSG00000135049 | HPA057208 | U-2 OS  |
| 6219 | ENSG00000135052 | HPA010638 | U-2 OS  |
| 6220 | ENSG00000135052 | HPA011929 | U-2 OS  |
| 6221 | ENSG00000135069 | CAB040567 | U-2 OS  |
| 6222 | ENSG00000135069 | HPA042924 | U-2 OS  |
| 6223 | ENSG00000135074 | HPA055537 | U-2 OS  |
| 6224 | ENSG00000135083 | HPA049970 | U-2 OS  |
| 6225 | ENSG00000135090 | HPA017160 | U-2 OS  |
| 6226 | ENSG00000135094 | HPA039230 | U-2 OS  |
| 6227 | ENSG00000135097 | HPA074923 | U-2 OS  |
| 6228 | ENSG00000135100 | HPA035231 | CACO-2  |
| 6229 | ENSG00000135108 | HPA062411 | U-2 OS  |
| 6230 | ENSG00000135111 | HPA005799 | RT4     |
| 6231 | ENSG00000135111 | HPA075876 | RT4     |
| 6232 | ENSG00000135114 | HPA001474 | RT4     |
| 6233 | ENSG00000135119 | HPA064161 | U-2 OS  |
| 6234 | ENSG00000135127 | HPA061116 | MCF7    |
| 6235 | ENSG00000135144 | HPA051249 | SH-SY5Y |
| 6236 | ENSG00000135148 | HPA039254 | U-2 OS  |
| 6237 | ENSG00000135164 | HPA023846 | U-2 OS  |
| 6238 | ENSG00000135205 | HPA020082 | A-431   |
| 6239 | ENSG00000135205 | HPA020105 | U-2 OS  |
| 6240 | ENSG00000135218 | HPA002018 | HEL     |
| 6241 | ENSG00000135218 | HPA071026 | HEL     |
| 6242 | ENSG00000135241 | HPA020083 | U-2 OS  |
| 6243 | ENSG00000135245 | HPA010515 | A549    |
| 6244 | ENSG00000135248 | HPA020636 | U-2 OS  |
| 6245 | ENSG00000135249 | HPA031646 | U-2 OS  |
| 6246 | ENSG00000135250 | HPA015522 | U-2 OS  |
| 6247 | ENSG00000135250 | HPA020876 | U-2 OS  |
| 6248 | ENSG00000135269 | HPA015269 | A-431   |
| 6249 | ENSG00000135269 | HPA018123 | A-431   |
| 6250 | ENSG00000135272 | HPA030716 | U-2 OS  |
| 6251 | ENSG00000135297 | HPA030232 | U-2 OS  |
| 6252 | ENSG00000135299 | HPA035694 | RT4     |
| 6253 | ENSG00000135299 | HPA064642 | U-2 OS  |
| 6254 | ENSG00000135312 | HPA028808 | U-2 OS  |
| 6255 | ENSG00000135314 | HPA029032 | A-431   |
| 6256 | ENSG00000135315 | HPA030171 | U-2 OS  |
| 6257 | ENSG00000135315 | HPA030173 | U-2 OS  |
| 6258 | ENSG00000135316 | CAB010895 | U-2 OS  |
| 6259 | ENSG00000135316 | HPA041275 | CACO-2  |
| 6260 | ENSG00000135317 | HPA017639 | U-2 OS  |
| 6261 | ENSG00000135318 | HPA017357 | A-431   |
| 6262 | ENSG00000135334 | HPA064239 | U-2 OS  |
| 6263 | ENSG00000135336 | HPA039553 | U-2 OS  |
| 6264 | ENSG00000135341 | HPA007633 | U-2 OS  |
| 6265 | ENSG00000135341 | HPA075335 | U-2 OS  |
| 6266 | ENSG00000135362 | HPA070174 | SiHa    |
| 6267 | ENSG00000135363 | HPA029285 | REH     |
| 6268 | ENSG00000135363 | HPA070901 | U-2 OS  |



|      |                 |           |           |
|------|-----------------|-----------|-----------|
| 6269 | ENSG00000135363 | HPA070910 | MCF7      |
| 6270 | ENSG00000135365 | HPA023253 | U-2 OS    |
| 6271 | ENSG00000135372 | HPA057576 | U-2 OS    |
| 6272 | ENSG00000135372 | HPA071628 | U-2 OS    |
| 6273 | ENSG00000135373 | HPA050923 | U-2 OS    |
| 6274 | ENSG00000135374 | HPA062706 | RT4       |
| 6275 | ENSG00000135378 | HPA009040 | RT4       |
| 6276 | ENSG00000135387 | HPA018126 | U-2 OS    |
| 6277 | ENSG00000135387 | HPA063617 | RT4       |
| 6278 | ENSG00000135404 | CAB026356 | U-2 OS    |
| 6279 | ENSG00000135409 | HPA060228 | CACO-2    |
| 6280 | ENSG00000135409 | HPA069636 | HEK 293   |
| 6281 | ENSG00000135414 | HPA060985 | CACO-2    |
| 6282 | ENSG00000135424 | HPA008427 | SK-MEL-30 |
| 6283 | ENSG00000135437 | HPA063345 | U-2 OS    |
| 6284 | ENSG00000135439 | HPA075831 | U-2 OS    |
| 6285 | ENSG00000135446 | HPA006024 | U-2 OS    |
| 6286 | ENSG00000135452 | HPA030758 | U-2 OS    |
| 6287 | ENSG00000135457 | HPA070247 | CACO-2    |
| 6288 | ENSG00000135469 | HPA068931 | U-2 OS    |
| 6289 | ENSG00000135472 | HPA018790 | U-2 OS    |
| 6290 | ENSG00000135476 | CAB012185 | U-2 OS    |
| 6291 | ENSG00000135480 | HPA007315 | SiHa      |
| 6292 | ENSG00000135482 | HPA062265 | U-2 OS    |
| 6293 | ENSG00000135486 | HPA005812 | U-2 OS    |
| 6294 | ENSG00000135486 | HPA007185 | U-2 OS    |
| 6295 | ENSG00000135503 | CAB026126 | U-2 OS    |
| 6296 | ENSG00000135503 | HPA063761 | U-2 OS    |
| 6297 | ENSG00000135506 | HPA013694 | RH-30     |
| 6298 | ENSG00000135519 | HPA051088 | U-2 OS    |
| 6299 | ENSG00000135521 | HPA030159 | U-2 OS    |
| 6300 | ENSG00000135521 | HPA030160 | U-2 OS    |
| 6301 | ENSG00000135525 | HPA029712 | U-2 OS    |
| 6302 | ENSG00000135537 | HPA030155 | U-2 OS    |
| 6303 | ENSG00000135540 | HPA029967 | U-2 OS    |
| 6304 | ENSG00000135541 | HPA031698 | SiHa      |
| 6305 | ENSG00000135547 | HPA074851 | HEK 293   |
| 6306 | ENSG00000135577 | HPA026665 | U-2 OS    |
| 6307 | ENSG00000135587 | HPA018125 | U-2 OS    |
| 6308 | ENSG00000135597 | HPA029962 | U-2 OS    |
| 6309 | ENSG00000135605 | HPA024657 | U-2 OS    |
| 6310 | ENSG00000135622 | HPA065969 | U-2 OS    |
| 6311 | ENSG00000135624 | HPA008425 | U-2 OS    |
| 6312 | ENSG00000135631 | HPA036406 | A-431     |
| 6313 | ENSG00000135631 | HPA036407 | U-2 OS    |
| 6314 | ENSG00000135632 | HPA015514 | U-2 OS    |
| 6315 | ENSG00000135636 | HPA017071 | RH-30     |
| 6316 | ENSG00000135638 | HPA006230 | CACO-2    |
| 6317 | ENSG00000135643 | HPA072287 | RT4       |
| 6318 | ENSG00000135655 | HPA006237 | U-2 OS    |
| 6319 | ENSG00000135655 | HPA071014 | U-2 OS    |
| 6320 | ENSG00000135678 | HPA077243 | U-2 OS    |
| 6321 | ENSG00000135679 | CAB016303 | U-2 OS    |
| 6322 | ENSG00000135686 | HPA023423 | MCF7      |
| 6323 | ENSG00000135697 | HPA043811 | U-2 OS    |

|      |                 |           |          |
|------|-----------------|-----------|----------|
| 6324 | ENSG00000135698 | HPA026948 | U-2 OS   |
| 6325 | ENSG00000135709 | HPA012866 | U-2 OS   |
| 6326 | ENSG00000135709 | HPA014431 | U-2 OS   |
| 6327 | ENSG00000135720 | HPA057201 | HEK 293  |
| 6328 | ENSG00000135722 | HPA035587 | A-431    |
| 6329 | ENSG00000135723 | HPA024468 | U-2 OS   |
| 6330 | ENSG00000135736 | HPA040598 | U-2 OS   |
| 6331 | ENSG00000135740 | HPA041004 | U-2 OS   |
| 6332 | ENSG00000135740 | HPA041329 | U-2 OS   |
| 6333 | ENSG00000135749 | HPA014427 | U-2 OS   |
| 6334 | ENSG00000135750 | HPA016049 | A-431    |
| 6335 | ENSG00000135763 | HPA008902 | U-2 OS   |
| 6336 | ENSG00000135763 | HPA046788 | U-2 OS   |
| 6337 | ENSG00000135775 | HPA076994 | U-2 OS   |
| 6338 | ENSG00000135778 | HPA054304 | U-2 OS   |
| 6339 | ENSG00000135801 | HPA067941 | U-2 OS   |
| 6340 | ENSG00000135821 | HPA007571 | U-2 OS   |
| 6341 | ENSG00000135821 | CAB008636 | U-2 OS   |
| 6342 | ENSG00000135823 | HPA038557 | U-2 OS   |
| 6343 | ENSG00000135823 | HPA038558 | U-2 OS   |
| 6344 | ENSG00000135828 | CAB010906 | U-251 MG |
| 6345 | ENSG00000135829 | CAB011819 | U-2 OS   |
| 6346 | ENSG00000135829 | HPA028050 | U-2 OS   |
| 6347 | ENSG00000135835 | HPA061684 | U-2 OS   |
| 6348 | ENSG00000135837 | HPA030845 | U-2 OS   |
| 6349 | ENSG00000135837 | CAB079754 | U-2 OS   |
| 6350 | ENSG00000135838 | HPA028345 | U-2 OS   |
| 6351 | ENSG00000135842 | HPA028657 | A-431    |
| 6352 | ENSG00000135862 | HPA001909 | U-2 OS   |
| 6353 | ENSG00000135870 | HPA027428 | U-2 OS   |
| 6354 | ENSG00000135870 | HPA027448 | U-2 OS   |
| 6355 | ENSG00000135899 | HPA058554 | U-2 OS   |
| 6356 | ENSG00000135900 | HPA038147 | U-2 OS   |
| 6357 | ENSG00000135902 | HPA056404 | U-2 OS   |
| 6358 | ENSG00000135902 | HPA065404 | U-2 OS   |
| 6359 | ENSG00000135903 | HPA063659 | RH-30    |
| 6360 | ENSG00000135903 | HPA069000 | U-2 OS   |
| 6361 | ENSG00000135905 | HPA058106 | U-2 OS   |
| 6362 | ENSG00000135912 | HPA050252 | U-2 OS   |
| 6363 | ENSG00000135913 | HPA045160 | U-2 OS   |
| 6364 | ENSG00000135914 | HPA012867 | U-2 OS   |
| 6365 | ENSG00000135914 | HPA063658 | U-2 OS   |
| 6366 | ENSG00000135917 | HPA038898 | CACO-2   |
| 6367 | ENSG00000135924 | HPA036268 | U-2 OS   |
| 6368 | ENSG00000135926 | HPA070824 | HaCaT    |
| 6369 | ENSG00000135929 | HPA059155 | Hep G2   |
| 6370 | ENSG00000135930 | HPA019253 | U-2 OS   |
| 6371 | ENSG00000135930 | HPA077074 | U-2 OS   |
| 6372 | ENSG00000135932 | CAB037112 | U-2 OS   |
| 6373 | ENSG00000135940 | HPA034517 | U-2 OS   |
| 6374 | ENSG00000135945 | HPA051036 | HEK 293  |
| 6375 | ENSG00000135951 | HPA036879 | U-2 OS   |
| 6376 | ENSG00000135953 | HPA061859 | CACO-2   |
| 6377 | ENSG00000135966 | HPA037672 | U-2 OS   |
| 6378 | ENSG00000135968 | HPA035849 | U-2 OS   |

|      |                 |           |        |
|------|-----------------|-----------|--------|
| 6379 | ENSG00000135968 | HPA035850 | U-2 OS |
| 6380 | ENSG00000135972 | HPA043476 | U-2 OS |
| 6381 | ENSG00000135972 | HPA048479 | U-2 OS |
| 6382 | ENSG00000135974 | HPA043846 | U-2 OS |
| 6383 | ENSG00000135974 | HPA060814 | CACO-2 |
| 6384 | ENSG00000135976 | HPA051757 | U-2 OS |
| 6385 | ENSG00000135976 | HPA057661 | U-2 OS |
| 6386 | ENSG00000135999 | HPA036759 | U-2 OS |
| 6387 | ENSG00000136003 | HPA038602 | CACO-2 |
| 6388 | ENSG00000136010 | HPA039481 | U-2 OS |
| 6389 | ENSG00000136010 | HPA059282 | A-431  |
| 6390 | ENSG00000136011 | HPA026871 | U-2 OS |
| 6391 | ENSG00000136014 | HPA026543 | U-2 OS |
| 6392 | ENSG00000136026 | HPA001225 | U-2 OS |
| 6393 | ENSG00000136040 | HPA066899 | CACO-2 |
| 6394 | ENSG00000136045 | HPA038708 | U-2 OS |
| 6395 | ENSG00000136051 | HPA045666 | U-2 OS |
| 6396 | ENSG00000136051 | HPA046737 | U-2 OS |
| 6397 | ENSG00000136068 | HPA004747 | U-2 OS |
| 6398 | ENSG00000136068 | CAB019322 | U-2 OS |
| 6399 | ENSG00000136098 | HPA043230 | U-2 OS |
| 6400 | ENSG00000136099 | HPA010509 | AF22   |
| 6401 | ENSG00000136100 | HPA039734 | U-2 OS |
| 6402 | ENSG00000136104 | HPA040084 | U-2 OS |
| 6403 | ENSG00000136104 | HPA041469 | U-2 OS |
| 6404 | ENSG00000136108 | HPA008410 | U-2 OS |
| 6405 | ENSG00000136111 | HPA040145 | CACO-2 |
| 6406 | ENSG00000136114 | HPA012611 | A-431  |
| 6407 | ENSG00000136114 | CAB020796 | U-2 OS |
| 6408 | ENSG00000136122 | HPA040866 | U-2 OS |
| 6409 | ENSG00000136141 | HPA021536 | U-2 OS |
| 6410 | ENSG00000136143 | HPA039536 | U-2 OS |
| 6411 | ENSG00000136143 | HPA061528 | U-2 OS |
| 6412 | ENSG00000136144 | HPA056783 | U-2 OS |
| 6413 | ENSG00000136146 | HPA006232 | U-2 OS |
| 6414 | ENSG00000136147 | HPA016566 | RT4    |
| 6415 | ENSG00000136152 | HPA040353 | U-2 OS |
| 6416 | ENSG00000136152 | HPA054470 | Hep G2 |
| 6417 | ENSG00000136153 | HPA020923 | U-2 OS |
| 6418 | ENSG00000136153 | HPA050184 | A-431  |
| 6419 | ENSG00000136155 | HPA039737 | U-2 OS |
| 6420 | ENSG00000136155 | HPA040154 | U-2 OS |
| 6421 | ENSG00000136156 | HPA029292 | A-431  |
| 6422 | ENSG00000136156 | HPA071992 | RT4    |
| 6423 | ENSG00000136158 | HPA042198 | CACO-2 |
| 6424 | ENSG00000136159 | HPA038968 | U-2 OS |
| 6425 | ENSG00000136160 | CAB017842 | U-2 OS |
| 6426 | ENSG00000136161 | HPA040242 | SiHa   |
| 6427 | ENSG00000136167 | HPA019493 | U-2 OS |
| 6428 | ENSG00000136167 | CAB020673 | A-431  |
| 6429 | ENSG00000136169 | HPA071677 | U-2 OS |
| 6430 | ENSG00000136193 | HPA024517 | U-2 OS |
| 6431 | ENSG00000136197 | HPA020120 | U-2 OS |
| 6432 | ENSG00000136197 | HPA049635 | U-2 OS |
| 6433 | ENSG00000136205 | HPA055338 | U-2 OS |

|      |                 |           |           |
|------|-----------------|-----------|-----------|
| 6434 | ENSG00000136205 | HPA056015 | U-2 OS    |
| 6435 | ENSG00000136213 | HPA041680 | A-431     |
| 6436 | ENSG00000136231 | HPA002037 | A-431     |
| 6437 | ENSG00000136237 | HPA076772 | U-2 OS    |
| 6438 | ENSG00000136238 | CAB035994 | U-2 OS    |
| 6439 | ENSG00000136243 | HPA049036 | U-2 OS    |
| 6440 | ENSG00000136243 | HPA057251 | A-431     |
| 6441 | ENSG00000136244 | CAB072821 | U-2 OS    |
| 6442 | ENSG00000136247 | HPA064358 | U-2 OS    |
| 6443 | ENSG00000136261 | HPA026709 | U-2 OS    |
| 6444 | ENSG00000136270 | HPA020582 | U-2 OS    |
| 6445 | ENSG00000136270 | HPA050430 | U-2 OS    |
| 6446 | ENSG00000136271 | CAB037320 | U-2 OS    |
| 6447 | ENSG00000136274 | HPA020981 | U-2 OS    |
| 6448 | ENSG00000136279 | HPA027735 | U-2 OS    |
| 6449 | ENSG00000136280 | HPA020273 | U-2 OS    |
| 6450 | ENSG00000136280 | HPA065815 | U-2 OS    |
| 6451 | ENSG00000136319 | HPA054198 | U-2 OS    |
| 6452 | ENSG00000136327 | HPA062879 | U-2 OS    |
| 6453 | ENSG00000136352 | HPA074316 | U-2 OS    |
| 6454 | ENSG00000136367 | HPA000720 | U-2 OS    |
| 6455 | ENSG00000136371 | HPA054177 | U-2 OS    |
| 6456 | ENSG00000136378 | HPA048453 | U-2 OS    |
| 6457 | ENSG00000136381 | HPA040371 | U-2 OS    |
| 6458 | ENSG00000136383 | HPA026558 | U-2 OS    |
| 6459 | ENSG00000136436 | HPA022989 | U-2 OS    |
| 6460 | ENSG00000136436 | HPA023195 | U-2 OS    |
| 6461 | ENSG00000136444 | HPA022436 | U-2 OS    |
| 6462 | ENSG00000136448 | HPA022949 | U-2 OS    |
| 6463 | ENSG00000136449 | HPA023257 | U-2 OS    |
| 6464 | ENSG00000136449 | HPA024405 | U-2 OS    |
| 6465 | ENSG00000136450 | CAB013073 | U-2 OS    |
| 6466 | ENSG00000136451 | HPA027520 | U-2 OS    |
| 6467 | ENSG00000136463 | HPA021626 | U-2 OS    |
| 6468 | ENSG00000136463 | HPA021643 | U-2 OS    |
| 6469 | ENSG00000136478 | HPA057116 | U-2 OS    |
| 6470 | ENSG00000136485 | HPA022948 | A-431     |
| 6471 | ENSG00000136490 | HPA062432 | RH-30     |
| 6472 | ENSG00000136492 | HPA005474 | U-2 OS    |
| 6473 | ENSG00000136504 | HPA044470 | U-2 OS    |
| 6474 | ENSG00000136504 | HPA071116 | CACO-2    |
| 6475 | ENSG00000136514 | HPA064887 | SK-MEL-30 |
| 6476 | ENSG00000136514 | HPA071189 | RT4       |
| 6477 | ENSG00000136518 | CAB012188 | U-2 OS    |
| 6478 | ENSG00000136518 | HPA018671 | U-2 OS    |
| 6479 | ENSG00000136521 | HPA005640 | U-2 OS    |
| 6480 | ENSG00000136522 | HPA047779 | CACO-2    |
| 6481 | ENSG00000136527 | CAB011692 | U-2 OS    |
| 6482 | ENSG00000136527 | HPA063597 | U-2 OS    |
| 6483 | ENSG00000136527 | HPA064972 | U-2 OS    |
| 6484 | ENSG00000136536 | HPA014275 | U-2 OS    |
| 6485 | ENSG00000136536 | HPA022152 | U-2 OS    |
| 6486 | ENSG00000136541 | HPA038295 | HAP1      |
| 6487 | ENSG00000136542 | HPA008963 | A-431     |
| 6488 | ENSG00000136542 | HPA009035 | U-2 OS    |

|      |                 |           |          |
|------|-----------------|-----------|----------|
| 6489 | ENSG00000136560 | CAB010345 | U-2 OS   |
| 6490 | ENSG00000136560 | HPA037676 | U-2 OS   |
| 6491 | ENSG00000136573 | HPA069571 | REH      |
| 6492 | ENSG00000136574 | HPA073899 | U-2 OS   |
| 6493 | ENSG00000136603 | HPA008472 | U-2 OS   |
| 6494 | ENSG00000136628 | HPA030052 | U-2 OS   |
| 6495 | ENSG00000136630 | HPA005968 | U-2 OS   |
| 6496 | ENSG00000136631 | HPA027425 | U-2 OS   |
| 6497 | ENSG00000136636 | HPA015142 | A-431    |
| 6498 | ENSG00000136643 | HPA026531 | U-2 OS   |
| 6499 | ENSG00000136643 | HPA031565 | U-2 OS   |
| 6500 | ENSG00000136682 | HPA042759 | U-2 OS   |
| 6501 | ENSG00000136689 | HPA001482 | RT4      |
| 6502 | ENSG00000136699 | HPA049426 | U-2 OS   |
| 6503 | ENSG00000136709 | HPA046527 | U-2 OS   |
| 6504 | ENSG00000136710 | HPA034598 | U-2 OS   |
| 6505 | ENSG00000136715 | HPA034664 | U-2 OS   |
| 6506 | ENSG00000136717 | HPA003894 | U-2 OS   |
| 6507 | ENSG00000136718 | HPA066222 | U-2 OS   |
| 6508 | ENSG00000136718 | HPA066673 | U-2 OS   |
| 6509 | ENSG00000136720 | HPA044586 | U-2 OS   |
| 6510 | ENSG00000136720 | HPA075890 | EF0-21   |
| 6511 | ENSG00000136731 | HPA015127 | U-2 OS   |
| 6512 | ENSG00000136732 | HPA008965 | HEL      |
| 6513 | ENSG00000136738 | HPA043882 | CACO-2   |
| 6514 | ENSG00000136754 | HPA029973 | U-2 OS   |
| 6515 | ENSG00000136754 | HPA068407 | CACO-2   |
| 6516 | ENSG00000136758 | HPA066953 | U-2 OS   |
| 6517 | ENSG00000136770 | HPA013432 | U-2 OS   |
| 6518 | ENSG00000136807 | HPA006738 | U-2 OS   |
| 6519 | ENSG00000136810 | CAB008678 | U-2 OS   |
| 6520 | ENSG00000136810 | HPA047478 | U-251 MG |
| 6521 | ENSG00000136811 | HPA048841 | U-2 OS   |
| 6522 | ENSG00000136813 | HPA021646 | U-2 OS   |
| 6523 | ENSG00000136816 | CAB022709 | U-2 OS   |
| 6524 | ENSG00000136819 | HPA021216 | U-2 OS   |
| 6525 | ENSG00000136819 | HPA021232 | U-2 OS   |
| 6526 | ENSG00000136819 | HPA021242 | U-2 OS   |
| 6527 | ENSG00000136824 | HPA071309 | U-2 OS   |
| 6528 | ENSG00000136826 | HPA002926 | U-2 OS   |
| 6529 | ENSG00000136827 | HPA051195 | U-2 OS   |
| 6530 | ENSG00000136830 | HPA021284 | A-431    |
| 6531 | ENSG00000136830 | HPA021417 | U-2 OS   |
| 6532 | ENSG00000136840 | HPA009042 | U-2 OS   |
| 6533 | ENSG00000136854 | HPA008209 | SiHa     |
| 6534 | ENSG00000136856 | HPA011935 | CACO-2   |
| 6535 | ENSG00000136859 | HPA041299 | BJ       |
| 6536 | ENSG00000136861 | HPA035820 | U-2 OS   |
| 6537 | ENSG00000136861 | HPA046529 | U-2 OS   |
| 6538 | ENSG00000136861 | CAB079753 | U-2 OS   |
| 6539 | ENSG00000136866 | HPA049112 | U-2 OS   |
| 6540 | ENSG00000136867 | HPA014861 | U-2 OS   |
| 6541 | ENSG00000136869 | HPA049174 | U-2 OS   |
| 6542 | ENSG00000136870 | HPA034814 | U-2 OS   |
| 6543 | ENSG00000136874 | HPA001204 | U-2 OS   |

|      |                 |           |             |
|------|-----------------|-----------|-------------|
| 6544 | ENSG00000136875 | HPA021794 | U-2 OS      |
| 6545 | ENSG00000136875 | HPA022248 | U-2 OS      |
| 6546 | ENSG00000136878 | HPA006287 | U-2 OS      |
| 6547 | ENSG00000136881 | HPA021251 | U-2 OS      |
| 6548 | ENSG00000136883 | HPA020192 | RPTEC TERT1 |
| 6549 | ENSG00000136888 | HPA042898 | MCF7        |
| 6550 | ENSG00000136895 | HPA028757 | A-431       |
| 6551 | ENSG00000136895 | HPA074886 | SH-SY5Y     |
| 6552 | ENSG00000136925 | HPA064304 | U-2 OS      |
| 6553 | ENSG00000136929 | HPA019572 | HEL         |
| 6554 | ENSG00000136929 | HPA019604 | HEL         |
| 6555 | ENSG00000136929 | HPA019606 | HEL         |
| 6556 | ENSG00000136930 | HPA054902 | U-2 OS      |
| 6557 | ENSG00000136932 | HPA052197 | U-2 OS      |
| 6558 | ENSG00000136933 | HPA067106 | CACO-2      |
| 6559 | ENSG00000136935 | CAB013065 | U-2 OS      |
| 6560 | ENSG00000136935 | HPA044329 | U-2 OS      |
| 6561 | ENSG00000136935 | HPA050555 | U-2 OS      |
| 6562 | ENSG00000136936 | HPA056856 | HeLa        |
| 6563 | ENSG00000136937 | HPA042411 | U-2 OS      |
| 6564 | ENSG00000136937 | HPA049031 | U-2 OS      |
| 6565 | ENSG00000136938 | HPA063133 | U-2 OS      |
| 6566 | ENSG00000136938 | HPA067561 | U-2 OS      |
| 6567 | ENSG00000136938 | HPA069657 | U-2 OS      |
| 6568 | ENSG00000136940 | HPA021571 | U-2 OS      |
| 6569 | ENSG00000136940 | HPA021647 | U-2 OS      |
| 6570 | ENSG00000136942 | HPA006047 | U-2 OS      |
| 6571 | ENSG00000136943 | CAB017112 | U-2 OS      |
| 6572 | ENSG00000136944 | HPA073716 | U-2 OS      |
| 6573 | ENSG00000136960 | HPA053652 | U-2 OS      |
| 6574 | ENSG00000136982 | HPA024401 | U-2 OS      |
| 6575 | ENSG00000136986 | HPA016562 | U-2 OS      |
| 6576 | ENSG00000136997 | HPA055893 | U-2 OS      |
| 6577 | ENSG00000136997 | HPA066556 | U-2 OS      |
| 6578 | ENSG00000136999 | HPA018449 | U-2 OS      |
| 6579 | ENSG00000136999 | HPA019684 | U-2 OS      |
| 6580 | ENSG00000137040 | HPA043748 | U-2 OS      |
| 6581 | ENSG00000137040 | HPA052684 | U-2 OS      |
| 6582 | ENSG00000137054 | HPA052400 | U-2 OS      |
| 6583 | ENSG00000137055 | HPA020994 | U-2 OS      |
| 6584 | ENSG00000137055 | HPA020996 | U-2 OS      |
| 6585 | ENSG00000137073 | HPA021684 | U-2 OS      |
| 6586 | ENSG00000137074 | HPA064930 | U-2 OS      |
| 6587 | ENSG00000137075 | HPA015853 | U-2 OS      |
| 6588 | ENSG00000137076 | HPA004748 | U-2 OS      |
| 6589 | ENSG00000137094 | HPA050794 | RH-30       |
| 6590 | ENSG00000137100 | HPA044905 | U-2 OS      |
| 6591 | ENSG00000137101 | HPA044658 | U-2 OS      |
| 6592 | ENSG00000137103 | HPA062701 | PC-3        |
| 6593 | ENSG00000137106 | HPA022971 | U-2 OS      |
| 6594 | ENSG00000137124 | HPA021037 | U-2 OS      |
| 6595 | ENSG00000137133 | HPA020961 | U-2 OS      |
| 6596 | ENSG00000137133 | HPA059109 | U-2 OS      |
| 6597 | ENSG00000137142 | HPA051354 | A549        |
| 6598 | ENSG00000137145 | HPA014917 | U-2 OS      |

|      |                 |           |          |
|------|-----------------|-----------|----------|
| 6599 | ENSG00000137145 | HPA015096 | U-251 MG |
| 6600 | ENSG00000137154 | HPA031153 | U-2 OS   |
| 6601 | ENSG00000137166 | HPA007176 | U-2 OS   |
| 6602 | ENSG00000137168 | HPA062916 | U-2 OS   |
| 6603 | ENSG00000137171 | HPA030169 | U-2 OS   |
| 6604 | ENSG00000137185 | HPA054512 | U-2 OS   |
| 6605 | ENSG00000137193 | HPA003941 | U-2 OS   |
| 6606 | ENSG00000137200 | HPA029954 | U-2 OS   |
| 6607 | ENSG00000137200 | HPA029979 | U-2 OS   |
| 6608 | ENSG00000137200 | HPA029980 | U-2 OS   |
| 6609 | ENSG00000137203 | CAB000326 | A-431    |
| 6610 | ENSG00000137203 | HPA056871 | A-431    |
| 6611 | ENSG00000137207 | HPA014859 | A-431    |
| 6612 | ENSG00000137207 | HPA063699 | U-2 OS   |
| 6613 | ENSG00000137216 | HPA029250 | U-2 OS   |
| 6614 | ENSG00000137216 | HPA029251 | U-2 OS   |
| 6615 | ENSG00000137218 | HPA030174 | U-2 OS   |
| 6616 | ENSG00000137221 | HPA030165 | U-2 OS   |
| 6617 | ENSG00000137261 | HPA076313 | HeLa     |
| 6618 | ENSG00000137265 | HPA002038 | A-431    |
| 6619 | ENSG00000137266 | HPA014697 | A-431    |
| 6620 | ENSG00000137267 | CAB015339 | U-2 OS   |
| 6621 | ENSG00000137269 | HPA031604 | RT4      |
| 6622 | ENSG00000137270 | HPA011343 | CACO-2   |
| 6623 | ENSG00000137274 | HPA036752 | RT4      |
| 6624 | ENSG00000137275 | CAB010302 | U-2 OS   |
| 6625 | ENSG00000137275 | HPA015257 | U-2 OS   |
| 6626 | ENSG00000137288 | HPA039111 | U-2 OS   |
| 6627 | ENSG00000137309 | CAB032200 | U-2 OS   |
| 6628 | ENSG00000137312 | HPA001393 | U-2 OS   |
| 6629 | ENSG00000137337 | HPA006915 | U-2 OS   |
| 6630 | ENSG00000137338 | HPA007267 | U-2 OS   |
| 6631 | ENSG00000137343 | HPA050999 | A-431    |
| 6632 | ENSG00000137393 | HPA072469 | U-2 OS   |
| 6633 | ENSG00000137404 | HPA072545 | U-2 OS   |
| 6634 | ENSG00000137404 | HPA073982 | RH-30    |
| 6635 | ENSG00000137411 | HPA062449 | U-2 OS   |
| 6636 | ENSG00000137413 | HPA031730 | U-2 OS   |
| 6637 | ENSG00000137413 | HPA031731 | A-431    |
| 6638 | ENSG00000137413 | HPA031734 | U-2 OS   |
| 6639 | ENSG00000137414 | HPA044698 | Hep G2   |
| 6640 | ENSG00000137434 | HPA051142 | CACO-2   |
| 6641 | ENSG00000137449 | HPA072513 | U-2 OS   |
| 6642 | ENSG00000137462 | HPA060231 | RT4      |
| 6643 | ENSG00000137462 | HPA071546 | RT4      |
| 6644 | ENSG00000137463 | HPA015994 | BJ       |
| 6645 | ENSG00000137474 | HPA028918 | U-2 OS   |
| 6646 | ENSG00000137478 | HPA038546 | U-2 OS   |
| 6647 | ENSG00000137486 | HPA049318 | Hep G2   |
| 6648 | ENSG00000137492 | HPA008758 | U-2 OS   |
| 6649 | ENSG00000137494 | HPA039917 | U-2 OS   |
| 6650 | ENSG00000137496 | CAB025980 | U-2 OS   |
| 6651 | ENSG00000137497 | HPA019841 | U-2 OS   |
| 6652 | ENSG00000137497 | HPA029912 | U-2 OS   |
| 6653 | ENSG00000137500 | HPA011130 | U-2 OS   |

|      |                 |           |           |
|------|-----------------|-----------|-----------|
| 6654 | ENSG00000137500 | HPA011931 | U-2 OS    |
| 6655 | ENSG00000137501 | HPA039651 | U-2 OS    |
| 6656 | ENSG00000137502 | HPA054514 | U-2 OS    |
| 6657 | ENSG00000137502 | HPA060565 | SiHa      |
| 6658 | ENSG00000137504 | HPA063652 | U-2 OS    |
| 6659 | ENSG00000137507 | HPA055775 | ASC TERT1 |
| 6660 | ENSG00000137507 | HPA058434 | ASC TERT1 |
| 6661 | ENSG00000137509 | HPA071115 | U-2 OS    |
| 6662 | ENSG00000137513 | HPA026793 | U-2 OS    |
| 6663 | ENSG00000137522 | HPA046041 | U-2 OS    |
| 6664 | ENSG00000137558 | HPA006593 | U-2 OS    |
| 6665 | ENSG00000137571 | HPA025062 | HEK 293   |
| 6666 | ENSG00000137574 | HPA029824 | U-2 OS    |
| 6667 | ENSG00000137575 | HPA023840 | U-2 OS    |
| 6668 | ENSG00000137601 | HPA020873 | U-2 OS    |
| 6669 | ENSG00000137628 | HPA046952 | A-431     |
| 6670 | ENSG00000137648 | HPA006238 | RT4       |
| 6671 | ENSG00000137656 | HPA038340 | U-2 OS    |
| 6672 | ENSG00000137656 | HPA038341 | U-2 OS    |
| 6673 | ENSG00000137673 | HPA051358 | U-251 MG  |
| 6674 | ENSG00000137691 | HPA038585 | A549      |
| 6675 | ENSG00000137692 | HPA050863 | U-2 OS    |
| 6676 | ENSG00000137693 | CAB009370 | U-2 OS    |
| 6677 | ENSG00000137699 | HPA020053 | U-2 OS    |
| 6678 | ENSG00000137700 | HPA038939 | U-2 OS    |
| 6679 | ENSG00000137707 | HPA057157 | CACO-2    |
| 6680 | ENSG00000137709 | HPA019652 | U-2 OS    |
| 6681 | ENSG00000137709 | HPA073468 | U-2 OS    |
| 6682 | ENSG00000137710 | HPA000763 | U-2 OS    |
| 6683 | ENSG00000137710 | CAB037312 | SiHa      |
| 6684 | ENSG00000137713 | CAB004034 | U-2 OS    |
| 6685 | ENSG00000137713 | HPA018908 | U-2 OS    |
| 6686 | ENSG00000137714 | HPA041630 | U-2 OS    |
| 6687 | ENSG00000137714 | HPA062087 | CACO-2    |
| 6688 | ENSG00000137720 | HPA038410 | U-2 OS    |
| 6689 | ENSG00000137720 | HPA057519 | U-2 OS    |
| 6690 | ENSG00000137726 | HPA042284 | RH-30     |
| 6691 | ENSG00000137727 | HPA076303 | U-2 OS    |
| 6692 | ENSG00000137731 | HPA064218 | A549      |
| 6693 | ENSG00000137752 | CAB002685 | U-2 OS    |
| 6694 | ENSG00000137760 | HPA061514 | U-2 OS    |
| 6695 | ENSG00000137764 | HPA027347 | U-2 OS    |
| 6696 | ENSG00000137767 | HPA017079 | A-431     |
| 6697 | ENSG00000137770 | HPA040763 | U-2 OS    |
| 6698 | ENSG00000137770 | HPA062198 | U-2 OS    |
| 6699 | ENSG00000137776 | HPA040256 | U-2 OS    |
| 6700 | ENSG00000137776 | HPA040381 | U-2 OS    |
| 6701 | ENSG00000137801 | HPA059756 | BJ        |
| 6702 | ENSG00000137802 | HPA030833 | U-2 OS    |
| 6703 | ENSG00000137804 | HPA042904 | U-2 OS    |
| 6704 | ENSG00000137804 | HPA074847 | U-2 OS    |
| 6705 | ENSG00000137806 | HPA039933 | U-2 OS    |
| 6706 | ENSG00000137806 | HPA040064 | U-2 OS    |
| 6707 | ENSG00000137807 | HPA045208 | U-2 OS    |
| 6708 | ENSG00000137807 | HPA068831 | U-2 OS    |



|      |                 |           |         |
|------|-----------------|-----------|---------|
| 6709 | ENSG00000137812 | HPA026624 | U-2 OS  |
| 6710 | ENSG00000137812 | HPA049647 | U-2 OS  |
| 6711 | ENSG00000137814 | HPA039965 | U-2 OS  |
| 6712 | ENSG00000137815 | HPA006714 | U-2 OS  |
| 6713 | ENSG00000137817 | HPA026991 | A-431   |
| 6714 | ENSG00000137818 | HPA003368 | U-2 OS  |
| 6715 | ENSG00000137819 | HPA076729 | U-2 OS  |
| 6716 | ENSG00000137822 | HPA043212 | A-431   |
| 6717 | ENSG00000137824 | HPA009975 | U-2 OS  |
| 6718 | ENSG00000137824 | HPA074840 | U-2 OS  |
| 6719 | ENSG00000137825 | HPA040454 | U-2 OS  |
| 6720 | ENSG00000137831 | HPA043503 | U-2 OS  |
| 6721 | ENSG00000137834 | HPA061917 | U-2 OS  |
| 6722 | ENSG00000137841 | HPA041298 | U-2 OS  |
| 6723 | ENSG00000137842 | HPA062359 | U-2 OS  |
| 6724 | ENSG00000137843 | HPA031124 | CACO-2  |
| 6725 | ENSG00000137845 | CAB001709 | U-2 OS  |
| 6726 | ENSG00000137845 | HPA050670 | U-2 OS  |
| 6727 | ENSG00000137869 | HPA051194 | U-2 OS  |
| 6728 | ENSG00000137871 | HPA030233 | U-2 OS  |
| 6729 | ENSG00000137872 | HPA043109 | A-431   |
| 6730 | ENSG00000137876 | HPA062724 | U-2 OS  |
| 6731 | ENSG00000137876 | HPA063392 | U-2 OS  |
| 6732 | ENSG00000137878 | HPA068141 | U-2 OS  |
| 6733 | ENSG00000137880 | HPA046258 | CACO-2  |
| 6734 | ENSG00000137936 | HPA014858 | A-431   |
| 6735 | ENSG00000137942 | HPA065273 | SiHa    |
| 6736 | ENSG00000137944 | HPA027168 | U-2 OS  |
| 6737 | ENSG00000137947 | HPA061626 | U-2 OS  |
| 6738 | ENSG00000137955 | HPA026585 | U-2 OS  |
| 6739 | ENSG00000137959 | HPA053247 | HeLa    |
| 6740 | ENSG00000137960 | HPA051212 | CACO-2  |
| 6741 | ENSG00000137962 | HPA026534 | U-2 OS  |
| 6742 | ENSG00000137965 | HPA043858 | U-2 OS  |
| 6743 | ENSG00000137968 | HPA047455 | SH-SY5Y |
| 6744 | ENSG00000137975 | HPA047192 | HaCaT   |
| 6745 | ENSG00000137992 | HPA026485 | A-431   |
| 6746 | ENSG00000137996 | HPA027982 | A-431   |
| 6747 | ENSG00000137996 | HPA027990 | U-2 OS  |
| 6748 | ENSG00000137996 | HPA028331 | U-2 OS  |
| 6749 | ENSG00000138002 | HPA044893 | U-2 OS  |
| 6750 | ENSG00000138028 | HPA071103 | MCF7    |
| 6751 | ENSG00000138029 | HPA066099 | U-2 OS  |
| 6752 | ENSG00000138030 | HPA007040 | U-2 OS  |
| 6753 | ENSG00000138032 | HPA016745 | U-2 OS  |
| 6754 | ENSG00000138035 | HPA034602 | U-2 OS  |
| 6755 | ENSG00000138035 | HPA034603 | U-2 OS  |
| 6756 | ENSG00000138036 | HPA062905 | U-2 OS  |
| 6757 | ENSG00000138050 | HPA058025 | A549    |
| 6758 | ENSG00000138061 | HPA026863 | SiHa    |
| 6759 | ENSG00000138069 | CAB005331 | U-2 OS  |
| 6760 | ENSG00000138071 | HPA015050 | A-431   |
| 6761 | ENSG00000138073 | HPA014133 | U-2 OS  |
| 6762 | ENSG00000138074 | HPA036958 | MCF7    |
| 6763 | ENSG00000138079 | HPA071102 | U-2 OS  |

|      |                 |           |         |
|------|-----------------|-----------|---------|
| 6764 | ENSG00000138081 | HPA002690 | U-2 OS  |
| 6765 | ENSG00000138083 | HPA067988 | U-2 OS  |
| 6766 | ENSG00000138092 | HPA046189 | U-2 OS  |
| 6767 | ENSG00000138095 | HPA036408 | U-2 OS  |
| 6768 | ENSG00000138095 | HPA036409 | U-2 OS  |
| 6769 | ENSG00000138100 | HPA019690 | U-2 OS  |
| 6770 | ENSG00000138101 | HPA061357 | U-2 OS  |
| 6771 | ENSG00000138107 | HPA047443 | U-2 OS  |
| 6772 | ENSG00000138111 | HPA018031 | U-2 OS  |
| 6773 | ENSG00000138119 | HPA014245 | U-2 OS  |
| 6774 | ENSG00000138131 | HPA037609 | U-2 OS  |
| 6775 | ENSG00000138134 | HPA040202 | U-2 OS  |
| 6776 | ENSG00000138136 | HPA002016 | HEK 293 |
| 6777 | ENSG00000138138 | HPA037569 | U-2 OS  |
| 6778 | ENSG00000138152 | HPA057638 | RT4     |
| 6779 | ENSG00000138160 | HPA010093 | U-2 OS  |
| 6780 | ENSG00000138161 | HPA074117 | U-2 OS  |
| 6781 | ENSG00000138162 | HPA061394 | A549    |
| 6782 | ENSG00000138172 | HPA014706 | U-2 OS  |
| 6783 | ENSG00000138175 | HPA063596 | U-2 OS  |
| 6784 | ENSG00000138180 | HPA023430 | U-2 OS  |
| 6785 | ENSG00000138182 | HPA050214 | U-2 OS  |
| 6786 | ENSG00000138185 | HPA014067 | U-2 OS  |
| 6787 | ENSG00000138190 | HPA059111 | U-2 OS  |
| 6788 | ENSG00000138193 | HPA015598 | U-2 OS  |
| 6789 | ENSG00000138231 | HPA035365 | U-2 OS  |
| 6790 | ENSG00000138246 | HPA036923 | U-2 OS  |
| 6791 | ENSG00000138246 | HPA036924 | SiHa    |
| 6792 | ENSG00000138271 | HPA066313 | U-2 OS  |
| 6793 | ENSG00000138279 | HPA064290 | CACO-2  |
| 6794 | ENSG00000138286 | HPA039859 | PC-3    |
| 6795 | ENSG00000138303 | HPA057567 | CACO-2  |
| 6796 | ENSG00000138311 | HPA052446 | U-2 OS  |
| 6797 | ENSG00000138326 | HPA003364 | U-2 OS  |
| 6798 | ENSG00000138336 | HPA019032 | U-2 OS  |
| 6799 | ENSG00000138336 | HPA057273 | CACO-2  |
| 6800 | ENSG00000138346 | HPA057526 | CACO-2  |
| 6801 | ENSG00000138347 | HPA036299 | U-2 OS  |
| 6802 | ENSG00000138363 | CAB013462 | U-2 OS  |
| 6803 | ENSG00000138363 | HPA021012 | U-2 OS  |
| 6804 | ENSG00000138376 | HPA035354 | CACO-2  |
| 6805 | ENSG00000138380 | HPA034557 | U-2 OS  |
| 6806 | ENSG00000138380 | HPA043191 | U-2 OS  |
| 6807 | ENSG00000138381 | HPA075042 | U-2 OS  |
| 6808 | ENSG00000138382 | HPA038223 | U-2 OS  |
| 6809 | ENSG00000138385 | HPA017287 | U-2 OS  |
| 6810 | ENSG00000138386 | HPA002738 | U-2 OS  |
| 6811 | ENSG00000138395 | HPA015786 | BJ      |
| 6812 | ENSG00000138398 | HPA021788 | U-2 OS  |
| 6813 | ENSG00000138399 | HPA043719 | HEK 293 |
| 6814 | ENSG00000138413 | CAB062556 | U-2 OS  |
| 6815 | ENSG00000138430 | HPA035790 | U-2 OS  |
| 6816 | ENSG00000138430 | HPA041443 | U-2 OS  |
| 6817 | ENSG00000138433 | HPA015784 | A-431   |
| 6818 | ENSG00000138434 | HPA034665 | U-2 OS  |

|      |                 |           |             |
|------|-----------------|-----------|-------------|
| 6819 | ENSG00000138435 | HPA071554 | RH-30       |
| 6820 | ENSG00000138439 | HPA028746 | U-2 OS      |
| 6821 | ENSG00000138442 | HPA036389 | U-2 OS      |
| 6822 | ENSG00000138443 | HPA070567 | SH-SY5Y     |
| 6823 | ENSG00000138448 | HPA004856 | U-2 OS      |
| 6824 | ENSG00000138449 | HPA065634 | RT4         |
| 6825 | ENSG00000138459 | HPA057964 | A-431       |
| 6826 | ENSG00000138463 | HPA072579 | CACO-2      |
| 6827 | ENSG00000138468 | HPA027259 | U-2 OS      |
| 6828 | ENSG00000138472 | HPA041597 | RPTEC TERT1 |
| 6829 | ENSG00000138495 | HPA042226 | U-2 OS      |
| 6830 | ENSG00000138496 | HPA066708 | U-2 OS      |
| 6831 | ENSG00000138587 | HPA039975 | U-2 OS      |
| 6832 | ENSG00000138592 | HPA050215 | U-2 OS      |
| 6833 | ENSG00000138593 | HPA039875 | U-2 OS      |
| 6834 | ENSG00000138594 | HPA001849 | U-2 OS      |
| 6835 | ENSG00000138600 | HPA067304 | U-2 OS      |
| 6836 | ENSG00000138604 | HPA040481 | U-2 OS      |
| 6837 | ENSG00000138606 | HPA057381 | U-2 OS      |
| 6838 | ENSG00000138614 | HPA040255 | U-2 OS      |
| 6839 | ENSG00000138621 | HPA045667 | A549        |
| 6840 | ENSG00000138623 | HPA008210 | BJ          |
| 6841 | ENSG00000138629 | HPA041897 | U-2 OS      |
| 6842 | ENSG00000138639 | HPA014288 | U-2 OS      |
| 6843 | ENSG00000138640 | HPA038108 | U-2 OS      |
| 6844 | ENSG00000138640 | HPA038109 | U-2 OS      |
| 6845 | ENSG00000138641 | HPA039170 | U-2 OS      |
| 6846 | ENSG00000138642 | HPA035846 | U-2 OS      |
| 6847 | ENSG00000138650 | HPA073462 | U-2 OS      |
| 6848 | ENSG00000138658 | HPA030704 | A-431       |
| 6849 | ENSG00000138660 | HPA058115 | U-2 OS      |
| 6850 | ENSG00000138663 | HPA042828 | U-2 OS      |
| 6851 | ENSG00000138668 | HPA004911 | U-2 OS      |
| 6852 | ENSG00000138670 | HPA044574 | CACO-2      |
| 6853 | ENSG00000138674 | HPA005457 | U-2 OS      |
| 6854 | ENSG00000138675 | CAB010313 | U-2 OS      |
| 6855 | ENSG00000138675 | HPA042442 | U-2 OS      |
| 6856 | ENSG00000138678 | CAB033749 | U-251 MG    |
| 6857 | ENSG00000138685 | CAB000125 | U-2 OS      |
| 6858 | ENSG00000138688 | HPA038076 | U-2 OS      |
| 6859 | ENSG00000138698 | HPA019060 | U-2 OS      |
| 6860 | ENSG00000138709 | HPA036280 | U-2 OS      |
| 6861 | ENSG00000138722 | HPA035769 | HUVEC TERT2 |
| 6862 | ENSG00000138735 | HPA004729 | U-2 OS      |
| 6863 | ENSG00000138738 | HPA051406 | U-2 OS      |
| 6864 | ENSG00000138750 | HPA058122 | U-2 OS      |
| 6865 | ENSG00000138756 | HPA026451 | U-2 OS      |
| 6866 | ENSG00000138757 | HPA018304 | U-2 OS      |
| 6867 | ENSG00000138757 | HPA018425 | U-2 OS      |
| 6868 | ENSG00000138758 | HPA005665 | U-2 OS      |
| 6869 | ENSG00000138760 | HPA018014 | A-431       |
| 6870 | ENSG00000138764 | HPA034684 | U-2 OS      |
| 6871 | ENSG00000138767 | HPA042688 | U-2 OS      |
| 6872 | ENSG00000138768 | HPA038282 | A-431       |
| 6873 | ENSG00000138768 | HPA038283 | U-2 OS      |

|      |                 |           |         |
|------|-----------------|-----------|---------|
| 6874 | ENSG00000138769 | HPA040672 | U-2 OS  |
| 6875 | ENSG00000138772 | HPA013398 | A-431   |
| 6876 | ENSG00000138772 | HPA013431 | U-2 OS  |
| 6877 | ENSG00000138777 | HPA031671 | U-2 OS  |
| 6878 | ENSG00000138778 | HPA042294 | U-2 OS  |
| 6879 | ENSG00000138780 | HPA046160 | U-2 OS  |
| 6880 | ENSG00000138780 | HPA061782 | U-2 OS  |
| 6881 | ENSG00000138785 | HPA035772 | U-2 OS  |
| 6882 | ENSG00000138785 | HPA041814 | U-2 OS  |
| 6883 | ENSG00000138794 | CAB003775 | U-2 OS  |
| 6884 | ENSG00000138794 | HPA011337 | U-2 OS  |
| 6885 | ENSG00000138795 | HPA002087 | U-2 OS  |
| 6886 | ENSG00000138796 | HPA043888 | U-2 OS  |
| 6887 | ENSG00000138801 | HPA049781 | U-2 OS  |
| 6888 | ENSG00000138802 | HPA038181 | U-2 OS  |
| 6889 | ENSG00000138814 | HPA012778 | U-2 OS  |
| 6890 | ENSG00000138814 | CAB018581 | U-2 OS  |
| 6891 | ENSG00000138823 | HPA051170 | U-2 OS  |
| 6892 | ENSG00000138829 | CAB026401 | U-2 OS  |
| 6893 | ENSG00000138834 | HPA041785 | U-2 OS  |
| 6894 | ENSG00000138835 | HPA044234 | U-2 OS  |
| 6895 | ENSG00000138867 | HPA022786 | U-2 OS  |
| 6896 | ENSG00000138944 | HPA051178 | U-2 OS  |
| 6897 | ENSG00000139044 | HPA011404 | CAC0-2  |
| 6898 | ENSG00000139053 | HPA045118 | U-2 OS  |
| 6899 | ENSG00000139083 | HPA000264 | U-2 OS  |
| 6900 | ENSG00000139112 | HPA065883 | HEK 293 |
| 6901 | ENSG00000139116 | HPA058432 | SH-SY5Y |
| 6902 | ENSG00000139131 | HPA074097 | U-2 OS  |
| 6903 | ENSG00000139132 | HPA039235 | U-2 OS  |
| 6904 | ENSG00000139133 | HPA063387 | U-2 OS  |
| 6905 | ENSG00000139146 | HPA038167 | CAC0-2  |
| 6906 | ENSG00000139154 | HPA020893 | RH-30   |
| 6907 | ENSG00000139154 | HPA022282 | RH-30   |
| 6908 | ENSG00000139163 | HPA029407 | U-2 OS  |
| 6909 | ENSG00000139174 | HPA001379 | U-2 OS  |
| 6910 | ENSG00000139174 | HPA050037 | A-431   |
| 6911 | ENSG00000139178 | HPA011338 | U-2 OS  |
| 6912 | ENSG00000139180 | HPA073212 | U-2 OS  |
| 6913 | ENSG00000139187 | HPA051403 | U-2 OS  |
| 6914 | ENSG00000139187 | HPA076494 | U-2 OS  |
| 6915 | ENSG00000139194 | HPA038723 | U-2 OS  |
| 6916 | ENSG00000139197 | HPA039259 | U-2 OS  |
| 6917 | ENSG00000139197 | HPA039260 | U-2 OS  |
| 6918 | ENSG00000139200 | HPA010631 | U-2 OS  |
| 6919 | ENSG00000139211 | HPA059601 | U-2 OS  |
| 6920 | ENSG00000139218 | HPA038862 | U-2 OS  |
| 6921 | ENSG00000139218 | HPA045456 | U-2 OS  |
| 6922 | ENSG00000139218 | HPA046345 | U-2 OS  |
| 6923 | ENSG00000139219 | HPA055753 | U-2 OS  |
| 6924 | ENSG00000139223 | HPA063133 | U-2 OS  |
| 6925 | ENSG00000139223 | HPA067561 | U-2 OS  |
| 6926 | ENSG00000139233 | HPA048920 | RT4     |
| 6927 | ENSG00000139233 | HPA058786 | RT4     |
| 6928 | ENSG00000139263 | HPA010773 | U-2 OS  |

|      |                 |           |        |
|------|-----------------|-----------|--------|
| 6929 | ENSG00000139269 | HPA016843 | Hep G2 |
| 6930 | ENSG00000139289 | HPA063520 | U-2 OS |
| 6931 | ENSG00000139304 | HPA053245 | BJ     |
| 6932 | ENSG00000139318 | HPA053188 | CACO-2 |
| 6933 | ENSG00000139318 | HPA064692 | U-2 OS |
| 6934 | ENSG00000139344 | HPA040149 | A549   |
| 6935 | ENSG00000139350 | HPA038591 | A-431  |
| 6936 | ENSG00000139352 | HPA076307 | U-2 OS |
| 6937 | ENSG00000139370 | HPA016713 | U-2 OS |
| 6938 | ENSG00000139372 | HPA052263 | U-2 OS |
| 6939 | ENSG00000139405 | HPA061531 | U-2 OS |
| 6940 | ENSG00000139410 | HPA005740 | U-2 OS |
| 6941 | ENSG00000139428 | HPA039017 | U-2 OS |
| 6942 | ENSG00000139433 | HPA056461 | PC-3   |
| 6943 | ENSG00000139436 | CAB004681 | U-2 OS |
| 6944 | ENSG00000139437 | HPA038638 | U-2 OS |
| 6945 | ENSG00000139438 | HPA040181 | U-2 OS |
| 6946 | ENSG00000139438 | HPA058774 | CACO-2 |
| 6947 | ENSG00000139445 | HPA050018 | U-2 OS |
| 6948 | ENSG00000139508 | HPA039930 | U-2 OS |
| 6949 | ENSG00000139515 | HPA059146 | HeLa   |
| 6950 | ENSG00000139517 | HPA040698 | U-2 OS |
| 6951 | ENSG00000139537 | HPA057573 | U-2 OS |
| 6952 | ENSG00000139540 | HPA018423 | CACO-2 |
| 6953 | ENSG00000139546 | HPA051181 | U-2 OS |
| 6954 | ENSG00000139579 | HPA044615 | U-2 OS |
| 6955 | ENSG00000139579 | HPA057213 | U-2 OS |
| 6956 | ENSG00000139597 | HPA038971 | U-2 OS |
| 6957 | ENSG00000139613 | CAB004321 | U-2 OS |
| 6958 | ENSG00000139613 | HPA021213 | U-2 OS |
| 6959 | ENSG00000139613 | HPA061788 | U-2 OS |
| 6960 | ENSG00000139618 | HPA026815 | U-2 OS |
| 6961 | ENSG00000139620 | HPA038497 | U-2 OS |
| 6962 | ENSG00000139620 | HPA038498 | U-2 OS |
| 6963 | ENSG00000139624 | HPA026589 | U-2 OS |
| 6964 | ENSG00000139625 | HPA071996 | U-2 OS |
| 6965 | ENSG00000139626 | HPA042277 | U-2 OS |
| 6966 | ENSG00000139629 | HPA017086 | MCF7   |
| 6967 | ENSG00000139637 | HPA038627 | A-431  |
| 6968 | ENSG00000139641 | HPA076926 | U-2 OS |
| 6969 | ENSG00000139645 | HPA043815 | U-2 OS |
| 6970 | ENSG00000139651 | HPA035691 | U-2 OS |
| 6971 | ENSG00000139656 | HPA077071 | U-2 OS |
| 6972 | ENSG00000139684 | HPA039700 | U-2 OS |
| 6973 | ENSG00000139687 | CAB000095 | U-2 OS |
| 6974 | ENSG00000139687 | CAB016687 | A-431  |
| 6975 | ENSG00000139697 | HPA042388 | U-2 OS |
| 6976 | ENSG00000139714 | HPA038710 | CACO-2 |
| 6977 | ENSG00000139718 | HPA021667 | U-2 OS |
| 6978 | ENSG00000139718 | HPA059412 | MCF7   |
| 6979 | ENSG00000139719 | HPA038701 | U-2 OS |
| 6980 | ENSG00000139725 | HPA045912 | U-2 OS |
| 6981 | ENSG00000139726 | HPA021783 | SiHa   |
| 6982 | ENSG00000139734 | HPA032151 | U-2 OS |
| 6983 | ENSG00000139746 | HPA040252 | U-2 OS |

|      |                 |           |           |
|------|-----------------|-----------|-----------|
| 6984 | ENSG00000139793 | HPA062685 | U-2 OS    |
| 6985 | ENSG00000139800 | HPA074045 | U-2 OS    |
| 6986 | ENSG00000139826 | HPA032143 | A-431     |
| 6987 | ENSG00000139832 | HPA003621 | SK-MEL-30 |
| 6988 | ENSG00000139832 | HPA052111 | CACO-2    |
| 6989 | ENSG00000139842 | HPA058979 | U-2 OS    |
| 6990 | ENSG00000139865 | HPA069293 | RT4       |
| 6991 | ENSG00000139874 | HPA003207 | BJ        |
| 6992 | ENSG00000139880 | HPA065233 | U-2 OS    |
| 6993 | ENSG00000139899 | HPA041266 | U-2 OS    |
| 6994 | ENSG00000139908 | HPA060660 | U-2 OS    |
| 6995 | ENSG00000139910 | HPA004155 | U-2 OS    |
| 6996 | ENSG00000139921 | HPA003085 | U-2 OS    |
| 6997 | ENSG00000139926 | HPA001297 | U-2 OS    |
| 6998 | ENSG00000139946 | HPA053182 | CACO-2    |
| 6999 | ENSG00000139970 | HPA040945 | U-2 OS    |
| 7000 | ENSG00000139970 | HPA044249 | SiHa      |
| 7001 | ENSG00000139971 | HPA001580 | U-2 OS    |
| 7002 | ENSG00000139973 | HPA076871 | A-431     |
| 7003 | ENSG00000139974 | HPA018508 | U-2 OS    |
| 7004 | ENSG00000139977 | HPA057824 | U-2 OS    |
| 7005 | ENSG00000139990 | HPA041575 | U-2 OS    |
| 7006 | ENSG00000139998 | HPA041177 | U-2 OS    |
| 7007 | ENSG00000140006 | HPA000813 | A-431     |
| 7008 | ENSG00000140015 | HPA072351 | RT4       |
| 7009 | ENSG00000140022 | HPA003086 | U-2 OS    |
| 7010 | ENSG00000140025 | HPA051209 | MCF7      |
| 7011 | ENSG00000140030 | HPA077397 | U-2 OS    |
| 7012 | ENSG00000140043 | HPA001125 | U-2 OS    |
| 7013 | ENSG00000140044 | HPA059511 | CACO-2    |
| 7014 | ENSG00000140092 | CAB025843 | U-2 OS    |
| 7015 | ENSG00000140093 | HPA048739 | Hep G2    |
| 7016 | ENSG00000140104 | HPA042052 | U-2 OS    |
| 7017 | ENSG00000140105 | HPA005573 | A-431     |
| 7018 | ENSG00000140105 | HPA018944 | A-431     |
| 7019 | ENSG00000140157 | HPA071342 | U-251 MG  |
| 7020 | ENSG00000140199 | HPA034563 | U-2 OS    |
| 7021 | ENSG00000140259 | HPA015583 | U-2 OS    |
| 7022 | ENSG00000140262 | HPA065827 | U-2 OS    |
| 7023 | ENSG00000140263 | HPA040260 | U-2 OS    |
| 7024 | ENSG00000140264 | HPA056613 | U-2 OS    |
| 7025 | ENSG00000140265 | HPA011109 | U-2 OS    |
| 7026 | ENSG00000140280 | HPA040460 | U-2 OS    |
| 7027 | ENSG00000140285 | HPA043605 | U-2 OS    |
| 7028 | ENSG00000140287 | HPA038891 | HEL       |
| 7029 | ENSG00000140297 | HPA011154 | A549      |
| 7030 | ENSG00000140307 | HPA056239 | U-2 OS    |
| 7031 | ENSG00000140319 | HPA053738 | MCF7      |
| 7032 | ENSG00000140319 | HPA065118 | U-2 OS    |
| 7033 | ENSG00000140320 | HPA041196 | A-431     |
| 7034 | ENSG00000140323 | HPA059903 | CACO-2    |
| 7035 | ENSG00000140326 | HPA039404 | U-2 OS    |
| 7036 | ENSG00000140326 | HPA040787 | HeLa      |
| 7037 | ENSG00000140332 | HPA054116 | U-2 OS    |
| 7038 | ENSG00000140350 | HPA063133 | U-2 OS    |

|      |                 |           |           |
|------|-----------------|-----------|-----------|
| 7039 | ENSG00000140350 | HPA067561 | U-2 OS    |
| 7040 | ENSG00000140365 | HPA066957 | U-2 OS    |
| 7041 | ENSG00000140374 | HPA018990 | U-2 OS    |
| 7042 | ENSG00000140374 | HPA018993 | U-2 OS    |
| 7043 | ENSG00000140374 | HPA024089 | U-2 OS    |
| 7044 | ENSG00000140382 | HPA008126 | U-2 OS    |
| 7045 | ENSG00000140386 | HPA061180 | HEK 293   |
| 7046 | ENSG00000140391 | HPA015996 | U-251 MG  |
| 7047 | ENSG00000140395 | HPA039932 | U-2 OS    |
| 7048 | ENSG00000140395 | HPA040065 | U-2 OS    |
| 7049 | ENSG00000140396 | HPA060243 | U-2 OS    |
| 7050 | ENSG00000140398 | HPA054084 | U-2 OS    |
| 7051 | ENSG00000140400 | HPA040627 | U-2 OS    |
| 7052 | ENSG00000140400 | HPA067407 | U-2 OS    |
| 7053 | ENSG00000140403 | HPA041790 | U-2 OS    |
| 7054 | ENSG00000140406 | HPA071716 | U-2 OS    |
| 7055 | ENSG00000140416 | HPA000261 | U-2 OS    |
| 7056 | ENSG00000140443 | CAB010268 | U-2 OS    |
| 7057 | ENSG00000140450 | HPA039934 | U-2 OS    |
| 7058 | ENSG00000140451 | CAB018701 | U-2 OS    |
| 7059 | ENSG00000140455 | HPA053275 | U-2 OS    |
| 7060 | ENSG00000140455 | HPA060513 | RT4       |
| 7061 | ENSG00000140455 | HPA077975 | RT4       |
| 7062 | ENSG00000140463 | HPA039418 | U-2 OS    |
| 7063 | ENSG00000140464 | CAB010194 | U-2 OS    |
| 7064 | ENSG00000140464 | CAB016304 | U-2 OS    |
| 7065 | ENSG00000140470 | HPA062487 | U-2 OS    |
| 7066 | ENSG00000140471 | HPA038578 | U-2 OS    |
| 7067 | ENSG00000140497 | HPA014699 | U-2 OS    |
| 7068 | ENSG00000140511 | HPA039237 | U-2 OS    |
| 7069 | ENSG00000140521 | HPA078482 | SiHa      |
| 7070 | ENSG00000140522 | HPA044083 | SK-MEL-30 |
| 7071 | ENSG00000140525 | HPA040379 | A-431     |
| 7072 | ENSG00000140526 | HPA005999 | U-2 OS    |
| 7073 | ENSG00000140527 | HPA046196 | U-2 OS    |
| 7074 | ENSG00000140534 | HPA046746 | U-2 OS    |
| 7075 | ENSG00000140534 | HPA049454 | U-2 OS    |
| 7076 | ENSG00000140538 | HPA027484 | U-2 OS    |
| 7077 | ENSG00000140538 | HPA048065 | U-2 OS    |
| 7078 | ENSG00000140543 | HPA048873 | U-2 OS    |
| 7079 | ENSG00000140545 | HPA002807 | U-2 OS    |
| 7080 | ENSG00000140548 | HPA030228 | U-2 OS    |
| 7081 | ENSG00000140553 | HPA039228 | U-2 OS    |
| 7082 | ENSG00000140557 | HPA054518 | RH-30     |
| 7083 | ENSG00000140563 | HPA051176 | RT4       |
| 7084 | ENSG00000140563 | HPA070541 | RT4       |
| 7085 | ENSG00000140564 | CAB009499 | U-2 OS    |
| 7086 | ENSG00000140575 | CAB013302 | U-2 OS    |
| 7087 | ENSG00000140577 | HPA043735 | U-2 OS    |
| 7088 | ENSG00000140577 | HPA063691 | U-2 OS    |
| 7089 | ENSG00000140598 | HPA047110 | U-2 OS    |
| 7090 | ENSG00000140600 | HPA077877 | U-2 OS    |
| 7091 | ENSG00000140612 | HPA047533 | MCF7      |
| 7092 | ENSG00000140623 | HPA041128 | U-2 OS    |
| 7093 | ENSG00000140632 | CAB017022 | U-2 OS    |

|      |                 |           |             |
|------|-----------------|-----------|-------------|
| 7094 | ENSG00000140632 | HPA048226 | A-431       |
| 7095 | ENSG00000140650 | HPA040852 | U-2 OS      |
| 7096 | ENSG00000140650 | HPA063649 | A549        |
| 7097 | ENSG00000140682 | CAB020844 | U-2 OS      |
| 7098 | ENSG00000140688 | HPA024406 | U-2 OS      |
| 7099 | ENSG00000140691 | HPA063706 | U-2 OS      |
| 7100 | ENSG00000140694 | HPA006314 | U-2 OS      |
| 7101 | ENSG00000140718 | CAB017123 | U-2 OS      |
| 7102 | ENSG00000140718 | HPA041086 | U-2 OS      |
| 7103 | ENSG00000140740 | HPA007998 | U-2 OS      |
| 7104 | ENSG00000140740 | HPA019146 | A-431       |
| 7105 | ENSG00000140743 | HPA023870 | A-431       |
| 7106 | ENSG00000140750 | HPA041703 | U-2 OS      |
| 7107 | ENSG00000140795 | HPA073447 | U-2 OS      |
| 7108 | ENSG00000140807 | HPA049413 | CACO-2      |
| 7109 | ENSG00000140829 | HPA041347 | U-2 OS      |
| 7110 | ENSG00000140829 | HPA041604 | MCF7        |
| 7111 | ENSG00000140830 | HPA065865 | U-2 OS      |
| 7112 | ENSG00000140832 | HPA043514 | U-2 OS      |
| 7113 | ENSG00000140832 | HPA045471 | U-2 OS      |
| 7114 | ENSG00000140848 | HPA041132 | A549        |
| 7115 | ENSG00000140853 | HPA059120 | U-2 OS      |
| 7116 | ENSG00000140853 | HPA060405 | U-2 OS      |
| 7117 | ENSG00000140854 | HPA041165 | U-2 OS      |
| 7118 | ENSG00000140873 | HPA044326 | HUVEC TERT2 |
| 7119 | ENSG00000140876 | HPA042042 | U-2 OS      |
| 7120 | ENSG00000140905 | HPA041368 | U-2 OS      |
| 7121 | ENSG00000140931 | HPA013870 | U-2 OS      |
| 7122 | ENSG00000140939 | CAB009208 | U-2 OS      |
| 7123 | ENSG00000140941 | HPA042824 | U-2 OS      |
| 7124 | ENSG00000140941 | HPA053767 | U-2 OS      |
| 7125 | ENSG00000140945 | HPA001380 | SiHa        |
| 7126 | ENSG00000140948 | HPA014122 | SiHa        |
| 7127 | ENSG00000140950 | HPA041020 | U-2 OS      |
| 7128 | ENSG00000140961 | HPA019239 | U-2 OS      |
| 7129 | ENSG00000140968 | HPA002267 | CACO-2      |
| 7130 | ENSG00000140968 | HPA002531 | CACO-2      |
| 7131 | ENSG00000140983 | HPA012624 | U-2 OS      |
| 7132 | ENSG00000140986 | HPA049136 | CACO-2      |
| 7133 | ENSG00000140987 | HPA005758 | A-431       |
| 7134 | ENSG00000140988 | HPA055133 | U-2 OS      |
| 7135 | ENSG00000140992 | HPA068961 | U-2 OS      |
| 7136 | ENSG00000140993 | HPA041357 | U-2 OS      |
| 7137 | ENSG00000140993 | HPA041474 | U-2 OS      |
| 7138 | ENSG00000140995 | HPA049434 | U-2 OS      |
| 7139 | ENSG00000141012 | CAB026404 | U-2 OS      |
| 7140 | ENSG00000141013 | HPA041311 | U-2 OS      |
| 7141 | ENSG00000141026 | HPA056415 | CACO-2      |
| 7142 | ENSG00000141027 | HPA043246 | U-2 OS      |
| 7143 | ENSG00000141027 | HPA051168 | U-2 OS      |
| 7144 | ENSG00000141030 | HPA021997 | U-2 OS      |
| 7145 | ENSG00000141030 | HPA050557 | A-431       |
| 7146 | ENSG00000141034 | HPA044348 | U-2 OS      |
| 7147 | ENSG00000141040 | HPA029290 | U-2 OS      |
| 7148 | ENSG00000141052 | HPA071528 | BJ          |



|      |                 |           |           |
|------|-----------------|-----------|-----------|
| 7149 | ENSG00000141052 | HPA072582 | U-2 OS    |
| 7150 | ENSG00000141076 | HPA043542 | U-2 OS    |
| 7151 | ENSG00000141098 | HPA040939 | U-2 OS    |
| 7152 | ENSG00000141098 | HPA041112 | MCF7      |
| 7153 | ENSG00000141101 | HPA041522 | U-2 OS    |
| 7154 | ENSG00000141101 | HPA067411 | CACO-2    |
| 7155 | ENSG00000141127 | HPA021881 | U-2 OS    |
| 7156 | ENSG00000141161 | HPA017861 | U-2 OS    |
| 7157 | ENSG00000141179 | HPA022979 | U-2 OS    |
| 7158 | ENSG00000141200 | HPA024795 | U-2 OS    |
| 7159 | ENSG00000141219 | HPA012896 | U-2 OS    |
| 7160 | ENSG00000141232 | HPA047839 | U-2 OS    |
| 7161 | ENSG00000141258 | HPA021641 | U-2 OS    |
| 7162 | ENSG00000141279 | HPA021453 | U-2 OS    |
| 7163 | ENSG00000141293 | HPA002969 | U-2 OS    |
| 7164 | ENSG00000141294 | HPA021882 | U-2 OS    |
| 7165 | ENSG00000141295 | HPA022934 | U-2 OS    |
| 7166 | ENSG00000141295 | HPA023434 | U-2 OS    |
| 7167 | ENSG00000141338 | HPA044914 | ASC TERT1 |
| 7168 | ENSG00000141349 | HPA067052 | PC-3      |
| 7169 | ENSG00000141367 | CAB011571 | U-2 OS    |
| 7170 | ENSG00000141367 | CAB017155 | A-431     |
| 7171 | ENSG00000141367 | HPA059143 | U-2 OS    |
| 7172 | ENSG00000141371 | HPA044415 | U-2 OS    |
| 7173 | ENSG00000141376 | HPA057289 | U-2 OS    |
| 7174 | ENSG00000141378 | HPA012897 | U-2 OS    |
| 7175 | ENSG00000141380 | HPA059539 | U-2 OS    |
| 7176 | ENSG00000141384 | HPA028937 | U-2 OS    |
| 7177 | ENSG00000141385 | HPA004479 | U-2 OS    |
| 7178 | ENSG00000141401 | HPA029561 | U-2 OS    |
| 7179 | ENSG00000141404 | CAB015464 | U-2 OS    |
| 7180 | ENSG00000141424 | HPA042377 | U-2 OS    |
| 7181 | ENSG00000141425 | HPA040602 | U-2 OS    |
| 7182 | ENSG00000141428 | HPA065505 | U-2 OS    |
| 7183 | ENSG00000141437 | HPA046388 | U-2 OS    |
| 7184 | ENSG00000141441 | HPA040709 | U-2 OS    |
| 7185 | ENSG00000141447 | HPA043401 | A-431     |
| 7186 | ENSG00000141448 | HPA066629 | CACO-2    |
| 7187 | ENSG00000141449 | HPA041647 | U-2 OS    |
| 7188 | ENSG00000141452 | HPA043589 | A-431     |
| 7189 | ENSG00000141456 | HPA053966 | CACO-2    |
| 7190 | ENSG00000141456 | HPA056028 | CACO-2    |
| 7191 | ENSG00000141458 | HPA077445 | RT4       |
| 7192 | ENSG00000141469 | HPA077233 | RT4       |
| 7193 | ENSG00000141480 | HPA065681 | U-2 OS    |
| 7194 | ENSG00000141485 | HPA044343 | U-2 OS    |
| 7195 | ENSG00000141497 | HPA023286 | U-2 OS    |
| 7196 | ENSG00000141499 | HPA023026 | U-2 OS    |
| 7197 | ENSG00000141499 | HPA029928 | U-2 OS    |
| 7198 | ENSG00000141505 | HPA011954 | Hep G2    |
| 7199 | ENSG00000141505 | HPA012852 | Hep G2    |
| 7200 | ENSG00000141506 | HPA044505 | U-2 OS    |
| 7201 | ENSG00000141506 | HPA052412 | U-2 OS    |
| 7202 | ENSG00000141510 | CAB039238 | U-2 OS    |
| 7203 | ENSG00000141510 | CAB039239 | A-431     |

|      |                 |           |          |
|------|-----------------|-----------|----------|
| 7204 | ENSG00000141510 | HPA051244 | A-431    |
| 7205 | ENSG00000141510 | HPA063532 | MCF7     |
| 7206 | ENSG00000141519 | HPA022974 | U-2 OS   |
| 7207 | ENSG00000141522 | CAB010005 | U-2 OS   |
| 7208 | ENSG00000141526 | HPA021451 | A-431    |
| 7209 | ENSG00000141542 | HPA076172 | U-2 OS   |
| 7210 | ENSG00000141543 | HPA021878 | U-2 OS   |
| 7211 | ENSG00000141551 | CAB015410 | U-2 OS   |
| 7212 | ENSG00000141552 | HPA021989 | U-2 OS   |
| 7213 | ENSG00000141552 | HPA027838 | U-2 OS   |
| 7214 | ENSG00000141560 | HPA056172 | A-431    |
| 7215 | ENSG00000141562 | HPA053006 | U-2 OS   |
| 7216 | ENSG00000141564 | CAB013514 | U-2 OS   |
| 7217 | ENSG00000141564 | HPA064306 | U-2 OS   |
| 7218 | ENSG00000141568 | HPA027523 | U-2 OS   |
| 7219 | ENSG00000141568 | HPA073491 | U-2 OS   |
| 7220 | ENSG00000141569 | HPA021575 | U-2 OS   |
| 7221 | ENSG00000141569 | HPA021578 | A-431    |
| 7222 | ENSG00000141569 | HPA064820 | U-2 OS   |
| 7223 | ENSG00000141570 | HPA031462 | U-2 OS   |
| 7224 | ENSG00000141576 | HPA021991 | U-2 OS   |
| 7225 | ENSG00000141577 | HPA024019 | U-2 OS   |
| 7226 | ENSG00000141580 | HPA017886 | U-2 OS   |
| 7227 | ENSG00000141582 | HPA012021 | U-2 OS   |
| 7228 | ENSG00000141622 | HPA041615 | U-2 OS   |
| 7229 | ENSG00000141627 | HPA049187 | U-2 OS   |
| 7230 | ENSG00000141639 | HPA007461 | HeLa     |
| 7231 | ENSG00000141642 | HPA066483 | U-2 OS   |
| 7232 | ENSG00000141644 | CAB009017 | U-2 OS   |
| 7233 | ENSG00000141644 | HPA068850 | U-2 OS   |
| 7234 | ENSG00000141646 | HPA019154 | U-2 OS   |
| 7235 | ENSG00000141655 | HPA047976 | A-431    |
| 7236 | ENSG00000141664 | HPA040943 | U-2 OS   |
| 7237 | ENSG00000141682 | HPA051063 | U-2 OS   |
| 7238 | ENSG00000141699 | HPA016492 | U-2 OS   |
| 7239 | ENSG00000141736 | HPA001060 | U-251 MG |
| 7240 | ENSG00000141736 | HPA001338 | U-2 OS   |
| 7241 | ENSG00000141738 | CAB073538 | U-2 OS   |
| 7242 | ENSG00000141750 | HPA076925 | U-2 OS   |
| 7243 | ENSG00000141756 | HPA051171 | U-2 OS   |
| 7244 | ENSG00000141759 | HPA041324 | U-2 OS   |
| 7245 | ENSG00000141837 | HPA071902 | U-2 OS   |
| 7246 | ENSG00000141858 | HPA041662 | U-2 OS   |
| 7247 | ENSG00000141867 | HPA015055 | U-251 MG |
| 7248 | ENSG00000141867 | HPA061646 | U-2 OS   |
| 7249 | ENSG00000141873 | HPA042139 | U-2 OS   |
| 7250 | ENSG00000141905 | HPA052625 | U-2 OS   |
| 7251 | ENSG00000141934 | HPA055540 | U-2 OS   |
| 7252 | ENSG00000141956 | HPA029255 | U-2 OS   |
| 7253 | ENSG00000141956 | HPA029256 | U-2 OS   |
| 7254 | ENSG00000141965 | HPA016565 | A-431    |
| 7255 | ENSG00000141965 | HPA063622 | U-2 OS   |
| 7256 | ENSG00000141968 | HPA001864 | U-2 OS   |
| 7257 | ENSG00000141971 | HPA041885 | U-2 OS   |
| 7258 | ENSG00000141985 | HPA021485 | U-2 OS   |

|      |                 |           |        |
|------|-----------------|-----------|--------|
| 7259 | ENSG00000141994 | HPA062846 | U-2 OS |
| 7260 | ENSG00000142002 | HPA036059 | U-2 OS |
| 7261 | ENSG00000142039 | HPA043320 | U-2 OS |
| 7262 | ENSG00000142039 | HPA043572 | U-2 OS |
| 7263 | ENSG00000142065 | HPA030637 | U-2 OS |
| 7264 | ENSG00000142102 | HPA039383 | U-2 OS |
| 7265 | ENSG00000142102 | HPA058829 | U-2 OS |
| 7266 | ENSG00000142149 | HPA027295 | U-2 OS |
| 7267 | ENSG00000142156 | HPA019142 | U-2 OS |
| 7268 | ENSG00000142168 | HPA001401 | U-2 OS |
| 7269 | ENSG00000142173 | HPA007029 | U-2 OS |
| 7270 | ENSG00000142173 | HPA030920 | U-2 OS |
| 7271 | ENSG00000142178 | HPA078064 | U-2 OS |
| 7272 | ENSG00000142182 | HPA055234 | CACO-2 |
| 7273 | ENSG00000142185 | HPA030976 | A-431  |
| 7274 | ENSG00000142186 | HPA015015 | A-431  |
| 7275 | ENSG00000142188 | HPA068995 | U-2 OS |
| 7276 | ENSG00000142192 | HPA001462 | U-2 OS |
| 7277 | ENSG00000142197 | HPA072065 | U-2 OS |
| 7278 | ENSG00000142207 | HPA018334 | U-2 OS |
| 7279 | ENSG00000142208 | HPA002891 | U-2 OS |
| 7280 | ENSG00000142227 | HPA062030 | A549   |
| 7281 | ENSG00000142235 | HPA040203 | U-2 OS |
| 7282 | ENSG00000142252 | HPA052075 | U-2 OS |
| 7283 | ENSG00000142273 | HPA035266 | RT4    |
| 7284 | ENSG00000142319 | HPA013602 | U-2 OS |
| 7285 | ENSG00000142327 | HPA036772 | A549   |
| 7286 | ENSG00000142330 | HPA056098 | U-2 OS |
| 7287 | ENSG00000142405 | HPA042099 | THP-1  |
| 7288 | ENSG00000142405 | HPA042981 | U-2 OS |
| 7289 | ENSG00000142409 | HPA035140 | U-2 OS |
| 7290 | ENSG00000142444 | HPA041858 | U-2 OS |
| 7291 | ENSG00000142453 | HPA043561 | MCF7   |
| 7292 | ENSG00000142453 | HPA048073 | U-2 OS |
| 7293 | ENSG00000142459 | HPA043563 | U-2 OS |
| 7294 | ENSG00000142484 | HPA055674 | CACO-2 |
| 7295 | ENSG00000142507 | HPA063656 | PC-3   |
| 7296 | ENSG00000142512 | CAB025807 | U-2 OS |
| 7297 | ENSG00000142512 | HPA027093 | U-2 OS |
| 7298 | ENSG00000142528 | HPA073309 | U-2 OS |
| 7299 | ENSG00000142530 | HPA048111 | U-2 OS |
| 7300 | ENSG00000142534 | HPA049719 | U-2 OS |
| 7301 | ENSG00000142541 | HPA038751 | U-2 OS |
| 7302 | ENSG00000142546 | HPA043464 | U-2 OS |
| 7303 | ENSG00000142546 | HPA062132 | U-2 OS |
| 7304 | ENSG00000142552 | HPA050402 | U-2 OS |
| 7305 | ENSG00000142556 | HPA021197 | U-2 OS |
| 7306 | ENSG00000142611 | HPA050343 | CACO-2 |
| 7307 | ENSG00000142611 | HPA060467 | CACO-2 |
| 7308 | ENSG00000142619 | HPA043739 | RT4    |
| 7309 | ENSG00000142623 | HPA062294 | U-2 OS |
| 7310 | ENSG00000142627 | CAB010464 | U-2 OS |
| 7311 | ENSG00000142632 | HPA068108 | U-2 OS |
| 7312 | ENSG00000142634 | HPA048961 | A-431  |
| 7313 | ENSG00000142655 | HPA046104 | U-2 OS |

|      |                 |           |          |
|------|-----------------|-----------|----------|
| 7314 | ENSG00000142655 | HPA049231 | U-2 OS   |
| 7315 | ENSG00000142657 | HPA031315 | U-2 OS   |
| 7316 | ENSG00000142661 | HPA028132 | U-2 OS   |
| 7317 | ENSG00000142661 | HPA028340 | U-2 OS   |
| 7318 | ENSG00000142669 | HPA076219 | U-2 OS   |
| 7319 | ENSG00000142675 | HPA030847 | U-2 OS   |
| 7320 | ENSG00000142676 | HPA074839 | U-2 OS   |
| 7321 | ENSG00000142684 | HPA054363 | U-2 OS   |
| 7322 | ENSG00000142684 | HPA059387 | U-2 OS   |
| 7323 | ENSG00000142686 | HPA031343 | U-251 MG |
| 7324 | ENSG00000142687 | HPA072692 | RT4      |
| 7325 | ENSG00000142694 | HPA041928 | A-431    |
| 7326 | ENSG00000142698 | HPA045805 | RH-30    |
| 7327 | ENSG00000142700 | HPA062958 | U-2 OS   |
| 7328 | ENSG00000142731 | HPA017327 | A-431    |
| 7329 | ENSG00000142733 | HPA051192 | U-2 OS   |
| 7330 | ENSG00000142784 | HPA028180 | U-2 OS   |
| 7331 | ENSG00000142784 | HPA028182 | U-2 OS   |
| 7332 | ENSG00000142789 | HPA028086 | U-2 OS   |
| 7333 | ENSG00000142794 | HPA042595 | U-2 OS   |
| 7334 | ENSG00000142798 | CAB020718 | U-2 OS   |
| 7335 | ENSG00000142856 | HPA028463 | U-2 OS   |
| 7336 | ENSG00000142864 | HPA020559 | U-2 OS   |
| 7337 | ENSG00000142864 | CAB026297 | U-2 OS   |
| 7338 | ENSG00000142867 | HPA017925 | A-431    |
| 7339 | ENSG00000142875 | HPA071185 | U-2 OS   |
| 7340 | ENSG00000142920 | HPA028527 | U-2 OS   |
| 7341 | ENSG00000142937 | HPA029266 | U-2 OS   |
| 7342 | ENSG00000142945 | HPA006219 | U-2 OS   |
| 7343 | ENSG00000142949 | HPA012710 | A-431    |
| 7344 | ENSG00000142961 | HPA057744 | U-2 OS   |
| 7345 | ENSG00000142973 | HPA004331 | RT4      |
| 7346 | ENSG00000143013 | HPA045877 | RT4      |
| 7347 | ENSG00000143013 | HPA061638 | U-2 OS   |
| 7348 | ENSG00000143028 | HPA076657 | U-2 OS   |
| 7349 | ENSG00000143033 | HPA069047 | U-2 OS   |
| 7350 | ENSG00000143033 | HPA069066 | U-2 OS   |
| 7351 | ENSG00000143061 | HPA036306 | U-2 OS   |
| 7352 | ENSG00000143067 | HPA049933 | U-2 OS   |
| 7353 | ENSG00000143079 | HPA007301 | U-2 OS   |
| 7354 | ENSG00000143093 | HPA060498 | U-2 OS   |
| 7355 | ENSG00000143105 | HPA015061 | U-2 OS   |
| 7356 | ENSG00000143105 | CAB022564 | A-431    |
| 7357 | ENSG00000143106 | HPA028398 | U-2 OS   |
| 7358 | ENSG00000143107 | HPA028079 | U-2 OS   |
| 7359 | ENSG00000143126 | HPA013952 | A-431    |
| 7360 | ENSG00000143147 | HPA072047 | CACO-2   |
| 7361 | ENSG00000143149 | HPA006077 | U-2 OS   |
| 7362 | ENSG00000143155 | HPA027995 | A-431    |
| 7363 | ENSG00000143155 | HPA054282 | A-431    |
| 7364 | ENSG00000143156 | HPA054289 | U-2 OS   |
| 7365 | ENSG00000143157 | HPA007838 | U-2 OS   |
| 7366 | ENSG00000143157 | HPA031630 | U-2 OS   |
| 7367 | ENSG00000143162 | HPA056390 | U-2 OS   |
| 7368 | ENSG00000143164 | HPA054305 | U-2 OS   |

|      |                 |           |         |
|------|-----------------|-----------|---------|
| 7369 | ENSG00000143171 | HPA012933 | U-2 OS  |
| 7370 | ENSG00000143178 | HPA005800 | U-2 OS  |
| 7371 | ENSG00000143179 | HPA057128 | MCF7    |
| 7372 | ENSG00000143183 | HPA054768 | U-2 OS  |
| 7373 | ENSG00000143190 | HPA058559 | CACO-2  |
| 7374 | ENSG00000143190 | HPA064323 | U-2 OS  |
| 7375 | ENSG00000143195 | HPA012815 | U-2 OS  |
| 7376 | ENSG00000143196 | HPA065548 | SH-SY5Y |
| 7377 | ENSG00000143198 | HPA053311 | CACO-2  |
| 7378 | ENSG00000143217 | HPA010775 | U-2 OS  |
| 7379 | ENSG00000143222 | HPA028722 | U-2 OS  |
| 7380 | ENSG00000143224 | HPA030123 | SH-SY5Y |
| 7381 | ENSG00000143224 | HPA054287 | HeLa    |
| 7382 | ENSG00000143226 | HPA010776 | HEL     |
| 7383 | ENSG00000143228 | HPA059692 | A-431   |
| 7384 | ENSG00000143228 | HPA076604 | U-2 OS  |
| 7385 | ENSG00000143256 | HPA028700 | U-2 OS  |
| 7386 | ENSG00000143256 | HPA058304 | U-2 OS  |
| 7387 | ENSG00000143257 | HPA051365 | MCF7    |
| 7388 | ENSG00000143258 | HPA028397 | U-2 OS  |
| 7389 | ENSG00000143294 | CAB017151 | U-2 OS  |
| 7390 | ENSG00000143294 | HPA019481 | U-2 OS  |
| 7391 | ENSG00000143303 | HPA047426 | U-2 OS  |
| 7392 | ENSG00000143318 | HPA007845 | RT4     |
| 7393 | ENSG00000143319 | HPA054285 | U-2 OS  |
| 7394 | ENSG00000143320 | HPA004135 | U-2 OS  |
| 7395 | ENSG00000143321 | CAB026035 | U-2 OS  |
| 7396 | ENSG00000143321 | HPA048728 | U-2 OS  |
| 7397 | ENSG00000143321 | HPA053422 | U-2 OS  |
| 7398 | ENSG00000143322 | HPA001866 | A-431   |
| 7399 | ENSG00000143322 | CAB017106 | U-2 OS  |
| 7400 | ENSG00000143333 | HPA053250 | U-2 OS  |
| 7401 | ENSG00000143337 | HPA050546 | U-2 OS  |
| 7402 | ENSG00000143344 | HPA019788 | U-2 OS  |
| 7403 | ENSG00000143353 | HPA045806 | U-2 OS  |
| 7404 | ENSG00000143355 | HPA009695 | BJ      |
| 7405 | ENSG00000143363 | HPA028411 | U-2 OS  |
| 7406 | ENSG00000143365 | HPA065620 | HeLa    |
| 7407 | ENSG00000143367 | HPA054301 | U-2 OS  |
| 7408 | ENSG00000143368 | HPA064660 | U-2 OS  |
| 7409 | ENSG00000143369 | HPA027241 | U-2 OS  |
| 7410 | ENSG00000143373 | HPA023948 | MCF7    |
| 7411 | ENSG00000143374 | HPA028626 | U-2 OS  |
| 7412 | ENSG00000143375 | HPA027586 | U-2 OS  |
| 7413 | ENSG00000143376 | HPA045816 | U-2 OS  |
| 7414 | ENSG00000143379 | HPA058484 | U-2 OS  |
| 7415 | ENSG00000143382 | HPA006279 | U-2 OS  |
| 7416 | ENSG00000143384 | HPA008455 | U-2 OS  |
| 7417 | ENSG00000143384 | HPA031125 | U-2 OS  |
| 7418 | ENSG00000143387 | HPA050346 | BJ      |
| 7419 | ENSG00000143393 | CAB022071 | U-2 OS  |
| 7420 | ENSG00000143398 | HPA029366 | U-2 OS  |
| 7421 | ENSG00000143401 | HPA063133 | U-2 OS  |
| 7422 | ENSG00000143401 | HPA067561 | U-2 OS  |
| 7423 | ENSG00000143409 | HPA028358 | U-2 OS  |

|      |                 |           |        |
|------|-----------------|-----------|--------|
| 7424 | ENSG00000143409 | HPA061086 | A-431  |
| 7425 | ENSG00000143412 | HPA028698 | U-2 OS |
| 7426 | ENSG00000143416 | HPA011731 | U-2 OS |
| 7427 | ENSG00000143418 | HPA027262 | U-2 OS |
| 7428 | ENSG00000143420 | HPA051294 | U-2 OS |
| 7429 | ENSG00000143434 | HPA076150 | U-2 OS |
| 7430 | ENSG00000143434 | HPA077625 | U-2 OS |
| 7431 | ENSG00000143436 | HPA008579 | U-2 OS |
| 7432 | ENSG00000143437 | HPA001759 | U-2 OS |
| 7433 | ENSG00000143442 | HPA006800 | U-2 OS |
| 7434 | ENSG00000143442 | HPA008781 | U-2 OS |
| 7435 | ENSG00000143450 | HPA030136 | U-2 OS |
| 7436 | ENSG00000143452 | HPA028346 | U-2 OS |
| 7437 | ENSG00000143457 | HPA028558 | U-2 OS |
| 7438 | ENSG00000143458 | HPA028471 | U-2 OS |
| 7439 | ENSG00000143458 | HPA058483 | MCF7   |
| 7440 | ENSG00000143469 | HPA036963 | U-2 OS |
| 7441 | ENSG00000143473 | HPA014551 | U-2 OS |
| 7442 | ENSG00000143476 | HPA032023 | U-2 OS |
| 7443 | ENSG00000143476 | HPA032031 | U-2 OS |
| 7444 | ENSG00000143479 | HPA075041 | SiHa   |
| 7445 | ENSG00000143486 | HPA028220 | U-2 OS |
| 7446 | ENSG00000143493 | HPA072611 | U-2 OS |
| 7447 | ENSG00000143494 | HPA045820 | U-2 OS |
| 7448 | ENSG00000143498 | HPA054334 | U-2 OS |
| 7449 | ENSG00000143499 | HPA029023 | U-2 OS |
| 7450 | ENSG00000143502 | HPA058296 | CACO-2 |
| 7451 | ENSG00000143507 | HPA016758 | U-2 OS |
| 7452 | ENSG00000143512 | HPA059673 | U-2 OS |
| 7453 | ENSG00000143514 | HPA021603 | U-2 OS |
| 7454 | ENSG00000143514 | HPA050429 | U-2 OS |
| 7455 | ENSG00000143537 | HPA072878 | U-2 OS |
| 7456 | ENSG00000143543 | HPA006514 | U-2 OS |
| 7457 | ENSG00000143545 | HPA003996 | U-2 OS |
| 7458 | ENSG00000143546 | HPA024372 | HaCaT  |
| 7459 | ENSG00000143549 | HPA000261 | U-2 OS |
| 7460 | ENSG00000143552 | HPA047195 | U-2 OS |
| 7461 | ENSG00000143553 | HPA046974 | U-2 OS |
| 7462 | ENSG00000143554 | HPA006935 | MCF7   |
| 7463 | ENSG00000143554 | HPA067508 | MCF7   |
| 7464 | ENSG00000143556 | HPA006997 | U-2 OS |
| 7465 | ENSG00000143569 | HPA035068 | U-2 OS |
| 7466 | ENSG00000143575 | HPA075289 | U-2 OS |
| 7467 | ENSG00000143578 | HPA038122 | U-2 OS |
| 7468 | ENSG00000143595 | HPA062621 | U-2 OS |
| 7469 | ENSG00000143603 | HPA057127 | RH-30  |
| 7470 | ENSG00000143614 | HPA017015 | U-2 OS |
| 7471 | ENSG00000143621 | HPA007484 | U-2 OS |
| 7472 | ENSG00000143624 | HPA074391 | U-2 OS |
| 7473 | ENSG00000143627 | HPA006653 | Hep G2 |
| 7474 | ENSG00000143631 | HPA027505 | HaCaT  |
| 7475 | ENSG00000143631 | HPA030188 | HaCaT  |
| 7476 | ENSG00000143641 | HPA011222 | U-2 OS |
| 7477 | ENSG00000143643 | HPA051558 | U-2 OS |
| 7478 | ENSG00000143653 | HPA050775 | U-2 OS |

|      |                 |           |         |
|------|-----------------|-----------|---------|
| 7479 | ENSG00000143669 | HPA053366 | U-2 OS  |
| 7480 | ENSG00000143669 | HPA055725 | U-2 OS  |
| 7481 | ENSG00000143674 | HPA007636 | U-2 OS  |
| 7482 | ENSG00000143702 | HPA042151 | U-2 OS  |
| 7483 | ENSG00000143702 | HPA045597 | U-2 OS  |
| 7484 | ENSG00000143727 | HPA016754 | U-2 OS  |
| 7485 | ENSG00000143740 | HPA028167 | U-2 OS  |
| 7486 | ENSG00000143748 | HPA028219 | U-2 OS  |
| 7487 | ENSG00000143748 | HPA028224 | MCF7    |
| 7488 | ENSG00000143751 | HPA028467 | U-2 OS  |
| 7489 | ENSG00000143751 | HPA031255 | U-2 OS  |
| 7490 | ENSG00000143753 | HPA076422 | U-2 OS  |
| 7491 | ENSG00000143756 | HPA003289 | U-2 OS  |
| 7492 | ENSG00000143761 | CAB007742 | U-2 OS  |
| 7493 | ENSG00000143772 | HPA072923 | U-2 OS  |
| 7494 | ENSG00000143774 | HPA028118 | U-2 OS  |
| 7495 | ENSG00000143776 | HPA071252 | RT4     |
| 7496 | ENSG00000143793 | HPA046175 | U-2 OS  |
| 7497 | ENSG00000143797 | HPA014836 | A-431   |
| 7498 | ENSG00000143799 | CAB003839 | A-431   |
| 7499 | ENSG00000143799 | CAB003840 | U-2 OS  |
| 7500 | ENSG00000143799 | HPA045168 | U-2 OS  |
| 7501 | ENSG00000143799 | CAB075726 | U-2 OS  |
| 7502 | ENSG00000143801 | CAB013634 | U-2 OS  |
| 7503 | ENSG00000143801 | HPA038005 | U-2 OS  |
| 7504 | ENSG00000143811 | HPA056873 | U-2 OS  |
| 7505 | ENSG00000143815 | HPA062236 | U-2 OS  |
| 7506 | ENSG00000143842 | HPA051790 | U-2 OS  |
| 7507 | ENSG00000143842 | HPA054843 | U-2 OS  |
| 7508 | ENSG00000143850 | HPA028152 | RT4     |
| 7509 | ENSG00000143870 | HPA034652 | U-2 OS  |
| 7510 | ENSG00000143882 | HPA034734 | U-2 OS  |
| 7511 | ENSG00000143889 | HPA046084 | U-2 OS  |
| 7512 | ENSG00000143891 | HPA035473 | A-431   |
| 7513 | ENSG00000143919 | HPA067912 | CACO-2  |
| 7514 | ENSG00000143921 | HPA019556 | U-2 OS  |
| 7515 | ENSG00000143924 | HPA036688 | U-2 OS  |
| 7516 | ENSG00000143942 | HPA049235 | U-2 OS  |
| 7517 | ENSG00000143947 | HPA054087 | U-2 OS  |
| 7518 | ENSG00000143951 | HPA044144 | CACO-2  |
| 7519 | ENSG00000143952 | HPA055894 | U-2 OS  |
| 7520 | ENSG00000143952 | HPA067981 | Hep G2  |
| 7521 | ENSG00000143952 | HPA070582 | Hep G2  |
| 7522 | ENSG00000143954 | HPA060705 | SH-SY5Y |
| 7523 | ENSG00000143970 | HPA034646 | U-2 OS  |
| 7524 | ENSG00000143970 | HPA058040 | U-2 OS  |
| 7525 | ENSG00000143971 | HPA035048 | U-2 OS  |
| 7526 | ENSG00000143977 | HPA067814 | Hep G2  |
| 7527 | ENSG00000143995 | HPA056000 | U-2 OS  |
| 7528 | ENSG00000143995 | HPA058641 | HeLa    |
| 7529 | ENSG00000144021 | HPA017882 | U-2 OS  |
| 7530 | ENSG00000144026 | HPA028974 | U-2 OS  |
| 7531 | ENSG00000144028 | HPA029321 | U-2 OS  |
| 7532 | ENSG00000144029 | HPA055765 | U-2 OS  |
| 7533 | ENSG00000144034 | HPA035712 | U-2 OS  |

|      |                 |           |          |
|------|-----------------|-----------|----------|
| 7534 | ENSG00000144035 | HPA074519 | CACO-2   |
| 7535 | ENSG00000144036 | HPA034546 | RT4      |
| 7536 | ENSG00000144040 | HPA056866 | U-2 OS   |
| 7537 | ENSG00000144043 | HPA016631 | U-2 OS   |
| 7538 | ENSG00000144045 | HPA039158 | U-2 OS   |
| 7539 | ENSG00000144048 | HPA021052 | U-2 OS   |
| 7540 | ENSG00000144057 | HPA014459 | U-2 OS   |
| 7541 | ENSG00000144061 | HPA074071 | U-2 OS   |
| 7542 | ENSG00000144120 | HPA036689 | CACO-2   |
| 7543 | ENSG00000144134 | HPA042642 | U-2 OS   |
| 7544 | ENSG00000144136 | CAB019279 | U-2 OS   |
| 7545 | ENSG00000144152 | HPA034992 | U-2 OS   |
| 7546 | ENSG00000144161 | HPA034803 | U-2 OS   |
| 7547 | ENSG00000144218 | HPA053379 | U-2 OS   |
| 7548 | ENSG00000144224 | HPA036325 | U-2 OS   |
| 7549 | ENSG00000144228 | HPA034687 | U-2 OS   |
| 7550 | ENSG00000144229 | HPA056745 | CACO-2   |
| 7551 | ENSG00000144230 | HPA029766 | U-2 OS   |
| 7552 | ENSG00000144231 | HPA034694 | U-2 OS   |
| 7553 | ENSG00000144233 | HPA057234 | A-431    |
| 7554 | ENSG00000144283 | HPA066647 | CACO-2   |
| 7555 | ENSG00000144283 | HPA070648 | Hep G2   |
| 7556 | ENSG00000144285 | HPA078664 | U-2 OS   |
| 7557 | ENSG00000144306 | HPA034690 | U-2 OS   |
| 7558 | ENSG00000144320 | HPA014205 | U-2 OS   |
| 7559 | ENSG00000144331 | HPA046086 | U-2 OS   |
| 7560 | ENSG00000144354 | HPA005565 | U-2 OS   |
| 7561 | ENSG00000144357 | HPA035390 | U-2 OS   |
| 7562 | ENSG00000144362 | HPA034726 | U-2 OS   |
| 7563 | ENSG00000144366 | HPA020587 | U-2 OS   |
| 7564 | ENSG00000144369 | HPA013434 | U-2 OS   |
| 7565 | ENSG00000144381 | HPA001523 | U-2 OS   |
| 7566 | ENSG00000144381 | CAB002775 | U-2 OS   |
| 7567 | ENSG00000144381 | HPA050025 | CACO-2   |
| 7568 | ENSG00000144395 | HPA048104 | U-251 MG |
| 7569 | ENSG00000144401 | HPA034712 | U-2 OS   |
| 7570 | ENSG00000144406 | HPA042472 | U-251 MG |
| 7571 | ENSG00000144406 | HPA050959 | SH-SY5Y  |
| 7572 | ENSG00000144426 | HPA049189 | U-2 OS   |
| 7573 | ENSG00000144445 | HPA043102 | U-2 OS   |
| 7574 | ENSG00000144451 | HPA037542 | U-2 OS   |
| 7575 | ENSG00000144452 | HPA078239 | U-2 OS   |
| 7576 | ENSG00000144460 | HPA045531 | U-2 OS   |
| 7577 | ENSG00000144468 | HPA057125 | U-2 OS   |
| 7578 | ENSG00000144476 | HPA032003 | U-2 OS   |
| 7579 | ENSG00000144485 | HPA061763 | U-2 OS   |
| 7580 | ENSG00000144504 | HPA026620 | U-2 OS   |
| 7581 | ENSG00000144524 | HPA034676 | U-2 OS   |
| 7582 | ENSG00000144554 | HPA063742 | U-2 OS   |
| 7583 | ENSG00000144559 | HPA044861 | U-2 OS   |
| 7584 | ENSG00000144560 | HPA038225 | U-2 OS   |
| 7585 | ENSG00000144560 | HPA038614 | U-251 MG |
| 7586 | ENSG00000144567 | HPA011844 | U-2 OS   |
| 7587 | ENSG00000144579 | HPA062654 | Hep G2   |
| 7588 | ENSG00000144580 | HPA046622 | U-2 OS   |



|      |                 |           |           |
|------|-----------------|-----------|-----------|
| 7589 | ENSG00000144589 | HPA036837 | U-2 OS    |
| 7590 | ENSG00000144589 | HPA053192 | U-2 OS    |
| 7591 | ENSG00000144591 | HPA035513 | U-2 OS    |
| 7592 | ENSG00000144596 | HPA035673 | U-2 OS    |
| 7593 | ENSG00000144597 | HPA059516 | CACO-2    |
| 7594 | ENSG00000144597 | HPA060569 | U-2 OS    |
| 7595 | ENSG00000144635 | HPA035013 | U-2 OS    |
| 7596 | ENSG00000144642 | HPA034719 | U-2 OS    |
| 7597 | ENSG00000144644 | HPA039160 | U-2 OS    |
| 7598 | ENSG00000144645 | HPA003636 | U-2 OS    |
| 7599 | ENSG00000144648 | HPA073493 | RT4       |
| 7600 | ENSG00000144649 | HPA047726 | U-2 OS    |
| 7601 | ENSG00000144655 | HPA045207 | U-2 OS    |
| 7602 | ENSG00000144655 | HPA058463 | U-2 OS    |
| 7603 | ENSG00000144668 | HPA030609 | CACO-2    |
| 7604 | ENSG00000144674 | HPA040675 | U-2 OS    |
| 7605 | ENSG00000144677 | HPA048325 | U-2 OS    |
| 7606 | ENSG00000144681 | HPA035143 | U-2 OS    |
| 7607 | ENSG00000144711 | HPA038143 | U-2 OS    |
| 7608 | ENSG00000144712 | HPA005777 | U-2 OS    |
| 7609 | ENSG00000144713 | HPA051994 | MCF7      |
| 7610 | ENSG00000144724 | HPA000546 | ASC TERT1 |
| 7611 | ENSG00000144730 | HPA043550 | U-2 OS    |
| 7612 | ENSG00000144736 | HPA042792 | U-2 OS    |
| 7613 | ENSG00000144741 | HPA026887 | U-2 OS    |
| 7614 | ENSG00000144744 | HPA034873 | A-431     |
| 7615 | ENSG00000144744 | HPA065335 | U-2 OS    |
| 7616 | ENSG00000144746 | HPA015540 | A-431     |
| 7617 | ENSG00000144747 | HPA008729 | U-2 OS    |
| 7618 | ENSG00000144749 | HPA011846 | U-2 OS    |
| 7619 | ENSG00000144785 | HPA068007 | EFO-21    |
| 7620 | ENSG00000144791 | HPA064220 | U-2 OS    |
| 7621 | ENSG00000144792 | HPA029705 | U-2 OS    |
| 7622 | ENSG00000144802 | HPA075363 | RT4       |
| 7623 | ENSG00000144810 | HPA053107 | U-2 OS    |
| 7624 | ENSG00000144815 | HPA036259 | U-2 OS    |
| 7625 | ENSG00000144824 | HPA035146 | U-2 OS    |
| 7626 | ENSG00000144824 | HPA035147 | U-2 OS    |
| 7627 | ENSG00000144827 | HPA066081 | U-2 OS    |
| 7628 | ENSG00000144837 | HPA059740 | U-2 OS    |
| 7629 | ENSG00000144840 | HPA035150 | U-2 OS    |
| 7630 | ENSG00000144843 | HPA036961 | U-2 OS    |
| 7631 | ENSG00000144847 | HPA046377 | U-2 OS    |
| 7632 | ENSG00000144848 | CAB037260 | U-2 OS    |
| 7633 | ENSG00000144852 | HPA029309 | U-2 OS    |
| 7634 | ENSG00000144852 | HPA055121 | U-2 OS    |
| 7635 | ENSG00000144852 | HPA073926 | U-2 OS    |
| 7636 | ENSG00000144857 | CAB025806 | U-2 OS    |
| 7637 | ENSG00000144857 | HPA060778 | U-2 OS    |
| 7638 | ENSG00000144857 | HPA061787 | U-2 OS    |
| 7639 | ENSG00000144867 | HPA011173 | U-2 OS    |
| 7640 | ENSG00000144868 | HPA063350 | U-2 OS    |
| 7641 | ENSG00000144891 | HPA003596 | ASC TERT1 |
| 7642 | ENSG00000144893 | HPA036807 | U-2 OS    |
| 7643 | ENSG00000144895 | HPA036256 | U-2 OS    |

|      |                 |           |        |
|------|-----------------|-----------|--------|
| 7644 | ENSG00000144908 | HPA050139 | RT4    |
| 7645 | ENSG00000144909 | HPA039144 | U-2 OS |
| 7646 | ENSG00000144935 | HPA021130 | U-2 OS |
| 7647 | ENSG00000144959 | HPA026888 | U-2 OS |
| 7648 | ENSG00000145002 | HPA041610 | U-2 OS |
| 7649 | ENSG00000145012 | HPA011133 | U-2 OS |
| 7650 | ENSG00000145012 | HPA017342 | U-2 OS |
| 7651 | ENSG00000145014 | HPA043718 | U-2 OS |
| 7652 | ENSG00000145016 | HPA050908 | U-2 OS |
| 7653 | ENSG00000145020 | HPA005566 | HeLa   |
| 7654 | ENSG00000145022 | HPA007342 | U-2 OS |
| 7655 | ENSG00000145029 | HPA058014 | U-2 OS |
| 7656 | ENSG00000145041 | HPA052445 | U-2 OS |
| 7657 | ENSG00000145041 | HPA053203 | CACO-2 |
| 7658 | ENSG00000145050 | HPA011175 | U-2 OS |
| 7659 | ENSG00000145191 | HPA064370 | U-2 OS |
| 7660 | ENSG00000145191 | HPA069303 | RT4    |
| 7661 | ENSG00000145192 | HPA001524 | Hep G2 |
| 7662 | ENSG00000145192 | HPA001525 | Hep G2 |
| 7663 | ENSG00000145198 | HPA036823 | U-2 OS |
| 7664 | ENSG00000145216 | HPA037475 | U-2 OS |
| 7665 | ENSG00000145216 | HPA058202 | U-2 OS |
| 7666 | ENSG00000145217 | HPA041654 | U-2 OS |
| 7667 | ENSG00000145220 | HPA035880 | U-2 OS |
| 7668 | ENSG00000145220 | HPA035881 | U-2 OS |
| 7669 | ENSG00000145241 | HPA049740 | U-2 OS |
| 7670 | ENSG00000145241 | HPA058252 | U-2 OS |
| 7671 | ENSG00000145244 | HPA070941 | U-2 OS |
| 7672 | ENSG00000145246 | HPA050808 | U-2 OS |
| 7673 | ENSG00000145247 | HPA040979 | U-2 OS |
| 7674 | ENSG00000145247 | HPA041090 | U-2 OS |
| 7675 | ENSG00000145287 | HPA077912 | A-431  |
| 7676 | ENSG00000145293 | HPA044607 | U-2 OS |
| 7677 | ENSG00000145331 | HPA058241 | U-2 OS |
| 7678 | ENSG00000145332 | HPA013856 | A-431  |
| 7679 | ENSG00000145332 | HPA017762 | A-431  |
| 7680 | ENSG00000145337 | HPA036455 | U-2 OS |
| 7681 | ENSG00000145348 | HPA051611 | U-2 OS |
| 7682 | ENSG00000145349 | HPA051783 | U-2 OS |
| 7683 | ENSG00000145349 | HPA051785 | U-2 OS |
| 7684 | ENSG00000145354 | HPA015914 | A-431  |
| 7685 | ENSG00000145358 | HPA050903 | U-2 OS |
| 7686 | ENSG00000145362 | HPA008007 | RH-30  |
| 7687 | ENSG00000145365 | HPA045889 | U-2 OS |
| 7688 | ENSG00000145375 | HPA036450 | U-2 OS |
| 7689 | ENSG00000145384 | CAB047325 | U-2 OS |
| 7690 | ENSG00000145384 | CAB047326 | U-2 OS |
| 7691 | ENSG00000145386 | CAB000114 | U-2 OS |
| 7692 | ENSG00000145386 | HPA020626 | U-2 OS |
| 7693 | ENSG00000145388 | HPA038002 | U-2 OS |
| 7694 | ENSG00000145390 | HPA035844 | U-2 OS |
| 7695 | ENSG00000145391 | HPA058111 | U-2 OS |
| 7696 | ENSG00000145414 | HPA066090 | U-2 OS |
| 7697 | ENSG00000145416 | HPA014600 | U-2 OS |
| 7698 | ENSG00000145423 | HPA002652 | AF22   |

|      |                 |           |          |
|------|-----------------|-----------|----------|
| 7699 | ENSG00000145425 | HPA047100 | U-2 OS   |
| 7700 | ENSG00000145425 | HPA053454 | U-2 OS   |
| 7701 | ENSG00000145431 | HPA009134 | U-2 OS   |
| 7702 | ENSG00000145476 | HPA029122 | U-2 OS   |
| 7703 | ENSG00000145495 | HPA040841 | U-2 OS   |
| 7704 | ENSG00000145536 | HPA067668 | U-2 OS   |
| 7705 | ENSG00000145555 | HPA024223 | U-2 OS   |
| 7706 | ENSG00000145569 | HPA046638 | U-2 OS   |
| 7707 | ENSG00000145604 | HPA051196 | PC-3     |
| 7708 | ENSG00000145623 | HPA017278 | U-2 OS   |
| 7709 | ENSG00000145626 | HPA047697 | U-2 OS   |
| 7710 | ENSG00000145632 | CAB009624 | U-2 OS   |
| 7711 | ENSG00000145632 | HPA069329 | U-2 OS   |
| 7712 | ENSG00000145675 | HPA001216 | U-2 OS   |
| 7713 | ENSG00000145681 | HPA019105 | U-2 OS   |
| 7714 | ENSG00000145685 | HPA042402 | U-2 OS   |
| 7715 | ENSG00000145687 | CAB020834 | U-2 OS   |
| 7716 | ENSG00000145687 | HPA068605 | HeLa     |
| 7717 | ENSG00000145692 | HPA038285 | U-2 OS   |
| 7718 | ENSG00000145703 | HPA037404 | CACO-2   |
| 7719 | ENSG00000145721 | HPA058426 | U-2 OS   |
| 7720 | ENSG00000145723 | HPA061362 | MCF7     |
| 7721 | ENSG00000145725 | HPA037895 | U-2 OS   |
| 7722 | ENSG00000145730 | CAB026119 | A-431    |
| 7723 | ENSG00000145730 | HPA042260 | U-2 OS   |
| 7724 | ENSG00000145734 | HPA064166 | U-2 OS   |
| 7725 | ENSG00000145734 | HPA077984 | EFO-21   |
| 7726 | ENSG00000145736 | HPA047001 | U-251 MG |
| 7727 | ENSG00000145740 | HPA035373 | U-2 OS   |
| 7728 | ENSG00000145741 | CAB013007 | U-2 OS   |
| 7729 | ENSG00000145741 | HPA056420 | U-2 OS   |
| 7730 | ENSG00000145743 | HPA036410 | U-2 OS   |
| 7731 | ENSG00000145757 | HPA010848 | U-2 OS   |
| 7732 | ENSG00000145777 | HPA056350 | HEK 293  |
| 7733 | ENSG00000145779 | HPA054434 | A-431    |
| 7734 | ENSG00000145779 | HPA057089 | A-431    |
| 7735 | ENSG00000145780 | HPA059919 | RT4      |
| 7736 | ENSG00000145780 | HPA060977 | U-2 OS   |
| 7737 | ENSG00000145781 | HPA054156 | MCF7     |
| 7738 | ENSG00000145808 | HPA058438 | MCF7     |
| 7739 | ENSG00000145817 | HPA042338 | U-2 OS   |
| 7740 | ENSG00000145817 | HPA073622 | U-2 OS   |
| 7741 | ENSG00000145819 | HPA035106 | U-2 OS   |
| 7742 | ENSG00000145832 | HPA014674 | U-2 OS   |
| 7743 | ENSG00000145833 | HPA036554 | U-2 OS   |
| 7744 | ENSG00000145833 | HPA057501 | U-2 OS   |
| 7745 | ENSG00000145860 | HPA036562 | U-2 OS   |
| 7746 | ENSG00000145861 | HPA061290 | U-251 MG |
| 7747 | ENSG00000145868 | HPA034821 | U-2 OS   |
| 7748 | ENSG00000145868 | HPA041444 | U-2 OS   |
| 7749 | ENSG00000145882 | HPA037463 | U-2 OS   |
| 7750 | ENSG00000145901 | HPA071950 | RT4      |
| 7751 | ENSG00000145907 | HPA004052 | U-2 OS   |
| 7752 | ENSG00000145908 | HPA028975 | U-2 OS   |
| 7753 | ENSG00000145911 | HPA030973 | U-2 OS   |

|      |                 |           |             |
|------|-----------------|-----------|-------------|
| 7754 | ENSG00000145911 | HPA061387 | U-2 OS      |
| 7755 | ENSG00000145912 | HPA050400 | U-2 OS      |
| 7756 | ENSG00000145916 | HPA047778 | U-2 OS      |
| 7757 | ENSG00000145920 | HPA071191 | U-2 OS      |
| 7758 | ENSG00000145934 | HPA068691 | U-2 OS      |
| 7759 | ENSG00000145945 | HPA067817 | MCF7        |
| 7760 | ENSG00000145949 | HPA015860 | U-2 OS      |
| 7761 | ENSG00000145982 | HPA028836 | U-2 OS      |
| 7762 | ENSG00000145990 | HPA029096 | U-2 OS      |
| 7763 | ENSG00000145996 | HPA057474 | HEK 293     |
| 7764 | ENSG00000146007 | HPA036518 | U-2 OS      |
| 7765 | ENSG00000146013 | HPA020731 | U-2 OS      |
| 7766 | ENSG00000146038 | HPA031582 | RPTEC TERT1 |
| 7767 | ENSG00000146038 | HPA031583 | RPTEC TERT1 |
| 7768 | ENSG00000146038 | HPA031584 | CACO-2      |
| 7769 | ENSG00000146054 | HPA039213 | U-2 OS      |
| 7770 | ENSG00000146063 | HPA024204 | U-251 MG    |
| 7771 | ENSG00000146066 | HPA042715 | U-2 OS      |
| 7772 | ENSG00000146067 | HPA035847 | CACO-2      |
| 7773 | ENSG00000146067 | HPA035848 | U-2 OS      |
| 7774 | ENSG00000146072 | CAB009805 | U-2 OS      |
| 7775 | ENSG00000146083 | HPA038981 | U-2 OS      |
| 7776 | ENSG00000146085 | HPA035971 | U-2 OS      |
| 7777 | ENSG00000146090 | HPA028242 | U-2 OS      |
| 7778 | ENSG00000146109 | HPA077039 | U-2 OS      |
| 7779 | ENSG00000146112 | HPA044745 | U-2 OS      |
| 7780 | ENSG00000146112 | HPA051000 | U-2 OS      |
| 7781 | ENSG00000146122 | HPA051300 | U-251 MG    |
| 7782 | ENSG00000146122 | HPA054630 | RH-30       |
| 7783 | ENSG00000146143 | HPA046566 | U-2 OS      |
| 7784 | ENSG00000146147 | HPA046654 | U-2 OS      |
| 7785 | ENSG00000146166 | HPA039983 | CACO-2      |
| 7786 | ENSG00000146197 | HPA040606 | ASC TERT1   |
| 7787 | ENSG00000146215 | HPA036198 | U-2 OS      |
| 7788 | ENSG00000146216 | HPA031735 | SH-SY5Y     |
| 7789 | ENSG00000146221 | HPA031739 | U-2 OS      |
| 7790 | ENSG00000146223 | HPA046049 | U-2 OS      |
| 7791 | ENSG00000146223 | HPA050478 | HEK 293     |
| 7792 | ENSG00000146232 | HPA005941 | U-2 OS      |
| 7793 | ENSG00000146232 | CAB010272 | U-2 OS      |
| 7794 | ENSG00000146242 | HPA010554 | U-2 OS      |
| 7795 | ENSG00000146243 | HPA035742 | HEK 293     |
| 7796 | ENSG00000146247 | HPA019140 | U-2 OS      |
| 7797 | ENSG00000146247 | HPA019838 | U-2 OS      |
| 7798 | ENSG00000146263 | HPA067042 | U-2 OS      |
| 7799 | ENSG00000146267 | HPA039106 | U-2 OS      |
| 7800 | ENSG00000146278 | HPA066513 | U-2 OS      |
| 7801 | ENSG00000146281 | HPA030325 | U-2 OS      |
| 7802 | ENSG00000146281 | HPA030326 | U-2 OS      |
| 7803 | ENSG00000146281 | HPA030327 | U-2 OS      |
| 7804 | ENSG00000146285 | HPA063326 | CACO-2      |
| 7805 | ENSG00000146350 | HPA013413 | U-2 OS      |
| 7806 | ENSG00000146376 | HPA031595 | U-2 OS      |
| 7807 | ENSG00000146386 | HPA030217 | U-2 OS      |
| 7808 | ENSG00000146409 | HPA029747 | U-2 OS      |

|      |                 |           |          |
|------|-----------------|-----------|----------|
| 7809 | ENSG00000146409 | HPA049659 | U-2 OS   |
| 7810 | ENSG00000146410 | HPA029792 | U-251 MG |
| 7811 | ENSG00000146410 | HPA029794 | U-2 OS   |
| 7812 | ENSG00000146411 | HPA031593 | U-2 OS   |
| 7813 | ENSG00000146411 | HPA031594 | HEK 293  |
| 7814 | ENSG00000146414 | HPA034950 | U-2 OS   |
| 7815 | ENSG00000146416 | HPA060766 | U-2 OS   |
| 7816 | ENSG00000146425 | HPA046559 | CACO-2   |
| 7817 | ENSG00000146426 | HPA011134 | U-2 OS   |
| 7818 | ENSG00000146426 | HPA013903 | U-2 OS   |
| 7819 | ENSG00000146433 | HPA040189 | U-2 OS   |
| 7820 | ENSG00000146457 | HPA010550 | U-2 OS   |
| 7821 | ENSG00000146463 | HPA051301 | U-2 OS   |
| 7822 | ENSG00000146463 | HPA054802 | U-2 OS   |
| 7823 | ENSG00000146469 | HPA072701 | U-2 OS   |
| 7824 | ENSG00000146476 | HPA003004 | U-2 OS   |
| 7825 | ENSG00000146477 | HPA029750 | U-2 OS   |
| 7826 | ENSG00000146530 | HPA026619 | U-2 OS   |
| 7827 | ENSG00000146535 | CAB010046 | U-2 OS   |
| 7828 | ENSG00000146540 | HPA052281 | U-2 OS   |
| 7829 | ENSG00000146555 | HPA011392 | U-2 OS   |
| 7830 | ENSG00000146574 | HPA045114 | U-2 OS   |
| 7831 | ENSG00000146574 | HPA050006 | A-431    |
| 7832 | ENSG00000146576 | HPA042899 | U-2 OS   |
| 7833 | ENSG00000146587 | HPA071231 | U-2 OS   |
| 7834 | ENSG00000146592 | HPA050020 | U-2 OS   |
| 7835 | ENSG00000146592 | HPA061622 | U-2 OS   |
| 7836 | ENSG00000146648 | CAB000035 | A-431    |
| 7837 | ENSG00000146648 | HPA018530 | A-431    |
| 7838 | ENSG00000146670 | HPA023691 | U-2 OS   |
| 7839 | ENSG00000146674 | CAB010360 | U-2 OS   |
| 7840 | ENSG00000146676 | HPA048766 | U-2 OS   |
| 7841 | ENSG00000146678 | HPA046972 | A549     |
| 7842 | ENSG00000146701 | HPA019714 | U-2 OS   |
| 7843 | ENSG00000146701 | HPA019716 | U-2 OS   |
| 7844 | ENSG00000146701 | HPA026720 | U-2 OS   |
| 7845 | ENSG00000146707 | HPA049817 | U-2 OS   |
| 7846 | ENSG00000146729 | HPA063084 | U-2 OS   |
| 7847 | ENSG00000146731 | HPA049949 | U-2 OS   |
| 7848 | ENSG00000146733 | HPA029515 | U-2 OS   |
| 7849 | ENSG00000146755 | HPA047843 | A-431    |
| 7850 | ENSG00000146757 | HPA003173 | U-2 OS   |
| 7851 | ENSG00000146776 | HPA021448 | U-2 OS   |
| 7852 | ENSG00000146802 | HPA077143 | SiHa     |
| 7853 | ENSG00000146826 | HPA019359 | U-2 OS   |
| 7854 | ENSG00000146826 | HPA029463 | U-2 OS   |
| 7855 | ENSG00000146830 | HPA020999 | A-431    |
| 7856 | ENSG00000146830 | HPA023995 | U-2 OS   |
| 7857 | ENSG00000146833 | HPA019356 | U-2 OS   |
| 7858 | ENSG00000146834 | CAB026384 | U-2 OS   |
| 7859 | ENSG00000146842 | HPA031678 | A-431    |
| 7860 | ENSG00000146856 | HPA020397 | A-431    |
| 7861 | ENSG00000146856 | HPA024150 | U-2 OS   |
| 7862 | ENSG00000146858 | HPA020386 | U-2 OS   |
| 7863 | ENSG00000146858 | HPA050741 | U-2 OS   |

|      |                 |           |          |
|------|-----------------|-----------|----------|
| 7864 | ENSG00000146909 | HPA019866 | U-2 OS   |
| 7865 | ENSG00000146909 | HPA051624 | MCF7     |
| 7866 | ENSG00000146918 | HPA026631 | U-2 OS   |
| 7867 | ENSG00000146918 | HPA049637 | U-2 OS   |
| 7868 | ENSG00000146950 | HPA051646 | A-431    |
| 7869 | ENSG00000146950 | HPA061435 | RT4      |
| 7870 | ENSG00000146963 | HPA051631 | U-2 OS   |
| 7871 | ENSG00000147003 | HPA048543 | U-2 OS   |
| 7872 | ENSG00000147010 | HPA003351 | U-2 OS   |
| 7873 | ENSG00000147027 | HPA046658 | RT4      |
| 7874 | ENSG00000147036 | HPA076575 | U-2 OS   |
| 7875 | ENSG00000147041 | HPA026074 | U-2 OS   |
| 7876 | ENSG00000147044 | HPA023857 | U-2 OS   |
| 7877 | ENSG00000147050 | HPA000568 | U-2 OS   |
| 7878 | ENSG00000147059 | HPA069835 | U-2 OS   |
| 7879 | ENSG00000147065 | CAB010898 | U-2 OS   |
| 7880 | ENSG00000147065 | HPA011135 | U-2 OS   |
| 7881 | ENSG00000147065 | CAB047336 | U-2 OS   |
| 7882 | ENSG00000147065 | CAB047337 | A-431    |
| 7883 | ENSG00000147065 | CAB047338 | U-2 OS   |
| 7884 | ENSG00000147082 | HPA000496 | A-431    |
| 7885 | ENSG00000147099 | HPA048560 | PC-3     |
| 7886 | ENSG00000147100 | HPA072719 | U-251 MG |
| 7887 | ENSG00000147118 | HPA059574 | U-2 OS   |
| 7888 | ENSG00000147119 | HPA030503 | U-2 OS   |
| 7889 | ENSG00000147121 | HPA065295 | U-2 OS   |
| 7890 | ENSG00000147123 | HPA030367 | U-2 OS   |
| 7891 | ENSG00000147124 | HPA069102 | U-2 OS   |
| 7892 | ENSG00000147130 | HPA003211 | U-2 OS   |
| 7893 | ENSG00000147130 | HPA075255 | U-2 OS   |
| 7894 | ENSG00000147133 | HPA001075 | U-2 OS   |
| 7895 | ENSG00000147133 | CAB016283 | U-2 OS   |
| 7896 | ENSG00000147138 | HPA041025 | A-431    |
| 7897 | ENSG00000147140 | CAB022069 | U-2 OS   |
| 7898 | ENSG00000147140 | HPA054094 | U-2 OS   |
| 7899 | ENSG00000147140 | HPA054559 | U-2 OS   |
| 7900 | ENSG00000147144 | HPA000561 | MCF7     |
| 7901 | ENSG00000147145 | HPA046563 | RH-30    |
| 7902 | ENSG00000147155 | HPA003130 | U-2 OS   |
| 7903 | ENSG00000147162 | HPA030753 | U-2 OS   |
| 7904 | ENSG00000147166 | HPA040721 | U-2 OS   |
| 7905 | ENSG00000147168 | HPA049691 | HaCaT    |
| 7906 | ENSG00000147174 | HPA023476 | U-2 OS   |
| 7907 | ENSG00000147180 | HPA030654 | HEK 293  |
| 7908 | ENSG00000147202 | HPA005647 | U-2 OS   |
| 7909 | ENSG00000147206 | HPA046757 | U-2 OS   |
| 7910 | ENSG00000147231 | HPA001374 | U-2 OS   |
| 7911 | ENSG00000147251 | HPA059695 | U-2 OS   |
| 7912 | ENSG00000147255 | HPA035582 | U-2 OS   |
| 7913 | ENSG00000147256 | HPA002064 | U-2 OS   |
| 7914 | ENSG00000147257 | HPA006316 | U-2 OS   |
| 7915 | ENSG00000147274 | HPA057707 | U-2 OS   |
| 7916 | ENSG00000147316 | HPA012064 | U-2 OS   |
| 7917 | ENSG00000147316 | CAB012177 | U-2 OS   |
| 7918 | ENSG00000147324 | HPA051213 | U-2 OS   |

|      |                 |           |          |
|------|-----------------|-----------|----------|
| 7919 | ENSG00000147324 | HPA054471 | U-2 OS   |
| 7920 | ENSG00000147381 | HPA021942 | U-2 OS   |
| 7921 | ENSG00000147383 | HPA000248 | U-2 OS   |
| 7922 | ENSG00000147383 | HPA000571 | U-2 OS   |
| 7923 | ENSG00000147394 | HPA000400 | U-2 OS   |
| 7924 | ENSG00000147394 | HPA016438 | U-2 OS   |
| 7925 | ENSG00000147403 | CAB010339 | U-2 OS   |
| 7926 | ENSG00000147403 | HPA011311 | U-2 OS   |
| 7927 | ENSG00000147408 | HPA061336 | U-2 OS   |
| 7928 | ENSG00000147416 | HPA008147 | U-2 OS   |
| 7929 | ENSG00000147419 | HPA023256 | U-2 OS   |
| 7930 | ENSG00000147421 | HPA055855 | U-2 OS   |
| 7931 | ENSG00000147421 | HPA058586 | U-2 OS   |
| 7932 | ENSG00000147454 | HPA045680 | HEL      |
| 7933 | ENSG00000147457 | HPA036119 | U-2 OS   |
| 7934 | ENSG00000147459 | HPA017719 | U-2 OS   |
| 7935 | ENSG00000147459 | HPA056837 | U-2 OS   |
| 7936 | ENSG00000147471 | CAB017033 | U-2 OS   |
| 7937 | ENSG00000147471 | HPA023646 | U-2 OS   |
| 7938 | ENSG00000147475 | HPA002025 | U-2 OS   |
| 7939 | ENSG00000147485 | HPA007919 | A-431    |
| 7940 | ENSG00000147526 | HPA056841 | U-2 OS   |
| 7941 | ENSG00000147535 | HPA055777 | U-2 OS   |
| 7942 | ENSG00000147536 | HPA024663 | U-2 OS   |
| 7943 | ENSG00000147548 | HPA018893 | A-431    |
| 7944 | ENSG00000147573 | HPA053691 | U-2 OS   |
| 7945 | ENSG00000147576 | HPA023062 | U-2 OS   |
| 7946 | ENSG00000147586 | HPA027202 | U-2 OS   |
| 7947 | ENSG00000147592 | HPA044391 | U-2 OS   |
| 7948 | ENSG00000147592 | HPA053040 | U-2 OS   |
| 7949 | ENSG00000147596 | HPA057070 | U-2 OS   |
| 7950 | ENSG00000147601 | HPA048379 | U-2 OS   |
| 7951 | ENSG00000147604 | HPA058373 | U-2 OS   |
| 7952 | ENSG00000147613 | HPA015095 | U-251 MG |
| 7953 | ENSG00000147613 | HPA056839 | U-2 OS   |
| 7954 | ENSG00000147614 | HPA058496 | U-2 OS   |
| 7955 | ENSG00000147642 | HPA053057 | CACO-2   |
| 7956 | ENSG00000147649 | HPA010932 | U-2 OS   |
| 7957 | ENSG00000147649 | HPA015104 | U-2 OS   |
| 7958 | ENSG00000147649 | CAB068204 | U-2 OS   |
| 7959 | ENSG00000147650 | HPA017245 | U-2 OS   |
| 7960 | ENSG00000147654 | CAB072810 | U-2 OS   |
| 7961 | ENSG00000147654 | CAB072811 | U-2 OS   |
| 7962 | ENSG00000147654 | CAB072812 | U-2 OS   |
| 7963 | ENSG00000147669 | HPA047477 | U-2 OS   |
| 7964 | ENSG00000147677 | HPA023117 | U-2 OS   |
| 7965 | ENSG00000147679 | HPA044418 | U-2 OS   |
| 7966 | ENSG00000147684 | HPA042768 | U-2 OS   |
| 7967 | ENSG00000147687 | HPA053045 | U-251 MG |
| 7968 | ENSG00000147689 | HPA052615 | RT4      |
| 7969 | ENSG00000147697 | HPA023670 | U-2 OS   |
| 7970 | ENSG00000147697 | HPA024767 | U-2 OS   |
| 7971 | ENSG00000147724 | HPA023950 | RH-30    |
| 7972 | ENSG00000147789 | HPA059090 | U-2 OS   |
| 7973 | ENSG00000147799 | HPA044491 | U-2 OS   |

|      |                 |           |          |
|------|-----------------|-----------|----------|
| 7974 | ENSG00000147813 | HPA023739 | U-2 OS   |
| 7975 | ENSG00000147852 | HPA051312 | U-251 MG |
| 7976 | ENSG00000147853 | HPA063324 | Hep G2   |
| 7977 | ENSG00000147854 | HPA026633 | U-2 OS   |
| 7978 | ENSG00000147854 | HPA026697 | U-2 OS   |
| 7979 | ENSG00000147862 | HPA003956 | U-2 OS   |
| 7980 | ENSG00000147872 | HPA016607 | RT4      |
| 7981 | ENSG00000147874 | HPA020965 | U-2 OS   |
| 7982 | ENSG00000147883 | HPA052838 | U-2 OS   |
| 7983 | ENSG00000147889 | HPA047838 | HEK 293  |
| 7984 | ENSG00000147905 | HPA020600 | U-2 OS   |
| 7985 | ENSG00000147905 | HPA021088 | U-2 OS   |
| 7986 | ENSG00000147912 | HPA072721 | U-2 OS   |
| 7987 | ENSG00000147996 | HPA042759 | U-2 OS   |
| 7988 | ENSG00000148053 | HPA007637 | U-2 OS   |
| 7989 | ENSG00000148057 | HPA058429 | U-2 OS   |
| 7990 | ENSG00000148082 | HPA031427 | RT4      |
| 7991 | ENSG00000148082 | HPA072448 | RT4      |
| 7992 | ENSG00000148110 | HPA017978 | U-2 OS   |
| 7993 | ENSG00000148120 | HPA072729 | U-2 OS   |
| 7994 | ENSG00000148123 | HPA014760 | U-2 OS   |
| 7995 | ENSG00000148123 | HPA014979 | U-2 OS   |
| 7996 | ENSG00000148143 | HPA022283 | U-2 OS   |
| 7997 | ENSG00000148153 | HPA020382 | U-2 OS   |
| 7998 | ENSG00000148158 | HPA019346 | U-2 OS   |
| 7999 | ENSG00000148175 | HPA010961 | U-2 OS   |
| 8000 | ENSG00000148175 | HPA011419 | U-2 OS   |
| 8001 | ENSG00000148180 | CAB016728 | U-2 OS   |
| 8002 | ENSG00000148187 | HPA049987 | U-2 OS   |
| 8003 | ENSG00000148200 | HPA031461 | CACO-2   |
| 8004 | ENSG00000148200 | HPA045145 | CACO-2   |
| 8005 | ENSG00000148219 | HPA027035 | U-2 OS   |
| 8006 | ENSG00000148225 | HPA019347 | U-2 OS   |
| 8007 | ENSG00000148229 | HPA047945 | MCF7     |
| 8008 | ENSG00000148291 | HPA044340 | U-2 OS   |
| 8009 | ENSG00000148291 | HPA052213 | U-2 OS   |
| 8010 | ENSG00000148296 | HPA023608 | U-2 OS   |
| 8011 | ENSG00000148296 | HPA074622 | U-2 OS   |
| 8012 | ENSG00000148297 | HPA063694 | CACO-2   |
| 8013 | ENSG00000148300 | HPA047006 | U-2 OS   |
| 8014 | ENSG00000148303 | HPA046794 | U-2 OS   |
| 8015 | ENSG00000148308 | HPA067063 | U-2 OS   |
| 8016 | ENSG00000148308 | HPA069805 | U-2 OS   |
| 8017 | ENSG00000148334 | HPA020631 | U-2 OS   |
| 8018 | ENSG00000148335 | HPA020092 | U-2 OS   |
| 8019 | ENSG00000148335 | HPA058420 | U-2 OS   |
| 8020 | ENSG00000148337 | HPA020380 | U-2 OS   |
| 8021 | ENSG00000148337 | HPA020387 | U-2 OS   |
| 8022 | ENSG00000148339 | HPA020381 | U-2 OS   |
| 8023 | ENSG00000148341 | HPA021438 | U-2 OS   |
| 8024 | ENSG00000148343 | HPA041363 | U-2 OS   |
| 8025 | ENSG00000148344 | HPA045064 | A549     |
| 8026 | ENSG00000148346 | CAB016549 | A-431    |
| 8027 | ENSG00000148356 | HPA021844 | A-431    |
| 8028 | ENSG00000148357 | HPA053903 | U-2 OS   |



|      |                 |           |         |
|------|-----------------|-----------|---------|
| 8029 | ENSG00000148358 | HPA031704 | U-2 OS  |
| 8030 | ENSG00000148362 | HPA045268 | U-2 OS  |
| 8031 | ENSG00000148396 | HPA005684 | U-2 OS  |
| 8032 | ENSG00000148399 | HPA022911 | A-431   |
| 8033 | ENSG00000148400 | HPA067168 | U-2 OS  |
| 8034 | ENSG00000148411 | HPA052962 | U-2 OS  |
| 8035 | ENSG00000148426 | HPA041337 | U-2 OS  |
| 8036 | ENSG00000148459 | HPA042741 | A549    |
| 8037 | ENSG00000148468 | HPA051345 | U-2 OS  |
| 8038 | ENSG00000148481 | HPA038400 | U-2 OS  |
| 8039 | ENSG00000148484 | HPA025927 | U-2 OS  |
| 8040 | ENSG00000148488 | HPA072708 | U-2 OS  |
| 8041 | ENSG00000148498 | HPA030443 | U-2 OS  |
| 8042 | ENSG00000148513 | HPA071849 | A549    |
| 8043 | ENSG00000148516 | HPA027524 | U-2 OS  |
| 8044 | ENSG00000148541 | HPA037888 | U-2 OS  |
| 8045 | ENSG00000148572 | HPA059477 | CACO-2  |
| 8046 | ENSG00000148584 | HPA044079 | CACO-2  |
| 8047 | ENSG00000148606 | HPA037926 | U-2 OS  |
| 8048 | ENSG00000148634 | HPA070301 | U-2 OS  |
| 8049 | ENSG00000148655 | HPA047446 | U-2 OS  |
| 8050 | ENSG00000148655 | HPA050419 | U-2 OS  |
| 8051 | ENSG00000148660 | HPA040656 | RT4     |
| 8052 | ENSG00000148660 | HPA051783 | U-2 OS  |
| 8053 | ENSG00000148660 | HPA051785 | U-2 OS  |
| 8054 | ENSG00000148671 | HPA026810 | A-431   |
| 8055 | ENSG00000148672 | HPA044839 | U-2 OS  |
| 8056 | ENSG00000148672 | HPA061369 | CACO-2  |
| 8057 | ENSG00000148677 | HPA038736 | CACO-2  |
| 8058 | ENSG00000148680 | CAB022708 | U-2 OS  |
| 8059 | ENSG00000148688 | HPA037578 | U-2 OS  |
| 8060 | ENSG00000148700 | HPA035696 | U-2 OS  |
| 8061 | ENSG00000148704 | HPA028946 | U-2 OS  |
| 8062 | ENSG00000148719 | HPA010642 | U-2 OS  |
| 8063 | ENSG00000148719 | HPA072702 | U-2 OS  |
| 8064 | ENSG00000148730 | HPA061665 | CACO-2  |
| 8065 | ENSG00000148735 | HPA037583 | RT4     |
| 8066 | ENSG00000148737 | HPA038800 | U-2 OS  |
| 8067 | ENSG00000148773 | CAB000058 | U-2 OS  |
| 8068 | ENSG00000148773 | HPA000451 | U-2 OS  |
| 8069 | ENSG00000148773 | HPA001164 | U-2 OS  |
| 8070 | ENSG00000148798 | HPA007572 | SiHa    |
| 8071 | ENSG00000148814 | HPA037595 | U-2 OS  |
| 8072 | ENSG00000148824 | HPA037827 | U-2 OS  |
| 8073 | ENSG00000148832 | HPA047782 | U-2 OS  |
| 8074 | ENSG00000148834 | HPA037603 | U-2 OS  |
| 8075 | ENSG00000148835 | HPA006474 | U-2 OS  |
| 8076 | ENSG00000148840 | HPA038511 | U-2 OS  |
| 8077 | ENSG00000148840 | HPA057571 | A-431   |
| 8078 | ENSG00000148841 | HPA043626 | U-2 OS  |
| 8079 | ENSG00000148842 | HPA059954 | U-2 OS  |
| 8080 | ENSG00000148842 | HPA071631 | HEK 293 |
| 8081 | ENSG00000148843 | CAB026472 | U-2 OS  |
| 8082 | ENSG00000148848 | HPA030867 | U-2 OS  |
| 8083 | ENSG00000148908 | HPA058485 | U-2 OS  |

|      |                 |           |           |
|------|-----------------|-----------|-----------|
| 8084 | ENSG00000148925 | HPA046777 | U-2 OS    |
| 8085 | ENSG00000148935 | HPA058904 | U-2 OS    |
| 8086 | ENSG00000148948 | HPA054800 | U-2 OS    |
| 8087 | ENSG00000148985 | HPA063099 | U-2 OS    |
| 8088 | ENSG00000149016 | HPA069055 | U-2 OS    |
| 8089 | ENSG00000149016 | HPA071838 | U-2 OS    |
| 8090 | ENSG00000149054 | HPA047243 | U-2 OS    |
| 8091 | ENSG00000149089 | HPA021188 | U-2 OS    |
| 8092 | ENSG00000149091 | HPA051336 | A-431     |
| 8093 | ENSG00000149100 | HPA031063 | U-2 OS    |
| 8094 | ENSG00000149136 | HPA002697 | U-2 OS    |
| 8095 | ENSG00000149150 | HPA018826 | U-2 OS    |
| 8096 | ENSG00000149179 | HPA040280 | U-2 OS    |
| 8097 | ENSG00000149182 | HPA016649 | U-2 OS    |
| 8098 | ENSG00000149187 | CAB016114 | U-2 OS    |
| 8099 | ENSG00000149187 | HPA044597 | U-2 OS    |
| 8100 | ENSG00000149196 | HPA012708 | SiHa      |
| 8101 | ENSG00000149212 | HPA037935 | RT4       |
| 8102 | ENSG00000149218 | HPA008932 | RT4       |
| 8103 | ENSG00000149231 | HPA038704 | U-2 OS    |
| 8104 | ENSG00000149231 | HPA070631 | U-2 OS    |
| 8105 | ENSG00000149243 | HPA039864 | U-2 OS    |
| 8106 | ENSG00000149257 | HPA029198 | U-2 OS    |
| 8107 | ENSG00000149260 | HPA072319 | SH-SY5Y   |
| 8108 | ENSG00000149262 | HPA042378 | U-2 OS    |
| 8109 | ENSG00000149269 | HPA003565 | U-2 OS    |
| 8110 | ENSG00000149273 | HPA063339 | U-2 OS    |
| 8111 | ENSG00000149289 | HPA038837 | U-2 OS    |
| 8112 | ENSG00000149292 | HPA038543 | U-2 OS    |
| 8113 | ENSG00000149294 | CAB018071 | U-2 OS    |
| 8114 | ENSG00000149294 | HPA039835 | U-2 OS    |
| 8115 | ENSG00000149300 | HPA038387 | MCF7      |
| 8116 | ENSG00000149300 | HPA038388 | MCF7      |
| 8117 | ENSG00000149308 | HPA045908 | SiHa      |
| 8118 | ENSG00000149308 | HPA066370 | CACO-2    |
| 8119 | ENSG00000149311 | HPA067142 | ASC TERT1 |
| 8120 | ENSG00000149328 | HPA054808 | U-2 OS    |
| 8121 | ENSG00000149328 | HPA059955 | A-431     |
| 8122 | ENSG00000149346 | HPA046372 | U-2 OS    |
| 8123 | ENSG00000149357 | HPA002997 | U-2 OS    |
| 8124 | ENSG00000149418 | HPA047014 | CACO-2    |
| 8125 | ENSG00000149451 | HPA071758 | U-2 OS    |
| 8126 | ENSG00000149474 | HPA068443 | CACO-2    |
| 8127 | ENSG00000149476 | HPA039486 | U-2 OS    |
| 8128 | ENSG00000149480 | CAB005315 | U-251 MG  |
| 8129 | ENSG00000149480 | HPA006214 | U-2 OS    |
| 8130 | ENSG00000149480 | CAB017522 | U-2 OS    |
| 8131 | ENSG00000149480 | HPA072727 | U-2 OS    |
| 8132 | ENSG00000149483 | HPA042373 | U-2 OS    |
| 8133 | ENSG00000149489 | HPA028910 | U-2 OS    |
| 8134 | ENSG00000149503 | HPA070550 | U-2 OS    |
| 8135 | ENSG00000149516 | HPA019210 | HEL       |
| 8136 | ENSG00000149532 | HPA041094 | U-2 OS    |
| 8137 | ENSG00000149547 | HPA051029 | U-2 OS    |
| 8138 | ENSG00000149548 | HPA041738 | A-431     |

|      |                 |           |          |
|------|-----------------|-----------|----------|
| 8139 | ENSG00000149554 | HPA044364 | U-2 OS   |
| 8140 | ENSG00000149557 | HPA038490 | U-2 OS   |
| 8141 | ENSG00000149564 | HPA051043 | CACO-2   |
| 8142 | ENSG00000149573 | HPA060740 | RT4      |
| 8143 | ENSG00000149582 | HPA012163 | CACO-2   |
| 8144 | ENSG00000149582 | HPA051562 | CACO-2   |
| 8145 | ENSG00000149591 | HPA019467 | U-2 OS   |
| 8146 | ENSG00000149599 | HPA076649 | U-2 OS   |
| 8147 | ENSG00000149600 | HPA054119 | U-2 OS   |
| 8148 | ENSG00000149633 | HPA051064 | U-2 OS   |
| 8149 | ENSG00000149634 | HPA041386 | U-2 OS   |
| 8150 | ENSG00000149636 | HPA002813 | U-2 OS   |
| 8151 | ENSG00000149636 | HPA030627 | U-2 OS   |
| 8152 | ENSG00000149639 | HPA043992 | U-2 OS   |
| 8153 | ENSG00000149657 | HPA041274 | U-2 OS   |
| 8154 | ENSG00000149657 | HPA061189 | U-2 OS   |
| 8155 | ENSG00000149679 | HPA052138 | CACO-2   |
| 8156 | ENSG00000149716 | HPA062696 | U-2 OS   |
| 8157 | ENSG00000149735 | HPA067068 | U-2 OS   |
| 8158 | ENSG00000149743 | HPA038705 | U-2 OS   |
| 8159 | ENSG00000149761 | HPA039334 | A-431    |
| 8160 | ENSG00000149761 | HPA053464 | U-251 MG |
| 8161 | ENSG00000149781 | HPA065231 | MCF7     |
| 8162 | ENSG00000149782 | CAB009257 | U-2 OS   |
| 8163 | ENSG00000149782 | HPA039279 | U-2 OS   |
| 8164 | ENSG00000149782 | HPA043907 | U-2 OS   |
| 8165 | ENSG00000149798 | HPA038562 | U-2 OS   |
| 8166 | ENSG00000149806 | HPA059015 | U-2 OS   |
| 8167 | ENSG00000149809 | HPA072704 | U-2 OS   |
| 8168 | ENSG00000149823 | HPA061447 | U-2 OS   |
| 8169 | ENSG00000149922 | HPA062498 | RT4      |
| 8170 | ENSG00000149923 | HPA043837 | U-2 OS   |
| 8171 | ENSG00000149925 | HPA004177 | U-2 OS   |
| 8172 | ENSG00000149927 | HPA065676 | CACO-2   |
| 8173 | ENSG00000149929 | HPA051897 | U-2 OS   |
| 8174 | ENSG00000149929 | HPA063205 | U-2 OS   |
| 8175 | ENSG00000149930 | HPA010650 | U-2 OS   |
| 8176 | ENSG00000149948 | CAB017809 | U-2 OS   |
| 8177 | ENSG00000149968 | HPA007875 | A-431    |
| 8178 | ENSG00000149970 | HPA001502 | A-431    |
| 8179 | ENSG00000150051 | HPA006927 | U-2 OS   |
| 8180 | ENSG00000150054 | HPA037597 | CACO-2   |
| 8181 | ENSG00000150093 | CAB003434 | U-2 OS   |
| 8182 | ENSG00000150316 | HPA039878 | CACO-2   |
| 8183 | ENSG00000150347 | HPA015037 | U-2 OS   |
| 8184 | ENSG00000150394 | HPA076441 | U-2 OS   |
| 8185 | ENSG00000150401 | HPA039349 | U-2 OS   |
| 8186 | ENSG00000150403 | HPA048126 | U-2 OS   |
| 8187 | ENSG00000150433 | HPA038489 | U-2 OS   |
| 8188 | ENSG00000150455 | HPA054431 | SiHa     |
| 8189 | ENSG00000150456 | HPA040417 | U-2 OS   |
| 8190 | ENSG00000150457 | HPA049037 | A-431    |
| 8191 | ENSG00000150459 | HPA011352 | U-2 OS   |
| 8192 | ENSG00000150477 | HPA040946 | U-2 OS   |
| 8193 | ENSG00000150510 | HPA048182 | U-2 OS   |

|      |                 |           |         |
|------|-----------------|-----------|---------|
| 8194 | ENSG00000150527 | HPA055459 | A549    |
| 8195 | ENSG00000150540 | HPA073754 | RT4     |
| 8196 | ENSG00000150593 | HPA027214 | U-2 OS  |
| 8197 | ENSG00000150627 | HPA042766 | U-2 OS  |
| 8198 | ENSG00000150636 | HPA040623 | U-2 OS  |
| 8199 | ENSG00000150637 | HPA050348 | U-2 OS  |
| 8200 | ENSG00000150667 | HPA041002 | U-2 OS  |
| 8201 | ENSG00000150672 | HPA023896 | CACO-2  |
| 8202 | ENSG00000150676 | HPA039707 | U-2 OS  |
| 8203 | ENSG00000150676 | HPA039882 | U-2 OS  |
| 8204 | ENSG00000150681 | HPA028727 | U-2 OS  |
| 8205 | ENSG00000150722 | HPA055043 | RT4     |
| 8206 | ENSG00000150756 | HPA074513 | U-2 OS  |
| 8207 | ENSG00000150760 | HPA048692 | U-2 OS  |
| 8208 | ENSG00000150760 | HPA053277 | U-2 OS  |
| 8209 | ENSG00000150764 | HPA039658 | U-2 OS  |
| 8210 | ENSG00000150768 | CAB003782 | U-2 OS  |
| 8211 | ENSG00000150768 | HPA040786 | U-2 OS  |
| 8212 | ENSG00000150768 | HPA062766 | CACO-2  |
| 8213 | ENSG00000150773 | HPA039496 | U-2 OS  |
| 8214 | ENSG00000150776 | HPA039892 | U-2 OS  |
| 8215 | ENSG00000150782 | HPA003980 | U-2 OS  |
| 8216 | ENSG00000150787 | HPA001481 | U-2 OS  |
| 8217 | ENSG00000150867 | HPA065440 | U-2 OS  |
| 8218 | ENSG00000150893 | HPA028831 | U-2 OS  |
| 8219 | ENSG00000150907 | CAB022326 | U-2 OS  |
| 8220 | ENSG00000150961 | HPA053486 | A-431   |
| 8221 | ENSG00000150967 | HPA035113 | U-2 OS  |
| 8222 | ENSG00000150977 | HPA028958 | U-2 OS  |
| 8223 | ENSG00000150990 | HPA047607 | U-2 OS  |
| 8224 | ENSG00000150995 | HPA014765 | HeLa    |
| 8225 | ENSG00000151012 | HPA064215 | U-2 OS  |
| 8226 | ENSG00000151014 | HPA012287 | A-431   |
| 8227 | ENSG00000151014 | HPA053714 | A-431   |
| 8228 | ENSG00000151025 | HPA013185 | U-2 OS  |
| 8229 | ENSG00000151065 | HPA039709 | U-2 OS  |
| 8230 | ENSG00000151090 | HPA061035 | RT4     |
| 8231 | ENSG00000151093 | HPA021293 | A-431   |
| 8232 | ENSG00000151116 | HPA047134 | U-2 OS  |
| 8233 | ENSG00000151117 | HPA057119 | RH-30   |
| 8234 | ENSG00000151131 | HPA038722 | U-2 OS  |
| 8235 | ENSG00000151136 | HPA055898 | U-2 OS  |
| 8236 | ENSG00000151136 | HPA061334 | U-2 OS  |
| 8237 | ENSG00000151148 | HPA041012 | U-2 OS  |
| 8238 | ENSG00000151150 | HPA038455 | RT4     |
| 8239 | ENSG00000151151 | HPA037837 | U-2 OS  |
| 8240 | ENSG00000151151 | HPA057542 | RH-30   |
| 8241 | ENSG00000151208 | HPA001746 | HaCaT   |
| 8242 | ENSG00000151229 | HPA006584 | HEK 293 |
| 8243 | ENSG00000151239 | HPA018116 | A-431   |
| 8244 | ENSG00000151240 | HPA059325 | U-2 OS  |
| 8245 | ENSG00000151247 | CAB016316 | U-2 OS  |
| 8246 | ENSG00000151247 | HPA051311 | U-2 OS  |
| 8247 | ENSG00000151276 | HPA031851 | U-2 OS  |
| 8248 | ENSG00000151276 | HPA031852 | U-2 OS  |

|      |                 |           |             |
|------|-----------------|-----------|-------------|
| 8249 | ENSG00000151276 | HPA077002 | U-2 OS      |
| 8250 | ENSG00000151304 | HPA042737 | U-2 OS      |
| 8251 | ENSG00000151304 | HPA058150 | U-2 OS      |
| 8252 | ENSG00000151322 | HPA075337 | U-2 OS      |
| 8253 | ENSG00000151327 | HPA053222 | CACO-2      |
| 8254 | ENSG00000151332 | HPA003388 | U-2 OS      |
| 8255 | ENSG00000151338 | HPA050179 | U-2 OS      |
| 8256 | ENSG00000151348 | HPA078409 | SiHa        |
| 8257 | ENSG00000151353 | HPA040233 | U-2 OS      |
| 8258 | ENSG00000151364 | HPA041118 | RPTEC TERT1 |
| 8259 | ENSG00000151365 | HPA040642 | U-2 OS      |
| 8260 | ENSG00000151366 | HPA038873 | U-2 OS      |
| 8261 | ENSG00000151388 | HPA075079 | U-2 OS      |
| 8262 | ENSG00000151413 | HPA029203 | U-2 OS      |
| 8263 | ENSG00000151414 | HPA018193 | A-431       |
| 8264 | ENSG00000151422 | HPA007641 | U-2 OS      |
| 8265 | ENSG00000151458 | HPA044008 | U-2 OS      |
| 8266 | ENSG00000151461 | HPA067008 | U-2 OS      |
| 8267 | ENSG00000151465 | HPA037830 | U-2 OS      |
| 8268 | ENSG00000151468 | HPA062425 | U-2 OS      |
| 8269 | ENSG00000151470 | HPA061199 | U-2 OS      |
| 8270 | ENSG00000151474 | HPA038449 | U-2 OS      |
| 8271 | ENSG00000151475 | HPA015064 | U-251 MG    |
| 8272 | ENSG00000151475 | HPA016841 | U-2 OS      |
| 8273 | ENSG00000151475 | HPA046835 | U-2 OS      |
| 8274 | ENSG00000151491 | HPA003897 | U-2 OS      |
| 8275 | ENSG00000151500 | HPA038732 | U-2 OS      |
| 8276 | ENSG00000151500 | HPA038733 | CACO-2      |
| 8277 | ENSG00000151503 | HPA040286 | U-2 OS      |
| 8278 | ENSG00000151532 | HPA054108 | U-2 OS      |
| 8279 | ENSG00000151552 | HPA058951 | U-2 OS      |
| 8280 | ENSG00000151553 | HPA043624 | U-2 OS      |
| 8281 | ENSG00000151575 | HPA039415 | U-2 OS      |
| 8282 | ENSG00000151576 | HPA036828 | U-2 OS      |
| 8283 | ENSG00000151611 | HPA037361 | U-2 OS      |
| 8284 | ENSG00000151612 | HPA021166 | U-2 OS      |
| 8285 | ENSG00000151617 | CAB018957 | U-2 OS      |
| 8286 | ENSG00000151623 | HPA074979 | U-2 OS      |
| 8287 | ENSG00000151632 | HPA068265 | U-2 OS      |
| 8288 | ENSG00000151640 | HPA049066 | U-2 OS      |
| 8289 | ENSG00000151650 | HPA050955 | CACO-2      |
| 8290 | ENSG00000151655 | HPA059150 | Hep G2      |
| 8291 | ENSG00000151657 | CAB016339 | U-2 OS      |
| 8292 | ENSG00000151657 | HPA038700 | U-2 OS      |
| 8293 | ENSG00000151687 | HPA036168 | U-2 OS      |
| 8294 | ENSG00000151689 | HPA036698 | U-2 OS      |
| 8295 | ENSG00000151690 | HPA022274 | U-2 OS      |
| 8296 | ENSG00000151692 | HPA049939 | U-2 OS      |
| 8297 | ENSG00000151693 | CAB018615 | U-2 OS      |
| 8298 | ENSG00000151694 | HPA010738 | U-2 OS      |
| 8299 | ENSG00000151694 | HPA051575 | U-2 OS      |
| 8300 | ENSG00000151702 | HPA073099 | U-2 OS      |
| 8301 | ENSG00000151715 | HPA015474 | RT4         |
| 8302 | ENSG00000151718 | HPA044005 | U-2 OS      |
| 8303 | ENSG00000151725 | HPA022048 | A-431       |

|      |                 |           |          |
|------|-----------------|-----------|----------|
| 8304 | ENSG00000151726 | HPA011316 | U-2 OS   |
| 8305 | ENSG00000151726 | HPA011964 | U-2 OS   |
| 8306 | ENSG00000151729 | HPA046835 | U-2 OS   |
| 8307 | ENSG00000151743 | HPA062290 | U-2 OS   |
| 8308 | ENSG00000151746 | HPA041309 | U-2 OS   |
| 8309 | ENSG00000151748 | HPA001808 | A-431    |
| 8310 | ENSG00000151773 | HPA054995 | SiHa     |
| 8311 | ENSG00000151778 | HPA038970 | A-431    |
| 8312 | ENSG00000151779 | HPA036817 | U-2 OS   |
| 8313 | ENSG00000151790 | HPA039611 | U-2 OS   |
| 8314 | ENSG00000151806 | HPA024222 | U-2 OS   |
| 8315 | ENSG00000151812 | HPA043853 | U-2 OS   |
| 8316 | ENSG00000151838 | HPA004200 | U-2 OS   |
| 8317 | ENSG00000151846 | HPA045423 | U-2 OS   |
| 8318 | ENSG00000151846 | HPA067156 | RT4      |
| 8319 | ENSG00000151849 | HPA060426 | U-2 OS   |
| 8320 | ENSG00000151876 | HPA003362 | U-2 OS   |
| 8321 | ENSG00000151881 | HPA059946 | U-2 OS   |
| 8322 | ENSG00000151883 | HPA049183 | U-2 OS   |
| 8323 | ENSG00000151892 | HPA043829 | U-2 OS   |
| 8324 | ENSG00000151893 | HPA050611 | RH-30    |
| 8325 | ENSG00000151914 | HPA030200 | U-2 OS   |
| 8326 | ENSG00000151917 | HPA052973 | U-2 OS   |
| 8327 | ENSG00000151923 | HPA060962 | U-2 OS   |
| 8328 | ENSG00000151929 | HPA018493 | U-2 OS   |
| 8329 | ENSG00000151929 | HPA020586 | U-2 OS   |
| 8330 | ENSG00000151948 | HPA039051 | U-2 OS   |
| 8331 | ENSG00000151948 | HPA039052 | U-2 OS   |
| 8332 | ENSG00000151967 | HPA003243 | U-2 OS   |
| 8333 | ENSG00000151967 | HPA069824 | SH-SY5Y  |
| 8334 | ENSG00000152049 | HPA011420 | U-2 OS   |
| 8335 | ENSG00000152056 | HPA066782 | HaCaT    |
| 8336 | ENSG00000152076 | HPA060727 | U-2 OS   |
| 8337 | ENSG00000152078 | HPA046762 | RT4      |
| 8338 | ENSG00000152082 | HPA051758 | U-2 OS   |
| 8339 | ENSG00000152082 | HPA052623 | U-2 OS   |
| 8340 | ENSG00000152086 | HPA039247 | U-2 OS   |
| 8341 | ENSG00000152086 | HPA043684 | U-2 OS   |
| 8342 | ENSG00000152092 | HPA074112 | U-2 OS   |
| 8343 | ENSG00000152104 | CAB011469 | A-431    |
| 8344 | ENSG00000152104 | HPA053864 | HeLa     |
| 8345 | ENSG00000152133 | HPA038232 | U-2 OS   |
| 8346 | ENSG00000152137 | HPA015876 | U-2 OS   |
| 8347 | ENSG00000152147 | HPA035727 | PC-3     |
| 8348 | ENSG00000152154 | HPA052128 | AF22     |
| 8349 | ENSG00000152193 | HPA034785 | A-431    |
| 8350 | ENSG00000152217 | HPA049022 | U-2 OS   |
| 8351 | ENSG00000152219 | HPA039634 | U-2 OS   |
| 8352 | ENSG00000152223 | HPA031689 | U-2 OS   |
| 8353 | ENSG00000152229 | HPA040923 | U-2 OS   |
| 8354 | ENSG00000152234 | CAB013067 | U-2 OS   |
| 8355 | ENSG00000152240 | HPA040601 | U-2 OS   |
| 8356 | ENSG00000152242 | HPA051899 | U-2 OS   |
| 8357 | ENSG00000152253 | HPA047144 | U-251 MG |
| 8358 | ENSG00000152253 | HPA050544 | U-2 OS   |

|      |                 |           |          |
|------|-----------------|-----------|----------|
| 8359 | ENSG00000152256 | HPA059083 | U-2 OS   |
| 8360 | ENSG00000152270 | HPA056111 | HEK 293  |
| 8361 | ENSG00000152284 | HPA071298 | U-2 OS   |
| 8362 | ENSG00000152291 | CAB011489 | U-2 OS   |
| 8363 | ENSG00000152291 | HPA012609 | U-2 OS   |
| 8364 | ENSG00000152291 | HPA012723 | U-2 OS   |
| 8365 | ENSG00000152315 | HPA003514 | RT4      |
| 8366 | ENSG00000152332 | HPA071190 | U-2 OS   |
| 8367 | ENSG00000152348 | HPA044163 | U-2 OS   |
| 8368 | ENSG00000152359 | HPA037509 | U-2 OS   |
| 8369 | ENSG00000152359 | HPA061521 | U-2 OS   |
| 8370 | ENSG00000152377 | HPA026770 | U-2 OS   |
| 8371 | ENSG00000152380 | HPA043805 | U-2 OS   |
| 8372 | ENSG00000152382 | HPA028651 | U-2 OS   |
| 8373 | ENSG00000152404 | HPA038166 | U-2 OS   |
| 8374 | ENSG00000152409 | HPA037508 | U-2 OS   |
| 8375 | ENSG00000152413 | HPA036522 | U-2 OS   |
| 8376 | ENSG00000152422 | HPA006801 | U-2 OS   |
| 8377 | ENSG00000152422 | HPA051538 | U-2 OS   |
| 8378 | ENSG00000152439 | HPA003152 | U-2 OS   |
| 8379 | ENSG00000152443 | HPA046653 | U-2 OS   |
| 8380 | ENSG00000152443 | HPA068553 | RT4      |
| 8381 | ENSG00000152454 | HPA055390 | U-2 OS   |
| 8382 | ENSG00000152455 | HPA045901 | U-2 OS   |
| 8383 | ENSG00000152457 | HPA069295 | U-2 OS   |
| 8384 | ENSG00000152464 | HPA045128 | U-2 OS   |
| 8385 | ENSG00000152465 | HPA001303 | U-2 OS   |
| 8386 | ENSG00000152467 | HPA007938 | U-2 OS   |
| 8387 | ENSG00000152475 | HPA042833 | U-2 OS   |
| 8388 | ENSG00000152484 | HPA059492 | U-2 OS   |
| 8389 | ENSG00000152492 | HPA001336 | U-2 OS   |
| 8390 | ENSG00000152495 | HPA011753 | U-2 OS   |
| 8391 | ENSG00000152503 | HPA061321 | U-2 OS   |
| 8392 | ENSG00000152527 | HPA077225 | U-2 OS   |
| 8393 | ENSG00000152556 | HPA002117 | U-2 OS   |
| 8394 | ENSG00000152558 | CAB026001 | U-2 OS   |
| 8395 | ENSG00000152558 | HPA062862 | U-2 OS   |
| 8396 | ENSG00000152580 | HPA012921 | U-2 OS   |
| 8397 | ENSG00000152601 | CAB016398 | U-251 MG |
| 8398 | ENSG00000152601 | HPA035098 | U-2 OS   |
| 8399 | ENSG00000152611 | HPA058495 | U-2 OS   |
| 8400 | ENSG00000152661 | HPA047551 | U-2 OS   |
| 8401 | ENSG00000152683 | HPA055032 | U-2 OS   |
| 8402 | ENSG00000152683 | HPA057328 | U-2 OS   |
| 8403 | ENSG00000152684 | HPA031458 | U-2 OS   |
| 8404 | ENSG00000152689 | HPA058937 | CAC0-2   |
| 8405 | ENSG00000152700 | HPA006923 | U-2 OS   |
| 8406 | ENSG00000152749 | HPA047250 | U-2 OS   |
| 8407 | ENSG00000152766 | HPA012922 | RT4      |
| 8408 | ENSG00000152767 | HPA000760 | U-2 OS   |
| 8409 | ENSG00000152778 | HPA062180 | A-431    |
| 8410 | ENSG00000152779 | HPA037587 | U-2 OS   |
| 8411 | ENSG00000152784 | HPA057253 | A-431    |
| 8412 | ENSG00000152795 | HPA056820 | U-2 OS   |
| 8413 | ENSG00000152804 | HPA055460 | U-2 OS   |

|      |                 |           |          |
|------|-----------------|-----------|----------|
| 8414 | ENSG00000152818 | HPA018894 | U-2 OS   |
| 8415 | ENSG00000152822 | HPA015701 | U-2 OS   |
| 8416 | ENSG00000152894 | HPA054056 | U-2 OS   |
| 8417 | ENSG00000152894 | HPA054822 | MCF7     |
| 8418 | ENSG00000152926 | HPA031148 | SH-SY5Y  |
| 8419 | ENSG00000152932 | HPA048156 | U-2 OS   |
| 8420 | ENSG00000152936 | HPA038640 | RT4      |
| 8421 | ENSG00000152939 | HPA061726 | MCF7     |
| 8422 | ENSG00000152942 | CAB004551 | U-2 OS   |
| 8423 | ENSG00000152942 | HPA005448 | U-2 OS   |
| 8424 | ENSG00000152944 | HPA017177 | U-2 OS   |
| 8425 | ENSG00000152952 | HPA069126 | U-2 OS   |
| 8426 | ENSG00000152953 | HPA058536 | U-2 OS   |
| 8427 | ENSG00000152954 | HPA019681 | SH-SY5Y  |
| 8428 | ENSG00000152977 | HPA004098 | U-2 OS   |
| 8429 | ENSG00000153006 | HPA062853 | CACO-2   |
| 8430 | ENSG00000153012 | HPA017140 | U-251 MG |
| 8431 | ENSG00000153015 | HPA020344 | U-2 OS   |
| 8432 | ENSG00000153015 | HPA024149 | U-2 OS   |
| 8433 | ENSG00000153015 | HPA065809 | U-251 MG |
| 8434 | ENSG00000153029 | HPA048304 | U-2 OS   |
| 8435 | ENSG00000153044 | HPA036494 | U-2 OS   |
| 8436 | ENSG00000153046 | HPA035578 | U-2 OS   |
| 8437 | ENSG00000153060 | HPA043578 | U-2 OS   |
| 8438 | ENSG00000153064 | HPA037002 | RT4      |
| 8439 | ENSG00000153066 | HPA041174 | U-2 OS   |
| 8440 | ENSG00000153066 | HPA041390 | A-431    |
| 8441 | ENSG00000153071 | CAB009314 | U-2 OS   |
| 8442 | ENSG00000153071 | HPA028888 | CACO-2   |
| 8443 | ENSG00000153093 | HPA035392 | RT4      |
| 8444 | ENSG00000153093 | HPA035393 | RT4      |
| 8445 | ENSG00000153107 | HPA042998 | U-2 OS   |
| 8446 | ENSG00000153113 | CAB009491 | U-2 OS   |
| 8447 | ENSG00000153113 | HPA036881 | U-2 OS   |
| 8448 | ENSG00000153113 | HPA036882 | U-2 OS   |
| 8449 | ENSG00000153130 | HPA061198 | Hep G2   |
| 8450 | ENSG00000153132 | HPA048761 | U-2 OS   |
| 8451 | ENSG00000153140 | HPA063704 | U-2 OS   |
| 8452 | ENSG00000153147 | HPA008751 | U-2 OS   |
| 8453 | ENSG00000153157 | HPA034679 | U-2 OS   |
| 8454 | ENSG00000153162 | CAB002773 | U-2 OS   |
| 8455 | ENSG00000153162 | HPA062683 | U-2 OS   |
| 8456 | ENSG00000153165 | HPA067564 | CACO-2   |
| 8457 | ENSG00000153179 | HPA038469 | U-2 OS   |
| 8458 | ENSG00000153187 | HPA058707 | U-2 OS   |
| 8459 | ENSG00000153201 | HPA018437 | U-2 OS   |
| 8460 | ENSG00000153201 | HPA023960 | CACO-2   |
| 8461 | ENSG00000153201 | CAB034063 | U-2 OS   |
| 8462 | ENSG00000153201 | HPA067564 | CACO-2   |
| 8463 | ENSG00000153207 | HPA031658 | U-2 OS   |
| 8464 | ENSG00000153208 | HPA075622 | RT4      |
| 8465 | ENSG00000153214 | HPA035183 | U-2 OS   |
| 8466 | ENSG00000153233 | HPA071067 | RT4      |
| 8467 | ENSG00000153234 | HPA000543 | U-2 OS   |
| 8468 | ENSG00000153237 | HPA042626 | U-2 OS   |



|      |                 |           |           |
|------|-----------------|-----------|-----------|
| 8469 | ENSG00000153246 | CAB068217 | U-2 OS    |
| 8470 | ENSG00000153250 | HPA047943 | U-2 OS    |
| 8471 | ENSG00000153250 | HPA061791 | U-2 OS    |
| 8472 | ENSG00000153291 | HPA069732 | U-2 OS    |
| 8473 | ENSG00000153294 | HPA007158 | RT4       |
| 8474 | ENSG00000153303 | HPA030347 | U-2 OS    |
| 8475 | ENSG00000153310 | HPA009076 | U-2 OS    |
| 8476 | ENSG00000153317 | HPA048565 | U-2 OS    |
| 8477 | ENSG00000153339 | HPA041107 | U-2 OS    |
| 8478 | ENSG00000153391 | HPA049060 | U-2 OS    |
| 8479 | ENSG00000153395 | HPA022268 | U-2 OS    |
| 8480 | ENSG00000153404 | HPA058157 | U-2 OS    |
| 8481 | ENSG00000153406 | HPA041353 | MCF7      |
| 8482 | ENSG00000153406 | HPA062287 | PC-3      |
| 8483 | ENSG00000153443 | HPA066771 | U-2 OS    |
| 8484 | ENSG00000153485 | HPA048559 | U-2 OS    |
| 8485 | ENSG00000153487 | HPA052591 | U-2 OS    |
| 8486 | ENSG00000153531 | HPA066478 | U-2 OS    |
| 8487 | ENSG00000153551 | HPA077409 | Hep G2    |
| 8488 | ENSG00000153558 | HPA061783 | U-2 OS    |
| 8489 | ENSG00000153560 | HPA003967 | U-2 OS    |
| 8490 | ENSG00000153561 | HPA060843 | U-2 OS    |
| 8491 | ENSG00000153563 | HPA037756 | U-2 OS    |
| 8492 | ENSG00000153574 | HPA057954 | U-2 OS    |
| 8493 | ENSG00000153707 | HPA054829 | U-2 OS    |
| 8494 | ENSG00000153714 | HPA024407 | A-431     |
| 8495 | ENSG00000153721 | CAB037133 | U-2 OS    |
| 8496 | ENSG00000153767 | HPA056359 | U-2 OS    |
| 8497 | ENSG00000153767 | HPA066881 | CACO-2    |
| 8498 | ENSG00000153774 | HPA048242 | U-2 OS    |
| 8499 | ENSG00000153779 | HPA034543 | U-2 OS    |
| 8500 | ENSG00000153786 | HPA059642 | U-2 OS    |
| 8501 | ENSG00000153790 | HPA020346 | U-2 OS    |
| 8502 | ENSG00000153814 | HPA066967 | U-2 OS    |
| 8503 | ENSG00000153815 | HPA054424 | U-2 OS    |
| 8504 | ENSG00000153822 | HPA059563 | U-2 OS    |
| 8505 | ENSG00000153823 | HPA036103 | U-2 OS    |
| 8506 | ENSG00000153827 | HPA036835 | RT4       |
| 8507 | ENSG00000153832 | HPA053865 | U-2 OS    |
| 8508 | ENSG00000153879 | HPA012024 | U-2 OS    |
| 8509 | ENSG00000153885 | HPA050822 | U-2 OS    |
| 8510 | ENSG00000153896 | HPA014701 | U-2 OS    |
| 8511 | ENSG00000153898 | HPA019114 | U-2 OS    |
| 8512 | ENSG00000153898 | HPA048999 | U-2 OS    |
| 8513 | ENSG00000153902 | HPA043556 | SK-MEL-30 |
| 8514 | ENSG00000153904 | HPA006308 | U-2 OS    |
| 8515 | ENSG00000153914 | HPA037673 | U-2 OS    |
| 8516 | ENSG00000153914 | HPA059332 | U-2 OS    |
| 8517 | ENSG00000153922 | HPA022236 | U-2 OS    |
| 8518 | ENSG00000153930 | HPA048953 | U-2 OS    |
| 8519 | ENSG00000153933 | HPA017167 | U-2 OS    |
| 8520 | ENSG00000153936 | HPA043069 | U-2 OS    |
| 8521 | ENSG00000153936 | HPA075001 | CACO-2    |
| 8522 | ENSG00000153944 | CAB022300 | U-2 OS    |
| 8523 | ENSG00000153975 | HPA044426 | U-2 OS    |

|      |                 |           |             |
|------|-----------------|-----------|-------------|
| 8524 | ENSG00000153976 | HPA062518 | U-2 OS      |
| 8525 | ENSG00000153989 | HPA027504 | U-2 OS      |
| 8526 | ENSG00000153993 | HPA037522 | HUVEC TERT2 |
| 8527 | ENSG00000154001 | HPA006034 | U-2 OS      |
| 8528 | ENSG00000154016 | HPA066654 | U-2 OS      |
| 8529 | ENSG00000154027 | HPA019128 | U-2 OS      |
| 8530 | ENSG00000154040 | HPA047801 | U-2 OS      |
| 8531 | ENSG00000154059 | HPA041968 | U-2 OS      |
| 8532 | ENSG00000154065 | HPA049419 | A549        |
| 8533 | ENSG00000154079 | HPA031824 | U-2 OS      |
| 8534 | ENSG00000154096 | HPA003733 | U-251 MG    |
| 8535 | ENSG00000154099 | HPA041166 | U-2 OS      |
| 8536 | ENSG00000154102 | HPA049367 | U-2 OS      |
| 8537 | ENSG00000154114 | HPA038594 | U-2 OS      |
| 8538 | ENSG00000154118 | HPA076304 | U-2 OS      |
| 8539 | ENSG00000154122 | HPA068104 | U-2 OS      |
| 8540 | ENSG00000154124 | HPA051074 | U-2 OS      |
| 8541 | ENSG00000154127 | HPA038607 | U-251 MG    |
| 8542 | ENSG00000154133 | HPA065212 | PC-3        |
| 8543 | ENSG00000154134 | HPA071053 | SH-SY5Y     |
| 8544 | ENSG00000154144 | HPA055645 | A-431       |
| 8545 | ENSG00000154144 | HPA068022 | CACO-2      |
| 8546 | ENSG00000154153 | HPA012077 | U-2 OS      |
| 8547 | ENSG00000154162 | HPA029325 | U-251 MG    |
| 8548 | ENSG00000154174 | HPA014589 | U-2 OS      |
| 8549 | ENSG00000154174 | CAB017156 | U-2 OS      |
| 8550 | ENSG00000154174 | HPA048020 | U-2 OS      |
| 8551 | ENSG00000154217 | HPA031250 | U-2 OS      |
| 8552 | ENSG00000154222 | HPA031426 | U-2 OS      |
| 8553 | ENSG00000154227 | HPA006092 | U-251 MG    |
| 8554 | ENSG00000154227 | HPA024356 | hTCEpi      |
| 8555 | ENSG00000154229 | HPA006563 | U-2 OS      |
| 8556 | ENSG00000154229 | HPA006564 | U-2 OS      |
| 8557 | ENSG00000154237 | HPA010537 | U-2 OS      |
| 8558 | ENSG00000154240 | HPA024481 | U-2 OS      |
| 8559 | ENSG00000154258 | HPA052113 | U-2 OS      |
| 8560 | ENSG00000154262 | HPA064878 | RT4         |
| 8561 | ENSG00000154262 | HPA067180 | RT4         |
| 8562 | ENSG00000154265 | HPA062904 | RT4         |
| 8563 | ENSG00000154274 | HPA043458 | RT4         |
| 8564 | ENSG00000154274 | HPA052894 | RT4         |
| 8565 | ENSG00000154277 | CAB002580 | U-251 MG    |
| 8566 | ENSG00000154305 | HPA055922 | U-2 OS      |
| 8567 | ENSG00000154305 | HPA056816 | U-2 OS      |
| 8568 | ENSG00000154309 | HPA051411 | U-2 OS      |
| 8569 | ENSG00000154310 | HPA012128 | U-2 OS      |
| 8570 | ENSG00000154319 | HPA023915 | SH-SY5Y     |
| 8571 | ENSG00000154328 | HPA073029 | U-2 OS      |
| 8572 | ENSG00000154328 | HPA073916 | U-2 OS      |
| 8573 | ENSG00000154330 | HPA046329 | PC-3        |
| 8574 | ENSG00000154342 | HPA066281 | A-431       |
| 8575 | ENSG00000154358 | HPA021186 | U-2 OS      |
| 8576 | ENSG00000154359 | HPA023584 | U-2 OS      |
| 8577 | ENSG00000154370 | HPA028541 | U-2 OS      |
| 8578 | ENSG00000154370 | HPA043879 | U-2 OS      |

|      |                 |           |             |
|------|-----------------|-----------|-------------|
| 8579 | ENSG00000154380 | HPA028448 | U-2 OS      |
| 8580 | ENSG00000154380 | HPA028696 | U-2 OS      |
| 8581 | ENSG00000154438 | HPA020558 | U-2 OS      |
| 8582 | ENSG00000154447 | HPA074783 | U-2 OS      |
| 8583 | ENSG00000154473 | HPA003601 | U-2 OS      |
| 8584 | ENSG00000154493 | HPA038648 | U-2 OS      |
| 8585 | ENSG00000154511 | HPA015718 | A-431       |
| 8586 | ENSG00000154511 | HPA017281 | A-431       |
| 8587 | ENSG00000154553 | HPA004749 | U-2 OS      |
| 8588 | ENSG00000154582 | HPA078113 | U-2 OS      |
| 8589 | ENSG00000154589 | HPA053060 | U-2 OS      |
| 8590 | ENSG00000154639 | CAB005103 | U-2 OS      |
| 8591 | ENSG00000154639 | HPA030411 | U-2 OS      |
| 8592 | ENSG00000154642 | HPA049030 | U-2 OS      |
| 8593 | ENSG00000154646 | HPA034857 | U-2 OS      |
| 8594 | ENSG00000154654 | HPA030901 | U-2 OS      |
| 8595 | ENSG00000154655 | HPA069042 | U-2 OS      |
| 8596 | ENSG00000154678 | HPA052375 | U-2 OS      |
| 8597 | ENSG00000154710 | HPA001407 | U-2 OS      |
| 8598 | ENSG00000154721 | HPA028789 | RH-30       |
| 8599 | ENSG00000154721 | HPA077346 | RH-30       |
| 8600 | ENSG00000154723 | HPA031069 | U-2 OS      |
| 8601 | ENSG00000154727 | HPA003258 | U-2 OS      |
| 8602 | ENSG00000154727 | CAB004411 | A-431       |
| 8603 | ENSG00000154727 | HPA028791 | U-2 OS      |
| 8604 | ENSG00000154734 | HPA031498 | HeLa        |
| 8605 | ENSG00000154736 | HPA030906 | U-2 OS      |
| 8606 | ENSG00000154736 | HPA030908 | RH-30       |
| 8607 | ENSG00000154743 | HPA027120 | U-2 OS      |
| 8608 | ENSG00000154743 | HPA027268 | U-2 OS      |
| 8609 | ENSG00000154760 | HPA022532 | U-2 OS      |
| 8610 | ENSG00000154767 | CAB009932 | U-2 OS      |
| 8611 | ENSG00000154767 | HPA035707 | U-2 OS      |
| 8612 | ENSG00000154767 | HPA069673 | U-2 OS      |
| 8613 | ENSG00000154781 | HPA043468 | U-2 OS      |
| 8614 | ENSG00000154781 | HPA060129 | U-2 OS      |
| 8615 | ENSG00000154783 | HPA014436 | HUVEC TERT2 |
| 8616 | ENSG00000154803 | HPA028760 | U-2 OS      |
| 8617 | ENSG00000154813 | HPA035287 | U-2 OS      |
| 8618 | ENSG00000154814 | HPA036830 | U-2 OS      |
| 8619 | ENSG00000154832 | HPA044511 | HEK 293     |
| 8620 | ENSG00000154839 | HPA045495 | U-2 OS      |
| 8621 | ENSG00000154845 | HPA040905 | U-2 OS      |
| 8622 | ENSG00000154864 | HPA031974 | U-2 OS      |
| 8623 | ENSG00000154864 | HPA031975 | HeLa        |
| 8624 | ENSG00000154889 | HPA012639 | CACO-2      |
| 8625 | ENSG00000154917 | HPA059131 | CACO-2      |
| 8626 | ENSG00000154920 | HPA052188 | U-2 OS      |
| 8627 | ENSG00000154928 | HPA067740 | U-2 OS      |
| 8628 | ENSG00000154945 | HPA021668 | U-2 OS      |
| 8629 | ENSG00000154945 | HPA021759 | U-2 OS      |
| 8630 | ENSG00000154945 | HPA074884 | CACO-2      |
| 8631 | ENSG00000154957 | HPA006144 | U-2 OS      |
| 8632 | ENSG00000154975 | HPA057837 | RT4         |
| 8633 | ENSG00000155008 | HPA000612 | U-2 OS      |

|      |                 |           |           |
|------|-----------------|-----------|-----------|
| 8634 | ENSG00000155011 | HPA052611 | U-2 OS    |
| 8635 | ENSG00000155016 | HPA064827 | U-2 OS    |
| 8636 | ENSG00000155034 | HPA036049 | U-2 OS    |
| 8637 | ENSG00000155052 | HPA069095 | CACO-2    |
| 8638 | ENSG00000155052 | HPA069356 | CACO-2    |
| 8639 | ENSG00000155066 | HPA063728 | U-2 OS    |
| 8640 | ENSG00000155085 | HPA030804 | U-2 OS    |
| 8641 | ENSG00000155085 | HPA030805 | U-2 OS    |
| 8642 | ENSG00000155093 | HPA006900 | A-431     |
| 8643 | ENSG00000155096 | HPA027948 | U-2 OS    |
| 8644 | ENSG00000155097 | HPA057297 | U-2 OS    |
| 8645 | ENSG00000155100 | HPA024046 | U-2 OS    |
| 8646 | ENSG00000155100 | HPA024503 | U-2 OS    |
| 8647 | ENSG00000155111 | HPA007053 | U-2 OS    |
| 8648 | ENSG00000155115 | HPA061345 | U-2 OS    |
| 8649 | ENSG00000155158 | HPA063162 | RT4       |
| 8650 | ENSG00000155189 | HPA011646 | U-2 OS    |
| 8651 | ENSG00000155229 | HPA051936 | U-2 OS    |
| 8652 | ENSG00000155229 | HPA056299 | CACO-2    |
| 8653 | ENSG00000155252 | HPA076857 | HaCaT     |
| 8654 | ENSG00000155256 | HPA037523 | A-431     |
| 8655 | ENSG00000155256 | HPA069876 | SK-MEL-30 |
| 8656 | ENSG00000155275 | HPA045461 | PC-3      |
| 8657 | ENSG00000155307 | HPA010645 | HEL       |
| 8658 | ENSG00000155307 | HPA017055 | U-2 OS    |
| 8659 | ENSG00000155313 | HPA024142 | U-2 OS    |
| 8660 | ENSG00000155324 | HPA009678 | U-2 OS    |
| 8661 | ENSG00000155324 | HPA010095 | U-2 OS    |
| 8662 | ENSG00000155329 | HPA038944 | U-2 OS    |
| 8663 | ENSG00000155330 | HPA041179 | U-2 OS    |
| 8664 | ENSG00000155363 | HPA031627 | U-2 OS    |
| 8665 | ENSG00000155367 | HPA046045 | MCF7      |
| 8666 | ENSG00000155380 | HPA003324 | U-2 OS    |
| 8667 | ENSG00000155380 | CAB017489 | U-2 OS    |
| 8668 | ENSG00000155380 | HPA071055 | U-2 OS    |
| 8669 | ENSG00000155393 | HPA058579 | U-2 OS    |
| 8670 | ENSG00000155428 | HPA047843 | A-431     |
| 8671 | ENSG00000155438 | CAB015382 | U-2 OS    |
| 8672 | ENSG00000155438 | HPA035735 | U-2 OS    |
| 8673 | ENSG00000155463 | HPA003531 | U-2 OS    |
| 8674 | ENSG00000155495 | CAB015452 | U-2 OS    |
| 8675 | ENSG00000155506 | CAB015222 | U-2 OS    |
| 8676 | ENSG00000155542 | HPA049936 | U-2 OS    |
| 8677 | ENSG00000155545 | HPA058349 | U-2 OS    |
| 8678 | ENSG00000155545 | HPA065946 | CACO-2    |
| 8679 | ENSG00000155592 | HPA049141 | U-2 OS    |
| 8680 | ENSG00000155621 | HPA050767 | U-2 OS    |
| 8681 | ENSG00000155629 | HPA038452 | U-2 OS    |
| 8682 | ENSG00000155636 | HPA020448 | U-2 OS    |
| 8683 | ENSG00000155659 | HPA003903 | U-2 OS    |
| 8684 | ENSG00000155660 | CAB017368 | U-2 OS    |
| 8685 | ENSG00000155666 | HPA026545 | A-431     |
| 8686 | ENSG00000155729 | HPA058028 | U-2 OS    |
| 8687 | ENSG00000155744 | HPA067307 | CACO-2    |
| 8688 | ENSG00000155749 | HPA035793 | U-2 OS    |

|      |                 |           |             |
|------|-----------------|-----------|-------------|
| 8689 | ENSG00000155760 | HPA059979 | BJ          |
| 8690 | ENSG00000155760 | HPA076183 | BJ          |
| 8691 | ENSG00000155792 | CAB020841 | U-2 OS      |
| 8692 | ENSG00000155792 | HPA023945 | RPTEC TERT1 |
| 8693 | ENSG00000155792 | HPA024011 | U-2 OS      |
| 8694 | ENSG00000155816 | HPA050649 | BJ          |
| 8695 | ENSG00000155827 | CAB012478 | U-2 OS      |
| 8696 | ENSG00000155827 | HPA051773 | U-2 OS      |
| 8697 | ENSG00000155846 | HPA050543 | RT4         |
| 8698 | ENSG00000155850 | HPA041957 | U-251 MG    |
| 8699 | ENSG00000155858 | HPA039587 | U-2 OS      |
| 8700 | ENSG00000155868 | HPA067181 | CACO-2      |
| 8701 | ENSG00000155876 | HPA003734 | U-2 OS      |
| 8702 | ENSG00000155890 | HPA003581 | U-2 OS      |
| 8703 | ENSG00000155890 | HPA022481 | U-2 OS      |
| 8704 | ENSG00000155903 | HPA035374 | U-2 OS      |
| 8705 | ENSG00000155906 | HPA031397 | U-2 OS      |
| 8706 | ENSG00000155957 | HPA077642 | SiHa        |
| 8707 | ENSG00000155959 | HPA023230 | U-2 OS      |
| 8708 | ENSG00000155962 | HPA047381 | ASC TERT1   |
| 8709 | ENSG00000155975 | HPA024705 | U-2 OS      |
| 8710 | ENSG00000155975 | HPA024781 | U-2 OS      |
| 8711 | ENSG00000155980 | HPA073448 | U-2 OS      |
| 8712 | ENSG00000156011 | HPA002455 | U-2 OS      |
| 8713 | ENSG00000156026 | HPA016480 | U-2 OS      |
| 8714 | ENSG00000156030 | HPA003111 | U-2 OS      |
| 8715 | ENSG00000156052 | CAB010036 | U-2 OS      |
| 8716 | ENSG00000156103 | HPA023693 | U-2 OS      |
| 8717 | ENSG00000156110 | HPA038409 | U-2 OS      |
| 8718 | ENSG00000156127 | HPA059588 | RT4         |
| 8719 | ENSG00000156127 | HPA064962 | RT4         |
| 8720 | ENSG00000156136 | HPA059609 | U-2 OS      |
| 8721 | ENSG00000156140 | HPA021368 | U-2 OS      |
| 8722 | ENSG00000156150 | HPA074290 | U-2 OS      |
| 8723 | ENSG00000156171 | HPA018036 | U-2 OS      |
| 8724 | ENSG00000156171 | HPA061701 | U-2 OS      |
| 8725 | ENSG00000156172 | HPA024198 | A-431       |
| 8726 | ENSG00000156218 | HPA034773 | U-2 OS      |
| 8727 | ENSG00000156232 | HPA039690 | U-2 OS      |
| 8728 | ENSG00000156239 | HPA059242 | U-2 OS      |
| 8729 | ENSG00000156256 | HPA021140 | U-2 OS      |
| 8730 | ENSG00000156261 | HPA021051 | U-2 OS      |
| 8731 | ENSG00000156261 | HPA029426 | U-2 OS      |
| 8732 | ENSG00000156265 | HPA030079 | CACO-2      |
| 8733 | ENSG00000156269 | HPA035922 | U-2 OS      |
| 8734 | ENSG00000156273 | HPA034949 | A-431       |
| 8735 | ENSG00000156299 | CAB010416 | U-2 OS      |
| 8736 | ENSG00000156299 | HPA034853 | RT4         |
| 8737 | ENSG00000156304 | HPA018319 | U-2 OS      |
| 8738 | ENSG00000156304 | HPA018668 | U-2 OS      |
| 8739 | ENSG00000156304 | HPA021504 | U-2 OS      |
| 8740 | ENSG00000156304 | HPA028807 | U-2 OS      |
| 8741 | ENSG00000156313 | HPA073455 | U-2 OS      |
| 8742 | ENSG00000156345 | HPA027379 | U-2 OS      |
| 8743 | ENSG00000156398 | HPA026834 | U-2 OS      |

|      |                 |           |          |
|------|-----------------|-----------|----------|
| 8744 | ENSG00000156411 | HPA058978 | U-2 OS   |
| 8745 | ENSG00000156413 | HPA043707 | Hep G2   |
| 8746 | ENSG00000156453 | HPA047720 | RT4      |
| 8747 | ENSG00000156463 | HPA035903 | A-431    |
| 8748 | ENSG00000156463 | HPA058119 | CACO-2   |
| 8749 | ENSG00000156466 | HPA045206 | LHCN-M2  |
| 8750 | ENSG00000156469 | HPA002966 | A-431    |
| 8751 | ENSG00000156471 | HPA016852 | U-2 OS   |
| 8752 | ENSG00000156475 | HPA042122 | A-431    |
| 8753 | ENSG00000156482 | HPA002651 | U-2 OS   |
| 8754 | ENSG00000156500 | HPA059961 | U-2 OS   |
| 8755 | ENSG00000156502 | HPA038380 | CACO-2   |
| 8756 | ENSG00000156504 | HPA000266 | U-2 OS   |
| 8757 | ENSG00000156508 | HPA051759 | U-2 OS   |
| 8758 | ENSG00000156508 | HPA053862 | U-2 OS   |
| 8759 | ENSG00000156508 | HPA056990 | U-2 OS   |
| 8760 | ENSG00000156510 | HPA064198 | CACO-2   |
| 8761 | ENSG00000156510 | HPA064230 | CACO-2   |
| 8762 | ENSG00000156515 | HPA007044 | U-2 OS   |
| 8763 | ENSG00000156515 | CAB010052 | A-431    |
| 8764 | ENSG00000156521 | HPA030304 | U-2 OS   |
| 8765 | ENSG00000156531 | HPA001023 | U-2 OS   |
| 8766 | ENSG00000156535 | HPA008992 | U-2 OS   |
| 8767 | ENSG00000156564 | HPA076660 | SH-SY5Y  |
| 8768 | ENSG00000156587 | HPA003328 | U-2 OS   |
| 8769 | ENSG00000156599 | HPA014670 | A-431    |
| 8770 | ENSG00000156603 | HPA039912 | U-251 MG |
| 8771 | ENSG00000156603 | HPA040860 | U-2 OS   |
| 8772 | ENSG00000156639 | HPA016755 | U-2 OS   |
| 8773 | ENSG00000156642 | HPA051497 | U-2 OS   |
| 8774 | ENSG00000156650 | HPA006104 | U-2 OS   |
| 8775 | ENSG00000156671 | HPA044402 | U-2 OS   |
| 8776 | ENSG00000156675 | CAB017037 | U-2 OS   |
| 8777 | ENSG00000156675 | HPA023904 | U-2 OS   |
| 8778 | ENSG00000156675 | HPA024010 | CACO-2   |
| 8779 | ENSG00000156675 | HPA025960 | U-2 OS   |
| 8780 | ENSG00000156689 | HPA065454 | U-2 OS   |
| 8781 | ENSG00000156697 | HPA047217 | U-2 OS   |
| 8782 | ENSG00000156711 | HPA007667 | RT4      |
| 8783 | ENSG00000156738 | HPA014341 | U-2 OS   |
| 8784 | ENSG00000156787 | HPA023710 | A-431    |
| 8785 | ENSG00000156795 | HPA024823 | U-2 OS   |
| 8786 | ENSG00000156795 | HPA053680 | U-251 MG |
| 8787 | ENSG00000156802 | HPA029424 | U-2 OS   |
| 8788 | ENSG00000156804 | HPA058955 | U-2 OS   |
| 8789 | ENSG00000156804 | HPA065209 | U-2 OS   |
| 8790 | ENSG00000156831 | HPA051614 | U-2 OS   |
| 8791 | ENSG00000156853 | HPA054095 | U-2 OS   |
| 8792 | ENSG00000156858 | HPA052022 | U-2 OS   |
| 8793 | ENSG00000156860 | HPA044117 | U-2 OS   |
| 8794 | ENSG00000156873 | HPA065618 | U-2 OS   |
| 8795 | ENSG00000156873 | HPA068751 | MCF7     |
| 8796 | ENSG00000156875 | HPA073681 | U-2 OS   |
| 8797 | ENSG00000156876 | HPA028187 | U-2 OS   |
| 8798 | ENSG00000156925 | HPA069523 | AF22     |

|      |                 |           |          |
|------|-----------------|-----------|----------|
| 8799 | ENSG00000156928 | HPA020487 | U-2 OS   |
| 8800 | ENSG00000156928 | HPA052210 | U-2 OS   |
| 8801 | ENSG00000156931 | HPA036871 | U-2 OS   |
| 8802 | ENSG00000156958 | HPA048267 | PC-3     |
| 8803 | ENSG00000156959 | HPA041421 | U-2 OS   |
| 8804 | ENSG00000156968 | HPA041180 | Hep G2   |
| 8805 | ENSG00000156970 | HPA008419 | U-2 OS   |
| 8806 | ENSG00000156976 | HPA068286 | CACO-2   |
| 8807 | ENSG00000156983 | HPA003359 | U-2 OS   |
| 8808 | ENSG00000156990 | HPA037551 | U-251 MG |
| 8809 | ENSG00000157014 | HPA036822 | U-2 OS   |
| 8810 | ENSG00000157020 | HPA057943 | A549     |
| 8811 | ENSG00000157036 | HPA071050 | U-2 OS   |
| 8812 | ENSG00000157045 | HPA051418 | U-2 OS   |
| 8813 | ENSG00000157077 | HPA065852 | RT4      |
| 8814 | ENSG00000157077 | HPA065862 | RT4      |
| 8815 | ENSG00000157103 | HPA013341 | U-2 OS   |
| 8816 | ENSG00000157106 | HPA073972 | U-2 OS   |
| 8817 | ENSG00000157107 | HPA077850 | RT4      |
| 8818 | ENSG00000157110 | HPA056999 | A549     |
| 8819 | ENSG00000157152 | HPA037012 | U-2 OS   |
| 8820 | ENSG00000157168 | HPA010964 | BJ       |
| 8821 | ENSG00000157181 | HPA015988 | U-2 OS   |
| 8822 | ENSG00000157181 | HPA031352 | U-2 OS   |
| 8823 | ENSG00000157184 | HPA028214 | U-2 OS   |
| 8824 | ENSG00000157191 | HPA028077 | U-2 OS   |
| 8825 | ENSG00000157212 | HPA016950 | U-2 OS   |
| 8826 | ENSG00000157214 | HPA055603 | A549     |
| 8827 | ENSG00000157227 | HPA051432 | BJ       |
| 8828 | ENSG00000157240 | CAB013008 | U-2 OS   |
| 8829 | ENSG00000157259 | HPA006105 | U-2 OS   |
| 8830 | ENSG00000157259 | HPA072785 | U-2 OS   |
| 8831 | ENSG00000157303 | HPA042310 | A-431    |
| 8832 | ENSG00000157326 | HPA023972 | U-2 OS   |
| 8833 | ENSG00000157330 | HPA028396 | U-2 OS   |
| 8834 | ENSG00000157343 | HPA030895 | U-2 OS   |
| 8835 | ENSG00000157349 | HPA066668 | CACO-2   |
| 8836 | ENSG00000157350 | HPA017270 | U-2 OS   |
| 8837 | ENSG00000157353 | HPA041971 | U-2 OS   |
| 8838 | ENSG00000157379 | HPA000599 | U-2 OS   |
| 8839 | ENSG00000157388 | HPA020215 | CACO-2   |
| 8840 | ENSG00000157399 | HPA060518 | Hep G2   |
| 8841 | ENSG00000157404 | HPA073252 | HEK 293  |
| 8842 | ENSG00000157423 | HPA074129 | SiHa     |
| 8843 | ENSG00000157429 | HPA063685 | U-2 OS   |
| 8844 | ENSG00000157445 | HPA030849 | U-2 OS   |
| 8845 | ENSG00000157450 | HPA038576 | U-2 OS   |
| 8846 | ENSG00000157456 | HPA008873 | U-2 OS   |
| 8847 | ENSG00000157456 | CAB009575 | U-2 OS   |
| 8848 | ENSG00000157470 | HPA065797 | U-2 OS   |
| 8849 | ENSG00000157500 | HPA073477 | U-2 OS   |
| 8850 | ENSG00000157514 | HPA001916 | U-2 OS   |
| 8851 | ENSG00000157538 | HPA023288 | U-2 OS   |
| 8852 | ENSG00000157540 | HPA015323 | U-2 OS   |
| 8853 | ENSG00000157540 | HPA015810 | A-431    |

|      |                 |           |             |
|------|-----------------|-----------|-------------|
| 8854 | ENSG00000157551 | HPA016702 | RT4         |
| 8855 | ENSG00000157554 | CAB018377 | U-2 OS      |
| 8856 | ENSG00000157557 | HPA003176 | U-2 OS      |
| 8857 | ENSG00000157578 | HPA019790 | A-431       |
| 8858 | ENSG00000157593 | HPA029638 | U-2 OS      |
| 8859 | ENSG00000157600 | HPA038784 | U-2 OS      |
| 8860 | ENSG00000157601 | HPA049724 | U-2 OS      |
| 8861 | ENSG00000157617 | HPA030924 | U-2 OS      |
| 8862 | ENSG00000157625 | HPA034981 | U-2 OS      |
| 8863 | ENSG00000157637 | HPA021374 | U-2 OS      |
| 8864 | ENSG00000157637 | HPA024631 | U-2 OS      |
| 8865 | ENSG00000157653 | HPA021310 | A-431       |
| 8866 | ENSG00000157654 | HPA058905 | U-2 OS      |
| 8867 | ENSG00000157654 | HPA074153 | U-2 OS      |
| 8868 | ENSG00000157654 | HPA076866 | U-2 OS      |
| 8869 | ENSG00000157657 | HPA061732 | U-2 OS      |
| 8870 | ENSG00000157693 | HPA017199 | U-2 OS      |
| 8871 | ENSG00000157734 | HPA038470 | U-2 OS      |
| 8872 | ENSG00000157741 | HPA019743 | A-431       |
| 8873 | ENSG00000157741 | HPA020122 | U-2 OS      |
| 8874 | ENSG00000157764 | HPA071048 | RT4         |
| 8875 | ENSG00000157765 | HPA037989 | RPTEC TERT1 |
| 8876 | ENSG00000157796 | HPA058847 | U-251 MG    |
| 8877 | ENSG00000157823 | HPA049270 | U-2 OS      |
| 8878 | ENSG00000157827 | HPA005464 | U-2 OS      |
| 8879 | ENSG00000157833 | HPA071575 | CACO-2      |
| 8880 | ENSG00000157837 | HPA004194 | U-2 OS      |
| 8881 | ENSG00000157851 | HPA072387 | U-2 OS      |
| 8882 | ENSG00000157873 | HPA006404 | U-2 OS      |
| 8883 | ENSG00000157881 | HPA011723 | PC-3        |
| 8884 | ENSG00000157895 | HPA046148 | U-2 OS      |
| 8885 | ENSG00000157895 | HPA061739 | U-2 OS      |
| 8886 | ENSG00000157911 | HPA049458 | U-2 OS      |
| 8887 | ENSG00000157916 | CAB037240 | A-431       |
| 8888 | ENSG00000157916 | HPA051400 | U-2 OS      |
| 8889 | ENSG00000157927 | HPA051776 | HEK 293     |
| 8890 | ENSG00000157933 | HPA066567 | CACO-2      |
| 8891 | ENSG00000157954 | HPA019852 | U-2 OS      |
| 8892 | ENSG00000157978 | CAB003705 | U-2 OS      |
| 8893 | ENSG00000157992 | HPA060203 | U-2 OS      |
| 8894 | ENSG00000157999 | HPA029511 | A-431       |
| 8895 | ENSG00000157999 | HPA050732 | U-2 OS      |
| 8896 | ENSG00000158014 | HPA017979 | U-2 OS      |
| 8897 | ENSG00000158019 | HPA017926 | U-2 OS      |
| 8898 | ENSG00000158023 | HPA039902 | A-431       |
| 8899 | ENSG00000158050 | HPA071920 | RT4         |
| 8900 | ENSG00000158055 | HPA059960 | RT4         |
| 8901 | ENSG00000158062 | HPA031357 | U-2 OS      |
| 8902 | ENSG00000158077 | HPA039477 | U-2 OS      |
| 8903 | ENSG00000158079 | HPA016747 | U-2 OS      |
| 8904 | ENSG00000158079 | HPA026832 | U-2 OS      |
| 8905 | ENSG00000158089 | HPA030138 | RT4         |
| 8906 | ENSG00000158092 | CAB005063 | U-2 OS      |
| 8907 | ENSG00000158092 | HPA030766 | U-2 OS      |
| 8908 | ENSG00000158104 | HPA038322 | U-2 OS      |



|      |                 |           |        |
|------|-----------------|-----------|--------|
| 8909 | ENSG00000158106 | HPA024288 | A-431  |
| 8910 | ENSG00000158109 | HPA063163 | U-2 OS |
| 8911 | ENSG00000158113 | HPA039425 | U-2 OS |
| 8912 | ENSG00000158125 | HPA062641 | U-2 OS |
| 8913 | ENSG00000158125 | HPA069323 | U-2 OS |
| 8914 | ENSG00000158156 | HPA053529 | CACO-2 |
| 8915 | ENSG00000158158 | HPA017732 | U-2 OS |
| 8916 | ENSG00000158161 | HPA052432 | U-2 OS |
| 8917 | ENSG00000158161 | HPA062889 | U-2 OS |
| 8918 | ENSG00000158163 | HPA030404 | U-2 OS |
| 8919 | ENSG00000158169 | HPA030771 | A-431  |
| 8920 | ENSG00000158186 | HPA042728 | U-2 OS |
| 8921 | ENSG00000158195 | HPA045288 | U-2 OS |
| 8922 | ENSG00000158201 | HPA010729 | U-2 OS |
| 8923 | ENSG00000158234 | HPA042440 | U-2 OS |
| 8924 | ENSG00000158258 | HPA061800 | CACO-2 |
| 8925 | ENSG00000158270 | HPA071056 | U-2 OS |
| 8926 | ENSG00000158286 | HPA042535 | U-2 OS |
| 8927 | ENSG00000158290 | HPA003046 | U-2 OS |
| 8928 | ENSG00000158290 | HPA011880 | U-2 OS |
| 8929 | ENSG00000158290 | HPA058979 | U-2 OS |
| 8930 | ENSG00000158296 | HPA014333 | BJ     |
| 8931 | ENSG00000158301 | HPA017438 | U-2 OS |
| 8932 | ENSG00000158321 | HPA000390 | U-2 OS |
| 8933 | ENSG00000158352 | HPA010089 | U-2 OS |
| 8934 | ENSG00000158373 | HPA048671 | U-2 OS |
| 8935 | ENSG00000158402 | CAB003800 | U-2 OS |
| 8936 | ENSG00000158402 | HPA066991 | CACO-2 |
| 8937 | ENSG00000158411 | HPA036162 | U-2 OS |
| 8938 | ENSG00000158411 | HPA036163 | U-2 OS |
| 8939 | ENSG00000158417 | HPA040095 | U-2 OS |
| 8940 | ENSG00000158423 | HPA001150 | HeLa   |
| 8941 | ENSG00000158435 | HPA069823 | RT4    |
| 8942 | ENSG00000158457 | HPA020357 | U-2 OS |
| 8943 | ENSG00000158458 | HPA038935 | PC-3   |
| 8944 | ENSG00000158458 | HPA047973 | U-2 OS |
| 8945 | ENSG00000158467 | HPA053128 | U-2 OS |
| 8946 | ENSG00000158473 | HPA072662 | U-2 OS |
| 8947 | ENSG00000158480 | HPA052224 | CACO-2 |
| 8948 | ENSG00000158486 | HPA062493 | CACO-2 |
| 8949 | ENSG00000158516 | HPA020342 | U-2 OS |
| 8950 | ENSG00000158525 | HPA020322 | RT4    |
| 8951 | ENSG00000158526 | HPA030514 | U-2 OS |
| 8952 | ENSG00000158528 | HPA075591 | RT4    |
| 8953 | ENSG00000158545 | HPA040847 | U-2 OS |
| 8954 | ENSG00000158545 | HPA041327 | U-2 OS |
| 8955 | ENSG00000158552 | HPA035160 | U-2 OS |
| 8956 | ENSG00000158555 | HPA069281 | U-2 OS |
| 8957 | ENSG00000158615 | HPA061088 | U-2 OS |
| 8958 | ENSG00000158636 | HPA050777 | U-2 OS |
| 8959 | ENSG00000158639 | HPA055869 | U-2 OS |
| 8960 | ENSG00000158691 | HPA006637 | U-2 OS |
| 8961 | ENSG00000158710 | HPA001925 | U-2 OS |
| 8962 | ENSG00000158711 | HPA028863 | U-2 OS |
| 8963 | ENSG00000158715 | HPA019073 | U-2 OS |

|      |                 |           |          |
|------|-----------------|-----------|----------|
| 8964 | ENSG00000158715 | HPA019075 | U-2 OS   |
| 8965 | ENSG00000158716 | HPA028211 | PC-3     |
| 8966 | ENSG00000158717 | HPA042970 | U-2 OS   |
| 8967 | ENSG00000158769 | HPA043616 | CACO-2   |
| 8968 | ENSG00000158773 | CAB001480 | U-2 OS   |
| 8969 | ENSG00000158773 | HPA036233 | U-2 OS   |
| 8970 | ENSG00000158773 | HPA036535 | U-2 OS   |
| 8971 | ENSG00000158792 | HPA041182 | U-2 OS   |
| 8972 | ENSG00000158796 | HPA030681 | U-2 OS   |
| 8973 | ENSG00000158805 | HPA021309 | U-2 OS   |
| 8974 | ENSG00000158806 | HPA041070 | U-2 OS   |
| 8975 | ENSG00000158813 | HPA037972 | HEK 293  |
| 8976 | ENSG00000158813 | HPA037973 | HEK 293  |
| 8977 | ENSG00000158816 | HPA027496 | A-431    |
| 8978 | ENSG00000158816 | HPA028405 | U-2 OS   |
| 8979 | ENSG00000158825 | HPA064202 | U-2 OS   |
| 8980 | ENSG00000158850 | HPA010793 | U-2 OS   |
| 8981 | ENSG00000158859 | HPA051296 | U-2 OS   |
| 8982 | ENSG00000158859 | HPA068374 | U-2 OS   |
| 8983 | ENSG00000158863 | HPA025040 | U-2 OS   |
| 8984 | ENSG00000158864 | HPA055140 | U-2 OS   |
| 8985 | ENSG00000158865 | HPA035331 | U-2 OS   |
| 8986 | ENSG00000158941 | HPA019907 | U-2 OS   |
| 8987 | ENSG00000158941 | CAB072827 | U-2 OS   |
| 8988 | ENSG00000158941 | CAB072828 | U-2 OS   |
| 8989 | ENSG00000158966 | HPA017202 | CACO-2   |
| 8990 | ENSG00000158987 | HPA037983 | U-2 OS   |
| 8991 | ENSG00000159023 | HPA028076 | U-2 OS   |
| 8992 | ENSG00000159023 | HPA028096 | U-2 OS   |
| 8993 | ENSG00000159023 | HPA028412 | U-2 OS   |
| 8994 | ENSG00000159055 | HPA018286 | U-2 OS   |
| 8995 | ENSG00000159055 | HPA020585 | U-2 OS   |
| 8996 | ENSG00000159063 | HPA051898 | U-2 OS   |
| 8997 | ENSG00000159069 | HPA046615 | U-2 OS   |
| 8998 | ENSG00000159082 | HPA011916 | U-2 OS   |
| 8999 | ENSG00000159086 | HPA003757 | U-2 OS   |
| 9000 | ENSG00000159111 | HPA021234 | U-2 OS   |
| 9001 | ENSG00000159111 | HPA029885 | CACO-2   |
| 9002 | ENSG00000159128 | HPA001535 | U-251 MG |
| 9003 | ENSG00000159131 | HPA002119 | U-2 OS   |
| 9004 | ENSG00000159131 | HPA005779 | U-2 OS   |
| 9005 | ENSG00000159140 | HPA023535 | U-2 OS   |
| 9006 | ENSG00000159140 | HPA031755 | U-2 OS   |
| 9007 | ENSG00000159140 | HPA031756 | U-2 OS   |
| 9008 | ENSG00000159147 | HPA049033 | U-2 OS   |
| 9009 | ENSG00000159164 | HPA007863 | U-2 OS   |
| 9010 | ENSG00000159166 | HPA007256 | A-431    |
| 9011 | ENSG00000159166 | HPA028732 | A-431    |
| 9012 | ENSG00000159173 | HPA028190 | U-2 OS   |
| 9013 | ENSG00000159182 | HPA047871 | PC-3     |
| 9014 | ENSG00000159184 | HPA062852 | PC-3     |
| 9015 | ENSG00000159184 | HPA065019 | PC-3     |
| 9016 | ENSG00000159200 | CAB037218 | U-2 OS   |
| 9017 | ENSG00000159202 | HPA007922 | U-2 OS   |
| 9018 | ENSG00000159208 | HPA054349 | A-431    |

|      |                 |           |         |
|------|-----------------|-----------|---------|
| 9019 | ENSG00000159210 | HPA059320 | CACO-2  |
| 9020 | ENSG00000159214 | HPA035424 | U-2 OS  |
| 9021 | ENSG00000159214 | HPA061710 | U-2 OS  |
| 9022 | ENSG00000159216 | HPA004176 | U-2 OS  |
| 9023 | ENSG00000159216 | HPA037912 | U-2 OS  |
| 9024 | ENSG00000159217 | HPA021367 | CACO-2  |
| 9025 | ENSG00000159228 | HPA018433 | A-431   |
| 9026 | ENSG00000159231 | HPA018434 | A-431   |
| 9027 | ENSG00000159256 | HPA034848 | A-431   |
| 9028 | ENSG00000159259 | HPA021679 | U-2 OS  |
| 9029 | ENSG00000159261 | HPA054707 | PC-3    |
| 9030 | ENSG00000159263 | HPA029295 | U-2 OS  |
| 9031 | ENSG00000159267 | HPA017379 | U-2 OS  |
| 9032 | ENSG00000159314 | HPA053053 | RT4     |
| 9033 | ENSG00000159322 | HPA058525 | SiHa    |
| 9034 | ENSG00000159335 | HPA038186 | U-2 OS  |
| 9035 | ENSG00000159348 | HPA010641 | U-2 OS  |
| 9036 | ENSG00000159348 | HPA014147 | U-2 OS  |
| 9037 | ENSG00000159352 | HPA038807 | U-2 OS  |
| 9038 | ENSG00000159352 | HPA039252 | MCF7    |
| 9039 | ENSG00000159352 | CAB047300 | U-2 OS  |
| 9040 | ENSG00000159374 | HPA045420 | RT4     |
| 9041 | ENSG00000159374 | HPA059302 | U-2 OS  |
| 9042 | ENSG00000159387 | HPA018332 | HEK 293 |
| 9043 | ENSG00000159388 | HPA002355 | U-2 OS  |
| 9044 | ENSG00000159403 | HPA001551 | U-2 OS  |
| 9045 | ENSG00000159409 | HPA006292 | CACO-2  |
| 9046 | ENSG00000159459 | HPA038838 | U-2 OS  |
| 9047 | ENSG00000159461 | HPA077835 | U-2 OS  |
| 9048 | ENSG00000159479 | HPA028438 | A-431   |
| 9049 | ENSG00000159496 | HPA035979 | REH     |
| 9050 | ENSG00000159556 | HPA075192 | U-2 OS  |
| 9051 | ENSG00000159592 | HPA028593 | U-2 OS  |
| 9052 | ENSG00000159593 | HPA041178 | U-2 OS  |
| 9053 | ENSG00000159593 | HPA042041 | U-2 OS  |
| 9054 | ENSG00000159596 | HPA026993 | U-2 OS  |
| 9055 | ENSG00000159618 | HPA007133 | CACO-2  |
| 9056 | ENSG00000159640 | HPA069790 | SH-SY5Y |
| 9057 | ENSG00000159658 | HPA011224 | U-2 OS  |
| 9058 | ENSG00000159658 | HPA011938 | U-2 OS  |
| 9059 | ENSG00000159674 | HPA066095 | HaCaT   |
| 9060 | ENSG00000159685 | HPA047673 | U-2 OS  |
| 9061 | ENSG00000159685 | HPA051975 | U-2 OS  |
| 9062 | ENSG00000159692 | CAB004217 | U-2 OS  |
| 9063 | ENSG00000159692 | HPA018987 | U-2 OS  |
| 9064 | ENSG00000159713 | HPA047629 | U-2 OS  |
| 9065 | ENSG00000159714 | HPA042531 | U-2 OS  |
| 9066 | ENSG00000159733 | HPA057587 | U-2 OS  |
| 9067 | ENSG00000159784 | HPA021371 | CACO-2  |
| 9068 | ENSG00000159784 | HPA029992 | CACO-2  |
| 9069 | ENSG00000159788 | HPA054646 | U-2 OS  |
| 9070 | ENSG00000159788 | HPA067421 | RT4     |
| 9071 | ENSG00000159792 | HPA053927 | A-431   |
| 9072 | ENSG00000159840 | HPA004835 | U-2 OS  |
| 9073 | ENSG00000159840 | CAB075747 | U-2 OS  |

|      |                 |           |        |
|------|-----------------|-----------|--------|
| 9074 | ENSG00000159842 | HPA053618 | U-2 OS |
| 9075 | ENSG00000159871 | HPA042511 | U-2 OS |
| 9076 | ENSG00000159873 | HPA000826 | U-2 OS |
| 9077 | ENSG00000159882 | HPA006172 | U-2 OS |
| 9078 | ENSG00000159884 | HPA016857 | U-2 OS |
| 9079 | ENSG00000159884 | HPA050442 | U-2 OS |
| 9080 | ENSG00000159885 | HPA004086 | U-2 OS |
| 9081 | ENSG00000159905 | HPA059435 | U-2 OS |
| 9082 | ENSG00000159915 | HPA020975 | U-2 OS |
| 9083 | ENSG00000159917 | HPA045582 | U-2 OS |
| 9084 | ENSG00000159921 | HPA007045 | U-2 OS |
| 9085 | ENSG00000159921 | HPA027258 | U-2 OS |
| 9086 | ENSG00000160007 | HPA056470 | U-2 OS |
| 9087 | ENSG00000160049 | HPA019938 | U-2 OS |
| 9088 | ENSG00000160051 | HPA028686 | U-2 OS |
| 9089 | ENSG00000160055 | HPA015049 | U-2 OS |
| 9090 | ENSG00000160058 | HPA031358 | A-431  |
| 9091 | ENSG00000160058 | HPA031360 | U-2 OS |
| 9092 | ENSG00000160062 | HPA031770 | U-2 OS |
| 9093 | ENSG00000160072 | HPA064867 | CACO-2 |
| 9094 | ENSG00000160072 | HPA065305 | CACO-2 |
| 9095 | ENSG00000160075 | HPA070604 | PC-3   |
| 9096 | ENSG00000160094 | HPA059239 | RT4    |
| 9097 | ENSG00000160111 | HPA031329 | U-2 OS |
| 9098 | ENSG00000160117 | HPA026789 | U-2 OS |
| 9099 | ENSG00000160124 | HPA051965 | U-2 OS |
| 9100 | ENSG00000160145 | HPA011913 | A-431  |
| 9101 | ENSG00000160179 | HPA031470 | U-2 OS |
| 9102 | ENSG00000160180 | HPA035464 | U-2 OS |
| 9103 | ENSG00000160185 | HPA035367 | HEL    |
| 9104 | ENSG00000160188 | HPA016816 | U-2 OS |
| 9105 | ENSG00000160191 | HPA011380 | U-2 OS |
| 9106 | ENSG00000160193 | HPA017381 | U-2 OS |
| 9107 | ENSG00000160194 | HPA020463 | U-2 OS |
| 9108 | ENSG00000160194 | HPA030427 | U-2 OS |
| 9109 | ENSG00000160199 | CAB004285 | U-2 OS |
| 9110 | ENSG00000160199 | HPA057215 | U-2 OS |
| 9111 | ENSG00000160199 | HPA065017 | U-2 OS |
| 9112 | ENSG00000160200 | HPA001223 | U-2 OS |
| 9113 | ENSG00000160201 | HPA044833 | U-2 OS |
| 9114 | ENSG00000160202 | HPA037737 | U-2 OS |
| 9115 | ENSG00000160207 | HPA031724 | U-2 OS |
| 9116 | ENSG00000160208 | HPA017893 | U-2 OS |
| 9117 | ENSG00000160208 | HPA020324 | U-2 OS |
| 9118 | ENSG00000160209 | HPA030196 | U-2 OS |
| 9119 | ENSG00000160209 | HPA030197 | U-2 OS |
| 9120 | ENSG00000160209 | HPA030198 | U-2 OS |
| 9121 | ENSG00000160209 | CAB033918 | U-2 OS |
| 9122 | ENSG00000160211 | HPA000247 | U-2 OS |
| 9123 | ENSG00000160211 | HPA000834 | U-2 OS |
| 9124 | ENSG00000160213 | HPA017380 | A-431  |
| 9125 | ENSG00000160214 | HPA016818 | U-2 OS |
| 9126 | ENSG00000160214 | HPA018166 | U-2 OS |
| 9127 | ENSG00000160221 | HPA018517 | U-2 OS |
| 9128 | ENSG00000160223 | HPA029179 | RT4    |

|      |                 |           |         |
|------|-----------------|-----------|---------|
| 9129 | ENSG00000160226 | HPA030283 | RT4     |
| 9130 | ENSG00000160255 | HPA016894 | U-2 OS  |
| 9131 | ENSG00000160256 | HPA036354 | U-2 OS  |
| 9132 | ENSG00000160271 | HPA025961 | U-2 OS  |
| 9133 | ENSG00000160282 | HPA030929 | U-2 OS  |
| 9134 | ENSG00000160282 | HPA036114 | U-2 OS  |
| 9135 | ENSG00000160284 | HPA018979 | U-2 OS  |
| 9136 | ENSG00000160284 | HPA029394 | U-2 OS  |
| 9137 | ENSG00000160285 | HPA032062 | CACO-2  |
| 9138 | ENSG00000160293 | HPA003224 | MCF7    |
| 9139 | ENSG00000160294 | HPA021527 | U-2 OS  |
| 9140 | ENSG00000160294 | HPA032103 | U-2 OS  |
| 9141 | ENSG00000160298 | HPA035110 | U-2 OS  |
| 9142 | ENSG00000160298 | HPA035111 | A-431   |
| 9143 | ENSG00000160299 | HPA016820 | U-2 OS  |
| 9144 | ENSG00000160299 | HPA019887 | U-2 OS  |
| 9145 | ENSG00000160299 | HPA032101 | U-2 OS  |
| 9146 | ENSG00000160305 | HPA052516 | MCF7    |
| 9147 | ENSG00000160307 | HPA015768 | U-2 OS  |
| 9148 | ENSG00000160310 | HPA018976 | U-2 OS  |
| 9149 | ENSG00000160318 | HPA056971 | HEK 293 |
| 9150 | ENSG00000160323 | HPA052077 | HEK 293 |
| 9151 | ENSG00000160325 | HPA015280 | U-2 OS  |
| 9152 | ENSG00000160345 | HPA021439 | U-2 OS  |
| 9153 | ENSG00000160360 | HPA042199 | A-431   |
| 9154 | ENSG00000160392 | HPA041843 | MCF7    |
| 9155 | ENSG00000160392 | HPA046309 | U-2 OS  |
| 9156 | ENSG00000160401 | HPA021474 | U-2 OS  |
| 9157 | ENSG00000160401 | HPA021786 | U-2 OS  |
| 9158 | ENSG00000160410 | HPA041887 | A-431   |
| 9159 | ENSG00000160439 | HPA042006 | U-2 OS  |
| 9160 | ENSG00000160445 | HPA048464 | U-2 OS  |
| 9161 | ENSG00000160446 | HPA059339 | U-2 OS  |
| 9162 | ENSG00000160447 | HPA058305 | U-2 OS  |
| 9163 | ENSG00000160460 | HPA054481 | U-2 OS  |
| 9164 | ENSG00000160469 | HPA021212 | U-2 OS  |
| 9165 | ENSG00000160471 | HPA035014 | U-2 OS  |
| 9166 | ENSG00000160505 | HPA062128 | U-2 OS  |
| 9167 | ENSG00000160539 | HPA070252 | U-2 OS  |
| 9168 | ENSG00000160551 | HPA007669 | U-2 OS  |
| 9169 | ENSG00000160563 | HPA007002 | U-2 OS  |
| 9170 | ENSG00000160570 | HPA043419 | U-2 OS  |
| 9171 | ENSG00000160584 | HPA045245 | CACO-2  |
| 9172 | ENSG00000160584 | HPA048161 | CACO-2  |
| 9173 | ENSG00000160588 | HPA029116 | A-431   |
| 9174 | ENSG00000160633 | HPA016832 | U-2 OS  |
| 9175 | ENSG00000160633 | HPA020076 | U-2 OS  |
| 9176 | ENSG00000160654 | HPA038494 | K-562   |
| 9177 | ENSG00000160679 | HPA028647 | U-2 OS  |
| 9178 | ENSG00000160679 | HPA030540 | U-2 OS  |
| 9179 | ENSG00000160685 | HPA006811 | U-2 OS  |
| 9180 | ENSG00000160685 | HPA025820 | U-2 OS  |
| 9181 | ENSG00000160688 | HPA028486 | A-431   |
| 9182 | ENSG00000160691 | CAB005374 | U-2 OS  |
| 9183 | ENSG00000160691 | CAB016305 | A-431   |

|      |                 |           |          |
|------|-----------------|-----------|----------|
| 9184 | ENSG00000160695 | HPA039020 | U-2 OS   |
| 9185 | ENSG00000160703 | HPA061516 | U-2 OS   |
| 9186 | ENSG00000160710 | HPA003890 | U-2 OS   |
| 9187 | ENSG00000160710 | HPA051519 | U-2 OS   |
| 9188 | ENSG00000160714 | HPA063368 | U-2 OS   |
| 9189 | ENSG00000160741 | HPA028454 | U-2 OS   |
| 9190 | ENSG00000160741 | HPA028465 | U-2 OS   |
| 9191 | ENSG00000160746 | HPA016624 | U-2 OS   |
| 9192 | ENSG00000160752 | HPA028200 | U-2 OS   |
| 9193 | ENSG00000160753 | HPA028510 | U-2 OS   |
| 9194 | ENSG00000160753 | HPA029923 | U-2 OS   |
| 9195 | ENSG00000160767 | HPA006659 | A-431    |
| 9196 | ENSG00000160767 | HPA050674 | U-2 OS   |
| 9197 | ENSG00000160781 | HPA073505 | RT4      |
| 9198 | ENSG00000160783 | HPA034583 | U-2 OS   |
| 9199 | ENSG00000160783 | HPA071854 | U-2 OS   |
| 9200 | ENSG00000160785 | HPA065411 | U-2 OS   |
| 9201 | ENSG00000160789 | CAB004022 | A-431    |
| 9202 | ENSG00000160789 | HPA006660 | U-2 OS   |
| 9203 | ENSG00000160789 | HPA012078 | U-2 OS   |
| 9204 | ENSG00000160799 | HPA056814 | U-2 OS   |
| 9205 | ENSG00000160799 | HPA060530 | U-2 OS   |
| 9206 | ENSG00000160803 | HPA061797 | U-2 OS   |
| 9207 | ENSG00000160808 | HPA016564 | CACO-2   |
| 9208 | ENSG00000160813 | HPA021604 | U-2 OS   |
| 9209 | ENSG00000160818 | HPA028323 | U-2 OS   |
| 9210 | ENSG00000160818 | HPA054319 | U-2 OS   |
| 9211 | ENSG00000160868 | HPA072245 | U-2 OS   |
| 9212 | ENSG00000160870 | HPA072245 | U-2 OS   |
| 9213 | ENSG00000160877 | HPA021238 | U-2 OS   |
| 9214 | ENSG00000160877 | HPA062245 | U-2 OS   |
| 9215 | ENSG00000160886 | HPA017770 | HeLa     |
| 9216 | ENSG00000160888 | HPA055387 | U-2 OS   |
| 9217 | ENSG00000160888 | HPA060574 | U-2 OS   |
| 9218 | ENSG00000160908 | HPA054639 | U-2 OS   |
| 9219 | ENSG00000160917 | HPA066470 | U-2 OS   |
| 9220 | ENSG00000160949 | HPA024679 | U-251 MG |
| 9221 | ENSG00000160949 | HPA046494 | U-2 OS   |
| 9222 | ENSG00000160953 | HPA048063 | RT4      |
| 9223 | ENSG00000160957 | HPA025821 | U-2 OS   |
| 9224 | ENSG00000160959 | HPA021047 | U-2 OS   |
| 9225 | ENSG00000160961 | HPA054680 | U-2 OS   |
| 9226 | ENSG00000160963 | HPA027059 | U-2 OS   |
| 9227 | ENSG00000160972 | HPA023755 | U-2 OS   |
| 9228 | ENSG00000160991 | HPA055137 | U-2 OS   |
| 9229 | ENSG00000160999 | HPA051131 | U-2 OS   |
| 9230 | ENSG00000161010 | HPA043975 | U-2 OS   |
| 9231 | ENSG00000161011 | CAB004587 | U-2 OS   |
| 9232 | ENSG00000161011 | HPA064165 | U-2 OS   |
| 9233 | ENSG00000161016 | HPA050165 | U-2 OS   |
| 9234 | ENSG00000161021 | HPA037687 | U-2 OS   |
| 9235 | ENSG00000161021 | HPA057531 | A-431    |
| 9236 | ENSG00000161031 | HPA075237 | MCF7     |
| 9237 | ENSG00000161036 | HPA021320 | U-2 OS   |
| 9238 | ENSG00000161048 | HPA019832 | U-2 OS   |

|      |                 |           |          |
|------|-----------------|-----------|----------|
| 9239 | ENSG00000161048 | HPA024338 | A-431    |
| 9240 | ENSG00000161057 | HPA049621 | U-2 OS   |
| 9241 | ENSG00000161091 | HPA042149 | U-2 OS   |
| 9242 | ENSG00000161179 | HPA061005 | U-2 OS   |
| 9243 | ENSG00000161202 | HPA058265 | CACO-2   |
| 9244 | ENSG00000161203 | HPA069870 | U-251 MG |
| 9245 | ENSG00000161204 | HPA036332 | U-2 OS   |
| 9246 | ENSG00000161217 | HPA035428 | U-2 OS   |
| 9247 | ENSG00000161243 | HPA062242 | U-2 OS   |
| 9248 | ENSG00000161249 | HPA029406 | U-2 OS   |
| 9249 | ENSG00000161265 | HPA061644 | A549     |
| 9250 | ENSG00000161267 | HPA030947 | U-2 OS   |
| 9251 | ENSG00000161267 | HPA058709 | MCF7     |
| 9252 | ENSG00000161277 | HPA064056 | A549     |
| 9253 | ENSG00000161277 | HPA070139 | U-2 OS   |
| 9254 | ENSG00000161298 | HPA049259 | U-2 OS   |
| 9255 | ENSG00000161395 | HPA016591 | A-431    |
| 9256 | ENSG00000161405 | HPA024377 | U-2 OS   |
| 9257 | ENSG00000161405 | HPA073266 | RT4      |
| 9258 | ENSG00000161513 | CAB008597 | U-2 OS   |
| 9259 | ENSG00000161513 | HPA044393 | U-2 OS   |
| 9260 | ENSG00000161513 | HPA053673 | U-2 OS   |
| 9261 | ENSG00000161526 | HPA042382 | U-2 OS   |
| 9262 | ENSG00000161526 | HPA052943 | U-2 OS   |
| 9263 | ENSG00000161533 | HPA021195 | U-2 OS   |
| 9264 | ENSG00000161542 | HPA062396 | U-2 OS   |
| 9265 | ENSG00000161544 | HPA017757 | Hep G2   |
| 9266 | ENSG00000161544 | HPA061642 | Hep G2   |
| 9267 | ENSG00000161547 | HPA049905 | U-2 OS   |
| 9268 | ENSG00000161551 | HPA041499 | U-2 OS   |
| 9269 | ENSG00000161551 | HPA046761 | U-2 OS   |
| 9270 | ENSG00000161558 | HPA014476 | U-2 OS   |
| 9271 | ENSG00000161618 | HPA059488 | U-2 OS   |
| 9272 | ENSG00000161640 | HPA052132 | U-2 OS   |
| 9273 | ENSG00000161642 | HPA039799 | RT4      |
| 9274 | ENSG00000161647 | HPA021818 | U-2 OS   |
| 9275 | ENSG00000161647 | HPA024742 | A-431    |
| 9276 | ENSG00000161653 | HPA027300 | CACO-2   |
| 9277 | ENSG00000161654 | HPA051934 | U-2 OS   |
| 9278 | ENSG00000161664 | HPA066834 | U-2 OS   |
| 9279 | ENSG00000161681 | HPA032129 | U-2 OS   |
| 9280 | ENSG00000161692 | HPA048465 | U-2 OS   |
| 9281 | ENSG00000161714 | HPA025711 | U-2 OS   |
| 9282 | ENSG00000161791 | HPA002552 | U-2 OS   |
| 9283 | ENSG00000161798 | HPA065008 | U-2 OS   |
| 9284 | ENSG00000161800 | HPA039427 | U-2 OS   |
| 9285 | ENSG00000161800 | HPA043912 | U-2 OS   |
| 9286 | ENSG00000161813 | HPA039306 | U-2 OS   |
| 9287 | ENSG00000161813 | HPA039673 | U-2 OS   |
| 9288 | ENSG00000161835 | HPA062028 | U-2 OS   |
| 9289 | ENSG00000161847 | HPA049457 | U-2 OS   |
| 9290 | ENSG00000161860 | HPA062919 | U-2 OS   |
| 9291 | ENSG00000161888 | HPA051234 | U-2 OS   |
| 9292 | ENSG00000161896 | HPA053644 | U-2 OS   |
| 9293 | ENSG00000161904 | HPA017340 | U-2 OS   |

|      |                 |           |         |
|------|-----------------|-----------|---------|
| 9294 | ENSG00000161914 | HPA023631 | U-2 OS  |
| 9295 | ENSG00000161914 | HPA023635 | U-2 OS  |
| 9296 | ENSG00000161920 | HPA056669 | U-2 OS  |
| 9297 | ENSG00000161921 | HPA053253 | CACO-2  |
| 9298 | ENSG00000161939 | HPA022961 | U-2 OS  |
| 9299 | ENSG00000161939 | HPA024457 | U-2 OS  |
| 9300 | ENSG00000161940 | HPA075112 | SH-SY5Y |
| 9301 | ENSG00000161944 | HPA014899 | Hep G2  |
| 9302 | ENSG00000161956 | HPA060290 | U-2 OS  |
| 9303 | ENSG00000161958 | HPA066605 | U-2 OS  |
| 9304 | ENSG00000161960 | HPA068286 | CACO-2  |
| 9305 | ENSG00000161970 | HPA030449 | U-2 OS  |
| 9306 | ENSG00000161980 | HPA005891 | U-2 OS  |
| 9307 | ENSG00000161981 | HPA041183 | U-2 OS  |
| 9308 | ENSG00000161996 | HPA061785 | U-2 OS  |
| 9309 | ENSG00000162009 | HPA066503 | PC-3    |
| 9310 | ENSG00000162032 | HPA046602 | U-2 OS  |
| 9311 | ENSG00000162062 | HPA051394 | CACO-2  |
| 9312 | ENSG00000162063 | HPA060596 | CACO-2  |
| 9313 | ENSG00000162065 | HPA068080 | U-2 OS  |
| 9314 | ENSG00000162066 | HPA041184 | U-2 OS  |
| 9315 | ENSG00000162069 | HPA043251 | U-2 OS  |
| 9316 | ENSG00000162073 | HPA068394 | U-2 OS  |
| 9317 | ENSG00000162076 | HPA041354 | U-2 OS  |
| 9318 | ENSG00000162078 | HPA053549 | U-2 OS  |
| 9319 | ENSG00000162086 | HPA001665 | U-2 OS  |
| 9320 | ENSG00000162104 | HPA041328 | U-2 OS  |
| 9321 | ENSG00000162105 | HPA017220 | RT4     |
| 9322 | ENSG00000162139 | HPA038729 | CACO-2  |
| 9323 | ENSG00000162139 | HPA070381 | CACO-2  |
| 9324 | ENSG00000162144 | HPA045674 | U-2 OS  |
| 9325 | ENSG00000162174 | HPA029725 | U-2 OS  |
| 9326 | ENSG00000162191 | HPA012669 | U-2 OS  |
| 9327 | ENSG00000162222 | HPA055169 | U-2 OS  |
| 9328 | ENSG00000162227 | HPA067239 | U-2 OS  |
| 9329 | ENSG00000162231 | HPA061593 | U-2 OS  |
| 9330 | ENSG00000162236 | HPA001358 | U-2 OS  |
| 9331 | ENSG00000162241 | HPA050821 | A549    |
| 9332 | ENSG00000162244 | HPA069064 | U-2 OS  |
| 9333 | ENSG00000162298 | HPA005480 | U-2 OS  |
| 9334 | ENSG00000162298 | HPA024300 | U-2 OS  |
| 9335 | ENSG00000162300 | HPA014909 | U-2 OS  |
| 9336 | ENSG00000162300 | HPA017347 | U-2 OS  |
| 9337 | ENSG00000162302 | CAB008649 | U-2 OS  |
| 9338 | ENSG00000162302 | HPA023225 | U-2 OS  |
| 9339 | ENSG00000162341 | HPA016561 | U-2 OS  |
| 9340 | ENSG00000162366 | HPA014907 | U-2 OS  |
| 9341 | ENSG00000162367 | HPA047866 | CACO-2  |
| 9342 | ENSG00000162367 | HPA073983 | HEL     |
| 9343 | ENSG00000162368 | HPA053730 | U-2 OS  |
| 9344 | ENSG00000162373 | HPA054347 | RT4     |
| 9345 | ENSG00000162374 | HPA043047 | U-2 OS  |
| 9346 | ENSG00000162377 | HPA029926 | U-2 OS  |
| 9347 | ENSG00000162378 | HPA028156 | U-2 OS  |
| 9348 | ENSG00000162384 | HPA043835 | U-2 OS  |



|      |                 |           |           |
|------|-----------------|-----------|-----------|
| 9349 | ENSG00000162385 | CAB015425 | A-431     |
| 9350 | ENSG00000162390 | HPA041047 | A-431     |
| 9351 | ENSG00000162396 | HPA028308 | U-2 OS    |
| 9352 | ENSG00000162402 | HPA026723 | U-2 OS    |
| 9353 | ENSG00000162402 | HPA028428 | U-2 OS    |
| 9354 | ENSG00000162402 | HPA067124 | U-2 OS    |
| 9355 | ENSG00000162407 | HPA072751 | Hep G2    |
| 9356 | ENSG00000162408 | HPA036347 | CACO-2    |
| 9357 | ENSG00000162409 | HPA044540 | U-2 OS    |
| 9358 | ENSG00000162413 | HPA059307 | U-2 OS    |
| 9359 | ENSG00000162415 | HPA018211 | U-2 OS    |
| 9360 | ENSG00000162419 | HPA044811 | A-431     |
| 9361 | ENSG00000162419 | HPA052975 | U-2 OS    |
| 9362 | ENSG00000162430 | HPA058076 | U-2 OS    |
| 9363 | ENSG00000162433 | HPA049461 | A-431     |
| 9364 | ENSG00000162437 | HPA045785 | U-2 OS    |
| 9365 | ENSG00000162441 | HPA058614 | SK-MEL-30 |
| 9366 | ENSG00000162444 | HPA034749 | U-251 MG  |
| 9367 | ENSG00000162458 | HPA025287 | A-431     |
| 9368 | ENSG00000162458 | HPA072750 | U-2 OS    |
| 9369 | ENSG00000162460 | HPA060282 | CACO-2    |
| 9370 | ENSG00000162461 | HPA069806 | U-2 OS    |
| 9371 | ENSG00000162482 | HPA064638 | U-2 OS    |
| 9372 | ENSG00000162493 | HPA073453 | U-2 OS    |
| 9373 | ENSG00000162496 | HPA010844 | U-2 OS    |
| 9374 | ENSG00000162511 | HPA051293 | U-2 OS    |
| 9375 | ENSG00000162512 | HPA048085 | U-2 OS    |
| 9376 | ENSG00000162517 | HPA061608 | U-2 OS    |
| 9377 | ENSG00000162520 | HPA028311 | U-2 OS    |
| 9378 | ENSG00000162521 | CAB006264 | U-2 OS    |
| 9379 | ENSG00000162521 | HPA060710 | U-2 OS    |
| 9380 | ENSG00000162521 | HPA060724 | U-2 OS    |
| 9381 | ENSG00000162522 | HPA032050 | RT4       |
| 9382 | ENSG00000162522 | HPA032051 | U-2 OS    |
| 9383 | ENSG00000162522 | HPA064839 | RT4       |
| 9384 | ENSG00000162526 | HPA037516 | U-2 OS    |
| 9385 | ENSG00000162542 | HPA014620 | U-2 OS    |
| 9386 | ENSG00000162551 | HPA008765 | U-2 OS    |
| 9387 | ENSG00000162551 | CAB020829 | U-2 OS    |
| 9388 | ENSG00000162552 | HPA011397 | HaCaT     |
| 9389 | ENSG00000162572 | HPA026884 | U-2 OS    |
| 9390 | ENSG00000162576 | HPA055780 | CACO-2    |
| 9391 | ENSG00000162585 | HPA038829 | U-2 OS    |
| 9392 | ENSG00000162591 | HPA052129 | U-2 OS    |
| 9393 | ENSG00000162595 | HPA028557 | U-2 OS    |
| 9394 | ENSG00000162599 | HPA006111 | U-2 OS    |
| 9395 | ENSG00000162599 | HPA008884 | U-2 OS    |
| 9396 | ENSG00000162600 | HPA055120 | A-431     |
| 9397 | ENSG00000162601 | HPA067133 | U-251 MG  |
| 9398 | ENSG00000162604 | HPA046058 | U-2 OS    |
| 9399 | ENSG00000162604 | HPA055621 | U-2 OS    |
| 9400 | ENSG00000162607 | HPA028387 | U-2 OS    |
| 9401 | ENSG00000162613 | HPA006149 | U-2 OS    |
| 9402 | ENSG00000162614 | HPA011904 | U-2 OS    |
| 9403 | ENSG00000162616 | HPA028383 | A-431     |

|      |                 |           |           |
|------|-----------------|-----------|-----------|
| 9404 | ENSG00000162616 | HPA028385 | U-2 OS    |
| 9405 | ENSG00000162620 | HPA030799 | U-2 OS    |
| 9406 | ENSG00000162623 | HPA029641 | U-2 OS    |
| 9407 | ENSG00000162624 | HPA071806 | A549      |
| 9408 | ENSG00000162627 | HPA054338 | U-2 OS    |
| 9409 | ENSG00000162630 | HPA078659 | U-2 OS    |
| 9410 | ENSG00000162631 | HPA065954 | ASC TERT1 |
| 9411 | ENSG00000162636 | HPA028451 | U-2 OS    |
| 9412 | ENSG00000162639 | HPA028497 | A-431     |
| 9413 | ENSG00000162642 | HPA036072 | U-2 OS    |
| 9414 | ENSG00000162642 | HPA061790 | U-2 OS    |
| 9415 | ENSG00000162645 | HPA042682 | RT4       |
| 9416 | ENSG00000162650 | HPA054952 | U-2 OS    |
| 9417 | ENSG00000162654 | HPA062039 | RT4       |
| 9418 | ENSG00000162664 | HPA028450 | U-2 OS    |
| 9419 | ENSG00000162664 | HPA028461 | U-2 OS    |
| 9420 | ENSG00000162664 | HPA028466 | U-2 OS    |
| 9421 | ENSG00000162669 | HPA035036 | U-2 OS    |
| 9422 | ENSG00000162669 | HPA035557 | U-2 OS    |
| 9423 | ENSG00000162687 | HPA051218 | SH-SY5Y   |
| 9424 | ENSG00000162688 | HPA028498 | U-2 OS    |
| 9425 | ENSG00000162688 | HPA054340 | U-2 OS    |
| 9426 | ENSG00000162692 | HPA069867 | U-2 OS    |
| 9427 | ENSG00000162694 | CAB020716 | U-251 MG  |
| 9428 | ENSG00000162694 | HPA068921 | U-2 OS    |
| 9429 | ENSG00000162695 | HPA018034 | A-431     |
| 9430 | ENSG00000162702 | HPA051228 | U-2 OS    |
| 9431 | ENSG00000162704 | HPA031972 | U-2 OS    |
| 9432 | ENSG00000162706 | HPA002981 | U-2 OS    |
| 9433 | ENSG00000162714 | HPA055834 | U-2 OS    |
| 9434 | ENSG00000162729 | HPA011917 | SH-SY5Y   |
| 9435 | ENSG00000162729 | HPA075970 | U-2 OS    |
| 9436 | ENSG00000162733 | HPA070112 | U-2 OS    |
| 9437 | ENSG00000162734 | HPA028356 | U-2 OS    |
| 9438 | ENSG00000162735 | HPA051966 | U-2 OS    |
| 9439 | ENSG00000162736 | HPA070642 | U-2 OS    |
| 9440 | ENSG00000162739 | HPA051363 | U-2 OS    |
| 9441 | ENSG00000162745 | HPA062739 | RH-30     |
| 9442 | ENSG00000162746 | CAB026139 | U-2 OS    |
| 9443 | ENSG00000162755 | HPA032058 | U-2 OS    |
| 9444 | ENSG00000162755 | HPA043197 | EFO-21    |
| 9445 | ENSG00000162757 | HPA028496 | U-2 OS    |
| 9446 | ENSG00000162761 | HPA028051 | U-2 OS    |
| 9447 | ENSG00000162761 | HPA030088 | U-2 OS    |
| 9448 | ENSG00000162769 | HPA046646 | CACO-2    |
| 9449 | ENSG00000162772 | HPA001562 | U-2 OS    |
| 9450 | ENSG00000162775 | CAB015201 | U-2 OS    |
| 9451 | ENSG00000162775 | HPA019824 | U-2 OS    |
| 9452 | ENSG00000162775 | HPA049642 | U-2 OS    |
| 9453 | ENSG00000162777 | HPA048642 | U-2 OS    |
| 9454 | ENSG00000162783 | HPA029894 | U-2 OS    |
| 9455 | ENSG00000162813 | HPA048461 | U-2 OS    |
| 9456 | ENSG00000162814 | HPA030099 | U-2 OS    |
| 9457 | ENSG00000162819 | HPA031445 | U-2 OS    |
| 9458 | ENSG00000162825 | HPA042595 | U-2 OS    |

|      |                 |           |         |
|------|-----------------|-----------|---------|
| 9459 | ENSG00000162849 | HPA028562 | U-2 OS  |
| 9460 | ENSG00000162851 | HPA028482 | U-2 OS  |
| 9461 | ENSG00000162851 | HPA028554 | U-2 OS  |
| 9462 | ENSG00000162852 | HPA007226 | U-2 OS  |
| 9463 | ENSG00000162869 | HPA036792 | U-2 OS  |
| 9464 | ENSG00000162885 | HPA012502 | A-431   |
| 9465 | ENSG00000162889 | HPA045556 | U-2 OS  |
| 9466 | ENSG00000162894 | HPA003910 | U-2 OS  |
| 9467 | ENSG00000162909 | HPA024470 | U-2 OS  |
| 9468 | ENSG00000162923 | HPA028539 | U-2 OS  |
| 9469 | ENSG00000162923 | HPA061094 | U-2 OS  |
| 9470 | ENSG00000162927 | HPA049582 | U-2 OS  |
| 9471 | ENSG00000162928 | HPA032141 | U-2 OS  |
| 9472 | ENSG00000162929 | HPA051240 | U-2 OS  |
| 9473 | ENSG00000162931 | HPA054908 | SH-SY5Y |
| 9474 | ENSG00000162946 | HPA048911 | U-2 OS  |
| 9475 | ENSG00000162949 | HPA029496 | RT4     |
| 9476 | ENSG00000162959 | HPA057952 | RT4     |
| 9477 | ENSG00000162961 | HPA043761 | U-2 OS  |
| 9478 | ENSG00000162971 | HPA028294 | PC-3    |
| 9479 | ENSG00000162972 | HPA064013 | CACO-2  |
| 9480 | ENSG00000162975 | HPA014738 | A-431   |
| 9481 | ENSG00000162976 | HPA061607 | U-2 OS  |
| 9482 | ENSG00000162981 | HPA047703 | RT4     |
| 9483 | ENSG00000162994 | HPA053557 | U-2 OS  |
| 9484 | ENSG00000162999 | HPA021501 | U-2 OS  |
| 9485 | ENSG00000163001 | HPA008994 | U-2 OS  |
| 9486 | ENSG00000163002 | HPA018441 | U-2 OS  |
| 9487 | ENSG00000163006 | HPA049899 | U-2 OS  |
| 9488 | ENSG00000163013 | HPA055246 | RH-30   |
| 9489 | ENSG00000163013 | HPA058386 | SiHa    |
| 9490 | ENSG00000163026 | HPA041054 | U-2 OS  |
| 9491 | ENSG00000163029 | HPA035057 | U-2 OS  |
| 9492 | ENSG00000163032 | HPA053808 | Hep G2  |
| 9493 | ENSG00000163040 | HPA060727 | U-2 OS  |
| 9494 | ENSG00000163041 | CAB011481 | U-2 OS  |
| 9495 | ENSG00000163050 | HPA061662 | Hep G2  |
| 9496 | ENSG00000163053 | HPA040518 | U-2 OS  |
| 9497 | ENSG00000163060 | HPA053929 | CACO-2  |
| 9498 | ENSG00000163064 | CAB014884 | U-2 OS  |
| 9499 | ENSG00000163069 | HPA058656 | U-2 OS  |
| 9500 | ENSG00000163071 | HPA036854 | Hep G2  |
| 9501 | ENSG00000163072 | HPA076885 | CACO-2  |
| 9502 | ENSG00000163092 | HPA074599 | U-2 OS  |
| 9503 | ENSG00000163104 | HPA016737 | U-2 OS  |
| 9504 | ENSG00000163106 | HPA024035 | U-2 OS  |
| 9505 | ENSG00000163110 | HPA016740 | U-2 OS  |
| 9506 | ENSG00000163110 | HPA020026 | U-2 OS  |
| 9507 | ENSG00000163114 | HPA047864 | U-2 OS  |
| 9508 | ENSG00000163125 | HPA061693 | U-2 OS  |
| 9509 | ENSG00000163126 | HPA036201 | U-2 OS  |
| 9510 | ENSG00000163131 | HPA002988 | U-2 OS  |
| 9511 | ENSG00000163132 | HPA063895 | CACO-2  |
| 9512 | ENSG00000163138 | HPA054666 | U-2 OS  |
| 9513 | ENSG00000163141 | HPA019946 | U-2 OS  |

|      |                 |           |             |
|------|-----------------|-----------|-------------|
| 9514 | ENSG00000163145 | HPA055392 | ASC TERT1   |
| 9515 | ENSG00000163154 | HPA062742 | U-2 OS      |
| 9516 | ENSG00000163155 | HPA028055 | U-2 OS      |
| 9517 | ENSG00000163155 | HPA064537 | HEK 293     |
| 9518 | ENSG00000163156 | HPA054324 | U-2 OS      |
| 9519 | ENSG00000163159 | HPA065709 | U-2 OS      |
| 9520 | ENSG00000163161 | CAB037153 | U-2 OS      |
| 9521 | ENSG00000163161 | HPA046077 | U-2 OS      |
| 9522 | ENSG00000163162 | HPA011424 | U-2 OS      |
| 9523 | ENSG00000163166 | HPA061866 | CACO-2      |
| 9524 | ENSG00000163170 | HPA046393 | U-2 OS      |
| 9525 | ENSG00000163171 | HPA061792 | LHCN-M2     |
| 9526 | ENSG00000163207 | CAB002243 | A-431       |
| 9527 | ENSG00000163207 | HPA055211 | RT4         |
| 9528 | ENSG00000163214 | HPA036160 | U-2 OS      |
| 9529 | ENSG00000163218 | CAB025879 | A-431       |
| 9530 | ENSG00000163219 | HPA061395 | RT4         |
| 9531 | ENSG00000163220 | HPA004193 | RT4         |
| 9532 | ENSG00000163235 | HPA042297 | U-2 OS      |
| 9533 | ENSG00000163239 | HPA054327 | HUVEC TERT2 |
| 9534 | ENSG00000163249 | HPA046825 | U-2 OS      |
| 9535 | ENSG00000163257 | HPA042487 | U-2 OS      |
| 9536 | ENSG00000163281 | HPA000499 | U-2 OS      |
| 9537 | ENSG00000163283 | HPA038764 | HeLa        |
| 9538 | ENSG00000163286 | HPA038764 | HeLa        |
| 9539 | ENSG00000163293 | HPA036765 | RT4         |
| 9540 | ENSG00000163295 | HPA038764 | HeLa        |
| 9541 | ENSG00000163312 | HPA036852 | U-2 OS      |
| 9542 | ENSG00000163320 | HPA035568 | U-2 OS      |
| 9543 | ENSG00000163320 | HPA037017 | U-251 MG    |
| 9544 | ENSG00000163322 | HPA037654 | U-2 OS      |
| 9545 | ENSG00000163328 | HPA057384 | U-2 OS      |
| 9546 | ENSG00000163331 | HPA058635 | HaCaT       |
| 9547 | ENSG00000163346 | HPA006949 | U-2 OS      |
| 9548 | ENSG00000163348 | HPA023689 | U-2 OS      |
| 9549 | ENSG00000163349 | HPA016664 | A-431       |
| 9550 | ENSG00000163374 | HPA064249 | U-2 OS      |
| 9551 | ENSG00000163378 | HPA019460 | U-2 OS      |
| 9552 | ENSG00000163382 | HPA043766 | CACO-2      |
| 9553 | ENSG00000163382 | HPA048164 | CACO-2      |
| 9554 | ENSG00000163389 | HPA037856 | U-2 OS      |
| 9555 | ENSG00000163395 | HPA050415 | HeLa        |
| 9556 | ENSG00000163412 | HPA058649 | SH-SY5Y     |
| 9557 | ENSG00000163428 | HPA057574 | U-2 OS      |
| 9558 | ENSG00000163430 | HPA035251 | U-2 OS      |
| 9559 | ENSG00000163431 | HPA028435 | U-2 OS      |
| 9560 | ENSG00000163435 | HPA003316 | RT4         |
| 9561 | ENSG00000163435 | HPA003479 | RT4         |
| 9562 | ENSG00000163444 | HPA072607 | U-2 OS      |
| 9563 | ENSG00000163449 | HPA062462 | U-2 OS      |
| 9564 | ENSG00000163449 | HPA062797 | U-2 OS      |
| 9565 | ENSG00000163453 | CAB020668 | U-251 MG    |
| 9566 | ENSG00000163466 | HPA008352 | U-2 OS      |
| 9567 | ENSG00000163467 | HPA029897 | U-2 OS      |
| 9568 | ENSG00000163468 | HPA006543 | U-2 OS      |

|      |                 |           |             |
|------|-----------------|-----------|-------------|
| 9569 | ENSG00000163472 | HPA055214 | U-2 OS      |
| 9570 | ENSG00000163481 | HPA036420 | U-2 OS      |
| 9571 | ENSG00000163481 | HPA036421 | U-2 OS      |
| 9572 | ENSG00000163482 | HPA027453 | U-2 OS      |
| 9573 | ENSG00000163485 | HPA044383 | U-2 OS      |
| 9574 | ENSG00000163491 | HPA038941 | U-2 OS      |
| 9575 | ENSG00000163492 | HPA012718 | CACO-2      |
| 9576 | ENSG00000163497 | HPA067679 | U-2 OS      |
| 9577 | ENSG00000163507 | HPA039570 | U-2 OS      |
| 9578 | ENSG00000163508 | HPA077118 | HAP1        |
| 9579 | ENSG00000163510 | HPA036748 | U-2 OS      |
| 9580 | ENSG00000163513 | CAB073537 | U-2 OS      |
| 9581 | ENSG00000163516 | HPA035208 | U-2 OS      |
| 9582 | ENSG00000163520 | HPA001934 | BJ          |
| 9583 | ENSG00000163527 | HPA036646 | U-2 OS      |
| 9584 | ENSG00000163528 | HPA063727 | MCF7        |
| 9585 | ENSG00000163530 | HPA036134 | U-2 OS      |
| 9586 | ENSG00000163535 | HPA035163 | U-2 OS      |
| 9587 | ENSG00000163535 | HPA040817 | U-2 OS      |
| 9588 | ENSG00000163536 | HPA001565 | U-2 OS      |
| 9589 | ENSG00000163539 | HPA067071 | U-2 OS      |
| 9590 | ENSG00000163541 | HPA036683 | U-2 OS      |
| 9591 | ENSG00000163545 | HPA008958 | U-2 OS      |
| 9592 | ENSG00000163558 | HPA026574 | U-2 OS      |
| 9593 | ENSG00000163558 | HPA038635 | U-2 OS      |
| 9594 | ENSG00000163563 | HPA073215 | SK-MEL-30   |
| 9595 | ENSG00000163565 | HPA002134 | U-2 OS      |
| 9596 | ENSG00000163565 | CAB016293 | U-2 OS      |
| 9597 | ENSG00000163568 | HPA031365 | RT4         |
| 9598 | ENSG00000163568 | HPA040309 | RT4         |
| 9599 | ENSG00000163576 | HPA078067 | RPTEC TERT1 |
| 9600 | ENSG00000163577 | HPA029090 | U-2 OS      |
| 9601 | ENSG00000163581 | HPA028997 | Hep G2      |
| 9602 | ENSG00000163584 | HPA048060 | RT4         |
| 9603 | ENSG00000163584 | HPA068294 | U-2 OS      |
| 9604 | ENSG00000163586 | HPA028275 | CACO-2      |
| 9605 | ENSG00000163590 | HPA019953 | U-2 OS      |
| 9606 | ENSG00000163596 | HPA042507 | U-2 OS      |
| 9607 | ENSG00000163600 | HPA034865 | U-2 OS      |
| 9608 | ENSG00000163602 | HPA053357 | RT4         |
| 9609 | ENSG00000163605 | HPA039837 | U-2 OS      |
| 9610 | ENSG00000163605 | HPA073758 | RT4         |
| 9611 | ENSG00000163606 | HPA068512 | HEL         |
| 9612 | ENSG00000163607 | HPA034831 | U-2 OS      |
| 9613 | ENSG00000163607 | HPA058631 | U-2 OS      |
| 9614 | ENSG00000163608 | HPA069654 | U-2 OS      |
| 9615 | ENSG00000163611 | HPA064843 | A-431       |
| 9616 | ENSG00000163617 | HPA047833 | U-2 OS      |
| 9617 | ENSG00000163618 | HPA059328 | SK-MEL-30   |
| 9618 | ENSG00000163623 | HPA036774 | U-2 OS      |
| 9619 | ENSG00000163624 | HPA036187 | U-2 OS      |
| 9620 | ENSG00000163625 | HPA048572 | U-2 OS      |
| 9621 | ENSG00000163629 | HPA063119 | RT4         |
| 9622 | ENSG00000163631 | HPA031024 | Hep G2      |
| 9623 | ENSG00000163631 | HPA031025 | Hep G2      |

|      |                 |           |           |
|------|-----------------|-----------|-----------|
| 9624 | ENSG00000163633 | HPA057434 | U-2 OS    |
| 9625 | ENSG00000163634 | HPA044143 | U-2 OS    |
| 9626 | ENSG00000163635 | HPA034989 | U-2 OS    |
| 9627 | ENSG00000163636 | HPA036921 | U-2 OS    |
| 9628 | ENSG00000163636 | HPA036922 | U-2 OS    |
| 9629 | ENSG00000163637 | HPA035493 | U-2 OS    |
| 9630 | ENSG00000163638 | HPA028601 | U-2 OS    |
| 9631 | ENSG00000163644 | HPA020066 | U-2 OS    |
| 9632 | ENSG00000163655 | HPA046630 | MCF7      |
| 9633 | ENSG00000163659 | HPA036796 | U-2 OS    |
| 9634 | ENSG00000163660 | HPA057911 | U-2 OS    |
| 9635 | ENSG00000163661 | HPA069320 | ASC TERT1 |
| 9636 | ENSG00000163666 | HPA024187 | SH-SY5Y   |
| 9637 | ENSG00000163681 | HPA002357 | U-2 OS    |
| 9638 | ENSG00000163681 | HPA002358 | U-2 OS    |
| 9639 | ENSG00000163682 | HPA003372 | U-2 OS    |
| 9640 | ENSG00000163684 | HPA036194 | U-2 OS    |
| 9641 | ENSG00000163686 | HPA073225 | U-2 OS    |
| 9642 | ENSG00000163689 | HPA069696 | U-2 OS    |
| 9643 | ENSG00000163694 | HPA006347 | U-2 OS    |
| 9644 | ENSG00000163697 | HPA023542 | U-2 OS    |
| 9645 | ENSG00000163703 | HPA026964 | U-2 OS    |
| 9646 | ENSG00000163704 | HPA035127 | U-2 OS    |
| 9647 | ENSG00000163710 | HPA013203 | U-2 OS    |
| 9648 | ENSG00000163714 | HPA037545 | U-2 OS    |
| 9649 | ENSG00000163728 | HPA009295 | U-2 OS    |
| 9650 | ENSG00000163743 | HPA030338 | U-2 OS    |
| 9651 | ENSG00000163751 | HPA006479 | U-2 OS    |
| 9652 | ENSG00000163751 | HPA008689 | U-251 MG  |
| 9653 | ENSG00000163754 | HPA030497 | U-2 OS    |
| 9654 | ENSG00000163755 | HPA046281 | U-2 OS    |
| 9655 | ENSG00000163755 | HPA052778 | U-2 OS    |
| 9656 | ENSG00000163762 | HPA053639 | U-2 OS    |
| 9657 | ENSG00000163762 | HPA069378 | A549      |
| 9658 | ENSG00000163781 | HPA036738 | U-2 OS    |
| 9659 | ENSG00000163781 | HPA036739 | U-2 OS    |
| 9660 | ENSG00000163785 | HPA075430 | U-2 OS    |
| 9661 | ENSG00000163788 | HPA042163 | U-2 OS    |
| 9662 | ENSG00000163792 | HPA044596 | U-2 OS    |
| 9663 | ENSG00000163794 | CAB010911 | U-2 OS    |
| 9664 | ENSG00000163798 | HPA036679 | U-2 OS    |
| 9665 | ENSG00000163806 | HPA035162 | U-2 OS    |
| 9666 | ENSG00000163807 | HPA061799 | U-2 OS    |
| 9667 | ENSG00000163812 | CAB012465 | A-431     |
| 9668 | ENSG00000163818 | HPA043466 | U-2 OS    |
| 9669 | ENSG00000163820 | HPA035526 | RT4       |
| 9670 | ENSG00000163820 | HPA057966 | RT4       |
| 9671 | ENSG00000163825 | HPA075932 | U-2 OS    |
| 9672 | ENSG00000163827 | HPA064844 | HEL       |
| 9673 | ENSG00000163832 | HPA064545 | U-2 OS    |
| 9674 | ENSG00000163840 | HPA010570 | U-2 OS    |
| 9675 | ENSG00000163848 | HPA001656 | U-2 OS    |
| 9676 | ENSG00000163864 | HPA039077 | U-2 OS    |
| 9677 | ENSG00000163866 | HPA065331 | U-2 OS    |
| 9678 | ENSG00000163867 | HPA011004 | U-2 OS    |

|      |                 |           |         |
|------|-----------------|-----------|---------|
| 9679 | ENSG00000163867 | HPA071865 | RT4     |
| 9680 | ENSG00000163870 | HPA019784 | U-2 OS  |
| 9681 | ENSG00000163872 | HPA045891 | A-431   |
| 9682 | ENSG00000163874 | HPA032053 | U-2 OS  |
| 9683 | ENSG00000163877 | HPA036896 | U-2 OS  |
| 9684 | ENSG00000163882 | HPA055813 | U-2 OS  |
| 9685 | ENSG00000163888 | HPA050835 | U-2 OS  |
| 9686 | ENSG00000163900 | HPA059101 | U-2 OS  |
| 9687 | ENSG00000163902 | HPA026828 | U-2 OS  |
| 9688 | ENSG00000163902 | HPA051520 | U-2 OS  |
| 9689 | ENSG00000163904 | HPA029248 | U-2 OS  |
| 9690 | ENSG00000163909 | HPA001438 | U-2 OS  |
| 9691 | ENSG00000163913 | HPA041815 | U-2 OS  |
| 9692 | ENSG00000163918 | HPA049123 | U-2 OS  |
| 9693 | ENSG00000163930 | CAB004322 | U-2 OS  |
| 9694 | ENSG00000163930 | HPA028815 | U-2 OS  |
| 9695 | ENSG00000163930 | HPA055560 | U-2 OS  |
| 9696 | ENSG00000163931 | HPA029480 | U-2 OS  |
| 9697 | ENSG00000163931 | HPA029481 | U-2 OS  |
| 9698 | ENSG00000163932 | HPA001863 | U-2 OS  |
| 9699 | ENSG00000163932 | HPA001890 | U-2 OS  |
| 9700 | ENSG00000163933 | HPA060327 | U-2 OS  |
| 9701 | ENSG00000163935 | HPA036152 | A-431   |
| 9702 | ENSG00000163935 | HPA064564 | U-2 OS  |
| 9703 | ENSG00000163938 | CAB020770 | U-2 OS  |
| 9704 | ENSG00000163938 | HPA036743 | U-2 OS  |
| 9705 | ENSG00000163939 | HPA015629 | RT4     |
| 9706 | ENSG00000163939 | HPA059373 | RT4     |
| 9707 | ENSG00000163945 | HPA053496 | U-2 OS  |
| 9708 | ENSG00000163946 | HPA017142 | U-2 OS  |
| 9709 | ENSG00000163947 | HPA064945 | U-2 OS  |
| 9710 | ENSG00000163950 | HPA061670 | U-2 OS  |
| 9711 | ENSG00000163956 | HPA008001 | U-2 OS  |
| 9712 | ENSG00000163956 | CAB025518 | U-2 OS  |
| 9713 | ENSG00000163960 | HPA048441 | U-2 OS  |
| 9714 | ENSG00000163960 | HPA049442 | CACO-2  |
| 9715 | ENSG00000163961 | HPA046109 | U-2 OS  |
| 9716 | ENSG00000163964 | HPA029409 | U-2 OS  |
| 9717 | ENSG00000163993 | HPA019502 | RT4     |
| 9718 | ENSG00000163995 | HPA035808 | SiHa    |
| 9719 | ENSG00000164002 | HPA028429 | U-2 OS  |
| 9720 | ENSG00000164010 | HPA054672 | HEL     |
| 9721 | ENSG00000164011 | HPA062527 | U-2 OS  |
| 9722 | ENSG00000164022 | CAB017618 | U-2 OS  |
| 9723 | ENSG00000164022 | HPA018476 | U-2 OS  |
| 9724 | ENSG00000164024 | CAB025485 | U-2 OS  |
| 9725 | ENSG00000164032 | CAB022549 | U-2 OS  |
| 9726 | ENSG00000164037 | HPA058971 | SH-SY5Y |
| 9727 | ENSG00000164037 | HPA065520 | U-2 OS  |
| 9728 | ENSG00000164038 | HPA047008 | U-2 OS  |
| 9729 | ENSG00000164039 | HPA036029 | U-2 OS  |
| 9730 | ENSG00000164040 | HPA041172 | U-2 OS  |
| 9731 | ENSG00000164045 | HPA005855 | U-2 OS  |
| 9732 | ENSG00000164048 | HPA003145 | A-431   |
| 9733 | ENSG00000164051 | HPA010980 | U-2 OS  |

|      |                 |           |          |
|------|-----------------|-----------|----------|
| 9734 | ENSG00000164051 | HPA011408 | U-2 OS   |
| 9735 | ENSG00000164053 | HPA047590 | U-2 OS   |
| 9736 | ENSG00000164056 | HPA070554 | Hep G2   |
| 9737 | ENSG00000164062 | HPA029700 | U-2 OS   |
| 9738 | ENSG00000164062 | HPA029702 | U-2 OS   |
| 9739 | ENSG00000164062 | HPA029703 | U-2 OS   |
| 9740 | ENSG00000164066 | HPA036714 | A-431    |
| 9741 | ENSG00000164068 | HPA071879 | SH-SY5Y  |
| 9742 | ENSG00000164070 | HPA039149 | U-2 OS   |
| 9743 | ENSG00000164073 | HPA044802 | U-2 OS   |
| 9744 | ENSG00000164074 | HPA051676 | A-431    |
| 9745 | ENSG00000164076 | HPA007656 | CACO-2   |
| 9746 | ENSG00000164077 | HPA058032 | HEK 293  |
| 9747 | ENSG00000164078 | HPA008180 | RT4      |
| 9748 | ENSG00000164080 | HPA035004 | U-2 OS   |
| 9749 | ENSG00000164080 | HPA039992 | U-2 OS   |
| 9750 | ENSG00000164081 | HPA017739 | U-2 OS   |
| 9751 | ENSG00000164088 | HPA062291 | PC-3     |
| 9752 | ENSG00000164089 | HPA072938 | U-2 OS   |
| 9753 | ENSG00000164091 | HPA040427 | U-2 OS   |
| 9754 | ENSG00000164093 | HPA050074 | CACO-2   |
| 9755 | ENSG00000164093 | HPA062728 | CACO-2   |
| 9756 | ENSG00000164096 | HPA026907 | U-251 MG |
| 9757 | ENSG00000164099 | HPA035054 | U-2 OS   |
| 9758 | ENSG00000164104 | HPA053314 | U-2 OS   |
| 9759 | ENSG00000164105 | HPA059012 | U-2 OS   |
| 9760 | ENSG00000164107 | HPA019591 | SH-SY5Y  |
| 9761 | ENSG00000164109 | HPA003348 | A-431    |
| 9762 | ENSG00000164111 | HPA035330 | PC-3     |
| 9763 | ENSG00000164116 | HPA056004 | RT4      |
| 9764 | ENSG00000164116 | HPA058617 | U-2 OS   |
| 9765 | ENSG00000164117 | HPA002885 | U-2 OS   |
| 9766 | ENSG00000164120 | HPA005679 | RT4      |
| 9767 | ENSG00000164122 | HPA028870 | RH-30    |
| 9768 | ENSG00000164124 | HPA063554 | CACO-2   |
| 9769 | ENSG00000164125 | HPA007227 | U-2 OS   |
| 9770 | ENSG00000164128 | HPA029903 | U-2 OS   |
| 9771 | ENSG00000164134 | HPA023589 | U-2 OS   |
| 9772 | ENSG00000164134 | HPA050661 | U-2 OS   |
| 9773 | ENSG00000164136 | HPA037738 | U-2 OS   |
| 9774 | ENSG00000164142 | HPA046348 | U-2 OS   |
| 9775 | ENSG00000164144 | HPA037375 | U-2 OS   |
| 9776 | ENSG00000164144 | HPA063759 | U-2 OS   |
| 9777 | ENSG00000164151 | HPA061934 | HeLa     |
| 9778 | ENSG00000164161 | HPA012616 | U-2 OS   |
| 9779 | ENSG00000164162 | HPA044547 | U-2 OS   |
| 9780 | ENSG00000164163 | HPA036846 | U-2 OS   |
| 9781 | ENSG00000164164 | HPA036623 | U-2 OS   |
| 9782 | ENSG00000164167 | HPA045079 | U-2 OS   |
| 9783 | ENSG00000164168 | HPA054013 | U-2 OS   |
| 9784 | ENSG00000164169 | HPA042537 | A-431    |
| 9785 | ENSG00000164171 | HPA060991 | U-2 OS   |
| 9786 | ENSG00000164172 | HPA037680 | U-2 OS   |
| 9787 | ENSG00000164182 | HPA048082 | U-2 OS   |
| 9788 | ENSG00000164182 | HPA054776 | U-2 OS   |



|      |                 |           |           |
|------|-----------------|-----------|-----------|
| 9789 | ENSG00000164187 | HPA012165 | U-2 OS    |
| 9790 | ENSG00000164188 | HPA037471 | U-2 OS    |
| 9791 | ENSG00000164190 | HPA040834 | A-431     |
| 9792 | ENSG00000164190 | HPA058239 | U-2 OS    |
| 9793 | ENSG00000164197 | HPA006897 | U-2 OS    |
| 9794 | ENSG00000164199 | HPA067503 | HEK 293   |
| 9795 | ENSG00000164209 | HPA039601 | CACO-2    |
| 9796 | ENSG00000164211 | HPA046177 | U-2 OS    |
| 9797 | ENSG00000164219 | HPA030646 | A-431     |
| 9798 | ENSG00000164221 | HPA045120 | A-431     |
| 9799 | ENSG00000164221 | HPA050621 | U-2 OS    |
| 9800 | ENSG00000164236 | HPA056974 | U-2 OS    |
| 9801 | ENSG00000164241 | HPA043240 | U-2 OS    |
| 9802 | ENSG00000164244 | HPA039212 | U-2 OS    |
| 9803 | ENSG00000164251 | HPA014091 | RT4       |
| 9804 | ENSG00000164253 | HPA043124 | U-2 OS    |
| 9805 | ENSG00000164258 | HPA003884 | U-2 OS    |
| 9806 | ENSG00000164284 | HPA018173 | U-2 OS    |
| 9807 | ENSG00000164284 | HPA023211 | A-431     |
| 9808 | ENSG00000164291 | HPA042384 | U-2 OS    |
| 9809 | ENSG00000164292 | HPA000265 | U-2 OS    |
| 9810 | ENSG00000164294 | HPA036720 | U-2 OS    |
| 9811 | ENSG00000164296 | HPA044599 | U-2 OS    |
| 9812 | ENSG00000164300 | HPA037898 | U-2 OS    |
| 9813 | ENSG00000164303 | HPA042740 | SH-SY5Y   |
| 9814 | ENSG00000164305 | HPA002643 | U-2 OS    |
| 9815 | ENSG00000164306 | HPA054372 | U-2 OS    |
| 9816 | ENSG00000164307 | HPA042317 | U-2 OS    |
| 9817 | ENSG00000164308 | HPA064360 | RT4       |
| 9818 | ENSG00000164323 | HPA053335 | U-2 OS    |
| 9819 | ENSG00000164327 | HPA037802 | U-2 OS    |
| 9820 | ENSG00000164329 | HPA054468 | U-2 OS    |
| 9821 | ENSG00000164330 | HPA061169 | U-2 OS    |
| 9822 | ENSG00000164331 | HPA003968 | ASC TERT1 |
| 9823 | ENSG00000164331 | HPA065263 | U-2 OS    |
| 9824 | ENSG00000164332 | HPA039615 | U-2 OS    |
| 9825 | ENSG00000164338 | HPA044697 | U-2 OS    |
| 9826 | ENSG00000164346 | HPA043487 | CACO-2    |
| 9827 | ENSG00000164347 | HPA069871 | SiHa      |
| 9828 | ENSG00000164362 | HPA054641 | ASC TERT1 |
| 9829 | ENSG00000164362 | HPA065897 | ASC TERT1 |
| 9830 | ENSG00000164366 | HPA045052 | U-2 OS    |
| 9831 | ENSG00000164379 | HPA059700 | RT4       |
| 9832 | ENSG00000164400 | HPA057404 | A-431     |
| 9833 | ENSG00000164400 | HPA062006 | A-431     |
| 9834 | ENSG00000164402 | HPA005665 | U-2 OS    |
| 9835 | ENSG00000164402 | HPA036534 | U-2 OS    |
| 9836 | ENSG00000164403 | HPA037691 | CACO-2    |
| 9837 | ENSG00000164405 | HPA046693 | MCF7      |
| 9838 | ENSG00000164405 | HPA053323 | U-2 OS    |
| 9839 | ENSG00000164430 | HPA031702 | U-2 OS    |
| 9840 | ENSG00000164434 | HPA028825 | U-251 MG  |
| 9841 | ENSG00000164438 | HPA030504 | U-2 OS    |
| 9842 | ENSG00000164438 | HPA060957 | HeLa      |
| 9843 | ENSG00000164442 | CAB016157 | U-2 OS    |

|      |                 |           |             |
|------|-----------------|-----------|-------------|
| 9844 | ENSG00000164458 | HPA003322 | HeLa        |
| 9845 | ENSG00000164463 | HPA015329 | U-2 OS      |
| 9846 | ENSG00000164465 | HPA059667 | U-2 OS      |
| 9847 | ENSG00000164466 | HPA019543 | U-2 OS      |
| 9848 | ENSG00000164466 | HPA063745 | U-2 OS      |
| 9849 | ENSG00000164494 | HPA029685 | U-2 OS      |
| 9850 | ENSG00000164494 | HPA029686 | U-2 OS      |
| 9851 | ENSG00000164506 | HPA039991 | U-2 OS      |
| 9852 | ENSG00000164506 | HPA049727 | U-2 OS      |
| 9853 | ENSG00000164509 | HPA051532 | U-2 OS      |
| 9854 | ENSG00000164512 | HPA051049 | HEL         |
| 9855 | ENSG00000164512 | HPA061649 | U-2 OS      |
| 9856 | ENSG00000164520 | HPA054022 | U-2 OS      |
| 9857 | ENSG00000164535 | HPA069377 | U-2 OS      |
| 9858 | ENSG00000164542 | HPA021036 | U-2 OS      |
| 9859 | ENSG00000164542 | HPA061066 | U-2 OS      |
| 9860 | ENSG00000164543 | HPA018138 | U-2 OS      |
| 9861 | ENSG00000164548 | HPA054018 | U-2 OS      |
| 9862 | ENSG00000164574 | HPA007525 | A-431       |
| 9863 | ENSG00000164587 | HPA018504 | U-2 OS      |
| 9864 | ENSG00000164597 | HPA020300 | U-2 OS      |
| 9865 | ENSG00000164597 | HPA041583 | U-2 OS      |
| 9866 | ENSG00000164603 | HPA050733 | A-431       |
| 9867 | ENSG00000164609 | HPA035907 | U-2 OS      |
| 9868 | ENSG00000164609 | HPA058120 | U-2 OS      |
| 9869 | ENSG00000164610 | HPA031523 | U-2 OS      |
| 9870 | ENSG00000164610 | HPA050778 | U-2 OS      |
| 9871 | ENSG00000164611 | HPA045034 | U-2 OS      |
| 9872 | ENSG00000164615 | HPA052636 | U-2 OS      |
| 9873 | ENSG00000164620 | HPA077928 | U-2 OS      |
| 9874 | ENSG00000164626 | HPA059148 | MCF7        |
| 9875 | ENSG00000164627 | HPA058624 | U-2 OS      |
| 9876 | ENSG00000164631 | HPA063402 | U-2 OS      |
| 9877 | ENSG00000164638 | HPA052829 | CACO-2      |
| 9878 | ENSG00000164645 | HPA023817 | U-2 OS      |
| 9879 | ENSG00000164645 | HPA024163 | U-2 OS      |
| 9880 | ENSG00000164649 | HPA027169 | U-2 OS      |
| 9881 | ENSG00000164651 | HPA054006 | PC-3        |
| 9882 | ENSG00000164654 | HPA042928 | U-2 OS      |
| 9883 | ENSG00000164654 | HPA052223 | U-2 OS      |
| 9884 | ENSG00000164659 | HPA076093 | RT4         |
| 9885 | ENSG00000164674 | HPA030586 | U-2 OS      |
| 9886 | ENSG00000164675 | HPA049626 | RPTEC TERT1 |
| 9887 | ENSG00000164683 | HPA063472 | U-2 OS      |
| 9888 | ENSG00000164684 | HPA024285 | RT4         |
| 9889 | ENSG00000164687 | CAB040577 | U-2 OS      |
| 9890 | ENSG00000164691 | HPA039982 | HEL         |
| 9891 | ENSG00000164692 | HPA059738 | BJ          |
| 9892 | ENSG00000164694 | HPA030962 | U-2 OS      |
| 9893 | ENSG00000164694 | HPA030963 | U-2 OS      |
| 9894 | ENSG00000164708 | HPA043801 | U-2 OS      |
| 9895 | ENSG00000164708 | HPA050314 | U-2 OS      |
| 9896 | ENSG00000164715 | HPA010657 | U-2 OS      |
| 9897 | ENSG00000164715 | HPA041836 | U-2 OS      |
| 9898 | ENSG00000164733 | CAB000457 | U-2 OS      |

|      |                 |           |             |
|------|-----------------|-----------|-------------|
| 9899 | ENSG00000164733 | HPA018156 | U-2 OS      |
| 9900 | ENSG00000164736 | CAB025594 | U-2 OS      |
| 9901 | ENSG00000164741 | HPA017753 | U-2 OS      |
| 9902 | ENSG00000164742 | HPA068274 | U-2 OS      |
| 9903 | ENSG00000164743 | HPA026107 | U-2 OS      |
| 9904 | ENSG00000164743 | HPA027440 | U-2 OS      |
| 9905 | ENSG00000164744 | HPA008344 | U-2 OS      |
| 9906 | ENSG00000164749 | HPA005438 | U-2 OS      |
| 9907 | ENSG00000164749 | HPA010610 | A549        |
| 9908 | ENSG00000164751 | HPA010983 | RT4         |
| 9909 | ENSG00000164754 | HPA020044 | U-2 OS      |
| 9910 | ENSG00000164754 | CAB022065 | U-2 OS      |
| 9911 | ENSG00000164758 | HPA045767 | U-2 OS      |
| 9912 | ENSG00000164764 | HPA029595 | RPTEC TERT1 |
| 9913 | ENSG00000164778 | HPA045646 | U-2 OS      |
| 9914 | ENSG00000164778 | HPA069809 | U-2 OS      |
| 9915 | ENSG00000164808 | HPA041582 | U-2 OS      |
| 9916 | ENSG00000164815 | HPA019730 | U-2 OS      |
| 9917 | ENSG00000164816 | HPA015309 | SH-SY5Y     |
| 9918 | ENSG00000164818 | HPA020243 | U-2 OS      |
| 9919 | ENSG00000164823 | HPA050595 | U-2 OS      |
| 9920 | ENSG00000164828 | HPA008346 | U-2 OS      |
| 9921 | ENSG00000164828 | HPA008461 | U-2 OS      |
| 9922 | ENSG00000164830 | HPA027380 | U-2 OS      |
| 9923 | ENSG00000164830 | HPA027395 | U-2 OS      |
| 9924 | ENSG00000164841 | HPA015672 | U-251 MG    |
| 9925 | ENSG00000164853 | HPA063294 | NB-4        |
| 9926 | ENSG00000164855 | HPA053790 | U-2 OS      |
| 9927 | ENSG00000164871 | HPA057479 | SH-SY5Y     |
| 9928 | ENSG00000164880 | HPA053009 | A-431       |
| 9929 | ENSG00000164885 | HPA064535 | U-2 OS      |
| 9930 | ENSG00000164889 | HPA019339 | U-2 OS      |
| 9931 | ENSG00000164896 | CAB032539 | U-2 OS      |
| 9932 | ENSG00000164897 | HPA029429 | U-2 OS      |
| 9933 | ENSG00000164898 | HPA050553 | MCF7        |
| 9934 | ENSG00000164902 | HPA059630 | U-2 OS      |
| 9935 | ENSG00000164902 | HPA070326 | CACO-2      |
| 9936 | ENSG00000164904 | HPA023296 | U-2 OS      |
| 9937 | ENSG00000164916 | HPA017998 | U-2 OS      |
| 9938 | ENSG00000164916 | HPA018864 | U-2 OS      |
| 9939 | ENSG00000164919 | HPA014295 | U-2 OS      |
| 9940 | ENSG00000164919 | CAB016244 | U-2 OS      |
| 9941 | ENSG00000164920 | HPA063486 | A-431       |
| 9942 | ENSG00000164924 | HPA061603 | U-2 OS      |
| 9943 | ENSG00000164929 | HPA068307 | U-2 OS      |
| 9944 | ENSG00000164930 | HPA017991 | U-2 OS      |
| 9945 | ENSG00000164932 | HPA061896 | RH-30       |
| 9946 | ENSG00000164933 | HPA024763 | U-2 OS      |
| 9947 | ENSG00000164934 | HPA044504 | MCF7        |
| 9948 | ENSG00000164938 | HPA005856 | SH-SY5Y     |
| 9949 | ENSG00000164941 | HPA057299 | CACO-2      |
| 9950 | ENSG00000164944 | HPA031530 | U-2 OS      |
| 9951 | ENSG00000164951 | HPA021152 | U-2 OS      |
| 9952 | ENSG00000164961 | HPA064649 | U-2 OS      |
| 9953 | ENSG00000164961 | HPA070916 | U-2 OS      |

|       |                 |           |        |
|-------|-----------------|-----------|--------|
| 9954  | ENSG00000164967 | HPA052187 | U-2 OS |
| 9955  | ENSG00000164967 | HPA059698 | U-2 OS |
| 9956  | ENSG00000164970 | HPA019338 | U-2 OS |
| 9957  | ENSG00000164970 | HPA052909 | A-431  |
| 9958  | ENSG00000164975 | HPA053145 | A-431  |
| 9959  | ENSG00000164975 | HPA066031 | HeLa   |
| 9960  | ENSG00000164976 | HPA067487 | U-2 OS |
| 9961  | ENSG00000164978 | HPA044903 | U-2 OS |
| 9962  | ENSG00000164978 | HPA058623 | PC-3   |
| 9963  | ENSG00000164983 | HPA025020 | U-2 OS |
| 9964  | ENSG00000164985 | HPA019697 | U-2 OS |
| 9965  | ENSG00000164989 | HPA024133 | U-2 OS |
| 9966  | ENSG00000165006 | HPA019804 | U-2 OS |
| 9967  | ENSG00000165025 | HPA001384 | U-2 OS |
| 9968  | ENSG00000165029 | HPA057283 | U-2 OS |
| 9969  | ENSG00000165030 | HPA003261 | U-2 OS |
| 9970  | ENSG00000165046 | HPA025032 | U-2 OS |
| 9971  | ENSG00000165059 | HPA071185 | U-2 OS |
| 9972  | ENSG00000165060 | CAB022164 | U-2 OS |
| 9973  | ENSG00000165061 | HPA071585 | A549   |
| 9974  | ENSG00000165071 | HPA058401 | RH-30  |
| 9975  | ENSG00000165071 | HPA070655 | U-2 OS |
| 9976  | ENSG00000165072 | HPA022249 | U-2 OS |
| 9977  | ENSG00000165084 | HPA053065 | U-2 OS |
| 9978  | ENSG00000165092 | HPA002123 | A549   |
| 9979  | ENSG00000165097 | HPA031269 | A-431  |
| 9980  | ENSG00000165097 | HPA055597 | U-2 OS |
| 9981  | ENSG00000165105 | HPA021431 | U-2 OS |
| 9982  | ENSG00000165113 | HPA035118 | U-2 OS |
| 9983  | ENSG00000165118 | HPA066190 | U-2 OS |
| 9984  | ENSG00000165119 | CAB004435 | U-2 OS |
| 9985  | ENSG00000165119 | HPA007644 | U-2 OS |
| 9986  | ENSG00000165119 | CAB016225 | U-2 OS |
| 9987  | ENSG00000165119 | HPA044105 | U-2 OS |
| 9988  | ENSG00000165138 | HPA008355 | U-2 OS |
| 9989  | ENSG00000165140 | HPA005857 | U-2 OS |
| 9990  | ENSG00000165152 | HPA011318 | U-2 OS |
| 9991  | ENSG00000165156 | HPA055357 | U-2 OS |
| 9992  | ENSG00000165156 | HPA060251 | U-2 OS |
| 9993  | ENSG00000165171 | HPA022420 | A-431  |
| 9994  | ENSG00000165181 | HPA032108 | U-2 OS |
| 9995  | ENSG00000165185 | HPA020625 | U-2 OS |
| 9996  | ENSG00000165194 | HPA027533 | U-2 OS |
| 9997  | ENSG00000165215 | HPA014361 | MCF7   |
| 9998  | ENSG00000165219 | HPA029386 | U-2 OS |
| 9999  | ENSG00000165219 | HPA029387 | U-2 OS |
| 10000 | ENSG00000165233 | HPA010990 | U-2 OS |
| 10001 | ENSG00000165238 | HPA015555 | Hep G2 |
| 10002 | ENSG00000165240 | HPA012887 | U-2 OS |
| 10003 | ENSG00000165240 | HPA048107 | U-2 OS |
| 10004 | ENSG00000165244 | HPA015319 | U-2 OS |
| 10005 | ENSG00000165259 | HPA047189 | U-2 OS |
| 10006 | ENSG00000165264 | HPA044001 | U-2 OS |
| 10007 | ENSG00000165264 | HPA053334 | U-2 OS |
| 10008 | ENSG00000165271 | HPA055891 | U-2 OS |

|       |                 |           |        |
|-------|-----------------|-----------|--------|
| 10009 | ENSG00000165271 | HPA061002 | U-2 OS |
| 10010 | ENSG00000165272 | HPA014924 | RT4    |
| 10011 | ENSG00000165275 | HPA021800 | U-2 OS |
| 10012 | ENSG00000165280 | CAB005593 | U-2 OS |
| 10013 | ENSG00000165280 | HPA012728 | U-2 OS |
| 10014 | ENSG00000165280 | HPA012814 | U-2 OS |
| 10015 | ENSG00000165282 | HPA014905 | U-2 OS |
| 10016 | ENSG00000165283 | CAB015944 | U-2 OS |
| 10017 | ENSG00000165288 | HPA012802 | U-2 OS |
| 10018 | ENSG00000165300 | HPA013843 | U-2 OS |
| 10019 | ENSG00000165312 | HPA038503 | U-2 OS |
| 10020 | ENSG00000165338 | HPA037767 | U-2 OS |
| 10021 | ENSG00000165355 | HPA046657 | U-2 OS |
| 10022 | ENSG00000165359 | HPA013200 | U-2 OS |
| 10023 | ENSG00000165359 | HPA030747 | U-2 OS |
| 10024 | ENSG00000165376 | HPA051548 | CACO-2 |
| 10025 | ENSG00000165392 | HPA028661 | U-2 OS |
| 10026 | ENSG00000165410 | CAB037078 | U-2 OS |
| 10027 | ENSG00000165410 | HPA045599 | U-2 OS |
| 10028 | ENSG00000165416 | CAB015942 | U-2 OS |
| 10029 | ENSG00000165417 | HPA000869 | U-2 OS |
| 10030 | ENSG00000165424 | HPA038348 | U-2 OS |
| 10031 | ENSG00000165434 | HPA060948 | RH-30  |
| 10032 | ENSG00000165443 | HPA038746 | Hep G2 |
| 10033 | ENSG00000165449 | HPA049286 | U-2 OS |
| 10034 | ENSG00000165458 | HPA037601 | U-2 OS |
| 10035 | ENSG00000165462 | HPA053810 | U-2 OS |
| 10036 | ENSG00000165462 | HPA065621 | U-2 OS |
| 10037 | ENSG00000165474 | HPA014362 | RT4    |
| 10038 | ENSG00000165475 | HPA040403 | U-2 OS |
| 10039 | ENSG00000165478 | HPA017613 | U-2 OS |
| 10040 | ENSG00000165480 | HPA039356 | HEL    |
| 10041 | ENSG00000165480 | HPA061534 | U-2 OS |
| 10042 | ENSG00000165487 | HPA058790 | U-2 OS |
| 10043 | ENSG00000165490 | HPA038541 | U-2 OS |
| 10044 | ENSG00000165494 | HPA040779 | U-2 OS |
| 10045 | ENSG00000165495 | HPA028867 | RH-30  |
| 10046 | ENSG00000165495 | HPA055368 | RH-30  |
| 10047 | ENSG00000165495 | HPA066962 | RH-30  |
| 10048 | ENSG00000165496 | HPA011311 | U-2 OS |
| 10049 | ENSG00000165501 | HPA069364 | U-2 OS |
| 10050 | ENSG00000165502 | HPA077586 | U-2 OS |
| 10051 | ENSG00000165506 | HPA004113 | U-2 OS |
| 10052 | ENSG00000165507 | HPA037818 | U-2 OS |
| 10053 | ENSG00000165512 | HPA016736 | U-2 OS |
| 10054 | ENSG00000165512 | HPA054893 | U-2 OS |
| 10055 | ENSG00000165516 | HPA000628 | U-2 OS |
| 10056 | ENSG00000165525 | HPA004160 | U-2 OS |
| 10057 | ENSG00000165526 | HPA039689 | CACO-2 |
| 10058 | ENSG00000165548 | HPA030657 | U-2 OS |
| 10059 | ENSG00000165556 | HPA045669 | CACO-2 |
| 10060 | ENSG00000165556 | HPA049580 | CACO-2 |
| 10061 | ENSG00000165568 | HPA037821 | CACO-2 |
| 10062 | ENSG00000165568 | HPA037822 | CACO-2 |
| 10063 | ENSG00000165583 | HPA045683 | U-2 OS |

|       |                 |           |          |
|-------|-----------------|-----------|----------|
| 10064 | ENSG00000165584 | HPA045683 | U-2 OS   |
| 10065 | ENSG00000165588 | HPA001123 | U-2 OS   |
| 10066 | ENSG00000165606 | HPA043978 | U-2 OS   |
| 10067 | ENSG00000165609 | HPA019827 | U-2 OS   |
| 10068 | ENSG00000165617 | HPA003016 | U-2 OS   |
| 10069 | ENSG00000165621 | HPA067673 | RT4      |
| 10070 | ENSG00000165626 | HPA037835 | U-2 OS   |
| 10071 | ENSG00000165630 | HPA037599 | U-2 OS   |
| 10072 | ENSG00000165632 | HPA066184 | U-2 OS   |
| 10073 | ENSG00000165633 | HPA017279 | U-2 OS   |
| 10074 | ENSG00000165637 | HPA043475 | U-2 OS   |
| 10075 | ENSG00000165643 | HPA059439 | CACO-2   |
| 10076 | ENSG00000165644 | HPA042165 | U-2 OS   |
| 10077 | ENSG00000165646 | HPA073224 | U-2 OS   |
| 10078 | ENSG00000165650 | HPA051610 | U-2 OS   |
| 10079 | ENSG00000165655 | HPA026848 | U-2 OS   |
| 10080 | ENSG00000165660 | HPA074089 | U-251 MG |
| 10081 | ENSG00000165661 | HPA012716 | U-2 OS   |
| 10082 | ENSG00000165661 | HPA017280 | U-2 OS   |
| 10083 | ENSG00000165669 | HPA038182 | U-2 OS   |
| 10084 | ENSG00000165669 | HPA062025 | U-2 OS   |
| 10085 | ENSG00000165671 | HPA048431 | U-2 OS   |
| 10086 | ENSG00000165671 | HPA070333 | U-2 OS   |
| 10087 | ENSG00000165675 | HPA003027 | U-251 MG |
| 10088 | ENSG00000165678 | HPA061664 | U-2 OS   |
| 10089 | ENSG00000165684 | HPA073243 | U-2 OS   |
| 10090 | ENSG00000165685 | HPA058096 | CACO-2   |
| 10091 | ENSG00000165688 | HPA021648 | U-2 OS   |
| 10092 | ENSG00000165688 | HPA063735 | U-2 OS   |
| 10093 | ENSG00000165698 | HPA022243 | U-2 OS   |
| 10094 | ENSG00000165699 | CAB011568 | U-2 OS   |
| 10095 | ENSG00000165699 | CAB012481 | U-2 OS   |
| 10096 | ENSG00000165699 | HPA074132 | U-2 OS   |
| 10097 | ENSG00000165702 | HPA006291 | U-2 OS   |
| 10098 | ENSG00000165704 | HPA006360 | U-2 OS   |
| 10099 | ENSG00000165714 | HPA039509 | U-2 OS   |
| 10100 | ENSG00000165716 | HPA054443 | CACO-2   |
| 10101 | ENSG00000165724 | HPA020642 | U-2 OS   |
| 10102 | ENSG00000165730 | HPA037844 | U-2 OS   |
| 10103 | ENSG00000165730 | HPA037845 | U-2 OS   |
| 10104 | ENSG00000165731 | HPA008356 | U-2 OS   |
| 10105 | ENSG00000165732 | HPA036592 | U-2 OS   |
| 10106 | ENSG00000165732 | HPA036593 | U-2 OS   |
| 10107 | ENSG00000165733 | HPA036589 | U-2 OS   |
| 10108 | ENSG00000165733 | HPA043081 | U-2 OS   |
| 10109 | ENSG00000165757 | HPA017956 | U-2 OS   |
| 10110 | ENSG00000165792 | HPA002955 | U-2 OS   |
| 10111 | ENSG00000165792 | HPA059802 | U-2 OS   |
| 10112 | ENSG00000165794 | HPA073231 | U-2 OS   |
| 10113 | ENSG00000165795 | HPA002896 | U-2 OS   |
| 10114 | ENSG00000165801 | HPA030745 | U-2 OS   |
| 10115 | ENSG00000165802 | HPA044316 | MCF7     |
| 10116 | ENSG00000165804 | HPA056168 | U-2 OS   |
| 10117 | ENSG00000165810 | HPA043429 | U-2 OS   |
| 10118 | ENSG00000165813 | HPA018019 | U-2 OS   |

|       |                 |           |          |
|-------|-----------------|-----------|----------|
| 10119 | ENSG00000165821 | HPA004162 | RT4      |
| 10120 | ENSG00000165832 | HPA037914 | U-2 OS   |
| 10121 | ENSG00000165832 | HPA057552 | U-2 OS   |
| 10122 | ENSG00000165861 | HPA002898 | U-2 OS   |
| 10123 | ENSG00000165863 | HPA043022 | U-2 OS   |
| 10124 | ENSG00000165868 | HPA073244 | U-2 OS   |
| 10125 | ENSG00000165879 | HPA055258 | U-2 OS   |
| 10126 | ENSG00000165886 | HPA034825 | U-2 OS   |
| 10127 | ENSG00000165887 | HPA040842 | U-2 OS   |
| 10128 | ENSG00000165887 | HPA040884 | U-2 OS   |
| 10129 | ENSG00000165891 | HPA064866 | U-2 OS   |
| 10130 | ENSG00000165895 | HPA039924 | RT4      |
| 10131 | ENSG00000165899 | HPA040364 | U-2 OS   |
| 10132 | ENSG00000165912 | HPA043904 | U-2 OS   |
| 10133 | ENSG00000165914 | HPA059577 | RH-30    |
| 10134 | ENSG00000165916 | HPA006065 | U-2 OS   |
| 10135 | ENSG00000165917 | HPA039475 | U-2 OS   |
| 10136 | ENSG00000165929 | HPA027549 | A-431    |
| 10137 | ENSG00000165934 | HPA024238 | U-2 OS   |
| 10138 | ENSG00000165943 | HPA000939 | MCF7     |
| 10139 | ENSG00000165959 | HPA012634 | U-2 OS   |
| 10140 | ENSG00000165983 | HPA038045 | A-431    |
| 10141 | ENSG00000165995 | HPA035326 | HAP1     |
| 10142 | ENSG00000166004 | HPA038596 | U-2 OS   |
| 10143 | ENSG00000166004 | HPA038597 | U-2 OS   |
| 10144 | ENSG00000166006 | HPA019664 | U-2 OS   |
| 10145 | ENSG00000166006 | CAB022571 | U-2 OS   |
| 10146 | ENSG00000166012 | HPA030703 | U-2 OS   |
| 10147 | ENSG00000166012 | HPA055935 | U-2 OS   |
| 10148 | ENSG00000166016 | HPA020065 | U-2 OS   |
| 10149 | ENSG00000166016 | HPA030699 | U-2 OS   |
| 10150 | ENSG00000166024 | HPA037367 | U-2 OS   |
| 10151 | ENSG00000166025 | HPA001196 | U-2 OS   |
| 10152 | ENSG00000166033 | HPA036655 | U-2 OS   |
| 10153 | ENSG00000166037 | HPA018315 | U-2 OS   |
| 10154 | ENSG00000166046 | HPA042188 | U-2 OS   |
| 10155 | ENSG00000166049 | HPA011122 | PC-3     |
| 10156 | ENSG00000166049 | HPA011152 | U-2 OS   |
| 10157 | ENSG00000166068 | HPA061805 | U-2 OS   |
| 10158 | ENSG00000166086 | HPA003417 | U-2 OS   |
| 10159 | ENSG00000166086 | HPA050434 | U-251 MG |
| 10160 | ENSG00000166091 | HPA052338 | HEL      |
| 10161 | ENSG00000166106 | HPA042867 | U-2 OS   |
| 10162 | ENSG00000166123 | HPA051514 | U-2 OS   |
| 10163 | ENSG00000166128 | HPA074534 | RT4      |
| 10164 | ENSG00000166130 | HPA038677 | U-2 OS   |
| 10165 | ENSG00000166130 | HPA061541 | U-2 OS   |
| 10166 | ENSG00000166133 | HPA042079 | U-2 OS   |
| 10167 | ENSG00000166135 | HPA048742 | U-2 OS   |
| 10168 | ENSG00000166136 | HPA003886 | U-2 OS   |
| 10169 | ENSG00000166145 | HPA006903 | U-2 OS   |
| 10170 | ENSG00000166145 | HPA031178 | RT4      |
| 10171 | ENSG00000166147 | HPA021057 | U-251 MG |
| 10172 | ENSG00000166153 | HPA039323 | U-2 OS   |
| 10173 | ENSG00000166159 | HPA062745 | HEL      |

|       |                 |           |         |
|-------|-----------------|-----------|---------|
| 10174 | ENSG00000166164 | HPA042389 | CAC0-2  |
| 10175 | ENSG00000166164 | HPA060171 | U-2 OS  |
| 10176 | ENSG00000166165 | HPA001254 | U-2 OS  |
| 10177 | ENSG00000166167 | HPA031156 | U-2 OS  |
| 10178 | ENSG00000166169 | HPA066704 | U-2 OS  |
| 10179 | ENSG00000166170 | HPA016429 | A-431   |
| 10180 | ENSG00000166171 | HPA036603 | U-2 OS  |
| 10181 | ENSG00000166173 | HPA049029 | U-2 OS  |
| 10182 | ENSG00000166181 | HPA026598 | U-2 OS  |
| 10183 | ENSG00000166188 | HPA052584 | U-2 OS  |
| 10184 | ENSG00000166192 | HPA036273 | U-2 OS  |
| 10185 | ENSG00000166197 | HPA037366 | U-2 OS  |
| 10186 | ENSG00000166197 | HPA050388 | U-2 OS  |
| 10187 | ENSG00000166199 | HPA009674 | U-2 OS  |
| 10188 | ENSG00000166199 | HPA046489 | A-431   |
| 10189 | ENSG00000166200 | HPA018271 | U-2 OS  |
| 10190 | ENSG00000166200 | HPA061071 | CAC0-2  |
| 10191 | ENSG00000166224 | HPA021125 | U-2 OS  |
| 10192 | ENSG00000166225 | HPA038323 | PC-3    |
| 10193 | ENSG00000166226 | HPA003198 | U-2 OS  |
| 10194 | ENSG00000166228 | HPA037575 | U-2 OS  |
| 10195 | ENSG00000166228 | HPA061723 | U-2 OS  |
| 10196 | ENSG00000166233 | HPA073245 | U-2 OS  |
| 10197 | ENSG00000166246 | HPA049468 | U-2 OS  |
| 10198 | ENSG00000166257 | HPA041707 | U-2 OS  |
| 10199 | ENSG00000166261 | HPA059229 | U-2 OS  |
| 10200 | ENSG00000166262 | HPA061695 | SH-SY5Y |
| 10201 | ENSG00000166263 | CAB007760 | A-431   |
| 10202 | ENSG00000166263 | HPA022888 | U-2 OS  |
| 10203 | ENSG00000166265 | HPA067685 | U-2 OS  |
| 10204 | ENSG00000166266 | HPA002185 | U-2 OS  |
| 10205 | ENSG00000166268 | HPA049340 | U-2 OS  |
| 10206 | ENSG00000166272 | HPA038371 | U-2 OS  |
| 10207 | ENSG00000166275 | HPA037648 | U-2 OS  |
| 10208 | ENSG00000166292 | HPA055936 | U-2 OS  |
| 10209 | ENSG00000166295 | HPA037815 | A-431   |
| 10210 | ENSG00000166313 | HPA038521 | U-2 OS  |
| 10211 | ENSG00000166313 | HPA038522 | U-2 OS  |
| 10212 | ENSG00000166317 | HPA055192 | CAC0-2  |
| 10213 | ENSG00000166317 | HPA057142 | CAC0-2  |
| 10214 | ENSG00000166321 | HPA040636 | U-2 OS  |
| 10215 | ENSG00000166326 | HPA049053 | U-2 OS  |
| 10216 | ENSG00000166333 | HPA048437 | U-2 OS  |
| 10217 | ENSG00000166337 | HPA004148 | A-431   |
| 10218 | ENSG00000166341 | HPA017970 | AF22    |
| 10219 | ENSG00000166342 | HPA064630 | RT4     |
| 10220 | ENSG00000166343 | HPA038564 | A-431   |
| 10221 | ENSG00000166347 | HPA047548 | RT4     |
| 10222 | ENSG00000166347 | HPA058547 | RT4     |
| 10223 | ENSG00000166348 | HPA047663 | U-2 OS  |
| 10224 | ENSG00000166349 | HPA043939 | U-2 OS  |
| 10225 | ENSG00000166352 | HPA044880 | HEK 293 |
| 10226 | ENSG00000166359 | HPA050336 | SH-SY5Y |
| 10227 | ENSG00000166387 | HPA001935 | U-2 OS  |
| 10228 | ENSG00000166394 | HPA038962 | A-431   |



|       |                 |           |           |
|-------|-----------------|-----------|-----------|
| 10229 | ENSG00000166396 | HPA024200 | U-2 OS    |
| 10230 | ENSG00000166398 | HPA014570 | U-2 OS    |
| 10231 | ENSG00000166401 | CAB034300 | A-431     |
| 10232 | ENSG00000166402 | HPA017997 | U-2 OS    |
| 10233 | ENSG00000166411 | HPA041465 | U-2 OS    |
| 10234 | ENSG00000166411 | HPA062971 | U-2 OS    |
| 10235 | ENSG00000166415 | HPA048212 | RT4       |
| 10236 | ENSG00000166432 | HPA012827 | A-431     |
| 10237 | ENSG00000166435 | HPA039263 | U-2 OS    |
| 10238 | ENSG00000166436 | HPA027420 | U-2 OS    |
| 10239 | ENSG00000166439 | HPA038505 | U-2 OS    |
| 10240 | ENSG00000166439 | HPA058368 | U-2 OS    |
| 10241 | ENSG00000166441 | HPA060776 | U-2 OS    |
| 10242 | ENSG00000166441 | HPA063379 | U-2 OS    |
| 10243 | ENSG00000166444 | HPA046796 | U-2 OS    |
| 10244 | ENSG00000166448 | HPA012928 | SH-SY5Y   |
| 10245 | ENSG00000166450 | HPA032138 | U-2 OS    |
| 10246 | ENSG00000166451 | HPA052870 | U-2 OS    |
| 10247 | ENSG00000166452 | HPA061391 | A549      |
| 10248 | ENSG00000166454 | HPA054967 | U-2 OS    |
| 10249 | ENSG00000166455 | HPA041136 | A-431     |
| 10250 | ENSG00000166455 | HPA041379 | A-431     |
| 10251 | ENSG00000166471 | HPA014946 | A-431     |
| 10252 | ENSG00000166477 | HPA040741 | U-2 OS    |
| 10253 | ENSG00000166478 | HPA074818 | U-2 OS    |
| 10254 | ENSG00000166482 | HPA054097 | U-2 OS    |
| 10255 | ENSG00000166483 | HPA068845 | RT4       |
| 10256 | ENSG00000166484 | CAB018561 | U-2 OS    |
| 10257 | ENSG00000166484 | HPA031031 | HeLa      |
| 10258 | ENSG00000166501 | HPA048321 | RT4       |
| 10259 | ENSG00000166501 | HPA054203 | RT4       |
| 10260 | ENSG00000166503 | HPA040719 | U-2 OS    |
| 10261 | ENSG00000166507 | HPA051515 | U-2 OS    |
| 10262 | ENSG00000166508 | CAB002163 | U-2 OS    |
| 10263 | ENSG00000166508 | HPA003898 | U-251 MG  |
| 10264 | ENSG00000166508 | CAB016312 | U-2 OS    |
| 10265 | ENSG00000166510 | HPA040865 | A-431     |
| 10266 | ENSG00000166523 | HPA004935 | U-2 OS    |
| 10267 | ENSG00000166526 | HPA003719 | U-2 OS    |
| 10268 | ENSG00000166529 | HPA016948 | U-2 OS    |
| 10269 | ENSG00000166532 | HPA059552 | U-2 OS    |
| 10270 | ENSG00000166546 | HPA053851 | U-2 OS    |
| 10271 | ENSG00000166557 | HPA076949 | U-2 OS    |
| 10272 | ENSG00000166562 | HPA047533 | MCF7      |
| 10273 | ENSG00000166575 | HPA056685 | U-2 OS    |
| 10274 | ENSG00000166578 | HPA048782 | SK-MEL-30 |
| 10275 | ENSG00000166582 | HPA042616 | U-2 OS    |
| 10276 | ENSG00000166592 | HPA041755 | U-2 OS    |
| 10277 | ENSG00000166595 | HPA041501 | A-431     |
| 10278 | ENSG00000166598 | HPA003901 | U-2 OS    |
| 10279 | ENSG00000166598 | CAB005224 | U-2 OS    |
| 10280 | ENSG00000166598 | HPA008424 | U-2 OS    |
| 10281 | ENSG00000166598 | CAB078151 | U-2 OS    |
| 10282 | ENSG00000166619 | HPA047390 | RT4       |
| 10283 | ENSG00000166670 | CAB002159 | U-251 MG  |

|       |                 |           |         |
|-------|-----------------|-----------|---------|
| 10284 | ENSG00000166676 | HPA060582 | SH-SY5Y |
| 10285 | ENSG00000166681 | HPA018886 | U-2 OS  |
| 10286 | ENSG00000166682 | HPA010992 | U-2 OS  |
| 10287 | ENSG00000166689 | HPA038610 | U-2 OS  |
| 10288 | ENSG00000166689 | HPA066103 | HaCaT   |
| 10289 | ENSG00000166704 | HPA043584 | RT4     |
| 10290 | ENSG00000166707 | HPA078516 | SH-SY5Y |
| 10291 | ENSG00000166710 | CAB002572 | U-2 OS  |
| 10292 | ENSG00000166710 | HPA006361 | U-2 OS  |
| 10293 | ENSG00000166716 | HPA021600 | U-2 OS  |
| 10294 | ENSG00000166734 | HPA043015 | U-2 OS  |
| 10295 | ENSG00000166734 | HPA049488 | U-2 OS  |
| 10296 | ENSG00000166741 | HPA059180 | SiHa    |
| 10297 | ENSG00000166747 | HPA041224 | U-2 OS  |
| 10298 | ENSG00000166750 | HPA017760 | A-431   |
| 10299 | ENSG00000166780 | HPA041114 | U-2 OS  |
| 10300 | ENSG00000166783 | HPA017992 | U-2 OS  |
| 10301 | ENSG00000166788 | HPA039003 | CACO-2  |
| 10302 | ENSG00000166794 | HPA012720 | U-2 OS  |
| 10303 | ENSG00000166797 | HPA040459 | U-2 OS  |
| 10304 | ENSG00000166797 | HPA063729 | U-2 OS  |
| 10305 | ENSG00000166801 | HPA040176 | U-2 OS  |
| 10306 | ENSG00000166803 | HPA047929 | U-2 OS  |
| 10307 | ENSG00000166816 | HPA066148 | U-2 OS  |
| 10308 | ENSG00000166819 | HPA024299 | U-2 OS  |
| 10309 | ENSG00000166823 | HPA069981 | A-431   |
| 10310 | ENSG00000166825 | HPA004625 | BJ      |
| 10311 | ENSG00000166828 | HPA071194 | RT4     |
| 10312 | ENSG00000166833 | HPA011755 | U-2 OS  |
| 10313 | ENSG00000166839 | HPA040757 | U-2 OS  |
| 10314 | ENSG00000166840 | HPA039501 | U-2 OS  |
| 10315 | ENSG00000166845 | HPA040704 | U-2 OS  |
| 10316 | ENSG00000166847 | HPA063710 | MCF7    |
| 10317 | ENSG00000166848 | HPA006719 | U-2 OS  |
| 10318 | ENSG00000166848 | CAB018660 | U-2 OS  |
| 10319 | ENSG00000166848 | CAB018749 | U-2 OS  |
| 10320 | ENSG00000166855 | HPA040262 | U-2 OS  |
| 10321 | ENSG00000166855 | HPA048199 | U-2 OS  |
| 10322 | ENSG00000166860 | HPA020306 | U-2 OS  |
| 10323 | ENSG00000166863 | HPA045919 | U-2 OS  |
| 10324 | ENSG00000166866 | HPA053490 | CACO-2  |
| 10325 | ENSG00000166881 | HPA014394 | A-431   |
| 10326 | ENSG00000166886 | HPA027464 | U-2 OS  |
| 10327 | ENSG00000166888 | HPA001861 | U-2 OS  |
| 10328 | ENSG00000166889 | HPA039030 | U-2 OS  |
| 10329 | ENSG00000166896 | HPA035804 | U-2 OS  |
| 10330 | ENSG00000166896 | HPA043204 | U-2 OS  |
| 10331 | ENSG00000166897 | HPA000781 | U-2 OS  |
| 10332 | ENSG00000166900 | HPA002191 | RT4     |
| 10333 | ENSG00000166908 | HPA058551 | U-2 OS  |
| 10334 | ENSG00000166912 | HPA006081 | U-2 OS  |
| 10335 | ENSG00000166913 | HPA011212 | U-2 OS  |
| 10336 | ENSG00000166913 | HPA061603 | U-2 OS  |
| 10337 | ENSG00000166924 | HPA022251 | U-2 OS  |
| 10338 | ENSG00000166925 | HPA006757 | U-2 OS  |

|       |                 |           |          |
|-------|-----------------|-----------|----------|
| 10339 | ENSG00000166928 | HPA058973 | THP-1    |
| 10340 | ENSG00000166938 | HPA041805 | U-2 OS   |
| 10341 | ENSG00000166946 | CAB020664 | HEL      |
| 10342 | ENSG00000166946 | HPA041065 | U-2 OS   |
| 10343 | ENSG00000166947 | HPA040261 | HEL      |
| 10344 | ENSG00000166949 | CAB008094 | U-2 OS   |
| 10345 | ENSG00000166949 | HPA046386 | U-2 OS   |
| 10346 | ENSG00000166961 | HPA054563 | HEL      |
| 10347 | ENSG00000166963 | HPA066488 | U-2 OS   |
| 10348 | ENSG00000166965 | HPA039683 | U-2 OS   |
| 10349 | ENSG00000166965 | HPA040776 | U-2 OS   |
| 10350 | ENSG00000166974 | HPA016739 | U-2 OS   |
| 10351 | ENSG00000166986 | HPA004125 | U-2 OS   |
| 10352 | ENSG00000166986 | CAB017097 | U-2 OS   |
| 10353 | ENSG00000166987 | HPA038948 | U-2 OS   |
| 10354 | ENSG00000166987 | HPA038949 | U-2 OS   |
| 10355 | ENSG00000166997 | HPA025240 | U-2 OS   |
| 10356 | ENSG00000167004 | HPA002645 | U-2 OS   |
| 10357 | ENSG00000167004 | HPA003230 | U-2 OS   |
| 10358 | ENSG00000167004 | CAB015181 | U-2 OS   |
| 10359 | ENSG00000167004 | CAB075744 | U-2 OS   |
| 10360 | ENSG00000167005 | HPA074228 | U-2 OS   |
| 10361 | ENSG00000167011 | HPA021918 | U-2 OS   |
| 10362 | ENSG00000167014 | HPA041780 | U-2 OS   |
| 10363 | ENSG00000167034 | HPA025693 | U-251 MG |
| 10364 | ENSG00000167065 | HPA051349 | U-2 OS   |
| 10365 | ENSG00000167081 | HPA003881 | U-2 OS   |
| 10366 | ENSG00000167085 | HPA003280 | U-2 OS   |
| 10367 | ENSG00000167100 | HPA051916 | U-2 OS   |
| 10368 | ENSG00000167103 | HPA056240 | HEK 293  |
| 10369 | ENSG00000167105 | HPA063009 | CACO-2   |
| 10370 | ENSG00000167105 | HPA069820 | CACO-2   |
| 10371 | ENSG00000167106 | HPA036030 | U-2 OS   |
| 10372 | ENSG00000167107 | HPA024693 | U-2 OS   |
| 10373 | ENSG00000167110 | HPA021178 | U-2 OS   |
| 10374 | ENSG00000167110 | HPA021799 | U-2 OS   |
| 10375 | ENSG00000167113 | HPA021406 | HeLa     |
| 10376 | ENSG00000167114 | HPA007293 | U-2 OS   |
| 10377 | ENSG00000167118 | HPA053645 | U-2 OS   |
| 10378 | ENSG00000167123 | HPA051595 | U-2 OS   |
| 10379 | ENSG00000167130 | HPA019179 | U-2 OS   |
| 10380 | ENSG00000167131 | HPA043131 | U-2 OS   |
| 10381 | ENSG00000167157 | HPA006607 | U-2 OS   |
| 10382 | ENSG00000167173 | HPA039961 | U-2 OS   |
| 10383 | ENSG00000167173 | HPA041907 | U-2 OS   |
| 10384 | ENSG00000167182 | HPA003357 | U-2 OS   |
| 10385 | ENSG00000167182 | CAB010245 | U-2 OS   |
| 10386 | ENSG00000167183 | HPA022918 | U-2 OS   |
| 10387 | ENSG00000167186 | HPA071922 | U-2 OS   |
| 10388 | ENSG00000167191 | HPA015247 | U-2 OS   |
| 10389 | ENSG00000167193 | HPA068087 | U-2 OS   |
| 10390 | ENSG00000167202 | HPA041833 | RT4      |
| 10391 | ENSG00000167202 | HPA052663 | U-2 OS   |
| 10392 | ENSG00000167207 | HPA054494 | U-2 OS   |
| 10393 | ENSG00000167208 | HPA043649 | U-2 OS   |

|       |                 |           |        |
|-------|-----------------|-----------|--------|
| 10394 | ENSG00000167216 | HPA042029 | U-2 OS |
| 10395 | ENSG00000167220 | HPA059818 | U-2 OS |
| 10396 | ENSG00000167244 | HPA007993 | CACO-2 |
| 10397 | ENSG00000167257 | HPA039332 | U-2 OS |
| 10398 | ENSG00000167258 | HPA008038 | U-2 OS |
| 10399 | ENSG00000167258 | HPA073305 | U-2 OS |
| 10400 | ENSG00000167264 | HPA042560 | U-2 OS |
| 10401 | ENSG00000167264 | HPA043528 | A-431  |
| 10402 | ENSG00000167272 | HPA069204 | U-2 OS |
| 10403 | ENSG00000167280 | HPA021551 | U-2 OS |
| 10404 | ENSG00000167281 | HPA030790 | U-2 OS |
| 10405 | ENSG00000167283 | HPA044629 | U-2 OS |
| 10406 | ENSG00000167291 | HPA065839 | U-2 OS |
| 10407 | ENSG00000167302 | HPA063410 | U-2 OS |
| 10408 | ENSG00000167306 | HPA069773 | U-2 OS |
| 10409 | ENSG00000167315 | HPA042303 | CACO-2 |
| 10410 | ENSG00000167323 | HPA011088 | A-431  |
| 10411 | ENSG00000167323 | HPA012123 | A-431  |
| 10412 | ENSG00000167325 | CAB022093 | U-2 OS |
| 10413 | ENSG00000167325 | HPA057265 | U-2 OS |
| 10414 | ENSG00000167333 | HPA023455 | U-2 OS |
| 10415 | ENSG00000167363 | HPA059151 | Hep G2 |
| 10416 | ENSG00000167371 | HPA019203 | U-2 OS |
| 10417 | ENSG00000167377 | HPA023534 | U-2 OS |
| 10418 | ENSG00000167378 | HPA050338 | U-2 OS |
| 10419 | ENSG00000167380 | HPA006145 | RT4    |
| 10420 | ENSG00000167384 | HPA028980 | U-2 OS |
| 10421 | ENSG00000167393 | HPA026606 | PC-3   |
| 10422 | ENSG00000167394 | HPA043048 | U-2 OS |
| 10423 | ENSG00000167395 | HPA042364 | A549   |
| 10424 | ENSG00000167397 | HPA042720 | U-2 OS |
| 10425 | ENSG00000167434 | HPA017258 | U-2 OS |
| 10426 | ENSG00000167447 | HPA024841 | U-2 OS |
| 10427 | ENSG00000167460 | CAB004685 | U-2 OS |
| 10428 | ENSG00000167461 | HPA041945 | U-2 OS |
| 10429 | ENSG00000167468 | HPA058546 | U-2 OS |
| 10430 | ENSG00000167470 | HPA049432 | U-2 OS |
| 10431 | ENSG00000167476 | HPA044741 | RH-30  |
| 10432 | ENSG00000167483 | HPA043277 | U-2 OS |
| 10433 | ENSG00000167491 | HPA006759 | U-2 OS |
| 10434 | ENSG00000167491 | HPA024373 | U-2 OS |
| 10435 | ENSG00000167508 | HPA041404 | U-2 OS |
| 10436 | ENSG00000167513 | HPA017224 | U-2 OS |
| 10437 | ENSG00000167515 | HPA041714 | U-2 OS |
| 10438 | ENSG00000167522 | CAB019288 | U-2 OS |
| 10439 | ENSG00000167522 | HPA049470 | U-2 OS |
| 10440 | ENSG00000167523 | HPA073096 | U-2 OS |
| 10441 | ENSG00000167524 | HPA046590 | U-2 OS |
| 10442 | ENSG00000167526 | HPA051702 | U-2 OS |
| 10443 | ENSG00000167528 | HPA035189 | U-2 OS |
| 10444 | ENSG00000167535 | HPA059515 | U-2 OS |
| 10445 | ENSG00000167536 | HPA022991 | U-2 OS |
| 10446 | ENSG00000167548 | HPA035977 | U-2 OS |
| 10447 | ENSG00000167549 | HPA021556 | U-2 OS |
| 10448 | ENSG00000167550 | HPA061001 | U-2 OS |

|       |                 |           |          |
|-------|-----------------|-----------|----------|
| 10449 | ENSG00000167552 | CAB008686 | U-2 OS   |
| 10450 | ENSG00000167552 | HPA039247 | U-2 OS   |
| 10451 | ENSG00000167552 | HPA043684 | U-2 OS   |
| 10452 | ENSG00000167553 | HPA039247 | U-2 OS   |
| 10453 | ENSG00000167553 | HPA043684 | U-2 OS   |
| 10454 | ENSG00000167554 | HPA078134 | RH-30    |
| 10455 | ENSG00000167555 | HPA065435 | RT4      |
| 10456 | ENSG00000167562 | HPA005532 | U-2 OS   |
| 10457 | ENSG00000167565 | HPA068262 | U-2 OS   |
| 10458 | ENSG00000167566 | HPA041034 | U-2 OS   |
| 10459 | ENSG00000167595 | HPA058492 | U-2 OS   |
| 10460 | ENSG00000167600 | HPA049227 | U-2 OS   |
| 10461 | ENSG00000167601 | HPA075217 | U-2 OS   |
| 10462 | ENSG00000167604 | HPA043573 | U-2 OS   |
| 10463 | ENSG00000167613 | HPA011155 | U-2 OS   |
| 10464 | ENSG00000167615 | HPA042004 | U-2 OS   |
| 10465 | ENSG00000167615 | HPA061571 | U-2 OS   |
| 10466 | ENSG00000167619 | HPA060462 | A549     |
| 10467 | ENSG00000167625 | HPA023070 | U-2 OS   |
| 10468 | ENSG00000167632 | HPA026579 | A-431    |
| 10469 | ENSG00000167634 | HPA051382 | RT4      |
| 10470 | ENSG00000167635 | HPA003358 | U-2 OS   |
| 10471 | ENSG00000167637 | HPA072977 | RT4      |
| 10472 | ENSG00000167641 | CAB005044 | U-2 OS   |
| 10473 | ENSG00000167641 | HPA054534 | CACO-2   |
| 10474 | ENSG00000167642 | HPA011101 | U-2 OS   |
| 10475 | ENSG00000167642 | CAB018969 | A-431    |
| 10476 | ENSG00000167644 | HPA054406 | A-431    |
| 10477 | ENSG00000167644 | HPA059696 | U-2 OS   |
| 10478 | ENSG00000167645 | HPA039328 | U-2 OS   |
| 10479 | ENSG00000167646 | HPA056220 | U-2 OS   |
| 10480 | ENSG00000167653 | HPA030783 | HeLa     |
| 10481 | ENSG00000167657 | HPA064809 | U-2 OS   |
| 10482 | ENSG00000167658 | CAB007795 | U-2 OS   |
| 10483 | ENSG00000167658 | HPA040534 | U-2 OS   |
| 10484 | ENSG00000167670 | CAB015186 | U-2 OS   |
| 10485 | ENSG00000167671 | HPA061872 | U-2 OS   |
| 10486 | ENSG00000167674 | HPA042559 | U-2 OS   |
| 10487 | ENSG00000167674 | HPA044208 | U-2 OS   |
| 10488 | ENSG00000167676 | HPA044682 | RT4      |
| 10489 | ENSG00000167676 | HPA054657 | RT4      |
| 10490 | ENSG00000167685 | HPA056895 | U-2 OS   |
| 10491 | ENSG00000167685 | HPA065203 | U-2 OS   |
| 10492 | ENSG00000167693 | HPA023566 | U-2 OS   |
| 10493 | ENSG00000167699 | HPA021623 | U-2 OS   |
| 10494 | ENSG00000167699 | HPA023246 | U-2 OS   |
| 10495 | ENSG00000167699 | HPA023248 | A-431    |
| 10496 | ENSG00000167700 | HPA056013 | HEK 293  |
| 10497 | ENSG00000167702 | HPA029264 | U-2 OS   |
| 10498 | ENSG00000167716 | HPA023044 | U-2 OS   |
| 10499 | ENSG00000167720 | HPA007529 | U-2 OS   |
| 10500 | ENSG00000167721 | HPA053087 | U-251 MG |
| 10501 | ENSG00000167723 | HPA069550 | CACO-2   |
| 10502 | ENSG00000167733 | HPA049078 | U-2 OS   |
| 10503 | ENSG00000167740 | HPA042299 | U-2 OS   |

|       |                 |           |         |
|-------|-----------------|-----------|---------|
| 10504 | ENSG00000167747 | HPA042000 | A-431   |
| 10505 | ENSG00000167755 | HPA051837 | CACO-2  |
| 10506 | ENSG00000167766 | HPA025970 | A-431   |
| 10507 | ENSG00000167767 | HPA077836 | U-2 OS  |
| 10508 | ENSG00000167767 | HPA077918 | U-2 OS  |
| 10509 | ENSG00000167770 | CAB072836 | U-2 OS  |
| 10510 | ENSG00000167771 | HPA021638 | U-2 OS  |
| 10511 | ENSG00000167772 | HPA007879 | U-2 OS  |
| 10512 | ENSG00000167775 | HPA073489 | HEK 293 |
| 10513 | ENSG00000167778 | HPA039426 | U-2 OS  |
| 10514 | ENSG00000167792 | HPA075051 | U-2 OS  |
| 10515 | ENSG00000167797 | HPA047599 | MCF7    |
| 10516 | ENSG00000167799 | HPA041252 | U-2 OS  |
| 10517 | ENSG00000167840 | HPA028611 | HEK 293 |
| 10518 | ENSG00000167850 | HPA060349 | U-2 OS  |
| 10519 | ENSG00000167861 | HPA031406 | U-2 OS  |
| 10520 | ENSG00000167862 | HPA003634 | U-2 OS  |
| 10521 | ENSG00000167863 | HPA042777 | U-2 OS  |
| 10522 | ENSG00000167880 | HPA053969 | RT4     |
| 10523 | ENSG00000167881 | HPA023303 | U-2 OS  |
| 10524 | ENSG00000167881 | HPA055617 | U-2 OS  |
| 10525 | ENSG00000167889 | HPA011082 | U-2 OS  |
| 10526 | ENSG00000167895 | HPA047387 | MCF7    |
| 10527 | ENSG00000167904 | HPA019173 | U-2 OS  |
| 10528 | ENSG00000167914 | HPA023313 | U-2 OS  |
| 10529 | ENSG00000167914 | HPA064826 | hTCEpi  |
| 10530 | ENSG00000167916 | HPA022978 | U-2 OS  |
| 10531 | ENSG00000167930 | HPA011651 | U-2 OS  |
| 10532 | ENSG00000167962 | HPA041760 | U-2 OS  |
| 10533 | ENSG00000167962 | HPA041896 | U-2 OS  |
| 10534 | ENSG00000167964 | HPA075624 | U-2 OS  |
| 10535 | ENSG00000167965 | HPA041841 | U-2 OS  |
| 10536 | ENSG00000167967 | HPA052042 | MCF7    |
| 10537 | ENSG00000167967 | HPA071325 | CACO-2  |
| 10538 | ENSG00000167968 | HPA044714 | U-2 OS  |
| 10539 | ENSG00000167969 | HPA041746 | U-2 OS  |
| 10540 | ENSG00000167969 | HPA043227 | U-2 OS  |
| 10541 | ENSG00000167971 | HPA055990 | MCF7    |
| 10542 | ENSG00000167972 | HPA007884 | U-2 OS  |
| 10543 | ENSG00000167978 | HPA041411 | U-2 OS  |
| 10544 | ENSG00000167978 | HPA066181 | U-2 OS  |
| 10545 | ENSG00000167981 | HPA001556 | RT4     |
| 10546 | ENSG00000167984 | HPA048062 | U-2 OS  |
| 10547 | ENSG00000167985 | HPA039464 | U-2 OS  |
| 10548 | ENSG00000167986 | HPA045174 | U-2 OS  |
| 10549 | ENSG00000167986 | HPA068456 | U-2 OS  |
| 10550 | ENSG00000167987 | HPA043348 | U-2 OS  |
| 10551 | ENSG00000167992 | HPA040401 | CACO-2  |
| 10552 | ENSG00000167992 | HPA043921 | U-2 OS  |
| 10553 | ENSG00000167994 | HPA039723 | U-2 OS  |
| 10554 | ENSG00000167996 | CAB008623 | U-2 OS  |
| 10555 | ENSG00000168002 | HPA053000 | U-2 OS  |
| 10556 | ENSG00000168003 | HPA017980 | U-2 OS  |
| 10557 | ENSG00000168004 | HPA042493 | A-431   |
| 10558 | ENSG00000168005 | HPA050313 | U-2 OS  |

|       |                 |           |          |
|-------|-----------------|-----------|----------|
| 10559 | ENSG00000168010 | HPA045444 | U-2 OS   |
| 10560 | ENSG00000168010 | HPA050312 | U-251 MG |
| 10561 | ENSG00000168014 | HPA040433 | U-251 MG |
| 10562 | ENSG00000168016 | HPA035508 | U-2 OS   |
| 10563 | ENSG00000168026 | HPA035510 | U-2 OS   |
| 10564 | ENSG00000168026 | HPA035511 | U-2 OS   |
| 10565 | ENSG00000168028 | CAB009561 | U-2 OS   |
| 10566 | ENSG00000168036 | CAB000108 | U-2 OS   |
| 10567 | ENSG00000168036 | HPA029159 | U-2 OS   |
| 10568 | ENSG00000168036 | HPA029160 | U-2 OS   |
| 10569 | ENSG00000168038 | HPA017930 | U-2 OS   |
| 10570 | ENSG00000168040 | HPA001464 | U-2 OS   |
| 10571 | ENSG00000168040 | CAB010209 | A-431    |
| 10572 | ENSG00000168056 | HPA073170 | U-2 OS   |
| 10573 | ENSG00000168060 | HPA047123 | U-2 OS   |
| 10574 | ENSG00000168061 | HPA042677 | U-2 OS   |
| 10575 | ENSG00000168062 | HPA062496 | U-2 OS   |
| 10576 | ENSG00000168066 | HPA018883 | U-2 OS   |
| 10577 | ENSG00000168067 | HPA007330 | U-2 OS   |
| 10578 | ENSG00000168071 | HPA026652 | U-2 OS   |
| 10579 | ENSG00000168077 | HPA029861 | U-2 OS   |
| 10580 | ENSG00000168077 | HPA047386 | U-2 OS   |
| 10581 | ENSG00000168078 | HPA005753 | U-2 OS   |
| 10582 | ENSG00000168090 | HPA044315 | U-2 OS   |
| 10583 | ENSG00000168092 | HPA051836 | U-2 OS   |
| 10584 | ENSG00000168096 | HPA041409 | U-2 OS   |
| 10585 | ENSG00000168101 | HPA044186 | U-2 OS   |
| 10586 | ENSG00000168116 | HPA036370 | U-2 OS   |
| 10587 | ENSG00000168137 | CAB017093 | U-2 OS   |
| 10588 | ENSG00000168137 | HPA035574 | U-2 OS   |
| 10589 | ENSG00000168140 | HPA016992 | U-2 OS   |
| 10590 | ENSG00000168148 | CAB003812 | U-2 OS   |
| 10591 | ENSG00000168152 | HPA037421 | U-2 OS   |
| 10592 | ENSG00000168159 | HPA030098 | U-2 OS   |
| 10593 | ENSG00000168172 | HPA024756 | U-2 OS   |
| 10594 | ENSG00000168175 | HPA034506 | U-2 OS   |
| 10595 | ENSG00000168209 | HPA034508 | U-2 OS   |
| 10596 | ENSG00000168214 | HPA060647 | U-2 OS   |
| 10597 | ENSG00000168228 | HPA035575 | U-2 OS   |
| 10598 | ENSG00000168234 | HPA065705 | U-2 OS   |
| 10599 | ENSG00000168237 | HPA006913 | U-2 OS   |
| 10600 | ENSG00000168255 | HPA046970 | A-431    |
| 10601 | ENSG00000168256 | HPA062861 | U-2 OS   |
| 10602 | ENSG00000168259 | HPA023015 | U-2 OS   |
| 10603 | ENSG00000168264 | HPA027815 | U-2 OS   |
| 10604 | ENSG00000168264 | HPA062269 | U-2 OS   |
| 10605 | ENSG00000168267 | CAB022612 | U-2 OS   |
| 10606 | ENSG00000168269 | HPA071469 | U-2 OS   |
| 10607 | ENSG00000168273 | HPA047771 | U-2 OS   |
| 10608 | ENSG00000168275 | HPA028588 | U-2 OS   |
| 10609 | ENSG00000168280 | HPA062272 | U-2 OS   |
| 10610 | ENSG00000168282 | HPA056824 | U-2 OS   |
| 10611 | ENSG00000168283 | HPA030471 | U-2 OS   |
| 10612 | ENSG00000168283 | HPA030472 | U-2 OS   |
| 10613 | ENSG00000168286 | HPA042189 | U-2 OS   |

|       |                 |           |           |
|-------|-----------------|-----------|-----------|
| 10614 | ENSG00000168286 | HPA072537 | U-2 OS    |
| 10615 | ENSG00000168291 | HPA036745 | U-2 OS    |
| 10616 | ENSG00000168297 | HPA024068 | A-431     |
| 10617 | ENSG00000168298 | CAB011506 | U-2 OS    |
| 10618 | ENSG00000168300 | HPA061444 | RT4       |
| 10619 | ENSG00000168301 | HPA036101 | U-2 OS    |
| 10620 | ENSG00000168303 | HPA058457 | A-431     |
| 10621 | ENSG00000168303 | HPA065463 | U-2 OS    |
| 10622 | ENSG00000168306 | HPA064845 | Hep G2    |
| 10623 | ENSG00000168309 | HPA055888 | U-2 OS    |
| 10624 | ENSG00000168310 | HPA030813 | U-2 OS    |
| 10625 | ENSG00000168310 | CAB032306 | U-2 OS    |
| 10626 | ENSG00000168310 | HPA057327 | A-431     |
| 10627 | ENSG00000168314 | HPA035152 | HAP1      |
| 10628 | ENSG00000168334 | HPA018458 | RH-30     |
| 10629 | ENSG00000168334 | CAB026391 | U-2 OS    |
| 10630 | ENSG00000168348 | HPA051925 | SH-SY5Y   |
| 10631 | ENSG00000168350 | HPA046644 | RT4       |
| 10632 | ENSG00000168385 | CAB017190 | U-2 OS    |
| 10633 | ENSG00000168385 | HPA018481 | U-2 OS    |
| 10634 | ENSG00000168386 | HPA043133 | U-2 OS    |
| 10635 | ENSG00000168389 | HPA043107 | U-2 OS    |
| 10636 | ENSG00000168393 | HPA042719 | U-2 OS    |
| 10637 | ENSG00000168394 | HPA072354 | SK-MEL-30 |
| 10638 | ENSG00000168397 | HPA069803 | RT4       |
| 10639 | ENSG00000168398 | HPA003551 | U-2 OS    |
| 10640 | ENSG00000168411 | HPA048258 | MCF7      |
| 10641 | ENSG00000168411 | HPA075649 | U-2 OS    |
| 10642 | ENSG00000168421 | HPA061314 | U-2 OS    |
| 10643 | ENSG00000168427 | HPA062095 | RH-30     |
| 10644 | ENSG00000168434 | HPA040758 | U-2 OS    |
| 10645 | ENSG00000168434 | HPA041824 | U-2 OS    |
| 10646 | ENSG00000168434 | HPA064645 | U-2 OS    |
| 10647 | ENSG00000168438 | HPA046620 | U-2 OS    |
| 10648 | ENSG00000168439 | HPA039291 | U-2 OS    |
| 10649 | ENSG00000168453 | HPA054888 | U-2 OS    |
| 10650 | ENSG00000168476 | HPA042683 | U-2 OS    |
| 10651 | ENSG00000168481 | HPA024826 | U-2 OS    |
| 10652 | ENSG00000168488 | HPA041506 | U-2 OS    |
| 10653 | ENSG00000168488 | HPA043391 | U-2 OS    |
| 10654 | ENSG00000168488 | HPA071955 | U-2 OS    |
| 10655 | ENSG00000168490 | HPA069318 | U-2 OS    |
| 10656 | ENSG00000168495 | HPA061331 | U-2 OS    |
| 10657 | ENSG00000168495 | HPA067875 | CACO-2    |
| 10658 | ENSG00000168495 | HPA069089 | U-2 OS    |
| 10659 | ENSG00000168496 | CAB002262 | U-251 MG  |
| 10660 | ENSG00000168496 | HPA006748 | U-2 OS    |
| 10661 | ENSG00000168497 | HPA039325 | U-2 OS    |
| 10662 | ENSG00000168497 | HPA062122 | U-2 OS    |
| 10663 | ENSG00000168505 | HPA067809 | U-2 OS    |
| 10664 | ENSG00000168517 | HPA028455 | U-2 OS    |
| 10665 | ENSG00000168522 | HPA018830 | U-2 OS    |
| 10666 | ENSG00000168528 | HPA005974 | RT4       |
| 10667 | ENSG00000168539 | HPA014101 | A-431     |
| 10668 | ENSG00000168539 | CAB022366 | U-251 MG  |



|       |                 |           |           |
|-------|-----------------|-----------|-----------|
| 10669 | ENSG00000168542 | HPA007583 | ASC TERT1 |
| 10670 | ENSG00000168546 | HPA024704 | A-431     |
| 10671 | ENSG00000168556 | HPA019486 | U-2 OS    |
| 10672 | ENSG00000168556 | HPA021517 | U-2 OS    |
| 10673 | ENSG00000168564 | HPA062142 | U-2 OS    |
| 10674 | ENSG00000168566 | HPA029234 | U-2 OS    |
| 10675 | ENSG00000168569 | HPA014504 | MCF7      |
| 10676 | ENSG00000168591 | HPA043137 | A-431     |
| 10677 | ENSG00000168610 | HPA001671 | U-2 OS    |
| 10678 | ENSG00000168612 | HPA041147 | U-2 OS    |
| 10679 | ENSG00000168615 | HPA004000 | U-2 OS    |
| 10680 | ENSG00000168621 | HPA070283 | U-2 OS    |
| 10681 | ENSG00000168646 | CAB017783 | U-2 OS    |
| 10682 | ENSG00000168658 | HPA036701 | U-2 OS    |
| 10683 | ENSG00000168661 | HPA030400 | U-2 OS    |
| 10684 | ENSG00000168671 | HPA059475 | U-2 OS    |
| 10685 | ENSG00000168672 | HPA062115 | A-431     |
| 10686 | ENSG00000168675 | HPA047633 | SH-SY5Y   |
| 10687 | ENSG00000168679 | HPA046986 | U-2 OS    |
| 10688 | ENSG00000168679 | HPA060163 | U-2 OS    |
| 10689 | ENSG00000168685 | CAB010215 | U-2 OS    |
| 10690 | ENSG00000168702 | HPA074788 | U-2 OS    |
| 10691 | ENSG00000168710 | HPA042589 | U-2 OS    |
| 10692 | ENSG00000168724 | HPA049208 | U-2 OS    |
| 10693 | ENSG00000168734 | HPA042703 | U-2 OS    |
| 10694 | ENSG00000168734 | HPA063690 | CACO-2    |
| 10695 | ENSG00000168743 | HPA050203 | U-2 OS    |
| 10696 | ENSG00000168754 | HPA062110 | U-2 OS    |
| 10697 | ENSG00000168757 | HPA049384 | U-2 OS    |
| 10698 | ENSG00000168763 | HPA016711 | U-2 OS    |
| 10699 | ENSG00000168765 | HPA055972 | HeLa      |
| 10700 | ENSG00000168765 | HPA055973 | HeLa      |
| 10701 | ENSG00000168769 | HPA043135 | U-2 OS    |
| 10702 | ENSG00000168772 | HPA036925 | U-2 OS    |
| 10703 | ENSG00000168778 | HPA039900 | U-2 OS    |
| 10704 | ENSG00000168781 | HPA039380 | U-2 OS    |
| 10705 | ENSG00000168792 | HPA014470 | A-431     |
| 10706 | ENSG00000168795 | HPA021521 | U-2 OS    |
| 10707 | ENSG00000168802 | HPA051872 | U-2 OS    |
| 10708 | ENSG00000168802 | HPA065522 | CACO-2    |
| 10709 | ENSG00000168803 | HPA046215 | U-2 OS    |
| 10710 | ENSG00000168806 | HPA048176 | U-2 OS    |
| 10711 | ENSG00000168813 | HPA030964 | U-2 OS    |
| 10712 | ENSG00000168813 | HPA049728 | U-2 OS    |
| 10713 | ENSG00000168818 | HPA003019 | U-2 OS    |
| 10714 | ENSG00000168826 | HPA024450 | A-431     |
| 10715 | ENSG00000168827 | HPA061405 | A-431     |
| 10716 | ENSG00000168872 | HPA066668 | CACO-2    |
| 10717 | ENSG00000168874 | HPA028406 | RT4       |
| 10718 | ENSG00000168876 | HPA040273 | U-2 OS    |
| 10719 | ENSG00000168876 | HPA048137 | U-2 OS    |
| 10720 | ENSG00000168883 | HPA034823 | U-2 OS    |
| 10721 | ENSG00000168884 | HPA049886 | U-2 OS    |
| 10722 | ENSG00000168884 | HPA063197 | U-2 OS    |
| 10723 | ENSG00000168887 | HPA051143 | CACO-2    |

|       |                 |           |           |
|-------|-----------------|-----------|-----------|
| 10724 | ENSG00000168894 | HPA046112 | U-2 OS    |
| 10725 | ENSG00000168899 | HPA035082 | BJ        |
| 10726 | ENSG00000168904 | HPA039378 | HEK 293   |
| 10727 | ENSG00000168904 | HPA066130 | U-2 OS    |
| 10728 | ENSG00000168906 | HPA043028 | U-251 MG  |
| 10729 | ENSG00000168907 | HPA042713 | RT4       |
| 10730 | ENSG00000168916 | HPA076984 | U-2 OS    |
| 10731 | ENSG00000168917 | HPA064728 | U-2 OS    |
| 10732 | ENSG00000168918 | HPA070455 | Hep G2    |
| 10733 | ENSG00000168924 | HPA011029 | U-2 OS    |
| 10734 | ENSG00000168939 | CAB013505 | U-2 OS    |
| 10735 | ENSG00000168944 | HPA028823 | U-2 OS    |
| 10736 | ENSG00000168955 | HPA065531 | A549      |
| 10737 | ENSG00000168958 | HPA074625 | U-2 OS    |
| 10738 | ENSG00000168961 | HPA046876 | U-2 OS    |
| 10739 | ENSG00000168970 | HPA005726 | U-2 OS    |
| 10740 | ENSG00000168993 | HPA071191 | U-2 OS    |
| 10741 | ENSG00000168994 | HPA019246 | U-2 OS    |
| 10742 | ENSG00000169016 | HPA075185 | U-2 OS    |
| 10743 | ENSG00000169018 | HPA041920 | U-2 OS    |
| 10744 | ENSG00000169019 | HPA035887 | A-431     |
| 10745 | ENSG00000169020 | HPA035010 | U-2 OS    |
| 10746 | ENSG00000169021 | HPA041863 | U-2 OS    |
| 10747 | ENSG00000169031 | HPA042064 | U-2 OS    |
| 10748 | ENSG00000169032 | CAB003834 | U-2 OS    |
| 10749 | ENSG00000169032 | HPA026430 | U-2 OS    |
| 10750 | ENSG00000169035 | HPA018994 | A-431     |
| 10751 | ENSG00000169045 | HPA000914 | U-2 OS    |
| 10752 | ENSG00000169045 | HPA016884 | U-2 OS    |
| 10753 | ENSG00000169047 | CAB005261 | U-2 OS    |
| 10754 | ENSG00000169047 | HPA046433 | U-2 OS    |
| 10755 | ENSG00000169057 | HPA000593 | U-2 OS    |
| 10756 | ENSG00000169062 | HPA061316 | U-2 OS    |
| 10757 | ENSG00000169083 | HPA065701 | U-2 OS    |
| 10758 | ENSG00000169084 | HPA003035 | U-2 OS    |
| 10759 | ENSG00000169085 | HPA075134 | SK-MEL-30 |
| 10760 | ENSG00000169087 | HPA044930 | U-2 OS    |
| 10761 | ENSG00000169093 | HPA003630 | U-2 OS    |
| 10762 | ENSG00000169093 | HPA021865 | U-2 OS    |
| 10763 | ENSG00000169100 | HPA046835 | U-2 OS    |
| 10764 | ENSG00000169105 | HPA057697 | U-2 OS    |
| 10765 | ENSG00000169116 | HPA038236 | RT4       |
| 10766 | ENSG00000169118 | HPA018209 | U-2 OS    |
| 10767 | ENSG00000169122 | HPA008318 | U-2 OS    |
| 10768 | ENSG00000169129 | HPA037843 | A-431     |
| 10769 | ENSG00000169131 | HPA052043 | A-431     |
| 10770 | ENSG00000169136 | HPA030187 | U-2 OS    |
| 10771 | ENSG00000169139 | HPA052535 | CACO-2    |
| 10772 | ENSG00000169139 | HPA053186 | Hep G2    |
| 10773 | ENSG00000169155 | HPA016825 | U-2 OS    |
| 10774 | ENSG00000169169 | HPA014529 | U-251 MG  |
| 10775 | ENSG00000169180 | HPA038246 | U-2 OS    |
| 10776 | ENSG00000169184 | HPA003072 | U-2 OS    |
| 10777 | ENSG00000169188 | HPA048577 | U-2 OS    |
| 10778 | ENSG00000169189 | HPA043091 | U-2 OS    |

|       |                 |           |          |
|-------|-----------------|-----------|----------|
| 10779 | ENSG00000169193 | HPA026883 | U-2 OS   |
| 10780 | ENSG00000169194 | HPA042421 | U-2 OS   |
| 10781 | ENSG00000169203 | HPA053611 | U-2 OS   |
| 10782 | ENSG00000169213 | HPA003159 | U-251 MG |
| 10783 | ENSG00000169217 | HPA041508 | U-2 OS   |
| 10784 | ENSG00000169217 | HPA061309 | U-2 OS   |
| 10785 | ENSG00000169220 | HPA046847 | CACO-2   |
| 10786 | ENSG00000169220 | HPA061819 | CACO-2   |
| 10787 | ENSG00000169224 | HPA027510 | NB-4     |
| 10788 | ENSG00000169228 | HPA034945 | U-2 OS   |
| 10789 | ENSG00000169230 | HPA005701 | U-2 OS   |
| 10790 | ENSG00000169231 | HPA073242 | U-2 OS   |
| 10791 | ENSG00000169239 | HPA012618 | HEK 293  |
| 10792 | ENSG00000169246 | HPA053611 | U-2 OS   |
| 10793 | ENSG00000169247 | HPA037683 | U-2 OS   |
| 10794 | ENSG00000169251 | HPA035019 | U-2 OS   |
| 10795 | ENSG00000169252 | HPA075322 | U-2 OS   |
| 10796 | ENSG00000169255 | HPA041204 | U-2 OS   |
| 10797 | ENSG00000169258 | HPA036478 | U-2 OS   |
| 10798 | ENSG00000169258 | HPA070892 | U-2 OS   |
| 10799 | ENSG00000169271 | HPA062124 | U-2 OS   |
| 10800 | ENSG00000169282 | HPA036110 | U-2 OS   |
| 10801 | ENSG00000169288 | HPA043656 | MCF7     |
| 10802 | ENSG00000169297 | HPA061948 | RT4      |
| 10803 | ENSG00000169297 | HPA067207 | RT4      |
| 10804 | ENSG00000169299 | HPA040676 | U-2 OS   |
| 10805 | ENSG00000169302 | HPA040236 | RT4      |
| 10806 | ENSG00000169330 | HPA011545 | U-2 OS   |
| 10807 | ENSG00000169359 | HPA060345 | U-2 OS   |
| 10808 | ENSG00000169371 | CAB005004 | U-2 OS   |
| 10809 | ENSG00000169372 | CAB005337 | U-2 OS   |
| 10810 | ENSG00000169375 | CAB004506 | A-431    |
| 10811 | ENSG00000169375 | HPA062123 | U-2 OS   |
| 10812 | ENSG00000169379 | HPA048926 | U-2 OS   |
| 10813 | ENSG00000169398 | HPA001842 | U-2 OS   |
| 10814 | ENSG00000169398 | HPA029671 | U-2 OS   |
| 10815 | ENSG00000169403 | HPA027543 | U-2 OS   |
| 10816 | ENSG00000169410 | HPA041922 | U-2 OS   |
| 10817 | ENSG00000169418 | HPA031087 | U-2 OS   |
| 10818 | ENSG00000169427 | HPA075842 | U-2 OS   |
| 10819 | ENSG00000169432 | HPA061843 | BJ       |
| 10820 | ENSG00000169435 | HPA037712 | RT4      |
| 10821 | ENSG00000169436 | HPA024830 | RT4      |
| 10822 | ENSG00000169439 | HPA044416 | U-2 OS   |
| 10823 | ENSG00000169490 | HPA047152 | U-2 OS   |
| 10824 | ENSG00000169499 | HPA004706 | U-2 OS   |
| 10825 | ENSG00000169504 | HPA008019 | U-2 OS   |
| 10826 | ENSG00000169508 | HPA028847 | U-2 OS   |
| 10827 | ENSG00000169515 | HPA041993 | U-2 OS   |
| 10828 | ENSG00000169519 | HPA039885 | U-2 OS   |
| 10829 | ENSG00000169548 | HPA044475 | U-2 OS   |
| 10830 | ENSG00000169551 | HPA059575 | K-562    |
| 10831 | ENSG00000169554 | HPA003456 | U-2 OS   |
| 10832 | ENSG00000169564 | HPA043803 | U-2 OS   |
| 10833 | ENSG00000169564 | HPA068497 | CACO-2   |

|       |                 |           |          |
|-------|-----------------|-----------|----------|
| 10834 | ENSG00000169567 | HPA044577 | U-2 OS   |
| 10835 | ENSG00000169570 | HPA054864 | U-2 OS   |
| 10836 | ENSG00000169583 | HPA005963 | U-2 OS   |
| 10837 | ENSG00000169592 | HPA043146 | U-2 OS   |
| 10838 | ENSG00000169594 | HPA063183 | A-431    |
| 10839 | ENSG00000169594 | HPA066947 | HaCaT    |
| 10840 | ENSG00000169594 | HPA077428 | U-2 OS   |
| 10841 | ENSG00000169598 | HPA052904 | PC-3     |
| 10842 | ENSG00000169599 | HPA035826 | U-2 OS   |
| 10843 | ENSG00000169604 | HPA054785 | U-2 OS   |
| 10844 | ENSG00000169607 | HPA070737 | A-431    |
| 10845 | ENSG00000169609 | HPA042980 | HEK 293  |
| 10846 | ENSG00000169612 | HPA041923 | U-2 OS   |
| 10847 | ENSG00000169621 | HPA034642 | U-2 OS   |
| 10848 | ENSG00000169627 | HPA045380 | U-2 OS   |
| 10849 | ENSG00000169629 | HPA067564 | CACO-2   |
| 10850 | ENSG00000169635 | HPA059399 | CACO-2   |
| 10851 | ENSG00000169641 | HPA028506 | U-2 OS   |
| 10852 | ENSG00000169641 | HPA028542 | U-2 OS   |
| 10853 | ENSG00000169660 | HPA023379 | U-2 OS   |
| 10854 | ENSG00000169679 | HPA006123 | U-2 OS   |
| 10855 | ENSG00000169682 | HPA041995 | U-2 OS   |
| 10856 | ENSG00000169682 | HPA042988 | U-2 OS   |
| 10857 | ENSG00000169683 | HPA023372 | U-2 OS   |
| 10858 | ENSG00000169684 | HPA054381 | U-2 OS   |
| 10859 | ENSG00000169692 | HPA019544 | U-2 OS   |
| 10860 | ENSG00000169696 | HPA026749 | U-2 OS   |
| 10861 | ENSG00000169710 | CAB005192 | U-2 OS   |
| 10862 | ENSG00000169710 | HPA006461 | U-2 OS   |
| 10863 | ENSG00000169714 | HPA063097 | SH-SY5Y  |
| 10864 | ENSG00000169715 | HPA041152 | BJ       |
| 10865 | ENSG00000169718 | HPA023384 | U-2 OS   |
| 10866 | ENSG00000169727 | HPA047448 | HEK 293  |
| 10867 | ENSG00000169727 | HPA052848 | MCF7     |
| 10868 | ENSG00000169733 | HPA011564 | U-251 MG |
| 10869 | ENSG00000169733 | HPA031673 | U-2 OS   |
| 10870 | ENSG00000169738 | HPA023371 | U-2 OS   |
| 10871 | ENSG00000169738 | HPA023863 | U-2 OS   |
| 10872 | ENSG00000169740 | HPA039148 | U-2 OS   |
| 10873 | ENSG00000169744 | HPA068634 | U-2 OS   |
| 10874 | ENSG00000169756 | HPA058455 | U-251 MG |
| 10875 | ENSG00000169758 | HPA041921 | U-2 OS   |
| 10876 | ENSG00000169760 | HPA006572 | U-2 OS   |
| 10877 | ENSG00000169762 | HPA048658 | U-2 OS   |
| 10878 | ENSG00000169764 | HPA064836 | U-2 OS   |
| 10879 | ENSG00000169783 | HPA074653 | U-2 OS   |
| 10880 | ENSG00000169813 | HPA016884 | U-2 OS   |
| 10881 | ENSG00000169813 | HPA069667 | U-2 OS   |
| 10882 | ENSG00000169826 | HPA031540 | U-2 OS   |
| 10883 | ENSG00000169851 | HPA046521 | U-2 OS   |
| 10884 | ENSG00000169855 | HPA052968 | U-2 OS   |
| 10885 | ENSG00000169855 | HPA074461 | U-2 OS   |
| 10886 | ENSG00000169857 | HPA020863 | U-2 OS   |
| 10887 | ENSG00000169862 | HPA015077 | MCF7     |
| 10888 | ENSG00000169871 | HPA024358 | U-2 OS   |

|       |                 |           |             |
|-------|-----------------|-----------|-------------|
| 10889 | ENSG00000169884 | HPA062539 | CACO-2      |
| 10890 | ENSG00000169895 | HPA000882 | U-2 OS      |
| 10891 | ENSG00000169895 | HPA048047 | U-2 OS      |
| 10892 | ENSG00000169902 | HPA061837 | U-2 OS      |
| 10893 | ENSG00000169903 | HPA046430 | U-2 OS      |
| 10894 | ENSG00000169905 | HPA051849 | U-2 OS      |
| 10895 | ENSG00000169905 | HPA070542 | SiHa        |
| 10896 | ENSG00000169914 | HPA028543 | U-2 OS      |
| 10897 | ENSG00000169914 | HPA028544 | U-2 OS      |
| 10898 | ENSG00000169918 | HPA044554 | U-2 OS      |
| 10899 | ENSG00000169919 | HPA036322 | U-2 OS      |
| 10900 | ENSG00000169925 | HPA051830 | U-2 OS      |
| 10901 | ENSG00000169946 | HPA004094 | A-431       |
| 10902 | ENSG00000169951 | HPA003203 | HEK 293     |
| 10903 | ENSG00000169955 | HPA003203 | HEK 293     |
| 10904 | ENSG00000169955 | HPA069173 | U-2 OS      |
| 10905 | ENSG00000169957 | HPA066512 | U-2 OS      |
| 10906 | ENSG00000169964 | HPA052569 | U-2 OS      |
| 10907 | ENSG00000169967 | HPA021540 | U-2 OS      |
| 10908 | ENSG00000169972 | HPA032057 | U-2 OS      |
| 10909 | ENSG00000169972 | HPA039999 | HEK 293     |
| 10910 | ENSG00000169976 | HPA054408 | U-2 OS      |
| 10911 | ENSG00000169981 | HPA054738 | U-2 OS      |
| 10912 | ENSG00000169989 | HPA035649 | U-2 OS      |
| 10913 | ENSG00000169991 | HPA064603 | CACO-2      |
| 10914 | ENSG00000169992 | HPA055321 | U-2 OS      |
| 10915 | ENSG00000170004 | HPA076524 | U-2 OS      |
| 10916 | ENSG00000170006 | HPA055411 | U-251 MG    |
| 10917 | ENSG00000170011 | HPA006433 | RT4         |
| 10918 | ENSG00000170027 | HPA026918 | U-2 OS      |
| 10919 | ENSG00000170027 | HPA061603 | U-2 OS      |
| 10920 | ENSG00000170037 | HPA023321 | U-2 OS      |
| 10921 | ENSG00000170044 | HPA077519 | RPTEC TERT1 |
| 10922 | ENSG00000170049 | HPA077993 | U-2 OS      |
| 10923 | ENSG00000170085 | HPA037889 | CACO-2      |
| 10924 | ENSG00000170085 | HPA037890 | CACO-2      |
| 10925 | ENSG00000170088 | HPA014717 | U-2 OS      |
| 10926 | ENSG00000170091 | HPA046531 | U-2 OS      |
| 10927 | ENSG00000170091 | HPA056191 | SH-SY5Y     |
| 10928 | ENSG00000170100 | HPA052057 | U-2 OS      |
| 10929 | ENSG00000170122 | HPA012836 | U-2 OS      |
| 10930 | ENSG00000170142 | CAB073413 | MCF7        |
| 10931 | ENSG00000170144 | HPA005812 | U-2 OS      |
| 10932 | ENSG00000170144 | HPA066381 | RT4         |
| 10933 | ENSG00000170145 | HPA016026 | CACO-2      |
| 10934 | ENSG00000170160 | HPA047220 | RT4         |
| 10935 | ENSG00000170166 | HPA054383 | HEK 293     |
| 10936 | ENSG00000170166 | HPA070349 | U-2 OS      |
| 10937 | ENSG00000170180 | HPA014811 | HEL         |
| 10938 | ENSG00000170185 | HPA036990 | CACO-2      |
| 10939 | ENSG00000170185 | HPA047948 | PC-3        |
| 10940 | ENSG00000170191 | HPA050342 | A-431       |
| 10941 | ENSG00000170214 | HPA074416 | U-2 OS      |
| 10942 | ENSG00000170234 | HPA046733 | CACO-2      |
| 10943 | ENSG00000170234 | HPA058233 | CACO-2      |

|       |                 |           |          |
|-------|-----------------|-----------|----------|
| 10944 | ENSG00000170248 | HPA011905 | U-2 OS   |
| 10945 | ENSG00000170248 | HPA051604 | U-2 OS   |
| 10946 | ENSG00000170260 | HPA049807 | MCF7     |
| 10947 | ENSG00000170260 | HPA054178 | HEK 293  |
| 10948 | ENSG00000170265 | HPA024374 | U-2 OS   |
| 10949 | ENSG00000170266 | HPA040610 | U-2 OS   |
| 10950 | ENSG00000170270 | HPA051832 | U-2 OS   |
| 10951 | ENSG00000170275 | HPA044150 | U-2 OS   |
| 10952 | ENSG00000170290 | CAB011628 | U-2 OS   |
| 10953 | ENSG00000170291 | HPA052411 | HEK 293  |
| 10954 | ENSG00000170293 | HPA073258 | HEK 293  |
| 10955 | ENSG00000170296 | HPA065883 | HEK 293  |
| 10956 | ENSG00000170298 | HPA046876 | U-2 OS   |
| 10957 | ENSG00000170310 | HPA001540 | U-2 OS   |
| 10958 | ENSG00000170312 | HPA003387 | A-431    |
| 10959 | ENSG00000170322 | HPA007082 | U-2 OS   |
| 10960 | ENSG00000170322 | HPA007128 | U-2 OS   |
| 10961 | ENSG00000170325 | HPA026997 | U-2 OS   |
| 10962 | ENSG00000170340 | HPA005997 | U-2 OS   |
| 10963 | ENSG00000170345 | HPA018531 | U-2 OS   |
| 10964 | ENSG00000170348 | HPA047139 | A-431    |
| 10965 | ENSG00000170364 | HPA057999 | U-2 OS   |
| 10966 | ENSG00000170365 | CAB005389 | U-2 OS   |
| 10967 | ENSG00000170370 | HPA065294 | RT4      |
| 10968 | ENSG00000170379 | HPA038756 | A-431    |
| 10969 | ENSG00000170381 | HPA063804 | U-2 OS   |
| 10970 | ENSG00000170382 | HPA029124 | U-2 OS   |
| 10971 | ENSG00000170385 | HPA015275 | U-2 OS   |
| 10972 | ENSG00000170385 | HPA049000 | U-2 OS   |
| 10973 | ENSG00000170396 | HPA029195 | U-251 MG |
| 10974 | ENSG00000170412 | HPA029776 | RT4      |
| 10975 | ENSG00000170417 | HPA045861 | CACO-2   |
| 10976 | ENSG00000170421 | CAB000131 | U-2 OS   |
| 10977 | ENSG00000170421 | HPA049866 | CACO-2   |
| 10978 | ENSG00000170425 | HPA073747 | U-2 OS   |
| 10979 | ENSG00000170430 | HPA032135 | CACO-2   |
| 10980 | ENSG00000170430 | HPA032136 | CACO-2   |
| 10981 | ENSG00000170439 | HPA038644 | U-2 OS   |
| 10982 | ENSG00000170442 | HPA039798 | U-2 OS   |
| 10983 | ENSG00000170445 | HPA036539 | U-2 OS   |
| 10984 | ENSG00000170448 | HPA059132 | Hep G2   |
| 10985 | ENSG00000170454 | HPA076201 | U-2 OS   |
| 10986 | ENSG00000170456 | HPA038865 | U-2 OS   |
| 10987 | ENSG00000170458 | HPA001887 | SiHa     |
| 10988 | ENSG00000170464 | HPA036538 | U-2 OS   |
| 10989 | ENSG00000170464 | HPA060154 | U-2 OS   |
| 10990 | ENSG00000170465 | HPA045697 | U-2 OS   |
| 10991 | ENSG00000170465 | HPA061168 | HaCaT    |
| 10992 | ENSG00000170468 | HPA003730 | U-2 OS   |
| 10993 | ENSG00000170469 | HPA044000 | U-2 OS   |
| 10994 | ENSG00000170471 | HPA051454 | CACO-2   |
| 10995 | ENSG00000170473 | HPA039717 | RT4      |
| 10996 | ENSG00000170477 | HPA034881 | HaCaT    |
| 10997 | ENSG00000170485 | HPA019674 | U-2 OS   |
| 10998 | ENSG00000170498 | HPA035542 | U-2 OS   |

|       |                 |           |          |
|-------|-----------------|-----------|----------|
| 10999 | ENSG00000170500 | HPA057366 | A549     |
| 11000 | ENSG00000170502 | HPA078535 | U-2 OS   |
| 11001 | ENSG00000170509 | HPA029125 | U-2 OS   |
| 11002 | ENSG00000170515 | CAB011711 | A-431    |
| 11003 | ENSG00000170515 | CAB012428 | U-2 OS   |
| 11004 | ENSG00000170525 | HPA008266 | U-251 MG |
| 11005 | ENSG00000170525 | HPA043889 | A549     |
| 11006 | ENSG00000170537 | HPA029465 | U-2 OS   |
| 11007 | ENSG00000170540 | HPA045307 | U-2 OS   |
| 11008 | ENSG00000170542 | HPA030067 | A549     |
| 11009 | ENSG00000170545 | HPA039711 | U-2 OS   |
| 11010 | ENSG00000170549 | HPA043160 | U-2 OS   |
| 11011 | ENSG00000170558 | CAB000141 | U-2 OS   |
| 11012 | ENSG00000170561 | HPA050895 | MCF7     |
| 11013 | ENSG00000170577 | HPA056958 | U-2 OS   |
| 11014 | ENSG00000170581 | HPA018888 | U-2 OS   |
| 11015 | ENSG00000170584 | HPA037385 | U-2 OS   |
| 11016 | ENSG00000170604 | HPA049480 | U-2 OS   |
| 11017 | ENSG00000170606 | HPA010023 | U-2 OS   |
| 11018 | ENSG00000170608 | HPA054034 | CACO-2   |
| 11019 | ENSG00000170619 | HPA046905 | PC-3     |
| 11020 | ENSG00000170627 | HPA038877 | U-2 OS   |
| 11021 | ENSG00000170631 | HPA061835 | U-2 OS   |
| 11022 | ENSG00000170632 | HPA011036 | U-2 OS   |
| 11023 | ENSG00000170632 | HPA011057 | U-2 OS   |
| 11024 | ENSG00000170633 | HPA074151 | CACO-2   |
| 11025 | ENSG00000170634 | HPA035301 | U-2 OS   |
| 11026 | ENSG00000170638 | HPA000822 | U-2 OS   |
| 11027 | ENSG00000170653 | HPA003384 | U-2 OS   |
| 11028 | ENSG00000170667 | HPA043010 | U-2 OS   |
| 11029 | ENSG00000170677 | CAB010189 | U-2 OS   |
| 11030 | ENSG00000170681 | HPA020973 | U-2 OS   |
| 11031 | ENSG00000170684 | HPA049576 | U-2 OS   |
| 11032 | ENSG00000170689 | HPA031463 | U-2 OS   |
| 11033 | ENSG00000170703 | HPA052397 | CACO-2   |
| 11034 | ENSG00000170734 | HPA006721 | U-2 OS   |
| 11035 | ENSG00000170745 | HPA014864 | A-431    |
| 11036 | ENSG00000170759 | HPA037589 | U-2 OS   |
| 11037 | ENSG00000170759 | HPA037590 | U-2 OS   |
| 11038 | ENSG00000170775 | HPA042903 | U-2 OS   |
| 11039 | ENSG00000170776 | HPA019773 | U-2 OS   |
| 11040 | ENSG00000170779 | HPA064971 | U-2 OS   |
| 11041 | ENSG00000170791 | HPA050783 | HEK 293  |
| 11042 | ENSG00000170801 | HPA063810 | HeLa     |
| 11043 | ENSG00000170802 | HPA003485 | U-2 OS   |
| 11044 | ENSG00000170819 | HPA038464 | U-2 OS   |
| 11045 | ENSG00000170832 | HPA044365 | U-2 OS   |
| 11046 | ENSG00000170836 | HPA022277 | A-431    |
| 11047 | ENSG00000170837 | HPA029395 | RT4      |
| 11048 | ENSG00000170852 | HPA021133 | U-2 OS   |
| 11049 | ENSG00000170854 | HPA007603 | U-2 OS   |
| 11050 | ENSG00000170855 | HPA053640 | MCF7     |
| 11051 | ENSG00000170860 | HPA044966 | U-2 OS   |
| 11052 | ENSG00000170871 | HPA036892 | U-2 OS   |
| 11053 | ENSG00000170873 | HPA019613 | HEL      |

|       |                 |           |          |
|-------|-----------------|-----------|----------|
| 11054 | ENSG00000170891 | HPA067201 | U-2 OS   |
| 11055 | ENSG00000170892 | HPA048208 | U-2 OS   |
| 11056 | ENSG00000170903 | HPA014411 | U-2 OS   |
| 11057 | ENSG00000170909 | HPA073996 | SiHa     |
| 11058 | ENSG00000170915 | HPA064625 | U-2 OS   |
| 11059 | ENSG00000170921 | HPA023274 | U-2 OS   |
| 11060 | ENSG00000170946 | HPA020025 | U-2 OS   |
| 11061 | ENSG00000170949 | HPA023599 | U-2 OS   |
| 11062 | ENSG00000170954 | HPA005553 | U-2 OS   |
| 11063 | ENSG00000170955 | HPA073327 | A-431    |
| 11064 | ENSG00000170961 | HPA052060 | U-2 OS   |
| 11065 | ENSG00000170962 | HPA046183 | U-2 OS   |
| 11066 | ENSG00000170989 | HPA075568 | U-251 MG |
| 11067 | ENSG00000171004 | HPA034626 | U-2 OS   |
| 11068 | ENSG00000171016 | HPA042248 | U-2 OS   |
| 11069 | ENSG00000171044 | HPA024828 | U-2 OS   |
| 11070 | ENSG00000171044 | HPA064769 | RT4      |
| 11071 | ENSG00000171045 | HPA015890 | SiHa     |
| 11072 | ENSG00000171051 | HPA061744 | U-2 OS   |
| 11073 | ENSG00000171055 | HPA035978 | U-2 OS   |
| 11074 | ENSG00000171056 | HPA009065 | U-2 OS   |
| 11075 | ENSG00000171060 | HPA027986 | U-2 OS   |
| 11076 | ENSG00000171067 | HPA012748 | U-2 OS   |
| 11077 | ENSG00000171094 | HPA010694 | RH-30    |
| 11078 | ENSG00000171097 | HPA021176 | U-2 OS   |
| 11079 | ENSG00000171100 | HPA010008 | U-2 OS   |
| 11080 | ENSG00000171103 | HPA026751 | U-2 OS   |
| 11081 | ENSG00000171105 | HPA036303 | U-2 OS   |
| 11082 | ENSG00000171109 | HPA059230 | U-2 OS   |
| 11083 | ENSG00000171119 | HPA065260 | U-2 OS   |
| 11084 | ENSG00000171121 | HPA019185 | U-2 OS   |
| 11085 | ENSG00000171126 | HPA041625 | HEK 293  |
| 11086 | ENSG00000171132 | HPA054252 | U-2 OS   |
| 11087 | ENSG00000171135 | HPA067610 | U-2 OS   |
| 11088 | ENSG00000171148 | HPA042250 | U-2 OS   |
| 11089 | ENSG00000171150 | HPA020884 | U-2 OS   |
| 11090 | ENSG00000171155 | HPA015632 | A-431    |
| 11091 | ENSG00000171159 | HPA020725 | U-2 OS   |
| 11092 | ENSG00000171161 | HPA055779 | U-2 OS   |
| 11093 | ENSG00000171161 | HPA062506 | U-2 OS   |
| 11094 | ENSG00000171163 | HPA059337 | U-2 OS   |
| 11095 | ENSG00000171163 | HPA062792 | U-2 OS   |
| 11096 | ENSG00000171169 | HPA054898 | U-2 OS   |
| 11097 | ENSG00000171169 | HPA064931 | MCF7     |
| 11098 | ENSG00000171174 | HPA019725 | U-2 OS   |
| 11099 | ENSG00000171202 | HPA046648 | U-2 OS   |
| 11100 | ENSG00000171204 | HPA014480 | U-2 OS   |
| 11101 | ENSG00000171206 | HPA023560 | U-2 OS   |
| 11102 | ENSG00000171206 | HPA023561 | U-2 OS   |
| 11103 | ENSG00000171208 | HPA013180 | U-2 OS   |
| 11104 | ENSG00000171219 | HPA027382 | U-2 OS   |
| 11105 | ENSG00000171222 | HPA047138 | U-2 OS   |
| 11106 | ENSG00000171223 | HPA019149 | U-2 OS   |
| 11107 | ENSG00000171224 | HPA034591 | U-2 OS   |
| 11108 | ENSG00000171227 | HPA053794 | CACO-2   |



|       |                 |           |             |
|-------|-----------------|-----------|-------------|
| 11109 | ENSG00000171236 | HPA001889 | Hep G2      |
| 11110 | ENSG00000171241 | HPA048876 | U-2 OS      |
| 11111 | ENSG00000171262 | HPA008502 | U-2 OS      |
| 11112 | ENSG00000171291 | HPA047845 | RT4         |
| 11113 | ENSG00000171295 | HPA047845 | RT4         |
| 11114 | ENSG00000171307 | HPA040214 | U-2 OS      |
| 11115 | ENSG00000171310 | HPA052828 | U-251 MG    |
| 11116 | ENSG00000171311 | HPA038370 | U-2 OS      |
| 11117 | ENSG00000171314 | HPA042528 | CACO-2      |
| 11118 | ENSG00000171314 | HPA060483 | U-2 OS      |
| 11119 | ENSG00000171316 | HPA053075 | U-2 OS      |
| 11120 | ENSG00000171320 | HPA027243 | U-2 OS      |
| 11121 | ENSG00000171320 | HPA053679 | U-2 OS      |
| 11122 | ENSG00000171345 | HPA002465 | RT4         |
| 11123 | ENSG00000171346 | HPA023910 | HaCaT       |
| 11124 | ENSG00000171346 | HPA024554 | HaCaT       |
| 11125 | ENSG00000171357 | HPA030060 | U-2 OS      |
| 11126 | ENSG00000171357 | HPA030061 | RPTEC TERT1 |
| 11127 | ENSG00000171365 | HPA003213 | CACO-2      |
| 11128 | ENSG00000171368 | HPA036576 | U-2 OS      |
| 11129 | ENSG00000171401 | HPA030877 | A-431       |
| 11130 | ENSG00000171401 | HPA069771 | A-431       |
| 11131 | ENSG00000171405 | HPA055941 | U-2 OS      |
| 11132 | ENSG00000171408 | HPA023967 | U-2 OS      |
| 11133 | ENSG00000171421 | HPA047238 | U-2 OS      |
| 11134 | ENSG00000171431 | HPA024684 | U-2 OS      |
| 11135 | ENSG00000171433 | HPA010667 | U-2 OS      |
| 11136 | ENSG00000171443 | HPA050981 | U-2 OS      |
| 11137 | ENSG00000171444 | HPA037390 | U-2 OS      |
| 11138 | ENSG00000171444 | HPA037391 | RT4         |
| 11139 | ENSG00000171451 | HPA060942 | RH-30       |
| 11140 | ENSG00000171453 | HPA031010 | U-2 OS      |
| 11141 | ENSG00000171456 | HPA064156 | CACO-2      |
| 11142 | ENSG00000171462 | HPA068672 | A-431       |
| 11143 | ENSG00000171462 | HPA070955 | U-2 OS      |
| 11144 | ENSG00000171466 | HPA062397 | PC-3        |
| 11145 | ENSG00000171467 | HPA027031 | U-2 OS      |
| 11146 | ENSG00000171469 | HPA062397 | PC-3        |
| 11147 | ENSG00000171475 | HPA024000 | U-2 OS      |
| 11148 | ENSG00000171475 | HPA024001 | U-2 OS      |
| 11149 | ENSG00000171476 | HPA030180 | HaCaT       |
| 11150 | ENSG00000171488 | HPA029347 | U-2 OS      |
| 11151 | ENSG00000171490 | HPA043483 | U-2 OS      |
| 11152 | ENSG00000171492 | HPA014745 | U-2 OS      |
| 11153 | ENSG00000171497 | HPA019692 | U-2 OS      |
| 11154 | ENSG00000171517 | HPA013421 | PC-3        |
| 11155 | ENSG00000171530 | HPA036487 | U-2 OS      |
| 11156 | ENSG00000171533 | HPA039062 | SH-SY5Y     |
| 11157 | ENSG00000171551 | HPA067560 | U-2 OS      |
| 11158 | ENSG00000171552 | CAB072801 | MCF7        |
| 11159 | ENSG00000171557 | HPA074638 | Hep G2      |
| 11160 | ENSG00000171560 | HPA051370 | Hep G2      |
| 11161 | ENSG00000171564 | HPA001900 | Hep G2      |
| 11162 | ENSG00000171564 | HPA001901 | Hep G2      |
| 11163 | ENSG00000171566 | HPA035931 | U-2 OS      |

|       |                 |           |          |
|-------|-----------------|-----------|----------|
| 11164 | ENSG00000171566 | HPA061486 | U-2 OS   |
| 11165 | ENSG00000171574 | HPA043408 | U-2 OS   |
| 11166 | ENSG00000171587 | HPA019324 | U-2 OS   |
| 11167 | ENSG00000171604 | HPA058148 | U-2 OS   |
| 11168 | ENSG00000171606 | HPA028880 | U-2 OS   |
| 11169 | ENSG00000171608 | HPA044953 | U-2 OS   |
| 11170 | ENSG00000171617 | HPA078061 | CACO-2   |
| 11171 | ENSG00000171634 | HPA029069 | U-2 OS   |
| 11172 | ENSG00000171634 | HPA048289 | U-2 OS   |
| 11173 | ENSG00000171649 | HPA059975 | U-2 OS   |
| 11174 | ENSG00000171659 | HPA010668 | U-2 OS   |
| 11175 | ENSG00000171659 | CAB025490 | U-2 OS   |
| 11176 | ENSG00000171680 | HPA049570 | U-2 OS   |
| 11177 | ENSG00000171681 | HPA016578 | U-2 OS   |
| 11178 | ENSG00000171681 | HPA023505 | U-2 OS   |
| 11179 | ENSG00000171695 | HPA056463 | SH-SY5Y  |
| 11180 | ENSG00000171700 | HPA056384 | CACO-2   |
| 11181 | ENSG00000171703 | HPA043836 | U-2 OS   |
| 11182 | ENSG00000171720 | CAB005583 | A-431    |
| 11183 | ENSG00000171720 | HPA052052 | U-2 OS   |
| 11184 | ENSG00000171723 | HPA024694 | U-2 OS   |
| 11185 | ENSG00000171724 | HPA044061 | U-2 OS   |
| 11186 | ENSG00000171729 | HPA019441 | U-2 OS   |
| 11187 | ENSG00000171735 | HPA036343 | U-2 OS   |
| 11188 | ENSG00000171747 | HPA031185 | U-2 OS   |
| 11189 | ENSG00000171757 | HPA035747 | U-2 OS   |
| 11190 | ENSG00000171759 | HPA028407 | CACO-2   |
| 11191 | ENSG00000171763 | HPA043679 | U-2 OS   |
| 11192 | ENSG00000171766 | HPA026077 | RT4      |
| 11193 | ENSG00000171772 | HPA040208 | U-2 OS   |
| 11194 | ENSG00000171777 | HPA041929 | U-2 OS   |
| 11195 | ENSG00000171786 | HPA017943 | U-2 OS   |
| 11196 | ENSG00000171790 | HPA054956 | CACO-2   |
| 11197 | ENSG00000171791 | HPA055295 | U-2 OS   |
| 11198 | ENSG00000171793 | CAB017111 | U-2 OS   |
| 11199 | ENSG00000171793 | HPA051322 | U-2 OS   |
| 11200 | ENSG00000171806 | HPA035314 | U-2 OS   |
| 11201 | ENSG00000171812 | HPA049788 | U-2 OS   |
| 11202 | ENSG00000171813 | HPA038056 | U-2 OS   |
| 11203 | ENSG00000171813 | HPA038502 | MCF7     |
| 11204 | ENSG00000171817 | HPA003444 | U-2 OS   |
| 11205 | ENSG00000171823 | HPA053889 | U-251 MG |
| 11206 | ENSG00000171824 | HPA028484 | U-2 OS   |
| 11207 | ENSG00000171827 | HPA028881 | U-2 OS   |
| 11208 | ENSG00000171840 | HPA058980 | SiHa     |
| 11209 | ENSG00000171843 | HPA001824 | U-2 OS   |
| 11210 | ENSG00000171848 | HPA056994 | U-2 OS   |
| 11211 | ENSG00000171853 | HPA043196 | U-2 OS   |
| 11212 | ENSG00000171858 | HPA003371 | U-2 OS   |
| 11213 | ENSG00000171861 | HPA022534 | U-2 OS   |
| 11214 | ENSG00000171862 | HPA031335 | U-2 OS   |
| 11215 | ENSG00000171863 | HPA056586 | U-2 OS   |
| 11216 | ENSG00000171867 | HPA043398 | U-2 OS   |
| 11217 | ENSG00000171885 | CAB005079 | A-431    |
| 11218 | ENSG00000171885 | HPA014784 | A-431    |

|       |                 |           |         |
|-------|-----------------|-----------|---------|
| 11219 | ENSG00000171914 | CAB017194 | U-2 OS  |
| 11220 | ENSG00000171916 | HPA046876 | U-2 OS  |
| 11221 | ENSG00000171928 | HPA019585 | A-431   |
| 11222 | ENSG00000171928 | HPA065603 | U-2 OS  |
| 11223 | ENSG00000171931 | HPA047457 | U-2 OS  |
| 11224 | ENSG00000171940 | HPA051857 | U-2 OS  |
| 11225 | ENSG00000171943 | HPA078079 | AF22    |
| 11226 | ENSG00000171951 | HPA075062 | SH-SY5Y |
| 11227 | ENSG00000171953 | HPA023329 | U-2 OS  |
| 11228 | ENSG00000171953 | HPA059422 | U-2 OS  |
| 11229 | ENSG00000171956 | HPA073369 | U-2 OS  |
| 11230 | ENSG00000171970 | HPA061915 | RT4     |
| 11231 | ENSG00000171984 | HPA040749 | U-2 OS  |
| 11232 | ENSG00000171988 | HPA056175 | U-2 OS  |
| 11233 | ENSG00000171988 | HPA066195 | U-2 OS  |
| 11234 | ENSG00000171992 | HPA034631 | U-2 OS  |
| 11235 | ENSG00000172000 | HPA060593 | U-2 OS  |
| 11236 | ENSG00000172005 | HPA065691 | A-431   |
| 11237 | ENSG00000172006 | HPA060247 | RT4     |
| 11238 | ENSG00000172006 | HPA063358 | RT4     |
| 11239 | ENSG00000172009 | CAB025497 | U-2 OS  |
| 11240 | ENSG00000172016 | HPA060705 | SH-SY5Y |
| 11241 | ENSG00000172020 | HPA013392 | SH-SY5Y |
| 11242 | ENSG00000172020 | HPA015600 | SH-SY5Y |
| 11243 | ENSG00000172031 | HPA035067 | U-2 OS  |
| 11244 | ENSG00000172037 | HPA050033 | U-2 OS  |
| 11245 | ENSG00000172053 | HPA036986 | U-2 OS  |
| 11246 | ENSG00000172053 | HPA036987 | Hep G2  |
| 11247 | ENSG00000172057 | HPA065643 | RT4     |
| 11248 | ENSG00000172058 | HPA075271 | HEK 293 |
| 11249 | ENSG00000172059 | HPA058276 | U-2 OS  |
| 11250 | ENSG00000172061 | HPA035503 | U-2 OS  |
| 11251 | ENSG00000172062 | CAB016324 | U-2 OS  |
| 11252 | ENSG00000172062 | HPA073601 | U-2 OS  |
| 11253 | ENSG00000172081 | HPA057744 | U-2 OS  |
| 11254 | ENSG00000172086 | HPA052666 | U-2 OS  |
| 11255 | ENSG00000172113 | HPA017909 | U-2 OS  |
| 11256 | ENSG00000172115 | CAB004222 | U-2 OS  |
| 11257 | ENSG00000172116 | HPA029164 | CACO-2  |
| 11258 | ENSG00000172137 | HPA007305 | U-2 OS  |
| 11259 | ENSG00000172137 | HPA007306 | U-2 OS  |
| 11260 | ENSG00000172159 | HPA017285 | RT4     |
| 11261 | ENSG00000172167 | HPA050594 | U-2 OS  |
| 11262 | ENSG00000172171 | HPA023788 | U-2 OS  |
| 11263 | ENSG00000172171 | HPA053044 | U-2 OS  |
| 11264 | ENSG00000172175 | HPA048432 | U-2 OS  |
| 11265 | ENSG00000172201 | HPA060800 | HEK 293 |
| 11266 | ENSG00000172216 | CAB004213 | U-2 OS  |
| 11267 | ENSG00000172216 | HPA061355 | U-2 OS  |
| 11268 | ENSG00000172216 | HPA062267 | U-2 OS  |
| 11269 | ENSG00000172232 | HPA055851 | U-2 OS  |
| 11270 | ENSG00000172232 | HPA075964 | THP-1   |
| 11271 | ENSG00000172239 | HPA076187 | U-2 OS  |
| 11272 | ENSG00000172260 | HPA011894 | U-2 OS  |
| 11273 | ENSG00000172262 | HPA027748 | U-2 OS  |

|       |                 |           |           |
|-------|-----------------|-----------|-----------|
| 11274 | ENSG00000172262 | HPA074630 | U-2 OS    |
| 11275 | ENSG00000172264 | HPA049076 | RT4       |
| 11276 | ENSG00000172270 | HPA074870 | HEK 293   |
| 11277 | ENSG00000172292 | HPA044683 | U-2 OS    |
| 11278 | ENSG00000172292 | HPA063527 | SH-SY5Y   |
| 11279 | ENSG00000172296 | HPA048079 | RT4       |
| 11280 | ENSG00000172301 | HPA052552 | U-2 OS    |
| 11281 | ENSG00000172331 | HPA028735 | U-2 OS    |
| 11282 | ENSG00000172336 | HPA021007 | U-2 OS    |
| 11283 | ENSG00000172339 | HPA031829 | A-431     |
| 11284 | ENSG00000172340 | HPA046705 | U-2 OS    |
| 11285 | ENSG00000172345 | HPA040662 | HaCaT     |
| 11286 | ENSG00000172346 | HPA076549 | U-2 OS    |
| 11287 | ENSG00000172348 | HPA053880 | U-2 OS    |
| 11288 | ENSG00000172349 | HPA018467 | U-2 OS    |
| 11289 | ENSG00000172349 | HPA048861 | U-2 OS    |
| 11290 | ENSG00000172354 | CAB010032 | U-2 OS    |
| 11291 | ENSG00000172354 | HPA040736 | U-2 OS    |
| 11292 | ENSG00000172361 | HPA041069 | U-2 OS    |
| 11293 | ENSG00000172375 | HPA011044 | U-2 OS    |
| 11294 | ENSG00000172379 | HPA001056 | RT4       |
| 11295 | ENSG00000172380 | HPA062208 | U-2 OS    |
| 11296 | ENSG00000172382 | HPA028848 | SH-SY5Y   |
| 11297 | ENSG00000172399 | HPA035764 | SK-MEL-30 |
| 11298 | ENSG00000172403 | HPA030665 | SH-SY5Y   |
| 11299 | ENSG00000172403 | HPA049707 | SH-SY5Y   |
| 11300 | ENSG00000172403 | HPA068563 | SH-SY5Y   |
| 11301 | ENSG00000172409 | HPA057770 | U-2 OS    |
| 11302 | ENSG00000172425 | HPA038731 | U-2 OS    |
| 11303 | ENSG00000172428 | HPA044845 | U-2 OS    |
| 11304 | ENSG00000172432 | HPA031418 | U-2 OS    |
| 11305 | ENSG00000172432 | HPA031419 | U-2 OS    |
| 11306 | ENSG00000172456 | HPA054971 | U-2 OS    |
| 11307 | ENSG00000172461 | HPA070923 | RT4       |
| 11308 | ENSG00000172465 | HPA057345 | U-2 OS    |
| 11309 | ENSG00000172465 | HPA060384 | U-2 OS    |
| 11310 | ENSG00000172466 | HPA024062 | A-431     |
| 11311 | ENSG00000172469 | HPA011046 | A-431     |
| 11312 | ENSG00000172476 | HPA076172 | U-2 OS    |
| 11313 | ENSG00000172478 | HPA052722 | CACO-2    |
| 11314 | ENSG00000172482 | HPA035371 | U-2 OS    |
| 11315 | ENSG00000172493 | HPA069947 | U-2 OS    |
| 11316 | ENSG00000172497 | HPA037723 | SK-MEL-30 |
| 11317 | ENSG00000172497 | HPA037724 | SK-MEL-30 |
| 11318 | ENSG00000172500 | HPA011729 | MCF7      |
| 11319 | ENSG00000172530 | HPA047164 | U-2 OS    |
| 11320 | ENSG00000172531 | HPA046833 | U-2 OS    |
| 11321 | ENSG00000172534 | HPA018312 | U-2 OS    |
| 11322 | ENSG00000172572 | HPA074258 | U-2 OS    |
| 11323 | ENSG00000172575 | HPA039389 | CACO-2    |
| 11324 | ENSG00000172578 | HPA024512 | U-2 OS    |
| 11325 | ENSG00000172586 | HPA039046 | U-2 OS    |
| 11326 | ENSG00000172590 | HPA012319 | U-2 OS    |
| 11327 | ENSG00000172594 | HPA030148 | U-2 OS    |
| 11328 | ENSG00000172602 | HPA077800 | A549      |

|       |                 |           |          |
|-------|-----------------|-----------|----------|
| 11329 | ENSG00000172613 | HPA006725 | U-2 OS   |
| 11330 | ENSG00000172613 | HPA048155 | U-2 OS   |
| 11331 | ENSG00000172661 | HPA047844 | U-2 OS   |
| 11332 | ENSG00000172661 | HPA060975 | RT4      |
| 11333 | ENSG00000172663 | HPA043744 | U-2 OS   |
| 11334 | ENSG00000172667 | HPA028671 | U-2 OS   |
| 11335 | ENSG00000172667 | HPA054356 | U-2 OS   |
| 11336 | ENSG00000172671 | HPA057543 | U-2 OS   |
| 11337 | ENSG00000172716 | HPA023030 | U-2 OS   |
| 11338 | ENSG00000172716 | HPA062062 | HEK 293  |
| 11339 | ENSG00000172725 | CAB017616 | U-2 OS   |
| 11340 | ENSG00000172725 | HPA040113 | U-2 OS   |
| 11341 | ENSG00000172728 | HPA058655 | CACO-2   |
| 11342 | ENSG00000172731 | HPA039630 | U-2 OS   |
| 11343 | ENSG00000172732 | HPA059530 | U-2 OS   |
| 11344 | ENSG00000172733 | HPA047746 | U-2 OS   |
| 11345 | ENSG00000172738 | HPA045432 | U-2 OS   |
| 11346 | ENSG00000172738 | HPA071187 | U-2 OS   |
| 11347 | ENSG00000172748 | HPA055463 | U-2 OS   |
| 11348 | ENSG00000172766 | HPA039761 | A-431    |
| 11349 | ENSG00000172766 | HPA040157 | U-2 OS   |
| 11350 | ENSG00000172771 | HPA037694 | U-2 OS   |
| 11351 | ENSG00000172771 | HPA057532 | U-2 OS   |
| 11352 | ENSG00000172775 | HPA054382 | U-2 OS   |
| 11353 | ENSG00000172775 | HPA059652 | U-2 OS   |
| 11354 | ENSG00000172780 | HPA046840 | U-2 OS   |
| 11355 | ENSG00000172785 | HPA042759 | U-2 OS   |
| 11356 | ENSG00000172789 | HPA026794 | U-2 OS   |
| 11357 | ENSG00000172795 | HPA057676 | CACO-2   |
| 11358 | ENSG00000172803 | HPA041775 | A-431    |
| 11359 | ENSG00000172809 | HPA052543 | U-2 OS   |
| 11360 | ENSG00000172818 | HPA003984 | A-431    |
| 11361 | ENSG00000172819 | HPA053883 | U-2 OS   |
| 11362 | ENSG00000172824 | HPA035701 | SiHa     |
| 11363 | ENSG00000172828 | HPA041307 | U-2 OS   |
| 11364 | ENSG00000172830 | HPA019949 | U-2 OS   |
| 11365 | ENSG00000172831 | HPA018897 | U-2 OS   |
| 11366 | ENSG00000172840 | HPA062059 | U-2 OS   |
| 11367 | ENSG00000172867 | HPA006299 | U-2 OS   |
| 11368 | ENSG00000172869 | HPA036431 | U-2 OS   |
| 11369 | ENSG00000172869 | HPA036432 | U-2 OS   |
| 11370 | ENSG00000172878 | HPA030299 | U-2 OS   |
| 11371 | ENSG00000172888 | HPA065518 | U-2 OS   |
| 11372 | ENSG00000172888 | HPA071440 | HeLa     |
| 11373 | ENSG00000172890 | CAB017798 | A-431    |
| 11374 | ENSG00000172890 | HPA038524 | U-2 OS   |
| 11375 | ENSG00000172893 | HPA044280 | CACO-2   |
| 11376 | ENSG00000172915 | HPA039730 | U-2 OS   |
| 11377 | ENSG00000172915 | HPA040385 | U-251 MG |
| 11378 | ENSG00000172922 | HPA065375 | MCF7     |
| 11379 | ENSG00000172927 | HPA012949 | U-2 OS   |
| 11380 | ENSG00000172932 | HPA039950 | U-2 OS   |
| 11381 | ENSG00000172935 | HPA028811 | BJ       |
| 11382 | ENSG00000172936 | CAB009104 | U-2 OS   |
| 11383 | ENSG00000172939 | HPA008237 | U-2 OS   |

|       |                 |           |          |
|-------|-----------------|-----------|----------|
| 11384 | ENSG00000172943 | HPA062015 | U-2 OS   |
| 11385 | ENSG00000172954 | HPA031880 | A-431    |
| 11386 | ENSG00000172977 | HPA016953 | U-2 OS   |
| 11387 | ENSG00000172985 | HPA044822 | U-2 OS   |
| 11388 | ENSG00000172985 | HPA048444 | U-2 OS   |
| 11389 | ENSG00000172986 | HPA068429 | U-2 OS   |
| 11390 | ENSG00000172992 | HPA060997 | U-2 OS   |
| 11391 | ENSG00000172995 | HPA017303 | U-2 OS   |
| 11392 | ENSG00000173011 | HPA035770 | U-2 OS   |
| 11393 | ENSG00000173020 | HPA048330 | U-2 OS   |
| 11394 | ENSG00000173039 | CAB004264 | U-2 OS   |
| 11395 | ENSG00000173039 | CAB005030 | U-2 OS   |
| 11396 | ENSG00000173039 | HPA063461 | U-2 OS   |
| 11397 | ENSG00000173040 | HPA040910 | U-2 OS   |
| 11398 | ENSG00000173041 | HPA003173 | U-2 OS   |
| 11399 | ENSG00000173064 | HPA041062 | U-2 OS   |
| 11400 | ENSG00000173065 | HPA051840 | CACO-2   |
| 11401 | ENSG00000173065 | HPA062239 | HEK 293  |
| 11402 | ENSG00000173068 | HPA059419 | U-251 MG |
| 11403 | ENSG00000173083 | CAB009813 | U-2 OS   |
| 11404 | ENSG00000173083 | HPA055344 | U-2 OS   |
| 11405 | ENSG00000173085 | HPA056599 | U-2 OS   |
| 11406 | ENSG00000173093 | HPA061568 | U-2 OS   |
| 11407 | ENSG00000173110 | HPA052504 | CACO-2   |
| 11408 | ENSG00000173113 | HPA040006 | U-2 OS   |
| 11409 | ENSG00000173114 | HPA046792 | SH-SY5Y  |
| 11410 | ENSG00000173120 | HPA044251 | U-2 OS   |
| 11411 | ENSG00000173137 | HPA028679 | U-2 OS   |
| 11412 | ENSG00000173141 | HPA059370 | U-2 OS   |
| 11413 | ENSG00000173145 | HPA063958 | U-2 OS   |
| 11414 | ENSG00000173145 | HPA067638 | U-2 OS   |
| 11415 | ENSG00000173145 | HPA070981 | U-2 OS   |
| 11416 | ENSG00000173153 | HPA053785 | U-2 OS   |
| 11417 | ENSG00000173163 | HPA049223 | U-2 OS   |
| 11418 | ENSG00000173166 | HPA020027 | U-2 OS   |
| 11419 | ENSG00000173171 | HPA011543 | U-2 OS   |
| 11420 | ENSG00000173175 | HPA017730 | MCF7     |
| 11421 | ENSG00000173175 | HPA077682 | MCF7     |
| 11422 | ENSG00000173193 | HPA008846 | U-2 OS   |
| 11423 | ENSG00000173193 | HPA012063 | U-2 OS   |
| 11424 | ENSG00000173200 | HPA035757 | U-2 OS   |
| 11425 | ENSG00000173207 | HPA003424 | U-2 OS   |
| 11426 | ENSG00000173210 | HPA003245 | U-251 MG |
| 11427 | ENSG00000173212 | HPA039551 | RT4      |
| 11428 | ENSG00000173218 | CAB076375 | U-2 OS   |
| 11429 | ENSG00000173221 | CAB008634 | U-2 OS   |
| 11430 | ENSG00000173226 | HPA042028 | U-2 OS   |
| 11431 | ENSG00000173230 | HPA011008 | U-2 OS   |
| 11432 | ENSG00000173230 | HPA011555 | U-2 OS   |
| 11433 | ENSG00000173258 | HPA055041 | U-2 OS   |
| 11434 | ENSG00000173261 | HPA074266 | U-2 OS   |
| 11435 | ENSG00000173262 | HPA006539 | CACO-2   |
| 11436 | ENSG00000173264 | HPA062871 | U-2 OS   |
| 11437 | ENSG00000173267 | HPA014404 | RT4      |
| 11438 | ENSG00000173269 | HPA020741 | U-2 OS   |

|       |                 |           |           |
|-------|-----------------|-----------|-----------|
| 11439 | ENSG00000173272 | HPA051758 | U-2 OS    |
| 11440 | ENSG00000173272 | HPA052623 | U-2 OS    |
| 11441 | ENSG00000173273 | HPA025690 | U-2 OS    |
| 11442 | ENSG00000173275 | HPA018079 | U-2 OS    |
| 11443 | ENSG00000173276 | HPA024655 | U-2 OS    |
| 11444 | ENSG00000173276 | HPA031757 | U-2 OS    |
| 11445 | ENSG00000173276 | HPA031758 | U-2 OS    |
| 11446 | ENSG00000173281 | HPA028731 | U-251 MG  |
| 11447 | ENSG00000173320 | HPA065002 | U-2 OS    |
| 11448 | ENSG00000173327 | CAB010165 | U-2 OS    |
| 11449 | ENSG00000173334 | HPA063982 | U-2 OS    |
| 11450 | ENSG00000173338 | HPA077577 | U-2 OS    |
| 11451 | ENSG00000173376 | HPA048881 | SH-SY5Y   |
| 11452 | ENSG00000173391 | HPA050798 | CACO-2    |
| 11453 | ENSG00000173402 | CAB016353 | U-2 OS    |
| 11454 | ENSG00000173406 | HPA052033 | RT4       |
| 11455 | ENSG00000173406 | HPA067495 | RT4       |
| 11456 | ENSG00000173409 | HPA035709 | U-2 OS    |
| 11457 | ENSG00000173418 | HPA063344 | U-2 OS    |
| 11458 | ENSG00000173421 | HPA069534 | U-2 OS    |
| 11459 | ENSG00000173436 | HPA059930 | U-2 OS    |
| 11460 | ENSG00000173451 | HPA039790 | U-2 OS    |
| 11461 | ENSG00000173452 | HPA043163 | U-2 OS    |
| 11462 | ENSG00000173456 | HPA027620 | U-2 OS    |
| 11463 | ENSG00000173465 | HPA039789 | U-2 OS    |
| 11464 | ENSG00000173467 | HPA053942 | U-2 OS    |
| 11465 | ENSG00000173473 | CAB016336 | U-251 MG  |
| 11466 | ENSG00000173473 | HPA024352 | U-2 OS    |
| 11467 | ENSG00000173473 | HPA026853 | U-2 OS    |
| 11468 | ENSG00000173480 | HPA042125 | U-251 MG  |
| 11469 | ENSG00000173482 | HPA003891 | CACO-2    |
| 11470 | ENSG00000173482 | CAB022442 | U-2 OS    |
| 11471 | ENSG00000173486 | HPA049405 | MCF7      |
| 11472 | ENSG00000173530 | HPA070971 | BJ        |
| 11473 | ENSG00000173540 | HPA014657 | A-431     |
| 11474 | ENSG00000173542 | HPA071690 | RT4       |
| 11475 | ENSG00000173545 | HPA036514 | HeLa      |
| 11476 | ENSG00000173545 | HPA036515 | U-2 OS    |
| 11477 | ENSG00000173546 | HPA001933 | SK-MEL-30 |
| 11478 | ENSG00000173546 | HPA050008 | U-2 OS    |
| 11479 | ENSG00000173557 | HPA062453 | U-2 OS    |
| 11480 | ENSG00000173559 | HPA054978 | U-2 OS    |
| 11481 | ENSG00000173559 | HPA067802 | PC-3      |
| 11482 | ENSG00000173575 | HPA060744 | U-2 OS    |
| 11483 | ENSG00000173575 | HPA060960 | U-2 OS    |
| 11484 | ENSG00000173581 | HPA043219 | U-2 OS    |
| 11485 | ENSG00000173588 | HPA038161 | A-431     |
| 11486 | ENSG00000173597 | HPA002107 | U-2 OS    |
| 11487 | ENSG00000173598 | HPA047027 | U-2 OS    |
| 11488 | ENSG00000173599 | CAB033742 | U-2 OS    |
| 11489 | ENSG00000173599 | HPA043922 | U-2 OS    |
| 11490 | ENSG00000173599 | HPA058765 | U-2 OS    |
| 11491 | ENSG00000173611 | HPA020632 | U-2 OS    |
| 11492 | ENSG00000173614 | HPA059447 | U-2 OS    |
| 11493 | ENSG00000173638 | HPA024802 | A-431     |

|       |                 |           |          |
|-------|-----------------|-----------|----------|
| 11494 | ENSG00000173641 | HPA027639 | U-2 OS   |
| 11495 | ENSG00000173673 | HPA072697 | AF22     |
| 11496 | ENSG00000173674 | HPA002561 | U-2 OS   |
| 11497 | ENSG00000173681 | HPA027215 | U-2 OS   |
| 11498 | ENSG00000173692 | HPA036736 | U-2 OS   |
| 11499 | ENSG00000173698 | HPA001478 | U-2 OS   |
| 11500 | ENSG00000173705 | HPA052788 | U-2 OS   |
| 11501 | ENSG00000173706 | HPA010952 | CAC0-2   |
| 11502 | ENSG00000173715 | HPA038933 | U-2 OS   |
| 11503 | ENSG00000173726 | CAB005585 | U-2 OS   |
| 11504 | ENSG00000173726 | HPA011562 | U-2 OS   |
| 11505 | ENSG00000173728 | HPA031179 | K-562    |
| 11506 | ENSG00000173728 | HPA031180 | U-2 OS   |
| 11507 | ENSG00000173744 | HPA008741 | U-2 OS   |
| 11508 | ENSG00000173786 | HPA023266 | U-2 OS   |
| 11509 | ENSG00000173786 | HPA023280 | U-2 OS   |
| 11510 | ENSG00000173801 | CAB002139 | A-431    |
| 11511 | ENSG00000173801 | HPA032047 | U-2 OS   |
| 11512 | ENSG00000173805 | HPA076992 | U-2 OS   |
| 11513 | ENSG00000173821 | HPA003347 | U-2 OS   |
| 11514 | ENSG00000173825 | HPA040016 | Hep G2   |
| 11515 | ENSG00000173838 | HPA023322 | U-2 OS   |
| 11516 | ENSG00000173848 | HPA020068 | U-2 OS   |
| 11517 | ENSG00000173852 | HPA059139 | U-2 OS   |
| 11518 | ENSG00000173868 | HPA065025 | U-2 OS   |
| 11519 | ENSG00000173875 | HPA021537 | U-2 OS   |
| 11520 | ENSG00000173889 | HPA062031 | U-2 OS   |
| 11521 | ENSG00000173890 | HPA006970 | RT4      |
| 11522 | ENSG00000173894 | HPA023083 | U-2 OS   |
| 11523 | ENSG00000173898 | HPA039293 | A-431    |
| 11524 | ENSG00000173905 | HPA001677 | U-2 OS   |
| 11525 | ENSG00000173905 | HPA002315 | U-2 OS   |
| 11526 | ENSG00000173914 | HPA047849 | U-2 OS   |
| 11527 | ENSG00000173915 | HPA044798 | U-2 OS   |
| 11528 | ENSG00000173917 | HPA047857 | U-2 OS   |
| 11529 | ENSG00000173918 | HPA051101 | U-2 OS   |
| 11530 | ENSG00000173926 | HPA043406 | U-251 MG |
| 11531 | ENSG00000173930 | HPA058249 | U-2 OS   |
| 11532 | ENSG00000173933 | HPA047849 | U-2 OS   |
| 11533 | ENSG00000173960 | HPA065482 | U-2 OS   |
| 11534 | ENSG00000173988 | HPA039763 | A-431    |
| 11535 | ENSG00000174007 | HPA071138 | U-2 OS   |
| 11536 | ENSG00000174010 | HPA065730 | HEK 293  |
| 11537 | ENSG00000174013 | HPA040730 | U-2 OS   |
| 11538 | ENSG00000174015 | HPA039359 | U-2 OS   |
| 11539 | ENSG00000174015 | HPA040046 | U-2 OS   |
| 11540 | ENSG00000174032 | HPA045260 | U-2 OS   |
| 11541 | ENSG00000174038 | HPA022029 | RT4      |
| 11542 | ENSG00000174059 | HPA036723 | U-2 OS   |
| 11543 | ENSG00000174080 | HPA031431 | U-2 OS   |
| 11544 | ENSG00000174080 | HPA055610 | U-2 OS   |
| 11545 | ENSG00000174106 | HPA076986 | RT4      |
| 11546 | ENSG00000174123 | HPA066755 | REH      |
| 11547 | ENSG00000174130 | HPA062733 | U-2 OS   |
| 11548 | ENSG00000174132 | HPA019539 | U-2 OS   |



|       |                 |           |           |
|-------|-----------------|-----------|-----------|
| 11549 | ENSG00000174136 | HPA016993 | U-2 OS    |
| 11550 | ENSG00000174137 | HPA036452 | U-2 OS    |
| 11551 | ENSG00000174156 | HPA053817 | Hep G2    |
| 11552 | ENSG00000174165 | HPA016619 | MCF7      |
| 11553 | ENSG00000174173 | HPA036671 | U-2 OS    |
| 11554 | ENSG00000174177 | HPA041135 | U-2 OS    |
| 11555 | ENSG00000174177 | HPA041894 | U-2 OS    |
| 11556 | ENSG00000174197 | HPA058183 | U-2 OS    |
| 11557 | ENSG00000174206 | HPA052855 | U-2 OS    |
| 11558 | ENSG00000174226 | HPA024284 | RT4       |
| 11559 | ENSG00000174227 | HPA015997 | U-2 OS    |
| 11560 | ENSG00000174231 | CAB009941 | U-2 OS    |
| 11561 | ENSG00000174231 | CAB015457 | U-2 OS    |
| 11562 | ENSG00000174233 | CAB018365 | U-2 OS    |
| 11563 | ENSG00000174238 | HPA000528 | U-2 OS    |
| 11564 | ENSG00000174243 | HPA039037 | U-2 OS    |
| 11565 | ENSG00000174282 | HPA064763 | U-2 OS    |
| 11566 | ENSG00000174292 | HPA056452 | MCF7      |
| 11567 | ENSG00000174306 | HPA046498 | U-2 OS    |
| 11568 | ENSG00000174325 | HPA068508 | ASC TERT1 |
| 11569 | ENSG00000174327 | HPA065245 | U-2 OS    |
| 11570 | ENSG00000174370 | HPA039716 | U-2 OS    |
| 11571 | ENSG00000174371 | HPA053079 | U-2 OS    |
| 11572 | ENSG00000174371 | HPA069738 | U-2 OS    |
| 11573 | ENSG00000174373 | HPA000851 | U-2 OS    |
| 11574 | ENSG00000174405 | HPA057325 | U-2 OS    |
| 11575 | ENSG00000174428 | HPA056679 | U-2 OS    |
| 11576 | ENSG00000174428 | HPA056680 | U-2 OS    |
| 11577 | ENSG00000174444 | HPA034600 | U-2 OS    |
| 11578 | ENSG00000174446 | HPA024379 | U-2 OS    |
| 11579 | ENSG00000174456 | HPA039713 | U-2 OS    |
| 11580 | ENSG00000174460 | HPA031016 | U-2 OS    |
| 11581 | ENSG00000174483 | HPA058283 | HeLa      |
| 11582 | ENSG00000174485 | HPA065343 | U-2 OS    |
| 11583 | ENSG00000174498 | HPA015713 | Hep G2    |
| 11584 | ENSG00000174501 | HPA051757 | U-2 OS    |
| 11585 | ENSG00000174501 | HPA057661 | U-2 OS    |
| 11586 | ENSG00000174502 | HPA051485 | U-2 OS    |
| 11587 | ENSG00000174516 | HPA062281 | U-2 OS    |
| 11588 | ENSG00000174529 | HPA052515 | U-2 OS    |
| 11589 | ENSG00000174547 | HPA057685 | CACO-2    |
| 11590 | ENSG00000174564 | HPA063914 | SiHa      |
| 11591 | ENSG00000174574 | HPA051871 | U-2 OS    |
| 11592 | ENSG00000174579 | HPA003339 | U-2 OS    |
| 11593 | ENSG00000174586 | HPA047872 | U-2 OS    |
| 11594 | ENSG00000174599 | HPA044560 | A-431     |
| 11595 | ENSG00000174606 | HPA030795 | U-2 OS    |
| 11596 | ENSG00000174606 | HPA030796 | A-431     |
| 11597 | ENSG00000174607 | HPA065785 | U-2 OS    |
| 11598 | ENSG00000174611 | HPA036492 | U-2 OS    |
| 11599 | ENSG00000174628 | HPA048786 | U-2 OS    |
| 11600 | ENSG00000174652 | HPA026836 | U-2 OS    |
| 11601 | ENSG00000174652 | HPA054110 | U-2 OS    |
| 11602 | ENSG00000174669 | HPA018168 | U-2 OS    |
| 11603 | ENSG00000174672 | HPA073690 | CACO-2    |

|       |                 |           |        |
|-------|-----------------|-----------|--------|
| 11604 | ENSG00000174695 | HPA077278 | AF22   |
| 11605 | ENSG00000174705 | HPA036471 | U-2 OS |
| 11606 | ENSG00000174718 | HPA013816 | U-2 OS |
| 11607 | ENSG00000174718 | HPA015622 | U-2 OS |
| 11608 | ENSG00000174720 | HPA027930 | U-2 OS |
| 11609 | ENSG00000174738 | HPA053868 | U-2 OS |
| 11610 | ENSG00000174744 | HPA019637 | A-431  |
| 11611 | ENSG00000174749 | HPA062443 | U-2 OS |
| 11612 | ENSG00000174749 | HPA069294 | U-2 OS |
| 11613 | ENSG00000174775 | HPA070222 | MCF7   |
| 11614 | ENSG00000174776 | HPA036226 | U-2 OS |
| 11615 | ENSG00000174788 | HPA057428 | U-2 OS |
| 11616 | ENSG00000174791 | HPA035491 | A-431  |
| 11617 | ENSG00000174796 | HPA035767 | U-2 OS |
| 11618 | ENSG00000174799 | HPA073950 | U-2 OS |
| 11619 | ENSG00000174804 | HPA074833 | U-2 OS |
| 11620 | ENSG00000174807 | HPA051856 | Hep G2 |
| 11621 | ENSG00000174827 | HPA006155 | U-2 OS |
| 11622 | ENSG00000174839 | HPA062618 | U-2 OS |
| 11623 | ENSG00000174842 | HPA031446 | U-2 OS |
| 11624 | ENSG00000174851 | HPA014840 | A-431  |
| 11625 | ENSG00000174886 | HPA072209 | PC-3   |
| 11626 | ENSG00000174891 | HPA044792 | U-2 OS |
| 11627 | ENSG00000174899 | HPA054395 | RT4    |
| 11628 | ENSG00000174903 | CAB010225 | U-2 OS |
| 11629 | ENSG00000174917 | HPA042672 | U-2 OS |
| 11630 | ENSG00000174928 | HPA037663 | U-2 OS |
| 11631 | ENSG00000174943 | HPA043524 | U-2 OS |
| 11632 | ENSG00000174950 | HPA062915 | A-431  |
| 11633 | ENSG00000174953 | HPA035399 | U-2 OS |
| 11634 | ENSG00000174963 | HPA030194 | U-2 OS |
| 11635 | ENSG00000174989 | HPA038851 | A-431  |
| 11636 | ENSG00000174996 | HPA040416 | U-2 OS |
| 11637 | ENSG00000174996 | HPA040434 | U-2 OS |
| 11638 | ENSG00000175029 | HPA023564 | U-2 OS |
| 11639 | ENSG00000175040 | HPA013620 | HEL    |
| 11640 | ENSG00000175048 | HPA063754 | U-2 OS |
| 11641 | ENSG00000175054 | HPA054320 | A-431  |
| 11642 | ENSG00000175063 | HPA034569 | U-2 OS |
| 11643 | ENSG00000175063 | CAB035990 | U-2 OS |
| 11644 | ENSG00000175066 | HPA057998 | U-2 OS |
| 11645 | ENSG00000175073 | HPA023932 | U-2 OS |
| 11646 | ENSG00000175084 | HPA018803 | RH-30  |
| 11647 | ENSG00000175087 | HPA064157 | U-2 OS |
| 11648 | ENSG00000175093 | HPA062793 | U-2 OS |
| 11649 | ENSG00000175097 | HPA065704 | REH    |
| 11650 | ENSG00000175104 | HPA019805 | U-2 OS |
| 11651 | ENSG00000175105 | HPA036173 | U-2 OS |
| 11652 | ENSG00000175105 | HPA077939 | U-2 OS |
| 11653 | ENSG00000175106 | HPA019585 | A-431  |
| 11654 | ENSG00000175106 | HPA065603 | U-2 OS |
| 11655 | ENSG00000175110 | HPA006083 | U-2 OS |
| 11656 | ENSG00000175115 | HPA038914 | U-2 OS |
| 11657 | ENSG00000175130 | CAB020787 | U-2 OS |
| 11658 | ENSG00000175130 | HPA030528 | U-2 OS |

|       |                 |           |          |
|-------|-----------------|-----------|----------|
| 11659 | ENSG00000175137 | HPA038068 | U-2 OS   |
| 11660 | ENSG00000175170 | HPA050100 | U-2 OS   |
| 11661 | ENSG00000175175 | HPA018462 | U-2 OS   |
| 11662 | ENSG00000175182 | HPA042800 | U-2 OS   |
| 11663 | ENSG00000175193 | HPA019545 | U-2 OS   |
| 11664 | ENSG00000175197 | HPA058416 | U-2 OS   |
| 11665 | ENSG00000175198 | HPA047792 | Hep G2   |
| 11666 | ENSG00000175202 | HPA042715 | U-2 OS   |
| 11667 | ENSG00000175203 | HPA039715 | U-2 OS   |
| 11668 | ENSG00000175213 | HPA017892 | U-2 OS   |
| 11669 | ENSG00000175215 | HPA052607 | MCF7     |
| 11670 | ENSG00000175216 | HPA040375 | U-2 OS   |
| 11671 | ENSG00000175220 | HPA004689 | U-2 OS   |
| 11672 | ENSG00000175221 | HPA046495 | U-251 MG |
| 11673 | ENSG00000175224 | HPA039350 | U-2 OS   |
| 11674 | ENSG00000175265 | HPA051808 | U-2 OS   |
| 11675 | ENSG00000175274 | HPA061276 | U-2 OS   |
| 11676 | ENSG00000175283 | HPA066767 | MCF7     |
| 11677 | ENSG00000175283 | HPA068706 | U-2 OS   |
| 11678 | ENSG00000175287 | HPA012115 | U-2 OS   |
| 11679 | ENSG00000175309 | HPA063608 | U-2 OS   |
| 11680 | ENSG00000175311 | HPA043523 | Hep G2   |
| 11681 | ENSG00000175315 | CAB019316 | U-2 OS   |
| 11682 | ENSG00000175318 | HPA029435 | U-2 OS   |
| 11683 | ENSG00000175322 | HPA028982 | U-2 OS   |
| 11684 | ENSG00000175324 | HPA024601 | U-2 OS   |
| 11685 | ENSG00000175329 | HPA060328 | CACO-2   |
| 11686 | ENSG00000175334 | HPA039242 | MCF7     |
| 11687 | ENSG00000175352 | HPA058827 | U-2 OS   |
| 11688 | ENSG00000175354 | HPA015004 | U-2 OS   |
| 11689 | ENSG00000175354 | HPA046176 | CACO-2   |
| 11690 | ENSG00000175376 | HPA054991 | U-2 OS   |
| 11691 | ENSG00000175387 | CAB073546 | U-2 OS   |
| 11692 | ENSG00000175395 | HPA030190 | U-2 OS   |
| 11693 | ENSG00000175416 | HPA036458 | U-2 OS   |
| 11694 | ENSG00000175445 | HPA048749 | U-2 OS   |
| 11695 | ENSG00000175449 | CAB016546 | U-2 OS   |
| 11696 | ENSG00000175455 | HPA035278 | A-431    |
| 11697 | ENSG00000175463 | HPA069743 | U-2 OS   |
| 11698 | ENSG00000175467 | HPA031188 | U-2 OS   |
| 11699 | ENSG00000175467 | HPA031189 | U-2 OS   |
| 11700 | ENSG00000175467 | HPA031190 | U-2 OS   |
| 11701 | ENSG00000175470 | HPA042122 | A-431    |
| 11702 | ENSG00000175471 | HPA019018 | PC-3     |
| 11703 | ENSG00000175482 | HPA078008 | U-2 OS   |
| 11704 | ENSG00000175505 | HPA042444 | U-251 MG |
| 11705 | ENSG00000175536 | HPA040249 | U-2 OS   |
| 11706 | ENSG00000175548 | HPA063387 | U-2 OS   |
| 11707 | ENSG00000175550 | HPA006790 | U-2 OS   |
| 11708 | ENSG00000175556 | HPA050422 | U-2 OS   |
| 11709 | ENSG00000175564 | CAB010771 | U-2 OS   |
| 11710 | ENSG00000175567 | HPA075202 | RT4      |
| 11711 | ENSG00000175573 | HPA045938 | U-2 OS   |
| 11712 | ENSG00000175575 | HPA040020 | U-2 OS   |
| 11713 | ENSG00000175582 | HPA059131 | CACO-2   |

|       |                 |           |           |
|-------|-----------------|-----------|-----------|
| 11714 | ENSG00000175591 | CAB022642 | U-2 OS    |
| 11715 | ENSG00000175592 | CAB004396 | U-2 OS    |
| 11716 | ENSG00000175592 | HPA030728 | U-2 OS    |
| 11717 | ENSG00000175595 | HPA045828 | U-2 OS    |
| 11718 | ENSG00000175606 | HPA023187 | U-2 OS    |
| 11719 | ENSG00000175634 | CAB019404 | U-2 OS    |
| 11720 | ENSG00000175643 | HPA040995 | U-2 OS    |
| 11721 | ENSG00000175662 | HPA023304 | U-2 OS    |
| 11722 | ENSG00000175691 | HPA023397 | U-2 OS    |
| 11723 | ENSG00000175697 | HPA028644 | U-2 OS    |
| 11724 | ENSG00000175707 | HPA068312 | A-431     |
| 11725 | ENSG00000175711 | HPA024547 | U-2 OS    |
| 11726 | ENSG00000175745 | CAB019281 | U-2 OS    |
| 11727 | ENSG00000175745 | HPA058974 | A-431     |
| 11728 | ENSG00000175756 | HPA031821 | U-2 OS    |
| 11729 | ENSG00000175768 | HPA048712 | U-2 OS    |
| 11730 | ENSG00000175785 | HPA046671 | U-2 OS    |
| 11731 | ENSG00000175787 | HPA041769 | U-2 OS    |
| 11732 | ENSG00000175792 | HPA019947 | U-2 OS    |
| 11733 | ENSG00000175793 | HPA011105 | U-2 OS    |
| 11734 | ENSG00000175793 | HPA061603 | U-2 OS    |
| 11735 | ENSG00000175806 | HPA023804 | U-2 OS    |
| 11736 | ENSG00000175806 | HPA053069 | MCF7      |
| 11737 | ENSG00000175826 | HPA066466 | A549      |
| 11738 | ENSG00000175832 | HPA005768 | U-2 OS    |
| 11739 | ENSG00000175854 | HPA052032 | U-2 OS    |
| 11740 | ENSG00000175854 | HPA055472 | U-2 OS    |
| 11741 | ENSG00000175866 | HPA023310 | U-2 OS    |
| 11742 | ENSG00000175877 | HPA077196 | U-2 OS    |
| 11743 | ENSG00000175893 | HPA065254 | SH-SY5Y   |
| 11744 | ENSG00000175906 | HPA060379 | U-2 OS    |
| 11745 | ENSG00000175920 | HPA059449 | U-2 OS    |
| 11746 | ENSG00000175920 | HPA062780 | MCF7      |
| 11747 | ENSG00000175931 | HPA023605 | U-2 OS    |
| 11748 | ENSG00000175938 | HPA015022 | U-2 OS    |
| 11749 | ENSG00000175946 | HPA027115 | U-2 OS    |
| 11750 | ENSG00000175970 | HPA077812 | U-2 OS    |
| 11751 | ENSG00000175984 | HPA054955 | MCF7      |
| 11752 | ENSG00000176018 | HPA018024 | U-2 OS    |
| 11753 | ENSG00000176024 | HPA026833 | U-2 OS    |
| 11754 | ENSG00000176046 | HPA006349 | SK-MEL-30 |
| 11755 | ENSG00000176049 | HPA065023 | U-2 OS    |
| 11756 | ENSG00000176055 | HPA037758 | U-2 OS    |
| 11757 | ENSG00000176058 | HPA020899 | U-2 OS    |
| 11758 | ENSG00000176076 | HPA042316 | U-2 OS    |
| 11759 | ENSG00000176087 | HPA062210 | CACO-2    |
| 11760 | ENSG00000176092 | HPA029629 | CACO-2    |
| 11761 | ENSG00000176095 | HPA040825 | U-2 OS    |
| 11762 | ENSG00000176102 | HPA039743 | U-2 OS    |
| 11763 | ENSG00000176105 | HPA026480 | U-2 OS    |
| 11764 | ENSG00000176142 | HPA039140 | U-2 OS    |
| 11765 | ENSG00000176148 | HPA005769 | U-2 OS    |
| 11766 | ENSG00000176153 | HPA003545 | A549      |
| 11767 | ENSG00000176155 | HPA023315 | U-2 OS    |
| 11768 | ENSG00000176155 | HPA023344 | U-2 OS    |

|       |                 |           |          |
|-------|-----------------|-----------|----------|
| 11769 | ENSG00000176170 | HPA022829 | U-2 OS   |
| 11770 | ENSG00000176171 | CAB011676 | U-2 OS   |
| 11771 | ENSG00000176182 | HPA065307 | U-2 OS   |
| 11772 | ENSG00000176208 | HPA066823 | U-2 OS   |
| 11773 | ENSG00000176209 | HPA074830 | U-2 OS   |
| 11774 | ENSG00000176222 | HPA032014 | U-2 OS   |
| 11775 | ENSG00000176222 | HPA063607 | U-2 OS   |
| 11776 | ENSG00000176244 | HPA043326 | U-251 MG |
| 11777 | ENSG00000176244 | HPA062478 | U-2 OS   |
| 11778 | ENSG00000176248 | CAB018692 | U-2 OS   |
| 11779 | ENSG00000176248 | HPA066539 | U-2 OS   |
| 11780 | ENSG00000176261 | HPA046315 | U-2 OS   |
| 11781 | ENSG00000176293 | HPA006961 | HEK 293  |
| 11782 | ENSG00000176371 | HPA007296 | U-2 OS   |
| 11783 | ENSG00000176383 | HPA055261 | U-2 OS   |
| 11784 | ENSG00000176386 | HPA044130 | U-2 OS   |
| 11785 | ENSG00000176387 | HPA056385 | CACO-2   |
| 11786 | ENSG00000176390 | HPA007596 | U-2 OS   |
| 11787 | ENSG00000176393 | HPA036074 | U-2 OS   |
| 11788 | ENSG00000176396 | HPA045477 | U-2 OS   |
| 11789 | ENSG00000176399 | HPA062253 | U-2 OS   |
| 11790 | ENSG00000176406 | HPA046538 | RT4      |
| 11791 | ENSG00000176407 | HPA030383 | U-2 OS   |
| 11792 | ENSG00000176407 | HPA030384 | U-2 OS   |
| 11793 | ENSG00000176422 | HPA053469 | U-2 OS   |
| 11794 | ENSG00000176428 | HPA040978 | U-2 OS   |
| 11795 | ENSG00000176435 | HPA039468 | U-2 OS   |
| 11796 | ENSG00000176435 | HPA048119 | U-2 OS   |
| 11797 | ENSG00000176438 | HPA077140 | RH-30    |
| 11798 | ENSG00000176444 | HPA055366 | U-2 OS   |
| 11799 | ENSG00000176444 | HPA059507 | U-2 OS   |
| 11800 | ENSG00000176472 | HPA051865 | U-2 OS   |
| 11801 | ENSG00000176473 | HPA003113 | MCF7     |
| 11802 | ENSG00000176476 | HPA052590 | U-2 OS   |
| 11803 | ENSG00000176485 | HPA058997 | U-2 OS   |
| 11804 | ENSG00000176531 | HPA043425 | U-2 OS   |
| 11805 | ENSG00000176532 | HPA040996 | U-2 OS   |
| 11806 | ENSG00000176542 | HPA029243 | A-431    |
| 11807 | ENSG00000176542 | HPA029245 | U-2 OS   |
| 11808 | ENSG00000176563 | HPA023324 | U-2 OS   |
| 11809 | ENSG00000176595 | HPA051159 | U-2 OS   |
| 11810 | ENSG00000176597 | HPA017292 | U-251 MG |
| 11811 | ENSG00000176601 | HPA011388 | U-2 OS   |
| 11812 | ENSG00000176619 | HPA062477 | U-2 OS   |
| 11813 | ENSG00000176623 | HPA026495 | U-2 OS   |
| 11814 | ENSG00000176624 | HPA040603 | U-2 OS   |
| 11815 | ENSG00000176658 | HPA054744 | U-2 OS   |
| 11816 | ENSG00000176681 | HPA045090 | RH-30    |
| 11817 | ENSG00000176692 | HPA056302 | HeLa     |
| 11818 | ENSG00000176697 | CAB009564 | U-2 OS   |
| 11819 | ENSG00000176697 | HPA031440 | U-2 OS   |
| 11820 | ENSG00000176697 | HPA056104 | U-2 OS   |
| 11821 | ENSG00000176714 | HPA051791 | U-2 OS   |
| 11822 | ENSG00000176731 | HPA044805 | U-2 OS   |
| 11823 | ENSG00000176731 | HPA071903 | U-2 OS   |

|       |                 |           |         |
|-------|-----------------|-----------|---------|
| 11824 | ENSG00000176749 | HPA000252 | SH-SY5Y |
| 11825 | ENSG00000176771 | HPA044859 | U-2 OS  |
| 11826 | ENSG00000176783 | HPA038804 | U-2 OS  |
| 11827 | ENSG00000176788 | HPA045218 | HeLa    |
| 11828 | ENSG00000176788 | HPA050333 | MCF7    |
| 11829 | ENSG00000176809 | HPA045090 | RH-30   |
| 11830 | ENSG00000176834 | HPA062022 | U-2 OS  |
| 11831 | ENSG00000176842 | HPA047130 | U-2 OS  |
| 11832 | ENSG00000176853 | HPA027978 | U-2 OS  |
| 11833 | ENSG00000176887 | HPA000448 | SH-SY5Y |
| 11834 | ENSG00000176896 | HPA000337 | U-2 OS  |
| 11835 | ENSG00000176907 | HPA027188 | U-2 OS  |
| 11836 | ENSG00000176909 | HPA049765 | U-2 OS  |
| 11837 | ENSG00000176915 | HPA074838 | U-2 OS  |
| 11838 | ENSG00000176920 | HPA014402 | CACO-2  |
| 11839 | ENSG00000176928 | HPA037431 | RT4     |
| 11840 | ENSG00000176945 | HPA042249 | RT4     |
| 11841 | ENSG00000176946 | HPA053448 | U-2 OS  |
| 11842 | ENSG00000176953 | HPA053587 | A-431   |
| 11843 | ENSG00000176974 | HPA023314 | U-2 OS  |
| 11844 | ENSG00000176978 | HPA021282 | U-2 OS  |
| 11845 | ENSG00000176978 | HPA059381 | U-2 OS  |
| 11846 | ENSG00000176986 | HPA040196 | U-2 OS  |
| 11847 | ENSG00000176986 | HPA040213 | U-2 OS  |
| 11848 | ENSG00000176994 | HPA021557 | U-2 OS  |
| 11849 | ENSG00000176994 | HPA024646 | A-431   |
| 11850 | ENSG00000177000 | HPA063389 | U-2 OS  |
| 11851 | ENSG00000177025 | HPA014527 | U-2 OS  |
| 11852 | ENSG00000177030 | HPA030302 | U-2 OS  |
| 11853 | ENSG00000177034 | HPA062061 | HeLa    |
| 11854 | ENSG00000177042 | HPA059592 | HEK 293 |
| 11855 | ENSG00000177051 | HPA049390 | U-2 OS  |
| 11856 | ENSG00000177054 | HPA016759 | A-431   |
| 11857 | ENSG00000177054 | HPA018791 | U-2 OS  |
| 11858 | ENSG00000177058 | HPA061702 | U-2 OS  |
| 11859 | ENSG00000177084 | HPA058210 | U-2 OS  |
| 11860 | ENSG00000177084 | HPA067385 | CACO-2  |
| 11861 | ENSG00000177106 | HPA041143 | U-2 OS  |
| 11862 | ENSG00000177108 | HPA049471 | RH-30   |
| 11863 | ENSG00000177108 | HPA072213 | U-2 OS  |
| 11864 | ENSG00000177119 | HPA038958 | U-2 OS  |
| 11865 | ENSG00000177125 | HPA023893 | U-2 OS  |
| 11866 | ENSG00000177138 | HPA035135 | U-2 OS  |
| 11867 | ENSG00000177144 | HPA047027 | U-2 OS  |
| 11868 | ENSG00000177150 | HPA014324 | U-2 OS  |
| 11869 | ENSG00000177150 | HPA051564 | U-2 OS  |
| 11870 | ENSG00000177156 | HPA048089 | U-2 OS  |
| 11871 | ENSG00000177169 | HPA063990 | U-2 OS  |
| 11872 | ENSG00000177181 | HPA027826 | U-2 OS  |
| 11873 | ENSG00000177189 | HPA003221 | U-2 OS  |
| 11874 | ENSG00000177192 | HPA057593 | U-2 OS  |
| 11875 | ENSG00000177200 | HPA042053 | U-2 OS  |
| 11876 | ENSG00000177225 | HPA008812 | U-2 OS  |
| 11877 | ENSG00000177238 | HPA054909 | RH-30   |
| 11878 | ENSG00000177239 | HPA051516 | U-2 OS  |

|       |                 |           |          |
|-------|-----------------|-----------|----------|
| 11879 | ENSG00000177283 | HPA071142 | U-2 OS   |
| 11880 | ENSG00000177303 | HPA071906 | RH-30    |
| 11881 | ENSG00000177303 | HPA075184 | RH-30    |
| 11882 | ENSG00000177311 | HPA014865 | U-2 OS   |
| 11883 | ENSG00000177311 | HPA059378 | A-431    |
| 11884 | ENSG00000177352 | HPA047547 | U-2 OS   |
| 11885 | ENSG00000177354 | HPA057556 | U-2 OS   |
| 11886 | ENSG00000177363 | HPA050317 | RH-30    |
| 11887 | ENSG00000177380 | HPA043567 | U-251 MG |
| 11888 | ENSG00000177383 | HPA054190 | U-2 OS   |
| 11889 | ENSG00000177409 | HPA019461 | U-2 OS   |
| 11890 | ENSG00000177425 | HPA012640 | A-431    |
| 11891 | ENSG00000177425 | CAB020779 | A-431    |
| 11892 | ENSG00000177426 | HPA062160 | U-2 OS   |
| 11893 | ENSG00000177432 | HPA058227 | U-2 OS   |
| 11894 | ENSG00000177453 | HPA007695 | U-2 OS   |
| 11895 | ENSG00000177459 | HPA025293 | RT4      |
| 11896 | ENSG00000177463 | HPA006313 | U-2 OS   |
| 11897 | ENSG00000177469 | HPA049838 | U-2 OS   |
| 11898 | ENSG00000177469 | HPA074213 | U-2 OS   |
| 11899 | ENSG00000177479 | HPA067381 | U-2 OS   |
| 11900 | ENSG00000177479 | HPA069715 | U-2 OS   |
| 11901 | ENSG00000177479 | HPA070963 | RT4      |
| 11902 | ENSG00000177485 | HPA000755 | U-2 OS   |
| 11903 | ENSG00000177485 | HPA005732 | U-2 OS   |
| 11904 | ENSG00000177494 | HPA029786 | U-2 OS   |
| 11905 | ENSG00000177508 | HPA062522 | U-2 OS   |
| 11906 | ENSG00000177511 | HPA066783 | SH-SY5Y  |
| 11907 | ENSG00000177542 | HPA014662 | U-2 OS   |
| 11908 | ENSG00000177548 | HPA047641 | U-2 OS   |
| 11909 | ENSG00000177551 | HPA055238 | U-2 OS   |
| 11910 | ENSG00000177556 | HPA055036 | U-2 OS   |
| 11911 | ENSG00000177565 | HPA019182 | U-2 OS   |
| 11912 | ENSG00000177570 | HPA024634 | A-431    |
| 11913 | ENSG00000177575 | HPA046404 | U-2 OS   |
| 11914 | ENSG00000177576 | HPA040921 | U-2 OS   |
| 11915 | ENSG00000177595 | HPA055473 | U-2 OS   |
| 11916 | ENSG00000177600 | HPA053635 | U-2 OS   |
| 11917 | ENSG00000177602 | HPA030698 | A-431    |
| 11918 | ENSG00000177606 | CAB003801 | U-2 OS   |
| 11919 | ENSG00000177606 | CAB007780 | U-2 OS   |
| 11920 | ENSG00000177606 | HPA059474 | U-2 OS   |
| 11921 | ENSG00000177613 | HPA039216 | U-2 OS   |
| 11922 | ENSG00000177613 | HPA062021 | U-2 OS   |
| 11923 | ENSG00000177614 | HPA065010 | U-2 OS   |
| 11924 | ENSG00000177627 | HPA073090 | HaCaT    |
| 11925 | ENSG00000177646 | HPA037716 | U-2 OS   |
| 11926 | ENSG00000177646 | HPA046720 | A-431    |
| 11927 | ENSG00000177663 | CAB024996 | U-251 MG |
| 11928 | ENSG00000177666 | HPA055173 | U-251 MG |
| 11929 | ENSG00000177666 | HPA062602 | U-2 OS   |
| 11930 | ENSG00000177669 | HPA044509 | Hep G2   |
| 11931 | ENSG00000177674 | HPA044120 | A-431    |
| 11932 | ENSG00000177675 | HPA015663 | U-2 OS   |
| 11933 | ENSG00000177679 | HPA019337 | U-2 OS   |

|       |                 |           |             |
|-------|-----------------|-----------|-------------|
| 11934 | ENSG00000177683 | HPA051488 | U-2 OS      |
| 11935 | ENSG00000177688 | HPA042123 | U-2 OS      |
| 11936 | ENSG00000177688 | HPA048064 | A-431       |
| 11937 | ENSG00000177694 | HPA012413 | ASC TERT1   |
| 11938 | ENSG00000177694 | HPA017425 | ASC TERT1   |
| 11939 | ENSG00000177706 | HPA019823 | U-2 OS      |
| 11940 | ENSG00000177707 | HPA011038 | A-431       |
| 11941 | ENSG00000177721 | HPA051482 | HUVEC TERT2 |
| 11942 | ENSG00000177728 | HPA008423 | U-2 OS      |
| 11943 | ENSG00000177728 | HPA050660 | U-2 OS      |
| 11944 | ENSG00000177731 | HPA007084 | U-2 OS      |
| 11945 | ENSG00000177731 | HPA008903 | U-2 OS      |
| 11946 | ENSG00000177732 | HPA055052 | U-2 OS      |
| 11947 | ENSG00000177732 | HPA061627 | U-2 OS      |
| 11948 | ENSG00000177733 | HPA036569 | U-2 OS      |
| 11949 | ENSG00000177733 | HPA059404 | U-2 OS      |
| 11950 | ENSG00000177830 | HPA039374 | U-2 OS      |
| 11951 | ENSG00000177842 | HPA059383 | RT4         |
| 11952 | ENSG00000177853 | HPA029049 | Hep G2      |
| 11953 | ENSG00000177854 | HPA038134 | U-2 OS      |
| 11954 | ENSG00000177868 | HPA008507 | A-431       |
| 11955 | ENSG00000177873 | HPA045094 | U-2 OS      |
| 11956 | ENSG00000177875 | HPA041715 | U-2 OS      |
| 11957 | ENSG00000177879 | HPA049270 | U-2 OS      |
| 11958 | ENSG00000177885 | HPA030749 | MCF7        |
| 11959 | ENSG00000177885 | HPA030750 | PC-3        |
| 11960 | ENSG00000177888 | HPA034842 | U-2 OS      |
| 11961 | ENSG00000177889 | HPA044976 | CACO-2      |
| 11962 | ENSG00000177917 | HPA014743 | U-2 OS      |
| 11963 | ENSG00000177932 | HPA030904 | U-2 OS      |
| 11964 | ENSG00000177943 | CAB026377 | U-2 OS      |
| 11965 | ENSG00000177943 | HPA059977 | MCF7        |
| 11966 | ENSG00000177946 | HPA060522 | U-2 OS      |
| 11967 | ENSG00000177951 | HPA039819 | U-2 OS      |
| 11968 | ENSG00000177954 | HPA066851 | U-2 OS      |
| 11969 | ENSG00000177963 | HPA041491 | U-2 OS      |
| 11970 | ENSG00000177971 | HPA060955 | HEK 293     |
| 11971 | ENSG00000177971 | HPA061177 | HEK 293     |
| 11972 | ENSG00000177990 | HPA071264 | U-2 OS      |
| 11973 | ENSG00000178021 | HPA034699 | U-2 OS      |
| 11974 | ENSG00000178026 | HPA002540 | U-2 OS      |
| 11975 | ENSG00000178028 | HPA028419 | U-2 OS      |
| 11976 | ENSG00000178031 | HPA074973 | ASC TERT1   |
| 11977 | ENSG00000178033 | HPA034970 | BJ          |
| 11978 | ENSG00000178035 | HPA001400 | U-2 OS      |
| 11979 | ENSG00000178035 | CAB020717 | U-2 OS      |
| 11980 | ENSG00000178053 | HPA069479 | U-2 OS      |
| 11981 | ENSG00000178075 | HPA012316 | U-2 OS      |
| 11982 | ENSG00000178104 | HPA012678 | U-2 OS      |
| 11983 | ENSG00000178105 | HPA004691 | U-2 OS      |
| 11984 | ENSG00000178127 | HPA077896 | U-2 OS      |
| 11985 | ENSG00000178149 | HPA036862 | U-2 OS      |
| 11986 | ENSG00000178150 | HPA025019 | U-2 OS      |
| 11987 | ENSG00000178163 | HPA031216 | U-2 OS      |
| 11988 | ENSG00000178171 | HPA045593 | CACO-2      |



|       |                 |           |           |
|-------|-----------------|-----------|-----------|
| 11989 | ENSG00000178171 | HPA054230 | CACO-2    |
| 11990 | ENSG00000178177 | HPA028794 | U-2 OS    |
| 11991 | ENSG00000178177 | HPA060033 | U-2 OS    |
| 11992 | ENSG00000178184 | HPA047017 | RT4       |
| 11993 | ENSG00000178188 | HPA076175 | U-2 OS    |
| 11994 | ENSG00000178199 | HPA036897 | U-2 OS    |
| 11995 | ENSG00000178201 | HPA062209 | U-2 OS    |
| 11996 | ENSG00000178202 | HPA039817 | A-431     |
| 11997 | ENSG00000178202 | HPA066134 | CACO-2    |
| 11998 | ENSG00000178209 | HPA025967 | U-2 OS    |
| 11999 | ENSG00000178209 | HPA029906 | U-2 OS    |
| 12000 | ENSG00000178229 | HPA046330 | U-2 OS    |
| 12001 | ENSG00000178252 | HPA042622 | U-2 OS    |
| 12002 | ENSG00000178287 | HPA057479 | SH-SY5Y   |
| 12003 | ENSG00000178295 | HPA020078 | U-2 OS    |
| 12004 | ENSG00000178301 | HPA042879 | U-2 OS    |
| 12005 | ENSG00000178307 | HPA062854 | U-2 OS    |
| 12006 | ENSG00000178338 | HPA029056 | U-2 OS    |
| 12007 | ENSG00000178343 | HPA054754 | U-2 OS    |
| 12008 | ENSG00000178372 | HPA040725 | A-431     |
| 12009 | ENSG00000178385 | HPA035046 | U-2 OS    |
| 12010 | ENSG00000178386 | HPA067823 | RT4       |
| 12011 | ENSG00000178397 | HPA055050 | U-2 OS    |
| 12012 | ENSG00000178401 | HPA039953 | CACO-2    |
| 12013 | ENSG00000178404 | HPA025717 | U-2 OS    |
| 12014 | ENSG00000178409 | HPA062067 | RT4       |
| 12015 | ENSG00000178445 | HPA052887 | CACO-2    |
| 12016 | ENSG00000178449 | HPA044618 | U-2 OS    |
| 12017 | ENSG00000178460 | HPA026522 | SK-MEL-30 |
| 12018 | ENSG00000178467 | HPA007199 | U-2 OS    |
| 12019 | ENSG00000178498 | HPA059654 | RH-30     |
| 12020 | ENSG00000178522 | HPA036099 | HEK 293   |
| 12021 | ENSG00000178531 | HPA016669 | U-2 OS    |
| 12022 | ENSG00000178537 | HPA029863 | U-2 OS    |
| 12023 | ENSG00000178585 | HPA042617 | U-2 OS    |
| 12024 | ENSG00000178597 | HPA038013 | CACO-2    |
| 12025 | ENSG00000178597 | HPA038482 | CACO-2    |
| 12026 | ENSG00000178605 | HPA055418 | CACO-2    |
| 12027 | ENSG00000178662 | HPA017905 | U-2 OS    |
| 12028 | ENSG00000178665 | HPA062887 | RT4       |
| 12029 | ENSG00000178685 | HPA052427 | U-2 OS    |
| 12030 | ENSG00000178691 | HPA057436 | U-2 OS    |
| 12031 | ENSG00000178694 | HPA057979 | U-2 OS    |
| 12032 | ENSG00000178695 | HPA056987 | U-2 OS    |
| 12033 | ENSG00000178700 | HPA051465 | MCF7      |
| 12034 | ENSG00000178718 | HPA046900 | U-2 OS    |
| 12035 | ENSG00000178719 | HPA036981 | MCF7      |
| 12036 | ENSG00000178726 | HPA002982 | U-2 OS    |
| 12037 | ENSG00000178732 | HPA072646 | HEL       |
| 12038 | ENSG00000178750 | HPA030604 | hTCEpi    |
| 12039 | ENSG00000178761 | HPA048929 | U-2 OS    |
| 12040 | ENSG00000178764 | HPA006769 | U-2 OS    |
| 12041 | ENSG00000178764 | HPA006996 | U-2 OS    |
| 12042 | ENSG00000178776 | HPA058999 | U-2 OS    |
| 12043 | ENSG00000178796 | HPA045703 | CACO-2    |

|       |                 |           |             |
|-------|-----------------|-----------|-------------|
| 12044 | ENSG00000178802 | HPA007200 | A-431       |
| 12045 | ENSG00000178809 | HPA047843 | A-431       |
| 12046 | ENSG00000178814 | HPA052429 | U-2 OS      |
| 12047 | ENSG00000178826 | HPA036983 | RT4         |
| 12048 | ENSG00000178852 | HPA021633 | U-2 OS      |
| 12049 | ENSG00000178852 | HPA023249 | U-2 OS      |
| 12050 | ENSG00000178860 | HPA062878 | RH-30       |
| 12051 | ENSG00000178878 | HPA052462 | U-2 OS      |
| 12052 | ENSG00000178878 | HPA058882 | U-2 OS      |
| 12053 | ENSG00000178882 | HPA058911 | U-2 OS      |
| 12054 | ENSG00000178896 | HPA024792 | A-431       |
| 12055 | ENSG00000178904 | HPA008325 | U-2 OS      |
| 12056 | ENSG00000178913 | HPA006429 | U-2 OS      |
| 12057 | ENSG00000178917 | HPA071850 | U-2 OS      |
| 12058 | ENSG00000178921 | HPA022140 | U-2 OS      |
| 12059 | ENSG00000178922 | HPA040092 | U-2 OS      |
| 12060 | ENSG00000178927 | HPA045696 | U-2 OS      |
| 12061 | ENSG00000178935 | HPA072145 | RT4         |
| 12062 | ENSG00000178950 | HPA027463 | U-2 OS      |
| 12063 | ENSG00000178951 | HPA046387 | U-2 OS      |
| 12064 | ENSG00000178952 | HPA018991 | U-2 OS      |
| 12065 | ENSG00000178952 | HPA024087 | U-2 OS      |
| 12066 | ENSG00000178952 | CAB075730 | U-2 OS      |
| 12067 | ENSG00000178952 | CAB075732 | U-2 OS      |
| 12068 | ENSG00000178966 | HPA021661 | U-2 OS      |
| 12069 | ENSG00000178974 | HPA052592 | U-2 OS      |
| 12070 | ENSG00000178982 | HPA054590 | U-2 OS      |
| 12071 | ENSG00000178996 | HPA037800 | U-2 OS      |
| 12072 | ENSG00000178999 | HPA037708 | U-2 OS      |
| 12073 | ENSG00000179008 | HPA059518 | RT4         |
| 12074 | ENSG00000179010 | HPA056367 | U-2 OS      |
| 12075 | ENSG00000179021 | HPA034736 | U-2 OS      |
| 12076 | ENSG00000179023 | HPA056616 | RT4         |
| 12077 | ENSG00000179029 | HPA059653 | U-2 OS      |
| 12078 | ENSG00000179041 | HPA055549 | U-2 OS      |
| 12079 | ENSG00000179041 | HPA060937 | U-2 OS      |
| 12080 | ENSG00000179044 | HPA029574 | HUVEC TERT2 |
| 12081 | ENSG00000179046 | HPA043838 | U-2 OS      |
| 12082 | ENSG00000179071 | HPA040628 | U-251 MG    |
| 12083 | ENSG00000179083 | HPA066175 | U-2 OS      |
| 12084 | ENSG00000179083 | HPA069513 | U-2 OS      |
| 12085 | ENSG00000179091 | HPA001247 | U-2 OS      |
| 12086 | ENSG00000179094 | HPA047947 | CACO-2      |
| 12087 | ENSG00000179094 | HPA067064 | U-2 OS      |
| 12088 | ENSG00000179104 | HPA026954 | U-2 OS      |
| 12089 | ENSG00000179111 | HPA072105 | U-2 OS      |
| 12090 | ENSG00000179115 | HPA001911 | A-431       |
| 12091 | ENSG00000179119 | HPA040177 | U-2 OS      |
| 12092 | ENSG00000179119 | HPA047957 | U-2 OS      |
| 12093 | ENSG00000179133 | HPA038130 | U-2 OS      |
| 12094 | ENSG00000179134 | HPA016800 | U-2 OS      |
| 12095 | ENSG00000179134 | HPA059385 | U-2 OS      |
| 12096 | ENSG00000179144 | HPA020266 | U-2 OS      |
| 12097 | ENSG00000179148 | HPA023120 | U-2 OS      |
| 12098 | ENSG00000179151 | HPA066137 | U-2 OS      |

|       |                 |           |          |
|-------|-----------------|-----------|----------|
| 12099 | ENSG00000179178 | HPA015796 | CACO-2   |
| 12100 | ENSG00000179195 | HPA047846 | RT4      |
| 12101 | ENSG00000179218 | CAB079775 | U-2 OS   |
| 12102 | ENSG00000179222 | HPA043645 | U-2 OS   |
| 12103 | ENSG00000179240 | HPA057405 | CACO-2   |
| 12104 | ENSG00000179241 | HPA038251 | U-2 OS   |
| 12105 | ENSG00000179242 | HPA015613 | U-2 OS   |
| 12106 | ENSG00000179262 | HPA026418 | U-2 OS   |
| 12107 | ENSG00000179262 | HPA053901 | U-2 OS   |
| 12108 | ENSG00000179262 | HPA057003 | U-2 OS   |
| 12109 | ENSG00000179271 | HPA055205 | A549     |
| 12110 | ENSG00000179271 | HPA071910 | U-2 OS   |
| 12111 | ENSG00000179284 | HPA043493 | SH-SY5Y  |
| 12112 | ENSG00000179292 | HPA041035 | U-2 OS   |
| 12113 | ENSG00000179295 | CAB005377 | U-2 OS   |
| 12114 | ENSG00000179299 | HPA020653 | U-2 OS   |
| 12115 | ENSG00000179300 | HPA075136 | U-2 OS   |
| 12116 | ENSG00000179314 | HPA015919 | RH-30    |
| 12117 | ENSG00000179335 | HPA046817 | U-2 OS   |
| 12118 | ENSG00000179344 | HPA013667 | HEK 293  |
| 12119 | ENSG00000179348 | HPA005633 | U-2 OS   |
| 12120 | ENSG00000179361 | HPA050320 | CACO-2   |
| 12121 | ENSG00000179363 | HPA052760 | MCF7     |
| 12122 | ENSG00000179364 | HPA077892 | U-2 OS   |
| 12123 | ENSG00000179387 | HPA047600 | U-251 MG |
| 12124 | ENSG00000179388 | HPA006206 | U-2 OS   |
| 12125 | ENSG00000179399 | HPA044081 | CACO-2   |
| 12126 | ENSG00000179409 | HPA065699 | U-2 OS   |
| 12127 | ENSG00000179431 | HPA059220 | U-2 OS   |
| 12128 | ENSG00000179454 | HPA000988 | U-2 OS   |
| 12129 | ENSG00000179455 | HPA029494 | A-431    |
| 12130 | ENSG00000179456 | HPA024656 | SH-SY5Y  |
| 12131 | ENSG00000179476 | HPA059635 | U-2 OS   |
| 12132 | ENSG00000179477 | HPA024002 | U-2 OS   |
| 12133 | ENSG00000179526 | HPA044453 | MCF7     |
| 12134 | ENSG00000179528 | HPA044257 | CACO-2   |
| 12135 | ENSG00000179532 | HPA040267 | U-2 OS   |
| 12136 | ENSG00000179532 | HPA057639 | HeLa     |
| 12137 | ENSG00000179542 | HPA000431 | U-2 OS   |
| 12138 | ENSG00000179562 | HPA019369 | U-2 OS   |
| 12139 | ENSG00000179562 | HPA021323 | U-2 OS   |
| 12140 | ENSG00000179583 | CAB016084 | A-431    |
| 12141 | ENSG00000179583 | HPA054757 | U-2 OS   |
| 12142 | ENSG00000179588 | HPA046603 | CACO-2   |
| 12143 | ENSG00000179593 | HPA010562 | U-2 OS   |
| 12144 | ENSG00000179604 | HPA023335 | U-2 OS   |
| 12145 | ENSG00000179604 | HPA024797 | U-2 OS   |
| 12146 | ENSG00000179627 | HPA066961 | RT4      |
| 12147 | ENSG00000179632 | HPA058548 | U-2 OS   |
| 12148 | ENSG00000179715 | HPA043901 | U-2 OS   |
| 12149 | ENSG00000179750 | HPA056980 | A-431    |
| 12150 | ENSG00000179750 | HPA066719 | U-2 OS   |
| 12151 | ENSG00000179772 | HPA042475 | U-2 OS   |
| 12152 | ENSG00000179776 | HPA075875 | U-2 OS   |
| 12153 | ENSG00000179820 | HPA056301 | U-2 OS   |

|       |                 |           |         |
|-------|-----------------|-----------|---------|
| 12154 | ENSG00000179832 | HPA024287 | RT4     |
| 12155 | ENSG00000179833 | HPA020904 | U-2 OS  |
| 12156 | ENSG00000179841 | CAB004308 | U-2 OS  |
| 12157 | ENSG00000179855 | HPA067765 | U-2 OS  |
| 12158 | ENSG00000179862 | HPA056434 | U-2 OS  |
| 12159 | ENSG00000179869 | HPA063601 | U-2 OS  |
| 12160 | ENSG00000179873 | HPA078027 | HEK 293 |
| 12161 | ENSG00000179889 | HPA047369 | U-2 OS  |
| 12162 | ENSG00000179889 | HPA049121 | U-2 OS  |
| 12163 | ENSG00000179889 | HPA051484 | U-2 OS  |
| 12164 | ENSG00000179902 | HPA031144 | U-2 OS  |
| 12165 | ENSG00000179909 | HPA076284 | AF22    |
| 12166 | ENSG00000179912 | HPA038327 | U-2 OS  |
| 12167 | ENSG00000179912 | HPA038328 | U-2 OS  |
| 12168 | ENSG00000179915 | HPA071400 | U-2 OS  |
| 12169 | ENSG00000179918 | HPA047931 | U-2 OS  |
| 12170 | ENSG00000179922 | HPA059676 | RT4     |
| 12171 | ENSG00000179933 | HPA003638 | U-2 OS  |
| 12172 | ENSG00000179943 | HPA074026 | U-2 OS  |
| 12173 | ENSG00000179950 | HPA045733 | U-2 OS  |
| 12174 | ENSG00000179950 | HPA059714 | U-2 OS  |
| 12175 | ENSG00000179954 | HPA042008 | U-2 OS  |
| 12176 | ENSG00000179954 | HPA053316 | U-2 OS  |
| 12177 | ENSG00000179958 | HPA002832 | A-431   |
| 12178 | ENSG00000179965 | HPA030730 | U-2 OS  |
| 12179 | ENSG00000179965 | HPA059398 | U-2 OS  |
| 12180 | ENSG00000179981 | HPA006982 | U-2 OS  |
| 12181 | ENSG00000179988 | HPA037781 | U-2 OS  |
| 12182 | ENSG00000180008 | HPA057961 | U-2 OS  |
| 12183 | ENSG00000180011 | HPA053646 | U-2 OS  |
| 12184 | ENSG00000180035 | HPA023806 | U-2 OS  |
| 12185 | ENSG00000180071 | HPA046346 | U-2 OS  |
| 12186 | ENSG00000180071 | HPA046695 | U-2 OS  |
| 12187 | ENSG00000180071 | HPA051288 | U-2 OS  |
| 12188 | ENSG00000180089 | HPA057689 | U-2 OS  |
| 12189 | ENSG00000180096 | HPA060339 | U-2 OS  |
| 12190 | ENSG00000180098 | HPA032068 | U-2 OS  |
| 12191 | ENSG00000180104 | HPA037880 | U-2 OS  |
| 12192 | ENSG00000180116 | HPA039032 | U-2 OS  |
| 12193 | ENSG00000180138 | HPA051334 | CACO-2  |
| 12194 | ENSG00000180176 | HPA014010 | PC-3    |
| 12195 | ENSG00000180182 | HPA064182 | U-2 OS  |
| 12196 | ENSG00000180185 | CAB025530 | U-2 OS  |
| 12197 | ENSG00000180185 | HPA043534 | U-2 OS  |
| 12198 | ENSG00000180190 | HPA008462 | U-2 OS  |
| 12199 | ENSG00000180198 | CAB015413 | U-2 OS  |
| 12200 | ENSG00000180198 | HPA027573 | U-2 OS  |
| 12201 | ENSG00000180198 | HPA027574 | U-2 OS  |
| 12202 | ENSG00000180228 | HPA034996 | U-2 OS  |
| 12203 | ENSG00000180228 | HPA034997 | U-2 OS  |
| 12204 | ENSG00000180251 | HPA036096 | RT4     |
| 12205 | ENSG00000180257 | HPA042466 | U-2 OS  |
| 12206 | ENSG00000180263 | HPA007974 | U-2 OS  |
| 12207 | ENSG00000180287 | HPA028389 | U-2 OS  |
| 12208 | ENSG00000180287 | HPA050367 | U-2 OS  |

|       |                 |           |          |
|-------|-----------------|-----------|----------|
| 12209 | ENSG00000180304 | HPA047694 | U-2 OS   |
| 12210 | ENSG00000180316 | HPA037853 | U-2 OS   |
| 12211 | ENSG00000180318 | HPA001598 | U-2 OS   |
| 12212 | ENSG00000180329 | HPA023391 | U-2 OS   |
| 12213 | ENSG00000180332 | HPA040734 | U-251 MG |
| 12214 | ENSG00000180336 | HPA027266 | U-2 OS   |
| 12215 | ENSG00000180340 | HPA057667 | CACO-2   |
| 12216 | ENSG00000180346 | HPA071168 | RT4      |
| 12217 | ENSG00000180347 | HPA024103 | U-2 OS   |
| 12218 | ENSG00000180353 | HPA019143 | RT4      |
| 12219 | ENSG00000180354 | HPA029507 | U-2 OS   |
| 12220 | ENSG00000180357 | HPA040742 | U-2 OS   |
| 12221 | ENSG00000180357 | HPA040832 | U-2 OS   |
| 12222 | ENSG00000180370 | CAB007794 | U-2 OS   |
| 12223 | ENSG00000180376 | HPA044185 | U-2 OS   |
| 12224 | ENSG00000180423 | HPA038671 | U-2 OS   |
| 12225 | ENSG00000180423 | HPA045457 | U-2 OS   |
| 12226 | ENSG00000180425 | HPA063943 | U-2 OS   |
| 12227 | ENSG00000180425 | HPA074787 | CACO-2   |
| 12228 | ENSG00000180440 | HPA054814 | HEK 293  |
| 12229 | ENSG00000180440 | HPA070485 | U-2 OS   |
| 12230 | ENSG00000180447 | HPA036085 | U-2 OS   |
| 12231 | ENSG00000180479 | HPA054762 | U-2 OS   |
| 12232 | ENSG00000180481 | HPA039795 | U-2 OS   |
| 12233 | ENSG00000180488 | HPA017589 | U-2 OS   |
| 12234 | ENSG00000180530 | HPA029785 | U-2 OS   |
| 12235 | ENSG00000180530 | HPA060036 | U-2 OS   |
| 12236 | ENSG00000180535 | HPA047834 | U-2 OS   |
| 12237 | ENSG00000180537 | HPA012309 | U-2 OS   |
| 12238 | ENSG00000180543 | HPA031347 | U-2 OS   |
| 12239 | ENSG00000180549 | HPA042780 | U-2 OS   |
| 12240 | ENSG00000180592 | HPA039208 | U-2 OS   |
| 12241 | ENSG00000180596 | HPA048671 | U-2 OS   |
| 12242 | ENSG00000180611 | HPA044026 | U-2 OS   |
| 12243 | ENSG00000180616 | HPA007264 | U-2 OS   |
| 12244 | ENSG00000180626 | HPA060283 | HeLa     |
| 12245 | ENSG00000180626 | HPA067178 | U-2 OS   |
| 12246 | ENSG00000180626 | HPA069360 | RH-30    |
| 12247 | ENSG00000180628 | HPA038349 | U-2 OS   |
| 12248 | ENSG00000180644 | HPA037940 | U-251 MG |
| 12249 | ENSG00000180660 | HPA049324 | BJ       |
| 12250 | ENSG00000180660 | HPA059864 | BJ       |
| 12251 | ENSG00000180667 | HPA028400 | U-2 OS   |
| 12252 | ENSG00000180667 | HPA028439 | U-2 OS   |
| 12253 | ENSG00000180720 | HPA072083 | U-2 OS   |
| 12254 | ENSG00000180730 | HPA049752 | PC-3     |
| 12255 | ENSG00000180730 | HPA050172 | U-2 OS   |
| 12256 | ENSG00000180758 | HPA028697 | U-2 OS   |
| 12257 | ENSG00000180773 | HPA017887 | U-2 OS   |
| 12258 | ENSG00000180776 | HPA014702 | A-431    |
| 12259 | ENSG00000180777 | HPA071849 | A549     |
| 12260 | ENSG00000180787 | HPA057290 | SH-SY5Y  |
| 12261 | ENSG00000180801 | HPA036481 | BJ       |
| 12262 | ENSG00000180801 | HPA036482 | BJ       |
| 12263 | ENSG00000180806 | HPA063965 | U-2 OS   |

|       |                 |           |          |
|-------|-----------------|-----------|----------|
| 12264 | ENSG00000180806 | HPA072160 | U-2 OS   |
| 12265 | ENSG00000180815 | HPA004006 | U-2 OS   |
| 12266 | ENSG00000180817 | HPA020096 | U-2 OS   |
| 12267 | ENSG00000180818 | HPA053919 | U-2 OS   |
| 12268 | ENSG00000180822 | HPA067652 | U-2 OS   |
| 12269 | ENSG00000180834 | HPA037991 | U-2 OS   |
| 12270 | ENSG00000180855 | HPA018683 | RT4      |
| 12271 | ENSG00000180871 | HPA031999 | THP-1    |
| 12272 | ENSG00000180871 | HPA032017 | THP-1    |
| 12273 | ENSG00000180881 | HPA040004 | U-2 OS   |
| 12274 | ENSG00000180884 | HPA035157 | U-2 OS   |
| 12275 | ENSG00000180891 | HPA024836 | U-2 OS   |
| 12276 | ENSG00000180900 | HPA023557 | U-2 OS   |
| 12277 | ENSG00000180900 | HPA064312 | U-2 OS   |
| 12278 | ENSG00000180902 | HPA060548 | RT4      |
| 12279 | ENSG00000180917 | HPA048265 | A-431    |
| 12280 | ENSG00000180921 | HPA024505 | U-2 OS   |
| 12281 | ENSG00000180938 | HPA066838 | U-2 OS   |
| 12282 | ENSG00000180957 | HPA000528 | U-2 OS   |
| 12283 | ENSG00000180964 | HPA059115 | RH-30    |
| 12284 | ENSG00000180979 | HPA040894 | U-2 OS   |
| 12285 | ENSG00000180992 | HPA076790 | U-2 OS   |
| 12286 | ENSG00000180998 | HPA003640 | U-2 OS   |
| 12287 | ENSG00000181007 | HPA051669 | U-2 OS   |
| 12288 | ENSG00000181016 | HPA013753 | U-2 OS   |
| 12289 | ENSG00000181016 | HPA047988 | U-2 OS   |
| 12290 | ENSG00000181019 | HPA007308 | U-2 OS   |
| 12291 | ENSG00000181026 | HPA048599 | U-2 OS   |
| 12292 | ENSG00000181027 | HPA043115 | U-2 OS   |
| 12293 | ENSG00000181029 | HPA042221 | HEK 293  |
| 12294 | ENSG00000181035 | HPA049449 | U-2 OS   |
| 12295 | ENSG00000181038 | HPA022889 | U-2 OS   |
| 12296 | ENSG00000181045 | HPA029893 | U-2 OS   |
| 12297 | ENSG00000181061 | HPA043336 | A-431    |
| 12298 | ENSG00000181085 | HPA002704 | MCF7     |
| 12299 | ENSG00000181090 | HPA060022 | U-2 OS   |
| 12300 | ENSG00000181135 | HPA044991 | U-2 OS   |
| 12301 | ENSG00000181163 | HPA011384 | U-2 OS   |
| 12302 | ENSG00000181163 | CAB012983 | U-2 OS   |
| 12303 | ENSG00000181191 | HPA000595 | U-2 OS   |
| 12304 | ENSG00000181192 | HPA037949 | A-431    |
| 12305 | ENSG00000181222 | CAB012226 | U-2 OS   |
| 12306 | ENSG00000181222 | CAB016388 | U-2 OS   |
| 12307 | ENSG00000181234 | HPA015633 | A-431    |
| 12308 | ENSG00000181234 | HPA015984 | U-251 MG |
| 12309 | ENSG00000181264 | HPA074432 | U-2 OS   |
| 12310 | ENSG00000181274 | HPA049763 | U-2 OS   |
| 12311 | ENSG00000181284 | HPA024433 | U-2 OS   |
| 12312 | ENSG00000181291 | HPA070608 | U-2 OS   |
| 12313 | ENSG00000181315 | HPA046692 | U-2 OS   |
| 12314 | ENSG00000181350 | HPA028528 | U-2 OS   |
| 12315 | ENSG00000181350 | HPA065840 | U-2 OS   |
| 12316 | ENSG00000181381 | HPA055501 | U-2 OS   |
| 12317 | ENSG00000181396 | HPA052099 | A-431    |
| 12318 | ENSG00000181404 | HPA002689 | U-2 OS   |

|       |                 |           |          |
|-------|-----------------|-----------|----------|
| 12319 | ENSG00000181409 | HPA009073 | CAC0-2   |
| 12320 | ENSG00000181418 | HPA060952 | CAC0-2   |
| 12321 | ENSG00000181433 | HPA003033 | U-2 OS   |
| 12322 | ENSG00000181433 | HPA003208 | U-2 OS   |
| 12323 | ENSG00000181444 | HPA042907 | U-2 OS   |
| 12324 | ENSG00000181449 | HPA045725 | U-2 OS   |
| 12325 | ENSG00000181449 | HPA062851 | U-251 MG |
| 12326 | ENSG00000181450 | HPA028507 | U-2 OS   |
| 12327 | ENSG00000181458 | HPA062101 | U-2 OS   |
| 12328 | ENSG00000181472 | HPA023458 | U-2 OS   |
| 12329 | ENSG00000181472 | HPA023487 | U-2 OS   |
| 12330 | ENSG00000181481 | HPA052404 | U-2 OS   |
| 12331 | ENSG00000181513 | HPA051772 | U-2 OS   |
| 12332 | ENSG00000181541 | HPA049324 | BJ       |
| 12333 | ENSG00000181541 | HPA059864 | BJ       |
| 12334 | ENSG00000181555 | HPA042451 | U-2 OS   |
| 12335 | ENSG00000181577 | HPA035765 | U-2 OS   |
| 12336 | ENSG00000181585 | HPA038298 | U-2 OS   |
| 12337 | ENSG00000181610 | HPA023453 | U-2 OS   |
| 12338 | ENSG00000181625 | HPA047038 | U-2 OS   |
| 12339 | ENSG00000181634 | HPA046522 | RT4      |
| 12340 | ENSG00000181638 | HPA047232 | U-2 OS   |
| 12341 | ENSG00000181649 | HPA003994 | MCF7     |
| 12342 | ENSG00000181666 | HPA044855 | U-2 OS   |
| 12343 | ENSG00000181690 | HPA072290 | U-2 OS   |
| 12344 | ENSG00000181704 | HPA003720 | U-2 OS   |
| 12345 | ENSG00000181722 | HPA015551 | U-2 OS   |
| 12346 | ENSG00000181722 | HPA016815 | U-2 OS   |
| 12347 | ENSG00000181754 | HPA046152 | U-2 OS   |
| 12348 | ENSG00000181788 | HPA061293 | U-2 OS   |
| 12349 | ENSG00000181789 | HPA037866 | U-2 OS   |
| 12350 | ENSG00000181789 | HPA037867 | U-2 OS   |
| 12351 | ENSG00000181817 | HPA048469 | U-2 OS   |
| 12352 | ENSG00000181826 | HPA013377 | U-2 OS   |
| 12353 | ENSG00000181827 | HPA035462 | U-2 OS   |
| 12354 | ENSG00000181830 | HPA064001 | U-2 OS   |
| 12355 | ENSG00000181852 | HPA016812 | SiHa     |
| 12356 | ENSG00000181873 | HPA030556 | CAC0-2   |
| 12357 | ENSG00000181885 | HPA073662 | CAC0-2   |
| 12358 | ENSG00000181894 | HPA044373 | U-2 OS   |
| 12359 | ENSG00000181904 | HPA057749 | U-2 OS   |
| 12360 | ENSG00000181904 | HPA062502 | SiHa     |
| 12361 | ENSG00000181924 | HPA040126 | U-2 OS   |
| 12362 | ENSG00000181929 | HPA077805 | PC-3     |
| 12363 | ENSG00000181938 | HPA041216 | U-2 OS   |
| 12364 | ENSG00000181938 | HPA048209 | U-2 OS   |
| 12365 | ENSG00000181982 | HPA044158 | A-431    |
| 12366 | ENSG00000181991 | HPA050345 | U-2 OS   |
| 12367 | ENSG00000182010 | HPA037946 | U-2 OS   |
| 12368 | ENSG00000182013 | HPA012956 | U-2 OS   |
| 12369 | ENSG00000182022 | HPA017584 | U-2 OS   |
| 12370 | ENSG00000182054 | HPA007831 | U-2 OS   |
| 12371 | ENSG00000182087 | HPA054801 | U-2 OS   |
| 12372 | ENSG00000182095 | HPA020730 | U-2 OS   |
| 12373 | ENSG00000182095 | HPA024251 | U-2 OS   |

|       |                 |           |        |
|-------|-----------------|-----------|--------|
| 12374 | ENSG00000182103 | HPA066861 | RT4    |
| 12375 | ENSG00000182108 | HPA041511 | U-2 OS |
| 12376 | ENSG00000182117 | HPA059198 | CACO-2 |
| 12377 | ENSG00000182118 | HPA059578 | U-2 OS |
| 12378 | ENSG00000182132 | HPA066717 | U-2 OS |
| 12379 | ENSG00000182134 | HPA019625 | U-2 OS |
| 12380 | ENSG00000182149 | HPA054532 | U-2 OS |
| 12381 | ENSG00000182150 | HPA021260 | A-431  |
| 12382 | ENSG00000182150 | HPA022422 | U-2 OS |
| 12383 | ENSG00000182154 | HPA024550 | U-2 OS |
| 12384 | ENSG00000182158 | HPA015534 | U-2 OS |
| 12385 | ENSG00000182175 | HPA039880 | U-2 OS |
| 12386 | ENSG00000182175 | HPA044222 | U-2 OS |
| 12387 | ENSG00000182179 | HPA058182 | RT4    |
| 12388 | ENSG00000182180 | HPA050081 | U-2 OS |
| 12389 | ENSG00000182185 | HPA051869 | U-2 OS |
| 12390 | ENSG00000182195 | HPA061842 | U-2 OS |
| 12391 | ENSG00000182199 | HPA020543 | U-2 OS |
| 12392 | ENSG00000182199 | HPA020549 | U-2 OS |
| 12393 | ENSG00000182208 | HPA046313 | U-2 OS |
| 12394 | ENSG00000182224 | HPA021632 | A-431  |
| 12395 | ENSG00000182247 | HPA028872 | U-2 OS |
| 12396 | ENSG00000182253 | HPA077856 | A549   |
| 12397 | ENSG00000182261 | HPA039498 | U-2 OS |
| 12398 | ENSG00000182261 | HPA040101 | U-2 OS |
| 12399 | ENSG00000182263 | HPA034987 | U-2 OS |
| 12400 | ENSG00000182263 | HPA057919 | U-2 OS |
| 12401 | ENSG00000182271 | HPA021946 | U-2 OS |
| 12402 | ENSG00000182272 | HPA053126 | U-2 OS |
| 12403 | ENSG00000182287 | HPA060945 | U-2 OS |
| 12404 | ENSG00000182307 | HPA024812 | A-431  |
| 12405 | ENSG00000182307 | HPA026104 | U-2 OS |
| 12406 | ENSG00000182318 | HPA006471 | U-2 OS |
| 12407 | ENSG00000182324 | HPA071765 | RT4    |
| 12408 | ENSG00000182325 | HPA008867 | U-2 OS |
| 12409 | ENSG00000182326 | HPA018852 | U-2 OS |
| 12410 | ENSG00000182327 | HPA065267 | CACO-2 |
| 12411 | ENSG00000182362 | HPA016593 | U-2 OS |
| 12412 | ENSG00000182378 | HPA007721 | U-2 OS |
| 12413 | ENSG00000182400 | HPA047928 | U-2 OS |
| 12414 | ENSG00000182405 | HPA059823 | U-2 OS |
| 12415 | ENSG00000182446 | HPA021560 | A-431  |
| 12416 | ENSG00000182446 | HPA023295 | U-2 OS |
| 12417 | ENSG00000182463 | HPA038123 | U-2 OS |
| 12418 | ENSG00000182472 | HPA053322 | CACO-2 |
| 12419 | ENSG00000182473 | HPA022840 | U-2 OS |
| 12420 | ENSG00000182481 | CAB015460 | U-2 OS |
| 12421 | ENSG00000182481 | HPA041270 | U-2 OS |
| 12422 | ENSG00000182492 | HPA003157 | BJ     |
| 12423 | ENSG00000182504 | HPA002980 | A-431  |
| 12424 | ENSG00000182511 | HPA001376 | U-2 OS |
| 12425 | ENSG00000182512 | HPA063716 | U-2 OS |
| 12426 | ENSG00000182533 | HPA054488 | RH-30  |
| 12427 | ENSG00000182534 | HPA044819 | U-2 OS |
| 12428 | ENSG00000182534 | HPA075316 | U-2 OS |



|       |                 |           |          |
|-------|-----------------|-----------|----------|
| 12429 | ENSG00000182541 | CAB019313 | U-2 OS   |
| 12430 | ENSG00000182551 | HPA035403 | U-2 OS   |
| 12431 | ENSG00000182552 | HPA036502 | U-2 OS   |
| 12432 | ENSG00000182568 | HPA051769 | RT4      |
| 12433 | ENSG00000182578 | HPA012323 | U-2 OS   |
| 12434 | ENSG00000182585 | HPA014420 | HeLa     |
| 12435 | ENSG00000182600 | HPA052824 | U-2 OS   |
| 12436 | ENSG00000182606 | HPA011367 | RT4      |
| 12437 | ENSG00000182621 | CAB005334 | U-2 OS   |
| 12438 | ENSG00000182636 | HPA074457 | U-2 OS   |
| 12439 | ENSG00000182670 | HPA036304 | U-2 OS   |
| 12440 | ENSG00000182674 | HPA065970 | U-2 OS   |
| 12441 | ENSG00000182685 | HPA063522 | U-2 OS   |
| 12442 | ENSG00000182700 | HPA041877 | SiHa     |
| 12443 | ENSG00000182704 | HPA008164 | MCF7     |
| 12444 | ENSG00000182712 | HPA045866 | U-2 OS   |
| 12445 | ENSG00000182718 | HPA046964 | U-2 OS   |
| 12446 | ENSG00000182732 | HPA003067 | U-2 OS   |
| 12447 | ENSG00000182742 | HPA057432 | HEK 293  |
| 12448 | ENSG00000182747 | HPA067497 | HEK 293  |
| 12449 | ENSG00000182749 | HPA046936 | U-2 OS   |
| 12450 | ENSG00000182768 | HPA041367 | U-2 OS   |
| 12451 | ENSG00000182768 | HPA076267 | RT4      |
| 12452 | ENSG00000182774 | HPA055060 | U-2 OS   |
| 12453 | ENSG00000182782 | HPA028660 | RT4      |
| 12454 | ENSG00000182793 | HPA053817 | Hep G2   |
| 12455 | ENSG00000182795 | HPA011888 | A-431    |
| 12456 | ENSG00000182795 | HPA011889 | RT4      |
| 12457 | ENSG00000182798 | HPA003756 | U-2 OS   |
| 12458 | ENSG00000182809 | HPA042664 | U-2 OS   |
| 12459 | ENSG00000182810 | HPA041911 | U-2 OS   |
| 12460 | ENSG00000182810 | HPA053585 | U-2 OS   |
| 12461 | ENSG00000182827 | HPA015594 | U-2 OS   |
| 12462 | ENSG00000182831 | HPA067492 | U-2 OS   |
| 12463 | ENSG00000182836 | HPA046849 | SH-SY5Y  |
| 12464 | ENSG00000182858 | HPA003076 | MCF7     |
| 12465 | ENSG00000182866 | HPA003494 | U-2 OS   |
| 12466 | ENSG00000182870 | HPA075016 | U-2 OS   |
| 12467 | ENSG00000182871 | HPA036104 | U-251 MG |
| 12468 | ENSG00000182872 | HPA034972 | U-2 OS   |
| 12469 | ENSG00000182872 | HPA057372 | U-2 OS   |
| 12470 | ENSG00000182890 | HPA044839 | U-2 OS   |
| 12471 | ENSG00000182890 | HPA061369 | CACO-2   |
| 12472 | ENSG00000182898 | HPA042579 | U-2 OS   |
| 12473 | ENSG00000182901 | CAB017561 | U-2 OS   |
| 12474 | ENSG00000182903 | HPA065313 | U-2 OS   |
| 12475 | ENSG00000182916 | HPA065080 | SH-SY5Y  |
| 12476 | ENSG00000182919 | HPA040088 | U-2 OS   |
| 12477 | ENSG00000182923 | HPA058154 | U-2 OS   |
| 12478 | ENSG00000182923 | HPA058313 | U-2 OS   |
| 12479 | ENSG00000182944 | CAB004230 | U-2 OS   |
| 12480 | ENSG00000182944 | HPA051771 | U-2 OS   |
| 12481 | ENSG00000182952 | HPA077364 | U-2 OS   |
| 12482 | ENSG00000182957 | HPA040185 | U-2 OS   |
| 12483 | ENSG00000182957 | HPA041208 | U-2 OS   |

|       |                 |           |         |
|-------|-----------------|-----------|---------|
| 12484 | ENSG00000182963 | HPA071788 | U-2 OS  |
| 12485 | ENSG00000182973 | HPA041450 | U-2 OS  |
| 12486 | ENSG00000182979 | CAB004508 | U-2 OS  |
| 12487 | ENSG00000182979 | HPA005544 | U-2 OS  |
| 12488 | ENSG00000182985 | CAB037266 | U-2 OS  |
| 12489 | ENSG00000182986 | HPA062474 | RT4     |
| 12490 | ENSG00000182993 | HPA043911 | U-2 OS  |
| 12491 | ENSG00000183011 | HPA059189 | U-2 OS  |
| 12492 | ENSG00000183020 | CAB017514 | U-2 OS  |
| 12493 | ENSG00000183020 | HPA043040 | U-2 OS  |
| 12494 | ENSG00000183023 | HPA070007 | U-2 OS  |
| 12495 | ENSG00000183036 | HPA005792 | U-2 OS  |
| 12496 | ENSG00000183044 | HPA041690 | U-2 OS  |
| 12497 | ENSG00000183048 | HPA023048 | U-2 OS  |
| 12498 | ENSG00000183049 | HPA007266 | A-431   |
| 12499 | ENSG00000183054 | HPA067564 | CACO-2  |
| 12500 | ENSG00000183060 | HPA029152 | U-2 OS  |
| 12501 | ENSG00000183067 | HPA057282 | hTCEpi  |
| 12502 | ENSG00000183072 | HPA065034 | U-2 OS  |
| 12503 | ENSG00000183077 | HPA023861 | U-2 OS  |
| 12504 | ENSG00000183087 | HPA056080 | U-2 OS  |
| 12505 | ENSG00000183092 | HPA002899 | U-2 OS  |
| 12506 | ENSG00000183098 | HPA017671 | U-2 OS  |
| 12507 | ENSG00000183111 | HPA053487 | SH-SY5Y |
| 12508 | ENSG00000183114 | HPA050813 | U-2 OS  |
| 12509 | ENSG00000183117 | HPA074707 | U-2 OS  |
| 12510 | ENSG00000183128 | HPA018205 | U-2 OS  |
| 12511 | ENSG00000183137 | HPA040378 | U-2 OS  |
| 12512 | ENSG00000183155 | HPA054936 | U-2 OS  |
| 12513 | ENSG00000183161 | HPA008899 | SH-SY5Y |
| 12514 | ENSG00000183166 | HPA036708 | CACO-2  |
| 12515 | ENSG00000183172 | HPA060340 | U-2 OS  |
| 12516 | ENSG00000183186 | HPA055915 | U-2 OS  |
| 12517 | ENSG00000183207 | HPA042880 | U-2 OS  |
| 12518 | ENSG00000183207 | HPA067966 | U-2 OS  |
| 12519 | ENSG00000183208 | HPA059841 | A549    |
| 12520 | ENSG00000183246 | HPA001183 | U-2 OS  |
| 12521 | ENSG00000183248 | HPA062741 | U-2 OS  |
| 12522 | ENSG00000183255 | HPA061827 | CACO-2  |
| 12523 | ENSG00000183258 | HPA017911 | U-2 OS  |
| 12524 | ENSG00000183258 | HPA048803 | U-2 OS  |
| 12525 | ENSG00000183260 | HPA059272 | CACO-2  |
| 12526 | ENSG00000183283 | HPA045940 | U-2 OS  |
| 12527 | ENSG00000183287 | HPA041361 | U-2 OS  |
| 12528 | ENSG00000183287 | HPA041374 | U-2 OS  |
| 12529 | ENSG00000183291 | HPA054937 | U-2 OS  |
| 12530 | ENSG00000183307 | HPA068790 | U-2 OS  |
| 12531 | ENSG00000183309 | HPA044372 | SiHa    |
| 12532 | ENSG00000183323 | HPA041878 | U-2 OS  |
| 12533 | ENSG00000183336 | HPA045380 | U-2 OS  |
| 12534 | ENSG00000183337 | HPA056308 | U-2 OS  |
| 12535 | ENSG00000183337 | HPA073591 | U-2 OS  |
| 12536 | ENSG00000183340 | HPA060341 | U-2 OS  |
| 12537 | ENSG00000183346 | HPA041398 | U-2 OS  |
| 12538 | ENSG00000183354 | HPA002109 | U-2 OS  |

|       |                 |           |          |
|-------|-----------------|-----------|----------|
| 12539 | ENSG00000183386 | HPA045723 | A-431    |
| 12540 | ENSG00000183397 | HPA048654 | U-2 OS   |
| 12541 | ENSG00000183401 | HPA054655 | A-431    |
| 12542 | ENSG00000183423 | HPA013454 | U-2 OS   |
| 12543 | ENSG00000183426 | HPA053611 | U-2 OS   |
| 12544 | ENSG00000183431 | HPA032054 | U-2 OS   |
| 12545 | ENSG00000183439 | HPA049109 | U-2 OS   |
| 12546 | ENSG00000183474 | HPA047001 | U-251 MG |
| 12547 | ENSG00000183475 | HPA003300 | U-2 OS   |
| 12548 | ENSG00000183495 | HPA016704 | U-2 OS   |
| 12549 | ENSG00000183495 | HPA049013 | U-2 OS   |
| 12550 | ENSG00000183496 | HPA041093 | U-2 OS   |
| 12551 | ENSG00000183508 | HPA054049 | U-2 OS   |
| 12552 | ENSG00000183513 | HPA057768 | U-2 OS   |
| 12553 | ENSG00000183520 | HPA045830 | U-2 OS   |
| 12554 | ENSG00000183527 | HPA057193 | A-431    |
| 12555 | ENSG00000183527 | HPA070225 | U-2 OS   |
| 12556 | ENSG00000183530 | HPA062645 | U-2 OS   |
| 12557 | ENSG00000183549 | HPA041435 | U-2 OS   |
| 12558 | ENSG00000183570 | HPA030247 | U-2 OS   |
| 12559 | ENSG00000183576 | HPA003591 | U-2 OS   |
| 12560 | ENSG00000183578 | HPA077484 | U-251 MG |
| 12561 | ENSG00000183579 | HPA036702 | Hep G2   |
| 12562 | ENSG00000183615 | HPA062074 | U-2 OS   |
| 12563 | ENSG00000183617 | HPA046767 | U-2 OS   |
| 12564 | ENSG00000183621 | HPA039843 | U-2 OS   |
| 12565 | ENSG00000183624 | HPA044968 | U-2 OS   |
| 12566 | ENSG00000183647 | HPA045868 | HEK 293  |
| 12567 | ENSG00000183648 | HPA063737 | U-2 OS   |
| 12568 | ENSG00000183655 | HPA023450 | A-431    |
| 12569 | ENSG00000183665 | HPA023939 | U-2 OS   |
| 12570 | ENSG00000183671 | HPA010525 | U-2 OS   |
| 12571 | ENSG00000183684 | HPA019799 | U-2 OS   |
| 12572 | ENSG00000183684 | HPA061282 | U-2 OS   |
| 12573 | ENSG00000183688 | HPA030879 | U-2 OS   |
| 12574 | ENSG00000183690 | HPA034492 | U-2 OS   |
| 12575 | ENSG00000183696 | HPA054040 | U-2 OS   |
| 12576 | ENSG00000183696 | HPA055394 | U-2 OS   |
| 12577 | ENSG00000183706 | HPA057442 | U-2 OS   |
| 12578 | ENSG00000183718 | HPA054565 | U-2 OS   |
| 12579 | ENSG00000183718 | HPA056819 | U-2 OS   |
| 12580 | ENSG00000183722 | HPA058975 | U-2 OS   |
| 12581 | ENSG00000183723 | HPA014704 | A-431    |
| 12582 | ENSG00000183723 | HPA023890 | U-2 OS   |
| 12583 | ENSG00000183726 | HPA065192 | U-2 OS   |
| 12584 | ENSG00000183735 | HPA045797 | A-431    |
| 12585 | ENSG00000183735 | HPA060211 | RT4      |
| 12586 | ENSG00000183741 | HPA048653 | HEK 293  |
| 12587 | ENSG00000183742 | HPA029476 | CACO-2   |
| 12588 | ENSG00000183742 | CAB068194 | U-2 OS   |
| 12589 | ENSG00000183751 | HPA042562 | U-2 OS   |
| 12590 | ENSG00000183751 | HPA055695 | U-2 OS   |
| 12591 | ENSG00000183762 | HPA058513 | U-2 OS   |
| 12592 | ENSG00000183763 | HPA036261 | U-2 OS   |
| 12593 | ENSG00000183765 | HPA001878 | A-431    |

|       |                 |           |         |
|-------|-----------------|-----------|---------|
| 12594 | ENSG00000183770 | HPA069613 | A-431   |
| 12595 | ENSG00000183773 | HPA001271 | U-2 OS  |
| 12596 | ENSG00000183775 | HPA050154 | U-2 OS  |
| 12597 | ENSG00000183780 | HPA061582 | A549    |
| 12598 | ENSG00000183783 | HPA031562 | U-2 OS  |
| 12599 | ENSG00000183785 | HPA043684 | U-2 OS  |
| 12600 | ENSG00000183793 | HPA053611 | U-2 OS  |
| 12601 | ENSG00000183808 | HPA053050 | U-2 OS  |
| 12602 | ENSG00000183813 | HPA031613 | U-2 OS  |
| 12603 | ENSG00000183814 | HPA030241 | U-2 OS  |
| 12604 | ENSG00000183826 | HPA041930 | U-2 OS  |
| 12605 | ENSG00000183828 | HPA058759 | U-2 OS  |
| 12606 | ENSG00000183831 | HPA031655 | U-2 OS  |
| 12607 | ENSG00000183831 | HPA031656 | U-2 OS  |
| 12608 | ENSG00000183844 | HPA029777 | CACO-2  |
| 12609 | ENSG00000183856 | HPA030143 | U-2 OS  |
| 12610 | ENSG00000183864 | HPA016603 | MCF7    |
| 12611 | ENSG00000183873 | HPA063346 | SH-SY5Y |
| 12612 | ENSG00000183876 | HPA038386 | Hep G2  |
| 12613 | ENSG00000183878 | HPA000568 | U-2 OS  |
| 12614 | ENSG00000183888 | HPA026676 | U-2 OS  |
| 12615 | ENSG00000183889 | HPA053611 | U-2 OS  |
| 12616 | ENSG00000183891 | HPA036024 | U-2 OS  |
| 12617 | ENSG00000183914 | HPA067103 | CACO-2  |
| 12618 | ENSG00000183943 | HPA015324 | U-2 OS  |
| 12619 | ENSG00000183955 | HPA064495 | U-2 OS  |
| 12620 | ENSG00000183960 | HPA016586 | SH-SY5Y |
| 12621 | ENSG00000183963 | HPA051778 | U-2 OS  |
| 12622 | ENSG00000183963 | HPA058590 | U-2 OS  |
| 12623 | ENSG00000183977 | HPA036870 | U-2 OS  |
| 12624 | ENSG00000183978 | HPA031966 | U-2 OS  |
| 12625 | ENSG00000184005 | HPA054566 | U-2 OS  |
| 12626 | ENSG00000184005 | HPA055399 | CACO-2  |
| 12627 | ENSG00000184012 | HPA034493 | CACO-2  |
| 12628 | ENSG00000184014 | HPA052923 | U-2 OS  |
| 12629 | ENSG00000184047 | HPA001825 | U-2 OS  |
| 12630 | ENSG00000184047 | CAB016688 | U-2 OS  |
| 12631 | ENSG00000184058 | HPA029330 | HEK 293 |
| 12632 | ENSG00000184083 | HPA047677 | U-2 OS  |
| 12633 | ENSG00000184110 | CAB034045 | A-431   |
| 12634 | ENSG00000184110 | HPA047097 | U-2 OS  |
| 12635 | ENSG00000184110 | HPA049495 | U-2 OS  |
| 12636 | ENSG00000184154 | HPA039949 | U-2 OS  |
| 12637 | ENSG00000184162 | HPA055653 | A-431   |
| 12638 | ENSG00000184163 | HPA024107 | U-2 OS  |
| 12639 | ENSG00000184178 | HPA036526 | A-431   |
| 12640 | ENSG00000184182 | HPA037444 | U-2 OS  |
| 12641 | ENSG00000184185 | HPA027021 | U-2 OS  |
| 12642 | ENSG00000184194 | HPA003905 | U-2 OS  |
| 12643 | ENSG00000184203 | HPA043729 | CACO-2  |
| 12644 | ENSG00000184203 | HPA059420 | A-431   |
| 12645 | ENSG00000184207 | HPA046739 | U-2 OS  |
| 12646 | ENSG00000184208 | HPA052741 | U-2 OS  |
| 12647 | ENSG00000184209 | HPA059145 | U-2 OS  |
| 12648 | ENSG00000184216 | HPA054476 | U-2 OS  |

|       |                 |           |          |
|-------|-----------------|-----------|----------|
| 12649 | ENSG00000184220 | HPA042820 | U-2 OS   |
| 12650 | ENSG00000184226 | HPA015581 | U-2 OS   |
| 12651 | ENSG00000184227 | HPA043705 | U-2 OS   |
| 12652 | ENSG00000184232 | HPA047412 | Hep G2   |
| 12653 | ENSG00000184254 | HPA046271 | U-2 OS   |
| 12654 | ENSG00000184254 | HPA064749 | U-2 OS   |
| 12655 | ENSG00000184258 | HPA073147 | U-2 OS   |
| 12656 | ENSG00000184270 | CAB011483 | U-2 OS   |
| 12657 | ENSG00000184271 | HPA050411 | U-2 OS   |
| 12658 | ENSG00000184277 | HPA054064 | U-2 OS   |
| 12659 | ENSG00000184281 | HPA058763 | U-2 OS   |
| 12660 | ENSG00000184292 | HPA055067 | A-431    |
| 12661 | ENSG00000184292 | CAB072852 | MCF7     |
| 12662 | ENSG00000184293 | HPA063928 | HEL      |
| 12663 | ENSG00000184302 | HPA001403 | A-431    |
| 12664 | ENSG00000184304 | HPA029834 | U-2 OS   |
| 12665 | ENSG00000184307 | HPA016808 | U-2 OS   |
| 12666 | ENSG00000184330 | HPA006997 | U-2 OS   |
| 12667 | ENSG00000184347 | HPA051630 | RT4      |
| 12668 | ENSG00000184349 | HPA054047 | A-431    |
| 12669 | ENSG00000184357 | CAB012241 | U-2 OS   |
| 12670 | ENSG00000184363 | CAB012993 | A-431    |
| 12671 | ENSG00000184363 | HPA062937 | A-431    |
| 12672 | ENSG00000184368 | HPA051508 | CACO-2   |
| 12673 | ENSG00000184371 | HPA076624 | U-2 OS   |
| 12674 | ENSG00000184378 | HPA035817 | U-2 OS   |
| 12675 | ENSG00000184381 | HPA001171 | U-2 OS   |
| 12676 | ENSG00000184384 | HPA035223 | U-2 OS   |
| 12677 | ENSG00000184402 | CAB011827 | A-431    |
| 12678 | ENSG00000184402 | HPA059046 | U-2 OS   |
| 12679 | ENSG00000184428 | HPA001915 | U-2 OS   |
| 12680 | ENSG00000184432 | HPA058180 | U-2 OS   |
| 12681 | ENSG00000184436 | HPA003083 | U-2 OS   |
| 12682 | ENSG00000184445 | HPA025241 | U-2 OS   |
| 12683 | ENSG00000184451 | HPA048007 | HeLa     |
| 12684 | ENSG00000184451 | HPA069188 | HeLa     |
| 12685 | ENSG00000184465 | HPA037497 | U-2 OS   |
| 12686 | ENSG00000184465 | HPA037498 | U-2 OS   |
| 12687 | ENSG00000184470 | HPA003323 | U-2 OS   |
| 12688 | ENSG00000184481 | HPA039560 | U-2 OS   |
| 12689 | ENSG00000184486 | HPA056261 | U-251 MG |
| 12690 | ENSG00000184492 | HPA012836 | U-2 OS   |
| 12691 | ENSG00000184497 | HPA043334 | A-431    |
| 12692 | ENSG00000184508 | HPA040895 | U-2 OS   |
| 12693 | ENSG00000184517 | HPA044916 | U-2 OS   |
| 12694 | ENSG00000184524 | HPA042527 | SH-SY5Y  |
| 12695 | ENSG00000184545 | HPA020071 | U-2 OS   |
| 12696 | ENSG00000184557 | HPA068569 | U-2 OS   |
| 12697 | ENSG00000184564 | HPA014513 | RT4      |
| 12698 | ENSG00000184575 | HPA048067 | U-2 OS   |
| 12699 | ENSG00000184575 | HPA057602 | MCF7     |
| 12700 | ENSG00000184584 | HPA038534 | U-2 OS   |
| 12701 | ENSG00000184588 | HPA003005 | U-2 OS   |
| 12702 | ENSG00000184602 | HPA011055 | U-2 OS   |
| 12703 | ENSG00000184613 | HPA035714 | U-2 OS   |

|       |                 |           |         |
|-------|-----------------|-----------|---------|
| 12704 | ENSG00000184619 | HPA022849 | U-2 OS  |
| 12705 | ENSG00000184634 | HPA003185 | U-2 OS  |
| 12706 | ENSG00000184640 | HPA042564 | U-2 OS  |
| 12707 | ENSG00000184640 | HPA050627 | U-2 OS  |
| 12708 | ENSG00000184659 | HPA012836 | U-2 OS  |
| 12709 | ENSG00000184661 | HPA026293 | U-2 OS  |
| 12710 | ENSG00000184661 | HPA030049 | U-2 OS  |
| 12711 | ENSG00000184672 | HPA059112 | SH-SY5Y |
| 12712 | ENSG00000184675 | HPA065265 | CACO-2  |
| 12713 | ENSG00000184677 | HPA042386 | HEK 293 |
| 12714 | ENSG00000184678 | HPA048671 | U-2 OS  |
| 12715 | ENSG00000184702 | HPA029095 | U-2 OS  |
| 12716 | ENSG00000184708 | HPA001619 | U-2 OS  |
| 12717 | ENSG00000184708 | HPA002078 | U-2 OS  |
| 12718 | ENSG00000184709 | HPA056312 | U-2 OS  |
| 12719 | ENSG00000184735 | HPA003186 | U-2 OS  |
| 12720 | ENSG00000184743 | HPA065702 | U-2 OS  |
| 12721 | ENSG00000184743 | HPA076616 | SiHa    |
| 12722 | ENSG00000184752 | HPA039903 | U-2 OS  |
| 12723 | ENSG00000184792 | HPA021514 | U-2 OS  |
| 12724 | ENSG00000184831 | HPA003187 | U-2 OS  |
| 12725 | ENSG00000184838 | HPA049254 | U-2 OS  |
| 12726 | ENSG00000184857 | HPA063559 | U-2 OS  |
| 12727 | ENSG00000184863 | HPA021768 | U-2 OS  |
| 12728 | ENSG00000184867 | HPA005761 | U-2 OS  |
| 12729 | ENSG00000184887 | HPA031355 | U-2 OS  |
| 12730 | ENSG00000184897 | CAB012235 | U-2 OS  |
| 12731 | ENSG00000184897 | HPA040099 | U-2 OS  |
| 12732 | ENSG00000184898 | HPA038204 | U-2 OS  |
| 12733 | ENSG00000184900 | CAB012180 | U-2 OS  |
| 12734 | ENSG00000184900 | HPA042123 | U-2 OS  |
| 12735 | ENSG00000184900 | HPA048064 | A-431   |
| 12736 | ENSG00000184903 | HPA026711 | U-2 OS  |
| 12737 | ENSG00000184905 | HPA076317 | U-2 OS  |
| 12738 | ENSG00000184916 | HPA030636 | A-431   |
| 12739 | ENSG00000184916 | HPA050567 | A-431   |
| 12740 | ENSG00000184922 | HPA008129 | U-2 OS  |
| 12741 | ENSG00000184923 | HPA064635 | U-2 OS  |
| 12742 | ENSG00000184924 | HPA019951 | U-2 OS  |
| 12743 | ENSG00000184937 | HPA035717 | CACO-2  |
| 12744 | ENSG00000184937 | HPA053848 | U-2 OS  |
| 12745 | ENSG00000184939 | HPA029017 | U-2 OS  |
| 12746 | ENSG00000184949 | HPA003077 | U-2 OS  |
| 12747 | ENSG00000184967 | HPA053424 | U-2 OS  |
| 12748 | ENSG00000184979 | HPA044768 | U-2 OS  |
| 12749 | ENSG00000184985 | HPA061916 | U-2 OS  |
| 12750 | ENSG00000184986 | HPA049857 | U-2 OS  |
| 12751 | ENSG00000184990 | HPA065398 | MCF7    |
| 12752 | ENSG00000184990 | HPA066693 | MCF7    |
| 12753 | ENSG00000184992 | HPA014957 | RT4     |
| 12754 | ENSG00000185000 | CAB032853 | U-2 OS  |
| 12755 | ENSG00000185008 | HPA013371 | U-2 OS  |
| 12756 | ENSG00000185015 | HPA024689 | U-2 OS  |
| 12757 | ENSG00000185019 | HPA028871 | U-2 OS  |
| 12758 | ENSG00000185022 | HPA055371 | U-2 OS  |

|       |                 |           |           |
|-------|-----------------|-----------|-----------|
| 12759 | ENSG00000185024 | HPA051918 | MCF7      |
| 12760 | ENSG00000185028 | HPA038047 | REH       |
| 12761 | ENSG00000185033 | HPA013372 | RT4       |
| 12762 | ENSG00000185038 | HPA052107 | RT4       |
| 12763 | ENSG00000185043 | HPA048825 | U-251 MG  |
| 12764 | ENSG00000185046 | HPA044628 | U-2 OS    |
| 12765 | ENSG00000185049 | HPA039858 | CACO-2    |
| 12766 | ENSG00000185049 | HPA043931 | U-2 OS    |
| 12767 | ENSG00000185052 | HPA043400 | U-2 OS    |
| 12768 | ENSG00000185085 | HPA046181 | U-2 OS    |
| 12769 | ENSG00000185085 | HPA056915 | HeLa      |
| 12770 | ENSG00000185088 | HPA066851 | U-2 OS    |
| 12771 | ENSG00000185090 | HPA063423 | U-2 OS    |
| 12772 | ENSG00000185101 | HPA040112 | Hep G2    |
| 12773 | ENSG00000185104 | HPA018253 | U-2 OS    |
| 12774 | ENSG00000185104 | CAB072814 | U-2 OS    |
| 12775 | ENSG00000185112 | HPA048345 | PC-3      |
| 12776 | ENSG00000185122 | HPA008888 | U-2 OS    |
| 12777 | ENSG00000185130 | HPA048671 | U-2 OS    |
| 12778 | ENSG00000185133 | HPA034539 | U-2 OS    |
| 12779 | ENSG00000185155 | HPA005662 | Hep G2    |
| 12780 | ENSG00000185158 | HPA015135 | U-2 OS    |
| 12781 | ENSG00000185163 | HPA039503 | U-2 OS    |
| 12782 | ENSG00000185187 | HPA023188 | U-2 OS    |
| 12783 | ENSG00000185189 | HPA029051 | U-2 OS    |
| 12784 | ENSG00000185215 | HPA030624 | RT4       |
| 12785 | ENSG00000185219 | HPA006678 | U-2 OS    |
| 12786 | ENSG00000185220 | HPA029890 | U-2 OS    |
| 12787 | ENSG00000185222 | HPA011790 | U-2 OS    |
| 12788 | ENSG00000185236 | HPA054396 | U-2 OS    |
| 12789 | ENSG00000185246 | HPA001176 | U-2 OS    |
| 12790 | ENSG00000185247 | HPA052687 | U-2 OS    |
| 12791 | ENSG00000185250 | HPA036717 | U-2 OS    |
| 12792 | ENSG00000185252 | HPA003354 | U-2 OS    |
| 12793 | ENSG00000185272 | HPA045885 | U-2 OS    |
| 12794 | ENSG00000185274 | HPA047986 | SK-MEL-30 |
| 12795 | ENSG00000185278 | HPA023438 | U-2 OS    |
| 12796 | ENSG00000185298 | HPA052637 | CACO-2    |
| 12797 | ENSG00000185298 | HPA053914 | CACO-2    |
| 12798 | ENSG00000185304 | HPA067564 | CACO-2    |
| 12799 | ENSG00000185305 | HPA063820 | CACO-2    |
| 12800 | ENSG00000185324 | HPA059634 | U-2 OS    |
| 12801 | ENSG00000185324 | HPA067060 | U-2 OS    |
| 12802 | ENSG00000185338 | HPA074108 | U-2 OS    |
| 12803 | ENSG00000185339 | HPA000837 | U-2 OS    |
| 12804 | ENSG00000185340 | HPA019858 | U-2 OS    |
| 12805 | ENSG00000185344 | HPA044279 | U-2 OS    |
| 12806 | ENSG00000185345 | HPA036012 | U-2 OS    |
| 12807 | ENSG00000185347 | HPA039050 | U-2 OS    |
| 12808 | ENSG00000185352 | HPA078257 | RT4       |
| 12809 | ENSG00000185359 | HPA004872 | U-2 OS    |
| 12810 | ENSG00000185359 | HPA007728 | U-2 OS    |
| 12811 | ENSG00000185386 | CAB012961 | U-2 OS    |
| 12812 | ENSG00000185404 | HPA055864 | HeLa      |
| 12813 | ENSG00000185418 | HPA066697 | U-2 OS    |

|       |                 |           |           |
|-------|-----------------|-----------|-----------|
| 12814 | ENSG00000185420 | HPA045821 | RT4       |
| 12815 | ENSG00000185432 | HPA017434 | RT4       |
| 12816 | ENSG00000185436 | HPA017319 | U-2 OS    |
| 12817 | ENSG00000185437 | CAB003685 | U-2 OS    |
| 12818 | ENSG00000185442 | HPA015306 | RT4       |
| 12819 | ENSG00000185453 | HPA061028 | HEK 293   |
| 12820 | ENSG00000185475 | HPA016585 | U-2 OS    |
| 12821 | ENSG00000185475 | HPA062068 | U-2 OS    |
| 12822 | ENSG00000185477 | HPA043148 | U-2 OS    |
| 12823 | ENSG00000185479 | HPA045697 | U-2 OS    |
| 12824 | ENSG00000185479 | HPA061168 | HaCaT     |
| 12825 | ENSG00000185480 | HPA039677 | U-2 OS    |
| 12826 | ENSG00000185482 | HPA039285 | RH-30     |
| 12827 | ENSG00000185482 | HPA039527 | RH-30     |
| 12828 | ENSG00000185483 | HPA057016 | CACO-2    |
| 12829 | ENSG00000185499 | HPA008855 | U-2 OS    |
| 12830 | ENSG00000185504 | HPA024626 | U-251 MG  |
| 12831 | ENSG00000185507 | HPA052757 | U-2 OS    |
| 12832 | ENSG00000185513 | HPA068051 | HeLa      |
| 12833 | ENSG00000185515 | HPA048737 | U-2 OS    |
| 12834 | ENSG00000185519 | HPA031046 | U-2 OS    |
| 12835 | ENSG00000185522 | HPA073912 | U-2 OS    |
| 12836 | ENSG00000185527 | HPA045118 | U-2 OS    |
| 12837 | ENSG00000185532 | HPA007699 | U-2 OS    |
| 12838 | ENSG00000185551 | HPA058974 | A-431     |
| 12839 | ENSG00000185559 | HPA062262 | U-2 OS    |
| 12840 | ENSG00000185561 | HPA046063 | CACO-2    |
| 12841 | ENSG00000185565 | HPA054051 | U-2 OS    |
| 12842 | ENSG00000185565 | HPA076122 | A549      |
| 12843 | ENSG00000185567 | HPA002940 | U-2 OS    |
| 12844 | ENSG00000185567 | HPA004145 | U-2 OS    |
| 12845 | ENSG00000185585 | HPA021180 | U-2 OS    |
| 12846 | ENSG00000185591 | HPA001853 | U-2 OS    |
| 12847 | ENSG00000185591 | HPA012292 | U-2 OS    |
| 12848 | ENSG00000185608 | HPA006181 | U-2 OS    |
| 12849 | ENSG00000185614 | HPA041879 | RT4       |
| 12850 | ENSG00000185619 | HPA061879 | U-2 OS    |
| 12851 | ENSG00000185621 | HPA016481 | U-2 OS    |
| 12852 | ENSG00000185621 | HPA028844 | U-2 OS    |
| 12853 | ENSG00000185624 | HPA018884 | U-2 OS    |
| 12854 | ENSG00000185627 | HPA038692 | U-2 OS    |
| 12855 | ENSG00000185630 | HPA003505 | U-2 OS    |
| 12856 | ENSG00000185630 | HPA003881 | U-2 OS    |
| 12857 | ENSG00000185630 | CAB018768 | U-2 OS    |
| 12858 | ENSG00000185633 | HPA055323 | U-2 OS    |
| 12859 | ENSG00000185634 | HPA074146 | SK-MEL-30 |
| 12860 | ENSG00000185640 | HPA059347 | SK-MEL-30 |
| 12861 | ENSG00000185651 | HPA062415 | A-431     |
| 12862 | ENSG00000185652 | HPA032001 | RT4       |
| 12863 | ENSG00000185658 | HPA030944 | A-431     |
| 12864 | ENSG00000185658 | HPA030945 | U-2 OS    |
| 12865 | ENSG00000185664 | HPA031649 | SK-MEL-30 |
| 12866 | ENSG00000185668 | HPA055980 | SK-MEL-30 |
| 12867 | ENSG00000185668 | HPA073824 | SK-MEL-30 |
| 12868 | ENSG00000185669 | HPA071127 | MCF7      |



|       |                 |           |          |
|-------|-----------------|-----------|----------|
| 12869 | ENSG00000185670 | HPA035321 | U-2 OS   |
| 12870 | ENSG00000185686 | HPA068562 | U-2 OS   |
| 12871 | ENSG00000185697 | HPA008791 | U-251 MG |
| 12872 | ENSG00000185721 | HPA001218 | U-2 OS   |
| 12873 | ENSG00000185722 | HPA024522 | U-2 OS   |
| 12874 | ENSG00000185722 | HPA065849 | U-2 OS   |
| 12875 | ENSG00000185728 | HPA048703 | SiHa     |
| 12876 | ENSG00000185730 | HPA072473 | U-2 OS   |
| 12877 | ENSG00000185737 | HPA075789 | U-2 OS   |
| 12878 | ENSG00000185745 | HPA055380 | HeLa     |
| 12879 | ENSG00000185753 | HPA050120 | U-2 OS   |
| 12880 | ENSG00000185760 | HPA016655 | U-2 OS   |
| 12881 | ENSG00000185761 | HPA044050 | CACO-2   |
| 12882 | ENSG00000185774 | HPA066717 | U-2 OS   |
| 12883 | ENSG00000185787 | HPA062010 | U-2 OS   |
| 12884 | ENSG00000185798 | HPA016420 | U-2 OS   |
| 12885 | ENSG00000185800 | HPA068172 | CACO-2   |
| 12886 | ENSG00000185808 | HPA026921 | U-2 OS   |
| 12887 | ENSG00000185813 | HPA023034 | U-2 OS   |
| 12888 | ENSG00000185818 | HPA040677 | HEK 293  |
| 12889 | ENSG00000185825 | HPA003906 | U-2 OS   |
| 12890 | ENSG00000185825 | CAB015350 | U-2 OS   |
| 12891 | ENSG00000185838 | HPA034628 | A-431    |
| 12892 | ENSG00000185842 | HPA028545 | U-2 OS   |
| 12893 | ENSG00000185860 | HPA028584 | U-251 MG |
| 12894 | ENSG00000185864 | HPA053611 | U-2 OS   |
| 12895 | ENSG00000185869 | HPA073073 | U-2 OS   |
| 12896 | ENSG00000185875 | HPA037585 | U-2 OS   |
| 12897 | ENSG00000185883 | HPA065100 | U-2 OS   |
| 12898 | ENSG00000185885 | HPA004810 | U-2 OS   |
| 12899 | ENSG00000185885 | CAB017615 | U-2 OS   |
| 12900 | ENSG00000185900 | HPA013321 | A-431    |
| 12901 | ENSG00000185909 | HPA008463 | U-2 OS   |
| 12902 | ENSG00000185909 | HPA014467 | U-2 OS   |
| 12903 | ENSG00000185917 | HPA035405 | U-2 OS   |
| 12904 | ENSG00000185920 | HPA075072 | U-2 OS   |
| 12905 | ENSG00000185946 | HPA052434 | U-2 OS   |
| 12906 | ENSG00000185947 | HPA003866 | A-431    |
| 12907 | ENSG00000185950 | HPA054664 | HEK 293  |
| 12908 | ENSG00000185955 | HPA060395 | U-2 OS   |
| 12909 | ENSG00000185960 | HPA035141 | BJ       |
| 12910 | ENSG00000185960 | HPA060931 | BJ       |
| 12911 | ENSG00000185963 | HPA023013 | U-2 OS   |
| 12912 | ENSG00000185973 | HPA040331 | U-2 OS   |
| 12913 | ENSG00000186001 | HPA012380 | U-2 OS   |
| 12914 | ENSG00000186001 | HPA017299 | A-431    |
| 12915 | ENSG00000186007 | HPA045425 | A-431    |
| 12916 | ENSG00000186010 | HPA041213 | U-2 OS   |
| 12917 | ENSG00000186017 | HPA023456 | U-2 OS   |
| 12918 | ENSG00000186020 | HPA031311 | A-431    |
| 12919 | ENSG00000186051 | HPA030886 | CACO-2   |
| 12920 | ENSG00000186063 | HPA027935 | U-2 OS   |
| 12921 | ENSG00000186073 | HPA061023 | RT4      |
| 12922 | ENSG00000186081 | HPA059479 | hTCEpi   |
| 12923 | ENSG00000186086 | HPA047447 | U-251 MG |

|       |                 |           |         |
|-------|-----------------|-----------|---------|
| 12924 | ENSG00000186088 | HPA023994 | U-2 OS  |
| 12925 | ENSG00000186106 | HPA013758 | CACO-2  |
| 12926 | ENSG00000186111 | HPA017168 | U-2 OS  |
| 12927 | ENSG00000186130 | HPA076894 | U-2 OS  |
| 12928 | ENSG00000186132 | HPA055362 | A-431   |
| 12929 | ENSG00000186136 | HPA036149 | U-2 OS  |
| 12930 | ENSG00000186141 | HPA027508 | U-2 OS  |
| 12931 | ENSG00000186141 | HPA027516 | U-2 OS  |
| 12932 | ENSG00000186153 | HPA050992 | U-2 OS  |
| 12933 | ENSG00000186166 | HPA071715 | CACO-2  |
| 12934 | ENSG00000186174 | HPA049370 | CACO-2  |
| 12935 | ENSG00000186174 | HPA053421 | CACO-2  |
| 12936 | ENSG00000186184 | HPA039337 | U-2 OS  |
| 12937 | ENSG00000186185 | HPA024205 | U-2 OS  |
| 12938 | ENSG00000186188 | HPA042563 | A549    |
| 12939 | ENSG00000186193 | HPA044154 | U-2 OS  |
| 12940 | ENSG00000186197 | HPA018836 | RT4     |
| 12941 | ENSG00000186198 | HPA008398 | CACO-2  |
| 12942 | ENSG00000186205 | HPA028702 | U-2 OS  |
| 12943 | ENSG00000186212 | HPA036809 | RT4     |
| 12944 | ENSG00000186222 | HPA043840 | U-2 OS  |
| 12945 | ENSG00000186230 | HPA042082 | U-2 OS  |
| 12946 | ENSG00000186260 | HPA011286 | U-2 OS  |
| 12947 | ENSG00000186280 | HPA055854 | U-2 OS  |
| 12948 | ENSG00000186281 | HPA036841 | U-2 OS  |
| 12949 | ENSG00000186297 | HPA077031 | HEK 293 |
| 12950 | ENSG00000186310 | HPA026075 | U-2 OS  |
| 12951 | ENSG00000186314 | HPA042486 | U-2 OS  |
| 12952 | ENSG00000186318 | CAB016358 | A-431   |
| 12953 | ENSG00000186326 | HPA049791 | U-2 OS  |
| 12954 | ENSG00000186329 | HPA045736 | U-2 OS  |
| 12955 | ENSG00000186340 | CAB017716 | U-2 OS  |
| 12956 | ENSG00000186340 | HPA044304 | U-2 OS  |
| 12957 | ENSG00000186350 | CAB005352 | U-2 OS  |
| 12958 | ENSG00000186352 | HPA058127 | U-2 OS  |
| 12959 | ENSG00000186364 | HPA030145 | U-2 OS  |
| 12960 | ENSG00000186376 | HPA004705 | U-2 OS  |
| 12961 | ENSG00000186416 | HPA001476 | U-2 OS  |
| 12962 | ENSG00000186431 | HPA014050 | U-2 OS  |
| 12963 | ENSG00000186432 | HPA045500 | U-2 OS  |
| 12964 | ENSG00000186439 | HPA038226 | U-2 OS  |
| 12965 | ENSG00000186446 | HPA044161 | U-2 OS  |
| 12966 | ENSG00000186448 | HPA054567 | U-2 OS  |
| 12967 | ENSG00000186451 | HPA043323 | U-2 OS  |
| 12968 | ENSG00000186462 | HPA054050 | U-2 OS  |
| 12969 | ENSG00000186462 | HPA057065 | U-2 OS  |
| 12970 | ENSG00000186468 | HPA054853 | U-2 OS  |
| 12971 | ENSG00000186469 | HPA003534 | U-2 OS  |
| 12972 | ENSG00000186472 | HPA029579 | U-2 OS  |
| 12973 | ENSG00000186479 | HPA039600 | U-2 OS  |
| 12974 | ENSG00000186480 | HPA071524 | U-2 OS  |
| 12975 | ENSG00000186487 | HPA060245 | U-2 OS  |
| 12976 | ENSG00000186493 | HPA073667 | SiHa    |
| 12977 | ENSG00000186501 | HPA016579 | U-2 OS  |
| 12978 | ENSG00000186501 | HPA059374 | U-2 OS  |

|       |                 |           |          |
|-------|-----------------|-----------|----------|
| 12979 | ENSG00000186517 | HPA036300 | U-2 OS   |
| 12980 | ENSG00000186522 | HPA047860 | U-2 OS   |
| 12981 | ENSG00000186522 | HPA060310 | U-2 OS   |
| 12982 | ENSG00000186523 | HPA041610 | U-2 OS   |
| 12983 | ENSG00000186532 | HPA030059 | U-2 OS   |
| 12984 | ENSG00000186566 | HPA044380 | U-2 OS   |
| 12985 | ENSG00000186567 | HPA052865 | U-2 OS   |
| 12986 | ENSG00000186575 | HPA003097 | U-2 OS   |
| 12987 | ENSG00000186575 | CAB005385 | U-2 OS   |
| 12988 | ENSG00000186591 | HPA003302 | U-2 OS   |
| 12989 | ENSG00000186603 | HPA031997 | CACO-2   |
| 12990 | ENSG00000186603 | HPA057346 | CACO-2   |
| 12991 | ENSG00000186625 | HPA036207 | U-2 OS   |
| 12992 | ENSG00000186628 | HPA046263 | U-2 OS   |
| 12993 | ENSG00000186635 | HPA070383 | CACO-2   |
| 12994 | ENSG00000186642 | CAB009752 | U-2 OS   |
| 12995 | ENSG00000186660 | HPA024037 | U-2 OS   |
| 12996 | ENSG00000186665 | HPA023036 | U-2 OS   |
| 12997 | ENSG00000186666 | HPA039911 | U-2 OS   |
| 12998 | ENSG00000186684 | HPA062460 | SiHa     |
| 12999 | ENSG00000186684 | HPA068731 | U-2 OS   |
| 13000 | ENSG00000186710 | HPA048539 | U-2 OS   |
| 13001 | ENSG00000186716 | HPA038337 | U-2 OS   |
| 13002 | ENSG00000186767 | HPA044559 | U-2 OS   |
| 13003 | ENSG00000186787 | HPA069835 | U-2 OS   |
| 13004 | ENSG00000186806 | HPA060453 | U-2 OS   |
| 13005 | ENSG00000186806 | HPA066745 | U-2 OS   |
| 13006 | ENSG00000186812 | HPA026087 | U-2 OS   |
| 13007 | ENSG00000186814 | HPA007289 | U-2 OS   |
| 13008 | ENSG00000186832 | HPA000539 | A-431    |
| 13009 | ENSG00000186834 | HPA008926 | U-2 OS   |
| 13010 | ENSG00000186834 | CAB011625 | U-2 OS   |
| 13011 | ENSG00000186847 | HPA000452 | HaCaT    |
| 13012 | ENSG00000186847 | HPA000539 | A-431    |
| 13013 | ENSG00000186847 | HPA023040 | HaCaT    |
| 13014 | ENSG00000186862 | HPA074542 | THP-1    |
| 13015 | ENSG00000186868 | HPA048895 | RT4      |
| 13016 | ENSG00000186871 | HPA050492 | U-2 OS   |
| 13017 | ENSG00000186889 | HPA018100 | U-2 OS   |
| 13018 | ENSG00000186908 | HPA016807 | U-2 OS   |
| 13019 | ENSG00000186908 | HPA058674 | U-2 OS   |
| 13020 | ENSG00000186918 | HPA049382 | PC-3     |
| 13021 | ENSG00000186951 | HPA058901 | A-431    |
| 13022 | ENSG00000186951 | HPA067049 | U-2 OS   |
| 13023 | ENSG00000186976 | HPA003098 | MCF7     |
| 13024 | ENSG00000186994 | HPA051153 | U-2 OS   |
| 13025 | ENSG00000187010 | HPA060951 | U-2 OS   |
| 13026 | ENSG00000187017 | HPA060220 | U-2 OS   |
| 13027 | ENSG00000187051 | HPA042874 | U-2 OS   |
| 13028 | ENSG00000187068 | HPA041861 | U-2 OS   |
| 13029 | ENSG00000187079 | HPA057339 | U-2 OS   |
| 13030 | ENSG00000187079 | HPA062471 | U-2 OS   |
| 13031 | ENSG00000187091 | CAB009913 | U-2 OS   |
| 13032 | ENSG00000187097 | HPA002927 | U-251 MG |
| 13033 | ENSG00000187109 | HPA028861 | U-2 OS   |

|       |                 |           |           |
|-------|-----------------|-----------|-----------|
| 13034 | ENSG00000187122 | HPA006879 | AF22      |
| 13035 | ENSG00000187123 | HPA042805 | U-2 OS    |
| 13036 | ENSG00000187134 | CAB047303 | Hep G2    |
| 13037 | ENSG00000187134 | HPA068265 | U-2 OS    |
| 13038 | ENSG00000187144 | HPA032080 | U-2 OS    |
| 13039 | ENSG00000187147 | HPA027577 | U-2 OS    |
| 13040 | ENSG00000187164 | HPA037943 | U-2 OS    |
| 13041 | ENSG00000187186 | HPA069617 | U-2 OS    |
| 13042 | ENSG00000187187 | HPA030838 | U-251 MG  |
| 13043 | ENSG00000187210 | HPA003522 | U-2 OS    |
| 13044 | ENSG00000187210 | HPA003523 | U-2 OS    |
| 13045 | ENSG00000187231 | HPA058236 | RH-30     |
| 13046 | ENSG00000187231 | HPA077408 | RT4       |
| 13047 | ENSG00000187240 | HPA039015 | U-2 OS    |
| 13048 | ENSG00000187240 | HPA039016 | U-2 OS    |
| 13049 | ENSG00000187244 | HPA005654 | U-2 OS    |
| 13050 | ENSG00000187257 | HPA020406 | U-2 OS    |
| 13051 | ENSG00000187257 | HPA020413 | U-2 OS    |
| 13052 | ENSG00000187266 | HPA077654 | HEL       |
| 13053 | ENSG00000187323 | HPA055376 | AF22      |
| 13054 | ENSG00000187325 | HPA045275 | A-431     |
| 13055 | ENSG00000187325 | HPA058961 | U-2 OS    |
| 13056 | ENSG00000187398 | HPA039007 | U-2 OS    |
| 13057 | ENSG00000187416 | HPA069691 | SH-SY5Y   |
| 13058 | ENSG00000187446 | HPA006616 | U-2 OS    |
| 13059 | ENSG00000187479 | HPA038843 | U-2 OS    |
| 13060 | ENSG00000187514 | HPA047183 | U-2 OS    |
| 13061 | ENSG00000187531 | CAB037261 | U-2 OS    |
| 13062 | ENSG00000187546 | HPA057900 | U-2 OS    |
| 13063 | ENSG00000187554 | CAB009013 | U-2 OS    |
| 13064 | ENSG00000187559 | HPA012836 | U-2 OS    |
| 13065 | ENSG00000187566 | HPA066030 | U-2 OS    |
| 13066 | ENSG00000187583 | HPA031742 | U-2 OS    |
| 13067 | ENSG00000187601 | HPA011324 | MCF7      |
| 13068 | ENSG00000187605 | HPA050845 | U-2 OS    |
| 13069 | ENSG00000187607 | HPA021594 | U-2 OS    |
| 13070 | ENSG00000187609 | HPA047395 | U-2 OS    |
| 13071 | ENSG00000187624 | HPA023583 | U-2 OS    |
| 13072 | ENSG00000187626 | HPA009637 | U-2 OS    |
| 13073 | ENSG00000187627 | HPA067564 | CACO-2    |
| 13074 | ENSG00000187630 | HPA023972 | U-2 OS    |
| 13075 | ENSG00000187634 | HPA030110 | U-2 OS    |
| 13076 | ENSG00000187678 | HPA055471 | U-251 MG  |
| 13077 | ENSG00000187678 | HPA072661 | SK-MEL-30 |
| 13078 | ENSG00000187688 | HPA044993 | SK-MEL-30 |
| 13079 | ENSG00000187690 | HPA004003 | U-2 OS    |
| 13080 | ENSG00000187690 | HPA006128 | U-2 OS    |
| 13081 | ENSG00000187726 | HPA061330 | U-2 OS    |
| 13082 | ENSG00000187730 | HPA044371 | MCF7      |
| 13083 | ENSG00000187735 | HPA043786 | U-2 OS    |
| 13084 | ENSG00000187736 | HPA043869 | CACO-2    |
| 13085 | ENSG00000187741 | HPA063236 | U-2 OS    |
| 13086 | ENSG00000187742 | HPA054905 | A-431     |
| 13087 | ENSG00000187754 | HPA045683 | U-2 OS    |
| 13088 | ENSG00000187758 | HPA047814 | U-2 OS    |

|       |                 |           |          |
|-------|-----------------|-----------|----------|
| 13089 | ENSG00000187764 | HPA015662 | U-2 OS   |
| 13090 | ENSG00000187764 | HPA023277 | U-2 OS   |
| 13091 | ENSG00000187772 | HPA061745 | U-2 OS   |
| 13092 | ENSG00000187775 | HPA024354 | U-2 OS   |
| 13093 | ENSG00000187778 | HPA039057 | U-2 OS   |
| 13094 | ENSG00000187790 | HPA055144 | U-2 OS   |
| 13095 | ENSG00000187792 | HPA018821 | U-2 OS   |
| 13096 | ENSG00000187800 | HPA035217 | U-2 OS   |
| 13097 | ENSG00000187801 | HPA044289 | U-2 OS   |
| 13098 | ENSG00000187815 | HPA054942 | U-2 OS   |
| 13099 | ENSG00000187823 | HPA003272 | U-2 OS   |
| 13100 | ENSG00000187824 | HPA047680 | U-2 OS   |
| 13101 | ENSG00000187837 | CAB011507 | U-2 OS   |
| 13102 | ENSG00000187838 | HPA048387 | U-2 OS   |
| 13103 | ENSG00000187840 | CAB005032 | U-2 OS   |
| 13104 | ENSG00000187840 | CAB005039 | U-2 OS   |
| 13105 | ENSG00000187862 | HPA029799 | REH      |
| 13106 | ENSG00000187866 | HPA056646 | U-2 OS   |
| 13107 | ENSG00000187867 | HPA052794 | CACO-2   |
| 13108 | ENSG00000187902 | HPA058935 | HEL      |
| 13109 | ENSG00000187908 | HPA040778 | U-2 OS   |
| 13110 | ENSG00000187954 | HPA053653 | PC-3     |
| 13111 | ENSG00000187954 | HPA059543 | PC-3     |
| 13112 | ENSG00000187955 | HPA023781 | U-2 OS   |
| 13113 | ENSG00000187961 | HPA031251 | U-2 OS   |
| 13114 | ENSG00000187994 | HPA042083 | U-2 OS   |
| 13115 | ENSG00000188001 | HPA044751 | RT4      |
| 13116 | ENSG00000188001 | HPA060187 | RT4      |
| 13117 | ENSG00000188010 | HPA057815 | U-2 OS   |
| 13118 | ENSG00000188015 | HPA042674 | U-2 OS   |
| 13119 | ENSG00000188015 | HPA056140 | U-251 MG |
| 13120 | ENSG00000188021 | HPA006431 | U-2 OS   |
| 13121 | ENSG00000188021 | CAB013481 | A-431    |
| 13122 | ENSG00000188026 | HPA041314 | U-2 OS   |
| 13123 | ENSG00000188042 | HPA028927 | U-2 OS   |
| 13124 | ENSG00000188051 | HPA041580 | U-2 OS   |
| 13125 | ENSG00000188060 | HPA050290 | HeLa     |
| 13126 | ENSG00000188070 | HPA045002 | U-2 OS   |
| 13127 | ENSG00000188092 | HPA076096 | U-2 OS   |
| 13128 | ENSG00000188112 | HPA044588 | U-2 OS   |
| 13129 | ENSG00000188130 | CAB025483 | U-251 MG |
| 13130 | ENSG00000188133 | HPA052804 | U-2 OS   |
| 13131 | ENSG00000188133 | HPA063207 | U-2 OS   |
| 13132 | ENSG00000188152 | HPA064635 | U-2 OS   |
| 13133 | ENSG00000188157 | HPA040090 | U-2 OS   |
| 13134 | ENSG00000188158 | HPA076257 | RT4      |
| 13135 | ENSG00000188167 | HPA027019 | U-2 OS   |
| 13136 | ENSG00000188171 | HPA045631 | SH-SY5Y  |
| 13137 | ENSG00000188175 | HPA012381 | HEL      |
| 13138 | ENSG00000188177 | HPA076065 | U-2 OS   |
| 13139 | ENSG00000188186 | HPA020998 | U-2 OS   |
| 13140 | ENSG00000188199 | HPA064635 | U-2 OS   |
| 13141 | ENSG00000188215 | HPA041983 | U-2 OS   |
| 13142 | ENSG00000188227 | HPA034781 | RT4      |
| 13143 | ENSG00000188229 | CAB010880 | U-2 OS   |

|       |                 |           |          |
|-------|-----------------|-----------|----------|
| 13144 | ENSG00000188266 | HPA040706 | HEK 293  |
| 13145 | ENSG00000188283 | HPA063945 | RT4      |
| 13146 | ENSG00000188290 | HPA062465 | U-2 OS   |
| 13147 | ENSG00000188312 | HPA058945 | RT4      |
| 13148 | ENSG00000188313 | HPA068923 | A-431    |
| 13149 | ENSG00000188315 | HPA043328 | U-2 OS   |
| 13150 | ENSG00000188316 | HPA037937 | U-2 OS   |
| 13151 | ENSG00000188321 | HPA059632 | RT4      |
| 13152 | ENSG00000188321 | HPA065485 | U-2 OS   |
| 13153 | ENSG00000188338 | HPA031871 | CACO-2   |
| 13154 | ENSG00000188342 | HPA006912 | U-2 OS   |
| 13155 | ENSG00000188343 | HPA034760 | U-2 OS   |
| 13156 | ENSG00000188352 | HPA055015 | U-2 OS   |
| 13157 | ENSG00000188368 | HPA070350 | U-2 OS   |
| 13158 | ENSG00000188386 | HPA047157 | U-2 OS   |
| 13159 | ENSG00000188393 | HPA072407 | U-2 OS   |
| 13160 | ENSG00000188404 | HPA051972 | U-2 OS   |
| 13161 | ENSG00000188419 | HPA003231 | U-2 OS   |
| 13162 | ENSG00000188428 | HPA077525 | U-2 OS   |
| 13163 | ENSG00000188452 | HPA035443 | RH-30    |
| 13164 | ENSG00000188452 | HPA043203 | U-2 OS   |
| 13165 | ENSG00000188483 | HPA021327 | U-2 OS   |
| 13166 | ENSG00000188486 | HPA051647 | U-2 OS   |
| 13167 | ENSG00000188488 | HPA056919 | CACO-2   |
| 13168 | ENSG00000188501 | HPA071640 | U-2 OS   |
| 13169 | ENSG00000188517 | HPA029107 | U-2 OS   |
| 13170 | ENSG00000188522 | HPA023369 | U-2 OS   |
| 13171 | ENSG00000188523 | HPA024647 | U-251 MG |
| 13172 | ENSG00000188529 | HPA053831 | U-2 OS   |
| 13173 | ENSG00000188542 | HPA047456 | A-431    |
| 13174 | ENSG00000188549 | HPA040484 | U-2 OS   |
| 13175 | ENSG00000188549 | HPA041834 | U-2 OS   |
| 13176 | ENSG00000188554 | HPA022944 | U-2 OS   |
| 13177 | ENSG00000188559 | HPA042707 | U-2 OS   |
| 13178 | ENSG00000188559 | HPA043622 | RT4      |
| 13179 | ENSG00000188566 | HPA024504 | U-2 OS   |
| 13180 | ENSG00000188573 | HPA049546 | U-2 OS   |
| 13181 | ENSG00000188580 | HPA045860 | HEK 293  |
| 13182 | ENSG00000188596 | HPA039897 | U-2 OS   |
| 13183 | ENSG00000188610 | HPA043271 | U-2 OS   |
| 13184 | ENSG00000188610 | HPA067321 | U-2 OS   |
| 13185 | ENSG00000188611 | HPA061171 | U-2 OS   |
| 13186 | ENSG00000188612 | HPA042123 | U-2 OS   |
| 13187 | ENSG00000188612 | HPA048064 | A-431    |
| 13188 | ENSG00000188613 | CAB012219 | U-2 OS   |
| 13189 | ENSG00000188620 | HPA069659 | U-2 OS   |
| 13190 | ENSG00000188636 | HPA005697 | U-2 OS   |
| 13191 | ENSG00000188643 | HPA045841 | U-2 OS   |
| 13192 | ENSG00000188647 | HPA021248 | U-2 OS   |
| 13193 | ENSG00000188649 | HPA072122 | CACO-2   |
| 13194 | ENSG00000188659 | HPA040487 | U-2 OS   |
| 13195 | ENSG00000188672 | HPA060951 | U-2 OS   |
| 13196 | ENSG00000188674 | HPA042639 | U-2 OS   |
| 13197 | ENSG00000188677 | HPA062601 | HeLa     |
| 13198 | ENSG00000188690 | HPA044038 | U-2 OS   |

|       |                 |           |           |
|-------|-----------------|-----------|-----------|
| 13199 | ENSG00000188706 | HPA031814 | U-2 OS    |
| 13200 | ENSG00000188707 | HPA055805 | U-2 OS    |
| 13201 | ENSG00000188732 | HPA026752 | U-2 OS    |
| 13202 | ENSG00000188735 | HPA014066 | U-2 OS    |
| 13203 | ENSG00000188738 | HPA036139 | RT4       |
| 13204 | ENSG00000188739 | HPA028606 | U-2 OS    |
| 13205 | ENSG00000188747 | HPA044781 | U-2 OS    |
| 13206 | ENSG00000188760 | HPA042385 | CACO-2    |
| 13207 | ENSG00000188766 | HPA071521 | U-2 OS    |
| 13208 | ENSG00000188785 | HPA066042 | U-2 OS    |
| 13209 | ENSG00000188786 | HPA028604 | U-2 OS    |
| 13210 | ENSG00000188786 | HPA028689 | U-2 OS    |
| 13211 | ENSG00000188807 | CAB039039 | U-2 OS    |
| 13212 | ENSG00000188818 | HPA069008 | U-2 OS    |
| 13213 | ENSG00000188827 | HPA049421 | MCF7      |
| 13214 | ENSG00000188833 | HPA021509 | U-2 OS    |
| 13215 | ENSG00000188846 | HPA004136 | U-2 OS    |
| 13216 | ENSG00000188848 | HPA036850 | U-2 OS    |
| 13217 | ENSG00000188859 | HPA073246 | RT4       |
| 13218 | ENSG00000188869 | HPA040265 | U-2 OS    |
| 13219 | ENSG00000188869 | HPA040510 | U-2 OS    |
| 13220 | ENSG00000188878 | HPA023677 | A-431     |
| 13221 | ENSG00000188883 | HPA018199 | HEK 293   |
| 13222 | ENSG00000188895 | HPA022800 | U-2 OS    |
| 13223 | ENSG00000188895 | HPA023567 | U-2 OS    |
| 13224 | ENSG00000188906 | HPA014293 | A549      |
| 13225 | ENSG00000188910 | HPA074472 | A-431     |
| 13226 | ENSG00000188917 | HPA040814 | U-251 MG  |
| 13227 | ENSG00000188959 | HPA050769 | U-2 OS    |
| 13228 | ENSG00000188976 | HPA044258 | U-2 OS    |
| 13229 | ENSG00000188976 | HPA062195 | U-2 OS    |
| 13230 | ENSG00000188986 | HPA020259 | U-2 OS    |
| 13231 | ENSG00000188994 | HPA032154 | U-2 OS    |
| 13232 | ENSG00000188996 | HPA034511 | U-2 OS    |
| 13233 | ENSG00000188996 | HPA063449 | U-2 OS    |
| 13234 | ENSG00000188997 | HPA041964 | U-2 OS    |
| 13235 | ENSG00000189001 | HPA067734 | BJ        |
| 13236 | ENSG00000189007 | HPA035479 | A-431     |
| 13237 | ENSG00000189023 | HPA055743 | K-562     |
| 13238 | ENSG00000189023 | HPA076456 | K-562     |
| 13239 | ENSG00000189042 | HPA023937 | U-2 OS    |
| 13240 | ENSG00000189043 | HPA055323 | U-2 OS    |
| 13241 | ENSG00000189046 | CAB011198 | U-2 OS    |
| 13242 | ENSG00000189046 | HPA045392 | U-2 OS    |
| 13243 | ENSG00000189046 | HPA051976 | MCF7      |
| 13244 | ENSG00000189050 | HPA013739 | A-431     |
| 13245 | ENSG00000189052 | HPA038925 | U-2 OS    |
| 13246 | ENSG00000189052 | HPA038934 | U-2 OS    |
| 13247 | ENSG00000189056 | HPA046512 | U-2 OS    |
| 13248 | ENSG00000189057 | HPA038637 | U-2 OS    |
| 13249 | ENSG00000189058 | HPA040520 | ASC TERT1 |
| 13250 | ENSG00000189060 | HPA000843 | U-2 OS    |
| 13251 | ENSG00000189064 | HPA043232 | U-2 OS    |
| 13252 | ENSG00000189067 | HPA006960 | A-431     |
| 13253 | ENSG00000189068 | HPA059365 | U-2 OS    |

|       |                 |           |          |
|-------|-----------------|-----------|----------|
| 13254 | ENSG00000189079 | HPA063044 | U-2 OS   |
| 13255 | ENSG00000189091 | HPA041134 | U-2 OS   |
| 13256 | ENSG00000189114 | HPA050111 | U-2 OS   |
| 13257 | ENSG00000189120 | HPA024516 | CACO-2   |
| 13258 | ENSG00000189120 | HPA044469 | CACO-2   |
| 13259 | ENSG00000189127 | HPA043327 | U-2 OS   |
| 13260 | ENSG00000189143 | CAB002610 | A-431    |
| 13261 | ENSG00000189144 | HPA042776 | U-2 OS   |
| 13262 | ENSG00000189152 | HPA066654 | U-2 OS   |
| 13263 | ENSG00000189157 | HPA053331 | U-2 OS   |
| 13264 | ENSG00000189159 | HPA059729 | U-2 OS   |
| 13265 | ENSG00000189164 | HPA037740 | U-2 OS   |
| 13266 | ENSG00000189171 | HPA019592 | U-2 OS   |
| 13267 | ENSG00000189180 | HPA005538 | U-2 OS   |
| 13268 | ENSG00000189182 | HPA045934 | HaCaT    |
| 13269 | ENSG00000189184 | HPA017976 | U-2 OS   |
| 13270 | ENSG00000189195 | HPA035311 | U-2 OS   |
| 13271 | ENSG00000189221 | HPA054807 | RT4      |
| 13272 | ENSG00000189221 | HPA059299 | RT4      |
| 13273 | ENSG00000189227 | HPA062820 | U-2 OS   |
| 13274 | ENSG00000189241 | HPA031970 | U-2 OS   |
| 13275 | ENSG00000189252 | HPA045652 | U-2 OS   |
| 13276 | ENSG00000189266 | HPA045837 | U-2 OS   |
| 13277 | ENSG00000189269 | HPA020446 | CACO-2   |
| 13278 | ENSG00000189283 | HPA018909 | U-2 OS   |
| 13279 | ENSG00000189298 | HPA009637 | U-2 OS   |
| 13280 | ENSG00000189298 | HPA060116 | U-2 OS   |
| 13281 | ENSG00000189299 | HPA034487 | U-251 MG |
| 13282 | ENSG00000189299 | HPA057358 | U-2 OS   |
| 13283 | ENSG00000189306 | HPA001586 | A-431    |
| 13284 | ENSG00000189306 | HPA046768 | U-2 OS   |
| 13285 | ENSG00000189308 | HPA056606 | U-2 OS   |
| 13286 | ENSG00000189319 | HPA037752 | U-2 OS   |
| 13287 | ENSG00000189320 | HPA021224 | U-2 OS   |
| 13288 | ENSG00000189334 | HPA027613 | A-431    |
| 13289 | ENSG00000189337 | HPA032095 | U-2 OS   |
| 13290 | ENSG00000189339 | HPA062711 | U-2 OS   |
| 13291 | ENSG00000189362 | HPA057719 | U-2 OS   |
| 13292 | ENSG00000189367 | HPA053341 | U-2 OS   |
| 13293 | ENSG00000189369 | HPA044769 | U-2 OS   |
| 13294 | ENSG00000189369 | HPA074588 | U-2 OS   |
| 13295 | ENSG00000189376 | HPA023708 | U-2 OS   |
| 13296 | ENSG00000189403 | CAB005873 | U-2 OS   |
| 13297 | ENSG00000189410 | HPA030182 | U-2 OS   |
| 13298 | ENSG00000189430 | HPA049311 | CACO-2   |
| 13299 | ENSG00000189431 | HPA040406 | U-2 OS   |
| 13300 | ENSG00000189433 | HPA055112 | U-2 OS   |
| 13301 | ENSG00000196074 | HPA062401 | CACO-2   |
| 13302 | ENSG00000196074 | HPA065613 | CACO-2   |
| 13303 | ENSG00000196083 | HPA035293 | U-2 OS   |
| 13304 | ENSG00000196092 | HPA068498 | U-2 OS   |
| 13305 | ENSG00000196116 | HPA022250 | U-2 OS   |
| 13306 | ENSG00000196118 | HPA041806 | U-2 OS   |
| 13307 | ENSG00000196118 | HPA046289 | U-2 OS   |
| 13308 | ENSG00000196123 | HPA065996 | U-2 OS   |



|       |                 |           |         |
|-------|-----------------|-----------|---------|
| 13309 | ENSG00000196132 | HPA006303 | A-431   |
| 13310 | ENSG00000196139 | HPA068265 | U-2 OS  |
| 13311 | ENSG00000196141 | HPA055427 | CAC0-2  |
| 13312 | ENSG00000196141 | HPA066310 | U-2 OS  |
| 13313 | ENSG00000196150 | HPA020853 | U-2 OS  |
| 13314 | ENSG00000196151 | HPA058172 | U-2 OS  |
| 13315 | ENSG00000196152 | HPA028977 | U-2 OS  |
| 13316 | ENSG00000196154 | CAB058698 | BJ      |
| 13317 | ENSG00000196154 | CAB068227 | BJ      |
| 13318 | ENSG00000196155 | HPA055696 | CAC0-2  |
| 13319 | ENSG00000196159 | HPA052819 | U-2 OS  |
| 13320 | ENSG00000196169 | HPA043638 | U-2 OS  |
| 13321 | ENSG00000196177 | HPA041458 | U-2 OS  |
| 13322 | ENSG00000196182 | HPA008026 | A-431   |
| 13323 | ENSG00000196187 | HPA066504 | RT4     |
| 13324 | ENSG00000196187 | HPA066936 | RT4     |
| 13325 | ENSG00000196187 | HPA068918 | RT4     |
| 13326 | ENSG00000196196 | HPA067038 | U-2 OS  |
| 13327 | ENSG00000196199 | HPA039701 | U-2 OS  |
| 13328 | ENSG00000196199 | HPA040035 | U-2 OS  |
| 13329 | ENSG00000196208 | HPA024616 | U-2 OS  |
| 13330 | ENSG00000196209 | HPA048032 | U-2 OS  |
| 13331 | ENSG00000196214 | HPA044882 | U-2 OS  |
| 13332 | ENSG00000196214 | HPA063496 | RH-30   |
| 13333 | ENSG00000196218 | HPA056416 | SiHa    |
| 13334 | ENSG00000196220 | HPA036959 | RT4     |
| 13335 | ENSG00000196220 | HPA044074 | RT4     |
| 13336 | ENSG00000196220 | HPA078079 | AF22    |
| 13337 | ENSG00000196227 | HPA041021 | U-2 OS  |
| 13338 | ENSG00000196227 | HPA056698 | A-431   |
| 13339 | ENSG00000196230 | CAB005417 | U-2 OS  |
| 13340 | ENSG00000196233 | HPA057621 | U-2 OS  |
| 13341 | ENSG00000196233 | HPA077000 | U-2 OS  |
| 13342 | ENSG00000196235 | HPA029273 | U-2 OS  |
| 13343 | ENSG00000196235 | CAB034370 | U-2 OS  |
| 13344 | ENSG00000196242 | HPA058578 | U-2 OS  |
| 13345 | ENSG00000196263 | HPA066695 | U-2 OS  |
| 13346 | ENSG00000196275 | HPA056679 | U-2 OS  |
| 13347 | ENSG00000196275 | HPA056680 | U-2 OS  |
| 13348 | ENSG00000196277 | HPA015964 | SH-SY5Y |
| 13349 | ENSG00000196284 | HPA024371 | U-2 OS  |
| 13350 | ENSG00000196290 | HPA036336 | U-2 OS  |
| 13351 | ENSG00000196296 | CAB002310 | U-2 OS  |
| 13352 | ENSG00000196305 | HPA029806 | A-431   |
| 13353 | ENSG00000196313 | CAB003710 | U-2 OS  |
| 13354 | ENSG00000196313 | HPA049817 | U-2 OS  |
| 13355 | ENSG00000196323 | HPA052589 | U-2 OS  |
| 13356 | ENSG00000196337 | HPA038925 | U-2 OS  |
| 13357 | ENSG00000196337 | HPA038934 | U-2 OS  |
| 13358 | ENSG00000196338 | HPA004066 | AF22    |
| 13359 | ENSG00000196344 | HPA039695 | HaCaT   |
| 13360 | ENSG00000196345 | HPA049906 | U-2 OS  |
| 13361 | ENSG00000196345 | HPA071850 | U-2 OS  |
| 13362 | ENSG00000196353 | HPA032036 | A-431   |
| 13363 | ENSG00000196357 | HPA044123 | U-2 OS  |

|       |                 |           |          |
|-------|-----------------|-----------|----------|
| 13364 | ENSG00000196358 | HPA065089 | A549     |
| 13365 | ENSG00000196363 | HPA047182 | U-2 OS   |
| 13366 | ENSG00000196365 | HPA002034 | U-2 OS   |
| 13367 | ENSG00000196365 | HPA002192 | A-431    |
| 13368 | ENSG00000196367 | HPA054376 | U-2 OS   |
| 13369 | ENSG00000196368 | HPA047027 | U-2 OS   |
| 13370 | ENSG00000196369 | HPA078079 | AF22     |
| 13371 | ENSG00000196371 | CAB000014 | A-431    |
| 13372 | ENSG00000196371 | CAB016129 | A-431    |
| 13373 | ENSG00000196372 | HPA061742 | RT4      |
| 13374 | ENSG00000196376 | HPA019576 | U-2 OS   |
| 13375 | ENSG00000196378 | HPA053925 | U-2 OS   |
| 13376 | ENSG00000196378 | HPA066805 | U-2 OS   |
| 13377 | ENSG00000196381 | HPA062512 | U-2 OS   |
| 13378 | ENSG00000196388 | HPA052401 | U-2 OS   |
| 13379 | ENSG00000196391 | HPA030839 | U-2 OS   |
| 13380 | ENSG00000196391 | HPA030840 | U-2 OS   |
| 13381 | ENSG00000196396 | CAB009329 | U-2 OS   |
| 13382 | ENSG00000196396 | HPA012542 | U-2 OS   |
| 13383 | ENSG00000196396 | CAB015217 | U-2 OS   |
| 13384 | ENSG00000196405 | HPA019536 | U-2 OS   |
| 13385 | ENSG00000196406 | HPA046423 | U-2 OS   |
| 13386 | ENSG00000196418 | HPA031127 | U-2 OS   |
| 13387 | ENSG00000196419 | HPA047549 | U-2 OS   |
| 13388 | ENSG00000196419 | HPA062226 | U-2 OS   |
| 13389 | ENSG00000196420 | HPA064184 | RT4      |
| 13390 | ENSG00000196422 | HPA044686 | U-2 OS   |
| 13391 | ENSG00000196422 | HPA063817 | U-2 OS   |
| 13392 | ENSG00000196427 | HPA047447 | U-251 MG |
| 13393 | ENSG00000196428 | HPA004926 | U-2 OS   |
| 13394 | ENSG00000196436 | HPA053611 | U-2 OS   |
| 13395 | ENSG00000196437 | HPA052994 | U-2 OS   |
| 13396 | ENSG00000196440 | HPA051930 | CACO-2   |
| 13397 | ENSG00000196449 | HPA030147 | U-2 OS   |
| 13398 | ENSG00000196453 | HPA003252 | U-2 OS   |
| 13399 | ENSG00000196455 | HPA036033 | U-2 OS   |
| 13400 | ENSG00000196458 | HPA061970 | HEK 293  |
| 13401 | ENSG00000196459 | HPA063308 | U-2 OS   |
| 13402 | ENSG00000196460 | HPA059745 | U-251 MG |
| 13403 | ENSG00000196465 | HPA038887 | U-2 OS   |
| 13404 | ENSG00000196466 | HPA018683 | RT4      |
| 13405 | ENSG00000196470 | CAB018724 | U-2 OS   |
| 13406 | ENSG00000196476 | HPA048649 | A549     |
| 13407 | ENSG00000196482 | HPA044678 | SH-SY5Y  |
| 13408 | ENSG00000196497 | HPA064572 | U-2 OS   |
| 13409 | ENSG00000196498 | HPA001928 | U-2 OS   |
| 13410 | ENSG00000196503 | HPA072942 | U-2 OS   |
| 13411 | ENSG00000196504 | HPA038272 | U-2 OS   |
| 13412 | ENSG00000196504 | HPA038273 | U-2 OS   |
| 13413 | ENSG00000196505 | HPA046185 | U-2 OS   |
| 13414 | ENSG00000196510 | CAB009567 | U-2 OS   |
| 13415 | ENSG00000196511 | HPA021545 | CACO-2   |
| 13416 | ENSG00000196517 | HPA013977 | U-2 OS   |
| 13417 | ENSG00000196526 | HPA015642 | U-2 OS   |
| 13418 | ENSG00000196531 | HPA073152 | U-2 OS   |

|       |                 |           |           |
|-------|-----------------|-----------|-----------|
| 13419 | ENSG00000196531 | HPA073648 | U-2 OS    |
| 13420 | ENSG00000196542 | HPA047712 | RT4       |
| 13421 | ENSG00000196544 | HPA045415 | A-431     |
| 13422 | ENSG00000196544 | HPA060791 | U-2 OS    |
| 13423 | ENSG00000196547 | HPA077930 | SK-MEL-30 |
| 13424 | ENSG00000196550 | HPA043271 | U-2 OS    |
| 13425 | ENSG00000196550 | HPA067321 | U-2 OS    |
| 13426 | ENSG00000196557 | HPA039125 | MCF7      |
| 13427 | ENSG00000196584 | HPA065153 | U-2 OS    |
| 13428 | ENSG00000196586 | CAB010762 | U-251 MG  |
| 13429 | ENSG00000196586 | HPA035482 | RT4       |
| 13430 | ENSG00000196588 | HPA030782 | U-2 OS    |
| 13431 | ENSG00000196591 | CAB005054 | U-2 OS    |
| 13432 | ENSG00000196591 | HPA011727 | U-2 OS    |
| 13433 | ENSG00000196597 | HPA011013 | U-2 OS    |
| 13434 | ENSG00000196605 | HPA034618 | U-2 OS    |
| 13435 | ENSG00000196611 | HPA004920 | U-2 OS    |
| 13436 | ENSG00000196616 | HPA047814 | U-2 OS    |
| 13437 | ENSG00000196628 | CAB020722 | U-2 OS    |
| 13438 | ENSG00000196632 | HPA077678 | U-2 OS    |
| 13439 | ENSG00000196636 | HPA020523 | U-2 OS    |
| 13440 | ENSG00000196639 | HPA029740 | U-2 OS    |
| 13441 | ENSG00000196642 | HPA044037 | U-2 OS    |
| 13442 | ENSG00000196646 | HPA054120 | RH-30     |
| 13443 | ENSG00000196652 | HPA003201 | U-2 OS    |
| 13444 | ENSG00000196655 | HPA041371 | U-2 OS    |
| 13445 | ENSG00000196659 | HPA051714 | U-2 OS    |
| 13446 | ENSG00000196659 | HPA052487 | SH-SY5Y   |
| 13447 | ENSG00000196663 | HPA000658 | U-2 OS    |
| 13448 | ENSG00000196670 | HPA048629 | U-2 OS    |
| 13449 | ENSG00000196678 | HPA035384 | U-2 OS    |
| 13450 | ENSG00000196678 | HPA035385 | A-431     |
| 13451 | ENSG00000196684 | HPA036616 | A-431     |
| 13452 | ENSG00000196693 | HPA005538 | U-2 OS    |
| 13453 | ENSG00000196700 | HPA006688 | U-2 OS    |
| 13454 | ENSG00000196704 | HPA023299 | A-431     |
| 13455 | ENSG00000196704 | HPA052406 | U-251 MG  |
| 13456 | ENSG00000196712 | HPA045502 | U-2 OS    |
| 13457 | ENSG00000196715 | HPA053954 | A549      |
| 13458 | ENSG00000196724 | HPA072145 | RT4       |
| 13459 | ENSG00000196730 | CAB037302 | U-2 OS    |
| 13460 | ENSG00000196754 | CAB002600 | U-2 OS    |
| 13461 | ENSG00000196757 | HPA047845 | RT4       |
| 13462 | ENSG00000196767 | HPA062295 | AF22      |
| 13463 | ENSG00000196776 | CAB016055 | U-2 OS    |
| 13464 | ENSG00000196781 | HPA071396 | A549      |
| 13465 | ENSG00000196782 | HPA037717 | U-2 OS    |
| 13466 | ENSG00000196792 | HPA003392 | U-2 OS    |
| 13467 | ENSG00000196792 | HPA004636 | U-2 OS    |
| 13468 | ENSG00000196793 | HPA030843 | CACO-2    |
| 13469 | ENSG00000196812 | HPA007290 | U-251 MG  |
| 13470 | ENSG00000196814 | HPA043683 | Hep G2    |
| 13471 | ENSG00000196814 | HPA049383 | U-2 OS    |
| 13472 | ENSG00000196821 | HPA034490 | U-2 OS    |
| 13473 | ENSG00000196839 | HPA001399 | U-2 OS    |

|       |                 |           |          |
|-------|-----------------|-----------|----------|
| 13474 | ENSG00000196843 | HPA002860 | U-2 OS   |
| 13475 | ENSG00000196843 | HPA023879 | U-2 OS   |
| 13476 | ENSG00000196850 | HPA039335 | U-2 OS   |
| 13477 | ENSG00000196862 | HPA067564 | CACO-2   |
| 13478 | ENSG00000196865 | HPA057564 | U-2 OS   |
| 13479 | ENSG00000196867 | HPA028879 | U-2 OS   |
| 13480 | ENSG00000196872 | HPA061678 | U-2 OS   |
| 13481 | ENSG00000196873 | HPA042759 | U-2 OS   |
| 13482 | ENSG00000196876 | CAB022169 | U-2 OS   |
| 13483 | ENSG00000196876 | HPA043937 | U-2 OS   |
| 13484 | ENSG00000196876 | HPA073590 | U-2 OS   |
| 13485 | ENSG00000196878 | HPA007584 | U-251 MG |
| 13486 | ENSG00000196890 | HPA048671 | U-2 OS   |
| 13487 | ENSG00000196911 | CAB026464 | U-2 OS   |
| 13488 | ENSG00000196911 | HPA054037 | A-431    |
| 13489 | ENSG00000196912 | HPA051757 | U-2 OS   |
| 13490 | ENSG00000196912 | HPA057661 | U-2 OS   |
| 13491 | ENSG00000196914 | HPA018911 | U-2 OS   |
| 13492 | ENSG00000196923 | HPA018794 | U-2 OS   |
| 13493 | ENSG00000196923 | HPA048815 | U-2 OS   |
| 13494 | ENSG00000196924 | CAB000356 | U-2 OS   |
| 13495 | ENSG00000196924 | HPA000368 | U-2 OS   |
| 13496 | ENSG00000196924 | HPA002925 | U-2 OS   |
| 13497 | ENSG00000196935 | HPA078079 | AF22     |
| 13498 | ENSG00000196937 | HPA043376 | U-2 OS   |
| 13499 | ENSG00000196937 | HPA050548 | A-431    |
| 13500 | ENSG00000196943 | HPA000850 | U-251 MG |
| 13501 | ENSG00000196950 | HPA036512 | U-2 OS   |
| 13502 | ENSG00000196950 | HPA066087 | CACO-2   |
| 13503 | ENSG00000196954 | HPA027588 | U-2 OS   |
| 13504 | ENSG00000196961 | CAB004306 | U-2 OS   |
| 13505 | ENSG00000196968 | HPA014033 | A-431    |
| 13506 | ENSG00000196975 | HPA007393 | U-2 OS   |
| 13507 | ENSG00000196976 | HPA036122 | U-2 OS   |
| 13508 | ENSG00000196990 | HPA067336 | SH-SY5Y  |
| 13509 | ENSG00000196993 | HPA053611 | U-2 OS   |
| 13510 | ENSG00000196998 | HPA027562 | U-2 OS   |
| 13511 | ENSG00000197006 | HPA056347 | U-2 OS   |
| 13512 | ENSG00000197013 | HPA004139 | HEK 293  |
| 13513 | ENSG00000197016 | HPA029000 | U-2 OS   |
| 13514 | ENSG00000197019 | HPA063323 | U-2 OS   |
| 13515 | ENSG00000197024 | HPA071533 | RT4      |
| 13516 | ENSG00000197037 | HPA055127 | CACO-2   |
| 13517 | ENSG00000197043 | HPA009977 | HAP1     |
| 13518 | ENSG00000197044 | HPA063338 | U-2 OS   |
| 13519 | ENSG00000197045 | HPA002954 | U-2 OS   |
| 13520 | ENSG00000197046 | HPA053509 | RT4      |
| 13521 | ENSG00000197050 | HPA059675 | U-2 OS   |
| 13522 | ENSG00000197054 | HPA047845 | RT4      |
| 13523 | ENSG00000197056 | HPA064019 | U-2 OS   |
| 13524 | ENSG00000197062 | HPA027521 | U-2 OS   |
| 13525 | ENSG00000197077 | HPA018135 | U-2 OS   |
| 13526 | ENSG00000197081 | CAB009661 | U-2 OS   |
| 13527 | ENSG00000197081 | HPA011332 | U-251 MG |
| 13528 | ENSG00000197093 | HPA038138 | U-2 OS   |

|       |                 |           |          |
|-------|-----------------|-----------|----------|
| 13529 | ENSG00000197102 | CAB010443 | A-431    |
| 13530 | ENSG00000197106 | HPA007663 | SiHa     |
| 13531 | ENSG00000197111 | HPA038356 | U-2 OS   |
| 13532 | ENSG00000197114 | HPA056705 | CACO-2   |
| 13533 | ENSG00000197122 | HPA030875 | A549     |
| 13534 | ENSG00000197124 | HPA055998 | RT4      |
| 13535 | ENSG00000197128 | HPA031312 | U-2 OS   |
| 13536 | ENSG00000197136 | HPA018084 | U-251 MG |
| 13537 | ENSG00000197140 | HPA062151 | U-2 OS   |
| 13538 | ENSG00000197142 | HPA007162 | U-2 OS   |
| 13539 | ENSG00000197147 | HPA017950 | U-2 OS   |
| 13540 | ENSG00000197150 | HPA045187 | U-2 OS   |
| 13541 | ENSG00000197157 | HPA002632 | U-2 OS   |
| 13542 | ENSG00000197157 | CAB019323 | U-2 OS   |
| 13543 | ENSG00000197162 | HPA030510 | U-2 OS   |
| 13544 | ENSG00000197170 | HPA023119 | U-2 OS   |
| 13545 | ENSG00000197183 | HPA041768 | U-2 OS   |
| 13546 | ENSG00000197183 | HPA043600 | U-2 OS   |
| 13547 | ENSG00000197191 | HPA021886 | U-2 OS   |
| 13548 | ENSG00000197208 | HPA036974 | U-2 OS   |
| 13549 | ENSG00000197213 | HPA060667 | U-2 OS   |
| 13550 | ENSG00000197217 | HPA017655 | U-2 OS   |
| 13551 | ENSG00000197223 | HPA037413 | U-2 OS   |
| 13552 | ENSG00000197226 | HPA038350 | U-2 OS   |
| 13553 | ENSG00000197249 | HPA000927 | Hep G2   |
| 13554 | ENSG00000197249 | HPA001292 | Hep G2   |
| 13555 | ENSG00000197261 | HPA036199 | U-2 OS   |
| 13556 | ENSG00000197265 | HPA004816 | U-2 OS   |
| 13557 | ENSG00000197265 | CAB009603 | U-2 OS   |
| 13558 | ENSG00000197265 | HPA025065 | U-2 OS   |
| 13559 | ENSG00000197279 | HPA007247 | U-2 OS   |
| 13560 | ENSG00000197283 | HPA038373 | A-431    |
| 13561 | ENSG00000197299 | HPA005689 | U-2 OS   |
| 13562 | ENSG00000197302 | HPA041570 | U-2 OS   |
| 13563 | ENSG00000197312 | HPA043119 | U-2 OS   |
| 13564 | ENSG00000197312 | HPA043225 | U-2 OS   |
| 13565 | ENSG00000197321 | HPA020138 | U-2 OS   |
| 13566 | ENSG00000197323 | HPA004345 | U-2 OS   |
| 13567 | ENSG00000197324 | HPA000932 | RT4      |
| 13568 | ENSG00000197329 | HPA053182 | CACO-2   |
| 13569 | ENSG00000197343 | HPA029534 | U-2 OS   |
| 13570 | ENSG00000197343 | HPA050750 | U-251 MG |
| 13571 | ENSG00000197345 | HPA051657 | CACO-2   |
| 13572 | ENSG00000197355 | HPA044356 | U-2 OS   |
| 13573 | ENSG00000197361 | HPA047624 | U-2 OS   |
| 13574 | ENSG00000197362 | HPA053459 | U-2 OS   |
| 13575 | ENSG00000197363 | HPA055337 | U-2 OS   |
| 13576 | ENSG00000197375 | HPA063062 | U-2 OS   |
| 13577 | ENSG00000197380 | HPA043053 | U-2 OS   |
| 13578 | ENSG00000197381 | HPA029645 | U-2 OS   |
| 13579 | ENSG00000197385 | HPA063386 | U-2 OS   |
| 13580 | ENSG00000197386 | HPA026114 | U-2 OS   |
| 13581 | ENSG00000197405 | HPA048012 | U-2 OS   |
| 13582 | ENSG00000197408 | HPA062973 | CACO-2   |
| 13583 | ENSG00000197410 | HPA064159 | U-2 OS   |

|       |                 |           |           |
|-------|-----------------|-----------|-----------|
| 13584 | ENSG00000197415 | HPA026645 | U-2 OS    |
| 13585 | ENSG00000197417 | HPA064939 | CACO-2    |
| 13586 | ENSG00000197442 | CAB007824 | U-2 OS    |
| 13587 | ENSG00000197444 | HPA043716 | U-2 OS    |
| 13588 | ENSG00000197448 | HPA022904 | U-2 OS    |
| 13589 | ENSG00000197451 | HPA046688 | U-2 OS    |
| 13590 | ENSG00000197461 | CAB005579 | A-431     |
| 13591 | ENSG00000197471 | HPA055244 | HEL       |
| 13592 | ENSG00000197472 | HPA024743 | U-2 OS    |
| 13593 | ENSG00000197479 | HPA045042 | RH-30     |
| 13594 | ENSG00000197483 | HPA044451 | U-2 OS    |
| 13595 | ENSG00000197496 | HPA041015 | U-2 OS    |
| 13596 | ENSG00000197497 | HPA023437 | RT4       |
| 13597 | ENSG00000197498 | HPA035475 | U-2 OS    |
| 13598 | ENSG00000197535 | HPA001356 | U-2 OS    |
| 13599 | ENSG00000197548 | HPA007639 | U-2 OS    |
| 13600 | ENSG00000197548 | CAB018771 | U-2 OS    |
| 13601 | ENSG00000197555 | HPA002875 | A-431     |
| 13602 | ENSG00000197557 | HPA051714 | U-2 OS    |
| 13603 | ENSG00000197557 | HPA052487 | SH-SY5Y   |
| 13604 | ENSG00000197562 | HPA076172 | U-2 OS    |
| 13605 | ENSG00000197563 | HPA039922 | U-2 OS    |
| 13606 | ENSG00000197563 | HPA040374 | U-2 OS    |
| 13607 | ENSG00000197565 | HPA065393 | U-2 OS    |
| 13608 | ENSG00000197566 | HPA023157 | SH-SY5Y   |
| 13609 | ENSG00000197568 | HPA031323 | U-2 OS    |
| 13610 | ENSG00000197576 | HPA060088 | U-2 OS    |
| 13611 | ENSG00000197579 | HPA060640 | U-2 OS    |
| 13612 | ENSG00000197586 | HPA015491 | SK-MEL-30 |
| 13613 | ENSG00000197599 | HPA041158 | U-2 OS    |
| 13614 | ENSG00000197601 | HPA017322 | RT4       |
| 13615 | ENSG00000197603 | HPA036776 | U-2 OS    |
| 13616 | ENSG00000197619 | HPA052422 | U-2 OS    |
| 13617 | ENSG00000197622 | HPA027634 | MCF7      |
| 13618 | ENSG00000197641 | HPA052630 | RT4       |
| 13619 | ENSG00000197646 | HPA013411 | U-2 OS    |
| 13620 | ENSG00000197647 | HPA073724 | RT4       |
| 13621 | ENSG00000197694 | HPA007927 | A-431     |
| 13622 | ENSG00000197696 | CAB019302 | U-2 OS    |
| 13623 | ENSG00000197702 | HPA005964 | U-2 OS    |
| 13624 | ENSG00000197705 | HPA024777 | U-2 OS    |
| 13625 | ENSG00000197712 | HPA067948 | U-2 OS    |
| 13626 | ENSG00000197712 | HPA069104 | U-2 OS    |
| 13627 | ENSG00000197712 | HPA069701 | U-2 OS    |
| 13628 | ENSG00000197713 | HPA036499 | U-2 OS    |
| 13629 | ENSG00000197714 | HPA066506 | U-2 OS    |
| 13630 | ENSG00000197724 | HPA010831 | U-2 OS    |
| 13631 | ENSG00000197728 | HPA043961 | U-2 OS    |
| 13632 | ENSG00000197728 | HPA055803 | U-251 MG  |
| 13633 | ENSG00000197746 | HPA004426 | U-2 OS    |
| 13634 | ENSG00000197747 | HPA003340 | U-2 OS    |
| 13635 | ENSG00000197756 | HPA065327 | CACO-2    |
| 13636 | ENSG00000197757 | HPA054981 | U-2 OS    |
| 13637 | ENSG00000197763 | CAB020802 | U-2 OS    |
| 13638 | ENSG00000197763 | HPA036109 | MCF7      |

|       |                 |           |          |
|-------|-----------------|-----------|----------|
| 13639 | ENSG00000197768 | HPA044352 | U-2 OS   |
| 13640 | ENSG00000197769 | HPA072670 | U-2 OS   |
| 13641 | ENSG00000197771 | CAB013792 | U-2 OS   |
| 13642 | ENSG00000197771 | HPA038481 | U-2 OS   |
| 13643 | ENSG00000197776 | HPA020461 | A-431    |
| 13644 | ENSG00000197780 | HPA044492 | U-2 OS   |
| 13645 | ENSG00000197782 | HPA003311 | RT4      |
| 13646 | ENSG00000197785 | HPA064867 | CACO-2   |
| 13647 | ENSG00000197785 | HPA065305 | CACO-2   |
| 13648 | ENSG00000197808 | HPA021139 | U-2 OS   |
| 13649 | ENSG00000197822 | HPA005933 | U-2 OS   |
| 13650 | ENSG00000197826 | HPA043383 | U-2 OS   |
| 13651 | ENSG00000197837 | CAB037279 | U-2 OS   |
| 13652 | ENSG00000197841 | HPA062305 | U-2 OS   |
| 13653 | ENSG00000197852 | HPA027809 | U-2 OS   |
| 13654 | ENSG00000197857 | HPA003146 | U-2 OS   |
| 13655 | ENSG00000197859 | HPA045634 | U-2 OS   |
| 13656 | ENSG00000197860 | HPA063674 | U-2 OS   |
| 13657 | ENSG00000197863 | HPA060288 | RT4      |
| 13658 | ENSG00000197872 | HPA060398 | RT4      |
| 13659 | ENSG00000197879 | HPA005924 | U-2 OS   |
| 13660 | ENSG00000197885 | HPA062521 | U-2 OS   |
| 13661 | ENSG00000197903 | HPA048671 | U-2 OS   |
| 13662 | ENSG00000197905 | HPA056896 | U-2 OS   |
| 13663 | ENSG00000197915 | HPA031469 | U-2 OS   |
| 13664 | ENSG00000197921 | HPA065458 | U-2 OS   |
| 13665 | ENSG00000197928 | HPA023106 | U-251 MG |
| 13666 | ENSG00000197937 | HPA023448 | U-2 OS   |
| 13667 | ENSG00000197943 | HPA020099 | U-2 OS   |
| 13668 | ENSG00000197948 | HPA043795 | U-2 OS   |
| 13669 | ENSG00000197951 | HPA018124 | U-2 OS   |
| 13670 | ENSG00000197956 | HPA007575 | U-2 OS   |
| 13671 | ENSG00000197956 | CAB040549 | U-2 OS   |
| 13672 | ENSG00000197956 | CAB047354 | U-251 MG |
| 13673 | ENSG00000197958 | HPA003403 | U-2 OS   |
| 13674 | ENSG00000197959 | HPA064121 | U-2 OS   |
| 13675 | ENSG00000197961 | HPA054961 | RT4      |
| 13676 | ENSG00000197965 | HPA063538 | U-2 OS   |
| 13677 | ENSG00000197971 | HPA064368 | HaCaT    |
| 13678 | ENSG00000197976 | HPA051020 | A-431    |
| 13679 | ENSG00000197980 | HPA047774 | U-2 OS   |
| 13680 | ENSG00000197991 | HPA062669 | SH-SY5Y  |
| 13681 | ENSG00000197993 | HPA064442 | U-2 OS   |
| 13682 | ENSG00000198000 | HPA062922 | U-2 OS   |
| 13683 | ENSG00000198001 | CAB016685 | U-2 OS   |
| 13684 | ENSG00000198001 | CAB022077 | U-2 OS   |
| 13685 | ENSG00000198003 | HPA044184 | U-2 OS   |
| 13686 | ENSG00000198015 | HPA039398 | U-2 OS   |
| 13687 | ENSG00000198018 | HPA014351 | A-431    |
| 13688 | ENSG00000198021 | HPA046423 | U-2 OS   |
| 13689 | ENSG00000198026 | HPA063999 | U-2 OS   |
| 13690 | ENSG00000198026 | HPA071230 | U-2 OS   |
| 13691 | ENSG00000198028 | HPA045439 | U-2 OS   |
| 13692 | ENSG00000198028 | HPA074438 | HEL      |
| 13693 | ENSG00000198033 | HPA039247 | U-2 OS   |

|       |                 |           |        |
|-------|-----------------|-----------|--------|
| 13694 | ENSG00000198033 | HPA043684 | U-2 OS |
| 13695 | ENSG00000198039 | HPA077549 | RH-30  |
| 13696 | ENSG00000198040 | HPA028860 | U-2 OS |
| 13697 | ENSG00000198042 | HPA050574 | U-2 OS |
| 13698 | ENSG00000198046 | HPA030731 | U-2 OS |
| 13699 | ENSG00000198055 | HPA018903 | U-2 OS |
| 13700 | ENSG00000198056 | HPA040010 | U-2 OS |
| 13701 | ENSG00000198060 | HPA056596 | U-2 OS |
| 13702 | ENSG00000198064 | HPA053611 | U-2 OS |
| 13703 | ENSG00000198074 | HPA020280 | A549   |
| 13704 | ENSG00000198074 | HPA073633 | A549   |
| 13705 | ENSG00000198075 | HPA034530 | U-2 OS |
| 13706 | ENSG00000198081 | HPA050758 | U-2 OS |
| 13707 | ENSG00000198081 | HPA070819 | RT4    |
| 13708 | ENSG00000198087 | HPA003267 | U-2 OS |
| 13709 | ENSG00000198087 | HPA003326 | U-2 OS |
| 13710 | ENSG00000198099 | HPA020525 | Hep G2 |
| 13711 | ENSG00000198105 | HPA018237 | U-2 OS |
| 13712 | ENSG00000198113 | HPA044913 | PC-3   |
| 13713 | ENSG00000198121 | HPA050667 | U-2 OS |
| 13714 | ENSG00000198130 | HPA036540 | U-2 OS |
| 13715 | ENSG00000198130 | HPA036541 | U-2 OS |
| 13716 | ENSG00000198131 | HPA002732 | U-2 OS |
| 13717 | ENSG00000198142 | HPA056131 | U-2 OS |
| 13718 | ENSG00000198156 | HPA053611 | U-2 OS |
| 13719 | ENSG00000198157 | HPA000511 | U-2 OS |
| 13720 | ENSG00000198157 | HPA076238 | U-2 OS |
| 13721 | ENSG00000198160 | HPA019589 | U-2 OS |
| 13722 | ENSG00000198160 | HPA050306 | U-2 OS |
| 13723 | ENSG00000198162 | HPA034559 | U-2 OS |
| 13724 | ENSG00000198162 | HPA057364 | U-2 OS |
| 13725 | ENSG00000198169 | HPA018290 | U-2 OS |
| 13726 | ENSG00000198171 | HPA013705 | U-2 OS |
| 13727 | ENSG00000198176 | HPA044754 | U-2 OS |
| 13728 | ENSG00000198176 | HPA068909 | U-2 OS |
| 13729 | ENSG00000198182 | HPA055018 | CACO-2 |
| 13730 | ENSG00000198185 | HPA050022 | U-2 OS |
| 13731 | ENSG00000198189 | HPA021608 | U-2 OS |
| 13732 | ENSG00000198198 | HPA029012 | U-2 OS |
| 13733 | ENSG00000198205 | HPA043789 | U-2 OS |
| 13734 | ENSG00000198208 | HPA027451 | A-431  |
| 13735 | ENSG00000198211 | CAB011512 | U-2 OS |
| 13736 | ENSG00000198216 | HPA042515 | CACO-2 |
| 13737 | ENSG00000198218 | HPA037677 | U-2 OS |
| 13738 | ENSG00000198218 | HPA037678 | U-2 OS |
| 13739 | ENSG00000198231 | HPA023447 | U-2 OS |
| 13740 | ENSG00000198231 | HPA023571 | U-2 OS |
| 13741 | ENSG00000198231 | HPA025941 | U-2 OS |
| 13742 | ENSG00000198242 | HPA077474 | RT4    |
| 13743 | ENSG00000198246 | HPA046085 | Hep G2 |
| 13744 | ENSG00000198246 | HPA057905 | Hep G2 |
| 13745 | ENSG00000198252 | HPA040290 | U-2 OS |
| 13746 | ENSG00000198265 | HPA028276 | U-2 OS |
| 13747 | ENSG00000198270 | HPA040720 | U-2 OS |
| 13748 | ENSG00000198276 | HPA004722 | U-2 OS |



|       |                 |           |           |
|-------|-----------------|-----------|-----------|
| 13749 | ENSG00000198300 | HPA026070 | Hep G2    |
| 13750 | ENSG00000198301 | HPA035949 | U-2 OS    |
| 13751 | ENSG00000198315 | HPA003483 | U-2 OS    |
| 13752 | ENSG00000198331 | HPA041210 | U-2 OS    |
| 13753 | ENSG00000198336 | HPA051884 | U-2 OS    |
| 13754 | ENSG00000198342 | HPA053407 | U-2 OS    |
| 13755 | ENSG00000198346 | HPA056406 | RT4       |
| 13756 | ENSG00000198353 | HPA053910 | U-251 MG  |
| 13757 | ENSG00000198354 | HPA044737 | A-431     |
| 13758 | ENSG00000198355 | HPA068758 | U-2 OS    |
| 13759 | ENSG00000198356 | HPA045951 | MCF7      |
| 13760 | ENSG00000198356 | HPA048087 | MCF7      |
| 13761 | ENSG00000198363 | HPA055161 | HeLa      |
| 13762 | ENSG00000198363 | HPA059303 | U-2 OS    |
| 13763 | ENSG00000198369 | HPA038256 | CACO-2    |
| 13764 | ENSG00000198380 | HPA047240 | U-2 OS    |
| 13765 | ENSG00000198393 | HPA018329 | A-431     |
| 13766 | ENSG00000198399 | HPA036475 | U-2 OS    |
| 13767 | ENSG00000198400 | HPA076570 | U-2 OS    |
| 13768 | ENSG00000198408 | HPA076501 | U-2 OS    |
| 13769 | ENSG00000198429 | HPA047845 | RT4       |
| 13770 | ENSG00000198431 | CAB015834 | A-431     |
| 13771 | ENSG00000198431 | HPA043871 | U-2 OS    |
| 13772 | ENSG00000198435 | HPA025729 | U-2 OS    |
| 13773 | ENSG00000198440 | HPA023957 | U-2 OS    |
| 13774 | ENSG00000198453 | HPA024541 | SH-SY5Y   |
| 13775 | ENSG00000198455 | HPA043789 | U-2 OS    |
| 13776 | ENSG00000198464 | HPA042218 | U-2 OS    |
| 13777 | ENSG00000198466 | HPA042125 | U-251 MG  |
| 13778 | ENSG00000198478 | HPA047486 | CACO-2    |
| 13779 | ENSG00000198483 | HPA035453 | ASC TERT1 |
| 13780 | ENSG00000198492 | HPA030063 | U-2 OS    |
| 13781 | ENSG00000198492 | HPA054080 | U-2 OS    |
| 13782 | ENSG00000198498 | HPA041571 | U-2 OS    |
| 13783 | ENSG00000198498 | HPA052688 | U-2 OS    |
| 13784 | ENSG00000198515 | HPA076168 | U-2 OS    |
| 13785 | ENSG00000198517 | CAB026820 | U-2 OS    |
| 13786 | ENSG00000198517 | HPA060841 | U-2 OS    |
| 13787 | ENSG00000198520 | HPA034769 | U-2 OS    |
| 13788 | ENSG00000198522 | HPA036793 | U-2 OS    |
| 13789 | ENSG00000198551 | HPA073463 | U-2 OS    |
| 13790 | ENSG00000198553 | HPA001027 | CACO-2    |
| 13791 | ENSG00000198554 | HPA000632 | U-2 OS    |
| 13792 | ENSG00000198556 | HPA029500 | U-2 OS    |
| 13793 | ENSG00000198556 | HPA050793 | MCF7      |
| 13794 | ENSG00000198561 | CAB003837 | U-2 OS    |
| 13795 | ENSG00000198561 | HPA015955 | U-2 OS    |
| 13796 | ENSG00000198563 | CAB034012 | U-2 OS    |
| 13797 | ENSG00000198563 | HPA055334 | U-2 OS    |
| 13798 | ENSG00000198563 | HPA058450 | U-2 OS    |
| 13799 | ENSG00000198573 | HPA046423 | U-2 OS    |
| 13800 | ENSG00000198576 | HPA056430 | U-2 OS    |
| 13801 | ENSG00000198585 | HPA060452 | U-2 OS    |
| 13802 | ENSG00000198586 | HPA016043 | U-2 OS    |
| 13803 | ENSG00000198589 | HPA019366 | U-2 OS    |

|       |                 |           |          |
|-------|-----------------|-----------|----------|
| 13804 | ENSG00000198597 | HPA077341 | U-2 OS   |
| 13805 | ENSG00000198604 | HPA002730 | A-431    |
| 13806 | ENSG00000198610 | HPA068265 | U-2 OS   |
| 13807 | ENSG00000198612 | HPA036485 | U-2 OS   |
| 13808 | ENSG00000198624 | HPA052896 | U-2 OS   |
| 13809 | ENSG00000198625 | HPA048821 | U-2 OS   |
| 13810 | ENSG00000198626 | HPA020028 | U-2 OS   |
| 13811 | ENSG00000198642 | HPA059901 | U-2 OS   |
| 13812 | ENSG00000198646 | HPA004198 | U-2 OS   |
| 13813 | ENSG00000198646 | HPA050211 | U-2 OS   |
| 13814 | ENSG00000198648 | HPA061803 | U-2 OS   |
| 13815 | ENSG00000198668 | CAB018558 | U-2 OS   |
| 13816 | ENSG00000198677 | HPA037905 | U-2 OS   |
| 13817 | ENSG00000198680 | HPA051426 | U-2 OS   |
| 13818 | ENSG00000198681 | CAB002620 | U-2 OS   |
| 13819 | ENSG00000198682 | HPA071224 | U-2 OS   |
| 13820 | ENSG00000198689 | HPA059590 | U-2 OS   |
| 13821 | ENSG00000198690 | HPA048198 | A-431    |
| 13822 | ENSG00000198692 | HPA002561 | U-2 OS   |
| 13823 | ENSG00000198700 | HPA059540 | U-2 OS   |
| 13824 | ENSG00000198707 | HPA064397 | U-2 OS   |
| 13825 | ENSG00000198718 | HPA050849 | RT4      |
| 13826 | ENSG00000198719 | HPA078298 | U-2 OS   |
| 13827 | ENSG00000198720 | HPA063748 | U-2 OS   |
| 13828 | ENSG00000198721 | HPA022130 | U-2 OS   |
| 13829 | ENSG00000198721 | HPA031626 | U-251 MG |
| 13830 | ENSG00000198722 | HPA024493 | U-2 OS   |
| 13831 | ENSG00000198722 | HPA062300 | U-2 OS   |
| 13832 | ENSG00000198727 | HPA068400 | U-2 OS   |
| 13833 | ENSG00000198728 | HPA034488 | U-2 OS   |
| 13834 | ENSG00000198730 | HPA061027 | U-2 OS   |
| 13835 | ENSG00000198730 | HPA068122 | RT4      |
| 13836 | ENSG00000198732 | HPA004153 | U-2 OS   |
| 13837 | ENSG00000198734 | HPA002036 | Hep G2   |
| 13838 | ENSG00000198736 | HPA043463 | MCF7     |
| 13839 | ENSG00000198736 | HPA069557 | U-2 OS   |
| 13840 | ENSG00000198739 | HPA070444 | HAP1     |
| 13841 | ENSG00000198739 | HPA078598 | HAP1     |
| 13842 | ENSG00000198740 | HPA044408 | U-2 OS   |
| 13843 | ENSG00000198742 | HPA019671 | U-2 OS   |
| 13844 | ENSG00000198743 | HPA029791 | U-2 OS   |
| 13845 | ENSG00000198746 | HPA054973 | U-2 OS   |
| 13846 | ENSG00000198755 | HPA053803 | U-2 OS   |
| 13847 | ENSG00000198756 | HPA031749 | U-251 MG |
| 13848 | ENSG00000198758 | HPA030998 | U-2 OS   |
| 13849 | ENSG00000198768 | HPA067015 | U-2 OS   |
| 13850 | ENSG00000198771 | HPA073490 | REH      |
| 13851 | ENSG00000198780 | HPA041574 | U-2 OS   |
| 13852 | ENSG00000198783 | HPA024754 | U-2 OS   |
| 13853 | ENSG00000198783 | HPA027211 | U-2 OS   |
| 13854 | ENSG00000198791 | HPA069543 | U-2 OS   |
| 13855 | ENSG00000198792 | HPA024076 | U-2 OS   |
| 13856 | ENSG00000198793 | HPA071227 | HEK 293  |
| 13857 | ENSG00000198795 | HPA023056 | U-2 OS   |
| 13858 | ENSG00000198796 | HPA029801 | BJ       |

|       |                 |           |             |
|-------|-----------------|-----------|-------------|
| 13859 | ENSG00000198799 | HPA015538 | U-2 OS      |
| 13860 | ENSG00000198804 | CAB016241 | A-431       |
| 13861 | ENSG00000198805 | HPA001625 | RPTEC TERT1 |
| 13862 | ENSG00000198807 | HPA038462 | U-2 OS      |
| 13863 | ENSG00000198815 | HPA067284 | U-2 OS      |
| 13864 | ENSG00000198816 | HPA063624 | U-2 OS      |
| 13865 | ENSG00000198818 | HPA014677 | U-2 OS      |
| 13866 | ENSG00000198824 | HPA006623 | U-2 OS      |
| 13867 | ENSG00000198824 | HPA008900 | U-2 OS      |
| 13868 | ENSG00000198825 | HPA042605 | U-2 OS      |
| 13869 | ENSG00000198826 | HPA040830 | U-2 OS      |
| 13870 | ENSG00000198830 | CAB018371 | U-2 OS      |
| 13871 | ENSG00000198830 | HPA077364 | U-2 OS      |
| 13872 | ENSG00000198832 | HPA019601 | U-2 OS      |
| 13873 | ENSG00000198835 | HPA069619 | U-2 OS      |
| 13874 | ENSG00000198836 | HPA036927 | U-2 OS      |
| 13875 | ENSG00000198837 | HPA040188 | U-2 OS      |
| 13876 | ENSG00000198838 | HPA062004 | U-2 OS      |
| 13877 | ENSG00000198839 | HPA027307 | U-2 OS      |
| 13878 | ENSG00000198840 | HPA063296 | MCF7        |
| 13879 | ENSG00000198841 | HPA031203 | U-2 OS      |
| 13880 | ENSG00000198842 | HPA012912 | U-2 OS      |
| 13881 | ENSG00000198844 | HPA044443 | HUVEC TERT2 |
| 13882 | ENSG00000198844 | HPA063495 | HUVEC TERT2 |
| 13883 | ENSG00000198846 | HPA073241 | U-2 OS      |
| 13884 | ENSG00000198848 | HPA046717 | U-2 OS      |
| 13885 | ENSG00000198855 | HPA071134 | U-2 OS      |
| 13886 | ENSG00000198858 | HPA043025 | U-2 OS      |
| 13887 | ENSG00000198860 | HPA029237 | U-2 OS      |
| 13888 | ENSG00000198862 | HPA029143 | U-2 OS      |
| 13889 | ENSG00000198862 | HPA055604 | U-2 OS      |
| 13890 | ENSG00000198863 | HPA023726 | A-431       |
| 13891 | ENSG00000198865 | HPA036240 | U-2 OS      |
| 13892 | ENSG00000198873 | HPA046838 | A-431       |
| 13893 | ENSG00000198874 | HPA014118 | CACO-2      |
| 13894 | ENSG00000198874 | HPA052097 | U-2 OS      |
| 13895 | ENSG00000198879 | HPA035447 | HEK 293     |
| 13896 | ENSG00000198879 | HPA070388 | U-2 OS      |
| 13897 | ENSG00000198887 | HPA054900 | U-2 OS      |
| 13898 | ENSG00000198889 | HPA044737 | A-431       |
| 13899 | ENSG00000198890 | HPA059424 | MCF7        |
| 13900 | ENSG00000198898 | HPA007643 | U-2 OS      |
| 13901 | ENSG00000198900 | HPA019039 | U-2 OS      |
| 13902 | ENSG00000198901 | HPA034521 | U-2 OS      |
| 13903 | ENSG00000198908 | HPA000887 | U-2 OS      |
| 13904 | ENSG00000198909 | HPA035410 | U-2 OS      |
| 13905 | ENSG00000198910 | CAB010896 | U-2 OS      |
| 13906 | ENSG00000198911 | HPA031963 | U-2 OS      |
| 13907 | ENSG00000198912 | HPA008270 | U-2 OS      |
| 13908 | ENSG00000198912 | HPA065778 | U-2 OS      |
| 13909 | ENSG00000198914 | HPA052792 | HEK 293     |
| 13910 | ENSG00000198914 | HPA056039 | SH-SY5Y     |
| 13911 | ENSG00000198915 | HPA035593 | U-2 OS      |
| 13912 | ENSG00000198919 | HPA049232 | U-2 OS      |
| 13913 | ENSG00000198920 | HPA023057 | U-2 OS      |

|       |                 |           |          |
|-------|-----------------|-----------|----------|
| 13914 | ENSG00000198920 | HPA023494 | U-2 OS   |
| 13915 | ENSG00000198924 | HPA036907 | U-2 OS   |
| 13916 | ENSG00000198925 | HPA059551 | Hep G2   |
| 13917 | ENSG00000198929 | HPA030066 | U-2 OS   |
| 13918 | ENSG00000198931 | HPA026681 | U-2 OS   |
| 13919 | ENSG00000198932 | HPA031061 | SH-SY5Y  |
| 13920 | ENSG00000198933 | HPA062347 | CACO-2   |
| 13921 | ENSG00000198934 | HPA003047 | U-2 OS   |
| 13922 | ENSG00000198937 | HPA045215 | U-2 OS   |
| 13923 | ENSG00000198945 | HPA044382 | U-2 OS   |
| 13924 | ENSG00000198945 | HPA053035 | CACO-2   |
| 13925 | ENSG00000198948 | HPA062306 | RT4      |
| 13926 | ENSG00000198952 | HPA072651 | CACO-2   |
| 13927 | ENSG00000198959 | CAB002598 | U-2 OS   |
| 13928 | ENSG00000198959 | HPA029518 | U-2 OS   |
| 13929 | ENSG00000198960 | HPA043030 | U-2 OS   |
| 13930 | ENSG00000198960 | HPA048125 | U-2 OS   |
| 13931 | ENSG00000198961 | HPA040347 | U-2 OS   |
| 13932 | ENSG00000198961 | HPA057636 | U-2 OS   |
| 13933 | ENSG00000198963 | HPA008393 | U-251 MG |
| 13934 | ENSG00000198964 | HPA045191 | U-2 OS   |
| 13935 | ENSG00000203485 | HPA000724 | U-2 OS   |
| 13936 | ENSG00000203666 | HPA031206 | U-2 OS   |
| 13937 | ENSG00000203667 | HPA043617 | U-2 OS   |
| 13938 | ENSG00000203667 | HPA045490 | U-2 OS   |
| 13939 | ENSG00000203668 | HPA029627 | PC-3     |
| 13940 | ENSG00000203668 | HPA062967 | PC-3     |
| 13941 | ENSG00000203685 | HPA074381 | HEL      |
| 13942 | ENSG00000203697 | HPA073939 | RT4      |
| 13943 | ENSG00000203705 | HPA032092 | U-2 OS   |
| 13944 | ENSG00000203722 | HPA062673 | HeLa     |
| 13945 | ENSG00000203724 | HPA065352 | U-2 OS   |
| 13946 | ENSG00000203727 | HPA067811 | CACO-2   |
| 13947 | ENSG00000203760 | HPA067285 | U-251 MG |
| 13948 | ENSG00000203778 | HPA036068 | U-2 OS   |
| 13949 | ENSG00000203780 | HPA038413 | U-2 OS   |
| 13950 | ENSG00000203791 | HPA050138 | A-431    |
| 13951 | ENSG00000203797 | HPA037525 | U-251 MG |
| 13952 | ENSG00000203797 | HPA037526 | U-2 OS   |
| 13953 | ENSG00000203805 | HPA045188 | U-2 OS   |
| 13954 | ENSG00000203814 | HPA048671 | U-2 OS   |
| 13955 | ENSG00000203857 | HPA044028 | CACO-2   |
| 13956 | ENSG00000203859 | HPA044028 | CACO-2   |
| 13957 | ENSG00000203867 | HPA035806 | U-2 OS   |
| 13958 | ENSG00000203872 | HPA044797 | RT4      |
| 13959 | ENSG00000203879 | CAB012979 | CACO-2   |
| 13960 | ENSG00000203880 | HPA057849 | U-2 OS   |
| 13961 | ENSG00000203883 | HPA073703 | Hep G2   |
| 13962 | ENSG00000203926 | HPA046423 | U-2 OS   |
| 13963 | ENSG00000203943 | HPA058929 | U-2 OS   |
| 13964 | ENSG00000203963 | HPA035316 | HEL      |
| 13965 | ENSG00000203965 | HPA029611 | U-2 OS   |
| 13966 | ENSG00000203985 | HPA052489 | U-2 OS   |
| 13967 | ENSG00000203989 | HPA003314 | K-562    |
| 13968 | ENSG00000203995 | HPA030378 | A-431    |

|       |                 |           |        |
|-------|-----------------|-----------|--------|
| 13969 | ENSG00000203995 | HPA030379 | SiHa   |
| 13970 | ENSG00000204052 | HPA046698 | U-2 OS |
| 13971 | ENSG00000204065 | HPA072199 | U-2 OS |
| 13972 | ENSG00000204084 | HPA028803 | U-2 OS |
| 13973 | ENSG00000204103 | HPA005653 | U-2 OS |
| 13974 | ENSG00000204116 | HPA052062 | U-2 OS |
| 13975 | ENSG00000204120 | HPA050899 | U-2 OS |
| 13976 | ENSG00000204120 | HPA054612 | U-2 OS |
| 13977 | ENSG00000204128 | HPA044962 | Hep G2 |
| 13978 | ENSG00000204130 | HPA039792 | U-2 OS |
| 13979 | ENSG00000204131 | HPA049771 | EF0-21 |
| 13980 | ENSG00000204138 | HPA028985 | U-2 OS |
| 13981 | ENSG00000204147 | HPA061171 | U-2 OS |
| 13982 | ENSG00000204160 | HPA040234 | U-2 OS |
| 13983 | ENSG00000204175 | HPA038129 | U-2 OS |
| 13984 | ENSG00000204176 | HPA064559 | U-2 OS |
| 13985 | ENSG00000204178 | HPA019680 | A-431  |
| 13986 | ENSG00000204179 | HPA046896 | A549   |
| 13987 | ENSG00000204186 | HPA050311 | U-2 OS |
| 13988 | ENSG00000204209 | HPA008797 | U-2 OS |
| 13989 | ENSG00000204209 | HPA065779 | U-2 OS |
| 13990 | ENSG00000204217 | HPA049014 | U-2 OS |
| 13991 | ENSG00000204219 | HPA055811 | U-2 OS |
| 13992 | ENSG00000204220 | HPA048123 | U-2 OS |
| 13993 | ENSG00000204227 | HPA008701 | U-2 OS |
| 13994 | ENSG00000204231 | HPA063653 | U-2 OS |
| 13995 | ENSG00000204237 | HPA056878 | U-2 OS |
| 13996 | ENSG00000204256 | HPA042816 | U-2 OS |
| 13997 | ENSG00000204257 | HPA017295 | RT4    |
| 13998 | ENSG00000204264 | HPA050327 | U-2 OS |
| 13999 | ENSG00000204267 | HPA001312 | U-2 OS |
| 14000 | ENSG00000204271 | HPA000727 | U-2 OS |
| 14001 | ENSG00000204291 | HPA017913 | BJ     |
| 14002 | ENSG00000204304 | HPA061478 | CACO-2 |
| 14003 | ENSG00000204305 | HPA064436 | U-2 OS |
| 14004 | ENSG00000204308 | HPA065032 | U-2 OS |
| 14005 | ENSG00000204310 | HPA048478 | U-2 OS |
| 14006 | ENSG00000204311 | HPA042621 | U-2 OS |
| 14007 | ENSG00000204315 | HPA060158 | U-2 OS |
| 14008 | ENSG00000204316 | HPA023054 | A-431  |
| 14009 | ENSG00000204323 | HPA065332 | RT4    |
| 14010 | ENSG00000204334 | HPA061010 | CACO-2 |
| 14011 | ENSG00000204335 | HPA074123 | CACO-2 |
| 14012 | ENSG00000204344 | HPA068559 | U-2 OS |
| 14013 | ENSG00000204348 | HPA046708 | U-2 OS |
| 14014 | ENSG00000204351 | HPA051959 | U-2 OS |
| 14015 | ENSG00000204352 | HPA071515 | U-2 OS |
| 14016 | ENSG00000204356 | HPA007594 | U-2 OS |
| 14017 | ENSG00000204356 | HPA046502 | U-2 OS |
| 14018 | ENSG00000204366 | HPA047161 | U-2 OS |
| 14019 | ENSG00000204371 | HPA060259 | U-2 OS |
| 14020 | ENSG00000204379 | HPA046363 | U-2 OS |
| 14021 | ENSG00000204381 | HPA040087 | U-2 OS |
| 14022 | ENSG00000204382 | HPA046363 | U-2 OS |
| 14023 | ENSG00000204386 | HPA021506 | U-2 OS |

|       |                 |           |          |
|-------|-----------------|-----------|----------|
| 14024 | ENSG00000204388 | CAB008640 | U-2 OS   |
| 14025 | ENSG00000204388 | HPA052504 | CACO-2   |
| 14026 | ENSG00000204389 | CAB032815 | A-431    |
| 14027 | ENSG00000204389 | HPA052504 | CACO-2   |
| 14028 | ENSG00000204390 | HPA052504 | CACO-2   |
| 14029 | ENSG00000204392 | HPA052805 | MCF7     |
| 14030 | ENSG00000204392 | HPA066718 | U-2 OS   |
| 14031 | ENSG00000204394 | HPA046710 | U-2 OS   |
| 14032 | ENSG00000204396 | HPA046954 | HeLa     |
| 14033 | ENSG00000204397 | HPA062805 | U-2 OS   |
| 14034 | ENSG00000204406 | HPA035964 | RT4      |
| 14035 | ENSG00000204410 | HPA062688 | U-2 OS   |
| 14036 | ENSG00000204420 | HPA054404 | HEL      |
| 14037 | ENSG00000204420 | HPA073017 | HEL      |
| 14038 | ENSG00000204428 | HPA038690 | U-2 OS   |
| 14039 | ENSG00000204438 | HPA006301 | U-2 OS   |
| 14040 | ENSG00000204439 | HPA045281 | U-2 OS   |
| 14041 | ENSG00000204442 | HPA058768 | RT4      |
| 14042 | ENSG00000204444 | HPA051006 | Hep G2   |
| 14043 | ENSG00000204463 | CAB020704 | U-2 OS   |
| 14044 | ENSG00000204463 | HPA053291 | U-2 OS   |
| 14045 | ENSG00000204469 | CAB026383 | U-2 OS   |
| 14046 | ENSG00000204469 | HPA046791 | U-2 OS   |
| 14047 | ENSG00000204469 | HPA066501 | U-2 OS   |
| 14048 | ENSG00000204472 | HPA062949 | U-2 OS   |
| 14049 | ENSG00000204498 | HPA006298 | U-251 MG |
| 14050 | ENSG00000204514 | HPA072145 | RT4      |
| 14051 | ENSG00000204516 | HPA064618 | U-2 OS   |
| 14052 | ENSG00000204519 | HPA038187 | A-431    |
| 14053 | ENSG00000204524 | HPA046330 | U-2 OS   |
| 14054 | ENSG00000204531 | CAB026380 | A-431    |
| 14055 | ENSG00000204531 | HPA058267 | RT4      |
| 14056 | ENSG00000204532 | HPA060667 | U-2 OS   |
| 14057 | ENSG00000204536 | HPA054167 | U-2 OS   |
| 14058 | ENSG00000204540 | HPA045049 | U-2 OS   |
| 14059 | ENSG00000204560 | HPA051455 | U-2 OS   |
| 14060 | ENSG00000204568 | HPA043485 | U-2 OS   |
| 14061 | ENSG00000204569 | CAB025501 | U-2 OS   |
| 14062 | ENSG00000204569 | HPA047248 | U-2 OS   |
| 14063 | ENSG00000204569 | HPA056756 | U-2 OS   |
| 14064 | ENSG00000204574 | HPA017578 | U-2 OS   |
| 14065 | ENSG00000204576 | HPA064061 | U-2 OS   |
| 14066 | ENSG00000204580 | HPA057194 | U-2 OS   |
| 14067 | ENSG00000204590 | HPA050455 | U-2 OS   |
| 14068 | ENSG00000204592 | HPA031454 | U-2 OS   |
| 14069 | ENSG00000204599 | HPA051120 | U-2 OS   |
| 14070 | ENSG00000204599 | HPA059496 | U-2 OS   |
| 14071 | ENSG00000204604 | HPA062474 | RT4      |
| 14072 | ENSG00000204610 | HPA047527 | HEL      |
| 14073 | ENSG00000204611 | HPA062639 | U-2 OS   |
| 14074 | ENSG00000204618 | CAB019278 | U-2 OS   |
| 14075 | ENSG00000204619 | HPA060174 | U-2 OS   |
| 14076 | ENSG00000204624 | HPA054579 | U-2 OS   |
| 14077 | ENSG00000204628 | HPA021676 | A-431    |
| 14078 | ENSG00000204634 | CAB015211 | A-431    |

|       |                 |           |             |
|-------|-----------------|-----------|-------------|
| 14079 | ENSG00000204634 | HPA037496 | U-2 OS      |
| 14080 | ENSG00000204653 | HPA042631 | U-2 OS      |
| 14081 | ENSG00000204673 | CAB021903 | U-2 OS      |
| 14082 | ENSG00000204673 | HPA043590 | U-2 OS      |
| 14083 | ENSG00000204681 | HPA058459 | HeLa        |
| 14084 | ENSG00000204682 | HPA064131 | SH-SY5Y     |
| 14085 | ENSG00000204687 | HPA017983 | U-2 OS      |
| 14086 | ENSG00000204713 | HPA053408 | U-2 OS      |
| 14087 | ENSG00000204740 | HPA035732 | Hep G2      |
| 14088 | ENSG00000204740 | HPA038106 | Hep G2      |
| 14089 | ENSG00000204764 | HPA029568 | U-2 OS      |
| 14090 | ENSG00000204779 | HPA012836 | U-2 OS      |
| 14091 | ENSG00000204822 | HPA034612 | U-2 OS      |
| 14092 | ENSG00000204839 | HPA068049 | U-2 OS      |
| 14093 | ENSG00000204842 | HPA018295 | U-2 OS      |
| 14094 | ENSG00000204843 | HPA071875 | U-2 OS      |
| 14095 | ENSG00000204852 | HPA040036 | U-2 OS      |
| 14096 | ENSG00000204856 | HPA038286 | U-2 OS      |
| 14097 | ENSG00000204859 | HPA030417 | A-431       |
| 14098 | ENSG00000204866 | HPA059137 | CACO-2      |
| 14099 | ENSG00000204869 | HPA047655 | U-2 OS      |
| 14100 | ENSG00000204882 | HPA071337 | U-2 OS      |
| 14101 | ENSG00000204897 | HPA058943 | RPTEC TERT1 |
| 14102 | ENSG00000204909 | HPA038288 | U-2 OS      |
| 14103 | ENSG00000204920 | HPA003220 | U-2 OS      |
| 14104 | ENSG00000204922 | HPA046851 | U-2 OS      |
| 14105 | ENSG00000204923 | HPA049775 | U-2 OS      |
| 14106 | ENSG00000204923 | HPA054782 | A-431       |
| 14107 | ENSG00000204946 | HPA020375 | U-2 OS      |
| 14108 | ENSG00000204947 | HPA020087 | MCF7        |
| 14109 | ENSG00000204950 | HPA047619 | U-2 OS      |
| 14110 | ENSG00000204954 | HPA038883 | U-2 OS      |
| 14111 | ENSG00000204956 | HPA010580 | U-2 OS      |
| 14112 | ENSG00000204965 | HPA044557 | U-2 OS      |
| 14113 | ENSG00000204967 | HPA043180 | A549        |
| 14114 | ENSG00000204970 | HPA035969 | U-2 OS      |
| 14115 | ENSG00000204978 | HPA048484 | CACO-2      |
| 14116 | ENSG00000204983 | HPA062452 | U-2 OS      |
| 14117 | ENSG00000204991 | HPA041413 | U-2 OS      |
| 14118 | ENSG00000205002 | HPA068290 | U-2 OS      |
| 14119 | ENSG00000205078 | HPA062464 | U-2 OS      |
| 14120 | ENSG00000205078 | HPA066691 | U-2 OS      |
| 14121 | ENSG00000205084 | HPA042081 | U-2 OS      |
| 14122 | ENSG00000205085 | HPA020513 | U-2 OS      |
| 14123 | ENSG00000205089 | HPA056288 | U-2 OS      |
| 14124 | ENSG00000205129 | HPA043662 | U-2 OS      |
| 14125 | ENSG00000205138 | HPA064277 | HEK 293     |
| 14126 | ENSG00000205177 | HPA047064 | U-2 OS      |
| 14127 | ENSG00000205189 | HPA021554 | U-2 OS      |
| 14128 | ENSG00000205189 | HPA050569 | U-2 OS      |
| 14129 | ENSG00000205208 | HPA052670 | U-2 OS      |
| 14130 | ENSG00000205212 | HPA023457 | U-2 OS      |
| 14131 | ENSG00000205213 | HPA054350 | U-2 OS      |
| 14132 | ENSG00000205220 | HPA030224 | U-2 OS      |
| 14133 | ENSG00000205220 | HPA030225 | U-2 OS      |

|       |                 |           |         |
|-------|-----------------|-----------|---------|
| 14134 | ENSG00000205250 | HPA054128 | U-2 OS  |
| 14135 | ENSG00000205269 | HPA055134 | U-2 OS  |
| 14136 | ENSG00000205302 | HPA037400 | U-2 OS  |
| 14137 | ENSG00000205307 | HPA062610 | U-2 OS  |
| 14138 | ENSG00000205323 | HPA030902 | U-2 OS  |
| 14139 | ENSG00000205323 | HPA030903 | U-2 OS  |
| 14140 | ENSG00000205339 | HPA056590 | U-2 OS  |
| 14141 | ENSG00000205352 | HPA039396 | CACO-2  |
| 14142 | ENSG00000205356 | HPA021061 | U-2 OS  |
| 14143 | ENSG00000205363 | HPA041563 | U-2 OS  |
| 14144 | ENSG00000205413 | HPA021318 | U-2 OS  |
| 14145 | ENSG00000205413 | HPA021319 | U-2 OS  |
| 14146 | ENSG00000205420 | HPA045697 | U-2 OS  |
| 14147 | ENSG00000205420 | HPA061168 | HaCaT   |
| 14148 | ENSG00000205423 | HPA077906 | U-2 OS  |
| 14149 | ENSG00000205464 | HPA053771 | U-2 OS  |
| 14150 | ENSG00000205476 | HPA058346 | U-2 OS  |
| 14151 | ENSG00000205517 | HPA064578 | CACO-2  |
| 14152 | ENSG00000205531 | CAB011567 | A-431   |
| 14153 | ENSG00000205542 | CAB033806 | U-2 OS  |
| 14154 | ENSG00000205544 | HPA062732 | U-2 OS  |
| 14155 | ENSG00000205571 | HPA073601 | U-2 OS  |
| 14156 | ENSG00000205572 | HPA075271 | HEK 293 |
| 14157 | ENSG00000205581 | HPA048694 | U-2 OS  |
| 14158 | ENSG00000205593 | HPA018934 | U-2 OS  |
| 14159 | ENSG00000205609 | HPA047097 | U-2 OS  |
| 14160 | ENSG00000205609 | HPA049495 | U-2 OS  |
| 14161 | ENSG00000205629 | HPA041559 | U-2 OS  |
| 14162 | ENSG00000205643 | HPA018823 | U-2 OS  |
| 14163 | ENSG00000205659 | HPA001777 | U-2 OS  |
| 14164 | ENSG00000205670 | HPA051321 | HEK 293 |
| 14165 | ENSG00000205683 | HPA066790 | BJ      |
| 14166 | ENSG00000205683 | HPA070601 | BJ      |
| 14167 | ENSG00000205710 | HPA069713 | U-2 OS  |
| 14168 | ENSG00000205726 | HPA018007 | U-2 OS  |
| 14169 | ENSG00000205730 | HPA042011 | A-431   |
| 14170 | ENSG00000205744 | HPA042758 | U-2 OS  |
| 14171 | ENSG00000205758 | CAB034129 | U-2 OS  |
| 14172 | ENSG00000205765 | HPA043779 | U-2 OS  |
| 14173 | ENSG00000205765 | HPA063816 | U-2 OS  |
| 14174 | ENSG00000205777 | HPA043232 | U-2 OS  |
| 14175 | ENSG00000205808 | HPA018096 | U-2 OS  |
| 14176 | ENSG00000205809 | HPA058052 | U-2 OS  |
| 14177 | ENSG00000205810 | HPA039910 | HeLa    |
| 14178 | ENSG00000205922 | HPA059936 | PC-3    |
| 14179 | ENSG00000205923 | HPA075926 | U-2 OS  |
| 14180 | ENSG00000205927 | HPA003254 | U-2 OS  |
| 14181 | ENSG00000205937 | HPA044014 | HEK 293 |
| 14182 | ENSG00000205978 | HPA018945 | RT4     |
| 14183 | ENSG00000206043 | HPA042233 | U-2 OS  |
| 14184 | ENSG00000206052 | HPA063534 | U-2 OS  |
| 14185 | ENSG00000206053 | HPA041888 | U-2 OS  |
| 14186 | ENSG00000206053 | HPA041908 | U-2 OS  |
| 14187 | ENSG00000206075 | HPA019025 | A-431   |
| 14188 | ENSG00000206077 | HPA069008 | U-2 OS  |



|       |                 |           |             |
|-------|-----------------|-----------|-------------|
| 14189 | ENSG00000206262 | HPA061017 | HeLa        |
| 14190 | ENSG00000206262 | HPA071790 | U-2 OS      |
| 14191 | ENSG00000206418 | HPA040727 | U-2 OS      |
| 14192 | ENSG00000206432 | HPA047253 | U-2 OS      |
| 14193 | ENSG00000206503 | CAB078470 | A-431       |
| 14194 | ENSG00000206535 | HPA047926 | U-2 OS      |
| 14195 | ENSG00000206538 | HPA054983 | U-2 OS      |
| 14196 | ENSG00000206557 | HPA038142 | CACO-2      |
| 14197 | ENSG00000206559 | HPA039839 | ASC TERT1   |
| 14198 | ENSG00000206561 | HPA045876 | U-2 OS      |
| 14199 | ENSG00000206562 | HPA035166 | U-2 OS      |
| 14200 | ENSG00000206579 | HPA025072 | A-431       |
| 14201 | ENSG00000211448 | HPA029544 | U-2 OS      |
| 14202 | ENSG00000211448 | HPA048002 | A549        |
| 14203 | ENSG00000211450 | HPA048362 | U-2 OS      |
| 14204 | ENSG00000211455 | HPA051324 | U-2 OS      |
| 14205 | ENSG00000211456 | HPA069869 | U-2 OS      |
| 14206 | ENSG00000211460 | HPA059561 | U-2 OS      |
| 14207 | ENSG00000211584 | HPA073994 | RT4         |
| 14208 | ENSG00000212123 | HPA044157 | U-2 OS      |
| 14209 | ENSG00000212719 | HPA052106 | CACO-2      |
| 14210 | ENSG00000212864 | HPA021256 | MCF7        |
| 14211 | ENSG00000212864 | HPA021429 | U-2 OS      |
| 14212 | ENSG00000212907 | HPA075648 | U-2 OS      |
| 14213 | ENSG00000212993 | HPA058267 | RT4         |
| 14214 | ENSG00000213015 | HPA054058 | U-2 OS      |
| 14215 | ENSG00000213024 | HPA005435 | U-2 OS      |
| 14216 | ENSG00000213030 | HPA038925 | U-2 OS      |
| 14217 | ENSG00000213030 | HPA038934 | U-2 OS      |
| 14218 | ENSG00000213047 | HPA042586 | U-2 OS      |
| 14219 | ENSG00000213066 | HPA071876 | U-2 OS      |
| 14220 | ENSG00000213079 | HPA035601 | U-2 OS      |
| 14221 | ENSG00000213079 | HPA035602 | U-2 OS      |
| 14222 | ENSG00000213085 | HPA042204 | A-431       |
| 14223 | ENSG00000213085 | HPA043618 | U-2 OS      |
| 14224 | ENSG00000213123 | HPA049555 | U-2 OS      |
| 14225 | ENSG00000213139 | HPA035103 | U-2 OS      |
| 14226 | ENSG00000213145 | HPA042462 | U-2 OS      |
| 14227 | ENSG00000213160 | HPA047593 | U-2 OS      |
| 14228 | ENSG00000213186 | HPA017750 | U-2 OS      |
| 14229 | ENSG00000213190 | HPA000540 | U-2 OS      |
| 14230 | ENSG00000213199 | HPA049155 | A549        |
| 14231 | ENSG00000213203 | HPA053441 | HUVEC TERT2 |
| 14232 | ENSG00000213221 | HPA062738 | U-2 OS      |
| 14233 | ENSG00000213231 | HPA053163 | U-2 OS      |
| 14234 | ENSG00000213246 | HPA059748 | U-251 MG    |
| 14235 | ENSG00000213316 | HPA044688 | HEL         |
| 14236 | ENSG00000213337 | HPA042678 | U-2 OS      |
| 14237 | ENSG00000213339 | HPA042695 | MCF7        |
| 14238 | ENSG00000213341 | HPA001402 | U-2 OS      |
| 14239 | ENSG00000213347 | HPA070111 | U-2 OS      |
| 14240 | ENSG00000213366 | CAB040547 | U-2 OS      |
| 14241 | ENSG00000213366 | HPA055972 | HeLa        |
| 14242 | ENSG00000213366 | HPA055973 | HeLa        |
| 14243 | ENSG00000213390 | HPA035777 | U-2 OS      |

|       |                 |           |          |
|-------|-----------------|-----------|----------|
| 14244 | ENSG00000213390 | HPA043231 | U-2 OS   |
| 14245 | ENSG00000213397 | HPA003614 | U-2 OS   |
| 14246 | ENSG00000213398 | HPA044767 | A-431    |
| 14247 | ENSG00000213413 | HPA047497 | A-431    |
| 14248 | ENSG00000213424 | HPA054586 | U-2 OS   |
| 14249 | ENSG00000213424 | HPA069774 | U-2 OS   |
| 14250 | ENSG00000213445 | HPA039867 | U-2 OS   |
| 14251 | ENSG00000213462 | HPA017209 | U-2 OS   |
| 14252 | ENSG00000213463 | HPA000866 | U-2 OS   |
| 14253 | ENSG00000213465 | HPA044610 | U-2 OS   |
| 14254 | ENSG00000213516 | HPA057707 | U-2 OS   |
| 14255 | ENSG00000213523 | HPA050153 | CACO-2   |
| 14256 | ENSG00000213533 | HPA051855 | U-2 OS   |
| 14257 | ENSG00000213551 | HPA035215 | U-2 OS   |
| 14258 | ENSG00000213551 | HPA035216 | U-2 OS   |
| 14259 | ENSG00000213563 | CAB034331 | U-2 OS   |
| 14260 | ENSG00000213585 | HPA030780 | U-2 OS   |
| 14261 | ENSG00000213588 | HPA058171 | U-2 OS   |
| 14262 | ENSG00000213593 | HPA063763 | U-2 OS   |
| 14263 | ENSG00000213619 | HPA004484 | MCF7     |
| 14264 | ENSG00000213625 | HPA069444 | U-2 OS   |
| 14265 | ENSG00000213626 | HPA034669 | CACO-2   |
| 14266 | ENSG00000213638 | HPA058899 | U-2 OS   |
| 14267 | ENSG00000213639 | CAB022558 | U-2 OS   |
| 14268 | ENSG00000213639 | HPA065425 | RT4      |
| 14269 | ENSG00000213658 | HPA011157 | HEL      |
| 14270 | ENSG00000213672 | CAB019267 | U-2 OS   |
| 14271 | ENSG00000213672 | HPA050005 | HeLa     |
| 14272 | ENSG00000213676 | HPA046871 | U-251 MG |
| 14273 | ENSG00000213689 | HPA046721 | U-2 OS   |
| 14274 | ENSG00000213699 | HPA034655 | U-2 OS   |
| 14275 | ENSG00000213719 | CAB040557 | U-2 OS   |
| 14276 | ENSG00000213722 | HPA012509 | A-431    |
| 14277 | ENSG00000213741 | HPA004107 | U-2 OS   |
| 14278 | ENSG00000213762 | HPA009064 | U-2 OS   |
| 14279 | ENSG00000213780 | HPA074336 | U-2 OS   |
| 14280 | ENSG00000213782 | HPA014855 | U-2 OS   |
| 14281 | ENSG00000213809 | HPA068877 | U-2 OS   |
| 14282 | ENSG00000213822 | HPA059487 | CACO-2   |
| 14283 | ENSG00000213853 | HPA014711 | A-431    |
| 14284 | ENSG00000213859 | HPA052035 | U-2 OS   |
| 14285 | ENSG00000213865 | HPA043660 | A-431    |
| 14286 | ENSG00000213865 | HPA054753 | U-2 OS   |
| 14287 | ENSG00000213886 | HPA043710 | RT4      |
| 14288 | ENSG00000213889 | HPA043577 | RT4      |
| 14289 | ENSG00000213901 | HPA019059 | CACO-2   |
| 14290 | ENSG00000213906 | HPA072921 | U-2 OS   |
| 14291 | ENSG00000213918 | HPA010703 | MCF7     |
| 14292 | ENSG00000213920 | HPA003064 | U-2 OS   |
| 14293 | ENSG00000213921 | HPA041498 | U-2 OS   |
| 14294 | ENSG00000213923 | CAB009626 | U-2 OS   |
| 14295 | ENSG00000213928 | HPA001862 | U-2 OS   |
| 14296 | ENSG00000213930 | HPA005729 | U-2 OS   |
| 14297 | ENSG00000213937 | HPA076613 | MCF7     |
| 14298 | ENSG00000213965 | HPA042761 | U-2 OS   |

|       |                 |           |         |
|-------|-----------------|-----------|---------|
| 14299 | ENSG00000213977 | HPA046410 | U-2 OS  |
| 14300 | ENSG00000213988 | HPA003227 | RT4     |
| 14301 | ENSG00000213999 | HPA004734 | U-2 OS  |
| 14302 | ENSG00000214013 | HPA016949 | U-2 OS  |
| 14303 | ENSG00000214022 | HPA036022 | U-2 OS  |
| 14304 | ENSG00000214026 | HPA050406 | U-2 OS  |
| 14305 | ENSG00000214029 | HPA040301 | U-2 OS  |
| 14306 | ENSG00000214046 | HPA043127 | U-2 OS  |
| 14307 | ENSG00000214050 | HPA058676 | U-2 OS  |
| 14308 | ENSG00000214078 | HPA047259 | CACO-2  |
| 14309 | ENSG00000214102 | HPA027418 | CACO-2  |
| 14310 | ENSG00000214102 | HPA054280 | CACO-2  |
| 14311 | ENSG00000214113 | HPA030362 | U-2 OS  |
| 14312 | ENSG00000214114 | HPA078331 | U-2 OS  |
| 14313 | ENSG00000214193 | HPA042456 | U-2 OS  |
| 14314 | ENSG00000214193 | HPA066168 | U-2 OS  |
| 14315 | ENSG00000214212 | HPA012150 | U-2 OS  |
| 14316 | ENSG00000214212 | HPA055027 | U-2 OS  |
| 14317 | ENSG00000214253 | HPA017430 | U-2 OS  |
| 14318 | ENSG00000214274 | HPA055896 | U-2 OS  |
| 14319 | ENSG00000214338 | HPA035389 | U-2 OS  |
| 14320 | ENSG00000214357 | HPA037612 | U-2 OS  |
| 14321 | ENSG00000214367 | HPA040649 | U-2 OS  |
| 14322 | ENSG00000214376 | HPA029525 | U-2 OS  |
| 14323 | ENSG00000214435 | HPA017856 | U-2 OS  |
| 14324 | ENSG00000214447 | HPA043131 | U-2 OS  |
| 14325 | ENSG00000214456 | HPA077050 | SH-SY5Y |
| 14326 | ENSG00000214491 | HPA067695 | U-2 OS  |
| 14327 | ENSG00000214510 | HPA036456 | HeLa    |
| 14328 | ENSG00000214517 | CAB004541 | U-2 OS  |
| 14329 | ENSG00000214517 | HPA064396 | CACO-2  |
| 14330 | ENSG00000214530 | HPA026661 | U-2 OS  |
| 14331 | ENSG00000214562 | HPA064635 | U-2 OS  |
| 14332 | ENSG00000214575 | HPA040396 | U-2 OS  |
| 14333 | ENSG00000214595 | HPA068759 | U-2 OS  |
| 14334 | ENSG00000214652 | HPA051027 | RT4     |
| 14335 | ENSG00000214655 | HPA041244 | U-2 OS  |
| 14336 | ENSG00000214694 | HPA034661 | SiHa    |
| 14337 | ENSG00000214717 | HPA077591 | U-2 OS  |
| 14338 | ENSG00000214736 | HPA004801 | U-2 OS  |
| 14339 | ENSG00000214753 | HPA056696 | U-2 OS  |
| 14340 | ENSG00000214753 | HPA067699 | U-2 OS  |
| 14341 | ENSG00000214827 | HPA032040 | U-2 OS  |
| 14342 | ENSG00000214860 | HPA045728 | RT4     |
| 14343 | ENSG00000214940 | HPA053611 | U-2 OS  |
| 14344 | ENSG00000214941 | HPA054681 | U-2 OS  |
| 14345 | ENSG00000214944 | HPA037602 | U-2 OS  |
| 14346 | ENSG00000214954 | HPA046337 | U-2 OS  |
| 14347 | ENSG00000214960 | HPA053554 | U-2 OS  |
| 14348 | ENSG00000214967 | HPA053611 | U-2 OS  |
| 14349 | ENSG00000215018 | HPA043844 | U-2 OS  |
| 14350 | ENSG00000215021 | CAB014889 | U-2 OS  |
| 14351 | ENSG00000215021 | HPA039874 | U-2 OS  |
| 14352 | ENSG00000215045 | HPA045381 | U-2 OS  |
| 14353 | ENSG00000215114 | HPA045278 | U-2 OS  |

|       |                 |           |         |
|-------|-----------------|-----------|---------|
| 14354 | ENSG00000215126 | HPA042759 | U-2 OS  |
| 14355 | ENSG00000215183 | HPA055174 | U-2 OS  |
| 14356 | ENSG00000215218 | HPA057414 | U-2 OS  |
| 14357 | ENSG00000215252 | HPA051808 | U-2 OS  |
| 14358 | ENSG00000215262 | HPA063317 | LHCN-M2 |
| 14359 | ENSG00000215269 | HPA043232 | U-2 OS  |
| 14360 | ENSG00000215271 | HPA036316 | U-2 OS  |
| 14361 | ENSG00000215274 | HPA043232 | U-2 OS  |
| 14362 | ENSG00000215301 | HPA001648 | U-2 OS  |
| 14363 | ENSG00000215301 | HPA005631 | U-2 OS  |
| 14364 | ENSG00000215375 | HPA037381 | U-2 OS  |
| 14365 | ENSG00000215397 | HPA067697 | U-2 OS  |
| 14366 | ENSG00000215421 | HPA041673 | U-2 OS  |
| 14367 | ENSG00000215440 | CAB017025 | U-2 OS  |
| 14368 | ENSG00000215440 | HPA036356 | U-2 OS  |
| 14369 | ENSG00000215472 | HPA043724 | U-2 OS  |
| 14370 | ENSG00000215472 | HPA046385 | U-2 OS  |
| 14371 | ENSG00000215644 | HPA071228 | U-2 OS  |
| 14372 | ENSG00000215695 | HPA027813 | U-2 OS  |
| 14373 | ENSG00000215784 | HPA043271 | U-2 OS  |
| 14374 | ENSG00000215784 | HPA067321 | U-2 OS  |
| 14375 | ENSG00000215788 | HPA069834 | U-2 OS  |
| 14376 | ENSG00000215790 | HPA062711 | U-2 OS  |
| 14377 | ENSG00000215817 | HPA028490 | U-2 OS  |
| 14378 | ENSG00000215845 | HPA006518 | U-2 OS  |
| 14379 | ENSG00000215883 | HPA042671 | U-2 OS  |
| 14380 | ENSG00000215883 | HPA060463 | PC-3    |
| 14381 | ENSG00000215915 | HPA065305 | CACO-2  |
| 14382 | ENSG00000216490 | HPA026650 | U-2 OS  |
| 14383 | ENSG00000216588 | HPA051811 | CACO-2  |
| 14384 | ENSG00000216649 | HPA043232 | U-2 OS  |
| 14385 | ENSG00000216921 | HPA073342 | REH     |
| 14386 | ENSG00000216937 | HPA075536 | U-2 OS  |
| 14387 | ENSG00000217236 | HPA062616 | U-2 OS  |
| 14388 | ENSG00000217442 | HPA047813 | U-2 OS  |
| 14389 | ENSG00000217555 | HPA062779 | U-2 OS  |
| 14390 | ENSG00000217930 | HPA062721 | CACO-2  |
| 14391 | ENSG00000218336 | HPA047043 | CACO-2  |
| 14392 | ENSG00000218739 | HPA053866 | U-2 OS  |
| 14393 | ENSG00000218891 | HPA062812 | U-2 OS  |
| 14394 | ENSG00000219073 | HPA028086 | U-2 OS  |
| 14395 | ENSG00000219435 | HPA052822 | CACO-2  |
| 14396 | ENSG00000219481 | HPA042595 | U-2 OS  |
| 14397 | ENSG00000219545 | HPA044806 | A-431   |
| 14398 | ENSG00000219626 | HPA063357 | U-2 OS  |
| 14399 | ENSG00000220008 | HPA043781 | U-2 OS  |
| 14400 | ENSG00000220008 | HPA059558 | U-2 OS  |
| 14401 | ENSG00000220201 | HPA049855 | U-2 OS  |
| 14402 | ENSG00000221821 | HPA045350 | U-2 OS  |
| 14403 | ENSG00000221823 | HPA047157 | U-2 OS  |
| 14404 | ENSG00000221829 | HPA045335 | U-2 OS  |
| 14405 | ENSG00000221843 | HPA056962 | U-2 OS  |
| 14406 | ENSG00000221866 | HPA075592 | U-2 OS  |
| 14407 | ENSG00000221869 | HPA067581 | SiHa    |
| 14408 | ENSG00000221874 | HPA051271 | RT4     |

|       |                 |           |        |
|-------|-----------------|-----------|--------|
| 14409 | ENSG00000221886 | HPA045445 | RH-30  |
| 14410 | ENSG00000221886 | HPA055817 | U-2 OS |
| 14411 | ENSG00000221890 | HPA001079 | RT4    |
| 14412 | ENSG00000221914 | HPA042122 | A-431  |
| 14413 | ENSG00000221916 | HPA062719 | A549   |
| 14414 | ENSG00000221926 | HPA023623 | U-2 OS |
| 14415 | ENSG00000221926 | HPA066431 | U-2 OS |
| 14416 | ENSG00000221932 | HPA043768 | Hep G2 |
| 14417 | ENSG00000221944 | HPA041717 | U-2 OS |
| 14418 | ENSG00000221947 | HPA044430 | U-2 OS |
| 14419 | ENSG00000221955 | HPA031123 | U-2 OS |
| 14420 | ENSG00000221963 | HPA029165 | U-2 OS |
| 14421 | ENSG00000221963 | HPA029167 | U-2 OS |
| 14422 | ENSG00000221968 | HPA045224 | A-431  |
| 14423 | ENSG00000221972 | HPA046432 | U-2 OS |
| 14424 | ENSG00000221978 | HPA053137 | CACO-2 |
| 14425 | ENSG00000221983 | HPA056624 | U-2 OS |
| 14426 | ENSG00000221994 | HPA068130 | U-2 OS |
| 14427 | ENSG00000222009 | HPA076404 | U-2 OS |
| 14428 | ENSG00000222011 | HPA020470 | U-2 OS |
| 14429 | ENSG00000222011 | HPA029883 | U-2 OS |
| 14430 | ENSG00000222014 | HPA059131 | CACO-2 |
| 14431 | ENSG00000222047 | HPA045739 | A-431  |
| 14432 | ENSG00000223510 | HPA055952 | CACO-2 |
| 14433 | ENSG00000223638 | HPA046368 | U-2 OS |
| 14434 | ENSG00000223802 | HPA045724 | CACO-2 |
| 14435 | ENSG00000223865 | HPA058509 | U-2 OS |
| 14436 | ENSG00000224051 | HPA056832 | A-431  |
| 14437 | ENSG00000224383 | HPA051264 | U-2 OS |
| 14438 | ENSG00000224470 | HPA062596 | U-2 OS |
| 14439 | ENSG00000224470 | HPA062789 | U-2 OS |
| 14440 | ENSG00000224531 | HPA065706 | U-2 OS |
| 14441 | ENSG00000224578 | HPA005812 | U-2 OS |
| 14442 | ENSG00000224659 | HPA043232 | U-2 OS |
| 14443 | ENSG00000224712 | HPA053611 | U-2 OS |
| 14444 | ENSG00000224877 | HPA057732 | A549   |
| 14445 | ENSG00000224902 | HPA043232 | U-2 OS |
| 14446 | ENSG00000224940 | HPA046373 | U-2 OS |
| 14447 | ENSG00000224982 | HPA075435 | U-2 OS |
| 14448 | ENSG00000225190 | HPA039473 | U-2 OS |
| 14449 | ENSG00000225526 | HPA065753 | RT4    |
| 14450 | ENSG00000225528 | HPA047397 | U-2 OS |
| 14451 | ENSG00000225614 | HPA069784 | U-2 OS |
| 14452 | ENSG00000225663 | HPA045542 | U-2 OS |
| 14453 | ENSG00000225697 | HPA048363 | U-2 OS |
| 14454 | ENSG00000225830 | HPA071297 | U-2 OS |
| 14455 | ENSG00000225950 | HPA049376 | CACO-2 |
| 14456 | ENSG00000225968 | HPA066382 | U-2 OS |
| 14457 | ENSG00000226124 | HPA065748 | U-2 OS |
| 14458 | ENSG00000226479 | HPA071744 | U-2 OS |
| 14459 | ENSG00000226650 | HPA034745 | U-2 OS |
| 14460 | ENSG00000226650 | HPA034746 | U-2 OS |
| 14461 | ENSG00000226650 | HPA061583 | SiHa   |
| 14462 | ENSG00000226742 | HPA048273 | PC-3   |
| 14463 | ENSG00000226784 | HPA042528 | CACO-2 |

|       |                 |           |         |
|-------|-----------------|-----------|---------|
| 14464 | ENSG00000226784 | HPA060483 | U-2 OS  |
| 14465 | ENSG00000226887 | HPA024053 | CACO-2  |
| 14466 | ENSG00000227124 | HPA044549 | U-2 OS  |
| 14467 | ENSG00000227234 | HPA046423 | U-2 OS  |
| 14468 | ENSG00000227268 | HPA074502 | U-2 OS  |
| 14469 | ENSG00000227345 | HPA021819 | U-2 OS  |
| 14470 | ENSG00000227345 | HPA053007 | MCF7    |
| 14471 | ENSG00000227471 | HPA020280 | A549    |
| 14472 | ENSG00000227471 | HPA073633 | A549    |
| 14473 | ENSG00000227488 | HPA043232 | U-2 OS  |
| 14474 | ENSG00000227500 | HPA043284 | U-2 OS  |
| 14475 | ENSG00000227507 | HPA048884 | RT4     |
| 14476 | ENSG00000228049 | HPA046970 | A-431   |
| 14477 | ENSG00000228278 | HPA047725 | U-2 OS  |
| 14478 | ENSG00000228300 | HPA043279 | U-2 OS  |
| 14479 | ENSG00000228570 | HPA064635 | U-2 OS  |
| 14480 | ENSG00000228672 | HPA060103 | CACO-2  |
| 14481 | ENSG00000228716 | HPA051465 | MCF7    |
| 14482 | ENSG00000228727 | HPA071699 | U-2 OS  |
| 14483 | ENSG00000228836 | HPA044735 | U-2 OS  |
| 14484 | ENSG00000228836 | HPA046872 | U-2 OS  |
| 14485 | ENSG00000228836 | HPA046987 | U-2 OS  |
| 14486 | ENSG00000228927 | HPA049384 | U-2 OS  |
| 14487 | ENSG00000229117 | HPA053169 | U-2 OS  |
| 14488 | ENSG00000229292 | HPA046368 | U-2 OS  |
| 14489 | ENSG00000229314 | HPA047725 | U-2 OS  |
| 14490 | ENSG00000229549 | HPA049384 | U-2 OS  |
| 14491 | ENSG00000229809 | HPA048922 | U-2 OS  |
| 14492 | ENSG00000229833 | HPA067288 | U-2 OS  |
| 14493 | ENSG00000230124 | HPA028457 | CACO-2  |
| 14494 | ENSG00000230453 | HPA046346 | U-2 OS  |
| 14495 | ENSG00000230453 | HPA046695 | U-2 OS  |
| 14496 | ENSG00000230453 | HPA051288 | U-2 OS  |
| 14497 | ENSG00000230510 | HPA073186 | U-2 OS  |
| 14498 | ENSG00000230626 | HPA051993 | U-2 OS  |
| 14499 | ENSG00000230667 | HPA063683 | U-2 OS  |
| 14500 | ENSG00000230797 | HPA030335 | U-2 OS  |
| 14501 | ENSG00000230873 | HPA067970 | U-2 OS  |
| 14502 | ENSG00000231274 | HPA078322 | U-2 OS  |
| 14503 | ENSG00000231389 | HPA017967 | U-2 OS  |
| 14504 | ENSG00000231500 | HPA055007 | HEK 293 |
| 14505 | ENSG00000231767 | HPA054087 | U-2 OS  |
| 14506 | ENSG00000231989 | HPA043729 | CACO-2  |
| 14507 | ENSG00000231989 | HPA059420 | A-431   |
| 14508 | ENSG00000232040 | HPA007246 | U-2 OS  |
| 14509 | ENSG00000232112 | HPA047397 | U-2 OS  |
| 14510 | ENSG00000232119 | HPA001045 | U-2 OS  |
| 14511 | ENSG00000232263 | HPA031438 | U-2 OS  |
| 14512 | ENSG00000232388 | HPA068733 | U-2 OS  |
| 14513 | ENSG00000232434 | HPA021200 | U-2 OS  |
| 14514 | ENSG00000233024 | HPA053611 | U-2 OS  |
| 14515 | ENSG00000233041 | HPA068787 | HaCaT   |
| 14516 | ENSG00000233087 | HPA059131 | CACO-2  |
| 14517 | ENSG00000233232 | HPA053611 | U-2 OS  |
| 14518 | ENSG00000233608 | HPA062870 | HEK 293 |

|       |                 |           |           |
|-------|-----------------|-----------|-----------|
| 14519 | ENSG00000233670 | HPA042337 | U-2 OS    |
| 14520 | ENSG00000233803 | HPA049384 | U-2 OS    |
| 14521 | ENSG00000233822 | HPA048671 | U-2 OS    |
| 14522 | ENSG00000233927 | HPA047132 | U-2 OS    |
| 14523 | ENSG00000234127 | HPA044975 | U-2 OS    |
| 14524 | ENSG00000234127 | HPA050456 | A-431     |
| 14525 | ENSG00000234224 | HPA056391 | U-2 OS    |
| 14526 | ENSG00000234284 | HPA068608 | SiHa      |
| 14527 | ENSG00000234289 | HPA048671 | U-2 OS    |
| 14528 | ENSG00000234409 | HPA049901 | U-2 OS    |
| 14529 | ENSG00000234444 | HPA051027 | RT4       |
| 14530 | ENSG00000234465 | HPA061218 | U-2 OS    |
| 14531 | ENSG00000234545 | HPA066175 | U-2 OS    |
| 14532 | ENSG00000234545 | HPA069513 | U-2 OS    |
| 14533 | ENSG00000234602 | HPA058073 | CACO-2    |
| 14534 | ENSG00000234616 | HPA052675 | U-2 OS    |
| 14535 | ENSG00000234719 | HPA053611 | U-2 OS    |
| 14536 | ENSG00000235034 | HPA060238 | HEK 293   |
| 14537 | ENSG00000235098 | HPA065720 | RT4       |
| 14538 | ENSG00000235109 | HPA007124 | U-2 OS    |
| 14539 | ENSG00000235162 | HPA065311 | CACO-2    |
| 14540 | ENSG00000235173 | HPA042470 | U-2 OS    |
| 14541 | ENSG00000235194 | HPA061600 | U-2 OS    |
| 14542 | ENSG00000235376 | HPA036499 | U-2 OS    |
| 14543 | ENSG00000235711 | HPA045329 | U-2 OS    |
| 14544 | ENSG00000235750 | HPA068812 | RT4       |
| 14545 | ENSG00000235961 | HPA045007 | U-2 OS    |
| 14546 | ENSG00000236104 | HPA043848 | U-2 OS    |
| 14547 | ENSG00000236287 | HPA050994 | U-2 OS    |
| 14548 | ENSG00000236362 | HPA043232 | U-2 OS    |
| 14549 | ENSG00000236424 | HPA049384 | U-2 OS    |
| 14550 | ENSG00000236444 | HPA062415 | A-431     |
| 14551 | ENSG00000236609 | HPA067690 | U-2 OS    |
| 14552 | ENSG00000236699 | HPA045484 | RT4       |
| 14553 | ENSG00000237172 | HPA062734 | U-2 OS    |
| 14554 | ENSG00000237441 | HPA047039 | SK-MEL-30 |
| 14555 | ENSG00000237452 | HPA049521 | K-562     |
| 14556 | ENSG00000237649 | HPA055997 | U-251 MG  |
| 14557 | ENSG00000237651 | HPA026826 | U-2 OS    |
| 14558 | ENSG00000237671 | HPA043232 | U-2 OS    |
| 14559 | ENSG00000238083 | HPA045090 | RH-30     |
| 14560 | ENSG00000238227 | HPA066070 | U-2 OS    |
| 14561 | ENSG00000239264 | HPA034678 | U-2 OS    |
| 14562 | ENSG00000239306 | HPA006628 | U-2 OS    |
| 14563 | ENSG00000239382 | HPA073835 | U-2 OS    |
| 14564 | ENSG00000239382 | HPA074340 | U-2 OS    |
| 14565 | ENSG00000239474 | HPA021165 | U-2 OS    |
| 14566 | ENSG00000239474 | HPA021753 | A-431     |
| 14567 | ENSG00000239605 | HPA047366 | RT4       |
| 14568 | ENSG00000239672 | HPA008467 | A-431     |
| 14569 | ENSG00000239672 | CAB040571 | U-2 OS    |
| 14570 | ENSG00000239697 | HPA035984 | SH-SY5Y   |
| 14571 | ENSG00000239704 | HPA021590 | U-2 OS    |
| 14572 | ENSG00000239713 | HPA073637 | RT4       |
| 14573 | ENSG00000239779 | HPA057067 | U-2 OS    |

|       |                 |           |          |
|-------|-----------------|-----------|----------|
| 14574 | ENSG00000239857 | HPA019765 | U-2 OS   |
| 14575 | ENSG00000239887 | HPA052251 | U-2 OS   |
| 14576 | ENSG00000239900 | HPA000525 | U-2 OS   |
| 14577 | ENSG00000240065 | CAB015180 | U-251 MG |
| 14578 | ENSG00000240065 | HPA042818 | U-2 OS   |
| 14579 | ENSG00000240184 | HPA010580 | U-2 OS   |
| 14580 | ENSG00000240184 | HPA077289 | U-251 MG |
| 14581 | ENSG00000240204 | HPA078358 | U-2 OS   |
| 14582 | ENSG00000240230 | HPA021226 | A-431    |
| 14583 | ENSG00000240344 | HPA040765 | U-2 OS   |
| 14584 | ENSG00000240344 | HPA062187 | HEK 293  |
| 14585 | ENSG00000240583 | HPA019206 | U-2 OS   |
| 14586 | ENSG00000240682 | HPA006312 | U-2 OS   |
| 14587 | ENSG00000240682 | HPA016995 | U-2 OS   |
| 14588 | ENSG00000240747 | HPA046901 | BJ       |
| 14589 | ENSG00000240764 | HPA010580 | U-2 OS   |
| 14590 | ENSG00000240771 | HPA052016 | U-2 OS   |
| 14591 | ENSG00000240849 | HPA059549 | CACO-2   |
| 14592 | ENSG00000240857 | HPA056686 | U-2 OS   |
| 14593 | ENSG00000240891 | HPA055947 | CACO-2   |
| 14594 | ENSG00000240972 | HPA003868 | U-2 OS   |
| 14595 | ENSG00000241058 | HPA045902 | U-2 OS   |
| 14596 | ENSG00000241127 | HPA031249 | U-2 OS   |
| 14597 | ENSG00000241186 | HPA051928 | U-2 OS   |
| 14598 | ENSG00000241258 | HPA007216 | A-431    |
| 14599 | ENSG00000241322 | HPA013332 | U-2 OS   |
| 14600 | ENSG00000241322 | HPA047457 | U-2 OS   |
| 14601 | ENSG00000241343 | HPA077586 | U-2 OS   |
| 14602 | ENSG00000241404 | HPA061173 | U-2 OS   |
| 14603 | ENSG00000241468 | HPA067267 | U-2 OS   |
| 14604 | ENSG00000241476 | HPA045683 | U-2 OS   |
| 14605 | ENSG00000241484 | HPA069694 | MCF7     |
| 14606 | ENSG00000241644 | HPA061343 | CACO-2   |
| 14607 | ENSG00000241685 | HPA004334 | U-2 OS   |
| 14608 | ENSG00000241837 | CAB016209 | U-2 OS   |
| 14609 | ENSG00000241837 | HPA041394 | U-2 OS   |
| 14610 | ENSG00000241839 | HPA040055 | U-2 OS   |
| 14611 | ENSG00000241852 | HPA028286 | U-2 OS   |
| 14612 | ENSG00000241878 | HPA031091 | U-2 OS   |
| 14613 | ENSG00000241945 | HPA024573 | U-2 OS   |
| 14614 | ENSG00000241973 | HPA075515 | U-2 OS   |
| 14615 | ENSG00000242028 | HPA055252 | U-2 OS   |
| 14616 | ENSG00000242110 | HPA020912 | U-2 OS   |
| 14617 | ENSG00000242114 | HPA077396 | A-431    |
| 14618 | ENSG00000242173 | HPA078260 | U-2 OS   |
| 14619 | ENSG00000242247 | HPA000638 | A-431    |
| 14620 | ENSG00000242259 | HPA073701 | U-2 OS   |
| 14621 | ENSG00000242265 | HPA051038 | Hep G2   |
| 14622 | ENSG00000242372 | HPA040873 | U-2 OS   |
| 14623 | ENSG00000242419 | HPA010580 | U-2 OS   |
| 14624 | ENSG00000242485 | HPA047074 | HEK 293  |
| 14625 | ENSG00000242550 | HPA059582 | HaCaT    |
| 14626 | ENSG00000242574 | HPA077524 | EFO-21   |
| 14627 | ENSG00000242612 | HPA047631 | U-2 OS   |
| 14628 | ENSG00000242689 | HPA019654 | U-2 OS   |



|       |                 |           |           |
|-------|-----------------|-----------|-----------|
| 14629 | ENSG00000242732 | HPA003652 | U-2 OS    |
| 14630 | ENSG00000242802 | HPA035693 | U-2 OS    |
| 14631 | ENSG00000242852 | HPA045573 | RT4       |
| 14632 | ENSG00000243156 | HPA003421 | U-2 OS    |
| 14633 | ENSG00000243156 | HPA034882 | U-2 OS    |
| 14634 | ENSG00000243232 | HPA076190 | U-2 OS    |
| 14635 | ENSG00000243279 | HPA005504 | U-2 OS    |
| 14636 | ENSG00000243317 | HPA065565 | U-2 OS    |
| 14637 | ENSG00000243444 | HPA074153 | U-2 OS    |
| 14638 | ENSG00000243444 | HPA076866 | U-2 OS    |
| 14639 | ENSG00000243449 | HPA052447 | PC-3      |
| 14640 | ENSG00000243646 | CAB020670 | U-2 OS    |
| 14641 | ENSG00000243649 | HPA000951 | A-431     |
| 14642 | ENSG00000243649 | HPA001817 | ASC TERT1 |
| 14643 | ENSG00000243660 | HPA037820 | U-2 OS    |
| 14644 | ENSG00000243667 | HPA035335 | U-2 OS    |
| 14645 | ENSG00000243678 | CAB036213 | U-2 OS    |
| 14646 | ENSG00000243678 | CAB036214 | U-2 OS    |
| 14647 | ENSG00000243678 | CAB036215 | U-2 OS    |
| 14648 | ENSG00000243710 | HPA028623 | U-2 OS    |
| 14649 | ENSG00000243716 | HPA053611 | U-2 OS    |
| 14650 | ENSG00000243725 | HPA041608 | U-2 OS    |
| 14651 | ENSG00000243725 | HPA042459 | U-2 OS    |
| 14652 | ENSG00000243749 | HPA051024 | U-2 OS    |
| 14653 | ENSG00000243789 | HPA005726 | U-2 OS    |
| 14654 | ENSG00000243927 | HPA008163 | CACO-2    |
| 14655 | ENSG00000243943 | HPA031430 | U-2 OS    |
| 14656 | ENSG00000243955 | HPA053817 | Hep G2    |
| 14657 | ENSG00000244005 | HPA051801 | MCF7      |
| 14658 | ENSG00000244038 | HPA046841 | U-2 OS    |
| 14659 | ENSG00000244067 | HPA053817 | Hep G2    |
| 14660 | ENSG00000244187 | HPA014615 | CACO-2    |
| 14661 | ENSG00000244187 | HPA050244 | U-251 MG  |
| 14662 | ENSG00000244255 | HPA000951 | A-431     |
| 14663 | ENSG00000244255 | HPA001817 | ASC TERT1 |
| 14664 | ENSG00000244274 | HPA043991 | U-2 OS    |
| 14665 | ENSG00000244405 | CAB009590 | U-2 OS    |
| 14666 | ENSG00000244405 | HPA063065 | U-2 OS    |
| 14667 | ENSG00000244414 | HPA038922 | A-431     |
| 14668 | ENSG00000244462 | HPA043258 | U-2 OS    |
| 14669 | ENSG00000244462 | HPA043621 | U-2 OS    |
| 14670 | ENSG00000244486 | HPA035079 | U-2 OS    |
| 14671 | ENSG00000244509 | HPA071523 | U-2 OS    |
| 14672 | ENSG00000244607 | HPA047429 | U-2 OS    |
| 14673 | ENSG00000244687 | HPA052535 | CACO-2    |
| 14674 | ENSG00000244687 | HPA053186 | Hep G2    |
| 14675 | ENSG00000244694 | HPA041276 | U-2 OS    |
| 14676 | ENSG00000244752 | HPA043749 | U-2 OS    |
| 14677 | ENSG00000244754 | HPA059327 | CACO-2    |
| 14678 | ENSG00000245680 | HPA075556 | RT4       |
| 14679 | ENSG00000245848 | HPA052734 | CACO-2    |
| 14680 | ENSG00000245848 | HPA067937 | CACO-2    |
| 14681 | ENSG00000246922 | HPA065334 | U-2 OS    |
| 14682 | ENSG00000247077 | HPA036978 | U-2 OS    |
| 14683 | ENSG00000247315 | HPA042972 | Hep G2    |

|       |                 |           |           |
|-------|-----------------|-----------|-----------|
| 14684 | ENSG00000247596 | HPA053874 | U-2 OS    |
| 14685 | ENSG00000247746 | HPA001942 | U-2 OS    |
| 14686 | ENSG00000248144 | HPA047814 | U-2 OS    |
| 14687 | ENSG00000248167 | HPA051120 | U-2 OS    |
| 14688 | ENSG00000248333 | HPA073626 | U-2 OS    |
| 14689 | ENSG00000248383 | HPA052775 | U-2 OS    |
| 14690 | ENSG00000248483 | HPA077615 | U-2 OS    |
| 14691 | ENSG00000248485 | HPA052833 | CACO-2    |
| 14692 | ENSG00000248487 | HPA038153 | Hep G2    |
| 14693 | ENSG00000248487 | HPA056913 | U-251 MG  |
| 14694 | ENSG00000248592 | HPA051855 | U-2 OS    |
| 14695 | ENSG00000248643 | HPA047849 | U-2 OS    |
| 14696 | ENSG00000248712 | HPA041497 | U-2 OS    |
| 14697 | ENSG00000248746 | HPA006035 | U-2 OS    |
| 14698 | ENSG00000248871 | HPA035984 | SH-SY5Y   |
| 14699 | ENSG00000248905 | HPA046786 | RH-30     |
| 14700 | ENSG00000248919 | HPA047679 | CACO-2    |
| 14701 | ENSG00000249158 | HPA077160 | MCF7      |
| 14702 | ENSG00000249222 | HPA044629 | U-2 OS    |
| 14703 | ENSG00000249459 | HPA068125 | U-2 OS    |
| 14704 | ENSG00000249471 | HPA023400 | U-2 OS    |
| 14705 | ENSG00000249481 | HPA030897 | SK-MEL-30 |
| 14706 | ENSG00000249709 | HPA043998 | U-2 OS    |
| 14707 | ENSG00000249751 | HPA063337 | U-2 OS    |
| 14708 | ENSG00000249915 | HPA047221 | U-2 OS    |
| 14709 | ENSG00000249967 | HPA076857 | HaCaT     |
| 14710 | ENSG00000250021 | HPA049270 | U-2 OS    |
| 14711 | ENSG00000250067 | HPA060789 | U-2 OS    |
| 14712 | ENSG00000250254 | HPA045034 | U-2 OS    |
| 14713 | ENSG00000250264 | HPA001312 | U-2 OS    |
| 14714 | ENSG00000250305 | HPA024673 | U-2 OS    |
| 14715 | ENSG00000250317 | HPA016552 | U-2 OS    |
| 14716 | ENSG00000250424 | HPA019206 | U-2 OS    |
| 14717 | ENSG00000250479 | HPA003440 | A-431     |
| 14718 | ENSG00000250506 | HPA007420 | U-2 OS    |
| 14719 | ENSG00000250510 | HPA055135 | U-2 OS    |
| 14720 | ENSG00000250571 | HPA023131 | U-2 OS    |
| 14721 | ENSG00000250709 | HPA029182 | U-2 OS    |
| 14722 | ENSG00000250722 | HPA036287 | U-2 OS    |
| 14723 | ENSG00000250799 | HPA051287 | Hep G2    |
| 14724 | ENSG00000251192 | HPA031026 | U-2 OS    |
| 14725 | ENSG00000251192 | HPA065295 | U-2 OS    |
| 14726 | ENSG00000251287 | HPA060392 | HEK 293   |
| 14727 | ENSG00000251322 | HPA003446 | HEL       |
| 14728 | ENSG00000251369 | HPA003251 | U-2 OS    |
| 14729 | ENSG00000251537 | HPA023623 | U-2 OS    |
| 14730 | ENSG00000251537 | HPA066431 | U-2 OS    |
| 14731 | ENSG00000251664 | HPA035812 | U-2 OS    |
| 14732 | ENSG00000253159 | HPA010580 | U-2 OS    |
| 14733 | ENSG00000253251 | HPA066071 | U-2 OS    |
| 14734 | ENSG00000253251 | HPA068764 | U-2 OS    |
| 14735 | ENSG00000253276 | HPA067925 | U-2 OS    |
| 14736 | ENSG00000253293 | CAB019384 | U-2 OS    |
| 14737 | ENSG00000253305 | HPA010580 | U-2 OS    |
| 14738 | ENSG00000253313 | HPA013788 | CACO-2    |

|       |                 |           |          |
|-------|-----------------|-----------|----------|
| 14739 | ENSG00000253457 | HPA066648 | U-2 OS   |
| 14740 | ENSG00000253485 | HPA010580 | U-2 OS   |
| 14741 | ENSG00000253506 | HPA073152 | U-2 OS   |
| 14742 | ENSG00000253506 | HPA073648 | U-2 OS   |
| 14743 | ENSG00000253537 | HPA010580 | U-2 OS   |
| 14744 | ENSG00000253598 | HPA025966 | U-251 MG |
| 14745 | ENSG00000253719 | HPA056612 | U-2 OS   |
| 14746 | ENSG00000253729 | CAB005167 | U-2 OS   |
| 14747 | ENSG00000253729 | HPA035174 | U-2 OS   |
| 14748 | ENSG00000253731 | HPA010580 | U-2 OS   |
| 14749 | ENSG00000253767 | HPA010580 | U-2 OS   |
| 14750 | ENSG00000253797 | HPA047217 | U-2 OS   |
| 14751 | ENSG00000253846 | HPA010580 | U-2 OS   |
| 14752 | ENSG00000253873 | HPA010580 | U-2 OS   |
| 14753 | ENSG00000253910 | HPA010580 | U-2 OS   |
| 14754 | ENSG00000253910 | HPA077526 | U-2 OS   |
| 14755 | ENSG00000253953 | HPA010580 | U-2 OS   |
| 14756 | ENSG00000253958 | HPA070578 | A-431    |
| 14757 | ENSG00000254004 | HPA028806 | U-2 OS   |
| 14758 | ENSG00000254087 | HPA001231 | U-2 OS   |
| 14759 | ENSG00000254093 | HPA023146 | K-562    |
| 14760 | ENSG00000254122 | HPA010580 | U-2 OS   |
| 14761 | ENSG00000254206 | HPA053611 | U-2 OS   |
| 14762 | ENSG00000254221 | HPA010580 | U-2 OS   |
| 14763 | ENSG00000254221 | HPA076182 | U-2 OS   |
| 14764 | ENSG00000254245 | HPA010580 | U-2 OS   |
| 14765 | ENSG00000254402 | HPA028171 | SH-SY5Y  |
| 14766 | ENSG00000254469 | HPA051121 | U-2 OS   |
| 14767 | ENSG00000254469 | HPA051124 | U-2 OS   |
| 14768 | ENSG00000254470 | HPA065739 | RT4      |
| 14769 | ENSG00000254470 | HPA067880 | RT4      |
| 14770 | ENSG00000254536 | HPA037827 | U-2 OS   |
| 14771 | ENSG00000254598 | HPA059206 | U-2 OS   |
| 14772 | ENSG00000254656 | HPA066979 | SH-SY5Y  |
| 14773 | ENSG00000254685 | HPA072331 | U-2 OS   |
| 14774 | ENSG00000254692 | HPA059249 | U-2 OS   |
| 14775 | ENSG00000254726 | HPA062703 | SH-SY5Y  |
| 14776 | ENSG00000254772 | HPA040688 | MCF7     |
| 14777 | ENSG00000254827 | HPA068288 | U-2 OS   |
| 14778 | ENSG00000254852 | HPA053611 | U-2 OS   |
| 14779 | ENSG00000254901 | HPA045700 | U-2 OS   |
| 14780 | ENSG00000254986 | HPA035780 | U-251 MG |
| 14781 | ENSG00000254999 | HPA060391 | U-2 OS   |
| 14782 | ENSG00000255112 | HPA061997 | U-2 OS   |
| 14783 | ENSG00000255150 | HPA059367 | U-2 OS   |
| 14784 | ENSG00000255151 | HPA039501 | U-2 OS   |
| 14785 | ENSG00000255154 | HPA066812 | U-2 OS   |
| 14786 | ENSG00000255245 | HPA075209 | U-2 OS   |
| 14787 | ENSG00000255302 | HPA051122 | U-2 OS   |
| 14788 | ENSG00000255398 | HPA028660 | RT4      |
| 14789 | ENSG00000255423 | HPA062510 | RT4      |
| 14790 | ENSG00000255439 | HPA042720 | U-2 OS   |
| 14791 | ENSG00000255524 | HPA053611 | U-2 OS   |
| 14792 | ENSG00000255526 | HPA003064 | U-2 OS   |
| 14793 | ENSG00000255526 | HPA060254 | U-2 OS   |

|       |                 |           |          |
|-------|-----------------|-----------|----------|
| 14794 | ENSG00000255529 | HPA068141 | U-2 OS   |
| 14795 | ENSG00000255552 | HPA056234 | U-2 OS   |
| 14796 | ENSG00000255561 | HPA061375 | U-2 OS   |
| 14797 | ENSG00000256060 | HPA063308 | U-2 OS   |
| 14798 | ENSG00000256061 | HPA051048 | U-2 OS   |
| 14799 | ENSG00000256087 | HPA052082 | RT4      |
| 14800 | ENSG00000256087 | HPA065606 | RT4      |
| 14801 | ENSG00000256223 | HPA003204 | U-2 OS   |
| 14802 | ENSG00000256235 | HPA075345 | U-2 OS   |
| 14803 | ENSG00000256269 | HPA050659 | U-2 OS   |
| 14804 | ENSG00000256294 | HPA073778 | U-2 OS   |
| 14805 | ENSG00000256349 | HPA058283 | HeLa     |
| 14806 | ENSG00000256500 | HPA052450 | U-2 OS   |
| 14807 | ENSG00000256514 | HPA078008 | U-2 OS   |
| 14808 | ENSG00000256525 | CAB017030 | U-2 OS   |
| 14809 | ENSG00000256671 | HPA058455 | U-251 MG |
| 14810 | ENSG00000256683 | HPA001521 | U-2 OS   |
| 14811 | ENSG00000256806 | HPA046824 | U-2 OS   |
| 14812 | ENSG00000256812 | HPA059749 | U-2 OS   |
| 14813 | ENSG00000256977 | HPA058455 | U-251 MG |
| 14814 | ENSG00000257008 | HPA031392 | U-2 OS   |
| 14815 | ENSG00000257017 | HPA047750 | HeLa     |
| 14816 | ENSG00000257093 | HPA061437 | CACO-2   |
| 14817 | ENSG00000257103 | HPA017961 | U-2 OS   |
| 14818 | ENSG00000257108 | HPA077301 | U-2 OS   |
| 14819 | ENSG00000257315 | HPA028490 | U-2 OS   |
| 14820 | ENSG00000257315 | HPA068807 | RT4      |
| 14821 | ENSG00000257365 | HPA062743 | U-2 OS   |
| 14822 | ENSG00000257390 | HPA030902 | U-2 OS   |
| 14823 | ENSG00000257390 | HPA030903 | U-2 OS   |
| 14824 | ENSG00000257446 | HPA052735 | U-2 OS   |
| 14825 | ENSG00000257529 | HPA077586 | U-2 OS   |
| 14826 | ENSG00000257591 | HPA074014 | RT4      |
| 14827 | ENSG00000257594 | HPA076116 | A549     |
| 14828 | ENSG00000257727 | HPA038465 | U-2 OS   |
| 14829 | ENSG00000257743 | HPA055697 | CACO-2   |
| 14830 | ENSG00000257923 | HPA003317 | U-2 OS   |
| 14831 | ENSG00000257949 | HPA065069 | U-2 OS   |
| 14832 | ENSG00000258102 | HPA042824 | U-2 OS   |
| 14833 | ENSG00000258102 | HPA053767 | U-2 OS   |
| 14834 | ENSG00000258227 | HPA054137 | NB-4     |
| 14835 | ENSG00000258289 | HPA040072 | PC-3     |
| 14836 | ENSG00000258315 | HPA022961 | U-2 OS   |
| 14837 | ENSG00000258315 | HPA024457 | U-2 OS   |
| 14838 | ENSG00000258366 | HPA020622 | U-2 OS   |
| 14839 | ENSG00000258366 | HPA067329 | CACO-2   |
| 14840 | ENSG00000258366 | HPA078328 | CACO-2   |
| 14841 | ENSG00000258429 | HPA063409 | U-2 OS   |
| 14842 | ENSG00000258465 | HPA027218 | U-2 OS   |
| 14843 | ENSG00000258472 | HPA046590 | U-2 OS   |
| 14844 | ENSG00000258529 | HPA038575 | U-2 OS   |
| 14845 | ENSG00000258588 | HPA077996 | U-2 OS   |
| 14846 | ENSG00000258643 | HPA000637 | U-2 OS   |
| 14847 | ENSG00000258643 | HPA048740 | U-2 OS   |
| 14848 | ENSG00000258644 | HPA000866 | U-2 OS   |

|       |                 |           |          |
|-------|-----------------|-----------|----------|
| 14849 | ENSG00000258644 | HPA062659 | MCF7     |
| 14850 | ENSG00000258659 | HPA077996 | U-2 OS   |
| 14851 | ENSG00000258724 | HPA009065 | U-2 OS   |
| 14852 | ENSG00000258890 | HPA023654 | U-2 OS   |
| 14853 | ENSG00000258986 | HPA002942 | U-2 OS   |
| 14854 | ENSG00000258992 | HPA049384 | U-2 OS   |
| 14855 | ENSG00000259024 | HPA065603 | U-2 OS   |
| 14856 | ENSG00000259030 | HPA072331 | U-2 OS   |
| 14857 | ENSG00000259075 | HPA076116 | A549     |
| 14858 | ENSG00000259112 | HPA038873 | U-2 OS   |
| 14859 | ENSG00000259120 | HPA065721 | U-2 OS   |
| 14860 | ENSG00000259132 | HPA029803 | U-2 OS   |
| 14861 | ENSG00000259207 | HPA027852 | U-251 MG |
| 14862 | ENSG00000259288 | HPA031124 | CACO-2   |
| 14863 | ENSG00000259305 | HPA023708 | U-2 OS   |
| 14864 | ENSG00000259431 | HPA028876 | U-2 OS   |
| 14865 | ENSG00000259494 | HPA050166 | U-2 OS   |
| 14866 | ENSG00000259956 | HPA036645 | U-2 OS   |
| 14867 | ENSG00000259956 | HPA058136 | U-2 OS   |
| 14868 | ENSG00000260001 | HPA074356 | U-2 OS   |
| 14869 | ENSG00000260027 | HPA049940 | U-2 OS   |
| 14870 | ENSG00000260238 | HPA034583 | U-2 OS   |
| 14871 | ENSG00000260238 | HPA071854 | U-2 OS   |
| 14872 | ENSG00000260287 | HPA046969 | U-2 OS   |
| 14873 | ENSG00000260342 | HPA045307 | U-2 OS   |
| 14874 | ENSG00000260456 | HPA067924 | A549     |
| 14875 | ENSG00000260458 | HPA027021 | U-2 OS   |
| 14876 | ENSG00000260537 | HPA066668 | CACO-2   |
| 14877 | ENSG00000260596 | HPA058451 | U-2 OS   |
| 14878 | ENSG00000260643 | HPA041368 | U-2 OS   |
| 14879 | ENSG00000260836 | HPA055060 | U-2 OS   |
| 14880 | ENSG00000260914 | HPA060092 | SiHa     |
| 14881 | ENSG00000260916 | HPA009432 | U-2 OS   |
| 14882 | ENSG00000261115 | HPA048771 | U-2 OS   |
| 14883 | ENSG00000261150 | HPA066808 | MCF7     |
| 14884 | ENSG00000261150 | HPA067357 | HeLa     |
| 14885 | ENSG00000261150 | HPA069333 | MCF7     |
| 14886 | ENSG00000261221 | HPA068079 | U-2 OS   |
| 14887 | ENSG00000261236 | HPA047869 | U-2 OS   |
| 14888 | ENSG00000261236 | HPA066764 | U-2 OS   |
| 14889 | ENSG00000261609 | HPA049473 | RT4      |
| 14890 | ENSG00000261652 | HPA067189 | U-2 OS   |
| 14891 | ENSG00000261678 | HPA045265 | SH-SY5Y  |
| 14892 | ENSG00000261701 | HPA047750 | HeLa     |
| 14893 | ENSG00000261796 | HPA006312 | U-2 OS   |
| 14894 | ENSG00000261796 | HPA016995 | U-2 OS   |
| 14895 | ENSG00000261832 | HPA053611 | U-2 OS   |
| 14896 | ENSG00000261934 | HPA010580 | U-2 OS   |
| 14897 | ENSG00000262179 | HPA051451 | U-2 OS   |
| 14898 | ENSG00000262209 | HPA010580 | U-2 OS   |
| 14899 | ENSG00000262209 | HPA035822 | U-2 OS   |
| 14900 | ENSG00000262576 | HPA010580 | U-2 OS   |
| 14901 | ENSG00000262655 | HPA038584 | CACO-2   |
| 14902 | ENSG00000262660 | HPA022853 | U-2 OS   |
| 14903 | ENSG00000262660 | HPA023043 | U-2 OS   |

|       |                 |           |         |
|-------|-----------------|-----------|---------|
| 14904 | ENSG00000262660 | HPA023048 | U-2 OS  |
| 14905 | ENSG00000262664 | HPA059002 | A-431   |
| 14906 | ENSG00000262814 | HPA022853 | U-2 OS  |
| 14907 | ENSG00000262814 | HPA023043 | U-2 OS  |
| 14908 | ENSG00000262874 | HPA068082 | K-562   |
| 14909 | ENSG00000262919 | HPA059843 | U-2 OS  |
| 14910 | ENSG00000263001 | CAB004595 | A-431   |
| 14911 | ENSG00000263001 | HPA026638 | U-2 OS  |
| 14912 | ENSG00000263002 | HPA001664 | U-2 OS  |
| 14913 | ENSG00000263465 | HPA049905 | U-2 OS  |
| 14914 | ENSG00000263513 | HPA043271 | U-2 OS  |
| 14915 | ENSG00000263513 | HPA067321 | U-2 OS  |
| 14916 | ENSG00000263528 | CAB025983 | U-2 OS  |
| 14917 | ENSG00000263956 | HPA042595 | U-2 OS  |
| 14918 | ENSG00000263961 | HPA037859 | HEL     |
| 14919 | ENSG00000264230 | HPA045246 | RT4     |
| 14920 | ENSG00000264230 | HPA047451 | RT4     |
| 14921 | ENSG00000264364 | HPA039954 | U-2 OS  |
| 14922 | ENSG00000264522 | HPA027045 | U-2 OS  |
| 14923 | ENSG00000264668 | HPA047232 | U-2 OS  |
| 14924 | ENSG00000265190 | HPA045246 | RT4     |
| 14925 | ENSG00000265190 | HPA047451 | RT4     |
| 14926 | ENSG00000265241 | HPA018403 | U-2 OS  |
| 14927 | ENSG00000265354 | HPA031408 | U-2 OS  |
| 14928 | ENSG00000265491 | HPA019130 | U-2 OS  |
| 14929 | ENSG00000265681 | HPA043724 | U-2 OS  |
| 14930 | ENSG00000265681 | HPA046385 | U-2 OS  |
| 14931 | ENSG00000265763 | HPA035957 | U-2 OS  |
| 14932 | ENSG00000265763 | HPA035958 | RT4     |
| 14933 | ENSG00000265817 | HPA025059 | RT4     |
| 14934 | ENSG00000265972 | HPA053694 | U-2 OS  |
| 14935 | ENSG00000266028 | HPA028191 | U-2 OS  |
| 14936 | ENSG00000266028 | HPA028196 | U-2 OS  |
| 14937 | ENSG00000266028 | HPA078079 | AF22    |
| 14938 | ENSG00000266074 | HPA076910 | U-2 OS  |
| 14939 | ENSG00000266173 | HPA031637 | A549    |
| 14940 | ENSG00000266338 | HPA042595 | U-2 OS  |
| 14941 | ENSG00000266412 | HPA051260 | U-2 OS  |
| 14942 | ENSG00000266472 | HPA078289 | U-2 OS  |
| 14943 | ENSG00000266524 | HPA015498 | SH-SY5Y |
| 14944 | ENSG00000266714 | HPA022857 | U-2 OS  |
| 14945 | ENSG00000266714 | HPA023105 | U-2 OS  |
| 14946 | ENSG00000266826 | HPA000634 | U-2 OS  |
| 14947 | ENSG00000266964 | HPA026873 | U-2 OS  |
| 14948 | ENSG00000266967 | HPA022869 | U-2 OS  |
| 14949 | ENSG00000267041 | HPA029299 | RT4     |
| 14950 | ENSG00000267179 | HPA047845 | RT4     |
| 14951 | ENSG00000267281 | HPA003384 | U-2 OS  |
| 14952 | ENSG00000267335 | HPA038925 | U-2 OS  |
| 14953 | ENSG00000267534 | HPA014255 | U-2 OS  |
| 14954 | ENSG00000267561 | HPA043069 | U-2 OS  |
| 14955 | ENSG00000267631 | HPA038925 | U-2 OS  |
| 14956 | ENSG00000267631 | HPA038934 | U-2 OS  |
| 14957 | ENSG00000267680 | HPA054045 | U-2 OS  |
| 14958 | ENSG00000267697 | HPA077907 | U-2 OS  |

|       |                 |           |          |
|-------|-----------------|-----------|----------|
| 14959 | ENSG00000267740 | HPA072209 | PC-3     |
| 14960 | ENSG00000267795 | HPA077331 | RT4      |
| 14961 | ENSG00000267796 | HPA043253 | U-2 OS   |
| 14962 | ENSG00000267796 | HPA047809 | U-2 OS   |
| 14963 | ENSG00000267855 | HPA059251 | U-2 OS   |
| 14964 | ENSG00000267978 | HPA045401 | Hep G2   |
| 14965 | ENSG00000267978 | HPA051687 | RT4      |
| 14966 | ENSG00000268009 | HPA045683 | U-2 OS   |
| 14967 | ENSG00000268043 | HPA042595 | U-2 OS   |
| 14968 | ENSG00000268083 | HPA002907 | U-2 OS   |
| 14969 | ENSG00000268104 | HPA003193 | Hep G2   |
| 14970 | ENSG00000268182 | HPA071857 | U-2 OS   |
| 14971 | ENSG00000268447 | HPA045683 | U-2 OS   |
| 14972 | ENSG00000268465 | HPA060662 | U-2 OS   |
| 14973 | ENSG00000268674 | HPA077864 | U-2 OS   |
| 14974 | ENSG00000268861 | HPA042689 | U-2 OS   |
| 14975 | ENSG00000268861 | HPA071867 | RT4      |
| 14976 | ENSG00000268870 | HPA018683 | RT4      |
| 14977 | ENSG00000268940 | HPA044735 | U-2 OS   |
| 14978 | ENSG00000268940 | HPA046872 | U-2 OS   |
| 14979 | ENSG00000268940 | HPA046987 | U-2 OS   |
| 14980 | ENSG00000268988 | HPA045652 | U-2 OS   |
| 14981 | ENSG00000269026 | HPA068553 | RT4      |
| 14982 | ENSG00000269035 | HPA041580 | U-2 OS   |
| 14983 | ENSG00000269096 | HPA044735 | U-2 OS   |
| 14984 | ENSG00000269096 | HPA046872 | U-2 OS   |
| 14985 | ENSG00000269096 | HPA046987 | U-2 OS   |
| 14986 | ENSG00000269313 | HPA007390 | RT4      |
| 14987 | ENSG00000269335 | HPA000426 | U-2 OS   |
| 14988 | ENSG00000269335 | CAB010373 | U-2 OS   |
| 14989 | ENSG00000269343 | HPA072145 | RT4      |
| 14990 | ENSG00000269547 | HPA056957 | U-2 OS   |
| 14991 | ENSG00000269556 | HPA071744 | U-2 OS   |
| 14992 | ENSG00000269586 | HPA044735 | U-2 OS   |
| 14993 | ENSG00000269586 | HPA046872 | U-2 OS   |
| 14994 | ENSG00000269586 | HPA046987 | U-2 OS   |
| 14995 | ENSG00000269590 | HPA065685 | U-2 OS   |
| 14996 | ENSG00000269699 | HPA071856 | Hep G2   |
| 14997 | ENSG00000269713 | HPA042595 | U-2 OS   |
| 14998 | ENSG00000269791 | HPA045683 | U-2 OS   |
| 14999 | ENSG00000269858 | HPA056649 | A549     |
| 15000 | ENSG00000269881 | HPA011651 | U-2 OS   |
| 15001 | ENSG00000269897 | HPA030471 | U-2 OS   |
| 15002 | ENSG00000269897 | HPA030472 | U-2 OS   |
| 15003 | ENSG00000269955 | HPA051631 | U-2 OS   |
| 15004 | ENSG00000270181 | HPA045845 | U-251 MG |
| 15005 | ENSG00000270181 | HPA050126 | U-2 OS   |
| 15006 | ENSG00000270181 | HPA050374 | U-2 OS   |
| 15007 | ENSG00000270249 | HPA046970 | A-431    |
| 15008 | ENSG00000270629 | HPA042595 | U-2 OS   |
| 15009 | ENSG00000270647 | HPA052059 | U-2 OS   |
| 15010 | ENSG00000270647 | HPA063647 | U-2 OS   |
| 15011 | ENSG00000270800 | HPA047027 | U-2 OS   |
| 15012 | ENSG00000270800 | HPA048084 | U-2 OS   |
| 15013 | ENSG00000270806 | HPA043184 | U-2 OS   |

|       |                 |           |          |
|-------|-----------------|-----------|----------|
| 15014 | ENSG00000270806 | HPA063464 | U-2 OS   |
| 15015 | ENSG00000270885 | HPA057092 | RH-30    |
| 15016 | ENSG00000270946 | HPA044735 | U-2 OS   |
| 15017 | ENSG00000270946 | HPA046872 | U-2 OS   |
| 15018 | ENSG00000270946 | HPA046987 | U-2 OS   |
| 15019 | ENSG00000271254 | HPA042595 | U-2 OS   |
| 15020 | ENSG00000271383 | HPA042595 | U-2 OS   |
| 15021 | ENSG00000271425 | HPA042595 | U-2 OS   |
| 15022 | ENSG00000271447 | HPA057288 | RT4      |
| 15023 | ENSG00000271447 | HPA057890 | RT4      |
| 15024 | ENSG00000271449 | HPA044735 | U-2 OS   |
| 15025 | ENSG00000271449 | HPA046872 | U-2 OS   |
| 15026 | ENSG00000271449 | HPA046987 | U-2 OS   |
| 15027 | ENSG00000271601 | HPA063598 | SiHa     |
| 15028 | ENSG00000272031 | HPA029642 | U-2 OS   |
| 15029 | ENSG00000272325 | HPA047027 | U-2 OS   |
| 15030 | ENSG00000272333 | HPA006487 | U-2 OS   |
| 15031 | ENSG00000272391 | HPA049817 | U-2 OS   |
| 15032 | ENSG00000272398 | HPA045879 | RT4      |
| 15033 | ENSG00000272398 | CAB078471 | U-2 OS   |
| 15034 | ENSG00000272414 | HPA053331 | U-2 OS   |
| 15035 | ENSG00000272514 | HPA072261 | RT4      |
| 15036 | ENSG00000272617 | HPA049429 | U-2 OS   |
| 15037 | ENSG00000272674 | HPA014668 | A-431    |
| 15038 | ENSG00000272822 | HPA068942 | U-2 OS   |
| 15039 | ENSG00000272886 | HPA013202 | U-2 OS   |
| 15040 | ENSG00000273136 | HPA042595 | U-2 OS   |
| 15041 | ENSG00000273173 | HPA065733 | U-2 OS   |
| 15042 | ENSG00000273217 | HPA037983 | U-2 OS   |
| 15043 | ENSG00000273513 | HPA046969 | U-2 OS   |
| 15044 | ENSG00000273514 | HPA012836 | U-2 OS   |
| 15045 | ENSG00000273559 | CAB014874 | U-2 OS   |
| 15046 | ENSG00000273559 | HPA062997 | U-2 OS   |
| 15047 | ENSG00000273590 | HPA051321 | HEK 293  |
| 15048 | ENSG00000273604 | HPA055190 | U-2 OS   |
| 15049 | ENSG00000273604 | HPA056555 | U-2 OS   |
| 15050 | ENSG00000273611 | HPA060019 | U-2 OS   |
| 15051 | ENSG00000273696 | HPA044735 | U-2 OS   |
| 15052 | ENSG00000273696 | HPA046872 | U-2 OS   |
| 15053 | ENSG00000273696 | HPA046987 | U-2 OS   |
| 15054 | ENSG00000273703 | HPA048671 | U-2 OS   |
| 15055 | ENSG00000273706 | HPA044307 | U-2 OS   |
| 15056 | ENSG00000273706 | HPA074382 | U-2 OS   |
| 15057 | ENSG00000273802 | HPA048671 | U-2 OS   |
| 15058 | ENSG00000273820 | HPA077264 | CAC0-2   |
| 15059 | ENSG00000273841 | HPA028930 | A549     |
| 15060 | ENSG00000273841 | HPA053429 | U-2 OS   |
| 15061 | ENSG00000273841 | HPA058961 | U-2 OS   |
| 15062 | ENSG00000273899 | HPA003547 | U-2 OS   |
| 15063 | ENSG00000274211 | HPA004475 | U-251 MG |
| 15064 | ENSG00000274226 | HPA046969 | U-2 OS   |
| 15065 | ENSG00000274274 | HPA043232 | U-2 OS   |
| 15066 | ENSG00000274276 | HPA001223 | U-2 OS   |
| 15067 | ENSG00000274290 | HPA048671 | U-2 OS   |
| 15068 | ENSG00000274349 | HPA048668 | RT4      |



|       |                 |           |          |
|-------|-----------------|-----------|----------|
| 15069 | ENSG00000274391 | HPA068342 | U-2 OS   |
| 15070 | ENSG00000274419 | HPA046969 | U-2 OS   |
| 15071 | ENSG00000274512 | HPA046969 | U-2 OS   |
| 15072 | ENSG00000274523 | HPA052184 | U-2 OS   |
| 15073 | ENSG00000274559 | HPA048671 | U-2 OS   |
| 15074 | ENSG00000274600 | HPA001183 | U-2 OS   |
| 15075 | ENSG00000274611 | HPA046969 | U-2 OS   |
| 15076 | ENSG00000274641 | HPA048671 | U-2 OS   |
| 15077 | ENSG00000274792 | HPA057442 | U-2 OS   |
| 15078 | ENSG00000274808 | HPA046969 | U-2 OS   |
| 15079 | ENSG00000274847 | HPA053929 | CACO-2   |
| 15080 | ENSG00000274933 | HPA046969 | U-2 OS   |
| 15081 | ENSG00000274944 | HPA078331 | U-2 OS   |
| 15082 | ENSG00000275004 | HPA059519 | U-2 OS   |
| 15083 | ENSG00000275023 | HPA004021 | U-2 OS   |
| 15084 | ENSG00000275052 | HPA001233 | U-2 OS   |
| 15085 | ENSG00000275052 | CAB017185 | A-431    |
| 15086 | ENSG00000275066 | HPA023554 | U-2 OS   |
| 15087 | ENSG00000275074 | HPA028581 | U-2 OS   |
| 15088 | ENSG00000275074 | HPA030125 | U-2 OS   |
| 15089 | ENSG00000275111 | HPA041358 | U-2 OS   |
| 15090 | ENSG00000275113 | HPA043232 | U-2 OS   |
| 15091 | ENSG00000275183 | HPA053556 | U-2 OS   |
| 15092 | ENSG00000275395 | HPA003564 | U-2 OS   |
| 15093 | ENSG00000275410 | HPA002083 | CACO-2   |
| 15094 | ENSG00000275464 | HPA024573 | U-2 OS   |
| 15095 | ENSG00000275489 | HPA051696 | hTCEpi   |
| 15096 | ENSG00000275700 | HPA075963 | U-2 OS   |
| 15097 | ENSG00000275713 | HPA048671 | U-2 OS   |
| 15098 | ENSG00000275718 | HPA058608 | CACO-2   |
| 15099 | ENSG00000275740 | HPA036422 | U-2 OS   |
| 15100 | ENSG00000275793 | HPA001183 | U-2 OS   |
| 15101 | ENSG00000275832 | HPA019818 | U-2 OS   |
| 15102 | ENSG00000275832 | HPA047291 | U-2 OS   |
| 15103 | ENSG00000275835 | HPA040366 | U-2 OS   |
| 15104 | ENSG00000275895 | HPA044833 | U-2 OS   |
| 15105 | ENSG00000275896 | HPA062452 | U-2 OS   |
| 15106 | ENSG00000275954 | HPA046969 | U-2 OS   |
| 15107 | ENSG00000275993 | HPA078064 | U-2 OS   |
| 15108 | ENSG00000276023 | HPA019911 | U-2 OS   |
| 15109 | ENSG00000276043 | HPA049408 | U-2 OS   |
| 15110 | ENSG00000276045 | HPA016583 | U-2 OS   |
| 15111 | ENSG00000276045 | HPA061823 | U-2 OS   |
| 15112 | ENSG00000276076 | HPA037737 | U-2 OS   |
| 15113 | ENSG00000276231 | HPA023077 | U-251 MG |
| 15114 | ENSG00000276234 | HPA076497 | U-2 OS   |
| 15115 | ENSG00000276293 | HPA062220 | RH-30    |
| 15116 | ENSG00000276345 | HPA050406 | U-2 OS   |
| 15117 | ENSG00000276410 | HPA048671 | U-2 OS   |
| 15118 | ENSG00000276547 | HPA010580 | U-2 OS   |
| 15119 | ENSG00000276644 | HPA012672 | U-2 OS   |
| 15120 | ENSG00000277075 | CAB012242 | U-2 OS   |
| 15121 | ENSG00000277117 | HPA029179 | RT4      |
| 15122 | ENSG00000277149 | HPA014118 | CACO-2   |
| 15123 | ENSG00000277149 | HPA052097 | U-2 OS   |

|       |                 |           |             |
|-------|-----------------|-----------|-------------|
| 15124 | ENSG00000277161 | HPA023499 | U-2 OS      |
| 15125 | ENSG00000277224 | HPA048671 | U-2 OS      |
| 15126 | ENSG00000277258 | HPA063531 | A549        |
| 15127 | ENSG00000277363 | HPA063795 | RT4         |
| 15128 | ENSG00000277443 | HPA054820 | A-431       |
| 15129 | ENSG00000277443 | HPA067595 | U-2 OS      |
| 15130 | ENSG00000277462 | HPA003142 | U-2 OS      |
| 15131 | ENSG00000277586 | HPA015021 | U-2 OS      |
| 15132 | ENSG00000277758 | HPA064559 | U-2 OS      |
| 15133 | ENSG00000278023 | HPA024794 | U-2 OS      |
| 15134 | ENSG00000278053 | HPA056173 | U-2 OS      |
| 15135 | ENSG00000278085 | HPA044735 | U-2 OS      |
| 15136 | ENSG00000278085 | HPA046872 | U-2 OS      |
| 15137 | ENSG00000278085 | HPA046987 | U-2 OS      |
| 15138 | ENSG00000278129 | HPA034797 | U-2 OS      |
| 15139 | ENSG00000278224 | HPA031240 | HeLa        |
| 15140 | ENSG00000278259 | HPA059715 | U-2 OS      |
| 15141 | ENSG00000278289 | HPA044735 | U-2 OS      |
| 15142 | ENSG00000278289 | HPA046872 | U-2 OS      |
| 15143 | ENSG00000278289 | HPA046987 | U-2 OS      |
| 15144 | ENSG00000278299 | HPA046969 | U-2 OS      |
| 15145 | ENSG00000278311 | HPA073392 | RT4         |
| 15146 | ENSG00000278318 | HPA001494 | RT4         |
| 15147 | ENSG00000278535 | HPA041226 | U-2 OS      |
| 15148 | ENSG00000278540 | HPA036650 | U-2 OS      |
| 15149 | ENSG00000278588 | HPA048671 | U-2 OS      |
| 15150 | ENSG00000278599 | HPA046969 | U-2 OS      |
| 15151 | ENSG00000278619 | HPA021598 | U-2 OS      |
| 15152 | ENSG00000278845 | HPA023373 | U-2 OS      |
| 15153 | ENSG00000278845 | HPA023385 | U-2 OS      |
| 15154 | ENSG00000279408 | HPA057442 | U-2 OS      |
| 15155 | ENSG00000280071 | HPA018517 | U-2 OS      |
| 15156 | ENSG00000280165 | HPA062669 | SH-SY5Y     |
| 15157 | ENSG00000280709 | HPA057442 | U-2 OS      |
| 15158 | ENSG00000280987 | HPA036565 | U-2 OS      |
| 15159 | ENSG00000281028 | HPA004099 | U-2 OS      |
| 15160 | ENSG00000281887 | HPA053441 | HUVEC TERT2 |
| 15161 | ENSG00000282218 | HPA019477 | A-431       |
| 15162 | ENSG00000282278 | HPA058202 | U-2 OS      |
| 15163 | ENSG00000282301 | HPA072245 | U-2 OS      |
| 15164 | ENSG00000283088 | HPA062474 | RT4         |
| 15165 | ENSG00000283149 | HPA010814 | U-2 OS      |
| 15166 | ENSG00000283154 | HPA003243 | U-2 OS      |
| 15167 | ENSG00000283528 | HPA038756 | A-431       |
| 15168 | ENSG00000283632 | HPA061110 | U-2 OS      |
| 15169 | ENSG00000283761 | HPA073681 | U-2 OS      |
| 15170 | ENSG00000283765 | HPA019545 | U-2 OS      |
| 15171 | ENSG00000283782 | HPA052291 | A-431       |
| 15172 | ENSG00000284057 | HPA046619 | U-2 OS      |
| 15173 | ENSG00000284194 | HPA046943 | U-2 OS      |
| 15174 | ENSG00000284292 | HPA004334 | U-2 OS      |
| 15175 | ENSG00000284308 | HPA049564 | U-2 OS      |
| 15176 | ENSG00000284512 | HPA041368 | U-2 OS      |
| 15177 | ENSG00000284723 | HPA045595 | U-2 OS      |
| 15178 | ENSG00000284753 | HPA062215 | U-2 OS      |

|       |                 |           |        |
|-------|-----------------|-----------|--------|
| 15179 | ENSG00000284776 | HPA040981 | U-2 OS |
| 15180 | ENSG00000284824 | HPA058578 | U-2 OS |
| 15181 | ENSG00000284906 | HPA064479 | U-2 OS |
| 15182 | ENSG00000284917 | HPA062215 | U-2 OS |
| 15183 | ENSG00000284922 | HPA039949 | U-2 OS |
| 15184 | ENSG00000284934 | HPA001825 | U-2 OS |
| 15185 | ENSG00000284969 | HPA026494 | U-2 OS |
| 15186 | ENSG00000285043 | HPA004177 | U-2 OS |
| 15187 | ENSG00000285077 | HPA064479 | U-2 OS |
| 15188 | ENSG00000285130 | HPA001813 | U-2 OS |
| 15189 | ENSG00000285130 | HPA070714 | U-2 OS |
| 15190 | ENSG00000285245 | HPA025961 | U-2 OS |
| 15191 | ENSG00000285258 | HPA034989 | U-2 OS |
| 15192 | ENSG00000285283 | HPA038474 | U-2 OS |
| 15193 | ENSG00000285292 | HPA020091 | U-2 OS |
| 15194 | ENSG00000285304 | HPA000757 | U-2 OS |
| 15195 | ENSG00000285382 | HPA054119 | U-2 OS |
| 15196 | ENSG00000285396 | HPA039310 | U-2 OS |
| 15197 | ENSG00000285437 | HPA046970 | A-431  |
| 15198 | ENSG00000285458 | HPA057434 | U-2 OS |
| 15199 | ENSG00000285472 | HPA057442 | U-2 OS |
| 15200 | ENSG00000285509 | HPA038594 | U-2 OS |

## 1 the HPA

| Subcellular location of cell line      | Cell line | Subcellular location of cell line     | Cell line | Subcellular location of cell line | Cell line |
|----------------------------------------|-----------|---------------------------------------|-----------|-----------------------------------|-----------|
| nucleoli fibrillar center              | RT4       | nucleoli                              | U-2 OS    | cytosol                           |           |
| microtubules                           | A-431     | nuclear bodies                        | U-251 MG  | microtubules                      |           |
| mitochondria                           | U-251 MG  | mitochondria                          |           |                                   |           |
| plasma membrane, aggregates            | U-2 OS    | plasma membrane                       |           |                                   |           |
| vesicles                               | U-251 MG  | vesicles                              |           |                                   |           |
| nucleoplasm, nucleoli, cytosol         | A-431     | nucleoplasm, nucleoli, cytosol        | U-251 MG  |                                   |           |
| nucleoplasm, cytosol                   | A-431     | nucleoplasm                           | U-251 MG  |                                   |           |
| nucleoplasm                            | U-2 OS    | nucleoplasm                           | A-431     |                                   |           |
| nucleoplasm                            | A-431     | nucleoplasm                           | U-251 MG  |                                   |           |
| nucleoplasm                            | A-431     | nucleoplasm                           | U-251 MG  |                                   |           |
| nucleoplasm, centriolar satellite      | A-431     | nucleoplasm, centriolar satellite     | U-251 MG  |                                   |           |
| plasma membrane, cytosol               | U-251 MG  | plasma membrane, cytosol              |           |                                   |           |
| plasma membrane, cytosol               | A-431     | cytosol                               | U-251 MG  | nucleoplasm, cytosol              |           |
| endoplasmic reticulum                  | A-431     | endoplasmic reticulum                 | U-251 MG  |                                   |           |
| endoplasmic reticulum vesicles         | MCF7      | vesicles                              |           |                                   |           |
| nuclear speckles                       | U-2 OS    | nuclear speckles, plasma membrane     | A549      |                                   |           |
| mitochondria                           | A-431     | mitochondria                          | U-251 MG  |                                   |           |
| mitochondria                           | U-251 MG  | mitochondria                          |           |                                   |           |
| cytosol                                | A-431     | cytosol                               | U-251 MG  | nucleoplasm, midbody, cytosol     |           |
| golgi apparatus                        | U-251 MG  | golgi apparatus                       |           |                                   |           |
| vesicles                               | A-431     | vesicles                              |           |                                   |           |
| cytosol                                |           |                                       |           |                                   |           |
| nucleoplasm, nuclear membrane          |           |                                       |           |                                   |           |
| plasma membrane, focal adhesion sites  | A-431     | plasma membrane, focal adhesion sites | U-251 MG  |                                   |           |
| plasma membrane, cytosol               | A-431     | golgi apparatus                       | U-251 MG  | plasma membrane, cytosol          |           |
| cytosol                                | A-431     | cytosol                               | U-251 MG  | cytosol                           |           |
| mitochondria                           |           |                                       |           |                                   |           |
| cytosol                                | HeLa      | cytosol                               |           |                                   |           |
| cytosol                                | A-431     | cytosol                               | U-251 MG  | cytosol                           |           |
| cytosol                                | U-2 OS    | vesicles                              | MCF7      | vesicles, cytosol                 |           |
| nuclear speckles                       | A-431     | nuclear speckles                      | U-251 MG  |                                   |           |
| intermediate filaments                 | A-431     | cytosol                               | U-251 MG  | cytosol                           |           |
| golgi apparatus, vesicles              | A-431     | golgi apparatus                       | Hep G2    |                                   |           |
| nucleoplasm, plasma membrane           | A-431     | nucleoplasm, plasma membrane, cytosol | U-251 MG  |                                   |           |
| nucleoplasm, nucleoli fibrillar center | A-431     | nucleoplasm, nuclear bodies, cytosol  | U-251 MG  |                                   |           |
| plasma membrane, cytosol               | A-431     | plasma membrane, cytosol              | U-251 MG  |                                   |           |
| cytosol                                | A-431     | intermediate filaments, cytosol       | U-251 MG  |                                   |           |
| nucleoplasm                            | A-431     | nucleoplasm                           | U-251 MG  |                                   |           |
| nucleoplasm                            | A-431     | nucleoplasm                           | U-251 MG  |                                   |           |
| nucleoplasm, cytosol                   | SH-SY5Y   | nucleoplasm, cytosol                  |           |                                   |           |
| plasma membrane, cell junctions        | MCF7      | plasma membrane                       |           |                                   |           |
| vesicles                               | SiHa      | vesicles                              |           |                                   |           |
| mitochondria                           | U-2 OS    | mitochondria                          | SiHa      | mitochondria                      |           |
| plasma membrane                        |           |                                       |           |                                   |           |
| nucleoplasm, cytosol                   | A-431     | nucleoplasm, cytosol                  | U-251 MG  |                                   |           |
| nucleoplasm, cytosol                   | MCF7      | nucleoplasm, cytosol                  | A549      |                                   |           |
| nucleoplasm, cytosol                   | A-431     | nucleoplasm, cytosol                  | U-251 MG  |                                   |           |
| nucleoplasm                            |           |                                       |           |                                   |           |
| nuclear speckles, cytoplasmic bodies   | A-431     | nuclear speckles, cytoplasmic bodies  | U-251 MG  |                                   |           |
| cytosol                                | A-431     | cytosol                               | U-251 MG  | cytosol                           |           |
| nucleoplasm                            | A-431     | nucleoplasm                           | U-251 MG  |                                   |           |
| nucleoplasm                            | A-431     | nucleoplasm                           | U-251 MG  |                                   |           |

|                                                        |           |                                           |                                |
|--------------------------------------------------------|-----------|-------------------------------------------|--------------------------------|
| nucleoplasm                                            | RH-30     | nucleoplasm                               |                                |
| plasma membrane, cytosol                               | A-431     | cytosol                                   | U-251 MG cytosol               |
| nucleoli, golgi apparatus                              | ASC TERT1 | cytosol                                   | BJ nucleoli, cytosol           |
| plasma membrane, actin filaments                       | A-431     | plasma membrane, actin filaments, cyto    | U-251 MG                       |
| mitochondria                                           | A-431     | mitochondria                              | HeLa nucleoplasm, mitochondria |
| plasma membrane, cytosol                               | A-431     | plasma membrane, cytosol                  | U-251 MG                       |
| mitochondria                                           | A-431     | mitochondria                              | U-251 MG                       |
| nucleoplasm                                            | A-431     | nucleoplasm                               | U-251 MG                       |
| nucleoplasm, cytosol                                   | A-431     | nucleoplasm, cytosol                      | U-251 MG                       |
| nucleoplasm                                            | A-431     | nucleoplasm                               | U-251 MG                       |
| nucleoplasm                                            | A-431     | nucleoplasm                               | U-251 MG                       |
| nucleoplasm                                            | A-431     | nucleoplasm                               | U-251 MG                       |
| nucleoplasm                                            | RH-30     | nucleoplasm                               | HELa                           |
| mitochondria                                           | A-431     | mitochondria                              | U-251 MG                       |
| nucleoplasm, nuclear bodies                            | A549      | nucleoplasm                               | SH-SY5Y                        |
| nucleoplasm, nuclear bodies                            | HEK 293   | nucleoplasm                               | SH-SY5Y                        |
| nucleoplasm                                            | MCF7      | nucleoplasm                               |                                |
| nucleoplasm                                            | A-431     | nucleoplasm                               | U-251 MG                       |
| nucleoplasm                                            | A-431     | nucleoplasm, cytosol                      | U-251 MG                       |
| nucleoplasm, cytosol                                   | U-251 MG  | nucleoplasm, cytosol                      |                                |
| mitochondria                                           | MCF7      | mitochondria                              | PC-3                           |
| nucleoplasm, vesicles, mitochondria                    |           |                                           |                                |
| nucleoplasm                                            | HEK 293   | nucleoplasm                               | BJ                             |
| nucleoplasm                                            |           |                                           |                                |
| nucleoli                                               | U-251 MG  | nucleoli                                  |                                |
| nucleoplasm, cytokinetic bridge, cytosol               |           |                                           |                                |
| nucleoplasm                                            | A-431     | nucleoplasm                               | U-251 MG                       |
| cytosol                                                | A-431     | cytosol                                   | U-251 MG                       |
| nuclear membrane, endoplasmic reticulum                | A-431     | nuclear membrane, nucleoli                | MCF7                           |
| nucleoplasm, mitochondria                              | A-431     | nucleoplasm, mitochondria                 | U-251 MG                       |
| nucleoplasm, plasma membrane, centrosomes              | A549      | nucleoplasm, plasma membrane, centrosomes | SiHa                           |
| nucleoplasm, nucleoli, fibrin                          | U-251 MG  | nucleoplasm                               | HeLa                           |
| mitochondria                                           | HEK 293   | mitochondria                              | SH-SY5Y                        |
| nucleoplasm                                            | A-431     | nucleoplasm                               | U-251 MG                       |
| nucleoplasm                                            |           |                                           |                                |
| nucleoplasm                                            | A-431     | nucleoplasm, nuclear bodies               | MCF7                           |
| vesicles                                               | SiHa      | vesicles                                  | RH-30                          |
| nucleoplasm, cytosol                                   | Hep G2    | nucleoplasm                               | SH-SY5Y                        |
| vesicles, cytosol                                      | MCF7      | vesicles                                  | A549                           |
| vesicles                                               | A-431     | vesicles                                  | U-251 MG                       |
| nucleoplasm, plasma membrane, nuclear bodies, vesicles | A549      | nucleoplasm, actin filaments              | Hep G2                         |
| nucleoplasm, nuclear bodies, vesicles                  | U-2 OS    | nucleoplasm, nuclear bodies, vesicles     | RH-30                          |
| golgi apparatus                                        | A-431     | golgi apparatus                           | U-251 MG                       |
| nucleoplasm, golgi apparatus                           | U-251 MG  | golgi apparatus                           | HeLa                           |
| nucleoplasm                                            | RH-30     | nucleoplasm, cytosol                      |                                |
| nucleoplasm                                            | HEK 293   | nucleoplasm                               | RH-30                          |
| nucleoplasm                                            | U-251 MG  | nucleoplasm                               |                                |
| nucleoplasm, cytosol                                   | A-431     | nucleoplasm, cytosol                      | U-251 MG                       |
| nucleoplasm, vesicles                                  |           |                                           |                                |
| nuclear bodies                                         | PC-3      | nuclear bodies                            |                                |
| nuclear bodies                                         | A-431     | nuclear bodies                            | HEK 293                        |
| nucleoplasm, mitochondria                              | A-431     | nucleoplasm, cytosol                      | U-251 MG                       |
| plasma membrane                                        | A-431     | vesicles, plasma membrane                 | U-251 MG                       |
| nucleoplasm                                            | A-431     | nucleoplasm                               | U-251 MG                       |
| nucleoplasm, nucleoli                                  | HeLa      | nucleoplasm                               | SiHa                           |

vesicles  
 plasma membrane  
 plasma membrane  
 nucleoplasm, nucleoli MCF7 nucleoli, HEK 293 nucleoplasm, nucleoli  
 vesicles A-431 vesicles U-251 MG vesicles  
 nucleoplasm, cytosol A-431 nucleoplaHeLa nucleoplasm, cytosol  
 nucleoplasm, cytosol A-431 nucleoplasm, cytosol  
 nucleoplasm A-431 nucleoplaHEK 293 nucleoplasm  
 nucleoplasm, nucleoli fibrA-431 nucleoplaU-251 MG nucleoplasm, nucleoli fibrillar cente  
 nucleoli, golgi apparatus, A-431 nucleoli, U-251 MG nucleoli, golgi apparatus, cytosol  
 mitochondria MCF7 mitochondA549 mitochondria  
 vesicles A-431 vesicles U-251 MG vesicles  
 vesicles A-431 vesicles U-251 MG vesicles  
 cytosol A-431 nucleoplaU-251 MG cytosol  
 cytosol A-431 nucleoplaU-251 MG mitotic spindle, cytosol  
 plasma membrane A-431 plasma meU-251 MG plasma membrane  
 nucleoplasm A-431 nucleoplaU-251 MG nucleoplasm  
 plasma membrane, cytosol U-251 MG plasma membrane, cytosol  
 nuclear bodies SH-SY5Y nuclear bodies  
 nucleoplasm, nucleoli A549 nucleoplasm, nucleoli  
 plasma membrane A-431 plasma mePC-3 plasma membrane, focal adhesion sites  
 plasma membrane, cytosol A-431 plasma meU-251 MG nucleoplasm, plasma membrane, cytosol  
 plasma membrane A-431 plasma meU-251 MG plasma membrane  
 plasma membrane A-431 plasma meU-251 MG plasma membrane  
 nucleoplasm A-431 nucleoplaU-251 MG nucleoplasm, nucleoli  
 nucleoplasm PC-3 nucleoplasm  
 vesicles, mitochondria U-251 MG mitochondHEK 293 vesicles, mitochondria  
 nucleoplasm, cytosol A-431 nucleoplaU-251 MG nucleoplasm, cytosol  
 cytosol HeLa cytosol  
 cytosol HeLa cytosol  
 cytosol U-251 MG cytosol  
 nucleoplasm SH-SY5Y nucleoplaRH-30 nucleoplasm, nuclear bodies  
 nuclear speckles, plasma nHeLa nuclear sBJ nuclear speckles, plasma membrane  
 plasma membrane, cytosol A-431 cytosol U-251 MG plasma membrane, cytosol  
 nucleoplasm EFO-21 nucleoplasm  
 nucleoli, mitochondria U-251 MG nucleoli, mitochondria, cytosol  
 nucleoplasm, cytosol A-431 nucleoplaU-251 MG nucleoplasm, cytosol  
 nucleoplasm MCF7 nucleoplaHEK 293 nucleoplasm, cell junctions  
 nucleoplasm A-431 nucleoplaU-251 MG nucleoplasm  
 plasma membrane  
 plasma membrane U-251 MG plasma meHEK 293 plasma membrane  
 vesicles, lipid droplets A549 lipid droplets  
 nucleoplasm, vesicles A-431 nucleoplaU-251 MG nucleoplasm, vesicles  
 mitochondria A-431 nucleoplaU-251 MG nucleoplasm, mitochondria  
 nucleoplasm, vesicles, cytoA-431 nucleoplaU-251 MG nucleoplasm, vesicles  
 cytosol A-431 cytosol  
 cytosol A-431 cytosol U-251 MG cytosol  
 plasma membrane, cytosol A-431 plasma meU-251 MG plasma membrane, cytosol  
 plasma membrane, cytosol U-251 MG plasma mePC-3 plasma membrane, cytosol  
 centrosome U-251 MG centrosome  
 nuclear speckles A-431 nuclear sU-251 MG nuclear speckles, cytosol  
 plasma membrane, focal adSK-MEL-30plasma membrane, actin filaments  
 microtubules MCF7 microtubuK-562 mitotic spindle, centriolar satellite  
 nucleoplasm, centriolar sRH-30 nucleoplasm  
 centrosome

|                                              |          |                                              |                                             |  |
|----------------------------------------------|----------|----------------------------------------------|---------------------------------------------|--|
| cytosol                                      |          |                                              |                                             |  |
| nucleoplasm, cytosol                         | U-251 MG | nucleoplaHEK 293                             | nucleoplasm                                 |  |
| nucleoplasm, golgi apparatus                 | A-431    | golgi appU-251 MG                            | nucleoplasm, golgi apparatus, cytosol       |  |
| vesicles                                     | U-2 OS   | vesicles MCF7                                | vesicles                                    |  |
| nucleoplasm                                  | A549     | nucleoplaHeLa                                | nucleoplasm                                 |  |
| nuclear speckles                             | MCF7     | nuclear sA549                                | nucleoplasm, mitochondria                   |  |
| vesicles                                     | SH-SY5Y  | vesicles                                     |                                             |  |
| golgi apparatus, cytosol                     | HEK 293  | cytosol                                      |                                             |  |
| nucleoplasm, vesicles                        | A-431    | nucleoplaU-251 MG                            | nucleoplasm, vesicles                       |  |
| golgi apparatus                              | HEK 293  | golgi apparatus                              |                                             |  |
| nucleoplasm, nucleoli, cytosol               | A-431    | nucleoplaU-251 MG                            | nucleoplasm, nucleoli, cytosol              |  |
| nucleoplasm                                  | Hep G2   | nucleoplasm                                  |                                             |  |
| nucleoplasm, mitochondria                    | SH-SY5Y  | nucleoplaSK-MEL-30                           | nucleoplasm, mitochondria                   |  |
| nucleoplasm                                  | A-431    | nucleoplaU-251 MG                            | nucleoplasm                                 |  |
| nuclear speckles, cytosol                    | A-431    | nuclear speckles, cytosol                    |                                             |  |
| nuclear speckles                             | SiHa     | nuclear sSK-MEL-30                           | nuclear speckles                            |  |
| nucleoplasm                                  | HeLa     | nucleoplasm, vesicles                        |                                             |  |
| nucleoplasm                                  | SH-SY5Y  | nucleoplasm                                  |                                             |  |
| cytosol                                      | A-431    | cytosol U-251 MG                             | cytosol                                     |  |
| cytosol                                      | A-431    | nucleoplaU-251 MG                            | nucleoplasm, cytosol                        |  |
| cell junctions                               |          |                                              |                                             |  |
| cytosol                                      | A-431    | centriolaU-251 MG                            | centriolar satellite, cytosol               |  |
| centriolar satellite, cytosol                | RH-30    | centriolar satellite, cytosol                |                                             |  |
| vesicles, mitochondria                       | A-431    | vesicles U-251 MG                            | vesicles, mitochondria                      |  |
| vesicles, mitochondria                       | A-431    | vesicles, U-251 MG                           | mitochondria                                |  |
| vesicles, mitochondria                       | A-431    | vesicles, U-251 MG                           | vesicles, mitochondria                      |  |
| cell junctions                               | U-2 OS   | cell junctions, centrosome                   |                                             |  |
| nucleoplasm, nucleoli, mitochondria          | A-431    | nucleoli, HEK 293                            | nucleoli, mitochondria                      |  |
| nucleoplasm, nucleoli                        | A-431    | nucleoplaU-251 MG                            | nucleoplasm, nucleoli                       |  |
| mitochondria                                 | A-431    | mitochondU-251 MG                            | endoplasmic reticulum, mitochondria         |  |
| nucleoplasm, microtubules                    | A-431    | nucleoplaHEK 293                             | nucleoplasm, nuclear membrane, microtubules |  |
| nucleoplasm                                  | A-431    | nucleoplaU-251 MG                            | nucleoplasm                                 |  |
| aggresome                                    | U-2 OS   | plasma membrane                              |                                             |  |
| nucleoplasm, nucleoli, cytosol               | A-431    | nucleoplasm, nucleoli, cytosol               |                                             |  |
| nuclear speckles, cytosol                    |          |                                              |                                             |  |
| endoplasmic reticulum, intermediate filament | A-431    | endoplasmic reticulum, intermediate filament |                                             |  |
| endoplasmic reticulum, cytosol               | A-431    | endoplasmic reticulum, cytosol               |                                             |  |
| cytosol                                      | U-251 MG | plasma membrane, cytosol                     |                                             |  |
| plasma membrane, cytosol                     | U-251 MG | golgi appMCF7                                | plasma membrane, cytosol                    |  |
| mitochondria                                 | A-431    | mitochondU-251 MG                            | nucleoplasm, plasma membrane, mitochondria  |  |
| nucleoplasm, cell junctions                  | Hep G2   | nucleoplaSK-MEL-30                           | nucleoplasm                                 |  |
| golgi apparatus                              | Hep G2   | golgi apparatus                              |                                             |  |
| plasma membrane                              | RT4      | nucleoplasm, plasma membrane                 |                                             |  |
| nucleoplasm, cytokinetic bridge, cytosol     |          |                                              |                                             |  |
| vesicles                                     | A-431    | vesicles U-251 MG                            | vesicles                                    |  |
| nucleoplasm, vesicles, cytosol               | MCF7     | nucleoplasm, vesicles, cytosol               |                                             |  |
| nucleoplasm                                  | MCF7     | nucleoplaHep G2                              | nucleoplasm, cytosol                        |  |
| nuclear bodies                               | U-251 MG | nuclear bSH-SY5Y                             | nuclear bodies                              |  |
| nucleoplasm, cytosol                         | A-431    | nucleoplaU-251 MG                            | nucleoplasm, cytosol                        |  |
| nucleoplasm                                  | U-251 MG | nucleoplasm                                  |                                             |  |
| nucleoplasm                                  | U-251 MG | nucleoplasm                                  |                                             |  |
| cytosol                                      | A-431    | cytosol U-251 MG                             | cytosol                                     |  |
| vesicles                                     | U-251 MG | vesicles                                     |                                             |  |

|                                   |           |                                            |                                        |
|-----------------------------------|-----------|--------------------------------------------|----------------------------------------|
| vesicles                          | MCF7      | vesicles                                   |                                        |
| nucleoplasm                       | A-431     | nucleoplaU-251 MG                          | nucleoplasm                            |
| nucleoplasm                       | HEK 293   | nucleoplaA549                              | nucleoplasm, nucleoli                  |
| mitochondria                      | A-431     | cytosol U-251 MG                           | cytosol                                |
| vesicles                          | U-251 MG  | vesicles RH-30                             | vesicles                               |
| plasma membrane                   | A-431     | plasma membrane                            |                                        |
| nucleoli, cytosol                 | A-431     | nucleoplaU-251 MG                          | cytosol                                |
| nucleoplasm, cytosol              |           |                                            |                                        |
| nucleoplasm, golgi apparatus      | A-431     | plasma meU-251 MG                          | nucleoplasm, golgi apparatus           |
| nuclear speckles, golgi apparatus | HaCaT     | nuclear speckles, golgi apparatus          |                                        |
| plasma membrane, cytosol          | A-431     | cytosol HUVEC TER                          | nucleoplasm, plasma membrane, cytosol  |
| cytosol                           | RH-30     | cytosol                                    |                                        |
| mitochondria                      | SK-MEL-30 | mitochondria, cytosol                      |                                        |
| mitochondria                      | SK-MEL-30 | nucleoplaRPTEC TER                         | nucleoli, mitochondria                 |
| endoplasmic reticulum, vesicles   | SH-SY5Y   | vesicles PC-3                              | endoplasmic reticulum                  |
| mitochondria                      | A-431     | mitochondU-251 MG                          | mitochondria                           |
| plasma membrane                   |           |                                            |                                        |
| nucleoli                          | A-431     | nucleoli, U-251 MG                         | nucleoli                               |
| nucleoli                          | A549      | nucleoli                                   |                                        |
| plasma membrane, cytosol          | REH       | plasma membrane, cytosol                   |                                        |
| nucleoplasm, plasma membrane      |           |                                            |                                        |
| nucleoplasm, nuclear bodies       | U-251 MG  | nucleoplaHep G2                            | nucleoplasm, nuclear bodies            |
| nucleoplasm                       | U-251 MG  | nucleoplaHep G2                            | nucleoplasm                            |
| plasma membrane, cytosol          | HEK 293   | plasma meAF22                              | plasma membrane                        |
| plasma membrane, cytosol          | HEK 293   | plasma membrane, cytosol                   |                                        |
| nucleoplasm                       | U-251 MG  | nucleoplasm                                |                                        |
| nuclear speckles, cytosol         | A-431     | nuclear sU-251 MG                          | nuclear speckles, cytosol              |
| nucleoplasm, cytosol              | SH-SY5Y   | nucleoplasm, cytosol                       |                                        |
| plasma membrane, cytosol          | A-431     | plasma meU-251 MG                          | plasma membrane, cytosol               |
| cytosol                           |           |                                            |                                        |
| nucleoplasm, golgi apparatus      | U-251 MG  | nucleoplaRH-30                             | nucleoplasm, golgi apparatus, cytosol  |
| focal adhesion sites              |           |                                            |                                        |
| vesicles                          | A-431     | vesicles U-251 MG                          | vesicles                               |
| nucleoplasm, vesicles, cytosol    | A-431     | vesicles, U-251 MG                         | vesicles                               |
| nuclear speckles                  | MCF7      | nuclear sHEK 293                           | nuclear speckles                       |
| nucleoplasm, cytosol              | A-431     | nucleoplaU-251 MG                          | nucleoplasm, cytosol                   |
| nucleoplasm, nucleoli             | A-431     | nucleoplaHEK 293                           | nucleoplasm, nuclear membrane, nucleol |
| cytosol                           | A-431     | nucleoplaU-251 MG                          | nucleoplasm, cytosol                   |
| mitochondria                      | A-431     | mitochondU-251 MG                          | mitochondria                           |
| mitochondria                      | A-431     | mitochondU-251 MG                          | mitochondria                           |
| nucleoplasm                       | A-431     | nucleoplaU-251 MG                          | nucleoplasm                            |
| nucleoplasm, mitochondria         | MCF7      | nucleoplaSH-SY5Y                           | nucleoplasm, cytosol                   |
| mitochondria                      | U-251 MG  | nucleoplasm, mitochondria                  |                                        |
| nucleoplasm                       | A-431     | nucleoplaU-251 MG                          | nucleoplasm                            |
| plasma membrane                   | MCF7      | nucleoplaHeLa                              | plasma membrane                        |
| nucleoplasm, midbody              | A-431     | nucleoplaU-251 MG                          | nucleoplasm                            |
| nucleoplasm                       |           |                                            |                                        |
| nucleoplasm                       | A-431     | nucleoplaU-251 MG                          | nucleoplasm                            |
| nucleoplasm, midbody              | SH-SY5Y   | nucleoplaPC-3                              | nucleoplasm                            |
| cytosol                           | MCF7      | cytosol RH-30                              | cytosol                                |
| cytosol                           | MCF7      | cytosol                                    |                                        |
| golgi apparatus                   |           |                                            |                                        |
| vesicles, cytosol                 | A-431     | cytosol U-251 MG                           | vesicles, cytosol                      |
| nucleoplasm, cell junctions       | RH-30     | nucleoplasm, centriolar satellite, cytosol |                                        |
| centriolar satellite              | A-431     | nucleoplaU-251 MG                          | centriolar satellite                   |



|                                 |           |                            |                                        |
|---------------------------------|-----------|----------------------------|----------------------------------------|
| vesicles                        | U-2 OS    | vesicles MCF7              | vesicles                               |
| nucleoplasm, nuclear bodies     |           |                            |                                        |
| nucleoplasm                     |           |                            |                                        |
| nucleoplasm                     | U-251 MG  | nucleoplaHeLa              | nucleoplasm                            |
| nucleoplasm, mitochondria,      | A-431     | nucleoplaA549              | nucleoplasm, mitochondria, cytosol     |
| nucleoplasm                     | A549      | nucleoplaHep G2            | nucleoplasm                            |
| nuclear speckles, endoplasmic   | U-251 MG  | endoplasmic reticulum      |                                        |
| reticulum                       | A-431     | endoplasmic reticulum      |                                        |
| endoplasmic reticulum           | ASC TERT1 | endoplasmic reticulum      |                                        |
| nucleoplasm                     | U-2 OS    | nucleoplasm                |                                        |
| nucleoli fibrillar center       | U-251 MG  | nucleoli Hep G2            | nucleoli fibrillar center              |
| cytosol                         | A-431     | vesicles, U-251 MG         | cytosol                                |
| cytosol                         | A-431     | cytosol U-251 MG           | cytosol                                |
| nucleoplasm                     | A-431     | nucleoplaU-251 MG          | nucleoplasm                            |
| plasma membrane, cytosol        | A-431     | plasma membrane, cytosol   |                                        |
| plasma membrane                 | SiHa      | plasma membrane            | plasma membrane                        |
| cytosol                         | A-431     | nucleoplaU-251 MG          | nucleoplasm                            |
| plasma membrane, cytosol        | SH-SY5Y   | nucleoplaLHCN-M2           | vesicles, cytosol                      |
| lipid droplets, cell junctions  |           |                            |                                        |
| cytosol                         | A-431     | cytosol U-251 MG           | cytosol                                |
| cytosol                         | A-431     | cytosol U-251 MG           | cytosol                                |
| cytosol                         |           |                            |                                        |
| nucleoli, cytosol               | MCF7      | nucleoplaHEK 293           | nucleoli, cytosol                      |
| nucleoplasm, nucleoli           | HEK 293   | nucleoplasm                |                                        |
| nucleoplasm, cytosol            | A-431     | nucleoplaU-251 MG          | nucleoplasm, cytosol                   |
| vesicles                        |           |                            |                                        |
| nucleoplasm, nuclear membrane   | HeLa      | nucleoplaPC-3              | nucleoplasm, nuclear membrane          |
| nuclear speckles                | A-431     | nuclear speckles           |                                        |
| nucleoplasm                     |           |                            |                                        |
| cytosol                         | A-431     | cytosol U-251 MG           | cytosol                                |
| nucleoplasm, centrosome         | HEK 293   | nucleoplaHeLa              | nucleoplasm, nucleoli fibrillar center |
| nucleoplasm, vesicles           | A-431     | nucleoplaU-251 MG          | nucleoplasm, vesicles                  |
| vesicles                        | SiHa      | vesicles SK-MEL-30         | vesicles                               |
| nucleoli, vesicles, plasma      | A-431     | vesicles U-251 MG          | nucleoli, vesicles                     |
| membrane                        | A-431     | vesicles A549              | vesicles, plasma membrane              |
| nucleoplasm                     | U-251 MG  | nucleoplaRH-30             | nucleoplasm                            |
| mitotic spindle, cytosol        | U-251 MG  | centriolaPC-3              | vesicles, cytosol                      |
| cytosol                         | A-431     | cytosol U-251 MG           | cytosol                                |
| mitotic spindle, centriolar     | A-431     | centriolaU-251 MG          | centriolar satellite, cytosol          |
| reticulum                       |           |                            |                                        |
| nucleoplasm                     | A-431     | nucleoplaU-251 MG          | nucleoplasm                            |
| nucleoplasm                     | A-431     | nucleoplaMCF7              | nucleoplasm                            |
| cytosol                         | A-431     | cytosol U-251 MG           | cytosol                                |
| centrosome, cytosol             | A-431     | centrosome U-251 MG        | centrosome, cytosol                    |
| centrosome                      | A-431     | centrosome U-251 MG        | centrosome                             |
| nucleoplasm, mitochondria       | A549      | mitochondria               |                                        |
| nucleoplasm, nucleoli fibrillar | A-431     | nucleoplaU-251 MG          | nucleoplasm, nucleoli fibrillar center |
| nucleoplasm                     | A-431     | nucleoplaU-251 MG          | nucleoplasm                            |
| nucleoplasm                     | A-431     | nucleoplaU-251 MG          | nucleoplasm                            |
| plasma membrane, cytosol        | REH       | plasma membrane, cytosol   |                                        |
| nucleoplasm, cell junctions     |           |                            |                                        |
| cytosol                         | A-431     | cytosol U-251 MG           | cytosol                                |
| nucleoplasm                     | A-431     | nucleoplaU-251 MG          | nucleoplasm                            |
| nuclear bodies                  | A-431     | nuclear bodies U-251 MG    | nuclear bodies, cytosol                |
| nuclear membrane, vesicles      | RT4       | nuclear membrane, vesicles |                                        |

|                                        |          |                                     |                                        |
|----------------------------------------|----------|-------------------------------------|----------------------------------------|
| golgi apparatus, vesicles              | U-251 MG | golgi appSH-SY5Y                    | golgi apparatus                        |
| plasma membrane, cytosol               | A-431    | nucleoplaU-251 MG                   | plasma membrane, cytosol               |
| nucleoplasm                            |          |                                     |                                        |
| cytosol                                | A-431    | cytosol U-251 MG                    | cytosol                                |
| nucleoplasm, aggresome                 | U-2 OS   | nucleoplaHeLa                       | plasma membrane                        |
| mitochondria                           | A-431    | mitochondU-251 MG                   | mitochondria                           |
| golgi apparatus                        | HaCaT    | golgi apparatus                     |                                        |
| vesicles                               | HeLa     | vesicles, plasma membrane, cytosol  |                                        |
| cytosol                                | A-431    | nuclear membrane, vesicles, cytosol |                                        |
| cytosol                                | A-431    | cytosol U-251 MG                    | cytosol                                |
| nucleoplasm, nuclear bodies            | A-431    | nucleoplaU-251 MG                   | nucleoplasm, nuclear bodies, cytosol   |
| peroxisomes                            | A-431    | peroxisomU-251 MG                   | peroxisomes                            |
| nucleoli, peroxisomes                  | A-431    | nucleoli, U-251 MG                  | nucleoli, peroxisomes                  |
| nucleoplasm, centrosome                | SiHa     | nucleoplaPC-3                       | nucleoplasm                            |
| nucleoli, mitochondria                 | A-431    | mitochondU-251 MG                   | mitochondria                           |
| nucleoplasm, cytosol                   | A-431    | nucleoplaU-251 MG                   | cytosol                                |
| nucleoplasm                            | U-2 OS   | nucleoplaU-251 MG                   | nucleoplasm                            |
| nucleoplasm                            | SiHa     | nucleoplaASC TERT1                  | nucleoplasm, mitotic spindle           |
| golgi apparatus                        | HeLa     | golgi appHaCaT                      | golgi apparatus, vesicles              |
| mitochondria                           | Hep G2   | nucleoplasm                         |                                        |
| nucleoplasm, plasma membrane           | A549     | nucleoplaHep G2                     | nucleoplasm, plasma membrane           |
| vesicles                               | MCF7     | vesicles A549                       | vesicles                               |
| nucleoplasm                            | A-431    | nucleoplaU-251 MG                   | nucleoplasm                            |
| golgi apparatus                        | U-251 MG | golgi apparatus                     |                                        |
| centrosome, cytosol                    | A-431    | cytosol SH-SY5Y                     | centrosome, cytosol                    |
| nucleoplasm, cytosol                   | A-431    | nucleoplaU-251 MG                   | nucleoplasm, cytosol                   |
| cytosol                                | U-251 MG | cytosol                             |                                        |
| nucleoplasm                            | A-431    | nucleoplaHeLa                       | nucleoplasm                            |
| nucleoplasm                            | A-431    | nucleoplaU-251 MG                   | nucleoplasm, cytosol                   |
| nucleoli fibrillar center              | U-2 OS   | cell juncA-431                      | cell junctions, cytosol                |
| nucleoplasm, vesicles, cytosol         | A549     | nucleoplaSiHa                       | nucleoplasm, nucleoli, cytosol         |
| nucleoplasm                            | A-431    | nucleoplaU-251 MG                   | nucleoplasm                            |
| nucleoplasm                            | U-251 MG | nucleoplasm                         |                                        |
| cytoplasmic bodies                     |          |                                     |                                        |
| cytosol                                | Hep G2   | cytosol                             |                                        |
| nucleoplasm, cytosol                   | A-431    | nucleoplaU-251 MG                   | nucleoplasm, cytosol                   |
| vesicles                               | HeLa     | vesicles BJ                         | vesicles                               |
| vesicles                               | BJ       | vesicles                            |                                        |
| nucleoplasm                            | A549     | nucleoplaRH-30                      | nucleoplasm                            |
| nucleoplasm                            | A-431    | nucleoplaA549                       | nucleoplasm                            |
| nucleoli                               | A-431    | nucleoli U-251 MG                   | nucleoli                               |
| cytosol                                | A-431    | plasma meU-251 MG                   | cytosol                                |
| nucleoplasm                            | A-431    | nucleoplaHeLa                       | nucleoplasm, nucleoli                  |
| cytosol                                | A-431    | golgi appA549                       | golgi apparatus, vesicles, cytosol     |
| plasma membrane                        | A-431    | plasma meU-251 MG                   | plasma membrane                        |
| nuclear speckles, mitochondria         | A-431    | nucleoplaU-251 MG                   | nucleoplasm, mitochondria              |
| nucleoplasm, plasma membrane           | A-431    | plasma meU-251 MG                   | nucleoplasm, plasma membrane           |
| nucleoli                               | A549     | nucleoli, HeLa                      | nucleoplasm, nucleoli, intermediate fi |
| nucleoplasm, cytosol                   | A-431    | nucleoplasm, cytosol                |                                        |
| nucleoplasm, cytosol                   | A-431    | nucleoplaU-251 MG                   | nucleoplasm, cytosol                   |
| mitochondria                           | RH-30    | mitochondPC-3                       | mitochondria                           |
| cytosol                                | HEK 293  | cytosol PC-3                        | nuclear membrane, cytosol              |
| nucleoplasm, nucleoli fibrillar center | A-431    | nucleoplaU-251 MG                   | nucleoplasm, mitochondria              |
| nucleoplasm, mitochondria, cytosol     | A-431    | nucleoplaU-251 MG                   | nucleoplasm, mitochondria              |
| nucleoplasm, cytosol                   | A-431    | nucleoplaU-251 MG                   | nucleoplasm, cytosol                   |

|                                    |                              |                                       |
|------------------------------------|------------------------------|---------------------------------------|
| nucleoli, plasma membrane, A-431   | nucleoli, U-251 MG           | nucleoli, plasma membrane, cytosol    |
| nucleoplasm A-431                  | nucleoplaU-251 MG            | nucleoplasm                           |
| vesicles A-431                     | nucleoplaU-251 MG            | nucleoplasm, vesicles                 |
| nucleoplasm, nucleoli U-251 MG     | nucleoli                     |                                       |
| nucleoplasm, nucleoli A-431        | nucleoplaU-251 MG            | nucleoplasm, nucleoli                 |
| nucleoplasm U-2 OS                 | nucleoplaA549                | nucleoplasm                           |
| cytosol                            |                              |                                       |
| cytosol U-2 OS                     | cytosol RH-30                | cytosol                               |
| nucleoplasm U-2 OS                 | nucleoplaA-431               | nucleoplasm                           |
| nucleoplasm U-2 OS                 | nucleoplaA-431               | nucleoplasm, cytosol                  |
| mitochondria U-251 MG              | mitochondrRH-30              | mitochondria                          |
| nucleoplasm, plasma membræA-431    | nucleoplaU-251 MG            | nucleoplasm, plasma membrane, cytosol |
| nucleoplasm, cytosol U-251 MG      | nucleoplasm, cytosol         |                                       |
| plasma membrane, focal adA-431     | plasma meU-251 MG            | plasma membrane, cytosol              |
| nucleoplasm, plasma membræA-431    | nucleoplaU-251 MG            | nucleoplasm, plasma membrane          |
| microtubules, cytokinetic A-431    | plasma membrane              |                                       |
| plasma membrane SiHa               | plasma meBJ                  | plasma membrane                       |
| nucleoplasm, nucleoli fibrA-431    | nucleoplaU-251 MG            | nucleoplasm, nucleoli fibrillar cente |
| plasma membrane THP-1              | nucleoplasm, plasma membrane |                                       |
| nucleoplasm, centrosome U-251 MG   | nucleoplaSK-MEL-30           | nucleoplasm, centrosome               |
| nucleoplasm U-251 MG               | nucleoplaHEK 293             | nucleoplasm                           |
| nucleoplasm, cytosol A-431         | nucleoplaU-251 MG            | nucleoplasm, cytosol                  |
| nucleoplasm A-431                  | nucleoplaU-251 MG            | nucleoplasm, nuclear membrane         |
| nucleoplasm HEK 293                | nucleoplaBJ                  | nucleoplasm, vesicles                 |
| nuclear bodies, golgi appæA-431    | nuclear bSiHa                | nuclear bodies, golgi apparatus       |
| nucleoplasm, cytokinetic tU-2 OS   | nucleoplaHEK 293             | nucleoplasm                           |
| nucleoplasm MCF7                   | nucleoplaHeLa                | nucleoplasm, cytokinetic bridge       |
| endoplasmic reticulum HEK 293      | endoplasmHep G2              | endoplasmic reticulum                 |
| cytosol A-431                      | nucleoplaU-251 MG            | nucleoplasm, cytosol                  |
| intermediate filaments U-251 MG    | intermediASC TERT1           | intermediate filaments                |
| nuclear bodies, plasma menU-251 MG | plasma membrane, cytosol     |                                       |
| plasma membrane                    |                              |                                       |
| plasma membrane A-431              | golgi appU-251 MG            | golgi apparatus, plasma membrane      |
| plasma membrane A-431              | golgi appU-251 MG            | plasma membrane                       |
| vesicles U-251 MG                  | vesicles                     |                                       |
| nucleoli, golgi apparatus U-251 MG | golgi appPC-3                | nucleoli, golgi apparatus, vesicles   |
| golgi apparatus                    |                              |                                       |
| vesicles SK-MEL-30                 | vesicles                     |                                       |
| vesicles, aggresome U-251 MG       | vesicles                     |                                       |
| mitochondria U-251 MG              | mitochondria                 |                                       |
| mitochondria U-251 MG              | mitochondria                 |                                       |
| plasma membrane, cytosol A-431     | plasma meU-251 MG            | plasma membrane, cytosol              |
| cytosol A-431                      | cytosol MCF7                 | cytosol                               |
| plasma membrane U-251 MG           | plasma membrane              |                                       |
| endoplasmic reticulum U-2 OS       | endoplasmrA-431              | endoplasmic reticulum                 |
| nucleoplasm A-431                  | nucleoplaU-251 MG            | nucleoplasm, cytosol                  |
| vesicles U-2 OS                    | nucleoplaBJ                  | nucleoplasm, vesicles                 |
| nucleoplasm, vesicles BJ           | nucleoplasm, vesicles        |                                       |
| nucleoplasm A-431                  | nucleoplaU-251 MG            | nucleoplasm                           |
| endosomes, lysosomes U-251 MG      | endosomesHeLa                | endosomes, lysosomes                  |
| vesicles U-251 MG                  | vesicles HeLa                | vesicles                              |
| nucleoplasm, cytosol SH-SY5Y       | nucleoplaSK-MEL-30           | nucleoplasm                           |
| nucleoplasm, nucleoli              |                              |                                       |
| nucleoli A-431                     | nucleoplaPC-3                | nucleoplasm, nucleoli                 |
| nuclear speckles SiHa              | nuclear sRH-30               | nuclear speckles                      |

|                                   |          |                                                  |                                        |
|-----------------------------------|----------|--------------------------------------------------|----------------------------------------|
| nuclear speckles                  | A-431    | nuclear sU-251 MG                                | nuclear speckles                       |
| endoplasmic reticulum             | A-431    | endoplasmA549                                    | endoplasmic reticulum                  |
| vesicles                          | A-431    | vesicles U-251 MG                                | vesicles                               |
| nucleoplasm, nucleoli             | A-431    | nucleoplaMCF7                                    | nucleoplasm, nucleoli                  |
| nucleoplasm                       | U-2 OS   | nucleoplaHeLa                                    | nuclear bodies                         |
| endoplasmic reticulum, lysA-431   |          | endoplasmic reticulum, lysosomes                 |                                        |
| endoplasmic reticulum, encA-431   |          | endoplasmU-251 MG                                | endoplasmic reticulum, endosomes, lyso |
| nucleoplasm                       | MCF7     | nucleoplaHep G2                                  | nucleoplasm                            |
| nucleoplasm                       | A-431    | nucleoplaHeLa                                    | nucleoplasm                            |
| nucleoplasm                       | HeLa     | nucleoplasm                                      |                                        |
| cytosol                           | A-431    | cytosol U-251 MG                                 | cytosol                                |
| cytosol                           | PC-3     | cytosol SK-MEL-30                                | cytosol                                |
| nucleoplasm                       | A-431    | nucleoplaU-251 MG                                | nucleoplasm                            |
| nucleoplasm                       | A-431    | nucleoplaU-251 MG                                | nucleoplasm                            |
| nucleoplasm                       | U-2 OS   | nucleoplaA-431                                   | nucleoplasm, plasma membrane, cytosol  |
| nucleoplasm, nucleoli, cytcA-431  |          | nucleoplasm, nucleoli, cytosol                   |                                        |
| nucleoplasm, nucleoli, inteMCF7   |          | nucleoplaA549                                    | nucleoplasm, nucleoli, cytosol         |
| nucleoli fibrillar centerHep G2   |          | nucleoli fibrillar center, endoplasmic reticulum |                                        |
| nucleoplasm                       | A-431    | nucleoplaU-251 MG                                | nucleoplasm                            |
| nucleoplasm, nuclear bodieA-431   |          | nucleoplaU-251 MG                                | nucleoplasm                            |
| mitochondria, cytosol             | A-431    | cytosol U-251 MG                                 | cytosol                                |
| cytosol                           | A-431    | cytosol U-251 MG                                 | cytosol                                |
| nucleoplasm, cytosol              | A-431    | nucleoplaU-251 MG                                | nucleoplasm, cytosol                   |
| plasma membrane, centrosomEFO-21  |          | nucleoplaHaCaT                                   | plasma membrane, centrosome, cytosol   |
| nucleoplasm, golgi aparataA-431   |          | golgi apparatus, cytosol                         |                                        |
| golgi apparatus, cytosol          | A-431    | cytosol                                          |                                        |
| plasma membrane                   |          |                                                  |                                        |
| golgi apparatus, vesicles         | U-251 MG | nuclear speckles, golgi apparatus, cytosol       |                                        |
| microtubules                      | A-431    | microtubuU-251 MG                                | microtubules                           |
| plasma membrane, cytosol          | A-431    | plasma meU-251 MG                                | plasma membrane                        |
| golgi apparatus                   | PC-3     | golgi apparatus                                  |                                        |
| nucleoplasm, golgi apparatHEK 293 |          | golgi appSH-SY5Y                                 | golgi apparatus                        |
| nucleoplasm, cytosol              | A549     | nucleoplasm, cytosol                             |                                        |
| nucleoplasm                       | HaCaT    | nucleoplasm, plasma membrane                     |                                        |
| endoplasmic reticulum             | A-431    | endoplasmU-251 MG                                | endoplasmic reticulum                  |
| nucleoplasm, peroxisomes          | A-431    | nucleoplaU-251 MG                                | nucleoplasm, peroxisomes               |
| nucleoplasm, cytosol              | A-431    | nucleoplaU-251 MG                                | nucleoplasm, cytosol                   |
| nucleoplasm                       | A-431    | nucleoplaU-251 MG                                | nucleoplasm                            |
| mitochondria                      | A-431    | mitochondU-251 MG                                | mitochondria                           |
| focal adhesion sites              | U-2 OS   | focal adhesion sites                             |                                        |
| nucleoplasm, golgi aparataA-431   |          | nucleoplaU-251 MG                                | nucleoplasm, golgi apparatus, cytosol  |
| golgi apparatus                   | HaCaT    | golgi apparatus, vesicles                        |                                        |
| nucleoli                          | A-431    | nucleoli                                         |                                        |
| cytosol                           | A-431    | cytosol U-251 MG                                 | plasma membrane, cytosol               |
| nucleoplasm, vesicles             | A-431    | nucleoplaU-251 MG                                | nucleoplasm, vesicles                  |
| nucleoplasm                       | A-431    | nucleoplaHEK 293                                 | nucleoplasm                            |
| nucleoplasm                       | U-251 MG | nucleoplaRH-30                                   | nucleoplasm                            |
| golgi apparatus                   | U-251 MG | golgi apparatus                                  |                                        |
| golgi apparatus                   | A-431    | golgi appU-251 MG                                | golgi apparatus                        |
| mitochondria                      |          |                                                  |                                        |
| mitochondria                      | A-431    | mitochondU-251 MG                                | mitochondria                           |
| nucleoplasm, nucleoli             | HEK 293  | nucleoplaPC-3                                    | nucleoplasm, nucleoli                  |
| nucleoplasm, nucleoli             | HeLa     | nucleoplaPC-3                                    | nucleoplasm, nucleoli                  |
| plasma membrane, cytosol          | A-431    | plasma meU-251 MG                                | plasma membrane, cytosol               |

|                                                  |           |                                           |           |                                           |
|--------------------------------------------------|-----------|-------------------------------------------|-----------|-------------------------------------------|
| cytosol                                          | A-431     | cytosol                                   | U-251 MG  | cytosol                                   |
| centriolar satellite                             | A-431     | centriola                                 | U-251 MG  | centriolar satellite                      |
| nucleoli, endoplasmic reticulum,                 | A-431     | nucleoli, U-251 MG                        |           | endoplasmic reticulum, cytosol            |
| nuclear speckles, plasma membrane                | A-431     | nuclear speckles, plasma membrane         |           |                                           |
| nucleoplasm, plasma membrane                     |           |                                           |           |                                           |
| nucleoplasm                                      | A-431     | nucleoplasm                               | U-251 MG  | nucleoplasm                               |
| nucleoplasm                                      | U-251 MG  | nucleoplasm                               |           |                                           |
| nucleoplasm, golgi apparatus                     | A-431     | nucleoplasm, golgi apparatus              |           |                                           |
| nucleoplasm, cytosol                             | A-431     | nucleoplasm, cytosol                      | U-251 MG  | nucleoplasm, cytosol                      |
| nucleoplasm, cytosol                             | A-431     | nucleoplasm, cytosol                      | U-251 MG  | nucleoplasm, cytosol                      |
| nucleoplasm                                      | A-431     | nucleoplasm, nucleoli                     | PC-3      | nucleoplasm, nucleoli                     |
| nucleoplasm, microtubules                        | A-431     | nucleoplasm, microtubules                 | U-251 MG  | nucleoplasm, microtubules                 |
| cytosol                                          | A-431     | cytosol                                   | U-251 MG  | cytosol                                   |
| nucleoplasm                                      | A-431     | nucleoplasm                               | U-251 MG  | nucleoplasm                               |
| nucleoplasm                                      | A-431     | nucleoplasm                               | U-251 MG  | nucleoplasm                               |
| plasma membrane                                  |           |                                           |           |                                           |
| vesicles                                         |           |                                           |           |                                           |
| nucleoplasm, cytoplasmic bodies                  | A-431     | nucleoplasm, cytoplasmic bodies           | U-251 MG  | nucleoplasm, cytoplasmic bodies           |
| cytoplasmic bodies                               | HEK 293   | cytoplasmic bodies                        | SiHa      | cytoplasmic bodies                        |
| vesicles, cytosol                                | SH-SY5Y   | vesicles, cytosol                         | SiHa      | vesicles                                  |
| vesicles                                         |           |                                           |           |                                           |
| nucleoplasm, vesicles                            | MCF7      | nucleoplasm, vesicles                     | A549      | nucleoplasm, vesicles                     |
| golgi apparatus, plasma membrane, cell junctions |           |                                           |           |                                           |
| nucleoplasm                                      | A-431     | nucleoplasm                               | U-251 MG  | nucleoplasm                               |
| vesicles, cytosol                                | A-431     | vesicles, cytosol                         | U-251 MG  | vesicles, cytosol                         |
| vesicles, cytosol                                | A-431     | vesicles, cytosol                         | U-251 MG  | vesicles, cytosol                         |
| cytosol                                          | A-431     | golgi apparatus                           | U-251 MG  | golgi apparatus                           |
| actin filaments, cytosol                         | A-431     | nucleoplasm, cytosol                      | U-251 MG  | nucleoplasm, cytosol                      |
| nucleoplasm, nucleoli fibrillar centers          | A-431     | nucleoplasm, nucleoli fibrillar centers   | U-251 MG  | nucleoplasm, nucleoli fibrillar centers   |
| nucleoplasm                                      | A-431     | nucleoplasm, nucleoli                     | U-251 MG  | nucleoplasm, nucleoli                     |
| vesicles                                         | MCF7      | vesicles                                  | HEK 293   | vesicles                                  |
| cytosol                                          | A-431     | cytosol                                   | U-251 MG  | cytosol                                   |
| nucleoplasm, cytosol                             | A-431     | nucleoplasm, cytosol                      | U-251 MG  | nucleoplasm, cytosol                      |
| vesicles                                         |           |                                           |           |                                           |
| vesicles, intermediate filaments                 | A-431     | vesicles, intermediate filaments          | U-251 MG  | intermediate filaments                    |
| plasma membrane, focal adhesion sites            | A-431     | plasma membrane, focal adhesion sites     | U-251 MG  | focal adhesion sites                      |
| nucleoplasm                                      | MCF7      | nucleoplasm                               | HeLa      | nucleoplasm                               |
| nucleoplasm, nuclear membrane                    | SH-SY5Y   | nucleoplasm, nuclear membrane             |           |                                           |
| plasma membrane, cytosol                         | A-431     | golgi apparatus, plasma membrane, cytosol | U-251 MG  | golgi apparatus, plasma membrane, cytosol |
| nucleoplasm, vesicles, cytosol                   | U-2 OS    | nucleoplasm, vesicles, cytosol            | A549      | cytosol                                   |
| vesicles                                         |           |                                           |           |                                           |
| nuclear membrane, vesicles                       |           |                                           |           |                                           |
| nucleoplasm, nuclear bodies, cytosol             | A-431     | nucleoplasm, nuclear bodies, cytosol      | U-251 MG  | nucleoplasm, nuclear bodies, cytosol      |
| nucleoplasm, nuclear bodies                      | ASC TERT1 | nucleoplasm, nuclear bodies               |           |                                           |
| nucleoplasm, nucleoli, mitochondria              | HEK 293   | nucleoplasm, mitochondria                 | SK-MEL-30 | nucleoplasm, mitochondria                 |
| nucleoplasm                                      | MCF7      | nucleoplasm, plasma membrane              | HEL       | nucleoplasm, plasma membrane              |
| nucleoplasm, vesicles, plasma membrane           | RH-30     | nucleoplasm, vesicles, plasma membrane    | PC-3      | nucleoplasm, vesicles, plasma membrane    |
| vesicles                                         |           |                                           |           |                                           |
| vesicles, plasma membrane                        | A549      | vesicles, plasma membrane                 | Hep G2    | vesicles                                  |
| cytosol                                          | A-431     | cytosol                                   | U-251 MG  | cytosol                                   |
| nucleoplasm, mitochondria, cytosol               | A-431     | nucleoplasm, cytosol                      | U-251 MG  | nucleoplasm, cytosol                      |
| nucleoplasm, cytosol                             | SH-SY5Y   | nuclear speckles, cytosol                 | EFO-21    | nuclear speckles, cytosol                 |
| nucleoli                                         | U-251 MG  | nucleoli                                  | Hep G2    | nucleoli                                  |
| nucleoplasm                                      | A-431     | nucleoplasm                               | U-251 MG  | nucleoplasm                               |
| plasma membrane, mitochondria                    |           |                                           |           |                                           |

|                                        |           |                                           |                                            |
|----------------------------------------|-----------|-------------------------------------------|--------------------------------------------|
| nucleoplasm, cytosol                   | HaCaT     | nucleoplasm, cytosol                      |                                            |
| nucleoplasm, cytosol                   | A-431     | nucleoplaU-251 MG                         | nucleoplasm, cytosol                       |
| nucleoplasm                            | A-431     | nucleoplaU-251 MG                         | nucleoplasm                                |
| nucleoplasm                            | A-431     | nucleoplaU-251 MG                         | nucleoplasm                                |
| nuclear bodies                         | U-251 MG  | nuclear bHEK 293                          | nucleoplasm, nuclear bodies                |
| nucleoplasm, cytosol                   | A-431     | nucleoplasm, cytosol                      |                                            |
| plasma membrane, cell junctions        |           |                                           |                                            |
| plasma membrane, cell junctions        | U-2 OS    | vesicles, plasma membrane, cell junctions |                                            |
| nucleoplasm                            | MCF7      | nucleoplaSiHa                             | nucleoplasm                                |
| nucleoplasm, centrosome, cytosol       |           |                                           |                                            |
| nucleoplasm, nuclear membrane, cytosol | U-251 MG  | nucleoplaAF22                             | nuclear membrane, plasma membrane, cytosol |
| cytosol                                | A-431     | cytosol U-251 MG                          | cytosol                                    |
| vesicles, cell junctions               |           |                                           |                                            |
| cell junctions                         |           |                                           |                                            |
| nucleoplasm, cytosol                   | A-431     | nucleoplaU-251 MG                         | nucleoplasm, cytosol                       |
| microtubules                           | A-431     | microtubuU-251 MG                         | microtubules                               |
| nucleoplasm, cytosol                   | SK-MEL-30 | nucleoplaK-562                            | nucleoplasm                                |
| endoplasmic reticulum                  | RH-30     | endoplasmHUVEC TER                        | endoplasmic reticulum                      |
| intermediate filaments                 | A-431     | intermediate filaments                    |                                            |
| nucleoplasm                            | HEK 293   | nucleoplaHeLa                             | nucleoplasm, centriolar satellite          |
| cytosol                                | A-431     | nucleoplaU-251 MG                         | nucleoplasm, cytosol                       |
| actin filaments                        | A-431     | actin filU-251 MG                         | actin filaments, cytosol                   |
| nucleoplasm                            | A-431     | nucleoplaU-251 MG                         | nucleoplasm                                |
| nucleoplasm                            | A-431     | nucleoplaU-251 MG                         | nucleoplasm                                |
| actin filaments, focal adhesion        | A-431     | focal adhU-251 MG                         | focal adhesion sites                       |
| nuclear membrane                       | A-431     | nuclear rU-251 MG                         | nuclear membrane                           |
| nuclear membrane                       | A-431     | nuclear rU-251 MG                         | nuclear membrane                           |
| nuclear membrane                       | A-431     | nuclear rU-251 MG                         | nuclear membrane                           |
| nuclear speckles, plasma membrane      | A-431     | nuclear sU-251 MG                         | nuclear speckles                           |
| microtubules                           | A-431     | microtubuMCF7                             | midbody                                    |
| microtubules                           | A-431     | microtubuU-251 MG                         | microtubules                               |
| mitochondria                           | A-431     | nucleoplaU-251 MG                         | vesicles, mitochondria                     |
| nucleoplasm, plasma membrane           | A-431     | nucleoplaU-251 MG                         | nucleoplasm, plasma membrane               |
| nuclear bodies                         | A-431     | nuclear bU-251 MG                         | nuclear bodies                             |
| nucleoplasm                            | A-431     | nucleoplaU-251 MG                         | nucleoplasm, nucleoli                      |
| nucleoplasm                            | HEK 293   | nucleoplaPC-3                             | nucleoplasm                                |
| actin filaments, cytosol               | A-431     | cytosol U-251 MG                          | cytosol                                    |
| cytosol                                |           |                                           |                                            |
| plasma membrane, microtubules          | A-431     | plasma meU-251 MG                         | plasma membrane, cytosol                   |
| plasma membrane, microtubules          | A-431     | plasma meU-251 MG                         | plasma membrane, cytosol                   |
| golgi apparatus                        | U-251 MG  | golgi apparatus                           |                                            |
| golgi apparatus                        | A-431     | golgi appU-251 MG                         | golgi apparatus                            |
| vesicles                               | HeLa      | vesicles SiHa                             | nucleoplasm, vesicles                      |
| nucleoplasm                            | A-431     | nucleoplaU-251 MG                         | nucleoplasm, nuclear bodies                |
| nucleoplasm                            | A-431     | nucleoplaU-251 MG                         | nucleoplasm                                |
| nucleoplasm                            |           |                                           |                                            |
| nucleoplasm, nucleoli, vesicles        | A-431     | nucleoplaU-251 MG                         | nucleoplasm, nucleoli, vesicles            |
| nucleoli                               | PC-3      | nucleoli                                  |                                            |
| nucleoplasm                            | U-251 MG  | nucleoplasm                               |                                            |
| nucleoplasm, cytosol                   | A-431     | nucleoplaU-251 MG                         | nucleoplasm, cytosol                       |
| nucleoli, cytosol                      | A-431     | nucleoli, U-251 MG                        | nucleoli, cytosol                          |
| nucleoplasm, nucleoli                  | A-431     | nucleoplaU-251 MG                         | nucleoplasm, nucleoli                      |
| actin filaments, mitochondria, cytosol | A-431     | actin filU-251 MG                         | actin filaments, mitochondria, cytosol     |
| cytosol                                | U-251 MG  | cytosol                                   |                                            |
| plasma membrane                        | A-431     | plasma meU-251 MG                         | plasma membrane                            |

|                                  |           |                   |           |                                               |
|----------------------------------|-----------|-------------------|-----------|-----------------------------------------------|
| nucleoplasm                      | MCF7      | nucleoplasm       | HEK 293   | nucleoplasm                                   |
| nucleoplasm                      | U-2 OS    | nucleoplasm       | MCF7      | nucleoplasm                                   |
| nucleoplasm                      | U-2 OS    | nucleoplasm       | RH-30     | nucleoplasm                                   |
| nucleoplasm, cytosol             | A-431     | nucleoplasm       | SiHa      | nucleoplasm, vesicles, cytosol                |
| nucleoplasm, cytokinetic         | HEK 293   | nucleoplasm       | RH-30     | nucleoplasm                                   |
| microtubules                     | RH-30     | microtubules      | SK-MEL-30 | microtubules                                  |
| cytosol                          | A-431     | cytosol           | U-251 MG  | cytosol                                       |
| cytosol                          | A-431     | cytosol           | U-251 MG  | cytosol                                       |
| nucleoplasm, cytosol             | A-431     | nucleoplasm       | U-251 MG  | nucleoplasm, cytosol                          |
| nucleoplasm, vesicles            | A-431     | vesicles          |           | vesicles                                      |
| vesicles                         | U-2 OS    | vesicles          | BJ        | vesicles                                      |
| nuclear speckles                 | A549      | nuclear speckles, |           | cytosol                                       |
| cytosol                          | A-431     | cytosol           | U-251 MG  | cytosol                                       |
| cytosol                          | A-431     | cytosol           | U-251 MG  | cytosol                                       |
| plasma membrane                  | U-2 OS    | nucleoli,         | A549      | nucleoli, plasma membrane                     |
| vesicles                         | MCF7      | vesicles          | HaCaT     | nucleoplasm, vesicles                         |
| cytosol                          | U-251 MG  | nucleoli,         |           | cytosol                                       |
| endoplasmic reticulum            | A-431     | endoplasmic       | U-251 MG  | endoplasmic reticulum                         |
| plasma membrane                  |           |                   |           |                                               |
| nucleoplasm                      | A-431     | nucleoplasm       | U-251 MG  | nucleoplasm                                   |
| nucleoplasm                      | A-431     | nucleoplasm       | U-251 MG  | nucleoplasm                                   |
| nucleoplasm                      | U-2 OS    | nucleoplasm       | U-251 MG  | nucleoplasm, plasma membrane                  |
| endoplasmic reticulum            | A-431     | endoplasmic       | U-251 MG  | endoplasmic reticulum                         |
| nucleoplasm                      | MCF7      | nucleoplasm       | PC-3      | nucleoplasm                                   |
| nucleoplasm, vesicles            | U-251 MG  | nucleoplasm       | MCF7      | nucleoplasm, vesicles                         |
| nucleoplasm                      | SiHa      | nucleoplasm       | HAP1      | nucleoplasm, midbody, mitotic spindle,        |
| nucleoplasm, vesicles            | RH-30     | nucleoplasm       | PC-3      | vesicles                                      |
| vesicles                         | A-431     | vesicles          | BJ        | nuclear bodies, vesicles, cytosol             |
| nucleoplasm, plasma membrane     | A-431     | nucleoplasm       | SiHa      | nucleoplasm, cytosol                          |
| nucleoplasm, plasma membrane     | A-431     | nucleoplasm       | SiHa      | nucleoplasm, plasma membrane, cytosol         |
| nucleoplasm, vesicles            | U-2 OS    | vesicles          |           |                                               |
| plasma membrane, actin filaments | A-431     | plasma membrane   | U-251 MG  | plasma membrane, cytosol                      |
| plasma membrane, actin filaments | A-431     | plasma membrane   | U-251 MG  | plasma membrane, focal adhesion sites         |
| mitochondria                     | ASC TERT1 | nucleoli,         | SK-MEL-30 | nucleoplasm, mitochondria                     |
| plasma membrane                  | AF22      | plasma membrane   |           |                                               |
| plasma membrane, cytosol         | A-431     | plasma membrane   | U-251 MG  | plasma membrane, cytosol                      |
| mitochondria                     | HEK 293   | mitochondria      | HeLa      | mitochondria                                  |
| plasma membrane, cytosol         | A-431     | plasma membrane   | U-251 MG  | plasma membrane, cytosol                      |
| cytosol, cytoplasmic bodies      | A-431     | plasma membrane   | U-251 MG  | cytosol, cytoplasmic bodies                   |
| cytosol                          | A-431     | plasma membrane   | U-251 MG  | cytosol                                       |
| nucleoli, cytosol                | A-431     | nucleoli          | U-251 MG  | nucleoli                                      |
| cytosol                          | A-431     | cytosol           | A549      | cytosol                                       |
| nucleoplasm, golgi apparatus     | A-431     | nucleoplasm       | A549      | nucleoplasm, golgi apparatus                  |
| nucleoplasm                      | A-431     | nucleoplasm       | SiHa      | nucleoplasm, nucleoli                         |
| nucleoplasm, nucleoli, midbody   | A-431     | nucleoplasm       | SK-MEL-30 | nucleoplasm                                   |
| nucleoplasm, vesicles            | A-431     | nucleoplasm       | U-251 MG  | nucleoplasm, vesicles                         |
| nucleoplasm, plasma membrane     | A-431     | plasma membrane   | U-251 MG  | nucleoplasm, golgi apparatus, plasma membrane |
| nucleoplasm, cytosol             | A-431     | nucleoplasm       | HeLa      | nucleoplasm, cytosol                          |
| vesicles                         | A-431     | focal adhesion    | U-251 MG  | focal adhesion sites                          |
| nucleoli                         | U-251 MG  | nucleoli,         | MCF7      | nucleoli                                      |
| nucleoli, cytosol                | U-251 MG  | nucleoli,         | A549      | nucleoli, vesicles, cytosol                   |
| centriolar satellite, cytosol    | A-431     | centriolar        | U-251 MG  | cytosol                                       |
| plasma membrane                  | A-431     | plasma membrane   | U-251 MG  | plasma membrane                               |
| nucleoplasm                      | SiHa      | nucleoplasm       |           |                                               |
| mitochondria                     | A549      | mitochondria      | HeLa      | nuclear membrane, mitochondria                |

|                                                         |          |                                          |           |
|---------------------------------------------------------|----------|------------------------------------------|-----------|
| nucleoplasm, plasma membrane, cytosol                   | U-2 OS   | nucleoplasm, plasma membrane, cytokine   |           |
| cytosol                                                 | A-431    | cytosol                                  | U-251 MG  |
| cytosol                                                 |          |                                          |           |
| nucleoplasm, nuclear membrane, plasma membrane, cytosol | A-431    | nucleoplasm, nuclear membrane            |           |
| plasma membrane, cytosol                                | A-431    | plasma membrane, cytosol                 | U-251 MG  |
| nucleoplasm, cytosol                                    | U-251 MG | nucleoplasm, cytosol                     | SH-SY5Y   |
| endoplasmic reticulum                                   |          | endoplasmic reticulum                    |           |
| endoplasmic reticulum                                   | U-251 MG | endoplasmic reticulum                    |           |
| intermediate filaments                                  |          |                                          |           |
| cytosol                                                 | A-431    | golgi apparatus                          | U-251 MG  |
| nuclear speckles                                        | A-431    | nuclear speckles                         | U-251 MG  |
| nuclear speckles                                        | A-431    | nuclear speckles                         | U-251 MG  |
| nuclear speckles                                        | SiHa     | nuclear speckles                         | RH-30     |
| cytosol                                                 | A-431    | nuclear bodies, cytosol                  | U-251 MG  |
| golgi apparatus                                         | U-2 OS   | golgi apparatus                          | A-431     |
| nucleoplasm                                             | MCF7     | nucleoplasm, vesicles                    | HEK 293   |
| nucleoplasm                                             | A549     | nucleoplasm                              | HaCaT     |
| centrosome                                              |          |                                          |           |
| centrosome                                              |          |                                          |           |
| endoplasmic reticulum                                   |          |                                          |           |
| golgi apparatus                                         | SH-SY5Y  | golgi apparatus                          | RH-30     |
| nucleoplasm                                             | A-431    | nucleoplasm, cytosol                     | U-251 MG  |
| golgi apparatus                                         | A-431    | golgi apparatus, vesicles                |           |
| nuclear membrane, intermediate filaments                | A-431    | nuclear membrane, intermediate filaments | MCF7      |
| centrosome                                              | MCF7     | nuclear bodies, centrosome               |           |
| nucleoplasm                                             |          |                                          |           |
| nucleoplasm                                             | PC-3     | nucleoplasm                              |           |
| nucleoplasm                                             | HaCaT    | nucleoplasm                              |           |
| nucleoplasm, nucleoli fibrillar center                  | A-431    | nucleoplasm, nucleoli fibrillar center   | U-251 MG  |
| nucleoli fibrillar center                               | A-431    | nucleoli fibrillar center                | U-251 MG  |
| nucleoplasm, cytosol                                    | A-431    | nucleoplasm, cytosol                     | U-251 MG  |
| nucleoplasm                                             | U-251 MG | nucleoplasm                              |           |
| nucleoplasm                                             | SiHa     | nucleoplasm, nucleoli                    | PC-3      |
| vesicles                                                | A-431    | vesicles                                 | U-251 MG  |
| endoplasmic reticulum                                   | HEK 293  | plasma membrane, cytosol                 | HeLa      |
| nucleoli fibrillar center                               | A-431    | nucleoli fibrillar center                | U-251 MG  |
| cytosol                                                 | A-431    | cytosol                                  | U-251 MG  |
| cytosol                                                 | A-431    | cytosol                                  | SK-MEL-30 |
| nucleoli                                                | A-431    | nucleoli                                 | U-251 MG  |
| nucleoli, nuclear speckles                              | U-251 MG | nucleoli, nuclear speckles               | HeLa      |
| nucleoplasm                                             | MCF7     | nucleoplasm                              | RH-30     |
| nucleoli, cytosol                                       | A-431    | nucleoli, cytosol                        | HEK 293   |
| cytosol                                                 | A-431    | cytosol                                  | U-251 MG  |
| cytosol                                                 | A-431    | nuclear membrane, cytosol                | U-251 MG  |
| nucleoplasm, mitochondria                               | Hep G2   | nucleoplasm, mitochondria                |           |
| vesicles                                                | U-2 OS   | vesicles                                 | U-251 MG  |
| vesicles                                                | A-431    | vesicles                                 | U-251 MG  |
| cytokinetic bridge, cytosol                             | A-431    | microtubules, cytosol                    | U-251 MG  |
| nucleoplasm                                             | A-431    | nucleoplasm                              | U-251 MG  |
| nucleoplasm, nucleoli fibrillar center                  | U-251 MG | nucleoplasm, nucleoli fibrillar center   | SH-SY5Y   |
| plasma membrane, actin filaments                        | U-251 MG | plasma membrane, actin filaments         |           |
| nucleoplasm, nucleoli fibrillar center                  | U-2 OS   | nucleoplasm, nucleoli fibrillar center   | SH-SY5Y   |
| nucleoplasm                                             |          |                                          |           |
| vesicles                                                |          |                                          |           |
| vesicles                                                | HEK 293  | vesicles                                 | BJ        |
|                                                         |          | vesicles                                 |           |



|                             |          |                                                    |                                       |
|-----------------------------|----------|----------------------------------------------------|---------------------------------------|
| golgi apparatus, vesicles   | A-431    | golgi appU-251 MG                                  | golgi apparatus, vesicles             |
| nucleoli, cytosol           | U-2 OS   | nucleoplaSK-MEL-30                                 | nucleoplasm, nucleoli, cytosol        |
| plasma membrane, cytosol    | A-431    | golgi appU-251 MG                                  | plasma membrane, cytosol              |
| cytosol                     | U-251 MG | plasma membrane, cytosol                           |                                       |
| endoplasmic reticulum       | A-431    | endoplasrU-251 MG                                  | nuclear bodies, endoplasmic reticulum |
| endoplasmic reticulum       | U-251 MG | endoplasmic reticulum                              |                                       |
| nucleoplasm, cell junctions |          |                                                    |                                       |
| cell junctions              |          |                                                    |                                       |
| mitochondria                | U-2 OS   | mitochondHep G2                                    | mitochondria                          |
| nucleoplasm, nucleoli       | U-251 MG | nucleoplasm, nucleoli                              |                                       |
| centrosome                  |          |                                                    |                                       |
| endoplasmic reticulum       | A-431    | endoplasrU-251 MG                                  | endoplasmic reticulum                 |
| nucleoplasm, vesicles       | A-431    | nucleoplaU-251 MG                                  | nucleoplasm                           |
| nucleoplasm, cytosol        | A-431    | nucleoplaU-251 MG                                  | nucleoplasm, cytosol                  |
| centriolar satellite        | A-431    | centriolaU-251 MG                                  | cytosol                               |
| cytosol                     | A-431    | cytosol                                            |                                       |
| nucleoplasm, cytosol        | A-431    | nucleoplaU-251 MG                                  | nucleoplasm                           |
| nucleoplasm, endoplasmic r  | A-431    | nucleoplaU-251 MG                                  | nucleoplasm, endoplasmic reticulum    |
| actin filaments, cytosol    | A-431    | actin filU-251 MG                                  | actin filaments, cytosol              |
| nucleoli, plasma membrane,  | U-2 OS   | nucleoli, SiHa                                     | nucleoli, actin filaments             |
| golgi apparatus             | A-431    | golgi appU-251 MG                                  | golgi apparatus                       |
| nuclear speckles, golgi ap  | A-431    | nucleoplaU-251 MG                                  | nucleoplasm, golgi apparatus          |
| cytosol                     | PC-3     | plasma membrane, cytosol                           |                                       |
| plasma membrane             | U-251 MG | plasma membrane, cell junctions                    |                                       |
| plasma membrane, actin fila | A-431    | plasma meU-251 MG                                  | plasma membrane, centrosome           |
| nucleoplasm                 | HEK 293  | nucleoplaHep G2                                    | nucleoplasm                           |
| nucleoplasm                 | A-431    | nucleoplaU-251 MG                                  | nucleoplasm                           |
| plasma membrane             | A-431    | plasma meU-251 MG                                  | plasma membrane                       |
| nuclear speckles            | A-431    | nuclear sU-251 MG                                  | nuclear speckles                      |
| cytosol                     | A-431    | cytosol U-251 MG                                   | plasma membrane, cytosol              |
| nucleoplasm                 | U-251 MG | nucleoplasm                                        |                                       |
| nuclear membrane, plasma n  | RH-30    | nuclear membrane, plasma membrane, actin filaments |                                       |
| vesicles, plasma membrane   | A-431    | vesicles, U-251 MG                                 | vesicles, plasma membrane             |
| nucleoplasm, nuclear bodie  | A-431    | nucleoplaU-251 MG                                  | nucleoplasm, nuclear bodies, cytosol  |
| cytosol                     | A549     | cytosol PC-3                                       | cytosol                               |
| nucleoplasm                 | A-431    | nucleoplasm                                        |                                       |
| mitochondria                | A-431    | mitochondria                                       |                                       |
| nuclear speckles            | A-431    | nuclear sU-251 MG                                  | nuclear speckles                      |
| mitochondria                | A-431    | mitochondU-251 MG                                  | mitochondria                          |
| nucleoplasm, mitochondria,  | U-251 MG | nucleoplasm, mitochondria                          |                                       |
| nucleoplasm, cytosol        | A-431    | nucleoplaU-251 MG                                  | nucleoplasm, cytosol                  |
| nucleoplasm, cytosol        | A-431    | nucleoplaU-251 MG                                  | nucleoplasm                           |
| plasma membrane             | U-2 OS   | plasma meHep G2                                    | plasma membrane, aggresome            |
| nucleoplasm, plasma membr   | MCF7     | nucleoplaSH-SY5Y                                   | nucleoplasm, cytosol                  |
| nucleoplasm, vesicles       | U-2 OS   | nucleoplaPC-3                                      | nucleoplasm, vesicles                 |
| cytosol                     | A-431    | cytosol U-251 MG                                   | cytosol                               |
| nucleoplasm, plasma membr   | BJ       | plasma membrane                                    |                                       |
| cytosol                     | A549     | cytosol HeLa                                       | cytosol                               |
| nucleoplasm, golgi apparat  | A-431    | nucleoplaU-251 MG                                  | nucleoplasm, golgi apparatus          |
| nucleoplasm                 | A-431    | nucleoplaU-251 MG                                  | nucleoplasm                           |
| nucleoplasm                 | A-431    | nucleoplaU-251 MG                                  | nucleoplasm                           |
| cytosol                     | HeLa     | endoplasmic reticulum, cytosol                     |                                       |
| nuclear speckles, cytosol   | A-431    | nuclear sU-251 MG                                  | nuclear speckles                      |
| nucleoplasm                 | A-431    | nucleoplaSH-SY5Y                                   | nucleoplasm, golgi apparatus          |
| nucleoplasm                 | SH-SY5Y  | nucleoplaRH-30                                     | nucleoplasm, cytosol                  |

|                                        |          |                                        |           |
|----------------------------------------|----------|----------------------------------------|-----------|
| endoplasmic reticulum                  | BJ       | endoplasmic reticulum                  |           |
| nucleoplasm, cytosol                   | A-431    | nucleoplasm, cytosol                   | U-251 MG  |
| mitochondria                           | A-431    | mitochondria                           | U-251 MG  |
| mitochondria                           |          |                                        |           |
| vesicles                               | U-251 MG | vesicles                               |           |
| peroxisomes                            | A-431    | peroxisomes                            | U-251 MG  |
| cytosol                                | A-431    | cytosol                                | U-251 MG  |
| nucleoli, plasma membrane              | RH-30    | nucleoli, plasma membrane              | SK-MEL-30 |
| nucleoplasm                            | A-431    | nucleoplasm                            | HEK 293   |
| cytosol                                | A-431    | cytosol                                | U-251 MG  |
| mitochondria, cytosol                  | A-431    | mitochondria, cytosol                  | U-251 MG  |
| cytosol                                | U-251 MG | cytosol                                |           |
| nucleoplasm, plasma membrane           | A-431    | nucleoplasm, plasma membrane           | U-251 MG  |
| nucleoplasm, cytosol                   | A-431    | nucleoplasm, cytosol                   |           |
| cytosol                                | A-431    | cytosol                                | U-251 MG  |
| nucleoplasm, nucleoli fibrillar center | A-431    | nucleoplasm, nucleoli fibrillar center | U-251 MG  |
| plasma membrane, cell junction         | U-2 OS   | plasma membrane                        | A-431     |
| cytosol                                | A-431    | cytosol                                | U-251 MG  |
| vesicles, cytosol                      | A-431    | vesicles, cytosol                      | U-251 MG  |
| centrosome                             | U-251 MG | centrosome                             |           |
| mitochondria                           | A-431    | mitochondria                           | U-251 MG  |
| mitochondria                           | A-431    | mitochondria                           | U-251 MG  |
| mitochondria                           |          |                                        |           |
| mitochondria                           |          |                                        |           |
| vesicles                               | SH-SY5Y  | vesicles                               | RH-30     |
| cytosol                                | A549     | cytosol                                |           |
| nucleoli                               | MCF7     | endoplasmic reticulum                  | A549      |
| centriolar satellite                   |          |                                        |           |
| nucleoplasm, cytosol                   | A-431    | nucleoplasm, cytosol                   | HEK 293   |
| cytosol                                | MCF7     | cytosol                                | HeLa      |
| cytosol                                | MCF7     | cytosol                                |           |
| golgi apparatus                        | A549     | golgi apparatus                        | RH-30     |
| nucleoplasm                            | U-251 MG | nucleoplasm                            | SiHa      |
| vesicles                               | SH-SY5Y  | vesicles                               |           |
| nucleoli, endoplasmic reticulum        | MCF7     | nucleoli, endoplasmic reticulum        | HEK 293   |
| vesicles, microtubules                 | A-431    | vesicles, microtubules                 | U-251 MG  |
| mitochondria, cytosol                  | HEK 293  | mitochondria                           |           |
| nucleoplasm, nuclear speckles          | A-431    | nucleoplasm, nuclear speckles          | U-251 MG  |
| nuclear speckles                       | HEK 293  | nuclear speckles                       |           |
| cytosol                                |          |                                        |           |
| vesicles, plasma membrane              | HEK 293  | plasma membrane, cytosol               | PC-3      |
| nucleoplasm                            | A-431    | nucleoplasm                            | A549      |
| nucleoplasm, cytosol                   | SiHa     | nucleoplasm                            |           |
| nucleoli fibrillar center              | A-431    | nucleoli                               | U-251 MG  |
| centrosome                             | RH-30    | centrosome                             |           |
| nucleoplasm, plasma membrane           | HaCaT    | plasma membrane, cytosol               |           |
| nucleoplasm                            | A-431    | nucleoplasm                            | MCF7      |
| nuclear bodies                         | U-251 MG | nucleoplasm, nuclear bodies            | SiHa      |
| nucleoplasm, cytosol                   | A-431    | nucleoplasm, cytosol                   | U-251 MG  |
| cytosol                                | A-431    | cytosol                                | U-251 MG  |
| actin filaments                        | HeLa     | actin filaments                        |           |
| nucleoplasm, vesicles                  | A-431    | nucleoplasm, vesicles                  | U-251 MG  |
| nucleoplasm, nuclear bodies            | Hep G2   | nucleoplasm                            | RH-30     |
| nucleoplasm                            | U-251 MG | nucleoplasm                            | RH-30     |

|                                       |           |                                         |                                        |
|---------------------------------------|-----------|-----------------------------------------|----------------------------------------|
| nucleoplasm, cytosol                  | A-431     | nucleoplaU-251 MG                       | nucleoplasm, cytosol                   |
| vesicles                              | A-431     | vesicles U-251 MG                       | vesicles                               |
| nucleoplasm                           | A-431     | nucleoplaHEL                            | nucleoplasm                            |
| plasma membrane, focal adhesion sites |           |                                         |                                        |
| nucleoplasm, plasma membrane          | A-431     | nucleoplaU-251 MG                       | nucleoplasm                            |
| nucleoplasm                           | A-431     | nucleoplaU-251 MG                       | nucleoplasm                            |
| vesicles                              | A-431     | vesicles U-251 MG                       | vesicles                               |
| vesicles                              |           |                                         |                                        |
| nucleoplasm, cell junction            | A-431     | nucleoplaU-251 MG                       | nucleoplasm, cytosol                   |
| nucleoplasm, cytosol                  | MCF7      | nucleoplaPC-3                           | nucleoplasm, cytosol                   |
| nucleoplasm, cytokinetic              | MCF7      | nucleoplaPC-3                           | nucleoplasm, cytosol                   |
| cytosol                               | A-431     | cytosol U-251 MG                        | cytosol                                |
| vesicles                              | A-431     | vesicles                                |                                        |
| vesicles                              | A-431     | vesicles U-251 MG                       | vesicles                               |
| nucleoplasm, nuclear bodies           | A-431     | nucleoplaU-251 MG                       | nucleoplasm, nuclear bodies            |
| nucleoplasm                           | HEK 293   | nucleoplaPC-3                           | nucleoplasm, nuclear bodies            |
| vesicles                              | U-2 OS    | vesicles, plasma membrane               |                                        |
| vesicles                              | SK-MEL-30 | nucleoplasm, vesicles                   |                                        |
| cytosol                               |           |                                         |                                        |
| cytosol                               | U-2 OS    | actin filHep G2                         | nucleoplasm, cytosol                   |
| golgi apparatus, plasma membrane      | A-431     | golgi appU-251 MG                       | golgi apparatus, plasma membrane       |
| cytoplasmic bodies                    | U-2 OS    | nucleoplaBJ                             | nucleoplasm, cytoplasmic bodies        |
| nucleoplasm, nuclear bodies, cytosol  |           |                                         |                                        |
| rods & rings                          | SiHa      | nucleoplasm, cytoplasmic bodies         |                                        |
| golgi apparatus                       | A-431     | nucleoli, U-251 MG                      | golgi apparatus                        |
| vesicles                              | MCF7      | vesicles                                |                                        |
| nucleoplasm, nuclear bodies           | U-2 OS    | nuclear bPC-3                           | nuclear bodies                         |
| nucleoplasm                           | HeLa      | nucleoplasm                             |                                        |
| nucleoplasm, nuclear bodies           | MCF7      | nucleoplaHeLa                           | nucleoplasm                            |
| plasma membrane                       | AF22      | plasma membrane                         |                                        |
| nucleoplasm                           | MCF7      | nucleoplaHEK 293                        | nucleoplasm                            |
| nucleoplasm                           | MCF7      | nucleoplaHEK 293                        | nucleoplasm, golgi apparatus           |
| nucleoplasm, cytosol                  | A-431     | nucleoplaU-251 MG                       | nucleoplasm, cytosol                   |
| cytosol                               | U-2 OS    | cytosol MCF7                            | cytosol                                |
| nucleoplasm, cytosol                  | A-431     | nucleoplaU-251 MG                       | nucleoplasm                            |
| plasma membrane                       | A-431     | plasma meU-251 MG                       | plasma membrane                        |
| nucleoplasm, nuclear membrane         | A-431     | nucleoplaU-251 MG                       | nucleoplasm, nuclear membrane, cytosol |
| centrosome                            | A549      | nucleoplasm, nucleoli, centrosome       |                                        |
| cytosol                               | A-431     | cytosol U-251 MG                        | nucleoplasm, cytosol                   |
| nucleoplasm, mitochondria             | A-431     | nucleoplasm, mitochondria               |                                        |
| nucleoplasm, nuclear membrane         | A-431     | nucleoplasm, nuclear membrane, nucleoli |                                        |
| nucleoplasm, nucleoli                 | A-431     | nucleoplaU-251 MG                       | nucleoplasm, nucleoli                  |
| nucleoplasm, nucleoli                 | RH-30     | nucleoli HAP1                           | nucleoplasm, nucleoli                  |
| nucleoplasm, intermediate             | A-431     | nucleoplaU-251 MG                       | nucleoplasm, centrosome                |
| nuclear bodies, intermediate          | A-431     | nucleoplaU-251 MG                       | nucleoplasm, nuclear bodies, plasma me |
| nucleoplasm                           | HEK 293   | nucleoplasm                             |                                        |
| cytosol                               | U-251 MG  | cytosol                                 |                                        |
| plasma membrane                       |           |                                         |                                        |
| nucleoplasm, nucleoli                 | RH-30     | nucleoplaHaCaT                          | nucleoplasm                            |
| vesicles                              | U-2 OS    | vesicles BJ                             | nucleoplasm, vesicles, mitochondria    |
| plasma membrane, actin filaments      | A-431     | plasma meU-251 MG                       | plasma membrane                        |
| mitochondria                          | HeLa      | nuclear speckles, mitochondria          |                                        |
| cytosol                               | A-431     | cytosol U-251 MG                        | cytosol                                |
| nucleoplasm, golgi apparatus          |           |                                         |                                        |
| nucleoplasm                           | A-431     | nucleoplaU-251 MG                       | nucleoplasm                            |

|                                        |           |                                        |           |
|----------------------------------------|-----------|----------------------------------------|-----------|
| nucleoplasm, nucleoli fibrillar center | A-431     | nucleoplasm, nucleoli fibrillar center | U-251 MG  |
| cytosol                                | A-431     | nuclear membrane, mitochondria         | U-251 MG  |
| nucleoplasm                            | A-431     | nucleoplasm                            | U-251 MG  |
| nuclear membrane, mitochondria         | U-251 MG  | nuclear membrane, mitochondria         | PC-3      |
| nucleoplasm                            | A-431     | nucleoplasm                            | U-251 MG  |
| nucleoplasm                            | A-431     | nucleoplasm                            | U-251 MG  |
| actin filaments                        | RPTEC TER | actin filaments                        |           |
| plasma membrane, actin filaments       |           |                                        |           |
| cytosol                                | A-431     | cytosol                                | U-251 MG  |
| nucleoli, cytosol                      | A-431     | cytosol                                | U-251 MG  |
| nucleoplasm                            | HEK 293   | nucleoplasm                            | RH-30     |
| centrosome, cytosol                    | U-251 MG  | centrosome, cytosol                    |           |
| plasma membrane, cytosol               | A-431     | plasma membrane, cytosol               | U-251 MG  |
| golgi apparatus                        | A-431     | golgi apparatus, plasma membrane       | appHTCEpi |
| centriolar satellite                   | A549      | centriolar satellite                   |           |
| centriolar satellite                   | U-2 OS    | centriolar satellite, aggresome        | HEK 293   |
| nuclear bodies                         | U-2 OS    | nuclear bodies                         | MCF7      |
| nucleoplasm                            | RH-30     | nucleoplasm                            |           |
| nucleoplasm                            | A-431     | nucleoplasm                            | U-251 MG  |
| nucleoplasm, golgi apparatus           | A-431     | nucleoplasm, golgi apparatus           | U-251 MG  |
| nucleoplasm                            | U-2 OS    | nucleoplasm, plasma membrane, cytosol  | A-431     |
| nucleoli                               | BJ        | nucleoli                               |           |
| nuclear speckles, golgi apparatus      | SiHa      | nuclear speckles, cytosol              |           |
| vesicles                               | U-2 OS    | vesicles                               |           |
| nucleoplasm, nucleoli fibrillar center | A-431     | nucleoplasm, nucleoli fibrillar center | U-251 MG  |
| vesicles, cytosol                      | A-431     | cytosol                                | U-251 MG  |
| nuclear membrane, vesicles             | A-431     | nuclear membrane, cytosol              | U-251 MG  |
| plasma membrane                        | U-2 OS    | plasma membrane                        | SK-MEL-30 |
| cytosol                                |           |                                        |           |
| nucleoplasm, nucleoli                  | A-431     | nucleoplasm, cytosol                   | U-251 MG  |
| endoplasmic reticulum                  | SiHa      | endoplasmic reticulum                  | PC-3      |
| nucleoplasm, vesicles                  | A-431     | nucleoplasm                            | U-251 MG  |
| nucleoli fibrillar center              | A-431     | nucleoli fibrillar center              | U-251 MG  |
| nucleoplasm                            | MCF7      | nucleoplasm                            | PC-3      |
| plasma membrane                        | A-431     | plasma membrane                        | U-251 MG  |
| plasma membrane, cytosol               |           |                                        |           |
| plasma membrane, cytosol               | A-431     | plasma membrane, cytosol               | U-251 MG  |
| plasma membrane                        | HEL       | plasma membrane                        |           |
| vesicles                               | HEL       | plasma membrane                        |           |
| endoplasmic reticulum                  | PC-3      | endoplasmic reticulum                  |           |
| nucleoplasm                            |           |                                        |           |
| nucleoli fibrillar center              | A-431     | nucleoli fibrillar center              | PC-3      |
| nucleoplasm, nucleoli fibrillar center | HEK 293   | nucleoplasm, nucleoli fibrillar center | REH       |
| nucleoli, vesicles                     | U-2 OS    | nucleoli                               | HaCaT     |
| nucleoplasm                            | A-431     | nucleoplasm                            | U-251 MG  |
| nucleoplasm                            | A-431     | nucleoplasm                            | U-251 MG  |
| nucleoplasm, nucleoli                  | MCF7      | nucleoplasm, nucleoli                  | RH-30     |
| golgi apparatus                        | U-251 MG  | golgi apparatus                        | SH-SY5Y   |
| nucleoplasm, vesicles, cell junctions  | U-2 OS    | nucleoplasm, vesicles, cell junctions  | HEK 293   |
| nucleoli                               | A-431     | nucleoli                               | U-251 MG  |
| endoplasmic reticulum, vesicles        | SH-SY5Y   | endoplasmic reticulum, vesicles        |           |
| nuclear bodies                         | HEK 293   | nuclear bodies                         | Hep G2    |
| cytosol                                | A-431     | cytosol                                | U-251 MG  |
| nucleoplasm                            | RH-30     | nucleoplasm                            | PC-3      |
| plasma membrane                        | MCF7      | nucleoplasm, plasma membrane           | HeLa      |

|                              |          |                                                          |
|------------------------------|----------|----------------------------------------------------------|
| nucleoplasm                  | U-251 MG | nucleoplasm                                              |
| nucleoplasm                  | U-251 MG | nucleoplasm                                              |
| nucleoplasm                  |          |                                                          |
| golgi apparatus, cytosol     | A-431    | golgi appU-251 MG nucleoplasm, golgi apparatus, cytosol  |
| nucleoplasm, golgi apparatus | A-431    | nucleoplaU-251 MG nucleoplasm, golgi apparatus           |
| nuclear bodies               | MCF7     | nucleoplasm, nuclear bodies                              |
| mitochondria, cytosol        | A-431    | mitochondU-251 MG mitochondria, cytosol                  |
| mitochondria, cytosol        | A-431    | mitochondU-251 MG cytosol                                |
| plasma membrane              | A-431    | plasma meU-251 MG plasma membrane                        |
| cytosol                      | A-431    | cytosol U-251 MG cytosol                                 |
| nucleoplasm, cytosol         | A-431    | cytosol U-251 MG cytosol                                 |
| cytosol                      | MCF7     | cytosol HeLa cytosol                                     |
| nucleoplasm, nuclear bodies  | A-431    | nucleoplaU-251 MG nucleoplasm, nuclear bodies            |
| nucleoplasm, nucleoli fibr   | BJ       | nucleoplaSK-MEL-30nucleoplasm, nucleoli, cytosol         |
| plasma membrane              |          |                                                          |
| nucleoplasm, plasma membr    | A-431    | nucleoplaU-251 MG nucleoplasm, golgi apparatus, plasma m |
| vesicles                     | A-431    | vesicles U-251 MG vesicles                               |
| cytosol                      | A-431    | cytosol U-251 MG cytosol                                 |
| cytosol                      | A-431    | cytosol U-251 MG cytosol                                 |
| cytosol                      | A-431    | cytosol U-251 MG cytosol                                 |
| cytosol                      | U-251 MG | cytosol                                                  |
| nucleoli                     | A-431    | nucleoli U-251 MG nucleoplasm, nucleoli                  |
| nucleoli                     | MCF7     | nucleoplaHep G2 nucleoplasm, nucleoli                    |
| nuclear bodies               | A-431    | nuclear bU-251 MG nuclear bodies                         |
| nucleoplasm, nuclear bodie   | A-431    | nuclear bU-251 MG nucleoplasm, nuclear bodies            |
| nucleoplasm                  | U-251 MG | nucleoplaHEK 293 nucleoplasm, nucleoli fibrillar cente   |
| nucleoli, mitochondria       | A-431    | nucleoplaU-251 MG nucleoplasm, nucleoli, mitochondria    |
| plasma membrane, cytosol     | A-431    | plasma meU-251 MG plasma membrane, cytosol               |
| nucleoplasm                  | A-431    | nucleoplaHEK 293 nucleoplasm, nuclear bodies             |
| plasma membrane, cytosol     | U-251 MG | plasma membrane, cytosol                                 |
| nucleoplasm, nucleoli        | HeLa     | nucleoplaSiHa nucleoplasm                                |
| mitochondria                 | A-431    | mitochondU-251 MG mitochondria, cytosol                  |
| mitochondria                 | A-431    | mitochondU-251 MG mitochondria                           |
| nuclear membrane, cytosol    | U-251 MG | nuclear nBJ nuclear membrane, cytosol                    |
| nucleoli, mitochondria       | A-431    | nucleoli, U-251 MG nucleoli, mitochondria                |
| cytosol                      | A-431    | nucleoplaU-251 MG nucleoplasm, cytosol                   |
| mitochondria                 | A-431    | nucleoli, MCF7 nucleoli, mitochondria                    |
| nuclear speckles             | THP-1    | nucleoplasm, nuclear speckles, cytosol                   |
| endoplasmic reticulum        | U-2 OS   | endoplasmic reticulum                                    |
| nucleoplasm, intermediate    | A549     | nucleoplaSK-MEL-30nucleoplasm, cytosol                   |
| mitochondria                 | MCF7     | mitochondRH-30 mitochondria                              |
| golgi apparatus              | MCF7     | golgi appHeLa golgi apparatus                            |
| nucleoplasm                  | A-431    | nucleoplaU-251 MG nucleoplasm, cytosol                   |
| nucleoplasm, nucleoli fibr   | A-431    | cytosol U-251 MG nucleoplasm, nucleoli fibrillar cente   |
| nucleoplasm, cytosol         | A-431    | nucleoplaU-251 MG nucleoplasm, cytosol                   |
| golgi apparatus, mitochonc   | A-431    | golgi appU-251 MG golgi apparatus                        |
| endoplasmic reticulum        |          |                                                          |
| nucleoplasm                  | A-431    | nucleoplaU-251 MG nucleoplasm                            |
| nucleoplasm                  | A-431    | nucleoplaU-251 MG nucleoplasm                            |
| vesicles, cytosol            | U-251 MG | nucleoplasm, vesicles, cytosol                           |
| cytosol                      | A-431    | cytosol U-251 MG cytosol                                 |
| endoplasmic reticulum        | U-251 MG | endoplasmMCF7 endoplasmic reticulum                      |
| vesicles                     | U-251 MG | vesicles                                                 |
| vesicles                     | A-431    | vesicles                                                 |
| nucleoplasm, nucleoli fibr   | A-431    | nucleoplaU-251 MG nucleoplasm, nucleoli fibrillar cente  |

|                                        |          |                                         |           |
|----------------------------------------|----------|-----------------------------------------|-----------|
| nucleoplasm, nucleoli fibrillar center | U-251 MG | nucleoplasm, nucleoli fibrillar center  | U-251 MG  |
| nucleoplasm, vesicles                  | SiHa     | golgi apparatus                         | HeLa      |
| nucleoplasm, cell junctions            | U-2 OS   | nucleoli                                | HeLa      |
| mitochondria, cytosol                  | A-431    | mitochondria                            | U-251 MG  |
| nucleoplasm, nuclear bodies            | A549     | nucleoplasm                             | RH-30     |
| nucleoplasm                            | U-2 OS   | nucleoplasm                             | Hep G2    |
| nucleoplasm, nucleoli, cytosol         | A-431    | nucleoplasm                             | U-251 MG  |
| nucleoli, cytosol                      | A-431    | nucleoli, plasma membrane, cytosol      | U-251 MG  |
| nucleoli fibrillar center              | A-431    | nucleoplasm, nucleoli fibrillar center  | U-251 MG  |
| nucleoli                               | A-431    | nucleoli                                | U-251 MG  |
| actin filaments, focal adhesions       | A-431    | focal adhesions                         | U-251 MG  |
| nucleoplasm, cytosol                   | A-431    | focal adhesion sites                    | U-251 MG  |
| nucleoplasm                            | A-431    | nucleoplasm, cytosol                    | U-251 MG  |
| nuclear membrane                       | HEK 293  | nucleoplasm                             | U-251 MG  |
| nucleoplasm                            | MCF7     | nuclear membrane                        | RH-30     |
| nucleoplasm                            | SH-SY5Y  | nucleoplasm, nucleoli                   | RH-30     |
| endosomes, lysosomes                   | A-431    | nucleoplasm, nucleoli                   | RH-30     |
| intermediate filaments, cytosol        | A-431    | nucleoplasm                             | U-251 MG  |
| nucleoplasm                            | U-251 MG | endosomes, lysosomes                    | U-251 MG  |
| nucleoplasm, vesicles, plasma membrane | A549     | nucleoli, cytosol                       | MCF7      |
| nucleoplasm                            | U-2 OS   | nucleoplasm                             | U-251 MG  |
| golgi apparatus, vesicles              | MCF7     | nucleoplasm, vesicles, midbody, cytosol | HeLa      |
| golgi apparatus                        | A-431    | nucleoplasm, cytosol                    | U-251 MG  |
| cytosol                                | A-431    | golgi apparatus                         | HEK 293   |
| plasma membrane                        |          | golgi apparatus                         | MCF7      |
| cytosol                                | HeLa     | nucleoplasm, golgi apparatus            | U-251 MG  |
| plasma membrane, cytosol               | A-431    | cytosol                                 | U-251 MG  |
| cytosol                                | A-431    | plasma membrane, cytosol                | U-251 MG  |
| cytosol                                | A-431    | cytosol                                 | U-251 MG  |
| nuclear speckles                       | A-431    | cytosol                                 | U-251 MG  |
| mitochondria                           | A-431    | nuclear speckles                        | U-251 MG  |
| nucleoplasm, cytosol                   | MCF7     | nucleoplasm, centrosome                 | U-251 MG  |
| nucleoplasm                            | A-431    | mitochondria                            | U-251 MG  |
| vesicles                               | U-2 OS   | mitochondria                            | U-251 MG  |
| nucleoplasm, cytosol                   | A-431    | nucleoplasm, cytosol                    | RH-30     |
| cytosol                                | A-431    | nucleoplasm, cytosol                    | U-251 MG  |
| golgi apparatus                        | A-431    | vesicles                                | SiHa      |
| golgi apparatus                        | A-431    | vesicles                                | U-2 OS    |
| cytosol                                | U-251 MG | nucleoplasm, cytosol                    | A-431     |
| nucleoplasm, mitochondria              | U-2 OS   | cytosol                                 | A-431     |
| nucleoplasm, cytosol                   | SiHa     | golgi apparatus                         | U-251 MG  |
| nucleoli, cytosol                      | A-431    | golgi apparatus                         | U-251 MG  |
| nucleoli, vesicles                     | RH-30    | cytosol                                 | U-251 MG  |
| nucleoplasm                            |          | cytosol                                 | K-562     |
| nucleoplasm, cytosol                   | A-431    | mitochondria                            | HeLa      |
| nucleoplasm                            | A549     | nucleoplasm, mitochondria               | HaCaT     |
| nucleoplasm                            | HeLa     | nucleoplasm, cytosol                    | HaCaT     |
| nucleoli                               | A-431    | nucleoli                                | U-251 MG  |
| nucleoplasm                            | HEK 293  | vesicles                                | U-251 MG  |
| vesicles                               | A-431    | nucleoplasm, cytosol                    | U-251 MG  |
| nucleoplasm, golgi apparatus           |          | nucleoplasm                             | HeLa      |
| nucleoplasm, golgi apparatus, cytosol  | A-431    | nucleoli                                | A-431     |
| cytosol                                | A-431    | nucleoplasm                             | HEK 293   |
| cytosol                                | MCF7     | nucleoplasm                             | A-431     |
|                                        |          | vesicles                                | U-251 MG  |
|                                        |          | vesicles                                | U-251 MG  |
|                                        |          | nucleoplasm, golgi apparatus, cytosol   | U-251 MG  |
|                                        |          | cytosol                                 | U-251 MG  |
|                                        |          | cytosol                                 | SK-MEL-30 |

|                                        |           |                                           |                                        |
|----------------------------------------|-----------|-------------------------------------------|----------------------------------------|
| vesicles, cytosol                      | A-431     | vesicles, U-251 MG                        | cytosol                                |
| cytosol                                | A549      | cytosol SiHa                              | plasma membrane, cytosol               |
| cytosol                                | A-431     | cytosol U-251 MG                          | cytosol                                |
| cytosol                                | A-431     | cytosol U-251 MG                          | cytosol                                |
| cytosol                                | U-2 OS    | cytosol A-431                             | cytosol                                |
| nucleoplasm                            | A-431     | nucleoplaU-251 MG                         | nucleoplasm                            |
| nucleoplasm, nuclear bodies            | SK-MEL-30 | nucleoplasm                               |                                        |
| nucleoplasm                            | A-431     | nucleoplaU-251 MG                         | nucleoplasm                            |
| nucleoplasm, golgi apparatus           | SH-SY5Y   | plasma membrane, golgi apparatus,         | plasma membrane, cytosol               |
| plasma membrane, cytosol               | A-431     | vesicles U-251 MG                         | vesicles                               |
| cytosol                                | A-431     | cytosol U-251 MG                          | cytosol                                |
| cytosol                                | PC-3      | plasma membrane, cytosol                  |                                        |
| plasma membrane                        | U-251 MG  | plasma membrane, cell junctions           |                                        |
| nucleoli fibrillar center              | A-431     | nucleoplaU-251 MG                         | nucleoplasm, nucleoli fibrillar center |
| nucleoplasm, nucleoli fibrillar center | A-431     | nucleoli U-251 MG                         | nucleoli fibrillar center              |
| microtubules, cytoskeleton             | A-431     | microtubule U-251 MG                      | microtubules                           |
| nucleoli, cytosol                      | U-251 MG  | cytosol                                   |                                        |
| cytosol                                |           |                                           |                                        |
| nucleoplasm, nuclear bodies            | PC-3      | nucleoplasm, nuclear bodies               |                                        |
| nucleoplasm, nuclear bodies            | A-431     | nucleoplaU-251 MG                         | nucleoplasm, nuclear bodies            |
| nucleoplasm, plasma membrane           |           |                                           |                                        |
| golgi apparatus                        | Hep G2    | golgi apparatus                           |                                        |
| plasma membrane, cell junctions        | U-251 MG  | plasma membrane, cell junctions           |                                        |
| nucleoli, endoplasmic reticulum        | RH-30     | golgi apparatus, plasma membrane, cytosol |                                        |
| nucleoplasm, cytosol                   | A-431     | nucleoplaU-251 MG                         | nucleoplasm, nuclear membrane, cytosol |
| nucleoplasm                            | U-251 MG  | nucleoplaHeLa                             | nucleoplasm                            |
| nucleoplasm                            | HEL       | nucleoplasm                               |                                        |
| nucleoplasm                            |           |                                           |                                        |
| nucleoplasm, plasma membrane           | A-431     | plasma membrane, cytosol                  |                                        |
| nucleoplasm, nucleoli                  | PC-3      | nucleoplasm, nucleoli                     |                                        |
| nuclear speckles, cytosol              | A549      | nucleoplaSiHa                             | nuclear speckles                       |
| plasma membrane, cytosol               | A-431     | microtubule U-251 MG                      | plasma membrane, cytosol               |
| nucleoplasm                            | MCF7      | nucleoplasm                               |                                        |
| nucleoplasm                            | MCF7      | nucleoplaHep G2                           | nucleoplasm                            |
| nucleoplasm, cytosol                   | A-431     | nucleoplaU-251 MG                         | nucleoplasm, cytosol                   |
| nucleoplasm, cytosol                   | A-431     | nucleoplaU-251 MG                         | nucleoplasm, cytosol                   |
| nucleoplasm, cytosol                   | A-431     | nucleoplaU-251 MG                         | nucleoplasm, cytosol                   |
| nucleoplasm                            | A-431     | nucleoplaU-251 MG                         | nucleoplasm                            |
| nucleoplasm                            | HEL       | nucleoplasm, cytosol                      |                                        |
| nucleoplasm                            |           |                                           |                                        |
| nucleoplasm                            | A-431     | nucleoplaU-251 MG                         | nucleoplasm                            |
| nucleoplasm, nucleoli                  | PC-3      | nucleoplaEFO-21                           | nucleoplasm, nucleoli                  |
| nucleoli                               | A-431     | nucleoplaU-251 MG                         | nucleoplasm, nucleoli                  |
| nucleoplasm                            | MCF7      | nucleoplaPC-3                             | nucleoplasm                            |
| nucleoplasm                            |           |                                           |                                        |
| cytosol                                | A-431     | golgi apparatus U-251 MG                  | cytosol                                |
| nucleoplasm, cytoskeleton              | Hep G2    | nucleoplasm                               |                                        |
| nucleoli, vesicles                     | HEK 293   | nucleoli, SK-MEL-30                       | nucleoli                               |
| cytosol                                | MCF7      | cytoskeleton PC-3                         | cytosol                                |
| plasma membrane, focal adhesion        | A-431     | plasma membrane, focal adhesion sites     |                                        |
| actin filaments                        | A-431     | actin filament U-251 MG                   | actin filaments                        |
| nucleoplasm, nucleoli, mitochondria    | RH-30     | nucleoli PC-3                             | nucleoplasm, nucleoli, mitochondria    |
| nucleoplasm, mitochondria              | RH-30     | nucleoplaPC-3                             | nucleoplasm, mitochondria              |
| vesicles                               | A549      | vesicles                                  |                                        |
| intermediate filaments                 | REH       | intermediate filaments                    |                                        |

|                                        |           |                              |                                        |
|----------------------------------------|-----------|------------------------------|----------------------------------------|
| focal adhesion sites                   | BJ        | focal adhesion sites         |                                        |
| golgi apparatus                        | A-431     | golgi appHEL                 | golgi apparatus                        |
| nucleoplasm, nuclear speckles          | SH-SY5Y   | nucleoplaHEL                 | nucleoplasm, plasma membrane, centriol |
| vesicles                               | U-251 MG  | vesicles                     |                                        |
| cell junctions                         | U-2 OS    | cell juncMCF7                | cell junctions                         |
| vesicles                               | A-431     | vesicles U-251 MG            | vesicles                               |
| endosomes, lysosomes                   | A-431     | endosomesU-251 MG            | endosomes, lysosomes                   |
| nucleoplasm, cytosol                   | A-431     | nucleoplaU-251 MG            | cytosol                                |
| cytosol                                | A549      | cytosol                      |                                        |
| nucleoplasm, nucleoli fibrillar center | U-2 OS    | nucleoplaSiHa                | nucleoplasm, nucleoli fibrillar cente  |
| plasma membrane, cytosol               | A-431     | plasma meU-251 MG            | plasma membrane, cytosol               |
| nucleoplasm, plasma membrane           | A-431     | nucleoplaU-251 MG            | nucleoplasm                            |
| nucleoplasm, cytosol                   | Hep G2    | nucleoplaRH-30               | nucleoplasm                            |
| nucleoplasm, cytosol                   | A-431     | nucleoplaU-251 MG            | nucleoplasm                            |
| nucleoplasm                            | A-431     | nucleoplasm                  |                                        |
| nucleoplasm, plasma membrane           | MCF7      | nucleoplasm, plasma membrane |                                        |
| microtubules                           | A-431     | cytosol U-251 MG             | microtubules                           |
| microtubules, centrosome               | MCF7      | microtubules                 |                                        |
| cytosol                                | SiHa      | microtubuRH-30               | microtubules, cytosol                  |
| microtubules                           | MCF7      | microtubuHep G2              | nuclear bodies, microtubules           |
| endoplasmic reticulum, vesicles        | A-431     | endoplasrU-251 MG            | endoplasmic reticulum                  |
| endoplasmic reticulum, vesicles        | A-431     | vesicles, U-251 MG           | nucleoplasm, endoplasmic reticulum, ve |
| nucleoplasm, cytosol                   | A-431     | nucleoplaU-251 MG            | nucleoplasm, cytosol                   |
| mitochondria                           | A-431     | mitochondria                 |                                        |
| nucleoplasm, mitochondria, nucleoli    | A-431     | nucleoplaA549                | nucleoplasm, nucleoli, mitochondria    |
| nucleoplasm                            | SK-MEL-30 | nucleoplasm, plasma membrane |                                        |
| nucleoli                               | SiHa      | nucleoli, RH-30              | nucleoli                               |
| golgi apparatus                        | A-431     | golgi appHeLa                | golgi apparatus                        |
| centrosome                             | REH       | centrosome, cytosol          |                                        |
| nucleoplasm                            | A-431     | nucleoplaU-251 MG            | nucleoplasm, cytosol                   |
| endoplasmic reticulum                  | U-251 MG  | endoplasmic reticulum        |                                        |
| nuclear bodies, cytosol                | U-251 MG  | nuclear bBJ                  | nuclear bodies, cytosol                |
| nucleoplasm                            | MCF7      | nucleoplaPC-3                | nucleoplasm                            |
| nucleoplasm                            | A-431     | nucleoplaU-251 MG            | nucleoplasm                            |
| nucleoplasm                            | A-431     | nucleoplaU-251 MG            | nucleoplasm, cytosol                   |
| nucleoplasm                            | A-431     | nucleoplaU-251 MG            | nucleoplasm                            |
| vesicles                               | U-2 OS    | vesicles SK-MEL-30           | vesicles                               |
| nucleoplasm, microtubules              | A-431     | nucleoplaMCF7                | nucleoplasm                            |
| nucleoplasm                            | A-431     | nucleoplaMCF7                | nucleoplasm                            |
| plasma membrane                        | Hep G2    | plasma membrane              |                                        |
| nucleoplasm                            |           |                              |                                        |
| nucleoplasm                            |           |                              |                                        |
| centrosome                             | U-251 MG  | centrosome                   |                                        |
| cytosol                                | A-431     | vesicles, MCF7               | vesicles, cytosol                      |
| golgi apparatus                        | A-431     | golgi appU-251 MG            | golgi apparatus                        |
| vesicles                               | SiHa      | vesicles PC-3                | vesicles                               |
| nucleoplasm, nucleoli                  | A-431     | nucleoplaU-251 MG            | nucleoplasm, nucleoli                  |
| mitochondria                           | MCF7      | mitochondHeLa                | mitochondria                           |
| nucleoli, mitochondria                 | SiHa      | nucleoli, PC-3               | nucleoli, mitochondria                 |
| nucleoplasm                            | A-431     | nucleoplaU-251 MG            | nucleoplasm                            |
| nucleoplasm, cytosol                   |           |                              |                                        |
| nuclear bodies, cytosol                | A-431     | nuclear bU-251 MG            | nuclear bodies, cytosol                |
| golgi apparatus                        | A-431     | golgi appBJ                  | golgi apparatus                        |
| nucleoplasm, focal adhesion sites      | A-431     | nucleoplaU-251 MG            | nucleoplasm, focal adhesion sites      |
| plasma membrane                        | A-431     | nucleoplaU-251 MG            | plasma membrane, cytosol               |



|                                   |          |                                         |          |                                            |
|-----------------------------------|----------|-----------------------------------------|----------|--------------------------------------------|
| endoplasmic reticulum             |          |                                         |          |                                            |
| cytosol                           | A-431    | cytosol                                 | U-251 MG | cytosol                                    |
| cytosol                           | A-431    | cytosol                                 | U-251 MG | cytosol                                    |
| nucleoplasm, centriolar satellite | A-431    | centriolar satellite                    |          |                                            |
| vesicles                          | A-431    | vesicles                                | U-251 MG | vesicles                                   |
| vesicles                          | A-431    | vesicles                                | U-251 MG | vesicles                                   |
| cytosol                           | A-431    | cytosol                                 |          |                                            |
| cytosol                           | U-2 OS   | cytosol                                 | MCF7     | cytosol                                    |
| nucleoplasm, nucleoli             | A549     | nucleoplasm                             | BJ       | nucleoplasm, nucleoli                      |
| mitochondria                      |          |                                         |          |                                            |
| nucleoplasm, actin filaments      | A-431    | nucleoplasm                             | MCF7     | nucleoplasm, actin filaments, cytosol      |
| microtubules, cytosol             | A-431    | microtubules                            | U-251 MG | microtubules, cytosol                      |
| nucleoplasm, cytosol              | A-431    | nucleoplasm                             | U-251 MG | nucleoplasm, cytosol                       |
| nucleoplasm, cytosol              | A-431    | nucleoplasm                             | U-251 MG | nucleoplasm, cytosol                       |
| cytosol                           | U-251 MG | cytosol                                 |          |                                            |
| cytosol                           | MCF7     | cytosol                                 | PC-3     | cytosol                                    |
| nucleoplasm                       | PC-3     | nucleoplasm                             |          |                                            |
| nucleoplasm, vesicles, cytosol    | PC-3     | nucleoplasm                             |          |                                            |
| nucleoplasm                       | U-2 OS   | nucleoplasm                             | A-431    | nucleoplasm                                |
| nucleoli, cytosol                 | A-431    | plasma membrane                         | U-251 MG | nucleoli, cytosol                          |
| nuclear speckles                  | A-431    | nuclear speckles                        | U-251 MG | nuclear speckles                           |
| nucleoplasm                       |          |                                         |          |                                            |
| nucleoplasm, vesicles             |          |                                         |          |                                            |
| nucleoplasm                       | U-251 MG | nucleoplasm                             | PC-3     | nucleoplasm                                |
| nucleoplasm                       | U-251 MG | nucleoplasm                             |          |                                            |
| nucleoplasm, nucleoli fibrillar   | A-431    | nucleoplasm, nucleoli fibrillar         | U-251 MG | centrosome                                 |
| cytosol                           | A-431    | cytosol                                 |          |                                            |
| microtubules                      | A-431    | microtubules                            | U-251 MG | microtubules                               |
| nucleoplasm                       | A-431    | nucleoplasm                             | U-251 MG | nucleoplasm, golgi apparatus               |
| cytosol                           | A-431    | cytosol                                 | U-251 MG | cytosol                                    |
| endoplasmic reticulum             | U-251 MG | endoplasmic reticulum                   |          |                                            |
| endoplasmic reticulum             | A549     | nuclear membrane, endoplasmic reticulum |          |                                            |
| nucleoli, nuclear speckles        | U-2 OS   | nucleoli, SH-SY5Y                       |          | nuclear speckles, plasma membrane, cytosol |
| nucleoplasm, mitochondria         | U-251 MG | nucleoplasm                             |          |                                            |
| vesicles                          |          |                                         |          |                                            |
| nucleoplasm, plasma membrane      | MCF7     | nucleoplasm                             | A549     | plasma membrane, cytosol                   |
| plasma membrane, cytosol          | HeLa     | plasma membrane, cytosol                |          |                                            |
| plasma membrane, cytosol          | A-431    | plasma membrane                         | PC-3     | plasma membrane, cytosol                   |
| nucleoplasm, vesicles             |          |                                         |          |                                            |
| nucleoplasm                       | HeLa     | nucleoplasm                             | PC-3     | nucleoplasm                                |
| vesicles                          | U-2 OS   | cytosol                                 |          |                                            |
| golgi apparatus                   |          |                                         |          |                                            |
| vesicles                          | A-431    | vesicles                                | PC-3     | vesicles                                   |
| nucleoplasm                       | U-2 OS   | nucleoplasm                             | A-431    | nucleoplasm                                |
| endoplasmic reticulum             | HEK 293  | endoplasmic reticulum                   | SH-SY5Y  | endoplasmic reticulum                      |
| plasma membrane                   | A-431    | plasma membrane                         |          |                                            |
| plasma membrane, cytosol          | A-431    | plasma membrane                         | U-251 MG | plasma membrane, cytosol                   |
| nucleoplasm, cytosol              | A-431    | nucleoplasm                             | U-251 MG | nucleoplasm, cytosol                       |
| cytosol                           | A-431    | cytosol                                 |          |                                            |
| nucleoplasm                       | A-431    | nucleoplasm                             | U-251 MG | nucleoplasm                                |
| vesicles                          | A-431    | nucleoplasm                             | U-251 MG | vesicles                                   |
| plasma membrane, centrosome       | HEK 293  | plasma membrane, centrosome             | RH-30    |                                            |
| golgi apparatus, plasma membrane  | A-431    | golgi apparatus                         | U-251 MG | golgi apparatus, cytosol                   |
| cytosol                           | A-431    | cytosol                                 | U-251 MG | cytosol                                    |
| mitochondria                      | A-431    | mitochondria                            | U-251 MG | mitochondria                               |

|                                                 |          |                                                 |           |                                             |
|-------------------------------------------------|----------|-------------------------------------------------|-----------|---------------------------------------------|
| mitochondria                                    | A-431    | mitochondria                                    | U-251 MG  | mitochondria                                |
| nucleoplasm, plasma membrane                    | A549     | plasma membrane                                 |           |                                             |
| plasma membrane                                 |          |                                                 |           |                                             |
| nucleoplasm, vesicles                           | A-431    | nucleoplasm, vesicles                           | U-251 MG  | nucleoplasm, vesicles                       |
| nucleoplasm, vesicles                           | A-431    | nucleoplasm, vesicles                           | U-251 MG  | nucleoplasm, vesicles                       |
| nucleoplasm, cytosol                            | U-251 MG | nucleoplasm, cytosol                            | A549      | nucleoplasm, cytosol                        |
| plasma membrane, focal adhesion                 | A-431    | plasma membrane, focal adhesion                 | U-251 MG  | focal adhesion sites                        |
| cytosol                                         | A-431    | cytosol                                         | U-251 MG  | cytosol                                     |
| vesicles                                        | A-431    | vesicles                                        | U-251 MG  | vesicles                                    |
| mitochondria                                    |          |                                                 |           |                                             |
| endoplasmic reticulum                           | A-431    | endoplasmic reticulum                           | U-251 MG  | endoplasmic reticulum                       |
| nucleoplasm                                     | A-431    | nucleoplasm                                     | U-251 MG  | nucleoplasm                                 |
| nucleoplasm                                     | U-251 MG | nucleoplasm                                     |           |                                             |
| cytosol                                         |          |                                                 |           |                                             |
| cytosol                                         | A-431    | cytosol                                         |           |                                             |
| cytokinetic bridge, cytosol                     | A-431    | cytosol                                         | U-251 MG  | microtubules, cytosol                       |
| intermediate filaments, actin                   | U-251 MG | intermediate filaments                          |           |                                             |
| vesicles                                        | A-431    | vesicles                                        | U-251 MG  | vesicles                                    |
| cytosol                                         | A-431    | cytosol                                         | U-251 MG  | cytosol                                     |
| plasma membrane, cytosol                        | A-431    | plasma membrane, cytosol                        | U-251 MG  | plasma membrane, cytosol                    |
| mitochondria, cytosol                           | U-2 OS   | mitochondria                                    | SiHa      | mitochondria                                |
| centriolar satellite                            | A-431    | cytosol                                         | U-251 MG  | cytosol                                     |
| vesicles                                        | SiHa     | vesicles                                        | HaCaT     | vesicles, plasma membrane                   |
| lysosomes                                       | A-431    | lysosomes                                       | U-251 MG  | lysosomes                                   |
| cytosol                                         | A-431    | cytosol                                         | HeLa      | cytosol                                     |
| nucleoplasm, vesicles, cytosol                  | HEK 293  | nucleoplasm, vesicles, cytosol                  | HeLa      | nucleoplasm, vesicles, cytosol              |
| nucleoplasm                                     | HAP1     | nucleoplasm                                     |           |                                             |
| golgi apparatus, vesicles                       | A-431    | golgi apparatus, vesicles                       | U-251 MG  | golgi apparatus, vesicles                   |
| microtubules                                    | A-431    | microtubules                                    | U-251 MG  | microtubules                                |
| microtubules                                    | U-251 MG | microtubules                                    | PC-3      | microtubules                                |
| nucleoli                                        | SiHa     | nucleoli, golgi apparatus                       | RH-30     | nucleoli, golgi apparatus                   |
| nuclear speckles                                | A-431    | nuclear speckles                                | A549      | nuclear speckles                            |
| nucleoli, cytosol                               | A-431    | cytosol                                         | U-251 MG  | cytosol                                     |
| nucleoplasm, cytosol                            | A-431    | nucleoplasm, cytosol                            | U-251 MG  | nucleoplasm, cytosol                        |
| nucleoplasm                                     | A-431    | nucleoplasm                                     | U-251 MG  | nucleoplasm                                 |
| nucleoli, focal adhesion sites                  | A-431    | mitochondria                                    | U-251 MG  | mitochondria                                |
| nucleoplasm                                     | A-431    | nucleoplasm                                     | U-251 MG  | nucleoplasm                                 |
| nucleoplasm                                     | A-431    | nucleoplasm                                     | U-251 MG  | nucleoplasm                                 |
| nucleoplasm, nucleoli fibrillar center, cytosol | SiHa     | nucleoplasm, nucleoli fibrillar center, cytosol |           |                                             |
| nuclear speckles, cytosol                       | A549     | nuclear speckles                                | SiHa      | nuclear speckles                            |
| nuclear speckles                                | A549     | nuclear speckles                                | SiHa      | nuclear speckles                            |
| nucleoplasm, nuclear bodies                     | A-431    | nucleoplasm, nuclear bodies                     | U-251 MG  | nucleoplasm, nuclear bodies                 |
| nucleoplasm                                     | A-431    | nucleoplasm                                     | U-251 MG  | nucleoplasm                                 |
| nucleoplasm                                     | RH-30    | nucleoplasm                                     |           |                                             |
| cytosol                                         |          |                                                 |           |                                             |
| vesicles, cytosol                               |          |                                                 |           |                                             |
| cytosol                                         | U-251 MG | golgi apparatus, cytosol                        |           |                                             |
| cytosol                                         | A-431    | plasma membrane, cytosol                        | U-251 MG  | plasma membrane, cytosol                    |
| plasma membrane                                 | A-431    | plasma membrane                                 | U-251 MG  | plasma membrane                             |
| cytosol                                         | A-431    | cytosol                                         | PC-3      | cytosol                                     |
| vesicles, plasma membrane                       | U-2 OS   | vesicles, plasma membrane                       | SK-MEL-30 | vesicles, plasma membrane                   |
| plasma membrane, cell junction                  | A-431    | plasma membrane, cell junction                  | U-251 MG  | plasma membrane, cell junction              |
| nucleoplasm, cytosol                            | A-431    | nucleoplasm                                     | U-251 MG  | nucleoplasm                                 |
| nucleoplasm, mitochondria                       | MCF7     | nucleoplasm, nuclear membrane, mitochondria     | PC-3      | nucleoplasm, nuclear membrane, mitochondria |
| plasma membrane                                 | U-251 MG | plasma membrane                                 |           |                                             |

|                                  |           |                                |                                                 |
|----------------------------------|-----------|--------------------------------|-------------------------------------------------|
| nucleoplasm, plasma membrane     | RPTEC TER | nucleoplasm, plasma membrane   |                                                 |
| vesicles                         | A-431     | golgi app                      | U-251 MG vesicles                               |
| nucleoplasm, centrosome          |           |                                |                                                 |
| cytosol                          | U-251 MG  | cytosol                        |                                                 |
| nucleoplasm, vesicles            | PC-3      | nucleoplasm, vesicles          |                                                 |
| plasma membrane, cytosol         | A-431     | plasma me                      | U-251 MG plasma membrane, cytosol               |
| plasma membrane, cytosol         | A-431     | cytosol                        | U-251 MG cytosol                                |
| cytosol                          | PC-3      | plasma membrane, cytosol       |                                                 |
| cytosol                          | U-2 OS    | cytosol                        |                                                 |
| cytosol                          | PC-3      | cytosol                        |                                                 |
| golgi apparatus, plasma membrane | PC-3      | plasma membrane, cytosol       |                                                 |
| nucleoplasm, vesicles            | SK-MEL-30 | nucleoplasm, vesicles          |                                                 |
| nucleoplasm, vesicles            | U-2 OS    | nucleopla                      | SK-MEL-30 nucleoplasm, vesicles                 |
| cytosol                          | U-2 OS    | cytosol                        |                                                 |
| midbody ring, cytosol            | HEK 293   | cytosol                        | HeLa midbody ring, cytosol                      |
| nucleoli                         | A-431     | nucleoli                       | U-251 MG nucleoli                               |
| nucleoplasm                      | A-431     | nucleopla                      | U-251 MG nucleoplasm                            |
| nucleoplasm                      | U-251 MG  | nucleopla                      | HEK 293 nucleoplasm                             |
| nucleoplasm                      | A-431     | nucleoplasm                    |                                                 |
| nucleoplasm                      | A-431     | nucleopla                      | U-251 MG nucleoplasm                            |
| nucleoplasm, cytosol             | A-431     | nucleopla                      | U-251 MG nucleoplasm, cytosol                   |
| vesicles                         | A-431     | golgi app                      | U-251 MG vesicles                               |
| cytosol                          | A-431     | cytosol                        | U-251 MG cytosol                                |
| nucleoplasm, cytosol             | A-431     | nucleopla                      | U-251 MG nucleoplasm, cytosol                   |
| nucleoplasm, nucleoli            | A-431     | nucleopla                      | U-251 MG nucleoplasm, nucleoli                  |
| plasma membrane, actin filaments | A-431     | plasma me                      | U-251 MG plasma membrane, actin filaments       |
| nucleoplasm, nucleoli            | A-431     | nucleopla                      | U-251 MG nucleoli                               |
| nucleoplasm, plasma membrane     | RH-30     | nucleopla                      | HEL nucleoplasm, plasma membrane, centriol      |
| nucleoplasm, golgi apparatus     | SH-SY5Y   | nucleopla                      | RH-30 nucleoplasm, golgi apparatus              |
| cytosol                          |           |                                |                                                 |
| vesicles                         |           |                                |                                                 |
| cytosol                          |           |                                |                                                 |
| nucleoplasm                      | A-431     | nucleopla                      | U-251 MG nucleoplasm                            |
| nucleoplasm                      | A-431     | nucleopla                      | U-251 MG nucleoplasm                            |
| nucleoplasm, nucleoli            | U-2 OS    | nucleopla                      | MCF7 nucleoplasm, nucleoli                      |
| nucleoli, endoplasmic reticulum  | A-431     | microtubu                      | U-251 MG endoplasmic reticulum, microtubules, c |
| endoplasmic reticulum, cytosol   | Hep G2    | endoplasmic reticulum, cytosol |                                                 |
| nucleoli fibrillar center        | HEK 293   | nucleoli                       | Hep G2 endoplasmic reticulum, cytosol           |
| plasma membrane, cytosol         |           |                                |                                                 |
| plasma membrane, cytosol         |           |                                |                                                 |
| focal adhesion sites             | A-431     | nucleopla                      | U-251 MG nucleoplasm, cytosol                   |
| nucleoplasm, nuclear membrane    | A-431     | nucleopla                      | U-251 MG nucleoplasm, nucleoli fibrillar center |
| nucleoplasm                      | A-431     | nucleopla                      | MCF7 nucleoplasm                                |
| vesicles                         |           |                                |                                                 |
| vesicles                         |           |                                |                                                 |
| nucleoplasm                      | U-251 MG  | nucleopla                      | RH-30 nucleoplasm                               |
| actin filaments                  | A-431     | actin fil                      | U-251 MG actin filaments                        |
| nucleoplasm, cytosol             | A-431     | nucleopla                      | U-251 MG nucleoplasm, cytosol                   |
| nucleoplasm                      | U-2 OS    | nucleopla                      | SH-SY5Y nucleoplasm                             |
| mitochondria                     | A-431     | mitochond                      | U-251 MG mitochondria                           |
| nucleoplasm                      | U-251 MG  | nucleoplasm                    |                                                 |
| nucleoplasm, cytosol             | A549      | nucleopla                      | PC-3 nucleoplasm, plasma membrane               |
| nucleoplasm, vesicles            | A-431     | nucleopla                      | U-251 MG nucleoplasm, vesicles, plasma membrane |
| nucleoplasm                      | A-431     | nucleopla                      | SK-MEL-30 nucleoplasm                           |
| nucleoplasm, cytosol             |           |                                |                                                 |

|                             |          |                              |                                        |
|-----------------------------|----------|------------------------------|----------------------------------------|
| endoplasmic reticulum       |          |                              |                                        |
| nucleoplasm                 | A-431    | nucleoplaRH-30               | nucleoplasm                            |
| plasma membrane, cytosol    | A-431    | cytosol U-251 MG             | plasma membrane, cytosol               |
| cytosol                     | A-431    | cytosol U-251 MG             | cytosol                                |
| nucleoplasm, nucleoli fibr  | MCF7     | nucleoplaHEK 293             | nucleoplasm, nucleoli fibrillar cente  |
| mitochondria                | A-431    | mitochondU-251 MG            | mitochondria                           |
| vesicles                    |          |                              |                                        |
| vesicles                    | A-431    | vesicles HEK 293             | vesicles                               |
| intermediate filaments, ac  | A-431    | actin filU-251 MG            | cytosol                                |
| cytosol                     |          |                              |                                        |
| nucleoplasm, plasma membræ  | A-431    | nucleoplasm                  |                                        |
| nucleoplasm                 | RH-30    | nucleoplaREH                 | nucleoplasm                            |
| cytosol                     |          |                              |                                        |
| cytosol                     | MCF7     | cytosol Hep G2               | cytosol                                |
| nucleoplasm, nucleoli, plas | A-431    | nucleoplaU-251 MG            | nucleoplasm, nucleoli, plasma membrane |
| microtubules, cytosol       | A-431    | microtubuU-251 MG            | microtubules                           |
| nucleoplasm, golgi apparat  | A-431    | nucleoplaU-251 MG            | nucleoplasm, cytosol                   |
| nucleoplasm, cytosol        | U-251 MG | nucleoplaRH-30               | nucleoplasm, golgi apparatus           |
| nucleoplasm, nucleoli fibr  | MCF7     | nucleoplaSK-MEL-30           | nucleoplasm                            |
| plasma membrane             | A-431    | golgi appU-251 MG            | plasma membrane                        |
| nucleoplasm                 | HEK 293  | nucleoplaPC-3                | nucleoplasm                            |
| nucleoplasm, nucleoli, golg | A-431    | nucleoplaU-251 MG            | nucleoplasm, nucleoli, golgi apparatus |
| nucleoplasm                 | A-431    | nucleoplaU-251 MG            | nucleoplasm, cytosol                   |
| golgi apparatus             | A-431    | golgi appU-251 MG            | golgi apparatus                        |
| vesicles                    | SH-SY5Y  | vesicles                     |                                        |
| vesicles                    | HEK 293  | vesicles SH-SY5Y             | vesicles                               |
| vesicles, plasma membrane   | HEL      | golgi appHAP1                | vesicles                               |
| nucleoplasm                 | U-251 MG | nucleoplaHeLa                | nucleoplasm                            |
| mitochondria                | A-431    | mitochondU-251 MG            | mitochondria                           |
| nuclear membrane, centrosc  | A-431    | centrosomU-251 MG            | nuclear membrane, centrosome, cytosol  |
| centrosome                  | A-431    | nuclear rU-251 MG            | nuclear membrane, centrosome           |
| nucleoplasm                 | HEK 293  | nucleoplaRH-30               | nucleoplasm                            |
| nuclear speckles            | SH-SY5Y  | nuclear sSiHa                | nuclear speckles                       |
| microtubules                | A-431    | microtubuU-251 MG            | microtubules                           |
| nucleoplasm                 | A-431    | nucleoplaHep G2              | nucleoplasm, vesicles                  |
| nucleoplasm, nuclear membr  | MCF7     | nucleoplaHeLa                | nucleoplasm, vesicles                  |
| nucleoplasm                 | HeLa     | nucleoplasm                  |                                        |
| plasma membrane, cytosol    | A-431    | plasma meU-251 MG            | plasma membrane, cytosol               |
| golgi apparatus             | A-431    | golgi appU-251 MG            | golgi apparatus                        |
| golgi apparatus             | A-431    | golgi appU-251 MG            | golgi apparatus                        |
| vesicles                    | HeLa     | vesicles Hep G2              | vesicles                               |
| nucleoplasm                 | HEK 293  | nucleoplaRH-30               | nucleoplasm, golgi apparatus           |
| nucleoplasm, golgi apparat  | RH-30    | nucleoplasm, golgi apparatus |                                        |
| plasma membrane, cytosol    | U-251 MG | plasma membræ                |                                        |
| plasma membrane, cytosol    | A-431    | plasma meU-251 MG            | plasma membrane, cytosol               |
| endoplasmic reticulum, plæ  | SH-SY5Y  | endoplasmBJ                  | endoplasmic reticulum, plasma membran  |
| nucleoplasm                 | HEK 293  | nucleoplasm                  |                                        |
| cell junctions              |          |                              |                                        |
| cell junctions              | A549     | nucleoplasm, cell junctions  |                                        |
| nuclear speckles            | A-431    | nuclear sU-251 MG            | nuclear speckles                       |
| nuclear speckles            | U-251 MG | nuclear speckles             |                                        |
| endoplasmic reticulum       | A-431    | endoplasmU-251 MG            | endoplasmic reticulum                  |
| plasma membrane             |          |                              |                                        |
| nucleoli, mitochondria      | A-431    | nucleoli, U-251 MG           | mitochondria                           |
| nucleoplasm                 | A-431    | nucleoplaU-251 MG            | nucleoplasm                            |

|                            |           |                           |                                        |
|----------------------------|-----------|---------------------------|----------------------------------------|
| nucleoplasm                | SH-SY5Y   | nucleoplaRH-30            | nucleoplasm, plasma membrane           |
| nucleoplasm, cytosol       | MCF7      | nucleoplasm, cytosol      |                                        |
| nucleoli fibrillar center  | Hep G2    | nucleoli RH-30            | nucleoli fibrillar center              |
| nucleoplasm                | HaCaT     | nucleoplasm               |                                        |
| focal adhesion sites       | RH-30     | focal adhesion sites      |                                        |
| focal adhesion sites       | RH-30     | focal adhesion sites      |                                        |
| nucleoplasm                | A-431     | nucleoplaU-251 MG         | nucleoplasm, nuclear bodies            |
| endoplasmic reticulum      | A-431     | endoplasrU-251 MG         | endoplasmic reticulum                  |
| endoplasmic reticulum      | A-431     | endoplasrU-251 MG         | endoplasmic reticulum                  |
| nucleoplasm, cytosol       | A-431     | nucleoplaU-251 MG         | nucleoplasm, cytosol                   |
| cytosol                    | A-431     | cytosol U-251 MG          | cytosol                                |
| nucleoplasm                | U-251 MG  | nucleoplasm               |                                        |
| nucleoplasm, nuclear membr | A-431     | nucleoplaU-251 MG         | nucleoplasm, focal adhesion sites      |
| nucleoplasm, vesicles      | A-431     | nucleoplaU-251 MG         | nucleoplasm, vesicles                  |
| nucleoplasm                | U-251 MG  | nucleoplaA549             | nucleoplasm                            |
| nucleoplasm, vesicles      | A549      | nucleoplaHeLa             | nucleoplasm, vesicles                  |
| cytosol                    | SH-SY5Y   | cytosol                   |                                        |
| endoplasmic reticulum      | A-431     | endoplasmic reticulum     |                                        |
| intermediate filaments     |           |                           |                                        |
| nucleoplasm, plasma membr  | A-431     | nucleoplaU-251 MG         | nucleoplasm, plasma membrane           |
| nuclear speckles           | A-431     | nuclear sMCF7             | nuclear speckles                       |
| cytosol                    | A-431     | cytosol U-251 MG          | cytosol                                |
| cytosol                    | A-431     | cytosol U-251 MG          | cytosol                                |
| nucleoplasm, cytosol       | A-431     | nucleoplaU-251 MG         | nuclear speckles, cytosol              |
| cytosol                    |           |                           |                                        |
| nucleoplasm                | A-431     | nucleoplaU-251 MG         | nucleoplasm, cytosol                   |
| nucleoplasm, cytosol       | A-431     | nucleoplaU-251 MG         | nucleoplasm, cytosol                   |
| cytosol                    | HeLa      | golgi apparatus           |                                        |
| plasma membrane, cell junc | A-431     | plasma meU-251 MG         | nucleoplasm                            |
| plasma membrane, cell junc | A-431     | plasma meU-251 MG         | nucleoplasm, plasma membrane           |
| cytosol                    |           |                           |                                        |
| lysosomes                  | A-431     | lysosomesU-251 MG         | lysosomes                              |
| vesicles, centrosome       | A-431     | centrosomU-251 MG         | centrosome                             |
| nucleoplasm, cytosol       | A-431     | nucleoplaU-251 MG         | nucleoplasm, centriolar satellite, cyt |
| mitochondria               | A-431     | mitochondPC-3             | mitochondria                           |
| vesicles                   | SK-MEL-30 | vesicles, plasma membrane |                                        |
| golgi apparatus            | MCF7      | nucleoplaA549             | nucleoplasm, golgi apparatus           |
| nucleoplasm, cytosol       | A-431     | nucleoplaU-251 MG         | nucleoplasm, cytosol                   |
| nucleoplasm                | A-431     | nucleoplaU-251 MG         | nucleoplasm                            |
| nucleoplasm                | HeLa      | nucleoplasm               |                                        |
| nucleoplasm, vesicles      | A-431     | nucleoplaU-251 MG         | nucleoplasm                            |
| nucleoplasm, plasma membr  | A-431     | nucleoplaHEK 293          | nucleoplasm, nuclear membrane, nuclear |
| nucleoplasm, vesicles      | A-431     | nucleoplaU-251 MG         | nucleoplasm, vesicles                  |
| nucleoplasm, nucleoli fibr | HEK 293   | nucleoli Hep G2           | nucleoli fibrillar center              |
| nucleoplasm, nuclear bodie | A-431     | nucleoplaU-251 MG         | nucleoplasm, golgi apparatus           |
| nucleoli                   | A-431     | nucleoli U-251 MG         | nucleoli                               |
| nucleoplasm, cytosol       | BJ        | nucleoplasm, cytosol      |                                        |
| nucleoplasm                | U-2 OS    | nucleoplaMCF7             | golgi apparatus, cell junctions        |
| mitochondria               | U-251 MG  | mitochondSK-MEL-30        | mitochondria                           |
| mitochondria               | U-251 MG  | mitochondria              |                                        |
| nucleoplasm, nucleoli      | A-431     | nucleoplaU-251 MG         | nucleoplasm                            |
| endoplasmic reticulum      | A-431     | endoplasrU-251 MG         | endoplasmic reticulum                  |
| cytosol                    | A-431     | cytosol U-251 MG          | cytosol                                |
| nucleoplasm                | A-431     | nucleoplaHeLa             | nucleoplasm                            |
| nucleoplasm                | A-431     | nucleoplasm               |                                        |

|                                             |          |                                                  |           |                                                                 |
|---------------------------------------------|----------|--------------------------------------------------|-----------|-----------------------------------------------------------------|
| nucleoplasm, focal adhesion                 | MCF7     | nucleoplasm                                      | HeLa      | nucleoplasm, cytosol                                            |
| cytosol                                     |          |                                                  |           |                                                                 |
| nucleoplasm                                 | U-251 MG | nucleoplasm                                      | RH-30     | nucleoplasm                                                     |
| nucleoplasm                                 | A-431    | nucleoplasm                                      | U-251 MG  | nucleoplasm                                                     |
| nucleoplasm, nuclear bodies, cell junctions | A-431    | nucleoplasm                                      | U-251 MG  | nucleoplasm, nuclear bodies, vesicles, golgi apparatus, cytosol |
| golgi apparatus, cytosol                    |          |                                                  |           |                                                                 |
| nucleoplasm                                 | U-2 OS   | nucleoplasm                                      | Hep G2    | nucleoplasm                                                     |
| nucleoplasm                                 | U-2 OS   | nucleoplasm                                      | Hep G2    | nucleoplasm                                                     |
| vesicles, cytosol                           | A-431    | nucleoplasm                                      | U-251 MG  | cytosol                                                         |
| nucleoplasm                                 | A-431    | nucleoplasm                                      | U-251 MG  | nucleoplasm, nuclear bodies                                     |
| nucleoplasm                                 | PC-3     | nucleoplasm                                      |           |                                                                 |
| intermediate filaments                      | A-431    | mitochondria                                     | U-251 MG  | mitochondria                                                    |
| mitochondria                                | U-2 OS   | nucleoplasm, mitochondria                        |           |                                                                 |
| nucleoplasm, vesicles                       | U-251 MG | nucleoplasm                                      | RH-30     | nucleoplasm, vesicles                                           |
| nucleoplasm, vesicles                       | A-431    | nucleoplasm                                      | HEL       | nucleoplasm, vesicles                                           |
| nucleoplasm                                 | A-431    | nucleoplasm                                      | PC-3      | nucleoplasm, plasma membrane                                    |
| vesicles, cytosol                           | A-431    | vesicles, cytosol                                |           |                                                                 |
| plasma membrane, cytosol                    | A-431    | plasma membrane                                  | U-251 MG  | plasma membrane, cytosol                                        |
| nucleoplasm                                 | Hep G2   | nucleoplasm                                      |           |                                                                 |
| nucleoplasm, vesicles, plasma membrane      | RH-30    | nucleoplasm, plasma membrane                     |           |                                                                 |
| vesicles, mitochondria                      | U-2 OS   | vesicles                                         | HEK 293   | mitochondria                                                    |
| plasma membrane                             | A-431    | vesicles, U-251 MG                               |           | vesicles, plasma membrane                                       |
| nucleoplasm                                 |          |                                                  |           |                                                                 |
| vesicles                                    | MCF7     | vesicles                                         |           |                                                                 |
| nucleoplasm                                 | A-431    | nucleoplasm                                      | U-251 MG  | nucleoplasm                                                     |
| nucleoplasm, golgi apparatus                | SiHa     | nucleoplasm                                      | PC-3      | nucleoplasm, golgi apparatus                                    |
| nucleoplasm                                 | Hep G2   | nucleoplasm, vesicles                            |           |                                                                 |
| plasma membrane, intermediate filaments     | A-431    | plasma membrane                                  | U-251 MG  | plasma membrane, cytosol                                        |
| vesicles                                    | AF22     | vesicles                                         |           |                                                                 |
| nucleoplasm, plasma membrane                | RH-30    | vesicles                                         | SK-MEL-30 | nucleoplasm, plasma membrane, cytosol                           |
| plasma membrane, focal adhesion             | BJ       | nucleoplasm, nucleoli, vesicles, plasma membrane |           |                                                                 |
| nucleoplasm, cytosol                        | A-431    | nucleoplasm                                      | U-251 MG  | nucleoplasm, cytosol                                            |
| nucleoplasm, plasma membrane                | A-431    | nucleoplasm                                      | U-251 MG  | nuclear bodies, plasma membrane, cytosol                        |
| plasma membrane                             | U-251 MG | plasma membrane                                  | SK-MEL-30 | plasma membrane                                                 |
| nucleoplasm                                 | SH-SY5Y  | nucleoplasm                                      | RH-30     | nucleoplasm                                                     |
| nucleoplasm                                 | HeLa     | nucleoplasm                                      |           |                                                                 |
| mitochondria                                | A-431    | mitochondria                                     | U-251 MG  | cytosol                                                         |
| plasma membrane                             | HEL      | nucleoplasm                                      | HaCaT     | plasma membrane                                                 |
| actin filaments, cytosol                    | BJ       | actin filaments                                  | LHCN-M2   | cytosol                                                         |
| aggresome, cytosol                          | U-251 MG | cytosol                                          |           |                                                                 |
| vesicles                                    | U-2 OS   | vesicles                                         |           |                                                                 |
| golgi apparatus                             |          |                                                  |           |                                                                 |
| mitochondria                                | A-431    | mitochondria                                     | U-251 MG  | mitochondria                                                    |
| vesicles, mitochondria                      | A-431    | vesicles, U-251 MG                               |           | vesicles                                                        |
| nuclear membrane                            | A-431    | nuclear membrane                                 | U-251 MG  | nuclear membrane                                                |
| nucleoplasm, plasma membrane                | A-431    | nucleoplasm, plasma membrane, cytosol            |           |                                                                 |
| nucleoplasm                                 | A-431    | nucleoplasm                                      | U-251 MG  | nucleoplasm                                                     |
| nucleoplasm, cytosol                        | A-431    | nucleoplasm, cytosol                             |           |                                                                 |
| plasma membrane, cell junctions             | U-251 MG | plasma membrane, cell junctions                  |           |                                                                 |
| cell junctions                              | A-431    | cell junctions                                   |           |                                                                 |
| nucleoplasm, nucleoli                       | PC-3     | nucleoli                                         |           |                                                                 |
| nucleoplasm, cytosol                        | A-431    | nucleoplasm, cytosol                             | U-251 MG  | nucleoplasm, cytosol                                            |
| nucleoplasm                                 | A-431    | nucleoplasm                                      | U-251 MG  | nucleoplasm                                                     |
| mitochondria                                | MCF7     | mitochondria                                     |           |                                                                 |

|                                                  |          |                                            |           |
|--------------------------------------------------|----------|--------------------------------------------|-----------|
| nuclear bodies, cytosol                          | A-431    | nuclear bodies, cytosol                    | bU-251 MG |
| nucleoplasm, plasma membrane, cytosol            | U-2 OS   | nucleoplasm, plasma membrane, cytosol      | AF22      |
| nucleoplasm, cytosol                             | U-251 MG | nucleoplasm, cytosol                       | RH-30     |
| cytosol                                          | AF22     | cytosol                                    |           |
| nucleoplasm                                      | A-431    | nucleoplasm                                | U-251 MG  |
| plasma membrane, mitochondria                    | U-251 MG | plasma membrane, mitochondria              |           |
| vesicles, plasma membrane, cytosol               | A-431    | vesicles, plasma membrane, cytosol         | U-251 MG  |
| plasma membrane, cytosol                         | A-431    | plasma membrane, cytosol                   | U-251 MG  |
| cytosol                                          | A-431    | cytosol                                    | U-251 MG  |
| nucleoplasm, nuclear membrane, vesicles, cytosol |          | vesicles, cytosol                          |           |
| nucleoplasm, nuclear membrane, vesicles          | A-431    | nucleoplasm, nuclear membrane, vesicles    | HEK 293   |
| nucleoplasm, vesicles                            | A-431    | nucleoplasm, cytosol                       | SK-MEL-30 |
| vesicles                                         | HeLa     | vesicles                                   | HAP1      |
| nucleoplasm                                      | A-431    | nucleoplasm                                | U-251 MG  |
| nucleoplasm, vesicles                            | A-431    | nucleoplasm, vesicles                      | U-251 MG  |
| cytosol                                          | SH-SY5Y  | cytosol                                    |           |
| nucleoli, mitochondria                           | RH-30    | mitochondria                               |           |
| nuclear speckles                                 |          |                                            |           |
| nuclear speckles, cytosol                        | RH-30    | nucleoli, nuclear speckles, cytosol        |           |
| cytosol                                          | A-431    | cytosol                                    | U-251 MG  |
| nucleoplasm                                      | HaCaT    | nucleoplasm                                |           |
| nucleoplasm, cytoplasmic vesicles, cytosol       | A-431    | nucleoplasm, cytoplasmic vesicles, cytosol | U-251 MG  |
| nucleoplasm, vesicles                            | PC-3     | nucleoplasm, vesicles                      |           |
| cytosol                                          | HeLa     | cytosol                                    |           |
| nucleoplasm, cytosol                             | A-431    | nucleoplasm, cytosol                       | U-251 MG  |
| nucleoplasm, cytosol                             | A-431    | nucleoplasm                                | U-251 MG  |
| centriolar satellite                             | A-431    | centriolar satellite                       | U-251 MG  |
| nucleoplasm, nuclear bodies, cytosol             | A-431    | nucleoplasm, nuclear bodies                | U-251 MG  |
| nucleoplasm, golgi apparatus, vesicles, cytosol  | SH-SY5Y  | nucleoplasm, golgi apparatus               | SK-MEL-30 |
| nucleoplasm, nucleoli                            | A-431    | nucleoplasm                                | U-251 MG  |
| nucleoplasm, nucleoli                            | U-251 MG | nucleoplasm, nucleoli                      | U-251 MG  |
| nucleoplasm                                      | A-431    | nucleoplasm                                | U-251 MG  |
| nucleoplasm                                      | A-431    | nucleoplasm                                | U-251 MG  |
| mitochondria                                     | A-431    | mitochondria                               | U-251 MG  |
| nucleoplasm, mitochondria                        | HeLa     | mitochondria                               | SiHa      |
| golgi apparatus, vesicles                        | A-431    | golgi apparatus                            | U-251 MG  |
| nucleoplasm, centriolar satellite, cytosol       | A-431    | nucleoplasm, centriolar satellite          | HEK 293   |
| nuclear membrane, cytosol                        | A-431    | nucleoplasm, nuclear membrane, cytosol     | HEK 293   |
| nucleoplasm                                      |          | cytosol                                    |           |
| nuclear bodies, cytosol                          | RH-30    | cytosol                                    |           |
| nucleoli fibrillar center                        | HEK 293  | nucleoli fibrillar center, vesicles        | PC-3      |
| nuclear speckles                                 | A-431    | nuclear speckles                           | HEK 293   |
| nucleoplasm                                      | HEK 293  | nucleoplasm                                | PC-3      |
| endoplasmic reticulum, cytosol                   | HeLa     | endoplasmic reticulum, cytosol             |           |
| nucleoplasm, plasma membrane, cytosol            | A-431    | nucleoplasm, plasma membrane, cytosol      | U-251 MG  |
| cytosol                                          | A-431    | cytosol                                    | U-251 MG  |
| nuclear speckles, cytosol                        | U-2 OS   | nuclear speckles                           | U-251 MG  |
| cytosol                                          | A-431    | cytosol                                    | U-251 MG  |
| mitochondria                                     | A-431    | mitochondria                               | RH-30     |
| mitochondria                                     |          |                                            |           |
| nucleoplasm, cytosol                             | A-431    | nucleoplasm, cytosol                       | U-251 MG  |
| cytosol                                          | A-431    | cytosol                                    |           |
| plasma membrane, cytosol                         | A-431    | plasma membrane, cytosol                   | U-251 MG  |
|                                                  |          | nucleoplasm, nuclear bodies                |           |

|                             |          |                             |          |                                        |
|-----------------------------|----------|-----------------------------|----------|----------------------------------------|
| mitochondria, cytosol       | A-431    | cytosol                     | U-251 MG | mitochondria, cytosol                  |
| vesicles                    | A-431    | vesicles                    | U-251 MG | vesicles                               |
| endoplasmic reticulum       | A-431    | endoplasm                   | U-251 MG | endoplasmic reticulum                  |
| plasma membrane             | U-2 OS   | plasma me                   | SH-SY5Y  | plasma membrane                        |
| nucleoplasm                 | HEK 293  | nucleopla                   | RH-30    | nucleoplasm                            |
| nucleoplasm, cytosol        | A-431    | nucleopla                   | U-251 MG | nucleoplasm                            |
| cytosol                     | A-431    | cytosol                     | U-251 MG | cytosol                                |
| cytosol                     | A-431    | golgi app                   | U-251 MG | golgi apparatus                        |
| cytosol                     | A-431    | plasma me                   | U-251 MG | cytosol                                |
| nucleoplasm, cytosol        | A-431    | nucleopla                   | U-251 MG | nucleoplasm, centrosome, cytosol       |
| vesicles                    | Hep G2   | vesicles, cytosol           |          |                                        |
| nucleoplasm                 | SiHa     | nucleopla                   | RH-30    | nucleoplasm, cytosol                   |
| nucleoplasm, plasma membr   | SiHa     | nucleopla                   | RH-30    | nucleoplasm, cytosol                   |
| microtubules, cytokinetic   | A-431    | cytokinet                   | U-251 MG | cytosol                                |
| plasma membrane, actin fil  | SH-SY5Y  | plasma me                   | RH-30    | plasma membrane, actin filaments, cyto |
| nuclear bodies, intermedi   | A-431    | nuclear                     | U-251 MG | nuclear bodies, intermediate filament  |
| intermediate filaments      |          |                             |          |                                        |
| mitochondria                | A-431    | mitochondria                |          |                                        |
| mitochondria                | A-431    | mitochond                   | MCF7     | mitochondria                           |
| cytosol                     | A-431    | cytosol                     | U-251 MG | cytosol                                |
| nucleoplasm                 | A-431    | nucleopla                   | U-251 MG | nucleoplasm                            |
| golgi apparatus, vesicles,  | A-431    | golgi app                   | PC-3     | vesicles                               |
| vesicles                    | RH-30    | vesicles                    |          |                                        |
| nucleoplasm, plasma membr   | U-2 OS   | nucleopla                   | HEK 293  | nucleoplasm, plasma membrane           |
| nuclear bodies              | RH-30    | nucleoplasm, nuclear bodies |          |                                        |
| nuclear speckles, centros   | U-2 OS   | nuclear                     | sBJ      | nuclear speckles, cytosol              |
| nucleoplasm                 | A-431    | nucleopla                   | U-251 MG | nucleoplasm                            |
| nuclear speckles            | U-2 OS   | nuclear                     | sHEK 293 | nuclear speckles                       |
| cell junctions              | A-431    | nucleopla                   | U-251 MG | nucleoplasm, cell junctions            |
| cytosol                     | A-431    | cytosol                     | U-251 MG | cytosol                                |
| endoplasmic reticulum       | SH-SY5Y  | nuclear                     | bRH-30   | endoplasmic reticulum                  |
| actin filaments             | RH-30    | nucleoplasm                 |          |                                        |
| mitochondria                | A-431    | mitochond                   | U-251 MG | mitochondria                           |
| mitochondria                | A-431    | mitochond                   | RH-30    | mitochondria                           |
| cytosol                     | U-251 MG | cytosol                     |          |                                        |
| cytosol                     | A-431    | nucleopla                   | U-251 MG | cytosol                                |
| nucleoplasm, focal adhesio  | A-431    | nucleopla                   | U-251 MG | nucleoplasm, focal adhesion sites      |
| cytosol                     | A-431    | nucleopla                   | U-251 MG | nucleoplasm, nuclear membrane, cytosol |
| nucleoplasm, vesicles       | MCF7     | nuclear membrane, vesicles  |          |                                        |
| nucleoplasm, cytosol        | A-431    | nucleopla                   | U-251 MG | nucleoplasm                            |
| nucleoplasm, cytosol        | A-431    | nucleopla                   | U-251 MG | nucleoplasm, cytosol                   |
| nucleoplasm, cytosol        |          |                             |          |                                        |
| nucleoplasm, nucleoli, mitc | A-431    | nucleopla                   | U-251 MG | nucleoplasm, cytosol                   |
| nucleoli                    | MCF7     | nucleoli                    | HEK 293  | nucleoli                               |
| golgi apparatus, vesicles,  | U-2 OS   | vesicles, A-431             |          | vesicles, plasma membrane              |
| cytosol                     | U-2 OS   | centrosom                   | HaCaT    | centrosome, cytosol                    |
| mitochondria                | A-431    | mitochond                   | U-251 MG | mitochondria                           |
| nucleoplasm, mitochondria   | Hep G2   | nucleoplasm, mitochondria   |          |                                        |
| cytosol                     | U-251 MG | cytosol                     |          |                                        |
| cytosol                     | A-431    | centriola                   | U-251 MG | centriolar satellite, cytosol          |
| centrosome                  | A-431    | centrosom                   | MCF7     | centrosome                             |
| vesicles, cytosol           | A-431    | vesicles, U-251 MG          |          | vesicles, cytosol                      |
| vesicles, cytosol           | A-431    | cytosol                     | U-251 MG | cytosol                                |
| vesicles, cytosol           | U-2 OS   | vesicles, RH-30             |          | vesicles, cytosol                      |
| nucleoplasm                 | REH      | nucleopla                   | HAP1     | nucleoplasm                            |



|                             |          |                                       |                                       |
|-----------------------------|----------|---------------------------------------|---------------------------------------|
| cytosol                     | Hep G2   | cytosol                               |                                       |
| vesicles                    | A-431    | vesicles U-251 MG                     | vesicles, focal adhesion sites        |
| nucleoplasm                 | A-431    | nucleoplaU-251 MG                     | nucleoplasm                           |
| nucleoplasm                 | A-431    | nucleoplaU-251 MG                     | nucleoplasm                           |
| cytosol                     | A-431    | cytosol U-251 MG                      | cytosol                               |
| microtubules, cytosol       | A-431    | microtubuU-251 MG                     | microtubules, cytosol                 |
| golgi apparatus             | SiHa     | golgi apparatus                       |                                       |
| golgi apparatus             | A-431    | golgi appU-251 MG                     | golgi apparatus                       |
| midbody, cytosol            | A-431    | nucleoplaU-251 MG                     | microtubules, cytosol                 |
| nucleoplasm, plasma membræ  | SiHa     | nucleoplasm, cytosol                  |                                       |
| nucleoplasm, cytosol        | HeLa     | nucleoplaPC-3                         | nucleoplasm, cytosol                  |
| nucleoli, cytosol           | U-251 MG | nucleoplasm, nucleoli, cytosol        |                                       |
| nucleoplasm                 | U-2 OS   | nucleoplasm, cytosol                  |                                       |
| nucleoplasm                 | A-431    | nucleoplaU-251 MG                     | nucleoplasm                           |
| nucleoplasm                 | Hep G2   | nucleoplasm, cytosol                  |                                       |
| nucleoplasm, nucleoli, micr | A-431    | nucleoplaSK-MEL-30                    | nucleoplasm, microtubules             |
| nucleoplasm                 | A-431    | nucleoplaU-251 MG                     | nucleoplasm                           |
| mitochondria                | A-431    | mitochondU-251 MG                     | mitochondria                          |
| lipid droplets              | U-2 OS   | lipid drcHep G2                       | lipid droplets                        |
| nuclear speckles            | U-2 OS   | nuclear sA-431                        | nuclear speckles                      |
| nucleoplasm                 | A-431    | nucleoplaU-251 MG                     | nucleoplasm                           |
| vesicles                    | A-431    | vesicles U-251 MG                     | vesicles                              |
| endoplasmic reticulum       | Hep G2   | endoplasmic reticulum                 |                                       |
| cytosol                     | A-431    | cytosol U-251 MG                      | cytosol                               |
| plasma membrane             | U-251 MG | plasma meHeLa                         | plasma membrane, cytokinetic bridge   |
| plasma membrane             | THP-1    | plasma membrane                       |                                       |
| nucleoplasm, cytosol        | A-431    | nucleoplaU-251 MG                     | nucleoplasm, cytosol                  |
| cytosol                     | A-431    | nucleoplaU-251 MG                     | nucleoplasm, cytosol                  |
| endoplasmic reticulum, cyt  | A-431    | cytosol U-251 MG                      | cytosol                               |
| endoplasmic reticulum       |          |                                       |                                       |
| nucleoplasm                 |          |                                       |                                       |
| peroxisomes                 | A-431    | peroxisomU-251 MG                     | peroxisomes                           |
| vesicles                    |          |                                       |                                       |
| vesicles                    | U-251 MG | vesicles                              |                                       |
| plasma membrane, focal ad   | MCF7     | plasma meHeLa                         | plasma membrane, focal adhesion sites |
| vesicles                    | MCF7     | golgi apparatus                       |                                       |
| cytosol                     |          |                                       |                                       |
| nucleoplasm                 | MCF7     | nucleoplaHEK 293                      | nucleoplasm                           |
| nucleoplasm                 | MCF7     | nucleoplaHEK 293                      | nucleoplasm                           |
| nucleoli                    | A-431    | nucleoplaU-251 MG                     | nucleoplasm, nucleoli                 |
| nucleoplasm, cell junctior  | A-431    | nucleoplaU-251 MG                     | nucleoplasm                           |
| plasma membrane             | BJ       | plasma membrane                       |                                       |
| vesicles, plasma membrane   |          |                                       |                                       |
| nuclear speckles            | U-2 OS   | nuclear sSH-SY5Y                      | nuclear speckles                      |
| intermediate filaments, a   | A-431    | vesicles, U-251 MG                    | vesicles                              |
| plasma membrane, cytosol    | U-251 MG | nucleoplasm, plasma membrane, cytosol |                                       |
| plasma membrane, cytosol    | A549     | plasma mePC-3                         | plasma membrane, cytosol              |
| nuclear bodies              | U-251 MG | nuclear bodies                        |                                       |
| nucleoplasm, nuclear bodie  | A-431    | nuclear bU-251 MG                     | nucleoplasm, nuclear bodies           |
| vesicles                    | A-431    | vesicles U-251 MG                     | vesicles                              |
| endoplasmic reticulum, lip  | U-251 MG | endoplasmic reticulum, lipid droplets |                                       |
| nucleoplasm, cytosol        | A-431    | nucleoplaU-251 MG                     | nucleoplasm, cytosol                  |
| nucleoplasm                 | SiHa     | nucleoplaHAP1                         | nucleoplasm                           |
| nucleoplasm, actin filamer  | U-251 MG | nucleoplasm                           |                                       |
| nucleoplasm, nucleoli       | A-431    | nucleoplaU-251 MG                     | nucleoplasm, nucleoli                 |

|                                     |          |                                               |  |
|-------------------------------------|----------|-----------------------------------------------|--|
| nucleoplasm, nucleoli               | PC-3     | nucleoplasm, nucleoli                         |  |
| plasma membrane                     | U-251 MG | nucleoplasm, plasma membrane                  |  |
| nuclear bodies, plasma membrane     | U-251 MG | nucleoplasm, nuclear bodies, plasma membrane  |  |
| mitochondria                        | U-2 OS   | mitochondria                                  |  |
| mitochondria                        | U-2 OS   | mitochondria                                  |  |
| mitochondria                        | A-431    | mitochondria                                  |  |
| nucleoplasm                         | A-431    | nucleoplasm                                   |  |
| plasma membrane                     | BJ       | plasma membrane                               |  |
| plasma membrane                     |          |                                               |  |
| nuclear speckles                    | A-431    | nuclear speckles                              |  |
| nucleoplasm, plasma membrane        | A-431    | nucleoplasm, plasma membrane, cytosol         |  |
| cytosol                             | A-431    | cytosol                                       |  |
| vesicles, cytosol                   | A-431    | vesicles, cytosol                             |  |
| nucleoplasm, cytosol                | A-431    | golgi apparatus                               |  |
| nucleoplasm                         |          |                                               |  |
| nucleoplasm                         | HEK 293  | nucleoplasm                                   |  |
| nucleoli, vesicles                  | HeLa     | nucleoli, vesicles                            |  |
| nucleoplasm, mitochondria           | PC-3     | nucleoplasm                                   |  |
| nucleoplasm                         | MCF7     | nucleoplasm                                   |  |
| nucleoplasm, centrosome, cytosol    | U-251 MG | nucleoplasm, centrosome, cytosol              |  |
| cytosol                             | A-431    | cytosol                                       |  |
| nucleoplasm, cytosol                | A-431    | nucleoplasm                                   |  |
| nucleoplasm                         | A-431    | nucleoplasm                                   |  |
| nucleoplasm, golgi apparatus        | U-2 OS   | nucleoplasm, golgi apparatus, cytosol         |  |
| vesicles                            | A-431    | vesicles                                      |  |
| endoplasmic reticulum               |          |                                               |  |
| cytosol                             | A-431    | cytosol                                       |  |
| nucleoplasm                         | U-2 OS   | nucleoplasm                                   |  |
| nucleoplasm, cytosol                | A-431    | nucleoplasm, cytosol                          |  |
| nucleoli                            | A-431    | nucleoli                                      |  |
| nucleoplasm                         | A-431    | nucleoplasm                                   |  |
| nucleoplasm                         | A-431    | nucleoplasm                                   |  |
| nucleoplasm, vesicles               | Hep G2   | nucleoplasm, vesicles                         |  |
| nucleoplasm                         | HEL      | nucleoplasm                                   |  |
| nucleoplasm, cytokinetic bridge     | RH-30    | nucleoplasm, cytokinetic bridge, mitochondria |  |
| actin filaments                     | U-2 OS   | actin filaments                               |  |
| plasma membrane                     | Hep G2   | plasma membrane                               |  |
| plasma membrane                     | Hep G2   | plasma membrane                               |  |
| nucleoplasm                         | U-2 OS   | nucleoplasm, cytosol                          |  |
| microtubules                        | A-431    | microtubules, cytosol                         |  |
| nucleoplasm, nucleoli, cytosol      | A-431    | nucleoplasm, cytosol                          |  |
| cytosol                             | A-431    | cytosol                                       |  |
| cytosol                             | A-431    | cytosol                                       |  |
| cytosol                             | A-431    | cytosol                                       |  |
| cytosol                             |          |                                               |  |
| nucleoplasm, cell junctions         |          |                                               |  |
| cell junctions                      |          |                                               |  |
| nucleoplasm, plasma membrane        | A-431    | nucleoplasm, cytosol                          |  |
| cytosol                             | A-431    | cytosol                                       |  |
| nucleoplasm, nuclear membrane       | A549     | nucleoplasm, nuclear membrane, vesicles       |  |
| nucleoplasm, intermediate filaments | A-431    | nucleoplasm, cytosol                          |  |
| nucleoplasm, cytosol                | A-431    | nucleoplasm, plasma membrane, cytosol         |  |
| nucleoplasm, aggregates             | A-431    | nucleoplasm, vesicles                         |  |
| nucleoplasm                         | A-431    | nucleoplasm                                   |  |
| nucleoli fibrillar center           | Hep G2   | nucleoli fibrillar center, cytosol            |  |

|                                |           |                                           |           |
|--------------------------------|-----------|-------------------------------------------|-----------|
| nucleoplasm                    | U-251 MG  | nucleoplasm                               |           |
| mitochondria                   | A-431     | mitochondria                              | U-251 MG  |
| mitochondria                   | A-431     | mitochondria                              | U-251 MG  |
| vesicles                       | Hep G2    | vesicles                                  |           |
| vesicles                       | Hep G2    | vesicles                                  |           |
| nucleoplasm, nucleoli          | MCF7      | nucleoplasm, nucleoli, aggresome          | HEK 293   |
| nucleoplasm                    | MCF7      | nucleoplasm, aggresome                    | HEK 293   |
| nucleoplasm, cytosol           | MCF7      | nucleoplasm, nuclear bodies, cytosol      | PC-3      |
| nucleoplasm, cytosol           | HEK 293   | nucleoplasm, cytosol                      | A549      |
| vesicles                       | Hep G2    | vesicles, cytosol                         | HEL       |
| microtubules, cytokinetic      | HEK 293   | microtubules                              | RH-30     |
| nucleoplasm, cytosol           | A-431     | nucleoplasm, cytosol                      | U-251 MG  |
| nucleoplasm, nucleoli          | Hep G2    | nucleoplasm, nucleoli                     |           |
| nucleoplasm                    | A-431     | nucleoplasm                               | PC-3      |
| nucleoplasm                    | MCF7      | nucleoplasm, cytosol                      | HEK 293   |
| vesicles                       | A-431     | golgi apparatus, vesicles                 | SK-MEL-30 |
| endoplasmic reticulum          | A-431     | endoplasmic reticulum                     | U-251 MG  |
| endoplasmic reticulum          | Hep G2    | endoplasmic reticulum                     | PC-3      |
| nucleoli fibrillar center      | U-2 OS    | nucleoli fibrillar center                 | A549      |
| nucleoplasm                    | A549      | nucleoplasm                               |           |
| plasma membrane                | A-431     | plasma membrane                           | U-251 MG  |
| cytosol                        | SK-MEL-30 | nucleoplasm, cytosol                      |           |
| cytosol                        | A-431     | cytosol                                   | U-251 MG  |
| cytosol                        | A-431     | cytosol                                   | U-251 MG  |
| endoplasmic reticulum, cytosol |           |                                           |           |
| focal adhesion sites           | A-431     | focal adhesion sites, centrosome, cytosol | U-251 MG  |
| focal adhesion sites, cytosol  | A-431     | focal adhesion sites, cytosol             | U-251 MG  |
| mitochondria                   | MCF7      | mitochondria                              | A549      |
| nucleoplasm                    | A-431     | nucleoplasm                               | PC-3      |
| nucleoplasm                    | A-431     | nucleoplasm                               | PC-3      |
| vesicles                       |           |                                           |           |
| vesicles                       |           |                                           |           |
| plasma membrane                | Hep G2    | plasma membrane                           |           |
| nucleoplasm                    | U-2 OS    | nucleoplasm                               | BJ        |
| nuclear membrane, cytosol      | A-431     | nuclear membrane, cytosol                 | U-251 MG  |
| cytosol                        | PC-3      | cytosol                                   |           |
| nucleoplasm, microtubules      | A-431     | nucleoplasm, microtubules                 | U-251 MG  |
| nucleoplasm, plasma membrane   | HaCaT     | plasma membrane                           |           |
| nucleoplasm                    | A-431     | nucleoplasm                               | U-251 MG  |
| nucleoplasm                    |           |                                           |           |
| nucleoplasm                    |           |                                           |           |
| microtubules                   | A-431     | microtubules                              | U-251 MG  |
| endoplasmic reticulum          |           |                                           |           |
| vesicles, cytokinetic          | RH-30     | vesicles                                  |           |
| plasma membrane, cytosol       | A-431     | plasma membrane, cytosol                  | U-251 MG  |
| nucleoplasm, plasma membrane   | HaCaT     | nucleoplasm                               | HTCEpi    |
| nucleoplasm, nuclear bodies    |           |                                           |           |
| nucleoplasm, centrosome        | HeLa      | centrosome                                | Hep G2    |
| nucleoplasm                    | A-431     | nucleoplasm                               | U-251 MG  |
| endoplasmic reticulum          | MCF7      | endoplasmic reticulum                     | RH-30     |
| nucleoplasm, cytosol           | U-251 MG  | nucleoplasm, cytosol                      |           |
| nucleoplasm, cytosol           | A-431     | nucleoplasm, plasma membrane, cytosol     |           |
| nuclear speckles, cytosol      | A-431     | nuclear speckles, cytosol                 | U-251 MG  |
| cytokinetic bridge             |           |                                           |           |
| nucleoplasm, plasma membrane   | A-431     | nucleoplasm, plasma membrane              | U-251 MG  |

|                                               |          |                              |                                        |
|-----------------------------------------------|----------|------------------------------|----------------------------------------|
| nucleoplasm, cytosol                          | A-431    | nucleoplasm, cytosol         |                                        |
| nucleoli, cytosol                             | A-431    | nucleoli, U-251 MG           | nucleoli, cytosol                      |
| nucleoplasm                                   | A-431    | nucleoplaHeLa                | nucleoplasm                            |
| vesicles                                      | MCF7     | cytosol HeLa                 | vesicles                               |
| nucleoplasm, focal adhesio                    | A-431    | nucleoplaMCF7                | focal adhesion sites                   |
| microtubules, cytosol                         | A-431    | microtubuU-251 MG            | microtubules, cytosol                  |
| nucleoplasm                                   | A-431    | nucleoplaMCF7                | nucleoplasm                            |
| nucleoplasm                                   | MCF7     | nucleoplasm                  |                                        |
| nucleoplasm, cytosol                          | A-431    | nucleoplaU-251 MG            | nucleoplasm                            |
| nucleoplasm, cytosol                          | A-431    | nucleoplaA549                | vesicles, plasma membrane, cytosol     |
| plasma membrane                               | MCF7     | nucleoplasm, plasma membrane |                                        |
| endoplasmic reticulum                         | A-431    | endoplasmU-251 MG            | endoplasmic reticulum                  |
| endoplasmic reticulum                         | SiHa     | endoplasmHaCaT               | endoplasmic reticulum                  |
| nucleoplasm                                   | A-431    | nucleoplaU-251 MG            | nucleoplasm                            |
| nucleoplasm                                   |          |                              |                                        |
| cytosol                                       | MCF7     | cytosol HeLa                 | cytosol                                |
| nucleoplasm, mitochondria                     | A549     | nucleoplasm, mitochondria    |                                        |
| cytosol                                       | A-431    | cytosol U-251 MG             | cytosol                                |
| cytosol                                       | A-431    | cytosol U-251 MG             | cytosol                                |
| nucleoplasm                                   | A-431    | nucleoplaU-251 MG            | nucleoplasm                            |
| nucleoplasm                                   | U-251 MG | nucleoplasm                  |                                        |
| cytosol                                       | U-251 MG | plasma membrane              |                                        |
| cytosol                                       | HEK 293  | cytosol A549                 | cytosol                                |
| vesicles                                      |          |                              |                                        |
| nucleoplasm, golgi apparatus, actin filaments |          |                              |                                        |
| nucleoplasm, mitochondria, A-431              |          | nucleoplaU-251 MG            | nucleoplasm, mitochondria, cytosol     |
| nucleoplasm                                   | U-251 MG | mitochondMCF7                | nucleoplasm, mitochondria              |
| plasma membrane                               | A-431    | nucleoli, U-251 MG           | nucleoli, plasma membrane              |
| vesicles, cytosol                             | MCF7     | vesicles A549                | vesicles, cytosol                      |
| endoplasmic reticulum                         | A-431    | endoplasmU-251 MG            | endoplasmic reticulum                  |
| nucleoplasm, golgi apparatus                  |          |                              |                                        |
| vesicles, cytokinetic bric                    | A-431    | nucleoplaU-251 MG            | vesicles                               |
| endoplasmic reticulum                         | A-431    | cytosol U-251 MG             | cytosol                                |
| cytosol                                       | SiHa     | actin filaments              |                                        |
| golgi apparatus                               | A-431    | nucleoplaU-251 MG            | nucleoplasm, golgi apparatus           |
| golgi apparatus                               | A-431    | nucleoplaU-251 MG            | nucleoplasm, nucleoli, golgi apparatus |
| cytosol                                       | A-431    | cytosol U-251 MG             | cytosol                                |
| cytosol                                       | A-431    | cytosol U-251 MG             | cytosol                                |
| nucleoplasm, vesicles                         | HEK 293  | vesicles                     |                                        |
| nucleoplasm, golgi apparatus                  | PC-3     | nucleoplaSK-MEL-30           | nucleoplasm, golgi apparatus           |
| nucleoplasm, cytosol                          | U-251 MG | nucleoplasm, mitochondria    |                                        |
| plasma membrane                               | PC-3     | plasma meHaCaT               | plasma membrane                        |
| mitochondria                                  |          |                              |                                        |
| cytosol                                       | A-431    | cytosol U-251 MG             | cytosol                                |
| cytosol                                       |          |                              |                                        |
| golgi apparatus                               | U-251 MG | golgi apparatus              |                                        |
| nucleoplasm                                   | A-431    | nucleoplaU-251 MG            | nucleoplasm                            |
| nucleoplasm                                   | A-431    | nucleoplaU-251 MG            | nucleoplasm                            |
| nucleoplasm, midbody                          | RH-30    | nucleoplasm                  |                                        |
| nucleoplasm, golgi apparatus                  | A-431    | nucleoplaU-251 MG            | nucleoplasm, golgi apparatus, vesicles |
| nucleoplasm                                   | U-251 MG | nucleoplasm, cytosol         |                                        |
| nucleoplasm, plasma membr                     | SH-SY5Y  | nucleoplaSK-MEL-30           | nucleoplasm, plasma membrane           |
| mitochondria                                  | HEK 293  | mitochondria                 |                                        |
| vesicles                                      | A-431    | vesicles U-251 MG            | vesicles                               |
| plasma membrane, microtub                     | A-431    | plasma meU-251 MG            | plasma membrane, cytosol               |

|                                                |          |                                       |                                        |
|------------------------------------------------|----------|---------------------------------------|----------------------------------------|
| nuclear speckles                               | A-431    | nuclear sU-251 MG                     | nuclear speckles                       |
| nucleoplasm                                    | A-431    | nucleoplaU-251 MG                     | nucleoplasm                            |
| vesicles, cytosol                              | A-431    | nucleoplaU-251 MG                     | vesicles, cytosol                      |
| nucleoplasm, nuclear membr                     | A-431    | nucleoplaU-251 MG                     | nucleoplasm, nuclear membrane          |
| nucleoplasm                                    | U-251 MG | nucleoplasm                           |                                        |
| nucleoplasm, vesicles                          | A549     | nucleoplaEF0-21                       | nucleoplasm, vesicles, plasma membrane |
| nucleoplasm, mitochondria                      | A-431    | mitochondU-251 MG                     | mitochondria                           |
| nucleoplasm, cytosol                           | A-431    | nucleoplaU-251 MG                     | nucleoplasm, cytosol                   |
| cytosol                                        | A-431    | cytosol U-251 MG                      | cytosol                                |
| cytosol                                        | A-431    | cytosol U-251 MG                      | cytosol                                |
| plasma membrane                                | U-2 OS   | plasma meHep G2                       | nucleoplasm, plasma membrane           |
| vesicles                                       | U-2 OS   | vesicles                              |                                        |
| focal adhesion sites                           | HEK 293  | focal adhesion sites                  |                                        |
| cytosol                                        | A-431    | cytosol                               |                                        |
| plasma membrane                                | Hep G2   | plasma membrane                       |                                        |
| mitochondria                                   |          |                                       |                                        |
| mitochondria                                   | A-431    | mitochondU-251 MG                     | mitochondria                           |
| nucleoplasm                                    | U-251 MG | nucleoplasm                           |                                        |
| nucleoplasm                                    | U-251 MG | nucleoplasm                           |                                        |
| nucleoli, cytosol                              | A-431    | nucleoli, U-251 MG                    | nucleoli, cytosol                      |
| cytosol                                        | A-431    | plasma meU-251 MG                     | cytosol                                |
| cytosol                                        | A-431    | cytosol U-251 MG                      | nucleoli fibrillar center, cytosol     |
| nucleoplasm, golgi apparatus                   | A-431    | nucleoplaU-251 MG                     | nucleoplasm, cytosol                   |
| golgi apparatus                                |          |                                       |                                        |
| nucleoplasm, cytosol                           | BJ       | nucleoplasm, cytosol                  |                                        |
| plasma membrane                                | HeLa     | plasma membrane                       |                                        |
| nucleoplasm                                    | A-431    | nucleoplaU-251 MG                     | nucleoplasm                            |
| nucleoplasm, intermediate                      | U-251 MG | nucleoplaHeLa                         | nucleoplasm                            |
| nucleoplasm                                    | HEK 293  | nucleoplaPC-3                         | nucleoplasm, nucleoli fibrillar cente  |
| nucleoplasm, nucleoli fibr                     | U-251 MG | nucleoplaA549                         | nucleoplasm, nucleoli fibrillar cente  |
| nucleoplasm, nuclear membr                     | A-431    | nucleoplaU-251 MG                     | nucleoplasm, nuclear membrane          |
| vesicles                                       | U-2 OS   | vesicles MCF7                         | nucleoplasm, vesicles                  |
| vesicles                                       | SH-SY5Y  | vesicles                              |                                        |
| nucleoplasm, cytosol                           | PC-3     | nucleoplaSK-MEL-30                    | nucleoplasm                            |
| cytosol                                        | A-431    | nuclear bU-251 MG                     | nuclear bodies, cytosol                |
| nucleoplasm, cytosol                           | SH-SY5Y  | nucleoplaSiHa                         | nucleoplasm, golgi apparatus           |
| plasma membrane, focal ad                      | A-431    | plasma membrane, focal adhesion sites |                                        |
| plasma membrane, focal ad                      | HaCaT    | nucleoplasm, plasma membrane          |                                        |
| nucleoplasm                                    | A-431    | nucleoplasm, cytosol                  |                                        |
| nucleoplasm                                    | A-431    | nucleoplaU-251 MG                     | nucleoplasm, cytosol                   |
| nucleoplasm, nuclear speckles, plasma membrane |          |                                       |                                        |
| cytosol                                        | PC-3     | cytosol                               |                                        |
| nucleoplasm, cytosol                           | U-251 MG | nucleoplasm, cytosol                  |                                        |
| vesicles, cytosol                              | A-431    | golgi appBJ                           | cytosol                                |
| nucleoplasm, nucleoli, cytosol                 |          |                                       |                                        |
| nucleoplasm, nucleoli                          | A-431    | nucleoplaHep G2                       | nucleoplasm, nucleoli                  |
| nucleoplasm                                    | A-431    | nucleoplaU-251 MG                     | nucleoplasm                            |
| nucleoplasm                                    | U-251 MG | nucleoplaHEK 293                      | nucleoplasm                            |
| nucleoplasm                                    |          |                                       |                                        |
| nucleoplasm                                    |          |                                       |                                        |
| nucleoplasm, nucleoli fibr                     | A-431    | nucleoplaU-251 MG                     | nucleoplasm, nucleoli fibrillar cente  |
| nucleoplasm                                    | A-431    | nucleoplaU-251 MG                     | nucleoplasm                            |
| nucleoplasm                                    | A-431    | nucleoplaU-251 MG                     | nucleoplasm                            |
| nucleoplasm, nucleoli, vesic                   | A-431    | nucleoplaU-251 MG                     | nucleoplasm, nucleoli, vesicles        |
| nucleoplasm, nucleoli, nucl                    | A-431    | nucleoplaMCF7                         | nucleoplasm, nucleoli, nuclear bodies  |

|                                                           |          |                                |                                        |
|-----------------------------------------------------------|----------|--------------------------------|----------------------------------------|
| nuclear bodies                                            | PC-3     | nuclear bodies                 |                                        |
| nuclear bodies                                            | Hep G2   | nuclear bPC-3                  | nucleoplasm, nuclear bodies            |
| nucleoplasm                                               |          |                                |                                        |
| nucleoplasm                                               | Hep G2   | nuclear bodies                 |                                        |
| nucleoplasm, intermediate vesicles, cytosol               | U-2 OS   | nucleoplaHep G2                | nucleoplasm                            |
| nucleoli fibrillar center                                 | U-2 OS   | nucleoplaMCF7                  | plasma membrane                        |
| plasma membrane                                           | A-431    | nuclear bU-251 MG              | nuclear bodies                         |
| nucleoplasm, centrosome                                   | A-431    | plasma meU-251 MG              | nucleoplasm, plasma membrane           |
| cytosol                                                   | A-431    | plasma meU-251 MG              | plasma membrane, cytosol               |
| plasma membrane, cytosol                                  | A-431    | nucleoplaU-251 MG              | plasma membrane, cytosol               |
| nucleoplasm, cytosol                                      | MCF7     | nucleoplaPC-3                  | nucleoplasm, plasma membrane, cytosol  |
| nucleoplasm, intermediate                                 | HeLa     | nucleoplaHep G2                | nucleoplasm                            |
| plasma membrane                                           | A-431    | plasma meU-251 MG              | plasma membrane                        |
| nucleoli fibrillar center                                 | A-431    | plasma meU-251 MG              | plasma membrane                        |
| plasma membrane                                           | A-431    | plasma meU-251 MG              | plasma membrane                        |
| plasma membrane                                           |          |                                |                                        |
| microtubules                                              | A-431    | microtubuU-251 MG              | microtubules                           |
| nucleoplasm, golgi apparatus                              | U-251 MG | nucleoplaRH-30                 | nucleoplasm, golgi apparatus           |
| nucleoplasm, golgi apparatus                              | U-251 MG | nucleoplaRH-30                 | nucleoplasm, golgi apparatus           |
| vesicles                                                  | A-431    | vesicles U-251 MG              | vesicles                               |
| cytosol                                                   | SH-SY5Y  | cytosol                        |                                        |
| cytosol                                                   | MCF7     | cytosol SH-SY5Y                | vesicles, cytosol                      |
| nuclear speckles                                          | A-431    | nuclear sU-251 MG              | nuclear speckles                       |
| plasma membrane, cytosol                                  | A-431    | cytosol U-251 MG               | plasma membrane, cytosol               |
| nuclear speckles                                          | A-431    | nuclear sU-251 MG              | nuclear speckles                       |
| nucleoplasm                                               | MCF7     | nucleoplaPC-3                  | nucleoplasm, nuclear membrane          |
| nucleoplasm, nuclear membr                                | A-431    | nucleoplaMCF7                  | nucleoplasm, nuclear membrane          |
| nucleoplasm                                               | A-431    | nucleoplaU-251 MG              | nucleoplasm, centrosome                |
| nucleoplasm, cytosol                                      | A-431    | nucleoplaU-251 MG              | nucleoplasm                            |
| vesicles                                                  | A-431    | vesicles U-251 MG              | vesicles                               |
| vesicles                                                  | Hep G2   | vesicles                       |                                        |
| plasma membrane, actin fila                               | A-431    | plasma meA549                  | plasma membrane, actin filaments       |
| nucleoplasm, golgi apparatus                              | PC-3     | nucleoplaSK-MEL-30             | nucleoplasm, golgi apparatus           |
| nuclear speckles                                          | A-431    | nuclear sU-251 MG              | nuclear speckles                       |
| nucleoplasm                                               | A-431    | nucleoplaU-251 MG              | nucleoplasm                            |
| nucleoplasm, cytokinetic bridge, mitotic spindle, cytosol |          |                                |                                        |
| nucleoplasm                                               | A-431    | nucleoplasm, vesicles          |                                        |
| nuclear membrane                                          | A-431    | nuclear rU-251 MG              | nucleoplasm, nuclear membrane, cytosol |
| nucleoplasm                                               | U-251 MG | nucleoplasm                    |                                        |
| nucleoplasm                                               | A-431    | nucleoplaU-251 MG              | nucleoplasm                            |
| nucleoli fibrillar center                                 | A-431    | nucleoli PC-3                  | nucleoli fibrillar center, cytosol     |
| nucleoplasm, vesicles                                     | A-431    | nucleoplaU-251 MG              | nucleoplasm                            |
| nucleoplasm                                               | RH-30    | nucleoplasm                    |                                        |
| cytosol                                                   | A-431    | cytosol                        |                                        |
| nucleoplasm                                               | A-431    | nucleoplaU-251 MG              | nucleoplasm                            |
| nucleoplasm, plasma membr                                 | A-431    | nucleoplaU-251 MG              | nucleoplasm, plasma membrane, cytosol  |
| vesicles                                                  | A-431    | cytosol MCF7                   | vesicles, cytosol                      |
| golgi apparatus, vesicles                                 | A-431    | golgi appU-251 MG              | golgi apparatus, vesicles, cytosol     |
| vesicles                                                  | U-251 MG | vesicles                       |                                        |
| plasma membrane, cytosol                                  | U-251 MG | cytosol                        |                                        |
| nucleoplasm, cytosol                                      | A-431    | nucleoplaU-251 MG              | nucleoplasm, cytosol                   |
| golgi apparatus, vesicles                                 | U-251 MG | golgi appBJ                    | golgi apparatus                        |
| nucleoplasm                                               | SiHa     | nucleoplaRH-30                 | nucleoplasm                            |
| nucleoplasm, nucleoli                                     | RH-30    | nucleoplasm, nucleoli, cytosol |                                        |

|                                     |           |                                             |
|-------------------------------------|-----------|---------------------------------------------|
| nuclear membrane                    | U-251 MG  | nucleoplasm, nuclear membrane               |
| nucleoplasm                         | A-431     | nucleoplasm, plasma membrane                |
| cytosol                             | A-431     | nucleoplasm                                 |
| nucleoplasm, golgi apparatus        | A-431     | nucleoplasm, golgi apparatus                |
| vesicles, lipid droplets            | A549      | vesicles, Hep G2 vesicles, lipid droplets   |
| nucleoplasm, vesicles               | HeLa      | nucleoplasm, vesicles                       |
| nucleoplasm                         | A-431     | nucleoplasm, cytosol                        |
| nucleoplasm, plasma membrane        | A-431     | nucleoplasm, plasma membrane                |
| plasma membrane, cytoplasmic bodies |           |                                             |
| focal adhesion sites, centrosome    | SK-MEL-30 | focal adhesion sites, centrosome            |
| nucleoli fibrillar center           | MCF7      | nucleoli fibrillar center, vesicles         |
| actin filaments, cytoplasm          | HEK 293   | actin filaments, cytoplasm, plasma membrane |
| nucleoplasm                         | A-431     | nucleoplasm                                 |
| nucleoplasm                         | HEL       | nucleoplasm                                 |
| nucleoplasm                         | A-431     | nucleoplasm                                 |
| nucleoplasm, cytosol                | U-251 MG  | nucleoplasm, cytosol                        |
| nuclear speckles                    |           |                                             |
| nucleoplasm, cytosol                |           |                                             |
| nucleoplasm, mitochondria           | MCF7      | nucleoplasm, nuclear bodies                 |
| nucleoplasm                         | A-431     | nucleoplasm, nucleoli fibrillar center      |
| nucleoplasm                         | A-431     | nucleoplasm                                 |
| nucleoplasm, plasma membrane        | A-431     | nucleoplasm, plasma membrane, cytosol       |
| nucleoplasm, mitochondria           | A-431     | nucleoplasm                                 |
| nucleoplasm                         | Hep G2    | nucleoplasm                                 |
| nucleoplasm                         | U-2 OS    | nucleoplasm, nucleoli                       |
| endoplasmic reticulum               | Hep G2    | endoplasmic reticulum                       |
| cytosol                             | U-251 MG  | cytosol                                     |
| nucleoplasm                         | A-431     | nucleoplasm                                 |
| vesicles                            | A-431     | vesicles                                    |
| nucleoplasm, cytosol                | A-431     | nucleoplasm, cytosol                        |
| nucleoplasm                         | RH-30     | nucleoplasm                                 |
| cell junctions                      |           |                                             |
| nucleoplasm, cytosol                | A-431     | nucleoplasm, cytosol                        |
| nucleoplasm, mitochondria           | A-431     | nucleoplasm                                 |
| nucleoplasm                         | A-431     | nucleoplasm                                 |
| golgi apparatus                     |           |                                             |
| nucleoplasm, plasma membrane        | HeLa      | nucleoplasm                                 |
| plasma membrane                     | REH       | plasma membrane                             |
| nucleoplasm                         | A-431     | nucleoplasm, nuclear bodies                 |
| nucleoplasm                         | A-431     | nucleoplasm                                 |
| nucleoplasm, cytosol                | U-251 MG  | cytosol                                     |
| cytosol                             | A-431     | cytosol                                     |
| nucleoplasm                         | A-431     | nucleoplasm, cytokinetic bridge, mitosis    |
| nucleoli, golgi apparatus           | U-2 OS    | nucleoli, golgi apparatus                   |
| golgi apparatus                     | U-2 OS    | golgi apparatus                             |
| endoplasmic reticulum               | A-431     | endoplasmic reticulum                       |
| nucleoli, endoplasmic reticulum     | MCF7      | endoplasmic reticulum                       |
| cytosol                             | A-431     | cytosol                                     |
| nucleoplasm, cytosol                | A-431     | nucleoplasm, cytosol                        |
| actin filaments                     | RH-30     | actin filaments                             |
| focal adhesion sites                | Hep G2    | plasma membrane, actin filaments            |
| nucleoplasm, cytosol                | U-251 MG  | nucleoplasm, cytosol                        |
| nucleoplasm                         | A-431     | nucleoplasm                                 |
| nucleoli, vesicles, cytosol         | A-431     | vesicles                                    |
| vesicles                            | U-2 OS    | vesicles                                    |

|                             |          |                              |                                       |
|-----------------------------|----------|------------------------------|---------------------------------------|
| nuclear speckles            | A-431    | nuclear sU-251 MG            | nuclear speckles                      |
| nucleoplasm                 |          |                              |                                       |
| golgi apparatus             | A-431    | golgi appU-251 MG            | golgi apparatus                       |
| cytosol                     | A-431    | cytosol U-251 MG             | cytosol                               |
| plasma membrane, cytosol    | A-431    | plasma meU-251 MG            | plasma membrane, cytosol              |
| nucleoplasm, nucleoli, cyto | U-2 OS   | nucleoplaMCF7                | nucleoplasm, nucleoli, cytosol        |
| cytosol                     | A-431    | cytosol U-251 MG             | nuclear speckles, cytosol             |
| intermediate filaments      | A-431    | intermediate filaments       |                                       |
| lipid droplets              |          |                              |                                       |
| lipid droplets              | Hep G2   | lipid droplets               |                                       |
| nuclear speckles            | U-251 MG | nuclear speckles             |                                       |
| nucleoplasm                 | A-431    | nucleoplaMCF7                | nucleoplasm                           |
| cytosol                     | K-562    | cytosol THP-1                | cytosol                               |
| mitochondria, cytosol       | SH-SY5Y  | cytosol                      |                                       |
| nucleoplasm                 | MCF7     | nucleoplaBJ                  | nucleoplasm                           |
| nucleoplasm                 | A-431    | nucleoplaU-251 MG            | nucleoplasm                           |
| nucleoplasm                 | A-431    | nucleoplaU-251 MG            | nucleoplasm                           |
| nucleoplasm                 | A-431    | nucleoplaU-251 MG            | nucleoplasm                           |
| endoplasmic reticulum       | PC-3     | endoplasrEF0-21              | endoplasmic reticulum, cytosol        |
| endoplasmic reticulum       | MCF7     | endoplasmic reticulum        |                                       |
| nucleoli fibrillar center   | HEK 293  | nucleoli HeLa                | mitochondria                          |
| nuclear speckles, cytosol   | A-431    | nuclear sU-251 MG            | nuclear speckles, cytosol             |
| cytosol                     |          |                              |                                       |
| plasma membrane, focal ad   | MCF7     | plasma meA549                | plasma membrane                       |
| vesicles, plasma membrane   | MCF7     | plasma meA549                | plasma membrane, focal adhesion sites |
| centrosome, cytosol         | MCF7     | microtubuHaCaT               | centrosome, cytosol                   |
| nucleoplasm                 | U-2 OS   | nucleoplaHep G2              | nucleoplasm                           |
| mitochondria                | U-251 MG | mitochondHEK 293             | mitochondria                          |
| centriolar satellite        |          |                              |                                       |
| nucleoplasm                 | A-431    | nucleoplasm, cytosol         |                                       |
| plasma membrane             | HEK 293  | nucleoplasm, plasma membrane |                                       |
| nucleoplasm, plasma membr   | MCF7     | nucleoplaHEK 293             | nucleoplasm, plasma membrane          |
| nuclear bodies              | SiHa     | nucleoplasm, nuclear bodies  |                                       |
| cell junctions              |          |                              |                                       |
| nuclear speckles, plasma n  | HEK 293  | plasma meSH-SY5Y             | plasma membrane, cell junctions       |
| nucleoplasm, cytosol        | A-431    | nucleoplaU-251 MG            | nucleoplasm, cytosol                  |
| cytosol                     | RH-30    | cytosol                      |                                       |
| cytosol                     |          |                              |                                       |
| nucleoplasm, cytosol        | A-431    | nucleoplaK-562               | cytosol                               |
| cytokinetic bridge, mitoti  | HaCaT    | golgi appHAP1                | golgi apparatus, cytokinetic bridge   |
| nucleoplasm                 | A-431    | nucleoplaU-251 MG            | nucleoplasm                           |
| vesicles                    |          |                              |                                       |
| nucleoplasm, cytosol        | A-431    | nucleoplaU-251 MG            | nucleoplasm, cytosol                  |
| cytosol                     | A-431    | cytosol U-251 MG             | centrosome, cytosol                   |
| nucleoplasm, cytosol        | RH-30    | nucleoplasm, cytosol         |                                       |
| nucleoplasm, centrosome     | HeLa     | nucleoplaBJ                  | nucleoplasm, centrosome               |
| nucleoplasm                 | HeLa     | nucleoplaBJ                  | nucleoplasm, cytosol                  |
| nucleoplasm, vesicles       | U-251 MG | nucleoplasm                  |                                       |
| nucleoplasm                 | A-431    | nucleoplaU-251 MG            | nucleoplasm, nucleoli fibrillar cente |
| nucleoli, cytosol           | U-251 MG | nucleoli, RH-30              | nucleoli, cytosol                     |
| vesicles                    | HEK 293  | vesicles                     |                                       |
| mitochondria                | HaCaT    | mitochondria                 |                                       |
| mitochondria                | A-431    | mitochondMCF7                | mitochondria                          |
| mitochondria                | HEK 293  | mitochondria                 |                                       |
| nucleoplasm, aggresome, cyt | A-431    | nucleoplaU-251 MG            | nucleoplasm, cytosol                  |



|                                              |           |                                        |                        |
|----------------------------------------------|-----------|----------------------------------------|------------------------|
| nucleoplasm, plasma membrane                 | MCF7      | nucleoplasm, plasma membrane           |                        |
| plasma membrane                              | MCF7      | plasma membrane                        | SK-MEL-30              |
| plasma membrane                              | A-431     | plasma membrane                        |                        |
| nuclear speckles                             | A-431     | nuclear speckles                       | U-251 MG               |
| nuclear speckles                             | A-431     | nuclear speckles                       | U-251 MG               |
| nucleoli fibrillar center                    | SH-SY5Y   | nucleoli fibrillar center              | ASC TERT1              |
| microtubules                                 | A549      | microtubules                           | PC-3                   |
| nucleoplasm                                  | A-431     | nucleoplasm, cytosol                   |                        |
| actin filaments                              | SiHa      | actin filaments                        | BJ cytosol             |
| nucleoplasm                                  | A-431     | nucleoplasm                            | U-251 MG               |
| nucleoplasm                                  | A-431     | nucleoplasm                            |                        |
| nucleoplasm, nuclear bodies                  | A-431     | nucleoplasm, nuclear bodies            | U-251 MG               |
| nucleoli                                     | A-431     | nucleoli                               | U-251 MG               |
| nucleoplasm, nucleoli, cytosol               | MCF7      | nucleoli, cytosol                      | PC-3                   |
| nucleoplasm, nucleoli                        | MCF7      | nucleoli                               | A549                   |
| vesicles                                     |           |                                        |                        |
| nucleoplasm                                  | A-431     | nucleoplasm                            | U-251 MG               |
| cytosol                                      |           |                                        |                        |
| nucleoplasm, cytosol                         | HEK 293   | nucleoplasm                            | HaCaT                  |
| nucleoplasm                                  | A-431     | nucleoplasm                            | U-251 MG               |
| vesicles                                     | HUVEC     | vesicles                               | TER                    |
| vesicles, intermediate filaments             | A-431     | vesicles                               | intermediate filaments |
| nucleoplasm                                  | A-431     | nucleoplasm                            | U-251 MG               |
| nucleoplasm, plasma membrane                 | A-431     | nucleoplasm                            | U-251 MG               |
| nucleoplasm, mitochondria                    | U-2 OS    | nucleoplasm, mitochondria              | A-431                  |
| nucleoplasm, golgi apparatus                 | MCF7      | nucleoplasm, golgi apparatus, vesicles | HEK 293                |
| nucleoplasm                                  | A-431     | nucleoplasm                            | U-251 MG               |
| nucleoplasm                                  | HEK 293   | nucleoplasm                            | HeLa                   |
| cytosol                                      | A-431     | cytosol                                |                        |
| vesicles                                     |           |                                        |                        |
| nucleoplasm, cytosol                         | A-431     | nucleoplasm, plasma membrane, cytosol  | U-251 MG               |
| cytosol                                      | A-431     | cytosol                                | U-251 MG               |
| centrosome                                   | U-251 MG  | centrosome                             |                        |
| cytosol                                      | A-431     | cytosol                                | U-251 MG               |
| nucleoplasm                                  | MCF7      | nucleoplasm                            | HEK 293                |
| nucleoplasm                                  | A-431     | nucleoplasm, cytosol                   | U-251 MG               |
| nuclear speckles, mitochondria               | A-431     | nucleoplasm                            | U-251 MG               |
| nucleoplasm, microtubules                    | HEK 293   | nucleoplasm, microtubules              | SK-MEL-30              |
| nucleoplasm, nucleoli                        | A-431     | nucleoplasm, nucleoli                  | U-251 MG               |
| nucleoplasm, cell junctions                  | A-431     | nucleoplasm, cell junctions, cytosol   | U-251 MG               |
| cell junctions, centriolar                   | A-431     | cell junctions, cytosol                | U-251 MG               |
| nucleoplasm, nucleoli fibrillar center       | A-431     | nucleoplasm, nucleoli fibrillar center | U-251 MG               |
| nucleoplasm, nucleoli fibrillar center       | A-431     | nucleoplasm, nucleoli fibrillar center | U-251 MG               |
| nucleoplasm                                  | SK-MEL-30 | nucleoplasm                            |                        |
| aggresome                                    | U-2 OS    | cytosol                                | HEK 293                |
| nucleoli, mitochondria                       | A-431     | nucleoli, mitochondria                 | U-251 MG               |
| intermediate filaments, focal adhesion sites | SiHa      | focal adhesion sites                   |                        |
| cytosol                                      |           |                                        |                        |
| cytosol                                      | HeLa      | cytosol                                |                        |
| nucleoplasm, plasma membrane                 | A-431     | nucleoplasm, plasma membrane           | U-251 MG               |
| nucleoplasm, vesicles                        | U-2 OS    | vesicles                               | SH-SY5Y                |
| endoplasmic reticulum                        | MCF7      | endoplasmic reticulum                  | SiHa                   |
| golgi apparatus, cytosol                     | A-431     | golgi apparatus, cytosol               | U-251 MG               |
| nuclear speckles                             | HEK 293   | nuclear speckles                       | SiHa                   |
| nucleoplasm                                  |           |                                        |                        |

|                                             |          |                                             |                           |
|---------------------------------------------|----------|---------------------------------------------|---------------------------|
| nucleoplasm                                 | U-251 MG | nucleoplasm, nuclear bodies                 |                           |
| nucleoplasm, mitochondria, HEK 293          |          | nucleoplasm, cytosol                        |                           |
| mitochondria                                | A-431    | mitochondria                                | U-251 MG                  |
| nucleoli                                    | A549     | nucleoli                                    | SiHa                      |
| nucleoplasm, vesicles, cytosol              | A-431    | nucleoplasm, vesicles, cytosol              | U-251 MG                  |
| nucleoplasm, cytosol                        | HEK 293  | nucleoplasm, cytosol                        |                           |
| nuclear bodies, golgi apparatus             | HEK 293  | nuclear bodies, golgi apparatus, cytosol    | RH-30                     |
| nuclear speckles, cytoplasmic bodies        | A-431    | nuclear speckles, cytoplasmic bodies        | U-251 MG                  |
| nuclear speckles                            | A-431    | nuclear speckles                            | U-251 MG                  |
| vesicles                                    | A549     | vesicles                                    | HaCaT                     |
| cytosol                                     | A-431    | cytosol                                     | U-251 MG                  |
| nuclear bodies                              | HEK 293  | nuclear bodies                              |                           |
| nuclear membrane                            | A-431    | nuclear membrane                            | U-251 MG                  |
| endoplasmic reticulum                       | A-431    | endoplasmic reticulum                       | U-251 MG                  |
| nucleoplasm, nucleoli, centrosome           | A-431    | centrosome                                  | U-251 MG                  |
| centrosome                                  | HEK 293  | centrosome                                  | HeLa                      |
| microtubules                                | A-431    | microtubules                                | U-251 MG                  |
| nuclear speckles, vesicles, plasma membrane | U-2 OS   | nuclear speckles, vesicles, plasma membrane | sHeLa                     |
| nucleoli, mitochondria                      | MCF7     | nucleoli                                    | RH-30                     |
| golgi apparatus, cytosol                    | U-2 OS   | golgi apparatus, cytosol                    | HEK 293                   |
| golgi apparatus, vesicles                   | U-2 OS   | golgi apparatus, vesicles                   | HEK 293                   |
| cytosol                                     | A-431    | cytosol                                     | U-251 MG                  |
| cytosol                                     | A-431    | cytosol                                     | U-251 MG                  |
| golgi apparatus, plasma membrane            | A-431    | golgi apparatus, plasma membrane            | U-251 MG                  |
| mitochondria                                |          |                                             |                           |
| nucleoplasm                                 | A-431    | nucleoplasm                                 | U-251 MG                  |
| nucleoplasm                                 | A-431    | nucleoplasm                                 | U-251 MG                  |
| nucleoplasm                                 |          |                                             |                           |
| nucleoplasm                                 |          |                                             |                           |
| golgi apparatus, cytosol                    | U-251 MG | golgi apparatus                             |                           |
| vesicles, cytosol                           | MCF7     | mitochondria                                | PC-3                      |
| plasma membrane, cytosol                    |          | nuclear membrane, cytosol                   |                           |
| plasma membrane, cytosol                    | A-431    | plasma membrane, cytosol                    | U-251 MG                  |
| nucleoplasm                                 | A-431    | nucleoplasm, cytosol                        | U-251 MG                  |
| vesicles                                    |          |                                             |                           |
| nucleoli, cytosol                           | A-431    | nucleoli, cytosol                           | U-251 MG                  |
| nucleoplasm                                 | A-431    | nucleoplasm                                 | U-251 MG                  |
| nucleoplasm                                 | A-431    | nucleoplasm                                 | U-251 MG                  |
| cytosol                                     | A-431    | cytosol                                     | U-251 MG                  |
| nuclear speckles, cytosol                   | A-431    | nuclear speckles, cytosol                   | U-251 MG                  |
| nuclear speckles, cytosol                   | A-431    | nuclear speckles, cytosol                   | U-251 MG                  |
| nucleoplasm, focal adhesion sites           | A-431    | nucleoplasm, focal adhesion sites, cytosol  | U-251 MG                  |
| nucleoplasm, cytosol                        | A-431    | nucleoplasm, nuclear speckles, cytosol      | U-251 MG                  |
| intermediate filaments, actin               | SiHa     | nucleoplasm, cytosol                        | RH-30                     |
| intermediate filaments, mitochondria        | HEK 293  | intermediate filaments                      |                           |
| vesicles                                    | U-2 OS   | vesicles                                    | SH-SY5Y                   |
| nucleoli, mitochondria                      | RH-30    | nucleoli                                    | fibrillar center, cytosol |
| actin filaments, cytosol                    | A-431    | plasma membrane, actin filaments, cytosol   | U-251 MG                  |
| nuclear bodies, plasma membrane             | U-251 MG | plasma membrane, actin filaments            |                           |
| mitochondria                                | A-431    | mitochondria                                | U-251 MG                  |
| mitochondria                                | A-431    | mitochondria                                | U-251 MG                  |
| mitochondria                                |          | nucleoli, mitochondria                      |                           |
| nucleoplasm, cytosol                        | U-251 MG | nucleoplasm, plasma membrane, cytosol       | HEL                       |
| cytosol                                     | A-431    | cytosol                                     | HEK 293                   |
| nucleoplasm, cytosol                        | HEK 293  | cytosol                                     | SK-MEL-30                 |

|                             |           |                                   |                                        |
|-----------------------------|-----------|-----------------------------------|----------------------------------------|
| golgi apparatus             | HEK 293   | golgi apparatus                   |                                        |
| mitochondria                | A-431     | nucleoplaU-251 MG                 | nucleoplasm                            |
| nucleoplasm                 | U-2 OS    | nucleoplaAF22                     | nucleoplasm                            |
| nucleoplasm, nuclear membr  | A-431     | nuclear nU-251 MG                 | nuclear membrane, mitochondria         |
| cytosol                     | A-431     | cytosol HEL                       | cytosol                                |
| cytosol                     |           |                                   |                                        |
| golgi apparatus             | HUVEC TER | golgi appREH                      | golgi apparatus                        |
| peroxisomes                 | HEK 293   | peroxisomes                       |                                        |
| nuclear membrane, nuclear   | U-2 OS    | nucleoplaHep G2                   | nucleoplasm, nuclear membrane          |
| nucleoplasm, intermediate   | U-251 MG  | intermediate filaments, cytosol   |                                        |
| cytosol                     | A-431     | cytosol Hep G2                    | cytosol                                |
| cytosol                     | A-431     | cytosol Hep G2                    | cytosol                                |
| cytosol                     | A-431     | cytosol Hep G2                    | cytosol                                |
| nucleoplasm                 | A-431     | nucleoplaHEK 293                  | nucleoplasm                            |
| nucleoplasm, cytosol        | A-431     | nucleoplaU-251 MG                 | nucleoplasm, cytosol                   |
| nucleoplasm                 | A-431     | nucleoplaU-251 MG                 | nucleoplasm                            |
| nucleoplasm                 | A-431     | nucleoplaU-251 MG                 | nucleoplasm                            |
| nuclear membrane, vesicles  | A-431     | nuclear nU-251 MG                 | nuclear membrane, vesicles             |
| nuclear membrane, vesicles  | A-431     | nuclear nU-251 MG                 | nuclear membrane, vesicles, cytosol    |
| nuclear membrane, vesicles  | MCF7      | nuclear nHEK 293                  | nuclear membrane, vesicles, aggresome, |
| cytosol                     | A-431     | cytosol U-251 MG                  | cytosol                                |
| nucleoplasm                 | A-431     | nucleoplaU-251 MG                 | nucleoplasm                            |
| mitochondria                | A-431     | mitochondU-251 MG                 | nucleoplasm, mitochondria              |
| nucleoplasm, vesicles       | A-431     | nucleoplaHEK 293                  | nucleoplasm, centrosome                |
| mitochondria                | HEK 293   | mitochondHeLa                     | nucleoplasm, mitochondria              |
| cytosol                     | SiHa      | cytosol SK-MEL-30                 | cytosol                                |
| cytokinetic bridge, cytosol | MCF7      | cytosol PC-3                      | cytosol                                |
| vesicles                    | SH-SY5Y   | vesicles RH-30                    | vesicles                               |
| nuclear speckles            | A-431     | nuclear sU-251 MG                 | nuclear speckles                       |
| nucleoplasm                 | A-431     | nucleoplaU-251 MG                 | nucleoplasm                            |
| nucleoplasm                 | SiHa      | nucleoplasm                       |                                        |
| nucleoplasm, aggresome, cyt | A-431     | nucleoplasm, cytosol              |                                        |
| cytosol                     | A-431     | cytosol U-251 MG                  | cytosol                                |
| cytosol                     | A-431     | cytosol U-251 MG                  | cytosol                                |
| nucleoplasm                 | Hep G2    | nucleoplasm, cytosol              |                                        |
| intermediate filaments      | A-431     | nucleoplaU-251 MG                 | intermediate filaments                 |
| nucleoplasm, cytosol        | A-431     | nucleoplaU-251 MG                 | nucleoplasm, cytosol                   |
| vesicles                    | HEK 293   | vesicles Hep G2                   | vesicles                               |
| vesicles                    | A-431     | vesicles U-251 MG                 | vesicles                               |
| nucleoplasm, vesicles       | A-431     | nucleoplaU-251 MG                 | nucleoplasm, nuclear bodies, vesicles  |
| cytosol                     | REH       | cytosol                           |                                        |
| nucleoplasm, vesicles       | A-431     | nucleoplaHEK 293                  | nucleoplasm, vesicles                  |
| nucleoplasm, vesicles       |           |                                   |                                        |
| nucleoplasm, vesicles       | U-2 OS    | nucleoplaA-431                    | nucleoplasm, vesicles                  |
| nucleoli, centrosome        | U-251 MG  | nucleoli, MCF7                    | nucleoli, centrosome                   |
| nucleoplasm, nucleoli, cent | U-2 OS    | nucleoplasm, nucleoli, centrosome |                                        |
| nucleoplasm, plasma membr   | A-431     | nucleoplaU-251 MG                 | nucleoplasm, plasma membrane, cytosol  |
| plasma membrane, cytosol    | A-431     | plasma meU-251 MG                 | plasma membrane, cytosol               |
| nucleoplasm, cytosol        | A-431     | nucleoplaU-251 MG                 | nucleoplasm, cytosol                   |
| cytosol                     | A-431     | cytosol U-251 MG                  | cytosol                                |
| cytosol                     | A-431     | cytosol U-251 MG                  | cytosol                                |
| cytosol                     | A-431     | cytosol PC-3                      | cytosol                                |
| vesicles                    | A-431     | vesicles U-251 MG                 | vesicles                               |
| nucleoplasm, vesicles       | A-431     | nucleoplaU-251 MG                 | nucleoplasm                            |
| nucleoplasm                 | A-431     | nucleoplasm                       |                                        |

|                                             |          |                                    |                                        |
|---------------------------------------------|----------|------------------------------------|----------------------------------------|
| nucleoplasm, cytosol vesicles               | A-431    | cytosol A549                       | nucleoplasm, cytosol vesicles, cytosol |
| golgi apparatus, vesicles                   | A-431    | golgi apparatus vesicles           |                                        |
| golgi apparatus, vesicles                   | PC-3     |                                    |                                        |
| mitochondria cytosol                        | A-431    | mitochondria U-251 MG              | mitochondria                           |
| nucleoplasm                                 | A-431    | nucleoplasm U-251 MG               | nucleoplasm                            |
| nucleoplasm, cytosol                        | A-431    | nucleoplasm, cytosol               |                                        |
| nucleoplasm, nuclear membrane               | A-431    | nucleoplasm U-251 MG               | nucleoplasm, nuclear membrane, nucleol |
| nucleoplasm cytosol                         | A-431    | nucleoplasm U-251 MG               | nucleoplasm                            |
| cytosol                                     | A-431    | cytosol U-251 MG                   | cytosol                                |
| cytosol                                     | A-431    | plasma membrane U-251 MG           | plasma membrane, cytosol               |
| cytosol                                     |          |                                    |                                        |
| nucleoplasm centrosome                      | Hep G2   | nucleoplasm, cytosol U-251 MG      | nucleoplasm                            |
| mitochondria                                | A-431    | mitochondria U-251 MG              | mitochondria                           |
| nucleoplasm, vesicles                       | A-431    | vesicles                           |                                        |
| nucleoplasm                                 | HEK 293  | nucleoplasm, endoplasmic reticulum |                                        |
| nucleoplasm                                 | A-431    | nucleoplasm U-251 MG               | nucleoplasm                            |
| nucleoplasm                                 | A-431    | nucleoplasm U-251 MG               | nucleoplasm, cytosol                   |
| nucleoplasm vesicles                        | A-431    | nucleoplasm U-251 MG               | nucleoplasm                            |
| mitochondria                                |          |                                    |                                        |
| nucleoplasm, mitochondria                   | A-431    | nucleoplasm U-251 MG               | nucleoplasm, mitochondria              |
| cytosol                                     | A-431    | plasma membrane, cytosol           |                                        |
| nucleoplasm                                 | A-431    | nucleoplasm U-251 MG               | nucleoplasm                            |
| nucleoplasm                                 | HEK 293  | nucleoplasm RH-30                  | nucleoplasm                            |
| nucleoli fibrillar center                   | Hep G2   | nucleoli SK-MEL-30                 | nucleoplasm, nucleoli fibrillar center |
| centriolar satellite, cytosol               | U-251 MG | centriolar satellite, cytosol      |                                        |
| nucleoplasm, cytosol                        | A-431    | nucleoplasm U-251 MG               | nucleoplasm                            |
| nucleoplasm, nuclear bodies                 | SiHa     | nucleoplasm, nuclear bodies        |                                        |
| nucleoplasm, intermediate filaments         | A-431    | nucleoplasm U-251 MG               | nucleoplasm, intermediate filaments    |
| nucleoplasm, nucleoli                       | A-431    | nucleoplasm, cytosol               |                                        |
| nucleoplasm                                 |          |                                    |                                        |
| plasma membrane, cytosol                    | A-431    | cytosol                            |                                        |
| cytosol                                     | A-431    | cytosol U-251 MG                   | cytosol                                |
| cytosol                                     | BJ       | cytosol                            |                                        |
| cytosol                                     | A-431    | cytosol U-251 MG                   | cytosol                                |
| cytosol                                     | A-431    | cytosol U-251 MG                   | cytosol                                |
| nucleoplasm, endoplasmic reticulum, cytosol |          |                                    |                                        |
| nuclear speckles                            | A-431    | nuclear speckles sMCF7             | nuclear speckles                       |
| nucleoli, nuclear speckles                  | A-431    | nucleoli, U-251 MG                 | nucleoli, nuclear speckles             |
| cytosol                                     | A-431    | cytosol U-251 MG                   | cytosol                                |
| nuclear bodies, cytosol                     | A-431    | nuclear bodies U-251 MG            | nuclear bodies, cytosol                |
| nucleoplasm                                 |          |                                    |                                        |
| vesicles                                    | A-431    | nucleoli, golgi apparatus          |                                        |
| nucleoplasm, cytosol                        | A-431    | nucleoplasm U-251 MG               | nucleoplasm                            |
| nucleoplasm                                 | A-431    | nucleoplasm U-251 MG               | nucleoplasm                            |
| nucleoplasm, cytosol                        | A-431    | nucleoplasm U-251 MG               | nucleoplasm, cytosol                   |
| nucleoplasm                                 | HEK 293  | nucleoplasm HeLa                   | nucleoplasm                            |
| nucleoplasm                                 | RH-30    | nucleoplasm                        |                                        |
| nucleoplasm                                 | A-431    | nucleoplasm U-251 MG               | nucleoplasm                            |
| nucleoplasm, nuclear speckles               | U-251 MG | nucleoplasm A549                   | nucleoplasm, cytosol                   |
| nucleoplasm                                 | MCF7     | nucleoplasm                        |                                        |
| nucleoplasm, plasma membrane                | A-431    | nucleoplasm U-251 MG               | nucleoplasm, plasma membrane           |

|                             |           |                                |                                        |
|-----------------------------|-----------|--------------------------------|----------------------------------------|
| nucleoplasm                 |           |                                |                                        |
| nucleoplasm, centrosome     | Hep G2    | nucleoplaPC-3                  | centrosome                             |
| nucleoplasm, nucleoli fibr  | A-431     | nucleoplaU-251 MG              | nucleoplasm, nucleoli fibrillar cente  |
| nucleoplasm, plasma membr   | A-431     | nucleoplaU-251 MG              | nucleoplasm                            |
| nucleoplasm, golgi apparat  | A-431     | golgi appU-251 MG              | golgi apparatus                        |
| golgi apparatus             | MCF7      | nuclear sHaCaT                 | nuclear speckles, golgi apparatus      |
| nucleoplasm                 | A-431     | nucleoplasm                    |                                        |
| nucleoplasm                 | A-431     | nucleoplaU-251 MG              | nucleoplasm, centrosome                |
| nucleoplasm                 | A-431     | nucleoplaU-251 MG              | nucleoplasm                            |
| nucleoplasm                 | A-431     | nucleoplaU-251 MG              | nucleoplasm                            |
| nucleoplasm                 | A-431     | nuclear sU-251 MG              | nucleoplasm                            |
| nucleoplasm, cytosol        | U-2 OS    | nucleoplaA-431                 | nucleoplasm, cytosol                   |
| endoplasmic reticulum, cyt  | A549      | endoplasmic reticulum, cytosol |                                        |
| nucleoplasm, mitochondria   | U-2 OS    | mitochondHep G2                | mitochondria                           |
| nucleoli, cytosol           | Hep G2    | nucleoli, cytosol              |                                        |
| cytosol                     | Hep G2    | cytosol                        |                                        |
| nucleoplasm                 |           |                                |                                        |
| nucleoplasm                 | U-2 OS    | nucleoplaHAP1                  | nucleoplasm, plasma membrane           |
| mitochondria                | A-431     | mitochondMCF7                  | mitochondria                           |
| mitochondria                | A-431     | mitochondMCF7                  | mitochondria                           |
| mitochondria                | MCF7      | mitochondHep G2                | mitochondria                           |
| nucleoplasm, mitochondria   | MCF7      | nucleoplaHep G2                | nucleoplasm, mitochondria              |
| nucleoplasm                 | A-431     | nucleoplaU-251 MG              | nucleoplasm                            |
| nucleoplasm                 | A-431     | nucleoplaU-251 MG              | nucleoplasm                            |
| nucleoplasm                 | U-251 MG  | nucleoplaREH                   | nucleoplasm                            |
| cytosol                     | U-251 MG  | cytosol                        |                                        |
| plasma membrane, cytosol    | A-431     | cytosol U-251 MG               | cytosol                                |
| golgi apparatus             | HeLa      | golgi appPC-3                  | golgi apparatus                        |
| nucleoplasm                 | MCF7      | nucleoplaHep G2                | nucleoplasm                            |
| nucleoplasm                 | A-431     | nucleoplaMCF7                  | nucleoplasm                            |
| nucleoplasm                 | A-431     | nucleoplaU-251 MG              | nucleoplasm                            |
| golgi apparatus             | Hep G2    | golgi appPC-3                  | golgi apparatus                        |
| nucleoplasm, vesicles       | A-431     | nucleoplaU-251 MG              | nucleoplasm, vesicles                  |
| nucleoplasm                 | MCF7      | nucleoplaHep G2                | nucleoplasm                            |
| nucleoplasm                 | MCF7      | nucleoplaHep G2                | nucleoplasm                            |
| nuclear speckles            | A-431     | nuclear sU-251 MG              | nuclear speckles                       |
| nucleoplasm                 | A-431     | nucleoplaU-251 MG              | nucleoplasm                            |
| nuclear speckles, cytosol   | ASC TERT1 | nuclear sHUVEC TER             | nuclear speckles, cytosol              |
| nucleoplasm, microtubules   | U-2 OS    | nucleoplaMCF7                  | nucleoplasm, microtubules, cytokinetic |
| nucleoplasm                 | HEK 293   | nucleoplaHep G2                | nucleoplasm                            |
| nucleoplasm                 | U-2 OS    | nucleoplaPC-3                  | nucleoplasm                            |
| cytosol                     | A-431     | cytosol U-251 MG               | cytosol                                |
| cytosol                     | U-2 OS    | cytosol Hep G2                 | cytosol                                |
| cytosol                     | PC-3      | cytosol                        |                                        |
| nucleoplasm                 | A-431     | nucleoplaMCF7                  | nucleoplasm                            |
| cytokinetic bridge, cytosol |           |                                |                                        |
| plasma membrane             | A-431     | nucleoplaU-251 MG              | nucleoplasm, plasma membrane           |
| nucleoplasm                 | A-431     | nucleoplaU-251 MG              | nucleoplasm, golgi apparatus           |
| nucleoplasm                 | A549      | nucleoplasm                    |                                        |
| cytosol                     |           |                                |                                        |
| nucleoplasm, cytosol        | A-431     | nucleoplaU-251 MG              | nucleoplasm, cytosol                   |
| nucleoplasm                 |           |                                |                                        |
| nucleoplasm                 | Hep G2    | nucleoplasm                    |                                        |
| nucleoplasm, golgi apparat  | U-2 OS    | golgi appHep G2                | nucleoplasm, golgi apparatus           |
| nucleoplasm, golgi apparat  | U-2 OS    | nucleoplaHep G2                | nucleoplasm, golgi apparatus, vesicles |

|                                    |           |                       |                                        |
|------------------------------------|-----------|-----------------------|----------------------------------------|
| cytosol                            | U-2 OS    | cytosol PC-3          | cytosol                                |
| nucleoplasm, cytosol               | U-251 MG  | nucleoplasm, cytosol  |                                        |
| nucleoplasm                        | MCF7      | nucleoplaSiHa         | nucleoplasm                            |
| cytosol                            | MCF7      | cytosol SK-MEL-30     | nuclear bodies, cytosol                |
| nucleoplasm, nuclear bodies        | U-2 OS    | nucleoplaU-251 MG     | nucleoplasm, nuclear bodies, cytosol   |
| nucleoplasm                        | SiHa      | nucleoplasm           |                                        |
| nucleoplasm                        | SiHa      | nucleoplasm, vesicles |                                        |
| nucleoplasm                        | A-431     | nucleoplaU-251 MG     | nucleoplasm                            |
| focal adhesion sites               | BJ        | focal adhesion sites  |                                        |
| nucleoplasm                        | A-431     | nucleoplaU-251 MG     | nucleoplasm                            |
| nucleoplasm                        | MCF7      | nucleoplaRH-30        | nucleoplasm                            |
| nucleoli                           | U-2 OS    | nucleoplaMCF7         | nucleoli, vesicles                     |
| nucleoli fibrillar center          | U-2 OS    | nucleoplaPC-3         | nucleoplasm, nucleoli fibrillar center |
| vesicles, cytosol                  | PC-3      | vesicles, cytosol     |                                        |
| golgi apparatus                    | U-251 MG  | golgi apparatus       |                                        |
| nucleoplasm, nuclear bodies        | MCF7      | nucleoplaPC-3         | nucleoplasm, nuclear bodies, vesicles  |
| nucleoplasm, cytosol               | MCF7      | nuclear bSH-SY5Y      | nuclear bodies, cytosol                |
| vesicles                           | U-2 OS    | vesicles A-431        | vesicles                               |
| nuclear speckles                   | HeLa      | nuclear speckles      |                                        |
| nucleoplasm                        | MCF7      | nucleoplaPC-3         | nucleoplasm                            |
| cell junctions                     |           |                       |                                        |
| nucleoplasm, plasma membrane       |           |                       |                                        |
| nucleoplasm                        | A-431     | nucleoplaU-251 MG     | nucleoplasm                            |
| nucleoplasm                        | MCF7      | nucleoplaHep G2       | nucleoplasm                            |
| nucleoplasm                        | A-431     | nucleoplaU-251 MG     | nucleoplasm                            |
| nucleoplasm, vesicles              | A-431     | nucleoplaHeLa         | nucleoplasm, vesicles                  |
| nucleoplasm                        | MCF7      | nucleoplaHeLa         | nucleoplasm                            |
| nucleoplasm                        | U-2 OS    | nucleoplaHep G2       | nucleoplasm                            |
| nucleoplasm, centrosome            | SK-MEL-30 | nucleoplasm, cytosol  |                                        |
| nucleoplasm, centrosome, cytosol   | SK-MEL-30 | nucleoplasm, cytosol  |                                        |
| golgi apparatus, vesicles, cytosol | U-2 OS    | nuclear membrane      | golgi apparatus, vesicles, cytosol     |
| golgi apparatus, vesicles, cytosol | U-2 OS    | golgi appU-251 MG     | golgi apparatus, cytosol               |
| nucleoli, cytosol                  | MCF7      | nucleoli, cytosol     |                                        |
| cytosol                            | MCF7      | cytosol PC-3          | cytosol                                |
| cytosol                            | Hep G2    | cytosol               |                                        |
| cytosol                            | Hep G2    | cytosol               |                                        |
| nucleoplasm, cytosol               | U-2 OS    | nucleoplaA-431        | nucleoplasm, nuclear bodies, cytosol   |
| nucleoplasm, cytosol               | U-251 MG  | nucleoplasm, cytosol  |                                        |
| nucleoplasm                        | U-2 OS    | nucleoplasm           |                                        |
| nucleoplasm, cytosol               | MCF7      | nucleoplaPC-3         | nucleoplasm, cytosol                   |
| vesicles                           | A-431     | vesicles A549         | vesicles                               |
| vesicles, mitotic spindle          | A549      | vesicles PC-3         | vesicles                               |
| golgi apparatus                    |           |                       |                                        |
| golgi apparatus                    |           |                       |                                        |
| nucleoplasm                        |           |                       |                                        |
| nucleoplasm, cytosol               | U-2 OS    | nucleoplaA549         | nucleoplasm, golgi apparatus, cytosol  |
| nucleoplasm                        | U-251 MG  | nucleoplasm           |                                        |
| nucleoplasm                        | A-431     | nucleoplaHep G2       | nucleoplasm                            |
| endoplasmic reticulum, cytosol     | A-431     | endoplasmU-251 MG     | endoplasmic reticulum, cytosol         |
| endoplasmic reticulum              | MCF7      | endoplasmPC-3         | endoplasmic reticulum                  |
| mitochondria                       | A549      | cytokinetPC-3         | mitochondria                           |
| endoplasmic reticulum              | SiHa      | endoplasmRH-30        | endoplasmic reticulum                  |
| vesicles                           | SK-MEL-30 | vesicles              |                                        |
| vesicles                           | A-431     | vesicles U-251 MG     | vesicles                               |
| nucleoplasm                        | RH-30     | nucleoplasm           |                                        |

|                                     |          |                                              |                                        |
|-------------------------------------|----------|----------------------------------------------|----------------------------------------|
| nucleoplasm, microtubules           | U-251 MG | microtubuBJ                                  | nucleoplasm, microtubules              |
| nucleoli fibrillar center           | U-2 OS   | nucleoplaBJ                                  | nucleoplasm, nucleoli fibrillar cente  |
| plasma membrane                     | SiHa     | nucleoplasm, plasma membrane                 |                                        |
| centrosome                          |          |                                              |                                        |
| nucleoplasm                         | U-2 OS   | nucleoplaU-251 MG                            | nucleoplasm, plasma membrane           |
| nucleoplasm                         | A-431    | nucleoplaU-251 MG                            | nucleoplasm                            |
| nucleoplasm                         | A-431    | nucleoplaU-251 MG                            | nucleoli                               |
| nucleoplasm                         | SH-SY5Y  | nucleoplasm, cytosol                         |                                        |
| nucleoli fibrillar center           | HEK 293  | nucleoli PC-3                                | nucleoli fibrillar center              |
| nucleoli fibrillar center           |          |                                              |                                        |
| nucleoplasm, mitochondria           | U-2 OS   | nucleoplaPC-3                                | nucleoplasm, mitochondria              |
| mitochondria                        | A549     | mitochondria                                 |                                        |
| mitochondria                        | A549     | mitochondria                                 |                                        |
| cytosol                             | U-251 MG | centriolar satellite, cytosol                |                                        |
| centriolar satellite, cytc          | A-431    | centriolaU-251 MG                            | centriolar satellite, cytosol          |
| centriolar satellite, cytc          | A-431    | cytosol U-251 MG                             | centriolar satellite, cytosol          |
| golgi apparatus, plasma membrane    |          |                                              |                                        |
| nuclear speckles, mitochor          | U-2 OS   | nuclear sHep G2                              | nuclear speckles                       |
| nucleoplasm, vesicles               | U-2 OS   | nucleoplaRH-30                               | vesicles                               |
| nucleoplasm                         | U-251 MG | nucleoplasm, centrosome                      |                                        |
| nucleoplasm                         | U-2 OS   | nucleoplaRH-30                               | centrosome                             |
| nucleoplasm                         | RH-30    | nucleoplasm                                  |                                        |
| nucleoli fibrillar center           | MCF7     | peroxisomes                                  |                                        |
| cytosol                             | A-431    | golgi appU-251 MG                            | golgi apparatus                        |
| golgi apparatus, vesicles           | U-251 MG | golgi appPC-3                                | cytosol                                |
| vesicles                            |          |                                              |                                        |
| cytosol                             | Hep G2   | cytosol                                      |                                        |
| nuclear speckles, plasma n          | A549     | nuclear sSH-SY5Y                             | nuclear speckles, plasma membrane      |
| cytokinetic bridge, mitotic spindle |          |                                              |                                        |
| mitotic spindle                     | A-431    | mitotic sSiHa                                | microtubules, cytosol                  |
| nuclear bodies                      | U-2 OS   | nuclear bRH-30                               | nucleoplasm, nuclear bodies, centrosom |
| nucleoplasm, nucleoli               | A-431    | nucleoplasm, nucleoli                        |                                        |
| vesicles                            | SiHa     | vesicles SK-MEL-30                           | vesicles                               |
| vesicles                            | RH-30    | vesicles BJ                                  | vesicles                               |
| vesicles                            | RH-30    | vesicles                                     |                                        |
| nucleoplasm, cytosol                | Hep G2   | nucleoplasm                                  |                                        |
| nucleoplasm, vesicles               | Hep G2   | nucleoplaSiHa                                | nucleoplasm, vesicles, plasma membrane |
| vesicles, mitochondria              | A-431    | vesicles, U-251 MG                           | vesicles                               |
| plasma membrane                     | RH-30    | plasma membrane                              |                                        |
| nucleoplasm                         |          |                                              |                                        |
| nucleoplasm                         | A-431    | nucleoplaU-251 MG                            | nucleoplasm, cytosol                   |
| mitochondria, cytosol               | A-431    | cytosol U-251 MG                             | mitochondria                           |
| mitochondria                        |          |                                              |                                        |
| cytosol                             | A-431    | cytosol U-251 MG                             | cytosol                                |
| endoplasmic reticulum               | A-431    | endoplasrU-251 MG                            | endoplasmic reticulum                  |
| mitochondria                        | A-431    | mitochondU-251 MG                            | mitochondria                           |
| cytosol                             | A-431    | cytosol U-251 MG                             | cytosol                                |
| plasma membrane, cytosol            | A-431    | plasma meU-251 MG                            | plasma membrane, cytosol               |
| nucleoplasm                         | U-251 MG | nucleoplasm, nuclear bodies, plasma membrane |                                        |
| nucleoli fibrillar center           | U-2 OS   | nucleoplaBJ                                  | nucleoplasm, nucleoli fibrillar cente  |
| plasma membrane, midbody            |          |                                              |                                        |
| centrosome, cytosol                 |          |                                              |                                        |
| nucleoplasm                         | A-431    | nucleoplaU-251 MG                            | nucleoplasm, nucleoli fibrillar cente  |
| nucleoplasm                         | A-431    | nucleoplaU-251 MG                            | nucleoplasm, nucleoli fibrillar cente  |
| nucleoli, cytosol                   | A-431    | nucleoli, SK-MEL-30                          | golgi apparatus                        |

|                                                    |          |                                                    |          |                                                    |
|----------------------------------------------------|----------|----------------------------------------------------|----------|----------------------------------------------------|
| nucleoplasm, cytosol                               | A-431    | nucleoplasma                                       | U-251 MG | nucleoplasm, cytosol                               |
| nucleoplasm                                        |          |                                                    |          |                                                    |
| nuclear speckles, cytoplasmic bodies               | A-431    | nuclear speckles, cytoplasmic bodies               | U-251 MG | nuclear speckles, cytoplasmic bodies               |
| vesicles, plasma membrane                          | A-431    | vesicles, plasma membrane                          | U-251 MG | vesicles, plasma membrane                          |
| nucleoplasm                                        | U-251 MG | nucleoplasm, vesicles                              | MCF7     | nucleoplasm, vesicles                              |
| plasma membrane, cytosol                           | A-431    | plasma membrane, centriolar satellite              | U-251 MG | plasma membrane, centriolar satellite              |
| nucleoplasm                                        | A-431    | nucleoplasm, nuclear bodies                        | U-251 MG | nucleoplasm, nuclear bodies                        |
| vesicles, cytosol                                  |          |                                                    |          |                                                    |
| intermediate filaments, cytosol                    | A-431    | cytosol                                            | U-251 MG | cytosol                                            |
| actin filaments, microtubules                      | MCF7     | microtubules                                       | PC-3     | microtubules                                       |
| nucleoplasm, nucleoli                              | A549     | nucleoplasm                                        | HeLa     | nucleoplasm                                        |
| nucleoli, endoplasmic reticulum                    | A-431    | nucleoli, endoplasmic reticulum                    | U-251 MG | nucleoli, endoplasmic reticulum                    |
| endoplasmic reticulum                              | HEK 293  | endoplasmic reticulum                              |          |                                                    |
| nucleoplasm, cytosol                               | A-431    | nucleoplasm, cytosol                               | U-251 MG | nucleoplasm, cytosol                               |
| centriolar satellite                               | A549     | centriolar satellite                               |          |                                                    |
| nucleoplasm, cytosol                               | A-431    | nucleoplasm, cytosol                               | U-251 MG | nucleoplasm, cytosol                               |
| nucleoplasm, cytosol                               |          |                                                    |          |                                                    |
| vesicles                                           |          |                                                    |          |                                                    |
| nucleoplasm, vesicles                              | A-431    | nucleoplasm, vesicles                              | U-251 MG | nucleoplasm, vesicles                              |
| nucleoplasm, mitochondria                          | A-431    | nucleoplasm, mitochondria                          | HeLa     | nucleoplasm, mitochondria                          |
| nucleoplasm, plasma membrane, centriolar satellite | A-431    | nucleoplasm, plasma membrane, centriolar satellite | U-251 MG | nucleoplasm, plasma membrane, centriolar satellite |
| vesicles                                           | U-2 OS   | golgi apparatus, vesicles                          | U-251 MG | golgi apparatus, vesicles                          |
| nucleoplasm, plasma membrane, cytosol              | A-431    | nucleoplasm, cytosol                               | U-251 MG | nucleoplasm, cytosol                               |
| nucleoplasm, cytosol                               | A-431    | nucleoplasm, cytosol                               | U-251 MG | nucleoplasm, cytosol                               |
| nucleoplasm, plasma membrane                       |          |                                                    |          |                                                    |
| plasma membrane, cytosol                           | U-251 MG | plasma membrane, cytosol                           | SiHa     | plasma membrane, cytosol                           |
| cytosol                                            | A-431    | cytosol                                            | U-251 MG | nucleoli, cytosol                                  |
| nucleoplasm, nuclear bodies                        | U-251 MG | nuclear bodies                                     |          |                                                    |
| nucleoplasm, vesicles                              | Hep G2   | nucleoplasm                                        | SH-SY5Y  | nucleoplasm                                        |
| golgi apparatus, vesicles                          | A-431    | endoplasmic reticulum                              | U-251 MG | endoplasmic reticulum                              |
| nucleoplasm                                        | A-431    | nucleoplasm                                        | U-251 MG | nucleoplasm                                        |
| nucleoplasm                                        | HEK 293  | nucleoplasm                                        | HeLa     | nucleoplasm                                        |
| nucleoplasm                                        | HEK 293  | nucleoplasm                                        | HeLa     | nucleoplasm                                        |
| nucleoplasm                                        | A-431    | nucleoplasm                                        | U-251 MG | nucleoplasm                                        |
| mitochondria                                       | U-251 MG | mitochondria                                       | PC-3     | mitochondria                                       |
| cytosol                                            | U-251 MG | cytosol                                            |          |                                                    |
| cytosol                                            | A-431    | cytosol                                            | U-251 MG | cytosol                                            |
| cytosol                                            | A-431    | cytosol                                            | U-251 MG | cytosol                                            |
| nucleoli, cytosol                                  | A-431    | cytosol                                            | U-251 MG | cytosol                                            |
| nucleoplasm, golgi apparatus                       | A-431    | golgi apparatus                                    | U-251 MG | golgi apparatus                                    |
| nuclear speckles                                   | A-431    | nuclear speckles, cytosol                          | U-251 MG | nuclear speckles, cytosol                          |
| vesicles                                           |          |                                                    |          |                                                    |
| nuclear membrane, endoplasmic reticulum            | A-431    | nuclear membrane, endoplasmic reticulum            | U-251 MG | nuclear membrane, endoplasmic reticulum            |
| nuclear membrane, endoplasmic reticulum            | A-431    | nuclear membrane, endoplasmic reticulum            | U-251 MG | nuclear membrane, endoplasmic reticulum            |
| nuclear membrane                                   | A-431    | nuclear membrane                                   | U-251 MG | nuclear membrane                                   |
| nuclear membrane, endoplasmic reticulum            |          |                                                    |          |                                                    |
| plasma membrane                                    |          |                                                    |          |                                                    |
| vesicles                                           | MCF7     | vesicles                                           | PC-3     | vesicles                                           |
| nucleoplasm                                        | HEL      | nucleoplasm                                        | K-562    | nucleoplasm                                        |
| nuclear bodies                                     | A-431    | nuclear bodies, cytosol                            | U-251 MG | nuclear bodies, cytosol                            |
| nucleoplasm, cytosol                               | U-251 MG | nucleoplasm, cytosol                               |          |                                                    |
| plasma membrane, intermediate filaments            | A-431    | plasma membrane                                    | U-251 MG | plasma membrane                                    |
| plasma membrane                                    |          |                                                    |          |                                                    |
| vesicles                                           | A-431    | vesicles                                           | U-251 MG | vesicles                                           |
| nucleoplasm                                        | HEK 293  | nucleoplasm, plasma membrane                       | HaCaT    | nucleoplasm, plasma membrane                       |



|                                   |           |                                   |           |                                              |
|-----------------------------------|-----------|-----------------------------------|-----------|----------------------------------------------|
| nucleoplasm, nuclear bodies       | SiHa      | nucleoplasm                       | RH-30     | nucleoplasm, nuclear bodies, plasma membrane |
| nucleoplasm, nucleoli             | SH-SY5Y   | nucleoplasm                       | RH-30     | nucleoplasm, nucleoli                        |
| microtubules, cytosol             | A-431     | microtubules                      | U-251 MG  | plasma membrane, microtubules, cytosol       |
| nucleoplasm, cytosol              | SH-SY5Y   | nucleoplasm                       | RH-30     | nucleoplasm, cytosol                         |
| nucleoplasm                       | A-431     | nucleoplasm                       | U-251 MG  | nucleoplasm                                  |
| nucleoplasm                       | U-2 OS    | nucleoplasm                       | A-431     | nucleoplasm                                  |
| golgi apparatus                   | A-431     | golgi apparatus                   | U-251 MG  | golgi apparatus                              |
| microtubules                      | RH-30     | microtubules                      | PC-3      | microtubules                                 |
| plasma membrane, cytosol          | A-431     | plasma membrane, cytosol          |           |                                              |
| nucleoplasm, nucleoli             | HeLa      | nucleoplasm                       | Hep G2    | nucleoplasm, nucleoli                        |
| nucleoplasm, nucleoli             | SH-SY5Y   | nucleoplasm, nucleoli             |           |                                              |
| vesicles                          | A549      | vesicles                          | PC-3      | vesicles                                     |
| nucleoplasm, nucleoli, cytosol    | A-431     | nucleoplasm, nucleoli, cytosol    | U-251 MG  | nucleoplasm, nucleoli, cytosol               |
| nucleoplasm, nucleoli, cytosol    | A-431     | nucleoplasm, cytosol              | U-251 MG  | nucleoplasm, cytosol                         |
| nucleoplasm                       | A-431     | nucleoplasm                       |           |                                              |
| nucleoplasm                       | A-431     | nucleoplasm                       | BJ        | nucleoplasm                                  |
| nucleoplasm, aggresome            | U-2 OS    | nucleoplasm, cytosol              | HEK 293   | nucleoplasm, cytosol                         |
| vesicles                          | U-2 OS    | vesicles                          | HAP1      | vesicles                                     |
| nuclear speckles, cytosol         | U-251 MG  | nuclear speckles, cytosol         | RH-30     | nuclear speckles, cytosol                    |
| nuclear bodies, cytosol           | SiHa      | nuclear bodies                    | RH-30     | nuclear bodies                               |
| nuclear speckles, plasma membrane | AF22      | nuclear speckles, plasma membrane |           |                                              |
| nucleoplasm                       | SK-MEL-30 | nucleoplasm                       |           |                                              |
| nucleoplasm, nucleoli, cytosol    | A-431     | nucleoplasm, nucleoli, cytosol    | U-251 MG  | nucleoplasm, nucleoli, cytosol               |
| nucleoplasm, cytosol              | A-431     | nucleoplasm, cytosol              | U-251 MG  | nucleoplasm, cytosol                         |
| nucleoplasm, golgi apparatus      | A-431     | nucleoplasm, golgi apparatus      | U-251 MG  | nucleoplasm, golgi apparatus                 |
| nucleoplasm, cytosol              | HEK 293   | nucleoplasm, cytosol              | PC-3      | nucleoplasm, cytosol                         |
| cytosol                           |           |                                   |           |                                              |
| nucleoli fibrillar center         | SH-SY5Y   | nucleoli fibrillar center         | HaCaT     | nucleoli fibrillar center                    |
| vesicles                          | A-431     | vesicles                          |           |                                              |
| endoplasmic reticulum             | A-431     | endoplasmic reticulum             | U-251 MG  | endoplasmic reticulum                        |
| nucleoplasm                       | A549      | nucleoplasm                       | BJ        | nucleoplasm                                  |
| vesicles                          | RT4       | vesicles                          | U-2 OS    | vesicles                                     |
| nucleoplasm, vesicles             | A-431     | nucleoplasm, golgi apparatus      | U-251 MG  | nucleoplasm, golgi apparatus                 |
| nucleoli, cytosol                 | A-431     | nucleoli, cytosol                 | U-251 MG  | nucleoli, cytosol                            |
| cytosol                           |           |                                   |           |                                              |
| endoplasmic reticulum             | A-431     | endoplasmic reticulum             | U-251 MG  | endoplasmic reticulum                        |
| cytosol                           | A-431     | cytosol                           | U-251 MG  | cytosol                                      |
| nucleoli fibrillar center         | A-431     | nucleoli fibrillar center         | U-251 MG  | nucleoli fibrillar center                    |
| mitochondria                      | A-431     | mitochondria                      | HEK 293   | mitochondria                                 |
| nucleoplasm, cytosol              | A-431     | nucleoplasm, cytosol              |           |                                              |
| plasma membrane                   | BJ        | plasma membrane, actin filaments  |           |                                              |
| nucleoplasm, nucleoli             | U-2 OS    | nucleoplasm                       |           |                                              |
| lipid droplets                    | A-431     | vesicles                          | U-251 MG  | vesicles                                     |
| cytosol                           | U-251 MG  | nucleoplasm                       |           |                                              |
| nucleoplasm                       | A-431     | nucleoplasm                       | U-251 MG  | nucleoplasm                                  |
| nucleoplasm                       | SH-SY5Y   | nucleoplasm                       | SK-MEL-30 | nucleoplasm                                  |
| nucleoplasm, vesicles             | SH-SY5Y   | nucleoplasm, vesicles             | SK-MEL-30 | nucleoplasm, vesicles                        |
| nucleoplasm, nuclear bodies       | U-2 OS    | nucleoplasm                       | A549      | nucleoplasm                                  |
| nucleoplasm                       | SH-SY5Y   | plasma membrane                   | HaCaT     | nucleoplasm, plasma membrane, cytokine       |
| vesicles                          | HeLa      | vesicles                          | SiHa      | nucleoplasm, vesicles                        |
| vesicles                          |           |                                   |           |                                              |
| nucleoplasm, golgi apparatus      | HEK 293   | nucleoplasm, golgi apparatus      |           |                                              |
| nucleoplasm                       | HEK 293   | nucleoplasm                       |           |                                              |
| cytosol                           | A-431     | cytosol                           | U-251 MG  | cytosol                                      |
| nuclear speckles                  | HEK 293   | nuclear speckles                  |           |                                              |

|                                 |          |                                 |                                       |
|---------------------------------|----------|---------------------------------|---------------------------------------|
| cytosol                         | Hep G2   | cytosol                         |                                       |
| nucleoplasm                     | A-431    | nucleoplaU-251 MG               | nucleoplasm                           |
| nucleoplasm, cytokinetic t      | Hep G2   | nucleoplasm, cytosol            |                                       |
| plasma membrane, cell junctions |          |                                 |                                       |
| golgi apparatus                 | Hep G2   | golgi appRH-30                  | golgi apparatus                       |
| nucleoplasm                     | MCF7     | nucleoplaHep G2                 | nucleoplasm                           |
| microtubules                    | A-431    | microtubuU-251 MG               | microtubules                          |
| nuclear bodies                  | MCF7     | nucleoplaHEK 293                | nucleoplasm, nuclear bodies           |
| nuclear bodies                  | MCF7     | nuclear bHEK 293                | nuclear bodies                        |
| nucleoplasm, cytosol            |          |                                 |                                       |
| nucleoplasm                     | A549     | nucleoplaHep G2                 | nucleoplasm, cytosol                  |
| nucleoplasm                     | U-2 OS   | nucleoplaSiHa                   | nucleoplasm                           |
| nucleoli fibrillar center       | U-251 MG | nucleoli fibrillar center       |                                       |
| nucleoplasm                     | A-431    | nucleoplaU-251 MG               | nucleoplasm                           |
| nucleoplasm                     | HeLa     | nucleoplaSH-SY5Y                | nucleoplasm                           |
| mitochondria                    | MCF7     | nucleoplasm, mitochondria       |                                       |
| nucleoplasm                     | MCF7     | nucleoplaA549                   | nucleoplasm, mitochondria, cytosol    |
| nucleoplasm                     | A-431    | nucleoplaU-251 MG               | nucleoplasm                           |
| nuclear bodies                  |          |                                 |                                       |
| nuclear bodies                  |          |                                 |                                       |
| nucleoplasm, microtubules       | A-431    | nucleoplaU-251 MG               | nucleoplasm, microtubules             |
| nucleoplasm, cytosol            | A-431    | nucleoplaPC-3                   | nucleoplasm                           |
| actin filaments, cytosol        | MCF7     | cell juncA549                   | actin filaments                       |
| nuclear speckles                | A-431    | nuclear sU-251 MG               | nuclear speckles                      |
| nuclear speckles                | U-251 MG | nucleoplaMCF7                   | nucleoplasm                           |
| nucleoplasm, plasma membræ      | U-251 MG | nucleoplasm, cytosol            |                                       |
| nucleoplasm                     | SiHa     | nucleoplasm, cytokinetic bridge |                                       |
| endoplasmic reticulum           | A-431    | endoplasmU-251 MG               | cytosol                               |
| nucleoplasm                     | U-251 MG | nucleoplaPC-3                   | nucleoplasm, cytosol                  |
| cytosol                         | A-431    | cytosol U-251 MG                | cytosol                               |
| nucleoli fibrillar center       | A-431    | nucleoplaU-251 MG               | nucleoli fibrillar center             |
| nucleoplasm                     | PC-3     | nucleoplasm                     |                                       |
| nucleoplasm                     | HeLa     | nucleoplasm                     |                                       |
| nucleoplasm, cytosol            | HEK 293  | nucleoplaPC-3                   | nucleoplasm                           |
| nucleoplasm, plasma membræ      | A-431    | plasma meU-251 MG               | nucleoplasm, plasma membrane, cytosol |
| vesicles, cytosol               | A-431    | vesicles, U-251 MG              | vesicles, cytosol                     |
| vesicles                        |          |                                 |                                       |
| microtubules                    | A-431    | microtubuU-251 MG               | microtubules                          |
| golgi apparatus, cytosol        | A-431    | golgi appU-251 MG               | golgi apparatus, cytosol              |
| golgi apparatus, vesicles       | A-431    | golgi appU-251 MG               | golgi apparatus                       |
| endoplasmic reticulum           | U-2 OS   | nucleoli, cytosol               |                                       |
| endoplasmic reticulum           | U-2 OS   | endoplasmic reticulum           |                                       |
| nucleoplasm                     | A-431    | nucleoplaU-251 MG               | nucleoplasm                           |
| plasma membrane                 | U-2 OS   | vesicles HeLa                   | vesicles                              |
| nucleoplasm, vesicles           |          |                                 |                                       |
| nucleoplasm                     | A-431    | nucleoplaMCF7                   | nucleoplasm                           |
| nucleoplasm                     | MCF7     | nucleoplasm                     |                                       |
| nuclear membrane                |          |                                 |                                       |
| cytosol                         | A-431    | cytosol U-251 MG                | cytosol                               |
| cytosol                         | A-431    | cytosol U-251 MG                | cytosol                               |
| mitochondria                    | A-431    | mitochondU-251 MG               | mitochondria                          |
| nucleoli, vesicles              | A-431    | nucleoli, U-251 MG              | nucleoli, vesicles                    |
| nucleoplasm                     | HeLa     | nucleoplasm                     |                                       |
| cytosol                         | U-251 MG | cytosol                         |                                       |
| nucleoplasm, cytosol            | A-431    | nucleoplaU-251 MG               | nucleoplasm, cytosol                  |

|                                  |           |                              |           |                                               |
|----------------------------------|-----------|------------------------------|-----------|-----------------------------------------------|
| vesicles, intermediate filaments | MCF7      | mitochondria                 | SK-MEL-30 | vesicles, intermediate filaments              |
| nucleoli fibrillar center        | SK-MEL-30 | nucleoplasm                  | HaCaT     | nucleoli fibrillar center                     |
| cytosol                          | A-431     | cytosol                      | U-251 MG  | cytosol                                       |
| golgi apparatus                  | U-251 MG  | golgi apparatus              |           |                                               |
| cytosol                          |           |                              |           |                                               |
| nucleoplasm, cytosol             | A-431     | nucleoplasm                  | U-251 MG  | nucleoplasm, cytosol                          |
| nucleoplasm, nucleoli            | SiHa      | nucleoplasm                  | BJ        | nucleoplasm, nucleoli                         |
| cytosol                          |           |                              |           |                                               |
| cytosol                          | A-431     | cytosol                      | U-251 MG  | cytosol                                       |
| nucleoplasm, cytosol             | HeLa      | cytosol                      |           |                                               |
| nucleoplasm, cytosol             | A-431     | nucleoplasm                  | U-251 MG  | nucleoplasm, cytosol                          |
| nucleoplasm, cytosol             | A549      | nucleoplasm                  |           |                                               |
| mitochondria                     | A549      | mitochondria                 | SH-SY5Y   | mitochondria                                  |
| plasma membrane                  | A-431     | plasma membrane              | U-251 MG  | plasma membrane                               |
| nucleoplasm                      | BJ        | nucleoplasm                  |           |                                               |
| cytosol                          | A-431     | plasma membrane              | U-251 MG  | cytosol                                       |
| nucleoplasm                      | A-431     | vesicles                     | U-251 MG  | nucleoplasm, vesicles                         |
| nucleoplasm                      | U-251 MG  | nucleoplasm                  | A549      | nucleoplasm                                   |
| nucleoplasm                      | A-431     | nucleoplasm                  | U-251 MG  | nucleoplasm                                   |
| cytosol                          | A-431     | cytosol                      | U-251 MG  | cytosol                                       |
| vesicles, plasma membrane        | MCF7      | cytosol                      | HeLa      | vesicles, cytosol                             |
| nucleoplasm, cytosol             | MCF7      | nucleoplasm                  | PC-3      | nuclear membrane, cytosol                     |
| nucleoplasm, cytosol             | Hep G2    | nucleoplasm, golgi apparatus |           |                                               |
| nucleoplasm, cytosol             | A549      | nucleoplasm, cytosol         |           |                                               |
| nucleoplasm, cytosol             | HEK 293   | nuclear membrane             | HeLa      | nucleoplasm                                   |
| nucleoplasm                      | HeLa      | nucleoplasm                  |           |                                               |
| cytosol                          | A-431     | plasma membrane              | U-251 MG  | cytosol                                       |
| nucleoplasm, cytosol             |           |                              |           |                                               |
| cytosol                          | A549      | cytosol                      | SH-SY5Y   | cytosol                                       |
| nucleoplasm                      |           |                              |           |                                               |
| nucleoplasm                      | MCF7      | nucleoplasm                  | A549      | nucleoplasm                                   |
| vesicles, cytosol                | MCF7      | cytosol                      | HeLa      | vesicles, cytosol                             |
| cytosol                          | SiHa      | cytosol                      | PC-3      | cytosol                                       |
| nucleoplasm, actin filaments     | A-431     | nucleoplasm                  | U-251 MG  | nucleoplasm, plasma membrane, actin filaments |
| nucleoplasm, vesicles            | A-431     | nucleoplasm                  | U-251 MG  | nucleoplasm, vesicles                         |
| nucleoplasm, nucleoli            | HeLa      | nucleoplasm                  |           |                                               |
| mitochondria                     | U-251 MG  | mitochondria                 | Hep G2    | mitochondria                                  |
| nucleoplasm, mitochondria        | A-431     | nucleoplasm                  | U-251 MG  | nucleoplasm, mitochondria                     |
| golgi apparatus                  | U-251 MG  | golgi apparatus              |           |                                               |
| golgi apparatus                  |           |                              |           |                                               |
| golgi apparatus                  | U-2 OS    | golgi apparatus              | RH-30     | golgi apparatus                               |
| plasma membrane, cytosol         | A549      | cytosol                      |           |                                               |
| cytosol                          | A-431     | cytosol                      | U-251 MG  | cytosol                                       |
| vesicles, cytosol                | A-431     | cytosol                      | U-251 MG  | vesicles                                      |
| vesicles, mitochondria           | MCF7      | mitochondria                 |           |                                               |
| mitochondria                     | MCF7      | mitochondria                 | HEK 293   | vesicles, mitochondria                        |
| nucleoplasm, mitochondria        | U-2 OS    | nucleoplasm                  | MCF7      | nucleoplasm, microtubules, mitochondria       |
| nucleoplasm, cytosol             | HEK 293   | nucleoplasm                  | Hep G2    | nucleoplasm, cytosol                          |
| nucleoplasm, nucleoli            | BJ        | nucleoplasm                  | RPTEC TER | nucleoplasm, nuclear speckles                 |
| nucleoplasm                      | A549      | nucleoplasm, cytosol         |           |                                               |
| nucleoplasm                      | U-2 OS    | nucleoplasm                  | Hep G2    | nucleoplasm                                   |
| nucleoplasm, nucleoli            | A-431     | nucleoplasm                  | U-251 MG  | nucleoplasm, nucleoli, cytosol                |
| endoplasmic reticulum            | ASC TERT1 | plasma membrane              | BJ        | plasma membrane                               |
| cytosol                          | A-431     | cytosol                      | MCF7      | nucleoplasm, nucleoli, cytosol                |
| plasma membrane, cytosol         | A549      | plasma membrane              | RH-30     | nucleoplasm, plasma membrane, cytosol         |

|                                                |           |                                  |                                          |
|------------------------------------------------|-----------|----------------------------------|------------------------------------------|
| nucleoplasm                                    | MCF7      | nucleoplasm                      |                                          |
| nucleoplasm                                    | MCF7      | nucleoplaHEK 293                 | nucleoplasm                              |
| plasma membrane                                | A-431     | plasma meU-251 MG                | plasma membrane                          |
| nucleoplasm, nuclear membrane, plasma membrane |           |                                  |                                          |
| mitochondria                                   | A-431     | mitochondU-251 MG                | mitochondria                             |
| nucleoplasm                                    | MCF7      | nucleoplasm                      |                                          |
| endoplasmic reticulum                          | A-431     | endoplasrU-251 MG                | endoplasmic reticulum                    |
| plasma membrane, cytosol                       | RH-30     | plasma membrane                  |                                          |
| nucleoplasm, cytosol                           | MCF7      | nucleoplaHeLa                    | nucleoplasm, cytosol                     |
| plasma membrane                                | A549      | nucleoplasm, plasma membrane     |                                          |
| centrosome                                     |           |                                  |                                          |
| mitochondria                                   | A-431     | nucleoplaHeLa                    | mitochondria                             |
| cytosol                                        | HaCaT     | mitochondria, cytosol            |                                          |
| nucleoplasm                                    | A-431     | nucleoplaHeLa                    | nucleoplasm                              |
| nucleoli, cytosol                              | A-431     | nucleoli, U-251 MG               | nucleoli, cytosol                        |
| nucleoli                                       | MCF7      | nucleoli                         |                                          |
| nuclear speckles, cytosol                      | A-431     | nuclear sU-251 MG                | nuclear speckles, cytosol                |
| cytosol                                        | A-431     | cytosol U-251 MG                 | cytosol                                  |
| mitochondria                                   | A-431     | mitochondU-251 MG                | mitochondria                             |
| plasma membrane, focal adh                     | A-431     | plasma meU-251 MG                | plasma membrane, focal adhesion sites    |
| vesicles, cytosol                              | A-431     | vesicles, U-251 MG               | vesicles, cytosol                        |
| nucleoplasm, nuclear bodie                     | A-431     | nucleoplaHeLa                    | nucleoplasm, nuclear bodies              |
| nucleoplasm, cytosol                           | A-431     | nucleoplaU-251 MG                | nucleoplasm, cytosol                     |
| nucleoplasm, golgi apparat                     | A-431     | nucleoplaU-251 MG                | nucleoplasm, golgi apparatus, cytosol    |
| nucleoplasm, vesicles                          | HEK 293   | vesicles SK-MEL-30               | nucleoplasm, vesicles                    |
| nucleoplasm, cytosol                           | RH-30     | nucleoplasm, cytosol             |                                          |
| vesicles, centriolar satel                     | A-431     | vesicles, U-251 MG               | vesicles, centriolar satellite           |
| vesicles, centriolar satel                     | A-431     | vesicles, U-251 MG               | vesicles, centriolar satellite           |
| cytosol, cytoplasmic bodie                     | U-2 OS    | vesicles A-431                   | vesicles                                 |
| plasma membrane, cytosol                       | A-431     | plasma meU-251 MG                | plasma membrane, cytosol                 |
| vesicles                                       | A-431     | vesicles U-251 MG                | vesicles                                 |
| cytosol                                        |           |                                  |                                          |
| nucleoplasm, cytosol                           | A-431     | nucleoplaU-251 MG                | nucleoplasm, cytosol                     |
| cytosol                                        | A-431     | cytosol U-251 MG                 | cytosol                                  |
| plasma membrane                                | SiHa      | plasma meBJ                      | plasma membrane                          |
| golgi apparatus                                | A-431     | golgi appU-251 MG                | golgi apparatus                          |
| nucleoplasm, golgi apparat                     | A-431     | nucleoplaU-251 MG                | golgi apparatus                          |
| nucleoplasm, nucleoli                          | A-431     | nucleoplaHeLa                    | nucleoplasm, nucleoli                    |
| nucleoplasm, centrosome                        | A-431     | nucleoplaU-251 MG                | centrosome                               |
| nucleoplasm, vesicles                          | U-251 MG  | nucleoplaSiHa                    | nucleoplasm, vesicles, cytosol           |
| plasma membrane                                | SK-MEL-30 | plasma membrane, cytosol         |                                          |
| nucleoplasm, nucleoli, vesic                   | A-431     | nucleoplaU-251 MG                | nucleoplasm, nucleoli, vesicles          |
| nucleoplasm                                    | HEK 293   | nucleoplasm, vesicles, aggresome |                                          |
| nucleoplasm                                    | U-251 MG  | nucleoplasm                      |                                          |
| nucleoplasm                                    | U-2 OS    | nucleoplaU-251 MG                | nucleoplasm                              |
| cell junctions, cytosol                        | A-431     | cell juncU-251 MG                | plasma membrane, cell junctions, cytosol |
| cell junctions, cytosol                        | A-431     | cell juncU-251 MG                | cell junctions, cytosol                  |
| cell junctions                                 | A-431     | cell juncU-251 MG                | cell junctions                           |
| nucleoplasm                                    | U-2 OS    | nucleoplaHeLa                    | nucleoplasm                              |
| vesicles                                       |           |                                  |                                          |
| nucleoplasm                                    | A-431     | nucleoplaU-251 MG                | nucleoplasm                              |
| cytosol                                        | A-431     | cytosol U-251 MG                 | cytosol                                  |
| nucleoli, plasma membrane, A-                  | A-431     | plasma meU-251 MG                | plasma membrane, cytosol                 |
| nuclear speckles, vesicles                     | U-251 MG  | nuclear speckles, vesicles       |                                          |
| nucleoplasm                                    | A-431     | nucleoplaU-251 MG                | nucleoplasm, cytosol                     |

|                                        |           |                              |           |                                        |
|----------------------------------------|-----------|------------------------------|-----------|----------------------------------------|
| nucleoplasm, vesicles                  | A-431     | nucleoplas                   | SK-MEL-30 | nucleoplasm, vesicles                  |
| nucleoplasm, nucleoli, golgi apparatus | HEK 293   | nucleoplas                   | A549      | nucleoplasm, nucleoli, golgi apparatus |
| centriolar satellite                   | A-431     | centriola                    | HEK 293   | centriolar satellite, aggresome        |
| nucleoli                               | A-431     | nucleoli                     | U-251 MG  | nucleoli                               |
| nucleoplasm                            | A-431     | nucleoplas                   | U-251 MG  | nucleoplasm                            |
| cytosol                                | A-431     | centrosom                    | U-251 MG  | centrosome, cytosol                    |
| nucleoplasm                            | A-431     | nucleoplas                   | A549      | nucleoplasm, cytosol                   |
| nucleoplasm                            | SK-MEL-30 | nucleoplas                   |           |                                        |
| cytosol                                | A-431     | cytosol                      | U-251 MG  | cytosol                                |
| cytosol                                | A-431     | cytosol                      | U-251 MG  | cytosol                                |
| nucleoplasm, nuclear bodies            | RH-30     | nucleoplas                   |           | nucleoplasm, nuclear bodies            |
| nucleoplasm, golgi apparatus           | A-431     | nucleoplas                   | U-251 MG  | nucleoplasm, golgi apparatus           |
| golgi apparatus, vesicles              | U-251 MG  | golgi app                    | ASC TERT1 | golgi apparatus, vesicles              |
| mitochondria, cytosol                  | A-431     | nucleoplas                   | U-251 MG  | mitochondria, cytosol                  |
| vesicles                               | A-431     | vesicles                     | U-251 MG  | vesicles                               |
| nucleoplasm, golgi apparatus           | A-431     | nucleoplas                   | U-251 MG  | nucleoplasm, nuclear bodies, golgi app |
| nucleoli                               | BJ        | nucleoli                     | SK-MEL-30 | nucleoli                               |
| golgi apparatus                        | SH-SY5Y   | golgi apparatus              |           |                                        |
| nucleoli                               | PC-3      | nucleoli                     | SK-MEL-30 | nucleoli                               |
| nucleoli                               | U-251 MG  | nucleoli                     | PC-3      | nucleoli                               |
| cytosol                                | A-431     | cytosol                      | U-251 MG  | cytosol                                |
| actin filaments                        | A-431     | actin fil                    | U-251 MG  | actin filaments                        |
| nucleoplasm                            | A-431     | nucleoplas                   | U-251 MG  | nucleoplasm                            |
| nucleoplasm                            | A-431     | nucleoplas                   | U-251 MG  | nucleoplasm                            |
| rods & rings                           | HaCaT     | intermediate filaments       |           |                                        |
| mitochondria, cytosol                  | A549      | mitochond                    | PC-3      | cytosol                                |
| cytosol                                | A-431     | cytosol                      |           |                                        |
| nucleoplasm, nuclear bodies            | U-2 OS    | nucleoplas                   | A-431     | nucleoplasm, nuclear bodies            |
| nuclear bodies                         | A-431     | nuclear bodies               |           |                                        |
| cytosol                                | A-431     | cytosol                      | U-251 MG  | cytosol                                |
| cytosol                                | A-431     | cytosol                      | U-251 MG  | cytosol                                |
| microtubules, cytosol                  | A-431     | cytosol                      | U-251 MG  | microtubules, cytosol                  |
| actin filaments, cytosol               | U-251 MG  | cytosol                      | SH-SY5Y   | cytosol                                |
| vesicles                               | U-251 MG  | vesicles                     | BJ        | endoplasmic reticulum, vesicles        |
| mitochondria                           | A-431     | mitochond                    | U-251 MG  | mitochondria                           |
| nucleoplasm                            | U-251 MG  | nucleoplas                   | MCF7      | nucleoplasm                            |
| cytosol                                | A-431     | cytosol                      |           |                                        |
| nucleoplasm                            | PC-3      | nucleoplasm                  |           |                                        |
| vesicles                               | BJ        | vesicles                     |           |                                        |
| nucleoplasm, cytosol                   | MCF7      | nucleoplas                   | PC-3      | nucleoplasm, cytosol                   |
| nuclear bodies                         | U-251 MG  | nucleoplasm                  |           |                                        |
| nucleoplasm                            | PC-3      | nucleoplasm                  |           |                                        |
| nucleoplasm, cytosol                   | A-431     | cytosol                      | U-251 MG  | cytosol                                |
| nucleoplasm, cytosol                   | MCF7      | nucleoplas                   | PC-3      | nucleoplasm, cytosol                   |
| nucleoplasm, nucleoli fibrillar center | MCF7      | nucleoplas                   | HEK 293   | nucleoplasm, nucleoli fibrillar center |
| plasma membrane                        | A549      | nucleoplasm, plasma membrane |           |                                        |
| plasma membrane, cytosol               | A-431     | plasma me                    | U-251 MG  | plasma membrane, cytosol               |
| vesicles, microtubules                 | A-431     | vesicles, U-251 MG           |           | vesicles                               |
| cytosol                                | A-431     | cytosol                      |           |                                        |
| cytosol                                | A-431     | cytosol                      |           |                                        |
| nucleoplasm, cytosol                   | A-431     | cytosol                      | U-251 MG  | nucleoplasm, cytosol                   |
| vesicles                               | U-2 OS    | microtubu                    | A-431     | vesicles, microtubules                 |
| endoplasmic reticulum, golgi apparatus | A-431     | endoplas                     | U-251 MG  | endoplasmic reticulum, golgi apparatus |
| centrosome                             | A549      | centrosom                    | BJ        | actin filaments, centrosome            |
| nucleoli, cytosol                      | A-431     | nucleoli                     | U-251 MG  | nucleoli, plasma membrane, cytosol     |

|                              |          |                        |                    |                                        |
|------------------------------|----------|------------------------|--------------------|----------------------------------------|
| cytosol                      |          |                        |                    |                                        |
| nucleoplasm, cytosol         | A-431    | cytosol                | U-251 MG           | cytosol                                |
| cytosol                      | A-431    | plasma me              | U-251 MG           | cytosol                                |
| nucleoplasm                  | A-431    | nucleoplasm            |                    |                                        |
| nucleoplasm, cytosol         | A549     | nucleoplasm            |                    |                                        |
| nucleoli, endoplasmic retic  | BJ       | nucleopla              | SK-MEL-30          | nucleoplasm, endoplasmic reticulum     |
| nucleoplasm                  | U-251 MG | nucleoplasm            |                    |                                        |
| nucleoli fibrillar center    | A-431    | nucleopla              | U-251 MG           | nucleoplasm, nucleoli fibrillar cente  |
| intermediate filaments       | SH-SY5Y  | intermediate filaments |                    |                                        |
| intermediate filaments       |          |                        |                    |                                        |
| nucleoplasm                  | A-431    | nucleopla              | U-251 MG           | nucleoplasm                            |
| nucleoli                     | A-431    | nucleoli               | U-251 MG           | nucleoli                               |
| nucleoplasm                  | A-431    | nucleopla              | U-251 MG           | nucleoplasm                            |
| nucleoplasm                  | A-431    | nucleopla              | A549               | nucleoplasm                            |
| nucleoplasm, intermediate    | U-251 MG | nucleopla              | MCF7               | nucleoplasm, intermediate filaments, c |
| nucleoplasm                  | MCF7     | nucleoplasm            |                    |                                        |
| nuclear speckles, mitochor   | A-431    | nuclear s              | U-251 MG           | nuclear speckles, mitochondria         |
| mitochondria                 | A-431    | mitochondria           |                    |                                        |
| nucleoplasm                  | A-431    | nucleopla              | U-251 MG           | nucleoplasm, vesicles                  |
| golgi apparatus              | U-251 MG | golgi app              | SiHa               | golgi apparatus, microtubules          |
| nucleoplasm, actin filaments |          |                        |                    |                                        |
| microtubules, cytosol        | A-431    | microtubu              | U-251 MG           | microtubules, cytosol                  |
| nucleoplasm                  | A-431    | nucleopla              | U-251 MG           | nucleoplasm                            |
| plasma membrane              |          |                        |                    |                                        |
| cytosol                      | A-431    | cytosol                |                    |                                        |
| cytosol                      | A-431    | cytosol                | U-251 MG           | cytosol                                |
| mitochondria                 | A-431    | mitochond              | U-251 MG           | mitochondria                           |
| mitochondria                 | A-431    | mitochond              | U-251 MG           | mitochondria                           |
| nucleoplasm                  | A-431    | nucleopla              | U-251 MG           | nucleoplasm                            |
| nucleoplasm                  | U-2 OS   | nucleopla              | MCF7               | nucleoplasm                            |
| nucleoplasm, cell junctior   | A549     | nucleoplasm, cytosol   |                    |                                        |
| cytosol                      | A-431    | cytosol                |                    |                                        |
| cytosol                      | A-431    | cytosol                |                    |                                        |
| cytosol                      | A-431    | cytosol                | U-251 MG           | cytosol                                |
| microtubules                 | A-431    | vesicles, U-           | 251 MG             | microtubules                           |
| mitochondria                 | MCF7     | nucleopla              | A549               | nucleoplasm, mitochondria              |
| nucleoplasm                  | U-251 MG | nucleoplasm            |                    |                                        |
| nucleoplasm                  | HEK 293  | nucleoplasm            |                    |                                        |
| nuclear membrane             | HEK 293  | nuclear m              | A549               | centriolar satellite                   |
| nucleoplasm, cytosol         | A-431    | nucleopla              | U-251 MG           | nucleoplasm, cytosol                   |
| nucleoplasm                  |          |                        |                    |                                        |
| nucleoplasm                  | HEK 293  | nucleopla              | HeLa               | nucleoplasm                            |
| cytosol                      | U-251 MG | cytosol                |                    |                                        |
| cytosol                      | A-431    | cytosol                | U-251 MG           | cytosol                                |
| cytosol                      | A-431    | plasma me              | U-251 MG           | cytosol                                |
| cytosol                      | U-2 OS   | cytosol                | PC-3               | cytosol                                |
| cytosol                      | A-431    | cell junc              | U-251 MG           | cytosol                                |
| nucleoplasm                  | U-251 MG | nucleopla              | SiHa               | nucleoplasm                            |
| nucleoplasm                  | PC-3     | nucleoplasm            |                    |                                        |
| nucleoplasm                  | U-251 MG | nucleopla              | PC-3               | nucleoplasm, vesicles                  |
| mitochondria                 |          |                        |                    |                                        |
| nucleoplasm                  | A-431    | nucleopla              | U-251 MG           | nucleoplasm, cytosol                   |
| actin filaments              | A-431    | nucleoplasm, actin     | filaments, cytosol |                                        |
| nucleoplasm                  | U-251 MG | nucleopla              | HEK 293            | nucleoplasm                            |
| vesicles, aggresome          |          |                        |                    |                                        |

|                              |          |                                    |                                       |
|------------------------------|----------|------------------------------------|---------------------------------------|
| vesicles                     | A549     | vesicles AF22                      | vesicles                              |
| golgi apparatus              | SH-SY5Y  | golgi apparatus                    |                                       |
| vesicles                     | A-431    | vesicles, U-251 MG                 | vesicles                              |
| plasma membrane, cytosol     | A-431    | nucleoplaU-251 MG                  | nucleoplasm, plasma membrane, cytosol |
| golgi apparatus              |          |                                    |                                       |
| vesicles, cytosol            | A-431    | vesicles, U-251 MG                 | vesicles, cytosol                     |
| cytosol                      | A-431    | cytosol U-251 MG                   | cytosol                               |
| nucleoplasm, cytosol         | EFO-21   | nucleoplasm, cytosol               |                                       |
| vesicles                     | HEK 293  | vesicles HeLa                      | vesicles                              |
| nucleoplasm                  |          |                                    |                                       |
| nucleoplasm                  | U-251 MG | nucleoplaA549                      | nucleoplasm                           |
| nuclear bodies               | AF22     | golgi appHUVEC TER                 | nucleoplasm, golgi apparatus          |
| nucleoplasm                  | A-431    | nucleoplaU-251 MG                  | nucleoplasm                           |
| nucleoplasm                  | HEK 293  | nucleoplaA549                      | nucleoplasm                           |
| nuclear bodies               | PC-3     | nucleoplasm, cytosol               |                                       |
| nucleoplasm                  | HEK 293  | nucleoplaPC-3                      | nucleoplasm, nucleoli                 |
| nucleoplasm, nucleoli        | MCF7     | nucleoli HEK 293                   | nucleoplasm, nucleoli                 |
| mitochondria                 | A-431    | mitochondU-251 MG                  | mitochondria                          |
| nucleoplasm, cytosol         | A-431    | nucleoplaSiHa                      | nucleoplasm                           |
| vesicles                     | A-431    | vesicles MCF7                      | vesicles                              |
| nucleoplasm                  | A-431    | nucleoplaHeLa                      | nucleoplasm                           |
| nucleoplasm, golgi apparatus | A-431    | nucleoplaMCF7                      | nucleoplasm, golgi apparatus, cytosol |
| nucleoplasm, vesicles        | HEK 293  | nucleoplaA549                      | nucleoplasm, nucleoli, vesicles       |
| nucleoplasm, nucleoli        | A-431    | nucleoplaU-251 MG                  | nucleoplasm, nucleoli                 |
| cytosol                      | A-431    | cytosol                            |                                       |
| cytosol                      | HEK 293  | cytosol A549                       | cytosol                               |
| nucleoplasm                  | HEK 293  | nuclear bPC-3                      | nucleoplasm                           |
| nucleoplasm, vesicles, cyto  | MCF7     | nucleoplaPC-3                      | nucleoplasm, vesicles, cytosol        |
| nucleoplasm                  | MCF7     | nucleoplaA549                      | nucleoplasm                           |
| nucleoplasm, plasma membrane |          |                                    |                                       |
| nucleoplasm                  | A-431    | nucleoplaU-251 MG                  | nucleoplasm                           |
| nucleoplasm                  |          |                                    |                                       |
| golgi apparatus, vesicles    | MCF7     | golgi apparatus, vesicles          |                                       |
| nucleoplasm                  | A-431    | nucleoplaU-251 MG                  | nucleoplasm, nucleoli fibrillar cente |
| nucleoplasm, nucleoli fibr   | A-431    | nucleoplaU-251 MG                  | nucleoplasm, nucleoli fibrillar cente |
| nucleoplasm, golgi apparatus | A-431    | nucleoplaU-251 MG                  | nucleoplasm, cytosol                  |
| cytosol                      | htCEpi   | nucleoplasm, mitochondria, cytosol |                                       |
| plasma membrane, intermedi   | HAP1     | plasma membrane                    |                                       |
| nucleoplasm                  | A-431    | nucleoplasm                        |                                       |
| nucleoplasm                  | U-251 MG | nucleoplasm                        |                                       |
| nucleoplasm, cytosol         | A-431    | nucleoplaA549                      | nucleoplasm, cytosol                  |
| cytosol                      | A-431    | nucleoplaU-251 MG                  | cytosol                               |
| cytosol                      | A-431    | cytosol U-251 MG                   | cytosol                               |
| endoplasmic reticulum, cyt   | MCF7     | endoplasmic reticulum, cytosol     |                                       |
| mitochondria                 | HEK 293  | mitochondA549                      | mitochondria                          |
| nucleoplasm                  | HEK 293  | nucleoplaA549                      | nucleoplasm                           |
| nucleoli fibrillar center    | A-431    | nucleoli U-251 MG                  | nucleoli fibrillar center             |
| nucleoplasm, nucleoli fibr   | A-431    | nucleoplaU-251 MG                  | nucleoplasm, nucleoli fibrillar cente |
| nucleoplasm                  |          |                                    |                                       |
| nucleoplasm, plasma membr    | A-431    | nucleoplaU-251 MG                  | nucleoplasm, plasma membrane, cytosol |
| plasma membrane, cytosol     | A-431    | plasma meU-251 MG                  | plasma membrane, cytosol              |
| vesicles, cytosol            | U-2 OS   | nucleoplaA549                      | nucleoplasm, vesicles, cytosol        |
| endoplasmic reticulum, cyt   | A-431    | endoplasrU-251 MG                  | nucleoplasm, cytosol                  |
| vesicles, plasma membrane    | A-431    | golgi appU-251 MG                  | golgi apparatus, vesicles, cytosol    |
| nucleoplasm                  |          |                                    |                                       |

|                            |          |                    |                                      |
|----------------------------|----------|--------------------|--------------------------------------|
| nucleoplasm                | A-431    | nucleoplaU-251 MG  | nucleoplasm                          |
| cytosol                    | U-251 MG | centriolaRH-30     | centriolar satellite, cytosol        |
| cytosol                    | A-431    | cytosol U-251 MG   | cytosol                              |
| nucleoplasm                |          |                    |                                      |
| nucleoplasm                | A-431    | nucleoplaU-251 MG  | nucleoplasm                          |
| nuclear speckles           | A-431    | nuclear sSiHa      | nucleoplasm                          |
| plasma membrane            | A-431    | plasma meU-251 MG  | plasma membrane                      |
| plasma membrane            | A-431    | plasma meU-251 MG  | plasma membrane                      |
| nucleoplasm, cytosol       | MCF7     | nucleoplaA549      | nucleoplasm, cytosol                 |
| nucleoplasm, cell junction | U-2 OS   | plasma meMCF7      | nucleoplasm, cell junctions          |
| nucleoplasm, cell junction | U-2 OS   | nucleoplaMCF7      | nucleoplasm, cell junctions          |
| nuclear speckles, cytosol  | A-431    | nucleoplaU-251 MG  | nuclear speckles, cytosol            |
| cytosol                    | MCF7     | cytosol SiHa       | cytosol                              |
| nucleoplasm                | MCF7     | nucleoplaHEK 293   | nucleoplasm                          |
| nucleoplasm                | MCF7     | nucleoplaHEK 293   | nucleoplasm                          |
| nucleoplasm, nuclear membr | A-431    | nucleoplaU-251 MG  | nucleoplasm, nuclear membrane        |
| cytosol                    | Hep G2   | cytosol SK-MEL-30  | cytosol                              |
| golgi apparatus, cytosol   | HEL      | golgi apparatus    |                                      |
| vesicles                   | A549     | vesicles, PC-3     | cytosol                              |
| mitochondria               | U-2 OS   | mitochondria       |                                      |
| lipid droplets, cytosol    | A-431    | lipid droU-251 MG  | lipid droplets, cytosol              |
| lipid droplets             | A-431    | lipid droPC-3      | lipid droplets                       |
| nucleoplasm                | U-2 OS   | nucleoplaMCF7      | nucleoplasm                          |
| cytosol                    | A-431    | cytosol U-251 MG   | cytosol                              |
| nucleoplasm                |          |                    |                                      |
| nucleoli, vesicles         | A-431    | nucleoli, vesicles |                                      |
| nucleoli                   | A-431    | nucleoli HeLa      | nucleoli                             |
| vesicles                   |          |                    |                                      |
| mitochondria               | A-431    | mitochondU-251 MG  | mitochondria                         |
| mitochondria               | A-431    | mitochondU-251 MG  | mitochondria                         |
| nucleoplasm                | RH-30    | nucleoplaPC-3      | nucleoplasm, plasma membrane         |
| plasma membrane            |          |                    |                                      |
| nucleoplasm, nuclear bodie | A-431    | nuclear bHeLa      | nucleoplasm, nuclear bodies, cytosol |
| nucleoplasm                | PC-3     | nuclear bEF0-21    | nuclear bodies                       |
| cytosol                    | U-251 MG | cytosol            |                                      |
| cytosol                    | Hep G2   | cytosol            |                                      |
| cytosol                    | A-431    | cytosol U-251 MG   | cytosol                              |
| cytosol                    | HeLa     | cytosol            |                                      |
| nuclear membrane           | A-431    | nuclear rU-251 MG  | nuclear membrane, nucleoli fibrillar |
| nucleoplasm                | MCF7     | nucleoplaA549      | nucleoplasm                          |
| plasma membrane, cytosol   |          |                    |                                      |
| microtubules               | HEK 293  | microtubuA549      | microtubules, cytokinetic bridge     |
| golgi apparatus, vesicles, | A-431    | golgi appU-251 MG  | golgi apparatus, cytosol             |
| plasma membrane, cytosol   | A-431    | golgi appU-251 MG  | golgi apparatus, cytosol             |
| plasma membrane, cytosol   |          |                    |                                      |
| nucleoplasm, nucleoli, cyt | A-431    | nucleoplaU-251 MG  | nucleoplasm, nucleoli, cytosol       |
| nucleoplasm, nucleoli      | A-431    | nucleoplaU-251 MG  | nucleoplasm, nucleoli                |
| golgi apparatus            | A549     | golgi apparatus    |                                      |
| centrosome                 | A-431    | centrosome         |                                      |
| nucleoplasm                | U-251 MG | nucleoplaA549      | nucleoplasm                          |
| nucleoplasm, nucleoli fibr | A-431    | nucleoplaU-251 MG  | nucleoplasm                          |
| nucleoplasm, golgi apparat | U-251 MG | nucleoplasm, golgi | apparatus                            |
| nucleoplasm, vesicles      | U-251 MG | nucleoplaHeLa      | nucleoplasm, vesicles                |
| intermediate filaments, cy | A-431    | cytosol U-251 MG   | nucleoplasm, cytosol                 |
| cytosol                    | U-251 MG | cytosol RH-30      | cytosol                              |



|                                               |          |                                                       |           |                                           |
|-----------------------------------------------|----------|-------------------------------------------------------|-----------|-------------------------------------------|
| nucleoplasm, plasma membrane                  | A549     | plasma membrane                                       | LHCN-M2   | nucleoplasm, plasma membrane              |
| vesicles                                      | MCF7     | vesicles                                              |           |                                           |
| endoplasmic reticulum                         | MCF7     | nucleoplasm, nuclear membrane, endoplasmic reticulum  |           |                                           |
| nucleoplasm, plasma membrane, cytosol         |          |                                                       |           |                                           |
| nucleoplasm                                   | U-251 MG | nucleoplasm                                           | PC-3      | nucleoplasm                               |
| mitochondria                                  |          |                                                       |           |                                           |
| nucleoplasm, cytosol                          | A-431    | nucleoplasm                                           | U-251 MG  | nucleoplasm, cytosol                      |
| plasma membrane, cytosol                      | A-431    | plasma membrane, cytosol                              | SK-MEL-30 | plasma membrane, centriolar satellite     |
| cytosol                                       | U-251 MG | cytosol                                               |           |                                           |
| nucleoplasm, nucleoli                         | MCF7     | nucleoplasm, nucleoli                                 | PC-3      | nucleoplasm, nucleoli                     |
| nuclear membrane, endoplasmic reticulum       | MCF7     | nuclear membrane, endoplasmic reticulum               |           |                                           |
| mitochondria                                  | A-431    | mitochondria                                          | U-251 MG  | mitochondria                              |
| nucleoplasm                                   | K-562    | nucleoplasm                                           |           |                                           |
| vesicles                                      | A-431    | vesicles                                              | PC-3      | vesicles                                  |
| plasma membrane                               | HEK 293  | nucleoplasm, plasma membrane                          | PC-3      | nucleoplasm, plasma membrane              |
| nucleoplasm                                   | PC-3     | nucleoplasm                                           |           |                                           |
| nucleoplasm                                   | A-431    | nucleoplasm, nuclear membrane                         | U-251 MG  | nucleoplasm, nuclear membrane             |
| plasma membrane, cytosol                      | REH      | plasma membrane, cytosol                              |           |                                           |
| nucleoplasm, nucleoli                         | U-2 OS   | nucleoli, A549                                        |           | nucleoplasm, nucleoli                     |
| actin filaments, cytosol                      | HEK 293  | actin filaments, cytosol                              | SH-SY5Y   | actin filaments, cytosol                  |
| nucleoplasm                                   | PC-3     | nucleoplasm, cytosol                                  |           |                                           |
| nucleoplasm                                   | PC-3     | nucleoplasm                                           | REH       | nucleoplasm                               |
| golgi apparatus                               |          |                                                       |           |                                           |
| nucleoplasm, centrosome, cytosol              | MCF7     | nucleoplasm, centrosome                               |           |                                           |
| nucleoplasm, cytosol                          | A-431    | nucleoplasm, cytosol                                  | HEK 293   | nucleoplasm, cytosol                      |
| nucleoplasm, nuclear bodies, golgi apparatus  | U-251 MG | nucleoplasm, nuclear bodies, plasma membrane, cytosol |           |                                           |
| golgi apparatus                               | U-251 MG | golgi apparatus                                       |           |                                           |
| golgi apparatus                               | A-431    | golgi apparatus                                       | U-251 MG  | golgi apparatus                           |
| nucleoli, mitochondria                        | A-431    | mitochondria                                          | PC-3      | mitochondria                              |
| cytosol                                       | A-431    | cytosol                                               | U-251 MG  | cytosol                                   |
| cytosol                                       |          |                                                       |           |                                           |
| actin filaments                               | MCF7     | golgi apparatus, actin filaments, cytosol             | A549      | golgi apparatus, actin filaments, cytosol |
| nucleoplasm                                   | U-251 MG | nucleoplasm, centrosome                               | SK-MEL-30 | nucleoplasm, centrosome                   |
| actin filaments                               | Hep G2   | actin filaments                                       | SH-SY5Y   | actin filaments                           |
| nucleoplasm, vesicles                         | MCF7     | nucleoplasm, vesicles                                 | A549      | nucleoplasm, vesicles                     |
| nucleoplasm                                   | A-431    | nucleoplasm                                           | U-251 MG  | nucleoplasm                               |
| nucleoplasm, cytosol                          | A-431    | nucleoplasm, plasma membrane, cytosol                 |           |                                           |
| nucleoli fibrillar center                     | A-431    | nucleoli, centrosome, cytosol                         | U-251 MG  | centrosome, cytosol                       |
| mitochondria                                  | A-431    | mitochondria                                          | U-251 MG  | mitochondria                              |
| endoplasmic reticulum, mitochondria           | A-431    | mitochondria, cytosol                                 | U-251 MG  | mitochondria, cytosol                     |
| nucleoplasm                                   | A-431    | nucleoplasm                                           | U-251 MG  | nucleoplasm                               |
| nucleoplasm, centrosome, cytosol              | PC-3     | nucleoplasm, cytosol                                  |           |                                           |
| vesicles                                      | A-431    | nucleoplasm, vesicles                                 |           |                                           |
| vesicles                                      |          |                                                       |           |                                           |
| nucleoplasm                                   | A549     | nucleoplasm, cytosol                                  |           |                                           |
| nucleoplasm                                   |          |                                                       |           |                                           |
| cytosol                                       | A-431    | cytosol                                               | U-251 MG  | cytosol                                   |
| vesicles                                      | A-431    | vesicles                                              | U-251 MG  | vesicles                                  |
| nucleoplasm                                   | MCF7     | nucleoplasm                                           | A549      | nucleoplasm                               |
| nucleoplasm, vesicles                         | MCF7     | nucleoplasm, vesicles                                 | A549      | nucleoplasm, vesicles                     |
| plasma membrane                               | REH      | nucleoplasm, plasma membrane                          |           |                                           |
| nucleoplasm, golgi apparatus, plasma membrane |          |                                                       |           |                                           |
| nucleoplasm                                   | RH-30    | nucleoplasm                                           |           |                                           |
| mitochondria                                  | A-431    | mitochondria                                          | U-251 MG  | mitochondria                              |

|                            |           |                                          |                                       |
|----------------------------|-----------|------------------------------------------|---------------------------------------|
| mitochondria               | A-431     | mitochondU-251 MG                        | mitochondria                          |
| nucleoplasm, mitochondria  | A-431     | nucleoplaU-251 MG                        | nucleoplasm, mitochondria             |
| nucleoplasm, nuclear membr | U-251 MG  | nucleoplasm, nuclear membrane            |                                       |
| plasma membrane, mitochonc | A-431     | mitochondU-251 MG                        | mitochondria, cytosol                 |
| endoplasmic reticulum      |           |                                          |                                       |
| vesicles                   | U-251 MG  | vesicles MCF7                            | vesicles, cell junctions              |
| nucleoplasm                | A-431     | nucleoplaU-251 MG                        | nucleoplasm, cytosol                  |
| mitochondria               | MCF7      | mitochondria                             |                                       |
| mitochondria               | SH-SY5Y   | mitochondSK-MEL-30                       | mitochondria                          |
| cytosol                    | A-431     | nuclear rU-251 MG                        | cytosol                               |
| nuclear speckles           | HEK 293   | nuclear sA549                            | nuclear speckles                      |
| nucleoplasm, nucleoli fibr | A-431     | nucleoplaU-251 MG                        | nucleoplasm, nucleoli fibrillar cente |
| nucleoplasm, nucleoli fibr | A-431     | nucleoplaU-251 MG                        | nucleoplasm, nucleoli fibrillar cente |
| plasma membrane, cytosol   | HUVEC TER | plasma membrane                          |                                       |
| nucleoplasm, plasma membrε | A-431     | nucleoplaU-251 MG                        | nucleoplasm, plasma membrane, cytosol |
| nucleoplasm                | A-431     | nuclear sU-251 MG                        | nuclear speckles                      |
| nuclear speckles, cytoplas | A-431     | nuclear sU-251 MG                        | nuclear speckles                      |
| cytosol                    |           |                                          |                                       |
| nucleoplasm, cytosol       | A-431     | nucleoplaU-251 MG                        | nucleoplasm, cytosol                  |
| nucleoplasm, cytosol       | U-251 MG  | nucleoplasm, cytosol                     |                                       |
| nuclear speckles           | A-431     | nuclear sU-251 MG                        | nuclear speckles                      |
| nucleoplasm                | A-431     | nucleoplaU-251 MG                        | nucleoplasm                           |
| plasma membrane, mitochonc | A-431     | plasma meU-251 MG                        | plasma membrane, cytosol              |
| endoplasmic reticulum      |           |                                          |                                       |
| cytosol                    | A-431     | cytosol U-251 MG                         | cytosol                               |
| cytosol                    | U-251 MG  | cytosol                                  |                                       |
| cytosol                    | A-431     | cytosol U-251 MG                         | cytosol                               |
| golgi apparatus, cytosol   | U-251 MG  | golgi appHeLa                            | golgi apparatus, cytosol              |
| cytosol                    | U-251 MG  | cytosol HeLa                             | cytosol                               |
| nucleoplasm, cytosol       | A-431     | nuclear speckles, intermediate filaments |                                       |
| mitochondria               | A-431     | mitochondU-251 MG                        | mitochondria                          |
| mitochondria               | A-431     | mitochondU-251 MG                        | mitochondria                          |
| plasma membrane, cytosol   | A-431     | plasma meU-251 MG                        | plasma membrane, cytosol              |
| nucleoplasm                |           |                                          |                                       |
| vesicles                   | A-431     | vesicles A549                            | vesicles                              |
| golgi apparatus            | A-431     | golgi appU-251 MG                        | golgi apparatus                       |
| cytosol                    | A-431     | plasma meU-251 MG                        | plasma membrane, cytosol              |
| cytosol                    |           |                                          |                                       |
| plasma membrane            |           |                                          |                                       |
| cytosol                    | U-251 MG  | cytosol                                  |                                       |
| vesicles                   | A-431     | vesicles U-251 MG                        | vesicles                              |
| nucleoplasm, cytosol       | A-431     | nucleoplaU-251 MG                        | cytosol                               |
| nucleoplasm                | A-431     | nucleoplaU-251 MG                        | nucleoplasm                           |
| nucleoplasm, vesicles      | HaCaT     | nucleoplaRPTEC TER                       | nucleoplasm, vesicles                 |
| nucleoplasm                | A-431     | nucleoplaU-251 MG                        | nucleoplasm                           |
| nucleoplasm, nuclear speck | RPTEC TER | nucleoplasm                              |                                       |
| nucleoplasm                | PC-3      | nucleoplasm                              |                                       |
| nucleoplasm, cytosol       | A-431     | nucleoplaU-251 MG                        | nucleoplasm                           |
| nucleoplasm                |           |                                          |                                       |
| nucleoplasm, centrosome    | SH-SY5Y   | nucleoplaSK-MEL-30                       | nucleoplasm                           |
| focal adhesion sites       | HeLa      | focal adhSH-SY5Y                         | focal adhesion sites                  |
| microtubules               | HEK 293   | vesicles, HeLa                           | microtubules                          |
| mitochondria               | A-431     | mitochondU-251 MG                        | mitochondria                          |
| nucleoplasm, cytosol       | HEK 293   | nucleoplasm, intermediate filaments      |                                       |
| nucleoplasm                | U-251 MG  | nucleoplasm                              |                                       |

|                              |          |                                |                                        |
|------------------------------|----------|--------------------------------|----------------------------------------|
| nucleoplasm                  |          |                                |                                        |
| cytosol                      | A-431    | nucleoplaU-251 MG              | nucleoplasm, cytosol                   |
| endoplasmic reticulum        | U-2 OS   | endoplasmHep G2                | endoplasmic reticulum                  |
| nucleoplasm                  | U-2 OS   | nucleoplaHep G2                | nucleoplasm                            |
| vesicles                     | U-251 MG | vesicles A549                  | nuclear membrane, vesicles             |
| mitochondria                 | MCF7     | nucleoli fibrillar center,     | mitochondria                           |
| mitochondria                 |          |                                |                                        |
| nucleoplasm, cell junction   | HeLa     | plasma membrane                |                                        |
| cytosol                      | U-251 MG | golgi apparatus, cytosol       |                                        |
| nucleoplasm, nucleoli, cyto  | A-431    | nucleoplaU-251 MG              | nucleoplasm, cytosol                   |
| nucleoplasm, golgi apparatus | SH-SY5Y  | nucleoplaSK-MEL-30             | nucleoplasm, golgi apparatus           |
| mitochondria                 | SH-SY5Y  | mitochondHaCaT                 | mitochondria                           |
| cytosol                      | A-431    | cytosol U-251 MG               | cytosol                                |
| nuclear speckles             | U-2 OS   | nuclear sPC-3                  | nuclear speckles                       |
| vesicles                     | A-431    | vesicles U-251 MG              | vesicles                               |
| vesicles, cytosol            | A-431    | vesicles, cytosol              |                                        |
| nucleoplasm                  | A-431    | nucleoplaU-251 MG              | nucleoplasm                            |
| mitochondria                 | A-431    | mitochondU-251 MG              | mitochondria                           |
| mitochondria                 |          |                                |                                        |
| cytosol                      | A-431    | plasma meU-251 MG              | plasma membrane, cytosol               |
| plasma membrane, cytosol     | A-431    | plasma meU-251 MG              | plasma membrane, cytosol               |
| plasma membrane, cytosol     | A-431    | plasma meU-251 MG              | cytosol                                |
| actin filaments, centrosom   | BJ       | actin fillHCN-M2               | golgi apparatus, actin filaments, cent |
| plasma membrane, cytosol     | U-251 MG | plasma meMCF7                  | cytosol                                |
| nucleoplasm, microtubules    | A-431    | nucleoplaU-251 MG              | nucleoplasm, microtubules              |
| mitochondria                 |          |                                |                                        |
| cytosol                      | Hep G2   | cytosol                        |                                        |
| nuclear bodies, mitochondr   | A-431    | nucleoplaU-251 MG              | nucleoplasm, nuclear bodies, mitochond |
| nucleoplasm, cytosol         | MCF7     | nucleoplaHEK 293               | nucleoplasm                            |
| vesicles                     | A-431    | vesicles MCF7                  | vesicles                               |
| cytosol                      | A-431    | cytosol U-251 MG               | cytosol                                |
| vesicles                     | U-251 MG | cytosol AF22                   | cytosol                                |
| nucleoplasm, cytosol         | A-431    | nucleoplaU-251 MG              | nucleoplasm, cytosol                   |
| nucleoli, cytosol            | A-431    | cytosol U-251 MG               | cytosol                                |
| cytosol                      | A-431    | cytosol A549                   | cytosol                                |
| cytosol                      | U-251 MG | cytosol                        |                                        |
| nucleoplasm, cytosol         |          |                                |                                        |
| golgi apparatus, vesicles    |          |                                |                                        |
| nucleoli                     | A-431    | nucleoli U-251 MG              | nucleoli                               |
| nucleoli                     | A-431    | nucleoli U-251 MG              | nucleoli                               |
| nucleoplasm                  | SH-SY5Y  | nucleoplaRH-30                 | nucleoplasm                            |
| cytosol                      | A-431    | cytosol, rU-251 MG             | cytosol                                |
| cytosol                      | U-251 MG | cytosol                        |                                        |
| golgi apparatus, vesicles    | MCF7     | golgi appPC-3                  | vesicles                               |
| centrosome                   | Hep G2   | centrosome                     |                                        |
| nuclear bodies, cytosol      | A-431    | nuclear bU-251 MG              | nuclear bodies, cytosol                |
| nucleoplasm                  | A-431    | nucleoplaU-251 MG              | nucleoplasm                            |
| nucleoli                     | A-431    | nucleoli U-251 MG              | nucleoli                               |
| microtubules                 | A-431    | microtubuU-251 MG              | microtubules, cytosol                  |
| vesicles                     | AF22     | nucleoplasm, vesicles, cytosol |                                        |
| nucleoplasm, cytosol         | U-251 MG | nucleoplasm                    |                                        |
| endosomes, lysosomes         | A549     | endosomes, lysosomes           |                                        |
| nucleoplasm                  | A-431    | nucleoplaU-251 MG              | nucleoplasm                            |
| mitochondria                 | A-431    | mitochondU-251 MG              | mitochondria                           |
| cytosol                      | A-431    | golgi appU-251 MG              | golgi apparatus                        |

|                                   |           |                                               |                                       |
|-----------------------------------|-----------|-----------------------------------------------|---------------------------------------|
| cytosol                           |           |                                               |                                       |
| nucleoplasm, cytosol              | U-2 OS    | cytosol                                       |                                       |
| nucleoplasm                       |           |                                               |                                       |
| endoplasmic reticulum             | A549      | endoplasmic reticulum                         |                                       |
| cytosol                           | A-431     | cytosol U-251 MG                              | nucleoplasm, cytosol                  |
| mitochondria                      | A-431     | mitochondU-251 MG                             | mitochondria                          |
| nucleoplasm, golgi apparatus      | U-2 OS    | nucleoplasm, golgi apparatus, plasma membrane |                                       |
| mitochondria                      | A-431     | cytosol U-251 MG                              | mitochondria                          |
| cytosol                           | A549      | cytosol PC-3                                  | cytosol                               |
| cytosol                           | A-431     | cytosol U-251 MG                              | cytosol                               |
| vesicles                          | A-431     | vesicles U-251 MG                             | vesicles                              |
| nucleoplasm                       | A-431     | nucleoplaU-251 MG                             | nucleoplasm                           |
| vesicles, cytosol                 | MCF7      | vesicles                                      |                                       |
| vesicles                          | MCF7      | nucleoplaBJ                                   | nucleoplasm, vesicles                 |
| nucleoplasm                       | A-431     | nucleoplaU-251 MG                             | nucleoplasm                           |
| cytosol                           | A-431     | cytosol U-251 MG                              | cytosol                               |
| golgi apparatus, cytosol          | A-431     | golgi appU-251 MG                             | golgi apparatus                       |
| nucleoplasm                       | A-431     | nucleoplaMCF7                                 | nucleoplasm                           |
| cytosol                           | A-431     | mitochondU-251 MG                             | cytosol                               |
| cytosol                           | A-431     | mitochondU-251 MG                             | cytosol                               |
| cytosol                           | A-431     | cytosol U-251 MG                              | cytosol                               |
| nucleoplasm, nuclear bodies       | A-431     | nucleoplaU-251 MG                             | nucleoplasm, nuclear bodies, cytosol  |
| nuclear speckles, cytosol         | A-431     | nuclear sU-251 MG                             | nuclear speckles, cytosol             |
| nucleoplasm                       | MCF7      | nucleoplaHeLa                                 | nucleoplasm                           |
| plasma membrane                   | A-431     | plasma membrane, actin filaments              |                                       |
| nucleoplasm, cytosol              | HeLa      | nucleoplaHaCaT                                | nucleoplasm, nuclear membrane         |
| nucleoplasm, cytosol              | RH-30     | nucleoplasm, cytosol                          |                                       |
| plasma membrane, cytosol          | U-251 MG  | plasma membrane, cytosol                      |                                       |
| nucleoplasm                       | A549      | nucleoplasm, cytosol                          |                                       |
| cytosol                           | U-2 OS    | nucleoplaMCF7                                 | nucleoplasm, cytosol                  |
| plasma membrane, cytosol          | A-431     | plasma meU-251 MG                             | plasma membrane, cytosol              |
| plasma membrane                   | A549      | plasma meRH-30                                | plasma membrane                       |
| endoplasmic reticulum             | MCF7      | endoplasmPC-3                                 | endoplasmic reticulum                 |
| endoplasmic reticulum             |           |                                               |                                       |
| nucleoplasm                       | BJ        | nucleoplasm                                   |                                       |
| nucleoli fibrillar center         | U-2 OS    | nucleoli fibrillar center, plasma membrane    |                                       |
| nucleoplasm                       | U-2 OS    | nucleoplaA549                                 | nucleoplasm                           |
| cytosol                           | RH-30     | golgi apparatus                               |                                       |
| nucleoplasm, vesicles, centrosome | SK-MEL-30 | nucleoplaHaCaT                                | nucleoplasm, centrosome, cytosol      |
| nucleoplasm                       | SK-MEL-30 | nucleoplaHaCaT                                | nucleoplasm, centrosome, cytosol      |
| nucleoplasm                       | U-251 MG  | nucleoplaA549                                 | nucleoplasm                           |
| nucleoplasm                       | A549      | nucleoplaHeLa                                 | nucleoplasm                           |
| nuclear bodies, plasma membrane   | SiHa      | nuclear bBJ                                   | plasma membrane                       |
| cytosol                           | A-431     | cytosol U-251 MG                              | cytosol                               |
| cytosol                           | SiHa      | cytosol                                       |                                       |
| mitochondria                      | A-431     | mitochondU-251 MG                             | mitochondria                          |
| nucleoli                          | A-431     | nucleoli                                      |                                       |
| nucleoplasm                       | A-431     | nucleoplaHep G2                               | nucleoplasm                           |
| nucleoplasm, centrosome, cytosol  | U-2 OS    | nucleoplaMCF7                                 | nucleoplasm, centrosome, mitochondria |
| plasma membrane                   | Hep G2    | plasma membrane                               |                                       |
| nucleoplasm, cytosol              | A-431     | nucleoplaSH-SY5Y                              | nucleoplasm                           |
| plasma membrane                   | A-431     | nucleoplaU-251 MG                             | plasma membrane                       |
| vesicles, plasma membrane         | A-431     | vesicles, U-251 MG                            | vesicles, plasma membrane             |
| plasma membrane, cytosol          |           |                                               |                                       |
| plasma membrane, cytosol          |           |                                               |                                       |

|                                      |          |                                     |                                        |
|--------------------------------------|----------|-------------------------------------|----------------------------------------|
| nucleoplasm vesicles cytosol cytosol | MCF7     | nucleoplaHeLa                       | nucleoplasm, cytosol                   |
| plasma membrane, cytosol             | U-251 MG | plasma membrane, cytosol            |                                        |
| plasma membrane, cytosol             | A-431    | plasma meHeLa                       | cytosol                                |
| cytosol                              | A-431    | nucleoplaU-251 MG                   | nucleoplasm, nucleoli, cytosol         |
| nucleoplasm                          | U-2 OS   | nucleoplaHep G2                     | nucleoplasm                            |
| nucleoplasm, golgi apparatus         | U-251 MG | nucleoplaA549                       | nucleoplasm                            |
| nucleoplasm vesicles                 | U-251 MG | nucleoplasm                         |                                        |
| nucleoplasm, cytosol                 | RH-30    | vesicles HaCaT                      | vesicles                               |
| golgi apparatus                      | U-251 MG | nucleoplasm                         |                                        |
| nuclear bodies, cytokinetic          | BJ       | golgi apparatus                     |                                        |
| nucleoplasm                          | SiHa     | nucleoplaRH-30                      | nucleoplasm, cytokinetic bridge        |
| microtubules cytosol                 | HEK 293  | microtubuHeLa                       | microtubules, cytokinetic bridge       |
| nucleoplasm, cytosol                 | U-251 MG | nucleoplaA549                       | nucleoplasm, cytosol                   |
| nucleoplasm, nucleoli                | HEK 293  | cytosol, cA549                      | nucleoplasm, cytosol                   |
| nucleoplasm                          | HeLa     | nucleoplaHep G2                     | nucleoplasm, nucleoli                  |
| nucleoplasm, cytosol                 | A-431    | nucleoplasm                         |                                        |
| actin filaments                      | A-431    | nucleoplaU-251 MG                   | nucleoplasm, nuclear bodies, cytosol   |
| plasma membrane                      | MCF7     | cell juncHeLa                       | plasma membrane, actin filaments       |
| nucleoplasm, golgi apparatus         | Hep G2   | golgi apparatus                     |                                        |
| nucleoplasm                          |          |                                     |                                        |
| nucleoplasm                          | U-251 MG | nucleoplaREH                        | nucleoplasm, cytosol                   |
| nucleoplasm                          | A-431    | nucleoplaU-251 MG                   | nucleoplasm                            |
| mitochondria                         | A-431    | nucleoplaU-251 MG                   | nucleoplasm, mitochondria              |
| nucleoplasm, nucleoli                | A-431    | nucleoplaU-251 MG                   | nucleoplasm, nucleoli                  |
| nucleoli, nuclear bodies, c          | BJ       | nucleoplaHUVEC                      | TER nucleoli, golgi apparatus, cytosol |
| vesicles                             | A-431    | nucleoplaU-251 MG                   | nucleoplasm, vesicles                  |
| endoplasmic reticulum                | A-431    | endoplasrU-251 MG                   | endoplasmic reticulum                  |
| nucleoplasm, cytosol                 | A-431    | nucleoplaU-251 MG                   | nucleoplasm, nucleoli, cytosol         |
| nucleoplasm, nucleoli                | HEK 293  | centrosomA549                       | nucleoplasm, nucleoli                  |
| nucleoli, plasma membrane            | A-431    | nucleoli U-251 MG                   | nucleoli                               |
| nucleoli                             | RH-30    | nucleoli PC-3                       | nucleoli                               |
| vesicles                             | A-431    | vesicles U-251 MG                   | vesicles                               |
| vesicles                             | A-431    | golgi appU-251 MG                   | vesicles                               |
| nucleoplasm                          | U-251 MG | nucleoplasm, nucleoli               |                                        |
| nucleoplasm                          |          |                                     |                                        |
| nucleoplasm                          | A-431    | nucleoplaU-251 MG                   | nucleoplasm                            |
| nucleoplasm                          | HEK 293  | nuclear bHep G2                     | nucleoplasm                            |
| nucleoplasm                          | A-431    | nucleoplaU-251 MG                   | nucleoplasm                            |
| nucleoplasm, cytosol                 | A-431    | nucleoplaU-251 MG                   | nucleoplasm                            |
| nucleoplasm, cytosol                 |          |                                     |                                        |
| nucleoplasm                          | A-431    | nucleoplaA549                       | nucleoplasm                            |
| mitochondria                         |          |                                     |                                        |
| mitochondria                         | U-251 MG | mitochondASC TERT1                  | mitochondria                           |
| nucleoplasm, cytosol                 | A-431    | nucleoplaU-251 MG                   | nucleoplasm, cytosol                   |
| cytosol                              | A-431    | cytosol U-251 MG                    | cytosol                                |
| actin filaments                      | A-431    | actin filU-251 MG                   | actin filaments                        |
| vesicles                             | HaCaT    | nucleoli fibrillar center, vesicles |                                        |
| nucleoplasm                          |          |                                     |                                        |
| plasma membrane, cytosol             | A-431    | plasma membrane, cytosol            |                                        |
| mitochondria                         | A-431    | mitochondU-251 MG                   | mitochondria                           |

|                                 |         |            |                           |         |                                        |
|---------------------------------|---------|------------|---------------------------|---------|----------------------------------------|
| mitochondria                    | A-431   | mitochondr | HUVEC                     | TER     | mitochondria                           |
| golgi apparatus                 | U-251   | MG         | golgi apparatus           |         |                                        |
| nucleoli, cytosol               | A-431   |            | nucleoli, U-251           | MG      | nucleoli, actin filaments, cytosol     |
| microtubules                    | U-251   | MG         | microtubules              |         |                                        |
| golgi apparatus                 |         |            |                           |         |                                        |
| actin filaments                 | A-431   |            | plasma me                 | HeLa    | plasma membrane, actin filaments       |
| nucleoplasm, nuclear bodie      | RH-30   |            | nucleopla                 | HaCaT   | nucleoplasm                            |
| nucleoplasm                     | A-431   |            | nucleopla                 | U-251   | MG nucleoplasm, cytosol                |
| nucleoplasm, cytosol            | A-431   |            | nucleopla                 | HEK 293 | nucleoplasm, nuclear membrane, cytosol |
| nucleoplasm                     | A-431   |            | nucleopla                 | U-251   | MG nucleoplasm                         |
| golgi apparatus, vesicles       | U-251   | MG         | golgi apparatus, vesicles |         |                                        |
| nucleoplasm, peroxisomes        | A-431   |            | peroxisom                 | U-251   | MG peroxisomes                         |
| nucleoplasm, peroxisomes        | A-431   |            | nucleopla                 | U-251   | MG nucleoplasm, peroxisomes            |
| nuclear speckles, cytosol       | A-431   |            | nuclear s                 | U-251   | MG nuclear speckles, cytosol           |
| cytosol                         | U-251   | MG         | cytosol                   |         |                                        |
| nucleoli, cytosol               | A-431   |            | nucleoli, U-251           | MG      | cytosol                                |
| nucleoplasm, nucleoli, cyto     | A-431   |            | nucleopla                 | U-251   | MG nuclear membrane, nucleoli, cytosol |
| nucleoli                        | U-251   | MG         | nucleoli                  |         |                                        |
| nucleoplasm, cytosol            | A-431   |            | nucleopla                 | U-251   | MG nucleoplasm, centrosome             |
| nucleoplasm, cytosol            | PC-3    |            | nucleoplasm, cytosol      |         |                                        |
| mitochondria                    | A-431   |            | vesicles, RH-30           |         | mitochondria                           |
| mitochondria                    | A-431   |            | mitochondr                | U-251   | MG mitochondria                        |
| nucleoplasm                     | U-251   | MG         | nucleoplasm, nucleoli     |         | fibrillar center                       |
| nucleoplasm                     | A-431   |            | nucleopla                 | U-251   | MG nucleoplasm                         |
| cytosol                         | A-431   |            | cytosol                   | U-251   | MG cytosol                             |
| nucleoplasm                     | HEK 293 |            | nucleopla                 | RH-30   | nucleoplasm, vesicles                  |
| plasma membrane, cytosol        | U-251   | MG         | plasma me                 | RH-30   | plasma membrane, cytosol               |
| nucleoplasm, cytosol            | A-431   |            | nucleopla                 | U-251   | MG nucleoplasm, cytosol                |
| nucleoplasm                     | A-431   |            | nucleopla                 | HEK 293 | nucleoplasm                            |
| cytosol                         | U-251   | MG         | cytosol                   | HUVEC   | TER                                    |
| cytosol                         | A-431   |            | cytosol                   | U-251   | MG cytosol                             |
| nucleoplasm                     | A-431   |            | nucleopla                 | U-251   | MG nucleoplasm                         |
| nucleoplasm, cytosol            | A-431   |            | nucleopla                 | U-251   | MG nucleoplasm, cytosol                |
| mitochondria                    | A-431   |            | mitochondria              |         |                                        |
| mitochondria                    | U-2     | OS         | mitochondr                | RH-30   | mitochondria                           |
| cytosol                         | A-431   |            | cytosol                   | U-251   | MG cytosol                             |
| nucleoplasm                     | A-431   |            | nucleopla                 | U-251   | MG nucleoplasm                         |
| nucleoplasm                     |         |            |                           |         |                                        |
| plasma membrane                 | A-431   |            | nucleopla                 | U-251   | MG plasma membrane                     |
| endoplasmic reticulum, cyt      | MCF7    |            | endoplasr                 | HEK 293 | endoplasmic reticulum, cytosol         |
| vesicles                        | A549    |            | nucleopla                 | PC-3    | vesicles                               |
| mitochondria                    | U-2     | OS         | mitochondr                | A-431   | mitochondria                           |
| vesicles                        | U-251   | MG         | vesicles                  |         |                                        |
| vesicles                        | U-251   | MG         | vesicles                  |         |                                        |
| vesicles                        | A-431   |            | vesicles                  |         |                                        |
| nuclear speckles                | A-431   |            | nucleopla                 | U-251   | MG nuclear speckles                    |
| intermediate filaments, cytosol |         |            |                           |         |                                        |
| nucleoplasm, cytosol            | U-2     | OS         | nuclear b                 | U-251   | MG nucleoplasm, cytosol                |
| focal adhesion sites, cyto      | A-431   |            | focal adh                 | U-251   | MG focal adhesion sites, cytosol       |
| focal adhesion sites, cyto      | U-251   | MG         | focal adh                 | A549    | focal adhesion sites, mitochondria, cy |
| nucleoli, cytosol               | A-431   |            | nucleoli, U-251           | MG      | nucleoli, cytosol                      |
| nucleoli                        | HEK 293 |            | nucleoli, cytosol         |         |                                        |
| microtubules                    | SiHa    |            | microtubu                 | RH-30   | microtubules                           |
| vesicles                        | U-251   | MG         | vesicles                  | SH-SY5Y | vesicles                               |
| nucleoli fibrillar center       | A-431   |            | nucleoplasm, nucleoli     |         | fibrillar center                       |

|                                |           |                                        |                                      |
|--------------------------------|-----------|----------------------------------------|--------------------------------------|
| nucleoli fibrillar center      | A-431     | nucleoli U-251 MG                      | nucleoli fibrillar center            |
| nucleoplasm, cytosol           | A-431     | nucleoplaU-251 MG                      | nucleoplasm, cytosol                 |
| nucleoplasm, cytosol           |           |                                        |                                      |
| nuclear membrane               | A-431     | nuclear rHEK 293                       | nuclear membrane                     |
| nucleoli, microtubules, cyto   | A-431     | nucleoplaU-251 MG                      | nucleoplasm, microtubules            |
| nucleoplasm                    | HEL       | nucleoplasm, vesicles                  |                                      |
| vesicles                       |           |                                        |                                      |
| cytosol                        | A-431     | cytosol U-251 MG                       | cytosol                              |
| nucleoplasm, vesicles          | MCF7      | nucleoplaHEK 293                       | nucleoplasm, cytosol                 |
| nucleoplasm                    | U-251 MG  | nucleoplaHep G2                        | nucleoplasm                          |
| nucleoplasm                    | A-431     | nucleoplaU-251 MG                      | nucleoplasm                          |
| nucleoplasm, cytosol           | U-251 MG  | nucleoplasm, cytosol                   |                                      |
| nucleoplasm, cytosol           | MCF7      | nucleoplasm                            |                                      |
| nuclear membrane, cytosol      | A-431     | nucleoplaU-251 MG                      | cytosol                              |
| nuclear membrane               | A-431     | nucleoplasm, nuclear membrane, cytosol |                                      |
| nucleoplasm, golgi apparatus   | A-431     | nucleoplaU-251 MG                      | nucleoplasm, golgi apparatus         |
| nucleoplasm, golgi apparatus   | A-431     | nucleoplaU-251 MG                      | nucleoplasm, cytosol                 |
| nucleoplasm, cytosol           | A-431     | nucleoplaU-251 MG                      | nucleoplasm, cytosol                 |
| nucleoplasm                    | A-431     | nucleoplaU-251 MG                      | nucleoplasm                          |
| nucleoplasm                    | A-431     | nucleoplaU-251 MG                      | nucleoplasm                          |
| cytosol                        | A549      | cytosol HeLa                           | plasma membrane, cytosol             |
| nucleoli, cytosol              | A-431     | cytosol U-251 MG                       | nucleoli, cytosol                    |
| cytosol                        | U-251 MG  | cytosol A549                           | vesicles, cytosol                    |
| nucleoplasm, nuclear bodies    | A-431     | nucleoplaU-251 MG                      | nucleoplasm, nuclear bodies          |
| nucleoplasm, cytosol           | A-431     | nucleoplaU-251 MG                      | nucleoplasm, cytosol                 |
| nucleoplasm, cytosol           | A-431     | nucleoplaU-251 MG                      | nucleoplasm, cytosol                 |
| cytosol                        | A-431     | cytosol U-251 MG                       | golgi apparatus, cytosol             |
| nucleoplasm, actin filaments   | U-251 MG  | nucleoplaHEK 293                       | nucleoplasm                          |
| nucleoplasm                    | MCF7      | nucleoplaRH-30                         | nucleoplasm                          |
| nucleoplasm, golgi apparatus   | A-431     | nucleoplaU-251 MG                      | nucleoplasm, golgi apparatus         |
| plasma membrane, cytosol       | A-431     | plasma meU-251 MG                      | plasma membrane, cytosol             |
| plasma membrane, cytosol       | HeLa      | plasma membrane, cytosol               |                                      |
| plasma membrane, cytosol       | A-431     | plasma mePC-3                          | plasma membrane, cytosol             |
| cytosol                        | U-251 MG  | cytosol                                |                                      |
| nucleoplasm, plasma membrane   | SK-MEL-30 | nucleoplasm                            |                                      |
| nucleoplasm                    | SH-SY5Y   | nucleoplasm                            |                                      |
| nucleoplasm                    | A549      | nucleoplasm                            |                                      |
| nucleoplasm                    | A-431     | nucleoplaU-251 MG                      | nucleoplasm                          |
| plasma membrane, mitochondria  | A-431     | plasma meU-251 MG                      | plasma membrane                      |
| vesicles                       | Hep G2    | golgi apparatus, vesicles              |                                      |
| nucleoplasm, nuclear bodies    | A-431     | nucleoplaU-251 MG                      | nucleoplasm, nuclear bodies, cytosol |
| nucleoplasm, nuclear membrane  | U-2 OS    | nucleoplaHEK 293                       | nuclear membrane, nuclear speckles   |
| endoplasmic reticulum          | A-431     | endoplasrU-251 MG                      | endoplasmic reticulum                |
| endoplasmic reticulum          | U-2 OS    | endoplasrMCF7                          | endoplasmic reticulum                |
| endoplasmic reticulum          | RH-30     | endoplasrHEL                           | endoplasmic reticulum                |
| nucleoplasm                    | A-431     | nucleoplaU-251 MG                      | nucleoplasm                          |
| nucleoplasm, vesicles, cyto    | A-431     | nucleoplaU-251 MG                      | nucleoplasm, vesicles, cytosol       |
| nucleoplasm, nucleoli          | A-431     | nucleoplaA549                          | nucleoplasm, nucleoli                |
| nucleoli                       | MCF7      | nucleoli PC-3                          | nucleoli                             |
| plasma membrane, cytosol       | A-431     | plasma meU-251 MG                      | plasma membrane, cytosol             |
| plasma membrane, cytosol       |           |                                        |                                      |
| nucleoplasm, vesicles, cytosol |           |                                        |                                      |
| nucleoplasm                    | MCF7      | nucleoplaHEK 293                       | nucleoplasm                          |
| nucleoplasm                    | MCF7      | nucleoplaHEK 293                       | nucleoplasm                          |
| cytosol                        | Hep G2    | cytosol HUVEC TER                      | plasma membrane, cytosol             |

|                                 |          |                                        |                                        |
|---------------------------------|----------|----------------------------------------|----------------------------------------|
| golgi apparatus                 | A-431    | golgi appU-251 MG                      | golgi apparatus                        |
| nucleoli                        | A-431    | nucleoli U-251 MG                      | nucleoli                               |
| nucleoli                        |          |                                        |                                        |
| nucleoplasm                     | A-431    | nucleoplaU-251 MG                      | nucleoplasm                            |
| nucleoplasm                     | A-431    | nucleoplaU-251 MG                      | nucleoplasm                            |
| cytosol                         | A-431    | golgi appU-251 MG                      | golgi apparatus, cytosol               |
| nucleoplasm, nucleoli           | A-431    | nucleoplaMCF7                          | nucleoplasm, nucleoli                  |
| nucleoplasm, golgi apparatus    | U-2 OS   | nucleoplaA549                          | nucleoplasm, golgi apparatus           |
| golgi apparatus, vesicles       | BJ       | golgi apparatus                        |                                        |
| nucleoplasm, golgi apparatus    | U-2 OS   | cytosol SK-MEL-30                      | nucleoplasm, golgi apparatus, cytosol  |
| endosomes                       | HEK 293  | endosomes                              |                                        |
| cytosol                         | U-251 MG | cytosol                                |                                        |
| nucleoplasm, nuclear membrane   | MCF7     | nucleoplasm, nuclear membrane, cytosol |                                        |
| nucleoplasm                     | HeLa     | nucleoplasm                            |                                        |
| nucleoplasm                     | A-431    | nucleoplaU-251 MG                      | nucleoplasm                            |
| nucleoplasm                     | HEK 293  | nucleoplasm                            |                                        |
| vesicles, cytosol               | A-431    | cytosol U-251 MG                       | cytosol                                |
| nuclear membrane, cytosol       | A-431    | nuclear mU-251 MG                      | nuclear membrane, cytosol              |
| endoplasmic reticulum           | A-431    | endoplasmU-251 MG                      | endoplasmic reticulum                  |
| endoplasmic reticulum           | A-431    | endoplasmU-251 MG                      | endoplasmic reticulum                  |
| nuclear speckles, cytosol       | A-431    | nuclear sU-251 MG                      | nuclear speckles, cytosol              |
| nuclear speckles, cytosol       | A-431    | nuclear sU-251 MG                      | nuclear speckles, golgi apparatus, cyt |
| plasma membrane                 |          |                                        |                                        |
| nuclear speckles                | A-431    | nuclear sU-251 MG                      | nucleoplasm                            |
| nuclear speckles                | A-431    | nuclear sU-251 MG                      | nuclear speckles                       |
| mitochondria                    | A-431    | mitochondRH-30                         | cytosol                                |
| nuclear speckles                | U-251 MG | nuclear sBJ                            | nuclear speckles                       |
| nucleoplasm, cytosol            | PC-3     | nucleoplasm, cytosol                   |                                        |
| nucleoplasm, vesicles           | A-431    | nucleoplaU-251 MG                      | nucleoplasm, cytosol                   |
| nucleoplasm                     |          |                                        |                                        |
| nucleoplasm                     | PC-3     | nucleoplasm                            |                                        |
| vesicles                        | MCF7     | vesicles SK-MEL-30                     | nucleoplasm, vesicles                  |
| cytosol                         | A-431    | cytosol U-251 MG                       | cytosol                                |
| cytosol                         | A-431    | cytosol U-251 MG                       | cytosol                                |
| nucleoli, cytosol               | HEK 293  | cytosol A549                           | nucleoplasm, nucleoli, cytosol         |
| vesicles                        | Hep G2   | vesicles SH-SY5Y                       | vesicles                               |
| nucleoplasm                     | A-431    | nucleoplaU-251 MG                      | nucleoplasm                            |
| nucleoplasm, cell junctions     | A549     | nucleoplasm, cell junctions            |                                        |
| nucleoplasm, cytosol            |          |                                        |                                        |
| plasma membrane, cytosol        | A-431    | plasma meU-251 MG                      | nucleoplasm, cell junctions, cytosol   |
| mitochondria                    | A-431    | mitochondria                           |                                        |
| vesicles, plasma membrane       | A-431    | vesicles, U-251 MG                     | vesicles, plasma membrane              |
| plasma membrane, centrioles     | A-431    | plasma meU-251 MG                      | plasma membrane, centriolar satellite  |
| nucleoplasm                     | U-2 OS   | nucleoplaA-431                         | nucleoplasm                            |
| nucleoplasm, golgi apparatus    | A-431    | nucleoplaU-251 MG                      | nucleoplasm, golgi apparatus           |
| endoplasmic reticulum, vesicles |          |                                        |                                        |
| nucleoli                        | A-431    | nucleoli U-251 MG                      | nucleoli                               |
| microtubules                    | A-431    | microtubuU-251 MG                      | microtubules                           |
| endoplasmic reticulum           | U-2 OS   | endoplasmic reticulum                  |                                        |
| cytosol                         | A-431    | cytosol U-251 MG                       | cytosol                                |
| nucleoli fibrillar center       | A-431    | nucleoplaU-251 MG                      | nucleoplasm, nucleoli fibrillar cente  |
| nucleoplasm, cytosol            | A-431    | nucleoplaU-251 MG                      | nucleoplasm, cytosol                   |
| nucleoplasm, plasma membrane    | U-251 MG | nucleoplasm, plasma membrane, cytosol  |                                        |
| nucleoplasm                     | A-431    | nucleoplaU-251 MG                      | nucleoplasm                            |
| nucleoplasm                     | A549     | nucleoplaHeLa                          | nucleoplasm                            |



|                                        |           |                           |                                          |
|----------------------------------------|-----------|---------------------------|------------------------------------------|
| nucleoplasm                            |           |                           |                                          |
| nucleoplasm                            |           |                           |                                          |
| centrosome, cytosol                    | U-251 MG  | centrosome, cytosol       |                                          |
| centrosome, cytosol                    | U-251 MG  | centrosome RH-30          | centrosome, cytosol                      |
| mitochondria                           | A-431     | mitochondria U-251 MG     | mitochondria                             |
| vesicles                               | BJ        | vesicles                  |                                          |
| nucleoplasm, vesicles                  | A-431     | nucleoplasm U-251 MG      | nucleoplasm, vesicles                    |
| nucleoli                               | A-431     | nucleoli BJ               | nucleoli                                 |
| nucleoli                               | A-431     | nucleoli BJ               | nucleoli                                 |
| nuclear membrane, cytosol              |           |                           |                                          |
| nucleoplasm                            |           |                           |                                          |
| nucleoplasm, cytosol                   |           |                           |                                          |
| nucleoplasm, mitotic spindle           |           |                           |                                          |
| vesicles, plasma membrane              |           |                           |                                          |
| vesicles, plasma membrane              | LHCN-M2   | vesicles, plasma membrane |                                          |
| nucleoplasm                            | SH-SY5Y   | nucleoplasm SK-MEL-30     | nucleoplasm, golgi apparatus             |
| nucleoplasm, mitochondria              | A-431     | nucleoplasm U-251 MG      | nucleoplasm, cytosol                     |
| mitochondria                           | A-431     | mitochondria U-251 MG     | mitochondria                             |
| vesicles                               | A-431     | vesicles A549             | vesicles                                 |
| plasma membrane, cytosol               | A-431     | plasma membrane U-251 MG  | plasma membrane, cytosol                 |
| nucleoplasm, nuclear bodies            | A-431     | nucleoplasm U-251 MG      | nucleoplasm, nuclear bodies, cytosol     |
| nucleoplasm                            | U-2 OS    | nucleoplasm               |                                          |
| mitochondria                           | A-431     | mitochondria U-251 MG     | mitochondria                             |
| nucleoplasm, cytosol                   | U-251 MG  | nucleoplasm, cytosol      |                                          |
| nucleoli                               | A-431     | nucleoli U-251 MG         | nucleoli                                 |
| centrosome                             | A-431     | centrosome U-251 MG       | centrosome                               |
| nucleoli fibrillar center              | REH       | plasma membrane HAP1      | nucleoli fibrillar center, cytosol       |
| nucleoplasm, vesicles                  | A-431     | nucleoplasm U-251 MG      | nucleoplasm, vesicles                    |
| centrosome                             | A-431     | nucleoplasm U-251 MG      | vesicles, centrosome                     |
| nucleoli, endoplasmic reticulum        | A-431     | nucleoli, U-251 MG        | nucleoli, endoplasmic reticulum, cytosol |
| nucleoplasm, nucleoli, vesicles        | U-2 OS    | nucleoli, vesicles        |                                          |
| nucleoplasm, mitochondria              | A-431     | nucleoplasm U-251 MG      | mitochondria                             |
| nucleoplasm, nucleoli fibrillar center | A-431     | nucleoplasm PC-3          | nucleoplasm, nucleoli fibrillar center   |
| vesicles                               | A-431     | vesicles U-251 MG         | vesicles                                 |
| vesicles, plasma membrane              | A-431     | plasma membrane U-251 MG  | plasma membrane                          |
| nucleoplasm, golgi apparatus           | HaCaT     | golgi apparatus           |                                          |
| golgi apparatus                        | HeLa      | golgi apparatus           |                                          |
| nuclear speckles                       | A-431     | nuclear speckles HEK 293  | nuclear speckles                         |
| vesicles, cytosol                      | RH-30     | vesicles PC-3             | vesicles                                 |
| plasma membrane                        | RH-30     | plasma membrane BJ        | plasma membrane                          |
| centrosome                             | U-251 MG  | centrosome                |                                          |
| nucleoplasm, vesicles                  | A-431     | nucleoplasm U-251 MG      | nucleoplasm, vesicles                    |
| nucleoplasm                            | A549      | nucleoplasm               |                                          |
| nuclear membrane                       | A-431     | nucleoplasm U-251 MG      | nucleoplasm, nuclear membrane            |
| nucleoplasm, vesicles                  | A-431     | vesicles U-251 MG         | nucleoplasm, vesicles                    |
| nucleoplasm                            | A-431     | nucleoplasm U-251 MG      | nucleoplasm                              |
| nucleoplasm, cytosol                   | ASC TERT1 | nucleoplasm PC-3          | nucleoplasm                              |
| nucleoplasm                            | A-431     | nucleoplasm               |                                          |
| nuclear membrane                       | MCF7      | nucleoplasm HEK 293       | nucleoplasm, nuclear membrane            |
| nucleoplasm, centrosome                | A-431     | nucleoplasm U-251 MG      | nucleoplasm, centrosome                  |
| vesicles                               | A-431     | vesicles U-251 MG         | vesicles                                 |
| nucleoplasm, cytokinesis               | A-431     | nucleoplasm U-251 MG      | nucleoplasm, cytosol                     |
| nucleoplasm                            | U-2 OS    | nucleoplasm A-431         | nucleoplasm                              |
| nucleoplasm                            | U-2 OS    | nucleoplasm               |                                          |
| golgi apparatus                        |           |                           |                                          |

|                              |          |                                                 |                                        |
|------------------------------|----------|-------------------------------------------------|----------------------------------------|
| nucleoplasm                  |          |                                                 |                                        |
| nucleoplasm                  | A-431    | nucleoplaU-251 MG                               | nucleoplasm                            |
| nucleoplasm                  | HeLa     | nucleoplaHep G2                                 | nucleoplasm, vesicles                  |
| plasma membrane, cytosol     | U-251 MG | plasma membrane, cytosol                        |                                        |
| plasma membrane, cytosol     | U-251 MG | plasma membrane, cytosol                        |                                        |
| cytosol                      | A-431    | cytosol U-251 MG                                | cytosol                                |
| vesicles, centrosome         | U-251 MG | vesicles BJ                                     | vesicles                               |
| nucleoplasm, vesicles        | U-251 MG | vesicles BJ                                     | vesicles                               |
| nuclear membrane, nucleoli   | A-431    | nuclear rU-251 MG                               | nuclear membrane, nucleoli fibrillar   |
| nucleoplasm                  | A-431    | nucleoplasm                                     |                                        |
| vesicles                     | U-2 OS   | vesicles                                        |                                        |
| mitochondria                 |          |                                                 |                                        |
| nuclear speckles             | A-431    | nuclear sU-251 MG                               | nuclear speckles                       |
| nuclear speckles             | A-431    | nuclear sU-251 MG                               | nuclear speckles                       |
| nucleoplasm                  | U-2 OS   | nucleoplaHaCaT                                  | nucleoplasm, endoplasmic reticulum, cy |
| nucleoplasm                  | A-431    | nucleoplaU-251 MG                               | nucleoplasm                            |
| nucleoplasm, golgi apparatus | A-431    | nucleoplaU-251 MG                               | nucleoplasm, golgi apparatus           |
| vesicles                     |          |                                                 |                                        |
| vesicles                     |          |                                                 |                                        |
| vesicles                     | U-2 OS   | vesicles PC-3                                   | nucleoplasm, vesicles                  |
| nucleoplasm                  | HeLa     | nucleoplaRH-30                                  | nucleoplasm                            |
| nucleoplasm                  | HeLa     | nucleoplaRH-30                                  | nucleoplasm, nucleoli                  |
| nucleoplasm                  | HeLa     | nucleoplaRH-30                                  | nucleoplasm                            |
| nucleoli, plasma membrane,   | A-431    | nucleoli, U-251 MG                              | nucleoli, plasma membrane, cytosol     |
| focal adhesion sites, cyto   | U-2 OS   | nuclear speckles, focal adhesion sites, cytosol |                                        |
| vesicles                     | U-2 OS   | vesicles HeLa                                   | vesicles                               |
| nucleoplasm, vesicles, cyto  | U-251 MG | cytosol                                         |                                        |
| plasma membrane              | SiHa     | plasma meBJ                                     | plasma membrane                        |
| plasma membrane              | A-431    | plasma meA549                                   | plasma membrane                        |
| golgi apparatus              | A-431    | nucleoplaU-251 MG                               | nucleoplasm, golgi apparatus, cytosol  |
| nucleoplasm, nucleoli, golg  | A-431    | nucleoplaPC-3                                   | nucleoplasm, golgi apparatus           |
| nucleoplasm                  | A549     | nucleoplaSiHa                                   | nucleoplasm                            |
| nucleoplasm, cytosol         |          |                                                 |                                        |
| nucleoplasm                  |          |                                                 |                                        |
| nucleoplasm, mitochondria    | A-431    | nucleoplaU-251 MG                               | nucleoplasm                            |
| nucleoplasm, cytosol         | A-431    | nucleoplaU-251 MG                               | nucleoplasm, cytosol                   |
| nucleoplasm                  | U-2 OS   | nucleoplaSK-MEL-30                              | nucleoplasm                            |
| mitochondria                 | Hep G2   | mitochondPC-3                                   | mitochondria                           |
| cytosol                      | U-251 MG | plasma membrane, cytosol                        |                                        |
| nucleoplasm, plasma membr    | U-2 OS   | plasma meA-431                                  | nucleoplasm, plasma membrane, cytosol  |
| nucleoplasm, plasma membr    | U-2 OS   | nucleoplaA-431                                  | nucleoplasm, plasma membrane, cytosol  |
| mitochondria                 | U-251 MG | mitochondria                                    |                                        |
| nucleoplasm                  | BJ       | nucleoplasm                                     |                                        |
| nucleoplasm, nucleoli        | A-431    | nucleoplaU-251 MG                               | nucleoplasm, nucleoli                  |
| nucleoplasm, nucleoli        | A-431    | nucleoplaU-251 MG                               | nucleoplasm, nucleoli                  |
| nuclear speckles             | A-431    | nuclear sU-251 MG                               | nuclear speckles                       |
| nuclear speckles             | A-431    | nuclear sU-251 MG                               | nuclear speckles                       |
| nuclear speckles             | A-431    | nuclear sMCF7                                   | nuclear speckles                       |
| nuclear membrane, cytosol    | A-431    | nuclear rU-251 MG                               | nuclear membrane, cytosol              |
| nucleoli, mitochondria       |          |                                                 |                                        |
| mitochondria                 | MCF7     | mitochondHeLa                                   | mitochondria                           |
| cytosol                      | A-431    | cytosol U-251 MG                                | cytosol                                |
| nuclear membrane             |          |                                                 |                                        |
| nucleoplasm, vesicles        | A-431    | nucleoplaU-251 MG                               | nucleoplasm, vesicles                  |
| plasma membrane              | A-431    | plasma meU-251 MG                               | plasma membrane                        |

|                                    |          |                             |                                       |
|------------------------------------|----------|-----------------------------|---------------------------------------|
| cytosol                            | U-251 MG | cytosol                     |                                       |
| vesicles                           |          |                             |                                       |
| nucleoplasm, cell junction         | U-2 OS   | nucleoplasm, Hep G2         | nucleoplasm, nucleoli                 |
| centrosome                         | A-431    | nucleoplasm, U-251 MG       | nucleoplasm, centrosome               |
| centrosome                         | SiHa     | vesicles, centrosome        |                                       |
| nucleoplasm, microtubules          | A-431    | nucleoplasm, U-251 MG       | microtubules                          |
| nucleoplasm                        | A-431    | nucleoplasm, U-251 MG       | nucleoplasm                           |
| cytosol                            | A-431    | cytosol, U-251 MG           | cytosol                               |
| cytosol                            | A-431    | cytosol, U-251 MG           | cytosol                               |
| mitochondria                       | A-431    | mitochondria, U-251 MG      | mitochondria                          |
| nucleoplasm, nucleoli fibrils      | A-431    | nucleoli, U-251 MG          | nucleoli fibrillar center, cytosol    |
| nuclear speckles                   | U-2 OS   | nuclear speckles, A-431     | nuclear speckles                      |
| nuclear speckles                   | MCF7     | nucleoli, SiHa              | nuclear speckles                      |
| cytosol, cytoplasmic bodies        | A-431    | cytoplasm, U-251 MG         | cytosol, cytoplasmic bodies           |
| cytosol                            | A-431    | cytosol, U-251 MG           | cytosol                               |
| cytosol                            | A-431    | nuclear bodies, U-251 MG    | cytosol                               |
| nucleoplasm, vesicles              | A-431    | nucleoplasm, U-251 MG       | nucleoplasm, vesicles                 |
| nucleoplasm                        | U-251 MG | nucleoplasm, BJ             | nucleoplasm                           |
| nucleoplasm, cytosol               | A-431    | nucleoplasm, U-251 MG       | nucleoplasm                           |
| nucleoplasm, plasma membrane       | A-431    | nucleoplasm, U-251 MG       | nucleoplasm, plasma membrane          |
| nucleoplasm, mitochondria          | A-431    | nucleoplasm, U-251 MG       | nucleoplasm, plasma membrane          |
| nucleoplasm, cytosol               | A-431    | nucleoplasm, U-251 MG       | nucleoplasm, golgi apparatus, cytosol |
| vesicles                           |          |                             |                                       |
| golgi apparatus                    | A-431    | golgi apparatus, U-251 MG   | golgi apparatus                       |
| vesicles                           | U-2 OS   | vesicles, PC-3              | vesicles                              |
| vesicles, mitochondria             | A-431    | vesicles, U-251 MG          | vesicles                              |
| plasma membrane, cytosol           | A-431    | plasma membrane, U-251 MG   | plasma membrane, cytosol              |
| mitochondria, cytosol              | A-431    | mitochondria, U-251 MG      | cytosol                               |
| mitochondria                       | A-431    | mitochondria, U-251 MG      | mitochondria                          |
| nuclear bodies                     | A-431    | nuclear bodies, U-251 MG    | nuclear bodies                        |
| cytosol                            | A-431    | cytosol, U-251 MG           | cytosol                               |
| cytosol                            | A-431    | cytosol, U-251 MG           | cytosol                               |
| plasma membrane                    |          |                             |                                       |
| plasma membrane, cytosol           |          |                             |                                       |
| mitochondria                       | A-431    | mitochondria, HEK 293       | mitochondria                          |
| nucleoplasm                        | HEL      | nucleoplasm, cytosol        |                                       |
| nucleoplasm, cytosol               | A-431    | nucleoplasm, RH-30          | nucleoplasm, cytosol                  |
| nucleoplasm, nuclear speckles      | HEK 293  | nucleoplasm, RH-30          | nucleoplasm                           |
| nucleoplasm                        | U-2 OS   | nucleoplasm, A-431          | nucleoplasm                           |
| nucleoplasm, endoplasmic reticulum | SiHa     | nucleoplasm, SK-MEL-30      | endoplasmic reticulum                 |
| cytosol, cytoplasmic bodies        | A549     | cytosol, cytoplasmic bodies |                                       |
| endoplasmic reticulum              |          |                             |                                       |
| cytosol                            | A-431    | cytosol                     |                                       |
| nucleoplasm, vesicles              | HEK 293  | nucleoplasm, A549           | nucleoplasm, vesicles                 |
| mitochondria                       | A-431    | mitochondria, U-251 MG      | mitochondria                          |
| mitochondria                       | A-431    | mitochondria, U-251 MG      | mitochondria                          |
| endoplasmic reticulum              | HeLa     | endoplasmic reticulum       |                                       |
| nucleoplasm                        | A-431    | nucleoplasm, U-251 MG       | nucleoplasm                           |
| nucleoplasm                        | A-431    | nucleoplasm, PC-3           | nucleoplasm                           |
| endoplasmic reticulum              |          |                             |                                       |
| plasma membrane, actin filaments   | A-431    | plasma membrane, U-251 MG   | plasma membrane, cytosol              |
| cytosol                            | A-431    | cytosol, U-251 MG           | cytosol                               |
| nucleoli, cytosol                  | A-431    | plasma membrane, U-251 MG   | plasma membrane, cytosol              |
| plasma membrane, cytosol           | A-431    | plasma membrane, U-251 MG   | plasma membrane, cytosol              |
| nucleoplasm, nuclear bodies        | A-431    | nucleoplasm, U-251 MG       | nucleoplasm, nuclear bodies, cytosol  |

|                                             |           |                      |                                           |
|---------------------------------------------|-----------|----------------------|-------------------------------------------|
| nucleoplasm, cytosol                        | A-431     | nucleoplaU-251 MG    | nucleoplasm                               |
| nucleoplasm                                 | SK-MEL-30 | nucleoplaU-251 MG    | nucleoplasm                               |
| nucleoli, mitochondria                      | A-431     | nucleoli MCF7        | nucleoli, mitochondria                    |
| golgi apparatus, plasma membrane            | HEK 293   | golgi appPC-3        | plasma membrane                           |
| centrosome, cytosol vesicles                | A-431     | nucleoplaU-251 MG    | nucleoplasm, centrosome, cytosol vesicles |
| nucleoplasm, cytosol                        | A-431     | nucleoplaU-251 MG    | nucleoplasm                               |
| mitochondria                                | A-431     | mitochondU-251 MG    | mitochondria                              |
| vesicles, cytosol                           |           |                      |                                           |
| nuclear speckles, mitochondria              | SiHa      | nuclear sAF22        | nuclear speckles                          |
| cytosol                                     | A-431     | cytosol U-251 MG     | cytosol                                   |
| plasma membrane                             |           |                      |                                           |
| cytosol                                     | A-431     | cytosol              |                                           |
| mitochondria                                | A-431     | mitochondU-251 MG    | mitochondria                              |
| mitochondria                                | A-431     | mitochondU-251 MG    | mitochondria                              |
| cytosol                                     | A-431     | nucleoplaU-251 MG    | cytosol                                   |
| nucleoplasm, vesicles                       | U-2 OS    | nucleoplaMCF7        | nucleoplasm, vesicles                     |
| nucleoplasm, vesicles                       | U-2 OS    | nucleoplaHEK 293     | nucleoplasm, vesicles                     |
| nucleoli fibrillar center                   | A-431     | nucleoli U-251 MG    | nucleoli fibrillar center, nuclear sp     |
| nuclear speckles                            | BJ        | nuclear sHEL         | nuclear speckles                          |
| nucleoplasm                                 |           |                      |                                           |
| cytosol                                     | A-431     | cytosol U-251 MG     | cytosol                                   |
| mitochondria                                | Hep G2    | mitochondRH-30       | mitochondria                              |
| nucleoplasm, cytosol                        |           |                      |                                           |
| nucleoplasm, cytosol                        | RH-30     | nucleoplasm, cytosol |                                           |
| nucleoplasm, cytosol                        | RH-30     | nucleoplasm, cytosol |                                           |
| nucleoplasm                                 | U-2 OS    | nucleoplaHep G2      | nucleoplasm                               |
| plasma membrane, cytosol                    | A-431     | plasma meU-251 MG    | plasma membrane, cytosol                  |
| nucleoplasm, cytosol                        |           |                      |                                           |
| nucleoplasm, cytosol                        | U-251 MG  | nucleoplasm, cytosol |                                           |
| nucleoplasm, mitochondria                   | A-431     | nucleoplaU-251 MG    | nucleoplasm                               |
| vesicles                                    | RPTEC     | TER vesicles         |                                           |
| vesicles                                    | U-251 MG  | vesicles BJ          | vesicles                                  |
| nucleoplasm, endoplasmic reticulum          | A-431     | nucleoplaU-251 MG    | nucleoplasm, endoplasmic reticulum        |
| nucleoplasm, nucleoli, cytosol              | A-431     | nucleoplaU-251 MG    | nucleoplasm, nucleoli, cytosol            |
| nucleoplasm, cytosol                        | A-431     | nucleoplaU-251 MG    | nucleoplasm, nuclear bodies, cytosol      |
| nucleoplasm                                 | A-431     | nucleoplaU-251 MG    | nucleoplasm                               |
| nuclear membrane, nuclear vesicles, cytosol | A-431     | nuclear sU-251 MG    | nuclear speckles, cytosol                 |
| microtubules                                | A-431     | microtubuU-251 MG    | microtubules, cytosol                     |
| nucleoplasm                                 | A-431     | nucleoplaU-251 MG    | nucleoplasm                               |
| nucleoplasm                                 | U-251 MG  | nucleoplasm          |                                           |
| cytosol                                     | A-431     | golgi appU-251 MG    | golgi apparatus, cytosol                  |
| vesicles                                    | A-431     | golgi appU-251 MG    | vesicles                                  |
| nucleoplasm                                 | A-431     | nucleoplasm          |                                           |
| mitochondria                                | A-431     | mitochondU-251 MG    | nucleoplasm, cytosol                      |
| nucleoplasm, vesicles                       | SiHa      | nucleoplasm          |                                           |
| golgi apparatus, cytosol                    | A-431     | golgi appU-251 MG    | golgi apparatus                           |
| golgi apparatus                             | A-431     | golgi appU-251 MG    | golgi apparatus                           |
| golgi apparatus                             |           |                      |                                           |
| nucleoplasm, nuclear bodies                 | U-251 MG  | nucleoplaA549        | nucleoplasm                               |
| nucleoplasm                                 | A549      | nucleoplasm, cytosol |                                           |
| nucleoplasm, cytosol                        | SH-SY5Y   | nucleoplaBJ          | nucleoplasm                               |
| plasma membrane, cytosol                    | A-431     | plasma meA549        | plasma membrane, cytosol                  |
| nucleoplasm, cytosol                        | A-431     | nucleoplaU-251 MG    | nucleoplasm, cytosol                      |

|                                   |           |                                           |                                             |                                       |
|-----------------------------------|-----------|-------------------------------------------|---------------------------------------------|---------------------------------------|
| centrosome                        |           |                                           |                                             |                                       |
| rods & rings                      | HUVEC     | TER                                       | rods & rings                                |                                       |
| plasma membrane, cytosol          | A-431     | MCF7                                      | plasma membrane, cell junctions, cytosol    |                                       |
| cytosol                           | U-251     | MG                                        | cytosol                                     |                                       |
| nucleoplasm                       | SiHa      | RH-30                                     | nucleoplasm                                 |                                       |
| cytosol                           | A-431     | HEK 293                                   | cytosol                                     |                                       |
| nucleoplasm, nucleoli, cytosol    | U-251     | MG                                        | nucleoplasm, nucleoli                       |                                       |
| nucleoplasm, nucleoli             | A-431     | U-251                                     | MG                                          | nucleoplasm, nucleoli, cytosol        |
| nucleoplasm                       | A-431     | REH                                       | nucleoplasm                                 |                                       |
| nucleoplasm, intermediate         | U-251     | MG                                        | nucleoplasm                                 |                                       |
| nucleoplasm                       | MCF7      | nucleoplasm                               |                                             |                                       |
| cytosol                           | HaCaT     | nucleoplasm, cytosol                      |                                             |                                       |
| nucleoplasm                       | A-431     | U-251                                     | MG                                          | nucleoplasm                           |
| nucleoplasm                       | A-431     | U-251                                     | MG                                          | nucleoplasm                           |
| nucleoplasm                       | A-431     | U-251                                     | MG                                          | nucleoplasm                           |
| nucleoplasm, cytosol              | U-251     | MG                                        | PC-3                                        | nucleoplasm                           |
| nucleoplasm, cytosol              | HeLa      | nucleoplasm, cytosol                      |                                             |                                       |
| plasma membrane                   | A-431     | U-251                                     | MG                                          | plasma membrane, cytosol              |
| nucleoplasm, golgi apparatus      | U-251     | MG                                        | A549                                        | nucleoplasm, golgi apparatus, cytosol |
| nucleoplasm, golgi apparatus      | A549      | RH-30                                     | nucleoplasm, golgi apparatus, cytosol       |                                       |
| vesicles                          | SK-MEL-30 | vesicles                                  |                                             |                                       |
| centrosome, cytosol               | U-251     | MG                                        | centrosome, cytosol                         |                                       |
| nucleoplasm, centrosome           | PC-3      | nucleoplasm, nuclear membrane, centrosome |                                             |                                       |
| nucleoplasm, cytosol              | U-2       | OS                                        | SiHa                                        | nucleoplasm, plasma membrane, cytosol |
| nucleoplasm                       | MCF7      | A549                                      | nucleoplasm                                 |                                       |
| nucleoplasm, nuclear speckles     | A-431     | U-251                                     | MG                                          | nucleoplasm, nuclear speckles         |
| nucleoli                          | A-431     | U-251                                     | MG                                          | nucleoplasm, nucleoli                 |
| nucleoli                          | A-431     | U-251                                     | MG                                          | nucleoli, cytokinetic bridge          |
| mitochondria                      |           |                                           |                                             |                                       |
| vesicles                          | U-251     | MG                                        | A549                                        | vesicles, plasma membrane             |
| nuclear membrane, plasma membrane | MCF7      | A549                                      | nuclear membrane, vesicles, plasma membrane |                                       |
| nucleoli                          | A-431     | U-251                                     | MG                                          | nucleoli                              |
| nucleoplasm                       | A-431     | U-251                                     | MG                                          | nucleoplasm                           |
| nucleoplasm, vesicles             | A-431     | U-251                                     | MG                                          | nucleoplasm, vesicles                 |
| nucleoplasm, cytosol              | SiHa      | nucleoplasm, vesicles, cytosol            |                                             |                                       |
| nucleoplasm                       | A-431     | U-251                                     | MG                                          | nucleoplasm, cytosol                  |
| nucleoplasm                       | HEK 293   | AF22                                      | nucleoplasm, intermediate filaments         |                                       |
| plasma membrane                   | A-431     | golgi apparatus                           | U-251                                       | MG                                    |
| cytosol                           |           |                                           |                                             |                                       |
| vesicles                          | HEK 293   | SK-MEL-30                                 | vesicles                                    |                                       |
| nucleoplasm, cytosol              | A-431     | U-251                                     | MG                                          | nucleoplasm, cytosol                  |
| nucleoplasm, vesicles             |           |                                           |                                             |                                       |
| nucleoplasm                       | MCF7      | HEK 293                                   | nucleoplasm                                 |                                       |
| golgi apparatus                   |           |                                           |                                             |                                       |
| plasma membrane, cytosol          | HeLa      | plasma membrane, cytosol                  |                                             |                                       |
| plasma membrane, cytosol          | A-431     | PC-3                                      | plasma membrane, cytosol                    |                                       |
| nucleoplasm                       | A-431     | U-251                                     | MG                                          | nucleoplasm                           |
| nuclear speckles                  | MCF7      | AF22                                      | nuclear speckles                            |                                       |
| nuclear speckles                  | MCF7      | SH-SY5Y                                   | nuclear speckles                            |                                       |
| nucleoplasm                       | A-431     | MCF7                                      | nucleoplasm, nucleoli                       |                                       |
| mitochondria, cytosol             | A-431     | U-251                                     | MG                                          | mitochondria, cytosol                 |
| plasma membrane                   | A-431     | U-251                                     | MG                                          | plasma membrane                       |
| cytosol                           | A-431     | U-251                                     | MG                                          | nuclear bodies, cytosol               |
| vesicles                          | BJ        | nucleoplasm, vesicles                     |                                             |                                       |
| cytosol                           | A-431     | U-251                                     | MG                                          | cytosol                               |

|                               |          |                          |                                          |
|-------------------------------|----------|--------------------------|------------------------------------------|
| nucleoplasm, cytosol          | A-431    | nucleoplaU-251 MG        | nucleoplasm, cytosol                     |
| cytosol                       | A-431    | nucleoli U-251 MG        | cytosol                                  |
| nucleoli, cytosol             | A-431    | cytosol U-251 MG         | cytosol                                  |
| nucleoplasm, plasma membræ    | U-251 MG | nucleoplaASC TERT1       | nucleoplasm, nuclear bodies, cytosol     |
| centriolar satellite, cytosol |          |                          |                                          |
| nucleoplasm                   | A-431    | nucleoplaU-251 MG        | nucleoplasm                              |
| mitochondria                  | MCF7     | mitochondPC-3            | mitochondria                             |
| mitochondria                  | MCF7     | mitochondPC-3            | mitochondria                             |
| nucleoplasm                   |          |                          |                                          |
| nucleoplasm, nucleoli         |          |                          |                                          |
| mitochondria                  | A-431    | mitochondU-251 MG        | mitochondria                             |
| nucleoplasm, cytosol          | U-251 MG | nucleoplasm, cytosol     |                                          |
| nucleoplasm                   | SiHa     | nucleoplaBJ              | nucleoplasm                              |
| nuclear bodies                | HEK 293  | nucleoplaHep G2          | nucleoplasm, nuclear bodies              |
| nucleoplasm                   | HaCaT    | nucleoplasm, cytosol     |                                          |
| nucleoplasm, cytosol          | A-431    | nucleoplaU-251 MG        | nucleoplasm, cytosol                     |
| nucleoplasm, cytosol          | A-431    | nucleoplaU-251 MG        | nucleoplasm                              |
| nucleoplasm                   | A-431    | nucleoplaU-251 MG        | nucleoplasm, nucleoli                    |
| nucleoplasm                   | U-251 MG | nucleoplasm              |                                          |
| nucleoplasm                   | A-431    | nucleoplaU-251 MG        | nucleoplasm                              |
| nucleoli                      |          |                          |                                          |
| golgi apparatus               |          |                          |                                          |
| vesicles                      | HEK 293  | vesicles RH-30           | vesicles                                 |
| nucleoplasm, cytosol          | U-251 MG | nucleoplaHep G2          | nucleoplasm, cytosol                     |
| nucleoli                      | U-2 OS   | nucleoli PC-3            | nucleoli                                 |
| nucleoplasm                   | Hep G2   | nucleoplaPC-3            | nucleoplasm                              |
| nucleoplasm                   | PC-3     | nucleoplasm              |                                          |
| nucleoplasm                   | A-431    | nucleoplaU-251 MG        | nucleoplasm                              |
| golgi apparatus               | HEK 293  | golgi appSH-SY5Y         | golgi apparatus                          |
| nucleoplasm, golgi apparat    | HEK 293  | nucleoplaHep G2          | nucleoplasm, golgi apparatus, cytosol    |
| nucleoplasm                   |          |                          |                                          |
| golgi apparatus, cytosol      | U-251 MG | golgi appHep G2          | golgi apparatus                          |
| cytosol                       | A-431    | cytosol U-251 MG         | cytosol                                  |
| nucleoplasm, nucleoli         | A-431    | nucleoplaU-251 MG        | nucleoplasm, nucleoli                    |
| cytosol                       | A-431    | cell juncU-251 MG        | plasma membrane, cell junctions, cytosol |
| nucleoli, mitochondria, cyt   | A-431    | nucleoli, U-251 MG       | nucleoli, mitochondria, cytosol          |
| nuclear bodies                | A-431    | nuclear bU-251 MG        | nuclear bodies                           |
| nucleoplasm, cytosol          | A-431    | nucleoplaU-251 MG        | nucleoplasm, cytosol                     |
| plasma membrane, cytosol      | SiHa     | plasma membrane, cytosol |                                          |
| nucleoplasm                   | A-431    | nucleoplaU-251 MG        | nucleoplasm                              |
| nucleoplasm                   | A-431    | nucleoplaU-251 MG        | nucleoplasm                              |
| nuclear speckles, cytosol     | A-431    | nuclear sU-251 MG        | nuclear speckles, cytosol                |
| endoplasmic reticulum         | K-562    | endoplasmic reticulum    |                                          |
| endoplasmic reticulum         | A-431    | nuclear sU-251 MG        | endoplasmic reticulum                    |
| cytosol                       | A-431    | cytosol U-251 MG         | cytosol                                  |
| nucleoplasm                   | A-431    | nucleoplaU-251 MG        | nucleoplasm                              |
| mitochondria                  |          |                          |                                          |
| mitochondria                  |          |                          |                                          |
| nucleoplasm                   | A-431    | nucleoplaU-251 MG        | nucleoplasm                              |
| nucleoplasm, centrosome       | A-431    | nucleoplaU-251 MG        | nucleoplasm, centrosome                  |
| nucleoplasm, cytosol          | RH-30    | nucleoplasm, cytosol     |                                          |
| plasma membrane               |          |                          |                                          |
| golgi apparatus, plasma mæ    | U-251 MG | golgi appA549            | golgi apparatus, plasma membrane         |
| nucleoli fibrillar center     | U-251 MG | nucleoli Hep G2          | nucleoli fibrillar center                |
| centrosome                    |          |                          |                                          |

|                              |           |                                      |                                        |
|------------------------------|-----------|--------------------------------------|----------------------------------------|
| nucleoli, cytosol            | A-431     | nucleoplaU-251 MG                    | nucleoli, cytosol                      |
| vesicles                     | A-431     | vesicles U-251 MG                    | vesicles                               |
| nucleoplasm, cytosol         | SH-SY5Y   | nucleoplaRH-30                       | nucleoplasm                            |
| nucleoplasm, cytosol         | RH-30     | nucleoplaBJ                          | nucleoplasm                            |
| nucleoplasm                  | BJ        | nucleoplasm, cytosol                 |                                        |
| nucleoplasm, cytosol         | A-431     | nucleoplaU-251 MG                    | plasma membrane, cytosol               |
| nucleoplasm                  | A-431     | nucleoplaU-251 MG                    | nucleoplasm                            |
| nucleoplasm                  | Hep G2    | nucleoplasm                          |                                        |
| plasma membrane, cytosol     | A-431     | plasma meU-251 MG                    | cytosol                                |
| plasma membrane, centrosome  | A-431     | plasma meU-251 MG                    | plasma membrane, centrosome, cytosol   |
| nucleoplasm, plasma membrane | U-251 MG  | nucleoplaHEK 293                     | nucleoplasm, cytosol                   |
| nuclear speckles             | A-431     | nuclear sU-251 MG                    | nuclear speckles                       |
| nucleoplasm, cytosol         | A-431     | nucleoplaU-251 MG                    | nucleoplasm, cytosol                   |
| nucleoplasm                  | U-2 OS    | nucleoplasm                          |                                        |
| nuclear speckles             | HEK 293   | nuclear sSH-SY5Y                     | nuclear speckles                       |
| nucleoplasm, cytosol         | U-251 MG  | nucleoplaSH-SY5Y                     | nucleoplasm                            |
| nuclear speckles             | BJ        | nuclear speckles                     |                                        |
| golgi apparatus              | A-431     | golgi appU-251 MG                    | golgi apparatus, cytosol               |
| cytosol                      | A-431     | cytosol U-251 MG                     | cytosol                                |
| cell junctions               | LHCN-M2   | plasma membrane                      |                                        |
| nucleoplasm, vesicles        | BJ        | nucleoplaHaCaT                       | nucleoplasm, vesicles                  |
| mitochondria                 | A-431     | mitochondria                         |                                        |
| cytosol                      | A-431     | nucleoplaU-251 MG                    | cytosol                                |
| nucleoplasm, microtubules    | A-431     | nucleoplaU-251 MG                    | nucleoplasm, microtubules, cytosol     |
| cell junctions               | U-251 MG  | nucleoplasm, cell junctions          |                                        |
| cytosol                      | A-431     | plasma meU-251 MG                    | golgi apparatus, plasma membrane, cyto |
| vesicles                     | U-251 MG  | cytosol SK-MEL-30                    | golgi apparatus, cytosol               |
| cytosol                      | A-431     | cytosol                              |                                        |
| nucleoplasm, cytosol         | A-431     | nucleoplaU-251 MG                    | nucleoplasm, cytosol                   |
| nucleoplasm, cytosol         | A-431     | nucleoplaU-251 MG                    | nucleoplasm                            |
| nucleoplasm                  | A-431     | nucleoplaU-251 MG                    | nucleoplasm                            |
| nucleoplasm                  | HeLa      | nucleoplaRH-30                       | nucleoplasm                            |
| nucleoplasm, vesicles        | HEK 293   | nucleoplaHep G2                      | nucleoplasm                            |
| nuclear bodies               |           |                                      |                                        |
| cytosol                      | U-251 MG  | cytosol                              |                                        |
| nuclear bodies, cytosol      | A-431     | nuclear bU-251 MG                    | nuclear bodies, cytosol                |
| centrosome                   | A-431     | plasma meU-251 MG                    | centrosome                             |
| nucleoplasm, vesicles        | MCF7      | nucleoplaBJ                          | nucleoplasm                            |
| nucleoplasm, centrosome      | HEK 293   | nucleoplaSK-MEL-30                   | nucleoplasm, centrosome                |
| nucleoplasm, cytokinetic     | HEK 293   | nucleoplasm                          |                                        |
| vesicles, lipid droplets     | SK-MEL-30 | vesicles, lipid droplets             |                                        |
| vesicles, cell junctions     |           |                                      |                                        |
| nucleoplasm                  | SH-SY5Y   | nucleoplasm                          |                                        |
| nucleoplasm                  | SH-SY5Y   | nucleoplasm                          |                                        |
| nucleoplasm, endoplasmic r   | MCF7      | endoplasrHep G2                      | endoplasmic reticulum                  |
| nucleoplasm                  |           |                                      |                                        |
| plasma membrane, focal adh   | A-431     | plasma meU-251 MG                    | plasma membrane, focal adhesion sites  |
| nucleoplasm                  | A-431     | nucleoplaU-251 MG                    | nucleoplasm                            |
| nucleoplasm                  | A-431     | nucleoplaU-251 MG                    | nucleoplasm                            |
| mitochondria                 | A-431     | mitochondU-251 MG                    | mitochondria                           |
| nucleoplasm                  | A-431     | nucleoplaU-251 MG                    | nucleoplasm                            |
| nucleoplasm                  | Hep G2    | nucleoplasm                          |                                        |
| nucleoplasm, nuclear bodie   | REH       | nucleoplasm, nuclear bodies, cytosol |                                        |
| nucleoplasm, nucleoli        | A-431     | nucleoplaU-251 MG                    | nucleoplasm, nucleoli                  |
| nucleoplasm, nucleoli, vesic | A-431     | nucleoplaU-251 MG                    | nucleoplasm, nucleoli                  |

|                                       |           |                                            |           |
|---------------------------------------|-----------|--------------------------------------------|-----------|
| nucleoplasm, cytosol                  |           | nucleoplasm                                |           |
| nucleoplasm, cytosol                  | A-431     | nucleoplasm                                | MCF7      |
| nucleoplasm                           |           | nucleoplasm                                |           |
| nucleoplasm                           | A-431     | nucleoplasm, cytosol                       | U-251 MG  |
| nucleoplasm                           | A-431     | nucleoplasm                                | U-251 MG  |
| cytosol                               | A-431     | cytosol                                    | U-251 MG  |
| nucleoplasm                           | A-431     | nucleoplasm                                | U-251 MG  |
| nucleoplasm, mitochondria             | MCF7      | mitochondria                               |           |
| nucleoplasm                           | A-431     | nucleoplasm                                | U-251 MG  |
| cytosol                               |           | cytosol                                    |           |
| nucleoplasm                           | A-431     | nucleoplasm                                | U-251 MG  |
| nucleoplasm, vesicles                 | A-431     | nucleoplasm, vesicles                      | U-251 MG  |
| vesicles                              | A-431     | vesicles                                   | U-251 MG  |
| mitochondria                          | A-431     | mitochondria                               | U-251 MG  |
| nucleoplasm, cytosol                  | A-431     | nucleoplasm                                | U-251 MG  |
| nuclear speckles                      | A-431     | nuclear speckles                           | sU-251 MG |
| nucleoli, cytosol                     | A-431     | nucleoli, cytosol                          | U-251 MG  |
| endoplasmic reticulum                 |           | endoplasmic reticulum                      |           |
| endoplasmic reticulum                 | SK-MEL-30 | endoplasmic reticulum                      |           |
| plasma membrane                       | U-251 MG  | plasma membrane                            |           |
| plasma membrane, cytosol              | A-431     | plasma membrane, cytosol                   | U-251 MG  |
| nucleoplasm, cytosol                  | HeLa      | nucleoplasm, cytosol                       |           |
| nuclear speckles, plasma membrane     | A-431     | nuclear speckles, plasma membrane          | sREH      |
| nucleoplasm, cytosol                  | MCF7      | nucleoplasm, plasma membrane, cytosol      | HEK 293   |
| nucleoplasm, cytosol                  |           | plasma membrane                            |           |
| plasma membrane                       | A-431     | plasma membrane                            | U-251 MG  |
| nuclear speckles, plasma membrane     | A-431     | nuclear speckles, plasma membrane, cytosol | sU-251 MG |
| nucleoplasm                           |           | cytosol                                    |           |
| cytosol                               | A-431     | cytosol                                    | U-251 MG  |
| centrosome                            |           |                                            |           |
| golgi apparatus                       | A-431     | golgi apparatus                            | U-251 MG  |
| nucleoplasm, nuclear membrane         | A-431     | nucleoplasm                                | U-251 MG  |
| nucleoplasm                           | A-431     | nucleoplasm, golgi apparatus               | U-251 MG  |
| plasma membrane, cytosol, centrosome  | HEK 293   | plasma membrane, cytosol, centrosome       | SK-MEL-30 |
| nucleoplasm, cytosol                  | A-431     | nucleoplasm, cytosol                       | U-251 MG  |
| nucleoplasm, plasma membrane          | A-431     | nucleoplasm, plasma membrane, cytosol      | U-251 MG  |
| mitochondria                          | U-251 MG  | nucleoplasm, vesicles                      |           |
| nucleoplasm, nuclear membrane         | SK-MEL-30 | nucleoplasm                                | RPTEC TER |
| nucleoplasm, mitochondria             | A-431     | nucleoplasm, mitochondria                  | U-251 MG  |
| nucleoplasm, cytokinesis              | A-431     | nucleoplasm                                | U-251 MG  |
| mitochondria                          | A-431     | mitochondria                               | U-251 MG  |
| mitochondria                          |           | mitochondria                               |           |
| mitochondria                          | A-431     | mitochondria                               | U-251 MG  |
| mitochondria                          | A-431     | mitochondria                               | U-251 MG  |
| nucleoli, mitochondria                | A549      | nucleoli, plasma membrane                  |           |
| plasma membrane, cytosol              | A-431     | plasma membrane, cytosol                   | U-251 MG  |
| endoplasmic reticulum                 | BJ        | endoplasmic reticulum                      |           |
| actin filaments, cytosol              | A-431     | actin filaments, cytosol                   | U-251 MG  |
| mitochondria                          | A-431     | nucleoplasm, mitochondria                  | U-251 MG  |
| vesicles                              |           |                                            |           |
| nuclear speckles                      | A-431     | nuclear speckles                           | sU-251 MG |
| nucleoplasm, golgi apparatus          | A-431     | nucleoplasm, golgi apparatus               | U-251 MG  |
| nucleoplasm, golgi apparatus          | U-251 MG  | golgi apparatus                            |           |
| lipid droplets                        | U-251 MG  | lipid droplets                             | MCF7      |
| endoplasmic reticulum, lipid droplets | U-2 OS    | endoplasmic reticulum, lipid droplets      | MCF7      |



|                                        |          |                                        |           |                                        |
|----------------------------------------|----------|----------------------------------------|-----------|----------------------------------------|
| nucleoplasm, nuclear membrane          | U-251 MG | nucleoplasm                            | SH-SY5Y   | nucleoplasm                            |
| vesicles                               | SH-SY5Y  | vesicles                               | RH-30     | vesicles                               |
| nucleoplasm, plasma membrane           | SH-SY5Y  | nucleoplasm                            |           |                                        |
| nucleoplasm, cytosol                   | A549     | nucleoplasm                            | HeLa      | nucleoplasm, cytosol                   |
| actin filaments                        | A-431    | actin filaments                        | U-251 MG  | actin filaments                        |
| mitochondria                           |          |                                        |           |                                        |
| vesicles                               | U-2 OS   | vesicles                               | A549      | vesicles                               |
| golgi apparatus                        | A-431    | golgi apparatus                        | U-251 MG  | golgi apparatus                        |
| nucleoplasm, vesicles                  | U-251 MG | vesicles                               | PC-3      | vesicles                               |
| vesicles                               | RH-30    | vesicles                               | AF22      | vesicles                               |
| cytosol                                | A-431    | cytosol                                | U-251 MG  | cytosol                                |
| cytosol                                | A-431    | cytosol                                | U-251 MG  | cytosol                                |
| cytosol                                | A-431    | cytosol                                | U-251 MG  | cytosol                                |
| nuclear bodies                         | A-431    | nuclear bodies                         | U-251 MG  | nuclear bodies                         |
| endoplasmic reticulum                  | U-2 OS   | endoplasmic reticulum                  | Hep G2    | endoplasmic reticulum                  |
| nucleoplasm                            | A-431    | nucleoplasm                            | U-251 MG  | nucleoplasm                            |
| nucleoplasm                            | A-431    | nucleoplasm                            | U-251 MG  | nucleoplasm                            |
| nucleoplasm                            | PC-3     | nucleoplasm, cytosol                   |           |                                        |
| cell junctions                         |          |                                        |           |                                        |
| nuclear membrane                       |          |                                        |           |                                        |
| nuclear membrane                       | MCF7     | nuclear membrane                       | HEK 293   | nuclear membrane                       |
| nuclear membrane                       |          |                                        |           |                                        |
| golgi apparatus, vesicles              | A-431    | golgi apparatus, vesicles              | U-251 MG  | golgi apparatus, vesicles              |
| nucleoplasm, nucleoli                  | A-431    | nucleoplasm                            | U-251 MG  | nucleoplasm                            |
| nucleoplasm, nucleoli                  | A-431    | nucleoplasm                            | U-251 MG  | nucleoplasm                            |
| cytosol                                | HeLa     | cytosol                                |           |                                        |
| nucleoplasm, cytosol                   | A-431    | nucleoplasm, cytosol                   | U-251 MG  | nucleoplasm, cytosol                   |
| nucleoplasm, plasma membrane           | U-251 MG | nucleoplasm, cytosol                   |           |                                        |
| nuclear bodies                         | SH-SY5Y  | nuclear bodies                         |           |                                        |
| actin filaments, cytosol               | A-431    | actin filaments, cytosol               | U-251 MG  | cytosol                                |
| nucleoplasm, vesicles                  | MCF7     | nucleoplasm, vesicles                  | HaCaT     | nucleoplasm, vesicles                  |
| plasma membrane, cytosol               |          |                                        |           |                                        |
| nucleoplasm, vesicles                  | A-431    | nucleoplasm, vesicles                  | U-251 MG  | nucleoplasm, vesicles                  |
| nucleoli                               | A-431    | nucleoli                               | U-251 MG  | nucleoplasm, nucleoli                  |
| cytosol                                | A-431    | cytosol                                | U-251 MG  | cytosol                                |
| nucleoplasm                            |          |                                        |           |                                        |
| nucleoplasm                            | A549     | nucleoplasm                            |           |                                        |
| golgi apparatus                        | A549     | golgi apparatus                        |           |                                        |
| vesicles                               | A-431    | golgi apparatus, vesicles              | U-251 MG  | vesicles                               |
| nucleoplasm, cytosol                   | MCF7     | nucleoplasm, cytosol                   | PC-3      | nucleoplasm, cytosol                   |
| nucleoplasm                            |          |                                        |           |                                        |
| nuclear membrane                       | A-431    | nuclear membrane                       | U-251 MG  | nuclear membrane                       |
| nucleoplasm                            | U-251 MG | nucleoplasm                            |           |                                        |
| nucleoplasm, cytosol                   | U-251 MG | nucleoplasm, cytosol                   |           |                                        |
| nucleoplasm, mitochondria, cytosol     | A-431    | nucleoplasm, mitochondria, cytosol     | U-251 MG  | nucleoplasm, mitochondria, cytosol     |
| golgi apparatus                        | HEK 293  | golgi apparatus                        | SK-MEL-30 | golgi apparatus                        |
| nuclear bodies                         | A-431    | nuclear bodies                         | U-251 MG  | nuclear bodies                         |
| nuclear speckles                       | A-431    | nuclear speckles, golgi apparatus      | U-251 MG  | nuclear speckles, golgi apparatus      |
| nuclear speckles                       | A-431    | nuclear speckles                       | U-251 MG  | nuclear speckles                       |
| nucleoplasm, plasma membrane           | A-431    | nucleoplasm                            | U-251 MG  | nucleoplasm                            |
| nucleoli fibrillar center, vesicles    | A-431    | nucleoli fibrillar center, vesicles    | Hep G2    | nucleoli fibrillar center, vesicles    |
| golgi apparatus                        | A-431    | golgi apparatus                        | U-251 MG  | golgi apparatus                        |
| nucleoplasm, golgi apparatus, vesicles | A-431    | nucleoplasm, golgi apparatus, vesicles | U-251 MG  | nucleoplasm, golgi apparatus, vesicles |
| nucleoplasm                            | A-431    | nucleoplasm                            | U-251 MG  | nucleoplasm                            |
| nucleoplasm, cytosol                   | A-431    | nucleoplasm, cytosol                   | U-251 MG  | nucleoplasm, cytosol                   |

|                             |          |                                       |           |                                      |
|-----------------------------|----------|---------------------------------------|-----------|--------------------------------------|
| cytosol                     | A-431    | cytosol                               | U-251 MG  | nucleoplasm, cytosol                 |
| golgi apparatus             | A-431    | golgi app                             | U-251 MG  | golgi apparatus                      |
| nucleoplasm                 | A-431    | nucleopla                             | U-251 MG  | nucleoplasm                          |
| nucleoplasm                 | HaCaT    | nucleoplasm                           |           |                                      |
| nucleoplasm                 | HaCaT    | nucleoplasm                           |           |                                      |
| cytosol                     | A-431    | cytosol                               | U-251 MG  | cytosol                              |
| nucleoplasm                 | A-431    | nucleopla                             | U-251 MG  | nucleoplasm, cytosol                 |
| cytosol                     | U-2 OS   | cytosol                               | PC-3      | cytosol                              |
| nucleoli                    | A-431    | nucleoli                              | U-251 MG  | nucleoli                             |
| nucleoplasm, vesicles       | A-431    | nucleopla                             | U-251 MG  | nucleoplasm, vesicles                |
| nucleoplasm, vesicles       | A-431    | nucleopla                             | U-251 MG  | nucleoplasm, vesicles                |
| golgi apparatus, vesicles   | U-251 MG | vesicles                              | ASC TERT1 | golgi apparatus, vesicles            |
| endoplasmic reticulum       | MCF7     | endoplasmic reticulum                 |           |                                      |
| endoplasmic reticulum       | A-431    | endoplasr                             | U-251 MG  | endoplasmic reticulum                |
| nucleoplasm, golgi apparat  | A-431    | nucleopla                             | U-251 MG  | nucleoplasm, golgi apparatus         |
| plasma membrane, actin fil  | HeLa     | plasma me                             | PC-3      | plasma membrane                      |
| plasma membrane, cytosol    | SH-SY5Y  | cytosol                               |           |                                      |
| nuclear speckles, cytosol   | A-431    | nuclear s                             | U-251 MG  | nuclear speckles, cytosol            |
| nucleoplasm, cytosol        | U-251 MG | nucleoplasm, cytosol                  |           |                                      |
| nucleoplasm, centrosome     | SH-SY5Y  | nucleopla                             | PC-3      | nucleoplasm                          |
| mitochondria                | MCF7     | nucleopla                             | PC-3      | nucleoplasm, mitochondria            |
| nucleoplasm, mitochondria   | MCF7     | mitochond                             | PC-3      | mitochondria                         |
| nucleoplasm                 | U-251 MG | nucleoplasm                           |           |                                      |
| nucleoplasm, golgi apparat  | U-251 MG | nucleoplasm                           |           |                                      |
| golgi apparatus             | RPTEC    | TER                                   |           | golgi apparatus                      |
| nucleoplasm, vesicles       | A-431    | nucleopla                             | U-251 MG  | nucleoplasm, vesicles                |
| cell junctions, centrosome  | A-431    | cell junctions, centrosome            |           |                                      |
| cytosol                     | A-431    | cytosol                               | U-251 MG  | centrosome, cytosol                  |
| mitochondria                | U-251 MG | mitochondria, cytosol                 |           |                                      |
| cytosol                     | A-431    | mitochond                             | U-251 MG  | cytosol                              |
| nucleoplasm                 | A-431    | nucleopla                             | U-251 MG  | nucleoplasm                          |
| nucleoplasm                 | A-431    | nucleopla                             | U-251 MG  | nucleoplasm                          |
| nucleoplasm, cytosol        | MCF7     | nucleopla                             | PC-3      | nucleoplasm, cytosol                 |
| nucleoplasm, cytosol        | PC-3     | nucleoplasm, cytosol                  |           |                                      |
| nucleoplasm, cytosol        | A-431    | nucleopla                             | U-251 MG  | nucleoplasm, cytosol                 |
| nucleoplasm, vesicles       | A-431    | nucleopla                             | HeLa      | nucleoplasm, cytosol                 |
| nucleoplasm, cytosol        | A-431    | nucleopla                             | U-251 MG  | nucleoplasm, centrosome, cytosol     |
| nucleoplasm, cytosol        | A-431    | nucleopla                             | U-251 MG  | nucleoplasm, cytosol                 |
| golgi apparatus             | U-2 OS   | golgi apparatus                       |           |                                      |
| nucleoplasm, cytosol        | SH-SY5Y  | nucleoplasm, cytosol                  |           |                                      |
| nucleoplasm, mitochondria,  | A-431    | nucleopla                             | U-251 MG  | cytosol                              |
| nucleoplasm                 | A-431    | nucleopla                             | U-251 MG  | nucleoplasm, cytosol                 |
| nucleoplasm                 | A-431    | nucleopla                             | U-251 MG  | nucleoplasm, vesicles                |
| nucleoplasm, mitotic spinch | HEL      | nucleopla                             | REH       | nucleoplasm                          |
| plasma membrane, cytosol    | A-431    | plasma me                             | U-251 MG  | plasma membrane, cytosol             |
| nucleoplasm, centrosome     |          |                                       |           |                                      |
| nucleoli                    | U-251 MG | nucleoli                              | PC-3      | nucleoli                             |
| nucleoplasm, cytosol        | U-251 MG | nucleopla                             | HeLa      | nucleoplasm, cytosol                 |
| nucleoplasm                 | U-2 OS   | nucleopla                             | HaCaT     | nucleoplasm                          |
| plasma membrane, cytosol    | A-431    | plasma me                             | U-251 MG  | plasma membrane, cytosol             |
| endosomes                   | A-431    | endosomes                             | U-251 MG  | endosomes                            |
| nucleoplasm, cytosol        | U-251 MG | nucleopla                             | A549      | nucleoplasm, nuclear bodies, cytosol |
| nucleoplasm                 | A-431    | nucleopla                             | U-251 MG  | nucleoplasm                          |
| nucleoplasm, plasma membr   | U-251 MG | nucleoplasm, plasma membrane, cytosol |           |                                      |
| vesicles, cytosol           | A-431    | vesicles, U-251 MG                    |           | vesicles                             |

|                             |          |                                              |                                    |
|-----------------------------|----------|----------------------------------------------|------------------------------------|
| vesicles                    | A-431    | vesicles, U-251 MG                           | vesicles                           |
| vesicles                    | U-2 OS   | vesicles Hep G2                              | vesicles                           |
| cytosol                     | A-431    | cytosol U-251 MG                             | vesicles, cytosol                  |
| plasma membrane, cytosol    | U-251 MG | cytosol                                      |                                    |
| cytosol                     | PC-3     | microtubules, cytosol                        |                                    |
| endoplasmic reticulum, cyto | MCF7     | endoplasm PC-3                               | endoplasmic reticulum, cytosol     |
| plasma membrane, cytosol    | PC-3     | plasma membrane, cytosol                     |                                    |
| cytosol                     | A-431    | cytosol U-251 MG                             | cytosol                            |
| cytosol                     | A-431    | cytosol U-251 MG                             | cytosol                            |
| nucleoplasm, cytosol        | A-431    | nucleopla U-251 MG                           | cytosol                            |
| nucleoplasm, cytosol        | A-431    | nucleopla U-251 MG                           | nucleoplasm                        |
| nucleoplasm, cytosol        | A-431    | nucleopla U-251 MG                           | nucleoplasm, cytosol               |
| nuclear speckles, cytosol   | A-431    | nuclear sU-251 MG                            | nuclear speckles, cytosol          |
| plasma membrane             | U-251 MG | plasma membrane                              |                                    |
| plasma membrane             | A-431    | golgi appU-251 MG                            | plasma membrane                    |
| actin filaments, cytosol    | A-431    | actin filU-251 MG                            | cytosol                            |
| nucleoplasm, cytosol        | A-431    | nucleopla U-251 MG                           | nucleoplasm, cytosol               |
| cytosol                     | A-431    | cytosol U-251 MG                             | cytosol                            |
| nucleoplasm                 | A-431    | nucleopla U-251 MG                           | nucleoplasm                        |
| nucleoplasm                 | MCF7     | nucleopla PC-3                               | nucleoplasm                        |
| plasma membrane             | MCF7     | plasma meHEK 293                             | plasma membrane                    |
| nucleoplasm, cytosol        | A-431    | nucleopla U-251 MG                           | nucleoplasm, cytosol               |
| nucleoplasm, cytosol        | A-431    | nucleopla U-251 MG                           | nucleoplasm, cytosol               |
| nucleoplasm, cytosol        |          |                                              |                                    |
| nucleoplasm, vesicles, cyto | A-431    | nucleopla A549                               | nucleoplasm, vesicles, cytosol     |
| cytosol                     | A-431    | nucleoli, U-251 MG                           | nucleoli, cytosol                  |
| plasma membrane, cytosol    | U-251 MG | cytosol                                      |                                    |
| golgi apparatus, vesicles   | HEK 293  | golgi appPC-3                                | vesicles                           |
| nucleoplasm, mitochondria   | HEK 293  | nucleopla PC-3                               | nucleoplasm                        |
| nuclear speckles, mitochor  | HEK 293  | nuclear sPC-3                                | nuclear speckles                   |
| nucleoplasm                 | A-431    | nucleopla PC-3                               | nucleoplasm, nuclear bodies        |
| nucleoplasm                 | A-431    | nucleopla U-251 MG                           | nucleoplasm                        |
| nucleoplasm                 | U-251 MG | nuclear bSiHa                                | nucleoplasm, nuclear bodies        |
| microtubules, cytokinetic   | U-2 OS   | microtubules, cytokinetic                    | bridge                             |
| nucleoplasm                 | A-431    | nucleopla PC-3                               | nucleoplasm                        |
| nucleoplasm, cytosol        | HEK 293  | nucleopla SH-SY5Y                            | nuclear bodies, cytosol            |
| vesicles                    | A-431    | vesicles U-251 MG                            | vesicles                           |
| nucleoplasm, nuclear bodie  | U-251 MG | nucleoplasm, nuclear bodies                  |                                    |
| golgi apparatus             | A549     | golgi appHeLa                                | golgi apparatus                    |
| nucleoplasm                 | A-431    | nucleopla U-251 MG                           | nucleoplasm                        |
| nucleoplasm, plasma membr   | MCF7     | nucleoplasm, plasma membrane, cell junctions |                                    |
| nucleoplasm, nucleoli, cyto | A-431    | nucleopla U-251 MG                           | nucleoplasm, nucleoli              |
| vesicles                    | PC-3     | vesicles                                     |                                    |
| nucleoplasm, plasma membr   | U-251 MG | nucleopla RH-30                              | nucleoplasm, cytosol               |
| vesicles                    | A549     | vesicles                                     |                                    |
| vesicles                    | HEK 293  | vesicles A549                                | vesicles                           |
| nucleoplasm, mitochondria   | HeLa     | nucleopla BJ                                 | nucleoplasm                        |
| nucleoplasm, actin filamer  | HeLa     | nucleopla Hep G2                             | nucleoplasm, mitochondria          |
| nucleoplasm, plasma membr   | A-431    | nucleopla U-251 MG                           | nucleoplasm, mitochondria, cytosol |
| nucleoplasm, plasma membr   | U-251 MG | nucleopla HeLa                               | nucleoplasm, plasma membrane       |
| cytosol                     |          |                                              |                                    |
| nucleoplasm                 | U-251 MG | nucleoplasm                                  |                                    |
| nucleoplasm                 | A-431    | nucleopla U-251 MG                           | nucleoplasm                        |
| cytosol                     | A-431    | cytosol U-251 MG                             | cytosol                            |
| vesicles, cytosol           | A-431    | vesicles, U-251 MG                           | vesicles, cytosol                  |

|                             |          |                             |                       |                                        |
|-----------------------------|----------|-----------------------------|-----------------------|----------------------------------------|
| golgi apparatus             | HeLa     | golgi app                   | PC-3                  | vesicles                               |
| cytosol                     | U-2 OS   | cytosol                     |                       |                                        |
| nucleoplasm                 | A-431    | nucleopla                   | SH-SY5Y               | nucleoplasm                            |
| nucleoli fibrillar center   | U-251 MG | nucleoli                    | Hep G2                | nucleoli fibrillar center, cytosol     |
| nucleoplasm, nucleoli, cyto | U-2 OS   | nucleopla                   | RH-30                 | nucleoplasm, nucleoli, cytosol         |
| nucleoplasm, vesicles       | A-431    | nucleopla                   | U-251 MG              | nucleoplasm                            |
| nucleoplasm, mitochondria   | A-431    | nucleopla                   | U-251 MG              | nucleoplasm, mitochondria              |
| nucleoplasm, vesicles       | BJ       | nucleopla                   | SK-MEL-30             | vesicles                               |
| vesicles                    | HEL      | vesicles                    |                       |                                        |
| vesicles                    | A-431    | vesicles                    | MCF7                  | vesicles                               |
| nucleoplasm, nucleoli       | A-431    | nucleopla                   | U-251 MG              | nucleoplasm, nucleoli                  |
| nucleoplasm, nucleoli, cyto | A-431    | nucleopla                   | U-251 MG              | nucleoplasm, nucleoli                  |
| nucleoli                    |          |                             |                       |                                        |
| microtubules                | A-431    | microtubu                   | U-251 MG              | microtubules                           |
| plasma membrane             |          |                             |                       |                                        |
| nucleoli, cytosol           | PC-3     | nucleoli, cytosol           |                       |                                        |
| nucleoplasm, plasma membr   | A-431    | plasma me                   | U-251 MG              | plasma membrane                        |
| plasma membrane             | A-431    | plasma me                   | U-251 MG              | plasma membrane                        |
| nucleoli fibrillar center   | U-2 OS   | nucleoli                    | U-251 MG              | nucleoli fibrillar center              |
| nucleoplasm                 | A-431    | nucleopla                   | U-251 MG              | nucleoplasm                            |
| vesicles                    | A549     | vesicles                    |                       |                                        |
| cytosol                     | A-431    | cytosol                     | U-251 MG              | cytosol                                |
| nucleoplasm, vesicles, cyto | A-431    | nucleopla                   | U-251 MG              | nucleoplasm, vesicles, cytosol         |
| nucleoplasm                 | RH-30    | nucleopla                   | PC-3                  | nucleoplasm                            |
| nucleoplasm, cytosol        | A-431    | nucleopla                   | U-251 MG              | nucleoplasm, cytosol                   |
| nucleoli, cytosol           | MCF7     | nucleoli                    | HEK 293               | nucleoli, cytosol                      |
| nucleoplasm, vesicles       | Hep G2   | nucleopla                   | RH-30                 | nucleoli, vesicles                     |
| nucleoplasm                 | SH-SY5Y  | nucleoplasm                 |                       |                                        |
| nuclear membrane, cytosol   | U-2 OS   | nuclear m                   | A-431                 | nuclear membrane, actin filaments, cyt |
| cytosol                     |          |                             |                       |                                        |
| nucleoplasm, cell junctio   | RH-30    | nucleoplasm, cell           | junctions, centrosome |                                        |
| nucleoplasm, aggresome, cyt | SH-SY5Y  | nucleopla                   | AF22                  | nucleoplasm                            |
| plasma membrane             | HaCaT    | plasma membrane             |                       |                                        |
| nucleoplasm, vesicles       | A-431    | nucleopla                   | U-251 MG              | nucleoplasm, cytosol                   |
| nucleoplasm                 | U-2 OS   | nucleopla                   | PC-3                  | nucleoplasm                            |
| vesicles                    | A-431    | vesicles                    | U-251 MG              | vesicles, cytosol                      |
| nucleoplasm                 | A-431    | nucleopla                   | U-251 MG              | nucleoplasm                            |
| nucleoplasm                 | A-431    | nucleopla                   | U-251 MG              | nucleoplasm                            |
| nucleoplasm                 | U-251 MG | nucleopla                   | HeLa                  | nucleoplasm                            |
| endoplasmic reticulum       |          |                             |                       |                                        |
| endoplasmic reticulum       | U-251 MG | endoplasm                   | EFO-21                | endoplasmic reticulum                  |
| cytokinetic bridge, midbo   | SH-SY5Y  | cytokinetic bridge, midbody |                       |                                        |
| endoplasmic reticulum, cyt  | U-2 OS   | endoplasm                   | A549                  | endoplasmic reticulum, cytosol         |
| cytosol                     | A-431    | plasma me                   | U-251 MG              | plasma membrane, cytosol               |
| cytosol                     | A-431    | cytosol                     | U-251 MG              | cytosol                                |
| nucleoplasm                 | SH-SY5Y  | nucleopla                   | PC-3                  | nucleoplasm, nucleoli                  |
| endoplasmic reticulum       | MCF7     | endoplasmic reticulum       |                       |                                        |
| cytosol                     | A-431    | nucleopla                   | U-251 MG              | nucleoplasm, cytosol                   |
| nucleoplasm                 | A-431    | nucleopla                   | U-251 MG              | nucleoplasm                            |
| nucleoplasm                 | HeLa     | nucleopla                   | RH-30                 | nucleoplasm                            |
| nucleoplasm, cytosol        |          |                             |                       |                                        |
| vesicles                    | U-251 MG | vesicles                    |                       |                                        |
| vesicles                    |          |                             |                       |                                        |
| nucleoplasm                 | SH-SY5Y  | nucleopla                   | SiHa                  | nucleoplasm                            |
| golgi apparatus             |          |                             |                       |                                        |

|                                                        |           |                                      |                                        |
|--------------------------------------------------------|-----------|--------------------------------------|----------------------------------------|
| nucleoplasm, vesicles                                  | A-431     | nucleoplaU-251 MG                    | nucleoplasm, vesicles                  |
| endoplasmic reticulum                                  |           |                                      |                                        |
| endoplasmic reticulum                                  | LHCN-M2   | endoplasmic reticulum                |                                        |
| mitochondria                                           | RH-30     | mitochondria                         |                                        |
| cytosol                                                | A-431     | cytosol U-251 MG                     | cytosol                                |
| golgi apparatus                                        | A-431     | golgi apparatus                      |                                        |
| nucleoplasm, cytosol                                   | A-431     | nucleoplaHeLa                        | nucleoplasm, cytosol                   |
| vesicles, plasma membrane                              | A-431     | vesicles, U-251 MG                   | vesicles, plasma membrane              |
| mitochondria                                           | HEK 293   | mitochondRH-30                       | mitochondria                           |
| microtubules                                           | A-431     | microtubuU-251 MG                    | microtubules                           |
| nucleoplasm                                            | A-431     | nucleoplaU-251 MG                    | nucleoplasm                            |
| mitochondria                                           | A-431     | nucleoplaU-251 MG                    | nucleoli, mitochondria                 |
| mitochondria                                           |           |                                      |                                        |
| nuclear bodies, vesicles                               | HEK 293   | nuclear bRH-30                       | nuclear bodies                         |
| cytosol                                                | A-431     | nucleoplaU-251 MG                    | nucleoli, cytosol                      |
| nucleoplasm, cytosol                                   | U-251 MG  | nucleoplasm, cytosol                 |                                        |
| mitochondria                                           |           |                                      |                                        |
| nucleoplasm                                            | A-431     | nucleoplasm, nuclear bodies, cytosol |                                        |
| nucleoplasm                                            | A-431     | nucleoplaHEK 293                     | nucleoplasm                            |
| peroxisomes                                            | A-431     | peroxisorU-251 MG                    | peroxisomes                            |
| endoplasmic reticulum                                  | MCF7      | endoplasHEK 293                      | endoplasmic reticulum                  |
| nucleoplasm, mitochondria                              | A-431     | nucleoplaU-251 MG                    | nucleoplasm, mitochondria              |
| nuclear bodies, golgi apparatus, vesicles              |           |                                      |                                        |
| nucleoplasm                                            | MCF7      | nucleoplaSK-MEL-30                   | nucleoplasm                            |
| nucleoli fibrillar center                              | HEK 293   | nucleoli BJ                          | nucleoli fibrillar center, golgi appa  |
| golgi apparatus                                        | BJ        | nucleoplasm, golgi apparatus         |                                        |
| cytosol                                                | A-431     | nucleoplasm, cytosol                 |                                        |
| plasma membrane, cytosol                               | A549      | nucleoplaHep G2                      | plasma membrane, cytosol               |
| plasma membrane, cytosol                               | A-431     | cytosol U-251 MG                     | cytosol                                |
| nuclear speckles, cytosol                              | U-251 MG  | nuclear speckles, cytosol            |                                        |
| cytosol                                                | A-431     | cytosol U-251 MG                     | cytosol                                |
| cell junctions, cytosol                                | U-2 OS    | cytosol A-431                        | cytosol                                |
| nuclear speckles                                       | A549      | nuclear sHeLa                        | nuclear speckles                       |
| vesicles                                               | U-2 OS    | vesicles SK-MEL-30                   | vesicles                               |
| cytosol                                                | U-251 MG  | cytosol HEK 293                      | cytosol                                |
| nucleoplasm, cytosol                                   | A-431     | nucleoplaU-251 MG                    | nucleoplasm, cytosol                   |
| nucleoplasm, cytosol                                   | A-431     | nucleoplaU-251 MG                    | nucleoplasm, cytosol                   |
| nucleoplasm                                            | U-251 MG  | nucleoplasm                          |                                        |
| nucleoplasm                                            | SH-SY5Y   | nucleoplaRH-30                       | nucleoplasm                            |
| cytosol                                                | A549      | nuclear rHeLa                        | plasma membrane, cytosol               |
| nucleoli fibrillar center                              | U-251 MG  | nucleoplaHeLa                        | nucleoplasm, nucleoli fibrillar cente  |
| nucleoplasm, cytosol                                   | ASC TERT1 | nucleoplaBJ                          | nucleoplasm, plasma membrane, cytosol  |
| vesicles                                               |           |                                      |                                        |
| plasma membrane, focal ad                              | PC-3      | plasma meHUVEC TER                   | plasma membrane, focal adhesion sites  |
| mitochondria                                           | A-431     | mitochondU-251 MG                    | mitochondria                           |
| cell junctions                                         | A-431     | cell juncU-251 MG                    | cell junctions                         |
| actin filaments, focal ad                              | A-431     | nucleoplaU-251 MG                    | nucleoplasm, actin filaments, focal ad |
| actin filaments, focal ad                              | A-431     | actin filU-251 MG                    | actin filaments, focal adhesion sites  |
| plasma membrane                                        | U-251 MG  | golgi appHep G2                      | golgi apparatus, plasma membrane       |
| mitochondria                                           | U-251 MG  | nucleoplaHep G2                      | golgi apparatus, cytosol               |
| cytosol                                                | U-251 MG  | cytosol                              |                                        |
| nuclear bodies, cell junctions, intermediate filaments |           |                                      |                                        |
| cytosol                                                | A-431     | cytosol U-251 MG                     | cytosol                                |
| nucleoli                                               | A-431     | nucleoli U-251 MG                    | nucleoli                               |
| cytosol                                                | A-431     | cytosol U-251 MG                     | cytosol                                |

|                            |          |                          |                                          |
|----------------------------|----------|--------------------------|------------------------------------------|
| nucleoplasm, centrosome    | A-431    | nucleoplaU-251 MG        | nucleoplasm, nuclear bodies, cytosol     |
| nucleoli                   | U-251 MG | nucleoplaU-251 MG        | nucleoplasm, nucleoli                    |
| plasma membrane, cytosol   | A-431    | plasma meU-251 MG        | plasma membrane, cytosol                 |
| vesicles                   | MCF7     | vesicles SH-SY5Y         | vesicles                                 |
| golgi apparatus, mitotic s | A-431    | golgi appA549            | golgi apparatus                          |
| nucleoli                   | U-251 MG | nucleoli RH-30           | nucleoli                                 |
| golgi apparatus            | A-431    | golgi appU-251 MG        | golgi apparatus                          |
| golgi apparatus            | A-431    | golgi appU-251 MG        | golgi apparatus                          |
| golgi apparatus            |          |                          |                                          |
| nucleoplasm, actin filamer | A-431    | cytosol U-251 MG         | cytosol                                  |
| nucleoplasm, vesicles      | MCF7     | nucleoplaHeLa            | nucleoplasm, vesicles                    |
| nucleoplasm, cytosol       | A-431    | nucleoplaU-251 MG        | nucleoplasm, cytosol                     |
| nucleoplasm                | HeLa     | nucleoplaHep G2          | nucleoplasm, cytosol                     |
| cytosol                    | HEK 293  | cytosol SK-MEL-30        | cytosol                                  |
| nucleoplasm, cytosol       | A-431    | nucleoplaU-251 MG        | nucleoplasm, centrosome, cytosol         |
| nuclear speckles, cytosol  | A-431    | nuclear sU-251 MG        | nuclear speckles                         |
| golgi apparatus, mitotic s | SH-SY5Y  | golgi appASC TERT1       | mitotic spindle, cytosol                 |
| nuclear speckles           | A-431    | nuclear sHEK 293         | nuclear speckles                         |
| cytosol                    | A-431    | cytosol U-251 MG         | cytosol                                  |
| nucleoplasm                | A-431    | nucleoplaU-251 MG        | nucleoplasm                              |
| nucleoplasm                | A-431    | nucleoplasm              |                                          |
| focal adhesion sites       | A-431    | focal adhU-251 MG        | focal adhesion sites                     |
| centrosome                 | A-431    | centrosomU-251 MG        | centrosome                               |
| centrosome                 |          |                          |                                          |
| cytosol                    | A-431    | cytosol U-251 MG         | cytosol                                  |
| nucleoplasm, cytosol       | HeLa     | nucleoplaSiHa            | nucleoplasm, cytosol                     |
| cytosol                    | HeLa     | plasma meSH-SY5Y         | cytosol                                  |
| nucleoplasm                | A-431    | nucleoplaU-251 MG        | nucleoplasm, cytosol                     |
| nucleoplasm                | HEK 293  | nucleoplaHep G2          | nucleoplasm                              |
| mitochondria               | U-2 OS   | mitochondPC-3            | nucleoli, mitochondria                   |
| mitochondria               | MCF7     | nucleoli, HeLa           | nucleoli, mitochondria                   |
| nucleoplasm, nucleoli      | A-431    | nucleoplaU-251 MG        | nucleoplasm, nucleoli                    |
| nucleoplasm, nucleoli      | RH-30    | nucleoplaPC-3            | nucleoplasm, nucleoli, cytosol           |
| nucleoli                   | HEL      | nucleoli NB-4            | nucleoli                                 |
| nucleoplasm                | A-431    | nucleoplaU-251 MG        | nucleoplasm                              |
| nucleoplasm                | A-431    | nucleoplaU-251 MG        | nucleoplasm                              |
| cytosol                    | A-431    | cytosol U-251 MG         | cytosol                                  |
| cytosol                    | A-431    | cytosol U-251 MG         | plasma membrane                          |
| plasma membrane, cytosol   | A-431    | plasma membrane, cytosol |                                          |
| nucleoplasm, vesicles      | BJ       | nuclear bPC-3            | nucleoplasm, nuclear bodies, vesicles    |
| nucleoplasm                | RH-30    | nucleoplasm              |                                          |
| nucleoplasm, nuclear membr | A-431    | nucleoplaU-251 MG        | nucleoplasm                              |
| nucleoplasm                | A-431    | nucleoplasm, cytosol     |                                          |
| vesicles, plasma membrane  |          |                          |                                          |
| nucleoplasm, cytosol       |          |                          |                                          |
| nucleoplasm, actin filamer | U-2 OS   | nucleoplaBJ              | nucleoplasm, cytokinetic bridge, cytosol |
| nucleoplasm                | U-2 OS   | nucleoplaK-562           | nucleoplasm                              |
| nucleoplasm, nuclear membr | A-431    | nucleoplaU-251 MG        | nuclear membrane, nucleoli               |
| cytosol                    | A-431    | cytosol U-251 MG         | cytosol                                  |
| nuclear speckles           | SH-SY5Y  | nuclear speckles         |                                          |
| nucleoplasm, nuclear membr | SH-SY5Y  | nucleoplaHaCaT           | nucleoplasm, nuclear membrane            |
| plasma membrane, cytosol   | A-431    | nucleoplaSiHa            | nucleoplasm, golgi apparatus, plasma m   |
| nucleoplasm, cytosol       | A-431    | plasma meHep G2          | nucleoplasm, plasma membrane, cytosol    |
| nucleoplasm, vesicles      | A-431    | nucleoplaU-251 MG        | nucleoplasm, vesicles, cytosol           |
| golgi apparatus            | A-431    | golgi appU-251 MG        | golgi apparatus                          |

|                                       |           |                                  |                                        |
|---------------------------------------|-----------|----------------------------------|----------------------------------------|
| golgi apparatus                       | A-431     | golgi appU-251 MG                | golgi apparatus                        |
| nucleoplasm, cytosol                  | A-431     | nucleoplaU-251 MG                | nucleoplasm, cytosol                   |
| cell junctions                        |           |                                  |                                        |
| nucleoplasm                           | A-431     | nucleoplaU-251 MG                | nucleoplasm, cytosol                   |
| centrosome, cytosol                   | HAP1      | nucleoplasm, centrosome, cytosol |                                        |
| nuclear speckles, centrosome, cytosol | RH-30     | centrosomHAP1                    | nuclear speckles, centrosome, cytosol  |
| cytosol                               | A-431     | cytosol U-251 MG                 | cytosol                                |
| nucleoplasm, nuclear bodies           | SH-SY5Y   | nucleoplaPC-3                    | nucleoplasm, nuclear bodies            |
| nucleoplasm                           | U-251 MG  | nucleoplaBJ                      | nucleoplasm, cytosol                   |
| vesicles                              | A-431     | vesicles U-251 MG                | vesicles                               |
| nucleoplasm, nucleoli, mitochondria   | HeLa      | nucleoplasm, mitochondria        |                                        |
| cytosol                               | A-431     | nucleoplaU-251 MG                | nucleoplasm, cytosol                   |
| cytosol                               | A-431     | nucleoplaU-251 MG                | cytosol                                |
| vesicles                              |           |                                  |                                        |
| nucleoplasm, peroxisomes              | A-431     | nucleoplaU-251 MG                | nucleoplasm, peroxisomes               |
| endoplasmic reticulum                 | A-431     | vesicles U-251 MG                | vesicles                               |
| nucleoplasm                           | A-431     | nucleoplaU-251 MG                | nucleoplasm                            |
| cytosol                               | U-251 MG  | cytosol                          |                                        |
| nucleoplasm, golgi apparatus          | U-251 MG  | golgi appSH-SY5Y                 | nucleoplasm, golgi apparatus           |
| nucleoplasm, vesicles                 | RH-30     | nucleoplaSK-MEL-30               | nucleoplasm, vesicles                  |
| nucleoplasm                           | A-431     | nucleoplaPC-3                    | nucleoplasm                            |
| nucleoplasm                           | A-431     | nucleoplaPC-3                    | nucleoplasm, cytosol                   |
| nucleoplasm, golgi apparatus          | RH-30     | nucleoplasm                      |                                        |
| mitochondria                          | A-431     | mitochondria                     |                                        |
| nucleoplasm, nucleoli                 | SK-MEL-30 | nucleoplasm, nucleoli            |                                        |
| nucleoplasm, nuclear speckles         | MCF7      | nucleoplaPC-3                    | nucleoplasm, nuclear speckles, cytosol |
| golgi apparatus, vesicles, cytosol    | A-431     | golgi appU-251 MG                | golgi apparatus                        |
| nucleoplasm, cytosol                  | A-431     | nucleoplaU-251 MG                | nucleoplasm, cytosol                   |
| cytosol                               | U-251 MG  | cytosol                          |                                        |
| cytosol                               |           |                                  |                                        |
| nucleoplasm, cytosol                  | A-431     | nucleoplaU-251 MG                | nucleoplasm, cytosol                   |
| plasma membrane                       |           |                                  |                                        |
| cytosol                               | MCF7      | cytosol HEK 293                  | cytosol                                |
| nuclear speckles                      | A-431     | nuclear sHeLa                    | nuclear speckles                       |
| mitochondria                          | A-431     | mitochondU-251 MG                | mitochondria                           |
| nucleoli, cytosol                     | A-431     | nucleoli, U-251 MG               | nucleoli, cytosol                      |
| endoplasmic reticulum                 | U-251 MG  | endoplasmBJ                      | endoplasmic reticulum                  |
| nucleoplasm, cytosol                  | A-431     | nucleoplaU-251 MG                | nucleoplasm, cytosol                   |
| mitochondria                          | MCF7      | nucleoplasm, mitochondria        |                                        |
| nucleoplasm                           | A-431     | nucleoplaU-251 MG                | nucleoplasm, vesicles                  |
| nucleoplasm                           | A-431     | nucleoplaU-251 MG                | nucleoplasm                            |
| nuclear speckles                      | U-251 MG  | nuclear sMCF7                    | nuclear speckles, cytosol              |
| cytosol                               | A-431     | cytosol A549                     | cytosol                                |
| vesicles                              | MCF7      | vesicles SH-SY5Y                 | vesicles                               |
| vesicles, focal adhesion sites        | RH-30     | focal adhesion sites             |                                        |
| nucleoplasm, golgi apparatus          | A-431     | golgi apparatus                  |                                        |
| nucleoplasm                           | MCF7      | nucleoplaHEK 293                 | nucleoplasm                            |
| nucleoplasm                           | MCF7      | nucleoplaHEK 293                 | nucleoplasm                            |
| nucleoplasm, nuclear bodies           | A-431     | nucleoplaU-251 MG                | nucleoplasm, nuclear bodies            |
| nucleoplasm, nuclear bodies           | HEK 293   | nucleoplaPC-3                    | nucleoplasm, nuclear bodies            |
| nucleoplasm, vesicles                 | A549      | nucleoplaPC-3                    | nucleoplasm, vesicles                  |
| nucleoplasm, vesicles                 | A-431     | nucleoplaU-251 MG                | nucleoplasm                            |
| nucleoplasm, vesicles                 | A-431     | nucleoplaU-251 MG                | nucleoplasm                            |
| nucleoplasm                           | U-251 MG  | nucleoplasm, cytosol             |                                        |
| nucleoplasm                           | A-431     | nucleoplaSiHa                    | nucleoplasm, cytosol                   |

|                             |          |                                     |                                        |
|-----------------------------|----------|-------------------------------------|----------------------------------------|
| nucleoplasm, cytosol        | A-431    | nucleoplaU-251 MG                   | nucleoplasm, cytosol                   |
| nucleoplasm, cytosol        |          |                                     |                                        |
| cytosol                     | A-431    | cytosol U-251 MG                    | cytosol                                |
| nucleoli, cytosol           | HEK 293  | cytosol PC-3                        | nucleoli, cytosol                      |
| cytosol                     | REH      | cytosol                             |                                        |
| nucleoplasm, cytosol        | A-431    | plasma meU-251 MG                   | nucleoplasm, nuclear bodies, cytosol   |
| cytosol                     | A-431    | cytosol U-251 MG                    | cytosol                                |
| golgi apparatus             | Hep G2   | golgi apparatus, cytosol            |                                        |
| nucleoplasm, cytosol        | A-431    | nucleoplaU-251 MG                   | nucleoplasm                            |
| intermediate filaments, cy  | A-431    | cytosol U-251 MG                    | intermediate filaments, cytosol        |
| cytosol                     | A-431    | cytosol U-251 MG                    | nucleoli, cytosol                      |
| nucleoli, cytosol           |          |                                     |                                        |
| cytosol                     | HeLa     | cytosol                             |                                        |
| lipid droplets, cytosol     | HeLa     | cytosol                             |                                        |
| nuclear speckles            | A-431    | nuclear sPC-3                       | nuclear speckles                       |
| nucleoplasm                 | A-431    | nucleoplaU-251 MG                   | nucleoplasm                            |
| cytosol                     | AF22     | endoplasmic reticulum               |                                        |
| golgi apparatus             | A-431    | nucleoplaU-251 MG                   | nucleoplasm, golgi apparatus           |
| cytosol                     | U-251 MG | cytosol                             |                                        |
| cytosol                     | A549     | nucleoplasm                         |                                        |
| nucleoplasm, mitochondria   | U-251 MG | nucleoplaSK-MEL-30                  | nucleoplasm, mitochondria              |
| nuclear speckles, centrosc  | U-251 MG | nuclear sMCF7                       | nuclear speckles, centrosome           |
| nuclear speckles            | A-431    | nuclear sU-251 MG                   | nuclear speckles                       |
| vesicles                    |          |                                     |                                        |
| cytosol                     | A-431    | cytosol U-251 MG                    | cytosol                                |
| nuclear bodies              | MCF7     | nuclear bRH-30                      | nucleoli, nuclear bodies, cytosol      |
| cytosol                     | MCF7     | cytosol RH-30                       | cytosol                                |
| nuclear speckles            | A-431    | nuclear sA549                       | nuclear speckles                       |
| cytosol                     | A-431    | plasma meHEL                        | plasma membrane, mitotic spindle       |
| nucleoplasm                 |          |                                     |                                        |
| nucleoplasm                 |          |                                     |                                        |
| nucleoplasm, nuclear bodie  | A-431    | nucleoplaU-251 MG                   | nucleoplasm                            |
| nucleoplasm                 | A-431    | nucleoplaU-251 MG                   | nucleoplasm                            |
| microtubules, cytosol       | A-431    | cytosol U-251 MG                    | microtubules, cytosol                  |
| plasma membrane, mitochonc  | U-2 OS   | mitochondMCF7                       | mitochondria                           |
| nucleoplasm, nucleoli       | U-251 MG | nucleoplasm                         |                                        |
| nucleoplasm, nucleoli       | A-431    | nucleoplaU-251 MG                   | nucleoplasm, nucleoli, plasma membrane |
| nuclear membrane, mitochor  | A-431    | nuclear nU-251 MG                   | nuclear membrane                       |
| mitochondria                | U-251 MG | nucleoplasm, nucleoli, mitochondria |                                        |
| cytosol                     | A-431    | cytosol U-251 MG                    | cytosol                                |
| nucleoplasm, golgi apparat  | SH-SY5Y  | nucleoplaSK-MEL-30                  | nucleoplasm, golgi apparatus           |
| nucleoplasm, cytosol        | A-431    | nucleoplaU-251 MG                   | nucleoplasm, cytosol                   |
| cytosol                     | PC-3     | nucleoplaSK-MEL-30                  | nucleoplasm, nucleoli, cytosol         |
| nucleoplasm, vesicles       | A-431    | nucleoplaPC-3                       | nucleoplasm, vesicles                  |
| plasma membrane             | U-2 OS   | plasma meHaCaT                      | plasma membrane                        |
| cytosol                     |          |                                     |                                        |
| cytosol                     | A-431    | cytosol U-251 MG                    | cytosol                                |
| nucleoplasm                 |          |                                     |                                        |
| nucleoplasm                 | U-2 OS   | nucleoplasm                         |                                        |
| nuclear bodies              | SiHa     | nuclear nAF22                       | nuclear membrane, nuclear bodies       |
| nucleoplasm                 | U-2 OS   | nucleoplaA-431                      | nucleoplasm, nucleoli                  |
| cytosol                     | SiHa     | nucleoplaRH-30                      | nucleoplasm, cytosol                   |
| nucleoplasm, nucleoli, mitc | MCF7     | nucleoli, SH-SY5Y                   | nucleoplasm, nucleoli, mitochondria    |
| cytosol                     | U-251 MG | cytosol                             |                                        |
| nucleoplasm                 | A-431    | nucleoplaU-251 MG                   | nucleoplasm                            |



|                                      |          |                                       |           |                                            |
|--------------------------------------|----------|---------------------------------------|-----------|--------------------------------------------|
| mitochondria                         | A-431    | mitochondria                          | U-251 MG  | mitochondria                               |
| mitochondria                         |          |                                       |           |                                            |
| vesicles                             | SH-SY5Y  | vesicles                              |           |                                            |
| nucleoli fibrillar center            | REH      | plasma membrane, cytosol              |           |                                            |
| plasma membrane, cell junction       | SH-SY5Y  | plasma membrane, cell junctions       |           |                                            |
| mitochondria                         | A-431    | mitochondria                          | PC-3      | nucleoplasm, plasma membrane, mitochondria |
| nucleoli                             | U-251 MG | nucleoli                              | SK-MEL-30 | nucleoli                                   |
| nucleoplasm                          | A-431    | nucleoplasm                           | U-251 MG  | nucleoplasm                                |
| nucleoplasm, plasma membrane         | U-251 MG | nucleoplasm, plasma membrane, cytosol |           |                                            |
| cytosol                              | A-431    | cytosol                               | U-251 MG  | cytosol                                    |
| cytosol                              | A-431    | cytosol                               | U-251 MG  | cytosol                                    |
| intermediate filaments               | LHCN-M2  | intermediate filaments                |           |                                            |
| vesicles, centriolar satellite       | SiHa     | vesicles, centriolar satellite        | RH-30     | centriolar satellite                       |
| cell junctions                       | RH-30    | cell junctions                        |           |                                            |
| nuclear speckles, vesicles           | A-431    | nuclear speckles, vesicles            | U-251 MG  | nuclear speckles, vesicles                 |
| nucleoplasm, nucleoli                | A-431    | nucleoplasm, nucleoli                 | PC-3      | nucleoplasm, nucleoli                      |
| nucleoplasm, plasma membrane         | A-431    | nucleoplasm, plasma membrane          | U-251 MG  | nucleoplasm, plasma membrane               |
| endoplasmic reticulum                | MCF7     | endoplasmic reticulum                 | SiHa      | endoplasmic reticulum                      |
| actin filaments                      |          |                                       |           |                                            |
| nucleoplasm, plasma membrane         | U-251 MG | nucleoplasm, plasma membrane, cytosol |           |                                            |
| nucleoplasm, mitochondria            | A-431    | nucleoplasm, mitochondria             | U-251 MG  | nucleoplasm, mitochondria                  |
| plasma membrane                      | A-431    | plasma membrane                       | U-251 MG  | plasma membrane                            |
| nucleoplasm, cytosol                 | A-431    | nucleoplasm, cytosol                  | U-251 MG  | nucleoplasm, cytosol                       |
| nucleoplasm                          | MCF7     | nucleoplasm                           | HeLa      | nucleoplasm                                |
| vesicles                             | A-431    | vesicles                              | U-251 MG  | vesicles                                   |
| plasma membrane                      | Hep G2   | plasma membrane                       |           |                                            |
| plasma membrane                      |          |                                       |           |                                            |
| nucleoli                             | A-431    | nucleoli                              |           |                                            |
| nucleoli                             | A-431    | nucleoli                              | U-251 MG  | nucleoli                                   |
| nucleoplasm, cytosol                 | U-251 MG | nucleoplasm, cytosol                  |           |                                            |
| nucleoplasm, cytosol                 | U-251 MG | nucleoplasm, cytosol                  |           |                                            |
| nucleoplasm, cytosol                 | U-2 OS   | nucleoplasm, cytosol                  | U-251 MG  | nucleoplasm, cytosol                       |
| plasma membrane                      | A-431    | plasma membrane                       | HEL       | nuclear membrane, plasma membrane          |
| cytosol                              | A-431    | cytosol                               | U-251 MG  | cytosol                                    |
| golgi apparatus                      | U-251 MG | golgi apparatus                       | PC-3      | nucleoplasm, vesicles                      |
| nucleoplasm                          | A-431    | nucleoplasm                           | HEK 293   | cytosol                                    |
| cytosol                              | A-431    | cytosol                               | U-251 MG  | cytosol                                    |
| nucleoplasm, cytosol                 | A-431    | nucleoplasm, cytosol                  | U-251 MG  | nucleoplasm, cytosol                       |
| mitochondria                         | A-431    | mitochondria                          | U-251 MG  | mitochondria                               |
| nucleoplasm, vesicles                | U-2 OS   | nucleoplasm, vesicles                 |           |                                            |
| nucleoplasm, vesicles, cell junction | U-2 OS   | nucleoplasm, vesicles, cell junction  | A-431     | nucleoplasm, vesicles                      |
| golgi apparatus                      | U-251 MG | golgi apparatus                       |           |                                            |
| nuclear speckles                     | U-251 MG | nuclear speckles                      |           |                                            |
| cytosol                              | A-431    | cytosol                               | U-251 MG  | cytosol                                    |
| cytosol                              | A-431    | cytosol                               | HaCaT     | cytosol                                    |
| nucleoplasm                          | HEK 293  | nucleoplasm                           | PC-3      | nucleoplasm                                |
| actin filaments                      | U-2 OS   | actin filaments                       | U-251 MG  | actin filaments, cytosol                   |
| actin filaments                      | U-2 OS   | actin filaments                       | U-251 MG  | actin filaments, cytosol                   |
| cytosol                              | A-431    | cytosol                               | U-251 MG  | cytosol                                    |
| vesicles                             |          |                                       |           |                                            |
| vesicles                             | HaCaT    | vesicles                              |           |                                            |
| vesicles                             | A-431    | vesicles                              | U-251 MG  | vesicles                                   |
| peroxisomes                          | A-431    | peroxisomes                           | U-251 MG  | peroxisomes                                |
| vesicles                             |          |                                       |           |                                            |
| golgi apparatus                      | A-431    | golgi apparatus                       | U-251 MG  | golgi apparatus                            |

|                                   |                                                         |
|-----------------------------------|---------------------------------------------------------|
| nucleoli, golgi apparatus, RH-30  | golgi appSK-MEL-30golgi apparatus                       |
| nucleoplasm A-431                 | nucleoplaU-251 MG nucleoplasm                           |
| nucleoplasm, vesicles BJ          | nucleoplasm, vesicles                                   |
| plasma membrane, cytosol A-431    | plasma meU-251 MG nucleoplasm, plasma membrane, cytosol |
| nucleoplasm, mitochondria A-431   | nucleoplaU-251 MG nucleoplasm, mitochondria             |
| nucleoplasm, cytosol HaCaT        | nucleoplasm, cell junctions, cytosol                    |
| cytosol HaCaT                     | cytosol                                                 |
| plasma membrane, actin filSH-SY5Y | plasma mePC-3 plasma membrane                           |
| nuclear speckles A-431            | nuclear sSK-MEL-30nucleoli fibrillar center, nuclear sp |
| nuclear speckles SH-SY5Y          | nuclear sSK-MEL-30nuclear speckles                      |
| nucleoplasm HeLa                  | nucleoplaBJ nucleoplasm                                 |
| nucleoplasm                       |                                                         |
| nucleoplasm, cytosol SiHa         | nucleoplasm, cytosol                                    |
| cytosol A-431                     | cytosol U-251 MG cytosol                                |
| mitochondria A-431                | cell juncU-251 MG mitochondria                          |
| nucleoplasm, vesicles SiHa        | nucleoplaRH-30 nucleoplasm, vesicles                    |
| centrosome A-431                  | nucleoplaU-251 MG nucleoplasm, centrosome               |
| nucleoplasm A-431                 | nucleoplaRH-30 nucleoplasm, centrosome                  |
| cytosol A-431                     | cytosol U-251 MG nucleoplasm, cytosol                   |
| plasma membrane A-431             | plasma meU-251 MG plasma membrane                       |
| nucleoplasm                       |                                                         |
| nucleoplasm U-251 MG              | nucleoplasm                                             |
| nuclear speckles U-251 MG         | nuclear sHep G2 nuclear speckles                        |
| cytosol Hep G2                    | nucleoplaRH-30 nucleoplasm, cytosol                     |
| nucleoplasm RH-30                 | nucleoplasm                                             |
| nucleoplasm A-431                 | nucleoplaU-251 MG nucleoplasm                           |
| nucleoplasm A-431                 | nucleoplaU-251 MG nucleoplasm                           |
| nucleoplasm MCF7                  | nucleoplaHeLa nucleoplasm                               |
| nucleoplasm, nuclear bodieA-431   | nucleoplaU-251 MG nucleoplasm, nuclear bodies           |
| nucleoplasm, nuclear bodieA-431   | nucleoplaU-251 MG nucleoplasm                           |
| nucleoplasm, nuclear bodieA-431   | nucleoplaU-251 MG nucleoplasm                           |
| nucleoplasm, nuclear speckA-431   | nuclear sU-251 MG nuclear speckles                      |
| nucleoplasm, nuclear speckA-431   | nuclear sU-251 MG nuclear speckles                      |
| nucleoplasm, nuclear speckA-431   | nuclear sU-251 MG nuclear speckles                      |
| nucleoplasm, golgi apparatA-431   | nucleoplaHeLa nucleoplasm, golgi apparatus              |
| actin filaments U-2 OS            | actin filHep G2 actin filaments, cytosol                |
| golgi apparatus, vesicles, A-431  | golgi appU-251 MG golgi apparatus, cytosol              |
| cytosol                           |                                                         |
| nucleoplasm, nucleoli fibrA-431   | nucleoplaU-251 MG nucleoplasm, nucleoli fibrillar cente |
| nucleoplasm, nucleoli fibrA-431   | nucleoplaU-251 MG nucleoplasm, nucleoli fibrillar cente |
| nuclear bodies, endoplasmiaA-431  | nuclear bU-251 MG nuclear bodies                        |
| endoplasmic reticulum A-431       | cytosol U-251 MG cytosol                                |
| endoplasmic reticulum A-431       | nucleoli, U-251 MG endoplasmic reticulum                |
| endoplasmic reticulum A-431       | endoplasmU-251 MG endoplasmic reticulum                 |
| endoplasmic reticulum, celSH-SY5Y | endoplasmic reticulum                                   |
| vesicles PC-3                     | vesicles                                                |
| nucleoplasm A-431                 | nucleoplaU-251 MG nucleoplasm, nuclear bodies           |
| nucleoplasm, nuclear bodieA-431   | nucleoplaU-251 MG nucleoplasm                           |
| nucleoplasm, cytosol A-431        | nucleoplaU-251 MG nucleoplasm, cytosol                  |
| nucleoplasm A-431                 | nucleoplaU-251 MG nucleoplasm, cytosol                  |
| actin filaments                   |                                                         |
| cytosol U-2 OS                    | vesicles Hep G2 vesicles                                |
| nucleoplasm, cytosol MCF7         | nucleoplasm, cytosol                                    |
| cytosol A-431                     | cytosol U-251 MG cytosol                                |
| nucleoplasm, cytosol A-431        | nucleoplaU-251 MG nucleoplasm, plasma membrane, cytosol |

|                              |          |                  |           |                                        |
|------------------------------|----------|------------------|-----------|----------------------------------------|
| endoplasmic reticulum, cyto  | A-431    | endoplasm        | U-251 MG  | endoplasmic reticulum, cytosol         |
| midbody ring, cytosol        | A-431    | cytosol          | U-251 MG  | cytosol                                |
| nucleoplasm, nucleoli, foc   | A-431    | nucleopla        | RH-30     | nucleoplasm, nucleoli, microtubules    |
| nucleoplasm, actin filame    | A-431    | nucleopla        | MCF7      | nucleoplasm, actin filaments           |
| microtubule ends, cytosol    | A-431    | microtubu        | U-251 MG  | microtubule ends, cytosol              |
| plasma membrane, interme     |          | diates           |           | kinetic bridge                         |
| vesicles                     | MCF7     | vesicles         | SK-MEL-30 | vesicles                               |
| nucleoplasm, mitochondria    | U-2 OS   | cytokinet        | Hep G2    | mitochondria                           |
| vesicles, plasma membrane    |          |                  |           |                                        |
| nucleoplasm                  | A-431    | nucleopla        | U-251 MG  | nucleoplasm                            |
| nucleoplasm                  | A-431    | nucleopla        | U-251 MG  | nucleoplasm                            |
| golgi apparatus              | A-431    | golgi app        | U-251 MG  | golgi apparatus                        |
| golgi apparatus              |          |                  |           |                                        |
| plasma membrane              | HEK 293  | plasma me        | ASC TERT1 | plasma membrane                        |
| plasma membrane              |          |                  |           |                                        |
| nucleoplasm, vesicles, cyt   | U-2 OS   | nucleopla        | U-251 MG  | nucleoplasm, vesicles                  |
| nucleoplasm                  | A-431    | nucleopla        | U-251 MG  | nucleoplasm                            |
| nucleoli fibrillar center    | U-2 OS   | nucleopla        | HeLa      | nucleoli fibrillar center              |
| plasma membrane, actin fila  | 549      | plasma me        | BJ        | nucleoli, plasma membrane, actin filam |
| nucleoli, nuclear bodies     | HEK 293  | nucleoli,        | RH-30     | nucleoli, nuclear bodies, cytosol      |
| nucleoplasm                  | A-431    | nucleopla        | U-251 MG  | nucleoplasm, cytosol                   |
| nucleoplasm                  | U-2 OS   | nucleopla        | RH-30     | nucleoplasm                            |
| rods & rings                 | RH-30    | rods & rings     |           |                                        |
| plasma membrane              | AF22     | plasma membrane, |           | actin filaments                        |
| mitochondria                 | SH-SY5Y  | mitochondria     |           |                                        |
| nucleoplasm                  | A-431    | nucleopla        | U-251 MG  | nucleoplasm                            |
| mitochondria                 | A-431    | mitochondria     |           |                                        |
| mitochondria                 | A-431    | nucleopla        | U-251 MG  | nucleoplasm, mitochondria              |
| nuclear bodies, golgi app    | U-251 MG | nuclear b        | HeLa      | nuclear bodies, golgi apparatus        |
| microtubules                 | A-431    | microtubu        | U-251 MG  | microtubules                           |
| vesicles                     |          |                  |           |                                        |
| vesicles                     | U-2 OS   | vesicles         |           |                                        |
| cytosol                      |          |                  |           |                                        |
| nucleoplasm, cytosol         | HEL      | nucleopla        | REH       | nucleoplasm                            |
| nucleoplasm, centrosome      | HEK 293  | nucleopla        | Hep G2    | nucleoplasm, centrosome                |
| centrosome                   | Hep G2   | centrosome       |           |                                        |
| nuclear speckles             | A-431    | nuclear s        | U-251 MG  | nuclear speckles                       |
| nuclear speckles, cytosol    | U-251 MG | nuclear s        | HeLa      | nuclear speckles                       |
| nucleoplasm, plasma membr    | A-431    | nucleopla        | U-251 MG  | plasma membrane, cytosol               |
| golgi apparatus, vesicles    | U-251 MG | golgi app        | EF0-21    | golgi apparatus, vesicles              |
| endoplasmic reticulum        | HEK 293  | endoplasm        | SH-SY5Y   | endoplasmic reticulum                  |
| nucleoplasm                  | A-431    | nucleopla        | U-251 MG  | nucleoplasm                            |
| nucleoplasm, plasma membrane |          |                  |           |                                        |
| golgi apparatus              | PC-3     | nucleoplasm      |           |                                        |
| nucleoplasm, golgi apparatus |          |                  |           |                                        |
| nucleoplasm, nuclear bodi    | MCF7     | nucleopla        | RH-30     | nucleoplasm, nuclear bodies            |
| nucleoli fibrillar center    | U-2 OS   | nucleopla        | BJ        | nucleoplasm, nucleoli fibrillar cente  |
| nucleoplasm                  | A-431    | nucleopla        | U-251 MG  | nucleoplasm                            |
| nucleoplasm                  | SH-SY5Y  | nucleopla        | RH-30     | nucleoplasm                            |
| nucleoplasm                  | RH-30    | nucleoplasm      |           |                                        |
| endoplasmic reticulum        | U-251 MG | nuclear bodies,  |           | endoplasmic reticulum                  |
| nucleoplasm                  | U-2 OS   | nucleopla        | MCF7      | nucleoplasm                            |
| nucleoplasm, centrosome      | SH-SY5Y  | nucleopla        | RH-30     | nucleoplasm, centrosome                |
| vesicles                     | RH-30    | vesicles         |           |                                        |
| endoplasmic reticulum        |          |                  |           |                                        |

|                                   |           |                                               |           |                                              |
|-----------------------------------|-----------|-----------------------------------------------|-----------|----------------------------------------------|
| plasma membrane                   | A-431     | plasma membrane                               | U-251 MG  | plasma membrane                              |
| nucleoplasm, plasma membrane      | A-431     | nucleoplasm                                   | A549      | plasma membrane                              |
| golgi apparatus                   | RPTEC     | golgi apparatus                               | TER       |                                              |
| golgi apparatus                   |           |                                               |           |                                              |
| cytosol                           |           |                                               |           |                                              |
| nucleoplasm, nuclear bodies       | A-431     | nucleoplasm                                   | U-251 MG  | nucleoplasm, nuclear bodies, golgi apparatus |
| golgi apparatus                   | MCF7      | golgi apparatus                               | SiHa      | golgi apparatus                              |
| golgi apparatus                   | A-431     | endoplasmic reticulum, golgi apparatus        |           |                                              |
| nucleoplasm                       | A-431     | nucleoplasm                                   | U-251 MG  | nucleoplasm, nucleoli                        |
| plasma membrane, cytosol          | U-251 MG  | cytosol                                       |           |                                              |
| vesicles                          | A-431     | vesicles                                      | U-251 MG  | vesicles                                     |
| nucleoplasm, plasma membrane      | A-431     | nucleoplasm                                   | SiHa      | nucleoplasm, plasma membrane                 |
| nucleoplasm                       | SiHa      | nucleoplasm                                   | RH-30     | nucleoplasm, nuclear bodies                  |
| nucleoplasm, cytosol              | SH-SY5Y   | nucleoplasm                                   | SK-MEL-30 | nucleoplasm, cytosol                         |
| nucleoplasm, cytosol              | A-431     | nucleoplasm                                   | U-251 MG  | nucleoplasm, cytosol                         |
| vesicles, cytosol                 | A-431     | vesicles, HEK 293                             |           | vesicles, cytosol                            |
| nucleoli, cytosol                 | A-431     | nucleoli, U-251 MG                            |           | nucleoli, cytosol                            |
| nuclear speckles, cytosol         | A-431     | nuclear speckles, cytosol                     |           |                                              |
| nucleoplasm                       | Hep G2    | nucleoplasm                                   |           |                                              |
| nucleoplasm                       |           |                                               |           |                                              |
| nucleoplasm                       | SiHa      | nucleoplasm                                   | BJ        | nucleoplasm                                  |
| cytosol                           | SH-SY5Y   | cytosol                                       | PC-3      | cytosol                                      |
| plasma membrane, cell junction    | U-2 OS    | nucleoplasm, plasma membrane, actin filaments |           |                                              |
| nucleoplasm, nuclear membrane     | HeLa      | nucleoplasm                                   | SH-SY5Y   | nucleoplasm, nuclear membrane                |
| nucleoplasm                       | A-431     | nucleoplasm                                   | U-251 MG  | nucleoplasm                                  |
| nucleoplasm, cytosol              | A549      | nucleoplasm                                   | PC-3      | nucleoplasm, plasma membrane                 |
| nucleoplasm, vesicles             | A-431     | nucleoplasm                                   | U-251 MG  | nucleoplasm, vesicles, plasma membrane       |
| nucleoplasm                       | A-431     | nucleoplasm                                   | SK-MEL-30 | nucleoplasm                                  |
| nucleoplasm                       | HeLa      | nucleoplasm                                   |           |                                              |
| nucleoplasm, plasma membrane      | A-431     | nucleoplasm                                   | U-251 MG  | nucleoplasm, plasma membrane, cytosol        |
| plasma membrane, cell junction    | A-431     | plasma membrane                               | U-251 MG  | plasma membrane, cell junctions, cytosol     |
| plasma membrane, cell junction    | A-431     | plasma membrane                               | U-251 MG  | plasma membrane, cell junctions              |
| nucleoplasm, plasma membrane      | A-431     | plasma membrane                               | HaCaT     | nucleoplasm, plasma membrane, cell junction  |
| nucleoplasm, centriolar satellite | U-251 MG  | nucleoplasm                                   | SK-MEL-30 | nucleoplasm, nuclear bodies                  |
| nucleoplasm, cytosol              | SK-MEL-30 | nucleoplasm, cytosol                          |           |                                              |
| vesicles                          | Hep G2    | vesicles                                      |           |                                              |
| nucleoli, plasma membrane         |           |                                               |           |                                              |
| nucleoplasm, vesicles, centrosome | A-431     | nucleoplasm                                   | MCF7      | nucleoplasm, centrosome                      |
| cytosol                           | A-431     | cytosol                                       | U-251 MG  | cytosol                                      |
| nucleoli fibrillar center         | A-431     | nucleoli                                      | HEK 293   | nucleoli fibrillar center                    |
| nucleoli fibrillar center         | U-251 MG  | nucleoli                                      | HEK 293   | nucleoli fibrillar center, mitochondria      |
| nucleoplasm                       | U-2 OS    | nucleoplasm                                   | A549      | nucleoplasm                                  |
| nucleoplasm, cytosol              | A-431     | nucleoplasm                                   | U-251 MG  | nucleoplasm, cytosol                         |
| nucleoplasm, cytosol              | A-431     | nucleoplasm                                   | U-251 MG  | nucleoplasm, cytosol                         |
| nucleoli, cytosol                 | A-431     | nucleoli, U-251 MG                            |           | nucleoli, cytosol                            |
| nucleoplasm, cytosol              |           |                                               |           |                                              |
| nucleoplasm, cytokinetic spindle  | A-431     | nucleoplasm                                   | U-251 MG  | nucleoplasm, cytosol                         |
| cytosol                           |           |                                               |           |                                              |
| nucleoplasm, lipid droplet        | SiHa      | nucleoplasm                                   | RH-30     | lipid droplets                               |
| nucleoplasm                       | A-431     | nucleoplasm                                   | U-251 MG  | nucleoplasm                                  |
| nuclear membrane, nucleoli        | MCF7      | nuclear membrane                              | A549      | nucleoli, cytosol                            |
| vesicles                          | A-431     | vesicles                                      | U-251 MG  | vesicles                                     |
| centrosome, cytosol               |           |                                               |           |                                              |
| intermediate filaments            | A-431     | intermediate filaments                        | A549      | intermediate filaments                       |
| nucleoplasm                       | U-251 MG  | nucleoplasm                                   | HeLa      | nucleoplasm                                  |

|                             |          |                           |                                        |
|-----------------------------|----------|---------------------------|----------------------------------------|
| nucleoplasm, vesicles, cent | A549     | nucleoplaHeLa             | nucleoplasm, cytosol                   |
| nucleoplasm, cytosol        | MCF7     | nucleoplasm, cytosol      |                                        |
| mitochondria                | A-431    | mitochondU-251 MG         | mitochondria                           |
| nucleoli, vesicles          | MCF7     | nucleoli, vesicles        |                                        |
| nucleoli, vesicles          | U-2 OS   | nucleoli, MCF7            | nucleoli                               |
| nucleoplasm                 | MCF7     | nucleoplasm, nucleoli     | fibrillar center, midbody              |
| nucleoplasm, cytosol        | RH-30    | nucleoplaHAP1             | nucleoplasm, cytosol                   |
| mitochondria                | RH-30    | mitochondria              |                                        |
| mitochondria                | A-431    | mitochondU-251 MG         | mitochondria                           |
| nucleoplasm, cytosol        | U-251 MG | nucleoplasm               |                                        |
| cytosol                     | A549     | cytosol HeLa              | cytosol                                |
| cytosol                     | A-431    | nucleoplaU-251 MG         | vesicles                               |
| actin filaments, cytosol    |          |                           |                                        |
| vesicles                    | U-2 OS   | vesicles, HaCaT           | vesicles                               |
| actin filaments             | A549     | nucleoplaHeLa             | nucleoplasm                            |
| intermediate filaments      | HEK 293  | intermediK-562            | intermediate filaments                 |
| cytosol                     | A-431    | cytosol U-251 MG          | cytosol                                |
| nucleoplasm                 | A-431    | nucleoplaA549             | nucleoplasm                            |
| nuclear speckles            | MCF7     | nuclear sA549             | nuclear speckles                       |
| nucleoplasm                 | MCF7     | nucleoplaPC-3             | nucleoplasm                            |
| nucleoplasm                 | A-431    | nucleoplaU-251 MG         | nucleoplasm                            |
| nucleoplasm, mitochondria   | A-431    | nucleoplasm, cytosol      |                                        |
| cytosol                     | MCF7     | nucleoli, ASC TERT1       | cytosol                                |
| nucleoplasm, plasma membræ  | A-431    | nucleoplaU-251 MG         | nucleoplasm, plasma membrane           |
| mitochondria                | A-431    | mitochondU-251 MG         | mitochondria                           |
| nucleoplasm, cytosol        | A-431    | nucleoplaU-251 MG         | cytosol                                |
| microtubules                | A-431    | microtubuU-251 MG         | microtubules, centriolar satellite     |
| nucleoplasm, centriolar sa  | MCF7     | nucleoplasm               |                                        |
| nucleoplasm                 | MCF7     | nucleoplaPC-3             | nucleoplasm                            |
| nucleoplasm                 | MCF7     | nucleoplaPC-3             | nucleoplasm                            |
| mitochondria                | U-251 MG | mitochondria              |                                        |
| nucleoplasm                 | A-431    | nucleoplaU-251 MG         | nucleoplasm                            |
| nucleoplasm                 | MCF7     | nucleoplaPC-3             | nucleoplasm                            |
| plasma membrane, cytosol    | A-431    | plasma meU-251 MG         | plasma membrane, cytosol               |
| cytosol                     | RH-30    | cytosol                   |                                        |
| vesicles                    |          |                           |                                        |
| nuclear speckles, mitochor  | U-2 OS   | nuclear sA549             | nuclear speckles                       |
| mitochondria                | A-431    | mitochondria              |                                        |
| nuclear speckles            | A-431    | nuclear sU-251 MG         | nuclear speckles                       |
| nuclear speckles            | HaCaT    | nuclear speckles          |                                        |
| nucleoplasm, mitochondria   | A-431    | nucleoplaU-251 MG         | nucleoplasm, mitochondria              |
| mitochondria                |          |                           |                                        |
| mitochondria                | MCF7     | mitochondria              |                                        |
| nucleoplasm, focal adhesic  | A-431    | nucleoplaMCF7             | nucleoplasm, plasma membrane, focal ad |
| nucleoplasm                 |          |                           |                                        |
| nucleoplasm, mitochondria   | MCF7     | nucleoplasm, mitochondria |                                        |
| nuclear bodies              | SiHa     | nuclear bodies            |                                        |
| vesicles, cytosol           | SH-SY5Y  | vesicles                  |                                        |
| nucleoplasm                 |          |                           |                                        |
| mitochondria                | HEK 293  | mitochondRH-30            | mitochondria                           |
| nucleoplasm                 | A-431    | nucleoplaU-251 MG         | nucleoplasm                            |
| endoplasmic reticulum, golU | U-251 MG | golgi apparatus, cytosol  |                                        |
| nucleoplasm                 | A-431    | nucleoplaU-251 MG         | nucleoplasm                            |
| vesicles                    | Hep G2   | vesicles SH-SY5Y          | vesicles                               |
| endoplasmic reticulum       | A-431    | endoplasrHep G2           | endoplasmic reticulum                  |

|                                    |           |                                 |                                       |
|------------------------------------|-----------|---------------------------------|---------------------------------------|
| cytosol                            | A-431     | nucleoplaU-251 MG               | nucleoplasm, cytosol                  |
| vesicles                           | A-431     | vesicles U-251 MG               | vesicles                              |
| golgi apparatus, vesicles, A-431   |           | golgi appU-251 MG               | golgi apparatus                       |
| golgi apparatus, vesicles, A-431   |           | golgi appU-251 MG               | nucleoplasm, cytosol                  |
| golgi apparatus, vesicles, A-431   |           | golgi apparatus, cytosol        |                                       |
| nucleoplasm                        | A-431     | nucleoplaU-251 MG               | nucleoplasm                           |
| cytosol                            | A-431     | cytosol U-251 MG                | cytosol                               |
| nucleoplasm, nuclear bodieA-431    |           | nucleoplaU-251 MG               | nucleoplasm, nuclear bodies           |
| nucleoplasm                        | A-431     | nucleoplaHEK 293                | nucleoplasm                           |
| nucleoplasm, nucleoli fibrA-431    |           | nucleoplaHep G2                 | nucleoplasm, nucleoli fibrillar cente |
| plasma membrane                    |           |                                 |                                       |
| plasma membrane, cytosol A-431     |           | plasma meU-251 MG               | plasma membrane, cytosol              |
| nucleoplasm, golgi apparatA-431    |           | nucleoplaU-251 MG               | nucleoplasm, golgi apparatus          |
| nucleoplasm, vesicles A-431        |           | nucleoplaU-251 MG               | nucleoplasm, vesicles                 |
| vesicles, cytosol                  | SiHa      | vesicles, cytosol               |                                       |
| mitochondria, cytosol              | HeLa      | mitochondria, cytosol           |                                       |
| nucleoli, cytosol                  | REH       | nucleoli, cytosol               |                                       |
| vesicles                           | A-431     | vesicles HeLa                   | vesicles                              |
| nucleoplasm, mitochondria RH-30    |           | mitochondria                    |                                       |
| cytosol                            | A-431     | nucleoplaU-251 MG               | nucleoplasm, nucleoli, cytosol        |
| mitochondria                       | HeLa      | mitochondASC TERT1              | mitochondria                          |
| plasma membrane, cytosol U-251 MG  |           | plasma meA549                   | plasma membrane, cytosol              |
| nucleoplasm                        | SH-SY5Y   | nucleoplaSK-MEL-30              | nucleoplasm                           |
| nucleoplasm, nucleoli A-431        |           | nucleoplaSK-MEL-30              | nucleoplasm, cytosol                  |
| nucleoplasm, nuclear bodieU-251 MG |           | nucleoplaRH-30                  | nucleoplasm                           |
| nucleoplasm                        | RH-30     | nucleoplaHAP1                   | nucleoplasm                           |
| nucleoplasm, golgi apparatRH-30    |           | nucleoplasm                     |                                       |
| microtubules                       | A-431     | microtubuU-251 MG               | microtubules                          |
| plasma membrane, centrosonA-431    |           | plasma meU-251 MG               | plasma membrane, centrosome, cytosol  |
| nucleoplasm, plasma membrane       |           |                                 |                                       |
| microtubules                       | A-431     | cytosol U-251 MG                | microtubules                          |
| vesicles                           | A-431     | vesicles HeLa                   | vesicles                              |
| vesicles                           | A-431     | vesicles MCF7                   | vesicles                              |
| vesicles, cytosol                  | U-251 MG  | vesicles, plasma membrane       |                                       |
| nucleoplasm                        | Hep G2    | nucleoplaSK-MEL-30              | nucleoplasm, mitochondria             |
| nucleoplasm, cytosol               | SK-MEL-30 | nucleoplasm                     |                                       |
| cytosol                            | RH-30     | cytosol                         |                                       |
| nucleoplasm                        | HEK 293   | nucleoplaSK-MEL-30              | nucleoplasm                           |
| nucleoplasm                        | A-431     | nucleoplaU-251 MG               | nucleoplasm                           |
| nucleoplasm                        |           |                                 |                                       |
| nucleoplasm, cytosol               | HEK 293   | nucleoplaA549                   | nucleoplasm                           |
| nucleoplasm                        | HEK 293   | nucleoplaHeLa                   | nucleoplasm                           |
| nucleoli, cytosol                  | SiHa      | nucleoli, BJ                    | nucleoplasm, nucleoli                 |
| nucleoplasm, golgi apparatRH-30    |           | nucleoplasm, golgi apparatus    |                                       |
| nuclear speckles                   | RT4       | nuclear sU-2 OS                 | nuclear speckles, cytosol             |
| plasma membrane, centriolBJ        |           | plasma meAF22                   | plasma membrane                       |
| nucleoplasm                        | MCF7      | nucleoplaSH-SY5Y                | nucleoplasm                           |
| vesicles                           | A-431     | vesicles U-251 MG               | vesicles                              |
| intermediate filaments, cyU-251 MG |           | intermediate filaments, cytosol |                                       |
| mitochondria                       | U-251 MG  | mitochondMCF7                   | mitochondria                          |
| mitochondria                       | HeLa      | mitochondSiHa                   | mitochondria                          |
| golgi apparatus                    | U-251 MG  | golgi appMCF7                   | golgi apparatus, cell junctions       |
| cytosol                            | A-431     | cytosol U-251 MG                | cytosol                               |
| nucleoplasm                        | RT4       | nucleoplaU-2 OS                 | nucleoplasm                           |
| nucleoplasm                        | U-2 OS    | nucleoplaU-251 MG               | nucleoplasm                           |

|                             |           |                             |                                        |
|-----------------------------|-----------|-----------------------------|----------------------------------------|
| nucleoplasm, vesicles       | U-251 MG  | nucleoplasm                 |                                        |
| nucleoplasm, vesicles       | U-251 MG  | nucleoplaREH                | nucleoplasm                            |
| nucleoplasm, nucleoli       | U-251 MG  | nucleoplaA549               | nucleoplasm, nucleoli                  |
| nucleoplasm, nucleoli       | U-2 OS    | nucleoplaSiHa               | nucleoplasm, nucleoli                  |
| vesicles                    | SH-SY5Y   | vesicles SiHa               | vesicles                               |
| plasma membrane             |           |                             |                                        |
| nuclear membrane, mitochor  | A-431     | nuclear $\mu$ HEK 293       | nuclear membrane, mitochondria         |
| endoplasmic reticulum, plæ  | Hep G2    | endoplasr SH-SY5Y           | endoplasmic reticulum, plasma membran  |
| nucleoplasm, nucleoli, golg | A-431     | nucleoplaU-251 MG           | nucleoplasm, nucleoli, golgi apparatus |
| nucleoplasm, golgi apparat  | A-431     | nucleoplaU-251 MG           | nucleoplasm, golgi apparatus, cytosol  |
| nucleoplasm, nucleoli, golg | SK-MEL-30 | nucleoplaHAP1               | nucleoplasm, golgi apparatus, cytosol  |
| nucleoplasm, cytosol        | A-431     | nucleoplaU-251 MG           | nucleoplasm, cytosol                   |
| nuclear membrane, nucleoli  | U-2 OS    | nuclear $\mu$ U-251 MG      | nuclear membrane                       |
| mitochondria                | A-431     | mitochondU-251 MG           | mitochondria                           |
| nuclear bodies              | PC-3      | nucleoplasm, nuclear bodies |                                        |
| nucleoplasm                 | U-251 MG  | nucleoplasm, cytosol        |                                        |
| nucleoplasm, mitochondria   | A-431     | nucleoplaU-251 MG           | nucleoplasm, mitochondria              |
| nucleoplasm                 | A-431     | nucleoplaU-251 MG           | nucleoplasm                            |
| nucleoplasm                 | A-431     | nucleoplaU-251 MG           | nucleoplasm                            |
| nucleoplasm, cytosol        | A-431     | nucleoplaU-251 MG           | nucleoplasm, cytosol                   |
| nucleoplasm, nuclear bodie  | HeLa      | nucleoplaHaCaT              | nuclear bodies, intermediate filament  |
| nuclear bodies              | HeLa      | nuclear $\mu$ HaCaT         | nuclear membrane, nuclear bodies       |
| nucleoplasm, nuclear bodies |           |                             |                                        |
| nucleoplasm, cytosol        | U-251 MG  | nucleoplaHEL                | nucleoplasm, cytosol                   |
| nuclear membrane            | A-431     | nuclear $\mu$ U-251 MG      | nuclear membrane                       |
| plasma membrane             | U-251 MG  | plasma membrane             |                                        |
| vesicles                    | A-431     | nucleoplaU-251 MG           | vesicles                               |
| nucleoplasm                 | U-2 OS    | nucleoplaA-431              | nucleoplasm, cytosol                   |
| nucleoplasm                 | A-431     | nucleoplaU-251 MG           | nucleoplasm                            |
| nucleoplasm, vesicles       | U-251 MG  | nucleoplaBJ                 | nucleoplasm, vesicles                  |
| nucleoplasm                 | A-431     | nucleoplaHep G2             | nucleoplasm                            |
| nucleoplasm, cytosol        |           |                             |                                        |
| nucleoplasm, cytosol        | HEK 293   | nucleoplaRH-30              | nucleoplasm, cytosol                   |
| nucleoplasm, cytosol        | U-251 MG  | nucleoplasm, cytosol        |                                        |
| cytosol                     | A-431     | nucleoplaU-251 MG           | nucleoplasm, cytosol                   |
| nucleoplasm, cytosol        | A-431     | nucleoplaU-251 MG           | nucleoplasm, cytosol                   |
| cytosol                     | A-431     | cytosol U-251 MG            | cytosol                                |
| nucleoplasm, nucleoli fibr  | RH-30     | nucleoli HEL                | vesicles, cytosol                      |
| vesicles                    | HeLa      | vesicles                    |                                        |
| nucleoplasm                 | A-431     | nucleoplaU-251 MG           | nucleoplasm                            |
| nucleoplasm                 | A-431     | nucleoplaU-251 MG           | nucleoplasm, golgi apparatus           |
| nucleoplasm                 | A-431     | nucleoplaMCF7               | nucleoplasm                            |
| nucleoplasm                 | A-431     | nucleoplaMCF7               | nucleoplasm                            |
| endoplasmic reticulum       | U-251 MG  | endoplasmic reticulum       |                                        |
| cytosol                     | A-431     | cytosol U-251 MG            | cytosol                                |
| nucleoplasm, plasma membræ  | A-431     | nucleoplaHEK 293            | nucleoplasm, cell junctions, aggresome |
| nucleoplasm, cytosol        | A-431     | nucleoplaHEK 293            | nucleoplasm, cytosol                   |
| nucleoli                    | SiHa      | nucleoli, RH-30             | nucleoli, plasma membrane              |
| nuclear membrane            | A-431     | nuclear $\mu$ U-251 MG      | nuclear membrane                       |
| nuclear membrane            | A-431     | nuclear $\mu$ U-251 MG      | nuclear membrane                       |
| golgi apparatus             | U-2 OS    | golgi appBJ                 | golgi apparatus                        |
| vesicles                    | ASC TERT1 | nuclear speckles, vesicles  |                                        |
| nucleoplasm, golgi apparat  | SiHa      | golgi appASC TERT1          | golgi apparatus, vesicles              |
| endoplasmic reticulum       | U-2 OS    | endoplasr U-251 MG          | endoplasmic reticulum                  |
| nucleoplasm                 | A-431     | nucleoplaU-251 MG           | nucleoplasm                            |

|                             |           |                                        |                                               |
|-----------------------------|-----------|----------------------------------------|-----------------------------------------------|
| vesicles, actin filaments   | A-431     | vesicles                               | U-251 MG vesicles                             |
| nucleoplasm, cytosol        | A-431     | nucleopla                              | U-251 MG nucleoplasm, cytosol                 |
| nucleoplasm                 | PC-3      | nucleoplasm                            |                                               |
| cytosol                     | A-431     | focal adh                              | U-251 MG cytosol                              |
| plasma membrane, cytosol    |           |                                        |                                               |
| vesicles                    | A-431     | vesicles                               | U-251 MG vesicles                             |
| actin filaments, focal adh  | A-431     | actin filaments, focal adhesion sites  |                                               |
| cytosol                     | A-431     | cytosol                                | U-251 MG cytosol                              |
| cytosol                     |           |                                        |                                               |
| vesicles                    | Hep G2    | vesicles                               | PC-3 vesicles                                 |
| nucleoplasm                 | A-431     | nucleopla                              | U-251 MG nucleoplasm                          |
| nucleoplasm                 | A-431     | nucleopla                              | U-251 MG nucleoplasm                          |
| plasma membrane             |           |                                        |                                               |
| plasma membrane             |           |                                        |                                               |
| nucleoplasm, cytosol        | SH-SY5Y   | nucleoplasm, cytosol                   |                                               |
| nucleoplasm                 | K-562     | nucleoplasm                            |                                               |
| nucleoplasm                 | A-431     | nucleoplasm                            |                                               |
| lipid droplets              | U-2 OS    | lipid droplets                         | A-431 lipid droplets                          |
| mitochondria                | U-2 OS    | mitochondria                           | PC-3 mitochondria                             |
| mitochondria                | A-431     | mitochondria                           | U-251 MG mitochondria                         |
| nucleoplasm, nucleoli fibr  | U-251 MG  | nuclear bodies                         |                                               |
| nucleoplasm, nucleoli fibr  | MCF7      | nucleopla                              | HEK 293 nucleoplasm, nuclear bodies           |
| nucleoplasm, nucleoli       | HEK 293   | nucleopla                              | SH-SY5Y nucleoplasm, nucleoli, nuclear bodies |
| nucleoplasm, nuclear bodies | A-431     | nucleopla                              | U-251 MG nucleoplasm, nuclear bodies, cytosol |
| golgi apparatus             | A-431     | golgi app                              | U-251 MG golgi apparatus                      |
| nucleoplasm, cytosol        | MCF7      | nucleoplasm                            |                                               |
| endoplasmic reticulum, ves  | U-2 OS    | nucleopla                              | PC-3 nucleoplasm, endoplasmic reticulum       |
| vesicles                    | BJ        | vesicles                               |                                               |
| plasma membrane, cytosol    | A-431     | plasma me                              | MCF7 vesicles, plasma membrane, cell juncti   |
| nucleoplasm                 |           |                                        |                                               |
| nucleoplasm, cytosol        | A-431     | nucleopla                              | U-251 MG nucleoplasm, cytosol                 |
| endoplasmic reticulum, gol  | SK-MEL-30 | endoplasmic reticulum, golgi apparatus |                                               |
| nucleoli fibrillar center   | A-431     | vesicles                               | U-251 MG nucleoli fibrillar center, vesicles  |
| cytosol                     | HaCaT     | cytosol                                |                                               |
| cytosol                     | U-251 MG  | cytosol                                |                                               |
| plasma membrane, cytosol    | A-431     | plasma me                              | U-251 MG plasma membrane, cytosol             |
| nucleoplasm                 | A-431     | nucleopla                              | U-251 MG nucleoplasm                          |
| nucleoplasm, plasma membr   | RH-30     | nucleopla                              | ASC TERT1 nucleoplasm, plasma membrane        |
| mitochondria                | HEK 293   | mitochondria                           | HeLa mitochondria                             |
| nuclear speckles            | A-431     | nuclear s                              | U-251 MG nuclear speckles                     |
| cytosol                     | A-431     | cytosol                                |                                               |
| nucleoplasm, nucleoli fibr  | A-431     | nucleopla                              | U-251 MG nucleoplasm                          |
| nucleoplasm, cytosol        | A-431     | nucleopla                              | U-251 MG nucleoplasm, cytosol                 |
| nucleoplasm                 | U-2 OS    | nucleopla                              | HEK 293 nucleoplasm                           |
| mitochondria                | U-251 MG  | mitochondria                           | HEK 293 mitochondria, rods & rings            |
| nuclear speckles            | A549      | nuclear speckles                       |                                               |
| nuclear bodies              | A-431     | nucleopla                              | U-251 MG nucleoplasm                          |
| nucleoplasm                 | A-431     | nucleopla                              | U-251 MG nucleoplasm                          |
| nucleoplasm, cytosol        | A-431     | nucleopla                              | HTCEpi nucleoplasm, cytosol                   |
| nucleoplasm, nucleoli, cyt  | A-431     | nucleopla                              | U-251 MG nucleoplasm, nucleoli, cytosol       |
| nucleoli, vesicles          | PC-3      | nucleopla                              | AF22 nucleoplasm, nucleoli                    |
| golgi apparatus             | HaCaT     | golgi apparatus                        |                                               |
| microtubules, cytokinetic   | A-431     | microtubu                              | U-251 MG microtubules, cytosol                |
| vesicles                    |           |                                        |                                               |
| plasma membrane             | PC-3      | plasma membrane                        |                                               |



|                            |          |                                                           |                                        |
|----------------------------|----------|-----------------------------------------------------------|----------------------------------------|
| plasma membrane            |          |                                                           |                                        |
| nuclear speckles, cytosol  | A-431    | nuclear sU-251 MG                                         | nuclear speckles, cytosol              |
| nucleoli                   | A-431    | nucleoplaU-251 MG                                         | nucleoplasm, nucleoli, cytosol         |
| vesicles                   | A-431    | vesicles U-251 MG                                         | vesicles                               |
| vesicles                   | U-251 MG | vesicles PC-3                                             | vesicles                               |
| mitochondria               | A-431    | mitochondU-251 MG                                         | mitochondria                           |
| nucleoplasm, endoplasmic r | A-431    | nucleoplaU-251 MG                                         | nucleoplasm, cytosol                   |
| cell junctions             |          |                                                           |                                        |
| mitochondria, cytosol      | A-431    | mitochondU-251 MG                                         | mitochondria, cytosol                  |
| centrosome                 | U-251 MG | centrosome                                                |                                        |
| centrosome                 | U-251 MG | centrosomHeLa                                             | centrosome                             |
| focal adhesion sites       | Hep G2   | golgi appASC TERT1                                        | plasma membrane, focal adhesion sites  |
| nucleoplasm                | A-431    | nucleoplaU-251 MG                                         | nucleoplasm                            |
| nucleoplasm                | A-431    | nucleoplaU-251 MG                                         | nucleoplasm                            |
| nucleoplasm                | A-431    | nucleoplaU-251 MG                                         | nucleoplasm                            |
| vesicles                   | A-431    | vesicles                                                  |                                        |
| microtubules, cytokinetic  | U-2 OS   | microtubules, cytokinetic bridge                          |                                        |
| nucleoplasm                | A-431    | nucleoplaMCF7                                             | nucleoplasm                            |
| mitochondria               | A-431    | mitochondU-251 MG                                         | mitochondria                           |
| mitochondria, cytosol      | A-431    | cytosol U-251 MG                                          | cytosol                                |
| nucleoplasm                | A-431    | nucleoplaU-251 MG                                         | nucleoplasm                            |
| nucleoplasm, plasma membr  | A-431    | nucleoplaU-251 MG                                         | nucleoplasm                            |
| nucleoplasm, mitochondria  | A-431    | nucleoplasm, mitochondria, cytosol                        |                                        |
| vesicles                   |          |                                                           |                                        |
| nucleoplasm                | A-431    | nucleoplaU-251 MG                                         | nucleoplasm, mitochondria              |
| nucleoplasm                | RH-30    | nucleoplasm, centriolar satellite                         |                                        |
| endoplasmic reticulum      | A-431    | endoplasmU-251 MG                                         | endoplasmic reticulum                  |
| endoplasmic reticulum, ves | A-431    | endoplasmU-251 MG                                         | endoplasmic reticulum, vesicles        |
| centrosome, cytosol        | A-431    | cytosol U-251 MG                                          | cytosol                                |
| cytosol                    | A-431    | cytosol U-251 MG                                          | cytosol                                |
| nucleoplasm                | MCF7     | nucleoplaHep G2                                           | nucleoplasm                            |
| cytosol                    | RH-30    | cytosol                                                   |                                        |
| nucleoplasm                | RH-30    | nucleoplasm                                               |                                        |
| nucleoplasm, nuclear bodie | A-431    | nucleoplaU-251 MG                                         | nucleoplasm, nuclear bodies            |
| nucleoplasm                | RH-30    | nucleoplasm                                               |                                        |
| nucleoplasm                | U-251 MG | nucleoplaBJ                                               | nucleoplasm                            |
| nucleoplasm, vesicles      | SH-SY5Y  | nucleoplasm, vesicles, cytosol                            |                                        |
| endoplasmic reticulum      | REH      | endoplasmic reticulum                                     |                                        |
| nucleoli fibrillar center  | HEK 293  | nucleoli fibrillar center, endoplasmic reticulum, cytosol |                                        |
| nucleoplasm, mitochondria  | A-431    | mitochondU-251 MG                                         | nucleoplasm, mitochondria              |
| nucleoplasm                | A-431    | nucleoplaU-251 MG                                         | nucleoplasm                            |
| nuclear bodies             | U-2 OS   | nuclear bPC-3                                             | nuclear bodies                         |
| centrosome                 | A-431    | centrosome                                                |                                        |
| nuclear speckles           |          |                                                           |                                        |
| mitochondria, cytosol      | U-251 MG | mitochondria, cytosol                                     |                                        |
| plasma membrane, cytosol   |          |                                                           |                                        |
| nucleoplasm, nuclear bodie | REH      | plasma membrane                                           |                                        |
| microtubules, cytosol      | A-431    | cytosol U-251 MG                                          | microtubules, centriolar satellite, cy |
| mitochondria               | U-2 OS   | mitochondPC-3                                             | mitochondria                           |
| nucleoplasm                |          |                                                           |                                        |
| plasma membrane, cytosol   | A-431    | golgi appU-251 MG                                         | golgi apparatus, cytosol               |
| plasma membrane, cytosol   | A-431    | golgi appU-251 MG                                         | plasma membrane, cytosol               |
| nucleoplasm                | A-431    | nucleoplaU-251 MG                                         | nucleoplasm                            |
| nucleoplasm, golgi apparat | U-251 MG | nucleoplasm, cytosol                                      |                                        |
| nuclear speckles           | MCF7     | nuclear sHEK 293                                          | nuclear speckles                       |

|                             |          |                                          |                                        |
|-----------------------------|----------|------------------------------------------|----------------------------------------|
| nuclear speckles            | MCF7     | nuclear speckles                         |                                        |
| cytosol                     | A-431    | cytosol                                  | U-251 MG cytosol                       |
| cytosol                     |          |                                          |                                        |
| nucleoplasm, cytosol        | A-431    | nucleoplaU-251 MG                        | nucleoplasm, cytosol                   |
| focal adhesion sites        | RH-30    | focal adhSK-MEL-30                       | nucleoplasm, cytosol                   |
| nucleoplasm, actin filamer  | A-431    | nucleoplaU-251 MG                        | nucleoplasm                            |
| nucleoplasm                 | A-431    | nucleoplaU-251 MG                        | nucleoplasm                            |
| actin filaments, cytosol    | A-431    | actin filU-251 MG                        | actin filaments, cytosol               |
| nucleoli, endoplasmic reti  | A-431    | nucleoli, U-251 MG                       | nucleoli, endoplasmic reticulum, cytos |
| nucleoplasm, plasma membræ  | A-431    | nucleoplaU-251 MG                        | nucleoplasm, plasma membrane, cytosol  |
| vesicles                    | A-431    | vesicles PC-3                            | vesicles                               |
| nucleoplasm, cytosol        | A-431    | nucleoplaU-251 MG                        | nuclear speckles, cytosol              |
| nucleoli, cytosol           | A-431    | nucleoli, U-251 MG                       | nucleoli, cytosol                      |
| nucleoplasm                 | A-431    | nucleoplaPC-3                            | nucleoplasm                            |
| nucleoplasm, cytosol        | MCF7     | nucleoplasm                              |                                        |
| nucleoplasm, plasma membræ  | SiHa     | nucleoplaHaCaT                           | nucleoplasm, plasma membrane           |
| nucleoplasm, cytosol        | SiHa     | nucleoplaHaCaT                           | nucleoplasm, cytoplasmic bodies        |
| nucleoplasm, mitochondria   | A-431    | nucleoplaU-251 MG                        | nucleoplasm                            |
| actin filaments, midbody    | A-431    | actin filaments                          |                                        |
| nucleoli, actin filaments   | A-431    | nucleoli, U-251 MG                       | nucleoli, cytosol                      |
| nuclear speckles            | Hep G2   | nuclear sPC-3                            | nuclear speckles, vesicles, plasma mem |
| nucleoplasm, plasma membræ  | A-431    | nucleoplaU-251 MG                        | nucleoplasm, cytosol                   |
| nucleoplasm, cytosol        | A-431    | nucleoplaU-251 MG                        | nucleoplasm                            |
| nucleoli                    | RH-30    | nucleoli HaCaT                           | nucleoli                               |
| nucleoplasm, nuclear bodiæ  | A-431    | nucleoplaU-251 MG                        | nucleoplasm, nuclear bodies            |
| nucleoplasm                 | A549     | nucleoplaPC-3                            | nucleoplasm                            |
| nucleoplasm                 | A-431    | nucleoplaU-251 MG                        | nucleoplasm                            |
| nucleoplasm                 | SH-SY5Y  | nucleoplaPC-3                            | nucleoplasm                            |
| mitochondria                | HEK 293  | mitochondSK-MEL-30                       | mitochondria                           |
| golgi apparatus             |          |                                          |                                        |
| golgi apparatus             |          |                                          |                                        |
| plasma membrane, cytosol    | A-431    | plasma meU-251 MG                        | cytosol                                |
| nucleoplasm                 | SiHa     | nucleoplasm, nuclear membrane            |                                        |
| mitochondria                | U-251 MG | vesicles                                 |                                        |
| mitochondria                | U-251 MG | golgi appHeLa                            | golgi apparatus                        |
| nucleoplasm, cytosol        | PC-3     | nucleoplasm, cytosol                     |                                        |
| vesicles                    | A-431    | vesicles U-251 MG                        | vesicles                               |
| vesicles                    | HeLa     | vesicles                                 |                                        |
| nucleoplasm                 | U-251 MG | nucleoplaPC-3                            | nucleoplasm                            |
| nucleoplasm, cytosol        | PC-3     | nucleoplasm, cytosol                     |                                        |
| vesicles                    | A-431    | vesicles U-251 MG                        | vesicles                               |
| vesicles                    | A-431    | vesicles U-251 MG                        | vesicles, microtubules                 |
| mitochondria                | MCF7     | mitochondria                             |                                        |
| vesicles                    | A-431    | vesicles U-251 MG                        | vesicles                               |
| endosomes, lysosomes        | A-431    | endosomesU-251 MG                        | endosomes, lysosomes                   |
| plasma membrane             | BJ       | plasma membrane                          |                                        |
| golgi apparatus, vesicles   | HeLa     | nucleoplaSiHa                            | nuclear bodies, golgi apparatus, vesic |
| mitochondria, cytosol       | A-431    | mitochondria, cytosol                    |                                        |
| nucleoli fibrillar center   | U-251 MG | nucleoli fibrillar center                |                                        |
| nuclear membrane            | U-251 MG | nuclear membrane, intermediate filaments |                                        |
| nucleoplasm                 | U-251 MG | nucleoplasm                              |                                        |
| nucleoplasm                 | Hep G2   | nucleoplasm                              |                                        |
| plasma membrane, actin fila | A-431    | plasma meU-251 MG                        | plasma membrane, actin filaments       |
| plasma membrane, actin filU | U-251 MG | plasma membrane, actin filaments         |                                        |
| nucleoplasm, cytosol        |          |                                          |                                        |

|                                     |          |                                |                                          |
|-------------------------------------|----------|--------------------------------|------------------------------------------|
| cytosol                             | U-251 MG | cytosol HEK 293                | cytosol                                  |
| nucleoplasm, nuclear speckles       | U-251 MG | nucleoplasm THP-1              | nucleoplasm, nuclear speckles            |
| golgi apparatus                     |          |                                |                                          |
| cytosol                             | U-251 MG | golgi apparatus HeLa           | cytosol                                  |
| nucleoplasm                         | U-251 MG | nucleoplasm                    |                                          |
| mitochondria                        | PC-3     | mitochondria                   |                                          |
| nucleoplasm, vesicles               | PC-3     | nucleoplasm                    |                                          |
| nucleoplasm, cytosol                | A-431    | nucleoplasm U-251 MG           | nucleoplasm, cytosol                     |
| endoplasmic reticulum, mitochondria | A-431    | mitochondria U-251 MG          | endoplasmic reticulum                    |
| endoplasmic reticulum, vesicles     | A-431    | vesicles U-251 MG              | endoplasmic reticulum, vesicles          |
| mitochondria                        |          |                                |                                          |
| nucleoplasm, nuclear bodies         | RH-30    | nucleoplasm PC-3               | nucleoplasm, cytosol                     |
| nuclear bodies                      | RH-30    | nucleoplasm PC-3               | nucleoplasm, cytosol                     |
| vesicles                            | A-431    | vesicles U-251 MG              | vesicles                                 |
| endosomes, lysosomes                | A-431    | endosomes U-251 MG             | endosomes, lysosomes                     |
| nucleoli                            | U-2 OS   | nucleoli U-251 MG              | nucleoli                                 |
| cytosol                             | SiHa     | cytosol RH-30                  | cytosol                                  |
| centrosome                          | A549     | cytosol                        |                                          |
| cytosol                             | U-251 MG | cytosol                        |                                          |
| nucleoplasm, mitochondria           |          |                                |                                          |
| mitochondria                        | Hep G2   | mitochondria SK-MEL-30         | nucleoplasm, centrosome, mitochondria    |
| nucleoplasm, golgi apparatus        | A549     | nucleoli                       |                                          |
| nucleoplasm, golgi apparatus        | A-431    | nucleoplasm U-251 MG           | nucleoplasm, golgi apparatus             |
| nucleoplasm, cytosol                | A-431    | nucleoplasm U-251 MG           | nucleoplasm, cytosol                     |
| mitochondria, cytosol               | A-431    | mitochondria U-251 MG          | mitochondria, cytosol                    |
| nucleoplasm                         | U-2 OS   | nucleoplasm A-431              | nucleoplasm                              |
| nucleoplasm, vesicles               | U-2 OS   | nucleoplasm SK-MEL-30          | nucleoplasm, vesicles                    |
| nucleoplasm, nuclear membrane       | SH-SY5Y  | nuclear membrane RH-30         | nuclear membrane                         |
| nucleoplasm, endoplasmic reticulum  | Hep G2   | nucleoplasm SiHa               | nucleoplasm, endoplasmic reticulum       |
| nucleoplasm, golgi apparatus        | A-431    | nucleoplasm U-251 MG           | nucleoplasm, golgi apparatus             |
| nucleoplasm, cytosol                | A-431    | nucleoplasm U-251 MG           | nucleoplasm, cytosol                     |
| nucleoplasm, cytosol                | A-431    | nucleoplasm U-251 MG           | nucleoplasm, cytosol                     |
| cytosol                             | A-431    | golgi apparatus U-251 MG       | plasma membrane, cytosol                 |
| nucleoplasm, plasma membrane        | A-431    | plasma membrane U-251 MG       | nucleoplasm, plasma membrane, cytosol    |
| cytosol                             | A-431    | cytosol U-251 MG               | cytosol                                  |
| endoplasmic reticulum               | A-431    | endoplasmic reticulum U-251 MG | endoplasmic reticulum                    |
| nuclear speckles                    | MCF7     | nuclear speckles PC-3          | nuclear speckles                         |
| nucleoplasm, nuclear bodies         | A-431    | nucleoplasm U-251 MG           | nucleoplasm, nuclear bodies, cytosol     |
| nucleoplasm                         | HEK 293  | nucleoplasm PC-3               | nucleoplasm                              |
| cytosol                             | A-431    | cytosol U-251 MG               | cytosol                                  |
| vesicles                            | A-431    | vesicles U-251 MG              | nucleoplasm, vesicles, centrosome        |
| vesicles                            | A-431    | vesicles U-251 MG              | vesicles                                 |
| cell junctions                      | PC-3     | nucleoplasm, plasma membrane   |                                          |
| vesicles                            | A-431    | vesicles U-251 MG              | vesicles                                 |
| endoplasmic reticulum               | PC-3     | endoplasmic reticulum          |                                          |
| golgi apparatus                     | Hep G2   | golgi apparatus                |                                          |
| nuclear membrane, plasma membrane   | A-431    | nuclear membrane U-251 MG      | nuclear membrane, plasma membrane, actin |
| mitochondria                        | A-431    | mitochondria U-251 MG          | mitochondria                             |
| cytosol                             | U-251 MG | cytosol                        |                                          |
| cytosol                             | A-431    | cytosol U-251 MG               | cytosol                                  |
| cytosol                             | A-431    | cytosol U-251 MG               | nucleoli fibrillar center, cytosol       |
| golgi apparatus                     | RH-30    | golgi apparatus BJ             | vesicles                                 |
| nucleoplasm                         | A-431    | nucleoplasm U-251 MG           | nucleoplasm                              |
| nucleoplasm                         | A-431    | nucleoplasm HeLa               | nucleoplasm                              |
| nucleoplasm                         | A-431    | nucleoplasm HeLa               | nucleoplasm                              |

|                                           |           |                                        |          |                                             |
|-------------------------------------------|-----------|----------------------------------------|----------|---------------------------------------------|
| nucleoplasm, mitochondria                 | A-431     | nucleoplasm                            | U-251 MG | nucleoplasm, mitochondria                   |
| cytosol                                   | REH       | cytosol                                | NB-4     | plasma membrane, cytosol                    |
| endoplasmic reticulum                     | BJ        | vesicles                               |          |                                             |
| intermediate filaments                    | A-431     | cytosol                                | U-251 MG | intermediate filaments, cytosol             |
| cytosol                                   | A-431     | cytosol                                | U-251 MG | cytosol                                     |
| cytosol                                   | RH-30     | cytosol                                | HUVEC    | TERcytosol                                  |
| endoplasmic reticulum                     | U-2 OS    | endoplasmic                            | PC-3     | endoplasmic reticulum                       |
| nucleoplasm, nuclear membrane             | MCF7      | nucleoplasm                            | HeLa     | nucleoplasm, cytosol                        |
| nucleoplasm                               | SK-MEL-30 | nucleoplasm, centrosome                |          |                                             |
| nucleoplasm, vesicles                     | ASC TERT1 | vesicles                               | BJ       | vesicles                                    |
| nucleoplasm, cytosol                      | U-251 MG  | nucleoplasm, cytosol                   |          |                                             |
| nucleoplasm, actin filaments              | U-251 MG  | nucleoplasm                            | Hep G2   | nucleoplasm, actin filaments                |
| nucleoplasm                               | U-2 OS    | nucleoplasm                            | RH-30    | nucleoplasm, nuclear bodies                 |
| nucleoplasm, nucleoli fibrils             | A549      | nucleoplasm, nucleoli fibrillar center |          |                                             |
| nucleoplasm, cytosol                      |           |                                        |          |                                             |
| microtubules                              | A-431     | microtubules                           | U-251 MG | microtubules                                |
| microtubules                              | U-251 MG  | microtubules                           | PC-3     | microtubules                                |
| centrosome                                | RH-30     | centrosome                             | HEL      | nucleoplasm, centrosome                     |
| nucleoplasm, cytosol                      | A-431     | nucleoplasm                            | U-251 MG | nucleoplasm                                 |
| mitochondria                              | Hep G2    | mitochondria                           |          |                                             |
| vesicles                                  |           |                                        |          |                                             |
| endoplasmic reticulum, vesicles           | SH-SY5Y   | endoplasmic                            | RH-30    | endoplasmic reticulum, vesicles, centrosome |
| mitochondria                              |           |                                        |          |                                             |
| plasma membrane, cytosol                  | A-431     | cytosol                                | U-251 MG | plasma membrane, cytosol                    |
| nucleoplasm, nucleoli                     | A-431     | nucleoplasm, nucleoli                  |          |                                             |
| nucleoplasm, nucleoli, mitochondria       | RH-30     | nucleoplasm, nucleoli                  |          |                                             |
| nucleoplasm, plasma membrane              | BJ        | nucleoplasm, plasma membrane           |          |                                             |
| cell junctions                            | U-251 MG  | plasma membrane                        | BJ       | vesicles                                    |
| endoplasmic reticulum                     |           |                                        |          |                                             |
| nucleoplasm                               | A-431     | nucleoplasm                            | U-251 MG | nucleoplasm                                 |
| mitochondria                              | U-251 MG  | mitochondria                           |          |                                             |
| nucleoplasm, cytosol                      | A-431     | nucleoplasm                            | U-251 MG | nucleoplasm, cytosol                        |
| nucleoplasm, plasma membrane              | MCF7      | nucleoplasm                            | HeLa     | nucleoplasm                                 |
| nucleoplasm                               | A-431     | nucleoplasm                            | HeLa     | nucleoplasm                                 |
| nucleoplasm, cytosol                      | RH-30     | nucleoplasm, cytosol                   |          |                                             |
| nucleoplasm, golgi apparatus              | U-251 MG  | nucleoplasm, golgi apparatus, cytosol  |          |                                             |
| nuclear speckles                          | HEK 293   | nuclear speckles                       |          |                                             |
| golgi apparatus                           |           |                                        |          |                                             |
| nucleoplasm                               | Hep G2    | golgi apparatus                        |          |                                             |
| nucleoplasm                               | A-431     | nucleoplasm                            | U-251 MG | nucleoplasm, cytosol                        |
| cytosol                                   |           |                                        |          |                                             |
| mitochondria                              | A-431     | mitochondria                           |          |                                             |
| mitochondria, cytosol                     | A-431     | mitochondria                           |          |                                             |
| nucleoplasm, cytosol                      | U-251 MG  | nucleoplasm, cytosol                   |          |                                             |
| nucleoplasm, cytosol                      | HeLa      | nucleoplasm, cytosol                   |          |                                             |
| nucleoli                                  | U-251 MG  | nucleoli                               |          |                                             |
| mitochondria                              | A-431     | mitochondria                           | A549     | mitochondria                                |
| mitochondria                              | HEK 293   | mitochondria                           | A549     | mitochondria                                |
| nucleoplasm                               | HeLa      | nucleoplasm                            |          |                                             |
| nucleoplasm                               |           |                                        |          |                                             |
| nucleoplasm, nucleoli, nuclear bodies     | SK-MEL-30 | nuclear bodies                         | hCaT     | nuclear bodies, mitochondria                |
| nucleoplasm                               | A-431     | nucleoplasm                            | U-251 MG | nucleoplasm, cell junctions                 |
| cytosol                                   | HEK 293   | cytosol                                | PC-3     | cytosol                                     |
| nucleoplasm, mitochondria, nuclear bodies | A549      | mitochondria                           | PC-3     | nucleoplasm, vesicles, cytosol              |
| nucleoplasm, nuclear bodies               | U-2 OS    | nucleoplasm                            | HUVEC    | TERnucleoplasm, plasma membrane             |

|                               |           |                                 |                                                 |
|-------------------------------|-----------|---------------------------------|-------------------------------------------------|
| nucleoli                      | U-2 OS    | nucleoli SK-MEL-30              | nucleoli, lipid droplets                        |
| vesicles, centrosome, cytosol | A-431     | centrosom                       | U-251 MG vesicles, centrosome, cytosol          |
| cytosol                       | MCF7      | cytosol                         |                                                 |
| vesicles                      |           |                                 |                                                 |
| nucleoplasm, centrosome       | A-431     | centrosom                       | U-251 MG centrosome                             |
| nucleoplasm, mitochondria     | SH-SY5Y   | nucleopla                       | HUVEC TER nucleoplasm                           |
| endosomes                     | A-431     | endosomes                       | U-251 MG endosomes                              |
| plasma membrane, centrosom    | A-431     | plasma me                       | U-251 MG plasma membrane, centrosome            |
| plasma membrane, cytosol      | A-431     | plasma me                       | U-251 MG plasma membrane, cytosol               |
| nucleoplasm, nuclear bodies   | A-431     | nucleopla                       | K-562 nucleoplasm, nuclear bodies, cytosol      |
| plasma membrane, cytosol      | A-431     | plasma me                       | U-251 MG plasma membrane, cytosol               |
| plasma membrane               | PC-3      | plasma membrane                 |                                                 |
| vesicles, centriolar satel    | SiHa      | vesicles                        |                                                 |
| golgi apparatus               | SiHa      | golgi app                       | EFO-21 golgi apparatus                          |
| golgi apparatus, cytosol      | U-2 OS    | golgi app                       | SiHa golgi apparatus, cytosol                   |
| vesicles, cytosol             | A-431     | vesicles, U-                    | 251 MG vesicles, cytosol                        |
| nucleoplasm, plasma membr     | A-431     | nucleopla                       | U-251 MG nucleoplasm, plasma membrane, cytosol  |
| plasma membrane, cell junc    | A-431     | plasma me                       | U-251 MG cytosol                                |
| golgi apparatus, plasma me    | A-431     | golgi app                       | U-251 MG golgi apparatus, plasma membrane       |
| nucleoplasm, cytosol          | A-431     | nucleopla                       | U-251 MG nucleoplasm, cytosol                   |
| nucleoplasm, actin filamer    | A-431     | nucleopla                       | MCF7 nucleoplasm, actin filaments               |
| endoplasmic reticulum         | A-431     | endoplasm                       | U-251 MG endoplasmic reticulum                  |
| endoplasmic reticulum, gol    | A-431     | endoplasm                       | U-251 MG endoplasmic reticulum, golgi apparatus |
| cytosol                       | A-431     | cytosol U-                      | 251 MG cytosol                                  |
| nucleoplasm                   | RH-30     | nucleoplasm                     |                                                 |
| cytosol                       |           | cytosol U-                      | 251 MG cytosol                                  |
| cytosol                       | A-431     | cytosol U-                      | 251 MG cytosol                                  |
| cytosol                       | A-431     | cytosol U-                      | 251 MG cytosol                                  |
| nucleoplasm                   | PC-3      | nucleoplasm                     |                                                 |
| nucleoplasm                   |           |                                 |                                                 |
| nuclear speckles              | A-431     | nuclear s                       | U-251 MG nuclear speckles                       |
| endoplasmic reticulum         | SH-SY5Y   | endoplasmic reticulum           |                                                 |
| nucleoli                      |           |                                 |                                                 |
| golgi apparatus               | A-431     | golgi apparatus                 |                                                 |
| mitochondria                  | U-2 OS    | mitochond                       | PC-3 mitochondria                               |
| nucleoplasm, cytosol          | U-251 MG  | nucleoplasm, cytosol            |                                                 |
| nucleoplasm, cytosol          | U-2 OS    | nucleopla                       | A-431 nucleoplasm, cytosol                      |
| nucleoplasm, cytosol          | U-2 OS    | nucleopla                       | A-431 nucleoplasm, cytosol                      |
| nucleoplasm                   | Hep G2    | nucleoplasm                     |                                                 |
| nucleoplasm                   |           |                                 |                                                 |
| centrosome                    | MCF7      | centrosom                       | SiHa centrosome                                 |
| endoplasmic reticulum         |           |                                 |                                                 |
| cytosol                       | Hep G2    | cytosol                         |                                                 |
| plasma membrane, microtubu    | Hep G2    | plasma membrane                 |                                                 |
| nucleoplasm, cytosol          | SH-SY5Y   | nucleopla                       | SiHa nucleoplasm                                |
| vesicles                      | A-431     | vesicles U-                     | 251 MG vesicles                                 |
| vesicles                      | A-431     | vesicles U-                     | 251 MG vesicles                                 |
| vesicles                      | U-251 MG  | vesicles                        |                                                 |
| plasma membrane, cytosol      | A-431     | plasma me                       | U-251 MG plasma membrane, cytosol               |
| nucleoli                      | A-431     | nucleoli U-                     | 251 MG nucleoli                                 |
| intermediate filaments, cy    | A-431     | intermediate filaments, cytosol |                                                 |
| vesicles                      | SK-MEL-30 | vesicles                        |                                                 |
| nucleoplasm, cytosol          |           |                                 |                                                 |
| nucleoplasm, intermediate     | A-431     | nucleopla                       | U-251 MG nucleoplasm                            |
| nucleoplasm, mitochondria     | HeLa      | nucleopla                       | SiHa nucleoplasm, mitochondria                  |

|                                       |          |                                 |                                       |
|---------------------------------------|----------|---------------------------------|---------------------------------------|
| nucleoplasm                           | A549     | nucleoplasm                     |                                       |
| nucleoplasm                           |          |                                 |                                       |
| vesicles                              | A-431    | vesicles U-251 MG               | vesicles                              |
| vesicles                              | A-431    | vesicles U-251 MG               | vesicles                              |
| nucleoplasm, plasma membræ            | A-431    | nucleoplaU-251 MG               | nucleoplasm, cytosol                  |
| nucleoplasm, plasma membrane, cytosol |          |                                 |                                       |
| cytosol                               | BJ       | cytosol                         |                                       |
| cytosol                               | A-431    | nucleoplasm, cytosol            |                                       |
| nucleoli                              | A-431    | nucleoli, U-251 MG              | nucleoli                              |
| cytosol                               | RH-30    | cytosol                         |                                       |
| nucleoplasm, cytosol                  | A-431    | nucleoplaU-251 MG               | nucleoplasm                           |
| nucleoli                              | A-431    | nucleoli U-251 MG               | nucleoli                              |
| nucleoli                              | A-431    | nucleoli U-251 MG               | nucleoli                              |
| nucleoli                              | A-431    | nucleoli U-251 MG               | nucleoli                              |
| vesicles                              | U-2 OS   | vesicles PC-3                   | vesicles                              |
| nuclear speckles                      | A-431    | nuclear sU-251 MG               | nuclear speckles                      |
| nucleoplasm, golgi apparatus          | U-2 OS   | nucleoplaA-431                  | nucleoplasm, golgi apparatus          |
| golgi apparatus                       | U-2 OS   | golgi appA-431                  | golgi apparatus                       |
| nucleoplasm, plasma membræ            | U-2 OS   | nucleoplaU-251 MG               | nucleoplasm, plasma membrane, cytosol |
| nucleoplasm, golgi apparatus          | HEK 293  | nucleoplaA549                   | nucleoplasm, golgi apparatus          |
| nucleoplasm                           | HEK 293  | nucleoplasm                     |                                       |
| vesicles                              | U-2 OS   | endoplasmHaCaT                  | endoplasmic reticulum, vesicles       |
| nucleoli                              | PC-3     | nucleoplasm, nucleoli, vesicles |                                       |
| vesicles                              | SiHa     | vesicles                        |                                       |
| nucleoplasm                           | U-2 OS   | nucleoplaPC-3                   | nucleoplasm, nucleoli fibrillar cente |
| nucleoplasm                           | A-431    | nucleoplaPC-3                   | nucleoplasm, cytosol                  |
| nucleoplasm, nucleoli, vesicles       | MCF7     | nucleoplaHEK 293                | vesicles                              |
| mitochondria                          | A-431    | mitochondU-251 MG               | mitochondria                          |
| mitochondria                          | A-431    | mitochondU-251 MG               | mitochondria                          |
| nucleoplasm                           | A-431    | nucleoplaU-251 MG               | nucleoplasm                           |
| nucleoplasm, nucleoli                 | A-431    | nucleoplaU-251 MG               | nucleoplasm, nucleoli                 |
| nucleoplasm                           | MCF7     | nucleoplaHEK 293                | nucleoplasm                           |
| nucleoplasm                           | MCF7     | nucleoplasm                     |                                       |
| golgi apparatus                       | A549     | golgi appRPTEC TER              | golgi apparatus                       |
| centrosome                            | U-251 MG | centrosome                      |                                       |
| nucleoplasm, cytosol                  | A-431    | nucleoplaU-251 MG               | nucleoplasm, cytosol                  |
| nucleoplasm                           | A-431    | nucleoplaU-251 MG               | nucleoplasm                           |
| nucleoplasm, cytosol                  | A-431    | nucleoplaU-251 MG               | nucleoplasm                           |
| nucleoplasm                           | A-431    | nucleoplaU-251 MG               | nucleoplasm                           |
| nucleoplasm, nuclear bodiæ            | A-431    | nucleoplaSK-MEL-30              | nucleoplasm                           |
| nucleoplasm, cytosol                  | A-431    | nucleoplaU-251 MG               | nucleoplasm, cytosol                  |
| nucleoplasm, nucleoli                 | A-431    | nucleoplaU-251 MG               | nucleoplasm, nucleoli                 |
| centrosome                            | A-431    | centrosomU-251 MG               | centrosome                            |
| mitochondria                          | A-431    | mitochondU-251 MG               | mitochondria                          |
| mitochondria                          | MCF7     | mitochondHEK 293                | mitochondria                          |
| cytosol                               | MCF7     | cytosol                         |                                       |
| plasma membrane                       | Hep G2   | cytosol                         |                                       |
| cytosol                               | Hep G2   | cytosol                         |                                       |
| nucleoplasm, cytosol                  | A-431    | nucleoplaHEK 293                | nucleoplasm, cytosol                  |
| centrosome                            | U-251 MG | nucleoplasm, centrosome         |                                       |
| cytosol                               | A-431    | cytosol U-251 MG                | cytosol                               |
| nucleoplasm, nucleoli                 |          |                                 |                                       |
| nucleoplasm                           | MCF7     | nucleoplaHEK 293                | nucleoplasm                           |
| nucleoplasm                           | A-431    | nucleoplaU-251 MG               | nucleoplasm                           |
| nucleoplasm                           | U-251 MG | nucleoplasm                     |                                       |

|                            |           |                                            |                                        |
|----------------------------|-----------|--------------------------------------------|----------------------------------------|
| nucleoplasm, vesicles      | A-431     | nucleoplaU-251 MG                          | nucleoplasm                            |
| cytosol                    | A-431     | cytosol U-251 MG                           | cytosol                                |
| cytosol                    | MCF7      | nucleoplasm                                |                                        |
| cytosol                    |           |                                            |                                        |
| nucleoplasm                | U-2 OS    | nucleoplaBJ                                | nucleoplasm, nuclear bodies            |
| nucleoplasm, mitochondria  | A-431     | nucleoplaU-251 MG                          | nucleoplasm                            |
| nucleoplasm, cytosol       | A-431     | nucleoplaU-251 MG                          | nucleoplasm, plasma membrane, cytosol  |
| plasma membrane, cytosol   | A-431     | nucleoplaU-251 MG                          | nucleoplasm, plasma membrane, cytosol  |
| nucleoplasm, cytosol       | A-431     | nucleoplaU-251 MG                          | nucleoplasm, plasma membrane, cytosol  |
| cytosol                    | A-431     | cytosol U-251 MG                           | cytosol                                |
| cytosol                    | A-431     | nucleoplaHEL                               | nucleoplasm, plasma membrane, cytosol  |
| nucleoli fibrillar center  | A-431     | nucleoli U-251 MG                          | nucleoli fibrillar center, nuclear sp  |
| endoplasmic reticulum      | U-251 MG  | endoplasmic reticulum                      |                                        |
| nuclear speckles           | HeLa      | nuclear sPC-3                              | nucleoli, nuclear speckles, cytosol    |
| nucleoplasm                | A-431     | nucleoplaU-251 MG                          | nucleoplasm                            |
| nucleoplasm, cytosol       | U-2 OS    | nucleoplasm, nucleoli                      |                                        |
| nuclear membrane, cytosol  | A-431     | nuclear rU-251 MG                          | nuclear membrane                       |
| nuclear membrane, cytosol  | A-431     | nuclear rU-251 MG                          | nuclear membrane                       |
| nuclear membrane, nucleoli | A-431     | nuclear rU-251 MG                          | nuclear membrane                       |
| nucleoplasm, cytosol       | A-431     | nucleoplaU-251 MG                          | nucleoplasm, cytosol                   |
| nucleoplasm                | HEK 293   | nucleoplaRH-30                             | nucleoplasm                            |
| nucleoplasm, cytosol       | A-431     | nucleoplaU-251 MG                          | nucleoplasm, cytosol                   |
| nucleoplasm, cytosol       | A-431     | nucleoplasm, nucleoli, cytosol             |                                        |
| nucleoplasm                | A-431     | nucleoplaU-251 MG                          | nucleoplasm                            |
| nucleoplasm                | U-251 MG  | nucleoplaRH-30                             | nucleoplasm                            |
| cytosol                    | A-431     | cytosol U-251 MG                           | plasma membrane, cytosol               |
| vesicles                   |           |                                            |                                        |
| nucleoli, vesicles         | U-251 MG  | vesicles SK-MEL-30                         | vesicles                               |
| nucleoplasm, cytosol       | A-431     | nucleoplaU-251 MG                          | nucleoplasm, golgi apparatus, cytosol  |
| vesicles                   | A-431     | vesicles EFO-21                            | vesicles                               |
| plasma membrane, cytosol   | A-431     | plasma meU-251 MG                          | plasma membrane, cytosol               |
| plasma membrane, cytosol   | A-431     | plasma meU-251 MG                          | plasma membrane, cytosol               |
| vesicles, plasma membrane, | A-431     | vesicles, U-251 MG                         | vesicles, plasma membrane, cytosol     |
| microtubules, cytosol      | A-431     | cytosol U-251 MG                           | cytosol                                |
| nucleoplasm, nucleoli      | MCF7      | nucleoplaHeLa                              | nucleoli, cytosol                      |
| cytosol                    |           |                                            |                                        |
| nucleoplasm                | U-251 MG  | nucleoplasm                                |                                        |
| nuclear speckles, cytosol  | A-431     | nuclear sU-251 MG                          | nucleoli fibrillar center, nuclear sp  |
| microtubules, cytokinetic  | U-2 OS    | vesicles, microtubules                     |                                        |
| cytosol                    | U-251 MG  | cytosol                                    |                                        |
| vesicles                   |           |                                            |                                        |
| nucleoli, plasma membrane  | HEL       | nucleoli, golgi apparatus, plasma membrane |                                        |
| nucleoplasm, cytosol       | A-431     | nucleoplaU-251 MG                          | nucleoplasm, cytosol                   |
| nucleoplasm, cytosol       |           |                                            |                                        |
| nucleoplasm                |           |                                            |                                        |
| nucleoplasm, cytosol       | A-431     | nucleoplaU-251 MG                          | nucleoplasm, cytosol                   |
| nucleoplasm, cytosol       | U-251 MG  | nucleoplasm, cytosol                       |                                        |
| nucleoli, cytosol          | SiHa      | nucleoplaRH-30                             | nucleoplasm, centriolar satellite, cyt |
| cytosol                    | A-431     | nucleoli, U-251 MG                         | cytosol                                |
| nucleoplasm                | SK-MEL-30 | nucleoplasm                                |                                        |
| cytosol                    | A-431     | cytosol U-251 MG                           | cytosol                                |
| nucleoplasm                | U-251 MG  | nuclear bHEK 293                           | nuclear bodies                         |
| cytosol                    | HEK 293   | mitochondria, cytosol                      |                                        |
| nucleoplasm, mitochondria  | A-431     | nucleoplaMCF7                              | nucleoplasm, mitochondria              |
| plasma membrane, cytosol   | U-251 MG  | cytosol                                    |                                        |

|                             |          |                       |                                        |
|-----------------------------|----------|-----------------------|----------------------------------------|
| vesicles                    | A-431    | vesicles              |                                        |
| nucleoplasm                 | A-431    | nucleoplaU-251 MG     | nucleoplasm                            |
| nucleoplasm                 | A-431    | nucleoplaU-251 MG     | nucleoplasm                            |
| vesicles                    | U-251 MG | vesicles Hep G2       | vesicles                               |
| vesicles, mitochondria      |          |                       |                                        |
| mitochondria                | A-431    | mitochondU-251 MG     | mitochondria                           |
| golgi apparatus             | A549     | golgi appRH-30        | golgi apparatus                        |
| cytosol                     | A-431    | cytosol U-251 MG      | cytosol                                |
| cytosol                     | MCF7     | cytosol PC-3          | vesicles, cytosol                      |
| nucleoplasm, cytosol        | MCF7     | nucleoplaHEK 293      | nucleoplasm, cytosol                   |
| nucleoli, cytosol           | MCF7     | nucleoli, A549        | nucleoli, golgi apparatus, cytosol     |
| cytosol                     | A-431    | cytosol U-251 MG      | cytosol                                |
| nucleoplasm, nucleoli, cyto | A-431    | nucleoplaMCF7         | nucleoplasm, nucleoli                  |
| nucleoplasm                 | A549     | nucleoplaHaCaT        | nucleoplasm                            |
| nucleoli, vesicles          | A549     | nucleoli SiHa         | nucleoli, golgi apparatus, vesicles    |
| cytosol                     |          |                       |                                        |
| intermediate filaments      | U-2 OS   | actin filmMCF7        | intermediate filaments, cytosol        |
| nuclear speckles            | MCF7     | nuclear sPC-3         | nuclear speckles                       |
| nucleoplasm, vesicles       | A-431    | nucleoplaSH-SY5Y      | nucleoplasm, vesicles, aggresome       |
| nucleoplasm, nucleoli, micr | A-431    | nucleoplaU-251 MG     | nucleoplasm, microtubules              |
| nucleoplasm, vesicles       | PC-3     | nucleoplasm, vesicles |                                        |
| mitochondria                | A-431    | mitochondU-251 MG     | mitochondria                           |
| nucleoplasm                 | A-431    | nucleoplaU-251 MG     | nucleoplasm                            |
| nucleoplasm                 | SiHa     | nucleoplaRPTEC TER    | nucleoplasm                            |
| nucleoli, cytosol           | U-251 MG | nucleoli, cytosol     |                                        |
| vesicles                    | A-431    | vesicles Hep G2       | vesicles                               |
| mitochondria                | PC-3     | mitochondria          |                                        |
| nucleoplasm                 | A-431    | nucleoplaU-251 MG     | nucleoplasm                            |
| nucleoplasm                 | MCF7     | nucleoplaHEK 293      | nucleoplasm, vesicles                  |
| mitochondria                |          |                       |                                        |
| mitochondria                | A-431    | mitochondU-251 MG     | mitochondria                           |
| nucleoli fibrillar center   | HeLa     | golgi appSiHa         | golgi apparatus                        |
| nucleoplasm                 | A-431    | nucleoplaMCF7         | nucleoplasm                            |
| nucleoplasm                 |          |                       |                                        |
| cytosol                     | A-431    | cytosol U-251 MG      | cytosol                                |
| nucleoplasm, cytosol        | A-431    | nucleoplaU-251 MG     | nucleoplasm, cytosol                   |
| nucleoplasm                 | SiHa     | nucleoplasm           |                                        |
| nucleoplasm, microtubules,  | A-431    | nucleoplaHaCaT        | nucleoplasm, microtubules, cytokinetic |
| nucleoplasm, vesicles       | A-431    | nucleoplaU-251 MG     | nucleoplasm, vesicles                  |
| golgi apparatus, vesicles   | A-431    | golgi appU-251 MG     | vesicles                               |
| golgi apparatus             | SiHa     | golgi apparatus       |                                        |
| nucleoplasm, vesicles       | BJ       | nucleoplasm           |                                        |
| cytosol                     | A-431    | nucleoplaU-251 MG     | nucleoplasm, cytosol                   |
| cytosol                     | A-431    | cytosol U-251 MG      | cytosol                                |
| nuclear speckles            | A-431    | nuclear sU-251 MG     | nuclear speckles, cytosol              |
| vesicles                    | MCF7     | vesicles              |                                        |
| focal adhesion sites        | U-251 MG | cell junctions        |                                        |
| plasma membrane, focal ad   | A-431    | plasma meU-251 MG     | plasma membrane, focal adhesion sites  |
| nucleoplasm, plasma membr   | A-431    | nucleoplaU-251 MG     | nucleoplasm, plasma membrane, cytosol  |
| nucleoplasm, cytosol        | HEK 293  | nucleoplaA549         | nucleoplasm, cytosol                   |
| nucleoplasm, plasma membr   | A-431    | nucleoplaA549         | nucleoplasm                            |
| vesicles                    | U-2 OS   | vesicles A-431        | vesicles, cytosol                      |
| cytosol                     | A-431    | cytosol U-251 MG      | cytosol                                |
| nucleoplasm, cell junctio   | A549     | nucleoplaHep G2       | nucleoplasm, cell junctions            |
| vesicles, plasma membrane   |          |                       |                                        |



|                                    |           |                                                |                                        |
|------------------------------------|-----------|------------------------------------------------|----------------------------------------|
| nucleoplasm, nucleoli              | A549      | nucleoplaPC-3                                  | nucleoplasm, nucleoli                  |
| cytosol                            | HeLa      | cytosol                                        |                                        |
| nuclear bodies                     | SK-MEL-30 | nuclear bodies                                 |                                        |
| nuclear bodies                     | U-251 MG  | nuclear bA549                                  | nucleoplasm, nuclear bodies            |
| nuclear bodies                     | A-431     | nucleoplaU-251 MG                              | nuclear bodies                         |
| cytosol                            | A-431     | cytosol U-251 MG                               | cytosol                                |
| cytosol                            | A-431     | cytosol U-251 MG                               | cytosol                                |
| nucleoli, cytosol                  | A-431     | nucleoli, U-251 MG                             | nucleoli, cytosol                      |
| nuclear membrane                   | A-431     | nuclear rU-251 MG                              | nuclear membrane                       |
| nucleoplasm, nuclear bodies        | HaCaT     | nucleoplasm, nuclear bodies                    |                                        |
| nucleoplasm                        | A-431     | nucleoplaU-251 MG                              | nucleoplasm                            |
| nucleoplasm                        | U-2 OS    | nucleoplaHEK 293                               | nucleoplasm                            |
| vesicles                           | A-431     | vesicles U-251 MG                              | nucleoplasm, cytosol                   |
| nucleoplasm, cytosol               | A549      | nucleoplasm, cytosol                           |                                        |
| nucleoplasm, cytosol               | A549      | nucleoplasm, cytosol                           |                                        |
| endoplasmic reticulum              | A-431     | endoplasmU-251 MG                              | endoplasmic reticulum                  |
| endoplasmic reticulum              | A-431     | endoplasmU-251 MG                              | endoplasmic reticulum                  |
| vesicles                           | U-2 OS    | vesicles                                       |                                        |
| vesicles                           | HaCaT     | vesicles                                       |                                        |
| vesicles                           | A-431     | nucleoplaU-251 MG                              | nucleoplasm, vesicles                  |
| plasma membrane, cytosol           | A549      | plasma mehTCEpi                                | plasma membrane, cell junctions        |
| nucleoplasm, cytosol               | U-2 OS    | nucleoplasm, cytosol                           |                                        |
| nucleoplasm, vesicles              | SH-SY5Y   | nucleoplaSK-MEL-30                             | nucleoplasm, vesicles                  |
| centrosome                         | A-431     | centrosomU-251 MG                              | centrosome                             |
| plasma membrane, actin filU-251 MG |           | plasma membrane, cytosol                       |                                        |
| plasma membrane, cytosol           | U-251 MG  | cytosol A549                                   | plasma membrane, cytosol               |
| cytosol                            | REH       | mitotic spindle, centriolar satellite, cytosol |                                        |
| nuclear speckles                   | MCF7      | nucleoli HEK 293                               | nuclear speckles                       |
| nuclear speckles                   | SH-SY5Y   | nuclear sSK-MEL-30                             | nuclear speckles, cytoplasmic bodies   |
| mitochondria                       | A-431     | mitochondria                                   |                                        |
| cytosol                            | HEL       | nucleoplasm, nuclear bodies, cytosol           |                                        |
| cytosol                            | A549      | nucleoplasm, cytosol                           |                                        |
| nuclear speckles                   | HEK 293   | nuclear speckles                               |                                        |
| nucleoplasm                        |           |                                                |                                        |
| nucleoplasm                        | RH-30     | nucleoplaHAP1                                  | nucleoplasm, cytosol                   |
| nucleoplasm, golgi apparatus       | U-2 OS    | nucleoplaHep G2                                | nucleoplasm, golgi apparatus           |
| nucleoplasm, vesicles              | A-431     | nucleoplaHaCaT                                 | nucleoplasm, vesicles, cytosol         |
| mitochondria                       | A-431     | mitochondU-251 MG                              | mitochondria                           |
| mitochondria                       | A-431     | mitochondU-251 MG                              | nucleoplasm, mitochondria              |
| mitochondria                       | REH       | mitochondNB-4                                  | mitochondria                           |
| mitochondria                       | REH       | mitochondNB-4                                  | mitochondria                           |
| lipid droplets                     | U-251 MG  | nucleoplasm, lipid droplets                    |                                        |
| cytosol                            | PC-3      | nucleoplaSK-MEL-30                             | nucleoplasm, cytosol                   |
| nucleoplasm                        | A-431     | nucleoplaU-251 MG                              | nucleoplasm                            |
| nucleoplasm                        | A-431     | nucleoplaU-251 MG                              | nucleoplasm                            |
| nucleoplasm, cytosol               | A-431     | nucleoplaU-251 MG                              | nucleoplasm, cytosol                   |
| nucleoplasm, golgi apparatus       | A-431     | nucleoplaU-251 MG                              | nucleoplasm, vesicles                  |
| nuclear speckles, cytosol          | A-431     | nuclear sU-251 MG                              | nuclear speckles, plasma membrane, cyt |
| plasma membrane                    | U-2 OS    | nucleoli, A549                                 | nucleoplasm, nucleoli                  |
| golgi apparatus                    |           |                                                |                                        |
| nucleoplasm                        | HeLa      | nucleoplaPC-3                                  | nucleoplasm                            |
| nucleoplasm                        |           |                                                |                                        |
| nucleoplasm, vesicles              | A-431     | nucleoplaU-251 MG                              | nucleoplasm, vesicles                  |
| nucleoplasm, vesicles, cyto        | A-431     | nucleoplaU-251 MG                              | nucleoplasm                            |
| endoplasmic reticulum              | Hep G2    | endoplasmic reticulum                          |                                        |

|                                       |          |                                   |                                 |
|---------------------------------------|----------|-----------------------------------|---------------------------------|
| nucleoli, endoplasmic reticulum       | U-2 OS   | nucleoli, PC-3                    | nucleoli, endoplasmic reticulum |
| nucleoplasm, cell junctions           |          |                                   |                                 |
| nucleoplasm                           | U-251 MG | nucleoplasm                       |                                 |
| centrosome                            | RH-30    | centrosome                        |                                 |
| nucleoplasm, cytosol                  | U-251 MG | nucleoplasm, cytosol              |                                 |
| plasma membrane                       |          |                                   |                                 |
| nucleoplasm, cytosol                  | HEK 293  | nucleoplasm                       |                                 |
| nucleoplasm, cytosol                  | HEK 293  | nucleoplasm, cytosol              |                                 |
| nucleoplasm, cell junctions           |          |                                   |                                 |
| golgi apparatus                       | A-431    | golgi apparatus                   |                                 |
| nucleoplasm                           | U-251 MG | nucleoplasm                       |                                 |
| nucleoplasm                           | PC-3     | nucleoplasm                       |                                 |
| nucleoplasm, cytoplasmic bodies       | SiHa     | nucleoplasm, cytoplasmic bodies   |                                 |
| nucleoplasm, cytosol                  | U-251 MG | nucleoplasm, cytosol              |                                 |
| golgi apparatus, focal adhesion sites | U-251 MG | golgi apparatus                   |                                 |
| nucleoplasm, plasma membrane          | PC-3     | plasma membrane                   |                                 |
| nucleoplasm                           | MCF7     | nucleoplasm                       |                                 |
| nucleoplasm, cytosol                  | HaCaT    | nucleoplasm                       |                                 |
| nucleoplasm, nucleoli                 | HeLa     | nucleoplasm, nucleoli             |                                 |
| focal adhesion sites                  | U-251 MG | focal adhesion sites              |                                 |
| nucleoplasm, cytosol                  | U-251 MG | nucleoplasm, cytosol              |                                 |
| mitochondria                          | A-431    | mitochondria                      |                                 |
| nuclear speckles, cytosol             | A-431    | nuclear speckles, cytosol         |                                 |
| centriolar satellite, cytosol         |          |                                   |                                 |
| centrosome                            |          |                                   |                                 |
| nucleoplasm                           | A-431    | nucleoplasm                       |                                 |
| vesicles, plasma membrane             | SiHa     | vesicles, plasma membrane         |                                 |
| mitochondria                          | A-431    | mitochondria                      |                                 |
| cytosol                               | A-431    | cytosol                           |                                 |
| cytosol                               | A-431    | cytosol                           |                                 |
| mitochondria                          | A549     | mitochondria                      |                                 |
| mitochondria                          | A549     | mitochondria                      |                                 |
| nuclear bodies                        | PC-3     | nuclear bodies                    |                                 |
| nucleoplasm, nucleoli, cytosol        | A-431    | nucleoplasm, nucleoli, cytosol    |                                 |
| mitochondria                          |          |                                   |                                 |
| mitochondria                          | MCF7     | mitochondria                      |                                 |
| vesicles, plasma membrane             | A-431    | vesicles, plasma membrane         |                                 |
| cytosol                               | A-431    | cytosol                           |                                 |
| nucleoplasm                           | U-2 OS   | nucleoplasm                       |                                 |
| vesicles                              | A549     | vesicles                          |                                 |
| nucleoplasm, nucleoli                 | A-431    | nucleoplasm, nucleoli             |                                 |
| nucleoplasm, cytosol                  | HeLa     | nucleoplasm, cytosol              |                                 |
| cytosol                               | A549     | cytosol                           |                                 |
| cytosol                               | A-431    | cytosol                           |                                 |
| nucleoplasm, cytosol                  | A-431    | nucleoplasm, cytosol              |                                 |
| nucleoplasm, cytosol                  | A-431    | nucleoplasm, cytosol              |                                 |
| mitochondria                          | A-431    | mitochondria                      |                                 |
| mitochondria                          | A-431    | mitochondria                      |                                 |
| nucleoplasm, plasma membrane, cytosol |          |                                   |                                 |
| nucleoplasm                           | A-431    | nucleoplasm                       |                                 |
| nucleoplasm                           | A-431    | nucleoplasm                       |                                 |
| nucleoplasm                           | REH      | nucleoplasm                       |                                 |
| nucleoplasm, focal adhesion sites     | A-431    | nucleoplasm, focal adhesion sites |                                 |
| mitochondria                          | A-431    | mitochondria                      |                                 |
| nucleoplasm                           |          |                                   |                                 |

|                                                  |           |                               |                                        |
|--------------------------------------------------|-----------|-------------------------------|----------------------------------------|
| nucleoplasm                                      | A-431     | nucleoplaU-251 MG             | nucleoplasm                            |
| nucleoplasm, nucleoli                            | U-2 OS    | nucleoplaU-251 MG             | nucleoplasm, nucleoli                  |
| nucleoplasm, nucleoli                            | RH-30     | nucleoplaPC-3                 | nucleoplasm, nucleoli                  |
| centriolar satellite                             |           |                               |                                        |
| nucleoplasm                                      | MCF7      | nucleoplasm                   |                                        |
| nucleoplasm                                      | A-431     | nucleoplaU-251 MG             | nucleoplasm                            |
| nucleoplasm                                      | MCF7      | nucleoplaHEK 293              | nucleoplasm                            |
| nucleoplasm                                      | SiHa      | nucleoplaPC-3                 | nucleoplasm                            |
| microtubules, mitochondria                       | A-431     | microtubuU-251 MG             | microtubules                           |
| cytosol                                          | U-251 MG  | cytosol                       |                                        |
| endoplasmic reticulum                            | A-431     | endoplasrU-251 MG             | endoplasmic reticulum                  |
| endoplasmic reticulum                            | A-431     | endoplasrU-251 MG             | endoplasmic reticulum                  |
| nucleoplasm                                      | A-431     | nucleoplaU-251 MG             | nucleoplasm                            |
| nucleoplasm, nucleoli, plasma                    | HUVEC TER | nucleoplasm, plasma           | membrane                               |
| cytosol                                          | A-431     | centriolaU-251 MG             | mitochondria, cytosol                  |
| vesicles                                         |           |                               |                                        |
| vesicles                                         | U-2 OS    | vesicles PC-3                 | nucleoplasm, vesicles                  |
| nucleoplasm, nuclear membr                       | A-431     | nucleoplaMCF7                 | nucleoplasm, nuclear membrane          |
| nucleoplasm, nucleoli, cyto                      | A-431     | nucleoplaU-251 MG             | nucleoplasm, nucleoli                  |
| nucleoplasm                                      | A-431     | nucleoplaPC-3                 | nucleoplasm                            |
| nucleoplasm                                      | A-431     | nucleoplaPC-3                 | nucleoplasm                            |
| plasma membrane, cytosol                         | A-431     | nucleoplaHaCaT                | plasma membrane, cytosol               |
| nucleoplasm, centrosome                          | A-431     | nucleoplaHaCaT                | nucleoplasm, plasma membrane, cytokine |
| nuclear speckles                                 | U-2 OS    | nuclear sSK-MEL-30            | nuclear speckles                       |
| nucleoplasm                                      | U-251 MG  | nucleoplaRH-30                | nucleoplasm, nuclear bodies            |
| centriolar satellite                             | A-431     | centriolaU-251 MG             | nucleoplasm, centriolar satellite, cyt |
| nucleoplasm                                      | A-431     | nucleoplaU-251 MG             | nucleoplasm                            |
| vesicles                                         | A-431     | vesicles                      |                                        |
| nucleoplasm                                      | A-431     | nucleoplaHEK 293              | nucleoplasm, vesicles                  |
| nucleoplasm, vesicles                            |           |                               |                                        |
| nucleoplasm, nuclear bodies, vesicles            |           |                               |                                        |
| intermediate filaments                           |           |                               |                                        |
| cytosol                                          | U-251 MG  | cytosol                       |                                        |
| cytosol                                          | U-251 MG  | cytosol MCF7                  | cytosol                                |
| nucleoplasm                                      | A-431     | nucleoplaU-251 MG             | nucleoplasm                            |
| nucleoplasm                                      | A-431     | nucleoplaU-251 MG             | nucleoplasm, cytosol                   |
| mitochondria                                     | RH-30     | nucleoplaSK-MEL-30            | nucleoplasm, cytosol                   |
| vesicles, focal adhesion s                       | SH-SY5Y   | vesicles BJ                   | focal adhesion sites, cytosol          |
| mitochondria                                     | A-431     | mitochondU-251 MG             | mitochondria                           |
| vesicles                                         | HEK 293   | vesicles, PC-3                | microtubules                           |
| endoplasmic reticulum                            | A-431     | endoplasrU-251 MG             | endoplasmic reticulum                  |
| endoplasmic reticulum                            | A-431     | endoplasrU-251 MG             | endoplasmic reticulum                  |
| nucleoplasm, cytosol                             | A-431     | nucleoplaU-251 MG             | nucleoplasm, cytosol                   |
| cytosol                                          | A-431     | cytosol U-251 MG              | cytosol                                |
| nucleoplasm, cytosol                             | U-251 MG  | nucleoplasm, nuclear membrane |                                        |
| nucleoli fibrillar center, endoplasmic reticulum |           |                               |                                        |
| nucleoplasm, cytosol                             | A-431     | nucleoplasm, cytosol          |                                        |
| nucleoplasm                                      | A-431     | nucleoplaPC-3                 | nucleoplasm                            |
| nucleoplasm, nucleoli fibr                       | A-431     | nucleoplaU-251 MG             | nucleoplasm, nucleoli fibrillar cente  |
| mitochondria                                     |           |                               |                                        |
| cytosol                                          | U-251 MG  | cytosol HeLa                  | cytosol                                |
| nucleoplasm                                      | U-2 OS    | nucleoplaMCF7                 | nucleoplasm, nucleoli fibrillar cente  |
| cytosol                                          | A-431     | cytosol U-251 MG              | cytosol                                |
| cytosol                                          | A-431     | cytosol U-251 MG              | cytosol                                |
| nucleoplasm, nuclear bodie                       | A-431     | nucleoplaPC-3                 | nucleoplasm                            |

|                                        |          |                                           |                                  |  |
|----------------------------------------|----------|-------------------------------------------|----------------------------------|--|
| nucleoplasm, cytosol                   |          |                                           |                                  |  |
| nucleoplasm, cytosol                   |          |                                           |                                  |  |
| nucleoplasm                            | MCF7     | nucleoplaHaCaT                            | nucleoplasm                      |  |
| focal adhesion sites, cytosol          | U-251 MG | focal adhPC-3                             | focal adhesion sites, cytosol    |  |
| nucleoplasm                            | HeLa     | nucleoplaPC-3                             | nucleoplasm                      |  |
| intermediate filaments                 | A-431    | intermediate filaments                    |                                  |  |
| vesicles, plasma membrane              | A-431    | vesicles, HaCaT                           | cell junctions                   |  |
| nucleoplasm, cytosol                   | A-431    | nucleoplaU-251 MG                         | nucleoplasm, cytosol             |  |
| nucleoplasm                            | A-431    | nucleoplaU-251 MG                         | nucleoplasm                      |  |
| nucleoplasm, nuclear membrane          | U-2 OS   | nucleoplasm                               |                                  |  |
| nucleoli                               | hTCEpi   | nucleoplasm, nucleoli, cytoplasmic bodies |                                  |  |
| nucleoplasm                            | A-431    | nucleoplaSiHa                             | nucleoplasm                      |  |
| vesicles                               | U-251 MG | vesicles                                  |                                  |  |
| vesicles                               |          |                                           |                                  |  |
| nucleoplasm, nuclear membrane          | MCF7     | nucleoplaHEK 293                          | nucleoplasm, nuclear membrane    |  |
| centrosome                             | U-251 MG | centrosome                                |                                  |  |
| nucleoplasm                            | A-431    | nucleoplaU-251 MG                         | nucleoplasm                      |  |
| nucleoplasm, cytosol                   | U-251 MG | nucleoplasm, cytosol                      |                                  |  |
| nucleoplasm                            | HEK 293  | nucleoplasm                               |                                  |  |
| nucleoplasm, cytosol                   | HEK 293  | nucleoplaPC-3                             | nucleoplasm                      |  |
| mitochondria                           | A-431    | mitochondU-251 MG                         | mitochondria                     |  |
| nucleoplasm                            | A-431    | nucleoplaU-251 MG                         | nucleoplasm, centrosome          |  |
| nuclear speckles                       | A-431    | nuclear sU-251 MG                         | nuclear speckles                 |  |
| vesicles, cytosol                      | U-251 MG | vesicles, HeLa                            | vesicles, cytosol                |  |
| nucleoplasm, plasma membrane           | U-251 MG | nucleoplaHEK 293                          | nucleoplasm, plasma membrane     |  |
| golgi apparatus                        | A-431    | golgi appU-251 MG                         | golgi apparatus                  |  |
| golgi apparatus                        | MCF7     | golgi appHEK 293                          | golgi apparatus                  |  |
| vesicles                               | MCF7     | vesicles                                  |                                  |  |
| nucleoplasm                            | BJ       | nucleoplasm                               |                                  |  |
| cytosol                                | HEL      | plasma meHaCaT                            | plasma membrane                  |  |
| plasma membrane                        |          |                                           |                                  |  |
| mitochondria, cytosol                  | A-431    | cytosol U-251 MG                          | cytosol                          |  |
| cytosol                                | MCF7     | mitochondA549                             | mitochondria, cytosol            |  |
| plasma membrane                        | SH-SY5Y  | plasma membrane                           |                                  |  |
| nucleoli, golgi apparatus              | MCF7     | nucleoplaHaCaT                            | nucleoli, golgi apparatus        |  |
| vesicles, cytosol                      | MCF7     | vesicles, cytosol                         |                                  |  |
| nucleoplasm, cytosol                   | MCF7     | nucleoplaHeLa                             | nucleoplasm, cytosol             |  |
| nucleoplasm                            | MCF7     | nucleoplaHeLa                             | nucleoplasm                      |  |
| plasma membrane, cell junction         | U-251 MG | plasma meRH-30                            | plasma membrane, actin filaments |  |
| nucleoplasm                            | A-431    | nucleoplaU-251 MG                         | nucleoplasm                      |  |
| nucleoplasm, cytosol                   | PC-3     | nucleoplasm, cytosol                      |                                  |  |
| nucleoplasm, nucleoli, plasma membrane |          |                                           |                                  |  |
| plasma membrane, mitochondria          | U-251 MG | plasma meHEK 293                          | mitochondria, aggresome          |  |
| nucleoplasm, centrosome                | HEK 293  | centrosomPC-3                             | nucleoplasm, centrosome          |  |
| nucleoplasm, cytosol                   | A-431    | nucleoplaU-251 MG                         | nucleoplasm, cytosol             |  |
| nucleoplasm                            | A-431    | nucleoplaU-251 MG                         | nucleoplasm                      |  |
| microtubules                           | A-431    | microtubules                              |                                  |  |
| microtubules                           | A-431    | microtubules                              |                                  |  |
| microtubules                           | A-431    | microtubuU-251 MG                         | microtubules                     |  |
| microtubules                           | U-251 MG | microtubuPC-3                             | microtubules                     |  |
| plasma membrane                        | Hep G2   | plasma membrane                           |                                  |  |
| plasma membrane                        | Hep G2   | plasma membrane                           |                                  |  |
| microtubules                           | A-431    | microtubuU-251 MG                         | microtubules                     |  |
| microtubules, cytosol                  | A-431    | microtubuMCF7                             | cytokinetic bridge               |  |
| mitochondria                           | A-431    | mitochondU-251 MG                         | mitochondria                     |  |

|                                      |          |                                   |           |                                        |
|--------------------------------------|----------|-----------------------------------|-----------|----------------------------------------|
| mitochondria                         | A-431    | mitochondria                      | U-251 MG  | mitochondria                           |
| mitochondria                         | U-251 MG | nucleoplasm                       | Hep G2    | nucleoplasm, mitochondria              |
| nuclear membrane                     | A-431    | nuclear membrane                  | U-251 MG  | nuclear membrane                       |
| nuclear membrane, vesicles           | A-431    | nuclear membrane                  | U-251 MG  | nuclear membrane                       |
| mitochondria                         |          |                                   |           |                                        |
| mitochondria                         | A-431    | mitochondria                      | U-251 MG  | mitochondria                           |
| mitochondria                         | A-431    | mitochondria                      | U-251 MG  | mitochondria                           |
| microtubules                         | SH-SY5Y  | microtubules                      | BJ        | microtubules                           |
| golgi apparatus, vesicles            | A-431    | golgi apparatus                   | U-251 MG  | golgi apparatus, centrosome            |
| golgi apparatus                      | A-431    | nucleoplasm                       | U-251 MG  | golgi apparatus                        |
| golgi apparatus                      | A-431    | golgi apparatus                   | U-251 MG  | golgi apparatus                        |
| cytosol                              |          |                                   |           |                                        |
| vesicles                             | A-431    | vesicles                          | U-251 MG  | vesicles                               |
| vesicles                             | U-251 MG | vesicles                          |           |                                        |
| plasma membrane, cytosol             | A-431    | plasma membrane                   | U-251 MG  | plasma membrane, cytosol               |
| nucleoplasm, vesicles, cytosol       | A-431    | nucleoplasm                       | U-251 MG  | nucleoplasm, vesicles, cytosol         |
| nuclear speckles, cytosol            | A-431    | nuclear speckles                  | PC-3      | nuclear speckles                       |
| nucleoplasm, plasma membrane         |          |                                   |           |                                        |
| centrosome                           | A549     | nucleoplasm, nucleoli, centrosome |           |                                        |
| peroxisomes                          |          |                                   |           |                                        |
| mitochondria                         | MCF7     | mitochondria                      | SK-MEL-30 | mitochondria, cytosol                  |
| nucleoplasm, golgi apparatus         | RH-30    | nucleoplasm                       | SK-MEL-30 | nucleoplasm, vesicles, plasma membrane |
| nucleoplasm                          | A-431    | nucleoplasm                       | U-251 MG  | nucleoplasm                            |
| nucleoplasm                          | A-431    | nucleoplasm                       | U-251 MG  | nucleoplasm                            |
| nucleoplasm                          | U-251 MG | nucleoplasm                       |           |                                        |
| nucleoplasm, centrosome              | RH-30    | nucleoplasm, centrosome           |           |                                        |
| intermediate filaments               |          |                                   |           |                                        |
| vesicles, plasma membrane, cytosol   | A-431    | plasma membrane                   | U-251 MG  | plasma membrane, cytosol               |
| nuclear bodies                       | RH-30    | nuclear bodies                    |           |                                        |
| cytosol                              | HEK 293  | cytosol                           | HeLa      | cytosol                                |
| plasma membrane                      |          |                                   |           |                                        |
| midbody ring                         | A-431    | midbody ring                      |           |                                        |
| vesicles                             | U-251 MG | vesicles                          |           |                                        |
| nucleoli, cytosol                    | HEK 293  | cytosol                           | A549      | nucleoplasm, nucleoli, cytosol         |
| nuclear speckles                     | SH-SY5Y  | nuclear speckles                  | SiHa      | nuclear speckles                       |
| nuclear speckles                     | SH-SY5Y  | nuclear speckles                  | SiHa      | nuclear speckles, plasma membrane      |
| nuclear speckles                     | SH-SY5Y  | nuclear speckles                  | SiHa      | nuclear speckles                       |
| nuclear speckles                     | SH-SY5Y  | nuclear speckles                  | SiHa      | nuclear speckles, plasma membrane      |
| vesicles                             | Hep G2   | vesicles                          |           |                                        |
| centriolar satellite, cytosol        |          |                                   |           |                                        |
| mitochondria                         | HeLa     | mitochondria                      |           |                                        |
| nuclear speckles                     | SH-SY5Y  | nuclear speckles                  | SiHa      | nuclear speckles                       |
| nuclear speckles                     | SH-SY5Y  | nuclear speckles                  | SiHa      | nuclear speckles, plasma membrane      |
| plasma membrane                      | A-431    | plasma membrane                   | U-251 MG  | plasma membrane, actin filaments       |
| mitochondria, cytosol                | A-431    | mitochondria                      | U-251 MG  | mitochondria, cytosol                  |
| mitochondria                         | U-251 MG | mitochondria                      |           |                                        |
| endoplasmic reticulum                |          |                                   |           |                                        |
| nucleoplasm, nuclear bodies, cytosol | A-431    | nucleoplasm                       | U-251 MG  | nucleoplasm, nuclear bodies, cytosol   |
| cytosol                              | A-431    | cytosol                           | U-251 MG  | cytosol                                |
| plasma membrane, cytosol             | A-431    | cytosol                           | U-251 MG  | cytosol                                |
| nucleoplasm                          |          |                                   |           |                                        |
| nucleoplasm                          | A549     | nucleoplasm                       |           |                                        |
| nucleoplasm                          | A-431    | nucleoplasm                       |           |                                        |
| nucleoplasm, cytosol                 | A-431    | nucleoplasm, cytosol              |           |                                        |
| intermediate filaments               | hTCEpi   | intermediate filaments            |           |                                        |

|                              |           |                                      |                                      |
|------------------------------|-----------|--------------------------------------|--------------------------------------|
| intermediate filaments       | A-431     | intermediate filaments               |                                      |
| intermediate filaments       | SiHa      | intermedihtCEpi                      | intermediate filaments               |
| intermediate filaments       | htCEpi    | intermediate filaments               |                                      |
| focal adhesion sites         | U-2 OS    | focal adhHeLa                        | focal adhesion sites                 |
| nuclear speckles, cytosol    | A-431     | nuclear sSH-SY5Y                     | nuclear speckles                     |
| nucleoplasm, nucleoli fibr   | U-2 OS    | nucleoplaSiHa                        | nucleoplasm, vesicles                |
| nucleoplasm, cytosol         | A-431     | nucleoplaU-251 MG                    | nucleoplasm, centrosome, cytosol     |
| nucleoli, golgi apparatus    | HEK 293   | nucleoli, PC-3                       | nucleoli, plasma membrane, cytosol   |
| nucleoplasm                  | HEK 293   | nucleoplasm                          |                                      |
| nucleoplasm, vesicles        |           |                                      |                                      |
| nucleoli fibrillar center    | A-431     | nucleoli U-251 MG                    | nucleoli fibrillar center            |
| actin filaments, cytosol     | HEK 293   | actin filaments, cytosol             |                                      |
| vesicles                     | MCF7      | golgi appSK-MEL-30                   | golgi apparatus                      |
| nucleoli, plasma membrane,   | U-251 MG  | nucleoli, vesicles, plasma membrane, | centriolar satellite                 |
| nucleoplasm                  | HEK 293   | nucleoplaRH-30                       | nucleoplasm                          |
| nucleoplasm                  | HEK 293   | nucleoplaRH-30                       | nucleoplasm, centrosome              |
| cytosol                      |           |                                      |                                      |
| microtubules, cytosol        | A-431     | microtubuU-251 MG                    | microtubules, cytosol                |
| plasma membrane, cytosol     | U-251 MG  | plasma meSiHa                        | vesicles, plasma membrane, cytosol   |
| endoplasmic reticulum, cyt   | A-431     | endoplasmBJ                          | endoplasmic reticulum, cytosol       |
| plasma membrane, cytosol     |           |                                      |                                      |
| golgi apparatus              | SH-SY5Y   | golgi appHaCaT                       | golgi apparatus                      |
| endoplasmic reticulum        | A-431     | endoplasmU-251 MG                    | endoplasmic reticulum                |
| nucleoli                     | A-431     | nucleoli U-251 MG                    | nucleoli                             |
| vesicles, cytokinetic bridge | LHCN-M2   | vesicles                             |                                      |
| nucleoplasm                  | A-431     | nucleoplaU-251 MG                    | nucleoplasm                          |
| nucleoplasm, cytosol         |           |                                      |                                      |
| nucleoplasm, nuclear bodie   | BJ        | nucleoplasm                          |                                      |
| nucleoplasm, cytosol         | U-251 MG  | nucleoplaBJ                          | nucleoplasm, cytokinetic bridge      |
| plasma membrane              | A-431     | plasma meU-251 MG                    | plasma membrane                      |
| plasma membrane              | BJ        | plasma mePC-3                        | plasma membrane                      |
| nucleoplasm                  | U-2 OS    | nucleoplaHep G2                      | nucleoplasm                          |
| nucleoplasm                  | U-2 OS    | nucleoplaHep G2                      | nucleoplasm                          |
| nucleoplasm                  | HEK 293   | nucleoplaSH-SY5Y                     | nucleoplasm                          |
| nucleoplasm, nuclear bodie   | HEK 293   | nucleoplaSH-SY5Y                     | nucleoplasm, nuclear bodies          |
| nucleoli, mitochondria       | SK-MEL-30 | mitochondria                         |                                      |
| cytosol                      |           |                                      |                                      |
| vesicles                     | A-431     | vesicles HEK 293                     | nucleoli fibrillar center, vesicles  |
| mitochondria                 | A-431     | mitochondU-251 MG                    | mitochondria                         |
| endoplasmic reticulum        | U-2 OS    | endoplasmPC-3                        | endoplasmic reticulum                |
| nucleoplasm                  | A-431     | nucleoplaU-251 MG                    | nucleoplasm                          |
| nucleoplasm                  | SH-SY5Y   | nucleoplasm, nucleoli                |                                      |
| nucleoplasm, cytosol         | HEK 293   | nucleoplaSiHa                        | nucleoplasm, cytosol                 |
| nucleoplasm                  |           |                                      |                                      |
| nucleoplasm                  | HEK 293   | nucleoplaSK-MEL-30                   | nucleoplasm                          |
| plasma membrane, cytosol     | HEL       | cytosol                              |                                      |
| nucleoplasm                  | U-2 OS    | nucleoplaHEK 293                     | nucleoplasm                          |
| nucleoplasm                  | A-431     | nuclear bU-251 MG                    | nuclear bodies                       |
| centrosome, cytosol          | A-431     | centrosomU-251 MG                    | centrosome, cytosol                  |
| nucleoplasm, plasma membr    | A-431     | nucleoplaU-251 MG                    | nucleoplasm, nuclear bodies, cytosol |
| nucleoplasm, cytosol         |           |                                      |                                      |
| cytosol                      | A-431     | cytosol U-251 MG                     | cytosol                              |
| cytosol                      | U-251 MG  | cytosol                              |                                      |
| cytosol                      | A-431     | cytosol MCF7                         | nucleoplasm, cytosol                 |
| cell junctions               | U-2 OS    | nuclear bodies, cell junctions       |                                      |

|                                           |          |                                           |                                          |
|-------------------------------------------|----------|-------------------------------------------|------------------------------------------|
| nucleoplasm, nucleoli fibrillar center    | U-251 MG | nucleoli SH-SY5Y                          | nucleoli fibrillar center                |
| intermediate filaments                    | U-2 OS   | intermediMCF7                             | intermediate filaments                   |
| nucleoli                                  | A-431    | nucleoplaU-251 MG                         | nucleoli                                 |
| nuclear speckles, vesicles                | A-431    | nuclear sU-251 MG                         | nuclear speckles, vesicles               |
| nucleoplasm, nuclear bodies               | HaCaT    | nucleoplasm, nuclear bodies               |                                          |
| nucleoplasm, nuclear bodies               | U-2 OS   | nucleoplaHaCaT                            | nucleoplasm, plasma membrane             |
| nucleoplasm, nuclear bodies               | A-431    | nucleoplaU-251 MG                         | nuclear bodies                           |
| nucleoplasm                               | A-431    | nucleoplaHeLa                             | nucleoplasm                              |
| nucleoplasm                               |          |                                           |                                          |
| mitochondria                              | A-431    | mitochondU-251 MG                         | nucleoplasm, mitochondria                |
| mitotic spindle                           | U-251 MG | plasma meHEL                              | plasma membrane, mitotic spindle, cent   |
| nucleoplasm                               | A-431    | nucleoplaHeLa                             | nucleoplasm                              |
| mitochondria                              | A-431    | mitochondU-251 MG                         | mitochondria                             |
| nucleoli, endoplasmic reticulum, vesicles |          |                                           |                                          |
| microtubules                              | U-2 OS   | microtubuHeLa                             | microtubules                             |
| nucleoplasm, golgi apparatus              | U-2 OS   | golgi appHEK 293                          | golgi apparatus                          |
| plasma membrane                           | SH-SY5Y  | golgi appBJ                               | plasma membrane                          |
| nucleoplasm, cytosol                      | A-431    | nucleoplasm, cytosol                      |                                          |
| endoplasmic reticulum                     | RH-30    | endoplasrBJ                               | endoplasmic reticulum                    |
| mitochondria                              | BJ       | vesicles, HUVEC TER                       | vesicles, mitochondria                   |
| mitochondria                              | U-251 MG | cytosol                                   |                                          |
| nuclear speckles                          | A-431    | nuclear sU-251 MG                         | nuclear speckles                         |
| golgi apparatus, vesicles                 | A-431    | golgi appHEK 293                          | golgi apparatus, cytosol                 |
| cytosol                                   | RH-30    | golgi appPC-3                             | golgi apparatus, cytosol                 |
| nucleoplasm                               | A-431    | nucleoplaU-251 MG                         | nucleoplasm, centrosome                  |
| nucleoplasm                               | A-431    | nucleoplaPC-3                             | nucleoplasm                              |
| vesicles, plasma membrane                 | A-431    | vesicles, SiHa                            | vesicles, plasma membrane                |
| plasma membrane, actin filaments          | U-251 MG | plasma membrane, actin filaments, cytosol |                                          |
| vesicles, actin filaments                 | U-251 MG | vesicles, hTCEpi                          | vesicles                                 |
| nucleoplasm                               | LHCN-M2  | nucleoplasm                               |                                          |
| nucleoplasm                               | LHCN-M2  | nucleoplasm                               |                                          |
| nucleoplasm, cytosol                      |          |                                           |                                          |
| nucleoplasm                               | Hep G2   | nucleoplasm, cytosol                      |                                          |
| nucleoplasm, nuclear membrane             | SH-SY5Y  | nucleoplaRH-30                            | nucleoplasm, nuclear membrane, centriole |
| nucleoplasm, nuclear membrane             | SH-SY5Y  | nucleoplaRH-30                            | nucleoplasm, nuclear membrane, nuclear   |
| cytosol                                   | A-431    | cytosol U-251 MG                          | cytosol                                  |
| nucleoplasm, nucleoli                     | U-2 OS   | nucleoli, A-431                           | nucleoli, cytosol                        |
| nucleoplasm, cytosol                      | U-251 MG | nucleoplasm, cytosol                      |                                          |
| nucleoplasm, nucleoli, vesicles           | A-431    | nucleoplaHaCaT                            | nucleoplasm                              |
| nucleoplasm                               | A-431    | nucleoplaHaCaT                            | nucleoplasm, golgi apparatus             |
| nucleoplasm                               | U-251 MG | nucleoplasm                               |                                          |
| nucleoplasm                               | U-251 MG | nucleoplaPC-3                             | nucleoplasm                              |
| nucleoplasm, nucleoli fibrillar center    | A-431    | nucleoplaU-251 MG                         | nucleoplasm, nucleoli fibrillar center   |
| vesicles                                  | A-431    | vesicles U-251 MG                         | vesicles                                 |
| nucleoplasm, cytosol                      | A-431    | nucleoplaU-251 MG                         | nucleoplasm                              |
| golgi apparatus, vesicles                 | A-431    | golgi appU-251 MG                         | golgi apparatus, vesicles                |
| cytosol                                   | A-431    | cytosol U-251 MG                          | cytosol                                  |
| mitochondria                              | A-431    | endoplasrU-251 MG                         | endoplasmic reticulum                    |
| nucleoplasm, plasma membrane              | A-431    | nucleoplaU-251 MG                         | nucleoplasm, plasma membrane             |
| nucleoplasm                               | A-431    | nucleoplaU-251 MG                         | nucleoplasm                              |
| nucleoplasm                               | A-431    | nucleoplaU-251 MG                         | nucleoplasm                              |
| nucleoli, nuclear speckles                | U-2 OS   | nuclear sU-251 MG                         | nuclear speckles                         |
| nucleoli                                  | MCF7     | nucleoli HEK 293                          | nucleoli                                 |
| nucleoli                                  | MCF7     | nucleoli HEK 293                          | nucleoli                                 |
| nucleoplasm, nucleoli, mitochondria       | A-431    | nucleoplaU-251 MG                         | nucleoplasm, nucleoli, mitochondria      |

|                                        |           |                                    |                                        |
|----------------------------------------|-----------|------------------------------------|----------------------------------------|
| cell junctions                         | HaCaT     | vesicles, cell junctions           |                                        |
| vesicles                               | U-2 OS    | vesicles A-431                     | vesicles                               |
| nucleoplasm, cytosol                   | A-431     | nucleoplasm                        |                                        |
| nucleoli, microtubules                 | A549      | microtubule SK-MEL-30              | microtubules                           |
| nucleoli                               | A549      | nucleoli, SK-MEL-30                | nucleoli, microtubules                 |
| vesicles                               |           |                                    |                                        |
| nucleoplasm, nucleoli, mitochondria    | A-431     | nucleoplasm U-251 MG               | nucleoplasm, nucleoli, mitochondria    |
| nucleoplasm                            | A-431     | nucleoplasm U-251 MG               | nucleoplasm                            |
| nucleoplasm, golgi apparatus           | A-431     | nucleoplasm U-251 MG               | nucleoplasm, golgi apparatus           |
| vesicles                               | Hep G2    | vesicles SiHa                      | vesicles                               |
| nucleoplasm, nucleoli                  | MCF7      | nucleoplasm HeLa                   | nucleoplasm                            |
| nucleoplasm, nucleoli fibrillar center | MCF7      | nucleoplasm PC-3                   | nucleoplasm, nucleoli fibrillar center |
| endosomes, lysosomes                   | A-431     | endosomes MCF7                     | endosomes, lysosomes                   |
| golgi apparatus, cytosol               | A-431     | nucleoplasm U-251 MG               | nucleoplasm, golgi apparatus           |
| cytosol                                | U-2 OS    | cytosol RH-30                      | cytosol                                |
| nucleoli, cytosol                      | A-431     | nucleoli, U-251 MG                 | nucleoli, cytosol                      |
| nucleoplasm, cytosol                   | Hep G2    | nucleoplasm, cytosol               |                                        |
| nucleoplasm, vesicles                  | RT4       | nucleoplasm, vesicles              |                                        |
| nucleoplasm, cytosol                   | A-431     | nucleoplasm U-251 MG               | nucleoplasm, cytosol                   |
| nucleoplasm, cytosol                   | MCF7      | nucleoplasm Hep G2                 | nucleoplasm                            |
| nucleoplasm                            | A549      | nucleoplasm Hep G2                 | nucleoplasm                            |
| cytosol                                | U-251 MG  | cytosol                            |                                        |
| nucleoplasm, vesicles                  | A-431     | nucleoplasm U-251 MG               | nucleoplasm                            |
| nucleoplasm, plasma membrane           | U-2 OS    | nucleoplasm HeLa                   | nucleoplasm, plasma membrane           |
| nucleoplasm, cytosol                   | U-251 MG  | nucleoplasm HEK 293                | nucleoplasm                            |
| endoplasmic reticulum                  | U-2 OS    | endoplasmic reticulum MCF7         | endoplasmic reticulum                  |
| intermediate filaments, aggregates     | U-251 MG  | intermediate filaments, aggregates |                                        |
| nucleoplasm, nuclear membrane, vesicle | PC-3      | nucleoplasm SK-MEL-30              | nucleoplasm, nuclear membrane, vesicle |
| nucleoplasm, cytosol                   | A-431     | nucleoplasm U-251 MG               | nucleoplasm, cytosol                   |
| cytosol                                |           | cytosol                            |                                        |
| nucleoplasm, centrosome, cytosol       | A-431     | centrosome U-251 MG                | nucleoplasm, centrosome, cytosol       |
| actin filaments, centrosome, cytosol   | U-251 MG  | nucleoplasm, centrosome, cytosol   |                                        |
| cytosol                                | U-251 MG  | cytosol PC-3                       | cytosol                                |
| nucleoplasm                            | A-431     | nucleoplasm U-251 MG               | nucleoplasm                            |
| cytosol                                | A-431     | nucleoplasm U-251 MG               | nucleoplasm, centrosome, cytosol       |
| centrosome                             | A-431     | nucleoplasm U-251 MG               | centrosome                             |
| nucleoplasm, nuclear bodies, cytosol   | HeLa      | nucleoplasm SiHa                   | nucleoplasm, nuclear bodies, cytosol   |
| nucleoplasm, nuclear bodies, cytosol   | A-431     | nucleoplasm U-251 MG               | nucleoplasm, cytosol                   |
| nucleoplasm                            | U-251 MG  | nucleoplasm RH-30                  | nucleoplasm                            |
| nucleoplasm                            | U-251 MG  | nucleoplasm RH-30                  | nucleoplasm                            |
| golgi apparatus, plasma membrane       |           |                                    |                                        |
| golgi apparatus, plasma membrane       |           |                                    |                                        |
| nucleoplasm                            | HEK 293   | nucleoplasm                        |                                        |
| nucleoplasm, cytokinetic bridge        | MCF7      | nucleoplasm, cytokinetic bridge    |                                        |
| nucleoplasm                            | SK-MEL-30 | nucleoplasm                        |                                        |
| nucleoplasm, cytosol                   | A-431     | nucleoplasm, cytosol               |                                        |
| nucleoli, cytosol                      | U-251 MG  | nucleoli, PC-3                     | nucleoli, cytosol                      |
| nucleoplasm                            | HEK 293   | nucleoplasm PC-3                   | nucleoplasm, nuclear bodies            |
| cytosol                                |           |                                    |                                        |
| nucleoplasm, golgi apparatus, cytosol  | HEK 293   | nucleoplasm A549                   | nucleoplasm, golgi apparatus, cytosol  |
| vesicles                               | A-431     | vesicles                           |                                        |
| vesicles, cytosol                      | HEK 293   | vesicles, SH-SY5Y                  | cytosol                                |
| nucleoplasm                            |           |                                    |                                        |
| nucleoplasm                            |           |                                    |                                        |



|                                   |           |                                                   |           |                                      |
|-----------------------------------|-----------|---------------------------------------------------|-----------|--------------------------------------|
| aggresome, cytosol                | A-431     | cytosol                                           | U-251 MG  | cytosol                              |
| nucleoplasm                       | A-431     | nucleoplasm                                       | HeLa      | nucleoplasm                          |
| vesicles                          | A-431     | vesicles                                          | U-251 MG  | vesicles                             |
| golgi apparatus, vesicles         |           |                                                   |           |                                      |
| cytosol                           | A-431     | cytosol                                           |           |                                      |
| nucleoplasm, nucleoli, cytosol    | A-431     | nucleoplasm, nucleoli, cytosol                    | U-251 MG  |                                      |
| endoplasmic reticulum             | A-431     | endoplasmic reticulum                             | U-251 MG  |                                      |
| cytosol                           | MCF7      | cytosol                                           |           |                                      |
| nucleoplasm, cytosol              | A-431     | nucleoplasm, cytosol                              | U-251 MG  |                                      |
| cytosol                           | A-431     | cytosol                                           | U-251 MG  |                                      |
| nucleoplasm, golgi apparatus      |           |                                                   |           |                                      |
| endoplasmic reticulum             |           |                                                   |           |                                      |
| endoplasmic reticulum             | U-251 MG  | endoplasmic reticulum                             | MCF7      |                                      |
| actin filaments                   | BJ        | actin filaments                                   |           |                                      |
| cytosol                           | U-251 MG  | nuclear speckles, cytosol                         |           |                                      |
| nucleoli fibrillar center         | U-2 OS    | nucleoli fibrillar center                         | MCF7      |                                      |
| vesicles                          | SK-MEL-30 | vesicles                                          |           |                                      |
| mitochondria, cytosol             | HEK 293   | mitochondria                                      |           |                                      |
| mitochondria, cytosol             | U-2 OS    | mitochondria                                      | HEK 293   |                                      |
| nucleoli                          | A-431     | nucleoli                                          | U-251 MG  | plasma membrane                      |
| nucleoplasm, nucleoli, cytosol    | MCF7      | nucleoplasm, nucleoli, cytosol                    |           |                                      |
| nucleoplasm, nuclear bodies       | MCF7      | nucleoplasm, nuclear bodies                       | HEK 293   |                                      |
| endoplasmic reticulum, cytosol    |           |                                                   |           |                                      |
| cytosol                           | HEK 293   | centriolar satellite, cytosol                     | SH-SY5Y   |                                      |
| mitochondria                      | A-431     | mitochondria                                      | U-251 MG  |                                      |
| cytosol                           | A-431     | cytosol                                           | EFO-21    | plasma membrane, centrosome, cytosol |
| golgi apparatus, plasma membrane  | U-251 MG  | cytosol                                           |           |                                      |
| plasma membrane, mitochondria     | PC-3      | plasma membrane, cytosol                          | SK-MEL-30 |                                      |
| nucleoli                          | A-431     | nucleoplasm, nucleoli                             | U-251 MG  |                                      |
| nucleoplasm, nucleoli             | MCF7      | nucleoplasm, nucleoli                             | HEK 293   |                                      |
| nucleoplasm, nucleoli, cytosol    | A-431     | nucleoplasm, cytosol                              | U-251 MG  |                                      |
| vesicles                          | HEK 293   | vesicles                                          |           |                                      |
| nucleoplasm, nucleoli             | U-251 MG  | nucleoplasm, nucleoli                             | PC-3      |                                      |
| nucleoplasm                       | A-431     | nucleoplasm                                       | U-251 MG  |                                      |
| nucleoplasm, cytosol              | A-431     | nucleoplasm, centrosome                           | U-251 MG  |                                      |
| nucleoli fibrillar center         | A-431     | nucleoli fibrillar center                         | U-251 MG  |                                      |
| plasma membrane, cytosol          | A-431     | plasma membrane, cytosol                          | U-251 MG  |                                      |
| cytosol                           | A-431     | plasma membrane, cytosol                          | U-251 MG  |                                      |
| vesicles                          | A-431     | vesicles                                          | U-251 MG  | centrosome                           |
| vesicles                          | HEK 293   | vesicles                                          |           |                                      |
| plasma membrane                   | A-431     | plasma membrane, cytosol                          |           |                                      |
| cytosol                           | A-431     | vesicles                                          |           |                                      |
| cytosol                           | A-431     | cytosol                                           | U-251 MG  | cytosol                              |
| nucleoplasm, cytosol              | A-431     | nucleoplasm, nucleoli fibrillar center            | U-251 MG  |                                      |
| nucleoplasm, cell junctions       | A-431     | cytosol                                           | U-251 MG  |                                      |
| nucleoplasm, plasma membrane      | A-431     | nucleoplasm, plasma membrane, cell junctions      | U-251 MG  |                                      |
| nuclear speckles, plasma membrane | A-431     | nuclear speckles, plasma membrane, cell junctions | U-251 MG  |                                      |
| cell junctions, cytosol           | A-431     | plasma membrane, cell junctions                   | U-251 MG  |                                      |
| plasma membrane, cell junctions   | A-431     | plasma membrane, cell junctions                   | U-251 MG  |                                      |
| nuclear bodies, cytosol           | A-431     | nuclear bodies                                    | U-251 MG  |                                      |
| actin filaments                   | A-431     | actin filaments                                   | U-251 MG  |                                      |
| nucleoplasm, cytosol              | U-251 MG  | nucleoplasm, nucleoli                             | HEK 293   |                                      |
| mitochondria                      |           |                                                   |           |                                      |
| vesicles, cytosol                 | A-431     | vesicles, cytosol                                 | U-251 MG  |                                      |
| nucleoli fibrillar center         | A549      | nucleoli fibrillar center, cytosol                |           |                                      |

|                                         |          |                                       |                                                    |
|-----------------------------------------|----------|---------------------------------------|----------------------------------------------------|
| cytosol                                 | U-251 MG | cytosol                               |                                                    |
| nucleoplasm                             | MCF7     | nucleoplasm                           | PC-3 nucleoplasm, cytosol                          |
| nucleoplasm                             | PC-3     | nucleoplasm, cytosol                  |                                                    |
| cytosol                                 | HEK 293  | cytosol                               | PC-3 nucleoplasm, nucleoli, cytosol                |
| cytosol                                 | PC-3     | cytosol                               |                                                    |
| plasma membrane                         |          |                                       |                                                    |
| mitochondria                            | MCF7     | mitochondria                          |                                                    |
| golgi apparatus                         |          |                                       |                                                    |
| golgi apparatus                         |          |                                       |                                                    |
| golgi apparatus                         |          |                                       |                                                    |
| vesicles                                | A-431    | vesicles                              | U-251 MG vesicles                                  |
| nucleoplasm                             | MCF7     | nucleoplasm                           | SH-SY5Y nucleoplasm                                |
| nucleoplasm, plasma membrane            | A-431    | nucleoplasm, plasma membrane          | U-251 MG nucleoplasm, plasma membrane              |
| intermediate filaments                  | A-431    | nucleoplasm, intermediate filaments   | U-251 MG nucleoplasm, intermediate filaments       |
| cell junctions                          | A-431    | cell junctions                        |                                                    |
| nucleoplasm, nucleoli, cytosol          | MCF7     | nucleoplasm, nucleoli                 |                                                    |
| cytosol                                 | SH-SY5Y  | mitotic spindle                       | AF22 cytosol                                       |
| plasma membrane, cytosol                | A-431    | plasma membrane, cytosol              | U-251 MG golgi apparatus, plasma membrane, cytosol |
| nucleoplasm                             |          |                                       |                                                    |
| nucleoplasm                             | A-431    | nucleoplasm, vesicles                 | U-251 MG nucleoplasm, vesicles                     |
| plasma membrane, intermediate filaments | HTCEpi   | plasma membrane                       |                                                    |
| vesicles                                | U-251 MG | vesicles                              | HeLa vesicles                                      |
| plasma membrane, cytosol                | A-431    | plasma membrane, cytosol              | HEK 293 plasma membrane, cytosol                   |
| nucleoplasm, centrosome                 | A-431    | nucleoplasm, centrosome               | U-251 MG nucleoplasm, centrosome                   |
| cytosol                                 | A-431    | centrioles                            | U-251 MG cytosol                                   |
| nucleoplasm, cytosol                    |          |                                       |                                                    |
| cytosol                                 |          |                                       |                                                    |
| plasma membrane, actin filaments        | MCF7     | plasma membrane                       | A549 plasma membrane                               |
| plasma membrane, cell junctions         | MCF7     | plasma membrane, cell junctions       | A549 plasma membrane, cell junctions               |
| nucleoplasm, nucleoli, cytosol          | MCF7     | nucleoplasm, nucleoli                 | HEK 293 nucleoplasm, nucleoli                      |
| nuclear speckles, plasma membrane       | A549     | nuclear speckles, plasma membrane     | Hep G2 nuclear speckles, plasma membrane           |
| nucleoli, golgi apparatus, cytosol      | A-431    | nucleoli, golgi apparatus, cytosol    | U-251 MG nucleoli, golgi apparatus, cytosol        |
| nucleoplasm                             | A-431    | nucleoplasm, cytosol                  | U-251 MG nucleoplasm, cytosol                      |
| nucleoplasm                             |          |                                       |                                                    |
| nucleoplasm, cytosol                    |          |                                       |                                                    |
| nucleoplasm                             | HeLa     | vesicles                              |                                                    |
| cytosol                                 | A-431    | cytosol                               | U-251 MG cytosol                                   |
| nucleoplasm, cytosol                    | A-431    | nucleoplasm, plasma membrane, cytosol | U-251 MG nucleoplasm, plasma membrane, cytosol     |
| cytosol                                 | A-431    | nucleoplasm, cytosol                  | MCF7 nucleoplasm, cytosol                          |
| nucleoplasm                             | RH-30    | nucleoplasm                           |                                                    |
| nucleoplasm                             | RH-30    | nucleoplasm, nucleoli                 | PC-3 nucleoplasm, nucleoli                         |
| golgi apparatus                         | MCF7     | golgi apparatus                       | HEK 293 golgi apparatus                            |
| nucleoplasm                             | MCF7     | nucleoplasm                           | HEK 293 nucleoplasm                                |
| cell junctions                          |          |                                       |                                                    |
| nuclear bodies, cytosol                 | A549     | cytosol                               | SiHa nuclear bodies, cytosol                       |
| cytosol                                 | A-431    | cytosol                               | U-251 MG cytosol                                   |
| nuclear bodies                          | MCF7     | nucleoplasm, nuclear bodies, cytosol  | HEK 293 nucleoplasm, nuclear bodies, cytosol       |
| nucleoplasm                             | MCF7     | nucleoplasm                           | HEK 293 nucleoplasm                                |
| nucleoplasm                             | MCF7     | nucleoplasm                           |                                                    |
| nucleoplasm                             | HEK 293  | nucleoplasm                           | A549 nucleoplasm                                   |
| golgi apparatus                         | HEK 293  | golgi apparatus                       |                                                    |
| mitochondria                            | A-431    | golgi apparatus, mitochondria         | U-251 MG golgi apparatus, mitochondria             |
| nucleoplasm, mitochondria               |          |                                       |                                                    |
| nucleoplasm                             | A-431    | nucleoplasm                           | U-251 MG nucleoplasm                               |
| nucleoplasm, actin filaments            | A-431    | nucleoplasm, cytosol                  | U-251 MG nucleoplasm, cytosol                      |

|                                                 |                |                                      |                                                 |
|-------------------------------------------------|----------------|--------------------------------------|-------------------------------------------------|
| nucleoplasm                                     | HEK 293        | nucleoplaBJ                          | nucleoplasm                                     |
| nucleoplasm, cytosol                            | U-251 MG       | nucleoplasm, nuclear bodies, cytosol |                                                 |
| nucleoplasm, cytosol                            | A-431          | actin filaments                      |                                                 |
| nucleoli fibrillar center, cytosol              | A-431 U-251 MG | nucleoli cytosol                     | nucleoli fibrillar center, cytosol              |
| golgi apparatus, cytosol                        | A-431          | golgi apparatus, cytosol             |                                                 |
| mitochondria                                    | A-431          | mitochondria                         |                                                 |
| nucleoplasm                                     | A-431          | nucleoplaU-251 MG                    | nucleoplasm                                     |
| nucleoplasm                                     |                |                                      |                                                 |
| cytosol                                         | SiHa           | microtubule ends                     |                                                 |
| nucleoplasm, plasma membrane, cytosol           | A-431          | nucleoplaU-251 MG                    | nucleoplasm, plasma membrane                    |
| vesicles, plasma membrane, cytosol              | A-431          | vesicles, U-251 MG                   | plasma membrane, cytosol                        |
| vesicles, plasma membrane, cytosol              | A-431          | vesicles, plasma membrane, cytosol   |                                                 |
| nucleoplasm, cytosol                            | A-431          | nucleoplaU-251 MG                    | nucleoplasm                                     |
| nucleoplasm                                     | A-431          | nucleoplaU-251 MG                    | nucleoplasm                                     |
| cytosol                                         | A-431          | cytosol U-251 MG                     | cytosol                                         |
| nucleoplasm                                     | A-431          | nucleoplaU-251 MG                    | nucleoplasm, cytosol                            |
| nucleoplasm                                     | U-251 MG       | nucleoplasm                          |                                                 |
| nucleoplasm                                     | A-431          | nucleoplasm                          |                                                 |
| plasma membrane, cytosol                        | A-431          | golgi appU-251 MG                    | plasma membrane, cytosol                        |
| nucleoplasm, nucleoli fibrillar center, cytosol | A-431          | nucleoplaU-251 MG                    | nucleoplasm, nucleoli fibrillar center, cytosol |
| vesicles, plasma membrane, cytosol              | MCF7           | nucleoplaHeLa                        | nucleoplasm, vesicles                           |
| endoplasmic reticulum                           | Hep G2         | nucleoplaPC-3                        | endoplasmic reticulum                           |
| centriolar satellite                            | HEL            | plasma meK-562                       | plasma membrane                                 |
| nucleoplasm                                     | HEK 293        | nucleoplasm                          |                                                 |
| cytosol                                         | A-431          | nucleoplaRH-30                       | nucleoplasm, cell junctions, cytosol            |
| nucleoli                                        | U-251 MG       | nucleoplasm, nucleoli                |                                                 |
| lipid droplets                                  |                |                                      |                                                 |
| cytosol                                         | A-431          | nucleoplaU-251 MG                    | nucleoplasm, cytosol                            |
| nucleoli                                        | A-431          | nucleoli                             |                                                 |
| nucleoplasm, vesicles                           | A-431          | nucleoplaU-251 MG                    | nucleoplasm                                     |
| nucleoplasm, cytosol                            | A-431          | nucleoplaU-251 MG                    | nucleoplasm, cytosol                            |
| vesicles                                        |                |                                      |                                                 |
| nuclear bodies                                  | MCF7           | nuclear bSH-SY5Y                     | nuclear bodies                                  |
| nucleoplasm, golgi apparatus, cytosol           | U-251 MG       | nucleoplasm, cytosol                 |                                                 |
| nucleoplasm                                     | SiHa           | plasma membrane                      |                                                 |
| golgi apparatus                                 | Hep G2         | golgi apparatus                      |                                                 |
| nucleoplasm, vesicles, plasma membrane, cytosol | A-431          | vesicles, PC-3                       | nucleoplasm                                     |
| nucleoplasm                                     | U-251 MG       | nucleoplasm, cytosol                 |                                                 |
| nucleoplasm                                     | A-431          | nucleoplaU-251 MG                    | nucleoplasm                                     |
| nucleoplasm                                     | Hep G2         | nucleoplasm                          |                                                 |
| nucleoplasm                                     | RH-30          | nucleoplasm                          |                                                 |
| nucleoplasm                                     | HEK 293        | nucleoplaRH-30                       | nucleoplasm                                     |
| nucleoplasm, cytosol                            | U-251 MG       | nucleoplaSiHa                        | nucleoplasm                                     |
| nucleoplasm, cytosol                            | A-431          | nucleoplaU-251 MG                    | nucleoplasm, cytosol                            |
| vesicles, plasma membrane, cytosol              | A-431          | vesicles, U-251 MG                   | vesicles, plasma membrane                       |
| plasma membrane, cytosol                        | A-431          | plasma meU-251 MG                    | plasma membrane, cytosol                        |
| plasma membrane, cytosol                        | A-431          | cytosol U-251 MG                     | plasma membrane, cytosol                        |
| nucleoplasm, nuclear membrane, cytosol          | U-251 MG       | nucleoplasm, nuclear membrane        |                                                 |
| vesicles, centriolar satellite, cytosol         | A-431          | vesicles                             |                                                 |
| vesicles                                        | SiHa           | nucleoplasm, vesicles                |                                                 |
| cytosol                                         | A-431          | cytosol MCF7                         | cytosol                                         |
| cytosol                                         | U-2 OS         | cytosol                              |                                                 |
| nucleoplasm, microtubules                       | A-431          | nucleoplaU-251 MG                    | nucleoplasm, microtubules                       |

|                                                                          |          |                                             |              |
|--------------------------------------------------------------------------|----------|---------------------------------------------|--------------|
| nucleoplasm, nuclear speckles                                            | A-431    | nucleoplasm, nuclear speckles, microtubules | U-251 MG     |
| nucleoplasm, nuclear bodies                                              | A549     | nucleoplasm, vesicles                       | SiHa         |
| nucleoplasm, vesicles                                                    | RH-30    | vesicles                                    | AF22         |
| nucleoplasm, cytosol                                                     | A-431    | nucleoplasm, vesicles, cytosol              | U-251 MG     |
| cell junctions                                                           | A549     | cell junctions                              | BJ           |
| cytosol                                                                  | U-251 MG | cytosol                                     |              |
| intermediate filaments                                                   | HEK 293  | intermediate filaments                      |              |
| nucleoplasm                                                              | A-431    | nucleoplasm                                 | U-251 MG     |
| plasma membrane                                                          | A-431    | plasma membrane                             |              |
| nucleoli, mitochondria                                                   | A-431    | nucleoli, U-251 MG                          | mitochondria |
| nucleoplasm, mitochondria                                                | A-431    | mitochondria                                | U-251 MG     |
| cytosol                                                                  | MCF7     | cytosol                                     | HEK 293      |
| nucleoplasm, mitochondria                                                | A-431    | nucleoplasm, mitochondria                   | U-251 MG     |
| nucleoplasm                                                              | A-431    | nucleoplasm                                 | MCF7         |
| vesicles                                                                 |          |                                             |              |
| nucleoplasm, nuclear speckles, plasma membrane, mitotic spindle, cytosol |          |                                             |              |
| nucleoplasm, plasma membrane                                             | U-251 MG | nucleoplasm, plasma membrane, cytosol       | PC-3         |
| nuclear bodies                                                           | MCF7     | nucleoplasm, nuclear bodies                 |              |
| nucleoplasm, vesicles                                                    | EFO-21   | nucleoplasm, vesicles, cytosol              |              |
| mitochondria, cytosol                                                    | SH-SY5Y  | mitochondria, cytosol                       | EFO-21       |
| cytosol                                                                  | A-431    | cytosol                                     | U-251 MG     |
| golgi apparatus, vesicles                                                |          |                                             |              |
| nucleoplasm, cytosol                                                     | U-251 MG | nucleoplasm, cytosol                        |              |
| mitochondria                                                             | A-431    | mitochondria                                |              |
| mitochondria                                                             | A-431    | mitochondria                                |              |
| nucleoplasm, nuclear bodies                                              | A-431    | nucleoplasm, nuclear bodies                 | HUVEC TER    |
| nucleoplasm, nuclear bodies                                              | U-251 MG | nucleoplasm, nuclear bodies                 | HUVEC TER    |
| nucleoplasm, vesicles                                                    | PC-3     | vesicles                                    |              |
| vesicles                                                                 | A-431    | golgi apparatus, vesicles                   | U-251 MG     |
| plasma membrane, cytosol                                                 |          |                                             |              |
| vesicles                                                                 | A-431    | vesicles                                    | U-251 MG     |
| golgi apparatus, cytosol                                                 |          |                                             |              |
| cell junctions, cytosol                                                  |          |                                             |              |
| nucleoplasm                                                              | A549     | nucleoplasm                                 | PC-3         |
| nucleoplasm                                                              | A549     | nucleoplasm                                 | PC-3         |
| actin filaments                                                          | U-251 MG | cytosol                                     |              |
| nucleoplasm, intermediate                                                | U-251 MG | nucleoplasm, cytosol                        |              |
| vesicles                                                                 | U-251 MG | vesicles                                    | A549         |
| nucleoplasm                                                              | A-431    | nucleoplasm                                 | U-251 MG     |
| nucleoplasm                                                              |          |                                             |              |
| cytosol                                                                  | A-431    | golgi apparatus, cytosol                    | U-251 MG     |
| nucleoplasm, plasma membrane                                             | A-431    | nucleoplasm, plasma membrane, cytosol       | U-251 MG     |
| nucleoplasm, plasma membrane                                             | U-251 MG | plasma membrane, cytosol                    |              |
| centrosome                                                               | A-431    | centrosome                                  | U-251 MG     |
| vesicles                                                                 |          |                                             |              |
| plasma membrane                                                          | A-431    | plasma membrane                             | HeLa         |
| plasma membrane, cytosol                                                 | A-431    | plasma membrane, cytosol                    | U-251 MG     |
| nucleoli                                                                 | A-431    | nucleoli                                    | U-251 MG     |
| nucleoplasm, nucleoli                                                    | A-431    | nucleoplasm, nucleoli                       | HEK 293      |
| nucleoplasm                                                              | A549     | nucleoplasm, golgi apparatus                | HeLa         |
| nucleoplasm, plasma membrane                                             | HeLa     | nucleoplasm, plasma membrane                |              |
| focal adhesion sites, cytosol                                            | A-431    | cytosol                                     |              |
| nucleoli                                                                 |          |                                             |              |
| nuclear speckles                                                         | A-431    | nuclear speckles, nuclear bodies            | HeLa         |
| vesicles, plasma membrane                                                | A-431    | vesicles                                    | U-251 MG     |

|                                        |           |                                             |           |                                            |
|----------------------------------------|-----------|---------------------------------------------|-----------|--------------------------------------------|
| nucleoplasm, vesicles                  |           |                                             |           |                                            |
| nucleoplasm, cytosol                   | HEK 293   | nucleoplasm                                 | HeLa      | nucleoplasm, nuclear bodies, vesicles      |
| cytosol                                | U-251 MG  | cytosol                                     | A549      | cytosol                                    |
| cytosol                                | U-251 MG  | cytosol                                     |           |                                            |
| nucleoplasm, plasma membrane           |           |                                             |           |                                            |
| nuclear bodies                         | U-251 MG  | vesicles                                    | SiHa      | nucleoplasm, vesicles                      |
| golgi apparatus                        | A-431     | golgi apparatus                             | U-251 MG  | golgi apparatus                            |
| nucleoplasm, nucleoli                  | A-431     | nucleoplasm                                 | U-251 MG  | nucleoplasm, nucleoli                      |
| nucleoplasm, vesicles                  | A-431     | nucleoplasm                                 | BJ        | nucleoplasm, vesicles                      |
| nucleoplasm                            | A-431     | nucleoplasm                                 | U-251 MG  | nucleoplasm                                |
| nucleoplasm                            | A-431     | nucleoplasm                                 | U-251 MG  | nucleoplasm                                |
| nucleoplasm, endoplasmic reticulum     | SK-MEL-30 | nucleoplasm, endoplasmic reticulum, cytosol |           |                                            |
| nucleoplasm, vesicles                  | U-251 MG  | nucleoplasm                                 | A549      | nucleoplasm, vesicles                      |
| nucleoplasm, actin filaments           | MCF7      | nucleoplasm                                 | RH-30     | nucleoplasm, cytosol                       |
| nucleoplasm                            | A-431     | nucleoplasm                                 | U-251 MG  | nucleoplasm                                |
| nucleoplasm                            | A-431     | nucleoplasm                                 | U-251 MG  | nucleoplasm                                |
| nucleoplasm                            | A-431     | nucleoplasm                                 | U-251 MG  | nucleoplasm, plasma membrane, cytosol      |
| vesicles                               |           |                                             |           |                                            |
| endoplasmic reticulum                  | U-251 MG  | cytosol                                     | Hep G2    | endoplasmic reticulum                      |
| nucleoplasm                            | MCF7      | nucleoplasm                                 |           |                                            |
| nucleoplasm                            | A-431     | nucleoplasm                                 |           |                                            |
| nucleoli, mitochondria                 | HeLa      | mitochondria                                | PC-3      | mitochondria                               |
| plasma membrane                        | HEK 293   | plasma membrane                             |           |                                            |
| mitochondria                           | A-431     | mitochondria                                | U-251 MG  | mitochondria                               |
| mitochondria                           | MCF7      | mitochondria                                | Hep G2    | mitochondria                               |
| nuclear speckles                       | HEK 293   | nuclear speckles                            | RH-30     | nucleoplasm, cytosol                       |
| nuclear speckles                       | HEK 293   | nuclear speckles                            | PC-3      | nuclear speckles                           |
| vesicles, intermediate filaments       | U-251 MG  | vesicles                                    | HEK 293   | vesicles, intermediate filaments           |
| endoplasmic reticulum                  | A-431     | endoplasmic reticulum                       | U-251 MG  | endoplasmic reticulum                      |
| nuclear speckles                       | A-431     | nuclear speckles                            | U-251 MG  | nuclear speckles                           |
| nucleoplasm, nuclear bodies            | U-2 OS    | nucleoplasm                                 | HEK 293   | nucleoplasm, nuclear bodies                |
| rods & rings                           | AF22      | nucleoli, cytosol                           |           |                                            |
| nucleoli, cytosol                      |           |                                             |           |                                            |
| nucleoplasm, vesicles                  | RH-30     | nucleoplasm                                 | SK-MEL-30 | nucleoplasm, nucleoli fibrillar center     |
| cytosol                                | A-431     | cytosol                                     | U-251 MG  | cytosol                                    |
| nucleoplasm, vesicles                  | A-431     | nucleoplasm                                 | U-251 MG  | nucleoplasm, vesicles                      |
| nucleoli                               | RH-30     | nucleoli                                    | SK-MEL-30 | nucleoli                                   |
| nucleoplasm                            | A-431     | nucleoplasm                                 | U-251 MG  | nucleoplasm                                |
| nucleoplasm, nuclear membrane          | A-431     | nucleoplasm                                 | U-251 MG  | nucleoplasm, cytosol                       |
| nucleoplasm, midbody ring              | A-431     | nucleoplasm, plasma membrane, cytosol       |           |                                            |
| nucleoplasm                            | A549      | nucleoplasm                                 | PC-3      | nucleoplasm                                |
| cytosol                                | A-431     | cytosol                                     | U-251 MG  | cytosol                                    |
| nucleoplasm, vesicles                  | MCF7      | nucleoplasm                                 | PC-3      | nucleoplasm                                |
| nucleoplasm                            | HEK 293   | nucleoplasm                                 | PC-3      | nucleoplasm                                |
| nucleoplasm, plasma membrane           | A-431     | nucleoplasm                                 | U-251 MG  | nucleoplasm, plasma membrane               |
| nucleoplasm                            | A-431     | nucleoplasm                                 | SiHa      | nucleoplasm                                |
| vesicles, mitochondria                 | MCF7      | mitochondria                                |           |                                            |
| plasma membrane, cytosol               | A-431     | plasma membrane, cytosol                    | U-251 MG  | nucleoli fibrillar center, plasma membrane |
| endoplasmic reticulum                  | SH-SY5Y   | endoplasmic reticulum                       | PC-3      | endoplasmic reticulum                      |
| endoplasmic reticulum, golgi apparatus | A-431     | golgi apparatus                             | Hep G2    | endoplasmic reticulum, golgi apparatus     |
| nucleoplasm                            | U-251 MG  | nucleoplasm                                 | HUVEC     | nucleoplasm                                |
| nucleoplasm, golgi apparatus           | SH-SY5Y   | nucleoplasm                                 | SK-MEL-30 | nucleoplasm, golgi apparatus, vesicles     |
| nucleoplasm, nuclear bodies            | HeLa      | nucleoplasm                                 | PC-3      | nucleoplasm, nuclear bodies                |
| cytosol                                | A-431     | cytosol                                     | PC-3      | cytosol                                    |
| mitochondria                           | A-431     | cytosol                                     | U-251 MG  | mitochondria, cytosol                      |

|                                 |          |                               |                                        |
|---------------------------------|----------|-------------------------------|----------------------------------------|
| nuclear speckles                | A-431    | nuclear sU-251 MG             | nuclear speckles                       |
| nucleoplasm, nucleoli, vesicles | HaCaT    | vesicles                      |                                        |
| vesicles                        | PC-3     | nucleoplasm                   |                                        |
| nucleoplasm                     | U-2 OS   | vesicles                      |                                        |
| nucleoplasm                     | A549     | nucleoplaHep G2               | nucleoplasm                            |
| nucleoplasm, nucleoli fibr      | A-431    | nucleoplaU-251 MG             | nucleoplasm, nucleoli fibrillar cente  |
| cytosol                         | A-431    | cytosol U-251 MG              | cytosol                                |
| nuclear bodies                  | A-431    | nucleoplaASC TERT1            | nucleoplasm, nuclear bodies, golgi app |
| nucleoplasm, nucleoli, cytc     | A-431    | nucleoplaU-251 MG             | nucleoplasm, nucleoli, cytosol         |
| nucleoplasm, nucleoli, cytc     | A-431    | nucleoplaU-251 MG             | nucleoplasm, nucleoli, cytosol         |
| plasma membrane, cytosol        |          |                               |                                        |
| plasma membrane, mitochondria   | A-431    | plasma meU-251 MG             | mitochondria                           |
| mitochondria                    | A-431    | nucleoplaU-251 MG             | mitochondria                           |
| mitochondria                    | MCF7     | mitochondHEK 293              | mitochondria                           |
| mitochondria                    | MCF7     | mitochondria                  |                                        |
| nucleoplasm                     | U-2 OS   | nucleoplaHeLa                 | nucleoplasm                            |
| nucleoplasm, cytosol            | A-431    | nucleoplaU-251 MG             | nucleoplasm                            |
| nucleoplasm                     | A-431    | nucleoplaU-251 MG             | nucleoplasm                            |
| nucleoplasm, nuclear membr      | PC-3     | nucleoplasm, nuclear membrane |                                        |
| golgi apparatus                 |          |                               |                                        |
| intermediate filaments          | U-251 MG | intermediate filaments        |                                        |
| nucleoplasm                     | U-2 OS   | nucleoplaPC-3                 | nucleoplasm                            |
| nuclear speckles, cytosol       | U-251 MG | nuclear sHeLa                 | nuclear speckles                       |
| nuclear membrane, cytosol       | A-431    | nuclear rU-251 MG             | nuclear membrane, cytosol              |
| nuclear bodies, vesicles        | U-2 OS   | nuclear bA549                 | vesicles                               |
| nucleoli, vesicles              | A-431    | nucleoli, U-251 MG            | nucleoli, vesicles                     |
| nucleoplasm                     | A-431    | nucleoplaA549                 | nucleoplasm                            |
| nucleoplasm                     | Hep G2   | nucleoplasm, cytosol          |                                        |
| nucleoplasm, nuclear bodie      | A-431    | nucleoplaU-251 MG             | nucleoplasm, nuclear bodies, cytosol   |
| nucleoplasm                     | RH-30    | nucleoplaSK-MEL-30            | nucleoplasm, golgi apparatus, vesicles |
| nucleoplasm, mitochondria       | A-431    | nucleoplaU-251 MG             | nucleoplasm, mitochondria              |
| nuclear speckles                | HeLa     | nuclear speckles, cytosol     |                                        |
| nucleoplasm, nuclear speck      | HeLa     | nucleoplaSH-SY5Y              | nucleoplasm, nuclear speckles, plasma  |
| nucleoli, cytosol               | A-431    | nucleoli, U-251 MG            | nucleoli, cytosol                      |
| cytosol                         | A-431    | cytosol U-251 MG              | cytosol                                |
| cytosol                         | A-431    | nucleoplasm, cytosol          |                                        |
| actin filaments                 | U-2 OS   | actin filSH-SY5Y              | actin filaments                        |
| mitochondria                    | A-431    | mitochondU-251 MG             | mitochondria                           |
| mitochondria                    | A-431    | mitochondU-251 MG             | mitochondria                           |
| nucleoplasm                     | U-2 OS   | nucleoplaRH-30                | nucleoplasm                            |
| nucleoli                        | A-431    | nucleoli, U-251 MG            | nucleoli                               |
| nucleoli                        | A-431    | nucleoli U-251 MG             | nucleoli                               |
| nuclear membrane, plasma n      | A-431    | nucleoli, HaCaT               | plasma membrane, cell junctions        |
| nucleoplasm, cytosol            | MCF7     | nucleoplaA549                 | nucleoplasm, cytosol                   |
| nucleoplasm                     | A-431    | nucleoplaU-251 MG             | nucleoplasm                            |
| nucleoplasm                     | A-431    | nucleoplaU-251 MG             | nucleoplasm                            |
| nuclear speckles, cytosol,      | A-431    | cytosol, cU-251 MG            | cytosol, cytoplasmic bodies            |
| cytosol                         | A549     | cytosol                       |                                        |
| nucleoplasm                     | MCF7     | nucleoplaPC-3                 | nucleoplasm                            |
| nucleoplasm                     | HEK 293  | nucleoplaHeLa                 | nucleoplasm                            |
| nucleoplasm, cytosol            | A-431    | nucleoplaU-251 MG             | nucleoplasm, cytosol                   |
| nuclear speckles                | A-431    | nuclear sU-251 MG             | nuclear speckles                       |
| nucleoplasm                     | U-2 OS   | nucleoplaHEK 293              | nucleoplasm                            |
| rods & rings                    | BJ       | nucleoplaSK-MEL-30            | nucleoplasm                            |
| cell junctions                  | A-431    | cell junctions                |                                        |

|                                               |          |                                                   |          |                                                   |
|-----------------------------------------------|----------|---------------------------------------------------|----------|---------------------------------------------------|
| plasma membrane vesicles                      | A-431    | plasma membrane vesicles                          | U-251 MG | plasma membrane vesicles                          |
| plasma membrane mitochondria                  | U-2 OS   | vesicles, SH-SY5Y                                 | U-251 MG | vesicles, plasma membrane mitochondria, cytosol   |
| mitochondria, cytosol                         | U-251 MG | mitochondria, cytosol                             | U-251 MG | mitochondria, cytosol                             |
| nucleoplasm                                   | A-431    | nucleoplasm, nucleoli                             | U-251 MG | nucleoplasm, nucleoli fibrillar center            |
| nucleoplasm, nucleoli                         | U-251 MG | nucleoplasm, nucleoli, cytosol                    | U-251 MG | nucleoplasm, nucleoli, cytosol                    |
| nuclear bodies                                | SiHa     | nucleoplasm                                       | U-251 MG | nucleoplasm                                       |
| midbody                                       |          |                                                   |          |                                                   |
| focal adhesion sites                          | MCF7     | focal adhesion sites                              | U-251 MG | focal adhesion sites                              |
| nucleoplasm                                   | EFO-21   | nucleoplasm                                       | U-251 MG | nucleoplasm                                       |
| nucleoli fibrillar center                     | A-431    | nucleoli fibrillar center                         | U-251 MG | nucleoli fibrillar center, plasma membrane        |
| nucleoplasm, cytosol                          | A-431    | nucleoplasm, cytosol                              | U-251 MG | nucleoplasm, cytosol                              |
| vesicles, cytosol                             | SH-SY5Y  | plasma membrane, cytosol                          | U-251 MG | plasma membrane, cytosol                          |
| vesicles                                      | A-431    | vesicles                                          | U-251 MG | vesicles                                          |
| nucleoplasm                                   |          |                                                   |          |                                                   |
| nuclear bodies                                | A-431    | nucleoplasm                                       | U-251 MG | nucleoplasm                                       |
| nucleoplasm, cytosol                          | MCF7     | nucleoplasm                                       | U-251 MG | nucleoplasm                                       |
| nucleoplasm                                   | RH-30    | nucleoplasm                                       | U-251 MG | nucleoplasm                                       |
| nucleoli, cytosol                             | A-431    | cytosol                                           | U-251 MG | golgi apparatus, cytosol                          |
| vesicles                                      | HaCaT    | nucleoplasm, vesicles                             | U-251 MG | nucleoplasm, vesicles                             |
| nucleoplasm, mitochondria                     | A-431    | nucleoplasm, mitochondria                         | U-251 MG | nucleoplasm, mitochondria                         |
| nucleoplasm                                   | Hep G2   | nucleoplasm                                       | U-251 MG | nucleoplasm                                       |
| nucleoplasm                                   | A-431    | nucleoplasm                                       | U-251 MG | nucleoplasm                                       |
| intermediate filaments                        |          |                                                   |          |                                                   |
| intermediate filaments                        | RH-30    | intermediate filaments                            | U-251 MG | intermediate filaments                            |
| intermediate filaments                        | U-251 MG | intermediate filaments                            | U-251 MG | intermediate filaments                            |
| nucleoplasm, vesicles, intermediate filaments | U-251 MG | nucleoplasm, vesicles, intermediate filaments     | U-251 MG | nucleoplasm, vesicles, intermediate filaments     |
| nucleoplasm, plasma membrane                  | U-251 MG | nucleoplasm, plasma membrane                      | U-251 MG | nucleoplasm, plasma membrane                      |
| cytosol                                       | A-431    | cytosol                                           | U-251 MG | cell junctions                                    |
| nucleoplasm, mitochondria, cytosol            | A-431    | nucleoplasm, cytosol                              | U-251 MG | nucleoplasm, cytosol                              |
| nucleoplasm                                   |          |                                                   |          |                                                   |
| nucleoplasm                                   | U-2 OS   | nucleoplasm                                       | U-251 MG | nucleoplasm                                       |
| nucleoplasm, vesicles                         | A-431    | nucleoplasm, vesicles                             | U-251 MG | nucleoplasm, vesicles                             |
| nucleoplasm, cytosol                          | A-431    | nucleoplasm, cytosol                              | U-251 MG | nucleoplasm, cytosol                              |
| nucleoplasm, plasma membrane                  | A-431    | nucleoplasm, plasma membrane                      | U-251 MG | nucleoplasm, plasma membrane                      |
| nucleoplasm                                   | Hep G2   | nucleoplasm                                       | U-251 MG | nucleoplasm                                       |
| nucleoplasm                                   | A549     | nucleoplasm, nuclear bodies                       | U-251 MG | nucleoplasm, nuclear bodies                       |
| nuclear bodies                                | RT4      | nucleoplasm, nuclear bodies                       | U-251 MG | nucleoplasm, nuclear bodies                       |
| nucleoplasm                                   | A-431    | nucleoplasm                                       | U-251 MG | nucleoplasm                                       |
| nucleoplasm                                   | U-251 MG | nucleoplasm                                       | U-251 MG | nucleoplasm                                       |
| nucleoplasm                                   | U-251 MG | nucleoplasm                                       | U-251 MG | nucleoplasm                                       |
| nucleoplasm                                   | A-431    | nucleoplasm                                       | U-251 MG | nucleoplasm                                       |
| nucleoplasm                                   | U-2 OS   | nucleoplasm, centrosome, cytosol                  | U-251 MG | nucleoplasm, centrosome, cytosol                  |
| cytosol                                       |          |                                                   |          |                                                   |
| cytosol                                       | MCF7     | cytosol                                           | U-251 MG | golgi apparatus, plasma membrane, cytosol         |
| golgi apparatus, vesicles                     | MCF7     | nucleoli                                          | U-251 MG | vesicles                                          |
| nucleoplasm, cytosol                          | A-431    | nucleoplasm, cytosol                              | U-251 MG | nucleoplasm, cytosol                              |
| nucleoli, nuclear speckles                    | A-431    | nucleoli, nuclear speckles                        | U-251 MG | nucleoli, nuclear speckles                        |
| nucleoli, vesicles, mitochondria              | A-431    | nucleoli fibrillar center, vesicles, mitochondria | U-251 MG | nucleoli fibrillar center, vesicles, mitochondria |
| mitochondria                                  | Hep G2   | mitochondria                                      | U-251 MG | mitochondria                                      |
| nucleoplasm                                   | A-431    | nucleoplasm                                       | U-251 MG | nucleoplasm                                       |
| nucleoplasm                                   | HeLa     | nucleoplasm, golgi apparatus                      | U-251 MG | nucleoplasm, golgi apparatus                      |
| nucleoplasm, plasma membrane                  | HeLa     | plasma membrane                                   | U-251 MG | plasma membrane                                   |

|                                  |           |                         |                                       |
|----------------------------------|-----------|-------------------------|---------------------------------------|
| centriolar satellite             | U-2 OS    | cell juncA-431          | cell junctions, centriolar satellite  |
| centriolar satellite, cyto       | U-2 OS    | centrosomA-431          | cell junctions, centriolar satellite, |
| microtubules, cytosol            | U-251 MG  | cytosol Hep G2          | cytosol                               |
| vesicles, plasma membrane        |           |                         |                                       |
| nucleoplasm                      | A-431     | nucleoplaU-251 MG       | nucleoplasm                           |
| nucleoplasm                      | A-431     | nucleoplaU-251 MG       | nucleoplasm                           |
| nucleoplasm                      |           |                         |                                       |
| mitochondria                     | U-251 MG  | mitochondria            |                                       |
| plasma membrane                  | EFO-21    | plasma membrane         |                                       |
| nucleoplasm                      | U-251 MG  | nucleoplasm, centrosome |                                       |
| plasma membrane                  | RH-30     | nucleoplaPC-3           | plasma membrane                       |
| microtubules, cytokinetic bridge |           |                         |                                       |
| nucleoplasm                      | HEL       | nucleoplaSK-MEL-30      | nucleoplasm                           |
| cytosol                          | U-2 OS    | nucleoplasm, cytosol    |                                       |
| endoplasmic reticulum, cyt       | PC-3      | cytosol                 |                                       |
| nuclear speckles                 | A-431     | nuclear sU-251 MG       | nuclear speckles                      |
| nucleoplasm                      | U-2 OS    | nucleoplaBJ             | nucleoplasm                           |
| plasma membrane                  | PC-3      | plasma membrane         |                                       |
| actin filaments                  |           |                         |                                       |
| actin filaments, mitochondr      | A-431     | actin filHEK 293        | actin filaments, cytosol              |
| cytosol                          | A549      | cytosol                 |                                       |
| cytosol                          | A-431     | actin filaA549          | actin filaments, cytosol              |
| golgi apparatus                  |           |                         |                                       |
| nucleoplasm, nucleoli, mitc      | U-2 OS    | nucleoli, RH-30         | nucleoplasm, nucleoli, mitochondria   |
| nucleoplasm                      | A-431     | nucleoplasm, cytosol    |                                       |
| nuclear speckles, intermec       | A-431     | nuclear sU-251 MG       | intermediate filaments                |
| nucleoplasm                      | U-2 OS    | mitochondRH-30          | nucleoplasm, mitochondria             |
| nucleoli, mitochondria           | A-431     | mitochondU-251 MG       | mitochondria                          |
| nucleoplasm, plasma membræ       | U-251 MG  | plasma meA549           | nucleoplasm, plasma membrane          |
| nucleoplasm, cytosol             | ASC TERT1 | nucleoplaAF22           | nucleoplasm                           |
| nucleoplasm, nuclear bodiè       | RH-30     | nucleoplaPC-3           | nucleoplasm, nuclear bodies           |
| nuclear speckles, golgi apar     | A-431     | nuclear sU-251 MG       | nuclear speckles, golgi apparatus     |
| cytosol                          | A-431     | plasma meU-251 MG       | plasma membrane, cytosol              |
| nucleoplasm                      | BJ        | nucleoplasm, golgi      | apparatus                             |
| nuclear speckles                 | HEK 293   | nuclear sRH-30          | nuclear speckles                      |
| cytosol                          |           |                         |                                       |
| nucleoplasm, nucleoli            | U-251 MG  | nucleoplaHEK 293        | nucleoli                              |
| plasma membrane                  |           |                         |                                       |
| nucleoplasm, vesicles, cyto      | A-431     | nucleoplaU-251 MG       | nucleoplasm, vesicles                 |
| nucleoplasm                      | A549      | nucleoplasm             |                                       |
| nucleoplasm                      | PC-3      | nucleoplasm             |                                       |
| cytosol                          | SH-SY5Y   | cytosol                 |                                       |
| cytosol                          | A-431     | cytosol U-251 MG        | cytosol                               |
| cytosol                          | SH-SY5Y   | cytosol                 |                                       |
| nucleoplasm, cytosol             | A-431     | nucleoplaU-251 MG       | nucleoplasm, cytosol                  |
| nucleoplasm                      | A549      | nucleoplasm             |                                       |
| plasma membrane                  | A-431     | nucleoplaU-251 MG       | nucleoplasm, plasma membrane          |
| nuclear speckles                 | HEK 293   | nuclear sHeLa           | nuclear speckles                      |
| nuclear speckles                 | HEK 293   | nuclear sHeLa           | nuclear speckles                      |
| golgi apparatus                  |           |                         |                                       |
| nucleoplasm                      | HEK 293   | nucleoplaHeLa           | nucleoplasm                           |
| nucleoplasm                      | HEK 293   | nucleoplaPC-3           | nucleoplasm, cytosol                  |
| cytosol                          | SH-SY5Y   | cytosol                 |                                       |
| cytosol                          | U-251 MG  | vesicles, cytosol       |                                       |
| cytosol                          | HEK 293   | vesicles A549           | centrosome, cytosol                   |



|                                     |          |                              |                                        |
|-------------------------------------|----------|------------------------------|----------------------------------------|
| vesicles                            | A-431    | vesicles HEK 293             | vesicles                               |
| nucleoplasm                         | A-431    | nucleoplaHeLa                | nucleoplasm                            |
| nucleoplasm, cytosol                | U-2 OS   | nucleoplaA-431               | nucleoplasm, cytosol                   |
| nucleoplasm, cytosol                | U-2 OS   | nucleoplaA-431               | nucleoplasm, cytosol                   |
| nucleoplasm                         | MCF7     | nucleoplaHeLa                | nucleoplasm                            |
| nucleoplasm, nucleoli               |          |                              |                                        |
| endoplasmic reticulum               |          |                              |                                        |
| mitochondria                        | A-431    | mitochondA549                | mitochondria                           |
| centrosome                          | A-431    | nucleoplaU-251 MG            | centrosome                             |
| nucleoplasm                         |          |                              |                                        |
| nucleoplasm                         | PC-3     | nucleoplasm                  |                                        |
| plasma membrane, cytosol            | HeLa     | plasma mePC-3                | plasma membrane, cytosol               |
| nucleoplasm, cytosol                | A-431    | nucleoplaU-251 MG            | nucleoplasm                            |
| cytosol                             | A-431    | nucleoplaRH-30               | nucleoplasm, cytosol                   |
| nucleoplasm, centrosome             |          |                              |                                        |
| cell junctions                      | MCF7     | cell juncSK-MEL-30           | nucleoplasm, cell junctions            |
| nucleoplasm                         | U-251 MG | nucleoplasm                  |                                        |
| vesicles                            |          |                              |                                        |
| mitochondria                        | U-2 OS   | mitochondHaCaT               | nucleoplasm, mitochondria              |
| centrosome                          |          |                              |                                        |
| cytosol                             | U-251 MG | centrosome, cytosol          |                                        |
| nucleoplasm, cytosol                | A-431    | nucleoplaU-251 MG            | nucleoplasm, nuclear membrane, cytosol |
| nucleoplasm, cytosol                | SH-SY5Y  | nucleoplasm                  |                                        |
| nucleoplasm, cytosol                | A-431    | nucleoplaU-251 MG            | nucleoplasm, cytosol                   |
| vesicles                            | A-431    | vesicles U-251 MG            | vesicles                               |
| nucleoli, plasma membrane,          | A-431    | nucleoli U-251 MG            | nucleoli, plasma membrane, cytosol     |
| plasma membrane                     | MCF7     | nucleoplasm, plasma membrane |                                        |
| nucleoplasm, cytosol                | A-431    | nucleoplaU-251 MG            | nucleoplasm, cytosol                   |
| nucleoplasm                         | A-431    | nucleoplaU-251 MG            | nucleoplasm                            |
| nuclear bodies, cytosol             | A-431    | nuclear bU-251 MG            | nuclear bodies, cytosol                |
| cytosol                             | A-431    | nuclear bU-251 MG            | nuclear bodies, cytosol                |
| vesicles                            | HaCaT    | vesicles                     |                                        |
| vesicles                            | HeLa     | vesicles                     |                                        |
| nucleoplasm, mitochondria           | A-431    | nucleoplaU-251 MG            | nucleoplasm, mitochondria              |
| centrosome                          |          |                              |                                        |
| nucleoplasm, nucleoli fibr          | A-431    | nucleoplaPC-3                | nucleoplasm, nucleoli                  |
| nucleoplasm, vesicles               | SH-SY5Y  | nucleoplaSK-MEL-30           | nucleoplasm, vesicles                  |
| nucleoplasm, nucleoli               | A-431    | nucleoplaU-251 MG            | nucleoplasm, nucleoli, plasma membrane |
| plasma membrane, actin filaments    |          |                              |                                        |
| nucleoplasm, vesicles               | A-431    | nucleoplaPC-3                | nucleoplasm, vesicles                  |
| nuclear membrane                    | A-431    | nuclear nPC-3                | nuclear membrane                       |
| nuclear membrane, nucleoli          | A-431    | nuclear nPC-3                | nuclear membrane, nucleoli             |
| nucleoplasm                         | A-431    | nucleoplaA549                | nucleoplasm, intermediate filaments    |
| golgi apparatus                     | A-431    | golgi appU-251 MG            | golgi apparatus                        |
| cytosol                             | A-431    | nucleoplaU-251 MG            | cytosol                                |
| nucleoplasm, cytosol                | A-431    | nucleoplaHep G2              | nucleoplasm, cytosol                   |
| peroxisomes                         | A-431    | peroxisomU-251 MG            | peroxisomes                            |
| peroxisomes                         | A-431    | peroxisomU-251 MG            | peroxisomes                            |
| nucleoplasm                         | A-431    | nucleoplaU-251 MG            | nucleoplasm                            |
| nucleoplasm, cytosol                | HEL      | nucleoplaSK-MEL-30           | nucleoplasm, cytosol                   |
| endoplasmic reticulum, rods & rings |          |                              |                                        |
| nucleoplasm                         |          |                              |                                        |
| nucleoplasm, vesicles               | A-431    | nucleoplaU-251 MG            | nucleoplasm, centrosome, cytosol       |
| nucleoplasm                         | A-431    | nucleoplaU-251 MG            | nucleoplasm                            |

|                              |           |                                       |                                              |
|------------------------------|-----------|---------------------------------------|----------------------------------------------|
| nucleoplasm, cytosol         | A-431     | nucleoplaU-251 MG                     | nucleoplasm, cytosol                         |
| nucleoplasm, cytosol         | MCF7      | nucleoplasm                           |                                              |
| cytosol                      | A-431     | cytosol U-251 MG                      | microtubules, cytosol                        |
| cytosol                      | U-251 MG  | cytosol                               |                                              |
| nucleoplasm, plasma membrane | SH-SY5Y   | plasma membrane                       | nucleoplasm, nuclear bodies, plasma membrane |
| cell junctions               |           | cell junctions                        |                                              |
| cytosol                      | A-431     | cell junctions U-251 MG               | cell junctions, cytosol                      |
| vesicles                     |           |                                       |                                              |
| nucleoplasm                  | U-2 OS    | nucleoplaU-251 MG                     | nucleoplasm                                  |
| mitochondria                 | PC-3      | mitochondria                          |                                              |
| nucleoplasm                  | A-431     | nucleoplaPC-3                         | nucleoplasm                                  |
| nucleoplasm                  | A-431     | nucleoplasm                           |                                              |
| cytosol                      | A-431     | cytosol U-251 MG                      | cytosol                                      |
| cytosol                      | MCF7      | cytosol                               |                                              |
| nucleoplasm                  | U-251 MG  | nucleoplaA549                         | nucleoplasm                                  |
| nucleoplasm                  | U-251 MG  | nucleoplaA549                         | nucleoplasm                                  |
| cytosol                      |           |                                       |                                              |
| cytosol                      | A-431     | cytosol U-251 MG                      | cytosol                                      |
| nucleoplasm                  |           |                                       |                                              |
| nucleoplasm                  | A-431     | nucleoplaHaCaT                        | nucleoplasm, cytosol                         |
| endoplasmic reticulum        | A-431     | endoplasmic reticulum U-251 MG        | endoplasmic reticulum                        |
| mitochondria                 | A-431     | mitochondria U-251 MG                 | mitochondria                                 |
| mitochondria                 | A-431     | mitochondria U-251 MG                 | mitochondria                                 |
| cytosol                      | A-431     | cytosol U-251 MG                      | cytosol                                      |
| cytosol                      | A-431     | cytosol U-251 MG                      | cytosol                                      |
| cytosol                      | MCF7      | cytosol A549                          | cytosol                                      |
| vesicles                     | U-2 OS    | vesicles A-431                        | vesicles                                     |
| cytosol                      |           |                                       |                                              |
| nucleoli, cytosol            | A-431     | nucleoli, U-251 MG                    | cytosol                                      |
| nucleoli, cytosol            | A-431     | cytosol U-251 MG                      | nucleoli, cytosol                            |
| nucleoplasm                  | HEK 293   | nucleoplasm                           |                                              |
| nucleoplasm                  | MCF7      | nucleoplasm                           |                                              |
| nuclear bodies               | U-251 MG  | nuclear bodies                        |                                              |
| aggresome                    |           |                                       |                                              |
| nucleoplasm, cytosol         | A-431     | nucleoplaU-251 MG                     | nucleoplasm                                  |
| nucleoplasm, nucleoli        | HEK 293   | nucleoplaHep G2                       | nucleoplasm, nucleoli                        |
| nucleoli                     | HEK 293   | nucleoli Hep G2                       | nucleoplasm, nucleoli                        |
| midbody                      | AF22      | nucleoplaHUVEC                        | nucleoplasm, cleavage furrow, mitotic        |
| nucleoplasm                  | A-431     | nucleoplaU-251 MG                     | nucleoplasm                                  |
| plasma membrane, centriole   | SK-MEL-30 | golgi apparatus, centriolar satellite |                                              |
| cytokinetic bridge, cytosol  |           |                                       |                                              |
| cytosol                      |           |                                       |                                              |
| nucleoplasm                  | A-431     | nucleoplaU-251 MG                     | nucleoplasm                                  |
| nucleoplasm                  | U-251 MG  | nucleoplaEFO-21                       | nucleoplasm                                  |
| cytokinetic bridge, cytosol  |           |                                       |                                              |
| cytosol                      |           |                                       |                                              |
| nucleoli, cytosol            | A-431     | cytosol U-251 MG                      | cytosol                                      |
| cytokinetic bridge, cytosol  |           |                                       |                                              |
| vesicles                     | A549      | vesicles                              |                                              |
| cytosol                      | U-251 MG  | cytosol HeLa                          | nucleoplasm, cytosol                         |
| mitochondria                 |           |                                       |                                              |
| nucleoplasm, vesicles        | RH-30     | nucleoplasm, plasma membrane          |                                              |
| nucleoplasm                  | RH-30     | nucleoplasm                           |                                              |
| plasma membrane, cytosol     | RH-30     | golgi apparatus                       |                                              |
| golgi apparatus, cytosol     | A-431     | cytosol U-251 MG                      | cytosol                                      |

|                                  |           |                                 |                                        |
|----------------------------------|-----------|---------------------------------|----------------------------------------|
| nucleoplasm, vesicles            | AF22      | nucleoplasm, vesicles           | nucleoplasm, vesicles                  |
| vesicles                         | HaCaT     | vesicles                        |                                        |
| cytosol                          | A-431     | cytosol U-251 MG                | cytosol                                |
| nucleoplasm, plasma membrane     | A-431     | nucleoplasm, MCF7               | nucleoplasm, plasma membrane           |
| cytokinetic bridge, cytosol      | U-251 MG  | cytosol MCF7                    | nucleoplasm, cytosol                   |
| mitochondria                     | HEK 293   | cytokinetic NB-4                | mitochondria                           |
| plasma membrane, focal adhesion  | MCF7      | plasma membrane, HaCaT          | plasma membrane, focal adhesion sites  |
| vesicles                         | A-431     | vesicles U-251 MG               | vesicles                               |
| plasma membrane, cytosol         | A-431     | cytosol                         |                                        |
| nucleoplasm, cytosol             | A-431     | nucleoplasm, U-251 MG           | nucleoplasm, cytosol                   |
| nucleoplasm                      | A-431     | nucleoplasm, U-251 MG           | nucleoplasm                            |
| nucleoplasm, golgi apparatus     | A-431     | nucleoplasm, U-251 MG           | nucleoplasm                            |
| centrosome, cytosol              | A-431     | centrosome, U-251 MG            | centrosome                             |
| vesicles                         | A-431     | vesicles U-251 MG               | vesicles                               |
| nucleoplasm, cytosol             | A-431     | cytosol U-251 MG                | nucleoplasm, cytosol                   |
| nucleoli, cytosol                | HEK 293   | cytosol A549                    | nucleoplasm, nucleoli, cytosol         |
| nucleoplasm, cytosol             | HEK 293   | nucleoplasm, cytosol            |                                        |
| nucleoplasm, vesicles            | U-2 OS    | nucleoplasm, U-251 MG           | nucleoplasm, vesicles, cytosol         |
| cytosol                          | Hep G2    | cytosol                         |                                        |
| nucleoli fibrillar center        | U-2 OS    | nucleoli SK-MEL-30              | nucleoli fibrillar center, endoplasmic |
| nucleoplasm, nucleoli            | U-2 OS    | nucleoplasm, RH-30              | nucleoli                               |
| plasma membrane, cytosol         |           |                                 |                                        |
| mitochondria                     |           |                                 |                                        |
| nucleoplasm                      | MCF7      | nucleoplasm, HEK 293            | nucleoplasm                            |
| cytosol                          | MCF7      | cytosol A549                    | vesicles, cytosol                      |
| plasma membrane                  | A-431     | golgi apparatus, U-251 MG       | plasma membrane                        |
| microtubules                     | A-431     | microtubules, U-251 MG          | cytosol                                |
| nucleoplasm                      | A-431     | nucleoplasm, U-251 MG           | nucleoplasm, cytosol                   |
| nucleoplasm, cytosol             | U-251 MG  | nucleoplasm, MCF7               | nucleoplasm                            |
| nucleoplasm, mitochondria        | A549      | nucleoplasm, SiHa               | nucleoplasm, mitochondria              |
| vesicles                         | SH-SY5Y   | vesicles                        |                                        |
| cytosol                          | A-431     | cytosol U-251 MG                | cytosol                                |
| centriolar satellite, cytosol    | A-431     | nucleoplasm, U-251 MG           | nucleoplasm, cytosol                   |
| nucleoplasm                      | A-431     | nucleoplasm, U-251 MG           | nucleoplasm                            |
| endoplasmic reticulum            | A549      | endoplasmic reticulum           |                                        |
| nucleoplasm                      |           |                                 |                                        |
| golgi apparatus                  | MCF7      | vesicles, SiHa                  | golgi apparatus                        |
| nucleoplasm                      | A549      | nucleoplasm, cytokinetic bridge |                                        |
| nucleoplasm, cytosol             | MCF7      | nucleoplasm, A549               | nucleoplasm, centriolar satellite      |
| nucleoplasm, nuclear bodies      | PC-3      | nucleoplasm, SK-MEL-30          | nucleoplasm, nuclear bodies            |
| nucleoplasm                      | HaCaT     | nucleoplasm                     |                                        |
| nucleoplasm                      | A-431     | nucleoplasm, PC-3               | nucleoplasm                            |
| nucleoplasm                      | SK-MEL-30 | nucleoplasm                     |                                        |
| plasma membrane                  | A549      | plasma membrane, HeLa           | plasma membrane                        |
| mitochondria                     | A-431     | nucleoplasm, U-251 MG           | nucleoplasm, mitochondria              |
| nucleoplasm, nucleoli, cytosol   | A-431     | nucleoplasm, U-251 MG           | nucleoplasm, nucleoli, cytosol         |
| nucleoplasm, cell junctions      | HEK 293   | nucleoplasm, A549               | nucleoplasm, cell junctions            |
| vesicles                         | SH-SY5Y   | vesicles, PC-3                  | vesicles                               |
| nucleoplasm                      | HEK 293   | nucleoplasm, AF22               | nucleoplasm                            |
| nucleoplasm                      | AF22      | nucleoplasm                     |                                        |
| nuclear membrane, nucleoli       | A-431     | nuclear membrane, U-251 MG      | nuclear membrane, nucleoli             |
| nucleoplasm, centrosome, cytosol | A-431     | nucleoplasm, HEK 293            | nucleoplasm, golgi apparatus, cytosol  |
| nucleoplasm, mitochondria        | PC-3      | nucleoplasm, NB-4               | nucleoplasm, mitochondria              |
| nucleoplasm, cytosol             | A-431     | nucleoplasm, U-251 MG           | nucleoplasm, cytosol                   |
| nucleoplasm, cytosol             | U-251 MG  | nucleoplasm, cytosol            |                                        |

|                                 |                         |                          |                                        |
|---------------------------------|-------------------------|--------------------------|----------------------------------------|
| cytosol                         | A-431                   | nucleoplaU-251 MG        | cytosol                                |
| nuclear bodies, cytosol         | A-431                   | nuclear bU-251 MG        | nuclear bodies, cytosol                |
| cytosol                         | A-431                   | cytosol U-251 MG         | cytosol                                |
| nucleoplasm                     | A-431                   | nucleoplaU-251 MG        | nucleoplasm                            |
| nucleoplasm, nucleoli, cyto     | A-431                   | nucleoplaU-251 MG        | nucleoplasm, nucleoli                  |
| nucleoli, cytokinetic bric      | A-431                   | nucleoli U-251 MG        | nucleoli                               |
| nucleoli                        | A-431                   | nucleoli U-251 MG        | nucleoli                               |
| nucleoli                        | A-431                   | nucleoli U-251 MG        | nucleoli                               |
| nucleoplasm, cytosol            | U-251 MG                | nucleoplaSH-SY5Y         | nucleoplasm, cytosol                   |
| cytosol                         | A-431                   | nucleoli, U-251 MG       | cytosol                                |
| nucleoplasm                     | U-2 OS                  | nucleoplaMCF7            | nucleoplasm, nuclear membrane          |
| nucleoplasm                     | HeLa                    | nucleoplasm              |                                        |
| mitochondria                    | A-431                   | mitochondU-251 MG        | mitochondria                           |
| cytosol                         | U-251 MG                | cytosol SK-MEL-30        | nucleoplasm, cytosol                   |
| cytosol                         | A-431                   | nucleoplaU-251 MG        | nucleoplasm, nuclear bodies, cytosol   |
| cell junctions                  |                         |                          |                                        |
| plasma membrane, cell junc      | HaCaT                   | cell junctions           |                                        |
| intermediate filaments          | MCF7                    | nucleoplaHEK 293         | intermediate filaments                 |
| nucleoplasm, vesicles           | A-431                   | nucleoplaSK-MEL-30       | nucleoplasm, vesicles                  |
| mitochondria                    | A-431                   | mitochondU-251 MG        | mitochondria                           |
| intermediate filaments          |                         |                          |                                        |
| nucleoplasm                     | A-431                   | nucleoplaU-251 MG        | nucleoplasm                            |
| cytosol                         | A-431                   | plasma meU-251 MG        | cytosol                                |
| golgi apparatus, vesicles       | A-431                   | golgi appU-251 MG        | golgi apparatus                        |
| golgi apparatus                 | U-251 MG                | golgi apparatus          |                                        |
| nucleoplasm, vesicles           | A-431                   | nucleoplaU-251 MG        | nucleoplasm                            |
| nucleoplasm, vesicles           | A-431                   | nucleoplaU-251 MG        | nucleoplasm, vesicles                  |
| nucleoplasm, plasma membr       | U-2 OS                  | nucleoplaBJ              | nucleoplasm, plasma membrane           |
| vesicles                        | A-431                   | vesicles HEK 293         | vesicles                               |
| nucleoplasm                     | U-251 MG                | nucleoplaRH-30           | nucleoplasm, centriolar satellite, cyt |
| cytosol                         | U-251 MG                | cytosol                  |                                        |
| nucleoplasm, cytosol            | A-431                   | nucleoplaU-251 MG        | nucleoplasm, cytosol                   |
| nucleoplasm, mitochondria       | A-431                   | nucleoplaU-251 MG        | nucleoplasm, mitochondria              |
| nucleoplasm                     | U-251 MG                | nucleoplasm              |                                        |
| nucleoplasm                     |                         |                          |                                        |
| nucleoplasm                     | U-251 MG                | nucleoplasm              |                                        |
| nucleoplasm                     | A-431                   | nucleoplaU-251 MG        | nucleoplasm                            |
| cytosol                         | RH-30                   | nuclear bPC-3            | nucleoplasm, nuclear bodies, cytosol   |
| nucleoplasm, cytosol            | U-251 MG                | nucleoplasm, cytosol     |                                        |
| nucleoplasm                     | A-431                   | nucleoplaPC-3            | nucleoplasm                            |
| nucleoplasm, cytosol            | HEK 293                 | nucleoplaSH-SY5Y         | nucleoplasm                            |
| nucleoplasm, mitochondria       | A-431                   | nucleoplaU-251 MG        | nucleoplasm, mitochondria              |
| nucleoplasm, nucleoli fibrillar | center, golgi apparatus |                          |                                        |
| nucleoplasm, vesicles, cyto     | A-431                   | nucleoplaU-251 MG        | nucleoplasm, cytosol                   |
| nucleoplasm                     | A-431                   | nucleoplaU-251 MG        | nucleoplasm                            |
| nucleoplasm                     | U-251 MG                | nucleoplaRH-30           | nucleoplasm                            |
| vesicles                        | RH-30                   | vesicles                 |                                        |
| nucleoli                        | A-431                   | nucleoli U-251 MG        | nucleoli                               |
| cytosol                         | A-431                   | cytosol U-251 MG         | cytosol                                |
| golgi apparatus                 | U-251 MG                | golgi appA549            | golgi apparatus                        |
| nucleoplasm, cytosol            | U-251 MG                | nucleoplasm, cytosol     |                                        |
| vesicles                        | U-251 MG                | vesicles HeLa            | nucleoplasm, vesicles                  |
| nucleoplasm, cytosol            | A-431                   | nucleoplaU-251 MG        | nucleoplasm, centrosome, cytosol       |
| plasma membrane, cytosol        | A-431                   | nucleoplaU-251 MG        | nucleoplasm, plasma membrane, cytosol  |
| nucleoplasm, plasma membr       | U-251 MG                | plasma membrane, cytosol |                                        |

|                                   |           |                                                |           |                                       |
|-----------------------------------|-----------|------------------------------------------------|-----------|---------------------------------------|
| plasma membrane, cytosol          | A-431     | plasma membrane, cytosol                       | U-251 MG  | plasma membrane, cytosol              |
| nuclear membrane, plasma membrane | U-251 MG  | nucleoplasm, plasma membrane, cytosol          |           |                                       |
| golgi apparatus, vesicles         |           |                                                |           |                                       |
| plasma membrane                   | A549      | vesicles, AF22                                 |           | vesicles, plasma membrane             |
| nucleoli, vesicles                | HEK 293   | nucleoli, RH-30                                |           | nucleoli, vesicles                    |
| golgi apparatus                   | A-431     | golgi apparatus                                | U-251 MG  | golgi apparatus                       |
| golgi apparatus                   | A-431     | golgi apparatus                                | U-251 MG  | golgi apparatus                       |
| cytosol                           | A-431     | cytosol                                        | U-251 MG  | cytosol                               |
| cytosol                           | Hep G2    | cytosol                                        | SK-MEL-30 | cytosol                               |
| vesicles                          | A-431     | vesicles                                       |           |                                       |
| nuclear speckles                  | U-251 MG  | nuclear speckles                               | A549      | nuclear speckles                      |
| mitochondria                      | A-431     | mitochondria                                   | U-251 MG  | mitochondria                          |
| mitochondria, cytosol             | A-431     | cytosol                                        | U-251 MG  | cytosol                               |
| nucleoplasm, cytosol              | SH-SY5Y   | nucleoplasm, cytosol                           | AF22      | nucleoplasm, cytosol                  |
| nucleoplasm                       | U-2 OS    | nucleoplasm                                    | Hep G2    | nucleoplasm                           |
| mitochondria                      | A549      | mitochondria                                   | SiHa      | nucleoplasm, mitochondria             |
| nucleoplasm                       | U-2 OS    | nucleoplasm, cytosol                           | U-251 MG  | nucleoplasm, cytosol                  |
| nucleoplasm                       | U-2 OS    | nucleoplasm                                    | BJ        | nucleoplasm                           |
| nucleoplasm, cytosol              | U-2 OS    | cytosol                                        | A-431     | nucleoplasm, cytosol                  |
| nucleoplasm, cytosol              | MCF7      | nucleoplasm, cytosol                           | A549      | nucleoplasm, cytosol                  |
| nucleoplasm, cytosol              | Hep G2    | nucleoplasm, vesicles, cytosol                 |           |                                       |
| nucleoplasm, nuclear bodies       | SK-MEL-30 | nucleoplasm, cytosol                           |           |                                       |
| nucleoplasm, focal adhesions      | A-431     | nucleoplasm, cytosol                           | U-251 MG  | nucleoplasm, cytosol                  |
| nucleoplasm, cytosol              | A-431     | nucleoplasm                                    | U-251 MG  | nucleoplasm                           |
| golgi apparatus                   | U-251 MG  | golgi apparatus, vesicles                      |           |                                       |
| vesicles                          | A-431     | vesicles                                       | U-251 MG  | vesicles                              |
| golgi apparatus                   |           |                                                |           |                                       |
| golgi apparatus                   |           |                                                |           |                                       |
| nucleoplasm, golgi apparatus      | A-431     | nucleoplasm, cytosol                           | U-251 MG  | nucleoplasm, cytosol                  |
| nucleoplasm, lipid droplets       |           |                                                |           |                                       |
| cytosol                           | A-431     | cytosol                                        |           |                                       |
| golgi apparatus                   | A-431     | golgi apparatus                                | MCF7      | golgi apparatus                       |
| nucleoplasm, nucleoli, cytosol    | A-431     | nucleoplasm, cytosol                           | U-251 MG  | nucleoplasm, cytosol                  |
| nucleoplasm, cytosol              | A-431     | cytosol                                        | U-251 MG  | cytosol                               |
| cell junctions, cytosol           | SiHa      | focal adhesion sites, cytosol                  |           |                                       |
| plasma membrane, cytosol          | SiHa      | plasma membrane, focal adhesion sites, cytosol |           |                                       |
| golgi apparatus                   | A-431     | nucleoplasm, golgi apparatus                   | U-251 MG  | nucleoplasm, golgi apparatus          |
| nucleoplasm, cytosol              | A-431     | nucleoplasm, cytosol                           | U-251 MG  | nucleoplasm, cytosol                  |
| vesicles                          | HEK 293   | vesicles                                       |           |                                       |
| vesicles                          | HEK 293   | vesicles                                       |           |                                       |
| plasma membrane                   | A549      | plasma membrane                                |           |                                       |
| mitochondria, cytosol             |           |                                                |           |                                       |
| nucleoplasm, plasma membrane      | A-431     | plasma membrane, cytosol                       | U-251 MG  | plasma membrane, cytosol              |
| plasma membrane, cytosol          | A-431     | plasma membrane, cytosol                       | U-251 MG  | plasma membrane, cytosol              |
| nucleoplasm, cytosol              | A-431     | nucleoplasm, cytosol                           | U-251 MG  | nucleoplasm, cytosol                  |
| nucleoplasm, aggresome, cytosol   | RT4       | nucleoplasm, cytosol                           | U-2 OS    | nucleoplasm, cytosol                  |
| cytosol                           | A-431     | cytosol                                        | U-251 MG  | cytosol                               |
| plasma membrane, cytosol          | U-251 MG  | plasma membrane, cytosol                       | LHCN-M2   | nucleoplasm, plasma membrane, cytosol |
| nucleoplasm                       | Hep G2    | nucleoplasm                                    | SH-SY5Y   | nucleoplasm                           |
| nucleoplasm, nuclear bodies       | HEK 293   | nucleoplasm                                    | RH-30     | nucleoplasm                           |
| nuclear speckles, cytosol         | A-431     | nuclear speckles, cytosol                      |           |                                       |
| plasma membrane                   | SH-SY5Y   | plasma membrane, cytosol                       | RH-30     | plasma membrane, cytosol              |
| cytokinetic bridge, cytosol       |           |                                                |           |                                       |
| nucleoplasm, cytosol              |           |                                                |           |                                       |
| nucleoplasm                       | MCF7      | nucleoplasm                                    | HEL       | nucleoplasm                           |

|                                             |           |                                |                                        |
|---------------------------------------------|-----------|--------------------------------|----------------------------------------|
| nucleoplasm                                 | RH-30     | nucleoplaREH                   | nucleoplasm                            |
| nucleoplasm                                 | SH-SY5Y   | nucleoplaSiHa                  | nucleoplasm                            |
| nucleoli                                    | MCF7      | nucleoli, A549                 | nucleoli                               |
| nucleoli                                    | U-251 MG  | nucleoli PC-3                  | nucleoli                               |
| nucleoplasm, golgi apparatus                | A-431     | nucleoplaA549                  | nucleoplasm, golgi apparatus           |
| nucleoplasm                                 | U-2 OS    | nucleoplasm                    |                                        |
| golgi apparatus                             | U-2 OS    | golgi appA-431                 | golgi apparatus                        |
| cytosol                                     | SiHa      | cytosol RH-30                  | cytosol                                |
| cytosol                                     |           |                                |                                        |
| vesicles                                    | A-431     | vesicles U-251 MG              | vesicles                               |
| nucleoplasm, vesicles                       | U-2 OS    | nucleoplaHEL                   | nucleoplasm, centriolar satellite, cyt |
| vesicles                                    |           |                                |                                        |
| nucleoplasm, vesicles                       | U-2 OS    | vesicles                       |                                        |
| nuclear speckles, vesicles, plasma membrane |           |                                |                                        |
| vesicles                                    | ASC TERT1 | vesicles                       |                                        |
| nucleoplasm, midbody ring, SH-SY5Y          | SH-SY5Y   | nucleoplaRH-30                 | cytosol                                |
| nucleoplasm, nucleoli, cyto                 | MCF7      | nucleoplaRH-30                 | cytosol                                |
| nucleoplasm, cytokinetic t                  | MCF7      | nucleoplaRH-30                 | golgi apparatus                        |
| nucleoplasm, cytosol                        | U-2 OS    | nucleoplaPC-3                  | nucleoplasm                            |
| endoplasmic reticulum, cyto                 | HeLa      | golgi appSH-SY5Y               | cytosol                                |
| intermediate filaments, ag                  | U-251 MG  | intermediSH-SY5Y               | intermediate filaments                 |
| vesicles                                    | A-431     | nucleoplaU-251 MG              | nucleoplasm, vesicles                  |
| intermediate filaments                      |           |                                |                                        |
| vesicles                                    | HEK 293   | vesicles                       |                                        |
| nucleoplasm                                 | A549      | nucleoplaPC-3                  | nucleoplasm                            |
| nucleoplasm                                 | SH-SY5Y   | nucleoplaRH-30                 | nucleoplasm                            |
| cytosol                                     | A-431     | cytosol U-251 MG               | cytosol                                |
| cytosol                                     | A549      | cytosol                        |                                        |
| endoplasmic reticulum                       |           |                                |                                        |
| nucleoplasm, mitochondria                   | A549      | nucleoplaHaCaT                 | nucleoplasm, mitochondria              |
| nucleoplasm, cytosol                        | A-431     | nucleoplaU-251 MG              | nucleoplasm, cytosol                   |
| nucleoplasm, cytosol                        | A-431     | nucleoplaU-251 MG              | nucleoplasm, cytosol                   |
| cytosol                                     | A-431     | microtubuU-251 MG              | cytosol                                |
| plasma membrane, cytosol                    | A-431     | plasma meU-251 MG              | plasma membrane, cytosol               |
| nuclear membrane                            | U-251 MG  | nucleoplaHep G2                | nuclear membrane                       |
| centrosome                                  |           |                                |                                        |
| nuclear bodies, aggresome                   |           |                                |                                        |
| plasma membrane, cytosol                    |           |                                |                                        |
| vesicles, plasma membrane                   | A-431     | vesicles, U-251 MG             | vesicles                               |
| vesicles, plasma membrane,                  | A-431     | vesicles, U-251 MG             | nucleoplasm, vesicles, plasma membrane |
| plasma membrane                             | A-431     | plasma meHEL                   | plasma membrane                        |
| nucleoplasm                                 | U-251 MG  | nucleoplaSH-SY5Y               | nucleoplasm                            |
| cytosol                                     | A-431     | cytosol U-251 MG               | cytosol                                |
| vesicles, centriolar satel                  | U-251 MG  | vesicles, centriolar satellite |                                        |
| vesicles, centriolar satel                  | A-431     | vesicles, U-251 MG             | vesicles, centriolar satellite         |
| mitochondria                                | A-431     | mitochondU-251 MG              | mitochondria                           |
| plasma membrane, centriolar satellite       |           |                                |                                        |
| nucleoli                                    | HEK 293   | nucleoli                       |                                        |
| cytosol                                     |           |                                |                                        |
| cytosol                                     |           |                                |                                        |
| cytosol                                     | PC-3      | cytosol                        |                                        |
| vesicles                                    | HeLa      | vesicles SiHa                  | vesicles                               |
| nucleoplasm                                 | A-431     | nucleoplaU-251 MG              | nucleoplasm                            |
| cytosol                                     | A549      | cytosol                        |                                        |
| centriolar satellite                        | U-251 MG  | actin filaA549                 | actin filaments                        |

|                             |           |                                    |                                        |
|-----------------------------|-----------|------------------------------------|----------------------------------------|
| nucleoplasm                 | A-431     | nucleoplaU-251 MG                  | nucleoplasm, cytosol                   |
| nucleoplasm                 | A-431     | nucleoplaU-251 MG                  | nucleoplasm, cytosol                   |
| cytosol                     | A-431     | cytosol U-251 MG                   | cytosol                                |
| centrosome                  | RH-30     | centrosome, cytosol                |                                        |
| golgi apparatus             |           |                                    |                                        |
| cytosol                     | A-431     | cytosol U-251 MG                   | nucleoplasm, cytosol                   |
| nucleoplasm                 | A-431     | nucleoplaU-251 MG                  | nucleoplasm, nuclear bodies            |
| nucleoplasm, cytosol        | A-431     | nucleoplaU-251 MG                  | nucleoplasm, cytosol                   |
| cytosol                     | A-431     | cytosol U-251 MG                   | cytosol                                |
| endoplasmic reticulum       | A-431     | endoplasrU-251 MG                  | endoplasmic reticulum                  |
| vesicles                    | HeLa      | vesicles                           |                                        |
| nucleoli                    | A-431     | nucleoli U-251 MG                  | nucleoli                               |
| nucleoli                    | HEK 293   | nucleoli, aggresome                |                                        |
| golgi apparatus             | RH-30     | golgi appPC-3                      | golgi apparatus                        |
| cytosol                     | A-431     | cytosol U-251 MG                   | cytosol                                |
| nuclear speckles, cytoplasm | U-251 MG  | nuclear sHEK 293                   | nuclear speckles                       |
| mitochondria, cytosol       | A-431     | mitochondria, cytosol              |                                        |
| nucleoplasm, mitochondria,  | A-431     | mitochondU-251 MG                  | nucleoplasm, cytosol                   |
| golgi apparatus             | A-431     | golgi appU-251 MG                  | nucleoplasm, golgi apparatus, cytosol  |
| nucleoplasm, golgi apparat  | A-431     | nucleoplaU-251 MG                  | nucleoplasm, golgi apparatus           |
| cytosol                     |           |                                    |                                        |
| nucleoplasm                 | A-431     | nucleoplaU-251 MG                  | nucleoplasm                            |
| nucleoplasm                 | A-431     | nucleoplaU-251 MG                  | nucleoplasm                            |
| vesicles                    | SH-SY5Y   | nuclear membrane, vesicles         |                                        |
| centrosome                  | A-431     | centrosomU-251 MG                  | centrosome                             |
| centrosome                  |           |                                    |                                        |
| vesicles                    | A-431     | vesicles, U-251 MG                 | vesicles                               |
| plasma membrane, cytosol    | U-251 MG  | plasma membrane, cytosol           |                                        |
| endoplasmic reticulum, pl   | A-431     | endoplasrU-251 MG                  | endoplasmic reticulum, plasma membran  |
| cytosol                     | A-431     | golgi appU-251 MG                  | cytosol                                |
| cytosol                     | A-431     | plasma meU-251 MG                  | plasma membrane, cytosol               |
| nucleoplasm                 | RH-30     | nucleoplasm                        |                                        |
| nucleoplasm, plasma membr   | A-431     | nucleoplaSK-MEL-30                 | nucleoplasm, plasma membrane, mitochon |
| nucleoplasm, cytosol        | HeLa      | nucleoplaRH-30                     | nucleoplasm, plasma membrane           |
| plasma membrane             | SH-SY5Y   | plasma meRH-30                     | plasma membrane                        |
| nucleoplasm                 | SK-MEL-30 | nucleoplasm                        |                                        |
| nucleoplasm                 | RH-30     | nucleoplaSK-MEL-30                 | nucleoplasm                            |
| nucleoplasm, cytosol        | U-251 MG  | nucleoplaBJ                        | nucleoplasm, cytosol                   |
| mitochondria                | A-431     | mitochondria                       |                                        |
| nucleoplasm, nucleoli       | U-251 MG  | nucleoplasm, nucleoli, centrosome  |                                        |
| nucleoplasm                 | U-251 MG  | nucleoplaSK-MEL-30                 | nucleoplasm                            |
| nucleoplasm                 | SH-SY5Y   | nucleoplaSK-MEL-30                 | nucleoplasm                            |
| nucleoplasm, plasma membr   | U-2 OS    | nucleoplaA-431                     | nucleoplasm, plasma membrane, cytosol  |
| nuclear membrane            | A-431     | nuclear rU-251 MG                  | nuclear membrane                       |
| vesicles                    |           |                                    |                                        |
| mitochondria                |           |                                    |                                        |
| mitochondria, cytosol       | A-431     | cytosol U-251 MG                   | mitochondria, cytosol                  |
| mitochondria                | SH-SY5Y   | mitochondRH-30                     | mitochondria                           |
| nucleoli fibrillar center   | A-431     | nucleoli fibrillar center, cytosol |                                        |
| mitochondria                | A-431     | mitochondU-251 MG                  | mitochondria                           |
| cytosol                     |           |                                    |                                        |
| cytosol                     | A-431     | nucleoplaU-251 MG                  | cytosol                                |
| nucleoli                    | U-2 OS    | nucleoli Hep G2                    | nucleoli                               |
| vesicles                    | A-431     | vesicles HEK 293                   | vesicles                               |
| nucleoplasm, golgi apparat  | A-431     | nucleoplaU-251 MG                  | nucleoplasm, golgi apparatus           |

|                                         |           |                                           |
|-----------------------------------------|-----------|-------------------------------------------|
| golgi apparatus                         | SiHa      | nucleoplasm, golgi apparatus              |
| nucleoli, mitochondria                  | A-431     | mitochondria                              |
| mitochondria                            | HEK 293   | mitochondria                              |
| nucleoplasm, mitochondria               | A-431     | nucleoplasm, mitochondria                 |
| nucleoplasm                             | U-2 OS    | nucleoplasm                               |
| nucleoplasm, cytosol                    | A-431     | nucleoplasm                               |
| nucleoplasm, cytosol                    | HeLa      | nucleoplasm, cytosol                      |
| nuclear speckles                        | A-431     | nuclear speckles                          |
| cytosol                                 | U-2 OS    | cytosol                                   |
| mitochondria                            | A-431     | mitochondria                              |
| nucleoplasm, mitochondria               | BJ        | mitochondria                              |
| cytosol                                 | A-431     | cytosol                                   |
| nucleoli fibrillar center               | A-431     | nucleoli fibrillar center, microtubules   |
| nuclear speckles, cytosol, mitochondria | A-431     | nuclear speckles, cytosol                 |
| nucleoli, golgi apparatus               | A-431     | nucleoli                                  |
| nucleoplasm                             | A549      | nucleoplasm                               |
| nucleoplasm                             | HeLa      | nucleoplasm                               |
| plasma membrane, cytosol                | A-431     | plasma membrane, cytosol                  |
| golgi apparatus, plasma membrane        | A-431     | golgi apparatus, cytosol                  |
| microtubules                            | HEK 293   | microtubules                              |
| golgi apparatus, cytosol                |           |                                           |
| vesicles, lysosomes                     | A-431     | vesicles                                  |
| nucleoplasm                             | A-431     | nucleoplasm                               |
| nucleoplasm                             | A-431     | nucleoplasm                               |
| microtubules, cytosol                   | A-431     | microtubules, cytosol                     |
| cytosol                                 | U-2 OS    | cytosol                                   |
| cytosol                                 | U-251 MG  | cytosol                                   |
| cytosol                                 | A-431     | cytosol                                   |
| nucleoplasm, nucleoli fibrillar center  | A-431     | nucleoplasm, nucleoli fibrillar center    |
| nucleoli, actin filaments, mitochondria | A-431     | actin filaments, cytosol                  |
| mitochondria                            | HEK 293   | mitochondria                              |
| nucleoplasm                             | HeLa      | nucleoplasm                               |
| nucleoplasm                             | A-431     | nucleoplasm                               |
| nucleoplasm                             | BJ        | nucleoplasm, nuclear membrane             |
| nucleoplasm, plasma membrane            | A-431     | nucleoplasm, plasma membrane, cytosol     |
| golgi apparatus                         | BJ        | golgi apparatus, plasma membrane, cytosol |
| actin filaments, cytosol                | A-431     | actin filaments, cytosol                  |
| actin filaments                         |           |                                           |
| nucleoplasm, plasma membrane            | A-431     | plasma membrane                           |
| plasma membrane, cytosol                | A-431     | plasma membrane                           |
| golgi apparatus, vesicles               | U-251 MG  | golgi apparatus, vesicles                 |
| golgi apparatus, vesicles               | U-2 OS    | golgi apparatus, vesicles                 |
| microtubules, microtubule               | SK-MEL-30 | actin filaments                           |
| nucleoplasm                             | A-431     | nucleoplasm                               |
| plasma membrane, cytosol                | A-431     | plasma membrane, cytosol                  |
| nucleoplasm, golgi apparatus            | BJ        | nucleoplasm, golgi apparatus              |
| plasma membrane, actin filaments        | A-431     | plasma membrane, cytosol                  |
| plasma membrane, cytosol                |           |                                           |
| nucleoplasm, cytosol                    | RH-30     | nucleoplasm                               |
| cytosol                                 | A-431     | cytosol                                   |
| nucleoplasm, cytosol                    | A-431     | nucleoplasm, cytosol                      |
| nucleoplasm                             | HEK 293   | nucleoplasm                               |
| focal adhesion sites                    | U-251 MG  | focal adhesion sites                      |



|                                 |          |                                      |                                        |
|---------------------------------|----------|--------------------------------------|----------------------------------------|
| focal adhesion sites, cytcA-431 |          | focal adhU-251 MG                    | focal adhesion sites, cytosol          |
| golgi apparatus                 |          |                                      |                                        |
| cytosol                         | U-251 MG | cytosol                              |                                        |
| nucleoplasm                     | PC-3     | nucleoplaHaCaT                       | nucleoplasm                            |
| nucleoplasm, cytosol            | A-431    | nucleoplaU-251 MG                    | nucleoplasm, cytosol                   |
| nucleoplasm                     | A-431    | nucleoplasm                          |                                        |
| nucleoplasm, cytosol            | HeLa     | nucleoplasm                          |                                        |
| vesicles                        |          |                                      |                                        |
| nuclear bodies                  | MCF7     | nuclear bSH-SY5Y                     | nuclear bodies                         |
| plasma membrane, actin fila     | A-431    | plasma meU-251 MG                    | plasma membrane, actin filaments, cyto |
| mitochondria                    | A-431    | mitochondU-251 MG                    | mitochondria                           |
| mitochondria                    | A-431    | mitochondU-251 MG                    | mitochondria                           |
| nucleoli                        |          |                                      |                                        |
| nucleoplasm, cytosol            | U-251 MG | nucleoplaSH-SY5Y                     | cytosol                                |
| nucleoplasm, cytosol            | A-431    | cytosol U-251 MG                     | nucleoplasm, cytosol                   |
| mitochondria                    | A-431    | mitochondU-251 MG                    | mitochondria                           |
| mitochondria                    | U-251 MG | mitochondMCF7                        | mitochondria                           |
| nucleoplasm                     | MCF7     | nucleoplaA549                        | nucleoplasm                            |
| nucleoplasm, plasma membræ      | PC-3     | nucleoplaHaCaT                       | nucleoplasm, plasma membrane           |
| golgi apparatus                 | U-251 MG | vesicles HEK 293                     | golgi apparatus                        |
| nucleoplasm, nucleoli fibr      | A549     | nucleoplaSH-SY5Y                     | nucleoplasm, nucleoli fibrillar cente  |
| cytosol                         | A-431    | cytosol MCF7                         | cytosol                                |
| vesicles                        | SH-SY5Y  | vesicles                             |                                        |
| cell junctions, cytosol         | HEK 293  | cell junctions                       |                                        |
| nucleoplasm                     | A-431    | nucleoplaRH-30                       | nucleoplasm                            |
| cytosol                         | A-431    | vesicles U-251 MG                    | vesicles, cytosol                      |
| cytosol                         | A-431    | cytosol U-251 MG                     | cytosol                                |
| cytosol                         | A-431    | nucleoplaU-251 MG                    | nucleoplasm, plasma membrane, cytosol  |
| plasma membrane, cytosol        | A-431    | plasma meU-251 MG                    | plasma membrane, cytosol               |
| vesicles                        | SH-SY5Y  | vesicles                             |                                        |
| nucleoplasm, vesicles           | SH-SY5Y  | nucleoplasm, vesicles                |                                        |
| nucleoplasm                     | A-431    | nucleoplaU-251 MG                    | nucleoplasm                            |
| nucleoplasm                     | A-431    | nucleoplaU-251 MG                    | nucleoplasm                            |
| mitochondria                    | A-431    | mitochondU-251 MG                    | mitochondria                           |
| mitochondria                    | A-431    | mitochondU-251 MG                    | mitochondria                           |
| nucleoplasm                     | A-431    | nucleoplaU-251 MG                    | nucleoplasm                            |
| nucleoplasm, cytosol            | U-251 MG | nucleoplasm, nuclear bodies, cytosol |                                        |
| nucleoplasm, cytosol            |          |                                      |                                        |
| nucleoplasm, nuclear membr      | A-431    | nucleoplaU-251 MG                    | nucleoplasm, nuclear membrane          |
| nucleoplasm, cytosol            | A-431    | nucleoplaPC-3                        | nucleoplasm, cytosol                   |
| nucleoplasm                     | U-2 OS   | nucleoplaRH-30                       | nucleoplasm                            |
| nucleoplasm                     |          |                                      |                                        |
| nucleoplasm                     |          |                                      |                                        |
| nucleoplasm, cytosol            | A-431    | nucleoplaU-251 MG                    | nucleoplasm, cytosol                   |
| nucleoplasm                     | A-431    | nucleoplasm                          |                                        |
| nucleoplasm, mitochondria       | A-431    | nucleoplaU-251 MG                    | nucleoplasm, mitochondria              |
| mitochondria                    | U-2 OS   | mitochondA-431                       | mitochondria                           |
| nucleoplasm, cytosol            | A-431    | nucleoplaU-251 MG                    | nucleoplasm, cytosol                   |
| nucleoplasm                     | A-431    | nucleoplaU-251 MG                    | nucleoplasm                            |
| nucleoplasm                     | A-431    | nucleoplaMCF7                        | nucleoplasm                            |
| plasma membrane, cytosol        | A-431    | plasma membrane, cytosol             |                                        |
| plasma membrane, cytosol        | A-431    | plasma meU-251 MG                    | plasma membrane, cytosol               |
| cell junctions, cytosol         |          |                                      |                                        |
| nucleoli, cytosol               | BJ       | nucleoli, golgi apparatus, vesicles  |                                        |
| cytosol                         | A-431    | cytosol BJ                           | golgi apparatus, cytosol               |

|                                    |           |                                            |                                        |                        |
|------------------------------------|-----------|--------------------------------------------|----------------------------------------|------------------------|
| nucleoli, plasma membrane, cytosol | A-431     | nucleoli fibrillar center, cytosol         | A-431                                  | cytosol Hep G2 cytosol |
| nucleoplasm                        |           |                                            |                                        |                        |
| nuclear bodies                     | Hep G2    | nuclear bodies                             |                                        |                        |
| nucleoplasm, cytosol               | A-431     | nucleoplaU-251 MG                          | nucleoplasm, cytosol                   |                        |
| cytosol                            | A-431     | cytosol U-251 MG                           | cytosol                                |                        |
| nucleoplasm, cytosol               | U-251 MG  | nucleoplaHEK 293                           | nucleoplasm, cytosol                   |                        |
| microtubules                       | A-431     | microtubuU-251 MG                          | microtubules                           |                        |
| cytosol                            | U-251 MG  | cytosol                                    |                                        |                        |
| vesicles                           | A-431     | vesicles U-251 MG                          | vesicles, cytosol                      |                        |
| endosomes, lysosomes               | U-251 MG  | endosomes, lysosomes                       |                                        |                        |
| plasma membrane                    |           |                                            |                                        |                        |
| nucleoplasm, centrosome, cy        | A-431     | cytosol                                    |                                        |                        |
| nuclear membrane                   | MCF7      | nuclear rHEK 293                           | nuclear membrane, cytosol              |                        |
| nucleoplasm                        | U-251 MG  | nucleoplaPC-3                              | nucleoplasm, nucleoli fibrillar cente  |                        |
| vesicles, plasma membrane          | A-431     | plasma meU-251 MG                          | plasma membrane, cytosol               |                        |
| nuclear speckles                   | A-431     | nuclear sU-251 MG                          | nuclear speckles                       |                        |
| cytosol                            | A-431     | cytosol U-251 MG                           | cytosol                                |                        |
| nucleoli                           | MCF7      | nucleoli PC-3                              | nucleoli                               |                        |
| nucleoli fibrillar center          | MCF7      | nucleoli PC-3                              | nucleoli fibrillar center              |                        |
| nucleoplasm                        | A-431     | nucleoplaU-251 MG                          | nucleoplasm                            |                        |
| nuclear speckles                   |           |                                            |                                        |                        |
| cytosol                            | U-251 MG  | cytosol                                    |                                        |                        |
| plasma membrane                    | SK-MEL-30 | plasma membrane                            |                                        |                        |
| vesicles                           | U-2 OS    | vesicles                                   |                                        |                        |
| plasma membrane, cell junc         | HEK 293   | plasma membrane, cell junctions, aggresome |                                        |                        |
| plasma membrane, cell junc         | U-2 OS    | plasma meSK-MEL-30                         | cell junctions, cytosol                |                        |
| nuclear bodies, mitochondr         | A-431     | nuclear bRH-30                             | nuclear bodies, mitochondria           |                        |
| endoplasmic reticulum              | A-431     | endoplasrU-251 MG                          | endoplasmic reticulum                  |                        |
| nucleoplasm, cytoplasmic b         | A-431     | nucleoplaU-251 MG                          | nucleoplasm, cytoplasmic bodies        |                        |
| nucleoplasm, nucleoli, cyt         | A-431     | cytosol U-251 MG                           | nucleoplasm, cytosol                   |                        |
| nucleoplasm, cytosol               |           |                                            |                                        |                        |
| centrosome                         | MCF7      | centrosome                                 |                                        |                        |
| nucleoplasm                        | MCF7      | nucleoplaRH-30                             | nucleoplasm                            |                        |
| nuclear speckles, cytosol          | A-431     | nuclear sU-251 MG                          | nuclear speckles, cytosol              |                        |
| nucleoplasm                        | A-431     | nucleoplaU-251 MG                          | nucleoplasm, cytosol                   |                        |
| nucleoplasm                        | A-431     | nucleoplaU-251 MG                          | nucleoplasm                            |                        |
| nucleoplasm                        | A-431     | nucleoplaU-251 MG                          | nucleoplasm                            |                        |
| nucleoplasm, nucleoli              | RH-30     | nucleoplaHaCaT                             | nucleoplasm, nucleoli                  |                        |
| nucleoplasm                        | A-431     | nucleoplaU-251 MG                          | nucleoplasm                            |                        |
| nuclear membrane, vesicles         | MCF7      | nuclear rHEK 293                           | nuclear membrane, vesicles             |                        |
| nucleoplasm, plasma membr          | U-251 MG  | nucleoplasm, plasma membrane, cytosol      |                                        |                        |
| nucleoplasm, plasma membr          | A-431     | nucleoplaU-251 MG                          | nucleoplasm, plasma membrane, cytosol  |                        |
| golgi apparatus                    | A-431     | nucleoplaHep G2                            | nucleoplasm, golgi apparatus           |                        |
| nucleoplasm, cytosol               | SK-MEL-30 | nucleoplasm, cytosol                       |                                        |                        |
| vesicles                           |           |                                            |                                        |                        |
| golgi apparatus                    |           |                                            |                                        |                        |
| centrosome                         | A-431     | cell juncU-251 MG                          | centrosome                             |                        |
| centrosome                         | U-251 MG  | centrosomMCF7                              | cell junctions, centrosome             |                        |
| centrosome                         |           |                                            |                                        |                        |
| nucleoplasm, vesicles              | SiHa      | nucleoplaRH-30                             | nucleoplasm, vesicles                  |                        |
| nuclear speckles                   | A-431     | nuclear sU-251 MG                          | nuclear speckles, plasma membrane, int |                        |
| golgi apparatus, plasma me         | U-251 MG  | golgi apparatus, plasma membrane           |                                        |                        |
| intermediate filaments, ag         | U-251 MG  | intermediate filaments                     |                                        |                        |
| nucleoli, cytosol                  | A-431     | nucleoli, U-251 MG                         | nucleoli, cytosol                      |                        |

|                                 |          |                       |                                        |
|---------------------------------|----------|-----------------------|----------------------------------------|
| nuclear speckles                | A-431    | nuclear sU-251 MG     | nuclear speckles                       |
| nuclear speckles                | A-431    | nuclear sU-251 MG     | nuclear speckles                       |
| nucleoplasm, plasma membrane    | A-431    | nucleoplaU-251 MG     | nucleoplasm, plasma membrane, cytosol  |
| vesicles                        | A-431    | vesicles U-251 MG     | vesicles                               |
| nucleoplasm                     |          |                       |                                        |
| nucleoplasm, nucleoli           | PC-3     | nucleoplasm, nucleoli |                                        |
| nucleoplasm, vesicles           | U-251 MG | nucleoplaSH-SY5Y      | vesicles                               |
| vesicles                        |          |                       |                                        |
| nucleoplasm                     | SH-SY5Y  | nucleoplaRH-30        | nucleoplasm                            |
| nucleoplasm                     | K-562    | nucleoplasm           |                                        |
| nucleoplasm                     | K-562    | nucleoplasm           |                                        |
| nucleoplasm                     | K-562    | nucleoplasm           |                                        |
| nucleoplasm, cytosol            | MCF7     | nucleoplaHeLa         | nucleoplasm, cytosol                   |
| nucleoplasm                     | A-431    | nucleoplaMCF7         | nucleoplasm                            |
| plasma membrane                 | MCF7     | plasma membrane       |                                        |
| golgi apparatus                 | A-431    | golgi appU-251 MG     | golgi apparatus                        |
| golgi apparatus                 | A-431    | golgi appA549         | golgi apparatus                        |
| golgi apparatus                 | A549     | golgi apparatus       |                                        |
| nucleoplasm, cytokinetic bridge |          |                       |                                        |
| mitochondria, cytosol           | A-431    | nucleoplaU-251 MG     | cytosol                                |
| cytosol                         | A-431    | nucleoplasm           |                                        |
| nucleoplasm, centrosome         | MCF7     | nucleoplaRH-30        | nucleoplasm, centrosome, cytosol       |
| nucleoplasm                     | HEK 293  | nucleoplaSK-MEL-30    | nucleoplasm, centrosome                |
| nucleoplasm                     | A-431    | nucleoplaMCF7         | nucleoplasm                            |
| cytosol                         | U-251 MG | cytosol               |                                        |
| cytosol                         | A-431    | nucleoplaU-251 MG     | cytosol                                |
| endoplasmic reticulum, cyto     | A-431    | endoplasrU-251 MG     | endoplasmic reticulum, cytosol         |
| nucleoli fibrillar center       | A-431    | plasma meU-251 MG     | nucleoplasm, nucleoli fibrillar cente  |
| nucleoplasm                     | MCF7     | nucleoplaHEK 293      | nucleoplasm                            |
| nucleoplasm, golgi apparatus    | HEK 293  | nucleoplaBJ           | nucleoplasm, golgi apparatus, actin fi |
| nucleoplasm                     | A-431    | nucleoplaU-251 MG     | nucleoplasm                            |
| endoplasmic reticulum           | A-431    | endoplasrU-251 MG     | endoplasmic reticulum                  |
| nucleoplasm                     | U-251 MG | nucleoplaPC-3         | nucleoplasm                            |
| nucleoplasm                     | HEK 293  | nucleoplaSK-MEL-30    | nucleoplasm                            |
| vesicles                        | A-431    | vesicles U-251 MG     | vesicles                               |
| vesicles                        | A-431    | vesicles U-251 MG     | vesicles                               |
| vesicles                        |          |                       |                                        |
| vesicles                        | A-431    | vesicles HeLa         | nucleoplasm, vesicles                  |
| nucleoplasm, nucleoli fibr      | U-251 MG | nucleoplaHeLa         | nucleoplasm, nucleoli fibrillar cente  |
| cytosol                         | A-431    | nucleoplaU-251 MG     | cytosol                                |
| nucleoplasm, plasma membr       | A-431    | nucleoplaU-251 MG     | nucleoplasm, plasma membrane, cytosol  |
| cytosol                         | A-431    | cytosol U-251 MG      | cytosol                                |
| nucleoplasm, nucleoli           | SiHa     | nucleoplaPC-3         | nucleoplasm, nucleoli                  |
| nucleoplasm                     | A-431    | nucleoplaU-251 MG     | nucleoplasm                            |
| focal adhesion sites, cyt       | A-431    | plasma meU-251 MG     | focal adhesion sites, centriolar sate  |
| nucleoplasm, cytosol            |          |                       |                                        |
| cytosol                         | A-431    | nucleoli, U-251 MG    | cytosol                                |
| nucleoplasm, mitochondria       | HEK 293  | nucleoplaSH-SY5Y      | nucleoplasm, mitochondria              |
| vesicles                        |          |                       |                                        |
| cytosol                         | A-431    | nucleoplaU-251 MG     | nucleoplasm, cytosol                   |
| nucleoplasm, mitochondria       | A-431    | nucleoplaU-251 MG     | nucleoplasm, vesicles                  |
| mitochondria                    | A-431    | mitochondU-251 MG     | mitochondria                           |
| mitochondria                    | U-251 MG | mitochondPC-3         | nucleoli, mitochondria                 |
| nucleoplasm                     | RH-30    | nucleoplasm, vesicles |                                        |
| golgi apparatus, vesicles,      | A-431    | golgi appU-251 MG     | golgi apparatus, vesicles, cytosol     |

cytosol  
 endoplasmic reticulum, cytoA-431 endoplasmU-251 MG endoplasmic reticulum, cytosol  
 nucleoplasm A-431 cytosol U-251 MG nucleoplasm, cytosol  
 nucleoli SK-MEL-30nucleoli  
 mitochondria, cytosol A-431 mitochondU-251 MG mitochondria  
 nucleoplasm A-431 nucleoplaU-251 MG nucleoplasm, cytosol  
 nucleoli, cytosol A-431 nucleoli, U-251 MG cytosol  
 nucleoplasm A-431 nucleoplaU-251 MG nucleoplasm  
 nucleoplasm A-431 nucleoplaU-251 MG nucleoplasm, cytosol  
 nucleoplasm, cytosol A-431 nucleoplaU-251 MG nucleoplasm, cytosol  
 nucleoplasm U-251 MG nucleoplasm  
 nucleoplasm U-251 MG nucleoplasm  
 golgi apparatus, vesicles  
 nucleoplasm, golgi apparatusMCF7 golgi appSH-SY5Y nucleoplasm, golgi apparatus  
 actin filaments A-431 plasma membrane, actin filaments  
 plasma membrane A-431 plasma membrane, actin filaments  
 nucleoplasm A-431 nucleoplaU-251 MG nucleoplasm  
 golgi apparatus A-431 golgi appHEK 293 golgi apparatus  
 vesicles  
 nucleoplasm, cytosol U-251 MG nucleoplaREH nucleoplasm, cytosol  
 nucleoplasm, vesicles, cytoU-251 MG nucleoplasm, vesicles, cytosol  
 microtubules A-431 microtubuU-251 MG microtubules  
 cytosol U-2 OS cytosol  
 vesicles U-2 OS vesicles  
 mitochondria PC-3 mitochondria  
 nucleoplasm, plasma membræA-431 plasma meU-251 MG nucleoplasm, plasma membrane, cytosol  
 cytosol A-431 cytosol U-251 MG cytosol  
 nuclear bodies, mitochondrA-431 nuclear bU-251 MG nuclear bodies, mitochondria  
 nucleoplasm, nucleoli A-431 nucleoplaU-251 MG nucleoplasm  
 vesicles A-431 golgi appU-251 MG golgi apparatus, plasma membrane  
 nucleoplasm, nuclear bodiεA-431 nucleoplaU-251 MG nucleoplasm, nuclear bodies, focal adh  
 nucleoplasm, cytosol A-431 nucleoplaU-251 MG nucleoplasm, cytosol  
 cytosol Hep G2 golgi apparatus, cytosol  
 nucleoli, mitochondria SK-MEL-30nucleoli HaCaT nucleoli  
 nuclear membrane HaCaT nuclear membrane  
 nuclear membrane  
 mitochondria HEK 293 mitochondHep G2 mitochondria  
 nucleoplasm A-431 nucleoplaU-251 MG nucleoplasm  
 nucleoplasm U-251 MG nucleoplasm  
 nucleoplasm A-431 nucleoplaU-251 MG nucleoplasm  
 golgi apparatus  
 nuclear speckles U-2 OS nuclear sMCF7 nuclear speckles  
 nucleoplasm, cytosol A549 cytosol SK-MEL-30cytosol  
 nucleoplasm, mitochondria U-2 OS nucleoplaA-431 nucleoplasm, mitochondria  
 nucleoplasm U-2 OS nucleoplaA-431 nucleoplasm, mitochondria  
 mitochondria  
 cytosol  
 nuclear speckles, plasma nA-431 nuclear sU-251 MG nuclear speckles, plasma membrane, foc  
 nucleoplasm RH-30 nucleoplasm, nuclear bodies  
 nucleoplasm A-431 nucleoplaU-251 MG nucleoplasm  
 nucleoplasm, cytosol A-431 nucleoplaU-251 MG nucleoplasm, cytosol  
 endoplasmic reticulum U-251 MG endoplasmic reticulum  
 nucleoplasm A-431 nucleoplaU-251 MG nucleoplasm  
 nucleoplasm A-431 nucleoplaU-251 MG nucleoplasm  
 mitochondria A-431 mitochondria

|                                         |          |                                            |           |
|-----------------------------------------|----------|--------------------------------------------|-----------|
| mitochondria                            | U-251 MG | mitochondria                               |           |
| nucleoplasm, golgi apparatus            | A-431    | nucleoplasm, golgi apparatus, vesicles     | U-251 MG  |
| vesicles                                | A-431    | vesicles                                   | HeLa      |
| vesicles                                |          |                                            |           |
| nucleoplasm, mitochondria               | HeLa     | nucleoplasm, mitochondria                  | HaCaT     |
| nucleoplasm                             |          |                                            |           |
| nucleoplasm                             |          |                                            |           |
| vesicles                                |          |                                            |           |
| nucleoplasm, mitochondria, cytosol      | A-431    | nucleoplasm, mitochondria, cytosol         | U-251 MG  |
| nucleoplasm, golgi apparatus, vesicles  | A-431    | nucleoplasm, golgi apparatus, vesicles     | U-251 MG  |
| cytosol                                 | U-251 MG | cytosol                                    | SH-SY5Y   |
| vesicles                                | HAP1     | plasma membrane                            |           |
| cytosol                                 | A-431    | cytosol                                    | U-251 MG  |
| nucleoplasm, nuclear membrane           | A-431    | nucleoplasm, nuclear membrane              | U-251 MG  |
| centriolar satellite, cytosol           | SH-SY5Y  | nucleoplasm, centriolar satellite, cytosol |           |
| intermediate filaments, cytosol         | U-251 MG | intermediate filaments, cytosol            |           |
| nucleoplasm, cytosol                    | U-2 OS   | nucleoplasm, cytosol                       |           |
| nucleoplasm                             | A-431    | nucleoplasm                                | U-251 MG  |
| nucleoplasm                             | A-431    | nucleoplasm                                | U-251 MG  |
| nucleoplasm, vesicles                   | A549     | nucleoplasm, vesicles, cytosol             |           |
| centrosome                              | SiHa     | centrosome                                 |           |
| nucleoplasm, nucleoli                   | MCF7     | nucleoplasm, nucleoli                      | HEK 293   |
| nucleoplasm, nucleoli                   | A-431    | nucleoplasm                                |           |
| nucleoplasm                             | A-431    | nucleoplasm                                | SiHa      |
| mitochondria                            | A-431    | mitochondria                               | U-251 MG  |
| endoplasmic reticulum, golgi apparatus  |          |                                            |           |
| nucleoplasm, cytosol                    | A-431    | nucleoplasm, cytosol                       | U-251 MG  |
| nucleoplasm, nucleoli, plasma membrane  | A-431    | nucleoplasm, nucleoli, plasma membrane     | HaCaT     |
| plasma membrane                         | U-251 MG | plasma membrane                            |           |
| nucleoplasm, plasma membrane            |          |                                            |           |
| nucleoplasm, centrosome, cytosol        | A-431    | nucleoplasm, centrosome, cytosol           | U-251 MG  |
| plasma membrane, cytosol                | A-431    | plasma membrane, cytosol                   | U-251 MG  |
| mitochondria                            | A-431    | mitochondria                               | U-251 MG  |
| mitochondria                            | U-2 OS   | mitochondria                               |           |
| nucleoplasm                             | A-431    | nucleoplasm                                | U-251 MG  |
| nucleoplasm                             | A-431    | nucleoplasm                                | U-251 MG  |
| nucleoplasm, cytosol                    |          |                                            |           |
| mitochondria                            | SiHa     | mitochondria                               | ASC TERT1 |
| mitochondria                            | Hep G2   | mitochondria                               | RPTEC TER |
| nucleoplasm, cytosol                    | A-431    | cytosol                                    | U-251 MG  |
| nucleoplasm, nuclear bodies             | RH-30    | nucleoplasm, nuclear bodies                | PC-3      |
| nucleoli, microtubules                  | A-431    | nucleoli, microtubules                     | U-251 MG  |
| mitochondria                            | A549     | mitochondria                               |           |
| nucleoplasm                             | A-431    | nucleoplasm                                | U-251 MG  |
| nucleoplasm                             | U-251 MG | nucleoplasm                                | RH-30     |
| nucleoplasm, nuclear bodies             | A-431    | nucleoplasm, nuclear bodies                | U-251 MG  |
| nucleoplasm, nuclear bodies             | A-431    | nucleoplasm, nuclear bodies                | U-251 MG  |
| plasma membrane                         |          |                                            |           |
| nucleoplasm, nucleoli                   | A-431    | nucleoplasm, nucleoli                      | U-251 MG  |
| nucleoplasm, nucleoli fibrillar centers | A-431    | nucleoplasm, nucleoli fibrillar centers    | U-251 MG  |
| nucleoplasm, nucleoli                   | U-251 MG | nucleoplasm                                | SiHa      |
| cytosol                                 | A-431    | cytosol                                    | U-251 MG  |
| cytosol                                 | A-431    | cytosol                                    | U-251 MG  |
| nucleoplasm, midbody ring               | U-251 MG | nucleoplasm, midbody ring                  | A549      |
| nucleoplasm                             | HaCaT    | nucleoplasm                                |           |

|                                         |           |                                                                |           |
|-----------------------------------------|-----------|----------------------------------------------------------------|-----------|
| nucleoplasm, nuclear bodies             | A-431     | nucleoplasm, nuclear bodies                                    | U-251 MG  |
| nucleoplasm, nuclear bodies             | A-431     | nucleoplasm, nuclear bodies                                    | U-251 MG  |
| nucleoplasm, cytosol                    | A-431     | nucleoplasm, cytosol                                           | U-251 MG  |
| nucleoplasm, cytosol                    | A-431     | nucleoplasm, cytosol                                           | U-251 MG  |
| plasma membrane                         | U-251 MG  | plasma membrane                                                | U-251 MG  |
| endoplasmic reticulum, cytosol          | A-431     | endoplasmic reticulum, cytosol                                 | U-251 MG  |
| vesicles                                | A549      | vesicles                                                       | RPTEC TER |
| centrosome                              | U-251 MG  | centrosome                                                     | U-251 MG  |
| mitochondria                            | A-431     | mitochondria                                                   | U-251 MG  |
| mitochondria                            | EFO-21    | cytokinetic bridge, mitochondria                               | HaCaT     |
| vesicles                                | A-431     | vesicles                                                       | U-251 MG  |
| nucleoplasm, cytosol                    | RH-30     | nucleoplasm                                                    | BJ        |
| nucleoplasm, cytosol                    | A549      | nucleoplasm, nuclear bodies, golgi apparatus                   | HeLa      |
| cytosol                                 | HeLa      | cytosol                                                        | PC-3      |
| nucleoplasm, nucleoli fibrillar centers | A-431     | nucleoplasm, nucleoli fibrillar centers                        | U-251 MG  |
| nucleoplasm, nucleoli fibrillar centers | U-2 OS    | nucleoplasm, cell junctions                                    | A-431     |
| nucleoplasm, plasma membrane            | A-431     | plasma membrane                                                | U-251 MG  |
| vesicles, plasma membrane               | U-251 MG  | vesicles, plasma membrane                                      | U-251 MG  |
| mitochondria                            | Hep G2    | mitochondria                                                   | ASC TERT1 |
| nucleoplasm, golgi apparatus            | A-431     | nucleoplasm, centrosome, cytosol                               | U-251 MG  |
| golgi apparatus, plasma membrane        | A-431     | nucleoplasm, nucleoli                                          | SK-MEL-30 |
| nucleoplasm, nucleoli                   | SH-SY5Y   | nucleoplasm, nucleoli                                          | SK-MEL-30 |
| nucleoplasm, nucleoli                   | SH-SY5Y   | nucleoplasm, nucleoli                                          | SK-MEL-30 |
| nucleoplasm                             | A549      | nucleoplasm                                                    | RH-30     |
| nucleoplasm                             | A549      | nucleoplasm                                                    | RH-30     |
| plasma membrane, cytosol                | U-251 MG  | plasma membrane, centrosome, cytosol                           | U-251 MG  |
| cytosol                                 | U-251 MG  | cytosol                                                        | U-251 MG  |
| nucleoli, cytosol                       | A-431     | nucleoli, cytosol                                              | U-251 MG  |
| nucleoplasm, nuclear bodies             | HEK 293   | nucleoplasm, nuclear bodies                                    | RH-30     |
| vesicles                                | A-431     | vesicles                                                       | U-251 MG  |
| nucleoplasm                             | PC-3      | nucleoplasm                                                    | U-251 MG  |
| nucleoplasm, cytosol                    | U-2 OS    | nucleoplasm, cytosol                                           | Hep G2    |
| nucleoplasm                             | A-431     | nucleoplasm, centrosome, cytosol                               | U-251 MG  |
| nucleoplasm                             | A-431     | nucleoplasm                                                    | HeLa      |
| cytosol                                 | A-431     | nucleoplasm, nuclear membrane, plasma membrane, cell junctions | rhTCEpi   |
| nucleoplasm, cell junctions             | rhTCEpi   | nucleoplasm, nuclear membrane, plasma membrane, cell junctions | rhTCEpi   |
| mitochondria                            | U-251 MG  | mitochondria                                                   | U-251 MG  |
| nucleoplasm                             | U-251 MG  | nucleoplasm                                                    | U-251 MG  |
| nucleoplasm                             | Hep G2    | nucleoplasm                                                    | SK-MEL-30 |
| nucleoplasm                             | U-251 MG  | nucleoplasm                                                    | SK-MEL-30 |
| vesicles                                | U-251 MG  | vesicles                                                       | U-251 MG  |
| golgi apparatus                         | SH-SY5Y   | golgi apparatus                                                | SH-SY5Y   |
| mitochondria                            | Hep G2    | mitochondria                                                   | SK-MEL-30 |
| cytosol                                 | Hep G2    | mitochondria                                                   | SK-MEL-30 |
| nucleoli, cytosol                       | A-431     | nucleoli, cytosol                                              | U-251 MG  |
| mitochondria                            | A-431     | mitochondria                                                   | U-251 MG  |
| mitochondria                            | A-431     | mitochondria, cytosol                                          | U-251 MG  |
| cytosol                                 | HEK 293   | cytosol                                                        | SH-SY5Y   |
| nucleoplasm                             | HEK 293   | cytosol                                                        | SH-SY5Y   |
| mitochondria                            | HEK 293   | cytosol                                                        | SH-SY5Y   |
| endoplasmic reticulum, cytosol          | A-431     | endoplasmic reticulum, cytosol                                 | U-251 MG  |
| cytosol                                 | A-431     | endoplasmic reticulum, cytosol                                 | U-251 MG  |
| endoplasmic reticulum                   | A-431     | endoplasmic reticulum                                          | U-251 MG  |
| cell junctions                          | A-431     | endoplasmic reticulum                                          | U-251 MG  |
| nuclear bodies                          | RPTEC TER | mitochondria                                                   | U-251 MG  |

|                                       |          |                                      |                                               |
|---------------------------------------|----------|--------------------------------------|-----------------------------------------------|
| nucleoplasm                           | A-431    | nucleoplaU-251 MG                    | nucleoplasm, nucleoli, cytosol                |
| nucleoplasm, cytosol                  | HEK 293  | nucleoplaSH-SY5Y                     | nucleoplasm                                   |
| nucleoplasm, nuclear bodies           | U-251 MG | nucleoplaRH-30                       | nucleoplasm, nuclear bodies                   |
| mitochondria                          | A-431    | mitochondU-251 MG                    | mitochondria                                  |
| mitochondria                          | A-431    | mitochondU-251 MG                    | mitochondria                                  |
| plasma membrane, cytosol              | A-431    | plasma meHAP1                        | plasma membrane, cytosol                      |
| mitochondria                          | HEK 293  | mitochondria                         |                                               |
| microtubules                          | A-431    | microtubuU-251 MG                    | microtubules                                  |
| golgi apparatus, cytosol              | A-431    | golgi apparatus, cytosol             |                                               |
| vesicles                              | A-431    | vesicles U-251 MG                    | vesicles, plasma membrane                     |
| vesicles                              | U-251 MG | vesicles                             |                                               |
| plasma membrane                       | A-431    | plasma meU-251 MG                    | plasma membrane                               |
| nucleoplasm, nuclear bodies           | RH-30    | nucleoplasm, nuclear bodies, cytosol |                                               |
| nucleoli, mitochondria                | A-431    | nucleoplaU-251 MG                    | nucleoplasm, nucleoli, mitochondria           |
| nucleoli                              | U-2 OS   | nucleoli, Hep G2                     | nucleoli                                      |
| mitotic spindle, cytosol              | A-431    | cytosol RH-30                        | cytosol                                       |
| nucleoli                              | HeLa     | nucleoli, RH-30                      | nucleoli                                      |
| plasma membrane, cytosol              | PC-3     | nucleoplasm, cytosol                 |                                               |
| mitochondria                          | A-431    | nucleoplaU-251 MG                    | nucleoplasm, mitochondria, cytosol            |
| centrosome                            | A549     | nucleoplaSH-SY5Y                     | nucleoplasm, centrosome                       |
| plasma membrane, midbody              | A-431    | plasma meU-251 MG                    | plasma membrane, centriolar satellite         |
| nucleoplasm, cytokinetic bridge       | A-431    | nucleoplaRH-30                       | nucleoplasm, cytokinetic bridge, midbody      |
| microtubules                          | A-431    | microtubuU-251 MG                    | microtubules                                  |
| nucleoplasm, vesicles                 | A-431    | nucleoplaA549                        | nucleoplasm, vesicles                         |
| cytosol                               | A-431    | cytosol U-251 MG                     | cytosol                                       |
| nucleoplasm                           | A-431    | nucleoplaU-251 MG                    | nucleoplasm                                   |
| vesicles, cytosol                     | A-431    | cytosol                              |                                               |
| vesicles, cytosol                     |          |                                      |                                               |
| nucleoplasm, lipid droplets           | A-431    | nucleoplaHaCaT                       | nucleoplasm, lipid droplets, mitochondria     |
| nucleoplasm                           | U-2 OS   | nucleoplaPC-3                        | nucleoplasm, cytosol                          |
| nucleoplasm                           |          |                                      |                                               |
| nucleoplasm                           | U-2 OS   | nucleoplaA549                        | nucleoplasm, cytosol                          |
| vesicles, centriolar satellite        | PC-3     | vesicles                             |                                               |
| nuclear bodies, endoplasmic reticulum | A-431    | nuclear bU-251 MG                    | nuclear bodies, endoplasmic reticulum         |
| nucleoplasm, nuclear membrane         | A-431    | nucleoplaU-251 MG                    | nucleoplasm, nuclear membrane                 |
| nucleoplasm                           | U-2 OS   | nucleoplaU-251 MG                    | nucleoplasm                                   |
| mitochondria                          | U-2 OS   | mitochondA-431                       | nucleoplasm, mitochondria                     |
| nucleoplasm, cytosol                  | A-431    | nucleoplaBJ                          | nucleoplasm, vesicles                         |
| cytosol                               | A-431    | cytosol                              |                                               |
| plasma membrane, cytosol              | A-431    | plasma meU-251 MG                    | plasma membrane, cytosol                      |
| nuclear speckles, cytoplasm           | U-2 OS   | nuclear sRH-30                       | nuclear speckles                              |
| cytosol                               | SH-SY5Y  | nucleoli SiHa                        | nucleoli fibrillar center, vesicles, i        |
| vesicles                              | SH-SY5Y  | vesicles SiHa                        | vesicles, cytosol                             |
| cytosol                               | SiHa     | cytosol BJ                           | cytosol                                       |
| nucleoli, cytosol                     | A-431    | nucleoli, U-251 MG                   | nucleoli fibrillar center, cytosol            |
| nucleoplasm                           | A-431    | nucleoplaU-251 MG                    | nucleoplasm                                   |
| nucleoplasm, golgi apparatus          | A-431    | nucleoplaU-251 MG                    | nucleoplasm, golgi apparatus, plasma membrane |
| nucleoplasm, golgi apparatus          |          |                                      |                                               |
| nuclear speckles, cytosol             | A-431    | nuclear sU-251 MG                    | nuclear speckles, cytosol                     |
| nucleoplasm                           |          |                                      |                                               |
| nuclear bodies                        | A-431    | nuclear bBJ                          | cytosol                                       |
| centrosome, cytosol                   | A-431    | centrosomU-251 MG                    | centrosome, cytosol                           |
| cytosol                               | U-251 MG | cytosol PC-3                         | cytosol                                       |
| nuclear speckles                      | HEK 293  | nuclear speckles                     |                                               |
| nucleoplasm, cytosol                  | HeLa     | plasma mePC-3                        | nucleoplasm, plasma membrane, cytosol         |

|                                        |          |                                                             |  |
|----------------------------------------|----------|-------------------------------------------------------------|--|
| plasma membrane                        | LHCN-M2  | plasma membrane                                             |  |
| nucleoplasm                            | SiHa     | nucleoplasm, centrosome                                     |  |
| nucleoli, plasma membrane,             | A-431    | plasma membrane, cytosol                                    |  |
| nucleoplasm, vesicles                  | PC-3     | nucleoplasm, vesicles                                       |  |
| focal adhesion sites, cyto             | A-431    | focal adhesion sites, cytosol                               |  |
| nucleoplasm, plasma membrane           | U-2 OS   | plasma membrane, cytosol                                    |  |
| golgi apparatus                        | A549     | golgi apparatus                                             |  |
| vesicles                               | RH-30    | vesicles                                                    |  |
| nucleoplasm, cytosol                   | A-431    | nucleoplasm, cytosol                                        |  |
| focal adhesion sites                   |          |                                                             |  |
| mitochondria                           | A-431    | mitochondria                                                |  |
| mitochondria, cytosol                  | RH-30    | nucleoplasm, cytosol                                        |  |
| nuclear speckles                       | A-431    | nuclear speckles, cytosol                                   |  |
| golgi apparatus                        | A-431    | golgi apparatus, cytosol                                    |  |
| nucleoplasm                            | A-431    | nucleoplasm                                                 |  |
| actin filaments, cytosol               | A-431    | actin filaments, cytosol                                    |  |
| vesicles                               | U-251 MG | vesicles, MCF7                                              |  |
| mitochondria                           | A-431    | mitochondria                                                |  |
| nucleoplasm                            | Hep G2   | nucleoplasm                                                 |  |
| nucleoplasm, nuclear bodies            | A-431    | nucleoplasm, nuclear membrane, nuclear                      |  |
| cytosol                                |          | cytosol                                                     |  |
| vesicles                               |          |                                                             |  |
| nucleoplasm, cytosol                   | HEK 293  | nucleoplasm, cytosol                                        |  |
| plasma membrane, cytosol               | A-431    | plasma membrane, cytosol                                    |  |
| cytosol                                | A-431    | cytosol                                                     |  |
| nucleoli, cell junctions, cyto         | A-431    | nucleoli fibrillar center, vesicles, c                      |  |
| cytosol                                | A-431    | cytosol                                                     |  |
| nucleoplasm, cytosol                   | A-431    | nucleoplasm, cytosol                                        |  |
| nucleoplasm, golgi apparatus           | U-251 MG | golgi apparatus                                             |  |
| cytosol                                |          |                                                             |  |
| golgi apparatus                        | A-431    | golgi apparatus                                             |  |
| nuclear speckles                       | A-431    | nuclear speckles, cell junctions                            |  |
| nucleoplasm                            | A-431    | nucleoplasm                                                 |  |
| nucleoplasm                            | U-2 OS   | nucleoplasm                                                 |  |
| vesicles, cytosol                      | A-431    | vesicles, cytosol                                           |  |
| nucleoplasm, nucleoli fibrillar center | U-251 MG | nucleoplasm, nucleoli fibrillar center                      |  |
| nucleoplasm, nucleoli fibrillar center | U-251 MG | nucleoli fibrillar center, aggregates                       |  |
| plasma membrane, cytosol               |          |                                                             |  |
| nucleoplasm, nuclear bodies            | A-431    | nucleoplasm, nuclear bodies                                 |  |
| nucleoplasm, centrosome                | A-431    | nucleoplasm, centrosome                                     |  |
| cytosol                                | A-431    | cytosol                                                     |  |
| cytosol                                | A-431    | cytosol                                                     |  |
| endoplasmic reticulum                  |          |                                                             |  |
| cytosol                                | HEL      | centriolar satellite, cytosol                               |  |
| nucleoplasm, nucleoli, nuclear bodies  | RH-30    | nucleoplasm, nuclear bodies                                 |  |
| nucleoplasm                            | A-431    | nucleoplasm                                                 |  |
| nuclear speckles                       | A-431    | nuclear speckles                                            |  |
| cytosol                                | A-431    | cytosol                                                     |  |
| cytosol                                | A-431    | cytosol                                                     |  |
| cytosol                                | A-431    | cytosol                                                     |  |
| cytosol                                | A-431    | cytosol                                                     |  |
| nucleoplasm, cytosol                   | A-431    | nucleoplasm, cytosol                                        |  |
| cytosol                                | U-251 MG | cytosol                                                     |  |
| golgi apparatus                        | Hep G2   | golgi apparatus                                             |  |
| nucleoli fibrillar center              | A-431    | golgi apparatus, nucleoli fibrillar center, golgi apparatus |  |



|                            |           |                      |                                       |
|----------------------------|-----------|----------------------|---------------------------------------|
| nucleoplasm, centrosome    | A-431     | nucleoplaU-251 MG    | nucleoplasm, centrosome               |
| cytosol                    | U-251 MG  | cytosol              |                                       |
| cytosol                    | U-251 MG  | cytosol              |                                       |
| nucleoplasm, mitochondria  | A-431     | nucleoplaU-251 MG    | nucleoplasm, mitochondria             |
| nucleoplasm                | A-431     | microtubuU-251 MG    | microtubules, cytosol                 |
| nucleoplasm, actin filamer | U-251 MG  | nucleoplasm          |                                       |
| nucleoplasm                | A549      | nucleoplaHep G2      | nucleoplasm                           |
| nucleoplasm, cytosol       | A-431     | nuclear bU-251 MG    | nucleoplasm, nuclear bodies, cytosol  |
| nucleoplasm, plasma membræ | A-431     | nucleoplaU-251 MG    | nucleoplasm                           |
| cytosol                    | A-431     | nucleoplaU-251 MG    | cytosol                               |
| nucleoplasm, cytosol       | A-431     | cytosol              |                                       |
| nucleoplasm, cytosol       | U-251 MG  | nucleoplaREH         | nucleoplasm                           |
| mitochondria               | A-431     | nucleoplaA549        | mitochondria                          |
| nucleoplasm, nucleoli      | A-431     | nucleoplaMCF7        | nucleoplasm, nucleoli                 |
| nucleoplasm, vesicles      | A-431     | nucleoplaU-251 MG    | nucleoplasm, vesicles                 |
| nucleoplasm                | A-431     | nucleoplaU-251 MG    | nucleoplasm, cytosol                  |
| nucleoplasm, cytosol       | A-431     | nucleoplaU-251 MG    | nucleoplasm, cytosol                  |
| cytosol                    | Hep G2    | cytosol              |                                       |
| cytosol                    | A-431     | nucleoplaU-251 MG    | cytosol                               |
| vesicles                   | MCF7      | vesicles HeLa        | vesicles, cytokinetic bridge          |
| plasma membrane            | Hep G2    | plasma membrane      |                                       |
| nucleoplasm                | A-431     | nucleoplaU-251 MG    | nucleoplasm                           |
| cytosol                    | HeLa      | vesicles, SiHa       | vesicles                              |
| golgi apparatus, vesicles  | HEK 293   | golgi apparatus      |                                       |
| vesicles                   | U-251 MG  | vesicles REH         | vesicles                              |
| nucleoli, cytosol          | A-431     | nucleoli, U-251 MG   | nucleoli, cytosol                     |
| vesicles                   | SH-SY5Y   | vesicles             |                                       |
| plasma membrane, cytosol   |           |                      |                                       |
| mitochondria               | HEK 293   | nuclear bRH-30       | nuclear bodies, mitochondria          |
| actin filaments            | A-431     | actin filU-251 MG    | actin filaments                       |
| endoplasmic reticulum      | SiHa      | endoplasmRH-30       | endoplasmic reticulum                 |
| nucleoplasm                | U-251 MG  | nucleoplasm, cytosol |                                       |
| nucleoplasm                |           |                      |                                       |
| nucleoplasm                |           |                      |                                       |
| plasma membrane, cytosol   | A-431     | nucleoplaU-251 MG    | nucleoplasm, plasma membrane, cytosol |
| nucleoplasm                | A-431     | nucleoplaU-251 MG    | nucleoplasm                           |
| nucleoplasm                | U-251 MG  | nucleoplasm, focal   | adhesion sites                        |
| microtubules               | A-431     | cytosol U-251 MG     | microtubules                          |
| nucleoplasm, mitochondria  | HEK 293   | nucleoplaRH-30       | nucleoplasm, mitochondria             |
| vesicles                   | A549      | vesicles             |                                       |
| vesicles                   | HUVEC TER | vesicles             |                                       |
| golgi apparatus, vesicles  | A-431     | golgi appHep G2      | golgi apparatus                       |
| cytosol                    | A-431     | golgi appU-251 MG    | cytosol                               |
| golgi apparatus            | A-431     | golgi appU-251 MG    | golgi apparatus                       |
| nucleoplasm                | SH-SY5Y   | nucleoplaBJ          | nucleoplasm                           |
| plasma membrane            | U-251 MG  | golgi appA549        | golgi apparatus, cytosol              |
| nucleoplasm                | A-431     | nucleoplaU-251 MG    | nucleoplasm                           |
| nucleoplasm, nuclear bodie | A-431     | nucleoplaU-251 MG    | nucleoplasm, nuclear bodies           |
| nucleoplasm, nucleoli      | A-431     | nucleoplaU-251 MG    | nucleoplasm                           |
| nucleoplasm                | HEK 293   | nucleoplaHep G2      | nucleoplasm                           |
| nucleoplasm, centrosome    | MCF7      | nucleoplaRH-30       | nucleoplasm, centrosome, cytosol      |
| nucleoplasm                | HEK 293   | nucleoplaSK-MEL-30   | nucleoplasm, centrosome               |
| nucleoli                   | U-2 OS    | nucleoli MCF7        | nucleoli                              |
| nucleoli                   | U-2 OS    | nucleoli MCF7        | nucleoli                              |
| cytosol                    | A-431     | cytosol U-251 MG     | cytosol                               |

|                                    |          |                                              |                                    |
|------------------------------------|----------|----------------------------------------------|------------------------------------|
| vesicles                           | RH-30    | vesicles                                     |                                    |
| nucleoli                           | PC-3     | nucleoplasm, nucleoli                        |                                    |
| cytosol                            |          |                                              |                                    |
| nucleoplasm, cytosol               | U-2 OS   | nucleoplasm, cytosol                         |                                    |
| nucleoplasm, cytosol               | PC-3     | cytosol SK-MEL-30                            | nucleoplasm, cytosol               |
| plasma membrane, cytosol           | Hep G2   | nucleoplasm, cytosol                         |                                    |
| nucleoplasm, plasma membrane       | U-251 MG | nucleoplasm, centrosome                      |                                    |
| nucleoplasm, cytosol               | SH-SY5Y  | nucleoplasm, cytosol                         |                                    |
| nucleoplasm                        | A-431    | nucleoplasm                                  |                                    |
| nucleoplasm, plasma membrane       | MCF7     | nucleoplasm                                  |                                    |
| nucleoplasm                        | MCF7     | nucleoplasm                                  |                                    |
| cytosol                            | A-431    | cytosol U-251 MG                             | cytosol                            |
| mitochondria                       | A-431    | mitochondria                                 |                                    |
| cytosol                            |          |                                              |                                    |
| microtubules                       | A-431    | microtubules                                 |                                    |
| plasma membrane, cytosol           | A-431    | plasma membrane, centrosome, cytosol         |                                    |
| nucleoplasm, plasma membrane       | A-431    | nucleoplasm, plasma membrane, focal adhesion |                                    |
| nucleoplasm                        | U-2 OS   | nucleoplasm, plasma membrane                 |                                    |
| nucleoplasm, mitochondria, HEK 293 |          | nucleoplasm, mitochondria                    |                                    |
| plasma membrane, actin filaments   | A-431    | plasma membrane, cytosol                     |                                    |
| nucleoplasm                        |          |                                              |                                    |
| vesicles                           | A-431    | vesicles, U-251 MG                           | vesicles, plasma membrane, cytosol |
| centriolar satellite               | A549     | vesicles                                     |                                    |
| nucleoplasm, vesicles              | Hep G2   | vesicles                                     |                                    |
| nucleoplasm, nuclear bodies        | MCF7     | nucleoplasm                                  |                                    |
| nucleoplasm                        | A-431    | nucleoplasm                                  |                                    |
| nucleoplasm, cytosol               | U-251 MG | nucleoplasm, cytosol                         |                                    |
| nucleoplasm, nuclear bodies        | U-251 MG | nucleoplasm, cytosol                         |                                    |
| nucleoplasm                        | A-431    | nucleoplasm                                  |                                    |
| nucleoplasm                        | A-431    | nucleoplasm                                  |                                    |
| nucleoplasm                        | MCF7     | nucleoplasm                                  |                                    |
| nucleoplasm, cytosol               | A-431    | nucleoplasm, cytosol                         |                                    |
| plasma membrane, microtubules      | A-431    | plasma membrane, cytosol                     |                                    |
| nucleoplasm, plasma membrane       | A-431    | nucleoplasm, plasma membrane, cytosol        |                                    |
| nucleoplasm, nucleoli              | A-431    | nucleoplasm, nucleoli                        |                                    |
| nucleoplasm, cell junctions        | BJ       | nucleoplasm, cell junctions                  |                                    |
| plasma membrane, cytosol           | A-431    | plasma membrane, cytosol                     |                                    |
| nucleoplasm, golgi apparatus       |          |                                              |                                    |
| nucleoplasm                        | U-251 MG | nucleoplasm                                  |                                    |
| endoplasmic reticulum              | SiHa     | endoplasmic reticulum                        |                                    |
| nucleoplasm, mitochondria          | A-431    | nucleoplasm, cytosol                         |                                    |
| nucleoplasm                        | A-431    | nucleoplasm                                  |                                    |
| nucleoplasm, nuclear bodies        | SiHa     | nuclear bodies                               |                                    |
| golgi apparatus                    | A-431    | golgi apparatus, cytosol                     |                                    |
| nucleoplasm                        | A-431    | nucleoplasm                                  |                                    |
| nucleoplasm                        | U-251 MG | nucleoplasm                                  |                                    |
| nucleoplasm                        | A-431    | nucleoplasm                                  |                                    |
| nucleoplasm                        | U-2 OS   | nucleoplasm                                  |                                    |
| nucleoplasm                        | A-431    | nucleoplasm                                  |                                    |
| nucleoplasm                        | HeLa     | nucleoplasm                                  |                                    |
| nucleoplasm                        | A-431    | nucleoplasm                                  |                                    |
| nucleoplasm, golgi apparatus       | A-431    | nucleoplasm, golgi apparatus                 |                                    |
| cytosol                            | PC-3     | cytosol                                      |                                    |
| plasma membrane, microtubules      | A-431    | plasma membrane, microtubules                |                                    |
| nuclear speckles                   | A-431    | nuclear speckles                             |                                    |

|                                       |          |                                |           |                                                   |
|---------------------------------------|----------|--------------------------------|-----------|---------------------------------------------------|
| nucleoplasm                           | BJ       | nucleoplasm                    | SK-MEL-30 | nucleoplasm                                       |
| nucleoplasm, vesicles                 | U-251 MG | nucleoplasm                    | HEK 293   | nucleoplasm, vesicles                             |
| cytosol                               | U-251 MG | cytosol                        |           |                                                   |
| golgi apparatus, vesicles             |          |                                |           |                                                   |
| golgi apparatus, vesicles             | U-2 OS   | golgi apparatus                | A-431     | golgi apparatus, vesicles                         |
| nucleoplasm                           | A-431    | nucleoplasm                    | U-251 MG  | nucleoplasm                                       |
| centrosome                            | U-2 OS   | centrosome                     | Hep G2    | centrosome                                        |
| plasma membrane                       |          |                                |           |                                                   |
| nucleoplasm, centriolar satellite     | SiHa     | nucleoplasm                    | HaCaT     | nucleoplasm, cell junctions, centriolar satellite |
| nucleoplasm                           | A-431    | nucleoplasm                    | ASC TERT1 | nucleoplasm                                       |
| cell junctions                        | HaCaT    | cell junctions                 |           |                                                   |
| nucleoli                              | A-431    | nucleoplasm                    | U-251 MG  | nucleoplasm, nucleoli, vesicles                   |
| nucleoli, endoplasmic reticulum       | A-431    | endoplasmic reticulum          | U-251 MG  | nucleoli, endoplasmic reticulum                   |
| mitochondria                          | A-431    | mitochondria                   | U-251 MG  | mitochondria                                      |
| nucleoplasm, nucleoli                 | U-2 OS   | nucleoplasm                    | HeLa      | intermediate filaments                            |
| nuclear bodies, endoplasmic reticulum | U-251 MG | nuclear bodies                 | HEK 293   | nuclear bodies, endoplasmic reticulum             |
| endoplasmic reticulum                 |          |                                |           |                                                   |
| plasma membrane                       | U-251 MG | plasma membrane                | PC-3      | plasma membrane                                   |
| cytosol                               | PC-3     | cytosol                        |           |                                                   |
| cell junctions, microtubules          | A-431    | plasma membrane                | U-251 MG  | cell junctions, microtubules                      |
| cytosol                               | A-431    | cytosol                        | MCF7      | cytosol                                           |
| mitochondria                          | A-431    | mitochondria                   | U-251 MG  | mitochondria                                      |
| vesicles, centriolar satellite        | A-431    | vesicles, centriolar satellite |           |                                                   |
| intermediate filaments, cytosol       |          |                                |           |                                                   |
| nucleoplasm, centrosome, cytosol      | U-2 OS   | nucleoplasm                    | HeLa      | centrosome                                        |
| nucleoli, cytosol                     | A-431    | nucleoli, cytosol              | U-251 MG  | nucleoli, cytosol                                 |
| cell junctions                        | PC-3     | cytosol                        |           |                                                   |
| nucleoli, vesicles                    | RH-30    | vesicles                       | HEL       | vesicles, cytosol                                 |
| vesicles                              | MCF7     | vesicles                       | A549      | vesicles                                          |
| nuclear speckles                      | U-2 OS   | nuclear speckles               | MCF7      | nucleoplasm                                       |
| plasma membrane                       |          |                                |           |                                                   |
| nucleoplasm, cytosol                  |          |                                |           |                                                   |
| nucleoplasm, nuclear bodies, cytosol  | A-431    | nucleoplasm                    | U-251 MG  | nucleoplasm, nuclear bodies, cytosol              |
| cytosol                               | U-251 MG | cytosol                        |           |                                                   |
| cytosol                               | U-251 MG | cytosol                        |           |                                                   |
| golgi apparatus                       | PC-3     | golgi apparatus                |           |                                                   |
| vesicles, cytosol                     | A-431    | vesicles, cytosol              | U-251 MG  | vesicles, cytosol                                 |
| nucleoplasm                           | SiHa     | nucleoplasm                    | HEL       | nucleoplasm, centrosome                           |
| nuclear speckles, vesicles, cytosol   | SH-SY5Y  | nucleoplasm                    | RH-30     | nucleoplasm                                       |
| cytosol                               | A-431    | cytosol                        | U-251 MG  | cytosol                                           |
| nucleoplasm                           | MCF7     | nucleoplasm                    | A549      | nucleoplasm                                       |
| nucleoplasm, actin filaments          | SH-SY5Y  | nucleoplasm, plasma membrane   |           |                                                   |
| mitochondria                          | A-431    | nuclear bodies                 | U-251 MG  | nuclear bodies, mitochondria                      |
| nucleoplasm, nucleoli                 | RH-30    | nucleoplasm                    | BJ        | nucleoplasm                                       |
| nuclear bodies                        |          |                                |           |                                                   |
| golgi apparatus                       | Hep G2   | golgi apparatus, vesicles      |           |                                                   |
| nucleoplasm                           | A-431    | nucleoplasm                    | U-251 MG  | nucleoplasm                                       |
| nucleoplasm, nucleoli                 | PC-3     | nucleoplasm, nucleoli, cytosol |           |                                                   |
| nucleoplasm, nucleoli                 | SH-SY5Y  | nucleoplasm                    | PC-3      | nucleoplasm, nucleoli                             |
| nucleoplasm                           |          |                                |           |                                                   |
| nucleoplasm, vesicles                 | U-2 OS   | nucleoplasm                    | HaCaT     | nucleoplasm                                       |
| plasma membrane, cytosol              | A-431    | plasma membrane, cytosol       | U-251 MG  | plasma membrane, cytosol                          |
| plasma membrane, cytosol              |          |                                |           |                                                   |
| nucleoplasm                           | A-431    | nucleoplasm                    | HeLa      | nucleoplasm                                       |
| nucleoplasm, centrosome               | MCF7     | nucleoplasm                    | RH-30     | nucleoplasm, centrosome, cytosol                  |

|                                  |          |                                            |           |                                    |
|----------------------------------|----------|--------------------------------------------|-----------|------------------------------------|
| nucleoplasm                      | HEK 293  | nucleoplas                                 | SK-MEL-30 | nucleoplasm, centrosome            |
| nucleoplasm, plasma membrane     | HEK 293  | plasma membrane                            | A549      | nuclear bodies, plasma membrane    |
| mitochondria                     | A-431    | mitochondria                               | U-251 MG  | mitochondria                       |
| mitochondria                     | A-431    | mitochondria                               | U-251 MG  | mitochondria                       |
| mitochondria                     | A-431    | mitochondria                               | U-251 MG  | mitochondria                       |
| nucleoplasm                      | A-431    | nucleoplasm                                | U-251 MG  | nucleoplasm                        |
| nucleoplasm, cytosol             | RH-30    | nucleoplasm, cytosol                       |           |                                    |
| nucleoplasm, golgi apparatus     |          |                                            |           |                                    |
| nucleoplasm, cytosol             | A-431    | nucleoplasm, cytosol                       | U-251 MG  | nucleoplasm, cytosol               |
| nucleoplasm, cytosol             | A-431    | nucleoplasm, cytosol                       | U-251 MG  | nucleoplasm, cytosol               |
| nucleoplasm, nuclear bodies      | HEK 293  | nuclear bodies                             | A549      | nucleoplasm, nuclear bodies        |
| nucleoplasm                      | HEK 293  | nucleoplasm                                | HeLa      | nucleoplasm                        |
| nucleoplasm                      | A-431    | nucleoplasm                                | U-251 MG  | nucleoplasm                        |
| nucleoplasm                      | HEK 293  | nucleoplasm                                | HeLa      | nucleoplasm                        |
| plasma membrane, cytosol         | A-431    | plasma membrane, cytosol                   |           |                                    |
| nucleoplasm, cytoplasmic bodies  | HEK 293  | nucleoplasm, cytoplasmic bodies            | SK-MEL-30 | nucleoplasm, cytoplasmic bodies    |
| actin filaments, cytosol         | A-431    | cytosol                                    |           |                                    |
| vesicles                         | A-431    | vesicles                                   | U-251 MG  | vesicles                           |
| vesicles, plasma membrane        | BJ       | vesicles, plasma membrane                  | SK-MEL-30 | vesicles, plasma membrane          |
| nucleoplasm                      | A-431    | nucleoplasm                                | U-251 MG  | nucleoplasm                        |
| nucleoplasm, midbody ring        | A-431    | nucleoplasm, midbody ring                  | HeLa      | nucleoplasm, midbody ring          |
| nucleoplasm                      | U-2 OS   | nucleoplasm                                |           |                                    |
| nucleoplasm, cytoplasmic bodies  | U-2 OS   | nucleoplasm, cytoplasmic bodies            |           |                                    |
| cytosol                          | A-431    | cytosol                                    | U-251 MG  | cytosol                            |
| nuclear bodies                   | A-431    | nuclear bodies                             | U-251 MG  | nuclear bodies                     |
| nuclear bodies                   | A-431    | nuclear bodies                             | U-251 MG  | nuclear bodies                     |
| nucleoplasm                      | HEK 293  | nucleoplasm                                | SK-MEL-30 | nucleoplasm                        |
| nucleoplasm, cytokinetic bodies  | A-431    | nucleoplasm                                | RH-30     | nucleoplasm                        |
| golgi apparatus, vesicles        | A-431    | golgi apparatus, vesicles                  | U-251 MG  | golgi apparatus, vesicles          |
| plasma membrane, cytosol         | A-431    | plasma membrane, cytosol                   | U-251 MG  | plasma membrane, cytosol           |
| mitochondria                     |          |                                            |           |                                    |
| nucleoplasm, centrosome, cytosol |          |                                            |           |                                    |
| nucleoplasm, cytosol             | U-251 MG | nucleoplasm, cytosol                       |           |                                    |
| cytosol                          | A-431    | nucleoplasm, cytosol                       | U-251 MG  | nucleoplasm, cytosol               |
| actin filaments                  | A-431    | actin filaments                            | U-251 MG  | actin filaments                    |
| nucleoplasm                      | A-431    | nucleoplasm                                | U-251 MG  | nucleoplasm                        |
| nucleoplasm                      | A-431    | nucleoplasm                                | HEK 293   | nucleoplasm                        |
| nucleoli                         | A549     | nuclear membrane, nucleoli                 |           |                                    |
| nucleoli                         | U-251 MG | nucleoli                                   | A549      | nucleoli                           |
| microtubules, cytokinetic        | A549     | nucleoplasm, microtubules, cytosol         | SK-MEL-30 | nucleoplasm, microtubules, cytosol |
| cytosol                          | A-431    | cytosol                                    | U-251 MG  | cytosol                            |
| nucleoplasm, mitochondria        | A-431    | nucleoplasm, mitochondria                  | U-251 MG  | nucleoplasm, mitochondria          |
| cytosol                          | MCF7     | nuclear membrane, golgi apparatus, cytosol | HEK 293   | golgi apparatus, cytosol           |
| centriolar satellite             |          |                                            |           |                                    |
| nucleoplasm, cytosol             | U-2 OS   | nucleoplasm, cytosol                       |           |                                    |
| nucleoplasm                      | HaCaT    | nucleoplasm, cytosol                       |           |                                    |
| golgi apparatus                  | U-251 MG | nucleoplasm, golgi apparatus               |           |                                    |
| plasma membrane, cell junctions  | A-431    | plasma membrane, cell junctions            | U-251 MG  | plasma membrane, cell junctions    |
| nucleoplasm, cytosol             | A-431    | nucleoplasm, cytosol                       | U-251 MG  | nucleoplasm, cytosol               |
| nucleoplasm                      | HeLa     | nucleoplasm, cytosol                       | SiHa      | nucleoplasm, cytosol               |
| cytosol                          | A-431    | cytosol                                    | U-251 MG  | cytosol                            |
| mitochondria                     | HEK 293  | mitochondria                               | RH-30     | mitochondria                       |
| nuclear membrane                 | Hep G2   | nuclear membrane, golgi apparatus          |           |                                    |
| microtubules                     | A-431    | microtubules                               | U-251 MG  | microtubules                       |
| nucleoplasm                      | A-431    | nucleoplasm                                | U-251 MG  | nucleoplasm                        |

|                                    |          |                                    |                                |
|------------------------------------|----------|------------------------------------|--------------------------------|
| nucleoplasm, cytosol               | U-251 MG | nucleoplasm, cytosol               |                                |
| nucleoplasm                        | A-431    | nucleoplasm                        |                                |
| nucleoplasm, cytosol               | SH-SY5Y  | nucleoplasm, cytosol               |                                |
| focal adhesion sites, cytosol      | A-431    | cytosol U-251 MG                   | focal adhesion sites, cytosol  |
| nucleoplasm, vesicles, cytosol     | A-431    | nucleoli, U-251 MG                 | nucleoli, golgi apparatus      |
| nucleoplasm, focal adhesion sites  | MCF7     | nucleoplasm, cytosol               |                                |
| nuclear speckles                   | A-431    | nuclear speckles                   |                                |
| cytosol                            | A-431    | cytosol U-251 MG                   | cytosol                        |
| cytosol                            | A-431    | vesicles U-251 MG                  | vesicles, plasma membrane      |
| mitochondria                       |          |                                    |                                |
| mitochondria                       | Hep G2   | nucleoplasm, mitochondria          |                                |
| nucleoplasm                        | U-251 MG | nucleoplasm                        |                                |
| nucleoplasm, cytosol               | A-431    | nucleoplasm, cytosol               |                                |
| nucleoplasm                        | HeLa     | nucleoplasm, vesicles              |                                |
| nucleoli fibrillar center          | U-2 OS   | nucleoli fibrillar center, cytosol |                                |
| nucleoplasm                        | A-431    | nucleoplasm                        |                                |
| nucleoplasm                        | Hep G2   | nucleoplasm, cell junctions        |                                |
| nucleoplasm, cytosol               |          |                                    |                                |
| vesicles                           | A-431    | vesicles                           |                                |
| vesicles, intermediate filaments   | A-431    | vesicles, intermediate filaments   |                                |
| nucleoplasm, mitochondria, cytosol |          |                                    |                                |
| centrosome                         | HeLa     | centrosome                         |                                |
| centrosome                         | HeLa     | centrosome                         |                                |
| plasma membrane, microtubules      | A-431    | plasma membrane, cytosol           |                                |
| midbody, mitotic spindle           |          |                                    |                                |
| nucleoplasm                        | Hep G2   | nucleoplasm, golgi apparatus       |                                |
| vesicles                           | A-431    | vesicles                           |                                |
| nucleoplasm                        | U-251 MG | nucleoplasm                        |                                |
| nucleoplasm, cytosol               | A-431    | nucleoplasm, cytosol               |                                |
| vesicles                           | SiHa     | vesicles                           |                                |
| vesicles                           | MCF7     | nucleoplasm, vesicles              |                                |
| plasma membrane                    | HaCaT    | plasma membrane                    |                                |
| nuclear membrane                   |          |                                    |                                |
| cytosol                            | A-431    | cytosol U-251 MG                   | nucleoplasm, nucleoli, cytosol |
| nucleoplasm, cytosol               | A-431    | nucleoplasm, cytosol               |                                |
| nucleoplasm                        | U-251 MG | nucleoplasm                        |                                |
| nucleoplasm                        | THP-1    | nucleoplasm                        |                                |
| nucleoplasm, mitochondria          | U-251 MG | mitochondria                       |                                |
| nuclear speckles                   | PC-3     | nuclear speckles                   |                                |
| nucleoplasm                        |          |                                    |                                |
| endoplasmic reticulum, cytosol     | MCF7     | endoplasmic reticulum, cytosol     |                                |
| vesicles                           | SiHa     | vesicles                           |                                |
| plasma membrane                    | A-431    | cytosol U-251 MG                   | cytosol                        |
| plasma membrane, cytosol           | A-431    | plasma membrane, cytosol           |                                |
| nucleoplasm, cytosol               | MCF7     | nucleoplasm, cytosol               |                                |
| cytosol                            | A-431    | cytosol U-251 MG                   | cytosol                        |
| plasma membrane, cytosol           | A-431    | plasma membrane, cytosol           |                                |
| nucleoplasm, midbody               | U-2 OS   | nucleoplasm                        |                                |
| nucleoplasm, cytosol               | A549     | nucleoplasm, cytosol               |                                |
| nucleoplasm, cytosol               | HEK 293  | nucleoplasm, cytosol               |                                |
| nucleoplasm, cytosol               | A-431    | nucleoplasm, cytosol               |                                |
| nucleoplasm                        |          |                                    |                                |
| cytosol                            | A-431    | cytosol U-251 MG                   | cytosol                        |
| golgi apparatus                    | A-431    | golgi apparatus                    |                                |
| nucleoplasm                        |          |                                    |                                |

|                                    |          |                                        |                  |
|------------------------------------|----------|----------------------------------------|------------------|
| nucleoplasm, nuclear membrane      | HeLa     | nucleoplasm, nuclear membrane          |                  |
| nucleoli fibrillar center          | SiHa     | nucleoli fibrillar center              |                  |
| nucleoplasm, cytosol               | A-431    | nucleoplasm, cytosol                   |                  |
| nucleoplasm                        | SiHa     | nucleoplasm                            |                  |
| cytosol                            | A549     | cytosol                                | Hep G2 cytosol   |
| cytosol                            | U-2 OS   | focal adhesion sites, cytosol          |                  |
| nucleoplasm, cytosol               | A-431    | nucleoplasm, cytosol                   |                  |
| cytosol                            | A-431    | cytosol                                | U-251 MG cytosol |
| nucleoplasm, nucleoli              | Hep G2   | nucleoplasm, nucleoli                  |                  |
| nucleoli, microtubules, cytosol    | U-251 MG | nucleoli, microtubules                 |                  |
| nucleoplasm, vesicles              | A-431    | nucleoplasm, vesicles                  |                  |
| nucleoplasm, vesicles              | MCF7     | nucleoplasm, vesicles                  |                  |
| nucleoplasm, cytosol               | A-431    | nucleoplasm, cytosol                   |                  |
| cytosol                            | A-431    | cytosol                                | A549 cytosol     |
| nucleoplasm, cytosol               | U-251 MG | nucleoplasm, plasma membrane, cytosol  |                  |
| cytosol                            | A-431    | cytosol                                | U-251 MG cytosol |
| nucleoplasm                        | A-431    | nucleoplasm                            |                  |
| nucleoplasm, golgi apparatus       | A-431    | nucleoplasm, golgi apparatus           |                  |
| nucleoplasm, cytosol               |          |                                        |                  |
| endoplasmic reticulum              |          |                                        |                  |
| vesicles, cytosol                  | A-431    | vesicles, U-251 MG                     | cytosol          |
| vesicles                           | U-251 MG | vesicles                               |                  |
| endosomes, lysosomes, mitochondria | A-431    | endosomes, lysosomes                   |                  |
| nucleoplasm                        | U-251 MG | nucleoplasm, vesicles                  |                  |
| nucleoli                           | PC-3     | nucleoli                               |                  |
| mitochondria                       |          |                                        |                  |
| nucleoplasm                        | SiHa     | nucleoplasm, cytosol                   |                  |
| nucleoplasm                        | A-431    | nucleoplasm, nucleoli fibrillar center |                  |
| mitochondria                       | A-431    | mitochondria                           |                  |
| nucleoplasm, mitochondria          | A549     | nucleoplasm, mitochondria              |                  |
| nucleoplasm, cytosol               | U-251 MG | nucleoplasm, cytosol                   |                  |
| nucleoplasm, cytosol               | A-431    | plasma membrane, cytosol               |                  |
| nucleoplasm, golgi apparatus       | A-431    | nucleoplasm, golgi apparatus           |                  |
| nucleoli, plasma membrane          | SH-SY5Y  | nucleoli, plasma membrane              |                  |
| mitochondria                       | MCF7     | mitochondria                           |                  |
| nucleoplasm, cytosol               | A-431    | nucleoplasm, cytosol                   |                  |
| nucleoplasm, cytosol               | U-251 MG | nucleoplasm, cytosol                   |                  |
| nucleoplasm                        | U-2 OS   | nucleoplasm, nuclear membrane          |                  |
| cytosol                            | AF22     | cytosol                                |                  |
| nucleoplasm                        | U-251 MG | nucleoli                               |                  |
| nucleoplasm                        | U-2 OS   | nucleoplasm, nucleoli                  |                  |
| nucleoplasm, nucleoli              | U-2 OS   | nucleoplasm                            |                  |
| nucleoplasm, vesicles              | U-2 OS   | nucleoplasm                            |                  |
| plasma membrane                    |          |                                        |                  |
| vesicles                           | HEK 293  | vesicles                               | A549 vesicles    |
| cytosol                            | Hep G2   | nucleoplasm, plasma membrane           |                  |
| nuclear speckles, cytosol          | A-431    | nucleoli, nuclear speckles, cytosol    |                  |
| nucleoplasm, cytosol               | A-431    | nucleoplasm, nuclear bodies, cytosol   |                  |
| nucleoplasm, cytosol               | A-431    | nuclear bodies                         |                  |
| vesicles                           |          |                                        |                  |
| vesicles, cell junctions           |          |                                        |                  |
| cytosol                            | REH      | centriolar satellite, cytosol          |                  |
| centriolar satellite, cytosol      | REH      | cytosol                                |                  |
| nucleoplasm                        | A-431    | nucleoplasm                            |                  |
| nucleoplasm, vesicles              | U-251 MG | nucleoplasm, vesicles                  |                  |

|                                       |           |                                |                                                 |
|---------------------------------------|-----------|--------------------------------|-------------------------------------------------|
| nucleoplasm                           | U-251 MG  | nucleoplasm                    |                                                 |
| nucleoplasm, nuclear membr            | A549      | nucleoplasm                    |                                                 |
| microtubules                          | A-431     | microtubu                      | U-251 MG microtubules                           |
| cytosol                               | A-431     | cytosol                        | U-251 MG cytosol                                |
| nuclear membrane, plasma n            | U-251 MG  | plasma membrane                |                                                 |
| vesicles                              | MCF7      | vesicles                       | PC-3 vesicles                                   |
| nucleoplasm                           | A-431     | nucleopla                      | U-251 MG nucleoplasm                            |
| nucleoplasm, nucleoli fibr            | A-431     | nucleopla                      | U-251 MG nucleoplasm, nucleoli fibrillar cente  |
| nucleoplasm                           | A-431     | nucleopla                      | U-251 MG nucleoplasm                            |
| nucleoplasm                           | A-431     | nucleopla                      | U-251 MG nucleoplasm                            |
| nucleoplasm                           | U-251 MG  | nucleoplasm                    |                                                 |
| nucleoplasm                           | MCF7      | nucleopla                      | HeLa nucleoplasm                                |
| vesicles                              | U-251 MG  | vesicles                       |                                                 |
| lysosomes                             | A549      | nucleopla                      | PC-3 nucleoplasm, lysosomes                     |
| nucleoplasm, vesicles                 | A-431     | nucleopla                      | U-251 MG nucleoplasm, vesicles                  |
| nucleoplasm, vesicles                 | SH-SY5Y   | nucleopla                      | SK-MEL-30 nucleoplasm, vesicles                 |
| nucleoplasm, vesicles                 | A-431     | nucleopla                      | U-251 MG nucleoplasm, vesicles                  |
| nucleoplasm, cytosol                  | U-251 MG  | nucleoplasm, cytosol           |                                                 |
| nucleoplasm, cytosol                  | MCF7      | nucleopla                      | HEK 293 nucleoplasm, cytosol                    |
| nucleoplasm                           | A-431     | nucleopla                      | U-251 MG nucleoplasm                            |
| golgi apparatus, vesicles             | A-431     | golgi app                      | U-251 MG golgi apparatus                        |
| vesicles, microtubules, cyt           | A-431     | centriolar satellite           |                                                 |
| nucleoplasm, golgi apparat            | A-431     | nucleopla                      | U-251 MG nucleoplasm, golgi apparatus, cytosol  |
| nuclear bodies                        | SK-MEL-30 | nucleoplasm                    |                                                 |
| nucleoplasm                           | A-431     | nucleopla                      | HeLa nucleoplasm, plasma membrane               |
| golgi apparatus                       | A-431     | golgi app                      | MCF7 golgi apparatus                            |
| nucleoplasm, golgi apparatus, midbody |           |                                |                                                 |
| nucleoplasm, cytosol                  | SH-SY5Y   | nucleopla                      | SK-MEL-30 nucleoplasm                           |
| nucleoplasm, vesicles                 | A-431     | nucleopla                      | U-251 MG nucleoplasm, golgi apparatus, vesicles |
| nucleoplasm, vesicles                 | HeLa      | nucleopla                      | HaCaT nucleoplasm, vesicles                     |
| nucleoplasm, centrosome, cy           | A-431     | nucleopla                      | U-251 MG nucleoplasm, centrosome, cytosol       |
| plasma membrane                       | HEK 293   | cytosol                        | PC-3 plasma membrane                            |
| nucleoplasm, nucleoli, cyt            | A-431     | nucleoli, U-251 MG             | nucleoplasm, nucleoli, cytosol                  |
| vesicles                              |           |                                |                                                 |
| nucleoplasm, nuclear membr            | A-431     | nucleopla                      | U-251 MG nucleoplasm, nuclear membrane, cytosol |
| plasma membrane                       |           |                                |                                                 |
| cytosol                               | A-431     | plasma me                      | U-251 MG cytosol                                |
| plasma membrane, cytosol              | MCF7      | cytosol                        | HeLa plasma membrane, cytosol                   |
| plasma membrane                       |           |                                |                                                 |
| vesicles                              | MCF7      | vesicles                       | HEK 293 vesicles                                |
| nucleoplasm, nuclear membr            | Hep G2    | nucleopla                      | PC-3 nucleoplasm, nuclear membrane, cytosol     |
| endoplasmic reticulum                 | BJ        | endoplasmic reticulum          |                                                 |
| cytosol                               | MCF7      | mitochond                      | Hep G2 cytosol                                  |
| nucleoplasm                           |           |                                |                                                 |
| nucleoplasm                           | MCF7      | nucleopla                      | PC-3 nucleoplasm                                |
| vesicles                              | A-431     | vesicles                       | U-251 MG vesicles                               |
| nucleoplasm, nucleoli fibr            | MCF7      | nucleopla                      | HeLa nucleoplasm, nucleoli fibrillar cente      |
| mitochondria                          | A-431     | mitochondria                   |                                                 |
| nucleoplasm, nuclear bodie            | HeLa      | nucleoplasm, nuclear bodies    |                                                 |
| nuclear bodies                        |           |                                |                                                 |
| nucleoplasm, golgi apparat            | U-251 MG  | nucleoplasm, nucleoli, cytosol |                                                 |
| nucleoplasm, golgi apparat            | SH-SY5Y   | nucleoplasm, golgi apparatus   |                                                 |
| cytosol                               | A-431     | cytosol                        |                                                 |
| nucleoplasm, golgi apparat            | A-431     | nucleopla                      | U-251 MG nucleoplasm                            |
| cytosol                               | A-431     | cytosol                        | U-251 MG cytosol                                |

|                               |          |                                                          |                                       |
|-------------------------------|----------|----------------------------------------------------------|---------------------------------------|
| nucleoplasm                   | MCF7     | nucleoplaPC-3                                            | nucleoplasm, cytosol                  |
| cytosol                       | A-431    | cytosol                                                  |                                       |
| nucleoplasm, plasma membræ    | A-431    | nucleoplaU-251 MG                                        | nucleoplasm, plasma membrane, cytosol |
| nucleoplasm                   | A-431    | nucleoplaU-251 MG                                        | nucleoplasm                           |
| nuclear speckles              | A-431    | nuclear sU-251 MG                                        | nuclear speckles                      |
| cytosol                       | U-251 MG | cytosol                                                  |                                       |
| cytosol                       | HEK 293  | cytosol                                                  |                                       |
| nucleoplasm, plasma membræ    | SiHa     | nucleoplaRH-30                                           | nucleoplasm, plasma membrane          |
| cytosol                       | A-431    | cytosol U-251 MG                                         | cytosol                               |
| nucleoplasm, cytosol          | A-431    | nucleoplaU-251 MG                                        | nucleoplasm, cytosol                  |
| cytosol                       | A-431    | plasma meU-251 MG                                        | cytosol                               |
| cytosol                       | BJ       | cytosol                                                  |                                       |
| nucleoplasm, vesicles         | A549     | nucleoplaSiHa                                            | nucleoplasm                           |
| nuclear speckles              | SiHa     | nuclear speckles                                         |                                       |
| nuclear membrane              | PC-3     | nuclear membrane                                         |                                       |
| cytosol                       | U-251 MG | cytosol                                                  |                                       |
| nucleoli fibrillar center     | A-431    | nucleoli BJ                                              | nucleoli fibrillar center             |
| golgi apparatus, vesicles     | A-431    | golgi appU-251 MG                                        | golgi apparatus                       |
| nucleoplasm                   | A-431    | nucleoplaMCF7                                            | nucleoplasm, mitochondria             |
| nucleoli fibrillar center     | A-431    | nucleoli U-251 MG                                        | nucleoli fibrillar center             |
| nucleoplasm, microtubules     | A-431    | nucleoplaU-251 MG                                        | nucleoplasm, microtubules             |
| vesicles                      | BJ       | plasma membrane                                          |                                       |
| nucleoplasm                   | A-431    | nucleoplaMCF7                                            | nucleoplasm, cell junctions           |
| nucleoplasm, cytosol          | MCF7     | nucleoplaHEK 293                                         | nucleoplasm, cytosol                  |
| nucleoplasm, aggresome        | A-431    | nucleoplasm                                              |                                       |
| vesicles                      |          |                                                          |                                       |
| nucleoplasm, nucleoli         | Hep G2   | nucleoplasm                                              |                                       |
| nucleoplasm, cytosol          | A-431    | nucleoplaU-251 MG                                        | nucleoplasm, cytosol                  |
| nucleoplasm, nuclear speckles |          |                                                          |                                       |
| nucleoplasm                   | A-431    | nucleoplaU-251 MG                                        | nucleoplasm                           |
| nucleoplasm, nucleoli, mitc   | A-431    | nucleoplaU-251 MG                                        | nucleoplasm                           |
| nucleoplasm, mitochondria     | A-431    | nucleoplaU-251 MG                                        | nucleoplasm, mitochondria             |
| nucleoplasm                   |          |                                                          |                                       |
| nucleoplasm, cytosol          | MCF7     | nucleoplaPC-3                                            | nucleoplasm, cytosol                  |
| nuclear bodies                | PC-3     | nuclear bodies                                           |                                       |
| nucleoplasm, cell junctior    | U-2 OS   | plasma meHep G2                                          | nucleoplasm, cell junctions           |
| nucleoplasm, cytosol          |          |                                                          |                                       |
| plasma membrane, actin fila   | A-431    | plasma meU-251 MG                                        | plasma membrane, cytosol              |
| cytosol                       | A-431    | cytosol U-251 MG                                         | cytosol                               |
| nucleoplasm                   | RH-30    | nucleoplaPC-3                                            | nucleoplasm                           |
| nucleoli fibrillar center     | MCF7     | nucleoli HEK 293                                         | nucleoli fibrillar center             |
| nucleoli, endoplasmic reti    | MCF7     | nucleoli, endoplasmic reticulum, cytosol                 |                                       |
| nucleoli, cytosol             | HEK 293  | nucleoli, A549                                           | nucleoli, cytosol                     |
| nucleoplasm                   | A-431    | nucleoplaU-251 MG                                        | nucleoplasm                           |
| nucleoplasm                   | HEK 293  | nucleoplaPC-3                                            | nucleoplasm                           |
| endoplasmic reticulum, ves    | A-431    | endoplasmPC-3                                            | endoplasmic reticulum, vesicles       |
| nucleoplasm, vesicles, cytc   | A-431    | nucleoplaU-251 MG                                        | nucleoplasm, vesicles                 |
| nucleoplasm                   | U-2 OS   | nucleoplaHEK 293                                         | nucleoplasm, aggresome, cytosol       |
| nucleoplasm                   | U-2 OS   | nucleoplaHEK 293                                         | nucleoplasm                           |
| nucleoplasm, vesicles         | U-2 OS   | nucleoplaA549                                            | nucleoplasm, vesicles                 |
| nucleoplasm, cytosol          | A549     | nucleoplaHaCaT                                           | cytosol                               |
| golgi apparatus, plasma me    | A549     | nuclear speckles, golgi apparatus, plasma membrane, cell |                                       |
| nuclear bodies                | HeLa     | nuclear bodies                                           |                                       |
| cytosol                       |          |                                                          |                                       |
| peroxisomes                   | A-431    | peroxisorU-251 MG                                        | peroxisomes                           |



|                             |          |                                 |                                       |
|-----------------------------|----------|---------------------------------|---------------------------------------|
| nucleoli fibrillar center   | A-431    | nucleoli U-251 MG               | nucleoli fibrillar center, peroxisome |
| intermediate filaments, cy  | A549     | intermediate filaments, cytosol |                                       |
| vesicles                    | A-431    | vesicles Hep G2                 | vesicles                              |
| vesicles                    | A549     | vesicles, Hep G2                | golgi apparatus, vesicles             |
| nuclear bodies              | SiHa     | nuclear bSK-MEL-30              | nuclear bodies                        |
| cytosol                     | A-431    | cytosol U-251 MG                | cytosol                               |
| vesicles                    | HEK 293  | vesicles                        |                                       |
| nucleoplasm, nucleoli       | HEK 293  | nucleoplaPC-3                   | nucleoplasm, nucleoli                 |
| nucleoplasm, nucleoli       | HEK 293  | nucleoplaPC-3                   | nucleoplasm, nucleoli                 |
| nucleoplasm, cytosol        | HeLa     | nucleoplasm, cytosol            |                                       |
| golgi apparatus             | U-2 OS   | golgi appSK-MEL-30              | nucleoli, golgi apparatus             |
| cytosol                     | U-251 MG | cytosol                         |                                       |
| nucleoplasm, cytosol        |          |                                 |                                       |
| mitochondria                | SH-SY5Y  | nucleoplaRH-30                  | nucleoplasm, mitochondria             |
| centrosome, cytosol         |          |                                 |                                       |
| nucleoplasm                 | MCF7     | nucleoplaHeLa                   | plasma membrane, actin filaments      |
| golgi apparatus, vesicles   | A-431    | golgi appU-251 MG               | golgi apparatus, vesicles             |
| vesicles                    | A-431    | vesicles U-251 MG               | vesicles                              |
| cytosol                     | A549     | cytosol                         |                                       |
| nucleoplasm, nuclear bodie  | A-431    | nucleoplaU-251 MG               | nucleoplasm, nuclear bodies           |
| nucleoplasm, plasma membr   | A-431    | nucleoplaU-251 MG               | nucleoplasm, plasma membrane, cytosol |
| nucleoplasm                 | A-431    | nucleoplaU-251 MG               | nucleoplasm                           |
| cytosol                     | A-431    | cytosol U-251 MG                | cytosol                               |
| cytosol                     | A-431    | cytosol U-251 MG                | cytosol                               |
| nucleoplasm                 | U-251 MG | nucleoplasm                     |                                       |
| cytosol                     | MCF7     | cytokinetPC-3                   | cytosol                               |
| cytosol                     | A-431    | cytosol U-251 MG                | cytosol                               |
| endoplasmic reticulum, cyt  | A-431    | endoplasmU-251 MG               | endoplasmic reticulum, cytosol        |
| nucleoplasm, midbody, centr | SiHa     | nucleoplaRH-30                  | nucleoplasm, centrosome, cytosol      |
| golgi apparatus             |          |                                 |                                       |
| intermediate filaments, cy  | U-251 MG | intermediate filaments, cytosol |                                       |
| vesicles                    |          |                                 |                                       |
| nucleoplasm                 | U-2 OS   | nucleoplaU-251 MG               | nucleoplasm                           |
| nucleoplasm, midbody ring   | U-251 MG | nucleoplaSiHa                   | nucleoplasm                           |
| cytosol                     | BJ       | cytosol HAP1                    | plasma membrane                       |
| nucleoplasm                 | HEK 293  | nucleoplaRH-30                  | nucleoplasm                           |
| nucleoplasm, focal adhesio  | HEK 293  | nucleoplaRH-30                  | nucleoplasm                           |
| nucleoplasm                 | A-431    | nucleoplaU-251 MG               | nucleoplasm                           |
| nucleoplasm                 | U-251 MG | nucleoplasm                     |                                       |
| nucleoli fibrillar center   | A-431    | nucleoli U-251 MG               | nucleoli fibrillar center, cytosol    |
| cytosol                     | RH-30    | cytosol                         |                                       |
| nucleoplasm                 | A-431    | nucleoplasm                     |                                       |
| cytosol                     | U-251 MG | cytosol                         |                                       |
| cytosol                     | A-431    | cytosol U-251 MG                | cytosol                               |
| actin filaments             | A-431    | nucleoplaU-251 MG               | nucleoplasm, actin filaments          |
| cytosol                     | U-251 MG | cytosol                         |                                       |
| nucleoplasm                 | U-2 OS   | nucleoplaHaCaT                  | nucleoplasm, nucleoli                 |
| cytosol                     | A-431    | cytosol U-251 MG                | cytosol                               |
| vesicles                    | U-251 MG | nucleoplasm, vesicles           |                                       |
| vesicles                    | U-251 MG | vesicles, cytosol               |                                       |
| mitochondria                | A-431    | mitochondU-251 MG               | mitochondria                          |
| nucleoplasm                 | A-431    | nucleoplaU-251 MG               | nucleoplasm                           |
| nucleoplasm, vesicles       | A-431    | nucleoplaU-251 MG               | nucleoplasm, vesicles                 |
| vesicles, microtubules      | A549     | microtubuHeLa                   | vesicles, microtubules                |
| nucleoplasm, focal adhesio  | A-431    | nucleoplaHeLa                   | focal adhesion sites                  |

|                                  |           |                                                          |
|----------------------------------|-----------|----------------------------------------------------------|
| nucleoplasm                      | SK-MEL-30 | nucleoplasm, nuclear bodies                              |
| nuclear speckles                 | A-431     | nuclear sU-251 MG nuclear speckles                       |
| nucleoplasm                      | A549      | nucleoplasm                                              |
| endoplasmic reticulum            | A-431     | endoplasmic reticulum                                    |
| nucleoplasm, vesicles            | U-2 OS    | nucleoplaA-431 nucleoplasm, vesicles                     |
| nucleoplasm                      | A-431     | nucleoplaSH-SY5Y nucleoplasm                             |
| plasma membrane                  |           |                                                          |
| vesicles                         | SiHa      | vesicles                                                 |
| nucleoplasm                      | U-2 OS    | nucleoplaPC-3 nucleoplasm                                |
| plasma membrane                  | U-251 MG  | plasma meHaCaT plasma membrane                           |
| nuclear speckles, cytosol        | A-431     | nuclear sU-251 MG nuclear speckles, cytosol              |
| vesicles                         |           |                                                          |
| golgi apparatus, vesicles        |           |                                                          |
| golgi apparatus, plasma membrane |           |                                                          |
| nucleoplasm                      | HEK 293   | nucleoplasm                                              |
| nucleoplasm                      | U-251 MG  | nucleoplasm                                              |
| cytosol                          | U-251 MG  | cytosol                                                  |
| cytosol                          | U-251 MG  | cytosol                                                  |
| nucleoplasm                      |           |                                                          |
| plasma membrane, cytosol         | A-431     | nucleoplaU-251 MG nucleoplasm, cytosol                   |
| nuclear speckles                 | A-431     | nuclear sU-251 MG nuclear speckles                       |
| nuclear speckles                 | A-431     | nuclear sU-251 MG nuclear speckles                       |
| nucleoli                         | A-431     | nucleoli, MCF7 nucleoli                                  |
| nucleoplasm, mitochondria        |           |                                                          |
| nucleoplasm                      | A-431     | nucleoplaU-251 MG nucleoplasm                            |
| cytosol                          | A-431     | cytosol U-251 MG nucleoplasm, cytosol                    |
| nucleoplasm                      | A-431     | nucleoplaU-251 MG nucleoplasm                            |
| nucleoplasm                      | U-251 MG  | nucleoplaMCF7 nucleoplasm                                |
| nucleoplasm                      | U-251 MG  | nucleoplaMCF7 nucleoplasm                                |
| nucleoplasm                      | U-251 MG  | nucleoplasm                                              |
| nucleoplasm                      | A-431     | nucleoplaU-251 MG nucleoplasm                            |
| cytosol                          |           |                                                          |
| nuclear membrane                 | A-431     | nuclear rMCF7 nuclear membrane                           |
| nucleoplasm, vesicles            | A-431     | nucleoplaU-251 MG nucleoplasm, golgi apparatus, vesicles |
| cytosol                          | A-431     | cytosol U-251 MG cytosol                                 |
| nucleoplasm                      |           |                                                          |
| cytosol                          | A-431     | cytosol U-251 MG cytosol                                 |
| nuclear bodies                   | Hep G2    | nuclear bodies                                           |
| vesicles                         | A-431     | vesicles U-251 MG vesicles                               |
| nuclear speckles                 | U-251 MG  | nuclear sMCF7 nuclear speckles                           |
| cytosol                          | A-431     | nucleoplaU-251 MG cytosol                                |
| nucleoplasm, cytosol             |           |                                                          |
| nucleoplasm, intermediate        | A-431     | nucleoplaU-251 MG nucleoplasm, cytosol                   |
| plasma membrane, cell junction   | A-431     | plasma meU-251 MG plasma membrane                        |
| nucleoplasm, cytosol             | A-431     | nucleoplaU-251 MG nucleoplasm, cytosol                   |
| nucleoplasm, vesicles            | A-431     | nucleoplaU-251 MG nucleoplasm                            |
| plasma membrane, cytosol         | A-431     | plasma meU-251 MG plasma membrane, cytosol               |
| mitochondria                     | A-431     | mitochondU-251 MG mitochondria                           |
| mitochondria                     | A-431     | mitochondria                                             |
| vesicles                         | SK-MEL-30 | nucleoplasm, vesicles                                    |
| golgi apparatus                  | A-431     | golgi appU-251 MG golgi apparatus                        |
| plasma membrane, cytosol         | A-431     | plasma meU-251 MG nucleoplasm, plasma membrane, cytosol  |
| nucleoplasm, centrosome          | MCF7      | nucleoplaRH-30 nucleoplasm, centrosome, cytosol          |
| nucleoplasm                      | HEK 293   | nucleoplaSK-MEL-30 nucleoplasm, centrosome               |
| nucleoplasm                      | A-431     | nucleoplaU-251 MG nucleoplasm, nuclear bodies            |

|                                         |           |                                         |                                |
|-----------------------------------------|-----------|-----------------------------------------|--------------------------------|
| nucleoplasm                             | MCF7      | nucleoplasm                             |                                |
| nuclear speckles, cytosol               | A-431     | cytosol                                 | MCF7 nuclear speckles, cytosol |
| nucleoli                                | HeLa      | nucleoli                                | fibrillar center               |
| nuclear membrane, endoplasmic reticulum | A-431     | nuclear membrane, endoplasmic reticulum | U-251 MG                       |
| nucleoplasm, nucleoli, microtubules     | MCF7      | nucleoplasm, nucleoli                   | PC-3                           |
| nucleoli fibrillar center               | HEK 293   | nucleoli                                | AF22 plasma membrane, cytosol  |
| nucleoplasm, nucleoli fibrillar center  | SH-SY5Y   | nucleoplasm, plasma membrane            | HUVEC TER                      |
| mitochondria                            | A-431     | mitochondria                            | U-251 MG                       |
| nucleoplasm                             | A-431     | nucleoplasm, nuclear bodies             | U-251 MG                       |
| nucleoplasm                             | A-431     | nucleoplasm                             | U-251 MG                       |
| nucleoplasm                             | A-431     | nucleoplasm                             | U-251 MG                       |
| nucleoplasm                             | MCF7      | nucleoplasm                             | HEK 293                        |
| nucleoplasm, nucleoli                   | A549      | nucleoplasm                             |                                |
| nucleoplasm, plasma membrane            | A-431     | nucleoplasm, plasma membrane, cytosol   | U-251 MG                       |
| nucleoplasm, cytosol                    | A-431     | nuclear speckles, cytosol               | U-251 MG                       |
| nucleoplasm                             | SiHa      | nucleoplasm, cytokinetic bridge         |                                |
| vesicles                                | A-431     | vesicles                                |                                |
| vesicles                                | RH-30     | vesicles                                |                                |
| nucleoplasm, cytosol                    | A-431     | nucleoplasm, nucleoli, cytosol          | U-251 MG                       |
| nucleoplasm, cytosol                    | A-431     | nucleoplasm, cytosol                    | U-251 MG                       |
| nucleoplasm, cytosol                    | BJ        | nucleoplasm, vesicles                   |                                |
| nuclear bodies, cytosol                 | A-431     | nuclear bodies, cytosol                 | U-251 MG                       |
| nuclear bodies                          | SH-SY5Y   | nuclear bodies                          | RH-30                          |
| cytosol                                 | HEK 293   | cytosol                                 | RH-30                          |
| nucleoplasm, microtubules               | A-431     | nucleoplasm, microtubules               | U-251 MG                       |
| mitochondria, cytosol                   | A-431     | mitochondria, cytosol                   | intermediary U-251 MG          |
| vesicles                                | U-2 OS    | vesicles                                | A-431                          |
| nucleoplasm, cytosol                    | A-431     | nuclear speckles, golgi apparatus       | U-251 MG                       |
| mitochondria                            | Hep G2    | mitochondria, cytosol                   | RH-30                          |
| cell junctions, cytosol                 | A-431     | cell junctions, cytosol                 | U-251 MG                       |
| cell junctions, cytosol                 | A-431     | cell junctions, cytosol                 | U-251 MG                       |
| vesicles                                | SiHa      | vesicles                                | HaCaT                          |
| vesicles, actin filaments               | A-431     | vesicles                                | U-251 MG                       |
| plasma membrane, cytosol                | A-431     | plasma membrane, cytosol                | U-251 MG                       |
| intermediate filaments                  | htCEpi    | intermediate filaments, cytosol         |                                |
| actin filaments, cytosol                | A-431     | cytosol                                 |                                |
| nuclear bodies                          | MCF7      | nuclear bodies                          | bRH-30                         |
| nucleoli, golgi apparatus               | A-431     | nucleoli, golgi apparatus               | U-251 MG                       |
| endoplasmic reticulum                   | HaCaT     | endoplasmic reticulum                   |                                |
| endoplasmic reticulum                   | HaCaT     | endoplasmic reticulum                   |                                |
| cytosol                                 | A-431     | cytosol                                 |                                |
| nuclear speckles, cytosol               | A-431     | nuclear speckles, cytosol               | sU-251 MG                      |
| mitochondria                            | SK-MEL-30 | mitochondria                            |                                |
| nucleoplasm, nuclear membrane           | A-431     | nucleoplasm, nuclear membrane           | U-251 MG                       |
| nuclear bodies                          | K-562     | plasma membrane                         | bHaCaT                         |
| nucleoplasm                             | PC-3      | nucleoplasm                             |                                |
| nucleoplasm                             | A-431     | nucleoplasm                             | U-251 MG                       |
| nucleoplasm                             | A-431     | nucleoplasm                             | U-251 MG                       |
| nucleoplasm, nucleoli                   | MCF7      | nucleoplasm, nucleoli                   | PC-3                           |
| golgi apparatus, cytosol                | K-562     | golgi apparatus, cytosol                |                                |
| cytoplasmic bodies                      |           |                                         |                                |
| cytoplasmic bodies                      |           |                                         |                                |
| golgi apparatus                         | A-431     | golgi apparatus                         | U-251 MG                       |
| nucleoplasm                             | A-431     | nucleoplasm                             | U-251 MG                       |
| vesicles                                | A-431     | vesicles                                | PC-3                           |

|                              |          |                          |                                         |
|------------------------------|----------|--------------------------|-----------------------------------------|
| nucleoplasm                  | A-431    | nucleoplaHEK 293         | nucleoplasm                             |
| nucleoplasm                  | A-431    | nucleoplaHEK 293         | nucleoplasm, centriolar satellite       |
| plasma membrane, cytosol     | A-431    | plasma meU-251 MG        | cytosol                                 |
| mitotic spindle, centrosome  | U-251 MG | centrosome, cytosol      |                                         |
| centrosome                   | U-251 MG | centrosom SH-SY5Y        | centrosome, cytosol                     |
| nucleoplasm, cytosol         | A-431    | nucleoplaU-251 MG        | nucleoplasm, cytosol                    |
| cytosol                      | A-431    | cytosol U-251 MG         | cytosol                                 |
| nucleoli                     | HEK 293  | nucleoplaRH-30           | nucleoplasm, nucleoli                   |
| nucleoli                     | HEK 293  | nucleoli                 |                                         |
| nuclear speckles, plasma     | nA-431   | nuclear sU-251 MG        | nuclear speckles, cytosol               |
| nuclear speckles, plasma     | nA-431   | nucleoplaU-251 MG        | nucleoplasm, plasma membrane, cytosol   |
| mitochondria                 | U-251 MG | mitochondBJ              | mitochondria                            |
| nucleoplasm, focal adhesion  | A-431    | nucleoplaU-251 MG        | nucleoplasm, focal adhesion sites       |
| plasma membrane, cytosol     | A-431    | plasma meU-251 MG        | cytosol                                 |
| nucleoplasm                  | RH-30    | nucleoplaSK-MEL-30       | nucleoplasm                             |
| cytosol                      | PC-3     | nucleoplasm, cytosol     |                                         |
| intermediate filaments       | SiHa     | intermediate filaments   |                                         |
| nuclear speckles, plasma     | nA-431   | plasma meU-251 MG        | nuclear speckles, plasma membrane, cyto |
| vesicles                     |          |                          |                                         |
| nucleoplasm                  | U-251 MG | nucleoplasm              |                                         |
| nucleoplasm                  | A-431    | nucleoplaU-251 MG        | nucleoplasm                             |
| nucleoplasm, nucleoli, nucle | A-431    | nucleoplaHEK 293         | nucleoplasm, nucleoli                   |
| nucleoplasm                  |          |                          |                                         |
| nucleoplasm                  | A-431    | nucleoplaU-251 MG        | nucleoplasm                             |
| nucleoplasm                  | A-431    | nucleoplaU-251 MG        | nucleoplasm                             |
| mitochondria                 | A-431    | mitochondU-251 MG        | mitochondria                            |
| nuclear membrane             | HEK 293  | nuclear nRH-30           | nuclear membrane                        |
| nucleoplasm                  | A-431    | nucleoplasm              |                                         |
| nucleoplasm                  | A-431    | nucleoplaMCF7            | nucleoplasm                             |
| cell junctions               | A-431    | vesicles, cell junctions |                                         |
| endoplasmic reticulum        | A-431    | cytosol U-251 MG         | cytosol                                 |
| mitochondria                 | A-431    | mitochondU-251 MG        | mitochondria                            |
| nucleoplasm, mitochondria    | A-431    | nucleoplaU-251 MG        | nucleoplasm, cytosol                    |
| nucleoplasm                  | Hep G2   | nucleoplasm              |                                         |
| nucleoplasm                  | U-2 OS   | nucleoplaHEK 293         | nucleoplasm                             |
| vesicles                     | U-251 MG | vesicles Hep G2          | vesicles                                |
| microtubules, cytosol        | A-431    | microtubuU-251 MG        | intermediate filaments, microtubules,   |
| cytosol                      | A-431    | cytosol HEK 293          | cytosol                                 |
| nucleoli, endoplasmic reti   | U-251 MG | nucleoli, MCF7           | nucleoli, endoplasmic reticulum, cytos  |
| cell junctions               | A-431    | cell junctions           |                                         |
| nucleoplasm                  | A-431    | nucleoplaHep G2          | nucleoplasm, golgi apparatus            |
| nucleoplasm, golgi apparatus |          |                          |                                         |
| nucleoplasm, golgi apparatus |          |                          |                                         |
| cytosol                      |          |                          |                                         |
| nucleoplasm                  | A-431    | nucleoplaU-251 MG        | nucleoplasm                             |
| nucleoplasm                  | A-431    | nucleoplaU-251 MG        | nucleoplasm                             |
| nucleoplasm, cytosol         | A-431    | nucleoplaU-251 MG        | nucleoplasm, cytosol                    |
| nucleoplasm                  |          |                          |                                         |
| nucleoplasm                  | A-431    | nucleoplaHeLa            | nucleoplasm                             |
| nucleoplasm                  |          |                          |                                         |
| nucleoplasm, golgi apparatus | A-431    | nucleoplaU-251 MG        | nucleoplasm, cytosol                    |
| nucleoplasm, nuclear bodies  | A-431    | nuclear bU-251 MG        | nuclear bodies                          |
| nucleoplasm                  | A-431    | nucleoplaU-251 MG        | nucleoplasm                             |
| mitochondria                 | A549     | mitochondria             |                                         |
| cytosol                      | A-431    | cytosol                  |                                         |

|                                        |           |                                              |                                              |
|----------------------------------------|-----------|----------------------------------------------|----------------------------------------------|
| endoplasmic reticulum                  | Hep G2    | endoplasmic reticulum                        |                                              |
| nucleoplasm, nuclear bodies            | U-2 OS    | nuclear bodies                               | nucleoplasm, nuclear bodies, cytosol         |
| mitochondria                           | U-251 MG  | mitochondria                                 | nucleoplasm, mitochondria                    |
| nucleoplasm, cytosol                   | A-431     | nucleoplasm, cytosol                         | nucleoplasm, cytosol                         |
| plasma membrane, cytosol               | A-431     | plasma membrane, cytosol                     | plasma membrane, cytosol                     |
| nucleoplasm, nucleoli fibrillar center | A-431     | nucleoplasm, nucleoli fibrillar center       | nucleoplasm, nucleoli fibrillar center       |
| nucleoplasm, nucleoli fibrillar center | SH-SY5Y   | nucleoplasm, nucleoli fibrillar center       | nucleoplasm, nucleoli fibrillar center       |
| vesicles                               | A-431     | vesicles                                     | vesicles                                     |
| nucleoplasm, nucleoli fibrillar center | U-2 OS    | nucleoli fibrillar center                    | nucleoli fibrillar center                    |
| vesicles, centrosome                   | A-431     | centrosome                                   | centrosome                                   |
| vesicles                               |           |                                              |                                              |
| plasma membrane                        | A-431     | plasma membrane                              | plasma membrane                              |
| nucleoplasm                            | U-251 MG  | nucleoplasm, nuclear bodies                  |                                              |
| nucleoplasm                            | A-431     | nucleoplasm, nuclear bodies, cytosol         | nucleoplasm, nuclear bodies, cytosol         |
| cytosol                                | A-431     | endoplasmic reticulum                        | endoplasmic reticulum                        |
| vesicles                               | A-431     | vesicles                                     | vesicles                                     |
| nucleoplasm                            | U-2 OS    | nucleoplasm, cytosol                         | nucleoplasm, cytosol                         |
| vesicles                               | A-431     | vesicles, cytosol                            | vesicles, cytosol                            |
| nucleoplasm, cytosol                   | HEK 293   | nuclear speckles                             | nuclear speckles                             |
| nucleoplasm, cytosol                   |           |                                              |                                              |
| cell junctions                         | U-2 OS    | cell junctions                               | cell junctions                               |
| cell junctions                         |           |                                              |                                              |
| nucleoplasm, nuclear bodies            | Hep G2    | nucleoplasm, plasma membrane                 | nucleoplasm, plasma membrane                 |
| vesicles, cytosol                      | A-431     | vesicles, cytosol                            | vesicles, cytosol                            |
| nucleoplasm, endoplasmic reticulum     | A-431     | nucleoplasm, endoplasmic reticulum           | nucleoplasm, endoplasmic reticulum           |
| nucleoli fibrillar center              | HEK 293   | nucleoli fibrillar center                    | nucleoli fibrillar center                    |
| nucleoplasm, cytosol                   | A-431     | nucleoplasm, cytosol                         | nucleoplasm, cytosol                         |
| nucleoplasm, nucleoli                  | A-431     | nucleoplasm, nucleoli                        | nucleoplasm, nucleoli                        |
| vesicles                               | A-431     | vesicles                                     | vesicles                                     |
| vesicles                               | A-431     | vesicles                                     | vesicles                                     |
| mitochondria                           | A-431     | nucleoplasm, mitochondria                    | nucleoplasm, mitochondria                    |
| mitochondria                           | A-431     | mitochondria                                 | mitochondria                                 |
| mitochondria                           | A-431     | mitochondria                                 | mitochondria                                 |
| mitochondria                           | U-2 OS    | mitochondria                                 | mitochondria                                 |
| nucleoplasm                            |           |                                              |                                              |
| nucleoplasm, cytosol                   | A-431     | nucleoplasm, cytosol                         | nucleoplasm, cytosol                         |
| vesicles                               | SH-SY5Y   | nuclear bodies                               |                                              |
| nuclear bodies                         |           |                                              |                                              |
| nucleoplasm                            | MCF7      | nucleoplasm, cytosol                         | nucleoplasm, cytosol                         |
| cytosol                                | A-431     | cytosol                                      | cytosol                                      |
| cytosol                                | A-431     | plasma membrane, cytosol                     | plasma membrane, cytosol                     |
| plasma membrane                        | A549      | nucleoli, vesicles, plasma membrane, cytosol | nucleoli, vesicles, plasma membrane, cytosol |
| nucleoplasm, intermediate filament     | A-431     | nucleoplasm                                  | nucleoplasm                                  |
| endoplasmic reticulum                  | A-431     | endoplasmic reticulum                        | endoplasmic reticulum                        |
| vesicles, plasma membrane              | HeLa      | vesicles, plasma membrane                    | vesicles, plasma membrane                    |
| nucleoli, nuclear bodies, cytosol      | Hep G2    | nucleoli, nuclear bodies, cytosol            | nucleoli, nuclear bodies, cytosol            |
| nucleoplasm, nuclear bodies, cytosol   | A-431     | nucleoplasm, nuclear bodies, cytosol         | nucleoplasm, nuclear bodies, cytosol         |
| nucleoplasm                            | A-431     | nucleoplasm                                  | nucleoplasm                                  |
| nucleoplasm, nuclear bodies, cytosol   | A549      | nucleoplasm, nuclear bodies, cytosol         | nucleoplasm, nuclear bodies, cytosol         |
| cytosol                                | U-251 MG  | cytosol                                      | cytosol                                      |
| nucleoplasm, nucleoli fibrillar center | A-431     | nucleoplasm, nucleoli fibrillar center       | nucleoplasm, nucleoli fibrillar center       |
| nucleoli fibrillar center              |           |                                              |                                              |
| cytosol                                | SK-MEL-30 | cytosol                                      | cytosol                                      |
| nucleoplasm                            |           |                                              |                                              |
| cytoplasmic bodies                     | A-431     | cytoplasmic bodies                           | cytoplasmic bodies                           |

|                                   |          |                                            |                                        |
|-----------------------------------|----------|--------------------------------------------|----------------------------------------|
| vesicles                          | HeLa     | vesicles                                   |                                        |
| vesicles                          | HeLa     | vesicles                                   |                                        |
| nucleoplasm                       | A-431    | nucleoplaU-251 MG                          | nucleoplasm                            |
| cytosol                           | A-431    | cytosol U-251 MG                           | cytosol                                |
| nucleoplasm, nuclear bodie        | U-2 OS   | nucleoplaMCF7                              | nucleoplasm, nuclear bodies, vesicles  |
| nucleoplasm, nuclear bodie        | HEK 293  | nucleoplaHep G2                            | nucleoplasm, vesicles                  |
| nucleoplasm, centrosome, cy       | A-431    | nucleoplaU-251 MG                          | plasma membrane, centrosome, cytosol   |
| vesicles                          | A-431    | vesicles U-251 MG                          | vesicles                               |
| plasma membrane, cytosol          | A-431    | plasma meU-251 MG                          | plasma membrane, cytosol               |
| golgi apparatus, plasma me        | A-431    | nucleoplaU-251 MG                          | golgi apparatus, plasma membrane, cyto |
| nucleoplasm, cytosol              | U-2 OS   | nucleoplasm, nuclear membrane, vesicles    |                                        |
| vesicles                          | HEK 293  | vesicles                                   |                                        |
| nucleoplasm                       | A-431    | nucleoplaU-251 MG                          | nucleoplasm                            |
| nucleoplasm, vesicles             | A-431    | nucleoplaU-251 MG                          | nucleoplasm, vesicles                  |
| nucleoplasm, vesicles, plas       | U-2 OS   | nucleoplaSH-SY5Y                           | vesicles, plasma membrane              |
| nucleoplasm, golgi apparat        | A-431    | nucleoplaU-251 MG                          | nucleoplasm, golgi apparatus           |
| vesicles                          | A-431    | vesicles Hep G2                            | nucleoplasm, vesicles                  |
| nucleoplasm, plasma membr         | A-431    | nucleoplaU-251 MG                          | nucleoplasm, plasma membrane           |
| nucleoli, vesicles                | A-431    | nucleoli, U-251 MG                         | nucleoli, vesicles                     |
| nuclear bodies                    | U-251 MG | nuclear bHEK 293                           | nuclear bodies, cytosol                |
| endoplasmic reticulum, cer        | PC-3     | endoplasmic reticulum, centrosome, cytosol |                                        |
| plasma membrane                   |          |                                            |                                        |
| nucleoplasm, golgi apparat        | U-251 MG | nucleoplaHEK 293                           | nucleoplasm, golgi apparatus           |
| nucleoplasm, cytosol              | A-431    | nucleoplaU-251 MG                          | nucleoplasm                            |
| mitochondria                      | A-431    | mitochondU-251 MG                          | mitochondria                           |
| nucleoplasm, plasma membr         | U-251 MG | plasma membrane, cytosol                   |                                        |
| nucleoplasm, cytosol              | U-251 MG | plasma meSiHa                              | nucleoplasm, plasma membrane, centroso |
| endoplasmic reticulum             | U-251 MG | endoplasmic reticulum                      |                                        |
| golgi apparatus                   | A-431    | golgi appU-251 MG                          | golgi apparatus                        |
| cytosol                           | U-251 MG | cytosol                                    |                                        |
| nucleoplasm, centriolar satellite |          |                                            |                                        |
| nucleoplasm, focal adhesic        | A549     | nucleoplaPC-3                              | nucleoplasm, plasma membrane           |
| nucleoli fibrillar center         | U-251 MG | nucleoli RH-30                             | nucleoli fibrillar center, cytosol     |
| nuclear speckles, cytoplas        | U-2 OS   | nuclear sSK-MEL-30                         | nuclear speckles, cytoplasmic bodies   |
| vesicles                          | U-251 MG | vesicles HeLa                              | vesicles                               |
| nucleoplasm, vesicles             | A-431    | nucleoplaU-251 MG                          | nucleoplasm, vesicles                  |
| intermediate filaments, cy        | A-431    | plasma membrane, cytosol                   |                                        |
| plasma membrane, cytosol          | A-431    | plasma membrane, cytosol                   |                                        |
| mitochondria                      | A-431    | mitochondria                               |                                        |
| nuclear speckles, cytoplas        | A549     | nucleoplaSK-MEL-30                         | nuclear speckles, cytoplasmic bodies   |
| nucleoplasm                       | A-431    | nucleoplaU-251 MG                          | nucleoplasm                            |
| nucleoplasm, nuclear membr        | RH-30    | nucleoplaPC-3                              | nucleoplasm, nuclear membrane          |
| nucleoplasm                       | A549     | nucleoplaSK-MEL-30                         | nucleoplasm                            |
| plasma membrane, cytosol          | A-431    | plasma meU-251 MG                          | plasma membrane, cytosol               |
| nucleoplasm, intermediate         | U-251 MG | nucleoplaHep G2                            | nucleoplasm                            |
| nucleoplasm, nuclear bodie        | Hep G2   | nucleoplaPC-3                              | nucleoplasm                            |
| nucleoplasm                       | Hep G2   | nucleoplaRH-30                             | nucleoplasm                            |
| nucleoplasm, nuclear bodie        | A-431    | nucleoplaU-251 MG                          | nucleoplasm, nuclear bodies, plasma me |
| nucleoplasm                       | A549     | nucleoplaRH-30                             | nucleoplasm                            |
| nucleoplasm                       | A549     | nucleoplaRH-30                             | nucleoplasm                            |
| plasma membrane                   | U-251 MG | plasma membrane                            |                                        |
| nucleoli, vesicles                | SH-SY5Y  | vesicles, RH-30                            | nucleoli fibrillar center, plasma mem  |
| vesicles                          |          |                                            |                                        |
| nucleoli                          | A-431    | nucleoli U-251 MG                          | nucleoli                               |
| mitochondria                      | A-431    | mitochondU-251 MG                          | cytosol                                |

|                                         |          |                                 |                                         |
|-----------------------------------------|----------|---------------------------------|-----------------------------------------|
| cytosol                                 | U-2 OS   | cytosol Hep G2                  | cytosol                                 |
| nucleoplasm, golgi apparatus            | A-431    | nucleoplasm U-251 MG            | nucleoplasm, golgi apparatus            |
| vesicles                                | U-251 MG | vesicles                        |                                         |
| endoplasmic reticulum                   | A-431    | endoplasm U-251 MG              | endoplasmic reticulum                   |
| vesicles                                | A-431    | vesicles U-251 MG               | vesicles                                |
| focal adhesion sites, cytosol           | A-431    | cytosol U-251 MG                | focal adhesion sites, cytosol           |
| focal adhesion sites, cytosol           | A-431    | focal adhesion sites, cytosol   |                                         |
| cytosol                                 | A-431    | cytosol                         |                                         |
| nucleoplasm, vesicles, cytosol          | A-431    | nucleoplasm MCF7                | nucleoplasm, cytosol                    |
| nucleoplasm, mitochondria               | Hep G2   | nucleoplasm, mitochondria       |                                         |
| cytosol                                 | A-431    | cytosol U-251 MG                | cytosol                                 |
| nucleoplasm                             | A549     | nucleoplasm HeLa                | nucleoplasm                             |
| nucleoplasm, nucleoli fibrillar centers | HeLa     | nucleoplasm PC-3                | nucleoplasm, nucleoli fibrillar centers |
| nucleoplasm, nucleoli fibrillar centers | U-2 OS   | nucleoplasm PC-3                | nucleoplasm                             |
| endoplasmic reticulum                   | A-431    | endoplasmic reticulum U-251 MG  | endoplasmic reticulum                   |
| cytosol                                 | MCF7     | cytosol PC-3                    | cytosol                                 |
| cytosol                                 | U-2 OS   | cytosol HaCaT                   | cytosol                                 |
| golgi apparatus                         |          |                                 |                                         |
| golgi apparatus                         |          |                                 |                                         |
| nucleoplasm, nucleoli, golgi apparatus  | A-431    | nucleoplasm U-251 MG            | nucleoplasm, golgi apparatus            |
| nucleoplasm                             | A-431    | nucleoplasm U-251 MG            | nucleoplasm                             |
| nucleoplasm                             | A-431    | nucleoplasm U-251 MG            | nucleoplasm                             |
| microtubules                            | U-251 MG | microtubules Hep G2             | microtubules                            |
| nucleoplasm, nucleoli                   | U-251 MG | nucleoplasm HEL                 | nucleoplasm, nucleoli                   |
| nucleoplasm, nucleoli                   | A-431    | nucleoplasm U-251 MG            | nucleoplasm, nucleoli                   |
| nuclear bodies                          | A-431    | nuclear bodies MCF7             | nuclear bodies                          |
| nucleoplasm, nuclear bodies             | A-431    | nucleoplasm RH-30               | nucleoplasm, nuclear bodies             |
| plasma membrane, actin filaments        | SH-SY5Y  | nuclear bodies BJJ              | nuclear bodies, plasma membrane         |
| nucleoplasm, plasma membrane            | U-251 MG | nucleoplasm A549                | nucleoplasm, plasma membrane            |
| plasma membrane, mitochondria           | A-431    | plasma membrane U-251 MG        | mitochondria                            |
| mitochondria                            | A-431    | mitochondria U-251 MG           | mitochondria                            |
| cytosol                                 | NB-4     | cytosol                         |                                         |
| nucleoplasm, nuclear bodies             | MCF7     | nucleoplasm Hep G2              | nucleoplasm                             |
| nucleoli, actin filaments, cytosol      | MCF7     | nucleoli, Hep G2                | nucleoplasm                             |
| nucleoplasm                             | U-251 MG | nucleoplasm                     |                                         |
| nucleoplasm                             | U-251 MG | nucleoplasm                     |                                         |
| nucleoplasm                             | A-431    | nucleoplasm U-251 MG            | nucleoplasm                             |
| nucleoplasm, nucleoli fibrillar centers | A-431    | nucleoplasm U-251 MG            | nucleoplasm, nucleoli fibrillar centers |
| cytosol                                 | PC-3     | plasma membrane, cytosol        |                                         |
| plasma membrane                         | U-251 MG | plasma membrane, cell junctions |                                         |
| endoplasmic reticulum                   | U-251 MG | endoplasmic reticulum           |                                         |
| plasma membrane, actin filaments        | BJJ      | nucleoplasm SK-MEL-30           | nucleoplasm, plasma membrane            |
| plasma membrane                         |          |                                 |                                         |
| nucleoplasm, nucleoli, cytosol          | A-431    | nucleoli, U-251 MG              | nucleoplasm, nucleoli, cytosol          |
| cytosol                                 | A-431    | cytosol U-251 MG                | cytosol                                 |
| actin filaments, cytosol                | A-431    | actin filaments, cytosol        |                                         |
| actin filaments, cytosol                | A-431    | plasma membrane U-251 MG        | cytosol                                 |
| nucleoplasm, cytosol                    | A-431    | nucleoplasm U-251 MG            | nucleoplasm                             |
| nucleoplasm, cytosol                    | A-431    | nucleoplasm RH-30               | nucleoplasm, cytosol                    |
| nucleoplasm                             | A-431    | nucleoplasm U-251 MG            | nucleoplasm                             |
| nucleoplasm, golgi apparatus            | A-431    | nucleoplasm U-251 MG            | nucleoplasm                             |
| nucleoli                                | MCF7     | nucleoli HEK 293                | nucleoli                                |
| nucleoplasm                             | HEK 293  | nucleoplasm SH-SY5Y             | nucleoplasm                             |
| mitochondria                            | A-431    | mitochondria                    |                                         |
| intermediate filaments                  |          |                                 |                                         |

|                                                 |          |                                       |                                          |
|-------------------------------------------------|----------|---------------------------------------|------------------------------------------|
| nucleoli, endoplasmic reticulum                 | MCF7     | nucleoli HEK 293                      | endoplasmic reticulum, cytosol           |
| nucleoli, endoplasmic reticulum                 | MCF7     | nucleoli, HEK 293                     | nucleoli, endoplasmic reticulum, cytosol |
| plasma membrane, cytosol                        | A-431    | plasma membrane                       | U-251 MG cytosol                         |
| nuclear speckles, cytosol                       | A-431    | nuclear speckles                      | sU-251 MG                                |
| endoplasmic reticulum                           | HeLa     | endoplasmic reticulum                 | SiHa                                     |
| nucleoplasm, nuclear membrane                   | RH-30    | nucleoplasm                           | EF0-21                                   |
| plasma membrane, cytosol                        | A-431    | nucleoli, U-251 MG                    | nucleoli, plasma membrane, cytosol       |
| nucleoli, cytosol                               | HeLa     | nucleoli, PC-3                        | nucleoli, cytosol                        |
| nucleoplasm, nucleoli, cytosol                  |          |                                       |                                          |
| nucleoli                                        | A-431    | nucleoli U-251 MG                     | nucleoli                                 |
| vesicles                                        | HeLa     | vesicles RH-30                        | cytosol                                  |
| nucleoplasm, mitochondria, cytosol              | A-431    | nucleoplasm                           | U-251 MG                                 |
| vesicles, mitochondria                          | U-251 MG | nucleoplasm                           | HaCaT                                    |
| cytosol                                         | A-431    | cytosol U-251 MG                      | cytosol                                  |
| vesicles                                        |          |                                       |                                          |
| vesicles, actin filaments                       | A-431    | vesicles, U-251 MG                    | vesicles, actin filaments                |
| nucleoplasm                                     | U-251 MG | nucleoplasm                           |                                          |
| nucleoplasm                                     | SH-SY5Y  | nucleoplasm                           | REH                                      |
| cytosol                                         | A-431    | cytosol U-251 MG                      | cytosol                                  |
| vesicles, plasma membrane                       | U-2 OS   | vesicles Hep G2                       | plasma membrane                          |
| cytokinetic bridge, cytosol                     | AF22     | cytosol RPTEC TER                     | vesicles, cytosol                        |
| nucleoplasm, nucleoli                           |          |                                       |                                          |
| vesicles                                        | U-251 MG | vesicles                              |                                          |
| golgi apparatus                                 | U-251 MG | golgi apparatus                       |                                          |
| cytosol                                         | U-251 MG | cytosol                               |                                          |
| nucleoplasm                                     | SiHa     | nucleoplasm                           | RH-30                                    |
| nucleoplasm                                     | K-562    | nucleoplasm                           |                                          |
| nuclear speckles                                |          |                                       |                                          |
| nucleoplasm, nucleoli, golgi apparatus, cytosol | A-431    | nucleoplasm                           | U-251 MG                                 |
| cytosol                                         | A-431    | cytosol U-251 MG                      | cytosol                                  |
| cytosol                                         | A-431    | cytosol U-251 MG                      | cytosol                                  |
| nucleoplasm                                     | A-431    | nucleoplasm                           | U-251 MG                                 |
| mitochondria                                    | A-431    | mitochondria                          |                                          |
| golgi apparatus, vesicles                       |          |                                       |                                          |
| nucleoplasm                                     |          |                                       |                                          |
| nucleoplasm                                     | A549     | nucleoplasm                           |                                          |
| nucleoplasm, cytosol                            | U-2 OS   | nucleoplasm                           | RH-30                                    |
| nucleoplasm                                     | RH-30    | nucleoplasm                           | BJ                                       |
| nucleoplasm                                     |          |                                       |                                          |
| vesicles, midbody                               |          |                                       |                                          |
| nucleoplasm, vesicles                           | BJ       | golgi apparatus                       | SK-MEL-30                                |
| endoplasmic reticulum, vesicles                 | BJ       | endoplasmic reticulum, vesicles       | SK-MEL-30                                |
| cytosol                                         | A-431    | cytosol U-251 MG                      | cytosol                                  |
| intermediate filaments, actin                   | U-251 MG | intermediate filaments                |                                          |
| nucleoli fibrillar center                       | A-431    | nuclear speckles                      | sU-251 MG                                |
| nuclear speckles                                | A-431    | nuclear speckles                      | sU-251 MG                                |
| nucleoplasm, plasma membrane                    | A-431    | nucleoplasm, plasma membrane, cytosol | U-251 MG                                 |
| golgi apparatus, centrosome                     | RH-30    | golgi apparatus, centrosome           |                                          |
| nucleoplasm, plasma membrane                    | A-431    | nucleoplasm, plasma membrane          | U-251 MG                                 |
| nucleoplasm, plasma membrane                    | A-431    | nucleoplasm, plasma membrane, cytosol | U-251 MG                                 |
| nucleoplasm, mitochondria                       | U-251 MG | nucleoplasm                           |                                          |
| nucleoplasm, cytosol                            | U-2 OS   | nucleoplasm, cytosol                  | RH-30                                    |
| cytosol                                         | A-431    | cytosol U-251 MG                      | cytosol                                  |
| nucleoplasm, nucleoli, nuclear bodies           | HeLa     | nucleoplasm, nuclear bodies           | SH-SY5Y                                  |
| nucleoplasm                                     | RH-30    | nucleoplasm                           |                                          |



|                                                             |           |                                                              |           |
|-------------------------------------------------------------|-----------|--------------------------------------------------------------|-----------|
| nucleoplasm, centrosome                                     | MCF7      | nucleoplasm, centrosome                                      | MCF7      |
| nucleoplasm, cytosol                                        | MCF7      | nucleoplasm, cytosol                                         | MCF7      |
| nucleoplasm                                                 | MCF7      | nucleoplasm                                                  | MCF7      |
| vesicles                                                    | A549      | vesicles, cytosol                                            | Hep G2    |
| nucleoli                                                    | U-251 MG  | nucleoli                                                     | RH-30     |
| nucleoplasm                                                 | HeLa      | nucleoplasm, cytokinetic bridge                              | HeLa      |
| nucleoli, golgi apparatus                                   | A-431     | golgi apparatus                                              | HEL       |
| plasma membrane                                             |           |                                                              |           |
| nucleoplasm, plasma membrane                                | A-431     | nucleoplasm, plasma membrane, cytosol                        | U-251 MG  |
| vesicles                                                    |           |                                                              |           |
| nucleoplasm, mitochondria                                   | A-431     | nucleoplasm, mitochondria                                    | U-251 MG  |
| plasma membrane, cytosol                                    | A-431     | cytosol                                                      | U-251 MG  |
| mitotic spindle, cytosol                                    |           |                                                              |           |
| nucleoplasm, mitotic spindle, centriolar satellite, cytosol |           |                                                              |           |
| cytosol                                                     | RPTEC     | microtubules, mitotic spindle, centriolar satellite, cytosol | TER       |
| nucleoplasm, vesicles, cytosol                              | A-431     | nucleoplasm, vesicles, cytosol                               | U-251 MG  |
| nucleoli, nuclear bodies                                    |           |                                                              |           |
| mitochondria, cytosol                                       | U-251 MG  | mitochondria, cytosol                                        | MCF7      |
| nucleoli, nuclear speckles                                  | RT4       | nucleoplasm, nucleoli                                        |           |
| nucleoplasm, nucleoli                                       | A-431     | nucleoplasm, nucleoli                                        | U-251 MG  |
| plasma membrane, cytosol                                    | U-251 MG  | plasma membrane, cytosol                                     |           |
| nucleoplasm                                                 | A-431     | nucleoplasm                                                  | U-251 MG  |
| cytosol                                                     | A-431     | cytosol                                                      | U-251 MG  |
| mitochondria                                                | MCF7      | mitochondria                                                 | HEK 293   |
| vesicles                                                    | Hep G2    | vesicles                                                     | SK-MEL-30 |
| plasma membrane                                             | A-431     | plasma membrane                                              | U-251 MG  |
| nucleoplasm, plasma membrane                                | A-431     | nucleoplasm, plasma membrane                                 | U-251 MG  |
| nucleoplasm, cytosol                                        | HEK 293   | nucleoplasm, cytosol                                         |           |
| nucleoplasm, vesicles                                       | SK-MEL-30 | nucleoplasm                                                  |           |
| nucleoplasm                                                 | Hep G2    | nucleoplasm, centrosome                                      | RH-30     |
| nucleoplasm, cytosol                                        | RH-30     | nucleoplasm, cytosol                                         | SK-MEL-30 |
| nucleoplasm, vesicles                                       | U-2 OS    | nucleoplasm, vesicles                                        | A549      |
| plasma membrane                                             |           |                                                              |           |
| nuclear speckles                                            | U-251 MG  | nuclear speckles                                             | sHep G2   |
| nucleoplasm, cytosol                                        |           |                                                              |           |
| vesicles                                                    | A-431     | vesicles, cytosol                                            | U-251 MG  |
| nucleoli, mitochondria                                      | A-431     | nucleoli, mitochondria                                       | U-251 MG  |
| nucleoli                                                    |           |                                                              |           |
| nucleoplasm, nucleoli fibrillar center                      | A-431     | nucleoplasm, nucleoli fibrillar center                       | U-251 MG  |
| nucleoplasm, nucleoli fibrillar center                      | A-431     | nucleoplasm, nucleoli fibrillar center                       | U-251 MG  |
| nucleoplasm                                                 | A-431     | nucleoplasm                                                  | U-251 MG  |
| vesicles                                                    | SH-SY5Y   | vesicles                                                     |           |
| nucleoplasm                                                 | U-251 MG  | nucleoplasm, nucleoli                                        | RH-30     |
| nucleoplasm                                                 | U-251 MG  | nucleoplasm, cytosol                                         | RH-30     |
| nucleoplasm, cytosol                                        | U-251 MG  | nucleoplasm                                                  | HEK 293   |
| nucleoplasm                                                 | A-431     | nucleoplasm                                                  | U-251 MG  |
| nucleoplasm                                                 | HEK 293   | nucleoli, nuclear speckles                                   |           |
| nucleoplasm                                                 | A-431     | nucleoplasm                                                  | U-251 MG  |
| nucleoplasm                                                 | A-431     | nucleoplasm                                                  | RH-30     |
| nucleoplasm                                                 | A-431     | nucleoplasm                                                  | U-251 MG  |
| nucleoplasm                                                 | SK-MEL-30 | nucleoplasm                                                  |           |
| mitochondria                                                | A-431     | mitochondria                                                 | U-251 MG  |
| nuclear speckles, plasma membrane, cytosol                  | U-251 MG  | plasma membrane, cytosol                                     | Hep G2    |
| nucleoplasm                                                 | A-431     | nucleoplasm, cytosol                                         | U-251 MG  |
| golgi apparatus, cytosol                                    | A-431     | golgi apparatus, cytosol                                     | U-251 MG  |

|                             |           |                                              |          |                                        |
|-----------------------------|-----------|----------------------------------------------|----------|----------------------------------------|
| cytosol                     | A-431     | cytosol                                      | U-251 MG | cytosol                                |
| vesicles                    |           |                                              |          |                                        |
| mitochondria                | A-431     | nucleoplasm, cytosol                         |          |                                        |
| cell junctions              | A-431     | cell juncU-251 MG                            |          | plasma membrane                        |
| plasma membrane             | HaCaT     | plasma membrane                              |          |                                        |
| mitochondria                | HEK 293   | mitochondrRH-30                              |          | mitochondria                           |
| golgi apparatus             | MCF7      | golgi appHep G2                              |          | golgi apparatus                        |
| nucleoplasm                 | U-2 OS    | nucleoplaU-251 MG                            |          | nucleoplasm                            |
| nucleoplasm, nucleoli fibr  | A-431     | nucleoplaU-251 MG                            |          | nucleoplasm, nucleoli fibrillar cente  |
| nucleoplasm, nucleoli fibr  | A-431     | nucleoplaU-251 MG                            |          | nucleoplasm, nucleoli fibrillar cente  |
| vesicles                    | A-431     | vesicles U-251 MG                            |          | golgi apparatus, vesicles              |
| nuclear speckles            | A-431     | nuclear sU-251 MG                            |          | nuclear speckles                       |
| nucleoplasm, cytosol        | A-431     | nucleoplaHEK 293                             |          | nucleoplasm, cytosol                   |
| nucleoplasm, nucleoli, cytc | A-431     | nucleoplaHEK 293                             |          | nucleoplasm                            |
| endoplasmic reticulum       | HeLa      | endoplasmSH-SY5Y                             |          | endoplasmic reticulum                  |
| nucleoplasm, nuclear bodie  | A-431     | nucleoplaU-251 MG                            |          | nucleoplasm, nuclear bodies, cytosol   |
| cytosol                     | A549      | vesicles, HeLa                               |          | nucleoplasm, vesicles, cytosol         |
| cytosol                     | A-431     | cytosol U-251 MG                             |          | nucleoplasm, cytosol                   |
| cytosol                     | A-431     | cytosol U-251 MG                             |          | cytosol                                |
| nucleoplasm, nucleoli       | MCF7      | nucleoplaHeLa                                |          | nucleoplasm, nucleoli                  |
| cytosol                     | A-431     | cytosol U-251 MG                             |          | cytosol                                |
| vesicles                    | A-431     | vesicles U-251 MG                            |          | vesicles                               |
| vesicles                    | HeLa      | vesicles                                     |          |                                        |
| nucleoplasm, cytosol        | U-251 MG  | nucleoplaMCF7                                |          | nucleoplasm, nucleoli, intermediate fi |
| nucleoplasm                 | MCF7      | nucleoplasm                                  |          |                                        |
| nucleoplasm                 | HEK 293   | nucleoplaPC-3                                |          | nucleoplasm, plasma membrane           |
| nucleoplasm, vesicles       | HEK 293   | nucleoplaPC-3                                |          | nucleoplasm, plasma membrane           |
| plasma membrane, cell junc  | U-251 MG  | plasma membrane, cell junctions              |          |                                        |
| plasma membrane, cell junc  | U-251 MG  | plasma membrane                              |          |                                        |
| nucleoplasm                 | A-431     | nucleoplasm                                  |          |                                        |
| nucleoplasm, vesicles       | A-431     | vesicles, cytosol                            |          |                                        |
| nucleoplasm                 | U-251 MG  | nucleoplaMCF7                                |          | nucleoplasm                            |
| golgi apparatus             | Hep G2    | golgi apparatus                              |          |                                        |
| mitochondria                | A-431     | mitochondria                                 |          |                                        |
| mitochondria                | A-431     | mitochondU-251 MG                            |          | mitochondria                           |
| mitochondria                | A-431     | mitochondU-251 MG                            |          | mitochondria                           |
| nucleoplasm, nuclear membr  | A-431     | nucleoplaHeLa                                |          | nucleoplasm, nuclear membrane          |
| mitochondria                | A-431     | mitochondSH-SY5Y                             |          | mitochondria                           |
| cytosol                     | A-431     | cytosol PC-3                                 |          | cytosol                                |
| cytosol                     | A-431     | cytosol U-251 MG                             |          | cytosol                                |
| cytosol                     |           |                                              |          |                                        |
| nucleoplasm                 | A-431     | nucleoplaU-251 MG                            |          | nucleoplasm                            |
| nucleoplasm, cytosol        | A-431     | nucleoplaU-251 MG                            |          | nucleoplasm, cytosol                   |
| golgi apparatus             | ASC TERT1 | golgi apparatus, cytosol                     |          |                                        |
| vesicles                    | A-431     | vesicles U-251 MG                            |          | vesicles, centriolar satellite         |
| vesicles, plasma membrane,  | A-431     | vesicles, centriolar satellite               |          |                                        |
| vesicles                    | U-251 MG  | vesicles                                     |          |                                        |
| microtubules                | A-431     | vesicles, U-251 MG                           |          | vesicles                               |
| cytosol                     | A-431     | cytosol U-251 MG                             |          | plasma membrane, cytosol               |
| nucleoplasm                 | A-431     | nucleoplaU-251 MG                            |          | nucleoplasm                            |
| nuclear membrane, nuclear   | U-251 MG  | nuclear membrane, nuclear speckles, vesicles |          |                                        |
| cytosol                     | U-251 MG  | cytosol                                      |          |                                        |
| mitochondria                | A-431     | nuclear sU-251 MG                            |          | nuclear speckles                       |
| cytosol                     | A-431     | cytosol U-251 MG                             |          | cytosol                                |
| cytosol                     | A-431     | cytosol PC-3                                 |          | cytosol                                |

|                                                 |          |                                 |                                           |
|-------------------------------------------------|----------|---------------------------------|-------------------------------------------|
| nucleoli                                        | MCF7     | nucleoli SH-SY5Y                | nucleoli                                  |
| nucleoli                                        |          |                                 |                                           |
| nucleoplasm, nuclear speckles                   | A-431    | nucleoplasm U-251 MG            | nucleoplasm, nuclear speckles             |
| nucleoplasm                                     | U-251 MG | nucleoplasm A549                | nucleoplasm                               |
| plasma membrane, cytosol                        | MCF7     | cell junctions                  |                                           |
| plasma membrane                                 |          |                                 |                                           |
| nucleoplasm                                     | MCF7     | nucleoplasm HeLa                | nucleoplasm                               |
| endoplasmic reticulum, vesicles                 | MCF7     | endoplasmic reticulum, vesicles | endoplasmic reticulum, vesicles           |
| cytosol                                         | A-431    | cytosol U-251 MG                | cytosol                                   |
| nuclear membrane                                | U-2 OS   | nuclear membrane HeLa           | nuclear membrane                          |
| mitochondria                                    | A-431    | mitochondria                    |                                           |
| nucleoplasm, microtubules, cytosol              | A-431    | nucleoplasm U-251 MG            | nucleoplasm, cytosol                      |
| nucleoplasm, cytosol                            | A-431    | nucleoplasm U-251 MG            | nucleoplasm                               |
| nucleoli                                        | U-251 MG | nucleoli SiHa                   | nucleoplasm, nucleoli                     |
| nucleoplasm, cytosol                            | HEK 293  | nucleoplasm HeLa                | nucleoplasm, cytosol                      |
| plasma membrane                                 | A-431    | plasma membrane U-251 MG        | plasma membrane                           |
| plasma membrane                                 | A-431    | plasma membrane U-251 MG        | plasma membrane                           |
| plasma membrane                                 | A-431    | plasma membrane U-251 MG        | plasma membrane                           |
| plasma membrane                                 | U-251 MG | plasma membrane                 |                                           |
| plasma membrane, cytosol                        | A-431    | plasma membrane U-251 MG        | plasma membrane, cytosol                  |
| nuclear speckles                                |          |                                 |                                           |
| nucleoplasm, plasma membrane                    |          |                                 |                                           |
| plasma membrane                                 |          |                                 |                                           |
| nucleoplasm                                     | SiHa     | nucleoplasm RH-30               | nucleoplasm                               |
| nucleoplasm, vesicles                           | PC-3     | nucleoplasm EFO-21              | nucleoplasm, vesicles                     |
| nucleoplasm                                     | RH-30    | nucleoplasm SK-MEL-30           | nucleoplasm                               |
| mitochondria                                    | A-431    | mitochondria U-251 MG           | mitochondria                              |
| nucleoplasm                                     | MCF7     | nucleoplasm SiHa                | nucleoplasm                               |
| nucleoplasm                                     | A-431    | nucleoplasm U-251 MG            | nucleoplasm                               |
| nucleoplasm                                     | HEK 293  | nucleoplasm AF22                | nucleoplasm                               |
| nucleoplasm                                     | A-431    | nucleoplasm U-251 MG            | nucleoplasm                               |
| nucleoplasm                                     | A-431    | nucleoplasm U-251 MG            | nucleoplasm                               |
| vesicles                                        |          |                                 |                                           |
| nuclear speckles                                | A-431    | nucleoplasm U-251 MG            | nucleoplasm                               |
| nucleoplasm                                     | A-431    | nucleoplasm U-251 MG            | nucleoplasm                               |
| nucleoplasm, nucleoli filaments                 | U-251 MG | nucleoplasm HeLa                | nucleoplasm                               |
| mitochondria                                    |          |                                 |                                           |
| nuclear bodies, vesicles, endoplasmic reticulum | AF22     | nuclear bodies, plasma membrane |                                           |
| endoplasmic reticulum                           | A-431    | endoplasmic reticulum U-251 MG  | endoplasmic reticulum                     |
| nucleoplasm                                     | A-431    | nucleoplasm HeLa                | nucleoplasm, plasma membrane, cytosol     |
| cytosol                                         | U-251 MG | cytosol                         |                                           |
| vesicles                                        |          |                                 |                                           |
| vesicles                                        | A-431    | vesicles U-251 MG               | vesicles                                  |
| nucleoplasm                                     | RH-30    | nucleoplasm                     |                                           |
| nucleoli, endoplasmic reticulum, vesicles       | A-431    | nucleoli, U-251 MG              | nucleoli, endoplasmic reticulum, vesicles |
| nucleoplasm                                     | A-431    | nucleoplasm U-251 MG            | nucleoplasm                               |
| intermediate filaments                          | A-431    | intermediate filaments HEK 293  | intermediate filaments                    |
| nuclear membrane, nucleoli                      | SiHa     | nuclear membrane RH-30          | nuclear membrane, nucleoli                |
| cytosol                                         | U-251 MG | cytosol Hep G2                  | cytosol                                   |
| nucleoplasm, vesicles                           | U-251 MG | nucleoplasm SH-SY5Y             | nucleoplasm, plasma membrane              |
| plasma membrane                                 | Hep G2   | plasma membrane                 |                                           |
| nucleoplasm                                     | MCF7     | nucleoplasm HEK 293             | nucleoplasm                               |
| nucleoplasm, nuclear bodies                     | SiHa     | nucleoplasm K-562               | nucleoplasm, nuclear bodies               |
| nucleoplasm, nuclear bodies                     | U-251 MG | nucleoplasm, nuclear bodies     |                                           |
| nucleoplasm, cytosol                            | A549     | nucleoplasm Hep G2              | nucleoplasm                               |

|                                          |           |                                            |           |                                                  |
|------------------------------------------|-----------|--------------------------------------------|-----------|--------------------------------------------------|
| nucleoplasm                              | A549      | nucleoplasm                                | Hep G2    | nucleoplasm                                      |
| nuclear speckles, cytosol                | A-431     | nuclear speckles                           | sU-251 MG | nuclear speckles                                 |
| endoplasmic reticulum, lipid droplets    | A-431     | endoplasmic reticulum, lipid droplets      | U-251 MG  | endoplasmic reticulum, lipid droplets            |
| endoplasmic reticulum, lipid droplets    | A-431     | endoplasmic reticulum, lipid droplets      | U-251 MG  | endoplasmic reticulum, lipid droplets            |
| plasma membrane, cytosol                 | A-431     | plasma membrane, cytosol                   | U-251 MG  | plasma membrane, cytosol                         |
| plasma membrane, cytosol                 | A-431     | plasma membrane, cytosol                   | U-251 MG  | nucleoplasm, cytosol                             |
| endoplasmic reticulum, cytosol           | MCF7      | endoplasmic reticulum, cytosol             |           | endoplasmic reticulum, cytosol                   |
| endoplasmic reticulum, cytosol           | A-431     | endoplasmic reticulum, cytosol             | U-251 MG  | endoplasmic reticulum, cytosol                   |
| actin filaments                          | A549      | actin filaments                            | SiHa      | actin filaments                                  |
| vesicles                                 | A-431     | vesicles                                   | U-251 MG  | vesicles                                         |
| nucleoplasm, golgi apparatus, cytosol    | A-431     | nucleoplasm, golgi apparatus, cytosol      | U-251 MG  | nucleoplasm, golgi apparatus, cytosol            |
| nucleoplasm, nuclear bodies              | U-251 MG  | nucleoplasm, cytosol                       | HeLa      | nucleoplasm, cytosol                             |
| nucleoplasm, nuclear bodies              | HeLa      | nucleoplasm, centrosome                    | K-562     | nucleoplasm, centrosome                          |
| mitochondria, cytosol                    |           |                                            |           |                                                  |
| nucleoplasm, cytosol                     | A-431     | nucleoplasm, cytosol                       | U-251 MG  | nucleoplasm, cytosol                             |
| cytosol                                  | A549      | cytosol                                    |           | cytosol                                          |
| cytosol                                  | A549      | cytosol                                    | HeLa      | cytosol                                          |
| cytosol                                  | A-431     | cytosol                                    | U-251 MG  | cytosol                                          |
| cytosol                                  |           |                                            |           |                                                  |
| plasma membrane, cytosol                 | A-431     | endoplasmic reticulum                      | U-251 MG  | endoplasmic reticulum                            |
| nucleoplasm, cytosol                     | AF22      | nucleoplasm                                |           | nucleoplasm                                      |
| cytosol                                  | HEL       | cytosol                                    |           | cytosol                                          |
| vesicles                                 | A-431     | vesicles                                   | A549      | vesicles                                         |
| nucleoplasm                              | A-431     | nucleoplasm, centrosome                    | U-251 MG  | nucleoplasm, centrosome                          |
| nucleoplasm, mitochondria                | U-251 MG  | nucleoplasm, mitochondria                  |           | nucleoplasm, mitochondria                        |
| golgi apparatus, cytosol                 | RH-30     | golgi apparatus, cytosol                   | BJ        | golgi apparatus, cytosol                         |
| vesicles                                 | A-431     | vesicles                                   | U-251 MG  | vesicles                                         |
| mitochondria                             | A-431     | mitochondria                               | U-251 MG  | mitochondria                                     |
| golgi apparatus, cytosol                 | A-431     | cytosol                                    | U-251 MG  | golgi apparatus, cytosol                         |
| nucleoplasm, cytosol                     | A-431     | cytosol                                    | U-251 MG  | nucleoplasm, cytosol                             |
| nucleoplasm                              | RH-30     | nucleoplasm                                |           | nucleoplasm                                      |
| nucleoli fibrillar center                | MCF7      | nucleoli fibrillar center                  | HEK 293   | nucleoli fibrillar center                        |
| nucleoli, endoplasmic reticulum, cytosol | A-431     | nucleoli, endoplasmic reticulum, cytosol   | Hep G2    | endoplasmic reticulum, cytosol                   |
| nucleoplasm, cytosol                     | HEL       | nucleoplasm, nuclear bodies                |           | nucleoplasm, nuclear bodies                      |
| nucleoplasm                              | HEL       | nucleoplasm                                |           | nucleoplasm                                      |
| vesicles                                 | SK-MEL-30 | vesicles                                   | HaCaT     | vesicles                                         |
| vesicles                                 | U-2 OS    | vesicles                                   |           | vesicles                                         |
| endoplasmic reticulum                    | A-431     | endoplasmic reticulum                      | U-251 MG  | nucleoli fibrillar center, endoplasmic reticulum |
| endoplasmic reticulum                    | A-431     | endoplasmic reticulum                      | U-251 MG  | endoplasmic reticulum                            |
| endoplasmic reticulum                    |           |                                            |           |                                                  |
| nucleoli fibrillar center                | A-431     | nucleoli fibrillar center, plasma membrane | U-251 MG  | nucleoli fibrillar center, plasma membrane       |
| golgi apparatus                          | MCF7      | golgi apparatus                            | HeLa      | golgi apparatus                                  |
| golgi apparatus                          | MCF7      | golgi apparatus                            | HeLa      | golgi apparatus                                  |
| golgi apparatus                          | MCF7      | golgi apparatus                            | HeLa      | golgi apparatus                                  |
| nucleoplasm, intermediate cytosol        | PC-3      | nucleoli fibrillar center                  | EF0-21    | nucleoli fibrillar center                        |
| cytosol                                  | A-431     | cytosol                                    | U-251 MG  | cytosol                                          |
| nucleoli                                 | A-431     | nucleoli                                   | MCF7      | nucleoli                                         |
| mitochondria                             | A-431     | mitochondria                               |           | mitochondria                                     |
| nucleoplasm                              |           |                                            |           |                                                  |
| nucleoplasm, cytosol                     | A-431     | nucleoplasm, cytosol                       |           | nucleoplasm, cytosol                             |
| mitochondria                             | A-431     | mitochondria                               |           | mitochondria                                     |
| mitochondria                             | A-431     | centriole                                  | U-251 MG  | mitochondria                                     |
| nucleoplasm, nuclear membrane            |           |                                            |           |                                                  |
| nuclear bodies, mitochondria             | A-431     | mitochondria                               | U-251 MG  | mitochondria                                     |
| microtubules, cytosol                    | U-251 MG  | cytosol                                    | MCF7      | nucleoplasm, cytosol                             |

|                                        |          |                                        |                           |
|----------------------------------------|----------|----------------------------------------|---------------------------|
| nucleoplasm, golgi apparatus           | A-431    | nucleoplasm, golgi apparatus, cytosol  |                           |
| centriolar satellite                   | HeLa     | vesicles, cytokinetic bridge           |                           |
| mitochondria                           | SiHa     | mitochondria                           |                           |
| nucleoplasm                            | A-431    | nucleoplasm                            |                           |
| nucleoplasm                            | A-431    | nucleoplasm                            |                           |
| nucleoplasm, nucleoli fibrillar        | A-431    | nucleoplasm, nucleoli fibrillar        | centrosome                |
| lipid droplets                         | U-2 OS   | lipid droplets                         |                           |
| nuclear speckles, centriolar satellite | A-431    | nuclear speckles, centriolar satellite |                           |
| nucleoplasm                            | HEK 293  | nucleoplasm                            |                           |
| nucleoli                               | PC-3     | nucleoli                               |                           |
| nucleoli, cytosol                      | A-431    | nucleoli, cytosol                      |                           |
| nucleoli, cytosol                      | A-431    | nucleoli, cytosol                      |                           |
| nucleoplasm, cytosol                   | RH-30    | nucleoplasm, cytosol                   |                           |
| plasma membrane                        |          |                                        |                           |
| cytosol                                | U-251 MG | cytosol                                |                           |
| mitochondria                           | MCF7     | cytosol Hep G2                         | mitochondria              |
| nucleoplasm, aggresome                 | U-2 OS   | nucleoplasm                            |                           |
| nucleoplasm, cytosol                   | U-2 OS   | nucleoplasm, nuclear bodies, cytosol   |                           |
| nucleoplasm, cytosol                   | A-431    | nucleoplasm, cytosol                   |                           |
| cell junctions                         | A549     | cell junctions                         |                           |
| nucleoplasm                            | Hep G2   | nucleoplasm                            |                           |
| nucleoplasm                            | Hep G2   | nucleoplasm                            |                           |
| nucleoplasm                            | A-431    | nucleoplasm                            |                           |
| nucleoplasm                            | A-431    | nucleoplasm                            |                           |
| nucleoplasm, nucleoli, cytosol         | A-431    | nucleoplasm, nucleoli, cytosol         |                           |
| cytosol                                | A-431    | cytosol hTCEpi                         | vesicles, plasma membrane |
| cytosol                                | U-251 MG | cytosol hTCEpi                         | plasma membrane           |
| actin filaments                        | U-251 MG | actin filaments                        |                           |
| microtubules, cytokinetic bridge       | A-431    | microtubules, cytokinetic bridge       |                           |
| nucleoplasm                            | Hep G2   | nucleoplasm                            |                           |
| nucleoplasm                            | U-2 OS   | nucleoplasm, centrosome                |                           |
| nucleoplasm, cytosol                   | A-431    | nucleoplasm, cytosol                   |                           |
| nuclear bodies, cytosol                | A-431    | nuclear bodies, cytosol                |                           |
| nucleoplasm                            | PC-3     | nucleoplasm, nucleoli                  |                           |
| nucleoplasm, nucleoli                  | MCF7     | nucleoplasm, nucleoli                  |                           |
| nucleoplasm, nucleoli, plasma membrane | MCF7     | nucleoplasm, nucleoli                  |                           |
| nucleoli                               | A-431    | nucleoli                               |                           |
| nucleoli                               | MCF7     | nucleoli                               |                           |
| nucleoplasm                            | U-2 OS   | nucleoplasm                            |                           |
| nuclear speckles                       | MCF7     | nucleoplasm, nucleoli                  |                           |
| nucleoli                               | MCF7     | nucleoli, vesicles                     |                           |
| nucleoplasm                            | HaCaT    | nucleoplasm                            |                           |
| nucleoplasm                            | MCF7     | nucleoplasm                            |                           |
| mitochondria                           | A-431    | mitochondria                           |                           |
| nucleoplasm, cytosol                   | A-431    | nucleoplasm, cytosol                   |                           |
| nucleoplasm, cytosol                   | A-431    | nucleoplasm, cytosol                   |                           |
| nucleoplasm                            | MCF7     | nucleoplasm                            |                           |
| nucleoplasm, plasma membrane           | MCF7     | nucleoplasm                            |                           |
| vesicles, mitochondria                 | A-431    | vesicles, mitochondria                 |                           |
| nucleoplasm, cytosol                   | A-431    | cytosol                                |                           |
| cytosol                                | A-431    | cytosol                                |                           |
| endoplasmic reticulum                  | SiHa     | endoplasmic reticulum                  |                           |
| endoplasmic reticulum                  |          |                                        |                           |
| cytosol                                |          |                                        |                           |
| vesicles                               | RH-30    | vesicles                               |                           |

|                                         |           |                                         |           |                                         |
|-----------------------------------------|-----------|-----------------------------------------|-----------|-----------------------------------------|
| nucleoplasm, golgi apparatus            | A-431     | nucleoplasma                            | U-251 MG  | nucleoplasm, golgi apparatus            |
| nucleoplasm                             | A-431     | nucleoplasma                            | U-251 MG  | nucleoplasm                             |
| endoplasmic reticulum, golgi apparatus  | A-431     | endoplasmic reticulum                   | U-251 MG  | endoplasmic reticulum, golgi apparatus  |
| nuclear bodies                          | U-251 MG  | nuclear bodies                          |           |                                         |
| nucleoplasm                             | HaCaT     | nucleoplasm                             |           |                                         |
| nucleoli, mitochondria                  | U-251 MG  | nucleoli, HeLa                          |           | nucleoli, mitochondria                  |
| plasma membrane, cytosol                | A-431     | plasma membrane                         | U-251 MG  | plasma membrane, cytosol                |
| cytosol                                 |           |                                         |           |                                         |
| nucleoplasm, plasma membrane            | Hep G2    | plasma membrane                         |           |                                         |
| nucleoplasm, nuclear membrane           | A-431     | nucleoplasma                            | U-251 MG  | nucleoplasm, nuclear membrane           |
| vesicles                                | A-431     | vesicles                                | U-251 MG  | vesicles                                |
| endoplasmic reticulum                   | MCF7      | endoplasmic reticulum                   | SK-MEL-30 | endoplasmic reticulum                   |
| cell junctions, cytoplasmic bodies      | U-251 MG  | cell junctions, cytoplasmic bodies      |           |                                         |
| nucleoli                                |           |                                         |           |                                         |
| nucleoplasm                             | U-251 MG  | nucleoplasm, cytosol                    |           |                                         |
| nucleoplasm, cytosol                    | A-431     | nucleoplasma                            | U-251 MG  | nucleoplasm, cytosol                    |
| nucleoplasm, cytosol                    | U-2 OS    | nucleoplasma                            | PC-3      | nucleoplasm, cytosol                    |
| nucleoplasm                             | Hep G2    | nucleoplasm                             |           |                                         |
| nucleoplasm                             | A-431     | nucleoplasma                            | U-251 MG  | nucleoplasm                             |
| nucleoli fibrillar center               | A-431     | nucleoli BJ                             |           | nucleoli fibrillar center, cytosol      |
| nucleoplasm, cytosol                    | Hep G2    | nucleoplasma                            | PC-3      | nucleoplasm, cytosol                    |
| nucleoplasm                             | Hep G2    | nucleoplasma                            | PC-3      | nucleoplasm                             |
| cytosol                                 | U-2 OS    | plasma membrane                         | PC-3      | plasma membrane                         |
| cytosol                                 | PC-3      | plasma membrane, cytosol                |           |                                         |
| plasma membrane                         | U-251 MG  | plasma membrane, cell junctions         |           |                                         |
| nucleoplasm, cytosol                    |           |                                         |           |                                         |
| mitochondria                            | A-431     | mitochondria                            | U-251 MG  | mitochondria                            |
| mitochondria                            | U-2 OS    | mitochondria                            | Hep G2    | mitochondria                            |
| nucleoli fibrillar center               | U-2 OS    | nucleoli A-431                          |           | nucleoplasm, nucleoli fibrillar center  |
| nuclear speckles, cytosol               | U-251 MG  | plasma membrane                         |           |                                         |
| nucleoplasm, nucleoli, cytosol          | A-431     | nucleoplasma                            | U-251 MG  | nucleoplasm, nucleoli, microtubule end  |
| plasma membrane                         | HEK 293   | plasma membrane                         |           |                                         |
| nucleoplasm, nucleoli                   | A-431     | nucleoplasma                            | U-251 MG  | nucleoplasm, nucleoli                   |
| endoplasmic reticulum                   | A-431     | endoplasmic reticulum                   | U-251 MG  | endoplasmic reticulum                   |
| nuclear membrane, endoplasmic reticulum | U-251 MG  | nuclear membrane, endoplasmic reticulum | HaCaT     | nuclear membrane, endoplasmic reticulum |
| nucleoplasm, mitochondria               | U-2 OS    | nucleoplasma                            | A-431     | nucleoplasm, mitochondria               |
| vesicles, centrosome                    | U-2 OS    | centrosome                              | A-431     | centrosome                              |
| nucleoplasm                             | A-431     | nucleoplasma                            | U-251 MG  | nucleoplasm, nuclear bodies, cytosol    |
| nucleoplasm, nucleoli                   | A-431     | nucleoplasma                            | U-251 MG  | nucleoplasm, nucleoli                   |
| nucleoplasm, nucleoli                   | A-431     | nucleoplasma                            | U-251 MG  | nucleoplasm, nucleoli                   |
| nucleoli, nuclear bodies                | A-431     | nucleoplasma                            | U-251 MG  | nucleoplasm, nucleoli                   |
| intermediate filaments                  |           |                                         |           |                                         |
| nucleoplasm                             | A-431     | nucleoplasma                            | U-251 MG  | nucleoplasm, golgi apparatus            |
| mitochondria                            | A-431     | nucleoplasma                            | U-251 MG  | mitochondria                            |
| nucleoplasm, centrosome, cytosol        | A-431     | nucleoplasma                            | A549      | nucleoplasm, centrosome                 |
| cytosol                                 | SK-MEL-30 | nucleoplasm                             |           |                                         |
| nucleoplasm, actin filaments            | A-431     | nucleoplasma                            | U-251 MG  | nucleoplasm                             |
| nucleoplasm                             | A-431     | nucleoplasma                            | U-251 MG  | nucleoplasm                             |
| nucleoplasm                             | U-251 MG  | nucleoplasm                             |           |                                         |
| vesicles                                | A-431     | vesicles                                | U-251 MG  | vesicles                                |
| vesicles                                | HEK 293   | vesicles                                | Hep G2    | vesicles                                |
| vesicles                                | Hep G2    | vesicles                                |           |                                         |
| nucleoli                                | A-431     | nucleoli                                | U-251 MG  | nucleoli, vesicles                      |
| plasma membrane                         | A-431     | plasma membrane                         | U-251 MG  | nucleoplasm, plasma membrane            |
| nucleoplasm, plasma membrane            | A-431     | nucleoplasma                            | PC-3      | nucleoplasm, plasma membrane            |

|                             |           |                             |                                       |
|-----------------------------|-----------|-----------------------------|---------------------------------------|
| nucleoplasm, nucleoli fibr  | U-251 MG  | nucleoplaMCF7               | nucleoplasm, nucleoli fibrillar cente |
| nucleoplasm, nucleoli, cyto | Hep G2    | nucleoplaAF22               | nucleoplasm, nucleoli                 |
| cytosol                     | AF22      | cytosol                     |                                       |
| microtubules                | MCF7      | microtubuA549               | microtubules                          |
| nucleoplasm, cytosol        | MCF7      | nucleoplaHaCaT              | nucleoplasm                           |
| nucleoplasm, cytosol        | MCF7      | nucleoplaHaCaT              | nucleoplasm, cytosol                  |
| nucleoplasm, vesicles       | HEK 293   | vesicles BJ                 | nucleoplasm                           |
| nucleoplasm                 | RH-30     | nucleoplaPC-3               | nucleoplasm, cytosol                  |
| nuclear speckles            | U-251 MG  | nuclear speckles            |                                       |
| cytosol                     | A-431     | cytosol U-251 MG            | cytosol                               |
| cytosol                     | A-431     | nucleoplaU-251 MG           | nucleoplasm, cytosol                  |
| golgi apparatus, vesicles   | A-431     | vesicles, U-251 MG          | golgi apparatus, plasma membrane      |
| nuclear speckles            | A-431     | nuclear sU-251 MG           | nuclear speckles                      |
| golgi apparatus             | A-431     | golgi appU-251 MG           | golgi apparatus                       |
| nucleoplasm                 | A-431     | nucleoplaU-251 MG           | nucleoplasm                           |
| nucleoplasm                 | U-251 MG  | nucleoplaA549               | nucleoplasm                           |
| nucleoplasm, nuclear speck  | EFO-21    | nuclear bodies              |                                       |
| nucleoplasm, cytosol        | U-2 OS    | nucleoplaHeLa               | nucleoplasm, cytosol                  |
| nucleoplasm, nuclear membr  | U-2 OS    | nucleoplaU-251 MG           | nuclear membrane, cytosol             |
| nucleoplasm, nucleoli, cyto | A-431     | nucleoplaU-251 MG           | nucleoplasm, cytosol                  |
| nucleoplasm                 | RH-30     | nucleoplaHEL                | nucleoplasm, nuclear bodies           |
| nucleoplasm, centrosome     | U-251 MG  | nucleoplaSiHa               | nucleoplasm, nucleoli fibrillar cente |
| endoplasmic reticulum       | SiHa      | endoplasmBJ                 | endoplasmic reticulum                 |
| nucleoplasm                 | ASC TERT1 | nucleoplasm, cytosol        |                                       |
| nucleoli                    | A-431     | nucleoli U-251 MG           | nucleoli                              |
| plasma membrane, cytosol    | A-431     | plasma meU-251 MG           | plasma membrane, cytosol              |
| endoplasmic reticulum, cyt  | MCF7      | endoplasmRH-30              | endoplasmic reticulum, cytosol        |
| nuclear membrane, golgi ap  | A-431     | nuclear nU-251 MG           | nuclear membrane, golgi apparatus     |
| nucleoplasm                 | A-431     | nucleoplaU-251 MG           | nucleoplasm                           |
| plasma membrane, cytosol    |           |                             |                                       |
| plasma membrane, cytosol    | A-431     | plasma meU-251 MG           | plasma membrane, cytosol              |
| cell junctions              |           |                             |                                       |
| nucleoplasm, cell junctions |           |                             |                                       |
| nucleoplasm, nuclear bodie  | RH-30     | nucleoplasm, nuclear bodies |                                       |
| nuclear bodies              | U-2 OS    | nuclear bSK-MEL-30          | nuclear bodies                        |
| nucleoplasm, vesicles       | EFO-21    | nucleoplasm, vesicles       |                                       |
| nucleoplasm                 | A-431     | nucleoplaHEK 293            | nucleoplasm                           |
| nucleoplasm                 | HEK 293   | nucleoplasm, vesicles       |                                       |
| cytosol                     | A-431     | cytosol U-251 MG            | cytosol                               |
| golgi apparatus, vesicles   | A-431     | golgi appU-251 MG           | golgi apparatus                       |
| nucleoplasm, vesicles       | U-2 OS    | nucleoplasm                 |                                       |
| nuclear speckles, plasma n  | BJ        | nuclear sPC-3               | nuclear speckles, plasma membrane     |
| vesicles                    | U-2 OS    | vesicles Hep G2             | vesicles                              |
| cytosol                     | MCF7      | nucleoplaHep G2             | nucleoplasm, cytosol                  |
| nucleoplasm                 |           |                             |                                       |
| nucleoplasm                 | A-431     | nucleoplaU-251 MG           | nucleoplasm                           |
| nucleoplasm                 | A-431     | nucleoplaU-251 MG           | nucleoplasm                           |
| nucleoplasm                 | REH       | nucleoplaHAP1               | nucleoplasm                           |
| microtubules                | A-431     | microtubuU-251 MG           | microtubules                          |
| plasma membrane, cytosol    | A-431     | plasma meU-251 MG           | nucleoplasm, plasma membrane, cytosol |
| nuclear bodies, cytosol     | MCF7      | nucleoplaHaCaT              | nucleoplasm, nuclear bodies, midbody  |
| golgi apparatus, vesicles   |           |                             |                                       |
| nucleoplasm                 | A-431     | nucleoplaU-251 MG           | nucleoplasm, cytosol                  |
| endoplasmic reticulum, cyt  | A-431     | golgi appHEK 293            | endoplasmic reticulum                 |
| plasma membrane, cytosol    | U-251 MG  | plasma membrane, cytosol    |                                       |

|                                  |          |                                             |          |                                          |
|----------------------------------|----------|---------------------------------------------|----------|------------------------------------------|
| nucleoplasm                      | MCF7     | nucleoplasm                                 | HEK 293  | nucleoplasm, vesicles                    |
| microtubules, cytosol            | A-431    | microtubules                                | U-251 MG | cytosol                                  |
| microtubules                     | U-2 OS   | microtubules                                | PC-3     | microtubules                             |
| cell junctions                   |          |                                             |          |                                          |
| vesicles                         | A-431    | vesicles                                    |          |                                          |
| golgi apparatus, vesicles,       | U-2 OS   | golgi apparatus                             | A-431    | golgi apparatus                          |
| microtubules, mitochondria,      | U-251 MG | mitochondria, cytosol                       |          |                                          |
| plasma membrane, cytosol         |          |                                             |          |                                          |
| vesicles                         | A549     | vesicles                                    |          |                                          |
| nucleoli                         | BJ       | nucleoli, SK-MEL-30                         |          | nucleoli, vesicles                       |
| golgi apparatus                  | HeLa     | golgi apparatus                             |          |                                          |
| nucleoplasm, cytosol             | RH-30    | nucleoplasm                                 | HELa     | nucleoplasm, nuclear bodies              |
| nucleoplasm, nucleoli, nuclear   | A-431    | nucleoplasm                                 | U-251 MG | nucleoli fibrillar center, cytosol       |
| cytosol                          | A-431    | nucleoli, U-251 MG                          |          | nucleoli, cytosol                        |
| nucleoli fibrillar center        | A-431    | nucleoli                                    | U-251 MG | nucleoli fibrillar center, cytosol       |
| vesicles                         | SiHa     | vesicles                                    | RH-30    | vesicles                                 |
| nucleoplasm, nuclear bodies,     | MCF7     | nucleoplasm, nuclear bodies, cell junctions |          |                                          |
| nucleoplasm                      | A-431    | nucleoplasm                                 | PC-3     | nucleoplasm                              |
| vesicles                         | Hep G2   | vesicles                                    |          |                                          |
| mitochondria                     | A-431    | mitochondria                                | U-251 MG | mitochondria                             |
| nucleoplasm                      | U-251 MG | nucleoplasm                                 |          |                                          |
| nucleoplasm                      | MCF7     | nucleoplasm                                 |          |                                          |
| vesicles                         |          |                                             |          |                                          |
| nucleoplasm, golgi apparatus,    | A-431    | nucleoplasm                                 | MCF7     | nucleoplasm, golgi apparatus             |
| nucleoplasm                      | MCF7     | nucleoplasm                                 |          |                                          |
| nucleoplasm                      | A-431    | nucleoplasm                                 | MCF7     | nucleoplasm                              |
| microtubules, cytosol            | A-431    | microtubules                                | U-251 MG | microtubules, cytosol                    |
| nucleoli, endoplasmic reticulum, | HEK 293  | endoplasmic reticulum, vesicles             | PC-3     | nucleoli, endoplasmic reticulum, cytosol |
| endoplasmic reticulum            | Hep G2   | endoplasmic reticulum, vesicles             |          |                                          |
| vesicles                         | MCF7     | nucleoli, golgi apparatus, vesicles         |          |                                          |
| nucleoplasm                      |          |                                             |          |                                          |
| nucleoplasm, plasma membrane,    | MCF7     | nucleoplasm                                 | Hep G2   | nucleoplasm                              |
| cytosol                          | A-431    | cytosol                                     | U-251 MG | cytosol                                  |
| nucleoplasm                      | U-2 OS   | nucleoplasm                                 | MCF7     | nucleoplasm, nucleoli, cell junctions    |
| nucleoplasm                      | HEK 293  | nucleoplasm                                 | HeLa     | nucleoplasm                              |
| nucleoplasm                      | SH-SY5Y  | nucleoplasm                                 | RH-30    | nucleoplasm                              |
| nucleoplasm, cytosol             | A-431    | nucleoplasm                                 | U-251 MG | nucleoplasm, nucleoli, cytosol           |
| nucleoplasm, nucleoli            | A-431    | nucleoplasm                                 | U-251 MG | nucleoplasm, nucleoli                    |
| vesicles                         | BJ       | vesicles                                    |          |                                          |
| golgi apparatus, plasma membrane |          |                                             |          |                                          |
| nucleoplasm                      | U-251 MG | nucleoplasm                                 | HeLa     | nuclear speckles                         |
| nucleoplasm, cell junctions,     | RT4      | nucleoplasm                                 | U-2 OS   | nucleoplasm                              |
| endoplasmic reticulum, plasma    | A-431    | plasma membrane, focal adhesion sites       | U-251 MG | plasma membrane, focal adhesion sites    |
| nuclear speckles, mitochondria,  | U-2 OS   | nuclear speckles, mitochondria              | PC-3     | nuclear speckles, mitochondria           |
| endoplasmic reticulum            | U-251 MG | plasma membrane                             | BJ       | nucleoplasm, endoplasmic reticulum       |
| plasma membrane                  | HaCaT    | plasma membrane                             | LHCN-M2  | plasma membrane                          |
| plasma membrane, cytosol         | A-431    | plasma membrane                             | U-251 MG | plasma membrane, cytosol                 |
| cytosol                          | A-431    | cytosol                                     | U-251 MG | cytosol                                  |
| plasma membrane, cytosol         | A-431    | plasma membrane                             | U-251 MG | plasma membrane, cytosol                 |
| nucleoplasm, cytokinetic bridge, | cytosol  |                                             |          |                                          |
| plasma membrane, cytosol         | A-431    | plasma membrane                             | U-251 MG | plasma membrane, cytosol                 |
| centriolar satellite             | U-251 MG | cytosol                                     |          |                                          |
| nucleoplasm, nuclear bodies,     | A-431    | nucleoplasm                                 | U-251 MG | nucleoplasm, cytosol                     |
| nuclear speckles, vesicles,      | A-431    | nuclear speckles, lipid droplets            | U-251 MG | nuclear speckles, lipid droplets         |
| nucleoplasm, cytosol             | HEK 293  | nucleoplasm                                 | SH-SY5Y  | nucleoplasm, cytosol                     |



|                                  |           |                                           |                                                     |
|----------------------------------|-----------|-------------------------------------------|-----------------------------------------------------|
| endoplasmic reticulum            | Hep G2    | endoplasmic reticulum                     |                                                     |
| nucleoplasm, cytosol             | U-2 OS    | nucleoplasm                               | Hep G2 nucleoplasm, cytosol                         |
| nucleoplasm                      | A-431     | nucleoplasm                               | U-251 MG nucleoplasm, nuclear bodies                |
| nuclear speckles                 | A-431     | nuclear speckles                          | U-251 MG nuclear speckles                           |
| mitochondria, cytosol            | A-431     | mitochondria, cytosol                     | U-251 MG mitochondria, cytosol                      |
| midbody                          | HEL       | midbody                                   |                                                     |
| nucleoplasm                      | A-431     | nucleoplasm                               | U-251 MG nucleoplasm                                |
| plasma membrane                  | U-2 OS    | plasma membrane                           | SH-SY5Y vesicles, plasma membrane                   |
| mitochondria, cytosol            | A-431     | plasma membrane                           | U-251 MG cytosol                                    |
| nucleoplasm, cytosol             | A-431     | nucleoplasm                               | U-251 MG cytosol                                    |
| golgi apparatus                  | U-251 MG  | golgi apparatus                           | NB-4 golgi apparatus                                |
| nucleoplasm                      | U-2 OS    | nucleoplasm                               | MCF7 nucleoplasm, nucleoli, golgi apparatus         |
| nucleoli, vesicles               | HeLa      | nucleoli, vesicles                        | SiHa nucleoplasm, nucleoli, vesicles                |
| nucleoplasm                      | U-251 MG  | nucleoplasm                               | A549 nucleoplasm                                    |
| nuclear speckles                 | U-251 MG  | nuclear speckles                          | sA549 nuclear speckles                              |
| cytosol                          | A-431     | cytosol                                   | U-251 MG cytosol                                    |
| mitochondria                     | A-431     | mitochondria                              | U-251 MG mitochondria                               |
| mitochondria                     | A-431     | mitochondria                              | U-251 MG mitochondria                               |
| mitochondria                     | U-2 OS    | mitochondria                              | PC-3 mitochondria                                   |
| nucleoplasm, cytosol             | A-431     | nucleoplasm, cytosol                      | U-251 MG nucleoplasm, cytosol                       |
| cytosol                          | A-431     | cytosol                                   | U-251 MG cytosol                                    |
| nucleoplasm, golgi apparatus     | A-431     | golgi apparatus                           | U-251 MG nucleoplasm, golgi apparatus               |
| cytosol                          | A-431     | cytosol                                   | U-251 MG cytosol                                    |
| golgi apparatus, plasma membrane | BJ        | golgi apparatus, plasma membrane, cytosol | SK-MEL-30 golgi apparatus, plasma membrane, cytosol |
| cytosol                          | U-251 MG  | cytosol                                   |                                                     |
| nucleoplasm, cytosol             | A-431     | nucleoplasm, cytosol                      | U-251 MG nucleoplasm, cytosol                       |
| vesicles                         |           | vesicles                                  | SK-MEL-30 vesicles                                  |
| vesicles                         | MCF7      | vesicles                                  |                                                     |
| cytosol                          | A-431     | cytosol                                   | U-251 MG cytosol                                    |
| nuclear membrane                 | MCF7      | nuclear membrane                          | HEK 293 nuclear membrane                            |
| vesicles                         | SH-SY5Y   | vesicles                                  |                                                     |
| vesicles                         | A549      | vesicles                                  |                                                     |
| nucleoplasm, cytosol             | U-251 MG  | nuclear bodies, cytosol                   |                                                     |
| nuclear bodies, cytosol          | U-251 MG  | nuclear bodies                            |                                                     |
| cytosol                          | A-431     | cytosol                                   | U-251 MG cytosol                                    |
| vesicles, cytosol                | A-431     | vesicles, cytosol                         | U-251 MG cytosol                                    |
| nuclear bodies                   | U-2 OS    | nuclear bodies                            | bSiHa nuclear bodies                                |
| mitochondria, cytosol            | U-251 MG  | mitochondria, cytosol                     |                                                     |
| nucleoplasm                      | A-431     | nucleoplasm, cytosol                      | PC-3 nucleoplasm, cytosol                           |
| nucleoplasm, golgi apparatus     | RPTEC TER | nucleoplasm                               |                                                     |
| nucleoplasm, nuclear membrane    | A-431     | nucleoplasm                               | U-251 MG nucleoplasm                                |
| nucleoplasm                      | A549      | nucleoplasm                               | Hep G2 nucleoplasm                                  |
| nucleoplasm                      | A549      | nucleoplasm                               | PC-3 nucleoplasm                                    |
| nuclear speckles, mitochondria   | A-431     | nuclear speckles                          | sU-251 MG nuclear speckles                          |
| plasma membrane                  | U-2 OS    | plasma membrane                           | PC-3 plasma membrane                                |
| nucleoplasm                      | A-431     | nucleoplasm                               | U-251 MG nucleoplasm                                |
| nucleoplasm                      |           |                                           |                                                     |
| cell junctions                   |           |                                           |                                                     |
| nuclear membrane                 | HeLa      | nuclear membrane                          |                                                     |
| cytosol                          |           |                                           |                                                     |
| nucleoplasm, vesicles, cytosol   | MCF7      | nucleoplasm, cytosol                      | BJ nucleoplasm, cytosol                             |
| cytosol, cytoplasmic bodies      | A-431     | cytosol, cytoplasmic bodies               | U-251 MG cytosol                                    |
| cytosol, cytoplasmic bodies      | A-431     | cytosol, cytoplasmic bodies               |                                                     |
| cell junctions                   | A-431     | cell junctions                            | U-251 MG nucleoplasm, cell junctions                |
| nucleoplasm, cell junctions      | A-431     | nucleoplasm, cell junctions               | MCF7 nucleoplasm, cell junctions                    |

|                                        |           |                                                 |                                        |
|----------------------------------------|-----------|-------------------------------------------------|----------------------------------------|
| nucleoplasm, nucleoli, cell            | HEL       | cell junctions                                  |                                        |
| nucleoli                               | A-431     | nucleoli U-251 MG                               | nucleoplasm, nucleoli                  |
| nucleoli fibrillar center              | U-251 MG  | nucleoplaRH-30                                  | nucleoli fibrillar center              |
| nucleoplasm                            | PC-3      | nucleoplaAF22                                   | nucleoplasm                            |
| nucleoplasm, vesicles                  | U-2 OS    | nucleoplaMCF7                                   | nucleoplasm, vesicles                  |
| cytosol                                | A-431     | nucleoli, U-251 MG                              | nucleoplasm, nucleoli, cytosol         |
| cytosol                                | A-431     | cytosol HEK 293                                 | cytosol                                |
| golgi apparatus                        |           |                                                 |                                        |
| mitochondria                           | A-431     | mitochondU-251 MG                               | mitochondria                           |
| nucleoplasm, vesicles, cytosol         |           |                                                 |                                        |
| nucleoplasm                            | A-431     | nucleoplaU-251 MG                               | nucleoplasm                            |
| mitochondria                           | A-431     | mitochondU-251 MG                               | mitochondria                           |
| nucleoli                               | A-431     | nucleoli, RH-30                                 | nucleoli                               |
| plasma membrane, mitochondria          | A-431     | mitochondHep G2                                 | mitochondria                           |
| nucleoplasm                            | U-251 MG  | nucleoplasm                                     |                                        |
| cytosol                                | A-431     | cytosol U-251 MG                                | cytosol                                |
| nucleoplasm, cytosol                   | A-431     | nucleoplaU-251 MG                               | nucleoplasm, cytosol                   |
| cytosol                                | BJ        | cytosol HaCaT                                   | cytosol, cytoplasmic bodies            |
| nucleoplasm, golgi apparatus           | A-431     | nucleoplaU-251 MG                               | nucleoplasm, golgi apparatus, cytosol  |
| nucleoplasm, cytosol                   | HEK 293   | nucleoplaSiHa                                   | nucleoplasm                            |
| nuclear bodies, golgi apparatus        | HEK 293   | golgi appRH-30                                  | nucleoplasm, golgi apparatus           |
| nucleoplasm, golgi apparatus           | A-431     | nucleoplaU-251 MG                               | nucleoplasm, golgi apparatus           |
| mitochondria                           |           |                                                 |                                        |
| mitochondria                           | A-431     | mitochondU-251 MG                               | mitochondria                           |
| mitochondria                           | MCF7      | mitochondPC-3                                   | mitochondria                           |
| golgi apparatus                        | A-431     | golgi appU-251 MG                               | golgi apparatus                        |
| nucleoplasm, nucleoli fibrillar center | A-431     | nucleoplaU-251 MG                               | nucleoplasm, nucleoli fibrillar center |
| nucleoplasm, nucleoli fibrillar center | U-251 MG  | nucleoplasm, nucleoli fibrillar center, cytosol |                                        |
| nucleoplasm                            | HEK 293   | nucleoplaPC-3                                   | nucleoplasm                            |
| vesicles                               | A-431     | golgi appHep G2                                 | golgi apparatus                        |
| mitochondria                           | A549      | mitochondria                                    |                                        |
| nuclear speckles, cytosol              | A-431     | nuclear sU-251 MG                               | nuclear speckles, cytosol              |
| cytosol                                | A-431     | cytosol U-251 MG                                | plasma membrane, cytosol               |
| nucleoplasm                            | A-431     | nucleoplaU-251 MG                               | nucleoplasm                            |
| cytosol                                | U-251 MG  | cytosol                                         |                                        |
| nucleoplasm                            | SK-MEL-30 | nucleoplasm                                     |                                        |
| plasma membrane, cytosol               | A-431     | cytosol U-251 MG                                | plasma membrane, cytosol               |
| nucleoplasm                            | PC-3      | nucleoplasm                                     |                                        |
| nucleoli fibrillar center              | A549      | nucleoplaHep G2                                 | nucleoplasm, nucleoli fibrillar center |
| nucleoplasm, vesicles, mitochondria    | U-251 MG  | nucleoplaA549                                   | vesicles, mitochondria                 |
| nucleoli fibrillar center              | U-2 OS    | nucleoli fibrillar center, cytosol              |                                        |
| golgi apparatus                        |           |                                                 |                                        |
| nucleoplasm                            | A-431     | nucleoplaU-251 MG                               | nucleoplasm                            |
| nucleoplasm, vesicles                  | A-431     | nucleoplaHep G2                                 | nucleoplasm                            |
| centriolar satellite                   | A-431     | centriolaU-251 MG                               | nucleoplasm, centriolar satellite      |
| centriolar satellite, cytosol          | A-431     | centriolaU-251 MG                               | centriolar satellite                   |
| actin filaments, cytosol               | A-431     | nucleoplaU-251 MG                               | nucleoplasm, cytosol                   |
| vesicles                               | A-431     | vesicles PC-3                                   | vesicles                               |
| cytosol                                | A-431     | cytosol U-251 MG                                | cytosol                                |
| cytosol                                |           |                                                 |                                        |
| cytosol                                | A-431     | cytosol U-251 MG                                | cytosol                                |
| nucleoplasm, nuclear bodies            | U-251 MG  | nucleoplaAF22                                   | nuclear bodies, cytosol                |
| nucleoplasm                            | PC-3      | nucleoplasm                                     |                                        |
| microtubules                           | U-251 MG  | microtubules                                    |                                        |
| nucleoplasm, centriolar satellite      | U-251 MG  | nucleoplasm, centriolar satellite               |                                        |

|                             |          |                                      |                                        |
|-----------------------------|----------|--------------------------------------|----------------------------------------|
| nucleoplasm                 | A-431    | nucleoplasm                          |                                        |
| nucleoplasm, mitochondria   | A-431    | nucleoplaU-251 MG                    | nucleoplasm, mitochondria              |
| mitochondria                | MCF7     | mitochondPC-3                        | mitochondria                           |
| centrosome                  | A549     | centrosomRH-30                       | centrosome                             |
| vesicles                    | A-431    | vesicles U-251 MG                    | vesicles                               |
| cytosol                     | SiHa     | cytosol                              |                                        |
| nucleoplasm, vesicles       |          |                                      |                                        |
| endoplasmic reticulum       | U-251 MG | endoplasmic reticulum                |                                        |
| nuclear membrane, nucleoli  | A-431    | golgi appU-251 MG                    | nuclear membrane, nucleoli, golgi appa |
| plasma membrane, cytosol    | A-431    | plasma meU-251 MG                    | plasma membrane, cytosol               |
| nucleoplasm, mitochondria   | U-251 MG | nucleoplaHep G2                      | nucleoplasm                            |
| nucleoli fibrillar center   | A-431    | nucleoli U-251 MG                    | nucleoli fibrillar center              |
| nucleoplasm, nucleoli       | A-431    | nucleoplaU-251 MG                    | nucleoplasm, cytosol                   |
| cytosol                     | A-431    | cytosol U-251 MG                     | cytosol                                |
| cytosol                     | U-2 OS   | cytosol A-431                        | cytosol                                |
| nucleoplasm, plasma membr   | RH-30    | nucleoplaBJ                          | nucleoplasm, plasma membrane, centroso |
| nucleoplasm                 | A-431    | nucleoplaU-251 MG                    | nucleoplasm                            |
| nucleoplasm                 | HeLa     | nucleoplasm                          |                                        |
| nucleoplasm                 | HEK 293  | nucleoplaHeLa                        | nucleoplasm, midbody ring, cytosol     |
| golgi apparatus             | U-251 MG | nucleoplaMCF7                        | nucleoplasm, golgi apparatus           |
| nucleoplasm                 |          |                                      |                                        |
| nucleoplasm                 | A-431    | nucleoplaU-251 MG                    | microtubules, cytosol                  |
| nucleoplasm, plasma membr   | SiHa     | nucleoplaASC TERT1                   | nucleoplasm, plasma membrane           |
| nucleoplasm, vesicles       | MCF7     | nucleoplaHEK 293                     | nucleoplasm, vesicles                  |
| plasma membrane, cytosol    | A-431    | plasma meU-251 MG                    | plasma membrane, cytosol               |
| plasma membrane, cytosol    | A-431    | plasma meU-251 MG                    | plasma membrane, cytosol               |
| cytosol                     |          |                                      |                                        |
| cytosol                     | A-431    | cytosol U-251 MG                     | cytosol                                |
| cytosol                     | A-431    | cytosol U-251 MG                     | cytosol                                |
| nucleoplasm, nuclear bodie  | AF22     | nuclear bHUVEC TER                   | nucleoplasm, plasma membrane, cell jun |
| microtubules                | U-251 MG | microtubuBJ                          | nuclear bodies, microtubules           |
| vesicles                    |          |                                      |                                        |
| vesicles                    | HEK 293  | vesicles HeLa                        | vesicles                               |
| nuclear speckles, cytosol   | U-2 OS   | nuclear sA-431                       | nuclear speckles, cytosol              |
| centrosome                  | MCF7     | cytosol PC-3                         | centrosome, cytosol                    |
| centrosome                  | MCF7     | centrosomPC-3                        | nucleoplasm, centrosome, cytosol       |
| microtubules                | A-431    | microtubuU-251 MG                    | microtubules                           |
| microtubules                | U-251 MG | microtubuPC-3                        | microtubules                           |
| golgi apparatus             | HEK 293  | golgi appSH-SY5Y                     | golgi apparatus, vesicles              |
| nucleoplasm                 |          |                                      |                                        |
| nucleoplasm                 |          |                                      |                                        |
| nucleoplasm                 | A-431    | nucleoplaU-251 MG                    | nucleoplasm                            |
| nucleoplasm, nuclear bodie  | U-251 MG | cytosol                              |                                        |
| nucleoplasm, nuclear bodies |          |                                      |                                        |
| nucleoplasm, vesicles       |          |                                      |                                        |
| nucleoplasm, nuclear bodie  | U-251 MG | nucleoplasm, nuclear bodies, cytosol |                                        |
| nucleoplasm                 | HaCaT    | nucleoplasm, nuclear bodies, cytosol |                                        |
| nucleoplasm, vesicles, plas | A-431    | nucleoplaU-251 MG                    | vesicles, focal adhesion sites, cyto   |
| nuclear speckles            | A-431    | nuclear sU-251 MG                    | nuclear speckles                       |
| nucleoplasm, plasma membr   | A-431    | nucleoplaU-251 MG                    | nucleoplasm, plasma membrane, mitochon |
| mitochondria                | U-251 MG | mitochondria                         |                                        |
| centrosome, cytosol         | A-431    | cytosol U-251 MG                     | cytosol                                |
| nucleoplasm, cytosol        | A-431    | nucleoplaHeLa                        | nucleoplasm, cytosol                   |
| cytosol                     |          |                                      |                                        |
| cytosol                     | U-251 MG | cytosol                              |                                        |

|                                        |           |                                           |           |                                           |
|----------------------------------------|-----------|-------------------------------------------|-----------|-------------------------------------------|
| nucleoplasm, nucleoli, mitochondria    | A-431     | nucleoplasm                               | BJ        | nucleoli, mitochondria                    |
| endoplasmic reticulum                  | Hep G2    | endoplasmic reticulum                     |           |                                           |
| nucleoplasm                            | SH-SY5Y   | nucleoplasm                               | RH-30     | nucleoplasm                               |
| nucleoplasm, golgi apparatus           | A-431     | nucleoplasm, golgi apparatus              | U-251 MG  | nucleoplasm, golgi apparatus              |
| nucleoplasm, golgi apparatus           | A-431     | nucleoplasm, golgi apparatus              | U-251 MG  | nucleoplasm, golgi apparatus              |
| golgi apparatus                        | A-431     | golgi apparatus                           | U-251 MG  | golgi apparatus                           |
| nuclear speckles, cell junctions       |           |                                           |           |                                           |
| nucleoplasm, golgi apparatus           | SiHa      | nucleoplasm, golgi apparatus, midbody     |           |                                           |
| nucleoplasm, nucleoli                  | MCF7      | nucleoplasm, nucleoli                     |           |                                           |
| nucleoplasm                            | A-431     | nucleoplasm                               | U-251 MG  | nucleoplasm                               |
| nucleoplasm, cytosol                   | U-251 MG  | nucleoplasm                               | RH-30     | nucleoplasm                               |
| vesicles                               | A-431     | vesicles                                  | HeLa      | vesicles                                  |
| cytosol                                | U-251 MG  | cytosol                                   |           |                                           |
| nucleoplasm, cytosol                   | A-431     | nucleoplasm, cytosol                      | U-251 MG  | nucleoplasm, cytosol                      |
| nuclear speckles, cytosol              | A-431     | nuclear speckles, cytosol                 | U-251 MG  | nuclear speckles, cytosol                 |
| nucleoplasm                            | HEK 293   | nucleoplasm                               | RH-30     | nucleoplasm, vesicles                     |
| cytosol                                | A-431     | cytosol                                   |           |                                           |
| nucleoplasm                            | A-431     | nucleoplasm                               | U-251 MG  | nucleoplasm                               |
| nucleoplasm                            | A-431     | nucleoplasm                               | U-251 MG  | nucleoplasm                               |
| nucleoplasm                            | A-431     | nucleoplasm                               | U-251 MG  | nucleoplasm, nucleoli fibrillar center    |
| nucleoplasm, cytosol                   | U-251 MG  | nucleoplasm                               | HEK 293   | nucleoplasm                               |
| nucleoplasm                            | U-2 OS    | nucleoplasm                               | HEK 293   | nucleoplasm                               |
| nucleoplasm                            | HEK 293   | nucleoplasm                               |           |                                           |
| mitochondria                           | A-431     | mitochondria                              | U-251 MG  | mitochondria                              |
| nucleoplasm                            | A-431     | nucleoplasm, golgi apparatus              | SK-MEL-30 | nucleoplasm, golgi apparatus              |
| nucleoli fibrillar center              | A-431     | nucleoli                                  | U-251 MG  | nucleoli                                  |
| golgi apparatus, plasma membrane       | A-431     | golgi apparatus, plasma membrane, cytosol | U-251 MG  | golgi apparatus, plasma membrane, cytosol |
| nucleoli                               | A-431     | nucleoli                                  | U-251 MG  | nucleoli                                  |
| nucleoli                               | U-251 MG  | nucleoli                                  | HEK 293   | nucleoli                                  |
| nucleoplasm                            | RH-30     | nucleoplasm                               |           |                                           |
| cytosol                                | A-431     | cytosol                                   | U-251 MG  | cytosol                                   |
| nucleoplasm, nucleoli fibrillar center | A-431     | nucleoplasm, nucleoli fibrillar center    | U-251 MG  | nucleoplasm, nucleoli fibrillar center    |
| nucleoplasm, cytosol                   | SH-SY5Y   | cytosol                                   | RH-30     | nucleoplasm, nuclear bodies, cytosol      |
| plasma membrane                        | RH-30     | nucleoplasm, nuclear bodies, cytosol      | SK-MEL-30 | nucleoplasm, nuclear bodies, cytosol      |
| endoplasmic reticulum                  | A-431     | endoplasmic reticulum                     | U-251 MG  | endoplasmic reticulum                     |
| golgi apparatus, cytosol               | A-431     | golgi apparatus, cytosol                  | U-251 MG  | golgi apparatus, cytosol                  |
| golgi apparatus, vesicles              | Hep G2    | golgi apparatus, vesicles                 | RH-30     | golgi apparatus, vesicles                 |
| intermediate filaments                 | HeLa      | nucleoplasm, intermediate filaments       |           |                                           |
| nucleoplasm                            |           |                                           |           |                                           |
| nucleoplasm, cytosol                   | A-431     | nucleoplasm, cytosol                      | U-251 MG  | nucleoplasm, cytosol                      |
| nucleoplasm, microtubules              | U-251 MG  | nucleoplasm, microtubules                 | BJ        | nucleoplasm, microtubules                 |
| nucleoplasm, vesicles, cell junctions  | BJ        | vesicles, cell junctions                  | AF22      | vesicles, cell junctions                  |
| golgi apparatus                        | A-431     | golgi apparatus                           | U-251 MG  | golgi apparatus                           |
| golgi apparatus                        | A-431     | golgi apparatus                           | U-251 MG  | golgi apparatus                           |
| nucleoli fibrillar center              | A-431     | nucleoli fibrillar center                 | U-251 MG  | nucleoli fibrillar center                 |
| nucleoplasm, golgi apparatus           | U-2 OS    | nucleoplasm                               | RH-30     | nucleoplasm                               |
| endoplasmic reticulum                  | A-431     | endoplasmic reticulum                     | U-251 MG  | endoplasmic reticulum                     |
| vesicles                               | HEK 293   | vesicles, aggresome                       |           |                                           |
| nucleoplasm                            |           |                                           |           |                                           |
| cytosol                                | A-431     | cytosol                                   | U-251 MG  | cytosol                                   |
| plasma membrane                        | SK-MEL-30 | plasma membrane                           |           |                                           |
| mitochondria                           | A-431     | mitochondria                              | ASC TERT1 | mitochondria                              |
| nuclear bodies                         | PC-3      | nuclear bodies                            |           |                                           |
| nucleoplasm                            | A-431     | nucleoplasm                               | U-251 MG  | nucleoplasm                               |
| mitochondria                           | A-431     | nucleoplasm, mitochondria                 | Hep G2    | nucleoplasm, mitochondria                 |

|                                        |          |                                        |                                        |
|----------------------------------------|----------|----------------------------------------|----------------------------------------|
| nucleoplasm, plasma membrane           | A-431    | nucleoplasm, plasma membrane           | U-251 MG                               |
| vesicles                               | A-431    | vesicles                               |                                        |
| vesicles                               | MCF7     | cell junctions                         | SiHa                                   |
| cell junctions                         | SiHa     | cell junctions                         |                                        |
| nucleoli fibrillar center              | AF22     | plasma membrane, cell junctions        |                                        |
| cytosol                                | U-251 MG | nucleoli fibrillar center, cytosol     |                                        |
| nucleoplasm, centrosome                | SH-SY5Y  | cytosol HeLa                           | cytosol                                |
| cell junctions                         |          | centrosome                             |                                        |
| nucleoplasm                            | A-431    | nucleoplasm                            | U-251 MG                               |
| nucleoplasm                            | A-431    | nucleoplasm                            | U-251 MG                               |
| nucleoplasm, nucleoli, cytosol         | A-431    | nucleoplasm, nucleoli                  | U-251 MG                               |
| nucleoli, cytosol                      | SiHa     | nucleoli, BJ                           | nucleoli, cytosol                      |
| microtubules                           | HeLa     | vesicles, HUVEC                        | microtubules                           |
| plasma membrane, cytosol               | PC-3     | plasma membrane                        |                                        |
| nucleoplasm                            | MCF7     | nucleoplasm                            | AF22                                   |
| nucleoli                               | U-2 OS   | nucleoplasm, nucleoli                  | U-251 MG                               |
| centrosome                             |          |                                        |                                        |
| nucleoplasm                            | A-431    | nucleoplasm                            | U-251 MG                               |
| nucleoplasm, microtubules              | A-431    | nucleoplasm                            | U-251 MG                               |
| nucleoplasm                            | MCF7     | nucleoplasm                            |                                        |
| plasma membrane                        | HaCaT    | plasma membrane                        |                                        |
| nucleoplasm, nucleoli                  | A-431    | nucleoplasm, nucleoli                  | U-251 MG                               |
| nuclear speckles                       | A-431    | nuclear speckles                       | PC-3                                   |
| actin filaments                        | A-431    | actin filaments                        | U-251 MG                               |
| nucleoplasm, plasma membrane           | U-2 OS   | nucleoplasm, plasma membrane           | PC-3                                   |
| plasma membrane, cytosol               | A-431    | plasma membrane, cytosol               | U-251 MG                               |
| cytosol                                | U-251 MG | cytosol                                |                                        |
| vesicles, plasma membrane              |          |                                        |                                        |
| nucleoli fibrillar center              | U-2 OS   | nucleoli HeLa                          | nucleoli fibrillar center, vesicles, p |
| cytosol                                | U-2 OS   | nucleoli, A-431                        | cytosol                                |
| cytosol                                | U-2 OS   | cytosol A-431                          | cytosol                                |
| vesicles                               | A-431    | vesicles                               |                                        |
| endoplasmic reticulum, cytosol         | A-431    | endoplasmic reticulum, cytosol         | A549                                   |
| endoplasmic reticulum, cytosol         | A-431    | endoplasmic reticulum, cytosol         | A549                                   |
| endoplasmic reticulum, plasma membrane | A-431    | endoplasmic reticulum, plasma membrane | A549                                   |
| nucleoplasm                            | SiHa     | nucleoplasm, golgi apparatus           |                                        |
| endoplasmic reticulum                  | U-251 MG | endoplasmic reticulum                  | PC-3                                   |
| centrosome                             | SiHa     | centrosome                             | RH-30                                  |
| nucleoplasm, nucleoli fibrillar center | A-431    | nucleoplasm, nucleoli fibrillar center | U-251 MG                               |
| nucleoplasm                            | A-431    | nucleoplasm                            | HEK 293                                |
| mitochondria                           | A-431    | mitochondria, cytosol                  | U-251 MG                               |
| mitochondria                           | SiHa     | mitochondria                           |                                        |
| nuclear membrane, vesicles             | RT4      | nuclear membrane, vesicles             | U-2 OS                                 |
| plasma membrane, cytosol               | A-431    | plasma membrane, cytosol               | U-251 MG                               |
| nucleoplasm                            | HEK 293  | nucleoplasm                            | Hep G2                                 |
| nuclear membrane, vesicles             | A-431    | nuclear membrane, vesicles             | U-251 MG                               |
| nuclear membrane, vesicles             | U-2 OS   | nuclear membrane, vesicles             | RH-30                                  |
| nuclear membrane                       |          |                                        |                                        |
| nuclear membrane, vesicles             | RT4      | nuclear membrane, vesicles             | U-2 OS                                 |
| nuclear membrane                       | A-431    | nuclear membrane                       | U-251 MG                               |
| plasma membrane, midbody, cytosol      | U-2 OS   | endoplasmic reticulum, plasma membrane |                                        |
| golgi apparatus, vesicles              | A-431    | golgi apparatus, vesicles              | U-251 MG                               |
| cytosol                                | U-2 OS   | cell junctions, cytosol                | plasma membrane, RH-30                 |
| nuclear speckles                       | HeLa     | nuclear speckles                       | SiHa                                   |
| nucleoplasm, nucleoli                  | A-431    | nucleoplasm                            | U-251 MG                               |

|                                        |           |                                        |                                                 |
|----------------------------------------|-----------|----------------------------------------|-------------------------------------------------|
| cytosol                                | BJ        | cytosol                                |                                                 |
| cytosol                                | MCF7      | cytosol                                | HEK 293 cytosol                                 |
| cytosol                                | A-431     | cytosol                                | RH-30 cytosol                                   |
| mitochondria                           |           |                                        |                                                 |
| mitochondria, aggresome                | U-2 OS    | mitochondria                           | A-431 mitochondria                              |
| actin filaments                        | A-431     | actin filaments                        | U-251 MG actin filaments                        |
| nucleoplasm                            | A-431     | nucleoplasm                            | U-251 MG nucleoplasm                            |
| plasma membrane, cytosol               | A-431     | centrosome                             | U-251 MG centrosome                             |
| microtubules, cytosol                  | A-431     | microtubules, cytosol                  | U-251 MG microtubules, cytosol                  |
| nucleoli fibrillar center              | MCF7      | nucleoli fibrillar center              | HEK 293 nucleoli fibrillar center               |
| endoplasmic reticulum, lipo            | A-431     | endoplasmic reticulum                  | U-251 MG endoplasmic reticulum                  |
| nucleoplasm                            | SiHa      | nucleoplasm                            | RH-30 nucleoplasm                               |
| nucleoplasm                            |           |                                        |                                                 |
| nucleoplasm                            |           |                                        |                                                 |
| nucleoplasm, cytosol                   | MCF7      | nucleoplasm, cytosol                   | HEK 293 nucleoplasm, cytosol                    |
| cell junctions                         | A-431     | cell junctions                         | MCF7 golgi apparatus, cell junctions            |
| nucleoplasm                            | A-431     | nucleoplasm, cytosol                   | U-251 MG nucleoplasm, cytosol                   |
| nucleoplasm                            | MCF7      | nucleoplasm                            |                                                 |
| plasma membrane                        |           |                                        |                                                 |
| nucleoplasm, nucleoli                  | A-431     | nucleoplasm, nucleoli                  | HeLa nucleoplasm, nucleoli                      |
| nucleoplasm, cytosol                   | A549      | nucleoplasm                            | PC-3 nucleoplasm                                |
| nucleoplasm                            | RH-30     | nucleoplasm                            |                                                 |
| plasma membrane                        | SH-SY5Y   | plasma membrane                        | RH-30 plasma membrane                           |
| nucleoplasm, vesicles, plasma membrane | A-431     | nucleoplasm, vesicles, plasma membrane | U-251 MG nucleoplasm, vesicles, plasma membrane |
| nucleoplasm, vesicles                  | RH-30     | vesicles                               |                                                 |
| nucleoli                               | U-251 MG  | nucleoplasm, nucleoli                  |                                                 |
| mitochondria, cytosol                  | A-431     | mitochondria, cytosol                  | U-251 MG mitochondria, cytosol                  |
| nucleoplasm                            | A-431     | nucleoplasm                            | PC-3 nucleoplasm                                |
| nucleoplasm                            | U-2 OS    | nucleoplasm                            |                                                 |
| nucleoplasm, vesicles                  | A-431     | nucleoplasm                            | U-251 MG nucleoplasm                            |
| nucleoplasm                            | SH-SY5Y   | nucleoplasm                            |                                                 |
| golgi apparatus                        | Hep G2    | golgi apparatus                        | SiHa nucleoplasm, golgi apparatus               |
| nucleoplasm, mitochondria, cytosol     | A-431     | nucleoplasm, mitochondria, cytosol     | U-251 MG nucleoplasm, mitochondria, cytosol     |
| nucleoplasm, nucleoli fibrillar center | U-251 MG  | nucleoplasm, nucleoli fibrillar center | HEK 293 nucleoplasm, nucleoli fibrillar center  |
| nucleoplasm, cytosol                   | A549      | nucleoplasm, cytosol                   | Hep G2 nucleoplasm, cytosol                     |
| vesicles                               | RPTEC TER | vesicles                               | REH vesicles                                    |
| endoplasmic reticulum                  | U-251 MG  | endoplasmic reticulum                  |                                                 |
| nuclear speckles                       | U-2 OS    | nuclear speckles                       | RH-30 nuclear speckles                          |
| nucleoplasm, cytosol                   | MCF7      | nucleoplasm, nucleoli, cytosol         | SH-SY5Y nucleoplasm, nucleoli, cytosol          |
| nucleoplasm                            | A-431     | nucleoplasm                            | U-251 MG nucleoplasm                            |
| nucleoplasm, golgi apparatus           | MCF7      | nucleoplasm                            | PC-3 nucleoplasm                                |
| plasma membrane, cytosol               | A-431     | plasma membrane, cytosol               | U-251 MG plasma membrane, cytosol               |
| intermediate filaments                 | A-431     | intermediate filaments                 | U-251 MG intermediate filaments                 |
| intermediate filaments                 | U-251 MG  | intermediate filaments                 | HEK 293 nucleoplasm, intermediate filaments     |
| golgi apparatus                        | HaCaT     | golgi apparatus                        |                                                 |
| plasma membrane, cytosol               | A-431     | nucleoli, plasma membrane, cytosol     |                                                 |
| nucleoplasm, nuclear speckles          | HeLa      | nucleoplasm, nuclear speckles          |                                                 |
| nucleoplasm                            | U-251 MG  | nucleoplasm, nuclear speckles          | HeLa nucleoplasm, nuclear speckles              |
| nucleoplasm, nucleoli fibrillar center | U-251 MG  | nucleoplasm, nucleoli fibrillar center | RH-30 nucleoplasm, nucleoli fibrillar center    |
| nucleoplasm                            | HeLa      | nucleoplasm, plasma membrane           | SiHa nucleoplasm, plasma membrane               |
| nucleoplasm, cytosol                   | A-431     | nucleoplasm, cytosol                   | U-251 MG nucleoplasm, cytosol                   |
| mitochondria                           | A-431     | mitochondria                           |                                                 |
| mitochondria                           | RT4       | mitochondria                           | U-2 OS mitochondria                             |
| cytosol                                | A-431     | cytosol                                | U-251 MG cytosol                                |
| nucleoplasm                            | A-431     | nucleoplasm, cytosol                   | U-251 MG nucleoplasm, cytosol                   |

|                                      |           |                                       |                                        |
|--------------------------------------|-----------|---------------------------------------|----------------------------------------|
| microtubules                         | U-251 MG  | microtubuPC-3                         | microtubules                           |
| vesicles, plasma membrane            | A-431     | vesicles, U-251 MG                    | vesicles, plasma membrane              |
| golgi apparatus, plasma membrane     |           |                                       |                                        |
| cytosol                              | A-431     | cytosol U-251 MG                      | cytosol                                |
| centrosome                           | Hep G2    | centrosomAF22                         | centrosome                             |
| centriolar satellite, cyto           | U-251 MG  | centriolaLHCN-M2                      | cytosol                                |
| nucleoplasm, cytosol                 | A549      | nucleoplaSiHa                         | nucleoplasm, cytosol                   |
| nucleoplasm                          | A-431     | nucleoplaU-251 MG                     | nucleoplasm                            |
| nucleoplasm                          | PC-3      | nucleoplasm, nuclear bodies           |                                        |
| nucleoplasm, mitochondria            | A-431     | nucleoplaU-251 MG                     | nucleoplasm, mitochondria              |
| nucleoplasm, plasma membr            | PC-3      | nucleoplasm                           |                                        |
| nuclear speckles, plasma m           | A-431     | nuclear sU-251 MG                     | nuclear speckles, plasma membrane, cyt |
| plasma membrane, centrosom           | MCF7      | plasma mePC-3                         | plasma membrane                        |
| cytosol                              | U-251 MG  | cytosol                               |                                        |
| nucleoplasm, cytosol                 | MCF7      | nucleoplaSiHa                         | nucleoplasm, cytosol                   |
| cytosol                              | HeLa      | cytosol SiHa                          | cytosol                                |
| plasma membrane, mitochonc           | A-431     | mitochondU-251 MG                     | mitochondria                           |
| plasma membrane                      | A549      | plasma membrane                       |                                        |
| plasma membrane                      |           |                                       |                                        |
| vesicles                             | PC-3      | plasma meAF22                         | plasma membrane                        |
| nucleoplasm                          | PC-3      | nucleoplasm                           |                                        |
| nucleoplasm                          | U-2 OS    | nucleoplasm                           |                                        |
| nucleoli, endoplasmic reti           | HeLa      | nuclear bodies, endoplasmic reticulum |                                        |
| vesicles                             | PC-3      | vesicles                              |                                        |
| mitochondria                         | A-431     | mitochondU-251 MG                     | mitochondria                           |
| mitochondria                         | A-431     | mitochondU-251 MG                     | mitochondria                           |
| mitochondria                         | A-431     | mitochondU-251 MG                     | mitochondria                           |
| nucleoplasm, cytosol                 | MCF7      | nucleoplaPC-3                         | nucleoplasm, cytosol                   |
| nucleoplasm, vesicles                | A-431     | nucleoplaHEK 293                      | nucleoplasm                            |
| nucleoplasm                          | htCEpi    | nucleoplasm                           |                                        |
| nucleoplasm                          |           |                                       |                                        |
| plasma membrane, cytosol             | A-431     | cytosol U-251 MG                      | plasma membrane, cytosol               |
| plasma membrane, cytosol             | A-431     | cytosol U-251 MG                      | cytosol                                |
| mitochondria, cytosol                | A-431     | mitochondU-251 MG                     | mitochondria, cytosol                  |
| nucleoplasm, golgi apparat           | A-431     | golgi appU-251 MG                     | nucleoplasm, golgi apparatus           |
| endoplasmic reticulum                | ASC TERT1 | endoplasmHUVEC TER                    | endoplasmic reticulum                  |
| nucleoplasm                          | U-2 OS    | nucleoplasm                           |                                        |
| nucleoplasm                          | U-2 OS    | nucleoplasm                           |                                        |
| nucleoplasm                          | U-2 OS    | nucleoplaSiHa                         | nucleoplasm, nuclear membrane          |
| cell junctions, centriolar satellite |           |                                       |                                        |
| nucleoplasm, cell junctions          |           |                                       |                                        |
| nucleoplasm, cytosol                 |           |                                       |                                        |
| vesicles                             | U-251 MG  | vesicles A549                         | vesicles                               |
| vesicles                             | U-251 MG  | vesicles A549                         | vesicles                               |
| nuclear bodies                       | HEK 293   | nuclear bHeLa                         | nuclear bodies                         |
| nucleoplasm, cytosol                 | A-431     | nucleoplaU-251 MG                     | nucleoplasm, cytosol                   |
| mitochondria                         | BJ        | mitochondria                          |                                        |
| nucleoplasm, vesicles                | A549      | nucleoplaSH-SY5Y                      | vesicles                               |
| nucleoplasm, vesicles                | A549      | nucleoplasm                           |                                        |
| cytosol                              |           |                                       |                                        |
| vesicles                             |           |                                       |                                        |
| plasma membrane, cytosol             | A-431     | nuclear bU-251 MG                     | nuclear bodies, plasma membrane, cytos |
| plasma membrane, cytosol             | A-431     | plasma meU-251 MG                     | plasma membrane, centrosome, cytosol   |
| nucleoplasm, cytosol                 | A-431     | nucleoplasm, cytosol                  |                                        |
| nucleoplasm, cytosol                 | HEK 293   | nucleoplasm, cytosol                  |                                        |

|                                        |          |                                        |                        |
|----------------------------------------|----------|----------------------------------------|------------------------|
| plasma membrane, focal adhesion sites  | A-431    | plasma membrane, focal adhesion sites  | U-251 MG               |
| plasma membrane, focal adhesion sites  | A-431    | plasma membrane, focal adhesion sites  | U-251 MG               |
| nucleoplasm, cytosol                   | A-431    | nucleoplasm, cytosol                   | U-251 MG               |
| vesicles, intermediate filaments       | HeLa     | vesicles                               | intermediate filaments |
| nucleoplasm                            | A-431    | nucleoplasm                            | U-251 MG               |
| plasma membrane, cytosol               | A-431    | plasma membrane, cytosol               | U-251 MG               |
| cytosol                                | U-251 MG | cytosol                                | U-251 MG               |
| nucleoplasm, cytosol                   | U-251 MG | cytosol                                | LHCN-M2                |
| cytosol                                | RH-30    | cytosol                                | LHCN-M2                |
| cell junctions                         | PC-3     | nucleoli, vesicles                     |                        |
| vesicles                               | A-431    | vesicles                               | U-251 MG               |
| plasma membrane, cell junctions        |          | vesicles                               | U-251 MG               |
| nucleoplasm, plasma membrane           | U-251 MG | nucleoplasm, cell junctions            |                        |
| microtubules, cytoskeleton             | A-431    | microtubules                           | U-251 MG               |
| nucleoli                               | HEL      | nucleoli, plasma membrane              |                        |
| nuclear bodies, plasma membrane        | HeLa     | nuclear bodies, plasma membrane        | bSH-SY5Y               |
| nucleoplasm, vesicles                  | SH-SY5Y  | nucleoplasm, vesicles                  |                        |
| nucleoplasm                            | U-251 MG | nucleoplasm                            | PC-3                   |
| cytosol                                | A-431    | nucleoli, U-251 MG                     |                        |
| nucleoplasm                            | AF22     | nucleoplasm, plasma membrane           |                        |
| plasma membrane                        |          |                                        |                        |
| mitochondria                           | A-431    | mitochondria                           | U-251 MG               |
| nucleoplasm                            | A-431    | nucleoplasm                            | U-251 MG               |
| nucleoplasm                            |          |                                        |                        |
| nucleoplasm                            | A-431    | nucleoplasm                            | U-251 MG               |
| plasma membrane                        |          |                                        |                        |
| nucleoplasm                            | HEK 293  | nucleoplasm                            | RH-30                  |
| nucleoplasm                            |          |                                        |                        |
| nucleoplasm, cytosol                   | A-431    | nucleoplasm, centrosome, cytosol       | U-251 MG               |
| nucleoplasm, cytosol                   | A-431    | nucleoplasm, cytosol                   | U-251 MG               |
| cytoskeleton bridge                    | A549     | cytoskeleton bridge                    |                        |
| nucleoplasm, plasma membrane           | A-431    | nucleoplasm                            | MCF7                   |
| nucleoplasm, nucleoli                  | A-431    | nucleoplasm                            | MCF7                   |
| nucleoplasm, vesicles, plasma membrane | A549     | nucleoplasm, vesicles, cytosol         | HeLa                   |
| nucleoplasm                            | A-431    | nucleoplasm                            | U-251 MG               |
| nucleoplasm                            | HEK 293  | nucleoplasm                            | PC-3                   |
| plasma membrane                        |          |                                        |                        |
| plasma membrane, cytosol               | A-431    | plasma membrane, cytosol               | U-251 MG               |
| nucleoplasm, cytosol                   | A-431    | nucleoplasm                            |                        |
| nucleoplasm                            | A549     | nucleoplasm                            | PC-3                   |
| nucleoplasm                            | HeLa     | nucleoplasm, cytosol                   |                        |
| microtubules                           | A-431    | microtubules                           | U-251 MG               |
| nucleoplasm                            | A-431    | nucleoplasm                            | U-251 MG               |
| plasma membrane, focal adhesion sites  | HeLa     | nucleoplasm, plasma membrane, cytosol  | Hep G2                 |
| nucleoplasm, vesicles                  | Hep G2   | vesicles                               |                        |
| nucleoplasm, golgi apparatus           | HeLa     | nucleoplasm, golgi apparatus           |                        |
| golgi apparatus                        | U-2 OS   | golgi apparatus                        | Hep G2                 |
| nuclear bodies, cytosol                | A-431    | nuclear bodies, cytosol                | U-251 MG               |
| plasma membrane, cytosol               | U-251 MG | endoplasmic reticulum, plasma membrane | BJ                     |
| golgi apparatus, cytosol               | A-431    | golgi apparatus, cytosol               | U-251 MG               |
| nucleoli fibrillar center              | A-431    | nucleoli fibrillar center              | U-251 MG               |
| nucleoli fibrillar center              | U-2 OS   | nucleoplasm, golgi apparatus           | HEL                    |
| nucleoplasm, golgi apparatus           | A-431    | nucleoplasm, golgi apparatus, cytosol  | U-251 MG               |
| vesicles                               | U-2 OS   | vesicles                               |                        |
| mitochondria                           | A-431    | mitochondria                           | U-251 MG               |



|                                              |          |                                             |           |
|----------------------------------------------|----------|---------------------------------------------|-----------|
| golgi apparatus                              | SH-SY5Y  | golgi apparatus, cytosol                    |           |
| nucleoplasm, vesicles                        | BJ       | nucleoplasm, golgi apparatus, vesicles      | SK-MEL-30 |
| nucleoplasm, cytosol                         | A-431    | nucleoplasm, cytosol                        | U-251 MG  |
| nucleoli fibrillar center                    | U-2 OS   | nucleoplasm, nucleoli fibrillar center      | SH-SY5Y   |
| nucleoli fibrillar center                    | U-2 OS   | nucleoli fibrillar center                   | SH-SY5Y   |
| nucleoplasm, plasma membrane                 | MCF7     | nucleoplasm, plasma membrane                | HaCaT     |
| nucleoplasm, nuclear membrane                | A-431    | nucleoplasm, nuclear membrane               | PC-3      |
| nucleoplasm, nuclear membrane                | A-431    | nucleoplasm                                 | U-251 MG  |
| vesicles                                     | SH-SY5Y  | vesicles                                    | AF22      |
| vesicles                                     | A-431    | vesicles                                    |           |
| nucleoplasm, cytosol                         | A-431    | nucleoplasm, cytosol                        | MCF7      |
| golgi apparatus, cytosol                     | A-431    | golgi apparatus, cytosol                    | U-251 MG  |
| nucleoplasm, golgi apparatus                 | A-431    | nucleoplasm                                 | U-251 MG  |
| nucleoplasm, vesicles                        | A-431    | nucleoplasm, vesicles                       | U-251 MG  |
| nucleoplasm                                  | HEK 293  | nucleoplasm, nuclear bodies                 | bHep G2   |
| endoplasmic reticulum                        | U-2 OS   | endoplasmic reticulum                       | Hep G2    |
| mitochondria                                 | HEL      | mitochondria                                |           |
| nucleoplasm                                  | MCF7     | nucleoplasm                                 |           |
| nucleoplasm                                  | U-2 OS   | nucleoplasm, cytosol                        |           |
| plasma membrane                              |          |                                             |           |
| nucleoplasm, vesicles, cytosol               | U-251 MG | nucleoplasm, cytosol                        |           |
| nucleoplasm, cytosol                         | HaCaT    | vesicles                                    |           |
| nucleoplasm                                  |          |                                             |           |
| plasma membrane                              | K-562    | plasma membrane                             | REH       |
| plasma membrane                              | HEL      | plasma membrane                             | REH       |
| cytosol                                      | A-431    | cytosol                                     | U-251 MG  |
| cytosol                                      | A-431    | cytosol                                     | U-251 MG  |
| cytosol                                      | A-431    | nucleoplasm, golgi apparatus, cytosol       |           |
| nucleoplasm, nucleoli                        | A-431    | nucleoplasm, nucleoli                       | U-251 MG  |
| nucleoplasm, nuclear bodies                  | A-431    | nucleoplasm                                 | U-251 MG  |
| cytosol                                      | MCF7     | cytosol                                     |           |
| vesicles                                     | HaCaT    | vesicles                                    |           |
| plasma membrane                              | A-431    | plasma membrane                             | U-251 MG  |
| plasma membrane, microtubules                | A-431    | plasma membrane                             | U-251 MG  |
| vesicles, plasma membrane, cell junctions    | HaCaT    | vesicles, plasma membrane, cell junctions   |           |
| nucleoplasm                                  | HEK 293  | nucleoplasm                                 | Hep G2    |
| cytosol                                      |          |                                             |           |
| nucleoli                                     | A-431    | nucleoli                                    | U-251 MG  |
| nucleoli                                     | A-431    | nucleoli                                    | PC-3      |
| mitochondria                                 | A-431    | mitochondria                                | U-251 MG  |
| nucleoplasm, cytosol                         | A-431    | nucleoplasm, cytosol                        |           |
| nucleoplasm, endoplasmic reticulum           | A-431    | nucleoplasm, endoplasmic reticulum, cytosol | U-251 MG  |
| nucleoplasm                                  | A-431    | nucleoplasm                                 | MCF7      |
| nucleoplasm                                  | U-251 MG | nucleoplasm                                 | A549      |
| nucleoplasm                                  | U-2 OS   | nucleoplasm                                 | SH-SY5Y   |
| nucleoplasm, nucleoli fibrillar center       | Hep G2   | nucleoplasm, golgi apparatus, cytosol       | SH-SY5Y   |
| golgi apparatus                              | MCF7     | golgi apparatus                             | HEK 293   |
| nucleoplasm, plasma membrane, cell junctions | HEK 293  | nucleoplasm, cytosol                        | RH-30     |
| nucleoplasm                                  | A-431    | nucleoplasm                                 | U-251 MG  |
| plasma membrane, cytosol                     | A-431    | plasma membrane, cytosol                    | U-251 MG  |
| endoplasmic reticulum                        | A-431    | endoplasmic reticulum                       | U-251 MG  |
| nucleoplasm, cytosol                         | U-251 MG | nucleoplasm, cytosol                        |           |
| mitochondria                                 | MCF7     | mitochondria                                | A549      |
| nucleoplasm, cell junctions                  | U-2 OS   | nucleoplasm, cell junctions                 | HEK 293   |
| plasma membrane, cytosol                     | U-251 MG | plasma membrane, cytosol                    | SK-MEL-30 |

vesicles  
 vesicles  
 nucleoplasm, mitochondria A-431 mitochondria  
 mitochondria MCF7  
 plasma membrane, actin filaments  
 nucleoplasm A-431  
 nucleoplasm A-431  
 nucleoplasm U-2 OS  
 vesicles  
 nucleoplasm A-431  
 nuclear bodies U-2 OS  
 golgi apparatus, vesicles A-431  
 mitochondria A-431  
 nucleoplasm A-431  
 vesicles A-431  
 mitochondria A-431  
 golgi apparatus  
 cytosol A-431  
 nucleoplasm, plasma membrane K-562  
 vesicles, cytosol A-431  
 vesicles A-431  
 nucleoplasm, plasma membrane Hep G2  
 nucleoplasm, vesicles, cytosol A-431  
 mitochondria A-431  
 nucleoplasm A-431  
 nuclear speckles, plasma membrane A-431  
 cytosol A-431  
 nucleoplasm, cytosol PC-3  
 nucleoplasm MCF7  
 nucleoplasm  
 nucleoplasm MCF7  
 intermediate filaments  
 nucleoli fibrillar center SH-SY5Y  
 golgi apparatus, vesicles A-431  
 vesicles HEK 293  
 plasma membrane, cell junction U-251 MG  
 vesicles A-431  
 cytosol A-431  
 nucleoplasm, centrosome A-431  
 nucleoplasm, cytosol A-431  
 intermediate filaments RH-30  
 intermediate filaments, cytosol A-431  
 nucleoplasm RH-30  
 nucleoplasm, cytosol A-431  
 nucleoplasm U-251 MG  
 nucleoplasm, nucleoli, cytosol MCF7  
 nucleoplasm, nuclear membrane U-2 OS  
 nucleoplasm A-431  
 nucleoplasm A-431  
 nucleoplasm A-431  
 nucleoplasm A-431  
 golgi apparatus RH-30  
 nucleoplasm A-431  
 mitochondria A-431  
 nucleoplasm U-251 MG  
 nucleoplasm, mitochondria  
 nucleoplasm, cell junctions, mitochondria  
 nucleoplasm U-251 MG  
 nucleoplasm U-251 MG  
 nucleoplasm  
 nucleoplasm U-251 MG  
 nucleoplasm, nuclear bodies  
 nuclear bodies U-251 MG  
 golgi apparatus U-251 MG  
 mitochondria U-251 MG  
 nucleoplasm, cytosol U-251 MG  
 vesicles U-251 MG  
 mitochondria MCF7  
 vesicles, U-251 MG  
 vesicles, cytosol  
 nucleoplasm, plasma membrane  
 nucleoplasm U-251 MG  
 vesicles, centrosome, cytosol U-251 MG  
 vesicles U-251 MG  
 nucleoplasm, mitotic spindle, cytosol SH-SY5Y  
 nucleoplasm, vesicles  
 mitochondria  
 nucleoplasm U-251 MG  
 nucleoplasm  
 nuclear speckles, plasma membrane, cytosol MCF7  
 vesicles, U-251 MG  
 nucleoplasm, cytosol  
 nucleoplasm  
 nucleoplasm  
 nucleoplasm  
 nucleoli BJ  
 nucleoli fibrillar center  
 golgi apparatus, vesicles U-251 MG  
 golgi apparatus RH-30  
 golgi apparatus  
 cytosol U-251 MG  
 vesicles U-251 MG  
 cytosol U-251 MG  
 cytosol  
 nucleoplasm, centrosome HEK 293  
 nucleoplasm, cytosol U-251 MG  
 nucleoplasm  
 nucleoplasm U-251 MG  
 intermediate filaments, cytosol U-251 MG  
 nucleoplasm  
 nucleoplasm K-562  
 nucleoplasm, golgi apparatus, centrosome U-251 MG  
 nucleoplasm, cytosol  
 nucleoplasm, nucleoli, cell junctions, cytokinetic bridge MCF7  
 nucleoplasm, nuclear membrane, cell junction U-251 MG  
 nucleoplasm U-251 MG  
 nucleoplasm U-251 MG  
 nucleoplasm U-251 MG  
 nucleoplasm U-251 MG  
 golgi apparatus  
 nucleoplasm U-251 MG  
 mitochondria U-251 MG  
 mitochondria

|                                         |           |                               |           |                                       |
|-----------------------------------------|-----------|-------------------------------|-----------|---------------------------------------|
| nucleoli fibrillar center               | MCF7      | mitochondr                    | PC-3      | nucleoli fibrillar center, mitochondr |
| golgi apparatus                         |           |                               |           |                                       |
| nucleoplasm, cell junction              | U-2 OS    | nucleopla                     | HaCaT     | nucleoli, vesicles, cell junctions    |
| nucleoplasm                             | U-251 MG  | nucleoplasm                   |           |                                       |
| nucleoplasm                             | A-431     | nucleoplasm                   |           |                                       |
| nucleoplasm, nuclear membrane, vesicles |           |                               |           |                                       |
| nucleoplasm, mitochondria               | U-251 MG  | nucleoplasm, mitochondria     |           |                                       |
| nucleoplasm, endoplasmic r              | A-431     | endoplasr                     | U-251 MG  | nucleoplasm, endoplasmic reticulum    |
| cytosol                                 | U-251 MG  | cytosol                       |           |                                       |
| endoplasmic reticulum, cyt              | A-431     | endoplasr                     | U-251 MG  | endoplasmic reticulum, cytosol        |
| nucleoplasm                             | MCF7      | nucleopla                     | HeLa      | nucleoplasm                           |
| mitochondria                            | U-2 OS    | mitochondria                  |           |                                       |
| nucleoplasm                             | A-431     | nucleopla                     | U-251 MG  | nucleoplasm                           |
| cytosol                                 | MCF7      | cytosol                       | PC-3      | cytosol                               |
| cytosol                                 | Hep G2    | cytosol                       |           |                                       |
| cytosol                                 | Hep G2    | cytosol                       |           |                                       |
| mitochondria                            | A549      | mitochondria                  |           |                                       |
| mitochondria                            | U-2 OS    | mitochond                     | A549      | mitochondria                          |
| mitochondria                            | A-431     | mitochond                     | U-251 MG  | mitochondria                          |
| mitochondria                            | U-251 MG  | mitochondria                  |           |                                       |
| nucleoplasm, centrosome, cy             | A-431     | nucleopla                     | U-251 MG  | nucleoplasm, centrosome               |
| nucleoplasm, nucleoli                   | A-431     | nucleopla                     | U-251 MG  | nucleoplasm, nucleoli                 |
| cytosol                                 | ASC TERT1 | plasma membrane               |           |                                       |
| vesicles                                |           |                               |           |                                       |
| cytosol                                 | A-431     | cytosol                       |           |                                       |
| nucleoplasm, plasma membr               | U-251 MG  | nucleopla                     | A549      | nucleoplasm, plasma membrane          |
| nucleoplasm, nuclear bodies             |           |                               |           |                                       |
| nuclear bodies                          | A-431     | nuclear b                     | U-251 MG  | nuclear bodies                        |
| nucleoplasm, vesicles                   | A-431     | nucleopla                     | U-251 MG  | nucleoplasm, vesicles                 |
| mitochondria                            | MCF7      | nucleopla                     | HeLa      | mitochondria                          |
| nucleoplasm                             | A-431     | nucleopla                     | U-251 MG  | nucleoplasm, nuclear bodies           |
| endoplasmic reticulum                   | PC-3      | cytosol                       | HaCaT     | endoplasmic reticulum                 |
| vesicles                                | A-431     | vesicles                      |           |                                       |
| vesicles, cytosol                       | A-431     | vesicles                      | U-251 MG  | vesicles                              |
| vesicles                                | U-2 OS    | vesicles, K-562               |           | vesicles                              |
| vesicles                                | A-431     | vesicles                      | K-562     | vesicles                              |
| mitochondria                            | U-251 MG  | mitochond                     | BJ        | mitochondria                          |
| nucleoli                                | MCF7      | nucleoli                      | HEK 293   | nucleoli, cytosol                     |
| nucleoli, cytosol                       | U-2 OS    | nucleopla                     | A-431     | nucleoplasm, nucleoli, cytosol        |
| nucleoplasm, plasma membr               | A-431     | nucleopla                     | REH       | nucleoplasm, plasma membrane          |
| centrosome                              | U-251 MG  | centrosome                    |           |                                       |
| nucleoplasm                             | A-431     | nucleopla                     | U-251 MG  | nucleoplasm, vesicles                 |
| nucleoplasm                             | MCF7      | nucleoplasm                   |           |                                       |
| nucleoplasm                             | A-431     | nucleopla                     | U-251 MG  | nucleoplasm                           |
| nucleoplasm, cytosol                    | A-431     | nucleopla                     | U-251 MG  | nucleoplasm, cytosol                  |
| nucleoplasm, cytosol                    | U-251 MG  | nucleopla                     | SK-MEL-30 | nucleoplasm, cytosol                  |
| nucleoplasm, nuclear bodie              | A-431     | nucleopla                     | U-251 MG  | nucleoplasm                           |
| nucleoplasm, nucleoli                   | HEK 293   | nucleoli                      | Hep G2    | nucleoplasm, nucleoli fibrillar cente |
| nucleoplasm                             | MCF7      | nucleopla                     | HEK 293   | nucleoplasm                           |
| nucleoplasm                             | A-431     | nucleopla                     | U-251 MG  | nucleoplasm                           |
| cytosol                                 | MCF7      | cytosol                       | HEK 293   | cytosol                               |
| cytosol                                 | HEK 293   | cytosol                       |           |                                       |
| vesicles                                | SH-SY5Y   | vesicles                      | RH-30     | vesicles                              |
| centriolar satellite, cyt               | U-251 MG  | centriolar satellite, cytosol |           |                                       |
| nucleoplasm                             |           |                               |           |                                       |

|                              |          |                                            |           |                                  |
|------------------------------|----------|--------------------------------------------|-----------|----------------------------------|
| mitochondria                 | A-431    | mitochondr                                 | U-251 MG  | cytosol                          |
| mitochondria                 | A-431    | mitochondr                                 | U-251 MG  | mitochondria                     |
| cytosol                      | A-431    | cytosol                                    | U-251 MG  | plasma membrane, cytosol         |
| nucleoplasm, cytosol         |          |                                            |           |                                  |
| nucleoplasm, golgi apparatus | U-251 MG | nuclear b                                  | SH-SY5Y   | golgi apparatus                  |
| vesicles                     |          |                                            |           |                                  |
| cytosol                      | A-431    | cytosol                                    | U-251 MG  | cytosol                          |
| cytosol                      | U-2 OS   | cytosol                                    | U-251 MG  | cytosol                          |
| plasma membrane, cytosol     | A-431    | plasma me                                  | U-251 MG  | plasma membrane, cytosol         |
| nucleoplasm                  | HEK 293  | nucleoplasm                                |           |                                  |
| nuclear speckles, cytosol    | A-431    | nuclear s                                  | U-251 MG  | nuclear speckles, cytosol        |
| nucleoplasm, vesicles        | HeLa     | nucleoplasm, vesicles                      |           |                                  |
| mitochondria                 | HeLa     | mitochondr                                 | BJ        | mitochondria                     |
| nucleoplasm, actin filamer   | A-431    | nucleopla                                  | U-251 MG  | nucleoplasm, golgi apparatus     |
| vesicles, cytosol            | U-2 OS   | cytosol                                    | RH-30     | vesicles, cytosol                |
| vesicles, cytosol            | U-2 OS   | cytosol                                    | RH-30     | vesicles, cytosol                |
| mitochondria                 | A-431    | mitochondria                               |           |                                  |
| nucleoplasm                  | A549     | nucleopla                                  | Hep G2    | nucleoplasm                      |
| centrosome, cytosol          | U-2 OS   | centrosom                                  | SiHa      | vesicles                         |
| nucleoplasm, cytosol         |          |                                            |           |                                  |
| nucleoplasm                  | HEK 293  | nucleopla                                  | SH-SY5Y   | nucleoplasm                      |
| nucleoplasm                  |          |                                            |           |                                  |
| plasma membrane              | A-431    | plasma me                                  | U-251 MG  | nucleoplasm, plasma membrane     |
| nucleoplasm                  | A-431    | nucleopla                                  | HeLa      | nucleoplasm                      |
| nucleoplasm, mitochondria    | A-431    | nucleopla                                  | U-251 MG  | nucleoplasm, mitochondria        |
| endoplasmic reticulum        | BJ       | endoplasmic reticulum                      |           |                                  |
| nucleoplasm, vesicles        | A-431    | nucleopla                                  | U-251 MG  | nucleoplasm, vesicles            |
| vesicles                     |          |                                            |           |                                  |
| cytosol                      | HaCaT    | intermediate filaments, cytosol            |           |                                  |
| plasma membrane              | U-251 MG | plasma membrane                            |           |                                  |
| nucleoplasm                  | A-431    | nucleopla                                  | U-251 MG  | nucleoplasm                      |
| nucleoplasm                  | RH-30    | nucleopla                                  | SK-MEL-30 | nucleoplasm                      |
| nucleoplasm                  | MCF7     | nucleoplasm                                |           |                                  |
| vesicles                     | A-431    | nuclear membrane, vesicles                 |           |                                  |
| cytosol                      | A-431    | cytosol                                    | U-251 MG  | cytosol                          |
| nucleoplasm, plasma membrε   | A-431    | nucleopla                                  | U-251 MG  | nucleoplasm, plasma membrane     |
| nucleoplasm                  | U-2 OS   | nucleopla                                  | SiHa      | nucleoplasm                      |
| vesicles                     | A-431    | vesicles                                   | U-251 MG  | vesicles                         |
| vesicles                     | MCF7     | vesicles                                   | SiHa      | vesicles                         |
| nucleoplasm, cytosol         | A-431    | nucleopla                                  | U-251 MG  | nucleoplasm, centrosome, cytosol |
| nuclear membrane             | RT4      | nuclear membrane                           |           |                                  |
| golgi apparatus              |          |                                            |           |                                  |
| plasma membrane              | HEL      | nucleoli fibrillar center, plasma membrane |           |                                  |
| plasma membrane, cytosol     |          |                                            |           |                                  |
| mitochondria                 | MCF7     | mitochondria                               |           |                                  |
| nucleoplasm                  | HEK 293  | nucleopla                                  | HeLa      | nucleoplasm                      |
| nucleoplasm, cytosol         | A-431    | nucleopla                                  | U-251 MG  | nucleoplasm, cytosol             |
| cytosol                      | A-431    | cytosol                                    | U-251 MG  | cytosol                          |
| golgi apparatus, cytosol     | A-431    | cytosol                                    | U-251 MG  | golgi apparatus, cytosol         |
| nucleoplasm, cytosol         | A549     | nucleopla                                  | SK-MEL-30 | nucleoplasm                      |
| centrosome                   | SH-SY5Y  | mitotic s                                  | RH-30     | centrosome                       |
| nuclear speckles, cytosol    | A-431    | nuclear s                                  | U-251 MG  | cytosol                          |
| mitochondria                 | A-431    | mitochondr                                 | U-251 MG  | mitochondria                     |
| nucleoli fibrillar center    | A-431    | cytosol                                    | U-251 MG  | cytosol                          |
| cytosol                      | U-251 MG | cytosol                                    |           |                                  |

|                                                        |          |                               |          |                                            |
|--------------------------------------------------------|----------|-------------------------------|----------|--------------------------------------------|
| vesicles                                               | U-2 OS   | plasma membrane               | A-431    | plasma membrane                            |
| nucleoplasm, cytosol                                   | A-431    | nucleoplasm                   | U-251 MG | nucleoplasm                                |
| plasma membrane, cytosol                               | A-431    | nucleoplasm                   | SiHa     | nucleoplasm                                |
| nucleoplasm                                            | U-251 MG | nucleoplasm, cytosol          |          |                                            |
| vesicles                                               | U-251 MG | vesicles                      |          |                                            |
| vesicles, cell junctions                               | A-431    | vesicles                      | U-251 MG | vesicles, cell junctions                   |
| nuclear membrane, cytosol                              | A-431    | nuclear membrane              | PC-3     | nuclear membrane, cytosol                  |
| nucleoplasm                                            | A-431    | nucleoplasm                   | U-251 MG | nucleoplasm                                |
| nuclear speckles, cytosol                              | A-431    | nuclear speckles, cytosol     | U-251 MG | nuclear speckles, cytosol                  |
| golgi apparatus                                        | A-431    | golgi apparatus               | U-251 MG | golgi apparatus                            |
| golgi apparatus                                        | A-431    | golgi apparatus               | U-251 MG | golgi apparatus                            |
| cytosol                                                | U-251 MG | cytosol                       |          |                                            |
| nucleoplasm, plasma membrane                           | U-251 MG | nuclear membrane              | RH-30    | plasma membrane                            |
| nucleoplasm, plasma membrane                           | U-251 MG | nucleoplasm                   | RH-30    | plasma membrane                            |
| plasma membrane                                        | U-251 MG | plasma membrane               | RH-30    | plasma membrane                            |
| nucleoplasm                                            | A549     | nucleoplasm                   | RH-30    | nucleoplasm, vesicles                      |
| plasma membrane, cytosol                               | A-431    | cytosol                       | U-251 MG | plasma membrane, cytosol                   |
| nucleoplasm, vesicles                                  | A-431    | nucleoplasm, vesicles         |          |                                            |
| nucleoplasm                                            |          |                               |          |                                            |
| nucleoplasm                                            | A-431    | nucleoplasm                   | U-251 MG | nucleoplasm                                |
| vesicles, cytosol                                      | U-2 OS   | vesicles                      | SiHa     | vesicles                                   |
| nucleoplasm, golgi apparatus, plasma membrane, cytosol |          | nucleoplasm                   |          |                                            |
| nucleoplasm                                            | HeLa     | nucleoplasm                   |          |                                            |
| vesicles                                               | HEK 293  | vesicles                      | PC-3     | vesicles                                   |
| cytosol                                                | A-431    | golgi apparatus               | U-251 MG | plasma membrane, cytosol                   |
| cytosol                                                | U-2 OS   | cytosol                       | SH-SY5Y  | cytosol                                    |
| vesicles, plasma membrane                              | A-431    | vesicles                      | U-251 MG | vesicles, plasma membrane                  |
| nucleoplasm                                            | HEK 293  | nucleoplasm                   | SH-SY5Y  | nucleoplasm, cytosol                       |
| cytosol, rods & rings                                  | A-431    | cytosol                       |          |                                            |
| cytosol                                                | REH      | cytosol                       |          |                                            |
| nucleoli                                               | A-431    | nucleoli                      | U-251 MG | nucleoli                                   |
| nucleoli, golgi apparatus                              | MCF7     | nucleoli, HEK 293             |          | nucleoli fibrillar center, golgi apparatus |
| nucleoplasm                                            | MCF7     | nucleoplasm                   | HEK 293  | nucleoplasm                                |
| golgi apparatus                                        |          |                               |          |                                            |
| golgi apparatus                                        | A-431    | golgi apparatus               |          |                                            |
| nucleoplasm, nuclear membrane                          | SH-SY5Y  | nucleoplasm, nuclear membrane |          |                                            |
| nucleoplasm, nuclear bodies                            | U-2 OS   | nucleoplasm                   | HEK 293  | nuclear bodies                             |
| nucleoplasm, cytosol                                   | A-431    | nucleoplasm, cytosol          |          |                                            |
| microtubules                                           | A-431    | microtubules                  | U-251 MG | microtubules                               |
| nucleoplasm, cytosol                                   | A-431    | nucleoplasm, cytosol          |          |                                            |
| nucleoplasm                                            | HeLa     | nucleoplasm                   |          |                                            |
| nucleoplasm                                            | HeLa     | nucleoplasm                   |          |                                            |
| vesicles                                               | A-431    | vesicles                      |          |                                            |
| cytosol                                                | A-431    | cytosol                       |          |                                            |
| plasma membrane, cytosol                               | U-251 MG | cytosol                       |          |                                            |
| nucleoplasm, nuclear membrane                          | U-2 OS   | nuclear membrane              | HeLa     | nucleoplasm, nuclear membrane              |
| nucleoplasm                                            | U-2 OS   | nucleoplasm                   | MCF7     | nucleoplasm                                |
| nucleoli, cytosol                                      | A-431    | nucleoli                      |          |                                            |
| cytosol                                                | A-431    | cytosol                       | U-251 MG | cytosol                                    |
| nucleoplasm                                            | A-431    | nucleoplasm                   | HeLa     | nucleoplasm                                |
| nucleoplasm                                            | A-431    | nucleoplasm                   | U-251 MG | nucleoplasm                                |
| nucleoplasm, golgi apparatus                           | A549     | nucleoplasm, golgi apparatus  |          |                                            |
| cytosol                                                | A-431    | plasma membrane               | U-251 MG | cytosol                                    |
| plasma membrane, cytosol                               | A-431    | plasma membrane               | PC-3     | plasma membrane, cytosol                   |
| nuclear speckles                                       | U-251 MG | nuclear speckles              | HeLa     | nuclear speckles                           |

|                             |           |                                   |                                            |
|-----------------------------|-----------|-----------------------------------|--------------------------------------------|
| nucleoplasm                 | U-251 MG  | nucleoplasm                       |                                            |
| cytosol                     | PC-3      | vesicles, SK-MEL-30               | vesicles, cytosol                          |
| golgi apparatus             | SH-SY5Y   | golgi app                         | HUVEC TERgolgi apparatus                   |
| nucleoplasm, cytosol        | U-251 MG  | nucleoplasm, centriolar satellite |                                            |
| nucleoplasm                 | U-251 MG  | nucleoplaBJ                       | nucleoplasm, nucleoli                      |
| golgi apparatus             | U-2 OS    | golgi app                         | HEK 293 golgi apparatus                    |
| plasma membrane, actin fila | A-431     | plasma me                         | U-251 MG plasma membrane, actin filaments  |
| nucleoplasm                 | A-431     | nucleopla                         | HEK 293 nucleoplasm                        |
| nucleoplasm                 | HEK 293   | nucleopla                         | RH-30 nucleoplasm, centrosome              |
| nucleoplasm, microtubules,  | A-431     | nucleopla                         | U-251 MG nucleoplasm, microtubules         |
| nucleoplasm                 | U-251 MG  | nucleoplasm                       |                                            |
| cytosol                     | U-251 MG  | cytosol                           | EFO-21 cytosol                             |
| plasma membrane             | A-431     | plasma me                         | HEK 293 plasma membrane, cytosol           |
| nucleoplasm, vesicles       | A-431     | vesicles                          | U-251 MG nucleoplasm, plasma membrane      |
| plasma membrane, cytosol    |           |                                   |                                            |
| cytokinetic bridge          | U-2 OS    | vesicles, SH-SY5Y                 | vesicles                                   |
| golgi apparatus, vesicles,  | HEK 293   | golgi app                         | BJ golgi apparatus, vesicles               |
| cytosol                     | A-431     | cytosol                           | HeLa cytosol                               |
| nucleoplasm, cytosol        | A-431     | nucleopla                         | U-251 MG nucleoplasm, cytosol              |
| nucleoplasm                 | U-251 MG  | nucleoplasm                       |                                            |
| nucleoplasm                 | A-431     | nucleopla                         | U-251 MG nucleoplasm                       |
| plasma membrane             |           |                                   |                                            |
| cytosol                     | A-431     | nucleopla                         | U-251 MG nucleoplasm, cytosol              |
| nucleoplasm, cytosol        | A-431     | nucleopla                         | U-251 MG nucleoplasm, cytosol              |
| vesicles                    | HUVEC TER | vesicles, focal adhesion sites    |                                            |
| nucleoplasm, cytosol        | A-431     | nucleopla                         | HEK 293 nucleoplasm, cytosol               |
| nuclear speckles            | A-431     | nuclear s                         | U-251 MG nuclear speckles                  |
| nuclear speckles            | U-2 OS    | nuclear speckles                  |                                            |
| vesicles                    |           |                                   |                                            |
| vesicles                    | A-431     | vesicles                          |                                            |
| plasma membrane, cytosol    | MCF7      | cytosol                           | HEK 293 cytosol                            |
| nuclear bodies              | SiHa      | nuclear bodies                    |                                            |
| nucleoplasm                 | U-2 OS    | nucleopla                         | SK-MEL-30 nucleoplasm                      |
| microtubules                | A-431     | microtubu                         | U-251 MG microtubules                      |
| nucleoplasm                 |           |                                   |                                            |
| nucleoplasm, nucleoli       | U-251 MG  | nucleopla                         | PC-3 nucleoplasm, nucleoli fibrillar cente |
| cytosol                     | PC-3      | nucleoplasm, cytosol              |                                            |
| endoplasmic reticulum       | HEK 293   | endoplasm                         | HaCaT endoplasmic reticulum                |
| nucleoli fibrillar center   | U-2 OS    | nucleoli                          | MCF7 nucleoplasm, nucleoli fibrillar cente |
| nuclear membrane, vesicles  | U-2 OS    | nuclear n                         | HaCaT nuclear membrane                     |
| golgi apparatus             | A-431     | golgi apparatus                   |                                            |
| nucleoplasm                 | U-2 OS    | nucleopla                         | RH-30 nucleoplasm                          |
| nucleoplasm, nucleoli, cyto | A-431     | nucleopla                         | U-251 MG nucleoplasm, nucleoli, cytosol    |
| plasma membrane             | A549      | plasma membrane                   |                                            |
| nuclear speckles            | A-431     | nuclear s                         | U-251 MG nuclear speckles                  |
| nuclear speckles            | A-431     | nuclear s                         | U-251 MG nuclear speckles                  |
| nucleoplasm, nucleoli       | A-431     | nucleopla                         | U-251 MG nucleoplasm, nucleoli             |
| golgi apparatus             | HeLa      | nucleopla                         | Hep G2 golgi apparatus                     |
| golgi apparatus             | SiHa      | golgi app                         | RH-30 golgi apparatus                      |
| nucleoplasm                 | U-251 MG  | nucleopla                         | HeLa nucleoplasm                           |
| mitochondria                | U-251 MG  | mitochond                         | PC-3 mitochondria                          |
| cytosol                     | A-431     | microtubu                         | U-251 MG cytosol                           |
| actin filaments, cytosol    | A-431     | cytosol                           | U-251 MG cytosol                           |
| nucleoplasm                 | A-431     | nucleopla                         | U-251 MG nucleoplasm, cytosol              |
| nucleoplasm                 | A-431     | vesicles                          |                                            |

|                             |           |                              |                                          |
|-----------------------------|-----------|------------------------------|------------------------------------------|
| vesicles                    | U-251 MG  | vesicles                     |                                          |
| nucleoplasm                 | SK-MEL-30 | nucleoplasm                  |                                          |
| nucleoplasm, cytosol        | A-431     | nucleoplaU-251 MG            | nucleoplasm, plasma membrane, cytosol    |
| cell junctions, microtubul  | U-2 OS    | microtubuMCF7                | microtubules                             |
| nucleoplasm                 | A-431     | nucleoplaU-251 MG            | nucleoplasm                              |
| nucleoplasm                 | MCF7      | nucleoplaHEK 293             | nucleoplasm                              |
| nucleoplasm                 | MCF7      | nucleoplaHEK 293             | nucleoplasm                              |
| nucleoplasm, plasma membræ  | A-431     | nucleoplaU-251 MG            | nucleoplasm, mitochondria                |
| nucleoplasm                 | U-251 MG  | nucleoplaMCF7                | nucleoplasm                              |
| nucleoplasm, nucleoli, cytc | A-431     | nucleoplaU-251 MG            | nucleoplasm, cytosol                     |
| nucleoplasm, nucleoli       | A-431     | nucleoplaHep G2              | nucleoplasm, nucleoli                    |
| vesicles                    |           |                              |                                          |
| vesicles                    | Hep G2    | lipid droplets               |                                          |
| plasma membrane, mitochonc  | U-251 MG  | cytosol                      |                                          |
| mitochondria                | A-431     | mitochondU-251 MG            | mitochondria                             |
| nucleoplasm                 | A-431     | nucleoplaSiHa                | nucleoplasm                              |
| cytosol                     | A-431     | golgi appU-251 MG            | golgi apparatus, cytosol                 |
| nuclear speckles            | U-251 MG  | nuclear speckles             |                                          |
| nuclear speckles            | U-251 MG  | nuclear sSH-SY5Y             | nuclear speckles                         |
| nucleoplasm, cytosol        | A-431     | nucleoplaU-251 MG            | nucleoplasm, cytosol                     |
| mitochondria                | A-431     | nucleoplaHeLa                | mitochondria                             |
| nucleoplasm, cytosol        | U-251 MG  | nucleoplaHep G2              | nucleoplasm                              |
| nucleoplasm                 | A-431     | nucleoplaU-251 MG            | nucleoplasm                              |
| nucleoplasm, nuclear bodie  | MCF7      | nucleoplaHeLa                | nucleoplasm, nuclear bodies              |
| nucleoplasm, nuclear bodie  | MCF7      | nucleoplaHeLa                | nucleoplasm, nuclear bodies              |
| nucleoplasm, nucleoli       |           |                              |                                          |
| cytosol                     | A-431     | cytosol U-251 MG             | centrosome, cytosol                      |
| plasma membrane, cytosol    | Hep G2    | cell junctions, cytosol      |                                          |
| nuclear bodies, plasma men  | SH-SY5Y   | nuclear bHEL                 | nuclear bodies, plasma membrane          |
| plasma membrane, cell junct | HEK 293   | plasma meHep G2              | plasma membrane, cell junctions, cytosol |
| cytosol                     | U-251 MG  | cytosol                      |                                          |
| nucleoplasm, cytosol        | A-431     | nucleoplaU-251 MG            | cytosol                                  |
| nucleoplasm                 | A-431     | nucleoplaU-251 MG            | nucleoplasm                              |
| mitochondria                | MCF7      | mitochondria                 |                                          |
| nucleoplasm, cytosol        | A-431     | nucleoplaU-251 MG            | nucleoplasm, centrosome, cytosol         |
| nucleoplasm, cytosol        | SiHa      | nucleoplaRH-30               | nucleoplasm, cytosol                     |
| mitochondria                | A-431     | mitochondria                 |                                          |
| nucleoplasm, mitochondria   | Hep G2    | nucleoplasm, mitochondria    |                                          |
| nucleoplasm                 | SiHa      | nucleoplasm, golgi apparatus |                                          |
| mitochondria, cytosol       | A-431     | cytosol U-251 MG             | mitochondria, cytosol                    |
| cytosol                     | A-431     | nucleoplaU-251 MG            | nucleoplasm                              |
| nuclear speckles            | A-431     | nuclear sU-251 MG            | nuclear speckles                         |
| nuclear speckles            | A-431     | nuclear sU-251 MG            | nuclear speckles                         |
| nuclear speckles            | A-431     | nuclear sU-251 MG            | nuclear speckles                         |
| nucleoplasm, cell junctior  | A-431     | nucleoplaU-251 MG            | nucleoplasm, cell junctions, cytosol     |
| cytosol                     | A-431     | cytosol U-251 MG             | cytosol                                  |
| actin filaments             | MCF7      | actin filaments              |                                          |
| actin filaments             | MCF7      | actin filaments              |                                          |
| nucleoplasm, nucleoli       | U-251 MG  | nucleoplaRH-30               | nucleoplasm, nucleoli                    |
| nucleoplasm, cytosol        |           |                              |                                          |
| nucleoplasm                 |           |                              |                                          |
| cytosol                     | A-431     | cytosol U-251 MG             | cytosol                                  |
| nucleoplasm, cytosol        | A-431     | nucleoplaU-251 MG            | nucleoplasm, cytosol                     |
| nucleoplasm                 | MCF7      | nucleoplasm                  |                                          |

|                                         |           |                                        |
|-----------------------------------------|-----------|----------------------------------------|
| nucleoplasm, cytosol                    | U-2 OS    | cytosol                                |
| plasma membrane, cytosol                | A-431     | plasma membrane, cytosol               |
| plasma membrane, cytosol                | A-431     | nucleoli, plasma membrane, cytosol     |
| nucleoplasm, vesicles                   | A-431     | nucleoplasm, vesicles                  |
| nucleoplasm, vesicles                   | A-431     | nucleoplasm, vesicles                  |
| cytosol                                 | U-2 OS    | nucleoplasm, cytosol                   |
| nucleoplasm, cytosol                    | A549      | nucleoplasm, cytosol                   |
| nucleoplasm, cytosol                    | U-251 MG  | nucleoplasm, cytosol                   |
| nucleoplasm                             | U-251 MG  | nucleoplasm                            |
| nucleoplasm                             | A-431     | nucleoplasm                            |
| vesicles                                | SK-MEL-30 | vesicles                               |
| nucleoplasm, nuclear bodies             | A-431     | nucleoplasm, nuclear bodies            |
| cytosol                                 | A-431     | cytosol                                |
| nucleoplasm                             |           |                                        |
| centrosome                              |           |                                        |
| nucleoplasm, nucleoli                   | A-431     | nucleoplasm, nucleoli                  |
| nucleoli fibrillar center               | A-431     | nucleoli, cytosol                      |
| cytosol                                 | A-431     | mitochondria                           |
| nucleoplasm, cytosol                    | A-431     | nucleoplasm, cytosol                   |
| nucleoplasm                             | PC-3      | nucleoplasm                            |
| nucleoplasm, cytosol                    | A-431     | nucleoplasm, cytosol                   |
| nucleoli                                | U-2 OS    | nucleoli, mitochondria                 |
| mitochondria                            |           |                                        |
| mitochondria                            | SK-MEL-30 | nucleoplasm, mitochondria              |
| nucleoplasm, vesicles                   | A-431     | vesicles                               |
| nucleoplasm, cytosol                    | A-431     | nucleoplasm, cytosol                   |
| nucleoplasm                             | U-2 OS    | nucleoplasm                            |
| nucleoplasm, vesicles                   | A-431     | nucleoplasm, vesicles                  |
| endoplasmic reticulum, golgi apparatus  | A549      | endoplasmic reticulum, golgi apparatus |
| nucleoplasm, golgi apparatus            | U-251 MG  | nucleoplasm                            |
| centrosome                              |           |                                        |
| rods & rings                            |           |                                        |
| nucleoplasm, focal adhesions            | A-431     | nucleoplasm, cytosol                   |
| nucleoplasm                             | A-431     | nucleoplasm                            |
| nucleoplasm, microtubules               | A-431     | nucleoplasm, microtubules              |
| nucleoplasm                             | A-431     | nucleoplasm                            |
| nucleoplasm, nuclear membrane, vesicles |           |                                        |
| vesicles                                | ASC TERT1 | vesicles                               |
| nucleoli, cytosol                       | A-431     | nucleoli, golgi apparatus              |
| cytosol                                 | U-251 MG  | cytosol                                |
| vesicles                                |           |                                        |
| mitochondria                            | A-431     | mitochondria                           |
| mitochondria                            | U-251 MG  | mitochondria                           |
| nucleoplasm                             | A-431     | nucleoplasm                            |
| nucleoplasm                             | A-431     | nucleoplasm                            |
| nucleoli fibrillar center               | HEK 293   | nucleoli fibrillar center              |
| cytosol                                 | A-431     | cytosol                                |
| nucleoplasm, plasma membrane            | HeLa      | nucleoplasm, plasma membrane, cytosol  |
| nucleoplasm, cytosol                    | U-2 OS    | nucleoplasm, cytosol                   |
| nucleoplasm                             | U-2 OS    | nucleoplasm, cytosol                   |
| nucleoplasm, nucleoli, cytosol          | U-251 MG  | nucleoplasm, nucleoli, cytosol         |
| nucleoplasm                             | U-2 OS    | nucleoplasm                            |
| nucleoplasm                             | MCF7      | nucleoplasm                            |
| focal adhesion sites                    | A-431     | focal adhesion sites, cytosol          |
| focal adhesion sites                    |           |                                        |



|                              |           |                                        |          |                                        |
|------------------------------|-----------|----------------------------------------|----------|----------------------------------------|
| cytosol                      | A-431     | cytosol                                | U-251 MG | nucleoplasm, cytosol                   |
| nucleoplasm, cytosol         | A-431     | nucleopla                              | U-251 MG | nucleoplasm, cytosol                   |
| nucleoplasm, microtubules,   | A-431     | nucleopla                              | U-251 MG | nucleoplasm, microtubules, cytosol     |
| mitochondria                 | SiHa      | mitochondr                             | RH-30    | mitochondria                           |
| nucleoplasm, cytosol         | A-431     | nucleopla                              | U-251 MG | nucleoplasm, plasma membrane, cell jun |
| nucleoplasm, plasma membr    | eBJ       | nucleopla                              | PC-3     | nucleoplasm, plasma membrane           |
| nucleoplasm                  | A-431     | nuclear b                              | U-251 MG | nucleoplasm                            |
| nuclear bodies               | HeLa      | nuclear b                              | RH-30    | nuclear bodies                         |
| nucleoplasm                  | A-431     | nucleopla                              | SH-SY5Y  | nucleoplasm                            |
| nucleoplasm                  | U-251 MG  | nucleoplasm                            |          |                                        |
| cytosol                      | U-251 MG  | cytosol                                |          |                                        |
| cytosol                      | A-431     | mitochond                              | U-251 MG | cytosol                                |
| nuclear bodies, aggresome    | MCF7      | nuclear b                              | HeLa     | nuclear bodies                         |
| plasma membrane, cytosol     | A-431     | plasma me                              | U-251 MG | plasma membrane, cytosol               |
| vesicles                     | A-431     | vesicles                               | U-251 MG | vesicles                               |
| vesicles                     | A-431     | vesicles                               |          |                                        |
| golgi apparatus, plasma me   | U-251 MG  | golgi apparatus, plasma membrane       |          |                                        |
| golgi apparatus              | A-431     | golgi app                              | U-251 MG | golgi apparatus                        |
| nuclear speckles, focal ac   | A-431     | nuclear s                              | HeLa     | nuclear speckles, focal adhesion site  |
| mitochondria                 | U-2 OS    | mitochond                              | PC-3     | mitochondria                           |
| mitochondria                 | U-2 OS    | mitochondria                           |          |                                        |
| nucleoplasm, cytosol         | SK-MEL-30 | nucleoplasm, cytosol                   |          |                                        |
| nucleoplasm                  | U-2 OS    | nucleopla                              | SiHa     | nucleoplasm                            |
| focal adhesion sites         | MCF7      | focal adh                              | EF0-21   | focal adhesion sites                   |
| cytosol                      | HeLa      | nucleoplasm, cytosol                   |          |                                        |
| intermediate filaments, mi   | MCF7      | nucleoli, PC-3                         |          | nucleoli, mitochondria                 |
| nucleoplasm, cytosol         | U-251 MG  | nucleoplasm, cytosol                   |          |                                        |
| vesicles                     | HeLa      | nucleoplasm, golgi apparatus, vesicles |          |                                        |
| nucleoplasm, nucleoli        | MCF7      | nucleoplasm, nucleoli                  |          |                                        |
| nucleoplasm, golgi apparatus |           |                                        |          |                                        |
| centrosome                   | RPTEC TER | centrosome                             |          |                                        |
| nucleoplasm, vesicles        | A-431     | vesicles                               |          |                                        |
| nucleoplasm, cytosol         | A-431     | nucleopla                              | U-251 MG | nucleoplasm, cytosol                   |
| mitochondria                 | A-431     | mitochond                              | U-251 MG | mitochondria                           |
| mitochondria                 | U-251 MG  | nucleoplasm, mitochondria              |          |                                        |
| nucleoplasm                  | A-431     | nucleopla                              | U-251 MG | nucleoplasm                            |
| nucleoplasm, cytosol         | A-431     | nucleopla                              | RH-30    | nucleoplasm                            |
| nucleoplasm                  | RH-30     | nucleopla                              | PC-3     | nucleoplasm                            |
| nucleoli, vesicles           | A-431     | vesicles                               | U-251 MG | nucleoli, vesicles                     |
| nucleoplasm                  | A-431     | nucleopla                              | U-251 MG | nucleoplasm                            |
| cytosol                      | U-251 MG  | cytosol                                | Hep G2   | nucleoplasm, cytosol                   |
| nucleoplasm, cytosol         | A-431     | nucleopla                              | U-251 MG | nucleoplasm                            |
| nucleoli                     | A-431     | nucleoli                               | U-251 MG | nucleoli                               |
| nucleoli                     | A-431     | nucleopla                              | U-251 MG | nucleoplasm, nucleoli                  |
| nucleoplasm                  | A-431     | nucleopla                              | U-251 MG | nucleoplasm                            |
| nucleoplasm                  | A-431     | nucleopla                              | U-251 MG | nucleoplasm                            |
| nucleoplasm, cytosol         | A-431     | nucleopla                              | U-251 MG | nucleoplasm, cytosol                   |
| nucleoplasm                  | A-431     | nucleopla                              | U-251 MG | nuclear speckles                       |
| cytosol                      | A-431     | vesicles, U-251 MG                     |          | cytosol                                |
| cytosol                      | A-431     | centriola                              | U-251 MG | cytosol                                |
| cytosol                      | U-251 MG  | nucleoli, cytosol                      |          |                                        |
| nucleoli                     | A-431     | nucleoli                               | U-251 MG | nucleoli                               |
| nucleoli                     | A-431     | nucleoli                               | U-251 MG | nucleoli                               |
| centrosome                   | MCF7      | mitochond                              | HEK 293  | centrosome, mitochondria               |
| cytoplasmic bodies           | U-2 OS    | cytoplasm                              | SiHa     | plasma membrane, cytoplasmic bodies    |

|                              |          |                              |           |                                        |
|------------------------------|----------|------------------------------|-----------|----------------------------------------|
| vesicles, mitochondria, cyto | U-2 OS   | mitochondr                   | REH       | mitochondria, cytosol                  |
| plasma membrane              | A-431    | plasma me                    | EFO-21    | plasma membrane, rods & rings          |
| golgi apparatus, vesicles    | A-431    | golgi app                    | U-251 MG  | golgi apparatus                        |
| nucleoplasm                  | A-431    | nucleopla                    | U-251 MG  | nucleoplasm, cytosol                   |
| plasma membrane, cytosol     | U-251 MG | plasma me                    | Hep G2    | cytosol                                |
| cytosol                      | U-251 MG | cytosol                      | Hep G2    | cytosol                                |
| vesicles                     | A-431    | vesicles                     | U-251 MG  | vesicles                               |
| plasma membrane, cytosol     | A-431    | plasma me                    | U-251 MG  | plasma membrane, cytosol               |
| cytosol                      | U-2 OS   | cytosol                      |           |                                        |
| vesicles                     |          |                              |           |                                        |
| nuclear membrane, cytosol    | A-431    | nuclear m                    | U-251 MG  | nuclear membrane, cytosol              |
| nucleoplasm, cytosol         | HeLa     | cytosol                      | SiHa      | cytosol                                |
| nucleoplasm, focal adhesio   | A-431    | nucleopla                    | U-251 MG  | nucleoplasm, nuclear bodies, focal adh |
| nucleoplasm                  | U-251 MG | nucleoplasm                  |           |                                        |
| centrosome                   | A-431    | centrosom                    | U-251 MG  | centriolar satellite                   |
| centriolar satellite, cyto   | A-431    | centriola                    | U-251 MG  | centrosome                             |
| centrosome                   | A-431    | centrosom                    | U-251 MG  | centrosome                             |
| nucleoplasm                  |          |                              |           |                                        |
| vesicles                     | U-251 MG | nucleopla                    | SK-MEL-30 | nucleoplasm, cytosol                   |
| nucleoplasm, cytosol         | A-431    | nucleopla                    | U-251 MG  | nucleoplasm, cytosol                   |
| nucleoplasm                  | Hep G2   | nucleoplasm                  |           |                                        |
| vesicles                     | SH-SY5Y  | vesicles                     |           |                                        |
| nucleoplasm                  | A-431    | nucleopla                    | U-251 MG  | nucleoplasm                            |
| nucleoplasm, cytosol         | A-431    | nucleoplasm, cytosol         |           |                                        |
| golgi apparatus              | U-251 MG | nucleoplasm, golgi apparatus |           |                                        |
| nucleoplasm                  | A549     | nucleoplasm                  |           |                                        |
| nucleoplasm                  | A-431    | nucleopla                    | U-251 MG  | nucleoplasm                            |
| plasma membrane, cytosol     | A-431    | vesicles, U-251 MG           |           | plasma membrane, cytosol               |
| plasma membrane, cytosol     | A-431    | plasma me                    | U-251 MG  | plasma membrane, cytosol               |
| cell junctions               | U-251 MG | cell junctions               |           |                                        |
| cytosol                      | A-431    | mitochond                    | U-251 MG  | mitochondria, cytosol                  |
| cytosol                      | MCF7     | cytosol                      | PC-3      | cytosol                                |
| nucleoplasm                  | MCF7     | nucleopla                    | A549      | nucleoplasm, intermediate filaments    |
| vesicles                     | U-251 MG | vesicles                     | HeLa      | vesicles                               |
| nucleoplasm, nucleoli, cyto  | HEK 293  | nucleoli                     | SH-SY5Y   | nucleoli                               |
| nucleoplasm, cell junctio    | A-431    | nucleopla                    | U-251 MG  | nucleoplasm                            |
| nucleoplasm, plasma membr    | A-431    | nucleopla                    | HeLa      | nucleoplasm, plasma membrane, cytosol  |
| mitochondria                 | EFO-21   | mitochondria                 |           |                                        |
| vesicles                     | Hep G2   | nucleopla                    | SH-SY5Y   | vesicles                               |
| vesicles                     | A-431    | vesicles                     | U-251 MG  | vesicles                               |
| nucleoplasm, nucleoli, cyto  | A-431    | nucleopla                    | U-251 MG  | nucleoplasm, nucleoli, cytosol         |
| nucleoplasm                  | U-251 MG | nucleopla                    | A549      | nucleoplasm                            |
| nucleoplasm                  | U-2 OS   | nucleopla                    | A-431     | nucleoplasm                            |
| nucleoplasm                  | A-431    | nucleoplasm                  |           |                                        |
| golgi apparatus              | U-251 MG | golgi apparatus              |           |                                        |
| nucleoplasm                  | A-431    | nucleopla                    | U-251 MG  | nucleoplasm                            |
| nucleoplasm                  | A-431    | nucleopla                    | U-251 MG  | nucleoplasm                            |
| plasma membrane, cytosol     |          |                              |           |                                        |
| nuclear speckles, cytoplas   | A-431    | nuclear s                    | U-251 MG  | nuclear speckles, cytoplasmic bodies   |
| nuclear speckles             | A-431    | nuclear s                    | U-251 MG  | nuclear speckles                       |
| nucleoplasm                  | A-431    | nucleopla                    | U-251 MG  | nucleoplasm                            |
| nucleoplasm                  | A-431    | nucleopla                    | U-251 MG  | nucleoplasm                            |
| plasma membrane, cytosol     | U-251 MG | plasma membrane, cytosol     |           |                                        |
| cytosol                      | U-251 MG | cytosol                      |           |                                        |
| cytosol                      |          |                              |           |                                        |

|                              |           |                              |                                        |
|------------------------------|-----------|------------------------------|----------------------------------------|
| cytosol                      | U-251 MG  | cytosol                      |                                        |
| mitochondria                 | MCF7      | cell juncA549                | plasma membrane, mitochondria          |
| nucleoplasm                  | A-431     | nucleoplaU-251 MG            | nucleoplasm, nucleoli                  |
| nucleoplasm, nucleoli        | A-431     | nucleoplaU-251 MG            | nucleoplasm, nucleoli                  |
| centrosome                   | MCF7      | nucleoplaSH-SY5Y             | centrosome                             |
| nucleoplasm                  | A-431     | nucleoplaU-251 MG            | nucleoplasm                            |
| nucleoplasm                  | A-431     | nucleoplaU-251 MG            | nucleoplasm                            |
| vesicles, plasma membrane    | HUVEC TER | vesicles, plasma membrane    |                                        |
| nucleoplasm, cytosol         | A-431     | nucleoplaU-251 MG            | nucleoplasm, cytosol                   |
| cytosol                      | A-431     | cytosol U-251 MG             | cytosol                                |
| cytosol                      | A-431     | cytosol U-251 MG             | cytosol                                |
| nucleoplasm                  |           |                              |                                        |
| nucleoplasm                  | A-431     | nucleoplaHEK 293             | nucleoplasm                            |
| nucleoplasm                  | U-2 OS    | nucleoli MCF7                | nucleoplasm, nucleoli                  |
| nucleoplasm                  | MCF7      | nucleoplaHEK 293             | nucleoplasm                            |
| nucleoplasm                  | MCF7      | nucleoplaSH-SY5Y             | nucleoplasm, golgi apparatus, vesicles |
| mitochondria                 | MCF7      | nucleoplasm, mitochondria    |                                        |
| nucleoplasm                  |           |                              |                                        |
| nucleoplasm                  | U-251 MG  | nucleoplasm, cytosol         |                                        |
| nucleoplasm, cytosol         | A-431     | nucleoplaU-251 MG            | nuclear bodies, cytosol                |
| nucleoplasm                  | MCF7      | nucleoplaHEK 293             | nucleoplasm                            |
| nucleoplasm                  | MCF7      | nucleoplaHep G2              | nucleoplasm                            |
| nucleoplasm                  | MCF7      | nucleoplasm                  |                                        |
| nucleoli, mitochondria       | U-2 OS    | nucleoli, RPTEC TER          | nucleoli, mitochondria                 |
| nucleoplasm, cytosol         | MCF7      | nucleoplaSK-MEL-30           | nucleoplasm                            |
| nucleoplasm, nucleoli        | A-431     | nucleoplaU-251 MG            | nucleoplasm, nucleoli, cytosol         |
| nucleoplasm, nucleoli        | A-431     | nucleoplaU-251 MG            | nucleoplasm, nucleoli                  |
| cytosol                      | Hep G2    | cytosol                      |                                        |
| cytosol                      | Hep G2    | cytosol                      |                                        |
| nucleoplasm, vesicles        | A-431     | nucleoplaU-251 MG            | nucleoplasm, vesicles                  |
| nucleoplasm, vesicles        | MCF7      | nucleoplaPC-3                | nucleoplasm                            |
| nucleoplasm, plasma membrane | SiHa      | nucleoplasm, plasma membrane |                                        |
| nucleoplasm                  | MCF7      | nucleoplaPC-3                | nucleoplasm                            |
| nucleoplasm                  | U-251 MG  | nucleoplaPC-3                | nucleoplasm                            |
| nucleoplasm, cytosol         | A-431     | nucleoplasm, cytosol         |                                        |
| nucleoplasm                  | MCF7      | nucleoplaSH-SY5Y             | nucleoplasm, vesicles                  |
| nucleoplasm                  | MCF7      | nucleoplasm                  |                                        |
| nucleoplasm                  | U-251 MG  | nucleoplaMCF7                | nucleoplasm                            |
| nucleoplasm                  | A-431     | nucleoplasm, cytosol         |                                        |
| nucleoplasm                  | A-431     | nucleoplaU-251 MG            | nucleoplasm                            |
| nucleoplasm, cytosol         | A-431     | nucleoplaU-251 MG            | nucleoplasm, cytosol                   |
| nucleoplasm                  | SH-SY5Y   | nucleoplasm                  |                                        |
| vesicles                     |           |                              |                                        |
| plasma membrane              |           |                              |                                        |
| nucleoplasm                  | U-251 MG  | nucleoplaA549                | nucleoplasm                            |
| cytosol                      | MCF7      | cytosol                      |                                        |
| plasma membrane, cytosol     | A-431     | plasma meU-251 MG            | plasma membrane, cytosol               |
| vesicles, cytosol            | A-431     | vesicles, U-251 MG           | vesicles, cytosol                      |
| vesicles                     | A549      | vesicles, SK-MEL-30          | vesicles, cytosol                      |
| nucleoli, endoplasmic reticu | U-251 MG  | nucleoli, MCF7               | nucleoli, endoplasmic reticulum, cytos |
| nucleoplasm, vesicles        | A-431     | nucleoplaU-251 MG            | nucleoplasm                            |
| nucleoplasm                  | U-251 MG  | nucleoplasm                  |                                        |
| cell junctions               |           |                              |                                        |
| nucleoplasm, nucleoli, vesic | A-431     | nucleoplaU-251 MG            | nucleoplasm, nucleoli                  |
| cytosol                      | A-431     | cytosol U-251 MG             | cytosol                                |

|                              |          |                                      |                                        |
|------------------------------|----------|--------------------------------------|----------------------------------------|
| cytosol                      |          |                                      |                                        |
| cytosol                      | MCF7     | cytosol, cHEK 293                    | cytosol, cytoplasmic bodies            |
| nucleoplasm, mitochondria    | A-431    | nucleoplaU-251 MG                    | nucleoplasm, mitochondria              |
| nucleoplasm                  | HEK 293  | nucleoplaPC-3                        | nucleoplasm                            |
| midbody ring, centrosome     | U-2 OS   | intermediate filaments, midbody ring |                                        |
| plasma membrane              | MCF7     | plasma membrane                      |                                        |
| nucleoli, cytosol            | A-431    | cytosol U-251 MG                     | cytosol                                |
| nucleoplasm                  | A-431    | nucleoplaU-251 MG                    | nucleoplasm                            |
| nucleoplasm                  | SiHa     | nucleoplaPC-3                        | nucleoplasm                            |
| nucleoplasm, cytosol         | A-431    | plasma meU-251 MG                    | nucleoplasm, golgi apparatus, cytosol  |
| nucleoplasm                  |          |                                      |                                        |
| nucleoplasm, mitochondria    | A-431    | nucleoplaU-251 MG                    | nucleoplasm, mitochondria              |
| mitochondria                 |          |                                      |                                        |
| nucleoplasm                  |          |                                      |                                        |
| nucleoplasm                  | A549     | nucleoplaSH-SY5Y                     | nucleoplasm, golgi apparatus           |
| nuclear speckles             | U-251 MG | nuclear sHEK 293                     | nuclear speckles                       |
| plasma membrane, cytosol     | U-251 MG | cytosol                              |                                        |
| nucleoplasm, cytosol         | A-431    | nucleoplaU-251 MG                    | plasma membrane, cytosol               |
| nucleoplasm                  | HEL      | nucleoplasm, cytosol                 |                                        |
| mitochondria                 |          |                                      |                                        |
| mitochondria                 | A549     | mitochondHep G2                      | mitochondria                           |
| mitochondria                 | A549     | mitochondHep G2                      | mitochondria                           |
| nucleoplasm                  | A-431    | nucleoplaU-251 MG                    | nucleoplasm                            |
| nucleoplasm                  | U-251 MG | nucleoplaMCF7                        | nucleoplasm                            |
| nucleoli, peroxisomes        | A-431    | peroxisomU-251 MG                    | nucleoli, peroxisomes                  |
| cytosol                      | HEK 293  | cytosol Hep G2                       | cytosol                                |
| nuclear speckles             | SH-SY5Y  | nuclear speckles, cytosol            |                                        |
| nuclear speckles             | SH-SY5Y  | nuclear speckles                     |                                        |
| nucleoplasm, cytosol         | U-251 MG | nuclear sHEK 293                     | nuclear speckles, cytosol              |
| nucleoplasm                  | A-431    | nucleoplaU-251 MG                    | nucleoplasm, nucleoli                  |
| nucleoli                     | A-431    | nucleoplasm                          |                                        |
| nucleoli fibrillar center    | A-431    | nucleoli U-251 MG                    | nucleoli fibrillar center              |
| mitochondria                 | A-431    | mitochondA549                        | mitochondria                           |
| nucleoplasm, golgi apparatus | HEL      | golgi apparatus                      |                                        |
| nucleoplasm, cytosol         | MCF7     | nucleoplasm, cytosol                 |                                        |
| nucleoplasm, cytosol         | A-431    | nucleoplaU-251 MG                    | nucleoplasm, cytosol                   |
| cytosol                      | U-251 MG | cytosol                              |                                        |
| mitochondria                 | U-2 OS   | mitochondA-431                       | mitochondria                           |
| cytosol                      | MCF7     | cytosol PC-3                         | cytosol                                |
| focal adhesion sites         | HeLa     | focal adhesion sites                 |                                        |
| plasma membrane              | A-431    | plasma membrane                      |                                        |
| nucleoplasm                  | A-431    | nucleoplaHEK 293                     | nucleoplasm, aggresome                 |
| plasma membrane              | A549     | plasma meHeLa                        | nucleoplasm, plasma membrane           |
| golgi apparatus, vesicles,   | A-431    | golgi appU-251 MG                    | golgi apparatus, vesicles, plasma memb |
| plasma membrane              | SiHa     | plasma meREH                         | plasma membrane                        |
| nucleoplasm                  | A-431    | nucleoplasm                          |                                        |
| nucleoplasm                  | A-431    | nucleoplaMCF7                        | nucleoplasm                            |
| cytosol                      | A-431    | cytosol U-251 MG                     | cytosol                                |
| nucleoli fibrillar center    | A-431    | nucleoli U-251 MG                    | nucleoli fibrillar center, cytosol     |
| vesicles                     | Hep G2   | nuclear bSK-MEL-30                   | vesicles                               |
| nucleoplasm                  | A-431    | nucleoplaHEK 293                     | nucleoplasm                            |
| nucleoplasm                  | A-431    | nucleoplaSiHa                        | nucleoplasm                            |
| nucleoplasm, nucleoli        | MCF7     | nucleoplaHeLa                        | nucleoplasm, nucleoli                  |
| nucleoplasm, cytosol         | Hep G2   | nucleoplaRH-30                       | nucleoplasm, cytosol                   |
| nuclear membrane             | A-431    | nuclear rU-251 MG                    | nuclear membrane                       |

|                                        |           |                                         |           |                                          |
|----------------------------------------|-----------|-----------------------------------------|-----------|------------------------------------------|
| nucleoplasm                            | MCF7      | nucleoplas                              | SH-SY5Y   | nucleoplasm, cytosol                     |
| nucleoplasm                            |           |                                         |           |                                          |
| nuclear bodies                         | MCF7      | nuclear                                 | bA549     | nucleoplasm                              |
| vesicles                               | U-2 OS    | golgi app                               | A-431     | golgi apparatus, vesicles                |
| nucleoplasm, cytosol                   | A-431     | nucleopla                               | U-251 MG  | nucleoplasm                              |
| nucleoplasm                            | A-431     | nucleopla                               | U-251 MG  | nucleoplasm                              |
| vesicles                               | HUVEC TER | vesicles                                |           |                                          |
| endoplasmic reticulum, plasma membrane |           |                                         |           |                                          |
| nucleoplasm, nucleoli                  | MCF7      | nucleopla                               | HEK 293   | nucleoplasm, nucleoli                    |
| centrosome                             | A-431     | centrosom                               | HaCaT     | centrosome                               |
| cytosol                                | U-2 OS    | cytosol                                 | U-251 MG  | cytosol                                  |
| nucleoli, endoplasmic reti             | A-431     | nucleoli, U-251 MG                      |           | endoplasmic reticulum, cytosol           |
| nucleoplasm, cytosol                   | A-431     | nucleopla                               | U-251 MG  | nucleoplasm                              |
| nucleoplasm, cytokinetic               | A-431     | nucleopla                               | U-251 MG  | nucleoplasm, cytosol                     |
| nuclear speckles                       | HEK 293   | nuclear s                               | HeLa      | nuclear speckles                         |
| plasma membrane                        |           |                                         |           |                                          |
| mitochondria                           | HeLa      | mitochondria                            |           |                                          |
| nucleoplasm, cell junctions            |           |                                         |           |                                          |
| cell junctions, centrosome             | MCF7      | centrosome                              |           |                                          |
| plasma membrane                        | HeLa      | cell junc                               | BJ        | plasma membrane, cell junctions          |
| nucleoli, cytosol                      | A-431     | nucleoli, U-251 MG                      |           | nucleoli, cytosol                        |
| intermediate filaments, ac             | A-431     | intermedi                               | MCF7      | cytosol                                  |
| vesicles                               | MCF7      | vesicles                                | SiHa      | nucleoplasm, vesicles                    |
| nucleoplasm                            | A-431     | nucleopla                               | U-251 MG  | nucleoplasm                              |
| vesicles                               | PC-3      | nucleoplasm, vesicles                   |           |                                          |
| nucleoplasm, nucleoli fibr             | A-431     | nucleopla                               | U-251 MG  | nucleoplasm                              |
| cytosol                                | A-431     | cytosol                                 | U-251 MG  | cytosol                                  |
| nuclear speckles, vesicles             | U-2 OS    | nucleoplasm, nuclear speckles, vesicles |           |                                          |
| nucleoplasm, vesicles                  | U-2 OS    | nucleopla                               | A549      | nucleoplasm, vesicles                    |
| nucleoplasm                            | SK-MEL-30 | nucleoplasm                             |           |                                          |
| nucleoplasm, cytosol                   | A549      | nucleopla                               | HaCaT     | nucleoli, vesicles                       |
| nucleoplasm, microtubules              | A-431     | nucleopla                               | U-251 MG  | nucleoplasm, microtubules                |
| nucleoplasm                            | A-431     | nucleopla                               | U-251 MG  | nucleoplasm                              |
| nucleoplasm                            | A549      | nucleoplasm                             |           |                                          |
| nucleoplasm                            | MCF7      | nucleopla                               | HEK 293   | nucleoplasm                              |
| nucleoplasm                            | MCF7      | nucleopla                               | HEK 293   | nucleoplasm                              |
| nucleoplasm, golgi apparatus           | A-431     | nucleopla                               | U-251 MG  | nucleoplasm, golgi apparatus             |
| nucleoplasm, cytosol                   |           |                                         |           |                                          |
| nucleoli, endoplasmic reti             | MCF7      | nucleoli, Hep G2                        |           | nucleoli, endoplasmic reticulum, cytosol |
| nucleoplasm, endoplasmic r             | A-431     | nucleopla                               | U-251 MG  | nucleoplasm, endoplasmic reticulum       |
| nucleoplasm, endoplasmic r             | U-251 MG  | nucleoplasm, plasma membrane            |           |                                          |
| golgi apparatus                        | A-431     | golgi app                               | U-251 MG  | golgi apparatus                          |
| golgi apparatus                        | A-431     | golgi app                               | U-251 MG  | golgi apparatus                          |
| nucleoplasm, cytosol                   | A-431     | nucleopla                               | U-251 MG  | nucleoplasm, cytosol                     |
| nucleoplasm, cytosol                   | A-431     | nucleopla                               | U-251 MG  | nucleoplasm                              |
| nucleoli                               | A-431     | nucleoli                                | U-251 MG  | nucleoli                                 |
| nuclear speckles                       | A-431     | nuclear s                               | RPTEC TER | nuclear speckles, cytosol                |
| nucleoplasm                            | U-2 OS    | nucleopla                               | HEL       | nucleoplasm                              |
| nucleoplasm                            | HUVEC TER | nucleoplasm                             |           |                                          |
| nucleoplasm                            | MCF7      | nucleopla                               | PC-3      | nucleoplasm, nucleoli                    |
| nuclear speckles                       | U-2 OS    | nuclear s                               | REH       | nuclear speckles                         |
| nucleoplasm, vesicles                  | U-251 MG  | nucleopla                               | SH-SY5Y   | nucleoplasm, vesicles                    |
| nucleoplasm, mitochondria              | A-431     | nucleopla                               | U-251 MG  | nucleoplasm, mitochondria                |
| intermediate filaments                 | A-431     | intermedi                               | U-251 MG  | golgi apparatus                          |
| cytosol                                | U-251 MG  | cytosol                                 | ASC TERT1 | vesicles, mitotic spindle, cytosol       |

|                             |           |                                        |                                        |
|-----------------------------|-----------|----------------------------------------|----------------------------------------|
| nucleoplasm                 | U-251 MG  | nucleoplasm                            |                                        |
| cytosol                     |           |                                        |                                        |
| nucleoli fibrillar center   | SK-MEL-30 | nucleoli fibrillar center              |                                        |
| nucleoplasm                 | A-431     | nucleoplaU-251 MG                      | nucleoplasm                            |
| nucleoplasm, cytosol        | A-431     | nucleoplaU-251 MG                      | nucleoplasm                            |
| nucleoplasm, actin filamer  | U-251 MG  | nucleoplaSK-MEL-30                     | nucleoplasm                            |
| golgi apparatus             | ASC TERT1 | golgi apparatus                        |                                        |
| nucleoli                    | MCF7      | nucleoli, intermediate filaments       |                                        |
| nuclear speckles            | HEK 293   | nuclear sHeLa                          | nuclear speckles                       |
| centrosome                  | U-251 MG  | centrosome                             |                                        |
| nuclear speckles, cytosol   | Hep G2    | nuclear speckles                       |                                        |
| nucleoplasm                 | U-251 MG  | nucleoplasm                            |                                        |
| nucleoplasm                 | A-431     | nucleoplaU-251 MG                      | nucleoplasm                            |
| cytosol                     | A-431     | cytosol A549                           | cytosol                                |
| mitochondria                | Hep G2    | mitochondria                           |                                        |
| nucleoplasm                 | A-431     | nucleoplaU-251 MG                      | nucleoplasm                            |
| nucleoplasm, cytosol        |           |                                        |                                        |
| cytosol                     | PC-3      | nuclear speckles, cytosol              |                                        |
| focal adhesion sites        | HaCaT     | focal adhesion sites                   |                                        |
| nucleoli fibrillar center   | A-431     | nucleoli HaCaT                         | nucleoli fibrillar center, focal adhe  |
| nucleoplasm                 | U-2 OS    | nucleoplaHep G2                        | nucleoplasm                            |
| mitochondria                | RH-30     | mitochondSK-MEL-30                     | mitochondria                           |
| cytosol                     |           |                                        |                                        |
| vesicles                    | HEK 293   | vesicles EF0-21                        | vesicles                               |
| nucleoli, mitochondria      | A-431     | nucleoli, A549                         | nucleoli, mitochondria                 |
| cytosol                     | RH-30     | cytosol                                |                                        |
| nucleoplasm, mitochondria   | A-431     | nuclear sU-251 MG                      | nucleoplasm, mitochondria              |
| nucleoplasm, vesicles, cyto | HEK 293   | nucleoplaPC-3                          | nucleoplasm, vesicles, cytosol         |
| plasma membrane             | A-431     | golgi appU-251 MG                      | vesicles, plasma membrane              |
| nucleoplasm                 | A-431     | nucleoplaU-251 MG                      | nucleoplasm, cytosol                   |
| nucleoplasm                 | HEK 293   | nucleoplaHeLa                          | nucleoplasm                            |
| nucleoplasm                 | HEK 293   | nucleoplaHeLa                          | nucleoplasm                            |
| cell junctions              | U-2 OS    | endoplasmic reticulum, plasma membrane |                                        |
| plasma membrane             | A-431     | nucleoplaU-251 MG                      | nuclear membrane, plasma membrane      |
| plasma membrane, cell junc  | U-2 OS    | nucleoplaHaCaT                         | nucleoplasm, plasma membrane, cell jun |
| nucleoplasm, nucleoli       | HeLa      | nucleoplaSK-MEL-30                     | nucleoplasm, nucleoli, nuclear bodies  |
| endoplasmic reticulum       | RH-30     | endoplasmic reticulum                  |                                        |
| cytosol                     | A-431     | cytosol U-251 MG                       | cytosol                                |
| cytosol                     | A-431     | cytosol U-251 MG                       | cytosol                                |
| vesicles                    |           |                                        |                                        |
| plasma membrane, actin fila | A-431     | plasma meU-251 MG                      | plasma membrane, actin filaments       |
| nucleoplasm, nucleoli       | U-2 OS    | nucleoli Hep G2                        | nucleoli                               |
| nucleoplasm                 | A-431     | nucleoplaU-251 MG                      | nucleoplasm, nuclear bodies            |
| microtubules                | A-431     | microtubuHeLa                          | microtubules, cytokinetic bridge       |
| nuclear membrane, cytosol   | U-251 MG  | nuclear membrane, cytosol              |                                        |
| nucleoplasm                 | A-431     | nucleoplaU-251 MG                      | nucleoplasm                            |
| nucleoplasm                 | A-431     | nucleoplaU-251 MG                      | nucleoplasm                            |
| nucleoplasm, mitochondria   | U-251 MG  | nucleoplasm, mitochondria              |                                        |
| nucleoplasm, plasma membr   | SK-MEL-30 | nucleoplasm                            |                                        |
| nucleoplasm                 | A-431     | nucleoplasm                            |                                        |
| nucleoplasm                 | A-431     | nucleoplaHEK 293                       | nucleoplasm                            |
| nucleoplasm                 | U-251 MG  | nucleoplaRH-30                         | nucleoplasm                            |
| nucleoplasm                 | A-431     | nucleoplaU-251 MG                      | nucleoplasm                            |
| actin filaments             |           |                                        |                                        |
| nucleoplasm, plasma membr   | U-251 MG  | nucleoplasm, cytosol                   |                                        |

|                                |           |                                       |                                       |
|--------------------------------|-----------|---------------------------------------|---------------------------------------|
| nucleoplasm, cytosol           | A-431     | nucleoplaU-251 MG                     | nucleoplasm, cytosol                  |
| plasma membrane                | U-251 MG  | plasma meSK-MEL-30                    | nucleoplasm, plasma membrane          |
| cytosol                        | U-251 MG  | plasma membrane, cytosol              |                                       |
| nucleoplasm, nucleoli, cytosol |           |                                       |                                       |
| nucleoli fibrillar center      | A-431     | nucleoli U-251 MG                     | nucleoli fibrillar center, cytosol    |
| plasma membrane, microtub      | ASC TERT1 | plasma meLHCN-M2                      | plasma membrane, microtubules         |
| plasma membrane                | BJ        | plasma membrane                       |                                       |
| nucleoli, cytosol              | A-431     | nucleoli, cytosol                     |                                       |
| plasma membrane                | U-251 MG  | plasma membrane, focal adhesion sites |                                       |
| nucleoplasm                    | A-431     | nucleoplaU-251 MG                     | nucleoplasm                           |
| nucleoplasm                    | HEK 293   | nucleoplaRH-30                        | nucleoplasm                           |
| nucleoplasm, cytosol           | U-2 OS    | nucleoplaA-431                        | nucleoplasm, cytosol                  |
| nucleoli, vesicles             | A-431     | nucleoli, U-251 MG                    | nucleoli, cytosol                     |
| golgi apparatus                | U-2 OS    | plasma meHEL                          | golgi apparatus                       |
| nucleoplasm, vesicles          | SiHa      | nucleoplaRH-30                        | nucleoplasm                           |
| nucleoplasm, golgi apparatus   | A-431     | nucleoplaU-251 MG                     | nucleoplasm, golgi apparatus          |
| nucleoplasm                    | A-431     | nucleoplaU-251 MG                     | nucleoplasm                           |
| golgi apparatus, vesicles      | U-251 MG  | golgi appAF22                         | golgi apparatus                       |
| vesicles                       | U-251 MG  | vesicles AF22                         | vesicles                              |
| vesicles                       |           |                                       |                                       |
| nucleoplasm, nuclear bodies    | A-431     | nucleoplaU-251 MG                     | nucleoplasm, cytosol                  |
| nucleoplasm                    | A-431     | nucleoplaHep G2                       | nucleoplasm                           |
| cell junctions                 | ASC TERT1 | cell junctions                        |                                       |
| nucleoplasm, cytosol           |           |                                       |                                       |
| nucleoplasm, cytosol           | SH-SY5Y   | nucleoplaRH-30                        | nucleoplasm, cytosol                  |
| golgi apparatus                |           |                                       |                                       |
| nucleoplasm                    | A-431     | nucleoplaHEK 293                      | nucleoplasm                           |
| vesicles, cytosol              | A-431     | vesicles, U-251 MG                    | vesicles, cytosol                     |
| cytosol                        | U-251 MG  | cytosol                               |                                       |
| golgi apparatus                | U-251 MG  | golgi appPC-3                         | golgi apparatus                       |
| vesicles                       |           |                                       |                                       |
| vesicles                       | SK-MEL-30 | vesicles HaCaT                        | vesicles                              |
| plasma membrane, actin fil     | SH-SY5Y   | plasma meBJ                           | actin filaments                       |
| nucleoplasm, cytosol           | A-431     | nucleoplaU-251 MG                     | nucleoplasm, cytosol                  |
| peroxisomes                    | HEK 293   | peroxisomeHeLa                        | nucleoplasm, peroxisomes              |
| cytosol                        |           |                                       |                                       |
| cytosol                        | HEL       | plasma membrane, cytosol              |                                       |
| cytosol                        |           |                                       |                                       |
| cytosol                        | A-431     | cytosol U-251 MG                      | cytosol                               |
| nucleoplasm                    | U-251 MG  | nucleoplaHEK 293                      | nucleoplasm                           |
| nucleoplasm, nucleoli          |           |                                       |                                       |
| plasma membrane, cytosol       | U-251 MG  | plasma membrane, cytosol              |                                       |
| golgi apparatus                | A-431     | golgi appU-251 MG                     | golgi apparatus                       |
| nucleoplasm, golgi apparatus   | A-431     | nucleoplaU-251 MG                     | nucleoplasm, golgi apparatus          |
| cell junctions                 |           |                                       |                                       |
| nucleoplasm, nucleoli          | A-431     | nucleoplaU-251 MG                     | nucleoplasm, nucleoli                 |
| nucleoplasm                    | A-431     | nucleoplaU-251 MG                     | nucleoplasm                           |
| nucleoplasm                    | A-431     | nucleoplaU-251 MG                     | nucleoplasm                           |
| nucleoplasm                    | A-431     | nucleoplaU-251 MG                     | nucleoplasm                           |
| nucleoplasm                    | A-431     | cytosol MCF7                          | nucleoplasm                           |
| nucleoplasm                    | A-431     | nucleoplaU-251 MG                     | nucleoplasm, nucleoli                 |
| nuclear speckles               | A-431     | nuclear sHEK 293                      | nuclear speckles                      |
| nucleoplasm                    | A-431     | nucleoplaMCF7                         | nucleoli                              |
| nucleoplasm, golgi apparatus   | A-431     | nucleoplaU-251 MG                     | nucleoplasm, golgi apparatus, cytosol |
| nucleoplasm, nuclear bodies    | A-431     | nucleoplaU-251 MG                     | nucleoplasm, nuclear bodies           |

|                                            |           |                                           |           |                                           |
|--------------------------------------------|-----------|-------------------------------------------|-----------|-------------------------------------------|
| plasma membrane, microtubules              | A-431     | plasma membrane, microtubules             | U-251 MG  | plasma membrane, microtubules             |
| mitochondria                               | U-251 MG  | mitochondria                              | PC-3      | mitochondria                              |
| mitochondria                               | U-251 MG  | mitochondria                              | SK-MEL-30 | mitochondria                              |
| vesicles                                   | BJ        | vesicles                                  | SK-MEL-30 | vesicles                                  |
| vesicles                                   | A-431     | nucleoplasm                               | U-251 MG  | nucleoplasm                               |
| nucleoplasm, golgi apparatus               | U-251 MG  | nucleoplasm                               |           |                                           |
| nucleoplasm, centrosome                    | A-431     | nucleoplasm, centrosome                   | MCF7      | nucleoplasm, centrosome                   |
| nucleoplasm, focal adhesion sites, cytosol | A-431     | focal adhesion sites, cytosol             | U-251 MG  | focal adhesion sites, cytosol             |
| cytosol                                    | A-431     | cytosol                                   | U-251 MG  | cytosol                                   |
| nucleoplasm, cytosol                       | A-431     | nucleoplasm, cytosol                      | U-251 MG  | nucleoplasm, cytosol                      |
| nucleoplasm, cytosol                       | HEK 293   | nucleoplasm, cytosol                      | RH-30     | nucleoplasm, cytosol                      |
| nucleoplasm, mitochondria                  | A-431     | nucleoplasm, nuclear bodies, mitochondria | HeLa      | nucleoplasm, nuclear bodies, mitochondria |
| vesicles                                   | A-431     | vesicles                                  | U-251 MG  | vesicles                                  |
| nucleoplasm, nucleoli                      | U-251 MG  | nucleoplasm, nucleoli                     | HeLa      | nucleoplasm, nucleoli                     |
| vesicles                                   | HaCaT     | vesicles                                  |           |                                           |
| intermediate filaments                     | SK-MEL-30 | intermediate filaments                    |           |                                           |
| nucleoplasm, cytosol                       | U-2 OS    | nucleoplasm                               |           |                                           |
| vesicles                                   | U-2 OS    | vesicles                                  |           |                                           |
| nucleoplasm                                | A-431     | nucleoplasm, golgi apparatus              | U-251 MG  | nucleoplasm, golgi apparatus              |
| nuclear bodies                             | SK-MEL-30 | nuclear bodies                            |           |                                           |
| mitochondria                               | U-2 OS    | mitochondria                              | PC-3      | mitochondria                              |
| golgi apparatus, vesicles                  | A549      | golgi apparatus                           |           |                                           |
| cytosol                                    | A549      | cytosol                                   |           |                                           |
| nucleoplasm                                | U-2 OS    | nucleoplasm                               | MCF7      | nucleoplasm                               |
| nucleoli fibrillar center, centrosome      | A-431     | nucleoli fibrillar center, centrosome     | U-251 MG  | nucleoli fibrillar center, centrosome     |
| nucleoplasm                                | U-251 MG  | nucleoplasm, nuclear speckles             | SK-MEL-30 | nucleoplasm, nuclear speckles             |
| nucleoplasm, cytosol                       |           |                                           |           |                                           |
| nucleoplasm, nuclear membrane              | A-431     | nucleoplasm, nuclear membrane             | U-251 MG  | nucleoplasm, nuclear membrane             |
| nucleoplasm, cytosol                       | A-431     | nucleoplasm, cytosol                      | Hep G2    | nucleoplasm, cytosol                      |
| nucleoplasm, cytosol                       |           |                                           |           |                                           |
| nucleoplasm, plasma membrane, cytosol      |           |                                           |           |                                           |
| nucleoli, cytosol                          | A-431     | nucleoli, cytosol                         | U-251 MG  | nucleoli, cytosol                         |
| nucleoplasm                                | A-431     | nucleoplasm                               | RH-30     | nucleoplasm                               |
| cytosol                                    |           |                                           |           |                                           |
| vesicles                                   | HEK 293   | vesicles                                  | HeLa      | vesicles                                  |
| nucleoplasm                                | A-431     | nucleoplasm                               | U-251 MG  | nucleoplasm                               |
| mitochondria                               |           |                                           |           |                                           |
| endoplasmic reticulum                      | A-431     | endoplasmic reticulum                     | U-251 MG  | endoplasmic reticulum                     |
| intermediate filaments                     | U-2 OS    | intermediate filaments                    | MCF7      | intermediate filaments                    |
| nucleoplasm, nucleoli                      | A-431     | nucleoplasm, nucleoli, nuclear bodies     | U-251 MG  | nucleoplasm, nucleoli, nuclear bodies     |
| cytosol                                    | A-431     | cytosol                                   | U-251 MG  | cytosol                                   |
| mitochondria                               |           |                                           |           |                                           |
| cytosol                                    | HEL       | vesicles, cytosol                         |           |                                           |
| nucleoplasm, plasma membrane               | RH-30     | nucleoplasm, plasma membrane              | HUVEC TER | nucleoplasm, plasma membrane              |
| nucleoplasm                                | A-431     | nucleoplasm                               | U-251 MG  | nucleoplasm                               |
| cytosol                                    | A-431     | nucleoplasm, vesicles                     | HEL       | nucleoplasm, vesicles                     |
| plasma membrane, focal adhesion sites      | A-431     | plasma membrane, focal adhesion sites     | U-251 MG  | plasma membrane, focal adhesion sites     |
| nucleoplasm, focal adhesion sites, cytosol | U-251 MG  | nucleoplasm, plasma membrane              | A549      | nucleoplasm, plasma membrane              |
| nucleoli, mitochondria                     | HeLa      | mitochondria                              | PC-3      | mitochondria                              |
| nucleoplasm, vesicles                      | MCF7      | nucleoplasm, vesicles                     | SiHa      | nucleoplasm, vesicles                     |
| nucleoplasm, actin filaments, cytosol      | A-431     | nucleoplasm, cytosol                      | U-251 MG  | nucleoplasm, cytosol                      |
| vesicles                                   | A-431     | vesicles                                  | U-251 MG  | vesicles                                  |
| nucleoplasm                                | U-2 OS    | nucleoplasm                               |           |                                           |
| nucleoplasm, vesicles                      | A-431     | nucleoplasm, vesicles                     | U-251 MG  | nucleoplasm, vesicles                     |
| cytosol                                    | A-431     | cytosol                                   | U-251 MG  | cytosol                                   |



|                                           |           |                                     |                                    |
|-------------------------------------------|-----------|-------------------------------------|------------------------------------|
| vesicles                                  |           |                                     |                                    |
| vesicles                                  | REH       | vesicles, aggresome                 |                                    |
| nucleoplasm                               | A-431     | nucleoplaU-251 MG                   | nucleoplasm                        |
| nucleoplasm                               | SH-SY5Y   | nucleoplasm                         |                                    |
| nucleoplasm                               | MCF7      | nucleoplaHeLa                       | nucleoplasm                        |
| nuclear speckles                          | MCF7      | nuclear sSH-SY5Y                    | nuclear speckles                   |
| nucleoplasm                               | A-431     | nucleoplaU-251 MG                   | nucleoplasm                        |
| nucleoplasm                               | A-431     | nucleoplaU-251 MG                   | nucleoplasm                        |
| vesicles, plasma membrane                 | A-431     | vesicles, U-251 MG                  | vesicles, plasma membrane          |
| nucleoplasm                               | U-2 OS    | nucleoplaHep G2                     | nucleoplasm                        |
| nuclear bodies, mitochondr                | HEK 293   | nuclear bPC-3                       | nuclear bodies, cytosol            |
| plasma membrane, actin filaments          |           |                                     |                                    |
| cytosol                                   |           |                                     |                                    |
| cytosol                                   | HaCaT     | nuclear bodies, centrosome, cytosol |                                    |
| intermediate filaments                    | A-431     | microtubuU-251 MG                   | nucleoli, cytosol                  |
| vesicles, plasma membrane                 |           |                                     |                                    |
| nucleoplasm, vesicles                     | U-2 OS    | nucleoplaRH-30                      | nucleoplasm, vesicles              |
| nucleoplasm, cell junction                | U-2 OS    | nucleoplaA-431                      | nucleoplasm, cytosol               |
| vesicles                                  | U-251 MG  | vesicles                            |                                    |
| vesicles                                  |           |                                     |                                    |
| plasma membrane                           | A-431     | plasma meU-251 MG                   | plasma membrane                    |
| plasma membrane, cytosol                  | A-431     | plasma meU-251 MG                   | vesicles, cytosol                  |
| vesicles                                  | A-431     | golgi appU-251 MG                   | vesicles                           |
| plasma membrane                           |           |                                     |                                    |
| plasma membrane                           |           |                                     |                                    |
| golgi apparatus                           |           |                                     |                                    |
| plasma membrane                           |           |                                     |                                    |
| nucleoplasm, nuclear speck                | MCF7      | nucleoplaRH-30                      | nucleoplasm, nuclear speckles      |
| nucleoplasm                               | A-431     | nucleoplaU-251 MG                   | nucleoplasm                        |
| nucleoplasm                               | RH-30     | nucleoplasm                         |                                    |
| nuclear bodies                            | U-251 MG  | nuclear bMCF7                       | nuclear bodies                     |
| nuclear bodies, cytosol                   | SH-SY5Y   | nuclear bRH-30                      | nuclear bodies, cytosol            |
| nucleoplasm, nuclear bodies, microtubules |           |                                     |                                    |
| nucleoli, vesicles, cytosol               | A-431     | vesicles, U-251 MG                  | vesicles, cytosol                  |
| nucleoplasm                               | A-431     | nucleoplaU-251 MG                   | nucleoplasm                        |
| cytosol                                   | U-251 MG  | nucleoplasm, centrosome             |                                    |
| nucleoli fibrillar center                 | SiHa      | nucleoli PC-3                       | nucleoli fibrillar center          |
| nucleoplasm, nuclear membr                | A-431     | nucleoplaU-251 MG                   | nucleoplasm, cytosol               |
| nucleoplasm                               | U-2 OS    | nucleoplaA549                       | nucleoplasm, cytosol               |
| nucleoplasm                               | U-2 OS    | nucleoplaA549                       | nucleoplasm, cytosol               |
| endoplasmic reticulum                     | U-251 MG  | cytosol SH-SY5Y                     | endoplasmic reticulum              |
| midbody ring                              |           |                                     |                                    |
| nucleoli fibrillar center                 |           |                                     |                                    |
| nucleoplasm                               | A-431     | nucleoplasm, cytosol                |                                    |
| vesicles, cytosol                         | A-431     | vesicles, U-251 MG                  | golgi apparatus, vesicles, cytosol |
| cytosol                                   | U-251 MG  | cytosol BJ                          | cytosol                            |
| nucleoplasm                               | A-431     | nucleoplasm, golgi apparatus        |                                    |
| nucleoplasm                               | A-431     | nucleoplasm, cytosol                |                                    |
| plasma membrane                           | MCF7      | nucleoplaRH-30                      | nucleoplasm, plasma membrane       |
| cytosol                                   | SH-SY5Y   | cytosol SK-MEL-30                   | nucleoplasm, cytosol               |
| nucleoplasm, cytosol                      | SK-MEL-30 | nucleoplasm, centrosome, cytosol    |                                    |
| golgi apparatus                           |           |                                     |                                    |
| cytosol                                   | A-431     | golgi appU-251 MG                   | golgi apparatus, cytosol           |
| nucleoplasm, nuclear bodie                | HEK 293   | nuclear bPC-3                       | nuclear bodies                     |
| plasma membrane, cytosol                  | A-431     | plasma meU-251 MG                   | plasma membrane, cytosol           |

|                                        |           |                       |                                        |
|----------------------------------------|-----------|-----------------------|----------------------------------------|
| nucleoli fibrillar center              | A-431     | nucleoli MCF7         | nucleoli fibrillar center              |
| cytosol                                | U-251 MG  | nucleoplaMCF7         | nucleoplasm                            |
| actin filaments, cytosol               | A-431     | cytosol U-251 MG      | cytosol                                |
| cytosol                                | A-431     | cytosol U-251 MG      | cytosol                                |
| plasma membrane                        | RH-30     | plasma membrane       |                                        |
| vesicles                               | HeLa      | nucleoplasm, vesicles |                                        |
| nucleoplasm                            | U-2 OS    | nucleoplaA-431        | nucleoplasm                            |
| nuclear speckles                       | SH-SY5Y   | nuclear speckles      |                                        |
| plasma membrane, cytosol               | A-431     | plasma meU-251 MG     | cytosol                                |
| vesicles                               |           |                       |                                        |
| nuclear speckles                       | A-431     | nuclear sU-251 MG     | nuclear speckles, cytosol              |
| plasma membrane                        | MCF7      | plasma meHeLa         | plasma membrane                        |
| nucleoplasm, nuclear bodie             | A-431     | nucleoplaU-251 MG     | nucleoplasm, cytosol                   |
| plasma membrane                        |           |                       |                                        |
| endoplasmic reticulum                  | A-431     | endoplasmU-251 MG     | endoplasmic reticulum                  |
| mitochondria                           |           |                       |                                        |
| nucleoplasm                            | A-431     | nucleoplaU-251 MG     | nucleoplasm                            |
| nucleoplasm                            | A-431     | nucleoplaU-251 MG     | nucleoplasm                            |
| nucleoplasm                            | PC-3      | nucleoplasm           |                                        |
| cytosol                                | U-251 MG  | cytosol HeLa          | cytosol                                |
| golgi apparatus                        | HEK 293   | golgi appSH-SY5Y      | golgi apparatus, cytosol               |
| plasma membrane, mitochondria          | A-431     | plasma meU-251 MG     | plasma membrane, mitochondria          |
| nucleoplasm, cytosol                   | A-431     | nucleoplaU-251 MG     | nucleoplasm, nucleoli fibrillar cente  |
| cytosol                                | A-431     | cytosol U-251 MG      | cytosol                                |
| microtubules, cytokinetic              | A-431     | cytosol MCF7          | microtubules, cytokinetic bridge, cyto |
| nucleoli                               | NB-4      | nucleoplasm, nucleoli |                                        |
| nucleoplasm, nucleoli                  | A-431     | nucleoplaU-251 MG     | nucleoplasm, nucleoli                  |
| nucleoplasm, nucleoli                  | A-431     | nucleoplaU-251 MG     | nucleoplasm, nucleoli                  |
| nucleoplasm, mitochondria              | U-2 OS    | nucleoplaA-431        | nucleoplasm, mitochondria              |
| mitochondria                           | U-2 OS    | mitochondA-431        | mitochondria, cytosol                  |
| nucleoli                               |           |                       |                                        |
| vesicles                               | U-251 MG  | vesicles              |                                        |
| plasma membrane                        |           |                       |                                        |
| nucleoplasm, nucleoli                  | U-2 OS    | nucleoli MCF7         | nucleoli                               |
| nucleoplasm, nucleoli                  | SK-MEL-30 | nucleoplasm, nucleoli |                                        |
| nucleoplasm, cytosol                   | U-2 OS    | nucleoplaHep G2       | nucleoplasm, cytosol                   |
| nucleoplasm, cytosol                   | A-431     | cytosol U-251 MG      | cytosol                                |
| mitochondria                           | A-431     | mitochondU-251 MG     | mitochondria                           |
| plasma membrane, actin fil             | HEL       | plasma membrane       |                                        |
| nucleoplasm                            | U-2 OS    | nucleoplaA-431        | nucleoplasm                            |
| nucleoplasm                            | A-431     | nucleoplaU-251 MG     | nucleoplasm                            |
| nucleoplasm                            | U-2 OS    | nucleoplaSK-MEL-30    | nucleoplasm                            |
| plasma membrane                        |           |                       |                                        |
| mitochondria                           | A-431     | mitochondU-251 MG     | mitochondria                           |
| mitochondria                           | A-431     | mitochondU-251 MG     | mitochondria                           |
| nucleoplasm, nucleoli                  | HaCaT     | nucleoplasm, nucleoli |                                        |
| centrosome                             |           |                       |                                        |
| mitochondria                           | A-431     | mitochondHaCaT        | nucleoplasm, mitochondria              |
| vesicles                               |           |                       |                                        |
| nucleoplasm                            | U-251 MG  | nucleoplasm           |                                        |
| nucleoplasm                            | A-431     | nucleoplaU-251 MG     | nucleoplasm                            |
| nucleoplasm, plasma membr              | A549      | nucleoli, HeLa        | nucleoli, plasma membrane, cytosol     |
| nucleoplasm, cytosol                   | U-2 OS    | nucleoplaHaCaT        | nucleoplasm, nucleoli fibrillar cente  |
| endoplasmic reticulum, golgi apparatus |           |                       |                                        |
| endoplasmic reticulum, golgi apparatus |           |                       |                                        |

|                            |           |                      |                                          |
|----------------------------|-----------|----------------------|------------------------------------------|
| focal adhesion sites, cyto | BJ        | focal adhesion sites |                                          |
| nuclear speckles, cytosol  | A-431     | nuclear sU-251 MG    | nuclear speckles                         |
| nucleoplasm, cytosol       | A-431     | nucleoplaU-251 MG    | nucleoplasm, cytosol                     |
| vesicles                   | A-431     | vesicles MCF7        | vesicles                                 |
| golgi apparatus, vesicles  | A-431     | golgi appU-251 MG    | golgi apparatus, vesicles                |
| golgi apparatus, vesicles  | A-431     | golgi appU-251 MG    | golgi apparatus                          |
| endoplasmic reticulum, ves | SH-SY5Y   | endoplasmAF22        | endoplasmic reticulum, vesicles          |
| mitochondria               | A-431     | mitochondU-251 MG    | mitochondria                             |
| cytosol                    |           |                      |                                          |
| microtubules               | A-431     | microtubuU-251 MG    | microtubules                             |
| nucleoplasm, nuclear bodie | A-431     | nucleoplaU-251 MG    | nucleoplasm, nuclear bodies              |
| plasma membrane            |           |                      |                                          |
| nucleoplasm                | SK-MEL-30 | nucleoplasm          |                                          |
| cytosol                    | A-431     | cytosol              |                                          |
| endoplasmic reticulum      | A-431     | endoplasmU-251 MG    | endoplasmic reticulum                    |
| endoplasmic reticulum, cyt | A-431     | nucleoli, U-251 MG   | nucleoli, endoplasmic reticulum, cytosol |
| nucleoplasm, cytosol       | A-431     | nucleoplaU-251 MG    | nucleoplasm, cytosol                     |
| vesicles                   | PC-3      | nucleoplaSK-MEL-30   | vesicles                                 |
| golgi apparatus            | A-431     | nucleoplaPC-3        | golgi apparatus                          |
| cytosol                    | A-431     | cytosol A549         | nucleoplasm, cytosol                     |
| mitochondria               | A-431     | mitochondU-251 MG    | mitochondria                             |
| nucleoli, cytosol          | A-431     | cytosol U-251 MG     | nucleoli, cytosol                        |
| plasma membrane            | A-431     | plasma meMCF7        | nucleoplasm, plasma membrane, cytosol    |
| nucleoplasm, cytosol       | A-431     | nucleoplaU-251 MG    | nucleoplasm, cytosol                     |
| nucleoplasm                | A-431     | nucleoplaU-251 MG    | nucleoplasm                              |
| nucleoplasm                | A-431     | nucleoplaU-251 MG    | nucleoplasm                              |
| vesicles, cytosol          | RH-30     | cytosol SK-MEL-30    | nucleoplasm                              |
| nucleoplasm, cytosol       | A-431     | nucleoplaHEL         | nucleoplasm, golgi apparatus             |
| nucleoplasm                | HEL       | golgi apparatus      |                                          |
| vesicles                   | A-431     | vesicles U-251 MG    | vesicles                                 |
| golgi apparatus            | A-431     | golgi appU-251 MG    | golgi apparatus                          |
| plasma membrane            | A-431     | plasma meU-251 MG    | plasma membrane                          |
| cytosol                    | A549      | vesicles             |                                          |
| vesicles                   |           |                      |                                          |
| nucleoplasm, nuclear bodie | A-431     | nucleoplaHEL         | nucleoplasm, nuclear bodies, vesicles    |
| nucleoplasm                | HeLa      | nucleoplaHEL         | nucleoplasm, plasma membrane             |
| golgi apparatus            | SiHa      | golgi appHaCaT       | golgi apparatus, cytosol                 |
| vesicles, cell junctions   | A-431     | nucleoplaU-251 MG    | nucleoplasm, vesicles, plasma membrane   |
| nuclear speckles           | U-251 MG  | nuclear sTHP-1       | nuclear speckles                         |
| endoplasmic reticulum      |           |                      |                                          |
| nucleoplasm, vesicles      | A-431     | nucleoplaU-251 MG    | nucleoplasm, vesicles                    |
| nucleoplasm                | Hep G2    | nucleoplaRH-30       | nucleoplasm                              |
| nucleoplasm                | SiHa      | nucleoplaRH-30       | nucleoplasm                              |
| golgi apparatus            |           |                      |                                          |
| cytosol                    | A-431     | cytosol U-251 MG     | cytosol                                  |
| golgi apparatus, vesicles  | U-2 OS    | vesicles A-431       | vesicles                                 |
| vesicles                   | U-2 OS    | vesicles U-251 MG    | vesicles                                 |
| mitochondria               | SiHa      | mitochondria         |                                          |
| nucleoplasm                | LHCN-M2   | nucleoplasm          |                                          |
| nucleoplasm, cytosol       | SH-SY5Y   | nucleoplaPC-3        | nucleoplasm, cytosol                     |
| cytosol                    | A-431     | nucleoplaU-251 MG    | nucleoplasm                              |
| nucleoplasm                | A-431     | nucleoplaU-251 MG    | nucleoplasm, golgi apparatus             |
| mitochondria               | HEK 293   | mitochondria         |                                          |
| mitochondria               | U-251 MG  | mitochondSK-MEL-30   | mitochondria                             |
| nucleoplasm                | A-431     | nucleoplaU-251 MG    | nucleoplasm                              |

|                                 |             |                            |                                           |
|---------------------------------|-------------|----------------------------|-------------------------------------------|
| nucleoplasm vesicles            | U-2 OS SiHa | nucleoplasmaK-562 vesicles | nucleoplasm                               |
| nucleoplasm                     | U-251 MG    | nucleoplasm                |                                           |
| nucleoplasm                     | U-251 MG    | cytoplasmHaCaT             | nucleoplasm, cytoplasmic bodies           |
| nucleoplasm                     | A-431       | nucleoplasmaU-251 MG       | nucleoplasm, cytosol                      |
| nucleoplasm                     | A-431       | nucleoplasmaU-251 MG       | nucleoplasm                               |
| nucleoplasm, centrosome         | A-431       | nucleoplasmaMCF7           | nucleoplasm, centrosome                   |
| nucleoplasm                     | A-431       | nucleoplasmaHep G2         | nucleoplasm, cytosol                      |
| cytosol                         | A-431       | endoplasmic reticulum      |                                           |
| endoplasmic reticulum           | A-431       | endoplasmU-251 MG          | cytosol                                   |
| cytosol                         | A-431       | cytosol U-251 MG           | cytosol                                   |
| mitochondria, cytosol           | U-251 MG    | mitochondria               |                                           |
| nucleoplasm, cytosol            | A-431       | nucleoplasmaU-251 MG       | nucleoplasm, cytosol                      |
| nucleoplasm                     | A-431       | nucleoplasmaU-251 MG       | nucleoplasm                               |
| nucleoplasm, cytosol            | A-431       | nucleoplasmaU-251 MG       | nucleoplasm, cytosol                      |
| nucleoplasm                     | HEK 293     | nucleoplasm                |                                           |
| nucleoplasm, cytosol            | A-431       | nucleoplasmaHeLa           | nucleoplasm                               |
| nuclear speckles                | A-431       | nucleoplasmaU-251 MG       | nucleoplasm                               |
| nucleoplasm                     | A-431       | nucleoplasmaU-251 MG       | nucleoplasm, nuclear bodies               |
| cytosol                         | A-431       | cytosol                    |                                           |
| cytosol                         | A-431       | cytosol U-251 MG           | cytosol                                   |
| vesicles                        | U-251 MG    | vesicles SiHa              | vesicles                                  |
| nucleoplasm                     | U-251 MG    | nucleoplasm                |                                           |
| nucleoplasm                     | SiHa        | nucleoplasm                |                                           |
| nucleoli                        | A-431       | nucleoli U-251 MG          | nucleoli                                  |
| nucleoli, nuclear bodies        | A-431       | nucleoli, U-251 MG         | nucleoli, nuclear bodies                  |
| nucleoplasm                     |             |                            |                                           |
| nucleoplasm                     | U-2 OS      | nucleoplasmaU-251 MG       | nucleoplasm                               |
| nucleoplasm                     | PC-3        | nucleoplasm                |                                           |
| nucleoplasm                     | A-431       | nucleoplasmaU-251 MG       | nucleoplasm                               |
| cytosol                         | A-431       | cytosol                    |                                           |
| nucleoplasm, nucleoli, cytosol  | U-251 MG    | nucleoplasmaRH-30          | nucleoplasm, nucleoli, cytosol            |
| endoplasmic reticulum           | A-431       | endoplasmU-251 MG          | endoplasmic reticulum                     |
| endoplasmic reticulum           | U-251 MG    | endoplasmic reticulum      |                                           |
| nucleoplasm, nuclear bodies     | A-431       | nucleoplasmaU-251 MG       | nucleoplasm                               |
| nucleoplasm                     | U-2 OS      | nucleoplasmaU-251 MG       | nucleoplasm                               |
| nucleoplasm, cytosol            | A-431       | nucleoplasmaMCF7           | nucleoplasm                               |
| nucleoplasm, cytosol            | A-431       | nucleoplasmaU-251 MG       | nucleoplasm, cytosol                      |
| nuclear bodies                  | Hep G2      | nuclear bodies             |                                           |
| nucleoplasm, mitochondria       |             |                            |                                           |
| nucleoplasm, cytosol            | A-431       | nucleoplasmaU-251 MG       | nucleoplasm, cytosol                      |
| golgi apparatus, cytosol        |             |                            |                                           |
| nucleoplasm, nucleoli, vesicles | HEK 293     | nucleoplasmaHeLa           | nucleoplasm, nucleoli                     |
| cytosol                         | A-431       | cytosol U-251 MG           | cytosol                                   |
| cytosol                         | A-431       | cytosol U-251 MG           | cytosol                                   |
| nucleoplasm, cytosol            | A-431       | plasma meU-251 MG          | nucleoplasm, cytosol                      |
| nucleoplasm                     | A-431       | nucleoplasmaU-251 MG       | nucleoplasm                               |
| mitochondria                    |             |                            |                                           |
| mitochondria                    | SH-SY5Y     | mitochondriaREH            | centriolar satellite                      |
| nucleoplasm                     | A-431       | nucleoplasmaHep G2         | nucleoplasm, cell junctions               |
| cytosol                         | A-431       | cytosol U-251 MG           | cytosol                                   |
| nuclear bodies, cytosol         | A-431       | nuclear bodiesHeLa         | nuclear membrane, nuclear bodies, cytosol |
| golgi apparatus, vesicles       | A-431       | nucleoplasmaU-251 MG       | nucleoplasm, golgi apparatus              |
| nucleoplasm                     | U-251 MG    | nucleoplasm                |                                           |
| nucleoplasm, mitochondria       | A-431       | nucleoplasmaU-251 MG       | nucleoplasm, mitochondria                 |

|                              |          |                                        |          |
|------------------------------|----------|----------------------------------------|----------|
| nucleoplasm, mitochondria    | A-431    | nucleoplasm, centrosome, mitochondria  | U-251 MG |
| nucleoplasm                  | HeLa     | nucleoplasm                            | RH-30    |
| nucleoplasm, golgi apparatus | PC-3     | golgi apparatus, cytosol               |          |
| cytosol                      | A-431    | nuclear membrane, cytosol              | U-251 MG |
| cytosol                      | A-431    | cytosol                                | U-251 MG |
| vesicles                     | U-251 MG | vesicles                               |          |
| nuclear membrane, cytosol    | PC-3     | cytosol                                |          |
| centrosome, cytosol          | MCF7     | cytosol                                | HEK 293  |
| nucleoplasm, vesicles        | A-431    | nucleoplasm, vesicles                  | U-251 MG |
| nuclear membrane             | HeLa     | nuclear membrane                       |          |
| nucleoplasm, cytokinetic     | SH-SY5Y  | nucleoplasm                            |          |
| cytosol                      | PC-3     | cytosol                                |          |
| cytosol                      | U-2 OS   | cytosol                                | A-431    |
| nucleoplasm                  | A-431    | nucleoplasm, cytosol                   | U-251 MG |
| nucleoplasm                  | HeLa     | nucleoplasm                            | RH-30    |
| nucleoli, cytosol            | A-431    | nucleoli, cytosol                      | U-251 MG |
| nuclear bodies               |          |                                        |          |
| nucleoplasm                  | HeLa     | nucleoplasm                            | Hep G2   |
| nucleoli                     | U-251 MG | nucleoli                               | PC-3     |
| nucleoplasm                  | U-2 OS   | nucleoplasm                            | HEK 293  |
| nucleoplasm                  | U-2 OS   | nucleoplasm                            | RH-30    |
| endoplasmic reticulum        | RH-30    | endoplasmic reticulum                  |          |
| actin filaments              | A-431    | nucleoplasm, nucleoli, actin filaments | U-251 MG |
| nucleoplasm, nucleoli        | A-431    | nucleoplasm                            | U-251 MG |
| nucleoplasm                  | A-431    | nucleoplasm                            | U-251 MG |
| nucleoplasm, vesicles        | BJ       | nuclear speckles, vesicles             |          |
| nucleoplasm                  |          |                                        |          |
| nuclear membrane             |          |                                        |          |
| nucleoplasm                  | HEK 293  | nucleoplasm                            |          |
| nucleoplasm                  | SH-SY5Y  | nucleoplasm                            |          |
| nucleoplasm, cytosol         | A-431    | nucleoplasm, cytosol                   | U-251 MG |
| nucleoplasm, cytosol         | U-2 OS   | cytosol                                |          |
| plasma membrane              | BJ       | plasma membrane                        | LHCN-M2  |
| mitochondria                 | U-2 OS   | mitochondria                           | A549     |
| nucleoplasm                  | U-251 MG | nucleoplasm, nucleoli fibrillar center | Hep G2   |
| nucleoplasm, mitochondria,   | U-251 MG | cytosol                                | PC-3     |
| cytosol                      | A-431    | cytosol                                | U-251 MG |
| cytosol                      | U-251 MG | cytosol                                |          |
| nucleoplasm                  | A549     | nucleoplasm                            | sHeLa    |
| cytosol                      | A-431    | cytosol                                | U-251 MG |
| nucleoplasm, golgi apparatus | A-431    | nucleoplasm, golgi apparatus, vesicles | MCF7     |
| golgi apparatus              | MCF7     | nucleoplasm, golgi apparatus           | SH-SY5Y  |
| nucleoplasm, nuclear bodies  | SiHa     | nucleoplasm, nuclear bodies            |          |
| nucleoplasm                  | A-431    | nucleoplasm                            | U-251 MG |
| nucleoplasm                  | A-431    | nucleoplasm, golgi apparatus           | U-251 MG |
| cytosol                      | A-431    | cytosol                                | U-251 MG |
| cytosol                      | A-431    | cytosol                                | U-251 MG |
| actin filaments              | A-431    | actin filaments                        |          |
| nucleoplasm, vesicles        | MCF7     | vesicles                               | A549     |
| microtubules, cytosol        | MCF7     | nucleoplasm                            |          |
| nucleoplasm, cytosol         | HaCaT    | nucleoplasm                            |          |
| nucleoplasm, cytosol         | A-431    | nucleoplasm, cytosol                   | U-251 MG |
| mitochondria                 | MCF7     | mitochondria                           | HEK 293  |
| mitochondria                 | MCF7     | mitochondria                           | HEK 293  |

|                              |          |                                             |                                       |
|------------------------------|----------|---------------------------------------------|---------------------------------------|
| nucleoplasm, cytosol         | A-431    | nucleoplaU-251 MG                           | nucleoplasm, cytosol                  |
| nucleoplasm                  | A-431    | nucleoplaU-251 MG                           | nucleoplasm                           |
| nucleoplasm                  | SiHa     | nucleoplasm                                 |                                       |
| nucleoplasm, vesicles        | A-431    | nucleoplaSiHa                               | nucleoplasm, vesicles, cytosol        |
| cytosol                      | A-431    | cytosol U-251 MG                            | cytosol                               |
| lipid droplets               |          |                                             |                                       |
| mitochondria                 | U-251 MG | mitochondria                                |                                       |
| plasma membrane              | HeLa     | plasma meSH-SY5Y                            | plasma membrane                       |
| nucleoplasm, endoplasmic r   | MCF7     | nucleoplasm, endoplasmic reticulum, cytosol |                                       |
| nucleoplasm, plasma membr    | MCF7     | nucleoplasm, cytosol                        |                                       |
| plasma membrane, cytosol     | A-431    | plasma membrane, cytosol                    |                                       |
| mitochondria                 | A549     | mitochondHeLa                               | mitochondria                          |
| mitochondria                 | A-431    | mitochondU-251 MG                           | mitochondria                          |
| vesicles                     | A-431    | vesicles U-251 MG                           | vesicles                              |
| plasma membrane              | U-2 OS   | plasma membrane                             |                                       |
| nucleoplasm, cytosol         | A-431    | nucleoplaU-251 MG                           | nucleoplasm, cytosol                  |
| mitochondria                 | A-431    | mitochondU-251 MG                           | mitochondria                          |
| mitochondria                 | A-431    | mitochondU-251 MG                           | mitochondria                          |
| mitochondria                 | U-251 MG | mitochondria                                |                                       |
| vesicles                     | A-431    | nucleoplaPC-3                               | nucleoplasm, vesicles                 |
| vesicles                     | HeLa     | vesicles HaCaT                              | vesicles                              |
| actin filaments, cytosol     | U-251 MG | cytosol HeLa                                | actin filaments, cytosol              |
| nucleoplasm, actin filamer   | MCF7     | nucleoplaPC-3                               | nucleoplasm, vesicles                 |
| vesicles, centrosome, cytos  | A-431    | vesicles, U-251 MG                          | plasma membrane, centrosome, cytosol  |
| golgi apparatus              |          |                                             |                                       |
| nucleoplasm, mitochondria    | A-431    | nucleoplaU-251 MG                           | nucleoplasm, mitochondria             |
| cytosol                      | A-431    | nucleoplaHeLa                               | cytosol                               |
| nucleoplasm, cytosol         | A-431    | nucleoplaU-251 MG                           | nucleoplasm, plasma membrane, cytosol |
| golgi apparatus, cell junc   | U-2 OS   | golgi appU-251 MG                           | golgi apparatus                       |
| nucleoli fibrillar center    | A-431    | nucleoli U-251 MG                           | nucleoli fibrillar center             |
| mitochondria                 | A-431    | mitochondU-251 MG                           | mitochondria                          |
| cytosol                      | U-251 MG | cytosol                                     |                                       |
| nucleoplasm                  | HEK 293  | nucleoplaRH-30                              | nucleoplasm, vesicles                 |
| nucleoplasm, plasma membrane |          |                                             |                                       |
| plasma membrane              | SH-SY5Y  | plasma meRH-30                              | nucleoplasm, plasma membrane          |
| nucleoplasm, nucleoli        | A-431    | nucleoplaU-251 MG                           | nucleoplasm, nucleoli                 |
| nucleoli, endoplasmic reti   | U-251 MG | nucleoli, endoplasmic reticulum             |                                       |
| nucleoplasm, nucleoli        | U-251 MG | nucleoplasm, nucleoli                       |                                       |
| nucleoplasm, mitochondria    |          |                                             |                                       |
| nucleoplasm, nuclear speck   | LHCN-M2  | nucleoplasm, nuclear speckles               |                                       |
| nucleoplasm                  | LHCN-M2  | nucleoplasm, cytosol                        |                                       |
| nucleoplasm, nucleoli fibr   | A-431    | nucleoplaU-251 MG                           | nucleoplasm, nucleoli fibrillar cente |
| nucleoplasm, aggresome       | U-2 OS   | nucleoplaHep G2                             | nucleoplasm                           |
| vesicles                     |          |                                             |                                       |
| vesicles                     |          |                                             |                                       |
| cytosol                      | A-431    | cytosol U-251 MG                            | cytosol                               |
| cytosol                      | A-431    | actin filaments                             |                                       |
| vesicles                     |          |                                             |                                       |
| mitochondria                 | HEK 293  | mitochondria                                |                                       |
| mitochondria                 | MCF7     | mitochondHEK 293                            | mitochondria                          |
| centriolar satellite         | A-431    | centriolar satellite, cytosol               |                                       |
| nucleoplasm, cytosol         | AF22     | nucleoplasm, golgi apparatus                |                                       |
| nucleoplasm                  | HeLa     | nucleoplaSH-SY5Y                            | nucleoplasm                           |
| nucleoplasm                  | SH-SY5Y  | nucleoplasm                                 |                                       |
| nucleoplasm                  | A-431    | nucleoplaU-251 MG                           | nucleoplasm                           |

|                                                   |           |                                               |           |                       |
|---------------------------------------------------|-----------|-----------------------------------------------|-----------|-----------------------|
| nucleoplasm                                       |           |                                               |           |                       |
| nucleoplasm                                       | SK-MEL-30 | nucleoplasm                                   |           |                       |
| cytosol                                           |           |                                               |           |                       |
| mitochondria                                      | A-431     | mitochondria                                  | U-251 MG  | mitochondria          |
| mitochondria                                      | MCF7      | mitochondria                                  | A549      | mitochondria          |
| cytosol                                           | U-251 MG  | cytosol                                       |           |                       |
| cytosol                                           | A-431     | cytosol                                       | U-251 MG  | cytosol               |
| cytosol                                           | A-431     | cytosol                                       | U-251 MG  | cytosol               |
| cytosol                                           | A-431     | cytosol                                       | U-251 MG  | cytosol               |
| nucleoplasm, vesicles                             | U-251 MG  | nucleoplasm, vesicles                         | PC-3      | nucleoplasm, vesicles |
| nucleoplasm, cytosol                              |           |                                               |           |                       |
| nuclear speckles                                  | Hep G2    | nuclear speckles                              |           | nuclear speckles      |
| focal adhesion sites                              | A-431     | focal adhesion sites, cytosol                 |           |                       |
| nucleoplasm, plasma membrane                      | HaCaT     | plasma membrane                               |           |                       |
| nucleoplasm, cytosol                              | A-431     | nucleoplasm, cytosol                          | HEK 293   | cytosol               |
| nucleoplasm, plasma membrane                      | HEK 293   | nucleoplasm                                   |           |                       |
| nuclear speckles, plasma membrane                 | U-251 MG  | nuclear speckles, plasma membrane             | PC-3      |                       |
| nucleoli                                          | A-431     | nucleoplasm, nucleoli, vesicles               |           |                       |
| nucleoplasm, plasma membrane                      | A549      | nucleoplasm, golgi apparatus, plasma membrane |           |                       |
| endoplasmic reticulum, cytosol                    | A-431     | endoplasmic reticulum, cytosol                | U-251 MG  |                       |
| nucleoplasm, golgi apparatus                      | A-431     | golgi apparatus                               | U-251 MG  |                       |
| golgi apparatus                                   | A-431     | golgi apparatus                               | U-251 MG  |                       |
| cytosol                                           | PC-3      | cytosol                                       |           |                       |
| nucleoplasm, vesicles                             | A-431     | nucleoplasm                                   | U-251 MG  |                       |
| nuclear speckles                                  | A-431     | nucleoplasm                                   | A549      |                       |
| nucleoplasm, vesicles, cytosol                    | A-431     | nucleoplasm, vesicles, cytosol                | U-251 MG  |                       |
| cytosol                                           | U-251 MG  | nucleoplasm, cytosol                          | MCF7      |                       |
| cytosol                                           | U-251 MG  | nucleoli, cytosol                             | PC-3      |                       |
| nucleoplasm, nucleoli, vesicles                   | MCF7      | vesicles                                      | HeLa      |                       |
| nucleoplasm                                       |           |                                               |           |                       |
| centrosome                                        | SK-MEL-30 | centrosome                                    | HaCaT     |                       |
| nucleoplasm                                       | SH-SY5Y   | nucleoplasm, centrosome                       | RH-30     |                       |
| microtubules                                      | U-2 OS    | microtubules, cytokinetic bridge              | MCF7      |                       |
| nucleoplasm                                       | A-431     | nucleoplasm                                   | U-251 MG  |                       |
| mitochondria                                      | A-431     | mitochondria                                  | U-251 MG  |                       |
| nucleoplasm, nucleoli, cytosol                    | A-431     | nucleoplasm, nucleoli fibrillar center        | U-251 MG  |                       |
| nucleoplasm                                       |           |                                               |           |                       |
| nucleoplasm, cytosol                              | A-431     | nucleoplasm, cytosol                          | U-251 MG  |                       |
| nucleoplasm, cytosol                              |           |                                               |           |                       |
| endoplasmic reticulum                             | U-2 OS    | endoplasmic reticulum                         | MCF7      |                       |
| nucleoli fibrillar center                         | A-431     | nucleoli fibrillar center, vesicles           | U-251 MG  |                       |
| nuclear speckles, intermediate filaments, cytosol |           |                                               |           |                       |
| nucleoplasm                                       | HEK 293   | nucleoplasm, cytosol                          | SK-MEL-30 |                       |
| nucleoplasm                                       | RH-30     | nucleoplasm                                   |           |                       |
| plasma membrane, cytosol                          | A-431     | plasma membrane, cytosol                      |           |                       |
| cytosol                                           | HaCaT     | cytosol                                       |           |                       |
| endoplasmic reticulum                             |           |                                               |           |                       |
| nuclear speckles                                  | A-431     | nuclear speckles                              | U-251 MG  |                       |
| nuclear speckles                                  | A-431     | nuclear speckles                              | U-251 MG  |                       |
| nucleoplasm, nucleoli, cytosol                    | U-251 MG  | nucleoplasm, nucleoli                         | SH-SY5Y   |                       |
| nucleoplasm                                       | SH-SY5Y   | nucleoplasm                                   | SK-MEL-30 |                       |
| nuclear speckles, cytosol                         | A-431     | nuclear speckles, centriolar satellite        | U-251 MG  |                       |
| nuclear speckles, plasma membrane, vesicles       | A-431     | nuclear speckles, plasma membrane, vesicles   | U-251 MG  |                       |

|                             |          |                                |                                        |
|-----------------------------|----------|--------------------------------|----------------------------------------|
| nucleoli, vesicles          | A-431    | nucleoli, U-251 MG             | nucleoli                               |
| nucleoplasm                 | U-251 MG | nucleoplasm                    |                                        |
| nucleoplasm, cytosol        | A-431    | nucleoplaU-251 MG              | nucleoplasm, vesicles                  |
| mitochondria                |          |                                |                                        |
| cytosol                     | A-431    | cytosol U-251 MG               | nucleoplasm, cytosol                   |
| cytosol                     | A-431    | cytosol U-251 MG               | cytosol                                |
| golgi apparatus, cytosol    | A-431    | golgi apparatus, cytosol       |                                        |
| cytosol                     | U-251 MG | nucleoplaPC-3                  | nucleoplasm, cytosol                   |
| nucleoplasm, cytosol        |          |                                |                                        |
| nucleoplasm, vesicles       | U-2 OS   | vesicles BJ                    | nucleoplasm, vesicles                  |
| nucleoplasm                 | A-431    | nucleoplaU-251 MG              | nucleoplasm                            |
| nucleoplasm                 | A-431    | nucleoplaU-251 MG              | nucleoplasm                            |
| nucleoplasm                 | A-431    | nucleoplaPC-3                  | nucleoplasm                            |
| vesicles                    |          |                                |                                        |
| nucleoplasm, nucleoli       | HEK 293  | nucleoplasm                    |                                        |
| nucleoplasm, nucleoli fibr  | HEK 293  | nucleoplaSK-MEL-30             | nucleoplasm, nucleoli fibrillar cente  |
| nucleoplasm                 | A-431    | nucleoplaA549                  | nucleoplasm                            |
| nucleoplasm                 | A-431    | nucleoplaU-251 MG              | nucleoplasm, cytosol                   |
| vesicles, midbody           |          |                                |                                        |
| nucleoplasm, cytosol        | A-431    | nucleoplaU-251 MG              | nucleoplasm, cytosol                   |
| nucleoli                    | A-431    | nucleoli                       |                                        |
| nuclear membrane            | A-431    | nuclear nU-251 MG              | nuclear membrane                       |
| nuclear membrane, vesicles  | A-431    | nuclear nU-251 MG              | nuclear membrane, vesicles             |
| vesicles                    |          |                                |                                        |
| vesicles                    | A-431    | nucleoplasm, vesicles          |                                        |
| cytosol                     | HEK 293  | cytosol                        |                                        |
| nucleoplasm                 |          |                                |                                        |
| nucleoplasm                 | PC-3     | nucleoplasm                    |                                        |
| golgi apparatus             |          |                                |                                        |
| nucleoplasm                 | MCF7     | nucleoplasm                    |                                        |
| plasma membrane             | SH-SY5Y  | nucleoplaPC-3                  | nucleoplasm, plasma membrane           |
| nuclear speckles, plasma n  | A-431    | nuclear sU-251 MG              | nuclear speckles, plasma membrane, cyt |
| nuclear speckles, mitochor  | A-431    | nuclear sU-251 MG              | mitochondria                           |
| nucleoplasm, cytosol        | A-431    | nucleoplaU-251 MG              | nucleoplasm, cytosol                   |
| mitochondria                | HEK 293  | mitochondria                   |                                        |
| nucleoplasm                 | U-251 MG | nucleoplaRH-30                 | nucleoplasm, centrosome                |
| nucleoplasm                 | U-2 OS   | nucleoplaU-251 MG              | nucleoplasm                            |
| mitochondria, cytosol       | A-431    | mitochondria                   |                                        |
| nucleoplasm, nucleoli fibr  | A-431    | nucleoplaU-251 MG              | nucleoplasm                            |
| nucleoplasm                 | A-431    | nucleoplaU-251 MG              | nucleoplasm                            |
| mitochondria                | A-431    | mitochondU-251 MG              | mitochondria                           |
| mitochondria                | A-431    | mitochondU-251 MG              | mitochondria                           |
| nucleoplasm, plasma membr   | HEK 293  | plasma meBJ                    | nucleoplasm, plasma membrane           |
| nucleoli, cytosol           | HEK 293  | cytosol A549                   | nucleoplasm, nucleoli, cytosol         |
| nucleoplasm, cytosol        | SH-SY5Y  | nucleoplaBJ                    | nucleoplasm                            |
| plasma membrane             | A-431    | plasma meU-251 MG              | plasma membrane                        |
| nucleoplasm                 |          |                                |                                        |
| mitochondria                | A-431    | nucleoplasm, mitochondria      |                                        |
| nucleoplasm, nucleoli, cell | PC-3     | nucleoplasm, nucleoli, cytosol |                                        |
| cytosol                     |          |                                |                                        |
| nucleoplasm                 | U-2 OS   | nucleoplaA-431                 | nucleoplasm                            |
| nucleoplasm, nuclear bodie  | A-431    | nuclear bU-251 MG              | nucleoplasm, nuclear bodies            |
| nucleoplasm, mitochondria,  | A-431    | nucleoplaU-251 MG              | nucleoplasm, cytosol                   |
| nucleoplasm                 | MCF7     | nucleoplaPC-3                  | nucleoplasm                            |
| nucleoplasm                 | MCF7     | nucleoplaPC-3                  | nucleoplasm                            |



|                                                 |          |                                       |                                        |
|-------------------------------------------------|----------|---------------------------------------|----------------------------------------|
| nucleoplasm                                     | MCF7     | nucleoplaPC-3                         | nucleoplasm, cytosol                   |
| nucleoplasm                                     | A549     | nucleoplaPC-3                         | nucleoplasm, nucleoli                  |
| nucleoplasm, golgi apparatus                    | A-431    | nucleoplaU-251 MG                     | nucleoplasm, golgi apparatus, vesicles |
| golgi apparatus                                 | U-251 MG | golgi apparatus                       |                                        |
| nuclear bodies                                  | PC-3     | nucleoplasm, nucleoli, nuclear bodies |                                        |
| nucleoplasm, nuclear bodies                     | PC-3     | nucleoplasm                           |                                        |
| mitochondria                                    | HeLa     | mitochondria                          |                                        |
| nucleoplasm, vesicles                           | A-431    | nucleoplaPC-3                         | nucleoplasm                            |
| nucleoplasm                                     |          |                                       |                                        |
| nucleoplasm                                     | A-431    | nucleoplaU-251 MG                     | nucleoplasm                            |
| nucleoplasm                                     | A-431    | nucleoplaU-251 MG                     | nucleoplasm                            |
| nucleoplasm, nucleoli                           | SH-SY5Y  | nucleoplaSK-MEL-30                    | nucleoplasm                            |
| vesicles, plasma membrane, cytosol              | U-251 MG | plasma membrane, cytosol              |                                        |
| vesicles, cytosol                               | A-431    | nucleoplaHEK 293                      | plasma membrane, cytosol               |
| nucleoplasm, vesicles                           | U-251 MG | nucleoplaHep G2                       | nucleoplasm, vesicles                  |
| nuclear bodies                                  | A-431    | nuclear bodies                        |                                        |
| nucleoplasm, cytosol                            | A-431    | nucleoplaU-251 MG                     | nucleoplasm, nuclear bodies, cytosol   |
| cytosol                                         | MCF7     | cytokinetPC-3                         | cytosol                                |
| mitochondria, cytosol                           | U-251 MG | cytosol                               |                                        |
| nucleoplasm, nucleoli                           | PC-3     | nucleoplasm, nucleoli                 |                                        |
| mitochondria                                    |          |                                       |                                        |
| mitochondria                                    | RH-30    | mitochondria                          |                                        |
| nuclear speckles, plasma membrane               | LHCN-M2  | nuclear speckles, plasma membrane     |                                        |
| nucleoplasm, nucleoli, golgi apparatus, cytosol | HEK 293  | nucleoplaRH-30                        | nucleoplasm, nucleoli                  |
| cytosol                                         | Hep G2   | cytosol                               |                                        |
| nucleoplasm                                     | U-251 MG | nucleoplasm                           |                                        |
| nucleoplasm                                     | U-251 MG | nucleoplasm                           |                                        |
| microtubules                                    | A-431    | microtubules                          |                                        |
| centriolar satellite, cytosol                   | A-431    | centriolar satellite, cytosol         |                                        |
| golgi apparatus                                 | MCF7     | golgi apparatus                       |                                        |
| nucleoplasm                                     | A-431    | nucleoplaU-251 MG                     | nucleoplasm                            |
| nucleoplasm                                     | A-431    | nucleoplaU-251 MG                     | nucleoplasm                            |
| nucleoplasm                                     | A-431    | nucleoplaU-251 MG                     | nucleoplasm                            |
| nucleoplasm                                     | U-251 MG | nucleoplaMCF7                         | nucleoplasm                            |
| nucleoli fibrillar center                       | A-431    | nucleoplaU-251 MG                     | nucleoli fibrillar center              |
| mitochondria                                    | MCF7     | mitochondria                          |                                        |
| mitochondria                                    | SH-SY5Y  | mitochondria                          |                                        |
| nucleoplasm                                     | A-431    | nucleoplaPC-3                         | nucleoplasm                            |
| nucleoplasm                                     | MCF7     | nucleoplasm                           |                                        |
| focal adhesion sites                            | U-251 MG | focal adhesion sites                  |                                        |
| vesicles                                        | A-431    | cytosol U-251 MG                      | cytosol                                |
| plasma membrane, cytosol                        | A-431    | plasma membrane, cytosol              |                                        |
| cytosol                                         | U-251 MG | cytosol HEK 293                       | nucleoplasm, cytosol                   |
| cell junctions                                  |          |                                       |                                        |
| cytosol                                         | A-431    | plasma membrane, cytosol              |                                        |
| cytosol                                         | A-431    | plasma membrane, cytosol              |                                        |
| mitochondria                                    | MCF7     | mitochondria                          |                                        |
| cytosol                                         |          |                                       |                                        |
| vesicles                                        | A-431    | vesicles U-251 MG                     | vesicles                               |
| golgi apparatus                                 | HeLa     | golgi apparatus                       |                                        |
| nucleoplasm                                     | A-431    | nucleoplaU-251 MG                     | nucleoplasm                            |
| cytosol                                         | A-431    | cytosol U-251 MG                      | cytosol                                |
| nucleoplasm, mitochondria                       | A-431    | nucleoplaU-251 MG                     | nucleoplasm, mitochondria              |
| mitochondria                                    | A-431    | mitochondria                          |                                        |
| nucleoplasm, nucleoli                           | U-251 MG | nucleoplaA549                         | nucleoplasm, mitochondria              |

|                                                    |           |                              |                                        |
|----------------------------------------------------|-----------|------------------------------|----------------------------------------|
| nucleoplasm, nucleoli                              | A549      | nucleoplaHeLa                | nucleoplasm, nucleoli                  |
| plasma membrane                                    | HeLa      | nucleoplasm, plasma membrane |                                        |
| nucleoplasm                                        | A-431     | nucleoplaU-251 MG            | nucleoplasm                            |
| nucleoplasm, cytosol                               | A-431     | nucleoplaU-251 MG            | nucleoplasm, cytosol                   |
| nucleoplasm, cytosol                               | A-431     | nucleoplaU-251 MG            | nucleoplasm, cytosol                   |
| cytosol                                            | A-431     | nucleoplaU-251 MG            | nucleoplasm, cytosol                   |
| nucleoplasm, nucleoli                              | A-431     | nucleoplaU-251 MG            | nucleoplasm, nucleoli                  |
| plasma membrane, cytosol                           | A-431     | plasma meU-251 MG            | plasma membrane, cytosol               |
| nucleoplasm, cytosol                               | U-251 MG  | nucleoplasm, cytosol         |                                        |
| nucleoplasm                                        | A-431     | nucleoplaHeLa                | nucleoplasm                            |
| nucleoplasm, nuclear bodies                        | SiHa      | nucleoplaRH-30               | nucleoplasm, nuclear bodies, golgi app |
| nucleoplasm                                        | A-431     | nucleoplaU-251 MG            | nucleoplasm                            |
| nucleoplasm                                        | A-431     | nucleoplaMCF7                | nucleoplasm                            |
| mitochondria                                       | U-251 MG  | centrosomHEK 293             | centrosome, mitochondria               |
| centrosome                                         | U-251 MG  | nuclear bHEK 293             | centrosome                             |
| nucleoplasm, cell junctions                        | A549      | nucleoplasm                  |                                        |
| nuclear speckles                                   | A-431     | nuclear sU-251 MG            | nuclear speckles                       |
| plasma membrane, cytosol                           | A-431     | plasma meU-251 MG            | nucleoplasm, plasma membrane, cytosol  |
| nucleoplasm, plasma membrane                       | A-431     | nucleoplasm                  |                                        |
| nucleoplasm, cytosol                               | A-431     | nucleoplaU-251 MG            | nucleoplasm, plasma membrane, cytosol  |
| nucleoplasm, cytosol                               | A-431     | nucleoplaU-251 MG            | nucleoplasm, cytosol                   |
| nucleoplasm, mitochondria                          | A-431     | nucleoplaU-251 MG            | nucleoplasm, mitochondria              |
| mitochondria                                       | AF22      | mitochondria                 |                                        |
| nucleoplasm, cytosol                               | SH-SY5Y   | cytosol                      |                                        |
| nucleoplasm, cell junctions                        | PC-3      | nucleoplasm                  |                                        |
| golgi apparatus, cytosol                           | A-431     | golgi appU-251 MG            | golgi apparatus, cytosol               |
| cytosol                                            | SH-SY5Y   | nucleoplasm                  |                                        |
| nuclear membrane, vesicles                         | SH-SY5Y   | nucleoplaSK-MEL-30           | nucleoplasm, nuclear membrane, vesicle |
| mitochondria                                       | HaCaT     | mitochondria                 |                                        |
| nucleoplasm, nucleoli, plasma membrane             | A-431     | nucleoplaU-251 MG            | nucleoplasm, nucleoli, plasma membrane |
| vesicles                                           | Hep G2    | vesicles                     |                                        |
| microtubules, mitotic spindle, centrosome, cytosol |           |                              |                                        |
| cytosol                                            | RH-30     | centrosomHEL                 | microtubules, mitotic spindle, centros |
| nucleoplasm                                        | RH-30     | nucleoplaBJ                  | nucleoplasm, mitochondria              |
| plasma membrane, cytosol                           | A-431     | plasma meU-251 MG            | plasma membrane, cytosol               |
| nucleoplasm, mitochondria                          | MCF7      | nucleoplaRH-30               | nucleoplasm, mitochondria              |
| nucleoplasm, cytokinesis                           | SK-MEL-30 | nucleoplaAF22                | nucleoplasm                            |
| nucleoplasm                                        | AF22      | nucleoplasm                  |                                        |
| nucleoplasm                                        | SK-MEL-30 | nucleoplasm                  |                                        |
| endoplasmic reticulum, cytosol                     | A-431     | endoplasrU-251 MG            | endoplasmic reticulum, cytosol         |
| nucleoplasm, nuclear membrane, vesicles            | A-431     | nucleoplaPC-3                | nucleoplasm, nuclear membrane, vesicle |
| endoplasmic reticulum, plasma membrane, cytosol    | A-431     | endoplasrPC-3                | endoplasmic reticulum, cytosol         |
| cytosol                                            | A-431     | cytosol                      |                                        |
| vesicles, mitochondria                             | A-431     | mitochondHep G2              | mitochondria                           |
| nucleoplasm                                        | A-431     | nucleoplaU-251 MG            | nucleoplasm                            |
| nucleoplasm                                        | A-431     | nucleoplaU-251 MG            | nucleoplasm                            |
| nucleoplasm, nuclear membrane, cytosol             | RH-30     | nuclear nPC-3                | nucleoplasm, nuclear membrane          |
| cytosol                                            | A-431     | nucleoplaU-251 MG            | nucleoplasm, nuclear bodies, cytosol   |
| nucleoplasm                                        | A-431     | nucleoplasm, mitochondria    |                                        |
| centrosome                                         | U-251 MG  | centrosome                   |                                        |
| nucleoplasm                                        |           |                              |                                        |
| nucleoplasm                                        |           |                              |                                        |
| nucleoplasm, golgi apparatus                       | U-2 OS    | nucleoplaA549                | nucleoplasm, golgi apparatus           |
| nucleoplasm, golgi apparatus, cytosol              | U-2 OS    | nucleoplaA549                | nucleoplasm, golgi apparatus, cytosol  |
| nucleoplasm, nucleoli                              | RH-30     | nucleoplaPC-3                | nucleoplasm, nucleoli                  |

|                            |          |                                     |                                        |
|----------------------------|----------|-------------------------------------|----------------------------------------|
| nucleoplasm, nucleoli      | RH-30    | nucleoplaPC-3                       | nucleoplasm, nucleoli                  |
| nucleoplasm, vesicles      | SiHa     | nucleoplaHAP1                       | nucleoplasm                            |
| nucleoplasm, nucleoli fibr | U-251 MG | nucleoplaRH-30                      | nucleoplasm, nucleoli                  |
| vesicles                   | A-431    | nucleoplaU-251 MG                   | nucleoplasm, vesicles, centrosome      |
| nucleoplasm                |          |                                     |                                        |
| plasma membrane            |          |                                     |                                        |
| nucleoplasm, nucleoli fibr | A-431    | nucleoplaU-251 MG                   | nucleoplasm, nucleoli fibrillar cente  |
| nuclear speckles, cytosol  | A-431    | nuclear sU-251 MG                   | nuclear speckles, cytosol              |
| nucleoplasm, nuclear membr | MCF7     | nucleoplaSiHa                       | nucleoplasm, nuclear membrane          |
| vesicles                   | SH-SY5Y  | nucleoplaRH-30                      | nucleoplasm                            |
| mitochondria               | A-431    | mitochondria                        |                                        |
| nuclear speckles           | U-2 OS   | nuclear sRH-30                      | nuclear speckles                       |
| golgi apparatus, cytosol   | A-431    | golgi appU-251 MG                   | golgi apparatus, cytosol               |
| centrosome                 | A549     | centrosomHEL                        | vesicles, centrosome                   |
| nucleoli fibrillar center  | A-431    | nucleoli U-251 MG                   | nucleoli fibrillar center, plasma mem  |
| nucleoplasm, cytosol       | A-431    | plasma meU-251 MG                   | plasma membrane, cytosol               |
| cytosol                    |          |                                     |                                        |
| golgi apparatus            | A-431    | nucleoplaU-251 MG                   | golgi apparatus                        |
| nucleoplasm, golgi apparat | HeLa     | nucleoplaHaCaT                      | nucleoplasm, golgi apparatus           |
| nucleoplasm, nucleoli      | A-431    | nucleoplaU-251 MG                   | nucleoplasm, nucleoli                  |
| centrosome                 | HEK 293  | nucleoplaRH-30                      | nucleoplasm, nucleoli                  |
| nucleoplasm, plasma membr  | HEK 293  | nucleoplaA549                       | nucleoplasm, plasma membrane, cytosol  |
| nucleoplasm, plasma membr  | HEK 293  | nucleoplaSiHa                       | plasma membrane                        |
| plasma membrane            | EFO-21   | plasma membrane                     |                                        |
| mitochondria               | MCF7     | mitochondHep G2                     | mitochondria                           |
| nucleoplasm, nuclear membr | MCF7     | nucleoplaHEK 293                    | nucleoplasm, nuclear membrane          |
| focal adhesion sites       | U-2 OS   | focal adhU-251 MG                   | focal adhesion sites                   |
| mitochondria               | A-431    | mitochondU-251 MG                   | mitochondria                           |
| mitochondria               | MCF7     | mitochondria                        |                                        |
| mitochondria               | A-431    | mitochondU-251 MG                   | mitochondria                           |
| cytosol                    | A-431    | nucleoplaU-251 MG                   | cytosol                                |
| cytosol                    | A-431    | cytosol U-251 MG                    | cytosol                                |
| cytosol                    | RH-30    | lipid drocHaCaT                     | cytosol                                |
| plasma membrane            | HEL      | nucleoplasm, plasma membrane        |                                        |
| cytosol                    | A-431    | cytosol U-251 MG                    | cytosol                                |
| cytosol                    | A-431    | cytosol U-251 MG                    | cytosol                                |
| nucleoplasm, nuclear bodie | U-2 OS   | nucleoplaHEK 293                    | nuclear bodies                         |
| golgi apparatus, vesicles  | A-431    | golgi appU-251 MG                   | golgi apparatus, vesicles              |
| nucleoplasm                | A-431    | nucleoplaU-251 MG                   | nucleoplasm, nucleoli fibrillar cente  |
| nucleoplasm, cytosol       | A-431    | nucleoplaU-251 MG                   | nucleoplasm, cytosol                   |
| cytosol                    | MCF7     | golgi appSH-SY5Y                    | golgi apparatus                        |
| nucleoplasm, nucleoli      | A-431    | nucleoplaU-251 MG                   | nucleoplasm, nucleoli                  |
| nucleoli                   | A-431    | nucleoli U-251 MG                   | nucleoplasm, nucleoli                  |
| nucleoplasm, nucleoli      | A-431    | nucleoplaU-251 MG                   | nucleoplasm, nucleoli                  |
| nucleoplasm, nucleoli      | A-431    | nucleoplaU-251 MG                   | nucleoplasm, nucleoli                  |
| vesicles, cell junctions   | A-431    | vesicles, cell junctions            |                                        |
| nucleoplasm                | A-431    | nucleoplaU-251 MG                   | nucleoplasm                            |
| nucleoplasm                | A-431    | nucleoplaHEK 293                    | nucleoplasm                            |
| plasma membrane, cytoplasm | NB-4     | plasma membrane, cytoplasmic bodies |                                        |
| nucleoplasm, centriolar s  | A-431    | nucleoplaU-251 MG                   | nucleoplasm, centriolar satellite, cyt |
| nucleoplasm, cytosol       | RH-30    | nucleoplasm, cytosol                |                                        |
| nucleoplasm                |          |                                     |                                        |
| nucleoplasm                | HeLa     | nucleoplaHep G2                     | nucleoplasm                            |
| nuclear membrane, vesicles | HEK 293  | nuclear membrane                    |                                        |
| golgi apparatus            | A-431    | golgi appU-251 MG                   | golgi apparatus                        |

|                                                   |          |                                       |          |                                       |
|---------------------------------------------------|----------|---------------------------------------|----------|---------------------------------------|
| vesicles                                          | U-2 OS   | nucleoplasm                           | HEK 293  | nucleoplasm, vesicles                 |
| actin filaments                                   | A-431    | actin filaments                       | U-251 MG | vesicles                              |
| vesicles                                          | A-431    | vesicles                              | RH-30    | vesicles                              |
| endoplasmic reticulum                             | A-431    | endoplasmic reticulum                 | U-251 MG | endoplasmic reticulum                 |
| mitochondria                                      | A-431    | mitochondria                          | Hep G2   | mitochondria                          |
| golgi apparatus, cytosol                          |          |                                       |          |                                       |
| vesicles, cytosol                                 | MCF7     | vesicles                              | PC-3     | vesicles, cytosol                     |
| vesicles, plasma membrane                         | A-431    | vesicles                              | U-251 MG | vesicles, cytosol                     |
| vesicles                                          | A-431    | vesicles                              |          |                                       |
| vesicles                                          |          |                                       |          |                                       |
| nuclear speckles                                  | U-251 MG | nuclear speckles                      | HeLa     | nuclear speckles                      |
| nuclear speckles, cytosol                         | U-2 OS   | nuclear speckles, cytosol             | RH-30    | nuclear speckles, cytosol             |
| cytosol                                           | A-431    | cytosol                               | U-251 MG | cytosol                               |
| plasma membrane, cytosol                          | MCF7     | cytosol                               |          |                                       |
| plasma membrane                                   | PC-3     | plasma membrane                       |          |                                       |
| nucleoplasm, cytosol                              | A-431    | nucleoplasm, cytosol                  | U-251 MG | nuclear bodies, cytosol               |
| plasma membrane, cytosol                          | U-251 MG | plasma membrane, cytosol              | RH-30    | centrosome                            |
| nucleoplasm, nuclear bodies                       | U-251 MG | nucleoplasm, nuclear bodies           |          |                                       |
| nucleoplasm, vesicles                             | A-431    | nucleoplasm, vesicles                 | U-251 MG | nucleoplasm                           |
| nucleoplasm, cell junctions                       |          |                                       |          |                                       |
| nuclear bodies, cytosol                           | A-431    | nuclear bodies, cytosol               | U-251 MG | nuclear bodies, cytosol               |
| nucleoplasm, cytosol                              |          |                                       |          |                                       |
| microtubules, cytokinetic bridge, mitotic spindle |          |                                       |          |                                       |
| plasma membrane, cytosol                          | A-431    | plasma membrane, cytosol              | U-251 MG | plasma membrane, cytosol              |
| plasma membrane, cytosol                          | A-431    | plasma membrane, cytosol              | HeLa     | plasma membrane, cytosol              |
| cytosol                                           | A-431    | cytosol                               | U-251 MG | cytosol                               |
| cytosol                                           | A-431    | cytosol                               | U-251 MG | cytosol                               |
| nucleoplasm, mitotic spindle                      | HeLa     | nucleoplasm, mitotic spindle          | HaCaT    | nucleoplasm, nucleoli                 |
| nucleoplasm, centriolar satellite                 | MCF7     | nucleoplasm, centriolar satellite     | A549     | nucleoplasm, centriolar satellite     |
| nucleoplasm                                       | A-431    | nucleoplasm                           | U-251 MG | nucleoplasm                           |
| nucleoplasm                                       | A-431    | nucleoplasm                           | U-251 MG | nucleoplasm                           |
| nucleoplasm                                       | A-431    | nucleoplasm                           | U-251 MG | nucleoplasm                           |
| cytosol                                           | A-431    | cell junctions, cytosol               |          |                                       |
| plasma membrane                                   | U-251 MG | plasma membrane                       | LHCN-M2  | plasma membrane                       |
| microtubules                                      | A-431    | microtubules                          | U-251 MG | nucleoplasm, cytosol                  |
| nuclear speckles                                  | A-431    | nuclear speckles                      | U-251 MG | nuclear speckles                      |
| nuclear speckles                                  |          |                                       |          |                                       |
| nuclear speckles                                  | A-431    | nuclear speckles                      | PC-3     | nuclear speckles                      |
| nucleoplasm                                       | PC-3     | nucleoplasm                           |          |                                       |
| golgi apparatus                                   | A-431    | golgi apparatus                       | U-251 MG | golgi apparatus                       |
| golgi apparatus                                   | RH-30    | golgi apparatus                       |          |                                       |
| golgi apparatus, vesicles                         |          |                                       |          |                                       |
| cytosol                                           | A-431    | cytosol                               |          |                                       |
| mitochondria                                      | A-431    | mitochondria                          | Hep G2   | mitochondria                          |
| nucleoplasm, vesicles                             | U-2 OS   | nucleoplasm, vesicles                 | RH-30    | nucleoplasm, vesicles                 |
| endoplasmic reticulum                             | U-251 MG | endoplasmic reticulum                 | BJ       | endoplasmic reticulum                 |
| endoplasmic reticulum                             | BJ       | endoplasmic reticulum                 |          |                                       |
| nucleoplasm, microtubules                         | A-431    | nucleoplasm, microtubules             | U-251 MG | nucleoplasm, microtubules             |
| nucleoplasm, cytosol                              | MCF7     | nucleoplasm, cytosol                  |          |                                       |
| mitochondria                                      | A-431    | mitochondria                          | U-251 MG | mitochondria                          |
| plasma membrane, cytosol                          | A-431    | plasma membrane, cytosol              |          |                                       |
| plasma membrane                                   | U-2 OS   | nucleoplasm, plasma membrane, cytosol | A-431    | nucleoplasm, plasma membrane, cytosol |
| cytosol                                           |          |                                       |          |                                       |
| microtubules                                      | A-431    | microtubules                          | U-251 MG | microtubules                          |
| cytosol                                           |          |                                       |          |                                       |

|                                 |           |                                      |                                       |
|---------------------------------|-----------|--------------------------------------|---------------------------------------|
| nucleoplasm, cytosol            | U-2 OS    | nucleoplaHep G2                      | nucleoplasm, cytosol                  |
| nucleoplasm, cytosol            | HEK 293   | nucleoplaHep G2                      | nucleoplasm, cytosol                  |
| cytosol                         | U-251 MG  | cytosol HEK 293                      | cytosol                               |
| nucleoplasm, cytosol            | A-431     | nucleoplaU-251 MG                    | nucleoplasm, plasma membrane, cytosol |
| nucleoplasm, golgi apparatus    | A-431     | nucleoplaSK-MEL-30                   | nucleoplasm, golgi apparatus          |
| vesicles                        | U-251 MG  | vesicles                             |                                       |
| nuclear speckles                | A-431     | nuclear sU-251 MG                    | nuclear speckles                      |
| microtubules, cytokinetic       | A-431     | microtubuU-251 MG                    | microtubules                          |
| nuclear speckles                | A-431     | nuclear sU-251 MG                    | nuclear speckles                      |
| nucleoplasm                     | A549      | nucleoplaSiHa                        | nucleoplasm                           |
| nucleoplasm, vesicles           | A-431     | nucleoplaU-251 MG                    | nucleoplasm                           |
| nucleoli fibrillar center       | A-431     | nucleoli U-251 MG                    | nucleoli fibrillar center             |
| nucleoli fibrillar center       | A-431     | nucleoli HEK 293                     | nucleoli fibrillar center             |
| nucleoplasm, cytosol            | A-431     | nucleoplaU-251 MG                    | nucleoplasm, mitochondria             |
| nucleoplasm                     |           |                                      |                                       |
| vesicles                        | A-431     | vesicles U-251 MG                    | vesicles                              |
| vesicles, cytokinetic bric      | U-2 OS    | vesicles U-251 MG                    | vesicles                              |
| endoplasmic reticulum           | A-431     | endoplasrU-251 MG                    | endoplasmic reticulum                 |
| cell junctions                  |           |                                      |                                       |
| cytosol                         | A-431     | cytosol                              |                                       |
| nucleoplasm                     | A-431     | nucleoplaU-251 MG                    | nucleoplasm, cytosol                  |
| nucleoplasm                     | A549      | nucleoplaHep G2                      | nucleoplasm                           |
| nucleoplasm, golgi apparatus    | A549      | golgi appSK-MEL-30                   | golgi apparatus                       |
| nuclear speckles                | MCF7      | nuclear sPC-3                        | nuclear speckles                      |
| intermediate filaments, cy      | SH-SY5Y   | intermediate filaments               |                                       |
| nucleoli                        | HEK 293   | nucleoli, HaCaT                      | nucleoli, nuclear bodies              |
| nuclear speckles                |           |                                      |                                       |
| plasma membrane, cell junctions |           |                                      |                                       |
| plasma membrane, cytosol        | U-251 MG  | plasma membrane, cytosol             |                                       |
| nucleoplasm                     | RH-30     | nucleoplasm                          |                                       |
| cytosol                         | A-431     | golgi appU-251 MG                    | golgi apparatus                       |
| nucleoli                        | A549      | nucleoli                             |                                       |
| microtubules                    | A-431     | nucleoplaU-251 MG                    | microtubules                          |
| nuclear speckles, cytosol       | A-431     | nuclear sU-251 MG                    | nuclear speckles, cytosol             |
| nucleoplasm                     | HEK 293   | nucleoplaSH-SY5Y                     | nucleoplasm                           |
| cytosol                         | U-251 MG  | cytosol                              |                                       |
| plasma membrane                 | HEK 293   | plasma meHUVEC TER                   | endoplasmic reticulum, plasma membran |
| plasma membrane                 | U-251 MG  | plasma membrane                      |                                       |
| nuclear speckles, cell jur      | RH-30     | nucleoplasm, cytosol                 |                                       |
| nuclear speckles, cytosol       | RH-30     | nucleoplasm, cytosol                 |                                       |
| nucleoplasm                     | A-431     | nucleoplaU-251 MG                    | nucleoplasm                           |
| vesicles                        | U-251 MG  | vesicles, HeLa                       | vesicles                              |
| focal adhesion sites            | A-431     | nucleoplasm, cell junctions, cytosol |                                       |
| nucleoplasm                     | U-251 MG  | nucleoplasm                          |                                       |
| plasma membrane                 | HUVEC TER | plasma membrane                      |                                       |
| golgi apparatus                 | U-2 OS    | golgi appBJ                          | golgi apparatus                       |
| cytosol                         | RH-30     | vesicles                             |                                       |
| vesicles, cytosol               | U-2 OS    | vesicles, cytosol                    |                                       |
| vesicles, cytosol               | U-2 OS    | vesicles, Hep G2                     | vesicles, cytosol                     |
| mitochondria                    | A-431     | mitochondHEK 293                     | mitochondria                          |
| nucleoplasm                     | REH       | nucleoplasm                          |                                       |
| aggresome, cytosol              |           |                                      |                                       |
| nucleoplasm, golgi apparatus    | SiHa      | nucleoplasm, golgi apparatus         |                                       |
| mitochondria                    | A-431     | mitochondU-251 MG                    | mitochondria                          |
| nucleoplasm, golgi apparatus    | U-251 MG  | golgi apparatus                      |                                       |

|                             |          |                                                         |
|-----------------------------|----------|---------------------------------------------------------|
| endoplasmic reticulum       | HaCaT    | endoplasmic reticulum, mitochondria                     |
| nucleoplasm                 | A-431    | nucleoplaU-251 MG nucleoplasm                           |
| nucleoplasm, cytosol        |          |                                                         |
| centriolar satellite        | A-431    | centriolaU-251 MG nucleoli, centriolar satellite        |
| mitochondria                | A-431    | mitochondU-251 MG mitochondria                          |
| mitochondria                | A549     | mitochondSiHa mitochondria                              |
| vesicles                    | U-2 OS   | vesicles A549 vesicles                                  |
| nucleoplasm                 |          |                                                         |
| nucleoplasm                 | SiHa     | nuclear bSK-MEL-30nucleoplasm                           |
| nucleoplasm, aggresome      | A-431    | nucleoplaU-251 MG nucleoplasm                           |
| nucleoplasm, nuclear bodies | RH-30    | nucleoplaSK-MEL-30nucleoplasm, nucleoli, nuclear bodies |
| nuclear bodies              | HeLa     | nuclear bRH-30 nuclear bodies                           |
| endoplasmic reticulum, cyto | HEK 293  | endoplasrHep G2 endoplasmic reticulum, cytosol          |
| endoplasmic reticulum, cyto | HEK 293  | endoplasrA549 endoplasmic reticulum, cytosol            |
| nucleoplasm                 | A-431    | nucleoplaHep G2 nucleoplasm                             |
| golgi apparatus             |          |                                                         |
| cytosol                     | A-431    | vesicles, U-251 MG cytosol                              |
| nucleoplasm                 | MCF7     | nucleoplaHeLa nucleoplasm                               |
| nucleoplasm                 | SiHa     | nucleoplasm                                             |
| nuclear bodies              |          |                                                         |
| nucleoplasm, cytosol        | U-251 MG | nucleoplasm, cytosol                                    |
| nucleoplasm, cytosol        | U-251 MG | nucleoplasm, cytosol                                    |
| peroxisomes                 | U-251 MG | peroxisomes                                             |
| nucleoplasm, nucleoli fibr  | A-431    | nucleoplaU-251 MG nucleoplasm, nucleoli fibrillar cente |
| nucleoplasm, nuclear bodie  | rHEK 293 | nucleoplaA549 nucleoplasm                               |
| endoplasmic reticulum       | BJ       | endoplasmic reticulum                                   |
| nucleoli                    | U-2 OS   | nucleoli RH-30 nucleoli                                 |
| nucleoplasm, cytosol        | A-431    | nucleoplaU-251 MG nucleoplasm                           |
| nucleoplasm                 |          |                                                         |
| nucleoplasm, cytosol        |          |                                                         |
| nucleoplasm                 | K-562    | nucleoplasm                                             |
| nucleoplasm                 | A-431    | nucleoplaU-251 MG nucleoplasm                           |
| cytosol                     | A-431    | cytosol PC-3 cytosol                                    |
| nucleoplasm                 | A-431    | nucleoplaU-251 MG nucleoplasm                           |
| nucleoplasm, cytosol        | MCF7     | nucleoplasm                                             |
| nucleoplasm                 | A-431    | nucleoplaU-251 MG nucleoplasm                           |
| golgi apparatus, cytosol    | U-251 MG | golgi apparatus, cytosol                                |
| cytosol                     | U-251 MG | cytosol                                                 |
| nucleoplasm                 | A-431    | nucleoplaU-251 MG nucleoplasm                           |
| endoplasmic reticulum       | A-431    | endoplasrU-251 MG endoplasmic reticulum                 |
| nucleoplasm, centriolar s   | rRH-30   | nucleoplasm                                             |
| nucleoplasm, centrosome     | A549     | nucleoplaSK-MEL-30nucleoplasm                           |
| golgi apparatus             | A549     | golgi appBJ golgi apparatus                             |
| nuclear membrane            | Hep G2   | nuclear membrane, golgi apparatus                       |
| vesicles                    | Hep G2   | vesicles                                                |
| nucleoplasm                 |          |                                                         |
| nucleoplasm, midbody        | A-431    | nucleoplaU-251 MG nucleoplasm, cytosol                  |
| nucleoplasm, plasma membr   | rA549    | nucleoplaSiHa golgi apparatus                           |
| nucleoplasm, cytosol        | U-251 MG | nucleoplasm, cytosol                                    |
| endoplasmic reticulum       | A-431    | endoplasrU-251 MG endoplasmic reticulum                 |
| endoplasmic reticulum       | A-431    | endoplasrU-251 MG endoplasmic reticulum                 |
| endoplasmic reticulum       | A-431    | endoplasrU-251 MG endoplasmic reticulum                 |
| endoplasmic reticulum       |          |                                                         |
| nucleoplasm, nucleoli       | U-2 OS   | nucleoli HaCaT nucleoli                                 |
| plasma membrane, cytosol    |          |                                                         |

|                                      |           |                                      |          |                                        |
|--------------------------------------|-----------|--------------------------------------|----------|----------------------------------------|
| vesicles                             |           |                                      |          |                                        |
| cytosol                              | A-431     | cytosol                              | U-251 MG | cytosol                                |
| nucleoplasm                          | SK-MEL-30 | nucleoplasm                          |          |                                        |
| cytosol                              | A-431     | nucleopla                            | U-251 MG | cytosol                                |
| nucleoplasm, cell junctions          |           |                                      |          |                                        |
| nucleoplasm                          | U-2 OS    | nucleopla                            | HEK 293  | nucleoplasm                            |
| vesicles                             |           |                                      |          |                                        |
| golgi apparatus, plasma membrane     | A-431     | golgi app                            | U-251 MG | golgi apparatus, plasma membrane, cyto |
| golgi apparatus, plasma membrane     | A-431     | golgi app                            | U-251 MG | golgi apparatus, plasma membrane, cyto |
| nucleoplasm                          | A-431     | nucleopla                            | U-251 MG | nucleoplasm                            |
| golgi apparatus                      | A-431     | golgi app                            | U-251 MG | golgi apparatus                        |
| golgi apparatus                      | A-431     | golgi app                            | U-251 MG | golgi apparatus                        |
| golgi apparatus                      | RH-30     | golgi app                            | RPTEC    | TERnucleoplasm, cytosol                |
| vesicles                             | A-431     | vesicles, MCF7                       |          | vesicles, cytosol                      |
| nucleoplasm, vesicles                | U-251 MG  | nucleoplasm                          |          |                                        |
| cytosol                              | A-431     | cytosol                              | U-251 MG | nucleoplasm, cytosol                   |
| golgi apparatus, vesicles            | A-431     | golgi app                            | U-251 MG | golgi apparatus, vesicles              |
| nucleoplasm                          | U-2 OS    | nucleopla                            | U-251 MG | nucleoplasm                            |
| nucleoplasm, endoplasmic reticulum   | U-251 MG  | endoplasm                            | HUVEC    | TERendoplasmic reticulum               |
| nucleoplasm, cytosol                 | A-431     | nucleopla                            | U-251 MG | nucleoplasm, cytosol                   |
| nucleoplasm, cytosol                 | MCF7      | nucleopla                            | A549     | nucleoplasm, cytosol                   |
| nucleoli fibrillar center            | A-431     | nucleopla                            | U-251 MG | nucleoplasm, nucleoli fibrillar center |
| centrosome                           | U-251 MG  | centrosom                            | RH-30    | centrosome                             |
| cytosol                              | MCF7      | cytosol                              | Hep G2   | cytosol                                |
| peroxisomes                          | A-431     | peroxisom                            | U-251 MG | peroxisomes                            |
| nucleoplasm                          | PC-3      | nucleoplasm, nucleoli                |          |                                        |
| plasma membrane                      |           |                                      |          |                                        |
| nucleoplasm, plasma membrane         |           |                                      |          |                                        |
| nucleoplasm                          | A-431     | nucleopla                            | U-251 MG | nucleoplasm                            |
| nucleoplasm                          | U-251 MG  | nucleoplasm                          |          |                                        |
| golgi apparatus                      | A-431     | golgi app                            | U-251 MG | golgi apparatus, cytosol               |
| nucleoplasm                          | A-431     | nucleopla                            | U-251 MG | nucleoplasm                            |
| nucleoplasm, nuclear membrane        | SH-SY5Y   | nucleoplasm, nuclear membrane        |          |                                        |
| nuclear bodies                       | A-431     | nucleopla                            | U-251 MG | nucleoplasm                            |
| nuclear bodies                       | U-251 MG  | nucleoplasm                          |          |                                        |
| nucleoplasm, nuclear bodies          | A-431     | nucleopla                            | U-251 MG | nucleoplasm                            |
| mitochondria                         | A-431     | mitochond                            | U-251 MG | nucleoplasm, mitochondria              |
| nucleoplasm, mitochondria, cytosol   | A549      | nucleoplasm, mitochondria, cytosol   |          |                                        |
| vesicles                             | RH-30     | vesicles                             |          |                                        |
| vesicles                             | U-251 MG  | vesicles                             |          |                                        |
| nucleoplasm                          | U-2 OS    | nucleopla                            | Hep G2   | nucleoplasm                            |
| nucleoplasm                          | U-251 MG  | nucleoplasm                          |          |                                        |
| nucleoplasm, cytosol                 | A-431     | nucleopla                            | U-251 MG | nucleoplasm, cytosol                   |
| nucleoplasm, cytosol                 | A-431     | nucleoplasm, cytosol                 |          |                                        |
| cytoplasmic bodies                   | A-431     | cytoplasmic bodies                   |          |                                        |
| vesicles, cytosol                    | A-431     | plasma membrane                      | U-251 MG | vesicles, cytosol                      |
| vesicles                             | A-431     | vesicles, plasma membrane            |          |                                        |
| nucleoplasm, vesicles                | A-431     | nucleopla                            | U-251 MG | nucleoplasm, vesicles                  |
| nucleoplasm, nuclear bodies          | U-2 OS    | nucleopla                            | U-251 MG | nucleoplasm, nuclear bodies            |
| vesicles                             | U-251 MG  | vesicles                             |          |                                        |
| nucleoplasm, nuclear bodies, cytosol | U-251 MG  | nucleoplasm, nuclear bodies, cytosol |          |                                        |
| cytosol                              | A-431     | cytosol                              | U-251 MG | cytosol                                |
| nucleoli, cytosol                    | HEK 293   | cytosol                              | A549     | nucleoplasm, nucleoli, cytosol         |
| vesicles                             | A-431     | vesicles                             | SH-SY5Y  | golgi apparatus, vesicles              |
| cytosol                              | A-431     | cytosol                              | U-251 MG | cytosol                                |

|                                        |          |                                        |            |
|----------------------------------------|----------|----------------------------------------|------------|
| nucleoplasm, plasma membrane           |          |                                        |            |
| plasma membrane, centrosome            | A-431    | plasma membrane, centrosome, cytosol   | meU-251 MG |
| nucleoplasm, nuclear bodies            |          |                                        |            |
| nucleoplasm                            | HEK 293  | nucleoplasm, nuclear bodies            | HEL        |
| nucleoplasm, cytosol                   |          |                                        |            |
| nucleoplasm, cytosol                   | A-431    | nucleoplasm                            | U-251 MG   |
| nucleoplasm, cytosol                   | A-431    | nucleoplasm, cytosol                   | A549       |
| plasma membrane, cytosol               | EF0-21   | plasma membrane, cytosol               |            |
| cytosol                                | RH-30    | cytosol                                | BJ         |
| plasma membrane, cytosol               | A-431    | plasma membrane, cytosol               | meU-251 MG |
| plasma membrane, cytosol               | A-431    | cytosol                                | meU-251 MG |
| nucleoplasm                            | A-431    | nucleoplasm                            | U-251 MG   |
| cytosol                                | A-431    | cytosol                                | U-251 MG   |
| cytosol                                | A-431    | cytosol                                | U-251 MG   |
| nucleoplasm                            | A-431    | nucleoplasm, nucleoli fibrillar center | U-251 MG   |
| nucleoplasm                            | A-431    | nucleoplasm                            | U-251 MG   |
| vesicles                               | A-431    | vesicles                               | U-251 MG   |
| endoplasmic reticulum                  | A-431    | endoplasmic reticulum                  | U-251 MG   |
| endoplasmic reticulum                  | A-431    | endoplasmic reticulum                  | U-251 MG   |
| endoplasmic reticulum                  | U-251 MG | endoplasmic reticulum                  |            |
| nuclear bodies                         | RH-30    | nuclear bodies                         | bPC-3      |
| nucleoplasm                            | A-431    | nucleoplasm                            | SH-SY5Y    |
| nucleoplasm, nucleoli                  | A-431    | nucleoplasm, nucleoli                  | U-251 MG   |
| cytosol                                | SiHa     | nucleoplasm                            |            |
| nucleoplasm                            | A-431    | nucleoplasm                            | U-251 MG   |
| nucleoplasm, nuclear bodies            | A549     | nucleoplasm                            | HEL        |
| vesicles, mitochondria                 | A-431    | vesicles, mitochondria                 | U-251 MG   |
| nucleoplasm, nucleoli fibrillar center | SH-SY5Y  | nucleoplasm, nucleoli fibrillar center | BJ         |
| cytosol                                |          |                                        |            |
| nucleoplasm                            | U-2 OS   | nucleoplasm                            | A549       |
| nucleoplasm                            | U-2 OS   | nucleoplasm                            | A549       |
| cytosol                                | A-431    | cytosol                                | U-251 MG   |
| microtubules, cytosol                  | A-431    | nucleoplasm                            | U-251 MG   |
| golgi apparatus                        | A-431    | golgi apparatus                        | U-251 MG   |
| golgi apparatus                        | A-431    | golgi apparatus                        | U-251 MG   |
| mitochondria                           | HaCaT    | mitochondria                           |            |
| vesicles                               | A-431    | vesicles                               | U-251 MG   |
| nucleoplasm, vesicles                  | MCF7     | nucleoplasm, vesicles                  | PC-3       |
| nucleoplasm, nucleoli, cell            | MCF7     | nucleoplasm, nucleoli                  | HeLa       |
| vesicles, intermediate filaments       | A-431    | vesicles, intermediate filaments       | U-251 MG   |
| cytosol                                | A-431    | cytosol                                |            |
| nucleoplasm                            | BJ       | nucleoplasm                            | PC-3       |
| cytosol                                | A-431    | cytosol                                | U-251 MG   |
| cytosol                                | HEK 293  | cytosol                                | Hep G2     |
| nucleoplasm                            | A-431    | nucleoplasm                            | U-251 MG   |
| nucleoplasm, vesicles                  | A-431    | nucleoplasm, vesicles                  | U-251 MG   |
| cytosol                                | A-431    | cytosol                                |            |
| plasma membrane                        | MCF7     | nucleoplasm, plasma membrane           | Hep G2     |
| vesicles                               | A-431    | nucleoplasm, vesicles                  | U-251 MG   |
| plasma membrane                        | A549     | plasma membrane                        | meHaCaT    |
| cytosol                                | U-2 OS   | cytosol                                |            |
| cytosol                                | MCF7     | cytosol                                |            |
| golgi apparatus                        | A-431    | golgi apparatus                        | NB-4       |
| nucleoplasm                            | A-431    | nucleoplasm                            | U-251 MG   |



|                                           |                  |                                           |                   |                                                     |
|-------------------------------------------|------------------|-------------------------------------------|-------------------|-----------------------------------------------------|
| nucleoplasm, intermediate vesicles        | A549<br>A-431    | nucleoplasm, intermediate vesicles        | SH-SY5Y<br>RH-30  | nucleoplasm, intermediate filaments vesicles        |
| nucleoplasm, vesicles cytosol             | U-2 OS<br>A-431  | nucleoplasm, cytosol golgi app            | U-251 MG          | golgi apparatus, cytosol                            |
| nucleoplasm                               | A-431            | nucleoplasm                               | U-251 MG          | nucleoplasm                                         |
| nucleoplasm, nuclear speck cytosol        | SiHa<br>A-431    | nucleoplasm, nuclear speck cytosol        | RH-30<br>U-251 MG | nucleoplasm, nuclear speckles cytosol               |
| cytosol                                   | U-251 MG         | cytosol                                   |                   |                                                     |
| nucleoplasm, nucleoli cytosol             | A549<br>A-431    | nucleoplasm, nucleoli cytosol             | SiHa<br>U-251 MG  | nucleoplasm centrosome, cytosol                     |
| nucleoplasm                               | U-251 MG         | nucleoplasm                               | A549              | nucleoplasm                                         |
| mitochondria                              | MCF7             | mitochondria                              | PC-3              | mitochondria                                        |
| intermediate filaments                    | SH-SY5Y          | intermediate filaments                    |                   |                                                     |
| nuclear membrane, nuclear plasma membrane | HEK 293<br>HaCaT | nuclear membrane, nuclear plasma membrane | HeLa              | nuclear membrane, nuclear speckles, golgi apparatus |
| mitochondria                              | U-2 OS           | mitochondria                              | Hep G2            | mitochondria                                        |
| endoplasmic reticulum                     | U-251 MG         | endoplasmic reticulum                     |                   |                                                     |
| endoplasmic reticulum cytosol             | A549<br>A-431    | endoplasmic reticulum cytosol             | U-251 MG          | plasma membrane, cytosol                            |
| cytosol                                   |                  | cytosol                                   |                   |                                                     |
| nucleoplasm, nucleoli, cytosol            | A-431            | nucleoplasm, nucleoli, cytosol            | U-251 MG          | nucleoplasm, golgi apparatus, cytosol               |
| mitochondria                              |                  | mitochondria                              |                   |                                                     |
| plasma membrane                           |                  | plasma membrane                           |                   |                                                     |
| cytosol                                   | A-431            | cytosol                                   | U-251 MG          | cytosol                                             |
| vesicles                                  | SH-SY5Y          | vesicles                                  | SiHa              | vesicles                                            |
| nuclear bodies                            | U-2 OS           | nuclear bodies                            | SiHa              | nuclear bodies                                      |
| nucleoplasm                               | A-431            | nucleoplasm                               | U-251 MG          | nucleoplasm                                         |
| nucleoplasm                               |                  | nucleoplasm                               |                   |                                                     |
| nucleoplasm, nucleoli                     | A-431            | nucleoplasm, nucleoli                     | U-251 MG          | nucleoplasm, nucleoli                               |
| nucleoplasm, plasma membrane              | RH-30            | nucleoplasm, plasma membrane, cytosol     |                   |                                                     |
| endoplasmic reticulum                     | MCF7             | endoplasmic reticulum                     | Hep G2            | endoplasmic reticulum                               |
| vesicles                                  | A-431            | vesicles                                  | U-251 MG          | vesicles                                            |
| nucleoplasm                               | A-431            | nucleoplasm                               | U-251 MG          | nucleoplasm                                         |
| cytosol                                   | A-431            | cytosol                                   | U-251 MG          | cytosol                                             |
| nucleoplasm, nucleoli                     | U-251 MG         | nucleoplasm, nucleoli, plasma membrane    | PC-3              |                                                     |
| nucleoplasm, mitochondria                 | U-251 MG         | nucleoplasm, mitochondria                 | A549              | nucleoplasm, mitochondria                           |
| nucleoplasm                               | U-251 MG         | nucleoplasm                               |                   |                                                     |
| endoplasmic reticulum                     |                  | endoplasmic reticulum                     |                   |                                                     |
| nucleoplasm                               | A-431            | nucleoplasm                               | REH               | cytosol                                             |
| nucleoplasm                               | A-431            | nucleoplasm                               | U-251 MG          | nucleoplasm                                         |
| nucleoplasm                               | A-431            | nucleoplasm                               | U-251 MG          | nucleoplasm                                         |
| cell junctions, cytosol                   | A-431            | cell junctions, cytosol                   | U-251 MG          | cytosol                                             |
| nucleoplasm                               | A-431            | nucleoplasm                               | U-251 MG          | nucleoplasm, nuclear bodies                         |
| vesicles, cytosol                         | A-431            | vesicles, cytosol                         |                   |                                                     |
| nucleoplasm, cytosol                      | A-431            | nucleoplasm, cytosol                      | U-251 MG          | nucleoplasm, cytosol                                |
| nucleoplasm, plasma membrane              | A-431            | nucleoplasm, plasma membrane, cytosol     | U-251 MG          | nucleoplasm, cytosol                                |
| nucleoplasm, vesicles                     | MCF7             | nucleoplasm, vesicles                     | SiHa              | nucleoplasm, vesicles                               |
| plasma membrane                           | MCF7             | plasma membrane                           | HeLa              | vesicles, plasma membrane                           |
| nucleoli, endoplasmic reticulum           | MCF7             | nucleoli, endoplasmic reticulum, cytosol  | PC-3              |                                                     |
| nucleoplasm, cytosol                      | A-431            | nucleoplasm, cytosol                      | U-251 MG          | nucleoplasm                                         |
| golgi apparatus                           | MCF7             | golgi apparatus                           |                   |                                                     |
| vesicles                                  | A-431            | vesicles                                  | U-251 MG          | vesicles                                            |
| nucleoplasm, plasma membrane              | A-431            | nucleoplasm, plasma membrane, cytosol     | U-251 MG          | nucleoplasm, plasma membrane, cytosol               |
| golgi apparatus                           | A-431            | golgi apparatus                           |                   |                                                     |
| nucleoli, centrosome                      | PC-3             | nucleoli, centrosome                      | SK-MEL-30         | nucleoplasm, centrosome                             |

|                                          |           |                                            |                                        |
|------------------------------------------|-----------|--------------------------------------------|----------------------------------------|
| microtubules                             | A-431     | microtubuU-251 MG                          | microtubules                           |
| microtubules                             | A-431     | microtubuU-251 MG                          | microtubules                           |
| microtubules                             | U-251 MG  | microtubuPC-3                              | microtubules                           |
| microtubules                             | A-431     | microtubuU-251 MG                          | microtubules                           |
| microtubules                             | U-251 MG  | microtubuPC-3                              | microtubules                           |
| nucleoplasm                              |           |                                            |                                        |
| nuclear speckles                         | U-2 OS    | nuclear sRH-30                             | nuclear speckles                       |
| nucleoplasm                              | A-431     | nucleoplaU-251 MG                          | nucleoplasm                            |
| nucleoli                                 | MCF7      | nucleoli A549                              | nucleoli                               |
| golgi apparatus                          | A-431     | golgi appU-251 MG                          | golgi apparatus                        |
| golgi apparatus                          | A549      | golgi appHeLa                              | golgi apparatus                        |
| endoplasmic reticulum                    |           |                                            |                                        |
| vesicles, plasma membrane,               | U-251 MG  | vesicles, plasma membrane, actin filaments |                                        |
| mitochondria                             | A-431     | mitochondU-251 MG                          | mitochondria                           |
| plasma membrane                          | A-431     | plasma meU-251 MG                          | plasma membrane                        |
| nucleoplasm                              | A-431     | nucleoplaU-251 MG                          | nucleoplasm                            |
| nucleoplasm                              | HEK 293   | nucleoplaHeLa                              | nucleoplasm, cytosol                   |
| vesicles                                 | SH-SY5Y   | vesicles                                   |                                        |
| nucleoplasm, golgi apparatus             | MCF7      | nucleoplaA549                              | nucleoplasm, golgi apparatus           |
| golgi apparatus                          | A549      | nucleoplasm, vesicles                      |                                        |
| golgi apparatus                          | U-2 OS    | golgi appA-431                             | golgi apparatus                        |
| nucleoli, cytosol                        | A-431     | nucleoli U-251 MG                          | nucleoli                               |
| nucleoplasm                              |           |                                            |                                        |
| nucleoplasm                              | A-431     | nucleoplasm, nuclear bodies                |                                        |
| nucleoplasm                              | U-2 OS    | nucleoplaA549                              | nucleoplasm                            |
| intermediate filaments                   | A-431     | intermediU-251 MG                          | plasma membrane, cytosol               |
| cytosol                                  |           |                                            |                                        |
| nucleoplasm, cytosol                     |           |                                            |                                        |
| nucleoplasm, cytosol                     | A549      | nucleoplaPC-3                              | nucleoplasm, plasma membrane, cytosol  |
| vesicles                                 | U-251 MG  | vesicles A549                              | golgi apparatus, vesicles              |
| mitochondria                             | HEK 293   | mitochondPC-3                              | nuclear bodies, mitochondria           |
| plasma membrane                          |           |                                            |                                        |
| nucleoplasm                              | U-251 MG  | nucleoplasm                                |                                        |
| plasma membrane, cytosol                 | U-251 MG  | cytosol                                    |                                        |
| plasma membrane, cytosol                 | U-251 MG  | plasma meHEK 293                           | plasma membrane, aggresome, cytosol    |
| nucleoplasm, cytosol                     | U-251 MG  | nucleoplasm, cytosol                       |                                        |
| golgi apparatus, cytosol                 | HEK 293   | golgi apparatus, cytosol                   |                                        |
| nucleoplasm, mitochondria                | A-431     | nucleoplaU-251 MG                          | nucleoplasm                            |
| nucleoplasm                              | A-431     | nucleoplaU-251 MG                          | nucleoplasm                            |
| lipid droplets, plasma membrane, cytosol |           |                                            |                                        |
| lipid droplets, cytosol                  | U-2 OS    | vesicles PC-3                              | vesicles, plasma membrane, cytosol     |
| nucleoplasm                              | HEK 293   | nucleoplaA549                              | nucleoplasm                            |
| nucleoplasm, nucleoli                    | HEK 293   | nucleoplaPC-3                              | nucleoplasm, nucleoli                  |
| golgi apparatus, cytosol                 | A-431     | golgi appU-251 MG                          | golgi apparatus, cytosol               |
| nucleoplasm, cytosol                     | A-431     | nucleoplasm, cytosol                       |                                        |
| cytosol                                  | A-431     | cytosol U-251 MG                           | cytosol                                |
| nucleoplasm, nucleoli, cyto              | U-251 MG  | nucleoplasm, nucleoli, cytosol             |                                        |
| vesicles                                 |           |                                            |                                        |
| nucleoplasm, cytosol                     | A-431     | nucleoplasm, cytosol                       |                                        |
| nucleoplasm                              | A-431     | nucleoplaU-251 MG                          | nucleoplasm                            |
| vesicles                                 | AF22      | vesicles                                   |                                        |
| nucleoplasm                              | HeLa      | nucleoplasm                                |                                        |
| plasma membrane                          | U-2 OS    | plasma meRH-30                             | centrosome, cytosol                    |
| nucleoplasm, vesicles                    | SK-MEL-30 | vesicles                                   |                                        |
| nuclear membrane                         | A-431     | nuclear rU-251 MG                          | nuclear membrane, nucleoli, centrosome |

|                                          |          |                               |                                        |
|------------------------------------------|----------|-------------------------------|----------------------------------------|
| plasma membrane                          | HEK 293  | aggresome                     |                                        |
| nucleoplasm                              | U-2 OS   | nucleoplaA-431                | nucleoplasm, nuclear membrane          |
| nucleoplasm                              | U-251 MG | nucleoplasm                   |                                        |
| intermediate filaments                   | A-431    | intermediHaCaT                | intermediate filaments                 |
| intermediate filaments                   | A-431    | intermediate filaments        |                                        |
| nucleoplasm, plasma membr                | MCF7     | nucleoplaHeLa                 | nucleoplasm, cytosol                   |
| nucleoplasm, vesicles                    | Hep G2   | nucleoplaSH-SY5Y              | nucleoplasm, midbody                   |
| vesicles                                 | SiHa     | nucleoplaBJ                   | nucleoplasm                            |
| cytosol                                  | PC-3     | cytosol                       |                                        |
| nucleoplasm, actin filamer               | A-431    | nucleoplaU-251 MG             | nucleoplasm, cytosol                   |
| mitochondria, cytosol                    | PC-3     | cytosol SK-MEL-30             | mitochondria, cytosol                  |
| nucleoplasm                              | PC-3     | nucleoplasm                   |                                        |
| nucleoli, cytosol                        | A-431    | nucleoli, U-251 MG            | nucleoli, cytosol                      |
| nucleoplasm, cytosol                     | Hep G2   | nucleoplasm, vesicles         |                                        |
| golgi apparatus, mitochonc               | HEL      | golgi apparatus, vesicles     |                                        |
| cytosol                                  | U-251 MG | golgi appMCF7                 | golgi apparatus                        |
| nucleoplasm                              | A-431    | nucleoplaA549                 | nucleoplasm, mitochondria              |
| mitochondria                             | A-431    | mitochondU-251 MG             | mitochondria                           |
| intermediate filaments                   | U-2 OS   | intermediMCF7                 | intermediate filaments                 |
| cytosol                                  | A-431    | cytosol                       |                                        |
| cytosol                                  | A-431    | cytosol U-251 MG              | focal adhesion sites, cytosol          |
| nucleoplasm, mitotic spinc               | A549     | nucleoplaAF22                 | nucleoplasm, cytokinetic bridge, mitot |
| golgi apparatus                          | HaCaT    | golgi apparatus               |                                        |
| vesicles                                 | A-431    | vesicles                      |                                        |
| nucleoplasm, plasma membr                | A-431    | nuclear bU-251 MG             | nucleoplasm, plasma membrane, cytosol  |
| nuclear bodies, plasma membrane, cytosol |          |                               |                                        |
| intermediate filaments                   | A-431    | intermediU-251 MG             | cytosol                                |
| mitochondria                             | MCF7     | nucleoplaSiHa                 | nucleoplasm, mitochondria              |
| plasma membrane, cytosol                 | A-431    | plasma meU-251 MG             | plasma membrane, cytosol               |
| cytosol                                  | A-431    | cytosol U-251 MG              | cytosol                                |
| plasma membrane, centroson               | MCF7     | cell juncHeLa                 | vesicles, plasma membrane              |
| nucleoplasm                              | MCF7     | nucleoplaHEK 293              | nucleoplasm, aggresome                 |
| nucleoplasm                              |          |                               |                                        |
| nucleoplasm                              | MCF7     | nucleoplasm                   |                                        |
| mitochondria                             |          |                               |                                        |
| mitochondria                             |          |                               |                                        |
| mitochondria                             |          |                               |                                        |
| nucleoplasm                              | Hep G2   | cytosol                       |                                        |
| nucleoplasm, cytosol                     | MCF7     | nucleoplaHUVEC TER            | nucleoplasm, cytosol                   |
| nuclear speckles                         | A-431    | nuclear sU-251 MG             | nuclear speckles                       |
| nuclear speckles                         | HEK 293  | nuclear sHeLa                 | nuclear speckles                       |
| nucleoplasm, nucleoli                    | U-2 OS   | nucleoplaRH-30                | nucleoplasm                            |
| vesicles                                 | REH      | centriolaNB-4                 | centriolar satellite, cytosol          |
| nucleoli, mitochondria, cyt              | A-431    | mitochondU-251 MG             | mitochondria, cytosol                  |
| nucleoplasm                              | A-431    | nucleoplaMCF7                 | nucleoplasm                            |
| nucleoplasm                              | HEK 293  | nucleoplaA549                 | nucleoplasm                            |
| vesicles                                 | A-431    | nucleoplaU-251 MG             | nucleoplasm, vesicles                  |
| nucleoplasm, cytosol                     | U-2 OS   | nucleoplaHep G2               | nucleoplasm, cytosol                   |
| nucleoplasm, vesicles                    | Hep G2   | nucleoplasm, vesicles         |                                        |
| cytosol                                  | K-562    | centriolar satellite, cytosol |                                        |
| microtubules                             | A-431    | microtubuU-251 MG             | microtubules                           |
| nucleoplasm                              | MCF7     | nucleoplaPC-3                 | nucleoplasm                            |
| nucleoplasm, plasma membr                | A-431    | nucleoplaU-251 MG             | nucleoplasm, plasma membrane, cytosol  |
| plasma membrane                          | HAP1     | plasma membrane               |                                        |
| nuclear speckles                         | A-431    | nuclear sU-251 MG             | nuclear speckles                       |

|                             |          |                          |                                    |
|-----------------------------|----------|--------------------------|------------------------------------|
| nucleoplasm                 | A-431    | nucleoplaU-251 MG        | nucleoplasm                        |
| nucleoplasm                 |          |                          |                                    |
| nucleoplasm                 | RH-30    | nucleoplasm,             | centriolar satellite               |
| nucleoplasm                 | A-431    | nucleoplaU-251 MG        | nucleoplasm                        |
| nucleoplasm                 | A-431    | nucleoplaU-251 MG        | nucleoplasm, centrosome            |
| nucleoplasm                 | A-431    | nucleoplaU-251 MG        | nucleoplasm                        |
| plasma membrane, cytosol    | MCF7     | cytosol                  |                                    |
| plasma membrane             | A-431    | plasma meU-251 MG        | plasma membrane                    |
| plasma membrane             | A-431    | plasma meU-251 MG        | plasma membrane                    |
| plasma membrane             | A-431    | plasma meU-251 MG        | plasma membrane                    |
| mitochondria                | A-431    | nucleoplaU-251 MG        | nucleoplasm, cytosol               |
| nucleoplasm, cytosol        | A-431    | nucleoplaU-251 MG        | nucleoplasm, cytosol               |
| nucleoplasm, cytosol        | U-251 MG | nucleoplasm, cytosol     |                                    |
| nucleoplasm                 | A549     | nucleoplaPC-3            | nucleoplasm, cytosol               |
| cytosol                     | Hep G2   | cytosol BJ               | cytosol                            |
| cytosol                     | A-431    | cytosol U-251 MG         | cytosol                            |
| nucleoli                    | Hep G2   | nucleoli SK-MEL-30       | nucleoli                           |
| nucleoplasm                 | A-431    | nucleoplaU-251 MG        | nucleoplasm                        |
| vesicles                    | A-431    | vesicles U-251 MG        | vesicles                           |
| nucleoplasm, centrosome, cy | U-251 MG | nucleoplaHeLa            | nucleoplasm, centrosome            |
| endoplasmic reticulum       | HeLa     | endoplasmic reticulum    |                                    |
| golgi apparatus, cytosol    |          |                          |                                    |
| cytosol                     | A-431    | cytosol U-251 MG         | cytosol                            |
| nucleoplasm                 | A-431    | nucleoplaU-251 MG        | nucleoplasm                        |
| plasma membrane, cytosol    | MCF7     | nucleoli HeLa            | nucleoli, plasma membrane, cytosol |
| nucleoplasm, cytosol        | A-431    | nucleoplaU-251 MG        | nucleoplasm, cytosol               |
| plasma membrane, cytosol    | A-431    | plasma membrane, cytosol |                                    |
| nucleoplasm, nuclear membr  | A-431    | nucleoplaU-251 MG        | nuclear membrane                   |
| nucleoplasm, cytosol        | A-431    | nucleoplaU-251 MG        | nucleoplasm, cytosol               |
| nucleoplasm                 | A-431    | nucleoplaHeLa            | nucleoplasm                        |
| mitochondria                | SiHa     | nucleoli, BJ             | nucleoplasm, mitochondria          |
| nucleoplasm                 | A-431    | nucleoplaU-251 MG        | nucleoplasm                        |
| mitochondria                | A-431    | mitochondU-251 MG        | mitochondria                       |
| nucleoplasm, cytosol        | A-431    | nucleoplaU-251 MG        | nucleoplasm, cytosol               |
| golgi apparatus, centriol   | A-431    | centriolaU-251 MG        | centriolar satellite, cytosol      |
| nucleoplasm, cytosol        | A-431    | nucleoplaU-251 MG        | nucleoplasm, cytosol               |
| cytosol                     | A-431    | cytosol hTCEpi           | cytosol                            |
| nucleoplasm                 | A-431    | nucleoplaU-251 MG        | nucleoplasm                        |
| nuclear speckles, golgi ap  | U-251 MG | nuclear sRH-30           | nuclear speckles, golgi apparatus  |
| nucleoplasm                 | HeLa     | nucleoplaSiHa            | nucleoplasm                        |
| cytosol, rods & rings       | A-431    | golgi appU-251 MG        | golgi apparatus, cytosol           |
| nucleoplasm                 |          |                          |                                    |
| nucleoplasm, nucleoli       | SH-SY5Y  | nucleoplaRH-30           | nucleoplasm, nucleoli              |
| nucleoplasm, cytosol        | A-431    | nucleoplaU-251 MG        | nucleoplasm, cytosol               |
| nucleoplasm                 | A-431    | nucleoplaU-251 MG        | nucleoplasm                        |
| nucleoplasm                 | A549     | nucleoplaSK-MEL-30       | nucleoplasm                        |
| nucleoplasm                 | A-431    | nucleoplaU-251 MG        | nucleoplasm                        |
| nucleoli, vesicles          | MCF7     | nucleoli, HaCaT          | nucleoli, vesicles                 |
| nucleoplasm, mitochondria   | MCF7     | nucleoplaHEK 293         | nucleoplasm, mitochondria          |
| nucleoplasm, mitochondria   | A-431    | mitochondU-251 MG        | mitochondria                       |
| vesicles                    | PC-3     | vesicles                 |                                    |
| golgi apparatus             | A-431    | golgi appU-251 MG        | golgi apparatus                    |
| nuclear bodies, cytosol     | HEK 293  | nuclear bPC-3            | nuclear bodies                     |
| nucleoplasm, nuclear bodi   | A-431    | nucleoplaU-251 MG        | nucleoplasm, nucleoli              |
| nucleoplasm, cytokinetic t  | A-431    | nucleoplaU-251 MG        | nucleoplasm, cytokinetic bridge    |

|                               |           |                           |                                        |
|-------------------------------|-----------|---------------------------|----------------------------------------|
| nucleoplasm, cytosol          | REH       | nucleoplaHAP1             | nucleoplasm, cytosol                   |
| mitochondria                  | A-431     | nucleoplaU-251 MG         | nucleoplasm                            |
| plasma membrane, centriolæ    | U-251 MG  | cytosol                   |                                        |
| nuclear speckles, cytosol     | A-431     | nuclear sU-251 MG         | nuclear speckles, cytosol              |
| nucleoplasm, plasma membræ    | U-2 OS    | plasma meHaCaT            | plasma membrane                        |
| nucleoli, mitochondria        | A-431     | nucleoli, U-251 MG        | nucleoli, mitochondria                 |
| nucleoplasm, golgi apparatus  | U-251 MG  | nucleoplasm               |                                        |
| nucleoplasm, vesicles         | SH-SY5Y   | nucleoplaPC-3             | nucleoplasm, vesicles                  |
| vesicles                      | ASC TERT1 | vesicles, cytosol         |                                        |
| nuclear speckles              | U-251 MG  | nuclear sHUVEC TER        | nuclear speckles                       |
| nucleoplasm                   | A-431     | nucleoplaU-251 MG         | nucleoplasm                            |
| nucleoplasm, cell junctionior | A-431     | nucleoplaU-251 MG         | nucleoplasm, cytosol                   |
| nucleoplasm, cytosol          | U-251 MG  | nucleoplasm, cytosol      |                                        |
| cytoplasmic bodies            |           |                           |                                        |
| plasma membrane               |           |                           |                                        |
| nucleoplasm, actin filamer    | A-431     | nucleoplaU-251 MG         | nucleoplasm, actin filaments           |
| nucleoplasm                   |           |                           |                                        |
| nucleoplasm, nucleoli         | MCF7      | nucleoplasm, nucleoli     |                                        |
| nucleoplasm, actin filamer    | A-431     | nucleoplaU-251 MG         | actin filaments                        |
| nucleoplasm, actin filamer    | RH-30     | plasma meBJ               | nucleoplasm, plasma membrane, actin fi |
| plasma membrane               | U-251 MG  | plasma membrane           |                                        |
| cytosol, cytoplasmic bodieæ   | A-431     | plasma meU-251 MG         | cytosol, cytoplasmic bodies            |
| mitochondria                  | A-431     | mitochondU-251 MG         | mitochondria                           |
| centriolar satellite          | HaCaT     | endoplasmic reticulum     |                                        |
| nucleoplasm, cytosol          | MCF7      | nucleoplasm, cytosol      |                                        |
| plasma membrane               | ASC TERT1 | plasma membrane           |                                        |
| nucleoplasm                   |           |                           |                                        |
| nucleoplasm                   | A549      | nucleoplasm               |                                        |
| golgi apparatus               | HEL       | golgi appREH              | golgi apparatus, vesicles              |
| centriolar satellite          |           |                           |                                        |
| nucleoli, golgi apparatus     | A-431     | golgi appU-251 MG         | golgi apparatus                        |
| golgi apparatus, vesicles     | A-431     | golgi apparatus, vesicles |                                        |
| golgi apparatus               | MCF7      | golgi appA549             | golgi apparatus                        |
| nucleoplasm                   | U-251 MG  | nucleoplaHEK 293          | nucleoplasm                            |
| nucleoplasm, cytosol          | MCF7      | nucleoplaPC-3             | nucleoplasm, plasma membrane           |
| nucleoplasm                   | HeLa      | nucleoplaPC-3             | nucleoplasm                            |
| cytosol                       | A-431     | cytosol U-251 MG          | cytosol                                |
| cytosol                       | A-431     | cytosol U-251 MG          | cytosol                                |
| cytosol                       | A-431     | cytosol U-251 MG          | cytosol                                |
| cytosol                       | A-431     | cytosol U-251 MG          | cytosol                                |
| cytosol                       | Hep G2    | cytosol HaCaT             | cytosol                                |
| mitochondria                  | SH-SY5Y   | mitochondSK-MEL-30        | nucleoplasm, mitochondria              |
| nucleoplasm, cytosol          | A549      | nucleoplaHep G2           | nucleoplasm, cytosol                   |
| nucleoplasm                   | U-2 OS    | nucleoplaSK-MEL-30        | nuclear speckles                       |
| nucleoplasm                   | A549      | nucleoplaSH-SY5Y          | nucleoplasm                            |
| nucleoplasm                   |           |                           |                                        |
| nucleoplasm                   | A-431     | nucleoplaU-251 MG         | nucleoplasm                            |
| plasma membrane               | Hep G2    | plasma meRH-30            | plasma membrane, cytosol               |
| nucleoplasm, plasma membræ    | Hep G2    | plasma meRH-30            | plasma membrane                        |
| nucleoplasm                   | PC-3      | nucleoplaAF22             | nucleoplasm                            |
| nuclear speckles, cytosol     | A-431     | nucleoplaU-251 MG         | nucleoplasm                            |
| cytosol                       | A-431     | cytosol U-251 MG          | cytosol                                |
| nucleoplasm, plasma membræ    | U-2 OS    | nucleoplaHaCaT            | nucleoplasm, plasma membrane           |
| nucleoplasm                   | U-251 MG  | cytosol                   |                                        |
| nucleoplasm, cytosol          |           |                           |                                        |

|                                             |          |                                       |                                        |
|---------------------------------------------|----------|---------------------------------------|----------------------------------------|
| endoplasmic reticulum                       | BJ       | endoplasmic reticulum                 |                                        |
| vesicles                                    | U-251 MG | vesicles                              |                                        |
| nucleoplasm                                 | A-431    | nucleoplaU-251 MG                     | nucleoplasm                            |
| nucleoplasm, golgi apparatus                | A-431    | nucleoplaU-251 MG                     | nucleoplasm, golgi apparatus, cytosol  |
| nucleoplasm                                 | HeLa     | nucleoplasm                           |                                        |
| nucleoplasm, cytosol                        | A-431    | nucleoplaU-251 MG                     | nucleoplasm, cytosol                   |
| nucleoplasm, nuclear membrane, mitochondria |          |                                       |                                        |
| vesicles, cytosol                           | U-251 MG | vesicles, cytosol                     |                                        |
| nucleoplasm, cytosol                        | A-431    | nucleoplaU-251 MG                     | nucleoplasm, cytosol                   |
| plasma membrane, cytosol                    | A-431    | plasma meU-251 MG                     | plasma membrane, cytosol               |
| endoplasmic reticulum, vesicles             |          |                                       |                                        |
| vesicles                                    | U-251 MG | nucleoplaRH-30                        | vesicles                               |
| nucleoplasm, plasma membrane                | A-431    | nucleoplaU-251 MG                     | nucleoplasm, plasma membrane, cytosol  |
| nucleoplasm, cytosol                        | A-431    | nucleoplaU-251 MG                     | nucleoplasm, cytosol                   |
| nucleoplasm, cytosol                        | A-431    | nucleoplaU-251 MG                     | nucleoplasm, cytosol                   |
| nucleoplasm, cytosol                        | SH-SY5Y  | nucleoplasm, golgi apparatus, cytosol |                                        |
| nucleoplasm                                 |          |                                       |                                        |
| vesicles                                    |          |                                       |                                        |
| microtubules, cytokinetic                   | A549     | nucleoplaBJ                           | microtubules                           |
| microtubules, cytosol                       | A549     | nucleoplaBJ                           | microtubules, cytosol                  |
| centriolar satellite                        | A-431    | plasma meU-251 MG                     | plasma membrane, centriolar satellite  |
| vesicles                                    | HEK 293  | vesicles                              |                                        |
| cytosol                                     | A-431    | cytosol U-251 MG                      | cytosol                                |
| vesicles, cytosol                           | U-251 MG | vesicles, HEK 293                     | vesicles                               |
| nucleoplasm, cytosol                        | A-431    | nucleoplaU-251 MG                     | nucleoplasm, cytosol                   |
| nucleoplasm                                 | U-2 OS   | nucleoplaPC-3                         | nucleoplasm, cytosol                   |
| cell junctions                              | MCF7     | nucleoplasm, cytosol                  |                                        |
| nuclear speckles, golgi apparatus           | A-431    | nuclear sRH-30                        | nuclear speckles, golgi apparatus      |
| cytosol                                     | A-431    | cytosol U-251 MG                      | cytosol                                |
| cytosol                                     | A-431    | cytosol U-251 MG                      | cytosol                                |
| cytokinetic bridge, cytosol                 |          |                                       |                                        |
| cytosol                                     |          |                                       |                                        |
| nucleoplasm                                 | A-431    | nucleoplaU-251 MG                     | nucleoplasm                            |
| nucleoplasm, golgi apparatus                | HeLa     | nucleoplaSH-SY5Y                      | nucleoplasm, golgi apparatus           |
| vesicles                                    | A-431    | golgi apparatus                       |                                        |
| plasma membrane, cytosol                    | A-431    | plasma meU-251 MG                     | plasma membrane, cytosol               |
| nucleoplasm, cytosol                        | U-251 MG | nucleoplasm, cytosol                  |                                        |
| nucleoplasm, nuclear bodies                 | HeLa     | nucleoplaSH-SY5Y                      | nucleoplasm, nuclear bodies, golgi app |
| nucleoplasm                                 | A-431    | nucleoplaU-251 MG                     | nucleoplasm                            |
| nucleoplasm                                 | U-2 OS   | nucleoplaMCF7                         | nucleoplasm                            |
| microtubules                                | HeLa     | microtubuRH-30                        | microtubules                           |
| vesicles                                    | A-431    | vesicles HeLa                         | nucleoplasm, vesicles                  |
| nucleoli, cytosol                           | A-431    | nucleoli, U-251 MG                    | nucleoli, cytosol                      |
| nucleoli                                    | A-431    | nucleoli A549                         | nucleoli                               |
| plasma membrane                             | A-431    | plasma meU-251 MG                     | plasma membrane                        |
| nucleoplasm, cytosol                        | U-251 MG | nucleoplasm, microtubules, cytosol    |                                        |
| nucleoplasm, mitochondria                   | SiHa     | nucleoplasm, mitochondria             |                                        |
| nucleoplasm                                 | U-2 OS   | nucleoplaSiHa                         | nucleoplasm                            |
| nucleoplasm                                 | RH-30    | nucleoplasm                           |                                        |
| nucleoplasm, cytosol                        | A-431    | nucleoplaU-251 MG                     | nucleoplasm                            |
| nucleoplasm, nucleoli, golgi apparatus      | U-251 MG | nucleoplaMCF7                         | nucleoplasm, nucleoli                  |
| nucleoplasm                                 | MCF7     | nucleoplaRH-30                        | nucleoplasm                            |
| cytosol                                     | MCF7     | nucleoplaPC-3                         | nucleoplasm, cytosol                   |
| nucleoplasm, cytosol                        | MCF7     | nucleoplaPC-3                         | nucleoplasm                            |
| nuclear membrane, nucleoli                  | U-2 OS   | nucleoplaA-431                        | nucleoplasm, nuclear membrane, mitoch  |

|                                            |           |                                       |                                            |
|--------------------------------------------|-----------|---------------------------------------|--------------------------------------------|
| nucleoplasm, cytosol                       | MCF7      | nucleoplaPC-3                         | nucleoplasm, cytosol                       |
| nucleoplasm, plasma membrane               | HUVEC     | TER                                   | nucleoplasm, plasma membrane               |
| nucleoplasm, golgi apparatus               |           |                                       |                                            |
| nucleoplasm, mitochondria                  | SK-MEL-30 | nucleoplasm                           |                                            |
| nucleoplasm                                | PC-3      | nucleoplasm, cytosol                  |                                            |
| nucleoplasm, vesicles                      |           |                                       |                                            |
| nucleoplasm                                | SH-SY5Y   | nucleoplaREH                          | nucleoplasm                                |
| plasma membrane                            | SK-MEL-30 | plasma membrane                       |                                            |
| cytosol                                    |           |                                       |                                            |
| mitochondria                               | A-431     | mitochondU-251 MG                     | mitochondria                               |
| cytosol                                    | A-431     | nucleoli, U-251 MG                    | cytosol                                    |
| microtubules                               | A-431     | microtubuU-251 MG                     | microtubules, cytosol                      |
| plasma membrane, focal adhesion            | SiHa      | plasma membrane, focal adhesion sites |                                            |
| mitochondria                               | HEK 293   | mitochondSiHa                         | mitochondria                               |
| cytosol                                    | A-431     | cytosol U-251 MG                      | cytosol                                    |
| cytosol                                    | U-251 MG  | cytosol                               |                                            |
| vesicles                                   | A549      | vesicles Hep G2                       | vesicles, cytosol                          |
| plasma membrane                            | BJ        | plasma meSK-MEL-30                    | plasma membrane                            |
| nucleoplasm                                | SH-SY5Y   | nucleoplaSK-MEL-30                    | nucleoplasm                                |
| nucleoplasm, cytosol                       | A-431     | nucleoplaU-251 MG                     | nucleoplasm, cytosol                       |
| cytosol                                    | U-251 MG  | nucleoplasm, cytosol                  |                                            |
| mitochondria                               | A-431     | mitochondU-251 MG                     | mitochondria                               |
| mitochondria                               | A-431     | mitochondU-251 MG                     | mitochondria                               |
| vesicles                                   | HeLa      | endoplasmic reticulum, vesicles       |                                            |
| cytosol                                    | A-431     | plasma meU-251 MG                     | cytosol                                    |
| plasma membrane, cytosol                   | A-431     | plasma meU-251 MG                     | plasma membrane, cytosol                   |
| nuclear membrane                           | HaCaT     | plasma membrane                       |                                            |
| nucleoplasm                                | A-431     | nucleoplaU-251 MG                     | nucleoplasm                                |
| nucleoplasm                                | A-431     | nucleoplaU-251 MG                     | nucleoplasm, cytosol                       |
| nucleoplasm, cytosol                       | MCF7      | nucleoplaPC-3                         | nucleoplasm, plasma membrane, cytosol      |
| nucleoplasm, cytosol                       | MCF7      | nucleoplaPC-3                         | nucleoplasm, plasma membrane, cytosol      |
| nucleoplasm                                | A-431     | nucleoplaU-251 MG                     | nucleoplasm                                |
| nucleoplasm, vesicles, cytosol             | HeLa      | nucleoplaHep G2                       | nucleoplasm, vesicles                      |
| mitochondria                               | BJ        | mitochondria                          |                                            |
| actin filaments, cytosol                   | A-431     | actin filaments, cytosol              |                                            |
| nuclear speckles                           |           |                                       |                                            |
| mitochondria                               | SK-MEL-30 | nucleoplasm, mitochondria             |                                            |
| cytosol                                    | A-431     | cytosol                               |                                            |
| cytosol                                    | A-431     | cytosol U-251 MG                      | cytosol                                    |
| mitochondria                               | MCF7      | mitochondPC-3                         | mitochondria                               |
| vesicles                                   | RH-30     | vesicles HaCaT                        | vesicles                                   |
| nucleoplasm, vesicles, cytosol             | U-2 OS    | nucleoplaU-251 MG                     | nucleoplasm, vesicles, cytosol             |
| cytosol                                    | A-431     | cytosol U-251 MG                      | cytosol                                    |
| cytosol                                    | A-431     | mitochondU-251 MG                     | cytosol                                    |
| plasma membrane, cytosol                   | A549      | plasma membrane, cytosol              |                                            |
| nucleoplasm, nucleoli, cytosol             | MCF7      | nucleoplasm, nucleoli, cytosol        |                                            |
| nucleoplasm                                | A-431     | nucleoplaU-251 MG                     | nucleoplasm, cytosol                       |
| nucleoplasm                                | Hep G2    | nucleoplasm                           |                                            |
| nucleoplasm                                |           |                                       |                                            |
| nucleoplasm, nucleoli                      | A-431     | nucleoplaU-251 MG                     | nucleoplasm, nucleoli fibrillar centrosome |
| centrosome                                 | AF22      | centrosome                            |                                            |
| nucleoplasm, nucleoli, plasma membrane     | A-431     | nucleoplaU-251 MG                     | nucleoplasm, nucleoli                      |
| nucleoplasm, cytosol                       | HeLa      | nucleoplaAF22                         | nucleoplasm                                |
| nucleoplasm, nucleoli fibrillar centrosome | A-431     | nucleoplaPC-3                         | nucleoplasm, nucleoli fibrillar centrosome |
| nucleoplasm, vesicles                      | MCF7      | nucleoplaA549                         | nucleoplasm                                |

|                                                        |          |                                      |          |                                        |
|--------------------------------------------------------|----------|--------------------------------------|----------|----------------------------------------|
| nucleoplasm                                            | A-431    | nucleoplasma                         | U-251 MG | nucleoplasm                            |
| plasma membrane, cytosol                               | A-431    | plasma membrane                      | U-251 MG | plasma membrane, cytosol               |
| nucleoplasm                                            | A-431    | nucleoplasma                         | U-251 MG | nucleoplasm                            |
| cell junctions                                         |          |                                      |          |                                        |
| nuclear speckles, cytosol                              | A-431    | nuclear speckles, cytosol            | U-251 MG | nuclear speckles, cytosol              |
| nuclear speckles, cytosol                              | MCF7     | nucleoli                             | HEK 293  | nuclear speckles                       |
| nucleoplasm                                            | U-2 OS   | nucleoplasma                         | HEL      | nucleoplasm, intermediate filaments    |
| nucleoplasm, vesicles                                  | U-2 OS   | nucleoplasma                         | U-251 MG | nucleoplasm, plasma membrane           |
| cytosol                                                |          |                                      |          |                                        |
| focal adhesion sites                                   | HeLa     | focal adhesion sites                 |          |                                        |
| mitochondria                                           | A-431    | nucleoplasma                         | U-251 MG | mitochondria                           |
| vesicles                                               | MCF7     | vesicles                             | SH-SY5Y  | vesicles                               |
| mitochondria                                           |          |                                      |          |                                        |
| nucleoplasm                                            | A-431    | nucleoplasma                         | U-251 MG | nucleoplasm                            |
| nucleoplasm, cytosol                                   | A-431    | nucleoplasm, cytosol                 |          |                                        |
| nucleoplasm, nucleoli                                  | A-431    | nucleoplasma                         | U-251 MG | nucleoplasm, nucleoli                  |
| cytokinetic bridge, cytosol                            | A-431    | cytosol                              | PC-3     | cytosol                                |
| vesicles                                               | A-431    | vesicles                             | U-251 MG | vesicles                               |
| plasma membrane                                        | MCF7     | nucleoli, PC-3                       |          | plasma membrane                        |
| vesicles, plasma membrane                              | MCF7     | vesicles, SH-SY5Y                    |          | vesicles, plasma membrane              |
| nuclear speckles                                       | HeLa     | nuclear speckles                     | sHaCaT   | nuclear speckles                       |
| nucleoplasm, vesicles, plasma membrane                 | HUVEC    | nucleoplasma                         | LHCN-M2  | nucleoplasm, vesicles, plasma membrane |
| mitochondria                                           | Hep G2   | mitochondria                         |          |                                        |
| nuclear speckles                                       | U-2 OS   | nuclear speckles                     | A549     | nuclear speckles, vesicles             |
| nuclear speckles, centrioles                           | U-2 OS   | nucleoplasma                         | A549     | nucleoplasm, centriolar satellite      |
| intermediate filaments                                 | U-251 MG | intermediate filaments               |          |                                        |
| centrosome                                             | U-2 OS   | centrosome                           | A-431    | centrosome                             |
| golgi apparatus                                        | A-431    | golgi apparatus                      | U-251 MG | golgi apparatus                        |
| nucleoplasm                                            | A-431    | nucleoplasma                         | U-251 MG | nucleoplasm                            |
| nuclear membrane                                       | A-431    | nuclear membrane                     | U-251 MG | nuclear membrane                       |
| nucleoplasm, cytosol                                   | A-431    | nucleoplasma                         | A549     | cytosol                                |
| nucleoplasm                                            | U-251 MG | nucleoplasm                          |          |                                        |
| nucleoplasm                                            | SiHa     | nucleoplasma                         | RH-30    | nucleoplasm                            |
| microtubules                                           | A-431    | microtubules, cytosol                |          |                                        |
| focal adhesion sites, cytosol                          | A-431    | focal adhesion sites, cytosol        | U-251 MG | focal adhesion sites, cytosol          |
| vesicles, focal adhesion sites                         | U-251 MG | vesicles                             | HUVEC    | focal adhesion sites                   |
| nucleoplasm, vesicles, plasma membrane                 | A-431    | nucleoplasma                         | U-251 MG | nucleoplasm, vesicles, plasma membrane |
| vesicles                                               | A-431    | vesicles                             | U-251 MG | vesicles                               |
| nucleoli                                               | U-251 MG | nucleoplasma                         | HeLa     | nucleoplasm, nucleoli, plasma membrane |
| plasma membrane                                        | SH-SY5Y  | plasma membrane                      | PC-3     | plasma membrane                        |
| plasma membrane, actin filaments, focal adhesion sites |          |                                      |          |                                        |
| nucleoplasm, golgi apparatus                           | A-431    | nucleoplasm, golgi apparatus         |          |                                        |
| endoplasmic reticulum, vesicles                        | U-2 OS   | vesicles                             | U-251 MG | vesicles                               |
| plasma membrane, cytosol                               | HEK 293  | plasma membrane, cytosol             | Hep G2   | plasma membrane, cytosol               |
| plasma membrane                                        | MCF7     | nucleoplasm, vesicles                |          |                                        |
| nucleoplasm, nuclear bodies, cytosol                   | A-431    | cytosol                              | U-251 MG | nucleoplasm, nuclear bodies, cytosol   |
| cytosol                                                | A-431    | cytosol                              | U-251 MG | cytosol                                |
| nuclear membrane, vesicles                             | A-431    | vesicles                             | U-251 MG | nuclear membrane, vesicles             |
| plasma membrane, cytosol                               | A-431    | plasma membrane, cytosol             | U-251 MG | nucleoplasm, plasma membrane, cytosol  |
| golgi apparatus, plasma membrane                       | HEK 293  | golgi apparatus, plasma membrane     | RH-30    | golgi apparatus, plasma membrane       |
| nucleoplasm                                            | A-431    | nucleoplasma                         | K-562    | nucleoplasm                            |
| vesicles                                               |          |                                      |          |                                        |
| nucleoli, cytosol                                      | U-251 MG | nucleoli, RH-30                      |          | nucleoplasm, nucleoli, cytosol         |
| nuclear speckles, cytosol                              | A-431    | nuclear speckles, cytoplasmic bodies | U-251 MG | nuclear speckles, cytoplasmic bodies   |
| nuclear speckles, cytoplasmic bodies                   | U-2 OS   | nucleoplasma                         | MCF7     | nuclear speckles, cytoplasmic bodies   |



|                                                  |           |                                                  |           |                                                  |
|--------------------------------------------------|-----------|--------------------------------------------------|-----------|--------------------------------------------------|
| nucleoplasm, plasma membrane                     | A-431     | nucleoplasm                                      | U-251 MG  | plasma membrane, cytosol                         |
| nuclear bodies, cytosol                          | A-431     | nuclear bodies                                   | MCF7      | nuclear bodies                                   |
| nuclear bodies                                   | A-431     | nuclear bodies                                   |           |                                                  |
| nucleoplasm, nucleoli                            | A-431     | nucleoplasm, nucleoli                            | U-251 MG  | nucleoplasm, nucleoli                            |
| nucleoplasm                                      | HaCaT     | nucleoplasm                                      |           |                                                  |
| nucleoplasm                                      |           |                                                  |           |                                                  |
| nucleoplasm, vesicles                            | A-431     | nucleoplasm                                      | HaCaT     | nucleoplasm                                      |
| nucleoplasm, nucleoli                            |           |                                                  |           |                                                  |
| nucleoplasm, cytosol                             | A-431     | nucleoplasm, cytosol                             | U-251 MG  | nucleoplasm, cytosol                             |
| vesicles                                         | HEK 293   | vesicles, HeLa                                   |           | vesicles                                         |
| mitotic spindle, cytosol                         |           |                                                  |           |                                                  |
| nucleoplasm, cytosol                             | PC-3      | nucleoplasm, cytosol                             |           |                                                  |
| nucleoplasm                                      | A-431     | nucleoplasm                                      | U-251 MG  | nucleoplasm                                      |
| nucleoplasm                                      | A-431     | nucleoplasm                                      | U-251 MG  | nucleoplasm                                      |
| nucleoplasm                                      | MCF7      | nucleoplasm                                      | HeLa      | nucleoplasm                                      |
| nuclear membrane, vesicles                       | RT4       | nuclear membrane, vesicles                       | U-2 OS    | nuclear membrane, vesicles                       |
| nucleoplasm                                      | U-2 OS    | nucleoplasm                                      | HEK 293   | nucleoplasm                                      |
| actin filaments, cytosol                         | A-431     | actin filaments, cytosol                         | U-251 MG  | actin filaments, cytosol                         |
| vesicles, actin filaments                        | A-431     | vesicles, actin filaments                        | U-251 MG  | vesicles, actin filaments                        |
| nucleoli fibrillar center                        | A-431     | nucleoli fibrillar center, mitochondria          | U-251 MG  | nucleoli fibrillar center, mitochondria          |
| nucleoplasm, cytosol                             | A-431     | nucleoplasm, cytosol                             | U-251 MG  | nucleoplasm, cytosol                             |
| vesicles                                         | A-431     | vesicles, golgi apparatus, cytosol               | U-251 MG  | nucleoli fibrillar center, vesicles              |
| vesicles                                         | A-431     | golgi apparatus, cytosol                         | U-251 MG  | golgi apparatus, cytosol                         |
| nucleoplasm, cytosol                             | A-431     | plasma membrane, cytosol                         | U-251 MG  | cytosol                                          |
| plasma membrane, focal adhesion sites            | A-431     | focal adhesion sites                             |           |                                                  |
| centrosome                                       | A-431     | centrosome                                       | U-251 MG  | centrosome                                       |
| nucleoplasm, plasma membrane                     | A-431     | nucleoplasm, vesicles                            | U-251 MG  | nucleoplasm, vesicles                            |
| cytosol                                          | A-431     | plasma membrane, cytosol                         | U-251 MG  | plasma membrane, cytosol                         |
| cytosol                                          | A-431     | golgi apparatus, plasma membrane, cytosol        | U-251 MG  | golgi apparatus, plasma membrane, cytosol        |
| nucleoplasm, cytosol                             |           |                                                  |           |                                                  |
| nucleoplasm                                      | RPTEC TER | nucleoplasm, cytosol                             |           |                                                  |
| plasma membrane                                  | A-431     | plasma membrane                                  | U-251 MG  | plasma membrane                                  |
| nucleoplasm, cytosol                             | A549      | nucleoplasm, cytosol                             |           |                                                  |
| nucleoplasm                                      | HeLa      | nucleoplasm, cytosol                             |           |                                                  |
| nucleoplasm                                      |           |                                                  |           |                                                  |
| nucleoplasm                                      | HEK 293   | nucleoplasm, microtubules                        | Hep G2    | nucleoplasm, microtubules                        |
| nucleoli                                         | A-431     | nucleoli                                         | U-251 MG  | nucleoli                                         |
| microtubules                                     | A-431     | microtubules                                     | U-251 MG  | microtubules                                     |
| nucleoplasm, nuclear bodies                      | RH-30     | nuclear bodies                                   | SK-MEL-30 | nuclear bodies                                   |
| nucleoplasm, nucleoli, plasma membrane           | BJ        | nucleoli                                         | AF22      | nucleoli                                         |
| focal adhesion sites, cytosol                    |           |                                                  |           |                                                  |
| plasma membrane, cytosol                         | A-431     | plasma membrane, cytosol                         | U-251 MG  | plasma membrane, cytosol                         |
| plasma membrane                                  | RH-30     | nuclear bodies, plasma membrane                  | SK-MEL-30 | nuclear bodies, plasma membrane                  |
| vesicles                                         | A-431     | vesicles                                         |           |                                                  |
| centrosome, mitochondria                         | A-431     | centrosome, mitochondria                         | RH-30     | centrosome, mitochondria                         |
| plasma membrane                                  | HEK 293   | plasma membrane                                  | AF22      | plasma membrane                                  |
| nucleoplasm                                      | A-431     | nucleoplasm, cytosol                             | U-251 MG  | nucleoplasm, cytosol                             |
| nucleoplasm                                      | A549      | nucleoplasm                                      | HaCaT     | nucleoplasm                                      |
| endoplasmic reticulum                            | A-431     | endoplasmic reticulum                            | U-251 MG  | endoplasmic reticulum                            |
| plasma membrane                                  |           |                                                  |           |                                                  |
| plasma membrane                                  | U-251 MG  | plasma membrane                                  | HeLa      | plasma membrane                                  |
| plasma membrane                                  | HeLa      | plasma membrane                                  |           |                                                  |
| plasma membrane, actin filaments, cell junctions | A-431     | plasma membrane, actin filaments, cell junctions | U-251 MG  | plasma membrane, actin filaments, cell junctions |
| nucleoplasm, golgi apparatus, cell junctions     |           |                                                  |           |                                                  |
| nucleoplasm, cytosol                             | A-431     | nucleoplasm                                      | U-251 MG  | nucleoplasm                                      |

golgi apparatus  
nucleoplasm, golgi apparatus A-431 nucleoplasm U-251 MG nucleoplasm, golgi apparatus, cytosol  
nucleoplasm, golgi apparatus A-431 nucleoplasm HEK 293 nucleoplasm, golgi apparatus, cytosol  
nucleoplasm, golgi apparatus U-251 MG golgi apparatus  
cytosol U-251 MG plasma membrane A549 plasma membrane, cytosol  
endoplasmic reticulum A-431 endoplasmic reticulum U-251 MG endoplasmic reticulum  
endoplasmic reticulum  
intermediate filaments, cytosol A-431 nucleoplasm U-251 MG intermediate filaments, cytosol  
cytosol A-431 cytosol  
nucleoli, cytosol A-431 nucleoli, U-251 MG nucleoli, cytosol  
vesicles A-431 vesicles  
nuclear bodies MCF7 nuclear bodies HeLa nuclear bodies  
nucleoplasm PC-3 nucleoplasm  
cytosol  
cytosol  
cytosol HEK 293 centrosome  
nucleoplasm, vesicles SH-SY5Y nucleoplasm SK-MEL-30 nucleoplasm, vesicles  
nucleoplasm A-431 nucleoli U-251 MG nucleoplasm  
nucleoplasm, cytosol A-431 nucleoplasm U-251 MG nucleoplasm, cytosol  
vesicles A-431 vesicles  
vesicles  
nucleoplasm U-251 MG nucleoplasm MCF7 nucleoplasm  
nucleoplasm, cytosol HeLa nucleoplasm PC-3 nucleoplasm, cytosol  
nucleoplasm, cytosol A-431 cytosol U-251 MG nucleoplasm, cytosol  
nucleoplasm, plasma membrane U-2 OS nucleoplasm U-251 MG nucleoplasm, plasma membrane  
mitochondria U-251 MG mitochondria MCF7 mitochondria  
nucleoplasm, nucleoli SiHa nucleoplasm REH nucleoplasm, nucleoli, centriolar satellite  
nucleoplasm, nuclear membrane  
golgi apparatus, aggresome U-2 OS nucleoplasm SH-SY5Y nucleoplasm, nucleoli fibrillar centrosome  
cytosol A-431 cytosol  
nucleoli, cytosol HEK 293 cytosol A549 nucleoplasm, nucleoli, cytosol  
centrosome, cytosol A-431 centrosome U-251 MG centrosome, cytosol  
nucleoplasm  
mitochondria SH-SY5Y mitochondria REH mitochondria  
nucleoplasm HEK 293 nucleoplasm  
nucleoplasm, nucleoli fibrillar centrosome U-2 OS nucleoplasm HEK 293 nucleoplasm, nucleoli fibrillar centrosome  
endosomes, lysosomes A-431 nucleoplasm U-251 MG endosomes, lysosomes  
golgi apparatus SH-SY5Y golgi apparatus  
golgi apparatus  
nuclear bodies MCF7 nuclear bodies HEK 293 nucleoplasm, nuclear bodies  
nucleoplasm A-431 nucleoplasm U-251 MG nucleoplasm  
nucleoplasm HeLa nucleoplasm  
nucleoplasm A549 nucleoplasm PC-3 nucleoplasm  
nucleoplasm U-2 OS nucleoplasm Hep G2 nucleoplasm  
golgi apparatus U-251 MG golgi apparatus  
nucleoplasm HaCaT nucleoplasm, vesicles  
nucleoplasm  
nucleoplasm, cell junctions SK-MEL-30 nucleoplasm  
nucleoplasm, plasma membrane, cytosol  
nucleoplasm, cytosol U-2 OS nucleoplasm PC-3 nucleoplasm, cytosol  
nucleoplasm, cytosol  
nuclear membrane  
plasma membrane U-251 MG plasma membrane HaCaT plasma membrane  
nucleoplasm U-2 OS nucleoplasm HeLa nucleoplasm  
nucleoplasm, focal adhesion sites U-2 OS nucleoplasm U-251 MG nucleoplasm, focal adhesion sites

|                                 |          |                                                         |
|---------------------------------|----------|---------------------------------------------------------|
| vesicles                        | A-431    | vesicles U-251 MG vesicles                              |
| vesicles                        |          |                                                         |
| nucleoplasm                     | HEK 293  | nucleoplasm                                             |
| nucleoplasm                     |          |                                                         |
| nucleoplasm                     | A-431    | nucleoplaU-251 MG nucleoplasm, cytosol                  |
| vesicles                        | A-431    | golgi appU-251 MG vesicles                              |
| nucleoplasm, nucleoli           | MCF7     | nucleoplaHeLa nucleoplasm, nucleoli                     |
| actin filaments, cytosol        | U-251 MG | intermediate filaments, cytosol                         |
| microtubules                    | A-431    | microtubules                                            |
| nucleoplasm                     | A549     | nucleoplasm, cytosol                                    |
| nucleoplasm                     |          |                                                         |
| vesicles                        | SH-SY5Y  | vesicles                                                |
| cytosol                         | A-431    | cytosol U-251 MG cytosol                                |
| golgi apparatus, cytosol        | U-251 MG | nuclear bodies, golgi apparatus, cytosol                |
| nucleoplasm, cytosol            | U-251 MG | nucleoplasm, cytosol                                    |
| nucleoplasm                     | A-431    | nucleoplaU-251 MG nucleoplasm                           |
| nucleoplasm                     | A-431    | nucleoplaU-251 MG nucleoplasm                           |
| nucleoplasm, nucleoli fibr      | A-431    | nucleoplaU-251 MG nucleoplasm, nucleoli fibrillar cente |
| vesicles                        | A-431    | vesicles U-251 MG vesicles                              |
| nucleoplasm                     | A-431    | nucleoplaU-251 MG nucleoplasm                           |
| golgi apparatus                 |          |                                                         |
| nucleoli                        | MCF7     | nucleoli RH-30 nucleoli                                 |
| nucleoplasm, plasma membr       | MCF7     | nucleoplasm, plasma membrane, cytosol                   |
| nucleoplasm                     | RH-30    | nucleoplaEF0-21 nucleoplasm                             |
| plasma membrane, cell junctions |          |                                                         |
| vesicles                        | MCF7     | nucleoplasm, vesicles                                   |
| endoplasmic reticulum           | A549     | endoplasmSiHa endoplasmic reticulum                     |
| plasma membrane                 | A-431    | vesicles U-251 MG vesicles, plasma membrane             |
| plasma membrane                 | A-431    | plasma meU-251 MG plasma membrane                       |
| endoplasmic reticulum           | RH-30    | endoplasmic reticulum                                   |
| centriolar satellite            | A-431    | nucleoplasm, centriolar satellite, cytosol              |
| nucleoplasm, vesicles           | A-431    | nucleoplasm, vesicles                                   |
| intermediate filaments          | A-431    | intermediate filaments                                  |
| intermediate filaments          | U-2 OS   | intermediMCF7 intermediate filaments                    |
| cytosol                         | A-431    | cytosol                                                 |
| nucleoplasm                     |          |                                                         |
| nucleoplasm                     | U-2 OS   | nucleoplaMCF7 nucleoplasm                               |
| microtubules                    | A-431    | microtubuU-251 MG vesicles, microtubules                |
| cytosol                         | A-431    | cytosol U-251 MG cytosol                                |
| cytosol                         | A-431    | cytosol U-251 MG cytosol                                |
| nucleoplasm                     |          |                                                         |
| cytosol                         | U-251 MG | cytosol PC-3 plasma membrane, cytosol                   |
| nucleoli, microtubules          | A-431    | microtubuU-251 MG microtubules                          |
| vesicles                        |          |                                                         |
| cell junctions, cytosol         | A-431    | cell juncU-251 MG cytosol                               |
| cell junctions                  | HEK 293  | cell juncRH-30 cell junctions                           |
| intermediate filaments          | HaCaT    | intermediate filaments                                  |
| intermediate filaments          | hTCEpi   | intermediate filaments                                  |
| nucleoli                        | MCF7     | nucleoli SiHa nucleoli                                  |
| nucleoplasm, cytosol            | A-431    | nucleoplaU-251 MG nucleoplasm, cytosol                  |
| nuclear speckles                | U-2 OS   | nuclear sPC-3 nuclear speckles, cytosol                 |
| nucleoplasm, cytosol            | U-2 OS   | nucleoplaMCF7 nucleoli, cell junctions, cytosol         |
| intermediate filaments          |          |                                                         |
| nucleoplasm                     | A-431    | nucleoplaU-251 MG nucleoplasm, cytosol                  |
| vesicles                        | BJ       | nucleoplasm, vesicles                                   |

|                                                |          |                                                |          |
|------------------------------------------------|----------|------------------------------------------------|----------|
| nucleoplasm                                    |          |                                                |          |
| nuclear bodies, mitochondria                   | A549     | nuclear bodies, mitochondria                   |          |
| golgi apparatus, vesicles                      | A-431    | golgi apparatus, vesicles                      |          |
| cytosol                                        |          |                                                |          |
| cytosol                                        | A-431    | cytosol                                        | U-251 MG |
| nucleoplasm                                    | A549     | nucleoplasm                                    |          |
| nucleoplasm                                    |          |                                                |          |
| vesicles                                       | A-431    | vesicles                                       | U-251 MG |
| endoplasmic reticulum                          | A-431    | endoplasmic reticulum                          | U-251 MG |
| nucleoplasm, cytosol                           | SiHa     | nucleoplasm, golgi apparatus, cytosol          |          |
| nucleoplasm, plasma membrane                   | A-431    | nucleoplasm, plasma membrane                   | U-251 MG |
| nucleoplasm, golgi apparatus                   | U-251 MG | golgi apparatus                                | REH      |
| plasma membrane, cell junctions                | U-251 MG | plasma membrane, cell junctions                |          |
| nucleoplasm, nucleoli                          |          |                                                |          |
| nuclear membrane                               | HeLa     | nuclear membrane                               | RH-30    |
| plasma membrane, cytosol                       | A-431    | plasma membrane, cytosol                       | U-251 MG |
| microtubules, cytokinetic bridge, mitochondria | U-251 MG | microtubules, cytokinetic bridge, mitochondria | EFO-21   |
| nucleoplasm                                    | HEK 293  | nucleoplasm                                    | A549     |
| nucleoplasm, cytosol                           | A-431    | nucleoplasm, cytosol                           | U-251 MG |
| nucleoplasm                                    | U-2 OS   | nucleoplasm                                    | Hep G2   |
| nucleoplasm, cytosol                           |          |                                                |          |
| nucleoplasm                                    | A-431    | nucleoplasm                                    | U-251 MG |
| nucleoplasm, nucleoli                          | SiHa     | nucleoplasm, nucleoli                          | PC-3     |
| mitochondria                                   | A-431    | mitochondria                                   | U-251 MG |
| mitochondria                                   | A-431    | mitochondria                                   | U-251 MG |
| nuclear bodies                                 | U-2 OS   | nuclear bodies                                 | PC-3     |
| nucleoplasm                                    | A-431    | nucleoplasm                                    | U-251 MG |
| nucleoplasm, mitochondria                      | MCF7     | nucleoplasm, mitochondria                      | HEK 293  |
| nucleoplasm, cytosol                           | A-431    | nucleoplasm, cytosol                           | U-251 MG |
| vesicles                                       | U-251 MG | vesicles, cell junctions                       | MCF7     |
| nuclear speckles, cytosol                      | A-431    | nuclear speckles, cytosol                      | sA549    |
| nucleoplasm, golgi apparatus, plasma membrane  | A-431    | nucleoplasm, golgi apparatus, plasma membrane  | RH-30    |
| nucleoplasm, centrosome                        | HEK 293  | nucleoplasm                                    | PC-3     |
| nucleoplasm, mitochondria                      | A-431    | nucleoplasm, mitochondria                      | U-251 MG |
| microtubules                                   | U-2 OS   | microtubules                                   | A549     |
| nucleoplasm, cytosol                           | A-431    | nucleoplasm, cytosol                           | U-251 MG |
| golgi apparatus, cytosol                       | U-251 MG | plasma membrane, cytosol                       |          |
| centriolar satellite, cytosol                  | A-431    | centriolar satellite, cytosol                  | A549     |
| centriolar satellite, cytosol                  | A549     | centriolar satellite, cytosol                  |          |
| nuclear membrane, nucleoli                     | PC-3     | nuclear membrane                               | AF22     |
| cytosol                                        | A-431    | cytosol                                        | U-251 MG |
| nucleoplasm, plasma membrane                   | MCF7     | nucleoplasm, cytosol                           | PC-3     |
| cell junctions, aggregates                     |          |                                                |          |
| vesicles                                       | SiHa     | vesicles                                       |          |
| nucleoplasm, vesicles                          | A-431    | nucleoplasm                                    | U-251 MG |
| plasma membrane, cytosol                       | A-431    | plasma membrane, cytosol                       | U-251 MG |
| golgi apparatus, cytosol                       | MCF7     | golgi apparatus                                |          |
| endoplasmic reticulum                          | U-251 MG | endoplasmic reticulum                          |          |
| nucleoplasm, cytosol                           | U-2 OS   | nucleoplasm, plasma membrane, actin filaments  |          |
| nucleoplasm, nucleoli fibrillar center         | A-431    | nucleoplasm, nucleoli fibrillar center         | U-251 MG |
| nucleoplasm, nucleoli                          | A-431    | nucleoplasm, nucleoli                          | U-251 MG |
| nucleoplasm, mitochondria                      | PC-3     | nucleoplasm, mitochondria                      |          |
| nucleoplasm, nucleoli                          | U-251 MG | nucleoplasm, nucleoli                          | MCF7     |
| cytosol                                        | A-431    | cytosol                                        | U-251 MG |
| plasma membrane, cytosol                       |          |                                                |          |

|                               |          |                                         |
|-------------------------------|----------|-----------------------------------------|
| endoplasmic reticulum         | RH-30    | nuclear membrane, endoplasmic reticulum |
| nucleoplasm                   | A-431    | nucleoplasm                             |
| nucleoplasm, cytosol          | U-251 MG | nucleoplasm                             |
| nucleoplasm, plasma membrane  | PC-3     | nucleoplasm, plasma membrane, cytosol   |
| plasma membrane               | Hep G2   | golgi apparatus, plasma membrane        |
| cytosol                       | U-251 MG | cytosol                                 |
| cytosol                       | A-431    | cytosol                                 |
| nuclear speckles, cytosol     | A-431    | nuclear speckles, cytosol               |
| nucleoli fibrillar center     | A-431    | nucleoli fibrillar center, microtubules |
| plasma membrane               | HaCaT    | plasma membrane                         |
| nuclear speckles, cytosol     | U-251 MG | nucleoplasm                             |
| vesicles                      | A-431    | golgi apparatus                         |
| vesicles                      | BJ       | nucleoplasm, vesicles                   |
| nucleoplasm                   |          |                                         |
| nucleoplasm, cytosol          | A-431    | nucleoplasm, cytosol                    |
| actin filaments               | A-431    | nucleoplasm, actin filaments            |
| actin filaments               |          |                                         |
| nucleoplasm                   | PC-3     | nucleoplasm                             |
| nucleoli, golgi apparatus     | U-251 MG | nucleoplasm, golgi apparatus            |
| nucleoli, cytosol             | A-431    | nucleoli, cytosol                       |
| nuclear speckles              | A-431    | nuclear speckles                        |
| nucleoplasm                   | A-431    | nucleoplasm                             |
| nucleoplasm, cytosol          | A-431    | nucleoplasm, vesicles                   |
| plasma membrane               |          |                                         |
| cytosol                       | U-251 MG | cytosol                                 |
| plasma membrane, cytosol      | A-431    | plasma membrane, cytosol                |
| cytosol                       | A-431    | cytosol                                 |
| vesicles, plasma membrane     | A-431    | vesicles                                |
| mitochondria                  |          |                                         |
| golgi apparatus               | HEK 293  | golgi apparatus                         |
| nucleoplasm, mitochondria     | A-431    | nucleoplasm                             |
| cytoplasmic bodies            |          |                                         |
| vesicles                      | RH-30    | vesicles                                |
| vesicles                      | MCF7     | vesicles                                |
| nucleoplasm                   | A-431    | nucleoplasm                             |
| nucleoplasm, plasma membrane  | A-431    | nucleoplasm, plasma membrane, cytosol   |
| cytosol                       | U-251 MG | cytosol                                 |
| microtubules                  | A-431    | microtubules                            |
| nucleoplasm                   | A-431    | nucleoplasm                             |
| nucleoplasm                   | U-251 MG | nucleoplasm                             |
| nucleoplasm                   | HeLa     | nucleoplasm, nucleoli                   |
| nucleoplasm                   | PC-3     | nucleoplasm, nucleoli                   |
| nucleoplasm, plasma membrane  | A-431    | nucleoplasm                             |
| nucleoplasm                   | PC-3     | nucleoplasm, cytosol                    |
| cytosol                       | A-431    | cytosol                                 |
| nucleoplasm, cytosol          | A-431    | nucleoplasm, cytosol                    |
| mitochondria                  | A-431    | mitochondria                            |
| nucleoplasm, cytosol          | A-431    | nucleoplasm                             |
| nucleoplasm, cytosol          | A-431    | nucleoplasm, vesicles                   |
| golgi apparatus               | A-431    | golgi apparatus                         |
| centriolar satellite, cytosol | MCF7     | cytosol                                 |
| nucleoplasm, actin filaments  | HEK 293  | nucleoplasm, cytosol                    |
| nucleoplasm                   | A-431    | nucleoplasm                             |
| nucleoplasm, nuclear bodies   | A-431    | nucleoplasm, centrosome, cytosol        |
| nucleoli fibrillar center     | U-2 OS   | nucleoli fibrillar center               |

vesicles  
 nuclear bodies, midbody, miA-431 nuclear bPC-3 nuclear bodies, microtubules  
 nucleoplasm, vesicles A-431 nucleoplaU-251 MG nucleoplasm, vesicles  
 nucleoplasm  
 nucleoplasm  
 nucleoplasm, cytosol A-431 nucleoplaU-251 MG nucleoplasm, cytosol  
 golgi apparatus  
 nuclear bodies A-431 nuclear bU-251 MG nucleoplasm, nuclear bodies  
 nucleoplasm PC-3 nucleoplasm  
 nucleoplasm Hep G2 nucleoplaPC-3 nucleoplasm  
 nucleoplasm MCF7 nucleoplaHep G2 nucleoplasm  
 nucleoplasm A-431 nucleoplaRH-30 nucleoplasm, golgi apparatus, cell jun  
 nucleoplasm, golgi apparatus A-431 nucleoplaA549 nucleoplasm, golgi apparatus  
 intermediate filaments MCF7 intermediate filaments  
 intermediate filaments  
 nucleoplasm, intermediate filaments  
 vesicles, cytosol A-431 vesicles HAP1 cytosol  
 vesicles, cytosol  
 golgi apparatus, plasma membrane U-2 OS plasma membrane RH-30 golgi apparatus, plasma membrane  
 cytosol A549 mitochondria SK-MEL-30 mitochondria  
 intermediate filaments  
 intermediate filaments HaCaT intermediate filaments  
 nucleoplasm, vesicles U-251 MG nucleoplaSK-MEL-30 nucleoplasm, vesicles, aggresome  
 nucleoplasm U-251 MG nucleoplaHeLa nucleoplasm  
 mitochondria HEK 293 nuclear bHeLa nuclear bodies, mitochondria  
 cytosol A-431 cytosol U-251 MG cytosol  
 mitochondria A-431 mitochondria U-251 MG mitochondria  
 nucleoplasm A-431 nucleoplaHEK 293 nucleoplasm  
 nucleoplasm, cytosol A-431 nucleoplaU-251 MG nucleoplasm  
 nucleoplasm, cytosol, cytoU-2 OS cytosol  
 nucleoplasm, plasma membrane BJ plasma membrane  
 nucleoplasm A-431 nucleoplaU-251 MG nucleoplasm  
 nucleoplasm, nucleoli U-2 OS nucleoplaHep G2 nucleoplasm, nucleoli  
 nucleoplasm  
 nucleoplasm, nucleoli A-431 nucleoplaHaCaT nucleoplasm, vesicles  
 nucleoplasm  
 nucleoplasm, cytosol A-431 nucleoplaU-251 MG nucleoplasm  
 nucleoplasm  
 nucleoplasm A-431 nucleoplaU-251 MG nucleoplasm  
 nucleoplasm A-431 nucleoplaU-251 MG nucleoplasm, plasma membrane  
 nuclear bodies, cytosol HUVEC TER nuclear bodies  
 golgi apparatus A-431 golgi apparatus U-251 MG golgi apparatus  
 nucleoli A-431 nucleoli U-251 MG nucleoli  
 nucleoplasm A-431 nucleoplaU-251 MG nucleoplasm, mitochondria  
 nucleoli, cytosol A-431 nucleoplaU-251 MG nucleoplasm, nucleoli, cytosol  
 plasma membrane  
 nucleoli, microtubules A-431 nucleoli, U-251 MG nucleoli, microtubules  
 plasma membrane  
 nucleoplasm HeLa nucleoplaSH-SY5Y nucleoplasm, nuclear membrane  
 mitochondria  
 endoplasmic reticulum  
 endoplasmic reticulum  
 endoplasmic reticulum  
 endoplasmic reticulum  
 nuclear speckles A-431 nuclear speckles sU-251 MG nuclear speckles

|                                |              |                                          |          |                                           |
|--------------------------------|--------------|------------------------------------------|----------|-------------------------------------------|
| nuclear membrane, nuclear      | MCF7         | nuclear membrane, nuclear                | Hep G2   | nuclear membrane, nuclear speckles        |
| nuclear speckles               | A-431        | nuclear speckles                         | U-251 MG | nuclear speckles                          |
| nucleoplasm, cytosol           | U-251 MG     | nucleoplasm                              | MCF7     | nucleoplasm                               |
| nucleoplasm                    | A-431        | nucleoplasm, cytosol                     | U-251 MG | nucleoplasm, cytosol                      |
| nucleoplasm                    | A-431        | nucleoplasm, centrosome                  | U-251 MG | nucleoplasm, centrosome                   |
| vesicles, cytokinetic          | bricU-251 MG | vesicles                                 | A549     | vesicles                                  |
| plasma membrane, cytoplasm     | U-2 OS       | plasma membrane                          | U-251 MG | plasma membrane                           |
| nucleoplasm                    | A-431        | nucleoplasm                              | U-251 MG | nucleoplasm                               |
| nucleoplasm                    | A-431        | nucleoplasm                              | U-251 MG | nucleoplasm                               |
| intermediate filaments         | HEK 293      | intermediate filaments                   |          | intermediate filaments                    |
| nucleoplasm                    | A-431        | nucleoplasm                              | U-251 MG | nucleoplasm                               |
| cytosol                        | A-431        | cytosol                                  | U-251 MG | cytosol                                   |
| nucleoplasm                    |              |                                          |          |                                           |
| nucleoplasm, nuclear bodies    | A-431        | nucleoplasm, nuclear bodies              | U-251 MG | nucleoplasm, nuclear bodies               |
| nucleoplasm, nuclear bodies    | A-431        | nucleoplasm, nuclear bodies              | U-251 MG | nucleoplasm, nuclear bodies               |
| nucleoplasm                    | REH          | nucleoplasm                              |          | nucleoplasm                               |
| nucleoli fibrillar center      | U-2 OS       | nucleoli fibrillar center, cell junction | PC-3     | nucleoli fibrillar center, cell junction  |
| nucleoplasm, centrosome        | A-431        | nucleoplasm, centrosome                  | U-251 MG | nucleoplasm, centrosome                   |
| nucleoplasm                    | U-251 MG     | nucleoplasm                              |          | nucleoplasm                               |
| nucleoplasm, golgi apparatus   | A-431        | nucleoplasm, golgi apparatus             | U-251 MG | nucleoplasm, golgi apparatus              |
| cytoplasmic bodies             | A-431        | cytoplasmic bodies                       |          | cytoplasmic bodies                        |
| cytosol                        |              |                                          |          |                                           |
| nucleoplasm, cytosol           | A-431        | nucleoplasm, cytosol                     | U-251 MG | nucleoplasm, cytosol                      |
| nucleoli, cytosol              | A-431        | cytosol                                  | U-251 MG | cytosol                                   |
| plasma membrane                |              |                                          |          |                                           |
| cell junctions, microtubules   | A-431        | cell junctions, microtubules             | HEK 293  | cell junctions, microtubules              |
| vesicles                       | U-2 OS       | vesicles                                 | Hep G2   | endoplasmic reticulum                     |
| nucleoplasm                    | A-431        | nucleoplasm, nucleoli                    | U-251 MG | nucleoplasm, nucleoli                     |
| mitochondria                   | RH-30        | mitochondria                             |          | mitochondria                              |
| cytosol                        | A-431        | nucleoplasm, vesicles                    | K-562    | nucleoplasm, vesicles                     |
| nucleoplasm, cytosol           | U-251 MG     | nucleoplasm, plasma membrane, cytosol    | HEL      | nucleoplasm, plasma membrane, cytosol     |
| golgi apparatus                | AF22         | golgi apparatus                          |          | golgi apparatus                           |
| cytosol                        | RT4          | nucleoplasm, cytosol                     | U-2 OS   | cytosol                                   |
| nucleoplasm, nuclear membrane  | SK-MEL-30    | nucleoplasm, nuclear membrane            |          | nucleoplasm, nuclear membrane             |
| cytosol                        | A-431        | cytosol                                  | U-251 MG | cytosol                                   |
| actin filaments, cytosol       | A-431        | actin filaments, cytosol                 | U-251 MG | plasma membrane, actin filaments, cytosol |
| nucleoplasm, cytosol           | A-431        | nucleoplasm                              | U-251 MG | nucleoplasm                               |
| golgi apparatus                | SH-SY5Y      | golgi apparatus                          | BJ       | golgi apparatus                           |
| nucleoplasm                    | A-431        | nucleoplasm                              | U-251 MG | nucleoplasm                               |
| nucleoplasm                    |              |                                          |          |                                           |
| nucleoplasm, vesicles, cytosol | A-431        | nucleoplasm, vesicles                    | U-251 MG | nucleoplasm, vesicles                     |
| nucleoplasm, cytosol           | HEK 293      | golgi apparatus                          |          | golgi apparatus                           |
| nucleoplasm, nucleoli, cytosol | A-431        | nucleoplasm, nucleoli, cytosol           | U-251 MG | nucleoplasm, nucleoli, cytosol            |
| nucleoplasm, cytosol           | A-431        | nucleoplasm                              | U-251 MG | nucleoplasm                               |
| endoplasmic reticulum          |              |                                          |          |                                           |
| nucleoplasm, cytosol           | U-251 MG     | nucleoplasm, cytosol                     | HEL      | nucleoplasm, cytosol                      |
| cytosol                        | A-431        | cytosol                                  | U-251 MG | cytosol                                   |
| nucleoplasm                    | MCF7         | nucleoplasm, golgi apparatus             | HEK 293  | nucleoplasm, golgi apparatus              |
| endoplasmic reticulum, cytosol | A-431        | endoplasmic reticulum, cytosol           | U-251 MG | endoplasmic reticulum, cytosol            |
| mitochondria                   | A-431        | mitochondria                             | U-251 MG | mitochondria                              |
| nucleoplasm, cytosol           | A-431        | nucleoplasm                              | MCF7     | nucleoplasm                               |
| endoplasmic reticulum, cytosol | A-431        | endoplasmic reticulum, cytosol           | U-251 MG | endoplasmic reticulum, cytosol            |
| nuclear membrane, cytosol      | A-431        | nuclear membrane, vesicles               | U-251 MG | nuclear membrane, vesicles                |
| cell junctions                 |              |                                          |          |                                           |
| plasma membrane, cell junction | U-251 MG     | plasma membrane                          |          | plasma membrane                           |

|                                 |           |                                 |          |                                 |
|---------------------------------|-----------|---------------------------------|----------|---------------------------------|
| cytosol                         | A-431     | cytosol                         | U-251 MG | focal adhesion sites            |
| cytosol                         | A-431     | cytosol                         | U-251 MG | cytosol                         |
| golgi apparatus                 | U-251 MG  | golgi apparatus                 |          |                                 |
| golgi apparatus                 | A-431     | golgi appA549                   |          | golgi apparatus                 |
| nucleoplasm                     | A549      | nucleoplaHeLa                   |          | nucleoplasm                     |
| nuclear speckles                | A-431     | nuclear sU-251 MG               |          | nuclear speckles                |
| cytosol                         |           |                                 |          |                                 |
| vesicles                        | ASC TERT1 | golgi apparatus                 |          |                                 |
| cytosol                         | A-431     | cytosol                         | U-251 MG | cytosol                         |
| cytosol                         | A-431     | cytosol                         | U-251 MG | cytosol                         |
| nucleoplasm, mitochondria       | A-431     | nucleoplaHEK 293                |          | nucleoplasm, mitochondria       |
| nucleoli                        | U-2 OS    | nucleoli RH-30                  |          | nucleoli                        |
| endoplasmic reticulum, vesicles | A-431     | golgi appU-251 MG               |          | endoplasmic reticulum, vesicles |
| nucleoplasm, cytosol            | A-431     | nucleoplaPC-3                   |          | nucleoplasm, nucleoli           |
| nucleoplasm                     | RH-30     | nucleoplaPC-3                   |          | nucleoplasm                     |
| nucleoplasm, actin filaments    | A-431     | nucleoplaU-251 MG               |          | nucleoplasm, cytosol            |
| nucleoplasm                     | Hep G2    | nucleoplaRH-30                  |          | nucleoplasm                     |
| centrosome                      | RPTEC TER | golgi apparatus                 |          |                                 |
| nucleoplasm                     | U-2 OS    | nucleoplaSH-SY5Y                |          | nucleoplasm                     |
| nucleoplasm                     | U-2 OS    | nucleoplaSH-SY5Y                |          | nucleoplasm                     |
| cytosol                         | A-431     | cytosol                         | U-251 MG | cytosol                         |
| cytosol                         |           |                                 |          |                                 |
| plasma membrane                 |           |                                 |          |                                 |
| plasma membrane                 |           |                                 |          |                                 |
| vesicles                        | A-431     | vesicles                        | U-251 MG | vesicles                        |
| vesicles                        | U-251 MG  | cytosol                         | HeLa     | vesicles                        |
| cytosol                         | A-431     | cytosol                         | U-251 MG | cytosol                         |
| cytosol                         | HEL       | cytosol                         |          |                                 |
| endoplasmic reticulum           | U-2 OS    | endoplasmPC-3                   |          | endoplasmic reticulum           |
| nuclear bodies                  | AF22      | nuclear bodies                  |          |                                 |
| nucleoplasm, focal adhesions    | SiHa      | nucleoplaSK-MEL-30              |          | nucleoplasm, nuclear bodies     |
| vesicles, plasma membrane       | A-431     | vesicles                        |          |                                 |
| nuclear bodies, cytosol         | A-431     | nuclear bU-251 MG               |          | nuclear bodies, cytosol         |
| nuclear bodies, cytosol         | HEK 293   | nuclear bHep G2                 |          | nuclear bodies, cytosol         |
| intermediate filaments, cytosol | U-251 MG  | intermediate filaments, cytosol |          |                                 |
| cytosol                         | A549      | nucleoli, cytosol               |          |                                 |
| vesicles                        | A-431     | vesicles                        | U-251 MG | vesicles                        |
| mitochondria                    | A-431     | mitochondria                    |          |                                 |
| plasma membrane                 |           |                                 |          |                                 |
| cytosol                         | A-431     | cytosol                         | AF22     | cytosol                         |
| cytosol                         | A-431     | cytosol                         | U-251 MG | cytosol                         |
| nucleoplasm, golgi apparatus    | SH-SY5Y   | nucleoplasm, plasma membrane    |          |                                 |
| nucleoplasm                     | U-251 MG  | nucleoplaHEK 293                |          | nucleoplasm, nuclear bodies     |
| mitochondria                    | U-251 MG  | mitochondriaA549                |          | mitochondria                    |
| mitochondria                    | HEK 293   | mitochondria                    |          |                                 |
| nucleoli fibrillar center       | A-431     | nucleoli                        | U-251 MG | nucleoli fibrillar center       |
| nucleoplasm                     |           |                                 |          |                                 |
| nucleoplasm                     | A-431     | nucleoplaU-251 MG               |          | nucleoplasm                     |
| nucleoplasm                     | SiHa      | nucleoplaPC-3                   |          | nucleoplasm                     |
| nucleoplasm                     | SiHa      | nucleoplaPC-3                   |          | nucleoplasm                     |
| vesicles                        | NB-4      | vesicles                        |          |                                 |
| vesicles                        |           |                                 |          |                                 |
| plasma membrane, cytosol        | SiHa      | plasma membrane, cytosol        |          |                                 |
| actin filaments                 | A-431     | vesicles, U-251 MG              |          | cytosol                         |
| nucleoplasm, intermediate       | HeLa      | nucleoplaSiHa                   |          | nucleoplasm                     |



|                                                         |                |                                                 |                                        |
|---------------------------------------------------------|----------------|-------------------------------------------------|----------------------------------------|
| nucleoplasm, intermediate                               | HeLa           | nucleoplasSiHa                                  | nucleoplasm                            |
| nucleoplasm, nucleoli vesicles                          | U-2 OS         | nucleoli HEK 293                                | nucleoplasm, nucleoli                  |
| nucleoplasm                                             | A-431          | nucleoplaU-251 MG                               | nucleoplasm                            |
| nucleoplasm                                             | RH-30          | nucleoplasm                                     |                                        |
| microtubules                                            | U-2 OS         | microtubuHep G2                                 | microtubules                           |
| nucleoplasm, plasma membrane                            | MCF7           | nucleoplaHeLa                                   | nucleoplasm, cytosol                   |
| nucleoli vesicles                                       | A-431 HEK 293  | nucleoli U-251 MG                               | nucleoplasm, nucleoli                  |
| nucleoplasm, nucleoli plasma membrane vesicles, cytosol | U-251 MG A-431 | nucleoplasm, nucleoli plasma meHep G2           | mitochondria                           |
| nucleoplasm, cytosol                                    | HEK 293        | nucleoplaHeLa                                   | nucleoplasm, cytosol                   |
| nucleoplasm, mitochondria                               | RH-30          | mitochondBJ                                     | nucleoplasm, mitochondria              |
| nuclear speckles, plasma membrane                       | A-431          | nuclear sU-251 MG                               | nuclear speckles, plasma membrane, cyt |
| nuclear speckles, midbody                               | HEL            | nuclear sSK-MEL-30                              | nuclear speckles, cytosol              |
| plasma membrane                                         | A-431          | plasma meU-251 MG                               | plasma membrane                        |
| plasma membrane midbody                                 | A-431          | golgi appU-251 MG                               | plasma membrane                        |
| nucleoplasm, nucleoli, cyto                             | A-431          | nucleoplaU-251 MG                               | nucleoplasm, nuclear membrane, nucleol |
| nucleoplasm mitochondria vesicles                       | BJ             | mitochondria                                    |                                        |
| nucleoplasm, cytosol vesicles, actin filaments          | BJ             | nucleoplasm, vesicles, actin filaments, cytosol |                                        |
| vesicles, actin filaments, cytosol                      |                |                                                 |                                        |
| vesicles, actin filaments, cytosol                      |                |                                                 |                                        |
| nucleoplasm                                             | A549           | nucleoplaRH-30                                  | nucleoplasm, cytosol                   |
| nucleoplasm                                             | A-431          | nucleoplaU-251 MG                               | nucleoplasm                            |
| nucleoplasm, cytosol vesicles                           | U-251 MG HeLa  | nucleoplasm, cytosol vesicles                   |                                        |
| vesicles                                                | A-431          | vesicles                                        |                                        |
| nucleoplasm, nuclear bodies                             | A-431          | nucleoplaHep G2                                 | nucleoplasm, nuclear bodies            |
| nucleoplasm, cytosol                                    | U-2 OS         | cytosol MCF7                                    | nucleoplasm, microtubules, cytokinetic |
| nucleoplasm                                             | A-431          | nucleoplaA549                                   | nucleoplasm                            |
| nucleoplasm                                             | RH-30          | nucleoplasm                                     |                                        |
| nucleoplasm                                             | U-251 MG       | nucleoplasm                                     |                                        |
| golgi apparatus                                         | U-251 MG       | golgi apparatus                                 |                                        |
| vesicles                                                | MCF7           | vesicles PC-3                                   | vesicles                               |
| nucleoplasm, golgi apparatus                            | U-2 OS         | golgi appMCF7                                   | nucleoplasm, golgi apparatus           |
| vesicles                                                | U-251 MG       | vesicles Hep G2                                 | vesicles                               |
| nucleoplasm, mitochondria                               | SiHa           | nucleoplasm, mitochondria                       |                                        |
| nucleoplasm, cytosol                                    |                |                                                 |                                        |
| nucleoplasm                                             |                |                                                 |                                        |
| nuclear speckles                                        | PC-3           | nuclear speckles                                |                                        |
| nucleoplasm                                             | MCF7           | nucleoplaPC-3                                   | nucleoplasm, nuclear bodies            |
| nucleoplasm, plasma membrane                            | A-431          | nucleoplaMCF7                                   | nucleoplasm, plasma membrane, cytosol  |
| nucleoplasm, mitochondria                               | A-431          | nucleoplaU-251 MG                               | nucleoplasm, mitochondria              |
| plasma membrane                                         | HeLa           | plasma meSH-SY5Y                                | plasma membrane                        |
| plasma membrane, cytosol                                | U-2 OS         | plasma meBJ                                     | plasma membrane, cytosol               |
| centriolar satellite                                    | A-431          | plasma meHEL                                    | plasma membrane, mitotic spindle, cent |
| nucleoplasm, nucleoli fibr                              | A-431          | nucleoplaU-251 MG                               | nucleoplasm, nucleoli fibrillar cente  |
| mitochondria                                            | A-431          | mitochondU-251 MG                               | nucleoplasm, mitochondria              |
| nucleoplasm, nucleoli, mitc                             | A-431          | nucleoplaU-251 MG                               | nucleoplasm, nucleoli                  |
| vesicles, plasma membrane, actin filaments              |                |                                                 |                                        |

|                                   |          |                                            |                                        |
|-----------------------------------|----------|--------------------------------------------|----------------------------------------|
| nucleoplasm                       | A-431    | nucleoplaU-251 MG                          | nucleoplasm                            |
| nucleoplasm                       | A-431    | nucleoplaMCF7                              | nucleoplasm                            |
| nucleoli, vesicles, cytosol       | A-431    | nucleoli, PC-3                             | vesicles                               |
| vesicles                          | U-2 OS   | nucleoli, HeLa                             | vesicles                               |
| cytosol                           | A-431    | cytosol                                    |                                        |
| nucleoplasm                       | Hep G2   | nucleoplasm                                |                                        |
| nucleoplasm, plasma membrane      | A-431    | nucleoplaHep G2                            | nucleoplasm                            |
| golgi apparatus                   | HEK 293  | golgi apparatus                            |                                        |
| nucleoplasm                       | A-431    | nucleoplaU-251 MG                          | nucleoplasm, cytosol                   |
| nucleoplasm                       | RH-30    | nucleoplasm                                |                                        |
| plasma membrane, cytosol          | A-431    | plasma meU-251 MG                          | plasma membrane, cytosol               |
| plasma membrane, cytosol          | A-431    | plasma meMCF7                              | plasma membrane, cytosol               |
| nucleoplasm                       | U-2 OS   | endoplasmA549                              | nucleoplasm, golgi apparatus           |
| nucleoplasm, cytosol              | A-431    | nucleoplaU-251 MG                          | nucleoplasm, cytosol                   |
| nucleoplasm, nucleoli fibr        | MCF7     | nucleoplaHeLa                              | nucleoplasm, nucleoli fibrillar cente  |
| nucleoplasm, nucleoli, plas       | HEK 293  | nucleoplaSH-SY5Y                           | nucleoplasm, nucleoli, plasma membrane |
| nucleoli                          | BJ       | nucleoli                                   |                                        |
| nucleoli                          | HeLa     | nucleoli HUVEC TER                         | nucleoli                               |
| nucleoli, mitochondria            | MCF7     | nucleoli, SH-SY5Y                          | nucleoli, mitochondria                 |
| cytosol                           | U-251 MG | cytosol                                    |                                        |
| cytosol                           | A-431    | cytosol                                    |                                        |
| nucleoplasm, nuclear bodie        | A-431    | nucleoplaU-251 MG                          | nucleoplasm, nuclear bodies            |
| nucleoplasm                       | A549     | nucleoplaHep G2                            | nucleoplasm                            |
| nucleoplasm                       | A-431    | nucleoplaHeLa                              | nucleoplasm                            |
| nucleoplasm, vesicles             | A-431    | nucleoplaHeLa                              | nucleoplasm, vesicles                  |
| plasma membrane                   | PC-3     | plasma membrane                            |                                        |
| plasma membrane                   |          |                                            |                                        |
| nucleoplasm                       | A-431    | nucleoplaU-251 MG                          | nucleoplasm                            |
| nucleoplasm, cell junctior        | U-2 OS   | nucleoplaMCF7                              | nucleoplasm, cell junctions, cytoplasm |
| nucleoplasm, cell junctior        | U-251 MG | focal adhesion sites                       |                                        |
| endoplasmic reticulum, cyt        | MCF7     | endoplasmHEK 293                           | endoplasmic reticulum, cytosol         |
| nucleoplasm                       | U-251 MG | nucleoplasm                                |                                        |
| nucleoplasm                       | MCF7     | nucleoplaPC-3                              | nucleoplasm                            |
| cytosol                           | PC-3     | cytosol                                    |                                        |
| nuclear membrane, endoplas        | U-251 MG | nuclear rHEK 293                           | nuclear membrane, endoplasmic reticul  |
| plasma membrane, actin fila       | A-431    | nuclear sU-251 MG                          | nuclear speckles, cytosol              |
| cytosol                           | A-431    | golgi appU-251 MG                          | cytosol                                |
| mitochondria                      | SiHa     | mitochondPC-3                              | mitochondria                           |
| intermediate filaments, cy        | A-431    | intermediU-251 MG                          | golgi apparatus, cytosol               |
| nucleoli fibrillar center         | A-431    | nucleoli U-251 MG                          | nucleoli fibrillar center              |
| nucleoli, cytosol                 | A-431    | nucleoli, U-251 MG                         | nucleoli, cytosol                      |
| vesicles                          | A-431    | vesicles U-251 MG                          | vesicles                               |
| nuclear speckles, vesicles        | SH-SY5Y  | nuclear sPC-3                              | nuclear speckles                       |
| nuclear speckles                  |          |                                            |                                        |
| vesicles                          |          |                                            |                                        |
| vesicles, cytosol                 | A-431    | golgi apparatus, vesicles                  |                                        |
| endoplasmic reticulum             | A-431    | cytosol                                    |                                        |
| golgi apparatus                   | SH-SY5Y  | golgi appAF22                              | golgi apparatus, cytosol               |
| nucleoplasm, nucleoli, golg       | SH-SY5Y  | nucleoli fibrillar center, golgi apparatus |                                        |
| nucleoplasm                       | HeLa     | nucleoplasm                                |                                        |
| nucleoplasm                       | A-431    | nucleoplaU-251 MG                          | nucleoplasm                            |
| nucleoplasm, mitochondria         | A-431    | nucleoplaU-251 MG                          | nucleoplasm                            |
| nuclear membrane, plasma membrane |          |                                            |                                        |
| mitochondria, cytosol             | A-431    | vesicles, cytosol                          |                                        |
| cytosol                           | A-431    | cytosol U-251 MG                           | cytosol                                |

|                            |          |                                |                                        |
|----------------------------|----------|--------------------------------|----------------------------------------|
| nucleoplasm                | HEK 293  | nucleoplaSiHa                  | nucleoplasm                            |
| endoplasmic reticulum      | U-251 MG | endoplasmic reticulum, cytosol |                                        |
| nucleoplasm                | A-431    | nucleoplaU-251 MG              | nucleoplasm                            |
| nucleoplasm                | A-431    | nucleoplaU-251 MG              | nucleoplasm                            |
| nucleoplasm, centrosome    | U-251 MG | nucleoplaPC-3                  | nucleoplasm                            |
| nucleoplasm                | Hep G2   | nucleoplaSiHa                  | nucleoplasm, cytokinetic bridge, midbo |
| nucleoplasm                | MCF7     | nucleoplaHEK 293               | nucleoplasm                            |
| nucleoli, cytosol          | U-251 MG | nucleoli, RH-30                | nucleoli, cytosol                      |
| nuclear speckles           | A-431    | nuclear sU-251 MG              | nuclear speckles                       |
| vesicles                   | A-431    | vesicles MCF7                  | vesicles                               |
| cytosol                    | A-431    | cytosol U-251 MG               | cytosol                                |
| cytosol                    | A-431    | cytosol U-251 MG               | cytosol                                |
| cytosol                    | PC-3     | cytosol                        |                                        |
| mitochondria               | U-251 MG | nucleoplaRH-30                 | mitochondria                           |
| nucleoplasm                | A-431    | nucleoplaU-251 MG              | nucleoplasm                            |
| nuclear speckles, vesicles | A-431    | vesicles U-251 MG              | nucleoplasm, vesicles                  |
| nucleoplasm                | U-2 OS   | nucleoplasm                    |                                        |
| nucleoplasm                | Hep G2   | nucleoplasm                    |                                        |
| nucleoplasm                |          |                                |                                        |
| nucleoplasm, vesicles      |          |                                |                                        |
| nucleoplasm                | A-431    | nucleoplaHeLa                  | nucleoplasm                            |
| cytosol                    | A-431    | cytosol                        |                                        |
| nuclear bodies             | MCF7     | nucleoplaHEK 293               | nuclear bodies                         |
| vesicles                   | U-2 OS   | vesicles PC-3                  | nucleoplasm, vesicles                  |
| microtubules               | A-431    | nucleoplaU-251 MG              | nucleoplasm, microtubules              |
| nucleoplasm, cytosol       | BJ       | nucleoplasm, cytosol           |                                        |
| nucleoplasm                | A-431    | nucleoplaU-251 MG              | nucleoplasm                            |
| plasma membrane, cytosol   | A-431    | plasma meU-251 MG              | plasma membrane, cytosol               |
| mitochondria               | MCF7     | mitochondHep G2                | mitochondria                           |
| nucleoli                   | A-431    | nucleoli U-251 MG              | nucleoli                               |
| nucleoli, mitochondria     | A-431    | nucleoli U-251 MG              | nucleoli                               |
| nucleoplasm, nucleoli      | U-251 MG | nucleoli                       |                                        |
| nucleoplasm, nucleoli fibr | MCF7     | nucleoplaPC-3                  | nucleoplasm, nucleoli fibrillar cente  |
| nucleoplasm                | A-431    | nucleoplaU-251 MG              | nucleoplasm                            |
| nuclear bodies, plasma men | A-431    | nuclear bU-251 MG              | nuclear bodies, plasma membrane, cytos |
| mitochondria               | A-431    | mitochondU-251 MG              | mitochondria                           |
| intermediate filaments     |          |                                |                                        |
| intermediate filaments     |          |                                |                                        |
| cytosol                    | A-431    | cytosol HUVEC TER              | plasma membrane, cytosol               |
| cytosol                    | A-431    | cytosol U-251 MG               | cytosol                                |
| mitochondria               | U-251 MG | mitochondria                   |                                        |
| nucleoplasm, mitochondria, | A549     | mitochondPC-3                  | nucleoplasm, vesicles, cytosol         |
| cell junctions             | PC-3     | nucleoplasm, plasma membrane   |                                        |
| nucleoplasm                | U-2 OS   | nucleoplaHep G2                | nucleoplasm                            |
| plasma membrane            | A-431    | plasma membrane                |                                        |
| plasma membrane, cytosol   | A-431    | plasma meU-251 MG              | plasma membrane, cytosol               |
| nucleoplasm, microtubules, | A-431    | nucleoplaHeLa                  | nucleoplasm, microtubules, cytokinetic |
| golgi apparatus            | A-431    | golgi appU-251 MG              | golgi apparatus                        |
| golgi apparatus            | A-431    | golgi appU-251 MG              | golgi apparatus                        |
| nucleoli                   | HeLa     | nucleoli RH-30                 | nucleoli                               |
| nucleoplasm                | HEK 293  | nucleoplahtTCEpi               | nucleoplasm                            |
| plasma membrane            | U-2 OS   | plasma meHep G2                | plasma membrane, aggresome             |
| nucleoplasm, actin filamer | A549     | nucleoplaPC-3                  | nucleoplasm, nucleoli                  |
| centrosome                 | U-2 OS   | nuclear bodies                 |                                        |
| vesicles                   | EFO-21   | vesicles HUVEC TER             | vesicles                               |

|                                  |          |                              |                                    |
|----------------------------------|----------|------------------------------|------------------------------------|
| centrosome                       | MCF7     | cytosol PC-3                 | centrosome, cytosol                |
| centrosome                       | MCF7     | centrosomPC-3                | nucleoplasm, centrosome, cytosol   |
| nucleoplasm                      | A-431    | nucleoplaU-251 MG            | nucleoplasm, nuclear bodies        |
| aggresome                        | A-431    | nucleoplaU-251 MG            | nucleoplasm, cytosol               |
| nucleoplasm, cytosol             | A-431    | nucleoplaU-251 MG            | nucleoplasm                        |
| nucleoplasm                      | MCF7     | nucleoplaHEK 293             | nucleoplasm                        |
| nucleoplasm                      | MCF7     | nucleoplaHEK 293             | nucleoplasm                        |
| cytosol                          |          |                              |                                    |
| nucleoplasm, actin filamer       | SH-SY5Y  |                              | nucleoplasm, cytosol               |
| centriolar satellite, cytosol    |          |                              |                                    |
| plasma membrane, cytosol         | HEL      | plasma meSK-MEL-30           | plasma membrane, cytosol           |
| plasma membrane                  | HaCaT    |                              | plasma membrane                    |
| vesicles                         |          |                              |                                    |
| nucleoplasm, vesicles, plas      | U-2 OS   | nucleoplaA-431               | nucleoplasm, plasma membrane       |
| vesicles                         | A-431    | vesicles U-251 MG            | vesicles                           |
| vesicles                         | HeLa     |                              | vesicles                           |
| vesicles                         |          |                              |                                    |
| vesicles                         | A-431    | vesicles U-251 MG            | vesicles                           |
| cytosol                          | RH-30    | cytosol PC-3                 | cytosol                            |
| nucleoplasm                      | SiHa     | nucleoplaBJ                  | nucleoplasm                        |
| mitochondria                     | A-431    | mitochondHEK 293             | mitochondria                       |
| nucleoplasm, golgi apparatus     | A-431    | nucleoplaU-251 MG            | nucleoplasm, golgi apparatus       |
| nucleoplasm, golgi apparatus     | A-431    | nucleoplaASC TERT1           | nucleoplasm, golgi apparatus       |
| nucleoplasm, vesicles            | A-431    | nucleoplaU-251 MG            | nucleoplasm, cytosol               |
| cytosol                          | A-431    | cytosol U-251 MG             | cytosol                            |
| endoplasmic reticulum, ves       | A549     | endoplasmRPTEC TER           | endoplasmic reticulum, vesicles    |
| nucleoplasm                      |          |                              |                                    |
| nucleoplasm                      | A-431    | nucleoplaU-251 MG            | nucleoplasm                        |
| nucleoplasm                      | A-431    | nucleoplaU-251 MG            | nucleoplasm                        |
| nucleoplasm                      | HEK 293  |                              |                                    |
| plasma membrane                  | RT4      | plasma meU-2 OS              | plasma membrane                    |
| plasma membrane                  |          |                              |                                    |
| plasma membrane                  | PC-3     |                              | plasma membrane                    |
| plasma membrane, actin filaments |          |                              |                                    |
| nucleoplasm                      | U-251 MG |                              | nucleoplasm                        |
| nucleoplasm, nucleoli, cytc      | U-2 OS   | nucleoplaRH-30               | nucleoplasm, nucleoli, cytosol     |
| nucleoplasm, golgi apparatus     | SiHa     |                              | golgi apparatus, cytosol           |
| nucleoli, golgi apparatus, A-    | 431      | golgi appU-251 MG            | nucleoli, golgi apparatus, cytosol |
| nucleoplasm, plasma membrane     |          |                              |                                    |
| nucleoplasm, plasma membræ       | A-431    | nucleoplaHeLa                | plasma membrane                    |
| nuclear membrane, vesicles       | A-431    | nuclear rA549                | nuclear membrane, vesicles         |
| nucleoplasm, cytosol             | A-431    | nucleoplaHeLa                | nucleoplasm, cytosol               |
| nucleoplasm, cytosol             |          |                              |                                    |
| nucleoplasm                      | SiHa     | nucleoplaRH-30               | nucleoplasm, nucleoli              |
| nucleoplasm                      | SiHa     | nucleoplaRH-30               | nucleoplasm                        |
| nucleoplasm, cytosol             | HEK 293  | nucleoplaA549                | nucleoplasm, cytosol               |
| nucleoplasm, golgi apparatus     | U-251 MG | nucleoplasm, golgi apparatus |                                    |
| golgi apparatus                  | A-431    | nucleoplaU-251 MG            | nucleoplasm, golgi apparatus       |
| cytosol                          | U-251 MG | cytosol HEK 293              | cytosol                            |
| mitochondria                     | U-251 MG | nucleoplasm, mitochondria    |                                    |
| mitochondria                     | MCF7     | mitochondA549                | mitochondria                       |
| mitochondria                     | MCF7     | mitochondHeLa                | mitochondria                       |
| nucleoplasm, nuclear membr       | A-431    | nucleoplaU-251 MG            | nucleoplasm, nuclear membrane      |
| nucleoplasm, nuclear bodie       | BJ       | nucleoplaPC-3                | nucleoplasm, nuclear bodies        |
| plasma membrane                  | U-251 MG |                              | plasma membrane                    |

|                                 |          |                                  |                                       |
|---------------------------------|----------|----------------------------------|---------------------------------------|
| nucleoplasm, aggresome          | U-251 MG | nucleoplaBJ                      | nucleoplasm                           |
| nucleoplasm                     |          |                                  |                                       |
| cytosol                         | A-431    | cytosol U-251 MG                 | cytosol                               |
| nucleoplasm                     | A-431    | nucleoplaU-251 MG                | nucleoplasm                           |
| nucleoplasm, actin filamer      | A-431    | nucleoplaMCF7                    | nucleoplasm                           |
| plasma membrane, cytosol        | A-431    | plasma meU-251 MG                | plasma membrane, cytosol              |
| golgi apparatus, vesicles       | HEK 293  | golgi appBJ                      | golgi apparatus, vesicles             |
| vesicles                        |          |                                  |                                       |
| centrosome                      | A-431    | centrosorU-251 MG                | centrosome                            |
| mitochondria                    | A-431    | mitochondU-251 MG                | mitochondria                          |
| mitochondria                    | A-431    | mitochondU-251 MG                | mitochondria                          |
| nucleoplasm, nuclear bodies     |          |                                  |                                       |
| nuclear bodies, cytosol         | U-251 MG | nucleoplaK-562                   | nucleoplasm                           |
| vesicles                        | A-431    | vesicles U-251 MG                | vesicles                              |
| nucleoplasm, cytosol            | A-431    | nucleoplaU-251 MG                | nucleoplasm, cytosol                  |
| nucleoplasm, cytosol            | A-431    | nucleoplaU-251 MG                | nucleoplasm, cytosol                  |
| plasma membrane, cell junctions |          |                                  |                                       |
| vesicles                        | A-431    | vesicles, MCF7                   | vesicles, cell junctions              |
| nucleoli, cytosol               | HaCaT    | nucleoli, REH                    | nucleoli, cytosol                     |
| nucleoli, cytosol               | A-431    | cytosol U-251 MG                 | cytosol                               |
| nucleoplasm, nuclear membr      | SH-SY5Y  | nucleoplasm, nuclear membrane    |                                       |
| plasma membrane, cytosol        | A-431    | plasma meU-251 MG                | plasma membrane, cytosol              |
| nucleoplasm, vesicles           | A-431    | nucleoplaHaCaT                   | nucleoplasm, vesicles                 |
| vesicles                        | A549     | vesicles                         |                                       |
| actin filaments                 | RH-30    | plasma membrane, actin filaments |                                       |
| nucleoplasm                     | A-431    | nucleoplasm                      |                                       |
| nucleoplasm                     | MCF7     | nucleoplaA549                    | nucleoplasm                           |
| plasma membrane                 |          |                                  |                                       |
| nucleoplasm                     | A-431    | nucleoplaU-251 MG                | nucleoplasm                           |
| cytosol                         | MCF7     | cell junctions                   |                                       |
| golgi apparatus                 | A-431    | golgi appU-251 MG                | golgi apparatus                       |
| golgi apparatus                 | U-251 MG | golgi appBJ                      | golgi apparatus                       |
| nucleoplasm, cytosol            | MCF7     | nucleoplaPC-3                    | nucleoplasm, cytosol                  |
| mitochondria                    | MCF7     | mitochondria                     |                                       |
| nuclear speckles                | HEK 293  | nucleoplaRH-30                   | nucleoplasm, cytosol                  |
| nucleoplasm, cytosol            | A549     | nucleoplaPC-3                    | nucleoplasm, cytosol                  |
| vesicles                        |          |                                  |                                       |
| nucleoplasm, cytosol            | MCF7     | nucleoplaRPTEC TER               | nucleoplasm, plasma membrane, cytosol |
| nucleoplasm, cytosol            | MCF7     | nucleoplaPC-3                    | nucleoplasm, cytosol                  |
| centrosome                      | RH-30    | centrosorSK-MEL-30               | centrosome                            |
| golgi apparatus                 | U-251 MG | golgi apparatus                  |                                       |
| centrosome                      | SiHa     | centrosorPC-3                    | centrosome                            |
| aggresome                       | HeLa     | cytosol                          |                                       |
| cytosol                         | A-431    | cytosol U-251 MG                 | cytosol                               |
| plasma membrane                 | A-431    | plasma meU-251 MG                | plasma membrane                       |
| nucleoplasm, cell junctior      | A-431    | nucleoplaU-251 MG                | nucleoplasm                           |
| nucleoplasm                     | A-431    | nucleoplaU-251 MG                | nucleoplasm                           |
| mitochondria                    | U-2 OS   | mitochondA-431                   | mitochondria                          |
| nucleoplasm, plasma membr       | RH-30    | cell juncHUVEC TER               | nucleoplasm, cell junctions           |
| plasma membrane, cytosol        | A549     | vesicles, HeLa                   | plasma membrane, cytosol              |
| cytosol                         | A549     | cytosol HeLa                     | cytosol                               |
| nuclear membrane                | U-2 OS   | nuclear nSiHa                    | nuclear membrane                      |
| centrosome, cytosol             |          |                                  |                                       |
| endoplasmic reticulum           | A549     | endoplasmic reticulum            |                                       |
| golgi apparatus, cytosol        | A-431    | golgi appU-251 MG                | golgi apparatus                       |

|                                                 |          |                       |                                                 |
|-------------------------------------------------|----------|-----------------------|-------------------------------------------------|
| nucleoplasm                                     | A-431    | nucleoplasm           |                                                 |
| nucleoplasm                                     | A-431    | nucleoplaU-251 MG     | nucleoplasm                                     |
| cytosol                                         |          |                       |                                                 |
| vesicles, cytosol                               |          |                       |                                                 |
| nucleoplasm, mitochondria                       | A-431    | nucleoplaU-251 MG     | nucleoplasm, mitochondria                       |
| mitochondria, cytosol                           | U-251 MG | cytosol HEK 293       | mitochondria, cytosol                           |
| nucleoli, mitochondria                          | U-251 MG | nucleoplasm, nucleoli |                                                 |
| nucleoplasm                                     | HeLa     | nucleoplasm, cytosol  |                                                 |
| cytokinetic bridge                              | A-431    | lysosomesMCF7         | cytokinetic bridge                              |
| nucleoplasm, golgi apparatus                    | U-2 OS   | golgi appU-251 MG     | nucleoplasm, cytosol                            |
| vesicles                                        | A-431    | vesicles U-251 MG     | nucleoplasm, vesicles, cytosol                  |
| nucleoplasm                                     | A-431    | nucleoplaU-251 MG     | nucleoplasm                                     |
| nucleoplasm                                     | U-251 MG | nucleoplasm           |                                                 |
| golgi apparatus                                 | A-431    | golgi appU-251 MG     | golgi apparatus                                 |
| vesicles, cytosol                               | A-431    | vesicles, U-251 MG    | cytosol                                         |
| nucleoplasm, nucleoli                           | A549     | nucleoplaHeLa         | nucleoplasm, nucleoli                           |
| nucleoplasm, nuclear bodies                     | U-251 MG | nucleoplaHaCaT        | nucleoplasm, nuclear bodies, cytosol            |
| cell junctions                                  |          |                       |                                                 |
| nucleoplasm                                     | A-431    | nucleoplaU-251 MG     | nucleoplasm                                     |
| nucleoplasm                                     |          |                       |                                                 |
| golgi apparatus                                 | A549     | cytosol               |                                                 |
| cytosol                                         | A-431    | cytosol U-251 MG      | cytosol                                         |
| nucleoplasm                                     | A-431    | nucleoplaHEK 293      | nucleoplasm                                     |
| nucleoplasm, nuclear bodies                     | U-251 MG | nucleoplaSH-SY5Y      | nucleoplasm, nuclear bodies                     |
| mitochondria, cytosol                           | A-431    | cytosol U-251 MG      | cytosol                                         |
| nucleoplasm, cytoplasmic bodies                 | A-431    | nucleoplaSK-MEL-30    | nucleoplasm, cytoplasmic bodies                 |
| nucleoplasm                                     | MCF7     | nucleoplaSH-SY5Y      | nucleoplasm                                     |
| nucleoplasm                                     | A-431    | nucleoplaMCF7         | nucleoplasm                                     |
| nucleoli, nuclear bodies, endoplasmic reticulum | A-431    | nuclear bU-251 MG     | nucleoli, nuclear bodies, endoplasmic reticulum |
| nucleoplasm                                     | A549     | nucleoplaSK-MEL-30    | nuclear bodies                                  |
| actin filaments                                 | A-431    | plasma meU-251 MG     | actin filaments                                 |
| nuclear bodies                                  | A-431    | nuclear bHEK 293      | nuclear bodies                                  |
| midbody                                         |          |                       |                                                 |
| nucleoplasm, nucleoli                           | U-251 MG | nucleoplaHaCaT        | nucleoplasm, nucleoli                           |
| nucleoplasm, vesicles                           | AF22     | nucleoplasm, vesicles |                                                 |
| nucleoplasm, cytosol                            | A-431    | nucleoplasm           |                                                 |
| nucleoplasm, cytosol                            | HeLa     | nucleoplaPC-3         | nucleoplasm, cytosol                            |
| cell junctions                                  | A549     | cell junctions        |                                                 |
| nucleoplasm, vesicles                           | A-431    | nucleoplaMCF7         | nucleoplasm, nucleoli, vesicles                 |
| intermediate filaments, actin                   | RH-30    | intermediSK-MEL-30    | intermediate filaments                          |
| mitochondria                                    | MCF7     | mitochondSK-MEL-30    | mitochondria                                    |
| vesicles                                        | HaCaT    | vesicles hTCEpi       | vesicles, cytosol                               |
| nucleoplasm, nuclear membranes                  | A-431    | nucleoplaU-251 MG     | nucleoplasm                                     |
| nucleoplasm                                     | SiHa     | nucleoplaHEL          | nucleoplasm                                     |
| nucleoplasm, cell junctions                     | HEK 293  | nucleoplaA549         | nucleoplasm, cell junctions                     |
| mitochondria                                    |          |                       |                                                 |
| nucleoplasm, nuclear bodies                     | SH-SY5Y  | nucleoplaRH-30        | nucleoplasm                                     |
| nucleoplasm, mitochondria                       | U-251 MG | nucleoplasm           |                                                 |
| mitochondria                                    | HeLa     | mitochondHaCaT        | mitochondria                                    |
| nucleoplasm                                     | A-431    | nucleoplaU-251 MG     | nucleoplasm                                     |
| nuclear speckles, cytosol                       | A-431    | nuclear sA549         | nuclear speckles, cytosol                       |
| nucleoplasm, vesicles, cytosol                  | HEK 293  | nucleoplaHeLa         | nucleoplasm, vesicles                           |
| vesicles                                        | A-431    | vesicles HeLa         | vesicles, rods & rings                          |
| nucleoplasm                                     | A-431    | nucleoplaU-251 MG     | nucleoplasm                                     |
| golgi apparatus                                 | U-2 OS   | golgi appAF22         | nucleoplasm, golgi apparatus                    |

vesicles  
 nucleoplasm, plasma membrane A-431 nucleoplasm U-251 MG nucleoplasm, nucleoli fibrillar center  
 nucleoli A-431 nucleoli, U-251 MG nucleoli  
 nucleoli, intermediate filament A-431 nucleoli U-251 MG nucleoli  
 nucleoplasm, cytosol A-431 nucleoplasm U-251 MG nucleoplasm, cytosol  
 nucleoplasm U-251 MG nucleoplasm PC-3 nucleoplasm  
 centrosome U-251 MG centrosome  
 golgi apparatus HEK 293 golgi apparatus PC-3 golgi apparatus  
 golgi apparatus HEK 293 golgi apparatus  
 nucleoplasm, cytosol PC-3 nucleoplasm, cytosol  
 nucleoplasm A-431 nuclear body THP-1 nucleoplasm, nuclear bodies, cytosol  
 nuclear speckles, vesicles A-431 nuclear speckles NB-4 nuclear speckles  
 nucleoplasm, nuclear membrane U-251 MG nuclear membrane  
 nucleoplasm, centrosome A-431 centrosome U-251 MG nucleoplasm, centrosome  
 focal adhesion sites U-251 MG focal adhesion sites SH-SY5Y focal adhesion sites  
 plasma membrane Hep G2 nucleoplasm, plasma membrane  
 nucleoplasm ASC TERT1 nucleoplasm BJ nucleoplasm, plasma membrane  
 nucleoplasm, vesicles A-431 nucleoplasm RPTEC TER nucleoplasm, vesicles, cytosol  
 vesicles SH-SY5Y vesicles SiHa vesicles  
 nucleoplasm, cytosol A-431 nucleoplasm U-251 MG nucleoplasm, cytosol  
 golgi apparatus, vesicles U-251 MG vesicles, centriolar satellite  
 mitochondria  
 nuclear speckles A-431 nuclear speckles U-251 MG nuclear speckles  
 nuclear bodies U-2 OS nucleoplasm PC-3 nuclear bodies, cytosol  
 endoplasmic reticulum, golgi apparatus A-431 endoplasmic reticulum U-251 MG endoplasmic reticulum, golgi apparatus  
 nucleoplasm, mitochondria A-431 nucleoplasm U-251 MG nucleoplasm, mitochondria  
 nucleoplasm, cytosol A-431 nucleoplasm U-251 MG nucleoplasm, cytosol  
 nucleoplasm, nuclear bodies A-431 nucleoplasm U-251 MG nucleoplasm, nuclear bodies  
 plasma membrane, cytosol HaCaT plasma membrane TCEpi plasma membrane  
 cytosol A-431 nucleoplasm U-251 MG nucleoplasm, cytosol  
 nucleoplasm, plasma membrane U-251 MG nucleoplasm MCF7 nucleoplasm, nucleoli  
 cytosol  
 plasma membrane, cytosol U-251 MG plasma membrane A549 cytosol  
 nucleoplasm, mitochondria, cytosol A-431 nucleoplasm U-251 MG nucleoplasm, plasma membrane, cytosol  
 cytosol  
 nucleoplasm, cytosol PC-3 golgi apparatus  
 nucleoli SiHa nucleoli PC-3 nucleoli, mitochondria  
 nucleoplasm U-251 MG nucleoplasm, golgi apparatus  
 plasma membrane, cytosol MCF7 cytosol PC-3 plasma membrane, cytosol  
 plasma membrane, cytosol A-431 plasma membrane U-251 MG plasma membrane, cytosol  
 nucleoplasm, cytosol A-431 nucleoplasm SiHa nucleoplasm, cytosol  
 plasma membrane A549 plasma membrane HEL centrosome, cytosol  
 intermediate filaments  
 nucleoplasm HEK 293 nucleoplasm SH-SY5Y nucleoplasm  
 nucleoplasm, golgi apparatus SH-SY5Y nucleoplasm AF22 nucleoplasm  
 nucleoplasm  
 nucleoli, mitochondria A-431 nucleoli, U-251 MG nucleoli, mitochondria  
 nucleoplasm, microtubules A-431 nucleoplasm U-251 MG nucleoplasm, microtubules  
 microtubules, cytokinetic SK-MEL-30 microtubules  
 golgi apparatus U-251 MG golgi apparatus  
 golgi apparatus A-431 golgi apparatus A549 golgi apparatus  
 mitochondria A-431 mitochondria U-251 MG mitochondria  
 microtubules, cytosol A-431 cytosol  
 nucleoplasm, cytosol A-431 nucleoplasm U-251 MG nucleoplasm, cytosol  
 actin filaments, cytosol HEK 293 cytosol Hep G2 cytosol

|                                        |           |                                |                                        |
|----------------------------------------|-----------|--------------------------------|----------------------------------------|
| nucleoplasm, vesicles                  | A-431     | nucleoplaU-251 MG              | nucleoplasm, golgi apparatus           |
| nucleoplasm                            | SH-SY5Y   | nucleoplaHaCaT                 | nucleoplasm                            |
| nucleoplasm, nucleoli                  | A-431     | nucleoplaU-251 MG              | nucleoplasm, nucleoli                  |
| nucleoli                               | A-431     | nucleoplaU-251 MG              | nucleoli                               |
| mitochondria                           | A-431     | mitochondU-251 MG              | mitochondria                           |
| nucleoplasm                            | PC-3      | nucleoplasm                    |                                        |
| mitochondria                           |           |                                |                                        |
| mitochondria, cytosol                  | U-251 MG  | mitochondMCF7                  | mitochondria, cytosol                  |
| centrosome                             | A-431     | centrosomU-251 MG              | centrosome                             |
| centriolar satellite, cytosol          | A-431     | cytosol U-251 MG               | centriolar satellite, cytosol          |
| nucleoplasm                            | ASC TERT1 | nucleoplasm, mitochondria      |                                        |
| nucleoli, plasma membrane, vesicles    | A-431     | nucleoli, U-251 MG             | nucleoli, plasma membrane              |
| nucleoli                               | A-431     | vesicles U-251 MG              | vesicles                               |
| nucleoplasm, cytosol                   | MCF7      | nucleoli                       |                                        |
| golgi apparatus, cytosol               | A-431     | plasma meU-251 MG              | cytosol                                |
| endoplasmic reticulum, golgi apparatus | HEK 293   | golgi appHeLa                  | golgi apparatus                        |
| nucleoplasm, nucleoli                  | MCF7      | golgi appA549                  | endoplasmic reticulum, golgi apparatus |
| nucleoli, cytosol                      | MCF7      | nucleoli HaCaT                 | nucleoplasm, nucleoli                  |
| nuclear speckles                       | Hep G2    | nuclear sRH-30                 | nuclear speckles                       |
| mitochondria                           |           |                                |                                        |
| nucleoplasm, cytosol                   |           |                                |                                        |
| plasma membrane                        | A-431     | plasma membrane, cytosol       |                                        |
| nucleoli, nuclear speckles             | A-431     | nucleoli, U-251 MG             | nucleoli, nuclear speckles, cytosol    |
| nucleoli                               | A-431     | nucleoli U-251 MG              | nucleoli, centrosome                   |
| vesicles, cytosol                      | A-431     | vesicles U-251 MG              | vesicles, cytosol                      |
| nucleoplasm, nuclear bodies            | U-2 OS    | nucleoplaHep G2                | nucleoplasm, nuclear bodies            |
| nucleoplasm                            | A549      | nucleoplasm, cytosol           |                                        |
| cytosol                                | SiHa      | cytosol                        |                                        |
| nucleoplasm                            | U-251 MG  | nucleoplaSiHa                  | nucleoplasm                            |
| nucleoplasm, cytosol                   | U-2 OS    | nucleoplaA-431                 | nucleoplasm, cytosol                   |
| vesicles, intermediate filaments       | A-431     | nucleoplaA549                  | nucleoplasm, vesicles                  |
| nucleoplasm, nucleoli, cytosol         | MCF7      | nucleoplasm, nucleoli, cytosol |                                        |
| nucleoplasm, cytosol                   | A-431     | golgi appU-251 MG              | nucleoplasm, golgi apparatus           |
| vesicles, plasma membrane              | A-431     | vesicles, MCF7                 | vesicles, cytosol                      |
| vesicles                               | HeLa      | vesicles                       |                                        |
| nucleoplasm                            | A-431     | nucleoplaU-251 MG              | nucleoplasm                            |
| centrosome                             | U-251 MG  | centrosome                     |                                        |
| nuclear bodies                         | Hep G2    | nuclear bodies                 |                                        |
| nuclear speckles                       | A-431     | nuclear sU-251 MG              | nuclear speckles                       |
| nuclear speckles, golgi apparatus      | A-431     | nuclear sU-251 MG              | nuclear speckles, golgi apparatus      |
| nuclear speckles, golgi apparatus      | A-431     | nuclear sU-251 MG              | nuclear speckles, golgi apparatus      |
| cytosol                                | U-251 MG  | cytosol                        |                                        |
| nucleoplasm, cytosol                   |           |                                |                                        |
| nucleoplasm                            | A549      | nucleoplaEFO-21                | nucleoplasm, centriolar satellite      |
| nuclear bodies                         | SiHa      | nuclear bodies, vesicles       |                                        |
| vesicles                               | A-431     | vesicles U-251 MG              | vesicles, centrosome                   |
| endoplasmic reticulum                  | SiHa      | endoplasmRH-30                 | endoplasmic reticulum                  |
| cytosol                                | A-431     | cytosol U-251 MG               | cytosol                                |
| nucleoplasm, plasma membrane           | U-251 MG  | nucleoplaPC-3                  | nucleoplasm                            |
| nucleoplasm, cytosol                   | A549      | nucleoplaHeLa                  | nucleoplasm, plasma membrane           |
| mitochondria                           |           |                                |                                        |
| nucleoplasm, nucleoli                  | A-431     | nucleoplaU-251 MG              | nucleoplasm, nucleoli                  |
| nucleoplasm, cytosol                   | RH-30     | nucleoplaSK-MEL-30             | nucleoplasm, cytosol                   |
| golgi apparatus                        | U-2 OS    | golgi appHep G2                | golgi apparatus                        |



|                                              |          |                                           |                                       |
|----------------------------------------------|----------|-------------------------------------------|---------------------------------------|
| cytosol                                      | A-431    | cytosol                                   |                                       |
| nucleoplasm                                  | A-431    | nucleoplaU-251 MG                         | nucleoplasm                           |
| nucleoplasm                                  | U-251 MG | nucleoplaPC-3                             | nucleoplasm                           |
| nucleoplasm, nuclear bodie                   | A-431    | nucleoplaU-251 MG                         | nucleoplasm                           |
| mitochondria                                 | MCF7     | mitochondA549                             | nucleoplasm, mitochondria             |
| cytosol                                      | A-431    | cytosol U-251 MG                          | cytosol                               |
| nuclear speckles, cytosol                    | A-431    | nuclear sU-251 MG                         | nuclear speckles, cytosol             |
| intermediate filaments                       | A-431    | golgi appU-251 MG                         | intermediate filaments                |
| nucleoli, cytosol                            | A-431    | nucleoplaU-251 MG                         | nucleoplasm, nucleoli                 |
| plasma membrane                              |          |                                           |                                       |
| nucleoplasm, cell junctions, mitotic spindle |          |                                           |                                       |
| nucleoli                                     | U-251 MG | nucleoli fibrillar center                 |                                       |
| nucleoplasm, cytosol                         | A-431    | nucleoplaU-251 MG                         | nucleoplasm, cytosol                  |
| nucleoplasm                                  | PC-3     | nucleoplasm, cytosol                      |                                       |
| nucleoplasm, mitochondria                    | A-431    | nucleoplaU-251 MG                         | nucleoplasm, mitochondria             |
| mitochondria                                 | HeLa     | mitochondHep G2                           | mitochondria                          |
| nucleoli, plasma membrane                    | SH-SY5Y  | nucleoli, plasma membrane, cytosol        |                                       |
| nuclear speckles, cytosol                    | A-431    | nuclear sU-251 MG                         | nuclear speckles, cytosol             |
| nucleoplasm, cytosol                         | A-431    | nucleoplaU-251 MG                         | nucleoplasm, cytosol                  |
| cytosol                                      | A-431    | cytosol                                   |                                       |
| nucleoli, cytosol                            | HEK 293  | cytosol A549                              | nucleoplasm, nucleoli, cytosol        |
| nucleoplasm, cytosol                         | A-431    | nucleoplaU-251 MG                         | nucleoplasm, actin filaments, cytosol |
| nucleoplasm                                  | BJ       | nuclear bodies, cytokinetic bridge        |                                       |
| lipid droplets                               |          |                                           |                                       |
| nucleoli                                     | A-431    | nucleoli U-251 MG                         | nucleoli                              |
| nucleoplasm, cytosol                         | MCF7     | nucleoplaHeLa                             | cytosol                               |
| nucleoplasm                                  |          |                                           |                                       |
| plasma membrane, cytosol                     | A-431    | plasma meU-251 MG                         | plasma membrane, cytosol              |
| vesicles                                     | MCF7     | vesicles PC-3                             | vesicles                              |
| golgi apparatus, cytosol                     | PC-3     | cytosol                                   |                                       |
| vesicles                                     | Hep G2   | golgi appSiHa                             | vesicles                              |
| nucleoplasm                                  | MCF7     | nucleoplaRH-30                            | nucleoplasm, mitochondria             |
| nucleoplasm                                  | RH-30    | nucleoplasm, mitochondria                 |                                       |
| nucleoplasm                                  | A549     | nuclear bPC-3                             | nucleoplasm, nuclear bodies           |
| nucleoplasm, cytosol                         | A-431    | nucleoplaU-251 MG                         | nucleoplasm, cytosol                  |
| nucleoplasm                                  | A-431    | nucleoplaU-251 MG                         | nucleoplasm, cytosol                  |
| cytokinetic bridge, mitoti                   | SiHa     | cytokinetic bridge, mitochondria, cytosol |                                       |
| nucleoplasm, nucleoli                        | RH-30    | nucleoplasm                               |                                       |
| cytosol                                      | A-431    | cytosol U-251 MG                          | cytosol                               |
| nucleoplasm                                  | A-431    | nucleoplaU-251 MG                         | nucleoplasm                           |
| nucleoplasm                                  |          |                                           |                                       |
| golgi apparatus                              | RH-30    | golgi apparatus                           |                                       |
| mitochondria                                 | SH-SY5Y  | nucleoplasm, mitochondria                 |                                       |
| plasma membrane                              | A-431    | plasma meU-251 MG                         | plasma membrane                       |
| cytosol                                      | A-431    | cytosol U-251 MG                          | cytosol                               |
| nucleoplasm                                  | U-2 OS   | nucleoplaA549                             | nucleoplasm                           |
| nucleoplasm                                  | U-2 OS   | nucleoplaA-431                            | nucleoplasm                           |
| nucleoli fibrillar center                    | A-431    | nucleoplaU-251 MG                         | nucleoli fibrillar center             |
| nucleoplasm                                  | A-431    | nucleoplaU-251 MG                         | nucleoplasm                           |
| plasma membrane, cytosol                     | A-431    | plasma meU-251 MG                         | plasma membrane, cytosol              |
| nucleoplasm, vesicles                        | A-431    | nucleoplaU-251 MG                         | nucleoplasm, vesicles                 |
| cytosol                                      | A-431    | golgi appU-251 MG                         | cytosol                               |
| nucleoplasm, cytosol                         | Hep G2   | nucleoplasm                               |                                       |
| microtubules                                 | A-431    | microtubuU-251 MG                         | microtubules                          |
| centriolar satellite, cytc                   | A-431    | nucleoplaU-251 MG                         | centriolar satellite, cytosol         |

|                                  |           |                                  |                                        |
|----------------------------------|-----------|----------------------------------|----------------------------------------|
| plasma membrane, cytosol         |           |                                  |                                        |
| cytosol                          | A-431     | cytosol U-251 MG                 | cytosol                                |
| nucleoplasm                      | HEK 293   | nucleoplaA549                    | nucleoplasm                            |
| nucleoplasm, mitotic spindle     | HaCaT     | nucleoplasm, cytokinetic bridge, | centriolar satellite, cy               |
| nuclear speckles                 | SK-MEL-30 | nuclear speckles                 |                                        |
| nucleoplasm, mitochondria        | A-431     | nucleoplaU-251 MG                | nucleoli                               |
| nucleoli, intermediate filaments | A-431     | nucleoli, BJ                     | nucleoli                               |
| cytosol                          |           |                                  |                                        |
| vesicles                         | MCF7      | vesicles HEK 293                 | vesicles                               |
| nucleoplasm                      | A-431     | nucleoplaU-251 MG                | nucleoplasm                            |
| nucleoplasm, mitochondria        | MCF7      | nucleoplaHaCaT                   | nucleoplasm                            |
| plasma membrane                  | A-431     | plasma meU-251 MG                | plasma membrane                        |
| cytosol                          |           |                                  |                                        |
| nucleoplasm, cytosol             | U-251 MG  | nucleoplasm, cytosol             |                                        |
| mitochondria                     | A-431     | mitochondMCF7                    | nucleoli, mitochondria                 |
| nucleoplasm                      | A-431     | nucleoplaU-251 MG                | nucleoplasm                            |
| vesicles                         | RT4       | vesicles                         |                                        |
| plasma membrane, cytosol         | A-431     | plasma meU-251 MG                | plasma membrane, cytosol               |
| nucleoplasm, golgi apparatus     | A-431     | nucleoplaU-251 MG                | nucleoplasm, golgi apparatus           |
| nucleoplasm                      | A-431     | nucleoplaU-251 MG                | nucleoplasm                            |
| vesicles                         |           |                                  |                                        |
| plasma membrane, cytosol         |           |                                  |                                        |
| cytosol                          | A-431     | cytosol U-251 MG                 | cytosol                                |
| nucleoplasm, cytosol             | A-431     | nucleoplaU-251 MG                | nucleoplasm, cytosol                   |
| nucleoplasm, cytosol             | A-431     | nucleoplaMCF7                    | nucleoplasm                            |
| vesicles                         | SH-SY5Y   | vesicles                         |                                        |
| golgi apparatus                  | BJ        | golgi appHUVEC TER               | endoplasmic reticulum, golgi apparatus |
| endoplasmic reticulum            | BJ        | endoplasmHUVEC TER               | endoplasmic reticulum                  |
| nuclear membrane                 | REH       | nuclear membrane                 |                                        |
| nucleoplasm                      | A-431     | nucleoplaA549                    | nucleoplasm                            |
| nucleoplasm, nuclear bodies      | U-251 MG  | nucleoplaHeLa                    | nucleoplasm                            |
| nucleoplasm, nucleoli fibrils    | A549      | nucleoplasm, cytosol             |                                        |
| nucleoplasm                      | PC-3      | nucleoplasm                      |                                        |
| nucleoplasm, nucleoli            | MCF7      | nucleoplaHEK 293                 | nucleoplasm, nucleoli                  |
| mitochondria                     | A-431     | mitochondA549                    | mitochondria                           |
| nuclear speckles, cytosol        | A-431     | nuclear sU-251 MG                | nuclear speckles, cytosol              |
| vesicles, cell junctions         | A-431     | vesicles, cell junctions         |                                        |
| nucleoli                         |           |                                  |                                        |
| centrosome                       | A-431     | nucleoplaU-251 MG                | centrosome                             |
| nucleoplasm, plasma membrane     | A-431     | nucleoplaU-251 MG                | nucleoplasm, focal adhesion sites      |
| intermediate filaments           | SH-SY5Y   | intermediate filaments           |                                        |
| nucleoli                         |           |                                  |                                        |
| cytosol                          | A-431     | cytosol U-251 MG                 | cytosol                                |
| nuclear membrane                 | A-431     | nuclear mU-251 MG                | nuclear membrane                       |
| actin filaments, centrosome      | A-431     | centrosomU-251 MG                | centrosome                             |
| vesicles                         | A-431     | vesicles U-251 MG                | vesicles                               |
| cytosol                          |           |                                  |                                        |
| vesicles                         |           |                                  |                                        |
| nucleoplasm, nuclear bodies      | BJ        | nucleoplasm, nuclear bodies      |                                        |
| nuclear speckles, mitochondria   | A549      | mitochondria                     |                                        |
| nuclear speckles, mitochondria   | A549      | nuclear sBJ                      | nuclear speckles, mitochondria         |
| nuclear speckles                 | A-431     | nuclear sA549                    | nuclear speckles                       |
| actin filaments, cytosol         |           |                                  |                                        |
| nucleoplasm, nucleoli            | PC-3      | nucleoplaSK-MEL-30               | nucleoplasm, nucleoli                  |
| nucleoplasm, nucleoli, cytosol   | PC-3      | nucleoplaSK-MEL-30               | nucleoplasm, nucleoli                  |

|                                        |          |                                |                                            |
|----------------------------------------|----------|--------------------------------|--------------------------------------------|
| nucleoplasm, vesicles                  |          |                                |                                            |
| nucleoli, cytosol                      | A549     | nucleoli, HeLa                 | nucleoli, golgi apparatus                  |
| nuclear speckles, cytosol              | A-431    | nuclear sU-251 MG              | nuclear speckles, vesicles, cytosol        |
| plasma membrane                        | SiHa     | plasma membrane                |                                            |
| cell junctions                         | HeLa     | plasma membrane                |                                            |
| vesicles                               |          |                                |                                            |
| cytosol                                | SiHa     | centriolar satellite, cytosol  |                                            |
| nuclear speckles, microtubules         | MCF7     | nuclear sHaCaT                 | nuclear speckles, cytosol                  |
| nucleoplasm, microtubules              | A-431    | nucleoplasm U-251 MG           | nucleoplasm, microtubules                  |
| nucleoplasm                            |          |                                |                                            |
| nuclear speckles                       | A-431    | nuclear sHEK 293               | nuclear speckles                           |
| plasma membrane, cytosol               | A549     | nucleoplasm HeLa               | nucleoplasm, plasma membrane               |
| nuclear speckles                       | Hep G2   | nuclear sRH-30                 | nuclear speckles                           |
| plasma membrane                        | HEK 293  | endoplasmic reticulum, HeLa    | endoplasmic reticulum, plasma membrane     |
| plasma membrane, cytosol               | U-2 OS   | plasma membrane A-431          | plasma membrane, cytosol                   |
| nucleoplasm, golgi apparatus           |          |                                |                                            |
| nucleoplasm, cytosol                   | U-2 OS   | nucleoplasm A-431              | nucleoplasm, cytosol                       |
| nucleoplasm                            | U-251 MG | nuclear sMCF7                  | nuclear speckles                           |
| nucleoplasm                            | HeLa     | nucleoplasm                    |                                            |
| nucleoplasm, cytosol                   | A-431    | nucleoplasm U-251 MG           | nucleoplasm, cytosol                       |
| golgi apparatus, vesicles              | A-431    | golgi apparatus U-251 MG       | golgi apparatus, vesicles                  |
| vesicles                               | A-431    | vesicles U-251 MG              | vesicles                                   |
| nucleoplasm, vesicles                  | A-431    | nucleoplasm U-251 MG           | nucleoplasm, vesicles                      |
| vesicles                               | A-431    | vesicles U-251 MG              | vesicles                                   |
| nucleoplasm                            | A-431    | nucleoplasm U-251 MG           | nucleoplasm                                |
| nucleoplasm                            | U-251 MG | nucleoplasm                    |                                            |
| cell junctions                         | SH-SY5Y  | cell junctions                 |                                            |
| golgi apparatus                        | HEK 293  | golgi apparatus                |                                            |
| nucleoplasm, nucleoli fibrillar center | A-431    | nucleoplasm HEK 293            | nucleoplasm, nucleoli fibrillar center     |
| mitochondria                           | RH-30    | mitochondria                   |                                            |
| golgi apparatus                        |          |                                |                                            |
| nucleoplasm, vesicles, cytosol         | HeLa     | nucleoplasm, vesicles, cytosol |                                            |
| golgi apparatus, vesicles              | U-251 MG | vesicles                       |                                            |
| vesicles                               | A-431    | vesicles U-251 MG              | vesicles                                   |
| vesicles                               | RH-30    | vesicles EFO-21                | vesicles                                   |
| nucleoplasm, plasma membrane           | HEK 293  | nucleoplasm HeLa               | nucleoplasm, plasma membrane               |
| nucleoplasm                            | U-2 OS   | nucleoplasm HEK 293            | nucleoplasm                                |
| plasma membrane, cytosol               | A-431    | plasma membrane, cytosol       |                                            |
| plasma membrane                        |          |                                |                                            |
| plasma membrane                        | RH-30    | plasma membrane                |                                            |
| plasma membrane, cytosol               | A-431    | plasma membrane U-251 MG       | cytosol                                    |
| nucleoplasm                            | A-431    | nucleoplasm U-251 MG           | nucleoplasm                                |
| nucleoplasm                            | A-431    | nucleoplasm U-251 MG           | nucleoplasm                                |
| cytosol                                | U-251 MG | cytosol HEK 293                | cytosol                                    |
| nucleoplasm, mitochondria              | A-431    | nucleoplasm U-251 MG           | nucleoplasm, mitochondria                  |
| nucleoplasm, golgi apparatus           | A-431    | nucleoplasm U-251 MG           | nucleoplasm, golgi apparatus               |
| nucleoplasm                            | A-431    | nucleoplasm A549               | nucleoplasm, cytosol                       |
| cytosol                                | A549     | cytosol PC-3                   | cytosol                                    |
| nucleoli fibrillar center              | A-431    | nucleoli PC-3                  | nucleoli fibrillar center                  |
| nucleoplasm, cytosol                   | A-431    | nucleoplasm U-251 MG           | nucleoplasm, cytosol                       |
| nucleoplasm, mitochondria              | A-431    | nucleoplasm, mitochondria      |                                            |
| plasma membrane, cytosol               | A-431    | plasma membrane U-251 MG       | nuclear speckles, plasma membrane, cytosol |
| nucleoplasm                            | A-431    | nucleoplasm U-251 MG           | nucleoplasm                                |
| nucleoplasm, vesicles                  | LHCN-M2  | nucleoplasm, vesicles          |                                            |
| vesicles                               | A-431    | vesicles U-251 MG              | vesicles                                   |

|                                         |           |                                       |          |                                       |
|-----------------------------------------|-----------|---------------------------------------|----------|---------------------------------------|
| endoplasmic reticulum                   | HEK 293   | endoplasmic reticulum                 | PC-3     | endoplasmic reticulum                 |
| nucleoplasm, plasma membrane            |           |                                       |          |                                       |
| plasma membrane                         |           |                                       |          |                                       |
| nucleoplasm                             | A-431     | nucleoplasm                           | U-251 MG | nucleoplasm                           |
| nucleoplasm                             | U-251 MG  | nucleoplasm                           |          |                                       |
| nuclear membrane                        | MCF7      | nuclear membrane                      | HeLa     | nuclear membrane                      |
| nucleoplasm                             | RH-30     | nucleoplasm                           | K-562    | nucleoplasm                           |
| nucleoplasm, nuclear bodies             | ASC TERT1 | nucleoplasm                           | BJ       | nucleoplasm                           |
| nucleoli fibrillar center, vesicles     |           |                                       |          |                                       |
| actin filaments                         | HEK 293   | actin filaments                       |          |                                       |
| cytosol                                 | A-431     | cytosol                               | U-251 MG | cytosol                               |
| plasma membrane, actin filaments        | SiHa      | plasma membrane, actin filaments      |          |                                       |
| plasma membrane, actin filaments        |           |                                       |          |                                       |
| nucleoplasm                             | A549      | nucleoplasm                           | SiHa     | nucleoplasm                           |
| nucleoplasm                             | SH-SY5Y   | nucleoplasm                           | BJ       | nucleoplasm                           |
| cytosol                                 | U-251 MG  | cytosol                               | PC-3     | cytosol                               |
| nucleoplasm, golgi apparatus            | U-2 OS    | golgi apparatus                       | HEK 293  | golgi apparatus                       |
| nucleoplasm                             | A-431     | nucleoplasm                           | U-251 MG | nucleoplasm                           |
| vesicles, plasma membrane               | U-251 MG  | vesicles,                             | A549     | vesicles                              |
| plasma membrane                         | U-251 MG  | plasma membrane                       | BJ       | plasma membrane                       |
| nucleoplasm                             | U-251 MG  | nucleoplasm                           | HEK 293  | nucleoplasm                           |
| nucleoplasm                             | U-251 MG  | nucleoplasm                           | SiHa     | nucleoplasm                           |
| nucleoplasm                             | U-2 OS    | nucleoplasm                           | PC-3     | nucleoplasm                           |
| nucleoplasm, plasma membrane            | A-431     | nucleoplasm, plasma membrane, cytosol | U-251 MG | nucleoplasm, plasma membrane, cytosol |
| nucleoplasm, nucleoli, plasma membrane  | A-431     | nucleoplasm, plasma membrane, cytosol | U-251 MG | nucleoplasm, plasma membrane, cytosol |
| mitochondria, cytosol                   | A-431     | nuclear bodies                        | HaCaT    | vesicles, mitochondria, cytosol       |
| vesicles                                | HEK 293   | vesicles                              |          |                                       |
| golgi apparatus                         |           |                                       |          |                                       |
| mitochondria                            | A-431     | nucleoplasm, mitochondria             | U-251 MG | nucleoplasm, mitochondria             |
| cytosol                                 | A-431     | cytosol                               | MCF7     | vesicles, cytosol                     |
| nucleoplasm, nuclear bodies             | HEK 293   | nuclear bodies                        | SiHa     | nucleoplasm, nuclear bodies           |
| nucleoplasm, plasma membrane            | PC-3      | nucleoplasm                           |          |                                       |
| nucleoplasm                             | A-431     | nucleoplasm                           | U-251 MG | nucleoplasm                           |
| golgi apparatus, cytosol                | U-251 MG  | golgi apparatus, cytosol              |          |                                       |
| plasma membrane                         | SH-SY5Y   | plasma membrane                       |          |                                       |
| vesicles                                | A-431     | nucleoplasm, vesicles                 | U-251 MG | nucleoplasm, vesicles                 |
| cytosol                                 | HEK 293   | golgi apparatus                       | HeLa     | golgi apparatus                       |
| mitochondria                            | A-431     | mitochondria                          | U-251 MG | mitochondria                          |
| nucleoplasm                             | U-251 MG  | nucleoplasm                           |          |                                       |
| nucleoplasm                             | A-431     | nucleoplasm                           | U-251 MG | nucleoplasm                           |
| nucleoplasm                             | A-431     | nucleoplasm                           | U-251 MG | nucleoplasm                           |
| nucleoplasm                             | U-251 MG  | nucleoplasm                           | RH-30    | nucleoplasm                           |
| nucleoplasm                             | A-431     | nucleoplasm, vesicles                 | U-251 MG | nucleoplasm, vesicles                 |
| vesicles                                | RH-30     | nucleoplasm, vesicles                 | PC-3     | nucleoplasm, vesicles                 |
| nucleoplasm                             | RH-30     | nucleoplasm                           |          |                                       |
| intermediate filaments                  |           |                                       |          |                                       |
| mitochondria                            | A-431     | mitochondria                          |          |                                       |
| mitochondria                            |           |                                       |          |                                       |
| nucleoplasm, cytosol                    |           |                                       |          |                                       |
| nucleoplasm, lipid droplets             | A549      | nucleoplasm, lipid droplets           |          |                                       |
| nucleoplasm, lipid droplets             | HEK 293   | nucleoplasm, lipid droplets           | SiHa     | nucleoplasm, lipid droplets           |
| golgi apparatus                         |           |                                       |          |                                       |
| vesicles                                | PC-3      | nucleoplasm, vesicles, cytosol        |          |                                       |
| nucleoplasm, cytosol                    | SiHa      | nucleoplasm, centrosome, cytosol      | RH-30    | centrosome, cytosol                   |
| plasma membrane, intermediate filaments | A-431     | plasma membrane, microtubules         | U-251 MG | plasma membrane, microtubules         |

|                                          |           |                                        |                                        |
|------------------------------------------|-----------|----------------------------------------|----------------------------------------|
| nucleoplasm                              | A-431     | nucleoplaU-251 MG                      | nucleoplasm                            |
| nucleoplasm, nuclear bodie               | A-431     | nucleoplaU-251 MG                      | nucleoplasm, nuclear bodies, cytosol   |
| nucleoplasm, nuclear bodie               | U-251 MG  | nucleoplasm, nuclear bodies            |                                        |
| nucleoplasm                              | BJ        | nucleoplaSK-MEL-30                     | nucleoplasm                            |
| nucleoplasm                              | SK-MEL-30 | nucleoplasm                            |                                        |
| nucleoplasm, golgi apparatus             | A-431     | nucleoplasm, golgi apparatus           |                                        |
| centriolar satellite                     | U-251 MG  | centriolar satellite                   |                                        |
| nucleoplasm, cytosol, cytoplasmic bodies |           |                                        |                                        |
| nucleoplasm, nuclear bodie               | A-431     | nucleoplaU-251 MG                      | nucleoplasm, nuclear bodies            |
| nucleoplasm                              | A-431     | nucleoplaU-251 MG                      | nucleoplasm                            |
| nucleoplasm, centriolar s                | A-431     | nucleoplaU-251 MG                      | nucleoplasm, cytosol                   |
| nucleoplasm, centriolar s                | A-431     | nucleoplaU-251 MG                      | nucleoplasm, centriolar satellite, cyt |
| nucleoplasm                              | A549      | nucleoplaHep G2                        | nucleoplasm                            |
| nucleoplasm                              | Hep G2    | nucleoplaPC-3                          | nucleoplasm                            |
| nucleoplasm                              | A-431     | nucleoplaU-251 MG                      | nucleoplasm                            |
| nucleoplasm                              | A-431     | nucleoplaU-251 MG                      | nucleoplasm                            |
| nucleoplasm, intermediate                | A-431     | nucleoplaU-251 MG                      | nucleoplasm                            |
| centrosome                               | U-2 OS    | centrosomHEK 293                       | centrosome                             |
| nucleoplasm                              | RH-30     | nucleoplasm                            |                                        |
| nucleoli, cytosol                        | A-431     | nucleoli, U-251 MG                     | nucleoli, cytosol                      |
| nucleoplasm, cytosol                     | U-251 MG  | nucleoplasm, nuclear bodies, cytosol   |                                        |
| nucleoplasm, intermediate                | A-431     | nucleoplaU-251 MG                      | nucleoplasm, intermediate filaments    |
| mitochondria                             | A549      | cytosol                                |                                        |
| vesicles                                 | HEK 293   | vesicles PC-3                          | vesicles                               |
| nucleoplasm                              | PC-3      | nucleoplasm, nucleoli                  |                                        |
| nucleoplasm                              |           |                                        |                                        |
| nuclear membrane, cytosol                | A-431     | nucleoplasm, nuclear membrane, cytosol |                                        |
| nucleoplasm, nucleoli fibr               | RT4       | nucleoplasm                            |                                        |
| nuclear membrane                         | A-431     | nuclear rU-251 MG                      | nuclear membrane, centrosome, cytosol  |
| cytosol                                  | A-431     | nuclear rSH-SY5Y                       | nuclear membrane, cytosol              |
| nucleoplasm, cytosol                     | A-431     | nucleoplaU-251 MG                      | nucleoplasm, cytosol                   |
| nucleoplasm                              | HeLa      | nucleoplasm                            |                                        |
| nucleoli, vesicles                       | MCF7      | nucleoli, Hep G2                       | nucleoli, vesicles                     |
| nucleoplasm, golgi apparatus             | A-431     | nucleoplaU-251 MG                      | nucleoplasm, golgi apparatus           |
| nucleoli, endoplasmic reti               | Hep G2    | endoplasrSK-MEL-30                     | endoplasmic reticulum, cytosol         |
| cytosol                                  | A-431     | nucleoplaU-251 MG                      | cytosol                                |
| nucleoplasm, nucleoli                    |           |                                        |                                        |
| nucleoplasm, nucleoli                    | PC-3      | nucleoplasm, nucleoli                  |                                        |
| nucleoplasm, mitochondria                | U-251 MG  | nucleoplaA549                          | mitochondria                           |
| nucleoli, cytosol                        | K-562     | nucleoplasm                            |                                        |
| cytosol                                  | A-431     | nucleoplaHep G2                        | nucleoplasm                            |
| nucleoplasm, cytosol                     | HEK 293   | nucleoplaHeLa                          | nucleoplasm, cytosol                   |
| vesicles                                 |           |                                        |                                        |
| golgi apparatus                          | AF22      | golgi apparatus                        |                                        |
| cytosol                                  | A-431     | cytosol, rU-251 MG                     | cytosol                                |
| cytosol                                  | A-431     | cytosol U-251 MG                       | cytosol                                |
| nucleoplasm                              | A-431     | nucleoplaSiHa                          | nucleoplasm, cytosol                   |
| plasma membrane, cytosol                 | A-431     | plasma meU-251 MG                      | plasma membrane, cytosol               |
| golgi apparatus                          | A-431     | golgi appU-251 MG                      | golgi apparatus                        |
| nucleoli                                 | A-431     | nucleoli, U-251 MG                     | nucleoli                               |
| mitochondria                             |           |                                        |                                        |
| nucleoplasm, cytosol                     | A-431     | nucleoplaU-251 MG                      | nucleoplasm, nuclear bodies, cytosol   |
| nucleoplasm, cytosol                     | A-431     | nucleoplaU-251 MG                      | nucleoplasm, cytosol                   |
| nucleoplasm                              | A-431     | nucleoplaU-251 MG                      | nucleoplasm                            |
| nucleoplasm, nuclear bodie               | U-2 OS    | nuclear bSH-SY5Y                       | nuclear bodies                         |

|                                        |          |                                    |                                        |
|----------------------------------------|----------|------------------------------------|----------------------------------------|
| nuclear bodies                         | SH-SY5Y  | nuclear bodies                     |                                        |
| nucleoplasm, nuclear membr             | A-431    | nucleoplaU-251 MG                  | nucleoplasm, nuclear membrane, cytosol |
| nucleoplasm                            | U-251 MG | nucleoplaRH-30                     | nucleoplasm                            |
| plasma membrane                        |          |                                    |                                        |
| vesicles                               | A549     | vesicles HeLa                      | vesicles                               |
| nucleoplasm, cytoplasmic               | HeLa     | nucleoplaHep G2                    | nucleoplasm, cytoplasmic bodies        |
| vesicles                               | HEK 293  | vesicles SH-SY5Y                   | nucleoplasm, vesicles                  |
| nucleoplasm                            | U-251 MG | nucleoplasm, vesicles              |                                        |
| nucleoplasm                            | U-2 OS   | nucleoplasm                        |                                        |
| intermediate filaments, cy             | A-431    | cytosol U-251 MG                   | focal adhesion sites, cytosol          |
| intermediate filaments, cy             | A-431    | intermediU-251 MG                  | intermediate filaments, focal adhesio  |
| nucleoplasm                            | HEK 293  | nucleoplaPC-3                      | nucleoplasm                            |
| plasma membrane, cytosol               | A-431    | cytosol U-251 MG                   | cytosol                                |
| golgi apparatus                        |          |                                    |                                        |
| nucleoplasm                            | A-431    | nucleoplaRH-30                     | nucleoplasm                            |
| nucleoplasm, vesicles                  | A-431    | nucleoplaHep G2                    | nucleoplasm                            |
| mitochondria                           | MCF7     | mitochondA549                      | mitochondria                           |
| nucleoplasm                            | A-431    | nucleoplaU-251 MG                  | nucleoplasm                            |
| lipid droplets, cytosol                | HEK 293  | cytosol PC-3                       | lipid droplets, cytosol                |
| plasma membrane, cytosol               | U-251 MG | nucleoli, plasma membrane          |                                        |
| cytosol                                | A-431    | vesicles, U-251 MG                 | cytosol                                |
| nucleoplasm                            | U-2 OS   | nucleoplaSH-SY5Y                   | nucleoplasm, mitochondria              |
| vesicles                               | MCF7     | vesicles                           |                                        |
| vesicles                               | U-2 OS   | vesicles MCF7                      | vesicles                               |
| vesicles                               |          |                                    |                                        |
| nucleoplasm                            | U-2 OS   | nucleoplasm                        |                                        |
| nucleoplasm, mitochondria              | U-2 OS   | nucleoplaHep G2                    | nucleoplasm, mitochondria              |
| mitochondria                           | A-431    | mitochondU-251 MG                  | mitochondria                           |
| actin filaments                        | HaCaT    | actin filaments                    |                                        |
| cytosol                                | A-431    | vesicles, U-251 MG                 | vesicles, cytosol                      |
| nucleoplasm, nucleoli, golgi apparatus |          |                                    |                                        |
| nucleoplasm, vesicles                  |          |                                    |                                        |
| nucleoplasm                            | A-431    | nucleoplaU-251 MG                  | nucleoplasm                            |
| cytosol                                | U-251 MG | mitochondPC-3                      | mitochondria, cytosol                  |
| plasma membrane, mitochonc             | A-431    | cell juncHep G2                    | mitochondria                           |
| cytosol                                | U-2 OS   | cytosol                            |                                        |
| cytosol                                |          |                                    |                                        |
| mitochondria                           | U-2 OS   | mitochondA549                      | mitochondria                           |
| nucleoli                               | A-431    | nucleoplaU-251 MG                  | nucleoplasm, nucleoli                  |
| nucleoli                               | U-2 OS   | nucleoli SH-SY5Y                   | nucleoli                               |
| nucleoli, cytosol                      | U-251 MG | nucleoli, MCF7                     | nucleoli, golgi apparatus, cytosol     |
| nucleoplasm, nucleoli, nucla           | A-431    | nucleoplaHEK 293                   | nucleoli, nuclear bodies               |
| nucleoplasm, nuclear membr             | U-251 MG | nucleoplaRH-30                     | nucleoplasm, nuclear membrane          |
| mitochondria                           | HEK 293  | mitochondria                       |                                        |
| mitochondria                           | PC-3     | mitochondria                       |                                        |
| nucleoplasm                            | A-431    | nucleoplaSiHa                      | nucleoplasm, centriolar satellite      |
| nucleoli fibrillar center              | PC-3     | nucleoli fibrillar center, cytosol |                                        |
| nucleoplasm, cytosol                   | A-431    | nucleoplasm, cytosol               |                                        |
| cytosol                                |          |                                    |                                        |
| intermediate filaments, cytosol        |          |                                    |                                        |
| nucleoplasm                            | HEK 293  | nucleoplaHeLa                      | nucleoplasm, golgi apparatus           |
| nucleoplasm, cytosol                   | HEL      | nucleoplaREH                       | nucleoplasm                            |
| nucleoplasm, cytosol                   | HEL      | nucleoplaREH                       | nucleoplasm, cytosol                   |
| nuclear speckles, mitochor             | SiHa     | nuclear sPC-3                      | nuclear speckles                       |
| nucleoplasm, cytosol                   | U-2 OS   | cytosol SH-SY5Y                    | cytosol                                |

|                                  |           |                                        |           |     |                                           |
|----------------------------------|-----------|----------------------------------------|-----------|-----|-------------------------------------------|
| cytosol                          | U-251 MG  | cytosol                                | HUVEC     | TER | plasma membrane, cytosol                  |
| cytosol                          |           |                                        |           |     |                                           |
| nucleoli fibrillar center        | PC-3      | nucleoli fibrillar center              |           |     |                                           |
| focal adhesion sites             | U-2 OS    | plasma membrane                        | A-431     |     | plasma membrane                           |
| nucleoplasm                      | ASC TERT1 | nucleoplasm, nuclear speckles, cytosol | SRPTEC    | TER |                                           |
| nucleoplasm, cytosol             | ASC TERT1 | nucleoplasm, cytosol                   | SRPTEC    | TER |                                           |
| nucleoplasm                      | SK-MEL-30 | nucleoplasm                            |           |     |                                           |
| nucleoplasm, cytosol             | A-431     | nucleoplasm, cytosol                   | SK-MEL-30 |     |                                           |
| nucleoplasm, cytosol             | A-431     | nucleoplasm, cytosol                   | SK-MEL-30 |     |                                           |
| nucleoplasm                      | RH-30     | nucleoplasm, golgi apparatus           | LHCN-M2   |     |                                           |
| intermediate filaments, cytosol  | U-251 MG  | intermediate filaments, cytosol        |           |     |                                           |
| microtubules                     | A-431     | microtubules                           | U-251 MG  |     |                                           |
| nucleoplasm, golgi apparatus     | A-431     | nucleoplasm, golgi apparatus           | U-251 MG  |     |                                           |
| cytosol                          | SH-SY5Y   | cytosol                                |           |     |                                           |
| vesicles                         | A549      | vesicles                               | HeLa      |     | vesicles                                  |
| plasma membrane, cytosol         | A-431     | plasma membrane, cytosol               | U-251 MG  |     | golgi apparatus, plasma membrane, cytosol |
| plasma membrane                  | A-431     | plasma membrane                        | U-251 MG  |     |                                           |
| nucleoplasm                      | HEK 293   | nucleoplasm                            |           |     |                                           |
| golgi apparatus, vesicles        | A-431     | golgi apparatus, vesicles              | U-251 MG  |     |                                           |
| nucleoplasm                      | A-431     | nucleoplasm                            | U-251 MG  |     |                                           |
| mitochondria                     | A-431     | mitochondria                           | U-251 MG  |     |                                           |
| mitochondria                     | A-431     | mitochondria                           | U-251 MG  |     |                                           |
| mitochondria                     |           |                                        |           |     |                                           |
| mitochondria                     |           |                                        |           |     |                                           |
| nucleoplasm, nuclear bodies      | A-431     | nucleoplasm, nuclear bodies            | RH-30     |     |                                           |
| nuclear speckles, cytosol        | MCF7      | nuclear speckles                       | HeLa      |     |                                           |
| cytosol                          | A-431     | cytosol                                | U-251 MG  |     |                                           |
| cytosol                          | A-431     | cytosol                                | U-251 MG  |     |                                           |
| nucleoplasm, midbody             | A-431     | nucleoplasm                            | HEK 293   |     |                                           |
| nucleoplasm, nucleoli            | U-2 OS    | nucleoplasm, nucleoli                  |           |     |                                           |
| nucleoplasm                      | MCF7      | nucleoplasm                            | A549      |     |                                           |
| nucleoplasm, plasma membrane     | A-431     | nucleoplasm, plasma membrane, cytosol  | U-251 MG  |     |                                           |
| nuclear speckles                 | U-2 OS    | nuclear speckles                       | A549      |     |                                           |
| nucleoplasm, plasma membrane     | MCF7      | nucleoplasm, plasma membrane, midbody  | SiHa      |     |                                           |
| nucleoli                         | A-431     | nucleoplasm, nucleoli                  | A549      |     |                                           |
| nucleoli fibrillar center        | MCF7      | nucleoli fibrillar center              | HEK 293   |     |                                           |
| vesicles, plasma membrane        |           |                                        |           |     |                                           |
| plasma membrane, cytosol         | A-431     | plasma membrane, cytosol               | U-251 MG  |     |                                           |
| nucleoplasm                      | RH-30     | nucleoplasm                            |           |     |                                           |
| nucleoplasm, nucleoli            | MCF7      | nucleoli                               | HEK 293   |     |                                           |
| nucleoplasm, nucleoli            | MCF7      | nucleoplasm, nucleoli                  |           |     |                                           |
| mitochondria                     | U-251 MG  | nucleoplasm, nuclear bodies, cytosol   | PC-3      |     |                                           |
| cytosol                          | U-2 OS    | nucleoplasm, cytosol                   | A549      |     |                                           |
| nucleoplasm, cytosol             | A549      | nucleoplasm, cytosol                   | HeLa      |     |                                           |
| plasma membrane, actin filaments | A-431     | plasma membrane, actin filaments       | U-251 MG  |     |                                           |
| nucleoplasm, nucleoli            | A-431     | nucleoplasm                            | HeLa      |     |                                           |
| cytosol                          | U-251 MG  | cytosol                                |           |     |                                           |
| nucleoplasm, nucleoli            | SiHa      | nucleoplasm, nucleoli                  | RH-30     |     |                                           |
| nucleoplasm, nucleoli            | A-431     | nucleoplasm, nucleoli                  | U-251 MG  |     |                                           |
| nucleoplasm, cytosol             | SiHa      | nucleoplasm, nucleoli                  | HeLa      |     |                                           |
| cytosol                          | A-431     | cytosol                                | U-251 MG  |     |                                           |
| cytosol                          | A-431     | cytosol                                | A549      |     |                                           |
| vesicles, cytosol                | A-431     | vesicles                               |           |     |                                           |
| plasma membrane, cytosol         | A-431     | plasma membrane, cytosol               | PC-3      |     |                                           |
| cytoplasmic bodies               | MCF7      | cytoplasmic bodies                     | HeLa      |     |                                           |

|                             |          |                                |           |                                        |
|-----------------------------|----------|--------------------------------|-----------|----------------------------------------|
| midbody                     | U-2 OS   | cytosol                        | A-431     | cytosol                                |
| nucleoplasm                 | PC-3     | nucleoplasm                    |           |                                        |
| endoplasmic reticulum       |          |                                |           |                                        |
| cytosol                     | MCF7     | cytosol                        | PC-3      | cytosol                                |
| nucleoplasm, centrosome     | U-2 OS   | endoplasm                      | HeLa      | nucleoplasm, centrosome, cytosol       |
| cell junctions              | U-251 MG | cell junctions                 |           |                                        |
| plasma membrane             | U-251 MG | plasma membrane                |           |                                        |
| nucleoplasm, vesicles       | U-251 MG | nucleopla                      | PC-3      | nucleoplasm, cytosol                   |
| nucleoplasm                 | MCF7     | nucleopla                      | PC-3      | nucleoplasm, cytosol                   |
| nucleoplasm, centriolar s   | U-251 MG | nucleopla                      | PC-3      | nucleoplasm                            |
| mitochondria                | PC-3     | mitochondria                   |           |                                        |
| mitochondria                |          |                                |           |                                        |
| mitochondria                |          |                                |           |                                        |
| nucleoli, cytosol           | U-251 MG | nucleoli, SH-SY5Y              |           | nucleoli, cytosol                      |
| nucleoplasm, nucleoli, acti | A-431    | nucleopla                      | U-251 MG  | nucleoli, cytosol                      |
| vesicles                    | A-431    | vesicles                       |           |                                        |
| nucleoplasm, golgi apparat  | U-251 MG | nucleopla                      | RH-30     | nucleoplasm, golgi apparatus, plasma m |
| nucleoplasm, golgi apparat  | PC-3     | nucleoplasm                    |           |                                        |
| intermediate filaments      | A-431    | nucleopla                      | U-251 MG  | nucleoplasm, intermediate filaments    |
| rods & rings                | HaCaT    | golgi apparatus, rods & rings  |           |                                        |
| nucleoplasm                 | A-431    | nucleopla                      | U-251 MG  | nucleoplasm                            |
| nucleoplasm                 | U-2 OS   | nucleopla                      | A-431     | nucleoplasm                            |
| nucleoli fibrillar center   | HEK 293  | nucleoli fibrillar center      |           |                                        |
| mitochondria                |          |                                |           |                                        |
| nucleoli, cytosol           | BJ       | nucleoplasm, nucleoli, cytosol |           |                                        |
| nucleoplasm, vesicles       | MCF7     | nucleopla                      | SK-MEL-30 | nucleoplasm, vesicles                  |
| nucleoplasm                 | U-2 OS   | nucleopla                      | HeLa      | nucleoplasm, cytosol                   |
| cytosol                     | HEK 293  | cytosol                        | A549      | nuclear bodies, cytosol                |
| vesicles                    | U-251 MG | vesicles                       |           |                                        |
| cytosol                     | A-431    | cytosol                        | U-251 MG  | cytosol                                |
| nucleoplasm, plasma membr   | U-251 MG | plasma membrane, cytosol       |           |                                        |
| nuclear speckles            | HAP1     | nuclear speckles               |           |                                        |
| cytosol                     | MCF7     | cytosol                        | BJ        | cytosol                                |
| cytosol                     | A-431    | cytosol                        |           |                                        |
| nucleoplasm, cytosol        | PC-3     | nucleoplasm, cytosol           |           |                                        |
| nucleoplasm, midbody        | U-2 OS   | midbody                        | Hep G2    | nucleoplasm                            |
| nucleoplasm, cytokinetic    | PC-3     | nucleopla                      | HaCaT     | nucleoplasm, nuclear bodies, cytokinet |
| nucleoplasm, cytokinetic    | HaCaT    | nucleoplasm                    |           |                                        |
| microtubules                | A-431    | microtubu                      | U-251 MG  | microtubules                           |
| plasma membrane, cytosol    | A-431    | golgi app                      | U-251 MG  | golgi apparatus, plasma membrane, cyto |
| golgi apparatus             | A-431    | golgi app                      | U-251 MG  | golgi apparatus                        |
| nucleoplasm                 | U-251 MG | nucleoplasm                    |           |                                        |
| nucleoplasm, cytosol        | HEL      | nucleopla                      | REH       | nucleoplasm, cytosol                   |
| nucleoplasm                 | U-2 OS   | nucleopla                      | SH-SY5Y   | nucleoplasm, vesicles, cytosol         |
| plasma membrane, cytosol    | A-431    | plasma meh                     | TCEpi     | plasma membrane, cytosol               |
| actin filaments, microtubu  | A-431    | microtubu                      | U-251 MG  | microtubules                           |
| plasma membrane, actin fila | A-431    | actin fila                     | A549      | actin filaments                        |
| nucleoplasm                 | U-2 OS   | nucleopla                      | MCF7      | nucleoplasm                            |
| nucleoplasm                 | A549     | nucleopla                      | PC-3      | nucleoplasm, nucleoli, vesicles        |
| vesicles                    | A549     | golgi app                      | HaCaT     | golgi apparatus, vesicles              |
| nucleoplasm                 | A549     | nucleoplasm                    |           |                                        |
| nucleoplasm                 | A-431    | nucleoplasm                    |           |                                        |
| nucleoplasm, cytosol        | U-251 MG | nucleoplasm, cytosol           |           |                                        |
| nucleoplasm, nuclear membr  | EFO-21   | nucleopla                      | HUVEC TER | nuclear membrane, plasma membrane      |
| nuclear speckles            | A549     | nuclear s                      | HeLa      | nuclear speckles                       |



|                                        |            |                           |                                        |  |
|----------------------------------------|------------|---------------------------|----------------------------------------|--|
| nucleoplasm                            |            |                           |                                        |  |
| nucleoplasm, cytosol                   | A-431      | nucleoplaU-251 MG         | nucleoplasm, cytosol                   |  |
| nucleoplasm                            | A-431      | nucleoplaU-251 MG         | nucleoplasm                            |  |
| nucleoplasm, golgi apparatus           | HeLa       | nucleoplaSK-MEL-30        | nucleoplasm, nuclear bodies            |  |
| vesicles                               | A-431      | vesicles A549             | vesicles                               |  |
| vesicles                               | U-251 MG   | nucleoplaPC-3             | nucleoplasm, vesicles, cytosol         |  |
| cytosol                                |            |                           |                                        |  |
| golgi apparatus, vesicles              | MCF7       | golgi appHEK 293          | golgi apparatus                        |  |
| vesicles                               | MCF7       | golgi appHEK 293          | golgi apparatus, vesicles              |  |
| golgi apparatus, vesicles              | MCF7       | golgi appHEK 293          | golgi apparatus                        |  |
| nuclear speckles                       | A-431      | nuclear sU-251 MG         | nuclear speckles, cytosol              |  |
| nucleoplasm, nucleoli fibrillar center |            |                           |                                        |  |
| nucleoplasm                            | A-431      | nucleoplaU-251 MG         | nucleoplasm                            |  |
| nucleoplasm                            | A-431      | nucleoplaU-251 MG         | nucleoplasm, nucleoli, golgi apparatus |  |
| nucleoli, plasma membrane              | HEK 293    | plasma meSH-SY5Y          | plasma membrane                        |  |
| nucleoplasm                            | MCF7       | nucleoplaHEK 293          | nucleoplasm, vesicles                  |  |
| nucleoplasm                            | U-2 OS     | nucleoplaPC-3             | nucleoplasm                            |  |
| mitochondria                           | A-431      | mitochondU-251 MG         | cytosol                                |  |
| nucleoplasm                            | HEK 293    | nucleoplaA549             | nucleoplasm                            |  |
| nucleoplasm                            | A-431      | nucleoplaU-251 MG         | nucleoplasm                            |  |
| nucleoplasm                            | U-251 MG   | nucleoplaMCF7             | nucleoplasm, cell junctions            |  |
| nucleoplasm, cytosol                   | U-251 MG   | nucleoplaBJ               | nucleoplasm, cytosol                   |  |
| nuclear membrane, plasma membrane      | nASC TERT1 | nucleoplaBJ               | nucleoplasm, plasma membrane, cytosol  |  |
| nucleoplasm, cytosol                   | U-251 MG   | nucleoplasm, cytosol      |                                        |  |
| nucleoplasm, nucleoli                  | HEK 293    | nucleoplasm, nucleoli     |                                        |  |
| nucleoplasm, nucleoli                  | MCF7       | nucleoplaHEK 293          | nucleoplasm, nucleoli                  |  |
| nucleoplasm                            | A-431      | nucleoplaU-251 MG         | nucleoplasm                            |  |
| nucleoli, nuclear bodies, centrosome   | A-431      | nuclear bU-251 MG         | nuclear bodies, actin filaments        |  |
| nucleoplasm, aggresome, cytosol        | A549       | nucleoplaHeLa             | nucleoplasm, plasma membrane, cytosol  |  |
| nucleoplasm, vesicles                  | A-431      | nucleoplaPC-3             | nucleoplasm, vesicles                  |  |
| mitochondria                           | A-431      | mitochondU-251 MG         | mitochondria                           |  |
| nucleoli                               | A-431      | nucleoli, HeLa            | nucleoli, cytosol                      |  |
| nucleoli, cytosol                      | A-431      | nucleoli, HeLa            | cytosol                                |  |
| nucleoli                               | A-431      | nucleoli                  |                                        |  |
| centrosome                             | HEK 293    | midbody, centrosome       |                                        |  |
| actin filaments                        | HEK 293    | actin filRH-30            | actin filaments                        |  |
| nucleoplasm, cytosol                   | PC-3       | nucleoplaSK-MEL-30        | nucleoplasm, cytosol                   |  |
| nucleoplasm, mitochondria              | A-431      | nucleoplasm, mitochondria |                                        |  |
| golgi apparatus, cytosol               | A-431      | golgi appK-562            | golgi apparatus                        |  |
| cytosol                                | U-2 OS     | cytosol PC-3              | cytosol                                |  |
| cytosol                                |            |                           |                                        |  |
| nucleoplasm                            | SiHa       | nucleoplaRH-30            | nucleoplasm                            |  |
| nucleoplasm, mitochondria              | A-431      | nucleoplaU-251 MG         | mitochondria                           |  |
| mitochondria                           | A-431      | nucleoplasm, mitochondria |                                        |  |
| vesicles, cytosol                      | A-431      | vesicles, Hep G2          | cytosol                                |  |
| nucleoplasm                            | A-431      | nucleoplaU-251 MG         | nucleoplasm                            |  |
| nucleoplasm                            | A-431      | nucleoplaU-251 MG         | nucleoplasm                            |  |
| nucleoplasm                            | A-431      | nucleoplaU-251 MG         | nucleoplasm, nuclear membrane          |  |
| nucleoplasm, cytosol                   | A-431      | nucleoplasm, cytosol      |                                        |  |
| cytosol                                | A-431      | cytosol PC-3              | cytosol                                |  |
| nucleoplasm, plasma membrane           |            |                           |                                        |  |
| nucleoli                               | A-431      | nucleoli U-251 MG         | nucleoli                               |  |
| vesicles                               | A-431      | vesicles U-251 MG         | vesicles                               |  |
| mitochondria                           | U-251 MG   | mitochondA549             | mitochondria                           |  |
| mitochondria, cytosol                  | A549       | vesicles, SH-SY5Y         | vesicles, cytosol                      |  |

|                                              |          |                             |                                              |
|----------------------------------------------|----------|-----------------------------|----------------------------------------------|
| golgi apparatus                              | MCF7     | golgi appHEK 293            | golgi apparatus                              |
| intermediate filaments                       |          |                             |                                              |
| nucleoplasm, nuclear bodies                  | U-251 MG | nucleoplaHEK 293            | nucleoplasm, nuclear bodies                  |
| cytosol                                      | A-431    | cytosol U-251 MG            | cytosol                                      |
| centriolar satellite                         |          |                             |                                              |
| cell junctions                               | A-431    | cell junctions              |                                              |
| nucleoplasm, nuclear bodies                  | U-2 OS   | nucleoplaA549               | nucleoplasm, nuclear bodies                  |
| nuclear bodies                               | U-2 OS   | nuclear bodies              |                                              |
| nucleoplasm                                  | U-251 MG | nucleoplasm                 |                                              |
| plasma membrane, cytosol                     | U-2 OS   | plasma meBJ                 | plasma membrane                              |
| nucleoplasm, cytosol                         | A-431    | cytosol U-251 MG            | cytosol                                      |
| nucleoplasm                                  | A-431    | nucleoplaU-251 MG           | nucleoplasm                                  |
| nucleoplasm, cytosol                         | A-431    | nucleoplaU-251 MG           | nucleoplasm, cytosol                         |
| nucleoplasm, vesicles                        | A-431    | nucleoplaU-251 MG           | nucleoplasm, vesicles                        |
| midbody ring                                 | A-431    | cell juncU-251 MG           | centriolar satellite                         |
| plasma membrane, cytosol                     | A-431    | plasma meU-251 MG           | plasma membrane, cytosol                     |
| plasma membrane, cytosol                     | PC-3     | plasma membrane, cytosol    |                                              |
| nucleoplasm                                  | HaCaT    | nucleoplasm                 |                                              |
| nucleoplasm                                  | U-2 OS   | nucleoplasm, nuclear bodies |                                              |
| vesicles                                     | SH-SY5Y  | vesicles                    |                                              |
| vesicles                                     | HEK 293  | vesicles SH-SY5Y            | vesicles                                     |
| nuclear speckles                             | HEK 293  | nuclear sHeLa               | nuclear speckles, cytosol                    |
| nucleoplasm, nucleoli, plasma membrane       | HEK 293  | nucleoplaSiHa               | nucleoplasm, nucleoli                        |
| vesicles, cytosol                            | A-431    | golgi appU-251 MG           | golgi apparatus, vesicles                    |
| mitochondria                                 | A-431    | mitochondU-251 MG           | mitochondria                                 |
| nucleoplasm, nucleoli fibrillar centers      | A549     | nucleoplaREH                | nucleoplasm, nucleoli fibrillar centers      |
| nucleoplasm                                  | A-431    | nucleoplaA549               | nucleoplasm, nucleoli                        |
| nucleoplasm, golgi apparatus                 | HEK 293  | golgi appHep G2             | nucleoplasm, golgi apparatus                 |
| vesicles                                     | U-251 MG | vesicles HeLa               | nucleoplasm, golgi apparatus, vesicles       |
| cytosol                                      | A549     | golgi apparatus, cytosol    |                                              |
| golgi apparatus                              | REH      | golgi apparatus             |                                              |
| nucleoplasm, nuclear bodies, cytosol         | A-431    | nucleoplaAF22               | nucleoplasm, nuclear bodies, cytosol         |
| nucleoplasm, cytosol                         | A-431    | nucleoplaHEK 293            | nucleoplasm, cytosol                         |
| cytosol                                      | A-431    | cytosol U-251 MG            | cytosol                                      |
| cytosol                                      | A-431    | cytosol                     |                                              |
| nucleoplasm                                  |          |                             |                                              |
| nucleoplasm                                  | HEK 293  | nucleoplaHeLa               | nucleoplasm                                  |
| nucleoplasm                                  |          |                             |                                              |
| nucleoli                                     | A-431    | nucleoli U-251 MG           | nucleoli                                     |
| cytosol                                      | Hep G2   | cytosol                     |                                              |
| nucleoplasm                                  |          |                             |                                              |
| nucleoplasm                                  |          |                             |                                              |
| nucleoplasm, nuclear bodies, plasma membrane | A-431    | nucleoplaU-251 MG           | nucleoplasm, nuclear bodies, plasma membrane |
| nucleoplasm                                  | A-431    | nucleoplaU-251 MG           | nucleoplasm, plasma membrane, cytosol        |
| nucleoplasm, golgi apparatus                 | MCF7     | nucleoplaRH-30              | nucleoplasm, golgi apparatus                 |
| nucleoplasm, nuclear bodies                  |          |                             |                                              |
| nucleoplasm, vesicles                        | RH-30    | nucleoplaPC-3               | nucleoplasm, nuclear bodies                  |
| nucleoli                                     | A-431    | nucleoli, U-251 MG          | nucleoli                                     |
| golgi apparatus, plasma membrane, cytosol    | A-431    | golgi appU-251 MG           | golgi apparatus, plasma membrane, cytosol    |
| vesicles                                     | U-251 MG | vesicles, plasma membrane   |                                              |
| nucleoli                                     |          |                             |                                              |
| nucleoplasm, cytosol                         | SiHa     | nucleoplasm, cytosol        |                                              |
| actin filaments                              |          |                             |                                              |
| actin filaments                              |          |                             |                                              |
| nucleoplasm                                  | HEK 293  | nucleoplaSK-MEL-30          | nucleoplasm                                  |

|                                                |           |                  |                           |                                       |
|------------------------------------------------|-----------|------------------|---------------------------|---------------------------------------|
| nucleoplasm                                    | HEK 293   | nucleoplasm      | SK-MEL-30                 | nucleoplasm                           |
| vesicles                                       | HEK 293   | vesicles         | A549                      | vesicles                              |
| vesicles                                       | A-431     | vesicles         | U-251 MG                  | vesicles                              |
| nucleoplasm, nuclear bodies                    | U-251 MG  | nucleoplasm      | HeLa                      | nucleoplasm, nuclear bodies           |
| nucleoplasm, mitochondria                      | A-431     | nucleoplasm      | HEK 293                   | nucleoplasm, mitochondria             |
| cytosol                                        | A-431     | cytosol          | U-251 MG                  | cytosol                               |
| nucleoplasm, centriolar satellite              | U-2 OS    | nucleoplasm      | Hep G2                    | nucleoplasm                           |
| plasma membrane, microtubules, mitotic spindle |           |                  |                           |                                       |
| nucleoplasm, plasma membrane                   |           |                  |                           |                                       |
| nucleoplasm, nucleoli, centrosome              | A-431     | nucleoplasm      | U-251 MG                  | centrosome                            |
| nucleoplasm, nuclear bodies                    | A549      | nucleoplasm      | SH-SY5Y                   | nucleoplasm, nuclear bodies           |
| plasma membrane, centrosome                    | A-431     | plasma membrane  | U-251 MG                  | plasma membrane, centrosome, cytosol  |
| nucleoplasm, plasma membrane                   | A-431     | nucleoplasm      | U-251 MG                  | nucleoplasm, plasma membrane          |
| plasma membrane, cell junctions                | MCF7      | plasma membrane  | HEK 293                   | plasma membrane, cell junctions       |
| mitochondria                                   | Hep G2    | mitochondria     |                           |                                       |
| nuclear speckles, cell junctions               |           |                  |                           |                                       |
| cytosol                                        | A-431     | cytosol          | U-251 MG                  | cytosol                               |
| nuclear speckles                               | MCF7      | nuclear speckles | SH-SY5Y                   | nuclear speckles                      |
| vesicles, cytosol                              | A-431     | vesicles         | U-251 MG                  | cytosol                               |
| nucleoplasm                                    | ASC TERT1 | nucleoplasm      |                           |                                       |
| cytosol                                        | A-431     | mitochondria     | U-251 MG                  | mitochondria, cytosol                 |
| mitochondria                                   | A-431     | mitochondria     |                           |                                       |
| nucleoli, vesicles                             | SH-SY5Y   | vesicles         | AF22                      | vesicles                              |
| nuclear membrane, cytosol                      | SH-SY5Y   | nucleoplasm      | AF22                      | nucleoplasm, cytosol                  |
| cytosol                                        | U-251 MG  | cytosol          |                           |                                       |
| cytosol                                        | HeLa      | cytosol          |                           |                                       |
| cytosol                                        | A-431     | cytosol          | U-251 MG                  | cytosol                               |
| nucleoplasm, nucleoli                          | Hep G2    | nucleoplasm      | nuclear membrane          |                                       |
| nucleoplasm, cytosol                           | U-251 MG  | nucleoplasm      | SH-SY5Y                   | nucleoplasm, golgi apparatus, cytosol |
| vesicles                                       |           |                  |                           |                                       |
| mitochondria                                   | Hep G2    | mitochondria     |                           |                                       |
| vesicles                                       | A549      | vesicles         | SK-MEL-30                 | vesicles                              |
| golgi apparatus, vesicles                      | MCF7      | nucleoplasm      | golgi apparatus, vesicles |                                       |
| nucleoplasm, mitochondria                      | U-251 MG  | nucleoplasm      | mitochondria              |                                       |
| nucleoplasm, cell junctions                    | HeLa      | nucleoplasm      | cytosol                   |                                       |
| nucleoplasm, nuclear bodies                    | MCF7      | nucleoplasm      | SiHa                      | nucleoplasm, nuclear bodies           |
| nucleoplasm                                    | A-431     | nucleoplasm      | U-251 MG                  | nucleoplasm                           |
| nucleoplasm, nucleoli                          | A-431     | nucleoplasm      | U-251 MG                  | nucleoplasm                           |
| nucleoplasm, nucleoli                          | A-431     | nucleoplasm      | U-251 MG                  | nucleoplasm, nucleoli                 |
| nucleoplasm, nucleoli                          | A-431     | nucleoplasm      | U-251 MG                  | nucleoplasm, nucleoli                 |
| mitochondria                                   | MCF7      | mitochondria     |                           |                                       |
| nucleoplasm, cytosol                           | A-431     | nucleoplasm      | U-251 MG                  | nucleoplasm, cytosol                  |
| nucleoplasm                                    | A-431     | nucleoplasm      | U-251 MG                  | nucleoplasm                           |
| centrosome, cytosol                            | U-251 MG  | centrosome       | cytosol                   |                                       |
| cytosol                                        |           |                  |                           |                                       |
| vesicles                                       | SH-SY5Y   | cytosol          |                           |                                       |
| nucleoplasm                                    | HEK 293   | nucleoplasm      | PC-3                      | nucleoplasm                           |
| vesicles                                       | A-431     | vesicles         | HEK 293                   | vesicles                              |
| nucleoplasm, golgi apparatus                   | HEL       | golgi apparatus  | HAP1                      | nucleoplasm, nuclear bodies, cytosol  |
| nucleoplasm, cytosol                           | RH-30     | nucleoplasm      | centrosome, cytosol       |                                       |
| nucleoplasm, cytosol                           | A-431     | nucleoplasm      | U-251 MG                  | nucleoplasm, cytosol                  |
| nucleoplasm, nucleoli                          | MCF7      | nucleoplasm      | SK-MEL-30                 | nucleoplasm                           |
| plasma membrane                                | A-431     | cytosol          | HeLa                      | plasma membrane, cytosol              |
| nucleoplasm                                    |           |                  |                           |                                       |
| vesicles                                       | A-431     | vesicles         | U-251 MG                  | vesicles                              |

|                                         |          |                                             |           |                                             |
|-----------------------------------------|----------|---------------------------------------------|-----------|---------------------------------------------|
| mitochondria                            | U-2 OS   | mitochondria                                | U-251 MG  | mitochondria                                |
| nucleoplasm                             | HEK 293  | nucleoplasm, cytosol                        |           |                                             |
| nucleoplasm                             | A-431    | nucleoplasm, nuclear bodies                 | K-562     | nucleoplasm, nuclear bodies                 |
| nucleoplasm                             | A-431    | nucleoplasm, nuclear bodies                 | K-562     | nucleoplasm, nuclear bodies                 |
| mitochondria                            | MCF7     | mitochondria                                | PC-3      | mitochondria                                |
| nucleoplasm                             | U-251 MG | nucleoplasm                                 | HEK 293   | nucleoplasm                                 |
| nucleoplasm                             | HEK 293  | nucleoplasm                                 |           |                                             |
| nucleoli, mitochondria                  | A-431    | mitochondria                                | U-251 MG  | nucleoli, intermediate filaments, cyto      |
| endoplasmic reticulum                   | A-431    | endoplasmic reticulum                       | BJ        | endoplasmic reticulum                       |
| nucleoplasm                             | A-431    | nucleoplasm                                 | U-251 MG  | nucleoplasm                                 |
| nucleoplasm, cytosol                    | A-431    | nucleoplasm, cytosol                        | U-251 MG  | nucleoplasm, cytosol                        |
| vesicles                                | A-431    | vesicles                                    | U-251 MG  | vesicles                                    |
| nucleoplasm, cytosol                    | A549     | nucleoplasm, vesicles                       | HeLa      | nucleoplasm, vesicles                       |
| nucleoplasm                             |          |                                             |           |                                             |
| nucleoplasm                             |          |                                             |           |                                             |
| nuclear speckles, cytosol               | A-431    | nuclear speckles, cytosol                   | U-251 MG  | nuclear speckles, cytosol                   |
| nucleoli fibrillar center               | A-431    | nucleoli fibrillar center                   | HeLa      | nucleoli fibrillar center                   |
| vesicles, cytosol                       | A-431    | vesicles, cytosol                           | SH-SY5Y   | vesicles, cytosol                           |
| nuclear membrane, mitochondria          | A-431    | nuclear membrane, mitochondria              |           |                                             |
| nucleoplasm                             | A549     | nucleoplasm                                 | Hep G2    | nucleoplasm                                 |
| nucleoplasm, nuclear membrane           | HaCaT    | nucleoplasm, nuclear membrane, cytosol      |           |                                             |
| nucleoli, plasma membrane               | MCF7     | nucleoplasm, nucleoli, plasma membrane      | PC-3      | nucleoplasm, nucleoli, plasma membrane      |
| nucleoli                                |          |                                             |           |                                             |
| nucleoplasm, mitochondria               | HEK 293  | nucleoplasm, mitochondria                   | HeLa      | nucleoplasm, mitochondria                   |
| nuclear speckles                        | HEK 293  | nuclear speckles, cytosol                   | ASC TERT1 | nucleoplasm, centrosome, cytosol            |
| vesicles                                | A-431    | vesicles                                    | U-251 MG  | vesicles                                    |
| nucleoplasm, nuclear bodies             | U-251 MG | nucleoplasm, nuclear bodies                 |           |                                             |
| nucleoplasm, nuclear bodies             | A-431    | nucleoplasm, nuclear bodies                 | U-251 MG  | nucleoplasm, nuclear bodies                 |
| nucleoplasm, nuclear bodies             | MCF7     | nucleoplasm, nuclear bodies                 | BJ        | nucleoplasm, nuclear bodies                 |
| nucleoplasm                             | MCF7     | nucleoplasm, vesicles                       | Hep G2    | nucleoplasm, vesicles                       |
| golgi apparatus                         | A-431    | golgi apparatus                             | U-251 MG  | golgi apparatus                             |
| nucleoplasm, golgi apparatus            | A-431    | nucleoplasm, cytosol                        | U-251 MG  | nucleoplasm, cytosol                        |
| nucleoplasm                             | MCF7     | nucleoplasm, nuclear bodies                 | PC-3      | nucleoplasm, nuclear bodies                 |
| plasma membrane, microtubules           | U-251 MG | plasma membrane, microtubules               |           |                                             |
| nucleoplasm                             | A-431    | nucleoplasm, nuclear membrane               | U-251 MG  | nucleoplasm, nuclear membrane               |
| golgi apparatus                         | A549     | golgi apparatus                             | PC-3      | golgi apparatus                             |
| nucleoplasm, nuclear bodies             | BJ       | nucleoplasm, nuclear bodies                 |           |                                             |
| mitochondria                            | HEK 293  | mitochondria                                |           |                                             |
| vesicles                                | MCF7     | vesicles, cell junctions                    | HaCaT     | vesicles, cell junctions                    |
| nuclear membrane, cytosol               | A-431    | nucleoplasm, nuclear membrane, cytosol      | U-251 MG  | nucleoplasm, nuclear membrane, cytosol      |
| nucleoplasm                             | MCF7     | nucleoplasm                                 | HEK 293   | nucleoplasm                                 |
| nucleoplasm                             | RH-30    | nucleoplasm, nucleoli                       |           |                                             |
| nucleoplasm, nucleoli fibrillar center  | A-431    | nucleoplasm, nucleoli fibrillar center      | U-251 MG  | nucleoplasm, nucleoli fibrillar center      |
| nucleoplasm, cytosol                    |          |                                             |           |                                             |
| nucleoplasm                             | A-431    | nucleoplasm                                 | U-251 MG  | nucleoplasm                                 |
| nucleoplasm                             | A-431    | nucleoplasm                                 | U-251 MG  | nucleoplasm                                 |
| nucleoli                                | U-251 MG | nucleoli                                    |           |                                             |
| mitochondria                            | MCF7     | mitochondria                                | HEK 293   | mitochondria                                |
| nucleoplasm, mitochondria               | A-431    | nucleoplasm, mitochondria                   | U-251 MG  | nucleoplasm, mitochondria                   |
| nucleoplasm, nuclear bodies             | U-251 MG | nucleoplasm, nuclear bodies                 | RH-30     | nucleoplasm, nuclear bodies                 |
| centrosome, cytosol                     | A-431    | centrosome                                  | A549      | centrosome                                  |
| mitochondria                            | A-431    | mitochondria                                | U-251 MG  | mitochondria                                |
| nuclear speckles, endoplasmic reticulum | U-251 MG | endoplasmic reticulum                       | HaCaT     | endoplasmic reticulum                       |
| nucleoplasm, nuclear membrane           | A-431    | nucleoplasm, nuclear membrane, mitochondria | U-251 MG  | nucleoplasm, nuclear membrane, mitochondria |
| nucleoplasm, mitochondria               | A-431    | nucleoplasm, cytosol                        | U-251 MG  | nucleoplasm, cytosol                        |

|                                        |          |                                             |          |                                             |
|----------------------------------------|----------|---------------------------------------------|----------|---------------------------------------------|
| nuclear membrane, mitochondria         | U-2 OS   | mitochondria                                | SH-SY5Y  | nuclear membrane, mitochondria              |
| nuclear speckles, cytosol              | A-431    | nuclear speckles                            | U-251 MG | nuclear speckles                            |
| nuclear bodies                         | U-2 OS   | nuclear bodies                              | PC-3     | nuclear bodies                              |
| nucleoplasm, golgi apparatus, vesicles | HEK 293  | golgi apparatus, vesicles                   | RH-30    | nucleoplasm, golgi apparatus, vesicles      |
| cytosol                                | A-431    | cytosol                                     | U-251 MG | cytosol                                     |
| vesicles                               | MCF7     | vesicles                                    | HAP1     | vesicles                                    |
| nucleoplasm, cytosol                   | U-251 MG | nucleoplasm, cytosol                        |          |                                             |
| nucleoplasm                            | RH-30    | nucleoplasm                                 |          |                                             |
| mitochondria                           | A-431    | mitochondria                                | U-251 MG | mitochondria                                |
| nucleoplasm, endoplasmic reticulum     | Hep G2   | nucleoplasm, endoplasmic reticulum          |          |                                             |
| nucleoplasm, cytosol                   | HEK 293  | nucleoplasm                                 |          |                                             |
| nucleoplasm, nuclear bodies            | HEK 293  | nucleoplasm, actin filaments                |          |                                             |
| nucleoplasm, vesicles, cytosol         | U-2 OS   | nucleoplasm, vesicles                       |          |                                             |
| mitochondria, cytosol                  | A549     | mitochondria, cytosol                       |          |                                             |
| nucleoplasm, nuclear bodies            | A-431    | nucleoplasm, nuclear bodies                 |          |                                             |
| nucleoplasm, nucleoli                  | MCF7     | nucleoplasm, nucleoli                       |          |                                             |
| microtubules, mitochondria             | A-431    | microtubules, mitochondria                  | U-251 MG | microtubules, mitochondria                  |
| microtubules, mitochondria             | A-431    | microtubules, mitochondria                  | U-251 MG | microtubules, mitochondria                  |
| nucleoplasm, nucleoli, cytosol         | A-431    | nucleoplasm, nucleoli, cytosol              | U-251 MG | nucleoplasm, nucleoli, cytosol              |
| nucleoli, golgi apparatus              | U-251 MG | nucleoli, golgi apparatus                   |          |                                             |
| nucleoplasm                            | A-431    | nucleoplasm                                 | U-251 MG | nucleoplasm                                 |
| intermediate filaments                 | HeLa     | intermediate filaments                      |          |                                             |
| nucleoplasm                            | A-431    | nucleoplasm, nuclear membrane               | U-251 MG | nucleoplasm, nuclear membrane               |
| nucleoplasm                            | A-431    | nucleoplasm                                 |          |                                             |
| plasma membrane, cytosol               | A-431    | plasma membrane, cytosol                    | U-251 MG | plasma membrane, cytosol                    |
| nucleoplasm, plasma membrane           | A-431    | nucleoplasm, plasma membrane, cell junction | HEK 293  | nucleoplasm, plasma membrane, cell junction |
| mitochondria, cytosol                  | A-431    | mitochondria, cytosol                       | U-251 MG | mitochondria, cytosol                       |
| nucleoplasm, microtubules              | MCF7     | nucleoplasm, microtubules                   |          |                                             |
| golgi apparatus, vesicles              | MCF7     | golgi apparatus, vesicles                   | PC-3     | vesicles                                    |
| nucleoplasm                            | U-251 MG | nucleoplasm                                 |          |                                             |
| plasma membrane                        | A-431    | nucleoplasm, plasma membrane                | U-251 MG | nucleoplasm, plasma membrane                |
| plasma membrane, actin filaments       | A-431    | plasma membrane, cytosol                    | U-251 MG | plasma membrane, cytosol                    |
| nucleoli                               | U-2 OS   | nucleoli                                    | HaCaT    | nucleoli                                    |
| nucleoplasm, vesicles                  | A-431    | nucleoplasm                                 | U-251 MG | nucleoplasm                                 |
| nucleoplasm, cytosol                   | SiHa     | nucleoplasm                                 | BJ       | nucleoplasm                                 |
| vesicles                               |          |                                             |          |                                             |
| nucleoplasm                            | A-431    | nucleoplasm                                 | U-251 MG | nucleoplasm                                 |
| cytosol                                | A549     | cytosol                                     |          |                                             |
| endoplasmic reticulum                  | A-431    | endoplasmic reticulum                       | PC-3     | endoplasmic reticulum                       |
| nucleoplasm                            | HeLa     | nucleoplasm                                 | HaCaT    | nucleoplasm                                 |
| nucleoplasm                            | U-251 MG | nucleoplasm                                 |          |                                             |
| cytosol                                | A-431    | nucleoplasm, cytosol                        | U-251 MG | nucleoplasm, cytosol                        |
| nucleoplasm, golgi apparatus           | HeLa     | golgi apparatus                             | SiHa     | golgi apparatus                             |
| nucleoplasm, focal adhesion sites      | A549     | nucleoplasm, focal adhesion sites           |          |                                             |
| vesicles, cytosol                      | A-431    | cytosol                                     | U-251 MG | cytosol                                     |
| nucleoplasm, cytosol                   | U-251 MG | nucleoplasm, cytosol                        |          |                                             |
| nucleoplasm, cytosol                   | MCF7     | nucleoplasm, cytosol                        | A549     | nucleoplasm, cytosol                        |
| endoplasmic reticulum, golgi apparatus |          |                                             |          |                                             |
| centriolar satellite, cytosol          | U-251 MG | centriolar satellite, cytosol               |          |                                             |
| nucleoplasm, vesicles                  | Hep G2   | nucleoplasm, cytosol                        |          |                                             |
| mitochondria                           | MCF7     | mitochondria                                | RH-30    | mitochondria                                |
| vesicles, plasma membrane              |          |                                             |          |                                             |
| endoplasmic reticulum                  | U-251 MG | endoplasmic reticulum                       |          |                                             |
| endoplasmic reticulum                  | U-251 MG | endoplasmic reticulum                       | RH-30    | endoplasmic reticulum                       |

|                                        |          |                                          |                                        |
|----------------------------------------|----------|------------------------------------------|----------------------------------------|
| nucleoplasm, cytosol                   | U-251 MG | nucleoplasm, cytosol                     |                                        |
| nucleoplasm, golgi apparatus           | A-431    | nucleoplasm, golgi apparatus             |                                        |
| intermediate filaments                 |          |                                          |                                        |
| nucleoplasm, nuclear bodies            | HEK 293  | nucleoplasm                              |                                        |
| vesicles                               | A-431    | vesicles, U-251 MG                       | nucleoplasm, vesicles, plasma membrane |
| nucleoplasm, cytosol                   | SiHa     | nucleoplasm, vesicles, cytosol           |                                        |
| nucleoplasm                            | PC-3     | nucleoplasm, nucleoli                    |                                        |
| endoplasmic reticulum                  | U-2 OS   | nucleoplasm, endoplasmic reticulum       |                                        |
| plasma membrane                        | A-431    | plasma membrane                          |                                        |
| nucleoplasm, cytosol                   | BJ       | nucleoplasm, cytosol                     |                                        |
| nucleoplasm, nucleoli, cytosol         | A-431    | nucleoli                                 |                                        |
| nucleoli, plasma membrane, HEK 293     |          | nucleoli, plasma membrane, centrosome    |                                        |
| actin filaments                        | HeLa     | nucleoplasm, actin filaments             |                                        |
| vesicles                               |          |                                          |                                        |
| nucleoplasm, nuclear bodies            | A549     | nucleoplasm                              |                                        |
| mitochondria                           | A-431    | mitochondria                             |                                        |
| plasma membrane, cytosol               |          |                                          |                                        |
| nucleoli, vesicles                     | A-431    | nucleoplasm, nucleoli                    |                                        |
| nucleoplasm, centrosome                | EFO-21   | nucleoplasm                              |                                        |
| centriolar satellite                   | SH-SY5Y  | centriolar satellite                     |                                        |
| cytosol                                | A-431    | cytosol                                  |                                        |
| mitochondria                           |          |                                          |                                        |
| nuclear bodies, cytosol                | U-2 OS   | nucleoplasm, cytosol                     |                                        |
| nucleoli, endoplasmic reticulum        | MCF7     | nucleoli, endoplasmic reticulum, cytosol |                                        |
| cell junctions                         |          |                                          |                                        |
| cytosol                                |          |                                          |                                        |
| plasma membrane, cytosol               |          |                                          |                                        |
| cytosol                                | A-431    | plasma membrane, cytosol                 |                                        |
| nucleoplasm                            | A-431    | nucleoplasm                              |                                        |
| nucleoplasm, nucleoli, plasma membrane | A-431    | nucleoli, plasma membrane                |                                        |
| mitochondria                           | A-431    | mitochondria                             |                                        |
| mitochondria                           | A-431    | mitochondria                             |                                        |
| golgi apparatus                        | A-431    | golgi apparatus                          |                                        |
| nucleoplasm, vesicles                  | RH-30    | nucleoplasm                              |                                        |
| golgi apparatus                        |          |                                          |                                        |
| endoplasmic reticulum                  |          |                                          |                                        |
| golgi apparatus                        | A-431    | golgi apparatus                          |                                        |
| vesicles                               | A549     | vesicles                                 |                                        |
| golgi apparatus                        | Hep G2   | golgi apparatus                          |                                        |
| nuclear speckles                       | A-431    | nuclear speckles                         |                                        |
| nuclear speckles                       | A-431    | nuclear speckles                         |                                        |
| mitochondria                           | A-431    | mitochondria                             |                                        |
| mitochondria                           | U-2 OS   | mitochondria                             |                                        |
| nuclear membrane, nucleoli             | A-431    | nuclear membrane, nucleoli               |                                        |
| mitochondria, cytosol                  | RH-30    | cytosol                                  |                                        |
| cytosol                                | SH-SY5Y  | cytosol                                  |                                        |
| nucleoplasm                            | RH-30    | nucleoplasm                              |                                        |
| nucleoplasm, nuclear bodies            | A-431    | nucleoplasm, nuclear bodies              |                                        |
| nucleoplasm                            | A-431    | nucleoplasm                              |                                        |
| nucleoplasm, vesicles                  | A-431    | nucleoplasm, vesicles                    |                                        |
| nucleoplasm                            | A-431    | nucleoplasm                              |                                        |
| nucleoplasm, nucleoli                  | A-431    | nucleoplasm, nucleoli                    |                                        |
| nucleoplasm                            | SiHa     | nucleoplasm, nucleoli                    |                                        |
| nucleoplasm, cytosol                   | A-431    | nucleoplasm, cytosol                     |                                        |
| nucleoplasm, cytosol                   | A-431    | nucleoplasm, cytosol                     |                                        |

|                                        |          |                                        |                                        |
|----------------------------------------|----------|----------------------------------------|----------------------------------------|
| nucleoli                               | A-431    | nucleoli, RH-30                        | nucleoli, cytosol                      |
| nucleoplasm, cytosol                   | MCF7     | nucleoplaHEK 293                       | centrosome                             |
| nucleoplasm                            | A-431    | nucleoplaU-251 MG                      | nucleoplasm                            |
| nucleoplasm, cytosol                   | A-431    | nucleoplaU-251 MG                      | nucleoplasm                            |
| cell junctions                         |          |                                        |                                        |
| nucleoplasm                            | U-2 OS   | nucleoplaHeLa                          | nucleoplasm, cytoplasmic bodies        |
| nucleoplasm, cytosol                   | A-431    | nucleoplaU-251 MG                      | nucleoplasm, cytosol                   |
| nucleoplasm                            | HEK 293  | nucleoplaPC-3                          | nucleoplasm                            |
| vesicles                               | A-431    | vesicles, U-251 MG                     | vesicles                               |
| nucleoplasm, vesicles                  | A-431    | nucleoplaHEK 293                       | vesicles                               |
| nucleoplasm, plasma membrane           | RH-30    | nucleoplaBJ                            | nucleoplasm, plasma membrane           |
| nucleoplasm, nucleoli fibrillar center | MCF7     | nucleoplasm, nucleoli fibrillar center |                                        |
| mitochondria                           | MCF7     | mitochondHep G2                        | mitochondria                           |
| mitochondria                           | A-431    | mitochondU-251 MG                      | nucleoplasm, mitochondria              |
| cytosol                                | U-251 MG | nucleoplasm                            |                                        |
| nuclear membrane, vesicles             | RT4      | nuclear U-2 OS                         | nuclear membrane, vesicles             |
| actin filaments, cytosol               | U-251 MG | cytosol                                |                                        |
| focal adhesion sites                   |          |                                        |                                        |
| nucleoplasm, cytosol                   | U-251 MG | nucleoplasm, cytosol                   |                                        |
| mitochondria                           | Hep G2   | mitochondPC-3                          | mitochondria                           |
| cytosol                                | A-431    | centriolaU-251 MG                      | cytosol                                |
| nucleoplasm, cytosol                   | U-251 MG | nucleoplaHeLa                          | nucleoplasm, golgi apparatus, cytosol  |
| golgi apparatus, vesicles              | A-431    | golgi apparatus, vesicles              |                                        |
| cytosol                                | HaCaT    | cytosol                                |                                        |
| cytosol                                |          |                                        |                                        |
| vesicles                               | RH-30    | vesicles PC-3                          | nucleoplasm, nuclear membrane, vesicle |
| nucleoplasm                            | A-431    | nucleoplaU-251 MG                      | nucleoplasm                            |
| plasma membrane, cytosol               | A-431    | plasma meU-251 MG                      | plasma membrane, cytosol               |
| microtubules, cytokinetic              | A-431    | microtubuU-251 MG                      | microtubules                           |
| nucleoplasm                            |          |                                        |                                        |
| vesicles                               | U-2 OS   | vesicles, plasma membrane              |                                        |
| nucleoplasm, mitochondria              | A-431    | nucleoplasm, mitochondria              |                                        |
| vesicles                               | MCF7     | vesicles SH-SY5Y                       | vesicles                               |
| nucleoplasm, cytosol                   | U-251 MG | cytosol HEK 293                        | cytosol                                |
| nucleoplasm, cytosol                   | HEK 293  | nucleoplaA549                          | nucleoplasm, centrosome, cytosol       |
| cytosol                                |          |                                        |                                        |
| vesicles, plasma membrane              | A-431    | vesicles, U-251 MG                     | vesicles, plasma membrane              |
| nuclear speckles, golgi apparatus      | HEK 293  | nucleoplaSH-SY5Y                       | nucleoplasm, golgi apparatus           |
| nucleoplasm                            | U-2 OS   | nucleoplaU-251 MG                      | nucleoplasm                            |
| nucleoplasm                            | A-431    | nucleoplaU-251 MG                      | nucleoplasm                            |
| nucleoplasm, nucleoli                  | U-251 MG | nucleoplaMCF7                          | nucleoplasm, nucleoli                  |
| nucleoplasm                            | U-2 OS   | nucleoplaPC-3                          | nucleoplasm                            |
| nuclear speckles                       | MCF7     | nuclear saA549                         | nuclear speckles                       |
| plasma membrane, cytosol               | A-431    | cytosol                                |                                        |
| nucleoli, plasma membrane,             | A-431    | plasma meU-251 MG                      | plasma membrane, cytosol               |
| nucleoli                               | A-431    | nucleoli, HeLa                         | nucleoli                               |
| nucleoplasm, vesicles                  | SH-SY5Y  | nucleoplaRH-30                         | nucleoplasm, plasma membrane           |
| nucleoplasm                            | PC-3     | nucleoplasm                            |                                        |
| intermediate filaments                 | MCF7     | nucleoplasm, nuclear membrane          |                                        |
| nucleoplasm                            | MCF7     | nucleoplaHeLa                          | nucleoplasm                            |
| nucleoplasm                            | HEK 293  | nucleoplaPC-3                          | nucleoplasm                            |
| nucleoplasm                            | HEK 293  | nucleoplaSH-SY5Y                       | nucleoplasm                            |
| nucleoplasm, cytokinetic               | HeLa     | nucleoplaRH-30                         | nucleoplasm                            |
| nucleoplasm, centrosome, cytosol       | U-251 MG | centrosomSH-SY5Y                       | centrosome                             |
| vesicles, cytosol                      | A-431    | vesicles, HeLa                         | nucleoplasm, vesicles                  |

|                                                  |           |                                                   |           |
|--------------------------------------------------|-----------|---------------------------------------------------|-----------|
| nucleoplasm                                      | SK-MEL-30 | nucleoplasm                                       |           |
| endoplasmic reticulum, plasma membrane, cytosol  | HeLa      | endoplasmic reticulum, plasma membrane, cytosol   | SK-MEL-30 |
| nucleoplasm, nuclear bodies, cytosol             | U-251 MG  | nucleoplasm, nuclear bodies, cytosol              |           |
| nucleoplasm, mitochondria, cytosol               | A-431     | nucleoplasm, mitochondria, cytosol                | U-251 MG  |
| nucleoplasm                                      | A-431     | nucleoplasm                                       | U-251 MG  |
| nucleoplasm, nuclear speckles                    | A-431     | nucleoplasm, nuclear speckles                     | U-251 MG  |
| nucleoli fibrillar center, endoplasmic reticulum | BJ        | nucleoli fibrillar center, endoplasmic reticulum  |           |
| nuclear speckles                                 |           |                                                   |           |
| vesicles                                         | A-431     | golgi apparatus, vesicles                         | U-251 MG  |
| nucleoplasm                                      | A-431     | nucleoplasm, nucleoli                             | U-251 MG  |
| nucleoplasm                                      | U-251 MG  | nucleoplasm                                       | PC-3      |
| nucleoplasm, cytosol                             | A-431     | nucleoplasm                                       | U-251 MG  |
| nucleoplasm                                      | MCF7      | nucleoplasm                                       |           |
| mitochondria                                     | MCF7      | mitochondria                                      | Hep G2    |
| nucleoplasm, nucleoli                            | A-431     | nucleoplasm                                       | U-251 MG  |
| golgi apparatus, cytosol                         | PC-3      | golgi apparatus, cytosol                          |           |
| golgi apparatus                                  | Hep G2    | golgi apparatus, cytosol                          | SiHa      |
| nucleoplasm                                      | SiHa      | nucleoplasm                                       |           |
| vesicles                                         | ASC TERT1 | vesicles                                          |           |
| mitochondria                                     | SH-SY5Y   | nucleoplasm, vesicles                             | ASC TERT1 |
| mitochondria                                     | A-431     | mitochondria                                      | U-251 MG  |
| nucleoplasm, cytosol                             | HeLa      | nucleoplasm, cytosol                              | HUVEC TER |
| golgi apparatus                                  |           |                                                   |           |
| actin filaments                                  | BJ        | actin filaments                                   |           |
| mitochondria                                     | U-251 MG  | mitochondria                                      | HEK 293   |
| nucleoplasm, cytosol                             | A-431     | nucleoplasm, cytosol                              | U-251 MG  |
| nucleoplasm                                      | A-431     | nucleoplasm                                       | U-251 MG  |
| vesicles                                         |           |                                                   |           |
| nuclear speckles, mitochondria                   | MCF7      | nuclear speckles                                  | PC-3      |
| nucleoplasm, cytosol                             | U-251 MG  | nucleoplasm, cytosol                              |           |
| nucleoplasm, mitochondria                        | A-431     | nucleoplasm                                       | U-251 MG  |
| vesicles, plasma membrane                        | HeLa      | plasma membrane                                   | HTCEpi    |
| nuclear speckles                                 | A-431     | nuclear speckles                                  | U-251 MG  |
| nuclear speckles                                 | U-251 MG  | nuclear speckles                                  |           |
| actin filaments, cytosol                         | A-431     | plasma membrane, actin filaments, cytosol         | U-251 MG  |
| nucleoplasm, nucleoli fibrillar center           | U-251 MG  | nucleoplasm, nucleoli fibrillar center            | HEL       |
| nucleoplasm                                      | U-251 MG  | nucleoplasm                                       |           |
| nucleoplasm                                      | U-251 MG  | nucleoplasm                                       | A549      |
| centrosome                                       |           |                                                   |           |
| intermediate filaments                           | MCF7      | nucleoli fibrillar center, intermediate filaments | HeLa      |
| nucleoli                                         | MCF7      | nucleoli                                          |           |
| nucleoli                                         | U-251 MG  | nucleoli                                          | RH-30     |
| golgi apparatus, plasma membrane, vesicles       | U-251 MG  | plasma membrane, vesicles                         | U-251 MG  |
| vesicles                                         | A-431     | vesicles                                          |           |
| plasma membrane, cytosol                         | HEK 293   | plasma membrane, actin filaments                  | RH-30     |
| nucleoplasm, vesicles                            | U-251 MG  | nucleoplasm, vesicles                             |           |
| nucleoplasm                                      | U-2 OS    | nucleoplasm                                       | SiHa      |
| nucleoplasm, mitochondria                        |           |                                                   |           |
| mitochondria                                     | U-2 OS    | mitochondria                                      | A-431     |
| mitochondria                                     | A-431     | mitochondria                                      |           |
| nucleoli                                         | A-431     | nucleoplasm, nucleoli                             | U-251 MG  |
| nucleoli                                         | A-431     | nucleoplasm, nucleoli                             | U-251 MG  |
| nucleoplasm, nuclear bodies, cytosol             | HEK 293   | nucleoplasm, nuclear bodies, cytosol              | RH-30     |
| plasma membrane, cytosol                         | A-431     | plasma membrane, cytosol                          | U-251 MG  |
| nucleoplasm, golgi apparatus                     | Hep G2    | nucleoplasm, golgi apparatus                      |           |



|                             |           |                                    |                                       |
|-----------------------------|-----------|------------------------------------|---------------------------------------|
| nucleoplasm                 | SiHa      | nucleoplasm, cytokinetic bridge    |                                       |
| mitochondria, cytosol       | A-431     | mitochondria                       |                                       |
| nuclear speckles            | BJ        | nuclear speckles                   |                                       |
| golgi apparatus             | PC-3      | nucleoli, golgi apparatus          |                                       |
| vesicles                    |           |                                    |                                       |
| microtubules                | U-251 MG  | microtubuPC-3                      | microtubules                          |
| nucleoplasm                 | A-431     | nucleoplaU-251 MG                  | nucleoplasm                           |
| nucleoplasm                 | HeLa      | nucleoplaHep G2                    | nucleoplasm                           |
| plasma membrane             | U-251 MG  | plasma meHEL                       | plasma membrane                       |
| nucleoplasm                 | A-431     | nucleoplaU-251 MG                  | nucleoplasm                           |
| nucleoplasm                 | A-431     | nucleoplaU-251 MG                  | nucleoplasm                           |
| microtubules                | MCF7      | nucleoli, microtubules             |                                       |
| plasma membrane, cytosol    | U-251 MG  | plasma meSH-SY5Y                   | plasma membrane, centrosome, cytosol  |
| cytosol                     | U-251 MG  | cytosol SH-SY5Y                    | cytosol                               |
| vesicles                    |           |                                    |                                       |
| nucleoplasm, nucleoli       | A-431     | nucleoplaU-251 MG                  | nucleoplasm, nucleoli                 |
| cytosol                     |           |                                    |                                       |
| nucleoli                    | LHCN-M2   | nucleoplasm, plasma membrane       |                                       |
| golgi apparatus             |           |                                    |                                       |
| nucleoli                    | U-251 MG  | nucleoli SiHa                      | nucleoplasm, nucleoli                 |
| nucleoplasm                 | A-431     | nucleoplaHep G2                    | nucleoplasm                           |
| nucleoplasm                 | A-431     | nucleoplaU-251 MG                  | nucleoplasm                           |
| nucleoplasm, mitochondria   | A-431     | nucleoplaU-251 MG                  | nucleoplasm, mitochondria             |
| microtubules                | U-2 OS    | microtubuSiHa                      | microtubules                          |
| nucleoplasm                 | A-431     | nucleoplaU-251 MG                  | nucleoplasm                           |
| nucleoplasm                 | HEK 293   | nucleoplaPC-3                      | nucleoplasm, cytosol                  |
| plasma membrane             |           |                                    |                                       |
| nucleoplasm, actin filamer  | A-431     | nucleoplaU-251 MG                  | nucleoplasm                           |
| nucleoplasm                 | A-431     | nucleoplaU-251 MG                  | nucleoplasm                           |
| nucleoplasm, intermediate   | A-431     | nucleoplaU-251 MG                  | nucleoplasm                           |
| mitochondria                | A-431     | mitochondU-251 MG                  | mitochondria                          |
| nucleoplasm                 | SK-MEL-30 | nucleoplasm                        |                                       |
| nucleoplasm                 | U-2 OS    | nucleoplaSK-MEL-30                 | nucleoplasm                           |
| nucleoplasm, cell junctions |           |                                    |                                       |
| vesicles                    | HeLa      | golgi appPC-3                      | vesicles                              |
| mitochondria                | A-431     | mitochondU-251 MG                  | mitochondria                          |
| mitochondria, cytosol       | A-431     | mitochondU-251 MG                  | mitochondria                          |
| nuclear bodies, cytoplasmic | PC-3      | nuclear bodies, cytoplasmic bodies |                                       |
| nuclear speckles            | HEK 293   | nuclear sPC-3                      | nuclear speckles, cytosol             |
| cytosol                     | U-251 MG  | cytosol                            |                                       |
| cytosol                     | MCF7      | cytosol Hep G2                     | cytosol                               |
| cytosol                     | MCF7      | cytosol Hep G2                     | cytosol                               |
| microtubules                | A-431     | nucleoli, U-251 MG                 | microtubules                          |
| nucleoplasm                 | U-251 MG  | nucleoplasm                        |                                       |
| vesicles                    | U-251 MG  | vesicles                           |                                       |
| nucleoplasm                 | U-251 MG  | nucleoplasm                        |                                       |
| cytosol                     | U-251 MG  | cytosol                            |                                       |
| golgi apparatus             | U-251 MG  | nucleoplaPC-3                      | nucleoplasm, golgi apparatus, cytosol |
| plasma membrane, cytosol    | U-251 MG  | cytosol SH-SY5Y                    | cytosol                               |
| nucleoplasm                 | U-2 OS    | nucleoplaA-431                     | nucleoplasm, cytosol                  |
| nucleoplasm                 | U-251 MG  | nucleoplasm, cytosol               |                                       |
| nuclear bodies              | MCF7      | nuclear bodies                     |                                       |
| nucleoplasm                 | A-431     | nucleoplaMCF7                      | nucleoplasm, nucleoli                 |
| nucleoli                    | MCF7      | nucleoli Hep G2                    | nucleoli                              |
| cytosol                     | U-251 MG  | cytosol MCF7                       | nucleoplasm, cytosol                  |

|                                       |           |                           |                                        |
|---------------------------------------|-----------|---------------------------|----------------------------------------|
| nucleoplasm, nucleoli                 | A-431     | nucleoplaU-251 MG         | nucleoplasm, nuclear membrane, nucleol |
| nucleoplasm, centrosome               | A549      | nucleoplaAF22             | nucleoplasm, centrosome                |
| mitochondria                          | U-251 MG  | mitochondria              |                                        |
| nucleoplasm                           | PC-3      | nucleoplasm               |                                        |
| nucleoplasm                           | A-431     | cytosol U-251 MG          | nucleoplasm                            |
| nucleoplasm                           | A-431     | nucleoplaPC-3             | nucleoplasm                            |
| nucleoplasm, golgi apparatus          | SH-SY5Y   | nucleoplaBJ               | nucleoplasm, golgi apparatus, centroso |
| nucleoplasm                           | A-431     | nucleoplaU-251 MG         | nucleoplasm                            |
| nuclear bodies, actin filæ            | U-251 MG  | nuclear bHEK 293          | nuclear bodies                         |
| nucleoplasm, cytosol                  | A-431     | nucleoplaHeLa             | nucleoplasm, cytosol                   |
| nucleoplasm                           | A-431     | nucleoplaU-251 MG         | nucleoplasm, cytosol                   |
| vesicles                              | MCF7      | nucleoli, plasma membrane |                                        |
| plasma membrane                       |           |                           |                                        |
| plasma membrane, centriolar satellite |           |                           |                                        |
| nucleoplasm                           | SH-SY5Y   | nucleoplasm               |                                        |
| plasma membrane                       | U-251 MG  | plasma membrane, cytosol  |                                        |
| nucleoplasm                           | A-431     | nucleoplaU-251 MG         | nucleoplasm                            |
| cytosol                               | A-431     | cytosol                   |                                        |
| cell junctions                        |           |                           |                                        |
| vesicles, cytosol                     | U-251 MG  | vesicles, cytosol         |                                        |
| nucleoplasm                           | A-431     | nucleoplaU-251 MG         | nucleoplasm                            |
| cell junctions, cytosol               |           |                           |                                        |
| nucleoplasm, cell junction            | HaCaT     | cell junctions            |                                        |
| nucleoplasm, cytosol                  | U-2 OS    | nucleoplasm               |                                        |
| plasma membrane                       | U-251 MG  | nuclear bASC TERT1        | plasma membrane                        |
| nucleoplasm, cytosol                  | A-431     | nucleoplaU-251 MG         | nucleoplasm                            |
| centriolar satellite, cyto            | A-431     | centriolaU-251 MG         | cytosol                                |
| nucleoplasm, cytosol                  | A-431     | nuclear bU-251 MG         | nucleoplasm, nuclear bodies, cytosol   |
| nucleoplasm, cytosol                  |           |                           |                                        |
| nucleoplasm, cytosol                  | HeLa      | nucleoplaRH-30            | nucleoplasm, cytosol                   |
| nucleoplasm, mitochondria             | A-431     | mitochondU-251 MG         | mitochondria                           |
| cytosol                               | A-431     | cytosol HeLa              | cytosol                                |
| nucleoplasm, vesicles                 | A-431     | nuclear rU-251 MG         | nucleoplasm, vesicles                  |
| plasma membrane, actin fila           | A-431     | plasma meU-251 MG         | plasma membrane, actin filaments, cyto |
| endoplasmic reticulum                 |           |                           |                                        |
| endoplasmic reticulum                 |           |                           |                                        |
| nucleoplasm                           | A-431     | nucleoplaU-251 MG         | nucleoplasm                            |
| nucleoplasm                           | A-431     | nucleoplasm               |                                        |
| cytosol                               | A-431     | mitochondria              |                                        |
| nuclear speckles, cytosol             | A-431     | nuclear sHEK 293          | nuclear speckles, cytosol              |
| nucleoplasm                           | PC-3      | nucleoplaAF22             | nucleoplasm                            |
| nucleoplasm                           | A-431     | nucleoplaU-251 MG         | nucleoplasm                            |
| nucleoplasm                           | PC-3      | nucleoplasm               |                                        |
| cytosol                               | A-431     | nucleoplaU-251 MG         | nucleoplasm, cytosol                   |
| nucleoplasm                           | MCF7      | nucleoplaSiHa             | nucleoplasm                            |
| mitochondria                          |           |                           |                                        |
| cytosol                               | A-431     | cytosol U-251 MG          | cytosol                                |
| cytosol                               | ASC TERT1 | plasma meBJ               | cytosol                                |
| plasma membrane                       | MCF7      | plasma membrane           |                                        |
| nucleoplasm                           | MCF7      | nucleoplaPC-3             | nucleoplasm, cytosol                   |
| nucleoplasm, cytosol                  | HeLa      | nucleoplasm               |                                        |
| nucleoplasm, cytosol                  | BJ        | cytosol EFO-21            | nucleoplasm, cytosol                   |
| golgi apparatus, cytosol              | AF22      | golgi apparatus           |                                        |
| cytosol                               | A-431     | cytosol U-251 MG          | cytosol                                |
| vesicles                              | HEK 293   | vesicles AF22             | vesicles                               |

|                             |          |                                 |                                       |
|-----------------------------|----------|---------------------------------|---------------------------------------|
| nucleoplasm                 | A-431    | nucleoplaU-251 MG               | nucleoplasm                           |
| nucleoplasm                 | A-431    | nucleoplaU-251 MG               | nucleoplasm                           |
| actin filaments             | A-431    | actin filU-251 MG               | actin filaments                       |
| actin filaments             | A-431    | actin filU-251 MG               | actin filaments                       |
| nucleoplasm                 | A-431    | nucleoplaU-251 MG               | nucleoplasm                           |
| nucleoplasm                 |          |                                 |                                       |
| nucleoplasm                 | A-431    | nucleoplaU-251 MG               | nucleoplasm, cytosol                  |
| nucleoplasm                 | AF22     | nucleoplasm                     |                                       |
| nuclear bodies, vesicles    | U-2 OS   | vesicles RH-30                  | nuclear bodies, plasma membrane       |
| nucleoplasm                 | HeLa     | nucleoplasm                     |                                       |
| nucleoplasm, cytosol        | A-431    | nucleoplaHEK 293                | nucleoplasm, cytosol                  |
| nucleoplasm, actin filamer  | U-251 MG | nucleoplaPC-3                   | nucleoplasm, cytosol                  |
| vesicles                    | A-431    | vesicles U-251 MG               | vesicles                              |
| vesicles                    | A-431    | vesicles U-251 MG               | vesicles                              |
| nucleoli fibrillar center   | HEK 293  | nucleoli REH                    | nucleoli fibrillar center, plasma mem |
| nucleoplasm, nucleoli, cytc | A-431    | nucleoli, K-562                 | nucleoplasm, vesicles                 |
| endoplasmic reticulum       | SiHa     | endoplasmic reticulum           |                                       |
| endoplasmic reticulum       |          |                                 |                                       |
| mitochondria                | A-431    | mitochondU-251 MG               | mitochondria                          |
| cytosol                     | A-431    | cytosol U-251 MG                | cytosol                               |
| mitochondria, cytosol       | A-431    | mitochondU-251 MG               | mitochondria, cytosol                 |
| midbody                     | BJ       | nucleoplasm, cytosol            |                                       |
| nucleoplasm, cell junctior  | MCF7     | cell juncHEK 293                | cell junctions                        |
| nucleoplasm                 | A-431    | nucleoplaU-251 MG               | nucleoplasm                           |
| mitochondria                | HeLa     | nucleoplaRH-30                  | mitochondria                          |
| nucleoplasm                 | A-431    | nucleoplaU-251 MG               | nucleoplasm                           |
| nucleoplasm, nucleoli       | A-431    | nucleoplaU-251 MG               | nucleoplasm, nucleoli                 |
| nucleoplasm, nucleoli       | A-431    | nucleoplasm, nucleoli           |                                       |
| nucleoplasm                 | A-431    | nucleoplaSK-MEL-30              | nucleoplasm, nucleoli                 |
| nucleoplasm                 | A-431    | nucleoplaU-251 MG               | nucleoplasm, nuclear bodies           |
| nucleoplasm, nuclear bodie  | A-431    | nucleoplaU-251 MG               | nucleoplasm, nuclear bodies, cytosol  |
| nucleoplasm, nuclear bodie  | U-251 MG | nucleoplasm, nuclear bodies     |                                       |
| nucleoplasm, mitochondria   | A-431    | mitochondU-251 MG               | mitochondria                          |
| nuclear speckles, cytosol   | SH-SY5Y  | nuclear speckles, cytosol       |                                       |
| vesicles, cytosol           |          |                                 |                                       |
| vesicles                    |          |                                 |                                       |
| cytosol                     | A-431    | cytosol U-251 MG                | cytosol                               |
| nuclear bodies              | MCF7     | nuclear bSH-SY5Y                | nuclear bodies                        |
| nucleoplasm                 | A-431    | nucleoplaU-251 MG               | nucleoplasm                           |
| nucleoplasm, cytosol        | U-2 OS   | nucleoplaHEK 293                | nucleoplasm                           |
| nucleoplasm, cytosol        | PC-3     | nucleoplasm, cytosol            |                                       |
| vesicles, plasma membrane,  | A-431    | vesicles, U-251 MG              | vesicles, centrosome                  |
| nucleoplasm                 | A-431    | nucleoplaHeLa                   | nucleoplasm                           |
| nucleoli                    | A-431    | nucleoli U-251 MG               | nucleoplasm, nucleoli                 |
| cytosol                     | A-431    | cytosol U-251 MG                | cytosol                               |
| nucleoplasm, cytosol        | SiHa     | nucleoplaHaCaT                  | nucleoplasm, cytosol                  |
| cytosol                     | MCF7     | cytosol PC-3                    | cytosol                               |
| nucleoplasm                 |          |                                 |                                       |
| nucleoplasm                 |          |                                 |                                       |
| nucleoplasm, mitochondria   |          |                                 |                                       |
| nucleoli, endoplasmic reti  | A-431    | nucleoli, endoplasmic reticulum |                                       |
| nucleoplasm, centriolar s   | HEK 293  | nucleoplaSH-SY5Y                | nucleoplasm                           |
| nucleoli                    | A-431    | nucleoplaU-251 MG               | nucleoplasm, nucleoli, vesicles       |
| nucleoplasm                 | A-431    | nucleoplaU-251 MG               | nucleoplasm                           |
| nucleoplasm, mitochondria   | U-251 MG | nucleoplasm, mitochondria       |                                       |

|                                        |           |                                              |                                        |
|----------------------------------------|-----------|----------------------------------------------|----------------------------------------|
| nucleoplasm, nuclear bodies            | PC-3      | nucleoplasm, nuclear bodies                  |                                        |
| nucleoplasm, cytosol                   |           |                                              |                                        |
| cell junctions                         | A549      | nucleoplasm, vesicles                        |                                        |
| cytosol                                | U-2 OS    | cytosol MCF7                                 | nucleoli fibrillar center, cytosol     |
| nucleoplasm, plasma membrane           | A549      | nucleoplasm, plasma membrane                 |                                        |
| plasma membrane, cytosol               | A549      | vesicles, plasma membrane, cytosol           |                                        |
| nucleoplasm, nuclear bodies            | U-2 OS    | nucleoplasm HEK 293                          | nucleoplasm, nuclear bodies            |
| nucleoplasm                            | PC-3      | nucleoplasm, cytosol                         |                                        |
| cytosol                                | A-431     | golgi apparatus HEL                          | golgi apparatus                        |
| nucleoplasm, cytosol                   | HaCaT     | nucleoplasm HAP1                             | nucleoplasm, cytosol                   |
| nucleoplasm                            |           |                                              |                                        |
| nucleoli, endoplasmic reticulum        | Hep G2    | endoplasmic reticulum SK-MEL-30              | endoplasmic reticulum, cytosol         |
| golgi apparatus                        | MCF7      | golgi apparatus SiHa                         | golgi apparatus                        |
| golgi apparatus                        |           |                                              |                                        |
| nucleoplasm                            | A-431     | nucleoplasm U-251 MG                         | nucleoplasm                            |
| nucleoplasm                            | MCF7      | nucleoplasm HeLa                             | nucleoplasm                            |
| vesicles                               | HUVEC TER | vesicles                                     |                                        |
| nucleoplasm, cytosol                   | A-431     | nucleoplasm U-251 MG                         | nucleoplasm, cytosol                   |
| nucleoplasm, cytosol                   | A-431     | nucleoplasm HEK 293                          | nucleoplasm, cytosol                   |
| nucleoli, cytosol                      | A-431     | nucleoli, U-251 MG                           | cytosol                                |
| nucleoplasm                            |           |                                              |                                        |
| cytosol                                | A-431     | cytosol U-251 MG                             | cytosol                                |
| nucleoli, cytosol                      | A-431     | nucleoplasm U-251 MG                         | nucleoplasm, nucleoli, cytosol         |
| cytosol                                | A-431     | nucleoli U-251 MG                            | nucleoli fibrillar center              |
| cytosol                                | HeLa      | cytosol SiHa                                 | cytosol                                |
| nucleoplasm, nuclear membrane          | U-2 OS    | nucleoplasm A549                             | golgi apparatus, cytosol               |
| nucleoplasm, nucleoli                  | SH-SY5Y   | nucleoplasm SiHa                             | nucleoplasm, mitochondria, cytosol     |
| vesicles                               | A-431     | vesicles U-251 MG                            | vesicles                               |
| nucleoplasm, cytosol                   | A-431     | nucleoplasm U-251 MG                         | nucleoplasm, cytosol                   |
| vesicles, centriolar satellite         | A-431     | vesicles, HeLa                               | vesicles, centriolar satellite         |
| nucleoplasm                            | A-431     | nucleoplasm U-251 MG                         | nucleoplasm                            |
| nucleoplasm, cytosol                   | A-431     | nuclear bodies PC-3                          | nucleoplasm, nuclear bodies, cytosol   |
| nucleoplasm, cytosol                   | A-431     | nucleoplasm U-251 MG                         | nucleoplasm, golgi apparatus, cytosol  |
| nucleoplasm, actin filament            | A-431     | nucleoplasm U-251 MG                         | nucleoplasm                            |
| nucleoplasm                            | A-431     | nucleoplasm U-251 MG                         | nucleoplasm                            |
| nucleoplasm, nucleoli, golgi apparatus | AF22      | nucleoplasm, nuclear bodies, golgi apparatus |                                        |
| nucleoplasm, nucleoli fibrillar center | A-431     | nucleoplasm U-251 MG                         | nucleoplasm, nucleoli fibrillar center |
| nucleoli fibrillar center              | U-2 OS    | nucleoli PC-3                                | nucleoli                               |
| nucleoli                               | U-2 OS    | nucleoli PC-3                                | nucleoli                               |
| nuclear membrane, vesicles             | RT4       | nuclear membrane U-2 OS                      | nuclear membrane, vesicles             |
| golgi apparatus, plasma membrane       | RT4       | golgi apparatus U-2 OS                       | golgi apparatus, plasma membrane       |
| nucleoplasm, midbody ring              | MCF7      | nucleoplasm HeLa                             | nucleoplasm                            |
| nucleoplasm, midbody                   | MCF7      | nucleoplasm HeLa                             | nucleoplasm                            |
| nucleoplasm, cytoplasmic filament      | MCF7      | nucleoplasm Hep G2                           | nucleoplasm                            |
| cytosol                                | A-431     | cytosol U-251 MG                             | cytosol                                |
| plasma membrane, cytosol               | A-431     | plasma membrane, cell junctions              |                                        |
| cytosol                                | A-431     | cytosol U-251 MG                             | plasma membrane, focal adhesion sites  |
| nuclear speckles                       | SH-SY5Y   | nuclear speckles PC-3                        | cytosol                                |
| golgi apparatus, cytosol               | A-431     | nucleoplasm U-251 MG                         | golgi apparatus                        |
| nucleoplasm, nuclear membrane          | U-2 OS    | nucleoplasm MCF7                             | nucleoplasm, nuclear membrane, plasma  |
| vesicles, cytosol                      | A-431     | vesicles, U-251 MG                           | vesicles, cytosol                      |
| endosomes, lysosomes                   | A-431     | endosomes U-251 MG                           | endosomes, lysosomes, cytosol          |
| mitochondria                           | A-431     | mitochondria                                 |                                        |
| nucleoplasm                            |           |                                              |                                        |
| cytosol                                | HEK 293   | cytosol                                      |                                        |

|                                        |          |                                                  |
|----------------------------------------|----------|--------------------------------------------------|
| nucleoplasm                            | HEK 293  | nucleoplasm, cytosol                             |
| lipid droplets                         | Hep G2   | lipid droplets                                   |
| cytosol                                | A-431    | cytosol U-251 MG cytosol                         |
| plasma membrane, cytosol               | A-431    | plasma meU-251 MG plasma membrane, cytosol       |
| intermediate filaments                 | U-2 OS   | intermediate filaments                           |
| nucleoplasm                            | SiHa     | nucleoplasm                                      |
| nuclear speckles                       | A-431    | nuclear sU-251 MG nuclear speckles               |
| nuclear speckles                       | MCF7     | nucleoli, SK-MEL-30 nuclear speckles             |
| nucleoli                               | HEK 293  | nucleoplaA549 nucleoplasm, nucleoli              |
| intermediate filaments                 | HaCaT    | intermediate filaments                           |
| intermediate filaments                 | hTCEpi   | intermediate filaments                           |
| nucleoplasm                            | A-431    | nucleoplaU-251 MG nucleoplasm                    |
| nucleoplasm, cytosol                   |          |                                                  |
| nucleoplasm, cytosol                   |          |                                                  |
| microtubules                           | U-2 OS   | microtubuA-431 microtubules                      |
| plasma membrane                        | A-431    | plasma meRPTEC TERplasma membrane                |
| nucleoplasm                            | A549     | nucleoplasm                                      |
| nucleoplasm, cytosol                   | HEK 293  | nucleoplaPC-3 nucleoplasm, cytosol               |
| plasma membrane                        | HaCaT    | nucleoplasm                                      |
| nucleoplasm                            | A-431    | nucleoplaU-251 MG nucleoplasm                    |
| nucleoli, cytosol                      | A-431    | nucleoli, A549 intermediate filaments, cytosol   |
| cytoplasmic bodies                     | A549     | cytoplasmic bodies                               |
| vesicles                               | U-251 MG | vesicles REH vesicles                            |
| cytosol                                | U-251 MG | cytosol HEK 293 vesicles                         |
| nucleoplasm                            | PC-3     | nucleoplasm, cytosol                             |
| golgi apparatus                        | SH-SY5Y  | golgi apparatus                                  |
| nucleoli, vesicles                     | U-2 OS   | vesicles SiHa vesicles                           |
| cytosol                                | A549     | cytosol SH-SY5Y cytosol                          |
| cytosol                                |          |                                                  |
| plasma membrane, cytosol               | A-431    | cytosol U-251 MG cytosol                         |
| plasma membrane, cytosol               | A-431    | cytosol U-251 MG cytosol                         |
| nucleoplasm, cytosol                   | A-431    | nucleoplaU-251 MG nucleoplasm                    |
| nucleoplasm                            | A-431    | nucleoplaU-251 MG nucleoplasm                    |
| nucleoplasm                            | A-431    | nucleoplaU-251 MG nucleoplasm                    |
| nucleoli, mitochondria                 | A-431    | nucleoli, U-251 MG nucleoli, mitochondria        |
| nucleoplasm, vesicles                  | U-2 OS   | nucleoplaA-431 nucleoplasm, vesicles             |
| nucleoplasm                            | Hep G2   | nucleoplaPC-3 nucleoplasm                        |
| cytosol                                | A-431    | cytosol U-251 MG cytosol                         |
| cytosol                                | A-431    | focal adhU-251 MG cytosol                        |
| endoplasmic reticulum                  | A-431    | endoplasrU-251 MG endoplasmic reticulum          |
| nuclear speckles, cytosol              | A-431    | nuclear sU-251 MG nucleoli, nuclear speckles     |
| nucleoplasm                            | A-431    | nucleoplaU-251 MG nucleoplasm                    |
| nucleoplasm, nuclear bodie             | A549     | nucleoplaHEL nucleoplasm                         |
| nucleoplasm                            | A-431    | nucleoplaU-251 MG nucleoplasm                    |
| mitochondria                           | MCF7     | mitochondria                                     |
| cytosol                                |          |                                                  |
| nucleoplasm, nuclear membrane, cytosol |          |                                                  |
| nucleoplasm, cytosol                   | HEK 293  | nucleoplasm, cytosol                             |
| vesicles                               | U-2 OS   | vesicles BJ vesicles                             |
| nucleoli, cytosol                      | SiHa     | nucleoli, cytosol                                |
| nucleoplasm, nucleoli                  | A-431    | nucleoplaU-251 MG nucleoplasm, nucleoli, cytosol |
| endoplasmic reticulum, golgi apparatus |          |                                                  |
| nucleoplasm                            | AF22     | nucleoplasm                                      |
| nucleoplasm                            | AF22     | nucleoplasm                                      |
| nucleoplasm                            |          |                                                  |

|                                  |           |                                                      |           |                                  |
|----------------------------------|-----------|------------------------------------------------------|-----------|----------------------------------|
| mitochondria                     | MCF7      | mitochondria                                         | A549      | mitochondria                     |
| nucleoplasm                      | K-562     | nucleoplasm, plasma membrane                         |           |                                  |
| nucleoplasm                      |           |                                                      |           |                                  |
| nuclear bodies, cytosol vesicles | A-431     | nuclear bodies, cytosol vesicles                     | U-251 MG  | nuclear bodies, cytosol vesicles |
| endosomes                        | HEK 293   | endosomes                                            | A549      | endosomes                        |
| nuclear speckles, mitochondria   | SK-MEL-30 | nuclear membrane, nuclear speckles, cytosol vesicles |           |                                  |
| nucleoplasm, nucleoli            | PC-3      | nucleoplasm                                          |           |                                  |
| vesicles                         | HEK 293   | vesicles                                             | SK-MEL-30 | vesicles                         |
| cytosol                          |           |                                                      |           |                                  |
| cytosol                          | A-431     | cytosol                                              |           |                                  |
| vesicles                         | A-431     | vesicles                                             | U-251 MG  | vesicles                         |
| golgi apparatus                  | BJ        | golgi apparatus                                      |           |                                  |
| vesicles                         | A-431     | vesicles                                             | MCF7      | vesicles                         |
| nuclear speckles                 | HEK 293   | nuclear speckles                                     | RH-30     | nuclear speckles                 |
| plasma membrane, cytosol         | A-431     | plasma membrane, cytosol                             | U-251 MG  | plasma membrane, cytosol         |
| plasma membrane, actin filaments | U-2 OS    | plasma membrane, actin filaments                     | A549      | plasma membrane, actin filaments |
| vesicles                         | A-431     | vesicles                                             | U-251 MG  | vesicles                         |
| centrosome                       | A-431     | centrosome                                           | U-251 MG  | centrosome                       |
| mitochondria                     |           |                                                      |           |                                  |
| endoplasmic reticulum            | A-431     | endoplasmic reticulum                                | U-251 MG  | endoplasmic reticulum            |
| endoplasmic reticulum            | A-431     | endoplasmic reticulum                                | U-251 MG  | endoplasmic reticulum            |
| cytosol                          | U-251 MG  | cytosol                                              |           |                                  |
| centrosome                       | RH-30     | centrosome                                           | SK-MEL-30 | centrosome                       |
| vesicles                         |           |                                                      |           |                                  |
| nucleoplasm                      | A-431     | nucleoplasm                                          | U-251 MG  | nucleoplasm                      |
| nucleoplasm                      | HEK 293   | nucleoplasm, nuclear bodies                          | SH-SY5Y   | nucleoplasm, nuclear bodies      |
| nuclear bodies, mitochondria     | A-431     | nuclear bodies, cytosol                              | U-251 MG  | nuclear bodies, cytosol          |
| cytosol                          | HEK 293   | cytosol                                              | SH-SY5Y   | cytosol                          |
| cytosol                          | A-431     | cytosol                                              |           |                                  |
| cytosol                          | A-431     | cytosol                                              | U-251 MG  | cytosol                          |
| nucleoplasm, cytosol             | U-251 MG  | nucleoplasm, cytosol                                 |           |                                  |
| cytosol                          | A-431     | cytosol                                              |           |                                  |
| cytosol                          |           |                                                      |           |                                  |
| nuclear speckles                 | A-431     | nuclear speckles                                     | HeLa      | nuclear speckles                 |
| golgi apparatus                  | RH-30     | golgi apparatus                                      | HaCaT     | golgi apparatus                  |
| nucleoplasm                      | HEK 293   | nucleoplasm                                          | HeLa      | nucleoplasm                      |
| nucleoplasm                      | U-251 MG  | nucleoplasm                                          |           |                                  |
| aggresome, cytosol               | HeLa      | aggresome, cytosol                                   |           |                                  |
| vesicles                         | MCF7      | vesicles                                             | HUVEC TER | vesicles                         |
| nucleoplasm, vesicles            |           |                                                      |           |                                  |
| nucleoplasm, vesicles            |           |                                                      |           |                                  |
| plasma membrane, cytosol         | A-431     | plasma membrane, cytosol                             | U-251 MG  | plasma membrane, cytosol         |
| mitochondria                     | HEK 293   | mitochondria                                         | HeLa      | mitochondria                     |
| cytosol                          | A-431     | cytosol                                              | U-251 MG  | cytosol                          |
| cytosol                          |           |                                                      |           |                                  |
| nucleoli, cytosol                |           |                                                      |           |                                  |
| mitochondria                     | A-431     | mitochondria                                         | U-251 MG  | mitochondria                     |
| nucleoplasm                      | A-431     | nucleoplasm                                          | U-251 MG  | nucleoplasm                      |
| nucleoplasm                      | U-251 MG  | nucleoplasm                                          |           |                                  |
| cytosol                          | U-2 OS    | cytosol                                              | U-251 MG  | cytosol                          |
| microtubules, cytokinetic        | A-431     | microtubules, cytosol                                | U-251 MG  | microtubules, cytosol            |
| nucleoplasm                      | A549      | nucleoplasm                                          |           |                                  |
| intermediate filaments           |           |                                                      |           |                                  |
| nucleoplasm, cytosol             | MCF7      | nucleoplasm, cytosol                                 |           |                                  |

|                                 |          |                                                  |                                        |
|---------------------------------|----------|--------------------------------------------------|----------------------------------------|
| vesicles                        | U-251 MG | vesicles                                         |                                        |
| cytosol                         | U-2 OS   | cytosol HEK 293                                  | cytosol                                |
| nucleoplasm, cytosol            | A-431    | nucleoplaU-251 MG                                | nucleoplasm, cytosol                   |
| nucleoplasm, mitochondria       | HeLa     | nucleoplaSiHa                                    | nucleoplasm                            |
| endoplasmic reticulum           |          |                                                  |                                        |
| nucleoplasm, actin filamer      | A-431    | nucleoplaU-251 MG                                | nucleoplasm                            |
| nucleoplasm                     | A-431    | nucleoplaU-251 MG                                | nucleoplasm                            |
| nucleoplasm                     | U-251 MG | nucleoplasm                                      |                                        |
| nucleoplasm, cytosol            | MCF7     | golgi appHEK 293                                 | golgi apparatus                        |
| nucleoplasm                     | U-2 OS   | nucleoplaHeLa                                    | nucleoplasm                            |
| nucleoplasm                     | U-2 OS   | nucleoplaMCF7                                    | nucleoplasm                            |
| nucleoplasm                     | U-2 OS   | nucleoplaMCF7                                    | nucleoplasm, nucleoli                  |
| nucleoplasm, golgi apparatus    | A-431    | nucleoplaU-251 MG                                | nucleoplasm, golgi apparatus           |
| nucleoplasm, nuclear bodie      | A-431    | microtubuU-251 MG                                | nucleoplasm, microtubule ends, cytosol |
| plasma membrane                 |          |                                                  |                                        |
| nucleoplasm, cytosol            | A-431    | nucleoplaU-251 MG                                | nucleoplasm, nucleoli, cytosol         |
| nucleoplasm, cytosol            | HEK 293  | nucleoplasm                                      |                                        |
| mitochondria                    | U-2 OS   | vesicles, Hep G2                                 | mitochondria                           |
| mitochondria                    | A-431    | mitochondU-251 MG                                | mitochondria                           |
| nucleoli fibrillar center       | U-2 OS   | nucleoli A-431                                   | nucleoli fibrillar center              |
| vesicles                        | A-431    | vesicles U-251 MG                                | cytosol                                |
| nucleoplasm, nuclear membr      | A-431    | nucleoplaU-251 MG                                | nucleoplasm, nuclear membrane          |
| nuclear speckles                | A-431    | nuclear sU-251 MG                                | nuclear speckles                       |
| nucleoplasm                     | SH-SY5Y  | nucleoplasm                                      |                                        |
| mitochondria                    | BJ       | mitochondria                                     |                                        |
| cytosol                         | A549     | nucleoplasm, plasma membrane, cytosol            |                                        |
| vesicles                        | A-431    | vesicles RH-30                                   | nucleoplasm, nucleoli, vesicles        |
| nucleoplasm                     | A-431    | nucleoplaU-251 MG                                | nucleoplasm                            |
| plasma membrane                 | U-251 MG | plasma membrane                                  |                                        |
| plasma membrane                 | HEL      | plasma membrane                                  |                                        |
| nucleoli fibrillar center       | SiHa     | nucleoli fibrillar center, endoplasmic reticulum |                                        |
| plasma membrane, cytosol        | A-431    | plasma meU-251 MG                                | plasma membrane, cytosol               |
| nuclear speckles, plasma n      | U-251 MG | nuclear sPC-3                                    | nuclear speckles, plasma membrane      |
| nucleoplasm                     | A-431    | nucleoplasm, golgi apparatus                     |                                        |
| nucleoplasm, cytosol            | A-431    | nucleoplaPC-3                                    | nucleoplasm, cytosol                   |
| cytosol                         | A-431    | centrosomU-251 MG                                | centrosome                             |
| nucleoplasm, golgi apparatus    | A-431    | nucleoplaU-251 MG                                | nucleoplasm, golgi apparatus           |
| nucleoli                        | A-431    | nucleoplaU-251 MG                                | nucleoplasm                            |
| plasma membrane                 | A-431    | plasma meU-251 MG                                | plasma membrane                        |
| nucleoplasm                     | A-431    | nucleoplaPC-3                                    | nucleoplasm                            |
| plasma membrane, cytosol        | A-431    | plasma meU-251 MG                                | plasma membrane, cytosol               |
| endoplasmic reticulum           | U-251 MG | endoplasrHep G2                                  | endoplasmic reticulum                  |
| nucleoplasm                     | A-431    | nucleoplaHeLa                                    | nucleoplasm                            |
| nucleoplasm, cytosol            | A-431    | nucleoplaU-251 MG                                | nucleoplasm, cytosol                   |
| plasma membrane, cytosol        | A549     | plasma mePC-3                                    | plasma membrane, cytosol               |
| vesicles, plasma membrane, A549 |          | plasma mePC-3                                    | plasma membrane, cytosol               |
| endoplasmic reticulum, cyt      | MCF7     | endoplasrHeLa                                    | endoplasmic reticulum, cytosol         |
| vesicles, plasma membrane       | A-431    | vesicles, U-251 MG                               | vesicles, plasma membrane              |
| nuclear speckles, plasma n      | A-431    | nuclear sU-251 MG                                | nuclear speckles, plasma membrane      |
| actin filaments, cytosol        | PC-3     | cytosol HUVEC TER                                | plasma membrane, cytosol               |
| vesicles                        | A-431    | vesicles HEK 293                                 | vesicles                               |
| vesicles                        | SH-SY5Y  | vesicles RH-30                                   | vesicles                               |
| golgi apparatus, vesicles       | HaCaT    | golgi apparatus, vesicles                        |                                        |
| plasma membrane                 | HEK 293  | plasma membrane                                  |                                        |
| cytosol                         | U-251 MG | cytosol                                          |                                        |

|                                     |          |                                    |                                            |
|-------------------------------------|----------|------------------------------------|--------------------------------------------|
| vesicles                            | A-431    | vesicles                           |                                            |
| actin filaments                     | A-431    | actin filB                         | actin filaments, centrosome                |
| nucleoplasm, actin filaments        | A-431    | nucleoplasm, actin filaments       |                                            |
| vesicles                            | A-431    | vesicles U-251 MG                  | vesicles                                   |
| golgi apparatus, vesicles           | A-431    | nucleoplaU-251 MG                  | nucleoplasm, golgi apparatus, vesicles     |
| nuclear speckles, mitochondria      | A-431    | nuclear sU-251 MG                  | nuclear speckles, mitochondria             |
| nucleoplasm, nucleoli, mitochondria | A-431    | nucleoplaA549                      | nucleoplasm, nucleoli, mitochondria        |
| plasma membrane, cytosol            | A-431    | plasma meU-251 MG                  | plasma membrane, cytosol                   |
| nucleoplasm, plasma membrane        | A-431    | nucleoplaU-251 MG                  | nucleoplasm, plasma membrane, cytosol      |
| mitochondria                        | A-431    | mitochondU-251 MG                  | mitochondria                               |
| mitochondria                        | MCF7     | mitochondria                       |                                            |
| nucleoplasm, mitochondria           | U-2 OS   | mitochondria                       |                                            |
| nucleoplasm, centriolar satellite   | A-431    | nucleoplaU-251 MG                  | nucleoplasm, centriolar satellite          |
| cytosol                             | HEK 293  | cytosol HaCaT                      | cytosol                                    |
| nucleoplasm, plasma membrane        | U-2 OS   | nucleoplaHaCaT                     | nucleoplasm, plasma membrane               |
| cytosol                             | PC-3     | cytosol                            |                                            |
| nucleoplasm, cytosol                | A-431    | nucleoplaU-251 MG                  | nucleoplasm, cytosol                       |
| plasma membrane, cytosol            | A-431    | cytosol U-251 MG                   | plasma membrane, cytosol                   |
| cytosol                             | A-431    | nucleoplaU-251 MG                  | cytosol                                    |
| vesicles                            |          | vesicles                           |                                            |
| vesicles                            | HaCaT    | vesicles                           |                                            |
| nucleoplasm, nucleoli fibrillar     | HeLa     | nucleoli REH                       | nucleoplasm, nucleoli fibrillar centrosome |
| nucleoplasm, cytosol                | A-431    | nucleoplaU-251 MG                  | nucleoplasm, cytosol                       |
| nucleoli, cytosol                   | U-251 MG | cytosol                            |                                            |
| nucleoplasm, cytosol                | HEK 293  | nucleoplaHeLa                      | nucleoplasm, cytosol                       |
| nucleoplasm                         | Hep G2   | nucleoplaPC-3                      | nucleoplasm                                |
| nucleoplasm                         | Hep G2   | nucleoplasm                        |                                            |
| nucleoli, plasma membrane, cytosol  | A-431    | nucleoli, plasma membrane, cytosol |                                            |
| nucleoplasm                         | A-431    | nucleoplaU-251 MG                  | nucleoplasm, cytosol                       |
| intermediate filaments              | SiHa     | intermedihtCEpi                    | intermediate filaments                     |
| nucleoplasm                         | A-431    | nucleoplaU-251 MG                  | nucleoplasm                                |
| nucleoplasm, vesicles               | A-431    | nucleoplaU-251 MG                  | nucleoplasm, vesicles                      |
| intermediate filaments              | htCEpi   | intermediate filaments             |                                            |
| intermediate filaments              | SiHa     | intermedihtCEpi                    | intermediate filaments                     |
| intermediate filaments              |          |                                    |                                            |
| nucleoplasm                         |          |                                    |                                            |
| nuclear speckles, plasma membrane   | U-2 OS   | nuclear sMCF7                      | nuclear speckles, plasma membrane          |
| centrosome                          | A-431    | nucleoplaPC-3                      | nucleoplasm, centrosome, cytosol           |
| actin filaments                     | A-431    | actin filU-251 MG                  | actin filaments                            |
| golgi apparatus, vesicles           | SH-SY5Y  | golgi appSiHa                      | golgi apparatus, vesicles                  |
| vesicles                            | HEK 293  | vesicles, A549                     | vesicles, aggresome                        |
| nucleoplasm, cytosol                |          |                                    |                                            |
| nucleoplasm                         |          |                                    |                                            |
| nucleoplasm                         | HEK 293  | nucleoplaRH-30                     | nucleoplasm                                |
| nucleoplasm                         | SiHa     | nucleoplasm                        |                                            |
| plasma membrane                     |          |                                    |                                            |
| nucleoplasm                         | HEL      | nucleoplaPC-3                      | nucleoplasm                                |
| vesicles                            | MCF7     | vesicles Hep G2                    | vesicles                                   |
| nucleoli, cytosol                   | A-431    | nucleoplaU-251 MG                  | nucleoplasm, nucleoli, cytosol             |
| cytosol                             |          |                                    |                                            |
| nucleoplasm                         | A-431    | nucleoplaA549                      | nucleoplasm                                |
| nucleoplasm                         | HeLa     | nucleoplaSiHa                      | nucleoplasm                                |
| microtubules                        | A-431    | microtubuU-251 MG                  | microtubules                               |
| cytosol                             |          |                                    |                                            |
| microtubules                        | A-431    | microtubuU-251 MG                  | microtubules                               |



|                                        |         |                                        |                                                   |
|----------------------------------------|---------|----------------------------------------|---------------------------------------------------|
| plasma membrane                        |         |                                        |                                                   |
| cytosol                                | A-431   | cytosol                                | U-251 MG cytosol                                  |
| endoplasmic reticulum, cytosol         |         |                                        |                                                   |
| nucleoli fibrillar center              | A549    | nucleoplasm                            | Hep G2 nucleoplasm, nucleoli fibrillar center     |
| cytosol                                | U-251   | MG cytosol                             | Hep G2 vesicles, cytosol                          |
| nucleoplasm                            | MCF7    | nucleoplasm                            | HEK 293 nucleoplasm                               |
| nucleoplasm, cytosol                   | A-431   | nucleoplasm                            | U-251 MG nucleoplasm, plasma membrane, cytosol    |
| nucleoplasm, nucleoli, vesicles        | HeLa    | vesicles                               | SH-SY5Y nucleoli, endoplasmic reticulum, vesicles |
| nucleoplasm                            | A549    | nucleoplasm, cytosol                   |                                                   |
| nuclear speckles                       | RH-30   | nuclear speckles                       | sBJ nucleoplasm, plasma membrane                  |
| nuclear speckles                       | RH-30   | nuclear speckles                       |                                                   |
| intermediate filaments                 | AF22    | intermediate filaments                 |                                                   |
| intermediate filaments                 |         |                                        |                                                   |
| nucleoplasm, mitochondria              | A-431   | nucleoplasm                            | PC-3 nucleoplasm, cytosol                         |
| mitochondria                           | A-431   | mitochondria                           | U-251 MG mitochondria                             |
| nucleoli fibrillar center              | A-431   | nucleoli                               | U-251 MG nucleoli fibrillar center                |
| nuclear speckles, aggregates           | A-431   | nucleoplasm                            |                                                   |
| nuclear speckles, plasma membrane      | A-431   | nuclear speckles                       | U-251 MG nuclear speckles, plasma membrane        |
| nuclear speckles, plasma membrane      |         |                                        |                                                   |
| golgi apparatus                        |         |                                        |                                                   |
| nucleoplasm                            | U-251   | MG nucleoplasm                         |                                                   |
| nucleoplasm                            | A-431   | nucleoplasm                            | PC-3 nucleoplasm                                  |
| nucleoplasm, plasma membrane           | HeLa    | nucleoplasm, cytosol                   |                                                   |
| vesicles                               |         |                                        |                                                   |
| vesicles                               | A-431   | vesicles                               |                                                   |
| nucleoplasm, focal adhesions           | U-251   | MG nucleoplasm, cytosol                | SH-SY5Y nucleoplasm, cytosol                      |
| nucleoplasm                            | U-251   | MG nucleoplasm, cytosol                |                                                   |
| nucleoli fibrillar center              | A-431   | nucleoli                               | U-251 MG nucleoli fibrillar center, vesicles      |
| vesicles                               | A549    | vesicles                               |                                                   |
| nucleoplasm, nucleoli, golgi apparatus | A-431   | nucleoplasm, golgi apparatus, cytosol  | U-251 MG nucleoplasm, golgi apparatus, cytosol    |
| nucleoplasm                            | A-431   | nucleoplasm                            | U-251 MG nucleoplasm                              |
| vesicles                               | SiHa    | vesicles                               |                                                   |
| nuclear speckles                       | A-431   | nuclear speckles                       | U-251 MG nuclear speckles                         |
| nucleoli                               |         |                                        |                                                   |
| nucleoplasm, vesicles, cytosol         | MCF7    | nucleoplasm, vesicles, cytosol         |                                                   |
| nucleoli                               | RH-30   | nucleoli                               | AF22 nucleoli                                     |
| actin filaments, focal adhesions       | A-431   | nucleoplasm                            | U-251 MG focal adhesion sites                     |
| nucleoli, cytosol                      | A-431   | nucleoli, cytosol                      | U-251 MG nucleoli, cytosol                        |
| nucleoplasm                            | SH-SY5Y | nucleoplasm                            | HAP1 nucleoplasm                                  |
| nuclear membrane, vesicles             | RT4     | nuclear membrane, vesicles             | U-2 OS nuclear membrane, vesicles                 |
| vesicles                               | A-431   | nuclear membrane, vesicles             |                                                   |
| vesicles                               | A-431   | nucleoplasm                            | U-251 MG nucleoplasm                              |
| golgi apparatus                        | PC-3    | golgi apparatus, cytosol               |                                                   |
| golgi apparatus                        |         |                                        |                                                   |
| plasma membrane                        |         |                                        |                                                   |
| nucleoplasm                            |         |                                        |                                                   |
| nucleoplasm                            |         |                                        |                                                   |
| nucleoli, plasma membrane              | PC-3    | plasma membrane                        | RPTEC TER plasma membrane                         |
| golgi apparatus, vesicles              | SH-SY5Y | golgi apparatus, vesicles              |                                                   |
| nucleoplasm, nucleoli                  | A-431   | nucleoplasm                            | U-251 MG nucleoplasm                              |
| nucleoplasm, nucleoli fibrillar center | U-2 OS  | nucleoplasm, nucleoli fibrillar center | Hep G2 nucleoplasm, nucleoli fibrillar center     |
| nucleoplasm                            | MCF7    | nucleoplasm                            | SiHa nucleoplasm                                  |
| nucleoplasm                            | MCF7    | nucleoplasm                            |                                                   |
| nucleoplasm, nucleoli                  | RH-30   | nucleoplasm, nucleoli                  | PC-3 nucleoplasm, nucleoli                        |
| nucleoplasm, plasma membrane           | SiHa    | plasma membrane, cytosol               | meASC TERT1 plasma membrane, cytosol              |

|                                        |           |                                           |          |                                        |
|----------------------------------------|-----------|-------------------------------------------|----------|----------------------------------------|
| endoplasmic reticulum                  | A-431     | endoplasm                                 | U-251 MG | endoplasmic reticulum, vesicles        |
| vesicles                               | A-431     | vesicles                                  | U-251 MG | vesicles                               |
| nucleoplasm                            | HEK 293   | nucleopla                                 | Hep G2   | nucleoplasm, nucleoli, cytosol         |
| nucleoplasm, plasma membrane           | HeLa      | nucleopla                                 | Hep G2   | nucleoplasm                            |
| nucleoplasm                            | U-251 MG  | nucleopla                                 | MCF7     | nucleoplasm                            |
| nucleoplasm                            | A-431     | nucleopla                                 | PC-3     | nucleoplasm                            |
| cytosol                                | A-431     | cytosol                                   | U-251 MG | cytosol                                |
| centrosome                             | A-431     | nucleopla                                 | U-251 MG | nucleoplasm                            |
| nucleoplasm                            | A-431     | nucleopla                                 | U-251 MG | nucleoplasm, cytosol                   |
| nucleoplasm                            | A-431     | nucleopla                                 | RH-30    | nucleoplasm                            |
| nucleoplasm, plasma membrane           | A-431     | nucleopla                                 | U-251 MG | nucleoplasm, plasma membrane, cytosol  |
| nucleoplasm                            | SH-SY5Y   | nucleopla                                 | BJ       | nucleoplasm                            |
| nucleoplasm, nucleoli                  | A-431     | nucleopla                                 | U-251 MG | nucleoplasm, nucleoli                  |
| mitochondria                           | A-431     | mitochondria                              |          |                                        |
| nucleoplasm, cytosol                   | A-431     | nucleopla                                 | U-251 MG | nucleoplasm, cytosol                   |
| nucleoplasm, cytosol                   | A-431     | nucleopla                                 | U-251 MG | nucleoplasm, cytosol                   |
| nucleoplasm                            |           |                                           |          |                                        |
| nucleoplasm, nuclear bodies            | HEK 293   | nucleopla                                 | PC-3     | nucleoplasm, nuclear bodies            |
| nucleoplasm, nuclear bodies            | U-2 OS    | nucleopla                                 | A-431    | nucleoplasm, nuclear bodies            |
| cytosol                                |           |                                           |          |                                        |
| centriolar satellite                   | SH-SY5Y   | centriola                                 | RH-30    | centriolar satellite                   |
| nucleoplasm                            |           |                                           |          |                                        |
| nucleoplasm                            |           |                                           |          |                                        |
| vesicles                               | U-251 MG  | vesicles                                  | RH-30    | vesicles                               |
| nucleoplasm, nuclear bodies            | A-431     | nucleopla                                 | U-251 MG | nucleoplasm, nuclear bodies            |
| nucleoplasm, vesicles                  | U-251 MG  | nucleopla                                 | SiHa     | nucleoplasm, vesicles                  |
| nucleoplasm                            | U-2 OS    | nucleopla                                 | A-431    | nucleoplasm                            |
| nucleoplasm                            | A-431     | nucleoplasm, cytosol                      |          |                                        |
| nucleoplasm, cytosol                   | MCF7      | nucleopla                                 | HeLa     | nucleoplasm                            |
| cytosol                                | A-431     | cytosol                                   | A549     | golgi apparatus, plasma membrane, cyto |
| cytosol                                | A549      | golgi apparatus, plasma membrane, cytosol |          |                                        |
| plasma membrane, cytosol               | A-431     | plasma me                                 | U-251 MG | plasma membrane, cytosol               |
| cytosol                                |           |                                           |          |                                        |
| nucleoplasm, cytosol                   | A-431     | nucleopla                                 | U-251 MG | nucleoplasm, plasma membrane, cytosol  |
| cytosol                                | A-431     | plasma me                                 | U-251 MG | plasma membrane, cytosol               |
| nuclear membrane                       | A-431     | nuclear m                                 | U-251 MG | nuclear membrane                       |
| endoplasmic reticulum                  |           |                                           |          |                                        |
| intermediate filaments                 | U-251 MG  | intermediate filaments                    |          |                                        |
| endoplasmic reticulum                  | MCF7      | endoplasm                                 | SiHa     | endoplasmic reticulum                  |
| cytosol                                | A-431     | golgi app                                 | U-251 MG | golgi apparatus, cytosol               |
| nuclear speckles, cytosol              |           |                                           |          |                                        |
| nucleoplasm, endoplasmic r             | SH-SY5Y   | nucleoplasm, endoplasmic reticulum        |          |                                        |
| nucleoplasm, vesicles                  | SH-SY5Y   | nucleoplasm, vesicles                     |          |                                        |
| nuclear bodies                         | MCF7      | nuclear b                                 | SH-SY5Y  | nuclear bodies                         |
| plasma membrane, cytosol               | A-431     | plasma membrane, cytosol                  |          |                                        |
| nuclear bodies, cell junct             | U-2 OS    | golgi app                                 | SiHa     | cell junctions                         |
| nucleoplasm, mitochondria              | A-431     | nucleopla                                 | U-251 MG | nucleoplasm, cytosol                   |
| nuclear membrane, vesicles             | SK-MEL-30 | nucleoplasm, nuclear membrane, vesicles   |          |                                        |
| nucleoplasm, vesicles, mitotic spindle |           |                                           |          |                                        |
| nucleoplasm, golgi apparatus           | SH-SY5Y   | nucleopla                                 | AF22     | nucleoplasm                            |
| vesicles                               | A-431     | vesicles                                  | U-251 MG | vesicles                               |
| nuclear bodies                         | MCF7      | nuclear b                                 | SH-SY5Y  | nuclear bodies                         |
| nucleoplasm, cytosol                   | A-431     | nucleopla                                 | U-251 MG | nucleoplasm, cytosol                   |
| nucleoplasm                            | U-2 OS    | nucleopla                                 | SH-SY5Y  | nucleoplasm, cytosol                   |
| microtubules                           | A-431     | microtubu                                 | U-251 MG | microtubules                           |

|                             |           |                                          |                                       |
|-----------------------------|-----------|------------------------------------------|---------------------------------------|
| aggresome                   | RH-30     | vesicles                                 |                                       |
| nucleoplasm, nuclear membr  | U-2 OS    | nucleoplaRH-30                           | nucleoplasm, nuclear membrane         |
| nucleoplasm, cytosol        | HEK 293   | nucleoplaPC-3                            | nucleoplasm, vesicles                 |
| nucleoplasm, nucleoli       | U-2 OS    | nucleoplaRH-30                           | nucleoplasm, nucleoli                 |
| nucleoplasm, golgi apparat  | SK-MEL-30 | nucleoplasm, golgi apparatus,            | plasma membrane                       |
| nuclear speckles            | A-431     | nuclear sU-251 MG                        | nuclear speckles                      |
| mitochondria                | U-251 MG  | nucleoplaMCF7                            | mitochondria                          |
| nucleoplasm, aggresome      | U-2 OS    | nucleoplaRH-30                           | nucleoplasm                           |
| nucleoplasm, cytosol        | SH-SY5Y   | nucleoplaSK-MEL-30                       | nucleoplasm                           |
| microtubules                | U-2 OS    | cytosol Hep G2                           | cytosol                               |
| nucleoplasm, microtubules   | A-431     | nucleoplaU-251 MG                        | nucleoplasm, microtubules             |
| mitochondria                | A-431     | mitochondU-251 MG                        | mitochondria                          |
| mitochondria                | A-431     | mitochondHeLa                            | mitochondria                          |
| nucleoplasm, nucleoli, mitc | MCF7      | nucleoplasm, nucleoli, nuclear bodies,   | mitochondria                          |
| plasma membrane             | U-251 MG  | plasma membrane, cytosol                 |                                       |
| plasma membrane             | RH-30     | plasma meHaCaT                           | plasma membrane                       |
| cytosol                     | MCF7      | cytosol REH                              | cytosol                               |
| nucleoplasm, cytosol        | A-431     | nucleoplaU-251 MG                        | nucleoplasm, cytosol                  |
| vesicles                    |           |                                          |                                       |
| nucleoplasm, cytosol        | BJ        | nucleoplasm, cytosol                     |                                       |
| nucleoplasm, cytosol        | BJ        | nucleoplasm, cytosol                     |                                       |
| nucleoplasm                 | A-431     | nucleoplaU-251 MG                        | nuclear speckles                      |
| nucleoplasm                 | A-431     | nucleoplaU-251 MG                        | nucleoplasm, nuclear speckles         |
| mitochondria                | U-2 OS    | mitochondria                             |                                       |
| plasma membrane             | U-251 MG  | endoplasmRH-30                           | plasma membrane                       |
| vesicles, cytosol           | HeLa      | endoplasmic reticulum, vesicles, cytosol |                                       |
| cytosol                     | A-431     | cytosol U-251 MG                         | cytosol                               |
| cytosol                     | SH-SY5Y   | cytosol                                  |                                       |
| nucleoplasm                 | A-431     | nucleoplaHEK 293                         | nucleoplasm                           |
| nuclear speckles, cytosol   | RH-30     | nuclear speckles                         |                                       |
| cytosol                     |           |                                          |                                       |
| nucleoplasm, cytosol        | A-431     | nucleoplaU-251 MG                        | nucleoplasm, cytosol                  |
| nuclear bodies, vesicles    | A549      | nucleoplaRH-30                           | vesicles                              |
| plasma membrane, cytosol    | A-431     | plasma meU-251 MG                        | plasma membrane, cytosol              |
| plasma membrane             | SiHa      | plasma membrane                          |                                       |
| nucleoplasm, cytosol        | A-431     | nucleoplaU-251 MG                        | intermediate filaments, cytosol       |
| nucleoplasm, nucleoli fibr  | A-431     | nucleoplaU-251 MG                        | nucleoplasm, nucleoli fibrillar cente |
| cytosol                     |           |                                          |                                       |
| microtubules, cytosol       | A-431     | microtubuU-251 MG                        | microtubules, cytosol                 |
| vesicles, cytosol           | A-431     | vesicles, cytosol                        |                                       |
| vesicles                    | A-431     | vesicles U-251 MG                        | vesicles, plasma membrane             |
| focal adhesion sites        | U-251 MG  | focal adhesion sites                     |                                       |
| nucleoplasm, nuclear bodie  | A-431     | nucleoplaU-251 MG                        | nucleoplasm, nuclear bodies, cytosol  |
| nucleoplasm, nuclear bodie  | U-251 MG  | nucleoplasm, nuclear bodies              |                                       |
| nucleoplasm, cytosol        | A-431     | nucleoplaU-251 MG                        | nucleoplasm, cytosol                  |
| nucleoplasm                 | HeLa      | nucleoplaSiHa                            | nucleoplasm                           |
| nuclear speckles, cytosol   | A-431     | nuclear sU-251 MG                        | nuclear speckles                      |
| cytosol                     | A-431     | plasma meU-251 MG                        | plasma membrane, cytosol              |
| centriolar satellite, rods  | A-431     | centriolaU-251 MG                        | centriolar satellite                  |
| nucleoli                    | U-2 OS    | nucleoli U-251 MG                        | nucleoli                              |
| nucleoplasm, cytosol        | A-431     | nucleoplaHEK 293                         | nucleoplasm, golgi apparatus          |
| nucleoplasm                 | HEL       | nucleoplaPC-3                            | nucleoplasm                           |
| golgi apparatus             | A-431     | golgi appU-251 MG                        | golgi apparatus                       |
| cytosol                     |           |                                          |                                       |
| nucleoplasm, cytosol        | A-431     | nucleoplaU-251 MG                        | nucleoplasm, cytosol                  |

|                                        |           |                                              |           |                                              |
|----------------------------------------|-----------|----------------------------------------------|-----------|----------------------------------------------|
| endoplasmic reticulum, cyto            | A-431     | golgi apparatus                              | ASC TERT1 | endoplasmic reticulum, cytosol               |
| nuclear membrane, vesicles             | A-431     | nuclear membrane                             | Hep G2    | nuclear membrane                             |
| cytosol                                | HEK 293   | cytosol                                      |           |                                              |
| nucleoli fibrillar center              | U-251 MG  | nucleoli fibrillar center, cytosol           |           |                                              |
| microtubules                           | U-2 OS    | microtubules                                 | A-431     | microtubules                                 |
| nucleoplasm, nucleoli                  | A-431     | nucleoplasm, nucleoli                        | U-251 MG  | nucleoplasm, nucleoli                        |
| vesicles                               | MCF7      | vesicles                                     | HaCaT     | vesicles                                     |
| vesicles                               | U-2 OS    | vesicles                                     |           |                                              |
| nucleoplasm, plasma membrane           | BJ        | nucleoplasm, plasma membrane, cytosol        | PC-3      | nucleoplasm, plasma membrane, cytosol        |
| nucleoplasm, cytosol                   | HEK 293   | nucleoplasm, cytosol                         | HeLa      | nucleoplasm, cytosol                         |
| nucleoplasm                            | A-431     | nucleoplasm                                  | U-251 MG  | nucleoplasm                                  |
| nucleoplasm                            | U-251 MG  | nucleoplasm                                  |           |                                              |
| nucleoplasm, nuclear membrane          | A-431     | nucleoplasm, nuclear membrane                | U-251 MG  | nucleoplasm, nuclear membrane                |
| lipid droplets                         | A549      | lipid droplets                               |           |                                              |
| nucleoplasm, cell junctions            | A549      | nucleoplasm, cytosol                         |           |                                              |
| nucleoplasm, cytosol                   | A-431     | nucleoplasm, vesicles, cytosol               | U-251 MG  | nucleoplasm, vesicles, cytosol               |
| endoplasmic reticulum, cyto            | A-431     | endoplasmic reticulum, cytosol               | U-251 MG  | endoplasmic reticulum, cytosol               |
| nucleoplasm, nucleoli fibrillar center | HEK 293   | nucleoli fibrillar center                    |           |                                              |
| golgi apparatus                        | U-2 OS    | vesicles                                     | SK-MEL-30 | golgi apparatus                              |
| cytosol                                | A-431     | cytosol                                      | U-251 MG  | cytosol                                      |
| cytosol                                | A-431     | centrosome                                   | U-251 MG  | cytosol                                      |
| centrosome                             | A549      | centrosome                                   |           |                                              |
| nucleoplasm                            |           | nucleoplasm                                  | U-251 MG  | nucleoplasm                                  |
| nucleoplasm                            | A-431     | nucleoplasm                                  | U-251 MG  | nucleoplasm                                  |
| nucleoplasm                            | A-431     | nucleoplasm                                  | U-251 MG  | nucleoplasm                                  |
| nucleoplasm, vesicles                  |           | vesicles, cell junctions                     |           |                                              |
| cell junctions                         | HaCaT     | nucleoplasm                                  |           |                                              |
| nucleoplasm, nuclear bodies            | MCF7      | nucleoplasm                                  | HaCaT     | nucleoplasm                                  |
| nucleoplasm                            | MCF7      | nucleoplasm                                  | HaCaT     | nucleoplasm                                  |
| nucleoli                               | A-431     | nucleoli                                     | U-251 MG  | nucleoli                                     |
| nucleoli                               | MCF7      | nucleoli                                     | HEK 293   | nucleoplasm, nucleoli, cytosol               |
| nucleoplasm                            | A-431     | nucleoplasm                                  | U-251 MG  | nucleoplasm                                  |
| nucleoplasm, nuclear membrane          | A-431     | nucleoplasm, nuclear membrane                | U-251 MG  | nucleoplasm, nuclear membrane                |
| nucleoplasm                            | HEK 293   | nucleoplasm                                  |           |                                              |
| nucleoplasm, cytosol                   | HEK 293   | nucleoplasm, cytosol                         |           |                                              |
| cytosol                                | A-431     | cytosol                                      | U-251 MG  | cytosol                                      |
| vesicles                               | SK-MEL-30 | vesicles                                     |           |                                              |
| nucleoplasm, golgi apparatus           | HeLa      | golgi apparatus, cytosol                     |           |                                              |
| nucleoplasm                            |           |                                              |           |                                              |
| nucleoplasm, centrosome                |           |                                              |           |                                              |
| nucleoplasm, cytosol                   | A-431     | nucleoplasm, cytosol                         | U-251 MG  | nucleoplasm, cytosol                         |
| mitochondria                           | MCF7      | mitochondria                                 |           |                                              |
| nucleoplasm, cytosol                   | A-431     | nucleoplasm, cytosol                         |           |                                              |
| nucleoplasm                            | HEK 293   | nucleoplasm                                  |           |                                              |
| nucleoplasm                            | HEK 293   | nucleoplasm                                  |           |                                              |
| nucleoli, cytosol                      | U-251 MG  | nucleoli                                     |           |                                              |
| cytosol                                | A-431     | cytosol                                      |           |                                              |
| cytosol                                | A-431     | cytosol                                      | U-251 MG  | cytosol                                      |
| focal adhesion sites                   | Hep G2    | focal adhesion sites                         | PC-3      | plasma membrane, focal adhesion sites        |
| nucleoplasm, cytosol                   | A-431     | nucleoplasm, cytosol                         | U-251 MG  | nucleoplasm, cytosol                         |
| plasma membrane                        |           |                                              |           |                                              |
| nucleoplasm                            | A-431     | nucleoplasm, nuclear bodies, golgi apparatus | U-251 MG  | nucleoplasm, nuclear bodies, golgi apparatus |
| plasma membrane, cytosol               | A-431     | plasma membrane                              | K-562     | plasma membrane                              |
| nucleoplasm, vesicles                  | U-251 MG  | nucleoplasm, cytosol                         |           |                                              |
| vesicles                               |           |                                              |           |                                              |

|                                        |           |                                                 |           |                                                  |
|----------------------------------------|-----------|-------------------------------------------------|-----------|--------------------------------------------------|
| nucleoplasm                            | SH-SY5Y   | nucleoplasm                                     | RH-30     | nucleoplasm, plasma membrane                     |
| nucleoplasm, nucleoli                  | MCF7      | nucleoplasm                                     | SiHa      | nucleoplasm, nucleoli                            |
| golgi apparatus                        | HEK 293   | golgi apparatus                                 | PC-3      | golgi apparatus                                  |
| nucleoplasm                            | RT4       | nucleoplasm                                     | U-2 OS    | nucleoplasm                                      |
| nucleoplasm, mitotic spindle           | RT4       | nucleoplasm, centrosome                         |           |                                                  |
| nucleoplasm, mitochondria              | A-431     | nucleoplasm, mitochondria, cytosol              | TER       |                                                  |
| plasma membrane                        |           |                                                 |           |                                                  |
| intermediate filaments                 | A-431     | intermediate filaments                          | U-251 MG  | cytosol                                          |
| centrosome                             | Hep G2    | centrosome                                      | AF22      | centrosome                                       |
| plasma membrane, cytosol               | A-431     | cytosol                                         | U-251 MG  | plasma membrane, cytosol                         |
| nucleoplasm, nuclear membrane          | A549      | nucleoplasm, nuclear membrane, nucleoli         | PC-3      |                                                  |
| nuclear speckles, golgi apparatus      | A-431     | nuclear speckles, golgi apparatus               | U-251 MG  |                                                  |
| nucleoplasm, plasma membrane           | A-431     | plasma membrane, cytosol                        | U-251 MG  |                                                  |
| nucleoli fibrillar center              | HEK 293   | vesicles                                        | SH-SY5Y   | nucleoli fibrillar center, endoplasmic reticulum |
| nuclear membrane, plasma membrane      |           |                                                 |           |                                                  |
| cytosol                                | ASC TERT1 | cytosol                                         | BJ        | golgi apparatus, cytosol                         |
| nucleoplasm                            | A-431     | nucleoplasm                                     | U-251 MG  | nucleoplasm                                      |
| mitochondria                           | U-2 OS    | cytosol                                         | Hep G2    | cytosol                                          |
| mitochondria                           |           |                                                 |           |                                                  |
| nucleoli, vesicles, cytosol            | HEK 293   | nucleoli, vesicles                              |           |                                                  |
| nucleoplasm, nucleoli                  | A-431     | nucleoplasm, nucleoli                           | U-251 MG  |                                                  |
| nucleoplasm, nucleoli fibrillar center | HEK 293   | nucleoli fibrillar center                       | SK-MEL-30 |                                                  |
| nucleoplasm                            | A-431     | nucleoplasm, golgi apparatus                    | Hep G2    |                                                  |
| nucleoplasm, nucleoli                  | U-2 OS    | nucleoplasm, nucleoli                           | U-251 MG  |                                                  |
| nucleoli fibrillar center              | U-251 MG  | nucleoli fibrillar center, plasma membrane      | HEK 293   |                                                  |
| nucleoplasm                            | SH-SY5Y   | nucleoplasm                                     | HAP1      |                                                  |
| nucleoplasm                            | SH-SY5Y   | nucleoplasm                                     | RH-30     |                                                  |
| nucleoplasm                            | SH-SY5Y   | nucleoplasm                                     |           |                                                  |
| nucleoplasm                            | A-431     | nucleoplasm                                     | SH-SY5Y   |                                                  |
| nucleoplasm, cytosol                   | U-251 MG  | nucleoplasm                                     |           |                                                  |
| nucleoplasm, nucleoli                  | MCF7      | nucleoplasm, nucleoli, cell junctions           | HEK 293   |                                                  |
| cytosol                                | A-431     | cytosol                                         | HeLa      | cytosol                                          |
| cytosol                                | U-251 MG  | cytosol                                         |           |                                                  |
| nucleoplasm                            | ASC TERT1 | nucleoplasm                                     | BJ        | nucleoplasm                                      |
| nuclear bodies, plasma membrane        | MCF7      | nuclear bodies, plasma membrane, cell junctions | HaCaT     |                                                  |
| nucleoplasm, cytosol                   | A-431     | nucleoplasm, cytosol                            | U-251 MG  |                                                  |
| nucleoplasm                            | SH-SY5Y   | nucleoplasm                                     | SK-MEL-30 |                                                  |
| nucleoplasm                            | A-431     | nucleoplasm                                     | PC-3      |                                                  |
| nucleoplasm, cytosol                   | SH-SY5Y   | nucleoplasm                                     | RH-30     |                                                  |
| cytosol                                | PC-3      | cytosol                                         |           |                                                  |
| cytosol                                | SiHa      | cytosol                                         | PC-3      | cytosol                                          |
| nucleoplasm                            | A-431     | nucleoplasm                                     | U-251 MG  | nucleoplasm                                      |
| nucleoplasm                            | A-431     | nucleoplasm                                     | U-251 MG  | nucleoplasm                                      |
| cytosol                                | A-431     | cytosol                                         | U-251 MG  | cytosol                                          |
| endoplasmic reticulum                  |           |                                                 |           |                                                  |
| vesicles, cytosol                      | A549      | vesicles                                        | HaCaT     | cytosol                                          |
| nucleoplasm, nucleoli                  | A-431     | nucleoplasm, cell junctions                     | HaCaT     |                                                  |
| nucleoplasm, plasma membrane           | U-2 OS    | nucleoplasm, cytosol                            | SiHa      |                                                  |
| nucleoplasm                            | U-2 OS    | nucleoplasm                                     | SiHa      |                                                  |
| cytosol                                | U-251 MG  | vesicles, cytosol                               | SK-MEL-30 |                                                  |
| nucleoplasm, vesicles                  | MCF7      | nucleoplasm, vesicles, cytosol                  | SH-SY5Y   |                                                  |
| nucleoplasm, cytoplasmic bodies        | A-431     | cytoplasmic bodies                              | SK-MEL-30 |                                                  |
| actin filaments, cytosol               | A-431     | cytosol                                         |           |                                                  |
| cytosol                                | HEK 293   | cytosol                                         | HeLa      | cytosol                                          |
| vesicles                               | HeLa      | nucleoplasm                                     | PC-3      | nucleoplasm                                      |

|                                        |           |                                        |                           |
|----------------------------------------|-----------|----------------------------------------|---------------------------|
| nucleoplasm                            | SH-SY5Y   | nucleoplasm, cytosol                   |                           |
| nucleoli fibrillar center              | A549      | nucleoplasm, cytosol                   | nucleoli fibrillar center |
| nucleoplasm, nucleoli, cytosol         | U-2 OS    | nucleoli, PC-3                         | nucleoli, cytosol         |
| nucleoli, cytosol                      | Hep G2    | nucleoli, RH-30                        | nucleoli, cytosol         |
| nuclear speckles                       | A-431     | nuclear speckles                       |                           |
| nucleoplasm, nucleoli, cytosol         | PC-3      | nucleoplasm, nucleoli, cytosol         |                           |
| nucleoplasm, cytosol                   | A-431     | plasma membrane                        | nucleoplasm, cytosol      |
| plasma membrane                        |           |                                        |                           |
| plasma membrane                        |           |                                        |                           |
| cell junctions                         |           |                                        |                           |
| cytosol                                | AF22      | cytosol                                |                           |
| plasma membrane, actin filaments       | A-431     | plasma membrane                        | plasma membrane           |
| mitochondria                           | A-431     | mitochondria                           | mitochondria              |
| nucleoplasm, cytosol                   | U-251 MG  | nucleoplasm, cytosol                   |                           |
| vesicles, centriolar satellite         |           |                                        |                           |
| vesicles, centriolar satellite         |           |                                        |                           |
| vesicles, centriolar satellite         |           |                                        |                           |
| nucleoplasm                            | U-251 MG  | nucleoplasm                            | nucleoplasm               |
| nucleoplasm, nucleoli, plasma membrane | A-431     | nucleoplasm, nucleoli, plasma membrane |                           |
| nucleoplasm, cytosol                   | U-251 MG  | nucleoplasm, cytosol                   |                           |
| mitochondria                           | MCF7      | mitochondria                           | cytosol                   |
| nuclear bodies                         | A-431     | nuclear bodies                         | nuclear bodies            |
| centrosome                             | A-431     | centrosome                             | centrosome                |
| centrosome                             |           |                                        |                           |
| golgi apparatus, cytosol               | RH-30     | vesicles                               |                           |
| nucleoplasm                            | U-2 OS    | nucleoplasm, vesicles                  |                           |
| nucleoplasm                            |           |                                        |                           |
| cytosol                                |           |                                        |                           |
| nucleoplasm                            | A-431     | nucleoplasm                            | nucleoplasm               |
| nucleoplasm, cytosol                   |           |                                        |                           |
| microtubules                           | MCF7      | microtubules                           |                           |
| nucleoplasm                            | U-251 MG  | nucleoplasm                            |                           |
| nucleoplasm                            | RH-30     | nucleoplasm                            |                           |
| nucleoplasm                            | A-431     | nucleoplasm                            | nucleoplasm               |
| nucleoplasm                            | A-431     | nucleoplasm                            | nucleoplasm               |
| plasma membrane                        | ASC TERT1 | plasma membrane                        |                           |
| nucleoplasm                            | U-251 MG  | nucleoplasm                            | nucleoplasm               |
| nucleoplasm                            | MCF7      | nucleoplasm                            | nucleoplasm               |
| nucleoplasm                            | A-431     | nucleoplasm                            | nucleoplasm               |
| cytosol                                |           |                                        |                           |
| nucleoplasm                            | A-431     | nucleoplasm                            | nucleoplasm               |
| vesicles                               | A-431     | vesicles                               | vesicles                  |
| endoplasmic reticulum                  | A-431     | endoplasmic reticulum                  | endoplasmic reticulum     |
| cytosol                                | U-251 MG  | cytosol                                |                           |
| nucleoplasm, nuclear membrane          | A-431     | nucleoplasm, nuclear membrane          |                           |
| nucleoplasm, nuclear membrane          | A-431     | nucleoplasm, nuclear membrane          |                           |
| nucleoplasm                            | A-431     | nucleoplasm                            |                           |
| cytosol                                | A-431     | cytosol                                |                           |
| cytosol                                | A-431     | cytosol                                | cytosol                   |
| golgi apparatus, cell junctions        |           |                                        |                           |
| plasma membrane, cytosol               |           |                                        |                           |
| cytosol                                | Hep G2    | cytosol                                | nuclear speckles, cytosol |
| cytosol                                | SH-SY5Y   | cytosol                                |                           |
| nucleoplasm, cytosol                   | A549      | nucleoplasm, cytosol                   |                           |
| nucleoplasm, nuclear bodies            | A-431     | nucleoplasm                            | nucleoplasm               |

plasma membrane, cytokinetic bridge, midbody ring  
 nucleoplasm HeLa nucleoplaPC-3 nucleoplasm  
 nucleoplasm, mitochondria, A-431 nucleoplaU-251 MG nucleoplasm, mitochondria  
 nucleoplasm, mitochondria U-251 MG nucleoplasm, mitochondria  
 nucleoplasm, golgi apparatus A-431 nucleoplaMCF7 nucleoplasm, golgi apparatus  
 cytosol U-251 MG cytosol HEK 293 cytosol  
 cytosol  
 vesicles  
 vesicles  
 nucleoplasm, golgi apparatus U-2 OS nucleoplaHEK 293 nucleoplasm, golgi apparatus  
 nucleoplasm, cytosol U-251 MG nucleoplaHEK 293 nucleoplasm, centriolar satellite, cyt  
 nucleoplasm MCF7 nucleoplaSiHa nucleoplasm, cytosol  
 nucleoplasm, cytosol MCF7 nucleoplaSiHa nucleoplasm, cytosol  
 nucleoplasm SH-SY5Y nucleoplaRH-30 nucleoplasm  
 nuclear bodies A549 nucleoplaHaCaT nuclear bodies  
 intermediate filaments  
 intermediate filaments, cyA-431 intermediate filaments, cytosol  
 endoplasmic reticulum A-431 endoplasmU-251 MG endoplasmic reticulum  
 endoplasmic reticulum A-431 endoplasmU-251 MG endoplasmic reticulum  
 endoplasmic reticulum, cytU-251 MG cytosol  
 cytosol MCF7 vesicles HEK 293 cytosol  
 nucleoplasm, vesicles A-431 nucleoplaA549 nucleoplasm  
 nucleoplasm, nuclear membrA-431 nucleoplaU-251 MG nucleoplasm, nuclear membrane  
 nucleoplasm HEK 293 nucleoplaPC-3 nucleoplasm  
 nucleoplasm HEK 293 nucleoplaRH-30 nucleoplasm  
 nucleoplasm A549 nucleoplasm  
 nucleoplasm A-431 nucleoplaU-251 MG nucleoplasm  
 nucleoplasm, cytosol MCF7 nucleoplasm, cytosol  
 nucleoplasm, cytosol MCF7 nucleoplasm, cytosol  
 cytosol A-431 cytosol U-251 MG cytosol  
 nucleoplasm A-431 nucleoplaU-251 MG nucleoplasm  
 nucleoplasm, golgi apparatus U-251 MG nucleoplaRH-30 nucleoplasm, golgi apparatus, vesicles  
 nucleoplasm, vesicles A-431 nucleoplaHUVEC TER nuclear speckles, vesicles  
 mitochondria A-431 mitochondU-251 MG mitochondria  
 nucleoplasm A-431 nucleoplaU-251 MG nucleoplasm  
 vesicles A-431 vesicles, microtubules  
 nucleoplasm PC-3 nucleoplasm, vesicles  
 nucleoplasm, endoplasmic rPC-3 nucleoplasm, vesicles  
 nucleoplasm, nuclear bodieBJ nucleoplasm  
 vesicles A-431 vesicles U-251 MG vesicles  
 nucleoplasm, centriolar sU-2 OS nucleoplaHep G2 nucleoplasm  
 mitochondria A-431 nucleoplaU-251 MG nucleoplasm, mitochondria  
 centriolar satellite REH centriolar satellite  
 nucleoplasm  
 cytosol MCF7 cytosol PC-3 cytosol  
 nucleoplasm A-431 nucleoplaU-251 MG nucleoplasm  
 mitochondria PC-3 nucleoli, mitochondria  
 nuclear speckles, cytosol A-431 nuclear sU-251 MG nuclear speckles, cytosol  
 nuclear speckles A-431 nuclear sU-251 MG nuclear speckles  
 endoplasmic reticulum A-431 endoplasmMCF7 endoplasmic reticulum  
 nucleoplasm, cytosol A-431 nucleoplaHEK 293 nucleoplasm, cytosol  
 vesicles U-2 OS vesicles PC-3 vesicles  
 nucleoplasm, golgi apparatus A-431 nucleoplaU-251 MG nucleoplasm, golgi apparatus  
 actin filaments, cytosol A-431 actin filU-251 MG actin filaments, focal adhesion sites  
 cytosol HEK 293 cytosol SH-SY5Y cytosol

|                                        |          |                                       |           |                                                  |
|----------------------------------------|----------|---------------------------------------|-----------|--------------------------------------------------|
| cytosol                                | HEK 293  | cytosol                               | SH-SY5Y   | cytosol                                          |
| nuclear speckles                       | U-2 OS   | nuclear                               | sMCF7     | nuclear speckles                                 |
| cytosol                                | HEK 293  | cytosol                               |           |                                                  |
| centrosome                             | HEK 293  | cytosol                               |           |                                                  |
| cytoplasmic bodies                     |          |                                       |           |                                                  |
| vesicles, cytosol                      | A-431    | vesicles, cytosol                     |           |                                                  |
| vesicles                               | A-431    | vesicles                              | U-251 MG  | vesicles, plasma membrane                        |
| nucleoplasm, vesicles                  | A549     | nucleoplasm, vesicles                 |           |                                                  |
| nucleoplasm, vesicles                  | SH-SY5Y  | nucleopla                             | RH-30     | nucleoplasm, vesicles                            |
| nucleoplasm                            |          |                                       |           |                                                  |
| nucleoplasm                            |          |                                       |           |                                                  |
| nucleoplasm, cytosol                   | A-431    | nucleopla                             | U-251 MG  | nucleoplasm                                      |
| nucleoplasm                            | A-431    | nucleopla                             | U-251 MG  | nucleoplasm                                      |
| nucleoplasm                            | A-431    | nucleopla                             | U-251 MG  | nucleoplasm                                      |
| nucleoplasm, mitochondria              | A-431    | nucleopla                             | U-251 MG  | nucleoplasm, mitochondria                        |
| actin filaments                        | A-431    | actin filaments                       |           |                                                  |
| vesicles                               | U-251 MG | vesicles                              |           |                                                  |
| nucleoplasm, plasma membrane           | SiHa     | plasma membrane                       | ASC TERT1 | plasma membrane, cytosol                         |
| nucleoplasm, cytosol                   | A-431    | nucleopla                             | U-251 MG  | nucleoplasm, cytosol                             |
| vesicles                               | SiHa     | vesicles                              | REH       | vesicles                                         |
| microtubules, mitochondria             | SiHa     | mitochondria                          |           |                                                  |
| plasma membrane                        | A-431    | plasma membrane                       | U-251 MG  | plasma membrane, cytosol                         |
| cytosol                                | A-431    | centrosome                            | U-251 MG  | centrosome, cytosol                              |
| nucleoli                               |          |                                       |           |                                                  |
| intermediate filaments                 | RH-30    | intermediate filaments                |           |                                                  |
| cytosol                                | PC-3     | cytosol                               |           |                                                  |
| nucleoplasm, centrosome                | A-431    | nucleopla                             | RH-30     | nucleoplasm, centrosome                          |
| nucleoplasm                            | RH-30    | nucleoplasm                           |           |                                                  |
| nucleoplasm, centrosome                | MCF7     | nucleopla                             | PC-3      | nucleoplasm, nucleoli                            |
| nucleoplasm, actin filaments           | A-431    | nucleopla                             | MCF7      | nucleoplasm, actin filaments                     |
| nucleoplasm, golgi apparatus           | A-431    | nucleopla                             | U-251 MG  | nucleoplasm, golgi apparatus                     |
| nucleoplasm, golgi apparatus           |          |                                       |           |                                                  |
| plasma membrane, cytosol               | U-251 MG | plasma membrane, focal adhesion sites |           |                                                  |
| nucleoli fibrillar center              | HEK 293  | vesicles                              | SH-SY5Y   | nucleoli fibrillar center, endoplasmic reticulum |
| nucleoplasm                            | A-431    | nucleopla                             | U-251 MG  | nucleoplasm                                      |
| nucleoplasm, cytosol                   | U-251 MG | nucleoplasm, cytosol                  |           |                                                  |
| nuclear bodies                         | MCF7     | nucleoplasm, nuclear bodies           |           |                                                  |
| mitochondria                           | A-431    | mitochondria                          | A549      | mitochondria                                     |
| endoplasmic reticulum                  |          |                                       |           |                                                  |
| nucleoplasm                            | HEK 293  | nucleoplasm                           |           |                                                  |
| centrosome                             | A-431    | centrosome                            | U-251 MG  | centrosome                                       |
| nucleoplasm, nucleoli, plasma membrane | A-431    | nucleopla                             | U-251 MG  | nucleoplasm, plasma membrane, cytosol            |
| nucleoplasm                            |          |                                       |           |                                                  |
| nucleoplasm                            |          |                                       |           |                                                  |
| plasma membrane                        | A-431    | vesicles, plasma membrane             |           |                                                  |
| nucleoplasm                            |          |                                       |           |                                                  |
| nuclear speckles                       | A-431    | nuclear speckles                      | U-251 MG  | nuclear speckles                                 |
| nucleoplasm, cytosol                   | A-431    | cytosol                               | U-251 MG  | cytosol                                          |
| actin filaments, cytosol               | A-431    | cytosol                               | U-251 MG  | cytosol                                          |
| nucleoplasm                            | U-2 OS   | nucleopla                             | U-251 MG  | nuclear bodies                                   |
| nucleoplasm                            | HEK 293  | nucleoplasm                           |           |                                                  |
| vesicles                               |          |                                       |           |                                                  |
| golgi apparatus                        | Hep G2   | golgi apparatus                       | RH-30     | golgi apparatus                                  |
| nuclear speckles                       | A-431    | nuclear speckles, centrosome          | SiHa      | nuclear speckles, centrosome                     |
| plasma membrane, cytosol               | A-431    | plasma membrane, cytosol              | U-251 MG  | cytosol                                          |



|                                                    |           |                                                    |                                        |
|----------------------------------------------------|-----------|----------------------------------------------------|----------------------------------------|
| nucleoplasm                                        | A-431     | nucleoplaU-251 MG                                  | nucleoplasm                            |
| nucleoplasm, nucleoli                              | A-431     | nucleoplaU-251 MG                                  | nucleoplasm, nucleoli                  |
| plasma membrane, cytosol                           | A-431     | plasma meU-251 MG                                  | plasma membrane, cytosol               |
| nuclear membrane, vesicles                         | RT4       | nuclear mU-2 OS                                    | nuclear membrane, vesicles             |
| nucleoplasm                                        | U-251 MG  | nucleoplaRH-30                                     | nucleoplasm                            |
| nucleoplasm, cytosol                               | A-431     | nucleoplaU-251 MG                                  | nucleoplasm                            |
| microtubules                                       | MCF7      | microtubuSiHa                                      | microtubules, cytokinetic bridge, cent |
| plasma membrane                                    |           |                                                    |                                        |
| vesicles                                           | A-431     | vesicles, cell junctions                           |                                        |
| plasma membrane                                    | AF22      | plasma membrane                                    |                                        |
| plasma membrane, cell junctions                    | U-251 MG  | plasma meBJ                                        | plasma membrane, cell junctions        |
| vesicles                                           | HaCaT     | vesicles                                           |                                        |
| nucleoplasm, cytosol                               | A-431     | nucleoplaHEK 293                                   | nucleoplasm, cytosol                   |
| cytosol                                            | A-431     | cytosol                                            |                                        |
| cytosol                                            | U-251 MG  | cytosol                                            |                                        |
| nucleoplasm, cytosol                               | A-431     | nucleoplasm                                        |                                        |
| nucleoplasm, cytosol                               | HeLa      | nucleoplaPC-3                                      | nucleoplasm, cytosol                   |
| plasma membrane, cytosol                           | A-431     | nucleoplaU-251 MG                                  | plasma membrane, cytosol               |
| actin filaments, focal adhesion sites              | A-431     | actin filU-251 MG                                  | actin filaments, focal adhesion sites  |
| nucleoplasm, actin filaments, focal adhesion sites | U-251 MG  | nucleoplasm, actin filaments, focal adhesion sites |                                        |
| plasma membrane, actin filaments, cytosol          | A-431     | plasma meU-251 MG                                  | plasma membrane, actin filaments, cyto |
| plasma membrane, actin filaments, cytosol          | A-431     | plasma meU-251 MG                                  | plasma membrane, actin filaments, cyto |
| plasma membrane, actin filaments, cytosol          | A-431     | plasma meU-251 MG                                  | plasma membrane, actin filaments, cyto |
| golgi apparatus                                    | A-431     | golgi appU-251 MG                                  | golgi apparatus                        |
| golgi apparatus                                    | U-251 MG  | golgi apparatus                                    |                                        |
| nucleoplasm, cytosol                               | SiHa      | nucleoplasm, nucleoli                              |                                        |
| nucleoplasm, plasma membrane, cytosol              | A-431     | nucleoplaU-251 MG                                  | nucleoplasm, cytosol                   |
| nucleoplasm                                        | U-2 OS    | nucleoplaHeLa                                      | nucleoplasm, cytosol                   |
| plasma membrane, cytosol                           | A-431     | plasma meU-251 MG                                  | cytosol                                |
| vesicles                                           | A-431     | vesicles U-251 MG                                  | vesicles                               |
| nuclear membrane, golgi apparatus, cytosol         | U-251 MG  | nuclear membrane                                   |                                        |
| cytosol                                            | A-431     | cytosol U-251 MG                                   | cytosol                                |
| nucleoplasm                                        | MCF7      | nucleoplaPC-3                                      | nucleoplasm, nuclear bodies            |
| nuclear bodies, plasma membrane, cytosol           |           |                                                    |                                        |
| nucleoplasm                                        | A-431     | nucleoplaU-251 MG                                  | nucleoplasm                            |
| nucleoli fibrillar center                          | A-431     | nucleoli U-251 MG                                  | nucleoli fibrillar center              |
| nucleoplasm, cell junctions                        | MCF7      | nucleoplaHeLa                                      | nucleoplasm, cytosol                   |
| nucleoplasm                                        |           |                                                    |                                        |
| nucleoplasm, nuclear bodies                        | A-431     | nucleoplaU-251 MG                                  | nucleoplasm, nuclear bodies            |
| nucleoplasm, golgi apparatus                       | MCF7      | nucleoplaA549                                      | nucleoplasm, golgi apparatus           |
| nucleoplasm, mitochondria                          | U-2 OS    | nucleoplaHEK 293                                   | nucleoplasm                            |
| nucleoplasm, nucleoli fibrillar center, cytosol    | U-2 OS    | nucleoplaU-251 MG                                  | nucleoplasm, nucleoli fibrillar center |
| nuclear speckles                                   | RH-30     | nuclear sBJ                                        | nuclear speckles                       |
| nucleoplasm, cytosol                               | U-251 MG  | nucleoplasm, nuclear bodies, cytosol               |                                        |
| golgi apparatus                                    | U-2 OS    | nucleoplaPC-3                                      | nucleoplasm, golgi apparatus           |
| nucleoplasm                                        | HEK 293   | nucleoplaRH-30                                     | nucleoplasm                            |
| nucleoplasm                                        |           |                                                    |                                        |
| centriolar satellite                               | SiHa      | centriolaRH-30                                     | nucleoplasm, centriolar satellite      |
| nucleoplasm, cytosol                               | A-431     | nucleoplaU-251 MG                                  | nucleoplasm, cytosol                   |
| microtubules                                       | A-431     | microtubuU-251 MG                                  | microtubules                           |
| vesicles                                           | A-431     | golgi appU-251 MG                                  | golgi apparatus, vesicles              |
| golgi apparatus                                    |           |                                                    |                                        |
| nucleoplasm, cytosol                               | SK-MEL-30 | nucleoplaHaCaT                                     | nucleoplasm, cytosol                   |

nucleoplasm, centrosome, cyU-251 MG centrosome, cytosol  
nucleoplasm, nucleoli, golgSK-MEL-30golgi apparatus  
nucleoplasm, cytosol A-431 nucleoplaU-251 MG nucleoplasm, cytosol  
nucleoplasm, plasma membrPC-3 nucleoplasm, plasma membrane  
plasma membrane, cell junctions, cytosol  
golgi apparatus U-2 OS golgi appRH-30 golgi apparatus  
cytosol A-431 cytosol U-251 MG cytosol  
cytosol  
nucleoplasm, vesicles MCF7 vesicles HeLa nuclear speckles, vesicles  
nucleoplasm, mitochondria A-431 nucleoplaU-251 MG nucleoli, mitochondria  
nuclear speckles A-431 nuclear sU-251 MG nuclear speckles  
nucleoplasm, nucleoli, mitcA-431 nucleoplaU-251 MG nucleoplasm, mitochondria  
cytosol A-431 cytosol U-251 MG cytosol  
cytosol A-431 cytosol U-251 MG cytosol  
plasma membrane MCF7 nucleoplasm, plasma membrane  
nucleoplasm, microtubules, U-251 MG microtubules  
nucleoplasm HeLa nucleoplaHep G2 nucleoplasm  
nucleoplasm  
nuclear speckles, vesiclesA-431 nuclear sMCF7 nuclear speckles  
mitochondria BJ mitochondria  
nuclear speckles HEK 293 nuclear sPC-3 nuclear speckles  
vesicles A-431 vesicles U-251 MG vesicles  
nucleoplasm, nucleoli A-431 nucleoplaU-251 MG nucleoplasm, nucleoli  
nucleoli fibrillar centerA-431 nucleoplaU-251 MG nucleoli fibrillar center, plasma mem  
vesicles  
vesicles  
nuclear membrane A-431 nuclear nPC-3 nuclear membrane  
nuclear speckles A-431 nucleoplaU-251 MG nucleoplasm, cytosol  
nucleoplasm, cytosol A-431 nucleoplaU-251 MG nucleoplasm, cytosol  
nucleoplasm A-431 nucleoplaU-251 MG nucleoplasm, cytosol  
nuclear speckles, microtutA-431 nuclear sHep G2 nuclear speckles, microtubules  
nucleoplasm U-251 MG nucleoplasm  
nucleoplasm, cytosol A-431 nucleoplaU-251 MG nucleoplasm, cytosol  
cytosol A-431 nucleoplasm, cytosol  
nucleoplasm, cytosol A-431 nucleoplaHEK 293 nucleoplasm, cytosol  
nucleoplasm, cytosol A-431 nucleoplaHEK 293 nucleoplasm, cytosol  
plasma membrane, cytosol A-431 plasma meU-251 MG plasma membrane, cytosol  
vesicles A-431 nucleoplaU-251 MG nucleoplasm, vesicles  
nucleoplasm PC-3 nucleoplasm, nucleoli  
nucleoplasm, nucleoli U-2 OS nucleoplaHeLa intermediate filaments  
nucleoplasm, plasma membrA-431 nucleoplaU-251 MG nucleoplasm, plasma membrane  
nucleoplasm  
nucleoplasm, mitochondria  
intermediate filaments A-431 intermediU-251 MG cytosol  
cytosol MCF7 nucleoli, Hep G2 cytosol  
nuclear speckles MCF7 nuclear sA549 nucleoplasm, nuclear bodies  
nucleoplasm Hep G2 nucleoplaPC-3 nucleoplasm  
mitochondria HeLa mitochondSiHa mitochondria  
vesicles SH-SY5Y nucleoplasm, vesicles  
nucleoplasm, cytosol A-431 nucleoplaU-251 MG nucleoplasm, cytosol  
nucleoli HeLa nucleoplaPC-3 nucleoplasm, nucleoli  
nucleoplasm, cytosol A-431 nucleoplaU-251 MG nucleoplasm, cytosol  
vesicles  
nucleoplasm, nuclear membrU-2 OS nucleoplaHaCaT nuclear membrane, cytosol  
vesicles, plasma membrane

|                                            |          |                                            |          |                                            |
|--------------------------------------------|----------|--------------------------------------------|----------|--------------------------------------------|
| nucleoli, cytosol                          | A-431    | nucleoplasm                                | U-2 OS   | nucleoli, cytosol                          |
| nucleoplasm                                | U-2 OS   | cytosol                                    | A-431    | nuclear speckles                           |
| cytosol                                    | A-431    | nucleoli fibrillar center                  | SH-SY5Y  | cytosol                                    |
| nucleoli fibrillar center                  | SH-SY5Y  | peroxisomes                                | A-431    | nucleoli fibrillar center                  |
| peroxisomes                                | A-431    | nucleoplasm                                | A-431    | peroxisomes                                |
| nucleoplasm                                | A-431    | vesicles, centriolar satellite             |          | nucleoplasm                                |
| vesicles, centriolar satellite             |          | plasma membrane                            | REH      | plasma membrane                            |
| plasma membrane                            | REH      | nuclear speckles                           | A-431    | nuclear speckles                           |
| nuclear speckles                           | A-431    | plasma membrane                            |          |                                            |
| plasma membrane                            |          | nucleoplasm                                | A-431    | nucleoplasm                                |
| nucleoplasm                                | A-431    | nucleoplasm, vesicles                      | A-431    | nucleoplasm, vesicles                      |
| nucleoplasm, vesicles                      | A-431    | nuclear membrane                           | U-2 OS   | nuclear membrane                           |
| nuclear membrane                           | U-2 OS   | nucleoplasm, nucleoli                      | A-431    | nucleoplasm, nucleoli                      |
| nucleoplasm, nucleoli                      | A-431    | focal adhesion sites, centriolar satellite | A-431    | focal adhesion sites, centriolar satellite |
| focal adhesion sites, centriolar satellite | A-431    | cytosol                                    | A-431    | cytosol                                    |
| cytosol                                    | A-431    | nucleoplasm, cytosol                       | A-431    | nucleoplasm, cytosol                       |
| nucleoplasm, cytosol                       | A-431    | plasma membrane, actin filament            | HeLa     | plasma membrane                            |
| plasma membrane, actin filament            | HeLa     | nucleoplasm, centrosome                    | A-431    | nucleoplasm, centrosome                    |
| nucleoplasm, centrosome                    | A-431    | nucleoplasm                                | RH-30    | nucleoplasm                                |
| nucleoplasm                                | RH-30    | vesicles                                   | MCF7     | vesicles                                   |
| vesicles                                   | MCF7     | cytosol                                    | A-431    | cytosol                                    |
| cytosol                                    | A-431    | plasma membrane, cytosol                   | A-431    | plasma membrane, cytosol                   |
| plasma membrane, cytosol                   | A-431    | endoplasmic reticulum                      | A549     | endoplasmic reticulum                      |
| endoplasmic reticulum                      | A549     | vesicles                                   | RH-30    | vesicles                                   |
| vesicles                                   | RH-30    | nucleoplasm, vesicles                      | A-431    | nucleoplasm, vesicles                      |
| nucleoplasm, vesicles                      | A-431    | nuclear bodies                             | HEK 293  | nuclear bodies                             |
| nuclear bodies                             | HEK 293  | nucleoplasm                                | HeLa     | nucleoplasm                                |
| nucleoplasm                                | HeLa     | golgi apparatus                            |          |                                            |
| golgi apparatus                            |          | plasma membrane                            | A-431    | golgi apparatus, plasma membrane           |
| plasma membrane                            | A-431    | peroxisomes                                | A-431    | peroxisomes                                |
| peroxisomes                                | A-431    | cytosol                                    | A-431    | cytosol                                    |
| cytosol                                    | A-431    | nucleoli, mitochondria                     | PC-3     | mitochondria                               |
| nucleoli, mitochondria                     | PC-3     | cell junctions                             |          |                                            |
| cell junctions                             |          | nuclear speckles, cytosol                  | U-2 OS   | nuclear speckles, cytosol                  |
| nuclear speckles, cytosol                  | U-2 OS   | cytosol                                    | U-251 MG | cytosol                                    |
| cytosol                                    | U-251 MG | nuclear bodies                             | A-431    | nuclear bodies                             |
| nuclear bodies                             | A-431    | vesicles, microtubules                     | U-251 MG | vesicles                                   |
| vesicles, microtubules                     | U-251 MG | nucleoplasm, vesicles                      | A-431    | nucleoplasm, vesicles                      |
| nucleoplasm, vesicles                      | A-431    | actin filaments, cytosol                   | A-431    | focal adhesion sites, cytosol              |
| actin filaments, cytosol                   | A-431    | actin filaments, cytosol                   | Hep G2   | aggresome, cytosol                         |
| actin filaments, cytosol                   | Hep G2   | nucleoplasm, cytosol                       | BJ       | nucleoplasm, golgi apparatus, cytosol      |
| nucleoplasm, cytosol                       | BJ       | nucleoplasm, golgi apparatus               | RH-30    | golgi apparatus, cytosol                   |
| nucleoplasm, golgi apparatus               | RH-30    | nucleoplasm, golgi apparatus               | RH-30    | golgi apparatus, cytosol                   |
| nucleoplasm, golgi apparatus               | RH-30    | nucleoplasm, plasma membrane               | A-431    | nucleoplasm, cytosol                       |
| nucleoplasm, plasma membrane               | A-431    | nucleoplasm                                | HEK 293  | nucleoplasm                                |
| nucleoplasm                                | HEK 293  | nucleoli                                   | U-251 MG | nucleoplasm, nucleoli                      |
| nucleoli                                   | U-251 MG | nucleoli, endoplasmic reticulum, cytosol   | A-431    | nucleoli, endoplasmic reticulum, cytosol   |
| nucleoli, endoplasmic reticulum, cytosol   | A-431    | endoplasmic reticulum, cytosol             |          |                                            |
| endoplasmic reticulum, cytosol             |          | vesicles                                   | A-431    | vesicles                                   |
| vesicles                                   | A-431    | mitochondria                               | A-431    | mitochondria                               |
| mitochondria                               | A-431    | endoplasmic reticulum, cytosol             | U-2 OS   | endoplasmic reticulum, cytosol             |
| endoplasmic reticulum, cytosol             | U-2 OS   | nucleoplasm                                | U-251 MG | nucleoplasm                                |
| nucleoplasm                                | U-251 MG | nucleoplasm, cytosol                       | A-431    | nucleoplasm, cytosol                       |
| nucleoplasm, cytosol                       | A-431    | nucleoplasm, cytosol                       |          |                                            |
| nucleoplasm, cytosol                       |          |                                            |          |                                            |

|                                 |           |                                           |                                        |
|---------------------------------|-----------|-------------------------------------------|----------------------------------------|
| vesicles                        | A-431     | vesicles U-251 MG                         | vesicles                               |
| cytoplasmic bodies              | RH-30     | cytoplasmic bodies                        |                                        |
| nucleoplasm, cytosol            | A-431     | nucleoplaU-251 MG                         | nucleoplasm, cytosol                   |
| nucleoplasm, cytosol            | A-431     | nucleoplaU-251 MG                         | nucleoplasm, cell junctions, cytosol   |
| cytosol                         |           |                                           |                                        |
| nucleoplasm                     | A-431     | nucleoplaU-251 MG                         | nucleoplasm                            |
| nucleoplasm, centrosome         | RH-30     | nucleoplasm, centrosome                   |                                        |
| mitochondria                    | U-2 OS    | mitochondPC-3                             | mitochondria                           |
| mitochondria                    | U-2 OS    | mitochondria                              |                                        |
| nucleoplasm, nucleoli, golgi    | HEK 293   | nucleoplaSH-SY5Y                          | nucleoplasm, nucleoli, golgi apparatus |
| plasma membrane                 | A-431     | plasma membrane, cell junctions           |                                        |
| plasma membrane, cytosol        | A-431     | plasma meU-251 MG                         | plasma membrane, cytosol               |
| nucleoplasm                     | A-431     | nucleoplaU-251 MG                         | nucleoplasm                            |
| nucleoplasm, nucleoli           | SiHa      | nucleoplaRH-30                            | nucleoplasm                            |
| nucleoplasm                     | A-431     | nucleoplaU-251 MG                         | nucleoplasm                            |
| nucleoplasm, microtubules       | A-431     | nucleoplaU-251 MG                         | nucleoplasm, microtubules              |
| vesicles                        | A-431     | vesicles SH-SY5Y                          | vesicles                               |
| nucleoplasm                     | RH-30     | nucleoplaBJ                               | nucleoplasm                            |
| nucleoli                        | U-2 OS    | nucleoli SH-SY5Y                          | nucleoli                               |
| nucleoplasm                     | RH-30     | nucleoplasm                               |                                        |
| nuclear bodies, plasma membrane | MCF7      | nuclear bA549                             | plasma membrane                        |
| microtubules                    | U-251 MG  | microtubuBJ                               | microtubules                           |
| nucleoplasm, cytosol            | A-431     | nucleoplaHEK 293                          | nucleoplasm, cytosol                   |
| nucleoplasm                     | A-431     | nucleoplaMCF7                             | nucleoplasm                            |
| mitochondria                    | U-251 MG  | mitochondria                              |                                        |
| nuclear speckles, cytosol       | PC-3      | nucleoplaHaCaT                            | nucleoplasm, cytosol                   |
| nucleoplasm                     | AF22      | nucleoplasm, centrosome                   |                                        |
| microtubules                    | A-431     | microtubuU-251 MG                         | microtubules                           |
| vesicles                        | U-251 MG  | vesicles                                  |                                        |
| nucleoplasm, cytosol            | A-431     | nucleoplaU-251 MG                         | nucleoplasm, cytosol                   |
| nucleoli                        | A-431     | nucleoplaU-251 MG                         | nucleoli                               |
| cytosol                         | A-431     | plasma meU-251 MG                         | plasma membrane, cytosol               |
| cytosol                         | A-431     | plasma meU-251 MG                         | plasma membrane, cytosol               |
| plasma membrane, cytosol        |           |                                           |                                        |
| golgi apparatus                 | A-431     | golgi appU-251 MG                         | golgi apparatus                        |
| golgi apparatus                 | U-251 MG  | golgi appRH-30                            | golgi apparatus                        |
| nucleoplasm, centrosome         | U-2 OS    | nucleoplaA-431                            | nucleoplasm                            |
| vesicles, plasma membrane,      | HaCaT     | vesicles, plasma membrane, cell junctions |                                        |
| plasma membrane                 |           |                                           |                                        |
| nuclear speckles                | HEK 293   | nuclear speckles, cytosol                 |                                        |
| nucleoplasm                     | A-431     | nucleoplaA549                             | nucleoplasm, nucleoli fibrillar cente  |
| vesicles                        | RPTEC TER | vesicles, cytokinetic bridge              |                                        |
| nucleoplasm, cytosol            | HEL       | nucleoplasm, plasma membrane, cytosol     |                                        |
| nucleoli                        | RH-30     | nucleoli PC-3                             | nucleoli                               |
| microtubules, cytosol           | A-431     | plasma meU-251 MG                         | microtubules, cytosol                  |
| nucleoli, microtubules, cyto    | A-431     | nucleoli, U-251 MG                        | nucleoli, microtubules, cytosol        |
| nucleoplasm                     | A-431     | nucleoplaU-251 MG                         | nucleoplasm                            |
| plasma membrane, mitochondria   | A-431     | plasma meU-251 MG                         | plasma membrane, mitochondria          |
| nucleoplasm                     | U-251 MG  | nucleoplasm                               |                                        |
| nucleoplasm, vesicles           | A-431     | nucleoplaA549                             | nucleoplasm                            |
| nucleoplasm                     | MCF7      | nucleoplaPC-3                             | nucleoplasm                            |
| nucleoplasm                     | MCF7      | nucleoplaPC-3                             | nucleoplasm                            |
| nucleoplasm, nuclear speck      | SH-SY5Y   | nucleoplaAF22                             | nucleoplasm                            |
| nucleoplasm                     |           |                                           |                                        |
| microtubules                    | A-431     | microtubuU-251 MG                         | microtubules                           |

|                                  |          |                      |                                            |
|----------------------------------|----------|----------------------|--------------------------------------------|
| microtubules                     | U-251 MG | microtubuPC-3        | microtubules                               |
| nucleoplasm                      |          |                      |                                            |
| nucleoplasm                      | A-431    | nucleoplaU-251 MG    | nucleoplasm                                |
| nucleoli, vesicles               | A-431    | nucleoli, U-251 MG   | nucleoli, vesicles                         |
| nucleoplasm                      | U-251 MG | nucleoplaSH-SY5Y     | nucleoplasm                                |
| mitochondria                     | A-431    | mitochondU-251 MG    | mitochondria                               |
| vesicles                         | A-431    | vesicles U-251 MG    | vesicles                                   |
| mitochondria                     | A-431    | mitochondU-251 MG    | mitochondria                               |
| nucleoplasm                      | A-431    | nucleoplaU-251 MG    | nucleoplasm                                |
| plasma membrane, cytosol         | Hep G2   | cytosol              |                                            |
| plasma membrane, cytosol         | Hep G2   | aggresome, cytosol   |                                            |
| cytosol                          | HEK 293  | cytosol SH-SY5Y      | cytosol                                    |
| nucleoplasm, cytosol             | MCF7     | nucleoplaHeLa        | nucleoplasm                                |
| nucleoplasm, aggresome           | U-2 OS   | nucleoplaMCF7        | nucleoplasm, nucleoli                      |
| plasma membrane, cytosol         | A-431    | plasma meU-251 MG    | plasma membrane                            |
| nucleoli fibrillar center        | A-431    | plasma meU-251 MG    | plasma membrane, cytosol                   |
| nucleoplasm, cytosol             |          |                      |                                            |
| nucleoplasm                      | RH-30    | nucleoplaPC-3        | nucleoplasm                                |
| nucleoplasm                      | HaCaT    | nucleoplasm          |                                            |
| nuclear speckles, plasma n       | A-431    | nuclear sPC-3        | nuclear speckles                           |
| nucleoplasm, mitochondria        | A-431    | nucleoplaU-251 MG    | nucleoplasm                                |
| mitochondria                     | A-431    | mitochondU-251 MG    | mitochondria                               |
| nucleoplasm                      | A-431    | nucleoplaU-251 MG    | nucleoplasm                                |
| cytosol                          | A-431    | cytosol PC-3         | cytosol                                    |
| nucleoplasm                      | A-431    | nucleoplaU-251 MG    | nucleoplasm                                |
| nucleoplasm                      | U-251 MG | nucleoplasm          |                                            |
| nucleoplasm, mitochondria        | U-251 MG | nucleoplaHeLa        | nucleoplasm                                |
| nucleoplasm                      | A-431    | nucleoplaU-251 MG    | nucleoplasm                                |
| nucleoplasm                      | A-431    | nucleoplaU-251 MG    | nucleoplasm                                |
| golgi apparatus                  | A-431    | golgi appU-251 MG    | golgi apparatus                            |
| golgi apparatus                  | A-431    | golgi appU-251 MG    | golgi apparatus                            |
| nucleoplasm, cytosol             | A-431    | nucleoplaU-251 MG    | nucleoplasm, cytosol                       |
| endoplasmic reticulum            | A549     | nucleoli, HaCaT      | nucleoli, endoplasmic reticulum            |
| nucleoplasm                      | MCF7     | nucleoplasm          |                                            |
| nucleoplasm                      | A-431    | nucleoplaU-251 MG    | nucleoplasm, cytosol                       |
| nucleoplasm                      | MCF7     | nucleoplasm          |                                            |
| nucleoplasm, cytosol             | Hep G2   | nucleoplaSH-SY5Y     | nucleoplasm, cytosol                       |
| lipid droplets                   | U-251 MG | lipid droplets       |                                            |
| nucleoplasm, vesicles, actin     | A-431    | nucleoplaU-251 MG    | nucleoplasm, vesicles, actin filaments     |
| nucleoplasm                      | A-431    | nucleoplaU-251 MG    | nucleoplasm                                |
| nucleoplasm                      | MCF7     | nucleoplasm          |                                            |
| microtubules                     | U-251 MG | microtubules         |                                            |
| plasma membrane                  | U-2 OS   | plasma meA-431       | plasma membrane, cytosol                   |
| nucleoplasm                      | A-431    | nucleoplaU-251 MG    | nucleoplasm                                |
| nucleoplasm                      | A-431    | nucleoplaU-251 MG    | nucleoplasm                                |
| nuclear speckles, cytosol        | A-431    | nuclear sU-251 MG    | nuclear speckles                           |
| nuclear speckles                 |          |                      |                                            |
| nuclear speckles                 | A-431    | nuclear sU-251 MG    | nuclear speckles                           |
| nucleoli fibrillar center        | U-2 OS   | nucleoli A549        | nucleoli fibrillar center, endoplasmic     |
| golgi apparatus, vesicles        |          |                      |                                            |
| golgi apparatus, vesicles        |          |                      |                                            |
| nucleoplasm                      | A-431    | nucleoplaMCF7        | nucleoplasm                                |
| nucleoli, plasma membrane, actin | A-431    | nucleoli U-251 MG    | nucleoli, plasma membrane, actin filaments |
| nucleoplasm, microtubules        | A-431    | nucleoplaU-251 MG    | nucleoplasm, microtubules                  |
| endoplasmic reticulum            | A-431    | endoplasmic U-251 MG | endoplasmic reticulum                      |

|                                 |          |                                        |                                       |
|---------------------------------|----------|----------------------------------------|---------------------------------------|
| nucleoplasm                     | RH-30    | nucleoplasm                            |                                       |
| nucleoplasm, nucleoli           | A-431    | nucleoplasm                            | U-251 MG nucleoplasm, nucleoli        |
| nucleoplasm, cytosol            | A-431    | nucleoplasm                            | U-251 MG nucleoplasm, cytosol         |
| plasma membrane, cytosol        | A-431    | plasma membrane                        | U-251 MG plasma membrane, cytosol     |
| plasma membrane                 | RH-30    | plasma membrane                        | HEL plasma membrane, cytosol          |
| nuclear membrane, vesicles      | RH-30    | nuclear membrane                       |                                       |
| aggresome                       | U-2 OS   | vesicles                               | HEK 293 vesicles                      |
| nucleoplasm                     |          |                                        |                                       |
| cytosol                         | U-251 MG | cytosol                                | EFO-21 cytosol                        |
| cytosol                         | HEK 293  | cytosol                                | SK-MEL-30 cytosol                     |
| nucleoplasm, nucleoli           |          |                                        |                                       |
| nucleoplasm, nucleoli           | PC-3     | nucleoli                               |                                       |
| endoplasmic reticulum           |          |                                        |                                       |
| endoplasmic reticulum           | A549     | endoplasmic reticulum                  | BJ endoplasmic reticulum              |
| nucleoplasm, cytosol            | U-2 OS   | nucleoplasm                            | U-251 MG nucleoplasm, cytosol         |
| nucleoplasm, nucleoli fibrillar | A-431    | nucleoplasm                            | PC-3 nucleoplasm, nucleoli fibrillar  |
| nuclear bodies, mitochondria    |          |                                        |                                       |
| vesicles, plasma membrane       | A-431    | vesicles, U-251 MG                     | vesicles, plasma membrane             |
| vesicles, cytosol               | SH-SY5Y  | vesicles, HEL                          | vesicles, cytosol                     |
| cytosol                         | A-431    | cytosol                                |                                       |
| nucleoplasm                     |          |                                        |                                       |
| nucleoplasm                     |          |                                        |                                       |
| nucleoplasm                     | U-251 MG | nucleoplasm                            | PC-3 nucleoplasm                      |
| cytosol                         | A-431    | nucleoplasm                            | HaCaT nucleoplasm, cytosol            |
| nucleoli                        | U-251 MG | nucleoli                               | RH-30 nucleoli, cytosol               |
| nucleoplasm                     |          |                                        |                                       |
| nucleoplasm                     | A-431    | nucleoplasm                            | U-251 MG nucleoplasm                  |
| nucleoplasm                     | A-431    | nucleoplasm                            | U-251 MG nucleoplasm                  |
| nucleoplasm                     | HEK 293  | nucleoplasm                            |                                       |
| nucleoplasm                     | U-2 OS   | nucleoplasm                            | HEK 293 nucleoplasm, nuclear membrane |
| nucleoplasm, plasma membrane    | BJ       | nucleoplasm, plasma membrane           |                                       |
| cytosol, cytoplasmic bodies     | SH-SY5Y  | centriola                              | SK-MEL-30 cytosol                     |
| cytosol                         | A-431    | cytosol                                | HeLa cytosol                          |
| nucleoplasm, nucleoli           | A-431    | nucleoplasm                            | U-251 MG nucleoplasm, nucleoli        |
| nucleoplasm                     | U-251 MG | nucleoplasm                            | MCF7 nucleoplasm, nucleoli            |
| nucleoplasm, vesicles           | A-431    | nucleoplasm, vesicles, plasma membrane |                                       |
| nucleoplasm                     | A-431    | nucleoplasm                            | U-251 MG nucleoplasm                  |
| nucleoplasm                     | A-431    | nucleoplasm                            | HeLa nucleoplasm                      |
| cytosol                         | U-251 MG | cytosol                                |                                       |
| nucleoplasm, cytosol            | A-431    | nucleoplasm                            | U-251 MG nucleoplasm, cytosol         |
| nucleoplasm                     | RH-30    | nucleoplasm                            | PC-3 nucleoplasm, nucleoli            |
| vesicles                        | U-2 OS   | nucleoplasm                            | SH-SY5Y vesicles                      |
| nucleoplasm                     | A-431    | nucleoplasm                            | U-251 MG nucleoplasm                  |
| nucleoplasm                     | A-431    | nucleoplasm                            | U-251 MG nucleoplasm                  |
| nucleoplasm                     |          |                                        |                                       |
| plasma membrane, cytosol        | A-431    | plasma membrane                        | U-251 MG plasma membrane              |
| plasma membrane                 | A-431    | plasma membrane                        | U-251 MG plasma membrane              |
| nuclear speckles, cytosol       | A-431    | nuclear speckles, cytosol              | U-251 MG nuclear speckles, cytosol    |
| nuclear speckles                | MCF7     | nuclear speckles                       | PC-3 nuclear speckles                 |
| nuclear speckles                | U-251 MG | nuclear speckles                       | MCF7 nuclear speckles                 |
| nucleoplasm, vesicles           | A-431    | nucleoplasm                            | A549 nucleoplasm                      |
| vesicles, microtubules          | HEK 293  | vesicles, SH-SY5Y                      | vesicles, microtubules                |
| nucleoplasm                     | MCF7     | nucleoplasm                            | PC-3 nucleoplasm, nucleoli            |
| nucleoplasm                     | A-431    | nucleoplasm                            | U-251 MG nucleoplasm                  |
| cytosol                         | A-431    | golgi apparatus                        | U-251 MG golgi apparatus, cytosol     |

|                              |          |                                          |                                        |
|------------------------------|----------|------------------------------------------|----------------------------------------|
| nucleoplasm, cell junction   | HEK 293  | nucleoplaAF22                            | nucleoplasm, cell junctions            |
| endoplasmic reticulum        | U-251 MG | endoplasmic reticulum                    |                                        |
| nucleoli fibrillar center    | A549     | nucleoplaHep G2                          | nucleoplasm, nucleoli fibrillar cente  |
| nucleoplasm, cytosol         | A-431    | nucleoplaU-251 MG                        | nucleoplasm, cytosol                   |
| plasma membrane, actin fila  | A-431    | golgi appU-251 MG                        | plasma membrane                        |
| nucleoplasm                  | A-431    | nucleoplaU-251 MG                        | nucleoplasm                            |
| nucleoplasm, plasma membr    | A-431    | nucleoplasm, plasma membrane, cytosol    |                                        |
| cytosol                      | HeLa     | cytosol                                  |                                        |
| nucleoplasm, vesicles        | A-431    | nucleoplaU-251 MG                        | nucleoplasm, vesicles                  |
| nucleoplasm, cytosol         | A-431    | nucleoplaU-251 MG                        | nucleoplasm                            |
| nucleoplasm, cytosol         | Hep G2   | nucleoplaBJ                              | nucleoplasm, cytosol                   |
| vesicles                     | A-431    | vesicles U-251 MG                        | vesicles                               |
| nucleoplasm, cytosol         | A-431    | nucleoplaU-251 MG                        | nucleoplasm, cytosol                   |
| vesicles                     | HeLa     | nucleoplaSH-SY5Y                         | vesicles                               |
| cytosol                      | A-431    | cytosol                                  |                                        |
| mitochondria                 | SiHa     | mitochondBJ                              | nucleoplasm, mitochondria              |
| vesicles                     | A-431    | vesicles RH-30                           | vesicles                               |
| nucleoplasm                  | HeLa     | nucleoplasm, cytokinetic bridge, cytosol |                                        |
| cytosol                      | A-431    | cytosol U-251 MG                         | cytosol                                |
| cytosol                      | A-431    | vesicles, cytosol                        |                                        |
| centrosome                   | RH-30    | centrosome                               |                                        |
| nucleoplasm                  | U-2 OS   | nucleoplaA-431                           | nucleoplasm                            |
| nucleoplasm                  | HaCaT    | nucleoplasm                              |                                        |
| vesicles                     | HEK 293  | vesicles                                 |                                        |
| vesicles, mitochondria       | U-251 MG | vesicles                                 |                                        |
| peroxisomes                  | Hep G2   | peroxisomes                              |                                        |
| vesicles, intermediate fila  | A-431    | nucleoplaU-251 MG                        | nucleoplasm, vesicles                  |
| golgi apparatus, vesicles    | HeLa     | golgi appSH-SY5Y                         | golgi apparatus                        |
| mitochondria                 | MCF7     | mitochondria                             |                                        |
| nucleoplasm                  | A-431    | nucleoplaU-251 MG                        | nucleoplasm                            |
| nucleoplasm                  | HEK 293  | nucleoplaRH-30                           | nucleoplasm                            |
| nucleoplasm                  |          |                                          |                                        |
| plasma membrane              | HeLa     | nucleoplasm, plasma membrane             |                                        |
| nucleoplasm, golgi apparatus |          |                                          |                                        |
| nucleoplasm                  | A549     | nucleoplasm                              |                                        |
| nucleoplasm                  | MCF7     | nucleoplaA549                            | nucleoplasm                            |
| nucleoplasm, nuclear bodies  |          |                                          |                                        |
| nucleoplasm                  |          |                                          |                                        |
| nucleoplasm                  | A-431    | nucleoplaU-251 MG                        | nucleoplasm                            |
| nucleoplasm, vesicles        |          |                                          |                                        |
| plasma membrane, cytosol     | A-431    | plasma meU-251 MG                        | plasma membrane, cytosol               |
| nucleoplasm, actin filamer   | A-431    | nucleoplaU-251 MG                        | nucleoplasm, cytosol                   |
| nucleoli, endoplasmic reti   | MCF7     | nucleoli, PC-3                           | nucleoli, endoplasmic reticulum, cytos |
| nucleoplasm, vesicles        | Hep G2   | nucleoplasm                              |                                        |
| vesicles                     | Hep G2   | vesicles                                 |                                        |
| mitochondria                 | U-251 MG | mitochondria                             |                                        |
| plasma membrane              |          |                                          |                                        |
| nuclear membrane, cytosol    | A-431    | cytosol U-251 MG                         | nuclear membrane, cytosol              |
| nucleoplasm, cytosol         | A-431    | nucleoplaU-251 MG                        | nucleoplasm                            |
| nucleoplasm                  | A-431    | nucleoplaU-251 MG                        | nucleoplasm                            |
| nuclear bodies               | A549     | nuclear bodies                           |                                        |
| golgi apparatus, cytosol     | A-431    | golgi appU-251 MG                        | nucleoplasm, golgi apparatus, cytosol  |
| vesicles                     | RH-30    | cytosol                                  |                                        |
| nucleoplasm                  | A-431    | nucleoplaU-251 MG                        | nucleoplasm                            |
| cytosol                      |          |                                          |                                        |

|                                        |          |                                                     |           |
|----------------------------------------|----------|-----------------------------------------------------|-----------|
| nucleoplasm, golgi apparatus           | A-431    | nucleoplasm, golgi apparatus                        | U-251 MG  |
| mitochondria                           | U-251 MG | mitochondria                                        |           |
| cytosol                                |          |                                                     |           |
| mitochondria                           | A-431    | mitochondria                                        | PC-3      |
| nuclear speckles, vesicles             | SiHa     | nucleoplasm, vesicles                               | RH-30     |
| nucleoplasm                            | SH-SY5Y  | nucleoplasm                                         | PC-3      |
| nuclear bodies                         | A-431    | nucleoplasm, nuclear bodies                         | U-251 MG  |
| nucleoplasm, midbody ring              | A-431    | nucleoplasm, nuclear bodies                         | HAP1      |
| nucleoplasm                            | A-431    | nucleoplasm                                         | U-251 MG  |
| vesicles                               | A-431    | vesicles                                            | U-251 MG  |
| nucleoli, cytosol                      | A-431    | nucleoli, cytosol                                   | U-251 MG  |
| nucleoplasm, nucleoli                  | A-431    | nucleoplasm                                         | U-251 MG  |
| nucleoplasm                            | SiHa     | nucleoplasm, nucleoli                               | RH-30     |
| nucleoplasm, cytosol                   | A-431    | nucleoplasm, cytosol                                | U-251 MG  |
| cytosol                                | SH-SY5Y  | plasma membrane, cytosol                            | EF0-21    |
| nucleoplasm, mitochondria              | A-431    | nucleoplasm, mitochondria, cytosol                  | U-251 MG  |
| nucleoplasm, golgi apparatus           | A-431    | nucleoplasm, golgi apparatus                        | U-251 MG  |
| vesicles                               | RH-30    | vesicles                                            | U-251 MG  |
| plasma membrane, cytosol               | A-431    | nucleoplasm                                         | U-251 MG  |
| cytosol                                |          |                                                     |           |
| cytoplasmic bodies                     | PC-3     | nuclear speckles, cytoplasmic bodies                | SK-MEL-30 |
| nucleoplasm                            | RH-30    | nucleoplasm                                         |           |
| plasma membrane                        |          |                                                     |           |
| nucleoplasm, plasma membrane           |          |                                                     |           |
| nucleoplasm                            | RH-30    | nucleoplasm, nucleoli fibrillar center              |           |
| endoplasmic reticulum                  | A549     | endoplasmic reticulum                               | Hep G2    |
| nucleoplasm                            | BJ       | nucleoplasm                                         | PC-3      |
| nucleoplasm, cytosol                   | A-431    | nucleoplasm, cytosol                                | U-251 MG  |
| nucleoplasm, nucleoli fibrillar center | A-431    | nucleoplasm, nucleoli, cytosol                      | U-251 MG  |
| cytosol                                | U-251 MG | cytosol                                             |           |
| cytosol                                | A-431    | cytosol                                             |           |
| nuclear speckles, cytosol              | U-251 MG | nucleoplasm, cytosol                                |           |
| nucleoplasm, cytosol                   | HeLa     | nucleoplasm, cytosol                                | Hep G2    |
| nuclear membrane, nuclear speckles     | Hep G2   | nuclear membrane, nuclear speckles, plasma membrane | HUVEC TER |
| nucleoplasm, nucleoli                  | U-2 OS   | nucleoplasm, nucleoli                               | A549      |
| nucleoplasm, nucleoli                  | A-431    | nucleoplasm, nucleoli                               | U-251 MG  |
| nuclear speckles, aggregation bodies   | HeLa     | nuclear speckles, vesicles                          |           |
| nucleoplasm, vesicles                  | SH-SY5Y  | nucleoplasm, nuclear bodies                         | REH       |
| nuclear speckles                       | A-431    | nuclear speckles                                    | sHeLa     |
| cytosol                                | U-251 MG | cytosol                                             | EF0-21    |
| nucleoplasm, nucleoli                  |          |                                                     |           |
| cytosol                                | A549     | endoplasmic reticulum                               | SiHa      |
| nucleoplasm, nucleoli fibrillar center | A-431    | nucleoplasm, nucleoli fibrillar center              | U-251 MG  |
| nucleoplasm, plasma membrane           | A-431    | nucleoplasm, microtubules, cytokinetic              | SiHa      |
| nucleoplasm, cytosol                   |          |                                                     |           |
| nucleoplasm                            | U-251 MG | nucleoplasm                                         |           |
| nucleoplasm, plasma membrane           | A-431    | nucleoplasm, plasma membrane                        | U-251 MG  |
| nucleoplasm, vesicles                  | HEK 293  | nucleoplasm, endoplasmic reticulum, vesicles        | SK-MEL-30 |
| nucleoplasm                            | U-251 MG | nucleoplasm                                         | HEL       |
| nucleoplasm                            | HaCaT    | nucleoplasm                                         |           |
| nucleoplasm                            | SH-SY5Y  | nucleoplasm                                         |           |
| nucleoplasm                            |          |                                                     |           |
| golgi apparatus                        | A-431    | golgi apparatus                                     | U-251 MG  |
| vesicles                               | A-431    | vesicles                                            | U-251 MG  |
| cytosol                                | A-431    | centrosome, cytosol                                 | U-251 MG  |



|                              |          |                              |                                        |
|------------------------------|----------|------------------------------|----------------------------------------|
| cytosol                      | A-431    | centrosomU-251 MG            | centrosome, cytosol                    |
| nucleoplasm, nucleoli fibr   | A-431    | nucleoplaU-251 MG            | nucleoplasm, nucleoli fibrillar cente  |
| vesicles                     |          |                              |                                        |
| nucleoplasm, vesicles        | A-431    | nucleoplaHEK 293             | vesicles                               |
| nucleoplasm, cytosol         | A-431    | nucleoplaU-251 MG            | nucleoplasm, cytosol                   |
| cytosol                      |          |                              |                                        |
| nucleoplasm                  | U-2 OS   | nucleoplaHEK 293             | nucleoplasm                            |
| cytosol                      | A549     | cytokinetPC-3                | cytosol                                |
| actin filaments, cytosol     | A-431    | cytosol U-251 MG             | cytosol                                |
| nucleoplasm, nucleoli        | HEK 293  | nucleoplasm, nucleoli        |                                        |
| nucleoplasm, nucleoli        | U-2 OS   | nucleoli                     |                                        |
| nucleoplasm, cell junction   | U-2 OS   | nucleoplaU-251 MG            | nucleoplasm                            |
| cytoplasmic bodies           | U-2 OS   | cytoplasmic bodies           |                                        |
| plasma membrane, cytosol     | A-431    | plasma meU-251 MG            | plasma membrane, cytosol               |
| plasma membrane, cytosol     | A-431    | plasma meU-251 MG            | plasma membrane, cytosol               |
| nucleoplasm, cytosol         | U-251 MG | nucleoplasm, cytosol         |                                        |
| cytosol                      | MCF7     | nuclear membrane, cytosol    |                                        |
| intermediate filaments       | U-251 MG | intermediate filaments       |                                        |
| intermediate filaments       | RH-30    | intermediate filaments       |                                        |
| nucleoplasm                  | SH-SY5Y  | nucleoplasm                  |                                        |
| nucleoplasm, nucleoli fibr   | A-431    | nucleoplaU-251 MG            | nucleoplasm, nucleoli fibrillar cente  |
| endoplasmic reticulum        | A-431    | endoplasmU-251 MG            | nuclear bodies, endoplasmic reticulum  |
| plasma membrane, mitochond   | A-431    | plasma meU-251 MG            | plasma membrane, cytosol               |
| mitochondria                 | A-431    | mitochondU-251 MG            | mitochondria                           |
| mitochondria                 | A-431    | mitochondU-251 MG            | mitochondria                           |
| nucleoplasm, cytosol         |          |                              |                                        |
| nucleoplasm, cytosol         |          |                              |                                        |
| cytosol                      |          |                              |                                        |
| nucleoplasm, nuclear membr   | U-2 OS   | nucleoplaHaCaT               | nucleoplasm, nuclear membrane, vesicle |
| nucleoplasm, golgi apparat   | A-431    | nucleoplaU-251 MG            | nucleoplasm, golgi apparatus, focal ad |
| vesicles                     | SiHa     | vesicles                     |                                        |
| vesicles                     | HEK 293  | aggresome                    |                                        |
| vesicles                     | RH-30    | vesicles                     |                                        |
| nucleoplasm                  |          |                              |                                        |
| nucleoplasm                  | A-431    | nucleoplaU-251 MG            | nuclear bodies                         |
| nucleoplasm                  | A-431    | nucleoplaMCF7                | nucleoplasm                            |
| nucleoplasm, cytosol         | PC-3     | nucleoplasm, nuclear bodies  |                                        |
| cytosol                      |          |                              |                                        |
| cytosol                      | A-431    | cytosol U-251 MG             | cytosol                                |
| nucleoli                     | A-431    | nucleoplaU-251 MG            | nucleoli                               |
| nucleoplasm, cytosol         | A-431    | nucleoplaHEK 293             | nucleoplasm, cytosol                   |
| nucleoli, endoplasmic reti   | U-2 OS   | nucleoli, U-251 MG           | nucleoli, endoplasmic reticulum        |
| nucleoli, endoplasmic reti   | U-2 OS   | nucleoli, U-251 MG           | nucleoli, endoplasmic reticulum        |
| nucleoli, golgi apparatus,   | RH-30    | nucleoplasm, golgi apparatus |                                        |
| nucleoplasm                  | A-431    | nucleoplasm                  |                                        |
| vesicles                     | U-2 OS   | vesicles                     |                                        |
| mitochondria                 | A-431    | nucleoplaHeLa                | nucleoplasm, mitochondria              |
| nucleoplasm                  |          |                              |                                        |
| nucleoplasm, vesicles        | A-431    | nucleoplaA549                | nucleoplasm                            |
| mitochondria                 | SH-SY5Y  | mitochondSK-MEL-30           | mitochondria                           |
| intermediate filaments       |          |                              |                                        |
| nucleoli, plasma membrane    | A-431    | nucleoplaU-251 MG            | nucleoplasm, nucleoli, cytosol         |
| nucleoplasm, golgi apparat   | Hep G2   | nucleoplaHaCaT               | nucleoplasm, golgi apparatus           |
| nucleoplasm, plasma membrane |          |                              |                                        |
| nucleoplasm, cytosol         | SiHa     | nucleoplasm, cytosol         |                                        |

|                                 |           |                                           |                                       |
|---------------------------------|-----------|-------------------------------------------|---------------------------------------|
| nucleoplasm                     |           |                                           |                                       |
| cytosol                         | A-431     | cytosol U-251 MG                          | cytosol                               |
| nucleoplasm, cytoplasmic        | SH-SY5Y   | nucleoplaBJ                               | nucleoplasm, cytosol                  |
| cytosol                         | U-251 MG  | cytosol                                   |                                       |
| nucleoplasm, cytosol            | SiHa      | nucleoplahTCEpi                           | nucleoplasm, golgi apparatus          |
| nuclear speckles, vesicles      | A549      | nuclear sSiHa                             | vesicles                              |
| cytosol                         | HEK 293   | cytosol                                   |                                       |
| cytosol                         | MCF7      | cytosol HEK 293                           | cytosol                               |
| nucleoplasm, plasma membrane    |           |                                           |                                       |
| nucleoplasm                     | A-431     | nucleoplaU-251 MG                         | nucleoplasm                           |
| plasma membrane, cell junctions |           |                                           |                                       |
| plasma membrane, intermediate   | A-431     | plasma meU-251 MG                         | plasma membrane, intermediate filamen |
| focal adhesion sites            | U-251 MG  | focal adhesion sites                      |                                       |
| microtubules                    | A-431     | microtubuU-251 MG                         | microtubules                          |
| nucleoplasm                     | A-431     | nucleoplaA549                             | nucleoplasm                           |
| golgi apparatus                 | A549      | golgi appHaCaT                            | golgi apparatus                       |
| cytosol                         | U-251 MG  | cytosol                                   |                                       |
| centriolar satellite            | SiHa      | centriolar satellite                      |                                       |
| nucleoplasm                     | HEK 293   | nucleoplaRH-30                            | nucleoplasm, cytosol                  |
| nucleoplasm, nuclear bodies     | A-431     | nucleoplaU-251 MG                         | nucleoplasm, nuclear bodies           |
| nucleoplasm, nuclear bodies     | HEK 293   | nucleoplaSH-SY5Y                          | nucleoplasm, nuclear bodies           |
| nucleoplasm                     | A-431     | nucleoplaU-251 MG                         | nucleoplasm, plasma membrane          |
| nucleoplasm                     | HeLa      | nucleoplaHep G2                           | nucleoplasm, vesicles                 |
| nucleoplasm, golgi apparatus    | MCF7      | nucleoplasm, golgi apparatus              |                                       |
| nucleoplasm, cytosol            | A-431     | nucleoplaU-251 MG                         | nucleoplasm, cytosol                  |
| nucleoplasm                     | SK-MEL-30 | nucleoplasm                               |                                       |
| vesicles                        | MCF7      | vesicles A549                             | cytosol                               |
| nuclear speckles                | A-431     | nucleoplaU-251 MG                         | nuclear speckles                      |
| vesicles                        | SK-MEL-30 | vesicles                                  |                                       |
| vesicles, cytokinetic bridge    | U-251 MG  | vesicles HeLa                             | vesicles, cytokinetic bridge          |
| nuclear speckles, endoplasmic   | A-431     | nuclear sU-251 MG                         | nuclear speckles, endoplasmic reticul |
| nucleoplasm                     | A-431     | nucleoplaU-251 MG                         | nucleoplasm                           |
| endoplasmic reticulum           |           |                                           |                                       |
| nucleoplasm                     | U-2 OS    | nucleoplaMCF7                             | nucleoplasm                           |
| nucleoli fibrillar center       | MCF7      | nucleoli fibrillar center, cell junctions |                                       |
| endoplasmic reticulum           | HEK 293   | endoplasmHep G2                           | endoplasmic reticulum                 |
| endoplasmic reticulum, rough    | SK-MEL-30 | endoplasmic reticulum                     |                                       |
| mitochondria                    | A-431     | mitochondU-251 MG                         | mitochondria                          |
| nucleoplasm, mitotic spindle    | HEK 293   | nucleoplasm                               |                                       |
| mitochondria                    | U-251 MG  | mitochondria                              |                                       |
| vesicles                        | U-2 OS    | golgi appMCF7                             | golgi apparatus, vesicles             |
| nucleoli fibrillar center       | U-2 OS    | nucleoplaSiHa                             | nucleoli fibrillar center, vesicles   |
| nucleoli                        | U-2 OS    | nucleoli Hep G2                           | nucleoplasm, nucleoli                 |
| nuclear speckles                | MCF7      | nuclear speckles                          |                                       |
| nucleoplasm, plasma membrane    | U-251 MG  | nucleoplaHEK 293                          | nucleoplasm, cytosol                  |
| nucleoplasm                     | MCF7      | nucleoplaHeLa                             | nucleoplasm                           |
| mitochondria                    | MCF7      | mitochondHaCaT                            | mitochondria                          |
| nucleoplasm, plasma membrane    | SH-SY5Y   | nucleoplaRH-30                            | nucleoplasm, nuclear bodies           |
| nuclear bodies                  | A-431     | nucleoplaU-251 MG                         | nucleoplasm, nuclear bodies           |
| nucleoplasm                     | U-251 MG  | nucleoplaHEK 293                          | nucleoplasm                           |
| nuclear speckles                | MCF7      | nucleoplaHEK 293                          | nucleoplasm, nuclear speckles         |
| nucleoplasm                     |           |                                           |                                       |
| cytosol                         | A-431     | cytosol U-251 MG                          | cytosol                               |
| nucleoplasm                     |           |                                           |                                       |
| vesicles                        | A-431     | vesicles, U-251 MG                        | vesicles                              |

|                                     |          |                                  |           |                                       |
|-------------------------------------|----------|----------------------------------|-----------|---------------------------------------|
| cytosol                             | U-251 MG | cytosol                          |           |                                       |
| vesicles                            | U-2 OS   | vesicles                         | PC-3      | nucleoplasm, vesicles                 |
| nucleoplasm, cytosol                |          |                                  |           |                                       |
| vesicles                            | U-2 OS   | vesicles                         | PC-3      | nucleoplasm, vesicles                 |
| vesicles                            | U-2 OS   | vesicles                         | PC-3      | nucleoplasm, vesicles                 |
| nucleoplasm                         | HeLa     | nucleoplasm                      |           |                                       |
| nucleoplasm                         | MCF7     | nucleoplasm                      | SK-MEL-30 | nucleoplasm                           |
| cytosol                             | A-431    | cytosol                          | U-251 MG  | cytosol                               |
| plasma membrane, cytosol            |          |                                  |           |                                       |
| mitochondria                        | SiHa     | mitochondria                     | SK-MEL-30 | mitochondria                          |
| nucleoplasm, midbody                |          |                                  |           |                                       |
| endoplasmic reticulum, vesicles     | A549     | vesicles                         | HeLa      | vesicles                              |
| golgi apparatus, cytosol            |          |                                  |           |                                       |
| nucleoplasm, endoplasmic reticulum  | HeLa     | golgi apparatus, plasma membrane |           |                                       |
| nucleoplasm, cytosol                | A-431    | nucleoplasm                      | U-251 MG  | nucleoplasm, cytosol                  |
| endoplasmic reticulum               | A-431    | endoplasmic reticulum            | U-251 MG  | endoplasmic reticulum                 |
| cytosol                             | A-431    | cytosol                          | MCF7      | cytosol                               |
| nucleoplasm, vesicles               | U-2 OS   | nucleoplasm                      | BJ        | nucleoplasm                           |
| golgi apparatus                     |          |                                  |           |                                       |
| nucleoplasm, cytosol                | A-431    | cytosol                          | U-251 MG  | nucleoplasm, cytosol                  |
| nucleoplasm, vesicles               | A-431    | nucleoplasm                      | U-251 MG  | nucleoplasm, cytosol                  |
| cytosol                             | A-431    | cytosol                          | U-251 MG  | plasma membrane, cytosol              |
| cytosol                             | A-431    | cytosol                          | HEK 293   | cytosol                               |
| nucleoplasm, cytosol                | U-251 MG | nucleoplasm                      | MCF7      | nucleoplasm, plasma membrane, cytosol |
| cytosol                             | REH      | cytosol                          | NB-4      | cytosol                               |
| nucleoplasm                         | HEK 293  | nucleoplasm                      | A549      | nucleoplasm                           |
| nucleoplasm                         | HEK 293  | nucleoplasm                      |           |                                       |
| golgi apparatus                     | SiHa     | golgi apparatus                  | BJ        | golgi apparatus, vesicles             |
| nucleoplasm                         | U-251 MG | nuclear speckles                 |           |                                       |
| nucleoplasm                         | HEK 293  | nucleoplasm                      | PC-3      | nucleoplasm                           |
| nucleoplasm, cytosol                |          |                                  |           |                                       |
| nucleoplasm                         | U-2 OS   | nucleoplasm                      | HeLa      | nucleoplasm, cytosol                  |
| nuclear speckles                    | HEK 293  | nuclear speckles                 | PC-3      | nuclear speckles                      |
| cytosol                             | A-431    | cytosol                          | U-251 MG  | cytosol                               |
| nucleoplasm                         | A-431    | nucleoplasm                      | U-251 MG  | nucleoplasm                           |
| nucleoplasm                         | MCF7     | nucleoplasm                      | HeLa      | nucleoplasm                           |
| cell junctions, mitochondria        | A-431    | nucleoplasm                      | U-251 MG  | cell junctions, mitochondria          |
| nucleoplasm                         | A-431    | nucleoplasm                      | U-251 MG  | nucleoplasm                           |
| nucleoplasm, nuclear bodies         | A-431    | nucleoplasm                      | U-251 MG  | nucleoplasm, nuclear bodies           |
| nucleoplasm                         | A-431    | nucleoplasm                      | U-251 MG  | nucleoplasm                           |
| cytosol                             | A-431    | cytosol                          | U-251 MG  | cytosol                               |
| nucleoplasm, cytosol                | HEK 293  | nucleoplasm                      | SH-SY5Y   | nucleoplasm, cytosol                  |
| nucleoplasm, cell junctions         | A-431    | nucleoplasm                      | MCF7      | nucleoplasm, cell junctions           |
| vesicles                            | MCF7     | vesicles                         | HEK 293   | vesicles                              |
| vesicles                            | A-431    | vesicles                         | U-251 MG  | vesicles                              |
| cytosol                             | A-431    | cytosol                          |           |                                       |
| cytosol                             | U-251 MG | cytosol                          |           |                                       |
| nucleoplasm                         | U-2 OS   | nucleoplasm                      | HeLa      | nucleoplasm, cytoplasmic bodies       |
| centriolar satellite, cytosol       |          |                                  |           |                                       |
| centrosome                          | RH-30    | centrosome                       |           |                                       |
| vesicles, plasma membrane, vesicles | A-431    | vesicles, vesicles               | U-251 MG  | plasma membrane, centrosome           |
| vesicles                            | A-431    | vesicles                         | RPTEC TER | vesicles                              |
| nucleoplasm                         | SH-SY5Y  | nucleoplasm                      | SiHa      | nucleoplasm, cytosol                  |
| nucleoplasm, vesicles               |          |                                  |           |                                       |
| nucleoplasm                         | U-251 MG | nucleoplasm                      |           |                                       |

|                                       |           |                              |                                                 |
|---------------------------------------|-----------|------------------------------|-------------------------------------------------|
| nuclear speckles                      | A-431     | nuclear speckles, vesicles   |                                                 |
| nucleoplasm, cytokinetic              | tU-251 MG | nucleoplas                   | SH-SY5Y nucleoplasm, mitotic spindle            |
| cytosol                               |           |                              |                                                 |
| cytosol                               | HEK 293   | cytosol                      | PC-3 cytosol                                    |
| centrosome                            | AF22      | centrosome                   |                                                 |
| nucleoplasm                           |           |                              |                                                 |
| plasma membrane, cytosol              | A-431     | nucleoplas                   | U-251 MG nucleoplasm, plasma membrane, cytosol  |
| nucleoplasm, nucleoli                 | A-431     | nucleoli                     | HEK 293 nucleoli fibrillar center               |
| golgi apparatus                       |           |                              |                                                 |
| golgi apparatus                       |           |                              |                                                 |
| nuclear membrane, nuclear             | HEK 293   | nuclear                      | rrRH-30 nuclear bodies                          |
| nucleoplasm                           | A-431     | nucleoplas                   | U-251 MG nucleoplasm                            |
| mitochondria                          | A549      | mitochondria                 |                                                 |
| nucleoplasm                           | MCF7      | nucleoplasm                  |                                                 |
| cytosol                               | A-431     | cytosol                      | U-251 MG cytosol                                |
| microtubules, cytokinetic             | RH-30     | microtubu                    | HEL microtubules, mitotic spindle               |
| nucleoplasm, actin filamer            | A-431     | nucleoplasm, actin filaments |                                                 |
| actin filaments                       | A-431     | actin fil                    | U-251 MG actin filaments                        |
| nucleoplasm, cytosol                  | U-251 MG  | nucleoplasm, cytosol         |                                                 |
| nucleoplasm                           | SiHa      | nucleoplasm, plasma membrane |                                                 |
| cytosol                               | A549      | cytosol                      |                                                 |
| cytosol                               | EFO-21    | plasma membrane              |                                                 |
| vesicles                              |           |                              |                                                 |
| nucleoplasm, vesicles                 | A-431     | nucleoplas                   | EFO-21 nucleoplasm, vesicles                    |
| cytosol                               | A-431     | nucleoplas                   | U-251 MG nucleoplasm, cytosol                   |
| nucleoplasm, cytosol                  | MCF7      | nucleoplas                   | A549 nucleoplasm, mitochondria, cytosol         |
| nuclear bodies                        | A-431     | nuclear                      | sRH-30 nuclear bodies                           |
| nuclear bodies                        | RH-30     | nuclear bodies               |                                                 |
| plasma membrane, cytosol              | A-431     | plasma me                    | U-251 MG plasma membrane, cytosol               |
| nucleoplasm                           | SK-MEL-30 | nucleoplasm                  |                                                 |
| nucleoplasm, nucleoli                 | SH-SY5Y   | nucleoplas                   | RH-30 nucleoplasm                               |
| centrosome, mitochondria              | A-431     | centrosom                    | U-251 MG plasma membrane, centrosome, mitochond |
| nucleoplasm, plasma membr             | RH-30     | vesicles                     | SK-MEL-30 nucleoplasm, plasma membrane, cytosol |
| plasma membrane, mitochond            | A549      | plasma me                    | EFO-21 nuclear speckles, plasma membrane        |
| nucleoplasm, plasma membrane, cytosol |           |                              |                                                 |
| plasma membrane                       |           |                              |                                                 |
| nucleoplasm, cytosol                  | U-2 OS    | nucleoplas                   | Hep G2 nucleoplasm, cytosol                     |
| endoplasmic reticulum, ves            | SH-SY5Y   | vesicles                     | PC-3 endoplasmic reticulum                      |
| nucleoplasm, intermediate             | A-431     | nucleoplas                   | U-251 MG nucleoplasm, vesicles, intermediate fi |
| lipid droplets, mitochondr            | BJ        | lipid dro                    | PC-3 lipid droplets                             |
| intermediate filaments                |           |                              |                                                 |
| intermediate filaments                |           |                              |                                                 |
| vesicles                              | A-431     | vesicles                     | U-251 MG vesicles                               |
| nucleoplasm                           | A-431     | nucleoplas                   | U-251 MG nucleoplasm                            |
| nucleoplasm, golgi apparat            | SiHa      | nucleoplas                   | RH-30 golgi apparatus                           |
| vesicles                              | A-431     | vesicles                     |                                                 |
| mitochondria                          |           |                              |                                                 |
| vesicles                              | HUVEC TER | vesicles                     |                                                 |
| nucleoplasm                           | A-431     | nucleoplas                   | U-251 MG nucleoplasm                            |
| nucleoplasm                           | U-251 MG  | nucleoplas                   | HEK 293 nucleoplasm                             |
| nucleoplasm                           | HeLa      | nucleoplas                   | PC-3 nucleoplasm                                |
| nucleoplasm, plasma membrane          |           |                              |                                                 |
| centriolar satellite                  | A-431     | centriola                    | HeLa centriolar satellite                       |
| cytosol                               | A549      | cytosol                      |                                                 |
| vesicles, cytosol                     | A-431     | cytosol                      | U-251 MG vesicles, cytosol                      |

|                                      |           |                                        |                |                                        |
|--------------------------------------|-----------|----------------------------------------|----------------|----------------------------------------|
| nucleoplasm                          | A-431     | nucleoplasm                            | HeLa           | nucleoplasm                            |
| centrosome                           | HEK 293   | centrosome                             | RH-30          | centrosome                             |
| endosomes, lysosomes                 | A-431     | endosomes                              | U-251 MG       | endosomes, lysosomes                   |
| nuclear bodies                       | U-251 MG  | nuclear bodies                         |                |                                        |
| nuclear speckles                     | A-431     | nuclear speckles                       | U-251 MG       | nuclear speckles                       |
| nuclear speckles, cytoplasmic bodies | A-431     | nuclear speckles, cytoplasmic bodies   | U-251 MG       | nuclear speckles, cytoplasmic bodies   |
| nucleoplasm, cytosol                 | A-431     | nucleoplasm, cytosol                   | U-251 MG       | nucleoplasm, cytosol                   |
| nucleoplasm, cytosol                 | U-2 OS    | nucleoplasm, cytosol                   | MCF7           | nucleoplasm                            |
| nucleoplasm, vesicles                | HEK 293   | vesicles                               |                |                                        |
| nucleoplasm, cytosol                 | A-431     | nucleoplasm, cytosol                   | U-251 MG       | nucleoplasm, cytosol                   |
| vesicles, cytosol                    | A-431     | vesicles, cytosol                      | U-251 MG       | cytosol                                |
| vesicles                             | A-431     | vesicles, cytosol                      | U-251 MG       | vesicles, cytosol                      |
| intermediate filaments               | HaCaT     | intermediate filaments                 |                |                                        |
| intermediate filaments               | hTCEpi    | intermediate filaments                 |                |                                        |
| cytosol                              | REH       | cytosol                                |                |                                        |
| cytosol                              | SH-SY5Y   | cytosol                                | SK-MEL-30      | nucleoli, cytosol                      |
| nuclear speckles, cell junctions     | A-431     | nuclear speckles, cell junctions       | A549           | nuclear speckles, cell junctions       |
| nucleoplasm                          | RT4       | nucleoplasm, cytosol                   | U-2 OS         | nucleoplasm, cytosol                   |
| nucleoplasm                          |           |                                        |                |                                        |
| nucleoplasm, vesicles, cytosol       | A-431     | nucleoplasm, vesicles, cytosol         |                |                                        |
| vesicles                             | A549      | vesicles                               |                |                                        |
| nuclear bodies, cytosol              | HEK 293   | nuclear bodies, cytosol                | Hep G2         | nuclear bodies, cytosol                |
| nuclear bodies                       | AF22      | nuclear bodies                         |                |                                        |
| nucleoplasm                          | HEK 293   | nucleoplasm                            |                |                                        |
| plasma membrane                      | A-431     | plasma membrane                        | U-251 MG       | plasma membrane                        |
| cytosol                              | MCF7      | cytosol                                | Hep G2         | cytosol                                |
| cytosol                              | MCF7      | cytosol                                | Hep G2         | cytosol                                |
| nucleoplasm, cytosol                 | A-431     | nucleoplasm, cytosol                   | U-251 MG       | nucleoplasm, cytosol                   |
| cytosol                              | A-431     | cytosol                                | U-251 MG       | cytosol                                |
| nuclear speckles                     | RH-30     | nuclear speckles                       | AF22           | nuclear speckles                       |
| focal adhesion sites                 |           |                                        |                |                                        |
| nucleoplasm                          |           |                                        |                |                                        |
| nucleoplasm                          |           |                                        |                |                                        |
| nucleoplasm                          | BJ        | nucleoplasm                            | HaCaT          | nucleoplasm                            |
| plasma membrane                      | A-431     | plasma membrane                        | U-251 MG       | plasma membrane                        |
| centrosome                           | SiHa      | centrosome                             |                |                                        |
| nucleoplasm, cytosol                 | A-431     | nucleoplasm, cytosol                   | HEL            | centrosome, cytosol                    |
| nucleoplasm, cytosol                 | A-431     | nucleoplasm, cytosol                   | U-251 MG       | nucleoplasm, cytosol                   |
| nucleoplasm, cytosol                 | A-431     | nucleoplasm, cytosol                   | U-251 MG       | nucleoplasm, cytosol                   |
| nucleoplasm, cytosol                 | HeLa      | nucleoplasm, cytosol                   |                |                                        |
| plasma membrane, cytosol             | A-431     | plasma membrane, cytosol               | golgi appK-562 | plasma membrane                        |
| nucleoplasm, vesicles                | A-431     | nucleoplasm, vesicles, cytosol         | HEL            | nucleoplasm, vesicles, cytosol         |
| plasma membrane                      | A549      | plasma membrane                        | HeLa           | plasma membrane                        |
| vesicles                             |           |                                        |                |                                        |
| nucleoplasm                          |           |                                        |                |                                        |
| nucleoplasm                          | SK-MEL-30 | nucleoplasm                            |                |                                        |
| nucleoplasm, plasma membrane         | A-431     | nucleoplasm, plasma membrane           | U-251 MG       | nucleoplasm, plasma membrane           |
| nucleoplasm                          |           |                                        |                |                                        |
| nucleoplasm, golgi apparatus         | U-2 OS    | nucleoplasm, golgi apparatus, vesicles | SH-SY5Y        | nucleoplasm, golgi apparatus, vesicles |
| mitochondria                         | A-431     | mitochondria                           | U-251 MG       | mitochondria                           |
| focal adhesion sites, cytosol        | Hep G2    | focal adhesion sites, cytosol          | SH-SY5Y        | cytosol                                |
| plasma membrane, cytosol             | A-431     | plasma membrane, cytosol               | U-251 MG       | plasma membrane, cytosol               |
| plasma membrane, cytosol             | A-431     | plasma membrane, cytosol               | U-251 MG       | plasma membrane, cytosol               |
| vesicles, cytosol                    |           |                                        |                |                                        |
| lipid droplets                       | A549      | lipid droplets                         |                |                                        |

|                                     |          |                                     |                                             |
|-------------------------------------|----------|-------------------------------------|---------------------------------------------|
| nucleoli fibrillar center           | SiHa     | nucleoli fibrillar center           |                                             |
| nucleoli fibrillar center           | SiHa     | nucleoli fibrillar center           |                                             |
| vesicles                            | A-431    | vesicles                            | U-251 MG vesicles                           |
| microtubules                        | U-251 MG | microtubu                           | PC-3 microtubules                           |
| golgi apparatus, plasma membrane    |          |                                     |                                             |
| vesicles                            | PC-3     | nuclear speckles, vesicles, cytosol |                                             |
| nucleoli, cytosol                   | A-431    | nucleoli, A549                      | nucleoli, cytosol                           |
| actin filaments, focal ad           | U-2 OS   | plasma me                           | Hep G2 plasma membrane                      |
| nuclear speckles                    |          |                                     |                                             |
| plasma membrane                     | A-431    | plasma me                           | U-251 MG plasma membrane                    |
| vesicles                            | A-431    | vesicles                            | U-251 MG vesicles                           |
| vesicles                            | U-251 MG | vesicles                            |                                             |
| cytosol                             | A-431    | cytosol                             | U-251 MG nucleoplasm, cytosol               |
| nucleoplasm, mitochondria,          | HeLa     | nucleoplasm, cytosol                |                                             |
| nucleoplasm                         | MCF7     | nucleopla                           | HEK 293 nucleoplasm                         |
| cytosol                             | A-431    | cytosol                             | U-251 MG cytosol                            |
| nucleoplasm, golgi apparatus        | BJ       | nucleoplasm, golgi apparatus        |                                             |
| nucleoplasm, endoplasmic reticulum  |          |                                     |                                             |
| vesicles                            | A549     | vesicles                            |                                             |
| nucleoplasm, cytosol                | HEK 293  | nucleoplasm, vesicles               |                                             |
| nucleoplasm, nuclear bodie          | U-2 OS   | nucleopla                           | HEK 293 nuclear bodies                      |
| nucleoplasm                         | Hep G2   | nucleoplasm, cytosol                |                                             |
| nucleoplasm, cytosol                | MCF7     | nucleopla                           | Hep G2 nucleoplasm                          |
| mitochondria                        |          |                                     |                                             |
| nucleoplasm                         | U-2 OS   | nucleopla                           | HaCaT nucleoplasm, cytosol                  |
| nucleoplasm                         | U-251 MG | nucleopla                           | HEK 293 nucleoplasm                         |
| nuclear membrane                    | A-431    | nucleopla                           | U-251 MG nucleoplasm, nuclear membrane      |
| cytosol                             | A-431    | cytosol                             |                                             |
| cytosol                             | A-431    | cytosol                             | U-251 MG cytosol                            |
| nuclear speckles, cytosol           | A-431    | nuclear s                           | U-251 MG nuclear speckles, cytosol          |
| centrosome                          | U-251 MG | centrosom                           | Hep G2 centrosome                           |
| nucleoplasm                         | A-431    | nucleopla                           | U-251 MG nucleoplasm                        |
| nucleoplasm                         | A-431    | nucleopla                           | U-251 MG nucleoplasm                        |
| nucleoplasm                         |          |                                     |                                             |
| nucleoplasm                         | A-431    | nucleopla                           | U-251 MG nucleoplasm                        |
| cytosol                             | PC-3     | cytosol                             |                                             |
| cytosol                             | U-251 MG | cytosol                             |                                             |
| nuclear speckles, centros           | A549     | nuclear s                           | HaCaT nuclear speckles, centrosome, cytosol |
| nucleoplasm                         | A-431    | nucleoplasm, actin filaments        |                                             |
| rods & rings                        | A-431    | rods &                              | U-251 MG rods & rings                       |
| cytosol                             | SH-SY5Y  | nucleopla                           | AF22 nucleoplasm, cytosol                   |
| nucleoplasm, cytosol                |          |                                     |                                             |
| endoplasmic reticulum               |          |                                     |                                             |
| nucleoplasm, mitochondria           | MCF7     | mitochond                           | PC-3 nucleoplasm, mitochondria              |
| cytosol                             | REH      | cytosol                             |                                             |
| nucleoplasm                         | HEK 293  | nucleoplasm                         |                                             |
| nucleoplasm, endoplasmic reticulum, |          |                                     |                                             |
| cytosol                             |          |                                     |                                             |
| nucleoplasm, vesicles               | A-431    | nucleopla                           | U-251 MG nucleoplasm, vesicles              |
| mitochondria                        |          |                                     |                                             |
| nucleoplasm, vesicles               | A-431    | nucleopla                           | U-251 MG nucleoplasm, cytosol               |
| nucleoplasm, nucleoli               | MCF7     | nucleopla                           | PC-3 nucleoplasm, nucleoli                  |
| cytosol                             | A-431    | cytosol                             | U-251 MG cytosol                            |
| cytokinetic bridge, cytosol         |          |                                     |                                             |
| cytosol                             |          |                                     |                                             |
| plasma membrane                     | RH-30    | plasma membrane                     |                                             |

|                                        |           |                                        |           |
|----------------------------------------|-----------|----------------------------------------|-----------|
| vesicles, plasma membrane              | A-431     | vesicles, plasma membrane              |           |
| plasma membrane, cytosol               | A-431     | plasma membrane, centrosome,           | U-251 MG  |
| nucleoplasm                            | U-251 MG  | nucleoli, plasma membrane, centrosome, |           |
| nucleoli, endoplasmic reticulum        |           | nucleoplasm                            |           |
| vesicles                               | HEK 293   | vesicles                               | A549      |
| lipid droplets                         | HEK 293   | lipid droplets                         | A549      |
| nucleoli, plasma membrane              | HeLa      | nucleoli, plasma membrane              | PC-3      |
| vesicles, plasma membrane,             | A-431     | vesicles                               | U-251 MG  |
| mitochondria                           | A-431     | mitochondria                           | U-251 MG  |
| nucleoplasm, nucleoli, cytosol         | A-431     | nucleoplasm, golgi apparatus, focal ad | U-251 MG  |
| nucleoplasm                            | MCF7      | nucleoplasm                            | HEK 293   |
| nucleoplasm, cytosol                   | U-2 OS    | nucleoplasm, plasma membrane           | PC-3      |
| cytosol                                | U-251 MG  | cytosol                                | PC-3      |
| nucleoplasm, plasma membrane           | A-431     | nucleoplasm                            | U-251 MG  |
| nucleoplasm, plasma membrane,          | U-251 MG  | nucleoplasm, plasma membrane, cytosol  | PC-3      |
| nucleoplasm                            | A-431     | nucleoplasm                            | U-251 MG  |
| vesicles                               |           |                                        |           |
| nucleoplasm                            | MCF7      | nucleoplasm, nuclear membrane          | HEK 293   |
| nucleoplasm, cytosol                   | HaCaT     | nucleoplasm, cytosol                   |           |
| nuclear bodies, mitochondria           |           |                                        |           |
| centrosome                             | SiHa      | centrosome                             | BJ        |
| nucleoli fibrillar center              | U-2 OS    | vesicles                               | RH-30     |
| nucleoplasm                            | HEK 293   | nucleoplasm                            | PC-3      |
| nucleoplasm, plasma membrane           | A-431     | nucleoplasm, plasma membrane, cytosol  | U-251 MG  |
| nucleoplasm, plasma membrane,          | U-2 OS    | nucleoplasm, plasma membrane           | RH-30     |
| golgi apparatus, plasma membrane       |           |                                        |           |
| plasma membrane                        | A-431     | plasma membrane                        | U-251 MG  |
| plasma membrane, cytosol               |           |                                        |           |
| nucleoplasm, nucleoli                  | SK-MEL-30 | nucleoplasm, nucleoli                  | HUVEC     |
| cytosol                                | U-251 MG  | cytosol                                | HeLa      |
| nucleoplasm, vesicles                  | A-431     | nucleoplasm, vesicles                  | U-251 MG  |
| cytosol                                | A-431     | cytosol                                | U-251 MG  |
| cytosol                                | U-251 MG  | centriolar satellite, cytosol          | ASC TERT1 |
| endoplasmic reticulum, cytosol         | A-431     | endoplasmic reticulum, cytosol         | U-251 MG  |
| nucleoplasm                            | A-431     | nucleoplasm                            | U-251 MG  |
| nuclear speckles                       | U-251 MG  | nuclear speckles                       | HEK 293   |
| nucleoli                               | A-431     | nucleoli                               | U-251 MG  |
| plasma membrane                        | HeLa      | plasma membrane                        | ASC TERT1 |
| midbody                                |           |                                        |           |
| nucleoplasm, cytosol                   | U-251 MG  | nucleoplasm                            |           |
| nucleoplasm                            | A-431     | nucleoplasm                            | BJ        |
| nucleoplasm                            |           |                                        |           |
| nucleoplasm                            | A-431     | nucleoplasm                            | U-251 MG  |
| nucleoplasm, nucleoli fibrillar center | U-2 OS    | nucleoplasm                            | Hep G2    |
| vesicles                               | U-2 OS    | vesicles                               | A549      |
| nucleoplasm, cell junctions            | U-2 OS    | nucleoplasm, vesicles                  | U-251 MG  |
| nucleoplasm, plasma membrane           | A549      | nucleoplasm                            | U-251 MG  |
| vesicles                               |           | nucleoplasm, plasma membrane           | HaCaT     |
| nucleoplasm                            | MCF7      | nucleoplasm                            | PC-3      |
| nucleoplasm, nucleoli                  | A-431     | nucleoplasm, nucleoli                  | U-251 MG  |
| nucleoplasm, cytosol                   | A-431     | nucleoplasm, cytosol                   | U-251 MG  |
| cytosol                                | A-431     | cytosol                                | U-251 MG  |
| cytosol                                | A-431     | cytosol                                | U-251 MG  |
| vesicles, cell junctions               |           |                                        |           |
| nucleoplasm, nucleoli, cytosol         | A549      | nucleoplasm, nucleoli, cytosol         | SiHa      |

|                                        |          |                                        |                                           |
|----------------------------------------|----------|----------------------------------------|-------------------------------------------|
| nucleoli fibrillar center              | A549     | nucleoli SiHa                          | nucleoli fibrillar center, vesicles       |
| nucleoplasm, golgi apparatus           | U-2 OS   | nucleoplaU-251 MG                      | nucleoplasm, golgi apparatus              |
| nucleoplasm, cell junction             | A-431    | nucleoplaU-251 MG                      | nucleoplasm, cytosol                      |
| nucleoplasm, actin filaments           | A-431    | nucleoplaU-251 MG                      | nucleoplasm, actin filaments              |
| nucleoplasm                            | A-431    | nucleoplaU-251 MG                      | nucleoplasm                               |
| nucleoli fibrillar center              | HEK 293  | nucleoli PC-3                          | nucleoli fibrillar center, mitochondria   |
| nucleoplasm, vesicles                  | A-431    | nucleoplaU-251 MG                      | nucleoplasm, vesicles                     |
| golgi apparatus                        | A-431    | golgi appU-251 MG                      | golgi apparatus                           |
| nucleoplasm, vesicles, plasma membrane | A-431    | nucleoplaSK-MEL-30                     | nucleoplasm, vesicles, plasma membrane    |
| nucleoplasm, nuclear membrane          | U-2 OS   | nucleoplaPC-3                          | nucleoplasm, nuclear membrane             |
| nucleoplasm                            | U-2 OS   | nucleoplasm                            |                                           |
| nucleoplasm                            |          |                                        |                                           |
| nuclear bodies                         | A-431    | nuclear bU-251 MG                      | nuclear bodies                            |
| mitochondria                           | RH-30    | nucleoplaPC-3                          | nucleoplasm                               |
| nucleoplasm, plasma membrane           | A-431    | nucleoplaU-251 MG                      | nucleoplasm, plasma membrane              |
| nucleoplasm, plasma membrane           | HaCaT    | nucleoplasm, plasma membrane           |                                           |
| plasma membrane, cytosol               | A-431    | golgi appU-251 MG                      | golgi apparatus, plasma membrane, cytosol |
| cytosol                                | A-431    | cytosol MCF7                           | cytosol                                   |
| mitochondria                           | A-431    | mitochondU-251 MG                      | mitochondria                              |
| nucleoli                               | A-431    | nucleoli, Hep G2                       | nucleoli                                  |
| nucleoplasm, cytosol                   | A-431    | nucleoplaU-251 MG                      | nucleoplasm, cytosol                      |
| vesicles                               | A-431    | vesicles U-251 MG                      | vesicles                                  |
| cytokinetic bridge, mitotic spindle    | RH-30    | microtubuPC-3                          | nucleoplasm, microtubules                 |
| endoplasmic reticulum                  | PC-3     | endoplasmic reticulum                  |                                           |
| mitochondria                           | SH-SY5Y  | mitochondREH                           | mitochondria                              |
| cytosol                                | A-431    | cytosol                                |                                           |
| vesicles, lipid droplets               |          |                                        |                                           |
| nucleoplasm                            | Hep G2   | nucleoplaSiHa                          | nucleoplasm                               |
| nucleoplasm, plasma membrane           |          |                                        |                                           |
| nucleoplasm                            | A-431    | nucleoplaU-251 MG                      | nucleoplasm                               |
| nucleoplasm, nuclear bodies            | RH-30    | nucleoplasm                            |                                           |
| cytosol                                |          |                                        |                                           |
| nuclear bodies                         | MCF7     | nuclear bSH-SY5Y                       | nuclear bodies                            |
| nucleoplasm, cytosol                   | SiHa     | nucleoplaSK-MEL-30                     | nucleoplasm, cytosol                      |
| vesicles, mitochondria                 | SH-SY5Y  | mitochondria                           |                                           |
| nucleoplasm                            | U-2 OS   | nucleoplaRH-30                         | nucleoplasm                               |
| plasma membrane, cytosol               | A-431    | plasma meU-251 MG                      | cytosol                                   |
| vesicles                               |          |                                        |                                           |
| nuclear membrane, centrosome           | A549     | nucleoplaSH-SY5Y                       | nucleoplasm, centrosome                   |
| mitochondria                           | A-431    | mitochondU-251 MG                      | mitochondria                              |
| nucleoplasm                            | A-431    | nucleoplaMCF7                          | nucleoplasm                               |
| nucleoplasm                            | SiHa     | nucleoplaRH-30                         | nucleoplasm                               |
| nucleoplasm, plasma membrane           | HeLa     | nucleoplaHaCaT                         | nucleoplasm, plasma membrane              |
| nucleoplasm                            | HeLa     | nucleoplasm, nuclear bodies            |                                           |
| nucleoplasm                            | A-431    | nucleoplaU-251 MG                      | nucleoplasm                               |
| cytosol                                |          |                                        |                                           |
| microtubules, cytosol                  | A-431    | plasma meU-251 MG                      | cytosol                                   |
| plasma membrane                        | HEK 293  | plasma mePC-3                          | plasma membrane                           |
| nucleoli fibrillar center              | HaCaT    | nucleoplasm, nucleoli fibrillar center |                                           |
| nucleoplasm                            | A-431    | nucleoplaU-251 MG                      | nucleoplasm                               |
| nucleoplasm, cytosol                   | A-431    | nucleoplaRPTEC TER                     | nucleoplasm, cytosol                      |
| mitochondria                           | U-251 MG | mitochondria                           |                                           |
| mitochondria                           | A-431    | mitochondU-251 MG                      | mitochondria                              |
| plasma membrane                        | U-251 MG | plasma meREH                           | plasma membrane                           |
| nucleoplasm                            | A-431    | nucleoplaU-251 MG                      | nucleoplasm                               |



|                                 |          |                              |                                               |
|---------------------------------|----------|------------------------------|-----------------------------------------------|
| plasma membrane                 |          |                              |                                               |
| vesicles                        | MCF7     | nucleoplasm                  | vesicles, cytosol                             |
| nucleoplasm                     | MCF7     | nucleoplasm                  | nucleoplasm, plasma membrane                  |
| golgi apparatus, cytosol        | HEK 293  | golgi apparatus              | golgi apparatus                               |
| plasma membrane                 |          |                              |                                               |
| plasma membrane, cytosol        | A-431    | golgi apparatus              | plasma membrane                               |
| nucleoplasm, nucleoli           | A-431    | nucleoplasm                  | nucleoplasm, nucleoli, cytosol                |
| plasma membrane, cytosol        | A-431    | golgi apparatus              | plasma membrane                               |
| cytosol                         | A-431    | cytosol                      | cytosol                                       |
| nucleoplasm, cytosol            | A-431    | cytosol                      | cytosol                                       |
| nucleoplasm, nucleoli           | A-431    | nucleoplasm                  | nucleoplasm, nucleoli                         |
| nucleoplasm                     | MCF7     | nucleoplasm                  | nucleoplasm                                   |
| nucleoplasm, plasma membrane    | RH-30    | nucleoplasm, plasma membrane | nucleoplasm, plasma membrane                  |
| nucleoplasm, cytosol            | A-431    | nucleoplasm                  | nucleoplasm, cytosol                          |
| nucleoplasm                     | A-431    | nucleoplasm                  | nucleoplasm                                   |
| endoplasmic reticulum, cytosol  | A-431    | endoplasmic reticulum        | endoplasmic reticulum, cytosol                |
| nucleoli, endoplasmic reticulum | HEK 293  | endoplasmic reticulum        | endoplasmic reticulum, cytosol                |
| golgi apparatus                 | HeLa     | nucleoplasm                  | nucleoplasm, golgi apparatus                  |
| nucleoplasm                     | A-431    | nucleoplasm                  | nucleoplasm                                   |
| vesicles, cytosol               | A-431    | vesicles                     | vesicles, cytosol                             |
| vesicles                        | A-431    | vesicles                     | vesicles, plasma membrane                     |
| nucleoplasm, plasma membrane    | MCF7     | nucleoplasm                  | nucleoplasm, plasma membrane, actin filaments |
| nucleoplasm                     | SH-SY5Y  | nucleoplasm                  | nucleoplasm                                   |
| nuclear speckles                | A-431    | nuclear speckles             | nuclear speckles                              |
| cytosol, cytoplasmic bodies     | MCF7     | cytosol, cytoplasmic bodies  | cytosol, cytoplasmic bodies                   |
| nucleoplasm                     | U-251 MG | nucleoplasm                  | nucleoplasm                                   |
| nucleoplasm                     |          |                              |                                               |
| mitochondria                    | U-2 OS   | mitochondria                 | mitochondria                                  |
| cytosol                         | A-431    | vesicles                     | cytosol                                       |
| nucleoplasm, cell junctions     | U-2 OS   | nucleoplasm                  | nucleoplasm                                   |
| plasma membrane, cytosol        | A-431    | golgi apparatus              | plasma membrane                               |
| nucleoplasm                     |          |                              |                                               |
| nucleoli, cytosol               | PC-3     | nucleoli                     | nucleoli, mitotic spindle                     |
| mitochondria                    | HEK 293  | mitochondria                 | nucleoplasm, mitochondria                     |
| nucleoplasm, golgi apparatus    | MCF7     | nucleoplasm                  | nucleoplasm, nucleoli, golgi apparatus        |
| vesicles                        | PC-3     | vesicles                     | vesicles                                      |
| nucleoplasm, mitochondria       | U-2 OS   | nucleoplasm                  | nucleoplasm, microtubules, mitochondria       |
| nucleoplasm                     | U-2 OS   | nucleoplasm                  | nucleoplasm                                   |
| nucleoplasm                     | A-431    | nucleoplasm                  | nucleoplasm                                   |
| nucleoplasm                     | HEK 293  | nucleoplasm                  | nucleoplasm                                   |
| cytosol                         | A549     | cytosol                      | cytosol                                       |
| nucleoplasm                     |          |                              |                                               |
| nucleoplasm, nuclear bodies     | A-431    | nucleoplasm                  | nucleoplasm, nuclear bodies                   |
| nucleoplasm                     | U-251 MG | nucleoplasm                  | nucleoplasm                                   |
| golgi apparatus                 | SH-SY5Y  | golgi apparatus              | golgi apparatus                               |
| mitochondria                    | REH      | mitochondria                 | mitochondria                                  |
| mitochondria                    |          |                              |                                               |
| nucleoplasm                     | MCF7     | nucleoplasm                  | nucleoplasm, vesicles                         |
| nuclear speckles                | A-431    | nuclear speckles             | nuclear speckles                              |
| plasma membrane                 | U-251 MG | plasma membrane              | plasma membrane, cytosol                      |
| nucleoli, plasma membrane       | A-431    | plasma membrane              | cytosol                                       |
| nuclear bodies                  | SiHa     | nuclear bodies               | nuclear bodies                                |
| plasma membrane                 | SH-SY5Y  | plasma membrane              | plasma membrane                               |
| nucleoplasm                     | BJ       | nucleoplasm                  | nucleoplasm                                   |
| nucleoplasm                     |          |                              |                                               |

|                            |           |                                                 |  |                                        |
|----------------------------|-----------|-------------------------------------------------|--|----------------------------------------|
| nucleoplasm                |           |                                                 |  |                                        |
| nucleoplasm                | A-431     | nucleoplaU-251 MG                               |  | nucleoplasm                            |
| plasma membrane, cytosol   | U-2 OS    | plasma meSiHa                                   |  | nucleoplasm, plasma membrane, cytosol  |
| cytosol                    | U-251 MG  | cytosol                                         |  |                                        |
| nucleoplasm, cytosol       |           |                                                 |  |                                        |
| plasma membrane, cytosol   | A-431     | plasma meU-251 MG                               |  | plasma membrane, cytosol               |
| cytosol                    | A549      | cytosol HeLa                                    |  | plasma membrane, cytosol               |
| golgi apparatus            |           |                                                 |  |                                        |
| nucleoplasm, nucleoli      | MCF7      | nucleoli, HeLa                                  |  | nucleoplasm, nucleoli, nuclear bodies  |
| mitochondria               | A-431     | mitochondria                                    |  |                                        |
| nucleoplasm                | A-431     | nucleoplaU-251 MG                               |  | nucleoplasm                            |
| nucleoplasm, nuclear bodie | A-431     | nuclear bU-251 MG                               |  | nucleoplasm, cytosol                   |
| nucleoplasm, nuclear bodie | A-431     | nucleoplaU-251 MG                               |  | nucleoplasm, nuclear bodies, centrosom |
| nucleoli fibrillar center  | U-251 MG  | nucleoli RH-30                                  |  | nucleoli fibrillar center              |
| nucleoplasm, nucleoli fibr | EFO-21    | nucleoplasm, nucleoli fibrillar center, cytosol |  |                                        |
| nucleoplasm, vesicles      | U-2 OS    | nucleoplaMCF7                                   |  | nucleoplasm                            |
| nucleoplasm, endoplasmic r | A-431     | nucleoplaU-251 MG                               |  | nucleoplasm, endoplasmic reticulum, pl |
| nucleoplasm, cytosol       | MCF7      | nucleoplaSiHa                                   |  | nuclear bodies, cytosol                |
| cytosol                    | U-251 MG  | cytosol BJ                                      |  | cytosol                                |
| cytosol                    |           |                                                 |  |                                        |
| cytosol                    | A-431     | cytosol U-251 MG                                |  | cytosol                                |
| golgi apparatus            | U-2 OS    | golgi appHep G2                                 |  | golgi apparatus                        |
| nucleoplasm                | U-251 MG  | nucleoplasm                                     |  |                                        |
| plasma membrane            | U-2 OS    | plasma meHEK 293                                |  | plasma membrane                        |
| centrosome, cytosol        | A-431     | centrosomHEK 293                                |  | centrosome, cytosol                    |
| endoplasmic reticulum      | U-2 OS    | endoplasmHEK 293                                |  | endoplasmic reticulum                  |
| nucleoplasm, cell junctior | HEK 293   | nucleoplasm, cell junctions                     |  |                                        |
| cytosol                    |           |                                                 |  |                                        |
| nucleoli                   | SH-SY5Y   | nucleoli                                        |  |                                        |
| nucleoplasm, nucleoli      | MCF7      | nucleoplaSiHa                                   |  | nucleoplasm                            |
| nucleoplasm                | MCF7      | nucleoplaSiHa                                   |  | nucleoplasm                            |
| nucleoplasm, nuclear membr | HEK 293   | golgi appSK-MEL-30                              |  | nucleoplasm, nuclear membrane, golgi a |
| nucleoplasm                | A549      | nucleoplaPC-3                                   |  | nucleoplasm                            |
| plasma membrane, cytosol   | A-431     | golgi appK-562                                  |  | plasma membrane                        |
| nucleoplasm                | A-431     | nucleoplaU-251 MG                               |  | nucleoplasm                            |
| mitochondria               |           |                                                 |  |                                        |
| plasma membrane, cytosol   | A-431     | golgi appK-562                                  |  | plasma membrane                        |
| nucleoplasm, peroxisomes   | HEK 293   | nucleoplaSH-SY5Y                                |  | nucleoplasm, peroxisomes, plasma membr |
| nucleoplasm                | RH-30     | nucleoplaLHCN-M2                                |  | nucleoplasm                            |
| nucleoli, vesicles         | A-431     | vesicles A549                                   |  | vesicles                               |
| golgi apparatus            |           |                                                 |  |                                        |
| nucleoli                   | U-251 MG  | nucleoplaMCF7                                   |  | nucleoplasm, nucleoli, nuclear bodies  |
| vesicles                   | A549      | vesicles SiHa                                   |  | vesicles                               |
| cytosol                    | U-251 MG  | cytosol                                         |  |                                        |
| cytosol                    | HeLa      | cytosol Hep G2                                  |  | cytosol                                |
| nucleoplasm, nuclear bodie | SiHa      | nuclear bBJ                                     |  | nucleoplasm                            |
| golgi apparatus            | RT4       | golgi appU-2 OS                                 |  | golgi apparatus                        |
| nucleoplasm                | MCF7      | nucleoplasm, cell junctions                     |  |                                        |
| vesicles                   | MCF7      | vesicles PC-3                                   |  | vesicles                               |
| endoplasmic reticulum      |           |                                                 |  |                                        |
| nucleoplasm                | A-431     | nucleoplaU-251 MG                               |  | nucleoplasm                            |
| nucleoplasm                | A-431     | nucleoplaU-251 MG                               |  | nucleoplasm                            |
| nucleoplasm, midbody       | RH-30     | nucleoplasm                                     |  |                                        |
| nucleoplasm                | SK-MEL-30 | nucleoplasm                                     |  |                                        |
| nucleoplasm                | PC-3      | nucleoplasm                                     |  |                                        |

|                                 |           |                                       |           |                                          |
|---------------------------------|-----------|---------------------------------------|-----------|------------------------------------------|
| nucleoplasm                     | Hep G2    | nucleoplasm                           | PC-3      | nucleoplasm                              |
| nucleoplasm                     | U-2 OS    | nucleoplasm                           | A-431     | nucleoplasm, cytosol                     |
| nucleoplasm, nuclear bodies     | HeLa      | nucleoplasm                           | PC-3      | nucleoplasm, nuclear bodies              |
| nucleoplasm, vesicles           | A-431     | nucleoplasm                           | A549      | nucleoplasm                              |
| nucleoplasm                     | MCF7      | nucleoplasm                           | A549      | nucleoplasm                              |
| nucleoplasm, vesicles           | A-431     | nucleoplasm, vesicles                 | U-251 MG  | nucleoplasm, vesicles                    |
| nucleoplasm                     | PC-3      | nucleoplasm, cytosol                  |           |                                          |
| plasma membrane, cytosol        | Hep G2    | cytosol                               |           |                                          |
| plasma membrane, cytosol        | Hep G2    | aggresome, cytosol                    |           |                                          |
| plasma membrane, cytosol        | A-431     | golgi apparatus                       | K-562     | plasma membrane                          |
| lipid droplets                  | A-431     | golgi apparatus                       | U-251 MG  | golgi apparatus, plasma membrane         |
| centrosome                      | U-2 OS    | centrosome                            | REH       | centrosome                               |
| nucleoplasm                     |           |                                       |           |                                          |
| vesicles                        | A-431     | vesicles                              | Hep G2    | golgi apparatus                          |
| nuclear speckles                | A-431     | nuclear speckles                      | U-251 MG  | nuclear speckles, golgi apparatus        |
| nuclear bodies                  | MCF7      | nuclear bodies                        | SH-SY5Y   | nuclear bodies                           |
| nucleoplasm                     | U-2 OS    | nucleoplasm                           | SiHa      | nuclear speckles                         |
| mitochondria                    | PC-3      | mitochondria                          |           |                                          |
| vesicles                        | HeLa      | vesicles, SH-SY5Y                     |           | vesicles                                 |
| nucleoplasm, nucleoli           |           |                                       |           |                                          |
| nucleoplasm, nucleoli           |           |                                       |           |                                          |
| nucleoplasm, nucleoli           |           |                                       |           |                                          |
| cytosol                         | A-431     | cytosol                               | U-251 MG  | cytosol                                  |
| endoplasmic reticulum           | MCF7      | endoplasmic reticulum                 | PC-3      | endoplasmic reticulum                    |
| centrosome, cytosol             | A-431     | centrosome                            | HEK 293   | centrosome, cytosol                      |
| vesicles                        | A-431     | vesicles                              | Hep G2    | golgi apparatus                          |
| cytosol                         | A-431     | cytosol                               | U-251 MG  | cytosol                                  |
| nucleoplasm, plasma membrane    | MCF7      | nucleoplasm, cell junctions           |           |                                          |
| nucleoplasm, mitochondria       | MCF7      | mitochondria                          | HEK 293   | mitochondria                             |
| nucleoplasm, cytosol            | U-2 OS    | nucleoplasm, aggresome, cytosol       | HEK 293   | nucleoplasm, aggresome, cytosol          |
| nucleoli                        | A-431     | nucleoli, HeLa                        |           | nucleoli, cytosol                        |
| nucleoli, cytosol               | A-431     | nucleoli, HeLa                        |           | cytosol                                  |
| nucleoli                        | A-431     | nucleoli                              |           |                                          |
| cytosol                         | MCF7      | cytosol                               | HEK 293   | cytosol                                  |
| cytosol                         | U-251 MG  | cytosol                               | MCF7      | cytosol                                  |
| nucleoplasm, lipid droplets     | SiHa      | nucleoplasm, lipid droplets           | RH-30     | lipid droplets                           |
| nuclear bodies                  | HeLa      | nuclear bodies                        |           |                                          |
| actin filaments                 | HEK 293   | actin filaments                       | SH-SY5Y   | actin filaments                          |
| nuclear speckles, mitochondria  | A549      | mitochondria                          | RH-30     | mitochondria                             |
| vesicles                        | HEK 293   | vesicles                              | SK-MEL-30 | vesicles                                 |
| cytosol                         | SK-MEL-30 | cytosol                               |           |                                          |
| nucleoli, endoplasmic reticulum | U-251 MG  | nucleoli, MCF7                        |           | nucleoli, endoplasmic reticulum, cytosol |
| nucleoplasm                     | U-2 OS    | nucleoplasm, cytosol                  | A-431     | nucleoplasm, cytosol                     |
| nucleoplasm                     | U-251 MG  | nucleoplasm, cytosol                  |           |                                          |
| nucleoplasm, nucleoli           | A-431     | nucleoplasm, nucleoli                 | U-251 MG  | nucleoplasm, nucleoli                    |
| nucleoli                        | U-251 MG  | nucleoplasm, nucleoli, nuclear bodies | MCF7      | nucleoplasm, nucleoli, nuclear bodies    |
| cytosol                         | A-431     | plasma membrane, cytosol              | U-251 MG  | cytosol                                  |
| nuclear membrane, cytosol       | A-431     | nuclear membrane, cytosol             | U-251 MG  | nuclear membrane, cytosol                |
| nucleoplasm, cytosol            | PC-3      | nucleoplasm, cytosol                  | SK-MEL-30 | nucleoplasm, cytosol                     |
| cytosol                         | U-251 MG  | focal adhesion sites, cytosol         |           |                                          |
| nucleoplasm                     | A-431     | nucleoplasm                           | U-251 MG  | nucleoplasm                              |
| vesicles                        |           |                                       |           |                                          |
| golgi apparatus                 | U-2 OS    | golgi apparatus                       | Hep G2    | golgi apparatus                          |
| nucleoplasm                     | A-431     | nucleoplasm                           | U-251 MG  | nucleoplasm                              |
| nucleoplasm                     | BJ        | nucleoplasm, nucleoli                 |           |                                          |

|                                        |           |                                             |                                        |
|----------------------------------------|-----------|---------------------------------------------|----------------------------------------|
| cytosol                                | A-431     | plasma meU-251 MG                           | cytosol                                |
| cytosol                                | A-431     | cytosol U-251 MG                            | cytosol                                |
| nucleoplasm, cytosol                   | A-431     | nucleoplaHEK 293                            | nucleoplasm, cytosol                   |
| cytosol                                | A-431     | cytosol                                     |                                        |
| nucleoplasm, cytosol                   | A-431     | nucleoplaU-251 MG                           | nucleoplasm, cytosol                   |
| nucleoplasm, cytosol                   |           |                                             |                                        |
| plasma membrane                        | SH-SY5Y   | plasma mePC-3                               | plasma membrane                        |
| nucleoplasm                            | SK-MEL-30 | nucleoplasm                                 |                                        |
| nucleoplasm, cytosol                   | A-431     | nucleoplaHEK 293                            | nucleoplasm, cytosol                   |
| nucleoplasm, nuclear bodies            | SH-SY5Y   | nucleoplasm, nuclear bodies                 |                                        |
| nucleoplasm                            | U-2 OS    | nucleoplaRH-30                              | nucleoplasm                            |
| vesicles                               | U-251 MG  | vesicles HaCaT                              | vesicles, microtubules                 |
| nucleoplasm, nucleoli                  | MCF7      | nucleoli HEK 293                            | nucleoli                               |
| nucleoplasm, nucleoli                  | MCF7      | nucleoplasm, nucleoli                       |                                        |
| nuclear bodies                         | U-2 OS    | nuclear bodies                              |                                        |
| nucleoplasm, nucleoli                  | HeLa      | nucleoplaSiHa                               | nucleoplasm, nucleoli, nuclear bodies  |
| nucleoplasm                            | A-431     | nucleoplaU-251 MG                           | nucleoplasm                            |
| vesicles, aggresome                    |           |                                             |                                        |
| nucleoplasm                            | Hep G2    | nucleoplasm                                 |                                        |
| nucleoplasm, cytosol                   | A-431     | nucleoplaU-251 MG                           | nucleoplasm, cytosol                   |
| vesicles                               | BJ        | vesicles                                    |                                        |
| nucleoplasm, nuclear bodies            | HEK 293   | nucleoplaPC-3                               | nucleoplasm, nuclear bodies, cytosol   |
| microtubules, mitochondria             | Hep G2    | microtubules, mitotic spindle, mitochondria |                                        |
| nucleoplasm, plasma membrane           | A-431     | nucleoplaU-251 MG                           | nucleoplasm, cytosol                   |
| mitochondria                           | A-431     | mitochondU-251 MG                           | mitochondria                           |
| nucleoplasm                            | U-2 OS    | nucleoplaHaCaT                              | nucleoplasm                            |
| nucleoli, mitochondria                 | A549      | mitochondria                                |                                        |
| nucleoplasm                            | A-431     | nucleoplaU-251 MG                           | nucleoplasm                            |
| nucleoplasm, nucleoli fibrillar center | A-431     | nucleoplaHEK 293                            | nucleoplasm, nucleoli fibrillar center |
| plasma membrane, cytosol               | A-431     | golgi appK-562                              | plasma membrane                        |
| cytosol                                | A-431     | cytosol U-251 MG                            | cytosol                                |
| nucleoplasm, cytosol                   | HEK 293   | nucleoplasm, cytosol                        |                                        |
| nucleoli                               | SH-SY5Y   | nucleoli RH-30                              | nucleoli                               |
| nucleoplasm                            | MCF7      | nucleoplasm, centrosome                     |                                        |
| nucleoli fibrillar center              | SiHa      | nucleoli BJ                                 | nucleoli fibrillar center, golgi appa  |
| nucleoplasm, cytosol                   |           |                                             |                                        |
| nucleoplasm                            |           |                                             |                                        |
| centrosome                             | HeLa      | centrosome                                  |                                        |
| centrosome                             | A-431     | centrosomU-251 MG                           | nucleoplasm, centrosome                |
| plasma membrane, cytosol               | A-431     | golgi appK-562                              | plasma membrane                        |
| vesicles                               |           |                                             |                                        |
| nucleoplasm                            | MCF7      | nucleoplaA549                               | nucleoplasm                            |
| endoplasmic reticulum                  | A-431     | endoplasmU-251 MG                           | endoplasmic reticulum                  |
| nuclear speckles                       | A-431     | nuclear sU-251 MG                           | nuclear speckles                       |
| nucleoplasm                            | MCF7      | nucleoplaA549                               | nucleoplasm                            |
| focal adhesion sites                   | PC-3      | nucleoplaSK-MEL-30                          | nucleoplasm                            |
| plasma membrane, cytosol               | RH-30     | plasma membrane, cytosol                    |                                        |
| nucleoplasm, plasma membrane, cytosol  |           |                                             |                                        |
| nucleoplasm, cytosol                   | U-2 OS    | nucleoplaPC-3                               | cytosol                                |
| cytosol                                |           |                                             |                                        |
| nucleoplasm, plasma membrane, cytosol  | A-431     | nucleoplaU-251 MG                           | nucleoplasm, plasma membrane, cytosol  |
| vesicles                               |           |                                             |                                        |
| mitochondria                           | A-431     | mitochondHep G2                             | mitochondria                           |
| nucleoplasm, cytosol                   | A-431     | nucleoplasm, cytosol                        |                                        |
| cytosol                                | U-251 MG  | cytosol A549                                | cytosol                                |

|                            |           |                          |                                       |
|----------------------------|-----------|--------------------------|---------------------------------------|
| nucleoplasm, cytosol       | A-431     | nucleoplaU-251 MG        | nucleoplasm, nucleoli, cytosol        |
| nucleoplasm                | A-431     | nucleoplaU-251 MG        | nucleoplasm                           |
| cytosol                    | A-431     | cytosol U-251 MG         | cytosol                               |
| cytosol                    |           | U-251 MG                 | cytosol                               |
| nucleoplasm, plasma membr  | RH-30     | vesicles SK-MEL-30       | nucleoplasm, plasma membrane, cytosol |
| plasma membrane            | ASC TERT1 | plasma membrane          |                                       |
| nucleoli                   | A549      | nucleoli PC-3            | nucleoli                              |
| cytosol                    |           |                          |                                       |
| nucleoplasm                | A-431     | nucleoplaU-251 MG        | nucleoplasm                           |
| nucleoplasm                | Hep G2    | nucleoplasm, nucleoli    |                                       |
| plasma membrane            | HeLa      | plasma meRH-30           | plasma membrane                       |
| nuclear speckles           | A-431     | nuclear sU-251 MG        | nuclear speckles                      |
| nuclear speckles           | A-431     | nuclear sU-251 MG        | nuclear speckles                      |
| nucleoplasm, golgi apparat | EFO-21    | nucleoplasm              |                                       |
| nucleoplasm, plasma membr  | RH-30     | vesicles SK-MEL-30       | nucleoplasm, plasma membrane, cytosol |
| vesicles                   | MCF7      | vesicles HEK 293         | vesicles                              |
| endoplasmic reticulum      | U-2 OS    | endoplasmHep G2          | endoplasmic reticulum                 |
| nucleoplasm                | A-431     | nucleoplasm, cytosol     |                                       |
| nucleoplasm                | U-2 OS    | nucleoplaA-431           | nucleoplasm                           |
| nucleoplasm, cytosol       | A-431     | nucleoplaU-251 MG        | cytosol                               |
| golgi apparatus            | A-431     | golgi appU-251 MG        | golgi apparatus                       |
| cytosol                    | U-251 MG  | cytosol                  |                                       |
| vesicles                   | Hep G2    | vesicles HEL             | vesicles, cytosol                     |
| nuclear bodies             | U-251 MG  | nuclear bodies           |                                       |
| nucleoplasm, nucleoli      | A-431     | nucleoplaU-251 MG        | nucleoplasm, nucleoli                 |
| nucleoplasm                | A549      | nucleoplaHeLa            | nucleoplasm                           |
| endoplasmic reticulum, pl  | A-431     | endoplasmPC-3            | endoplasmic reticulum, cytosol        |
| vesicles                   | HEK 293   | nuclear sSK-MEL-30       | vesicles                              |
| mitochondria               | MCF7      | mitochondHEK 293         | mitochondria                          |
| nucleoplasm, nucleoli      | RH-30     | nucleoplaPC-3            | nucleoplasm, nucleoli                 |
| nucleoplasm                | HEK 293   | nucleoplasm              |                                       |
| golgi apparatus, vesicles  | U-2 OS    | golgi appBJ              | golgi apparatus, vesicles             |
| cytosol                    | A-431     | cell juncMCF7            | cell junctions, cytosol               |
| mitochondria               | A-431     | mitochondU-251 MG        | mitochondria                          |
| mitochondria               |           |                          |                                       |
| plasma membrane, cytosol   | A-431     | nucleoplaU-251 MG        | nucleoplasm, plasma membrane, cytosol |
| nuclear bodies             | A-431     | nuclear bU-251 MG        | nuclear bodies                        |
| golgi apparatus, cytosol   | A-431     | cytosol U-251 MG         | golgi apparatus, cytosol              |
| nucleoli, cytosol          | A-431     | nucleoli, U-251 MG       | nucleoli                              |
| nucleoplasm, plasma membr  | MCF7      | nucleoplaRH-30           | nucleoplasm, plasma membrane          |
| nucleoplasm, microtubules  | MCF7      | nucleoplaHep G2          | nucleoplasm, microtubules             |
| vesicles, plasma membrane  | A-431     | vesicles, PC-3           | plasma membrane                       |
| mitochondria               |           |                          |                                       |
| plasma membrane, cytosol   | SH-SY5Y   | plasma membrane, cytosol |                                       |
| cytosol                    | U-251 MG  | golgi apparatus, cytosol |                                       |
| endoplasmic reticulum      | HEK 293   | endoplasmHep G2          | endoplasmic reticulum                 |
| nucleoplasm, cytosol       | RH-30     | nucleoplasm, cytosol     |                                       |
| nucleoplasm                | A-431     | nucleoplaU-251 MG        | nucleoplasm                           |
| nucleoplasm, plasma membr  | RH-30     | vesicles SK-MEL-30       | nucleoplasm, plasma membrane, cytosol |
| mitochondria               |           |                          |                                       |
| nucleoplasm, cytosol       |           |                          |                                       |
| vesicles                   |           |                          |                                       |
| peroxisomes                | MCF7      | peroxisomA549            | peroxisomes                           |
| vesicles                   | A-431     | vesicles U-251 MG        | vesicles                              |

|                                 |           |                              |                                        |
|---------------------------------|-----------|------------------------------|----------------------------------------|
| nucleoplasm, aggresome          | A-431     | nucleoplaU-251 MG            | nucleoplasm, cytosol                   |
| nuclear speckles                | A-431     | nucleoplaU-251 MG            | nuclear speckles                       |
| nucleoplasm                     | U-2 OS    | nucleoplaRH-30               | nucleoplasm                            |
| nucleoplasm, plasma membrane    | U-251 MG  | nucleoplaSK-MEL-30           | nucleoplasm, plasma membrane           |
| nucleoplasm, midbody ring, SiHa |           | nucleoplaSK-MEL-30           | nucleoplasm, cytosol                   |
| nucleoplasm, mitochondria       | A549      | nucleoplaPC-3                | nucleoplasm                            |
| endoplasmic reticulum           | A549      | vesicles SiHa                | endoplasmic reticulum                  |
| mitochondria                    | SH-SY5Y   | mitochondSiHa                | mitochondria                           |
| nucleoplasm, plasma membrane    | U-251 MG  | nucleoplaRH-30               | plasma membrane                        |
| plasma membrane                 | U-251 MG  | plasma meRH-30               | plasma membrane                        |
| cytosol                         |           |                              |                                        |
| cytosol                         | A-431     | cytosol U-251 MG             | cytosol                                |
| cell junctions                  | ASC TERT1 | vesicles                     |                                        |
| endoplasmic reticulum           |           |                              |                                        |
| nucleoplasm, nuclear membrane   | A-431     | nucleoplaU-251 MG            | nucleoplasm, nuclear membrane, cytosol |
| nucleoplasm                     | A-431     | nucleoplaU-251 MG            | nucleoplasm                            |
| nucleoplasm, cytosol            |           |                              |                                        |
| cytosol                         |           |                              |                                        |
| cytosol                         |           |                              |                                        |
| cytosol                         | U-251 MG  | cytosol HaCaT                | cytosol                                |
| nucleoplasm                     | A-431     | nucleoplaU-251 MG            | nucleoplasm                            |
| intermediate filaments, cytosol | RH-30     | intermediHAP1                | intermediate filaments, cytoplasmic b  |
| intermediate filaments          | RH-30     | intermediate filaments       |                                        |
| nucleoplasm, nucleoli           | A-431     | nucleoplaPC-3                | nucleoplasm, nucleoli                  |
| cytosol                         | U-251 MG  | cytosol                      |                                        |
| mitochondria                    |           |                              |                                        |
| nucleoplasm                     | A-431     | nucleoplaU-251 MG            | nucleoplasm                            |
| cytosol                         |           |                              |                                        |
| nucleoplasm, cytosol            |           |                              |                                        |
| endoplasmic reticulum           |           |                              |                                        |
| cytosol                         |           |                              |                                        |
| mitochondria                    | MCF7      | cell junctions, mitochondria |                                        |
| mitochondria                    |           |                              |                                        |
| cell junctions                  | ASC TERT1 | vesicles                     |                                        |
| endoplasmic reticulum           |           |                              |                                        |
| nucleoplasm, cytosol            | A-431     | nucleoplaMCF7                | nucleoplasm, cytosol                   |
| nucleoplasm                     | A549      | nucleoplasm                  |                                        |
| nucleoplasm                     | U-251 MG  | nucleoplaSK-MEL-30           | nucleoplasm                            |
| vesicles                        | U-251 MG  | vesicles                     |                                        |
| nucleoplasm                     | A-431     | nucleoplaU-251 MG            | nucleoplasm                            |
| nucleoplasm                     | A-431     | nucleoplaU-251 MG            | nucleoplasm                            |
| nucleoplasm, cytosol            | A-431     | nucleoplaU-251 MG            | nucleoplasm, cytosol                   |
| intermediate filaments          | PC-3      | intermediate filaments       |                                        |
| nucleoplasm, centrosome         | PC-3      | centrosome, cytosol          |                                        |
| nucleoplasm                     | Hep G2    | nucleoplasm                  |                                        |
| nucleoplasm                     |           |                              |                                        |
| plasma membrane, cytosol        | Hep G2    | plasma meAF22                | plasma membrane, cytosol               |
| nucleoplasm                     | HeLa      | nucleoplaSH-SY5Y             | nucleoplasm                            |
| nucleoplasm                     | U-2 OS    | nucleoplaHeLa                | nucleoplasm                            |
| nucleoplasm, cytoplasmic bodies | U-2 OS    | nucleoplaA549                | nucleoplasm, cytoplasmic bodies        |
| nucleoplasm, vesicles           | Hep G2    | nucleoplasm, vesicles        |                                        |
| nucleoplasm                     | Hep G2    | nucleoplasm                  |                                        |
| nuclear bodies                  | HeLa      | nuclear bSK-MEL-30           | nuclear bodies                         |
| mitochondria                    | MCF7      | mitochondHEK 293             | mitochondria                           |
| vesicles                        |           |                              |                                        |

|                                         |           |                                                  |            |
|-----------------------------------------|-----------|--------------------------------------------------|------------|
| plasma membrane                         | U-251 MG  | plasma membrane                                  |            |
| cytosol                                 | A-431     | cytosol                                          | SK-MEL-30  |
| nucleoplasm, plasma membrane            | SiHa      | plasma membrane                                  | ASC TERT1  |
| cytosol                                 | A-431     | cytosol                                          |            |
| nuclear speckles                        | SiHa      | nuclear speckles                                 | sSK-MEL-30 |
| nucleoplasm, nucleoli                   | A549      | nucleoplasm, nucleoli                            | PC-3       |
| nucleoplasm                             |           |                                                  |            |
| nucleoplasm, mitochondria               | U-2 OS    | nucleoplasm, mitochondria                        |            |
| vesicles                                | PC-3      | vesicles                                         |            |
| vesicles                                | Hep G2    | vesicles                                         |            |
| cytosol                                 | U-251 MG  | cytosol                                          | PC-3       |
| nucleoplasm, cytosol                    | MCF7      | nucleoplasm, cytosol                             | PC-3       |
| cytosol                                 | A-431     | cytosol                                          | U-251 MG   |
| actin filaments                         | A-431     | actin filaments                                  | U-251 MG   |
| vesicles                                |           |                                                  |            |
| nucleoplasm, cytosol                    |           |                                                  |            |
| mitochondria                            |           |                                                  |            |
| vesicles, cell junctions                | PC-3      | cytoplasmic bodies                               |            |
| mitochondria                            | MCF7      | mitochondria                                     | PC-3       |
| nuclear speckles, cytosol               | HEK 293   | nuclear speckles                                 | sRH-30     |
| nucleoli, cytosol                       | A-431     | nucleoli                                         | U-251 MG   |
| nucleoplasm                             |           |                                                  |            |
| golgi apparatus                         | A-431     | golgi apparatus                                  | U-251 MG   |
| vesicles                                | U-251 MG  | vesicles                                         | HUVEC TER  |
| cytosol                                 | HeLa      | cytosol                                          | PC-3       |
| plasma membrane                         |           |                                                  |            |
| vesicles                                | HEK 293   | vesicles                                         | PC-3       |
| mitochondria                            | MCF7      | mitochondria                                     | HEK 293    |
| cytosol                                 | U-251 MG  | cytosol                                          | PC-3       |
| nuclear speckles, endoplasmic reticulum | A-431     | nuclear speckles, endoplasmic reticulum          | sU-251 MG  |
| nucleoplasm, cytosol                    | HEK 293   | nucleoplasm, cytosol                             | BJ         |
| nucleoplasm, cytosol                    | A-431     | nucleoplasm, nucleoli, cytosol                   | U-251 MG   |
| plasma membrane                         | HeLa      | plasma membrane                                  | RH-30      |
| mitochondria                            | PC-3      | mitochondria                                     |            |
| cytosol                                 | A-431     | cytosol                                          | U-251 MG   |
| centriolar satellite                    | U-251 MG  | centriolar satellite                             |            |
| cytokinetic bridge                      | A549      | nucleoplasm                                      |            |
| vesicles                                | A-431     | vesicles                                         | U-251 MG   |
| nucleoplasm                             | HEK 293   | nucleoplasm, golgi apparatus                     | Hep G2     |
| nucleoplasm, cytosol                    |           |                                                  |            |
| nucleoplasm                             | A-431     | nucleoplasm                                      | U-251 MG   |
| nucleoplasm                             | RH-30     | nucleoplasm                                      | SK-MEL-30  |
| nucleoli fibrillar center               | Hep G2    | nucleoli fibrillar center, endoplasmic reticulum |            |
| nucleoplasm, plasma membrane            |           |                                                  |            |
| vesicles, microtubules                  | U-251 MG  | vesicles                                         |            |
| plasma membrane, cytosol                | A-431     | plasma membrane, cytosol                         | U-251 MG   |
| cytosol                                 | A549      | cytosol                                          | HeLa       |
| plasma membrane, cytosol                | A549      | plasma membrane, cytosol                         | PC-3       |
| nucleoplasm, plasma membrane            | RH-30     | vesicles                                         | SK-MEL-30  |
| nucleoplasm                             | SK-MEL-30 | nucleoplasm, nucleoli                            |            |
| nucleoplasm, nucleoli                   | HEK 293   | nucleoplasm                                      | SK-MEL-30  |
| actin filaments                         | BJ        | golgi apparatus, cytosol                         |            |
| nucleoplasm                             | A-431     | nucleoplasm, nuclear bodies                      | U-251 MG   |
| nucleoplasm, plasma membrane            | RH-30     | vesicles                                         | SK-MEL-30  |
| nucleoli                                | U-2 OS    | nucleoli                                         | A-431      |

|                                 |          |                                       |           |
|---------------------------------|----------|---------------------------------------|-----------|
| nucleoplasm, centrosome         | Hep G2   | nucleoplasm, centrosome, cytosol      |           |
| nucleoplasm, plasma membrane    | RH-30    | vesicles                              | SK-MEL-30 |
| cytosol                         | HEK 293  | cytosol                               | SH-SY5Y   |
| cytosol                         | HEK 293  | cytosol                               | SH-SY5Y   |
| nucleoplasm, plasma membrane    | RH-30    | vesicles                              | SK-MEL-30 |
| plasma membrane                 |          | nucleoplasm, plasma membrane, cytosol |           |
| nucleoplasm                     | MCF7     | nucleoplasm, cytosol                  |           |
| nucleoplasm                     | A-431    | nucleoplasm                           |           |
| nucleoplasm                     | A-431    | nucleoplasm                           |           |
| nucleoplasm, plasma membrane    | RH-30    | vesicles                              | SK-MEL-30 |
| nucleoplasm, plasma membrane    | RH-30    | vesicles                              | SK-MEL-30 |
| nucleoli                        | MCF7     | nucleoli, cytosol                     |           |
| nucleoplasm, plasma membrane    | RH-30    | vesicles                              | SK-MEL-30 |
| nucleoplasm, plasma membrane    | RH-30    | vesicles                              | SK-MEL-30 |
| nucleoplasm, plasma membrane    | RH-30    | vesicles                              | SK-MEL-30 |
| vesicles                        | SH-SY5Y  | vesicles, plasma membrane, cytosol    |           |
| nucleoplasm, plasma membrane    | RH-30    | vesicles                              | SK-MEL-30 |
| nucleoplasm                     | HaCaT    | nucleoplasm, plasma membrane          |           |
| nucleoplasm, cytosol            | A-431    | nucleoplasm, cytosol                  |           |
| vesicles, plasma membrane       | A-431    | golgi apparatus                       | U-251 MG  |
| nucleoplasm, nucleoli           | HAP1     | vesicles, plasma membrane, cytosol    |           |
| nucleoplasm, plasma membrane    | RH-30    | nucleoplasm, plasma membrane, cytosol |           |
| nucleoplasm                     | A-431    | nucleoplasm                           |           |
| nucleoplasm, plasma membrane    | RH-30    | vesicles                              | SK-MEL-30 |
| plasma membrane, focal adhesion | MCF7     | midbody                               | A549      |
| nucleoplasm, plasma membrane    | RH-30    | vesicles                              | SK-MEL-30 |
| vesicles                        |          | nucleoplasm, plasma membrane, cytosol |           |
| nucleoli                        | RH-30    | nucleoli                              | HaCaT     |
| nucleoli                        | RH-30    | nucleoli                              | HEL       |
| nucleoplasm                     | U-2 OS   | nucleoplasm                           | SK-MEL-30 |
| nucleoplasm, golgi apparatus    | U-2 OS   | nucleoplasm                           | SK-MEL-30 |
| mitochondria                    | A-431    | mitochondria                          | U-251 MG  |
| nucleoplasm                     | A-431    | nucleoplasm                           | Hep G2    |
| cytosol                         |          |                                       |           |
| vesicles                        | RH-30    | vesicles                              | SK-MEL-30 |
| golgi apparatus                 | Hep G2   | golgi apparatus                       | PC-3      |
| cytosol                         |          |                                       |           |
| mitochondria                    | HEK 293  | mitochondria                          |           |
| nucleoplasm                     | MCF7     | nucleoplasm                           | SK-MEL-30 |
| nucleoplasm                     | A-431    | nucleoplasm                           | U-251 MG  |
| vesicles                        | A-431    | vesicles                              | PC-3      |
| cytosol                         |          | nucleoplasm, vesicles                 |           |
| nuclear speckles                | MCF7     | nuclear speckles                      | PC-3      |
| nucleoplasm, midbody            | MCF7     | nucleoplasm, midbody                  | SiHa      |
| nucleoplasm, nucleoli           | A549     | nucleoplasm, nucleoli                 | BJ        |
| golgi apparatus                 | A-431    | golgi apparatus, cytosol              | U-251 MG  |
| nucleoli, mitochondria          | U-251 MG | nucleoli, mitochondria                |           |
| nuclear membrane, vesicles      | SH-SY5Y  | nuclear membrane, vesicles            | RPTEC TER |
| nucleoplasm                     | MCF7     | nucleoplasm, cytoplasmic bodies       | HEK 293   |
| cell junctions                  |          |                                       |           |
| nuclear bodies                  | U-2 OS   | nuclear bodies                        | HeLa      |
| endoplasmic reticulum           | MCF7     | endoplasmic reticulum                 | Hep G2    |
| nucleoplasm                     | A-431    | nucleoplasm                           | U-251 MG  |
| nucleoplasm                     | MCF7     | nucleoplasm                           | PC-3      |
| nucleoplasm                     | A549     | nucleoplasm                           | Hep G2    |



|                               |          |                       |                                        |
|-------------------------------|----------|-----------------------|----------------------------------------|
| nucleoplasm                   | A549     | nucleoplaRH-30        | nucleoplasm                            |
| nucleoplasm                   | HEL      | nucleoplasm           |                                        |
| nucleoplasm, cytosol          | PC-3     | nucleoplaHaCaT        | nucleoplasm, cytosol                   |
| nucleoplasm, endoplasmic r    | PC-3     | nucleoplasm, vesicles |                                        |
| plasma membrane, cytosol      | HeLa     | plasma mePC-3         | plasma membrane, cytosol               |
| nucleoplasm                   |          |                       |                                        |
| nucleoplasm                   |          |                       |                                        |
| vesicles, plasma membrane     | A-431    | nucleoplaU-251 MG     | vesicles, plasma membrane              |
| vesicles, cytokinetic bric    | U-251 MG | vesicles BJ           | vesicles                               |
| lipid droplets                | A-431    | lipid droU-251 MG     | lipid droplets                         |
| nucleoplasm                   | SiHa     | nucleoplaRH-30        | nucleoplasm                            |
| midbody                       |          |                       |                                        |
| nucleoplasm, plasma membræ    | PC-3     | plasma membrane       |                                        |
| nucleoplasm                   | A549     | nucleoplaEFO-21       | nucleoplasm, centriolar satellite      |
| nuclear bodies, mitochondr    | A-431    | nuclear bU-251 MG     | nuclear bodies, mitochondria           |
| focal adhesion sites, cytosol |          |                       |                                        |
| nucleoplasm, nuclear bodie    | A-431    | nucleoplaU-251 MG     | nucleoplasm, nuclear bodies            |
| nucleoplasm, cytosol          | SH-SY5Y  | nucleoplaHaCaT        | nucleoplasm, cytokinetic bridge, cytos |
| cytosol                       | HaCaT    | cytosol hTCEpi        | cytosol                                |
| focal adhesion sites, cytosol |          |                       |                                        |
| plasma membrane, cytosol      | A-431    | plasma meU-251 MG     | plasma membrane, cytosol               |
| nucleoplasm                   | Hep G2   | nucleoplasm, vesicles |                                        |
| golgi apparatus               | U-251 MG | golgi apparatus       |                                        |
| cytoplasmic bodies            | A-431    | cytoplasmU-251 MG     | cytosol, cytoplasmic bodies            |
| mitochondria                  | HEL      | mitochondria          |                                        |
| nuclear speckles              | A-431    | nuclear sU-251 MG     | nuclear speckles                       |
| nucleoplasm                   | U-2 OS   | nucleoplaSH-SY5Y      | nucleoplasm, centriolar satellite      |
| centrosome                    | A-431    | centrosome, cytosol   |                                        |
| nuclear speckles              | A-431    | nuclear sU-251 MG     | nuclear speckles                       |
| nuclear speckles, cytoplasm   | A-431    | nuclear sU-251 MG     | nuclear speckles, cytoplasmic bodies   |
| nucleoplasm                   | Hep G2   | nucleoplaRH-30        | nucleoplasm, nucleoli                  |
| endoplasmic reticulum, plæ    | A-431    | endoplasmPC-3         | endoplasmic reticulum, cytosol         |
| nucleoplasm, mitochondria     | U-2 OS   | mitochondrRH-30       | mitochondria                           |
| golgi apparatus               | PC-3     | golgi apparatus       |                                        |
| cytosol                       | A-431    | cytosol U-251 MG      | cytosol                                |
| vesicles                      | U-2 OS   | vesicles RH-30        | cytosol                                |
| nucleoplasm, golgi apparat    | MCF7     | nucleoplaSH-SY5Y      | nucleoplasm, golgi apparatus           |
| nucleoplasm                   | SH-SY5Y  | nucleoplaPC-3         | nucleoplasm                            |
| vesicles                      | SiHa     | vesicles SK-MEL-30    | vesicles                               |
| vesicles                      | MCF7     | nucleoplaHeLa         | nucleoplasm, vesicles                  |
| plasma membrane, cytosol      |          |                       |                                        |
| cytosol                       |          |                       |                                        |
| nucleoplasm, cytosol          | A-431    | nucleoplaU-251 MG     | nucleoplasm                            |
| nucleoplasm                   | A-431    | nucleoplaU-251 MG     | nucleoplasm                            |
| nuclear membrane, nuclear     | A-431    | nuclear rPC-3         | nuclear membrane, nuclear speckles     |
| nuclear bodies                | U-2 OS   | nuclear bHeLa         | nuclear bodies                         |
| nuclear speckles, vesicles    | U-2 OS   | nuclear sPC-3         | nuclear speckles                       |
| nucleoplasm, mitochondria     | HEK 293  | nucleoplaHep G2       | mitochondria                           |
| nucleoplasm, mitochondria,    | A-431    | nucleoplaU-251 MG     | nucleoplasm, cytosol                   |
| plasma membrane               | MCF7     | nucleoplaHeLa         | vesicles, plasma membrane              |
| endoplasmic reticulum         |          |                       |                                        |
| centrosome                    | A549     | nucleoli, REH         | centrosome                             |
| nucleoplasm                   | A-431    | nuclear sU-251 MG     | nucleoplasm                            |
| nucleoplasm                   | A-431    | nucleoplaU-251 MG     | nucleoplasm                            |
| mitochondria                  | A-431    | mitochondU-251 MG     | mitochondria                           |

|                                                      |          |                                        |                                          |
|------------------------------------------------------|----------|----------------------------------------|------------------------------------------|
| mitochondria                                         | PC-3     | mitochondria                           |                                          |
| centrosome                                           | A549     | nucleoli, REH                          | centrosome                               |
| nuclear speckles                                     | A-431    | nuclear sPC-3                          | nuclear speckles                         |
| nucleoplasm, vesicles, mitochondria                  | A-431    | nucleoplaU-251 MG                      | nucleoplasm, vesicles                    |
| mitochondria                                         | SH-SY5Y  | mitochondria                           |                                          |
| cytosol                                              | A-431    | cytosol U-251 MG                       | cytosol                                  |
| golgi apparatus                                      | A-431    | golgi appA549                          | golgi apparatus                          |
| vesicles                                             | RH-30    | vesicles SK-MEL-30                     | nucleoplasm, vesicles                    |
| golgi apparatus                                      | PC-3     | golgi apparatus                        |                                          |
| mitochondria                                         | A-431    | mitochondU-251 MG                      | mitochondria                             |
| nucleoplasm                                          | A549     | nucleoplaHep G2                        | nucleoplasm                              |
| plasma membrane, focal adhesion sites                | A-431    | plasma membrane, focal adhesion sites  |                                          |
| nucleoplasm, plasma membrane                         |          |                                        |                                          |
| nucleoplasm, nucleoli fibrils                        | U-2 OS   | nucleoplaA-431                         | nucleoplasm, cell junctions              |
| nucleoplasm                                          | A-431    | nucleoplaU-251 MG                      | nucleoplasm                              |
| nucleoplasm                                          | A-431    | nucleoplaU-251 MG                      | nucleoplasm, nucleoli                    |
| nucleoplasm, mitochondria                            | HEK 293  | nucleoplaHep G2                        | nucleoplasm, mitochondria                |
| nucleoplasm                                          | A-431    | nucleoplaU-251 MG                      | nucleoplasm                              |
| nucleoplasm                                          | A-431    | nucleoplaU-251 MG                      | nucleoplasm                              |
| nucleoplasm, vesicles                                | PC-3     | vesicles HaCaT                         | vesicles                                 |
| nucleoplasm, nuclear bodies                          | MCF7     | nucleoplaHEK 293                       | nuclear bodies                           |
| nucleoplasm                                          | MCF7     | nucleoplaHEK 293                       | nucleoplasm                              |
| nucleoplasm                                          | MCF7     | nucleoplaSH-SY5Y                       | nucleoplasm, golgi apparatus, vesicles   |
| vesicles                                             | A-431    | vesicles U-251 MG                      | vesicles                                 |
| endoplasmic reticulum                                | A-431    | endoplasmU-251 MG                      | endoplasmic reticulum                    |
| endoplasmic reticulum                                |          |                                        |                                          |
| golgi apparatus                                      | U-251 MG | nucleoplaPC-3                          | nucleoplasm, golgi apparatus, cytosol    |
| nucleoplasm                                          | U-2 OS   | nucleoplaSiHa                          | nucleoplasm                              |
| nucleoplasm, nucleoli, cytosol                       | A549     | nucleoplaHep G2                        | nucleoplasm, nucleoli, golgi apparatus   |
| vesicles                                             | A-431    | vesicles Hep G2                        | vesicles                                 |
| nucleoli, endoplasmic reticulum, midbody             | MCF7     | nucleoli, HeLa                         | nucleoli, endoplasmic reticulum, cytosol |
| golgi apparatus                                      | HeLa     | endoplasmSK-MEL-30                     | golgi apparatus                          |
| nucleoli, vesicles                                   | HEK 293  | nucleoli, SH-SY5Y                      | nucleoli, vesicles                       |
| intermediate filaments                               | HeLa     | intermediate filaments                 |                                          |
| intermediate filaments                               |          |                                        |                                          |
| intermediate filaments                               | HeLa     | intermediate filaments                 |                                          |
| nucleoplasm, nucleoli                                | HEK 293  | nucleoplaSH-SY5Y                       | nucleoplasm, nucleoli fibrillar centers  |
| nucleoplasm, nucleoli                                | MCF7     | nucleoplaPC-3                          | nucleoplasm, nucleoli                    |
| nucleoli                                             | MCF7     | nucleoli PC-3                          | nucleoplasm, nucleoli                    |
| microtubules                                         |          |                                        |                                          |
| nucleoplasm, cytosol                                 | HeLa     | nucleoplaSK-MEL-30                     | nucleoplasm                              |
| nuclear bodies                                       |          |                                        |                                          |
| nucleoplasm                                          | Hep G2   | nucleoplasm, vesicles                  |                                          |
| nuclear speckles                                     | A-431    | nuclear sU-251 MG                      | nuclear speckles                         |
| nuclear speckles                                     | A-431    | nuclear sU-251 MG                      | nuclear speckles                         |
| nucleoplasm                                          | A-431    | nucleoplaU-251 MG                      | nucleoplasm                              |
| nucleoplasm, plasma membrane, vesicles, mitochondria | RH-30    | vesicles SK-MEL-30                     | nucleoplasm, plasma membrane, cytosol    |
| vesicles, mitochondria                               | RH-30    | vesicles, cytosol                      |                                          |
| nucleoplasm, plasma membrane, vesicles               | RH-30    | vesicles SK-MEL-30                     | nucleoplasm, plasma membrane, cytosol    |
| plasma membrane                                      | BJ       | nucleoplasm, vesicles, plasma membrane |                                          |
| nucleoplasm, plasma membrane, vesicles               | RH-30    | vesicles SK-MEL-30                     | nucleoplasm, plasma membrane, cytosol    |
| nucleoli, microtubule ends                           | U-2 OS   | nucleoplaRPTEC TER                     | nucleoli, microtubule ends               |
| mitochondria                                         | A-431    | mitochondU-251 MG                      | mitochondria                             |
| mitochondria                                         | A-431    | mitochondU-251 MG                      | mitochondria                             |

|                                   |           |                                        |          |                                        |
|-----------------------------------|-----------|----------------------------------------|----------|----------------------------------------|
| mitochondria                      | A-431     | mitochondria                           | U-251 MG | nucleoplasm, mitochondria              |
| nucleoplasm                       | U-251 MG  | nucleoplasm, cytosol                   |          |                                        |
| mitochondria                      | A-431     | mitochondria                           | U-251 MG | mitochondria                           |
| mitochondria                      | A-431     | mitochondria                           | U-251 MG | mitochondria                           |
| vesicles                          |           |                                        |          |                                        |
| cytosol                           | A-431     | nucleoplasm                            | MCF7     | nucleoplasm                            |
| nucleoplasm, cytosol              | U-251 MG  | nucleoplasm                            |          |                                        |
| nucleoplasm                       | A-431     | nucleoplasm                            | U-251 MG | nucleoplasm                            |
| nuclear bodies                    | A-431     | nuclear bodies                         | U-251 MG | nuclear bodies                         |
| nucleoplasm, cytosol              | U-251 MG  | nuclear speckles, cytosol              | HEK 293  | nuclear speckles, cytosol              |
| vesicles, cytosol                 | A-431     | vesicles, cytosol                      |          |                                        |
| vesicles                          | A-431     | vesicles                               | U-251 MG | vesicles, plasma membrane              |
| cytosol                           | A-431     | cytosol                                | U-251 MG | cytosol                                |
| nucleoplasm, nuclear bodies       | A-431     | nucleoplasm, nuclear bodies            | U-251 MG | nucleoplasm, nuclear bodies            |
| plasma membrane                   |           |                                        |          |                                        |
| nucleoplasm                       | U-2 OS    | nucleoplasm                            | A-431    | nucleoplasm                            |
| nucleoplasm                       |           |                                        |          |                                        |
| nucleoplasm, cytosol              | MCF7      | nucleoplasm, nuclear bodies, cytosol   | PC-3     | nucleoplasm, nuclear bodies, cytosol   |
| nucleoplasm, microtubules         | A-431     | nucleoplasm, microtubules              | U-251 MG | nucleoplasm, microtubules              |
| nucleoli, plasma membrane         | MCF7      | nucleoplasm, nucleoli, plasma membrane | PC-3     | nucleoplasm, nucleoli, plasma membrane |
| nucleoplasm                       | U-2 OS    | nucleoplasm                            | A-431    | nucleoplasm                            |
| nucleoplasm                       |           |                                        |          |                                        |
| nuclear speckles                  | A-431     | nuclear speckles                       | U-251 MG | nuclear speckles                       |
| mitochondria                      | A-431     | mitochondria                           | U-251 MG | mitochondria                           |
| nucleoli, mitochondria            | A-431     | nucleoli, mitochondria                 | U-251 MG | nucleoli, mitochondria                 |
| endoplasmic reticulum, cytosol    | A-431     | endoplasmic reticulum, cytosol         | U-251 MG | endoplasmic reticulum, cytosol         |
| nucleoli, endoplasmic reticulum   | HEK 293   | endoplasmic reticulum, cytosol         | Hep G2   | endoplasmic reticulum, cytosol         |
| nucleoplasm, cytosol              | A-431     | nucleoplasm, cytosol                   | U-251 MG | nucleoplasm, cytosol                   |
| nucleoplasm                       | U-2 OS    | nucleoplasm, cytosol                   | HaCaT    | nucleoplasm, cytosol                   |
| nucleoplasm                       | SK-MEL-30 | nucleoplasm                            |          |                                        |
| plasma membrane, cytosol          | U-251 MG  | plasma membrane                        | MCF7     | plasma membrane                        |
| nucleoplasm, cytosol              | A-431     | nucleoplasm, cytosol                   | U-251 MG | nucleoplasm, cytosol                   |
| nucleoplasm, cytosol              | A-431     | nucleoplasm, cytosol                   | U-251 MG | nucleoplasm, cytosol                   |
| cytosol                           |           |                                        |          |                                        |
| nucleoli                          | A549      | nucleoli, SK-MEL-30                    |          | nucleoli                               |
| nucleoplasm, cytosol              | RH-30     | nucleoplasm, cytosol                   |          |                                        |
| nucleoplasm, nuclear bodies       | A-431     | nucleoplasm, nuclear bodies            | U-251 MG | nucleoplasm, nuclear bodies            |
| nucleoli, cytosol                 | MCF7      | nucleoli, golgi apparatus, cytosol     | HeLa     | nucleoli, golgi apparatus, cytosol     |
| mitochondria                      | SH-SY5Y   | mitochondria                           |          |                                        |
| vesicles                          |           |                                        |          |                                        |
| cytosol                           |           |                                        |          |                                        |
| cytosol                           | U-251 MG  | cytosol                                | A549     | vesicles, cytosol                      |
| microtubules                      | A-431     | microtubules                           | U-251 MG | microtubules                           |
| nucleoplasm, cytosol              | A-431     | nucleoplasm, nucleoli                  | BJ       | nucleoplasm, nucleoli                  |
| nuclear membrane, cytosol         | A-431     | nuclear membrane, cytosol              | U-251 MG | nuclear membrane, cytosol              |
| nucleoplasm                       | RH-30     | nucleoplasm                            |          |                                        |
| nucleoplasm                       |           |                                        |          |                                        |
| nucleoplasm, cytosol              | A-431     | nucleoplasm, cytosol                   | U-251 MG | nucleoplasm, cytosol                   |
| cytosol                           | A-431     | cytosol                                |          |                                        |
| nuclear speckles, golgi apparatus | HEK 293   | golgi apparatus                        | SH-SY5Y  | golgi apparatus                        |
| mitochondria                      | A-431     | mitochondria                           |          |                                        |
| cytosol                           | A-431     | cytosol                                |          |                                        |
| cytosol                           | A-431     | cytosol                                | U-251 MG | cytosol                                |
| nucleoplasm, nuclear membrane     | HEK 293   | nucleoplasm, nuclear membrane          | HeLa     | nucleoplasm, nuclear membrane          |
| lipid droplets                    |           |                                        |          |                                        |

|                             |           |                                         |                                 |
|-----------------------------|-----------|-----------------------------------------|---------------------------------|
| mitochondria                |           |                                         |                                 |
| nucleoplasm, cytosol        |           |                                         |                                 |
| nucleoplasm                 | A-431     | nucleoplaU-251 MG                       | nucleoplasm                     |
| nucleoplasm, mitochondria   | U-251 MG  | nucleoplaA549                           | nucleoplasm, mitochondria       |
| mitochondria                | HEK 293   | mitochondPC-3                           | mitochondria                    |
| golgi apparatus             |           |                                         |                                 |
| nucleoplasm                 | Hep G2    | golgi apparatus                         |                                 |
| nucleoplasm, nucleoli       | RH-30     | nucleoplaPC-3                           | nucleoplasm, nucleoli           |
| nucleoplasm, nuclear bodies | A-431     | nucleoplaU-251 MG                       | nucleoplasm, nuclear bodies     |
| mitochondria                | A-431     | mitochondU-251 MG                       | mitochondria                    |
| vesicles                    |           |                                         |                                 |
| vesicles                    | HEK 293   | vesicles RH-30                          | vesicles                        |
| nucleoplasm, nucleoli       | RH-30     | nucleoplaPC-3                           | nucleoplasm, nucleoli           |
| plasma membrane, cytosol    |           |                                         |                                 |
| intermediate filaments      | ASC TERT1 | intermedihtCEpi                         | intermediate filaments, cytosol |
| cytosol                     | A-431     | plasma meU-251 MG                       | cytosol                         |
| cytosol                     | U-2 OS    | cytosol PC-3                            | cytosol                         |
| nucleoplasm, centriolar s   | U-2 OS    | nucleoplaHep G2                         | nucleoplasm                     |
| nucleoplasm, nucleoli       |           |                                         |                                 |
| nucleoplasm, nucleoli       |           |                                         |                                 |
| nucleoplasm, nucleoli       |           |                                         |                                 |
| nucleoplasm, nucleoli fibr  | HEK 293   | nucleoplaSK-MEL-30                      | nucleoli fibrillar center       |
| nucleoplasm                 | U-2 OS    | nucleoplaHEK 293                        | nucleoplasm                     |
| nuclear membrane            | A-431     | nuclear nU-251 MG                       | nuclear membrane                |
| nucleoplasm, nucleoli       |           |                                         |                                 |
| nucleoplasm, nucleoli       |           |                                         |                                 |
| nucleoplasm, nucleoli       |           |                                         |                                 |
| nucleoplasm                 | U-2 OS    | nucleoplasm                             |                                 |
| cytosol                     | A-431     | cytosol U-251 MG                        | cytosol                         |
| nuclear bodies, cytosol     | PC-3      | cytosol                                 |                                 |
| nucleoplasm                 | HEK 293   | nucleoplasm                             |                                 |
| mitochondria                | MCF7      | nucleoplaA549                           | nucleoplasm, mitochondria       |
| endoplasmic reticulum       |           |                                         |                                 |
| nucleoplasm, nucleoli       |           |                                         |                                 |
| nucleoplasm, nucleoli       |           |                                         |                                 |
| nucleoplasm, nucleoli       |           |                                         |                                 |
| nuclear membrane, endoplas  | MCF7      | nuclear membrane, endoplasmic reticulum |                                 |
| nuclear speckles, cytosol   | RH-30     | nuclear speckles, cytosol               |                                 |
| nucleoplasm, nuclear bodie  | A-431     | nucleoplaU-251 MG                       | nucleoplasm, nuclear bodies     |
| nucleoplasm, nucleoli       | RH-30     | nucleoplaPC-3                           | nucleoplasm, nucleoli           |
| nucleoplasm                 |           |                                         |                                 |
| mitochondria                | MCF7      | nucleoplaSiHa                           | nucleoplasm, mitochondria       |
| nuclear bodies, cytosol     | HEK 293   | nuclear bPC-3                           | nuclear bodies                  |
| nucleoplasm, nuclear bodie  | A-431     | nucleoplaU-251 MG                       | nucleoplasm, nucleoli           |
| nucleoplasm                 | MCF7      | nucleoplaHeLa                           | nucleoplasm                     |
| nucleoplasm                 |           |                                         |                                 |
| nucleoplasm                 | U-251 MG  | nucleoplasm                             |                                 |
| nucleoplasm                 | A-431     | nucleoplaU-251 MG                       | nucleoplasm                     |
| nucleoplasm                 |           |                                         |                                 |
| nucleoplasm, nuclear bodie  | A-431     | nucleoplaU-251 MG                       | nucleoplasm, nuclear bodies     |
| nucleoplasm                 | MCF7      | nucleoplaHeLa                           | nucleoplasm                     |
| nucleoplasm                 | A549      | nucleoplaSiHa                           | nucleoplasm                     |
| cytosol                     | U-251 MG  | cytosol HEK 293                         | cytosol                         |
| cytosol                     | MCF7      | cytosol                                 |                                 |
| nucleoplasm                 | A549      | nucleoplaHaCaT                          | nucleoplasm                     |

|                                  |           |                               |            |
|----------------------------------|-----------|-------------------------------|------------|
| nucleoplasm vesicles             | A549      | nucleoplasm, cell junctions   |            |
| nucleoplasm, nucleoli            |           |                               |            |
| nucleoplasm, nucleoli            |           |                               |            |
| nucleoplasm, nucleoli            |           |                               |            |
| nucleoplasm, nuclear bodies      | A-431     | nucleoplasm, nuclear bodies   | U-251 MG   |
| nucleoplasm, nuclear bodies      | A-431     | nucleoplasm, nuclear bodies   | U-251 MG   |
| nucleoplasm, nuclear bodies      | A-431     | nucleoplasm, nuclear bodies   | U-251 MG   |
| nucleoplasm                      | U-2 OS    | nucleoplasm                   | HeLa       |
| nucleoplasm                      | U-2 OS    | nucleoplasm                   | HaCaT      |
| nucleoplasm, nucleoli            |           |                               |            |
| nucleoplasm, nucleoli            |           |                               |            |
| nucleoplasm, nucleoli            |           |                               |            |
| cytosol                          |           |                               |            |
| cytosol                          |           |                               |            |
| cytosol                          | U-251 MG  | cytosol                       | HEK 293    |
| nucleoplasm                      | A-431     | nucleoplasm                   | U-251 MG   |
| nucleoplasm, nuclear membrane    | A-431     | nucleoplasm, nuclear membrane | HeLa       |
| vesicles                         |           | vesicles                      | HaCaT      |
| vesicles                         | A-431     | vesicles                      | U-251 MG   |
| plasma membrane, cytosol         | A-431     | plasma membrane, cytosol      | U-251 MG   |
| nucleoplasm                      | U-2 OS    | nucleoplasm, cell junctions   | MCF7       |
| golgi apparatus                  | A-431     | golgi apparatus               | MCF7       |
| vesicles, plasma membrane        | U-251 MG  | vesicles, plasma membrane     |            |
| nucleoplasm, nuclear bodies      | AF22      | nucleoplasm, nuclear bodies   |            |
| cytoplasmic bodies               | A-431     | cytoplasmic bodies            | U-251 MG   |
| nucleoplasm, nuclear bodies      | A-431     | nucleoplasm, nuclear bodies   | U-251 MG   |
| nuclear speckles                 | SH-SY5Y   | nuclear speckles              | sSK-MEL-30 |
| cytosol                          | A-431     | cytosol                       | U-251 MG   |
| vesicles                         | A-431     | vesicles                      | U-251 MG   |
| nucleoplasm                      | A-431     | nucleoplasm                   | U-251 MG   |
| nuclear speckles                 | A-431     | nuclear speckles              | sU-251 MG  |
| nuclear speckles                 | U-251 MG  | nuclear speckles              | sHEK 293   |
| focal adhesion sites             |           |                               |            |
| nucleoplasm                      | MCF7      | nucleoplasm                   | Hep G2     |
| nucleoplasm, cytosol, cytochrome | MCF7      | nucleoplasm, cytosol          | Hep G2     |
| mitochondria                     | MCF7      | mitochondria                  | RH-30      |
| nucleoplasm, nucleoli            |           |                               |            |
| nucleoplasm, nucleoli            |           |                               |            |
| nucleoplasm, nucleoli            |           |                               |            |
| nucleoplasm, cytosol             | A-431     | nucleoplasm, cytosol          | HEK 293    |
| nucleoplasm                      | A-431     | nucleoplasm, nuclear membrane | PC-3       |
| nucleoplasm, golgi apparatus     | A-431     | nucleoplasm, golgi apparatus  | PC-3       |
| nucleoplasm, cytosol             | A-431     | nucleoplasm, cytosol          | HEK 293    |
| vesicles                         | U-2 OS    | nucleoplasm, vesicles         | Hep G2     |
| nucleoplasm                      | SK-MEL-30 | nucleoplasm                   |            |
| nucleoplasm                      | U-251 MG  | nucleoplasm                   | MCF7       |
| nucleoplasm                      | A-431     | nucleoplasm                   | PC-3       |
| nucleoli                         | HEK 293   | nucleoplasm, nucleoli         | PC-3       |
| cytosol                          |           |                               |            |
| vesicles                         | A-431     | vesicles                      | U-251 MG   |
| plasma membrane, cytosol         | A-431     | plasma membrane               | K-562      |
| nucleoli, vesicles               | A-431     | nucleoli, vesicles            | U-251 MG   |
| nucleoplasm, cytosol             | A-431     | nucleoplasm, cytosol          | HEK 293    |
| nucleoplasm                      | U-2 OS    | nucleoplasm                   | PC-3       |

|                                  |          |                                                        |                                                 |
|----------------------------------|----------|--------------------------------------------------------|-------------------------------------------------|
| endoplasmic reticulum, cytosol   | PC-3     | cytosol                                                |                                                 |
| vesicles                         | A-431    | vesicles                                               | U-251 MG vesicles                               |
| vesicles                         | A-431    | vesicles                                               | U-251 MG vesicles                               |
| nucleoplasm, cytosol             | A-431    | nucleoplasm, cytosol                                   | U-251 MG nucleoplasm, cytosol                   |
| nucleoplasm, cytosol             | A-431    | nucleoplasm, cytosol                                   | HEK 293 nucleoplasm, cytosol                    |
| vesicles, plasma membrane        | A-431    | vesicles, plasma membrane                              | U-251 MG vesicles, plasma membrane              |
| vesicles                         | A-431    | vesicles                                               | U-251 MG vesicles                               |
| nucleoplasm, cytosol             | A-431    | nucleoplasm, cytosol                                   | HEK 293 nucleoplasm, cytosol                    |
| centrosome                       |          |                                                        |                                                 |
| vesicles                         | A-431    | vesicles                                               | U-251 MG vesicles                               |
| intermediate filaments           | U-2 OS   | intermediate filaments                                 | MCF7 intermediate filaments                     |
| vesicles                         | A-431    | vesicles                                               | U-251 MG vesicles                               |
| mitochondria                     | RH-30    | nucleoplasm                                            | PC-3 nucleoplasm                                |
| nucleoplasm                      | HEK 293  | nucleoplasm                                            | Hep G2 nucleoplasm                              |
| nucleoplasm                      | A-431    | nucleoplasm                                            | U-251 MG nucleoplasm                            |
| nucleoplasm                      | A-431    | nucleoplasm, centrosome                                | U-251 MG nucleoplasm, centrosome                |
| nuclear speckles                 |          |                                                        |                                                 |
| cytosol                          | U-251 MG | cytosol                                                |                                                 |
| nucleoplasm                      | A-431    | nucleoplasm, golgi apparatus, cytosol                  | U-251 MG nucleoplasm, golgi apparatus, cytosol  |
| nucleoplasm, golgi apparatus     | A549     | nucleoplasm, golgi apparatus                           | HaCaT nucleoplasm, golgi apparatus              |
| plasma membrane, cytosol         | A-431    | nucleoplasm, plasma membrane, cytosol                  | U-251 MG nucleoplasm, plasma membrane, cytosol  |
| plasma membrane, cytosol         | A-431    | plasma membrane                                        | golgi apparatus K-562 plasma membrane           |
| nucleoli fibrillar center        | HaCaT    | nucleoli fibrillar center                              |                                                 |
| plasma membrane                  | A549     | plasma membrane                                        | golgi apparatus RH-30 plasma membrane           |
| nucleoplasm                      | EFO-21   | nucleoplasm, vesicles                                  |                                                 |
| nucleoli, cytosol                | A-431    | nucleoli                                               | U-251 MG nucleoli                               |
| nucleoli, intermediate filaments |          |                                                        |                                                 |
| nucleoplasm, nucleoli            | U-251 MG | nucleoplasm, nucleoli                                  |                                                 |
| nucleoplasm, cytosol             | A-431    | nucleoplasm, cytosol                                   | HEK 293 nucleoplasm, cytosol                    |
| golgi apparatus, vesicles        | Hep G2   | golgi apparatus                                        |                                                 |
| nuclear speckles                 | A-431    | nuclear speckles                                       | U-251 MG nuclear speckles                       |
| vesicles, plasma membrane        | A-431    | vesicles, plasma membrane                              | U-251 MG vesicles, plasma membrane              |
| nucleoplasm, plasma membrane     | A-431    | nucleoplasm, plasma membrane                           | U-251 MG nucleoplasm, plasma membrane           |
| nucleoplasm                      | HeLa     | nucleoplasm                                            |                                                 |
| cytosol                          | A-431    | cytosol                                                | U-251 MG centrosome, cytosol                    |
| nucleoplasm                      | A-431    | nucleoplasm                                            | U-251 MG nucleoplasm                            |
| endoplasmic reticulum, vesicles  | SH-SY5Y  | endoplasmic reticulum                                  | PC-3 endoplasmic reticulum                      |
| vesicles                         | A-431    | vesicles                                               | U-251 MG vesicles                               |
| nucleoplasm, vesicles            | A549     | nucleoplasm                                            | SiHa nucleoplasm                                |
| nucleoplasm, cytosol             | U-251 MG | nucleoplasm, cytosol                                   |                                                 |
| nucleoplasm                      | MCF7     | nucleoplasm                                            | HEK 293 nucleoplasm                             |
| cytosol                          | A-431    | cytosol                                                | U-251 MG cytosol                                |
| cytosol                          | A549     | cytosol                                                |                                                 |
| cytosol                          | U-251 MG | cytosol                                                | Hep G2 nucleoplasm, cytosol                     |
| nucleoplasm, golgi apparatus     | HEL      | nucleoplasm, golgi apparatus, plasma membrane, cytosol |                                                 |
| nuclear speckles                 | SH-SY5Y  | nuclear speckles                                       | REH nuclear speckles                            |
| nucleoplasm                      |          |                                                        |                                                 |
| nucleoli fibrillar center        | HEK 293  | nucleoli fibrillar center, mitochondria                | PC-3 nucleoli fibrillar center, mitochondria    |
| nucleoplasm, cytosol             | A-431    | nucleoplasm, cytosol                                   | HEK 293 nucleoplasm, cytosol                    |
| nucleoplasm, plasma membrane     | RH-30    | nucleoplasm, plasma membrane, cytosol                  | SK-MEL-30 nucleoplasm, plasma membrane, cytosol |
| nucleoplasm, vesicles            | A-431    | nucleoplasm, vesicles                                  | HEK 293 nucleoplasm, vesicles                   |
| nucleoplasm                      | A-431    | nucleoplasm                                            | U-251 MG nucleoplasm                            |
| cytoplasmic bodies               | U-2 OS   | cytoplasmic bodies                                     | SiHa plasma membrane, cytoplasmic bodies        |
| nucleoplasm, nucleoli            | U-2 OS   | nucleoplasm, nucleoli                                  | A549 nucleoplasm, nucleoli                      |
| nucleoplasm, nucleoli            | A-431    | nucleoplasm, nucleoli                                  | U-251 MG nucleoplasm, nucleoli                  |

|                                  |           |                                          |                                                  |
|----------------------------------|-----------|------------------------------------------|--------------------------------------------------|
| plasma membrane                  | SiHa      | plasma membrane                          |                                                  |
| nucleoplasm, cytosol             | A-431     | nucleoplasm                              | HEK 293 nucleoplasm, cytosol                     |
| nucleoplasm                      | SH-SY5Y   | nucleoplasm                              |                                                  |
| cell junctions                   | MCF7      | cell junctions                           |                                                  |
| nucleoplasm, plasma membrane     | U-251 MG  | cytosol                                  |                                                  |
| nuclear speckles, cell junctions | U-251 MG  | endoplasmic reticulum                    | SH-SY5Y endoplasmic reticulum, plasma membrane   |
| nucleoplasm, cytosol             | A-431     | nucleoplasm                              | U-251 MG nucleoplasm, nucleoli                   |
| nuclear speckles                 | PC-3      | nuclear speckles, intermediate filaments |                                                  |
| golgi apparatus                  | A549      | golgi apparatus                          | HaCaT golgi apparatus                            |
| nucleoli, cytosol                | A-431     | nucleoli                                 |                                                  |
| nucleoplasm, nucleoli            | U-251 MG  | nucleoplasm                              | A549 nucleoplasm, nucleoli                       |
| nucleoplasm, nucleoli            |           |                                          |                                                  |
| nucleoplasm, nucleoli            |           |                                          |                                                  |
| nucleoplasm, cytosol             | A-431     | nucleoplasm                              | U-251 MG nucleoplasm, nuclear bodies             |
| mitotic spindle                  | HaCaT     | centriolar satellite                     |                                                  |
| mitochondria, cytosol            | U-251 MG  | mitochondria                             | SiHa mitochondria, cytosol                       |
| nucleoplasm, nucleoli            |           |                                          |                                                  |
| nucleoplasm, nucleoli            |           |                                          |                                                  |
| nucleoplasm, nucleoli            |           |                                          |                                                  |
| vesicles                         | A-431     | vesicles                                 | U-251 MG vesicles                                |
| endoplasmic reticulum            | U-2 OS    | endoplasmic reticulum                    | SK-MEL-30 endoplasmic reticulum                  |
| vesicles                         | U-2 OS    | vesicles, HEK 293                        | vesicles                                         |
| cytosol                          | A-431     | golgi apparatus                          | U-251 MG cytosol                                 |
| actin filaments, cytosol         | U-251 MG  | nucleoli                                 | A549 cytosol                                     |
| nucleoplasm, cytosol             | A-431     | nucleoplasm                              | HEK 293 nucleoplasm, cytosol                     |
| vesicles                         | A-431     | vesicles                                 | U-251 MG vesicles                                |
| mitochondria                     | A-431     | mitochondria                             | HEL mitochondria                                 |
| mitochondria                     | A-431     | mitochondria                             | U-251 MG mitochondria                            |
| mitochondria                     | A-431     | mitochondria                             | U-251 MG mitochondria                            |
| centrosome                       |           |                                          |                                                  |
| centrosome                       | MCF7      | mitochondria                             | HEK 293 centrosome, mitochondria                 |
| vesicles                         | RPTEC TER | vesicles, cytokinetic bridge             |                                                  |
| centrosome                       |           |                                          |                                                  |
| nucleoplasm                      | A-431     | nucleoplasm                              | U-251 MG nucleoplasm                             |
| cytosol                          | A-431     | cytosol                                  | U-251 MG cytosol                                 |
| endoplasmic reticulum            |           |                                          |                                                  |
| golgi apparatus                  | U-251 MG  | golgi apparatus                          |                                                  |
| nucleoplasm                      | A-431     | nucleoplasm                              | U-251 MG nucleoplasm                             |
| cytosol                          | Hep G2    | cytosol                                  |                                                  |
| nucleoplasm                      | U-2 OS    | nucleoplasm                              | HeLa nucleoplasm, cytoplasmic bodies             |
| endoplasmic reticulum            | A-431     | endoplasmic reticulum                    | U-251 MG endoplasmic reticulum                   |
| cytosol                          | A-431     | cytosol                                  | U-251 MG cytosol                                 |
| plasma membrane, cell junctions  |           |                                          |                                                  |
| vesicles, cytosol                | HEL       | nucleoplasm                              | PC-3 nucleoplasm, vesicles                       |
| vesicles                         | SH-SY5Y   | vesicles                                 | RH-30 vesicles                                   |
| mitochondria                     | A-431     | mitochondria                             | U-251 MG mitochondria                            |
| nucleoplasm                      | A549      | nucleoplasm                              |                                                  |
| nucleoplasm, cytosol             | SH-SY5Y   | nuclear speckles                         | EFO-21 nuclear speckles, cytosol                 |
| mitochondria                     | MCF7      | mitochondria                             |                                                  |
| cytosol                          | A-431     | cell junctions                           | MCF7 cell junctions, cytosol                     |
| nucleoplasm, nucleoli            | fibrMCF7  | nucleoplasm                              | A549 nucleoplasm, nucleoli fibrillar centrosomes |
| vesicles                         | A-431     | vesicles                                 | Hep G2 vesicles                                  |
| plasma membrane                  | A-431     | plasma membrane                          | U-251 MG plasma membrane                         |
| nucleoplasm                      | MCF7      | nucleoplasm                              | PC-3 nucleoplasm, cytosol                        |

|                                    |           |                                |                                              |
|------------------------------------|-----------|--------------------------------|----------------------------------------------|
| nucleoli, cytosol                  | A-431     | nucleoli, U-251 MG             | nucleoli, cytosol                            |
| plasma membrane                    | ASC TERT1 | plasma membrane                |                                              |
| vesicles                           | HeLa      | vesicles RH-30                 | vesicles                                     |
| nucleoplasm                        | MCF7      | nucleoplasm PC-3               | nucleoplasm, cytosol                         |
| microtubules                       | A-431     | nucleoli, U-251 MG             | microtubules                                 |
| mitochondria                       | A-431     | mitochondria U-251 MG          | mitochondria                                 |
| golgi apparatus, vesicles,         | A-431     | golgi apparatus PC-3           | vesicles                                     |
| cytosol                            | A-431     | cytosol U-251 MG               | cytosol                                      |
| vesicles                           | HeLa      | vesicles RH-30                 | vesicles                                     |
| plasma membrane, cell junctions    | A-431     | plasma membrane U-251 MG       | plasma membrane, cell junctions, cytosol     |
| nucleoplasm, plasma membrane       | A-431     | plasma membrane HaCaT          | nucleoplasm, plasma membrane, cell junctions |
| nucleoplasm                        | A-431     | nucleoplasm U-251 MG           | nucleoplasm, cytosol                         |
| nucleoplasm, cytosol               | A-431     | nucleoplasm U-251 MG           | nucleoplasm, cytosol                         |
| endoplasmic reticulum              | A-431     | endoplasmic reticulum U-251 MG | endoplasmic reticulum                        |
| mitochondria, cytosol              | A-431     | cytosol U-251 MG               | cytosol                                      |
| cytosol                            | A-431     | cytosol                        |                                              |
| vesicles                           | A549      | vesicles                       |                                              |
| nucleoli, cytosol                  | A-431     | nucleoli U-251 MG              | nucleoli                                     |
| nucleoplasm                        |           |                                |                                              |
| focal adhesion sites, cytoskeleton | BJ        | focal adhesion sites           |                                              |
| centrosome                         |           |                                |                                              |
| cytosol                            | U-251 MG  | cytosol                        |                                              |



, cytosol

sol

me

er, vesicles, cytosol

;

, cytosol

ibules

Filaments

ndria



or

or

.laments

۱۲



OSOME

er, cytosol

er, cytosol

osol

,

osol

cytosol

;

membrane, cytosol

etic bridge

ents

er

er

er, cytosol

1

er

sol

ile ends

membrane



er, golgi apparatus

er

er

membrane

er

er, cytosol

er, cytosol

er, intermediate filaments

er, cytosol

sol

er

.

;

.ar satellite

er

esicles

er, microtubules

oplasmic bodies

. junctions

ndria

ar satellite

cytosol

er

,



er

o

o

ie

osol

bodies

cytosol

sol

»S

sol  
is

, cytosol

membrane

mitotic spindle

MS

sol



3

3

3

31  
31

31



oplasmic bodies

er

ic spindle

3

21

3

21  
21

sol

ibrane, cytosol

tosol

sol

cytosol



.i

er, cytosol

er

bridge

s

er

sicles

er

ie

,

er

er, centrosome, cytosol

, cytosol

.ar satellite

.um

.um

membrane

cytosolic bridge, cytosol



er

.laments, cytosol

.a



3

sol

;

paratus

er

is, plasma membrane

er

cytosol

۱۲  
۱۲

۱۲

center

, cytosol

sol

er, microtubules  
er

rosome

lria







rtosol



cytosol

,

cytosol

sol

er

center

rtosol





eckles, cytosol

sol

ibrane

sol

sol

3

.1 junctions

bodies









:osol

iratus

er

, cytosol

hesion sites  
;

sol

membrane



3

ndria

beckles

er, cytosol  
er

ents

er



paratus

,

sol

actions

ria

lesion sites

۱۱

ie, actin filaments  
s, cytosol

is

o

.ons, cytosol

3

01

rtos01

sol

ibrane

les

in filaments



riolar satellite

1S

or

beckles

beckles, cytosol

osol

; bridge

, cytosol

osol

2

sol

etic bridge, centrosome

osol

er

er





3

3

tricular satellite

ular satellite  
: bodies, vesicles

er

21

25

er

ctions

.1 junctions

sol

۲۱



ibules

er

ibrane, cytosol

is

;

er

paratus

;

membrane

er

ibrane, cytosol

osol

itochondria

cytosol



membrane

spindle

;

.c reticulum



osol



cytosol

, cytosol

ie

ndria

.es

er

sol

r, cytosol

er

ermediate filaments

er, cytosol

laments

er

ellite, cytosol



hesion sites

onal adhesion sites

membrane

;

;

er, cytosol

paratus

er, cytoplasmic bodies

tions, cytosol

ody

ria

, cytosol

.intermediate filaments

embrane

odies

ytosol

iratus



lesion sites, mitochondria

ur satellite, cytosol

1







۲۱

or

;

.

.

or

junctions

9S



.um



tosol

cytosol

sol

er, cytokinetic bridge  
er

rtosol

er

sol

me

brane

brane, cytosol

۱۲

۱۲

sol

reckles

sol

er, cytosol  
er, cytosol

er, cytosol  
er, cytosol

.laments, cytosol

les



;

.c reticulum

brane, mitochondria

er

re, cytosol

1S

er

ls

.um

er

er, centrosome

sol

3

;

sol

er

er, endoplasmic reticulum, cytosol

uratus, cytosol

ome

ctions, cytosol

ol

idria



osol

er

osol

er

plasma membrane

cytosol

or

3

11

11

:osol

:sol

, cytosol  
, cytosol

ie, cytosol

;

er, vesicles

rtosol

cytosol

cytosol

cytosol

ria

er





iratus

ۛr

ۛr

sol



ctions, cytosol

3S

resion sites

3

sol



rane

sol

ersion sites

ctions



ria

,

, cytosol



er, cytosol

sol

er

sol

2



sol

;

er, golgi apparatus

;



er

ie  
atriolar satellite

er

osol

3

aratus

S

,

some, cytosol

S

er, vesicles

ibrane

er, cytosol

osol





1e

r, centrosome

sol  
sol

r

or

or

olgi apparatus

,

sol



otic spindle





.laments, cytokinetic bridge

,

aratus

ndria

۱۲

۱۲

3

3

3

ria

sol

osome

ellite

er, golgi apparatus

er

er, vesicles



otic spindle

membrane

er

.um

.es

er, cytosol

ctions

tions

sol



cytosol

cytosol

bridge

ribosomal satellite  
ribosomes, mitochondria

er  
,

ic bodies

.um

ody ring

er, microtubules

sol

bridge







reticulum, cytosol

er, plasma membrane

1S

1S



rtosol

1S

ie

or

osol





:osol

on sites, cytosol

sol

ring

membrane

mic bridge, cytosol

sol

, cytosol

er, cytosol

;

embrane, cytosol

osol





sol

,

r, mitochondria

ndria, cytosol

;

ctions

,

hondria  
sol

»S

sol  
r, plasma membrane

ite filaments



.i, mitochondria

me

sol

ibrane



r, cytosol

s, cytosol

membrane







, cytosol

r, vesicles

er, endoplasmic reticulum, cytosol

les

er

sol





3

paratus

.i

.c reticulum

brane

junctions, cytosol

er, endoplasmic reticulum, cytosol

3

cytosol

;

cytosol

.c reticulum

osome

;

sol  
sol  
sol

r

ibrane

ollite, cytosol

sol



3

er

;

.c reticulum, cytosol

ments

۲۱

er, endoplasmic reticulum, cytosol

sol

.asma membrane

er  
> bridge

osicles

er

er, cytosol  
1

es  
hesion sites

its, cytosol

.um





ria

.laments





cytosol

lesion sites, cytosol

ria

, cytosol

sol

.laments

;

.a

ie

.asma membrane, cytosol

pparatus

ane

sol



er, golgi apparatus

iratus



odies

3

.um



sol

;

;

sol

er

3







ria

le

er

sol  
utions

Supplementary Table 5. Mapping subcellular locations of immunofluorescence images in the human protein atlas to common subcellular locations mapped to common subcellular location set

| IF subcellular location   | GO         | Upper level in HPA     | location set          |
|---------------------------|------------|------------------------|-----------------------|
| actin filaments           | GO:0015629 | actin filaments        | cytoskeleton          |
| aggresome                 | GO:0016235 | cytosol                | cytosol               |
| cell junctions            | GO:0030054 | plasma membrane        | cell junctions        |
| centriolar satellite      | GO:0034451 | centrosome             | centrosome            |
| centrosome                | GO:0005813 | centrosome             | centrosome            |
| cleavage furrow           | GO:0032154 | microtubules           | cleavage furrow       |
| cytokinetic bridge        | GO:0045171 | microtubules           | cytoskeleton          |
| cytoplasmic bodies        | GO:0036464 | cytosol                | cytosol               |
| cytosol                   | GO:0005829 | cytosol                | cytosol               |
| endoplasmic reticulum     | GO:0005783 | endoplasmic reticulum  | endoplasmic reticulum |
| endosomes                 | GO:0005768 | vesicles               | endosomes             |
| focal adhesion sites      | GO:0005925 | actin filaments        | focal adhesion sites  |
| golgi apparatus           | GO:0005794 | golgi apparatus        | golgi apparatus       |
| intermediate filaments    | GO:0045111 | intermediate filaments | cytoskeleton          |
| lipid droplets            | GO:0005811 | vesicles               | lipid droplets        |
| lysosomes                 | GO:0005764 | vesicles               | lysosomes             |
| microtubule ends          | GO:1990752 | microtubules           | cytoskeleton          |
| microtubules              | GO:0015630 | microtubules           | cytoskeleton          |
| midbody                   | GO:0030496 | microtubules           | midbody               |
| midbody ring              | GO:0090543 | microtubules           | midbody ring          |
| mitochondria              | GO:0005739 | mitochondria           | mitochondria          |
| mitotic spindle           | GO:0072686 | microtubules           | mitotic spindle       |
| nuclear bodies            | GO:0016604 | nucleoplasm            | nucleoplasm           |
| nuclear membrane          | GO:0031965 | nuclear membrane       | nuclear membrane      |
| nuclear speckles          | GO:0016607 | nucleoplasm            | nuclear speckles      |
| nucleoli                  | GO:0005730 | nucleoli               | nucleoli              |
| nucleoli fibrillar center | GO:0001650 | nucleoli               | nucleoli              |
| nucleoplasm               | GO:0005654 | nucleoplasm            | nucleoplasm           |
| peroxisomes               | GO:0005777 | vesicles               | peroxisomes           |
| plasma membrane           | GO:0005886 | plasma membrane        | plasma membrane       |
| rods & rings              |            | cytosol                | cytosol               |
| vesicles                  | GO:0043231 | vesicles               | vesicles              |

lular locations

**Supplementary Table 6. Mapping subcellular locations in the UniProtKB/Swiss-Prot to**

| Subcellul | Swiss-Prot subcellular location       | Is a           | Part of           |
|-----------|---------------------------------------|----------------|-------------------|
| SL-0015   | apical cell membrane                  |                | Cell membrane.    |
| SL-0017   | apicolateral cell membrane            |                | Cell membrane.    |
| SL-0024   | basal cell membrane                   |                | Cell membrane.    |
| SL-0026   | basolateral cell membrane             |                | Cell membrane.    |
| SL-0153   | lateral cell membrane                 |                | Cell membrane.    |
| SL-0038   | cell junction                         |                |                   |
| SL-0039   | cell membrane                         | Membrane.      | Cell envelope.    |
| SL-0048   | centrosome                            |                | Microtubule       |
| SL-0079   | cornified envelope                    |                |                   |
| SL-0086   | cytoplasm                             |                |                   |
| SL-0088   | cytoplasmic vesicle                   | Vesicle.       |                   |
| SL-0089   | cytoplasmic vesicle membrane          | Membrane.      | Cytoplasmic       |
| SL-0325   | cytoplasmic vesicle lumen             |                | Cytoplasmic       |
| SL-0090   | cytoskeleton                          |                | Cytoplasm.        |
| SL-0091   | cytosol                               |                | Cytoplasm.        |
| SL-0093   | early endosome membrane               | Endosome       | Early endosome.   |
| SL-0094   | early endosome                        |                | Endosome.         |
| SL-0100   | endosome membrane                     | Membrane.      | Endosome.         |
| SL-0101   | endosome                              |                |                   |
| SL-0151   | late endosome membrane                | Endosome       | Late endosome.    |
| SL-0152   | late endosome                         |                | Endosome.         |
| SL-0327   | endosome lumen                        |                | Endosome.         |
| SL-0231   | recycling endosome membrane           | Endosome       | Recycling         |
| SL-0232   | recycling endosome                    |                | Endosome.         |
| SL-0095   | endoplasmic reticulum                 |                |                   |
| SL-0096   | endoplasmic reticulum lumen           |                | Endoplasmic       |
| SL-0097   | endoplasmic reticulum membrane        | Membrane.      | Endoplasmic       |
| SL-0235   | rough endoplasmic reticulum           |                | Endoplasmic       |
| SL-0236   | rough endoplasmic reticulum lumen     | Endoplasmic    | Rough endoplasmic |
| SL-0237   | rough endoplasmic reticulum membrane  | Endoplasmic    | Rough endoplasmic |
| SL-0250   | smooth endoplasmic reticulum membrane | Endoplasmic    | Smooth            |
| SL-0239   | sarcoplasmic reticulum                |                |                   |
| SL-0240   | sarcoplasmic reticulum lumen          |                | Sarcoplasmic      |
| SL-0241   | sarcoplasmic reticulum membrane       | Membrane.      | Endomembrane      |
| SL-0098   | endoplasmic reticulum-golgi           |                |                   |
| SL-0099   | endoplasmic reticulum-golgi           | Membrane.      | Endoplasmic       |
| SL-0326   | endoplasmic reticulum-golgi           |                | Endoplasmic       |
| SL-0147   | endomembrane system                   | Membrane.      |                   |
| SL-0118   | focal adhesion                        | Cell junction. |                   |
| SL-0132   | golgi apparatus                       |                |                   |
| SL-0133   | golgi apparatus lumen                 |                | Golgi apparatus.  |
| SL-0134   | golgi apparatus membrane              | Membrane.      | Golgi apparatus.  |
| SL-0154   | lipid droplet                         |                |                   |
| SL-0156   | lysosome lumen                        |                | Lysosome.         |
| SL-0157   | lysosome membrane                     | Membrane.      | Endomembrane      |
| SL-0158   | lysosome                              |                |                   |
| SL-0160   | melanosome membrane                   | Membrane.      | Endomembrane      |
| SL-0161   | melanosome                            |                |                   |
| SL-0162   | membrane                              |                |                   |
| SL-0165   | microsome membrane                    | Membrane.      | Endomembrane      |
| SL-0166   | microsome                             |                | Endoplasmic       |
| SL-0167   | mitochondrion envelope                |                | Mitochondrion.    |
| SL-0168   | mitochondrion inner membrane          | Mitochondrion  |                   |
| SL-0169   | mitochondrion intermembrane space     |                | Mitochondrion     |



|         |                                      |                |                   |
|---------|--------------------------------------|----------------|-------------------|
| SL-0170 | mitochondrion matrix                 |                | Mitochondrion.    |
| SL-0171 | mitochondrion membrane               | Membrane.      | Mitochondrion     |
| SL-0172 | mitochondrion outer membrane         | Mitochondrion  |                   |
| SL-0173 | mitochondrion                        |                |                   |
| SL-0176 | myelin membrane                      | Cell membrane. |                   |
| SL-0178 | nucleus envelope                     |                | Nucleus.          |
| SL-0179 | nucleus inner membrane               | Nucleus        |                   |
| SL-0180 | nucleus lamina                       |                | Nucleus envelope. |
| SL-0181 | nucleus matrix                       |                | Nucleus.          |
| SL-0182 | nucleus membrane                     | Membrane.      | Endomembrane      |
| SL-0183 | nucleus outer membrane               | Nucleus        |                   |
| SL-0186 | nucleus speckle                      | Nuclear body.  | Nucleus.          |
| SL-0188 | nucleolus                            |                | Nucleus.          |
| SL-0190 | nucleoplasm                          |                | Nucleus.          |
| SL-0191 | nucleus                              |                |                   |
| SL-0197 | perikaryon                           |                |                   |
| SL-0202 | peroxisome matrix                    |                | Peroxisome.       |
| SL-0203 | peroxisome membrane                  | Membrane.      | Endomembrane      |
| SL-0204 | peroxisome                           |                |                   |
| SL-0220 | preautophagosomal structure          |                |                   |
| SL-0221 | preautophagosomal structure membrane | Membrane.      | Endomembrane      |
| SL-0224 | prevacuolar compartment membrane     | Membrane.      | Endomembrane      |
| SL-0243 | secreted                             |                |                   |
| SL-0251 | spindle                              |                | Cytoskeleton.     |
| SL-0271 | vacuole membrane                     | Membrane.      | Endomembrane      |
| SL-0272 | vacuole                              |                |                   |
| SL-0274 | virion                               |                |                   |
| SL-0280 | cell projection                      |                |                   |
| SL-0281 | cytoplasmic granule                  |                |                   |
| SL-0282 | cytoplasmic granule membrane         | Membrane.      | Endomembrane      |
| SL-0324 | cytoplasmic granule lumen            |                | Cytoplasmic       |
| SL-0310 | cell surface                         |                |                   |
| SL-0370 | membrane raft                        |                | Endomembrane      |
| SL-0451 | target cell membrane                 | Target         |                   |
| SL-0457 | photoreceptor inner segment          |                |                   |
| SL-0467 | cleavage furrow                      |                |                   |
| SL-0468 | chromosome                           |                |                   |
| SL-0469 | midbody                              |                |                   |
| SL-0490 | midbody ring                         | Midbody.       |                   |
| SL-0488 | inflammasome                         |                | Cytosol.          |
| SL-0498 | vesicle                              |                |                   |
| SL-0499 | extracellular vesicle                | Vesicle.       |                   |
| SL-0500 | extracellular vesicle membrane       | Membrane.      | Extracellular     |

## o common subcellular locations

| Description                                 | Mapped to IF common set | Mapped to IHC   |
|---------------------------------------------|-------------------------|-----------------|
| The fraction of the cell membrane at the    | plasma membrane         | plasma membrane |
| The fraction of the cell membrane at the    | plasma membrane         | plasma membrane |
| The basal cell membrane is the fraction of  | plasma membrane         | plasma membrane |
| The basolateral cell membrane is the        | plasma membrane         | plasma membrane |
| The portion of the plasma membrane at the   | plasma membrane         | plasma membrane |
| The cell junction is a cell-cell or cell-   | cell junctions          | plasma membrane |
| The cell membrane is the selectively        | plasma membrane         | plasma membrane |
| The centrosome is a microtubule organizing  | centrosome              | cytoplasm       |
| The cornified envelope is a structure which | plasma membrane         | plasma membrane |
| The cytoplasm is the content of a cell      | cytosol                 | cytoplasm       |
| The cytoplasmic vesicles mediate vesicular  | vesicles                | cytoplasm       |
| The membrane surrounding a cytoplasmic      | vesicles                | cytoplasm       |
| The cytoplasmic vesicle compartment bounded | vesicles                | cytoplasm       |
| The cytoskeleton is a dynamic three-        | cytoskeleton            | cytoplasm       |
| The cytosol is the unstructured aqueous     | cytosol                 | cytoplasm       |
| The membrane surrounding the early          | endosomes               | cytoplasm       |
| Early endosomes form a tubulovesicular      | endosomes               | cytoplasm       |
| The membrane surrounding the endosome.      | endosomes               | cytoplasm       |
| Endosomes are highly dynamic membrane       | endosomes               | cytoplasm       |
| The membrane surrounding the late           | endosomes               | cytoplasm       |
| Late endosomes are pleiomorphic with        | endosomes               | cytoplasm       |
| The endosomal compartment bounded by the    | endosomes               | cytoplasm       |
| The membrane surrounding the recycling      | endosomes               | cytoplasm       |
| The recycling endosome is a membrane        | endosomes               | cytoplasm       |
| The endoplasmic reticulum (ER) is an        | endoplasmic reticulum   | cytoplasm       |
| The lumen of the endoplasmic reticulum (ER) | endoplasmic reticulum   | cytoplasm       |
| The membrane surrounding the endoplasmic    | endoplasmic reticulum   | cytoplasm       |
| The rough endoplasmic reticulum (RER) is    | endoplasmic reticulum   | cytoplasm       |
| The rough endoplasmic reticulum lumen is    | endoplasmic reticulum   | cytoplasm       |
| The membrane surrounding the rough          | endoplasmic reticulum   | cytoplasm       |
| The membrane surrounding the smooth         | endoplasmic reticulum   | cytoplasm       |
| The sarcoplasmic reticulum (SR) is a highly | endoplasmic reticulum   | cytoplasm       |
| The lumen of the sarcoplasmic reticulum is  | endoplasmic reticulum   | cytoplasm       |
| The membrane surrounding the sarcoplasmic   | endoplasmic reticulum   | cytoplasm       |
| The ER-Golgi intermediate compartment is a  | endoplasmic reticulum   | cytoplasm       |
| The membrane surrounding the ER-Golgi       | endoplasmic reticulum   | cytoplasm       |
| The ERGIC compartment bounded by the ERGIC  | endoplasmic reticulum   | cytoplasm       |
| A collection of membranous structures       | endoplasmic reticulum   | cytoplasm       |
| Focal adhesions are sites of tightest       | focal adhesion sites    | plasma membrane |
| The Golgi apparatus is a series of          | golgi apparatus         | cytoplasm       |
| The Golgi lumen consist of the cisternal    | golgi apparatus         | cytoplasm       |
| The membrane surrounding the Golgi          | golgi apparatus         | cytoplasm       |
| The lipid droplet is a dynamic cytoplasmic  | lipid droplets          | cytoplasm       |
| The lumen of a lysosome is the volume       | lysosomes               | cytoplasm       |
| The membrane surrounding a lysosome.        | lysosomes               | cytoplasm       |
| The lysosome is a membrane-limited          | lysosomes               | cytoplasm       |
| The membrane surrounding a melanosome.      | endoplasmic reticulum   | cytoplasm       |
| The melanosome is a melanin-containing      | endoplasmic reticulum   | cytoplasm       |
| A membrane is a lipid bilayer which         | plasma membrane         | plasma membrane |
| The membrane surrounding the microsomes.    | endoplasmic reticulum   | cytoplasm       |
| The microsomes are a heterogenous set of    | endoplasmic reticulum   | cytoplasm       |
| The mitochondrial envelope comprises the    | mitochondria            | cytoplasm       |
| The inner membrane of a mitochondrion is    | mitochondria            | cytoplasm       |
| The mitochondrial intermembrane space is    | mitochondria            | cytoplasm       |

|                                              |                       |                 |
|----------------------------------------------|-----------------------|-----------------|
| The matrix of a mitochondrion is the         | mitochondria          | cytoplasm       |
| The membrane surrounding a mitochondrion.    | mitochondria          | cytoplasm       |
| The outer membrane of a mitochondrion is     | mitochondria          | cytoplasm       |
| The mitochondrion is a semiautonomous, self- | mitochondria          | cytoplasm       |
| The myelin membrane is the white matter      | plasma membrane       | plasma membrane |
| The nuclear envelope is a membrane system    | nuclear membrane      | nucleus         |
| The inner membrane of the nucleus is the     | nuclear membrane      | nucleus         |
| The nuclear lamina is a meshwork of          | nuclear membrane      | nucleus         |
| The nuclear matrix is a three-dimensional    | nucleoplasm           | nucleus         |
| The membrane surrounding the nucleus. This   | nuclear membrane      | nucleus         |
| The outer membrane of the nucleus is the     | nuclear membrane      | nucleus         |
| The nuclear speckles are small subnuclear    | nuclear speckles      | nucleus         |
| The nucleolus is a non-membrane bound        | nucleoli              | nucleus         |
| The nucleoplasm is a highly viscous liquid   | nucleoplasm           | nucleus         |
| The nucleus is the most obvious organelle    | nucleoplasm           | nucleus         |
| The perikaryon is the cell body of a         | cytosol               | cytoplasm       |
| The matrix of a peroxisome is the area       | peroxisomes           | cytoplasm       |
| The membrane surrounding a peroxysome.       | peroxisomes           | cytoplasm       |
| The peroxisome is a small eukaryotic         | peroxisomes           | cytoplasm       |
| The pre-autophagosomal structure is the      | endoplasmic reticulum | cytoplasm       |
| The membrane surrounding the pre-            | endoplasmic reticulum | cytoplasm       |
| The membrane surrounding the prevacuolar     | endoplasmic reticulum | cytoplasm       |
| Protein located outside the cell             |                       |                 |
| The spindle is a specialized microtubule     | mitotic spindle       | cytoplasm       |
| The membrane surrounding a vacuole.          | vesicles              | cytoplasm       |
| The vacuole is a generally large fluid-      | vesicles              | cytoplasm       |
| The virion is the complete fully infectious  | cell junctions        | plasma membrane |
| A cell projection is a cell protrusion such  | cell junctions        | plasma membrane |
| Protein found in or associated with          | cytosol               | cytoplasm       |
| The membrane surrounding a cytoplasmic       | cytosol               | cytoplasm       |
| The cytoplasmic granule compartment bounded  | cytosol               | cytoplasm       |
| The outermost side of the cell.              | cell junctions        | plasma membrane |
| Membrane rafts are small (10-200 nm),        | endoplasmic reticulum | cytoplasm       |
| The target cell membrane is the selectively  | plasma membrane       | plasma membrane |
| The inner segment of a vertebrate            | mitochondria          | cytoplasm       |
| In fungal, amoeboid and animal cells,        | cleavage furrow       | plasma membrane |
| An organized structure composed of a single  | nucleoplasm           | nucleus         |
| The midbody is the central region of the     | midbody               | cytoplasm       |
| The midbody ring is the central region of    | midbody ring          | cytoplasm       |
| Inflammasomes are supramolecular micron-     | cytosol               | cytoplasm       |
| A vesicle is a small structure consisting    | vesicles              | cytoplasm       |
| Extracellular vesicles are vesicles that     | vesicles              | plasma membrane |
| The membrane surrounding an extracellular    | vesicles              | plasma membrane |

Table S-7. Ranking of low-consistency proteins

| Rank | Gene            | Antibody Overlap | fEquality | Jaccard | sSet-incluP | value | iP     | value  | i |
|------|-----------------|------------------|-----------|---------|-------------|-------|--------|--------|---|
| 1    | ENSG00000008853 | HPA060938        | 0         | 0       | 0           | 0     |        |        |   |
| 1    | ENSG00000074964 | HPA026440        | 0         | 0       | 0           | 0     |        |        |   |
| 1    | ENSG00000079805 | HPA054246        | 0         | 0       | 0           | 0     |        |        |   |
| 1    | ENSG00000085433 | HPA027287        | 0         | 0       | 0           | 0     |        | 0.2615 |   |
| 1    | ENSG00000087085 | HPA027098        | 0         | 0       | 0           | 0     |        |        |   |
| 1    | ENSG00000090339 | CAB002142        | 0         | 0       | 0           | 0     |        |        |   |
| 1    | ENSG00000090612 | HPA001794        | 0         | 0       | 0           | 0     |        |        |   |
| 1    | ENSG00000100744 | HPA043054        | 0         | 0       | 0           | 0     |        |        |   |
| 1    | ENSG00000102781 | HPA046205        | 0         | 0       | 0           | 0     |        |        |   |
| 1    | ENSG00000105948 | HPA036339        | 0         | 0       | 0           | 0     |        |        |   |
| 1    | ENSG00000106078 | HPA019167        | 0         | 0       | 0           | 0     | 0.3788 |        |   |
| 1    | ENSG00000106927 | HPA075585        | 0         | 0       | 0           | 0     |        |        |   |
| 1    | ENSG00000112276 | HPA014788        | 0         | 0       | 0           | 0     |        |        |   |
| 1    | ENSG00000112977 | HPA029456        | 0         | 0       | 0           | 0     |        |        |   |
| 1    | ENSG00000116729 | HPA069520        | 0         | 0       | 0           | 0     |        |        |   |
| 1    | ENSG00000116747 | HPA005142        | 0         | 0       | 0           | 0     |        |        |   |
| 1    | ENSG00000118600 | HPA064014        | 0         | 0       | 0           | 0     |        |        |   |
| 1    | ENSG00000123064 | HPA070786        | 0         | 0       | 0           | 0     |        |        |   |
| 1    | ENSG00000123159 | HPA061786        | 0         | 0       | 0           | 0     |        |        |   |
| 1    | ENSG00000123342 | HPA070804        | 0         | 0       | 0           | 0     |        |        |   |
| 1    | ENSG00000123584 | HPA045401        | 0         | 0       | 0           | 0     |        |        |   |
| 1    | ENSG00000124733 | HPA017921        | 0         | 0       | 0           | 0     |        |        |   |
| 1    | ENSG00000129055 | HPA046114        | 0         | 0       | 0           | 0     |        |        |   |
| 1    | ENSG00000130702 | HPA054609        | 0         | 0       | 0           | 0     |        |        |   |
| 1    | ENSG00000130758 | HPA007039        | 0         | 0       | 0           | 0     |        |        |   |
| 1    | ENSG00000130779 | HPA026678        | 0         | 0       | 0           | 0     |        |        |   |
| 1    | ENSG00000130957 | HPA055286        | 0         | 0       | 0           | 0     |        |        |   |
| 1    | ENSG00000131435 | HPA011912        | 0         | 0       | 0           | 0     |        |        |   |
| 1    | ENSG00000137571 | HPA025062        | 0         | 0       | 0           | 0     |        |        |   |
| 1    | ENSG00000138079 | HPA071102        | 0         | 0       | 0           | 0     |        |        |   |
| 1    | ENSG00000139537 | HPA057573        | 0         | 0       | 0           | 0     |        |        |   |
| 1    | ENSG00000140025 | HPA051209        | 0         | 0       | 0           | 0     |        |        |   |
| 1    | ENSG00000141452 | HPA043589        | 0         | 0       | 0           | 0     |        |        |   |
| 1    | ENSG00000141485 | HPA044343        | 0         | 0       | 0           | 0     |        |        |   |
| 1    | ENSG00000142227 | HPA062030        | 0         | 0       | 0           | 0     |        |        |   |
| 1    | ENSG00000144406 | HPA042472        | 0         | 0       | 0           | 0     |        |        |   |
| 1    | ENSG00000146278 | HPA066513        | 0         | 0       | 0           | 0     |        |        |   |
| 1    | ENSG00000146410 | HPA029792        | 0         | 0       | 0           | 0     |        |        |   |
| 1    | ENSG00000147852 | HPA051312        | 0         | 0       | 0           | 0     |        |        |   |
| 1    | ENSG00000148680 | CAB022708        | 0         | 0       | 0           | 0     |        |        |   |
| 1    | ENSG00000148834 | HPA037603        | 0         | 0       | 0           | 0     |        |        |   |
| 1    | ENSG00000150457 | HPA049037        | 0         | 0       | 0           | 0     |        |        |   |
| 1    | ENSG00000154582 | HPA078113        | 0         | 0       | 0           | 0     |        |        |   |
| 1    | ENSG00000156535 | HPA008992        | 0         | 0       | 0           | 0     |        |        |   |
| 1    | ENSG00000158813 | HPA037972        | 0         | 0       | 0           | 0     |        |        |   |
| 1    | ENSG00000163349 | HPA016664        | 0         | 0       | 0           | 0     |        |        |   |
| 1    | ENSG00000163762 | HPA053639        | 0         | 0       | 0           | 0     |        |        |   |
| 1    | ENSG00000164169 | HPA042537        | 0         | 0       | 0           | 0     |        |        |   |
| 1    | ENSG00000166333 | HPA048437        | 0         | 0       | 0           | 0     |        |        |   |
| 1    | ENSG00000166343 | HPA038564        | 0         | 0       | 0           | 0     |        |        |   |
| 1    | ENSG00000167034 | HPA025693        | 0         | 0       | 0           | 0     |        |        |   |
| 1    | ENSG00000167535 | HPA059515        | 0         | 0       | 0           | 0     |        |        |   |
| 1    | ENSG00000167632 | HPA026579        | 0         | 0       | 0           | 0     |        |        |   |

|     |                 |           |          |   |          |   |            |
|-----|-----------------|-----------|----------|---|----------|---|------------|
| 1   | ENSG00000167747 | HPA042000 | 0        | 0 | 0        | 0 |            |
| 1   | ENSG00000167971 | HPA055990 | 0        | 0 | 0        | 0 |            |
| 1   | ENSG00000168394 | HPA072354 | 0        | 0 | 0        | 0 | 0.4762     |
| 1   | ENSG00000168743 | HPA050203 | 0        | 0 | 0        | 0 |            |
| 1   | ENSG00000168778 | HPA039900 | 0        | 0 | 0        | 0 |            |
| 1   | ENSG00000169035 | HPA018994 | 0        | 0 | 0        | 0 |            |
| 1   | ENSG00000169490 | HPA047152 | 0        | 0 | 0        | 0 |            |
| 1   | ENSG00000171823 | HPA053889 | 0        | 0 | 0        | 0 |            |
| 1   | ENSG00000171951 | HPA075062 | 0        | 0 | 0        | 0 |            |
| 1   | ENSG00000172005 | HPA065691 | 0        | 0 | 0        | 0 |            |
| 1   | ENSG00000172336 | HPA021007 | 0        | 0 | 0        | 0 |            |
| 1   | ENSG00000172803 | HPA041775 | 0        | 0 | 0        | 0 |            |
| 1   | ENSG00000172893 | HPA044280 | 0        | 0 | 0        | 0 |            |
| 1   | ENSG00000173210 | HPA003245 | 0        | 0 | 0        | 0 |            |
| 1   | ENSG00000173267 | HPA014404 | 0        | 0 | 0        | 0 |            |
| 1   | ENSG00000173898 | HPA039293 | 0        | 0 | 0        | 0 |            |
| 1   | ENSG00000174327 | HPA065245 | 0        | 0 | 0        | 0 |            |
| 1   | ENSG00000175040 | HPA013620 | 0        | 0 | 0        | 0 |            |
| 1   | ENSG00000177875 | HPA041715 | 0        | 0 | 0        | 0 |            |
| 1   | ENSG00000178021 | HPA034699 | 0        | 0 | 0        | 0 |            |
| 1   | ENSG00000180376 | HPA044185 | 0        | 0 | 0        | 0 |            |
| 1   | ENSG00000181264 | HPA074432 | 0        | 0 | 0        | 0 |            |
| 1   | ENSG00000183049 | HPA007266 | 0        | 0 | 0        | 0 |            |
| 1   | ENSG00000183323 | HPA041878 | 0        | 0 | 0        | 0 |            |
| 1   | ENSG00000183873 | HPA063346 | 0        | 0 | 0        | 0 |            |
| 1   | ENSG00000184292 | HPA055067 | 0        | 0 | 0        | 0 |            |
| 1   | ENSG00000184470 | HPA003323 | 0        | 0 | 0        | 0 |            |
| 1   | ENSG00000184838 | HPA049254 | 0        | 0 | 0        | 0 |            |
| 1   | ENSG00000185033 | HPA013372 | 0        | 0 | 0        | 0 |            |
| 1   | ENSG00000185513 | HPA068051 | 0        | 0 | 0        | 0 |            |
| 1   | ENSG00000188266 | HPA040706 | 0        | 0 | 0        | 0 |            |
| 1   | ENSG00000196218 | HPA056416 | 0        | 0 | 0        | 0 |            |
| 1   | ENSG00000198793 | HPA071227 | 0        | 0 | 0        | 0 |            |
| 1   | ENSG00000203724 | HPA065352 | 0        | 0 | 0        | 0 |            |
| 1   | ENSG00000204519 | HPA038187 | 0        | 0 | 0        | 0 |            |
| 1   | ENSG00000204882 | HPA071337 | 0        | 0 | 0        | 0 |            |
| 1   | ENSG00000243649 | HPA000951 | 0        | 0 | 0        | 0 | 0.42       |
| 1   | ENSG00000244255 | HPA000951 | 0        | 0 | 0        | 0 |            |
| 1   | ENSG00000249158 | HPA077160 | 0        | 0 | 0        | 0 |            |
| 1   | ENSG00000250571 | HPA023131 | 0        | 0 | 0        | 0 |            |
| 1   | ENSG00000253276 | HPA067925 | 0        | 0 | 0        | 0 |            |
| 1   | ENSG00000267978 | HPA045401 | 0        | 0 | 0        | 0 |            |
| 1   | ENSG00000278224 | HPA031240 | 0        | 0 | 0        | 0 |            |
| 97  | ENSG00000087157 | HPA022526 | 0.333333 | 0 | 0.111111 | 0 |            |
| 97  | ENSG00000092439 | HPA035522 | 0.333333 | 0 | 0.111111 | 0 |            |
| 97  | ENSG00000100300 | HPA046260 | 0.333333 | 0 | 0.111111 | 0 |            |
| 97  | ENSG00000179133 | HPA038130 | 0.333333 | 0 | 0.111111 | 0 | 0.34 0.314 |
| 97  | ENSG00000183475 | HPA003300 | 0.333333 | 0 | 0.111111 | 0 |            |
| 97  | ENSG00000213462 | HPA017209 | 0.333333 | 0 | 0.111111 | 0 |            |
| 103 | ENSG00000068697 | HPA068554 | 0.333333 | 0 | 0.166667 | 0 |            |
| 103 | ENSG00000071539 | HPA005727 | 0.333333 | 0 | 0.166667 | 0 |            |
| 103 | ENSG00000103269 | HPA030359 | 0.333333 | 0 | 0.166667 | 0 |            |
| 103 | ENSG00000122642 | HPA012595 | 0.333333 | 0 | 0.166667 | 0 |            |
| 103 | ENSG00000143507 | HPA016758 | 0.333333 | 0 | 0.166667 | 0 |            |
| 103 | ENSG00000157107 | HPA077850 | 0.333333 | 0 | 0.166667 | 0 |            |

|     |                 |           |          |   |          |   |        |        |
|-----|-----------------|-----------|----------|---|----------|---|--------|--------|
| 103 | ENSG00000157551 | HPA016702 | 0.333333 | 0 | 0.166667 | 0 |        |        |
| 103 | ENSG00000163743 | HPA030338 | 0.333333 | 0 | 0.166667 | 0 |        |        |
| 103 | ENSG00000170961 | HPA052060 | 0.333333 | 0 | 0.166667 | 0 |        |        |
| 103 | ENSG00000172260 | HPA011894 | 0.333333 | 0 | 0.166667 | 0 |        |        |
| 103 | ENSG00000178585 | HPA042617 | 0.333333 | 0 | 0.166667 | 0 |        |        |
| 103 | ENSG00000187800 | HPA035217 | 0.333333 | 0 | 0.166667 | 0 |        |        |
| 115 | ENSG00000227500 | HPA043284 | 0.333333 | 0 | 0.222222 | 0 |        |        |
| 116 | ENSG00000115657 | HPA046723 | 0.666667 | 0 | 0.166667 | 0 |        |        |
| 117 | ENSG00000141564 | CAB013514 | 0.5      | 0 | 0.194444 | 0 |        |        |
| 118 | ENSG00000277443 | HPA054820 | 0.5      | 0 | 0.208333 | 0 |        |        |
| 119 | ENSG00000010318 | HPA036283 | 0.5      | 0 | 0.222222 | 0 |        |        |
| 120 | ENSG00000198879 | HPA035447 | 0.6      | 0 | 0.216667 | 0 |        |        |
| 121 | ENSG00000167964 | HPA075624 | 0.666667 | 0 | 0.194444 | 0 |        |        |
| 122 | ENSG00000115194 | HPA067637 | 0.666667 | 0 | 0.222222 | 0 |        |        |
| 122 | ENSG00000120699 | HPA075230 | 0.666667 | 0 | 0.222222 | 0 |        |        |
| 122 | ENSG00000169744 | HPA068634 | 0.666667 | 0 | 0.222222 | 0 |        |        |
| 122 | ENSG00000197226 | HPA038350 | 0.666667 | 0 | 0.222222 | 0 |        |        |
| 126 | ENSG00000016602 | HPA064770 | 0.666667 | 0 | 0.277778 | 0 |        |        |
| 126 | ENSG00000040608 | CAB012443 | 0.666667 | 0 | 0.277778 | 0 |        |        |
| 126 | ENSG00000075391 | HPA018805 | 0.666667 | 0 | 0.277778 | 0 |        |        |
| 126 | ENSG00000100065 | HPA055612 | 0.666667 | 0 | 0.277778 | 0 | 0.3536 | 0.2786 |
| 126 | ENSG00000100116 | HPA020460 | 0.666667 | 0 | 0.277778 | 0 |        |        |
| 126 | ENSG00000101695 | HPA041514 | 0.666667 | 0 | 0.277778 | 0 |        |        |
| 126 | ENSG00000108582 | HPA055465 | 0.666667 | 0 | 0.277778 | 0 |        |        |
| 126 | ENSG00000109458 | HPA066404 | 0.666667 | 0 | 0.277778 | 0 |        |        |
| 126 | ENSG00000126264 | HPA063026 | 0.666667 | 0 | 0.277778 | 0 |        |        |
| 126 | ENSG00000126950 | HPA048583 | 0.666667 | 0 | 0.277778 | 0 |        |        |
| 126 | ENSG00000140262 | HPA065827 | 0.666667 | 0 | 0.277778 | 0 |        |        |
| 126 | ENSG00000144231 | HPA034694 | 0.666667 | 0 | 0.277778 | 0 |        |        |
| 126 | ENSG00000149547 | HPA051029 | 0.666667 | 0 | 0.277778 | 0 |        |        |
| 126 | ENSG00000158201 | HPA010729 | 0.666667 | 0 | 0.277778 | 0 |        |        |
| 126 | ENSG00000172461 | HPA070923 | 0.666667 | 0 | 0.277778 | 0 |        |        |
| 126 | ENSG00000181291 | HPA070608 | 0.666667 | 0 | 0.277778 | 0 |        |        |
| 126 | ENSG00000184675 | HPA065265 | 0.666667 | 0 | 0.277778 | 0 |        |        |
| 126 | ENSG00000196440 | HPA051930 | 0.666667 | 0 | 0.277778 | 0 |        |        |
| 126 | ENSG00000198721 | HPA022130 | 0.666667 | 0 | 0.277778 | 0 |        |        |
| 126 | ENSG00000206557 | HPA038142 | 0.666667 | 0 | 0.277778 | 0 |        |        |
| 146 | ENSG00000184735 | HPA003186 | 0.666667 | 0 | 0.305556 | 0 |        |        |
| 147 | ENSG00000010438 | HPA062452 | 0.666667 | 0 | 0.333333 | 0 |        |        |
| 147 | ENSG00000038382 | HPA064664 | 0.666667 | 0 | 0.333333 | 0 |        |        |
| 147 | ENSG00000040531 | HPA046947 | 0.666667 | 0 | 0.333333 | 0 |        |        |
| 147 | ENSG00000081479 | HPA064792 | 0.666667 | 0 | 0.333333 | 0 |        |        |
| 147 | ENSG00000101544 | HPA007126 | 0.666667 | 0 | 0.333333 | 0 |        |        |
| 147 | ENSG00000103415 | CAB025464 | 0.666667 | 0 | 0.333333 | 0 |        |        |
| 147 | ENSG00000110881 | HPA058870 | 0.666667 | 0 | 0.333333 | 0 |        |        |
| 147 | ENSG00000114631 | HPA042265 | 0.666667 | 0 | 0.333333 | 0 |        |        |
| 147 | ENSG00000119335 | HPA063683 | 0.666667 | 0 | 0.333333 | 0 |        |        |
| 147 | ENSG00000130962 | HPA078129 | 0.666667 | 0 | 0.333333 | 0 |        |        |
| 147 | ENSG00000133059 | HPA044140 | 0.666667 | 0 | 0.333333 | 0 |        |        |
| 147 | ENSG00000143164 | HPA054305 | 0.666667 | 0 | 0.333333 | 0 |        |        |
| 147 | ENSG00000145703 | HPA037404 | 0.666667 | 0 | 0.333333 | 0 |        |        |
| 147 | ENSG00000149054 | HPA047243 | 0.666667 | 0 | 0.333333 | 0 |        |        |
| 147 | ENSG00000154447 | HPA074783 | 0.666667 | 0 | 0.333333 | 0 |        |        |
| 147 | ENSG00000163902 | HPA026828 | 0.666667 | 0 | 0.333333 | 0 |        |        |
| 147 | ENSG00000179528 | HPA044257 | 0.666667 | 0 | 0.333333 | 0 |        |        |

|     |                 |           |          |   |          |   |        |
|-----|-----------------|-----------|----------|---|----------|---|--------|
| 147 | ENSG00000183648 | HPA063737 | 0.666667 | 0 | 0.333333 | 0 |        |
| 147 | ENSG00000184381 | HPA001171 | 0.666667 | 0 | 0.333333 | 0 |        |
| 147 | ENSG00000186501 | HPA016579 | 0.666667 | 0 | 0.333333 | 0 |        |
| 147 | ENSG00000189431 | HPA040406 | 0.666667 | 0 | 0.333333 | 0 |        |
| 147 | ENSG00000204983 | HPA062452 | 0.666667 | 0 | 0.333333 | 0 |        |
| 147 | ENSG00000205089 | HPA056288 | 0.666667 | 0 | 0.333333 | 0 |        |
| 147 | ENSG00000206052 | HPA063534 | 0.666667 | 0 | 0.333333 | 0 |        |
| 147 | ENSG00000213886 | HPA043710 | 0.666667 | 0 | 0.333333 | 0 |        |
| 147 | ENSG00000230667 | HPA063683 | 0.666667 | 0 | 0.333333 | 0 |        |
| 147 | ENSG00000239605 | HPA047366 | 0.666667 | 0 | 0.333333 | 0 |        |
| 147 | ENSG00000265972 | HPA053694 | 0.666667 | 0 | 0.333333 | 0 |        |
| 147 | ENSG00000275896 | HPA062452 | 0.666667 | 0 | 0.333333 | 0 |        |
| 176 | ENSG00000204420 | HPA054404 | 1        | 0 | 0.2      | 0 |        |
| 177 | ENSG00000033627 | HPA022144 | 1        | 0 | 0.25     | 0 |        |
| 177 | ENSG00000104825 | HPA063734 | 1        | 0 | 0.25     | 0 |        |
| 177 | ENSG00000113048 | HPA071751 | 1        | 0 | 0.25     | 0 |        |
| 177 | ENSG00000144648 | HPA073493 | 1        | 0 | 0.25     | 0 |        |
| 177 | ENSG00000153208 | HPA075622 | 1        | 0 | 0.25     | 0 |        |
| 177 | ENSG00000166317 | HPA055192 | 1        | 0 | 0.25     | 0 |        |
| 177 | ENSG00000170837 | HPA029395 | 1        | 0 | 0.25     | 0 |        |
| 177 | ENSG00000185728 | HPA048703 | 1        | 0 | 0.25     | 0 |        |
| 177 | ENSG00000203867 | HPA035806 | 1        | 0 | 0.25     | 0 |        |
| 186 | ENSG00000108384 | HPA045198 | 1        | 0 | 0.277778 | 0 |        |
| 186 | ENSG00000134504 | HPA057808 | 1        | 0 | 0.277778 | 0 |        |
| 186 | ENSG00000156453 | HPA047720 | 1        | 0 | 0.277778 | 0 |        |
| 186 | ENSG00000181450 | HPA028507 | 1        | 0 | 0.277778 | 0 |        |
| 190 | ENSG00000007392 | HPA056424 | 0.833333 | 0 | 0.333333 | 0 |        |
| 191 | ENSG00000007237 | HPA064678 | 1        | 0 | 0.333333 | 0 |        |
| 191 | ENSG00000065883 | HPA059241 | 1        | 0 | 0.333333 | 0 |        |
| 191 | ENSG00000073803 | HPA016497 | 1        | 0 | 0.333333 | 0 |        |
| 191 | ENSG00000090686 | HPA030046 | 1        | 0 | 0.333333 | 0 | 0.2752 |
| 191 | ENSG00000100344 | HPA058058 | 1        | 0 | 0.333333 | 0 |        |
| 191 | ENSG00000102886 | HPA041470 | 1        | 0 | 0.333333 | 0 |        |
| 191 | ENSG00000103260 | HPA051164 | 1        | 0 | 0.333333 | 0 |        |
| 191 | ENSG00000103264 | HPA030150 | 1        | 0 | 0.333333 | 0 | 0.2862 |
| 191 | ENSG00000106031 | HPA069061 | 1        | 0 | 0.333333 | 0 |        |
| 191 | ENSG00000110046 | HPA038715 | 1        | 0 | 0.333333 | 0 |        |
| 191 | ENSG00000113211 | HPA029566 | 1        | 0 | 0.333333 | 0 |        |
| 191 | ENSG00000119630 | HPA041624 | 1        | 0 | 0.333333 | 0 |        |
| 191 | ENSG00000119969 | HPA063242 | 1        | 0 | 0.333333 | 0 |        |
| 191 | ENSG00000120051 | HPA071938 | 1        | 0 | 0.333333 | 0 |        |
| 191 | ENSG00000122545 | HPA023309 | 1        | 0 | 0.333333 | 0 |        |
| 191 | ENSG00000124788 | HPA070756 | 1        | 0 | 0.333333 | 0 |        |
| 191 | ENSG00000126214 | HPA052450 | 1        | 0 | 0.333333 | 0 |        |
| 191 | ENSG00000127081 | HPA028973 | 1        | 0 | 0.333333 | 0 |        |
| 191 | ENSG00000128487 | HPA061073 | 1        | 0 | 0.333333 | 0 |        |
| 191 | ENSG00000130303 | HPA017060 | 1        | 0 | 0.333333 | 0 |        |
| 191 | ENSG00000132164 | HPA037981 | 1        | 0 | 0.333333 | 0 |        |
| 191 | ENSG00000132639 | HPA071013 | 1        | 0 | 0.333333 | 0 |        |
| 191 | ENSG00000134160 | HPA071139 | 1        | 0 | 0.333333 | 0 |        |
| 191 | ENSG00000134242 | HPA004912 | 1        | 0 | 0.333333 | 0 |        |
| 191 | ENSG00000136155 | HPA039737 | 1        | 0 | 0.333333 | 0 |        |
| 191 | ENSG00000136689 | HPA001482 | 1        | 0 | 0.333333 | 0 | 0.2516 |
| 191 | ENSG00000138162 | HPA061394 | 1        | 0 | 0.333333 | 0 |        |
| 191 | ENSG00000139344 | HPA040149 | 1        | 0 | 0.333333 | 0 |        |

|     |                 |           |          |   |          |          |        |        |
|-----|-----------------|-----------|----------|---|----------|----------|--------|--------|
| 191 | ENSG00000140265 | HPA011109 | 1        | 0 | 0.333333 | 0        | 0.3753 | 0.3529 |
| 191 | ENSG00000141577 | HPA024019 | 1        | 0 | 0.333333 | 0        |        |        |
| 191 | ENSG00000143479 | HPA075041 | 1        | 0 | 0.333333 | 0        |        |        |
| 191 | ENSG00000144868 | HPA063350 | 1        | 0 | 0.333333 | 0        |        |        |
| 191 | ENSG00000146674 | CAB010360 | 1        | 0 | 0.333333 | 0        |        |        |
| 191 | ENSG00000149150 | HPA018826 | 1        | 0 | 0.333333 | 0        |        |        |
| 191 | ENSG00000149591 | HPA019467 | 1        | 0 | 0.333333 | 0        |        |        |
| 191 | ENSG00000154153 | HPA012077 | 1        | 0 | 0.333333 | 0        |        |        |
| 191 | ENSG00000156172 | HPA024198 | 1        | 0 | 0.333333 | 0        |        |        |
| 191 | ENSG00000158125 | HPA062641 | 1        | 0 | 0.333333 | 0        |        |        |
| 191 | ENSG00000161202 | HPA058265 | 1        | 0 | 0.333333 | 0        |        |        |
| 191 | ENSG00000164107 | HPA019591 | 1        | 0 | 0.333333 | 0        |        |        |
| 191 | ENSG00000164434 | HPA028825 | 1        | 0 | 0.333333 | 0        |        |        |
| 191 | ENSG00000167244 | HPA007993 | 1        | 0 | 0.333333 | 0        |        |        |
| 191 | ENSG00000167840 | HPA028611 | 1        | 0 | 0.333333 | 0        |        | 0.379  |
| 191 | ENSG00000167850 | HPA060349 | 1        | 0 | 0.333333 | 0        |        |        |
| 191 | ENSG00000168077 | HPA029861 | 1        | 0 | 0.333333 | 0        |        |        |
| 191 | ENSG00000168297 | HPA024068 | 1        | 0 | 0.333333 | 0        |        |        |
| 191 | ENSG00000170745 | HPA014864 | 1        | 0 | 0.333333 | 0        |        |        |
| 191 | ENSG00000172159 | HPA017285 | 1        | 0 | 0.333333 | 0        |        |        |
| 191 | ENSG00000172890 | CAB017798 | 1        | 0 | 0.333333 | 0        |        |        |
| 191 | ENSG00000172936 | CAB009104 | 1        | 0 | 0.333333 | 0        |        |        |
| 191 | ENSG00000174226 | HPA024284 | 1        | 0 | 0.333333 | 0        |        |        |
| 191 | ENSG00000174851 | HPA014840 | 1        | 0 | 0.333333 | 0        |        |        |
| 191 | ENSG00000176907 | HPA027188 | 1        | 0 | 0.333333 | 0        |        |        |
| 191 | ENSG00000178372 | HPA040725 | 1        | 0 | 0.333333 | 0        |        |        |
| 191 | ENSG00000180481 | HPA039795 | 1        | 0 | 0.333333 | 0        |        |        |
| 191 | ENSG00000181026 | HPA048599 | 1        | 0 | 0.333333 | 0        |        |        |
| 191 | ENSG00000182511 | HPA001376 | 1        | 0 | 0.333333 | 0        |        |        |
| 191 | ENSG00000184363 | CAB012993 | 1        | 0 | 0.333333 | 0        | 0.4234 |        |
| 191 | ENSG00000185340 | HPA019858 | 1        | 0 | 0.333333 | 0        |        |        |
| 191 | ENSG00000188827 | HPA049421 | 1        | 0 | 0.333333 | 0        |        |        |
| 191 | ENSG00000188848 | HPA036850 | 1        | 0 | 0.333333 | 0        |        |        |
| 191 | ENSG00000189007 | HPA035479 | 1        | 0 | 0.333333 | 0        |        |        |
| 191 | ENSG00000189067 | HPA006960 | 1        | 0 | 0.333333 | 0        |        |        |
| 191 | ENSG00000196459 | HPA063308 | 1        | 0 | 0.333333 | 0        |        |        |
| 191 | ENSG00000196684 | HPA036616 | 1        | 0 | 0.333333 | 0        |        |        |
| 191 | ENSG00000196943 | HPA000850 | 1        | 0 | 0.333333 | 0        |        |        |
| 191 | ENSG00000197106 | HPA007663 | 1        | 0 | 0.333333 | 0        |        |        |
| 191 | ENSG00000197170 | HPA023119 | 1        | 0 | 0.333333 | 0        |        |        |
| 191 | ENSG00000198863 | HPA023726 | 1        | 0 | 0.333333 | 0        |        |        |
| 191 | ENSG00000204103 | HPA005653 | 1        | 0 | 0.333333 | 0        |        |        |
| 191 | ENSG00000204305 | HPA064436 | 1        | 0 | 0.333333 | 0        |        |        |
| 191 | ENSG00000212123 | HPA044157 | 1        | 0 | 0.333333 | 0        |        |        |
| 191 | ENSG00000213523 | HPA050153 | 1        | 0 | 0.333333 | 0        |        |        |
| 191 | ENSG00000229809 | HPA048922 | 1        | 0 | 0.333333 | 0        |        |        |
| 191 | ENSG00000244607 | HPA047429 | 1        | 0 | 0.333333 | 0        |        |        |
| 191 | ENSG00000256060 | HPA063308 | 1        | 0 | 0.333333 | 0        |        |        |
| 191 | ENSG00000256500 | HPA052450 | 1        | 0 | 0.333333 | 0        |        |        |
| 191 | ENSG00000262179 | HPA051451 | 1        | 0 | 0.333333 | 0        |        |        |
| 269 | ENSG00000006194 | HPA035085 | 0.333333 | 0 | 0.166667 | 0.333333 |        |        |
| 269 | ENSG00000101350 | HPA007119 | 0.333333 | 0 | 0.166667 | 0.333333 |        |        |
| 269 | ENSG00000103018 | HPA007893 | 0.333333 | 0 | 0.166667 | 0.333333 |        | 0.4835 |
| 269 | ENSG00000107438 | CAB072838 | 0.333333 | 0 | 0.166667 | 0.333333 |        |        |
| 269 | ENSG00000112306 | HPA006365 | 0.333333 | 0 | 0.166667 | 0.333333 |        |        |



|     |                 |           |          |   |          |          |
|-----|-----------------|-----------|----------|---|----------|----------|
| 269 | ENSG00000117411 | HPA007620 | 0.333333 | 0 | 0.166667 | 0.333333 |
| 269 | ENSG00000121769 | HPA055754 | 0.333333 | 0 | 0.166667 | 0.333333 |
| 269 | ENSG00000137312 | HPA001393 | 0.333333 | 0 | 0.166667 | 0.333333 |
| 269 | ENSG00000138587 | HPA039975 | 0.333333 | 0 | 0.166667 | 0.333333 |
| 269 | ENSG00000142733 | HPA051192 | 0.333333 | 0 | 0.166667 | 0.333333 |
| 269 | ENSG00000143595 | HPA062621 | 0.333333 | 0 | 0.166667 | 0.333333 |
| 269 | ENSG00000146950 | HPA051646 | 0.333333 | 0 | 0.166667 | 0.333333 |
| 269 | ENSG00000150347 | HPA015037 | 0.333333 | 0 | 0.166667 | 0.333333 |
| 269 | ENSG00000152894 | HPA054056 | 0.333333 | 0 | 0.166667 | 0.333333 |
| 269 | ENSG00000153233 | HPA071067 | 0.333333 | 0 | 0.166667 | 0.333333 |
| 269 | ENSG00000172728 | HPA058655 | 0.333333 | 0 | 0.166667 | 0.333333 |
| 269 | ENSG00000173917 | HPA047857 | 0.333333 | 0 | 0.166667 | 0.333333 |
| 269 | ENSG00000275052 | HPA001233 | 0.333333 | 0 | 0.166667 | 0.333333 |
| 287 | ENSG00000099260 | HPA017959 | 0.333333 | 0 | 0.222222 | 0.333333 |
| 287 | ENSG00000123496 | HPA045831 | 0.333333 | 0 | 0.222222 | 0.333333 |
| 287 | ENSG00000182810 | HPA041911 | 0.333333 | 0 | 0.222222 | 0.333333 |
| 287 | ENSG00000204956 | HPA010580 | 0.333333 | 0 | 0.222222 | 0.333333 |
| 287 | ENSG00000240764 | HPA010580 | 0.333333 | 0 | 0.222222 | 0.333333 |
| 287 | ENSG00000242419 | HPA010580 | 0.333333 | 0 | 0.222222 | 0.333333 |
| 287 | ENSG00000253159 | HPA010580 | 0.333333 | 0 | 0.222222 | 0.333333 |
| 287 | ENSG00000253305 | HPA010580 | 0.333333 | 0 | 0.222222 | 0.333333 |
| 287 | ENSG00000253485 | HPA010580 | 0.333333 | 0 | 0.222222 | 0.333333 |
| 287 | ENSG00000253537 | HPA010580 | 0.333333 | 0 | 0.222222 | 0.333333 |
| 287 | ENSG00000253731 | HPA010580 | 0.333333 | 0 | 0.222222 | 0.333333 |
| 287 | ENSG00000253767 | HPA010580 | 0.333333 | 0 | 0.222222 | 0.333333 |
| 287 | ENSG00000253846 | HPA010580 | 0.333333 | 0 | 0.222222 | 0.333333 |
| 287 | ENSG00000253873 | HPA010580 | 0.333333 | 0 | 0.222222 | 0.333333 |
| 287 | ENSG00000253953 | HPA010580 | 0.333333 | 0 | 0.222222 | 0.333333 |
| 287 | ENSG00000254122 | HPA010580 | 0.333333 | 0 | 0.222222 | 0.333333 |
| 287 | ENSG00000254245 | HPA010580 | 0.333333 | 0 | 0.222222 | 0.333333 |
| 287 | ENSG00000261934 | HPA010580 | 0.333333 | 0 | 0.222222 | 0.333333 |
| 287 | ENSG00000262576 | HPA010580 | 0.333333 | 0 | 0.222222 | 0.333333 |
| 287 | ENSG00000276547 | HPA010580 | 0.333333 | 0 | 0.222222 | 0.333333 |
| 307 | ENSG00000143434 | HPA076150 | 0.5      | 0 | 0.216667 | 0.1      |
| 308 | ENSG00000081853 | HPA010580 | 0.666667 | 0 | 0.258333 | 0.166667 |
| 309 | ENSG00000090565 | HPA028631 | 1        | 0 | 0.361111 | 0        |
| 309 | ENSG00000132801 | HPA060508 | 1        | 0 | 0.361111 | 0        |
| 309 | ENSG00000136100 | HPA039734 | 1        | 0 | 0.361111 | 0        |
| 309 | ENSG00000169683 | HPA023372 | 1        | 0 | 0.361111 | 0        |
| 309 | ENSG00000254470 | HPA065739 | 1        | 0 | 0.361111 | 0        |
| 314 | ENSG00000005471 | HPA049395 | 1        | 0 | 0.383333 | 0        |
| 315 | ENSG00000150676 | HPA039707 | 1        | 0 | 0.388889 | 0        |
| 316 | ENSG00000119522 | HPA020481 | 0.666667 | 0 | 0.222222 | 0.333333 |
| 316 | ENSG00000137699 | HPA020053 | 0.666667 | 0 | 0.222222 | 0.333333 |
| 316 | ENSG00000165731 | HPA008356 | 0.666667 | 0 | 0.222222 | 0.333333 |
| 316 | ENSG00000204634 | CAB015211 | 0.666667 | 0 | 0.222222 | 0.333333 |
| 320 | ENSG00000138640 | HPA038108 | 1        | 0 | 0.4      | 0        |
| 321 | ENSG00000071203 | HPA048616 | 1        | 0 | 0.4      | 0        |
| 321 | ENSG00000164934 | HPA044504 | 1        | 0 | 0.4      | 0        |
| 321 | ENSG00000176208 | HPA066823 | 1        | 0 | 0.4      | 0        |
| 324 | ENSG00000013293 | HPA045929 | 1        | 0 | 0.416667 | 0        |
| 324 | ENSG00000086065 | CAB033874 | 1        | 0 | 0.416667 | 0        |
| 324 | ENSG00000119636 | HPA003136 | 1        | 0 | 0.416667 | 0        |
| 324 | ENSG00000119844 | HPA034990 | 1        | 0 | 0.416667 | 0        |
| 324 | ENSG00000125482 | HPA054837 | 1        | 0 | 0.416667 | 0        |

0.1723

|     |                 |           |          |   |          |          |
|-----|-----------------|-----------|----------|---|----------|----------|
| 324 | ENSG00000129194 | HPA067196 | 1        | 0 | 0.416667 | 0        |
| 324 | ENSG00000132470 | HPA036348 | 1        | 0 | 0.416667 | 0        |
| 324 | ENSG00000164741 | HPA017753 | 1        | 0 | 0.416667 | 0        |
| 324 | ENSG00000165025 | HPA001384 | 1        | 0 | 0.416667 | 0        |
| 324 | ENSG00000174963 | HPA030194 | 1        | 0 | 0.416667 | 0        |
| 324 | ENSG00000176771 | HPA044859 | 1        | 0 | 0.416667 | 0        |
| 324 | ENSG00000187257 | HPA020406 | 1        | 0 | 0.416667 | 0        |
| 324 | ENSG00000214367 | HPA040649 | 1        | 0 | 0.416667 | 0        |
| 324 | ENSG00000258890 | HPA023654 | 1        | 0 | 0.416667 | 0        |
| 324 | ENSG00000283632 | HPA061110 | 1        | 0 | 0.416667 | 0        |
| 339 | ENSG00000101439 | CAB000118 | 0.666667 | 0 | 0.305556 | 0.166667 |
| 339 | ENSG00000163481 | HPA036420 | 0.666667 | 0 | 0.305556 | 0.166667 |
| 341 | ENSG00000007264 | HPA066547 | 0.666667 | 0 | 0.25     | 0.333333 |
| 342 | ENSG00000004776 | HPA054811 | 0.666667 | 0 | 0.277778 | 0.333333 |
| 342 | ENSG00000022840 | HPA052643 | 0.666667 | 0 | 0.277778 | 0.333333 |
| 342 | ENSG00000066735 | HPA046882 | 0.666667 | 0 | 0.277778 | 0.333333 |
| 342 | ENSG00000069966 | HPA044198 | 0.666667 | 0 | 0.277778 | 0.333333 |
| 342 | ENSG00000080815 | HPA067496 | 0.666667 | 0 | 0.277778 | 0.333333 |
| 342 | ENSG00000100593 | HPA039314 | 0.666667 | 0 | 0.277778 | 0.333333 |
| 342 | ENSG00000103257 | HPA056077 | 0.666667 | 0 | 0.277778 | 0.333333 |
| 342 | ENSG00000104835 | HPA056957 | 0.666667 | 0 | 0.277778 | 0.333333 |
| 342 | ENSG00000107863 | HPA057861 | 0.666667 | 0 | 0.277778 | 0.333333 |
| 342 | ENSG00000116852 | HPA027249 | 0.666667 | 0 | 0.277778 | 0.333333 |
| 342 | ENSG00000125966 | HPA049280 | 0.666667 | 0 | 0.277778 | 0.333333 |
| 342 | ENSG00000126947 | HPA005685 | 0.666667 | 0 | 0.277778 | 0.333333 |
| 342 | ENSG00000130544 | HPA029291 | 0.666667 | 0 | 0.277778 | 0.333333 |
| 342 | ENSG00000130921 | HPA057595 | 0.666667 | 0 | 0.277778 | 0.333333 |
| 342 | ENSG00000131845 | HPA050531 | 0.666667 | 0 | 0.277778 | 0.333333 |
| 342 | ENSG00000134152 | HPA062573 | 0.666667 | 0 | 0.277778 | 0.333333 |
| 342 | ENSG00000139211 | HPA059601 | 0.666667 | 0 | 0.277778 | 0.333333 |
| 342 | ENSG00000148300 | HPA047006 | 0.666667 | 0 | 0.277778 | 0.333333 |
| 342 | ENSG00000151914 | HPA030200 | 0.666667 | 0 | 0.277778 | 0.333333 |
| 342 | ENSG00000163106 | HPA024035 | 0.666667 | 0 | 0.277778 | 0.333333 |
| 342 | ENSG00000163214 | HPA036160 | 0.666667 | 0 | 0.277778 | 0.333333 |
| 342 | ENSG00000165462 | HPA053810 | 0.666667 | 0 | 0.277778 | 0.333333 |
| 342 | ENSG00000167524 | HPA046590 | 0.666667 | 0 | 0.277778 | 0.333333 |
| 342 | ENSG00000167642 | HPA011101 | 0.666667 | 0 | 0.277778 | 0.333333 |
| 342 | ENSG00000167676 | HPA044682 | 0.666667 | 0 | 0.277778 | 0.333333 |
| 342 | ENSG00000171772 | HPA040208 | 0.666667 | 0 | 0.277778 | 0.333333 |
| 342 | ENSG00000175073 | HPA023932 | 0.666667 | 0 | 0.277778 | 0.333333 |
| 342 | ENSG00000175395 | HPA030190 | 0.666667 | 0 | 0.277778 | 0.333333 |
| 342 | ENSG00000179091 | HPA001247 | 0.666667 | 0 | 0.277778 | 0.333333 |
| 342 | ENSG00000181007 | HPA051669 | 0.666667 | 0 | 0.277778 | 0.333333 |
| 342 | ENSG00000183570 | HPA030247 | 0.666667 | 0 | 0.277778 | 0.333333 |
| 342 | ENSG00000258472 | HPA046590 | 0.666667 | 0 | 0.277778 | 0.333333 |
| 342 | ENSG00000269547 | HPA056957 | 0.666667 | 0 | 0.277778 | 0.333333 |
| 375 | ENSG00000051382 | HPA042288 | 1        | 0 | 0.430556 | 0        |
| 375 | ENSG00000169220 | HPA046847 | 1        | 0 | 0.430556 | 0        |
| 377 | ENSG00000078328 | HPA040809 | 1        | 0 | 0.441667 | 0        |
| 378 | ENSG00000005238 | HPA048831 | 1        | 0 | 0.444444 | 0        |
| 378 | ENSG00000010292 | CAB012423 | 1        | 0 | 0.444444 | 0        |
| 378 | ENSG00000033867 | CAB022494 | 1        | 0 | 0.444444 | 0        |
| 378 | ENSG00000066382 | HPA062575 | 1        | 0 | 0.444444 | 0        |
| 378 | ENSG00000080822 | HPA029841 | 1        | 0 | 0.444444 | 0        |
| 378 | ENSG00000091947 | HPA039739 | 1        | 0 | 0.444444 | 0        |

|     |                 |           |          |   |          |                 |
|-----|-----------------|-----------|----------|---|----------|-----------------|
| 378 | ENSG00000092140 | HPA001601 | 1        | 0 | 0.444444 | 0               |
| 378 | ENSG00000100650 | HPA043484 | 1        | 0 | 0.444444 | 0               |
| 378 | ENSG00000102981 | HPA041551 | 1        | 0 | 0.444444 | 0               |
| 378 | ENSG00000118246 | HPA067191 | 1        | 0 | 0.444444 | 0               |
| 378 | ENSG00000120075 | HPA043851 | 1        | 0 | 0.444444 | 0               |
| 378 | ENSG00000123444 | HPA037792 | 1        | 0 | 0.444444 | 0               |
| 378 | ENSG00000132749 | HPA018539 | 1        | 0 | 0.444444 | 0               |
| 378 | ENSG00000135469 | HPA068931 | 1        | 0 | 0.444444 | 0               |
| 378 | ENSG00000136937 | HPA042411 | 1        | 0 | 0.444444 | 0               |
| 378 | ENSG00000149357 | HPA002997 | 1        | 0 | 0.444444 | 0               |
| 378 | ENSG00000158486 | HPA062493 | 1        | 0 | 0.444444 | 0               |
| 378 | ENSG00000164172 | HPA037680 | 1        | 0 | 0.444444 | 0               |
| 378 | ENSG00000168904 | HPA039378 | 1        | 0 | 0.444444 | 0               |
| 378 | ENSG00000170775 | HPA042903 | 1        | 0 | 0.444444 | 0               |
| 378 | ENSG00000174718 | HPA013816 | 1        | 0 | 0.444444 | 0               |
| 378 | ENSG00000175224 | HPA039350 | 1        | 0 | 0.444444 | 0               |
| 378 | ENSG00000176095 | HPA040825 | 1        | 0 | 0.444444 | 0               |
| 378 | ENSG00000182473 | HPA022840 | 1        | 0 | 0.444444 | 0               |
| 378 | ENSG00000182979 | CAB004508 | 1        | 0 | 0.444444 | 0               |
| 378 | ENSG00000183671 | HPA010525 | 1        | 0 | 0.444444 | 0               |
| 378 | ENSG00000188158 | HPA076257 | 1        | 0 | 0.444444 | 0               |
| 378 | ENSG00000197841 | HPA062305 | 1        | 0 | 0.444444 | 0               |
| 378 | ENSG00000197961 | HPA054961 | 1        | 0 | 0.444444 | 0               |
| 378 | ENSG00000204442 | HPA058768 | 1        | 0 | 0.444444 | 0               |
| 378 | ENSG00000214944 | HPA037602 | 1        | 0 | 0.444444 | 0               |
| 409 | ENSG00000102984 | HPA036372 | 0.666667 | 0 | 0.305556 | 0.333333        |
| 409 | ENSG00000133265 | CAB005865 | 0.666667 | 0 | 0.305556 | 0.333333        |
| 409 | ENSG00000168887 | HPA051143 | 0.666667 | 0 | 0.305556 | 0.333333        |
| 409 | ENSG00000204388 | CAB008640 | 0.666667 | 0 | 0.305556 | 0.333333        |
| 413 | ENSG00000013275 | HPA002044 | 0.666667 | 0 | 0.333333 | 0.333333 0.2953 |
| 413 | ENSG00000077454 | HPA037667 | 0.666667 | 0 | 0.333333 | 0.333333        |
| 413 | ENSG00000095383 | HPA030871 | 0.666667 | 0 | 0.333333 | 0.333333        |
| 413 | ENSG00000100360 | HPA018418 | 0.666667 | 0 | 0.333333 | 0.333333        |
| 413 | ENSG00000104853 | HPA068702 | 0.666667 | 0 | 0.333333 | 0.333333        |
| 413 | ENSG00000105339 | HPA024491 | 0.666667 | 0 | 0.333333 | 0.333333        |
| 413 | ENSG00000117419 | HPA029895 | 0.666667 | 0 | 0.333333 | 0.333333        |
| 413 | ENSG00000126970 | HPA049584 | 0.666667 | 0 | 0.333333 | 0.333333        |
| 413 | ENSG00000128564 | HPA055177 | 0.666667 | 0 | 0.333333 | 0.333333        |
| 413 | ENSG00000135697 | HPA043811 | 0.666667 | 0 | 0.333333 | 0.333333        |
| 413 | ENSG00000138413 | CAB062556 | 0.666667 | 0 | 0.333333 | 0.333333        |
| 413 | ENSG00000138944 | HPA051178 | 0.666667 | 0 | 0.333333 | 0.333333        |
| 413 | ENSG00000139946 | HPA053182 | 0.666667 | 0 | 0.333333 | 0.333333        |
| 413 | ENSG00000143105 | HPA015061 | 0.666667 | 0 | 0.333333 | 0.333333        |
| 413 | ENSG00000146830 | HPA020999 | 0.666667 | 0 | 0.333333 | 0.333333        |
| 413 | ENSG00000146856 | HPA020397 | 0.666667 | 0 | 0.333333 | 0.333333        |
| 413 | ENSG00000151532 | HPA054108 | 0.666667 | 0 | 0.333333 | 0.333333        |
| 413 | ENSG00000158258 | HPA061800 | 0.666667 | 0 | 0.333333 | 0.333333        |
| 413 | ENSG00000162814 | HPA030099 | 0.666667 | 0 | 0.333333 | 0.333333        |
| 413 | ENSG00000162869 | HPA036792 | 0.666667 | 0 | 0.333333 | 0.333333        |
| 413 | ENSG00000163840 | HPA010570 | 0.666667 | 0 | 0.333333 | 0.333333        |
| 413 | ENSG00000165633 | HPA017279 | 0.666667 | 0 | 0.333333 | 0.333333        |
| 413 | ENSG00000165917 | HPA039475 | 0.666667 | 0 | 0.333333 | 0.333333        |
| 413 | ENSG00000166592 | HPA041755 | 0.666667 | 0 | 0.333333 | 0.333333        |
| 413 | ENSG00000167207 | HPA054494 | 0.666667 | 0 | 0.333333 | 0.333333        |
| 413 | ENSG00000167772 | HPA007879 | 0.666667 | 0 | 0.333333 | 0.333333        |

|     |                 |           |          |   |          |          |        |
|-----|-----------------|-----------|----------|---|----------|----------|--------|
| 413 | ENSG00000168291 | HPA036745 | 0.666667 | 0 | 0.333333 | 0.333333 |        |
| 413 | ENSG00000170577 | HPA056958 | 0.666667 | 0 | 0.333333 | 0.333333 |        |
| 413 | ENSG00000171368 | HPA036576 | 0.666667 | 0 | 0.333333 | 0.333333 |        |
| 413 | ENSG00000172340 | HPA046705 | 0.666667 | 0 | 0.333333 | 0.333333 |        |
| 413 | ENSG00000177595 | HPA055473 | 0.666667 | 0 | 0.333333 | 0.333333 |        |
| 413 | ENSG00000178026 | HPA002540 | 0.666667 | 0 | 0.333333 | 0.333333 | 0.2933 |
| 413 | ENSG00000178826 | HPA036983 | 0.666667 | 0 | 0.333333 | 0.333333 |        |
| 413 | ENSG00000179933 | HPA003638 | 0.666667 | 0 | 0.333333 | 0.333333 |        |
| 413 | ENSG00000182973 | HPA041450 | 0.666667 | 0 | 0.333333 | 0.333333 |        |
| 413 | ENSG00000185052 | HPA043400 | 0.666667 | 0 | 0.333333 | 0.333333 |        |
| 413 | ENSG00000185187 | HPA023188 | 0.666667 | 0 | 0.333333 | 0.333333 |        |
| 413 | ENSG00000186364 | HPA030145 | 0.666667 | 0 | 0.333333 | 0.333333 |        |
| 413 | ENSG00000186416 | HPA001476 | 0.666667 | 0 | 0.333333 | 0.333333 |        |
| 413 | ENSG00000187634 | HPA030110 | 0.666667 | 0 | 0.333333 | 0.333333 |        |
| 413 | ENSG00000196123 | HPA065996 | 0.666667 | 0 | 0.333333 | 0.333333 |        |
| 413 | ENSG00000197329 | HPA053182 | 0.666667 | 0 | 0.333333 | 0.333333 |        |
| 455 | ENSG00000044524 | HPA069390 | 1        | 0 | 0.466667 | 0        |        |
| 456 | ENSG00000020633 | HPA004195 | 1        | 0 | 0.472222 | 0        |        |
| 456 | ENSG00000068985 | HPA003473 | 1        | 0 | 0.472222 | 0        |        |
| 456 | ENSG00000085733 | HPA057242 | 1        | 0 | 0.472222 | 0        | 0.2539 |
| 456 | ENSG00000107099 | HPA003218 | 1        | 0 | 0.472222 | 0        |        |
| 456 | ENSG00000123975 | HPA003424 | 1        | 0 | 0.472222 | 0        |        |
| 456 | ENSG00000169180 | HPA038246 | 1        | 0 | 0.472222 | 0        |        |
| 456 | ENSG00000173207 | HPA003424 | 1        | 0 | 0.472222 | 0        |        |
| 456 | ENSG00000174177 | HPA041135 | 1        | 0 | 0.472222 | 0        |        |
| 464 | ENSG00000000938 | HPA002024 | 1        | 0 | 0.5      | 0        |        |
| 464 | ENSG00000003989 | HPA009277 | 1        | 0 | 0.5      | 0        |        |
| 464 | ENSG00000006756 | HPA063835 | 1        | 0 | 0.5      | 0        | 0.363  |
| 464 | ENSG00000007314 | HPA053992 | 1        | 0 | 0.5      | 0        |        |
| 464 | ENSG00000007520 | HPA040760 | 1        | 0 | 0.5      | 0        |        |
| 464 | ENSG00000011198 | HPA035851 | 1        | 0 | 0.5      | 0        |        |
| 464 | ENSG00000011523 | HPA040493 | 1        | 0 | 0.5      | 0        |        |
| 464 | ENSG00000014919 | HPA066096 | 1        | 0 | 0.5      | 0        |        |
| 464 | ENSG00000026950 | HPA012565 | 1        | 0 | 0.5      | 0        |        |
| 464 | ENSG00000041357 | HPA055466 | 1        | 0 | 0.5      | 0        |        |
| 464 | ENSG00000049089 | HPA056316 | 1        | 0 | 0.5      | 0        |        |
| 464 | ENSG00000050344 | HPA055889 | 1        | 0 | 0.5      | 0        |        |
| 464 | ENSG00000060140 | HPA040468 | 1        | 0 | 0.5      | 0        |        |
| 464 | ENSG00000063241 | HPA043142 | 1        | 0 | 0.5      | 0        |        |
| 464 | ENSG00000063438 | HPA021483 | 1        | 0 | 0.5      | 0        |        |
| 464 | ENSG00000065534 | HPA031677 | 1        | 0 | 0.5      | 0        |        |
| 464 | ENSG00000066294 | HPA063316 | 1        | 0 | 0.5      | 0        |        |
| 464 | ENSG00000070371 | HPA075795 | 1        | 0 | 0.5      | 0        |        |
| 464 | ENSG00000070882 | HPA000691 | 1        | 0 | 0.5      | 0        |        |
| 464 | ENSG00000071282 | HPA024059 | 1        | 0 | 0.5      | 0        |        |
| 464 | ENSG00000071994 | HPA075534 | 1        | 0 | 0.5      | 0        |        |
| 464 | ENSG00000074755 | HPA031778 | 1        | 0 | 0.5      | 0        |        |
| 464 | ENSG00000075275 | HPA052976 | 1        | 0 | 0.5      | 0        |        |
| 464 | ENSG00000082458 | HPA078130 | 1        | 0 | 0.5      | 0        |        |
| 464 | ENSG00000083123 | HPA031956 | 1        | 0 | 0.5      | 0        |        |
| 464 | ENSG00000083817 | HPA063318 | 1        | 0 | 0.5      | 0        |        |
| 464 | ENSG00000085063 | HPA026494 | 1        | 0 | 0.5      | 0        |        |
| 464 | ENSG00000087266 | HPA036790 | 1        | 0 | 0.5      | 0        |        |
| 464 | ENSG00000089250 | HPA058312 | 1        | 0 | 0.5      | 0        |        |
| 464 | ENSG00000089335 | HPA059503 | 1        | 0 | 0.5      | 0        |        |

|     |                 |           |   |   |     |   |        |
|-----|-----------------|-----------|---|---|-----|---|--------|
| 464 | ENSG00000089820 | HPA001083 | 1 | 0 | 0.5 | 0 |        |
| 464 | ENSG00000090661 | HPA054729 | 1 | 0 | 0.5 | 0 |        |
| 464 | ENSG00000095203 | HPA042862 | 1 | 0 | 0.5 | 0 |        |
| 464 | ENSG00000096968 | HPA043870 | 1 | 0 | 0.5 | 0 |        |
| 464 | ENSG00000097021 | HPA025735 | 1 | 0 | 0.5 | 0 |        |
| 464 | ENSG00000099617 | HPA067567 | 1 | 0 | 0.5 | 0 |        |
| 464 | ENSG00000099954 | HPA002943 | 1 | 0 | 0.5 | 0 |        |
| 464 | ENSG00000100156 | HPA075017 | 1 | 0 | 0.5 | 0 |        |
| 464 | ENSG00000100299 | HPA005554 | 1 | 0 | 0.5 | 0 |        |
| 464 | ENSG00000100335 | HPA061059 | 1 | 0 | 0.5 | 0 |        |
| 464 | ENSG00000100600 | HPA001426 | 1 | 0 | 0.5 | 0 |        |
| 464 | ENSG00000100813 | HPA000657 | 1 | 0 | 0.5 | 0 | 0.2746 |
| 464 | ENSG00000101417 | HPA050077 | 1 | 0 | 0.5 | 0 |        |
| 464 | ENSG00000101464 | HPA046766 | 1 | 0 | 0.5 | 0 |        |
| 464 | ENSG00000102760 | HPA063701 | 1 | 0 | 0.5 | 0 | 0.262  |
| 464 | ENSG00000103353 | HPA051746 | 1 | 0 | 0.5 | 0 |        |
| 464 | ENSG00000103381 | HPA041970 | 1 | 0 | 0.5 | 0 |        |
| 464 | ENSG00000103522 | HPA042296 | 1 | 0 | 0.5 | 0 |        |
| 464 | ENSG00000105143 | HPA041505 | 1 | 0 | 0.5 | 0 |        |
| 464 | ENSG00000105329 | HPA073356 | 1 | 0 | 0.5 | 0 |        |
| 464 | ENSG00000105486 | CAB037015 | 1 | 0 | 0.5 | 0 |        |
| 464 | ENSG00000105851 | HPA069976 | 1 | 0 | 0.5 | 0 |        |
| 464 | ENSG00000106006 | HPA077900 | 1 | 0 | 0.5 | 0 | 0.2698 |
| 464 | ENSG00000106459 | HPA029329 | 1 | 0 | 0.5 | 0 |        |
| 464 | ENSG00000106948 | HPA052367 | 1 | 0 | 0.5 | 0 |        |
| 464 | ENSG00000107281 | HPA008189 | 1 | 0 | 0.5 | 0 |        |
| 464 | ENSG00000107443 | HPA058151 | 1 | 0 | 0.5 | 0 |        |
| 464 | ENSG00000108551 | HPA047896 | 1 | 0 | 0.5 | 0 |        |
| 464 | ENSG00000108691 | HPA019163 | 1 | 0 | 0.5 | 0 |        |
| 464 | ENSG00000110060 | HPA038040 | 1 | 0 | 0.5 | 0 |        |
| 464 | ENSG00000111276 | HPA059086 | 1 | 0 | 0.5 | 0 |        |
| 464 | ENSG00000112651 | HPA064814 | 1 | 0 | 0.5 | 0 |        |
| 464 | ENSG00000113763 | HPA071450 | 1 | 0 | 0.5 | 0 |        |
| 464 | ENSG00000116260 | HPA056243 | 1 | 0 | 0.5 | 0 |        |
| 464 | ENSG00000116525 | HPA050061 | 1 | 0 | 0.5 | 0 |        |
| 464 | ENSG00000116539 | HPA004806 | 1 | 0 | 0.5 | 0 |        |
| 464 | ENSG00000116711 | HPA050062 | 1 | 0 | 0.5 | 0 |        |
| 464 | ENSG00000117598 | HPA059085 | 1 | 0 | 0.5 | 0 |        |
| 464 | ENSG00000117971 | HPA059484 | 1 | 0 | 0.5 | 0 |        |
| 464 | ENSG00000118873 | HPA026273 | 1 | 0 | 0.5 | 0 |        |
| 464 | ENSG00000119004 | HPA055872 | 1 | 0 | 0.5 | 0 | 0.4459 |
| 464 | ENSG00000119487 | HPA029091 | 1 | 0 | 0.5 | 0 |        |
| 464 | ENSG00000119661 | HPA053129 | 1 | 0 | 0.5 | 0 |        |
| 464 | ENSG00000119729 | HPA044938 | 1 | 0 | 0.5 | 0 |        |
| 464 | ENSG00000119927 | HPA060090 | 1 | 0 | 0.5 | 0 |        |
| 464 | ENSG00000120279 | HPA047992 | 1 | 0 | 0.5 | 0 |        |
| 464 | ENSG00000121068 | HPA008586 | 1 | 0 | 0.5 | 0 |        |
| 464 | ENSG00000122122 | HPA001085 | 1 | 0 | 0.5 | 0 |        |
| 464 | ENSG00000122877 | HPA031165 | 1 | 0 | 0.5 | 0 |        |
| 464 | ENSG00000123607 | HPA035494 | 1 | 0 | 0.5 | 0 |        |
| 464 | ENSG00000124104 | HPA046359 | 1 | 0 | 0.5 | 0 |        |
| 464 | ENSG00000124215 | HPA047578 | 1 | 0 | 0.5 | 0 |        |
| 464 | ENSG00000124615 | HPA045783 | 1 | 0 | 0.5 | 0 |        |
| 464 | ENSG00000124789 | HPA027896 | 1 | 0 | 0.5 | 0 |        |
| 464 | ENSG00000125386 | HPA043116 | 1 | 0 | 0.5 | 0 |        |

|     |                 |           |   |   |     |   |      |        |
|-----|-----------------|-----------|---|---|-----|---|------|--------|
| 464 | ENSG00000125740 | HPA054663 | 1 | 0 | 0.5 | 0 |      |        |
| 464 | ENSG00000125991 | HPA015242 | 1 | 0 | 0.5 | 0 |      |        |
| 464 | ENSG00000127337 | HPA072532 | 1 | 0 | 0.5 | 0 |      |        |
| 464 | ENSG00000128606 | HPA073458 | 1 | 0 | 0.5 | 0 | 0.31 | 0.4781 |
| 464 | ENSG00000128654 | HPA031550 | 1 | 0 | 0.5 | 0 |      |        |
| 464 | ENSG00000128731 | HPA074166 | 1 | 0 | 0.5 | 0 |      |        |
| 464 | ENSG00000129355 | HPA043546 | 1 | 0 | 0.5 | 0 |      |        |
| 464 | ENSG00000130598 | HPA055938 | 1 | 0 | 0.5 | 0 |      |        |
| 464 | ENSG00000131019 | HPA056541 | 1 | 0 | 0.5 | 0 |      |        |
| 464 | ENSG00000131373 | HPA073760 | 1 | 0 | 0.5 | 0 |      |        |
| 464 | ENSG00000131626 | HPA042271 | 1 | 0 | 0.5 | 0 |      | 0.3169 |
| 464 | ENSG00000131981 | CAB005191 | 1 | 0 | 0.5 | 0 |      |        |
| 464 | ENSG00000132017 | HPA068351 | 1 | 0 | 0.5 | 0 |      |        |
| 464 | ENSG00000132530 | HPA057302 | 1 | 0 | 0.5 | 0 |      |        |
| 464 | ENSG00000132846 | HPA055995 | 1 | 0 | 0.5 | 0 |      |        |
| 464 | ENSG00000132958 | HPA068342 | 1 | 0 | 0.5 | 0 |      |        |
| 464 | ENSG00000133619 | HPA050448 | 1 | 0 | 0.5 | 0 |      |        |
| 464 | ENSG00000133935 | HPA063568 | 1 | 0 | 0.5 | 0 |      |        |
| 464 | ENSG00000134265 | HPA008208 | 1 | 0 | 0.5 | 0 |      |        |
| 464 | ENSG00000135269 | HPA015269 | 1 | 0 | 0.5 | 0 |      |        |
| 464 | ENSG00000135414 | HPA060985 | 1 | 0 | 0.5 | 0 |      |        |
| 464 | ENSG00000135439 | HPA075831 | 1 | 0 | 0.5 | 0 |      |        |
| 464 | ENSG00000136381 | HPA040371 | 1 | 0 | 0.5 | 0 |      |        |
| 464 | ENSG00000136560 | CAB010345 | 1 | 0 | 0.5 | 0 |      | 0.3979 |
| 464 | ENSG00000136870 | HPA034814 | 1 | 0 | 0.5 | 0 |      |        |
| 464 | ENSG00000137628 | HPA046952 | 1 | 0 | 0.5 | 0 |      |        |
| 464 | ENSG00000137693 | CAB009370 | 1 | 0 | 0.5 | 0 |      |        |
| 464 | ENSG00000138311 | HPA052446 | 1 | 0 | 0.5 | 0 |      |        |
| 464 | ENSG00000138650 | HPA073462 | 1 | 0 | 0.5 | 0 |      |        |
| 464 | ENSG00000139044 | HPA011404 | 1 | 0 | 0.5 | 0 |      |        |
| 464 | ENSG00000139540 | HPA018423 | 1 | 0 | 0.5 | 0 |      |        |
| 464 | ENSG00000140416 | HPA000261 | 1 | 0 | 0.5 | 0 |      |        |
| 464 | ENSG00000141526 | HPA021451 | 1 | 0 | 0.5 | 0 |      |        |
| 464 | ENSG00000142273 | HPA035266 | 1 | 0 | 0.5 | 0 |      |        |
| 464 | ENSG00000142327 | HPA036772 | 1 | 0 | 0.5 | 0 |      |        |
| 464 | ENSG00000142409 | HPA035140 | 1 | 0 | 0.5 | 0 |      |        |
| 464 | ENSG00000143224 | HPA030123 | 1 | 0 | 0.5 | 0 |      |        |
| 464 | ENSG00000143452 | HPA028346 | 1 | 0 | 0.5 | 0 |      |        |
| 464 | ENSG00000143549 | HPA000261 | 1 | 0 | 0.5 | 0 |      |        |
| 464 | ENSG00000145882 | HPA037463 | 1 | 0 | 0.5 | 0 |      |        |
| 464 | ENSG00000147485 | HPA007919 | 1 | 0 | 0.5 | 0 |      |        |
| 464 | ENSG00000148468 | HPA051345 | 1 | 0 | 0.5 | 0 |      |        |
| 464 | ENSG00000149196 | HPA012708 | 1 | 0 | 0.5 | 0 |      |        |
| 464 | ENSG00000149418 | HPA047014 | 1 | 0 | 0.5 | 0 |      |        |
| 464 | ENSG00000151117 | HPA057119 | 1 | 0 | 0.5 | 0 |      |        |
| 464 | ENSG00000152137 | HPA015876 | 1 | 0 | 0.5 | 0 |      |        |
| 464 | ENSG00000152936 | HPA038640 | 1 | 0 | 0.5 | 0 |      |        |
| 464 | ENSG00000152954 | HPA019681 | 1 | 0 | 0.5 | 0 |      |        |
| 464 | ENSG00000153707 | HPA054829 | 1 | 0 | 0.5 | 0 |      |        |
| 464 | ENSG00000154096 | HPA003733 | 1 | 0 | 0.5 | 0 |      |        |
| 464 | ENSG00000154511 | HPA015718 | 1 | 0 | 0.5 | 0 |      |        |
| 464 | ENSG00000154813 | HPA035287 | 1 | 0 | 0.5 | 0 |      |        |
| 464 | ENSG00000158023 | HPA039902 | 1 | 0 | 0.5 | 0 |      |        |
| 464 | ENSG00000158062 | HPA031357 | 1 | 0 | 0.5 | 0 |      |        |
| 464 | ENSG00000159210 | HPA059320 | 1 | 0 | 0.5 | 0 |      |        |

|     |                 |           |   |   |     |   |
|-----|-----------------|-----------|---|---|-----|---|
| 464 | ENSG00000159388 | HPA002355 | 1 | 0 | 0.5 | 0 |
| 464 | ENSG00000159479 | HPA028438 | 1 | 0 | 0.5 | 0 |
| 464 | ENSG00000160191 | HPA011380 | 1 | 0 | 0.5 | 0 |
| 464 | ENSG00000161395 | HPA016591 | 1 | 0 | 0.5 | 0 |
| 464 | ENSG00000161640 | HPA052132 | 1 | 0 | 0.5 | 0 |
| 464 | ENSG00000162063 | HPA060596 | 1 | 0 | 0.5 | 0 |
| 464 | ENSG00000162396 | HPA028308 | 1 | 0 | 0.5 | 0 |
| 464 | ENSG00000162415 | HPA018211 | 1 | 0 | 0.5 | 0 |
| 464 | ENSG00000162601 | HPA067133 | 1 | 0 | 0.5 | 0 |
| 464 | ENSG00000162885 | HPA012502 | 1 | 0 | 0.5 | 0 |
| 464 | ENSG00000162949 | HPA029496 | 1 | 0 | 0.5 | 0 |
| 464 | ENSG00000162975 | HPA014738 | 1 | 0 | 0.5 | 0 |
| 464 | ENSG00000163600 | HPA034865 | 1 | 0 | 0.5 | 0 |
| 464 | ENSG00000163633 | HPA057434 | 1 | 0 | 0.5 | 0 |
| 464 | ENSG00000163909 | HPA001438 | 1 | 0 | 0.5 | 0 |
| 464 | ENSG00000164068 | HPA071879 | 1 | 0 | 0.5 | 0 |
| 464 | ENSG00000164076 | HPA007656 | 1 | 0 | 0.5 | 0 |
| 464 | ENSG00000164120 | HPA005679 | 1 | 0 | 0.5 | 0 |
| 464 | ENSG00000164128 | HPA029903 | 1 | 0 | 0.5 | 0 |
| 464 | ENSG00000164171 | HPA060991 | 1 | 0 | 0.5 | 0 |
| 464 | ENSG00000164300 | HPA037898 | 1 | 0 | 0.5 | 0 |
| 464 | ENSG00000164535 | HPA069377 | 1 | 0 | 0.5 | 0 |
| 464 | ENSG00000164904 | HPA023296 | 1 | 0 | 0.5 | 0 |
| 464 | ENSG00000165060 | CAB022164 | 1 | 0 | 0.5 | 0 |
| 464 | ENSG00000165376 | HPA051548 | 1 | 0 | 0.5 | 0 |
| 464 | ENSG00000165443 | HPA038746 | 1 | 0 | 0.5 | 0 |
| 464 | ENSG00000165449 | HPA049286 | 1 | 0 | 0.5 | 0 |
| 464 | ENSG00000165810 | HPA043429 | 1 | 0 | 0.5 | 0 |
| 464 | ENSG00000165912 | HPA043904 | 1 | 0 | 0.5 | 0 |
| 464 | ENSG00000166257 | HPA041707 | 1 | 0 | 0.5 | 0 |
| 464 | ENSG00000166394 | HPA038962 | 1 | 0 | 0.5 | 0 |
| 464 | ENSG00000166501 | HPA048321 | 1 | 0 | 0.5 | 0 |
| 464 | ENSG00000166532 | HPA059552 | 1 | 0 | 0.5 | 0 |
| 464 | ENSG00000166750 | HPA017760 | 1 | 0 | 0.5 | 0 |
| 464 | ENSG00000167733 | HPA049078 | 1 | 0 | 0.5 | 0 |
| 464 | ENSG00000168028 | CAB009561 | 1 | 0 | 0.5 | 0 |
| 464 | ENSG00000169684 | HPA054381 | 1 | 0 | 0.5 | 0 |
| 464 | ENSG00000169902 | HPA061837 | 1 | 0 | 0.5 | 0 |
| 464 | ENSG00000170832 | HPA044365 | 1 | 0 | 0.5 | 0 |
| 464 | ENSG00000171105 | HPA036303 | 1 | 0 | 0.5 | 0 |
| 464 | ENSG00000171121 | HPA019185 | 1 | 0 | 0.5 | 0 |
| 464 | ENSG00000171219 | HPA027382 | 1 | 0 | 0.5 | 0 |
| 464 | ENSG00000171451 | HPA060942 | 1 | 0 | 0.5 | 0 |
| 464 | ENSG00000171476 | HPA030180 | 1 | 0 | 0.5 | 0 |
| 464 | ENSG00000171885 | CAB005079 | 1 | 0 | 0.5 | 0 |
| 464 | ENSG00000172059 | HPA058276 | 1 | 0 | 0.5 | 0 |
| 464 | ENSG00000172061 | HPA035503 | 1 | 0 | 0.5 | 0 |
| 464 | ENSG00000174791 | HPA035491 | 1 | 0 | 0.5 | 0 |
| 464 | ENSG00000175115 | HPA038914 | 1 | 0 | 0.5 | 0 |
| 464 | ENSG00000175893 | HPA065254 | 1 | 0 | 0.5 | 0 |
| 464 | ENSG00000175970 | HPA077812 | 1 | 0 | 0.5 | 0 |
| 464 | ENSG00000175984 | HPA054955 | 1 | 0 | 0.5 | 0 |
| 464 | ENSG00000176153 | HPA003545 | 1 | 0 | 0.5 | 0 |
| 464 | ENSG00000177459 | HPA025293 | 1 | 0 | 0.5 | 0 |
| 464 | ENSG00000177556 | HPA055036 | 1 | 0 | 0.5 | 0 |

|     |                 |           |          |   |          |          |              |
|-----|-----------------|-----------|----------|---|----------|----------|--------------|
| 464 | ENSG00000177889 | HPA044976 | 1        | 0 | 0.5      | 0        |              |
| 464 | ENSG00000179144 | HPA020266 | 1        | 0 | 0.5      | 0        |              |
| 464 | ENSG00000179314 | HPA015919 | 1        | 0 | 0.5      | 0        |              |
| 464 | ENSG00000181852 | HPA016812 | 1        | 0 | 0.5      | 0        |              |
| 464 | ENSG00000182670 | HPA036304 | 1        | 0 | 0.5      | 0        |              |
| 464 | ENSG00000182742 | HPA057432 | 1        | 0 | 0.5      | 0        |              |
| 464 | ENSG00000182901 | CAB017561 | 1        | 0 | 0.5      | 0        |              |
| 464 | ENSG00000183060 | HPA029152 | 1        | 0 | 0.5      | 0        | 0.2468       |
| 464 | ENSG00000183773 | HPA001271 | 1        | 0 | 0.5      | 0        |              |
| 464 | ENSG00000184368 | HPA051508 | 1        | 0 | 0.5      | 0        |              |
| 464 | ENSG00000184588 | HPA003005 | 1        | 0 | 0.5      | 0        |              |
| 464 | ENSG00000185730 | HPA072473 | 1        | 0 | 0.5      | 0        |              |
| 464 | ENSG00000186136 | HPA036149 | 1        | 0 | 0.5      | 0        |              |
| 464 | ENSG00000186197 | HPA018836 | 1        | 0 | 0.5      | 0        | 0.3857       |
| 464 | ENSG00000186767 | HPA044559 | 1        | 0 | 0.5      | 0        |              |
| 464 | ENSG00000187775 | HPA024354 | 1        | 0 | 0.5      | 0        |              |
| 464 | ENSG00000188542 | HPA047456 | 1        | 0 | 0.5      | 0        |              |
| 464 | ENSG00000189050 | HPA013739 | 1        | 0 | 0.5      | 0        |              |
| 464 | ENSG00000189120 | HPA024516 | 1        | 0 | 0.5      | 0        |              |
| 464 | ENSG00000196636 | HPA020523 | 1        | 0 | 0.5      | 0        |              |
| 464 | ENSG00000196968 | HPA014033 | 1        | 0 | 0.5      | 0        |              |
| 464 | ENSG00000197191 | HPA021886 | 1        | 0 | 0.5      | 0        |              |
| 464 | ENSG00000197555 | HPA002875 | 1        | 0 | 0.5      | 0        |              |
| 464 | ENSG00000197619 | HPA052422 | 1        | 0 | 0.5      | 0        |              |
| 464 | ENSG00000197694 | HPA007927 | 1        | 0 | 0.5      | 0        |              |
| 464 | ENSG00000197705 | HPA024777 | 1        | 0 | 0.5      | 0        | 0.5232       |
| 464 | ENSG00000198074 | HPA020280 | 1        | 0 | 0.5      | 0        |              |
| 464 | ENSG00000198342 | HPA053407 | 1        | 0 | 0.5      | 0        |              |
| 464 | ENSG00000198356 | HPA045951 | 1        | 0 | 0.5      | 0        |              |
| 464 | ENSG00000198756 | HPA031749 | 1        | 0 | 0.5      | 0        |              |
| 464 | ENSG00000203791 | HPA050138 | 1        | 0 | 0.5      | 0        |              |
| 464 | ENSG00000204315 | HPA060158 | 1        | 0 | 0.5      | 0        |              |
| 464 | ENSG00000204764 | HPA029568 | 1        | 0 | 0.5      | 0        |              |
| 464 | ENSG00000205356 | HPA021061 | 1        | 0 | 0.5      | 0        |              |
| 464 | ENSG00000213853 | HPA014711 | 1        | 0 | 0.5      | 0        |              |
| 464 | ENSG00000214595 | HPA068759 | 1        | 0 | 0.5      | 0        |              |
| 464 | ENSG00000221829 | HPA045335 | 1        | 0 | 0.5      | 0        |              |
| 464 | ENSG00000227471 | HPA020280 | 1        | 0 | 0.5      | 0        |              |
| 464 | ENSG00000235961 | HPA045007 | 1        | 0 | 0.5      | 0        |              |
| 464 | ENSG00000240747 | HPA046901 | 1        | 0 | 0.5      | 0        |              |
| 464 | ENSG00000251369 | HPA003251 | 1        | 0 | 0.5      | 0        |              |
| 464 | ENSG00000274391 | HPA068342 | 1        | 0 | 0.5      | 0        |              |
| 464 | ENSG00000275718 | HPA058608 | 1        | 0 | 0.5      | 0        |              |
| 464 | ENSG00000278023 | HPA024794 | 1        | 0 | 0.5      | 0        |              |
| 464 | ENSG00000284969 | HPA026494 | 1        | 0 | 0.5      | 0        |              |
| 464 | ENSG00000285458 | HPA057434 | 1        | 0 | 0.5      | 0        |              |
| 705 | ENSG00000253910 | HPA010580 | 0.833333 | 0 | 0.361111 | 0.166667 |              |
| 706 | ENSG00000112242 | HPA029779 | 0.833333 | 0 | 0.416667 | 0.166667 |              |
| 707 | ENSG00000085644 | HPA035000 | 0.833333 | 0 | 0.347222 | 0.333333 |              |
| 708 | ENSG00000133884 | HPA020880 | 1        | 0 | 0.361111 | 0.333333 |              |
| 708 | ENSG00000171241 | HPA048876 | 1        | 0 | 0.361111 | 0.333333 |              |
| 710 | ENSG00000155380 | HPA003324 | 1        | 0 | 0.430556 | 0.166667 |              |
| 711 | ENSG00000065243 | HPA034861 | 1        | 0 | 0.372222 | 0.333333 |              |
| 712 | ENSG00000127914 | HPA008548 | 1        | 0 | 0.377778 | 0.333333 |              |
| 713 | ENSG00000144744 | HPA034873 | 1        | 0 | 0.444444 | 0.166667 | 0.316 0.2988 |



|     |                 |           |          |   |          |          |        |        |
|-----|-----------------|-----------|----------|---|----------|----------|--------|--------|
| 713 | ENSG00000154767 | CAB009932 | 1        | 0 | 0.398333 | 0.3      |        |        |
| 715 | ENSG00000155592 | HPA049141 | 1        | 0 | 0.388889 | 0.333333 |        |        |
| 715 | ENSG00000187186 | HPA069617 | 1        | 0 | 0.388889 | 0.333333 |        |        |
| 717 | ENSG00000180287 | HPA028389 | 0.833333 | 0 | 0.416667 | 0.333333 |        |        |
| 718 | ENSG00000101265 | HPA051200 | 1        | 0 | 0.416667 | 0.333333 |        |        |
| 718 | ENSG00000120820 | HPA012740 | 1        | 0 | 0.416667 | 0.333333 |        |        |
| 718 | ENSG00000128512 | HPA071516 | 1        | 0 | 0.416667 | 0.333333 |        |        |
| 718 | ENSG00000136943 | CAB017112 | 1        | 0 | 0.416667 | 0.333333 |        |        |
| 718 | ENSG00000155980 | HPA073448 | 1        | 0 | 0.416667 | 0.333333 |        | 0.2912 |
| 718 | ENSG00000161249 | HPA029406 | 1        | 0 | 0.416667 | 0.333333 |        |        |
| 718 | ENSG00000177494 | HPA029786 | 1        | 0 | 0.416667 | 0.333333 |        |        |
| 718 | ENSG00000179240 | HPA057405 | 1        | 0 | 0.416667 | 0.333333 |        |        |
| 718 | ENSG00000182175 | HPA039880 | 1        | 0 | 0.416667 | 0.333333 |        |        |
| 718 | ENSG00000185219 | HPA006678 | 1        | 0 | 0.416667 | 0.333333 | 0.4143 | 0.1985 |
| 718 | ENSG00000203965 | HPA029611 | 1        | 0 | 0.416667 | 0.333333 |        |        |
| 729 | ENSG00000013573 | HPA065197 | 1        | 0 | 0.444444 | 0.333333 |        |        |
| 729 | ENSG00000079819 | HPA005730 | 1        | 0 | 0.444444 | 0.333333 |        |        |
| 729 | ENSG00000080845 | HPA056378 | 1        | 0 | 0.444444 | 0.333333 |        |        |
| 729 | ENSG00000105497 | HPA002717 | 1        | 0 | 0.444444 | 0.333333 |        |        |
| 729 | ENSG00000106723 | HPA068784 | 1        | 0 | 0.444444 | 0.333333 |        |        |
| 729 | ENSG00000110245 | HPA065365 | 1        | 0 | 0.444444 | 0.333333 |        |        |
| 729 | ENSG00000114388 | HPA038196 | 1        | 0 | 0.444444 | 0.333333 |        |        |
| 729 | ENSG00000125848 | HPA056033 | 1        | 0 | 0.444444 | 0.333333 |        |        |
| 729 | ENSG00000126106 | HPA021134 | 1        | 0 | 0.444444 | 0.333333 |        |        |
| 729 | ENSG00000129680 | HPA035598 | 1        | 0 | 0.444444 | 0.333333 |        |        |
| 729 | ENSG00000130304 | HPA076520 | 1        | 0 | 0.444444 | 0.333333 |        |        |
| 729 | ENSG00000130313 | HPA040744 | 1        | 0 | 0.444444 | 0.333333 |        |        |
| 729 | ENSG00000130382 | HPA031166 | 1        | 0 | 0.444444 | 0.333333 |        |        |
| 729 | ENSG00000130413 | HPA056855 | 1        | 0 | 0.444444 | 0.333333 |        |        |
| 729 | ENSG00000131759 | HPA058282 | 1        | 0 | 0.444444 | 0.333333 |        |        |
| 729 | ENSG00000132300 | HPA041154 | 1        | 0 | 0.444444 | 0.333333 |        |        |
| 729 | ENSG00000132669 | HPA034641 | 1        | 0 | 0.444444 | 0.333333 |        |        |
| 729 | ENSG00000134253 | HPA054308 | 1        | 0 | 0.444444 | 0.333333 |        |        |
| 729 | ENSG00000135446 | HPA006024 | 1        | 0 | 0.444444 | 0.333333 |        |        |
| 729 | ENSG00000136710 | HPA034598 | 1        | 0 | 0.444444 | 0.333333 |        |        |
| 729 | ENSG00000137834 | HPA061917 | 1        | 0 | 0.444444 | 0.333333 |        |        |
| 729 | ENSG00000140030 | HPA077397 | 1        | 0 | 0.444444 | 0.333333 |        |        |
| 729 | ENSG00000145721 | HPA058426 | 1        | 0 | 0.444444 | 0.333333 |        |        |
| 729 | ENSG00000147256 | HPA002064 | 1        | 0 | 0.444444 | 0.333333 |        |        |
| 729 | ENSG00000147799 | HPA044491 | 1        | 0 | 0.444444 | 0.333333 |        |        |
| 729 | ENSG00000150093 | CAB003434 | 1        | 0 | 0.444444 | 0.333333 |        | 0.481  |
| 729 | ENSG00000163629 | HPA063119 | 1        | 0 | 0.444444 | 0.333333 |        |        |
| 729 | ENSG00000165886 | HPA034825 | 1        | 0 | 0.444444 | 0.333333 |        |        |
| 729 | ENSG00000167550 | HPA061001 | 1        | 0 | 0.444444 | 0.333333 |        |        |
| 729 | ENSG00000167771 | HPA021638 | 1        | 0 | 0.444444 | 0.333333 |        |        |
| 729 | ENSG00000171462 | HPA068672 | 1        | 0 | 0.444444 | 0.333333 |        |        |
| 729 | ENSG00000172301 | HPA052552 | 1        | 0 | 0.444444 | 0.333333 |        |        |
| 729 | ENSG00000173064 | HPA041062 | 1        | 0 | 0.444444 | 0.333333 |        |        |
| 729 | ENSG00000173456 | HPA027620 | 1        | 0 | 0.444444 | 0.333333 |        |        |
| 729 | ENSG00000182768 | HPA041367 | 1        | 0 | 0.444444 | 0.333333 |        |        |
| 729 | ENSG00000186479 | HPA039600 | 1        | 0 | 0.444444 | 0.333333 |        |        |
| 729 | ENSG00000196663 | HPA000658 | 1        | 0 | 0.444444 | 0.333333 |        |        |
| 729 | ENSG00000197140 | HPA062151 | 1        | 0 | 0.444444 | 0.333333 |        |        |
| 729 | ENSG00000204653 | HPA042631 | 1        | 0 | 0.444444 | 0.333333 |        |        |
| 729 | ENSG00000204965 | HPA044557 | 1        | 0 | 0.444444 | 0.333333 |        |        |

|     |                 |           |   |   |          |          |        |        |
|-----|-----------------|-----------|---|---|----------|----------|--------|--------|
| 729 | ENSG00000213977 | HPA046410 | 1 | 0 | 0.444444 | 0.333333 |        |        |
| 770 | ENSG00000088451 | HPA040857 | 1 | 0 | 0.555556 | 0        |        |        |
| 770 | ENSG00000089693 | HPA010811 | 1 | 0 | 0.555556 | 0        |        |        |
| 770 | ENSG00000090674 | HPA069495 | 1 | 0 | 0.555556 | 0        |        |        |
| 770 | ENSG00000100811 | CAB009392 | 1 | 0 | 0.555556 | 0        |        |        |
| 770 | ENSG00000115841 | HPA034706 | 1 | 0 | 0.555556 | 0        |        |        |
| 770 | ENSG00000116030 | HPA056956 | 1 | 0 | 0.555556 | 0        |        |        |
| 770 | ENSG00000122884 | HPA007599 | 1 | 0 | 0.555556 | 0        |        | 0.3497 |
| 770 | ENSG00000127603 | HPA068103 | 1 | 0 | 0.555556 | 0        |        |        |
| 770 | ENSG00000127720 | HPA039534 | 1 | 0 | 0.555556 | 0        |        |        |
| 770 | ENSG00000135821 | HPA007571 | 1 | 0 | 0.555556 | 0        |        |        |
| 770 | ENSG00000137843 | HPA031124 | 1 | 0 | 0.555556 | 0        |        |        |
| 770 | ENSG00000142556 | HPA021197 | 1 | 0 | 0.555556 | 0        | 0.4229 | 0.5561 |
| 770 | ENSG00000149582 | HPA012163 | 1 | 0 | 0.555556 | 0        |        |        |
| 770 | ENSG00000151640 | HPA049066 | 1 | 0 | 0.555556 | 0        |        |        |
| 770 | ENSG00000152661 | HPA047551 | 1 | 0 | 0.555556 | 0        |        |        |
| 770 | ENSG00000152944 | HPA017177 | 1 | 0 | 0.555556 | 0        |        |        |
| 770 | ENSG00000153064 | HPA037002 | 1 | 0 | 0.555556 | 0        |        |        |
| 770 | ENSG00000163378 | HPA019460 | 1 | 0 | 0.555556 | 0        |        |        |
| 770 | ENSG00000164011 | HPA062527 | 1 | 0 | 0.555556 | 0        |        |        |
| 770 | ENSG00000165084 | HPA053065 | 1 | 0 | 0.555556 | 0        |        |        |
| 770 | ENSG00000169567 | HPA044577 | 1 | 0 | 0.555556 | 0        |        |        |
| 770 | ENSG00000259288 | HPA031124 | 1 | 0 | 0.555556 | 0        |        |        |
| 792 | ENSG00000067082 | HPA069585 | 1 | 0 | 0.472222 | 0.333333 |        |        |
| 792 | ENSG00000090013 | HPA041698 | 1 | 0 | 0.472222 | 0.333333 |        |        |
| 792 | ENSG00000105227 | HPA001868 | 1 | 0 | 0.472222 | 0.333333 |        |        |
| 792 | ENSG00000109016 | HPA016873 | 1 | 0 | 0.472222 | 0.333333 |        |        |
| 792 | ENSG00000116062 | HPA028376 | 1 | 0 | 0.472222 | 0.333333 |        |        |
| 792 | ENSG00000163625 | HPA048572 | 1 | 0 | 0.472222 | 0.333333 |        |        |
| 792 | ENSG00000170473 | HPA039717 | 1 | 0 | 0.472222 | 0.333333 |        |        |
| 792 | ENSG00000204991 | HPA041413 | 1 | 0 | 0.472222 | 0.333333 |        |        |
| 800 | ENSG00000164542 | HPA021036 | 1 | 0 | 0.5      | 0.166667 |        |        |
| 801 | ENSG00000000003 | HPA004109 | 1 | 0 | 0.5      | 0.333333 |        |        |
| 801 | ENSG00000042286 | HPA028961 | 1 | 0 | 0.5      | 0.333333 |        |        |
| 801 | ENSG00000078596 | HPA000296 | 1 | 0 | 0.5      | 0.333333 |        |        |
| 801 | ENSG00000081087 | HPA010851 | 1 | 0 | 0.5      | 0.333333 |        |        |
| 801 | ENSG00000100749 | HPA000660 | 1 | 0 | 0.5      | 0.333333 |        |        |
| 801 | ENSG00000119950 | HPA035320 | 1 | 0 | 0.5      | 0.333333 |        |        |
| 801 | ENSG00000134283 | HPA038902 | 1 | 0 | 0.5      | 0.333333 |        |        |
| 801 | ENSG00000135587 | HPA018125 | 1 | 0 | 0.5      | 0.333333 |        |        |
| 801 | ENSG00000138794 | CAB003775 | 1 | 0 | 0.5      | 0.333333 | 0.3818 |        |
| 801 | ENSG00000140455 | HPA053275 | 1 | 0 | 0.5      | 0.333333 |        |        |
| 801 | ENSG00000145384 | CAB047325 | 1 | 0 | 0.5      | 0.333333 |        |        |
| 801 | ENSG00000145949 | HPA015860 | 1 | 0 | 0.5      | 0.333333 |        |        |
| 801 | ENSG00000157514 | HPA001916 | 1 | 0 | 0.5      | 0.333333 |        |        |
| 801 | ENSG00000167981 | HPA001556 | 1 | 0 | 0.5      | 0.333333 |        |        |
| 801 | ENSG00000168876 | HPA040273 | 1 | 0 | 0.5      | 0.333333 |        |        |
| 801 | ENSG00000182463 | HPA038123 | 1 | 0 | 0.5      | 0.333333 |        |        |
| 801 | ENSG00000185347 | HPA039050 | 1 | 0 | 0.5      | 0.333333 | 0.4254 |        |
| 801 | ENSG00000187609 | HPA047395 | 1 | 0 | 0.5      | 0.333333 |        |        |
| 801 | ENSG00000189064 | HPA043232 | 1 | 0 | 0.5      | 0.333333 |        |        |
| 801 | ENSG00000198624 | HPA052896 | 1 | 0 | 0.5      | 0.333333 |        |        |
| 801 | ENSG00000205777 | HPA043232 | 1 | 0 | 0.5      | 0.333333 |        |        |
| 801 | ENSG00000215269 | HPA043232 | 1 | 0 | 0.5      | 0.333333 |        |        |
| 801 | ENSG00000215274 | HPA043232 | 1 | 0 | 0.5      | 0.333333 |        |        |

|     |                 |           |     |     |          |          |        |
|-----|-----------------|-----------|-----|-----|----------|----------|--------|
| 801 | ENSG00000216649 | HPA043232 | 1   | 0   | 0.5      | 0.333333 |        |
| 801 | ENSG00000224659 | HPA043232 | 1   | 0   | 0.5      | 0.333333 |        |
| 801 | ENSG00000224902 | HPA043232 | 1   | 0   | 0.5      | 0.333333 |        |
| 801 | ENSG00000227488 | HPA043232 | 1   | 0   | 0.5      | 0.333333 |        |
| 801 | ENSG00000236362 | HPA043232 | 1   | 0   | 0.5      | 0.333333 |        |
| 801 | ENSG00000237671 | HPA043232 | 1   | 0   | 0.5      | 0.333333 |        |
| 801 | ENSG00000274274 | HPA043232 | 1   | 0   | 0.5      | 0.333333 |        |
| 801 | ENSG00000275113 | HPA043232 | 1   | 0   | 0.5      | 0.333333 |        |
| 801 | ENSG00000278540 | HPA036650 | 1   | 0   | 0.5      | 0.333333 |        |
| 833 | ENSG00000008952 | HPA014059 | 1   | 0   | 0.5      | 0.333333 |        |
| 833 | ENSG00000013588 | HPA007928 | 1   | 0   | 0.5      | 0.333333 |        |
| 833 | ENSG00000041988 | HPA067114 | 1   | 0   | 0.5      | 0.333333 |        |
| 833 | ENSG00000059915 | HPA059237 | 1   | 0   | 0.5      | 0.333333 |        |
| 833 | ENSG00000064490 | HPA049157 | 1   | 0   | 0.5      | 0.333333 |        |
| 833 | ENSG00000075568 | HPA017678 | 1   | 0   | 0.5      | 0.333333 |        |
| 833 | ENSG00000077458 | HPA036608 | 1   | 0   | 0.5      | 0.333333 |        |
| 833 | ENSG00000079387 | HPA011765 | 1   | 0   | 0.5      | 0.333333 | 0.253  |
| 833 | ENSG00000099812 | HPA049511 | 1   | 0   | 0.5      | 0.333333 |        |
| 833 | ENSG00000100364 | HPA038091 | 1   | 0   | 0.5      | 0.333333 |        |
| 833 | ENSG00000117472 | HPA011909 | 1   | 0   | 0.5      | 0.333333 |        |
| 833 | ENSG00000123358 | HPA059742 | 1   | 0   | 0.5      | 0.333333 |        |
| 833 | ENSG00000130675 | HPA071717 | 1   | 0   | 0.5      | 0.333333 |        |
| 833 | ENSG00000131979 | HPA028612 | 1   | 0   | 0.5      | 0.333333 |        |
| 833 | ENSG00000133958 | HPA071881 | 1   | 0   | 0.5      | 0.333333 |        |
| 833 | ENSG00000136810 | CAB008678 | 1   | 0   | 0.5      | 0.333333 |        |
| 833 | ENSG00000137804 | HPA042904 | 1   | 0   | 0.5      | 0.333333 |        |
| 833 | ENSG00000137845 | CAB001709 | 1   | 0   | 0.5      | 0.333333 |        |
| 833 | ENSG00000150782 | HPA003980 | 1   | 0   | 0.5      | 0.333333 |        |
| 833 | ENSG00000160226 | HPA030283 | 1   | 0   | 0.5      | 0.333333 | 0.4764 |
| 833 | ENSG00000163110 | HPA016740 | 1   | 0   | 0.5      | 0.333333 |        |
| 833 | ENSG00000174059 | HPA036723 | 1   | 0   | 0.5      | 0.333333 |        |
| 833 | ENSG00000182809 | HPA042664 | 1   | 0   | 0.5      | 0.333333 |        |
| 856 | ENSG00000254221 | HPA010580 | 0.2 | 0.1 | 0.15     | 0.1      |        |
| 857 | ENSG00000110048 | HPA039227 | 1   | 0   | 0.580556 | 0        |        |
| 858 | ENSG00000058453 | HPA021191 | 1   | 0   | 0.611111 | 0        |        |
| 858 | ENSG00000130669 | HPA070175 | 1   | 0   | 0.611111 | 0        | 0.3668 |
| 858 | ENSG00000148291 | HPA044340 | 1   | 0   | 0.611111 | 0        |        |
| 858 | ENSG00000148935 | HPA058904 | 1   | 0   | 0.611111 | 0        |        |
| 858 | ENSG00000158792 | HPA041182 | 1   | 0   | 0.611111 | 0        |        |
| 858 | ENSG00000159592 | HPA028593 | 1   | 0   | 0.611111 | 0        |        |
| 864 | ENSG00000152219 | HPA039634 | 1   | 0   | 0.622222 | 0        |        |
| 865 | ENSG00000136068 | HPA004747 | 1   | 0   | 0.638889 | 0        |        |
| 865 | ENSG00000144668 | HPA030609 | 1   | 0   | 0.638889 | 0        |        |
| 865 | ENSG00000145536 | HPA067668 | 1   | 0   | 0.638889 | 0        |        |
| 865 | ENSG00000185215 | HPA030624 | 1   | 0   | 0.638889 | 0        |        |
| 865 | ENSG00000198901 | HPA034521 | 1   | 0   | 0.638889 | 0        |        |
| 870 | ENSG00000026103 | HPA027444 | 1   | 0   | 0.666667 | 0        |        |
| 870 | ENSG00000033170 | CAB017129 | 1   | 0   | 0.666667 | 0        |        |
| 870 | ENSG00000050405 | HPA023871 | 1   | 0   | 0.666667 | 0        |        |
| 870 | ENSG00000059728 | HPA001599 | 1   | 0   | 0.666667 | 0        |        |
| 870 | ENSG00000063660 | HPA030571 | 1   | 0   | 0.666667 | 0        |        |
| 870 | ENSG00000074706 | HPA028710 | 1   | 0   | 0.666667 | 0        |        |
| 870 | ENSG00000076984 | HPA064711 | 1   | 0   | 0.666667 | 0        |        |
| 870 | ENSG00000081386 | HPA049139 | 1   | 0   | 0.666667 | 0        |        |
| 870 | ENSG00000100209 | HPA031518 | 1   | 0   | 0.666667 | 0        |        |

|     |                  |           |          |          |          |          |        |
|-----|------------------|-----------|----------|----------|----------|----------|--------|
| 870 | ENSG00000100376  | HPA003902 | 1        | 0        | 0.666667 | 0        |        |
| 870 | ENSG00000101197  | HPA047850 | 1        | 0        | 0.666667 | 0        | 0.26   |
| 870 | ENSG00000102996  | CAB002611 | 1        | 0        | 0.666667 | 0        |        |
| 870 | ENSG00000105649  | CAB009949 | 1        | 0        | 0.666667 | 0        |        |
| 870 | ENSG00000105708  | HPA049863 | 1        | 0        | 0.666667 | 0        |        |
| 870 | ENSG00000109511  | HPA005469 | 1        | 0        | 0.666667 | 0        |        |
| 870 | ENSG00000115266  | HPA078002 | 1        | 0        | 0.666667 | 0        |        |
| 870 | ENSG00000116151  | HPA005858 | 1        | 0        | 0.666667 | 0        |        |
| 870 | ENSG00000117091  | HPA055146 | 1        | 0        | 0.666667 | 0        |        |
| 870 | ENSG00000119777  | HPA034551 | 1        | 0        | 0.666667 | 0        |        |
| 870 | ENSG00000122218  | HPA028024 | 1        | 0        | 0.666667 | 0        | 0.466  |
| 870 | ENSG00000126785  | HPA003050 | 1        | 0        | 0.666667 | 0        |        |
| 870 | ENSG00000130558  | HPA057444 | 1        | 0        | 0.666667 | 0        |        |
| 870 | ENSG00000130956  | HPA055969 | 1        | 0        | 0.666667 | 0        |        |
| 870 | ENSG00000131437  | CAB037085 | 1        | 0        | 0.666667 | 0        |        |
| 870 | ENSG00000135932  | CAB037112 | 1        | 0        | 0.666667 | 0        |        |
| 870 | ENSG00000139350  | HPA038591 | 1        | 0        | 0.666667 | 0        | 0.3276 |
| 870 | ENSG00000141200  | HPA024795 | 1        | 0        | 0.666667 | 0        |        |
| 870 | ENSG00000144824  | HPA035146 | 1        | 0        | 0.666667 | 0        |        |
| 870 | ENSG00000147145  | HPA046563 | 1        | 0        | 0.666667 | 0        |        |
| 870 | ENSG00000154639  | CAB005103 | 1        | 0        | 0.666667 | 0        |        |
| 870 | ENSG00000156011  | HPA002455 | 1        | 0        | 0.666667 | 0        |        |
| 870 | ENSG00000157927  | HPA051776 | 1        | 0        | 0.666667 | 0        |        |
| 870 | ENSG00000163013  | HPA055246 | 1        | 0        | 0.666667 | 0        |        |
| 870 | ENSG00000164056  | HPA070554 | 1        | 0        | 0.666667 | 0        |        |
| 870 | ENSG00000173320  | HPA065002 | 1        | 0        | 0.666667 | 0        |        |
| 870 | ENSG00000176472  | HPA051865 | 1        | 0        | 0.666667 | 0        |        |
| 870 | ENSG00000179455  | HPA029494 | 1        | 0        | 0.666667 | 0        |        |
| 870 | ENSG00000181085  | HPA002704 | 1        | 0        | 0.666667 | 0        |        |
| 870 | ENSG00000185274  | HPA047986 | 1        | 0        | 0.666667 | 0        |        |
| 870 | ENSG00000185278  | HPA023438 | 1        | 0        | 0.666667 | 0        |        |
| 870 | ENSG00000187398  | HPA039007 | 1        | 0        | 0.666667 | 0        |        |
| 870 | ENSG00000189227  | HPA062820 | 1        | 0        | 0.666667 | 0        |        |
| 870 | ENSG00000197102  | CAB010443 | 1        | 0        | 0.666667 | 0        |        |
| 870 | ENSG00000211456  | HPA069869 | 1        | 0        | 0.666667 | 0        |        |
| 914 | ENSG00000182263  | HPA034987 | 1        | 0        | 0.511111 | 0.166667 |        |
| 915 | ENSG00000243156  | HPA003421 | 1        | 0        | 0.519444 | 0.166667 |        |
| 916 | ENSG00000134243  | HPA006889 | 0.666667 | 0.166667 | 0.333333 | 0.166667 |        |
| 917 | ENSG00000003393  | HPA046588 | 0.333333 | 0.333333 | 0.333333 | 0.333333 |        |
| 917 | ENSG000000010256 | HPA002815 | 0.333333 | 0.333333 | 0.333333 | 0.333333 |        |
| 917 | ENSG000000039523 | HPA005923 | 0.333333 | 0.333333 | 0.333333 | 0.333333 |        |
| 917 | ENSG000000052723 | HPA024177 | 0.333333 | 0.333333 | 0.333333 | 0.333333 | 0.3548 |
| 917 | ENSG000000055163 | HPA071459 | 0.333333 | 0.333333 | 0.333333 | 0.333333 |        |
| 917 | ENSG000000058063 | HPA036237 | 0.333333 | 0.333333 | 0.333333 | 0.333333 |        |
| 917 | ENSG000000062716 | HPA064780 | 0.333333 | 0.333333 | 0.333333 | 0.333333 |        |
| 917 | ENSG000000068745 | HPA070811 | 0.333333 | 0.333333 | 0.333333 | 0.333333 |        |
| 917 | ENSG000000071553 | CAB015218 | 0.333333 | 0.333333 | 0.333333 | 0.333333 | 0.3749 |
| 917 | ENSG000000071967 | HPA056736 | 0.333333 | 0.333333 | 0.333333 | 0.333333 |        |
| 917 | ENSG000000075702 | HPA043255 | 0.333333 | 0.333333 | 0.333333 | 0.333333 |        |
| 917 | ENSG000000081177 | HPA005848 | 0.333333 | 0.333333 | 0.333333 | 0.333333 |        |
| 917 | ENSG000000082068 | HPA043064 | 0.333333 | 0.333333 | 0.333333 | 0.333333 |        |
| 917 | ENSG000000084112 | HPA019845 | 0.333333 | 0.333333 | 0.333333 | 0.333333 |        |
| 917 | ENSG000000087494 | HPA035982 | 0.333333 | 0.333333 | 0.333333 | 0.333333 |        |
| 917 | ENSG000000088002 | HPA041724 | 0.333333 | 0.333333 | 0.333333 | 0.333333 | 0.283  |
| 917 | ENSG000000089818 | HPA053980 | 0.333333 | 0.333333 | 0.333333 | 0.333333 |        |

|     |                 |           |          |          |          |          |        |        |
|-----|-----------------|-----------|----------|----------|----------|----------|--------|--------|
| 917 | ENSG00000090581 | HPA004055 | 0.333333 | 0.333333 | 0.333333 | 0.333333 | 0.3856 | 0.2228 |
| 917 | ENSG00000092470 | HPA039804 | 0.333333 | 0.333333 | 0.333333 | 0.333333 |        |        |
| 917 | ENSG00000100014 | HPA070614 | 0.333333 | 0.333333 | 0.333333 | 0.333333 |        |        |
| 917 | ENSG00000100151 | HPA067384 | 0.333333 | 0.333333 | 0.333333 | 0.333333 |        |        |
| 917 | ENSG00000100239 | HPA030656 | 0.333333 | 0.333333 | 0.333333 | 0.333333 |        |        |
| 917 | ENSG00000100461 | HPA004144 | 0.333333 | 0.333333 | 0.333333 | 0.333333 |        |        |
| 917 | ENSG00000100836 | HPA000637 | 0.333333 | 0.333333 | 0.333333 | 0.333333 | 0.321  |        |
| 917 | ENSG00000102053 | HPA000836 | 0.333333 | 0.333333 | 0.333333 | 0.333333 |        |        |
| 917 | ENSG00000102763 | HPA039075 | 0.333333 | 0.333333 | 0.333333 | 0.333333 |        |        |
| 917 | ENSG00000103064 | HPA050713 | 0.333333 | 0.333333 | 0.333333 | 0.333333 |        |        |
| 917 | ENSG00000103160 | HPA045745 | 0.333333 | 0.333333 | 0.333333 | 0.333333 |        |        |
| 917 | ENSG00000103489 | HPA007966 | 0.333333 | 0.333333 | 0.333333 | 0.333333 |        |        |
| 917 | ENSG00000103811 | HPA003524 | 0.333333 | 0.333333 | 0.333333 | 0.333333 |        |        |
| 917 | ENSG00000105278 | HPA043275 | 0.333333 | 0.333333 | 0.333333 | 0.333333 |        |        |
| 917 | ENSG00000106278 | HPA015103 | 0.333333 | 0.333333 | 0.333333 | 0.333333 |        |        |
| 917 | ENSG00000106484 | HPA005623 | 0.333333 | 0.333333 | 0.333333 | 0.333333 |        |        |
| 917 | ENSG00000106603 | HPA011944 | 0.333333 | 0.333333 | 0.333333 | 0.333333 |        |        |
| 917 | ENSG00000106636 | HPA030818 | 0.333333 | 0.333333 | 0.333333 | 0.333333 |        | 0.3546 |
| 917 | ENSG00000107614 | HPA036946 | 0.333333 | 0.333333 | 0.333333 | 0.333333 |        |        |
| 917 | ENSG00000108239 | HPA038277 | 0.333333 | 0.333333 | 0.333333 | 0.333333 |        |        |
| 917 | ENSG00000108852 | HPA026486 | 0.333333 | 0.333333 | 0.333333 | 0.333333 |        |        |
| 917 | ENSG00000111269 | HPA043738 | 0.333333 | 0.333333 | 0.333333 | 0.333333 |        |        |
| 917 | ENSG00000114902 | HPA055273 | 0.333333 | 0.333333 | 0.333333 | 0.333333 |        |        |
| 917 | ENSG00000116183 | HPA018430 | 0.333333 | 0.333333 | 0.333333 | 0.333333 |        |        |
| 917 | ENSG00000118137 | HPA046715 | 0.333333 | 0.333333 | 0.333333 | 0.333333 |        |        |
| 917 | ENSG00000119547 | HPA057058 | 0.333333 | 0.333333 | 0.333333 | 0.333333 |        |        |
| 917 | ENSG00000120008 | HPA038980 | 0.333333 | 0.333333 | 0.333333 | 0.333333 |        |        |
| 917 | ENSG00000122367 | HPA048955 | 0.333333 | 0.333333 | 0.333333 | 0.333333 |        |        |
| 917 | ENSG00000123243 | HPA038305 | 0.333333 | 0.333333 | 0.333333 | 0.333333 |        |        |
| 917 | ENSG00000125841 | HPA015967 | 0.333333 | 0.333333 | 0.333333 | 0.333333 |        |        |
| 917 | ENSG00000126756 | HPA050499 | 0.333333 | 0.333333 | 0.333333 | 0.333333 |        |        |
| 917 | ENSG00000127329 | HPA067868 | 0.333333 | 0.333333 | 0.333333 | 0.333333 |        |        |
| 917 | ENSG00000127533 | HPA031401 | 0.333333 | 0.333333 | 0.333333 | 0.333333 |        |        |
| 917 | ENSG00000128886 | HPA028938 | 0.333333 | 0.333333 | 0.333333 | 0.333333 |        |        |
| 917 | ENSG00000129009 | HPA040326 | 0.333333 | 0.333333 | 0.333333 | 0.333333 |        |        |
| 917 | ENSG00000129255 | HPA014845 | 0.333333 | 0.333333 | 0.333333 | 0.333333 |        |        |
| 917 | ENSG00000130822 | HPA007458 | 0.333333 | 0.333333 | 0.333333 | 0.333333 |        |        |
| 917 | ENSG00000130830 | HPA076675 | 0.333333 | 0.333333 | 0.333333 | 0.333333 |        |        |
| 917 | ENSG00000131652 | HPA052953 | 0.333333 | 0.333333 | 0.333333 | 0.333333 |        |        |
| 917 | ENSG00000131781 | HPA012373 | 0.333333 | 0.333333 | 0.333333 | 0.333333 |        |        |
| 917 | ENSG00000132170 | HPA051239 | 0.333333 | 0.333333 | 0.333333 | 0.333333 |        |        |
| 917 | ENSG00000132698 | HPA010872 | 0.333333 | 0.333333 | 0.333333 | 0.333333 |        |        |
| 917 | ENSG00000134369 | HPA018127 | 0.333333 | 0.333333 | 0.333333 | 0.333333 | 0.337  |        |
| 917 | ENSG00000134490 | HPA029489 | 0.333333 | 0.333333 | 0.333333 | 0.333333 |        |        |
| 917 | ENSG00000134769 | HPA071177 | 0.333333 | 0.333333 | 0.333333 | 0.333333 |        |        |
| 917 | ENSG00000135452 | HPA030758 | 0.333333 | 0.333333 | 0.333333 | 0.333333 |        |        |
| 917 | ENSG00000136352 | HPA074316 | 0.333333 | 0.333333 | 0.333333 | 0.333333 |        |        |
| 917 | ENSG00000137558 | HPA006593 | 0.333333 | 0.333333 | 0.333333 | 0.333333 | 0.2626 |        |
| 917 | ENSG00000138778 | HPA042294 | 0.333333 | 0.333333 | 0.333333 | 0.333333 |        |        |
| 917 | ENSG00000139178 | HPA011338 | 0.333333 | 0.333333 | 0.333333 | 0.333333 |        |        |
| 917 | ENSG00000140044 | HPA059511 | 0.333333 | 0.333333 | 0.333333 | 0.333333 |        |        |
| 917 | ENSG00000140688 | HPA024406 | 0.333333 | 0.333333 | 0.333333 | 0.333333 |        |        |
| 917 | ENSG00000141655 | HPA047976 | 0.333333 | 0.333333 | 0.333333 | 0.333333 |        |        |
| 917 | ENSG00000143028 | HPA076657 | 0.333333 | 0.333333 | 0.333333 | 0.333333 |        |        |
| 917 | ENSG00000143499 | HPA029023 | 0.333333 | 0.333333 | 0.333333 | 0.333333 |        |        |

|     |                 |           |          |          |          |          |        |
|-----|-----------------|-----------|----------|----------|----------|----------|--------|
| 917 | ENSG00000143870 | HPA034652 | 0.333333 | 0.333333 | 0.333333 | 0.333333 |        |
| 917 | ENSG00000144224 | HPA036325 | 0.333333 | 0.333333 | 0.333333 | 0.333333 | 0.398  |
| 917 | ENSG00000144837 | HPA059740 | 0.333333 | 0.333333 | 0.333333 | 0.333333 |        |
| 917 | ENSG00000144895 | HPA036256 | 0.333333 | 0.333333 | 0.333333 | 0.333333 |        |
| 917 | ENSG00000145331 | HPA058241 | 0.333333 | 0.333333 | 0.333333 | 0.333333 |        |
| 917 | ENSG00000145626 | HPA047697 | 0.333333 | 0.333333 | 0.333333 | 0.333333 |        |
| 917 | ENSG00000147475 | HPA002025 | 0.333333 | 0.333333 | 0.333333 | 0.333333 | 0.2987 |
| 917 | ENSG00000147669 | HPA047477 | 0.333333 | 0.333333 | 0.333333 | 0.333333 |        |
| 917 | ENSG00000148057 | HPA058429 | 0.333333 | 0.333333 | 0.333333 | 0.333333 |        |
| 917 | ENSG00000148343 | HPA041363 | 0.333333 | 0.333333 | 0.333333 | 0.333333 |        |
| 917 | ENSG00000150051 | HPA006927 | 0.333333 | 0.333333 | 0.333333 | 0.333333 |        |
| 917 | ENSG00000152527 | HPA077225 | 0.333333 | 0.333333 | 0.333333 | 0.333333 |        |
| 917 | ENSG00000153317 | HPA048565 | 0.333333 | 0.333333 | 0.333333 | 0.333333 |        |
| 917 | ENSG00000154134 | HPA071053 | 0.333333 | 0.333333 | 0.333333 | 0.333333 | 0.626  |
| 917 | ENSG00000156671 | HPA044402 | 0.333333 | 0.333333 | 0.333333 | 0.333333 |        |
| 917 | ENSG00000157557 | HPA003176 | 0.333333 | 0.333333 | 0.333333 | 0.333333 |        |
| 917 | ENSG00000160307 | HPA015768 | 0.333333 | 0.333333 | 0.333333 | 0.333333 |        |
| 917 | ENSG00000160539 | HPA070252 | 0.333333 | 0.333333 | 0.333333 | 0.333333 |        |
| 917 | ENSG00000162144 | HPA045674 | 0.333333 | 0.333333 | 0.333333 | 0.333333 |        |
| 917 | ENSG00000162378 | HPA028156 | 0.333333 | 0.333333 | 0.333333 | 0.333333 |        |
| 917 | ENSG00000162654 | HPA062039 | 0.333333 | 0.333333 | 0.333333 | 0.333333 |        |
| 917 | ENSG00000162777 | HPA048642 | 0.333333 | 0.333333 | 0.333333 | 0.333333 |        |
| 917 | ENSG00000163389 | HPA037856 | 0.333333 | 0.333333 | 0.333333 | 0.333333 |        |
| 917 | ENSG00000164037 | HPA058971 | 0.333333 | 0.333333 | 0.333333 | 0.333333 |        |
| 917 | ENSG00000164136 | HPA037738 | 0.333333 | 0.333333 | 0.333333 | 0.333333 |        |
| 917 | ENSG00000165181 | HPA032108 | 0.333333 | 0.333333 | 0.333333 | 0.333333 |        |
| 917 | ENSG00000166024 | HPA037367 | 0.333333 | 0.333333 | 0.333333 | 0.333333 |        |
| 917 | ENSG00000166037 | HPA018315 | 0.333333 | 0.333333 | 0.333333 | 0.333333 |        |
| 917 | ENSG00000166266 | HPA002185 | 0.333333 | 0.333333 | 0.333333 | 0.333333 |        |
| 917 | ENSG00000166741 | HPA059180 | 0.333333 | 0.333333 | 0.333333 | 0.333333 |        |
| 917 | ENSG00000167107 | HPA024693 | 0.333333 | 0.333333 | 0.333333 | 0.333333 |        |
| 917 | ENSG00000167460 | CAB004685 | 0.333333 | 0.333333 | 0.333333 | 0.333333 |        |
| 917 | ENSG00000167483 | HPA043277 | 0.333333 | 0.333333 | 0.333333 | 0.333333 |        |
| 917 | ENSG00000167723 | HPA069550 | 0.333333 | 0.333333 | 0.333333 | 0.333333 |        |
| 917 | ENSG00000167861 | HPA031406 | 0.333333 | 0.333333 | 0.333333 | 0.333333 |        |
| 917 | ENSG00000167916 | HPA022978 | 0.333333 | 0.333333 | 0.333333 | 0.333333 |        |
| 917 | ENSG00000167984 | HPA048062 | 0.333333 | 0.333333 | 0.333333 | 0.333333 |        |
| 917 | ENSG00000168038 | HPA017930 | 0.333333 | 0.333333 | 0.333333 | 0.333333 |        |
| 917 | ENSG00000168517 | HPA028455 | 0.333333 | 0.333333 | 0.333333 | 0.333333 | 0.3352 |
| 917 | ENSG00000169122 | HPA008318 | 0.333333 | 0.333333 | 0.333333 | 0.333333 |        |
| 917 | ENSG00000169964 | HPA052569 | 0.333333 | 0.333333 | 0.333333 | 0.333333 |        |
| 917 | ENSG00000170962 | HPA046183 | 0.333333 | 0.333333 | 0.333333 | 0.333333 |        |
| 917 | ENSG00000171759 | HPA028407 | 0.333333 | 0.333333 | 0.333333 | 0.333333 |        |
| 917 | ENSG00000171914 | CAB017194 | 0.333333 | 0.333333 | 0.333333 | 0.333333 |        |
| 917 | ENSG00000172037 | HPA050033 | 0.333333 | 0.333333 | 0.333333 | 0.333333 |        |
| 917 | ENSG00000172831 | HPA018897 | 0.333333 | 0.333333 | 0.333333 | 0.333333 |        |
| 917 | ENSG00000175662 | HPA023304 | 0.333333 | 0.333333 | 0.333333 | 0.333333 |        |
| 917 | ENSG00000175906 | HPA060379 | 0.333333 | 0.333333 | 0.333333 | 0.333333 |        |
| 917 | ENSG00000176788 | HPA045218 | 0.333333 | 0.333333 | 0.333333 | 0.333333 |        |
| 917 | ENSG00000176946 | HPA053448 | 0.333333 | 0.333333 | 0.333333 | 0.333333 |        |
| 917 | ENSG00000179178 | HPA015796 | 0.333333 | 0.333333 | 0.333333 | 0.333333 |        |
| 917 | ENSG00000181690 | HPA072290 | 0.333333 | 0.333333 | 0.333333 | 0.333333 |        |
| 917 | ENSG00000184014 | HPA052923 | 0.333333 | 0.333333 | 0.333333 | 0.333333 |        |
| 917 | ENSG00000184371 | HPA076624 | 0.333333 | 0.333333 | 0.333333 | 0.333333 |        |
| 917 | ENSG00000185345 | HPA036012 | 0.333333 | 0.333333 | 0.333333 | 0.333333 |        |

|      |                 |           |          |          |          |          |        |
|------|-----------------|-----------|----------|----------|----------|----------|--------|
| 917  | ENSG00000185532 | HPA007699 | 0.333333 | 0.333333 | 0.333333 | 0.333333 |        |
| 917  | ENSG00000186153 | HPA050992 | 0.333333 | 0.333333 | 0.333333 | 0.333333 |        |
| 917  | ENSG00000186222 | HPA043840 | 0.333333 | 0.333333 | 0.333333 | 0.333333 |        |
| 917  | ENSG00000187210 | HPA003522 | 0.333333 | 0.333333 | 0.333333 | 0.333333 |        |
| 917  | ENSG00000188338 | HPA031871 | 0.333333 | 0.333333 | 0.333333 | 0.333333 |        |
| 917  | ENSG00000188483 | HPA021327 | 0.333333 | 0.333333 | 0.333333 | 0.333333 |        |
| 917  | ENSG00000188859 | HPA073246 | 0.333333 | 0.333333 | 0.333333 | 0.333333 |        |
| 917  | ENSG00000189144 | HPA042776 | 0.333333 | 0.333333 | 0.333333 | 0.333333 |        |
| 917  | ENSG00000189180 | HPA005538 | 0.333333 | 0.333333 | 0.333333 | 0.333333 |        |
| 917  | ENSG00000189221 | HPA054807 | 0.333333 | 0.333333 | 0.333333 | 0.333333 |        |
| 917  | ENSG00000196208 | HPA024616 | 0.333333 | 0.333333 | 0.333333 | 0.333333 |        |
| 917  | ENSG00000196405 | HPA019536 | 0.333333 | 0.333333 | 0.333333 | 0.333333 |        |
| 917  | ENSG00000196544 | HPA045415 | 0.333333 | 0.333333 | 0.333333 | 0.333333 |        |
| 917  | ENSG00000196693 | HPA005538 | 0.333333 | 0.333333 | 0.333333 | 0.333333 |        |
| 917  | ENSG00000197355 | HPA044356 | 0.333333 | 0.333333 | 0.333333 | 0.333333 |        |
| 917  | ENSG00000197362 | HPA053459 | 0.333333 | 0.333333 | 0.333333 | 0.333333 |        |
| 917  | ENSG00000197417 | HPA064939 | 0.333333 | 0.333333 | 0.333333 | 0.333333 |        |
| 917  | ENSG00000198346 | HPA056406 | 0.333333 | 0.333333 | 0.333333 | 0.333333 |        |
| 917  | ENSG00000198839 | HPA027307 | 0.333333 | 0.333333 | 0.333333 | 0.333333 |        |
| 917  | ENSG00000198898 | HPA007643 | 0.333333 | 0.333333 | 0.333333 | 0.333333 |        |
| 917  | ENSG00000204237 | HPA056878 | 0.333333 | 0.333333 | 0.333333 | 0.333333 |        |
| 917  | ENSG00000204256 | HPA042816 | 0.333333 | 0.333333 | 0.333333 | 0.333333 |        |
| 917  | ENSG00000214114 | HPA078331 | 0.333333 | 0.333333 | 0.333333 | 0.333333 |        |
| 917  | ENSG00000216490 | HPA026650 | 0.333333 | 0.333333 | 0.333333 | 0.333333 |        |
| 917  | ENSG00000228278 | HPA047725 | 0.333333 | 0.333333 | 0.333333 | 0.333333 |        |
| 917  | ENSG00000228672 | HPA060103 | 0.333333 | 0.333333 | 0.333333 | 0.333333 |        |
| 917  | ENSG00000229314 | HPA047725 | 0.333333 | 0.333333 | 0.333333 | 0.333333 |        |
| 917  | ENSG00000242802 | HPA035693 | 0.333333 | 0.333333 | 0.333333 | 0.333333 |        |
| 917  | ENSG00000243279 | HPA005504 | 0.333333 | 0.333333 | 0.333333 | 0.333333 |        |
| 917  | ENSG00000257743 | HPA055697 | 0.333333 | 0.333333 | 0.333333 | 0.333333 |        |
| 917  | ENSG00000262919 | HPA059843 | 0.333333 | 0.333333 | 0.333333 | 0.333333 |        |
| 917  | ENSG00000274944 | HPA078331 | 0.333333 | 0.333333 | 0.333333 | 0.333333 |        |
| 1076 | ENSG00000131203 | HPA023072 | 0.666667 | 0        | 0.291667 | 0.5      |        |
| 1077 | ENSG00000147394 | HPA000400 | 1        | 0        | 0.522222 | 0.333333 |        |
| 1078 | ENSG00000051825 | HPA037485 | 1        | 0        | 0.55     | 0.333333 |        |
| 1078 | ENSG00000165480 | HPA039356 | 0.666667 | 0        | 0.166667 | 0.666667 | 0.3566 |
| 1078 | ENSG00000213465 | HPA044610 | 1        | 0        | 0.55     | 0.333333 |        |
| 1081 | ENSG00000070778 | HPA073999 | 1        | 0        | 0.555556 | 0.333333 |        |
| 1081 | ENSG00000082996 | HPA064784 | 1        | 0        | 0.555556 | 0.333333 |        |
| 1081 | ENSG00000085231 | HPA070217 | 1        | 0        | 0.555556 | 0.333333 |        |
| 1081 | ENSG00000093009 | HPA000614 | 1        | 0        | 0.555556 | 0.333333 |        |
| 1081 | ENSG00000099910 | HPA040766 | 1        | 0        | 0.555556 | 0.333333 |        |
| 1081 | ENSG00000102554 | HPA040398 | 1        | 0        | 0.555556 | 0.333333 |        |
| 1081 | ENSG00000107938 | HPA031820 | 1        | 0        | 0.555556 | 0.333333 | 0.3269 |
| 1081 | ENSG00000112941 | HPA045487 | 1        | 0        | 0.555556 | 0.333333 |        |
| 1081 | ENSG00000114854 | HPA044848 | 1        | 0        | 0.555556 | 0.333333 |        |
| 1081 | ENSG00000115738 | HPA027612 | 1        | 0        | 0.555556 | 0.333333 |        |
| 1081 | ENSG00000121073 | HPA048655 | 1        | 0        | 0.555556 | 0.333333 |        |
| 1081 | ENSG00000129518 | HPA002916 | 1        | 0        | 0.555556 | 0.333333 |        |
| 1081 | ENSG00000130827 | HPA058989 | 1        | 0        | 0.555556 | 0.333333 |        |
| 1081 | ENSG00000133026 | CAB017180 | 1        | 0        | 0.555556 | 0.333333 |        |
| 1081 | ENSG00000134444 | HPA040038 | 1        | 0        | 0.555556 | 0.333333 | 0.3513 |
| 1081 | ENSG00000141424 | HPA042377 | 1        | 0        | 0.555556 | 0.333333 |        |
| 1081 | ENSG00000146592 | HPA050020 | 1        | 0        | 0.555556 | 0.333333 |        |
| 1081 | ENSG00000149218 | HPA008932 | 1        | 0        | 0.555556 | 0.333333 |        |

|      |                 |           |          |          |          |          |        |
|------|-----------------|-----------|----------|----------|----------|----------|--------|
| 1081 | ENSG00000164221 | HPA045120 | 1        | 0        | 0.555556 | 0.333333 |        |
| 1081 | ENSG00000168439 | HPA039291 | 1        | 0        | 0.555556 | 0.333333 |        |
| 1081 | ENSG00000169696 | HPA026749 | 1        | 0        | 0.555556 | 0.333333 |        |
| 1081 | ENSG00000175137 | HPA038068 | 1        | 0        | 0.555556 | 0.333333 |        |
| 1081 | ENSG00000175416 | HPA036458 | 1        | 0        | 0.555556 | 0.333333 |        |
| 1081 | ENSG00000176842 | HPA047130 | 1        | 0        | 0.555556 | 0.333333 |        |
| 1081 | ENSG00000177675 | HPA015663 | 1        | 0        | 0.555556 | 0.333333 |        |
| 1081 | ENSG00000179776 | HPA075875 | 1        | 0        | 0.555556 | 0.333333 |        |
| 1081 | ENSG00000182732 | HPA003067 | 1        | 0        | 0.555556 | 0.333333 | 0.3899 |
| 1081 | ENSG00000185519 | HPA031046 | 1        | 0        | 0.555556 | 0.333333 |        |
| 1081 | ENSG00000197702 | HPA005964 | 1        | 0        | 0.555556 | 0.333333 |        |
| 1081 | ENSG00000214717 | HPA077591 | 1        | 0        | 0.555556 | 0.333333 |        |
| 1111 | ENSG00000186185 | HPA024205 | 0.666667 | 0        | 0.222222 | 0.666667 |        |
| 1112 | ENSG00000117360 | HPA027226 | 0.4      | 0.2      | 0.3      | 0.2      |        |
| 1113 | ENSG00000115760 | HPA074409 | 0.6      | 0.2      | 0.333333 | 0.2      |        |
| 1114 | ENSG00000102837 | HPA077718 | 0.666667 | 0        | 0.25     | 0.666667 |        |
| 1115 | ENSG00000003147 | HPA061452 | 0.666667 | 0        | 0.333333 | 0.666667 |        |
| 1115 | ENSG00000041353 | HPA019849 | 0.666667 | 0        | 0.333333 | 0.666667 |        |
| 1115 | ENSG00000047230 | HPA017437 | 0.666667 | 0        | 0.333333 | 0.666667 | 0.2578 |
| 1115 | ENSG00000090447 | HPA001912 | 0.666667 | 0        | 0.333333 | 0.666667 |        |
| 1115 | ENSG00000095066 | HPA050351 | 0.666667 | 0        | 0.333333 | 0.666667 |        |
| 1115 | ENSG00000102195 | HPA054678 | 0.666667 | 0        | 0.333333 | 0.666667 |        |
| 1115 | ENSG00000103248 | HPA041333 | 0.666667 | 0        | 0.333333 | 0.666667 |        |
| 1115 | ENSG00000104231 | HPA023383 | 0.666667 | 0        | 0.333333 | 0.666667 | 0.2846 |
| 1115 | ENSG00000104626 | HPA055548 | 0.666667 | 0        | 0.333333 | 0.666667 |        |
| 1115 | ENSG00000104967 | HPA045607 | 0.666667 | 0        | 0.333333 | 0.666667 |        |
| 1115 | ENSG00000108771 | HPA018670 | 0.666667 | 0        | 0.333333 | 0.666667 |        |
| 1115 | ENSG00000114023 | HPA035856 | 0.666667 | 0        | 0.333333 | 0.666667 |        |
| 1115 | ENSG00000117707 | HPA000842 | 0.666667 | 0        | 0.333333 | 0.666667 |        |
| 1115 | ENSG00000123349 | HPA008587 | 0.666667 | 0        | 0.333333 | 0.666667 | 0.2492 |
| 1115 | ENSG00000124466 | HPA077859 | 0.666667 | 0        | 0.333333 | 0.666667 |        |
| 1115 | ENSG00000130733 | HPA019902 | 0.666667 | 0        | 0.333333 | 0.666667 | 0.472  |
| 1115 | ENSG00000131724 | HPA001587 | 0.666667 | 0        | 0.333333 | 0.666667 |        |
| 1115 | ENSG00000132153 | HPA034806 | 0.666667 | 0        | 0.333333 | 0.666667 |        |
| 1115 | ENSG00000133030 | HPA022901 | 0.666667 | 0        | 0.333333 | 0.666667 |        |
| 1115 | ENSG00000137166 | HPA007176 | 0.666667 | 0        | 0.333333 | 0.666667 |        |
| 1115 | ENSG00000141736 | HPA001060 | 0.666667 | 0        | 0.333333 | 0.666667 |        |
| 1115 | ENSG00000144040 | HPA056866 | 0.666667 | 0        | 0.333333 | 0.666667 |        |
| 1115 | ENSG00000145730 | CAB026119 | 0.666667 | 0        | 0.333333 | 0.666667 |        |
| 1115 | ENSG00000160221 | HPA018517 | 0.666667 | 0        | 0.333333 | 0.666667 |        |
| 1115 | ENSG00000160781 | HPA073505 | 0.666667 | 0        | 0.333333 | 0.666667 |        |
| 1115 | ENSG00000162065 | HPA068080 | 0.666667 | 0        | 0.333333 | 0.666667 |        |
| 1115 | ENSG00000162994 | HPA053557 | 0.666667 | 0        | 0.333333 | 0.666667 |        |
| 1115 | ENSG00000163874 | HPA032053 | 0.666667 | 0        | 0.333333 | 0.666667 |        |
| 1115 | ENSG00000167280 | HPA021551 | 0.666667 | 0        | 0.333333 | 0.666667 |        |
| 1115 | ENSG00000168685 | CAB010215 | 0.666667 | 0        | 0.333333 | 0.666667 |        |
| 1115 | ENSG00000179335 | HPA046817 | 0.666667 | 0        | 0.333333 | 0.666667 |        |
| 1115 | ENSG00000180979 | HPA040894 | 0.666667 | 0        | 0.333333 | 0.666667 |        |
| 1115 | ENSG00000181381 | HPA055501 | 0.666667 | 0        | 0.333333 | 0.666667 |        |
| 1115 | ENSG00000188042 | HPA028927 | 0.666667 | 0        | 0.333333 | 0.666667 |        |
| 1115 | ENSG00000196642 | HPA044037 | 0.666667 | 0        | 0.333333 | 0.666667 |        |
| 1115 | ENSG00000198589 | HPA019366 | 0.666667 | 0        | 0.333333 | 0.666667 | 0.3162 |
| 1115 | ENSG00000280071 | HPA018517 | 0.666667 | 0        | 0.333333 | 0.666667 |        |
| 1152 | ENSG00000156261 | HPA021051 | 0.666667 | 0.166667 | 0.361111 | 0.166667 | 0.3182 |
| 1153 | ENSG00000111640 | HPA040067 | 1        | 0        | 0.569444 | 0.166667 |        |



|      |                 |           |          |          |          |          |        |
|------|-----------------|-----------|----------|----------|----------|----------|--------|
| 1153 | ENSG00000179954 | HPA042008 | 1        | 0        | 0.569444 | 0.166667 |        |
| 1155 | ENSG00000257315 | HPA028490 | 0.6      | 0.1      | 0.333333 | 0.3      |        |
| 1156 | ENSG00000072310 | CAB005406 | 0.666667 | 0.166667 | 0.388889 | 0.166667 | 0.3152 |
| 1157 | ENSG00000262209 | HPA010580 | 0.666667 | 0        | 0.361111 | 0.5      |        |
| 1158 | ENSG00000165240 | HPA012887 | 0.666667 | 0.166667 | 0.416667 | 0.166667 |        |
| 1159 | ENSG00000137709 | HPA019652 | 1        | 0        | 0.625    | 0.166667 |        |
| 1160 | ENSG00000155256 | HPA037523 | 0.666667 | 0.166667 | 0.444444 | 0.166667 |        |
| 1161 | ENSG00000166689 | HPA038610 | 0.666667 | 0.166667 | 0.388889 | 0.333333 |        |
| 1162 | ENSG00000081019 | HPA042124 | 1        | 0        | 0.611111 | 0.333333 |        |
| 1162 | ENSG00000106080 | HPA013329 | 1        | 0        | 0.611111 | 0.333333 |        |
| 1162 | ENSG00000134602 | HPA059921 | 1        | 0        | 0.611111 | 0.333333 |        |
| 1162 | ENSG00000148688 | HPA037578 | 1        | 0        | 0.611111 | 0.333333 |        |
| 1162 | ENSG00000167333 | HPA023455 | 1        | 0        | 0.611111 | 0.333333 | 0.2739 |
| 1167 | ENSG00000198722 | HPA024493 | 0.8      | 0.1      | 0.366667 | 0.1      |        |
| 1168 | ENSG00000007001 | HPA035225 | 1        | 0        | 0.638889 | 0.333333 |        |
| 1168 | ENSG00000039560 | HPA036949 | 1        | 0        | 0.638889 | 0.333333 |        |
| 1168 | ENSG00000105559 | HPA048473 | 1        | 0        | 0.638889 | 0.333333 |        |
| 1168 | ENSG00000136141 | HPA021536 | 1        | 0        | 0.638889 | 0.333333 |        |
| 1168 | ENSG00000158805 | HPA021309 | 1        | 0        | 0.638889 | 0.333333 |        |
| 1168 | ENSG00000168310 | HPA030813 | 1        | 0        | 0.638889 | 0.333333 |        |
| 1168 | ENSG00000174015 | HPA039359 | 1        | 0        | 0.638889 | 0.333333 |        |
| 1168 | ENSG00000185352 | HPA078257 | 1        | 0        | 0.638889 | 0.333333 |        |
| 1168 | ENSG00000189171 | HPA019592 | 1        | 0        | 0.638889 | 0.333333 |        |
| 1168 | ENSG00000215788 | HPA069834 | 1        | 0        | 0.638889 | 0.333333 |        |
| 1178 | ENSG00000007541 | HPA039828 | 0.6      | 0.2      | 0.4      | 0.3      |        |
| 1178 | ENSG00000131876 | HPA045622 | 0.6      | 0.2      | 0.4      | 0.3      |        |
| 1180 | ENSG00000258366 | HPA020622 | 0.8      | 0.1      | 0.4      | 0.1      |        |
| 1181 | ENSG00000107554 | HPA058216 | 1        | 0        | 0.666667 | 0.333333 |        |
| 1182 | ENSG00000159023 | HPA028076 | 1        | 0.1      | 0.4      | 0.1      |        |
| 1183 | ENSG00000037280 | CAB000099 | 0.833333 | 0.166667 | 0.388889 | 0.166667 |        |
| 1184 | ENSG00000143458 | HPA028471 | 0.7      | 0.1      | 0.366667 | 0.3      | 0.377  |
| 1185 | ENSG00000135409 | HPA060228 | 0.833333 | 0.166667 | 0.416667 | 0.166667 |        |
| 1186 | ENSG00000108424 | HPA029878 | 0.833333 | 0        | 0.388889 | 0.5      |        |
| 1187 | ENSG00000048740 | HPA035813 | 0.833333 | 0.166667 | 0.444444 | 0.166667 |        |
| 1187 | ENSG00000187240 | HPA039015 | 0.833333 | 0.166667 | 0.444444 | 0.166667 |        |
| 1189 | ENSG00000069399 | CAB002051 | 1        | 0        | 0.430556 | 0.5      |        |
| 1189 | ENSG00000172915 | HPA039730 | 1        | 0        | 0.430556 | 0.5      |        |
| 1191 | ENSG00000072182 | HPA036042 | 1        | 0        | 0.441667 | 0.5      |        |
| 1192 | ENSG00000119596 | HPA048070 | 0.833333 | 0.166667 | 0.444444 | 0.333333 |        |
| 1193 | ENSG00000077721 | HPA003875 | 1        | 0.066667 | 0.472222 | 0.066667 |        |
| 1193 | ENSG00000119048 | HPA003875 | 1        | 0.066667 | 0.472222 | 0.066667 |        |
| 1195 | ENSG00000058272 | HPA041296 | 1        | 0.1      | 0.491667 | 0.1      |        |
| 1196 | ENSG00000094914 | HPA040086 | 1        | 0        | 0.361111 | 0.666667 |        |
| 1196 | ENSG00000107960 | HPA037924 | 1        | 0        | 0.361111 | 0.666667 |        |
| 1196 | ENSG00000167740 | HPA042299 | 1        | 0        | 0.361111 | 0.666667 |        |
| 1196 | ENSG00000167965 | HPA041841 | 1        | 0        | 0.361111 | 0.666667 |        |
| 1196 | ENSG00000186908 | HPA016807 | 0.8      | 0.2      | 0.433333 | 0.3      |        |
| 1201 | ENSG00000164609 | HPA035907 | 1        | 0.166667 | 0.472222 | 0.166667 |        |
| 1202 | ENSG00000136152 | HPA040353 | 0.8      | 0.1      | 0.483333 | 0.3      |        |
| 1203 | ENSG00000109929 | HPA070248 | 1        | 0        | 0.388889 | 0.666667 |        |
| 1203 | ENSG00000120594 | HPA017268 | 1        | 0        | 0.388889 | 0.666667 |        |
| 1203 | ENSG00000137962 | HPA026534 | 1        | 0        | 0.388889 | 0.666667 |        |
| 1203 | ENSG00000151883 | HPA049183 | 1        | 0        | 0.388889 | 0.666667 |        |
| 1203 | ENSG00000172578 | HPA024512 | 1        | 0        | 0.388889 | 0.666667 |        |
| 1203 | ENSG00000179869 | HPA063601 | 1        | 0        | 0.388889 | 0.666667 |        |

|      |                 |           |          |          |          |          |        |
|------|-----------------|-----------|----------|----------|----------|----------|--------|
| 1209 | ENSG00000176222 | HPA032014 | 1        | 0.166667 | 0.486111 | 0.166667 |        |
| 1210 | ENSG00000196876 | CAB022169 | 0.9      | 0.1      | 0.5      | 0.1      |        |
| 1211 | ENSG00000010379 | HPA036449 | 1        | 0        | 0.416667 | 0.666667 |        |
| 1211 | ENSG00000078900 | HPA027314 | 1        | 0        | 0.416667 | 0.666667 |        |
| 1211 | ENSG00000146576 | HPA042899 | 1        | 0        | 0.416667 | 0.666667 |        |
| 1211 | ENSG00000167191 | HPA015247 | 1        | 0        | 0.416667 | 0.666667 |        |
| 1215 | ENSG00000177469 | HPA049838 | 0.833333 | 0.166667 | 0.5      | 0.166667 |        |
| 1216 | ENSG00000179262 | HPA026418 | 1        | 0.166667 | 0.472222 | 0.333333 |        |
| 1217 | ENSG00000047188 | HPA072678 | 1        | 0        | 0.444444 | 0.666667 |        |
| 1217 | ENSG00000047597 | HPA019036 | 1        | 0        | 0.444444 | 0.666667 |        |
| 1217 | ENSG00000050426 | HPA074361 | 1        | 0        | 0.444444 | 0.666667 |        |
| 1217 | ENSG00000064666 | HPA049095 | 1        | 0        | 0.444444 | 0.666667 |        |
| 1217 | ENSG00000099956 | HPA018248 | 1        | 0        | 0.444444 | 0.666667 |        |
| 1217 | ENSG00000101144 | HPA057757 | 1        | 0        | 0.444444 | 0.666667 |        |
| 1217 | ENSG00000111653 | HPA031817 | 1        | 0        | 0.444444 | 0.666667 |        |
| 1217 | ENSG00000115380 | HPA049806 | 1        | 0        | 0.444444 | 0.666667 |        |
| 1217 | ENSG00000115556 | HPA038140 | 1        | 0        | 0.444444 | 0.666667 |        |
| 1217 | ENSG00000123124 | HPA023180 | 1        | 0        | 0.444444 | 0.666667 | 0.2341 |
| 1217 | ENSG00000126787 | HPA005546 | 1        | 0        | 0.444444 | 0.666667 |        |
| 1217 | ENSG00000126883 | HPA048789 | 1        | 0        | 0.444444 | 0.666667 |        |
| 1217 | ENSG00000128573 | HPA000382 | 1        | 0        | 0.444444 | 0.666667 |        |
| 1217 | ENSG00000130725 | HPA054551 | 1        | 0        | 0.444444 | 0.666667 |        |
| 1217 | ENSG00000133812 | HPA050933 | 1        | 0        | 0.444444 | 0.666667 |        |
| 1217 | ENSG00000135698 | HPA026948 | 1        | 0        | 0.444444 | 0.666667 |        |
| 1217 | ENSG00000136643 | HPA026531 | 1        | 0        | 0.444444 | 0.666667 |        |
| 1217 | ENSG00000138592 | HPA050215 | 1        | 0        | 0.444444 | 0.666667 |        |
| 1217 | ENSG00000140553 | HPA039228 | 1        | 0        | 0.444444 | 0.666667 |        |
| 1217 | ENSG00000143669 | HPA053366 | 1        | 0        | 0.444444 | 0.666667 |        |
| 1217 | ENSG00000148200 | HPA031461 | 1        | 0        | 0.444444 | 0.666667 |        |
| 1217 | ENSG00000149633 | HPA051064 | 1        | 0        | 0.444444 | 0.666667 |        |
| 1217 | ENSG00000152092 | HPA074112 | 1        | 0        | 0.444444 | 0.666667 |        |
| 1217 | ENSG00000157827 | HPA005464 | 1        | 0        | 0.444444 | 0.666667 | 0.3994 |
| 1217 | ENSG00000160703 | HPA061516 | 1        | 0        | 0.444444 | 0.666667 |        |
| 1217 | ENSG00000161692 | HPA048465 | 1        | 0        | 0.444444 | 0.666667 |        |
| 1217 | ENSG00000162520 | HPA028311 | 1        | 0        | 0.444444 | 0.666667 |        |
| 1217 | ENSG00000163382 | HPA043766 | 1        | 0        | 0.444444 | 0.666667 |        |
| 1217 | ENSG00000163900 | HPA059101 | 1        | 0        | 0.444444 | 0.666667 |        |
| 1217 | ENSG00000167755 | HPA051837 | 1        | 0        | 0.444444 | 0.666667 |        |
| 1217 | ENSG00000168140 | HPA016992 | 1        | 0        | 0.444444 | 0.666667 |        |
| 1217 | ENSG00000170584 | HPA037385 | 1        | 0        | 0.444444 | 0.666667 |        |
| 1217 | ENSG00000171551 | HPA067560 | 1        | 0        | 0.444444 | 0.666667 |        |
| 1217 | ENSG00000173575 | HPA060744 | 1        | 0        | 0.444444 | 0.666667 |        |
| 1217 | ENSG00000174899 | HPA054395 | 1        | 0        | 0.444444 | 0.666667 |        |
| 1217 | ENSG00000182261 | HPA039498 | 1        | 0        | 0.444444 | 0.666667 |        |
| 1217 | ENSG00000182963 | HPA071788 | 1        | 0        | 0.444444 | 0.666667 |        |
| 1217 | ENSG00000186871 | HPA050492 | 1        | 0        | 0.444444 | 0.666667 |        |
| 1217 | ENSG00000188227 | HPA034781 | 1        | 0        | 0.444444 | 0.666667 |        |
| 1217 | ENSG00000189060 | HPA000843 | 1        | 0        | 0.444444 | 0.666667 | 0.418  |
| 1217 | ENSG00000212993 | HPA058267 | 1        | 0        | 0.444444 | 0.666667 |        |
| 1217 | ENSG00000215183 | HPA055174 | 1        | 0        | 0.444444 | 0.666667 |        |
| 1217 | ENSG00000273899 | HPA003547 | 1        | 0        | 0.444444 | 0.666667 |        |
| 1260 | ENSG00000149657 | HPA041274 | 0.8      | 0.2      | 0.466667 | 0.2      |        |
| 1261 | ENSG00000151304 | HPA042737 | 1        | 0.166667 | 0.486111 | 0.333333 |        |
| 1262 | ENSG00000052749 | HPA049945 | 1        | 0        | 0.5      | 0.5      |        |
| 1263 | ENSG00000100568 | HPA044121 | 0.833333 | 0.166667 | 0.5      | 0.333333 |        |

|      |                  |           |          |          |     |          |
|------|------------------|-----------|----------|----------|-----|----------|
| 1263 | ENSG00000109184  | HPA036483 | 0.833333 | 0.166667 | 0.5 | 0.333333 |
| 1263 | ENSG00000145632  | CAB009624 | 0.833333 | 0.166667 | 0.5 | 0.333333 |
| 1263 | ENSG00000171357  | HPA030060 | 0.833333 | 0.166667 | 0.5 | 0.333333 |
| 1267 | ENSG00000125734  | HPA041924 | 0.8      | 0.2      | 0.5 | 0.2      |
| 1267 | ENSG00000170464  | HPA036538 | 0.8      | 0.2      | 0.5 | 0.2      |
| 1269 | ENSG00000135930  | HPA019253 | 0.8      | 0.2      | 0.5 | 0.3      |
| 1270 | ENSG00000001629  | HPA019358 | 1        | 0        | 0.5 | 0.666667 |
| 1270 | ENSG000000010327 | HPA005434 | 1        | 0        | 0.5 | 0.666667 |
| 1270 | ENSG000000083168 | CAB017023 | 1        | 0        | 0.5 | 0.666667 |
| 1270 | ENSG000000095574 | HPA015297 | 1        | 0        | 0.5 | 0.666667 |
| 1270 | ENSG000000095777 | HPA051893 | 1        | 0        | 0.5 | 0.666667 |
| 1270 | ENSG000000099949 | HPA067852 | 1        | 0        | 0.5 | 0.666667 |
| 1270 | ENSG00000101470  | HPA058481 | 1        | 0        | 0.5 | 0.666667 |
| 1270 | ENSG00000122126  | HPA012495 | 1        | 0        | 0.5 | 0.666667 |
| 1270 | ENSG00000125485  | HPA020891 | 1        | 0        | 0.5 | 0.666667 |
| 1270 | ENSG00000128245  | HPA061603 | 1        | 0        | 0.5 | 0.666667 |
| 1270 | ENSG00000163449  | HPA062462 | 1        | 0        | 0.5 | 0.666667 |
| 1270 | ENSG00000164924  | HPA061603 | 1        | 0        | 0.5 | 0.666667 |
| 1270 | ENSG00000166167  | HPA031156 | 1        | 0        | 0.5 | 0.666667 |
| 1270 | ENSG00000167889  | HPA011082 | 1        | 0        | 0.5 | 0.666667 |
| 1270 | ENSG00000173930  | HPA058249 | 1        | 0        | 0.5 | 0.666667 |
| 1270 | ENSG00000205978  | HPA018945 | 1        | 0        | 0.5 | 0.666667 |
| 1270 | ENSG00000224940  | HPA046373 | 1        | 0        | 0.5 | 0.666667 |
| 1270 | ENSG00000266412  | HPA051260 | 1        | 0        | 0.5 | 0.666667 |
| 1270 | ENSG00000273706  | HPA044307 | 1        | 0        | 0.5 | 0.666667 |
| 1289 | ENSG000000026508 | CAB000112 | 1        | 0        | 0.5 | 0.666667 |
| 1289 | ENSG000000060709 | HPA041494 | 1        | 0        | 0.5 | 0.666667 |
| 1289 | ENSG000000073734 | HPA019035 | 1        | 0        | 0.5 | 0.666667 |
| 1289 | ENSG000000084636 | HPA027235 | 1        | 0        | 0.5 | 0.666667 |
| 1289 | ENSG000000085365 | HPA044753 | 1        | 0        | 0.5 | 0.666667 |
| 1289 | ENSG00000101019  | HPA034875 | 1        | 0        | 0.5 | 0.666667 |
| 1289 | ENSG00000104714  | HPA003725 | 1        | 0        | 0.5 | 0.666667 |
| 1289 | ENSG00000109472  | HPA003819 | 1        | 0        | 0.5 | 0.666667 |
| 1289 | ENSG00000116991  | HPA027224 | 1        | 0        | 0.5 | 0.666667 |
| 1289 | ENSG00000127481  | HPA013394 | 1        | 0        | 0.5 | 0.666667 |
| 1289 | ENSG00000135870  | HPA027428 | 1        | 0        | 0.5 | 0.666667 |
| 1289 | ENSG00000151779  | HPA036817 | 1        | 0        | 0.5 | 0.666667 |
| 1289 | ENSG00000158816  | HPA027496 | 1        | 0        | 0.5 | 0.666667 |
| 1289 | ENSG00000163444  | HPA072607 | 1        | 0        | 0.5 | 0.666667 |
| 1289 | ENSG00000164683  | HPA063472 | 1        | 0        | 0.5 | 0.666667 |
| 1289 | ENSG00000173801  | CAB002139 | 1        | 0        | 0.5 | 0.666667 |
| 1289 | ENSG00000182307  | HPA024812 | 1        | 0        | 0.5 | 0.666667 |
| 1289 | ENSG00000183723  | HPA014704 | 1        | 0        | 0.5 | 0.666667 |
| 1289 | ENSG00000198216  | HPA042515 | 1        | 0        | 0.5 | 0.666667 |
| 1289 | ENSG00000272514  | HPA072261 | 1        | 0        | 0.5 | 0.666667 |
| 1309 | ENSG000000085719 | HPA029552 | 1        | 0.333333 | 0.5 | 0.333333 |
| 1309 | ENSG00000100246  | HPA003647 | 1        | 0.333333 | 0.5 | 0.333333 |
| 1309 | ENSG00000105640  | HPA055259 | 1        | 0.333333 | 0.5 | 0.333333 |
| 1309 | ENSG00000119408  | HPA056828 | 1        | 0.333333 | 0.5 | 0.333333 |
| 1309 | ENSG00000127990  | HPA074790 | 1        | 0.333333 | 0.5 | 0.333333 |
| 1309 | ENSG00000162704  | HPA031972 | 1        | 0.333333 | 0.5 | 0.333333 |
| 1309 | ENSG00000163788  | HPA042163 | 1        | 0.333333 | 0.5 | 0.333333 |
| 1309 | ENSG00000170011  | HPA006433 | 1        | 0.333333 | 0.5 | 0.333333 |
| 1309 | ENSG00000172830  | HPA019949 | 1        | 0.333333 | 0.5 | 0.333333 |
| 1309 | ENSG00000185324  | HPA059634 | 1        | 0.333333 | 0.5 | 0.333333 |

0.4546

|      |                 |           |     |          |          |          |        |
|------|-----------------|-----------|-----|----------|----------|----------|--------|
| 1309 | ENSG00000186635 | HPA070383 | 1   | 0.333333 | 0.5      | 0.333333 |        |
| 1320 | ENSG00000149636 | HPA002813 | 0.9 | 0.1      | 0.516667 | 0.1      |        |
| 1321 | ENSG00000154945 | HPA021668 | 1   | 0.1      | 0.515    | 0.1      |        |
| 1322 | ENSG00000146038 | HPA031582 | 1   | 0        | 0.2      | 1        |        |
| 1323 | ENSG00000103449 | HPA049829 | 1   | 0.1      | 0.508333 | 0.2      |        |
| 1324 | ENSG00000143190 | HPA058559 | 1   | 0.166667 | 0.527778 | 0.166667 |        |
| 1324 | ENSG00000146122 | HPA051300 | 1   | 0.166667 | 0.527778 | 0.166667 |        |
| 1324 | ENSG00000198081 | HPA050758 | 1   | 0.166667 | 0.527778 | 0.166667 |        |
| 1327 | ENSG00000013810 | HPA006050 | 1   | 0.166667 | 0.541667 | 0.166667 |        |
| 1327 | ENSG00000131748 | HPA024307 | 1   | 0.166667 | 0.541667 | 0.166667 | 0.3751 |
| 1329 | ENSG00000077380 | CAB033836 | 1   | 0.1      | 0.55     | 0.2      |        |
| 1330 | ENSG00000083544 | CAB034925 | 1   | 0.1      | 0.55     | 0.3      |        |
| 1331 | ENSG00000153898 | HPA019114 | 0.5 | 0.166667 | 0.333333 | 0.5      |        |
| 1331 | ENSG00000196220 | HPA036959 | 0.5 | 0.166667 | 0.333333 | 0.5      |        |
| 1333 | ENSG00000100029 | HPA040210 | 1   | 0.133333 | 0.555556 | 0.2      |        |
| 1334 | ENSG00000037897 | HPA020914 | 1   | 0.166667 | 0.527778 | 0.333333 |        |
| 1334 | ENSG00000100796 | HPA002568 | 1   | 0.166667 | 0.527778 | 0.333333 |        |
| 1334 | ENSG00000137207 | HPA014859 | 1   | 0.166667 | 0.527778 | 0.333333 |        |
| 1334 | ENSG00000163751 | HPA006479 | 1   | 0.166667 | 0.527778 | 0.333333 |        |
| 1334 | ENSG00000171988 | HPA056175 | 1   | 0.166667 | 0.527778 | 0.333333 |        |
| 1339 | ENSG00000017483 | HPA047411 | 1   | 0        | 0.333333 | 1        |        |
| 1339 | ENSG00000017797 | HPA046651 | 1   | 0        | 0.333333 | 1        |        |
| 1339 | ENSG00000054611 | HPA001173 | 1   | 0        | 0.333333 | 1        |        |
| 1339 | ENSG00000065135 | HPA042141 | 1   | 0        | 0.333333 | 1        |        |
| 1339 | ENSG00000068024 | HPA048723 | 1   | 0        | 0.333333 | 1        |        |
| 1339 | ENSG00000103056 | HPA065535 | 1   | 0        | 0.333333 | 1        |        |
| 1339 | ENSG00000104892 | HPA056508 | 1   | 0        | 0.333333 | 1        |        |
| 1339 | ENSG00000105141 | HPA027062 | 1   | 0        | 0.333333 | 1        |        |
| 1339 | ENSG00000105518 | HPA041504 | 1   | 0        | 0.333333 | 1        |        |
| 1339 | ENSG00000106443 | HPA017376 | 1   | 0        | 0.333333 | 1        |        |
| 1339 | ENSG00000124479 | HPA003095 | 1   | 0        | 0.333333 | 1        |        |
| 1339 | ENSG00000125869 | HPA070765 | 1   | 0        | 0.333333 | 1        |        |
| 1339 | ENSG00000127366 | HPA053742 | 1   | 0        | 0.333333 | 1        |        |
| 1339 | ENSG00000127955 | HPA042141 | 1   | 0        | 0.333333 | 1        |        |
| 1339 | ENSG00000143155 | HPA027995 | 1   | 0        | 0.333333 | 1        |        |
| 1339 | ENSG00000149823 | HPA061447 | 1   | 0        | 0.333333 | 1        | 0.1987 |
| 1339 | ENSG00000160179 | HPA031470 | 1   | 0        | 0.333333 | 1        |        |
| 1339 | ENSG00000163435 | HPA003316 | 1   | 0        | 0.333333 | 1        |        |
| 1339 | ENSG00000170412 | HPA029776 | 1   | 0        | 0.333333 | 1        |        |
| 1339 | ENSG00000177674 | HPA044120 | 1   | 0        | 0.333333 | 1        |        |
| 1339 | ENSG00000186297 | HPA077031 | 1   | 0        | 0.333333 | 1        |        |
| 1339 | ENSG00000198690 | HPA048198 | 1   | 0        | 0.333333 | 1        |        |
| 1339 | ENSG00000206535 | HPA047926 | 1   | 0        | 0.333333 | 1        |        |
| 1362 | ENSG00000078177 | HPA042607 | 1   | 0.166667 | 0.555556 | 0.333333 |        |
| 1362 | ENSG00000141965 | HPA016565 | 1   | 0.166667 | 0.555556 | 0.333333 |        |
| 1362 | ENSG00000162402 | HPA026723 | 1   | 0.166667 | 0.555556 | 0.333333 |        |
| 1362 | ENSG00000183020 | CAB017514 | 1   | 0.166667 | 0.555556 | 0.333333 | 0.268  |
| 1366 | ENSG00000013374 | HPA050722 | 1   | 0        | 0.555556 | 0.666667 |        |
| 1366 | ENSG00000025293 | HPA029620 | 1   | 0        | 0.555556 | 0.666667 |        |
| 1366 | ENSG00000067533 | HPA024639 | 1   | 0        | 0.555556 | 0.666667 |        |
| 1366 | ENSG00000079999 | HPA005558 | 1   | 0        | 0.555556 | 0.666667 |        |
| 1366 | ENSG00000110888 | HPA039746 | 1   | 0        | 0.555556 | 0.666667 |        |
| 1366 | ENSG00000125457 | HPA051222 | 1   | 0        | 0.555556 | 0.666667 |        |
| 1366 | ENSG00000132849 | HPA066960 | 1   | 0        | 0.555556 | 0.666667 |        |
| 1366 | ENSG00000138434 | HPA034665 | 1   | 0        | 0.555556 | 0.666667 |        |

|      |                 |           |   |          |          |          |        |        |
|------|-----------------|-----------|---|----------|----------|----------|--------|--------|
| 1366 | ENSG00000143793 | HPA046175 | 1 | 0        | 0.555556 | 0.666667 |        |        |
| 1366 | ENSG00000153832 | HPA053865 | 1 | 0        | 0.555556 | 0.666667 |        |        |
| 1366 | ENSG00000154928 | HPA067740 | 1 | 0        | 0.555556 | 0.666667 |        |        |
| 1366 | ENSG00000159131 | HPA002119 | 1 | 0        | 0.555556 | 0.666667 | 0.1646 |        |
| 1366 | ENSG00000164190 | HPA040834 | 1 | 0        | 0.555556 | 0.666667 |        |        |
| 1366 | ENSG00000165501 | HPA069364 | 1 | 0        | 0.555556 | 0.666667 |        |        |
| 1366 | ENSG00000167461 | HPA041945 | 1 | 0        | 0.555556 | 0.666667 |        |        |
| 1366 | ENSG00000168092 | HPA051836 | 1 | 0        | 0.555556 | 0.666667 |        |        |
| 1366 | ENSG00000178685 | HPA052427 | 1 | 0        | 0.555556 | 0.666667 |        |        |
| 1366 | ENSG00000181027 | HPA043115 | 1 | 0        | 0.555556 | 0.666667 |        |        |
| 1366 | ENSG00000181894 | HPA044373 | 1 | 0        | 0.555556 | 0.666667 |        |        |
| 1366 | ENSG00000275111 | HPA041358 | 1 | 0        | 0.555556 | 0.666667 |        |        |
| 1386 | ENSG00000005189 | HPA040755 | 1 | 0.333333 | 0.555556 | 0.333333 |        |        |
| 1386 | ENSG00000005882 | HPA008287 | 1 | 0.333333 | 0.555556 | 0.333333 |        |        |
| 1386 | ENSG00000006007 | HPA074747 | 1 | 0.333333 | 0.555556 | 0.333333 |        |        |
| 1386 | ENSG00000011332 | HPA049148 | 1 | 0.333333 | 0.555556 | 0.333333 |        |        |
| 1386 | ENSG00000020577 | HPA065309 | 1 | 0.333333 | 0.555556 | 0.333333 |        |        |
| 1386 | ENSG00000028839 | HPA071810 | 1 | 0.333333 | 0.555556 | 0.333333 |        |        |
| 1386 | ENSG00000042429 | HPA046619 | 1 | 0.333333 | 0.555556 | 0.333333 |        |        |
| 1386 | ENSG00000058335 | CAB010413 | 1 | 0.333333 | 0.555556 | 0.333333 |        |        |
| 1386 | ENSG00000058404 | HPA051783 | 1 | 0.333333 | 0.555556 | 0.333333 |        |        |
| 1386 | ENSG00000065978 | HPA040304 | 1 | 0.333333 | 0.555556 | 0.333333 |        |        |
| 1386 | ENSG00000066044 | CAB005256 | 1 | 0.333333 | 0.555556 | 0.333333 |        |        |
| 1386 | ENSG00000068079 | HPA045946 | 1 | 0.333333 | 0.555556 | 0.333333 |        |        |
| 1386 | ENSG00000069345 | HPA049789 | 1 | 0.333333 | 0.555556 | 0.333333 |        |        |
| 1386 | ENSG00000070785 | HPA024213 | 1 | 0.333333 | 0.555556 | 0.333333 | 0.2965 | 0.3291 |
| 1386 | ENSG00000070808 | HPA051783 | 1 | 0.333333 | 0.555556 | 0.333333 |        |        |
| 1386 | ENSG00000072415 | HPA000993 | 1 | 0.333333 | 0.555556 | 0.333333 |        |        |
| 1386 | ENSG00000074219 | HPA066292 | 1 | 0.333333 | 0.555556 | 0.333333 |        |        |
| 1386 | ENSG00000074319 | HPA006161 | 1 | 0.333333 | 0.555556 | 0.333333 |        |        |
| 1386 | ENSG00000075884 | HPA032125 | 1 | 0.333333 | 0.555556 | 0.333333 | 0.2385 |        |
| 1386 | ENSG00000076043 | HPA038450 | 1 | 0.333333 | 0.555556 | 0.333333 | 0.257  | 0.3649 |
| 1386 | ENSG00000076641 | HPA066527 | 1 | 0.333333 | 0.555556 | 0.333333 |        |        |
| 1386 | ENSG00000079691 | HPA029038 | 1 | 0.333333 | 0.555556 | 0.333333 |        |        |
| 1386 | ENSG00000080345 | HPA036887 | 1 | 0.333333 | 0.555556 | 0.333333 |        |        |
| 1386 | ENSG00000082556 | HPA067549 | 1 | 0.333333 | 0.555556 | 0.333333 |        |        |
| 1386 | ENSG00000084731 | HPA035755 | 1 | 0.333333 | 0.555556 | 0.333333 |        |        |
| 1386 | ENSG00000088280 | HPA020546 | 1 | 0.333333 | 0.555556 | 0.333333 |        |        |
| 1386 | ENSG00000088836 | HPA018120 | 1 | 0.333333 | 0.555556 | 0.333333 |        |        |
| 1386 | ENSG00000090989 | HPA044873 | 1 | 0.333333 | 0.555556 | 0.333333 |        |        |
| 1386 | ENSG00000092020 | HPA058834 | 1 | 0.333333 | 0.555556 | 0.333333 |        |        |
| 1386 | ENSG00000092036 | HPA029803 | 1 | 0.333333 | 0.555556 | 0.333333 |        |        |
| 1386 | ENSG00000093183 | HPA031242 | 1 | 0.333333 | 0.555556 | 0.333333 |        |        |
| 1386 | ENSG00000099256 | HPA021458 | 1 | 0.333333 | 0.555556 | 0.333333 |        |        |
| 1386 | ENSG00000099814 | HPA000871 | 1 | 0.333333 | 0.555556 | 0.333333 |        |        |
| 1386 | ENSG00000100097 | HPA000687 | 1 | 0.333333 | 0.555556 | 0.333333 |        |        |
| 1386 | ENSG00000100124 | HPA071287 | 1 | 0.333333 | 0.555556 | 0.333333 |        |        |
| 1386 | ENSG00000100413 | HPA046787 | 1 | 0.333333 | 0.555556 | 0.333333 |        |        |
| 1386 | ENSG00000103034 | HPA015313 | 1 | 0.333333 | 0.555556 | 0.333333 |        |        |
| 1386 | ENSG00000103994 | HPA054267 | 1 | 0.333333 | 0.555556 | 0.333333 |        |        |
| 1386 | ENSG00000104691 | HPA077538 | 1 | 0.333333 | 0.555556 | 0.333333 |        |        |
| 1386 | ENSG00000105223 | CAB020812 | 1 | 0.333333 | 0.555556 | 0.333333 |        |        |
| 1386 | ENSG00000105289 | HPA046863 | 1 | 0.333333 | 0.555556 | 0.333333 |        |        |
| 1386 | ENSG00000105298 | HPA042548 | 1 | 0.333333 | 0.555556 | 0.333333 |        |        |
| 1386 | ENSG00000105443 | CAB014872 | 1 | 0.333333 | 0.555556 | 0.333333 |        |        |

|      |                 |           |   |          |          |          |        |
|------|-----------------|-----------|---|----------|----------|----------|--------|
| 1386 | ENSG00000105701 | CAB025346 | 1 | 0.333333 | 0.555556 | 0.333333 |        |
| 1386 | ENSG00000105856 | HPA020225 | 1 | 0.333333 | 0.555556 | 0.333333 |        |
| 1386 | ENSG00000106624 | CAB009966 | 1 | 0.333333 | 0.555556 | 0.333333 |        |
| 1386 | ENSG00000108352 | HPA022895 | 1 | 0.333333 | 0.555556 | 0.333333 |        |
| 1386 | ENSG00000108509 | HPA051147 | 1 | 0.333333 | 0.555556 | 0.333333 |        |
| 1386 | ENSG00000108883 | HPA022021 | 1 | 0.333333 | 0.555556 | 0.333333 | 0.2461 |
| 1386 | ENSG00000109861 | HPA066610 | 1 | 0.333333 | 0.555556 | 0.333333 |        |
| 1386 | ENSG00000110811 | HPA043695 | 1 | 0.333333 | 0.555556 | 0.333333 |        |
| 1386 | ENSG00000111727 | HPA006227 | 1 | 0.333333 | 0.555556 | 0.333333 |        |
| 1386 | ENSG00000112186 | HPA050530 | 1 | 0.333333 | 0.555556 | 0.333333 |        |
| 1386 | ENSG00000112984 | HPA036910 | 1 | 0.333333 | 0.555556 | 0.333333 |        |
| 1386 | ENSG00000113742 | HPA038394 | 1 | 0.333333 | 0.555556 | 0.333333 |        |
| 1386 | ENSG00000114098 | HPA044869 | 1 | 0.333333 | 0.555556 | 0.333333 |        |
| 1386 | ENSG00000114120 | HPA027036 | 1 | 0.333333 | 0.555556 | 0.333333 |        |
| 1386 | ENSG00000114446 | HPA035514 | 1 | 0.333333 | 0.555556 | 0.333333 |        |
| 1386 | ENSG00000114626 | HPA035022 | 1 | 0.333333 | 0.555556 | 0.333333 |        |
| 1386 | ENSG00000115109 | HPA037563 | 1 | 0.333333 | 0.555556 | 0.333333 |        |
| 1386 | ENSG00000115808 | HPA017286 | 1 | 0.333333 | 0.555556 | 0.333333 | 0.3574 |
| 1386 | ENSG00000116675 | HPA031182 | 1 | 0.333333 | 0.555556 | 0.333333 |        |
| 1386 | ENSG00000117543 | HPA076234 | 1 | 0.333333 | 0.555556 | 0.333333 |        |
| 1386 | ENSG00000117899 | HPA039414 | 1 | 0.333333 | 0.555556 | 0.333333 |        |
| 1386 | ENSG00000119392 | HPA061560 | 1 | 0.333333 | 0.555556 | 0.333333 |        |
| 1386 | ENSG00000119820 | HPA017884 | 1 | 0.333333 | 0.555556 | 0.333333 |        |
| 1386 | ENSG00000120053 | HPA064532 | 1 | 0.333333 | 0.555556 | 0.333333 |        |
| 1386 | ENSG00000120129 | HPA069577 | 1 | 0.333333 | 0.555556 | 0.333333 |        |
| 1386 | ENSG00000121741 | HPA031765 | 1 | 0.333333 | 0.555556 | 0.333333 |        |
| 1386 | ENSG00000122483 | HPA028035 | 1 | 0.333333 | 0.555556 | 0.333333 |        |
| 1386 | ENSG00000123415 | HPA026804 | 1 | 0.333333 | 0.555556 | 0.333333 |        |
| 1386 | ENSG00000124275 | HPA038113 | 1 | 0.333333 | 0.555556 | 0.333333 |        |
| 1386 | ENSG00000124507 | HPA055491 | 1 | 0.333333 | 0.555556 | 0.333333 |        |
| 1386 | ENSG00000125089 | HPA056807 | 1 | 0.333333 | 0.555556 | 0.333333 |        |
| 1386 | ENSG00000125657 | HPA059857 | 1 | 0.333333 | 0.555556 | 0.333333 |        |
| 1386 | ENSG00000125952 | CAB000328 | 1 | 0.333333 | 0.555556 | 0.333333 |        |
| 1386 | ENSG00000126254 | HPA043671 | 1 | 0.333333 | 0.555556 | 0.333333 |        |
| 1386 | ENSG00000128617 | HPA013562 | 1 | 0.333333 | 0.555556 | 0.333333 |        |
| 1386 | ENSG00000128805 | CAB020696 | 1 | 0.333333 | 0.555556 | 0.333333 |        |
| 1386 | ENSG00000129007 | HPA051109 | 1 | 0.333333 | 0.555556 | 0.333333 |        |
| 1386 | ENSG00000129173 | HPA064882 | 1 | 0.333333 | 0.555556 | 0.333333 |        |
| 1386 | ENSG00000131697 | HPA063852 | 1 | 0.333333 | 0.555556 | 0.333333 |        |
| 1386 | ENSG00000131931 | HPA071310 | 1 | 0.333333 | 0.555556 | 0.333333 |        |
| 1386 | ENSG00000133067 | HPA008556 | 1 | 0.333333 | 0.555556 | 0.333333 |        |
| 1386 | ENSG00000133805 | HPA038662 | 1 | 0.333333 | 0.555556 | 0.333333 |        |
| 1386 | ENSG00000134258 | HPA054200 | 1 | 0.333333 | 0.555556 | 0.333333 |        |
| 1386 | ENSG00000137124 | HPA021037 | 1 | 0.333333 | 0.555556 | 0.333333 | 0.4555 |
| 1386 | ENSG00000138180 | HPA023430 | 1 | 0.333333 | 0.555556 | 0.333333 |        |
| 1386 | ENSG00000138347 | HPA036299 | 1 | 0.333333 | 0.555556 | 0.333333 | 0.2834 |
| 1386 | ENSG00000138496 | HPA066708 | 1 | 0.333333 | 0.555556 | 0.333333 |        |
| 1386 | ENSG00000138614 | HPA040255 | 1 | 0.333333 | 0.555556 | 0.333333 |        |
| 1386 | ENSG00000139645 | HPA043815 | 1 | 0.333333 | 0.555556 | 0.333333 |        |
| 1386 | ENSG00000139974 | HPA018508 | 1 | 0.333333 | 0.555556 | 0.333333 |        |
| 1386 | ENSG00000140015 | HPA072351 | 1 | 0.333333 | 0.555556 | 0.333333 |        |
| 1386 | ENSG00000142484 | HPA055674 | 1 | 0.333333 | 0.555556 | 0.333333 |        |
| 1386 | ENSG00000143258 | HPA028397 | 1 | 0.333333 | 0.555556 | 0.333333 |        |
| 1386 | ENSG00000143702 | HPA042151 | 1 | 0.333333 | 0.555556 | 0.333333 |        |
| 1386 | ENSG00000143889 | HPA046084 | 1 | 0.333333 | 0.555556 | 0.333333 |        |

|      |                 |           |   |          |          |          |        |        |
|------|-----------------|-----------|---|----------|----------|----------|--------|--------|
| 1386 | ENSG00000144791 | HPA064220 | 1 | 0.333333 | 0.555556 | 0.333333 |        |        |
| 1386 | ENSG00000145244 | HPA070941 | 1 | 0.333333 | 0.555556 | 0.333333 |        |        |
| 1386 | ENSG00000145349 | HPA051783 | 1 | 0.333333 | 0.555556 | 0.333333 |        |        |
| 1386 | ENSG00000145358 | HPA050903 | 1 | 0.333333 | 0.555556 | 0.333333 |        |        |
| 1386 | ENSG00000149016 | HPA069055 | 1 | 0.333333 | 0.555556 | 0.333333 |        |        |
| 1386 | ENSG00000149503 | HPA070550 | 1 | 0.333333 | 0.555556 | 0.333333 |        |        |
| 1386 | ENSG00000149923 | HPA043837 | 1 | 0.333333 | 0.555556 | 0.333333 |        |        |
| 1386 | ENSG00000150477 | HPA040946 | 1 | 0.333333 | 0.555556 | 0.333333 |        |        |
| 1386 | ENSG00000150540 | HPA073754 | 1 | 0.333333 | 0.555556 | 0.333333 | 0.2967 | 0.3581 |
| 1386 | ENSG00000151690 | HPA022274 | 1 | 0.333333 | 0.555556 | 0.333333 |        |        |
| 1386 | ENSG00000151838 | HPA004200 | 1 | 0.333333 | 0.555556 | 0.333333 |        |        |
| 1386 | ENSG00000151923 | HPA060962 | 1 | 0.333333 | 0.555556 | 0.333333 |        |        |
| 1386 | ENSG00000157045 | HPA051418 | 1 | 0.333333 | 0.555556 | 0.333333 |        |        |
| 1386 | ENSG00000160124 | HPA051965 | 1 | 0.333333 | 0.555556 | 0.333333 |        |        |
| 1386 | ENSG00000160460 | HPA054481 | 1 | 0.333333 | 0.555556 | 0.333333 |        |        |
| 1386 | ENSG00000161547 | HPA049905 | 1 | 0.333333 | 0.555556 | 0.333333 |        |        |
| 1386 | ENSG00000162512 | HPA048085 | 1 | 0.333333 | 0.555556 | 0.333333 |        |        |
| 1386 | ENSG00000162645 | HPA042682 | 1 | 0.333333 | 0.555556 | 0.333333 |        |        |
| 1386 | ENSG00000162650 | HPA054952 | 1 | 0.333333 | 0.555556 | 0.333333 | 0.318  |        |
| 1386 | ENSG00000163170 | HPA046393 | 1 | 0.333333 | 0.555556 | 0.333333 |        |        |
| 1386 | ENSG00000163257 | HPA042487 | 1 | 0.333333 | 0.555556 | 0.333333 |        |        |
| 1386 | ENSG00000164024 | CAB025485 | 1 | 0.333333 | 0.555556 | 0.333333 |        |        |
| 1386 | ENSG00000164045 | HPA005855 | 1 | 0.333333 | 0.555556 | 0.333333 | 0.1939 |        |
| 1386 | ENSG00000164296 | HPA044599 | 1 | 0.333333 | 0.555556 | 0.333333 |        |        |
| 1386 | ENSG00000164615 | HPA052636 | 1 | 0.333333 | 0.555556 | 0.333333 |        |        |
| 1386 | ENSG00000165655 | HPA026848 | 1 | 0.333333 | 0.555556 | 0.333333 |        |        |
| 1386 | ENSG00000166199 | HPA009674 | 1 | 0.333333 | 0.555556 | 0.333333 |        |        |
| 1386 | ENSG00000166263 | CAB007760 | 1 | 0.333333 | 0.555556 | 0.333333 |        |        |
| 1386 | ENSG00000166582 | HPA042616 | 1 | 0.333333 | 0.555556 | 0.333333 |        |        |
| 1386 | ENSG00000167770 | CAB072836 | 1 | 0.333333 | 0.555556 | 0.333333 |        |        |
| 1386 | ENSG00000168497 | HPA039325 | 1 | 0.333333 | 0.555556 | 0.333333 |        |        |
| 1386 | ENSG00000169764 | HPA064836 | 1 | 0.333333 | 0.555556 | 0.333333 |        |        |
| 1386 | ENSG00000169914 | HPA028543 | 1 | 0.333333 | 0.555556 | 0.333333 |        |        |
| 1386 | ENSG00000170779 | HPA064971 | 1 | 0.333333 | 0.555556 | 0.333333 |        |        |
| 1386 | ENSG00000171051 | HPA061744 | 1 | 0.333333 | 0.555556 | 0.333333 |        |        |
| 1386 | ENSG00000171067 | HPA012748 | 1 | 0.333333 | 0.555556 | 0.333333 |        |        |
| 1386 | ENSG00000171206 | HPA023560 | 1 | 0.333333 | 0.555556 | 0.333333 |        |        |
| 1386 | ENSG00000171365 | HPA003213 | 1 | 0.333333 | 0.555556 | 0.333333 |        |        |
| 1386 | ENSG00000171867 | HPA043398 | 1 | 0.333333 | 0.555556 | 0.333333 |        |        |
| 1386 | ENSG00000171984 | HPA040749 | 1 | 0.333333 | 0.555556 | 0.333333 |        |        |
| 1386 | ENSG00000172867 | HPA006299 | 1 | 0.333333 | 0.555556 | 0.333333 | 0.2441 | 0.2692 |
| 1386 | ENSG00000173145 | HPA063958 | 1 | 0.333333 | 0.555556 | 0.333333 |        |        |
| 1386 | ENSG00000173264 | HPA062871 | 1 | 0.333333 | 0.555556 | 0.333333 |        |        |
| 1386 | ENSG00000175283 | HPA066767 | 1 | 0.333333 | 0.555556 | 0.333333 |        |        |
| 1386 | ENSG00000175376 | HPA054991 | 1 | 0.333333 | 0.555556 | 0.333333 |        |        |
| 1386 | ENSG00000175564 | CAB010771 | 1 | 0.333333 | 0.555556 | 0.333333 |        |        |
| 1386 | ENSG00000175691 | HPA023397 | 1 | 0.333333 | 0.555556 | 0.333333 |        |        |
| 1386 | ENSG00000176563 | HPA023324 | 1 | 0.333333 | 0.555556 | 0.333333 | 0.3327 |        |
| 1386 | ENSG00000176945 | HPA042249 | 1 | 0.333333 | 0.555556 | 0.333333 |        |        |
| 1386 | ENSG00000180011 | HPA053646 | 1 | 0.333333 | 0.555556 | 0.333333 |        |        |
| 1386 | ENSG00000180881 | HPA040004 | 1 | 0.333333 | 0.555556 | 0.333333 |        |        |
| 1386 | ENSG00000181513 | HPA051772 | 1 | 0.333333 | 0.555556 | 0.333333 |        |        |
| 1386 | ENSG00000183248 | HPA062741 | 1 | 0.333333 | 0.555556 | 0.333333 |        |        |
| 1386 | ENSG00000183307 | HPA068790 | 1 | 0.333333 | 0.555556 | 0.333333 |        |        |
| 1386 | ENSG00000183346 | HPA041398 | 1 | 0.333333 | 0.555556 | 0.333333 |        |        |

|      |                 |           |          |          |          |          |
|------|-----------------|-----------|----------|----------|----------|----------|
| 1386 | ENSG00000183354 | HPA002109 | 1        | 0.333333 | 0.555556 | 0.333333 |
| 1386 | ENSG00000183726 | HPA065192 | 1        | 0.333333 | 0.555556 | 0.333333 |
| 1386 | ENSG00000184436 | HPA003083 | 1        | 0.333333 | 0.555556 | 0.333333 |
| 1386 | ENSG00000185627 | HPA038692 | 1        | 0.333333 | 0.555556 | 0.333333 |
| 1386 | ENSG00000185875 | HPA037585 | 1        | 0.333333 | 0.555556 | 0.333333 |
| 1386 | ENSG00000185963 | HPA023013 | 1        | 0.333333 | 0.555556 | 0.333333 |
| 1386 | ENSG00000186352 | HPA058127 | 1        | 0.333333 | 0.555556 | 0.333333 |
| 1386 | ENSG00000186522 | HPA047860 | 1        | 0.333333 | 0.555556 | 0.333333 |
| 1386 | ENSG00000188167 | HPA027019 | 1        | 0.333333 | 0.555556 | 0.333333 |
| 1386 | ENSG00000188290 | HPA062465 | 1        | 0.333333 | 0.555556 | 0.333333 |
| 1386 | ENSG00000188566 | HPA024504 | 1        | 0.333333 | 0.555556 | 0.333333 |
| 1386 | ENSG00000188610 | HPA043271 | 1        | 0.333333 | 0.555556 | 0.333333 |
| 1386 | ENSG00000188659 | HPA040487 | 1        | 0.333333 | 0.555556 | 0.333333 |
| 1386 | ENSG00000188706 | HPA031814 | 1        | 0.333333 | 0.555556 | 0.333333 |
| 1386 | ENSG00000189337 | HPA032095 | 1        | 0.333333 | 0.555556 | 0.333333 |
| 1386 | ENSG00000189433 | HPA055112 | 1        | 0.333333 | 0.555556 | 0.333333 |
| 1386 | ENSG00000196074 | HPA062401 | 1        | 0.333333 | 0.555556 | 0.333333 |
| 1386 | ENSG00000196152 | HPA028977 | 1        | 0.333333 | 0.555556 | 0.333333 |
| 1386 | ENSG00000196169 | HPA043638 | 1        | 0.333333 | 0.555556 | 0.333333 |
| 1386 | ENSG00000196550 | HPA043271 | 1        | 0.333333 | 0.555556 | 0.333333 |
| 1386 | ENSG00000196792 | HPA003392 | 1        | 0.333333 | 0.555556 | 0.333333 |
| 1386 | ENSG00000197006 | HPA056347 | 1        | 0.333333 | 0.555556 | 0.333333 |
| 1386 | ENSG00000197142 | HPA007162 | 1        | 0.333333 | 0.555556 | 0.333333 |
| 1386 | ENSG00000197408 | HPA062973 | 1        | 0.333333 | 0.555556 | 0.333333 |
| 1386 | ENSG00000197857 | HPA003146 | 1        | 0.333333 | 0.555556 | 0.333333 |
| 1386 | ENSG00000197921 | HPA065458 | 1        | 0.333333 | 0.555556 | 0.333333 |
| 1386 | ENSG00000198648 | HPA061803 | 1        | 0.333333 | 0.555556 | 0.333333 |
| 1386 | ENSG00000198815 | HPA067284 | 1        | 0.333333 | 0.555556 | 0.333333 |
| 1386 | ENSG00000198960 | HPA043030 | 1        | 0.333333 | 0.555556 | 0.333333 |
| 1386 | ENSG00000204116 | HPA052062 | 1        | 0.333333 | 0.555556 | 0.333333 |
| 1386 | ENSG00000205744 | HPA042758 | 1        | 0.333333 | 0.555556 | 0.333333 |
| 1386 | ENSG00000213341 | HPA001402 | 1        | 0.333333 | 0.555556 | 0.333333 |
| 1386 | ENSG00000215784 | HPA043271 | 1        | 0.333333 | 0.555556 | 0.333333 |
| 1386 | ENSG00000216937 | HPA075536 | 1        | 0.333333 | 0.555556 | 0.333333 |
| 1386 | ENSG00000232263 | HPA031438 | 1        | 0.333333 | 0.555556 | 0.333333 |
| 1386 | ENSG00000254087 | HPA001231 | 1        | 0.333333 | 0.555556 | 0.333333 |
| 1386 | ENSG00000263465 | HPA049905 | 1        | 0.333333 | 0.555556 | 0.333333 |
| 1386 | ENSG00000263513 | HPA043271 | 1        | 0.333333 | 0.555556 | 0.333333 |
| 1386 | ENSG00000266964 | HPA026873 | 1        | 0.333333 | 0.555556 | 0.333333 |
| 1386 | ENSG00000277462 | HPA003142 | 1        | 0.333333 | 0.555556 | 0.333333 |
| 1386 | ENSG00000284057 | HPA046619 | 1        | 0.333333 | 0.555556 | 0.333333 |
| 1580 | ENSG00000124143 | HPA042636 | 1        | 0        | 0.716667 | 0        |
| 1581 | ENSG00000240184 | HPA010580 | 0.6      | 0.1      | 0.333333 | 0.4      |
| 1582 | ENSG00000186812 | HPA026087 | 1        | 0        | 0.75     | 0        |
| 1583 | ENSG00000174996 | HPA040416 | 1        | 0.166667 | 0.555556 | 0.166667 |
| 1584 | ENSG00000102978 | HPA040919 | 1        | 0.166667 | 0.583333 | 0.166667 |
| 1584 | ENSG00000275832 | HPA019818 | 1        | 0.166667 | 0.583333 | 0.166667 |
| 1586 | ENSG00000172349 | HPA018467 | 1        | 0.1      | 0.575    | 0.2      |
| 1587 | ENSG00000100330 | HPA034516 | 1        | 0.1      | 0.583333 | 0.3      |
| 1588 | ENSG00000115594 | HPA001237 | 0.5      | 0.166667 | 0.388889 | 0.5      |
| 1588 | ENSG00000175105 | HPA036173 | 1        | 0.166667 | 0.611111 | 0.166667 |
| 1590 | ENSG00000101158 | HPA050641 | 1        | 0.166667 | 0.611111 | 0.166667 |
| 1590 | ENSG00000129932 | HPA041953 | 1        | 0.166667 | 0.611111 | 0.166667 |
| 1590 | ENSG00000135341 | HPA007633 | 1        | 0.166667 | 0.611111 | 0.166667 |
| 1593 | ENSG00000204389 | CAB032815 | 0.666667 | 0.166667 | 0.388889 | 0.5      |

0.3183

0.2424



|      |                 |           |          |          |          |          |        |        |
|------|-----------------|-----------|----------|----------|----------|----------|--------|--------|
| 1594 | ENSG00000169398 | HPA001842 | 1        | 0.166667 | 0.583333 | 0.333333 |        |        |
| 1594 | ENSG00000178177 | HPA028794 | 1        | 0.166667 | 0.583333 | 0.333333 |        |        |
| 1596 | ENSG00000137975 | HPA047192 | 1        | 0        | 0.4      | 1        |        |        |
| 1597 | ENSG00000050030 | HPA000407 | 1        | 0        | 0.416667 | 1        |        |        |
| 1597 | ENSG00000101665 | HPA028897 | 1        | 0        | 0.416667 | 1        |        |        |
| 1597 | ENSG00000136542 | HPA008963 | 1        | 0        | 0.416667 | 1        |        |        |
| 1597 | ENSG00000144452 | HPA078239 | 1        | 0        | 0.416667 | 1        |        |        |
| 1597 | ENSG00000169682 | HPA041995 | 1        | 0        | 0.416667 | 1        |        |        |
| 1602 | ENSG00000111331 | HPA041253 | 1        | 0.166667 | 0.666667 | 0.166667 |        |        |
| 1603 | ENSG00000110675 | HPA038435 | 1        | 0.166667 | 0.611111 | 0.333333 |        |        |
| 1603 | ENSG00000135902 | HPA056404 | 1        | 0.166667 | 0.611111 | 0.333333 |        |        |
| 1603 | ENSG00000169258 | HPA036478 | 1        | 0.166667 | 0.611111 | 0.333333 |        |        |
| 1606 | ENSG00000114126 | CAB018396 | 1        | 0.2      | 0.566667 | 0.2      | 0.3211 | 0.362  |
| 1606 | ENSG00000162664 | HPA028450 | 1        | 0.2      | 0.566667 | 0.2      |        |        |
| 1608 | ENSG00000084463 | HPA039710 | 1        | 0.2      | 0.566667 | 0.3      |        |        |
| 1608 | ENSG00000160199 | CAB004285 | 1        | 0.2      | 0.566667 | 0.3      |        |        |
| 1610 | ENSG00000116918 | HPA024613 | 1        | 0.2      | 0.6      | 0.2      |        |        |
| 1610 | ENSG00000152558 | CAB026001 | 1        | 0.2      | 0.6      | 0.2      |        |        |
| 1612 | ENSG00000118816 | HPA039853 | 1        | 0.2      | 0.6      | 0.2      |        |        |
| 1612 | ENSG00000149231 | HPA038704 | 1        | 0.2      | 0.6      | 0.2      |        |        |
| 1612 | ENSG00000160294 | HPA021527 | 1        | 0.2      | 0.6      | 0.2      |        |        |
| 1612 | ENSG00000175130 | CAB020787 | 1        | 0.2      | 0.6      | 0.2      |        |        |
| 1612 | ENSG00000181350 | HPA028528 | 1        | 0.2      | 0.6      | 0.2      |        |        |
| 1617 | ENSG00000111424 | CAB004617 | 0.7      | 0.1      | 0.383333 | 0.4      |        |        |
| 1617 | ENSG00000133065 | HPA014721 | 0.7      | 0.1      | 0.383333 | 0.4      |        |        |
| 1619 | ENSG00000116044 | HPA002990 | 1        | 0.166667 | 0.65     | 0.333333 |        | 0.351  |
| 1620 | ENSG00000164610 | HPA031523 | 1        | 0.166667 | 0.666667 | 0.333333 |        |        |
| 1620 | ENSG00000186340 | CAB017716 | 1        | 0.166667 | 0.666667 | 0.333333 |        |        |
| 1622 | ENSG00000160877 | HPA021238 | 1        | 0.3      | 0.6      | 0.3      |        |        |
| 1622 | ENSG00000169217 | HPA041508 | 1        | 0.3      | 0.6      | 0.3      |        |        |
| 1624 | ENSG00000065183 | HPA027509 | 1        | 0.2      | 0.633333 | 0.3      |        |        |
| 1625 | ENSG00000072682 | HPA016997 | 1        | 0        | 0.611111 | 0.666667 |        |        |
| 1625 | ENSG00000101782 | HPA024184 | 1        | 0        | 0.611111 | 0.666667 | 0.2631 | 0.3293 |
| 1625 | ENSG00000137076 | HPA004748 | 1        | 0        | 0.611111 | 0.666667 |        |        |
| 1625 | ENSG00000164040 | HPA041172 | 1        | 0        | 0.611111 | 0.666667 |        |        |
| 1625 | ENSG00000181789 | HPA037866 | 1        | 0        | 0.611111 | 0.666667 |        |        |
| 1630 | ENSG00000154864 | HPA031974 | 1        | 0.333333 | 0.6      | 0.333333 |        |        |
| 1631 | ENSG00000168434 | HPA040758 | 1        | 0.3      | 0.616667 | 0.3      |        |        |
| 1632 | ENSG00000166012 | HPA030703 | 1        | 0.1      | 0.431667 | 0.4      |        |        |
| 1633 | ENSG00000100345 | HPA001644 | 1        | 0        | 0.638889 | 0.666667 |        |        |
| 1633 | ENSG00000104671 | HPA024049 | 1        | 0        | 0.638889 | 0.666667 |        |        |
| 1633 | ENSG00000155975 | HPA024705 | 1        | 0        | 0.638889 | 0.666667 |        | 0.1831 |
| 1633 | ENSG00000167992 | HPA040401 | 1        | 0        | 0.638889 | 0.666667 |        |        |
| 1633 | ENSG00000196092 | HPA068498 | 1        | 0        | 0.638889 | 0.666667 |        |        |
| 1638 | ENSG00000148660 | HPA040656 | 0.833333 | 0.166667 | 0.444444 | 0.5      |        |        |
| 1639 | ENSG00000003400 | HPA017059 | 1        | 0.333333 | 0.666667 | 0.333333 |        |        |
| 1639 | ENSG00000004766 | HPA026679 | 1        | 0.333333 | 0.666667 | 0.333333 | 0.2969 |        |
| 1639 | ENSG00000005436 | HPA077882 | 1        | 0.333333 | 0.666667 | 0.333333 |        |        |
| 1639 | ENSG00000005448 | HPA053558 | 1        | 0.333333 | 0.666667 | 0.333333 |        |        |
| 1639 | ENSG00000007372 | HPA030775 | 1        | 0.333333 | 0.666667 | 0.333333 |        |        |
| 1639 | ENSG00000007376 | HPA041144 | 1        | 0.333333 | 0.666667 | 0.333333 |        | 0.2474 |
| 1639 | ENSG00000008128 | CAB010467 | 1        | 0.333333 | 0.666667 | 0.333333 |        |        |
| 1639 | ENSG00000009413 | HPA069382 | 1        | 0.333333 | 0.666667 | 0.333333 |        |        |
| 1639 | ENSG00000010803 | HPA048898 | 1        | 0.333333 | 0.666667 | 0.333333 |        |        |
| 1639 | ENSG00000010810 | HPA023887 | 1        | 0.333333 | 0.666667 | 0.333333 |        |        |

|      |                 |           |   |          |          |          |        |        |
|------|-----------------|-----------|---|----------|----------|----------|--------|--------|
| 1639 | ENSG00000011426 | HPA050556 | 1 | 0.333333 | 0.666667 | 0.333333 |        |        |
| 1639 | ENSG00000015592 | HPA027765 | 1 | 0.333333 | 0.666667 | 0.333333 |        |        |
| 1639 | ENSG00000018610 | HPA064831 | 1 | 0.333333 | 0.666667 | 0.333333 |        |        |
| 1639 | ENSG00000018699 | HPA031246 | 1 | 0.333333 | 0.666667 | 0.333333 | 0.3341 | 0.2285 |
| 1639 | ENSG00000018869 | HPA028858 | 1 | 0.333333 | 0.666667 | 0.333333 |        |        |
| 1639 | ENSG00000023330 | CAB017498 | 1 | 0.333333 | 0.666667 | 0.333333 |        |        |
| 1639 | ENSG00000033050 | HPA020091 | 1 | 0.333333 | 0.666667 | 0.333333 |        |        |
| 1639 | ENSG00000033122 | HPA005625 | 1 | 0.333333 | 0.666667 | 0.333333 |        |        |
| 1639 | ENSG00000046774 | HPA062230 | 1 | 0.333333 | 0.666667 | 0.333333 |        |        |
| 1639 | ENSG00000047365 | HPA035925 | 1 | 0.333333 | 0.666667 | 0.333333 |        |        |
| 1639 | ENSG00000047578 | HPA035090 | 1 | 0.333333 | 0.666667 | 0.333333 |        | 0.3122 |
| 1639 | ENSG00000047644 | HPA039814 | 1 | 0.333333 | 0.666667 | 0.333333 |        |        |
| 1639 | ENSG00000050130 | HPA071650 | 1 | 0.333333 | 0.666667 | 0.333333 |        |        |
| 1639 | ENSG00000051180 | HPA039310 | 1 | 0.333333 | 0.666667 | 0.333333 |        |        |
| 1639 | ENSG00000052795 | HPA052758 | 1 | 0.333333 | 0.666667 | 0.333333 |        |        |
| 1639 | ENSG00000055211 | HPA041679 | 1 | 0.333333 | 0.666667 | 0.333333 |        |        |
| 1639 | ENSG00000057935 | HPA039433 | 1 | 0.333333 | 0.666667 | 0.333333 |        |        |
| 1639 | ENSG00000058091 | HPA015267 | 1 | 0.333333 | 0.666667 | 0.333333 |        |        |
| 1639 | ENSG00000059769 | HPA019122 | 1 | 0.333333 | 0.666667 | 0.333333 |        |        |
| 1639 | ENSG00000060688 | HPA026527 | 1 | 0.333333 | 0.666667 | 0.333333 |        |        |
| 1639 | ENSG00000061337 | HPA006294 | 1 | 0.333333 | 0.666667 | 0.333333 |        |        |
| 1639 | ENSG00000062038 | HPA001767 | 1 | 0.333333 | 0.666667 | 0.333333 |        |        |
| 1639 | ENSG00000064300 | HPA004765 | 1 | 0.333333 | 0.666667 | 0.333333 |        |        |
| 1639 | ENSG00000065029 | HPA030091 | 1 | 0.333333 | 0.666667 | 0.333333 |        |        |
| 1639 | ENSG00000065328 | HPA071952 | 1 | 0.333333 | 0.666667 | 0.333333 |        |        |
| 1639 | ENSG00000065361 | CAB025331 | 1 | 0.333333 | 0.666667 | 0.333333 |        |        |
| 1639 | ENSG00000065548 | HPA031099 | 1 | 0.333333 | 0.666667 | 0.333333 | 0.43   |        |
| 1639 | ENSG00000066117 | HPA004101 | 1 | 0.333333 | 0.666667 | 0.333333 |        |        |
| 1639 | ENSG00000067048 | HPA001648 | 1 | 0.333333 | 0.666667 | 0.333333 |        |        |
| 1639 | ENSG00000067646 | HPA071863 | 1 | 0.333333 | 0.666667 | 0.333333 |        |        |
| 1639 | ENSG00000068366 | HPA000286 | 1 | 0.333333 | 0.666667 | 0.333333 |        |        |
| 1639 | ENSG00000069018 | HPA031126 | 1 | 0.333333 | 0.666667 | 0.333333 |        |        |
| 1639 | ENSG00000069482 | HPA049864 | 1 | 0.333333 | 0.666667 | 0.333333 |        |        |
| 1639 | ENSG00000070366 | HPA042932 | 1 | 0.333333 | 0.666667 | 0.333333 |        |        |
| 1639 | ENSG00000072041 | HPA008609 | 1 | 0.333333 | 0.666667 | 0.333333 |        |        |
| 1639 | ENSG00000072422 | HPA040205 | 1 | 0.333333 | 0.666667 | 0.333333 |        |        |
| 1639 | ENSG00000072501 | HPA005499 | 1 | 0.333333 | 0.666667 | 0.333333 |        |        |
| 1639 | ENSG00000072778 | HPA019006 | 1 | 0.333333 | 0.666667 | 0.333333 |        |        |
| 1639 | ENSG00000073111 | HPA031495 | 1 | 0.333333 | 0.666667 | 0.333333 |        |        |
| 1639 | ENSG00000075643 | HPA047958 | 1 | 0.333333 | 0.666667 | 0.333333 |        |        |
| 1639 | ENSG00000076108 | HPA005782 | 1 | 0.333333 | 0.666667 | 0.333333 |        |        |
| 1639 | ENSG00000077235 | HPA051617 | 1 | 0.333333 | 0.666667 | 0.333333 |        |        |
| 1639 | ENSG00000078140 | HPA028869 | 1 | 0.333333 | 0.666667 | 0.333333 |        | 0.366  |
| 1639 | ENSG00000078269 | HPA031575 | 1 | 0.333333 | 0.666667 | 0.333333 |        |        |
| 1639 | ENSG00000079215 | HPA037467 | 1 | 0.333333 | 0.666667 | 0.333333 |        |        |
| 1639 | ENSG00000079263 | HPA067493 | 1 | 0.333333 | 0.666667 | 0.333333 |        |        |
| 1639 | ENSG00000079974 | HPA042642 | 1 | 0.333333 | 0.666667 | 0.333333 |        |        |
| 1639 | ENSG00000080298 | HPA035689 | 1 | 0.333333 | 0.666667 | 0.333333 |        |        |
| 1639 | ENSG00000080546 | HPA073659 | 1 | 0.333333 | 0.666667 | 0.333333 |        |        |
| 1639 | ENSG00000082126 | HPA057393 | 1 | 0.333333 | 0.666667 | 0.333333 |        |        |
| 1639 | ENSG00000083750 | HPA003734 | 1 | 0.333333 | 0.666667 | 0.333333 |        |        |
| 1639 | ENSG00000083896 | HPA036462 | 1 | 0.333333 | 0.666667 | 0.333333 |        |        |
| 1639 | ENSG00000084072 | HPA019357 | 1 | 0.333333 | 0.666667 | 0.333333 |        |        |
| 1639 | ENSG00000084693 | HPA030981 | 1 | 0.333333 | 0.666667 | 0.333333 |        |        |
| 1639 | ENSG00000086827 | HPA051253 | 1 | 0.333333 | 0.666667 | 0.333333 |        |        |

|      |                 |           |   |          |          |          |
|------|-----------------|-----------|---|----------|----------|----------|
| 1639 | ENSG00000087884 | HPA037918 | 1 | 0.333333 | 0.666667 | 0.333333 |
| 1639 | ENSG00000088833 | HPA047108 | 1 | 0.333333 | 0.666667 | 0.333333 |
| 1639 | ENSG00000089356 | HPA010856 | 1 | 0.333333 | 0.666667 | 0.333333 |
| 1639 | ENSG00000089916 | HPA018856 | 1 | 0.333333 | 0.666667 | 0.333333 |
| 1639 | ENSG00000091140 | HPA044849 | 1 | 0.333333 | 0.666667 | 0.333333 |
| 1639 | ENSG00000092758 | HPA058323 | 1 | 0.333333 | 0.666667 | 0.333333 |
| 1639 | ENSG00000092820 | CAB004035 | 1 | 0.333333 | 0.666667 | 0.333333 |
| 1639 | ENSG00000095002 | CAB009572 | 1 | 0.333333 | 0.666667 | 0.333333 |
| 1639 | ENSG00000095303 | HPA002834 | 1 | 0.333333 | 0.666667 | 0.333333 |
| 1639 | ENSG00000095951 | HPA050724 | 1 | 0.333333 | 0.666667 | 0.333333 |
| 1639 | ENSG00000096070 | HPA022787 | 1 | 0.333333 | 0.666667 | 0.333333 |
| 1639 | ENSG00000099800 | HPA048985 | 1 | 0.333333 | 0.666667 | 0.333333 |
| 1639 | ENSG00000099904 | HPA003422 | 1 | 0.333333 | 0.666667 | 0.333333 |
| 1639 | ENSG00000100038 | HPA072114 | 1 | 0.333333 | 0.666667 | 0.333333 |
| 1639 | ENSG00000100077 | HPA000804 | 1 | 0.333333 | 0.666667 | 0.333333 |
| 1639 | ENSG00000100170 | HPA055106 | 1 | 0.333333 | 0.666667 | 0.333333 |
| 1639 | ENSG00000100271 | HPA048392 | 1 | 0.333333 | 0.666667 | 0.333333 |
| 1639 | ENSG00000100418 | HPA053415 | 1 | 0.333333 | 0.666667 | 0.333333 |
| 1639 | ENSG00000100532 | HPA002930 | 1 | 0.333333 | 0.666667 | 0.333333 |
| 1639 | ENSG00000100578 | HPA000846 | 1 | 0.333333 | 0.666667 | 0.333333 |
| 1639 | ENSG00000100632 | HPA002567 | 1 | 0.333333 | 0.666667 | 0.333333 |
| 1639 | ENSG00000100664 | HPA000867 | 1 | 0.333333 | 0.666667 | 0.333333 |
| 1639 | ENSG00000100867 | HPA053915 | 1 | 0.333333 | 0.666667 | 0.333333 |
| 1639 | ENSG00000100906 | CAB003815 | 1 | 0.333333 | 0.666667 | 0.333333 |
| 1639 | ENSG00000101210 | CAB034019 | 1 | 0.333333 | 0.666667 | 0.333333 |
| 1639 | ENSG00000101391 | HPA066301 | 1 | 0.333333 | 0.666667 | 0.333333 |
| 1639 | ENSG00000101407 | HPA068338 | 1 | 0.333333 | 0.666667 | 0.333333 |
| 1639 | ENSG00000101473 | CAB010261 | 1 | 0.333333 | 0.666667 | 0.333333 |
| 1639 | ENSG00000101843 | HPA002920 | 1 | 0.333333 | 0.666667 | 0.333333 |
| 1639 | ENSG00000101849 | HPA067703 | 1 | 0.333333 | 0.666667 | 0.333333 |
| 1639 | ENSG00000102038 | HPA064712 | 1 | 0.333333 | 0.666667 | 0.333333 |
| 1639 | ENSG00000102098 | HPA001662 | 1 | 0.333333 | 0.666667 | 0.333333 |
| 1639 | ENSG00000102100 | HPA036087 | 1 | 0.333333 | 0.666667 | 0.333333 |
| 1639 | ENSG00000102384 | HPA061297 | 1 | 0.333333 | 0.666667 | 0.333333 |
| 1639 | ENSG00000103037 | HPA053546 | 1 | 0.333333 | 0.666667 | 0.333333 |
| 1639 | ENSG00000103051 | HPA040924 | 1 | 0.333333 | 0.666667 | 0.333333 |
| 1639 | ENSG00000103978 | HPA018104 | 1 | 0.333333 | 0.666667 | 0.333333 |
| 1639 | ENSG00000103995 | HPA039408 | 1 | 0.333333 | 0.666667 | 0.333333 |
| 1639 | ENSG00000104381 | HPA014266 | 1 | 0.333333 | 0.666667 | 0.333333 |
| 1639 | ENSG00000104427 | HPA024726 | 1 | 0.333333 | 0.666667 | 0.333333 |
| 1639 | ENSG00000104522 | HPA023361 | 1 | 0.333333 | 0.666667 | 0.333333 |
| 1639 | ENSG00000104679 | HPA023153 | 1 | 0.333333 | 0.666667 | 0.333333 |
| 1639 | ENSG00000104983 | HPA061548 | 1 | 0.333333 | 0.666667 | 0.333333 |
| 1639 | ENSG00000105373 | HPA018999 | 1 | 0.333333 | 0.666667 | 0.333333 |
| 1639 | ENSG00000105671 | HPA048093 | 1 | 0.333333 | 0.666667 | 0.333333 |
| 1639 | ENSG00000106012 | HPA019515 | 1 | 0.333333 | 0.666667 | 0.333333 |
| 1639 | ENSG00000106013 | HPA043489 | 1 | 0.333333 | 0.666667 | 0.333333 |
| 1639 | ENSG00000106125 | HPA019475 | 1 | 0.333333 | 0.666667 | 0.333333 |
| 1639 | ENSG00000106244 | HPA050294 | 1 | 0.333333 | 0.666667 | 0.333333 |
| 1639 | ENSG00000106263 | HPA048983 | 1 | 0.333333 | 0.666667 | 0.333333 |
| 1639 | ENSG00000106299 | HPA005750 | 1 | 0.333333 | 0.666667 | 0.333333 |
| 1639 | ENSG00000106367 | HPA060945 | 1 | 0.333333 | 0.666667 | 0.333333 |
| 1639 | ENSG00000106524 | HPA050447 | 1 | 0.333333 | 0.666667 | 0.333333 |
| 1639 | ENSG00000106991 | HPA067440 | 1 | 0.333333 | 0.666667 | 0.333333 |
| 1639 | ENSG00000107105 | HPA063001 | 1 | 0.333333 | 0.666667 | 0.333333 |

0.539

0.385

|      |                 |           |   |          |          |          |        |
|------|-----------------|-----------|---|----------|----------|----------|--------|
| 1639 | ENSG00000107201 | HPA047193 | 1 | 0.333333 | 0.666667 | 0.333333 |        |
| 1639 | ENSG00000107249 | HPA056426 | 1 | 0.333333 | 0.666667 | 0.333333 |        |
| 1639 | ENSG00000107929 | HPA036566 | 1 | 0.333333 | 0.666667 | 0.333333 |        |
| 1639 | ENSG00000107937 | HPA039618 | 1 | 0.333333 | 0.666667 | 0.333333 |        |
| 1639 | ENSG00000108423 | HPA023980 | 1 | 0.333333 | 0.666667 | 0.333333 |        |
| 1639 | ENSG00000108561 | HPA026483 | 1 | 0.333333 | 0.666667 | 0.333333 |        |
| 1639 | ENSG00000108821 | HPA011795 | 1 | 0.333333 | 0.666667 | 0.333333 |        |
| 1639 | ENSG00000109107 | HPA003282 | 1 | 0.333333 | 0.666667 | 0.333333 |        |
| 1639 | ENSG00000109519 | HPA036647 | 1 | 0.333333 | 0.666667 | 0.333333 |        |
| 1639 | ENSG00000109576 | HPA037502 | 1 | 0.333333 | 0.666667 | 0.333333 |        |
| 1639 | ENSG00000109618 | HPA070409 | 1 | 0.333333 | 0.666667 | 0.333333 |        |
| 1639 | ENSG00000109686 | HPA058562 | 1 | 0.333333 | 0.666667 | 0.333333 |        |
| 1639 | ENSG00000110315 | HPA018133 | 1 | 0.333333 | 0.666667 | 0.333333 |        |
| 1639 | ENSG00000110429 | HPA002467 | 1 | 0.333333 | 0.666667 | 0.333333 |        |
| 1639 | ENSG00000110497 | HPA038535 | 1 | 0.333333 | 0.666667 | 0.333333 |        |
| 1639 | ENSG00000110696 | HPA076406 | 1 | 0.333333 | 0.666667 | 0.333333 |        |
| 1639 | ENSG00000110906 | HPA014273 | 1 | 0.333333 | 0.666667 | 0.333333 |        |
| 1639 | ENSG00000110925 | HPA019914 | 1 | 0.333333 | 0.666667 | 0.333333 | 0.387  |
| 1639 | ENSG00000111145 | HPA001600 | 1 | 0.333333 | 0.666667 | 0.333333 |        |
| 1639 | ENSG00000111300 | HPA039322 | 1 | 0.333333 | 0.666667 | 0.333333 |        |
| 1639 | ENSG00000111450 | HPA038189 | 1 | 0.333333 | 0.666667 | 0.333333 |        |
| 1639 | ENSG00000111726 | HPA039905 | 1 | 0.333333 | 0.666667 | 0.333333 |        |
| 1639 | ENSG00000111885 | HPA053198 | 1 | 0.333333 | 0.666667 | 0.333333 |        |
| 1639 | ENSG00000112182 | HPA058384 | 1 | 0.333333 | 0.666667 | 0.333333 |        |
| 1639 | ENSG00000112320 | HPA029242 | 1 | 0.333333 | 0.666667 | 0.333333 |        |
| 1639 | ENSG00000112357 | HPA049202 | 1 | 0.333333 | 0.666667 | 0.333333 |        |
| 1639 | ENSG00000112473 | HPA053999 | 1 | 0.333333 | 0.666667 | 0.333333 |        |
| 1639 | ENSG00000112592 | CAB009442 | 1 | 0.333333 | 0.666667 | 0.333333 |        |
| 1639 | ENSG00000112701 | HPA024376 | 1 | 0.333333 | 0.666667 | 0.333333 |        |
| 1639 | ENSG00000113194 | HPA065968 | 1 | 0.333333 | 0.666667 | 0.333333 |        |
| 1639 | ENSG00000113196 | HPA040925 | 1 | 0.333333 | 0.666667 | 0.333333 |        |
| 1639 | ENSG00000113282 | HPA043280 | 1 | 0.333333 | 0.666667 | 0.333333 |        |
| 1639 | ENSG00000113387 | HPA001311 | 1 | 0.333333 | 0.666667 | 0.333333 |        |
| 1639 | ENSG00000113407 | HPA037425 | 1 | 0.333333 | 0.666667 | 0.333333 |        |
| 1639 | ENSG00000113597 | HPA037777 | 1 | 0.333333 | 0.666667 | 0.333333 |        |
| 1639 | ENSG00000113638 | HPA038252 | 1 | 0.333333 | 0.666667 | 0.333333 |        |
| 1639 | ENSG00000113758 | HPA051452 | 1 | 0.333333 | 0.666667 | 0.333333 |        |
| 1639 | ENSG00000113812 | HPA065236 | 1 | 0.333333 | 0.666667 | 0.333333 |        |
| 1639 | ENSG00000113916 | HPA004899 | 1 | 0.333333 | 0.666667 | 0.333333 |        |
| 1639 | ENSG00000114354 | HPA019473 | 1 | 0.333333 | 0.666667 | 0.333333 |        |
| 1639 | ENSG00000114423 | HPA019880 | 1 | 0.333333 | 0.666667 | 0.333333 |        |
| 1639 | ENSG00000114473 | HPA042787 | 1 | 0.333333 | 0.666667 | 0.333333 |        |
| 1639 | ENSG00000114853 | HPA074057 | 1 | 0.333333 | 0.666667 | 0.333333 |        |
| 1639 | ENSG00000114982 | HPA035017 | 1 | 0.333333 | 0.666667 | 0.333333 |        |
| 1639 | ENSG00000114999 | HPA066819 | 1 | 0.333333 | 0.666667 | 0.333333 |        |
| 1639 | ENSG00000115226 | HPA063581 | 1 | 0.333333 | 0.666667 | 0.333333 |        |
| 1639 | ENSG00000115392 | HPA036685 | 1 | 0.333333 | 0.666667 | 0.333333 | 0.472  |
| 1639 | ENSG00000115520 | HPA046057 | 1 | 0.333333 | 0.666667 | 0.333333 |        |
| 1639 | ENSG00000115840 | HPA035333 | 1 | 0.333333 | 0.666667 | 0.333333 |        |
| 1639 | ENSG00000115977 | HPA017931 | 1 | 0.333333 | 0.666667 | 0.333333 | 0.2413 |
| 1639 | ENSG00000116604 | HPA004807 | 1 | 0.333333 | 0.666667 | 0.333333 |        |
| 1639 | ENSG00000116668 | HPA024214 | 1 | 0.333333 | 0.666667 | 0.333333 |        |
| 1639 | ENSG00000116691 | HPA044948 | 1 | 0.333333 | 0.666667 | 0.333333 |        |
| 1639 | ENSG00000116874 | HPA069692 | 1 | 0.333333 | 0.666667 | 0.333333 |        |
| 1639 | ENSG00000117153 | HPA071324 | 1 | 0.333333 | 0.666667 | 0.333333 |        |

|      |                 |           |   |          |          |          |        |        |
|------|-----------------|-----------|---|----------|----------|----------|--------|--------|
| 1639 | ENSG00000117751 | HPA027406 | 1 | 0.333333 | 0.666667 | 0.333333 |        |        |
| 1639 | ENSG00000118193 | HPA058220 | 1 | 0.333333 | 0.666667 | 0.333333 |        |        |
| 1639 | ENSG00000118513 | HPA071605 | 1 | 0.333333 | 0.666667 | 0.333333 | 0.4872 |        |
| 1639 | ENSG00000118515 | CAB022085 | 1 | 0.333333 | 0.666667 | 0.333333 |        |        |
| 1639 | ENSG00000118777 | CAB037299 | 1 | 0.333333 | 0.666667 | 0.333333 |        |        |
| 1639 | ENSG00000119640 | HPA034944 | 1 | 0.333333 | 0.666667 | 0.333333 | 0.3683 |        |
| 1639 | ENSG00000119703 | HPA050928 | 1 | 0.333333 | 0.666667 | 0.333333 |        |        |
| 1639 | ENSG00000120156 | HPA073265 | 1 | 0.333333 | 0.666667 | 0.333333 |        |        |
| 1639 | ENSG00000120280 | HPA001185 | 1 | 0.333333 | 0.666667 | 0.333333 |        |        |
| 1639 | ENSG00000120440 | HPA027985 | 1 | 0.333333 | 0.666667 | 0.333333 |        |        |
| 1639 | ENSG00000120798 | HPA035040 | 1 | 0.333333 | 0.666667 | 0.333333 |        |        |
| 1639 | ENSG00000120860 | HPA038339 | 1 | 0.333333 | 0.666667 | 0.333333 |        |        |
| 1639 | ENSG00000121390 | HPA038904 | 1 | 0.333333 | 0.666667 | 0.333333 | 0.3629 |        |
| 1639 | ENSG00000121879 | HPA009985 | 1 | 0.333333 | 0.666667 | 0.333333 |        | 0.2987 |
| 1639 | ENSG00000121892 | HPA036661 | 1 | 0.333333 | 0.666667 | 0.333333 |        |        |
| 1639 | ENSG00000121957 | HPA007327 | 1 | 0.333333 | 0.666667 | 0.333333 | 0.2916 | 0.4841 |
| 1639 | ENSG00000122376 | HPA036582 | 1 | 0.333333 | 0.666667 | 0.333333 |        |        |
| 1639 | ENSG00000122515 | HPA040716 | 1 | 0.333333 | 0.666667 | 0.333333 |        |        |
| 1639 | ENSG00000122591 | HPA042873 | 1 | 0.333333 | 0.666667 | 0.333333 |        |        |
| 1639 | ENSG00000123096 | HPA066432 | 1 | 0.333333 | 0.666667 | 0.333333 |        |        |
| 1639 | ENSG00000123384 | HPA004182 | 1 | 0.333333 | 0.666667 | 0.333333 |        |        |
| 1639 | ENSG00000124006 | HPA036405 | 1 | 0.333333 | 0.666667 | 0.333333 |        |        |
| 1639 | ENSG00000124019 | HPA070240 | 1 | 0.333333 | 0.666667 | 0.333333 |        |        |
| 1639 | ENSG00000124216 | HPA056831 | 1 | 0.333333 | 0.666667 | 0.333333 |        |        |
| 1639 | ENSG00000124380 | HPA034541 | 1 | 0.333333 | 0.666667 | 0.333333 |        |        |
| 1639 | ENSG00000124702 | HPA030131 | 1 | 0.333333 | 0.666667 | 0.333333 |        |        |
| 1639 | ENSG00000124766 | HPA029901 | 1 | 0.333333 | 0.666667 | 0.333333 |        |        |
| 1639 | ENSG00000124900 | HPA077883 | 1 | 0.333333 | 0.666667 | 0.333333 |        |        |
| 1639 | ENSG00000125037 | HPA042372 | 1 | 0.333333 | 0.666667 | 0.333333 |        |        |
| 1639 | ENSG00000125772 | HPA042987 | 1 | 0.333333 | 0.666667 | 0.333333 |        |        |
| 1639 | ENSG00000125864 | HPA040748 | 1 | 0.333333 | 0.666667 | 0.333333 |        |        |
| 1639 | ENSG00000126768 | HPA029093 | 1 | 0.333333 | 0.666667 | 0.333333 |        |        |
| 1639 | ENSG00000126882 | HPA021472 | 1 | 0.333333 | 0.666667 | 0.333333 |        |        |
| 1639 | ENSG00000127837 | CAB017717 | 1 | 0.333333 | 0.666667 | 0.333333 |        |        |
| 1639 | ENSG00000127870 | HPA039343 | 1 | 0.333333 | 0.666667 | 0.333333 |        |        |
| 1639 | ENSG00000127952 | HPA050261 | 1 | 0.333333 | 0.666667 | 0.333333 |        |        |
| 1639 | ENSG00000128342 | HPA018844 | 1 | 0.333333 | 0.666667 | 0.333333 |        |        |
| 1639 | ENSG00000128482 | HPA015970 | 1 | 0.333333 | 0.666667 | 0.333333 |        |        |
| 1639 | ENSG00000128872 | HPA041365 | 1 | 0.333333 | 0.666667 | 0.333333 |        |        |
| 1639 | ENSG00000129151 | HPA027823 | 1 | 0.333333 | 0.666667 | 0.333333 |        |        |
| 1639 | ENSG00000129221 | HPA026578 | 1 | 0.333333 | 0.666667 | 0.333333 |        |        |
| 1639 | ENSG00000129317 | HPA056203 | 1 | 0.333333 | 0.666667 | 0.333333 |        |        |
| 1639 | ENSG00000129484 | HPA052003 | 1 | 0.333333 | 0.666667 | 0.333333 |        |        |
| 1639 | ENSG00000129566 | HPA029206 | 1 | 0.333333 | 0.666667 | 0.333333 |        |        |
| 1639 | ENSG00000129596 | HPA036573 | 1 | 0.333333 | 0.666667 | 0.333333 |        |        |
| 1639 | ENSG00000129925 | HPA051281 | 1 | 0.333333 | 0.666667 | 0.333333 |        |        |
| 1639 | ENSG00000129991 | HPA046428 | 1 | 0.333333 | 0.666667 | 0.333333 |        |        |
| 1639 | ENSG00000130202 | HPA073459 | 1 | 0.333333 | 0.666667 | 0.333333 |        |        |
| 1639 | ENSG00000130204 | HPA036231 | 1 | 0.333333 | 0.666667 | 0.333333 |        |        |
| 1639 | ENSG00000130254 | HPA050894 | 1 | 0.333333 | 0.666667 | 0.333333 |        |        |
| 1639 | ENSG00000130695 | HPA028252 | 1 | 0.333333 | 0.666667 | 0.333333 | 0.2113 |        |
| 1639 | ENSG00000130803 | HPA042075 | 1 | 0.333333 | 0.666667 | 0.333333 |        |        |
| 1639 | ENSG00000131116 | HPA042596 | 1 | 0.333333 | 0.666667 | 0.333333 |        |        |
| 1639 | ENSG00000131653 | HPA041229 | 1 | 0.333333 | 0.666667 | 0.333333 |        |        |
| 1639 | ENSG00000131828 | HPA047864 | 1 | 0.333333 | 0.666667 | 0.333333 |        |        |

|      |                 |           |   |          |          |          |        |
|------|-----------------|-----------|---|----------|----------|----------|--------|
| 1639 | ENSG00000132005 | HPA048722 | 1 | 0.333333 | 0.666667 | 0.333333 |        |
| 1639 | ENSG00000132323 | HPA004752 | 1 | 0.333333 | 0.666667 | 0.333333 | 0.3365 |
| 1639 | ENSG00000132356 | HPA035409 | 1 | 0.333333 | 0.666667 | 0.333333 |        |
| 1639 | ENSG00000132361 | HPA031505 | 1 | 0.333333 | 0.666667 | 0.333333 |        |
| 1639 | ENSG00000132478 | HPA027962 | 1 | 0.333333 | 0.666667 | 0.333333 |        |
| 1639 | ENSG00000132661 | HPA047471 | 1 | 0.333333 | 0.666667 | 0.333333 |        |
| 1639 | ENSG00000132825 | HPA041146 | 1 | 0.333333 | 0.666667 | 0.333333 |        |
| 1639 | ENSG00000132854 | HPA014030 | 1 | 0.333333 | 0.666667 | 0.333333 | 0.2258 |
| 1639 | ENSG00000133083 | HPA015040 | 1 | 0.333333 | 0.666667 | 0.333333 |        |
| 1639 | ENSG00000133114 | HPA058739 | 1 | 0.333333 | 0.666667 | 0.333333 |        |
| 1639 | ENSG00000133422 | HPA000436 | 1 | 0.333333 | 0.666667 | 0.333333 |        |
| 1639 | ENSG00000134138 | HPA003256 | 1 | 0.333333 | 0.666667 | 0.333333 |        |
| 1639 | ENSG00000134285 | HPA041709 | 1 | 0.333333 | 0.666667 | 0.333333 |        |
| 1639 | ENSG00000134323 | HPA057420 | 1 | 0.333333 | 0.666667 | 0.333333 |        |
| 1639 | ENSG00000134762 | CAB037328 | 1 | 0.333333 | 0.666667 | 0.333333 |        |
| 1639 | ENSG00000135046 | HPA011271 | 1 | 0.333333 | 0.666667 | 0.333333 |        |
| 1639 | ENSG00000135094 | HPA039230 | 1 | 0.333333 | 0.666667 | 0.333333 |        |
| 1639 | ENSG00000135164 | HPA023846 | 1 | 0.333333 | 0.666667 | 0.333333 |        |
| 1639 | ENSG00000135457 | HPA070247 | 1 | 0.333333 | 0.666667 | 0.333333 |        |
| 1639 | ENSG00000135472 | HPA018790 | 1 | 0.333333 | 0.666667 | 0.333333 |        |
| 1639 | ENSG00000135801 | HPA067941 | 1 | 0.333333 | 0.666667 | 0.333333 |        |
| 1639 | ENSG00000136045 | HPA038708 | 1 | 0.333333 | 0.666667 | 0.333333 |        |
| 1639 | ENSG00000136169 | HPA071677 | 1 | 0.333333 | 0.666667 | 0.333333 |        |
| 1639 | ENSG00000136274 | HPA020981 | 1 | 0.333333 | 0.666667 | 0.333333 |        |
| 1639 | ENSG00000136895 | HPA028757 | 1 | 0.333333 | 0.666667 | 0.333333 |        |
| 1639 | ENSG00000137171 | HPA030169 | 1 | 0.333333 | 0.666667 | 0.333333 |        |
| 1639 | ENSG00000137193 | HPA003941 | 1 | 0.333333 | 0.666667 | 0.333333 |        |
| 1639 | ENSG00000137309 | CAB032200 | 1 | 0.333333 | 0.666667 | 0.333333 |        |
| 1639 | ENSG00000137393 | HPA072469 | 1 | 0.333333 | 0.666667 | 0.333333 |        |
| 1639 | ENSG00000137449 | HPA072513 | 1 | 0.333333 | 0.666667 | 0.333333 |        |
| 1639 | ENSG00000137478 | HPA038546 | 1 | 0.333333 | 0.666667 | 0.333333 |        |
| 1639 | ENSG00000137752 | CAB002685 | 1 | 0.333333 | 0.666667 | 0.333333 |        |
| 1639 | ENSG00000137831 | HPA043503 | 1 | 0.333333 | 0.666667 | 0.333333 |        |
| 1639 | ENSG00000137871 | HPA030233 | 1 | 0.333333 | 0.666667 | 0.333333 |        |
| 1639 | ENSG00000138083 | HPA067988 | 1 | 0.333333 | 0.666667 | 0.333333 |        |
| 1639 | ENSG00000138160 | HPA010093 | 1 | 0.333333 | 0.666667 | 0.333333 | 0.524  |
| 1639 | ENSG00000138376 | HPA035354 | 1 | 0.333333 | 0.666667 | 0.333333 |        |
| 1639 | ENSG00000138639 | HPA014288 | 1 | 0.333333 | 0.666667 | 0.333333 |        |
| 1639 | ENSG00000138738 | HPA051406 | 1 | 0.333333 | 0.666667 | 0.333333 |        |
| 1639 | ENSG00000138795 | HPA002087 | 1 | 0.333333 | 0.666667 | 0.333333 |        |
| 1639 | ENSG00000139194 | HPA038723 | 1 | 0.333333 | 0.666667 | 0.333333 |        |
| 1639 | ENSG00000139218 | HPA038862 | 1 | 0.333333 | 0.666667 | 0.333333 |        |
| 1639 | ENSG00000139372 | HPA052263 | 1 | 0.333333 | 0.666667 | 0.333333 |        |
| 1639 | ENSG00000140285 | HPA043605 | 1 | 0.333333 | 0.666667 | 0.333333 |        |
| 1639 | ENSG00000140323 | HPA059903 | 1 | 0.333333 | 0.666667 | 0.333333 |        |
| 1639 | ENSG00000140471 | HPA038578 | 1 | 0.333333 | 0.666667 | 0.333333 |        |
| 1639 | ENSG00000140983 | HPA012624 | 1 | 0.333333 | 0.666667 | 0.333333 |        |
| 1639 | ENSG00000141026 | HPA056415 | 1 | 0.333333 | 0.666667 | 0.333333 |        |
| 1639 | ENSG00000141458 | HPA077445 | 1 | 0.333333 | 0.666667 | 0.333333 |        |
| 1639 | ENSG00000141576 | HPA021991 | 1 | 0.333333 | 0.666667 | 0.333333 |        |
| 1639 | ENSG00000141642 | HPA066483 | 1 | 0.333333 | 0.666667 | 0.333333 |        |
| 1639 | ENSG00000141971 | HPA041885 | 1 | 0.333333 | 0.666667 | 0.333333 |        |
| 1639 | ENSG00000142178 | HPA078064 | 1 | 0.333333 | 0.666667 | 0.333333 |        |
| 1639 | ENSG00000142192 | HPA001462 | 1 | 0.333333 | 0.666667 | 0.333333 |        |
| 1639 | ENSG00000142623 | HPA062294 | 1 | 0.333333 | 0.666667 | 0.333333 |        |

|      |                 |           |   |          |          |          |        |
|------|-----------------|-----------|---|----------|----------|----------|--------|
| 1639 | ENSG00000143033 | HPA069047 | 1 | 0.333333 | 0.666667 | 0.333333 |        |
| 1639 | ENSG00000143375 | HPA027586 | 1 | 0.333333 | 0.666667 | 0.333333 |        |
| 1639 | ENSG00000143379 | HPA058484 | 1 | 0.333333 | 0.666667 | 0.333333 |        |
| 1639 | ENSG00000143420 | HPA051294 | 1 | 0.333333 | 0.666667 | 0.333333 |        |
| 1639 | ENSG00000143543 | HPA006514 | 1 | 0.333333 | 0.666667 | 0.333333 |        |
| 1639 | ENSG00000143674 | HPA007636 | 1 | 0.333333 | 0.666667 | 0.333333 |        |
| 1639 | ENSG00000143761 | CAB007742 | 1 | 0.333333 | 0.666667 | 0.333333 | 0.2151 |
| 1639 | ENSG00000144120 | HPA036689 | 1 | 0.333333 | 0.666667 | 0.333333 |        |
| 1639 | ENSG00000144134 | HPA042642 | 1 | 0.333333 | 0.666667 | 0.333333 |        |
| 1639 | ENSG00000144460 | HPA045531 | 1 | 0.333333 | 0.666667 | 0.333333 |        |
| 1639 | ENSG00000144635 | HPA035013 | 1 | 0.333333 | 0.666667 | 0.333333 |        |
| 1639 | ENSG00000144736 | HPA042792 | 1 | 0.333333 | 0.666667 | 0.333333 |        |
| 1639 | ENSG00000145247 | HPA040979 | 1 | 0.333333 | 0.666667 | 0.333333 |        |
| 1639 | ENSG00000145390 | HPA035844 | 1 | 0.333333 | 0.666667 | 0.333333 |        |
| 1639 | ENSG00000145476 | HPA029122 | 1 | 0.333333 | 0.666667 | 0.333333 |        |
| 1639 | ENSG00000145817 | HPA042338 | 1 | 0.333333 | 0.666667 | 0.333333 |        |
| 1639 | ENSG00000145868 | HPA034821 | 1 | 0.333333 | 0.666667 | 0.333333 |        |
| 1639 | ENSG00000145908 | HPA028975 | 1 | 0.333333 | 0.666667 | 0.333333 |        |
| 1639 | ENSG00000146013 | HPA020731 | 1 | 0.333333 | 0.666667 | 0.333333 |        |
| 1639 | ENSG00000146263 | HPA067042 | 1 | 0.333333 | 0.666667 | 0.333333 |        |
| 1639 | ENSG00000146426 | HPA011134 | 1 | 0.333333 | 0.666667 | 0.333333 |        |
| 1639 | ENSG00000147044 | HPA023857 | 1 | 0.333333 | 0.666667 | 0.333333 | 0.217  |
| 1639 | ENSG00000147324 | HPA051213 | 1 | 0.333333 | 0.666667 | 0.333333 |        |
| 1639 | ENSG00000147381 | HPA021942 | 1 | 0.333333 | 0.666667 | 0.333333 |        |
| 1639 | ENSG00000147601 | HPA048379 | 1 | 0.333333 | 0.666667 | 0.333333 |        |
| 1639 | ENSG00000147789 | HPA059090 | 1 | 0.333333 | 0.666667 | 0.333333 |        |
| 1639 | ENSG00000148082 | HPA031427 | 1 | 0.333333 | 0.666667 | 0.333333 |        |
| 1639 | ENSG00000148337 | HPA020380 | 1 | 0.333333 | 0.666667 | 0.333333 |        |
| 1639 | ENSG00000148341 | HPA021438 | 1 | 0.333333 | 0.666667 | 0.333333 | 0.24   |
| 1639 | ENSG00000148735 | HPA037583 | 1 | 0.333333 | 0.666667 | 0.333333 |        |
| 1639 | ENSG00000148835 | HPA006474 | 1 | 0.333333 | 0.666667 | 0.333333 | 0.2743 |
| 1639 | ENSG00000149557 | HPA038490 | 1 | 0.333333 | 0.666667 | 0.333333 |        |
| 1639 | ENSG00000150054 | HPA037597 | 1 | 0.333333 | 0.666667 | 0.333333 |        |
| 1639 | ENSG00000151065 | HPA039709 | 1 | 0.333333 | 0.666667 | 0.333333 | 0.341  |
| 1639 | ENSG00000151131 | HPA038722 | 1 | 0.333333 | 0.666667 | 0.333333 |        |
| 1639 | ENSG00000151148 | HPA041012 | 1 | 0.333333 | 0.666667 | 0.333333 |        |
| 1639 | ENSG00000151413 | HPA029203 | 1 | 0.333333 | 0.666667 | 0.333333 |        |
| 1639 | ENSG00000151468 | HPA062425 | 1 | 0.333333 | 0.666667 | 0.333333 |        |
| 1639 | ENSG00000151657 | CAB016339 | 1 | 0.333333 | 0.666667 | 0.333333 |        |
| 1639 | ENSG00000151689 | HPA036698 | 1 | 0.333333 | 0.666667 | 0.333333 |        |
| 1639 | ENSG00000151806 | HPA024222 | 1 | 0.333333 | 0.666667 | 0.333333 |        |
| 1639 | ENSG00000152240 | HPA040601 | 1 | 0.333333 | 0.666667 | 0.333333 | 0.3473 |
| 1639 | ENSG00000152689 | HPA058937 | 1 | 0.333333 | 0.666667 | 0.333333 |        |
| 1639 | ENSG00000153237 | HPA042626 | 1 | 0.333333 | 0.666667 | 0.333333 |        |
| 1639 | ENSG00000153294 | HPA007158 | 1 | 0.333333 | 0.666667 | 0.333333 |        |
| 1639 | ENSG00000153395 | HPA022268 | 1 | 0.333333 | 0.666667 | 0.333333 |        |
| 1639 | ENSG00000153560 | HPA003967 | 1 | 0.333333 | 0.666667 | 0.333333 |        |
| 1639 | ENSG00000153774 | HPA048242 | 1 | 0.333333 | 0.666667 | 0.333333 |        |
| 1639 | ENSG00000153885 | HPA050822 | 1 | 0.333333 | 0.666667 | 0.333333 |        |
| 1639 | ENSG00000154027 | HPA019128 | 1 | 0.333333 | 0.666667 | 0.333333 |        |
| 1639 | ENSG00000154102 | HPA049367 | 1 | 0.333333 | 0.666667 | 0.333333 |        |
| 1639 | ENSG00000154124 | HPA051074 | 1 | 0.333333 | 0.666667 | 0.333333 |        |
| 1639 | ENSG00000154222 | HPA031426 | 1 | 0.333333 | 0.666667 | 0.333333 |        |
| 1639 | ENSG00000154328 | HPA073029 | 1 | 0.333333 | 0.666667 | 0.333333 |        |
| 1639 | ENSG00000154803 | HPA028760 | 1 | 0.333333 | 0.666667 | 0.333333 |        |

|      |                 |           |   |          |          |          |        |        |
|------|-----------------|-----------|---|----------|----------|----------|--------|--------|
| 1639 | ENSG00000155749 | HPA035793 | 1 | 0.333333 | 0.666667 | 0.333333 |        |        |
| 1639 | ENSG00000155876 | HPA003734 | 1 | 0.333333 | 0.666667 | 0.333333 |        |        |
| 1639 | ENSG00000156239 | HPA059242 | 1 | 0.333333 | 0.666667 | 0.333333 |        |        |
| 1639 | ENSG00000156959 | HPA041421 | 1 | 0.333333 | 0.666667 | 0.333333 |        |        |
| 1639 | ENSG00000157470 | HPA065797 | 1 | 0.333333 | 0.666667 | 0.333333 |        |        |
| 1639 | ENSG00000157540 | HPA015323 | 1 | 0.333333 | 0.666667 | 0.333333 | 0.462  |        |
| 1639 | ENSG00000157554 | CAB018377 | 1 | 0.333333 | 0.666667 | 0.333333 |        |        |
| 1639 | ENSG00000157654 | HPA058905 | 1 | 0.333333 | 0.666667 | 0.333333 |        |        |
| 1639 | ENSG00000157764 | HPA071048 | 1 | 0.333333 | 0.666667 | 0.333333 |        |        |
| 1639 | ENSG00000158417 | HPA040095 | 1 | 0.333333 | 0.666667 | 0.333333 |        |        |
| 1639 | ENSG00000158526 | HPA030514 | 1 | 0.333333 | 0.666667 | 0.333333 |        |        |
| 1639 | ENSG00000158710 | HPA001925 | 1 | 0.333333 | 0.666667 | 0.333333 |        |        |
| 1639 | ENSG00000158715 | HPA019073 | 1 | 0.333333 | 0.666667 | 0.333333 |        |        |
| 1639 | ENSG00000158769 | HPA043616 | 1 | 0.333333 | 0.666667 | 0.333333 |        | 0.4689 |
| 1639 | ENSG00000158865 | HPA035331 | 1 | 0.333333 | 0.666667 | 0.333333 |        |        |
| 1639 | ENSG00000159055 | HPA018286 | 1 | 0.333333 | 0.666667 | 0.333333 |        |        |
| 1639 | ENSG00000160007 | HPA056470 | 1 | 0.333333 | 0.666667 | 0.333333 |        |        |
| 1639 | ENSG00000160207 | HPA031724 | 1 | 0.333333 | 0.666667 | 0.333333 |        |        |
| 1639 | ENSG00000160256 | HPA036354 | 1 | 0.333333 | 0.666667 | 0.333333 |        |        |
| 1639 | ENSG00000160282 | HPA030929 | 1 | 0.333333 | 0.666667 | 0.333333 |        |        |
| 1639 | ENSG00000160299 | HPA016820 | 1 | 0.333333 | 0.666667 | 0.333333 |        |        |
| 1639 | ENSG00000160469 | HPA021212 | 1 | 0.333333 | 0.666667 | 0.333333 |        |        |
| 1639 | ENSG00000160813 | HPA021604 | 1 | 0.333333 | 0.666667 | 0.333333 |        |        |
| 1639 | ENSG00000161021 | HPA037687 | 1 | 0.333333 | 0.666667 | 0.333333 |        |        |
| 1639 | ENSG00000161204 | HPA036332 | 1 | 0.333333 | 0.666667 | 0.333333 |        |        |
| 1639 | ENSG00000161939 | HPA022961 | 1 | 0.333333 | 0.666667 | 0.333333 | 0.4511 |        |
| 1639 | ENSG00000161980 | HPA005891 | 1 | 0.333333 | 0.666667 | 0.333333 |        |        |
| 1639 | ENSG00000162069 | HPA043251 | 1 | 0.333333 | 0.666667 | 0.333333 |        |        |
| 1639 | ENSG00000162086 | HPA001665 | 1 | 0.333333 | 0.666667 | 0.333333 |        |        |
| 1639 | ENSG00000162576 | HPA055780 | 1 | 0.333333 | 0.666667 | 0.333333 |        |        |
| 1639 | ENSG00000162733 | HPA070112 | 1 | 0.333333 | 0.666667 | 0.333333 |        |        |
| 1639 | ENSG00000163114 | HPA047864 | 1 | 0.333333 | 0.666667 | 0.333333 |        |        |
| 1639 | ENSG00000163507 | HPA039570 | 1 | 0.333333 | 0.666667 | 0.333333 |        |        |
| 1639 | ENSG00000163590 | HPA019953 | 1 | 0.333333 | 0.666667 | 0.333333 |        |        |
| 1639 | ENSG00000163634 | HPA044143 | 1 | 0.333333 | 0.666667 | 0.333333 |        |        |
| 1639 | ENSG00000163637 | HPA035493 | 1 | 0.333333 | 0.666667 | 0.333333 |        |        |
| 1639 | ENSG00000163681 | HPA002357 | 1 | 0.333333 | 0.666667 | 0.333333 |        |        |
| 1639 | ENSG00000163931 | HPA029480 | 1 | 0.333333 | 0.666667 | 0.333333 |        |        |
| 1639 | ENSG00000163961 | HPA046109 | 1 | 0.333333 | 0.666667 | 0.333333 |        |        |
| 1639 | ENSG00000164104 | HPA053314 | 1 | 0.333333 | 0.666667 | 0.333333 | 0.4749 | 0.3274 |
| 1639 | ENSG00000164168 | HPA054013 | 1 | 0.333333 | 0.666667 | 0.333333 |        |        |
| 1639 | ENSG00000164308 | HPA064360 | 1 | 0.333333 | 0.666667 | 0.333333 |        |        |
| 1639 | ENSG00000164379 | HPA059700 | 1 | 0.333333 | 0.666667 | 0.333333 |        |        |
| 1639 | ENSG00000164597 | HPA020300 | 1 | 0.333333 | 0.666667 | 0.333333 |        |        |
| 1639 | ENSG00000164896 | CAB032539 | 1 | 0.333333 | 0.666667 | 0.333333 |        |        |
| 1639 | ENSG00000164916 | HPA017998 | 1 | 0.333333 | 0.666667 | 0.333333 | 0.4232 |        |
| 1639 | ENSG00000164929 | HPA068307 | 1 | 0.333333 | 0.666667 | 0.333333 |        |        |
| 1639 | ENSG00000164944 | HPA031530 | 1 | 0.333333 | 0.666667 | 0.333333 |        |        |
| 1639 | ENSG00000164978 | HPA044903 | 1 | 0.333333 | 0.666667 | 0.333333 |        |        |
| 1639 | ENSG00000164989 | HPA024133 | 1 | 0.333333 | 0.666667 | 0.333333 |        |        |
| 1639 | ENSG00000165475 | HPA040403 | 1 | 0.333333 | 0.666667 | 0.333333 |        |        |
| 1639 | ENSG00000165495 | HPA028867 | 1 | 0.333333 | 0.666667 | 0.333333 |        |        |
| 1639 | ENSG00000165507 | HPA037818 | 1 | 0.333333 | 0.666667 | 0.333333 |        |        |
| 1639 | ENSG00000165588 | HPA001123 | 1 | 0.333333 | 0.666667 | 0.333333 |        |        |
| 1639 | ENSG00000165716 | HPA054443 | 1 | 0.333333 | 0.666667 | 0.333333 |        |        |



|      |                 |           |   |          |          |          |
|------|-----------------|-----------|---|----------|----------|----------|
| 1639 | ENSG00000165832 | HPA037914 | 1 | 0.333333 | 0.666667 | 0.333333 |
| 1639 | ENSG00000165934 | HPA024238 | 1 | 0.333333 | 0.666667 | 0.333333 |
| 1639 | ENSG00000166192 | HPA036273 | 1 | 0.333333 | 0.666667 | 0.333333 |
| 1639 | ENSG00000166233 | HPA073245 | 1 | 0.333333 | 0.666667 | 0.333333 |
| 1639 | ENSG00000166436 | HPA027420 | 1 | 0.333333 | 0.666667 | 0.333333 |
| 1639 | ENSG00000166484 | CAB018561 | 1 | 0.333333 | 0.666667 | 0.333333 |
| 1639 | ENSG00000166546 | HPA053851 | 1 | 0.333333 | 0.666667 | 0.333333 |
| 1639 | ENSG00000166619 | HPA047390 | 1 | 0.333333 | 0.666667 | 0.333333 |
| 1639 | ENSG00000166794 | HPA012720 | 1 | 0.333333 | 0.666667 | 0.333333 |
| 1639 | ENSG00000167272 | HPA069204 | 1 | 0.333333 | 0.666667 | 0.333333 |
| 1639 | ENSG00000167508 | HPA041404 | 1 | 0.333333 | 0.666667 | 0.333333 |
| 1639 | ENSG00000167528 | HPA035189 | 1 | 0.333333 | 0.666667 | 0.333333 |
| 1639 | ENSG00000167635 | HPA003358 | 1 | 0.333333 | 0.666667 | 0.333333 |
| 1639 | ENSG00000167674 | HPA042559 | 1 | 0.333333 | 0.666667 | 0.333333 |
| 1639 | ENSG00000168116 | HPA036370 | 1 | 0.333333 | 0.666667 | 0.333333 |
| 1639 | ENSG00000168275 | HPA028588 | 1 | 0.333333 | 0.666667 | 0.333333 |
| 1639 | ENSG00000168300 | HPA061444 | 1 | 0.333333 | 0.666667 | 0.333333 |
| 1639 | ENSG00000168724 | HPA049208 | 1 | 0.333333 | 0.666667 | 0.333333 |
| 1639 | ENSG00000169184 | HPA003072 | 1 | 0.333333 | 0.666667 | 0.333333 |
| 1639 | ENSG00000169189 | HPA043091 | 1 | 0.333333 | 0.666667 | 0.333333 |
| 1639 | ENSG00000169252 | HPA075322 | 1 | 0.333333 | 0.666667 | 0.333333 |
| 1639 | ENSG00000169372 | CAB005337 | 1 | 0.333333 | 0.666667 | 0.333333 |
| 1639 | ENSG00000169436 | HPA024830 | 1 | 0.333333 | 0.666667 | 0.333333 |
| 1639 | ENSG00000169570 | HPA054864 | 1 | 0.333333 | 0.666667 | 0.333333 |
| 1639 | ENSG00000169594 | HPA063183 | 1 | 0.333333 | 0.666667 | 0.333333 |
| 1639 | ENSG00000169871 | HPA024358 | 1 | 0.333333 | 0.666667 | 0.333333 |
| 1639 | ENSG00000170166 | HPA054383 | 1 | 0.333333 | 0.666667 | 0.333333 |
| 1639 | ENSG00000170456 | HPA038865 | 1 | 0.333333 | 0.666667 | 0.333333 |
| 1639 | ENSG00000170549 | HPA043160 | 1 | 0.333333 | 0.666667 | 0.333333 |
| 1639 | ENSG00000170684 | HPA049576 | 1 | 0.333333 | 0.666667 | 0.333333 |
| 1639 | ENSG00000170802 | HPA003485 | 1 | 0.333333 | 0.666667 | 0.333333 |
| 1639 | ENSG00000170903 | HPA014411 | 1 | 0.333333 | 0.666667 | 0.333333 |
| 1639 | ENSG00000171100 | HPA010008 | 1 | 0.333333 | 0.666667 | 0.333333 |
| 1639 | ENSG00000171444 | HPA037390 | 1 | 0.333333 | 0.666667 | 0.333333 |
| 1639 | ENSG00000171467 | HPA027031 | 1 | 0.333333 | 0.666667 | 0.333333 |
| 1639 | ENSG00000171587 | HPA019324 | 1 | 0.333333 | 0.666667 | 0.333333 |
| 1639 | ENSG00000171608 | HPA044953 | 1 | 0.333333 | 0.666667 | 0.333333 |
| 1639 | ENSG00000171617 | HPA078061 | 1 | 0.333333 | 0.666667 | 0.333333 |
| 1639 | ENSG00000171681 | HPA016578 | 1 | 0.333333 | 0.666667 | 0.333333 |
| 1639 | ENSG00000171735 | HPA036343 | 1 | 0.333333 | 0.666667 | 0.333333 |
| 1639 | ENSG00000171806 | HPA035314 | 1 | 0.333333 | 0.666667 | 0.333333 |
| 1639 | ENSG00000171827 | HPA028881 | 1 | 0.333333 | 0.666667 | 0.333333 |
| 1639 | ENSG00000171862 | HPA031335 | 1 | 0.333333 | 0.666667 | 0.333333 |
| 1639 | ENSG00000172175 | HPA048432 | 1 | 0.333333 | 0.666667 | 0.333333 |
| 1639 | ENSG00000172262 | HPA027748 | 1 | 0.333333 | 0.666667 | 0.333333 |
| 1639 | ENSG00000172586 | HPA039046 | 1 | 0.333333 | 0.666667 | 0.333333 |
| 1639 | ENSG00000172667 | HPA028671 | 1 | 0.333333 | 0.666667 | 0.333333 |
| 1639 | ENSG00000172932 | HPA039950 | 1 | 0.333333 | 0.666667 | 0.333333 |
| 1639 | ENSG00000173083 | CAB009813 | 1 | 0.333333 | 0.666667 | 0.333333 |
| 1639 | ENSG00000173641 | HPA027639 | 1 | 0.333333 | 0.666667 | 0.333333 |
| 1639 | ENSG00000173692 | HPA036736 | 1 | 0.333333 | 0.666667 | 0.333333 |
| 1639 | ENSG00000173728 | HPA031179 | 1 | 0.333333 | 0.666667 | 0.333333 |
| 1639 | ENSG00000173821 | HPA003347 | 1 | 0.333333 | 0.666667 | 0.333333 |
| 1639 | ENSG00000174132 | HPA019539 | 1 | 0.333333 | 0.666667 | 0.333333 |
| 1639 | ENSG00000174238 | HPA000528 | 1 | 0.333333 | 0.666667 | 0.333333 |

|      |                 |           |   |          |          |          |        |
|------|-----------------|-----------|---|----------|----------|----------|--------|
| 1639 | ENSG00000174373 | HPA000851 | 1 | 0.333333 | 0.666667 | 0.333333 |        |
| 1639 | ENSG00000174574 | HPA051871 | 1 | 0.333333 | 0.666667 | 0.333333 |        |
| 1639 | ENSG00000174788 | HPA057428 | 1 | 0.333333 | 0.666667 | 0.333333 |        |
| 1639 | ENSG00000174950 | HPA062915 | 1 | 0.333333 | 0.666667 | 0.333333 |        |
| 1639 | ENSG00000175093 | HPA062793 | 1 | 0.333333 | 0.666667 | 0.333333 |        |
| 1639 | ENSG00000175265 | HPA051808 | 1 | 0.333333 | 0.666667 | 0.333333 |        |
| 1639 | ENSG00000175556 | HPA050422 | 1 | 0.333333 | 0.666667 | 0.333333 |        |
| 1639 | ENSG00000175854 | HPA052032 | 1 | 0.333333 | 0.666667 | 0.333333 |        |
| 1639 | ENSG00000176155 | HPA023315 | 1 | 0.333333 | 0.666667 | 0.333333 | 0.2878 |
| 1639 | ENSG00000176422 | HPA053469 | 1 | 0.333333 | 0.666667 | 0.333333 |        |
| 1639 | ENSG00000176623 | HPA026495 | 1 | 0.333333 | 0.666667 | 0.333333 |        |
| 1639 | ENSG00000177119 | HPA038958 | 1 | 0.333333 | 0.666667 | 0.333333 |        |
| 1639 | ENSG00000177830 | HPA039374 | 1 | 0.333333 | 0.666667 | 0.333333 |        |
| 1639 | ENSG00000177990 | HPA071264 | 1 | 0.333333 | 0.666667 | 0.333333 |        |
| 1639 | ENSG00000178171 | HPA045593 | 1 | 0.333333 | 0.666667 | 0.333333 |        |
| 1639 | ENSG00000178252 | HPA042622 | 1 | 0.333333 | 0.666667 | 0.333333 |        |
| 1639 | ENSG00000178301 | HPA042879 | 1 | 0.333333 | 0.666667 | 0.333333 | 0.2944 |
| 1639 | ENSG00000178776 | HPA058999 | 1 | 0.333333 | 0.666667 | 0.333333 |        |
| 1639 | ENSG00000178796 | HPA045703 | 1 | 0.333333 | 0.666667 | 0.333333 |        |
| 1639 | ENSG00000178974 | HPA052592 | 1 | 0.333333 | 0.666667 | 0.333333 |        |
| 1639 | ENSG00000178999 | HPA037708 | 1 | 0.333333 | 0.666667 | 0.333333 |        |
| 1639 | ENSG00000179083 | HPA066175 | 1 | 0.333333 | 0.666667 | 0.333333 |        |
| 1639 | ENSG00000179111 | HPA072105 | 1 | 0.333333 | 0.666667 | 0.333333 |        |
| 1639 | ENSG00000179295 | CAB005377 | 1 | 0.333333 | 0.666667 | 0.333333 |        |
| 1639 | ENSG00000179855 | HPA067765 | 1 | 0.333333 | 0.666667 | 0.333333 |        |
| 1639 | ENSG00000179915 | HPA071400 | 1 | 0.333333 | 0.666667 | 0.333333 |        |
| 1639 | ENSG00000180116 | HPA039032 | 1 | 0.333333 | 0.666667 | 0.333333 |        |
| 1639 | ENSG00000180185 | CAB025530 | 1 | 0.333333 | 0.666667 | 0.333333 |        |
| 1639 | ENSG00000180190 | HPA008462 | 1 | 0.333333 | 0.666667 | 0.333333 | 0.491  |
| 1639 | ENSG00000180228 | HPA034996 | 1 | 0.333333 | 0.666667 | 0.333333 |        |
| 1639 | ENSG00000180318 | HPA001598 | 1 | 0.333333 | 0.666667 | 0.333333 |        |
| 1639 | ENSG00000180340 | HPA057667 | 1 | 0.333333 | 0.666667 | 0.333333 |        |
| 1639 | ENSG00000180353 | HPA019143 | 1 | 0.333333 | 0.666667 | 0.333333 |        |
| 1639 | ENSG00000180354 | HPA029507 | 1 | 0.333333 | 0.666667 | 0.333333 |        |
| 1639 | ENSG00000180667 | HPA028400 | 1 | 0.333333 | 0.666667 | 0.333333 |        |
| 1639 | ENSG00000180730 | HPA049752 | 1 | 0.333333 | 0.666667 | 0.333333 |        |
| 1639 | ENSG00000180855 | HPA018683 | 1 | 0.333333 | 0.666667 | 0.333333 |        |
| 1639 | ENSG00000180957 | HPA000528 | 1 | 0.333333 | 0.666667 | 0.333333 |        |
| 1639 | ENSG00000180998 | HPA003640 | 1 | 0.333333 | 0.666667 | 0.333333 |        |
| 1639 | ENSG00000182013 | HPA012956 | 1 | 0.333333 | 0.666667 | 0.333333 | 0.4521 |
| 1639 | ENSG00000182022 | HPA017584 | 1 | 0.333333 | 0.666667 | 0.333333 | 0.2862 |
| 1639 | ENSG00000182087 | HPA054801 | 1 | 0.333333 | 0.666667 | 0.333333 |        |
| 1639 | ENSG00000182108 | HPA041511 | 1 | 0.333333 | 0.666667 | 0.333333 | 0.3726 |
| 1639 | ENSG00000182287 | HPA060945 | 1 | 0.333333 | 0.666667 | 0.333333 |        |
| 1639 | ENSG00000182325 | HPA008867 | 1 | 0.333333 | 0.666667 | 0.333333 |        |
| 1639 | ENSG00000182326 | HPA018852 | 1 | 0.333333 | 0.666667 | 0.333333 |        |
| 1639 | ENSG00000182674 | HPA065970 | 1 | 0.333333 | 0.666667 | 0.333333 |        |
| 1639 | ENSG00000182831 | HPA067492 | 1 | 0.333333 | 0.666667 | 0.333333 |        |
| 1639 | ENSG00000183340 | HPA060341 | 1 | 0.333333 | 0.666667 | 0.333333 |        |
| 1639 | ENSG00000183496 | HPA041093 | 1 | 0.333333 | 0.666667 | 0.333333 |        |
| 1639 | ENSG00000183520 | HPA045830 | 1 | 0.333333 | 0.666667 | 0.333333 |        |
| 1639 | ENSG00000183665 | HPA023939 | 1 | 0.333333 | 0.666667 | 0.333333 |        |
| 1639 | ENSG00000183963 | HPA051778 | 1 | 0.333333 | 0.666667 | 0.333333 |        |
| 1639 | ENSG00000183977 | HPA036870 | 1 | 0.333333 | 0.666667 | 0.333333 |        |
| 1639 | ENSG00000184047 | HPA001825 | 1 | 0.333333 | 0.666667 | 0.333333 |        |

|      |                 |           |   |          |          |          |        |        |
|------|-----------------|-----------|---|----------|----------|----------|--------|--------|
| 1639 | ENSG00000184194 | HPA003905 | 1 | 0.333333 | 0.666667 | 0.333333 |        |        |
| 1639 | ENSG00000184271 | HPA050411 | 1 | 0.333333 | 0.666667 | 0.333333 |        |        |
| 1639 | ENSG00000184378 | HPA035817 | 1 | 0.333333 | 0.666667 | 0.333333 |        |        |
| 1639 | ENSG00000184428 | HPA001915 | 1 | 0.333333 | 0.666667 | 0.333333 |        | 0.2625 |
| 1639 | ENSG00000184857 | HPA063559 | 1 | 0.333333 | 0.666667 | 0.333333 |        |        |
| 1639 | ENSG00000184903 | HPA026711 | 1 | 0.333333 | 0.666667 | 0.333333 |        |        |
| 1639 | ENSG00000185008 | HPA013371 | 1 | 0.333333 | 0.666667 | 0.333333 |        |        |
| 1639 | ENSG00000185133 | HPA034539 | 1 | 0.333333 | 0.666667 | 0.333333 |        |        |
| 1639 | ENSG00000185252 | HPA003354 | 1 | 0.333333 | 0.666667 | 0.333333 |        |        |
| 1639 | ENSG00000185338 | HPA074108 | 1 | 0.333333 | 0.666667 | 0.333333 |        |        |
| 1639 | ENSG00000185561 | HPA046063 | 1 | 0.333333 | 0.666667 | 0.333333 |        |        |
| 1639 | ENSG00000185567 | HPA002940 | 1 | 0.333333 | 0.666667 | 0.333333 |        |        |
| 1639 | ENSG00000185585 | HPA021180 | 1 | 0.333333 | 0.666667 | 0.333333 |        |        |
| 1639 | ENSG00000186130 | HPA076894 | 1 | 0.333333 | 0.666667 | 0.333333 |        |        |
| 1639 | ENSG00000186603 | HPA031997 | 1 | 0.333333 | 0.666667 | 0.333333 |        |        |
| 1639 | ENSG00000187726 | HPA061330 | 1 | 0.333333 | 0.666667 | 0.333333 |        |        |
| 1639 | ENSG00000187735 | HPA043786 | 1 | 0.333333 | 0.666667 | 0.333333 |        |        |
| 1639 | ENSG00000187867 | HPA052794 | 1 | 0.333333 | 0.666667 | 0.333333 |        |        |
| 1639 | ENSG00000188010 | HPA057815 | 1 | 0.333333 | 0.666667 | 0.333333 |        |        |
| 1639 | ENSG00000188177 | HPA076065 | 1 | 0.333333 | 0.666667 | 0.333333 |        |        |
| 1639 | ENSG00000188554 | HPA022944 | 1 | 0.333333 | 0.666667 | 0.333333 |        |        |
| 1639 | ENSG00000188636 | HPA005697 | 1 | 0.333333 | 0.666667 | 0.333333 |        |        |
| 1639 | ENSG00000188707 | HPA055805 | 1 | 0.333333 | 0.666667 | 0.333333 |        |        |
| 1639 | ENSG00000189046 | CAB011198 | 1 | 0.333333 | 0.666667 | 0.333333 |        |        |
| 1639 | ENSG00000189252 | HPA045652 | 1 | 0.333333 | 0.666667 | 0.333333 |        |        |
| 1639 | ENSG00000189367 | HPA053341 | 1 | 0.333333 | 0.666667 | 0.333333 |        |        |
| 1639 | ENSG00000196116 | HPA022250 | 1 | 0.333333 | 0.666667 | 0.333333 |        |        |
| 1639 | ENSG00000196406 | HPA046423 | 1 | 0.333333 | 0.666667 | 0.333333 |        |        |
| 1639 | ENSG00000196466 | HPA018683 | 1 | 0.333333 | 0.666667 | 0.333333 |        |        |
| 1639 | ENSG00000196588 | HPA030782 | 1 | 0.333333 | 0.666667 | 0.333333 |        |        |
| 1639 | ENSG00000196704 | HPA023299 | 1 | 0.333333 | 0.666667 | 0.333333 |        |        |
| 1639 | ENSG00000196839 | HPA001399 | 1 | 0.333333 | 0.666667 | 0.333333 |        |        |
| 1639 | ENSG00000196867 | HPA028879 | 1 | 0.333333 | 0.666667 | 0.333333 | 0.4423 | 0.2522 |
| 1639 | ENSG00000196954 | HPA027588 | 1 | 0.333333 | 0.666667 | 0.333333 |        |        |
| 1639 | ENSG00000197024 | HPA071533 | 1 | 0.333333 | 0.666667 | 0.333333 |        |        |
| 1639 | ENSG00000197879 | HPA005924 | 1 | 0.333333 | 0.666667 | 0.333333 |        |        |
| 1639 | ENSG00000198021 | HPA046423 | 1 | 0.333333 | 0.666667 | 0.333333 |        |        |
| 1639 | ENSG00000198121 | HPA050667 | 1 | 0.333333 | 0.666667 | 0.333333 |        |        |
| 1639 | ENSG00000198157 | HPA000511 | 1 | 0.333333 | 0.666667 | 0.333333 |        |        |
| 1639 | ENSG00000198231 | HPA023447 | 1 | 0.333333 | 0.666667 | 0.333333 | 0.331  |        |
| 1639 | ENSG00000198561 | CAB003837 | 1 | 0.333333 | 0.666667 | 0.333333 |        |        |
| 1639 | ENSG00000198573 | HPA046423 | 1 | 0.333333 | 0.666667 | 0.333333 |        |        |
| 1639 | ENSG00000198783 | HPA024754 | 1 | 0.333333 | 0.666667 | 0.333333 |        |        |
| 1639 | ENSG00000198873 | HPA046838 | 1 | 0.333333 | 0.666667 | 0.333333 |        |        |
| 1639 | ENSG00000198929 | HPA030066 | 1 | 0.333333 | 0.666667 | 0.333333 | 0.277  |        |
| 1639 | ENSG00000198937 | HPA045215 | 1 | 0.333333 | 0.666667 | 0.333333 |        |        |
| 1639 | ENSG00000198948 | HPA062306 | 1 | 0.333333 | 0.666667 | 0.333333 |        |        |
| 1639 | ENSG00000198964 | HPA045191 | 1 | 0.333333 | 0.666667 | 0.333333 |        |        |
| 1639 | ENSG00000203926 | HPA046423 | 1 | 0.333333 | 0.666667 | 0.333333 |        |        |
| 1639 | ENSG00000204410 | HPA062688 | 1 | 0.333333 | 0.666667 | 0.333333 |        |        |
| 1639 | ENSG00000204713 | HPA053408 | 1 | 0.333333 | 0.666667 | 0.333333 |        |        |
| 1639 | ENSG00000204950 | HPA047619 | 1 | 0.333333 | 0.666667 | 0.333333 |        |        |
| 1639 | ENSG00000205002 | HPA068290 | 1 | 0.333333 | 0.666667 | 0.333333 |        |        |
| 1639 | ENSG00000205352 | HPA039396 | 1 | 0.333333 | 0.666667 | 0.333333 |        |        |
| 1639 | ENSG00000213390 | HPA035777 | 1 | 0.333333 | 0.666667 | 0.333333 |        |        |

|      |                 |           |   |          |          |          |        |        |
|------|-----------------|-----------|---|----------|----------|----------|--------|--------|
| 1639 | ENSG00000213626 | HPA034669 | 1 | 0.333333 | 0.666667 | 0.333333 | 0.2676 | 0.4482 |
| 1639 | ENSG00000213901 | HPA019059 | 1 | 0.333333 | 0.666667 | 0.333333 |        |        |
| 1639 | ENSG00000214655 | HPA041244 | 1 | 0.333333 | 0.666667 | 0.333333 |        |        |
| 1639 | ENSG00000215252 | HPA051808 | 1 | 0.333333 | 0.666667 | 0.333333 |        |        |
| 1639 | ENSG00000215301 | HPA001648 | 1 | 0.333333 | 0.666667 | 0.333333 |        |        |
| 1639 | ENSG00000216588 | HPA051811 | 1 | 0.333333 | 0.666667 | 0.333333 |        |        |
| 1639 | ENSG00000221978 | HPA053137 | 1 | 0.333333 | 0.666667 | 0.333333 |        |        |
| 1639 | ENSG00000224470 | HPA062596 | 1 | 0.333333 | 0.666667 | 0.333333 |        |        |
| 1639 | ENSG00000225190 | HPA039473 | 1 | 0.333333 | 0.666667 | 0.333333 |        |        |
| 1639 | ENSG00000227234 | HPA046423 | 1 | 0.333333 | 0.666667 | 0.333333 |        |        |
| 1639 | ENSG00000229833 | HPA067288 | 1 | 0.333333 | 0.666667 | 0.333333 |        |        |
| 1639 | ENSG00000231274 | HPA078322 | 1 | 0.333333 | 0.666667 | 0.333333 |        |        |
| 1639 | ENSG00000234545 | HPA066175 | 1 | 0.333333 | 0.666667 | 0.333333 |        |        |
| 1639 | ENSG00000240972 | HPA003868 | 1 | 0.333333 | 0.666667 | 0.333333 | 0.3167 |        |
| 1639 | ENSG00000241945 | HPA024573 | 1 | 0.333333 | 0.666667 | 0.333333 |        |        |
| 1639 | ENSG00000242110 | HPA020912 | 1 | 0.333333 | 0.666667 | 0.333333 |        |        |
| 1639 | ENSG00000243232 | HPA076190 | 1 | 0.333333 | 0.666667 | 0.333333 |        |        |
| 1639 | ENSG00000243444 | HPA074153 | 1 | 0.333333 | 0.666667 | 0.333333 |        |        |
| 1639 | ENSG00000249459 | HPA068125 | 1 | 0.333333 | 0.666667 | 0.333333 |        |        |
| 1639 | ENSG00000249471 | HPA023400 | 1 | 0.333333 | 0.666667 | 0.333333 |        |        |
| 1639 | ENSG00000256235 | HPA075345 | 1 | 0.333333 | 0.666667 | 0.333333 |        |        |
| 1639 | ENSG00000257591 | HPA074014 | 1 | 0.333333 | 0.666667 | 0.333333 |        |        |
| 1639 | ENSG00000258315 | HPA022961 | 1 | 0.333333 | 0.666667 | 0.333333 |        |        |
| 1639 | ENSG00000258429 | HPA063409 | 1 | 0.333333 | 0.666667 | 0.333333 |        |        |
| 1639 | ENSG00000260001 | HPA074356 | 1 | 0.333333 | 0.666667 | 0.333333 |        |        |
| 1639 | ENSG00000260027 | HPA049940 | 1 | 0.333333 | 0.666667 | 0.333333 |        |        |
| 1639 | ENSG00000260596 | HPA058451 | 1 | 0.333333 | 0.666667 | 0.333333 |        |        |
| 1639 | ENSG00000261652 | HPA067189 | 1 | 0.333333 | 0.666667 | 0.333333 |        |        |
| 1639 | ENSG00000267534 | HPA014255 | 1 | 0.333333 | 0.666667 | 0.333333 |        |        |
| 1639 | ENSG00000268870 | HPA018683 | 1 | 0.333333 | 0.666667 | 0.333333 |        |        |
| 1639 | ENSG00000268988 | HPA045652 | 1 | 0.333333 | 0.666667 | 0.333333 |        |        |
| 1639 | ENSG00000275464 | HPA024573 | 1 | 0.333333 | 0.666667 | 0.333333 |        |        |
| 1639 | ENSG00000275993 | HPA078064 | 1 | 0.333333 | 0.666667 | 0.333333 |        |        |
| 1639 | ENSG00000278129 | HPA034797 | 1 | 0.333333 | 0.666667 | 0.333333 |        |        |
| 1639 | ENSG00000285292 | HPA020091 | 1 | 0.333333 | 0.666667 | 0.333333 |        |        |
| 1639 | ENSG00000285396 | HPA039310 | 1 | 0.333333 | 0.666667 | 0.333333 |        |        |
| 2235 | ENSG00000008130 | HPA053368 | 1 | 0        | 0.5      | 1        |        |        |
| 2235 | ENSG00000008323 | HPA058230 | 1 | 0        | 0.5      | 1        |        |        |
| 2235 | ENSG00000009765 | HPA059627 | 1 | 0        | 0.5      | 1        |        |        |
| 2235 | ENSG00000011376 | HPA066085 | 1 | 0        | 0.5      | 1        |        |        |
| 2235 | ENSG00000023171 | HPA008557 | 1 | 0        | 0.5      | 1        |        |        |
| 2235 | ENSG00000024862 | HPA055125 | 1 | 0        | 0.5      | 1        |        |        |
| 2235 | ENSG00000034239 | HPA069955 | 1 | 0        | 0.5      | 1        |        |        |
| 2235 | ENSG00000035664 | HPA071581 | 1 | 0        | 0.5      | 1        |        |        |
| 2235 | ENSG00000049167 | HPA029328 | 1 | 0        | 0.5      | 1        |        |        |
| 2235 | ENSG00000049323 | HPA005707 | 1 | 0        | 0.5      | 1        |        |        |
| 2235 | ENSG00000054690 | HPA047707 | 1 | 0        | 0.5      | 1        |        |        |
| 2235 | ENSG00000057149 | CAB036006 | 1 | 0        | 0.5      | 1        |        |        |
| 2235 | ENSG00000057294 | HPA014314 | 1 | 0        | 0.5      | 1        |        |        |
| 2235 | ENSG00000060642 | HPA054181 | 1 | 0        | 0.5      | 1        |        |        |
| 2235 | ENSG00000064651 | HPA063697 | 1 | 0        | 0.5      | 1        |        |        |
| 2235 | ENSG00000064652 | HPA073934 | 1 | 0        | 0.5      | 1        |        |        |
| 2235 | ENSG00000065413 | HPA056549 | 1 | 0        | 0.5      | 1        |        |        |
| 2235 | ENSG00000071794 | HPA015284 | 1 | 0        | 0.5      | 1        |        |        |
| 2235 | ENSG00000072786 | CAB020840 | 1 | 0        | 0.5      | 1        |        |        |

|      |                 |           |   |   |     |   |        |
|------|-----------------|-----------|---|---|-----|---|--------|
| 2235 | ENSG00000072832 | HPA035640 | 1 | 0 | 0.5 | 1 |        |
| 2235 | ENSG00000074410 | HPA008773 | 1 | 0 | 0.5 | 1 |        |
| 2235 | ENSG00000076321 | HPA025034 | 1 | 0 | 0.5 | 1 |        |
| 2235 | ENSG00000079112 | HPA023616 | 1 | 0 | 0.5 | 1 |        |
| 2235 | ENSG00000080166 | HPA010742 | 1 | 0 | 0.5 | 1 |        |
| 2235 | ENSG00000081181 | CAB009435 | 1 | 0 | 0.5 | 1 |        |
| 2235 | ENSG00000081803 | HPA056398 | 1 | 0 | 0.5 | 1 |        |
| 2235 | ENSG00000084674 | HPA049793 | 1 | 0 | 0.5 | 1 |        |
| 2235 | ENSG00000086200 | HPA065346 | 1 | 0 | 0.5 | 1 |        |
| 2235 | ENSG00000087116 | HPA028363 | 1 | 0 | 0.5 | 1 |        |
| 2235 | ENSG00000089127 | HPA003657 | 1 | 0 | 0.5 | 1 |        |
| 2235 | ENSG00000090020 | HPA052891 | 1 | 0 | 0.5 | 1 |        |
| 2235 | ENSG00000090924 | HPA048054 | 1 | 0 | 0.5 | 1 |        |
| 2235 | ENSG00000092051 | CAB013492 | 1 | 0 | 0.5 | 1 | 0.2939 |
| 2235 | ENSG00000094841 | HPA000805 | 1 | 0 | 0.5 | 1 |        |
| 2235 | ENSG00000095319 | HPA061750 | 1 | 0 | 0.5 | 1 |        |
| 2235 | ENSG00000095321 | HPA022815 | 1 | 0 | 0.5 | 1 |        |
| 2235 | ENSG00000099860 | HPA029816 | 1 | 0 | 0.5 | 1 |        |
| 2235 | ENSG00000100003 | HPA064466 | 1 | 0 | 0.5 | 1 |        |
| 2235 | ENSG00000100445 | HPA044294 | 1 | 0 | 0.5 | 1 |        |
| 2235 | ENSG00000100558 | HPA001208 | 1 | 0 | 0.5 | 1 |        |
| 2235 | ENSG00000100577 | HPA004701 | 1 | 0 | 0.5 | 1 | 0.1222 |
| 2235 | ENSG00000100601 | HPA060061 | 1 | 0 | 0.5 | 1 |        |
| 2235 | ENSG00000100614 | HPA029209 | 1 | 0 | 0.5 | 1 |        |
| 2235 | ENSG00000101115 | HPA015291 | 1 | 0 | 0.5 | 1 |        |
| 2235 | ENSG00000101336 | HPA063768 | 1 | 0 | 0.5 | 1 |        |
| 2235 | ENSG00000101353 | HPA060298 | 1 | 0 | 0.5 | 1 |        |
| 2235 | ENSG00000101447 | HPA049333 | 1 | 0 | 0.5 | 1 |        |
| 2235 | ENSG00000101596 | HPA039441 | 1 | 0 | 0.5 | 1 |        |
| 2235 | ENSG00000102755 | HPA011740 | 1 | 0 | 0.5 | 1 |        |
| 2235 | ENSG00000103005 | HPA059854 | 1 | 0 | 0.5 | 1 |        |
| 2235 | ENSG00000103534 | HPA040810 | 1 | 0 | 0.5 | 1 |        |
| 2235 | ENSG00000103546 | HPA004057 | 1 | 0 | 0.5 | 1 |        |
| 2235 | ENSG00000104044 | HPA036402 | 1 | 0 | 0.5 | 1 |        |
| 2235 | ENSG00000104537 | HPA019650 | 1 | 0 | 0.5 | 1 |        |
| 2235 | ENSG00000104976 | HPA049843 | 1 | 0 | 0.5 | 1 |        |
| 2235 | ENSG00000105722 | HPA058532 | 1 | 0 | 0.5 | 1 |        |
| 2235 | ENSG00000105737 | HPA074001 | 1 | 0 | 0.5 | 1 |        |
| 2235 | ENSG00000106077 | HPA024042 | 1 | 0 | 0.5 | 1 |        |
| 2235 | ENSG00000106701 | HPA035138 | 1 | 0 | 0.5 | 1 |        |
| 2235 | ENSG00000106780 | HPA050238 | 1 | 0 | 0.5 | 1 |        |
| 2235 | ENSG00000106852 | HPA058319 | 1 | 0 | 0.5 | 1 |        |
| 2235 | ENSG00000107223 | HPA035642 | 1 | 0 | 0.5 | 1 | 0.331  |
| 2235 | ENSG00000107669 | HPA038444 | 1 | 0 | 0.5 | 1 |        |
| 2235 | ENSG00000107798 | HPA057052 | 1 | 0 | 0.5 | 1 |        |
| 2235 | ENSG00000108370 | HPA014137 | 1 | 0 | 0.5 | 1 |        |
| 2235 | ENSG00000108576 | HPA074728 | 1 | 0 | 0.5 | 1 |        |
| 2235 | ENSG00000110665 | HPA037607 | 1 | 0 | 0.5 | 1 |        |
| 2235 | ENSG00000111615 | HPA043433 | 1 | 0 | 0.5 | 1 |        |
| 2235 | ENSG00000111711 | HPA055909 | 1 | 0 | 0.5 | 1 |        |
| 2235 | ENSG00000111816 | HPA030479 | 1 | 0 | 0.5 | 1 |        |
| 2235 | ENSG00000111907 | HPA027916 | 1 | 0 | 0.5 | 1 |        |
| 2235 | ENSG00000112304 | HPA019881 | 1 | 0 | 0.5 | 1 |        |
| 2235 | ENSG00000112305 | HPA030574 | 1 | 0 | 0.5 | 1 |        |
| 2235 | ENSG00000115415 | HPA000931 | 1 | 0 | 0.5 | 1 |        |

|      |                 |           |   |   |     |   |        |
|------|-----------------|-----------|---|---|-----|---|--------|
| 2235 | ENSG00000115484 | HPA029349 | 1 | 0 | 0.5 | 1 |        |
| 2235 | ENSG00000115750 | HPA071254 | 1 | 0 | 0.5 | 1 |        |
| 2235 | ENSG00000116001 | HPA056961 | 1 | 0 | 0.5 | 1 |        |
| 2235 | ENSG00000116459 | HPA057347 | 1 | 0 | 0.5 | 1 |        |
| 2235 | ENSG00000116649 | HPA015746 | 1 | 0 | 0.5 | 1 |        |
| 2235 | ENSG00000116685 | HPA060536 | 1 | 0 | 0.5 | 1 |        |
| 2235 | ENSG00000116922 | HPA027127 | 1 | 0 | 0.5 | 1 |        |
| 2235 | ENSG00000117475 | HPA067113 | 1 | 0 | 0.5 | 1 |        |
| 2235 | ENSG00000117595 | HPA063121 | 1 | 0 | 0.5 | 1 |        |
| 2235 | ENSG00000118432 | HPA042256 | 1 | 0 | 0.5 | 1 |        |
| 2235 | ENSG00000118705 | HPA025922 | 1 | 0 | 0.5 | 1 | 0.4914 |
| 2235 | ENSG00000118849 | HPA003892 | 1 | 0 | 0.5 | 1 | 0.311  |
| 2235 | ENSG00000119929 | HPA038619 | 1 | 0 | 0.5 | 1 |        |
| 2235 | ENSG00000120526 | HPA023183 | 1 | 0 | 0.5 | 1 |        |
| 2235 | ENSG00000121690 | HPA015800 | 1 | 0 | 0.5 | 1 | 0.397  |
| 2235 | ENSG00000121931 | HPA044515 | 1 | 0 | 0.5 | 1 |        |
| 2235 | ENSG00000122592 | HPA074048 | 1 | 0 | 0.5 | 1 |        |
| 2235 | ENSG00000122778 | HPA019560 | 1 | 0 | 0.5 | 1 | 0.3387 |
| 2235 | ENSG00000122971 | HPA004799 | 1 | 0 | 0.5 | 1 | 0.3944 |
| 2235 | ENSG00000123374 | HPA066915 | 1 | 0 | 0.5 | 1 |        |
| 2235 | ENSG00000124641 | HPA040717 | 1 | 0 | 0.5 | 1 |        |
| 2235 | ENSG00000124784 | HPA051446 | 1 | 0 | 0.5 | 1 |        |
| 2235 | ENSG00000125170 | HPA055849 | 1 | 0 | 0.5 | 1 |        |
| 2235 | ENSG00000125356 | HPA029768 | 1 | 0 | 0.5 | 1 |        |
| 2235 | ENSG00000125912 | HPA006625 | 1 | 0 | 0.5 | 1 |        |
| 2235 | ENSG00000126870 | HPA020607 | 1 | 0 | 0.5 | 1 |        |
| 2235 | ENSG00000128709 | HPA068683 | 1 | 0 | 0.5 | 1 |        |
| 2235 | ENSG00000128849 | HPA069214 | 1 | 0 | 0.5 | 1 |        |
| 2235 | ENSG00000128944 | HPA042027 | 1 | 0 | 0.5 | 1 |        |
| 2235 | ENSG00000129158 | HPA037812 | 1 | 0 | 0.5 | 1 |        |
| 2235 | ENSG00000129353 | HPA070799 | 1 | 0 | 0.5 | 1 |        |
| 2235 | ENSG00000130193 | HPA023255 | 1 | 0 | 0.5 | 1 |        |
| 2235 | ENSG00000130876 | HPA041884 | 1 | 0 | 0.5 | 1 |        |
| 2235 | ENSG00000131023 | HPA031804 | 1 | 0 | 0.5 | 1 |        |
| 2235 | ENSG00000132388 | HPA050551 | 1 | 0 | 0.5 | 1 |        |
| 2235 | ENSG00000132670 | HPA069480 | 1 | 0 | 0.5 | 1 |        |
| 2235 | ENSG00000132912 | CAB017532 | 1 | 0 | 0.5 | 1 |        |
| 2235 | ENSG00000132953 | HPA053768 | 1 | 0 | 0.5 | 1 |        |
| 2235 | ENSG00000133056 | HPA050360 | 1 | 0 | 0.5 | 1 |        |
| 2235 | ENSG00000133110 | HPA012306 | 1 | 0 | 0.5 | 1 |        |
| 2235 | ENSG00000133597 | HPA036036 | 1 | 0 | 0.5 | 1 |        |
| 2235 | ENSG00000133678 | HPA029105 | 1 | 0 | 0.5 | 1 |        |
| 2235 | ENSG00000134874 | HPA070194 | 1 | 0 | 0.5 | 1 |        |
| 2235 | ENSG00000135720 | HPA057201 | 1 | 0 | 0.5 | 1 |        |
| 2235 | ENSG00000135835 | HPA061684 | 1 | 0 | 0.5 | 1 |        |
| 2235 | ENSG00000136147 | HPA016566 | 1 | 0 | 0.5 | 1 |        |
| 2235 | ENSG00000136867 | HPA014861 | 1 | 0 | 0.5 | 1 |        |
| 2235 | ENSG00000137142 | HPA051354 | 1 | 0 | 0.5 | 1 |        |
| 2235 | ENSG00000137343 | HPA050999 | 1 | 0 | 0.5 | 1 |        |
| 2235 | ENSG00000138081 | HPA002690 | 1 | 0 | 0.5 | 1 |        |
| 2235 | ENSG00000138439 | HPA028746 | 1 | 0 | 0.5 | 1 |        |
| 2235 | ENSG00000138735 | HPA004729 | 1 | 0 | 0.5 | 1 |        |
| 2235 | ENSG00000139146 | HPA038167 | 1 | 0 | 0.5 | 1 |        |
| 2235 | ENSG00000139289 | HPA063520 | 1 | 0 | 0.5 | 1 |        |
| 2235 | ENSG00000139517 | HPA040698 | 1 | 0 | 0.5 | 1 |        |

|      |                 |           |   |   |     |   |        |        |
|------|-----------------|-----------|---|---|-----|---|--------|--------|
| 2235 | ENSG00000139910 | HPA004155 | 1 | 0 | 0.5 | 1 |        |        |
| 2235 | ENSG00000140297 | HPA011154 | 1 | 0 | 0.5 | 1 |        |        |
| 2235 | ENSG00000140564 | CAB009499 | 1 | 0 | 0.5 | 1 |        |        |
| 2235 | ENSG00000140612 | HPA047533 | 1 | 0 | 0.5 | 1 |        |        |
| 2235 | ENSG00000140718 | CAB017123 | 1 | 0 | 0.5 | 1 |        |        |
| 2235 | ENSG00000140876 | HPA042042 | 1 | 0 | 0.5 | 1 |        |        |
| 2235 | ENSG00000140950 | HPA041020 | 1 | 0 | 0.5 | 1 |        |        |
| 2235 | ENSG00000143387 | HPA050346 | 1 | 0 | 0.5 | 1 |        |        |
| 2235 | ENSG00000143546 | HPA024372 | 1 | 0 | 0.5 | 1 |        |        |
| 2235 | ENSG00000143774 | HPA028118 | 1 | 0 | 0.5 | 1 |        |        |
| 2235 | ENSG00000143850 | HPA028152 | 1 | 0 | 0.5 | 1 |        |        |
| 2235 | ENSG00000144451 | HPA037542 | 1 | 0 | 0.5 | 1 |        |        |
| 2235 | ENSG00000145945 | HPA067817 | 1 | 0 | 0.5 | 1 |        |        |
| 2235 | ENSG00000146477 | HPA029750 | 1 | 0 | 0.5 | 1 | 0.317  |        |
| 2235 | ENSG00000146802 | HPA077143 | 1 | 0 | 0.5 | 1 |        |        |
| 2235 | ENSG00000148229 | HPA047945 | 1 | 0 | 0.5 | 1 |        |        |
| 2235 | ENSG00000148516 | HPA027524 | 1 | 0 | 0.5 | 1 |        |        |
| 2235 | ENSG00000149260 | HPA072319 | 1 | 0 | 0.5 | 1 |        |        |
| 2235 | ENSG00000149809 | HPA072704 | 1 | 0 | 0.5 | 1 |        |        |
| 2235 | ENSG00000149927 | HPA065676 | 1 | 0 | 0.5 | 1 |        |        |
| 2235 | ENSG00000150722 | HPA055043 | 1 | 0 | 0.5 | 1 |        |        |
| 2235 | ENSG00000151332 | HPA003388 | 1 | 0 | 0.5 | 1 |        |        |
| 2235 | ENSG00000151650 | HPA050955 | 1 | 0 | 0.5 | 1 |        |        |
| 2235 | ENSG00000152082 | HPA051758 | 1 | 0 | 0.5 | 1 |        |        |
| 2235 | ENSG00000152217 | HPA049022 | 1 | 0 | 0.5 | 1 |        |        |
| 2235 | ENSG00000152580 | HPA012921 | 1 | 0 | 0.5 | 1 |        |        |
| 2235 | ENSG00000152749 | HPA047250 | 1 | 0 | 0.5 | 1 |        |        |
| 2235 | ENSG00000153130 | HPA061198 | 1 | 0 | 0.5 | 1 |        |        |
| 2235 | ENSG00000153714 | HPA024407 | 1 | 0 | 0.5 | 1 |        |        |
| 2235 | ENSG00000154646 | HPA034857 | 1 | 0 | 0.5 | 1 |        |        |
| 2235 | ENSG00000154832 | HPA044511 | 1 | 0 | 0.5 | 1 |        |        |
| 2235 | ENSG00000155011 | HPA052611 | 1 | 0 | 0.5 | 1 |        |        |
| 2235 | ENSG00000156273 | HPA034949 | 1 | 0 | 0.5 | 1 |        |        |
| 2235 | ENSG00000157227 | HPA051432 | 1 | 0 | 0.5 | 1 |        |        |
| 2235 | ENSG00000157326 | HPA023972 | 1 | 0 | 0.5 | 1 |        |        |
| 2235 | ENSG00000157404 | HPA073252 | 1 | 0 | 0.5 | 1 |        |        |
| 2235 | ENSG00000157578 | HPA019790 | 1 | 0 | 0.5 | 1 |        |        |
| 2235 | ENSG00000158352 | HPA010089 | 1 | 0 | 0.5 | 1 |        |        |
| 2235 | ENSG00000158467 | HPA053128 | 1 | 0 | 0.5 | 1 |        |        |
| 2235 | ENSG00000159128 | HPA001535 | 1 | 0 | 0.5 | 1 |        |        |
| 2235 | ENSG00000159387 | HPA018332 | 1 | 0 | 0.5 | 1 | 0.2734 | 0.3999 |
| 2235 | ENSG00000160117 | HPA026789 | 1 | 0 | 0.5 | 1 |        |        |
| 2235 | ENSG00000160213 | HPA017380 | 1 | 0 | 0.5 | 1 |        |        |
| 2235 | ENSG00000160360 | HPA042199 | 1 | 0 | 0.5 | 1 |        |        |
| 2235 | ENSG00000160785 | HPA065411 | 1 | 0 | 0.5 | 1 |        |        |
| 2235 | ENSG00000160953 | HPA048063 | 1 | 0 | 0.5 | 1 |        |        |
| 2235 | ENSG00000161544 | HPA017757 | 1 | 0 | 0.5 | 1 |        |        |
| 2235 | ENSG00000162078 | HPA053549 | 1 | 0 | 0.5 | 1 |        |        |
| 2235 | ENSG00000162408 | HPA036347 | 1 | 0 | 0.5 | 1 |        |        |
| 2235 | ENSG00000162444 | HPA034749 | 1 | 0 | 0.5 | 1 |        |        |
| 2235 | ENSG00000162623 | HPA029641 | 1 | 0 | 0.5 | 1 |        |        |
| 2235 | ENSG00000162639 | HPA028497 | 1 | 0 | 0.5 | 1 |        |        |
| 2235 | ENSG00000162739 | HPA051363 | 1 | 0 | 0.5 | 1 |        |        |
| 2235 | ENSG00000163072 | HPA076885 | 1 | 0 | 0.5 | 1 |        |        |
| 2235 | ENSG00000163154 | HPA062742 | 1 | 0 | 0.5 | 1 |        |        |

|      |                 |           |   |   |     |   |        |
|------|-----------------|-----------|---|---|-----|---|--------|
| 2235 | ENSG00000163428 | HPA057574 | 1 | 0 | 0.5 | 1 |        |
| 2235 | ENSG00000163491 | HPA038941 | 1 | 0 | 0.5 | 1 |        |
| 2235 | ENSG00000163563 | HPA073215 | 1 | 0 | 0.5 | 1 |        |
| 2235 | ENSG00000164125 | HPA007227 | 1 | 0 | 0.5 | 1 |        |
| 2235 | ENSG00000164430 | HPA031702 | 1 | 0 | 0.5 | 1 |        |
| 2235 | ENSG00000164548 | HPA054018 | 1 | 0 | 0.5 | 1 |        |
| 2235 | ENSG00000164830 | HPA027380 | 1 | 0 | 0.5 | 1 | 0.2981 |
| 2235 | ENSG00000164933 | HPA024763 | 1 | 0 | 0.5 | 1 |        |
| 2235 | ENSG00000165272 | HPA014924 | 1 | 0 | 0.5 | 1 |        |
| 2235 | ENSG00000165526 | HPA039689 | 1 | 0 | 0.5 | 1 |        |
| 2235 | ENSG00000165609 | HPA019827 | 1 | 0 | 0.5 | 1 |        |
| 2235 | ENSG00000165702 | HPA006291 | 1 | 0 | 0.5 | 1 |        |
| 2235 | ENSG00000166025 | HPA001196 | 1 | 0 | 0.5 | 1 |        |
| 2235 | ENSG00000166396 | HPA024200 | 1 | 0 | 0.5 | 1 |        |
| 2235 | ENSG00000166562 | HPA047533 | 1 | 0 | 0.5 | 1 |        |
| 2235 | ENSG00000166823 | HPA069981 | 1 | 0 | 0.5 | 1 |        |
| 2235 | ENSG00000167994 | HPA039723 | 1 | 0 | 0.5 | 1 |        |
| 2235 | ENSG00000168014 | HPA040433 | 1 | 0 | 0.5 | 1 | 0.178  |
| 2235 | ENSG00000168306 | HPA064845 | 1 | 0 | 0.5 | 1 |        |
| 2235 | ENSG00000168539 | HPA014101 | 1 | 0 | 0.5 | 1 |        |
| 2235 | ENSG00000168906 | HPA043028 | 1 | 0 | 0.5 | 1 |        |
| 2235 | ENSG00000169019 | HPA035887 | 1 | 0 | 0.5 | 1 | 0.399  |
| 2235 | ENSG00000169031 | HPA042064 | 1 | 0 | 0.5 | 1 |        |
| 2235 | ENSG00000169087 | HPA044930 | 1 | 0 | 0.5 | 1 |        |
| 2235 | ENSG00000169379 | HPA048926 | 1 | 0 | 0.5 | 1 |        |
| 2235 | ENSG00000169418 | HPA031087 | 1 | 0 | 0.5 | 1 |        |
| 2235 | ENSG00000169710 | CAB005192 | 1 | 0 | 0.5 | 1 | 0.2727 |
| 2235 | ENSG00000169715 | HPA041152 | 1 | 0 | 0.5 | 1 |        |
| 2235 | ENSG00000169955 | HPA003203 | 1 | 0 | 0.5 | 1 |        |
| 2235 | ENSG00000170160 | HPA047220 | 1 | 0 | 0.5 | 1 |        |
| 2235 | ENSG00000170291 | HPA052411 | 1 | 0 | 0.5 | 1 | 0.3794 |
| 2235 | ENSG00000170381 | HPA063804 | 1 | 0 | 0.5 | 1 |        |
| 2235 | ENSG00000170498 | HPA035542 | 1 | 0 | 0.5 | 1 |        |
| 2235 | ENSG00000170989 | HPA075568 | 1 | 0 | 0.5 | 1 |        |
| 2235 | ENSG00000172086 | HPA052666 | 1 | 0 | 0.5 | 1 |        |
| 2235 | ENSG00000172954 | HPA031880 | 1 | 0 | 0.5 | 1 |        |
| 2235 | ENSG00000173272 | HPA051758 | 1 | 0 | 0.5 | 1 |        |
| 2235 | ENSG00000173868 | HPA065025 | 1 | 0 | 0.5 | 1 |        |
| 2235 | ENSG00000174197 | HPA058183 | 1 | 0 | 0.5 | 1 |        |
| 2235 | ENSG00000174804 | HPA074833 | 1 | 0 | 0.5 | 1 |        |
| 2235 | ENSG00000175054 | HPA054320 | 1 | 0 | 0.5 | 1 |        |
| 2235 | ENSG00000175215 | HPA052607 | 1 | 0 | 0.5 | 1 |        |
| 2235 | ENSG00000175315 | CAB019316 | 1 | 0 | 0.5 | 1 |        |
| 2235 | ENSG00000175334 | HPA039242 | 1 | 0 | 0.5 | 1 | 0.465  |
| 2235 | ENSG00000175505 | HPA042444 | 1 | 0 | 0.5 | 1 |        |
| 2235 | ENSG00000176055 | HPA037758 | 1 | 0 | 0.5 | 1 |        |
| 2235 | ENSG00000176834 | HPA062022 | 1 | 0 | 0.5 | 1 |        |
| 2235 | ENSG00000177885 | HPA030749 | 1 | 0 | 0.5 | 1 | 0.325  |
| 2235 | ENSG00000177917 | HPA014743 | 1 | 0 | 0.5 | 1 |        |
| 2235 | ENSG00000178719 | HPA036981 | 1 | 0 | 0.5 | 1 |        |
| 2235 | ENSG00000179588 | HPA046603 | 1 | 0 | 0.5 | 1 |        |
| 2235 | ENSG00000180089 | HPA057689 | 1 | 0 | 0.5 | 1 |        |
| 2235 | ENSG00000180543 | HPA031347 | 1 | 0 | 0.5 | 1 |        |
| 2235 | ENSG00000180776 | HPA014702 | 1 | 0 | 0.5 | 1 |        |
| 2235 | ENSG00000181418 | HPA060952 | 1 | 0 | 0.5 | 1 |        |



|      |                 |           |          |          |          |          |        |        |
|------|-----------------|-----------|----------|----------|----------|----------|--------|--------|
| 2235 | ENSG00000182578 | HPA012323 | 1        | 0        | 0.5      | 1        |        |        |
| 2235 | ENSG00000182600 | HPA052824 | 1        | 0        | 0.5      | 1        |        |        |
| 2235 | ENSG00000182685 | HPA063522 | 1        | 0        | 0.5      | 1        |        |        |
| 2235 | ENSG00000182795 | HPA011888 | 1        | 0        | 0.5      | 1        |        |        |
| 2235 | ENSG00000183166 | HPA036708 | 1        | 0        | 0.5      | 1        |        |        |
| 2235 | ENSG00000183770 | HPA069613 | 1        | 0        | 0.5      | 1        |        |        |
| 2235 | ENSG00000183780 | HPA061582 | 1        | 0        | 0.5      | 1        |        |        |
| 2235 | ENSG00000183828 | HPA058759 | 1        | 0        | 0.5      | 1        |        |        |
| 2235 | ENSG00000184304 | HPA029834 | 1        | 0        | 0.5      | 1        |        |        |
| 2235 | ENSG00000185420 | HPA045821 | 1        | 0        | 0.5      | 1        |        |        |
| 2235 | ENSG00000185551 | HPA058974 | 1        | 0        | 0.5      | 1        |        |        |
| 2235 | ENSG00000185686 | HPA068562 | 1        | 0        | 0.5      | 1        |        |        |
| 2235 | ENSG00000186350 | CAB005352 | 1        | 0        | 0.5      | 1        | 0.2798 | 0.349  |
| 2235 | ENSG00000187187 | HPA030838 | 1        | 0        | 0.5      | 1        |        |        |
| 2235 | ENSG00000187514 | HPA047183 | 1        | 0        | 0.5      | 1        |        |        |
| 2235 | ENSG00000187630 | HPA023972 | 1        | 0        | 0.5      | 1        |        |        |
| 2235 | ENSG00000188386 | HPA047157 | 1        | 0        | 0.5      | 1        |        |        |
| 2235 | ENSG00000188910 | HPA074472 | 1        | 0        | 0.5      | 1        |        |        |
| 2235 | ENSG00000196132 | HPA006303 | 1        | 0        | 0.5      | 1        |        |        |
| 2235 | ENSG00000196455 | HPA036033 | 1        | 0        | 0.5      | 1        |        |        |
| 2235 | ENSG00000196458 | HPA061970 | 1        | 0        | 0.5      | 1        |        |        |
| 2235 | ENSG00000196503 | HPA072942 | 1        | 0        | 0.5      | 1        |        |        |
| 2235 | ENSG00000196776 | CAB016055 | 1        | 0        | 0.5      | 1        |        |        |
| 2235 | ENSG00000197162 | HPA030510 | 1        | 0        | 0.5      | 1        |        |        |
| 2235 | ENSG00000197302 | HPA041570 | 1        | 0        | 0.5      | 1        |        |        |
| 2235 | ENSG00000197324 | HPA000932 | 1        | 0        | 0.5      | 1        |        |        |
| 2235 | ENSG00000197380 | HPA043053 | 1        | 0        | 0.5      | 1        |        |        |
| 2235 | ENSG00000197822 | HPA005933 | 1        | 0        | 0.5      | 1        |        |        |
| 2235 | ENSG00000197928 | HPA023106 | 1        | 0        | 0.5      | 1        |        |        |
| 2235 | ENSG00000197976 | HPA051020 | 1        | 0        | 0.5      | 1        |        |        |
| 2235 | ENSG00000197991 | HPA062669 | 1        | 0        | 0.5      | 1        |        |        |
| 2235 | ENSG00000198700 | HPA059540 | 1        | 0        | 0.5      | 1        |        |        |
| 2235 | ENSG00000198732 | HPA004153 | 1        | 0        | 0.5      | 1        |        | 0.3464 |
| 2235 | ENSG00000198846 | HPA073241 | 1        | 0        | 0.5      | 1        |        |        |
| 2235 | ENSG00000204866 | HPA059137 | 1        | 0        | 0.5      | 1        |        |        |
| 2235 | ENSG00000213160 | HPA047593 | 1        | 0        | 0.5      | 1        |        |        |
| 2235 | ENSG00000214960 | HPA053554 | 1        | 0        | 0.5      | 1        |        |        |
| 2235 | ENSG00000221823 | HPA047157 | 1        | 0        | 0.5      | 1        |        |        |
| 2235 | ENSG00000225968 | HPA066382 | 1        | 0        | 0.5      | 1        |        |        |
| 2235 | ENSG00000232434 | HPA021200 | 1        | 0        | 0.5      | 1        |        |        |
| 2235 | ENSG00000233608 | HPA062870 | 1        | 0        | 0.5      | 1        |        |        |
| 2235 | ENSG00000236699 | HPA045484 | 1        | 0        | 0.5      | 1        |        |        |
| 2235 | ENSG00000240857 | HPA056686 | 1        | 0        | 0.5      | 1        |        |        |
| 2235 | ENSG00000242247 | HPA000638 | 1        | 0        | 0.5      | 1        |        |        |
| 2235 | ENSG00000253958 | HPA070578 | 1        | 0        | 0.5      | 1        |        |        |
| 2235 | ENSG00000257017 | HPA047750 | 1        | 0        | 0.5      | 1        |        |        |
| 2235 | ENSG00000257365 | HPA062743 | 1        | 0        | 0.5      | 1        |        |        |
| 2235 | ENSG00000261701 | HPA047750 | 1        | 0        | 0.5      | 1        |        |        |
| 2235 | ENSG00000262664 | HPA059002 | 1        | 0        | 0.5      | 1        |        |        |
| 2235 | ENSG00000275410 | HPA002083 | 1        | 0        | 0.5      | 1        |        |        |
| 2235 | ENSG00000276231 | HPA023077 | 1        | 0        | 0.5      | 1        |        |        |
| 2235 | ENSG00000277586 | HPA015021 | 1        | 0        | 0.5      | 1        |        |        |
| 2235 | ENSG00000280165 | HPA062669 | 1        | 0        | 0.5      | 1        |        |        |
| 2527 | ENSG00000168495 | HPA061331 | 0.666667 | 0.266667 | 0.466667 | 0.466667 |        |        |
| 2528 | ENSG00000189306 | HPA001586 | 1        | 0.1      | 0.483333 | 0.5      |        |        |

|      |                 |           |     |          |          |          |        |
|------|-----------------|-----------|-----|----------|----------|----------|--------|
| 2529 | ENSG00000125351 | HPA001592 | 1   | 0.1      | 0.5      | 0.5      |        |
| 2530 | ENSG00000163781 | HPA036738 | 1   | 0.166667 | 0.472222 | 0.5      |        |
| 2531 | ENSG00000161405 | HPA024377 | 0.9 | 0.1      | 0.5      | 0.5      |        |
| 2532 | ENSG00000072571 | CAB002433 | 0.8 | 0.2      | 0.466667 | 0.466667 |        |
| 2533 | ENSG00000132424 | HPA038796 | 1   | 0.166667 | 0.5      | 0.5      |        |
| 2534 | ENSG00000139438 | HPA040181 | 1   | 0.1      | 0.483333 | 0.6      |        |
| 2535 | ENSG00000101412 | CAB000329 | 0.8 | 0.2      | 0.5      | 0.5      |        |
| 2535 | ENSG00000127554 | HPA041227 | 0.8 | 0.2      | 0.5      | 0.5      | 0.4499 |
| 2537 | ENSG00000076650 | HPA043430 | 1   | 0        | 0.7      | 0.333333 |        |
| 2538 | ENSG00000100139 | HPA043480 | 1   | 0        | 0.716667 | 0.333333 | 0.424  |
| 2539 | ENSG00000176542 | HPA029243 | 1   | 0.333333 | 0.5      | 0.666667 |        |
| 2540 | ENSG00000168286 | HPA042189 | 1   | 0.1      | 0.533333 | 0.4      |        |
| 2541 | ENSG00000162522 | HPA032050 | 1   | 0.1      | 0.536667 | 0.4      |        |
| 2542 | ENSG00000133740 | HPA055723 | 1   | 0.1      | 0.55     | 0.4      |        |
| 2543 | ENSG00000159884 | HPA016857 | 1   | 0.1      | 0.55     | 0.4      |        |
| 2543 | ENSG00000175806 | HPA023804 | 1   | 0.1      | 0.55     | 0.4      |        |
| 2545 | ENSG00000139223 | HPA063133 | 1   | 0.1      | 0.55     | 0.5      |        |
| 2545 | ENSG00000140350 | HPA063133 | 1   | 0.1      | 0.55     | 0.5      |        |
| 2545 | ENSG00000143401 | HPA063133 | 1   | 0.1      | 0.55     | 0.5      |        |
| 2548 | ENSG00000108465 | HPA022141 | 1   | 0.166667 | 0.527778 | 0.5      | 0.159  |
| 2548 | ENSG00000166439 | HPA038505 | 1   | 0.166667 | 0.527778 | 0.5      |        |
| 2550 | ENSG00000134202 | CAB040583 | 1   | 0.166667 | 0.555556 | 0.5      |        |
| 2550 | ENSG00000171169 | HPA054898 | 1   | 0.166667 | 0.555556 | 0.5      |        |
| 2552 | ENSG00000115233 | HPA002114 | 1   | 0.2      | 0.516667 | 0.5      |        |
| 2553 | ENSG00000168385 | CAB017190 | 1   | 0.1      | 0.55     | 0.6      |        |
| 2554 | ENSG00000136938 | HPA063133 | 1   | 0.133333 | 0.555556 | 0.6      |        |
| 2555 | ENSG00000049618 | HPA016511 | 1   | 0.166667 | 0.527778 | 0.666667 |        |
| 2555 | ENSG00000110274 | HPA037606 | 1   | 0.166667 | 0.527778 | 0.666667 |        |
| 2555 | ENSG00000164331 | HPA003968 | 1   | 0.166667 | 0.527778 | 0.666667 |        |
| 2555 | ENSG00000204531 | CAB026380 | 1   | 0.166667 | 0.527778 | 0.666667 |        |
| 2559 | ENSG00000138380 | HPA034557 | 1   | 0        | 0.638889 | 1        | 0.392  |
| 2559 | ENSG00000156299 | CAB010416 | 1   | 0        | 0.638889 | 1        |        |
| 2559 | ENSG00000184220 | HPA042820 | 1   | 0        | 0.638889 | 1        |        |
| 2559 | ENSG00000186532 | HPA030059 | 1   | 0        | 0.638889 | 1        |        |
| 2559 | ENSG00000213397 | HPA003614 | 1   | 0        | 0.638889 | 1        |        |
| 2564 | ENSG00000006695 | HPA032006 | 1   | 0        | 0.666667 | 1        |        |
| 2564 | ENSG00000044115 | HPA046119 | 1   | 0        | 0.666667 | 1        |        |
| 2564 | ENSG00000068400 | HPA000615 | 1   | 0        | 0.666667 | 1        |        |
| 2564 | ENSG00000086189 | HPA042944 | 1   | 0        | 0.666667 | 1        |        |
| 2564 | ENSG00000105699 | HPA007270 | 1   | 0        | 0.666667 | 1        |        |
| 2564 | ENSG00000110031 | HPA061441 | 1   | 0        | 0.666667 | 1        |        |
| 2564 | ENSG00000111581 | HPA031679 | 1   | 0        | 0.666667 | 1        |        |
| 2564 | ENSG00000111647 | HPA075150 | 1   | 0        | 0.666667 | 1        |        |
| 2564 | ENSG00000115221 | HPA023626 | 1   | 0        | 0.666667 | 1        |        |
| 2564 | ENSG00000121897 | HPA018842 | 1   | 0        | 0.666667 | 1        |        |
| 2564 | ENSG00000122012 | HPA040722 | 1   | 0        | 0.666667 | 1        |        |
| 2564 | ENSG00000125257 | HPA002476 | 1   | 0        | 0.666667 | 1        | 0.2485 |
| 2564 | ENSG00000126460 | HPA010702 | 1   | 0        | 0.666667 | 1        |        |
| 2564 | ENSG00000130363 | HPA039109 | 1   | 0        | 0.666667 | 1        |        |
| 2564 | ENSG00000132603 | HPA040856 | 1   | 0        | 0.666667 | 1        |        |
| 2564 | ENSG00000135127 | HPA061116 | 1   | 0        | 0.666667 | 1        |        |
| 2564 | ENSG00000135913 | HPA045160 | 1   | 0        | 0.666667 | 1        |        |
| 2564 | ENSG00000137601 | HPA020873 | 1   | 0        | 0.666667 | 1        | 0.388  |
| 2564 | ENSG00000137673 | HPA051358 | 1   | 0        | 0.666667 | 1        |        |
| 2564 | ENSG00000137936 | HPA014858 | 1   | 0        | 0.666667 | 1        |        |

|      |                 |           |   |          |          |          |        |
|------|-----------------|-----------|---|----------|----------|----------|--------|
| 2564 | ENSG00000152332 | HPA071190 | 1 | 0        | 0.666667 | 1        |        |
| 2564 | ENSG00000153904 | HPA006308 | 1 | 0        | 0.666667 | 1        |        |
| 2564 | ENSG00000162105 | HPA017220 | 1 | 0        | 0.666667 | 1        |        |
| 2564 | ENSG00000164219 | HPA030646 | 1 | 0        | 0.666667 | 1        |        |
| 2564 | ENSG00000164362 | HPA054641 | 1 | 0        | 0.666667 | 1        |        |
| 2564 | ENSG00000164574 | HPA007525 | 1 | 0        | 0.666667 | 1        |        |
| 2564 | ENSG00000168671 | HPA059475 | 1 | 0        | 0.666667 | 1        |        |
| 2564 | ENSG00000168826 | HPA024450 | 1 | 0        | 0.666667 | 1        |        |
| 2564 | ENSG00000170310 | HPA001540 | 1 | 0        | 0.666667 | 1        |        |
| 2564 | ENSG00000170542 | HPA030067 | 1 | 0        | 0.666667 | 1        |        |
| 2564 | ENSG00000175785 | HPA046671 | 1 | 0        | 0.666667 | 1        |        |
| 2564 | ENSG00000177888 | HPA034842 | 1 | 0        | 0.666667 | 1        |        |
| 2564 | ENSG00000179387 | HPA047600 | 1 | 0        | 0.666667 | 1        |        |
| 2564 | ENSG00000181045 | HPA029893 | 1 | 0        | 0.666667 | 1        |        |
| 2564 | ENSG00000181315 | HPA046692 | 1 | 0        | 0.666667 | 1        |        |
| 2564 | ENSG00000181634 | HPA046522 | 1 | 0        | 0.666667 | 1        |        |
| 2564 | ENSG00000185046 | HPA044628 | 1 | 0        | 0.666667 | 1        |        |
| 2564 | ENSG00000188171 | HPA045631 | 1 | 0        | 0.666667 | 1        |        |
| 2564 | ENSG00000188517 | HPA029107 | 1 | 0        | 0.666667 | 1        |        |
| 2564 | ENSG00000197993 | HPA064442 | 1 | 0        | 0.666667 | 1        |        |
| 2564 | ENSG00000198515 | HPA076168 | 1 | 0        | 0.666667 | 1        |        |
| 2564 | ENSG00000221972 | HPA046432 | 1 | 0        | 0.666667 | 1        |        |
| 2564 | ENSG00000235194 | HPA061600 | 1 | 0        | 0.666667 | 1        |        |
| 2607 | ENSG00000013619 | HPA003923 | 1 | 0.333333 | 0.555556 | 0.666667 |        |
| 2607 | ENSG00000048544 | HPA029133 | 1 | 0.333333 | 0.555556 | 0.666667 | 0.4375 |
| 2607 | ENSG00000066468 | HPA035305 | 1 | 0.333333 | 0.555556 | 0.666667 |        |
| 2607 | ENSG00000068308 | HPA017375 | 1 | 0.333333 | 0.555556 | 0.666667 |        |
| 2607 | ENSG00000073008 | HPA012568 | 1 | 0.333333 | 0.555556 | 0.666667 |        |
| 2607 | ENSG00000088325 | HPA005487 | 1 | 0.333333 | 0.555556 | 0.666667 |        |
| 2607 | ENSG00000100284 | HPA000818 | 1 | 0.333333 | 0.555556 | 0.666667 |        |
| 2607 | ENSG00000100362 | HPA048536 | 1 | 0.333333 | 0.555556 | 0.666667 |        |
| 2607 | ENSG00000104814 | HPA007419 | 1 | 0.333333 | 0.555556 | 0.666667 |        |
| 2607 | ENSG00000104881 | HPA041231 | 1 | 0.333333 | 0.555556 | 0.666667 |        |
| 2607 | ENSG00000112343 | HPA031685 | 1 | 0.333333 | 0.555556 | 0.666667 |        |
| 2607 | ENSG00000115602 | HPA007406 | 1 | 0.333333 | 0.555556 | 0.666667 |        |
| 2607 | ENSG00000124688 | HPA028729 | 1 | 0.333333 | 0.555556 | 0.666667 |        |
| 2607 | ENSG00000130724 | HPA041153 | 1 | 0.333333 | 0.555556 | 0.666667 |        |
| 2607 | ENSG00000133657 | HPA029471 | 1 | 0.333333 | 0.555556 | 0.666667 |        |
| 2607 | ENSG00000134668 | HPA031713 | 1 | 0.333333 | 0.555556 | 0.666667 |        |
| 2607 | ENSG00000135622 | HPA065969 | 1 | 0.333333 | 0.555556 | 0.666667 |        |
| 2607 | ENSG00000144847 | HPA046377 | 1 | 0.333333 | 0.555556 | 0.666667 |        |
| 2607 | ENSG00000147592 | HPA044391 | 1 | 0.333333 | 0.555556 | 0.666667 |        |
| 2607 | ENSG00000149182 | HPA016649 | 1 | 0.333333 | 0.555556 | 0.666667 | 0.2215 |
| 2607 | ENSG00000155324 | HPA009678 | 1 | 0.333333 | 0.555556 | 0.666667 |        |
| 2607 | ENSG00000155621 | HPA050767 | 1 | 0.333333 | 0.555556 | 0.666667 |        |
| 2607 | ENSG00000156642 | HPA051497 | 1 | 0.333333 | 0.555556 | 0.666667 |        |
| 2607 | ENSG00000160211 | HPA000247 | 1 | 0.333333 | 0.555556 | 0.666667 |        |
| 2607 | ENSG00000165138 | HPA008355 | 1 | 0.333333 | 0.555556 | 0.666667 |        |
| 2607 | ENSG00000165275 | HPA021800 | 1 | 0.333333 | 0.555556 | 0.666667 |        |
| 2607 | ENSG00000166450 | HPA032138 | 1 | 0.333333 | 0.555556 | 0.666667 |        |
| 2607 | ENSG00000166477 | HPA040741 | 1 | 0.333333 | 0.555556 | 0.666667 |        |
| 2607 | ENSG00000170909 | HPA073996 | 1 | 0.333333 | 0.555556 | 0.666667 |        |
| 2607 | ENSG00000172167 | HPA050594 | 1 | 0.333333 | 0.555556 | 0.666667 |        |
| 2607 | ENSG00000177963 | HPA041491 | 1 | 0.333333 | 0.555556 | 0.666667 |        |
| 2607 | ENSG00000178531 | HPA016669 | 1 | 0.333333 | 0.555556 | 0.666667 |        |

|      |                 |           |          |          |          |          |        |       |
|------|-----------------|-----------|----------|----------|----------|----------|--------|-------|
| 2607 | ENSG00000180758 | HPA028697 | 1        | 0.333333 | 0.555556 | 0.666667 |        |       |
| 2607 | ENSG00000182118 | HPA059578 | 1        | 0.333333 | 0.555556 | 0.666667 |        |       |
| 2607 | ENSG00000186710 | HPA048539 | 1        | 0.333333 | 0.555556 | 0.666667 |        |       |
| 2607 | ENSG00000198265 | HPA028276 | 1        | 0.333333 | 0.555556 | 0.666667 |        |       |
| 2607 | ENSG00000203778 | HPA036068 | 1        | 0.333333 | 0.555556 | 0.666667 |        |       |
| 2607 | ENSG00000224531 | HPA065706 | 1        | 0.333333 | 0.555556 | 0.666667 |        |       |
| 2607 | ENSG00000275395 | HPA003564 | 1        | 0.333333 | 0.555556 | 0.666667 |        |       |
| 2646 | ENSG00000172985 | HPA044822 | 1        | 0.166667 | 0.555556 | 0.5      |        |       |
| 2647 | ENSG00000165671 | HPA048431 | 1        | 0.166667 | 0.583333 | 0.5      |        |       |
| 2647 | ENSG00000214212 | HPA012150 | 1        | 0.166667 | 0.583333 | 0.5      |        |       |
| 2649 | ENSG00000101191 | CAB004374 | 1        | 0.166667 | 0.611111 | 0.5      |        |       |
| 2649 | ENSG00000119185 | HPA067348 | 1        | 0.166667 | 0.611111 | 0.5      |        |       |
| 2649 | ENSG00000131558 | HPA031443 | 1        | 0.166667 | 0.611111 | 0.5      |        |       |
| 2649 | ENSG00000166949 | CAB008094 | 1        | 0.166667 | 0.611111 | 0.5      |        |       |
| 2649 | ENSG00000174652 | HPA026836 | 1        | 0.166667 | 0.611111 | 0.5      |        |       |
| 2654 | ENSG00000070729 | HPA039159 | 1        | 0.2      | 0.566667 | 0.4      |        |       |
| 2655 | ENSG00000111011 | HPA040070 | 1        | 0.2      | 0.6      | 0.4      |        |       |
| 2656 | ENSG00000025770 | HPA067932 | 1        | 0.2      | 0.566667 | 0.5      |        |       |
| 2656 | ENSG00000141510 | CAB039238 | 1        | 0.2      | 0.566667 | 0.5      |        |       |
| 2658 | ENSG00000136754 | HPA029973 | 1        | 0.166667 | 0.666667 | 0.5      |        |       |
| 2658 | ENSG00000185658 | HPA030944 | 1        | 0.166667 | 0.666667 | 0.5      |        |       |
| 2660 | ENSG00000135974 | HPA043846 | 1        | 0.2      | 0.6      | 0.5      |        |       |
| 2661 | ENSG00000227345 | HPA021819 | 1        | 0.3      | 0.6      | 0.4      |        |       |
| 2662 | ENSG00000026652 | HPA053287 | 1        | 0.166667 | 0.555556 | 0.666667 |        |       |
| 2662 | ENSG00000170027 | HPA026918 | 1        | 0.166667 | 0.555556 | 0.666667 |        |       |
| 2662 | ENSG00000175793 | HPA011105 | 1        | 0.166667 | 0.555556 | 0.666667 |        |       |
| 2665 | ENSG00000168303 | HPA058457 | 1        | 0.3      | 0.6      | 0.5      |        |       |
| 2666 | ENSG00000180900 | HPA023557 | 1        | 0.2      | 0.666667 | 0.4      |        |       |
| 2667 | ENSG00000122512 | CAB010235 | 1        | 0.166667 | 0.583333 | 0.666667 |        |       |
| 2667 | ENSG00000166855 | HPA040262 | 1        | 0.166667 | 0.583333 | 0.666667 |        |       |
| 2669 | ENSG00000168283 | HPA030471 | 1        | 0.3      | 0.633333 | 0.4      |        |       |
| 2669 | ENSG00000269897 | HPA030471 | 1        | 0.3      | 0.633333 | 0.4      |        |       |
| 2671 | ENSG00000009307 | HPA018846 | 1        | 0.166667 | 0.611111 | 0.666667 |        |       |
| 2671 | ENSG00000124356 | HPA035800 | 1        | 0.166667 | 0.611111 | 0.666667 |        | 0.517 |
| 2671 | ENSG00000138336 | HPA019032 | 1        | 0.166667 | 0.611111 | 0.666667 | 0.4259 |       |
| 2671 | ENSG00000164749 | HPA005438 | 1        | 0.166667 | 0.611111 | 0.666667 |        |       |
| 2671 | ENSG00000179532 | HPA040267 | 1        | 0.166667 | 0.611111 | 0.666667 |        |       |
| 2676 | ENSG00000100815 | HPA002570 | 1        | 0.2      | 0.566667 | 0.6      | 0.533  |       |
| 2676 | ENSG00000116212 | HPA047458 | 1        | 0.2      | 0.566667 | 0.6      |        |       |
| 2676 | ENSG00000134308 | CAB010286 | 1        | 0.2      | 0.566667 | 0.6      |        |       |
| 2676 | ENSG00000204469 | CAB026383 | 1        | 0.2      | 0.566667 | 0.6      |        |       |
| 2680 | ENSG00000151967 | HPA003243 | 0.8      | 0.2      | 0.444444 | 0.733333 |        |       |
| 2681 | ENSG00000133961 | HPA002874 | 0.833333 | 0.166667 | 0.5      | 0.833333 |        |       |
| 2682 | ENSG00000006042 | HPA040473 | 1        | 0.333333 | 0.666667 | 0.5      |        |       |
| 2682 | ENSG00000099992 | HPA007725 | 1        | 0.333333 | 0.666667 | 0.5      |        |       |
| 2682 | ENSG00000105355 | HPA006427 | 1        | 0.333333 | 0.666667 | 0.5      |        |       |
| 2682 | ENSG00000116670 | HPA024176 | 1        | 0.333333 | 0.666667 | 0.5      |        |       |
| 2682 | ENSG00000131013 | HPA031599 | 1        | 0.333333 | 0.666667 | 0.5      |        |       |
| 2682 | ENSG00000134371 | CAB016359 | 1        | 0.333333 | 0.666667 | 0.5      |        |       |
| 2682 | ENSG00000135972 | HPA043476 | 1        | 0.333333 | 0.666667 | 0.5      |        |       |
| 2682 | ENSG00000170234 | HPA046733 | 1        | 0.333333 | 0.666667 | 0.5      |        |       |
| 2682 | ENSG00000172888 | HPA065518 | 1        | 0.333333 | 0.666667 | 0.5      |        |       |
| 2682 | ENSG00000205220 | HPA030224 | 1        | 0.333333 | 0.666667 | 0.5      |        |       |
| 2692 | ENSG00000068654 | CAB010145 | 1        | 0.166667 | 0.666667 | 0.666667 |        |       |
| 2693 | ENSG00000070010 | HPA030286 | 1        | 0.3      | 0.6      | 0.6      |        |       |

|      |                 |           |   |          |          |          |        |        |
|------|-----------------|-----------|---|----------|----------|----------|--------|--------|
| 2694 | ENSG00000104756 | HPA042468 | 1 | 0.333333 | 0.555556 | 0.666667 |        |        |
| 2694 | ENSG00000213551 | HPA035215 | 1 | 0.333333 | 0.555556 | 0.666667 |        |        |
| 2696 | ENSG00000165699 | CAB011568 | 1 | 0.3      | 0.633333 | 0.6      |        | 0.337  |
| 2697 | ENSG00000003249 | HPA043018 | 1 | 0.333333 | 0.666667 | 0.666667 | 0.2441 |        |
| 2697 | ENSG00000005381 | HPA061464 | 1 | 0.333333 | 0.666667 | 0.666667 |        |        |
| 2697 | ENSG00000006530 | HPA053471 | 1 | 0.333333 | 0.666667 | 0.666667 |        |        |
| 2697 | ENSG00000006652 | HPA024122 | 1 | 0.333333 | 0.666667 | 0.666667 |        |        |
| 2697 | ENSG00000011422 | CAB073533 | 1 | 0.333333 | 0.666667 | 0.666667 |        |        |
| 2697 | ENSG00000011485 | HPA029065 | 1 | 0.333333 | 0.666667 | 0.666667 |        |        |
| 2697 | ENSG00000011566 | HPA030380 | 1 | 0.333333 | 0.666667 | 0.666667 |        |        |
| 2697 | ENSG00000012822 | HPA038313 | 1 | 0.333333 | 0.666667 | 0.666667 |        |        |
| 2697 | ENSG00000014138 | HPA037570 | 1 | 0.333333 | 0.666667 | 0.666667 |        |        |
| 2697 | ENSG00000015153 | HPA026867 | 1 | 0.333333 | 0.666667 | 0.666667 |        |        |
| 2697 | ENSG00000019991 | HPA040360 | 1 | 0.333333 | 0.666667 | 0.666667 |        |        |
| 2697 | ENSG00000022267 | HPA001040 | 1 | 0.333333 | 0.666667 | 0.666667 |        |        |
| 2697 | ENSG00000022976 | HPA020434 | 1 | 0.333333 | 0.666667 | 0.666667 |        |        |
| 2697 | ENSG00000030419 | HPA059142 | 1 | 0.333333 | 0.666667 | 0.666667 |        |        |
| 2697 | ENSG00000031691 | HPA029043 | 1 | 0.333333 | 0.666667 | 0.666667 |        |        |
| 2697 | ENSG00000038532 | HPA061385 | 1 | 0.333333 | 0.666667 | 0.666667 |        |        |
| 2697 | ENSG00000049541 | HPA029493 | 1 | 0.333333 | 0.666667 | 0.666667 |        |        |
| 2697 | ENSG00000051128 | CAB032656 | 1 | 0.333333 | 0.666667 | 0.666667 |        |        |
| 2697 | ENSG00000052841 | HPA038508 | 1 | 0.333333 | 0.666667 | 0.666667 |        |        |
| 2697 | ENSG00000054116 | HPA028408 | 1 | 0.333333 | 0.666667 | 0.666667 |        |        |
| 2697 | ENSG00000055732 | HPA018106 | 1 | 0.333333 | 0.666667 | 0.666667 |        |        |
| 2697 | ENSG00000056050 | HPA043467 | 1 | 0.333333 | 0.666667 | 0.666667 |        |        |
| 2697 | ENSG00000056972 | HPA036352 | 1 | 0.333333 | 0.666667 | 0.666667 |        |        |
| 2697 | ENSG00000057704 | HPA014272 | 1 | 0.333333 | 0.666667 | 0.666667 |        |        |
| 2697 | ENSG00000060339 | HPA007856 | 1 | 0.333333 | 0.666667 | 0.666667 | 0.3796 | 0.1942 |
| 2697 | ENSG00000064763 | HPA015884 | 1 | 0.333333 | 0.666667 | 0.666667 |        |        |
| 2697 | ENSG00000065559 | HPA060074 | 1 | 0.333333 | 0.666667 | 0.666667 |        |        |
| 2697 | ENSG00000065717 | HPA049103 | 1 | 0.333333 | 0.666667 | 0.666667 |        |        |
| 2697 | ENSG00000065809 | HPA039661 | 1 | 0.333333 | 0.666667 | 0.666667 |        |        |
| 2697 | ENSG00000065989 | HPA076091 | 1 | 0.333333 | 0.666667 | 0.666667 |        |        |
| 2697 | ENSG00000066135 | HPA007610 | 1 | 0.333333 | 0.666667 | 0.666667 |        |        |
| 2697 | ENSG00000070214 | HPA064714 | 1 | 0.333333 | 0.666667 | 0.666667 |        |        |
| 2697 | ENSG00000072062 | HPA071185 | 1 | 0.333333 | 0.666667 | 0.666667 |        |        |
| 2697 | ENSG00000072201 | HPA071091 | 1 | 0.333333 | 0.666667 | 0.666667 |        |        |
| 2697 | ENSG00000072364 | HPA029634 | 1 | 0.333333 | 0.666667 | 0.666667 |        |        |
| 2697 | ENSG00000072803 | HPA062578 | 1 | 0.333333 | 0.666667 | 0.666667 |        |        |
| 2697 | ENSG00000073712 | HPA040505 | 1 | 0.333333 | 0.666667 | 0.666667 |        |        |
| 2697 | ENSG00000074266 | HPA060089 | 1 | 0.333333 | 0.666667 | 0.666667 |        |        |
| 2697 | ENSG00000074855 | HPA031787 | 1 | 0.333333 | 0.666667 | 0.666667 |        |        |
| 2697 | ENSG00000075213 | HPA052235 | 1 | 0.333333 | 0.666667 | 0.666667 | 0.3893 |        |
| 2697 | ENSG00000075218 | HPA029457 | 1 | 0.333333 | 0.666667 | 0.666667 |        |        |
| 2697 | ENSG00000075399 | HPA023620 | 1 | 0.333333 | 0.666667 | 0.666667 |        |        |
| 2697 | ENSG00000075539 | HPA031106 | 1 | 0.333333 | 0.666667 | 0.666667 |        |        |
| 2697 | ENSG00000076554 | HPA062167 | 1 | 0.333333 | 0.666667 | 0.666667 |        |        |
| 2697 | ENSG00000076770 | HPA001584 | 1 | 0.333333 | 0.666667 | 0.666667 |        |        |
| 2697 | ENSG00000077063 | HPA044654 | 1 | 0.333333 | 0.666667 | 0.666667 |        |        |
| 2697 | ENSG00000077147 | HPA039609 | 1 | 0.333333 | 0.666667 | 0.666667 |        |        |
| 2697 | ENSG00000078053 | HPA019828 | 1 | 0.333333 | 0.666667 | 0.666667 |        |        |
| 2697 | ENSG00000078369 | HPA040736 | 1 | 0.333333 | 0.666667 | 0.666667 |        |        |
| 2697 | ENSG00000078487 | HPA020911 | 1 | 0.333333 | 0.666667 | 0.666667 |        |        |
| 2697 | ENSG00000079101 | HPA075240 | 1 | 0.333333 | 0.666667 | 0.666667 |        |        |
| 2697 | ENSG00000079616 | HPA048213 | 1 | 0.333333 | 0.666667 | 0.666667 |        |        |

|      |                 |           |   |          |          |          |        |
|------|-----------------|-----------|---|----------|----------|----------|--------|
| 2697 | ENSG00000080819 | HPA015736 | 1 | 0.333333 | 0.666667 | 0.666667 |        |
| 2697 | ENSG00000080986 | HPA066330 | 1 | 0.333333 | 0.666667 | 0.666667 |        |
| 2697 | ENSG00000082074 | HPA026796 | 1 | 0.333333 | 0.666667 | 0.666667 |        |
| 2697 | ENSG00000082641 | HPA063384 | 1 | 0.333333 | 0.666667 | 0.666667 |        |
| 2697 | ENSG00000083635 | HPA029958 | 1 | 0.333333 | 0.666667 | 0.666667 |        |
| 2697 | ENSG00000083799 | HPA050095 | 1 | 0.333333 | 0.666667 | 0.666667 |        |
| 2697 | ENSG00000084073 | HPA006988 | 1 | 0.333333 | 0.666667 | 0.666667 |        |
| 2697 | ENSG00000084207 | HPA019869 | 1 | 0.333333 | 0.666667 | 0.666667 |        |
| 2697 | ENSG00000085382 | HPA046071 | 1 | 0.333333 | 0.666667 | 0.666667 |        |
| 2697 | ENSG00000085760 | HPA006021 | 1 | 0.333333 | 0.666667 | 0.666667 |        |
| 2697 | ENSG00000086504 | HPA030594 | 1 | 0.333333 | 0.666667 | 0.666667 |        |
| 2697 | ENSG00000087152 | HPA064316 | 1 | 0.333333 | 0.666667 | 0.666667 |        |
| 2697 | ENSG00000087301 | HPA002543 | 1 | 0.333333 | 0.666667 | 0.666667 | 0.3323 |
| 2697 | ENSG00000087470 | CAB009952 | 1 | 0.333333 | 0.666667 | 0.666667 | 0.3278 |
| 2697 | ENSG00000087510 | HPA055179 | 1 | 0.333333 | 0.666667 | 0.666667 |        |
| 2697 | ENSG00000088992 | HPA053200 | 1 | 0.333333 | 0.666667 | 0.666667 |        |
| 2697 | ENSG00000089057 | HPA059314 | 1 | 0.333333 | 0.666667 | 0.666667 |        |
| 2697 | ENSG00000089195 | HPA047032 | 1 | 0.333333 | 0.666667 | 0.666667 |        |
| 2697 | ENSG00000089486 | HPA049352 | 1 | 0.333333 | 0.666667 | 0.666667 |        |
| 2697 | ENSG00000090487 | HPA040407 | 1 | 0.333333 | 0.666667 | 0.666667 |        |
| 2697 | ENSG00000092964 | HPA002381 | 1 | 0.333333 | 0.666667 | 0.666667 |        |
| 2697 | ENSG00000095794 | CAB018352 | 1 | 0.333333 | 0.666667 | 0.666667 |        |
| 2697 | ENSG00000096433 | HPA064704 | 1 | 0.333333 | 0.666667 | 0.666667 |        |
| 2697 | ENSG00000100034 | HPA030989 | 1 | 0.333333 | 0.666667 | 0.666667 |        |
| 2697 | ENSG00000100304 | HPA003054 | 1 | 0.333333 | 0.666667 | 0.666667 |        |
| 2697 | ENSG00000100316 | HPA003365 | 1 | 0.333333 | 0.666667 | 0.666667 |        |
| 2697 | ENSG00000100320 | HPA006240 | 1 | 0.333333 | 0.666667 | 0.666667 |        |
| 2697 | ENSG00000100353 | HPA045882 | 1 | 0.333333 | 0.666667 | 0.666667 |        |
| 2697 | ENSG00000100557 | HPA029202 | 1 | 0.333333 | 0.666667 | 0.666667 |        |
| 2697 | ENSG00000100592 | HPA026605 | 1 | 0.333333 | 0.666667 | 0.666667 |        |
| 2697 | ENSG00000100647 | HPA030464 | 1 | 0.333333 | 0.666667 | 0.666667 |        |
| 2697 | ENSG00000100916 | HPA046623 | 1 | 0.333333 | 0.666667 | 0.666667 |        |
| 2697 | ENSG00000100938 | HPA067884 | 1 | 0.333333 | 0.666667 | 0.666667 |        |
| 2697 | ENSG00000100982 | HPA049517 | 1 | 0.333333 | 0.666667 | 0.666667 |        |
| 2697 | ENSG00000101193 | HPA055047 | 1 | 0.333333 | 0.666667 | 0.666667 |        |
| 2697 | ENSG00000101290 | HPA019698 | 1 | 0.333333 | 0.666667 | 0.666667 |        |
| 2697 | ENSG00000101298 | HPA049393 | 1 | 0.333333 | 0.666667 | 0.666667 |        |
| 2697 | ENSG00000101333 | HPA007951 | 1 | 0.333333 | 0.666667 | 0.666667 |        |
| 2697 | ENSG00000101882 | HPA000916 | 1 | 0.333333 | 0.666667 | 0.666667 |        |
| 2697 | ENSG00000101935 | HPA051762 | 1 | 0.333333 | 0.666667 | 0.666667 |        |
| 2697 | ENSG00000102189 | CAB018782 | 1 | 0.333333 | 0.666667 | 0.666667 |        |
| 2697 | ENSG00000102271 | HPA029192 | 1 | 0.333333 | 0.666667 | 0.666667 |        |
| 2697 | ENSG00000102349 | HPA071740 | 1 | 0.333333 | 0.666667 | 0.666667 |        |
| 2697 | ENSG00000102738 | HPA046344 | 1 | 0.333333 | 0.666667 | 0.666667 |        |
| 2697 | ENSG00000102786 | HPA001846 | 1 | 0.333333 | 0.666667 | 0.666667 | 0.3931 |
| 2697 | ENSG00000102897 | HPA059840 | 1 | 0.333333 | 0.666667 | 0.666667 |        |
| 2697 | ENSG00000103061 | HPA041533 | 1 | 0.333333 | 0.666667 | 0.666667 |        |
| 2697 | ENSG00000103196 | HPA030054 | 1 | 0.333333 | 0.666667 | 0.666667 |        |
| 2697 | ENSG00000103245 | HPA040851 | 1 | 0.333333 | 0.666667 | 0.666667 | 0.3692 |
| 2697 | ENSG00000103274 | HPA041799 | 1 | 0.333333 | 0.666667 | 0.666667 |        |
| 2697 | ENSG00000103423 | HPA040875 | 1 | 0.333333 | 0.666667 | 0.666667 |        |
| 2697 | ENSG00000103460 | HPA040240 | 1 | 0.333333 | 0.666667 | 0.666667 |        |
| 2697 | ENSG00000103544 | HPA053547 | 1 | 0.333333 | 0.666667 | 0.666667 |        |
| 2697 | ENSG00000103642 | HPA036362 | 1 | 0.333333 | 0.666667 | 0.666667 | 0.313  |
| 2697 | ENSG00000103740 | HPA058869 | 1 | 0.333333 | 0.666667 | 0.666667 |        |

|      |                 |           |   |          |          |          |        |
|------|-----------------|-----------|---|----------|----------|----------|--------|
| 2697 | ENSG00000104064 | HPA067444 | 1 | 0.333333 | 0.666667 | 0.666667 | 0.4836 |
| 2697 | ENSG00000104228 | HPA019647 | 1 | 0.333333 | 0.666667 | 0.666667 |        |
| 2697 | ENSG00000104332 | HPA064870 | 1 | 0.333333 | 0.666667 | 0.666667 |        |
| 2697 | ENSG00000104419 | HPA006881 | 1 | 0.333333 | 0.666667 | 0.666667 |        |
| 2697 | ENSG00000104517 | HPA053688 | 1 | 0.333333 | 0.666667 | 0.666667 |        |
| 2697 | ENSG00000104613 | HPA039129 | 1 | 0.333333 | 0.666667 | 0.666667 |        |
| 2697 | ENSG00000104687 | CAB008632 | 1 | 0.333333 | 0.666667 | 0.666667 |        |
| 2697 | ENSG00000104689 | HPA050958 | 1 | 0.333333 | 0.666667 | 0.666667 |        |
| 2697 | ENSG00000104833 | CAB010768 | 1 | 0.333333 | 0.666667 | 0.666667 |        |
| 2697 | ENSG00000104884 | HPA069266 | 1 | 0.333333 | 0.666667 | 0.666667 |        |
| 2697 | ENSG00000104904 | HPA009291 | 1 | 0.333333 | 0.666667 | 0.666667 |        |
| 2697 | ENSG00000105185 | HPA018471 | 1 | 0.333333 | 0.666667 | 0.666667 |        |
| 2697 | ENSG00000105509 | HPA067602 | 1 | 0.333333 | 0.666667 | 0.666667 |        |
| 2697 | ENSG00000105696 | HPA070701 | 1 | 0.333333 | 0.666667 | 0.666667 |        |
| 2697 | ENSG00000105717 | HPA049859 | 1 | 0.333333 | 0.666667 | 0.666667 |        |
| 2697 | ENSG00000105821 | HPA020454 | 1 | 0.333333 | 0.666667 | 0.666667 | 0.299  |
| 2697 | ENSG00000105835 | HPA057722 | 1 | 0.333333 | 0.666667 | 0.666667 |        |
| 2697 | ENSG00000106025 | HPA051570 | 1 | 0.333333 | 0.666667 | 0.666667 |        |
| 2697 | ENSG00000106261 | HPA006672 | 1 | 0.333333 | 0.666667 | 0.666667 |        |
| 2697 | ENSG00000106638 | HPA007477 | 1 | 0.333333 | 0.666667 | 0.666667 |        |
| 2697 | ENSG00000106868 | HPA048554 | 1 | 0.333333 | 0.666667 | 0.666667 |        |
| 2697 | ENSG00000107242 | HPA009687 | 1 | 0.333333 | 0.666667 | 0.666667 |        |
| 2697 | ENSG00000107295 | HPA026685 | 1 | 0.333333 | 0.666667 | 0.666667 |        |
| 2697 | ENSG00000107651 | HPA038403 | 1 | 0.333333 | 0.666667 | 0.666667 |        |
| 2697 | ENSG00000107864 | HPA059056 | 1 | 0.333333 | 0.666667 | 0.666667 |        |
| 2697 | ENSG00000107951 | HPA058232 | 1 | 0.333333 | 0.666667 | 0.666667 | 0.3426 |
| 2697 | ENSG00000108106 | HPA057150 | 1 | 0.333333 | 0.666667 | 0.666667 |        |
| 2697 | ENSG00000108175 | HPA045144 | 1 | 0.333333 | 0.666667 | 0.666667 |        |
| 2697 | ENSG00000108256 | HPA067443 | 1 | 0.333333 | 0.666667 | 0.666667 |        |
| 2697 | ENSG00000108312 | CAB004611 | 1 | 0.333333 | 0.666667 | 0.666667 |        |
| 2697 | ENSG00000108669 | HPA047498 | 1 | 0.333333 | 0.666667 | 0.666667 |        |
| 2697 | ENSG00000108961 | HPA057280 | 1 | 0.333333 | 0.666667 | 0.666667 |        |
| 2697 | ENSG00000109066 | HPA044330 | 1 | 0.333333 | 0.666667 | 0.666667 |        |
| 2697 | ENSG00000109586 | HPA064243 | 1 | 0.333333 | 0.666667 | 0.666667 |        |
| 2697 | ENSG00000109684 | HPA035671 | 1 | 0.333333 | 0.666667 | 0.666667 |        |
| 2697 | ENSG00000110200 | HPA036596 | 1 | 0.333333 | 0.666667 | 0.666667 |        |
| 2697 | ENSG00000110422 | HPA028069 | 1 | 0.333333 | 0.666667 | 0.666667 |        |
| 2697 | ENSG00000110871 | HPA049487 | 1 | 0.333333 | 0.666667 | 0.666667 |        |
| 2697 | ENSG00000110958 | HPA038673 | 1 | 0.333333 | 0.666667 | 0.666667 |        |
| 2697 | ENSG00000111664 | HPA040736 | 1 | 0.333333 | 0.666667 | 0.666667 |        |
| 2697 | ENSG00000111669 | HPA050924 | 1 | 0.333333 | 0.666667 | 0.666667 |        |
| 2697 | ENSG00000111802 | HPA074011 | 1 | 0.333333 | 0.666667 | 0.666667 |        |
| 2697 | ENSG00000111912 | HPA030292 | 1 | 0.333333 | 0.666667 | 0.666667 |        |
| 2697 | ENSG00000112078 | HPA030092 | 1 | 0.333333 | 0.666667 | 0.666667 |        |
| 2697 | ENSG00000112159 | HPA029666 | 1 | 0.333333 | 0.666667 | 0.666667 | 0.2993 |
| 2697 | ENSG00000112339 | HPA029728 | 1 | 0.333333 | 0.666667 | 0.666667 |        |
| 2697 | ENSG00000112531 | HPA019123 | 1 | 0.333333 | 0.666667 | 0.666667 |        |
| 2697 | ENSG00000112667 | HPA029675 | 1 | 0.333333 | 0.666667 | 0.666667 |        |
| 2697 | ENSG00000112769 | HPA015693 | 1 | 0.333333 | 0.666667 | 0.666667 |        |
| 2697 | ENSG00000112893 | CAB022377 | 1 | 0.333333 | 0.666667 | 0.666667 |        |
| 2697 | ENSG00000113273 | HPA037770 | 1 | 0.333333 | 0.666667 | 0.666667 |        |
| 2697 | ENSG00000113552 | HPA000499 | 1 | 0.333333 | 0.666667 | 0.666667 |        |
| 2697 | ENSG00000113721 | HPA028499 | 1 | 0.333333 | 0.666667 | 0.666667 |        |
| 2697 | ENSG00000114030 | HPA053627 | 1 | 0.333333 | 0.666667 | 0.666667 |        |
| 2697 | ENSG00000114450 | CAB018383 | 1 | 0.333333 | 0.666667 | 0.666667 | 0.2136 |

|      |                 |           |   |          |          |          |        |        |
|------|-----------------|-----------|---|----------|----------|----------|--------|--------|
| 2697 | ENSG00000114739 | HPA007398 | 1 | 0.333333 | 0.666667 | 0.666667 |        |        |
| 2697 | ENSG00000115112 | HPA029708 | 1 | 0.333333 | 0.666667 | 0.666667 |        |        |
| 2697 | ENSG00000115170 | HPA046514 | 1 | 0.333333 | 0.666667 | 0.666667 |        |        |
| 2697 | ENSG00000115263 | HPA036760 | 1 | 0.333333 | 0.666667 | 0.666667 |        |        |
| 2697 | ENSG00000115350 | HPA054979 | 1 | 0.333333 | 0.666667 | 0.666667 |        |        |
| 2697 | ENSG00000115421 | HPA035349 | 1 | 0.333333 | 0.666667 | 0.666667 |        |        |
| 2697 | ENSG00000115884 | HPA006185 | 1 | 0.333333 | 0.666667 | 0.666667 |        |        |
| 2697 | ENSG00000115935 | HPA070706 | 1 | 0.333333 | 0.666667 | 0.666667 |        |        |
| 2697 | ENSG00000115993 | HPA062163 | 1 | 0.333333 | 0.666667 | 0.666667 |        |        |
| 2697 | ENSG00000116017 | HPA076330 | 1 | 0.333333 | 0.666667 | 0.666667 |        |        |
| 2697 | ENSG00000116199 | HPA007409 | 1 | 0.333333 | 0.666667 | 0.666667 |        |        |
| 2697 | ENSG00000116205 | HPA046918 | 1 | 0.333333 | 0.666667 | 0.666667 |        |        |
| 2697 | ENSG00000116266 | HPA027225 | 1 | 0.333333 | 0.666667 | 0.666667 |        |        |
| 2697 | ENSG00000116698 | HPA029350 | 1 | 0.333333 | 0.666667 | 0.666667 |        |        |
| 2697 | ENSG00000116726 | HPA045286 | 1 | 0.333333 | 0.666667 | 0.666667 |        |        |
| 2697 | ENSG00000116871 | HPA028075 | 1 | 0.333333 | 0.666667 | 0.666667 |        |        |
| 2697 | ENSG00000117139 | HPA053723 | 1 | 0.333333 | 0.666667 | 0.666667 | 0.392  |        |
| 2697 | ENSG00000117385 | HPA012113 | 1 | 0.333333 | 0.666667 | 0.666667 |        |        |
| 2697 | ENSG00000117640 | HPA027130 | 1 | 0.333333 | 0.666667 | 0.666667 |        |        |
| 2697 | ENSG00000117906 | HPA030694 | 1 | 0.333333 | 0.666667 | 0.666667 |        |        |
| 2697 | ENSG00000118369 | HPA055213 | 1 | 0.333333 | 0.666667 | 0.666667 |        |        |
| 2697 | ENSG00000118922 | HPA064146 | 1 | 0.333333 | 0.666667 | 0.666667 |        |        |
| 2697 | ENSG00000119285 | HPA046917 | 1 | 0.333333 | 0.666667 | 0.666667 |        |        |
| 2697 | ENSG00000119541 | HPA040393 | 1 | 0.333333 | 0.666667 | 0.666667 |        |        |
| 2697 | ENSG00000119632 | HPA049588 | 1 | 0.333333 | 0.666667 | 0.666667 |        |        |
| 2697 | ENSG00000119771 | HPA057379 | 1 | 0.333333 | 0.666667 | 0.666667 |        |        |
| 2697 | ENSG00000120669 | HPA029182 | 1 | 0.333333 | 0.666667 | 0.666667 |        |        |
| 2697 | ENSG00000120896 | HPA015849 | 1 | 0.333333 | 0.666667 | 0.666667 |        |        |
| 2697 | ENSG00000121210 | HPA043472 | 1 | 0.333333 | 0.666667 | 0.666667 |        |        |
| 2697 | ENSG00000121486 | HPA026728 | 1 | 0.333333 | 0.666667 | 0.666667 |        |        |
| 2697 | ENSG00000121940 | HPA009087 | 1 | 0.333333 | 0.666667 | 0.666667 |        |        |
| 2697 | ENSG00000122033 | HPA039791 | 1 | 0.333333 | 0.666667 | 0.666667 | 0.3362 |        |
| 2697 | ENSG00000122863 | HPA047523 | 1 | 0.333333 | 0.666667 | 0.666667 |        |        |
| 2697 | ENSG00000122970 | HPA019087 | 1 | 0.333333 | 0.666667 | 0.666667 |        |        |
| 2697 | ENSG00000123066 | HPA039445 | 1 | 0.333333 | 0.666667 | 0.666667 |        |        |
| 2697 | ENSG00000123473 | HPA046543 | 1 | 0.333333 | 0.666667 | 0.666667 |        |        |
| 2697 | ENSG00000124145 | HPA005716 | 1 | 0.333333 | 0.666667 | 0.666667 | 0.3715 | 0.34   |
| 2697 | ENSG00000124357 | HPA035206 | 1 | 0.333333 | 0.666667 | 0.666667 |        |        |
| 2697 | ENSG00000124370 | HPA035196 | 1 | 0.333333 | 0.666667 | 0.666667 |        |        |
| 2697 | ENSG00000124587 | HPA074179 | 1 | 0.333333 | 0.666667 | 0.666667 |        |        |
| 2697 | ENSG00000125450 | HPA061910 | 1 | 0.333333 | 0.666667 | 0.666667 |        |        |
| 2697 | ENSG00000125484 | HPA069369 | 1 | 0.333333 | 0.666667 | 0.666667 |        |        |
| 2697 | ENSG00000125611 | HPA038263 | 1 | 0.333333 | 0.666667 | 0.666667 |        |        |
| 2697 | ENSG00000126453 | HPA020856 | 1 | 0.333333 | 0.666667 | 0.666667 |        | 0.4412 |
| 2697 | ENSG00000126464 | HPA011959 | 1 | 0.333333 | 0.666667 | 0.666667 |        |        |
| 2697 | ENSG00000126602 | HPA041082 | 1 | 0.333333 | 0.666667 | 0.666667 |        |        |
| 2697 | ENSG00000126778 | HPA001893 | 1 | 0.333333 | 0.666667 | 0.666667 |        |        |
| 2697 | ENSG00000127252 | HPA051179 | 1 | 0.333333 | 0.666667 | 0.666667 |        |        |
| 2697 | ENSG00000127586 | HPA040976 | 1 | 0.333333 | 0.666667 | 0.666667 |        |        |
| 2697 | ENSG00000127774 | HPA062681 | 1 | 0.333333 | 0.666667 | 0.666667 |        |        |
| 2697 | ENSG00000128309 | HPA001240 | 1 | 0.333333 | 0.666667 | 0.666667 |        |        |
| 2697 | ENSG00000128652 | HPA051831 | 1 | 0.333333 | 0.666667 | 0.666667 |        |        |
| 2697 | ENSG00000128915 | HPA040058 | 1 | 0.333333 | 0.666667 | 0.666667 |        |        |
| 2697 | ENSG00000129195 | HPA043783 | 1 | 0.333333 | 0.666667 | 0.666667 |        |        |
| 2697 | ENSG00000129691 | HPA042289 | 1 | 0.333333 | 0.666667 | 0.666667 |        |        |



|      |                 |           |   |          |          |          |        |
|------|-----------------|-----------|---|----------|----------|----------|--------|
| 2697 | ENSG00000129810 | HPA035501 | 1 | 0.333333 | 0.666667 | 0.666667 |        |
| 2697 | ENSG00000130559 | HPA020527 | 1 | 0.333333 | 0.666667 | 0.666667 |        |
| 2697 | ENSG00000130653 | HPA009130 | 1 | 0.333333 | 0.666667 | 0.666667 |        |
| 2697 | ENSG00000130684 | HPA044303 | 1 | 0.333333 | 0.666667 | 0.666667 |        |
| 2697 | ENSG00000130723 | HPA064301 | 1 | 0.333333 | 0.666667 | 0.666667 |        |
| 2697 | ENSG00000130829 | HPA003336 | 1 | 0.333333 | 0.666667 | 0.666667 |        |
| 2697 | ENSG00000131067 | HPA013339 | 1 | 0.333333 | 0.666667 | 0.666667 |        |
| 2697 | ENSG00000131143 | HPA002485 | 1 | 0.333333 | 0.666667 | 0.666667 |        |
| 2697 | ENSG00000131149 | HPA036365 | 1 | 0.333333 | 0.666667 | 0.666667 |        |
| 2697 | ENSG00000131408 | HPA005446 | 1 | 0.333333 | 0.666667 | 0.666667 |        |
| 2697 | ENSG00000131467 | HPA012510 | 1 | 0.333333 | 0.666667 | 0.666667 |        |
| 2697 | ENSG00000131471 | HPA000980 | 1 | 0.333333 | 0.666667 | 0.666667 |        |
| 2697 | ENSG00000131732 | HPA038404 | 1 | 0.333333 | 0.666667 | 0.666667 |        |
| 2697 | ENSG00000131747 | CAB002448 | 1 | 0.333333 | 0.666667 | 0.666667 |        |
| 2697 | ENSG00000131849 | HPA008726 | 1 | 0.333333 | 0.666667 | 0.666667 |        |
| 2697 | ENSG00000132031 | HPA051250 | 1 | 0.333333 | 0.666667 | 0.666667 |        |
| 2697 | ENSG00000132434 | HPA019711 | 1 | 0.333333 | 0.666667 | 0.666667 |        |
| 2697 | ENSG00000132466 | HPA063731 | 1 | 0.333333 | 0.666667 | 0.666667 |        |
| 2697 | ENSG00000132467 | HPA035655 | 1 | 0.333333 | 0.666667 | 0.666667 |        |
| 2697 | ENSG00000132932 | HPA040033 | 1 | 0.333333 | 0.666667 | 0.666667 |        |
| 2697 | ENSG00000132950 | HPA015544 | 1 | 0.333333 | 0.666667 | 0.666667 |        |
| 2697 | ENSG00000133393 | HPA040599 | 1 | 0.333333 | 0.666667 | 0.666667 | 0.2483 |
| 2697 | ENSG00000133816 | HPA030437 | 1 | 0.333333 | 0.666667 | 0.666667 |        |
| 2697 | ENSG00000133858 | HPA007151 | 1 | 0.333333 | 0.666667 | 0.666667 |        |
| 2697 | ENSG00000134049 | HPA010027 | 1 | 0.333333 | 0.666667 | 0.666667 |        |
| 2697 | ENSG00000134256 | HPA049527 | 1 | 0.333333 | 0.666667 | 0.666667 |        |
| 2697 | ENSG00000134352 | CAB025784 | 1 | 0.333333 | 0.666667 | 0.666667 |        |
| 2697 | ENSG00000134627 | HPA036587 | 1 | 0.333333 | 0.666667 | 0.666667 |        |
| 2697 | ENSG00000134744 | HPA027973 | 1 | 0.333333 | 0.666667 | 0.666667 |        |
| 2697 | ENSG00000134815 | HPA042159 | 1 | 0.333333 | 0.666667 | 0.666667 |        |
| 2697 | ENSG00000134825 | HPA044602 | 1 | 0.333333 | 0.666667 | 0.666667 |        |
| 2697 | ENSG00000135111 | HPA005799 | 1 | 0.333333 | 0.666667 | 0.666667 |        |
| 2697 | ENSG00000135114 | HPA001474 | 1 | 0.333333 | 0.666667 | 0.666667 |        |
| 2697 | ENSG00000135119 | HPA064161 | 1 | 0.333333 | 0.666667 | 0.666667 |        |
| 2697 | ENSG00000135297 | HPA030232 | 1 | 0.333333 | 0.666667 | 0.666667 |        |
| 2697 | ENSG00000135525 | HPA029712 | 1 | 0.333333 | 0.666667 | 0.666667 |        |
| 2697 | ENSG00000135540 | HPA029967 | 1 | 0.333333 | 0.666667 | 0.666667 |        |
| 2697 | ENSG00000135838 | HPA028345 | 1 | 0.333333 | 0.666667 | 0.666667 |        |
| 2697 | ENSG00000135951 | HPA036879 | 1 | 0.333333 | 0.666667 | 0.666667 |        |
| 2697 | ENSG00000135976 | HPA051757 | 1 | 0.333333 | 0.666667 | 0.666667 |        |
| 2697 | ENSG00000136014 | HPA026543 | 1 | 0.333333 | 0.666667 | 0.666667 |        |
| 2697 | ENSG00000136160 | CAB017842 | 1 | 0.333333 | 0.666667 | 0.666667 |        |
| 2697 | ENSG00000136243 | HPA049036 | 1 | 0.333333 | 0.666667 | 0.666667 |        |
| 2697 | ENSG00000136279 | HPA027735 | 1 | 0.333333 | 0.666667 | 0.666667 |        |
| 2697 | ENSG00000136824 | HPA071309 | 1 | 0.333333 | 0.666667 | 0.666667 |        |
| 2697 | ENSG00000136930 | HPA054902 | 1 | 0.333333 | 0.666667 | 0.666667 |        |
| 2697 | ENSG00000136940 | HPA021571 | 1 | 0.333333 | 0.666667 | 0.666667 |        |
| 2697 | ENSG00000137100 | HPA044905 | 1 | 0.333333 | 0.666667 | 0.666667 |        |
| 2697 | ENSG00000137434 | HPA051142 | 1 | 0.333333 | 0.666667 | 0.666667 |        |
| 2697 | ENSG00000137492 | HPA008758 | 1 | 0.333333 | 0.666667 | 0.666667 |        |
| 2697 | ENSG00000137497 | HPA019841 | 1 | 0.333333 | 0.666667 | 0.666667 | 0.275  |
| 2697 | ENSG00000137814 | HPA039965 | 1 | 0.333333 | 0.666667 | 0.666667 | 0.2358 |
| 2697 | ENSG00000137944 | HPA027168 | 1 | 0.333333 | 0.666667 | 0.666667 |        |
| 2697 | ENSG00000138152 | HPA057638 | 1 | 0.333333 | 0.666667 | 0.666667 |        |
| 2697 | ENSG00000138161 | HPA074117 | 1 | 0.333333 | 0.666667 | 0.666667 |        |

|      |                 |           |   |          |          |          |        |
|------|-----------------|-----------|---|----------|----------|----------|--------|
| 2697 | ENSG00000138246 | HPA036923 | 1 | 0.333333 | 0.666667 | 0.666667 |        |
| 2697 | ENSG00000138594 | HPA001849 | 1 | 0.333333 | 0.666667 | 0.666667 | 0.3544 |
| 2697 | ENSG00000138600 | HPA067304 | 1 | 0.333333 | 0.666667 | 0.666667 |        |
| 2697 | ENSG00000138670 | HPA044574 | 1 | 0.333333 | 0.666667 | 0.666667 |        |
| 2697 | ENSG00000138768 | HPA038282 | 1 | 0.333333 | 0.666667 | 0.666667 |        |
| 2697 | ENSG00000138796 | HPA043888 | 1 | 0.333333 | 0.666667 | 0.666667 | 0.3718 |
| 2697 | ENSG00000138829 | CAB026401 | 1 | 0.333333 | 0.666667 | 0.666667 |        |
| 2697 | ENSG00000139352 | HPA076307 | 1 | 0.333333 | 0.666667 | 0.666667 |        |
| 2697 | ENSG00000139921 | HPA003085 | 1 | 0.333333 | 0.666667 | 0.666667 |        |
| 2697 | ENSG00000140264 | HPA056613 | 1 | 0.333333 | 0.666667 | 0.666667 |        |
| 2697 | ENSG00000140307 | HPA056239 | 1 | 0.333333 | 0.666667 | 0.666667 |        |
| 2697 | ENSG00000140365 | HPA066957 | 1 | 0.333333 | 0.666667 | 0.666667 |        |
| 2697 | ENSG00000140682 | CAB020844 | 1 | 0.333333 | 0.666667 | 0.666667 |        |
| 2697 | ENSG00000141101 | HPA041522 | 1 | 0.333333 | 0.666667 | 0.666667 |        |
| 2697 | ENSG00000141179 | HPA022979 | 1 | 0.333333 | 0.666667 | 0.666667 |        |
| 2697 | ENSG00000141499 | HPA023026 | 1 | 0.333333 | 0.666667 | 0.666667 |        |
| 2697 | ENSG00000141552 | HPA021989 | 1 | 0.333333 | 0.666667 | 0.666667 |        |
| 2697 | ENSG00000141562 | HPA053006 | 1 | 0.333333 | 0.666667 | 0.666667 |        |
| 2697 | ENSG00000141738 | CAB073538 | 1 | 0.333333 | 0.666667 | 0.666667 |        |
| 2697 | ENSG00000141858 | HPA041662 | 1 | 0.333333 | 0.666667 | 0.666667 |        |
| 2697 | ENSG00000142453 | HPA043561 | 1 | 0.333333 | 0.666667 | 0.666667 |        |
| 2697 | ENSG00000142875 | HPA071185 | 1 | 0.333333 | 0.666667 | 0.666667 |        |
| 2697 | ENSG00000143061 | HPA036306 | 1 | 0.333333 | 0.666667 | 0.666667 |        |
| 2697 | ENSG00000143162 | HPA056390 | 1 | 0.333333 | 0.666667 | 0.666667 |        |
| 2697 | ENSG00000143303 | HPA047426 | 1 | 0.333333 | 0.666667 | 0.666667 |        |
| 2697 | ENSG00000143369 | HPA027241 | 1 | 0.333333 | 0.666667 | 0.666667 |        |
| 2697 | ENSG00000143412 | HPA028698 | 1 | 0.333333 | 0.666667 | 0.666667 |        |
| 2697 | ENSG00000143442 | HPA006800 | 1 | 0.333333 | 0.666667 | 0.666667 |        |
| 2697 | ENSG00000143498 | HPA054334 | 1 | 0.333333 | 0.666667 | 0.666667 |        |
| 2697 | ENSG00000143552 | HPA047195 | 1 | 0.333333 | 0.666667 | 0.666667 |        |
| 2697 | ENSG00000143799 | CAB003839 | 1 | 0.333333 | 0.666667 | 0.666667 |        |
| 2697 | ENSG00000143995 | HPA056000 | 1 | 0.333333 | 0.666667 | 0.666667 |        |
| 2697 | ENSG00000144057 | HPA014459 | 1 | 0.333333 | 0.666667 | 0.666667 |        |
| 2697 | ENSG00000144152 | HPA034992 | 1 | 0.333333 | 0.666667 | 0.666667 | 0.545  |
| 2697 | ENSG00000144283 | HPA066647 | 1 | 0.333333 | 0.666667 | 0.666667 |        |
| 2697 | ENSG00000144285 | HPA078664 | 1 | 0.333333 | 0.666667 | 0.666667 |        |
| 2697 | ENSG00000144306 | HPA034690 | 1 | 0.333333 | 0.666667 | 0.666667 | 0.341  |
| 2697 | ENSG00000144362 | HPA034726 | 1 | 0.333333 | 0.666667 | 0.666667 | 0.25   |
| 2697 | ENSG00000145780 | HPA059919 | 1 | 0.333333 | 0.666667 | 0.666667 |        |
| 2697 | ENSG00000145833 | HPA036554 | 1 | 0.333333 | 0.666667 | 0.666667 |        |
| 2697 | ENSG00000146834 | CAB026384 | 1 | 0.333333 | 0.666667 | 0.666667 |        |
| 2697 | ENSG00000147613 | HPA015095 | 1 | 0.333333 | 0.666667 | 0.666667 |        |
| 2697 | ENSG00000147697 | HPA023670 | 1 | 0.333333 | 0.666667 | 0.666667 |        |
| 2697 | ENSG00000148339 | HPA020381 | 1 | 0.333333 | 0.666667 | 0.666667 |        |
| 2697 | ENSG00000148824 | HPA037827 | 1 | 0.333333 | 0.666667 | 0.666667 |        |
| 2697 | ENSG00000151388 | HPA075079 | 1 | 0.333333 | 0.666667 | 0.666667 |        |
| 2697 | ENSG00000151470 | HPA061199 | 1 | 0.333333 | 0.666667 | 0.666667 |        |
| 2697 | ENSG00000151576 | HPA036828 | 1 | 0.333333 | 0.666667 | 0.666667 |        |
| 2697 | ENSG00000151617 | CAB018957 | 1 | 0.333333 | 0.666667 | 0.666667 |        |
| 2697 | ENSG00000152284 | HPA071298 | 1 | 0.333333 | 0.666667 | 0.666667 |        |
| 2697 | ENSG00000152503 | HPA061321 | 1 | 0.333333 | 0.666667 | 0.666667 |        |
| 2697 | ENSG00000152953 | HPA058536 | 1 | 0.333333 | 0.666667 | 0.666667 |        |
| 2697 | ENSG00000153093 | HPA035392 | 1 | 0.333333 | 0.666667 | 0.666667 |        |
| 2697 | ENSG00000153162 | CAB002773 | 1 | 0.333333 | 0.666667 | 0.666667 |        |
| 2697 | ENSG00000153310 | HPA009076 | 1 | 0.333333 | 0.666667 | 0.666667 |        |

|      |                 |           |   |          |          |          |        |
|------|-----------------|-----------|---|----------|----------|----------|--------|
| 2697 | ENSG00000153721 | CAB037133 | 1 | 0.333333 | 0.666667 | 0.666667 |        |
| 2697 | ENSG00000154217 | HPA031250 | 1 | 0.333333 | 0.666667 | 0.666667 |        |
| 2697 | ENSG00000154229 | HPA006563 | 1 | 0.333333 | 0.666667 | 0.666667 |        |
| 2697 | ENSG00000154240 | HPA024481 | 1 | 0.333333 | 0.666667 | 0.666667 |        |
| 2697 | ENSG00000154736 | HPA030906 | 1 | 0.333333 | 0.666667 | 0.666667 |        |
| 2697 | ENSG00000155229 | HPA051936 | 1 | 0.333333 | 0.666667 | 0.666667 |        |
| 2697 | ENSG00000155393 | HPA058579 | 1 | 0.333333 | 0.666667 | 0.666667 |        |
| 2697 | ENSG00000156103 | HPA023693 | 1 | 0.333333 | 0.666667 | 0.666667 |        |
| 2697 | ENSG00000156411 | HPA058978 | 1 | 0.333333 | 0.666667 | 0.666667 |        |
| 2697 | ENSG00000156471 | HPA016852 | 1 | 0.333333 | 0.666667 | 0.666667 |        |
| 2697 | ENSG00000156795 | HPA024823 | 1 | 0.333333 | 0.666667 | 0.666667 |        |
| 2697 | ENSG00000156853 | HPA054095 | 1 | 0.333333 | 0.666667 | 0.666667 |        |
| 2697 | ENSG00000157077 | HPA065852 | 1 | 0.333333 | 0.666667 | 0.666667 |        |
| 2697 | ENSG00000157456 | HPA008873 | 1 | 0.333333 | 0.666667 | 0.666667 |        |
| 2697 | ENSG00000157500 | HPA073477 | 1 | 0.333333 | 0.666667 | 0.666667 |        |
| 2697 | ENSG00000157600 | HPA038784 | 1 | 0.333333 | 0.666667 | 0.666667 |        |
| 2697 | ENSG00000157693 | HPA017199 | 1 | 0.333333 | 0.666667 | 0.666667 |        |
| 2697 | ENSG00000158050 | HPA071920 | 1 | 0.333333 | 0.666667 | 0.666667 |        |
| 2697 | ENSG00000158113 | HPA039425 | 1 | 0.333333 | 0.666667 | 0.666667 |        |
| 2697 | ENSG00000158321 | HPA000390 | 1 | 0.333333 | 0.666667 | 0.666667 |        |
| 2697 | ENSG00000158555 | HPA069281 | 1 | 0.333333 | 0.666667 | 0.666667 |        |
| 2697 | ENSG00000158691 | HPA006637 | 1 | 0.333333 | 0.666667 | 0.666667 |        |
| 2697 | ENSG00000158864 | HPA055140 | 1 | 0.333333 | 0.666667 | 0.666667 |        |
| 2697 | ENSG00000159111 | HPA021234 | 1 | 0.333333 | 0.666667 | 0.666667 | 0.3755 |
| 2697 | ENSG00000159217 | HPA021367 | 1 | 0.333333 | 0.666667 | 0.666667 |        |
| 2697 | ENSG00000159871 | HPA042511 | 1 | 0.333333 | 0.666667 | 0.666667 |        |
| 2697 | ENSG00000159921 | HPA007045 | 1 | 0.333333 | 0.666667 | 0.666667 |        |
| 2697 | ENSG00000160094 | HPA059239 | 1 | 0.333333 | 0.666667 | 0.666667 |        |
| 2697 | ENSG00000160200 | HPA001223 | 1 | 0.333333 | 0.666667 | 0.666667 |        |
| 2697 | ENSG00000160298 | HPA035110 | 1 | 0.333333 | 0.666667 | 0.666667 |        |
| 2697 | ENSG00000160714 | HPA063368 | 1 | 0.333333 | 0.666667 | 0.666667 |        |
| 2697 | ENSG00000160767 | HPA006659 | 1 | 0.333333 | 0.666667 | 0.666667 |        |
| 2697 | ENSG00000161533 | HPA021195 | 1 | 0.333333 | 0.666667 | 0.666667 | 0.384  |
| 2697 | ENSG00000161551 | HPA041499 | 1 | 0.333333 | 0.666667 | 0.666667 |        |
| 2697 | ENSG00000161835 | HPA062028 | 1 | 0.333333 | 0.666667 | 0.666667 |        |
| 2697 | ENSG00000161896 | HPA053644 | 1 | 0.333333 | 0.666667 | 0.666667 |        |
| 2697 | ENSG00000162373 | HPA054347 | 1 | 0.333333 | 0.666667 | 0.666667 |        |
| 2697 | ENSG00000162409 | HPA044540 | 1 | 0.333333 | 0.666667 | 0.666667 |        |
| 2697 | ENSG00000162460 | HPA060282 | 1 | 0.333333 | 0.666667 | 0.666667 |        |
| 2697 | ENSG00000162585 | HPA038829 | 1 | 0.333333 | 0.666667 | 0.666667 |        |
| 2697 | ENSG00000162599 | HPA006111 | 1 | 0.333333 | 0.666667 | 0.666667 |        |
| 2697 | ENSG00000162630 | HPA078659 | 1 | 0.333333 | 0.666667 | 0.666667 |        |
| 2697 | ENSG00000163092 | HPA074599 | 1 | 0.333333 | 0.666667 | 0.666667 |        |
| 2697 | ENSG00000163156 | HPA054324 | 1 | 0.333333 | 0.666667 | 0.666667 |        |
| 2697 | ENSG00000163281 | HPA000499 | 1 | 0.333333 | 0.666667 | 0.666667 |        |
| 2697 | ENSG00000163492 | HPA012718 | 1 | 0.333333 | 0.666667 | 0.666667 |        |
| 2697 | ENSG00000163558 | HPA026574 | 1 | 0.333333 | 0.666667 | 0.666667 |        |
| 2697 | ENSG00000163586 | HPA028275 | 1 | 0.333333 | 0.666667 | 0.666667 |        |
| 2697 | ENSG00000163624 | HPA036187 | 1 | 0.333333 | 0.666667 | 0.666667 |        |
| 2697 | ENSG00000163686 | HPA073225 | 1 | 0.333333 | 0.666667 | 0.666667 |        |
| 2697 | ENSG00000163689 | HPA069696 | 1 | 0.333333 | 0.666667 | 0.666667 |        |
| 2697 | ENSG00000163703 | HPA026964 | 1 | 0.333333 | 0.666667 | 0.666667 |        |
| 2697 | ENSG00000163807 | HPA061799 | 1 | 0.333333 | 0.666667 | 0.666667 |        |
| 2697 | ENSG00000164070 | HPA039149 | 1 | 0.333333 | 0.666667 | 0.666667 |        |
| 2697 | ENSG00000164188 | HPA037471 | 1 | 0.333333 | 0.666667 | 0.666667 |        |

|      |                 |           |   |          |          |          |        |
|------|-----------------|-----------|---|----------|----------|----------|--------|
| 2697 | ENSG00000164294 | HPA036720 | 1 | 0.333333 | 0.666667 | 0.666667 |        |
| 2697 | ENSG00000164306 | HPA054372 | 1 | 0.333333 | 0.666667 | 0.666667 |        |
| 2697 | ENSG00000164402 | HPA005665 | 1 | 0.333333 | 0.666667 | 0.666667 |        |
| 2697 | ENSG00000164627 | HPA058624 | 1 | 0.333333 | 0.666667 | 0.666667 |        |
| 2697 | ENSG00000164751 | HPA010983 | 1 | 0.333333 | 0.666667 | 0.666667 |        |
| 2697 | ENSG00000164778 | HPA045646 | 1 | 0.333333 | 0.666667 | 0.666667 |        |
| 2697 | ENSG00000164920 | HPA063486 | 1 | 0.333333 | 0.666667 | 0.666667 |        |
| 2697 | ENSG00000165046 | HPA025032 | 1 | 0.333333 | 0.666667 | 0.666667 |        |
| 2697 | ENSG00000165059 | HPA071185 | 1 | 0.333333 | 0.666667 | 0.666667 |        |
| 2697 | ENSG00000165300 | HPA013843 | 1 | 0.333333 | 0.666667 | 0.666667 |        |
| 2697 | ENSG00000165879 | HPA055258 | 1 | 0.333333 | 0.666667 | 0.666667 |        |
| 2697 | ENSG00000165895 | HPA039924 | 1 | 0.333333 | 0.666667 | 0.666667 |        |
| 2697 | ENSG00000165959 | HPA012634 | 1 | 0.333333 | 0.666667 | 0.666667 |        |
| 2697 | ENSG00000166006 | HPA019664 | 1 | 0.333333 | 0.666667 | 0.666667 |        |
| 2697 | ENSG00000166128 | HPA074534 | 1 | 0.333333 | 0.666667 | 0.666667 |        |
| 2697 | ENSG00000166272 | HPA038371 | 1 | 0.333333 | 0.666667 | 0.666667 |        |
| 2697 | ENSG00000166326 | HPA049053 | 1 | 0.333333 | 0.666667 | 0.666667 |        |
| 2697 | ENSG00000166444 | HPA046796 | 1 | 0.333333 | 0.666667 | 0.666667 |        |
| 2697 | ENSG00000166478 | HPA074818 | 1 | 0.333333 | 0.666667 | 0.666667 |        |
| 2697 | ENSG00000166848 | HPA006719 | 1 | 0.333333 | 0.666667 | 0.666667 |        |
| 2697 | ENSG00000166896 | HPA035804 | 1 | 0.333333 | 0.666667 | 0.666667 |        |
| 2697 | ENSG00000167005 | HPA074228 | 1 | 0.333333 | 0.666667 | 0.666667 |        |
| 2697 | ENSG00000167081 | HPA003881 | 1 | 0.333333 | 0.666667 | 0.666667 |        |
| 2697 | ENSG00000167130 | HPA019179 | 1 | 0.333333 | 0.666667 | 0.666667 |        |
| 2697 | ENSG00000167523 | HPA073096 | 1 | 0.333333 | 0.666667 | 0.666667 |        |
| 2697 | ENSG00000167555 | HPA065435 | 1 | 0.333333 | 0.666667 | 0.666667 |        |
| 2697 | ENSG00000167562 | HPA005532 | 1 | 0.333333 | 0.666667 | 0.666667 |        |
| 2697 | ENSG00000167792 | HPA075051 | 1 | 0.333333 | 0.666667 | 0.666667 |        |
| 2697 | ENSG00000167880 | HPA053969 | 1 | 0.333333 | 0.666667 | 0.666667 |        |
| 2697 | ENSG00000168036 | CAB000108 | 1 | 0.333333 | 0.666667 | 0.666667 | 0.3632 |
| 2697 | ENSG00000168159 | HPA030098 | 1 | 0.333333 | 0.666667 | 0.666667 | 0.3391 |
| 2697 | ENSG00000168298 | CAB011506 | 1 | 0.333333 | 0.666667 | 0.666667 |        |
| 2697 | ENSG00000168389 | HPA043107 | 1 | 0.333333 | 0.666667 | 0.666667 |        |
| 2697 | ENSG00000168496 | CAB002262 | 1 | 0.333333 | 0.666667 | 0.666667 |        |
| 2697 | ENSG00000168621 | HPA070283 | 1 | 0.333333 | 0.666667 | 0.666667 |        |
| 2697 | ENSG00000168658 | HPA036701 | 1 | 0.333333 | 0.666667 | 0.666667 | 0.2848 |
| 2697 | ENSG00000168884 | HPA049886 | 1 | 0.333333 | 0.666667 | 0.666667 |        |
| 2697 | ENSG00000168916 | HPA076984 | 1 | 0.333333 | 0.666667 | 0.666667 |        |
| 2697 | ENSG00000168939 | CAB013505 | 1 | 0.333333 | 0.666667 | 0.666667 |        |
| 2697 | ENSG00000169230 | HPA005701 | 1 | 0.333333 | 0.666667 | 0.666667 |        |
| 2697 | ENSG00000169499 | HPA004706 | 1 | 0.333333 | 0.666667 | 0.666667 |        |
| 2697 | ENSG00000169508 | HPA028847 | 1 | 0.333333 | 0.666667 | 0.666667 |        |
| 2697 | ENSG00000169592 | HPA043146 | 1 | 0.333333 | 0.666667 | 0.666667 | 0.3935 |
| 2697 | ENSG00000169604 | HPA054785 | 1 | 0.333333 | 0.666667 | 0.666667 |        |
| 2697 | ENSG00000169981 | HPA054738 | 1 | 0.333333 | 0.666667 | 0.666667 |        |
| 2697 | ENSG00000169989 | HPA035649 | 1 | 0.333333 | 0.666667 | 0.666667 |        |
| 2697 | ENSG00000170266 | HPA040610 | 1 | 0.333333 | 0.666667 | 0.666667 |        |
| 2697 | ENSG00000170502 | HPA078535 | 1 | 0.333333 | 0.666667 | 0.666667 |        |
| 2697 | ENSG00000170509 | HPA029125 | 1 | 0.333333 | 0.666667 | 0.666667 |        |
| 2697 | ENSG00000170608 | HPA054034 | 1 | 0.333333 | 0.666667 | 0.666667 |        |
| 2697 | ENSG00000170627 | HPA038877 | 1 | 0.333333 | 0.666667 | 0.666667 |        |
| 2697 | ENSG00000170631 | HPA061835 | 1 | 0.333333 | 0.666667 | 0.666667 |        |
| 2697 | ENSG00000170677 | CAB010189 | 1 | 0.333333 | 0.666667 | 0.666667 |        |
| 2697 | ENSG00000171056 | HPA009065 | 1 | 0.333333 | 0.666667 | 0.666667 |        |
| 2697 | ENSG00000171202 | HPA046648 | 1 | 0.333333 | 0.666667 | 0.666667 |        |

|      |                 |           |   |          |          |          |        |
|------|-----------------|-----------|---|----------|----------|----------|--------|
| 2697 | ENSG00000171316 | HPA053075 | 1 | 0.333333 | 0.666667 | 0.666667 |        |
| 2697 | ENSG00000171790 | HPA054956 | 1 | 0.333333 | 0.666667 | 0.666667 |        |
| 2697 | ENSG00000171812 | HPA049788 | 1 | 0.333333 | 0.666667 | 0.666667 |        |
| 2697 | ENSG00000171940 | HPA051857 | 1 | 0.333333 | 0.666667 | 0.666667 |        |
| 2697 | ENSG00000172006 | HPA060247 | 1 | 0.333333 | 0.666667 | 0.666667 |        |
| 2697 | ENSG00000172264 | HPA049076 | 1 | 0.333333 | 0.666667 | 0.666667 |        |
| 2697 | ENSG00000172346 | HPA076549 | 1 | 0.333333 | 0.666667 | 0.666667 | 0.245  |
| 2697 | ENSG00000172348 | HPA053880 | 1 | 0.333333 | 0.666667 | 0.666667 |        |
| 2697 | ENSG00000172354 | CAB010032 | 1 | 0.333333 | 0.666667 | 0.666667 | 0.2833 |
| 2697 | ENSG00000172478 | HPA052722 | 1 | 0.333333 | 0.666667 | 0.666667 |        |
| 2697 | ENSG00000172775 | HPA054382 | 1 | 0.333333 | 0.666667 | 0.666667 |        |
| 2697 | ENSG00000172789 | HPA026794 | 1 | 0.333333 | 0.666667 | 0.666667 |        |
| 2697 | ENSG00000172927 | HPA012949 | 1 | 0.333333 | 0.666667 | 0.666667 |        |
| 2697 | ENSG00000172943 | HPA062015 | 1 | 0.333333 | 0.666667 | 0.666667 |        |
| 2697 | ENSG00000173040 | HPA040910 | 1 | 0.333333 | 0.666667 | 0.666667 |        |
| 2697 | ENSG00000173093 | HPA061568 | 1 | 0.333333 | 0.666667 | 0.666667 |        |
| 2697 | ENSG00000173163 | HPA049223 | 1 | 0.333333 | 0.666667 | 0.666667 |        |
| 2697 | ENSG00000173273 | HPA025690 | 1 | 0.333333 | 0.666667 | 0.666667 |        |
| 2697 | ENSG00000173581 | HPA043219 | 1 | 0.333333 | 0.666667 | 0.666667 |        |
| 2697 | ENSG00000174137 | HPA036452 | 1 | 0.333333 | 0.666667 | 0.666667 |        |
| 2697 | ENSG00000174206 | HPA052855 | 1 | 0.333333 | 0.666667 | 0.666667 |        |
| 2697 | ENSG00000174282 | HPA064763 | 1 | 0.333333 | 0.666667 | 0.666667 |        |
| 2697 | ENSG00000174446 | HPA024379 | 1 | 0.333333 | 0.666667 | 0.666667 |        |
| 2697 | ENSG00000174456 | HPA039713 | 1 | 0.333333 | 0.666667 | 0.666667 |        |
| 2697 | ENSG00000174501 | HPA051757 | 1 | 0.333333 | 0.666667 | 0.666667 |        |
| 2697 | ENSG00000174579 | HPA003339 | 1 | 0.333333 | 0.666667 | 0.666667 |        |
| 2697 | ENSG00000174586 | HPA047872 | 1 | 0.333333 | 0.666667 | 0.666667 |        |
| 2697 | ENSG00000174628 | HPA048786 | 1 | 0.333333 | 0.666667 | 0.666667 |        |
| 2697 | ENSG00000174796 | HPA035767 | 1 | 0.333333 | 0.666667 | 0.666667 |        |
| 2697 | ENSG00000175182 | HPA042800 | 1 | 0.333333 | 0.666667 | 0.666667 | 0.2466 |
| 2697 | ENSG00000175203 | HPA039715 | 1 | 0.333333 | 0.666667 | 0.666667 |        |
| 2697 | ENSG00000175213 | HPA017892 | 1 | 0.333333 | 0.666667 | 0.666667 |        |
| 2697 | ENSG00000175274 | HPA061276 | 1 | 0.333333 | 0.666667 | 0.666667 |        |
| 2697 | ENSG00000175324 | HPA024601 | 1 | 0.333333 | 0.666667 | 0.666667 |        |
| 2697 | ENSG00000175575 | HPA040020 | 1 | 0.333333 | 0.666667 | 0.666667 |        |
| 2697 | ENSG00000175595 | HPA045828 | 1 | 0.333333 | 0.666667 | 0.666667 |        |
| 2697 | ENSG00000176024 | HPA026833 | 1 | 0.333333 | 0.666667 | 0.666667 |        |
| 2697 | ENSG00000176087 | HPA062210 | 1 | 0.333333 | 0.666667 | 0.666667 |        |
| 2697 | ENSG00000176148 | HPA005769 | 1 | 0.333333 | 0.666667 | 0.666667 | 0.1881 |
| 2697 | ENSG00000177054 | HPA016759 | 1 | 0.333333 | 0.666667 | 0.666667 |        |
| 2697 | ENSG00000177354 | HPA057556 | 1 | 0.333333 | 0.666667 | 0.666667 |        |
| 2697 | ENSG00000177432 | HPA058227 | 1 | 0.333333 | 0.666667 | 0.666667 |        |
| 2697 | ENSG00000177600 | HPA053635 | 1 | 0.333333 | 0.666667 | 0.666667 |        |
| 2697 | ENSG00000177873 | HPA045094 | 1 | 0.333333 | 0.666667 | 0.666667 |        |
| 2697 | ENSG00000178105 | HPA004691 | 1 | 0.333333 | 0.666667 | 0.666667 |        |
| 2697 | ENSG00000178343 | HPA054754 | 1 | 0.333333 | 0.666667 | 0.666667 |        |
| 2697 | ENSG00000178385 | HPA035046 | 1 | 0.333333 | 0.666667 | 0.666667 |        |
| 2697 | ENSG00000178913 | HPA006429 | 1 | 0.333333 | 0.666667 | 0.666667 |        |
| 2697 | ENSG00000178927 | HPA045696 | 1 | 0.333333 | 0.666667 | 0.666667 |        |
| 2697 | ENSG00000178950 | HPA027463 | 1 | 0.333333 | 0.666667 | 0.666667 |        |
| 2697 | ENSG00000179627 | HPA066961 | 1 | 0.333333 | 0.666667 | 0.666667 |        |
| 2697 | ENSG00000180098 | HPA032068 | 1 | 0.333333 | 0.666667 | 0.666667 |        |
| 2697 | ENSG00000180535 | HPA047834 | 1 | 0.333333 | 0.666667 | 0.666667 |        |
| 2697 | ENSG00000180806 | HPA063965 | 1 | 0.333333 | 0.666667 | 0.666667 |        |
| 2697 | ENSG00000181274 | HPA049763 | 1 | 0.333333 | 0.666667 | 0.666667 |        |

|      |                 |           |   |          |          |          |        |        |
|------|-----------------|-----------|---|----------|----------|----------|--------|--------|
| 2697 | ENSG00000181444 | HPA042907 | 1 | 0.333333 | 0.666667 | 0.666667 |        |        |
| 2697 | ENSG00000181458 | HPA062101 | 1 | 0.333333 | 0.666667 | 0.666667 |        |        |
| 2697 | ENSG00000181704 | HPA003720 | 1 | 0.333333 | 0.666667 | 0.666667 |        |        |
| 2697 | ENSG00000182103 | HPA066861 | 1 | 0.333333 | 0.666667 | 0.666667 |        |        |
| 2697 | ENSG00000182150 | HPA021260 | 1 | 0.333333 | 0.666667 | 0.666667 |        |        |
| 2697 | ENSG00000182405 | HPA059823 | 1 | 0.333333 | 0.666667 | 0.666667 |        |        |
| 2697 | ENSG00000182606 | HPA011367 | 1 | 0.333333 | 0.666667 | 0.666667 |        |        |
| 2697 | ENSG00000182944 | CAB004230 | 1 | 0.333333 | 0.666667 | 0.666667 |        |        |
| 2697 | ENSG00000183087 | HPA056080 | 1 | 0.333333 | 0.666667 | 0.666667 |        |        |
| 2697 | ENSG00000183291 | HPA054937 | 1 | 0.333333 | 0.666667 | 0.666667 |        |        |
| 2697 | ENSG00000183576 | HPA003591 | 1 | 0.333333 | 0.666667 | 0.666667 |        |        |
| 2697 | ENSG00000183578 | HPA077484 | 1 | 0.333333 | 0.666667 | 0.666667 |        |        |
| 2697 | ENSG00000183718 | HPA054565 | 1 | 0.333333 | 0.666667 | 0.666667 |        |        |
| 2697 | ENSG00000184154 | HPA039949 | 1 | 0.333333 | 0.666667 | 0.666667 |        |        |
| 2697 | ENSG00000184277 | HPA054064 | 1 | 0.333333 | 0.666667 | 0.666667 |        |        |
| 2697 | ENSG00000184557 | HPA068569 | 1 | 0.333333 | 0.666667 | 0.666667 |        |        |
| 2697 | ENSG00000184584 | HPA038534 | 1 | 0.333333 | 0.666667 | 0.666667 |        |        |
| 2697 | ENSG00000184752 | HPA039903 | 1 | 0.333333 | 0.666667 | 0.666667 |        |        |
| 2697 | ENSG00000184831 | HPA003187 | 1 | 0.333333 | 0.666667 | 0.666667 |        |        |
| 2697 | ENSG00000184867 | HPA005761 | 1 | 0.333333 | 0.666667 | 0.666667 |        |        |
| 2697 | ENSG00000184985 | HPA061916 | 1 | 0.333333 | 0.666667 | 0.666667 |        |        |
| 2697 | ENSG00000185019 | HPA028871 | 1 | 0.333333 | 0.666667 | 0.666667 |        |        |
| 2697 | ENSG00000185085 | HPA046181 | 1 | 0.333333 | 0.666667 | 0.666667 |        |        |
| 2697 | ENSG00000185247 | HPA052687 | 1 | 0.333333 | 0.666667 | 0.666667 |        |        |
| 2697 | ENSG00000185621 | HPA016481 | 1 | 0.333333 | 0.666667 | 0.666667 |        |        |
| 2697 | ENSG00000185722 | HPA024522 | 1 | 0.333333 | 0.666667 | 0.666667 |        |        |
| 2697 | ENSG00000185813 | HPA023034 | 1 | 0.333333 | 0.666667 | 0.666667 |        |        |
| 2697 | ENSG00000186198 | HPA008398 | 1 | 0.333333 | 0.666667 | 0.666667 |        |        |
| 2697 | ENSG00000186432 | HPA045500 | 1 | 0.333333 | 0.666667 | 0.666667 |        |        |
| 2697 | ENSG00000186566 | HPA044380 | 1 | 0.333333 | 0.666667 | 0.666667 |        |        |
| 2697 | ENSG00000186660 | HPA024037 | 1 | 0.333333 | 0.666667 | 0.666667 |        |        |
| 2697 | ENSG00000186665 | HPA023036 | 1 | 0.333333 | 0.666667 | 0.666667 |        |        |
| 2697 | ENSG00000186666 | HPA039911 | 1 | 0.333333 | 0.666667 | 0.666667 |        |        |
| 2697 | ENSG00000187010 | HPA060951 | 1 | 0.333333 | 0.666667 | 0.666667 |        |        |
| 2697 | ENSG00000187624 | HPA023583 | 1 | 0.333333 | 0.666667 | 0.666667 |        |        |
| 2697 | ENSG00000187678 | HPA055471 | 1 | 0.333333 | 0.666667 | 0.666667 |        |        |
| 2697 | ENSG00000187736 | HPA043869 | 1 | 0.333333 | 0.666667 | 0.666667 |        |        |
| 2697 | ENSG00000188316 | HPA037937 | 1 | 0.333333 | 0.666667 | 0.666667 |        |        |
| 2697 | ENSG00000188501 | HPA071640 | 1 | 0.333333 | 0.666667 | 0.666667 |        |        |
| 2697 | ENSG00000188620 | HPA069659 | 1 | 0.333333 | 0.666667 | 0.666667 |        |        |
| 2697 | ENSG00000188672 | HPA060951 | 1 | 0.333333 | 0.666667 | 0.666667 |        |        |
| 2697 | ENSG00000188738 | HPA036139 | 1 | 0.333333 | 0.666667 | 0.666667 | 0.2427 | 0.2898 |
| 2697 | ENSG00000188785 | HPA066042 | 1 | 0.333333 | 0.666667 | 0.666667 |        |        |
| 2697 | ENSG00000188869 | HPA040265 | 1 | 0.333333 | 0.666667 | 0.666667 |        |        |
| 2697 | ENSG00000188959 | HPA050769 | 1 | 0.333333 | 0.666667 | 0.666667 |        |        |
| 2697 | ENSG00000189157 | HPA053331 | 1 | 0.333333 | 0.666667 | 0.666667 |        |        |
| 2697 | ENSG00000189164 | HPA037740 | 1 | 0.333333 | 0.666667 | 0.666667 |        |        |
| 2697 | ENSG00000189376 | HPA023708 | 1 | 0.333333 | 0.666667 | 0.666667 |        |        |
| 2697 | ENSG00000196083 | HPA035293 | 1 | 0.333333 | 0.666667 | 0.666667 |        |        |
| 2697 | ENSG00000196150 | HPA020853 | 1 | 0.333333 | 0.666667 | 0.666667 |        |        |
| 2697 | ENSG00000196199 | HPA039701 | 1 | 0.333333 | 0.666667 | 0.666667 |        |        |
| 2697 | ENSG00000196227 | HPA041021 | 1 | 0.333333 | 0.666667 | 0.666667 |        |        |
| 2697 | ENSG00000196396 | CAB009329 | 1 | 0.333333 | 0.666667 | 0.666667 |        |        |
| 2697 | ENSG00000196422 | HPA044686 | 1 | 0.333333 | 0.666667 | 0.666667 |        |        |
| 2697 | ENSG00000196814 | HPA043683 | 1 | 0.333333 | 0.666667 | 0.666667 |        |        |

|      |                 |           |   |          |          |          |               |
|------|-----------------|-----------|---|----------|----------|----------|---------------|
| 2697 | ENSG00000196912 | HPA051757 | 1 | 0.333333 | 0.666667 | 0.666667 |               |
| 2697 | ENSG00000197093 | HPA038138 | 1 | 0.333333 | 0.666667 | 0.666667 |               |
| 2697 | ENSG00000197183 | HPA041768 | 1 | 0.333333 | 0.666667 | 0.666667 |               |
| 2697 | ENSG00000197361 | HPA047624 | 1 | 0.333333 | 0.666667 | 0.666667 |               |
| 2697 | ENSG00000197641 | HPA052630 | 1 | 0.333333 | 0.666667 | 0.666667 |               |
| 2697 | ENSG00000197757 | HPA054981 | 1 | 0.333333 | 0.666667 | 0.666667 |               |
| 2697 | ENSG00000197780 | HPA044492 | 1 | 0.333333 | 0.666667 | 0.666667 |               |
| 2697 | ENSG00000197951 | HPA018124 | 1 | 0.333333 | 0.666667 | 0.666667 |               |
| 2697 | ENSG00000198185 | HPA050022 | 1 | 0.333333 | 0.666667 | 0.666667 |               |
| 2697 | ENSG00000198464 | HPA042218 | 1 | 0.333333 | 0.666667 | 0.666667 |               |
| 2697 | ENSG00000198553 | HPA001027 | 1 | 0.333333 | 0.666667 | 0.666667 |               |
| 2697 | ENSG00000198680 | HPA051426 | 1 | 0.333333 | 0.666667 | 0.666667 |               |
| 2697 | ENSG00000198780 | HPA041574 | 1 | 0.333333 | 0.666667 | 0.666667 |               |
| 2697 | ENSG00000198807 | HPA038462 | 1 | 0.333333 | 0.666667 | 0.666667 |               |
| 2697 | ENSG00000198818 | HPA014677 | 1 | 0.333333 | 0.666667 | 0.666667 | 0.4264        |
| 2697 | ENSG00000198826 | HPA040830 | 1 | 0.333333 | 0.666667 | 0.666667 |               |
| 2697 | ENSG00000198887 | HPA054900 | 1 | 0.333333 | 0.666667 | 0.666667 |               |
| 2697 | ENSG00000198910 | CAB010896 | 1 | 0.333333 | 0.666667 | 0.666667 |               |
| 2697 | ENSG00000198934 | HPA003047 | 1 | 0.333333 | 0.666667 | 0.666667 |               |
| 2697 | ENSG00000203805 | HPA045188 | 1 | 0.333333 | 0.666667 | 0.666667 |               |
| 2697 | ENSG00000203985 | HPA052489 | 1 | 0.333333 | 0.666667 | 0.666667 |               |
| 2697 | ENSG00000204264 | HPA050327 | 1 | 0.333333 | 0.666667 | 0.666667 |               |
| 2697 | ENSG00000204386 | HPA021506 | 1 | 0.333333 | 0.666667 | 0.666667 |               |
| 2697 | ENSG00000204843 | HPA071875 | 1 | 0.333333 | 0.666667 | 0.666667 |               |
| 2697 | ENSG00000204923 | HPA049775 | 1 | 0.333333 | 0.666667 | 0.666667 |               |
| 2697 | ENSG00000205323 | HPA030902 | 1 | 0.333333 | 0.666667 | 0.666667 |               |
| 2697 | ENSG00000205476 | HPA058346 | 1 | 0.333333 | 0.666667 | 0.666667 |               |
| 2697 | ENSG00000205643 | HPA018823 | 1 | 0.333333 | 0.666667 | 0.666667 |               |
| 2697 | ENSG00000206561 | HPA045876 | 1 | 0.333333 | 0.666667 | 0.666667 |               |
| 2697 | ENSG00000211450 | HPA048362 | 1 | 0.333333 | 0.666667 | 0.666667 |               |
| 2697 | ENSG00000212719 | HPA052106 | 1 | 0.333333 | 0.666667 | 0.666667 |               |
| 2697 | ENSG00000212864 | HPA021256 | 1 | 0.333333 | 0.666667 | 0.666667 |               |
| 2697 | ENSG00000213221 | HPA062738 | 1 | 0.333333 | 0.666667 | 0.666667 |               |
| 2697 | ENSG00000213445 | HPA039867 | 1 | 0.333333 | 0.666667 | 0.666667 |               |
| 2697 | ENSG00000214274 | HPA055896 | 1 | 0.333333 | 0.666667 | 0.666667 |               |
| 2697 | ENSG00000214827 | HPA032040 | 1 | 0.333333 | 0.666667 | 0.666667 |               |
| 2697 | ENSG00000215695 | HPA027813 | 1 | 0.333333 | 0.666667 | 0.666667 |               |
| 2697 | ENSG00000221994 | HPA068130 | 1 | 0.333333 | 0.666667 | 0.666667 |               |
| 2697 | ENSG00000227124 | HPA044549 | 1 | 0.333333 | 0.666667 | 0.666667 |               |
| 2697 | ENSG00000227268 | HPA074502 | 1 | 0.333333 | 0.666667 | 0.666667 |               |
| 2697 | ENSG00000228727 | HPA071699 | 1 | 0.333333 | 0.666667 | 0.666667 |               |
| 2697 | ENSG00000232119 | HPA001045 | 1 | 0.333333 | 0.666667 | 0.666667 |               |
| 2697 | ENSG00000233670 | HPA042337 | 1 | 0.333333 | 0.666667 | 0.666667 |               |
| 2697 | ENSG00000234616 | HPA052675 | 1 | 0.333333 | 0.666667 | 0.666667 |               |
| 2697 | ENSG00000235109 | HPA007124 | 1 | 0.333333 | 0.666667 | 0.666667 | 0.392         |
| 2697 | ENSG00000241404 | HPA061173 | 1 | 0.333333 | 0.666667 | 0.666667 |               |
| 2697 | ENSG00000241878 | HPA031091 | 1 | 0.333333 | 0.666667 | 0.666667 | 0.3983 0.3347 |
| 2697 | ENSG00000242612 | HPA047631 | 1 | 0.333333 | 0.666667 | 0.666667 |               |
| 2697 | ENSG00000242732 | HPA003652 | 1 | 0.333333 | 0.666667 | 0.666667 |               |
| 2697 | ENSG00000243725 | HPA041608 | 1 | 0.333333 | 0.666667 | 0.666667 |               |
| 2697 | ENSG00000250709 | HPA029182 | 1 | 0.333333 | 0.666667 | 0.666667 |               |
| 2697 | ENSG00000253251 | HPA066071 | 1 | 0.333333 | 0.666667 | 0.666667 |               |
| 2697 | ENSG00000254536 | HPA037827 | 1 | 0.333333 | 0.666667 | 0.666667 |               |
| 2697 | ENSG00000254999 | HPA060391 | 1 | 0.333333 | 0.666667 | 0.666667 |               |
| 2697 | ENSG00000255112 | HPA061997 | 1 | 0.333333 | 0.666667 | 0.666667 |               |

|      |                 |           |   |          |          |          |
|------|-----------------|-----------|---|----------|----------|----------|
| 2697 | ENSG00000257390 | HPA030902 | 1 | 0.333333 | 0.666667 | 0.666667 |
| 2697 | ENSG00000258588 | HPA077996 | 1 | 0.333333 | 0.666667 | 0.666667 |
| 2697 | ENSG00000258643 | HPA000637 | 1 | 0.333333 | 0.666667 | 0.666667 |
| 2697 | ENSG00000258659 | HPA077996 | 1 | 0.333333 | 0.666667 | 0.666667 |
| 2697 | ENSG00000258724 | HPA009065 | 1 | 0.333333 | 0.666667 | 0.666667 |
| 2697 | ENSG00000259305 | HPA023708 | 1 | 0.333333 | 0.666667 | 0.666667 |
| 2697 | ENSG00000260916 | HPA009432 | 1 | 0.333333 | 0.666667 | 0.666667 |
| 2697 | ENSG00000263001 | CAB004595 | 1 | 0.333333 | 0.666667 | 0.666667 |
| 2697 | ENSG00000266074 | HPA076910 | 1 | 0.333333 | 0.666667 | 0.666667 |
| 2697 | ENSG00000272333 | HPA006487 | 1 | 0.333333 | 0.666667 | 0.666667 |
| 2697 | ENSG00000272414 | HPA053331 | 1 | 0.333333 | 0.666667 | 0.666667 |
| 2697 | ENSG00000274276 | HPA001223 | 1 | 0.333333 | 0.666667 | 0.666667 |
| 2697 | ENSG00000278053 | HPA056173 | 1 | 0.333333 | 0.666667 | 0.666667 |
| 2697 | ENSG00000278318 | HPA001494 | 1 | 0.333333 | 0.666667 | 0.666667 |
| 2697 | ENSG00000278535 | HPA041226 | 1 | 0.333333 | 0.666667 | 0.666667 |
| 2697 | ENSG00000284922 | HPA039949 | 1 | 0.333333 | 0.666667 | 0.666667 |
| 3315 | ENSG00000151632 | HPA068265 | 1 | 0.333333 | 0.5      | 1        |
| 3315 | ENSG00000179912 | HPA038327 | 1 | 0.333333 | 0.5      | 1        |
| 3315 | ENSG00000187134 | CAB047303 | 1 | 0.333333 | 0.5      | 1        |
| 3315 | ENSG00000196139 | HPA068265 | 1 | 0.333333 | 0.5      | 1        |
| 3315 | ENSG00000198610 | HPA068265 | 1 | 0.333333 | 0.5      | 1        |
| 3320 | ENSG00000119139 | HPA001813 | 1 | 0.166667 | 0.708333 | 0.166667 |
| 3320 | ENSG00000285130 | HPA001813 | 1 | 0.166667 | 0.708333 | 0.166667 |
| 3322 | ENSG00000032389 | HPA031231 | 1 | 0.166667 | 0.722222 | 0.333333 |
| 3323 | ENSG00000151276 | HPA031851 | 1 | 0.3      | 0.683333 | 0.3      |
| 3324 | ENSG00000121570 | CAB020678 | 1 | 0.2      | 0.716667 | 0.2      |
| 3325 | ENSG00000116127 | HPA035276 | 1 | 0.1      | 0.508333 | 0.7      |
| 3326 | ENSG00000143751 | HPA028467 | 1 | 0        | 0.716667 | 0.666667 |
| 3327 | ENSG00000129159 | HPA047634 | 1 | 0.333333 | 0.733333 | 0.333333 |
| 3327 | ENSG00000139620 | HPA038497 | 1 | 0.333333 | 0.733333 | 0.333333 |
| 3329 | ENSG00000160783 | HPA034583 | 1 | 0.166667 | 0.555556 | 0.833333 |
| 3329 | ENSG00000164967 | HPA052187 | 1 | 0.166667 | 0.555556 | 0.833333 |
| 3329 | ENSG00000260238 | HPA034583 | 1 | 0.166667 | 0.555556 | 0.833333 |
| 3332 | ENSG00000001497 | HPA044431 | 1 | 0.333333 | 0.777778 | 0.333333 |
| 3332 | ENSG00000008324 | HPA047377 | 1 | 0.333333 | 0.777778 | 0.333333 |
| 3332 | ENSG00000037241 | HPA030449 | 1 | 0.333333 | 0.777778 | 0.333333 |
| 3332 | ENSG00000042317 | HPA038082 | 1 | 0.333333 | 0.777778 | 0.333333 |
| 3332 | ENSG00000047849 | HPA038149 | 1 | 0.333333 | 0.777778 | 0.333333 |
| 3332 | ENSG00000053372 | HPA026446 | 1 | 0.333333 | 0.777778 | 0.333333 |
| 3332 | ENSG00000056277 | HPA051494 | 1 | 0.333333 | 0.777778 | 0.333333 |
| 3332 | ENSG00000061936 | HPA039362 | 1 | 0.333333 | 0.777778 | 0.333333 |
| 3332 | ENSG00000063245 | CAB009729 | 1 | 0.333333 | 0.777778 | 0.333333 |
| 3332 | ENSG00000064489 | HPA004734 | 1 | 0.333333 | 0.777778 | 0.333333 |
| 3332 | ENSG00000075223 | HPA042418 | 1 | 0.333333 | 0.777778 | 0.333333 |
| 3332 | ENSG00000075975 | HPA037559 | 1 | 0.333333 | 0.777778 | 0.333333 |
| 3332 | ENSG00000077254 | HPA005719 | 1 | 0.333333 | 0.777778 | 0.333333 |
| 3332 | ENSG00000078304 | HPA027553 | 1 | 0.333333 | 0.777778 | 0.333333 |
| 3332 | ENSG00000081818 | HPA014466 | 1 | 0.333333 | 0.777778 | 0.333333 |
| 3332 | ENSG00000084676 | HPA070213 | 1 | 0.333333 | 0.777778 | 0.333333 |
| 3332 | ENSG00000086300 | HPA064782 | 1 | 0.333333 | 0.777778 | 0.333333 |
| 3332 | ENSG00000087095 | HPA018192 | 1 | 0.333333 | 0.777778 | 0.333333 |
| 3332 | ENSG00000088808 | HPA006394 | 1 | 0.333333 | 0.777778 | 0.333333 |
| 3332 | ENSG00000088854 | HPA067418 | 1 | 0.333333 | 0.777778 | 0.333333 |
| 3332 | ENSG00000091542 | HPA007196 | 1 | 0.333333 | 0.777778 | 0.333333 |
| 3332 | ENSG00000095739 | HPA010819 | 1 | 0.333333 | 0.777778 | 0.333333 |



|      |                 |           |   |          |          |          |        |
|------|-----------------|-----------|---|----------|----------|----------|--------|
| 3332 | ENSG00000096717 | HPA006295 | 1 | 0.333333 | 0.777778 | 0.333333 |        |
| 3332 | ENSG00000099889 | HPA055264 | 1 | 0.333333 | 0.777778 | 0.333333 |        |
| 3332 | ENSG00000100167 | HPA003548 | 1 | 0.333333 | 0.777778 | 0.333333 |        |
| 3332 | ENSG00000100503 | HPA005939 | 1 | 0.333333 | 0.777778 | 0.333333 |        |
| 3332 | ENSG00000101966 | CAB009203 | 1 | 0.333333 | 0.777778 | 0.333333 |        |
| 3332 | ENSG00000104133 | HPA040412 | 1 | 0.333333 | 0.777778 | 0.333333 |        |
| 3332 | ENSG00000104320 | HPA001429 | 1 | 0.333333 | 0.777778 | 0.333333 |        |
| 3332 | ENSG00000104331 | HPA009411 | 1 | 0.333333 | 0.777778 | 0.333333 | 0.337  |
| 3332 | ENSG00000104529 | HPA051002 | 1 | 0.333333 | 0.777778 | 0.333333 |        |
| 3332 | ENSG00000105136 | HPA003152 | 1 | 0.333333 | 0.777778 | 0.333333 |        |
| 3332 | ENSG00000105137 | HPA013328 | 1 | 0.333333 | 0.777778 | 0.333333 |        |
| 3332 | ENSG00000105438 | CAB017455 | 1 | 0.333333 | 0.777778 | 0.333333 |        |
| 3332 | ENSG00000105700 | HPA041507 | 1 | 0.333333 | 0.777778 | 0.333333 |        |
| 3332 | ENSG00000105771 | HPA041763 | 1 | 0.333333 | 0.777778 | 0.333333 |        |
| 3332 | ENSG00000105887 | HPA019735 | 1 | 0.333333 | 0.777778 | 0.333333 |        |
| 3332 | ENSG00000109320 | HPA027305 | 1 | 0.333333 | 0.777778 | 0.333333 |        |
| 3332 | ENSG00000109775 | HPA043298 | 1 | 0.333333 | 0.777778 | 0.333333 |        |
| 3332 | ENSG00000110063 | HPA039632 | 1 | 0.333333 | 0.777778 | 0.333333 |        |
| 3332 | ENSG00000110330 | CAB020661 | 1 | 0.333333 | 0.777778 | 0.333333 |        |
| 3332 | ENSG00000110435 | HPA038484 | 1 | 0.333333 | 0.777778 | 0.333333 |        |
| 3332 | ENSG00000110801 | HPA040512 | 1 | 0.333333 | 0.777778 | 0.333333 |        |
| 3332 | ENSG00000111203 | HPA038664 | 1 | 0.333333 | 0.777778 | 0.333333 | 0.4232 |
| 3332 | ENSG00000111231 | HPA039764 | 1 | 0.333333 | 0.777778 | 0.333333 |        |
| 3332 | ENSG00000112218 | HPA039103 | 1 | 0.333333 | 0.777778 | 0.333333 |        |
| 3332 | ENSG00000112578 | HPA031217 | 1 | 0.333333 | 0.777778 | 0.333333 |        |
| 3332 | ENSG00000112972 | HPA036913 | 1 | 0.333333 | 0.777778 | 0.333333 |        |
| 3332 | ENSG00000114646 | HPA049529 | 1 | 0.333333 | 0.777778 | 0.333333 |        |
| 3332 | ENSG00000114779 | HPA036444 | 1 | 0.333333 | 0.777778 | 0.333333 |        |
| 3332 | ENSG00000114790 | HPA049195 | 1 | 0.333333 | 0.777778 | 0.333333 |        |
| 3332 | ENSG00000115053 | CAB004210 | 1 | 0.333333 | 0.777778 | 0.333333 | 0.4135 |
| 3332 | ENSG00000117758 | HPA055300 | 1 | 0.333333 | 0.777778 | 0.333333 |        |
| 3332 | ENSG00000117859 | HPA027397 | 1 | 0.333333 | 0.777778 | 0.333333 | 0.3734 |
| 3332 | ENSG00000118308 | HPA002967 | 1 | 0.333333 | 0.777778 | 0.333333 |        |
| 3332 | ENSG00000118495 | HPA055706 | 1 | 0.333333 | 0.777778 | 0.333333 |        |
| 3332 | ENSG00000118518 | HPA027209 | 1 | 0.333333 | 0.777778 | 0.333333 |        |
| 3332 | ENSG00000119242 | HPA057580 | 1 | 0.333333 | 0.777778 | 0.333333 |        |
| 3332 | ENSG00000119328 | HPA035917 | 1 | 0.333333 | 0.777778 | 0.333333 |        |
| 3332 | ENSG00000122550 | HPA029491 | 1 | 0.333333 | 0.777778 | 0.333333 |        |
| 3332 | ENSG00000123485 | HPA008436 | 1 | 0.333333 | 0.777778 | 0.333333 |        |
| 3332 | ENSG00000123892 | HPA071701 | 1 | 0.333333 | 0.777778 | 0.333333 |        |
| 3332 | ENSG00000125534 | HPA040929 | 1 | 0.333333 | 0.777778 | 0.333333 |        |
| 3332 | ENSG00000125970 | HPA040971 | 1 | 0.333333 | 0.777778 | 0.333333 |        |
| 3332 | ENSG00000126814 | HPA000943 | 1 | 0.333333 | 0.777778 | 0.333333 |        |
| 3332 | ENSG00000127125 | HPA031361 | 1 | 0.333333 | 0.777778 | 0.333333 |        |
| 3332 | ENSG00000128039 | HPA027006 | 1 | 0.333333 | 0.777778 | 0.333333 |        |
| 3332 | ENSG00000129474 | HPA006171 | 1 | 0.333333 | 0.777778 | 0.333333 |        |
| 3332 | ENSG00000130402 | HPA001873 | 1 | 0.333333 | 0.777778 | 0.333333 |        |
| 3332 | ENSG00000130749 | HPA040934 | 1 | 0.333333 | 0.777778 | 0.333333 |        |
| 3332 | ENSG00000130787 | CAB017187 | 1 | 0.333333 | 0.777778 | 0.333333 | 0.3127 |
| 3332 | ENSG00000130940 | HPA028222 | 1 | 0.333333 | 0.777778 | 0.333333 |        |
| 3332 | ENSG00000131473 | HPA022434 | 1 | 0.333333 | 0.777778 | 0.333333 |        |
| 3332 | ENSG00000132254 | HPA038156 | 1 | 0.333333 | 0.777778 | 0.333333 |        |
| 3332 | ENSG00000132693 | HPA027367 | 1 | 0.333333 | 0.777778 | 0.333333 |        |
| 3332 | ENSG00000132716 | HPA027218 | 1 | 0.333333 | 0.777778 | 0.333333 |        |
| 3332 | ENSG00000132763 | HPA027394 | 1 | 0.333333 | 0.777778 | 0.333333 |        |

|      |                 |           |   |          |          |          |        |
|------|-----------------|-----------|---|----------|----------|----------|--------|
| 3332 | ENSG00000133119 | HPA030149 | 1 | 0.333333 | 0.777778 | 0.333333 |        |
| 3332 | ENSG00000134690 | HPA028120 | 1 | 0.333333 | 0.777778 | 0.333333 |        |
| 3332 | ENSG00000134853 | HPA004947 | 1 | 0.333333 | 0.777778 | 0.333333 |        |
| 3332 | ENSG00000134910 | HPA030735 | 1 | 0.333333 | 0.777778 | 0.333333 |        |
| 3332 | ENSG00000135148 | HPA039254 | 1 | 0.333333 | 0.777778 | 0.333333 |        |
| 3332 | ENSG00000135241 | HPA020083 | 1 | 0.333333 | 0.777778 | 0.333333 | 0.3874 |
| 3332 | ENSG00000135250 | HPA015522 | 1 | 0.333333 | 0.777778 | 0.333333 |        |
| 3332 | ENSG00000135315 | HPA030171 | 1 | 0.333333 | 0.777778 | 0.333333 | 0.3862 |
| 3332 | ENSG00000136122 | HPA040866 | 1 | 0.333333 | 0.777778 | 0.333333 |        |
| 3332 | ENSG00000136167 | HPA019493 | 1 | 0.333333 | 0.777778 | 0.333333 |        |
| 3332 | ENSG00000137575 | HPA023840 | 1 | 0.333333 | 0.777778 | 0.333333 |        |
| 3332 | ENSG00000138442 | HPA036389 | 1 | 0.333333 | 0.777778 | 0.333333 |        |
| 3332 | ENSG00000138675 | CAB010313 | 1 | 0.333333 | 0.777778 | 0.333333 |        |
| 3332 | ENSG00000138785 | HPA035772 | 1 | 0.333333 | 0.777778 | 0.333333 | 0.382  |
| 3332 | ENSG00000139445 | HPA050018 | 1 | 0.333333 | 0.777778 | 0.333333 |        |
| 3332 | ENSG00000139508 | HPA039930 | 1 | 0.333333 | 0.777778 | 0.333333 |        |
| 3332 | ENSG00000140691 | HPA063706 | 1 | 0.333333 | 0.777778 | 0.333333 |        |
| 3332 | ENSG00000140854 | HPA041165 | 1 | 0.333333 | 0.777778 | 0.333333 |        |
| 3332 | ENSG00000142512 | CAB025807 | 1 | 0.333333 | 0.777778 | 0.333333 |        |
| 3332 | ENSG00000143374 | HPA028626 | 1 | 0.333333 | 0.777778 | 0.333333 | 0.3165 |
| 3332 | ENSG00000143578 | HPA038122 | 1 | 0.333333 | 0.777778 | 0.333333 |        |
| 3332 | ENSG00000144021 | HPA017882 | 1 | 0.333333 | 0.777778 | 0.333333 |        |
| 3332 | ENSG00000145016 | HPA050908 | 1 | 0.333333 | 0.777778 | 0.333333 |        |
| 3332 | ENSG00000145198 | HPA036823 | 1 | 0.333333 | 0.777778 | 0.333333 |        |
| 3332 | ENSG00000145348 | HPA051611 | 1 | 0.333333 | 0.777778 | 0.333333 |        |
| 3332 | ENSG00000145740 | HPA035373 | 1 | 0.333333 | 0.777778 | 0.333333 |        |
| 3332 | ENSG00000146376 | HPA031595 | 1 | 0.333333 | 0.777778 | 0.333333 |        |
| 3332 | ENSG00000146463 | HPA051301 | 1 | 0.333333 | 0.777778 | 0.333333 |        |
| 3332 | ENSG00000146826 | HPA019359 | 1 | 0.333333 | 0.777778 | 0.333333 |        |
| 3332 | ENSG00000147041 | HPA026074 | 1 | 0.333333 | 0.777778 | 0.333333 |        |
| 3332 | ENSG00000147604 | HPA058373 | 1 | 0.333333 | 0.777778 | 0.333333 |        |
| 3332 | ENSG00000148832 | HPA047782 | 1 | 0.333333 | 0.777778 | 0.333333 |        |
| 3332 | ENSG00000151240 | HPA059325 | 1 | 0.333333 | 0.777778 | 0.333333 |        |
| 3332 | ENSG00000152256 | HPA059083 | 1 | 0.333333 | 0.777778 | 0.333333 |        |
| 3332 | ENSG00000155066 | HPA063728 | 1 | 0.333333 | 0.777778 | 0.333333 |        |
| 3332 | ENSG00000155629 | HPA038452 | 1 | 0.333333 | 0.777778 | 0.333333 |        |
| 3332 | ENSG00000156521 | HPA030304 | 1 | 0.333333 | 0.777778 | 0.333333 |        |
| 3332 | ENSG00000156599 | HPA014670 | 1 | 0.333333 | 0.777778 | 0.333333 |        |
| 3332 | ENSG00000158163 | HPA030404 | 1 | 0.333333 | 0.777778 | 0.333333 |        |
| 3332 | ENSG00000158270 | HPA071056 | 1 | 0.333333 | 0.777778 | 0.333333 |        |
| 3332 | ENSG00000159593 | HPA041178 | 1 | 0.333333 | 0.777778 | 0.333333 |        |
| 3332 | ENSG00000161036 | HPA021320 | 1 | 0.333333 | 0.777778 | 0.333333 |        |
| 3332 | ENSG00000161970 | HPA030449 | 1 | 0.333333 | 0.777778 | 0.333333 |        |
| 3332 | ENSG00000161981 | HPA041183 | 1 | 0.333333 | 0.777778 | 0.333333 |        |
| 3332 | ENSG00000162761 | HPA028051 | 1 | 0.333333 | 0.777778 | 0.333333 | 0.2249 |
| 3332 | ENSG00000162894 | HPA003910 | 1 | 0.333333 | 0.777778 | 0.333333 |        |
| 3332 | ENSG00000163002 | HPA018441 | 1 | 0.333333 | 0.777778 | 0.333333 |        |
| 3332 | ENSG00000163126 | HPA036201 | 1 | 0.333333 | 0.777778 | 0.333333 |        |
| 3332 | ENSG00000163220 | HPA004193 | 1 | 0.333333 | 0.777778 | 0.333333 |        |
| 3332 | ENSG00000163346 | HPA006949 | 1 | 0.333333 | 0.777778 | 0.333333 |        |
| 3332 | ENSG00000163541 | HPA036683 | 1 | 0.333333 | 0.777778 | 0.333333 |        |
| 3332 | ENSG00000164649 | HPA027169 | 1 | 0.333333 | 0.777778 | 0.333333 |        |
| 3332 | ENSG00000164951 | HPA021152 | 1 | 0.333333 | 0.777778 | 0.333333 | 0.4921 |
| 3332 | ENSG00000165006 | HPA019804 | 1 | 0.333333 | 0.777778 | 0.333333 |        |
| 3332 | ENSG00000165502 | HPA077586 | 1 | 0.333333 | 0.777778 | 0.333333 |        |

|      |                 |           |   |          |          |          |        |
|------|-----------------|-----------|---|----------|----------|----------|--------|
| 3332 | ENSG00000165606 | HPA043978 | 1 | 0.333333 | 0.777778 | 0.333333 |        |
| 3332 | ENSG00000165684 | HPA073243 | 1 | 0.333333 | 0.777778 | 0.333333 |        |
| 3332 | ENSG00000167123 | HPA051595 | 1 | 0.333333 | 0.777778 | 0.333333 |        |
| 3332 | ENSG00000167522 | CAB019288 | 1 | 0.333333 | 0.777778 | 0.333333 |        |
| 3332 | ENSG00000167625 | HPA023070 | 1 | 0.333333 | 0.777778 | 0.333333 |        |
| 3332 | ENSG00000167778 | HPA039426 | 1 | 0.333333 | 0.777778 | 0.333333 |        |
| 3332 | ENSG00000167985 | HPA039464 | 1 | 0.333333 | 0.777778 | 0.333333 |        |
| 3332 | ENSG00000168071 | HPA026652 | 1 | 0.333333 | 0.777778 | 0.333333 |        |
| 3332 | ENSG00000168172 | HPA024756 | 1 | 0.333333 | 0.777778 | 0.333333 |        |
| 3332 | ENSG00000169062 | HPA061316 | 1 | 0.333333 | 0.777778 | 0.333333 |        |
| 3332 | ENSG00000169188 | HPA048577 | 1 | 0.333333 | 0.777778 | 0.333333 |        |
| 3332 | ENSG00000169519 | HPA039885 | 1 | 0.333333 | 0.777778 | 0.333333 |        |
| 3332 | ENSG00000171222 | HPA047138 | 1 | 0.333333 | 0.777778 | 0.333333 |        |
| 3332 | ENSG00000171817 | HPA003444 | 1 | 0.333333 | 0.777778 | 0.333333 | 0.5196 |
| 3332 | ENSG00000171992 | HPA034631 | 1 | 0.333333 | 0.777778 | 0.333333 |        |
| 3332 | ENSG00000172594 | HPA030148 | 1 | 0.333333 | 0.777778 | 0.333333 | 0.2969 |
| 3332 | ENSG00000173226 | HPA042028 | 1 | 0.333333 | 0.777778 | 0.333333 |        |
| 3332 | ENSG00000173391 | HPA050798 | 1 | 0.333333 | 0.777778 | 0.333333 |        |
| 3332 | ENSG00000175216 | HPA040375 | 1 | 0.333333 | 0.777778 | 0.333333 | 0.291  |
| 3332 | ENSG00000176731 | HPA044805 | 1 | 0.333333 | 0.777778 | 0.333333 |        |
| 3332 | ENSG00000177954 | HPA066851 | 1 | 0.333333 | 0.777778 | 0.333333 |        |
| 3332 | ENSG00000179988 | HPA037781 | 1 | 0.333333 | 0.777778 | 0.333333 | 0.483  |
| 3332 | ENSG00000180479 | HPA054762 | 1 | 0.333333 | 0.777778 | 0.333333 |        |
| 3332 | ENSG00000182179 | HPA058182 | 1 | 0.333333 | 0.777778 | 0.333333 |        |
| 3332 | ENSG00000182318 | HPA006471 | 1 | 0.333333 | 0.777778 | 0.333333 |        |
| 3332 | ENSG00000183287 | HPA041361 | 1 | 0.333333 | 0.777778 | 0.333333 |        |
| 3332 | ENSG00000183397 | HPA048654 | 1 | 0.333333 | 0.777778 | 0.333333 |        |
| 3332 | ENSG00000184702 | HPA029095 | 1 | 0.333333 | 0.777778 | 0.333333 |        |
| 3332 | ENSG00000184939 | HPA029017 | 1 | 0.333333 | 0.777778 | 0.333333 |        |
| 3332 | ENSG00000185088 | HPA066851 | 1 | 0.333333 | 0.777778 | 0.333333 |        |
| 3332 | ENSG00000186462 | HPA054050 | 1 | 0.333333 | 0.777778 | 0.333333 |        |
| 3332 | ENSG00000187479 | HPA038843 | 1 | 0.333333 | 0.777778 | 0.333333 |        |
| 3332 | ENSG00000187531 | CAB037261 | 1 | 0.333333 | 0.777778 | 0.333333 |        |
| 3332 | ENSG00000187758 | HPA047814 | 1 | 0.333333 | 0.777778 | 0.333333 |        |
| 3332 | ENSG00000196365 | HPA002034 | 1 | 0.333333 | 0.777778 | 0.333333 |        |
| 3332 | ENSG00000196616 | HPA047814 | 1 | 0.333333 | 0.777778 | 0.333333 |        |
| 3332 | ENSG00000197019 | HPA063323 | 1 | 0.333333 | 0.777778 | 0.333333 |        |
| 3332 | ENSG00000197150 | HPA045187 | 1 | 0.333333 | 0.777778 | 0.333333 |        |
| 3332 | ENSG00000197265 | HPA004816 | 1 | 0.333333 | 0.777778 | 0.333333 |        |
| 3332 | ENSG00000197713 | HPA036499 | 1 | 0.333333 | 0.777778 | 0.333333 |        |
| 3332 | ENSG00000198087 | HPA003267 | 1 | 0.333333 | 0.777778 | 0.333333 |        |
| 3332 | ENSG00000198646 | HPA004198 | 1 | 0.333333 | 0.777778 | 0.333333 |        |
| 3332 | ENSG00000198746 | HPA054973 | 1 | 0.333333 | 0.777778 | 0.333333 |        |
| 3332 | ENSG00000203666 | HPA031206 | 1 | 0.333333 | 0.777778 | 0.333333 |        |
| 3332 | ENSG00000204348 | HPA046708 | 1 | 0.333333 | 0.777778 | 0.333333 |        |
| 3332 | ENSG00000204463 | CAB020704 | 1 | 0.333333 | 0.777778 | 0.333333 |        |
| 3332 | ENSG00000204618 | CAB019278 | 1 | 0.333333 | 0.777778 | 0.333333 |        |
| 3332 | ENSG00000213999 | HPA004734 | 1 | 0.333333 | 0.777778 | 0.333333 |        |
| 3332 | ENSG00000235376 | HPA036499 | 1 | 0.333333 | 0.777778 | 0.333333 |        |
| 3332 | ENSG00000241343 | HPA077586 | 1 | 0.333333 | 0.777778 | 0.333333 |        |
| 3332 | ENSG00000241973 | HPA075515 | 1 | 0.333333 | 0.777778 | 0.333333 |        |
| 3332 | ENSG00000248144 | HPA047814 | 1 | 0.333333 | 0.777778 | 0.333333 |        |
| 3332 | ENSG00000257529 | HPA077586 | 1 | 0.333333 | 0.777778 | 0.333333 |        |
| 3332 | ENSG00000258465 | HPA027218 | 1 | 0.333333 | 0.777778 | 0.333333 |        |
| 3518 | ENSG00000002549 | HPA029606 | 1 | 0.333333 | 0.555556 | 1        |        |

|      |                 |           |   |          |          |          |        |
|------|-----------------|-----------|---|----------|----------|----------|--------|
| 3518 | ENSG00000009335 | HPA039915 | 1 | 0.333333 | 0.555556 | 1        |        |
| 3518 | ENSG00000022556 | HPA021183 | 1 | 0.333333 | 0.555556 | 1        |        |
| 3518 | ENSG00000032219 | HPA048899 | 1 | 0.333333 | 0.555556 | 1        |        |
| 3518 | ENSG00000050165 | HPA011868 | 1 | 0.333333 | 0.555556 | 1        |        |
| 3518 | ENSG00000065357 | HPA045462 | 1 | 0.333333 | 0.555556 | 1        |        |
| 3518 | ENSG00000065833 | HPA006493 | 1 | 0.333333 | 0.555556 | 1        |        |
| 3518 | ENSG00000090615 | HPA039809 | 1 | 0.333333 | 0.555556 | 1        |        |
| 3518 | ENSG00000097046 | HPA035831 | 1 | 0.333333 | 0.555556 | 1        |        |
| 3518 | ENSG00000100628 | HPA001546 | 1 | 0.333333 | 0.555556 | 1        |        |
| 3518 | ENSG00000103490 | HPA049074 | 1 | 0.333333 | 0.555556 | 1        |        |
| 3518 | ENSG00000104059 | HPA009410 | 1 | 0.333333 | 0.555556 | 1        | 0.2754 |
| 3518 | ENSG00000105677 | HPA067837 | 1 | 0.333333 | 0.555556 | 1        |        |
| 3518 | ENSG00000116793 | HPA059486 | 1 | 0.333333 | 0.555556 | 1        |        |
| 3518 | ENSG00000117118 | HPA002868 | 1 | 0.333333 | 0.555556 | 1        | 0.4162 |
| 3518 | ENSG00000122547 | HPA053668 | 1 | 0.333333 | 0.555556 | 1        |        |
| 3518 | ENSG00000123154 | HPA042629 | 1 | 0.333333 | 0.555556 | 1        |        |
| 3518 | ENSG00000124780 | HPA043892 | 1 | 0.333333 | 0.555556 | 1        |        |
| 3518 | ENSG00000126698 | HPA026275 | 1 | 0.333333 | 0.555556 | 1        |        |
| 3518 | ENSG00000130300 | HPA002279 | 1 | 0.333333 | 0.555556 | 1        |        |
| 3518 | ENSG00000130479 | HPA050934 | 1 | 0.333333 | 0.555556 | 1        |        |
| 3518 | ENSG00000130856 | HPA008600 | 1 | 0.333333 | 0.555556 | 1        |        |
| 3518 | ENSG00000131778 | HPA027789 | 1 | 0.333333 | 0.555556 | 1        |        |
| 3518 | ENSG00000132405 | HPA067398 | 1 | 0.333333 | 0.555556 | 1        |        |
| 3518 | ENSG00000132793 | HPA051466 | 1 | 0.333333 | 0.555556 | 1        |        |
| 3518 | ENSG00000136444 | HPA022436 | 1 | 0.333333 | 0.555556 | 1        |        |
| 3518 | ENSG00000138172 | HPA014706 | 1 | 0.333333 | 0.555556 | 1        |        |
| 3518 | ENSG00000139684 | HPA039700 | 1 | 0.333333 | 0.555556 | 1        |        |
| 3518 | ENSG00000140543 | HPA048873 | 1 | 0.333333 | 0.555556 | 1        |        |
| 3518 | ENSG00000146247 | HPA019140 | 1 | 0.333333 | 0.555556 | 1        |        |
| 3518 | ENSG00000147162 | HPA030753 | 1 | 0.333333 | 0.555556 | 1        |        |
| 3518 | ENSG00000162384 | HPA043835 | 1 | 0.333333 | 0.555556 | 1        |        |
| 3518 | ENSG00000163207 | CAB002243 | 1 | 0.333333 | 0.555556 | 1        |        |
| 3518 | ENSG00000163704 | HPA035127 | 1 | 0.333333 | 0.555556 | 1        |        |
| 3518 | ENSG00000164099 | HPA035054 | 1 | 0.333333 | 0.555556 | 1        |        |
| 3518 | ENSG00000164512 | HPA051049 | 1 | 0.333333 | 0.555556 | 1        |        |
| 3518 | ENSG00000166145 | HPA006903 | 1 | 0.333333 | 0.555556 | 1        |        |
| 3518 | ENSG00000171227 | HPA053794 | 1 | 0.333333 | 0.555556 | 1        |        |
| 3518 | ENSG00000172986 | HPA068429 | 1 | 0.333333 | 0.555556 | 1        |        |
| 3518 | ENSG00000174227 | HPA015997 | 1 | 0.333333 | 0.555556 | 1        |        |
| 3518 | ENSG00000179632 | HPA058548 | 1 | 0.333333 | 0.555556 | 1        |        |
| 3518 | ENSG00000180537 | HPA012309 | 1 | 0.333333 | 0.555556 | 1        |        |
| 3518 | ENSG00000183117 | HPA074707 | 1 | 0.333333 | 0.555556 | 1        |        |
| 3518 | ENSG00000184185 | HPA027021 | 1 | 0.333333 | 0.555556 | 1        |        |
| 3518 | ENSG00000185015 | HPA024689 | 1 | 0.333333 | 0.555556 | 1        |        |
| 3518 | ENSG00000185344 | HPA044279 | 1 | 0.333333 | 0.555556 | 1        |        |
| 3518 | ENSG00000186310 | HPA026075 | 1 | 0.333333 | 0.555556 | 1        |        |
| 3518 | ENSG00000187772 | HPA061745 | 1 | 0.333333 | 0.555556 | 1        |        |
| 3518 | ENSG00000221963 | HPA029165 | 1 | 0.333333 | 0.555556 | 1        |        |
| 3518 | ENSG00000249751 | HPA063337 | 1 | 0.333333 | 0.555556 | 1        |        |
| 3518 | ENSG00000260458 | HPA027021 | 1 | 0.333333 | 0.555556 | 1        |        |
| 3569 | ENSG00000142661 | HPA028132 | 1 | 0.166667 | 0.555556 | 0.833333 |        |
| 3570 | ENSG00000183207 | HPA042880 | 1 | 0.166667 | 0.583333 | 0.833333 |        |
| 3571 | ENSG00000125651 | HPA022793 | 1 | 0.2      | 0.566667 | 0.7      |        |
| 3571 | ENSG00000125870 | HPA050814 | 1 | 0.2      | 0.566667 | 0.7      |        |
| 3573 | ENSG00000115504 | HPA035468 | 1 | 0.2      | 0.6      | 0.7      |        |

|      |                 |           |     |          |          |          |        |
|------|-----------------|-----------|-----|----------|----------|----------|--------|
| 3573 | ENSG00000171566 | HPA035931 | 1   | 0.2      | 0.6      | 0.7      |        |
| 3575 | ENSG00000211448 | HPA029544 | 1   | 0.2      | 0.6      | 0.9      |        |
| 3576 | ENSG00000108953 | HPA008445 | 1   | 0.3      | 0.616667 | 0.7      |        |
| 3576 | ENSG00000166913 | HPA011212 | 1   | 0.3      | 0.616667 | 0.7      |        |
| 3578 | ENSG00000135363 | HPA029285 | 1   | 0.3      | 0.633333 | 0.7      |        |
| 3578 | ENSG00000181904 | HPA057749 | 1   | 0.3      | 0.633333 | 0.7      |        |
| 3580 | ENSG00000132792 | HPA004742 | 1   | 0.3      | 0.616667 | 0.8      |        |
| 3581 | ENSG00000146411 | HPA031593 | 0.4 | 0.4      | 0.4      | 0.4      |        |
| 3582 | ENSG00000003402 | HPA019044 | 1   | 0.333333 | 0.833333 | 0.333333 |        |
| 3582 | ENSG00000005206 | HPA039292 | 1   | 0.333333 | 0.833333 | 0.333333 |        |
| 3582 | ENSG00000023909 | CAB009568 | 1   | 0.333333 | 0.833333 | 0.333333 |        |
| 3582 | ENSG00000082898 | CAB010184 | 1   | 0.333333 | 0.833333 | 0.333333 |        |
| 3582 | ENSG00000100583 | HPA030673 | 1   | 0.333333 | 0.833333 | 0.333333 |        |
| 3582 | ENSG00000104549 | HPA018038 | 1   | 0.333333 | 0.833333 | 0.333333 |        |
| 3582 | ENSG00000117877 | HPA041664 | 1   | 0.333333 | 0.833333 | 0.333333 |        |
| 3582 | ENSG00000118194 | HPA017888 | 1   | 0.333333 | 0.833333 | 0.333333 |        |
| 3582 | ENSG00000142945 | HPA006219 | 1   | 0.333333 | 0.833333 | 0.333333 |        |
| 3582 | ENSG00000161791 | HPA002552 | 1   | 0.333333 | 0.833333 | 0.333333 |        |
| 3582 | ENSG00000164715 | HPA010657 | 1   | 0.333333 | 0.833333 | 0.333333 |        |
| 3582 | ENSG00000177485 | HPA000755 | 1   | 0.333333 | 0.833333 | 0.333333 | 0.4343 |
| 3582 | ENSG00000187554 | CAB009013 | 1   | 0.333333 | 0.833333 | 0.333333 |        |
| 3582 | ENSG00000196754 | CAB002600 | 1   | 0.333333 | 0.833333 | 0.333333 |        |
| 3596 | ENSG00000136861 | HPA035820 | 1   | 0.333333 | 0.666667 | 0.833333 |        |
| 3596 | ENSG00000177084 | HPA058210 | 1   | 0.333333 | 0.666667 | 0.833333 |        |
| 3596 | ENSG00000184575 | HPA048067 | 1   | 0.333333 | 0.666667 | 0.833333 |        |
| 3599 | ENSG00000141367 | CAB011571 | 1   | 0.333333 | 0.866667 | 0.333333 |        |
| 3600 | ENSG00000000457 | HPA005624 | 1   | 0.333333 | 0.666667 | 1        |        |
| 3600 | ENSG00000002016 | HPA028957 | 1   | 0.333333 | 0.666667 | 1        |        |
| 3600 | ENSG00000003436 | CAB020842 | 1   | 0.333333 | 0.666667 | 1        |        |
| 3600 | ENSG00000004779 | HPA054364 | 1   | 0.333333 | 0.666667 | 1        |        |
| 3600 | ENSG00000005020 | HPA005560 | 1   | 0.333333 | 0.666667 | 1        |        |
| 3600 | ENSG00000005483 | HPA042866 | 1   | 0.333333 | 0.666667 | 1        |        |
| 3600 | ENSG00000005513 | HPA041640 | 1   | 0.333333 | 0.666667 | 1        |        |
| 3600 | ENSG00000005884 | CAB018594 | 1   | 0.333333 | 0.666667 | 1        |        |
| 3600 | ENSG00000006451 | HPA047037 | 1   | 0.333333 | 0.666667 | 1        |        |
| 3600 | ENSG00000006459 | HPA012114 | 1   | 0.333333 | 0.666667 | 1        |        |
| 3600 | ENSG00000006712 | HPA043637 | 1   | 0.333333 | 0.666667 | 1        |        |
| 3600 | ENSG00000007202 | HPA042781 | 1   | 0.333333 | 0.666667 | 1        |        |
| 3600 | ENSG00000008256 | HPA013979 | 1   | 0.333333 | 0.666667 | 1        |        |
| 3600 | ENSG00000008394 | HPA044840 | 1   | 0.333333 | 0.666667 | 1        |        |
| 3600 | ENSG00000009950 | HPA064640 | 1   | 0.333333 | 0.666667 | 1        |        |
| 3600 | ENSG00000011275 | HPA018955 | 1   | 0.333333 | 0.666667 | 1        | 0.3386 |
| 3600 | ENSG00000015532 | HPA016456 | 1   | 0.333333 | 0.666667 | 1        |        |
| 3600 | ENSG00000018408 | HPA007415 | 1   | 0.333333 | 0.666667 | 1        |        |
| 3600 | ENSG00000019144 | HPA061506 | 1   | 0.333333 | 0.666667 | 1        |        |
| 3600 | ENSG00000019169 | HPA063793 | 1   | 0.333333 | 0.666667 | 1        |        |
| 3600 | ENSG00000020426 | HPA001154 | 1   | 0.333333 | 0.666667 | 1        |        |
| 3600 | ENSG00000022277 | HPA053986 | 1   | 0.333333 | 0.666667 | 1        |        |
| 3600 | ENSG00000023287 | HPA053049 | 1   | 0.333333 | 0.666667 | 1        |        |
| 3600 | ENSG00000023892 | HPA038975 | 1   | 0.333333 | 0.666667 | 1        |        |
| 3600 | ENSG00000025423 | HPA059141 | 1   | 0.333333 | 0.666667 | 1        |        |
| 3600 | ENSG00000025800 | HPA018863 | 1   | 0.333333 | 0.666667 | 1        |        |
| 3600 | ENSG00000028203 | HPA004811 | 1   | 0.333333 | 0.666667 | 1        | 0.4195 |
| 3600 | ENSG00000029153 | HPA059074 | 1   | 0.333333 | 0.666667 | 1        |        |
| 3600 | ENSG00000035687 | HPA024400 | 1   | 0.333333 | 0.666667 | 1        |        |

|      |                 |           |   |          |          |   |
|------|-----------------|-----------|---|----------|----------|---|
| 3600 | ENSG00000039650 | HPA006782 | 1 | 0.333333 | 0.666667 | 1 |
| 3600 | ENSG00000042062 | HPA051823 | 1 | 0.333333 | 0.666667 | 1 |
| 3600 | ENSG00000047249 | HPA023421 | 1 | 0.333333 | 0.666667 | 1 |
| 3600 | ENSG00000047936 | HPA072424 | 1 | 0.333333 | 0.666667 | 1 |
| 3600 | ENSG00000049249 | HPA071425 | 1 | 0.333333 | 0.666667 | 1 |
| 3600 | ENSG00000049283 | HPA063224 | 1 | 0.333333 | 0.666667 | 1 |
| 3600 | ENSG00000053108 | HPA045920 | 1 | 0.333333 | 0.666667 | 1 |
| 3600 | ENSG00000054148 | HPA020952 | 1 | 0.333333 | 0.666667 | 1 |
| 3600 | ENSG00000054267 | HPA053692 | 1 | 0.333333 | 0.666667 | 1 |
| 3600 | ENSG00000054598 | HPA040670 | 1 | 0.333333 | 0.666667 | 1 |
| 3600 | ENSG00000055917 | HPA030316 | 1 | 0.333333 | 0.666667 | 1 |
| 3600 | ENSG00000057252 | CAB009533 | 1 | 0.333333 | 0.666667 | 1 |
| 3600 | ENSG00000058729 | HPA005681 | 1 | 0.333333 | 0.666667 | 1 |
| 3600 | ENSG00000059804 | HPA006539 | 1 | 0.333333 | 0.666667 | 1 |
| 3600 | ENSG00000060971 | HPA006764 | 1 | 0.333333 | 0.666667 | 1 |
| 3600 | ENSG00000063046 | HPA039072 | 1 | 0.333333 | 0.666667 | 1 |
| 3600 | ENSG00000063978 | HPA022047 | 1 | 0.333333 | 0.666667 | 1 |
| 3600 | ENSG00000064692 | HPA064687 | 1 | 0.333333 | 0.666667 | 1 |
| 3600 | ENSG00000064995 | HPA029326 | 1 | 0.333333 | 0.666667 | 1 |
| 3600 | ENSG00000065150 | CAB009110 | 1 | 0.333333 | 0.666667 | 1 |
| 3600 | ENSG00000065618 | HPA052963 | 1 | 0.333333 | 0.666667 | 1 |
| 3600 | ENSG00000067334 | HPA044502 | 1 | 0.333333 | 0.666667 | 1 |
| 3600 | ENSG00000067365 | HPA074173 | 1 | 0.333333 | 0.666667 | 1 |
| 3600 | ENSG00000067445 | HPA053358 | 1 | 0.333333 | 0.666667 | 1 |
| 3600 | ENSG00000067704 | HPA024594 | 1 | 0.333333 | 0.666667 | 1 |
| 3600 | ENSG00000067955 | HPA038852 | 1 | 0.333333 | 0.666667 | 1 |
| 3600 | ENSG00000067992 | HPA072492 | 1 | 0.333333 | 0.666667 | 1 |
| 3600 | ENSG00000068305 | HPA046597 | 1 | 0.333333 | 0.666667 | 1 |
| 3600 | ENSG00000069431 | HPA007279 | 1 | 0.333333 | 0.666667 | 1 |
| 3600 | ENSG00000069493 | HPA047584 | 1 | 0.333333 | 0.666667 | 1 |
| 3600 | ENSG00000072609 | HPA045768 | 1 | 0.333333 | 0.666667 | 1 |
| 3600 | ENSG00000072840 | HPA016046 | 1 | 0.333333 | 0.666667 | 1 |
| 3600 | ENSG00000073050 | CAB005427 | 1 | 0.333333 | 0.666667 | 1 |
| 3600 | ENSG00000073350 | HPA022913 | 1 | 0.333333 | 0.666667 | 1 |
| 3600 | ENSG00000074657 | HPA015322 | 1 | 0.333333 | 0.666667 | 1 |
| 3600 | ENSG00000075711 | HPA069593 | 1 | 0.333333 | 0.666667 | 1 |
| 3600 | ENSG00000075891 | HPA070751 | 1 | 0.333333 | 0.666667 | 1 |
| 3600 | ENSG00000076351 | CAB011614 | 1 | 0.333333 | 0.666667 | 1 |
| 3600 | ENSG00000078403 | HPA005747 | 1 | 0.333333 | 0.666667 | 1 |
| 3600 | ENSG00000080189 | HPA027011 | 1 | 0.333333 | 0.666667 | 1 |
| 3600 | ENSG00000080603 | HPA028929 | 1 | 0.333333 | 0.666667 | 1 |
| 3600 | ENSG00000081277 | HPA027221 | 1 | 0.333333 | 0.666667 | 1 |
| 3600 | ENSG00000081692 | HPA027260 | 1 | 0.333333 | 0.666667 | 1 |
| 3600 | ENSG00000083223 | HPA020620 | 1 | 0.333333 | 0.666667 | 1 |
| 3600 | ENSG00000085741 | HPA063569 | 1 | 0.333333 | 0.666667 | 1 |
| 3600 | ENSG00000085788 | CAB015202 | 1 | 0.333333 | 0.666667 | 1 |
| 3600 | ENSG00000085982 | HPA005821 | 1 | 0.333333 | 0.666667 | 1 |
| 3600 | ENSG00000086717 | HPA034577 | 1 | 0.333333 | 0.666667 | 1 |
| 3600 | ENSG00000088386 | HPA002827 | 1 | 0.333333 | 0.666667 | 1 |
| 3600 | ENSG00000088448 | HPA038879 | 1 | 0.333333 | 0.666667 | 1 |
| 3600 | ENSG00000089006 | HPA076450 | 1 | 0.333333 | 0.666667 | 1 |
| 3600 | ENSG00000089053 | HPA039801 | 1 | 0.333333 | 0.666667 | 1 |
| 3600 | ENSG00000090470 | HPA049388 | 1 | 0.333333 | 0.666667 | 1 |
| 3600 | ENSG00000091262 | HPA038105 | 1 | 0.333333 | 0.666667 | 1 |
| 3600 | ENSG00000091651 | HPA072587 | 1 | 0.333333 | 0.666667 | 1 |

0.3924

|      |                 |           |   |          |          |   |        |
|------|-----------------|-----------|---|----------|----------|---|--------|
| 3600 | ENSG00000091831 | HPA000449 | 1 | 0.333333 | 0.666667 | 1 |        |
| 3600 | ENSG00000092010 | HPA006632 | 1 | 0.333333 | 0.666667 | 1 |        |
| 3600 | ENSG00000092067 | CAB005113 | 1 | 0.333333 | 0.666667 | 1 |        |
| 3600 | ENSG00000092531 | HPA001214 | 1 | 0.333333 | 0.666667 | 1 |        |
| 3600 | ENSG00000092929 | HPA067117 | 1 | 0.333333 | 0.666667 | 1 |        |
| 3600 | ENSG00000095380 | HPA019223 | 1 | 0.333333 | 0.666667 | 1 |        |
| 3600 | ENSG00000096088 | HPA031717 | 1 | 0.333333 | 0.666667 | 1 |        |
| 3600 | ENSG00000096092 | HPA072536 | 1 | 0.333333 | 0.666667 | 1 |        |
| 3600 | ENSG00000099341 | HPA006702 | 1 | 0.333333 | 0.666667 | 1 |        |
| 3600 | ENSG00000099785 | HPA014063 | 1 | 0.333333 | 0.666667 | 1 | 0.5554 |
| 3600 | ENSG00000099999 | HPA056498 | 1 | 0.333333 | 0.666667 | 1 |        |
| 3600 | ENSG00000100028 | HPA001170 | 1 | 0.333333 | 0.666667 | 1 |        |
| 3600 | ENSG00000100109 | HPA027085 | 1 | 0.333333 | 0.666667 | 1 |        |
| 3600 | ENSG00000100307 | HPA056480 | 1 | 0.333333 | 0.666667 | 1 |        |
| 3600 | ENSG00000100348 | HPA000994 | 1 | 0.333333 | 0.666667 | 1 | 0.3331 |
| 3600 | ENSG00000100412 | HPA001097 | 1 | 0.333333 | 0.666667 | 1 |        |
| 3600 | ENSG00000100416 | HPA043300 | 1 | 0.333333 | 0.666667 | 1 |        |
| 3600 | ENSG00000100603 | HPA002457 | 1 | 0.333333 | 0.666667 | 1 |        |
| 3600 | ENSG00000100823 | HPA000956 | 1 | 0.333333 | 0.666667 | 1 | 0.4663 |
| 3600 | ENSG00000100883 | HPA048977 | 1 | 0.333333 | 0.666667 | 1 |        |
| 3600 | ENSG00000101040 | HPA020949 | 1 | 0.333333 | 0.666667 | 1 |        |
| 3600 | ENSG00000101104 | HPA066650 | 1 | 0.333333 | 0.666667 | 1 |        |
| 3600 | ENSG00000101146 | HPA048795 | 1 | 0.333333 | 0.666667 | 1 |        |
| 3600 | ENSG00000101216 | HPA009706 | 1 | 0.333333 | 0.666667 | 1 | 0.2879 |
| 3600 | ENSG00000101335 | HPA045244 | 1 | 0.333333 | 0.666667 | 1 |        |
| 3600 | ENSG00000101347 | HPA047072 | 1 | 0.333333 | 0.666667 | 1 |        |
| 3600 | ENSG00000101452 | HPA062700 | 1 | 0.333333 | 0.666667 | 1 |        |
| 3600 | ENSG00000101493 | HPA015792 | 1 | 0.333333 | 0.666667 | 1 |        |
| 3600 | ENSG00000101608 | HPA045244 | 1 | 0.333333 | 0.666667 | 1 |        |
| 3600 | ENSG00000101654 | HPA039409 | 1 | 0.333333 | 0.666667 | 1 |        |
| 3600 | ENSG00000101773 | HPA052946 | 1 | 0.333333 | 0.666667 | 1 |        |
| 3600 | ENSG00000101951 | HPA023880 | 1 | 0.333333 | 0.666667 | 1 |        |
| 3600 | ENSG00000102030 | HPA030711 | 1 | 0.333333 | 0.666667 | 1 |        |
| 3600 | ENSG00000102103 | HPA001880 | 1 | 0.333333 | 0.666667 | 1 |        |
| 3600 | ENSG00000102172 | HPA029852 | 1 | 0.333333 | 0.666667 | 1 |        |
| 3600 | ENSG00000102854 | HPA017172 | 1 | 0.333333 | 0.666667 | 1 |        |
| 3600 | ENSG00000103024 | HPA052733 | 1 | 0.333333 | 0.666667 | 1 |        |
| 3600 | ENSG00000103168 | HPA072229 | 1 | 0.333333 | 0.666667 | 1 |        |
| 3600 | ENSG00000103184 | HPA041492 | 1 | 0.333333 | 0.666667 | 1 |        |
| 3600 | ENSG00000104177 | HPA004883 | 1 | 0.333333 | 0.666667 | 1 |        |
| 3600 | ENSG00000104218 | HPA056174 | 1 | 0.333333 | 0.666667 | 1 |        |
| 3600 | ENSG00000104435 | HPA026922 | 1 | 0.333333 | 0.666667 | 1 |        |
| 3600 | ENSG00000104643 | HPA070944 | 1 | 0.333333 | 0.666667 | 1 |        |
| 3600 | ENSG00000104774 | HPA053404 | 1 | 0.333333 | 0.666667 | 1 |        |
| 3600 | ENSG00000104805 | HPA008176 | 1 | 0.333333 | 0.666667 | 1 | 0.3818 |
| 3600 | ENSG00000104885 | HPA011875 | 1 | 0.333333 | 0.666667 | 1 |        |
| 3600 | ENSG00000104889 | HPA042692 | 1 | 0.333333 | 0.666667 | 1 |        |
| 3600 | ENSG00000105251 | HPA017955 | 1 | 0.333333 | 0.666667 | 1 |        |
| 3600 | ENSG00000105383 | HPA064807 | 1 | 0.333333 | 0.666667 | 1 |        |
| 3600 | ENSG00000105404 | HPA029171 | 1 | 0.333333 | 0.666667 | 1 |        |
| 3600 | ENSG00000105617 | HPA043541 | 1 | 0.333333 | 0.666667 | 1 |        |
| 3600 | ENSG00000105619 | HPA058534 | 1 | 0.333333 | 0.666667 | 1 |        |
| 3600 | ENSG00000105669 | HPA041605 | 1 | 0.333333 | 0.666667 | 1 |        |
| 3600 | ENSG00000105679 | HPA042666 | 1 | 0.333333 | 0.666667 | 1 |        |
| 3600 | ENSG00000105808 | HPA043010 | 1 | 0.333333 | 0.666667 | 1 |        |

|      |                 |           |   |          |          |   |        |        |
|------|-----------------|-----------|---|----------|----------|---|--------|--------|
| 3600 | ENSG00000105810 | HPA002637 | 1 | 0.333333 | 0.666667 | 1 |        |        |
| 3600 | ENSG00000105976 | CAB005282 | 1 | 0.333333 | 0.666667 | 1 | 0.3858 | 0.3524 |
| 3600 | ENSG00000106052 | HPA024432 | 1 | 0.333333 | 0.666667 | 1 |        |        |
| 3600 | ENSG00000106070 | HPA031818 | 1 | 0.333333 | 0.666667 | 1 |        |        |
| 3600 | ENSG00000106330 | HPA041137 | 1 | 0.333333 | 0.666667 | 1 |        |        |
| 3600 | ENSG00000106436 | HPA019763 | 1 | 0.333333 | 0.666667 | 1 |        |        |
| 3600 | ENSG00000106546 | CAB005072 | 1 | 0.333333 | 0.666667 | 1 |        |        |
| 3600 | ENSG00000106785 | HPA053217 | 1 | 0.333333 | 0.666667 | 1 |        |        |
| 3600 | ENSG00000107164 | HPA058392 | 1 | 0.333333 | 0.666667 | 1 |        |        |
| 3600 | ENSG00000107447 | HPA036532 | 1 | 0.333333 | 0.666667 | 1 |        |        |
| 3600 | ENSG00000107518 | HPA038070 | 1 | 0.333333 | 0.666667 | 1 |        |        |
| 3600 | ENSG00000107560 | HPA037726 | 1 | 0.333333 | 0.666667 | 1 |        |        |
| 3600 | ENSG00000108001 | HPA061169 | 1 | 0.333333 | 0.666667 | 1 |        |        |
| 3600 | ENSG00000108448 | HPA066431 | 1 | 0.333333 | 0.666667 | 1 |        |        |
| 3600 | ENSG00000108479 | HPA007094 | 1 | 0.333333 | 0.666667 | 1 |        |        |
| 3600 | ENSG00000108622 | HPA071155 | 1 | 0.333333 | 0.666667 | 1 |        |        |
| 3600 | ENSG00000108666 | HPA004061 | 1 | 0.333333 | 0.666667 | 1 |        |        |
| 3600 | ENSG00000108848 | HPA018475 | 1 | 0.333333 | 0.666667 | 1 | 0.451  | 0.2879 |
| 3600 | ENSG00000108932 | HPA066328 | 1 | 0.333333 | 0.666667 | 1 |        |        |
| 3600 | ENSG00000109265 | HPA048148 | 1 | 0.333333 | 0.666667 | 1 |        |        |
| 3600 | ENSG00000109680 | HPA039592 | 1 | 0.333333 | 0.666667 | 1 | 0.4456 |        |
| 3600 | ENSG00000109736 | HPA043209 | 1 | 0.333333 | 0.666667 | 1 |        |        |
| 3600 | ENSG00000109819 | HPA063136 | 1 | 0.333333 | 0.666667 | 1 |        |        |
| 3600 | ENSG00000109971 | HPA052504 | 1 | 0.333333 | 0.666667 | 1 |        |        |
| 3600 | ENSG00000110002 | HPA037813 | 1 | 0.333333 | 0.666667 | 1 |        |        |
| 3600 | ENSG00000111245 | HPA019763 | 1 | 0.333333 | 0.666667 | 1 |        |        |
| 3600 | ENSG00000111490 | HPA039772 | 1 | 0.333333 | 0.666667 | 1 |        |        |
| 3600 | ENSG00000111652 | HPA026915 | 1 | 0.333333 | 0.666667 | 1 |        |        |
| 3600 | ENSG00000111679 | HPA001466 | 1 | 0.333333 | 0.666667 | 1 |        |        |
| 3600 | ENSG00000111707 | HPA040402 | 1 | 0.333333 | 0.666667 | 1 |        |        |
| 3600 | ENSG00000111834 | HPA031196 | 1 | 0.333333 | 0.666667 | 1 |        |        |
| 3600 | ENSG00000112624 | HPA029390 | 1 | 0.333333 | 0.666667 | 1 | 0.5148 |        |
| 3600 | ENSG00000113119 | HPA037474 | 1 | 0.333333 | 0.666667 | 1 |        |        |
| 3600 | ENSG00000113460 | HPA039614 | 1 | 0.333333 | 0.666667 | 1 |        |        |
| 3600 | ENSG00000113594 | HPA004478 | 1 | 0.333333 | 0.666667 | 1 |        |        |
| 3600 | ENSG00000113658 | HPA058931 | 1 | 0.333333 | 0.666667 | 1 |        |        |
| 3600 | ENSG00000114021 | HPA036999 | 1 | 0.333333 | 0.666667 | 1 |        |        |
| 3600 | ENSG00000114125 | HPA036995 | 1 | 0.333333 | 0.666667 | 1 |        |        |
| 3600 | ENSG00000114383 | HPA030116 | 1 | 0.333333 | 0.666667 | 1 |        |        |
| 3600 | ENSG00000115234 | HPA043867 | 1 | 0.333333 | 0.666667 | 1 |        |        |
| 3600 | ENSG00000115271 | HPA035033 | 1 | 0.333333 | 0.666667 | 1 |        |        |
| 3600 | ENSG00000115274 | HPA070644 | 1 | 0.333333 | 0.666667 | 1 |        |        |
| 3600 | ENSG00000115282 | HPA041783 | 1 | 0.333333 | 0.666667 | 1 | 0.3595 |        |
| 3600 | ENSG00000115568 | HPA049594 | 1 | 0.333333 | 0.666667 | 1 |        |        |
| 3600 | ENSG00000115827 | HPA055040 | 1 | 0.333333 | 0.666667 | 1 |        |        |
| 3600 | ENSG00000116120 | HPA036678 | 1 | 0.333333 | 0.666667 | 1 |        |        |
| 3600 | ENSG00000116132 | HPA063566 | 1 | 0.333333 | 0.666667 | 1 |        |        |
| 3600 | ENSG00000116161 | HPA025753 | 1 | 0.333333 | 0.666667 | 1 |        |        |
| 3600 | ENSG00000116191 | HPA027143 | 1 | 0.333333 | 0.666667 | 1 |        |        |
| 3600 | ENSG00000116478 | CAB005017 | 1 | 0.333333 | 0.666667 | 1 |        |        |
| 3600 | ENSG00000116497 | HPA027328 | 1 | 0.333333 | 0.666667 | 1 |        |        |
| 3600 | ENSG00000116661 | HPA005472 | 1 | 0.333333 | 0.666667 | 1 |        |        |
| 3600 | ENSG00000116701 | HPA006040 | 1 | 0.333333 | 0.666667 | 1 |        |        |
| 3600 | ENSG00000116731 | HPA005809 | 1 | 0.333333 | 0.666667 | 1 |        |        |
| 3600 | ENSG00000116898 | HPA028100 | 1 | 0.333333 | 0.666667 | 1 |        |        |



|      |                 |           |   |          |          |   |        |
|------|-----------------|-----------|---|----------|----------|---|--------|
| 3600 | ENSG00000117000 | HPA054653 | 1 | 0.333333 | 0.666667 | 1 |        |
| 3600 | ENSG00000117010 | HPA059153 | 1 | 0.333333 | 0.666667 | 1 |        |
| 3600 | ENSG00000117400 | HPA007619 | 1 | 0.333333 | 0.666667 | 1 |        |
| 3600 | ENSG00000117519 | CAB009849 | 1 | 0.333333 | 0.666667 | 1 |        |
| 3600 | ENSG00000117602 | HPA064289 | 1 | 0.333333 | 0.666667 | 1 |        |
| 3600 | ENSG00000117676 | HPA007981 | 1 | 0.333333 | 0.666667 | 1 | 0.2732 |
| 3600 | ENSG00000117834 | HPA050263 | 1 | 0.333333 | 0.666667 | 1 |        |
| 3600 | ENSG00000118058 | HPA044910 | 1 | 0.333333 | 0.666667 | 1 |        |
| 3600 | ENSG00000118492 | HPA036340 | 1 | 0.333333 | 0.666667 | 1 |        |
| 3600 | ENSG00000118680 | HPA045244 | 1 | 0.333333 | 0.666667 | 1 |        |
| 3600 | ENSG00000118855 | HPA057924 | 1 | 0.333333 | 0.666667 | 1 |        |
| 3600 | ENSG00000119650 | HPA003438 | 1 | 0.333333 | 0.666667 | 1 |        |
| 3600 | ENSG00000119801 | HPA042809 | 1 | 0.333333 | 0.666667 | 1 |        |
| 3600 | ENSG00000120149 | HPA005652 | 1 | 0.333333 | 0.666667 | 1 |        |
| 3600 | ENSG00000120262 | HPA027114 | 1 | 0.333333 | 0.666667 | 1 |        |
| 3600 | ENSG00000120685 | HPA055687 | 1 | 0.333333 | 0.666667 | 1 |        |
| 3600 | ENSG00000120733 | HPA016610 | 1 | 0.333333 | 0.666667 | 1 | 0.427  |
| 3600 | ENSG00000120800 | HPA049341 | 1 | 0.333333 | 0.666667 | 1 |        |
| 3600 | ENSG00000121101 | HPA030620 | 1 | 0.333333 | 0.666667 | 1 |        |
| 3600 | ENSG00000121903 | HPA017933 | 1 | 0.333333 | 0.666667 | 1 | 0.3934 |
| 3600 | ENSG00000122678 | HPA058900 | 1 | 0.333333 | 0.666667 | 1 |        |
| 3600 | ENSG00000122694 | HPA029478 | 1 | 0.333333 | 0.666667 | 1 |        |
| 3600 | ENSG00000122952 | HPA005757 | 1 | 0.333333 | 0.666667 | 1 | 0.3525 |
| 3600 | ENSG00000123240 | HPA003279 | 1 | 0.333333 | 0.666667 | 1 | 0.4339 |
| 3600 | ENSG00000123338 | HPA039490 | 1 | 0.333333 | 0.666667 | 1 |        |
| 3600 | ENSG00000123427 | HPA045492 | 1 | 0.333333 | 0.666667 | 1 |        |
| 3600 | ENSG00000123595 | CAB016411 | 1 | 0.333333 | 0.666667 | 1 |        |
| 3600 | ENSG00000123908 | HPA058075 | 1 | 0.333333 | 0.666667 | 1 |        |
| 3600 | ENSG00000123977 | HPA046118 | 1 | 0.333333 | 0.666667 | 1 |        |
| 3600 | ENSG00000123983 | HPA071021 | 1 | 0.333333 | 0.666667 | 1 | 0.2576 |
| 3600 | ENSG00000124831 | HPA006979 | 1 | 0.333333 | 0.666667 | 1 |        |
| 3600 | ENSG00000125508 | HPA073987 | 1 | 0.333333 | 0.666667 | 1 |        |
| 3600 | ENSG00000125741 | HPA044881 | 1 | 0.333333 | 0.666667 | 1 |        |
| 3600 | ENSG00000125744 | HPA034941 | 1 | 0.333333 | 0.666667 | 1 |        |
| 3600 | ENSG00000125775 | HPA054554 | 1 | 0.333333 | 0.666667 | 1 |        |
| 3600 | ENSG00000125846 | HPA001493 | 1 | 0.333333 | 0.666667 | 1 |        |
| 3600 | ENSG00000125877 | HPA022824 | 1 | 0.333333 | 0.666667 | 1 |        |
| 3600 | ENSG00000125901 | HPA045472 | 1 | 0.333333 | 0.666667 | 1 |        |
| 3600 | ENSG00000125931 | HPA049051 | 1 | 0.333333 | 0.666667 | 1 |        |
| 3600 | ENSG00000126709 | HPA005543 | 1 | 0.333333 | 0.666667 | 1 |        |
| 3600 | ENSG00000126803 | HPA052504 | 1 | 0.333333 | 0.666667 | 1 |        |
| 3600 | ENSG00000126945 | HPA000914 | 1 | 0.333333 | 0.666667 | 1 |        |
| 3600 | ENSG00000127152 | HPA049117 | 1 | 0.333333 | 0.666667 | 1 |        |
| 3600 | ENSG00000127863 | HPA010135 | 1 | 0.333333 | 0.666667 | 1 |        |
| 3600 | ENSG00000127989 | HPA069560 | 1 | 0.333333 | 0.666667 | 1 |        |
| 3600 | ENSG00000128250 | HPA048320 | 1 | 0.333333 | 0.666667 | 1 |        |
| 3600 | ENSG00000128253 | HPA048320 | 1 | 0.333333 | 0.666667 | 1 |        |
| 3600 | ENSG00000128276 | HPA048320 | 1 | 0.333333 | 0.666667 | 1 |        |
| 3600 | ENSG00000128283 | HPA006379 | 1 | 0.333333 | 0.666667 | 1 |        |
| 3600 | ENSG00000128683 | HPA031949 | 1 | 0.333333 | 0.666667 | 1 |        |
| 3600 | ENSG00000128908 | HPA041417 | 1 | 0.333333 | 0.666667 | 1 |        |
| 3600 | ENSG00000128928 | HPA041391 | 1 | 0.333333 | 0.666667 | 1 |        |
| 3600 | ENSG00000129048 | HPA054926 | 1 | 0.333333 | 0.666667 | 1 |        |
| 3600 | ENSG00000130224 | HPA003233 | 1 | 0.333333 | 0.666667 | 1 |        |
| 3600 | ENSG00000130294 | HPA005442 | 1 | 0.333333 | 0.666667 | 1 |        |

|      |                 |           |   |          |          |   |        |        |
|------|-----------------|-----------|---|----------|----------|---|--------|--------|
| 3600 | ENSG00000130475 | HPA041653 | 1 | 0.333333 | 0.666667 | 1 |        |        |
| 3600 | ENSG00000130590 | HPA040973 | 1 | 0.333333 | 0.666667 | 1 |        |        |
| 3600 | ENSG00000130699 | HPA008599 | 1 | 0.333333 | 0.666667 | 1 |        |        |
| 3600 | ENSG00000130707 | HPA020934 | 1 | 0.333333 | 0.666667 | 1 |        |        |
| 3600 | ENSG00000130713 | HPA021756 | 1 | 0.333333 | 0.666667 | 1 | 0.3576 | 0.67   |
| 3600 | ENSG00000130813 | HPA042001 | 1 | 0.333333 | 0.666667 | 1 |        |        |
| 3600 | ENSG00000130985 | HPA001506 | 1 | 0.333333 | 0.666667 | 1 |        |        |
| 3600 | ENSG00000131374 | HPA035125 | 1 | 0.333333 | 0.666667 | 1 |        |        |
| 3600 | ENSG00000131584 | HPA058381 | 1 | 0.333333 | 0.666667 | 1 |        |        |
| 3600 | ENSG00000132274 | HPA003575 | 1 | 0.333333 | 0.666667 | 1 |        |        |
| 3600 | ENSG00000132394 | HPA035795 | 1 | 0.333333 | 0.666667 | 1 |        |        |
| 3600 | ENSG00000132589 | HPA071038 | 1 | 0.333333 | 0.666667 | 1 | 0.434  | 0.3852 |
| 3600 | ENSG00000132600 | HPA044241 | 1 | 0.333333 | 0.666667 | 1 |        |        |
| 3600 | ENSG00000133104 | HPA039054 | 1 | 0.333333 | 0.666667 | 1 |        |        |
| 3600 | ENSG00000133216 | HPA071200 | 1 | 0.333333 | 0.666667 | 1 |        | 0.4238 |
| 3600 | ENSG00000133250 | HPA053769 | 1 | 0.333333 | 0.666667 | 1 |        |        |
| 3600 | ENSG00000133433 | HPA000750 | 1 | 0.333333 | 0.666667 | 1 |        |        |
| 3600 | ENSG00000133460 | HPA071184 | 1 | 0.333333 | 0.666667 | 1 |        |        |
| 3600 | ENSG00000133477 | HPA064657 | 1 | 0.333333 | 0.666667 | 1 |        |        |
| 3600 | ENSG00000133943 | HPA041423 | 1 | 0.333333 | 0.666667 | 1 |        |        |
| 3600 | ENSG00000134046 | HPA067582 | 1 | 0.333333 | 0.666667 | 1 |        |        |
| 3600 | ENSG00000134222 | HPA056561 | 1 | 0.333333 | 0.666667 | 1 |        |        |
| 3600 | ENSG00000134333 | CAB015336 | 1 | 0.333333 | 0.666667 | 1 |        |        |
| 3600 | ENSG00000134900 | HPA049630 | 1 | 0.333333 | 0.666667 | 1 |        | 0.1919 |
| 3600 | ENSG00000135040 | HPA051586 | 1 | 0.333333 | 0.666667 | 1 |        |        |
| 3600 | ENSG00000135048 | HPA044889 | 1 | 0.333333 | 0.666667 | 1 |        |        |
| 3600 | ENSG00000135108 | HPA062411 | 1 | 0.333333 | 0.666667 | 1 |        |        |
| 3600 | ENSG00000135205 | HPA020082 | 1 | 0.333333 | 0.666667 | 1 |        |        |
| 3600 | ENSG00000135272 | HPA030716 | 1 | 0.333333 | 0.666667 | 1 |        |        |
| 3600 | ENSG00000135476 | CAB012185 | 1 | 0.333333 | 0.666667 | 1 |        |        |
| 3600 | ENSG00000135723 | HPA024468 | 1 | 0.333333 | 0.666667 | 1 |        |        |
| 3600 | ENSG00000136436 | HPA022989 | 1 | 0.333333 | 0.666667 | 1 |        |        |
| 3600 | ENSG00000136699 | HPA049426 | 1 | 0.333333 | 0.666667 | 1 |        |        |
| 3600 | ENSG00000136709 | HPA046527 | 1 | 0.333333 | 0.666667 | 1 |        |        |
| 3600 | ENSG00000136819 | HPA021216 | 1 | 0.333333 | 0.666667 | 1 | 0.2191 | 0.6251 |
| 3600 | ENSG00000136840 | HPA009042 | 1 | 0.333333 | 0.666667 | 1 |        |        |
| 3600 | ENSG00000137040 | HPA043748 | 1 | 0.333333 | 0.666667 | 1 |        |        |
| 3600 | ENSG00000137106 | HPA022971 | 1 | 0.333333 | 0.666667 | 1 |        |        |
| 3600 | ENSG00000137185 | HPA054512 | 1 | 0.333333 | 0.666667 | 1 |        |        |
| 3600 | ENSG00000137337 | HPA006915 | 1 | 0.333333 | 0.666667 | 1 |        |        |
| 3600 | ENSG00000137710 | HPA000763 | 1 | 0.333333 | 0.666667 | 1 |        |        |
| 3600 | ENSG00000138035 | HPA034602 | 1 | 0.333333 | 0.666667 | 1 |        |        |
| 3600 | ENSG00000138119 | HPA014245 | 1 | 0.333333 | 0.666667 | 1 |        |        |
| 3600 | ENSG00000138175 | HPA063596 | 1 | 0.333333 | 0.666667 | 1 |        |        |
| 3600 | ENSG00000138279 | HPA064290 | 1 | 0.333333 | 0.666667 | 1 |        |        |
| 3600 | ENSG00000138303 | HPA057567 | 1 | 0.333333 | 0.666667 | 1 |        |        |
| 3600 | ENSG00000138346 | HPA057526 | 1 | 0.333333 | 0.666667 | 1 |        | 0.514  |
| 3600 | ENSG00000138663 | HPA042828 | 1 | 0.333333 | 0.666667 | 1 |        |        |
| 3600 | ENSG00000138834 | HPA041785 | 1 | 0.333333 | 0.666667 | 1 |        |        |
| 3600 | ENSG00000139131 | HPA074097 | 1 | 0.333333 | 0.666667 | 1 |        |        |
| 3600 | ENSG00000139174 | HPA001379 | 1 | 0.333333 | 0.666667 | 1 |        |        |
| 3600 | ENSG00000139597 | HPA038971 | 1 | 0.333333 | 0.666667 | 1 |        |        |
| 3600 | ENSG00000139880 | HPA065233 | 1 | 0.333333 | 0.666667 | 1 |        |        |
| 3600 | ENSG00000140259 | HPA015583 | 1 | 0.333333 | 0.666667 | 1 | 0.2939 |        |
| 3600 | ENSG00000140280 | HPA040460 | 1 | 0.333333 | 0.666667 | 1 |        |        |

|      |                 |           |   |          |          |   |        |
|------|-----------------|-----------|---|----------|----------|---|--------|
| 3600 | ENSG00000140526 | HPA005999 | 1 | 0.333333 | 0.666667 | 1 |        |
| 3600 | ENSG00000140538 | HPA027484 | 1 | 0.333333 | 0.666667 | 1 |        |
| 3600 | ENSG00000140632 | CAB017022 | 1 | 0.333333 | 0.666667 | 1 | 0.319  |
| 3600 | ENSG00000140740 | HPA007998 | 1 | 0.333333 | 0.666667 | 1 |        |
| 3600 | ENSG00000140795 | HPA073447 | 1 | 0.333333 | 0.666667 | 1 |        |
| 3600 | ENSG00000140807 | HPA049413 | 1 | 0.333333 | 0.666667 | 1 |        |
| 3600 | ENSG00000141371 | HPA044415 | 1 | 0.333333 | 0.666667 | 1 |        |
| 3600 | ENSG00000141380 | HPA059539 | 1 | 0.333333 | 0.666667 | 1 |        |
| 3600 | ENSG00000141384 | HPA028937 | 1 | 0.333333 | 0.666667 | 1 |        |
| 3600 | ENSG00000141448 | HPA066629 | 1 | 0.333333 | 0.666667 | 1 |        |
| 3600 | ENSG00000141622 | HPA041615 | 1 | 0.333333 | 0.666667 | 1 |        |
| 3600 | ENSG00000141994 | HPA062846 | 1 | 0.333333 | 0.666667 | 1 |        |
| 3600 | ENSG00000142197 | HPA072065 | 1 | 0.333333 | 0.666667 | 1 |        |
| 3600 | ENSG00000142235 | HPA040203 | 1 | 0.333333 | 0.666667 | 1 |        |
| 3600 | ENSG00000142611 | HPA050343 | 1 | 0.333333 | 0.666667 | 1 |        |
| 3600 | ENSG00000142687 | HPA072692 | 1 | 0.333333 | 0.666667 | 1 |        |
| 3600 | ENSG00000142700 | HPA062958 | 1 | 0.333333 | 0.666667 | 1 |        |
| 3600 | ENSG00000143107 | HPA028079 | 1 | 0.333333 | 0.666667 | 1 |        |
| 3600 | ENSG00000143147 | HPA072047 | 1 | 0.333333 | 0.666667 | 1 | 0.3533 |
| 3600 | ENSG00000143320 | HPA004135 | 1 | 0.333333 | 0.666667 | 1 |        |
| 3600 | ENSG00000143512 | HPA059673 | 1 | 0.333333 | 0.666667 | 1 |        |
| 3600 | ENSG00000143748 | HPA028219 | 1 | 0.333333 | 0.666667 | 1 |        |
| 3600 | ENSG00000143952 | HPA055894 | 1 | 0.333333 | 0.666667 | 1 |        |
| 3600 | ENSG00000144218 | HPA053379 | 1 | 0.333333 | 0.666667 | 1 |        |
| 3600 | ENSG00000144229 | HPA056745 | 1 | 0.333333 | 0.666667 | 1 |        |
| 3600 | ENSG00000144230 | HPA029766 | 1 | 0.333333 | 0.666667 | 1 |        |
| 3600 | ENSG00000144369 | HPA013434 | 1 | 0.333333 | 0.666667 | 1 | 0.3786 |
| 3600 | ENSG00000144426 | HPA049189 | 1 | 0.333333 | 0.666667 | 1 |        |
| 3600 | ENSG00000144504 | HPA026620 | 1 | 0.333333 | 0.666667 | 1 |        |
| 3600 | ENSG00000144677 | HPA048325 | 1 | 0.333333 | 0.666667 | 1 |        |
| 3600 | ENSG00000144712 | HPA005777 | 1 | 0.333333 | 0.666667 | 1 |        |
| 3600 | ENSG00000145920 | HPA071191 | 1 | 0.333333 | 0.666667 | 1 |        |
| 3600 | ENSG00000146085 | HPA035971 | 1 | 0.333333 | 0.666667 | 1 |        |
| 3600 | ENSG00000146143 | HPA046566 | 1 | 0.333333 | 0.666667 | 1 |        |
| 3600 | ENSG00000146221 | HPA031739 | 1 | 0.333333 | 0.666667 | 1 |        |
| 3600 | ENSG00000146386 | HPA030217 | 1 | 0.333333 | 0.666667 | 1 |        |
| 3600 | ENSG00000146433 | HPA040189 | 1 | 0.333333 | 0.666667 | 1 |        |
| 3600 | ENSG00000146530 | HPA026619 | 1 | 0.333333 | 0.666667 | 1 |        |
| 3600 | ENSG00000146833 | HPA019356 | 1 | 0.333333 | 0.666667 | 1 |        |
| 3600 | ENSG00000147050 | HPA000568 | 1 | 0.333333 | 0.666667 | 1 |        |
| 3600 | ENSG00000147536 | HPA024663 | 1 | 0.333333 | 0.666667 | 1 |        |
| 3600 | ENSG00000147649 | HPA010932 | 1 | 0.333333 | 0.666667 | 1 | 0.5312 |
| 3600 | ENSG00000148303 | HPA046794 | 1 | 0.333333 | 0.666667 | 1 |        |
| 3600 | ENSG00000148677 | HPA038736 | 1 | 0.333333 | 0.666667 | 1 |        |
| 3600 | ENSG00000148737 | HPA038800 | 1 | 0.333333 | 0.666667 | 1 |        |
| 3600 | ENSG00000148814 | HPA037595 | 1 | 0.333333 | 0.666667 | 1 |        |
| 3600 | ENSG00000148843 | CAB026472 | 1 | 0.333333 | 0.666667 | 1 |        |
| 3600 | ENSG00000148848 | HPA030867 | 1 | 0.333333 | 0.666667 | 1 |        |
| 3600 | ENSG00000149089 | HPA021188 | 1 | 0.333333 | 0.666667 | 1 |        |
| 3600 | ENSG00000149136 | HPA002697 | 1 | 0.333333 | 0.666667 | 1 |        |
| 3600 | ENSG00000149328 | HPA054808 | 1 | 0.333333 | 0.666667 | 1 |        |
| 3600 | ENSG00000149476 | HPA039486 | 1 | 0.333333 | 0.666667 | 1 |        |
| 3600 | ENSG00000149532 | HPA041094 | 1 | 0.333333 | 0.666667 | 1 |        |
| 3600 | ENSG00000149554 | HPA044364 | 1 | 0.333333 | 0.666667 | 1 |        |
| 3600 | ENSG00000149639 | HPA043992 | 1 | 0.333333 | 0.666667 | 1 |        |

|      |                 |           |   |          |          |   |        |        |
|------|-----------------|-----------|---|----------|----------|---|--------|--------|
| 3600 | ENSG00000150459 | HPA011352 | 1 | 0.333333 | 0.666667 | 1 | 0.3592 | 0.34   |
| 3600 | ENSG00000150672 | HPA023896 | 1 | 0.333333 | 0.666667 | 1 |        |        |
| 3600 | ENSG00000151116 | HPA047134 | 1 | 0.333333 | 0.666667 | 1 |        |        |
| 3600 | ENSG00000151575 | HPA039415 | 1 | 0.333333 | 0.666667 | 1 |        |        |
| 3600 | ENSG00000151687 | HPA036168 | 1 | 0.333333 | 0.666667 | 1 |        |        |
| 3600 | ENSG00000151702 | HPA073099 | 1 | 0.333333 | 0.666667 | 1 |        |        |
| 3600 | ENSG00000151892 | HPA043829 | 1 | 0.333333 | 0.666667 | 1 |        |        |
| 3600 | ENSG00000152049 | HPA011420 | 1 | 0.333333 | 0.666667 | 1 |        |        |
| 3600 | ENSG00000152409 | HPA037508 | 1 | 0.333333 | 0.666667 | 1 |        |        |
| 3600 | ENSG00000152439 | HPA003152 | 1 | 0.333333 | 0.666667 | 1 |        |        |
| 3600 | ENSG00000152457 | HPA069295 | 1 | 0.333333 | 0.666667 | 1 |        |        |
| 3600 | ENSG00000152804 | HPA055460 | 1 | 0.333333 | 0.666667 | 1 |        |        |
| 3600 | ENSG00000153006 | HPA062853 | 1 | 0.333333 | 0.666667 | 1 |        |        |
| 3600 | ENSG00000153485 | HPA048559 | 1 | 0.333333 | 0.666667 | 1 |        |        |
| 3600 | ENSG00000153487 | HPA052591 | 1 | 0.333333 | 0.666667 | 1 |        |        |
| 3600 | ENSG00000153786 | HPA059642 | 1 | 0.333333 | 0.666667 | 1 |        |        |
| 3600 | ENSG00000153930 | HPA048953 | 1 | 0.333333 | 0.666667 | 1 |        |        |
| 3600 | ENSG00000153975 | HPA044426 | 1 | 0.333333 | 0.666667 | 1 |        |        |
| 3600 | ENSG00000154265 | HPA062904 | 1 | 0.333333 | 0.666667 | 1 | 0.282  | 0.4941 |
| 3600 | ENSG00000154710 | HPA001407 | 1 | 0.333333 | 0.666667 | 1 |        |        |
| 3600 | ENSG00000155959 | HPA023230 | 1 | 0.333333 | 0.666667 | 1 |        | 0.6183 |
| 3600 | ENSG00000156269 | HPA035922 | 1 | 0.333333 | 0.666667 | 1 |        |        |
| 3600 | ENSG00000156697 | HPA047217 | 1 | 0.333333 | 0.666667 | 1 |        |        |
| 3600 | ENSG00000156928 | HPA020487 | 1 | 0.333333 | 0.666667 | 1 |        |        |
| 3600 | ENSG00000156931 | HPA036871 | 1 | 0.333333 | 0.666667 | 1 |        |        |
| 3600 | ENSG00000157657 | HPA061732 | 1 | 0.333333 | 0.666667 | 1 |        |        |
| 3600 | ENSG00000157851 | HPA072387 | 1 | 0.333333 | 0.666667 | 1 |        |        |
| 3600 | ENSG00000158109 | HPA063163 | 1 | 0.333333 | 0.666667 | 1 |        |        |
| 3600 | ENSG00000158195 | HPA045288 | 1 | 0.333333 | 0.666667 | 1 |        |        |
| 3600 | ENSG00000158301 | HPA017438 | 1 | 0.333333 | 0.666667 | 1 |        |        |
| 3600 | ENSG00000158480 | HPA052224 | 1 | 0.333333 | 0.666667 | 1 |        |        |
| 3600 | ENSG00000158711 | HPA028863 | 1 | 0.333333 | 0.666667 | 1 |        |        |
| 3600 | ENSG00000158850 | HPA010793 | 1 | 0.333333 | 0.666667 | 1 |        |        |
| 3600 | ENSG00000158987 | HPA037983 | 1 | 0.333333 | 0.666667 | 1 | 0.3498 |        |
| 3600 | ENSG00000159374 | HPA045420 | 1 | 0.333333 | 0.666667 | 1 |        |        |
| 3600 | ENSG00000159840 | HPA004835 | 1 | 0.333333 | 0.666667 | 1 |        |        |
| 3600 | ENSG00000159842 | HPA053618 | 1 | 0.333333 | 0.666667 | 1 |        |        |
| 3600 | ENSG00000160058 | HPA031358 | 1 | 0.333333 | 0.666667 | 1 |        |        |
| 3600 | ENSG00000160194 | HPA020463 | 1 | 0.333333 | 0.666667 | 1 |        |        |
| 3600 | ENSG00000160202 | HPA037737 | 1 | 0.333333 | 0.666667 | 1 |        |        |
| 3600 | ENSG00000160208 | HPA017893 | 1 | 0.333333 | 0.666667 | 1 |        |        |
| 3600 | ENSG00000160223 | HPA029179 | 1 | 0.333333 | 0.666667 | 1 |        | 0.3286 |
| 3600 | ENSG00000160271 | HPA025961 | 1 | 0.333333 | 0.666667 | 1 |        |        |
| 3600 | ENSG00000160439 | HPA042006 | 1 | 0.333333 | 0.666667 | 1 |        |        |
| 3600 | ENSG00000160446 | HPA059339 | 1 | 0.333333 | 0.666667 | 1 |        |        |
| 3600 | ENSG00000160917 | HPA066470 | 1 | 0.333333 | 0.666667 | 1 |        |        |
| 3600 | ENSG00000161277 | HPA064056 | 1 | 0.333333 | 0.666667 | 1 |        |        |
| 3600 | ENSG00000161714 | HPA025711 | 1 | 0.333333 | 0.666667 | 1 |        |        |
| 3600 | ENSG00000161914 | HPA023631 | 1 | 0.333333 | 0.666667 | 1 |        |        |
| 3600 | ENSG00000161921 | HPA053253 | 1 | 0.333333 | 0.666667 | 1 |        |        |
| 3600 | ENSG00000162073 | HPA068394 | 1 | 0.333333 | 0.666667 | 1 |        |        |
| 3600 | ENSG00000162366 | HPA014907 | 1 | 0.333333 | 0.666667 | 1 |        |        |
| 3600 | ENSG00000162368 | HPA053730 | 1 | 0.333333 | 0.666667 | 1 |        |        |
| 3600 | ENSG00000162620 | HPA030799 | 1 | 0.333333 | 0.666667 | 1 |        |        |
| 3600 | ENSG00000162735 | HPA051966 | 1 | 0.333333 | 0.666667 | 1 |        |        |

|      |                 |           |   |          |          |   |        |
|------|-----------------|-----------|---|----------|----------|---|--------|
| 3600 | ENSG00000162783 | HPA029894 | 1 | 0.333333 | 0.666667 | 1 |        |
| 3600 | ENSG00000162961 | HPA043761 | 1 | 0.333333 | 0.666667 | 1 |        |
| 3600 | ENSG00000162999 | HPA021501 | 1 | 0.333333 | 0.666667 | 1 |        |
| 3600 | ENSG00000163466 | HPA008352 | 1 | 0.333333 | 0.666667 | 1 | 0.2487 |
| 3600 | ENSG00000163510 | HPA036748 | 1 | 0.333333 | 0.666667 | 1 |        |
| 3600 | ENSG00000163539 | HPA067071 | 1 | 0.333333 | 0.666667 | 1 |        |
| 3600 | ENSG00000163617 | HPA047833 | 1 | 0.333333 | 0.666667 | 1 |        |
| 3600 | ENSG00000163694 | HPA006347 | 1 | 0.333333 | 0.666667 | 1 |        |
| 3600 | ENSG00000163785 | HPA075430 | 1 | 0.333333 | 0.666667 | 1 |        |
| 3600 | ENSG00000163848 | HPA001656 | 1 | 0.333333 | 0.666667 | 1 | 0.2612 |
| 3600 | ENSG00000163877 | HPA036896 | 1 | 0.333333 | 0.666667 | 1 |        |
| 3600 | ENSG00000164038 | HPA047008 | 1 | 0.333333 | 0.666667 | 1 |        |
| 3600 | ENSG00000164062 | HPA029700 | 1 | 0.333333 | 0.666667 | 1 |        |
| 3600 | ENSG00000164162 | HPA044547 | 1 | 0.333333 | 0.666667 | 1 |        |
| 3600 | ENSG00000164291 | HPA042384 | 1 | 0.333333 | 0.666667 | 1 |        |
| 3600 | ENSG00000164330 | HPA061169 | 1 | 0.333333 | 0.666667 | 1 |        |
| 3600 | ENSG00000164520 | HPA054022 | 1 | 0.333333 | 0.666667 | 1 |        |
| 3600 | ENSG00000164611 | HPA045034 | 1 | 0.333333 | 0.666667 | 1 |        |
| 3600 | ENSG00000164631 | HPA063402 | 1 | 0.333333 | 0.666667 | 1 |        |
| 3600 | ENSG00000164743 | HPA026107 | 1 | 0.333333 | 0.666667 | 1 |        |
| 3600 | ENSG00000164815 | HPA019730 | 1 | 0.333333 | 0.666667 | 1 |        |
| 3600 | ENSG00000164885 | HPA064535 | 1 | 0.333333 | 0.666667 | 1 |        |
| 3600 | ENSG00000164975 | HPA053145 | 1 | 0.333333 | 0.666667 | 1 |        |
| 3600 | ENSG00000165194 | HPA027533 | 1 | 0.333333 | 0.666667 | 1 |        |
| 3600 | ENSG00000165219 | HPA029386 | 1 | 0.333333 | 0.666667 | 1 |        |
| 3600 | ENSG00000165312 | HPA038503 | 1 | 0.333333 | 0.666667 | 1 |        |
| 3600 | ENSG00000165487 | HPA058790 | 1 | 0.333333 | 0.666667 | 1 |        |
| 3600 | ENSG00000165525 | HPA004160 | 1 | 0.333333 | 0.666667 | 1 |        |
| 3600 | ENSG00000165646 | HPA073224 | 1 | 0.333333 | 0.666667 | 1 |        |
| 3600 | ENSG00000165821 | HPA004162 | 1 | 0.333333 | 0.666667 | 1 |        |
| 3600 | ENSG00000166261 | HPA059229 | 1 | 0.333333 | 0.666667 | 1 |        |
| 3600 | ENSG00000166402 | HPA017997 | 1 | 0.333333 | 0.666667 | 1 |        |
| 3600 | ENSG00000166747 | HPA041224 | 1 | 0.333333 | 0.666667 | 1 | 0.1775 |
| 3600 | ENSG00000166780 | HPA041114 | 1 | 0.333333 | 0.666667 | 1 |        |
| 3600 | ENSG00000166801 | HPA040176 | 1 | 0.333333 | 0.666667 | 1 |        |
| 3600 | ENSG00000166840 | HPA039501 | 1 | 0.333333 | 0.666667 | 1 |        |
| 3600 | ENSG00000166924 | HPA022251 | 1 | 0.333333 | 0.666667 | 1 |        |
| 3600 | ENSG00000166987 | HPA038948 | 1 | 0.333333 | 0.666667 | 1 |        |
| 3600 | ENSG00000167186 | HPA071922 | 1 | 0.333333 | 0.666667 | 1 |        |
| 3600 | ENSG00000167257 | HPA039332 | 1 | 0.333333 | 0.666667 | 1 | 0.3139 |
| 3600 | ENSG00000167325 | CAB022093 | 1 | 0.333333 | 0.666667 | 1 |        |
| 3600 | ENSG00000167645 | HPA039328 | 1 | 0.333333 | 0.666667 | 1 |        |
| 3600 | ENSG00000167646 | HPA056220 | 1 | 0.333333 | 0.666667 | 1 |        |
| 3600 | ENSG00000167862 | HPA003634 | 1 | 0.333333 | 0.666667 | 1 |        |
| 3600 | ENSG00000167881 | HPA023303 | 1 | 0.333333 | 0.666667 | 1 |        |
| 3600 | ENSG00000167930 | HPA011651 | 1 | 0.333333 | 0.666667 | 1 |        |
| 3600 | ENSG00000167987 | HPA043348 | 1 | 0.333333 | 0.666667 | 1 |        |
| 3600 | ENSG00000168026 | HPA035510 | 1 | 0.333333 | 0.666667 | 1 |        |
| 3600 | ENSG00000168056 | HPA073170 | 1 | 0.333333 | 0.666667 | 1 |        |
| 3600 | ENSG00000168237 | HPA006913 | 1 | 0.333333 | 0.666667 | 1 | 0.5648 |
| 3600 | ENSG00000168421 | HPA061314 | 1 | 0.333333 | 0.666667 | 1 |        |
| 3600 | ENSG00000168490 | HPA069318 | 1 | 0.333333 | 0.666667 | 1 |        |
| 3600 | ENSG00000168795 | HPA021521 | 1 | 0.333333 | 0.666667 | 1 |        |
| 3600 | ENSG00000168806 | HPA048176 | 1 | 0.333333 | 0.666667 | 1 |        |
| 3600 | ENSG00000168944 | HPA028823 | 1 | 0.333333 | 0.666667 | 1 |        |

|      |                 |           |   |          |          |   |        |        |
|------|-----------------|-----------|---|----------|----------|---|--------|--------|
| 3600 | ENSG00000168993 | HPA071191 | 1 | 0.333333 | 0.666667 | 1 |        |        |
| 3600 | ENSG00000169045 | HPA000914 | 1 | 0.333333 | 0.666667 | 1 |        |        |
| 3600 | ENSG00000169136 | HPA030187 | 1 | 0.333333 | 0.666667 | 1 |        |        |
| 3600 | ENSG00000169297 | HPA061948 | 1 | 0.333333 | 0.666667 | 1 |        |        |
| 3600 | ENSG00000169760 | HPA006572 | 1 | 0.333333 | 0.666667 | 1 |        |        |
| 3600 | ENSG00000169903 | HPA046430 | 1 | 0.333333 | 0.666667 | 1 |        |        |
| 3600 | ENSG00000170265 | HPA024374 | 1 | 0.333333 | 0.666667 | 1 |        |        |
| 3600 | ENSG00000170385 | HPA015275 | 1 | 0.333333 | 0.666667 | 1 |        |        |
| 3600 | ENSG00000170439 | HPA038644 | 1 | 0.333333 | 0.666667 | 1 |        |        |
| 3600 | ENSG00000170454 | HPA076201 | 1 | 0.333333 | 0.666667 | 1 |        |        |
| 3600 | ENSG00000170471 | HPA051454 | 1 | 0.333333 | 0.666667 | 1 |        |        |
| 3600 | ENSG00000170485 | HPA019674 | 1 | 0.333333 | 0.666667 | 1 |        |        |
| 3600 | ENSG00000170667 | HPA043010 | 1 | 0.333333 | 0.666667 | 1 |        |        |
| 3600 | ENSG00000170703 | HPA052397 | 1 | 0.333333 | 0.666667 | 1 | 0.2712 | 0.4425 |
| 3600 | ENSG00000170891 | HPA067201 | 1 | 0.333333 | 0.666667 | 1 |        |        |
| 3600 | ENSG00000170915 | HPA064625 | 1 | 0.333333 | 0.666667 | 1 |        |        |
| 3600 | ENSG00000171044 | HPA024828 | 1 | 0.333333 | 0.666667 | 1 |        |        |
| 3600 | ENSG00000171163 | HPA059337 | 1 | 0.333333 | 0.666667 | 1 |        |        |
| 3600 | ENSG00000171421 | HPA047238 | 1 | 0.333333 | 0.666667 | 1 |        |        |
| 3600 | ENSG00000171475 | HPA024000 | 1 | 0.333333 | 0.666667 | 1 | 0.2138 |        |
| 3600 | ENSG00000171492 | HPA014745 | 1 | 0.333333 | 0.666667 | 1 |        |        |
| 3600 | ENSG00000171604 | HPA058148 | 1 | 0.333333 | 0.666667 | 1 |        |        |
| 3600 | ENSG00000171606 | HPA028880 | 1 | 0.333333 | 0.666667 | 1 |        |        |
| 3600 | ENSG00000171763 | HPA043679 | 1 | 0.333333 | 0.666667 | 1 |        |        |
| 3600 | ENSG00000171853 | HPA043196 | 1 | 0.333333 | 0.666667 | 1 | 0.3759 |        |
| 3600 | ENSG00000172331 | HPA028735 | 1 | 0.333333 | 0.666667 | 1 |        |        |
| 3600 | ENSG00000172409 | HPA057770 | 1 | 0.333333 | 0.666667 | 1 |        |        |
| 3600 | ENSG00000172590 | HPA012319 | 1 | 0.333333 | 0.666667 | 1 |        | 0.3578 |
| 3600 | ENSG00000173110 | HPA052504 | 1 | 0.333333 | 0.666667 | 1 |        |        |
| 3600 | ENSG00000173113 | HPA040006 | 1 | 0.333333 | 0.666667 | 1 |        |        |
| 3600 | ENSG00000173262 | HPA006539 | 1 | 0.333333 | 0.666667 | 1 |        |        |
| 3600 | ENSG00000173275 | HPA018079 | 1 | 0.333333 | 0.666667 | 1 |        |        |
| 3600 | ENSG00000173597 | HPA002107 | 1 | 0.333333 | 0.666667 | 1 |        |        |
| 3600 | ENSG00000174564 | HPA063914 | 1 | 0.333333 | 0.666667 | 1 |        |        |
| 3600 | ENSG00000174672 | HPA073690 | 1 | 0.333333 | 0.666667 | 1 |        |        |
| 3600 | ENSG00000174776 | HPA036226 | 1 | 0.333333 | 0.666667 | 1 |        |        |
| 3600 | ENSG00000174807 | HPA051856 | 1 | 0.333333 | 0.666667 | 1 |        |        |
| 3600 | ENSG00000174953 | HPA035399 | 1 | 0.333333 | 0.666667 | 1 |        |        |
| 3600 | ENSG00000175048 | HPA063754 | 1 | 0.333333 | 0.666667 | 1 |        |        |
| 3600 | ENSG00000175322 | HPA028982 | 1 | 0.333333 | 0.666667 | 1 |        |        |
| 3600 | ENSG00000175482 | HPA078008 | 1 | 0.333333 | 0.666667 | 1 |        |        |
| 3600 | ENSG00000175536 | HPA040249 | 1 | 0.333333 | 0.666667 | 1 |        |        |
| 3600 | ENSG00000175606 | HPA023187 | 1 | 0.333333 | 0.666667 | 1 |        |        |
| 3600 | ENSG00000175920 | HPA059449 | 1 | 0.333333 | 0.666667 | 1 |        |        |
| 3600 | ENSG00000175946 | HPA027115 | 1 | 0.333333 | 0.666667 | 1 |        |        |
| 3600 | ENSG00000176383 | HPA055261 | 1 | 0.333333 | 0.666667 | 1 |        |        |
| 3600 | ENSG00000176915 | HPA074838 | 1 | 0.333333 | 0.666667 | 1 |        |        |
| 3600 | ENSG00000177156 | HPA048089 | 1 | 0.333333 | 0.666667 | 1 | 0.3567 | 0.1871 |
| 3600 | ENSG00000177542 | HPA014662 | 1 | 0.333333 | 0.666667 | 1 |        |        |
| 3600 | ENSG00000177548 | HPA047641 | 1 | 0.333333 | 0.666667 | 1 |        |        |
| 3600 | ENSG00000177576 | HPA040921 | 1 | 0.333333 | 0.666667 | 1 |        | 0.2973 |
| 3600 | ENSG00000177932 | HPA030904 | 1 | 0.333333 | 0.666667 | 1 |        |        |
| 3600 | ENSG00000178053 | HPA069479 | 1 | 0.333333 | 0.666667 | 1 |        |        |
| 3600 | ENSG00000178201 | HPA062209 | 1 | 0.333333 | 0.666667 | 1 |        |        |
| 3600 | ENSG00000178386 | HPA067823 | 1 | 0.333333 | 0.666667 | 1 |        |        |

|      |                 |           |   |          |          |   |       |
|------|-----------------|-----------|---|----------|----------|---|-------|
| 3600 | ENSG00000178467 | HPA007199 | 1 | 0.333333 | 0.666667 | 1 |       |
| 3600 | ENSG00000178537 | HPA029863 | 1 | 0.333333 | 0.666667 | 1 |       |
| 3600 | ENSG00000178662 | HPA017905 | 1 | 0.333333 | 0.666667 | 1 |       |
| 3600 | ENSG00000178718 | HPA046900 | 1 | 0.333333 | 0.666667 | 1 |       |
| 3600 | ENSG00000178761 | HPA048929 | 1 | 0.333333 | 0.666667 | 1 |       |
| 3600 | ENSG00000178802 | HPA007200 | 1 | 0.333333 | 0.666667 | 1 |       |
| 3600 | ENSG00000178882 | HPA058911 | 1 | 0.333333 | 0.666667 | 1 |       |
| 3600 | ENSG00000179399 | HPA044081 | 1 | 0.333333 | 0.666667 | 1 |       |
| 3600 | ENSG00000179409 | HPA065699 | 1 | 0.333333 | 0.666667 | 1 |       |
| 3600 | ENSG00000179715 | HPA043901 | 1 | 0.333333 | 0.666667 | 1 |       |
| 3600 | ENSG00000179902 | HPA031144 | 1 | 0.333333 | 0.666667 | 1 |       |
| 3600 | ENSG00000179918 | HPA047931 | 1 | 0.333333 | 0.666667 | 1 |       |
| 3600 | ENSG00000180198 | CAB015413 | 1 | 0.333333 | 0.666667 | 1 |       |
| 3600 | ENSG00000180447 | HPA036085 | 1 | 0.333333 | 0.666667 | 1 |       |
| 3600 | ENSG00000181788 | HPA061293 | 1 | 0.333333 | 0.666667 | 1 |       |
| 3600 | ENSG00000181827 | HPA035462 | 1 | 0.333333 | 0.666667 | 1 |       |
| 3600 | ENSG00000181885 | HPA073662 | 1 | 0.333333 | 0.666667 | 1 |       |
| 3600 | ENSG00000182134 | HPA019625 | 1 | 0.333333 | 0.666667 | 1 |       |
| 3600 | ENSG00000182446 | HPA021560 | 1 | 0.333333 | 0.666667 | 1 |       |
| 3600 | ENSG00000182903 | HPA065313 | 1 | 0.333333 | 0.666667 | 1 |       |
| 3600 | ENSG00000182952 | HPA077364 | 1 | 0.333333 | 0.666667 | 1 |       |
| 3600 | ENSG00000182986 | HPA062474 | 1 | 0.333333 | 0.666667 | 1 |       |
| 3600 | ENSG00000183048 | HPA023048 | 1 | 0.333333 | 0.666667 | 1 | 0.263 |
| 3600 | ENSG00000183751 | HPA042562 | 1 | 0.333333 | 0.666667 | 1 |       |
| 3600 | ENSG00000183878 | HPA000568 | 1 | 0.333333 | 0.666667 | 1 |       |
| 3600 | ENSG00000183955 | HPA064495 | 1 | 0.333333 | 0.666667 | 1 |       |
| 3600 | ENSG00000184083 | HPA047677 | 1 | 0.333333 | 0.666667 | 1 |       |
| 3600 | ENSG00000184203 | HPA043729 | 1 | 0.333333 | 0.666667 | 1 |       |
| 3600 | ENSG00000184208 | HPA052741 | 1 | 0.333333 | 0.666667 | 1 |       |
| 3600 | ENSG00000184216 | HPA054476 | 1 | 0.333333 | 0.666667 | 1 |       |
| 3600 | ENSG00000184281 | HPA058763 | 1 | 0.333333 | 0.666667 | 1 |       |
| 3600 | ENSG00000184508 | HPA040895 | 1 | 0.333333 | 0.666667 | 1 |       |
| 3600 | ENSG00000184661 | HPA026293 | 1 | 0.333333 | 0.666667 | 1 |       |
| 3600 | ENSG00000184709 | HPA056312 | 1 | 0.333333 | 0.666667 | 1 |       |
| 3600 | ENSG00000184898 | HPA038204 | 1 | 0.333333 | 0.666667 | 1 |       |
| 3600 | ENSG00000184967 | HPA053424 | 1 | 0.333333 | 0.666667 | 1 |       |
| 3600 | ENSG00000185038 | HPA052107 | 1 | 0.333333 | 0.666667 | 1 |       |
| 3600 | ENSG00000185477 | HPA043148 | 1 | 0.333333 | 0.666667 | 1 |       |
| 3600 | ENSG00000186174 | HPA049370 | 1 | 0.333333 | 0.666667 | 1 |       |
| 3600 | ENSG00000186814 | HPA007289 | 1 | 0.333333 | 0.666667 | 1 |       |
| 3600 | ENSG00000187144 | HPA032080 | 1 | 0.333333 | 0.666667 | 1 |       |
| 3600 | ENSG00000187801 | HPA044289 | 1 | 0.333333 | 0.666667 | 1 |       |
| 3600 | ENSG00000188001 | HPA044751 | 1 | 0.333333 | 0.666667 | 1 |       |
| 3600 | ENSG00000188112 | HPA044588 | 1 | 0.333333 | 0.666667 | 1 |       |
| 3600 | ENSG00000188486 | HPA051647 | 1 | 0.333333 | 0.666667 | 1 |       |
| 3600 | ENSG00000188643 | HPA045841 | 1 | 0.333333 | 0.666667 | 1 |       |
| 3600 | ENSG00000189056 | HPA046512 | 1 | 0.333333 | 0.666667 | 1 |       |
| 3600 | ENSG00000189079 | HPA063044 | 1 | 0.333333 | 0.666667 | 1 |       |
| 3600 | ENSG00000189184 | HPA017976 | 1 | 0.333333 | 0.666667 | 1 |       |
| 3600 | ENSG00000189266 | HPA045837 | 1 | 0.333333 | 0.666667 | 1 | 0.443 |
| 3600 | ENSG00000196345 | HPA049906 | 1 | 0.333333 | 0.666667 | 1 |       |
| 3600 | ENSG00000196470 | CAB018724 | 1 | 0.333333 | 0.666667 | 1 | 0.495 |
| 3600 | ENSG00000196639 | HPA029740 | 1 | 0.333333 | 0.666667 | 1 |       |
| 3600 | ENSG00000196821 | HPA034490 | 1 | 0.333333 | 0.666667 | 1 |       |
| 3600 | ENSG00000196872 | HPA061678 | 1 | 0.333333 | 0.666667 | 1 |       |

|      |                 |           |   |          |          |   |
|------|-----------------|-----------|---|----------|----------|---|
| 3600 | ENSG00000197046 | HPA053509 | 1 | 0.333333 | 0.666667 | 1 |
| 3600 | ENSG00000197056 | HPA064019 | 1 | 0.333333 | 0.666667 | 1 |
| 3600 | ENSG00000197081 | CAB009661 | 1 | 0.333333 | 0.666667 | 1 |
| 3600 | ENSG00000197323 | HPA004345 | 1 | 0.333333 | 0.666667 | 1 |
| 3600 | ENSG00000197385 | HPA063386 | 1 | 0.333333 | 0.666667 | 1 |
| 3600 | ENSG00000197599 | HPA041158 | 1 | 0.333333 | 0.666667 | 1 |
| 3600 | ENSG00000197724 | HPA010831 | 1 | 0.333333 | 0.666667 | 1 |
| 3600 | ENSG00000197956 | HPA007575 | 1 | 0.333333 | 0.666667 | 1 |
| 3600 | ENSG00000197980 | HPA047774 | 1 | 0.333333 | 0.666667 | 1 |
| 3600 | ENSG00000198171 | HPA013705 | 1 | 0.333333 | 0.666667 | 1 |
| 3600 | ENSG00000198336 | HPA051884 | 1 | 0.333333 | 0.666667 | 1 |
| 3600 | ENSG00000198435 | HPA025729 | 1 | 0.333333 | 0.666667 | 1 |
| 3600 | ENSG00000198440 | HPA023957 | 1 | 0.333333 | 0.666667 | 1 |
| 3600 | ENSG00000198478 | HPA047486 | 1 | 0.333333 | 0.666667 | 1 |
| 3600 | ENSG00000198551 | HPA073463 | 1 | 0.333333 | 0.666667 | 1 |
| 3600 | ENSG00000198585 | HPA060452 | 1 | 0.333333 | 0.666667 | 1 |
| 3600 | ENSG00000198682 | HPA071224 | 1 | 0.333333 | 0.666667 | 1 |
| 3600 | ENSG00000198835 | HPA069619 | 1 | 0.333333 | 0.666667 | 1 |
| 3600 | ENSG00000198841 | HPA031203 | 1 | 0.333333 | 0.666667 | 1 |
| 3600 | ENSG00000198920 | HPA023057 | 1 | 0.333333 | 0.666667 | 1 |
| 3600 | ENSG00000203485 | HPA000724 | 1 | 0.333333 | 0.666667 | 1 |
| 3600 | ENSG00000203880 | HPA057849 | 1 | 0.333333 | 0.666667 | 1 |
| 3600 | ENSG00000204186 | HPA050311 | 1 | 0.333333 | 0.666667 | 1 |
| 3600 | ENSG00000204217 | HPA049014 | 1 | 0.333333 | 0.666667 | 1 |
| 3600 | ENSG00000204219 | HPA055811 | 1 | 0.333333 | 0.666667 | 1 |
| 3600 | ENSG00000204323 | HPA065332 | 1 | 0.333333 | 0.666667 | 1 |
| 3600 | ENSG00000204335 | HPA074123 | 1 | 0.333333 | 0.666667 | 1 |
| 3600 | ENSG00000204371 | HPA060259 | 1 | 0.333333 | 0.666667 | 1 |
| 3600 | ENSG00000204390 | HPA052504 | 1 | 0.333333 | 0.666667 | 1 |
| 3600 | ENSG00000204516 | HPA064618 | 1 | 0.333333 | 0.666667 | 1 |
| 3600 | ENSG00000204604 | HPA062474 | 1 | 0.333333 | 0.666667 | 1 |
| 3600 | ENSG00000204624 | HPA054579 | 1 | 0.333333 | 0.666667 | 1 |
| 3600 | ENSG00000204920 | HPA003220 | 1 | 0.333333 | 0.666667 | 1 |
| 3600 | ENSG00000205464 | HPA053771 | 1 | 0.333333 | 0.666667 | 1 |
| 3600 | ENSG00000205517 | HPA064578 | 1 | 0.333333 | 0.666667 | 1 |
| 3600 | ENSG00000213024 | HPA005435 | 1 | 0.333333 | 0.666667 | 1 |
| 3600 | ENSG00000213190 | HPA000540 | 1 | 0.333333 | 0.666667 | 1 |
| 3600 | ENSG00000213588 | HPA058171 | 1 | 0.333333 | 0.666667 | 1 |
| 3600 | ENSG00000213722 | HPA012509 | 1 | 0.333333 | 0.666667 | 1 |
| 3600 | ENSG00000213889 | HPA043577 | 1 | 0.333333 | 0.666667 | 1 |
| 3600 | ENSG00000215218 | HPA057414 | 1 | 0.333333 | 0.666667 | 1 |
| 3600 | ENSG00000215644 | HPA071228 | 1 | 0.333333 | 0.666667 | 1 |
| 3600 | ENSG00000217236 | HPA062616 | 1 | 0.333333 | 0.666667 | 1 |
| 3600 | ENSG00000220201 | HPA049855 | 1 | 0.333333 | 0.666667 | 1 |
| 3600 | ENSG00000225528 | HPA047397 | 1 | 0.333333 | 0.666667 | 1 |
| 3600 | ENSG00000226887 | HPA024053 | 1 | 0.333333 | 0.666667 | 1 |
| 3600 | ENSG00000228300 | HPA043279 | 1 | 0.333333 | 0.666667 | 1 |
| 3600 | ENSG00000231989 | HPA043729 | 1 | 0.333333 | 0.666667 | 1 |
| 3600 | ENSG00000232112 | HPA047397 | 1 | 0.333333 | 0.666667 | 1 |
| 3600 | ENSG00000234465 | HPA061218 | 1 | 0.333333 | 0.666667 | 1 |
| 3600 | ENSG00000237651 | HPA026826 | 1 | 0.333333 | 0.666667 | 1 |
| 3600 | ENSG00000241186 | HPA051928 | 1 | 0.333333 | 0.666667 | 1 |
| 3600 | ENSG00000241685 | HPA004334 | 1 | 0.333333 | 0.666667 | 1 |
| 3600 | ENSG00000244187 | HPA014615 | 1 | 0.333333 | 0.666667 | 1 |
| 3600 | ENSG00000247746 | HPA001942 | 1 | 0.333333 | 0.666667 | 1 |



|      |                 |           |     |          |          |          |        |        |
|------|-----------------|-----------|-----|----------|----------|----------|--------|--------|
| 3600 | ENSG00000249915 | HPA047221 | 1   | 0.333333 | 0.666667 | 1        |        |        |
| 3600 | ENSG00000250067 | HPA060789 | 1   | 0.333333 | 0.666667 | 1        |        |        |
| 3600 | ENSG00000250254 | HPA045034 | 1   | 0.333333 | 0.666667 | 1        |        |        |
| 3600 | ENSG00000250722 | HPA036287 | 1   | 0.333333 | 0.666667 | 1        |        |        |
| 3600 | ENSG00000253719 | HPA056612 | 1   | 0.333333 | 0.666667 | 1        |        |        |
| 3600 | ENSG00000253797 | HPA047217 | 1   | 0.333333 | 0.666667 | 1        |        |        |
| 3600 | ENSG00000254685 | HPA072331 | 1   | 0.333333 | 0.666667 | 1        |        |        |
| 3600 | ENSG00000254901 | HPA045700 | 1   | 0.333333 | 0.666667 | 1        |        |        |
| 3600 | ENSG00000255151 | HPA039501 | 1   | 0.333333 | 0.666667 | 1        |        |        |
| 3600 | ENSG00000255302 | HPA051122 | 1   | 0.333333 | 0.666667 | 1        |        |        |
| 3600 | ENSG00000256514 | HPA078008 | 1   | 0.333333 | 0.666667 | 1        |        |        |
| 3600 | ENSG00000257446 | HPA052735 | 1   | 0.333333 | 0.666667 | 1        |        |        |
| 3600 | ENSG00000259030 | HPA072331 | 1   | 0.333333 | 0.666667 | 1        |        |        |
| 3600 | ENSG00000259431 | HPA028876 | 1   | 0.333333 | 0.666667 | 1        |        |        |
| 3600 | ENSG00000262660 | HPA022853 | 1   | 0.333333 | 0.666667 | 1        |        |        |
| 3600 | ENSG00000266714 | HPA022857 | 1   | 0.333333 | 0.666667 | 1        |        |        |
| 3600 | ENSG00000268674 | HPA077864 | 1   | 0.333333 | 0.666667 | 1        |        |        |
| 3600 | ENSG00000269881 | HPA011651 | 1   | 0.333333 | 0.666667 | 1        |        |        |
| 3600 | ENSG00000270806 | HPA043184 | 1   | 0.333333 | 0.666667 | 1        |        |        |
| 3600 | ENSG00000273217 | HPA037983 | 1   | 0.333333 | 0.666667 | 1        |        |        |
| 3600 | ENSG00000273820 | HPA077264 | 1   | 0.333333 | 0.666667 | 1        |        |        |
| 3600 | ENSG00000275835 | HPA040366 | 1   | 0.333333 | 0.666667 | 1        |        |        |
| 3600 | ENSG00000276076 | HPA037737 | 1   | 0.333333 | 0.666667 | 1        |        |        |
| 3600 | ENSG00000277117 | HPA029179 | 1   | 0.333333 | 0.666667 | 1        |        |        |
| 3600 | ENSG00000283088 | HPA062474 | 1   | 0.333333 | 0.666667 | 1        |        |        |
| 3600 | ENSG00000284292 | HPA004334 | 1   | 0.333333 | 0.666667 | 1        |        |        |
| 3600 | ENSG00000284753 | HPA062215 | 1   | 0.333333 | 0.666667 | 1        |        |        |
| 3600 | ENSG00000284917 | HPA062215 | 1   | 0.333333 | 0.666667 | 1        |        |        |
| 3600 | ENSG00000285245 | HPA025961 | 1   | 0.333333 | 0.666667 | 1        |        |        |
| 4263 | ENSG00000047579 | HPA028053 | 0.5 | 0.5      | 0.5      | 0.5      |        |        |
| 4263 | ENSG00000070501 | HPA049104 | 0.5 | 0.5      | 0.5      | 0.5      |        |        |
| 4263 | ENSG00000136720 | HPA044586 | 0.5 | 0.5      | 0.5      | 0.5      |        |        |
| 4263 | ENSG00000148175 | HPA010961 | 0.5 | 0.5      | 0.5      | 0.5      |        |        |
| 4263 | ENSG00000168334 | HPA018458 | 0.5 | 0.5      | 0.5      | 0.5      |        |        |
| 4263 | ENSG00000176244 | HPA043326 | 0.5 | 0.5      | 0.5      | 0.5      |        |        |
| 4269 | ENSG00000008869 | HPA042025 | 1   | 0        | 0.75     | 1        |        |        |
| 4269 | ENSG00000128567 | HPA002110 | 1   | 0        | 0.75     | 1        |        |        |
| 4269 | ENSG00000142627 | CAB010464 | 1   | 0        | 0.75     | 1        |        |        |
| 4269 | ENSG00000172403 | HPA030665 | 1   | 0        | 0.75     | 1        |        |        |
| 4273 | ENSG00000173545 | HPA036514 | 1   | 0.2      | 0.7      | 0.4      |        |        |
| 4274 | ENSG00000144597 | HPA059516 | 1   | 0.3      | 0.683333 | 0.4      |        |        |
| 4275 | ENSG00000078747 | HPA049032 | 1   | 0.3      | 0.683333 | 0.5      |        |        |
| 4276 | ENSG00000114857 | HPA022120 | 1   | 0.166667 | 0.680556 | 0.666667 |        |        |
| 4277 | ENSG00000120370 | HPA027208 | 1   | 0.3      | 0.741667 | 0.4      |        |        |
| 4278 | ENSG00000129083 | HPA043954 | 1   | 0.3      | 0.683333 | 0.6      |        |        |
| 4278 | ENSG00000155792 | CAB020841 | 1   | 0.3      | 0.683333 | 0.6      |        |        |
| 4278 | ENSG00000169564 | HPA043803 | 1   | 0.3      | 0.683333 | 0.6      |        | 0.257  |
| 4281 | ENSG00000006071 | HPA042318 | 1   | 0.333333 | 0.777778 | 0.666667 |        |        |
| 4281 | ENSG00000012174 | CAB009486 | 1   | 0.333333 | 0.777778 | 0.666667 | 0.3136 | 0.3491 |
| 4281 | ENSG00000015676 | HPA019136 | 1   | 0.333333 | 0.777778 | 0.666667 | 0.365  |        |
| 4281 | ENSG00000019186 | HPA022261 | 1   | 0.333333 | 0.777778 | 0.666667 |        |        |
| 4281 | ENSG00000019995 | HPA029241 | 1   | 0.333333 | 0.777778 | 0.666667 |        |        |
| 4281 | ENSG00000029993 | HPA062583 | 1   | 0.333333 | 0.777778 | 0.666667 |        |        |
| 4281 | ENSG00000042088 | HPA071317 | 1   | 0.333333 | 0.777778 | 0.666667 |        |        |
| 4281 | ENSG00000055044 | HPA018472 | 1   | 0.333333 | 0.777778 | 0.666667 |        |        |

|      |                 |           |   |          |          |          |        |
|------|-----------------|-----------|---|----------|----------|----------|--------|
| 4281 | ENSG00000057019 | HPA016909 | 1 | 0.333333 | 0.777778 | 0.666667 |        |
| 4281 | ENSG00000062194 | HPA037773 | 1 | 0.333333 | 0.777778 | 0.666667 |        |
| 4281 | ENSG00000064687 | HPA041564 | 1 | 0.333333 | 0.777778 | 0.666667 |        |
| 4281 | ENSG00000065485 | HPA030355 | 1 | 0.333333 | 0.777778 | 0.666667 |        |
| 4281 | ENSG00000065491 | HPA027908 | 1 | 0.333333 | 0.777778 | 0.666667 |        |
| 4281 | ENSG00000066427 | HPA069338 | 1 | 0.333333 | 0.777778 | 0.666667 |        |
| 4281 | ENSG00000070269 | HPA003502 | 1 | 0.333333 | 0.777778 | 0.666667 |        |
| 4281 | ENSG00000070814 | HPA038237 | 1 | 0.333333 | 0.777778 | 0.666667 |        |
| 4281 | ENSG00000074181 | HPA044392 | 1 | 0.333333 | 0.777778 | 0.666667 |        |
| 4281 | ENSG00000074590 | HPA057143 | 1 | 0.333333 | 0.777778 | 0.666667 |        |
| 4281 | ENSG00000075340 | HPA034510 | 1 | 0.333333 | 0.777778 | 0.666667 |        |
| 4281 | ENSG00000077009 | HPA049909 | 1 | 0.333333 | 0.777778 | 0.666667 |        |
| 4281 | ENSG00000077549 | HPA031531 | 1 | 0.333333 | 0.777778 | 0.666667 |        |
| 4281 | ENSG00000078674 | HPA023370 | 1 | 0.333333 | 0.777778 | 0.666667 |        |
| 4281 | ENSG00000080503 | HPA029981 | 1 | 0.333333 | 0.777778 | 0.666667 | 0.3984 |
| 4281 | ENSG00000087460 | CAB010337 | 1 | 0.333333 | 0.777778 | 0.666667 |        |
| 4281 | ENSG00000087502 | HPA049695 | 1 | 0.333333 | 0.777778 | 0.666667 |        |
| 4281 | ENSG00000088179 | HPA019351 | 1 | 0.333333 | 0.777778 | 0.666667 |        |
| 4281 | ENSG00000089639 | HPA042484 | 1 | 0.333333 | 0.777778 | 0.666667 |        |
| 4281 | ENSG00000091039 | HPA001309 | 1 | 0.333333 | 0.777778 | 0.666667 |        |
| 4281 | ENSG00000091527 | HPA029761 | 1 | 0.333333 | 0.777778 | 0.666667 |        |
| 4281 | ENSG00000092203 | HPA017880 | 1 | 0.333333 | 0.777778 | 0.666667 |        |
| 4281 | ENSG00000096063 | HPA056486 | 1 | 0.333333 | 0.777778 | 0.666667 | 0.297  |
| 4281 | ENSG00000099337 | CAB022637 | 1 | 0.333333 | 0.777778 | 0.666667 |        |
| 4281 | ENSG00000100220 | HPA000535 | 1 | 0.333333 | 0.777778 | 0.666667 |        |
| 4281 | ENSG00000100280 | HPA065226 | 1 | 0.333333 | 0.777778 | 0.666667 |        |
| 4281 | ENSG00000100519 | HPA042823 | 1 | 0.333333 | 0.777778 | 0.666667 |        |
| 4281 | ENSG00000101213 | HPA036071 | 1 | 0.333333 | 0.777778 | 0.666667 |        |
| 4281 | ENSG00000101577 | HPA017857 | 1 | 0.333333 | 0.777778 | 0.666667 |        |
| 4281 | ENSG00000101940 | HPA000913 | 1 | 0.333333 | 0.777778 | 0.666667 |        |
| 4281 | ENSG00000102401 | HPA000967 | 1 | 0.333333 | 0.777778 | 0.666667 |        |
| 4281 | ENSG00000102796 | HPA057028 | 1 | 0.333333 | 0.777778 | 0.666667 |        |
| 4281 | ENSG00000103042 | HPA041777 | 1 | 0.333333 | 0.777778 | 0.666667 |        |
| 4281 | ENSG00000104325 | HPA023162 | 1 | 0.333333 | 0.777778 | 0.666667 | 0.3714 |
| 4281 | ENSG00000105085 | HPA071835 | 1 | 0.333333 | 0.777778 | 0.666667 |        |
| 4281 | ENSG00000106245 | HPA028943 | 1 | 0.333333 | 0.777778 | 0.666667 |        |
| 4281 | ENSG00000107130 | CAB018587 | 1 | 0.333333 | 0.777778 | 0.666667 |        |
| 4281 | ENSG00000107551 | HPA038834 | 1 | 0.333333 | 0.777778 | 0.666667 |        |
| 4281 | ENSG00000109111 | CAB012416 | 1 | 0.333333 | 0.777778 | 0.666667 |        |
| 4281 | ENSG00000109756 | HPA057169 | 1 | 0.333333 | 0.777778 | 0.666667 |        |
| 4281 | ENSG00000111206 | CAB017832 | 1 | 0.333333 | 0.777778 | 0.666667 |        |
| 4281 | ENSG00000111725 | HPA004247 | 1 | 0.333333 | 0.777778 | 0.666667 |        |
| 4281 | ENSG00000111859 | HPA039270 | 1 | 0.333333 | 0.777778 | 0.666667 |        |
| 4281 | ENSG00000113068 | HPA006499 | 1 | 0.333333 | 0.777778 | 0.666667 |        |
| 4281 | ENSG00000113391 | HPA012299 | 1 | 0.333333 | 0.777778 | 0.666667 |        |
| 4281 | ENSG00000114978 | HPA071690 | 1 | 0.333333 | 0.777778 | 0.666667 |        |
| 4281 | ENSG00000116171 | HPA027135 | 1 | 0.333333 | 0.777778 | 0.666667 |        |
| 4281 | ENSG00000116254 | HPA015809 | 1 | 0.333333 | 0.777778 | 0.666667 |        |
| 4281 | ENSG00000116455 | HPA027271 | 1 | 0.333333 | 0.777778 | 0.666667 | 0.2593 |
| 4281 | ENSG00000117016 | HPA055285 | 1 | 0.333333 | 0.777778 | 0.666667 |        |
| 4281 | ENSG00000118898 | HPA042550 | 1 | 0.333333 | 0.777778 | 0.666667 |        |
| 4281 | ENSG00000118946 | HPA026817 | 1 | 0.333333 | 0.777778 | 0.666667 |        |
| 4281 | ENSG00000119041 | HPA069179 | 1 | 0.333333 | 0.777778 | 0.666667 |        |
| 4281 | ENSG00000120341 | HPA054292 | 1 | 0.333333 | 0.777778 | 0.666667 |        |
| 4281 | ENSG00000120437 | HPA025736 | 1 | 0.333333 | 0.777778 | 0.666667 | 0.2781 |

|      |                 |           |   |          |          |          |       |        |
|------|-----------------|-----------|---|----------|----------|----------|-------|--------|
| 4281 | ENSG00000120868 | HPA031373 | 1 | 0.333333 | 0.777778 | 0.666667 |       |        |
| 4281 | ENSG00000123130 | HPA035533 | 1 | 0.333333 | 0.777778 | 0.666667 |       |        |
| 4281 | ENSG00000123989 | HPA035123 | 1 | 0.333333 | 0.777778 | 0.666667 |       |        |
| 4281 | ENSG00000124802 | HPA027901 | 1 | 0.333333 | 0.777778 | 0.666667 |       |        |
| 4281 | ENSG00000127564 | HPA068860 | 1 | 0.333333 | 0.777778 | 0.666667 |       |        |
| 4281 | ENSG00000127948 | HPA010136 | 1 | 0.333333 | 0.777778 | 0.666667 |       |        |
| 4281 | ENSG00000129292 | HPA028417 | 1 | 0.333333 | 0.777778 | 0.666667 |       |        |
| 4281 | ENSG00000129646 | HPA052219 | 1 | 0.333333 | 0.777778 | 0.666667 |       |        |
| 4281 | ENSG00000130311 | HPA055272 | 1 | 0.333333 | 0.777778 | 0.666667 |       |        |
| 4281 | ENSG00000131737 | HPA072208 | 1 | 0.333333 | 0.777778 | 0.666667 |       |        |
| 4281 | ENSG00000133055 | HPA061383 | 1 | 0.333333 | 0.777778 | 0.666667 |       |        |
| 4281 | ENSG00000134717 | HPA067026 | 1 | 0.333333 | 0.777778 | 0.666667 |       |        |
| 4281 | ENSG00000134802 | HPA077244 | 1 | 0.333333 | 0.777778 | 0.666667 |       |        |
| 4281 | ENSG00000134884 | HPA034962 | 1 | 0.333333 | 0.777778 | 0.666667 |       | 0.3885 |
| 4281 | ENSG00000136238 | CAB035994 | 1 | 0.333333 | 0.777778 | 0.666667 |       |        |
| 4281 | ENSG00000136367 | HPA000720 | 1 | 0.333333 | 0.777778 | 0.666667 |       |        |
| 4281 | ENSG00000136536 | HPA014275 | 1 | 0.333333 | 0.777778 | 0.666667 |       |        |
| 4281 | ENSG00000137275 | CAB010302 | 1 | 0.333333 | 0.777778 | 0.666667 | 0.334 | 0.5357 |
| 4281 | ENSG00000137462 | HPA060231 | 1 | 0.333333 | 0.777778 | 0.666667 |       |        |
| 4281 | ENSG00000137494 | HPA039917 | 1 | 0.333333 | 0.777778 | 0.666667 |       |        |
| 4281 | ENSG00000137513 | HPA026793 | 1 | 0.333333 | 0.777778 | 0.666667 | 0.372 | 0.3781 |
| 4281 | ENSG00000137522 | HPA046041 | 1 | 0.333333 | 0.777778 | 0.666667 |       |        |
| 4281 | ENSG00000138386 | HPA002738 | 1 | 0.333333 | 0.777778 | 0.666667 |       |        |
| 4281 | ENSG00000138449 | HPA065634 | 1 | 0.333333 | 0.777778 | 0.666667 |       |        |
| 4281 | ENSG00000140104 | HPA042052 | 1 | 0.333333 | 0.777778 | 0.666667 |       |        |
| 4281 | ENSG00000141664 | HPA040943 | 1 | 0.333333 | 0.777778 | 0.666667 |       |        |
| 4281 | ENSG00000142149 | HPA027295 | 1 | 0.333333 | 0.777778 | 0.666667 |       |        |
| 4281 | ENSG00000144554 | HPA063742 | 1 | 0.333333 | 0.777778 | 0.666667 |       |        |
| 4281 | ENSG00000145365 | HPA045889 | 1 | 0.333333 | 0.777778 | 0.666667 |       |        |
| 4281 | ENSG00000145911 | HPA030973 | 1 | 0.333333 | 0.777778 | 0.666667 |       |        |
| 4281 | ENSG00000145990 | HPA029096 | 1 | 0.333333 | 0.777778 | 0.666667 |       |        |
| 4281 | ENSG00000148908 | HPA058485 | 1 | 0.333333 | 0.777778 | 0.666667 |       |        |
| 4281 | ENSG00000149806 | HPA059015 | 1 | 0.333333 | 0.777778 | 0.666667 |       |        |
| 4281 | ENSG00000150760 | HPA048692 | 1 | 0.333333 | 0.777778 | 0.666667 |       |        |
| 4281 | ENSG00000151500 | HPA038732 | 1 | 0.333333 | 0.777778 | 0.666667 |       | 0.5583 |
| 4281 | ENSG00000153214 | HPA035183 | 1 | 0.333333 | 0.777778 | 0.666667 |       |        |
| 4281 | ENSG00000153443 | HPA066771 | 1 | 0.333333 | 0.777778 | 0.666667 |       |        |
| 4281 | ENSG00000153558 | HPA061783 | 1 | 0.333333 | 0.777778 | 0.666667 |       |        |
| 4281 | ENSG00000153790 | HPA020346 | 1 | 0.333333 | 0.777778 | 0.666667 |       |        |
| 4281 | ENSG00000153814 | HPA066967 | 1 | 0.333333 | 0.777778 | 0.666667 |       |        |
| 4281 | ENSG00000153896 | HPA014701 | 1 | 0.333333 | 0.777778 | 0.666667 |       |        |
| 4281 | ENSG00000154493 | HPA038648 | 1 | 0.333333 | 0.777778 | 0.666667 |       |        |
| 4281 | ENSG00000155659 | HPA003903 | 1 | 0.333333 | 0.777778 | 0.666667 |       |        |
| 4281 | ENSG00000157184 | HPA028214 | 1 | 0.333333 | 0.777778 | 0.666667 |       |        |
| 4281 | ENSG00000158552 | HPA035160 | 1 | 0.333333 | 0.777778 | 0.666667 |       |        |
| 4281 | ENSG00000159214 | HPA035424 | 1 | 0.333333 | 0.777778 | 0.666667 |       |        |
| 4281 | ENSG00000160401 | HPA021474 | 1 | 0.333333 | 0.777778 | 0.666667 |       |        |
| 4281 | ENSG00000162298 | HPA005480 | 1 | 0.333333 | 0.777778 | 0.666667 | 0.226 |        |
| 4281 | ENSG00000162458 | HPA025287 | 1 | 0.333333 | 0.777778 | 0.666667 |       |        |
| 4281 | ENSG00000162616 | HPA028383 | 1 | 0.333333 | 0.777778 | 0.666667 |       |        |
| 4281 | ENSG00000163565 | HPA002134 | 1 | 0.333333 | 0.777778 | 0.666667 |       |        |
| 4281 | ENSG00000163798 | HPA036679 | 1 | 0.333333 | 0.777778 | 0.666667 |       |        |
| 4281 | ENSG00000163832 | HPA064545 | 1 | 0.333333 | 0.777778 | 0.666667 |       |        |
| 4281 | ENSG00000163950 | HPA061670 | 1 | 0.333333 | 0.777778 | 0.666667 |       |        |
| 4281 | ENSG00000163964 | HPA029409 | 1 | 0.333333 | 0.777778 | 0.666667 |       |        |

|      |                 |           |   |          |          |          |        |        |
|------|-----------------|-----------|---|----------|----------|----------|--------|--------|
| 4281 | ENSG00000164253 | HPA043124 | 1 | 0.333333 | 0.777778 | 0.666667 |        |        |
| 4281 | ENSG00000164654 | HPA042928 | 1 | 0.333333 | 0.777778 | 0.666667 |        |        |
| 4281 | ENSG00000165359 | HPA013200 | 1 | 0.333333 | 0.777778 | 0.666667 |        |        |
| 4281 | ENSG00000165644 | HPA042165 | 1 | 0.333333 | 0.777778 | 0.666667 |        |        |
| 4281 | ENSG00000168040 | HPA001464 | 1 | 0.333333 | 0.777778 | 0.666667 |        |        |
| 4281 | ENSG00000168679 | HPA046986 | 1 | 0.333333 | 0.777778 | 0.666667 |        |        |
| 4281 | ENSG00000169403 | HPA027543 | 1 | 0.333333 | 0.777778 | 0.666667 |        |        |
| 4281 | ENSG00000170088 | HPA014717 | 1 | 0.333333 | 0.777778 | 0.666667 | 0.4498 | 0.3211 |
| 4281 | ENSG00000170185 | HPA036990 | 1 | 0.333333 | 0.777778 | 0.666667 |        |        |
| 4281 | ENSG00000170270 | HPA051832 | 1 | 0.333333 | 0.777778 | 0.666667 |        |        |
| 4281 | ENSG00000170545 | HPA039711 | 1 | 0.333333 | 0.777778 | 0.666667 |        |        |
| 4281 | ENSG00000170681 | HPA020973 | 1 | 0.333333 | 0.777778 | 0.666667 |        |        |
| 4281 | ENSG00000171150 | HPA020884 | 1 | 0.333333 | 0.777778 | 0.666667 | 0.3521 |        |
| 4281 | ENSG00000171307 | HPA040214 | 1 | 0.333333 | 0.777778 | 0.666667 |        |        |
| 4281 | ENSG00000171720 | CAB005583 | 1 | 0.333333 | 0.777778 | 0.666667 |        |        |
| 4281 | ENSG00000172733 | HPA047746 | 1 | 0.333333 | 0.777778 | 0.666667 |        |        |
| 4281 | ENSG00000172795 | HPA057676 | 1 | 0.333333 | 0.777778 | 0.666667 |        |        |
| 4281 | ENSG00000173166 | HPA020027 | 1 | 0.333333 | 0.777778 | 0.666667 |        |        |
| 4281 | ENSG00000173542 | HPA071690 | 1 | 0.333333 | 0.777778 | 0.666667 |        |        |
| 4281 | ENSG00000174080 | HPA031431 | 1 | 0.333333 | 0.777778 | 0.666667 |        |        |
| 4281 | ENSG00000174485 | HPA065343 | 1 | 0.333333 | 0.777778 | 0.666667 |        |        |
| 4281 | ENSG00000175756 | HPA031821 | 1 | 0.333333 | 0.777778 | 0.666667 | 0.4434 |        |
| 4281 | ENSG00000176531 | HPA043425 | 1 | 0.333333 | 0.777778 | 0.666667 |        |        |
| 4281 | ENSG00000177189 | HPA003221 | 1 | 0.333333 | 0.777778 | 0.666667 |        |        |
| 4281 | ENSG00000177688 | HPA042123 | 1 | 0.333333 | 0.777778 | 0.666667 |        |        |
| 4281 | ENSG00000177731 | HPA007084 | 1 | 0.333333 | 0.777778 | 0.666667 | 0.2371 |        |
| 4281 | ENSG00000178445 | HPA052887 | 1 | 0.333333 | 0.777778 | 0.666667 |        |        |
| 4281 | ENSG00000179021 | HPA034736 | 1 | 0.333333 | 0.777778 | 0.666667 |        |        |
| 4281 | ENSG00000179046 | HPA043838 | 1 | 0.333333 | 0.777778 | 0.666667 |        |        |
| 4281 | ENSG00000182272 | HPA053126 | 1 | 0.333333 | 0.777778 | 0.666667 |        |        |
| 4281 | ENSG00000184445 | HPA025241 | 1 | 0.333333 | 0.777778 | 0.666667 |        |        |
| 4281 | ENSG00000184900 | CAB012180 | 1 | 0.333333 | 0.777778 | 0.666667 |        |        |
| 4281 | ENSG00000185305 | HPA063820 | 1 | 0.333333 | 0.777778 | 0.666667 |        |        |
| 4281 | ENSG00000186451 | HPA043323 | 1 | 0.333333 | 0.777778 | 0.666667 |        |        |
| 4281 | ENSG00000188612 | HPA042123 | 1 | 0.333333 | 0.777778 | 0.666667 |        |        |
| 4281 | ENSG00000189159 | HPA059729 | 1 | 0.333333 | 0.777778 | 0.666667 |        |        |
| 4281 | ENSG00000196437 | HPA052994 | 1 | 0.333333 | 0.777778 | 0.666667 |        |        |
| 4281 | ENSG00000196678 | HPA035384 | 1 | 0.333333 | 0.777778 | 0.666667 |        |        |
| 4281 | ENSG00000196914 | HPA018911 | 1 | 0.333333 | 0.777778 | 0.666667 |        | 0.6336 |
| 4281 | ENSG00000196923 | HPA018794 | 1 | 0.333333 | 0.777778 | 0.666667 |        |        |
| 4281 | ENSG00000197321 | HPA020138 | 1 | 0.333333 | 0.777778 | 0.666667 |        |        |
| 4281 | ENSG00000197415 | HPA026645 | 1 | 0.333333 | 0.777778 | 0.666667 |        |        |
| 4281 | ENSG00000197535 | HPA001356 | 1 | 0.333333 | 0.777778 | 0.666667 |        |        |
| 4281 | ENSG00000197548 | HPA007639 | 1 | 0.333333 | 0.777778 | 0.666667 |        |        |
| 4281 | ENSG00000197696 | CAB019302 | 1 | 0.333333 | 0.777778 | 0.666667 |        |        |
| 4281 | ENSG00000197712 | HPA067948 | 1 | 0.333333 | 0.777778 | 0.666667 |        |        |
| 4281 | ENSG00000197808 | HPA021139 | 1 | 0.333333 | 0.777778 | 0.666667 |        |        |
| 4281 | ENSG00000198522 | HPA036793 | 1 | 0.333333 | 0.777778 | 0.666667 |        |        |
| 4281 | ENSG00000203857 | HPA044028 | 1 | 0.333333 | 0.777778 | 0.666667 |        |        |
| 4281 | ENSG00000203859 | HPA044028 | 1 | 0.333333 | 0.777778 | 0.666667 |        |        |
| 4281 | ENSG00000204138 | HPA028985 | 1 | 0.333333 | 0.777778 | 0.666667 |        |        |
| 4281 | ENSG00000204334 | HPA061010 | 1 | 0.333333 | 0.777778 | 0.666667 |        |        |
| 4281 | ENSG00000204568 | HPA043485 | 1 | 0.333333 | 0.777778 | 0.666667 |        |        |
| 4281 | ENSG00000213699 | HPA034655 | 1 | 0.333333 | 0.777778 | 0.666667 |        |        |
| 4281 | ENSG00000213965 | HPA042761 | 1 | 0.333333 | 0.777778 | 0.666667 |        |        |

|      |                 |           |   |          |          |          |        |        |
|------|-----------------|-----------|---|----------|----------|----------|--------|--------|
| 4281 | ENSG00000232040 | HPA007246 | 1 | 0.333333 | 0.777778 | 0.666667 |        |        |
| 4281 | ENSG00000239474 | HPA021165 | 1 | 0.333333 | 0.777778 | 0.666667 |        |        |
| 4281 | ENSG00000248383 | HPA052775 | 1 | 0.333333 | 0.777778 | 0.666667 |        |        |
| 4281 | ENSG00000256223 | HPA003204 | 1 | 0.333333 | 0.777778 | 0.666667 |        |        |
| 4281 | ENSG00000257008 | HPA031392 | 1 | 0.333333 | 0.777778 | 0.666667 |        |        |
| 4281 | ENSG00000259494 | HPA050166 | 1 | 0.333333 | 0.777778 | 0.666667 |        |        |
| 4281 | ENSG00000262655 | HPA038584 | 1 | 0.333333 | 0.777778 | 0.666667 |        |        |
| 4461 | ENSG00000048162 | HPA036506 | 1 | 0.4      | 0.6      | 0.4      |        |        |
| 4462 | ENSG00000119446 | HPA057281 | 1 | 0.5      | 0.625    | 0.5      |        |        |
| 4463 | ENSG00000099290 | HPA047844 | 1 | 0.4      | 0.6      | 0.6      |        |        |
| 4463 | ENSG00000172661 | HPA047844 | 1 | 0.4      | 0.6      | 0.6      |        |        |
| 4465 | ENSG00000002834 | HPA012072 | 1 | 0.333333 | 0.833333 | 0.666667 |        |        |
| 4465 | ENSG00000082805 | HPA019513 | 1 | 0.333333 | 0.833333 | 0.666667 | 0.2615 |        |
| 4465 | ENSG00000110025 | HPA038955 | 1 | 0.333333 | 0.833333 | 0.666667 |        |        |
| 4465 | ENSG00000112210 | HPA029135 | 1 | 0.333333 | 0.833333 | 0.666667 | 0.199  | 0.3776 |
| 4465 | ENSG00000116016 | HPA031200 | 1 | 0.333333 | 0.833333 | 0.666667 |        |        |
| 4465 | ENSG00000131051 | HPA001591 | 1 | 0.333333 | 0.833333 | 0.666667 |        |        |
| 4465 | ENSG00000132275 | HPA038487 | 1 | 0.333333 | 0.833333 | 0.666667 |        |        |
| 4465 | ENSG00000138182 | HPA050214 | 1 | 0.333333 | 0.833333 | 0.666667 |        |        |
| 4465 | ENSG00000144645 | HPA003636 | 1 | 0.333333 | 0.833333 | 0.666667 |        |        |
| 4465 | ENSG00000154380 | HPA028448 | 1 | 0.333333 | 0.833333 | 0.666667 |        |        |
| 4465 | ENSG00000154957 | HPA006144 | 1 | 0.333333 | 0.833333 | 0.666667 | 0.231  |        |
| 4465 | ENSG00000174444 | HPA034600 | 1 | 0.333333 | 0.833333 | 0.666667 |        |        |
| 4465 | ENSG00000198001 | CAB016685 | 1 | 0.333333 | 0.833333 | 0.666667 |        | 0.4164 |
| 4465 | ENSG00000203705 | HPA032092 | 1 | 0.333333 | 0.833333 | 0.666667 |        |        |
| 4465 | ENSG00000213145 | HPA042462 | 1 | 0.333333 | 0.833333 | 0.666667 |        |        |
| 4480 | ENSG00000055483 | HPA012082 | 1 | 0.5      | 0.666667 | 0.5      |        |        |
| 4480 | ENSG00000093000 | HPA047162 | 1 | 0.5      | 0.666667 | 0.5      |        |        |
| 4480 | ENSG00000111879 | HPA034572 | 1 | 0.5      | 0.666667 | 0.5      |        |        |
| 4480 | ENSG00000112365 | HPA017872 | 1 | 0.5      | 0.666667 | 0.5      |        |        |
| 4480 | ENSG00000120688 | HPA038965 | 1 | 0.5      | 0.666667 | 0.5      | 0.4547 |        |
| 4480 | ENSG00000137807 | HPA045208 | 1 | 0.5      | 0.666667 | 0.5      | 0.479  | 0.2718 |
| 4480 | ENSG00000147140 | CAB022069 | 1 | 0.5      | 0.666667 | 0.5      |        |        |
| 4480 | ENSG00000147421 | HPA055855 | 1 | 0.5      | 0.666667 | 0.5      |        |        |
| 4480 | ENSG00000164708 | HPA043801 | 1 | 0.5      | 0.666667 | 0.5      |        |        |
| 4489 | ENSG00000143013 | HPA045877 | 1 | 0.5      | 0.666667 | 0.666667 |        |        |
| 4490 | ENSG00000196950 | HPA036512 | 1 | 0.3      | 0.683333 | 0.7      |        |        |
| 4490 | ENSG00000275074 | HPA028581 | 1 | 0.3      | 0.683333 | 0.7      |        |        |
| 4492 | ENSG00000168734 | HPA042703 | 1 | 0.3      | 0.683333 | 0.8      |        |        |
| 4493 | ENSG00000183527 | HPA057193 | 1 | 0.3      | 0.683333 | 1        |        |        |
| 4494 | ENSG00000006453 | HPA019484 | 1 | 0.333333 | 0.777778 | 1        | 0.2948 | 0.4732 |
| 4494 | ENSG00000008405 | CAB018762 | 1 | 0.333333 | 0.777778 | 1        | 0.4597 |        |
| 4494 | ENSG00000011260 | HPA052378 | 1 | 0.333333 | 0.777778 | 1        |        |        |
| 4494 | ENSG00000037757 | HPA042744 | 1 | 0.333333 | 0.777778 | 1        |        |        |
| 4494 | ENSG00000048707 | HPA027332 | 1 | 0.333333 | 0.777778 | 1        |        |        |
| 4494 | ENSG00000053254 | HPA059209 | 1 | 0.333333 | 0.777778 | 1        |        |        |
| 4494 | ENSG00000056487 | HPA053834 | 1 | 0.333333 | 0.777778 | 1        |        |        |
| 4494 | ENSG00000056998 | HPA064686 | 1 | 0.333333 | 0.777778 | 1        |        |        |
| 4494 | ENSG00000067141 | HPA027806 | 1 | 0.333333 | 0.777778 | 1        |        |        |
| 4494 | ENSG00000068796 | HPA004715 | 1 | 0.333333 | 0.777778 | 1        |        |        |
| 4494 | ENSG00000070610 | HPA024026 | 1 | 0.333333 | 0.777778 | 1        |        |        |
| 4494 | ENSG00000071205 | HPA039589 | 1 | 0.333333 | 0.777778 | 1        |        |        |
| 4494 | ENSG00000076662 | HPA049820 | 1 | 0.333333 | 0.777778 | 1        |        |        |
| 4494 | ENSG00000077238 | HPA070380 | 1 | 0.333333 | 0.777778 | 1        |        |        |
| 4494 | ENSG00000083812 | HPA039774 | 1 | 0.333333 | 0.777778 | 1        |        |        |

|      |                 |           |   |          |          |   |        |
|------|-----------------|-----------|---|----------|----------|---|--------|
| 4494 | ENSG00000084652 | HPA045383 | 1 | 0.333333 | 0.777778 | 1 |        |
| 4494 | ENSG00000084710 | HPA071831 | 1 | 0.333333 | 0.777778 | 1 |        |
| 4494 | ENSG00000087903 | HPA048969 | 1 | 0.333333 | 0.777778 | 1 |        |
| 4494 | ENSG00000088930 | HPA047118 | 1 | 0.333333 | 0.777778 | 1 |        |
| 4494 | ENSG00000089159 | CAB003841 | 1 | 0.333333 | 0.777778 | 1 |        |
| 4494 | ENSG00000091129 | HPA012606 | 1 | 0.333333 | 0.777778 | 1 |        |
| 4494 | ENSG00000092148 | HPA002929 | 1 | 0.333333 | 0.777778 | 1 |        |
| 4494 | ENSG00000095139 | HPA037573 | 1 | 0.333333 | 0.777778 | 1 |        |
| 4494 | ENSG00000099940 | HPA031823 | 1 | 0.333333 | 0.777778 | 1 | 0.3895 |
| 4494 | ENSG00000100351 | HPA005788 | 1 | 0.333333 | 0.777778 | 1 |        |
| 4494 | ENSG00000101082 | HPA053746 | 1 | 0.333333 | 0.777778 | 1 |        |
| 4494 | ENSG00000102225 | HPA000974 | 1 | 0.333333 | 0.777778 | 1 |        |
| 4494 | ENSG00000102967 | HPA010123 | 1 | 0.333333 | 0.777778 | 1 |        |
| 4494 | ENSG00000103426 | HPA062721 | 1 | 0.333333 | 0.777778 | 1 |        |
| 4494 | ENSG00000103479 | HPA019703 | 1 | 0.333333 | 0.777778 | 1 | 0.3152 |
| 4494 | ENSG00000103494 | HPA040530 | 1 | 0.333333 | 0.777778 | 1 |        |
| 4494 | ENSG00000104043 | HPA040254 | 1 | 0.333333 | 0.777778 | 1 |        |
| 4494 | ENSG00000104067 | HPA001636 | 1 | 0.333333 | 0.777778 | 1 | 0.3149 |
| 4494 | ENSG00000104907 | HPA041130 | 1 | 0.333333 | 0.777778 | 1 | 0.248  |
| 4494 | ENSG00000105053 | HPA056489 | 1 | 0.333333 | 0.777778 | 1 |        |
| 4494 | ENSG00000105221 | HPA064521 | 1 | 0.333333 | 0.777778 | 1 |        |
| 4494 | ENSG00000106236 | HPA058320 | 1 | 0.333333 | 0.777778 | 1 |        |
| 4494 | ENSG00000107581 | HPA038316 | 1 | 0.333333 | 0.777778 | 1 | 0.3749 |
| 4494 | ENSG00000107833 | HPA036295 | 1 | 0.333333 | 0.777778 | 1 |        |
| 4494 | ENSG00000108433 | HPA048956 | 1 | 0.333333 | 0.777778 | 1 |        |
| 4494 | ENSG00000108840 | HPA030991 | 1 | 0.333333 | 0.777778 | 1 |        |
| 4494 | ENSG00000110442 | HPA009142 | 1 | 0.333333 | 0.777778 | 1 |        |
| 4494 | ENSG00000111261 | HPA007955 | 1 | 0.333333 | 0.777778 | 1 |        |
| 4494 | ENSG00000111344 | HPA041650 | 1 | 0.333333 | 0.777778 | 1 |        |
| 4494 | ENSG00000111596 | HPA067711 | 1 | 0.333333 | 0.777778 | 1 |        |
| 4494 | ENSG00000112787 | HPA049880 | 1 | 0.333333 | 0.777778 | 1 |        |
| 4494 | ENSG00000114107 | HPA036941 | 1 | 0.333333 | 0.777778 | 1 |        |
| 4494 | ENSG00000115211 | HPA039993 | 1 | 0.333333 | 0.777778 | 1 |        |
| 4494 | ENSG00000115468 | HPA049331 | 1 | 0.333333 | 0.777778 | 1 |        |
| 4494 | ENSG00000115641 | HPA005922 | 1 | 0.333333 | 0.777778 | 1 |        |
| 4494 | ENSG00000115839 | HPA034495 | 1 | 0.333333 | 0.777778 | 1 |        |
| 4494 | ENSG00000115947 | HPA064562 | 1 | 0.333333 | 0.777778 | 1 | 0.3548 |
| 4494 | ENSG00000116885 | HPA028436 | 1 | 0.333333 | 0.777778 | 1 |        |
| 4494 | ENSG00000117592 | CAB008663 | 1 | 0.333333 | 0.777778 | 1 |        |
| 4494 | ENSG00000118162 | HPA041710 | 1 | 0.333333 | 0.777778 | 1 |        |
| 4494 | ENSG00000118407 | HPA053564 | 1 | 0.333333 | 0.777778 | 1 |        |
| 4494 | ENSG00000118412 | HPA053573 | 1 | 0.333333 | 0.777778 | 1 |        |
| 4494 | ENSG00000119718 | HPA048028 | 1 | 0.333333 | 0.777778 | 1 |        |
| 4494 | ENSG00000122188 | HPA002461 | 1 | 0.333333 | 0.777778 | 1 |        |
| 4494 | ENSG00000122711 | HPA007286 | 1 | 0.333333 | 0.777778 | 1 |        |
| 4494 | ENSG00000123454 | HPA005960 | 1 | 0.333333 | 0.777778 | 1 |        |
| 4494 | ENSG00000124920 | HPA018310 | 1 | 0.333333 | 0.777778 | 1 |        |
| 4494 | ENSG00000125149 | HPA041214 | 1 | 0.333333 | 0.777778 | 1 |        |
| 4494 | ENSG00000125531 | HPA041341 | 1 | 0.333333 | 0.777778 | 1 |        |
| 4494 | ENSG00000125898 | HPA069240 | 1 | 0.333333 | 0.777778 | 1 |        |
| 4494 | ENSG00000125962 | HPA000996 | 1 | 0.333333 | 0.777778 | 1 |        |
| 4494 | ENSG00000128510 | HPA021030 | 1 | 0.333333 | 0.777778 | 1 |        |
| 4494 | ENSG00000128585 | HPA041810 | 1 | 0.333333 | 0.777778 | 1 |        |
| 4494 | ENSG00000129696 | HPA023523 | 1 | 0.333333 | 0.777778 | 1 |        |
| 4494 | ENSG00000130560 | HPA005651 | 1 | 0.333333 | 0.777778 | 1 |        |

|      |                 |           |   |          |          |   |        |        |
|------|-----------------|-----------|---|----------|----------|---|--------|--------|
| 4494 | ENSG00000130706 | HPA042266 | 1 | 0.333333 | 0.777778 | 1 |        |        |
| 4494 | ENSG00000131069 | HPA004141 | 1 | 0.333333 | 0.777778 | 1 |        |        |
| 4494 | ENSG00000132024 | HPA005436 | 1 | 0.333333 | 0.777778 | 1 |        |        |
| 4494 | ENSG00000133606 | HPA000567 | 1 | 0.333333 | 0.777778 | 1 |        |        |
| 4494 | ENSG00000133773 | HPA038555 | 1 | 0.333333 | 0.777778 | 1 |        |        |
| 4494 | ENSG00000134317 | HPA006420 | 1 | 0.333333 | 0.777778 | 1 |        |        |
| 4494 | ENSG00000135045 | HPA042167 | 1 | 0.333333 | 0.777778 | 1 |        |        |
| 4494 | ENSG00000135318 | HPA017357 | 1 | 0.333333 | 0.777778 | 1 |        |        |
| 4494 | ENSG00000135823 | HPA038557 | 1 | 0.333333 | 0.777778 | 1 |        |        |
| 4494 | ENSG00000135917 | HPA038898 | 1 | 0.333333 | 0.777778 | 1 |        |        |
| 4494 | ENSG00000136960 | HPA053652 | 1 | 0.333333 | 0.777778 | 1 |        |        |
| 4494 | ENSG00000138138 | HPA037569 | 1 | 0.333333 | 0.777778 | 1 |        |        |
| 4494 | ENSG00000139163 | HPA029407 | 1 | 0.333333 | 0.777778 | 1 |        |        |
| 4494 | ENSG00000139437 | HPA038638 | 1 | 0.333333 | 0.777778 | 1 |        |        |
| 4494 | ENSG00000141293 | HPA002969 | 1 | 0.333333 | 0.777778 | 1 |        |        |
| 4494 | ENSG00000141497 | HPA023286 | 1 | 0.333333 | 0.777778 | 1 |        |        |
| 4494 | ENSG00000143344 | HPA019788 | 1 | 0.333333 | 0.777778 | 1 |        |        |
| 4494 | ENSG00000143398 | HPA029366 | 1 | 0.333333 | 0.777778 | 1 |        |        |
| 4494 | ENSG00000143476 | HPA032023 | 1 | 0.333333 | 0.777778 | 1 |        |        |
| 4494 | ENSG00000145555 | HPA024223 | 1 | 0.333333 | 0.777778 | 1 | 0.38   |        |
| 4494 | ENSG00000147419 | HPA023256 | 1 | 0.333333 | 0.777778 | 1 |        |        |
| 4494 | ENSG00000147813 | HPA023739 | 1 | 0.333333 | 0.777778 | 1 |        |        |
| 4494 | ENSG00000149243 | HPA039864 | 1 | 0.333333 | 0.777778 | 1 |        |        |
| 4494 | ENSG00000149489 | HPA028910 | 1 | 0.333333 | 0.777778 | 1 |        |        |
| 4494 | ENSG00000149930 | HPA010650 | 1 | 0.333333 | 0.777778 | 1 |        |        |
| 4494 | ENSG00000150756 | HPA074513 | 1 | 0.333333 | 0.777778 | 1 |        |        |
| 4494 | ENSG00000152382 | HPA028651 | 1 | 0.333333 | 0.777778 | 1 |        |        |
| 4494 | ENSG00000154358 | HPA021186 | 1 | 0.333333 | 0.777778 | 1 |        |        |
| 4494 | ENSG00000154359 | HPA023584 | 1 | 0.333333 | 0.777778 | 1 |        |        |
| 4494 | ENSG00000154743 | HPA027120 | 1 | 0.333333 | 0.777778 | 1 |        |        |
| 4494 | ENSG00000155016 | HPA064827 | 1 | 0.333333 | 0.777778 | 1 |        |        |
| 4494 | ENSG00000155052 | HPA069095 | 1 | 0.333333 | 0.777778 | 1 |        |        |
| 4494 | ENSG00000155890 | HPA003581 | 1 | 0.333333 | 0.777778 | 1 |        |        |
| 4494 | ENSG00000156711 | HPA007667 | 1 | 0.333333 | 0.777778 | 1 |        |        |
| 4494 | ENSG00000157379 | HPA000599 | 1 | 0.333333 | 0.777778 | 1 |        |        |
| 4494 | ENSG00000158717 | HPA042970 | 1 | 0.333333 | 0.777778 | 1 |        |        |
| 4494 | ENSG00000159082 | HPA011916 | 1 | 0.333333 | 0.777778 | 1 |        |        |
| 4494 | ENSG00000159147 | HPA049033 | 1 | 0.333333 | 0.777778 | 1 |        |        |
| 4494 | ENSG00000159348 | HPA010641 | 1 | 0.333333 | 0.777778 | 1 |        |        |
| 4494 | ENSG00000159658 | HPA011224 | 1 | 0.333333 | 0.777778 | 1 |        |        |
| 4494 | ENSG00000160209 | HPA030196 | 1 | 0.333333 | 0.777778 | 1 |        |        |
| 4494 | ENSG00000160818 | HPA028323 | 1 | 0.333333 | 0.777778 | 1 |        |        |
| 4494 | ENSG00000163430 | HPA035251 | 1 | 0.333333 | 0.777778 | 1 |        |        |
| 4494 | ENSG00000163545 | HPA008958 | 1 | 0.333333 | 0.777778 | 1 |        |        |
| 4494 | ENSG00000163568 | HPA031365 | 1 | 0.333333 | 0.777778 | 1 | 0.2855 | 0.4295 |
| 4494 | ENSG00000163682 | HPA003372 | 1 | 0.333333 | 0.777778 | 1 |        |        |
| 4494 | ENSG00000164051 | HPA010980 | 1 | 0.333333 | 0.777778 | 1 |        | 0.3666 |
| 4494 | ENSG00000164307 | HPA042317 | 1 | 0.333333 | 0.777778 | 1 |        |        |
| 4494 | ENSG00000165416 | CAB015942 | 1 | 0.333333 | 0.777778 | 1 |        |        |
| 4494 | ENSG00000165568 | HPA037821 | 1 | 0.333333 | 0.777778 | 1 |        |        |
| 4494 | ENSG00000165730 | HPA037844 | 1 | 0.333333 | 0.777778 | 1 |        |        |
| 4494 | ENSG00000167644 | HPA054406 | 1 | 0.333333 | 0.777778 | 1 |        |        |
| 4494 | ENSG00000167699 | HPA021623 | 1 | 0.333333 | 0.777778 | 1 |        |        |
| 4494 | ENSG00000168556 | HPA019486 | 1 | 0.333333 | 0.777778 | 1 |        |        |
| 4494 | ENSG00000169047 | CAB005261 | 1 | 0.333333 | 0.777778 | 1 |        |        |

|      |                 |           |   |          |          |   |        |
|------|-----------------|-----------|---|----------|----------|---|--------|
| 4494 | ENSG00000169515 | HPA041993 | 1 | 0.333333 | 0.777778 | 1 | 0.41   |
| 4494 | ENSG00000169554 | HPA003456 | 1 | 0.333333 | 0.777778 | 1 |        |
| 4494 | ENSG00000169857 | HPA020863 | 1 | 0.333333 | 0.777778 | 1 |        |
| 4494 | ENSG00000170004 | HPA076524 | 1 | 0.333333 | 0.777778 | 1 |        |
| 4494 | ENSG00000171055 | HPA035978 | 1 | 0.333333 | 0.777778 | 1 |        |
| 4494 | ENSG00000171224 | HPA034591 | 1 | 0.333333 | 0.777778 | 1 |        |
| 4494 | ENSG00000171405 | HPA055941 | 1 | 0.333333 | 0.777778 | 1 |        |
| 4494 | ENSG00000171497 | HPA019692 | 1 | 0.333333 | 0.777778 | 1 | 0.1364 |
| 4494 | ENSG00000171777 | HPA041929 | 1 | 0.333333 | 0.777778 | 1 |        |
| 4494 | ENSG00000171793 | CAB017111 | 1 | 0.333333 | 0.777778 | 1 | 0.4937 |
| 4494 | ENSG00000174516 | HPA062281 | 1 | 0.333333 | 0.777778 | 1 | 0.4242 |
| 4494 | ENSG00000174705 | HPA036471 | 1 | 0.333333 | 0.777778 | 1 |        |
| 4494 | ENSG00000174827 | HPA006155 | 1 | 0.333333 | 0.777778 | 1 |        |
| 4494 | ENSG00000176783 | HPA038804 | 1 | 0.333333 | 0.777778 | 1 |        |
| 4494 | ENSG00000177200 | HPA042053 | 1 | 0.333333 | 0.777778 | 1 |        |
| 4494 | ENSG00000178209 | HPA025967 | 1 | 0.333333 | 0.777778 | 1 | 0.3171 |
| 4494 | ENSG00000178852 | HPA021633 | 1 | 0.333333 | 0.777778 | 1 |        |
| 4494 | ENSG00000178922 | HPA040092 | 1 | 0.333333 | 0.777778 | 1 |        |
| 4494 | ENSG00000179029 | HPA059653 | 1 | 0.333333 | 0.777778 | 1 |        |
| 4494 | ENSG00000180008 | HPA057961 | 1 | 0.333333 | 0.777778 | 1 |        |
| 4494 | ENSG00000180530 | HPA029785 | 1 | 0.333333 | 0.777778 | 1 |        |
| 4494 | ENSG00000181638 | HPA047232 | 1 | 0.333333 | 0.777778 | 1 |        |
| 4494 | ENSG00000181924 | HPA040126 | 1 | 0.333333 | 0.777778 | 1 |        |
| 4494 | ENSG00000182585 | HPA014420 | 1 | 0.333333 | 0.777778 | 1 |        |
| 4494 | ENSG00000183092 | HPA002899 | 1 | 0.333333 | 0.777778 | 1 |        |
| 4494 | ENSG00000183688 | HPA030879 | 1 | 0.333333 | 0.777778 | 1 |        |
| 4494 | ENSG00000183690 | HPA034492 | 1 | 0.333333 | 0.777778 | 1 |        |
| 4494 | ENSG00000183831 | HPA031655 | 1 | 0.333333 | 0.777778 | 1 | 0.3325 |
| 4494 | ENSG00000185163 | HPA039503 | 1 | 0.333333 | 0.777778 | 1 |        |
| 4494 | ENSG00000185250 | HPA036717 | 1 | 0.333333 | 0.777778 | 1 |        |
| 4494 | ENSG00000186193 | HPA044154 | 1 | 0.333333 | 0.777778 | 1 |        |
| 4494 | ENSG00000187051 | HPA042874 | 1 | 0.333333 | 0.777778 | 1 |        |
| 4494 | ENSG00000187164 | HPA037943 | 1 | 0.333333 | 0.777778 | 1 |        |
| 4494 | ENSG00000188026 | HPA041314 | 1 | 0.333333 | 0.777778 | 1 |        |
| 4494 | ENSG00000188833 | HPA021509 | 1 | 0.333333 | 0.777778 | 1 |        |
| 4494 | ENSG00000189127 | HPA043327 | 1 | 0.333333 | 0.777778 | 1 |        |
| 4494 | ENSG00000196376 | HPA019576 | 1 | 0.333333 | 0.777778 | 1 |        |
| 4494 | ENSG00000196526 | HPA015642 | 1 | 0.333333 | 0.777778 | 1 |        |
| 4494 | ENSG00000197771 | CAB013792 | 1 | 0.333333 | 0.777778 | 1 |        |
| 4494 | ENSG00000198792 | HPA024076 | 1 | 0.333333 | 0.777778 | 1 |        |
| 4494 | ENSG00000198836 | HPA036927 | 1 | 0.333333 | 0.777778 | 1 |        |
| 4494 | ENSG00000198860 | HPA029237 | 1 | 0.333333 | 0.777778 | 1 |        |
| 4494 | ENSG00000198911 | HPA031963 | 1 | 0.333333 | 0.777778 | 1 |        |
| 4494 | ENSG00000204687 | HPA017983 | 1 | 0.333333 | 0.777778 | 1 |        |
| 4494 | ENSG00000204922 | HPA046851 | 1 | 0.333333 | 0.777778 | 1 |        |
| 4494 | ENSG00000204954 | HPA038883 | 1 | 0.333333 | 0.777778 | 1 |        |
| 4494 | ENSG00000205808 | HPA018096 | 1 | 0.333333 | 0.777778 | 1 |        |
| 4494 | ENSG00000215271 | HPA036316 | 1 | 0.333333 | 0.777778 | 1 |        |
| 4494 | ENSG00000217442 | HPA047813 | 1 | 0.333333 | 0.777778 | 1 |        |
| 4494 | ENSG00000217930 | HPA062721 | 1 | 0.333333 | 0.777778 | 1 |        |
| 4494 | ENSG00000221890 | HPA001079 | 1 | 0.333333 | 0.777778 | 1 |        |
| 4494 | ENSG00000239857 | HPA019765 | 1 | 0.333333 | 0.777778 | 1 |        |
| 4494 | ENSG00000241839 | HPA040055 | 1 | 0.333333 | 0.777778 | 1 |        |
| 4494 | ENSG00000250317 | HPA016552 | 1 | 0.333333 | 0.777778 | 1 |        |
| 4494 | ENSG00000253457 | HPA066648 | 1 | 0.333333 | 0.777778 | 1 |        |



|      |                 |           |   |          |          |          |        |
|------|-----------------|-----------|---|----------|----------|----------|--------|
| 4494 | ENSG00000256806 | HPA046824 | 1 | 0.333333 | 0.777778 | 1        |        |
| 4494 | ENSG00000264668 | HPA047232 | 1 | 0.333333 | 0.777778 | 1        |        |
| 4676 | ENSG00000159788 | HPA054646 | 1 | 0.4      | 0.6      | 0.7      |        |
| 4677 | ENSG00000068903 | CAB004573 | 1 | 0.333333 | 0.833333 | 1        |        |
| 4677 | ENSG00000101199 | HPA051019 | 1 | 0.333333 | 0.833333 | 1        |        |
| 4677 | ENSG00000103343 | HPA009656 | 1 | 0.333333 | 0.833333 | 1        |        |
| 4677 | ENSG00000125753 | CAB004612 | 1 | 0.333333 | 0.833333 | 1        | 0.3953 |
| 4677 | ENSG00000135597 | HPA029962 | 1 | 0.333333 | 0.833333 | 1        |        |
| 4677 | ENSG00000172375 | HPA011044 | 1 | 0.333333 | 0.833333 | 1        |        |
| 4677 | ENSG00000221983 | HPA056624 | 1 | 0.333333 | 0.833333 | 1        |        |
| 4684 | ENSG00000126822 | HPA063455 | 1 | 0.333333 | 0.866667 | 1        |        |
| 4685 | ENSG00000124496 | HPA027771 | 1 | 0.5      | 0.666667 | 1        |        |
| 4685 | ENSG00000188015 | HPA042674 | 1 | 0.5      | 0.666667 | 1        |        |
| 4687 | ENSG00000013583 | HPA056417 | 1 | 0.4      | 0.7      | 0.4      |        |
| 4687 | ENSG00000038358 | HPA041164 | 1 | 0.4      | 0.7      | 0.4      |        |
| 4687 | ENSG00000063244 | CAB010910 | 1 | 0.4      | 0.7      | 0.4      |        |
| 4687 | ENSG00000064102 | HPA039543 | 1 | 0.4      | 0.7      | 0.4      |        |
| 4687 | ENSG00000087263 | HPA003215 | 1 | 0.4      | 0.7      | 0.4      |        |
| 4687 | ENSG00000096654 | HPA003226 | 1 | 0.4      | 0.7      | 0.4      |        |
| 4687 | ENSG00000134901 | CAB020780 | 1 | 0.4      | 0.7      | 0.4      |        |
| 4687 | ENSG00000141098 | HPA040939 | 1 | 0.4      | 0.7      | 0.4      |        |
| 4687 | ENSG00000144857 | CAB025806 | 1 | 0.4      | 0.7      | 0.4      | 0.3272 |
| 4687 | ENSG00000156171 | HPA018036 | 1 | 0.4      | 0.7      | 0.4      |        |
| 4687 | ENSG00000159352 | HPA038807 | 1 | 0.4      | 0.7      | 0.4      |        |
| 4687 | ENSG00000163930 | CAB004322 | 1 | 0.4      | 0.7      | 0.4      |        |
| 4687 | ENSG00000188321 | HPA059632 | 1 | 0.4      | 0.7      | 0.4      |        |
| 4687 | ENSG00000198563 | CAB034012 | 1 | 0.4      | 0.7      | 0.4      |        |
| 4687 | ENSG00000241322 | HPA013332 | 1 | 0.4      | 0.7      | 0.4      |        |
| 4702 | ENSG00000103342 | HPA052488 | 1 | 0.4      | 0.7      | 0.5      |        |
| 4702 | ENSG00000105393 | HPA054386 | 1 | 0.4      | 0.7      | 0.5      |        |
| 4702 | ENSG00000108592 | HPA055544 | 1 | 0.4      | 0.7      | 0.5      |        |
| 4702 | ENSG00000111328 | HPA057648 | 1 | 0.4      | 0.7      | 0.5      |        |
| 4702 | ENSG00000124795 | CAB015226 | 1 | 0.4      | 0.7      | 0.5      | 0.3727 |
| 4702 | ENSG00000175354 | HPA015004 | 1 | 0.4      | 0.7      | 0.5      |        |
| 4702 | ENSG00000177943 | CAB026377 | 1 | 0.4      | 0.7      | 0.5      |        |
| 4709 | ENSG00000129559 | CAB004082 | 1 | 0.466667 | 0.733333 | 0.466667 |        |
| 4710 | ENSG00000005486 | HPA045074 | 1 | 0.5      | 0.75     | 0.5      |        |
| 4710 | ENSG00000012660 | CAB017042 | 1 | 0.5      | 0.75     | 0.5      |        |
| 4710 | ENSG00000024422 | HPA047394 | 1 | 0.5      | 0.75     | 0.5      |        |
| 4710 | ENSG00000027075 | HPA026294 | 1 | 0.5      | 0.75     | 0.5      |        |
| 4710 | ENSG00000034053 | HPA058796 | 1 | 0.5      | 0.75     | 0.5      |        |
| 4710 | ENSG00000047634 | HPA035270 | 1 | 0.4      | 0.7      | 0.6      |        |
| 4710 | ENSG00000070061 | CAB021340 | 1 | 0.5      | 0.75     | 0.5      |        |
| 4710 | ENSG00000089234 | HPA040357 | 1 | 0.5      | 0.75     | 0.5      |        |
| 4710 | ENSG00000091640 | HPA024032 | 1 | 0.5      | 0.75     | 0.5      |        |
| 4710 | ENSG00000092421 | HPA031264 | 1 | 0.5      | 0.75     | 0.5      |        |
| 4710 | ENSG00000100722 | HPA049798 | 1 | 0.5      | 0.75     | 0.5      |        |
| 4710 | ENSG00000101224 | HPA038893 | 1 | 0.5      | 0.75     | 0.5      |        |
| 4710 | ENSG00000101856 | HPA002877 | 1 | 0.5      | 0.75     | 0.5      |        |
| 4710 | ENSG00000102181 | HPA038783 | 1 | 0.5      | 0.75     | 0.5      |        |
| 4710 | ENSG00000103043 | HPA027766 | 1 | 0.5      | 0.75     | 0.5      |        |
| 4710 | ENSG00000103356 | HPA043289 | 1 | 0.5      | 0.75     | 0.5      |        |
| 4710 | ENSG00000103550 | HPA041079 | 1 | 0.5      | 0.75     | 0.5      |        |
| 4710 | ENSG00000108021 | HPA038043 | 1 | 0.5      | 0.75     | 0.5      |        |
| 4710 | ENSG00000110427 | HPA010132 | 1 | 0.5      | 0.75     | 0.5      |        |

|      |                  |           |   |          |          |          |        |
|------|------------------|-----------|---|----------|----------|----------|--------|
| 4710 | ENSG00000110851  | HPA024322 | 1 | 0.5      | 0.75     | 0.5      |        |
| 4710 | ENSG00000119711  | HPA029073 | 1 | 0.5      | 0.75     | 0.5      |        |
| 4710 | ENSG00000123562  | HPA031872 | 1 | 0.5      | 0.75     | 0.5      |        |
| 4710 | ENSG00000126705  | HPA028685 | 1 | 0.5      | 0.75     | 0.5      |        |
| 4710 | ENSG00000136197  | HPA020120 | 1 | 0.5      | 0.75     | 0.5      |        |
| 4710 | ENSG00000136205  | HPA055338 | 1 | 0.5      | 0.75     | 0.5      |        |
| 4710 | ENSG00000136527  | CAB011692 | 1 | 0.5      | 0.75     | 0.5      |        |
| 4710 | ENSG00000138430  | HPA035790 | 1 | 0.5      | 0.75     | 0.5      |        |
| 4710 | ENSG00000138780  | HPA046160 | 1 | 0.5      | 0.75     | 0.5      |        |
| 4710 | ENSG00000139970  | HPA040945 | 1 | 0.5      | 0.75     | 0.5      |        |
| 4710 | ENSG00000140941  | HPA042824 | 1 | 0.4      | 0.7      | 0.6      |        |
| 4710 | ENSG00000145241  | HPA049740 | 1 | 0.5      | 0.75     | 0.5      |        |
| 4710 | ENSG00000146223  | HPA046049 | 1 | 0.5      | 0.75     | 0.5      |        |
| 4710 | ENSG00000146918  | HPA026631 | 1 | 0.5      | 0.75     | 0.5      |        |
| 4710 | ENSG00000148296  | HPA023608 | 1 | 0.4      | 0.7      | 0.6      |        |
| 4710 | ENSG00000152359  | HPA037509 | 1 | 0.5      | 0.75     | 0.5      |        |
| 4710 | ENSG00000153015  | HPA020344 | 1 | 0.5      | 0.75     | 0.5      |        |
| 4710 | ENSG00000157181  | HPA015988 | 1 | 0.5      | 0.75     | 0.5      |        |
| 4710 | ENSG00000161267  | HPA030947 | 1 | 0.5      | 0.75     | 0.5      |        |
| 4710 | ENSG00000162139  | HPA038729 | 1 | 0.5      | 0.75     | 0.5      |        |
| 4710 | ENSG00000162688  | HPA028498 | 1 | 0.5      | 0.75     | 0.5      |        |
| 4710 | ENSG00000163636  | HPA036921 | 1 | 0.5      | 0.75     | 0.5      |        |
| 4710 | ENSG00000163820  | HPA035526 | 1 | 0.5      | 0.75     | 0.5      |        |
| 4710 | ENSG00000164080  | HPA035004 | 1 | 0.4      | 0.7      | 0.6      |        |
| 4710 | ENSG00000166200  | HPA018271 | 1 | 0.5      | 0.75     | 0.5      |        |
| 4710 | ENSG00000168137  | CAB017093 | 1 | 0.5      | 0.75     | 0.5      |        |
| 4710 | ENSG00000168813  | HPA030964 | 1 | 0.5      | 0.75     | 0.5      |        |
| 4710 | ENSG00000169813  | HPA016884 | 1 | 0.4      | 0.7      | 0.6      |        |
| 4710 | ENSG00000172716  | HPA023030 | 1 | 0.4      | 0.7      | 0.6      |        |
| 4710 | ENSG00000179604  | HPA023335 | 1 | 0.5      | 0.75     | 0.5      |        |
| 4710 | ENSG00000196118  | HPA041806 | 1 | 0.5      | 0.75     | 0.5      |        |
| 4710 | ENSG00000198028  | HPA045439 | 1 | 0.5      | 0.75     | 0.5      |        |
| 4710 | ENSG00000198824  | HPA006623 | 1 | 0.5      | 0.75     | 0.5      | 0.2514 |
| 4710 | ENSG00000258102  | HPA042824 | 1 | 0.4      | 0.7      | 0.6      |        |
| 4710 | ENSG00000266028  | HPA028191 | 1 | 0.5      | 0.75     | 0.5      |        |
| 4710 | ENSG00000269335  | HPA000426 | 1 | 0.5      | 0.75     | 0.5      |        |
| 4765 | ENSG00000121058  | CAB017524 | 1 | 0.466667 | 0.733333 | 0.666667 |        |
| 4766 | ENSG00000004975  | HPA021611 | 1 | 0.5      | 0.75     | 0.666667 | 0.3776 |
| 4766 | ENSG000000010626 | HPA037766 | 1 | 0.5      | 0.75     | 0.666667 |        |
| 4766 | ENSG000000069275 | HPA062351 | 1 | 0.5      | 0.75     | 0.666667 |        |
| 4766 | ENSG000000086102 | HPA056310 | 1 | 0.5      | 0.75     | 0.666667 |        |
| 4766 | ENSG00000107338  | CAB010161 | 1 | 0.5      | 0.75     | 0.666667 |        |
| 4766 | ENSG00000107679  | HPA002043 | 1 | 0.5      | 0.75     | 0.666667 |        |
| 4766 | ENSG00000110107  | CAB012448 | 1 | 0.5      | 0.75     | 0.666667 | 0.347  |
| 4766 | ENSG00000110171  | HPA043396 | 1 | 0.5      | 0.75     | 0.666667 |        |
| 4766 | ENSG00000123095  | HPA056035 | 1 | 0.5      | 0.75     | 0.666667 |        |
| 4766 | ENSG00000125977  | HPA041262 | 1 | 0.5      | 0.75     | 0.666667 |        |
| 4766 | ENSG00000134531  | HPA051931 | 1 | 0.5      | 0.75     | 0.666667 |        |
| 4766 | ENSG00000134851  | HPA038299 | 1 | 0.5      | 0.75     | 0.666667 |        |
| 4766 | ENSG00000136010  | HPA039481 | 1 | 0.5      | 0.75     | 0.666667 |        |
| 4766 | ENSG00000142173  | HPA007029 | 1 | 0.5      | 0.75     | 0.666667 |        |
| 4766 | ENSG00000145386  | CAB000114 | 1 | 0.5      | 0.75     | 0.666667 |        |
| 4766 | ENSG00000151136  | HPA055898 | 1 | 0.5      | 0.75     | 0.666667 |        |
| 4766 | ENSG00000152443  | HPA046653 | 1 | 0.5      | 0.75     | 0.666667 |        |
| 4766 | ENSG00000153936  | HPA043069 | 1 | 0.5      | 0.75     | 0.666667 |        |

|      |                 |           |   |          |          |          |        |        |
|------|-----------------|-----------|---|----------|----------|----------|--------|--------|
| 4766 | ENSG00000155085 | HPA030804 | 1 | 0.5      | 0.75     | 0.666667 |        |        |
| 4766 | ENSG00000158092 | CAB005063 | 1 | 0.5      | 0.75     | 0.666667 |        |        |
| 4766 | ENSG00000160799 | HPA056814 | 1 | 0.5      | 0.75     | 0.666667 |        |        |
| 4766 | ENSG00000161526 | HPA042382 | 1 | 0.5      | 0.75     | 0.666667 |        |        |
| 4766 | ENSG00000163584 | HPA048060 | 1 | 0.5      | 0.75     | 0.666667 |        |        |
| 4766 | ENSG00000167685 | HPA056895 | 1 | 0.5      | 0.75     | 0.666667 |        |        |
| 4766 | ENSG00000173546 | HPA001933 | 1 | 0.5      | 0.75     | 0.666667 |        | 0.2423 |
| 4766 | ENSG00000182481 | CAB015460 | 1 | 0.5      | 0.75     | 0.666667 |        |        |
| 4766 | ENSG00000184254 | HPA046271 | 1 | 0.5      | 0.75     | 0.666667 |        |        |
| 4766 | ENSG00000184402 | CAB011827 | 1 | 0.5      | 0.75     | 0.666667 |        |        |
| 4766 | ENSG00000184937 | HPA035717 | 1 | 0.5      | 0.75     | 0.666667 |        |        |
| 4766 | ENSG00000196214 | HPA044882 | 1 | 0.5      | 0.75     | 0.666667 |        |        |
| 4766 | ENSG00000196659 | HPA051714 | 1 | 0.5      | 0.75     | 0.666667 |        |        |
| 4766 | ENSG00000197557 | HPA051714 | 1 | 0.5      | 0.75     | 0.666667 |        |        |
| 4766 | ENSG00000271447 | HPA057288 | 1 | 0.5      | 0.75     | 0.666667 |        |        |
| 4799 | ENSG00000146067 | HPA035847 | 1 | 0.6      | 0.733333 | 0.6      | 0.3861 | 0.3925 |
| 4800 | ENSG00000125755 | HPA041756 | 1 | 0.4      | 0.8      | 0.4      |        |        |
| 4800 | ENSG00000130305 | HPA020536 | 1 | 0.4      | 0.8      | 0.4      |        |        |
| 4800 | ENSG00000141569 | HPA021575 | 1 | 0.4      | 0.8      | 0.4      |        |        |
| 4803 | ENSG00000110075 | CAB017183 | 1 | 0.5      | 0.833333 | 0.5      |        |        |
| 4803 | ENSG00000111364 | HPA039962 | 1 | 0.5      | 0.833333 | 0.5      |        |        |
| 4803 | ENSG00000164144 | HPA037375 | 1 | 0.5      | 0.833333 | 0.5      | 0.4383 |        |
| 4806 | ENSG00000074800 | CAB018614 | 1 | 0.466667 | 0.822222 | 0.533333 |        |        |
| 4807 | ENSG00000087191 | HPA017871 | 1 | 0.5      | 0.833333 | 0.666667 |        |        |
| 4807 | ENSG00000180423 | HPA038671 | 1 | 0.5      | 0.833333 | 0.666667 |        |        |
| 4809 | ENSG00000005889 | HPA003877 | 1 | 0.6      | 0.8      | 0.6      |        |        |
| 4809 | ENSG00000011451 | HPA022923 | 1 | 0.6      | 0.8      | 0.6      |        |        |
| 4809 | ENSG00000083720 | HPA012047 | 1 | 0.6      | 0.8      | 0.6      |        |        |
| 4809 | ENSG00000099194 | HPA012107 | 1 | 0.6      | 0.8      | 0.6      |        |        |
| 4809 | ENSG00000107625 | HPA037388 | 1 | 0.6      | 0.8      | 0.6      |        |        |
| 4809 | ENSG00000115998 | HPA031840 | 1 | 0.6      | 0.8      | 0.6      |        |        |
| 4809 | ENSG00000127445 | CAB004528 | 1 | 0.6      | 0.8      | 0.6      |        |        |
| 4809 | ENSG00000144852 | HPA029309 | 1 | 0.6      | 0.8      | 0.6      |        |        |
| 4809 | ENSG00000173276 | HPA024655 | 1 | 0.6      | 0.8      | 0.6      |        |        |
| 4809 | ENSG00000174371 | HPA053079 | 1 | 0.6      | 0.8      | 0.6      |        |        |
| 4809 | ENSG00000176248 | CAB018692 | 1 | 0.6      | 0.8      | 0.6      |        |        |
| 4809 | ENSG00000204356 | HPA007594 | 1 | 0.6      | 0.8      | 0.6      |        |        |
| 4809 | ENSG00000239382 | HPA073835 | 1 | 0.6      | 0.8      | 0.6      |        |        |
| 4822 | ENSG00000165669 | HPA038182 | 1 | 0.6      | 0.866667 | 0.6      |        |        |
| 4822 | ENSG00000196141 | HPA055427 | 1 | 0.6      | 0.866667 | 0.6      |        |        |
| 4822 | ENSG00000213639 | CAB022558 | 1 | 0.6      | 0.866667 | 0.6      |        |        |
| 4822 | ENSG00000215472 | HPA043724 | 1 | 0.6      | 0.866667 | 0.6      |        |        |
| 4822 | ENSG00000265681 | HPA043724 | 1 | 0.6      | 0.866667 | 0.6      |        |        |
| 4827 | ENSG00000066379 | HPA055074 | 1 | 0.4      | 0.7      | 0.7      |        |        |
| 4827 | ENSG00000090889 | HPA034745 | 1 | 0.4      | 0.7      | 0.7      |        |        |
| 4827 | ENSG00000105698 | HPA029764 | 1 | 0.4      | 0.7      | 0.7      |        |        |
| 4827 | ENSG00000183735 | HPA045797 | 1 | 0.4      | 0.7      | 0.7      |        |        |
| 4827 | ENSG00000188559 | HPA042707 | 1 | 0.4      | 0.7      | 0.7      |        |        |
| 4827 | ENSG00000198830 | CAB018371 | 1 | 0.4      | 0.7      | 0.7      |        |        |
| 4827 | ENSG00000226650 | HPA034745 | 1 | 0.4      | 0.7      | 0.7      |        |        |
| 4834 | ENSG00000073578 | HPA041981 | 1 | 0.4      | 0.7      | 0.8      |        |        |
| 4834 | ENSG00000081791 | HPA036548 | 1 | 0.4      | 0.7      | 0.8      |        |        |
| 4834 | ENSG00000121297 | HPA008834 | 1 | 0.4      | 0.7      | 0.8      |        |        |
| 4834 | ENSG00000136504 | HPA044470 | 1 | 0.4      | 0.7      | 0.8      |        |        |
| 4834 | ENSG00000157895 | HPA046148 | 1 | 0.4      | 0.7      | 0.8      |        |        |

|      |                 |           |   |     |      |          |        |
|------|-----------------|-----------|---|-----|------|----------|--------|
| 4834 | ENSG00000162521 | CAB006264 | 1 | 0.4 | 0.7  | 0.8      |        |
| 4834 | ENSG00000166228 | HPA037575 | 1 | 0.4 | 0.7  | 0.8      |        |
| 4834 | ENSG00000179041 | HPA055549 | 1 | 0.4 | 0.7  | 0.8      |        |
| 4834 | ENSG00000179583 | CAB016084 | 1 | 0.4 | 0.7  | 0.8      |        |
| 4843 | ENSG00000118707 | HPA053786 | 1 | 0.4 | 0.7  | 0.9      |        |
| 4844 | ENSG00000055130 | CAB002676 | 1 | 0.4 | 0.7  | 1        |        |
| 4844 | ENSG00000115944 | HPA059124 | 1 | 0.4 | 0.7  | 1        |        |
| 4844 | ENSG00000137824 | HPA009975 | 1 | 0.4 | 0.7  | 1        |        |
| 4844 | ENSG00000140650 | HPA040852 | 1 | 0.4 | 0.7  | 1        |        |
| 4848 | ENSG00000065675 | HPA065279 | 1 | 0.5 | 0.75 | 0.833333 |        |
| 4848 | ENSG00000096060 | CAB009315 | 1 | 0.5 | 0.75 | 0.833333 |        |
| 4848 | ENSG00000104299 | HPA051615 | 1 | 0.5 | 0.75 | 0.833333 |        |
| 4848 | ENSG00000104979 | HPA059928 | 1 | 0.5 | 0.75 | 0.833333 |        |
| 4848 | ENSG00000105643 | HPA053788 | 1 | 0.5 | 0.75 | 0.833333 |        |
| 4848 | ENSG00000107290 | HPA024105 | 1 | 0.5 | 0.75 | 0.833333 |        |
| 4848 | ENSG00000125968 | HPA051456 | 1 | 0.5 | 0.75 | 0.833333 |        |
| 4848 | ENSG00000129084 | HPA037646 | 1 | 0.5 | 0.75 | 0.833333 | 0.3171 |
| 4848 | ENSG00000130348 | HPA029585 | 1 | 0.5 | 0.75 | 0.833333 | 0.387  |
| 4848 | ENSG00000134748 | HPA053099 | 1 | 0.5 | 0.75 | 0.833333 |        |
| 4848 | ENSG00000139579 | HPA044615 | 1 | 0.5 | 0.75 | 0.833333 |        |
| 4848 | ENSG00000148719 | HPA010642 | 1 | 0.5 | 0.75 | 0.833333 |        |
| 4848 | ENSG00000153767 | HPA056359 | 1 | 0.5 | 0.75 | 0.833333 |        |
| 4848 | ENSG00000159685 | HPA047673 | 1 | 0.5 | 0.75 | 0.833333 |        |
| 4848 | ENSG00000166508 | CAB002163 | 1 | 0.5 | 0.75 | 0.833333 |        |
| 4848 | ENSG00000173559 | HPA054978 | 1 | 0.5 | 0.75 | 0.833333 |        |
| 4848 | ENSG00000176697 | CAB009564 | 1 | 0.5 | 0.75 | 0.833333 |        |
| 4848 | ENSG00000183258 | HPA017911 | 1 | 0.5 | 0.75 | 0.833333 |        |
| 4848 | ENSG00000183495 | HPA016704 | 1 | 0.5 | 0.75 | 0.833333 |        |
| 4848 | ENSG00000198176 | HPA044754 | 1 | 0.5 | 0.75 | 0.833333 |        |
| 4848 | ENSG00000198431 | CAB015834 | 1 | 0.5 | 0.75 | 0.833333 | 0.2643 |
| 4848 | ENSG00000267796 | HPA043253 | 1 | 0.5 | 0.75 | 0.833333 |        |
| 4870 | ENSG00000065457 | HPA040713 | 1 | 0.5 | 0.75 | 1        |        |
| 4870 | ENSG00000074696 | HPA014837 | 1 | 0.5 | 0.75 | 1        | 0.313  |
| 4870 | ENSG00000100888 | HPA052186 | 1 | 0.5 | 0.75 | 1        |        |
| 4870 | ENSG00000109381 | HPA006057 | 1 | 0.5 | 0.75 | 1        |        |
| 4870 | ENSG00000112237 | CAB010499 | 1 | 0.5 | 0.75 | 1        |        |
| 4870 | ENSG00000113356 | CAB010109 | 1 | 0.5 | 0.75 | 1        |        |
| 4870 | ENSG00000125885 | HPA045141 | 1 | 0.5 | 0.75 | 1        |        |
| 4870 | ENSG00000128833 | CAB020790 | 1 | 0.5 | 0.75 | 1        |        |
| 4870 | ENSG00000130035 | HPA012638 | 1 | 0.5 | 0.75 | 1        |        |
| 4870 | ENSG00000132842 | HPA038737 | 1 | 0.5 | 0.75 | 1        |        |
| 4870 | ENSG00000134759 | HPA002996 | 1 | 0.5 | 0.75 | 1        |        |
| 4870 | ENSG00000135763 | HPA008902 | 1 | 0.5 | 0.75 | 1        |        |
| 4870 | ENSG00000137133 | HPA020961 | 1 | 0.5 | 0.75 | 1        |        |
| 4870 | ENSG00000142405 | HPA042099 | 1 | 0.5 | 0.75 | 1        |        |
| 4870 | ENSG00000155307 | HPA010645 | 1 | 0.5 | 0.75 | 1        |        |
| 4870 | ENSG00000158161 | HPA052432 | 1 | 0.5 | 0.75 | 1        |        |
| 4870 | ENSG00000162755 | HPA032058 | 1 | 0.5 | 0.75 | 1        | 0.3292 |
| 4870 | ENSG00000164902 | HPA059630 | 1 | 0.5 | 0.75 | 1        |        |
| 4870 | ENSG00000166313 | HPA038521 | 1 | 0.5 | 0.75 | 1        |        |
| 4870 | ENSG00000169727 | HPA047448 | 1 | 0.5 | 0.75 | 1        |        |
| 4870 | ENSG00000169733 | HPA011564 | 1 | 0.5 | 0.75 | 1        |        |
| 4870 | ENSG00000173193 | HPA008846 | 1 | 0.5 | 0.75 | 1        |        |
| 4870 | ENSG00000178202 | HPA039817 | 1 | 0.5 | 0.75 | 1        |        |
| 4870 | ENSG00000179094 | HPA047947 | 1 | 0.5 | 0.75 | 1        |        |

|      |                 |           |   |     |          |          |        |        |
|------|-----------------|-----------|---|-----|----------|----------|--------|--------|
| 4870 | ENSG00000179950 | HPA045733 | 1 | 0.5 | 0.75     | 1        |        |        |
| 4870 | ENSG00000185049 | HPA039858 | 1 | 0.5 | 0.75     | 1        |        |        |
| 4870 | ENSG00000213366 | CAB040547 | 1 | 0.5 | 0.75     | 1        |        |        |
| 4870 | ENSG00000213672 | CAB019267 | 1 | 0.5 | 0.75     | 1        |        |        |
| 4898 | ENSG00000188976 | HPA044258 | 1 | 0.6 | 0.733333 | 1        |        |        |
| 4899 | ENSG00000165271 | HPA055891 | 1 | 0.5 | 0.833333 | 0.833333 |        |        |
| 4899 | ENSG00000167914 | HPA023313 | 1 | 0.5 | 0.833333 | 0.833333 |        |        |
| 4901 | ENSG00000107874 | HPA036544 | 1 | 0.5 | 0.833333 | 1        |        |        |
| 4901 | ENSG00000108262 | HPA004059 | 1 | 0.5 | 0.833333 | 1        |        |        |
| 4901 | ENSG00000140319 | HPA053738 | 1 | 0.5 | 0.833333 | 1        |        |        |
| 4901 | ENSG00000171320 | HPA027243 | 1 | 0.5 | 0.833333 | 1        |        |        |
| 4905 | ENSG00000076928 | CAB009502 | 1 | 0.6 | 0.8      | 0.7      |        |        |
| 4905 | ENSG00000149929 | HPA051897 | 1 | 0.6 | 0.8      | 0.7      |        |        |
| 4905 | ENSG00000156675 | CAB017037 | 1 | 0.6 | 0.8      | 0.7      |        |        |
| 4905 | ENSG00000158773 | CAB001480 | 1 | 0.6 | 0.8      | 0.7      |        |        |
| 4905 | ENSG00000166797 | HPA040459 | 1 | 0.6 | 0.8      | 0.7      |        |        |
| 4905 | ENSG00000172292 | HPA044683 | 1 | 0.6 | 0.8      | 0.7      |        |        |
| 4905 | ENSG00000173599 | CAB033742 | 1 | 0.6 | 0.8      | 0.7      | 0.3527 |        |
| 4905 | ENSG00000174606 | HPA030795 | 1 | 0.6 | 0.8      | 0.7      |        |        |
| 4905 | ENSG00000175063 | HPA034569 | 1 | 0.6 | 0.8      | 0.7      |        |        |
| 4905 | ENSG00000221926 | HPA023623 | 1 | 0.6 | 0.8      | 0.7      | 0.1718 | 0.5252 |
| 4905 | ENSG00000251537 | HPA023623 | 1 | 0.6 | 0.8      | 0.7      |        |        |
| 4916 | ENSG00000104880 | HPA042689 | 1 | 0.6 | 0.8      | 0.8      |        |        |
| 4916 | ENSG00000115942 | CAB003693 | 1 | 0.6 | 0.8      | 0.8      |        |        |
| 4916 | ENSG00000120314 | HPA048143 | 1 | 0.6 | 0.8      | 0.8      |        |        |
| 4916 | ENSG00000126215 | HPA062422 | 1 | 0.6 | 0.8      | 0.8      |        |        |
| 4916 | ENSG00000135372 | HPA057576 | 1 | 0.6 | 0.8      | 0.8      |        |        |
| 4916 | ENSG00000163867 | HPA011004 | 1 | 0.6 | 0.8      | 0.8      |        |        |
| 4916 | ENSG00000165661 | HPA012716 | 1 | 0.6 | 0.8      | 0.8      |        |        |
| 4916 | ENSG00000167258 | HPA008038 | 1 | 0.6 | 0.8      | 0.8      |        |        |
| 4916 | ENSG00000268861 | HPA042689 | 1 | 0.6 | 0.8      | 0.8      |        |        |
| 4925 | ENSG00000102054 | CAB037084 | 1 | 0.6 | 0.8      | 0.9      |        |        |
| 4925 | ENSG00000102908 | HPA057304 | 1 | 0.6 | 0.8      | 0.9      |        |        |
| 4925 | ENSG00000110344 | HPA055035 | 1 | 0.6 | 0.8      | 0.9      |        |        |
| 4925 | ENSG00000118418 | HPA027971 | 1 | 0.6 | 0.8      | 0.9      |        |        |
| 4925 | ENSG00000136156 | HPA029292 | 1 | 0.6 | 0.8      | 0.9      |        |        |
| 4925 | ENSG00000145687 | CAB020834 | 1 | 0.6 | 0.8      | 0.9      |        |        |
| 4925 | ENSG00000172771 | HPA037694 | 1 | 0.6 | 0.8      | 0.9      |        |        |
| 4925 | ENSG00000177613 | HPA039216 | 1 | 0.6 | 0.8      | 0.9      |        |        |
| 4925 | ENSG00000185475 | HPA016585 | 1 | 0.6 | 0.8      | 0.9      |        |        |
| 4925 | ENSG00000185630 | HPA003505 | 1 | 0.6 | 0.8      | 0.9      |        |        |
| 4925 | ENSG00000198492 | HPA030063 | 1 | 0.6 | 0.8      | 0.9      |        |        |
| 4936 | ENSG00000010244 | HPA017013 | 1 | 0.6 | 0.8      | 1        | 0.3636 |        |
| 4936 | ENSG00000079246 | HPA025813 | 1 | 0.6 | 0.8      | 1        |        |        |
| 4936 | ENSG00000086232 | HPA016496 | 1 | 0.6 | 0.8      | 1        |        |        |
| 4936 | ENSG00000125449 | HPA024229 | 1 | 0.6 | 0.8      | 1        |        |        |
| 4936 | ENSG00000140829 | HPA041347 | 1 | 0.6 | 0.8      | 1        |        |        |
| 4936 | ENSG00000167615 | HPA042004 | 1 | 0.6 | 0.8      | 1        |        |        |
| 4936 | ENSG00000240344 | HPA040765 | 1 | 0.6 | 0.8      | 1        |        |        |
| 4936 | ENSG00000265763 | HPA035957 | 1 | 0.6 | 0.8      | 1        |        |        |
| 4944 | ENSG00000100401 | CAB004293 | 1 | 0.6 | 0.866667 | 0.7      |        |        |
| 4945 | ENSG00000092621 | CAB003681 | 1 | 0.6 | 0.866667 | 0.8      |        |        |
| 4945 | ENSG00000141644 | CAB009017 | 1 | 0.6 | 0.866667 | 0.8      |        |        |
| 4947 | ENSG00000141568 | HPA027523 | 1 | 0.6 | 0.866667 | 0.9      |        |        |
| 4948 | ENSG00000000460 | HPA024451 | 1 | 1   | 1        | 1        |        |        |

|      |                 |           |   |   |   |   |         |
|------|-----------------|-----------|---|---|---|---|---------|
| 4948 | ENSG00000000971 | HPA038922 | 1 | 1 | 1 | 1 |         |
| 4948 | ENSG00000001084 | CAB009569 | 1 | 1 | 1 | 1 | 0. 296  |
| 4948 | ENSG00000001167 | HPA050779 | 1 | 1 | 1 | 1 |         |
| 4948 | ENSG00000001460 | HPA024301 | 1 | 1 | 1 | 1 |         |
| 4948 | ENSG00000001461 | HPA039978 | 1 | 1 | 1 | 1 |         |
| 4948 | ENSG00000001630 | HPA041325 | 1 | 1 | 1 | 1 |         |
| 4948 | ENSG00000001631 | HPA049606 | 1 | 1 | 1 | 1 |         |
| 4948 | ENSG00000002330 | CAB004205 | 1 | 1 | 1 | 1 |         |
| 4948 | ENSG00000002586 | CAB000020 | 1 | 1 | 1 | 1 |         |
| 4948 | ENSG00000002587 | HPA002237 | 1 | 1 | 1 | 1 |         |
| 4948 | ENSG00000002919 | HPA044787 | 1 | 1 | 1 | 1 |         |
| 4948 | ENSG00000003096 | HPA059901 | 1 | 1 | 1 | 1 |         |
| 4948 | ENSG00000003137 | HPA012567 | 1 | 1 | 1 | 1 |         |
| 4948 | ENSG00000003756 | HPA017335 | 1 | 1 | 1 | 1 |         |
| 4948 | ENSG00000003987 | HPA075682 | 1 | 1 | 1 | 1 |         |
| 4948 | ENSG00000004139 | HPA024759 | 1 | 1 | 1 | 1 |         |
| 4948 | ENSG00000004142 | HPA007700 | 1 | 1 | 1 | 1 |         |
| 4948 | ENSG00000004478 | HPA006148 | 1 | 1 | 1 | 1 |         |
| 4948 | ENSG00000004487 | CAB005884 | 1 | 1 | 1 | 1 |         |
| 4948 | ENSG00000004534 | HPA027164 | 1 | 1 | 1 | 1 |         |
| 4948 | ENSG00000004660 | HPA028062 | 1 | 1 | 1 | 1 |         |
| 4948 | ENSG00000004700 | CAB009743 | 1 | 1 | 1 | 1 |         |
| 4948 | ENSG00000004777 | HPA030117 | 1 | 1 | 1 | 1 |         |
| 4948 | ENSG00000004838 | HPA035255 | 1 | 1 | 1 | 1 |         |
| 4948 | ENSG00000004864 | HPA018997 | 1 | 1 | 1 | 1 |         |
| 4948 | ENSG00000004866 | HPA038325 | 1 | 1 | 1 | 1 |         |
| 4948 | ENSG00000004897 | CAB016315 | 1 | 1 | 1 | 1 |         |
| 4948 | ENSG00000004961 | HPA002946 | 1 | 1 | 1 | 1 |         |
| 4948 | ENSG00000005001 | HPA049161 | 1 | 1 | 1 | 1 |         |
| 4948 | ENSG00000005007 | HPA019587 | 1 | 1 | 1 | 1 |         |
| 4948 | ENSG00000005022 | HPA046835 | 1 | 1 | 1 | 1 |         |
| 4948 | ENSG00000005073 | HPA006770 | 1 | 1 | 1 | 1 |         |
| 4948 | ENSG00000005100 | HPA073875 | 1 | 1 | 1 | 1 |         |
| 4948 | ENSG00000005156 | HPA006723 | 1 | 1 | 1 | 1 |         |
| 4948 | ENSG00000005175 | HPA038311 | 1 | 1 | 1 | 1 | 0. 3352 |
| 4948 | ENSG00000005194 | HPA041350 | 1 | 1 | 1 | 1 |         |
| 4948 | ENSG00000005249 | HPA063879 | 1 | 1 | 1 | 1 |         |
| 4948 | ENSG00000005302 | HPA034536 | 1 | 1 | 1 | 1 |         |
| 4948 | ENSG00000005339 | CAB004212 | 1 | 1 | 1 | 1 |         |
| 4948 | ENSG00000005469 | HPA019365 | 1 | 1 | 1 | 1 |         |
| 4948 | ENSG00000005700 | HPA023826 | 1 | 1 | 1 | 1 |         |
| 4948 | ENSG00000005801 | HPA030605 | 1 | 1 | 1 | 1 | 0. 36   |
| 4948 | ENSG00000005812 | HPA053283 | 1 | 1 | 1 | 1 |         |
| 4948 | ENSG00000006015 | HPA043414 | 1 | 1 | 1 | 1 |         |
| 4948 | ENSG00000006025 | HPA053083 | 1 | 1 | 1 | 1 |         |
| 4948 | ENSG00000006062 | HPA027270 | 1 | 1 | 1 | 1 |         |
| 4948 | ENSG00000006118 | HPA060492 | 1 | 1 | 1 | 1 |         |
| 4948 | ENSG00000006125 | CAB017631 | 1 | 1 | 1 | 1 |         |
| 4948 | ENSG00000006210 | CAB026192 | 1 | 1 | 1 | 1 |         |
| 4948 | ENSG00000006282 | HPA022023 | 1 | 1 | 1 | 1 |         |
| 4948 | ENSG00000006327 | HPA007853 | 1 | 1 | 1 | 1 |         |
| 4948 | ENSG00000006377 | HPA061460 | 1 | 1 | 1 | 1 |         |
| 4948 | ENSG00000006432 | HPA000942 | 1 | 1 | 1 | 1 |         |
| 4948 | ENSG00000006468 | HPA077249 | 1 | 1 | 1 | 1 |         |
| 4948 | ENSG00000006576 | HPA012312 | 1 | 1 | 1 | 1 |         |

|      |                 |           |   |   |   |   |         |
|------|-----------------|-----------|---|---|---|---|---------|
| 4948 | ENSG00000006607 | HPA055592 | 1 | 1 | 1 | 1 |         |
| 4948 | ENSG00000006611 | HPA027398 | 1 | 1 | 1 | 1 |         |
| 4948 | ENSG00000006634 | HPA042923 | 1 | 1 | 1 | 1 |         |
| 4948 | ENSG00000006638 | HPA077366 | 1 | 1 | 1 | 1 |         |
| 4948 | ENSG00000006659 | HPA065180 | 1 | 1 | 1 | 1 |         |
| 4948 | ENSG00000006704 | HPA044254 | 1 | 1 | 1 | 1 |         |
| 4948 | ENSG00000006744 | HPA019535 | 1 | 1 | 1 | 1 |         |
| 4948 | ENSG00000006747 | HPA020518 | 1 | 1 | 1 | 1 |         |
| 4948 | ENSG00000006837 | HPA027751 | 1 | 1 | 1 | 1 |         |
| 4948 | ENSG00000007038 | HPA008477 | 1 | 1 | 1 | 1 |         |
| 4948 | ENSG00000007047 | HPA039186 | 1 | 1 | 1 | 1 |         |
| 4948 | ENSG00000007080 | HPA041708 | 1 | 1 | 1 | 1 |         |
| 4948 | ENSG00000007168 | HPA020036 | 1 | 1 | 1 | 1 |         |
| 4948 | ENSG00000007384 | HPA077399 | 1 | 1 | 1 | 1 |         |
| 4948 | ENSG00000007402 | HPA071829 | 1 | 1 | 1 | 1 |         |
| 4948 | ENSG00000007545 | HPA041752 | 1 | 1 | 1 | 1 |         |
| 4948 | ENSG00000008018 | HPA029635 | 1 | 1 | 1 | 1 | 0. 4265 |
| 4948 | ENSG00000008083 | HPA063889 | 1 | 1 | 1 | 1 |         |
| 4948 | ENSG00000008086 | CAB011577 | 1 | 1 | 1 | 1 |         |
| 4948 | ENSG00000008196 | HPA062942 | 1 | 1 | 1 | 1 |         |
| 4948 | ENSG00000008226 | HPA019077 | 1 | 1 | 1 | 1 |         |
| 4948 | ENSG00000008294 | HPA040446 | 1 | 1 | 1 | 1 |         |
| 4948 | ENSG00000008311 | HPA020637 | 1 | 1 | 1 | 1 |         |
| 4948 | ENSG00000008382 | HPA043274 | 1 | 1 | 1 | 1 |         |
| 4948 | ENSG00000008441 | HPA007533 | 1 | 1 | 1 | 1 |         |
| 4948 | ENSG00000008988 | HPA003570 | 1 | 1 | 1 | 1 |         |
| 4948 | ENSG00000009724 | HPA029313 | 1 | 1 | 1 | 1 |         |
| 4948 | ENSG00000009790 | HPA040796 | 1 | 1 | 1 | 1 |         |
| 4948 | ENSG00000009844 | HPA030969 | 1 | 1 | 1 | 1 |         |
| 4948 | ENSG00000009954 | HPA067010 | 1 | 1 | 1 | 1 |         |
| 4948 | ENSG00000010017 | CAB033767 | 1 | 1 | 1 | 1 |         |
| 4948 | ENSG00000010030 | HPA029033 | 1 | 1 | 1 | 1 |         |
| 4948 | ENSG00000010072 | HPA025073 | 1 | 1 | 1 | 1 |         |
| 4948 | ENSG00000010165 | HPA044498 | 1 | 1 | 1 | 1 |         |
| 4948 | ENSG00000010219 | HPA028065 | 1 | 1 | 1 | 1 | 0. 3996 |
| 4948 | ENSG00000010270 | HPA019204 | 1 | 1 | 1 | 1 |         |
| 4948 | ENSG00000010278 | CAB002490 | 1 | 1 | 1 | 1 |         |
| 4948 | ENSG00000010361 | HPA041779 | 1 | 1 | 1 | 1 |         |
| 4948 | ENSG00000010539 | HPA018981 | 1 | 1 | 1 | 1 | 0. 3418 |
| 4948 | ENSG00000010671 | HPA002028 | 1 | 1 | 1 | 1 |         |
| 4948 | ENSG00000010818 | HPA055954 | 1 | 1 | 1 | 1 |         |
| 4948 | ENSG00000011007 | HPA005910 | 1 | 1 | 1 | 1 |         |
| 4948 | ENSG00000011009 | HPA063151 | 1 | 1 | 1 | 1 |         |
| 4948 | ENSG00000011021 | HPA032097 | 1 | 1 | 1 | 1 |         |
| 4948 | ENSG00000011105 | HPA014002 | 1 | 1 | 1 | 1 |         |
| 4948 | ENSG00000011132 | HPA045577 | 1 | 1 | 1 | 1 |         |
| 4948 | ENSG00000011243 | HPA042485 | 1 | 1 | 1 | 1 |         |
| 4948 | ENSG00000011258 | HPA021876 | 1 | 1 | 1 | 1 |         |
| 4948 | ENSG00000011295 | HPA023010 | 1 | 1 | 1 | 1 |         |
| 4948 | ENSG00000011304 | CAB013507 | 1 | 1 | 1 | 1 |         |
| 4948 | ENSG00000011405 | HPA037641 | 1 | 1 | 1 | 1 | 0. 3419 |
| 4948 | ENSG00000011454 | HPA064860 | 1 | 1 | 1 | 1 |         |
| 4948 | ENSG00000011638 | HPA063509 | 1 | 1 | 1 | 1 |         |
| 4948 | ENSG00000012061 | CAB004390 | 1 | 1 | 1 | 1 |         |
| 4948 | ENSG00000012504 | HPA047699 | 1 | 1 | 1 | 1 |         |

|      |                 |           |   |   |   |   |         |
|------|-----------------|-----------|---|---|---|---|---------|
| 4948 | ENSG00000012779 | HPA071285 | 1 | 1 | 1 | 1 | 0. 2234 |
| 4948 | ENSG00000012817 | HPA049086 | 1 | 1 | 1 | 1 |         |
| 4948 | ENSG00000012963 | HPA000861 | 1 | 1 | 1 | 1 |         |
| 4948 | ENSG00000012983 | HPA036696 | 1 | 1 | 1 | 1 |         |
| 4948 | ENSG00000013016 | HPA066751 | 1 | 1 | 1 | 1 |         |
| 4948 | ENSG00000013364 | HPA002321 | 1 | 1 | 1 | 1 |         |
| 4948 | ENSG00000013375 | HPA029760 | 1 | 1 | 1 | 1 |         |
| 4948 | ENSG00000013441 | HPA062405 | 1 | 1 | 1 | 1 |         |
| 4948 | ENSG00000013503 | HPA036466 | 1 | 1 | 1 | 1 |         |
| 4948 | ENSG00000013561 | HPA008716 | 1 | 1 | 1 | 1 |         |
| 4948 | ENSG00000014164 | HPA050577 | 1 | 1 | 1 | 1 |         |
| 4948 | ENSG00000014216 | HPA005992 | 1 | 1 | 1 | 1 |         |
| 4948 | ENSG00000014641 | HPA027296 | 1 | 1 | 1 | 1 |         |
| 4948 | ENSG00000014914 | HPA030351 | 1 | 1 | 1 | 1 |         |
| 4948 | ENSG00000015133 | HPA005832 | 1 | 1 | 1 | 1 | 0. 338  |
| 4948 | ENSG00000015171 | HPA015816 | 1 | 1 | 1 | 1 | 0. 1883 |
| 4948 | ENSG00000015285 | HPA002022 | 1 | 1 | 1 | 1 |         |
| 4948 | ENSG00000015475 | HPA000722 | 1 | 1 | 1 | 1 |         |
| 4948 | ENSG00000015479 | HPA036565 | 1 | 1 | 1 | 1 |         |
| 4948 | ENSG00000015568 | HPA067564 | 1 | 1 | 1 | 1 |         |
| 4948 | ENSG00000016402 | CAB024990 | 1 | 1 | 1 | 1 |         |
| 4948 | ENSG00000016864 | HPA010588 | 1 | 1 | 1 | 1 |         |
| 4948 | ENSG00000017260 | HPA069684 | 1 | 1 | 1 | 1 | 0. 2291 |
| 4948 | ENSG00000018189 | HPA022970 | 1 | 1 | 1 | 1 |         |
| 4948 | ENSG00000018510 | HPA030209 | 1 | 1 | 1 | 1 |         |
| 4948 | ENSG00000019102 | HPA035919 | 1 | 1 | 1 | 1 |         |
| 4948 | ENSG00000019505 | HPA056602 | 1 | 1 | 1 | 1 |         |
| 4948 | ENSG00000019549 | CAB011671 | 1 | 1 | 1 | 1 |         |
| 4948 | ENSG00000019582 | CAB002506 | 1 | 1 | 1 | 1 |         |
| 4948 | ENSG00000020129 | HPA023676 | 1 | 1 | 1 | 1 |         |
| 4948 | ENSG00000020256 | HPA058387 | 1 | 1 | 1 | 1 |         |
| 4948 | ENSG00000020922 | HPA002691 | 1 | 1 | 1 | 1 |         |
| 4948 | ENSG00000021461 | HPA072245 | 1 | 1 | 1 | 1 |         |
| 4948 | ENSG00000021574 | HPA017311 | 1 | 1 | 1 | 1 |         |
| 4948 | ENSG00000021762 | HPA038335 | 1 | 1 | 1 | 1 |         |
| 4948 | ENSG00000021776 | HPA040624 | 1 | 1 | 1 | 1 |         |
| 4948 | ENSG00000021826 | HPA021400 | 1 | 1 | 1 | 1 |         |
| 4948 | ENSG00000022567 | HPA023154 | 1 | 1 | 1 | 1 |         |
| 4948 | ENSG00000023191 | HPA039223 | 1 | 1 | 1 | 1 |         |
| 4948 | ENSG00000023228 | HPA064605 | 1 | 1 | 1 | 1 |         |
| 4948 | ENSG00000023445 | HPA002317 | 1 | 1 | 1 | 1 |         |
| 4948 | ENSG00000023516 | HPA039089 | 1 | 1 | 1 | 1 |         |
| 4948 | ENSG00000023572 | HPA023087 | 1 | 1 | 1 | 1 |         |
| 4948 | ENSG00000023608 | HPA067076 | 1 | 1 | 1 | 1 |         |
| 4948 | ENSG00000023697 | HPA055897 | 1 | 1 | 1 | 1 |         |
| 4948 | ENSG00000023734 | HPA055557 | 1 | 1 | 1 | 1 |         |
| 4948 | ENSG00000023902 | HPA061018 | 1 | 1 | 1 | 1 |         |
| 4948 | ENSG00000024048 | HPA027880 | 1 | 1 | 1 | 1 | 0. 3147 |
| 4948 | ENSG00000024526 | CAB017845 | 1 | 1 | 1 | 1 |         |
| 4948 | ENSG00000025039 | HPA068664 | 1 | 1 | 1 | 1 |         |
| 4948 | ENSG00000025156 | HPA031455 | 1 | 1 | 1 | 1 |         |
| 4948 | ENSG00000025708 | HPA000530 | 1 | 1 | 1 | 1 |         |
| 4948 | ENSG00000025796 | HPA053295 | 1 | 1 | 1 | 1 |         |
| 4948 | ENSG00000026025 | HPA001762 | 1 | 1 | 1 | 1 |         |
| 4948 | ENSG00000026559 | HPA039530 | 1 | 1 | 1 | 1 |         |



|      |                 |           |   |   |   |   |         |
|------|-----------------|-----------|---|---|---|---|---------|
| 4948 | ENSG00000026751 | HPA061654 | 1 | 1 | 1 | 1 |         |
| 4948 | ENSG00000027001 | HPA030676 | 1 | 1 | 1 | 1 |         |
| 4948 | ENSG00000027697 | HPA029213 | 1 | 1 | 1 | 1 |         |
| 4948 | ENSG00000028116 | HPA047503 | 1 | 1 | 1 | 1 |         |
| 4948 | ENSG00000028277 | HPA049056 | 1 | 1 | 1 | 1 |         |
| 4948 | ENSG00000028310 | HPA021465 | 1 | 1 | 1 | 1 |         |
| 4948 | ENSG00000028528 | HPA047373 | 1 | 1 | 1 | 1 |         |
| 4948 | ENSG00000029363 | HPA006484 | 1 | 1 | 1 | 1 | 0. 4293 |
| 4948 | ENSG00000029364 | HPA075390 | 1 | 1 | 1 | 1 | 0. 2854 |
| 4948 | ENSG00000029725 | HPA024235 | 1 | 1 | 1 | 1 |         |
| 4948 | ENSG00000030582 | HPA008763 | 1 | 1 | 1 | 1 |         |
| 4948 | ENSG00000031003 | HPA041819 | 1 | 1 | 1 | 1 |         |
| 4948 | ENSG00000031698 | HPA016939 | 1 | 1 | 1 | 1 |         |
| 4948 | ENSG00000031823 | HPA043375 | 1 | 1 | 1 | 1 |         |
| 4948 | ENSG00000033011 | HPA060392 | 1 | 1 | 1 | 1 |         |
| 4948 | ENSG00000033030 | HPA037483 | 1 | 1 | 1 | 1 | 0. 3657 |
| 4948 | ENSG00000033100 | HPA020992 | 1 | 1 | 1 | 1 |         |
| 4948 | ENSG00000033800 | HPA005743 | 1 | 1 | 1 | 1 |         |
| 4948 | ENSG00000034152 | CAB018548 | 1 | 1 | 1 | 1 |         |
| 4948 | ENSG00000034533 | HPA037011 | 1 | 1 | 1 | 1 |         |
| 4948 | ENSG00000034693 | HPA042830 | 1 | 1 | 1 | 1 |         |
| 4948 | ENSG00000034713 | HPA036726 | 1 | 1 | 1 | 1 |         |
| 4948 | ENSG00000035115 | HPA030927 | 1 | 1 | 1 | 1 |         |
| 4948 | ENSG00000035141 | HPA030104 | 1 | 1 | 1 | 1 | 0. 2494 |
| 4948 | ENSG00000035403 | HPA063777 | 1 | 1 | 1 | 1 |         |
| 4948 | ENSG00000035499 | HPA038255 | 1 | 1 | 1 | 1 |         |
| 4948 | ENSG00000035681 | HPA023151 | 1 | 1 | 1 | 1 |         |
| 4948 | ENSG00000035720 | HPA038529 | 1 | 1 | 1 | 1 |         |
| 4948 | ENSG00000035928 | HPA046116 | 1 | 1 | 1 | 1 |         |
| 4948 | ENSG00000036054 | HPA038151 | 1 | 1 | 1 | 1 | 0. 3362 |
| 4948 | ENSG00000036473 | HPA000243 | 1 | 1 | 1 | 1 |         |
| 4948 | ENSG00000036549 | HPA053663 | 1 | 1 | 1 | 1 |         |
| 4948 | ENSG00000036672 | HPA006777 | 1 | 1 | 1 | 1 |         |
| 4948 | ENSG00000037042 | CAB011495 | 1 | 1 | 1 | 1 |         |
| 4948 | ENSG00000037474 | HPA037896 | 1 | 1 | 1 | 1 | 0. 2299 |
| 4948 | ENSG00000037637 | HPA025071 | 1 | 1 | 1 | 1 |         |
| 4948 | ENSG00000037749 | HPA049198 | 1 | 1 | 1 | 1 |         |
| 4948 | ENSG00000037965 | HPA028911 | 1 | 1 | 1 | 1 |         |
| 4948 | ENSG00000038210 | HPA004099 | 1 | 1 | 1 | 1 |         |
| 4948 | ENSG00000038219 | HPA037362 | 1 | 1 | 1 | 1 |         |
| 4948 | ENSG00000039123 | HPA037379 | 1 | 1 | 1 | 1 |         |
| 4948 | ENSG00000039319 | HPA035935 | 1 | 1 | 1 | 1 |         |
| 4948 | ENSG00000040199 | HPA048598 | 1 | 1 | 1 | 1 |         |
| 4948 | ENSG00000040275 | HPA044700 | 1 | 1 | 1 | 1 |         |
| 4948 | ENSG00000040341 | CAB020836 | 1 | 1 | 1 | 1 |         |
| 4948 | ENSG00000040633 | HPA052410 | 1 | 1 | 1 | 1 |         |
| 4948 | ENSG00000040933 | HPA001628 | 1 | 1 | 1 | 1 |         |
| 4948 | ENSG00000041802 | HPA037704 | 1 | 1 | 1 | 1 | 0. 328  |
| 4948 | ENSG00000041880 | HPA020984 | 1 | 1 | 1 | 1 |         |
| 4948 | ENSG00000042445 | HPA046513 | 1 | 1 | 1 | 1 |         |
| 4948 | ENSG00000042493 | HPA019080 | 1 | 1 | 1 | 1 |         |
| 4948 | ENSG00000043039 | HPA068414 | 1 | 1 | 1 | 1 |         |
| 4948 | ENSG00000043093 | HPA035911 | 1 | 1 | 1 | 1 |         |
| 4948 | ENSG00000043143 | HPA025959 | 1 | 1 | 1 | 1 |         |
| 4948 | ENSG00000043355 | HPA055031 | 1 | 1 | 1 | 1 |         |

|      |                 |           |   |   |   |   |         |         |
|------|-----------------|-----------|---|---|---|---|---------|---------|
| 4948 | ENSG00000043514 | HPA024174 | 1 | 1 | 1 | 1 |         |         |
| 4948 | ENSG00000044446 | HPA002912 | 1 | 1 | 1 | 1 |         |         |
| 4948 | ENSG00000044574 | HPA038845 | 1 | 1 | 1 | 1 |         | 0. 265  |
| 4948 | ENSG00000046647 | HPA028613 | 1 | 1 | 1 | 1 |         |         |
| 4948 | ENSG00000046651 | HPA031103 | 1 | 1 | 1 | 1 |         |         |
| 4948 | ENSG00000046889 | HPA075956 | 1 | 1 | 1 | 1 |         |         |
| 4948 | ENSG00000047056 | HPA037565 | 1 | 1 | 1 | 1 |         |         |
| 4948 | ENSG00000047315 | HPA037506 | 1 | 1 | 1 | 1 |         |         |
| 4948 | ENSG00000047346 | HPA040180 | 1 | 1 | 1 | 1 |         |         |
| 4948 | ENSG00000047410 | HPA019661 | 1 | 1 | 1 | 1 | 0. 3646 |         |
| 4948 | ENSG00000047617 | HPA036276 | 1 | 1 | 1 | 1 | 0. 3567 | 0. 3182 |
| 4948 | ENSG00000047621 | HPA037871 | 1 | 1 | 1 | 1 |         |         |
| 4948 | ENSG00000047932 | HPA019477 | 1 | 1 | 1 | 1 | 0. 489  | 0. 5466 |
| 4948 | ENSG00000048028 | HPA006778 | 1 | 1 | 1 | 1 |         |         |
| 4948 | ENSG00000048052 | HPA028926 | 1 | 1 | 1 | 1 | 0. 2578 |         |
| 4948 | ENSG00000048392 | CAB006854 | 1 | 1 | 1 | 1 |         |         |
| 4948 | ENSG00000048405 | HPA023090 | 1 | 1 | 1 | 1 |         |         |
| 4948 | ENSG00000048545 | HPA005561 | 1 | 1 | 1 | 1 |         |         |
| 4948 | ENSG00000048649 | HPA046129 | 1 | 1 | 1 | 1 |         |         |
| 4948 | ENSG00000048828 | HPA019734 | 1 | 1 | 1 | 1 |         |         |
| 4948 | ENSG00000048991 | HPA030936 | 1 | 1 | 1 | 1 |         |         |
| 4948 | ENSG00000049130 | HPA070395 | 1 | 1 | 1 | 1 |         |         |
| 4948 | ENSG00000049239 | HPA005440 | 1 | 1 | 1 | 1 |         | 0. 3717 |
| 4948 | ENSG00000049246 | HPA019530 | 1 | 1 | 1 | 1 | 0. 3784 |         |
| 4948 | ENSG00000049449 | HPA038474 | 1 | 1 | 1 | 1 |         |         |
| 4948 | ENSG00000049656 | HPA014791 | 1 | 1 | 1 | 1 |         |         |
| 4948 | ENSG00000049768 | HPA045943 | 1 | 1 | 1 | 1 |         |         |
| 4948 | ENSG00000049769 | HPA000244 | 1 | 1 | 1 | 1 |         |         |
| 4948 | ENSG00000050327 | HPA020980 | 1 | 1 | 1 | 1 |         |         |
| 4948 | ENSG00000050438 | HPA077895 | 1 | 1 | 1 | 1 |         |         |
| 4948 | ENSG00000050820 | CAB000443 | 1 | 1 | 1 | 1 | 0. 3161 |         |
| 4948 | ENSG00000051009 | HPA063987 | 1 | 1 | 1 | 1 |         |         |
| 4948 | ENSG00000051108 | HPA041219 | 1 | 1 | 1 | 1 |         |         |
| 4948 | ENSG00000051341 | HPA048931 | 1 | 1 | 1 | 1 |         |         |
| 4948 | ENSG00000051596 | HPA042764 | 1 | 1 | 1 | 1 |         |         |
| 4948 | ENSG00000052126 | HPA041455 | 1 | 1 | 1 | 1 |         |         |
| 4948 | ENSG00000052850 | HPA001903 | 1 | 1 | 1 | 1 |         |         |
| 4948 | ENSG00000053371 | CAB032841 | 1 | 1 | 1 | 1 |         |         |
| 4948 | ENSG00000053524 | HPA038947 | 1 | 1 | 1 | 1 |         |         |
| 4948 | ENSG00000053702 | HPA039860 | 1 | 1 | 1 | 1 |         |         |
| 4948 | ENSG00000053747 | HPA009309 | 1 | 1 | 1 | 1 |         |         |
| 4948 | ENSG00000054118 | HPA012041 | 1 | 1 | 1 | 1 |         | 0. 241  |
| 4948 | ENSG00000054219 | HPA054073 | 1 | 1 | 1 | 1 |         |         |
| 4948 | ENSG00000054277 | HPA064443 | 1 | 1 | 1 | 1 |         |         |
| 4948 | ENSG00000054392 | HPA016462 | 1 | 1 | 1 | 1 |         |         |
| 4948 | ENSG00000054654 | HPA050204 | 1 | 1 | 1 | 1 |         |         |
| 4948 | ENSG00000054967 | HPA062824 | 1 | 1 | 1 | 1 |         |         |
| 4948 | ENSG00000055070 | HPA024221 | 1 | 1 | 1 | 1 | 0. 3162 |         |
| 4948 | ENSG00000055147 | HPA035870 | 1 | 1 | 1 | 1 |         |         |
| 4948 | ENSG00000055332 | CAB003845 | 1 | 1 | 1 | 1 |         |         |
| 4948 | ENSG00000055609 | HPA074736 | 1 | 1 | 1 | 1 |         |         |
| 4948 | ENSG00000055950 | HPA073022 | 1 | 1 | 1 | 1 |         |         |
| 4948 | ENSG00000055955 | HPA003948 | 1 | 1 | 1 | 1 |         |         |
| 4948 | ENSG00000055957 | HPA042049 | 1 | 1 | 1 | 1 |         |         |
| 4948 | ENSG00000056097 | HPA016666 | 1 | 1 | 1 | 1 |         |         |

|      |                 |           |   |   |   |   |        |        |
|------|-----------------|-----------|---|---|---|---|--------|--------|
| 4948 | ENSG00000056291 | HPA026825 | 1 | 1 | 1 | 1 |        |        |
| 4948 | ENSG00000056586 | HPA042863 | 1 | 1 | 1 | 1 |        |        |
| 4948 | ENSG00000057593 | HPA004826 | 1 | 1 | 1 | 1 |        |        |
| 4948 | ENSG00000057657 | HPA030033 | 1 | 1 | 1 | 1 |        |        |
| 4948 | ENSG00000058056 | HPA004827 | 1 | 1 | 1 | 1 |        |        |
| 4948 | ENSG00000058085 | HPA024638 | 1 | 1 | 1 | 1 |        |        |
| 4948 | ENSG00000058262 | CAB022076 | 1 | 1 | 1 | 1 |        |        |
| 4948 | ENSG00000058600 | HPA041419 | 1 | 1 | 1 | 1 |        |        |
| 4948 | ENSG00000058668 | HPA040431 | 1 | 1 | 1 | 1 |        |        |
| 4948 | ENSG00000058673 | HPA028490 | 1 | 1 | 1 | 1 |        |        |
| 4948 | ENSG00000058799 | HPA014716 | 1 | 1 | 1 | 1 |        |        |
| 4948 | ENSG00000058804 | HPA070882 | 1 | 1 | 1 | 1 |        |        |
| 4948 | ENSG00000058866 | HPA036577 | 1 | 1 | 1 | 1 |        |        |
| 4948 | ENSG00000059122 | HPA041001 | 1 | 1 | 1 | 1 |        | 0.2566 |
| 4948 | ENSG00000059145 | HPA073949 | 1 | 1 | 1 | 1 |        |        |
| 4948 | ENSG00000059378 | HPA063872 | 1 | 1 | 1 | 1 | 0.4517 | 0.2223 |
| 4948 | ENSG00000059573 | HPA012604 | 1 | 1 | 1 | 1 |        |        |
| 4948 | ENSG00000059588 | HPA024632 | 1 | 1 | 1 | 1 |        |        |
| 4948 | ENSG00000059691 | HPA042610 | 1 | 1 | 1 | 1 |        |        |
| 4948 | ENSG00000059758 | HPA015325 | 1 | 1 | 1 | 1 |        |        |
| 4948 | ENSG00000060069 | HPA070389 | 1 | 1 | 1 | 1 |        |        |
| 4948 | ENSG00000060138 | HPA034838 | 1 | 1 | 1 | 1 |        |        |
| 4948 | ENSG00000060237 | HPA046541 | 1 | 1 | 1 | 1 |        |        |
| 4948 | ENSG00000060491 | HPA017899 | 1 | 1 | 1 | 1 |        |        |
| 4948 | ENSG00000060718 | HPA058335 | 1 | 1 | 1 | 1 |        |        |
| 4948 | ENSG00000060749 | HPA005682 | 1 | 1 | 1 | 1 |        |        |
| 4948 | ENSG00000060762 | HPA045119 | 1 | 1 | 1 | 1 |        |        |
| 4948 | ENSG00000061273 | HPA004775 | 1 | 1 | 1 | 1 |        |        |
| 4948 | ENSG00000061455 | HPA030324 | 1 | 1 | 1 | 1 |        |        |
| 4948 | ENSG00000061676 | HPA020449 | 1 | 1 | 1 | 1 |        |        |
| 4948 | ENSG00000061794 | HPA038513 | 1 | 1 | 1 | 1 |        |        |
| 4948 | ENSG00000061918 | CAB010890 | 1 | 1 | 1 | 1 |        |        |
| 4948 | ENSG00000061938 | HPA041954 | 1 | 1 | 1 | 1 |        |        |
| 4948 | ENSG00000061987 | HPA038697 | 1 | 1 | 1 | 1 |        |        |
| 4948 | ENSG00000062096 | HPA000549 | 1 | 1 | 1 | 1 |        |        |
| 4948 | ENSG00000062370 | HPA023856 | 1 | 1 | 1 | 1 |        |        |
| 4948 | ENSG00000062485 | HPA038460 | 1 | 1 | 1 | 1 |        |        |
| 4948 | ENSG00000062524 | HPA059545 | 1 | 1 | 1 | 1 |        |        |
| 4948 | ENSG00000062598 | HPA018811 | 1 | 1 | 1 | 1 |        |        |
| 4948 | ENSG00000062822 | HPA046524 | 1 | 1 | 1 | 1 |        |        |
| 4948 | ENSG00000063127 | HPA076812 | 1 | 1 | 1 | 1 |        |        |
| 4948 | ENSG00000063169 | HPA056211 | 1 | 1 | 1 | 1 |        |        |
| 4948 | ENSG00000063176 | HPA065508 | 1 | 1 | 1 | 1 |        |        |
| 4948 | ENSG00000063177 | HPA046572 | 1 | 1 | 1 | 1 |        |        |
| 4948 | ENSG00000063180 | HPA041778 | 1 | 1 | 1 | 1 |        |        |
| 4948 | ENSG00000063322 | HPA055956 | 1 | 1 | 1 | 1 |        |        |
| 4948 | ENSG00000063587 | HPA000566 | 1 | 1 | 1 | 1 |        |        |
| 4948 | ENSG00000063601 | HPA002977 | 1 | 1 | 1 | 1 |        |        |
| 4948 | ENSG00000063761 | HPA055014 | 1 | 1 | 1 | 1 |        |        |
| 4948 | ENSG00000064012 | HPA001302 | 1 | 1 | 1 | 1 |        | 0.1923 |
| 4948 | ENSG00000064042 | HPA063840 | 1 | 1 | 1 | 1 |        |        |
| 4948 | ENSG00000064115 | HPA057640 | 1 | 1 | 1 | 1 |        |        |
| 4948 | ENSG00000064199 | HPA037568 | 1 | 1 | 1 | 1 |        |        |
| 4948 | ENSG00000064201 | HPA024135 | 1 | 1 | 1 | 1 |        |        |
| 4948 | ENSG00000064393 | HPA007611 | 1 | 1 | 1 | 1 |        |        |

|      |                 |           |   |   |   |   |         |         |
|------|-----------------|-----------|---|---|---|---|---------|---------|
| 4948 | ENSG00000064419 | HPA039555 | 1 | 1 | 1 | 1 |         |         |
| 4948 | ENSG00000064545 | HPA043365 | 1 | 1 | 1 | 1 |         |         |
| 4948 | ENSG00000064601 | CAB024930 | 1 | 1 | 1 | 1 |         |         |
| 4948 | ENSG00000064607 | HPA041557 | 1 | 1 | 1 | 1 |         |         |
| 4948 | ENSG00000064787 | HPA054745 | 1 | 1 | 1 | 1 |         |         |
| 4948 | ENSG00000064933 | HPA031013 | 1 | 1 | 1 | 1 |         |         |
| 4948 | ENSG00000064961 | HPA050220 | 1 | 1 | 1 | 1 |         |         |
| 4948 | ENSG00000064989 | HPA046515 | 1 | 1 | 1 | 1 |         |         |
| 4948 | ENSG00000064999 | HPA036768 | 1 | 1 | 1 | 1 |         |         |
| 4948 | ENSG00000065000 | HPA074408 | 1 | 1 | 1 | 1 |         |         |
| 4948 | ENSG00000065054 | HPA001672 | 1 | 1 | 1 | 1 |         |         |
| 4948 | ENSG00000065060 | HPA032099 | 1 | 1 | 1 | 1 |         |         |
| 4948 | ENSG00000065154 | HPA064742 | 1 | 1 | 1 | 1 |         |         |
| 4948 | ENSG00000065268 | HPA050193 | 1 | 1 | 1 | 1 |         |         |
| 4948 | ENSG00000065308 | HPA035092 | 1 | 1 | 1 | 1 | 0. 3232 | 0. 2138 |
| 4948 | ENSG00000065427 | HPA041345 | 1 | 1 | 1 | 1 | 0. 355  |         |
| 4948 | ENSG00000065518 | HPA051739 | 1 | 1 | 1 | 1 |         |         |
| 4948 | ENSG00000065526 | HPA015825 | 1 | 1 | 1 | 1 |         |         |
| 4948 | ENSG00000065609 | HPA029632 | 1 | 1 | 1 | 1 |         |         |
| 4948 | ENSG00000065613 | HPA015757 | 1 | 1 | 1 | 1 |         |         |
| 4948 | ENSG00000065802 | HPA003508 | 1 | 1 | 1 | 1 |         |         |
| 4948 | ENSG00000065882 | HPA058158 | 1 | 1 | 1 | 1 |         |         |
| 4948 | ENSG00000065923 | HPA075385 | 1 | 1 | 1 | 1 |         |         |
| 4948 | ENSG00000065970 | HPA008723 | 1 | 1 | 1 | 1 |         |         |
| 4948 | ENSG00000066084 | HPA038472 | 1 | 1 | 1 | 1 |         |         |
| 4948 | ENSG00000066136 | HPA055011 | 1 | 1 | 1 | 1 |         |         |
| 4948 | ENSG00000066230 | HPA036493 | 1 | 1 | 1 | 1 |         |         |
| 4948 | ENSG00000066279 | CAB017816 | 1 | 1 | 1 | 1 |         |         |
| 4948 | ENSG00000066322 | HPA056557 | 1 | 1 | 1 | 1 |         |         |
| 4948 | ENSG00000066422 | HPA015328 | 1 | 1 | 1 | 1 |         |         |
| 4948 | ENSG00000066455 | HPA000992 | 1 | 1 | 1 | 1 |         | 0. 3351 |
| 4948 | ENSG00000066557 | HPA026564 | 1 | 1 | 1 | 1 |         |         |
| 4948 | ENSG00000066583 | HPA070307 | 1 | 1 | 1 | 1 |         |         |
| 4948 | ENSG00000066651 | HPA030473 | 1 | 1 | 1 | 1 |         |         |
| 4948 | ENSG00000066654 | HPA027851 | 1 | 1 | 1 | 1 |         |         |
| 4948 | ENSG00000066697 | HPA062662 | 1 | 1 | 1 | 1 |         |         |
| 4948 | ENSG00000066739 | HPA000880 | 1 | 1 | 1 | 1 |         |         |
| 4948 | ENSG00000066777 | HPA023399 | 1 | 1 | 1 | 1 |         |         |
| 4948 | ENSG00000066827 | HPA063592 | 1 | 1 | 1 | 1 |         |         |
| 4948 | ENSG00000066855 | HPA023152 | 1 | 1 | 1 | 1 |         |         |
| 4948 | ENSG00000066933 | HPA040071 | 1 | 1 | 1 | 1 |         |         |
| 4948 | ENSG00000067057 | HPA056484 | 1 | 1 | 1 | 1 |         |         |
| 4948 | ENSG00000067066 | HPA017384 | 1 | 1 | 1 | 1 |         |         |
| 4948 | ENSG00000067177 | HPA001081 | 1 | 1 | 1 | 1 |         |         |
| 4948 | ENSG00000067221 | HPA042353 | 1 | 1 | 1 | 1 | 0. 2763 |         |
| 4948 | ENSG00000067225 | CAB019421 | 1 | 1 | 1 | 1 |         |         |
| 4948 | ENSG00000067248 | HPA038318 | 1 | 1 | 1 | 1 |         |         |
| 4948 | ENSG00000067369 | HPA008788 | 1 | 1 | 1 | 1 |         |         |
| 4948 | ENSG00000067560 | CAB005052 | 1 | 1 | 1 | 1 |         |         |
| 4948 | ENSG00000067596 | HPA049285 | 1 | 1 | 1 | 1 |         |         |
| 4948 | ENSG00000067606 | HPA021851 | 1 | 1 | 1 | 1 |         |         |
| 4948 | ENSG00000067798 | HPA032111 | 1 | 1 | 1 | 1 |         |         |
| 4948 | ENSG00000067829 | HPA002017 | 1 | 1 | 1 | 1 |         |         |
| 4948 | ENSG00000068078 | HPA067204 | 1 | 1 | 1 | 1 |         |         |
| 4948 | ENSG00000068097 | HPA062157 | 1 | 1 | 1 | 1 |         |         |

|      |                 |           |   |   |   |   |        |        |
|------|-----------------|-----------|---|---|---|---|--------|--------|
| 4948 | ENSG00000068137 | HPA046234 | 1 | 1 | 1 | 1 |        |        |
| 4948 | ENSG00000068323 | HPA023881 | 1 | 1 | 1 | 1 |        |        |
| 4948 | ENSG00000068394 | HPA000287 | 1 | 1 | 1 | 1 |        |        |
| 4948 | ENSG00000068438 | HPA002718 | 1 | 1 | 1 | 1 |        |        |
| 4948 | ENSG00000068489 | HPA052376 | 1 | 1 | 1 | 1 |        |        |
| 4948 | ENSG00000068650 | HPA035583 | 1 | 1 | 1 | 1 |        |        |
| 4948 | ENSG00000068784 | HPA030567 | 1 | 1 | 1 | 1 |        |        |
| 4948 | ENSG00000068878 | HPA060922 | 1 | 1 | 1 | 1 |        |        |
| 4948 | ENSG00000069011 | HPA008743 | 1 | 1 | 1 | 1 |        |        |
| 4948 | ENSG00000069020 | HPA000544 | 1 | 1 | 1 | 1 |        |        |
| 4948 | ENSG00000069188 | HPA014725 | 1 | 1 | 1 | 1 |        |        |
| 4948 | ENSG00000069248 | HPA059767 | 1 | 1 | 1 | 1 |        |        |
| 4948 | ENSG00000069329 | HPA040802 | 1 | 1 | 1 | 1 |        |        |
| 4948 | ENSG00000069702 | CAB018971 | 1 | 1 | 1 | 1 |        |        |
| 4948 | ENSG00000069869 | CAB072833 | 1 | 1 | 1 | 1 |        |        |
| 4948 | ENSG00000069943 | HPA039929 | 1 | 1 | 1 | 1 |        |        |
| 4948 | ENSG00000069956 | CAB005184 | 1 | 1 | 1 | 1 | 0.3232 | 0.3866 |
| 4948 | ENSG00000069998 | HPA005548 | 1 | 1 | 1 | 1 |        |        |
| 4948 | ENSG00000070019 | HPA073759 | 1 | 1 | 1 | 1 |        |        |
| 4948 | ENSG00000070081 | HPA008395 | 1 | 1 | 1 | 1 |        |        |
| 4948 | ENSG00000070182 | HPA003394 | 1 | 1 | 1 | 1 |        |        |
| 4948 | ENSG00000070423 | HPA043050 | 1 | 1 | 1 | 1 |        |        |
| 4948 | ENSG00000070444 | HPA059532 | 1 | 1 | 1 | 1 |        |        |
| 4948 | ENSG00000070476 | HPA049593 | 1 | 1 | 1 | 1 |        |        |
| 4948 | ENSG00000070495 | HPA059156 | 1 | 1 | 1 | 1 |        |        |
| 4948 | ENSG00000070669 | HPA004924 | 1 | 1 | 1 | 1 |        |        |
| 4948 | ENSG00000070756 | CAB011536 | 1 | 1 | 1 | 1 |        |        |
| 4948 | ENSG00000070759 | HPA027257 | 1 | 1 | 1 | 1 |        |        |
| 4948 | ENSG00000070761 | HPA018195 | 1 | 1 | 1 | 1 |        |        |
| 4948 | ENSG00000070831 | CAB004360 | 1 | 1 | 1 | 1 |        |        |
| 4948 | ENSG00000070950 | HPA006724 | 1 | 1 | 1 | 1 |        |        |
| 4948 | ENSG00000071073 | HPA007608 | 1 | 1 | 1 | 1 |        |        |
| 4948 | ENSG00000071127 | HPA070293 | 1 | 1 | 1 | 1 |        |        |
| 4948 | ENSG00000071242 | HPA045061 | 1 | 1 | 1 | 1 |        |        |
| 4948 | ENSG00000071243 | HPA004762 | 1 | 1 | 1 | 1 |        |        |
| 4948 | ENSG00000071462 | HPA052185 | 1 | 1 | 1 | 1 |        |        |
| 4948 | ENSG00000071564 | CAB018351 | 1 | 1 | 1 | 1 |        |        |
| 4948 | ENSG00000071575 | HPA001305 | 1 | 1 | 1 | 1 |        |        |
| 4948 | ENSG00000071626 | HPA004201 | 1 | 1 | 1 | 1 |        |        |
| 4948 | ENSG00000071655 | CAB013265 | 1 | 1 | 1 | 1 |        |        |
| 4948 | ENSG00000071859 | HPA003585 | 1 | 1 | 1 | 1 | 0.4851 |        |
| 4948 | ENSG00000071889 | HPA035268 | 1 | 1 | 1 | 1 |        |        |
| 4948 | ENSG00000071894 | HPA065167 | 1 | 1 | 1 | 1 |        |        |
| 4948 | ENSG00000072110 | CAB004303 | 1 | 1 | 1 | 1 |        |        |
| 4948 | ENSG00000072133 | HPA002852 | 1 | 1 | 1 | 1 | 0.3715 | 0.3351 |
| 4948 | ENSG00000072134 | HPA053360 | 1 | 1 | 1 | 1 |        |        |
| 4948 | ENSG00000072135 | HPA053367 | 1 | 1 | 1 | 1 |        |        |
| 4948 | ENSG00000072163 | HPA058340 | 1 | 1 | 1 | 1 |        |        |
| 4948 | ENSG00000072195 | HPA018904 | 1 | 1 | 1 | 1 |        |        |
| 4948 | ENSG00000072274 | CAB000153 | 1 | 1 | 1 | 1 |        |        |
| 4948 | ENSG00000072401 | HPA003920 | 1 | 1 | 1 | 1 |        |        |
| 4948 | ENSG00000072518 | HPA074905 | 1 | 1 | 1 | 1 |        |        |
| 4948 | ENSG00000072736 | HPA050665 | 1 | 1 | 1 | 1 |        |        |
| 4948 | ENSG00000072756 | HPA036938 | 1 | 1 | 1 | 1 |        |        |
| 4948 | ENSG00000072818 | HPA075570 | 1 | 1 | 1 | 1 |        |        |

|      |                 |           |   |   |   |   |        |        |
|------|-----------------|-----------|---|---|---|---|--------|--------|
| 4948 | ENSG00000072849 | CAB037287 | 1 | 1 | 1 | 1 | 0.4411 |        |
| 4948 | ENSG00000072952 | HPA008704 | 1 | 1 | 1 | 1 |        | 0.3844 |
| 4948 | ENSG00000072954 | HPA048100 | 1 | 1 | 1 | 1 |        |        |
| 4948 | ENSG00000073060 | HPA066285 | 1 | 1 | 1 | 1 |        |        |
| 4948 | ENSG00000073150 | HPA004624 | 1 | 1 | 1 | 1 |        |        |
| 4948 | ENSG00000073331 | HPA027435 | 1 | 1 | 1 | 1 |        |        |
| 4948 | ENSG00000073417 | HPA007722 | 1 | 1 | 1 | 1 |        |        |
| 4948 | ENSG00000073464 | HPA063637 | 1 | 1 | 1 | 1 |        |        |
| 4948 | ENSG00000073536 | HPA018807 | 1 | 1 | 1 | 1 |        |        |
| 4948 | ENSG00000073584 | HPA003916 | 1 | 1 | 1 | 1 |        |        |
| 4948 | ENSG00000073614 | HPA006201 | 1 | 1 | 1 | 1 |        |        |
| 4948 | ENSG00000073711 | HPA065338 | 1 | 1 | 1 | 1 |        |        |
| 4948 | ENSG00000073792 | CAB017126 | 1 | 1 | 1 | 1 |        |        |
| 4948 | ENSG00000073921 | HPA019053 | 1 | 1 | 1 | 1 |        |        |
| 4948 | ENSG00000073969 | HPA003154 | 1 | 1 | 1 | 1 |        |        |
| 4948 | ENSG00000074047 | HPA074275 | 1 | 1 | 1 | 1 |        | 0.2835 |
| 4948 | ENSG00000074201 | CAB017840 | 1 | 1 | 1 | 1 |        |        |
| 4948 | ENSG00000074211 | HPA042122 | 1 | 1 | 1 | 1 |        |        |
| 4948 | ENSG00000074356 | HPA008959 | 1 | 1 | 1 | 1 |        |        |
| 4948 | ENSG00000074416 | HPA011348 | 1 | 1 | 1 | 1 |        |        |
| 4948 | ENSG00000074603 | HPA008706 | 1 | 1 | 1 | 1 |        |        |
| 4948 | ENSG00000074621 | HPA039370 | 1 | 1 | 1 | 1 |        |        |
| 4948 | ENSG00000074695 | HPA002320 | 1 | 1 | 1 | 1 |        |        |
| 4948 | ENSG00000074966 | HPA062482 | 1 | 1 | 1 | 1 |        |        |
| 4948 | ENSG00000075035 | HPA048133 | 1 | 1 | 1 | 1 |        |        |
| 4948 | ENSG00000075043 | HPA057112 | 1 | 1 | 1 | 1 |        |        |
| 4948 | ENSG00000075073 | HPA076573 | 1 | 1 | 1 | 1 |        |        |
| 4948 | ENSG00000075089 | HPA038587 | 1 | 1 | 1 | 1 |        |        |
| 4948 | ENSG00000075142 | HPA019004 | 1 | 1 | 1 | 1 |        |        |
| 4948 | ENSG00000075151 | HPA025031 | 1 | 1 | 1 | 1 |        |        |
| 4948 | ENSG00000075188 | HPA056300 | 1 | 1 | 1 | 1 |        |        |
| 4948 | ENSG00000075234 | HPA029302 | 1 | 1 | 1 | 1 |        |        |
| 4948 | ENSG00000075239 | HPA004428 | 1 | 1 | 1 | 1 |        |        |
| 4948 | ENSG00000075292 | HPA036784 | 1 | 1 | 1 | 1 |        |        |
| 4948 | ENSG00000075407 | HPA003172 | 1 | 1 | 1 | 1 |        |        |
| 4948 | ENSG00000075420 | HPA007859 | 1 | 1 | 1 | 1 |        |        |
| 4948 | ENSG00000075426 | HPA004817 | 1 | 1 | 1 | 1 |        |        |
| 4948 | ENSG00000075618 | HPA005723 | 1 | 1 | 1 | 1 |        |        |
| 4948 | ENSG00000075785 | HPA006964 | 1 | 1 | 1 | 1 |        |        |
| 4948 | ENSG00000075790 | HPA049694 | 1 | 1 | 1 | 1 |        |        |
| 4948 | ENSG00000075826 | HPA060052 | 1 | 1 | 1 | 1 |        |        |
| 4948 | ENSG00000075856 | HPA028840 | 1 | 1 | 1 | 1 |        |        |
| 4948 | ENSG00000075886 | HPA039247 | 1 | 1 | 1 | 1 |        |        |
| 4948 | ENSG00000075914 | HPA057980 | 1 | 1 | 1 | 1 |        |        |
| 4948 | ENSG00000076003 | HPA004818 | 1 | 1 | 1 | 1 |        |        |
| 4948 | ENSG00000076053 | HPA013993 | 1 | 1 | 1 | 1 |        |        |
| 4948 | ENSG00000076067 | HPA058784 | 1 | 1 | 1 | 1 |        |        |
| 4948 | ENSG00000076201 | HPA016845 | 1 | 1 | 1 | 1 |        |        |
| 4948 | ENSG00000076242 | HPA052707 | 1 | 1 | 1 | 1 |        |        |
| 4948 | ENSG00000076513 | HPA039488 | 1 | 1 | 1 | 1 |        |        |
| 4948 | ENSG00000076706 | CAB002147 | 1 | 1 | 1 | 1 |        |        |
| 4948 | ENSG00000076716 | HPA030834 | 1 | 1 | 1 | 1 |        |        |
| 4948 | ENSG00000076864 | CAB003851 | 1 | 1 | 1 | 1 |        |        |
| 4948 | ENSG00000076924 | HPA048751 | 1 | 1 | 1 | 1 |        |        |
| 4948 | ENSG00000076944 | HPA015564 | 1 | 1 | 1 | 1 |        |        |

|      |                 |           |   |   |   |   |        |
|------|-----------------|-----------|---|---|---|---|--------|
| 4948 | ENSG00000077044 | HPA027530 | 1 | 1 | 1 | 1 |        |
| 4948 | ENSG00000077080 | HPA045126 | 1 | 1 | 1 | 1 |        |
| 4948 | ENSG00000077092 | CAB002617 | 1 | 1 | 1 | 1 |        |
| 4948 | ENSG00000077097 | CAB004601 | 1 | 1 | 1 | 1 | 0.3916 |
| 4948 | ENSG00000077150 | HPA008422 | 1 | 1 | 1 | 1 |        |
| 4948 | ENSG00000077152 | HPA002831 | 1 | 1 | 1 | 1 |        |
| 4948 | ENSG00000077157 | HPA024640 | 1 | 1 | 1 | 1 |        |
| 4948 | ENSG00000077312 | CAB004652 | 1 | 1 | 1 | 1 |        |
| 4948 | ENSG00000077348 | HPA055677 | 1 | 1 | 1 | 1 |        |
| 4948 | ENSG00000077463 | HPA049729 | 1 | 1 | 1 | 1 |        |
| 4948 | ENSG00000077514 | HPA058846 | 1 | 1 | 1 | 1 | 0.3139 |
| 4948 | ENSG00000077522 | HPA006035 | 1 | 1 | 1 | 1 |        |
| 4948 | ENSG00000077616 | HPA065419 | 1 | 1 | 1 | 1 |        |
| 4948 | ENSG00000077684 | HPA020016 | 1 | 1 | 1 | 1 |        |
| 4948 | ENSG00000077713 | HPA035188 | 1 | 1 | 1 | 1 |        |
| 4948 | ENSG00000078043 | HPA068792 | 1 | 1 | 1 | 1 |        |
| 4948 | ENSG00000078061 | HPA046188 | 1 | 1 | 1 | 1 |        |
| 4948 | ENSG00000078070 | HPA008310 | 1 | 1 | 1 | 1 |        |
| 4948 | ENSG00000078081 | CAB025133 | 1 | 1 | 1 | 1 |        |
| 4948 | ENSG00000078237 | CAB034010 | 1 | 1 | 1 | 1 |        |
| 4948 | ENSG00000078246 | HPA018496 | 1 | 1 | 1 | 1 |        |
| 4948 | ENSG00000078399 | HPA061982 | 1 | 1 | 1 | 1 |        |
| 4948 | ENSG00000078401 | HPA031976 | 1 | 1 | 1 | 1 |        |
| 4948 | ENSG00000078549 | HPA030739 | 1 | 1 | 1 | 1 |        |
| 4948 | ENSG00000078618 | HPA053661 | 1 | 1 | 1 | 1 |        |
| 4948 | ENSG00000078668 | HPA026864 | 1 | 1 | 1 | 1 |        |
| 4948 | ENSG00000078687 | HPA062051 | 1 | 1 | 1 | 1 |        |
| 4948 | ENSG00000078699 | HPA072433 | 1 | 1 | 1 | 1 |        |
| 4948 | ENSG00000078725 | HPA038828 | 1 | 1 | 1 | 1 |        |
| 4948 | ENSG00000078795 | HPA041903 | 1 | 1 | 1 | 1 |        |
| 4948 | ENSG00000078808 | HPA011249 | 1 | 1 | 1 | 1 |        |
| 4948 | ENSG00000078898 | HPA049491 | 1 | 1 | 1 | 1 |        |
| 4948 | ENSG00000078902 | HPA038621 | 1 | 1 | 1 | 1 |        |
| 4948 | ENSG00000078967 | HPA003920 | 1 | 1 | 1 | 1 |        |
| 4948 | ENSG00000079102 | HPA049852 | 1 | 1 | 1 | 1 |        |
| 4948 | ENSG00000079134 | HPA019096 | 1 | 1 | 1 | 1 |        |
| 4948 | ENSG00000079150 | HPA008707 | 1 | 1 | 1 | 1 |        |
| 4948 | ENSG00000079257 | HPA014179 | 1 | 1 | 1 | 1 |        |
| 4948 | ENSG00000079277 | HPA071293 | 1 | 1 | 1 | 1 |        |
| 4948 | ENSG00000079308 | HPA036089 | 1 | 1 | 1 | 1 |        |
| 4948 | ENSG00000079313 | HPA042552 | 1 | 1 | 1 | 1 |        |
| 4948 | ENSG00000079332 | HPA006923 | 1 | 1 | 1 | 1 |        |
| 4948 | ENSG00000079335 | HPA023783 | 1 | 1 | 1 | 1 |        |
| 4948 | ENSG00000079337 | CAB004386 | 1 | 1 | 1 | 1 |        |
| 4948 | ENSG00000079432 | CAB026388 | 1 | 1 | 1 | 1 |        |
| 4948 | ENSG00000079435 | HPA006567 | 1 | 1 | 1 | 1 |        |
| 4948 | ENSG00000079459 | HPA008874 | 1 | 1 | 1 | 1 |        |
| 4948 | ENSG00000079482 | HPA002919 | 1 | 1 | 1 | 1 |        |
| 4948 | ENSG00000079689 | CAB004005 | 1 | 1 | 1 | 1 |        |
| 4948 | ENSG00000079785 | HPA034502 | 1 | 1 | 1 | 1 | 0.2836 |
| 4948 | ENSG00000079950 | HPA001467 | 1 | 1 | 1 | 1 |        |
| 4948 | ENSG00000080031 | HPA042300 | 1 | 1 | 1 | 1 |        |
| 4948 | ENSG00000080200 | HPA044122 | 1 | 1 | 1 | 1 |        |
| 4948 | ENSG00000080224 | HPA007397 | 1 | 1 | 1 | 1 |        |
| 4948 | ENSG00000080608 | HPA002353 | 1 | 1 | 1 | 1 |        |

|      |                 |           |   |   |   |   |         |
|------|-----------------|-----------|---|---|---|---|---------|
| 4948 | ENSG00000080709 | HPA038221 | 1 | 1 | 1 | 1 |         |
| 4948 | ENSG00000080823 | HPA027292 | 1 | 1 | 1 | 1 |         |
| 4948 | ENSG00000080824 | CAB002058 | 1 | 1 | 1 | 1 |         |
| 4948 | ENSG00000080839 | HPA054962 | 1 | 1 | 1 | 1 |         |
| 4948 | ENSG00000081026 | HPA008444 | 1 | 1 | 1 | 1 |         |
| 4948 | ENSG00000081059 | HPA058863 | 1 | 1 | 1 | 1 |         |
| 4948 | ENSG00000081154 | HPA035011 | 1 | 1 | 1 | 1 |         |
| 4948 | ENSG00000081189 | HPA005533 | 1 | 1 | 1 | 1 |         |
| 4948 | ENSG00000081237 | HPA000440 | 1 | 1 | 1 | 1 |         |
| 4948 | ENSG00000081307 | HPA017235 | 1 | 1 | 1 | 1 |         |
| 4948 | ENSG00000081320 | HPA034858 | 1 | 1 | 1 | 1 |         |
| 4948 | ENSG00000081377 | HPA064747 | 1 | 1 | 1 | 1 |         |
| 4948 | ENSG00000081760 | HPA058815 | 1 | 1 | 1 | 1 |         |
| 4948 | ENSG00000081842 | HPA059326 | 1 | 1 | 1 | 1 |         |
| 4948 | ENSG00000081870 | HPA030140 | 1 | 1 | 1 | 1 |         |
| 4948 | ENSG00000081923 | HPA018673 | 1 | 1 | 1 | 1 | 0. 3978 |
| 4948 | ENSG00000081985 | HPA024168 | 1 | 1 | 1 | 1 |         |
| 4948 | ENSG00000082014 | HPA063955 | 1 | 1 | 1 | 1 |         |
| 4948 | ENSG00000082146 | HPA026549 | 1 | 1 | 1 | 1 |         |
| 4948 | ENSG00000082153 | HPA047288 | 1 | 1 | 1 | 1 |         |
| 4948 | ENSG00000082212 | HPA008247 | 1 | 1 | 1 | 1 |         |
| 4948 | ENSG00000082213 | HPA043062 | 1 | 1 | 1 | 1 |         |
| 4948 | ENSG00000082258 | HPA005559 | 1 | 1 | 1 | 1 |         |
| 4948 | ENSG00000082269 | HPA031743 | 1 | 1 | 1 | 1 |         |
| 4948 | ENSG00000082397 | HPA028605 | 1 | 1 | 1 | 1 |         |
| 4948 | ENSG00000082438 | HPA044933 | 1 | 1 | 1 | 1 |         |
| 4948 | ENSG00000082497 | HPA027344 | 1 | 1 | 1 | 1 |         |
| 4948 | ENSG00000082515 | HPA047063 | 1 | 1 | 1 | 1 |         |
| 4948 | ENSG00000082516 | HPA037392 | 1 | 1 | 1 | 1 |         |
| 4948 | ENSG00000082684 | HPA066548 | 1 | 1 | 1 | 1 |         |
| 4948 | ENSG00000082701 | HPA028017 | 1 | 1 | 1 | 1 |         |
| 4948 | ENSG00000082781 | CAB022050 | 1 | 1 | 1 | 1 |         |
| 4948 | ENSG00000083067 | HPA072650 | 1 | 1 | 1 | 1 |         |
| 4948 | ENSG00000083093 | HPA057000 | 1 | 1 | 1 | 1 | 0. 2912 |
| 4948 | ENSG00000083097 | HPA027902 | 1 | 1 | 1 | 1 |         |
| 4948 | ENSG00000083099 | HPA063932 | 1 | 1 | 1 | 1 |         |
| 4948 | ENSG00000083307 | HPA062839 | 1 | 1 | 1 | 1 |         |
| 4948 | ENSG00000083312 | CAB016325 | 1 | 1 | 1 | 1 |         |
| 4948 | ENSG00000083444 | HPA049137 | 1 | 1 | 1 | 1 |         |
| 4948 | ENSG00000083454 | HPA021948 | 1 | 1 | 1 | 1 |         |
| 4948 | ENSG00000083520 | HPA039281 | 1 | 1 | 1 | 1 |         |
| 4948 | ENSG00000083535 | HPA052269 | 1 | 1 | 1 | 1 |         |
| 4948 | ENSG00000083642 | HPA039513 | 1 | 1 | 1 | 1 |         |
| 4948 | ENSG00000083828 | HPA030306 | 1 | 1 | 1 | 1 |         |
| 4948 | ENSG00000083838 | HPA052786 | 1 | 1 | 1 | 1 |         |
| 4948 | ENSG00000083844 | HPA046330 | 1 | 1 | 1 | 1 |         |
| 4948 | ENSG00000083845 | HPA055878 | 1 | 1 | 1 | 1 |         |
| 4948 | ENSG00000083937 | HPA052754 | 1 | 1 | 1 | 1 |         |
| 4948 | ENSG00000084090 | HPA064958 | 1 | 1 | 1 | 1 | 0. 3839 |
| 4948 | ENSG00000084093 | HPA006079 | 1 | 1 | 1 | 1 |         |
| 4948 | ENSG00000084110 | HPA038547 | 1 | 1 | 1 | 1 |         |
| 4948 | ENSG00000084234 | HPA039319 | 1 | 1 | 1 | 1 |         |
| 4948 | ENSG00000084444 | HPA010803 | 1 | 1 | 1 | 1 |         |
| 4948 | ENSG00000084453 | HPA071152 | 1 | 1 | 1 | 1 |         |
| 4948 | ENSG00000084623 | HPA029939 | 1 | 1 | 1 | 1 |         |



|      |                 |           |   |   |   |   |         |
|------|-----------------|-----------|---|---|---|---|---------|
| 4948 | ENSG00000084754 | HPA015536 | 1 | 1 | 1 | 1 |         |
| 4948 | ENSG00000084764 | HPA009263 | 1 | 1 | 1 | 1 |         |
| 4948 | ENSG00000084774 | HPA057266 | 1 | 1 | 1 | 1 |         |
| 4948 | ENSG00000085117 | HPA061418 | 1 | 1 | 1 | 1 |         |
| 4948 | ENSG00000085185 | HPA068568 | 1 | 1 | 1 | 1 |         |
| 4948 | ENSG00000085224 | HPA064684 | 1 | 1 | 1 | 1 |         |
| 4948 | ENSG00000085274 | HPA045149 | 1 | 1 | 1 | 1 |         |
| 4948 | ENSG00000085276 | HPA046537 | 1 | 1 | 1 | 1 |         |
| 4948 | ENSG00000085377 | HPA031390 | 1 | 1 | 1 | 1 |         |
| 4948 | ENSG00000085491 | HPA028519 | 1 | 1 | 1 | 1 |         |
| 4948 | ENSG00000085511 | HPA007625 | 1 | 1 | 1 | 1 |         |
| 4948 | ENSG00000085563 | CAB001716 | 1 | 1 | 1 | 1 |         |
| 4948 | ENSG00000085662 | HPA026425 | 1 | 1 | 1 | 1 |         |
| 4948 | ENSG00000085721 | HPA049837 | 1 | 1 | 1 | 1 |         |
| 4948 | ENSG00000085831 | HPA043440 | 1 | 1 | 1 | 1 |         |
| 4948 | ENSG00000085832 | HPA008451 | 1 | 1 | 1 | 1 |         |
| 4948 | ENSG00000085840 | HPA027439 | 1 | 1 | 1 | 1 |         |
| 4948 | ENSG00000085978 | HPA012577 | 1 | 1 | 1 | 1 |         |
| 4948 | ENSG00000085999 | HPA028954 | 1 | 1 | 1 | 1 |         |
| 4948 | ENSG00000086015 | HPA039722 | 1 | 1 | 1 | 1 |         |
| 4948 | ENSG00000086061 | HPA001306 | 1 | 1 | 1 | 1 |         |
| 4948 | ENSG00000086062 | HPA010806 | 1 | 1 | 1 | 1 | 0. 297  |
| 4948 | ENSG00000086475 | HPA037645 | 1 | 1 | 1 | 1 | 0. 3715 |
| 4948 | ENSG00000086506 | HPA062473 | 1 | 1 | 1 | 1 |         |
| 4948 | ENSG00000086544 | HPA053003 | 1 | 1 | 1 | 1 |         |
| 4948 | ENSG00000086589 | HPA001634 | 1 | 1 | 1 | 1 |         |
| 4948 | ENSG00000086598 | HPA014060 | 1 | 1 | 1 | 1 | 0. 387  |
| 4948 | ENSG00000086696 | HPA021826 | 1 | 1 | 1 | 1 |         |
| 4948 | ENSG00000086712 | HPA000841 | 1 | 1 | 1 | 1 |         |
| 4948 | ENSG00000086730 | HPA003462 | 1 | 1 | 1 | 1 |         |
| 4948 | ENSG00000086758 | HPA002548 | 1 | 1 | 1 | 1 |         |
| 4948 | ENSG00000087008 | HPA035840 | 1 | 1 | 1 | 1 |         |
| 4948 | ENSG00000087074 | HPA020240 | 1 | 1 | 1 | 1 |         |
| 4948 | ENSG00000087077 | HPA052813 | 1 | 1 | 1 | 1 |         |
| 4948 | ENSG00000087087 | HPA042858 | 1 | 1 | 1 | 1 |         |
| 4948 | ENSG00000087206 | HPA037503 | 1 | 1 | 1 | 1 |         |
| 4948 | ENSG00000087245 | HPA001939 | 1 | 1 | 1 | 1 |         |
| 4948 | ENSG00000087253 | HPA007891 | 1 | 1 | 1 | 1 |         |
| 4948 | ENSG00000087269 | HPA039596 | 1 | 1 | 1 | 1 |         |
| 4948 | ENSG00000087274 | CAB009794 | 1 | 1 | 1 | 1 |         |
| 4948 | ENSG00000087299 | HPA065409 | 1 | 1 | 1 | 1 |         |
| 4948 | ENSG00000087302 | HPA039824 | 1 | 1 | 1 | 1 |         |
| 4948 | ENSG00000087303 | HPA052460 | 1 | 1 | 1 | 1 |         |
| 4948 | ENSG00000087365 | HPA045028 | 1 | 1 | 1 | 1 |         |
| 4948 | ENSG00000087495 | HPA051834 | 1 | 1 | 1 | 1 |         |
| 4948 | ENSG00000087586 | HPA002636 | 1 | 1 | 1 | 1 |         |
| 4948 | ENSG00000087842 | HPA000697 | 1 | 1 | 1 | 1 |         |
| 4948 | ENSG00000088038 | HPA006408 | 1 | 1 | 1 | 1 |         |
| 4948 | ENSG00000088053 | HPA066482 | 1 | 1 | 1 | 1 |         |
| 4948 | ENSG00000088205 | HPA041056 | 1 | 1 | 1 | 1 |         |
| 4948 | ENSG00000088247 | HPA034739 | 1 | 1 | 1 | 1 | 0. 4733 |
| 4948 | ENSG00000088305 | HPA001803 | 1 | 1 | 1 | 1 |         |
| 4948 | ENSG00000088356 | HPA063542 | 1 | 1 | 1 | 1 |         |
| 4948 | ENSG00000088367 | HPA054104 | 1 | 1 | 1 | 1 |         |
| 4948 | ENSG00000088538 | HPA037543 | 1 | 1 | 1 | 1 |         |

|      |                 |           |   |   |   |   |         |
|------|-----------------|-----------|---|---|---|---|---------|
| 4948 | ENSG00000088543 | HPA012105 | 1 | 1 | 1 | 1 |         |
| 4948 | ENSG00000088812 | HPA008853 | 1 | 1 | 1 | 1 |         |
| 4948 | ENSG00000088826 | HPA060198 | 1 | 1 | 1 | 1 |         |
| 4948 | ENSG00000088876 | HPA052438 | 1 | 1 | 1 | 1 |         |
| 4948 | ENSG00000088888 | CAB009187 | 1 | 1 | 1 | 1 |         |
| 4948 | ENSG00000088899 | HPA031008 | 1 | 1 | 1 | 1 |         |
| 4948 | ENSG00000088926 | HPA039808 | 1 | 1 | 1 | 1 |         |
| 4948 | ENSG00000088986 | HPA039954 | 1 | 1 | 1 | 1 |         |
| 4948 | ENSG00000089009 | HPA060903 | 1 | 1 | 1 | 1 |         |
| 4948 | ENSG00000089022 | HPA015515 | 1 | 1 | 1 | 1 |         |
| 4948 | ENSG00000089048 | HPA050396 | 1 | 1 | 1 | 1 |         |
| 4948 | ENSG00000089050 | HPA049005 | 1 | 1 | 1 | 1 |         |
| 4948 | ENSG00000089063 | HPA009078 | 1 | 1 | 1 | 1 | 0. 398  |
| 4948 | ENSG00000089091 | HPA064255 | 1 | 1 | 1 | 1 |         |
| 4948 | ENSG00000089094 | HPA071257 | 1 | 1 | 1 | 1 |         |
| 4948 | ENSG00000089123 | HPA030824 | 1 | 1 | 1 | 1 |         |
| 4948 | ENSG00000089154 | HPA018799 | 1 | 1 | 1 | 1 |         |
| 4948 | ENSG00000089177 | HPA051198 | 1 | 1 | 1 | 1 |         |
| 4948 | ENSG00000089220 | HPA063904 | 1 | 1 | 1 | 1 |         |
| 4948 | ENSG00000089225 | HPA064683 | 1 | 1 | 1 | 1 |         |
| 4948 | ENSG00000089248 | HPA039456 | 1 | 1 | 1 | 1 | 0. 2682 |
| 4948 | ENSG00000089280 | HPA008784 | 1 | 1 | 1 | 1 |         |
| 4948 | ENSG00000089289 | HPA000634 | 1 | 1 | 1 | 1 |         |
| 4948 | ENSG00000089351 | HPA008852 | 1 | 1 | 1 | 1 |         |
| 4948 | ENSG00000089505 | HPA013801 | 1 | 1 | 1 | 1 |         |
| 4948 | ENSG00000089597 | HPA061426 | 1 | 1 | 1 | 1 |         |
| 4948 | ENSG00000089682 | HPA042881 | 1 | 1 | 1 | 1 |         |
| 4948 | ENSG00000089737 | HPA002554 | 1 | 1 | 1 | 1 |         |
| 4948 | ENSG00000089775 | HPA054699 | 1 | 1 | 1 | 1 |         |
| 4948 | ENSG00000089847 | HPA041534 | 1 | 1 | 1 | 1 |         |
| 4948 | ENSG00000089902 | HPA049327 | 1 | 1 | 1 | 1 | 0. 2367 |
| 4948 | ENSG00000090054 | CAB018747 | 1 | 1 | 1 | 1 | 0. 3324 |
| 4948 | ENSG00000090060 | HPA001788 | 1 | 1 | 1 | 1 |         |
| 4948 | ENSG00000090097 | HPA057754 | 1 | 1 | 1 | 1 |         |
| 4948 | ENSG00000090266 | HPA051377 | 1 | 1 | 1 | 1 |         |
| 4948 | ENSG00000090273 | HPA027183 | 1 | 1 | 1 | 1 |         |
| 4948 | ENSG00000090316 | HPA036886 | 1 | 1 | 1 | 1 |         |
| 4948 | ENSG00000090372 | HPA043051 | 1 | 1 | 1 | 1 |         |
| 4948 | ENSG00000090432 | HPA026827 | 1 | 1 | 1 | 1 |         |
| 4948 | ENSG00000090520 | HPA010814 | 1 | 1 | 1 | 1 | 0. 4651 |
| 4948 | ENSG00000090621 | HPA027301 | 1 | 1 | 1 | 1 |         |
| 4948 | ENSG00000090776 | HPA067188 | 1 | 1 | 1 | 1 |         |
| 4948 | ENSG00000090861 | CAB034261 | 1 | 1 | 1 | 1 |         |
| 4948 | ENSG00000090863 | HPA010815 | 1 | 1 | 1 | 1 |         |
| 4948 | ENSG00000090905 | HPA015305 | 1 | 1 | 1 | 1 |         |
| 4948 | ENSG00000090932 | HPA056533 | 1 | 1 | 1 | 1 |         |
| 4948 | ENSG00000090971 | HPA047187 | 1 | 1 | 1 | 1 |         |
| 4948 | ENSG00000090975 | HPA003414 | 1 | 1 | 1 | 1 |         |
| 4948 | ENSG00000091009 | HPA036422 | 1 | 1 | 1 | 1 |         |
| 4948 | ENSG00000091010 | HPA038215 | 1 | 1 | 1 | 1 |         |
| 4948 | ENSG00000091073 | HPA042931 | 1 | 1 | 1 | 1 |         |
| 4948 | ENSG00000091127 | HPA024116 | 1 | 1 | 1 | 1 |         |
| 4948 | ENSG00000091157 | HPA042074 | 1 | 1 | 1 | 1 |         |
| 4948 | ENSG00000091164 | HPA002828 | 1 | 1 | 1 | 1 | 0. 368  |
| 4948 | ENSG00000091317 | HPA063491 | 1 | 1 | 1 | 1 |         |

|      |                 |           |   |   |   |   |        |        |
|------|-----------------|-----------|---|---|---|---|--------|--------|
| 4948 | ENSG00000091428 | HPA028968 | 1 | 1 | 1 | 1 | 0.411  |        |
| 4948 | ENSG00000091436 | HPA017205 | 1 | 1 | 1 | 1 |        |        |
| 4948 | ENSG00000091482 | HPA077360 | 1 | 1 | 1 | 1 |        |        |
| 4948 | ENSG00000091483 | CAB017785 | 1 | 1 | 1 | 1 | 0.382  |        |
| 4948 | ENSG00000091490 | HPA040045 | 1 | 1 | 1 | 1 |        |        |
| 4948 | ENSG00000091592 | HPA064431 | 1 | 1 | 1 | 1 |        |        |
| 4948 | ENSG00000091622 | HPA022432 | 1 | 1 | 1 | 1 |        |        |
| 4948 | ENSG00000091656 | HPA023837 | 1 | 1 | 1 | 1 |        |        |
| 4948 | ENSG00000091732 | HPA024023 | 1 | 1 | 1 | 1 | 0.4425 | 0.349  |
| 4948 | ENSG00000091844 | HPA056493 | 1 | 1 | 1 | 1 |        |        |
| 4948 | ENSG00000092098 | HPA048745 | 1 | 1 | 1 | 1 |        |        |
| 4948 | ENSG00000092108 | HPA003579 | 1 | 1 | 1 | 1 |        |        |
| 4948 | ENSG00000092199 | CAB005223 | 1 | 1 | 1 | 1 | 0.3599 |        |
| 4948 | ENSG00000092201 | CAB022551 | 1 | 1 | 1 | 1 |        |        |
| 4948 | ENSG00000092208 | HPA057114 | 1 | 1 | 1 | 1 |        |        |
| 4948 | ENSG00000092330 | HPA059061 | 1 | 1 | 1 | 1 |        |        |
| 4948 | ENSG00000092850 | HPA027248 | 1 | 1 | 1 | 1 |        |        |
| 4948 | ENSG00000092853 | HPA026305 | 1 | 1 | 1 | 1 |        |        |
| 4948 | ENSG00000092871 | HPA017910 | 1 | 1 | 1 | 1 | 0.2954 | 0.3681 |
| 4948 | ENSG00000092931 | HPA022001 | 1 | 1 | 1 | 1 |        |        |
| 4948 | ENSG00000092978 | HPA027181 | 1 | 1 | 1 | 1 |        |        |
| 4948 | ENSG00000093010 | HPA001169 | 1 | 1 | 1 | 1 |        |        |
| 4948 | ENSG00000093144 | HPA035446 | 1 | 1 | 1 | 1 |        |        |
| 4948 | ENSG00000093167 | HPA042023 | 1 | 1 | 1 | 1 |        |        |
| 4948 | ENSG00000093217 | HPA038415 | 1 | 1 | 1 | 1 |        |        |
| 4948 | ENSG00000094631 | HPA026321 | 1 | 1 | 1 | 1 |        |        |
| 4948 | ENSG00000094916 | HPA016699 | 1 | 1 | 1 | 1 | 0.2752 |        |
| 4948 | ENSG00000094975 | HPA047251 | 1 | 1 | 1 | 1 |        |        |
| 4948 | ENSG00000095015 | HPA046509 | 1 | 1 | 1 | 1 |        |        |
| 4948 | ENSG00000095059 | HPA014461 | 1 | 1 | 1 | 1 | 0.32   |        |
| 4948 | ENSG00000095261 | HPA003216 | 1 | 1 | 1 | 1 |        |        |
| 4948 | ENSG00000095485 | HPA036890 | 1 | 1 | 1 | 1 |        |        |
| 4948 | ENSG00000095539 | HPA077752 | 1 | 1 | 1 | 1 |        |        |
| 4948 | ENSG00000095564 | HPA070682 | 1 | 1 | 1 | 1 |        |        |
| 4948 | ENSG00000095637 | HPA027559 | 1 | 1 | 1 | 1 |        |        |
| 4948 | ENSG00000095787 | HPA042609 | 1 | 1 | 1 | 1 |        |        |
| 4948 | ENSG00000095906 | HPA041704 | 1 | 1 | 1 | 1 |        |        |
| 4948 | ENSG00000096384 | HPA055729 | 1 | 1 | 1 | 1 |        | 0.1788 |
| 4948 | ENSG00000096401 | HPA011361 | 1 | 1 | 1 | 1 |        |        |
| 4948 | ENSG00000096746 | HPA038264 | 1 | 1 | 1 | 1 |        |        |
| 4948 | ENSG00000096996 | HPA074414 | 1 | 1 | 1 | 1 |        |        |
| 4948 | ENSG00000097007 | HPA027280 | 1 | 1 | 1 | 1 |        |        |
| 4948 | ENSG00000097033 | HPA015608 | 1 | 1 | 1 | 1 |        |        |
| 4948 | ENSG00000097096 | HPA058378 | 1 | 1 | 1 | 1 |        |        |
| 4948 | ENSG00000099139 | HPA031072 | 1 | 1 | 1 | 1 |        |        |
| 4948 | ENSG00000099204 | HPA038952 | 1 | 1 | 1 | 1 |        |        |
| 4948 | ENSG00000099282 | HPA044657 | 1 | 1 | 1 | 1 |        |        |
| 4948 | ENSG00000099284 | HPA035865 | 1 | 1 | 1 | 1 |        |        |
| 4948 | ENSG00000099308 | HPA035061 | 1 | 1 | 1 | 1 |        |        |
| 4948 | ENSG00000099330 | HPA043223 | 1 | 1 | 1 | 1 |        |        |
| 4948 | ENSG00000099331 | HPA042043 | 1 | 1 | 1 | 1 |        |        |
| 4948 | ENSG00000099338 | HPA052777 | 1 | 1 | 1 | 1 |        |        |
| 4948 | ENSG00000099364 | HPA035317 | 1 | 1 | 1 | 1 |        |        |
| 4948 | ENSG00000099377 | HPA050521 | 1 | 1 | 1 | 1 |        |        |
| 4948 | ENSG00000099381 | HPA020646 | 1 | 1 | 1 | 1 |        |        |

|      |                 |           |   |   |   |   |        |        |
|------|-----------------|-----------|---|---|---|---|--------|--------|
| 4948 | ENSG00000099385 | HPA052654 | 1 | 1 | 1 | 1 |        |        |
| 4948 | ENSG00000099399 | HPA065224 | 1 | 1 | 1 | 1 |        |        |
| 4948 | ENSG00000099622 | HPA060537 | 1 | 1 | 1 | 1 |        |        |
| 4948 | ENSG00000099625 | HPA012777 | 1 | 1 | 1 | 1 |        |        |
| 4948 | ENSG00000099783 | CAB016113 | 1 | 1 | 1 | 1 | 0.327  | 0.4478 |
| 4948 | ENSG00000099797 | HPA056488 | 1 | 1 | 1 | 1 |        |        |
| 4948 | ENSG00000099804 | HPA002382 | 1 | 1 | 1 | 1 |        |        |
| 4948 | ENSG00000099817 | HPA063030 | 1 | 1 | 1 | 1 |        |        |
| 4948 | ENSG00000099821 | HPA006366 | 1 | 1 | 1 | 1 |        |        |
| 4948 | ENSG00000099864 | HPA041713 | 1 | 1 | 1 | 1 |        |        |
| 4948 | ENSG00000099875 | HPA070499 | 1 | 1 | 1 | 1 |        |        |
| 4948 | ENSG00000099899 | HPA001077 | 1 | 1 | 1 | 1 |        | 0.2447 |
| 4948 | ENSG00000099901 | HPA065868 | 1 | 1 | 1 | 1 |        |        |
| 4948 | ENSG00000099917 | HPA003179 | 1 | 1 | 1 | 1 |        |        |
| 4948 | ENSG00000099942 | HPA000532 | 1 | 1 | 1 | 1 |        |        |
| 4948 | ENSG00000099957 | HPA028776 | 1 | 1 | 1 | 1 |        |        |
| 4948 | ENSG00000099958 | HPA049306 | 1 | 1 | 1 | 1 |        |        |
| 4948 | ENSG00000099968 | HPA030994 | 1 | 1 | 1 | 1 |        |        |
| 4948 | ENSG00000099977 | HPA049871 | 1 | 1 | 1 | 1 |        |        |
| 4948 | ENSG00000099991 | HPA043296 | 1 | 1 | 1 | 1 |        |        |
| 4948 | ENSG00000099994 | HPA004117 | 1 | 1 | 1 | 1 |        |        |
| 4948 | ENSG00000099995 | HPA000690 | 1 | 1 | 1 | 1 |        |        |
| 4948 | ENSG00000099998 | HPA008121 | 1 | 1 | 1 | 1 |        |        |
| 4948 | ENSG00000100023 | HPA035344 | 1 | 1 | 1 | 1 | 0.3488 |        |
| 4948 | ENSG00000100056 | HPA001221 | 1 | 1 | 1 | 1 |        |        |
| 4948 | ENSG00000100060 | HPA056479 | 1 | 1 | 1 | 1 |        |        |
| 4948 | ENSG00000100068 | HPA028717 | 1 | 1 | 1 | 1 |        |        |
| 4948 | ENSG00000100079 | HPA003536 | 1 | 1 | 1 | 1 |        |        |
| 4948 | ENSG00000100083 | HPA048280 | 1 | 1 | 1 | 1 |        |        |
| 4948 | ENSG00000100084 | CAB039243 | 1 | 1 | 1 | 1 |        |        |
| 4948 | ENSG00000100092 | HPA000757 | 1 | 1 | 1 | 1 |        |        |
| 4948 | ENSG00000100099 | HPA050189 | 1 | 1 | 1 | 1 |        |        |
| 4948 | ENSG00000100104 | HPA002945 | 1 | 1 | 1 | 1 |        |        |
| 4948 | ENSG00000100105 | HPA047893 | 1 | 1 | 1 | 1 |        |        |
| 4948 | ENSG00000100129 | HPA003028 | 1 | 1 | 1 | 1 |        |        |
| 4948 | ENSG00000100142 | HPA000827 | 1 | 1 | 1 | 1 |        |        |
| 4948 | ENSG00000100146 | HPA068898 | 1 | 1 | 1 | 1 |        |        |
| 4948 | ENSG00000100154 | HPA003099 | 1 | 1 | 1 | 1 |        |        |
| 4948 | ENSG00000100162 | HPA042404 | 1 | 1 | 1 | 1 |        |        |
| 4948 | ENSG00000100196 | HPA076405 | 1 | 1 | 1 | 1 |        |        |
| 4948 | ENSG00000100197 | HPA045223 | 1 | 1 | 1 | 1 |        |        |
| 4948 | ENSG00000100201 | HPA063142 | 1 | 1 | 1 | 1 |        |        |
| 4948 | ENSG00000100207 | HPA036786 | 1 | 1 | 1 | 1 |        |        |
| 4948 | ENSG00000100216 | HPA003037 | 1 | 1 | 1 | 1 |        |        |
| 4948 | ENSG00000100218 | HPA050425 | 1 | 1 | 1 | 1 |        |        |
| 4948 | ENSG00000100225 | HPA032113 | 1 | 1 | 1 | 1 |        |        |
| 4948 | ENSG00000100226 | HPA064702 | 1 | 1 | 1 | 1 |        |        |
| 4948 | ENSG00000100227 | HPA018419 | 1 | 1 | 1 | 1 |        |        |
| 4948 | ENSG00000100228 | HPA059631 | 1 | 1 | 1 | 1 |        |        |
| 4948 | ENSG00000100241 | HPA074004 | 1 | 1 | 1 | 1 |        |        |
| 4948 | ENSG00000100242 | HPA001209 | 1 | 1 | 1 | 1 | 0.2939 |        |
| 4948 | ENSG00000100243 | HPA001566 | 1 | 1 | 1 | 1 |        |        |
| 4948 | ENSG00000100258 | HPA062626 | 1 | 1 | 1 | 1 |        |        |
| 4948 | ENSG00000100263 | HPA043979 | 1 | 1 | 1 | 1 |        |        |
| 4948 | ENSG00000100266 | HPA049854 | 1 | 1 | 1 | 1 |        |        |

|      |                 |           |   |   |   |   |        |        |
|------|-----------------|-----------|---|---|---|---|--------|--------|
| 4948 | ENSG00000100288 | HPA018797 | 1 | 1 | 1 | 1 |        |        |
| 4948 | ENSG00000100292 | HPA000635 | 1 | 1 | 1 | 1 |        |        |
| 4948 | ENSG00000100296 | HPA048402 | 1 | 1 | 1 | 1 |        |        |
| 4948 | ENSG00000100297 | HPA052880 | 1 | 1 | 1 | 1 |        |        |
| 4948 | ENSG00000100319 | HPA004858 | 1 | 1 | 1 | 1 | 0.2957 |        |
| 4948 | ENSG00000100321 | HPA029673 | 1 | 1 | 1 | 1 |        |        |
| 4948 | ENSG00000100324 | CAB032328 | 1 | 1 | 1 | 1 |        |        |
| 4948 | ENSG00000100325 | HPA001439 | 1 | 1 | 1 | 1 |        |        |
| 4948 | ENSG00000100336 | HPA055435 | 1 | 1 | 1 | 1 |        |        |
| 4948 | ENSG00000100347 | HPA034537 | 1 | 1 | 1 | 1 |        | 0.26   |
| 4948 | ENSG00000100359 | HPA048980 | 1 | 1 | 1 | 1 |        |        |
| 4948 | ENSG00000100365 | HPA036156 | 1 | 1 | 1 | 1 |        |        |
| 4948 | ENSG00000100368 | HPA078677 | 1 | 1 | 1 | 1 |        |        |
| 4948 | ENSG00000100372 | HPA060972 | 1 | 1 | 1 | 1 |        |        |
| 4948 | ENSG00000100373 | HPA018415 | 1 | 1 | 1 | 1 |        |        |
| 4948 | ENSG00000100380 | HPA043233 | 1 | 1 | 1 | 1 |        |        |
| 4948 | ENSG00000100387 | HPA003038 | 1 | 1 | 1 | 1 |        |        |
| 4948 | ENSG00000100393 | HPA003128 | 1 | 1 | 1 | 1 |        |        |
| 4948 | ENSG00000100395 | HPA000815 | 1 | 1 | 1 | 1 |        |        |
| 4948 | ENSG00000100403 | HPA001784 | 1 | 1 | 1 | 1 |        |        |
| 4948 | ENSG00000100410 | HPA028885 | 1 | 1 | 1 | 1 |        |        |
| 4948 | ENSG00000100417 | HPA074950 | 1 | 1 | 1 | 1 |        |        |
| 4948 | ENSG00000100422 | HPA064699 | 1 | 1 | 1 | 1 |        |        |
| 4948 | ENSG00000100425 | HPA001063 | 1 | 1 | 1 | 1 |        |        |
| 4948 | ENSG00000100426 | HPA045341 | 1 | 1 | 1 | 1 |        |        |
| 4948 | ENSG00000100439 | HPA000600 | 1 | 1 | 1 | 1 |        |        |
| 4948 | ENSG00000100441 | HPA003402 | 1 | 1 | 1 | 1 |        |        |
| 4948 | ENSG00000100442 | HPA000864 | 1 | 1 | 1 | 1 | 0.1823 | 0.2736 |
| 4948 | ENSG00000100462 | HPA005525 | 1 | 1 | 1 | 1 |        |        |
| 4948 | ENSG00000100473 | HPA065086 | 1 | 1 | 1 | 1 |        |        |
| 4948 | ENSG00000100478 | HPA039963 | 1 | 1 | 1 | 1 |        |        |
| 4948 | ENSG00000100479 | HPA027555 | 1 | 1 | 1 | 1 |        |        |
| 4948 | ENSG00000100483 | HPA076561 | 1 | 1 | 1 | 1 |        |        |
| 4948 | ENSG00000100485 | HPA052689 | 1 | 1 | 1 | 1 |        |        |
| 4948 | ENSG00000100490 | HPA059605 | 1 | 1 | 1 | 1 |        |        |
| 4948 | ENSG00000100504 | HPA000962 | 1 | 1 | 1 | 1 |        |        |
| 4948 | ENSG00000100526 | CAB005285 | 1 | 1 | 1 | 1 |        |        |
| 4948 | ENSG00000100528 | HPA002544 | 1 | 1 | 1 | 1 |        |        |
| 4948 | ENSG00000100554 | HPA057316 | 1 | 1 | 1 | 1 |        |        |
| 4948 | ENSG00000100575 | HPA002932 | 1 | 1 | 1 | 1 |        |        |
| 4948 | ENSG00000100591 | HPA000903 | 1 | 1 | 1 | 1 |        |        |
| 4948 | ENSG00000100596 | HPA027552 | 1 | 1 | 1 | 1 |        |        |
| 4948 | ENSG00000100612 | HPA031121 | 1 | 1 | 1 | 1 |        |        |
| 4948 | ENSG00000100625 | HPA031794 | 1 | 1 | 1 | 1 |        |        |
| 4948 | ENSG00000100626 | HPA059136 | 1 | 1 | 1 | 1 |        |        |
| 4948 | ENSG00000100629 | HPA000602 | 1 | 1 | 1 | 1 |        |        |
| 4948 | ENSG00000100644 | HPA000907 | 1 | 1 | 1 | 1 |        |        |
| 4948 | ENSG00000100697 | CAB068185 | 1 | 1 | 1 | 1 |        |        |
| 4948 | ENSG00000100714 | HPA000704 | 1 | 1 | 1 | 1 |        | 0.3736 |
| 4948 | ENSG00000100726 | HPA041348 | 1 | 1 | 1 | 1 | 0.3475 |        |
| 4948 | ENSG00000100764 | HPA000872 | 1 | 1 | 1 | 1 |        |        |
| 4948 | ENSG00000100767 | HPA053453 | 1 | 1 | 1 | 1 |        |        |
| 4948 | ENSG00000100784 | HPA001780 | 1 | 1 | 1 | 1 |        |        |
| 4948 | ENSG00000100802 | HPA002569 | 1 | 1 | 1 | 1 |        |        |
| 4948 | ENSG00000100804 | HPA049518 | 1 | 1 | 1 | 1 |        |        |

|      |                 |           |   |   |   |   |        |        |
|------|-----------------|-----------|---|---|---|---|--------|--------|
| 4948 | ENSG00000100842 | HPA001790 | 1 | 1 | 1 | 1 |        |        |
| 4948 | ENSG00000100852 | HPA056507 | 1 | 1 | 1 | 1 |        |        |
| 4948 | ENSG00000100889 | CAB018734 | 1 | 1 | 1 | 1 |        |        |
| 4948 | ENSG00000100890 | HPA020459 | 1 | 1 | 1 | 1 |        |        |
| 4948 | ENSG00000100897 | HPA003583 | 1 | 1 | 1 | 1 | 0.2584 |        |
| 4948 | ENSG00000100902 | HPA003049 | 1 | 1 | 1 | 1 |        |        |
| 4948 | ENSG00000100908 | HPA054715 | 1 | 1 | 1 | 1 |        |        |
| 4948 | ENSG00000100911 | HPA062661 | 1 | 1 | 1 | 1 |        |        |
| 4948 | ENSG00000100918 | HPA031727 | 1 | 1 | 1 | 1 |        |        |
| 4948 | ENSG00000100926 | HPA059249 | 1 | 1 | 1 | 1 |        |        |
| 4948 | ENSG00000100934 | HPA043806 | 1 | 1 | 1 | 1 |        |        |
| 4948 | ENSG00000100941 | HPA001378 | 1 | 1 | 1 | 1 |        |        |
| 4948 | ENSG00000100949 | HPA043488 | 1 | 1 | 1 | 1 |        |        |
| 4948 | ENSG00000100968 | HPA076526 | 1 | 1 | 1 | 1 |        |        |
| 4948 | ENSG00000100983 | HPA054508 | 1 | 1 | 1 | 1 |        |        |
| 4948 | ENSG00000100985 | HPA001238 | 1 | 1 | 1 | 1 |        |        |
| 4948 | ENSG00000100991 | HPA065061 | 1 | 1 | 1 | 1 |        |        |
| 4948 | ENSG00000100994 | HPA031067 | 1 | 1 | 1 | 1 |        |        |
| 4948 | ENSG00000101003 | HPA051185 | 1 | 1 | 1 | 1 |        |        |
| 4948 | ENSG00000101049 | HPA008859 | 1 | 1 | 1 | 1 |        |        |
| 4948 | ENSG00000101057 | CAB017114 | 1 | 1 | 1 | 1 | 0.2766 | 0.2514 |
| 4948 | ENSG00000101076 | HPA004712 | 1 | 1 | 1 | 1 |        |        |
| 4948 | ENSG00000101084 | HPA057387 | 1 | 1 | 1 | 1 |        |        |
| 4948 | ENSG00000101096 | HPA008789 | 1 | 1 | 1 | 1 |        |        |
| 4948 | ENSG00000101098 | HPA060928 | 1 | 1 | 1 | 1 |        |        |
| 4948 | ENSG00000101109 | HPA015270 | 1 | 1 | 1 | 1 |        |        |
| 4948 | ENSG00000101126 | HPA006371 | 1 | 1 | 1 | 1 |        |        |
| 4948 | ENSG00000101134 | HPA054460 | 1 | 1 | 1 | 1 |        |        |
| 4948 | ENSG00000101138 | CAB019270 | 1 | 1 | 1 | 1 |        |        |
| 4948 | ENSG00000101150 | HPA047489 | 1 | 1 | 1 | 1 |        |        |
| 4948 | ENSG00000101152 | HPA012737 | 1 | 1 | 1 | 1 |        | 0.318  |
| 4948 | ENSG00000101160 | HPA049876 | 1 | 1 | 1 | 1 |        |        |
| 4948 | ENSG00000101161 | HPA047106 | 1 | 1 | 1 | 1 |        |        |
| 4948 | ENSG00000101166 | HPA047721 | 1 | 1 | 1 | 1 |        |        |
| 4948 | ENSG00000101189 | HPA017012 | 1 | 1 | 1 | 1 |        |        |
| 4948 | ENSG00000101190 | HPA055223 | 1 | 1 | 1 | 1 |        |        |
| 4948 | ENSG00000101194 | HPA047470 | 1 | 1 | 1 | 1 |        |        |
| 4948 | ENSG00000101220 | HPA047483 | 1 | 1 | 1 | 1 |        |        |
| 4948 | ENSG00000101266 | CAB020680 | 1 | 1 | 1 | 1 |        |        |
| 4948 | ENSG00000101294 | HPA056062 | 1 | 1 | 1 | 1 |        |        |
| 4948 | ENSG00000101306 | HPA059704 | 1 | 1 | 1 | 1 |        |        |
| 4948 | ENSG00000101307 | HPA047463 | 1 | 1 | 1 | 1 |        |        |
| 4948 | ENSG00000101310 | HPA008216 | 1 | 1 | 1 | 1 |        |        |
| 4948 | ENSG00000101331 | HPA071063 | 1 | 1 | 1 | 1 |        |        |
| 4948 | ENSG00000101349 | HPA020444 | 1 | 1 | 1 | 1 |        |        |
| 4948 | ENSG00000101361 | HPA049918 | 1 | 1 | 1 | 1 |        |        |
| 4948 | ENSG00000101363 | HPA052348 | 1 | 1 | 1 | 1 |        |        |
| 4948 | ENSG00000101365 | HPA049387 | 1 | 1 | 1 | 1 |        |        |
| 4948 | ENSG00000101367 | HPA003600 | 1 | 1 | 1 | 1 |        |        |
| 4948 | ENSG00000101413 | HPA072645 | 1 | 1 | 1 | 1 |        |        |
| 4948 | ENSG00000101444 | HPA044675 | 1 | 1 | 1 | 1 |        |        |
| 4948 | ENSG00000101445 | HPA049571 | 1 | 1 | 1 | 1 |        |        |
| 4948 | ENSG00000101457 | HPA045496 | 1 | 1 | 1 | 1 |        |        |
| 4948 | ENSG00000101460 | HPA042824 | 1 | 1 | 1 | 1 |        |        |
| 4948 | ENSG00000101463 | HPA044271 | 1 | 1 | 1 | 1 |        |        |

|      |                 |           |   |   |   |   |
|------|-----------------|-----------|---|---|---|---|
| 4948 | ENSG00000101474 | HPA064700 | 1 | 1 | 1 | 1 |
| 4948 | ENSG00000101557 | HPA001308 | 1 | 1 | 1 | 1 |
| 4948 | ENSG00000101558 | HPA009174 | 1 | 1 | 1 | 1 |
| 4948 | ENSG00000101574 | HPA040061 | 1 | 1 | 1 | 1 |
| 4948 | ENSG00000101745 | HPA040705 | 1 | 1 | 1 | 1 |
| 4948 | ENSG00000101751 | HPA012000 | 1 | 1 | 1 | 1 |
| 4948 | ENSG00000101752 | HPA019100 | 1 | 1 | 1 | 1 |
| 4948 | ENSG00000101811 | HPA000427 | 1 | 1 | 1 | 1 |
| 4948 | ENSG00000101844 | HPA064759 | 1 | 1 | 1 | 1 |
| 4948 | ENSG00000101868 | HPA002947 | 1 | 1 | 1 | 1 |
| 4948 | ENSG00000101871 | HPA002878 | 1 | 1 | 1 | 1 |
| 4948 | ENSG00000101928 | HPA031158 | 1 | 1 | 1 | 1 |
| 4948 | ENSG00000101997 | HPA000888 | 1 | 1 | 1 | 1 |
| 4948 | ENSG00000102024 | HPA076083 | 1 | 1 | 1 | 1 |
| 4948 | ENSG00000102034 | HPA060277 | 1 | 1 | 1 | 1 |
| 4948 | ENSG00000102057 | HPA000524 | 1 | 1 | 1 | 1 |
| 4948 | ENSG00000102078 | HPA060316 | 1 | 1 | 1 | 1 |
| 4948 | ENSG00000102081 | CAB012444 | 1 | 1 | 1 | 1 |
| 4948 | ENSG00000102096 | HPA000285 | 1 | 1 | 1 | 1 |
| 4948 | ENSG00000102119 | HPA000609 | 1 | 1 | 1 | 1 |
| 4948 | ENSG00000102128 | HPA076172 | 1 | 1 | 1 | 1 |
| 4948 | ENSG00000102145 | HPA000233 | 1 | 1 | 1 | 1 |
| 4948 | ENSG00000102178 | HPA003617 | 1 | 1 | 1 | 1 |
| 4948 | ENSG00000102218 | HPA000909 | 1 | 1 | 1 | 1 |
| 4948 | ENSG00000102221 | HPA064697 | 1 | 1 | 1 | 1 |
| 4948 | ENSG00000102226 | HPA003103 | 1 | 1 | 1 | 1 |
| 4948 | ENSG00000102241 | HPA000504 | 1 | 1 | 1 | 1 |
| 4948 | ENSG00000102243 | HPA064616 | 1 | 1 | 1 | 1 |
| 4948 | ENSG00000102265 | CAB022360 | 1 | 1 | 1 | 1 |
| 4948 | ENSG00000102302 | HPA000911 | 1 | 1 | 1 | 1 |
| 4948 | ENSG00000102309 | HPA054483 | 1 | 1 | 1 | 1 |
| 4948 | ENSG00000102312 | HPA049215 | 1 | 1 | 1 | 1 |
| 4948 | ENSG00000102316 | HPA031572 | 1 | 1 | 1 | 1 |
| 4948 | ENSG00000102317 | HPA003624 | 1 | 1 | 1 | 1 |
| 4948 | ENSG00000102362 | HPA075138 | 1 | 1 | 1 | 1 |
| 4948 | ENSG00000102383 | HPA003618 | 1 | 1 | 1 | 1 |
| 4948 | ENSG00000102385 | HPA002949 | 1 | 1 | 1 | 1 |
| 4948 | ENSG00000102387 | HPA001879 | 1 | 1 | 1 | 1 |
| 4948 | ENSG00000102390 | HPA003155 | 1 | 1 | 1 | 1 |
| 4948 | ENSG00000102409 | HPA051935 | 1 | 1 | 1 | 1 |
| 4948 | ENSG00000102466 | HPA049828 | 1 | 1 | 1 | 1 |
| 4948 | ENSG00000102471 | HPA009160 | 1 | 1 | 1 | 1 |
| 4948 | ENSG00000102531 | HPA008927 | 1 | 1 | 1 | 1 |
| 4948 | ENSG00000102543 | HPA047615 | 1 | 1 | 1 | 1 |
| 4948 | ENSG00000102547 | HPA045954 | 1 | 1 | 1 | 1 |
| 4948 | ENSG00000102572 | HPA026502 | 1 | 1 | 1 | 1 |
| 4948 | ENSG00000102580 | HPA039336 | 1 | 1 | 1 | 1 |
| 4948 | ENSG00000102699 | HPA011739 | 1 | 1 | 1 | 1 |
| 4948 | ENSG00000102710 | HPA038906 | 1 | 1 | 1 | 1 |
| 4948 | ENSG00000102753 | HPA046852 | 1 | 1 | 1 | 1 |
| 4948 | ENSG00000102804 | HPA077414 | 1 | 1 | 1 | 1 |
| 4948 | ENSG00000102870 | HPA019550 | 1 | 1 | 1 | 1 |
| 4948 | ENSG00000102871 | CAB004602 | 1 | 1 | 1 | 1 |
| 4948 | ENSG00000102878 | HPA048584 | 1 | 1 | 1 | 1 |
| 4948 | ENSG00000102879 | HPA051132 | 1 | 1 | 1 | 1 |

|      |                 |           |   |   |   |   |                 |
|------|-----------------|-----------|---|---|---|---|-----------------|
| 4948 | ENSG00000102882 | CAB002683 | 1 | 1 | 1 | 1 |                 |
| 4948 | ENSG00000102893 | HPA073380 | 1 | 1 | 1 | 1 |                 |
| 4948 | ENSG00000102898 | HPA040956 | 1 | 1 | 1 | 1 |                 |
| 4948 | ENSG00000102901 | HPA041220 | 1 | 1 | 1 | 1 |                 |
| 4948 | ENSG00000102921 | HPA040849 | 1 | 1 | 1 | 1 |                 |
| 4948 | ENSG00000102935 | HPA015258 | 1 | 1 | 1 | 1 |                 |
| 4948 | ENSG00000102974 | HPA004122 | 1 | 1 | 1 | 1 |                 |
| 4948 | ENSG00000103035 | HPA049824 | 1 | 1 | 1 | 1 |                 |
| 4948 | ENSG00000103044 | CAB033850 | 1 | 1 | 1 | 1 |                 |
| 4948 | ENSG00000103047 | HPA041312 | 1 | 1 | 1 | 1 |                 |
| 4948 | ENSG00000103067 | HPA040751 | 1 | 1 | 1 | 1 |                 |
| 4948 | ENSG00000103091 | HPA041084 | 1 | 1 | 1 | 1 |                 |
| 4948 | ENSG00000103111 | HPA046285 | 1 | 1 | 1 | 1 |                 |
| 4948 | ENSG00000103121 | CAB026396 | 1 | 1 | 1 | 1 |                 |
| 4948 | ENSG00000103126 | CAB012987 | 1 | 1 | 1 | 1 | 0. 434          |
| 4948 | ENSG00000103145 | HPA059647 | 1 | 1 | 1 | 1 |                 |
| 4948 | ENSG00000103148 | HPA011741 | 1 | 1 | 1 | 1 |                 |
| 4948 | ENSG00000103152 | HPA006531 | 1 | 1 | 1 | 1 |                 |
| 4948 | ENSG00000103194 | HPA006731 | 1 | 1 | 1 | 1 | 0. 2715         |
| 4948 | ENSG00000103197 | CAB002225 | 1 | 1 | 1 | 1 |                 |
| 4948 | ENSG00000103199 | HPA035498 | 1 | 1 | 1 | 1 |                 |
| 4948 | ENSG00000103202 | HPA072588 | 1 | 1 | 1 | 1 |                 |
| 4948 | ENSG00000103222 | HPA002380 | 1 | 1 | 1 | 1 |                 |
| 4948 | ENSG00000103241 | HPA028886 | 1 | 1 | 1 | 1 |                 |
| 4948 | ENSG00000103249 | HPA043019 | 1 | 1 | 1 | 1 |                 |
| 4948 | ENSG00000103254 | HPA046262 | 1 | 1 | 1 | 1 |                 |
| 4948 | ENSG00000103266 | HPA043531 | 1 | 1 | 1 | 1 |                 |
| 4948 | ENSG00000103316 | HPA030619 | 1 | 1 | 1 | 1 |                 |
| 4948 | ENSG00000103326 | HPA011960 | 1 | 1 | 1 | 1 |                 |
| 4948 | ENSG00000103351 | HPA044191 | 1 | 1 | 1 | 1 | 0. 2934         |
| 4948 | ENSG00000103365 | CAB034422 | 1 | 1 | 1 | 1 |                 |
| 4948 | ENSG00000103404 | HPA006937 | 1 | 1 | 1 | 1 |                 |
| 4948 | ENSG00000103495 | HPA059495 | 1 | 1 | 1 | 1 |                 |
| 4948 | ENSG00000103496 | HPA001330 | 1 | 1 | 1 | 1 |                 |
| 4948 | ENSG00000103507 | HPA056067 | 1 | 1 | 1 | 1 | 0. 3184         |
| 4948 | ENSG00000103510 | HPA066324 | 1 | 1 | 1 | 1 |                 |
| 4948 | ENSG00000103512 | CAB025192 | 1 | 1 | 1 | 1 |                 |
| 4948 | ENSG00000103528 | HPA042059 | 1 | 1 | 1 | 1 | 0. 2749 0. 3288 |
| 4948 | ENSG00000103549 | HPA054227 | 1 | 1 | 1 | 1 |                 |
| 4948 | ENSG00000103591 | HPA040174 | 1 | 1 | 1 | 1 |                 |
| 4948 | ENSG00000103599 | HPA040845 | 1 | 1 | 1 | 1 |                 |
| 4948 | ENSG00000103647 | HPA017960 | 1 | 1 | 1 | 1 |                 |
| 4948 | ENSG00000103653 | HPA028425 | 1 | 1 | 1 | 1 |                 |
| 4948 | ENSG00000103671 | HPA050666 | 1 | 1 | 1 | 1 |                 |
| 4948 | ENSG00000103707 | HPA040710 | 1 | 1 | 1 | 1 |                 |
| 4948 | ENSG00000103723 | HPA039818 | 1 | 1 | 1 | 1 |                 |
| 4948 | ENSG00000103742 | HPA008576 | 1 | 1 | 1 | 1 |                 |
| 4948 | ENSG00000103769 | CAB013097 | 1 | 1 | 1 | 1 |                 |
| 4948 | ENSG00000103852 | HPA039806 | 1 | 1 | 1 | 1 |                 |
| 4948 | ENSG00000103855 | HPA017139 | 1 | 1 | 1 | 1 | 0. 4464         |
| 4948 | ENSG00000103932 | HPA041739 | 1 | 1 | 1 | 1 |                 |
| 4948 | ENSG00000103942 | HPA040134 | 1 | 1 | 1 | 1 |                 |
| 4948 | ENSG00000103966 | HPA066751 | 1 | 1 | 1 | 1 |                 |
| 4948 | ENSG00000104047 | HPA042214 | 1 | 1 | 1 | 1 |                 |
| 4948 | ENSG00000104081 | HPA010120 | 1 | 1 | 1 | 1 |                 |



|      |                 |           |   |   |   |   |        |        |
|------|-----------------|-----------|---|---|---|---|--------|--------|
| 4948 | ENSG00000104129 | HPA040914 | 1 | 1 | 1 | 1 |        |        |
| 4948 | ENSG00000104131 | HPA050977 | 1 | 1 | 1 | 1 |        |        |
| 4948 | ENSG00000104147 | HPA059602 | 1 | 1 | 1 | 1 |        |        |
| 4948 | ENSG00000104205 | HPA006699 | 1 | 1 | 1 | 1 |        |        |
| 4948 | ENSG00000104213 | HPA052801 | 1 | 1 | 1 | 1 |        |        |
| 4948 | ENSG00000104221 | CAB019269 | 1 | 1 | 1 | 1 | 0.2583 |        |
| 4948 | ENSG00000104312 | HPA015273 | 1 | 1 | 1 | 1 |        |        |
| 4948 | ENSG00000104313 | HPA028917 | 1 | 1 | 1 | 1 |        |        |
| 4948 | ENSG00000104324 | HPA023235 | 1 | 1 | 1 | 1 |        |        |
| 4948 | ENSG00000104327 | HPA023099 | 1 | 1 | 1 | 1 |        |        |
| 4948 | ENSG00000104341 | HPA068830 | 1 | 1 | 1 | 1 |        |        |
| 4948 | ENSG00000104343 | HPA073181 | 1 | 1 | 1 | 1 |        |        |
| 4948 | ENSG00000104356 | HPA066194 | 1 | 1 | 1 | 1 |        |        |
| 4948 | ENSG00000104365 | HPA001249 | 1 | 1 | 1 | 1 | 0.2927 |        |
| 4948 | ENSG00000104368 | HPA003412 | 1 | 1 | 1 | 1 |        |        |
| 4948 | ENSG00000104369 | HPA008996 | 1 | 1 | 1 | 1 |        |        |
| 4948 | ENSG00000104408 | HPA023973 | 1 | 1 | 1 | 1 |        |        |
| 4948 | ENSG00000104413 | HPA023720 | 1 | 1 | 1 | 1 |        |        |
| 4948 | ENSG00000104415 | HPA007121 | 1 | 1 | 1 | 1 |        |        |
| 4948 | ENSG00000104442 | HPA026085 | 1 | 1 | 1 | 1 |        |        |
| 4948 | ENSG00000104447 | HPA060380 | 1 | 1 | 1 | 1 |        |        |
| 4948 | ENSG00000104450 | HPA023748 | 1 | 1 | 1 | 1 |        |        |
| 4948 | ENSG00000104472 | HPA059008 | 1 | 1 | 1 | 1 |        |        |
| 4948 | ENSG00000104497 | HPA024730 | 1 | 1 | 1 | 1 |        |        |
| 4948 | ENSG00000104518 | CAB004656 | 1 | 1 | 1 | 1 |        |        |
| 4948 | ENSG00000104524 | HPA063416 | 1 | 1 | 1 | 1 |        |        |
| 4948 | ENSG00000104611 | HPA001871 | 1 | 1 | 1 | 1 |        |        |
| 4948 | ENSG00000104635 | HPA016508 | 1 | 1 | 1 | 1 |        |        |
| 4948 | ENSG00000104695 | CAB018600 | 1 | 1 | 1 | 1 | 0.3111 | 0.4964 |
| 4948 | ENSG00000104722 | HPA022845 | 1 | 1 | 1 | 1 |        |        |
| 4948 | ENSG00000104728 | HPA024649 | 1 | 1 | 1 | 1 |        |        |
| 4948 | ENSG00000104731 | HPA041665 | 1 | 1 | 1 | 1 |        |        |
| 4948 | ENSG00000104738 | HPA004873 | 1 | 1 | 1 | 1 |        |        |
| 4948 | ENSG00000104765 | HPA015652 | 1 | 1 | 1 | 1 |        |        |
| 4948 | ENSG00000104812 | HPA041598 | 1 | 1 | 1 | 1 |        |        |
| 4948 | ENSG00000104818 | HPA038925 | 1 | 1 | 1 | 1 |        |        |
| 4948 | ENSG00000104823 | HPA002907 | 1 | 1 | 1 | 1 |        |        |
| 4948 | ENSG00000104824 | CAB016326 | 1 | 1 | 1 | 1 | 0.436  |        |
| 4948 | ENSG00000104826 | HPA038925 | 1 | 1 | 1 | 1 |        |        |
| 4948 | ENSG00000104827 | HPA038925 | 1 | 1 | 1 | 1 |        |        |
| 4948 | ENSG00000104852 | HPA042050 | 1 | 1 | 1 | 1 | 0.2232 |        |
| 4948 | ENSG00000104856 | HPA040506 | 1 | 1 | 1 | 1 |        |        |
| 4948 | ENSG00000104859 | HPA060469 | 1 | 1 | 1 | 1 |        |        |
| 4948 | ENSG00000104866 | HPA041500 | 1 | 1 | 1 | 1 |        |        |
| 4948 | ENSG00000104872 | HPA047258 | 1 | 1 | 1 | 1 |        |        |
| 4948 | ENSG00000104897 | HPA049439 | 1 | 1 | 1 | 1 |        |        |
| 4948 | ENSG00000104901 | HPA047194 | 1 | 1 | 1 | 1 |        |        |
| 4948 | ENSG00000104903 | HPA075004 | 1 | 1 | 1 | 1 |        |        |
| 4948 | ENSG00000104936 | HPA007164 | 1 | 1 | 1 | 1 |        |        |
| 4948 | ENSG00000104951 | HPA045598 | 1 | 1 | 1 | 1 |        |        |
| 4948 | ENSG00000104957 | HPA056977 | 1 | 1 | 1 | 1 |        |        |
| 4948 | ENSG00000104964 | HPA049499 | 1 | 1 | 1 | 1 |        |        |
| 4948 | ENSG00000104969 | HPA056309 | 1 | 1 | 1 | 1 |        |        |
| 4948 | ENSG00000104973 | HPA068802 | 1 | 1 | 1 | 1 |        |        |
| 4948 | ENSG00000104980 | HPA043052 | 1 | 1 | 1 | 1 |        |        |

|      |                 |           |   |   |   |   |         |
|------|-----------------|-----------|---|---|---|---|---------|
| 4948 | ENSG00000104998 | HPA073441 | 1 | 1 | 1 | 1 |         |
| 4948 | ENSG00000105011 | HPA054036 | 1 | 1 | 1 | 1 |         |
| 4948 | ENSG00000105048 | CAB015168 | 1 | 1 | 1 | 1 | 0. 3574 |
| 4948 | ENSG00000105058 | HPA051712 | 1 | 1 | 1 | 1 |         |
| 4948 | ENSG00000105063 | HPA043989 | 1 | 1 | 1 | 1 |         |
| 4948 | ENSG00000105072 | HPA049414 | 1 | 1 | 1 | 1 |         |
| 4948 | ENSG00000105088 | HPA049961 | 1 | 1 | 1 | 1 |         |
| 4948 | ENSG00000105127 | HPA004776 | 1 | 1 | 1 | 1 |         |
| 4948 | ENSG00000105135 | HPA067682 | 1 | 1 | 1 | 1 |         |
| 4948 | ENSG00000105173 | CAB000308 | 1 | 1 | 1 | 1 |         |
| 4948 | ENSG00000105176 | HPA071709 | 1 | 1 | 1 | 1 |         |
| 4948 | ENSG00000105186 | HPA042769 | 1 | 1 | 1 | 1 |         |
| 4948 | ENSG00000105193 | HPA064222 | 1 | 1 | 1 | 1 |         |
| 4948 | ENSG00000105197 | HPA048843 | 1 | 1 | 1 | 1 |         |
| 4948 | ENSG00000105202 | CAB001514 | 1 | 1 | 1 | 1 |         |
| 4948 | ENSG00000105220 | HPA024305 | 1 | 1 | 1 | 1 |         |
| 4948 | ENSG00000105248 | HPA055675 | 1 | 1 | 1 | 1 |         |
| 4948 | ENSG00000105254 | HPA041722 | 1 | 1 | 1 | 1 |         |
| 4948 | ENSG00000105258 | HPA035632 | 1 | 1 | 1 | 1 |         |
| 4948 | ENSG00000105281 | HPA035239 | 1 | 1 | 1 | 1 |         |
| 4948 | ENSG00000105287 | HPA056727 | 1 | 1 | 1 | 1 |         |
| 4948 | ENSG00000105321 | HPA072007 | 1 | 1 | 1 | 1 |         |
| 4948 | ENSG00000105323 | HPA046290 | 1 | 1 | 1 | 1 |         |
| 4948 | ENSG00000105325 | HPA043536 | 1 | 1 | 1 | 1 |         |
| 4948 | ENSG00000105327 | HPA070403 | 1 | 1 | 1 | 1 |         |
| 4948 | ENSG00000105341 | HPA041427 | 1 | 1 | 1 | 1 |         |
| 4948 | ENSG00000105357 | HPA062391 | 1 | 1 | 1 | 1 |         |
| 4948 | ENSG00000105366 | HPA012556 | 1 | 1 | 1 | 1 |         |
| 4948 | ENSG00000105379 | HPA018910 | 1 | 1 | 1 | 1 | 0. 6125 |
| 4948 | ENSG00000105397 | HPA005157 | 1 | 1 | 1 | 1 |         |
| 4948 | ENSG00000105398 | HPA041487 | 1 | 1 | 1 | 1 |         |
| 4948 | ENSG00000105401 | HPA003928 | 1 | 1 | 1 | 1 |         |
| 4948 | ENSG00000105402 | HPA050196 | 1 | 1 | 1 | 1 |         |
| 4948 | ENSG00000105419 | HPA046699 | 1 | 1 | 1 | 1 |         |
| 4948 | ENSG00000105427 | HPA053997 | 1 | 1 | 1 | 1 |         |
| 4948 | ENSG00000105447 | HPA042643 | 1 | 1 | 1 | 1 |         |
| 4948 | ENSG00000105467 | HPA059286 | 1 | 1 | 1 | 1 |         |
| 4948 | ENSG00000105472 | HPA042690 | 1 | 1 | 1 | 1 |         |
| 4948 | ENSG00000105483 | HPA043513 | 1 | 1 | 1 | 1 |         |
| 4948 | ENSG00000105499 | HPA043083 | 1 | 1 | 1 | 1 | 0. 2987 |
| 4948 | ENSG00000105514 | HPA063283 | 1 | 1 | 1 | 1 |         |
| 4948 | ENSG00000105520 | HPA048973 | 1 | 1 | 1 | 1 |         |
| 4948 | ENSG00000105556 | HPA041439 | 1 | 1 | 1 | 1 |         |
| 4948 | ENSG00000105568 | CAB018599 | 1 | 1 | 1 | 1 |         |
| 4948 | ENSG00000105576 | HPA071498 | 1 | 1 | 1 | 1 |         |
| 4948 | ENSG00000105583 | HPA065685 | 1 | 1 | 1 | 1 |         |
| 4948 | ENSG00000105607 | HPA043252 | 1 | 1 | 1 | 1 |         |
| 4948 | ENSG00000105610 | HPA051850 | 1 | 1 | 1 | 1 |         |
| 4948 | ENSG00000105613 | HPA028181 | 1 | 1 | 1 | 1 |         |
| 4948 | ENSG00000105618 | HPA061873 | 1 | 1 | 1 | 1 |         |
| 4948 | ENSG00000105639 | HPA070314 | 1 | 1 | 1 | 1 |         |
| 4948 | ENSG00000105642 | HPA065938 | 1 | 1 | 1 | 1 |         |
| 4948 | ENSG00000105655 | HPA007931 | 1 | 1 | 1 | 1 |         |
| 4948 | ENSG00000105662 | HPA022035 | 1 | 1 | 1 | 1 |         |
| 4948 | ENSG00000105676 | HPA041420 | 1 | 1 | 1 | 1 |         |

|      |                 |           |   |   |   |   |         |
|------|-----------------|-----------|---|---|---|---|---------|
| 4948 | ENSG00000105705 | HPA004890 | 1 | 1 | 1 | 1 |         |
| 4948 | ENSG00000105723 | CAB004422 | 1 | 1 | 1 | 1 |         |
| 4948 | ENSG00000105726 | HPA031798 | 1 | 1 | 1 | 1 |         |
| 4948 | ENSG00000105732 | HPA023196 | 1 | 1 | 1 | 1 |         |
| 4948 | ENSG00000105750 | HPA044760 | 1 | 1 | 1 | 1 |         |
| 4948 | ENSG00000105755 | HPA028360 | 1 | 1 | 1 | 1 |         |
| 4948 | ENSG00000105767 | HPA012612 | 1 | 1 | 1 | 1 |         |
| 4948 | ENSG00000105819 | HPA040674 | 1 | 1 | 1 | 1 |         |
| 4948 | ENSG00000105849 | HPA019071 | 1 | 1 | 1 | 1 |         |
| 4948 | ENSG00000105855 | HPA027796 | 1 | 1 | 1 | 1 |         |
| 4948 | ENSG00000105866 | CAB010246 | 1 | 1 | 1 | 1 |         |
| 4948 | ENSG00000105879 | HPA026699 | 1 | 1 | 1 | 1 |         |
| 4948 | ENSG00000105880 | HPA005670 | 1 | 1 | 1 | 1 |         |
| 4948 | ENSG00000105928 | HPA011326 | 1 | 1 | 1 | 1 |         |
| 4948 | ENSG00000105929 | HPA018029 | 1 | 1 | 1 | 1 |         |
| 4948 | ENSG00000105939 | HPA047818 | 1 | 1 | 1 | 1 |         |
| 4948 | ENSG00000105953 | HPA019514 | 1 | 1 | 1 | 1 | 0. 581  |
| 4948 | ENSG00000105963 | HPA007033 | 1 | 1 | 1 | 1 |         |
| 4948 | ENSG00000105971 | HPA044810 | 1 | 1 | 1 | 1 |         |
| 4948 | ENSG00000105974 | CAB003791 | 1 | 1 | 1 | 1 |         |
| 4948 | ENSG00000105983 | HPA016592 | 1 | 1 | 1 | 1 |         |
| 4948 | ENSG00000105989 | HPA020920 | 1 | 1 | 1 | 1 |         |
| 4948 | ENSG00000105993 | HPA024258 | 1 | 1 | 1 | 1 |         |
| 4948 | ENSG00000105996 | HPA078220 | 1 | 1 | 1 | 1 |         |
| 4948 | ENSG00000105997 | HPA029157 | 1 | 1 | 1 | 1 |         |
| 4948 | ENSG00000106009 | HPA076508 | 1 | 1 | 1 | 1 |         |
| 4948 | ENSG00000106018 | HPA062707 | 1 | 1 | 1 | 1 |         |
| 4948 | ENSG00000106028 | HPA002866 | 1 | 1 | 1 | 1 |         |
| 4948 | ENSG00000106034 | HPA012058 | 1 | 1 | 1 | 1 |         |
| 4948 | ENSG00000106066 | HPA056466 | 1 | 1 | 1 | 1 |         |
| 4948 | ENSG00000106069 | HPA018989 | 1 | 1 | 1 | 1 |         |
| 4948 | ENSG00000106086 | HPA072314 | 1 | 1 | 1 | 1 |         |
| 4948 | ENSG00000106100 | HPA074367 | 1 | 1 | 1 | 1 |         |
| 4948 | ENSG00000106105 | HPA017896 | 1 | 1 | 1 | 1 |         |
| 4948 | ENSG00000106123 | HPA035784 | 1 | 1 | 1 | 1 |         |
| 4948 | ENSG00000106144 | HPA050678 | 1 | 1 | 1 | 1 |         |
| 4948 | ENSG00000106153 | HPA027407 | 1 | 1 | 1 | 1 |         |
| 4948 | ENSG00000106211 | CAB047330 | 1 | 1 | 1 | 1 |         |
| 4948 | ENSG00000106258 | HPA072245 | 1 | 1 | 1 | 1 |         |
| 4948 | ENSG00000106266 | HPA057296 | 1 | 1 | 1 | 1 |         |
| 4948 | ENSG00000106268 | HPA012636 | 1 | 1 | 1 | 1 | 0. 3538 |
| 4948 | ENSG00000106290 | HPA006566 | 1 | 1 | 1 | 1 |         |
| 4948 | ENSG00000106305 | HPA019098 | 1 | 1 | 1 | 1 |         |
| 4948 | ENSG00000106344 | HPA026672 | 1 | 1 | 1 | 1 |         |
| 4948 | ENSG00000106346 | HPA064800 | 1 | 1 | 1 | 1 | 0. 343  |
| 4948 | ENSG00000106348 | HPA001400 | 1 | 1 | 1 | 1 |         |
| 4948 | ENSG00000106366 | HPA050039 | 1 | 1 | 1 | 1 |         |
| 4948 | ENSG00000106384 | HPA011940 | 1 | 1 | 1 | 1 |         |
| 4948 | ENSG00000106392 | HPA012819 | 1 | 1 | 1 | 1 | 0. 345  |
| 4948 | ENSG00000106400 | HPA019043 | 1 | 1 | 1 | 1 |         |
| 4948 | ENSG00000106415 | HPA001674 | 1 | 1 | 1 | 1 |         |
| 4948 | ENSG00000106460 | HPA058342 | 1 | 1 | 1 | 1 |         |
| 4948 | ENSG00000106462 | CAB009589 | 1 | 1 | 1 | 1 |         |
| 4948 | ENSG00000106479 | HPA024154 | 1 | 1 | 1 | 1 |         |
| 4948 | ENSG00000106541 | HPA007912 | 1 | 1 | 1 | 1 |         |

|      |                 |           |   |   |   |   |        |        |
|------|-----------------|-----------|---|---|---|---|--------|--------|
| 4948 | ENSG00000106554 | HPA042935 | 1 | 1 | 1 | 1 | 0.2227 |        |
| 4948 | ENSG00000106565 | HPA047509 | 1 | 1 | 1 | 1 |        |        |
| 4948 | ENSG00000106605 | HPA019709 | 1 | 1 | 1 | 1 |        |        |
| 4948 | ENSG00000106608 | HPA020134 | 1 | 1 | 1 | 1 |        |        |
| 4948 | ENSG00000106609 | HPA016495 | 1 | 1 | 1 | 1 |        |        |
| 4948 | ENSG00000106617 | HPA004246 | 1 | 1 | 1 | 1 |        |        |
| 4948 | ENSG00000106628 | HPA026745 | 1 | 1 | 1 | 1 |        |        |
| 4948 | ENSG00000106633 | HPA007034 | 1 | 1 | 1 | 1 | 0.3619 |        |
| 4948 | ENSG00000106635 | HPA049943 | 1 | 1 | 1 | 1 |        |        |
| 4948 | ENSG00000106682 | HPA030542 | 1 | 1 | 1 | 1 | 0.2391 |        |
| 4948 | ENSG00000106683 | HPA028516 | 1 | 1 | 1 | 1 | 0.3199 | 0.2532 |
| 4948 | ENSG00000106689 | HPA000838 | 1 | 1 | 1 | 1 |        |        |
| 4948 | ENSG00000106733 | HPA049795 | 1 | 1 | 1 | 1 |        |        |
| 4948 | ENSG00000106771 | HPA023892 | 1 | 1 | 1 | 1 |        |        |
| 4948 | ENSG00000106789 | HPA041302 | 1 | 1 | 1 | 1 |        |        |
| 4948 | ENSG00000106799 | HPA056473 | 1 | 1 | 1 | 1 |        |        |
| 4948 | ENSG00000106803 | HPA049407 | 1 | 1 | 1 | 1 |        |        |
| 4948 | ENSG00000106829 | HPA065357 | 1 | 1 | 1 | 1 |        |        |
| 4948 | ENSG00000106976 | HPA049910 | 1 | 1 | 1 | 1 |        |        |
| 4948 | ENSG00000106992 | HPA006456 | 1 | 1 | 1 | 1 |        |        |
| 4948 | ENSG00000106993 | HPA021175 | 1 | 1 | 1 | 1 |        |        |
| 4948 | ENSG00000107020 | HPA011144 | 1 | 1 | 1 | 1 |        |        |
| 4948 | ENSG00000107021 | HPA045865 | 1 | 1 | 1 | 1 |        |        |
| 4948 | ENSG00000107077 | HPA069357 | 1 | 1 | 1 | 1 |        |        |
| 4948 | ENSG00000107104 | HPA056090 | 1 | 1 | 1 | 1 | 0.2883 | 0.228  |
| 4948 | ENSG00000107185 | HPA020414 | 1 | 1 | 1 | 1 |        |        |
| 4948 | ENSG00000107262 | CAB002486 | 1 | 1 | 1 | 1 |        |        |
| 4948 | ENSG00000107263 | HPA075984 | 1 | 1 | 1 | 1 |        |        |
| 4948 | ENSG00000107282 | HPA061287 | 1 | 1 | 1 | 1 |        |        |
| 4948 | ENSG00000107341 | HPA061000 | 1 | 1 | 1 | 1 |        |        |
| 4948 | ENSG00000107371 | HPA020485 | 1 | 1 | 1 | 1 |        |        |
| 4948 | ENSG00000107372 | HPA018129 | 1 | 1 | 1 | 1 |        |        |
| 4948 | ENSG00000107485 | HPA029730 | 1 | 1 | 1 | 1 |        |        |
| 4948 | ENSG00000107566 | HPA011252 | 1 | 1 | 1 | 1 |        |        |
| 4948 | ENSG00000107672 | HPA037459 | 1 | 1 | 1 | 1 |        |        |
| 4948 | ENSG00000107738 | HPA007968 | 1 | 1 | 1 | 1 |        |        |
| 4948 | ENSG00000107758 | HPA008823 | 1 | 1 | 1 | 1 |        |        |
| 4948 | ENSG00000107771 | HPA037482 | 1 | 1 | 1 | 1 |        |        |
| 4948 | ENSG00000107779 | CAB019398 | 1 | 1 | 1 | 1 |        |        |
| 4948 | ENSG00000107796 | CAB003761 | 1 | 1 | 1 | 1 |        |        |
| 4948 | ENSG00000107816 | HPA044956 | 1 | 1 | 1 | 1 |        |        |
| 4948 | ENSG00000107819 | HPA008028 | 1 | 1 | 1 | 1 |        |        |
| 4948 | ENSG00000107829 | HPA043496 | 1 | 1 | 1 | 1 |        |        |
| 4948 | ENSG00000107854 | HPA036606 | 1 | 1 | 1 | 1 |        |        |
| 4948 | ENSG00000107882 | HPA008700 | 1 | 1 | 1 | 1 |        |        |
| 4948 | ENSG00000107890 | HPA040654 | 1 | 1 | 1 | 1 |        |        |
| 4948 | ENSG00000107897 | HPA011861 | 1 | 1 | 1 | 1 | 0.4213 |        |
| 4948 | ENSG00000107902 | HPA009163 | 1 | 1 | 1 | 1 |        |        |
| 4948 | ENSG00000107949 | HPA038011 | 1 | 1 | 1 | 1 |        |        |
| 4948 | ENSG00000107959 | HPA006753 | 1 | 1 | 1 | 1 |        |        |
| 4948 | ENSG00000107968 | HPA017962 | 1 | 1 | 1 | 1 | 0.349  |        |
| 4948 | ENSG00000108018 | HPA011948 | 1 | 1 | 1 | 1 |        |        |
| 4948 | ENSG00000108039 | HPA030419 | 1 | 1 | 1 | 1 |        |        |
| 4948 | ENSG00000108055 | HPA043206 | 1 | 1 | 1 | 1 |        |        |
| 4948 | ENSG00000108061 | HPA009164 | 1 | 1 | 1 | 1 |        |        |

|      |                 |           |   |   |   |   |         |
|------|-----------------|-----------|---|---|---|---|---------|
| 4948 | ENSG00000108064 | HPA040648 | 1 | 1 | 1 | 1 |         |
| 4948 | ENSG00000108091 | HPA019051 | 1 | 1 | 1 | 1 |         |
| 4948 | ENSG00000108094 | CAB002677 | 1 | 1 | 1 | 1 |         |
| 4948 | ENSG00000108107 | HPA050459 | 1 | 1 | 1 | 1 |         |
| 4948 | ENSG00000108179 | HPA077416 | 1 | 1 | 1 | 1 |         |
| 4948 | ENSG00000108187 | HPA038035 | 1 | 1 | 1 | 1 |         |
| 4948 | ENSG00000108219 | HPA014773 | 1 | 1 | 1 | 1 |         |
| 4948 | ENSG00000108298 | HPA043014 | 1 | 1 | 1 | 1 |         |
| 4948 | ENSG00000108306 | HPA050397 | 1 | 1 | 1 | 1 |         |
| 4948 | ENSG00000108309 | HPA023548 | 1 | 1 | 1 | 1 |         |
| 4948 | ENSG00000108344 | CAB017038 | 1 | 1 | 1 | 1 | 0. 2953 |
| 4948 | ENSG00000108349 | HPA050262 | 1 | 1 | 1 | 1 |         |
| 4948 | ENSG00000108381 | HPA022145 | 1 | 1 | 1 | 1 |         |
| 4948 | ENSG00000108387 | HPA022905 | 1 | 1 | 1 | 1 |         |
| 4948 | ENSG00000108406 | HPA044350 | 1 | 1 | 1 | 1 |         |
| 4948 | ENSG00000108439 | HPA023204 | 1 | 1 | 1 | 1 |         |
| 4948 | ENSG00000108443 | HPA039442 | 1 | 1 | 1 | 1 | 0. 4963 |
| 4948 | ENSG00000108468 | CAB012265 | 1 | 1 | 1 | 1 |         |
| 4948 | ENSG00000108469 | HPA029971 | 1 | 1 | 1 | 1 |         |
| 4948 | ENSG00000108474 | HPA012739 | 1 | 1 | 1 | 1 |         |
| 4948 | ENSG00000108510 | HPA067939 | 1 | 1 | 1 | 1 |         |
| 4948 | ENSG00000108511 | HPA042063 | 1 | 1 | 1 | 1 |         |
| 4948 | ENSG00000108515 | HPA000793 | 1 | 1 | 1 | 1 |         |
| 4948 | ENSG00000108518 | CAB037140 | 1 | 1 | 1 | 1 | 0. 3241 |
| 4948 | ENSG00000108557 | HPA023898 | 1 | 1 | 1 | 1 |         |
| 4948 | ENSG00000108559 | HPA021816 | 1 | 1 | 1 | 1 |         |
| 4948 | ENSG00000108578 | HPA039548 | 1 | 1 | 1 | 1 |         |
| 4948 | ENSG00000108588 | HPA029674 | 1 | 1 | 1 | 1 | 0. 365  |
| 4948 | ENSG00000108590 | HPA035947 | 1 | 1 | 1 | 1 |         |
| 4948 | ENSG00000108591 | HPA007716 | 1 | 1 | 1 | 1 |         |
| 4948 | ENSG00000108599 | HPA028901 | 1 | 1 | 1 | 1 |         |
| 4948 | ENSG00000108604 | HPA059934 | 1 | 1 | 1 | 1 |         |
| 4948 | ENSG00000108639 | HPA014742 | 1 | 1 | 1 | 1 |         |
| 4948 | ENSG00000108651 | HPA025936 | 1 | 1 | 1 | 1 |         |
| 4948 | ENSG00000108654 | CAB005868 | 1 | 1 | 1 | 1 |         |
| 4948 | ENSG00000108671 | HPA067433 | 1 | 1 | 1 | 1 |         |
| 4948 | ENSG00000108774 | HPA004167 | 1 | 1 | 1 | 1 | 0. 342  |
| 4948 | ENSG00000108786 | HPA021032 | 1 | 1 | 1 | 1 |         |
| 4948 | ENSG00000108788 | HPA064438 | 1 | 1 | 1 | 1 |         |
| 4948 | ENSG00000108797 | HPA011772 | 1 | 1 | 1 | 1 |         |
| 4948 | ENSG00000108799 | HPA005478 | 1 | 1 | 1 | 1 |         |
| 4948 | ENSG00000108813 | HPA059933 | 1 | 1 | 1 | 1 |         |
| 4948 | ENSG00000108825 | HPA022869 | 1 | 1 | 1 | 1 |         |
| 4948 | ENSG00000108829 | HPA030827 | 1 | 1 | 1 | 1 |         |
| 4948 | ENSG00000108839 | CAB019287 | 1 | 1 | 1 | 1 |         |
| 4948 | ENSG00000108854 | HPA071508 | 1 | 1 | 1 | 1 |         |
| 4948 | ENSG00000108861 | HPA063616 | 1 | 1 | 1 | 1 |         |
| 4948 | ENSG00000108924 | HPA068156 | 1 | 1 | 1 | 1 |         |
| 4948 | ENSG00000108946 | CAB019378 | 1 | 1 | 1 | 1 |         |
| 4948 | ENSG00000108960 | HPA026978 | 1 | 1 | 1 | 1 |         |
| 4948 | ENSG00000108963 | HPA069750 | 1 | 1 | 1 | 1 |         |
| 4948 | ENSG00000109046 | HPA003293 | 1 | 1 | 1 | 1 |         |
| 4948 | ENSG00000109062 | HPA009672 | 1 | 1 | 1 | 1 |         |
| 4948 | ENSG00000109065 | HPA057149 | 1 | 1 | 1 | 1 |         |
| 4948 | ENSG00000109079 | HPA013333 | 1 | 1 | 1 | 1 |         |

|      |                 |           |   |   |   |   |        |       |
|------|-----------------|-----------|---|---|---|---|--------|-------|
| 4948 | ENSG00000109083 | HPA021376 | 1 | 1 | 1 | 1 | 0.3918 |       |
| 4948 | ENSG00000109084 | HPA076689 | 1 | 1 | 1 | 1 |        |       |
| 4948 | ENSG00000109089 | HPA022015 | 1 | 1 | 1 | 1 |        |       |
| 4948 | ENSG00000109118 | HPA021410 | 1 | 1 | 1 | 1 |        |       |
| 4948 | ENSG00000109171 | HPA035824 | 1 | 1 | 1 | 1 |        |       |
| 4948 | ENSG00000109180 | HPA044803 | 1 | 1 | 1 | 1 |        |       |
| 4948 | ENSG00000109189 | CAB076369 | 1 | 1 | 1 | 1 |        |       |
| 4948 | ENSG00000109220 | HPA026784 | 1 | 1 | 1 | 1 |        |       |
| 4948 | ENSG00000109321 | CAB023519 | 1 | 1 | 1 | 1 | 0.259  |       |
| 4948 | ENSG00000109323 | HPA053478 | 1 | 1 | 1 | 1 |        |       |
| 4948 | ENSG00000109332 | HPA003920 | 1 | 1 | 1 | 1 |        |       |
| 4948 | ENSG00000109390 | HPA044556 | 1 | 1 | 1 | 1 |        |       |
| 4948 | ENSG00000109436 | HPA006503 | 1 | 1 | 1 | 1 |        |       |
| 4948 | ENSG00000109445 | HPA056325 | 1 | 1 | 1 | 1 |        |       |
| 4948 | ENSG00000109452 | HPA037682 | 1 | 1 | 1 | 1 |        |       |
| 4948 | ENSG00000109466 | HPA051637 | 1 | 1 | 1 | 1 |        |       |
| 4948 | ENSG00000109475 | HPA035139 | 1 | 1 | 1 | 1 |        |       |
| 4948 | ENSG00000109534 | HPA059098 | 1 | 1 | 1 | 1 |        |       |
| 4948 | ENSG00000109572 | HPA044723 | 1 | 1 | 1 | 1 |        |       |
| 4948 | ENSG00000109606 | HPA047047 | 1 | 1 | 1 | 1 |        |       |
| 4948 | ENSG00000109625 | HPA078608 | 1 | 1 | 1 | 1 | 0.4659 |       |
| 4948 | ENSG00000109654 | HPA035854 | 1 | 1 | 1 | 1 |        |       |
| 4948 | ENSG00000109670 | CAB013793 | 1 | 1 | 1 | 1 |        |       |
| 4948 | ENSG00000109674 | HPA065761 | 1 | 1 | 1 | 1 |        |       |
| 4948 | ENSG00000109685 | HPA015801 | 1 | 1 | 1 | 1 |        |       |
| 4948 | ENSG00000109705 | HPA027564 | 1 | 1 | 1 | 1 |        |       |
| 4948 | ENSG00000109762 | HPA036928 | 1 | 1 | 1 | 1 |        |       |
| 4948 | ENSG00000109787 | HPA049512 | 1 | 1 | 1 | 1 |        |       |
| 4948 | ENSG00000109814 | CAB034444 | 1 | 1 | 1 | 1 |        |       |
| 4948 | ENSG00000109846 | CAB002053 | 1 | 1 | 1 | 1 |        |       |
| 4948 | ENSG00000109854 | HPA006417 | 1 | 1 | 1 | 1 |        |       |
| 4948 | ENSG00000109881 | HPA037574 | 1 | 1 | 1 | 1 |        |       |
| 4948 | ENSG00000109911 | HPA038572 | 1 | 1 | 1 | 1 |        |       |
| 4948 | ENSG00000109917 | HPA030979 | 1 | 1 | 1 | 1 |        |       |
| 4948 | ENSG00000109920 | HPA039485 | 1 | 1 | 1 | 1 |        |       |
| 4948 | ENSG00000109944 | HPA039612 | 1 | 1 | 1 | 1 |        |       |
| 4948 | ENSG00000109956 | CAB010893 | 1 | 1 | 1 | 1 |        |       |
| 4948 | ENSG00000110042 | HPA059294 | 1 | 1 | 1 | 1 |        |       |
| 4948 | ENSG00000110047 | HPA066751 | 1 | 1 | 1 | 1 |        |       |
| 4948 | ENSG00000110057 | HPA038716 | 1 | 1 | 1 | 1 |        |       |
| 4948 | ENSG00000110066 | HPA063648 | 1 | 1 | 1 | 1 |        |       |
| 4948 | ENSG00000110074 | HPA039620 | 1 | 1 | 1 | 1 |        |       |
| 4948 | ENSG00000110090 | HPA008835 | 1 | 1 | 1 | 1 | 0.465  |       |
| 4948 | ENSG00000110092 | HPA027802 | 1 | 1 | 1 | 1 |        |       |
| 4948 | ENSG00000110104 | HPA041117 | 1 | 1 | 1 | 1 |        |       |
| 4948 | ENSG00000110108 | HPA011785 | 1 | 1 | 1 | 1 |        |       |
| 4948 | ENSG00000110172 | HPA041040 | 1 | 1 | 1 | 1 |        |       |
| 4948 | ENSG00000110218 | HPA016930 | 1 | 1 | 1 | 1 |        |       |
| 4948 | ENSG00000110237 | HPA007991 | 1 | 1 | 1 | 1 |        |       |
| 4948 | ENSG00000110318 | HPA038381 | 1 | 1 | 1 | 1 |        |       |
| 4948 | ENSG00000110321 | HPA006773 | 1 | 1 | 1 | 1 | 0.2839 | 0.394 |
| 4948 | ENSG00000110328 | HPA012955 | 1 | 1 | 1 | 1 |        |       |
| 4948 | ENSG00000110367 | HPA024201 | 1 | 1 | 1 | 1 |        |       |
| 4948 | ENSG00000110395 | HPA027956 | 1 | 1 | 1 | 1 |        |       |
| 4948 | ENSG00000110455 | HPA018873 | 1 | 1 | 1 | 1 |        |       |

|      |                 |           |   |   |   |   |
|------|-----------------|-----------|---|---|---|---|
| 4948 | ENSG00000110492 | HPA057126 | 1 | 1 | 1 | 1 |
| 4948 | ENSG00000110514 | HPA038568 | 1 | 1 | 1 | 1 |
| 4948 | ENSG00000110536 | HPA040348 | 1 | 1 | 1 | 1 |
| 4948 | ENSG00000110583 | HPA037816 | 1 | 1 | 1 | 1 |
| 4948 | ENSG00000110619 | HPA002383 | 1 | 1 | 1 | 1 |
| 4948 | ENSG00000110660 | HPA050695 | 1 | 1 | 1 | 1 |
| 4948 | ENSG00000110693 | HPA001923 | 1 | 1 | 1 | 1 |
| 4948 | ENSG00000110697 | HPA060227 | 1 | 1 | 1 | 1 |
| 4948 | ENSG00000110711 | HPA050217 | 1 | 1 | 1 | 1 |
| 4948 | ENSG00000110713 | HPA074810 | 1 | 1 | 1 | 1 |
| 4948 | ENSG00000110717 | HPA018524 | 1 | 1 | 1 | 1 |
| 4948 | ENSG00000110719 | HPA038742 | 1 | 1 | 1 | 1 |
| 4948 | ENSG00000110721 | CAB072803 | 1 | 1 | 1 | 1 |
| 4948 | ENSG00000110768 | CAB004637 | 1 | 1 | 1 | 1 |
| 4948 | ENSG00000110841 | HPA001924 | 1 | 1 | 1 | 1 |
| 4948 | ENSG00000110844 | HPA038426 | 1 | 1 | 1 | 1 |
| 4948 | ENSG00000110911 | HPA032140 | 1 | 1 | 1 | 1 |
| 4948 | ENSG00000110931 | HPA017389 | 1 | 1 | 1 | 1 |
| 4948 | ENSG00000110944 | HPA001554 | 1 | 1 | 1 | 1 |
| 4948 | ENSG00000110955 | HPA001520 | 1 | 1 | 1 | 1 |
| 4948 | ENSG00000110975 | HPA055426 | 1 | 1 | 1 | 1 |
| 4948 | ENSG00000110987 | HPA019762 | 1 | 1 | 1 | 1 |
| 4948 | ENSG00000111057 | HPA001605 | 1 | 1 | 1 | 1 |
| 4948 | ENSG00000111058 | HPA061517 | 1 | 1 | 1 | 1 |
| 4948 | ENSG00000111087 | CAB009460 | 1 | 1 | 1 | 1 |
| 4948 | ENSG00000111110 | HPA058777 | 1 | 1 | 1 | 1 |
| 4948 | ENSG00000111142 | HPA019095 | 1 | 1 | 1 | 1 |
| 4948 | ENSG00000111144 | HPA008399 | 1 | 1 | 1 | 1 |
| 4948 | ENSG00000111181 | HPA034973 | 1 | 1 | 1 | 1 |
| 4948 | ENSG00000111186 | HPA061991 | 1 | 1 | 1 | 1 |
| 4948 | ENSG00000111224 | HPA026895 | 1 | 1 | 1 | 1 |
| 4948 | ENSG00000111229 | HPA006550 | 1 | 1 | 1 | 1 |
| 4948 | ENSG00000111247 | HPA051499 | 1 | 1 | 1 | 1 |
| 4948 | ENSG00000111252 | HPA005483 | 1 | 1 | 1 | 1 |
| 4948 | ENSG00000111266 | HPA020326 | 1 | 1 | 1 | 1 |
| 4948 | ENSG00000111321 | CAB026202 | 1 | 1 | 1 | 1 |
| 4948 | ENSG00000111325 | HPA040306 | 1 | 1 | 1 | 1 |
| 4948 | ENSG00000111348 | CAB018584 | 1 | 1 | 1 | 1 |
| 4948 | ENSG00000111358 | HPA004844 | 1 | 1 | 1 | 1 |
| 4948 | ENSG00000111361 | HPA049509 | 1 | 1 | 1 | 1 |
| 4948 | ENSG00000111404 | HPA041740 | 1 | 1 | 1 | 1 |
| 4948 | ENSG00000111432 | HPA014484 | 1 | 1 | 1 | 1 |
| 4948 | ENSG00000111445 | HPA041037 | 1 | 1 | 1 | 1 |
| 4948 | ENSG00000111452 | HPA042395 | 1 | 1 | 1 | 1 |
| 4948 | ENSG00000111530 | HPA055748 | 1 | 1 | 1 | 1 |
| 4948 | ENSG00000111540 | HPA068337 | 1 | 1 | 1 | 1 |
| 4948 | ENSG00000111554 | HPA041594 | 1 | 1 | 1 | 1 |
| 4948 | ENSG00000111602 | HPA060655 | 1 | 1 | 1 | 1 |
| 4948 | ENSG00000111605 | HPA039973 | 1 | 1 | 1 | 1 |
| 4948 | ENSG00000111641 | HPA040119 | 1 | 1 | 1 | 1 |
| 4948 | ENSG00000111642 | HPA012008 | 1 | 1 | 1 | 1 |
| 4948 | ENSG00000111644 | HPA039082 | 1 | 1 | 1 | 1 |
| 4948 | ENSG00000111666 | HPA067643 | 1 | 1 | 1 | 1 |
| 4948 | ENSG00000111667 | HPA006756 | 1 | 1 | 1 | 1 |
| 4948 | ENSG00000111674 | HPA068284 | 1 | 1 | 1 | 1 |

0. 3362

0. 3135

|      |                 |           |   |   |   |   |         |         |
|------|-----------------|-----------|---|---|---|---|---------|---------|
| 4948 | ENSG00000111676 | HPA031619 | 1 | 1 | 1 | 1 |         |         |
| 4948 | ENSG00000111678 | HPA046182 | 1 | 1 | 1 | 1 |         |         |
| 4948 | ENSG00000111696 | HPA041634 | 1 | 1 | 1 | 1 | 0. 272  | 0. 2893 |
| 4948 | ENSG00000111700 | HPA004943 | 1 | 1 | 1 | 1 |         |         |
| 4948 | ENSG00000111716 | HPA019007 | 1 | 1 | 1 | 1 |         |         |
| 4948 | ENSG00000111752 | HPA006973 | 1 | 1 | 1 | 1 |         |         |
| 4948 | ENSG00000111775 | HPA062394 | 1 | 1 | 1 | 1 |         |         |
| 4948 | ENSG00000111780 | HPA062394 | 1 | 1 | 1 | 1 |         |         |
| 4948 | ENSG00000111790 | HPA038696 | 1 | 1 | 1 | 1 |         |         |
| 4948 | ENSG00000111796 | HPA039113 | 1 | 1 | 1 | 1 |         |         |
| 4948 | ENSG00000111799 | HPA070695 | 1 | 1 | 1 | 1 |         |         |
| 4948 | ENSG00000111817 | HPA014764 | 1 | 1 | 1 | 1 |         |         |
| 4948 | ENSG00000111850 | HPA067453 | 1 | 1 | 1 | 1 |         |         |
| 4948 | ENSG00000111863 | HPA048113 | 1 | 1 | 1 | 1 |         |         |
| 4948 | ENSG00000111875 | HPA030502 | 1 | 1 | 1 | 1 |         |         |
| 4948 | ENSG00000111877 | HPA031137 | 1 | 1 | 1 | 1 |         |         |
| 4948 | ENSG00000111897 | HPA035738 | 1 | 1 | 1 | 1 |         |         |
| 4948 | ENSG00000111906 | HPA035677 | 1 | 1 | 1 | 1 |         |         |
| 4948 | ENSG00000111911 | HPA027914 | 1 | 1 | 1 | 1 |         |         |
| 4948 | ENSG00000111961 | HPA029947 | 1 | 1 | 1 | 1 |         |         |
| 4948 | ENSG00000111981 | HPA071005 | 1 | 1 | 1 | 1 |         |         |
| 4948 | ENSG00000112029 | HPA029048 | 1 | 1 | 1 | 1 |         |         |
| 4948 | ENSG00000112039 | CAB014893 | 1 | 1 | 1 | 1 |         |         |
| 4948 | ENSG00000112062 | HPA051825 | 1 | 1 | 1 | 1 |         |         |
| 4948 | ENSG00000112077 | HPA046051 | 1 | 1 | 1 | 1 |         |         |
| 4948 | ENSG00000112079 | HPA051324 | 1 | 1 | 1 | 1 |         |         |
| 4948 | ENSG00000112081 | CAB012986 | 1 | 1 | 1 | 1 | 0. 3585 | 0. 4278 |
| 4948 | ENSG00000112118 | CAB002162 | 1 | 1 | 1 | 1 |         |         |
| 4948 | ENSG00000112130 | HPA064925 | 1 | 1 | 1 | 1 |         |         |
| 4948 | ENSG00000112139 | HPA050382 | 1 | 1 | 1 | 1 |         |         |
| 4948 | ENSG00000112144 | HPA000791 | 1 | 1 | 1 | 1 |         |         |
| 4948 | ENSG00000112167 | HPA007959 | 1 | 1 | 1 | 1 |         |         |
| 4948 | ENSG00000112183 | HPA066927 | 1 | 1 | 1 | 1 |         |         |
| 4948 | ENSG00000112200 | HPA028838 | 1 | 1 | 1 | 1 |         |         |
| 4948 | ENSG00000112208 | HPA019918 | 1 | 1 | 1 | 1 |         |         |
| 4948 | ENSG00000112234 | HPA029140 | 1 | 1 | 1 | 1 |         |         |
| 4948 | ENSG00000112246 | HPA024385 | 1 | 1 | 1 | 1 | 0. 2544 |         |
| 4948 | ENSG00000112249 | HPA031608 | 1 | 1 | 1 | 1 |         | 0. 245  |
| 4948 | ENSG00000112282 | HPA070341 | 1 | 1 | 1 | 1 |         |         |
| 4948 | ENSG00000112294 | HPA029716 | 1 | 1 | 1 | 1 | 0. 498  |         |
| 4948 | ENSG00000112297 | CAB026378 | 1 | 1 | 1 | 1 |         |         |
| 4948 | ENSG00000112308 | HPA030566 | 1 | 1 | 1 | 1 |         |         |
| 4948 | ENSG00000112312 | CAB047328 | 1 | 1 | 1 | 1 |         |         |
| 4948 | ENSG00000112319 | HPA004805 | 1 | 1 | 1 | 1 |         |         |
| 4948 | ENSG00000112367 | HPA068859 | 1 | 1 | 1 | 1 | 0. 3854 | 0. 412  |
| 4948 | ENSG00000112425 | HPA053643 | 1 | 1 | 1 | 1 |         |         |
| 4948 | ENSG00000112514 | CAB016787 | 1 | 1 | 1 | 1 |         |         |
| 4948 | ENSG00000112539 | HPA029789 | 1 | 1 | 1 | 1 |         |         |
| 4948 | ENSG00000112559 | HPA049973 | 1 | 1 | 1 | 1 |         |         |
| 4948 | ENSG00000112561 | HPA049532 | 1 | 1 | 1 | 1 |         |         |
| 4948 | ENSG00000112576 | HPA071369 | 1 | 1 | 1 | 1 |         |         |
| 4948 | ENSG00000112640 | HPA029045 | 1 | 1 | 1 | 1 |         |         |
| 4948 | ENSG00000112658 | CAB005416 | 1 | 1 | 1 | 1 |         |         |
| 4948 | ENSG00000112679 | HPA031394 | 1 | 1 | 1 | 1 |         |         |
| 4948 | ENSG00000112685 | HPA032093 | 1 | 1 | 1 | 1 |         |         |



|      |                 |           |   |   |   |   |         |
|------|-----------------|-----------|---|---|---|---|---------|
| 4948 | ENSG00000112697 | HPA014561 | 1 | 1 | 1 | 1 |         |
| 4948 | ENSG00000112739 | HPA020638 | 1 | 1 | 1 | 1 |         |
| 4948 | ENSG00000112742 | CAB010166 | 1 | 1 | 1 | 1 |         |
| 4948 | ENSG00000112761 | HPA062438 | 1 | 1 | 1 | 1 |         |
| 4948 | ENSG00000112763 | HPA019208 | 1 | 1 | 1 | 1 |         |
| 4948 | ENSG00000112773 | HPA051067 | 1 | 1 | 1 | 1 |         |
| 4948 | ENSG00000112782 | HPA074371 | 1 | 1 | 1 | 1 |         |
| 4948 | ENSG00000112851 | HPA048606 | 1 | 1 | 1 | 1 |         |
| 4948 | ENSG00000112855 | HPA035941 | 1 | 1 | 1 | 1 |         |
| 4948 | ENSG00000112964 | HPA057705 | 1 | 1 | 1 | 1 |         |
| 4948 | ENSG00000112981 | HPA035648 | 1 | 1 | 1 | 1 |         |
| 4948 | ENSG00000112983 | HPA001841 | 1 | 1 | 1 | 1 |         |
| 4948 | ENSG00000112992 | CAB004975 | 1 | 1 | 1 | 1 |         |
| 4948 | ENSG00000113013 | HPA000898 | 1 | 1 | 1 | 1 | 0. 2638 |
| 4948 | ENSG00000113083 | HPA043930 | 1 | 1 | 1 | 1 |         |
| 4948 | ENSG00000113108 | HPA005571 | 1 | 1 | 1 | 1 |         |
| 4948 | ENSG00000113141 | HPA048798 | 1 | 1 | 1 | 1 |         |
| 4948 | ENSG00000113163 | HPA035645 | 1 | 1 | 1 | 1 |         |
| 4948 | ENSG00000113205 | HPA050296 | 1 | 1 | 1 | 1 |         |
| 4948 | ENSG00000113231 | HPA036911 | 1 | 1 | 1 | 1 |         |
| 4948 | ENSG00000113240 | HPA043746 | 1 | 1 | 1 | 1 |         |
| 4948 | ENSG00000113249 | HPA007173 | 1 | 1 | 1 | 1 |         |
| 4948 | ENSG00000113296 | HPA042426 | 1 | 1 | 1 | 1 |         |
| 4948 | ENSG00000113300 | HPA044568 | 1 | 1 | 1 | 1 |         |
| 4948 | ENSG00000113312 | HPA036557 | 1 | 1 | 1 | 1 |         |
| 4948 | ENSG00000113318 | HPA036081 | 1 | 1 | 1 | 1 |         |
| 4948 | ENSG00000113319 | HPA018679 | 1 | 1 | 1 | 1 | 0. 495  |
| 4948 | ENSG00000113328 | CAB000350 | 1 | 1 | 1 | 1 |         |
| 4948 | ENSG00000113368 | CAB005269 | 1 | 1 | 1 | 1 |         |
| 4948 | ENSG00000113384 | HPA055841 | 1 | 1 | 1 | 1 |         |
| 4948 | ENSG00000113389 | HPA052702 | 1 | 1 | 1 | 1 |         |
| 4948 | ENSG00000113396 | HPA008987 | 1 | 1 | 1 | 1 |         |
| 4948 | ENSG00000113430 | HPA064094 | 1 | 1 | 1 | 1 |         |
| 4948 | ENSG00000113456 | HPA006692 | 1 | 1 | 1 | 1 |         |
| 4948 | ENSG00000113504 | HPA041652 | 1 | 1 | 1 | 1 |         |
| 4948 | ENSG00000113522 | CAB022103 | 1 | 1 | 1 | 1 | 0. 268  |
| 4948 | ENSG00000113532 | HPA053995 | 1 | 1 | 1 | 1 |         |
| 4948 | ENSG00000113558 | HPA053745 | 1 | 1 | 1 | 1 |         |
| 4948 | ENSG00000113569 | HPA037775 | 1 | 1 | 1 | 1 |         |
| 4948 | ENSG00000113578 | HPA003265 | 1 | 1 | 1 | 1 |         |
| 4948 | ENSG00000113580 | HPA004248 | 1 | 1 | 1 | 1 |         |
| 4948 | ENSG00000113583 | HPA011951 | 1 | 1 | 1 | 1 |         |
| 4948 | ENSG00000113593 | HPA019360 | 1 | 1 | 1 | 1 | 0. 4314 |
| 4948 | ENSG00000113615 | HPA056825 | 1 | 1 | 1 | 1 |         |
| 4948 | ENSG00000113621 | HPA015483 | 1 | 1 | 1 | 1 |         |
| 4948 | ENSG00000113643 | HPA003979 | 1 | 1 | 1 | 1 |         |
| 4948 | ENSG00000113645 | HPA038016 | 1 | 1 | 1 | 1 |         |
| 4948 | ENSG00000113648 | HPA050962 | 1 | 1 | 1 | 1 |         |
| 4948 | ENSG00000113649 | HPA069752 | 1 | 1 | 1 | 1 |         |
| 4948 | ENSG00000113657 | HPA010948 | 1 | 1 | 1 | 1 |         |
| 4948 | ENSG00000113712 | HPA051334 | 1 | 1 | 1 | 1 |         |
| 4948 | ENSG00000113716 | HPA005967 | 1 | 1 | 1 | 1 |         |
| 4948 | ENSG00000113719 | HPA018666 | 1 | 1 | 1 | 1 | 0. 3139 |
| 4948 | ENSG00000113734 | HPA008149 | 1 | 1 | 1 | 1 |         |
| 4948 | ENSG00000113739 | HPA045372 | 1 | 1 | 1 | 1 |         |

|      |                 |           |   |   |   |   |        |      |
|------|-----------------|-----------|---|---|---|---|--------|------|
| 4948 | ENSG00000113810 | HPA029449 | 1 | 1 | 1 | 1 |        |      |
| 4948 | ENSG00000113811 | HPA008196 | 1 | 1 | 1 | 1 |        |      |
| 4948 | ENSG00000113845 | HPA053214 | 1 | 1 | 1 | 1 |        |      |
| 4948 | ENSG00000113924 | HPA052359 | 1 | 1 | 1 | 1 |        |      |
| 4948 | ENSG00000113966 | HPA019361 | 1 | 1 | 1 | 1 |        |      |
| 4948 | ENSG00000114019 | HPA063027 | 1 | 1 | 1 | 1 |        |      |
| 4948 | ENSG00000114026 | HPA027514 | 1 | 1 | 1 | 1 |        |      |
| 4948 | ENSG00000114062 | HPA039410 | 1 | 1 | 1 | 1 |        |      |
| 4948 | ENSG00000114113 | HPA035866 | 1 | 1 | 1 | 1 |        |      |
| 4948 | ENSG00000114115 | HPA007338 | 1 | 1 | 1 | 1 |        |      |
| 4948 | ENSG00000114127 | HPA035006 | 1 | 1 | 1 | 1 |        |      |
| 4948 | ENSG00000114268 | HPA047719 | 1 | 1 | 1 | 1 |        |      |
| 4948 | ENSG00000114279 | HPA071557 | 1 | 1 | 1 | 1 |        |      |
| 4948 | ENSG00000114315 | HPA066929 | 1 | 1 | 1 | 1 |        |      |
| 4948 | ENSG00000114316 | HPA018499 | 1 | 1 | 1 | 1 |        |      |
| 4948 | ENSG00000114331 | HPA034808 | 1 | 1 | 1 | 1 | 0.2886 | 0.55 |
| 4948 | ENSG00000114346 | HPA036363 | 1 | 1 | 1 | 1 |        |      |
| 4948 | ENSG00000114353 | HPA007704 | 1 | 1 | 1 | 1 |        |      |
| 4948 | ENSG00000114374 | HPA057687 | 1 | 1 | 1 | 1 |        |      |
| 4948 | ENSG00000114391 | HPA051653 | 1 | 1 | 1 | 1 |        |      |
| 4948 | ENSG00000114405 | HPA048286 | 1 | 1 | 1 | 1 |        |      |
| 4948 | ENSG00000114416 | HPA018246 | 1 | 1 | 1 | 1 |        |      |
| 4948 | ENSG00000114439 | HPA006049 | 1 | 1 | 1 | 1 |        |      |
| 4948 | ENSG00000114480 | HPA038073 | 1 | 1 | 1 | 1 |        |      |
| 4948 | ENSG00000114491 | HPA036178 | 1 | 1 | 1 | 1 |        |      |
| 4948 | ENSG00000114503 | HPA044850 | 1 | 1 | 1 | 1 |        |      |
| 4948 | ENSG00000114544 | HPA045847 | 1 | 1 | 1 | 1 |        |      |
| 4948 | ENSG00000114554 | HPA007499 | 1 | 1 | 1 | 1 |        |      |
| 4948 | ENSG00000114573 | HPA035083 | 1 | 1 | 1 | 1 |        |      |
| 4948 | ENSG00000114648 | HPA035028 | 1 | 1 | 1 | 1 |        |      |
| 4948 | ENSG00000114670 | HPA016908 | 1 | 1 | 1 | 1 |        |      |
| 4948 | ENSG00000114698 | HPA002276 | 1 | 1 | 1 | 1 |        |      |
| 4948 | ENSG00000114737 | HPA040812 | 1 | 1 | 1 | 1 |        |      |
| 4948 | ENSG00000114738 | HPA058275 | 1 | 1 | 1 | 1 |        |      |
| 4948 | ENSG00000114742 | HPA038421 | 1 | 1 | 1 | 1 |        |      |
| 4948 | ENSG00000114744 | HPA044190 | 1 | 1 | 1 | 1 |        |      |
| 4948 | ENSG00000114745 | HPA056283 | 1 | 1 | 1 | 1 |        |      |
| 4948 | ENSG00000114767 | HPA038798 | 1 | 1 | 1 | 1 |        |      |
| 4948 | ENSG00000114770 | HPA044067 | 1 | 1 | 1 | 1 |        |      |
| 4948 | ENSG00000114786 | HPA038153 | 1 | 1 | 1 | 1 |        |      |
| 4948 | ENSG00000114805 | HPA036176 | 1 | 1 | 1 | 1 |        |      |
| 4948 | ENSG00000114861 | HPA003876 | 1 | 1 | 1 | 1 |        |      |
| 4948 | ENSG00000114867 | HPA028487 | 1 | 1 | 1 | 1 |        |      |
| 4948 | ENSG00000114904 | HPA058543 | 1 | 1 | 1 | 1 |        |      |
| 4948 | ENSG00000114923 | HPA063498 | 1 | 1 | 1 | 1 |        |      |
| 4948 | ENSG00000114942 | HPA035029 | 1 | 1 | 1 | 1 |        |      |
| 4948 | ENSG00000114993 | HPA030259 | 1 | 1 | 1 | 1 |        |      |
| 4948 | ENSG00000115020 | HPA042558 | 1 | 1 | 1 | 1 |        |      |
| 4948 | ENSG00000115041 | HPA066717 | 1 | 1 | 1 | 1 |        |      |
| 4948 | ENSG00000115073 | HPA047443 | 1 | 1 | 1 | 1 |        |      |
| 4948 | ENSG00000115107 | HPA050510 | 1 | 1 | 1 | 1 |        |      |
| 4948 | ENSG00000115128 | HPA034829 | 1 | 1 | 1 | 1 |        |      |
| 4948 | ENSG00000115129 | HPA022012 | 1 | 1 | 1 | 1 |        |      |
| 4948 | ENSG00000115137 | HPA036815 | 1 | 1 | 1 | 1 |        |      |
| 4948 | ENSG00000115145 | HPA035529 | 1 | 1 | 1 | 1 |        |      |

|      |                 |           |   |   |   |   |        |
|------|-----------------|-----------|---|---|---|---|--------|
| 4948 | ENSG00000115163 | HPA073086 | 1 | 1 | 1 | 1 |        |
| 4948 | ENSG00000115165 | HPA007191 | 1 | 1 | 1 | 1 |        |
| 4948 | ENSG00000115207 | HPA008274 | 1 | 1 | 1 | 1 |        |
| 4948 | ENSG00000115232 | HPA074961 | 1 | 1 | 1 | 1 |        |
| 4948 | ENSG00000115241 | HPA035530 | 1 | 1 | 1 | 1 |        |
| 4948 | ENSG00000115252 | HPA022151 | 1 | 1 | 1 | 1 |        |
| 4948 | ENSG00000115268 | HPA054510 | 1 | 1 | 1 | 1 |        |
| 4948 | ENSG00000115275 | HPA011322 | 1 | 1 | 1 | 1 |        |
| 4948 | ENSG00000115289 | HPA011356 | 1 | 1 | 1 | 1 |        |
| 4948 | ENSG00000115295 | HPA043366 | 1 | 1 | 1 | 1 |        |
| 4948 | ENSG00000115297 | HPA062254 | 1 | 1 | 1 | 1 |        |
| 4948 | ENSG00000115307 | HPA007674 | 1 | 1 | 1 | 1 |        |
| 4948 | ENSG00000115310 | CAB005388 | 1 | 1 | 1 | 1 |        |
| 4948 | ENSG00000115317 | HPA006602 | 1 | 1 | 1 | 1 |        |
| 4948 | ENSG00000115325 | HPA048561 | 1 | 1 | 1 | 1 |        |
| 4948 | ENSG00000115339 | HPA007613 | 1 | 1 | 1 | 1 |        |
| 4948 | ENSG00000115363 | HPA008055 | 1 | 1 | 1 | 1 |        |
| 4948 | ENSG00000115364 | HPA046805 | 1 | 1 | 1 | 1 |        |
| 4948 | ENSG00000115365 | HPA034994 | 1 | 1 | 1 | 1 |        |
| 4948 | ENSG00000115368 | HPA038199 | 1 | 1 | 1 | 1 |        |
| 4948 | ENSG00000115425 | HPA021593 | 1 | 1 | 1 | 1 | 0.55   |
| 4948 | ENSG00000115457 | HPA077723 | 1 | 1 | 1 | 1 |        |
| 4948 | ENSG00000115459 | HPA012126 | 1 | 1 | 1 | 1 |        |
| 4948 | ENSG00000115464 | HPA070764 | 1 | 1 | 1 | 1 |        |
| 4948 | ENSG00000115507 | CAB012341 | 1 | 1 | 1 | 1 |        |
| 4948 | ENSG00000115514 | HPA031846 | 1 | 1 | 1 | 1 |        |
| 4948 | ENSG00000115524 | HPA050275 | 1 | 1 | 1 | 1 |        |
| 4948 | ENSG00000115525 | HPA068928 | 1 | 1 | 1 | 1 |        |
| 4948 | ENSG00000115526 | HPA051545 | 1 | 1 | 1 | 1 |        |
| 4948 | ENSG00000115539 | HPA018469 | 1 | 1 | 1 | 1 |        |
| 4948 | ENSG00000115548 | HPA055543 | 1 | 1 | 1 | 1 |        |
| 4948 | ENSG00000115604 | HPA007615 | 1 | 1 | 1 | 1 |        |
| 4948 | ENSG00000115616 | HPA035121 | 1 | 1 | 1 | 1 |        |
| 4948 | ENSG00000115661 | HPA029450 | 1 | 1 | 1 | 1 |        |
| 4948 | ENSG00000115677 | HPA004189 | 1 | 1 | 1 | 1 |        |
| 4948 | ENSG00000115685 | HPA034500 | 1 | 1 | 1 | 1 | 0.5144 |
| 4948 | ENSG00000115687 | HPA021079 | 1 | 1 | 1 | 1 |        |
| 4948 | ENSG00000115758 | CAB035996 | 1 | 1 | 1 | 1 |        |
| 4948 | ENSG00000115761 | HPA035286 | 1 | 1 | 1 | 1 |        |
| 4948 | ENSG00000115806 | HPA035274 | 1 | 1 | 1 | 1 |        |
| 4948 | ENSG00000115816 | HPA052065 | 1 | 1 | 1 | 1 |        |
| 4948 | ENSG00000115825 | HPA029529 | 1 | 1 | 1 | 1 |        |
| 4948 | ENSG00000115828 | HPA008406 | 1 | 1 | 1 | 1 |        |
| 4948 | ENSG00000115844 | HPA056965 | 1 | 1 | 1 | 1 |        |
| 4948 | ENSG00000115866 | HPA020451 | 1 | 1 | 1 | 1 |        |
| 4948 | ENSG00000115875 | HPA043850 | 1 | 1 | 1 | 1 |        |
| 4948 | ENSG00000115902 | HPA034963 | 1 | 1 | 1 | 1 | 0.13   |
| 4948 | ENSG00000115904 | CAB005396 | 1 | 1 | 1 | 1 |        |
| 4948 | ENSG00000115919 | HPA031686 | 1 | 1 | 1 | 1 |        |
| 4948 | ENSG00000115946 | HPA056928 | 1 | 1 | 1 | 1 |        |
| 4948 | ENSG00000115956 | HPA057341 | 1 | 1 | 1 | 1 |        |
| 4948 | ENSG00000115966 | CAB003769 | 1 | 1 | 1 | 1 |        |
| 4948 | ENSG00000115970 | HPA035191 | 1 | 1 | 1 | 1 |        |
| 4948 | ENSG00000116031 | HPA011216 | 1 | 1 | 1 | 1 |        |
| 4948 | ENSG00000116035 | HPA009708 | 1 | 1 | 1 | 1 |        |

|      |                 |           |   |   |   |   |         |
|------|-----------------|-----------|---|---|---|---|---------|
| 4948 | ENSG00000116039 | HPA031847 | 1 | 1 | 1 | 1 |         |
| 4948 | ENSG00000116095 | HPA034496 | 1 | 1 | 1 | 1 |         |
| 4948 | ENSG00000116096 | HPA039505 | 1 | 1 | 1 | 1 | 0. 3543 |
| 4948 | ENSG00000116128 | HPA020274 | 1 | 1 | 1 | 1 |         |
| 4948 | ENSG00000116138 | HPA043643 | 1 | 1 | 1 | 1 |         |
| 4948 | ENSG00000116221 | HPA025951 | 1 | 1 | 1 | 1 |         |
| 4948 | ENSG00000116251 | HPA068294 | 1 | 1 | 1 | 1 |         |
| 4948 | ENSG00000116285 | HPA027206 | 1 | 1 | 1 | 1 |         |
| 4948 | ENSG00000116288 | HPA004190 | 1 | 1 | 1 | 1 | 0. 2678 |
| 4948 | ENSG00000116337 | HPA045760 | 1 | 1 | 1 | 1 |         |
| 4948 | ENSG00000116350 | HPA050975 | 1 | 1 | 1 | 1 |         |
| 4948 | ENSG00000116353 | HPA028740 | 1 | 1 | 1 | 1 |         |
| 4948 | ENSG00000116396 | HPA014740 | 1 | 1 | 1 | 1 |         |
| 4948 | ENSG00000116406 | HPA027297 | 1 | 1 | 1 | 1 |         |
| 4948 | ENSG00000116514 | HPA049587 | 1 | 1 | 1 | 1 |         |
| 4948 | ENSG00000116521 | HPA071167 | 1 | 1 | 1 | 1 |         |
| 4948 | ENSG00000116560 | HPA047513 | 1 | 1 | 1 | 1 |         |
| 4948 | ENSG00000116580 | HPA057305 | 1 | 1 | 1 | 1 |         |
| 4948 | ENSG00000116586 | HPA004126 | 1 | 1 | 1 | 1 |         |
| 4948 | ENSG00000116667 | HPA026831 | 1 | 1 | 1 | 1 |         |
| 4948 | ENSG00000116679 | HPA003405 | 1 | 1 | 1 | 1 |         |
| 4948 | ENSG00000116717 | HPA053420 | 1 | 1 | 1 | 1 |         |
| 4948 | ENSG00000116741 | HPA013385 | 1 | 1 | 1 | 1 |         |
| 4948 | ENSG00000116750 | HPA075383 | 1 | 1 | 1 | 1 |         |
| 4948 | ENSG00000116752 | HPA067881 | 1 | 1 | 1 | 1 |         |
| 4948 | ENSG00000116754 | HPA008762 | 1 | 1 | 1 | 1 |         |
| 4948 | ENSG00000116791 | HPA021921 | 1 | 1 | 1 | 1 | 0. 3372 |
| 4948 | ENSG00000116830 | HPA070762 | 1 | 1 | 1 | 1 |         |
| 4948 | ENSG00000116833 | HPA005455 | 1 | 1 | 1 | 1 | 0. 2635 |
| 4948 | ENSG00000116863 | HPA026641 | 1 | 1 | 1 | 1 |         |
| 4948 | ENSG00000116903 | HPA027438 | 1 | 1 | 1 | 1 |         |
| 4948 | ENSG00000116954 | HPA055489 | 1 | 1 | 1 | 1 | 0. 3196 |
| 4948 | ENSG00000116977 | HPA012734 | 1 | 1 | 1 | 1 |         |
| 4948 | ENSG00000116984 | HPA044474 | 1 | 1 | 1 | 1 |         |
| 4948 | ENSG00000116990 | HPA063132 | 1 | 1 | 1 | 1 |         |
| 4948 | ENSG00000117020 | CAB013090 | 1 | 1 | 1 | 1 |         |
| 4948 | ENSG00000117036 | HPA004794 | 1 | 1 | 1 | 1 |         |
| 4948 | ENSG00000117054 | HPA006198 | 1 | 1 | 1 | 1 |         |
| 4948 | ENSG00000117069 | HPA065593 | 1 | 1 | 1 | 1 |         |
| 4948 | ENSG00000117114 | HPA043447 | 1 | 1 | 1 | 1 |         |
| 4948 | ENSG00000117133 | HPA024642 | 1 | 1 | 1 | 1 |         |
| 4948 | ENSG00000117143 | HPA014659 | 1 | 1 | 1 | 1 |         |
| 4948 | ENSG00000117148 | HPA027176 | 1 | 1 | 1 | 1 |         |
| 4948 | ENSG00000117151 | HPA048810 | 1 | 1 | 1 | 1 |         |
| 4948 | ENSG00000117152 | HPA030802 | 1 | 1 | 1 | 1 |         |
| 4948 | ENSG00000117155 | HPA075946 | 1 | 1 | 1 | 1 |         |
| 4948 | ENSG00000117174 | HPA018132 | 1 | 1 | 1 | 1 | 0. 3858 |
| 4948 | ENSG00000117222 | HPA049042 | 1 | 1 | 1 | 1 |         |
| 4948 | ENSG00000117245 | HPA032085 | 1 | 1 | 1 | 1 |         |
| 4948 | ENSG00000117262 | HPA076096 | 1 | 1 | 1 | 1 |         |
| 4948 | ENSG00000117308 | HPA007340 | 1 | 1 | 1 | 1 | 0. 4419 |
| 4948 | ENSG00000117318 | CAB021353 | 1 | 1 | 1 | 1 |         |
| 4948 | ENSG00000117335 | CAB010401 | 1 | 1 | 1 | 1 |         |
| 4948 | ENSG00000117394 | HPA031345 | 1 | 1 | 1 | 1 |         |
| 4948 | ENSG00000117395 | HPA026512 | 1 | 1 | 1 | 1 |         |

|      |                 |           |   |   |   |   |         |         |
|------|-----------------|-----------|---|---|---|---|---------|---------|
| 4948 | ENSG00000117399 | CAB004525 | 1 | 1 | 1 | 1 |         |         |
| 4948 | ENSG00000117410 | HPA044281 | 1 | 1 | 1 | 1 |         |         |
| 4948 | ENSG00000117448 | HPA017919 | 1 | 1 | 1 | 1 |         |         |
| 4948 | ENSG00000117450 | HPA007730 | 1 | 1 | 1 | 1 |         |         |
| 4948 | ENSG00000117461 | HPA071988 | 1 | 1 | 1 | 1 |         |         |
| 4948 | ENSG00000117477 | HPA027189 | 1 | 1 | 1 | 1 |         |         |
| 4948 | ENSG00000117479 | HPA006119 | 1 | 1 | 1 | 1 |         |         |
| 4948 | ENSG00000117480 | HPA007425 | 1 | 1 | 1 | 1 |         |         |
| 4948 | ENSG00000117505 | HPA055308 | 1 | 1 | 1 | 1 |         |         |
| 4948 | ENSG00000117523 | HPA025766 | 1 | 1 | 1 | 1 |         |         |
| 4948 | ENSG00000117525 | HPA049292 | 1 | 1 | 1 | 1 |         |         |
| 4948 | ENSG00000117528 | HPA032026 | 1 | 1 | 1 | 1 |         |         |
| 4948 | ENSG00000117533 | HPA050418 | 1 | 1 | 1 | 1 |         |         |
| 4948 | ENSG00000117569 | HPA047420 | 1 | 1 | 1 | 1 |         |         |
| 4948 | ENSG00000117586 | HPA059579 | 1 | 1 | 1 | 1 |         |         |
| 4948 | ENSG00000117593 | HPA026528 | 1 | 1 | 1 | 1 |         |         |
| 4948 | ENSG00000117614 | HPA070710 | 1 | 1 | 1 | 1 |         |         |
| 4948 | ENSG00000117616 | HPA067651 | 1 | 1 | 1 | 1 |         |         |
| 4948 | ENSG00000117625 | HPA007621 | 1 | 1 | 1 | 1 |         |         |
| 4948 | ENSG00000117632 | CAB010107 | 1 | 1 | 1 | 1 |         |         |
| 4948 | ENSG00000117643 | HPA048352 | 1 | 1 | 1 | 1 |         |         |
| 4948 | ENSG00000117650 | CAB017530 | 1 | 1 | 1 | 1 |         |         |
| 4948 | ENSG00000117682 | HPA026727 | 1 | 1 | 1 | 1 |         |         |
| 4948 | ENSG00000117691 | HPA026763 | 1 | 1 | 1 | 1 |         |         |
| 4948 | ENSG00000117697 | HPA053721 | 1 | 1 | 1 | 1 |         |         |
| 4948 | ENSG00000117713 | HPA005456 | 1 | 1 | 1 | 1 |         |         |
| 4948 | ENSG00000117724 | HPA052382 | 1 | 1 | 1 | 1 |         |         |
| 4948 | ENSG00000117748 | CAB016538 | 1 | 1 | 1 | 1 |         |         |
| 4948 | ENSG00000117983 | HPA008246 | 1 | 1 | 1 | 1 |         |         |
| 4948 | ENSG00000118007 | HPA035015 | 1 | 1 | 1 | 1 |         |         |
| 4948 | ENSG00000118046 | HPA067481 | 1 | 1 | 1 | 1 |         |         |
| 4948 | ENSG00000118156 | HPA058541 | 1 | 1 | 1 | 1 |         |         |
| 4948 | ENSG00000118181 | HPA031801 | 1 | 1 | 1 | 1 | 0. 2921 | 0. 3482 |
| 4948 | ENSG00000118197 | HPA047166 | 1 | 1 | 1 | 1 |         |         |
| 4948 | ENSG00000118200 | HPA026511 | 1 | 1 | 1 | 1 | 0. 3882 |         |
| 4948 | ENSG00000118242 | HPA068583 | 1 | 1 | 1 | 1 |         |         |
| 4948 | ENSG00000118260 | CAB003803 | 1 | 1 | 1 | 1 |         |         |
| 4948 | ENSG00000118263 | HPA030490 | 1 | 1 | 1 | 1 |         |         |
| 4948 | ENSG00000118292 | HPA043874 | 1 | 1 | 1 | 1 |         |         |
| 4948 | ENSG00000118363 | HPA013386 | 1 | 1 | 1 | 1 |         |         |
| 4948 | ENSG00000118473 | HPA017963 | 1 | 1 | 1 | 1 |         |         |
| 4948 | ENSG00000118482 | HPA025763 | 1 | 1 | 1 | 1 |         |         |
| 4948 | ENSG00000118496 | HPA012583 | 1 | 1 | 1 | 1 |         |         |
| 4948 | ENSG00000118507 | HPA027200 | 1 | 1 | 1 | 1 |         | 0. 472  |
| 4948 | ENSG00000118514 | HPA026292 | 1 | 1 | 1 | 1 |         |         |
| 4948 | ENSG00000118523 | HPA031074 | 1 | 1 | 1 | 1 |         |         |
| 4948 | ENSG00000118557 | HPA056716 | 1 | 1 | 1 | 1 |         |         |
| 4948 | ENSG00000118579 | HPA035900 | 1 | 1 | 1 | 1 |         |         |
| 4948 | ENSG00000118655 | HPA064934 | 1 | 1 | 1 | 1 |         |         |
| 4948 | ENSG00000118689 | CAB004074 | 1 | 1 | 1 | 1 |         |         |
| 4948 | ENSG00000118690 | HPA053696 | 1 | 1 | 1 | 1 |         |         |
| 4948 | ENSG00000118733 | HPA050297 | 1 | 1 | 1 | 1 |         |         |
| 4948 | ENSG00000118785 | HPA027540 | 1 | 1 | 1 | 1 |         |         |
| 4948 | ENSG00000118894 | HPA041610 | 1 | 1 | 1 | 1 |         |         |
| 4948 | ENSG00000118900 | HPA061029 | 1 | 1 | 1 | 1 |         |         |

|      |                 |           |   |   |   |   |         |
|------|-----------------|-----------|---|---|---|---|---------|
| 4948 | ENSG00000118939 | HPA019678 | 1 | 1 | 1 | 1 |         |
| 4948 | ENSG00000118960 | HPA035050 | 1 | 1 | 1 | 1 |         |
| 4948 | ENSG00000118961 | HPA034729 | 1 | 1 | 1 | 1 |         |
| 4948 | ENSG00000118971 | HPA049138 | 1 | 1 | 1 | 1 |         |
| 4948 | ENSG00000118985 | HPA013569 | 1 | 1 | 1 | 1 |         |
| 4948 | ENSG00000118997 | HPA044070 | 1 | 1 | 1 | 1 |         |
| 4948 | ENSG00000119042 | HPA029543 | 1 | 1 | 1 | 1 |         |
| 4948 | ENSG00000119125 | HPA024099 | 1 | 1 | 1 | 1 |         |
| 4948 | ENSG00000119138 | HPA029308 | 1 | 1 | 1 | 1 | 0. 3371 |
| 4948 | ENSG00000119227 | HPA058599 | 1 | 1 | 1 | 1 |         |
| 4948 | ENSG00000119280 | HPA004798 | 1 | 1 | 1 | 1 |         |
| 4948 | ENSG00000119314 | HPA048374 | 1 | 1 | 1 | 1 |         |
| 4948 | ENSG00000119318 | HPA029718 | 1 | 1 | 1 | 1 | 0. 2277 |
| 4948 | ENSG00000119321 | HPA007979 | 1 | 1 | 1 | 1 |         |
| 4948 | ENSG00000119383 | HPA005695 | 1 | 1 | 1 | 1 |         |
| 4948 | ENSG00000119396 | HPA026419 | 1 | 1 | 1 | 1 |         |
| 4948 | ENSG00000119401 | HPA050060 | 1 | 1 | 1 | 1 |         |
| 4948 | ENSG00000119402 | HPA067878 | 1 | 1 | 1 | 1 |         |
| 4948 | ENSG00000119411 | HPA042889 | 1 | 1 | 1 | 1 |         |
| 4948 | ENSG00000119421 | HPA041600 | 1 | 1 | 1 | 1 | 0. 353  |
| 4948 | ENSG00000119431 | HPA020427 | 1 | 1 | 1 | 1 |         |
| 4948 | ENSG00000119471 | HPA042890 | 1 | 1 | 1 | 1 |         |
| 4948 | ENSG00000119509 | HPA049994 | 1 | 1 | 1 | 1 |         |
| 4948 | ENSG00000119559 | HPA067491 | 1 | 1 | 1 | 1 |         |
| 4948 | ENSG00000119574 | HPA035754 | 1 | 1 | 1 | 1 |         |
| 4948 | ENSG00000119599 | HPA047276 | 1 | 1 | 1 | 1 |         |
| 4948 | ENSG00000119616 | HPA046681 | 1 | 1 | 1 | 1 |         |
| 4948 | ENSG00000119638 | HPA001405 | 1 | 1 | 1 | 1 |         |
| 4948 | ENSG00000119669 | HPA050862 | 1 | 1 | 1 | 1 |         |
| 4948 | ENSG00000119673 | HPA043705 | 1 | 1 | 1 | 1 |         |
| 4948 | ENSG00000119681 | HPA003415 | 1 | 1 | 1 | 1 |         |
| 4948 | ENSG00000119684 | HPA060570 | 1 | 1 | 1 | 1 |         |
| 4948 | ENSG00000119685 | HPA032128 | 1 | 1 | 1 | 1 |         |
| 4948 | ENSG00000119698 | HPA041866 | 1 | 1 | 1 | 1 |         |
| 4948 | ENSG00000119705 | HPA020291 | 1 | 1 | 1 | 1 |         |
| 4948 | ENSG00000119707 | HPA003025 | 1 | 1 | 1 | 1 |         |
| 4948 | ENSG00000119720 | HPA047050 | 1 | 1 | 1 | 1 |         |
| 4948 | ENSG00000119725 | HPA002871 | 1 | 1 | 1 | 1 |         |
| 4948 | ENSG00000119772 | HPA026588 | 1 | 1 | 1 | 1 |         |
| 4948 | ENSG00000119778 | HPA034555 | 1 | 1 | 1 | 1 |         |
| 4948 | ENSG00000119782 | HPA045572 | 1 | 1 | 1 | 1 |         |
| 4948 | ENSG00000119787 | HPA075302 | 1 | 1 | 1 | 1 |         |
| 4948 | ENSG00000119812 | HPA036250 | 1 | 1 | 1 | 1 |         |
| 4948 | ENSG00000119862 | HPA046079 | 1 | 1 | 1 | 1 |         |
| 4948 | ENSG00000119865 | HPA035337 | 1 | 1 | 1 | 1 |         |
| 4948 | ENSG00000119866 | CAB014891 | 1 | 1 | 1 | 1 |         |
| 4948 | ENSG00000119878 | HPA046080 | 1 | 1 | 1 | 1 |         |
| 4948 | ENSG00000119899 | HPA044479 | 1 | 1 | 1 | 1 |         |
| 4948 | ENSG00000119900 | HPA027122 | 1 | 1 | 1 | 1 |         |
| 4948 | ENSG00000119906 | HPA057568 | 1 | 1 | 1 | 1 | 0. 3125 |
| 4948 | ENSG00000119915 | HPA036236 | 1 | 1 | 1 | 1 |         |
| 4948 | ENSG00000119917 | HPA059914 | 1 | 1 | 1 | 1 |         |
| 4948 | ENSG00000119919 | HPA047561 | 1 | 1 | 1 | 1 |         |
| 4948 | ENSG00000119922 | HPA003408 | 1 | 1 | 1 | 1 |         |
| 4948 | ENSG00000119943 | HPA067394 | 1 | 1 | 1 | 1 |         |

|      |                 |           |   |   |   |   |        |
|------|-----------------|-----------|---|---|---|---|--------|
| 4948 | ENSG00000119946 | HPA040408 | 1 | 1 | 1 | 1 |        |
| 4948 | ENSG00000119953 | HPA061214 | 1 | 1 | 1 | 1 |        |
| 4948 | ENSG00000119977 | HPA026987 | 1 | 1 | 1 | 1 |        |
| 4948 | ENSG00000119979 | HPA041159 | 1 | 1 | 1 | 1 |        |
| 4948 | ENSG00000120029 | HPA053580 | 1 | 1 | 1 | 1 |        |
| 4948 | ENSG00000120049 | HPA066717 | 1 | 1 | 1 | 1 |        |
| 4948 | ENSG00000120063 | HPA010087 | 1 | 1 | 1 | 1 |        |
| 4948 | ENSG00000120068 | HPA075905 | 1 | 1 | 1 | 1 |        |
| 4948 | ENSG00000120071 | HPA007208 | 1 | 1 | 1 | 1 |        |
| 4948 | ENSG00000120093 | HPA064990 | 1 | 1 | 1 | 1 |        |
| 4948 | ENSG00000120137 | HPA062358 | 1 | 1 | 1 | 1 |        |
| 4948 | ENSG00000120158 | HPA071308 | 1 | 1 | 1 | 1 |        |
| 4948 | ENSG00000120159 | HPA024100 | 1 | 1 | 1 | 1 |        |
| 4948 | ENSG00000120162 | HPA057744 | 1 | 1 | 1 | 1 |        |
| 4948 | ENSG00000120254 | HPA074911 | 1 | 1 | 1 | 1 |        |
| 4948 | ENSG00000120256 | HPA064002 | 1 | 1 | 1 | 1 |        |
| 4948 | ENSG00000120265 | HPA003239 | 1 | 1 | 1 | 1 |        |
| 4948 | ENSG00000120278 | HPA027128 | 1 | 1 | 1 | 1 |        |
| 4948 | ENSG00000120327 | HPA007692 | 1 | 1 | 1 | 1 |        |
| 4948 | ENSG00000120333 | HPA051087 | 1 | 1 | 1 | 1 |        |
| 4948 | ENSG00000120451 | HPA013447 | 1 | 1 | 1 | 1 |        |
| 4948 | ENSG00000120458 | HPA038695 | 1 | 1 | 1 | 1 |        |
| 4948 | ENSG00000120533 | HPA024648 | 1 | 1 | 1 | 1 |        |
| 4948 | ENSG00000120539 | HPA027175 | 1 | 1 | 1 | 1 |        |
| 4948 | ENSG00000120549 | HPA004941 | 1 | 1 | 1 | 1 |        |
| 4948 | ENSG00000120645 | HPA039025 | 1 | 1 | 1 | 1 |        |
| 4948 | ENSG00000120647 | HPA038854 | 1 | 1 | 1 | 1 |        |
| 4948 | ENSG00000120658 | HPA038355 | 1 | 1 | 1 | 1 |        |
| 4948 | ENSG00000120690 | CAB005172 | 1 | 1 | 1 | 1 |        |
| 4948 | ENSG00000120693 | CAB009119 | 1 | 1 | 1 | 1 | 0.47   |
| 4948 | ENSG00000120694 | CAB002060 | 1 | 1 | 1 | 1 | 0.319  |
| 4948 | ENSG00000120697 | HPA007989 | 1 | 1 | 1 | 1 |        |
| 4948 | ENSG00000120727 | HPA056766 | 1 | 1 | 1 | 1 |        |
| 4948 | ENSG00000120738 | HPA029937 | 1 | 1 | 1 | 1 |        |
| 4948 | ENSG00000120742 | HPA038970 | 1 | 1 | 1 | 1 |        |
| 4948 | ENSG00000120784 | HPA030606 | 1 | 1 | 1 | 1 |        |
| 4948 | ENSG00000120802 | HPA008150 | 1 | 1 | 1 | 1 |        |
| 4948 | ENSG00000120805 | HPA062656 | 1 | 1 | 1 | 1 |        |
| 4948 | ENSG00000120833 | CAB010356 | 1 | 1 | 1 | 1 |        |
| 4948 | ENSG00000120837 | CAB004211 | 1 | 1 | 1 | 1 |        |
| 4948 | ENSG00000120875 | HPA061967 | 1 | 1 | 1 | 1 |        |
| 4948 | ENSG00000120910 | HPA023396 | 1 | 1 | 1 | 1 |        |
| 4948 | ENSG00000120913 | HPA003880 | 1 | 1 | 1 | 1 |        |
| 4948 | ENSG00000120915 | HPA023094 | 1 | 1 | 1 | 1 |        |
| 4948 | ENSG00000120942 | HPA044862 | 1 | 1 | 1 | 1 |        |
| 4948 | ENSG00000120948 | CAB003703 | 1 | 1 | 1 | 1 | 0.4414 |
| 4948 | ENSG00000120992 | HPA063151 | 1 | 1 | 1 | 1 |        |
| 4948 | ENSG00000121022 | HPA004845 | 1 | 1 | 1 | 1 |        |
| 4948 | ENSG00000121039 | HPA049199 | 1 | 1 | 1 | 1 |        |
| 4948 | ENSG00000121057 | HPA008620 | 1 | 1 | 1 | 1 | 0.3719 |
| 4948 | ENSG00000121060 | HPA005909 | 1 | 1 | 1 | 1 |        |
| 4948 | ENSG00000121064 | HPA039102 | 1 | 1 | 1 | 1 |        |
| 4948 | ENSG00000121075 | HPA044457 | 1 | 1 | 1 | 1 |        |
| 4948 | ENSG00000121152 | HPA003008 | 1 | 1 | 1 | 1 |        |
| 4948 | ENSG00000121207 | HPA070726 | 1 | 1 | 1 | 1 |        |

|      |                 |           |   |   |   |   |         |
|------|-----------------|-----------|---|---|---|---|---------|
| 4948 | ENSG00000121281 | HPA041218 | 1 | 1 | 1 | 1 |         |
| 4948 | ENSG00000121289 | HPA039382 | 1 | 1 | 1 | 1 |         |
| 4948 | ENSG00000121310 | HPA026731 | 1 | 1 | 1 | 1 |         |
| 4948 | ENSG00000121350 | HPA038320 | 1 | 1 | 1 | 1 |         |
| 4948 | ENSG00000121380 | HPA040665 | 1 | 1 | 1 | 1 |         |
| 4948 | ENSG00000121406 | HPA039511 | 1 | 1 | 1 | 1 | 0. 465  |
| 4948 | ENSG00000121413 | HPA024318 | 1 | 1 | 1 | 1 |         |
| 4948 | ENSG00000121417 | HPA049967 | 1 | 1 | 1 | 1 |         |
| 4948 | ENSG00000121454 | HPA055705 | 1 | 1 | 1 | 1 |         |
| 4948 | ENSG00000121481 | HPA026803 | 1 | 1 | 1 | 1 |         |
| 4948 | ENSG00000121552 | HPA001031 | 1 | 1 | 1 | 1 |         |
| 4948 | ENSG00000121578 | HPA063546 | 1 | 1 | 1 | 1 |         |
| 4948 | ENSG00000121621 | HPA039312 | 1 | 1 | 1 | 1 |         |
| 4948 | ENSG00000121653 | HPA058921 | 1 | 1 | 1 | 1 |         |
| 4948 | ENSG00000121671 | HPA037577 | 1 | 1 | 1 | 1 | 0. 3985 |
| 4948 | ENSG00000121691 | CAB001515 | 1 | 1 | 1 | 1 |         |
| 4948 | ENSG00000121716 | HPA026750 | 1 | 1 | 1 | 1 |         |
| 4948 | ENSG00000121749 | HPA013388 | 1 | 1 | 1 | 1 | 0. 4884 |
| 4948 | ENSG00000121753 | HPA052612 | 1 | 1 | 1 | 1 |         |
| 4948 | ENSG00000121774 | CAB005355 | 1 | 1 | 1 | 1 |         |
| 4948 | ENSG00000121775 | HPA040191 | 1 | 1 | 1 | 1 |         |
| 4948 | ENSG00000121858 | HPA054938 | 1 | 1 | 1 | 1 |         |
| 4948 | ENSG00000121864 | HPA049023 | 1 | 1 | 1 | 1 |         |
| 4948 | ENSG00000121871 | HPA017636 | 1 | 1 | 1 | 1 |         |
| 4948 | ENSG00000121964 | HPA036694 | 1 | 1 | 1 | 1 |         |
| 4948 | ENSG00000121988 | HPA035234 | 1 | 1 | 1 | 1 |         |
| 4948 | ENSG00000121989 | HPA046997 | 1 | 1 | 1 | 1 |         |
| 4948 | ENSG00000122008 | HPA012035 | 1 | 1 | 1 | 1 |         |
| 4948 | ENSG00000122025 | HPA047539 | 1 | 1 | 1 | 1 | 0. 4772 |
| 4948 | ENSG00000122026 | HPA047252 | 1 | 1 | 1 | 1 |         |
| 4948 | ENSG00000122034 | HPA007990 | 1 | 1 | 1 | 1 |         |
| 4948 | ENSG00000122035 | HPA053296 | 1 | 1 | 1 | 1 |         |
| 4948 | ENSG00000122042 | HPA053772 | 1 | 1 | 1 | 1 |         |
| 4948 | ENSG00000122085 | HPA027097 | 1 | 1 | 1 | 1 |         |
| 4948 | ENSG00000122140 | HPA029487 | 1 | 1 | 1 | 1 |         |
| 4948 | ENSG00000122203 | HPA044701 | 1 | 1 | 1 | 1 |         |
| 4948 | ENSG00000122257 | HPA041725 | 1 | 1 | 1 | 1 |         |
| 4948 | ENSG00000122299 | HPA040808 | 1 | 1 | 1 | 1 |         |
| 4948 | ENSG00000122359 | HPA027545 | 1 | 1 | 1 | 1 |         |
| 4948 | ENSG00000122386 | HPA001791 | 1 | 1 | 1 | 1 |         |
| 4948 | ENSG00000122390 | HPA040916 | 1 | 1 | 1 | 1 |         |
| 4948 | ENSG00000122406 | HPA054444 | 1 | 1 | 1 | 1 |         |
| 4948 | ENSG00000122435 | HPA028494 | 1 | 1 | 1 | 1 |         |
| 4948 | ENSG00000122482 | HPA057795 | 1 | 1 | 1 | 1 |         |
| 4948 | ENSG00000122484 | HPA046443 | 1 | 1 | 1 | 1 |         |
| 4948 | ENSG00000122490 | HPA051666 | 1 | 1 | 1 | 1 |         |
| 4948 | ENSG00000122557 | HPA076087 | 1 | 1 | 1 | 1 |         |
| 4948 | ENSG00000122565 | HPA004902 | 1 | 1 | 1 | 1 |         |
| 4948 | ENSG00000122566 | HPA005812 | 1 | 1 | 1 | 1 |         |
| 4948 | ENSG00000122574 | HPA041145 | 1 | 1 | 1 | 1 |         |
| 4948 | ENSG00000122644 | HPA064513 | 1 | 1 | 1 | 1 |         |
| 4948 | ENSG00000122674 | HPA045114 | 1 | 1 | 1 | 1 |         |
| 4948 | ENSG00000122692 | HPA019708 | 1 | 1 | 1 | 1 |         |
| 4948 | ENSG00000122696 | HPA046388 | 1 | 1 | 1 | 1 |         |
| 4948 | ENSG00000122705 | CAB002665 | 1 | 1 | 1 | 1 |         |



|      |                 |           |   |   |   |   |        |        |
|------|-----------------|-----------|---|---|---|---|--------|--------|
| 4948 | ENSG00000122707 | HPA071729 | 1 | 1 | 1 | 1 |        |        |
| 4948 | ENSG00000122729 | HPA019371 | 1 | 1 | 1 | 1 |        |        |
| 4948 | ENSG00000122741 | HPA024160 | 1 | 1 | 1 | 1 |        |        |
| 4948 | ENSG00000122779 | HPA043495 | 1 | 1 | 1 | 1 |        |        |
| 4948 | ENSG00000122786 | HPA008066 | 1 | 1 | 1 | 1 |        |        |
| 4948 | ENSG00000122824 | HPA047027 | 1 | 1 | 1 | 1 |        |        |
| 4948 | ENSG00000122859 | HPA039785 | 1 | 1 | 1 | 1 |        |        |
| 4948 | ENSG00000122870 | HPA045212 | 1 | 1 | 1 | 1 |        |        |
| 4948 | ENSG00000122873 | HPA074383 | 1 | 1 | 1 | 1 |        |        |
| 4948 | ENSG00000122882 | HPA006465 | 1 | 1 | 1 | 1 |        |        |
| 4948 | ENSG00000122958 | CAB011602 | 1 | 1 | 1 | 1 |        |        |
| 4948 | ENSG00000122965 | HPA058732 | 1 | 1 | 1 | 1 |        |        |
| 4948 | ENSG00000122966 | HPA075506 | 1 | 1 | 1 | 1 |        |        |
| 4948 | ENSG00000123080 | CAB018398 | 1 | 1 | 1 | 1 | 0.4385 | 0.2884 |
| 4948 | ENSG00000123094 | HPA038164 | 1 | 1 | 1 | 1 |        |        |
| 4948 | ENSG00000123104 | HPA062260 | 1 | 1 | 1 | 1 |        |        |
| 4948 | ENSG00000123106 | HPA038169 | 1 | 1 | 1 | 1 |        |        |
| 4948 | ENSG00000123119 | HPA023252 | 1 | 1 | 1 | 1 |        |        |
| 4948 | ENSG00000123131 | CAB027389 | 1 | 1 | 1 | 1 |        | 0.523  |
| 4948 | ENSG00000123136 | HPA055334 | 1 | 1 | 1 | 1 |        |        |
| 4948 | ENSG00000123143 | CAB010278 | 1 | 1 | 1 | 1 |        | 0.234  |
| 4948 | ENSG00000123144 | HPA059965 | 1 | 1 | 1 | 1 |        |        |
| 4948 | ENSG00000123146 | HPA013707 | 1 | 1 | 1 | 1 |        |        |
| 4948 | ENSG00000123178 | HPA043934 | 1 | 1 | 1 | 1 |        |        |
| 4948 | ENSG00000123179 | HPA049891 | 1 | 1 | 1 | 1 |        |        |
| 4948 | ENSG00000123191 | HPA009137 | 1 | 1 | 1 | 1 |        |        |
| 4948 | ENSG00000123200 | HPA040140 | 1 | 1 | 1 | 1 |        |        |
| 4948 | ENSG00000123213 | HPA031862 | 1 | 1 | 1 | 1 |        |        |
| 4948 | ENSG00000123268 | CAB016222 | 1 | 1 | 1 | 1 |        |        |
| 4948 | ENSG00000123297 | HPA006204 | 1 | 1 | 1 | 1 |        |        |
| 4948 | ENSG00000123352 | HPA038643 | 1 | 1 | 1 | 1 |        |        |
| 4948 | ENSG00000123353 | HPA065643 | 1 | 1 | 1 | 1 |        |        |
| 4948 | ENSG00000123388 | HPA038291 | 1 | 1 | 1 | 1 |        |        |
| 4948 | ENSG00000123405 | HPA001914 | 1 | 1 | 1 | 1 |        |        |
| 4948 | ENSG00000123411 | HPA046270 | 1 | 1 | 1 | 1 |        |        |
| 4948 | ENSG00000123416 | HPA039247 | 1 | 1 | 1 | 1 |        |        |
| 4948 | ENSG00000123453 | HPA058086 | 1 | 1 | 1 | 1 |        |        |
| 4948 | ENSG00000123505 | HPA029281 | 1 | 1 | 1 | 1 |        |        |
| 4948 | ENSG00000123545 | HPA046560 | 1 | 1 | 1 | 1 |        |        |
| 4948 | ENSG00000123552 | HPA029604 | 1 | 1 | 1 | 1 |        |        |
| 4948 | ENSG00000123572 | HPA017238 | 1 | 1 | 1 | 1 | 0.3928 |        |
| 4948 | ENSG00000123575 | HPA003093 | 1 | 1 | 1 | 1 |        |        |
| 4948 | ENSG00000123576 | HPA051992 | 1 | 1 | 1 | 1 |        |        |
| 4948 | ENSG00000123609 | HPA008588 | 1 | 1 | 1 | 1 |        |        |
| 4948 | ENSG00000123636 | HPA059292 | 1 | 1 | 1 | 1 |        |        |
| 4948 | ENSG00000123737 | HPA041838 | 1 | 1 | 1 | 1 |        |        |
| 4948 | ENSG00000123815 | HPA027229 | 1 | 1 | 1 | 1 |        |        |
| 4948 | ENSG00000123836 | HPA049975 | 1 | 1 | 1 | 1 |        |        |
| 4948 | ENSG00000123933 | HPA053363 | 1 | 1 | 1 | 1 |        |        |
| 4948 | ENSG00000123992 | HPA044860 | 1 | 1 | 1 | 1 |        |        |
| 4948 | ENSG00000124067 | HPA041138 | 1 | 1 | 1 | 1 |        |        |
| 4948 | ENSG00000124074 | HPA041163 | 1 | 1 | 1 | 1 |        |        |
| 4948 | ENSG00000124092 | HPA001472 | 1 | 1 | 1 | 1 |        |        |
| 4948 | ENSG00000124098 | HPA042652 | 1 | 1 | 1 | 1 |        |        |
| 4948 | ENSG00000124102 | CAB009449 | 1 | 1 | 1 | 1 |        |        |

|      |                 |           |   |   |   |   |                 |
|------|-----------------|-----------|---|---|---|---|-----------------|
| 4948 | ENSG00000124107 | HPA027774 | 1 | 1 | 1 | 1 |                 |
| 4948 | ENSG00000124120 | HPA066532 | 1 | 1 | 1 | 1 |                 |
| 4948 | ENSG00000124126 | HPA001927 | 1 | 1 | 1 | 1 |                 |
| 4948 | ENSG00000124151 | HPA024210 | 1 | 1 | 1 | 1 | 0. 3744         |
| 4948 | ENSG00000124160 | HPA050231 | 1 | 1 | 1 | 1 |                 |
| 4948 | ENSG00000124164 | HPA013144 | 1 | 1 | 1 | 1 |                 |
| 4948 | ENSG00000124171 | HPA013376 | 1 | 1 | 1 | 1 |                 |
| 4948 | ENSG00000124177 | HPA015543 | 1 | 1 | 1 | 1 |                 |
| 4948 | ENSG00000124181 | CAB004277 | 1 | 1 | 1 | 1 | 0. 175          |
| 4948 | ENSG00000124191 | HPA049900 | 1 | 1 | 1 | 1 |                 |
| 4948 | ENSG00000124193 | CAB034889 | 1 | 1 | 1 | 1 | 0. 4558 0. 3156 |
| 4948 | ENSG00000124194 | HPA054182 | 1 | 1 | 1 | 1 |                 |
| 4948 | ENSG00000124198 | CAB026382 | 1 | 1 | 1 | 1 | 0. 413          |
| 4948 | ENSG00000124201 | HPA046629 | 1 | 1 | 1 | 1 |                 |
| 4948 | ENSG00000124207 | CAB002140 | 1 | 1 | 1 | 1 |                 |
| 4948 | ENSG00000124208 | HPA052535 | 1 | 1 | 1 | 1 |                 |
| 4948 | ENSG00000124209 | HPA058894 | 1 | 1 | 1 | 1 |                 |
| 4948 | ENSG00000124214 | HPA049892 | 1 | 1 | 1 | 1 |                 |
| 4948 | ENSG00000124222 | HPA041019 | 1 | 1 | 1 | 1 |                 |
| 4948 | ENSG00000124225 | HPA072291 | 1 | 1 | 1 | 1 |                 |
| 4948 | ENSG00000124226 | HPA021184 | 1 | 1 | 1 | 1 | 0. 513          |
| 4948 | ENSG00000124228 | HPA047087 | 1 | 1 | 1 | 1 |                 |
| 4948 | ENSG00000124243 | HPA038812 | 1 | 1 | 1 | 1 |                 |
| 4948 | ENSG00000124257 | HPA059842 | 1 | 1 | 1 | 1 |                 |
| 4948 | ENSG00000124279 | HPA074462 | 1 | 1 | 1 | 1 |                 |
| 4948 | ENSG00000124299 | HPA015599 | 1 | 1 | 1 | 1 |                 |
| 4948 | ENSG00000124313 | HPA003973 | 1 | 1 | 1 | 1 |                 |
| 4948 | ENSG00000124333 | HPA036733 | 1 | 1 | 1 | 1 | 0. 3549         |
| 4948 | ENSG00000124374 | HPA072371 | 1 | 1 | 1 | 1 |                 |
| 4948 | ENSG00000124383 | HPA035059 | 1 | 1 | 1 | 1 |                 |
| 4948 | ENSG00000124406 | HPA052935 | 1 | 1 | 1 | 1 |                 |
| 4948 | ENSG00000124422 | HPA044980 | 1 | 1 | 1 | 1 |                 |
| 4948 | ENSG00000124429 | HPA002033 | 1 | 1 | 1 | 1 |                 |
| 4948 | ENSG00000124440 | HPA041141 | 1 | 1 | 1 | 1 |                 |
| 4948 | ENSG00000124444 | HPA050064 | 1 | 1 | 1 | 1 |                 |
| 4948 | ENSG00000124459 | HPA075124 | 1 | 1 | 1 | 1 |                 |
| 4948 | ENSG00000124486 | HPA047417 | 1 | 1 | 1 | 1 |                 |
| 4948 | ENSG00000124508 | HPA051504 | 1 | 1 | 1 | 1 |                 |
| 4948 | ENSG00000124523 | HPA022002 | 1 | 1 | 1 | 1 | 0. 2748         |
| 4948 | ENSG00000124535 | HPA031753 | 1 | 1 | 1 | 1 |                 |
| 4948 | ENSG00000124541 | HPA029905 | 1 | 1 | 1 | 1 |                 |
| 4948 | ENSG00000124562 | HPA042419 | 1 | 1 | 1 | 1 |                 |
| 4948 | ENSG00000124568 | HPA050513 | 1 | 1 | 1 | 1 |                 |
| 4948 | ENSG00000124570 | HPA009668 | 1 | 1 | 1 | 1 | 0. 3943         |
| 4948 | ENSG00000124571 | CAB012357 | 1 | 1 | 1 | 1 | 0. 3165         |
| 4948 | ENSG00000124588 | HPA021332 | 1 | 1 | 1 | 1 |                 |
| 4948 | ENSG00000124596 | HPA029036 | 1 | 1 | 1 | 1 |                 |
| 4948 | ENSG00000124602 | HPA015725 | 1 | 1 | 1 | 1 |                 |
| 4948 | ENSG00000124608 | HPA035636 | 1 | 1 | 1 | 1 |                 |
| 4948 | ENSG00000124614 | HPA048084 | 1 | 1 | 1 | 1 |                 |
| 4948 | ENSG00000124635 | HPA048671 | 1 | 1 | 1 | 1 |                 |
| 4948 | ENSG00000124659 | HPA035073 | 1 | 1 | 1 | 1 |                 |
| 4948 | ENSG00000124713 | HPA027501 | 1 | 1 | 1 | 1 | 0. 2541         |
| 4948 | ENSG00000124762 | HPA005946 | 1 | 1 | 1 | 1 |                 |
| 4948 | ENSG00000124767 | CAB040541 | 1 | 1 | 1 | 1 |                 |

|      |                 |           |   |   |   |   |        |        |
|------|-----------------|-----------|---|---|---|---|--------|--------|
| 4948 | ENSG00000124772 | HPA031369 | 1 | 1 | 1 | 1 |        |        |
| 4948 | ENSG00000124782 | HPA034843 | 1 | 1 | 1 | 1 |        |        |
| 4948 | ENSG00000124783 | HPA011276 | 1 | 1 | 1 | 1 |        |        |
| 4948 | ENSG00000124787 | HPA035686 | 1 | 1 | 1 | 1 |        |        |
| 4948 | ENSG00000124813 | HPA022040 | 1 | 1 | 1 | 1 |        |        |
| 4948 | ENSG00000124939 | HPA034584 | 1 | 1 | 1 | 1 |        |        |
| 4948 | ENSG00000124942 | HPA019010 | 1 | 1 | 1 | 1 |        |        |
| 4948 | ENSG00000125122 | HPA034998 | 1 | 1 | 1 | 1 |        |        |
| 4948 | ENSG00000125246 | HPA039959 | 1 | 1 | 1 | 1 | 0.2613 | 0.5878 |
| 4948 | ENSG00000125266 | HPA008999 | 1 | 1 | 1 | 1 |        |        |
| 4948 | ENSG00000125319 | HPA023004 | 1 | 1 | 1 | 1 |        |        |
| 4948 | ENSG00000125347 | CAB011662 | 1 | 1 | 1 | 1 |        |        |
| 4948 | ENSG00000125352 | HPA076658 | 1 | 1 | 1 | 1 |        |        |
| 4948 | ENSG00000125354 | HPA005665 | 1 | 1 | 1 | 1 |        |        |
| 4948 | ENSG00000125355 | HPA048470 | 1 | 1 | 1 | 1 |        |        |
| 4948 | ENSG00000125375 | HPA062690 | 1 | 1 | 1 | 1 |        |        |
| 4948 | ENSG00000125388 | HPA028737 | 1 | 1 | 1 | 1 |        |        |
| 4948 | ENSG00000125398 | HPA001758 | 1 | 1 | 1 | 1 |        |        |
| 4948 | ENSG00000125430 | HPA064126 | 1 | 1 | 1 | 1 |        |        |
| 4948 | ENSG00000125445 | HPA022522 | 1 | 1 | 1 | 1 |        |        |
| 4948 | ENSG00000125447 | HPA024645 | 1 | 1 | 1 | 1 |        |        |
| 4948 | ENSG00000125458 | HPA023632 | 1 | 1 | 1 | 1 |        |        |
| 4948 | ENSG00000125520 | HPA063050 | 1 | 1 | 1 | 1 |        |        |
| 4948 | ENSG00000125571 | HPA057950 | 1 | 1 | 1 | 1 |        |        |
| 4948 | ENSG00000125618 | HPA030062 | 1 | 1 | 1 | 1 |        |        |
| 4948 | ENSG00000125630 | HPA037528 | 1 | 1 | 1 | 1 |        |        |
| 4948 | ENSG00000125633 | HPA054183 | 1 | 1 | 1 | 1 |        |        |
| 4948 | ENSG00000125648 | HPA009675 | 1 | 1 | 1 | 1 |        |        |
| 4948 | ENSG00000125656 | HPA010649 | 1 | 1 | 1 | 1 |        |        |
| 4948 | ENSG00000125676 | HPA047921 | 1 | 1 | 1 | 1 |        |        |
| 4948 | ENSG00000125691 | HPA003373 | 1 | 1 | 1 | 1 |        |        |
| 4948 | ENSG00000125703 | HPA007049 | 1 | 1 | 1 | 1 |        |        |
| 4948 | ENSG00000125726 | HPA046582 | 1 | 1 | 1 | 1 |        |        |
| 4948 | ENSG00000125731 | HPA064382 | 1 | 1 | 1 | 1 |        |        |
| 4948 | ENSG00000125733 | HPA041934 | 1 | 1 | 1 | 1 |        |        |
| 4948 | ENSG00000125743 | HPA041437 | 1 | 1 | 1 | 1 |        |        |
| 4948 | ENSG00000125746 | HPA012757 | 1 | 1 | 1 | 1 |        |        |
| 4948 | ENSG00000125779 | HPA008440 | 1 | 1 | 1 | 1 |        |        |
| 4948 | ENSG00000125798 | HPA066846 | 1 | 1 | 1 | 1 |        |        |
| 4948 | ENSG00000125812 | HPA024520 | 1 | 1 | 1 | 1 |        |        |
| 4948 | ENSG00000125814 | HPA050196 | 1 | 1 | 1 | 1 |        |        |
| 4948 | ENSG00000125816 | HPA074996 | 1 | 1 | 1 | 1 |        |        |
| 4948 | ENSG00000125817 | HPA053507 | 1 | 1 | 1 | 1 |        |        |
| 4948 | ENSG00000125818 | HPA041122 | 1 | 1 | 1 | 1 |        |        |
| 4948 | ENSG00000125821 | HPA040981 | 1 | 1 | 1 | 1 |        |        |
| 4948 | ENSG00000125827 | HPA015752 | 1 | 1 | 1 | 1 |        |        |
| 4948 | ENSG00000125834 | HPA026452 | 1 | 1 | 1 | 1 |        |        |
| 4948 | ENSG00000125835 | CAB009610 | 1 | 1 | 1 | 1 |        |        |
| 4948 | ENSG00000125843 | HPA043533 | 1 | 1 | 1 | 1 |        |        |
| 4948 | ENSG00000125844 | HPA009026 | 1 | 1 | 1 | 1 |        | 0.3137 |
| 4948 | ENSG00000125845 | HPA058610 | 1 | 1 | 1 | 1 |        |        |
| 4948 | ENSG00000125850 | HPA038531 | 1 | 1 | 1 | 1 |        |        |
| 4948 | ENSG00000125851 | HPA049627 | 1 | 1 | 1 | 1 |        |        |
| 4948 | ENSG00000125863 | HPA044233 | 1 | 1 | 1 | 1 |        |        |
| 4948 | ENSG00000125871 | HPA040913 | 1 | 1 | 1 | 1 |        |        |

|      |                 |           |   |   |   |   |
|------|-----------------|-----------|---|---|---|---|
| 4948 | ENSG00000125878 | HPA060221 | 1 | 1 | 1 | 1 |
| 4948 | ENSG00000125895 | HPA045213 | 1 | 1 | 1 | 1 |
| 4948 | ENSG00000125910 | HPA060601 | 1 | 1 | 1 | 1 |
| 4948 | ENSG00000125944 | CAB011687 | 1 | 1 | 1 | 1 |
| 4948 | ENSG00000125945 | HPA043817 | 1 | 1 | 1 | 1 |
| 4948 | ENSG00000126001 | HPA064875 | 1 | 1 | 1 | 1 |
| 4948 | ENSG00000126003 | HPA005900 | 1 | 1 | 1 | 1 |
| 4948 | ENSG00000126012 | HPA038244 | 1 | 1 | 1 | 1 |
| 4948 | ENSG00000126062 | CAB006319 | 1 | 1 | 1 | 1 |
| 4948 | ENSG00000126067 | HPA026322 | 1 | 1 | 1 | 1 |
| 4948 | ENSG00000126070 | HPA075436 | 1 | 1 | 1 | 1 |
| 4948 | ENSG00000126088 | HPA030350 | 1 | 1 | 1 | 1 |
| 4948 | ENSG00000126226 | HPA073074 | 1 | 1 | 1 | 1 |
| 4948 | ENSG00000126246 | HPA012369 | 1 | 1 | 1 | 1 |
| 4948 | ENSG00000126247 | HPA006872 | 1 | 1 | 1 | 1 |
| 4948 | ENSG00000126249 | HPA052181 | 1 | 1 | 1 | 1 |
| 4948 | ENSG00000126261 | HPA041436 | 1 | 1 | 1 | 1 |
| 4948 | ENSG00000126267 | HPA004192 | 1 | 1 | 1 | 1 |
| 4948 | ENSG00000126351 | HPA009654 | 1 | 1 | 1 | 1 |
| 4948 | ENSG00000126353 | HPA031383 | 1 | 1 | 1 | 1 |
| 4948 | ENSG00000126368 | HPA007935 | 1 | 1 | 1 | 1 |
| 4948 | ENSG00000126391 | HPA005506 | 1 | 1 | 1 | 1 |
| 4948 | ENSG00000126432 | CAB008661 | 1 | 1 | 1 | 1 |
| 4948 | ENSG00000126456 | HPA004895 | 1 | 1 | 1 | 1 |
| 4948 | ENSG00000126457 | HPA072136 | 1 | 1 | 1 | 1 |
| 4948 | ENSG00000126458 | HPA060364 | 1 | 1 | 1 | 1 |
| 4948 | ENSG00000126461 | HPA054593 | 1 | 1 | 1 | 1 |
| 4948 | ENSG00000126522 | CAB003696 | 1 | 1 | 1 | 1 |
| 4948 | ENSG00000126524 | HPA028891 | 1 | 1 | 1 | 1 |
| 4948 | ENSG00000126561 | HPA027873 | 1 | 1 | 1 | 1 |
| 4948 | ENSG00000126653 | HPA015593 | 1 | 1 | 1 | 1 |
| 4948 | ENSG00000126746 | HPA004051 | 1 | 1 | 1 | 1 |
| 4948 | ENSG00000126749 | HPA039304 | 1 | 1 | 1 | 1 |
| 4948 | ENSG00000126752 | HPA045683 | 1 | 1 | 1 | 1 |
| 4948 | ENSG00000126767 | CAB003808 | 1 | 1 | 1 | 1 |
| 4948 | ENSG00000126773 | HPA003390 | 1 | 1 | 1 | 1 |
| 4948 | ENSG00000126777 | HPA003178 | 1 | 1 | 1 | 1 |
| 4948 | ENSG00000126804 | HPA050516 | 1 | 1 | 1 | 1 |
| 4948 | ENSG00000126821 | HPA053149 | 1 | 1 | 1 | 1 |
| 4948 | ENSG00000126856 | HPA059944 | 1 | 1 | 1 | 1 |
| 4948 | ENSG00000126860 | HPA057051 | 1 | 1 | 1 | 1 |
| 4948 | ENSG00000126934 | CAB003835 | 1 | 1 | 1 | 1 |
| 4948 | ENSG00000126953 | HPA003628 | 1 | 1 | 1 | 1 |
| 4948 | ENSG00000127022 | HPA009433 | 1 | 1 | 1 | 1 |
| 4948 | ENSG00000127054 | HPA028379 | 1 | 1 | 1 | 1 |
| 4948 | ENSG00000127080 | HPA020603 | 1 | 1 | 1 | 1 |
| 4948 | ENSG00000127084 | HPA021018 | 1 | 1 | 1 | 1 |
| 4948 | ENSG00000127124 | HPA005728 | 1 | 1 | 1 | 1 |
| 4948 | ENSG00000127129 | HPA028459 | 1 | 1 | 1 | 1 |
| 4948 | ENSG00000127191 | HPA009972 | 1 | 1 | 1 | 1 |
| 4948 | ENSG00000127220 | HPA058209 | 1 | 1 | 1 | 1 |
| 4948 | ENSG00000127249 | HPA051932 | 1 | 1 | 1 | 1 |
| 4948 | ENSG00000127324 | HPA044337 | 1 | 1 | 1 | 1 |
| 4948 | ENSG00000127328 | HPA039794 | 1 | 1 | 1 | 1 |
| 4948 | ENSG00000127334 | HPA027230 | 1 | 1 | 1 | 1 |

0. 3279

0. 266

0. 4147

0. 3854

|      |                 |           |   |   |   |   |        |        |
|------|-----------------|-----------|---|---|---|---|--------|--------|
| 4948 | ENSG00000127399 | HPA019355 | 1 | 1 | 1 | 1 |        |        |
| 4948 | ENSG00000127415 | CAB025901 | 1 | 1 | 1 | 1 |        |        |
| 4948 | ENSG00000127419 | HPA057160 | 1 | 1 | 1 | 1 |        |        |
| 4948 | ENSG00000127423 | HPA028730 | 1 | 1 | 1 | 1 |        |        |
| 4948 | ENSG00000127452 | HPA002843 | 1 | 1 | 1 | 1 |        |        |
| 4948 | ENSG00000127483 | HPA054295 | 1 | 1 | 1 | 1 |        |        |
| 4948 | ENSG00000127507 | HPA055200 | 1 | 1 | 1 | 1 |        |        |
| 4948 | ENSG00000127511 | HPA050329 | 1 | 1 | 1 | 1 |        |        |
| 4948 | ENSG00000127526 | HPA016570 | 1 | 1 | 1 | 1 |        |        |
| 4948 | ENSG00000127527 | HPA055309 | 1 | 1 | 1 | 1 |        |        |
| 4948 | ENSG00000127528 | HPA055964 | 1 | 1 | 1 | 1 |        |        |
| 4948 | ENSG00000127561 | HPA042842 | 1 | 1 | 1 | 1 |        |        |
| 4948 | ENSG00000127580 | HPA039506 | 1 | 1 | 1 | 1 | 0.1552 | 0.1625 |
| 4948 | ENSG00000127616 | CAB004208 | 1 | 1 | 1 | 1 |        |        |
| 4948 | ENSG00000127663 | HPA062872 | 1 | 1 | 1 | 1 |        |        |
| 4948 | ENSG00000127804 | HPA020352 | 1 | 1 | 1 | 1 |        |        |
| 4948 | ENSG00000127824 | CAB004621 | 1 | 1 | 1 | 1 |        |        |
| 4948 | ENSG00000127831 | HPA006884 | 1 | 1 | 1 | 1 |        |        |
| 4948 | ENSG00000127838 | HPA010134 | 1 | 1 | 1 | 1 |        |        |
| 4948 | ENSG00000127884 | CAB003783 | 1 | 1 | 1 | 1 | 0.223  | 0.4136 |
| 4948 | ENSG00000127903 | HPA051136 | 1 | 1 | 1 | 1 |        |        |
| 4948 | ENSG00000127946 | HPA013606 | 1 | 1 | 1 | 1 |        |        |
| 4948 | ENSG00000127947 | HPA007097 | 1 | 1 | 1 | 1 |        |        |
| 4948 | ENSG00000127993 | HPA021777 | 1 | 1 | 1 | 1 |        |        |
| 4948 | ENSG00000127995 | HPA044404 | 1 | 1 | 1 | 1 |        |        |
| 4948 | ENSG00000128000 | HPA003311 | 1 | 1 | 1 | 1 |        |        |
| 4948 | ENSG00000128045 | HPA057803 | 1 | 1 | 1 | 1 |        |        |
| 4948 | ENSG00000128050 | HPA041538 | 1 | 1 | 1 | 1 |        | 0.4225 |
| 4948 | ENSG00000128059 | HPA036091 | 1 | 1 | 1 | 1 |        |        |
| 4948 | ENSG00000128242 | HPA001220 | 1 | 1 | 1 | 1 |        |        |
| 4948 | ENSG00000128266 | HPA003011 | 1 | 1 | 1 | 1 |        |        |
| 4948 | ENSG00000128274 | HPA001141 | 1 | 1 | 1 | 1 |        |        |
| 4948 | ENSG00000128311 | HPA003044 | 1 | 1 | 1 | 1 |        | 0.3158 |
| 4948 | ENSG00000128335 | HPA001078 | 1 | 1 | 1 | 1 |        |        |
| 4948 | ENSG00000128383 | HPA056980 | 1 | 1 | 1 | 1 |        |        |
| 4948 | ENSG00000128394 | HPA073637 | 1 | 1 | 1 | 1 |        |        |
| 4948 | ENSG00000128422 | HPA000452 | 1 | 1 | 1 | 1 |        |        |
| 4948 | ENSG00000128463 | HPA026868 | 1 | 1 | 1 | 1 |        |        |
| 4948 | ENSG00000128513 | HPA068538 | 1 | 1 | 1 | 1 |        |        |
| 4948 | ENSG00000128536 | HPA011218 | 1 | 1 | 1 | 1 |        |        |
| 4948 | ENSG00000128563 | HPA051146 | 1 | 1 | 1 | 1 |        |        |
| 4948 | ENSG00000128581 | HPA042930 | 1 | 1 | 1 | 1 |        |        |
| 4948 | ENSG00000128590 | HPA041553 | 1 | 1 | 1 | 1 |        |        |
| 4948 | ENSG00000128594 | HPA051100 | 1 | 1 | 1 | 1 |        |        |
| 4948 | ENSG00000128595 | HPA006018 | 1 | 1 | 1 | 1 | 0.285  |        |
| 4948 | ENSG00000128596 | HPA010647 | 1 | 1 | 1 | 1 |        |        |
| 4948 | ENSG00000128607 | HPA020119 | 1 | 1 | 1 | 1 |        |        |
| 4948 | ENSG00000128641 | HPA013607 | 1 | 1 | 1 | 1 |        |        |
| 4948 | ENSG00000128645 | HPA040062 | 1 | 1 | 1 | 1 |        |        |
| 4948 | ENSG00000128694 | HPA030693 | 1 | 1 | 1 | 1 |        |        |
| 4948 | ENSG00000128699 | HPA065643 | 1 | 1 | 1 | 1 |        |        |
| 4948 | ENSG00000128708 | HPA036788 | 1 | 1 | 1 | 1 |        |        |
| 4948 | ENSG00000128710 | HPA065871 | 1 | 1 | 1 | 1 |        |        |
| 4948 | ENSG00000128714 | HPA064064 | 1 | 1 | 1 | 1 |        |        |
| 4948 | ENSG00000128739 | HPA067842 | 1 | 1 | 1 | 1 |        |        |

|      |                 |           |   |   |   |   |
|------|-----------------|-----------|---|---|---|---|
| 4948 | ENSG00000128789 | HPA046741 | 1 | 1 | 1 | 1 |
| 4948 | ENSG00000128791 | HPA014898 | 1 | 1 | 1 | 1 |
| 4948 | ENSG00000128829 | HPA011811 | 1 | 1 | 1 | 1 |
| 4948 | ENSG00000128881 | HPA049866 | 1 | 1 | 1 | 1 |
| 4948 | ENSG00000128891 | HPA041688 | 1 | 1 | 1 | 1 |
| 4948 | ENSG00000128923 | HPA051103 | 1 | 1 | 1 | 1 |
| 4948 | ENSG00000128951 | HPA054422 | 1 | 1 | 1 | 1 |
| 4948 | ENSG00000128965 | HPA042708 | 1 | 1 | 1 | 1 |
| 4948 | ENSG00000129003 | HPA043507 | 1 | 1 | 1 | 1 |
| 4948 | ENSG00000129028 | HPA041416 | 1 | 1 | 1 | 1 |
| 4948 | ENSG00000129038 | HPA063583 | 1 | 1 | 1 | 1 |
| 4948 | ENSG00000129071 | HPA002031 | 1 | 1 | 1 | 1 |
| 4948 | ENSG00000129103 | HPA074892 | 1 | 1 | 1 | 1 |
| 4948 | ENSG00000129116 | HPA035905 | 1 | 1 | 1 | 1 |
| 4948 | ENSG00000129152 | HPA055436 | 1 | 1 | 1 | 1 |
| 4948 | ENSG00000129167 | HPA022483 | 1 | 1 | 1 | 1 |
| 4948 | ENSG00000129187 | HPA035894 | 1 | 1 | 1 | 1 |
| 4948 | ENSG00000129197 | HPA031526 | 1 | 1 | 1 | 1 |
| 4948 | ENSG00000129204 | HPA046969 | 1 | 1 | 1 | 1 |
| 4948 | ENSG00000129226 | CAB000051 | 1 | 1 | 1 | 1 |
| 4948 | ENSG00000129245 | HPA022997 | 1 | 1 | 1 | 1 |
| 4948 | ENSG00000129315 | HPA004892 | 1 | 1 | 1 | 1 |
| 4948 | ENSG00000129347 | HPA043110 | 1 | 1 | 1 | 1 |
| 4948 | ENSG00000129351 | HPA001897 | 1 | 1 | 1 | 1 |
| 4948 | ENSG00000129354 | HPA054999 | 1 | 1 | 1 | 1 |
| 4948 | ENSG00000129422 | HPA067903 | 1 | 1 | 1 | 1 |
| 4948 | ENSG00000129460 | HPA000944 | 1 | 1 | 1 | 1 |
| 4948 | ENSG00000129473 | HPA048740 | 1 | 1 | 1 | 1 |
| 4948 | ENSG00000129480 | HPA001117 | 1 | 1 | 1 | 1 |
| 4948 | ENSG00000129514 | HPA050505 | 1 | 1 | 1 | 1 |
| 4948 | ENSG00000129515 | HPA049374 | 1 | 1 | 1 | 1 |
| 4948 | ENSG00000129521 | HPA064895 | 1 | 1 | 1 | 1 |
| 4948 | ENSG00000129534 | HPA006504 | 1 | 1 | 1 | 1 |
| 4948 | ENSG00000129535 | HPA064599 | 1 | 1 | 1 | 1 |
| 4948 | ENSG00000129538 | HPA001140 | 1 | 1 | 1 | 1 |
| 4948 | ENSG00000129562 | HPA028882 | 1 | 1 | 1 | 1 |
| 4948 | ENSG00000129595 | HPA036580 | 1 | 1 | 1 | 1 |
| 4948 | ENSG00000129625 | HPA069960 | 1 | 1 | 1 | 1 |
| 4948 | ENSG00000129636 | HPA019728 | 1 | 1 | 1 | 1 |
| 4948 | ENSG00000129657 | HPA028703 | 1 | 1 | 1 | 1 |
| 4948 | ENSG00000129675 | HPA003578 | 1 | 1 | 1 | 1 |
| 4948 | ENSG00000129682 | HPA002809 | 1 | 1 | 1 | 1 |
| 4948 | ENSG00000129757 | HPA002924 | 1 | 1 | 1 | 1 |
| 4948 | ENSG00000129911 | HPA052481 | 1 | 1 | 1 | 1 |
| 4948 | ENSG00000129933 | HPA059897 | 1 | 1 | 1 | 1 |
| 4948 | ENSG00000129951 | HPA057034 | 1 | 1 | 1 | 1 |
| 4948 | ENSG00000129968 | HPA047226 | 1 | 1 | 1 | 1 |
| 4948 | ENSG00000130023 | HPA041741 | 1 | 1 | 1 | 1 |
| 4948 | ENSG00000130024 | HPA055649 | 1 | 1 | 1 | 1 |
| 4948 | ENSG00000130045 | HPA045526 | 1 | 1 | 1 | 1 |
| 4948 | ENSG00000130119 | HPA036315 | 1 | 1 | 1 | 1 |
| 4948 | ENSG00000130150 | HPA003334 | 1 | 1 | 1 | 1 |
| 4948 | ENSG00000130158 | HPA049423 | 1 | 1 | 1 | 1 |
| 4948 | ENSG00000130159 | HPA042979 | 1 | 1 | 1 | 1 |
| 4948 | ENSG00000130165 | HPA045606 | 1 | 1 | 1 | 1 |

0. 253

0. 4482

|      |                 |           |   |   |   |   |         |
|------|-----------------|-----------|---|---|---|---|---------|
| 4948 | ENSG00000130175 | CAB004465 | 1 | 1 | 1 | 1 |         |
| 4948 | ENSG00000130176 | HPA014263 | 1 | 1 | 1 | 1 |         |
| 4948 | ENSG00000130203 | HPA065539 | 1 | 1 | 1 | 1 |         |
| 4948 | ENSG00000130244 | HPA040930 | 1 | 1 | 1 | 1 |         |
| 4948 | ENSG00000130299 | HPA042158 | 1 | 1 | 1 | 1 |         |
| 4948 | ENSG00000130309 | HPA047821 | 1 | 1 | 1 | 1 |         |
| 4948 | ENSG00000130332 | HPA041850 | 1 | 1 | 1 | 1 |         |
| 4948 | ENSG00000130340 | HPA031410 | 1 | 1 | 1 | 1 |         |
| 4948 | ENSG00000130377 | HPA043421 | 1 | 1 | 1 | 1 |         |
| 4948 | ENSG00000130396 | CAB013496 | 1 | 1 | 1 | 1 |         |
| 4948 | ENSG00000130429 | HPA004832 | 1 | 1 | 1 | 1 |         |
| 4948 | ENSG00000130433 | HPA056615 | 1 | 1 | 1 | 1 |         |
| 4948 | ENSG00000130449 | HPA035938 | 1 | 1 | 1 | 1 |         |
| 4948 | ENSG00000130489 | HPA046943 | 1 | 1 | 1 | 1 |         |
| 4948 | ENSG00000130520 | HPA040932 | 1 | 1 | 1 | 1 |         |
| 4948 | ENSG00000130522 | HPA063029 | 1 | 1 | 1 | 1 |         |
| 4948 | ENSG00000130529 | HPA041169 | 1 | 1 | 1 | 1 |         |
| 4948 | ENSG00000130545 | HPA013835 | 1 | 1 | 1 | 1 |         |
| 4948 | ENSG00000130635 | HPA030769 | 1 | 1 | 1 | 1 | 0. 3829 |
| 4948 | ENSG00000130638 | HPA049531 | 1 | 1 | 1 | 1 |         |
| 4948 | ENSG00000130640 | HPA037885 | 1 | 1 | 1 | 1 |         |
| 4948 | ENSG00000130703 | HPA041127 | 1 | 1 | 1 | 1 |         |
| 4948 | ENSG00000130711 | HPA043143 | 1 | 1 | 1 | 1 |         |
| 4948 | ENSG00000130714 | HPA065252 | 1 | 1 | 1 | 1 |         |
| 4948 | ENSG00000130717 | HPA050969 | 1 | 1 | 1 | 1 |         |
| 4948 | ENSG00000130726 | CAB010066 | 1 | 1 | 1 | 1 |         |
| 4948 | ENSG00000130731 | HPA067414 | 1 | 1 | 1 | 1 |         |
| 4948 | ENSG00000130751 | HPA072259 | 1 | 1 | 1 | 1 |         |
| 4948 | ENSG00000130755 | HPA002954 | 1 | 1 | 1 | 1 |         |
| 4948 | ENSG00000130764 | HPA008512 | 1 | 1 | 1 | 1 |         |
| 4948 | ENSG00000130766 | HPA018191 | 1 | 1 | 1 | 1 |         |
| 4948 | ENSG00000130768 | HPA030561 | 1 | 1 | 1 | 1 |         |
| 4948 | ENSG00000130770 | HPA027999 | 1 | 1 | 1 | 1 |         |
| 4948 | ENSG00000130772 | HPA027429 | 1 | 1 | 1 | 1 |         |
| 4948 | ENSG00000130783 | HPA039021 | 1 | 1 | 1 | 1 |         |
| 4948 | ENSG00000130811 | HPA041997 | 1 | 1 | 1 | 1 |         |
| 4948 | ENSG00000130816 | CAB005876 | 1 | 1 | 1 | 1 |         |
| 4948 | ENSG00000130818 | HPA029342 | 1 | 1 | 1 | 1 |         |
| 4948 | ENSG00000130826 | HPA001022 | 1 | 1 | 1 | 1 | 0. 2524 |
| 4948 | ENSG00000130844 | HPA063157 | 1 | 1 | 1 | 1 |         |
| 4948 | ENSG00000130935 | HPA022010 | 1 | 1 | 1 | 1 |         |
| 4948 | ENSG00000130950 | HPA064635 | 1 | 1 | 1 | 1 |         |
| 4948 | ENSG00000130958 | HPA064047 | 1 | 1 | 1 | 1 |         |
| 4948 | ENSG00000130988 | HPA029102 | 1 | 1 | 1 | 1 |         |
| 4948 | ENSG00000130997 | HPA035939 | 1 | 1 | 1 | 1 |         |
| 4948 | ENSG00000131015 | CAB018974 | 1 | 1 | 1 | 1 |         |
| 4948 | ENSG00000131016 | HPA006344 | 1 | 1 | 1 | 1 |         |
| 4948 | ENSG00000131018 | HPA019113 | 1 | 1 | 1 | 1 |         |
| 4948 | ENSG00000131037 | HPA043545 | 1 | 1 | 1 | 1 |         |
| 4948 | ENSG00000131043 | HPA048645 | 1 | 1 | 1 | 1 |         |
| 4948 | ENSG00000131044 | HPA041772 | 1 | 1 | 1 | 1 |         |
| 4948 | ENSG00000131061 | HPA067108 | 1 | 1 | 1 | 1 |         |
| 4948 | ENSG00000131080 | HPA054522 | 1 | 1 | 1 | 1 |         |
| 4948 | ENSG00000131089 | HPA055291 | 1 | 1 | 1 | 1 |         |
| 4948 | ENSG00000131095 | HPA056030 | 1 | 1 | 1 | 1 |         |

|      |                 |           |   |   |   |   |        |
|------|-----------------|-----------|---|---|---|---|--------|
| 4948 | ENSG00000131100 | HPA029196 | 1 | 1 | 1 | 1 |        |
| 4948 | ENSG00000131115 | HPA030573 | 1 | 1 | 1 | 1 |        |
| 4948 | ENSG00000131148 | HPA049476 | 1 | 1 | 1 | 1 |        |
| 4948 | ENSG00000131153 | HPA057285 | 1 | 1 | 1 | 1 |        |
| 4948 | ENSG00000131188 | HPA046636 | 1 | 1 | 1 | 1 |        |
| 4948 | ENSG00000131196 | HPA071732 | 1 | 1 | 1 | 1 |        |
| 4948 | ENSG00000131236 | HPA030124 | 1 | 1 | 1 | 1 |        |
| 4948 | ENSG00000131263 | HPA018895 | 1 | 1 | 1 | 1 |        |
| 4948 | ENSG00000131269 | HPA034982 | 1 | 1 | 1 | 1 |        |
| 4948 | ENSG00000131368 | HPA043490 | 1 | 1 | 1 | 1 |        |
| 4948 | ENSG00000131370 | HPA036445 | 1 | 1 | 1 | 1 |        |
| 4948 | ENSG00000131381 | HPA044878 | 1 | 1 | 1 | 1 |        |
| 4948 | ENSG00000131459 | HPA059910 | 1 | 1 | 1 | 1 |        |
| 4948 | ENSG00000131475 | HPA052217 | 1 | 1 | 1 | 1 |        |
| 4948 | ENSG00000131504 | HPA076913 | 1 | 1 | 1 | 1 |        |
| 4948 | ENSG00000131508 | HPA003920 | 1 | 1 | 1 | 1 |        |
| 4948 | ENSG00000131620 | HPA032148 | 1 | 1 | 1 | 1 |        |
| 4948 | ENSG00000131711 | CAB009792 | 1 | 1 | 1 | 1 |        |
| 4948 | ENSG00000131725 | HPA046719 | 1 | 1 | 1 | 1 |        |
| 4948 | ENSG00000131773 | HPA000981 | 1 | 1 | 1 | 1 |        |
| 4948 | ENSG00000131788 | HPA067383 | 1 | 1 | 1 | 1 |        |
| 4948 | ENSG00000131791 | HPA044342 | 1 | 1 | 1 | 1 |        |
| 4948 | ENSG00000131831 | HPA051054 | 1 | 1 | 1 | 1 |        |
| 4948 | ENSG00000131844 | HPA038300 | 1 | 1 | 1 | 1 |        |
| 4948 | ENSG00000131848 | HPA060667 | 1 | 1 | 1 | 1 |        |
| 4948 | ENSG00000131871 | HPA010025 | 1 | 1 | 1 | 1 |        |
| 4948 | ENSG00000131943 | HPA046930 | 1 | 1 | 1 | 1 |        |
| 4948 | ENSG00000131944 | HPA041168 | 1 | 1 | 1 | 1 |        |
| 4948 | ENSG00000131966 | HPA071251 | 1 | 1 | 1 | 1 |        |
| 4948 | ENSG00000131969 | HPA002873 | 1 | 1 | 1 | 1 |        |
| 4948 | ENSG00000132002 | HPA063247 | 1 | 1 | 1 | 1 | 0.1782 |
| 4948 | ENSG00000132004 | HPA042087 | 1 | 1 | 1 | 1 |        |
| 4948 | ENSG00000132010 | HPA020887 | 1 | 1 | 1 | 1 |        |
| 4948 | ENSG00000132016 | HPA054615 | 1 | 1 | 1 | 1 |        |
| 4948 | ENSG00000132026 | HPA052511 | 1 | 1 | 1 | 1 |        |
| 4948 | ENSG00000132109 | HPA005673 | 1 | 1 | 1 | 1 |        |
| 4948 | ENSG00000132122 | HPA028234 | 1 | 1 | 1 | 1 |        |
| 4948 | ENSG00000132128 | HPA051941 | 1 | 1 | 1 | 1 |        |
| 4948 | ENSG00000132141 | HPA049949 | 1 | 1 | 1 | 1 |        |
| 4948 | ENSG00000132155 | HPA002640 | 1 | 1 | 1 | 1 |        |
| 4948 | ENSG00000132207 | HPA047038 | 1 | 1 | 1 | 1 |        |
| 4948 | ENSG00000132256 | CAB013497 | 1 | 1 | 1 | 1 |        |
| 4948 | ENSG00000132305 | HPA036164 | 1 | 1 | 1 | 1 |        |
| 4948 | ENSG00000132321 | HPA057320 | 1 | 1 | 1 | 1 |        |
| 4948 | ENSG00000132329 | HPA057814 | 1 | 1 | 1 | 1 |        |
| 4948 | ENSG00000132334 | HPA015870 | 1 | 1 | 1 | 1 |        |
| 4948 | ENSG00000132341 | HPA063353 | 1 | 1 | 1 | 1 |        |
| 4948 | ENSG00000132359 | HPA022896 | 1 | 1 | 1 | 1 |        |
| 4948 | ENSG00000132382 | HPA005466 | 1 | 1 | 1 | 1 |        |
| 4948 | ENSG00000132383 | HPA046497 | 1 | 1 | 1 | 1 |        |
| 4948 | ENSG00000132423 | HPA031274 | 1 | 1 | 1 | 1 |        |
| 4948 | ENSG00000132429 | HPA012514 | 1 | 1 | 1 | 1 |        |
| 4948 | ENSG00000132437 | HPA017742 | 1 | 1 | 1 | 1 | 0.2748 |
| 4948 | ENSG00000132463 | HPA036984 | 1 | 1 | 1 | 1 |        |
| 4948 | ENSG00000132471 | HPA068819 | 1 | 1 | 1 | 1 |        |



|      |                 |           |   |   |   |   |        |
|------|-----------------|-----------|---|---|---|---|--------|
| 4948 | ENSG00000132475 | CAB037166 | 1 | 1 | 1 | 1 | 0.4219 |
| 4948 | ENSG00000132481 | HPA014933 | 1 | 1 | 1 | 1 |        |
| 4948 | ENSG00000132485 | HPA053960 | 1 | 1 | 1 | 1 |        |
| 4948 | ENSG00000132507 | CAB005042 | 1 | 1 | 1 | 1 |        |
| 4948 | ENSG00000132510 | HPA037988 | 1 | 1 | 1 | 1 |        |
| 4948 | ENSG00000132522 | HPA067540 | 1 | 1 | 1 | 1 |        |
| 4948 | ENSG00000132549 | HPA043865 | 1 | 1 | 1 | 1 |        |
| 4948 | ENSG00000132570 | HPA036428 | 1 | 1 | 1 | 1 |        |
| 4948 | ENSG00000132591 | HPA021425 | 1 | 1 | 1 | 1 | 0.4289 |
| 4948 | ENSG00000132604 | HPA001907 | 1 | 1 | 1 | 1 |        |
| 4948 | ENSG00000132613 | HPA066469 | 1 | 1 | 1 | 1 |        |
| 4948 | ENSG00000132622 | HPA015639 | 1 | 1 | 1 | 1 |        |
| 4948 | ENSG00000132623 | HPA041151 | 1 | 1 | 1 | 1 |        |
| 4948 | ENSG00000132635 | HPA050816 | 1 | 1 | 1 | 1 |        |
| 4948 | ENSG00000132640 | HPA042048 | 1 | 1 | 1 | 1 |        |
| 4948 | ENSG00000132646 | CAB000148 | 1 | 1 | 1 | 1 |        |
| 4948 | ENSG00000132664 | HPA072298 | 1 | 1 | 1 | 1 |        |
| 4948 | ENSG00000132676 | HPA023687 | 1 | 1 | 1 | 1 |        |
| 4948 | ENSG00000132677 | HPA042726 | 1 | 1 | 1 | 1 |        |
| 4948 | ENSG00000132680 | HPA008796 | 1 | 1 | 1 | 1 | 0.1851 |
| 4948 | ENSG00000132688 | CAB005889 | 1 | 1 | 1 | 1 |        |
| 4948 | ENSG00000132694 | HPA012037 | 1 | 1 | 1 | 1 | 0.3973 |
| 4948 | ENSG00000132740 | HPA004092 | 1 | 1 | 1 | 1 |        |
| 4948 | ENSG00000132768 | HPA045796 | 1 | 1 | 1 | 1 |        |
| 4948 | ENSG00000132773 | HPA053775 | 1 | 1 | 1 | 1 |        |
| 4948 | ENSG00000132780 | HPA028136 | 1 | 1 | 1 | 1 |        |
| 4948 | ENSG00000132781 | HPA008732 | 1 | 1 | 1 | 1 |        |
| 4948 | ENSG00000132819 | CAB017036 | 1 | 1 | 1 | 1 |        |
| 4948 | ENSG00000132823 | HPA045125 | 1 | 1 | 1 | 1 |        |
| 4948 | ENSG00000132837 | HPA077849 | 1 | 1 | 1 | 1 |        |
| 4948 | ENSG00000132879 | HPA003363 | 1 | 1 | 1 | 1 |        |
| 4948 | ENSG00000132881 | HPA028453 | 1 | 1 | 1 | 1 | 0.4994 |
| 4948 | ENSG00000132906 | HPA001473 | 1 | 1 | 1 | 1 |        |
| 4948 | ENSG00000132911 | HPA027800 | 1 | 1 | 1 | 1 |        |
| 4948 | ENSG00000132963 | HPA026995 | 1 | 1 | 1 | 1 |        |
| 4948 | ENSG00000132964 | HPA044721 | 1 | 1 | 1 | 1 |        |
| 4948 | ENSG00000133019 | HPA048036 | 1 | 1 | 1 | 1 | 0.3231 |
| 4948 | ENSG00000133027 | HPA042375 | 1 | 1 | 1 | 1 |        |
| 4948 | ENSG00000133101 | HPA060646 | 1 | 1 | 1 | 1 |        |
| 4948 | ENSG00000133103 | HPA040441 | 1 | 1 | 1 | 1 |        |
| 4948 | ENSG00000133111 | HPA032035 | 1 | 1 | 1 | 1 |        |
| 4948 | ENSG00000133131 | HPA000395 | 1 | 1 | 1 | 1 |        |
| 4948 | ENSG00000133134 | HPA078630 | 1 | 1 | 1 | 1 |        |
| 4948 | ENSG00000133138 | HPA023883 | 1 | 1 | 1 | 1 |        |
| 4948 | ENSG00000133169 | HPA078630 | 1 | 1 | 1 | 1 |        |
| 4948 | ENSG00000133193 | HPA021459 | 1 | 1 | 1 | 1 |        |
| 4948 | ENSG00000133195 | HPA021455 | 1 | 1 | 1 | 1 |        |
| 4948 | ENSG00000133226 | HPA049941 | 1 | 1 | 1 | 1 |        |
| 4948 | ENSG00000133247 | HPA052294 | 1 | 1 | 1 | 1 |        |
| 4948 | ENSG00000133256 | HPA059929 | 1 | 1 | 1 | 1 |        |
| 4948 | ENSG00000133275 | HPA056572 | 1 | 1 | 1 | 1 |        |
| 4948 | ENSG00000133302 | HPA054213 | 1 | 1 | 1 | 1 |        |
| 4948 | ENSG00000133313 | HPA036898 | 1 | 1 | 1 | 1 |        |
| 4948 | ENSG00000133315 | HPA071075 | 1 | 1 | 1 | 1 | 0.3329 |
| 4948 | ENSG00000133328 | HPA058997 | 1 | 1 | 1 | 1 |        |

|      |                 |           |   |   |   |   |               |
|------|-----------------|-----------|---|---|---|---|---------------|
| 4948 | ENSG00000133398 | HPA042795 | 1 | 1 | 1 | 1 |               |
| 4948 | ENSG00000133401 | HPA036504 | 1 | 1 | 1 | 1 |               |
| 4948 | ENSG00000133466 | HPA002042 | 1 | 1 | 1 | 1 |               |
| 4948 | ENSG00000133639 | HPA005972 | 1 | 1 | 1 | 1 |               |
| 4948 | ENSG00000133641 | HPA039663 | 1 | 1 | 1 | 1 |               |
| 4948 | ENSG00000133687 | HPA016720 | 1 | 1 | 1 | 1 |               |
| 4948 | ENSG00000133704 | HPA023765 | 1 | 1 | 1 | 1 |               |
| 4948 | ENSG00000133706 | HPA036424 | 1 | 1 | 1 | 1 |               |
| 4948 | ENSG00000133710 | HPA009067 | 1 | 1 | 1 | 1 |               |
| 4948 | ENSG00000133731 | HPA037489 | 1 | 1 | 1 | 1 |               |
| 4948 | ENSG00000133794 | HPA050938 | 1 | 1 | 1 | 1 |               |
| 4948 | ENSG00000133818 | CAB010420 | 1 | 1 | 1 | 1 | 0. 392        |
| 4948 | ENSG00000133835 | HPA021302 | 1 | 1 | 1 | 1 | 0. 3969       |
| 4948 | ENSG00000133863 | HPA036800 | 1 | 1 | 1 | 1 |               |
| 4948 | ENSG00000133895 | HPA030342 | 1 | 1 | 1 | 1 |               |
| 4948 | ENSG00000133980 | HPA001460 | 1 | 1 | 1 | 1 |               |
| 4948 | ENSG00000133983 | HPA062659 | 1 | 1 | 1 | 1 |               |
| 4948 | ENSG00000133997 | HPA030764 | 1 | 1 | 1 | 1 |               |
| 4948 | ENSG00000134001 | CAB011663 | 1 | 1 | 1 | 1 | 0. 4375       |
| 4948 | ENSG00000134013 | HPA036257 | 1 | 1 | 1 | 1 |               |
| 4948 | ENSG00000134030 | HPA016865 | 1 | 1 | 1 | 1 |               |
| 4948 | ENSG00000134056 | HPA035802 | 1 | 1 | 1 | 1 |               |
| 4948 | ENSG00000134057 | CAB000115 | 1 | 1 | 1 | 1 |               |
| 4948 | ENSG00000134070 | HPA050520 | 1 | 1 | 1 | 1 |               |
| 4948 | ENSG00000134077 | HPA036170 | 1 | 1 | 1 | 1 |               |
| 4948 | ENSG00000134086 | HPA031631 | 1 | 1 | 1 | 1 |               |
| 4948 | ENSG00000134107 | HPA028922 | 1 | 1 | 1 | 1 |               |
| 4948 | ENSG00000134146 | HPA042976 | 1 | 1 | 1 | 1 |               |
| 4948 | ENSG00000134153 | HPA047572 | 1 | 1 | 1 | 1 |               |
| 4948 | ENSG00000134198 | HPA015640 | 1 | 1 | 1 | 1 |               |
| 4948 | ENSG00000134207 | HPA058362 | 1 | 1 | 1 | 1 | 0. 3442       |
| 4948 | ENSG00000134245 | HPA047274 | 1 | 1 | 1 | 1 |               |
| 4948 | ENSG00000134248 | HPA006812 | 1 | 1 | 1 | 1 | 0. 25 0. 3467 |
| 4948 | ENSG00000134250 | HPA048743 | 1 | 1 | 1 | 1 |               |
| 4948 | ENSG00000134262 | HPA028162 | 1 | 1 | 1 | 1 | 0. 345        |
| 4948 | ENSG00000134278 | HPA040737 | 1 | 1 | 1 | 1 |               |
| 4948 | ENSG00000134294 | HPA035180 | 1 | 1 | 1 | 1 |               |
| 4948 | ENSG00000134313 | HPA014790 | 1 | 1 | 1 | 1 |               |
| 4948 | ENSG00000134318 | HPA044109 | 1 | 1 | 1 | 1 |               |
| 4948 | ENSG00000134321 | HPA049409 | 1 | 1 | 1 | 1 |               |
| 4948 | ENSG00000134330 | HPA040523 | 1 | 1 | 1 | 1 |               |
| 4948 | ENSG00000134375 | HPA010083 | 1 | 1 | 1 | 1 |               |
| 4948 | ENSG00000134376 | HPA061250 | 1 | 1 | 1 | 1 |               |
| 4948 | ENSG00000134440 | HPA040017 | 1 | 1 | 1 | 1 |               |
| 4948 | ENSG00000134453 | HPA037478 | 1 | 1 | 1 | 1 |               |
| 4948 | ENSG00000134461 | HPA037920 | 1 | 1 | 1 | 1 |               |
| 4948 | ENSG00000134508 | HPA073649 | 1 | 1 | 1 | 1 |               |
| 4948 | ENSG00000134532 | HPA060499 | 1 | 1 | 1 | 1 |               |
| 4948 | ENSG00000134545 | HPA058052 | 1 | 1 | 1 | 1 |               |
| 4948 | ENSG00000134569 | HPA011934 | 1 | 1 | 1 | 1 |               |
| 4948 | ENSG00000134574 | HPA058406 | 1 | 1 | 1 | 1 |               |
| 4948 | ENSG00000134594 | HPA059737 | 1 | 1 | 1 | 1 |               |
| 4948 | ENSG00000134595 | HPA054720 | 1 | 1 | 1 | 1 |               |
| 4948 | ENSG00000134597 | HPA026609 | 1 | 1 | 1 | 1 |               |
| 4948 | ENSG00000134644 | HPA027424 | 1 | 1 | 1 | 1 |               |

|      |                 |           |   |   |   |   |        |        |
|------|-----------------|-----------|---|---|---|---|--------|--------|
| 4948 | ENSG00000134684 | HPA018950 | 1 | 1 | 1 | 1 | 0.311  |        |
| 4948 | ENSG00000134686 | HPA047403 | 1 | 1 | 1 | 1 |        |        |
| 4948 | ENSG00000134697 | HPA027163 | 1 | 1 | 1 | 1 |        |        |
| 4948 | ENSG00000134758 | HPA041101 | 1 | 1 | 1 | 1 |        |        |
| 4948 | ENSG00000134809 | HPA039946 | 1 | 1 | 1 | 1 |        |        |
| 4948 | ENSG00000134852 | HPA001867 | 1 | 1 | 1 | 1 |        |        |
| 4948 | ENSG00000134871 | HPA029118 | 1 | 1 | 1 | 1 |        |        |
| 4948 | ENSG00000134882 | HPA013448 | 1 | 1 | 1 | 1 |        |        |
| 4948 | ENSG00000134897 | HPA050126 | 1 | 1 | 1 | 1 |        |        |
| 4948 | ENSG00000134899 | HPA045845 | 1 | 1 | 1 | 1 |        |        |
| 4948 | ENSG00000134905 | HPA041776 | 1 | 1 | 1 | 1 |        |        |
| 4948 | ENSG00000134954 | CAB002575 | 1 | 1 | 1 | 1 |        |        |
| 4948 | ENSG00000134986 | HPA000545 | 1 | 1 | 1 | 1 |        |        |
| 4948 | ENSG00000134987 | HPA037796 | 1 | 1 | 1 | 1 |        |        |
| 4948 | ENSG00000134996 | HPA020514 | 1 | 1 | 1 | 1 |        |        |
| 4948 | ENSG00000135002 | HPA057163 | 1 | 1 | 1 | 1 |        |        |
| 4948 | ENSG00000135018 | HPA054143 | 1 | 1 | 1 | 1 |        |        |
| 4948 | ENSG00000135049 | HPA057208 | 1 | 1 | 1 | 1 |        |        |
| 4948 | ENSG00000135052 | HPA010638 | 1 | 1 | 1 | 1 |        |        |
| 4948 | ENSG00000135069 | CAB040567 | 1 | 1 | 1 | 1 |        |        |
| 4948 | ENSG00000135074 | HPA055537 | 1 | 1 | 1 | 1 |        |        |
| 4948 | ENSG00000135083 | HPA049970 | 1 | 1 | 1 | 1 |        |        |
| 4948 | ENSG00000135090 | HPA017160 | 1 | 1 | 1 | 1 |        |        |
| 4948 | ENSG00000135097 | HPA074923 | 1 | 1 | 1 | 1 | 0.394  | 0.4374 |
| 4948 | ENSG00000135100 | HPA035231 | 1 | 1 | 1 | 1 |        |        |
| 4948 | ENSG00000135144 | HPA051249 | 1 | 1 | 1 | 1 |        |        |
| 4948 | ENSG00000135248 | HPA020636 | 1 | 1 | 1 | 1 | 0.267  | 0.393  |
| 4948 | ENSG00000135249 | HPA031646 | 1 | 1 | 1 | 1 |        |        |
| 4948 | ENSG00000135299 | HPA035694 | 1 | 1 | 1 | 1 |        |        |
| 4948 | ENSG00000135312 | HPA028808 | 1 | 1 | 1 | 1 |        |        |
| 4948 | ENSG00000135316 | CAB010895 | 1 | 1 | 1 | 1 |        |        |
| 4948 | ENSG00000135317 | HPA017639 | 1 | 1 | 1 | 1 |        |        |
| 4948 | ENSG00000135334 | HPA064239 | 1 | 1 | 1 | 1 |        |        |
| 4948 | ENSG00000135336 | HPA039553 | 1 | 1 | 1 | 1 |        |        |
| 4948 | ENSG00000135365 | HPA023253 | 1 | 1 | 1 | 1 |        |        |
| 4948 | ENSG00000135373 | HPA050923 | 1 | 1 | 1 | 1 |        |        |
| 4948 | ENSG00000135374 | HPA062706 | 1 | 1 | 1 | 1 |        |        |
| 4948 | ENSG00000135378 | HPA009040 | 1 | 1 | 1 | 1 |        |        |
| 4948 | ENSG00000135387 | HPA018126 | 1 | 1 | 1 | 1 | 0.2544 | 0.3129 |
| 4948 | ENSG00000135404 | CAB026356 | 1 | 1 | 1 | 1 |        |        |
| 4948 | ENSG00000135437 | HPA063345 | 1 | 1 | 1 | 1 |        |        |
| 4948 | ENSG00000135482 | HPA062265 | 1 | 1 | 1 | 1 |        |        |
| 4948 | ENSG00000135486 | HPA005812 | 1 | 1 | 1 | 1 |        |        |
| 4948 | ENSG00000135503 | CAB026126 | 1 | 1 | 1 | 1 |        |        |
| 4948 | ENSG00000135519 | HPA051088 | 1 | 1 | 1 | 1 |        |        |
| 4948 | ENSG00000135521 | HPA030159 | 1 | 1 | 1 | 1 |        |        |
| 4948 | ENSG00000135537 | HPA030155 | 1 | 1 | 1 | 1 |        |        |
| 4948 | ENSG00000135605 | HPA024657 | 1 | 1 | 1 | 1 |        |        |
| 4948 | ENSG00000135624 | HPA008425 | 1 | 1 | 1 | 1 |        |        |
| 4948 | ENSG00000135631 | HPA036406 | 1 | 1 | 1 | 1 |        |        |
| 4948 | ENSG00000135632 | HPA015514 | 1 | 1 | 1 | 1 |        |        |
| 4948 | ENSG00000135638 | HPA006230 | 1 | 1 | 1 | 1 |        | 0.318  |
| 4948 | ENSG00000135655 | HPA006237 | 1 | 1 | 1 | 1 |        |        |
| 4948 | ENSG00000135678 | HPA077243 | 1 | 1 | 1 | 1 |        |        |
| 4948 | ENSG00000135679 | CAB016303 | 1 | 1 | 1 | 1 | 0.3433 | 0.2222 |

|      |                 |           |   |   |   |   |         |
|------|-----------------|-----------|---|---|---|---|---------|
| 4948 | ENSG00000135686 | HPA023423 | 1 | 1 | 1 | 1 |         |
| 4948 | ENSG00000135709 | HPA012866 | 1 | 1 | 1 | 1 |         |
| 4948 | ENSG00000135736 | HPA040598 | 1 | 1 | 1 | 1 |         |
| 4948 | ENSG00000135740 | HPA041004 | 1 | 1 | 1 | 1 |         |
| 4948 | ENSG00000135749 | HPA014427 | 1 | 1 | 1 | 1 | 0. 3216 |
| 4948 | ENSG00000135750 | HPA016049 | 1 | 1 | 1 | 1 |         |
| 4948 | ENSG00000135775 | HPA076994 | 1 | 1 | 1 | 1 |         |
| 4948 | ENSG00000135778 | HPA054304 | 1 | 1 | 1 | 1 |         |
| 4948 | ENSG00000135829 | CAB011819 | 1 | 1 | 1 | 1 |         |
| 4948 | ENSG00000135837 | HPA030845 | 1 | 1 | 1 | 1 | 0. 192  |
| 4948 | ENSG00000135842 | HPA028657 | 1 | 1 | 1 | 1 |         |
| 4948 | ENSG00000135862 | HPA001909 | 1 | 1 | 1 | 1 |         |
| 4948 | ENSG00000135899 | HPA058554 | 1 | 1 | 1 | 1 |         |
| 4948 | ENSG00000135900 | HPA038147 | 1 | 1 | 1 | 1 |         |
| 4948 | ENSG00000135903 | HPA063659 | 1 | 1 | 1 | 1 | 0. 3389 |
| 4948 | ENSG00000135905 | HPA058106 | 1 | 1 | 1 | 1 |         |
| 4948 | ENSG00000135912 | HPA050252 | 1 | 1 | 1 | 1 |         |
| 4948 | ENSG00000135914 | HPA012867 | 1 | 1 | 1 | 1 | 0. 466  |
| 4948 | ENSG00000135924 | HPA036268 | 1 | 1 | 1 | 1 |         |
| 4948 | ENSG00000135940 | HPA034517 | 1 | 1 | 1 | 1 | 0. 385  |
| 4948 | ENSG00000135953 | HPA061859 | 1 | 1 | 1 | 1 |         |
| 4948 | ENSG00000135966 | HPA037672 | 1 | 1 | 1 | 1 |         |
| 4948 | ENSG00000135968 | HPA035849 | 1 | 1 | 1 | 1 |         |
| 4948 | ENSG00000135999 | HPA036759 | 1 | 1 | 1 | 1 | 0. 4237 |
| 4948 | ENSG00000136003 | HPA038602 | 1 | 1 | 1 | 1 |         |
| 4948 | ENSG00000136011 | HPA026871 | 1 | 1 | 1 | 1 |         |
| 4948 | ENSG00000136026 | HPA001225 | 1 | 1 | 1 | 1 |         |
| 4948 | ENSG00000136040 | HPA066899 | 1 | 1 | 1 | 1 |         |
| 4948 | ENSG00000136051 | HPA045666 | 1 | 1 | 1 | 1 |         |
| 4948 | ENSG00000136098 | HPA043230 | 1 | 1 | 1 | 1 |         |
| 4948 | ENSG00000136104 | HPA040084 | 1 | 1 | 1 | 1 |         |
| 4948 | ENSG00000136108 | HPA008410 | 1 | 1 | 1 | 1 | 0. 3359 |
| 4948 | ENSG00000136111 | HPA040145 | 1 | 1 | 1 | 1 |         |
| 4948 | ENSG00000136114 | HPA012611 | 1 | 1 | 1 | 1 |         |
| 4948 | ENSG00000136143 | HPA039536 | 1 | 1 | 1 | 1 |         |
| 4948 | ENSG00000136144 | HPA056783 | 1 | 1 | 1 | 1 |         |
| 4948 | ENSG00000136146 | HPA006232 | 1 | 1 | 1 | 1 |         |
| 4948 | ENSG00000136153 | HPA020923 | 1 | 1 | 1 | 1 |         |
| 4948 | ENSG00000136158 | HPA042198 | 1 | 1 | 1 | 1 | 0. 339  |
| 4948 | ENSG00000136159 | HPA038968 | 1 | 1 | 1 | 1 |         |
| 4948 | ENSG00000136161 | HPA040242 | 1 | 1 | 1 | 1 |         |
| 4948 | ENSG00000136193 | HPA024517 | 1 | 1 | 1 | 1 |         |
| 4948 | ENSG00000136231 | HPA002037 | 1 | 1 | 1 | 1 |         |
| 4948 | ENSG00000136237 | HPA076772 | 1 | 1 | 1 | 1 |         |
| 4948 | ENSG00000136247 | HPA064358 | 1 | 1 | 1 | 1 |         |
| 4948 | ENSG00000136261 | HPA026709 | 1 | 1 | 1 | 1 |         |
| 4948 | ENSG00000136270 | HPA020582 | 1 | 1 | 1 | 1 |         |
| 4948 | ENSG00000136280 | HPA020273 | 1 | 1 | 1 | 1 | 0. 3234 |
| 4948 | ENSG00000136319 | HPA054198 | 1 | 1 | 1 | 1 |         |
| 4948 | ENSG00000136327 | HPA062879 | 1 | 1 | 1 | 1 |         |
| 4948 | ENSG00000136371 | HPA054177 | 1 | 1 | 1 | 1 | 0. 2658 |
| 4948 | ENSG00000136378 | HPA048453 | 1 | 1 | 1 | 1 |         |
| 4948 | ENSG00000136383 | HPA026558 | 1 | 1 | 1 | 1 |         |
| 4948 | ENSG00000136448 | HPA022949 | 1 | 1 | 1 | 1 |         |
| 4948 | ENSG00000136449 | HPA023257 | 1 | 1 | 1 | 1 |         |

|      |                 |           |   |   |   |   |         |         |
|------|-----------------|-----------|---|---|---|---|---------|---------|
| 4948 | ENSG00000136450 | CAB013073 | 1 | 1 | 1 | 1 |         |         |
| 4948 | ENSG00000136451 | HPA027520 | 1 | 1 | 1 | 1 |         |         |
| 4948 | ENSG00000136463 | HPA021626 | 1 | 1 | 1 | 1 | 0. 3516 | 0. 3757 |
| 4948 | ENSG00000136478 | HPA057116 | 1 | 1 | 1 | 1 |         |         |
| 4948 | ENSG00000136485 | HPA022948 | 1 | 1 | 1 | 1 |         |         |
| 4948 | ENSG00000136492 | HPA005474 | 1 | 1 | 1 | 1 |         |         |
| 4948 | ENSG00000136514 | HPA064887 | 1 | 1 | 1 | 1 |         |         |
| 4948 | ENSG00000136518 | CAB012188 | 1 | 1 | 1 | 1 |         |         |
| 4948 | ENSG00000136521 | HPA005640 | 1 | 1 | 1 | 1 |         |         |
| 4948 | ENSG00000136522 | HPA047779 | 1 | 1 | 1 | 1 |         | 0. 3332 |
| 4948 | ENSG00000136574 | HPA073899 | 1 | 1 | 1 | 1 | 0. 363  | 0. 3926 |
| 4948 | ENSG00000136603 | HPA008472 | 1 | 1 | 1 | 1 |         |         |
| 4948 | ENSG00000136628 | HPA030052 | 1 | 1 | 1 | 1 |         |         |
| 4948 | ENSG00000136630 | HPA005968 | 1 | 1 | 1 | 1 |         |         |
| 4948 | ENSG00000136631 | HPA027425 | 1 | 1 | 1 | 1 |         |         |
| 4948 | ENSG00000136636 | HPA015142 | 1 | 1 | 1 | 1 | 0. 3466 |         |
| 4948 | ENSG00000136715 | HPA034664 | 1 | 1 | 1 | 1 |         |         |
| 4948 | ENSG00000136717 | HPA003894 | 1 | 1 | 1 | 1 |         |         |
| 4948 | ENSG00000136718 | HPA066222 | 1 | 1 | 1 | 1 |         |         |
| 4948 | ENSG00000136731 | HPA015127 | 1 | 1 | 1 | 1 |         | 0. 2813 |
| 4948 | ENSG00000136732 | HPA008965 | 1 | 1 | 1 | 1 |         |         |
| 4948 | ENSG00000136738 | HPA043882 | 1 | 1 | 1 | 1 |         |         |
| 4948 | ENSG00000136758 | HPA066953 | 1 | 1 | 1 | 1 |         |         |
| 4948 | ENSG00000136770 | HPA013432 | 1 | 1 | 1 | 1 | 0. 4383 |         |
| 4948 | ENSG00000136807 | HPA006738 | 1 | 1 | 1 | 1 |         |         |
| 4948 | ENSG00000136811 | HPA048841 | 1 | 1 | 1 | 1 |         |         |
| 4948 | ENSG00000136813 | HPA021646 | 1 | 1 | 1 | 1 |         |         |
| 4948 | ENSG00000136816 | CAB022709 | 1 | 1 | 1 | 1 |         |         |
| 4948 | ENSG00000136826 | HPA002926 | 1 | 1 | 1 | 1 |         |         |
| 4948 | ENSG00000136827 | HPA051195 | 1 | 1 | 1 | 1 |         |         |
| 4948 | ENSG00000136830 | HPA021284 | 1 | 1 | 1 | 1 |         |         |
| 4948 | ENSG00000136854 | HPA008209 | 1 | 1 | 1 | 1 |         |         |
| 4948 | ENSG00000136866 | HPA049112 | 1 | 1 | 1 | 1 |         |         |
| 4948 | ENSG00000136869 | HPA049174 | 1 | 1 | 1 | 1 |         |         |
| 4948 | ENSG00000136874 | HPA001204 | 1 | 1 | 1 | 1 |         |         |
| 4948 | ENSG00000136875 | HPA021794 | 1 | 1 | 1 | 1 | 0. 2847 |         |
| 4948 | ENSG00000136878 | HPA006287 | 1 | 1 | 1 | 1 |         |         |
| 4948 | ENSG00000136881 | HPA021251 | 1 | 1 | 1 | 1 |         |         |
| 4948 | ENSG00000136888 | HPA042898 | 1 | 1 | 1 | 1 |         |         |
| 4948 | ENSG00000136925 | HPA064304 | 1 | 1 | 1 | 1 |         |         |
| 4948 | ENSG00000136929 | HPA019572 | 1 | 1 | 1 | 1 |         |         |
| 4948 | ENSG00000136932 | HPA052197 | 1 | 1 | 1 | 1 |         |         |
| 4948 | ENSG00000136933 | HPA067106 | 1 | 1 | 1 | 1 |         |         |
| 4948 | ENSG00000136935 | CAB013065 | 1 | 1 | 1 | 1 |         |         |
| 4948 | ENSG00000136942 | HPA006047 | 1 | 1 | 1 | 1 |         |         |
| 4948 | ENSG00000136944 | HPA073716 | 1 | 1 | 1 | 1 |         |         |
| 4948 | ENSG00000136982 | HPA024401 | 1 | 1 | 1 | 1 |         |         |
| 4948 | ENSG00000136986 | HPA016562 | 1 | 1 | 1 | 1 |         |         |
| 4948 | ENSG00000136997 | HPA055893 | 1 | 1 | 1 | 1 |         |         |
| 4948 | ENSG00000136999 | HPA018449 | 1 | 1 | 1 | 1 | 0. 4148 |         |
| 4948 | ENSG00000137054 | HPA052400 | 1 | 1 | 1 | 1 |         |         |
| 4948 | ENSG00000137055 | HPA020994 | 1 | 1 | 1 | 1 |         |         |
| 4948 | ENSG00000137073 | HPA021684 | 1 | 1 | 1 | 1 |         |         |
| 4948 | ENSG00000137074 | HPA064930 | 1 | 1 | 1 | 1 |         |         |
| 4948 | ENSG00000137075 | HPA015853 | 1 | 1 | 1 | 1 |         |         |

|      |                 |           |   |   |   |   |         |
|------|-----------------|-----------|---|---|---|---|---------|
| 4948 | ENSG00000137101 | HPA044658 | 1 | 1 | 1 | 1 |         |
| 4948 | ENSG00000137145 | HPA014917 | 1 | 1 | 1 | 1 |         |
| 4948 | ENSG00000137154 | HPA031153 | 1 | 1 | 1 | 1 |         |
| 4948 | ENSG00000137168 | HPA062916 | 1 | 1 | 1 | 1 |         |
| 4948 | ENSG00000137200 | HPA029954 | 1 | 1 | 1 | 1 |         |
| 4948 | ENSG00000137203 | CAB000326 | 1 | 1 | 1 | 1 |         |
| 4948 | ENSG00000137216 | HPA029250 | 1 | 1 | 1 | 1 |         |
| 4948 | ENSG00000137218 | HPA030174 | 1 | 1 | 1 | 1 |         |
| 4948 | ENSG00000137221 | HPA030165 | 1 | 1 | 1 | 1 |         |
| 4948 | ENSG00000137265 | HPA002038 | 1 | 1 | 1 | 1 |         |
| 4948 | ENSG00000137266 | HPA014697 | 1 | 1 | 1 | 1 | 0. 2736 |
| 4948 | ENSG00000137267 | CAB015339 | 1 | 1 | 1 | 1 |         |
| 4948 | ENSG00000137269 | HPA031604 | 1 | 1 | 1 | 1 |         |
| 4948 | ENSG00000137270 | HPA011343 | 1 | 1 | 1 | 1 |         |
| 4948 | ENSG00000137274 | HPA036752 | 1 | 1 | 1 | 1 |         |
| 4948 | ENSG00000137288 | HPA039111 | 1 | 1 | 1 | 1 |         |
| 4948 | ENSG00000137338 | HPA007267 | 1 | 1 | 1 | 1 |         |
| 4948 | ENSG00000137404 | HPA072545 | 1 | 1 | 1 | 1 |         |
| 4948 | ENSG00000137411 | HPA062449 | 1 | 1 | 1 | 1 |         |
| 4948 | ENSG00000137413 | HPA031730 | 1 | 1 | 1 | 1 |         |
| 4948 | ENSG00000137486 | HPA049318 | 1 | 1 | 1 | 1 |         |
| 4948 | ENSG00000137496 | CAB025980 | 1 | 1 | 1 | 1 |         |
| 4948 | ENSG00000137500 | HPA011130 | 1 | 1 | 1 | 1 |         |
| 4948 | ENSG00000137501 | HPA039651 | 1 | 1 | 1 | 1 |         |
| 4948 | ENSG00000137502 | HPA054514 | 1 | 1 | 1 | 1 |         |
| 4948 | ENSG00000137504 | HPA063652 | 1 | 1 | 1 | 1 |         |
| 4948 | ENSG00000137574 | HPA029824 | 1 | 1 | 1 | 1 |         |
| 4948 | ENSG00000137648 | HPA006238 | 1 | 1 | 1 | 1 |         |
| 4948 | ENSG00000137656 | HPA038340 | 1 | 1 | 1 | 1 |         |
| 4948 | ENSG00000137691 | HPA038585 | 1 | 1 | 1 | 1 |         |
| 4948 | ENSG00000137692 | HPA050863 | 1 | 1 | 1 | 1 |         |
| 4948 | ENSG00000137700 | HPA038939 | 1 | 1 | 1 | 1 |         |
| 4948 | ENSG00000137713 | CAB004034 | 1 | 1 | 1 | 1 | 0. 3311 |
| 4948 | ENSG00000137714 | HPA041630 | 1 | 1 | 1 | 1 |         |
| 4948 | ENSG00000137720 | HPA038410 | 1 | 1 | 1 | 1 |         |
| 4948 | ENSG00000137727 | HPA076303 | 1 | 1 | 1 | 1 |         |
| 4948 | ENSG00000137731 | HPA064218 | 1 | 1 | 1 | 1 |         |
| 4948 | ENSG00000137760 | HPA061514 | 1 | 1 | 1 | 1 |         |
| 4948 | ENSG00000137764 | HPA027347 | 1 | 1 | 1 | 1 |         |
| 4948 | ENSG00000137767 | HPA017079 | 1 | 1 | 1 | 1 | 0. 2497 |
| 4948 | ENSG00000137770 | HPA040763 | 1 | 1 | 1 | 1 |         |
| 4948 | ENSG00000137776 | HPA040256 | 1 | 1 | 1 | 1 |         |
| 4948 | ENSG00000137802 | HPA030833 | 1 | 1 | 1 | 1 |         |
| 4948 | ENSG00000137806 | HPA039933 | 1 | 1 | 1 | 1 | 0. 1989 |
| 4948 | ENSG00000137812 | HPA026624 | 1 | 1 | 1 | 1 |         |
| 4948 | ENSG00000137815 | HPA006714 | 1 | 1 | 1 | 1 |         |
| 4948 | ENSG00000137817 | HPA026991 | 1 | 1 | 1 | 1 |         |
| 4948 | ENSG00000137818 | HPA003368 | 1 | 1 | 1 | 1 |         |
| 4948 | ENSG00000137819 | HPA076729 | 1 | 1 | 1 | 1 |         |
| 4948 | ENSG00000137822 | HPA043212 | 1 | 1 | 1 | 1 |         |
| 4948 | ENSG00000137825 | HPA040454 | 1 | 1 | 1 | 1 |         |
| 4948 | ENSG00000137841 | HPA041298 | 1 | 1 | 1 | 1 | 0. 3943 |
| 4948 | ENSG00000137842 | HPA062359 | 1 | 1 | 1 | 1 |         |
| 4948 | ENSG00000137869 | HPA051194 | 1 | 1 | 1 | 1 |         |
| 4948 | ENSG00000137876 | HPA062724 | 1 | 1 | 1 | 1 |         |

|      |                 |           |   |   |   |   |        |
|------|-----------------|-----------|---|---|---|---|--------|
| 4948 | ENSG00000137878 | HPA068141 | 1 | 1 | 1 | 1 |        |
| 4948 | ENSG00000137947 | HPA061626 | 1 | 1 | 1 | 1 |        |
| 4948 | ENSG00000137955 | HPA026585 | 1 | 1 | 1 | 1 |        |
| 4948 | ENSG00000137959 | HPA053247 | 1 | 1 | 1 | 1 |        |
| 4948 | ENSG00000137960 | HPA051212 | 1 | 1 | 1 | 1 |        |
| 4948 | ENSG00000137965 | HPA043858 | 1 | 1 | 1 | 1 |        |
| 4948 | ENSG00000137992 | HPA026485 | 1 | 1 | 1 | 1 |        |
| 4948 | ENSG00000137996 | HPA027982 | 1 | 1 | 1 | 1 |        |
| 4948 | ENSG00000138028 | HPA071103 | 1 | 1 | 1 | 1 |        |
| 4948 | ENSG00000138029 | HPA066099 | 1 | 1 | 1 | 1 |        |
| 4948 | ENSG00000138032 | HPA016745 | 1 | 1 | 1 | 1 |        |
| 4948 | ENSG00000138036 | HPA062905 | 1 | 1 | 1 | 1 |        |
| 4948 | ENSG00000138069 | CAB005331 | 1 | 1 | 1 | 1 | 0.4723 |
| 4948 | ENSG00000138073 | HPA014133 | 1 | 1 | 1 | 1 | 0.2921 |
| 4948 | ENSG00000138092 | HPA046189 | 1 | 1 | 1 | 1 |        |
| 4948 | ENSG00000138095 | HPA036408 | 1 | 1 | 1 | 1 | 0.354  |
| 4948 | ENSG00000138100 | HPA019690 | 1 | 1 | 1 | 1 |        |
| 4948 | ENSG00000138101 | HPA061357 | 1 | 1 | 1 | 1 |        |
| 4948 | ENSG00000138107 | HPA047443 | 1 | 1 | 1 | 1 |        |
| 4948 | ENSG00000138111 | HPA018031 | 1 | 1 | 1 | 1 |        |
| 4948 | ENSG00000138131 | HPA037609 | 1 | 1 | 1 | 1 |        |
| 4948 | ENSG00000138134 | HPA040202 | 1 | 1 | 1 | 1 |        |
| 4948 | ENSG00000138136 | HPA002016 | 1 | 1 | 1 | 1 |        |
| 4948 | ENSG00000138185 | HPA014067 | 1 | 1 | 1 | 1 |        |
| 4948 | ENSG00000138190 | HPA059111 | 1 | 1 | 1 | 1 |        |
| 4948 | ENSG00000138193 | HPA015598 | 1 | 1 | 1 | 1 |        |
| 4948 | ENSG00000138231 | HPA035365 | 1 | 1 | 1 | 1 |        |
| 4948 | ENSG00000138271 | HPA066313 | 1 | 1 | 1 | 1 |        |
| 4948 | ENSG00000138326 | HPA003364 | 1 | 1 | 1 | 1 |        |
| 4948 | ENSG00000138363 | CAB013462 | 1 | 1 | 1 | 1 |        |
| 4948 | ENSG00000138381 | HPA075042 | 1 | 1 | 1 | 1 |        |
| 4948 | ENSG00000138382 | HPA038223 | 1 | 1 | 1 | 1 |        |
| 4948 | ENSG00000138385 | HPA017287 | 1 | 1 | 1 | 1 |        |
| 4948 | ENSG00000138398 | HPA021788 | 1 | 1 | 1 | 1 | 0.196  |
| 4948 | ENSG00000138433 | HPA015784 | 1 | 1 | 1 | 1 |        |
| 4948 | ENSG00000138435 | HPA071554 | 1 | 1 | 1 | 1 |        |
| 4948 | ENSG00000138443 | HPA070567 | 1 | 1 | 1 | 1 |        |
| 4948 | ENSG00000138448 | HPA004856 | 1 | 1 | 1 | 1 |        |
| 4948 | ENSG00000138459 | HPA057964 | 1 | 1 | 1 | 1 |        |
| 4948 | ENSG00000138463 | HPA072579 | 1 | 1 | 1 | 1 |        |
| 4948 | ENSG00000138468 | HPA027259 | 1 | 1 | 1 | 1 |        |
| 4948 | ENSG00000138495 | HPA042226 | 1 | 1 | 1 | 1 |        |
| 4948 | ENSG00000138593 | HPA039875 | 1 | 1 | 1 | 1 |        |
| 4948 | ENSG00000138604 | HPA040481 | 1 | 1 | 1 | 1 |        |
| 4948 | ENSG00000138606 | HPA057381 | 1 | 1 | 1 | 1 |        |
| 4948 | ENSG00000138629 | HPA041897 | 1 | 1 | 1 | 1 |        |
| 4948 | ENSG00000138641 | HPA039170 | 1 | 1 | 1 | 1 |        |
| 4948 | ENSG00000138642 | HPA035846 | 1 | 1 | 1 | 1 |        |
| 4948 | ENSG00000138660 | HPA058115 | 1 | 1 | 1 | 1 |        |
| 4948 | ENSG00000138668 | HPA004911 | 1 | 1 | 1 | 1 |        |
| 4948 | ENSG00000138674 | HPA005457 | 1 | 1 | 1 | 1 |        |
| 4948 | ENSG00000138685 | CAB000125 | 1 | 1 | 1 | 1 |        |
| 4948 | ENSG00000138688 | HPA038076 | 1 | 1 | 1 | 1 |        |
| 4948 | ENSG00000138698 | HPA019060 | 1 | 1 | 1 | 1 |        |
| 4948 | ENSG00000138709 | HPA036280 | 1 | 1 | 1 | 1 |        |

|      |                 |           |   |   |   |   |         |         |
|------|-----------------|-----------|---|---|---|---|---------|---------|
| 4948 | ENSG00000138750 | HPA058122 | 1 | 1 | 1 | 1 |         |         |
| 4948 | ENSG00000138756 | HPA026451 | 1 | 1 | 1 | 1 |         | 0. 3979 |
| 4948 | ENSG00000138757 | HPA018304 | 1 | 1 | 1 | 1 |         |         |
| 4948 | ENSG00000138758 | HPA005665 | 1 | 1 | 1 | 1 |         |         |
| 4948 | ENSG00000138764 | HPA034684 | 1 | 1 | 1 | 1 |         |         |
| 4948 | ENSG00000138767 | HPA042688 | 1 | 1 | 1 | 1 |         |         |
| 4948 | ENSG00000138769 | HPA040672 | 1 | 1 | 1 | 1 |         |         |
| 4948 | ENSG00000138772 | HPA013398 | 1 | 1 | 1 | 1 |         |         |
| 4948 | ENSG00000138777 | HPA031671 | 1 | 1 | 1 | 1 | 0. 3674 | 0. 5337 |
| 4948 | ENSG00000138801 | HPA049781 | 1 | 1 | 1 | 1 |         |         |
| 4948 | ENSG00000138802 | HPA038181 | 1 | 1 | 1 | 1 |         |         |
| 4948 | ENSG00000138814 | HPA012778 | 1 | 1 | 1 | 1 |         |         |
| 4948 | ENSG00000138823 | HPA051170 | 1 | 1 | 1 | 1 |         |         |
| 4948 | ENSG00000138835 | HPA044234 | 1 | 1 | 1 | 1 |         |         |
| 4948 | ENSG00000138867 | HPA022786 | 1 | 1 | 1 | 1 |         |         |
| 4948 | ENSG00000139053 | HPA045118 | 1 | 1 | 1 | 1 |         |         |
| 4948 | ENSG00000139083 | HPA000264 | 1 | 1 | 1 | 1 |         |         |
| 4948 | ENSG00000139112 | HPA065883 | 1 | 1 | 1 | 1 |         |         |
| 4948 | ENSG00000139132 | HPA039235 | 1 | 1 | 1 | 1 |         |         |
| 4948 | ENSG00000139133 | HPA063387 | 1 | 1 | 1 | 1 |         |         |
| 4948 | ENSG00000139180 | HPA073212 | 1 | 1 | 1 | 1 |         |         |
| 4948 | ENSG00000139187 | HPA051403 | 1 | 1 | 1 | 1 |         |         |
| 4948 | ENSG00000139197 | HPA039259 | 1 | 1 | 1 | 1 | 0. 3225 |         |
| 4948 | ENSG00000139200 | HPA010631 | 1 | 1 | 1 | 1 |         |         |
| 4948 | ENSG00000139219 | HPA055753 | 1 | 1 | 1 | 1 |         |         |
| 4948 | ENSG00000139233 | HPA048920 | 1 | 1 | 1 | 1 |         |         |
| 4948 | ENSG00000139263 | HPA010773 | 1 | 1 | 1 | 1 |         |         |
| 4948 | ENSG00000139269 | HPA016843 | 1 | 1 | 1 | 1 |         |         |
| 4948 | ENSG00000139318 | HPA053188 | 1 | 1 | 1 | 1 |         |         |
| 4948 | ENSG00000139370 | HPA016713 | 1 | 1 | 1 | 1 |         |         |
| 4948 | ENSG00000139405 | HPA061531 | 1 | 1 | 1 | 1 |         |         |
| 4948 | ENSG00000139410 | HPA005740 | 1 | 1 | 1 | 1 |         |         |
| 4948 | ENSG00000139428 | HPA039017 | 1 | 1 | 1 | 1 |         |         |
| 4948 | ENSG00000139436 | CAB004681 | 1 | 1 | 1 | 1 |         |         |
| 4948 | ENSG00000139546 | HPA051181 | 1 | 1 | 1 | 1 |         |         |
| 4948 | ENSG00000139613 | CAB004321 | 1 | 1 | 1 | 1 |         |         |
| 4948 | ENSG00000139618 | HPA026815 | 1 | 1 | 1 | 1 |         |         |
| 4948 | ENSG00000139624 | HPA026589 | 1 | 1 | 1 | 1 |         |         |
| 4948 | ENSG00000139625 | HPA071996 | 1 | 1 | 1 | 1 |         |         |
| 4948 | ENSG00000139626 | HPA042277 | 1 | 1 | 1 | 1 |         |         |
| 4948 | ENSG00000139637 | HPA038627 | 1 | 1 | 1 | 1 |         |         |
| 4948 | ENSG00000139641 | HPA076926 | 1 | 1 | 1 | 1 |         |         |
| 4948 | ENSG00000139651 | HPA035691 | 1 | 1 | 1 | 1 |         |         |
| 4948 | ENSG00000139656 | HPA077071 | 1 | 1 | 1 | 1 |         |         |
| 4948 | ENSG00000139687 | CAB000095 | 1 | 1 | 1 | 1 |         |         |
| 4948 | ENSG00000139697 | HPA042388 | 1 | 1 | 1 | 1 | 0. 2737 |         |
| 4948 | ENSG00000139714 | HPA038710 | 1 | 1 | 1 | 1 |         |         |
| 4948 | ENSG00000139718 | HPA021667 | 1 | 1 | 1 | 1 |         |         |
| 4948 | ENSG00000139719 | HPA038701 | 1 | 1 | 1 | 1 |         |         |
| 4948 | ENSG00000139725 | HPA045912 | 1 | 1 | 1 | 1 |         |         |
| 4948 | ENSG00000139726 | HPA021783 | 1 | 1 | 1 | 1 |         |         |
| 4948 | ENSG00000139734 | HPA032151 | 1 | 1 | 1 | 1 |         |         |
| 4948 | ENSG00000139746 | HPA040252 | 1 | 1 | 1 | 1 |         |         |
| 4948 | ENSG00000139793 | HPA062685 | 1 | 1 | 1 | 1 |         |         |
| 4948 | ENSG00000139800 | HPA074045 | 1 | 1 | 1 | 1 |         |         |



|      |                 |           |   |   |   |   |                |
|------|-----------------|-----------|---|---|---|---|----------------|
| 4948 | ENSG00000139826 | HPA032143 | 1 | 1 | 1 | 1 |                |
| 4948 | ENSG00000139832 | HPA003621 | 1 | 1 | 1 | 1 |                |
| 4948 | ENSG00000139842 | HPA058979 | 1 | 1 | 1 | 1 |                |
| 4948 | ENSG00000139865 | HPA069293 | 1 | 1 | 1 | 1 |                |
| 4948 | ENSG00000139899 | HPA041266 | 1 | 1 | 1 | 1 |                |
| 4948 | ENSG00000139908 | HPA060660 | 1 | 1 | 1 | 1 |                |
| 4948 | ENSG00000139926 | HPA001297 | 1 | 1 | 1 | 1 |                |
| 4948 | ENSG00000139971 | HPA001580 | 1 | 1 | 1 | 1 |                |
| 4948 | ENSG00000139973 | HPA076871 | 1 | 1 | 1 | 1 |                |
| 4948 | ENSG00000139977 | HPA057824 | 1 | 1 | 1 | 1 |                |
| 4948 | ENSG00000139990 | HPA041575 | 1 | 1 | 1 | 1 |                |
| 4948 | ENSG00000139998 | HPA041177 | 1 | 1 | 1 | 1 |                |
| 4948 | ENSG00000140022 | HPA003086 | 1 | 1 | 1 | 1 | 0. 486         |
| 4948 | ENSG00000140043 | HPA001125 | 1 | 1 | 1 | 1 |                |
| 4948 | ENSG00000140105 | HPA005573 | 1 | 1 | 1 | 1 |                |
| 4948 | ENSG00000140157 | HPA071342 | 1 | 1 | 1 | 1 |                |
| 4948 | ENSG00000140199 | HPA034563 | 1 | 1 | 1 | 1 |                |
| 4948 | ENSG00000140263 | HPA040260 | 1 | 1 | 1 | 1 |                |
| 4948 | ENSG00000140326 | HPA039404 | 1 | 1 | 1 | 1 |                |
| 4948 | ENSG00000140332 | HPA054116 | 1 | 1 | 1 | 1 |                |
| 4948 | ENSG00000140374 | HPA018990 | 1 | 1 | 1 | 1 | 0. 466         |
| 4948 | ENSG00000140382 | HPA008126 | 1 | 1 | 1 | 1 |                |
| 4948 | ENSG00000140386 | HPA061180 | 1 | 1 | 1 | 1 |                |
| 4948 | ENSG00000140395 | HPA039932 | 1 | 1 | 1 | 1 |                |
| 4948 | ENSG00000140396 | HPA060243 | 1 | 1 | 1 | 1 |                |
| 4948 | ENSG00000140398 | HPA054084 | 1 | 1 | 1 | 1 |                |
| 4948 | ENSG00000140400 | HPA040627 | 1 | 1 | 1 | 1 |                |
| 4948 | ENSG00000140403 | HPA041790 | 1 | 1 | 1 | 1 |                |
| 4948 | ENSG00000140406 | HPA071716 | 1 | 1 | 1 | 1 |                |
| 4948 | ENSG00000140443 | CAB010268 | 1 | 1 | 1 | 1 |                |
| 4948 | ENSG00000140450 | HPA039934 | 1 | 1 | 1 | 1 |                |
| 4948 | ENSG00000140451 | CAB018701 | 1 | 1 | 1 | 1 | 0. 462 0. 2575 |
| 4948 | ENSG00000140463 | HPA039418 | 1 | 1 | 1 | 1 |                |
| 4948 | ENSG00000140464 | CAB010194 | 1 | 1 | 1 | 1 |                |
| 4948 | ENSG00000140470 | HPA062487 | 1 | 1 | 1 | 1 |                |
| 4948 | ENSG00000140497 | HPA014699 | 1 | 1 | 1 | 1 |                |
| 4948 | ENSG00000140511 | HPA039237 | 1 | 1 | 1 | 1 |                |
| 4948 | ENSG00000140525 | HPA040379 | 1 | 1 | 1 | 1 |                |
| 4948 | ENSG00000140527 | HPA046196 | 1 | 1 | 1 | 1 |                |
| 4948 | ENSG00000140534 | HPA046746 | 1 | 1 | 1 | 1 |                |
| 4948 | ENSG00000140545 | HPA002807 | 1 | 1 | 1 | 1 |                |
| 4948 | ENSG00000140548 | HPA030228 | 1 | 1 | 1 | 1 |                |
| 4948 | ENSG00000140563 | HPA051176 | 1 | 1 | 1 | 1 |                |
| 4948 | ENSG00000140575 | CAB013302 | 1 | 1 | 1 | 1 | 0. 3849        |
| 4948 | ENSG00000140577 | HPA043735 | 1 | 1 | 1 | 1 |                |
| 4948 | ENSG00000140598 | HPA047110 | 1 | 1 | 1 | 1 |                |
| 4948 | ENSG00000140600 | HPA077877 | 1 | 1 | 1 | 1 |                |
| 4948 | ENSG00000140623 | HPA041128 | 1 | 1 | 1 | 1 | 0. 3794        |
| 4948 | ENSG00000140694 | HPA006314 | 1 | 1 | 1 | 1 |                |
| 4948 | ENSG00000140743 | HPA023870 | 1 | 1 | 1 | 1 | 0. 1959        |
| 4948 | ENSG00000140750 | HPA041703 | 1 | 1 | 1 | 1 |                |
| 4948 | ENSG00000140832 | HPA043514 | 1 | 1 | 1 | 1 |                |
| 4948 | ENSG00000140853 | HPA059120 | 1 | 1 | 1 | 1 |                |
| 4948 | ENSG00000140905 | HPA041368 | 1 | 1 | 1 | 1 |                |
| 4948 | ENSG00000140931 | HPA013870 | 1 | 1 | 1 | 1 |                |

|      |                 |           |   |   |   |   |         |
|------|-----------------|-----------|---|---|---|---|---------|
| 4948 | ENSG00000140939 | CAB009208 | 1 | 1 | 1 | 1 |         |
| 4948 | ENSG00000140945 | HPA001380 | 1 | 1 | 1 | 1 |         |
| 4948 | ENSG00000140961 | HPA019239 | 1 | 1 | 1 | 1 |         |
| 4948 | ENSG00000140968 | HPA002267 | 1 | 1 | 1 | 1 |         |
| 4948 | ENSG00000140986 | HPA049136 | 1 | 1 | 1 | 1 |         |
| 4948 | ENSG00000140988 | HPA055133 | 1 | 1 | 1 | 1 |         |
| 4948 | ENSG00000140992 | HPA068961 | 1 | 1 | 1 | 1 |         |
| 4948 | ENSG00000140993 | HPA041357 | 1 | 1 | 1 | 1 |         |
| 4948 | ENSG00000140995 | HPA049434 | 1 | 1 | 1 | 1 |         |
| 4948 | ENSG00000141012 | CAB026404 | 1 | 1 | 1 | 1 |         |
| 4948 | ENSG00000141013 | HPA041311 | 1 | 1 | 1 | 1 |         |
| 4948 | ENSG00000141027 | HPA043246 | 1 | 1 | 1 | 1 |         |
| 4948 | ENSG00000141030 | HPA021997 | 1 | 1 | 1 | 1 |         |
| 4948 | ENSG00000141034 | HPA044348 | 1 | 1 | 1 | 1 |         |
| 4948 | ENSG00000141040 | HPA029290 | 1 | 1 | 1 | 1 | 0. 2989 |
| 4948 | ENSG00000141052 | HPA071528 | 1 | 1 | 1 | 1 |         |
| 4948 | ENSG00000141076 | HPA043542 | 1 | 1 | 1 | 1 |         |
| 4948 | ENSG00000141127 | HPA021881 | 1 | 1 | 1 | 1 |         |
| 4948 | ENSG00000141161 | HPA017861 | 1 | 1 | 1 | 1 |         |
| 4948 | ENSG00000141219 | HPA012896 | 1 | 1 | 1 | 1 |         |
| 4948 | ENSG00000141232 | HPA047839 | 1 | 1 | 1 | 1 |         |
| 4948 | ENSG00000141258 | HPA021641 | 1 | 1 | 1 | 1 | 0. 3162 |
| 4948 | ENSG00000141279 | HPA021453 | 1 | 1 | 1 | 1 |         |
| 4948 | ENSG00000141294 | HPA021882 | 1 | 1 | 1 | 1 |         |
| 4948 | ENSG00000141295 | HPA022934 | 1 | 1 | 1 | 1 | 0. 2367 |
| 4948 | ENSG00000141376 | HPA057289 | 1 | 1 | 1 | 1 |         |
| 4948 | ENSG00000141385 | HPA004479 | 1 | 1 | 1 | 1 |         |
| 4948 | ENSG00000141401 | HPA029561 | 1 | 1 | 1 | 1 |         |
| 4948 | ENSG00000141404 | CAB015464 | 1 | 1 | 1 | 1 |         |
| 4948 | ENSG00000141425 | HPA040602 | 1 | 1 | 1 | 1 |         |
| 4948 | ENSG00000141428 | HPA065505 | 1 | 1 | 1 | 1 |         |
| 4948 | ENSG00000141437 | HPA046388 | 1 | 1 | 1 | 1 |         |
| 4948 | ENSG00000141441 | HPA040709 | 1 | 1 | 1 | 1 |         |
| 4948 | ENSG00000141447 | HPA043401 | 1 | 1 | 1 | 1 |         |
| 4948 | ENSG00000141449 | HPA041647 | 1 | 1 | 1 | 1 |         |
| 4948 | ENSG00000141456 | HPA053966 | 1 | 1 | 1 | 1 |         |
| 4948 | ENSG00000141480 | HPA065681 | 1 | 1 | 1 | 1 |         |
| 4948 | ENSG00000141506 | HPA044505 | 1 | 1 | 1 | 1 |         |
| 4948 | ENSG00000141519 | HPA022974 | 1 | 1 | 1 | 1 |         |
| 4948 | ENSG00000141522 | CAB010005 | 1 | 1 | 1 | 1 | 0. 316  |
| 4948 | ENSG00000141542 | HPA076172 | 1 | 1 | 1 | 1 |         |
| 4948 | ENSG00000141543 | HPA021878 | 1 | 1 | 1 | 1 |         |
| 4948 | ENSG00000141551 | CAB015410 | 1 | 1 | 1 | 1 |         |
| 4948 | ENSG00000141560 | HPA056172 | 1 | 1 | 1 | 1 |         |
| 4948 | ENSG00000141570 | HPA031462 | 1 | 1 | 1 | 1 |         |
| 4948 | ENSG00000141580 | HPA017886 | 1 | 1 | 1 | 1 |         |
| 4948 | ENSG00000141582 | HPA012021 | 1 | 1 | 1 | 1 |         |
| 4948 | ENSG00000141627 | HPA049187 | 1 | 1 | 1 | 1 |         |
| 4948 | ENSG00000141646 | HPA019154 | 1 | 1 | 1 | 1 |         |
| 4948 | ENSG00000141699 | HPA016492 | 1 | 1 | 1 | 1 |         |
| 4948 | ENSG00000141756 | HPA051171 | 1 | 1 | 1 | 1 |         |
| 4948 | ENSG00000141759 | HPA041324 | 1 | 1 | 1 | 1 |         |
| 4948 | ENSG00000141837 | HPA071902 | 1 | 1 | 1 | 1 |         |
| 4948 | ENSG00000141867 | HPA015055 | 1 | 1 | 1 | 1 |         |
| 4948 | ENSG00000141873 | HPA042139 | 1 | 1 | 1 | 1 |         |

|      |                 |           |   |   |   |   |         |
|------|-----------------|-----------|---|---|---|---|---------|
| 4948 | ENSG00000141905 | HPA052625 | 1 | 1 | 1 | 1 |         |
| 4948 | ENSG00000141934 | HPA055540 | 1 | 1 | 1 | 1 |         |
| 4948 | ENSG00000141956 | HPA029255 | 1 | 1 | 1 | 1 |         |
| 4948 | ENSG00000141968 | HPA001864 | 1 | 1 | 1 | 1 |         |
| 4948 | ENSG00000141985 | HPA021485 | 1 | 1 | 1 | 1 |         |
| 4948 | ENSG00000142002 | HPA036059 | 1 | 1 | 1 | 1 |         |
| 4948 | ENSG00000142039 | HPA043320 | 1 | 1 | 1 | 1 |         |
| 4948 | ENSG00000142065 | HPA030637 | 1 | 1 | 1 | 1 |         |
| 4948 | ENSG00000142102 | HPA039383 | 1 | 1 | 1 | 1 | 0. 3957 |
| 4948 | ENSG00000142156 | HPA019142 | 1 | 1 | 1 | 1 |         |
| 4948 | ENSG00000142168 | HPA001401 | 1 | 1 | 1 | 1 | 0. 2553 |
| 4948 | ENSG00000142182 | HPA055234 | 1 | 1 | 1 | 1 |         |
| 4948 | ENSG00000142185 | HPA030976 | 1 | 1 | 1 | 1 |         |
| 4948 | ENSG00000142186 | HPA015015 | 1 | 1 | 1 | 1 |         |
| 4948 | ENSG00000142188 | HPA068995 | 1 | 1 | 1 | 1 |         |
| 4948 | ENSG00000142207 | HPA018334 | 1 | 1 | 1 | 1 | 0. 3412 |
| 4948 | ENSG00000142208 | HPA002891 | 1 | 1 | 1 | 1 |         |
| 4948 | ENSG00000142252 | HPA052075 | 1 | 1 | 1 | 1 |         |
| 4948 | ENSG00000142330 | HPA056098 | 1 | 1 | 1 | 1 |         |
| 4948 | ENSG00000142444 | HPA041858 | 1 | 1 | 1 | 1 |         |
| 4948 | ENSG00000142459 | HPA043563 | 1 | 1 | 1 | 1 |         |
| 4948 | ENSG00000142528 | HPA073309 | 1 | 1 | 1 | 1 |         |
| 4948 | ENSG00000142530 | HPA048111 | 1 | 1 | 1 | 1 |         |
| 4948 | ENSG00000142534 | HPA049719 | 1 | 1 | 1 | 1 |         |
| 4948 | ENSG00000142541 | HPA038751 | 1 | 1 | 1 | 1 |         |
| 4948 | ENSG00000142546 | HPA043464 | 1 | 1 | 1 | 1 |         |
| 4948 | ENSG00000142552 | HPA050402 | 1 | 1 | 1 | 1 |         |
| 4948 | ENSG00000142619 | HPA043739 | 1 | 1 | 1 | 1 |         |
| 4948 | ENSG00000142632 | HPA068108 | 1 | 1 | 1 | 1 |         |
| 4948 | ENSG00000142655 | HPA046104 | 1 | 1 | 1 | 1 |         |
| 4948 | ENSG00000142657 | HPA031315 | 1 | 1 | 1 | 1 |         |
| 4948 | ENSG00000142669 | HPA076219 | 1 | 1 | 1 | 1 |         |
| 4948 | ENSG00000142675 | HPA030847 | 1 | 1 | 1 | 1 |         |
| 4948 | ENSG00000142676 | HPA074839 | 1 | 1 | 1 | 1 |         |
| 4948 | ENSG00000142684 | HPA054363 | 1 | 1 | 1 | 1 |         |
| 4948 | ENSG00000142686 | HPA031343 | 1 | 1 | 1 | 1 |         |
| 4948 | ENSG00000142694 | HPA041928 | 1 | 1 | 1 | 1 |         |
| 4948 | ENSG00000142784 | HPA028180 | 1 | 1 | 1 | 1 |         |
| 4948 | ENSG00000142789 | HPA028086 | 1 | 1 | 1 | 1 |         |
| 4948 | ENSG00000142794 | HPA042595 | 1 | 1 | 1 | 1 |         |
| 4948 | ENSG00000142798 | CAB020718 | 1 | 1 | 1 | 1 |         |
| 4948 | ENSG00000142856 | HPA028463 | 1 | 1 | 1 | 1 | 0. 3698 |
| 4948 | ENSG00000142864 | HPA020559 | 1 | 1 | 1 | 1 |         |
| 4948 | ENSG00000142867 | HPA017925 | 1 | 1 | 1 | 1 |         |
| 4948 | ENSG00000142920 | HPA028527 | 1 | 1 | 1 | 1 |         |
| 4948 | ENSG00000142937 | HPA029266 | 1 | 1 | 1 | 1 |         |
| 4948 | ENSG00000142961 | HPA057744 | 1 | 1 | 1 | 1 |         |
| 4948 | ENSG00000143067 | HPA049933 | 1 | 1 | 1 | 1 |         |
| 4948 | ENSG00000143079 | HPA007301 | 1 | 1 | 1 | 1 |         |
| 4948 | ENSG00000143093 | HPA060498 | 1 | 1 | 1 | 1 |         |
| 4948 | ENSG00000143106 | HPA028398 | 1 | 1 | 1 | 1 | 0. 6272 |
| 4948 | ENSG00000143126 | HPA013952 | 1 | 1 | 1 | 1 |         |
| 4948 | ENSG00000143149 | HPA006077 | 1 | 1 | 1 | 1 |         |
| 4948 | ENSG00000143156 | HPA054289 | 1 | 1 | 1 | 1 |         |
| 4948 | ENSG00000143157 | HPA007838 | 1 | 1 | 1 | 1 |         |

|      |                 |           |   |   |   |   |         |
|------|-----------------|-----------|---|---|---|---|---------|
| 4948 | ENSG00000143171 | HPA012933 | 1 | 1 | 1 | 1 |         |
| 4948 | ENSG00000143178 | HPA005800 | 1 | 1 | 1 | 1 |         |
| 4948 | ENSG00000143179 | HPA057128 | 1 | 1 | 1 | 1 |         |
| 4948 | ENSG00000143183 | HPA054768 | 1 | 1 | 1 | 1 |         |
| 4948 | ENSG00000143196 | HPA065548 | 1 | 1 | 1 | 1 |         |
| 4948 | ENSG00000143198 | HPA053311 | 1 | 1 | 1 | 1 |         |
| 4948 | ENSG00000143217 | HPA010775 | 1 | 1 | 1 | 1 |         |
| 4948 | ENSG00000143222 | HPA028722 | 1 | 1 | 1 | 1 |         |
| 4948 | ENSG00000143228 | HPA059692 | 1 | 1 | 1 | 1 |         |
| 4948 | ENSG00000143256 | HPA028700 | 1 | 1 | 1 | 1 |         |
| 4948 | ENSG00000143294 | CAB017151 | 1 | 1 | 1 | 1 |         |
| 4948 | ENSG00000143319 | HPA054285 | 1 | 1 | 1 | 1 |         |
| 4948 | ENSG00000143321 | CAB026035 | 1 | 1 | 1 | 1 |         |
| 4948 | ENSG00000143322 | HPA001866 | 1 | 1 | 1 | 1 |         |
| 4948 | ENSG00000143337 | HPA050546 | 1 | 1 | 1 | 1 |         |
| 4948 | ENSG00000143353 | HPA045806 | 1 | 1 | 1 | 1 |         |
| 4948 | ENSG00000143363 | HPA028411 | 1 | 1 | 1 | 1 |         |
| 4948 | ENSG00000143365 | HPA065620 | 1 | 1 | 1 | 1 |         |
| 4948 | ENSG00000143367 | HPA054301 | 1 | 1 | 1 | 1 |         |
| 4948 | ENSG00000143368 | HPA064660 | 1 | 1 | 1 | 1 |         |
| 4948 | ENSG00000143376 | HPA045816 | 1 | 1 | 1 | 1 |         |
| 4948 | ENSG00000143382 | HPA006279 | 1 | 1 | 1 | 1 |         |
| 4948 | ENSG00000143384 | HPA008455 | 1 | 1 | 1 | 1 |         |
| 4948 | ENSG00000143393 | CAB022071 | 1 | 1 | 1 | 1 |         |
| 4948 | ENSG00000143409 | HPA028358 | 1 | 1 | 1 | 1 |         |
| 4948 | ENSG00000143416 | HPA011731 | 1 | 1 | 1 | 1 |         |
| 4948 | ENSG00000143418 | HPA027262 | 1 | 1 | 1 | 1 |         |
| 4948 | ENSG00000143436 | HPA008579 | 1 | 1 | 1 | 1 |         |
| 4948 | ENSG00000143437 | HPA001759 | 1 | 1 | 1 | 1 |         |
| 4948 | ENSG00000143450 | HPA030136 | 1 | 1 | 1 | 1 |         |
| 4948 | ENSG00000143457 | HPA028558 | 1 | 1 | 1 | 1 |         |
| 4948 | ENSG00000143469 | HPA036963 | 1 | 1 | 1 | 1 |         |
| 4948 | ENSG00000143473 | HPA014551 | 1 | 1 | 1 | 1 |         |
| 4948 | ENSG00000143486 | HPA028220 | 1 | 1 | 1 | 1 |         |
| 4948 | ENSG00000143493 | HPA072611 | 1 | 1 | 1 | 1 |         |
| 4948 | ENSG00000143494 | HPA045820 | 1 | 1 | 1 | 1 |         |
| 4948 | ENSG00000143502 | HPA058296 | 1 | 1 | 1 | 1 |         |
| 4948 | ENSG00000143514 | HPA021603 | 1 | 1 | 1 | 1 | 0. 215  |
| 4948 | ENSG00000143537 | HPA072878 | 1 | 1 | 1 | 1 |         |
| 4948 | ENSG00000143545 | HPA003996 | 1 | 1 | 1 | 1 |         |
| 4948 | ENSG00000143553 | HPA046974 | 1 | 1 | 1 | 1 |         |
| 4948 | ENSG00000143554 | HPA006935 | 1 | 1 | 1 | 1 | 0. 2758 |
| 4948 | ENSG00000143556 | HPA006997 | 1 | 1 | 1 | 1 |         |
| 4948 | ENSG00000143569 | HPA035068 | 1 | 1 | 1 | 1 |         |
| 4948 | ENSG00000143575 | HPA075289 | 1 | 1 | 1 | 1 |         |
| 4948 | ENSG00000143603 | HPA057127 | 1 | 1 | 1 | 1 |         |
| 4948 | ENSG00000143614 | HPA017015 | 1 | 1 | 1 | 1 | 0. 2668 |
| 4948 | ENSG00000143621 | HPA007484 | 1 | 1 | 1 | 1 |         |
| 4948 | ENSG00000143624 | HPA074391 | 1 | 1 | 1 | 1 |         |
| 4948 | ENSG00000143627 | HPA006653 | 1 | 1 | 1 | 1 |         |
| 4948 | ENSG00000143641 | HPA011222 | 1 | 1 | 1 | 1 |         |
| 4948 | ENSG00000143643 | HPA051558 | 1 | 1 | 1 | 1 |         |
| 4948 | ENSG00000143653 | HPA050775 | 1 | 1 | 1 | 1 |         |
| 4948 | ENSG00000143727 | HPA016754 | 1 | 1 | 1 | 1 |         |
| 4948 | ENSG00000143740 | HPA028167 | 1 | 1 | 1 | 1 |         |

|      |                 |           |   |   |   |   |         |
|------|-----------------|-----------|---|---|---|---|---------|
| 4948 | ENSG00000143753 | HPA076422 | 1 | 1 | 1 | 1 |         |
| 4948 | ENSG00000143756 | HPA003289 | 1 | 1 | 1 | 1 |         |
| 4948 | ENSG00000143772 | HPA072923 | 1 | 1 | 1 | 1 |         |
| 4948 | ENSG00000143776 | HPA071252 | 1 | 1 | 1 | 1 |         |
| 4948 | ENSG00000143801 | CAB013634 | 1 | 1 | 1 | 1 |         |
| 4948 | ENSG00000143811 | HPA056873 | 1 | 1 | 1 | 1 |         |
| 4948 | ENSG00000143815 | HPA062236 | 1 | 1 | 1 | 1 |         |
| 4948 | ENSG00000143842 | HPA051790 | 1 | 1 | 1 | 1 |         |
| 4948 | ENSG00000143882 | HPA034734 | 1 | 1 | 1 | 1 |         |
| 4948 | ENSG00000143891 | HPA035473 | 1 | 1 | 1 | 1 |         |
| 4948 | ENSG00000143919 | HPA067912 | 1 | 1 | 1 | 1 |         |
| 4948 | ENSG00000143921 | HPA019556 | 1 | 1 | 1 | 1 |         |
| 4948 | ENSG00000143924 | HPA036688 | 1 | 1 | 1 | 1 |         |
| 4948 | ENSG00000143942 | HPA049235 | 1 | 1 | 1 | 1 |         |
| 4948 | ENSG00000143947 | HPA054087 | 1 | 1 | 1 | 1 |         |
| 4948 | ENSG00000143951 | HPA044144 | 1 | 1 | 1 | 1 |         |
| 4948 | ENSG00000143970 | HPA034646 | 1 | 1 | 1 | 1 |         |
| 4948 | ENSG00000143971 | HPA035048 | 1 | 1 | 1 | 1 | 0. 3862 |
| 4948 | ENSG00000144026 | HPA028974 | 1 | 1 | 1 | 1 |         |
| 4948 | ENSG00000144028 | HPA029321 | 1 | 1 | 1 | 1 |         |
| 4948 | ENSG00000144029 | HPA055765 | 1 | 1 | 1 | 1 |         |
| 4948 | ENSG00000144034 | HPA035712 | 1 | 1 | 1 | 1 |         |
| 4948 | ENSG00000144035 | HPA074519 | 1 | 1 | 1 | 1 |         |
| 4948 | ENSG00000144036 | HPA034546 | 1 | 1 | 1 | 1 |         |
| 4948 | ENSG00000144043 | HPA016631 | 1 | 1 | 1 | 1 |         |
| 4948 | ENSG00000144045 | HPA039158 | 1 | 1 | 1 | 1 |         |
| 4948 | ENSG00000144048 | HPA021052 | 1 | 1 | 1 | 1 |         |
| 4948 | ENSG00000144061 | HPA074071 | 1 | 1 | 1 | 1 |         |
| 4948 | ENSG00000144161 | HPA034803 | 1 | 1 | 1 | 1 |         |
| 4948 | ENSG00000144228 | HPA034687 | 1 | 1 | 1 | 1 |         |
| 4948 | ENSG00000144320 | HPA014205 | 1 | 1 | 1 | 1 | 0. 4336 |
| 4948 | ENSG00000144331 | HPA046086 | 1 | 1 | 1 | 1 |         |
| 4948 | ENSG00000144354 | HPA005565 | 1 | 1 | 1 | 1 |         |
| 4948 | ENSG00000144357 | HPA035390 | 1 | 1 | 1 | 1 | 0. 221  |
| 4948 | ENSG00000144366 | HPA020587 | 1 | 1 | 1 | 1 |         |
| 4948 | ENSG00000144381 | HPA001523 | 1 | 1 | 1 | 1 | 0. 2413 |
| 4948 | ENSG00000144401 | HPA034712 | 1 | 1 | 1 | 1 | 0. 1513 |
| 4948 | ENSG00000144445 | HPA043102 | 1 | 1 | 1 | 1 |         |
| 4948 | ENSG00000144468 | HPA057125 | 1 | 1 | 1 | 1 |         |
| 4948 | ENSG00000144476 | HPA032003 | 1 | 1 | 1 | 1 |         |
| 4948 | ENSG00000144485 | HPA061763 | 1 | 1 | 1 | 1 |         |
| 4948 | ENSG00000144524 | HPA034676 | 1 | 1 | 1 | 1 |         |
| 4948 | ENSG00000144559 | HPA044861 | 1 | 1 | 1 | 1 |         |
| 4948 | ENSG00000144560 | HPA038225 | 1 | 1 | 1 | 1 |         |
| 4948 | ENSG00000144567 | HPA011844 | 1 | 1 | 1 | 1 |         |
| 4948 | ENSG00000144580 | HPA046622 | 1 | 1 | 1 | 1 |         |
| 4948 | ENSG00000144589 | HPA036837 | 1 | 1 | 1 | 1 |         |
| 4948 | ENSG00000144591 | HPA035513 | 1 | 1 | 1 | 1 |         |
| 4948 | ENSG00000144596 | HPA035673 | 1 | 1 | 1 | 1 |         |
| 4948 | ENSG00000144642 | HPA034719 | 1 | 1 | 1 | 1 |         |
| 4948 | ENSG00000144644 | HPA039160 | 1 | 1 | 1 | 1 |         |
| 4948 | ENSG00000144649 | HPA047726 | 1 | 1 | 1 | 1 |         |
| 4948 | ENSG00000144655 | HPA045207 | 1 | 1 | 1 | 1 |         |
| 4948 | ENSG00000144674 | HPA040675 | 1 | 1 | 1 | 1 | 0. 289  |
| 4948 | ENSG00000144681 | HPA035143 | 1 | 1 | 1 | 1 | 0. 2915 |

|      |                 |           |   |   |   |   |         |         |
|------|-----------------|-----------|---|---|---|---|---------|---------|
| 4948 | ENSG00000144711 | HPA038143 | 1 | 1 | 1 | 1 |         |         |
| 4948 | ENSG00000144713 | HPA051994 | 1 | 1 | 1 | 1 |         |         |
| 4948 | ENSG00000144730 | HPA043550 | 1 | 1 | 1 | 1 |         |         |
| 4948 | ENSG00000144741 | HPA026887 | 1 | 1 | 1 | 1 |         |         |
| 4948 | ENSG00000144746 | HPA015540 | 1 | 1 | 1 | 1 | 0. 298  | 0. 3731 |
| 4948 | ENSG00000144747 | HPA008729 | 1 | 1 | 1 | 1 |         |         |
| 4948 | ENSG00000144749 | HPA011846 | 1 | 1 | 1 | 1 |         |         |
| 4948 | ENSG00000144792 | HPA029705 | 1 | 1 | 1 | 1 |         |         |
| 4948 | ENSG00000144802 | HPA075363 | 1 | 1 | 1 | 1 |         |         |
| 4948 | ENSG00000144810 | HPA053107 | 1 | 1 | 1 | 1 |         |         |
| 4948 | ENSG00000144815 | HPA036259 | 1 | 1 | 1 | 1 |         |         |
| 4948 | ENSG00000144827 | HPA066081 | 1 | 1 | 1 | 1 | 0. 3342 |         |
| 4948 | ENSG00000144840 | HPA035150 | 1 | 1 | 1 | 1 |         |         |
| 4948 | ENSG00000144843 | HPA036961 | 1 | 1 | 1 | 1 |         |         |
| 4948 | ENSG00000144848 | CAB037260 | 1 | 1 | 1 | 1 |         | 0. 3884 |
| 4948 | ENSG00000144867 | HPA011173 | 1 | 1 | 1 | 1 |         |         |
| 4948 | ENSG00000144893 | HPA036807 | 1 | 1 | 1 | 1 |         |         |
| 4948 | ENSG00000144908 | HPA050139 | 1 | 1 | 1 | 1 |         |         |
| 4948 | ENSG00000144909 | HPA039144 | 1 | 1 | 1 | 1 |         |         |
| 4948 | ENSG00000144935 | HPA021130 | 1 | 1 | 1 | 1 | 0. 3933 | 0. 2988 |
| 4948 | ENSG00000144959 | HPA026888 | 1 | 1 | 1 | 1 |         |         |
| 4948 | ENSG00000145002 | HPA041610 | 1 | 1 | 1 | 1 |         |         |
| 4948 | ENSG00000145012 | HPA011133 | 1 | 1 | 1 | 1 |         |         |
| 4948 | ENSG00000145014 | HPA043718 | 1 | 1 | 1 | 1 |         |         |
| 4948 | ENSG00000145020 | HPA005566 | 1 | 1 | 1 | 1 |         | 0. 2566 |
| 4948 | ENSG00000145022 | HPA007342 | 1 | 1 | 1 | 1 |         |         |
| 4948 | ENSG00000145029 | HPA058014 | 1 | 1 | 1 | 1 |         |         |
| 4948 | ENSG00000145041 | HPA052445 | 1 | 1 | 1 | 1 |         |         |
| 4948 | ENSG00000145050 | HPA011175 | 1 | 1 | 1 | 1 |         | 0. 3514 |
| 4948 | ENSG00000145191 | HPA064370 | 1 | 1 | 1 | 1 |         |         |
| 4948 | ENSG00000145216 | HPA037475 | 1 | 1 | 1 | 1 |         |         |
| 4948 | ENSG00000145217 | HPA041654 | 1 | 1 | 1 | 1 |         |         |
| 4948 | ENSG00000145220 | HPA035880 | 1 | 1 | 1 | 1 |         |         |
| 4948 | ENSG00000145246 | HPA050808 | 1 | 1 | 1 | 1 |         |         |
| 4948 | ENSG00000145287 | HPA077912 | 1 | 1 | 1 | 1 |         |         |
| 4948 | ENSG00000145293 | HPA044607 | 1 | 1 | 1 | 1 |         |         |
| 4948 | ENSG00000145332 | HPA013856 | 1 | 1 | 1 | 1 |         |         |
| 4948 | ENSG00000145337 | HPA036455 | 1 | 1 | 1 | 1 |         |         |
| 4948 | ENSG00000145354 | HPA015914 | 1 | 1 | 1 | 1 |         |         |
| 4948 | ENSG00000145375 | HPA036450 | 1 | 1 | 1 | 1 |         |         |
| 4948 | ENSG00000145388 | HPA038002 | 1 | 1 | 1 | 1 | 0. 43   |         |
| 4948 | ENSG00000145391 | HPA058111 | 1 | 1 | 1 | 1 |         |         |
| 4948 | ENSG00000145414 | HPA066090 | 1 | 1 | 1 | 1 |         |         |
| 4948 | ENSG00000145416 | HPA014600 | 1 | 1 | 1 | 1 |         |         |
| 4948 | ENSG00000145425 | HPA047100 | 1 | 1 | 1 | 1 |         |         |
| 4948 | ENSG00000145431 | HPA009134 | 1 | 1 | 1 | 1 |         |         |
| 4948 | ENSG00000145495 | HPA040841 | 1 | 1 | 1 | 1 |         |         |
| 4948 | ENSG00000145569 | HPA046638 | 1 | 1 | 1 | 1 |         |         |
| 4948 | ENSG00000145623 | HPA017278 | 1 | 1 | 1 | 1 |         |         |
| 4948 | ENSG00000145675 | HPA001216 | 1 | 1 | 1 | 1 |         |         |
| 4948 | ENSG00000145685 | HPA042402 | 1 | 1 | 1 | 1 |         |         |
| 4948 | ENSG00000145692 | HPA038285 | 1 | 1 | 1 | 1 |         |         |
| 4948 | ENSG00000145725 | HPA037895 | 1 | 1 | 1 | 1 |         |         |
| 4948 | ENSG00000145734 | HPA064166 | 1 | 1 | 1 | 1 |         |         |
| 4948 | ENSG00000145741 | CAB013007 | 1 | 1 | 1 | 1 |         |         |

|      |                 |           |   |   |   |   |         |         |
|------|-----------------|-----------|---|---|---|---|---------|---------|
| 4948 | ENSG00000145743 | HPA036410 | 1 | 1 | 1 | 1 |         |         |
| 4948 | ENSG00000145757 | HPA010848 | 1 | 1 | 1 | 1 |         |         |
| 4948 | ENSG00000145779 | HPA054434 | 1 | 1 | 1 | 1 |         |         |
| 4948 | ENSG00000145819 | HPA035106 | 1 | 1 | 1 | 1 |         |         |
| 4948 | ENSG00000145832 | HPA014674 | 1 | 1 | 1 | 1 |         |         |
| 4948 | ENSG00000145860 | HPA036562 | 1 | 1 | 1 | 1 |         |         |
| 4948 | ENSG00000145861 | HPA061290 | 1 | 1 | 1 | 1 |         |         |
| 4948 | ENSG00000145901 | HPA071950 | 1 | 1 | 1 | 1 |         |         |
| 4948 | ENSG00000145907 | HPA004052 | 1 | 1 | 1 | 1 |         |         |
| 4948 | ENSG00000145912 | HPA050400 | 1 | 1 | 1 | 1 |         |         |
| 4948 | ENSG00000145916 | HPA047778 | 1 | 1 | 1 | 1 |         |         |
| 4948 | ENSG00000145934 | HPA068691 | 1 | 1 | 1 | 1 |         |         |
| 4948 | ENSG00000146007 | HPA036518 | 1 | 1 | 1 | 1 |         |         |
| 4948 | ENSG00000146054 | HPA039213 | 1 | 1 | 1 | 1 |         |         |
| 4948 | ENSG00000146066 | HPA042715 | 1 | 1 | 1 | 1 |         |         |
| 4948 | ENSG00000146072 | CAB009805 | 1 | 1 | 1 | 1 |         |         |
| 4948 | ENSG00000146083 | HPA038981 | 1 | 1 | 1 | 1 |         |         |
| 4948 | ENSG00000146090 | HPA028242 | 1 | 1 | 1 | 1 |         |         |
| 4948 | ENSG00000146109 | HPA077039 | 1 | 1 | 1 | 1 |         |         |
| 4948 | ENSG00000146112 | HPA044745 | 1 | 1 | 1 | 1 |         |         |
| 4948 | ENSG00000146147 | HPA046654 | 1 | 1 | 1 | 1 |         |         |
| 4948 | ENSG00000146166 | HPA039983 | 1 | 1 | 1 | 1 |         |         |
| 4948 | ENSG00000146215 | HPA036198 | 1 | 1 | 1 | 1 |         |         |
| 4948 | ENSG00000146232 | HPA005941 | 1 | 1 | 1 | 1 |         | 0. 4139 |
| 4948 | ENSG00000146242 | HPA010554 | 1 | 1 | 1 | 1 |         | 0. 3658 |
| 4948 | ENSG00000146243 | HPA035742 | 1 | 1 | 1 | 1 | 0. 3624 |         |
| 4948 | ENSG00000146267 | HPA039106 | 1 | 1 | 1 | 1 |         |         |
| 4948 | ENSG00000146281 | HPA030325 | 1 | 1 | 1 | 1 |         |         |
| 4948 | ENSG00000146285 | HPA063326 | 1 | 1 | 1 | 1 |         |         |
| 4948 | ENSG00000146350 | HPA013413 | 1 | 1 | 1 | 1 |         |         |
| 4948 | ENSG00000146409 | HPA029747 | 1 | 1 | 1 | 1 | 0. 25   |         |
| 4948 | ENSG00000146414 | HPA034950 | 1 | 1 | 1 | 1 |         |         |
| 4948 | ENSG00000146416 | HPA060766 | 1 | 1 | 1 | 1 |         |         |
| 4948 | ENSG00000146425 | HPA046559 | 1 | 1 | 1 | 1 |         |         |
| 4948 | ENSG00000146457 | HPA010550 | 1 | 1 | 1 | 1 |         |         |
| 4948 | ENSG00000146469 | HPA072701 | 1 | 1 | 1 | 1 |         |         |
| 4948 | ENSG00000146476 | HPA003004 | 1 | 1 | 1 | 1 |         |         |
| 4948 | ENSG00000146535 | CAB010046 | 1 | 1 | 1 | 1 |         |         |
| 4948 | ENSG00000146540 | HPA052281 | 1 | 1 | 1 | 1 |         |         |
| 4948 | ENSG00000146555 | HPA011392 | 1 | 1 | 1 | 1 |         |         |
| 4948 | ENSG00000146574 | HPA045114 | 1 | 1 | 1 | 1 |         |         |
| 4948 | ENSG00000146587 | HPA071231 | 1 | 1 | 1 | 1 |         |         |
| 4948 | ENSG00000146648 | CAB000035 | 1 | 1 | 1 | 1 |         |         |
| 4948 | ENSG00000146670 | HPA023691 | 1 | 1 | 1 | 1 |         |         |
| 4948 | ENSG00000146676 | HPA048766 | 1 | 1 | 1 | 1 |         |         |
| 4948 | ENSG00000146678 | HPA046972 | 1 | 1 | 1 | 1 |         |         |
| 4948 | ENSG00000146701 | HPA019714 | 1 | 1 | 1 | 1 | 0. 3385 | 0. 3178 |
| 4948 | ENSG00000146707 | HPA049817 | 1 | 1 | 1 | 1 |         |         |
| 4948 | ENSG00000146729 | HPA063084 | 1 | 1 | 1 | 1 |         |         |
| 4948 | ENSG00000146731 | HPA049949 | 1 | 1 | 1 | 1 |         |         |
| 4948 | ENSG00000146733 | HPA029515 | 1 | 1 | 1 | 1 |         |         |
| 4948 | ENSG00000146757 | HPA003173 | 1 | 1 | 1 | 1 |         |         |
| 4948 | ENSG00000146776 | HPA021448 | 1 | 1 | 1 | 1 |         |         |
| 4948 | ENSG00000146842 | HPA031678 | 1 | 1 | 1 | 1 |         |         |
| 4948 | ENSG00000146858 | HPA020386 | 1 | 1 | 1 | 1 |         |         |

|      |                 |           |   |   |   |   |                 |
|------|-----------------|-----------|---|---|---|---|-----------------|
| 4948 | ENSG00000146909 | HPA019866 | 1 | 1 | 1 | 1 |                 |
| 4948 | ENSG00000146963 | HPA051631 | 1 | 1 | 1 | 1 |                 |
| 4948 | ENSG00000147003 | HPA048543 | 1 | 1 | 1 | 1 |                 |
| 4948 | ENSG00000147010 | HPA003351 | 1 | 1 | 1 | 1 |                 |
| 4948 | ENSG00000147027 | HPA046658 | 1 | 1 | 1 | 1 |                 |
| 4948 | ENSG00000147036 | HPA076575 | 1 | 1 | 1 | 1 |                 |
| 4948 | ENSG00000147059 | HPA069835 | 1 | 1 | 1 | 1 |                 |
| 4948 | ENSG00000147065 | CAB010898 | 1 | 1 | 1 | 1 |                 |
| 4948 | ENSG00000147118 | HPA059574 | 1 | 1 | 1 | 1 |                 |
| 4948 | ENSG00000147119 | HPA030503 | 1 | 1 | 1 | 1 |                 |
| 4948 | ENSG00000147121 | HPA065295 | 1 | 1 | 1 | 1 |                 |
| 4948 | ENSG00000147123 | HPA030367 | 1 | 1 | 1 | 1 | 0. 4714         |
| 4948 | ENSG00000147124 | HPA069102 | 1 | 1 | 1 | 1 |                 |
| 4948 | ENSG00000147130 | HPA003211 | 1 | 1 | 1 | 1 |                 |
| 4948 | ENSG00000147133 | HPA001075 | 1 | 1 | 1 | 1 |                 |
| 4948 | ENSG00000147155 | HPA003130 | 1 | 1 | 1 | 1 |                 |
| 4948 | ENSG00000147166 | HPA040721 | 1 | 1 | 1 | 1 |                 |
| 4948 | ENSG00000147174 | HPA023476 | 1 | 1 | 1 | 1 |                 |
| 4948 | ENSG00000147180 | HPA030654 | 1 | 1 | 1 | 1 |                 |
| 4948 | ENSG00000147202 | HPA005647 | 1 | 1 | 1 | 1 |                 |
| 4948 | ENSG00000147206 | HPA046757 | 1 | 1 | 1 | 1 |                 |
| 4948 | ENSG00000147231 | HPA001374 | 1 | 1 | 1 | 1 |                 |
| 4948 | ENSG00000147251 | HPA059695 | 1 | 1 | 1 | 1 |                 |
| 4948 | ENSG00000147255 | HPA035582 | 1 | 1 | 1 | 1 |                 |
| 4948 | ENSG00000147257 | HPA006316 | 1 | 1 | 1 | 1 |                 |
| 4948 | ENSG00000147274 | HPA057707 | 1 | 1 | 1 | 1 |                 |
| 4948 | ENSG00000147316 | HPA012064 | 1 | 1 | 1 | 1 |                 |
| 4948 | ENSG00000147383 | HPA000248 | 1 | 1 | 1 | 1 |                 |
| 4948 | ENSG00000147403 | CAB010339 | 1 | 1 | 1 | 1 | 0. 2761 0. 3378 |
| 4948 | ENSG00000147408 | HPA061336 | 1 | 1 | 1 | 1 |                 |
| 4948 | ENSG00000147416 | HPA008147 | 1 | 1 | 1 | 1 |                 |
| 4948 | ENSG00000147457 | HPA036119 | 1 | 1 | 1 | 1 |                 |
| 4948 | ENSG00000147459 | HPA017719 | 1 | 1 | 1 | 1 |                 |
| 4948 | ENSG00000147471 | CAB017033 | 1 | 1 | 1 | 1 |                 |
| 4948 | ENSG00000147526 | HPA056841 | 1 | 1 | 1 | 1 |                 |
| 4948 | ENSG00000147535 | HPA055777 | 1 | 1 | 1 | 1 |                 |
| 4948 | ENSG00000147548 | HPA018893 | 1 | 1 | 1 | 1 | 0. 316          |
| 4948 | ENSG00000147573 | HPA053691 | 1 | 1 | 1 | 1 |                 |
| 4948 | ENSG00000147576 | HPA023062 | 1 | 1 | 1 | 1 |                 |
| 4948 | ENSG00000147586 | HPA027202 | 1 | 1 | 1 | 1 |                 |
| 4948 | ENSG00000147596 | HPA057070 | 1 | 1 | 1 | 1 |                 |
| 4948 | ENSG00000147614 | HPA058496 | 1 | 1 | 1 | 1 |                 |
| 4948 | ENSG00000147642 | HPA053057 | 1 | 1 | 1 | 1 |                 |
| 4948 | ENSG00000147650 | HPA017245 | 1 | 1 | 1 | 1 |                 |
| 4948 | ENSG00000147654 | CAB072810 | 1 | 1 | 1 | 1 | 0. 4348         |
| 4948 | ENSG00000147677 | HPA023117 | 1 | 1 | 1 | 1 |                 |
| 4948 | ENSG00000147679 | HPA044418 | 1 | 1 | 1 | 1 |                 |
| 4948 | ENSG00000147684 | HPA042768 | 1 | 1 | 1 | 1 |                 |
| 4948 | ENSG00000147689 | HPA052615 | 1 | 1 | 1 | 1 |                 |
| 4948 | ENSG00000147853 | HPA063324 | 1 | 1 | 1 | 1 |                 |
| 4948 | ENSG00000147854 | HPA026633 | 1 | 1 | 1 | 1 | 0. 33           |
| 4948 | ENSG00000147862 | HPA003956 | 1 | 1 | 1 | 1 |                 |
| 4948 | ENSG00000147872 | HPA016607 | 1 | 1 | 1 | 1 |                 |
| 4948 | ENSG00000147874 | HPA020965 | 1 | 1 | 1 | 1 |                 |
| 4948 | ENSG00000147883 | HPA052838 | 1 | 1 | 1 | 1 |                 |



|      |                 |           |   |   |   |   |        |
|------|-----------------|-----------|---|---|---|---|--------|
| 4948 | ENSG00000147889 | HPA047838 | 1 | 1 | 1 | 1 | 0.3916 |
| 4948 | ENSG00000147905 | HPA020600 | 1 | 1 | 1 | 1 |        |
| 4948 | ENSG00000147912 | HPA072721 | 1 | 1 | 1 | 1 |        |
| 4948 | ENSG00000148053 | HPA007637 | 1 | 1 | 1 | 1 |        |
| 4948 | ENSG00000148110 | HPA017978 | 1 | 1 | 1 | 1 |        |
| 4948 | ENSG00000148120 | HPA072729 | 1 | 1 | 1 | 1 |        |
| 4948 | ENSG00000148123 | HPA014760 | 1 | 1 | 1 | 1 |        |
| 4948 | ENSG00000148143 | HPA022283 | 1 | 1 | 1 | 1 |        |
| 4948 | ENSG00000148153 | HPA020382 | 1 | 1 | 1 | 1 |        |
| 4948 | ENSG00000148158 | HPA019346 | 1 | 1 | 1 | 1 |        |
| 4948 | ENSG00000148180 | CAB016728 | 1 | 1 | 1 | 1 |        |
| 4948 | ENSG00000148187 | HPA049987 | 1 | 1 | 1 | 1 |        |
| 4948 | ENSG00000148219 | HPA027035 | 1 | 1 | 1 | 1 |        |
| 4948 | ENSG00000148225 | HPA019347 | 1 | 1 | 1 | 1 |        |
| 4948 | ENSG00000148297 | HPA063694 | 1 | 1 | 1 | 1 |        |
| 4948 | ENSG00000148308 | HPA067063 | 1 | 1 | 1 | 1 |        |
| 4948 | ENSG00000148334 | HPA020631 | 1 | 1 | 1 | 1 |        |
| 4948 | ENSG00000148335 | HPA020092 | 1 | 1 | 1 | 1 |        |
| 4948 | ENSG00000148344 | HPA045064 | 1 | 1 | 1 | 1 |        |
| 4948 | ENSG00000148357 | HPA053903 | 1 | 1 | 1 | 1 |        |
| 4948 | ENSG00000148358 | HPA031704 | 1 | 1 | 1 | 1 |        |
| 4948 | ENSG00000148362 | HPA045268 | 1 | 1 | 1 | 1 |        |
| 4948 | ENSG00000148396 | HPA005684 | 1 | 1 | 1 | 1 |        |
| 4948 | ENSG00000148399 | HPA022911 | 1 | 1 | 1 | 1 |        |
| 4948 | ENSG00000148400 | HPA067168 | 1 | 1 | 1 | 1 |        |
| 4948 | ENSG00000148411 | HPA052962 | 1 | 1 | 1 | 1 |        |
| 4948 | ENSG00000148426 | HPA041337 | 1 | 1 | 1 | 1 |        |
| 4948 | ENSG00000148481 | HPA038400 | 1 | 1 | 1 | 1 |        |
| 4948 | ENSG00000148484 | HPA025927 | 1 | 1 | 1 | 1 |        |
| 4948 | ENSG00000148488 | HPA072708 | 1 | 1 | 1 | 1 | 0.4887 |
| 4948 | ENSG00000148498 | HPA030443 | 1 | 1 | 1 | 1 |        |
| 4948 | ENSG00000148541 | HPA037888 | 1 | 1 | 1 | 1 |        |
| 4948 | ENSG00000148572 | HPA059477 | 1 | 1 | 1 | 1 |        |
| 4948 | ENSG00000148584 | HPA044079 | 1 | 1 | 1 | 1 |        |
| 4948 | ENSG00000148606 | HPA037926 | 1 | 1 | 1 | 1 |        |
| 4948 | ENSG00000148634 | HPA070301 | 1 | 1 | 1 | 1 |        |
| 4948 | ENSG00000148655 | HPA047446 | 1 | 1 | 1 | 1 |        |
| 4948 | ENSG00000148672 | HPA044839 | 1 | 1 | 1 | 1 |        |
| 4948 | ENSG00000148700 | HPA035696 | 1 | 1 | 1 | 1 |        |
| 4948 | ENSG00000148704 | HPA028946 | 1 | 1 | 1 | 1 |        |
| 4948 | ENSG00000148730 | HPA061665 | 1 | 1 | 1 | 1 |        |
| 4948 | ENSG00000148773 | CAB000058 | 1 | 1 | 1 | 1 |        |
| 4948 | ENSG00000148840 | HPA038511 | 1 | 1 | 1 | 1 |        |
| 4948 | ENSG00000148841 | HPA043626 | 1 | 1 | 1 | 1 |        |
| 4948 | ENSG00000148842 | HPA059954 | 1 | 1 | 1 | 1 |        |
| 4948 | ENSG00000148925 | HPA046777 | 1 | 1 | 1 | 1 |        |
| 4948 | ENSG00000148948 | HPA054800 | 1 | 1 | 1 | 1 |        |
| 4948 | ENSG00000148985 | HPA063099 | 1 | 1 | 1 | 1 |        |
| 4948 | ENSG00000149091 | HPA051336 | 1 | 1 | 1 | 1 |        |
| 4948 | ENSG00000149100 | HPA031063 | 1 | 1 | 1 | 1 |        |
| 4948 | ENSG00000149179 | HPA040280 | 1 | 1 | 1 | 1 |        |
| 4948 | ENSG00000149187 | CAB016114 | 1 | 1 | 1 | 1 |        |
| 4948 | ENSG00000149212 | HPA037935 | 1 | 1 | 1 | 1 |        |
| 4948 | ENSG00000149257 | HPA029198 | 1 | 1 | 1 | 1 |        |
| 4948 | ENSG00000149262 | HPA042378 | 1 | 1 | 1 | 1 |        |

|      |                 |           |   |   |   |   |         |
|------|-----------------|-----------|---|---|---|---|---------|
| 4948 | ENSG00000149269 | HPA003565 | 1 | 1 | 1 | 1 |         |
| 4948 | ENSG00000149273 | HPA063339 | 1 | 1 | 1 | 1 |         |
| 4948 | ENSG00000149289 | HPA038837 | 1 | 1 | 1 | 1 |         |
| 4948 | ENSG00000149292 | HPA038543 | 1 | 1 | 1 | 1 | 0. 3386 |
| 4948 | ENSG00000149294 | CAB018071 | 1 | 1 | 1 | 1 |         |
| 4948 | ENSG00000149308 | HPA045908 | 1 | 1 | 1 | 1 |         |
| 4948 | ENSG00000149311 | HPA067142 | 1 | 1 | 1 | 1 | 0. 438  |
| 4948 | ENSG00000149346 | HPA046372 | 1 | 1 | 1 | 1 |         |
| 4948 | ENSG00000149451 | HPA071758 | 1 | 1 | 1 | 1 |         |
| 4948 | ENSG00000149474 | HPA068443 | 1 | 1 | 1 | 1 |         |
| 4948 | ENSG00000149480 | CAB005315 | 1 | 1 | 1 | 1 |         |
| 4948 | ENSG00000149483 | HPA042373 | 1 | 1 | 1 | 1 |         |
| 4948 | ENSG00000149548 | HPA041738 | 1 | 1 | 1 | 1 |         |
| 4948 | ENSG00000149564 | HPA051043 | 1 | 1 | 1 | 1 |         |
| 4948 | ENSG00000149600 | HPA054119 | 1 | 1 | 1 | 1 |         |
| 4948 | ENSG00000149634 | HPA041386 | 1 | 1 | 1 | 1 |         |
| 4948 | ENSG00000149679 | HPA052138 | 1 | 1 | 1 | 1 |         |
| 4948 | ENSG00000149716 | HPA062696 | 1 | 1 | 1 | 1 |         |
| 4948 | ENSG00000149735 | HPA067068 | 1 | 1 | 1 | 1 |         |
| 4948 | ENSG00000149743 | HPA038705 | 1 | 1 | 1 | 1 |         |
| 4948 | ENSG00000149761 | HPA039334 | 1 | 1 | 1 | 1 |         |
| 4948 | ENSG00000149782 | CAB009257 | 1 | 1 | 1 | 1 |         |
| 4948 | ENSG00000149798 | HPA038562 | 1 | 1 | 1 | 1 |         |
| 4948 | ENSG00000149925 | HPA004177 | 1 | 1 | 1 | 1 |         |
| 4948 | ENSG00000149948 | CAB017809 | 1 | 1 | 1 | 1 |         |
| 4948 | ENSG00000149968 | HPA007875 | 1 | 1 | 1 | 1 |         |
| 4948 | ENSG00000150316 | HPA039878 | 1 | 1 | 1 | 1 |         |
| 4948 | ENSG00000150394 | HPA076441 | 1 | 1 | 1 | 1 |         |
| 4948 | ENSG00000150401 | HPA039349 | 1 | 1 | 1 | 1 |         |
| 4948 | ENSG00000150403 | HPA048126 | 1 | 1 | 1 | 1 |         |
| 4948 | ENSG00000150433 | HPA038489 | 1 | 1 | 1 | 1 |         |
| 4948 | ENSG00000150456 | HPA040417 | 1 | 1 | 1 | 1 |         |
| 4948 | ENSG00000150510 | HPA048182 | 1 | 1 | 1 | 1 |         |
| 4948 | ENSG00000150527 | HPA055459 | 1 | 1 | 1 | 1 |         |
| 4948 | ENSG00000150593 | HPA027214 | 1 | 1 | 1 | 1 | 0. 468  |
| 4948 | ENSG00000150627 | HPA042766 | 1 | 1 | 1 | 1 |         |
| 4948 | ENSG00000150636 | HPA040623 | 1 | 1 | 1 | 1 | 0. 4535 |
| 4948 | ENSG00000150637 | HPA050348 | 1 | 1 | 1 | 1 |         |
| 4948 | ENSG00000150667 | HPA041002 | 1 | 1 | 1 | 1 |         |
| 4948 | ENSG00000150681 | HPA028727 | 1 | 1 | 1 | 1 |         |
| 4948 | ENSG00000150764 | HPA039658 | 1 | 1 | 1 | 1 |         |
| 4948 | ENSG00000150768 | CAB003782 | 1 | 1 | 1 | 1 |         |
| 4948 | ENSG00000150773 | HPA039496 | 1 | 1 | 1 | 1 |         |
| 4948 | ENSG00000150776 | HPA039892 | 1 | 1 | 1 | 1 |         |
| 4948 | ENSG00000150787 | HPA001481 | 1 | 1 | 1 | 1 |         |
| 4948 | ENSG00000150867 | HPA065440 | 1 | 1 | 1 | 1 |         |
| 4948 | ENSG00000150893 | HPA028831 | 1 | 1 | 1 | 1 | 0. 4565 |
| 4948 | ENSG00000150907 | CAB022326 | 1 | 1 | 1 | 1 |         |
| 4948 | ENSG00000150967 | HPA035113 | 1 | 1 | 1 | 1 |         |
| 4948 | ENSG00000150977 | HPA028958 | 1 | 1 | 1 | 1 |         |
| 4948 | ENSG00000150990 | HPA047607 | 1 | 1 | 1 | 1 |         |
| 4948 | ENSG00000150995 | HPA014765 | 1 | 1 | 1 | 1 |         |
| 4948 | ENSG00000151012 | HPA064215 | 1 | 1 | 1 | 1 |         |
| 4948 | ENSG00000151014 | HPA012287 | 1 | 1 | 1 | 1 |         |
| 4948 | ENSG00000151025 | HPA013185 | 1 | 1 | 1 | 1 |         |

|      |                 |           |   |   |   |   |         |
|------|-----------------|-----------|---|---|---|---|---------|
| 4948 | ENSG00000151090 | HPA061035 | 1 | 1 | 1 | 1 |         |
| 4948 | ENSG00000151093 | HPA021293 | 1 | 1 | 1 | 1 | 0. 255  |
| 4948 | ENSG00000151150 | HPA038455 | 1 | 1 | 1 | 1 |         |
| 4948 | ENSG00000151151 | HPA037837 | 1 | 1 | 1 | 1 |         |
| 4948 | ENSG00000151229 | HPA006584 | 1 | 1 | 1 | 1 |         |
| 4948 | ENSG00000151247 | CAB016316 | 1 | 1 | 1 | 1 |         |
| 4948 | ENSG00000151322 | HPA075337 | 1 | 1 | 1 | 1 |         |
| 4948 | ENSG00000151327 | HPA053222 | 1 | 1 | 1 | 1 |         |
| 4948 | ENSG00000151338 | HPA050179 | 1 | 1 | 1 | 1 |         |
| 4948 | ENSG00000151353 | HPA040233 | 1 | 1 | 1 | 1 |         |
| 4948 | ENSG00000151365 | HPA040642 | 1 | 1 | 1 | 1 |         |
| 4948 | ENSG00000151366 | HPA038873 | 1 | 1 | 1 | 1 |         |
| 4948 | ENSG00000151414 | HPA018193 | 1 | 1 | 1 | 1 |         |
| 4948 | ENSG00000151422 | HPA007641 | 1 | 1 | 1 | 1 |         |
| 4948 | ENSG00000151458 | HPA044008 | 1 | 1 | 1 | 1 |         |
| 4948 | ENSG00000151461 | HPA067008 | 1 | 1 | 1 | 1 |         |
| 4948 | ENSG00000151465 | HPA037830 | 1 | 1 | 1 | 1 |         |
| 4948 | ENSG00000151474 | HPA038449 | 1 | 1 | 1 | 1 |         |
| 4948 | ENSG00000151475 | HPA015064 | 1 | 1 | 1 | 1 |         |
| 4948 | ENSG00000151491 | HPA003897 | 1 | 1 | 1 | 1 |         |
| 4948 | ENSG00000151503 | HPA040286 | 1 | 1 | 1 | 1 |         |
| 4948 | ENSG00000151552 | HPA058951 | 1 | 1 | 1 | 1 |         |
| 4948 | ENSG00000151553 | HPA043624 | 1 | 1 | 1 | 1 |         |
| 4948 | ENSG00000151611 | HPA037361 | 1 | 1 | 1 | 1 |         |
| 4948 | ENSG00000151612 | HPA021166 | 1 | 1 | 1 | 1 |         |
| 4948 | ENSG00000151623 | HPA074979 | 1 | 1 | 1 | 1 | 0. 285  |
| 4948 | ENSG00000151692 | HPA049939 | 1 | 1 | 1 | 1 |         |
| 4948 | ENSG00000151693 | CAB018615 | 1 | 1 | 1 | 1 |         |
| 4948 | ENSG00000151694 | HPA010738 | 1 | 1 | 1 | 1 | 0. 422  |
| 4948 | ENSG00000151715 | HPA015474 | 1 | 1 | 1 | 1 |         |
| 4948 | ENSG00000151718 | HPA044005 | 1 | 1 | 1 | 1 |         |
| 4948 | ENSG00000151725 | HPA022048 | 1 | 1 | 1 | 1 | 0. 235  |
| 4948 | ENSG00000151726 | HPA011316 | 1 | 1 | 1 | 1 |         |
| 4948 | ENSG00000151729 | HPA046835 | 1 | 1 | 1 | 1 |         |
| 4948 | ENSG00000151743 | HPA062290 | 1 | 1 | 1 | 1 |         |
| 4948 | ENSG00000151746 | HPA041309 | 1 | 1 | 1 | 1 | 0. 3565 |
| 4948 | ENSG00000151748 | HPA001808 | 1 | 1 | 1 | 1 |         |
| 4948 | ENSG00000151778 | HPA038970 | 1 | 1 | 1 | 1 |         |
| 4948 | ENSG00000151790 | HPA039611 | 1 | 1 | 1 | 1 |         |
| 4948 | ENSG00000151812 | HPA043853 | 1 | 1 | 1 | 1 |         |
| 4948 | ENSG00000151846 | HPA045423 | 1 | 1 | 1 | 1 |         |
| 4948 | ENSG00000151849 | HPA060426 | 1 | 1 | 1 | 1 |         |
| 4948 | ENSG00000151876 | HPA003362 | 1 | 1 | 1 | 1 |         |
| 4948 | ENSG00000151881 | HPA059946 | 1 | 1 | 1 | 1 |         |
| 4948 | ENSG00000151917 | HPA052973 | 1 | 1 | 1 | 1 | 0. 3536 |
| 4948 | ENSG00000151929 | HPA018493 | 1 | 1 | 1 | 1 |         |
| 4948 | ENSG00000151948 | HPA039051 | 1 | 1 | 1 | 1 |         |
| 4948 | ENSG00000152076 | HPA060727 | 1 | 1 | 1 | 1 |         |
| 4948 | ENSG00000152078 | HPA046762 | 1 | 1 | 1 | 1 |         |
| 4948 | ENSG00000152086 | HPA039247 | 1 | 1 | 1 | 1 |         |
| 4948 | ENSG00000152104 | CAB011469 | 1 | 1 | 1 | 1 |         |
| 4948 | ENSG00000152133 | HPA038232 | 1 | 1 | 1 | 1 |         |
| 4948 | ENSG00000152193 | HPA034785 | 1 | 1 | 1 | 1 |         |
| 4948 | ENSG00000152223 | HPA031689 | 1 | 1 | 1 | 1 |         |
| 4948 | ENSG00000152229 | HPA040923 | 1 | 1 | 1 | 1 | 0. 2793 |

|      |                 |           |   |   |   |   |        |        |
|------|-----------------|-----------|---|---|---|---|--------|--------|
| 4948 | ENSG00000152234 | CAB013067 | 1 | 1 | 1 | 1 | 0.217  | 0.262  |
| 4948 | ENSG00000152242 | HPA051899 | 1 | 1 | 1 | 1 |        |        |
| 4948 | ENSG00000152253 | HPA047144 | 1 | 1 | 1 | 1 |        |        |
| 4948 | ENSG00000152270 | HPA056111 | 1 | 1 | 1 | 1 |        |        |
| 4948 | ENSG00000152291 | CAB011489 | 1 | 1 | 1 | 1 |        | 0.3332 |
| 4948 | ENSG00000152348 | HPA044163 | 1 | 1 | 1 | 1 |        |        |
| 4948 | ENSG00000152377 | HPA026770 | 1 | 1 | 1 | 1 |        |        |
| 4948 | ENSG00000152380 | HPA043805 | 1 | 1 | 1 | 1 |        |        |
| 4948 | ENSG00000152404 | HPA038166 | 1 | 1 | 1 | 1 |        |        |
| 4948 | ENSG00000152413 | HPA036522 | 1 | 1 | 1 | 1 |        |        |
| 4948 | ENSG00000152422 | HPA006801 | 1 | 1 | 1 | 1 |        |        |
| 4948 | ENSG00000152454 | HPA055390 | 1 | 1 | 1 | 1 |        |        |
| 4948 | ENSG00000152455 | HPA045901 | 1 | 1 | 1 | 1 |        |        |
| 4948 | ENSG00000152464 | HPA045128 | 1 | 1 | 1 | 1 |        |        |
| 4948 | ENSG00000152465 | HPA001303 | 1 | 1 | 1 | 1 |        |        |
| 4948 | ENSG00000152467 | HPA007938 | 1 | 1 | 1 | 1 |        |        |
| 4948 | ENSG00000152475 | HPA042833 | 1 | 1 | 1 | 1 |        |        |
| 4948 | ENSG00000152484 | HPA059492 | 1 | 1 | 1 | 1 |        |        |
| 4948 | ENSG00000152492 | HPA001336 | 1 | 1 | 1 | 1 |        |        |
| 4948 | ENSG00000152495 | HPA011753 | 1 | 1 | 1 | 1 |        |        |
| 4948 | ENSG00000152556 | HPA002117 | 1 | 1 | 1 | 1 |        |        |
| 4948 | ENSG00000152601 | CAB016398 | 1 | 1 | 1 | 1 |        |        |
| 4948 | ENSG00000152611 | HPA058495 | 1 | 1 | 1 | 1 |        |        |
| 4948 | ENSG00000152683 | HPA055032 | 1 | 1 | 1 | 1 |        |        |
| 4948 | ENSG00000152684 | HPA031458 | 1 | 1 | 1 | 1 |        |        |
| 4948 | ENSG00000152700 | HPA006923 | 1 | 1 | 1 | 1 |        |        |
| 4948 | ENSG00000152767 | HPA000760 | 1 | 1 | 1 | 1 |        |        |
| 4948 | ENSG00000152778 | HPA062180 | 1 | 1 | 1 | 1 |        |        |
| 4948 | ENSG00000152779 | HPA037587 | 1 | 1 | 1 | 1 |        |        |
| 4948 | ENSG00000152784 | HPA057253 | 1 | 1 | 1 | 1 |        |        |
| 4948 | ENSG00000152795 | HPA056820 | 1 | 1 | 1 | 1 |        |        |
| 4948 | ENSG00000152818 | HPA018894 | 1 | 1 | 1 | 1 |        |        |
| 4948 | ENSG00000152822 | HPA015701 | 1 | 1 | 1 | 1 |        |        |
| 4948 | ENSG00000152926 | HPA031148 | 1 | 1 | 1 | 1 |        |        |
| 4948 | ENSG00000152932 | HPA048156 | 1 | 1 | 1 | 1 |        |        |
| 4948 | ENSG00000152942 | CAB004551 | 1 | 1 | 1 | 1 |        |        |
| 4948 | ENSG00000152952 | HPA069126 | 1 | 1 | 1 | 1 |        |        |
| 4948 | ENSG00000152977 | HPA004098 | 1 | 1 | 1 | 1 |        |        |
| 4948 | ENSG00000153029 | HPA048304 | 1 | 1 | 1 | 1 |        |        |
| 4948 | ENSG00000153044 | HPA036494 | 1 | 1 | 1 | 1 |        |        |
| 4948 | ENSG00000153046 | HPA035578 | 1 | 1 | 1 | 1 |        |        |
| 4948 | ENSG00000153060 | HPA043578 | 1 | 1 | 1 | 1 |        |        |
| 4948 | ENSG00000153066 | HPA041174 | 1 | 1 | 1 | 1 |        |        |
| 4948 | ENSG00000153071 | CAB009314 | 1 | 1 | 1 | 1 |        |        |
| 4948 | ENSG00000153107 | HPA042998 | 1 | 1 | 1 | 1 |        |        |
| 4948 | ENSG00000153113 | CAB009491 | 1 | 1 | 1 | 1 |        |        |
| 4948 | ENSG00000153132 | HPA048761 | 1 | 1 | 1 | 1 |        |        |
| 4948 | ENSG00000153140 | HPA063704 | 1 | 1 | 1 | 1 |        |        |
| 4948 | ENSG00000153147 | HPA008751 | 1 | 1 | 1 | 1 |        |        |
| 4948 | ENSG00000153157 | HPA034679 | 1 | 1 | 1 | 1 |        |        |
| 4948 | ENSG00000153165 | HPA067564 | 1 | 1 | 1 | 1 |        |        |
| 4948 | ENSG00000153179 | HPA038469 | 1 | 1 | 1 | 1 |        |        |
| 4948 | ENSG00000153187 | HPA058707 | 1 | 1 | 1 | 1 |        |        |
| 4948 | ENSG00000153201 | HPA018437 | 1 | 1 | 1 | 1 |        |        |
| 4948 | ENSG00000153207 | HPA031658 | 1 | 1 | 1 | 1 | 0.2651 |        |

|      |                 |           |   |   |   |   |
|------|-----------------|-----------|---|---|---|---|
| 4948 | ENSG00000153234 | HPA000543 | 1 | 1 | 1 | 1 |
| 4948 | ENSG00000153246 | CAB068217 | 1 | 1 | 1 | 1 |
| 4948 | ENSG00000153250 | HPA047943 | 1 | 1 | 1 | 1 |
| 4948 | ENSG00000153303 | HPA030347 | 1 | 1 | 1 | 1 |
| 4948 | ENSG00000153339 | HPA041107 | 1 | 1 | 1 | 1 |
| 4948 | ENSG00000153391 | HPA049060 | 1 | 1 | 1 | 1 |
| 4948 | ENSG00000153404 | HPA058157 | 1 | 1 | 1 | 1 |
| 4948 | ENSG00000153406 | HPA041353 | 1 | 1 | 1 | 1 |
| 4948 | ENSG00000153531 | HPA066478 | 1 | 1 | 1 | 1 |
| 4948 | ENSG00000153561 | HPA060843 | 1 | 1 | 1 | 1 |
| 4948 | ENSG00000153563 | HPA037756 | 1 | 1 | 1 | 1 |
| 4948 | ENSG00000153574 | HPA057954 | 1 | 1 | 1 | 1 |
| 4948 | ENSG00000153779 | HPA034543 | 1 | 1 | 1 | 1 |
| 4948 | ENSG00000153815 | HPA054424 | 1 | 1 | 1 | 1 |
| 4948 | ENSG00000153822 | HPA059563 | 1 | 1 | 1 | 1 |
| 4948 | ENSG00000153823 | HPA036103 | 1 | 1 | 1 | 1 |
| 4948 | ENSG00000153827 | HPA036835 | 1 | 1 | 1 | 1 |
| 4948 | ENSG00000153879 | HPA012024 | 1 | 1 | 1 | 1 |
| 4948 | ENSG00000153902 | HPA043556 | 1 | 1 | 1 | 1 |
| 4948 | ENSG00000153914 | HPA037673 | 1 | 1 | 1 | 1 |
| 4948 | ENSG00000153922 | HPA022236 | 1 | 1 | 1 | 1 |
| 4948 | ENSG00000153933 | HPA017167 | 1 | 1 | 1 | 1 |
| 4948 | ENSG00000153944 | CAB022300 | 1 | 1 | 1 | 1 |
| 4948 | ENSG00000153976 | HPA062518 | 1 | 1 | 1 | 1 |
| 4948 | ENSG00000153989 | HPA027504 | 1 | 1 | 1 | 1 |
| 4948 | ENSG00000154001 | HPA006034 | 1 | 1 | 1 | 1 |
| 4948 | ENSG00000154016 | HPA066654 | 1 | 1 | 1 | 1 |
| 4948 | ENSG00000154040 | HPA047801 | 1 | 1 | 1 | 1 |
| 4948 | ENSG00000154059 | HPA041968 | 1 | 1 | 1 | 1 |
| 4948 | ENSG00000154065 | HPA049419 | 1 | 1 | 1 | 1 |
| 4948 | ENSG00000154079 | HPA031824 | 1 | 1 | 1 | 1 |
| 4948 | ENSG00000154099 | HPA041166 | 1 | 1 | 1 | 1 |
| 4948 | ENSG00000154114 | HPA038594 | 1 | 1 | 1 | 1 |
| 4948 | ENSG00000154118 | HPA076304 | 1 | 1 | 1 | 1 |
| 4948 | ENSG00000154122 | HPA068104 | 1 | 1 | 1 | 1 |
| 4948 | ENSG00000154127 | HPA038607 | 1 | 1 | 1 | 1 |
| 4948 | ENSG00000154144 | HPA055645 | 1 | 1 | 1 | 1 |
| 4948 | ENSG00000154162 | HPA029325 | 1 | 1 | 1 | 1 |
| 4948 | ENSG00000154174 | HPA014589 | 1 | 1 | 1 | 1 |
| 4948 | ENSG00000154227 | HPA006092 | 1 | 1 | 1 | 1 |
| 4948 | ENSG00000154237 | HPA010537 | 1 | 1 | 1 | 1 |
| 4948 | ENSG00000154258 | HPA052113 | 1 | 1 | 1 | 1 |
| 4948 | ENSG00000154262 | HPA064878 | 1 | 1 | 1 | 1 |
| 4948 | ENSG00000154305 | HPA055922 | 1 | 1 | 1 | 1 |
| 4948 | ENSG00000154309 | HPA051411 | 1 | 1 | 1 | 1 |
| 4948 | ENSG00000154310 | HPA012128 | 1 | 1 | 1 | 1 |
| 4948 | ENSG00000154319 | HPA023915 | 1 | 1 | 1 | 1 |
| 4948 | ENSG00000154370 | HPA028541 | 1 | 1 | 1 | 1 |
| 4948 | ENSG00000154438 | HPA020558 | 1 | 1 | 1 | 1 |
| 4948 | ENSG00000154473 | HPA003601 | 1 | 1 | 1 | 1 |
| 4948 | ENSG00000154553 | HPA004749 | 1 | 1 | 1 | 1 |
| 4948 | ENSG00000154589 | HPA053060 | 1 | 1 | 1 | 1 |
| 4948 | ENSG00000154642 | HPA049030 | 1 | 1 | 1 | 1 |
| 4948 | ENSG00000154654 | HPA030901 | 1 | 1 | 1 | 1 |
| 4948 | ENSG00000154655 | HPA069042 | 1 | 1 | 1 | 1 |

0. 174

0. 454

|      |                 |           |   |   |   |   |         |         |
|------|-----------------|-----------|---|---|---|---|---------|---------|
| 4948 | ENSG00000154678 | HPA052375 | 1 | 1 | 1 | 1 |         |         |
| 4948 | ENSG00000154721 | HPA028789 | 1 | 1 | 1 | 1 |         |         |
| 4948 | ENSG00000154723 | HPA031069 | 1 | 1 | 1 | 1 | 0. 316  | 0. 3587 |
| 4948 | ENSG00000154727 | HPA003258 | 1 | 1 | 1 | 1 |         |         |
| 4948 | ENSG00000154760 | HPA022532 | 1 | 1 | 1 | 1 |         |         |
| 4948 | ENSG00000154781 | HPA043468 | 1 | 1 | 1 | 1 |         |         |
| 4948 | ENSG00000154814 | HPA036830 | 1 | 1 | 1 | 1 |         |         |
| 4948 | ENSG00000154839 | HPA045495 | 1 | 1 | 1 | 1 |         |         |
| 4948 | ENSG00000154845 | HPA040905 | 1 | 1 | 1 | 1 |         |         |
| 4948 | ENSG00000154889 | HPA012639 | 1 | 1 | 1 | 1 | 0. 2264 |         |
| 4948 | ENSG00000154917 | HPA059131 | 1 | 1 | 1 | 1 |         |         |
| 4948 | ENSG00000154920 | HPA052188 | 1 | 1 | 1 | 1 |         |         |
| 4948 | ENSG00000154975 | HPA057837 | 1 | 1 | 1 | 1 |         |         |
| 4948 | ENSG00000155008 | HPA000612 | 1 | 1 | 1 | 1 |         |         |
| 4948 | ENSG00000155034 | HPA036049 | 1 | 1 | 1 | 1 |         |         |
| 4948 | ENSG00000155093 | HPA006900 | 1 | 1 | 1 | 1 |         |         |
| 4948 | ENSG00000155096 | HPA027948 | 1 | 1 | 1 | 1 |         |         |
| 4948 | ENSG00000155097 | HPA057297 | 1 | 1 | 1 | 1 |         |         |
| 4948 | ENSG00000155100 | HPA024046 | 1 | 1 | 1 | 1 |         |         |
| 4948 | ENSG00000155111 | HPA007053 | 1 | 1 | 1 | 1 |         |         |
| 4948 | ENSG00000155115 | HPA061345 | 1 | 1 | 1 | 1 |         |         |
| 4948 | ENSG00000155158 | HPA063162 | 1 | 1 | 1 | 1 |         |         |
| 4948 | ENSG00000155189 | HPA011646 | 1 | 1 | 1 | 1 |         |         |
| 4948 | ENSG00000155313 | HPA024142 | 1 | 1 | 1 | 1 |         |         |
| 4948 | ENSG00000155329 | HPA038944 | 1 | 1 | 1 | 1 |         |         |
| 4948 | ENSG00000155330 | HPA041179 | 1 | 1 | 1 | 1 |         |         |
| 4948 | ENSG00000155363 | HPA031627 | 1 | 1 | 1 | 1 |         |         |
| 4948 | ENSG00000155367 | HPA046045 | 1 | 1 | 1 | 1 |         |         |
| 4948 | ENSG00000155438 | CAB015382 | 1 | 1 | 1 | 1 |         |         |
| 4948 | ENSG00000155463 | HPA003531 | 1 | 1 | 1 | 1 |         |         |
| 4948 | ENSG00000155495 | CAB015452 | 1 | 1 | 1 | 1 |         |         |
| 4948 | ENSG00000155506 | CAB015222 | 1 | 1 | 1 | 1 |         |         |
| 4948 | ENSG00000155542 | HPA049936 | 1 | 1 | 1 | 1 |         |         |
| 4948 | ENSG00000155545 | HPA058349 | 1 | 1 | 1 | 1 |         |         |
| 4948 | ENSG00000155636 | HPA020448 | 1 | 1 | 1 | 1 |         |         |
| 4948 | ENSG00000155660 | CAB017368 | 1 | 1 | 1 | 1 | 0. 2828 | 0. 3589 |
| 4948 | ENSG00000155666 | HPA026545 | 1 | 1 | 1 | 1 |         |         |
| 4948 | ENSG00000155729 | HPA058028 | 1 | 1 | 1 | 1 |         |         |
| 4948 | ENSG00000155744 | HPA067307 | 1 | 1 | 1 | 1 |         |         |
| 4948 | ENSG00000155827 | CAB012478 | 1 | 1 | 1 | 1 |         |         |
| 4948 | ENSG00000155846 | HPA050543 | 1 | 1 | 1 | 1 |         |         |
| 4948 | ENSG00000155858 | HPA039587 | 1 | 1 | 1 | 1 |         |         |
| 4948 | ENSG00000155868 | HPA067181 | 1 | 1 | 1 | 1 |         |         |
| 4948 | ENSG00000155903 | HPA035374 | 1 | 1 | 1 | 1 |         |         |
| 4948 | ENSG00000155906 | HPA031397 | 1 | 1 | 1 | 1 | 0. 4537 |         |
| 4948 | ENSG00000155962 | HPA047381 | 1 | 1 | 1 | 1 |         |         |
| 4948 | ENSG00000156026 | HPA016480 | 1 | 1 | 1 | 1 |         |         |
| 4948 | ENSG00000156030 | HPA003111 | 1 | 1 | 1 | 1 |         |         |
| 4948 | ENSG00000156052 | CAB010036 | 1 | 1 | 1 | 1 |         | 0. 4734 |
| 4948 | ENSG00000156110 | HPA038409 | 1 | 1 | 1 | 1 |         |         |
| 4948 | ENSG00000156127 | HPA059588 | 1 | 1 | 1 | 1 |         |         |
| 4948 | ENSG00000156136 | HPA059609 | 1 | 1 | 1 | 1 |         |         |
| 4948 | ENSG00000156150 | HPA074290 | 1 | 1 | 1 | 1 |         |         |
| 4948 | ENSG00000156218 | HPA034773 | 1 | 1 | 1 | 1 |         |         |
| 4948 | ENSG00000156232 | HPA039690 | 1 | 1 | 1 | 1 |         |         |

|      |                 |           |   |   |   |   |
|------|-----------------|-----------|---|---|---|---|
| 4948 | ENSG00000156256 | HPA021140 | 1 | 1 | 1 | 1 |
| 4948 | ENSG00000156265 | HPA030079 | 1 | 1 | 1 | 1 |
| 4948 | ENSG00000156304 | HPA018319 | 1 | 1 | 1 | 1 |
| 4948 | ENSG00000156313 | HPA073455 | 1 | 1 | 1 | 1 |
| 4948 | ENSG00000156345 | HPA027379 | 1 | 1 | 1 | 1 |
| 4948 | ENSG00000156398 | HPA026834 | 1 | 1 | 1 | 1 |
| 4948 | ENSG00000156463 | HPA035903 | 1 | 1 | 1 | 1 |
| 4948 | ENSG00000156469 | HPA002966 | 1 | 1 | 1 | 1 |
| 4948 | ENSG00000156475 | HPA042122 | 1 | 1 | 1 | 1 |
| 4948 | ENSG00000156482 | HPA002651 | 1 | 1 | 1 | 1 |
| 4948 | ENSG00000156500 | HPA059961 | 1 | 1 | 1 | 1 |
| 4948 | ENSG00000156502 | HPA038380 | 1 | 1 | 1 | 1 |
| 4948 | ENSG00000156504 | HPA000266 | 1 | 1 | 1 | 1 |
| 4948 | ENSG00000156508 | HPA051759 | 1 | 1 | 1 | 1 |
| 4948 | ENSG00000156510 | HPA064198 | 1 | 1 | 1 | 1 |
| 4948 | ENSG00000156515 | HPA007044 | 1 | 1 | 1 | 1 |
| 4948 | ENSG00000156531 | HPA001023 | 1 | 1 | 1 | 1 |
| 4948 | ENSG00000156587 | HPA003328 | 1 | 1 | 1 | 1 |
| 4948 | ENSG00000156603 | HPA039912 | 1 | 1 | 1 | 1 |
| 4948 | ENSG00000156639 | HPA016755 | 1 | 1 | 1 | 1 |
| 4948 | ENSG00000156650 | HPA006104 | 1 | 1 | 1 | 1 |
| 4948 | ENSG00000156689 | HPA065454 | 1 | 1 | 1 | 1 |
| 4948 | ENSG00000156738 | HPA014341 | 1 | 1 | 1 | 1 |
| 4948 | ENSG00000156787 | HPA023710 | 1 | 1 | 1 | 1 |
| 4948 | ENSG00000156802 | HPA029424 | 1 | 1 | 1 | 1 |
| 4948 | ENSG00000156804 | HPA058955 | 1 | 1 | 1 | 1 |
| 4948 | ENSG00000156831 | HPA051614 | 1 | 1 | 1 | 1 |
| 4948 | ENSG00000156858 | HPA052022 | 1 | 1 | 1 | 1 |
| 4948 | ENSG00000156860 | HPA044117 | 1 | 1 | 1 | 1 |
| 4948 | ENSG00000156873 | HPA065618 | 1 | 1 | 1 | 1 |
| 4948 | ENSG00000156875 | HPA073681 | 1 | 1 | 1 | 1 |
| 4948 | ENSG00000156876 | HPA028187 | 1 | 1 | 1 | 1 |
| 4948 | ENSG00000156970 | HPA008419 | 1 | 1 | 1 | 1 |
| 4948 | ENSG00000156976 | HPA068286 | 1 | 1 | 1 | 1 |
| 4948 | ENSG00000156983 | HPA003359 | 1 | 1 | 1 | 1 |
| 4948 | ENSG00000156990 | HPA037551 | 1 | 1 | 1 | 1 |
| 4948 | ENSG00000157014 | HPA036822 | 1 | 1 | 1 | 1 |
| 4948 | ENSG00000157020 | HPA057943 | 1 | 1 | 1 | 1 |
| 4948 | ENSG00000157036 | HPA071050 | 1 | 1 | 1 | 1 |
| 4948 | ENSG00000157103 | HPA013341 | 1 | 1 | 1 | 1 |
| 4948 | ENSG00000157106 | HPA073972 | 1 | 1 | 1 | 1 |
| 4948 | ENSG00000157152 | HPA037012 | 1 | 1 | 1 | 1 |
| 4948 | ENSG00000157191 | HPA028077 | 1 | 1 | 1 | 1 |
| 4948 | ENSG00000157212 | HPA016950 | 1 | 1 | 1 | 1 |
| 4948 | ENSG00000157240 | CAB013008 | 1 | 1 | 1 | 1 |
| 4948 | ENSG00000157259 | HPA006105 | 1 | 1 | 1 | 1 |
| 4948 | ENSG00000157303 | HPA042310 | 1 | 1 | 1 | 1 |
| 4948 | ENSG00000157330 | HPA028396 | 1 | 1 | 1 | 1 |
| 4948 | ENSG00000157343 | HPA030895 | 1 | 1 | 1 | 1 |
| 4948 | ENSG00000157349 | HPA066668 | 1 | 1 | 1 | 1 |
| 4948 | ENSG00000157350 | HPA017270 | 1 | 1 | 1 | 1 |
| 4948 | ENSG00000157353 | HPA041971 | 1 | 1 | 1 | 1 |
| 4948 | ENSG00000157388 | HPA020215 | 1 | 1 | 1 | 1 |
| 4948 | ENSG00000157429 | HPA063685 | 1 | 1 | 1 | 1 |
| 4948 | ENSG00000157445 | HPA030849 | 1 | 1 | 1 | 1 |

0. 254

0. 3862

0. 2711

|      |                 |           |   |   |   |   |
|------|-----------------|-----------|---|---|---|---|
| 4948 | ENSG00000157450 | HPA038576 | 1 | 1 | 1 | 1 |
| 4948 | ENSG00000157538 | HPA023288 | 1 | 1 | 1 | 1 |
| 4948 | ENSG00000157593 | HPA029638 | 1 | 1 | 1 | 1 |
| 4948 | ENSG00000157601 | HPA049724 | 1 | 1 | 1 | 1 |
| 4948 | ENSG00000157617 | HPA030924 | 1 | 1 | 1 | 1 |
| 4948 | ENSG00000157625 | HPA034981 | 1 | 1 | 1 | 1 |
| 4948 | ENSG00000157637 | HPA021374 | 1 | 1 | 1 | 1 |
| 4948 | ENSG00000157653 | HPA021310 | 1 | 1 | 1 | 1 |
| 4948 | ENSG00000157734 | HPA038470 | 1 | 1 | 1 | 1 |
| 4948 | ENSG00000157741 | HPA019743 | 1 | 1 | 1 | 1 |
| 4948 | ENSG00000157796 | HPA058847 | 1 | 1 | 1 | 1 |
| 4948 | ENSG00000157823 | HPA049270 | 1 | 1 | 1 | 1 |
| 4948 | ENSG00000157833 | HPA071575 | 1 | 1 | 1 | 1 |
| 4948 | ENSG00000157837 | HPA004194 | 1 | 1 | 1 | 1 |
| 4948 | ENSG00000157873 | HPA006404 | 1 | 1 | 1 | 1 |
| 4948 | ENSG00000157881 | HPA011723 | 1 | 1 | 1 | 1 |
| 4948 | ENSG00000157911 | HPA049458 | 1 | 1 | 1 | 1 |
| 4948 | ENSG00000157916 | CAB037240 | 1 | 1 | 1 | 1 |
| 4948 | ENSG00000157933 | HPA066567 | 1 | 1 | 1 | 1 |
| 4948 | ENSG00000157954 | HPA019852 | 1 | 1 | 1 | 1 |
| 4948 | ENSG00000157978 | CAB003705 | 1 | 1 | 1 | 1 |
| 4948 | ENSG00000157992 | HPA060203 | 1 | 1 | 1 | 1 |
| 4948 | ENSG00000157999 | HPA029511 | 1 | 1 | 1 | 1 |
| 4948 | ENSG00000158014 | HPA017979 | 1 | 1 | 1 | 1 |
| 4948 | ENSG00000158019 | HPA017926 | 1 | 1 | 1 | 1 |
| 4948 | ENSG00000158055 | HPA059960 | 1 | 1 | 1 | 1 |
| 4948 | ENSG00000158077 | HPA039477 | 1 | 1 | 1 | 1 |
| 4948 | ENSG00000158079 | HPA016747 | 1 | 1 | 1 | 1 |
| 4948 | ENSG00000158089 | HPA030138 | 1 | 1 | 1 | 1 |
| 4948 | ENSG00000158104 | HPA038322 | 1 | 1 | 1 | 1 |
| 4948 | ENSG00000158106 | HPA024288 | 1 | 1 | 1 | 1 |
| 4948 | ENSG00000158156 | HPA053529 | 1 | 1 | 1 | 1 |
| 4948 | ENSG00000158158 | HPA017732 | 1 | 1 | 1 | 1 |
| 4948 | ENSG00000158169 | HPA030771 | 1 | 1 | 1 | 1 |
| 4948 | ENSG00000158186 | HPA042728 | 1 | 1 | 1 | 1 |
| 4948 | ENSG00000158286 | HPA042535 | 1 | 1 | 1 | 1 |
| 4948 | ENSG00000158290 | HPA003046 | 1 | 1 | 1 | 1 |
| 4948 | ENSG00000158373 | HPA048671 | 1 | 1 | 1 | 1 |
| 4948 | ENSG00000158402 | CAB003800 | 1 | 1 | 1 | 1 |
| 4948 | ENSG00000158411 | HPA036162 | 1 | 1 | 1 | 1 |
| 4948 | ENSG00000158423 | HPA001150 | 1 | 1 | 1 | 1 |
| 4948 | ENSG00000158435 | HPA069823 | 1 | 1 | 1 | 1 |
| 4948 | ENSG00000158457 | HPA020357 | 1 | 1 | 1 | 1 |
| 4948 | ENSG00000158458 | HPA038935 | 1 | 1 | 1 | 1 |
| 4948 | ENSG00000158473 | HPA072662 | 1 | 1 | 1 | 1 |
| 4948 | ENSG00000158516 | HPA020342 | 1 | 1 | 1 | 1 |
| 4948 | ENSG00000158525 | HPA020322 | 1 | 1 | 1 | 1 |
| 4948 | ENSG00000158528 | HPA075591 | 1 | 1 | 1 | 1 |
| 4948 | ENSG00000158545 | HPA040847 | 1 | 1 | 1 | 1 |
| 4948 | ENSG00000158615 | HPA061088 | 1 | 1 | 1 | 1 |
| 4948 | ENSG00000158636 | HPA050777 | 1 | 1 | 1 | 1 |
| 4948 | ENSG00000158639 | HPA055869 | 1 | 1 | 1 | 1 |
| 4948 | ENSG00000158716 | HPA028211 | 1 | 1 | 1 | 1 |
| 4948 | ENSG00000158796 | HPA030681 | 1 | 1 | 1 | 1 |
| 4948 | ENSG00000158806 | HPA041070 | 1 | 1 | 1 | 1 |

0. 2958

0. 42



|      |                 |           |   |   |   |   |         |
|------|-----------------|-----------|---|---|---|---|---------|
| 4948 | ENSG00000158825 | HPA064202 | 1 | 1 | 1 | 1 |         |
| 4948 | ENSG00000158859 | HPA051296 | 1 | 1 | 1 | 1 |         |
| 4948 | ENSG00000158863 | HPA025040 | 1 | 1 | 1 | 1 |         |
| 4948 | ENSG00000158941 | HPA019907 | 1 | 1 | 1 | 1 |         |
| 4948 | ENSG00000159063 | HPA051898 | 1 | 1 | 1 | 1 |         |
| 4948 | ENSG00000159069 | HPA046615 | 1 | 1 | 1 | 1 |         |
| 4948 | ENSG00000159086 | HPA003757 | 1 | 1 | 1 | 1 | 0. 3597 |
| 4948 | ENSG00000159140 | HPA023535 | 1 | 1 | 1 | 1 |         |
| 4948 | ENSG00000159164 | HPA007863 | 1 | 1 | 1 | 1 |         |
| 4948 | ENSG00000159166 | HPA007256 | 1 | 1 | 1 | 1 |         |
| 4948 | ENSG00000159173 | HPA028190 | 1 | 1 | 1 | 1 |         |
| 4948 | ENSG00000159200 | CAB037218 | 1 | 1 | 1 | 1 | 0. 484  |
| 4948 | ENSG00000159202 | HPA007922 | 1 | 1 | 1 | 1 |         |
| 4948 | ENSG00000159208 | HPA054349 | 1 | 1 | 1 | 1 |         |
| 4948 | ENSG00000159216 | HPA004176 | 1 | 1 | 1 | 1 |         |
| 4948 | ENSG00000159228 | HPA018433 | 1 | 1 | 1 | 1 |         |
| 4948 | ENSG00000159231 | HPA018434 | 1 | 1 | 1 | 1 |         |
| 4948 | ENSG00000159256 | HPA034848 | 1 | 1 | 1 | 1 |         |
| 4948 | ENSG00000159259 | HPA021679 | 1 | 1 | 1 | 1 |         |
| 4948 | ENSG00000159261 | HPA054707 | 1 | 1 | 1 | 1 |         |
| 4948 | ENSG00000159263 | HPA029295 | 1 | 1 | 1 | 1 |         |
| 4948 | ENSG00000159267 | HPA017379 | 1 | 1 | 1 | 1 |         |
| 4948 | ENSG00000159335 | HPA038186 | 1 | 1 | 1 | 1 |         |
| 4948 | ENSG00000159403 | HPA001551 | 1 | 1 | 1 | 1 |         |
| 4948 | ENSG00000159409 | HPA006292 | 1 | 1 | 1 | 1 |         |
| 4948 | ENSG00000159459 | HPA038838 | 1 | 1 | 1 | 1 |         |
| 4948 | ENSG00000159461 | HPA077835 | 1 | 1 | 1 | 1 |         |
| 4948 | ENSG00000159596 | HPA026993 | 1 | 1 | 1 | 1 |         |
| 4948 | ENSG00000159640 | HPA069790 | 1 | 1 | 1 | 1 |         |
| 4948 | ENSG00000159692 | CAB004217 | 1 | 1 | 1 | 1 |         |
| 4948 | ENSG00000159713 | HPA047629 | 1 | 1 | 1 | 1 |         |
| 4948 | ENSG00000159714 | HPA042531 | 1 | 1 | 1 | 1 |         |
| 4948 | ENSG00000159733 | HPA057587 | 1 | 1 | 1 | 1 |         |
| 4948 | ENSG00000159784 | HPA021371 | 1 | 1 | 1 | 1 |         |
| 4948 | ENSG00000159792 | HPA053927 | 1 | 1 | 1 | 1 |         |
| 4948 | ENSG00000159873 | HPA000826 | 1 | 1 | 1 | 1 |         |
| 4948 | ENSG00000159882 | HPA006172 | 1 | 1 | 1 | 1 |         |
| 4948 | ENSG00000159885 | HPA004086 | 1 | 1 | 1 | 1 |         |
| 4948 | ENSG00000159905 | HPA059435 | 1 | 1 | 1 | 1 |         |
| 4948 | ENSG00000159915 | HPA020975 | 1 | 1 | 1 | 1 |         |
| 4948 | ENSG00000159917 | HPA045582 | 1 | 1 | 1 | 1 |         |
| 4948 | ENSG00000160049 | HPA019938 | 1 | 1 | 1 | 1 | 0. 337  |
| 4948 | ENSG00000160051 | HPA028686 | 1 | 1 | 1 | 1 |         |
| 4948 | ENSG00000160055 | HPA015049 | 1 | 1 | 1 | 1 |         |
| 4948 | ENSG00000160062 | HPA031770 | 1 | 1 | 1 | 1 |         |
| 4948 | ENSG00000160072 | HPA064867 | 1 | 1 | 1 | 1 |         |
| 4948 | ENSG00000160075 | HPA070604 | 1 | 1 | 1 | 1 |         |
| 4948 | ENSG00000160111 | HPA031329 | 1 | 1 | 1 | 1 |         |
| 4948 | ENSG00000160145 | HPA011913 | 1 | 1 | 1 | 1 |         |
| 4948 | ENSG00000160180 | HPA035464 | 1 | 1 | 1 | 1 |         |
| 4948 | ENSG00000160188 | HPA016816 | 1 | 1 | 1 | 1 |         |
| 4948 | ENSG00000160193 | HPA017381 | 1 | 1 | 1 | 1 |         |
| 4948 | ENSG00000160201 | HPA044833 | 1 | 1 | 1 | 1 |         |
| 4948 | ENSG00000160214 | HPA016818 | 1 | 1 | 1 | 1 |         |
| 4948 | ENSG00000160255 | HPA016894 | 1 | 1 | 1 | 1 |         |

|      |                 |           |   |   |   |   |         |
|------|-----------------|-----------|---|---|---|---|---------|
| 4948 | ENSG00000160284 | HPA018979 | 1 | 1 | 1 | 1 |         |
| 4948 | ENSG00000160285 | HPA032062 | 1 | 1 | 1 | 1 |         |
| 4948 | ENSG00000160310 | HPA018976 | 1 | 1 | 1 | 1 |         |
| 4948 | ENSG00000160318 | HPA056971 | 1 | 1 | 1 | 1 |         |
| 4948 | ENSG00000160323 | HPA052077 | 1 | 1 | 1 | 1 |         |
| 4948 | ENSG00000160325 | HPA015280 | 1 | 1 | 1 | 1 |         |
| 4948 | ENSG00000160345 | HPA021439 | 1 | 1 | 1 | 1 | 0. 5185 |
| 4948 | ENSG00000160392 | HPA041843 | 1 | 1 | 1 | 1 |         |
| 4948 | ENSG00000160410 | HPA041887 | 1 | 1 | 1 | 1 |         |
| 4948 | ENSG00000160445 | HPA048464 | 1 | 1 | 1 | 1 |         |
| 4948 | ENSG00000160447 | HPA058305 | 1 | 1 | 1 | 1 |         |
| 4948 | ENSG00000160471 | HPA035014 | 1 | 1 | 1 | 1 |         |
| 4948 | ENSG00000160505 | HPA062128 | 1 | 1 | 1 | 1 |         |
| 4948 | ENSG00000160551 | HPA007669 | 1 | 1 | 1 | 1 |         |
| 4948 | ENSG00000160563 | HPA007002 | 1 | 1 | 1 | 1 |         |
| 4948 | ENSG00000160570 | HPA043419 | 1 | 1 | 1 | 1 |         |
| 4948 | ENSG00000160584 | HPA045245 | 1 | 1 | 1 | 1 |         |
| 4948 | ENSG00000160588 | HPA029116 | 1 | 1 | 1 | 1 |         |
| 4948 | ENSG00000160633 | HPA016832 | 1 | 1 | 1 | 1 | 0. 3773 |
| 4948 | ENSG00000160679 | HPA028647 | 1 | 1 | 1 | 1 |         |
| 4948 | ENSG00000160685 | HPA006811 | 1 | 1 | 1 | 1 |         |
| 4948 | ENSG00000160688 | HPA028486 | 1 | 1 | 1 | 1 | 0. 2936 |
| 4948 | ENSG00000160691 | CAB005374 | 1 | 1 | 1 | 1 |         |
| 4948 | ENSG00000160695 | HPA039020 | 1 | 1 | 1 | 1 |         |
| 4948 | ENSG00000160710 | HPA003890 | 1 | 1 | 1 | 1 |         |
| 4948 | ENSG00000160741 | HPA028454 | 1 | 1 | 1 | 1 |         |
| 4948 | ENSG00000160746 | HPA016624 | 1 | 1 | 1 | 1 |         |
| 4948 | ENSG00000160752 | HPA028200 | 1 | 1 | 1 | 1 |         |
| 4948 | ENSG00000160753 | HPA028510 | 1 | 1 | 1 | 1 |         |
| 4948 | ENSG00000160789 | CAB004022 | 1 | 1 | 1 | 1 | 0. 1693 |
| 4948 | ENSG00000160803 | HPA061797 | 1 | 1 | 1 | 1 |         |
| 4948 | ENSG00000160808 | HPA016564 | 1 | 1 | 1 | 1 |         |
| 4948 | ENSG00000160868 | HPA072245 | 1 | 1 | 1 | 1 |         |
| 4948 | ENSG00000160870 | HPA072245 | 1 | 1 | 1 | 1 |         |
| 4948 | ENSG00000160886 | HPA017770 | 1 | 1 | 1 | 1 |         |
| 4948 | ENSG00000160888 | HPA055387 | 1 | 1 | 1 | 1 |         |
| 4948 | ENSG00000160908 | HPA054639 | 1 | 1 | 1 | 1 |         |
| 4948 | ENSG00000160949 | HPA024679 | 1 | 1 | 1 | 1 |         |
| 4948 | ENSG00000160957 | HPA025821 | 1 | 1 | 1 | 1 |         |
| 4948 | ENSG00000160959 | HPA021047 | 1 | 1 | 1 | 1 |         |
| 4948 | ENSG00000160961 | HPA054680 | 1 | 1 | 1 | 1 |         |
| 4948 | ENSG00000160991 | HPA055137 | 1 | 1 | 1 | 1 |         |
| 4948 | ENSG00000160999 | HPA051131 | 1 | 1 | 1 | 1 |         |
| 4948 | ENSG00000161010 | HPA043975 | 1 | 1 | 1 | 1 |         |
| 4948 | ENSG00000161011 | CAB004587 | 1 | 1 | 1 | 1 |         |
| 4948 | ENSG00000161016 | HPA050165 | 1 | 1 | 1 | 1 |         |
| 4948 | ENSG00000161048 | HPA019832 | 1 | 1 | 1 | 1 |         |
| 4948 | ENSG00000161057 | HPA049621 | 1 | 1 | 1 | 1 | 0. 3487 |
| 4948 | ENSG00000161091 | HPA042149 | 1 | 1 | 1 | 1 |         |
| 4948 | ENSG00000161179 | HPA061005 | 1 | 1 | 1 | 1 |         |
| 4948 | ENSG00000161203 | HPA069870 | 1 | 1 | 1 | 1 |         |
| 4948 | ENSG00000161217 | HPA035428 | 1 | 1 | 1 | 1 |         |
| 4948 | ENSG00000161243 | HPA062242 | 1 | 1 | 1 | 1 |         |
| 4948 | ENSG00000161298 | HPA049259 | 1 | 1 | 1 | 1 |         |
| 4948 | ENSG00000161513 | CAB008597 | 1 | 1 | 1 | 1 | 0. 321  |

|      |                 |           |   |   |   |   |         |
|------|-----------------|-----------|---|---|---|---|---------|
| 4948 | ENSG00000161542 | HPA062396 | 1 | 1 | 1 | 1 |         |
| 4948 | ENSG00000161558 | HPA014476 | 1 | 1 | 1 | 1 |         |
| 4948 | ENSG00000161618 | HPA059488 | 1 | 1 | 1 | 1 |         |
| 4948 | ENSG00000161642 | HPA039799 | 1 | 1 | 1 | 1 |         |
| 4948 | ENSG00000161647 | HPA021818 | 1 | 1 | 1 | 1 |         |
| 4948 | ENSG00000161653 | HPA027300 | 1 | 1 | 1 | 1 |         |
| 4948 | ENSG00000161654 | HPA051934 | 1 | 1 | 1 | 1 |         |
| 4948 | ENSG00000161664 | HPA066834 | 1 | 1 | 1 | 1 |         |
| 4948 | ENSG00000161681 | HPA032129 | 1 | 1 | 1 | 1 |         |
| 4948 | ENSG00000161798 | HPA065008 | 1 | 1 | 1 | 1 |         |
| 4948 | ENSG00000161800 | HPA039427 | 1 | 1 | 1 | 1 |         |
| 4948 | ENSG00000161813 | HPA039306 | 1 | 1 | 1 | 1 | 0. 2979 |
| 4948 | ENSG00000161847 | HPA049457 | 1 | 1 | 1 | 1 |         |
| 4948 | ENSG00000161860 | HPA062919 | 1 | 1 | 1 | 1 |         |
| 4948 | ENSG00000161888 | HPA051234 | 1 | 1 | 1 | 1 |         |
| 4948 | ENSG00000161904 | HPA017340 | 1 | 1 | 1 | 1 |         |
| 4948 | ENSG00000161920 | HPA056669 | 1 | 1 | 1 | 1 |         |
| 4948 | ENSG00000161940 | HPA075112 | 1 | 1 | 1 | 1 |         |
| 4948 | ENSG00000161956 | HPA060290 | 1 | 1 | 1 | 1 |         |
| 4948 | ENSG00000161958 | HPA066605 | 1 | 1 | 1 | 1 |         |
| 4948 | ENSG00000161960 | HPA068286 | 1 | 1 | 1 | 1 |         |
| 4948 | ENSG00000161996 | HPA061785 | 1 | 1 | 1 | 1 |         |
| 4948 | ENSG00000162032 | HPA046602 | 1 | 1 | 1 | 1 |         |
| 4948 | ENSG00000162066 | HPA041184 | 1 | 1 | 1 | 1 |         |
| 4948 | ENSG00000162076 | HPA041354 | 1 | 1 | 1 | 1 |         |
| 4948 | ENSG00000162104 | HPA041328 | 1 | 1 | 1 | 1 |         |
| 4948 | ENSG00000162174 | HPA029725 | 1 | 1 | 1 | 1 |         |
| 4948 | ENSG00000162191 | HPA012669 | 1 | 1 | 1 | 1 |         |
| 4948 | ENSG00000162222 | HPA055169 | 1 | 1 | 1 | 1 |         |
| 4948 | ENSG00000162227 | HPA067239 | 1 | 1 | 1 | 1 |         |
| 4948 | ENSG00000162231 | HPA061593 | 1 | 1 | 1 | 1 |         |
| 4948 | ENSG00000162236 | HPA001358 | 1 | 1 | 1 | 1 |         |
| 4948 | ENSG00000162244 | HPA069064 | 1 | 1 | 1 | 1 |         |
| 4948 | ENSG00000162300 | HPA014909 | 1 | 1 | 1 | 1 | 0. 2782 |
| 4948 | ENSG00000162302 | CAB008649 | 1 | 1 | 1 | 1 |         |
| 4948 | ENSG00000162341 | HPA016561 | 1 | 1 | 1 | 1 |         |
| 4948 | ENSG00000162367 | HPA047866 | 1 | 1 | 1 | 1 |         |
| 4948 | ENSG00000162374 | HPA043047 | 1 | 1 | 1 | 1 |         |
| 4948 | ENSG00000162377 | HPA029926 | 1 | 1 | 1 | 1 |         |
| 4948 | ENSG00000162385 | CAB015425 | 1 | 1 | 1 | 1 | 0. 3698 |
| 4948 | ENSG00000162407 | HPA072751 | 1 | 1 | 1 | 1 |         |
| 4948 | ENSG00000162413 | HPA059307 | 1 | 1 | 1 | 1 |         |
| 4948 | ENSG00000162419 | HPA044811 | 1 | 1 | 1 | 1 |         |
| 4948 | ENSG00000162430 | HPA058076 | 1 | 1 | 1 | 1 |         |
| 4948 | ENSG00000162433 | HPA049461 | 1 | 1 | 1 | 1 |         |
| 4948 | ENSG00000162437 | HPA045785 | 1 | 1 | 1 | 1 |         |
| 4948 | ENSG00000162461 | HPA069806 | 1 | 1 | 1 | 1 |         |
| 4948 | ENSG00000162493 | HPA073453 | 1 | 1 | 1 | 1 |         |
| 4948 | ENSG00000162496 | HPA010844 | 1 | 1 | 1 | 1 |         |
| 4948 | ENSG00000162511 | HPA051293 | 1 | 1 | 1 | 1 |         |
| 4948 | ENSG00000162517 | HPA061608 | 1 | 1 | 1 | 1 |         |
| 4948 | ENSG00000162526 | HPA037516 | 1 | 1 | 1 | 1 |         |
| 4948 | ENSG00000162542 | HPA014620 | 1 | 1 | 1 | 1 |         |
| 4948 | ENSG00000162551 | HPA008765 | 1 | 1 | 1 | 1 |         |
| 4948 | ENSG00000162572 | HPA026884 | 1 | 1 | 1 | 1 |         |

|      |                 |           |   |   |   |   |         |
|------|-----------------|-----------|---|---|---|---|---------|
| 4948 | ENSG00000162591 | HPA052129 | 1 | 1 | 1 | 1 |         |
| 4948 | ENSG00000162595 | HPA028557 | 1 | 1 | 1 | 1 |         |
| 4948 | ENSG00000162600 | HPA055120 | 1 | 1 | 1 | 1 |         |
| 4948 | ENSG00000162604 | HPA046058 | 1 | 1 | 1 | 1 |         |
| 4948 | ENSG00000162607 | HPA028387 | 1 | 1 | 1 | 1 |         |
| 4948 | ENSG00000162613 | HPA006149 | 1 | 1 | 1 | 1 | 0. 3323 |
| 4948 | ENSG00000162627 | HPA054338 | 1 | 1 | 1 | 1 |         |
| 4948 | ENSG00000162631 | HPA065954 | 1 | 1 | 1 | 1 |         |
| 4948 | ENSG00000162636 | HPA028451 | 1 | 1 | 1 | 1 |         |
| 4948 | ENSG00000162642 | HPA036072 | 1 | 1 | 1 | 1 |         |
| 4948 | ENSG00000162669 | HPA035036 | 1 | 1 | 1 | 1 |         |
| 4948 | ENSG00000162692 | HPA069867 | 1 | 1 | 1 | 1 |         |
| 4948 | ENSG00000162694 | CAB020716 | 1 | 1 | 1 | 1 |         |
| 4948 | ENSG00000162702 | HPA051228 | 1 | 1 | 1 | 1 |         |
| 4948 | ENSG00000162706 | HPA002981 | 1 | 1 | 1 | 1 |         |
| 4948 | ENSG00000162714 | HPA055834 | 1 | 1 | 1 | 1 |         |
| 4948 | ENSG00000162729 | HPA011917 | 1 | 1 | 1 | 1 |         |
| 4948 | ENSG00000162734 | HPA028356 | 1 | 1 | 1 | 1 |         |
| 4948 | ENSG00000162746 | CAB026139 | 1 | 1 | 1 | 1 |         |
| 4948 | ENSG00000162757 | HPA028496 | 1 | 1 | 1 | 1 |         |
| 4948 | ENSG00000162772 | HPA001562 | 1 | 1 | 1 | 1 |         |
| 4948 | ENSG00000162775 | CAB015201 | 1 | 1 | 1 | 1 |         |
| 4948 | ENSG00000162813 | HPA048461 | 1 | 1 | 1 | 1 |         |
| 4948 | ENSG00000162819 | HPA031445 | 1 | 1 | 1 | 1 |         |
| 4948 | ENSG00000162825 | HPA042595 | 1 | 1 | 1 | 1 |         |
| 4948 | ENSG00000162849 | HPA028562 | 1 | 1 | 1 | 1 |         |
| 4948 | ENSG00000162851 | HPA028482 | 1 | 1 | 1 | 1 |         |
| 4948 | ENSG00000162852 | HPA007226 | 1 | 1 | 1 | 1 |         |
| 4948 | ENSG00000162889 | HPA045556 | 1 | 1 | 1 | 1 |         |
| 4948 | ENSG00000162909 | HPA024470 | 1 | 1 | 1 | 1 |         |
| 4948 | ENSG00000162923 | HPA028539 | 1 | 1 | 1 | 1 |         |
| 4948 | ENSG00000162927 | HPA049582 | 1 | 1 | 1 | 1 |         |
| 4948 | ENSG00000162928 | HPA032141 | 1 | 1 | 1 | 1 |         |
| 4948 | ENSG00000162929 | HPA051240 | 1 | 1 | 1 | 1 |         |
| 4948 | ENSG00000162931 | HPA054908 | 1 | 1 | 1 | 1 |         |
| 4948 | ENSG00000162946 | HPA048911 | 1 | 1 | 1 | 1 |         |
| 4948 | ENSG00000162959 | HPA057952 | 1 | 1 | 1 | 1 |         |
| 4948 | ENSG00000162971 | HPA028294 | 1 | 1 | 1 | 1 |         |
| 4948 | ENSG00000162972 | HPA064013 | 1 | 1 | 1 | 1 |         |
| 4948 | ENSG00000162976 | HPA061607 | 1 | 1 | 1 | 1 |         |
| 4948 | ENSG00000162981 | HPA047703 | 1 | 1 | 1 | 1 |         |
| 4948 | ENSG00000163006 | HPA049899 | 1 | 1 | 1 | 1 |         |
| 4948 | ENSG00000163026 | HPA041054 | 1 | 1 | 1 | 1 |         |
| 4948 | ENSG00000163029 | HPA035057 | 1 | 1 | 1 | 1 |         |
| 4948 | ENSG00000163040 | HPA060727 | 1 | 1 | 1 | 1 |         |
| 4948 | ENSG00000163041 | CAB011481 | 1 | 1 | 1 | 1 |         |
| 4948 | ENSG00000163053 | HPA040518 | 1 | 1 | 1 | 1 |         |
| 4948 | ENSG00000163060 | HPA053929 | 1 | 1 | 1 | 1 |         |
| 4948 | ENSG00000163064 | CAB014884 | 1 | 1 | 1 | 1 | 0. 3646 |
| 4948 | ENSG00000163069 | HPA058656 | 1 | 1 | 1 | 1 |         |
| 4948 | ENSG00000163104 | HPA016737 | 1 | 1 | 1 | 1 |         |
| 4948 | ENSG00000163125 | HPA061693 | 1 | 1 | 1 | 1 |         |
| 4948 | ENSG00000163131 | HPA002988 | 1 | 1 | 1 | 1 |         |
| 4948 | ENSG00000163132 | HPA063895 | 1 | 1 | 1 | 1 |         |
| 4948 | ENSG00000163138 | HPA054666 | 1 | 1 | 1 | 1 |         |

|      |                 |           |   |   |   |   |         |
|------|-----------------|-----------|---|---|---|---|---------|
| 4948 | ENSG00000163141 | HPA019946 | 1 | 1 | 1 | 1 |         |
| 4948 | ENSG00000163155 | HPA028055 | 1 | 1 | 1 | 1 |         |
| 4948 | ENSG00000163159 | HPA065709 | 1 | 1 | 1 | 1 |         |
| 4948 | ENSG00000163161 | CAB037153 | 1 | 1 | 1 | 1 |         |
| 4948 | ENSG00000163162 | HPA011424 | 1 | 1 | 1 | 1 |         |
| 4948 | ENSG00000163166 | HPA061866 | 1 | 1 | 1 | 1 |         |
| 4948 | ENSG00000163219 | HPA061395 | 1 | 1 | 1 | 1 |         |
| 4948 | ENSG00000163235 | HPA042297 | 1 | 1 | 1 | 1 |         |
| 4948 | ENSG00000163249 | HPA046825 | 1 | 1 | 1 | 1 |         |
| 4948 | ENSG00000163312 | HPA036852 | 1 | 1 | 1 | 1 |         |
| 4948 | ENSG00000163320 | HPA035568 | 1 | 1 | 1 | 1 |         |
| 4948 | ENSG00000163322 | HPA037654 | 1 | 1 | 1 | 1 |         |
| 4948 | ENSG00000163328 | HPA057384 | 1 | 1 | 1 | 1 |         |
| 4948 | ENSG00000163348 | HPA023689 | 1 | 1 | 1 | 1 |         |
| 4948 | ENSG00000163374 | HPA064249 | 1 | 1 | 1 | 1 |         |
| 4948 | ENSG00000163431 | HPA028435 | 1 | 1 | 1 | 1 |         |
| 4948 | ENSG00000163467 | HPA029897 | 1 | 1 | 1 | 1 |         |
| 4948 | ENSG00000163468 | HPA006543 | 1 | 1 | 1 | 1 |         |
| 4948 | ENSG00000163472 | HPA055214 | 1 | 1 | 1 | 1 |         |
| 4948 | ENSG00000163482 | HPA027453 | 1 | 1 | 1 | 1 | 0. 4491 |
| 4948 | ENSG00000163485 | HPA044383 | 1 | 1 | 1 | 1 |         |
| 4948 | ENSG00000163497 | HPA067679 | 1 | 1 | 1 | 1 |         |
| 4948 | ENSG00000163513 | CAB073537 | 1 | 1 | 1 | 1 |         |
| 4948 | ENSG00000163516 | HPA035208 | 1 | 1 | 1 | 1 | 0. 2748 |
| 4948 | ENSG00000163527 | HPA036646 | 1 | 1 | 1 | 1 |         |
| 4948 | ENSG00000163530 | HPA036134 | 1 | 1 | 1 | 1 | 0. 2819 |
| 4948 | ENSG00000163535 | HPA035163 | 1 | 1 | 1 | 1 |         |
| 4948 | ENSG00000163536 | HPA001565 | 1 | 1 | 1 | 1 |         |
| 4948 | ENSG00000163577 | HPA029090 | 1 | 1 | 1 | 1 |         |
| 4948 | ENSG00000163596 | HPA042507 | 1 | 1 | 1 | 1 |         |
| 4948 | ENSG00000163602 | HPA053357 | 1 | 1 | 1 | 1 |         |
| 4948 | ENSG00000163605 | HPA039837 | 1 | 1 | 1 | 1 |         |
| 4948 | ENSG00000163607 | HPA034831 | 1 | 1 | 1 | 1 |         |
| 4948 | ENSG00000163608 | HPA069654 | 1 | 1 | 1 | 1 |         |
| 4948 | ENSG00000163623 | HPA036774 | 1 | 1 | 1 | 1 |         |
| 4948 | ENSG00000163635 | HPA034989 | 1 | 1 | 1 | 1 |         |
| 4948 | ENSG00000163638 | HPA028601 | 1 | 1 | 1 | 1 |         |
| 4948 | ENSG00000163644 | HPA020066 | 1 | 1 | 1 | 1 | 0. 398  |
| 4948 | ENSG00000163659 | HPA036796 | 1 | 1 | 1 | 1 |         |
| 4948 | ENSG00000163660 | HPA057911 | 1 | 1 | 1 | 1 |         |
| 4948 | ENSG00000163666 | HPA024187 | 1 | 1 | 1 | 1 |         |
| 4948 | ENSG00000163684 | HPA036194 | 1 | 1 | 1 | 1 |         |
| 4948 | ENSG00000163697 | HPA023542 | 1 | 1 | 1 | 1 |         |
| 4948 | ENSG00000163710 | HPA013203 | 1 | 1 | 1 | 1 |         |
| 4948 | ENSG00000163714 | HPA037545 | 1 | 1 | 1 | 1 |         |
| 4948 | ENSG00000163728 | HPA009295 | 1 | 1 | 1 | 1 |         |
| 4948 | ENSG00000163754 | HPA030497 | 1 | 1 | 1 | 1 |         |
| 4948 | ENSG00000163755 | HPA046281 | 1 | 1 | 1 | 1 |         |
| 4948 | ENSG00000163792 | HPA044596 | 1 | 1 | 1 | 1 |         |
| 4948 | ENSG00000163806 | HPA035162 | 1 | 1 | 1 | 1 |         |
| 4948 | ENSG00000163818 | HPA043466 | 1 | 1 | 1 | 1 |         |
| 4948 | ENSG00000163825 | HPA075932 | 1 | 1 | 1 | 1 | 0. 5491 |
| 4948 | ENSG00000163827 | HPA064844 | 1 | 1 | 1 | 1 |         |
| 4948 | ENSG00000163864 | HPA039077 | 1 | 1 | 1 | 1 |         |
| 4948 | ENSG00000163866 | HPA065331 | 1 | 1 | 1 | 1 |         |

|      |                 |           |   |   |   |   |         |
|------|-----------------|-----------|---|---|---|---|---------|
| 4948 | ENSG00000163870 | HPA019784 | 1 | 1 | 1 | 1 |         |
| 4948 | ENSG00000163872 | HPA045891 | 1 | 1 | 1 | 1 |         |
| 4948 | ENSG00000163882 | HPA055813 | 1 | 1 | 1 | 1 |         |
| 4948 | ENSG00000163888 | HPA050835 | 1 | 1 | 1 | 1 |         |
| 4948 | ENSG00000163904 | HPA029248 | 1 | 1 | 1 | 1 |         |
| 4948 | ENSG00000163913 | HPA041815 | 1 | 1 | 1 | 1 |         |
| 4948 | ENSG00000163918 | HPA049123 | 1 | 1 | 1 | 1 |         |
| 4948 | ENSG00000163932 | HPA001863 | 1 | 1 | 1 | 1 |         |
| 4948 | ENSG00000163933 | HPA060327 | 1 | 1 | 1 | 1 |         |
| 4948 | ENSG00000163935 | HPA036152 | 1 | 1 | 1 | 1 |         |
| 4948 | ENSG00000163938 | CAB020770 | 1 | 1 | 1 | 1 |         |
| 4948 | ENSG00000163939 | HPA015629 | 1 | 1 | 1 | 1 |         |
| 4948 | ENSG00000163945 | HPA053496 | 1 | 1 | 1 | 1 |         |
| 4948 | ENSG00000163946 | HPA017142 | 1 | 1 | 1 | 1 |         |
| 4948 | ENSG00000163947 | HPA064945 | 1 | 1 | 1 | 1 | 0. 3248 |
| 4948 | ENSG00000163956 | HPA008001 | 1 | 1 | 1 | 1 |         |
| 4948 | ENSG00000163960 | HPA048441 | 1 | 1 | 1 | 1 |         |
| 4948 | ENSG00000163993 | HPA019502 | 1 | 1 | 1 | 1 |         |
| 4948 | ENSG00000164002 | HPA028429 | 1 | 1 | 1 | 1 |         |
| 4948 | ENSG00000164022 | CAB017618 | 1 | 1 | 1 | 1 | 0. 3469 |
| 4948 | ENSG00000164032 | CAB022549 | 1 | 1 | 1 | 1 |         |
| 4948 | ENSG00000164039 | HPA036029 | 1 | 1 | 1 | 1 |         |
| 4948 | ENSG00000164048 | HPA003145 | 1 | 1 | 1 | 1 |         |
| 4948 | ENSG00000164053 | HPA047590 | 1 | 1 | 1 | 1 |         |
| 4948 | ENSG00000164066 | HPA036714 | 1 | 1 | 1 | 1 |         |
| 4948 | ENSG00000164073 | HPA044802 | 1 | 1 | 1 | 1 |         |
| 4948 | ENSG00000164074 | HPA051676 | 1 | 1 | 1 | 1 |         |
| 4948 | ENSG00000164077 | HPA058032 | 1 | 1 | 1 | 1 |         |
| 4948 | ENSG00000164078 | HPA008180 | 1 | 1 | 1 | 1 | 0. 6357 |
| 4948 | ENSG00000164081 | HPA017739 | 1 | 1 | 1 | 1 |         |
| 4948 | ENSG00000164089 | HPA072938 | 1 | 1 | 1 | 1 |         |
| 4948 | ENSG00000164091 | HPA040427 | 1 | 1 | 1 | 1 |         |
| 4948 | ENSG00000164093 | HPA050074 | 1 | 1 | 1 | 1 |         |
| 4948 | ENSG00000164096 | HPA026907 | 1 | 1 | 1 | 1 |         |
| 4948 | ENSG00000164105 | HPA059012 | 1 | 1 | 1 | 1 |         |
| 4948 | ENSG00000164116 | HPA056004 | 1 | 1 | 1 | 1 |         |
| 4948 | ENSG00000164117 | HPA002885 | 1 | 1 | 1 | 1 |         |
| 4948 | ENSG00000164122 | HPA028870 | 1 | 1 | 1 | 1 |         |
| 4948 | ENSG00000164124 | HPA063554 | 1 | 1 | 1 | 1 |         |
| 4948 | ENSG00000164134 | HPA023589 | 1 | 1 | 1 | 1 |         |
| 4948 | ENSG00000164142 | HPA046348 | 1 | 1 | 1 | 1 |         |
| 4948 | ENSG00000164151 | HPA061934 | 1 | 1 | 1 | 1 |         |
| 4948 | ENSG00000164161 | HPA012616 | 1 | 1 | 1 | 1 |         |
| 4948 | ENSG00000164163 | HPA036846 | 1 | 1 | 1 | 1 | 0. 3533 |
| 4948 | ENSG00000164164 | HPA036623 | 1 | 1 | 1 | 1 |         |
| 4948 | ENSG00000164167 | HPA045079 | 1 | 1 | 1 | 1 |         |
| 4948 | ENSG00000164182 | HPA048082 | 1 | 1 | 1 | 1 |         |
| 4948 | ENSG00000164187 | HPA012165 | 1 | 1 | 1 | 1 |         |
| 4948 | ENSG00000164197 | HPA006897 | 1 | 1 | 1 | 1 |         |
| 4948 | ENSG00000164209 | HPA039601 | 1 | 1 | 1 | 1 |         |
| 4948 | ENSG00000164211 | HPA046177 | 1 | 1 | 1 | 1 |         |
| 4948 | ENSG00000164236 | HPA056974 | 1 | 1 | 1 | 1 |         |
| 4948 | ENSG00000164241 | HPA043240 | 1 | 1 | 1 | 1 |         |
| 4948 | ENSG00000164244 | HPA039212 | 1 | 1 | 1 | 1 |         |
| 4948 | ENSG00000164251 | HPA014091 | 1 | 1 | 1 | 1 |         |

|      |                 |           |   |   |   |   |         |         |
|------|-----------------|-----------|---|---|---|---|---------|---------|
| 4948 | ENSG00000164258 | HPA003884 | 1 | 1 | 1 | 1 |         |         |
| 4948 | ENSG00000164284 | HPA018173 | 1 | 1 | 1 | 1 |         |         |
| 4948 | ENSG00000164292 | HPA000265 | 1 | 1 | 1 | 1 |         |         |
| 4948 | ENSG00000164305 | HPA002643 | 1 | 1 | 1 | 1 |         |         |
| 4948 | ENSG00000164323 | HPA053335 | 1 | 1 | 1 | 1 |         |         |
| 4948 | ENSG00000164327 | HPA037802 | 1 | 1 | 1 | 1 |         |         |
| 4948 | ENSG00000164329 | HPA054468 | 1 | 1 | 1 | 1 |         |         |
| 4948 | ENSG00000164332 | HPA039615 | 1 | 1 | 1 | 1 |         |         |
| 4948 | ENSG00000164338 | HPA044697 | 1 | 1 | 1 | 1 |         |         |
| 4948 | ENSG00000164346 | HPA043487 | 1 | 1 | 1 | 1 |         |         |
| 4948 | ENSG00000164366 | HPA045052 | 1 | 1 | 1 | 1 |         |         |
| 4948 | ENSG00000164405 | HPA046693 | 1 | 1 | 1 | 1 |         |         |
| 4948 | ENSG00000164438 | HPA030504 | 1 | 1 | 1 | 1 |         |         |
| 4948 | ENSG00000164442 | CAB016157 | 1 | 1 | 1 | 1 |         |         |
| 4948 | ENSG00000164463 | HPA015329 | 1 | 1 | 1 | 1 |         |         |
| 4948 | ENSG00000164466 | HPA019543 | 1 | 1 | 1 | 1 |         |         |
| 4948 | ENSG00000164494 | HPA029685 | 1 | 1 | 1 | 1 |         |         |
| 4948 | ENSG00000164506 | HPA039991 | 1 | 1 | 1 | 1 |         |         |
| 4948 | ENSG00000164509 | HPA051532 | 1 | 1 | 1 | 1 |         |         |
| 4948 | ENSG00000164543 | HPA018138 | 1 | 1 | 1 | 1 | 0. 3415 |         |
| 4948 | ENSG00000164587 | HPA018504 | 1 | 1 | 1 | 1 | 0. 4121 |         |
| 4948 | ENSG00000164603 | HPA050733 | 1 | 1 | 1 | 1 |         |         |
| 4948 | ENSG00000164638 | HPA052829 | 1 | 1 | 1 | 1 |         |         |
| 4948 | ENSG00000164645 | HPA023817 | 1 | 1 | 1 | 1 | 0. 2513 | 0. 3116 |
| 4948 | ENSG00000164659 | HPA076093 | 1 | 1 | 1 | 1 |         |         |
| 4948 | ENSG00000164674 | HPA030586 | 1 | 1 | 1 | 1 |         |         |
| 4948 | ENSG00000164684 | HPA024285 | 1 | 1 | 1 | 1 |         |         |
| 4948 | ENSG00000164687 | CAB040577 | 1 | 1 | 1 | 1 |         |         |
| 4948 | ENSG00000164691 | HPA039982 | 1 | 1 | 1 | 1 |         |         |
| 4948 | ENSG00000164694 | HPA030962 | 1 | 1 | 1 | 1 |         |         |
| 4948 | ENSG00000164733 | CAB000457 | 1 | 1 | 1 | 1 |         |         |
| 4948 | ENSG00000164736 | CAB025594 | 1 | 1 | 1 | 1 |         |         |
| 4948 | ENSG00000164744 | HPA008344 | 1 | 1 | 1 | 1 |         |         |
| 4948 | ENSG00000164754 | HPA020044 | 1 | 1 | 1 | 1 | 0. 513  |         |
| 4948 | ENSG00000164758 | HPA045767 | 1 | 1 | 1 | 1 |         |         |
| 4948 | ENSG00000164808 | HPA041582 | 1 | 1 | 1 | 1 |         |         |
| 4948 | ENSG00000164818 | HPA020243 | 1 | 1 | 1 | 1 |         |         |
| 4948 | ENSG00000164823 | HPA050595 | 1 | 1 | 1 | 1 |         |         |
| 4948 | ENSG00000164828 | HPA008346 | 1 | 1 | 1 | 1 |         |         |
| 4948 | ENSG00000164841 | HPA015672 | 1 | 1 | 1 | 1 | 0. 3129 |         |
| 4948 | ENSG00000164855 | HPA053790 | 1 | 1 | 1 | 1 |         |         |
| 4948 | ENSG00000164880 | HPA053009 | 1 | 1 | 1 | 1 |         |         |
| 4948 | ENSG00000164889 | HPA019339 | 1 | 1 | 1 | 1 |         |         |
| 4948 | ENSG00000164897 | HPA029429 | 1 | 1 | 1 | 1 |         |         |
| 4948 | ENSG00000164898 | HPA050553 | 1 | 1 | 1 | 1 |         |         |
| 4948 | ENSG00000164919 | HPA014295 | 1 | 1 | 1 | 1 |         |         |
| 4948 | ENSG00000164930 | HPA017991 | 1 | 1 | 1 | 1 | 0. 439  |         |
| 4948 | ENSG00000164941 | HPA057299 | 1 | 1 | 1 | 1 |         |         |
| 4948 | ENSG00000164961 | HPA064649 | 1 | 1 | 1 | 1 |         |         |
| 4948 | ENSG00000164970 | HPA019338 | 1 | 1 | 1 | 1 |         |         |
| 4948 | ENSG00000164976 | HPA067487 | 1 | 1 | 1 | 1 |         |         |
| 4948 | ENSG00000164983 | HPA025020 | 1 | 1 | 1 | 1 |         |         |
| 4948 | ENSG00000164985 | HPA019697 | 1 | 1 | 1 | 1 | 0. 4684 |         |
| 4948 | ENSG00000165029 | HPA057283 | 1 | 1 | 1 | 1 |         |         |
| 4948 | ENSG00000165030 | HPA003261 | 1 | 1 | 1 | 1 |         |         |

|      |                 |           |   |   |   |   |         |
|------|-----------------|-----------|---|---|---|---|---------|
| 4948 | ENSG00000165061 | HPA071585 | 1 | 1 | 1 | 1 |         |
| 4948 | ENSG00000165071 | HPA058401 | 1 | 1 | 1 | 1 |         |
| 4948 | ENSG00000165072 | HPA022249 | 1 | 1 | 1 | 1 |         |
| 4948 | ENSG00000165092 | HPA002123 | 1 | 1 | 1 | 1 |         |
| 4948 | ENSG00000165097 | HPA031269 | 1 | 1 | 1 | 1 |         |
| 4948 | ENSG00000165105 | HPA021431 | 1 | 1 | 1 | 1 |         |
| 4948 | ENSG00000165113 | HPA035118 | 1 | 1 | 1 | 1 |         |
| 4948 | ENSG00000165118 | HPA066190 | 1 | 1 | 1 | 1 |         |
| 4948 | ENSG00000165119 | CAB004435 | 1 | 1 | 1 | 1 | 0. 2476 |
| 4948 | ENSG00000165140 | HPA005857 | 1 | 1 | 1 | 1 |         |
| 4948 | ENSG00000165152 | HPA011318 | 1 | 1 | 1 | 1 |         |
| 4948 | ENSG00000165156 | HPA055357 | 1 | 1 | 1 | 1 |         |
| 4948 | ENSG00000165171 | HPA022420 | 1 | 1 | 1 | 1 |         |
| 4948 | ENSG00000165185 | HPA020625 | 1 | 1 | 1 | 1 |         |
| 4948 | ENSG00000165233 | HPA010990 | 1 | 1 | 1 | 1 |         |
| 4948 | ENSG00000165244 | HPA015319 | 1 | 1 | 1 | 1 |         |
| 4948 | ENSG00000165259 | HPA047189 | 1 | 1 | 1 | 1 |         |
| 4948 | ENSG00000165264 | HPA044001 | 1 | 1 | 1 | 1 |         |
| 4948 | ENSG00000165280 | CAB005593 | 1 | 1 | 1 | 1 |         |
| 4948 | ENSG00000165282 | HPA014905 | 1 | 1 | 1 | 1 |         |
| 4948 | ENSG00000165283 | CAB015944 | 1 | 1 | 1 | 1 |         |
| 4948 | ENSG00000165288 | HPA012802 | 1 | 1 | 1 | 1 |         |
| 4948 | ENSG00000165338 | HPA037767 | 1 | 1 | 1 | 1 | 0. 296  |
| 4948 | ENSG00000165355 | HPA046657 | 1 | 1 | 1 | 1 |         |
| 4948 | ENSG00000165392 | HPA028661 | 1 | 1 | 1 | 1 |         |
| 4948 | ENSG00000165410 | CAB037078 | 1 | 1 | 1 | 1 | 0. 248  |
| 4948 | ENSG00000165417 | HPA000869 | 1 | 1 | 1 | 1 |         |
| 4948 | ENSG00000165424 | HPA038348 | 1 | 1 | 1 | 1 |         |
| 4948 | ENSG00000165434 | HPA060948 | 1 | 1 | 1 | 1 |         |
| 4948 | ENSG00000165458 | HPA037601 | 1 | 1 | 1 | 1 | 0. 394  |
| 4948 | ENSG00000165474 | HPA014362 | 1 | 1 | 1 | 1 |         |
| 4948 | ENSG00000165478 | HPA017613 | 1 | 1 | 1 | 1 |         |
| 4948 | ENSG00000165490 | HPA038541 | 1 | 1 | 1 | 1 |         |
| 4948 | ENSG00000165494 | HPA040779 | 1 | 1 | 1 | 1 |         |
| 4948 | ENSG00000165496 | HPA011311 | 1 | 1 | 1 | 1 |         |
| 4948 | ENSG00000165506 | HPA004113 | 1 | 1 | 1 | 1 |         |
| 4948 | ENSG00000165512 | HPA016736 | 1 | 1 | 1 | 1 |         |
| 4948 | ENSG00000165516 | HPA000628 | 1 | 1 | 1 | 1 |         |
| 4948 | ENSG00000165548 | HPA030657 | 1 | 1 | 1 | 1 |         |
| 4948 | ENSG00000165583 | HPA045683 | 1 | 1 | 1 | 1 |         |
| 4948 | ENSG00000165584 | HPA045683 | 1 | 1 | 1 | 1 |         |
| 4948 | ENSG00000165626 | HPA037835 | 1 | 1 | 1 | 1 |         |
| 4948 | ENSG00000165630 | HPA037599 | 1 | 1 | 1 | 1 |         |
| 4948 | ENSG00000165632 | HPA066184 | 1 | 1 | 1 | 1 |         |
| 4948 | ENSG00000165637 | HPA043475 | 1 | 1 | 1 | 1 |         |
| 4948 | ENSG00000165643 | HPA059439 | 1 | 1 | 1 | 1 |         |
| 4948 | ENSG00000165650 | HPA051610 | 1 | 1 | 1 | 1 | 0. 3787 |
| 4948 | ENSG00000165675 | HPA003027 | 1 | 1 | 1 | 1 |         |
| 4948 | ENSG00000165678 | HPA061664 | 1 | 1 | 1 | 1 |         |
| 4948 | ENSG00000165685 | HPA058096 | 1 | 1 | 1 | 1 |         |
| 4948 | ENSG00000165688 | HPA021648 | 1 | 1 | 1 | 1 | 0. 464  |
| 4948 | ENSG00000165698 | HPA022243 | 1 | 1 | 1 | 1 |         |
| 4948 | ENSG00000165704 | HPA006360 | 1 | 1 | 1 | 1 |         |
| 4948 | ENSG00000165714 | HPA039509 | 1 | 1 | 1 | 1 |         |
| 4948 | ENSG00000165724 | HPA020642 | 1 | 1 | 1 | 1 |         |



|      |                 |           |   |   |   |   |
|------|-----------------|-----------|---|---|---|---|
| 4948 | ENSG00000165732 | HPA036592 | 1 | 1 | 1 | 1 |
| 4948 | ENSG00000165733 | HPA036589 | 1 | 1 | 1 | 1 |
| 4948 | ENSG00000165757 | HPA017956 | 1 | 1 | 1 | 1 |
| 4948 | ENSG00000165792 | HPA002955 | 1 | 1 | 1 | 1 |
| 4948 | ENSG00000165794 | HPA073231 | 1 | 1 | 1 | 1 |
| 4948 | ENSG00000165795 | HPA002896 | 1 | 1 | 1 | 1 |
| 4948 | ENSG00000165801 | HPA030745 | 1 | 1 | 1 | 1 |
| 4948 | ENSG00000165804 | HPA056168 | 1 | 1 | 1 | 1 |
| 4948 | ENSG00000165813 | HPA018019 | 1 | 1 | 1 | 1 |
| 4948 | ENSG00000165861 | HPA002898 | 1 | 1 | 1 | 1 |
| 4948 | ENSG00000165863 | HPA043022 | 1 | 1 | 1 | 1 |
| 4948 | ENSG00000165887 | HPA040842 | 1 | 1 | 1 | 1 |
| 4948 | ENSG00000165891 | HPA064866 | 1 | 1 | 1 | 1 |
| 4948 | ENSG00000165899 | HPA040364 | 1 | 1 | 1 | 1 |
| 4948 | ENSG00000165914 | HPA059577 | 1 | 1 | 1 | 1 |
| 4948 | ENSG00000165916 | HPA006065 | 1 | 1 | 1 | 1 |
| 4948 | ENSG00000165929 | HPA027549 | 1 | 1 | 1 | 1 |
| 4948 | ENSG00000166004 | HPA038596 | 1 | 1 | 1 | 1 |
| 4948 | ENSG00000166016 | HPA020065 | 1 | 1 | 1 | 1 |
| 4948 | ENSG00000166033 | HPA036655 | 1 | 1 | 1 | 1 |
| 4948 | ENSG00000166046 | HPA042188 | 1 | 1 | 1 | 1 |
| 4948 | ENSG00000166049 | HPA011122 | 1 | 1 | 1 | 1 |
| 4948 | ENSG00000166068 | HPA061805 | 1 | 1 | 1 | 1 |
| 4948 | ENSG00000166086 | HPA003417 | 1 | 1 | 1 | 1 |
| 4948 | ENSG00000166106 | HPA042867 | 1 | 1 | 1 | 1 |
| 4948 | ENSG00000166123 | HPA051514 | 1 | 1 | 1 | 1 |
| 4948 | ENSG00000166130 | HPA038677 | 1 | 1 | 1 | 1 |
| 4948 | ENSG00000166133 | HPA042079 | 1 | 1 | 1 | 1 |
| 4948 | ENSG00000166135 | HPA048742 | 1 | 1 | 1 | 1 |
| 4948 | ENSG00000166136 | HPA003886 | 1 | 1 | 1 | 1 |
| 4948 | ENSG00000166153 | HPA039323 | 1 | 1 | 1 | 1 |
| 4948 | ENSG00000166164 | HPA042389 | 1 | 1 | 1 | 1 |
| 4948 | ENSG00000166165 | HPA001254 | 1 | 1 | 1 | 1 |
| 4948 | ENSG00000166169 | HPA066704 | 1 | 1 | 1 | 1 |
| 4948 | ENSG00000166170 | HPA016429 | 1 | 1 | 1 | 1 |
| 4948 | ENSG00000166171 | HPA036603 | 1 | 1 | 1 | 1 |
| 4948 | ENSG00000166173 | HPA049029 | 1 | 1 | 1 | 1 |
| 4948 | ENSG00000166181 | HPA026598 | 1 | 1 | 1 | 1 |
| 4948 | ENSG00000166188 | HPA052584 | 1 | 1 | 1 | 1 |
| 4948 | ENSG00000166197 | HPA037366 | 1 | 1 | 1 | 1 |
| 4948 | ENSG00000166224 | HPA021125 | 1 | 1 | 1 | 1 |
| 4948 | ENSG00000166226 | HPA003198 | 1 | 1 | 1 | 1 |
| 4948 | ENSG00000166246 | HPA049468 | 1 | 1 | 1 | 1 |
| 4948 | ENSG00000166265 | HPA067685 | 1 | 1 | 1 | 1 |
| 4948 | ENSG00000166268 | HPA049340 | 1 | 1 | 1 | 1 |
| 4948 | ENSG00000166275 | HPA037648 | 1 | 1 | 1 | 1 |
| 4948 | ENSG00000166292 | HPA055936 | 1 | 1 | 1 | 1 |
| 4948 | ENSG00000166295 | HPA037815 | 1 | 1 | 1 | 1 |
| 4948 | ENSG00000166321 | HPA040636 | 1 | 1 | 1 | 1 |
| 4948 | ENSG00000166337 | HPA004148 | 1 | 1 | 1 | 1 |
| 4948 | ENSG00000166341 | HPA017970 | 1 | 1 | 1 | 1 |
| 4948 | ENSG00000166342 | HPA064630 | 1 | 1 | 1 | 1 |
| 4948 | ENSG00000166347 | HPA047548 | 1 | 1 | 1 | 1 |
| 4948 | ENSG00000166348 | HPA047663 | 1 | 1 | 1 | 1 |
| 4948 | ENSG00000166349 | HPA043939 | 1 | 1 | 1 | 1 |

0. 4627

0. 285

0. 4669 0. 5314

|      |                 |           |   |   |   |   |
|------|-----------------|-----------|---|---|---|---|
| 4948 | ENSG00000166359 | HPA050336 | 1 | 1 | 1 | 1 |
| 4948 | ENSG00000166387 | HPA001935 | 1 | 1 | 1 | 1 |
| 4948 | ENSG00000166398 | HPA014570 | 1 | 1 | 1 | 1 |
| 4948 | ENSG00000166411 | HPA041465 | 1 | 1 | 1 | 1 |
| 4948 | ENSG00000166415 | HPA048212 | 1 | 1 | 1 | 1 |
| 4948 | ENSG00000166435 | HPA039263 | 1 | 1 | 1 | 1 |
| 4948 | ENSG00000166441 | HPA060776 | 1 | 1 | 1 | 1 |
| 4948 | ENSG00000166451 | HPA052870 | 1 | 1 | 1 | 1 |
| 4948 | ENSG00000166452 | HPA061391 | 1 | 1 | 1 | 1 |
| 4948 | ENSG00000166455 | HPA041136 | 1 | 1 | 1 | 1 |
| 4948 | ENSG00000166471 | HPA014946 | 1 | 1 | 1 | 1 |
| 4948 | ENSG00000166482 | HPA054097 | 1 | 1 | 1 | 1 |
| 4948 | ENSG00000166483 | HPA068845 | 1 | 1 | 1 | 1 |
| 4948 | ENSG00000166503 | HPA040719 | 1 | 1 | 1 | 1 |
| 4948 | ENSG00000166507 | HPA051515 | 1 | 1 | 1 | 1 |
| 4948 | ENSG00000166510 | HPA040865 | 1 | 1 | 1 | 1 |
| 4948 | ENSG00000166523 | HPA004935 | 1 | 1 | 1 | 1 |
| 4948 | ENSG00000166526 | HPA003719 | 1 | 1 | 1 | 1 |
| 4948 | ENSG00000166529 | HPA016948 | 1 | 1 | 1 | 1 |
| 4948 | ENSG00000166557 | HPA076949 | 1 | 1 | 1 | 1 |
| 4948 | ENSG00000166575 | HPA056685 | 1 | 1 | 1 | 1 |
| 4948 | ENSG00000166595 | HPA041501 | 1 | 1 | 1 | 1 |
| 4948 | ENSG00000166598 | HPA003901 | 1 | 1 | 1 | 1 |
| 4948 | ENSG00000166681 | HPA018886 | 1 | 1 | 1 | 1 |
| 4948 | ENSG00000166682 | HPA010992 | 1 | 1 | 1 | 1 |
| 4948 | ENSG00000166704 | HPA043584 | 1 | 1 | 1 | 1 |
| 4948 | ENSG00000166710 | CAB002572 | 1 | 1 | 1 | 1 |
| 4948 | ENSG00000166716 | HPA021600 | 1 | 1 | 1 | 1 |
| 4948 | ENSG00000166734 | HPA043015 | 1 | 1 | 1 | 1 |
| 4948 | ENSG00000166783 | HPA017992 | 1 | 1 | 1 | 1 |
| 4948 | ENSG00000166788 | HPA039003 | 1 | 1 | 1 | 1 |
| 4948 | ENSG00000166803 | HPA047929 | 1 | 1 | 1 | 1 |
| 4948 | ENSG00000166816 | HPA066148 | 1 | 1 | 1 | 1 |
| 4948 | ENSG00000166819 | HPA024299 | 1 | 1 | 1 | 1 |
| 4948 | ENSG00000166833 | HPA011755 | 1 | 1 | 1 | 1 |
| 4948 | ENSG00000166839 | HPA040757 | 1 | 1 | 1 | 1 |
| 4948 | ENSG00000166845 | HPA040704 | 1 | 1 | 1 | 1 |
| 4948 | ENSG00000166847 | HPA063710 | 1 | 1 | 1 | 1 |
| 4948 | ENSG00000166860 | HPA020306 | 1 | 1 | 1 | 1 |
| 4948 | ENSG00000166863 | HPA045919 | 1 | 1 | 1 | 1 |
| 4948 | ENSG00000166866 | HPA053490 | 1 | 1 | 1 | 1 |
| 4948 | ENSG00000166881 | HPA014394 | 1 | 1 | 1 | 1 |
| 4948 | ENSG00000166886 | HPA027464 | 1 | 1 | 1 | 1 |
| 4948 | ENSG00000166888 | HPA001861 | 1 | 1 | 1 | 1 |
| 4948 | ENSG00000166889 | HPA039030 | 1 | 1 | 1 | 1 |
| 4948 | ENSG00000166897 | HPA000781 | 1 | 1 | 1 | 1 |
| 4948 | ENSG00000166900 | HPA002191 | 1 | 1 | 1 | 1 |
| 4948 | ENSG00000166908 | HPA058551 | 1 | 1 | 1 | 1 |
| 4948 | ENSG00000166912 | HPA006081 | 1 | 1 | 1 | 1 |
| 4948 | ENSG00000166925 | HPA006757 | 1 | 1 | 1 | 1 |
| 4948 | ENSG00000166938 | HPA041805 | 1 | 1 | 1 | 1 |
| 4948 | ENSG00000166946 | CAB020664 | 1 | 1 | 1 | 1 |
| 4948 | ENSG00000166961 | HPA054563 | 1 | 1 | 1 | 1 |
| 4948 | ENSG00000166963 | HPA066488 | 1 | 1 | 1 | 1 |
| 4948 | ENSG00000166965 | HPA039683 | 1 | 1 | 1 | 1 |

0. 3158

0. 1711

|      |                 |           |   |   |   |   |         |
|------|-----------------|-----------|---|---|---|---|---------|
| 4948 | ENSG00000166974 | HPA016739 | 1 | 1 | 1 | 1 |         |
| 4948 | ENSG00000166986 | HPA004125 | 1 | 1 | 1 | 1 | 0. 3454 |
| 4948 | ENSG00000166997 | HPA025240 | 1 | 1 | 1 | 1 |         |
| 4948 | ENSG00000167004 | HPA002645 | 1 | 1 | 1 | 1 | 0. 452  |
| 4948 | ENSG00000167011 | HPA021918 | 1 | 1 | 1 | 1 |         |
| 4948 | ENSG00000167014 | HPA041780 | 1 | 1 | 1 | 1 | 0. 377  |
| 4948 | ENSG00000167065 | HPA051349 | 1 | 1 | 1 | 1 |         |
| 4948 | ENSG00000167085 | HPA003280 | 1 | 1 | 1 | 1 |         |
| 4948 | ENSG00000167100 | HPA051916 | 1 | 1 | 1 | 1 |         |
| 4948 | ENSG00000167105 | HPA063009 | 1 | 1 | 1 | 1 |         |
| 4948 | ENSG00000167106 | HPA036030 | 1 | 1 | 1 | 1 |         |
| 4948 | ENSG00000167110 | HPA021178 | 1 | 1 | 1 | 1 |         |
| 4948 | ENSG00000167113 | HPA021406 | 1 | 1 | 1 | 1 |         |
| 4948 | ENSG00000167114 | HPA007293 | 1 | 1 | 1 | 1 | 0. 371  |
| 4948 | ENSG00000167118 | HPA053645 | 1 | 1 | 1 | 1 |         |
| 4948 | ENSG00000167131 | HPA043131 | 1 | 1 | 1 | 1 |         |
| 4948 | ENSG00000167157 | HPA006607 | 1 | 1 | 1 | 1 |         |
| 4948 | ENSG00000167173 | HPA039961 | 1 | 1 | 1 | 1 |         |
| 4948 | ENSG00000167182 | HPA003357 | 1 | 1 | 1 | 1 |         |
| 4948 | ENSG00000167183 | HPA022918 | 1 | 1 | 1 | 1 |         |
| 4948 | ENSG00000167193 | HPA068087 | 1 | 1 | 1 | 1 |         |
| 4948 | ENSG00000167202 | HPA041833 | 1 | 1 | 1 | 1 |         |
| 4948 | ENSG00000167208 | HPA043649 | 1 | 1 | 1 | 1 |         |
| 4948 | ENSG00000167216 | HPA042029 | 1 | 1 | 1 | 1 |         |
| 4948 | ENSG00000167220 | HPA059818 | 1 | 1 | 1 | 1 |         |
| 4948 | ENSG00000167264 | HPA042560 | 1 | 1 | 1 | 1 |         |
| 4948 | ENSG00000167281 | HPA030790 | 1 | 1 | 1 | 1 |         |
| 4948 | ENSG00000167283 | HPA044629 | 1 | 1 | 1 | 1 |         |
| 4948 | ENSG00000167291 | HPA065839 | 1 | 1 | 1 | 1 |         |
| 4948 | ENSG00000167302 | HPA063410 | 1 | 1 | 1 | 1 |         |
| 4948 | ENSG00000167306 | HPA069773 | 1 | 1 | 1 | 1 |         |
| 4948 | ENSG00000167315 | HPA042303 | 1 | 1 | 1 | 1 |         |
| 4948 | ENSG00000167323 | HPA011088 | 1 | 1 | 1 | 1 |         |
| 4948 | ENSG00000167377 | HPA023534 | 1 | 1 | 1 | 1 |         |
| 4948 | ENSG00000167378 | HPA050338 | 1 | 1 | 1 | 1 |         |
| 4948 | ENSG00000167380 | HPA006145 | 1 | 1 | 1 | 1 |         |
| 4948 | ENSG00000167384 | HPA028980 | 1 | 1 | 1 | 1 |         |
| 4948 | ENSG00000167394 | HPA043048 | 1 | 1 | 1 | 1 |         |
| 4948 | ENSG00000167395 | HPA042364 | 1 | 1 | 1 | 1 |         |
| 4948 | ENSG00000167397 | HPA042720 | 1 | 1 | 1 | 1 |         |
| 4948 | ENSG00000167434 | HPA017258 | 1 | 1 | 1 | 1 |         |
| 4948 | ENSG00000167447 | HPA024841 | 1 | 1 | 1 | 1 |         |
| 4948 | ENSG00000167468 | HPA058546 | 1 | 1 | 1 | 1 |         |
| 4948 | ENSG00000167470 | HPA049432 | 1 | 1 | 1 | 1 |         |
| 4948 | ENSG00000167491 | HPA006759 | 1 | 1 | 1 | 1 |         |
| 4948 | ENSG00000167513 | HPA017224 | 1 | 1 | 1 | 1 | 0. 388  |
| 4948 | ENSG00000167515 | HPA041714 | 1 | 1 | 1 | 1 |         |
| 4948 | ENSG00000167526 | HPA051702 | 1 | 1 | 1 | 1 |         |
| 4948 | ENSG00000167536 | HPA022991 | 1 | 1 | 1 | 1 |         |
| 4948 | ENSG00000167548 | HPA035977 | 1 | 1 | 1 | 1 |         |
| 4948 | ENSG00000167549 | HPA021556 | 1 | 1 | 1 | 1 |         |
| 4948 | ENSG00000167552 | CAB008686 | 1 | 1 | 1 | 1 |         |
| 4948 | ENSG00000167553 | HPA039247 | 1 | 1 | 1 | 1 |         |
| 4948 | ENSG00000167565 | HPA068262 | 1 | 1 | 1 | 1 |         |
| 4948 | ENSG00000167566 | HPA041034 | 1 | 1 | 1 | 1 | 0. 2414 |

|      |                 |           |   |   |   |   |         |
|------|-----------------|-----------|---|---|---|---|---------|
| 4948 | ENSG00000167595 | HPA058492 | 1 | 1 | 1 | 1 |         |
| 4948 | ENSG00000167601 | HPA075217 | 1 | 1 | 1 | 1 |         |
| 4948 | ENSG00000167604 | HPA043573 | 1 | 1 | 1 | 1 |         |
| 4948 | ENSG00000167613 | HPA011155 | 1 | 1 | 1 | 1 |         |
| 4948 | ENSG00000167619 | HPA060462 | 1 | 1 | 1 | 1 |         |
| 4948 | ENSG00000167634 | HPA051382 | 1 | 1 | 1 | 1 |         |
| 4948 | ENSG00000167641 | CAB005044 | 1 | 1 | 1 | 1 |         |
| 4948 | ENSG00000167657 | HPA064809 | 1 | 1 | 1 | 1 |         |
| 4948 | ENSG00000167658 | CAB007795 | 1 | 1 | 1 | 1 |         |
| 4948 | ENSG00000167670 | CAB015186 | 1 | 1 | 1 | 1 |         |
| 4948 | ENSG00000167671 | HPA061872 | 1 | 1 | 1 | 1 |         |
| 4948 | ENSG00000167693 | HPA023566 | 1 | 1 | 1 | 1 |         |
| 4948 | ENSG00000167702 | HPA029264 | 1 | 1 | 1 | 1 |         |
| 4948 | ENSG00000167716 | HPA023044 | 1 | 1 | 1 | 1 |         |
| 4948 | ENSG00000167720 | HPA007529 | 1 | 1 | 1 | 1 |         |
| 4948 | ENSG00000167721 | HPA053087 | 1 | 1 | 1 | 1 |         |
| 4948 | ENSG00000167766 | HPA025970 | 1 | 1 | 1 | 1 | 0. 3976 |
| 4948 | ENSG00000167767 | HPA077836 | 1 | 1 | 1 | 1 | 0. 3787 |
| 4948 | ENSG00000167775 | HPA073489 | 1 | 1 | 1 | 1 |         |
| 4948 | ENSG00000167797 | HPA047599 | 1 | 1 | 1 | 1 |         |
| 4948 | ENSG00000167799 | HPA041252 | 1 | 1 | 1 | 1 |         |
| 4948 | ENSG00000167863 | HPA042777 | 1 | 1 | 1 | 1 |         |
| 4948 | ENSG00000167895 | HPA047387 | 1 | 1 | 1 | 1 |         |
| 4948 | ENSG00000167904 | HPA019173 | 1 | 1 | 1 | 1 |         |
| 4948 | ENSG00000167962 | HPA041760 | 1 | 1 | 1 | 1 |         |
| 4948 | ENSG00000167967 | HPA052042 | 1 | 1 | 1 | 1 |         |
| 4948 | ENSG00000167972 | HPA007884 | 1 | 1 | 1 | 1 |         |
| 4948 | ENSG00000167978 | HPA041411 | 1 | 1 | 1 | 1 | 0. 3647 |
| 4948 | ENSG00000167986 | HPA045174 | 1 | 1 | 1 | 1 |         |
| 4948 | ENSG00000167996 | CAB008623 | 1 | 1 | 1 | 1 |         |
| 4948 | ENSG00000168002 | HPA053000 | 1 | 1 | 1 | 1 |         |
| 4948 | ENSG00000168003 | HPA017980 | 1 | 1 | 1 | 1 |         |
| 4948 | ENSG00000168004 | HPA042493 | 1 | 1 | 1 | 1 |         |
| 4948 | ENSG00000168005 | HPA050313 | 1 | 1 | 1 | 1 |         |
| 4948 | ENSG00000168010 | HPA045444 | 1 | 1 | 1 | 1 |         |
| 4948 | ENSG00000168016 | HPA035508 | 1 | 1 | 1 | 1 |         |
| 4948 | ENSG00000168060 | HPA047123 | 1 | 1 | 1 | 1 |         |
| 4948 | ENSG00000168061 | HPA042677 | 1 | 1 | 1 | 1 |         |
| 4948 | ENSG00000168062 | HPA062496 | 1 | 1 | 1 | 1 |         |
| 4948 | ENSG00000168066 | HPA018883 | 1 | 1 | 1 | 1 |         |
| 4948 | ENSG00000168067 | HPA007330 | 1 | 1 | 1 | 1 |         |
| 4948 | ENSG00000168078 | HPA005753 | 1 | 1 | 1 | 1 |         |
| 4948 | ENSG00000168090 | HPA044315 | 1 | 1 | 1 | 1 |         |
| 4948 | ENSG00000168096 | HPA041409 | 1 | 1 | 1 | 1 |         |
| 4948 | ENSG00000168101 | HPA044186 | 1 | 1 | 1 | 1 |         |
| 4948 | ENSG00000168148 | CAB003812 | 1 | 1 | 1 | 1 | 0. 4167 |
| 4948 | ENSG00000168152 | HPA037421 | 1 | 1 | 1 | 1 |         |
| 4948 | ENSG00000168175 | HPA034506 | 1 | 1 | 1 | 1 |         |
| 4948 | ENSG00000168209 | HPA034508 | 1 | 1 | 1 | 1 |         |
| 4948 | ENSG00000168214 | HPA060647 | 1 | 1 | 1 | 1 |         |
| 4948 | ENSG00000168228 | HPA035575 | 1 | 1 | 1 | 1 |         |
| 4948 | ENSG00000168234 | HPA065705 | 1 | 1 | 1 | 1 |         |
| 4948 | ENSG00000168256 | HPA062861 | 1 | 1 | 1 | 1 |         |
| 4948 | ENSG00000168259 | HPA023015 | 1 | 1 | 1 | 1 |         |
| 4948 | ENSG00000168264 | HPA027815 | 1 | 1 | 1 | 1 |         |

|      |                 |           |   |   |   |   |        |        |
|------|-----------------|-----------|---|---|---|---|--------|--------|
| 4948 | ENSG00000168267 | CAB022612 | 1 | 1 | 1 | 1 |        |        |
| 4948 | ENSG00000168269 | HPA071469 | 1 | 1 | 1 | 1 |        |        |
| 4948 | ENSG00000168273 | HPA047771 | 1 | 1 | 1 | 1 |        |        |
| 4948 | ENSG00000168280 | HPA062272 | 1 | 1 | 1 | 1 |        |        |
| 4948 | ENSG00000168282 | HPA056824 | 1 | 1 | 1 | 1 |        |        |
| 4948 | ENSG00000168301 | HPA036101 | 1 | 1 | 1 | 1 |        |        |
| 4948 | ENSG00000168309 | HPA055888 | 1 | 1 | 1 | 1 |        |        |
| 4948 | ENSG00000168350 | HPA046644 | 1 | 1 | 1 | 1 |        |        |
| 4948 | ENSG00000168386 | HPA043133 | 1 | 1 | 1 | 1 |        |        |
| 4948 | ENSG00000168393 | HPA042719 | 1 | 1 | 1 | 1 |        |        |
| 4948 | ENSG00000168397 | HPA069803 | 1 | 1 | 1 | 1 | 0.3513 | 0.3644 |
| 4948 | ENSG00000168398 | HPA003551 | 1 | 1 | 1 | 1 |        |        |
| 4948 | ENSG00000168411 | HPA048258 | 1 | 1 | 1 | 1 |        |        |
| 4948 | ENSG00000168438 | HPA046620 | 1 | 1 | 1 | 1 |        |        |
| 4948 | ENSG00000168453 | HPA054888 | 1 | 1 | 1 | 1 |        |        |
| 4948 | ENSG00000168476 | HPA042683 | 1 | 1 | 1 | 1 |        |        |
| 4948 | ENSG00000168481 | HPA024826 | 1 | 1 | 1 | 1 | 0.346  |        |
| 4948 | ENSG00000168488 | HPA041506 | 1 | 1 | 1 | 1 |        |        |
| 4948 | ENSG00000168505 | HPA067809 | 1 | 1 | 1 | 1 |        |        |
| 4948 | ENSG00000168522 | HPA018830 | 1 | 1 | 1 | 1 | 0.4985 |        |
| 4948 | ENSG00000168528 | HPA005974 | 1 | 1 | 1 | 1 |        |        |
| 4948 | ENSG00000168542 | HPA007583 | 1 | 1 | 1 | 1 |        |        |
| 4948 | ENSG00000168546 | HPA024704 | 1 | 1 | 1 | 1 |        |        |
| 4948 | ENSG00000168564 | HPA062142 | 1 | 1 | 1 | 1 |        |        |
| 4948 | ENSG00000168566 | HPA029234 | 1 | 1 | 1 | 1 |        |        |
| 4948 | ENSG00000168591 | HPA043137 | 1 | 1 | 1 | 1 | 0.3682 |        |
| 4948 | ENSG00000168610 | HPA001671 | 1 | 1 | 1 | 1 |        |        |
| 4948 | ENSG00000168612 | HPA041147 | 1 | 1 | 1 | 1 |        |        |
| 4948 | ENSG00000168646 | CAB017783 | 1 | 1 | 1 | 1 |        |        |
| 4948 | ENSG00000168661 | HPA030400 | 1 | 1 | 1 | 1 |        |        |
| 4948 | ENSG00000168702 | HPA074788 | 1 | 1 | 1 | 1 |        |        |
| 4948 | ENSG00000168710 | HPA042589 | 1 | 1 | 1 | 1 |        |        |
| 4948 | ENSG00000168754 | HPA062110 | 1 | 1 | 1 | 1 |        |        |
| 4948 | ENSG00000168757 | HPA049384 | 1 | 1 | 1 | 1 |        |        |
| 4948 | ENSG00000168763 | HPA016711 | 1 | 1 | 1 | 1 |        |        |
| 4948 | ENSG00000168769 | HPA043135 | 1 | 1 | 1 | 1 | 0.371  |        |
| 4948 | ENSG00000168772 | HPA036925 | 1 | 1 | 1 | 1 |        |        |
| 4948 | ENSG00000168781 | HPA039380 | 1 | 1 | 1 | 1 |        |        |
| 4948 | ENSG00000168792 | HPA014470 | 1 | 1 | 1 | 1 |        |        |
| 4948 | ENSG00000168802 | HPA051872 | 1 | 1 | 1 | 1 |        |        |
| 4948 | ENSG00000168803 | HPA046215 | 1 | 1 | 1 | 1 |        |        |
| 4948 | ENSG00000168818 | HPA003019 | 1 | 1 | 1 | 1 |        |        |
| 4948 | ENSG00000168827 | HPA061405 | 1 | 1 | 1 | 1 |        |        |
| 4948 | ENSG00000168872 | HPA066668 | 1 | 1 | 1 | 1 |        |        |
| 4948 | ENSG00000168874 | HPA028406 | 1 | 1 | 1 | 1 |        |        |
| 4948 | ENSG00000168883 | HPA034823 | 1 | 1 | 1 | 1 |        |        |
| 4948 | ENSG00000168894 | HPA046112 | 1 | 1 | 1 | 1 |        |        |
| 4948 | ENSG00000168899 | HPA035082 | 1 | 1 | 1 | 1 |        |        |
| 4948 | ENSG00000168917 | HPA064728 | 1 | 1 | 1 | 1 |        |        |
| 4948 | ENSG00000168924 | HPA011029 | 1 | 1 | 1 | 1 |        | 0.3687 |
| 4948 | ENSG00000168955 | HPA065531 | 1 | 1 | 1 | 1 |        |        |
| 4948 | ENSG00000168958 | HPA074625 | 1 | 1 | 1 | 1 |        |        |
| 4948 | ENSG00000168961 | HPA046876 | 1 | 1 | 1 | 1 |        |        |
| 4948 | ENSG00000168970 | HPA005726 | 1 | 1 | 1 | 1 |        |        |
| 4948 | ENSG00000168994 | HPA019246 | 1 | 1 | 1 | 1 |        |        |

|      |                 |           |   |   |   |   |         |         |
|------|-----------------|-----------|---|---|---|---|---------|---------|
| 4948 | ENSG00000169016 | HPA075185 | 1 | 1 | 1 | 1 |         |         |
| 4948 | ENSG00000169018 | HPA041920 | 1 | 1 | 1 | 1 |         |         |
| 4948 | ENSG00000169020 | HPA035010 | 1 | 1 | 1 | 1 | 0. 4276 | 0. 4419 |
| 4948 | ENSG00000169021 | HPA041863 | 1 | 1 | 1 | 1 |         |         |
| 4948 | ENSG00000169032 | CAB003834 | 1 | 1 | 1 | 1 |         |         |
| 4948 | ENSG00000169057 | HPA000593 | 1 | 1 | 1 | 1 |         |         |
| 4948 | ENSG00000169083 | HPA065701 | 1 | 1 | 1 | 1 |         |         |
| 4948 | ENSG00000169084 | HPA003035 | 1 | 1 | 1 | 1 |         |         |
| 4948 | ENSG00000169093 | HPA003630 | 1 | 1 | 1 | 1 | 0. 3124 |         |
| 4948 | ENSG00000169100 | HPA046835 | 1 | 1 | 1 | 1 |         |         |
| 4948 | ENSG00000169105 | HPA057697 | 1 | 1 | 1 | 1 |         |         |
| 4948 | ENSG00000169116 | HPA038236 | 1 | 1 | 1 | 1 |         |         |
| 4948 | ENSG00000169118 | HPA018209 | 1 | 1 | 1 | 1 |         |         |
| 4948 | ENSG00000169129 | HPA037843 | 1 | 1 | 1 | 1 |         |         |
| 4948 | ENSG00000169131 | HPA052043 | 1 | 1 | 1 | 1 |         |         |
| 4948 | ENSG00000169139 | HPA052535 | 1 | 1 | 1 | 1 |         |         |
| 4948 | ENSG00000169155 | HPA016825 | 1 | 1 | 1 | 1 |         |         |
| 4948 | ENSG00000169169 | HPA014529 | 1 | 1 | 1 | 1 |         |         |
| 4948 | ENSG00000169193 | HPA026883 | 1 | 1 | 1 | 1 |         |         |
| 4948 | ENSG00000169194 | HPA042421 | 1 | 1 | 1 | 1 |         |         |
| 4948 | ENSG00000169203 | HPA053611 | 1 | 1 | 1 | 1 |         |         |
| 4948 | ENSG00000169228 | HPA034945 | 1 | 1 | 1 | 1 |         |         |
| 4948 | ENSG00000169231 | HPA073242 | 1 | 1 | 1 | 1 |         |         |
| 4948 | ENSG00000169246 | HPA053611 | 1 | 1 | 1 | 1 |         |         |
| 4948 | ENSG00000169247 | HPA037683 | 1 | 1 | 1 | 1 |         |         |
| 4948 | ENSG00000169251 | HPA035019 | 1 | 1 | 1 | 1 |         |         |
| 4948 | ENSG00000169255 | HPA041204 | 1 | 1 | 1 | 1 |         |         |
| 4948 | ENSG00000169271 | HPA062124 | 1 | 1 | 1 | 1 |         |         |
| 4948 | ENSG00000169282 | HPA036110 | 1 | 1 | 1 | 1 |         |         |
| 4948 | ENSG00000169288 | HPA043656 | 1 | 1 | 1 | 1 |         |         |
| 4948 | ENSG00000169299 | HPA040676 | 1 | 1 | 1 | 1 |         |         |
| 4948 | ENSG00000169302 | HPA040236 | 1 | 1 | 1 | 1 |         |         |
| 4948 | ENSG00000169330 | HPA011545 | 1 | 1 | 1 | 1 |         |         |
| 4948 | ENSG00000169359 | HPA060345 | 1 | 1 | 1 | 1 |         |         |
| 4948 | ENSG00000169371 | CAB005004 | 1 | 1 | 1 | 1 |         |         |
| 4948 | ENSG00000169375 | CAB004506 | 1 | 1 | 1 | 1 |         |         |
| 4948 | ENSG00000169410 | HPA041922 | 1 | 1 | 1 | 1 |         |         |
| 4948 | ENSG00000169427 | HPA075842 | 1 | 1 | 1 | 1 |         |         |
| 4948 | ENSG00000169435 | HPA037712 | 1 | 1 | 1 | 1 |         |         |
| 4948 | ENSG00000169439 | HPA044416 | 1 | 1 | 1 | 1 |         |         |
| 4948 | ENSG00000169504 | HPA008019 | 1 | 1 | 1 | 1 |         |         |
| 4948 | ENSG00000169548 | HPA044475 | 1 | 1 | 1 | 1 |         |         |
| 4948 | ENSG00000169583 | HPA005963 | 1 | 1 | 1 | 1 |         |         |
| 4948 | ENSG00000169599 | HPA035826 | 1 | 1 | 1 | 1 |         |         |
| 4948 | ENSG00000169609 | HPA042980 | 1 | 1 | 1 | 1 |         |         |
| 4948 | ENSG00000169612 | HPA041923 | 1 | 1 | 1 | 1 | 0. 3587 | 0. 369  |
| 4948 | ENSG00000169621 | HPA034642 | 1 | 1 | 1 | 1 |         |         |
| 4948 | ENSG00000169627 | HPA045380 | 1 | 1 | 1 | 1 |         |         |
| 4948 | ENSG00000169629 | HPA067564 | 1 | 1 | 1 | 1 |         |         |
| 4948 | ENSG00000169635 | HPA059399 | 1 | 1 | 1 | 1 |         |         |
| 4948 | ENSG00000169641 | HPA028506 | 1 | 1 | 1 | 1 |         |         |
| 4948 | ENSG00000169660 | HPA023379 | 1 | 1 | 1 | 1 |         |         |
| 4948 | ENSG00000169679 | HPA006123 | 1 | 1 | 1 | 1 |         |         |
| 4948 | ENSG00000169692 | HPA019544 | 1 | 1 | 1 | 1 |         |         |
| 4948 | ENSG00000169718 | HPA023384 | 1 | 1 | 1 | 1 | 0. 2584 |         |

|      |                 |           |   |   |   |   |       |        |
|------|-----------------|-----------|---|---|---|---|-------|--------|
| 4948 | ENSG00000169738 | HPA023371 | 1 | 1 | 1 | 1 |       |        |
| 4948 | ENSG00000169740 | HPA039148 | 1 | 1 | 1 | 1 |       |        |
| 4948 | ENSG00000169758 | HPA041921 | 1 | 1 | 1 | 1 |       |        |
| 4948 | ENSG00000169762 | HPA048658 | 1 | 1 | 1 | 1 |       |        |
| 4948 | ENSG00000169783 | HPA074653 | 1 | 1 | 1 | 1 |       |        |
| 4948 | ENSG00000169826 | HPA031540 | 1 | 1 | 1 | 1 |       |        |
| 4948 | ENSG00000169855 | HPA052968 | 1 | 1 | 1 | 1 |       |        |
| 4948 | ENSG00000169895 | HPA000882 | 1 | 1 | 1 | 1 |       |        |
| 4948 | ENSG00000169905 | HPA051849 | 1 | 1 | 1 | 1 |       |        |
| 4948 | ENSG00000169918 | HPA044554 | 1 | 1 | 1 | 1 |       |        |
| 4948 | ENSG00000169919 | HPA036322 | 1 | 1 | 1 | 1 |       |        |
| 4948 | ENSG00000169925 | HPA051830 | 1 | 1 | 1 | 1 |       |        |
| 4948 | ENSG00000169946 | HPA004094 | 1 | 1 | 1 | 1 |       |        |
| 4948 | ENSG00000169957 | HPA066512 | 1 | 1 | 1 | 1 |       |        |
| 4948 | ENSG00000169967 | HPA021540 | 1 | 1 | 1 | 1 |       |        |
| 4948 | ENSG00000169972 | HPA032057 | 1 | 1 | 1 | 1 |       |        |
| 4948 | ENSG00000169976 | HPA054408 | 1 | 1 | 1 | 1 |       |        |
| 4948 | ENSG00000169991 | HPA064603 | 1 | 1 | 1 | 1 |       | 0.3739 |
| 4948 | ENSG00000169992 | HPA055321 | 1 | 1 | 1 | 1 |       |        |
| 4948 | ENSG00000170037 | HPA023321 | 1 | 1 | 1 | 1 | 0.371 | 0.4623 |
| 4948 | ENSG00000170049 | HPA077993 | 1 | 1 | 1 | 1 |       |        |
| 4948 | ENSG00000170085 | HPA037889 | 1 | 1 | 1 | 1 |       |        |
| 4948 | ENSG00000170091 | HPA046531 | 1 | 1 | 1 | 1 |       |        |
| 4948 | ENSG00000170100 | HPA052057 | 1 | 1 | 1 | 1 |       |        |
| 4948 | ENSG00000170122 | HPA012836 | 1 | 1 | 1 | 1 |       |        |
| 4948 | ENSG00000170142 | CAB073413 | 1 | 1 | 1 | 1 |       |        |
| 4948 | ENSG00000170144 | HPA005812 | 1 | 1 | 1 | 1 |       |        |
| 4948 | ENSG00000170145 | HPA016026 | 1 | 1 | 1 | 1 |       |        |
| 4948 | ENSG00000170214 | HPA074416 | 1 | 1 | 1 | 1 |       |        |
| 4948 | ENSG00000170248 | HPA011905 | 1 | 1 | 1 | 1 |       |        |
| 4948 | ENSG00000170260 | HPA049807 | 1 | 1 | 1 | 1 |       |        |
| 4948 | ENSG00000170275 | HPA044150 | 1 | 1 | 1 | 1 |       |        |
| 4948 | ENSG00000170290 | CAB011628 | 1 | 1 | 1 | 1 |       |        |
| 4948 | ENSG00000170296 | HPA065883 | 1 | 1 | 1 | 1 |       |        |
| 4948 | ENSG00000170298 | HPA046876 | 1 | 1 | 1 | 1 |       |        |
| 4948 | ENSG00000170312 | HPA003387 | 1 | 1 | 1 | 1 |       |        |
| 4948 | ENSG00000170322 | HPA007082 | 1 | 1 | 1 | 1 |       |        |
| 4948 | ENSG00000170325 | HPA026997 | 1 | 1 | 1 | 1 | 0.575 |        |
| 4948 | ENSG00000170340 | HPA005997 | 1 | 1 | 1 | 1 |       |        |
| 4948 | ENSG00000170345 | HPA018531 | 1 | 1 | 1 | 1 |       |        |
| 4948 | ENSG00000170364 | HPA057999 | 1 | 1 | 1 | 1 |       |        |
| 4948 | ENSG00000170365 | CAB005389 | 1 | 1 | 1 | 1 |       |        |
| 4948 | ENSG00000170370 | HPA065294 | 1 | 1 | 1 | 1 |       |        |
| 4948 | ENSG00000170382 | HPA029124 | 1 | 1 | 1 | 1 |       |        |
| 4948 | ENSG00000170396 | HPA029195 | 1 | 1 | 1 | 1 |       |        |
| 4948 | ENSG00000170417 | HPA045861 | 1 | 1 | 1 | 1 |       |        |
| 4948 | ENSG00000170421 | CAB000131 | 1 | 1 | 1 | 1 |       |        |
| 4948 | ENSG00000170425 | HPA073747 | 1 | 1 | 1 | 1 |       |        |
| 4948 | ENSG00000170430 | HPA032135 | 1 | 1 | 1 | 1 |       |        |
| 4948 | ENSG00000170442 | HPA039798 | 1 | 1 | 1 | 1 |       |        |
| 4948 | ENSG00000170445 | HPA036539 | 1 | 1 | 1 | 1 |       |        |
| 4948 | ENSG00000170465 | HPA045697 | 1 | 1 | 1 | 1 |       |        |
| 4948 | ENSG00000170468 | HPA003730 | 1 | 1 | 1 | 1 |       |        |
| 4948 | ENSG00000170469 | HPA044000 | 1 | 1 | 1 | 1 |       |        |
| 4948 | ENSG00000170515 | CAB011711 | 1 | 1 | 1 | 1 |       |        |

|      |                 |           |   |   |   |   |        |        |
|------|-----------------|-----------|---|---|---|---|--------|--------|
| 4948 | ENSG00000170525 | HPA008266 | 1 | 1 | 1 | 1 |        |        |
| 4948 | ENSG00000170537 | HPA029465 | 1 | 1 | 1 | 1 |        |        |
| 4948 | ENSG00000170540 | HPA045307 | 1 | 1 | 1 | 1 |        |        |
| 4948 | ENSG00000170558 | CAB000141 | 1 | 1 | 1 | 1 |        |        |
| 4948 | ENSG00000170581 | HPA018888 | 1 | 1 | 1 | 1 |        |        |
| 4948 | ENSG00000170604 | HPA049480 | 1 | 1 | 1 | 1 |        |        |
| 4948 | ENSG00000170606 | HPA010023 | 1 | 1 | 1 | 1 |        |        |
| 4948 | ENSG00000170632 | HPA011036 | 1 | 1 | 1 | 1 |        |        |
| 4948 | ENSG00000170633 | HPA074151 | 1 | 1 | 1 | 1 |        |        |
| 4948 | ENSG00000170634 | HPA035301 | 1 | 1 | 1 | 1 |        |        |
| 4948 | ENSG00000170638 | HPA000822 | 1 | 1 | 1 | 1 |        |        |
| 4948 | ENSG00000170653 | HPA003384 | 1 | 1 | 1 | 1 |        |        |
| 4948 | ENSG00000170689 | HPA031463 | 1 | 1 | 1 | 1 |        |        |
| 4948 | ENSG00000170734 | HPA006721 | 1 | 1 | 1 | 1 |        |        |
| 4948 | ENSG00000170759 | HPA037589 | 1 | 1 | 1 | 1 | 0.3187 |        |
| 4948 | ENSG00000170776 | HPA019773 | 1 | 1 | 1 | 1 |        |        |
| 4948 | ENSG00000170801 | HPA063810 | 1 | 1 | 1 | 1 |        |        |
| 4948 | ENSG00000170819 | HPA038464 | 1 | 1 | 1 | 1 |        |        |
| 4948 | ENSG00000170836 | HPA022277 | 1 | 1 | 1 | 1 |        |        |
| 4948 | ENSG00000170852 | HPA021133 | 1 | 1 | 1 | 1 | 0.2955 |        |
| 4948 | ENSG00000170854 | HPA007603 | 1 | 1 | 1 | 1 |        | 0.2124 |
| 4948 | ENSG00000170855 | HPA053640 | 1 | 1 | 1 | 1 |        |        |
| 4948 | ENSG00000170860 | HPA044966 | 1 | 1 | 1 | 1 |        |        |
| 4948 | ENSG00000170871 | HPA036892 | 1 | 1 | 1 | 1 |        |        |
| 4948 | ENSG00000170892 | HPA048208 | 1 | 1 | 1 | 1 |        |        |
| 4948 | ENSG00000170921 | HPA023274 | 1 | 1 | 1 | 1 |        |        |
| 4948 | ENSG00000170946 | HPA020025 | 1 | 1 | 1 | 1 |        |        |
| 4948 | ENSG00000170949 | HPA023599 | 1 | 1 | 1 | 1 |        |        |
| 4948 | ENSG00000170954 | HPA005553 | 1 | 1 | 1 | 1 |        |        |
| 4948 | ENSG00000170955 | HPA073327 | 1 | 1 | 1 | 1 |        |        |
| 4948 | ENSG00000171016 | HPA042248 | 1 | 1 | 1 | 1 |        |        |
| 4948 | ENSG00000171045 | HPA015890 | 1 | 1 | 1 | 1 |        |        |
| 4948 | ENSG00000171060 | HPA027986 | 1 | 1 | 1 | 1 |        |        |
| 4948 | ENSG00000171097 | HPA021176 | 1 | 1 | 1 | 1 | 0.3224 | 0.2967 |
| 4948 | ENSG00000171103 | HPA026751 | 1 | 1 | 1 | 1 |        | 0.1983 |
| 4948 | ENSG00000171119 | HPA065260 | 1 | 1 | 1 | 1 |        |        |
| 4948 | ENSG00000171132 | HPA054252 | 1 | 1 | 1 | 1 |        |        |
| 4948 | ENSG00000171135 | HPA067610 | 1 | 1 | 1 | 1 |        |        |
| 4948 | ENSG00000171148 | HPA042250 | 1 | 1 | 1 | 1 |        |        |
| 4948 | ENSG00000171155 | HPA015632 | 1 | 1 | 1 | 1 |        | 0.2794 |
| 4948 | ENSG00000171159 | HPA020725 | 1 | 1 | 1 | 1 |        |        |
| 4948 | ENSG00000171161 | HPA055779 | 1 | 1 | 1 | 1 |        |        |
| 4948 | ENSG00000171174 | HPA019725 | 1 | 1 | 1 | 1 |        |        |
| 4948 | ENSG00000171204 | HPA014480 | 1 | 1 | 1 | 1 |        |        |
| 4948 | ENSG00000171208 | HPA013180 | 1 | 1 | 1 | 1 |        |        |
| 4948 | ENSG00000171223 | HPA019149 | 1 | 1 | 1 | 1 |        |        |
| 4948 | ENSG00000171262 | HPA008502 | 1 | 1 | 1 | 1 |        |        |
| 4948 | ENSG00000171311 | HPA038370 | 1 | 1 | 1 | 1 |        |        |
| 4948 | ENSG00000171314 | HPA042528 | 1 | 1 | 1 | 1 |        |        |
| 4948 | ENSG00000171345 | HPA002465 | 1 | 1 | 1 | 1 |        |        |
| 4948 | ENSG00000171401 | HPA030877 | 1 | 1 | 1 | 1 |        |        |
| 4948 | ENSG00000171408 | HPA023967 | 1 | 1 | 1 | 1 |        |        |
| 4948 | ENSG00000171431 | HPA024684 | 1 | 1 | 1 | 1 |        |        |
| 4948 | ENSG00000171433 | HPA010667 | 1 | 1 | 1 | 1 |        |        |
| 4948 | ENSG00000171443 | HPA050981 | 1 | 1 | 1 | 1 |        |        |



|      |                 |           |   |   |   |   |         |
|------|-----------------|-----------|---|---|---|---|---------|
| 4948 | ENSG00000171453 | HPA031010 | 1 | 1 | 1 | 1 |         |
| 4948 | ENSG00000171456 | HPA064156 | 1 | 1 | 1 | 1 |         |
| 4948 | ENSG00000171488 | HPA029347 | 1 | 1 | 1 | 1 |         |
| 4948 | ENSG00000171490 | HPA043483 | 1 | 1 | 1 | 1 |         |
| 4948 | ENSG00000171530 | HPA036487 | 1 | 1 | 1 | 1 | 0. 2966 |
| 4948 | ENSG00000171574 | HPA043408 | 1 | 1 | 1 | 1 |         |
| 4948 | ENSG00000171634 | HPA029069 | 1 | 1 | 1 | 1 |         |
| 4948 | ENSG00000171649 | HPA059975 | 1 | 1 | 1 | 1 |         |
| 4948 | ENSG00000171659 | HPA010668 | 1 | 1 | 1 | 1 |         |
| 4948 | ENSG00000171695 | HPA056463 | 1 | 1 | 1 | 1 |         |
| 4948 | ENSG00000171700 | HPA056384 | 1 | 1 | 1 | 1 |         |
| 4948 | ENSG00000171703 | HPA043836 | 1 | 1 | 1 | 1 |         |
| 4948 | ENSG00000171723 | HPA024694 | 1 | 1 | 1 | 1 | 0. 4773 |
| 4948 | ENSG00000171729 | HPA019441 | 1 | 1 | 1 | 1 |         |
| 4948 | ENSG00000171757 | HPA035747 | 1 | 1 | 1 | 1 |         |
| 4948 | ENSG00000171766 | HPA026077 | 1 | 1 | 1 | 1 |         |
| 4948 | ENSG00000171786 | HPA017943 | 1 | 1 | 1 | 1 |         |
| 4948 | ENSG00000171791 | HPA055295 | 1 | 1 | 1 | 1 |         |
| 4948 | ENSG00000171813 | HPA038056 | 1 | 1 | 1 | 1 |         |
| 4948 | ENSG00000171824 | HPA028484 | 1 | 1 | 1 | 1 | 0. 379  |
| 4948 | ENSG00000171843 | HPA001824 | 1 | 1 | 1 | 1 |         |
| 4948 | ENSG00000171848 | HPA056994 | 1 | 1 | 1 | 1 |         |
| 4948 | ENSG00000171858 | HPA003371 | 1 | 1 | 1 | 1 |         |
| 4948 | ENSG00000171861 | HPA022534 | 1 | 1 | 1 | 1 |         |
| 4948 | ENSG00000171863 | HPA056586 | 1 | 1 | 1 | 1 |         |
| 4948 | ENSG00000171916 | HPA046876 | 1 | 1 | 1 | 1 |         |
| 4948 | ENSG00000171928 | HPA019585 | 1 | 1 | 1 | 1 |         |
| 4948 | ENSG00000171931 | HPA047457 | 1 | 1 | 1 | 1 |         |
| 4948 | ENSG00000171953 | HPA023329 | 1 | 1 | 1 | 1 |         |
| 4948 | ENSG00000171956 | HPA073369 | 1 | 1 | 1 | 1 |         |
| 4948 | ENSG00000171970 | HPA061915 | 1 | 1 | 1 | 1 |         |
| 4948 | ENSG00000172000 | HPA060593 | 1 | 1 | 1 | 1 |         |
| 4948 | ENSG00000172009 | CAB025497 | 1 | 1 | 1 | 1 |         |
| 4948 | ENSG00000172031 | HPA035067 | 1 | 1 | 1 | 1 |         |
| 4948 | ENSG00000172053 | HPA036986 | 1 | 1 | 1 | 1 |         |
| 4948 | ENSG00000172057 | HPA065643 | 1 | 1 | 1 | 1 |         |
| 4948 | ENSG00000172058 | HPA075271 | 1 | 1 | 1 | 1 |         |
| 4948 | ENSG00000172062 | CAB016324 | 1 | 1 | 1 | 1 |         |
| 4948 | ENSG00000172081 | HPA057744 | 1 | 1 | 1 | 1 |         |
| 4948 | ENSG00000172113 | HPA017909 | 1 | 1 | 1 | 1 |         |
| 4948 | ENSG00000172115 | CAB004222 | 1 | 1 | 1 | 1 |         |
| 4948 | ENSG00000172137 | HPA007305 | 1 | 1 | 1 | 1 |         |
| 4948 | ENSG00000172171 | HPA023788 | 1 | 1 | 1 | 1 |         |
| 4948 | ENSG00000172216 | CAB004213 | 1 | 1 | 1 | 1 |         |
| 4948 | ENSG00000172232 | HPA055851 | 1 | 1 | 1 | 1 |         |
| 4948 | ENSG00000172239 | HPA076187 | 1 | 1 | 1 | 1 |         |
| 4948 | ENSG00000172296 | HPA048079 | 1 | 1 | 1 | 1 |         |
| 4948 | ENSG00000172339 | HPA031829 | 1 | 1 | 1 | 1 |         |
| 4948 | ENSG00000172380 | HPA062208 | 1 | 1 | 1 | 1 |         |
| 4948 | ENSG00000172425 | HPA038731 | 1 | 1 | 1 | 1 |         |
| 4948 | ENSG00000172428 | HPA044845 | 1 | 1 | 1 | 1 |         |
| 4948 | ENSG00000172432 | HPA031418 | 1 | 1 | 1 | 1 |         |
| 4948 | ENSG00000172456 | HPA054971 | 1 | 1 | 1 | 1 |         |
| 4948 | ENSG00000172465 | HPA057345 | 1 | 1 | 1 | 1 |         |
| 4948 | ENSG00000172466 | HPA024062 | 1 | 1 | 1 | 1 |         |

|      |                 |           |   |   |   |   |        |        |
|------|-----------------|-----------|---|---|---|---|--------|--------|
| 4948 | ENSG00000172469 | HPA011046 | 1 | 1 | 1 | 1 |        |        |
| 4948 | ENSG00000172476 | HPA076172 | 1 | 1 | 1 | 1 |        |        |
| 4948 | ENSG00000172482 | HPA035371 | 1 | 1 | 1 | 1 |        |        |
| 4948 | ENSG00000172493 | HPA069947 | 1 | 1 | 1 | 1 |        |        |
| 4948 | ENSG00000172500 | HPA011729 | 1 | 1 | 1 | 1 |        |        |
| 4948 | ENSG00000172530 | HPA047164 | 1 | 1 | 1 | 1 |        |        |
| 4948 | ENSG00000172531 | HPA046833 | 1 | 1 | 1 | 1 |        |        |
| 4948 | ENSG00000172534 | HPA018312 | 1 | 1 | 1 | 1 |        |        |
| 4948 | ENSG00000172572 | HPA074258 | 1 | 1 | 1 | 1 |        |        |
| 4948 | ENSG00000172575 | HPA039389 | 1 | 1 | 1 | 1 |        |        |
| 4948 | ENSG00000172613 | HPA006725 | 1 | 1 | 1 | 1 |        |        |
| 4948 | ENSG00000172663 | HPA043744 | 1 | 1 | 1 | 1 |        |        |
| 4948 | ENSG00000172671 | HPA057543 | 1 | 1 | 1 | 1 |        |        |
| 4948 | ENSG00000172725 | CAB017616 | 1 | 1 | 1 | 1 |        |        |
| 4948 | ENSG00000172731 | HPA039630 | 1 | 1 | 1 | 1 |        |        |
| 4948 | ENSG00000172732 | HPA059530 | 1 | 1 | 1 | 1 |        |        |
| 4948 | ENSG00000172738 | HPA045432 | 1 | 1 | 1 | 1 |        |        |
| 4948 | ENSG00000172748 | HPA055463 | 1 | 1 | 1 | 1 |        |        |
| 4948 | ENSG00000172766 | HPA039761 | 1 | 1 | 1 | 1 |        |        |
| 4948 | ENSG00000172780 | HPA046840 | 1 | 1 | 1 | 1 |        |        |
| 4948 | ENSG00000172809 | HPA052543 | 1 | 1 | 1 | 1 |        |        |
| 4948 | ENSG00000172818 | HPA003984 | 1 | 1 | 1 | 1 |        |        |
| 4948 | ENSG00000172819 | HPA053883 | 1 | 1 | 1 | 1 |        |        |
| 4948 | ENSG00000172824 | HPA035701 | 1 | 1 | 1 | 1 |        |        |
| 4948 | ENSG00000172828 | HPA041307 | 1 | 1 | 1 | 1 |        |        |
| 4948 | ENSG00000172840 | HPA062059 | 1 | 1 | 1 | 1 |        |        |
| 4948 | ENSG00000172869 | HPA036431 | 1 | 1 | 1 | 1 |        |        |
| 4948 | ENSG00000172878 | HPA030299 | 1 | 1 | 1 | 1 |        |        |
| 4948 | ENSG00000172922 | HPA065375 | 1 | 1 | 1 | 1 |        |        |
| 4948 | ENSG00000172939 | HPA008237 | 1 | 1 | 1 | 1 | 0.317  |        |
| 4948 | ENSG00000172977 | HPA016953 | 1 | 1 | 1 | 1 |        |        |
| 4948 | ENSG00000172992 | HPA060997 | 1 | 1 | 1 | 1 |        |        |
| 4948 | ENSG00000172995 | HPA017303 | 1 | 1 | 1 | 1 |        |        |
| 4948 | ENSG00000173011 | HPA035770 | 1 | 1 | 1 | 1 |        |        |
| 4948 | ENSG00000173020 | HPA048330 | 1 | 1 | 1 | 1 |        |        |
| 4948 | ENSG00000173039 | CAB004264 | 1 | 1 | 1 | 1 |        |        |
| 4948 | ENSG00000173041 | HPA003173 | 1 | 1 | 1 | 1 |        |        |
| 4948 | ENSG00000173065 | HPA051840 | 1 | 1 | 1 | 1 |        |        |
| 4948 | ENSG00000173085 | HPA056599 | 1 | 1 | 1 | 1 |        |        |
| 4948 | ENSG00000173114 | HPA046792 | 1 | 1 | 1 | 1 |        |        |
| 4948 | ENSG00000173120 | HPA044251 | 1 | 1 | 1 | 1 | 0.4795 | 0.3319 |
| 4948 | ENSG00000173137 | HPA028679 | 1 | 1 | 1 | 1 |        |        |
| 4948 | ENSG00000173141 | HPA059370 | 1 | 1 | 1 | 1 |        |        |
| 4948 | ENSG00000173153 | HPA053785 | 1 | 1 | 1 | 1 |        |        |
| 4948 | ENSG00000173171 | HPA011543 | 1 | 1 | 1 | 1 |        |        |
| 4948 | ENSG00000173200 | HPA035757 | 1 | 1 | 1 | 1 |        |        |
| 4948 | ENSG00000173212 | HPA039551 | 1 | 1 | 1 | 1 |        |        |
| 4948 | ENSG00000173218 | CAB076375 | 1 | 1 | 1 | 1 |        |        |
| 4948 | ENSG00000173221 | CAB008634 | 1 | 1 | 1 | 1 |        |        |
| 4948 | ENSG00000173230 | HPA011008 | 1 | 1 | 1 | 1 |        |        |
| 4948 | ENSG00000173258 | HPA055041 | 1 | 1 | 1 | 1 |        |        |
| 4948 | ENSG00000173261 | HPA074266 | 1 | 1 | 1 | 1 |        |        |
| 4948 | ENSG00000173269 | HPA020741 | 1 | 1 | 1 | 1 |        |        |
| 4948 | ENSG00000173334 | HPA063982 | 1 | 1 | 1 | 1 |        |        |
| 4948 | ENSG00000173338 | HPA077577 | 1 | 1 | 1 | 1 |        |        |

|      |                 |           |   |   |   |   |         |
|------|-----------------|-----------|---|---|---|---|---------|
| 4948 | ENSG00000173402 | CAB016353 | 1 | 1 | 1 | 1 |         |
| 4948 | ENSG00000173406 | HPA052033 | 1 | 1 | 1 | 1 |         |
| 4948 | ENSG00000173409 | HPA035709 | 1 | 1 | 1 | 1 |         |
| 4948 | ENSG00000173418 | HPA063344 | 1 | 1 | 1 | 1 |         |
| 4948 | ENSG00000173421 | HPA069534 | 1 | 1 | 1 | 1 |         |
| 4948 | ENSG00000173436 | HPA059930 | 1 | 1 | 1 | 1 |         |
| 4948 | ENSG00000173451 | HPA039790 | 1 | 1 | 1 | 1 |         |
| 4948 | ENSG00000173452 | HPA043163 | 1 | 1 | 1 | 1 |         |
| 4948 | ENSG00000173465 | HPA039789 | 1 | 1 | 1 | 1 |         |
| 4948 | ENSG00000173467 | HPA053942 | 1 | 1 | 1 | 1 |         |
| 4948 | ENSG00000173473 | CAB016336 | 1 | 1 | 1 | 1 |         |
| 4948 | ENSG00000173480 | HPA042125 | 1 | 1 | 1 | 1 |         |
| 4948 | ENSG00000173482 | HPA003891 | 1 | 1 | 1 | 1 |         |
| 4948 | ENSG00000173486 | HPA049405 | 1 | 1 | 1 | 1 |         |
| 4948 | ENSG00000173540 | HPA014657 | 1 | 1 | 1 | 1 | 0. 3156 |
| 4948 | ENSG00000173557 | HPA062453 | 1 | 1 | 1 | 1 |         |
| 4948 | ENSG00000173588 | HPA038161 | 1 | 1 | 1 | 1 |         |
| 4948 | ENSG00000173598 | HPA047027 | 1 | 1 | 1 | 1 |         |
| 4948 | ENSG00000173611 | HPA020632 | 1 | 1 | 1 | 1 |         |
| 4948 | ENSG00000173614 | HPA059447 | 1 | 1 | 1 | 1 |         |
| 4948 | ENSG00000173638 | HPA024802 | 1 | 1 | 1 | 1 |         |
| 4948 | ENSG00000173674 | HPA002561 | 1 | 1 | 1 | 1 |         |
| 4948 | ENSG00000173681 | HPA027215 | 1 | 1 | 1 | 1 |         |
| 4948 | ENSG00000173698 | HPA001478 | 1 | 1 | 1 | 1 |         |
| 4948 | ENSG00000173705 | HPA052788 | 1 | 1 | 1 | 1 |         |
| 4948 | ENSG00000173715 | HPA038933 | 1 | 1 | 1 | 1 |         |
| 4948 | ENSG00000173726 | CAB005585 | 1 | 1 | 1 | 1 | 0. 2929 |
| 4948 | ENSG00000173744 | HPA008741 | 1 | 1 | 1 | 1 |         |
| 4948 | ENSG00000173786 | HPA023266 | 1 | 1 | 1 | 1 |         |
| 4948 | ENSG00000173805 | HPA076992 | 1 | 1 | 1 | 1 |         |
| 4948 | ENSG00000173825 | HPA040016 | 1 | 1 | 1 | 1 |         |
| 4948 | ENSG00000173838 | HPA023322 | 1 | 1 | 1 | 1 | 0. 4569 |
| 4948 | ENSG00000173848 | HPA020068 | 1 | 1 | 1 | 1 |         |
| 4948 | ENSG00000173852 | HPA059139 | 1 | 1 | 1 | 1 |         |
| 4948 | ENSG00000173875 | HPA021537 | 1 | 1 | 1 | 1 |         |
| 4948 | ENSG00000173889 | HPA062031 | 1 | 1 | 1 | 1 | 0. 1975 |
| 4948 | ENSG00000173894 | HPA023083 | 1 | 1 | 1 | 1 |         |
| 4948 | ENSG00000173905 | HPA001677 | 1 | 1 | 1 | 1 |         |
| 4948 | ENSG00000173914 | HPA047849 | 1 | 1 | 1 | 1 |         |
| 4948 | ENSG00000173915 | HPA044798 | 1 | 1 | 1 | 1 |         |
| 4948 | ENSG00000173918 | HPA051101 | 1 | 1 | 1 | 1 |         |
| 4948 | ENSG00000173933 | HPA047849 | 1 | 1 | 1 | 1 |         |
| 4948 | ENSG00000173960 | HPA065482 | 1 | 1 | 1 | 1 |         |
| 4948 | ENSG00000173988 | HPA039763 | 1 | 1 | 1 | 1 |         |
| 4948 | ENSG00000174007 | HPA071138 | 1 | 1 | 1 | 1 |         |
| 4948 | ENSG00000174010 | HPA065730 | 1 | 1 | 1 | 1 |         |
| 4948 | ENSG00000174013 | HPA040730 | 1 | 1 | 1 | 1 |         |
| 4948 | ENSG00000174032 | HPA045260 | 1 | 1 | 1 | 1 |         |
| 4948 | ENSG00000174038 | HPA022029 | 1 | 1 | 1 | 1 |         |
| 4948 | ENSG00000174106 | HPA076986 | 1 | 1 | 1 | 1 |         |
| 4948 | ENSG00000174130 | HPA062733 | 1 | 1 | 1 | 1 |         |
| 4948 | ENSG00000174136 | HPA016993 | 1 | 1 | 1 | 1 |         |
| 4948 | ENSG00000174173 | HPA036671 | 1 | 1 | 1 | 1 |         |
| 4948 | ENSG00000174231 | CAB009941 | 1 | 1 | 1 | 1 |         |
| 4948 | ENSG00000174233 | CAB018365 | 1 | 1 | 1 | 1 |         |

|      |                 |           |   |   |   |   |
|------|-----------------|-----------|---|---|---|---|
| 4948 | ENSG00000174243 | HPA039037 | 1 | 1 | 1 | 1 |
| 4948 | ENSG00000174306 | HPA046498 | 1 | 1 | 1 | 1 |
| 4948 | ENSG00000174370 | HPA039716 | 1 | 1 | 1 | 1 |
| 4948 | ENSG00000174405 | HPA057325 | 1 | 1 | 1 | 1 |
| 4948 | ENSG00000174428 | HPA056679 | 1 | 1 | 1 | 1 |
| 4948 | ENSG00000174460 | HPA031016 | 1 | 1 | 1 | 1 |
| 4948 | ENSG00000174498 | HPA015713 | 1 | 1 | 1 | 1 |
| 4948 | ENSG00000174502 | HPA051485 | 1 | 1 | 1 | 1 |
| 4948 | ENSG00000174529 | HPA052515 | 1 | 1 | 1 | 1 |
| 4948 | ENSG00000174547 | HPA057685 | 1 | 1 | 1 | 1 |
| 4948 | ENSG00000174607 | HPA065785 | 1 | 1 | 1 | 1 |
| 4948 | ENSG00000174611 | HPA036492 | 1 | 1 | 1 | 1 |
| 4948 | ENSG00000174669 | HPA018168 | 1 | 1 | 1 | 1 |
| 4948 | ENSG00000174720 | HPA027930 | 1 | 1 | 1 | 1 |
| 4948 | ENSG00000174738 | HPA053868 | 1 | 1 | 1 | 1 |
| 4948 | ENSG00000174744 | HPA019637 | 1 | 1 | 1 | 1 |
| 4948 | ENSG00000174749 | HPA062443 | 1 | 1 | 1 | 1 |
| 4948 | ENSG00000174775 | HPA070222 | 1 | 1 | 1 | 1 |
| 4948 | ENSG00000174799 | HPA073950 | 1 | 1 | 1 | 1 |
| 4948 | ENSG00000174839 | HPA062618 | 1 | 1 | 1 | 1 |
| 4948 | ENSG00000174842 | HPA031446 | 1 | 1 | 1 | 1 |
| 4948 | ENSG00000174891 | HPA044792 | 1 | 1 | 1 | 1 |
| 4948 | ENSG00000174903 | CAB010225 | 1 | 1 | 1 | 1 |
| 4948 | ENSG00000174917 | HPA042672 | 1 | 1 | 1 | 1 |
| 4948 | ENSG00000174928 | HPA037663 | 1 | 1 | 1 | 1 |
| 4948 | ENSG00000174943 | HPA043524 | 1 | 1 | 1 | 1 |
| 4948 | ENSG00000175066 | HPA057998 | 1 | 1 | 1 | 1 |
| 4948 | ENSG00000175087 | HPA064157 | 1 | 1 | 1 | 1 |
| 4948 | ENSG00000175104 | HPA019805 | 1 | 1 | 1 | 1 |
| 4948 | ENSG00000175106 | HPA019585 | 1 | 1 | 1 | 1 |
| 4948 | ENSG00000175110 | HPA006083 | 1 | 1 | 1 | 1 |
| 4948 | ENSG00000175170 | HPA050100 | 1 | 1 | 1 | 1 |
| 4948 | ENSG00000175175 | HPA018462 | 1 | 1 | 1 | 1 |
| 4948 | ENSG00000175193 | HPA019545 | 1 | 1 | 1 | 1 |
| 4948 | ENSG00000175197 | HPA058416 | 1 | 1 | 1 | 1 |
| 4948 | ENSG00000175202 | HPA042715 | 1 | 1 | 1 | 1 |
| 4948 | ENSG00000175220 | HPA004689 | 1 | 1 | 1 | 1 |
| 4948 | ENSG00000175221 | HPA046495 | 1 | 1 | 1 | 1 |
| 4948 | ENSG00000175287 | HPA012115 | 1 | 1 | 1 | 1 |
| 4948 | ENSG00000175318 | HPA029435 | 1 | 1 | 1 | 1 |
| 4948 | ENSG00000175329 | HPA060328 | 1 | 1 | 1 | 1 |
| 4948 | ENSG00000175352 | HPA058827 | 1 | 1 | 1 | 1 |
| 4948 | ENSG00000175387 | CAB073546 | 1 | 1 | 1 | 1 |
| 4948 | ENSG00000175445 | HPA048749 | 1 | 1 | 1 | 1 |
| 4948 | ENSG00000175449 | CAB016546 | 1 | 1 | 1 | 1 |
| 4948 | ENSG00000175455 | HPA035278 | 1 | 1 | 1 | 1 |
| 4948 | ENSG00000175463 | HPA069743 | 1 | 1 | 1 | 1 |
| 4948 | ENSG00000175467 | HPA031188 | 1 | 1 | 1 | 1 |
| 4948 | ENSG00000175470 | HPA042122 | 1 | 1 | 1 | 1 |
| 4948 | ENSG00000175548 | HPA063387 | 1 | 1 | 1 | 1 |
| 4948 | ENSG00000175550 | HPA006790 | 1 | 1 | 1 | 1 |
| 4948 | ENSG00000175573 | HPA045938 | 1 | 1 | 1 | 1 |
| 4948 | ENSG00000175582 | HPA059131 | 1 | 1 | 1 | 1 |
| 4948 | ENSG00000175591 | CAB022642 | 1 | 1 | 1 | 1 |
| 4948 | ENSG00000175592 | CAB004396 | 1 | 1 | 1 | 1 |

|      |                 |           |   |   |   |   |        |
|------|-----------------|-----------|---|---|---|---|--------|
| 4948 | ENSG00000175634 | CAB019404 | 1 | 1 | 1 | 1 | 0.2766 |
| 4948 | ENSG00000175643 | HPA040995 | 1 | 1 | 1 | 1 |        |
| 4948 | ENSG00000175711 | HPA024547 | 1 | 1 | 1 | 1 |        |
| 4948 | ENSG00000175745 | CAB019281 | 1 | 1 | 1 | 1 |        |
| 4948 | ENSG00000175768 | HPA048712 | 1 | 1 | 1 | 1 |        |
| 4948 | ENSG00000175787 | HPA041769 | 1 | 1 | 1 | 1 |        |
| 4948 | ENSG00000175792 | HPA019947 | 1 | 1 | 1 | 1 |        |
| 4948 | ENSG00000175832 | HPA005768 | 1 | 1 | 1 | 1 |        |
| 4948 | ENSG00000175866 | HPA023310 | 1 | 1 | 1 | 1 |        |
| 4948 | ENSG00000175877 | HPA077196 | 1 | 1 | 1 | 1 |        |
| 4948 | ENSG00000175931 | HPA023605 | 1 | 1 | 1 | 1 |        |
| 4948 | ENSG00000175938 | HPA015022 | 1 | 1 | 1 | 1 |        |
| 4948 | ENSG00000176018 | HPA018024 | 1 | 1 | 1 | 1 |        |
| 4948 | ENSG00000176049 | HPA065023 | 1 | 1 | 1 | 1 |        |
| 4948 | ENSG00000176058 | HPA020899 | 1 | 1 | 1 | 1 |        |
| 4948 | ENSG00000176076 | HPA042316 | 1 | 1 | 1 | 1 |        |
| 4948 | ENSG00000176092 | HPA029629 | 1 | 1 | 1 | 1 |        |
| 4948 | ENSG00000176102 | HPA039743 | 1 | 1 | 1 | 1 |        |
| 4948 | ENSG00000176105 | HPA026480 | 1 | 1 | 1 | 1 |        |
| 4948 | ENSG00000176142 | HPA039140 | 1 | 1 | 1 | 1 |        |
| 4948 | ENSG00000176171 | CAB011676 | 1 | 1 | 1 | 1 |        |
| 4948 | ENSG00000176182 | HPA065307 | 1 | 1 | 1 | 1 |        |
| 4948 | ENSG00000176209 | HPA074830 | 1 | 1 | 1 | 1 |        |
| 4948 | ENSG00000176261 | HPA046315 | 1 | 1 | 1 | 1 |        |
| 4948 | ENSG00000176371 | HPA007296 | 1 | 1 | 1 | 1 | 0.2213 |
| 4948 | ENSG00000176386 | HPA044130 | 1 | 1 | 1 | 1 |        |
| 4948 | ENSG00000176387 | HPA056385 | 1 | 1 | 1 | 1 |        |
| 4948 | ENSG00000176390 | HPA007596 | 1 | 1 | 1 | 1 |        |
| 4948 | ENSG00000176393 | HPA036074 | 1 | 1 | 1 | 1 |        |
| 4948 | ENSG00000176396 | HPA045477 | 1 | 1 | 1 | 1 |        |
| 4948 | ENSG00000176407 | HPA030383 | 1 | 1 | 1 | 1 |        |
| 4948 | ENSG00000176428 | HPA040978 | 1 | 1 | 1 | 1 |        |
| 4948 | ENSG00000176435 | HPA039468 | 1 | 1 | 1 | 1 |        |
| 4948 | ENSG00000176438 | HPA077140 | 1 | 1 | 1 | 1 |        |
| 4948 | ENSG00000176444 | HPA055366 | 1 | 1 | 1 | 1 |        |
| 4948 | ENSG00000176473 | HPA003113 | 1 | 1 | 1 | 1 |        |
| 4948 | ENSG00000176476 | HPA052590 | 1 | 1 | 1 | 1 |        |
| 4948 | ENSG00000176485 | HPA058997 | 1 | 1 | 1 | 1 |        |
| 4948 | ENSG00000176532 | HPA040996 | 1 | 1 | 1 | 1 |        |
| 4948 | ENSG00000176595 | HPA051159 | 1 | 1 | 1 | 1 |        |
| 4948 | ENSG00000176601 | HPA011388 | 1 | 1 | 1 | 1 | 0.6496 |
| 4948 | ENSG00000176619 | HPA062477 | 1 | 1 | 1 | 1 |        |
| 4948 | ENSG00000176624 | HPA040603 | 1 | 1 | 1 | 1 |        |
| 4948 | ENSG00000176692 | HPA056302 | 1 | 1 | 1 | 1 |        |
| 4948 | ENSG00000176853 | HPA027978 | 1 | 1 | 1 | 1 |        |
| 4948 | ENSG00000176896 | HPA000337 | 1 | 1 | 1 | 1 |        |
| 4948 | ENSG00000176909 | HPA049765 | 1 | 1 | 1 | 1 |        |
| 4948 | ENSG00000176920 | HPA014402 | 1 | 1 | 1 | 1 | 0.3187 |
| 4948 | ENSG00000176953 | HPA053587 | 1 | 1 | 1 | 1 |        |
| 4948 | ENSG00000176974 | HPA023314 | 1 | 1 | 1 | 1 |        |
| 4948 | ENSG00000176978 | HPA021282 | 1 | 1 | 1 | 1 |        |
| 4948 | ENSG00000176986 | HPA040196 | 1 | 1 | 1 | 1 |        |
| 4948 | ENSG00000176994 | HPA021557 | 1 | 1 | 1 | 1 |        |
| 4948 | ENSG00000177000 | HPA063389 | 1 | 1 | 1 | 1 |        |
| 4948 | ENSG00000177025 | HPA014527 | 1 | 1 | 1 | 1 |        |

|      |                 |           |   |   |   |   |         |         |
|------|-----------------|-----------|---|---|---|---|---------|---------|
| 4948 | ENSG00000177030 | HPA030302 | 1 | 1 | 1 | 1 |         |         |
| 4948 | ENSG00000177034 | HPA062061 | 1 | 1 | 1 | 1 |         |         |
| 4948 | ENSG00000177051 | HPA049390 | 1 | 1 | 1 | 1 |         |         |
| 4948 | ENSG00000177058 | HPA061702 | 1 | 1 | 1 | 1 |         |         |
| 4948 | ENSG00000177106 | HPA041143 | 1 | 1 | 1 | 1 |         |         |
| 4948 | ENSG00000177108 | HPA049471 | 1 | 1 | 1 | 1 |         |         |
| 4948 | ENSG00000177125 | HPA023893 | 1 | 1 | 1 | 1 |         |         |
| 4948 | ENSG00000177138 | HPA035135 | 1 | 1 | 1 | 1 |         |         |
| 4948 | ENSG00000177144 | HPA047027 | 1 | 1 | 1 | 1 |         |         |
| 4948 | ENSG00000177150 | HPA014324 | 1 | 1 | 1 | 1 |         |         |
| 4948 | ENSG00000177169 | HPA063990 | 1 | 1 | 1 | 1 |         |         |
| 4948 | ENSG00000177181 | HPA027826 | 1 | 1 | 1 | 1 |         |         |
| 4948 | ENSG00000177192 | HPA057593 | 1 | 1 | 1 | 1 |         |         |
| 4948 | ENSG00000177225 | HPA008812 | 1 | 1 | 1 | 1 |         |         |
| 4948 | ENSG00000177238 | HPA054909 | 1 | 1 | 1 | 1 |         |         |
| 4948 | ENSG00000177239 | HPA051516 | 1 | 1 | 1 | 1 |         |         |
| 4948 | ENSG00000177283 | HPA071142 | 1 | 1 | 1 | 1 |         |         |
| 4948 | ENSG00000177311 | HPA014865 | 1 | 1 | 1 | 1 |         |         |
| 4948 | ENSG00000177352 | HPA047547 | 1 | 1 | 1 | 1 |         |         |
| 4948 | ENSG00000177363 | HPA050317 | 1 | 1 | 1 | 1 |         |         |
| 4948 | ENSG00000177383 | HPA054190 | 1 | 1 | 1 | 1 |         |         |
| 4948 | ENSG00000177409 | HPA019461 | 1 | 1 | 1 | 1 | 0. 3264 | 0. 3657 |
| 4948 | ENSG00000177425 | HPA012640 | 1 | 1 | 1 | 1 | 0. 2971 |         |
| 4948 | ENSG00000177426 | HPA062160 | 1 | 1 | 1 | 1 |         |         |
| 4948 | ENSG00000177453 | HPA007695 | 1 | 1 | 1 | 1 |         |         |
| 4948 | ENSG00000177463 | HPA006313 | 1 | 1 | 1 | 1 |         |         |
| 4948 | ENSG00000177479 | HPA067381 | 1 | 1 | 1 | 1 |         |         |
| 4948 | ENSG00000177508 | HPA062522 | 1 | 1 | 1 | 1 |         |         |
| 4948 | ENSG00000177551 | HPA055238 | 1 | 1 | 1 | 1 |         |         |
| 4948 | ENSG00000177565 | HPA019182 | 1 | 1 | 1 | 1 |         |         |
| 4948 | ENSG00000177570 | HPA024634 | 1 | 1 | 1 | 1 |         |         |
| 4948 | ENSG00000177575 | HPA046404 | 1 | 1 | 1 | 1 |         |         |
| 4948 | ENSG00000177602 | HPA030698 | 1 | 1 | 1 | 1 |         |         |
| 4948 | ENSG00000177606 | CAB003801 | 1 | 1 | 1 | 1 |         |         |
| 4948 | ENSG00000177614 | HPA065010 | 1 | 1 | 1 | 1 |         |         |
| 4948 | ENSG00000177646 | HPA037716 | 1 | 1 | 1 | 1 |         |         |
| 4948 | ENSG00000177666 | HPA055173 | 1 | 1 | 1 | 1 |         |         |
| 4948 | ENSG00000177679 | HPA019337 | 1 | 1 | 1 | 1 | 0. 2788 |         |
| 4948 | ENSG00000177683 | HPA051488 | 1 | 1 | 1 | 1 |         |         |
| 4948 | ENSG00000177694 | HPA012413 | 1 | 1 | 1 | 1 |         |         |
| 4948 | ENSG00000177706 | HPA019823 | 1 | 1 | 1 | 1 |         |         |
| 4948 | ENSG00000177707 | HPA011038 | 1 | 1 | 1 | 1 |         |         |
| 4948 | ENSG00000177728 | HPA008423 | 1 | 1 | 1 | 1 |         |         |
| 4948 | ENSG00000177732 | HPA055052 | 1 | 1 | 1 | 1 |         |         |
| 4948 | ENSG00000177733 | HPA036569 | 1 | 1 | 1 | 1 |         |         |
| 4948 | ENSG00000177842 | HPA059383 | 1 | 1 | 1 | 1 | 0. 281  |         |
| 4948 | ENSG00000177853 | HPA029049 | 1 | 1 | 1 | 1 |         |         |
| 4948 | ENSG00000177854 | HPA038134 | 1 | 1 | 1 | 1 |         |         |
| 4948 | ENSG00000177868 | HPA008507 | 1 | 1 | 1 | 1 |         |         |
| 4948 | ENSG00000177879 | HPA049270 | 1 | 1 | 1 | 1 |         |         |
| 4948 | ENSG00000177946 | HPA060522 | 1 | 1 | 1 | 1 |         |         |
| 4948 | ENSG00000177951 | HPA039819 | 1 | 1 | 1 | 1 |         |         |
| 4948 | ENSG00000177971 | HPA060955 | 1 | 1 | 1 | 1 |         |         |
| 4948 | ENSG00000178028 | HPA028419 | 1 | 1 | 1 | 1 |         |         |
| 4948 | ENSG00000178033 | HPA034970 | 1 | 1 | 1 | 1 |         |         |

|      |                 |           |   |   |   |   |        |
|------|-----------------|-----------|---|---|---|---|--------|
| 4948 | ENSG00000178035 | HPA001400 | 1 | 1 | 1 | 1 |        |
| 4948 | ENSG00000178075 | HPA012316 | 1 | 1 | 1 | 1 |        |
| 4948 | ENSG00000178104 | HPA012678 | 1 | 1 | 1 | 1 |        |
| 4948 | ENSG00000178149 | HPA036862 | 1 | 1 | 1 | 1 |        |
| 4948 | ENSG00000178150 | HPA025019 | 1 | 1 | 1 | 1 |        |
| 4948 | ENSG00000178163 | HPA031216 | 1 | 1 | 1 | 1 |        |
| 4948 | ENSG00000178188 | HPA076175 | 1 | 1 | 1 | 1 |        |
| 4948 | ENSG00000178199 | HPA036897 | 1 | 1 | 1 | 1 |        |
| 4948 | ENSG00000178229 | HPA046330 | 1 | 1 | 1 | 1 |        |
| 4948 | ENSG00000178295 | HPA020078 | 1 | 1 | 1 | 1 |        |
| 4948 | ENSG00000178307 | HPA062854 | 1 | 1 | 1 | 1 |        |
| 4948 | ENSG00000178338 | HPA029056 | 1 | 1 | 1 | 1 |        |
| 4948 | ENSG00000178397 | HPA055050 | 1 | 1 | 1 | 1 |        |
| 4948 | ENSG00000178401 | HPA039953 | 1 | 1 | 1 | 1 |        |
| 4948 | ENSG00000178409 | HPA062067 | 1 | 1 | 1 | 1 |        |
| 4948 | ENSG00000178449 | HPA044618 | 1 | 1 | 1 | 1 |        |
| 4948 | ENSG00000178460 | HPA026522 | 1 | 1 | 1 | 1 |        |
| 4948 | ENSG00000178597 | HPA038013 | 1 | 1 | 1 | 1 |        |
| 4948 | ENSG00000178605 | HPA055418 | 1 | 1 | 1 | 1 |        |
| 4948 | ENSG00000178665 | HPA062887 | 1 | 1 | 1 | 1 |        |
| 4948 | ENSG00000178691 | HPA057436 | 1 | 1 | 1 | 1 |        |
| 4948 | ENSG00000178694 | HPA057979 | 1 | 1 | 1 | 1 |        |
| 4948 | ENSG00000178695 | HPA056987 | 1 | 1 | 1 | 1 |        |
| 4948 | ENSG00000178700 | HPA051465 | 1 | 1 | 1 | 1 |        |
| 4948 | ENSG00000178726 | HPA002982 | 1 | 1 | 1 | 1 |        |
| 4948 | ENSG00000178764 | HPA006769 | 1 | 1 | 1 | 1 |        |
| 4948 | ENSG00000178814 | HPA052429 | 1 | 1 | 1 | 1 |        |
| 4948 | ENSG00000178860 | HPA062878 | 1 | 1 | 1 | 1 |        |
| 4948 | ENSG00000178878 | HPA052462 | 1 | 1 | 1 | 1 |        |
| 4948 | ENSG00000178896 | HPA024792 | 1 | 1 | 1 | 1 |        |
| 4948 | ENSG00000178904 | HPA008325 | 1 | 1 | 1 | 1 |        |
| 4948 | ENSG00000178917 | HPA071850 | 1 | 1 | 1 | 1 |        |
| 4948 | ENSG00000178921 | HPA022140 | 1 | 1 | 1 | 1 |        |
| 4948 | ENSG00000178935 | HPA072145 | 1 | 1 | 1 | 1 |        |
| 4948 | ENSG00000178951 | HPA046387 | 1 | 1 | 1 | 1 |        |
| 4948 | ENSG00000178952 | HPA018991 | 1 | 1 | 1 | 1 |        |
| 4948 | ENSG00000178966 | HPA021661 | 1 | 1 | 1 | 1 |        |
| 4948 | ENSG00000178982 | HPA054590 | 1 | 1 | 1 | 1 |        |
| 4948 | ENSG00000178996 | HPA037800 | 1 | 1 | 1 | 1 |        |
| 4948 | ENSG00000179008 | HPA059518 | 1 | 1 | 1 | 1 |        |
| 4948 | ENSG00000179010 | HPA056367 | 1 | 1 | 1 | 1 |        |
| 4948 | ENSG00000179023 | HPA056616 | 1 | 1 | 1 | 1 |        |
| 4948 | ENSG00000179071 | HPA040628 | 1 | 1 | 1 | 1 | 0.3322 |
| 4948 | ENSG00000179104 | HPA026954 | 1 | 1 | 1 | 1 |        |
| 4948 | ENSG00000179115 | HPA001911 | 1 | 1 | 1 | 1 |        |
| 4948 | ENSG00000179119 | HPA040177 | 1 | 1 | 1 | 1 |        |
| 4948 | ENSG00000179134 | HPA016800 | 1 | 1 | 1 | 1 |        |
| 4948 | ENSG00000179148 | HPA023120 | 1 | 1 | 1 | 1 |        |
| 4948 | ENSG00000179151 | HPA066137 | 1 | 1 | 1 | 1 |        |
| 4948 | ENSG00000179195 | HPA047846 | 1 | 1 | 1 | 1 |        |
| 4948 | ENSG00000179222 | HPA043645 | 1 | 1 | 1 | 1 |        |
| 4948 | ENSG00000179241 | HPA038251 | 1 | 1 | 1 | 1 |        |
| 4948 | ENSG00000179242 | HPA015613 | 1 | 1 | 1 | 1 |        |
| 4948 | ENSG00000179271 | HPA055205 | 1 | 1 | 1 | 1 |        |
| 4948 | ENSG00000179292 | HPA041035 | 1 | 1 | 1 | 1 |        |

|      |                 |           |   |   |   |   |        |
|------|-----------------|-----------|---|---|---|---|--------|
| 4948 | ENSG00000179299 | HPA020653 | 1 | 1 | 1 | 1 |        |
| 4948 | ENSG00000179300 | HPA075136 | 1 | 1 | 1 | 1 |        |
| 4948 | ENSG00000179348 | HPA005633 | 1 | 1 | 1 | 1 |        |
| 4948 | ENSG00000179361 | HPA050320 | 1 | 1 | 1 | 1 |        |
| 4948 | ENSG00000179363 | HPA052760 | 1 | 1 | 1 | 1 |        |
| 4948 | ENSG00000179388 | HPA006206 | 1 | 1 | 1 | 1 |        |
| 4948 | ENSG00000179431 | HPA059220 | 1 | 1 | 1 | 1 |        |
| 4948 | ENSG00000179454 | HPA000988 | 1 | 1 | 1 | 1 |        |
| 4948 | ENSG00000179456 | HPA024656 | 1 | 1 | 1 | 1 |        |
| 4948 | ENSG00000179476 | HPA059635 | 1 | 1 | 1 | 1 |        |
| 4948 | ENSG00000179477 | HPA024002 | 1 | 1 | 1 | 1 |        |
| 4948 | ENSG00000179526 | HPA044453 | 1 | 1 | 1 | 1 |        |
| 4948 | ENSG00000179542 | HPA000431 | 1 | 1 | 1 | 1 |        |
| 4948 | ENSG00000179562 | HPA019369 | 1 | 1 | 1 | 1 | 0.3914 |
| 4948 | ENSG00000179593 | HPA010562 | 1 | 1 | 1 | 1 |        |
| 4948 | ENSG00000179750 | HPA056980 | 1 | 1 | 1 | 1 |        |
| 4948 | ENSG00000179772 | HPA042475 | 1 | 1 | 1 | 1 |        |
| 4948 | ENSG00000179820 | HPA056301 | 1 | 1 | 1 | 1 |        |
| 4948 | ENSG00000179833 | HPA020904 | 1 | 1 | 1 | 1 |        |
| 4948 | ENSG00000179841 | CAB004308 | 1 | 1 | 1 | 1 |        |
| 4948 | ENSG00000179862 | HPA056434 | 1 | 1 | 1 | 1 |        |
| 4948 | ENSG00000179889 | HPA047369 | 1 | 1 | 1 | 1 |        |
| 4948 | ENSG00000179922 | HPA059676 | 1 | 1 | 1 | 1 |        |
| 4948 | ENSG00000179943 | HPA074026 | 1 | 1 | 1 | 1 |        |
| 4948 | ENSG00000179958 | HPA002832 | 1 | 1 | 1 | 1 |        |
| 4948 | ENSG00000179965 | HPA030730 | 1 | 1 | 1 | 1 |        |
| 4948 | ENSG00000179981 | HPA006982 | 1 | 1 | 1 | 1 |        |
| 4948 | ENSG00000180035 | HPA023806 | 1 | 1 | 1 | 1 |        |
| 4948 | ENSG00000180071 | HPA046346 | 1 | 1 | 1 | 1 |        |
| 4948 | ENSG00000180096 | HPA060339 | 1 | 1 | 1 | 1 |        |
| 4948 | ENSG00000180104 | HPA037880 | 1 | 1 | 1 | 1 |        |
| 4948 | ENSG00000180138 | HPA051334 | 1 | 1 | 1 | 1 |        |
| 4948 | ENSG00000180182 | HPA064182 | 1 | 1 | 1 | 1 |        |
| 4948 | ENSG00000180257 | HPA042466 | 1 | 1 | 1 | 1 |        |
| 4948 | ENSG00000180263 | HPA007974 | 1 | 1 | 1 | 1 |        |
| 4948 | ENSG00000180304 | HPA047694 | 1 | 1 | 1 | 1 |        |
| 4948 | ENSG00000180329 | HPA023391 | 1 | 1 | 1 | 1 |        |
| 4948 | ENSG00000180336 | HPA027266 | 1 | 1 | 1 | 1 |        |
| 4948 | ENSG00000180346 | HPA071168 | 1 | 1 | 1 | 1 |        |
| 4948 | ENSG00000180347 | HPA024103 | 1 | 1 | 1 | 1 |        |
| 4948 | ENSG00000180357 | HPA040742 | 1 | 1 | 1 | 1 |        |
| 4948 | ENSG00000180370 | CAB007794 | 1 | 1 | 1 | 1 |        |
| 4948 | ENSG00000180425 | HPA063943 | 1 | 1 | 1 | 1 |        |
| 4948 | ENSG00000180440 | HPA054814 | 1 | 1 | 1 | 1 |        |
| 4948 | ENSG00000180488 | HPA017589 | 1 | 1 | 1 | 1 |        |
| 4948 | ENSG00000180549 | HPA042780 | 1 | 1 | 1 | 1 |        |
| 4948 | ENSG00000180592 | HPA039208 | 1 | 1 | 1 | 1 |        |
| 4948 | ENSG00000180596 | HPA048671 | 1 | 1 | 1 | 1 |        |
| 4948 | ENSG00000180611 | HPA044026 | 1 | 1 | 1 | 1 |        |
| 4948 | ENSG00000180616 | HPA007264 | 1 | 1 | 1 | 1 |        |
| 4948 | ENSG00000180626 | HPA060283 | 1 | 1 | 1 | 1 |        |
| 4948 | ENSG00000180628 | HPA038349 | 1 | 1 | 1 | 1 |        |
| 4948 | ENSG00000180644 | HPA037940 | 1 | 1 | 1 | 1 |        |
| 4948 | ENSG00000180720 | HPA072083 | 1 | 1 | 1 | 1 |        |
| 4948 | ENSG00000180773 | HPA017887 | 1 | 1 | 1 | 1 | 0.2184 |



|      |                 |           |   |   |   |   |        |        |
|------|-----------------|-----------|---|---|---|---|--------|--------|
| 4948 | ENSG00000180787 | HPA057290 | 1 | 1 | 1 | 1 |        |        |
| 4948 | ENSG00000180815 | HPA004006 | 1 | 1 | 1 | 1 |        |        |
| 4948 | ENSG00000180817 | HPA020096 | 1 | 1 | 1 | 1 | 0.3321 |        |
| 4948 | ENSG00000180818 | HPA053919 | 1 | 1 | 1 | 1 |        |        |
| 4948 | ENSG00000180822 | HPA067652 | 1 | 1 | 1 | 1 |        |        |
| 4948 | ENSG00000180834 | HPA037991 | 1 | 1 | 1 | 1 |        |        |
| 4948 | ENSG00000180884 | HPA035157 | 1 | 1 | 1 | 1 |        |        |
| 4948 | ENSG00000180891 | HPA024836 | 1 | 1 | 1 | 1 | 0.2665 | 0.745  |
| 4948 | ENSG00000180902 | HPA060548 | 1 | 1 | 1 | 1 |        |        |
| 4948 | ENSG00000180921 | HPA024505 | 1 | 1 | 1 | 1 |        |        |
| 4948 | ENSG00000180938 | HPA066838 | 1 | 1 | 1 | 1 |        |        |
| 4948 | ENSG00000180964 | HPA059115 | 1 | 1 | 1 | 1 |        |        |
| 4948 | ENSG00000180992 | HPA076790 | 1 | 1 | 1 | 1 |        |        |
| 4948 | ENSG00000181016 | HPA013753 | 1 | 1 | 1 | 1 |        |        |
| 4948 | ENSG00000181019 | HPA007308 | 1 | 1 | 1 | 1 | 0.4174 |        |
| 4948 | ENSG00000181035 | HPA049449 | 1 | 1 | 1 | 1 |        |        |
| 4948 | ENSG00000181038 | HPA022889 | 1 | 1 | 1 | 1 |        |        |
| 4948 | ENSG00000181061 | HPA043336 | 1 | 1 | 1 | 1 |        |        |
| 4948 | ENSG00000181090 | HPA060022 | 1 | 1 | 1 | 1 |        |        |
| 4948 | ENSG00000181135 | HPA044991 | 1 | 1 | 1 | 1 |        |        |
| 4948 | ENSG00000181163 | HPA011384 | 1 | 1 | 1 | 1 |        | 0.2386 |
| 4948 | ENSG00000181191 | HPA000595 | 1 | 1 | 1 | 1 |        |        |
| 4948 | ENSG00000181192 | HPA037949 | 1 | 1 | 1 | 1 |        |        |
| 4948 | ENSG00000181222 | CAB012226 | 1 | 1 | 1 | 1 | 0.4858 |        |
| 4948 | ENSG00000181234 | HPA015633 | 1 | 1 | 1 | 1 | 0.3872 |        |
| 4948 | ENSG00000181284 | HPA024433 | 1 | 1 | 1 | 1 |        |        |
| 4948 | ENSG00000181404 | HPA002689 | 1 | 1 | 1 | 1 |        |        |
| 4948 | ENSG00000181409 | HPA009073 | 1 | 1 | 1 | 1 |        |        |
| 4948 | ENSG00000181433 | HPA003033 | 1 | 1 | 1 | 1 |        |        |
| 4948 | ENSG00000181449 | HPA045725 | 1 | 1 | 1 | 1 |        |        |
| 4948 | ENSG00000181472 | HPA023458 | 1 | 1 | 1 | 1 |        |        |
| 4948 | ENSG00000181481 | HPA052404 | 1 | 1 | 1 | 1 |        |        |
| 4948 | ENSG00000181555 | HPA042451 | 1 | 1 | 1 | 1 |        |        |
| 4948 | ENSG00000181577 | HPA035765 | 1 | 1 | 1 | 1 |        |        |
| 4948 | ENSG00000181585 | HPA038298 | 1 | 1 | 1 | 1 |        |        |
| 4948 | ENSG00000181610 | HPA023453 | 1 | 1 | 1 | 1 |        |        |
| 4948 | ENSG00000181625 | HPA047038 | 1 | 1 | 1 | 1 |        |        |
| 4948 | ENSG00000181666 | HPA044855 | 1 | 1 | 1 | 1 |        |        |
| 4948 | ENSG00000181722 | HPA015551 | 1 | 1 | 1 | 1 |        |        |
| 4948 | ENSG00000181754 | HPA046152 | 1 | 1 | 1 | 1 |        |        |
| 4948 | ENSG00000181817 | HPA048469 | 1 | 1 | 1 | 1 |        |        |
| 4948 | ENSG00000181826 | HPA013377 | 1 | 1 | 1 | 1 |        |        |
| 4948 | ENSG00000181830 | HPA064001 | 1 | 1 | 1 | 1 |        |        |
| 4948 | ENSG00000181873 | HPA030556 | 1 | 1 | 1 | 1 |        |        |
| 4948 | ENSG00000181938 | HPA041216 | 1 | 1 | 1 | 1 |        |        |
| 4948 | ENSG00000181982 | HPA044158 | 1 | 1 | 1 | 1 |        |        |
| 4948 | ENSG00000181991 | HPA050345 | 1 | 1 | 1 | 1 |        |        |
| 4948 | ENSG00000182010 | HPA037946 | 1 | 1 | 1 | 1 |        |        |
| 4948 | ENSG00000182054 | HPA007831 | 1 | 1 | 1 | 1 |        |        |
| 4948 | ENSG00000182095 | HPA020730 | 1 | 1 | 1 | 1 |        |        |
| 4948 | ENSG00000182117 | HPA059198 | 1 | 1 | 1 | 1 |        |        |
| 4948 | ENSG00000182132 | HPA066717 | 1 | 1 | 1 | 1 |        |        |
| 4948 | ENSG00000182149 | HPA054532 | 1 | 1 | 1 | 1 | 0.288  |        |
| 4948 | ENSG00000182154 | HPA024550 | 1 | 1 | 1 | 1 | 0.1497 |        |
| 4948 | ENSG00000182158 | HPA015534 | 1 | 1 | 1 | 1 |        |        |

|      |                 |           |   |   |   |   |        |
|------|-----------------|-----------|---|---|---|---|--------|
| 4948 | ENSG00000182180 | HPA050081 | 1 | 1 | 1 | 1 |        |
| 4948 | ENSG00000182185 | HPA051869 | 1 | 1 | 1 | 1 | 0.3931 |
| 4948 | ENSG00000182195 | HPA061842 | 1 | 1 | 1 | 1 |        |
| 4948 | ENSG00000182199 | HPA020543 | 1 | 1 | 1 | 1 |        |
| 4948 | ENSG00000182208 | HPA046313 | 1 | 1 | 1 | 1 |        |
| 4948 | ENSG00000182224 | HPA021632 | 1 | 1 | 1 | 1 |        |
| 4948 | ENSG00000182247 | HPA028872 | 1 | 1 | 1 | 1 |        |
| 4948 | ENSG00000182253 | HPA077856 | 1 | 1 | 1 | 1 |        |
| 4948 | ENSG00000182271 | HPA021946 | 1 | 1 | 1 | 1 |        |
| 4948 | ENSG00000182324 | HPA071765 | 1 | 1 | 1 | 1 |        |
| 4948 | ENSG00000182362 | HPA016593 | 1 | 1 | 1 | 1 |        |
| 4948 | ENSG00000182378 | HPA007721 | 1 | 1 | 1 | 1 |        |
| 4948 | ENSG00000182400 | HPA047928 | 1 | 1 | 1 | 1 |        |
| 4948 | ENSG00000182472 | HPA053322 | 1 | 1 | 1 | 1 |        |
| 4948 | ENSG00000182504 | HPA002980 | 1 | 1 | 1 | 1 |        |
| 4948 | ENSG00000182512 | HPA063716 | 1 | 1 | 1 | 1 |        |
| 4948 | ENSG00000182534 | HPA044819 | 1 | 1 | 1 | 1 |        |
| 4948 | ENSG00000182541 | CAB019313 | 1 | 1 | 1 | 1 |        |
| 4948 | ENSG00000182551 | HPA035403 | 1 | 1 | 1 | 1 |        |
| 4948 | ENSG00000182568 | HPA051769 | 1 | 1 | 1 | 1 |        |
| 4948 | ENSG00000182621 | CAB005334 | 1 | 1 | 1 | 1 |        |
| 4948 | ENSG00000182636 | HPA074457 | 1 | 1 | 1 | 1 |        |
| 4948 | ENSG00000182704 | HPA008164 | 1 | 1 | 1 | 1 |        |
| 4948 | ENSG00000182712 | HPA045866 | 1 | 1 | 1 | 1 |        |
| 4948 | ENSG00000182747 | HPA067497 | 1 | 1 | 1 | 1 |        |
| 4948 | ENSG00000182749 | HPA046936 | 1 | 1 | 1 | 1 |        |
| 4948 | ENSG00000182774 | HPA055060 | 1 | 1 | 1 | 1 |        |
| 4948 | ENSG00000182798 | HPA003756 | 1 | 1 | 1 | 1 |        |
| 4948 | ENSG00000182827 | HPA015594 | 1 | 1 | 1 | 1 |        |
| 4948 | ENSG00000182866 | HPA003494 | 1 | 1 | 1 | 1 |        |
| 4948 | ENSG00000182870 | HPA075016 | 1 | 1 | 1 | 1 |        |
| 4948 | ENSG00000182871 | HPA036104 | 1 | 1 | 1 | 1 |        |
| 4948 | ENSG00000182872 | HPA034972 | 1 | 1 | 1 | 1 |        |
| 4948 | ENSG00000182890 | HPA044839 | 1 | 1 | 1 | 1 |        |
| 4948 | ENSG00000182898 | HPA042579 | 1 | 1 | 1 | 1 |        |
| 4948 | ENSG00000182916 | HPA065080 | 1 | 1 | 1 | 1 |        |
| 4948 | ENSG00000182919 | HPA040088 | 1 | 1 | 1 | 1 |        |
| 4948 | ENSG00000182923 | HPA058154 | 1 | 1 | 1 | 1 |        |
| 4948 | ENSG00000182957 | HPA040185 | 1 | 1 | 1 | 1 |        |
| 4948 | ENSG00000182993 | HPA043911 | 1 | 1 | 1 | 1 |        |
| 4948 | ENSG00000183011 | HPA059189 | 1 | 1 | 1 | 1 |        |
| 4948 | ENSG00000183023 | HPA070007 | 1 | 1 | 1 | 1 |        |
| 4948 | ENSG00000183036 | HPA005792 | 1 | 1 | 1 | 1 |        |
| 4948 | ENSG00000183044 | HPA041690 | 1 | 1 | 1 | 1 |        |
| 4948 | ENSG00000183054 | HPA067564 | 1 | 1 | 1 | 1 |        |
| 4948 | ENSG00000183072 | HPA065034 | 1 | 1 | 1 | 1 |        |
| 4948 | ENSG00000183077 | HPA023861 | 1 | 1 | 1 | 1 |        |
| 4948 | ENSG00000183098 | HPA017671 | 1 | 1 | 1 | 1 |        |
| 4948 | ENSG00000183111 | HPA053487 | 1 | 1 | 1 | 1 |        |
| 4948 | ENSG00000183128 | HPA018205 | 1 | 1 | 1 | 1 |        |
| 4948 | ENSG00000183137 | HPA040378 | 1 | 1 | 1 | 1 | 0.2716 |
| 4948 | ENSG00000183155 | HPA054936 | 1 | 1 | 1 | 1 |        |
| 4948 | ENSG00000183172 | HPA060340 | 1 | 1 | 1 | 1 |        |
| 4948 | ENSG00000183186 | HPA055915 | 1 | 1 | 1 | 1 |        |
| 4948 | ENSG00000183246 | HPA001183 | 1 | 1 | 1 | 1 |        |

|      |                 |           |   |   |   |   |         |
|------|-----------------|-----------|---|---|---|---|---------|
| 4948 | ENSG00000183255 | HPA061827 | 1 | 1 | 1 | 1 |         |
| 4948 | ENSG00000183260 | HPA059272 | 1 | 1 | 1 | 1 |         |
| 4948 | ENSG00000183283 | HPA045940 | 1 | 1 | 1 | 1 |         |
| 4948 | ENSG00000183309 | HPA044372 | 1 | 1 | 1 | 1 |         |
| 4948 | ENSG00000183336 | HPA045380 | 1 | 1 | 1 | 1 |         |
| 4948 | ENSG00000183337 | HPA056308 | 1 | 1 | 1 | 1 |         |
| 4948 | ENSG00000183386 | HPA045723 | 1 | 1 | 1 | 1 |         |
| 4948 | ENSG00000183401 | HPA054655 | 1 | 1 | 1 | 1 |         |
| 4948 | ENSG00000183423 | HPA013454 | 1 | 1 | 1 | 1 | 0. 2934 |
| 4948 | ENSG00000183426 | HPA053611 | 1 | 1 | 1 | 1 |         |
| 4948 | ENSG00000183431 | HPA032054 | 1 | 1 | 1 | 1 |         |
| 4948 | ENSG00000183439 | HPA049109 | 1 | 1 | 1 | 1 |         |
| 4948 | ENSG00000183508 | HPA054049 | 1 | 1 | 1 | 1 |         |
| 4948 | ENSG00000183513 | HPA057768 | 1 | 1 | 1 | 1 |         |
| 4948 | ENSG00000183530 | HPA062645 | 1 | 1 | 1 | 1 |         |
| 4948 | ENSG00000183549 | HPA041435 | 1 | 1 | 1 | 1 |         |
| 4948 | ENSG00000183615 | HPA062074 | 1 | 1 | 1 | 1 |         |
| 4948 | ENSG00000183617 | HPA046767 | 1 | 1 | 1 | 1 |         |
| 4948 | ENSG00000183621 | HPA039843 | 1 | 1 | 1 | 1 |         |
| 4948 | ENSG00000183624 | HPA044968 | 1 | 1 | 1 | 1 |         |
| 4948 | ENSG00000183655 | HPA023450 | 1 | 1 | 1 | 1 |         |
| 4948 | ENSG00000183684 | HPA019799 | 1 | 1 | 1 | 1 | 0. 2725 |
| 4948 | ENSG00000183696 | HPA054040 | 1 | 1 | 1 | 1 |         |
| 4948 | ENSG00000183722 | HPA058975 | 1 | 1 | 1 | 1 |         |
| 4948 | ENSG00000183742 | HPA029476 | 1 | 1 | 1 | 1 |         |
| 4948 | ENSG00000183762 | HPA058513 | 1 | 1 | 1 | 1 |         |
| 4948 | ENSG00000183763 | HPA036261 | 1 | 1 | 1 | 1 |         |
| 4948 | ENSG00000183765 | HPA001878 | 1 | 1 | 1 | 1 |         |
| 4948 | ENSG00000183775 | HPA050154 | 1 | 1 | 1 | 1 |         |
| 4948 | ENSG00000183785 | HPA043684 | 1 | 1 | 1 | 1 |         |
| 4948 | ENSG00000183793 | HPA053611 | 1 | 1 | 1 | 1 |         |
| 4948 | ENSG00000183808 | HPA053050 | 1 | 1 | 1 | 1 |         |
| 4948 | ENSG00000183813 | HPA031613 | 1 | 1 | 1 | 1 |         |
| 4948 | ENSG00000183814 | HPA030241 | 1 | 1 | 1 | 1 |         |
| 4948 | ENSG00000183826 | HPA041930 | 1 | 1 | 1 | 1 |         |
| 4948 | ENSG00000183856 | HPA030143 | 1 | 1 | 1 | 1 |         |
| 4948 | ENSG00000183888 | HPA026676 | 1 | 1 | 1 | 1 |         |
| 4948 | ENSG00000183889 | HPA053611 | 1 | 1 | 1 | 1 |         |
| 4948 | ENSG00000183891 | HPA036024 | 1 | 1 | 1 | 1 |         |
| 4948 | ENSG00000183914 | HPA067103 | 1 | 1 | 1 | 1 |         |
| 4948 | ENSG00000183943 | HPA015324 | 1 | 1 | 1 | 1 |         |
| 4948 | ENSG00000183978 | HPA031966 | 1 | 1 | 1 | 1 | 0. 3577 |
| 4948 | ENSG00000184005 | HPA054566 | 1 | 1 | 1 | 1 |         |
| 4948 | ENSG00000184058 | HPA029330 | 1 | 1 | 1 | 1 |         |
| 4948 | ENSG00000184110 | CAB034045 | 1 | 1 | 1 | 1 |         |
| 4948 | ENSG00000184162 | HPA055653 | 1 | 1 | 1 | 1 |         |
| 4948 | ENSG00000184163 | HPA024107 | 1 | 1 | 1 | 1 |         |
| 4948 | ENSG00000184178 | HPA036526 | 1 | 1 | 1 | 1 |         |
| 4948 | ENSG00000184182 | HPA037444 | 1 | 1 | 1 | 1 |         |
| 4948 | ENSG00000184207 | HPA046739 | 1 | 1 | 1 | 1 |         |
| 4948 | ENSG00000184209 | HPA059145 | 1 | 1 | 1 | 1 |         |
| 4948 | ENSG00000184226 | HPA015581 | 1 | 1 | 1 | 1 |         |
| 4948 | ENSG00000184227 | HPA043705 | 1 | 1 | 1 | 1 |         |
| 4948 | ENSG00000184232 | HPA047412 | 1 | 1 | 1 | 1 |         |
| 4948 | ENSG00000184258 | HPA073147 | 1 | 1 | 1 | 1 |         |

|      |                 |           |   |   |   |   |         |         |
|------|-----------------|-----------|---|---|---|---|---------|---------|
| 4948 | ENSG00000184270 | CAB011483 | 1 | 1 | 1 | 1 |         |         |
| 4948 | ENSG00000184302 | HPA001403 | 1 | 1 | 1 | 1 |         |         |
| 4948 | ENSG00000184307 | HPA016808 | 1 | 1 | 1 | 1 |         |         |
| 4948 | ENSG00000184330 | HPA006997 | 1 | 1 | 1 | 1 |         |         |
| 4948 | ENSG00000184349 | HPA054047 | 1 | 1 | 1 | 1 |         |         |
| 4948 | ENSG00000184357 | CAB012241 | 1 | 1 | 1 | 1 |         |         |
| 4948 | ENSG00000184384 | HPA035223 | 1 | 1 | 1 | 1 |         |         |
| 4948 | ENSG00000184432 | HPA058180 | 1 | 1 | 1 | 1 |         |         |
| 4948 | ENSG00000184465 | HPA037497 | 1 | 1 | 1 | 1 |         |         |
| 4948 | ENSG00000184481 | HPA039560 | 1 | 1 | 1 | 1 |         |         |
| 4948 | ENSG00000184486 | HPA056261 | 1 | 1 | 1 | 1 |         |         |
| 4948 | ENSG00000184492 | HPA012836 | 1 | 1 | 1 | 1 |         |         |
| 4948 | ENSG00000184497 | HPA043334 | 1 | 1 | 1 | 1 |         |         |
| 4948 | ENSG00000184517 | HPA044916 | 1 | 1 | 1 | 1 |         |         |
| 4948 | ENSG00000184545 | HPA020071 | 1 | 1 | 1 | 1 |         |         |
| 4948 | ENSG00000184564 | HPA014513 | 1 | 1 | 1 | 1 |         |         |
| 4948 | ENSG00000184602 | HPA011055 | 1 | 1 | 1 | 1 |         |         |
| 4948 | ENSG00000184613 | HPA035714 | 1 | 1 | 1 | 1 |         |         |
| 4948 | ENSG00000184619 | HPA022849 | 1 | 1 | 1 | 1 |         |         |
| 4948 | ENSG00000184634 | HPA003185 | 1 | 1 | 1 | 1 |         | 0. 3286 |
| 4948 | ENSG00000184640 | HPA042564 | 1 | 1 | 1 | 1 |         |         |
| 4948 | ENSG00000184659 | HPA012836 | 1 | 1 | 1 | 1 |         |         |
| 4948 | ENSG00000184672 | HPA059112 | 1 | 1 | 1 | 1 |         |         |
| 4948 | ENSG00000184677 | HPA042386 | 1 | 1 | 1 | 1 |         |         |
| 4948 | ENSG00000184678 | HPA048671 | 1 | 1 | 1 | 1 |         |         |
| 4948 | ENSG00000184708 | HPA001619 | 1 | 1 | 1 | 1 | 0. 3298 | 0. 3976 |
| 4948 | ENSG00000184743 | HPA065702 | 1 | 1 | 1 | 1 |         |         |
| 4948 | ENSG00000184792 | HPA021514 | 1 | 1 | 1 | 1 |         |         |
| 4948 | ENSG00000184863 | HPA021768 | 1 | 1 | 1 | 1 |         |         |
| 4948 | ENSG00000184887 | HPA031355 | 1 | 1 | 1 | 1 |         |         |
| 4948 | ENSG00000184897 | CAB012235 | 1 | 1 | 1 | 1 |         |         |
| 4948 | ENSG00000184905 | HPA076317 | 1 | 1 | 1 | 1 |         |         |
| 4948 | ENSG00000184922 | HPA008129 | 1 | 1 | 1 | 1 |         |         |
| 4948 | ENSG00000184923 | HPA064635 | 1 | 1 | 1 | 1 |         |         |
| 4948 | ENSG00000184924 | HPA019951 | 1 | 1 | 1 | 1 |         |         |
| 4948 | ENSG00000184949 | HPA003077 | 1 | 1 | 1 | 1 |         |         |
| 4948 | ENSG00000184979 | HPA044768 | 1 | 1 | 1 | 1 |         |         |
| 4948 | ENSG00000184986 | HPA049857 | 1 | 1 | 1 | 1 |         |         |
| 4948 | ENSG00000185000 | CAB032853 | 1 | 1 | 1 | 1 |         |         |
| 4948 | ENSG00000185022 | HPA055371 | 1 | 1 | 1 | 1 |         |         |
| 4948 | ENSG00000185024 | HPA051918 | 1 | 1 | 1 | 1 |         |         |
| 4948 | ENSG00000185043 | HPA048825 | 1 | 1 | 1 | 1 |         |         |
| 4948 | ENSG00000185090 | HPA063423 | 1 | 1 | 1 | 1 |         |         |
| 4948 | ENSG00000185104 | HPA018253 | 1 | 1 | 1 | 1 |         |         |
| 4948 | ENSG00000185112 | HPA048345 | 1 | 1 | 1 | 1 |         |         |
| 4948 | ENSG00000185122 | HPA008888 | 1 | 1 | 1 | 1 |         |         |
| 4948 | ENSG00000185130 | HPA048671 | 1 | 1 | 1 | 1 |         |         |
| 4948 | ENSG00000185158 | HPA015135 | 1 | 1 | 1 | 1 |         |         |
| 4948 | ENSG00000185189 | HPA029051 | 1 | 1 | 1 | 1 |         |         |
| 4948 | ENSG00000185220 | HPA029890 | 1 | 1 | 1 | 1 |         |         |
| 4948 | ENSG00000185222 | HPA011790 | 1 | 1 | 1 | 1 |         |         |
| 4948 | ENSG00000185236 | HPA054396 | 1 | 1 | 1 | 1 |         |         |
| 4948 | ENSG00000185246 | HPA001176 | 1 | 1 | 1 | 1 |         |         |
| 4948 | ENSG00000185272 | HPA045885 | 1 | 1 | 1 | 1 |         |         |
| 4948 | ENSG00000185298 | HPA052637 | 1 | 1 | 1 | 1 |         |         |

|      |                 |           |   |   |   |   |        |        |
|------|-----------------|-----------|---|---|---|---|--------|--------|
| 4948 | ENSG00000185304 | HPA067564 | 1 | 1 | 1 | 1 |        |        |
| 4948 | ENSG00000185339 | HPA000837 | 1 | 1 | 1 | 1 |        |        |
| 4948 | ENSG00000185359 | HPA004872 | 1 | 1 | 1 | 1 |        |        |
| 4948 | ENSG00000185386 | CAB012961 | 1 | 1 | 1 | 1 | 0.3244 |        |
| 4948 | ENSG00000185418 | HPA066697 | 1 | 1 | 1 | 1 |        |        |
| 4948 | ENSG00000185432 | HPA017434 | 1 | 1 | 1 | 1 |        |        |
| 4948 | ENSG00000185436 | HPA017319 | 1 | 1 | 1 | 1 | 0.1769 |        |
| 4948 | ENSG00000185437 | CAB003685 | 1 | 1 | 1 | 1 |        |        |
| 4948 | ENSG00000185442 | HPA015306 | 1 | 1 | 1 | 1 |        |        |
| 4948 | ENSG00000185453 | HPA061028 | 1 | 1 | 1 | 1 |        |        |
| 4948 | ENSG00000185479 | HPA045697 | 1 | 1 | 1 | 1 |        |        |
| 4948 | ENSG00000185480 | HPA039677 | 1 | 1 | 1 | 1 |        |        |
| 4948 | ENSG00000185483 | HPA057016 | 1 | 1 | 1 | 1 |        |        |
| 4948 | ENSG00000185499 | HPA008855 | 1 | 1 | 1 | 1 |        |        |
| 4948 | ENSG00000185504 | HPA024626 | 1 | 1 | 1 | 1 |        |        |
| 4948 | ENSG00000185507 | HPA052757 | 1 | 1 | 1 | 1 |        |        |
| 4948 | ENSG00000185515 | HPA048737 | 1 | 1 | 1 | 1 |        |        |
| 4948 | ENSG00000185522 | HPA073912 | 1 | 1 | 1 | 1 |        |        |
| 4948 | ENSG00000185527 | HPA045118 | 1 | 1 | 1 | 1 |        |        |
| 4948 | ENSG00000185559 | HPA062262 | 1 | 1 | 1 | 1 |        |        |
| 4948 | ENSG00000185565 | HPA054051 | 1 | 1 | 1 | 1 |        |        |
| 4948 | ENSG00000185591 | HPA001853 | 1 | 1 | 1 | 1 |        |        |
| 4948 | ENSG00000185608 | HPA006181 | 1 | 1 | 1 | 1 |        |        |
| 4948 | ENSG00000185614 | HPA041879 | 1 | 1 | 1 | 1 |        |        |
| 4948 | ENSG00000185619 | HPA061879 | 1 | 1 | 1 | 1 |        |        |
| 4948 | ENSG00000185624 | HPA018884 | 1 | 1 | 1 | 1 |        |        |
| 4948 | ENSG00000185633 | HPA055323 | 1 | 1 | 1 | 1 |        |        |
| 4948 | ENSG00000185651 | HPA062415 | 1 | 1 | 1 | 1 |        |        |
| 4948 | ENSG00000185652 | HPA032001 | 1 | 1 | 1 | 1 |        |        |
| 4948 | ENSG00000185668 | HPA055980 | 1 | 1 | 1 | 1 |        |        |
| 4948 | ENSG00000185670 | HPA035321 | 1 | 1 | 1 | 1 |        |        |
| 4948 | ENSG00000185721 | HPA001218 | 1 | 1 | 1 | 1 |        |        |
| 4948 | ENSG00000185737 | HPA075789 | 1 | 1 | 1 | 1 |        |        |
| 4948 | ENSG00000185753 | HPA050120 | 1 | 1 | 1 | 1 |        |        |
| 4948 | ENSG00000185760 | HPA016655 | 1 | 1 | 1 | 1 |        |        |
| 4948 | ENSG00000185761 | HPA044050 | 1 | 1 | 1 | 1 |        |        |
| 4948 | ENSG00000185774 | HPA066717 | 1 | 1 | 1 | 1 |        |        |
| 4948 | ENSG00000185787 | HPA062010 | 1 | 1 | 1 | 1 |        |        |
| 4948 | ENSG00000185798 | HPA016420 | 1 | 1 | 1 | 1 | 0.3554 | 0.352  |
| 4948 | ENSG00000185800 | HPA068172 | 1 | 1 | 1 | 1 |        |        |
| 4948 | ENSG00000185808 | HPA026921 | 1 | 1 | 1 | 1 |        |        |
| 4948 | ENSG00000185825 | HPA003906 | 1 | 1 | 1 | 1 |        | 0.4549 |
| 4948 | ENSG00000185838 | HPA034628 | 1 | 1 | 1 | 1 |        | 0.251  |
| 4948 | ENSG00000185842 | HPA028545 | 1 | 1 | 1 | 1 |        |        |
| 4948 | ENSG00000185864 | HPA053611 | 1 | 1 | 1 | 1 |        |        |
| 4948 | ENSG00000185869 | HPA073073 | 1 | 1 | 1 | 1 |        |        |
| 4948 | ENSG00000185883 | HPA065100 | 1 | 1 | 1 | 1 |        |        |
| 4948 | ENSG00000185885 | HPA004810 | 1 | 1 | 1 | 1 |        |        |
| 4948 | ENSG00000185900 | HPA013321 | 1 | 1 | 1 | 1 |        |        |
| 4948 | ENSG00000185909 | HPA008463 | 1 | 1 | 1 | 1 |        |        |
| 4948 | ENSG00000185917 | HPA035405 | 1 | 1 | 1 | 1 |        |        |
| 4948 | ENSG00000185920 | HPA075072 | 1 | 1 | 1 | 1 |        |        |
| 4948 | ENSG00000185946 | HPA052434 | 1 | 1 | 1 | 1 |        |        |
| 4948 | ENSG00000185947 | HPA003866 | 1 | 1 | 1 | 1 |        |        |
| 4948 | ENSG00000185950 | HPA054664 | 1 | 1 | 1 | 1 |        |        |

|      |                 |           |   |   |   |   |
|------|-----------------|-----------|---|---|---|---|
| 4948 | ENSG00000185955 | HPA060395 | 1 | 1 | 1 | 1 |
| 4948 | ENSG00000185973 | HPA040331 | 1 | 1 | 1 | 1 |
| 4948 | ENSG00000186001 | HPA012380 | 1 | 1 | 1 | 1 |
| 4948 | ENSG00000186010 | HPA041213 | 1 | 1 | 1 | 1 |
| 4948 | ENSG00000186017 | HPA023456 | 1 | 1 | 1 | 1 |
| 4948 | ENSG00000186020 | HPA031311 | 1 | 1 | 1 | 1 |
| 4948 | ENSG00000186051 | HPA030886 | 1 | 1 | 1 | 1 |
| 4948 | ENSG00000186063 | HPA027935 | 1 | 1 | 1 | 1 |
| 4948 | ENSG00000186073 | HPA061023 | 1 | 1 | 1 | 1 |
| 4948 | ENSG00000186086 | HPA047447 | 1 | 1 | 1 | 1 |
| 4948 | ENSG00000186088 | HPA023994 | 1 | 1 | 1 | 1 |
| 4948 | ENSG00000186106 | HPA013758 | 1 | 1 | 1 | 1 |
| 4948 | ENSG00000186111 | HPA017168 | 1 | 1 | 1 | 1 |
| 4948 | ENSG00000186141 | HPA027508 | 1 | 1 | 1 | 1 |
| 4948 | ENSG00000186166 | HPA071715 | 1 | 1 | 1 | 1 |
| 4948 | ENSG00000186184 | HPA039337 | 1 | 1 | 1 | 1 |
| 4948 | ENSG00000186205 | HPA028702 | 1 | 1 | 1 | 1 |
| 4948 | ENSG00000186212 | HPA036809 | 1 | 1 | 1 | 1 |
| 4948 | ENSG00000186230 | HPA042082 | 1 | 1 | 1 | 1 |
| 4948 | ENSG00000186260 | HPA011286 | 1 | 1 | 1 | 1 |
| 4948 | ENSG00000186280 | HPA055854 | 1 | 1 | 1 | 1 |
| 4948 | ENSG00000186281 | HPA036841 | 1 | 1 | 1 | 1 |
| 4948 | ENSG00000186314 | HPA042486 | 1 | 1 | 1 | 1 |
| 4948 | ENSG00000186318 | CAB016358 | 1 | 1 | 1 | 1 |
| 4948 | ENSG00000186326 | HPA049791 | 1 | 1 | 1 | 1 |
| 4948 | ENSG00000186329 | HPA045736 | 1 | 1 | 1 | 1 |
| 4948 | ENSG00000186376 | HPA004705 | 1 | 1 | 1 | 1 |
| 4948 | ENSG00000186431 | HPA014050 | 1 | 1 | 1 | 1 |
| 4948 | ENSG00000186439 | HPA038226 | 1 | 1 | 1 | 1 |
| 4948 | ENSG00000186446 | HPA044161 | 1 | 1 | 1 | 1 |
| 4948 | ENSG00000186448 | HPA054567 | 1 | 1 | 1 | 1 |
| 4948 | ENSG00000186468 | HPA054853 | 1 | 1 | 1 | 1 |
| 4948 | ENSG00000186469 | HPA003534 | 1 | 1 | 1 | 1 |
| 4948 | ENSG00000186472 | HPA029579 | 1 | 1 | 1 | 1 |
| 4948 | ENSG00000186480 | HPA071524 | 1 | 1 | 1 | 1 |
| 4948 | ENSG00000186487 | HPA060245 | 1 | 1 | 1 | 1 |
| 4948 | ENSG00000186493 | HPA073667 | 1 | 1 | 1 | 1 |
| 4948 | ENSG00000186517 | HPA036300 | 1 | 1 | 1 | 1 |
| 4948 | ENSG00000186523 | HPA041610 | 1 | 1 | 1 | 1 |
| 4948 | ENSG00000186567 | HPA052865 | 1 | 1 | 1 | 1 |
| 4948 | ENSG00000186575 | HPA003097 | 1 | 1 | 1 | 1 |
| 4948 | ENSG00000186591 | HPA003302 | 1 | 1 | 1 | 1 |
| 4948 | ENSG00000186625 | HPA036207 | 1 | 1 | 1 | 1 |
| 4948 | ENSG00000186628 | HPA046263 | 1 | 1 | 1 | 1 |
| 4948 | ENSG00000186642 | CAB009752 | 1 | 1 | 1 | 1 |
| 4948 | ENSG00000186684 | HPA062460 | 1 | 1 | 1 | 1 |
| 4948 | ENSG00000186716 | HPA038337 | 1 | 1 | 1 | 1 |
| 4948 | ENSG00000186787 | HPA069835 | 1 | 1 | 1 | 1 |
| 4948 | ENSG00000186806 | HPA060453 | 1 | 1 | 1 | 1 |
| 4948 | ENSG00000186832 | HPA000539 | 1 | 1 | 1 | 1 |
| 4948 | ENSG00000186834 | HPA008926 | 1 | 1 | 1 | 1 |
| 4948 | ENSG00000186847 | HPA000452 | 1 | 1 | 1 | 1 |
| 4948 | ENSG00000186868 | HPA048895 | 1 | 1 | 1 | 1 |
| 4948 | ENSG00000186889 | HPA018100 | 1 | 1 | 1 | 1 |
| 4948 | ENSG00000186951 | HPA058901 | 1 | 1 | 1 | 1 |

0. 2469

0. 366

0. 2389

|      |                 |           |   |   |   |   |        |
|------|-----------------|-----------|---|---|---|---|--------|
| 4948 | ENSG00000186976 | HPA003098 | 1 | 1 | 1 | 1 |        |
| 4948 | ENSG00000187017 | HPA060220 | 1 | 1 | 1 | 1 |        |
| 4948 | ENSG00000187079 | HPA057339 | 1 | 1 | 1 | 1 |        |
| 4948 | ENSG00000187091 | CAB009913 | 1 | 1 | 1 | 1 |        |
| 4948 | ENSG00000187109 | HPA028861 | 1 | 1 | 1 | 1 |        |
| 4948 | ENSG00000187123 | HPA042805 | 1 | 1 | 1 | 1 |        |
| 4948 | ENSG00000187147 | HPA027577 | 1 | 1 | 1 | 1 |        |
| 4948 | ENSG00000187231 | HPA058236 | 1 | 1 | 1 | 1 |        |
| 4948 | ENSG00000187244 | HPA005654 | 1 | 1 | 1 | 1 |        |
| 4948 | ENSG00000187325 | HPA045275 | 1 | 1 | 1 | 1 |        |
| 4948 | ENSG00000187446 | HPA006616 | 1 | 1 | 1 | 1 |        |
| 4948 | ENSG00000187546 | HPA057900 | 1 | 1 | 1 | 1 |        |
| 4948 | ENSG00000187559 | HPA012836 | 1 | 1 | 1 | 1 |        |
| 4948 | ENSG00000187566 | HPA066030 | 1 | 1 | 1 | 1 |        |
| 4948 | ENSG00000187583 | HPA031742 | 1 | 1 | 1 | 1 |        |
| 4948 | ENSG00000187605 | HPA050845 | 1 | 1 | 1 | 1 |        |
| 4948 | ENSG00000187607 | HPA021594 | 1 | 1 | 1 | 1 |        |
| 4948 | ENSG00000187626 | HPA009637 | 1 | 1 | 1 | 1 |        |
| 4948 | ENSG00000187627 | HPA067564 | 1 | 1 | 1 | 1 |        |
| 4948 | ENSG00000187730 | HPA044371 | 1 | 1 | 1 | 1 |        |
| 4948 | ENSG00000187741 | HPA063236 | 1 | 1 | 1 | 1 |        |
| 4948 | ENSG00000187742 | HPA054905 | 1 | 1 | 1 | 1 |        |
| 4948 | ENSG00000187754 | HPA045683 | 1 | 1 | 1 | 1 |        |
| 4948 | ENSG00000187764 | HPA015662 | 1 | 1 | 1 | 1 | 0.1756 |
| 4948 | ENSG00000187778 | HPA039057 | 1 | 1 | 1 | 1 |        |
| 4948 | ENSG00000187790 | HPA055144 | 1 | 1 | 1 | 1 |        |
| 4948 | ENSG00000187792 | HPA018821 | 1 | 1 | 1 | 1 |        |
| 4948 | ENSG00000187815 | HPA054942 | 1 | 1 | 1 | 1 |        |
| 4948 | ENSG00000187823 | HPA003272 | 1 | 1 | 1 | 1 |        |
| 4948 | ENSG00000187824 | HPA047680 | 1 | 1 | 1 | 1 |        |
| 4948 | ENSG00000187837 | CAB011507 | 1 | 1 | 1 | 1 | 0.4127 |
| 4948 | ENSG00000187838 | HPA048387 | 1 | 1 | 1 | 1 |        |
| 4948 | ENSG00000187840 | CAB005032 | 1 | 1 | 1 | 1 |        |
| 4948 | ENSG00000187866 | HPA056646 | 1 | 1 | 1 | 1 |        |
| 4948 | ENSG00000187908 | HPA040778 | 1 | 1 | 1 | 1 |        |
| 4948 | ENSG00000187955 | HPA023781 | 1 | 1 | 1 | 1 |        |
| 4948 | ENSG00000187961 | HPA031251 | 1 | 1 | 1 | 1 |        |
| 4948 | ENSG00000187994 | HPA042083 | 1 | 1 | 1 | 1 |        |
| 4948 | ENSG00000188021 | HPA006431 | 1 | 1 | 1 | 1 | 0.2598 |
| 4948 | ENSG00000188051 | HPA041580 | 1 | 1 | 1 | 1 |        |
| 4948 | ENSG00000188070 | HPA045002 | 1 | 1 | 1 | 1 |        |
| 4948 | ENSG00000188092 | HPA076096 | 1 | 1 | 1 | 1 |        |
| 4948 | ENSG00000188133 | HPA052804 | 1 | 1 | 1 | 1 |        |
| 4948 | ENSG00000188152 | HPA064635 | 1 | 1 | 1 | 1 |        |
| 4948 | ENSG00000188157 | HPA040090 | 1 | 1 | 1 | 1 |        |
| 4948 | ENSG00000188186 | HPA020998 | 1 | 1 | 1 | 1 |        |
| 4948 | ENSG00000188199 | HPA064635 | 1 | 1 | 1 | 1 |        |
| 4948 | ENSG00000188215 | HPA041983 | 1 | 1 | 1 | 1 |        |
| 4948 | ENSG00000188229 | CAB010880 | 1 | 1 | 1 | 1 |        |
| 4948 | ENSG00000188283 | HPA063945 | 1 | 1 | 1 | 1 |        |
| 4948 | ENSG00000188312 | HPA058945 | 1 | 1 | 1 | 1 |        |
| 4948 | ENSG00000188313 | HPA068923 | 1 | 1 | 1 | 1 |        |
| 4948 | ENSG00000188315 | HPA043328 | 1 | 1 | 1 | 1 |        |
| 4948 | ENSG00000188342 | HPA006912 | 1 | 1 | 1 | 1 |        |
| 4948 | ENSG00000188343 | HPA034760 | 1 | 1 | 1 | 1 |        |

|      |                 |           |   |   |   |   |        |       |
|------|-----------------|-----------|---|---|---|---|--------|-------|
| 4948 | ENSG00000188352 | HPA055015 | 1 | 1 | 1 | 1 |        |       |
| 4948 | ENSG00000188368 | HPA070350 | 1 | 1 | 1 | 1 |        |       |
| 4948 | ENSG00000188393 | HPA072407 | 1 | 1 | 1 | 1 |        |       |
| 4948 | ENSG00000188404 | HPA051972 | 1 | 1 | 1 | 1 |        |       |
| 4948 | ENSG00000188419 | HPA003231 | 1 | 1 | 1 | 1 |        |       |
| 4948 | ENSG00000188452 | HPA035443 | 1 | 1 | 1 | 1 |        |       |
| 4948 | ENSG00000188488 | HPA056919 | 1 | 1 | 1 | 1 |        |       |
| 4948 | ENSG00000188522 | HPA023369 | 1 | 1 | 1 | 1 |        |       |
| 4948 | ENSG00000188523 | HPA024647 | 1 | 1 | 1 | 1 |        |       |
| 4948 | ENSG00000188529 | HPA053831 | 1 | 1 | 1 | 1 |        |       |
| 4948 | ENSG00000188549 | HPA040484 | 1 | 1 | 1 | 1 |        |       |
| 4948 | ENSG00000188573 | HPA049546 | 1 | 1 | 1 | 1 |        |       |
| 4948 | ENSG00000188596 | HPA039897 | 1 | 1 | 1 | 1 |        |       |
| 4948 | ENSG00000188611 | HPA061171 | 1 | 1 | 1 | 1 |        |       |
| 4948 | ENSG00000188613 | CAB012219 | 1 | 1 | 1 | 1 |        |       |
| 4948 | ENSG00000188647 | HPA021248 | 1 | 1 | 1 | 1 |        |       |
| 4948 | ENSG00000188649 | HPA072122 | 1 | 1 | 1 | 1 |        |       |
| 4948 | ENSG00000188674 | HPA042639 | 1 | 1 | 1 | 1 |        |       |
| 4948 | ENSG00000188690 | HPA044038 | 1 | 1 | 1 | 1 |        |       |
| 4948 | ENSG00000188732 | HPA026752 | 1 | 1 | 1 | 1 | 0.4218 | 0.653 |
| 4948 | ENSG00000188735 | HPA014066 | 1 | 1 | 1 | 1 |        |       |
| 4948 | ENSG00000188739 | HPA028606 | 1 | 1 | 1 | 1 |        |       |
| 4948 | ENSG00000188747 | HPA044781 | 1 | 1 | 1 | 1 |        |       |
| 4948 | ENSG00000188760 | HPA042385 | 1 | 1 | 1 | 1 |        |       |
| 4948 | ENSG00000188766 | HPA071521 | 1 | 1 | 1 | 1 |        |       |
| 4948 | ENSG00000188786 | HPA028604 | 1 | 1 | 1 | 1 |        |       |
| 4948 | ENSG00000188807 | CAB039039 | 1 | 1 | 1 | 1 |        |       |
| 4948 | ENSG00000188818 | HPA069008 | 1 | 1 | 1 | 1 |        |       |
| 4948 | ENSG00000188846 | HPA004136 | 1 | 1 | 1 | 1 | 0.344  |       |
| 4948 | ENSG00000188878 | HPA023677 | 1 | 1 | 1 | 1 |        |       |
| 4948 | ENSG00000188895 | HPA022800 | 1 | 1 | 1 | 1 | 0.278  |       |
| 4948 | ENSG00000188917 | HPA040814 | 1 | 1 | 1 | 1 |        |       |
| 4948 | ENSG00000188986 | HPA020259 | 1 | 1 | 1 | 1 | 0.391  |       |
| 4948 | ENSG00000188994 | HPA032154 | 1 | 1 | 1 | 1 |        |       |
| 4948 | ENSG00000188996 | HPA034511 | 1 | 1 | 1 | 1 |        |       |
| 4948 | ENSG00000188997 | HPA041964 | 1 | 1 | 1 | 1 |        |       |
| 4948 | ENSG00000189001 | HPA067734 | 1 | 1 | 1 | 1 |        |       |
| 4948 | ENSG00000189042 | HPA023937 | 1 | 1 | 1 | 1 |        |       |
| 4948 | ENSG00000189043 | HPA055323 | 1 | 1 | 1 | 1 |        |       |
| 4948 | ENSG00000189052 | HPA038925 | 1 | 1 | 1 | 1 |        |       |
| 4948 | ENSG00000189057 | HPA038637 | 1 | 1 | 1 | 1 |        |       |
| 4948 | ENSG00000189091 | HPA041134 | 1 | 1 | 1 | 1 |        |       |
| 4948 | ENSG00000189114 | HPA050111 | 1 | 1 | 1 | 1 |        |       |
| 4948 | ENSG00000189152 | HPA066654 | 1 | 1 | 1 | 1 |        |       |
| 4948 | ENSG00000189195 | HPA035311 | 1 | 1 | 1 | 1 |        |       |
| 4948 | ENSG00000189241 | HPA031970 | 1 | 1 | 1 | 1 |        |       |
| 4948 | ENSG00000189269 | HPA020446 | 1 | 1 | 1 | 1 |        |       |
| 4948 | ENSG00000189283 | HPA018909 | 1 | 1 | 1 | 1 |        |       |
| 4948 | ENSG00000189298 | HPA009637 | 1 | 1 | 1 | 1 |        |       |
| 4948 | ENSG00000189299 | HPA034487 | 1 | 1 | 1 | 1 |        |       |
| 4948 | ENSG00000189308 | HPA056606 | 1 | 1 | 1 | 1 |        |       |
| 4948 | ENSG00000189319 | HPA037752 | 1 | 1 | 1 | 1 | 0.1565 |       |
| 4948 | ENSG00000189320 | HPA021224 | 1 | 1 | 1 | 1 |        |       |
| 4948 | ENSG00000189334 | HPA027613 | 1 | 1 | 1 | 1 |        |       |
| 4948 | ENSG00000189339 | HPA062711 | 1 | 1 | 1 | 1 |        |       |



|      |                 |           |   |   |   |   |
|------|-----------------|-----------|---|---|---|---|
| 4948 | ENSG00000189362 | HPA057719 | 1 | 1 | 1 | 1 |
| 4948 | ENSG00000189369 | HPA044769 | 1 | 1 | 1 | 1 |
| 4948 | ENSG00000189403 | CAB005873 | 1 | 1 | 1 | 1 |
| 4948 | ENSG00000189410 | HPA030182 | 1 | 1 | 1 | 1 |
| 4948 | ENSG00000196151 | HPA058172 | 1 | 1 | 1 | 1 |
| 4948 | ENSG00000196159 | HPA052819 | 1 | 1 | 1 | 1 |
| 4948 | ENSG00000196177 | HPA041458 | 1 | 1 | 1 | 1 |
| 4948 | ENSG00000196182 | HPA008026 | 1 | 1 | 1 | 1 |
| 4948 | ENSG00000196196 | HPA067038 | 1 | 1 | 1 | 1 |
| 4948 | ENSG00000196209 | HPA048032 | 1 | 1 | 1 | 1 |
| 4948 | ENSG00000196230 | CAB005417 | 1 | 1 | 1 | 1 |
| 4948 | ENSG00000196233 | HPA057621 | 1 | 1 | 1 | 1 |
| 4948 | ENSG00000196235 | HPA029273 | 1 | 1 | 1 | 1 |
| 4948 | ENSG00000196242 | HPA058578 | 1 | 1 | 1 | 1 |
| 4948 | ENSG00000196263 | HPA066695 | 1 | 1 | 1 | 1 |
| 4948 | ENSG00000196275 | HPA056679 | 1 | 1 | 1 | 1 |
| 4948 | ENSG00000196284 | HPA024371 | 1 | 1 | 1 | 1 |
| 4948 | ENSG00000196290 | HPA036336 | 1 | 1 | 1 | 1 |
| 4948 | ENSG00000196296 | CAB002310 | 1 | 1 | 1 | 1 |
| 4948 | ENSG00000196305 | HPA029806 | 1 | 1 | 1 | 1 |
| 4948 | ENSG00000196313 | CAB003710 | 1 | 1 | 1 | 1 |
| 4948 | ENSG00000196323 | HPA052589 | 1 | 1 | 1 | 1 |
| 4948 | ENSG00000196337 | HPA038925 | 1 | 1 | 1 | 1 |
| 4948 | ENSG00000196353 | HPA032036 | 1 | 1 | 1 | 1 |
| 4948 | ENSG00000196357 | HPA044123 | 1 | 1 | 1 | 1 |
| 4948 | ENSG00000196363 | HPA047182 | 1 | 1 | 1 | 1 |
| 4948 | ENSG00000196367 | HPA054376 | 1 | 1 | 1 | 1 |
| 4948 | ENSG00000196368 | HPA047027 | 1 | 1 | 1 | 1 |
| 4948 | ENSG00000196372 | HPA061742 | 1 | 1 | 1 | 1 |
| 4948 | ENSG00000196378 | HPA053925 | 1 | 1 | 1 | 1 |
| 4948 | ENSG00000196381 | HPA062512 | 1 | 1 | 1 | 1 |
| 4948 | ENSG00000196388 | HPA052401 | 1 | 1 | 1 | 1 |
| 4948 | ENSG00000196391 | HPA030839 | 1 | 1 | 1 | 1 |
| 4948 | ENSG00000196418 | HPA031127 | 1 | 1 | 1 | 1 |
| 4948 | ENSG00000196419 | HPA047549 | 1 | 1 | 1 | 1 |
| 4948 | ENSG00000196420 | HPA064184 | 1 | 1 | 1 | 1 |
| 4948 | ENSG00000196427 | HPA047447 | 1 | 1 | 1 | 1 |
| 4948 | ENSG00000196428 | HPA004926 | 1 | 1 | 1 | 1 |
| 4948 | ENSG00000196436 | HPA053611 | 1 | 1 | 1 | 1 |
| 4948 | ENSG00000196449 | HPA030147 | 1 | 1 | 1 | 1 |
| 4948 | ENSG00000196453 | HPA003252 | 1 | 1 | 1 | 1 |
| 4948 | ENSG00000196460 | HPA059745 | 1 | 1 | 1 | 1 |
| 4948 | ENSG00000196465 | HPA038887 | 1 | 1 | 1 | 1 |
| 4948 | ENSG00000196476 | HPA048649 | 1 | 1 | 1 | 1 |
| 4948 | ENSG00000196497 | HPA064572 | 1 | 1 | 1 | 1 |
| 4948 | ENSG00000196498 | HPA001928 | 1 | 1 | 1 | 1 |
| 4948 | ENSG00000196504 | HPA038272 | 1 | 1 | 1 | 1 |
| 4948 | ENSG00000196505 | HPA046185 | 1 | 1 | 1 | 1 |
| 4948 | ENSG00000196510 | CAB009567 | 1 | 1 | 1 | 1 |
| 4948 | ENSG00000196511 | HPA021545 | 1 | 1 | 1 | 1 |
| 4948 | ENSG00000196517 | HPA013977 | 1 | 1 | 1 | 1 |
| 4948 | ENSG00000196531 | HPA073152 | 1 | 1 | 1 | 1 |
| 4948 | ENSG00000196542 | HPA047712 | 1 | 1 | 1 | 1 |
| 4948 | ENSG00000196557 | HPA039125 | 1 | 1 | 1 | 1 |
| 4948 | ENSG00000196584 | HPA065153 | 1 | 1 | 1 | 1 |

0. 4375

0. 3778

|      |                 |           |   |   |   |   |         |
|------|-----------------|-----------|---|---|---|---|---------|
| 4948 | ENSG00000196586 | CAB010762 | 1 | 1 | 1 | 1 |         |
| 4948 | ENSG00000196591 | CAB005054 | 1 | 1 | 1 | 1 | 0. 4588 |
| 4948 | ENSG00000196597 | HPA011013 | 1 | 1 | 1 | 1 |         |
| 4948 | ENSG00000196605 | HPA034618 | 1 | 1 | 1 | 1 |         |
| 4948 | ENSG00000196611 | HPA004920 | 1 | 1 | 1 | 1 |         |
| 4948 | ENSG00000196628 | CAB020722 | 1 | 1 | 1 | 1 |         |
| 4948 | ENSG00000196632 | HPA077678 | 1 | 1 | 1 | 1 |         |
| 4948 | ENSG00000196652 | HPA003201 | 1 | 1 | 1 | 1 |         |
| 4948 | ENSG00000196655 | HPA041371 | 1 | 1 | 1 | 1 |         |
| 4948 | ENSG00000196670 | HPA048629 | 1 | 1 | 1 | 1 |         |
| 4948 | ENSG00000196700 | HPA006688 | 1 | 1 | 1 | 1 |         |
| 4948 | ENSG00000196712 | HPA045502 | 1 | 1 | 1 | 1 |         |
| 4948 | ENSG00000196724 | HPA072145 | 1 | 1 | 1 | 1 |         |
| 4948 | ENSG00000196730 | CAB037302 | 1 | 1 | 1 | 1 |         |
| 4948 | ENSG00000196782 | HPA037717 | 1 | 1 | 1 | 1 |         |
| 4948 | ENSG00000196793 | HPA030843 | 1 | 1 | 1 | 1 |         |
| 4948 | ENSG00000196812 | HPA007290 | 1 | 1 | 1 | 1 | 0. 318  |
| 4948 | ENSG00000196843 | HPA002860 | 1 | 1 | 1 | 1 |         |
| 4948 | ENSG00000196850 | HPA039335 | 1 | 1 | 1 | 1 |         |
| 4948 | ENSG00000196862 | HPA067564 | 1 | 1 | 1 | 1 |         |
| 4948 | ENSG00000196865 | HPA057564 | 1 | 1 | 1 | 1 |         |
| 4948 | ENSG00000196878 | HPA007584 | 1 | 1 | 1 | 1 |         |
| 4948 | ENSG00000196890 | HPA048671 | 1 | 1 | 1 | 1 |         |
| 4948 | ENSG00000196911 | CAB026464 | 1 | 1 | 1 | 1 |         |
| 4948 | ENSG00000196924 | CAB000356 | 1 | 1 | 1 | 1 |         |
| 4948 | ENSG00000196937 | HPA043376 | 1 | 1 | 1 | 1 |         |
| 4948 | ENSG00000196961 | CAB004306 | 1 | 1 | 1 | 1 | 0. 2911 |
| 4948 | ENSG00000196975 | HPA007393 | 1 | 1 | 1 | 1 |         |
| 4948 | ENSG00000196976 | HPA036122 | 1 | 1 | 1 | 1 |         |
| 4948 | ENSG00000196993 | HPA053611 | 1 | 1 | 1 | 1 |         |
| 4948 | ENSG00000196998 | HPA027562 | 1 | 1 | 1 | 1 |         |
| 4948 | ENSG00000197016 | HPA029000 | 1 | 1 | 1 | 1 |         |
| 4948 | ENSG00000197037 | HPA055127 | 1 | 1 | 1 | 1 |         |
| 4948 | ENSG00000197044 | HPA063338 | 1 | 1 | 1 | 1 |         |
| 4948 | ENSG00000197045 | HPA002954 | 1 | 1 | 1 | 1 |         |
| 4948 | ENSG00000197050 | HPA059675 | 1 | 1 | 1 | 1 |         |
| 4948 | ENSG00000197062 | HPA027521 | 1 | 1 | 1 | 1 |         |
| 4948 | ENSG00000197077 | HPA018135 | 1 | 1 | 1 | 1 |         |
| 4948 | ENSG00000197111 | HPA038356 | 1 | 1 | 1 | 1 |         |
| 4948 | ENSG00000197114 | HPA056705 | 1 | 1 | 1 | 1 |         |
| 4948 | ENSG00000197124 | HPA055998 | 1 | 1 | 1 | 1 |         |
| 4948 | ENSG00000197128 | HPA031312 | 1 | 1 | 1 | 1 |         |
| 4948 | ENSG00000197147 | HPA017950 | 1 | 1 | 1 | 1 |         |
| 4948 | ENSG00000197157 | HPA002632 | 1 | 1 | 1 | 1 |         |
| 4948 | ENSG00000197208 | HPA036974 | 1 | 1 | 1 | 1 |         |
| 4948 | ENSG00000197213 | HPA060667 | 1 | 1 | 1 | 1 |         |
| 4948 | ENSG00000197217 | HPA017655 | 1 | 1 | 1 | 1 |         |
| 4948 | ENSG00000197223 | HPA037413 | 1 | 1 | 1 | 1 |         |
| 4948 | ENSG00000197261 | HPA036199 | 1 | 1 | 1 | 1 |         |
| 4948 | ENSG00000197279 | HPA007247 | 1 | 1 | 1 | 1 |         |
| 4948 | ENSG00000197283 | HPA038373 | 1 | 1 | 1 | 1 |         |
| 4948 | ENSG00000197299 | HPA005689 | 1 | 1 | 1 | 1 |         |
| 4948 | ENSG00000197312 | HPA043119 | 1 | 1 | 1 | 1 |         |
| 4948 | ENSG00000197343 | HPA029534 | 1 | 1 | 1 | 1 |         |
| 4948 | ENSG00000197363 | HPA055337 | 1 | 1 | 1 | 1 |         |

|      |                 |           |   |   |   |   |         |
|------|-----------------|-----------|---|---|---|---|---------|
| 4948 | ENSG00000197375 | HPA063062 | 1 | 1 | 1 | 1 |         |
| 4948 | ENSG00000197381 | HPA029645 | 1 | 1 | 1 | 1 |         |
| 4948 | ENSG00000197386 | HPA026114 | 1 | 1 | 1 | 1 |         |
| 4948 | ENSG00000197442 | CAB007824 | 1 | 1 | 1 | 1 |         |
| 4948 | ENSG00000197444 | HPA043716 | 1 | 1 | 1 | 1 |         |
| 4948 | ENSG00000197448 | HPA022904 | 1 | 1 | 1 | 1 | 0. 4532 |
| 4948 | ENSG00000197451 | HPA046688 | 1 | 1 | 1 | 1 |         |
| 4948 | ENSG00000197471 | HPA055244 | 1 | 1 | 1 | 1 |         |
| 4948 | ENSG00000197472 | HPA024743 | 1 | 1 | 1 | 1 |         |
| 4948 | ENSG00000197483 | HPA044451 | 1 | 1 | 1 | 1 |         |
| 4948 | ENSG00000197496 | HPA041015 | 1 | 1 | 1 | 1 |         |
| 4948 | ENSG00000197497 | HPA023437 | 1 | 1 | 1 | 1 |         |
| 4948 | ENSG00000197498 | HPA035475 | 1 | 1 | 1 | 1 |         |
| 4948 | ENSG00000197562 | HPA076172 | 1 | 1 | 1 | 1 |         |
| 4948 | ENSG00000197563 | HPA039922 | 1 | 1 | 1 | 1 | 0. 2531 |
| 4948 | ENSG00000197565 | HPA065393 | 1 | 1 | 1 | 1 |         |
| 4948 | ENSG00000197566 | HPA023157 | 1 | 1 | 1 | 1 |         |
| 4948 | ENSG00000197568 | HPA031323 | 1 | 1 | 1 | 1 |         |
| 4948 | ENSG00000197576 | HPA060088 | 1 | 1 | 1 | 1 |         |
| 4948 | ENSG00000197579 | HPA060640 | 1 | 1 | 1 | 1 |         |
| 4948 | ENSG00000197601 | HPA017322 | 1 | 1 | 1 | 1 |         |
| 4948 | ENSG00000197603 | HPA036776 | 1 | 1 | 1 | 1 |         |
| 4948 | ENSG00000197646 | HPA013411 | 1 | 1 | 1 | 1 |         |
| 4948 | ENSG00000197647 | HPA073724 | 1 | 1 | 1 | 1 |         |
| 4948 | ENSG00000197714 | HPA066506 | 1 | 1 | 1 | 1 |         |
| 4948 | ENSG00000197728 | HPA043961 | 1 | 1 | 1 | 1 |         |
| 4948 | ENSG00000197746 | HPA004426 | 1 | 1 | 1 | 1 |         |
| 4948 | ENSG00000197747 | HPA003340 | 1 | 1 | 1 | 1 | 0. 2638 |
| 4948 | ENSG00000197756 | HPA065327 | 1 | 1 | 1 | 1 |         |
| 4948 | ENSG00000197763 | CAB020802 | 1 | 1 | 1 | 1 |         |
| 4948 | ENSG00000197768 | HPA044352 | 1 | 1 | 1 | 1 |         |
| 4948 | ENSG00000197769 | HPA072670 | 1 | 1 | 1 | 1 |         |
| 4948 | ENSG00000197782 | HPA003311 | 1 | 1 | 1 | 1 |         |
| 4948 | ENSG00000197785 | HPA064867 | 1 | 1 | 1 | 1 |         |
| 4948 | ENSG00000197826 | HPA043383 | 1 | 1 | 1 | 1 | 0. 188  |
| 4948 | ENSG00000197837 | CAB037279 | 1 | 1 | 1 | 1 |         |
| 4948 | ENSG00000197852 | HPA027809 | 1 | 1 | 1 | 1 |         |
| 4948 | ENSG00000197859 | HPA045634 | 1 | 1 | 1 | 1 |         |
| 4948 | ENSG00000197860 | HPA063674 | 1 | 1 | 1 | 1 |         |
| 4948 | ENSG00000197863 | HPA060288 | 1 | 1 | 1 | 1 |         |
| 4948 | ENSG00000197872 | HPA060398 | 1 | 1 | 1 | 1 | 0. 2895 |
| 4948 | ENSG00000197885 | HPA062521 | 1 | 1 | 1 | 1 |         |
| 4948 | ENSG00000197903 | HPA048671 | 1 | 1 | 1 | 1 |         |
| 4948 | ENSG00000197905 | HPA056896 | 1 | 1 | 1 | 1 |         |
| 4948 | ENSG00000197915 | HPA031469 | 1 | 1 | 1 | 1 |         |
| 4948 | ENSG00000197937 | HPA023448 | 1 | 1 | 1 | 1 |         |
| 4948 | ENSG00000197943 | HPA020099 | 1 | 1 | 1 | 1 |         |
| 4948 | ENSG00000197948 | HPA043795 | 1 | 1 | 1 | 1 |         |
| 4948 | ENSG00000197958 | HPA003403 | 1 | 1 | 1 | 1 |         |
| 4948 | ENSG00000197959 | HPA064121 | 1 | 1 | 1 | 1 |         |
| 4948 | ENSG00000197965 | HPA063538 | 1 | 1 | 1 | 1 |         |
| 4948 | ENSG00000198000 | HPA062922 | 1 | 1 | 1 | 1 |         |
| 4948 | ENSG00000198003 | HPA044184 | 1 | 1 | 1 | 1 |         |
| 4948 | ENSG00000198015 | HPA039398 | 1 | 1 | 1 | 1 | 0. 162  |
| 4948 | ENSG00000198018 | HPA014351 | 1 | 1 | 1 | 1 |         |

|      |                 |           |   |   |   |   |
|------|-----------------|-----------|---|---|---|---|
| 4948 | ENSG00000198026 | HPA063999 | 1 | 1 | 1 | 1 |
| 4948 | ENSG00000198033 | HPA039247 | 1 | 1 | 1 | 1 |
| 4948 | ENSG00000198040 | HPA028860 | 1 | 1 | 1 | 1 |
| 4948 | ENSG00000198042 | HPA050574 | 1 | 1 | 1 | 1 |
| 4948 | ENSG00000198046 | HPA030731 | 1 | 1 | 1 | 1 |
| 4948 | ENSG00000198055 | HPA018903 | 1 | 1 | 1 | 1 |
| 4948 | ENSG00000198056 | HPA040010 | 1 | 1 | 1 | 1 |
| 4948 | ENSG00000198060 | HPA056596 | 1 | 1 | 1 | 1 |
| 4948 | ENSG00000198064 | HPA053611 | 1 | 1 | 1 | 1 |
| 4948 | ENSG00000198075 | HPA034530 | 1 | 1 | 1 | 1 |
| 4948 | ENSG00000198105 | HPA018237 | 1 | 1 | 1 | 1 |
| 4948 | ENSG00000198113 | HPA044913 | 1 | 1 | 1 | 1 |
| 4948 | ENSG00000198130 | HPA036540 | 1 | 1 | 1 | 1 |
| 4948 | ENSG00000198131 | HPA002732 | 1 | 1 | 1 | 1 |
| 4948 | ENSG00000198142 | HPA056131 | 1 | 1 | 1 | 1 |
| 4948 | ENSG00000198156 | HPA053611 | 1 | 1 | 1 | 1 |
| 4948 | ENSG00000198160 | HPA019589 | 1 | 1 | 1 | 1 |
| 4948 | ENSG00000198162 | HPA034559 | 1 | 1 | 1 | 1 |
| 4948 | ENSG00000198169 | HPA018290 | 1 | 1 | 1 | 1 |
| 4948 | ENSG00000198182 | HPA055018 | 1 | 1 | 1 | 1 |
| 4948 | ENSG00000198189 | HPA021608 | 1 | 1 | 1 | 1 |
| 4948 | ENSG00000198198 | HPA029012 | 1 | 1 | 1 | 1 |
| 4948 | ENSG00000198205 | HPA043789 | 1 | 1 | 1 | 1 |
| 4948 | ENSG00000198208 | HPA027451 | 1 | 1 | 1 | 1 |
| 4948 | ENSG00000198211 | CAB011512 | 1 | 1 | 1 | 1 |
| 4948 | ENSG00000198218 | HPA037677 | 1 | 1 | 1 | 1 |
| 4948 | ENSG00000198242 | HPA077474 | 1 | 1 | 1 | 1 |
| 4948 | ENSG00000198252 | HPA040290 | 1 | 1 | 1 | 1 |
| 4948 | ENSG00000198270 | HPA040720 | 1 | 1 | 1 | 1 |
| 4948 | ENSG00000198276 | HPA004722 | 1 | 1 | 1 | 1 |
| 4948 | ENSG00000198300 | HPA026070 | 1 | 1 | 1 | 1 |
| 4948 | ENSG00000198301 | HPA035949 | 1 | 1 | 1 | 1 |
| 4948 | ENSG00000198315 | HPA003483 | 1 | 1 | 1 | 1 |
| 4948 | ENSG00000198331 | HPA041210 | 1 | 1 | 1 | 1 |
| 4948 | ENSG00000198354 | HPA044737 | 1 | 1 | 1 | 1 |
| 4948 | ENSG00000198355 | HPA068758 | 1 | 1 | 1 | 1 |
| 4948 | ENSG00000198363 | HPA055161 | 1 | 1 | 1 | 1 |
| 4948 | ENSG00000198369 | HPA038256 | 1 | 1 | 1 | 1 |
| 4948 | ENSG00000198380 | HPA047240 | 1 | 1 | 1 | 1 |
| 4948 | ENSG00000198399 | HPA036475 | 1 | 1 | 1 | 1 |
| 4948 | ENSG00000198400 | HPA076570 | 1 | 1 | 1 | 1 |
| 4948 | ENSG00000198408 | HPA076501 | 1 | 1 | 1 | 1 |
| 4948 | ENSG00000198455 | HPA043789 | 1 | 1 | 1 | 1 |
| 4948 | ENSG00000198466 | HPA042125 | 1 | 1 | 1 | 1 |
| 4948 | ENSG00000198483 | HPA035453 | 1 | 1 | 1 | 1 |
| 4948 | ENSG00000198498 | HPA041571 | 1 | 1 | 1 | 1 |
| 4948 | ENSG00000198517 | CAB026820 | 1 | 1 | 1 | 1 |
| 4948 | ENSG00000198520 | HPA034769 | 1 | 1 | 1 | 1 |
| 4948 | ENSG00000198554 | HPA000632 | 1 | 1 | 1 | 1 |
| 4948 | ENSG00000198556 | HPA029500 | 1 | 1 | 1 | 1 |
| 4948 | ENSG00000198576 | HPA056430 | 1 | 1 | 1 | 1 |
| 4948 | ENSG00000198586 | HPA016043 | 1 | 1 | 1 | 1 |
| 4948 | ENSG00000198597 | HPA077341 | 1 | 1 | 1 | 1 |
| 4948 | ENSG00000198604 | HPA002730 | 1 | 1 | 1 | 1 |
| 4948 | ENSG00000198612 | HPA036485 | 1 | 1 | 1 | 1 |

0.3343

|      |                 |           |   |   |   |   |
|------|-----------------|-----------|---|---|---|---|
| 4948 | ENSG00000198625 | HPA048821 | 1 | 1 | 1 | 1 |
| 4948 | ENSG00000198626 | HPA020028 | 1 | 1 | 1 | 1 |
| 4948 | ENSG00000198642 | HPA059901 | 1 | 1 | 1 | 1 |
| 4948 | ENSG00000198668 | CAB018558 | 1 | 1 | 1 | 1 |
| 4948 | ENSG00000198677 | HPA037905 | 1 | 1 | 1 | 1 |
| 4948 | ENSG00000198681 | CAB002620 | 1 | 1 | 1 | 1 |
| 4948 | ENSG00000198689 | HPA059590 | 1 | 1 | 1 | 1 |
| 4948 | ENSG00000198692 | HPA002561 | 1 | 1 | 1 | 1 |
| 4948 | ENSG00000198707 | HPA064397 | 1 | 1 | 1 | 1 |
| 4948 | ENSG00000198718 | HPA050849 | 1 | 1 | 1 | 1 |
| 4948 | ENSG00000198719 | HPA078298 | 1 | 1 | 1 | 1 |
| 4948 | ENSG00000198720 | HPA063748 | 1 | 1 | 1 | 1 |
| 4948 | ENSG00000198727 | HPA068400 | 1 | 1 | 1 | 1 |
| 4948 | ENSG00000198728 | HPA034488 | 1 | 1 | 1 | 1 |
| 4948 | ENSG00000198730 | HPA061027 | 1 | 1 | 1 | 1 |
| 4948 | ENSG00000198736 | HPA043463 | 1 | 1 | 1 | 1 |
| 4948 | ENSG00000198740 | HPA044408 | 1 | 1 | 1 | 1 |
| 4948 | ENSG00000198743 | HPA029791 | 1 | 1 | 1 | 1 |
| 4948 | ENSG00000198755 | HPA053803 | 1 | 1 | 1 | 1 |
| 4948 | ENSG00000198758 | HPA030998 | 1 | 1 | 1 | 1 |
| 4948 | ENSG00000198768 | HPA067015 | 1 | 1 | 1 | 1 |
| 4948 | ENSG00000198791 | HPA069543 | 1 | 1 | 1 | 1 |
| 4948 | ENSG00000198795 | HPA023056 | 1 | 1 | 1 | 1 |
| 4948 | ENSG00000198799 | HPA015538 | 1 | 1 | 1 | 1 |
| 4948 | ENSG00000198804 | CAB016241 | 1 | 1 | 1 | 1 |
| 4948 | ENSG00000198816 | HPA063624 | 1 | 1 | 1 | 1 |
| 4948 | ENSG00000198825 | HPA042605 | 1 | 1 | 1 | 1 |
| 4948 | ENSG00000198832 | HPA019601 | 1 | 1 | 1 | 1 |
| 4948 | ENSG00000198837 | HPA040188 | 1 | 1 | 1 | 1 |
| 4948 | ENSG00000198838 | HPA062004 | 1 | 1 | 1 | 1 |
| 4948 | ENSG00000198842 | HPA012912 | 1 | 1 | 1 | 1 |
| 4948 | ENSG00000198848 | HPA046717 | 1 | 1 | 1 | 1 |
| 4948 | ENSG00000198855 | HPA071134 | 1 | 1 | 1 | 1 |
| 4948 | ENSG00000198858 | HPA043025 | 1 | 1 | 1 | 1 |
| 4948 | ENSG00000198862 | HPA029143 | 1 | 1 | 1 | 1 |
| 4948 | ENSG00000198865 | HPA036240 | 1 | 1 | 1 | 1 |
| 4948 | ENSG00000198874 | HPA014118 | 1 | 1 | 1 | 1 |
| 4948 | ENSG00000198889 | HPA044737 | 1 | 1 | 1 | 1 |
| 4948 | ENSG00000198900 | HPA019039 | 1 | 1 | 1 | 1 |
| 4948 | ENSG00000198909 | HPA035410 | 1 | 1 | 1 | 1 |
| 4948 | ENSG00000198912 | HPA008270 | 1 | 1 | 1 | 1 |
| 4948 | ENSG00000198914 | HPA052792 | 1 | 1 | 1 | 1 |
| 4948 | ENSG00000198915 | HPA035593 | 1 | 1 | 1 | 1 |
| 4948 | ENSG00000198919 | HPA049232 | 1 | 1 | 1 | 1 |
| 4948 | ENSG00000198924 | HPA036907 | 1 | 1 | 1 | 1 |
| 4948 | ENSG00000198931 | HPA026681 | 1 | 1 | 1 | 1 |
| 4948 | ENSG00000198933 | HPA062347 | 1 | 1 | 1 | 1 |
| 4948 | ENSG00000198945 | HPA044382 | 1 | 1 | 1 | 1 |
| 4948 | ENSG00000198952 | HPA072651 | 1 | 1 | 1 | 1 |
| 4948 | ENSG00000198959 | CAB002598 | 1 | 1 | 1 | 1 |
| 4948 | ENSG00000198961 | HPA040347 | 1 | 1 | 1 | 1 |
| 4948 | ENSG00000198963 | HPA008393 | 1 | 1 | 1 | 1 |
| 4948 | ENSG00000203667 | HPA043617 | 1 | 1 | 1 | 1 |
| 4948 | ENSG00000203697 | HPA073939 | 1 | 1 | 1 | 1 |
| 4948 | ENSG00000203722 | HPA062673 | 1 | 1 | 1 | 1 |

|      |                 |           |   |   |   |   |         |
|------|-----------------|-----------|---|---|---|---|---------|
| 4948 | ENSG00000203727 | HPA067811 | 1 | 1 | 1 | 1 |         |
| 4948 | ENSG00000203780 | HPA038413 | 1 | 1 | 1 | 1 |         |
| 4948 | ENSG00000203797 | HPA037525 | 1 | 1 | 1 | 1 | 0. 2487 |
| 4948 | ENSG00000203814 | HPA048671 | 1 | 1 | 1 | 1 |         |
| 4948 | ENSG00000203872 | HPA044797 | 1 | 1 | 1 | 1 |         |
| 4948 | ENSG00000203879 | CAB012979 | 1 | 1 | 1 | 1 |         |
| 4948 | ENSG00000203943 | HPA058929 | 1 | 1 | 1 | 1 |         |
| 4948 | ENSG00000203995 | HPA030378 | 1 | 1 | 1 | 1 |         |
| 4948 | ENSG00000204052 | HPA046698 | 1 | 1 | 1 | 1 |         |
| 4948 | ENSG00000204065 | HPA072199 | 1 | 1 | 1 | 1 |         |
| 4948 | ENSG00000204084 | HPA028803 | 1 | 1 | 1 | 1 |         |
| 4948 | ENSG00000204120 | HPA050899 | 1 | 1 | 1 | 1 |         |
| 4948 | ENSG00000204130 | HPA039792 | 1 | 1 | 1 | 1 |         |
| 4948 | ENSG00000204147 | HPA061171 | 1 | 1 | 1 | 1 |         |
| 4948 | ENSG00000204160 | HPA040234 | 1 | 1 | 1 | 1 |         |
| 4948 | ENSG00000204175 | HPA038129 | 1 | 1 | 1 | 1 |         |
| 4948 | ENSG00000204176 | HPA064559 | 1 | 1 | 1 | 1 |         |
| 4948 | ENSG00000204178 | HPA019680 | 1 | 1 | 1 | 1 |         |
| 4948 | ENSG00000204179 | HPA046896 | 1 | 1 | 1 | 1 |         |
| 4948 | ENSG00000204209 | HPA008797 | 1 | 1 | 1 | 1 |         |
| 4948 | ENSG00000204220 | HPA048123 | 1 | 1 | 1 | 1 |         |
| 4948 | ENSG00000204227 | HPA008701 | 1 | 1 | 1 | 1 |         |
| 4948 | ENSG00000204231 | HPA063653 | 1 | 1 | 1 | 1 |         |
| 4948 | ENSG00000204257 | HPA017295 | 1 | 1 | 1 | 1 |         |
| 4948 | ENSG00000204267 | HPA001312 | 1 | 1 | 1 | 1 |         |
| 4948 | ENSG00000204271 | HPA000727 | 1 | 1 | 1 | 1 |         |
| 4948 | ENSG00000204304 | HPA061478 | 1 | 1 | 1 | 1 |         |
| 4948 | ENSG00000204308 | HPA065032 | 1 | 1 | 1 | 1 |         |
| 4948 | ENSG00000204310 | HPA048478 | 1 | 1 | 1 | 1 |         |
| 4948 | ENSG00000204311 | HPA042621 | 1 | 1 | 1 | 1 |         |
| 4948 | ENSG00000204316 | HPA023054 | 1 | 1 | 1 | 1 |         |
| 4948 | ENSG00000204344 | HPA068559 | 1 | 1 | 1 | 1 |         |
| 4948 | ENSG00000204351 | HPA051959 | 1 | 1 | 1 | 1 |         |
| 4948 | ENSG00000204352 | HPA071515 | 1 | 1 | 1 | 1 |         |
| 4948 | ENSG00000204366 | HPA047161 | 1 | 1 | 1 | 1 |         |
| 4948 | ENSG00000204381 | HPA040087 | 1 | 1 | 1 | 1 |         |
| 4948 | ENSG00000204392 | HPA052805 | 1 | 1 | 1 | 1 |         |
| 4948 | ENSG00000204394 | HPA046710 | 1 | 1 | 1 | 1 |         |
| 4948 | ENSG00000204397 | HPA062805 | 1 | 1 | 1 | 1 |         |
| 4948 | ENSG00000204428 | HPA038690 | 1 | 1 | 1 | 1 |         |
| 4948 | ENSG00000204438 | HPA006301 | 1 | 1 | 1 | 1 |         |
| 4948 | ENSG00000204439 | HPA045281 | 1 | 1 | 1 | 1 |         |
| 4948 | ENSG00000204472 | HPA062949 | 1 | 1 | 1 | 1 |         |
| 4948 | ENSG00000204498 | HPA006298 | 1 | 1 | 1 | 1 |         |
| 4948 | ENSG00000204514 | HPA072145 | 1 | 1 | 1 | 1 |         |
| 4948 | ENSG00000204524 | HPA046330 | 1 | 1 | 1 | 1 |         |
| 4948 | ENSG00000204532 | HPA060667 | 1 | 1 | 1 | 1 |         |
| 4948 | ENSG00000204536 | HPA054167 | 1 | 1 | 1 | 1 |         |
| 4948 | ENSG00000204540 | HPA045049 | 1 | 1 | 1 | 1 |         |
| 4948 | ENSG00000204560 | HPA051455 | 1 | 1 | 1 | 1 |         |
| 4948 | ENSG00000204569 | CAB025501 | 1 | 1 | 1 | 1 |         |
| 4948 | ENSG00000204574 | HPA017578 | 1 | 1 | 1 | 1 |         |
| 4948 | ENSG00000204576 | HPA064061 | 1 | 1 | 1 | 1 |         |
| 4948 | ENSG00000204580 | HPA057194 | 1 | 1 | 1 | 1 | 0. 3735 |
| 4948 | ENSG00000204590 | HPA050455 | 1 | 1 | 1 | 1 |         |

|      |                 |           |   |   |   |   |
|------|-----------------|-----------|---|---|---|---|
| 4948 | ENSG00000204592 | HPA031454 | 1 | 1 | 1 | 1 |
| 4948 | ENSG00000204599 | HPA051120 | 1 | 1 | 1 | 1 |
| 4948 | ENSG00000204611 | HPA062639 | 1 | 1 | 1 | 1 |
| 4948 | ENSG00000204619 | HPA060174 | 1 | 1 | 1 | 1 |
| 4948 | ENSG00000204673 | CAB021903 | 1 | 1 | 1 | 1 |
| 4948 | ENSG00000204681 | HPA058459 | 1 | 1 | 1 | 1 |
| 4948 | ENSG00000204779 | HPA012836 | 1 | 1 | 1 | 1 |
| 4948 | ENSG00000204822 | HPA034612 | 1 | 1 | 1 | 1 |
| 4948 | ENSG00000204839 | HPA068049 | 1 | 1 | 1 | 1 |
| 4948 | ENSG00000204842 | HPA018295 | 1 | 1 | 1 | 1 |
| 4948 | ENSG00000204852 | HPA040036 | 1 | 1 | 1 | 1 |
| 4948 | ENSG00000204856 | HPA038286 | 1 | 1 | 1 | 1 |
| 4948 | ENSG00000204859 | HPA030417 | 1 | 1 | 1 | 1 |
| 4948 | ENSG00000204869 | HPA047655 | 1 | 1 | 1 | 1 |
| 4948 | ENSG00000204909 | HPA038288 | 1 | 1 | 1 | 1 |
| 4948 | ENSG00000204946 | HPA020375 | 1 | 1 | 1 | 1 |
| 4948 | ENSG00000204947 | HPA020087 | 1 | 1 | 1 | 1 |
| 4948 | ENSG00000204978 | HPA048484 | 1 | 1 | 1 | 1 |
| 4948 | ENSG00000205084 | HPA042081 | 1 | 1 | 1 | 1 |
| 4948 | ENSG00000205085 | HPA020513 | 1 | 1 | 1 | 1 |
| 4948 | ENSG00000205129 | HPA043662 | 1 | 1 | 1 | 1 |
| 4948 | ENSG00000205177 | HPA047064 | 1 | 1 | 1 | 1 |
| 4948 | ENSG00000205189 | HPA021554 | 1 | 1 | 1 | 1 |
| 4948 | ENSG00000205208 | HPA052670 | 1 | 1 | 1 | 1 |
| 4948 | ENSG00000205213 | HPA054350 | 1 | 1 | 1 | 1 |
| 4948 | ENSG00000205250 | HPA054128 | 1 | 1 | 1 | 1 |
| 4948 | ENSG00000205269 | HPA055134 | 1 | 1 | 1 | 1 |
| 4948 | ENSG00000205302 | HPA037400 | 1 | 1 | 1 | 1 |
| 4948 | ENSG00000205307 | HPA062610 | 1 | 1 | 1 | 1 |
| 4948 | ENSG00000205339 | HPA056590 | 1 | 1 | 1 | 1 |
| 4948 | ENSG00000205363 | HPA041563 | 1 | 1 | 1 | 1 |
| 4948 | ENSG00000205413 | HPA021318 | 1 | 1 | 1 | 1 |
| 4948 | ENSG00000205420 | HPA045697 | 1 | 1 | 1 | 1 |
| 4948 | ENSG00000205423 | HPA077906 | 1 | 1 | 1 | 1 |
| 4948 | ENSG00000205542 | CAB033806 | 1 | 1 | 1 | 1 |
| 4948 | ENSG00000205544 | HPA062732 | 1 | 1 | 1 | 1 |
| 4948 | ENSG00000205571 | HPA073601 | 1 | 1 | 1 | 1 |
| 4948 | ENSG00000205572 | HPA075271 | 1 | 1 | 1 | 1 |
| 4948 | ENSG00000205581 | HPA048694 | 1 | 1 | 1 | 1 |
| 4948 | ENSG00000205593 | HPA018934 | 1 | 1 | 1 | 1 |
| 4948 | ENSG00000205609 | HPA047097 | 1 | 1 | 1 | 1 |
| 4948 | ENSG00000205629 | HPA041559 | 1 | 1 | 1 | 1 |
| 4948 | ENSG00000205659 | HPA001777 | 1 | 1 | 1 | 1 |
| 4948 | ENSG00000205710 | HPA069713 | 1 | 1 | 1 | 1 |
| 4948 | ENSG00000205726 | HPA018007 | 1 | 1 | 1 | 1 |
| 4948 | ENSG00000205730 | HPA042011 | 1 | 1 | 1 | 1 |
| 4948 | ENSG00000205758 | CAB034129 | 1 | 1 | 1 | 1 |
| 4948 | ENSG00000205765 | HPA043779 | 1 | 1 | 1 | 1 |
| 4948 | ENSG00000205809 | HPA058052 | 1 | 1 | 1 | 1 |
| 4948 | ENSG00000205923 | HPA075926 | 1 | 1 | 1 | 1 |
| 4948 | ENSG00000205927 | HPA003254 | 1 | 1 | 1 | 1 |
| 4948 | ENSG00000206043 | HPA042233 | 1 | 1 | 1 | 1 |
| 4948 | ENSG00000206053 | HPA041888 | 1 | 1 | 1 | 1 |
| 4948 | ENSG00000206077 | HPA069008 | 1 | 1 | 1 | 1 |
| 4948 | ENSG00000206262 | HPA061017 | 1 | 1 | 1 | 1 |

0.3557

|      |                 |           |   |   |   |   |        |
|------|-----------------|-----------|---|---|---|---|--------|
| 4948 | ENSG00000206418 | HPA040727 | 1 | 1 | 1 | 1 | 0.3672 |
| 4948 | ENSG00000206432 | HPA047253 | 1 | 1 | 1 | 1 |        |
| 4948 | ENSG00000206538 | HPA054983 | 1 | 1 | 1 | 1 |        |
| 4948 | ENSG00000206562 | HPA035166 | 1 | 1 | 1 | 1 | 0.1818 |
| 4948 | ENSG00000206579 | HPA025072 | 1 | 1 | 1 | 1 |        |
| 4948 | ENSG00000211455 | HPA051324 | 1 | 1 | 1 | 1 |        |
| 4948 | ENSG00000211584 | HPA073994 | 1 | 1 | 1 | 1 |        |
| 4948 | ENSG00000213015 | HPA054058 | 1 | 1 | 1 | 1 |        |
| 4948 | ENSG00000213030 | HPA038925 | 1 | 1 | 1 | 1 |        |
| 4948 | ENSG00000213047 | HPA042586 | 1 | 1 | 1 | 1 |        |
| 4948 | ENSG00000213066 | HPA071876 | 1 | 1 | 1 | 1 |        |
| 4948 | ENSG00000213079 | HPA035601 | 1 | 1 | 1 | 1 |        |
| 4948 | ENSG00000213085 | HPA042204 | 1 | 1 | 1 | 1 |        |
| 4948 | ENSG00000213123 | HPA049555 | 1 | 1 | 1 | 1 |        |
| 4948 | ENSG00000213139 | HPA035103 | 1 | 1 | 1 | 1 |        |
| 4948 | ENSG00000213231 | HPA053163 | 1 | 1 | 1 | 1 |        |
| 4948 | ENSG00000213246 | HPA059748 | 1 | 1 | 1 | 1 |        |
| 4948 | ENSG00000213337 | HPA042678 | 1 | 1 | 1 | 1 |        |
| 4948 | ENSG00000213347 | HPA070111 | 1 | 1 | 1 | 1 |        |
| 4948 | ENSG00000213398 | HPA044767 | 1 | 1 | 1 | 1 |        |
| 4948 | ENSG00000213424 | HPA054586 | 1 | 1 | 1 | 1 |        |
| 4948 | ENSG00000213463 | HPA000866 | 1 | 1 | 1 | 1 |        |
| 4948 | ENSG00000213516 | HPA057707 | 1 | 1 | 1 | 1 |        |
| 4948 | ENSG00000213533 | HPA051855 | 1 | 1 | 1 | 1 |        |
| 4948 | ENSG00000213563 | CAB034331 | 1 | 1 | 1 | 1 |        |
| 4948 | ENSG00000213593 | HPA063763 | 1 | 1 | 1 | 1 |        |
| 4948 | ENSG00000213625 | HPA069444 | 1 | 1 | 1 | 1 |        |
| 4948 | ENSG00000213638 | HPA058899 | 1 | 1 | 1 | 1 |        |
| 4948 | ENSG00000213676 | HPA046871 | 1 | 1 | 1 | 1 |        |
| 4948 | ENSG00000213689 | HPA046721 | 1 | 1 | 1 | 1 |        |
| 4948 | ENSG00000213719 | CAB040557 | 1 | 1 | 1 | 1 |        |
| 4948 | ENSG00000213741 | HPA004107 | 1 | 1 | 1 | 1 | 0.262  |
| 4948 | ENSG00000213762 | HPA009064 | 1 | 1 | 1 | 1 |        |
| 4948 | ENSG00000213780 | HPA074336 | 1 | 1 | 1 | 1 |        |
| 4948 | ENSG00000213782 | HPA014855 | 1 | 1 | 1 | 1 |        |
| 4948 | ENSG00000213809 | HPA068877 | 1 | 1 | 1 | 1 |        |
| 4948 | ENSG00000213859 | HPA052035 | 1 | 1 | 1 | 1 |        |
| 4948 | ENSG00000213865 | HPA043660 | 1 | 1 | 1 | 1 |        |
| 4948 | ENSG00000213906 | HPA072921 | 1 | 1 | 1 | 1 |        |
| 4948 | ENSG00000213920 | HPA003064 | 1 | 1 | 1 | 1 |        |
| 4948 | ENSG00000213921 | HPA041498 | 1 | 1 | 1 | 1 |        |
| 4948 | ENSG00000213923 | CAB009626 | 1 | 1 | 1 | 1 |        |
| 4948 | ENSG00000213928 | HPA001862 | 1 | 1 | 1 | 1 |        |
| 4948 | ENSG00000213930 | HPA005729 | 1 | 1 | 1 | 1 |        |
| 4948 | ENSG00000213988 | HPA003227 | 1 | 1 | 1 | 1 |        |
| 4948 | ENSG00000214013 | HPA016949 | 1 | 1 | 1 | 1 |        |
| 4948 | ENSG00000214022 | HPA036022 | 1 | 1 | 1 | 1 |        |
| 4948 | ENSG00000214026 | HPA050406 | 1 | 1 | 1 | 1 |        |
| 4948 | ENSG00000214029 | HPA040301 | 1 | 1 | 1 | 1 |        |
| 4948 | ENSG00000214046 | HPA043127 | 1 | 1 | 1 | 1 |        |
| 4948 | ENSG00000214050 | HPA058676 | 1 | 1 | 1 | 1 |        |
| 4948 | ENSG00000214078 | HPA047259 | 1 | 1 | 1 | 1 |        |
| 4948 | ENSG00000214102 | HPA027418 | 1 | 1 | 1 | 1 |        |
| 4948 | ENSG00000214113 | HPA030362 | 1 | 1 | 1 | 1 |        |
| 4948 | ENSG00000214193 | HPA042456 | 1 | 1 | 1 | 1 |        |



|      |                 |           |   |   |   |   |        |        |
|------|-----------------|-----------|---|---|---|---|--------|--------|
| 4948 | ENSG00000214253 | HPA017430 | 1 | 1 | 1 | 1 | 0.314  | 0.3693 |
| 4948 | ENSG00000214338 | HPA035389 | 1 | 1 | 1 | 1 |        |        |
| 4948 | ENSG00000214357 | HPA037612 | 1 | 1 | 1 | 1 | 0.4277 |        |
| 4948 | ENSG00000214376 | HPA029525 | 1 | 1 | 1 | 1 |        |        |
| 4948 | ENSG00000214435 | HPA017856 | 1 | 1 | 1 | 1 |        |        |
| 4948 | ENSG00000214447 | HPA043131 | 1 | 1 | 1 | 1 |        |        |
| 4948 | ENSG00000214491 | HPA067695 | 1 | 1 | 1 | 1 |        |        |
| 4948 | ENSG00000214517 | CAB004541 | 1 | 1 | 1 | 1 |        |        |
| 4948 | ENSG00000214562 | HPA064635 | 1 | 1 | 1 | 1 |        |        |
| 4948 | ENSG00000214575 | HPA040396 | 1 | 1 | 1 | 1 |        |        |
| 4948 | ENSG00000214652 | HPA051027 | 1 | 1 | 1 | 1 |        |        |
| 4948 | ENSG00000214736 | HPA004801 | 1 | 1 | 1 | 1 |        |        |
| 4948 | ENSG00000214753 | HPA056696 | 1 | 1 | 1 | 1 |        |        |
| 4948 | ENSG00000214860 | HPA045728 | 1 | 1 | 1 | 1 |        |        |
| 4948 | ENSG00000214940 | HPA053611 | 1 | 1 | 1 | 1 |        |        |
| 4948 | ENSG00000214954 | HPA046337 | 1 | 1 | 1 | 1 |        |        |
| 4948 | ENSG00000214967 | HPA053611 | 1 | 1 | 1 | 1 |        |        |
| 4948 | ENSG00000215018 | HPA043844 | 1 | 1 | 1 | 1 |        |        |
| 4948 | ENSG00000215021 | CAB014889 | 1 | 1 | 1 | 1 |        | 0.661  |
| 4948 | ENSG00000215045 | HPA045381 | 1 | 1 | 1 | 1 |        |        |
| 4948 | ENSG00000215114 | HPA045278 | 1 | 1 | 1 | 1 |        |        |
| 4948 | ENSG00000215375 | HPA037381 | 1 | 1 | 1 | 1 |        |        |
| 4948 | ENSG00000215397 | HPA067697 | 1 | 1 | 1 | 1 |        |        |
| 4948 | ENSG00000215421 | HPA041673 | 1 | 1 | 1 | 1 |        |        |
| 4948 | ENSG00000215440 | CAB017025 | 1 | 1 | 1 | 1 |        |        |
| 4948 | ENSG00000215790 | HPA062711 | 1 | 1 | 1 | 1 |        |        |
| 4948 | ENSG00000215817 | HPA028490 | 1 | 1 | 1 | 1 |        |        |
| 4948 | ENSG00000215845 | HPA006518 | 1 | 1 | 1 | 1 |        |        |
| 4948 | ENSG00000215883 | HPA042671 | 1 | 1 | 1 | 1 |        |        |
| 4948 | ENSG00000215915 | HPA065305 | 1 | 1 | 1 | 1 |        |        |
| 4948 | ENSG00000217555 | HPA062779 | 1 | 1 | 1 | 1 |        |        |
| 4948 | ENSG00000218336 | HPA047043 | 1 | 1 | 1 | 1 |        |        |
| 4948 | ENSG00000218739 | HPA053866 | 1 | 1 | 1 | 1 |        |        |
| 4948 | ENSG00000218891 | HPA062812 | 1 | 1 | 1 | 1 |        |        |
| 4948 | ENSG00000219073 | HPA028086 | 1 | 1 | 1 | 1 |        |        |
| 4948 | ENSG00000219481 | HPA042595 | 1 | 1 | 1 | 1 |        |        |
| 4948 | ENSG00000219545 | HPA044806 | 1 | 1 | 1 | 1 |        |        |
| 4948 | ENSG00000219626 | HPA063357 | 1 | 1 | 1 | 1 |        |        |
| 4948 | ENSG00000220008 | HPA043781 | 1 | 1 | 1 | 1 |        |        |
| 4948 | ENSG00000221821 | HPA045350 | 1 | 1 | 1 | 1 |        |        |
| 4948 | ENSG00000221843 | HPA056962 | 1 | 1 | 1 | 1 |        |        |
| 4948 | ENSG00000221866 | HPA075592 | 1 | 1 | 1 | 1 |        |        |
| 4948 | ENSG00000221869 | HPA067581 | 1 | 1 | 1 | 1 |        |        |
| 4948 | ENSG00000221886 | HPA045445 | 1 | 1 | 1 | 1 |        |        |
| 4948 | ENSG00000221914 | HPA042122 | 1 | 1 | 1 | 1 |        |        |
| 4948 | ENSG00000221944 | HPA041717 | 1 | 1 | 1 | 1 |        |        |
| 4948 | ENSG00000221947 | HPA044430 | 1 | 1 | 1 | 1 |        |        |
| 4948 | ENSG00000221955 | HPA031123 | 1 | 1 | 1 | 1 |        |        |
| 4948 | ENSG00000221968 | HPA045224 | 1 | 1 | 1 | 1 |        |        |
| 4948 | ENSG00000222009 | HPA076404 | 1 | 1 | 1 | 1 |        |        |
| 4948 | ENSG00000222011 | HPA020470 | 1 | 1 | 1 | 1 |        |        |
| 4948 | ENSG00000222014 | HPA059131 | 1 | 1 | 1 | 1 |        |        |
| 4948 | ENSG00000222047 | HPA045739 | 1 | 1 | 1 | 1 |        |        |
| 4948 | ENSG00000223510 | HPA055952 | 1 | 1 | 1 | 1 |        |        |
| 4948 | ENSG00000223638 | HPA046368 | 1 | 1 | 1 | 1 |        |        |

|      |                 |           |   |   |   |   |
|------|-----------------|-----------|---|---|---|---|
| 4948 | ENSG00000223802 | HPA045724 | 1 | 1 | 1 | 1 |
| 4948 | ENSG00000223865 | HPA058509 | 1 | 1 | 1 | 1 |
| 4948 | ENSG00000224383 | HPA051264 | 1 | 1 | 1 | 1 |
| 4948 | ENSG00000224578 | HPA005812 | 1 | 1 | 1 | 1 |
| 4948 | ENSG00000224712 | HPA053611 | 1 | 1 | 1 | 1 |
| 4948 | ENSG00000224982 | HPA075435 | 1 | 1 | 1 | 1 |
| 4948 | ENSG00000225614 | HPA069784 | 1 | 1 | 1 | 1 |
| 4948 | ENSG00000225663 | HPA045542 | 1 | 1 | 1 | 1 |
| 4948 | ENSG00000225697 | HPA048363 | 1 | 1 | 1 | 1 |
| 4948 | ENSG00000225830 | HPA071297 | 1 | 1 | 1 | 1 |
| 4948 | ENSG00000225950 | HPA049376 | 1 | 1 | 1 | 1 |
| 4948 | ENSG00000226124 | HPA065748 | 1 | 1 | 1 | 1 |
| 4948 | ENSG00000226742 | HPA048273 | 1 | 1 | 1 | 1 |
| 4948 | ENSG00000226784 | HPA042528 | 1 | 1 | 1 | 1 |
| 4948 | ENSG00000227507 | HPA048884 | 1 | 1 | 1 | 1 |
| 4948 | ENSG00000228570 | HPA064635 | 1 | 1 | 1 | 1 |
| 4948 | ENSG00000228716 | HPA051465 | 1 | 1 | 1 | 1 |
| 4948 | ENSG00000228927 | HPA049384 | 1 | 1 | 1 | 1 |
| 4948 | ENSG00000229117 | HPA053169 | 1 | 1 | 1 | 1 |
| 4948 | ENSG00000229292 | HPA046368 | 1 | 1 | 1 | 1 |
| 4948 | ENSG00000229549 | HPA049384 | 1 | 1 | 1 | 1 |
| 4948 | ENSG00000230124 | HPA028457 | 1 | 1 | 1 | 1 |
| 4948 | ENSG00000230453 | HPA046346 | 1 | 1 | 1 | 1 |
| 4948 | ENSG00000230510 | HPA073186 | 1 | 1 | 1 | 1 |
| 4948 | ENSG00000230626 | HPA051993 | 1 | 1 | 1 | 1 |
| 4948 | ENSG00000230797 | HPA030335 | 1 | 1 | 1 | 1 |
| 4948 | ENSG00000230873 | HPA067970 | 1 | 1 | 1 | 1 |
| 4948 | ENSG00000231389 | HPA017967 | 1 | 1 | 1 | 1 |
| 4948 | ENSG00000231500 | HPA055007 | 1 | 1 | 1 | 1 |
| 4948 | ENSG00000231767 | HPA054087 | 1 | 1 | 1 | 1 |
| 4948 | ENSG00000232388 | HPA068733 | 1 | 1 | 1 | 1 |
| 4948 | ENSG00000233024 | HPA053611 | 1 | 1 | 1 | 1 |
| 4948 | ENSG00000233087 | HPA059131 | 1 | 1 | 1 | 1 |
| 4948 | ENSG00000233232 | HPA053611 | 1 | 1 | 1 | 1 |
| 4948 | ENSG00000233803 | HPA049384 | 1 | 1 | 1 | 1 |
| 4948 | ENSG00000233822 | HPA048671 | 1 | 1 | 1 | 1 |
| 4948 | ENSG00000233927 | HPA047132 | 1 | 1 | 1 | 1 |
| 4948 | ENSG00000234127 | HPA044975 | 1 | 1 | 1 | 1 |
| 4948 | ENSG00000234224 | HPA056391 | 1 | 1 | 1 | 1 |
| 4948 | ENSG00000234284 | HPA068608 | 1 | 1 | 1 | 1 |
| 4948 | ENSG00000234289 | HPA048671 | 1 | 1 | 1 | 1 |
| 4948 | ENSG00000234409 | HPA049901 | 1 | 1 | 1 | 1 |
| 4948 | ENSG00000234444 | HPA051027 | 1 | 1 | 1 | 1 |
| 4948 | ENSG00000234602 | HPA058073 | 1 | 1 | 1 | 1 |
| 4948 | ENSG00000234719 | HPA053611 | 1 | 1 | 1 | 1 |
| 4948 | ENSG00000235098 | HPA065720 | 1 | 1 | 1 | 1 |
| 4948 | ENSG00000235162 | HPA065311 | 1 | 1 | 1 | 1 |
| 4948 | ENSG00000235173 | HPA042470 | 1 | 1 | 1 | 1 |
| 4948 | ENSG00000235711 | HPA045329 | 1 | 1 | 1 | 1 |
| 4948 | ENSG00000235750 | HPA068812 | 1 | 1 | 1 | 1 |
| 4948 | ENSG00000236104 | HPA043848 | 1 | 1 | 1 | 1 |
| 4948 | ENSG00000236287 | HPA050994 | 1 | 1 | 1 | 1 |
| 4948 | ENSG00000236424 | HPA049384 | 1 | 1 | 1 | 1 |
| 4948 | ENSG00000236444 | HPA062415 | 1 | 1 | 1 | 1 |
| 4948 | ENSG00000236609 | HPA067690 | 1 | 1 | 1 | 1 |

|      |                 |           |   |   |   |   |
|------|-----------------|-----------|---|---|---|---|
| 4948 | ENSG00000237172 | HPA062734 | 1 | 1 | 1 | 1 |
| 4948 | ENSG00000237649 | HPA055997 | 1 | 1 | 1 | 1 |
| 4948 | ENSG00000238227 | HPA066070 | 1 | 1 | 1 | 1 |
| 4948 | ENSG00000239264 | HPA034678 | 1 | 1 | 1 | 1 |
| 4948 | ENSG00000239306 | HPA006628 | 1 | 1 | 1 | 1 |
| 4948 | ENSG00000239672 | HPA008467 | 1 | 1 | 1 | 1 |
| 4948 | ENSG00000239704 | HPA021590 | 1 | 1 | 1 | 1 |
| 4948 | ENSG00000239713 | HPA073637 | 1 | 1 | 1 | 1 |
| 4948 | ENSG00000239779 | HPA057067 | 1 | 1 | 1 | 1 |
| 4948 | ENSG00000239887 | HPA052251 | 1 | 1 | 1 | 1 |
| 4948 | ENSG00000239900 | HPA000525 | 1 | 1 | 1 | 1 |
| 4948 | ENSG00000240065 | CAB015180 | 1 | 1 | 1 | 1 |
| 4948 | ENSG00000240204 | HPA078358 | 1 | 1 | 1 | 1 |
| 4948 | ENSG00000240583 | HPA019206 | 1 | 1 | 1 | 1 |
| 4948 | ENSG00000240682 | HPA006312 | 1 | 1 | 1 | 1 |
| 4948 | ENSG00000240771 | HPA052016 | 1 | 1 | 1 | 1 |
| 4948 | ENSG00000240849 | HPA059549 | 1 | 1 | 1 | 1 |
| 4948 | ENSG00000240891 | HPA055947 | 1 | 1 | 1 | 1 |
| 4948 | ENSG00000241058 | HPA045902 | 1 | 1 | 1 | 1 |
| 4948 | ENSG00000241127 | HPA031249 | 1 | 1 | 1 | 1 |
| 4948 | ENSG00000241258 | HPA007216 | 1 | 1 | 1 | 1 |
| 4948 | ENSG00000241468 | HPA067267 | 1 | 1 | 1 | 1 |
| 4948 | ENSG00000241476 | HPA045683 | 1 | 1 | 1 | 1 |
| 4948 | ENSG00000241484 | HPA069694 | 1 | 1 | 1 | 1 |
| 4948 | ENSG00000241644 | HPA061343 | 1 | 1 | 1 | 1 |
| 4948 | ENSG00000241837 | CAB016209 | 1 | 1 | 1 | 1 |
| 4948 | ENSG00000241852 | HPA028286 | 1 | 1 | 1 | 1 |
| 4948 | ENSG00000242028 | HPA055252 | 1 | 1 | 1 | 1 |
| 4948 | ENSG00000242173 | HPA078260 | 1 | 1 | 1 | 1 |
| 4948 | ENSG00000242259 | HPA073701 | 1 | 1 | 1 | 1 |
| 4948 | ENSG00000242265 | HPA051038 | 1 | 1 | 1 | 1 |
| 4948 | ENSG00000242372 | HPA040873 | 1 | 1 | 1 | 1 |
| 4948 | ENSG00000242689 | HPA019654 | 1 | 1 | 1 | 1 |
| 4948 | ENSG00000242852 | HPA045573 | 1 | 1 | 1 | 1 |
| 4948 | ENSG00000243317 | HPA065565 | 1 | 1 | 1 | 1 |
| 4948 | ENSG00000243646 | CAB020670 | 1 | 1 | 1 | 1 |
| 4948 | ENSG00000243660 | HPA037820 | 1 | 1 | 1 | 1 |
| 4948 | ENSG00000243667 | HPA035335 | 1 | 1 | 1 | 1 |
| 4948 | ENSG00000243710 | HPA028623 | 1 | 1 | 1 | 1 |
| 4948 | ENSG00000243716 | HPA053611 | 1 | 1 | 1 | 1 |
| 4948 | ENSG00000243749 | HPA051024 | 1 | 1 | 1 | 1 |
| 4948 | ENSG00000243789 | HPA005726 | 1 | 1 | 1 | 1 |
| 4948 | ENSG00000243943 | HPA031430 | 1 | 1 | 1 | 1 |
| 4948 | ENSG00000244274 | HPA043991 | 1 | 1 | 1 | 1 |
| 4948 | ENSG00000244405 | CAB009590 | 1 | 1 | 1 | 1 |
| 4948 | ENSG00000244414 | HPA038922 | 1 | 1 | 1 | 1 |
| 4948 | ENSG00000244462 | HPA043258 | 1 | 1 | 1 | 1 |
| 4948 | ENSG00000244486 | HPA035079 | 1 | 1 | 1 | 1 |
| 4948 | ENSG00000244509 | HPA071523 | 1 | 1 | 1 | 1 |
| 4948 | ENSG00000244687 | HPA052535 | 1 | 1 | 1 | 1 |
| 4948 | ENSG00000244694 | HPA041276 | 1 | 1 | 1 | 1 |
| 4948 | ENSG00000244752 | HPA043749 | 1 | 1 | 1 | 1 |
| 4948 | ENSG00000244754 | HPA059327 | 1 | 1 | 1 | 1 |
| 4948 | ENSG00000245680 | HPA075556 | 1 | 1 | 1 | 1 |
| 4948 | ENSG00000245848 | HPA052734 | 1 | 1 | 1 | 1 |

0. 2385

0. 1558

|      |                 |           |   |   |   |   |
|------|-----------------|-----------|---|---|---|---|
| 4948 | ENSG00000246922 | HPA065334 | 1 | 1 | 1 | 1 |
| 4948 | ENSG00000247077 | HPA036978 | 1 | 1 | 1 | 1 |
| 4948 | ENSG00000247596 | HPA053874 | 1 | 1 | 1 | 1 |
| 4948 | ENSG00000248167 | HPA051120 | 1 | 1 | 1 | 1 |
| 4948 | ENSG00000248333 | HPA073626 | 1 | 1 | 1 | 1 |
| 4948 | ENSG00000248485 | HPA052833 | 1 | 1 | 1 | 1 |
| 4948 | ENSG00000248487 | HPA038153 | 1 | 1 | 1 | 1 |
| 4948 | ENSG00000248592 | HPA051855 | 1 | 1 | 1 | 1 |
| 4948 | ENSG00000248643 | HPA047849 | 1 | 1 | 1 | 1 |
| 4948 | ENSG00000248712 | HPA041497 | 1 | 1 | 1 | 1 |
| 4948 | ENSG00000248746 | HPA006035 | 1 | 1 | 1 | 1 |
| 4948 | ENSG00000249222 | HPA044629 | 1 | 1 | 1 | 1 |
| 4948 | ENSG00000249709 | HPA043998 | 1 | 1 | 1 | 1 |
| 4948 | ENSG00000250021 | HPA049270 | 1 | 1 | 1 | 1 |
| 4948 | ENSG00000250264 | HPA001312 | 1 | 1 | 1 | 1 |
| 4948 | ENSG00000250305 | HPA024673 | 1 | 1 | 1 | 1 |
| 4948 | ENSG00000250424 | HPA019206 | 1 | 1 | 1 | 1 |
| 4948 | ENSG00000250479 | HPA003440 | 1 | 1 | 1 | 1 |
| 4948 | ENSG00000250506 | HPA007420 | 1 | 1 | 1 | 1 |
| 4948 | ENSG00000250510 | HPA055135 | 1 | 1 | 1 | 1 |
| 4948 | ENSG00000251192 | HPA031026 | 1 | 1 | 1 | 1 |
| 4948 | ENSG00000251287 | HPA060392 | 1 | 1 | 1 | 1 |
| 4948 | ENSG00000251664 | HPA035812 | 1 | 1 | 1 | 1 |
| 4948 | ENSG00000253293 | CAB019384 | 1 | 1 | 1 | 1 |
| 4948 | ENSG00000253313 | HPA013788 | 1 | 1 | 1 | 1 |
| 4948 | ENSG00000253506 | HPA073152 | 1 | 1 | 1 | 1 |
| 4948 | ENSG00000253729 | CAB005167 | 1 | 1 | 1 | 1 |
| 4948 | ENSG00000254004 | HPA028806 | 1 | 1 | 1 | 1 |
| 4948 | ENSG00000254093 | HPA023146 | 1 | 1 | 1 | 1 |
| 4948 | ENSG00000254206 | HPA053611 | 1 | 1 | 1 | 1 |
| 4948 | ENSG00000254469 | HPA051121 | 1 | 1 | 1 | 1 |
| 4948 | ENSG00000254598 | HPA059206 | 1 | 1 | 1 | 1 |
| 4948 | ENSG00000254692 | HPA059249 | 1 | 1 | 1 | 1 |
| 4948 | ENSG00000254772 | HPA040688 | 1 | 1 | 1 | 1 |
| 4948 | ENSG00000254827 | HPA068288 | 1 | 1 | 1 | 1 |
| 4948 | ENSG00000254852 | HPA053611 | 1 | 1 | 1 | 1 |
| 4948 | ENSG00000255150 | HPA059367 | 1 | 1 | 1 | 1 |
| 4948 | ENSG00000255154 | HPA066812 | 1 | 1 | 1 | 1 |
| 4948 | ENSG00000255245 | HPA075209 | 1 | 1 | 1 | 1 |
| 4948 | ENSG00000255423 | HPA062510 | 1 | 1 | 1 | 1 |
| 4948 | ENSG00000255439 | HPA042720 | 1 | 1 | 1 | 1 |
| 4948 | ENSG00000255524 | HPA053611 | 1 | 1 | 1 | 1 |
| 4948 | ENSG00000255526 | HPA003064 | 1 | 1 | 1 | 1 |
| 4948 | ENSG00000255529 | HPA068141 | 1 | 1 | 1 | 1 |
| 4948 | ENSG00000255552 | HPA056234 | 1 | 1 | 1 | 1 |
| 4948 | ENSG00000255561 | HPA061375 | 1 | 1 | 1 | 1 |
| 4948 | ENSG00000256061 | HPA051048 | 1 | 1 | 1 | 1 |
| 4948 | ENSG00000256269 | HPA050659 | 1 | 1 | 1 | 1 |
| 4948 | ENSG00000256294 | HPA073778 | 1 | 1 | 1 | 1 |
| 4948 | ENSG00000256525 | CAB017030 | 1 | 1 | 1 | 1 |
| 4948 | ENSG00000256683 | HPA001521 | 1 | 1 | 1 | 1 |
| 4948 | ENSG00000256812 | HPA059749 | 1 | 1 | 1 | 1 |
| 4948 | ENSG00000257093 | HPA061437 | 1 | 1 | 1 | 1 |
| 4948 | ENSG00000257103 | HPA017961 | 1 | 1 | 1 | 1 |
| 4948 | ENSG00000257108 | HPA077301 | 1 | 1 | 1 | 1 |

|      |                 |           |   |   |   |   |
|------|-----------------|-----------|---|---|---|---|
| 4948 | ENSG00000257594 | HPA076116 | 1 | 1 | 1 | 1 |
| 4948 | ENSG00000257727 | HPA038465 | 1 | 1 | 1 | 1 |
| 4948 | ENSG00000257923 | HPA003317 | 1 | 1 | 1 | 1 |
| 4948 | ENSG00000257949 | HPA065069 | 1 | 1 | 1 | 1 |
| 4948 | ENSG00000258644 | HPA000866 | 1 | 1 | 1 | 1 |
| 4948 | ENSG00000258986 | HPA002942 | 1 | 1 | 1 | 1 |
| 4948 | ENSG00000258992 | HPA049384 | 1 | 1 | 1 | 1 |
| 4948 | ENSG00000259024 | HPA065603 | 1 | 1 | 1 | 1 |
| 4948 | ENSG00000259075 | HPA076116 | 1 | 1 | 1 | 1 |
| 4948 | ENSG00000259112 | HPA038873 | 1 | 1 | 1 | 1 |
| 4948 | ENSG00000259120 | HPA065721 | 1 | 1 | 1 | 1 |
| 4948 | ENSG00000259132 | HPA029803 | 1 | 1 | 1 | 1 |
| 4948 | ENSG00000259956 | HPA036645 | 1 | 1 | 1 | 1 |
| 4948 | ENSG00000260287 | HPA046969 | 1 | 1 | 1 | 1 |
| 4948 | ENSG00000260342 | HPA045307 | 1 | 1 | 1 | 1 |
| 4948 | ENSG00000260537 | HPA066668 | 1 | 1 | 1 | 1 |
| 4948 | ENSG00000260643 | HPA041368 | 1 | 1 | 1 | 1 |
| 4948 | ENSG00000260836 | HPA055060 | 1 | 1 | 1 | 1 |
| 4948 | ENSG00000261115 | HPA048771 | 1 | 1 | 1 | 1 |
| 4948 | ENSG00000261150 | HPA066808 | 1 | 1 | 1 | 1 |
| 4948 | ENSG00000261221 | HPA068079 | 1 | 1 | 1 | 1 |
| 4948 | ENSG00000261236 | HPA047869 | 1 | 1 | 1 | 1 |
| 4948 | ENSG00000261796 | HPA006312 | 1 | 1 | 1 | 1 |
| 4948 | ENSG00000261832 | HPA053611 | 1 | 1 | 1 | 1 |
| 4948 | ENSG00000262814 | HPA022853 | 1 | 1 | 1 | 1 |
| 4948 | ENSG00000263002 | HPA001664 | 1 | 1 | 1 | 1 |
| 4948 | ENSG00000263528 | CAB025983 | 1 | 1 | 1 | 1 |
| 4948 | ENSG00000263956 | HPA042595 | 1 | 1 | 1 | 1 |
| 4948 | ENSG00000264230 | HPA045246 | 1 | 1 | 1 | 1 |
| 4948 | ENSG00000264364 | HPA039954 | 1 | 1 | 1 | 1 |
| 4948 | ENSG00000264522 | HPA027045 | 1 | 1 | 1 | 1 |
| 4948 | ENSG00000265190 | HPA045246 | 1 | 1 | 1 | 1 |
| 4948 | ENSG00000265241 | HPA018403 | 1 | 1 | 1 | 1 |
| 4948 | ENSG00000265354 | HPA031408 | 1 | 1 | 1 | 1 |
| 4948 | ENSG00000265491 | HPA019130 | 1 | 1 | 1 | 1 |
| 4948 | ENSG00000265817 | HPA025059 | 1 | 1 | 1 | 1 |
| 4948 | ENSG00000266173 | HPA031637 | 1 | 1 | 1 | 1 |
| 4948 | ENSG00000266338 | HPA042595 | 1 | 1 | 1 | 1 |
| 4948 | ENSG00000266472 | HPA078289 | 1 | 1 | 1 | 1 |
| 4948 | ENSG00000266826 | HPA000634 | 1 | 1 | 1 | 1 |
| 4948 | ENSG00000266967 | HPA022869 | 1 | 1 | 1 | 1 |
| 4948 | ENSG00000267041 | HPA029299 | 1 | 1 | 1 | 1 |
| 4948 | ENSG00000267281 | HPA003384 | 1 | 1 | 1 | 1 |
| 4948 | ENSG00000267335 | HPA038925 | 1 | 1 | 1 | 1 |
| 4948 | ENSG00000267561 | HPA043069 | 1 | 1 | 1 | 1 |
| 4948 | ENSG00000267631 | HPA038925 | 1 | 1 | 1 | 1 |
| 4948 | ENSG00000267680 | HPA054045 | 1 | 1 | 1 | 1 |
| 4948 | ENSG00000267855 | HPA059251 | 1 | 1 | 1 | 1 |
| 4948 | ENSG00000268009 | HPA045683 | 1 | 1 | 1 | 1 |
| 4948 | ENSG00000268043 | HPA042595 | 1 | 1 | 1 | 1 |
| 4948 | ENSG00000268083 | HPA002907 | 1 | 1 | 1 | 1 |
| 4948 | ENSG00000268182 | HPA071857 | 1 | 1 | 1 | 1 |
| 4948 | ENSG00000268447 | HPA045683 | 1 | 1 | 1 | 1 |
| 4948 | ENSG00000269026 | HPA068553 | 1 | 1 | 1 | 1 |
| 4948 | ENSG00000269035 | HPA041580 | 1 | 1 | 1 | 1 |

|      |                 |           |   |   |   |   |
|------|-----------------|-----------|---|---|---|---|
| 4948 | ENSG00000269313 | HPA007390 | 1 | 1 | 1 | 1 |
| 4948 | ENSG00000269343 | HPA072145 | 1 | 1 | 1 | 1 |
| 4948 | ENSG00000269590 | HPA065685 | 1 | 1 | 1 | 1 |
| 4948 | ENSG00000269699 | HPA071856 | 1 | 1 | 1 | 1 |
| 4948 | ENSG00000269713 | HPA042595 | 1 | 1 | 1 | 1 |
| 4948 | ENSG00000269791 | HPA045683 | 1 | 1 | 1 | 1 |
| 4948 | ENSG00000269955 | HPA051631 | 1 | 1 | 1 | 1 |
| 4948 | ENSG00000270181 | HPA045845 | 1 | 1 | 1 | 1 |
| 4948 | ENSG00000270629 | HPA042595 | 1 | 1 | 1 | 1 |
| 4948 | ENSG00000270647 | HPA052059 | 1 | 1 | 1 | 1 |
| 4948 | ENSG00000270800 | HPA047027 | 1 | 1 | 1 | 1 |
| 4948 | ENSG00000271254 | HPA042595 | 1 | 1 | 1 | 1 |
| 4948 | ENSG00000271383 | HPA042595 | 1 | 1 | 1 | 1 |
| 4948 | ENSG00000271425 | HPA042595 | 1 | 1 | 1 | 1 |
| 4948 | ENSG00000272325 | HPA047027 | 1 | 1 | 1 | 1 |
| 4948 | ENSG00000272391 | HPA049817 | 1 | 1 | 1 | 1 |
| 4948 | ENSG00000272398 | HPA045879 | 1 | 1 | 1 | 1 |
| 4948 | ENSG00000272617 | HPA049429 | 1 | 1 | 1 | 1 |
| 4948 | ENSG00000272674 | HPA014668 | 1 | 1 | 1 | 1 |
| 4948 | ENSG00000272822 | HPA068942 | 1 | 1 | 1 | 1 |
| 4948 | ENSG00000272886 | HPA013202 | 1 | 1 | 1 | 1 |
| 4948 | ENSG00000273136 | HPA042595 | 1 | 1 | 1 | 1 |
| 4948 | ENSG00000273173 | HPA065733 | 1 | 1 | 1 | 1 |
| 4948 | ENSG00000273513 | HPA046969 | 1 | 1 | 1 | 1 |
| 4948 | ENSG00000273514 | HPA012836 | 1 | 1 | 1 | 1 |
| 4948 | ENSG00000273559 | CAB014874 | 1 | 1 | 1 | 1 |
| 4948 | ENSG00000273604 | HPA055190 | 1 | 1 | 1 | 1 |
| 4948 | ENSG00000273611 | HPA060019 | 1 | 1 | 1 | 1 |
| 4948 | ENSG00000273703 | HPA048671 | 1 | 1 | 1 | 1 |
| 4948 | ENSG00000273802 | HPA048671 | 1 | 1 | 1 | 1 |
| 4948 | ENSG00000273841 | HPA028930 | 1 | 1 | 1 | 1 |
| 4948 | ENSG00000274226 | HPA046969 | 1 | 1 | 1 | 1 |
| 4948 | ENSG00000274290 | HPA048671 | 1 | 1 | 1 | 1 |
| 4948 | ENSG00000274349 | HPA048668 | 1 | 1 | 1 | 1 |
| 4948 | ENSG00000274419 | HPA046969 | 1 | 1 | 1 | 1 |
| 4948 | ENSG00000274512 | HPA046969 | 1 | 1 | 1 | 1 |
| 4948 | ENSG00000274523 | HPA052184 | 1 | 1 | 1 | 1 |
| 4948 | ENSG00000274559 | HPA048671 | 1 | 1 | 1 | 1 |
| 4948 | ENSG00000274600 | HPA001183 | 1 | 1 | 1 | 1 |
| 4948 | ENSG00000274611 | HPA046969 | 1 | 1 | 1 | 1 |
| 4948 | ENSG00000274641 | HPA048671 | 1 | 1 | 1 | 1 |
| 4948 | ENSG00000274808 | HPA046969 | 1 | 1 | 1 | 1 |
| 4948 | ENSG00000274847 | HPA053929 | 1 | 1 | 1 | 1 |
| 4948 | ENSG00000274933 | HPA046969 | 1 | 1 | 1 | 1 |
| 4948 | ENSG00000275004 | HPA059519 | 1 | 1 | 1 | 1 |
| 4948 | ENSG00000275023 | HPA004021 | 1 | 1 | 1 | 1 |
| 4948 | ENSG00000275066 | HPA023554 | 1 | 1 | 1 | 1 |
| 4948 | ENSG00000275183 | HPA053556 | 1 | 1 | 1 | 1 |
| 4948 | ENSG00000275700 | HPA075963 | 1 | 1 | 1 | 1 |
| 4948 | ENSG00000275713 | HPA048671 | 1 | 1 | 1 | 1 |
| 4948 | ENSG00000275740 | HPA036422 | 1 | 1 | 1 | 1 |
| 4948 | ENSG00000275793 | HPA001183 | 1 | 1 | 1 | 1 |
| 4948 | ENSG00000275895 | HPA044833 | 1 | 1 | 1 | 1 |
| 4948 | ENSG00000275954 | HPA046969 | 1 | 1 | 1 | 1 |
| 4948 | ENSG00000276023 | HPA019911 | 1 | 1 | 1 | 1 |

|      |                 |           |   |   |   |   |
|------|-----------------|-----------|---|---|---|---|
| 4948 | ENSG00000276043 | HPA049408 | 1 | 1 | 1 | 1 |
| 4948 | ENSG00000276045 | HPA016583 | 1 | 1 | 1 | 1 |
| 4948 | ENSG00000276234 | HPA076497 | 1 | 1 | 1 | 1 |
| 4948 | ENSG00000276345 | HPA050406 | 1 | 1 | 1 | 1 |
| 4948 | ENSG00000276410 | HPA048671 | 1 | 1 | 1 | 1 |
| 4948 | ENSG00000276644 | HPA012672 | 1 | 1 | 1 | 1 |
| 4948 | ENSG00000277075 | CAB012242 | 1 | 1 | 1 | 1 |
| 4948 | ENSG00000277149 | HPA014118 | 1 | 1 | 1 | 1 |
| 4948 | ENSG00000277161 | HPA023499 | 1 | 1 | 1 | 1 |
| 4948 | ENSG00000277224 | HPA048671 | 1 | 1 | 1 | 1 |
| 4948 | ENSG00000277258 | HPA063531 | 1 | 1 | 1 | 1 |
| 4948 | ENSG00000277363 | HPA063795 | 1 | 1 | 1 | 1 |
| 4948 | ENSG00000277758 | HPA064559 | 1 | 1 | 1 | 1 |
| 4948 | ENSG00000278259 | HPA059715 | 1 | 1 | 1 | 1 |
| 4948 | ENSG00000278299 | HPA046969 | 1 | 1 | 1 | 1 |
| 4948 | ENSG00000278311 | HPA073392 | 1 | 1 | 1 | 1 |
| 4948 | ENSG00000278588 | HPA048671 | 1 | 1 | 1 | 1 |
| 4948 | ENSG00000278599 | HPA046969 | 1 | 1 | 1 | 1 |
| 4948 | ENSG00000278619 | HPA021598 | 1 | 1 | 1 | 1 |
| 4948 | ENSG00000278845 | HPA023373 | 1 | 1 | 1 | 1 |
| 4948 | ENSG00000280987 | HPA036565 | 1 | 1 | 1 | 1 |
| 4948 | ENSG00000281028 | HPA004099 | 1 | 1 | 1 | 1 |
| 4948 | ENSG00000282218 | HPA019477 | 1 | 1 | 1 | 1 |
| 4948 | ENSG00000282278 | HPA058202 | 1 | 1 | 1 | 1 |
| 4948 | ENSG00000282301 | HPA072245 | 1 | 1 | 1 | 1 |
| 4948 | ENSG00000283149 | HPA010814 | 1 | 1 | 1 | 1 |
| 4948 | ENSG00000283154 | HPA003243 | 1 | 1 | 1 | 1 |
| 4948 | ENSG00000283761 | HPA073681 | 1 | 1 | 1 | 1 |
| 4948 | ENSG00000283765 | HPA019545 | 1 | 1 | 1 | 1 |
| 4948 | ENSG00000283782 | HPA052291 | 1 | 1 | 1 | 1 |
| 4948 | ENSG00000284194 | HPA046943 | 1 | 1 | 1 | 1 |
| 4948 | ENSG00000284308 | HPA049564 | 1 | 1 | 1 | 1 |
| 4948 | ENSG00000284512 | HPA041368 | 1 | 1 | 1 | 1 |
| 4948 | ENSG00000284723 | HPA045595 | 1 | 1 | 1 | 1 |
| 4948 | ENSG00000284776 | HPA040981 | 1 | 1 | 1 | 1 |
| 4948 | ENSG00000284824 | HPA058578 | 1 | 1 | 1 | 1 |
| 4948 | ENSG00000284906 | HPA064479 | 1 | 1 | 1 | 1 |
| 4948 | ENSG00000284934 | HPA001825 | 1 | 1 | 1 | 1 |
| 4948 | ENSG00000285043 | HPA004177 | 1 | 1 | 1 | 1 |
| 4948 | ENSG00000285077 | HPA064479 | 1 | 1 | 1 | 1 |
| 4948 | ENSG00000285258 | HPA034989 | 1 | 1 | 1 | 1 |
| 4948 | ENSG00000285283 | HPA038474 | 1 | 1 | 1 | 1 |
| 4948 | ENSG00000285304 | HPA000757 | 1 | 1 | 1 | 1 |
| 4948 | ENSG00000285382 | HPA054119 | 1 | 1 | 1 | 1 |
| 4948 | ENSG00000285509 | HPA038594 | 1 | 1 | 1 | 1 |

P value i P value in Kumar et al. (Bladder)

0.5137



0.2758

0.414

0.3357

0.4789

0.2563

0.3857

0.3471

0.4714

0.3835

0.412 0.356

0.4421

0.3621

0.3279

0.465



0.5689

0.492

0.2743

0.3623

0.23  
0.3619

0.497



0.46

0.3476

0.3366

0.2618

0.4187

0.594

0.3891

0.43

0.3584

0.3131

0.4476

0.358

0.2659

0.336

0.4255

0.383

0.341

0.415

0.347

0.5242

0.3745

0. 3956

0. 4299



0.3866

0.2627

0.5397

0.57

0.334 0.3643

0.429 0.3833

0.2523

0.389



0.35 0.3156

0.3757

0.599

0.4838

0.34

0.47

0.268

0.3442

0.3859

0.3893

0.247

0.283





0.3161

0.3715

0.4515

0.3325

0.293

0.2923

0.3224

0.338

0.252

0.4755

0.3829

0.3565 0.5299

0.372 0.5514

0.3969

0.1882

0.2516

0.4185 0.1889

0.2824

0.3756 0.3714

0.462 0.3285

0.3752

0.3521

0.4492

0.317

0.3368

0.2625

0.38

0.441

0.3598

0.415

0.219

0.3928



0.5159

0.6194

0.5428

0.488

0.2687

0.2573

0.3437

0.391

0.4237

0.1955

0.4589

0.4283

0.383

0.48

0.3616

0.344

0.3371

0.2754

0.3365

0.2893

0.4622

0.3716 0.4242

0.5552

0.2698

0.3499



0.4556

0.2925

0.3232

0.3531 0.5111  
0.4837

0.5173 0.2642

0.2724 0.1849  
0.3516

0.2854

0.2217

0.3835

0.46

0.4629

0.3366

0.8742

0.396

0.2945

0.453

0.283

0.3435

0. 569

0. 3872

0. 3683

0.4691 0.332

0.5657

0.3562



0.3244

0.5451

0.4237

0.385

0.4265

0.442

0.2619

0.3525

0.3482

0.3119  
0.4762

0.69

0.2656

0. 5136

0. 4189

0. 2934    0. 3191

0.524

0. 2896

0. 313

0. 3458    0. 2777  
            0. 3542

0.1936

0.2165

0.3954

0.4386

0.2931

0.3825

0.1685

0.4691



0.3912

0.337

0.2864

0.3853

0.486

0.4986

0.3114

0. 5232

0. 2553

0. 327

0. 4288

0. 4654

0.1475

0.3377      0.2489

0.297

0.2493

0.266

0.2142

0.3971

0.4647



0.33

0.392 0.489

0.452

0.4735

0.5651 0.5411

0.3727

0.3439

0.2628

0.41

0.3949

0.448

0.511

0.582

0.535

0.3128

0.3164

0.3474

0.36

0.3711  
0.315

0.2148

0. 2526 0. 3177

0. 2819

0. 413

0. 3979

0. 2623

0.435

0.2364

0.3733

0.493

0.2896

0.393



0.5781

0.4883

0.4213

0.3764

0.3319

0.3186

0.3961

0.2424

0.4535

0.4482

0.1214

0.484

0.3591

0.4287

0.396

0.3317

0.3125



0.3957

0.3932



0.2915

0.2111  
0.473  
0.3975

0.4519

0.3371

0.3955

0.3121 0.2833

0. 2626

0. 2463

0. 6164

0. 3599

0.385

0.3394

0.2844  
0.4562

0.3241

0.428

0.3728

0.4168

0.4734

0.6

0.472 0.3613

0.3924 0.3215

0.348

0.3492 0.26

0.4194

0.4888

0.514

0.372

0.3914

0.3598 0.4279

0.5246



0.3516

0.177

0.2769

0.2919

0.4765

0.3733 0.3289  
0.2466

0.347

0.3751

0.334

0.4148  
0.297

0.262

0.617

0.2575

0.4418

0.35

0.3634

0.2541

0.1894  
0.3319

0.364

0.3139

0.428

0.4177

0. 2893

0. 232

0. 448

0. 182

0. 451 0. 5273

0. 1741

0. 3248

0. 3351

0. 4794 0. 4568

0.3672

0.281 0.3725

0.6226 0.4388

0.441

0.474

0.3873

0.3689

0.3316 0.3561

0.2975



0.3279

0.43

0.426    0.328

0.413

0.5857      0.275

0.5758      0.4586

0.6196

0.3217

0.319

0.3737

0.3297

0.332

0.4776

0. 2469

0. 5611

0. 5734 0. 3465

0. 384  
0. 5732

0.2314

0.342 0.3712

0.4182

0.2964

0.4589

0.3932 0.466  
0.4191

0.3871

0.6239 0.2476

0.3451

0.3385

0.4228

0.3468

0.4599

0.446  
0.2922

0.3159

0.3149

0.3493 0.475

0.3227

0.285

0.562 0.4285

0.3924



0.2965

0.2514 0.2255

0.2932

0.37

0.3544

0.258

0.3146

0.4199

0.4142

0.426

0.3334

0.2876

0.2198

0.3549

0.3342

0.3963

0.3132

0.488      0.392

0.487

0.5122

0.433

0.324

0. 3812

0. 4452

0. 4675

0. 1932

0. 3456

0. 3175

0. 5129

0. 4125

0. 4658

0. 2479

0.434

0.4695

0.3182

0.3145



0.2179

0.3176

0.1489

0.3673

0.569

0.2831

0.2873

0.4273

0.4616

0.5735 0.3598

0.271

0.588

0.367

0.1683 0.1447

0.3822

0.268

0.3831

0.495

0.1446 0.2493

0.2458

0.4617

0.5624 0.4697

0.4825 0.2956

0.441  
0.275

0.3313

0.3367

0.3571  
0.3122

0.3534

0.4387 0.2973

0.3532

0.448

0.3178

0.438 0.2715

0.3845



0. 446

0. 5569

0. 3656

0. 4141

0. 3827

0.5174  
0.4532  
0.331

0.3565  
0.3383

0.325

0.386

0.4928 0.1988  
0.2564

0.5548  
0.3232  
0.3655

0.3223 0.3918  
0.469  
0.2852 0.3623

0. 2451      0. 335

0. 4786

0. 3211

0. 4556

0.315

0.256

0.2736 0.2476

0.3727

0.5197

0.2591 0.37

0.4195 0.3878

0.3934

0.3594

0.3246

0.46

0.2926

0.3811

0.5191

0.3893 0.318

0.4564

0.2488

0.4114

0.448  
0.4779

0.3116



0.3811  
0.5399

0.3146

0.366

0.4918

0.3764

0.2961      0.3436

0.4913

0. 2739

0. 3233

0. 467

0. 56

0. 655

0. 1886    0. 2673



0.419

0.1663

0.3982

0.2686

0.2692

0.314

0.387

0.3179

0.33

0.5244

0.3494

0.4168

0.3914  
0.2223 0.3741

0.4818

0.6347

0.313

0.393

0.3836



0.324

0.4695

0.2399

0.4715

0.384

0.4176

|       |        |
|-------|--------|
|       | 0.2829 |
| 0.435 | 0.321  |

0.2312 0.3856

0.4324

0.2317

0.2592

0.2787

0.1693

0.4885      0.3616

0.5986

0.3249

0.2335

0.1899 0.2916

0.4474

0.2843

0.3489

0. 2967

0. 4672

0. 3447

0. 2651    0. 7296  
0. 2498

0.3731

0.3293

0.3681

0.3763

0.346 0.2561

0.429

0.3228

0.212

0.3416

0.3898

0.515

0.2215

0. 2214

0. 4413 0. 2846  
0. 4492

0. 4328

0. 5569 0. 384  
0. 3923



0.3877

0.4352

0.2597

0.2321 0.3975

0.3138  
0.425 0.1941

0.342  
0.343

0.587

0.2463

0.3415

0.3857

0. 2755

0. 2961    0. 447

0.385

0.2887 0.477

0.2896

0.4474

0.439

0.495

0.4176

0. 2666    0. 3568

0. 3968

0. 489    0. 4783

0. 5133

0.2837 0.2657

0.3593

0.2591

0.6986

0.28 0.3331

0.4155

0.4335 0.193

0.3738 0.2999

0.4331

0.2484



0.1566

0.2542

0.3191

0.368

0.3598

0.2836

0.331

0.599 0.5198

0.422

0.3253

0.3827

0.4773

0.3888

0.3646

0.3653

0.289

0.3511

0.4556

0.215

0.258

0.2531

0. 4673

0. 3972    0. 5385

0. 348

0.4488

0.368



0. 2935

0. 3598

0. 3275

0. 283

0. 3258

0. 2975

0. 2664

0. 343

0. 5439

0. 3125

0. 3481

0. 2623

0.476

0.4488

0.2826

0.4165

0.3289

0.335

0.4196

0. 4828    0. 348

0. 3468

0. 1334

0.3882 0.286

0.594 0.321

0.3177

0.3663

0.493

0.3948

0.529

0.4115

0.418



0.3623 0.1922

0.2239

0.2535

0.3349      0.326

0.3326

0.3145

0. 4131

0. 2945

0.3689  
0.352

0.398

0.318

0.2381

0.296    0.417

0.2751

0.3218  
0.313

0.5382    0.422

0.5374

0.3728

0.3638 0.6292

0.3274

0.5329

0.2836

0.2828

0.457



0.4232

0.3845

0.698

0.3384 0.3613

0. 2299

0. 5227

0. 4524

0.365

0.3187

0.3518

0.49

0.3852

0.1733 0.5432

0.3111

0.3843

0.2981

0.3716

0.3694

0.41

0.4215

0.492

0.2832 0.429

0.3757

0.364

0.48



0.3495

0.3673

0.4962

0.242

0.433

0.3651

0. 3222

0. 5713

0. 4136

0. 72

0.346

0.3423

0.44

0.3389 0.2967

0.356

0.3216

0.3166    0.2232  
          0.3392

0.4275

0.347

0.4186

0.245 0.2577

0.526

0.222

0.423

0.35

0.441

0.494



0.3338

0.5284

0.3811 0.4267

0.4824 0.331

0.3422

0.3495

0.3765

0.246 0.4512

0.337

0.2738 0.419

0.2899

0.585 0.3963



0.282

Table S-7. Ranking of low-consistency proteins

| Rank | Gene      | Gene name | Overlap  | fEquality | Jaccard  | sSet-incluP | value  | iP | value | i |
|------|-----------|-----------|----------|-----------|----------|-------------|--------|----|-------|---|
| 1    | ENSG00000 | TIMELESS  | 0.581818 | 0.167677  | 0.359596 | 0.30202     |        |    |       |   |
| 2    | ENSG00000 | BCAT1     | 0.551515 | 0.176768  | 0.35202  | 0.30303     |        |    |       |   |
| 3    | ENSG00000 | ZNHIT3    | 0.608081 | 0.153535  | 0.360606 | 0.279798    |        |    |       |   |
| 4    | ENSG00000 | ADTRP     | 0.572939 | 0.17019   | 0.357646 | 0.319239    |        |    |       |   |
| 5    | ENSG00000 | MC3R      | 0.617391 | 0.145894  | 0.363285 | 0.291787    |        |    |       |   |
| 6    | ENSG00000 | CENPQ     | 0.617172 | 0.147475  | 0.36431  | 0.30303     |        |    |       |   |
| 7    | ENSG00000 | HKR1      | 0.606765 | 0.157505  | 0.36487  | 0.308668    |        |    |       |   |
| 8    | ENSG00000 | LYG2      | 0.573737 | 0.164646  | 0.355387 | 0.337374    |        |    |       |   |
| 9    | ENSG00000 | ORC6      | 0.616279 | 0.153277  | 0.367865 | 0.288584    |        |    |       |   |
| 10   | ENSG00000 | FOXN3     | 0.605051 | 0.154545  | 0.362626 | 0.333333    |        |    |       |   |
| 11   | ENSG00000 | NUDT13    | 0.585859 | 0.169697  | 0.361953 | 0.327273    |        |    |       |   |
| 12   | ENSG00000 | HYPK      | 0.563636 | 0.168687  | 0.352357 | 0.345455    |        |    |       |   |
| 13   | ENSG00000 | DENND4A   | 0.566667 | 0.183838  | 0.360943 | 0.308081    |        |    |       |   |
| 14   | ENSG00000 | MUS81     | 0.609091 | 0.162626  | 0.367508 | 0.323232    |        |    |       |   |
| 15   | ENSG00000 | LYPD6B    | 0.610101 | 0.151515  | 0.362795 | 0.340404    |        |    |       |   |
| 16   | ENSG00000 | TK1       | 0.594949 | 0.175758  | 0.37138  | 0.313131    |        |    |       |   |
| 17   | ENSG00000 | ZNF155    | 0.60101  | 0.166667  | 0.368687 | 0.331313    |        |    |       |   |
| 18   | ENSG00000 | LIX1      | 0.623232 | 0.155556  | 0.372391 | 0.306061    |        |    |       |   |
| 19   | ENSG00000 | FLG2      | 0.607071 | 0.172727  | 0.372727 | 0.313131    |        |    |       |   |
| 20   | ENSG00000 | CMSS1     | 0.621212 | 0.156566  | 0.372391 | 0.317172    |        |    |       |   |
| 21   | ENSG00000 | VWA3B     | 0.608081 | 0.171717  | 0.373064 | 0.318182    | 0.2848 |    |       |   |
| 22   | ENSG00000 | ZNF177    | 0.619192 | 0.164646  | 0.374916 | 0.271717    |        |    |       |   |
| 23   | ENSG00000 | ZNF559-ZN | 0.619192 | 0.164646  | 0.374916 | 0.271717    |        |    |       |   |
| 24   | ENSG00000 | CASZ1     | 0.610101 | 0.164646  | 0.370539 | 0.334343    |        |    |       |   |
| 25   | ENSG00000 | LRRC49    | 0.627907 | 0.151163  | 0.371564 | 0.32241     |        |    |       |   |
| 26   | ENSG00000 | GRHL2     | 0.605708 | 0.155391  | 0.364341 | 0.35518     |        |    |       |   |
| 27   | ENSG00000 | CHCHD4    | 0.619192 | 0.166667  | 0.369192 | 0.323232    |        |    |       |   |
| 28   | ENSG00000 | TOGARAM1  | 0.596899 | 0.182724  | 0.375784 | 0.310078    |        |    |       |   |
| 29   | ENSG00000 | XKR9      | 0.627907 | 0.157505  | 0.374912 | 0.315011    |        |    |       |   |
| 30   | ENSG00000 | POLE3     | 0.626263 | 0.157576  | 0.373906 | 0.324242    |        |    |       |   |
| 31   | ENSG00000 | ADRA1D    | 0.587879 | 0.187879  | 0.375084 | 0.289899    |        |    |       |   |
| 32   | ENSG00000 | SYT8      | 0.600423 | 0.173362  | 0.372093 | 0.342495    |        |    |       |   |
| 33   | ENSG00000 | HAS1      | 0.557576 | 0.188889  | 0.359259 | 0.343434    |        |    |       |   |
| 34   | ENSG00000 | ZNF205    | 0.523232 | 0.194949  | 0.349327 | 0.337374    |        |    |       |   |
| 35   | ENSG00000 | TP53INP1  | 0.618182 | 0.173737  | 0.380471 | 0.309091    |        |    |       |   |
| 36   | ENSG00000 | ERICH1    | 0.589852 | 0.186047  | 0.373855 | 0.327696    |        |    |       |   |
| 37   | ENSG00000 | ZBTB49    | 0.494715 | 0.205074  | 0.340733 | 0.307611    |        |    |       |   |
| 38   | ENSG00000 | POMZP3    | 0.606061 | 0.186869  | 0.379461 | 0.273737    |        |    |       |   |
| 39   | ENSG00000 | DAGLA     | 0.636364 | 0.156566  | 0.377946 | 0.317172    |        |    |       |   |
| 40   | ENSG00000 | ZNF576    | 0.619192 | 0.170707  | 0.380808 | 0.327273    |        |    |       |   |
| 41   | ENSG00000 | FAM84A    | 0.625793 | 0.160677  | 0.375793 | 0.337209    |        |    |       |   |
| 42   | ENSG00000 | ZKSCAN2   | 0.618182 | 0.177778  | 0.380808 | 0.315152    |        |    |       |   |
| 43   | ENSG00000 | TBC1D2    | 0.638384 | 0.145455  | 0.373232 | 0.334343    |        |    |       |   |
| 44   | ENSG00000 | RBPM5     | 0.581818 | 0.186869  | 0.370034 | 0.346465    |        |    |       |   |
| 45   | ENSG00000 | MYBPC2    | 0.569697 | 0.19596   | 0.369529 | 0.334343    |        |    |       |   |
| 46   | ENSG00000 | BMS1      | 0.622222 | 0.169697  | 0.37963  | 0.332323    |        |    |       |   |
| 47   | ENSG00000 | TMEM260   | 0.626263 | 0.172727  | 0.382997 | 0.317172    |        |    |       |   |
| 48   | ENSG00000 | ELL       | 0.632323 | 0.165657  | 0.383502 | 0.314141    |        |    |       |   |
| 49   | ENSG00000 | PLCB4     | 0.596135 | 0.184541  | 0.37649  | 0.343961    |        |    |       |   |
| 50   | ENSG00000 | RBM15B    | 0.609091 | 0.181818  | 0.381145 | 0.332323    |        |    |       |   |
| 51   | ENSG00000 | CLCN5     | 0.605708 | 0.173362  | 0.373326 | 0.358351    |        |    |       |   |
| 52   | ENSG00000 | E2F8      | 0.60202  | 0.186869  | 0.377441 | 0.333333    |        |    |       |   |
| 53   | ENSG00000 | TMEFF1    | 0.533333 | 0.20101   | 0.357239 | 0.342424    |        |    |       |   |



|     |                   |          |          |          |          |
|-----|-------------------|----------|----------|----------|----------|
| 54  | ENSG00000STPG4    | 0.600465 | 0.184669 | 0.377274 | 0.343786 |
| 55  | ENSG00000GMNC     | 0.633444 | 0.158361 | 0.376154 | 0.344408 |
| 56  | ENSG00000L3MBTL3  | 0.652525 | 0.147475 | 0.379798 | 0.281818 |
| 57  | ENSG00000ZBTB25   | 0.60404  | 0.192929 | 0.381987 | 0.325253 |
| 58  | ENSG00000DUSP19   | 0.623232 | 0.165657 | 0.376094 | 0.354545 |
| 59  | ENSG00000ESYT3    | 0.640404 | 0.164646 | 0.383165 | 0.321212 |
| 60  | ENSG00000BIRC3    | 0.576768 | 0.2      | 0.376094 | 0.337374 |
| 61  | ENSG00000SPRYD4   | 0.581818 | 0.19596  | 0.378451 | 0.342424 |
| 62  | ENSG00000PRMT9    | 0.608879 | 0.183932 | 0.380021 | 0.352008 |
| 63  | ENSG00000KCNJ1    | 0.563636 | 0.20303  | 0.369529 | 0.347475 |
| 64  | ENSG00000BCL3     | 0.581395 | 0.197121 | 0.372647 | 0.352159 |
| 65  | ENSG00000TRES2    | 0.629293 | 0.144444 | 0.367172 | 0.374747 |
| 66  | ENSG00000PITHD1   | 0.623477 | 0.179402 | 0.383536 | 0.342193 |
| 67  | ENSG00000SP9      | 0.518182 | 0.20404  | 0.354209 | 0.357576 |
| 68  | ENSG00000RAB43    | 0.653535 | 0.148485 | 0.381145 | 0.324242 |
| 69  | ENSG00000MEN1     | 0.623232 | 0.182828 | 0.385522 | 0.334343 |
| 70  | ENSG00000RNF8     | 0.608879 | 0.196617 | 0.386011 | 0.328753 |
| 71  | ENSG00000CXorf65  | 0.585859 | 0.20404  | 0.385859 | 0.326263 |
| 72  | ENSG00000IL24     | 0.624242 | 0.179798 | 0.385185 | 0.350505 |
| 73  | ENSG00000DOCK11   | 0.631229 | 0.172757 | 0.386489 | 0.351052 |
| 74  | ENSG00000RRP9     | 0.618182 | 0.169697 | 0.379798 | 0.376768 |
| 75  | ENSG00000SDAD1    | 0.616162 | 0.190909 | 0.387205 | 0.342424 |
| 76  | ENSG00000PTGER3   | 0.637374 | 0.184848 | 0.389226 | 0.311111 |
| 77  | ENSG00000CENPT    | 0.657576 | 0.150505 | 0.385859 | 0.326263 |
| 78  | ENSG00000PBDC1    | 0.628283 | 0.177778 | 0.389226 | 0.357576 |
| 79  | ENSG00000FAM9A    | 0.649495 | 0.172727 | 0.394276 | 0.308081 |
| 80  | ENSG00000CNEP1R1  | 0.653535 | 0.162626 | 0.387037 | 0.332323 |
| 81  | ENSG00000ZNF688   | 0.660606 | 0.149495 | 0.385522 | 0.321212 |
| 82  | ENSG00000C16orf87 | 0.640404 | 0.179798 | 0.390572 | 0.339394 |
| 83  | ENSG00000CT62     | 0.619192 | 0.181818 | 0.384512 | 0.369697 |
| 84  | ENSG00000TOX3     | 0.619192 | 0.2      | 0.387542 | 0.334343 |
| 85  | ENSG00000RUNX1    | 0.652525 | 0.165657 | 0.391246 | 0.341414 |
| 86  | ENSG00000MRPL34   | 0.638384 | 0.174747 | 0.391582 | 0.357576 |
| 87  | ENSG00000CCND2    | 0.621212 | 0.19899  | 0.395118 | 0.334343 |
| 88  | ENSG00000ZNF652   | 0.593939 | 0.19899  | 0.386027 | 0.366667 |
| 89  | ENSG00000GINS3    | 0.650055 | 0.177187 | 0.396825 | 0.326689 |
| 90  | ENSG00000FAM151A  | 0.59697  | 0.206061 | 0.387205 | 0.353535 |
| 91  | ENSG00000HES5     | 0.554968 | 0.208245 | 0.371036 | 0.374207 |
| 92  | ENSG00000AURKB    | 0.537374 | 0.222222 | 0.371717 | 0.350505 |
| 93  | ENSG00000HERC6    | 0.566667 | 0.208081 | 0.376094 | 0.371717 |
| 94  | ENSG00000GXYLT2   | 0.576768 | 0.217172 | 0.380471 | 0.348485 |
| 95  | ENSG00000GATA3    | 0.533333 | 0.220202 | 0.367172 | 0.360606 |
| 96  | ENSG00000CASC10   | 0.662626 | 0.156566 | 0.388721 | 0.329293 |
| 97  | ENSG00000RFTN1    | 0.619192 | 0.194949 | 0.390236 | 0.358586 |
| 98  | ENSG00000CCND1    | 0.512121 | 0.219192 | 0.35303  | 0.368687 |
| 99  | ENSG00000COL28A1  | 0.655556 | 0.152525 | 0.384848 | 0.362626 |
| 100 | ENSG00000CENPH    | 0.639954 | 0.184669 | 0.397987 | 0.343786 |
| 101 | ENSG00000RUNX1T1  | 0.650505 | 0.171717 | 0.396128 | 0.349495 |
| 102 | ENSG00000ZBTB6    | 0.672727 | 0.136364 | 0.383838 | 0.321212 |
| 103 | ENSG00000FRAT2    | 0.649495 | 0.164646 | 0.387037 | 0.365657 |
| 104 | ENSG00000C1orf210 | 0.636766 | 0.188261 | 0.394611 | 0.351052 |
| 105 | ENSG00000CDK2     | 0.59899  | 0.213131 | 0.392088 | 0.349495 |
| 106 | ENSG00000ICA1     | 0.642424 | 0.187879 | 0.39899  | 0.339394 |
| 107 | ENSG00000ACOT4    | 0.579798 | 0.189899 | 0.374579 | 0.40202  |
| 108 | ENSG00000PAPSS1   | 0.640592 | 0.163848 | 0.384778 | 0.384778 |

|     |                    |          |          |          |          |
|-----|--------------------|----------|----------|----------|----------|
| 109 | ENSG00000RTL5      | 0.630021 | 0.192389 | 0.394292 | 0.358351 |
| 110 | ENSG00000PPDPFL    | 0.616162 | 0.19697  | 0.393098 | 0.367677 |
| 111 | ENSG00000WSB1      | 0.566667 | 0.221212 | 0.383838 | 0.355556 |
| 112 | ENSG00000PQLC1     | 0.653535 | 0.160606 | 0.388889 | 0.369697 |
| 113 | ENSG00000EAF2      | 0.583838 | 0.207071 | 0.381818 | 0.378788 |
| 114 | ENSG00000TRIM13    | 0.534884 | 0.221987 | 0.373855 | 0.368922 |
| 115 | ENSG00000SLC5A10   | 0.657505 | 0.180761 | 0.400282 | 0.326638 |
| 116 | ENSG00000PPM1D     | 0.659619 | 0.17759  | 0.397111 | 0.328753 |
| 117 | ENSG00000DSCAML1   | 0.649495 | 0.184848 | 0.400337 | 0.340404 |
| 118 | ENSG00000ZNF746    | 0.520202 | 0.218182 | 0.363636 | 0.381818 |
| 119 | ENSG00000ZNF574    | 0.668882 | 0.146179 | 0.387966 | 0.355482 |
| 120 | ENSG00000METTL11B  | 0.6      | 0.209091 | 0.38468  | 0.377778 |
| 121 | ENSG00000RNF112    | 0.661616 | 0.170707 | 0.400842 | 0.342424 |
| 122 | ENSG00000SAPCD2    | 0.630303 | 0.189899 | 0.396465 | 0.376768 |
| 123 | ENSG00000C5orf60   | 0.647475 | 0.184848 | 0.40202  | 0.353535 |
| 124 | ENSG00000ICE1      | 0.678647 | 0.147992 | 0.394996 | 0.305497 |
| 125 | ENSG00000IRF9      | 0.641414 | 0.191919 | 0.400673 | 0.353535 |
| 126 | ENSG00000OASL      | 0.530778 | 0.236934 | 0.3765   | 0.347271 |
| 127 | ENSG00000IFFO1     | 0.632323 | 0.187879 | 0.395623 | 0.384848 |
| 128 | ENSG00000C2orf70   | 0.630021 | 0.214588 | 0.40222  | 0.325581 |
| 129 | ENSG00000GIN1      | 0.665657 | 0.169697 | 0.398316 | 0.351515 |
| 130 | ENSG00000MROH8     | 0.60202  | 0.221212 | 0.39899  | 0.350505 |
| 131 | ENSG00000OSGEP     | 0.676533 | 0.149049 | 0.390768 | 0.343552 |
| 132 | ENSG00000FANCD2    | 0.59697  | 0.214141 | 0.393266 | 0.374747 |
| 133 | ENSG00000KCNT2     | 0.675476 | 0.158562 | 0.399225 | 0.323467 |
| 134 | ENSG00000TXNRD3    | 0.680808 | 0.155556 | 0.397306 | 0.288889 |
| 135 | ENSG00000PWWP2B    | 0.642424 | 0.186869 | 0.399832 | 0.371717 |
| 136 | ENSG00000PFKFB4    | 0.646934 | 0.198732 | 0.405567 | 0.335095 |
| 137 | ENSG00000JAKMIP1   | 0.591919 | 0.219192 | 0.393266 | 0.369697 |
| 138 | ENSG00000 3/3/2019 | 0.620202 | 0.19899  | 0.390572 | 0.388889 |
| 139 | ENSG00000DEFB107A  | 0.584848 | 0.213131 | 0.385185 | 0.390909 |
| 140 | ENSG00000SMARCAL1  | 0.684848 | 0.138384 | 0.391919 | 0.30101  |
| 141 | ENSG00000DEFB107B  | 0.584848 | 0.213131 | 0.385185 | 0.390909 |
| 142 | ENSG00000B4GALT4   | 0.609091 | 0.207071 | 0.392929 | 0.386869 |
| 143 | ENSG00000NDE1      | 0.587879 | 0.230303 | 0.39596  | 0.351515 |
| 144 | ENSG00000TMEM37    | 0.614141 | 0.208081 | 0.398653 | 0.377778 |
| 145 | ENSG00000PCP4L1    | 0.67759  | 0.161734 | 0.401691 | 0.318182 |
| 146 | ENSG00000NGDN      | 0.677778 | 0.158586 | 0.399663 | 0.328283 |
| 147 | ENSG00000FAM120C   | 0.683838 | 0.148485 | 0.39697  | 0.306061 |
| 148 | ENSG00000CEBPA     | 0.656448 | 0.190275 | 0.40592  | 0.34778  |
| 149 | ENSG00000GRWD1     | 0.679798 | 0.154545 | 0.398316 | 0.334343 |
| 150 | ENSG00000PHTF2     | 0.681818 | 0.143763 | 0.392354 | 0.348837 |
| 151 | ENSG00000ARNTL2    | 0.661616 | 0.187879 | 0.405387 | 0.333333 |
| 152 | ENSG00000CCR2      | 0.581395 | 0.229387 | 0.39852  | 0.358351 |
| 153 | ENSG00000ASCL4     | 0.680808 | 0.156566 | 0.398822 | 0.329293 |
| 154 | ENSG00000RPP38     | 0.650106 | 0.196617 | 0.402925 | 0.357294 |
| 155 | ENSG00000BANK1     | 0.660606 | 0.188889 | 0.407239 | 0.336364 |
| 156 | ENSG00000MAFF      | 0.65222  | 0.19556  | 0.404158 | 0.353066 |
| 157 | ENSG00000KLK12     | 0.565657 | 0.224242 | 0.381481 | 0.389899 |
| 158 | ENSG00000BCL11A    | 0.590909 | 0.226263 | 0.40202  | 0.363636 |
| 159 | ENSG00000CDC14B    | 0.669697 | 0.169697 | 0.403704 | 0.355556 |
| 160 | ENSG00000LCA5L     | 0.597252 | 0.226216 | 0.404863 | 0.358351 |
| 161 | ENSG00000NOC2L     | 0.671717 | 0.145455 | 0.386869 | 0.384848 |
| 162 | ENSG00000MUCL1     | 0.652525 | 0.207071 | 0.412963 | 0.284848 |
| 163 | ENSG00000ARHGEF10  | 0.653535 | 0.174747 | 0.395623 | 0.393939 |

|     |                    |          |          |          |          |        |
|-----|--------------------|----------|----------|----------|----------|--------|
| 164 | ENSG00000ZNF485    | 0.656566 | 0.162626 | 0.392424 | 0.39798  |        |
| 165 | ENSG00000STX5      | 0.537099 | 0.239203 | 0.375415 | 0.370986 |        |
| 166 | ENSG00000HCN3      | 0.617172 | 0.219192 | 0.403872 | 0.362626 |        |
| 167 | ENSG00000SHCBP1    | 0.684848 | 0.157576 | 0.399327 | 0.30303  |        |
| 168 | ENSG00000TEAD4     | 0.565657 | 0.230303 | 0.387542 | 0.379798 |        |
| 169 | ENSG00000YBX3      | 0.679798 | 0.146465 | 0.393603 | 0.362626 |        |
| 170 | ENSG00000ELK3      | 0.652525 | 0.185859 | 0.400337 | 0.382828 |        |
| 171 | ENSG00000KNSTRN    | 0.585859 | 0.233333 | 0.402189 | 0.356566 |        |
| 172 | ENSG00000MFS2B     | 0.624242 | 0.208081 | 0.403535 | 0.377778 |        |
| 173 | ENSG00000ZNF628    | 0.520202 | 0.237374 | 0.373569 | 0.380808 |        |
| 174 | ENSG00000ZMIZ1     | 0.569697 | 0.226263 | 0.38771  | 0.392929 |        |
| 175 | ENSG00000TEX33     | 0.533827 | 0.250529 | 0.384073 | 0.331924 |        |
| 176 | ENSG00000KCNC3     | 0.680808 | 0.149495 | 0.394613 | 0.363636 |        |
| 177 | ENSG00000KNOP1     | 0.662626 | 0.180808 | 0.402357 | 0.370707 |        |
| 178 | ENSG00000PNP       | 0.623232 | 0.215152 | 0.399663 | 0.373737 |        |
| 179 | ENSG00000DLX6      | 0.658586 | 0.193939 | 0.408249 | 0.354545 |        |
| 180 | ENSG00000NRXN3     | 0.682875 | 0.145877 | 0.395701 | 0.35518  |        |
| 181 | ENSG00000TGM3      | 0.637374 | 0.210101 | 0.407407 | 0.365657 |        |
| 182 | ENSG00000SYT11     | 0.609091 | 0.211111 | 0.394276 | 0.40101  |        |
| 183 | ENSG00000RNF2      | 0.680808 | 0.155556 | 0.399158 | 0.359596 |        |
| 184 | ENSG00000PRDM4     | 0.675758 | 0.177778 | 0.411111 | 0.335354 |        |
| 185 | ENSG00000DDX43     | 0.591919 | 0.226263 | 0.398822 | 0.385859 |        |
| 186 | ENSG00000PPARG     | 0.662626 | 0.169697 | 0.390067 | 0.39798  |        |
| 187 | ENSG00000SPINK13   | 0.641649 | 0.200846 | 0.404158 | 0.381607 |        |
| 188 | ENSG00000TSTD1     | 0.684848 | 0.159596 | 0.404209 | 0.327273 |        |
| 189 | ENSG00000RASGEF1B  | 0.662626 | 0.19697  | 0.413973 | 0.336364 |        |
| 190 | ENSG00000TFAP2B    | 0.519192 | 0.249495 | 0.381313 | 0.358586 |        |
| 191 | ENSG00000PRR23B    | 0.553535 | 0.249495 | 0.388721 | 0.348485 |        |
| 192 | ENSG00000CCDC89    | 0.585825 | 0.220377 | 0.391473 | 0.403101 | 0.3322 |
| 193 | ENSG00000PTDSS1    | 0.60404  | 0.228283 | 0.406229 | 0.371717 |        |
| 194 | ENSG00000SIDT2     | 0.634249 | 0.207188 | 0.407505 | 0.382664 |        |
| 195 | ENSG00000PRR23A    | 0.553535 | 0.249495 | 0.388721 | 0.348485 |        |
| 196 | ENSG00000ANO9      | 0.656566 | 0.208081 | 0.41835  | 0.325253 |        |
| 197 | ENSG00000BCL9L     | 0.650505 | 0.186869 | 0.405892 | 0.391919 |        |
| 198 | ENSG00000PRR23C    | 0.553535 | 0.249495 | 0.388721 | 0.348485 |        |
| 199 | ENSG00000FAM199X   | 0.668687 | 0.182828 | 0.403367 | 0.370707 |        |
| 200 | ENSG00000AMIG02    | 0.634249 | 0.221987 | 0.418252 | 0.350951 |        |
| 201 | ENSG00000C16orf46  | 0.584848 | 0.228283 | 0.397643 | 0.392929 |        |
| 202 | ENSG00000FOXJ1     | 0.565891 | 0.250277 | 0.399225 | 0.33887  |        |
| 203 | ENSG00000GPT2      | 0.645455 | 0.207071 | 0.412458 | 0.367677 |        |
| 204 | ENSG00000DLX4      | 0.666667 | 0.182828 | 0.404545 | 0.379798 |        |
| 205 | ENSG00000USP36     | 0.553535 | 0.238384 | 0.379798 | 0.39697  |        |
| 206 | ENSG00000LHX9      | 0.592929 | 0.238384 | 0.407071 | 0.362626 |        |
| 207 | ENSG00000UPB1      | 0.567677 | 0.242424 | 0.395791 | 0.374747 |        |
| 208 | ENSG00000DNAH6     | 0.631313 | 0.212121 | 0.411785 | 0.385859 |        |
| 209 | ENSG00000PDILT     | 0.638384 | 0.190909 | 0.397475 | 0.418182 |        |
| 210 | ENSG00000NUFIP1    | 0.655556 | 0.207071 | 0.415993 | 0.361616 |        |
| 211 | ENSG00000IFI44     | 0.688889 | 0.164646 | 0.408249 | 0.338384 |        |
| 212 | ENSG00000HCN1      | 0.6      | 0.228283 | 0.403704 | 0.392929 |        |
| 213 | ENSG00000DAOA      | 0.674747 | 0.169697 | 0.405051 | 0.380808 |        |
| 214 | ENSG00000GOLGA6L1  | 0.682875 | 0.183932 | 0.410853 | 0.328753 |        |
| 215 | ENSG00000GOLGA6L6  | 0.682875 | 0.183932 | 0.410853 | 0.328753 |        |
| 216 | ENSG00000GOLGA6L22 | 0.682875 | 0.183932 | 0.410853 | 0.328753 |        |
| 217 | ENSG00000FAM50B    | 0.686869 | 0.171717 | 0.411111 | 0.339394 |        |
| 218 | ENSG00000KRR1      | 0.688889 | 0.176768 | 0.414815 | 0.312121 |        |

|     |                   |          |          |          |          |
|-----|-------------------|----------|----------|----------|----------|
| 219 | ENSG00000RBM24    | 0.578788 | 0.241414 | 0.40202  | 0.380808 |
| 220 | ENSG00000SLC38A9  | 0.660022 | 0.215947 | 0.42045  | 0.330011 |
| 221 | ENSG00000IL31     | 0.642424 | 0.209091 | 0.409596 | 0.391919 |
| 222 | ENSG00000ATP5F1C  | 0.636364 | 0.226263 | 0.419865 | 0.360606 |
| 223 | ENSG00000ZNF396   | 0.674747 | 0.184848 | 0.413636 | 0.364646 |
| 224 | ENSG00000TRIM24   | 0.657505 | 0.17759  | 0.397992 | 0.419662 |
| 225 | ENSG00000RYBP     | 0.618393 | 0.229387 | 0.41191  | 0.378436 |
| 226 | ENSG00000LY6G5C   | 0.646465 | 0.214141 | 0.416162 | 0.371717 |
| 227 | ENSG00000ZNF764   | 0.645455 | 0.218182 | 0.418519 | 0.365657 |
| 228 | ENSG00000ZNF747   | 0.645455 | 0.218182 | 0.418519 | 0.365657 |
| 229 | ENSG00000CXCL8    | 0.567677 | 0.248485 | 0.39798  | 0.372727 |
| 230 | ENSG00000HYAL3    | 0.693446 | 0.168076 | 0.412086 | 0.303383 |
| 231 | ENSG00000CPSF4    | 0.69338  | 0.157956 | 0.401665 | 0.350755 |
| 232 | ENSG00000CLIC3    | 0.656566 | 0.20101  | 0.411279 | 0.385859 |
| 233 | ENSG00000CSN2     | 0.67343  | 0.203865 | 0.420773 | 0.333333 |
| 234 | ENSG00000ABCC12   | 0.681818 | 0.194949 | 0.420202 | 0.321212 |
| 235 | ENSG00000UVRAG    | 0.573737 | 0.245455 | 0.392929 | 0.389899 |
| 236 | ENSG00000TRPS1    | 0.578224 | 0.245243 | 0.402925 | 0.382664 |
| 237 | ENSG00000GNRH1    | 0.702415 | 0.155556 | 0.404509 | 0.280193 |
| 238 | ENSG00000SETD1B   | 0.660606 | 0.20303  | 0.414983 | 0.380808 |
| 239 | ENSG00000SOX15    | 0.660606 | 0.213131 | 0.422896 | 0.359596 |
| 240 | ENSG00000SYNE3    | 0.565657 | 0.220202 | 0.374074 | 0.440404 |
| 241 | ENSG00000MRT04    | 0.679798 | 0.19697  | 0.420707 | 0.345455 |
| 242 | ENSG00000UBE2Q1   | 0.541231 | 0.263647 | 0.395277 | 0.360046 |
| 243 | ENSG00000SLURP1   | 0.649495 | 0.213131 | 0.415993 | 0.390909 |
| 244 | ENSG00000MYO16    | 0.560606 | 0.258586 | 0.408081 | 0.359596 |
| 245 | ENSG00000C19orf25 | 0.649049 | 0.200846 | 0.407329 | 0.414376 |
| 246 | ENSG00000PRR22    | 0.636364 | 0.230444 | 0.421247 | 0.369979 |
| 247 | ENSG00000RBM43    | 0.676768 | 0.193939 | 0.418182 | 0.363636 |
| 248 | ENSG00000CERS6    | 0.608081 | 0.242424 | 0.412795 | 0.377778 |
| 249 | ENSG00000ACTL6B   | 0.694949 | 0.170707 | 0.413468 | 0.343434 |
| 250 | ENSG00000PSG8     | 0.618182 | 0.231313 | 0.410269 | 0.40101  |
| 251 | ENSG00000BRD2     | 0.585859 | 0.241414 | 0.388215 | 0.409091 |
| 252 | ENSG00000DCK      | 0.660606 | 0.223232 | 0.427778 | 0.337374 |
| 253 | ENSG00000ZFPM1    | 0.69596  | 0.176768 | 0.418013 | 0.320202 |
| 254 | ENSG00000PSG6     | 0.618182 | 0.231313 | 0.410269 | 0.40101  |
| 255 | ENSG00000PSG9     | 0.618182 | 0.231313 | 0.410269 | 0.40101  |
| 256 | ENSG00000TRIM37   | 0.658562 | 0.191332 | 0.4105   | 0.415433 |
| 257 | ENSG00000PSG5     | 0.618182 | 0.231313 | 0.410269 | 0.40101  |
| 258 | ENSG00000MSX2     | 0.678848 | 0.190476 | 0.417866 | 0.372093 |
| 259 | ENSG00000RIPPLY1  | 0.669697 | 0.19899  | 0.413468 | 0.387879 |
| 260 | ENSG00000BACH1    | 0.612051 | 0.22093  | 0.402748 | 0.426004 |
| 261 | ENSG00000PSG3     | 0.618182 | 0.231313 | 0.410269 | 0.40101  |
| 262 | ENSG00000RPP25L   | 0.636364 | 0.227273 | 0.41835  | 0.389899 |
| 263 | ENSG00000PSG7     | 0.618182 | 0.231313 | 0.410269 | 0.40101  |
| 264 | ENSG00000NIT2     | 0.684848 | 0.189899 | 0.420034 | 0.354545 |
| 265 | ENSG00000PSG1     | 0.618182 | 0.231313 | 0.410269 | 0.40101  |
| 266 | ENSG00000PSG4     | 0.618182 | 0.231313 | 0.410269 | 0.40101  |
| 267 | ENSG00000NOP16    | 0.668687 | 0.209091 | 0.428451 | 0.361616 |
| 268 | ENSG00000DMTN     | 0.687879 | 0.167677 | 0.408081 | 0.387879 |
| 269 | ENSG00000FSCB     | 0.658915 | 0.217054 | 0.426357 | 0.368771 |
| 270 | ENSG00000EFR3B    | 0.593939 | 0.234343 | 0.410101 | 0.413131 |
| 271 | ENSG00000STK25    | 0.612121 | 0.246465 | 0.414141 | 0.375758 |
| 272 | ENSG00000JAML     | 0.675758 | 0.160606 | 0.398316 | 0.425253 |
| 273 | ENSG00000TMEM86A  | 0.621564 | 0.232558 | 0.417371 | 0.395349 |

|     |                   |          |          |          |          |
|-----|-------------------|----------|----------|----------|----------|
| 274 | ENSG00000FOXN4    | 0.579798 | 0.250505 | 0.399158 | 0.39596  |
| 275 | ENSG00000TFCP2L1  | 0.588795 | 0.250529 | 0.413319 | 0.379493 |
| 276 | ENSG00000DUSP7    | 0.62685  | 0.244186 | 0.427414 | 0.361522 |
| 277 | ENSG00000DRGX     | 0.618393 | 0.214588 | 0.396758 | 0.436575 |
| 278 | ENSG00000SIN3B    | 0.660606 | 0.219192 | 0.428114 | 0.366667 |
| 279 | ENSG00000UBE2E1   | 0.697674 | 0.169133 | 0.409443 | 0.358351 |
| 280 | ENSG00000CCDC137  | 0.647475 | 0.214141 | 0.415825 | 0.409091 |
| 281 | ENSG00000B4GALNT1 | 0.50303  | 0.280808 | 0.387205 | 0.342424 |
| 282 | ENSG00000ADAMTS19 | 0.638384 | 0.241414 | 0.431313 | 0.357576 |
| 283 | ENSG00000FBX042   | 0.711111 | 0.154545 | 0.411953 | 0.318182 |
| 284 | ENSG00000MCM10    | 0.669697 | 0.183838 | 0.405051 | 0.424242 |
| 285 | ENSG00000DENND4B  | 0.651163 | 0.232558 | 0.423714 | 0.367865 |
| 286 | ENSG00000DPF1     | 0.55814  | 0.262458 | 0.397564 | 0.389812 |
| 287 | ENSG00000LICAM    | 0.70101  | 0.170707 | 0.417677 | 0.339394 |
| 288 | ENSG00000GDF2     | 0.653277 | 0.205074 | 0.418605 | 0.41649  |
| 289 | ENSG00000RNGTT    | 0.707071 | 0.170707 | 0.41532  | 0.329293 |
| 290 | ENSG00000TMEM135  | 0.69596  | 0.178788 | 0.415825 | 0.361616 |
| 291 | ENSG00000KIF18B   | 0.608879 | 0.241015 | 0.41561  | 0.40592  |
| 292 | ENSG00000MFS05    | 0.660677 | 0.194503 | 0.412438 | 0.422833 |
| 293 | ENSG00000ECD      | 0.653891 | 0.228804 | 0.426055 | 0.380952 |
| 294 | ENSG00000FBX027   | 0.708749 | 0.152824 | 0.407715 | 0.361019 |
| 295 | ENSG00000DSE      | 0.692929 | 0.168687 | 0.414983 | 0.385859 |
| 296 | ENSG00000BSN      | 0.630303 | 0.225253 | 0.417677 | 0.419192 |
| 297 | ENSG00000RASAL3   | 0.593939 | 0.262626 | 0.418519 | 0.365657 |
| 298 | ENSG00000MRFAP1   | 0.585859 | 0.257576 | 0.418687 | 0.379798 |
| 299 | ENSG00000MY07B    | 0.670707 | 0.210101 | 0.423569 | 0.387879 |
| 300 | ENSG00000MAFB     | 0.680761 | 0.178647 | 0.413848 | 0.413319 |
| 301 | ENSG00000TIGD4    | 0.699789 | 0.162791 | 0.4142   | 0.371036 |
| 302 | ENSG00000PLEKHF1  | 0.571717 | 0.261616 | 0.403872 | 0.390909 |
| 303 | ENSG00000SMAD1    | 0.674747 | 0.20202  | 0.423232 | 0.390909 |
| 304 | ENSG00000ITGA7    | 0.683838 | 0.191919 | 0.421549 | 0.387879 |
| 305 | ENSG00000MGEA5    | 0.70303  | 0.155556 | 0.412458 | 0.375758 |
| 306 | ENSG00000ODF1     | 0.580808 | 0.260606 | 0.415488 | 0.387879 |
| 307 | ENSG00000HINFP    | 0.623232 | 0.235354 | 0.417172 | 0.415152 |
| 308 | ENSG00000NUP133   | 0.712121 | 0.161616 | 0.415152 | 0.332323 |
| 309 | ENSG00000RFWD3    | 0.646934 | 0.231501 | 0.428295 | 0.393235 |
| 310 | ENSG00000PAAF1    | 0.699789 | 0.174419 | 0.420366 | 0.366808 |
| 311 | ENSG00000RBM47    | 0.717172 | 0.149495 | 0.412795 | 0.327273 |
| 312 | ENSG00000VN1R2    | 0.635354 | 0.238384 | 0.421886 | 0.40101  |
| 313 | ENSG00000PRDM6    | 0.60202  | 0.246465 | 0.408923 | 0.419192 |
| 314 | ENSG00000DDX39A   | 0.677778 | 0.216162 | 0.43064  | 0.367677 |
| 315 | ENSG00000ZIC1     | 0.655391 | 0.199789 | 0.409091 | 0.438689 |
| 316 | ENSG00000C10orf55 | 0.644444 | 0.242424 | 0.43064  | 0.377778 |
| 317 | ENSG00000ZNF774   | 0.673737 | 0.219192 | 0.431313 | 0.372727 |
| 318 | ENSG00000RADIL    | 0.538055 | 0.278013 | 0.40592  | 0.364693 |
| 319 | ENSG00000MLC1     | 0.709091 | 0.163636 | 0.416162 | 0.367677 |
| 320 | ENSG00000FAM111B  | 0.686869 | 0.209091 | 0.428788 | 0.360606 |
| 321 | ENSG00000PABPN1L  | 0.70303  | 0.193939 | 0.427778 | 0.318182 |
| 322 | ENSG00000TSN      | 0.707071 | 0.187879 | 0.423064 | 0.330303 |
| 323 | ENSG00000HMCN1    | 0.668882 | 0.211517 | 0.422665 | 0.408638 |
| 324 | ENSG00000ZNF678   | 0.676768 | 0.210101 | 0.430471 | 0.386869 |
| 325 | ENSG00000HOXA3    | 0.611111 | 0.254545 | 0.426263 | 0.394949 |
| 326 | ENSG00000BROX     | 0.683838 | 0.205051 | 0.434343 | 0.374747 |
| 327 | ENSG00000NOP2     | 0.673362 | 0.226216 | 0.438865 | 0.366808 |
| 328 | ENSG00000FLVCR2   | 0.714141 | 0.164646 | 0.419024 | 0.345455 |

|     |                    |          |          |          |          |
|-----|--------------------|----------|----------|----------|----------|
| 329 | ENSG00000NAAA      | 0.606061 | 0.262626 | 0.430976 | 0.376768 |
| 330 | ENSG00000CARMIL3   | 0.70101  | 0.174747 | 0.42138  | 0.376768 |
| 331 | ENSG00000CC2D2A    | 0.657576 | 0.217172 | 0.424916 | 0.421212 |
| 332 | ENSG00000IFT140    | 0.614141 | 0.265657 | 0.431987 | 0.363636 |
| 333 | ENSG00000SREK1IP1  | 0.665657 | 0.217172 | 0.425758 | 0.411111 |
| 334 | ENSG00000CAND1     | 0.622622 | 0.242072 | 0.427061 | 0.415433 |
| 335 | ENSG00000DTL       | 0.717172 | 0.142424 | 0.409091 | 0.367677 |
| 336 | ENSG00000ITIH6     | 0.640592 | 0.251586 | 0.430761 | 0.376321 |
| 337 | ENSG00000FAM212A   | 0.614141 | 0.264646 | 0.432492 | 0.372727 |
| 338 | ENSG00000PRDM1     | 0.60202  | 0.250505 | 0.420875 | 0.418182 |
| 339 | ENSG00000FGF3      | 0.647475 | 0.229293 | 0.426263 | 0.418182 |
| 340 | ENSG00000LZIC      | 0.659596 | 0.233333 | 0.430303 | 0.392929 |
| 341 | ENSG00000METTL1    | 0.69596  | 0.191919 | 0.427946 | 0.379798 |
| 342 | ENSG00000IFNA6     | 0.517172 | 0.291919 | 0.402694 | 0.352525 |
| 343 | ENSG00000AC012476. | 0.715152 | 0.174747 | 0.429966 | 0.313131 |
| 344 | ENSG00000IFNA8     | 0.517172 | 0.291919 | 0.402694 | 0.352525 |
| 345 | ENSG00000IFNA21    | 0.517172 | 0.291919 | 0.402694 | 0.352525 |
| 346 | ENSG00000NUSAP1    | 0.692929 | 0.19596  | 0.431481 | 0.377778 |
| 347 | ENSG00000EGFL8     | 0.658586 | 0.228283 | 0.428283 | 0.407071 |
| 348 | ENSG00000IFNA5     | 0.517172 | 0.291919 | 0.402694 | 0.352525 |
| 349 | ENSG00000ZNF142    | 0.690909 | 0.178788 | 0.420707 | 0.414141 |
| 350 | ENSG00000TNFAIP2   | 0.625253 | 0.222222 | 0.405387 | 0.448485 |
| 351 | ENSG00000IFNA16    | 0.517172 | 0.291919 | 0.402694 | 0.352525 |
| 352 | ENSG00000IFNA10    | 0.517172 | 0.291919 | 0.402694 | 0.352525 |
| 353 | ENSG00000RNF220    | 0.668076 | 0.231501 | 0.43728  | 0.378436 |
| 354 | ENSG00000CACNB2    | 0.682828 | 0.211111 | 0.430976 | 0.387879 |
| 355 | ENSG00000IFNA2     | 0.517172 | 0.291919 | 0.402694 | 0.352525 |
| 356 | ENSG00000GREM1     | 0.625253 | 0.246465 | 0.429293 | 0.411111 |
| 357 | ENSG00000IFNA1     | 0.517172 | 0.291919 | 0.402694 | 0.352525 |
| 358 | ENSG00000EMG1      | 0.70303  | 0.20101  | 0.434848 | 0.332323 |
| 359 | ENSG00000ZNF784    | 0.69697  | 0.194949 | 0.429461 | 0.371717 |
| 360 | ENSG00000IFNA7     | 0.517172 | 0.291919 | 0.402694 | 0.352525 |
| 361 | ENSG00000PRG4      | 0.672727 | 0.232323 | 0.437374 | 0.373737 |
| 362 | ENSG00000IFNA14    | 0.517172 | 0.291919 | 0.402694 | 0.352525 |
| 363 | ENSG00000IFNA13    | 0.517172 | 0.291919 | 0.402694 | 0.352525 |
| 364 | ENSG00000IFNA17    | 0.517172 | 0.291919 | 0.402694 | 0.352525 |
| 365 | ENSG00000SLC25A33  | 0.70296  | 0.190275 | 0.43129  | 0.364693 |
| 366 | ENSG00000IFNA4     | 0.517172 | 0.291919 | 0.402694 | 0.352525 |
| 367 | ENSG00000NOP14     | 0.689899 | 0.220202 | 0.440404 | 0.339394 |
| 368 | ENSG00000ZNF789    | 0.676768 | 0.222222 | 0.434343 | 0.380808 |
| 369 | ENSG00000ZNF333    | 0.726263 | 0.139394 | 0.411785 | 0.333333 |
| 370 | ENSG00000TMEM92    | 0.551515 | 0.280808 | 0.411448 | 0.383838 |
| 371 | ENSG00000MAGEF1    | 0.709091 | 0.177778 | 0.427609 | 0.367677 |
| 372 | ENSG00000ULBP3     | 0.627907 | 0.260042 | 0.433932 | 0.385835 |
| 373 | ENSG00000HEBP1     | 0.715152 | 0.150505 | 0.41229  | 0.387879 |
| 374 | ENSG00000RCAN2     | 0.648485 | 0.229293 | 0.425926 | 0.429293 |
| 375 | ENSG00000PPP2R5B   | 0.726263 | 0.154545 | 0.417172 | 0.334343 |
| 376 | ENSG00000RGS17     | 0.725253 | 0.162626 | 0.423569 | 0.320202 |
| 377 | ENSG00000FAM217A   | 0.723232 | 0.142424 | 0.413973 | 0.362626 |
| 378 | ENSG00000ZNF773    | 0.698026 | 0.203252 | 0.437669 | 0.357724 |
| 379 | ENSG00000OGFOD3    | 0.718182 | 0.166667 | 0.419697 | 0.362626 |
| 380 | ENSG00000KNL1      | 0.589852 | 0.270613 | 0.427237 | 0.39852  |
| 381 | ENSG00000SNU13     | 0.730303 | 0.147475 | 0.416498 | 0.322222 |
| 382 | ENSG00000PRRX2     | 0.69798  | 0.20101  | 0.43165  | 0.372727 |
| 383 | ENSG00000MICAL3    | 0.661734 | 0.232558 | 0.434109 | 0.40592  |

|     |                   |          |          |          |          |
|-----|-------------------|----------|----------|----------|----------|
| 384 | ENSG00000NR1H2    | 0.622222 | 0.267677 | 0.436195 | 0.381818 |
| 385 | ENSG00000RPF1     | 0.688889 | 0.211111 | 0.436195 | 0.392929 |
| 386 | ENSG00000HTN1     | 0.612121 | 0.255556 | 0.422391 | 0.424242 |
| 387 | ENSG00000POP5     | 0.657505 | 0.214588 | 0.424419 | 0.44186  |
| 388 | ENSG00000RNF44    | 0.709302 | 0.181818 | 0.430233 | 0.375264 |
| 389 | ENSG00000SOX17    | 0.560606 | 0.287879 | 0.420202 | 0.374747 |
| 390 | ENSG00000GSG1L    | 0.669697 | 0.232323 | 0.438721 | 0.39798  |
| 391 | ENSG00000KAT14    | 0.629293 | 0.264646 | 0.435017 | 0.390909 |
| 392 | ENSG00000KBTBD13  | 0.641414 | 0.225253 | 0.420034 | 0.445455 |
| 393 | ENSG00000FAM222A  | 0.716702 | 0.162791 | 0.4216   | 0.385835 |
| 394 | ENSG00000ZBTB48   | 0.721212 | 0.156566 | 0.422896 | 0.367677 |
| 395 | ENSG00000IZUM04   | 0.696864 | 0.207898 | 0.436508 | 0.37863  |
| 396 | ENSG00000LRP8     | 0.577167 | 0.27907  | 0.423009 | 0.392178 |
| 397 | ENSG00000TMEM151B | 0.658586 | 0.231313 | 0.427104 | 0.426263 |
| 398 | ENSG00000MROH6    | 0.640404 | 0.254545 | 0.438215 | 0.39798  |
| 399 | ENSG00000OTX2     | 0.652525 | 0.244444 | 0.437037 | 0.408081 |
| 400 | ENSG00000SH3BP1   | 0.70404  | 0.20202  | 0.4367   | 0.367677 |
| 401 | ENSG00000TUSC1    | 0.719873 | 0.165962 | 0.422481 | 0.374207 |
| 402 | ENSG00000MTBP     | 0.70303  | 0.194949 | 0.432155 | 0.384848 |
| 403 | ENSG00000CAPRIN2  | 0.706131 | 0.189218 | 0.428823 | 0.392178 |
| 404 | ENSG00000TAX1BP1  | 0.670707 | 0.226263 | 0.432997 | 0.420202 |
| 405 | ENSG00000Z83844.3 | 0.70404  | 0.20202  | 0.4367   | 0.367677 |
| 406 | ENSG00000DHX40    | 0.644444 | 0.258586 | 0.441246 | 0.390909 |
| 407 | ENSG00000PRSS22   | 0.541414 | 0.291919 | 0.409259 | 0.385859 |
| 408 | ENSG00000FOXA2    | 0.503171 | 0.295983 | 0.396758 | 0.386892 |
| 409 | ENSG00000SERPINB8 | 0.631229 | 0.253599 | 0.429679 | 0.421927 |
| 410 | ENSG00000COL8A2   | 0.675958 | 0.214866 | 0.428184 | 0.428571 |
| 411 | ENSG00000PAPOLG   | 0.70303  | 0.20303  | 0.435185 | 0.378788 |
| 412 | ENSG00000TLE2     | 0.69596  | 0.213131 | 0.441077 | 0.383838 |
| 413 | ENSG00000DHX33    | 0.716162 | 0.194949 | 0.440236 | 0.345455 |
| 414 | ENSG00000SLC26A1  | 0.714141 | 0.152525 | 0.413636 | 0.415152 |
| 415 | ENSG00000THUMPDI  | 0.669697 | 0.217172 | 0.433333 | 0.435354 |
| 416 | ENSG00000PEAR1    | 0.632135 | 0.256871 | 0.442389 | 0.412262 |
| 417 | ENSG00000GRAPL    | 0.69596  | 0.179798 | 0.421886 | 0.434343 |
| 418 | ENSG00000EHF      | 0.712121 | 0.183838 | 0.43064  | 0.389899 |
| 419 | ENSG00000SAMDI    | 0.654545 | 0.221212 | 0.423401 | 0.451515 |
| 420 | ENSG00000COPS9    | 0.684848 | 0.225253 | 0.441246 | 0.39798  |
| 421 | ENSG00000GPR158   | 0.707071 | 0.213131 | 0.441582 | 0.359596 |
| 422 | ENSG00000KLF12    | 0.650106 | 0.258985 | 0.443975 | 0.394292 |
| 423 | ENSG00000PROCR    | 0.645455 | 0.249495 | 0.432997 | 0.424242 |
| 424 | ENSG00000KIAA0355 | 0.69697  | 0.188889 | 0.426599 | 0.426263 |
| 425 | ENSG00000MCIDAS   | 0.727273 | 0.162626 | 0.427273 | 0.360606 |
| 426 | ENSG00000FBRSL1   | 0.669697 | 0.239394 | 0.442424 | 0.408081 |
| 427 | ENSG00000INCENP   | 0.723232 | 0.170707 | 0.425084 | 0.378788 |
| 428 | ENSG00000STRBP    | 0.638478 | 0.250529 | 0.424419 | 0.432347 |
| 429 | ENSG00000TAX1BP3  | 0.70101  | 0.185859 | 0.427609 | 0.422222 |
| 430 | ENSG00000GPRC5A   | 0.677778 | 0.240404 | 0.448148 | 0.387879 |
| 431 | ENSG00000SCO2     | 0.709091 | 0.189899 | 0.43165  | 0.406061 |
| 432 | ENSG00000CRIP1    | 0.690909 | 0.233333 | 0.44697  | 0.365657 |
| 433 | ENSG00000C9orf64  | 0.696617 | 0.199789 | 0.434813 | 0.419662 |
| 434 | ENSG00000MYO1E    | 0.668687 | 0.239394 | 0.445455 | 0.413131 |
| 435 | ENSG00000SCO2     | 0.709091 | 0.189899 | 0.43165  | 0.406061 |
| 436 | ENSG00000CHST3    | 0.721212 | 0.20101  | 0.438552 | 0.345455 |
| 437 | ENSG00000SMARCA1  | 0.604651 | 0.286469 | 0.433051 | 0.395349 |
| 438 | ENSG00000SLC13A4  | 0.660677 | 0.243129 | 0.441156 | 0.42389  |

|     |                     |          |          |          |          |
|-----|---------------------|----------|----------|----------|----------|
| 439 | ENSG000000R51B5     | 0.668687 | 0.237374 | 0.437542 | 0.428283 |
| 440 | ENSG000000MMP24     | 0.678788 | 0.249495 | 0.454714 | 0.372727 |
| 441 | ENSG000000MFS1      | 0.609937 | 0.266385 | 0.425652 | 0.438689 |
| 442 | ENSG000000SWSAP1    | 0.716162 | 0.19798  | 0.438721 | 0.378788 |
| 443 | ENSG000000PITX1     | 0.718182 | 0.208081 | 0.442761 | 0.349495 |
| 444 | ENSG000000CBX6      | 0.715152 | 0.185859 | 0.427946 | 0.408081 |
| 445 | ENSG000000GRM4      | 0.665657 | 0.243434 | 0.439562 | 0.428283 |
| 446 | ENSG000000CBX2      | 0.581395 | 0.290698 | 0.432523 | 0.401691 |
| 447 | ENSG000000TBC1D29   | 0.586869 | 0.282828 | 0.428956 | 0.420202 |
| 448 | ENSG000000RXRG      | 0.72093  | 0.188161 | 0.431113 | 0.392178 |
| 449 | ENSG000000MT-C03    | 0.724242 | 0.186869 | 0.444613 | 0.365657 |
| 450 | ENSG000000NCR3LG1   | 0.720202 | 0.180808 | 0.431987 | 0.40101  |
| 451 | ENSG000000LMD2      | 0.629293 | 0.278788 | 0.448485 | 0.39697  |
| 452 | ENSG000000HORMAD1   | 0.565539 | 0.29704  | 0.427061 | 0.399577 |
| 453 | ENSG000000DMRTC2    | 0.658586 | 0.253535 | 0.447306 | 0.419192 |
| 454 | ENSG000000HIC1      | 0.654545 | 0.260606 | 0.448316 | 0.414141 |
| 455 | ENSG000000KIF24     | 0.721987 | 0.194503 | 0.441156 | 0.376321 |
| 456 | ENSG000000ZNF286B   | 0.718182 | 0.167677 | 0.427609 | 0.423232 |
| 457 | ENSG000000TEKT2     | 0.69899  | 0.218182 | 0.443939 | 0.406061 |
| 458 | ENSG000000RECK      | 0.665657 | 0.254545 | 0.442761 | 0.418182 |
| 459 | ENSG000000MORC1     | 0.586681 | 0.289641 | 0.435166 | 0.413319 |
| 460 | ENSG000000CYSLTR1   | 0.670707 | 0.249495 | 0.44899  | 0.414141 |
| 461 | ENSG000000NUDT3     | 0.667677 | 0.234343 | 0.441077 | 0.442424 |
| 462 | ENSG000000AADAC     | 0.578224 | 0.290698 | 0.430937 | 0.421776 |
| 463 | ENSG000000LNX1      | 0.69798  | 0.241414 | 0.457912 | 0.364646 |
| 464 | ENSG000000TMEM201   | 0.739394 | 0.172727 | 0.433502 | 0.354545 |
| 465 | ENSG000000SCLY      | 0.690275 | 0.247357 | 0.454898 | 0.377378 |
| 466 | ENSG000000ISPD      | 0.725159 | 0.180761 | 0.437632 | 0.400634 |
| 467 | ENSG000000ZNF227    | 0.729293 | 0.192929 | 0.441077 | 0.369697 |
| 468 | ENSG000000FAM169A   | 0.60148  | 0.293869 | 0.432523 | 0.410148 |
| 469 | ENSG000000PES1      | 0.734672 | 0.175476 | 0.437456 | 0.375264 |
| 470 | ENSG000000C15orf53  | 0.676768 | 0.247475 | 0.457912 | 0.410101 |
| 471 | ENSG000000PRR9      | 0.652174 | 0.250242 | 0.441868 | 0.443478 |
| 472 | ENSG000000ZNF354A   | 0.743434 | 0.170707 | 0.441919 | 0.344444 |
| 473 | ENSG000000PBX4      | 0.684989 | 0.218816 | 0.437984 | 0.443975 |
| 474 | ENSG000000PLXNC1    | 0.646465 | 0.252525 | 0.440741 | 0.446465 |
| 475 | ENSG000000NTM       | 0.654545 | 0.273737 | 0.456061 | 0.40101  |
| 476 | ENSG000000ODF3L2    | 0.746465 | 0.173737 | 0.441077 | 0.320202 |
| 477 | ENSG000000NAT10     | 0.741015 | 0.175476 | 0.43957  | 0.359408 |
| 478 | ENSG000000TM2D1     | 0.70101  | 0.208081 | 0.438384 | 0.432323 |
| 479 | ENSG000000SSRP1     | 0.562368 | 0.303383 | 0.430233 | 0.406977 |
| 480 | ENSG000000ABHD14A   | 0.731313 | 0.179798 | 0.435017 | 0.394949 |
| 481 | ENSG000000C14orf177 | 0.747475 | 0.158586 | 0.432997 | 0.353535 |
| 482 | ENSG000000RSPH14    | 0.569767 | 0.283298 | 0.419486 | 0.446089 |
| 483 | ENSG000000PRRX1     | 0.702671 | 0.222997 | 0.448703 | 0.412311 |
| 484 | ENSG000000FAM110A   | 0.637374 | 0.269697 | 0.43367  | 0.440404 |
| 485 | ENSG000000VCPIP1    | 0.640404 | 0.276768 | 0.452525 | 0.416162 |
| 486 | ENSG000000PLCXD3    | 0.728283 | 0.19899  | 0.446801 | 0.367677 |
| 487 | ENSG000000IPP       | 0.691919 | 0.245455 | 0.457071 | 0.387879 |
| 488 | ENSG000000MX2       | 0.69697  | 0.233333 | 0.447138 | 0.408081 |
| 489 | ENSG000000SLC2A4    | 0.581818 | 0.29596  | 0.422054 | 0.427273 |
| 490 | ENSG000000NUP54     | 0.714588 | 0.184989 | 0.434461 | 0.434461 |
| 491 | ENSG000000COL6A6    | 0.742424 | 0.174747 | 0.436195 | 0.366667 |
| 492 | ENSG000000CCL23     | 0.730303 | 0.210101 | 0.451852 | 0.347475 |
| 493 | ENSG000000TRMT10A   | 0.681818 | 0.251515 | 0.457576 | 0.411111 |



|     |                    |          |          |          |          |
|-----|--------------------|----------|----------|----------|----------|
| 494 | ENSG000003/6/2019  | 0.712121 | 0.215152 | 0.444949 | 0.408081 |
| 495 | ENSG00000SDCBP2    | 0.727273 | 0.183838 | 0.438721 | 0.412121 |
| 496 | ENSG00000TDP1      | 0.744444 | 0.159596 | 0.429966 | 0.389899 |
| 497 | ENSG00000AN08      | 0.637374 | 0.219192 | 0.405724 | 0.487879 |
| 498 | ENSG00000TM6SF2    | 0.639394 | 0.292929 | 0.452862 | 0.389899 |
| 499 | ENSG00000BTBD9     | 0.654545 | 0.275758 | 0.456734 | 0.413131 |
| 500 | ENSG00000SETD7     | 0.720202 | 0.19596  | 0.441077 | 0.422222 |
| 501 | ENSG00000TRIB3     | 0.721987 | 0.218816 | 0.455603 | 0.372093 |
| 502 | ENSG00000MTRF1     | 0.722222 | 0.191919 | 0.439731 | 0.422222 |
| 503 | ENSG00000WT1       | 0.684848 | 0.229293 | 0.446633 | 0.444444 |
| 504 | ENSG00000BBIP1     | 0.627273 | 0.29798  | 0.461111 | 0.386869 |
| 505 | ENSG00000ZNF444    | 0.734672 | 0.198732 | 0.448555 | 0.367865 |
| 506 | ENSG00000BOP1      | 0.72093  | 0.218816 | 0.453136 | 0.385835 |
| 507 | ENSG00000DOK1      | 0.622222 | 0.279798 | 0.442761 | 0.440404 |
| 508 | ENSG00000CXCL12    | 0.728283 | 0.211111 | 0.460943 | 0.360606 |
| 509 | ENSG00000TEX30     | 0.606866 | 0.294574 | 0.441491 | 0.426357 |
| 510 | ENSG00000ZNF605    | 0.69697  | 0.237374 | 0.452525 | 0.416162 |
| 511 | ENSG00000PRUNE1    | 0.714141 | 0.226263 | 0.454882 | 0.392929 |
| 512 | ENSG00000PRPF4B    | 0.753535 | 0.159596 | 0.437037 | 0.366667 |
| 513 | ENSG00000PLPP4     | 0.753535 | 0.154545 | 0.434848 | 0.370707 |
| 514 | ENSG00000EZH2      | 0.58351  | 0.298097 | 0.429352 | 0.432347 |
| 515 | ENSG00000CAPN15    | 0.681818 | 0.252525 | 0.459259 | 0.423232 |
| 516 | ENSG00000SINHCAF   | 0.632323 | 0.30202  | 0.465657 | 0.365657 |
| 517 | ENSG00000BIVM      | 0.69697  | 0.225253 | 0.444949 | 0.439394 |
| 518 | ENSG00000ADAM10    | 0.660606 | 0.275758 | 0.460438 | 0.413131 |
| 519 | ENSG00000SMIM34A   | 0.658586 | 0.270707 | 0.460943 | 0.423232 |
| 520 | ENSG00000BANP      | 0.730444 | 0.198732 | 0.446794 | 0.397463 |
| 521 | ENSG00000SMIM34B   | 0.658586 | 0.270707 | 0.460943 | 0.423232 |
| 522 | ENSG00000TSSC4     | 0.688889 | 0.256566 | 0.459596 | 0.4      |
| 523 | ENSG00000VPREB1    | 0.717172 | 0.220202 | 0.454377 | 0.40101  |
| 524 | ENSG00000MED12L    | 0.670707 | 0.268687 | 0.454714 | 0.422222 |
| 525 | ENSG00000SH3D19    | 0.716162 | 0.20101  | 0.445455 | 0.432323 |
| 526 | ENSG00000LHFPL2    | 0.638384 | 0.286869 | 0.44697  | 0.429293 |
| 527 | ENSG00000FBRS      | 0.743434 | 0.176768 | 0.441919 | 0.390909 |
| 528 | ENSG00000ZNF684    | 0.646465 | 0.260606 | 0.443098 | 0.456566 |
| 529 | ENSG00000CHAF1A    | 0.700846 | 0.242072 | 0.442918 | 0.415433 |
| 530 | ENSG00000ATRNL1    | 0.674747 | 0.251515 | 0.454714 | 0.441414 |
| 531 | ENSG00000ZNF222    | 0.715152 | 0.223232 | 0.45303  | 0.411111 |
| 532 | ENSG00000HAGHL     | 0.658586 | 0.252525 | 0.448822 | 0.456566 |
| 533 | ENSG00000ADAMTS7   | 0.733333 | 0.194949 | 0.440236 | 0.410101 |
| 534 | ENSG00000ALG3      | 0.687879 | 0.262626 | 0.46734  | 0.390909 |
| 535 | ENSG00000CKMT1A    | 0.749471 | 0.17019  | 0.440803 | 0.385835 |
| 536 | ENSG00000AC010522. | 0.737374 | 0.190909 | 0.442256 | 0.391919 |
| 537 | ENSG00000CKMT1B    | 0.749471 | 0.17019  | 0.440803 | 0.385835 |
| 538 | ENSG00000TMC4      | 0.604651 | 0.284355 | 0.431818 | 0.454545 |
| 539 | ENSG00000TBCD      | 0.661734 | 0.267442 | 0.460712 | 0.434461 |
| 540 | ENSG00000NUP62CL   | 0.611111 | 0.308081 | 0.451684 | 0.40101  |
| 541 | ENSG00000ARL5C     | 0.636364 | 0.284355 | 0.455779 | 0.434461 |
| 542 | ENSG00000SUSD3     | 0.735354 | 0.208081 | 0.456734 | 0.371717 |
| 543 | ENSG00000AC008560. | 0.70303  | 0.245455 | 0.461448 | 0.39697  |
| 544 | ENSG00000TYW3      | 0.744444 | 0.168687 | 0.438721 | 0.408081 |
| 545 | ENSG00000LTBP1     | 0.734343 | 0.185859 | 0.440404 | 0.418182 |
| 546 | ENSG00000POLR3C    | 0.763636 | 0.148485 | 0.437879 | 0.358586 |
| 547 | ENSG00000DPH2      | 0.653277 | 0.295983 | 0.463178 | 0.386892 |
| 548 | ENSG00000DBNDD2    | 0.715152 | 0.215152 | 0.448316 | 0.429293 |

|     |                    |          |          |          |          |
|-----|--------------------|----------|----------|----------|----------|
| 549 | ENSG00000ASH2L     | 0.730303 | 0.205051 | 0.449158 | 0.409091 |
| 550 | ENSG00000ITPK1     | 0.625793 | 0.301268 | 0.458774 | 0.411205 |
| 551 | ENSG00000P2RX3     | 0.719192 | 0.213131 | 0.443434 | 0.430303 |
| 552 | ENSG00000FZD5      | 0.668687 | 0.282828 | 0.461448 | 0.406061 |
| 553 | ENSG00000EPOP      | 0.656448 | 0.27907  | 0.460888 | 0.429175 |
| 554 | ENSG00000MAST4     | 0.673737 | 0.270707 | 0.463973 | 0.423232 |
| 555 | ENSG00000SLC22A18A | 0.636364 | 0.246465 | 0.428283 | 0.480808 |
| 556 | ENSG00000USP1      | 0.649495 | 0.292929 | 0.458923 | 0.415152 |
| 557 | ENSG00000MGAM      | 0.662626 | 0.274747 | 0.458418 | 0.432323 |
| 558 | ENSG00000WDR97     | 0.619192 | 0.312121 | 0.461785 | 0.384848 |
| 559 | ENSG00000ZNF197    | 0.69103  | 0.233666 | 0.448874 | 0.449612 |
| 560 | ENSG00000GPC6      | 0.713131 | 0.237374 | 0.462795 | 0.39798  |
| 561 | ENSG00000ORC2      | 0.655391 | 0.295983 | 0.471459 | 0.387949 |
| 562 | ENSG00000L3MBTL4   | 0.721212 | 0.20303  | 0.444444 | 0.439394 |
| 563 | ENSG00000TMEM8B    | 0.714588 | 0.217759 | 0.450493 | 0.436575 |
| 564 | ENSG00000ADCYAP1R1 | 0.610101 | 0.30101  | 0.445286 | 0.438384 |
| 565 | ENSG00000BHLHE40   | 0.753535 | 0.176768 | 0.445118 | 0.391919 |
| 566 | ENSG00000ELK4      | 0.745455 | 0.190909 | 0.448485 | 0.394949 |
| 567 | ENSG00000ETNPPL    | 0.641414 | 0.292929 | 0.460269 | 0.428283 |
| 568 | ENSG00000CCDC61    | 0.665962 | 0.285412 | 0.473749 | 0.40592  |
| 569 | ENSG00000DGKZ      | 0.661734 | 0.264271 | 0.453488 | 0.454545 |
| 570 | ENSG00000CRABP2    | 0.685859 | 0.266667 | 0.468013 | 0.412121 |
| 571 | ENSG00000NSMCE4A   | 0.735354 | 0.207071 | 0.459428 | 0.39899  |
| 572 | ENSG00000ATP2A2    | 0.72536  | 0.215947 | 0.455519 | 0.415282 |
| 573 | ENSG00000MZF1      | 0.687879 | 0.251515 | 0.456229 | 0.442424 |
| 574 | ENSG00000ST6GALNAC | 0.612051 | 0.306554 | 0.450317 | 0.428118 |
| 575 | ENSG00000GLI1      | 0.721212 | 0.238384 | 0.463973 | 0.389899 |
| 576 | ENSG00000C3orf70   | 0.7      | 0.245455 | 0.463973 | 0.423232 |
| 577 | ENSG00000UBL4A     | 0.730444 | 0.22093  | 0.460888 | 0.397463 |
| 578 | ENSG00000TRMT10C   | 0.692929 | 0.241414 | 0.457407 | 0.445455 |
| 579 | ENSG00000C3orf36   | 0.696617 | 0.269556 | 0.471459 | 0.385835 |
| 580 | ENSG00000RNF217    | 0.676768 | 0.285859 | 0.463468 | 0.40202  |
| 581 | ENSG00000CENPE     | 0.632323 | 0.29798  | 0.460774 | 0.432323 |
| 582 | ENSG00000ABHD16B   | 0.67019  | 0.261099 | 0.454017 | 0.455603 |
| 583 | ENSG00000WEE1      | 0.717172 | 0.224242 | 0.45     | 0.435354 |
| 584 | ENSG00000SMARCD3   | 0.658586 | 0.30101  | 0.471886 | 0.385859 |
| 585 | ENSG00000FOXRED1   | 0.709091 | 0.222222 | 0.450505 | 0.451515 |
| 586 | ENSG00000LSM5      | 0.750529 | 0.181818 | 0.448027 | 0.408034 |
| 587 | ENSG00000PARP10    | 0.710359 | 0.2463   | 0.46494  | 0.411205 |
| 588 | ENSG00000EFS       | 0.749495 | 0.20101  | 0.454545 | 0.383838 |
| 589 | ENSG00000IAH1      | 0.749495 | 0.207071 | 0.460606 | 0.366667 |
| 590 | ENSG00000GCNT7     | 0.721212 | 0.233333 | 0.461279 | 0.413131 |
| 591 | ENSG00000ERN2      | 0.671247 | 0.294926 | 0.476744 | 0.385835 |
| 592 | ENSG00000LIN9      | 0.715152 | 0.218182 | 0.450168 | 0.445455 |
| 593 | ENSG00000C5orf24   | 0.749495 | 0.188889 | 0.458081 | 0.39596  |
| 594 | ENSG00000ZNF277    | 0.729293 | 0.20202  | 0.448148 | 0.437374 |
| 595 | ENSG00000KCNK10    | 0.722222 | 0.242424 | 0.470034 | 0.381818 |
| 596 | ENSG00000ZKSCAN4   | 0.732323 | 0.206061 | 0.453199 | 0.429293 |
| 597 | ENSG00000ZKSCAN3   | 0.732323 | 0.206061 | 0.453199 | 0.429293 |
| 598 | ENSG00000OR6B3     | 0.623232 | 0.3      | 0.461616 | 0.437374 |
| 599 | ENSG00000WNT10B    | 0.616162 | 0.319192 | 0.460774 | 0.39798  |
| 600 | ENSG00000ELP6      | 0.692929 | 0.269697 | 0.467172 | 0.409091 |
| 601 | ENSG00000OR6B2     | 0.623232 | 0.3      | 0.461616 | 0.437374 |
| 602 | ENSG00000CDK13     | 0.585624 | 0.306554 | 0.438161 | 0.450317 |
| 603 | ENSG00000FURIN     | 0.751515 | 0.194949 | 0.455556 | 0.394949 |

|     |                   |          |          |          |          |
|-----|-------------------|----------|----------|----------|----------|
| 604 | ENSG00000ALDH3B2  | 0.70404  | 0.254545 | 0.470707 | 0.413131 |
| 605 | ENSG00000MUC3A    | 0.621212 | 0.306061 | 0.459764 | 0.433333 |
| 606 | ENSG00000USP8     | 0.658586 | 0.271717 | 0.458418 | 0.458586 |
| 607 | ENSG00000ZNF837   | 0.763636 | 0.184848 | 0.452525 | 0.373737 |
| 608 | ENSG00000ANKRD23  | 0.615152 | 0.315152 | 0.462626 | 0.414141 |
| 609 | ENSG00000NDST2    | 0.607071 | 0.309091 | 0.453535 | 0.438384 |
| 610 | ENSG00000CLEC11A  | 0.69798  | 0.271717 | 0.475084 | 0.385859 |
| 611 | ENSG00000ATL2     | 0.588889 | 0.316162 | 0.451347 | 0.430303 |
| 612 | ENSG00000BHMGI    | 0.640404 | 0.273737 | 0.440909 | 0.470707 |
| 613 | ENSG00000DNASE1L1 | 0.688889 | 0.261616 | 0.462963 | 0.441414 |
| 614 | ENSG00000SOX2     | 0.743434 | 0.213131 | 0.461448 | 0.390909 |
| 615 | ENSG00000SLC10A1  | 0.592929 | 0.328283 | 0.458418 | 0.379798 |
| 616 | ENSG00000POLR3G   | 0.664646 | 0.271717 | 0.458923 | 0.457576 |
| 617 | ENSG00000ONECUT2  | 0.614141 | 0.290909 | 0.449832 | 0.464646 |
| 618 | ENSG00000PARP11   | 0.744444 | 0.19798  | 0.453872 | 0.421212 |
| 619 | ENSG00000PFKL     | 0.676768 | 0.288889 | 0.468519 | 0.414141 |
| 620 | ENSG00000ZNF350   | 0.737374 | 0.216162 | 0.455556 | 0.410101 |
| 621 | ENSG00000ZBED3    | 0.642424 | 0.3      | 0.463636 | 0.435354 |
| 622 | ENSG00000QPRT     | 0.671717 | 0.259596 | 0.454209 | 0.467677 |
| 623 | ENSG00000PIGP     | 0.753535 | 0.205051 | 0.461279 | 0.379798 |
| 624 | ENSG00000PREPL    | 0.765657 | 0.185859 | 0.456397 | 0.376768 |
| 625 | ENSG00000KIF2A    | 0.69899  | 0.228283 | 0.453704 | 0.465657 |
| 626 | ENSG00000FBX046   | 0.713131 | 0.245455 | 0.461785 | 0.425253 |
| 627 | ENSG00000C6orf47  | 0.724242 | 0.19697  | 0.445455 | 0.457576 |
| 628 | ENSG00000TMEM171  | 0.682828 | 0.266667 | 0.462963 | 0.445455 |
| 629 | ENSG00000MAP7D3   | 0.705051 | 0.232323 | 0.45404  | 0.458586 |
| 630 | ENSG00000DDN      | 0.619192 | 0.307071 | 0.429293 | 0.453535 |
| 631 | ENSG00000SENP3    | 0.738384 | 0.225253 | 0.46229  | 0.393939 |
| 632 | ENSG00000BACH2    | 0.689899 | 0.278788 | 0.476094 | 0.40303  |
| 633 | ENSG00000AC009086 | 0.671717 | 0.259596 | 0.454209 | 0.467677 |
| 634 | ENSG00000ESPN     | 0.75526  | 0.207087 | 0.465116 | 0.369878 |
| 635 | ENSG00000MKX      | 0.728283 | 0.235354 | 0.46936  | 0.39899  |
| 636 | ENSG00000DCLK2    | 0.676533 | 0.269556 | 0.457717 | 0.455603 |
| 637 | ENSG00000MGA      | 0.737374 | 0.215152 | 0.464141 | 0.410101 |
| 638 | ENSG00000CHST8    | 0.572727 | 0.328283 | 0.447138 | 0.410101 |
| 639 | ENSG00000CREB3L2  | 0.725253 | 0.224242 | 0.462121 | 0.431313 |
| 640 | ENSG00000HENMT1   | 0.769697 | 0.187879 | 0.459933 | 0.360606 |
| 641 | ENSG00000NOM1     | 0.756871 | 0.208245 | 0.460712 | 0.37315  |
| 642 | ENSG00000PLEKHN1  | 0.730303 | 0.233333 | 0.464983 | 0.407071 |
| 643 | ENSG00000ELOVL7   | 0.692929 | 0.251515 | 0.46532  | 0.448485 |
| 644 | ENSG00000ETV6     | 0.614165 | 0.301268 | 0.452784 | 0.45666  |
| 645 | ENSG00000HOXD12   | 0.730444 | 0.217759 | 0.453665 | 0.437632 |
| 646 | ENSG00000SRGAP1   | 0.673737 | 0.285859 | 0.464646 | 0.435354 |
| 647 | ENSG00000PGM2     | 0.655556 | 0.30101  | 0.475084 | 0.421212 |
| 648 | ENSG00000ANKRD52  | 0.774747 | 0.179798 | 0.460269 | 0.360606 |
| 649 | ENSG00000TMCC1    | 0.765328 | 0.196617 | 0.463531 | 0.365751 |
| 650 | ENSG00000UHRF1    | 0.781818 | 0.178788 | 0.453367 | 0.331313 |
| 651 | ENSG00000FTSJ3    | 0.700846 | 0.251586 | 0.467407 | 0.439746 |
| 652 | ENSG00000ESR2     | 0.7      | 0.264646 | 0.472391 | 0.424242 |
| 653 | ENSG00000WDR46    | 0.763636 | 0.188889 | 0.463805 | 0.382828 |
| 654 | ENSG00000SLC17A4  | 0.657576 | 0.276768 | 0.4633   | 0.463636 |
| 655 | ENSG00000TRIML2   | 0.735729 | 0.20296  | 0.452431 | 0.443975 |
| 656 | ENSG00000DRD2     | 0.665657 | 0.30404  | 0.483165 | 0.39697  |
| 657 | ENSG00000COL14A1  | 0.684848 | 0.264646 | 0.463973 | 0.452525 |
| 658 | ENSG00000FOXI1    | 0.652525 | 0.287879 | 0.459428 | 0.459596 |

0.3533

|     |                    |          |          |          |          |
|-----|--------------------|----------|----------|----------|----------|
| 659 | ENSG00000MBLAC2    | 0.754757 | 0.20296  | 0.460712 | 0.402748 |
| 660 | ENSG00000TMEM236   | 0.576768 | 0.331313 | 0.451515 | 0.405051 |
| 661 | ENSG00000YLPM1     | 0.756566 | 0.181818 | 0.454882 | 0.426263 |
| 662 | ENSG00000CPPED1    | 0.728283 | 0.222222 | 0.458586 | 0.441414 |
| 663 | ENSG00000SEBOX     | 0.761616 | 0.192929 | 0.457912 | 0.40101  |
| 664 | ENSG00000CASP7     | 0.753535 | 0.209091 | 0.464815 | 0.39697  |
| 665 | ENSG00000ZNF586    | 0.661616 | 0.293939 | 0.471044 | 0.439394 |
| 666 | ENSG00000RNF126    | 0.725253 | 0.20202  | 0.446801 | 0.465657 |
| 667 | ENSG00000ELF3      | 0.766667 | 0.191919 | 0.456902 | 0.394949 |
| 668 | ENSG00000NDUFB2    | 0.772727 | 0.20101  | 0.459428 | 0.361616 |
| 669 | ENSG00000ABRAXAS1  | 0.644444 | 0.29899  | 0.46431  | 0.449495 |
| 670 | ENSG00000EVA1A     | 0.636364 | 0.310101 | 0.465825 | 0.438384 |
| 671 | ENSG00000NOXA1     | 0.738384 | 0.228283 | 0.47037  | 0.40101  |
| 672 | ENSG00000HYAL1     | 0.728283 | 0.249495 | 0.468013 | 0.39596  |
| 673 | ENSG00000CDK3      | 0.732558 | 0.223044 | 0.462297 | 0.435518 |
| 674 | ENSG00000HELZ      | 0.765657 | 0.193939 | 0.4633   | 0.391919 |
| 675 | ENSG00000NEK6      | 0.643763 | 0.286469 | 0.463354 | 0.468288 |
| 676 | ENSG00000PTPN18    | 0.784053 | 0.180509 | 0.461425 | 0.353267 |
| 677 | ENSG00000DPPA5     | 0.704017 | 0.255814 | 0.46635  | 0.445032 |
| 678 | ENSG00000PRMT6     | 0.730444 | 0.241015 | 0.471987 | 0.414376 |
| 679 | ENSG00000CREBZF    | 0.750529 | 0.214588 | 0.465821 | 0.410148 |
| 680 | ENSG00000TRMT1L    | 0.778788 | 0.188889 | 0.467172 | 0.355556 |
| 681 | ENSG00000C2CD2L    | 0.753535 | 0.217172 | 0.470539 | 0.394949 |
| 682 | ENSG00000NRARP     | 0.606061 | 0.328283 | 0.463805 | 0.414141 |
| 683 | ENSG00000OR10G3    | 0.722222 | 0.259596 | 0.479125 | 0.39596  |
| 684 | ENSG00000MED18     | 0.741414 | 0.228283 | 0.477441 | 0.405051 |
| 685 | ENSG00000FOXN2     | 0.629293 | 0.318182 | 0.46229  | 0.437374 |
| 686 | ENSG00000SERP1     | 0.776768 | 0.192929 | 0.463468 | 0.373737 |
| 687 | ENSG00000G6PC      | 0.731313 | 0.240404 | 0.47037  | 0.423232 |
| 688 | ENSG00000SLC12A8   | 0.765657 | 0.20303  | 0.462795 | 0.393939 |
| 689 | ENSG00000SERP2     | 0.776768 | 0.192929 | 0.463468 | 0.373737 |
| 690 | ENSG00000ZNF317    | 0.739394 | 0.229293 | 0.469697 | 0.418182 |
| 691 | ENSG00000B3GAT3    | 0.667774 | 0.301218 | 0.480066 | 0.427464 |
| 692 | ENSG00000CXCR1     | 0.692137 | 0.292359 | 0.483758 | 0.397564 |
| 693 | ENSG00000ARMCX5    | 0.622222 | 0.320202 | 0.459091 | 0.441414 |
| 694 | ENSG00000AP001273. | 0.678647 | 0.289641 | 0.46494  | 0.445032 |
| 695 | ENSG00000WDR89     | 0.631313 | 0.325253 | 0.470034 | 0.412121 |
| 696 | ENSG00000TRAF7     | 0.70303  | 0.264646 | 0.472054 | 0.442424 |
| 697 | ENSG00000ESPL1     | 0.705051 | 0.280808 | 0.484848 | 0.4      |
| 698 | ENSG00000SYT13     | 0.647475 | 0.311111 | 0.477778 | 0.434343 |
| 699 | ENSG00000SMIM4     | 0.764228 | 0.18583  | 0.456446 | 0.428571 |
| 700 | ENSG00000BRCA2     | 0.772727 | 0.20202  | 0.468013 | 0.373737 |
| 701 | ENSG00000PSMB5     | 0.710101 | 0.273737 | 0.483502 | 0.406061 |
| 702 | ENSG00000AKR1E2    | 0.775899 | 0.206131 | 0.471459 | 0.345666 |
| 703 | ENSG00000GNPNAT1   | 0.725253 | 0.232323 | 0.461953 | 0.450505 |
| 704 | ENSG00000CASKIN1   | 0.669697 | 0.271717 | 0.461448 | 0.474747 |
| 705 | ENSG00000NLE1      | 0.765657 | 0.19697  | 0.464815 | 0.412121 |
| 706 | ENSG00000FZD8      | 0.740404 | 0.251515 | 0.483165 | 0.357576 |
| 707 | ENSG00000UVSSA     | 0.774747 | 0.182828 | 0.460774 | 0.406061 |
| 708 | ENSG00000ZYG11A    | 0.676768 | 0.30101  | 0.482828 | 0.417172 |
| 709 | ENSG00000ZNF529    | 0.791919 | 0.173737 | 0.461953 | 0.362626 |
| 710 | ENSG00000ZNF280B   | 0.725253 | 0.253535 | 0.477946 | 0.413131 |
| 711 | ENSG00000HS3ST2    | 0.612121 | 0.324242 | 0.462121 | 0.438384 |
| 712 | ENSG00000CRAMP1    | 0.737374 | 0.242424 | 0.472727 | 0.413131 |
| 713 | ENSG00000PRM1      | 0.630021 | 0.328753 | 0.475863 | 0.400634 |

|     |                    |          |          |          |          |
|-----|--------------------|----------|----------|----------|----------|
| 714 | ENSG00000DUSP16    | 0.753535 | 0.19697  | 0.459259 | 0.442424 |
| 715 | ENSG00000DMPA1     | 0.673737 | 0.314141 | 0.473401 | 0.40303  |
| 716 | ENSG00000CRIP2     | 0.654545 | 0.291919 | 0.464815 | 0.466667 |
| 717 | ENSG00000SLC7A7    | 0.678788 | 0.270707 | 0.460606 | 0.472727 |
| 718 | ENSG00000VPS33B    | 0.60148  | 0.305497 | 0.444327 | 0.476744 |
| 719 | ENSG00000SYS1      | 0.69798  | 0.267677 | 0.469529 | 0.449495 |
| 720 | ENSG00000NDUF5     | 0.696617 | 0.292812 | 0.487667 | 0.399577 |
| 721 | ENSG00000HOXC11    | 0.774747 | 0.190909 | 0.46633  | 0.39798  |
| 722 | ENSG00000SAP30     | 0.769697 | 0.228283 | 0.46835  | 0.348485 |
| 723 | ENSG00000TRAPPC10  | 0.667774 | 0.30897  | 0.476929 | 0.429679 |
| 724 | ENSG00000GAS2L3    | 0.688161 | 0.267442 | 0.465469 | 0.468288 |
| 725 | ENSG00000ZSCAN1    | 0.706131 | 0.281184 | 0.47692  | 0.42389  |
| 726 | ENSG00000UPK3B     | 0.739394 | 0.238384 | 0.472727 | 0.417172 |
| 727 | ENSG00000GINS1     | 0.792812 | 0.186047 | 0.473925 | 0.338266 |
| 728 | ENSG00000ABRACL    | 0.681818 | 0.291919 | 0.476094 | 0.443434 |
| 729 | ENSG00000MGAT2     | 0.743434 | 0.243434 | 0.476094 | 0.39899  |
| 730 | ENSG00000GPR19     | 0.788889 | 0.185859 | 0.46936  | 0.361616 |
| 731 | ENSG00000NFAT5     | 0.763636 | 0.227273 | 0.482997 | 0.363636 |
| 732 | ENSG00000PROCA1    | 0.660606 | 0.316162 | 0.484007 | 0.415152 |
| 733 | ENSG00000GNL2      | 0.714141 | 0.250505 | 0.46835  | 0.453535 |
| 734 | ENSG00000RRP1      | 0.79798  | 0.160606 | 0.461111 | 0.380808 |
| 735 | ENSG00000THAP6     | 0.681818 | 0.29798  | 0.488047 | 0.425253 |
| 736 | ENSG00000F8A2      | 0.658562 | 0.309725 | 0.477097 | 0.44186  |
| 737 | ENSG00000F8A3      | 0.658562 | 0.309725 | 0.477097 | 0.44186  |
| 738 | ENSG00000UGDH      | 0.787879 | 0.144444 | 0.44899  | 0.426263 |
| 739 | ENSG00000F8A1      | 0.658562 | 0.309725 | 0.477097 | 0.44186  |
| 740 | ENSG00000ZBTB7B    | 0.744444 | 0.237374 | 0.470875 | 0.418182 |
| 741 | ENSG00000EDDM3A    | 0.689218 | 0.276956 | 0.473397 | 0.454545 |
| 742 | ENSG00000ACP6      | 0.683838 | 0.285859 | 0.481145 | 0.447475 |
| 743 | ENSG00000TCEAL9    | 0.661616 | 0.29798  | 0.473737 | 0.456566 |
| 744 | ENSG00000GON4L     | 0.705426 | 0.283499 | 0.475083 | 0.427464 |
| 745 | ENSG00000TMEM242   | 0.681818 | 0.30404  | 0.488889 | 0.410101 |
| 746 | ENSG00000AL365214. | 0.654334 | 0.302326 | 0.472868 | 0.457717 |
| 747 | ENSG00000YY1AP1    | 0.705426 | 0.283499 | 0.475083 | 0.427464 |
| 748 | ENSG00000TEFM      | 0.691332 | 0.27167  | 0.47463  | 0.458774 |
| 749 | ENSG00000PTPN4     | 0.767677 | 0.20303  | 0.473737 | 0.407071 |
| 750 | ENSG00000CHIA      | 0.773784 | 0.190275 | 0.461593 | 0.418605 |
| 751 | ENSG00000HPGDS     | 0.663636 | 0.308081 | 0.485859 | 0.435354 |
| 752 | ENSG00000THAP4     | 0.752525 | 0.229293 | 0.476094 | 0.411111 |
| 753 | ENSG00000ESRRG     | 0.669697 | 0.30101  | 0.479798 | 0.444444 |
| 754 | ENSG00000EVI5      | 0.760606 | 0.224242 | 0.46633  | 0.408081 |
| 755 | ENSG00000NFATC1    | 0.672727 | 0.292929 | 0.466162 | 0.463636 |
| 756 | ENSG00000RPL39L    | 0.539394 | 0.347475 | 0.442088 | 0.40303  |
| 757 | ENSG00000GPR157    | 0.646465 | 0.277778 | 0.449832 | 0.491919 |
| 758 | ENSG00000TSEN15    | 0.764646 | 0.211111 | 0.477104 | 0.410101 |
| 759 | ENSG00000UNC5B     | 0.681818 | 0.30404  | 0.488889 | 0.424242 |
| 760 | ENSG00000RPL39     | 0.539394 | 0.347475 | 0.442088 | 0.40303  |
| 761 | ENSG00000GALNT16   | 0.767677 | 0.215152 | 0.471212 | 0.40202  |
| 762 | ENSG00000ZNF214    | 0.683932 | 0.288584 | 0.479211 | 0.453488 |
| 763 | ENSG00000PDLIM3    | 0.758586 | 0.19798  | 0.460269 | 0.445455 |
| 764 | ENSG00000ZIC3      | 0.774747 | 0.211111 | 0.472896 | 0.389899 |
| 765 | ENSG00000KLF7      | 0.768687 | 0.19596  | 0.46633  | 0.428283 |
| 766 | ENSG00000TPX2      | 0.77167  | 0.200846 | 0.467054 | 0.421776 |
| 767 | ENSG00000DHRSX     | 0.708081 | 0.289899 | 0.485522 | 0.411111 |
| 768 | ENSG00000SPINK9    | 0.712121 | 0.260606 | 0.477778 | 0.448485 |

0.3419

|     |                   |          |          |          |          |
|-----|-------------------|----------|----------|----------|----------|
| 769 | ENSG00000RASL11B  | 0.684848 | 0.292929 | 0.479461 | 0.446465 |
| 770 | ENSG00000FAM227B  | 0.706131 | 0.275899 | 0.479387 | 0.442918 |
| 771 | ENSG00000PPP6R1   | 0.690909 | 0.245455 | 0.446296 | 0.492929 |
| 772 | ENSG00000PARP2    | 0.736364 | 0.247475 | 0.479125 | 0.427273 |
| 773 | ENSG00000CYP4X1   | 0.742424 | 0.241414 | 0.477441 | 0.424242 |
| 774 | ENSG00000ZFP3     | 0.760606 | 0.215152 | 0.471044 | 0.425253 |
| 775 | ENSG00000RNF7     | 0.728283 | 0.261616 | 0.482155 | 0.421212 |
| 776 | ENSG00000ZNF337   | 0.666667 | 0.314141 | 0.483502 | 0.433333 |
| 777 | ENSG00000FGD1     | 0.656566 | 0.303030 | 0.468350 | 0.466667 |
| 778 | ENSG00000CLUH     | 0.698732 | 0.288584 | 0.488372 | 0.429175 |
| 779 | ENSG00000TRIT1    | 0.709091 | 0.272727 | 0.482323 | 0.445455 |
| 780 | ENSG00000ZNF554   | 0.723044 | 0.257928 | 0.473044 | 0.443975 |
| 781 | ENSG00000TMEM102  | 0.657576 | 0.320202 | 0.480976 | 0.430303 |
| 782 | ENSG00000LRRTM1   | 0.736364 | 0.201010 | 0.452020 | 0.476768 |
| 783 | ENSG00000CTSS     | 0.744444 | 0.247475 | 0.482492 | 0.408081 |
| 784 | ENSG00000TEX11    | 0.621262 | 0.336656 | 0.468623 | 0.417497 |
| 785 | ENSG00000KIAA1755 | 0.777778 | 0.202020 | 0.470370 | 0.406061 |
| 786 | ENSG00000TMEM134  | 0.698782 | 0.292359 | 0.488557 | 0.420819 |
| 787 | ENSG00000SERPINE1 | 0.696970 | 0.301010 | 0.488552 | 0.412121 |
| 788 | ENSG00000FBX045   | 0.774747 | 0.194949 | 0.474411 | 0.418182 |
| 789 | ENSG00000LYZL4    | 0.673737 | 0.310101 | 0.471549 | 0.445455 |
| 790 | ENSG00000IL15     | 0.735729 | 0.253700 | 0.484848 | 0.418605 |
| 791 | ENSG00000MLLT11   | 0.754757 | 0.206131 | 0.463883 | 0.452431 |
| 792 | ENSG00000ADH7     | 0.696970 | 0.283838 | 0.480135 | 0.446465 |
| 793 | ENSG00000KLHL3    | 0.712121 | 0.269697 | 0.468687 | 0.452525 |
| 794 | ENSG00000ATF3     | 0.758583 | 0.235880 | 0.482466 | 0.395349 |
| 795 | ENSG00000LSM3     | 0.615222 | 0.323467 | 0.457364 | 0.464059 |
| 796 | ENSG00000EID3     | 0.629293 | 0.322222 | 0.467340 | 0.454545 |
| 797 | ENSG00000CCDC166  | 0.763636 | 0.215152 | 0.477441 | 0.422222 |
| 798 | ENSG00000RSPH10B  | 0.582051 | 0.342308 | 0.461111 | 0.425641 |
| 799 | ENSG00000RSPH10B2 | 0.582051 | 0.342308 | 0.461111 | 0.425641 |
| 800 | ENSG00000WASHC3   | 0.709091 | 0.285859 | 0.488721 | 0.427273 |
| 801 | ENSG00000CYB5RL   | 0.757928 | 0.213531 | 0.468816 | 0.438689 |
| 802 | ENSG00000KRAS     | 0.647475 | 0.306061 | 0.470034 | 0.471717 |
| 803 | ENSG00000TDP2     | 0.733333 | 0.258586 | 0.484848 | 0.427273 |
| 804 | ENSG00000SLC6A11  | 0.653535 | 0.315152 | 0.482828 | 0.451515 |
| 805 | ENSG00000BBS12    | 0.673737 | 0.283838 | 0.467508 | 0.477778 |
| 806 | ENSG00000DPH6     | 0.682828 | 0.306061 | 0.489394 | 0.433333 |
| 807 | ENSG00000S100A16  | 0.692929 | 0.303030 | 0.483670 | 0.427273 |
| 808 | ENSG00000PIANP    | 0.777778 | 0.218182 | 0.481481 | 0.384848 |
| 809 | ENSG00000IRGQ     | 0.726263 | 0.263636 | 0.483165 | 0.434343 |
| 810 | ENSG00000PEBP4    | 0.749495 | 0.233333 | 0.480976 | 0.431313 |
| 811 | ENSG00000PAX6     | 0.800000 | 0.172947 | 0.466828 | 0.404831 |
| 812 | ENSG00000ST3GAL4  | 0.637374 | 0.331313 | 0.481818 | 0.426263 |
| 813 | ENSG00000SLC02A1  | 0.681818 | 0.316162 | 0.483838 | 0.421212 |
| 814 | ENSG00000NSUN5    | 0.760606 | 0.200000 | 0.465993 | 0.452525 |
| 815 | ENSG00000ANGPTL4  | 0.754545 | 0.207071 | 0.461616 | 0.459596 |
| 816 | ENSG00000PLEKH02  | 0.639535 | 0.327696 | 0.480973 | 0.436575 |
| 817 | ENSG00000SMIM1    | 0.741015 | 0.262156 | 0.487491 | 0.399577 |
| 818 | ENSG00000DLX1     | 0.693939 | 0.304040 | 0.493603 | 0.416162 |
| 819 | ENSG00000ANKRD30B | 0.753535 | 0.205051 | 0.465488 | 0.460606 |
| 820 | ENSG00000NRG2     | 0.769697 | 0.190909 | 0.464141 | 0.448485 |
| 821 | ENSG00000TEDC2    | 0.596195 | 0.329810 | 0.461769 | 0.460888 |
| 822 | ENSG00000BCL6     | 0.788889 | 0.185859 | 0.464646 | 0.424242 |
| 823 | ENSG00000SLC12A6  | 0.711111 | 0.275758 | 0.484343 | 0.446465 |

|     |                    |          |          |          |          |        |
|-----|--------------------|----------|----------|----------|----------|--------|
| 824 | ENSG00000C1orf167  | 0.59899  | 0.339394 | 0.461616 | 0.438384 |        |
| 825 | ENSG00000ASIP      | 0.629293 | 0.334343 | 0.472391 | 0.438384 |        |
| 826 | ENSG00000MS4A4E    | 0.649495 | 0.312121 | 0.479293 | 0.465657 |        |
| 827 | ENSG00000CLCA2     | 0.69798  | 0.293939 | 0.493939 | 0.432323 |        |
| 828 | ENSG00000RAD9B     | 0.705051 | 0.29596  | 0.486027 | 0.431313 |        |
| 829 | ENSG00000FHAD1     | 0.637874 | 0.336656 | 0.487265 | 0.410853 |        |
| 830 | ENSG00000CHSY3     | 0.664646 | 0.321212 | 0.492929 | 0.428283 |        |
| 831 | ENSG00000IRF6      | 0.749471 | 0.224101 | 0.481149 | 0.44926  |        |
| 832 | ENSG00000ZNF461    | 0.745455 | 0.243434 | 0.478114 | 0.438384 |        |
| 833 | ENSG00000FZD4      | 0.754545 | 0.225253 | 0.473569 | 0.448485 |        |
| 834 | ENSG00000EFCAB3    | 0.773737 | 0.193939 | 0.474747 | 0.442424 |        |
| 835 | ENSG00000NEURL2    | 0.762626 | 0.237374 | 0.483502 | 0.415152 |        |
| 836 | ENSG00000CCDC36    | 0.650106 | 0.317125 | 0.478858 | 0.464059 |        |
| 837 | ENSG00000RBPJL     | 0.634551 | 0.323367 | 0.476375 | 0.460687 |        |
| 838 | ENSG00000NOG       | 0.716162 | 0.294949 | 0.495286 | 0.40101  | 0.2925 |
| 839 | ENSG00000EFHD2     | 0.644444 | 0.335354 | 0.487542 | 0.416162 |        |
| 840 | ENSG00000SEPHS2    | 0.675758 | 0.3      | 0.478451 | 0.467677 |        |
| 841 | ENSG00000ZCCHC18   | 0.647475 | 0.29596  | 0.467677 | 0.488889 |        |
| 842 | ENSG00000SART1     | 0.793939 | 0.19596  | 0.478788 | 0.40202  |        |
| 843 | ENSG00000CWF19L2   | 0.730897 | 0.250277 | 0.47656  | 0.458472 |        |
| 844 | ENSG00000NPM2      | 0.685859 | 0.283838 | 0.475589 | 0.475758 |        |
| 845 | ENSG00000FKBPL     | 0.780808 | 0.19899  | 0.476431 | 0.428283 |        |
| 846 | ENSG00000ZCCHC12   | 0.647475 | 0.29596  | 0.467677 | 0.488889 |        |
| 847 | ENSG00000ZUFSP     | 0.766667 | 0.20303  | 0.467172 | 0.454545 |        |
| 848 | ENSG00000BASP1     | 0.600423 | 0.337209 | 0.466173 | 0.452431 |        |
| 849 | ENSG00000CDH19     | 0.612121 | 0.321212 | 0.466667 | 0.476768 |        |
| 850 | ENSG00000RNF114    | 0.717172 | 0.270707 | 0.481987 | 0.457576 | 0.513  |
| 851 | ENSG00000HOXB1     | 0.669697 | 0.308081 | 0.479798 | 0.466667 |        |
| 852 | ENSG00000PNLDC1    | 0.693939 | 0.306061 | 0.496465 | 0.426263 |        |
| 853 | ENSG00000SERPINB2  | 0.726263 | 0.224242 | 0.46229  | 0.485859 |        |
| 854 | ENSG00000FOXK2     | 0.783838 | 0.229293 | 0.489731 | 0.365657 |        |
| 855 | ENSG00000KRTAP25-1 | 0.660606 | 0.330303 | 0.477778 | 0.430303 |        |
| 856 | ENSG00000ZC3H12B   | 0.672727 | 0.320202 | 0.490741 | 0.439394 |        |
| 857 | ENSG00000CCNH      | 0.709091 | 0.287879 | 0.494276 | 0.441414 |        |
| 858 | ENSG00000KIFC1     | 0.807071 | 0.164646 | 0.472727 | 0.416162 |        |
| 859 | ENSG00000NPAS3     | 0.769697 | 0.217172 | 0.478283 | 0.437374 |        |
| 860 | ENSG00000PBOV1     | 0.58804  | 0.34773  | 0.460317 | 0.434109 |        |
| 861 | ENSG00000TMED5     | 0.756871 | 0.231501 | 0.477449 | 0.443975 |        |
| 862 | ENSG00000TPPP      | 0.767442 | 0.23588  | 0.488003 | 0.409745 |        |
| 863 | ENSG00000SLC6A14   | 0.759596 | 0.256566 | 0.481987 | 0.39596  |        |
| 864 | ENSG00000HNF1A     | 0.824242 | 0.154545 | 0.471044 | 0.377778 |        |
| 865 | ENSG00000GINS2     | 0.711111 | 0.289899 | 0.489394 | 0.440404 |        |
| 866 | ENSG00000TSTA3     | 0.708081 | 0.287879 | 0.492424 | 0.448485 |        |
| 867 | ENSG00000AMN1      | 0.653535 | 0.320202 | 0.485354 | 0.459596 |        |
| 868 | ENSG00000NBEAL2    | 0.774747 | 0.205051 | 0.473064 | 0.443434 |        |
| 869 | ENSG00000ANKRD44   | 0.714141 | 0.287879 | 0.493771 | 0.438384 |        |
| 870 | ENSG00000ZNF589    | 0.688889 | 0.316162 | 0.49596  | 0.423232 |        |
| 871 | ENSG00000GNA11     | 0.69596  | 0.288889 | 0.483165 | 0.468687 |        |
| 872 | ENSG00000ENTPD7    | 0.691919 | 0.30404  | 0.494444 | 0.442424 |        |
| 873 | ENSG00000NET1      | 0.661734 | 0.327696 | 0.491896 | 0.432347 |        |
| 874 | ENSG00000DDX54     | 0.681818 | 0.320202 | 0.490741 | 0.435354 |        |
| 875 | ENSG00000METRNL    | 0.708081 | 0.289899 | 0.492256 | 0.447475 |        |
| 876 | ENSG00000DUPD1     | 0.673737 | 0.320202 | 0.491246 | 0.441414 |        |
| 877 | ENSG00000GNA14     | 0.69596  | 0.288889 | 0.483165 | 0.468687 |        |
| 878 | ENSG00000NDST3     | 0.672727 | 0.328283 | 0.49899  | 0.412121 |        |

|     |                    |          |          |          |          |
|-----|--------------------|----------|----------|----------|----------|
| 879 | ENSG00000STAP1     | 0.726216 | 0.27907  | 0.494362 | 0.432347 |
| 880 | ENSG00000LENG8     | 0.709091 | 0.29798  | 0.499663 | 0.428283 |
| 881 | ENSG00000LRP1B     | 0.730303 | 0.266667 | 0.488889 | 0.448485 |
| 882 | ENSG00000NFASC     | 0.691332 | 0.301268 | 0.48802  | 0.45666  |
| 883 | ENSG00000TCIM      | 0.745455 | 0.265657 | 0.490236 | 0.422222 |
| 884 | ENSG00000ZC3H12D   | 0.755814 | 0.212474 | 0.466526 | 0.472516 |
| 885 | ENSG00000DOCK8     | 0.776301 | 0.228128 | 0.486711 | 0.423034 |
| 886 | ENSG00000TTYH3     | 0.706131 | 0.269556 | 0.483263 | 0.478858 |
| 887 | ENSG00000MTERF2    | 0.682875 | 0.32981  | 0.504757 | 0.371036 |
| 888 | ENSG00000LRRC3C    | 0.681818 | 0.318182 | 0.495455 | 0.437374 |
| 889 | ENSG00000DGKE      | 0.643434 | 0.315152 | 0.475758 | 0.481818 |
| 890 | ENSG00000BMT2      | 0.712121 | 0.273737 | 0.478788 | 0.471717 |
| 891 | ENSG00000RACGAP1   | 0.812121 | 0.191919 | 0.480303 | 0.39596  |
| 892 | ENSG00000SHQ1      | 0.691919 | 0.294949 | 0.486532 | 0.468687 |
| 893 | ENSG00000SRCAP     | 0.69596  | 0.312121 | 0.495791 | 0.435354 |
| 894 | ENSG00000JPH2      | 0.765657 | 0.223232 | 0.477441 | 0.454545 |
| 895 | ENSG00000TSPAN13   | 0.734343 | 0.260606 | 0.482492 | 0.457576 |
| 896 | ENSG00000HCN4      | 0.69899  | 0.29798  | 0.493098 | 0.453535 |
| 897 | ENSG00000ANKRD34B  | 0.747357 | 0.255814 | 0.480444 | 0.445032 |
| 898 | ENSG00000PIP5KL1   | 0.654545 | 0.326263 | 0.47963  | 0.461616 |
| 899 | ENSG00000SMIM6     | 0.714141 | 0.290909 | 0.492929 | 0.443434 |
| 900 | ENSG00000LHFPL5    | 0.654545 | 0.331313 | 0.487037 | 0.443434 |
| 901 | ENSG00000ZDHHC15   | 0.810782 | 0.190275 | 0.479035 | 0.408034 |
| 902 | ENSG00000POU2AF1   | 0.692929 | 0.281818 | 0.479461 | 0.482828 |
| 903 | ENSG00000JOSD1     | 0.682875 | 0.315011 | 0.488548 | 0.454545 |
| 904 | ENSG00000ZNF674    | 0.719192 | 0.294949 | 0.493266 | 0.430303 |
| 905 | ENSG00000SORD      | 0.817125 | 0.186047 | 0.486963 | 0.384778 |
| 906 | ENSG00000TCTEX1D1  | 0.629293 | 0.338384 | 0.483838 | 0.446465 |
| 907 | ENSG00000ENPP6     | 0.658562 | 0.32981  | 0.488196 | 0.448203 |
| 908 | ENSG00000HNF1B     | 0.743434 | 0.264646 | 0.493266 | 0.433333 |
| 909 | ENSG00000SRGAP3    | 0.820202 | 0.164646 | 0.473064 | 0.413131 |
| 910 | ENSG00000SLC35E2   | 0.618182 | 0.318182 | 0.468182 | 0.488889 |
| 911 | ENSG00000TCEAL8    | 0.615152 | 0.334343 | 0.468013 | 0.468687 |
| 912 | ENSG00000TOX       | 0.736364 | 0.259596 | 0.48569  | 0.455556 |
| 913 | ENSG00000CCDC32    | 0.69798  | 0.251515 | 0.46532  | 0.50303  |
| 914 | ENSG00000UACA      | 0.714141 | 0.29697  | 0.49596  | 0.436364 |
| 915 | ENSG00000CHEK2     | 0.843434 | 0.151515 | 0.474411 | 0.345455 |
| 916 | ENSG00000ELL3      | 0.767677 | 0.245455 | 0.488215 | 0.422222 |
| 917 | ENSG00000MEI1      | 0.711111 | 0.286869 | 0.487542 | 0.461616 |
| 918 | ENSG00000GPR37     | 0.69697  | 0.282828 | 0.476431 | 0.481818 |
| 919 | ENSG00000CIZ1      | 0.712474 | 0.311839 | 0.499648 | 0.399577 |
| 920 | ENSG00000FAM47A    | 0.638384 | 0.332323 | 0.484007 | 0.457576 |
| 921 | ENSG00000AL162417. | 0.775758 | 0.241414 | 0.493434 | 0.40101  |
| 922 | ENSG00000IGLON5    | 0.692929 | 0.29899  | 0.488215 | 0.466667 |
| 923 | ENSG00000OR52D1    | 0.679704 | 0.284355 | 0.479915 | 0.4926   |
| 924 | ENSG00000P2RY2     | 0.681818 | 0.30404  | 0.485354 | 0.473737 |
| 925 | ENSG00000ZNF691    | 0.689218 | 0.311839 | 0.490486 | 0.454545 |
| 926 | ENSG00000ESRP1     | 0.787526 | 0.227273 | 0.495419 | 0.402748 |
| 927 | ENSG00000SMIM8     | 0.676633 | 0.305648 | 0.486711 | 0.47619  |
| 928 | ENSG00000PPP1R26   | 0.77167  | 0.245243 | 0.492424 | 0.414376 |
| 929 | ENSG00000TBX10     | 0.761616 | 0.241414 | 0.4867   | 0.443434 |
| 930 | ENSG00000KHK       | 0.737374 | 0.280808 | 0.499327 | 0.416162 |
| 931 | ENSG00000LOXL1     | 0.707071 | 0.274747 | 0.482492 | 0.481818 |
| 932 | ENSG00000H1FNT     | 0.667019 | 0.295983 | 0.473749 | 0.493658 |
| 933 | ENSG00000SASH3     | 0.70303  | 0.285859 | 0.486532 | 0.474747 |



|     |                    |          |          |          |          |        |
|-----|--------------------|----------|----------|----------|----------|--------|
| 934 | ENSG00000PLA2G2A   | 0.747475 | 0.226263 | 0.47138  | 0.477778 |        |
| 935 | ENSG00000SLC16A7   | 0.636364 | 0.348485 | 0.491246 | 0.415152 |        |
| 936 | ENSG00000SPEM2     | 0.732323 | 0.267677 | 0.482997 | 0.463636 |        |
| 937 | ENSG00000ZBTB16    | 0.829293 | 0.173737 | 0.491246 | 0.367677 |        |
| 938 | ENSG00000KCNAB1    | 0.675526 | 0.323367 | 0.497785 | 0.445183 |        |
| 939 | ENSG00000TTLL7     | 0.725253 | 0.29596  | 0.500337 | 0.421212 |        |
| 940 | ENSG00000BTBD1     | 0.781818 | 0.239394 | 0.490909 | 0.410101 |        |
| 941 | ENSG00000BRMS1L    | 0.613108 | 0.326638 | 0.467407 | 0.485201 |        |
| 942 | ENSG00000ZNF575    | 0.717172 | 0.29697  | 0.499158 | 0.435354 |        |
| 943 | ENSG00000IQCB1     | 0.701449 | 0.288889 | 0.490016 | 0.472464 |        |
| 944 | ENSG00000TBX5      | 0.80404  | 0.19697  | 0.487205 | 0.426263 |        |
| 945 | ENSG00000ALDH1A3   | 0.782828 | 0.193939 | 0.473064 | 0.462626 |        |
| 946 | ENSG00000FABP12    | 0.660606 | 0.328283 | 0.490909 | 0.455556 |        |
| 947 | ENSG00000GZMA      | 0.729293 | 0.274747 | 0.485522 | 0.460606 |        |
| 948 | ENSG00000APOBEC3G  | 0.676768 | 0.331313 | 0.488889 | 0.433333 |        |
| 949 | ENSG00000NAT2      | 0.758586 | 0.247475 | 0.488552 | 0.443434 |        |
| 950 | ENSG00000PRR14     | 0.765657 | 0.267677 | 0.503199 | 0.370707 |        |
| 951 | ENSG00000AHCYL2    | 0.620202 | 0.344444 | 0.475421 | 0.455556 |        |
| 952 | ENSG00000PRDM13    | 0.609091 | 0.351515 | 0.472727 | 0.443434 |        |
| 953 | ENSG00000SLC2A12   | 0.655391 | 0.325581 | 0.483615 | 0.471459 |        |
| 954 | ENSG00000MRGPRF    | 0.712121 | 0.249495 | 0.46633  | 0.49899  |        |
| 955 | ENSG00000SKI       | 0.771717 | 0.231313 | 0.48367  | 0.449495 |        |
| 956 | ENSG00000TMEM52B   | 0.646465 | 0.326263 | 0.482492 | 0.474747 |        |
| 957 | ENSG00000BDKRB2    | 0.624242 | 0.342424 | 0.479293 | 0.456566 |        |
| 958 | ENSG00000CHIC2     | 0.775758 | 0.240404 | 0.491919 | 0.429293 |        |
| 959 | ENSG00000FUT5      | 0.723232 | 0.276768 | 0.488215 | 0.467677 |        |
| 960 | ENSG00000BLK       | 0.751586 | 0.239958 | 0.480973 | 0.470402 |        |
| 961 | ENSG00000ODF2      | 0.725159 | 0.287526 | 0.497533 | 0.447146 |        |
| 962 | ENSG00000POU3F3    | 0.553535 | 0.365657 | 0.45303  | 0.435354 |        |
| 963 | ENSG00000AC091057. | 0.676768 | 0.330303 | 0.50202  | 0.425253 |        |
| 964 | ENSG00000ARHGAP11B | 0.676768 | 0.330303 | 0.50202  | 0.425253 |        |
| 965 | ENSG00000LGI2      | 0.654545 | 0.338384 | 0.495118 | 0.440404 |        |
| 966 | ENSG00000FUT6      | 0.723232 | 0.276768 | 0.488215 | 0.467677 |        |
| 967 | ENSG00000CCNJL     | 0.803383 | 0.197674 | 0.480973 | 0.438689 |        |
| 968 | ENSG00000FUT3      | 0.723232 | 0.276768 | 0.488215 | 0.467677 |        |
| 969 | ENSG00000OR52E2    | 0.690909 | 0.321212 | 0.504377 | 0.428283 |        |
| 970 | ENSG00000ACAD10    | 0.69697  | 0.308081 | 0.495791 | 0.459596 |        |
| 971 | ENSG00000ARL6IP6   | 0.768549 | 0.239203 | 0.499077 | 0.434109 |        |
| 972 | ENSG00000CHIC1     | 0.775758 | 0.240404 | 0.491919 | 0.429293 |        |
| 973 | ENSG00000PFKFB2    | 0.737844 | 0.262156 | 0.490486 | 0.460888 |        |
| 974 | ENSG00000SLC16A6   | 0.684989 | 0.312896 | 0.498943 | 0.461945 |        |
| 975 | ENSG00000SMYD1     | 0.690909 | 0.321212 | 0.504377 | 0.432323 | 0.3276 |
| 976 | ENSG00000TMEM45A   | 0.681818 | 0.306061 | 0.468013 | 0.485859 |        |
| 977 | ENSG00000KIAA2013  | 0.733615 | 0.27167  | 0.49172  | 0.458774 |        |
| 978 | ENSG00000DZIP1     | 0.828283 | 0.164646 | 0.48569  | 0.413131 |        |
| 979 | ENSG00000FLYWCH2   | 0.560606 | 0.354545 | 0.454377 | 0.461616 |        |
| 980 | ENSG00000ZNF112    | 0.69899  | 0.293939 | 0.494444 | 0.472727 |        |
| 981 | ENSG00000AP2M1     | 0.770707 | 0.238384 | 0.488215 | 0.445455 |        |
| 982 | ENSG00000GPATCH3   | 0.732323 | 0.270707 | 0.491582 | 0.463636 |        |
| 983 | ENSG00000TIRAP     | 0.69596  | 0.30202  | 0.487374 | 0.473737 |        |
| 984 | ENSG00000CCL28     | 0.69556  | 0.311839 | 0.492072 | 0.460888 |        |
| 985 | ENSG00000CD226     | 0.681818 | 0.334343 | 0.506566 | 0.40101  |        |
| 986 | ENSG00000NID1      | 0.722222 | 0.279798 | 0.488721 | 0.468687 |        |
| 987 | ENSG00000ZAR1L     | 0.749723 | 0.246955 | 0.488188 | 0.465116 |        |
| 988 | ENSG00000TTC23L    | 0.704017 | 0.313953 | 0.499119 | 0.440803 |        |

|      |           |          |          |          |          |          |
|------|-----------|----------|----------|----------|----------|----------|
| 989  | ENSG00000 | SHKBP1   | 0.785859 | 0.246465 | 0.498316 | 0.393939 |
| 990  | ENSG00000 | DNAJC21  | 0.785412 | 0.247357 | 0.499824 | 0.387949 |
| 991  | ENSG00000 | ZNF711   | 0.77167  | 0.239958 | 0.495419 | 0.439746 |
| 992  | ENSG00000 | DYNAP    | 0.60101  | 0.359596 | 0.478451 | 0.431313 |
| 993  | ENSG00000 | YEATS2   | 0.570707 | 0.367677 | 0.467677 | 0.423232 |
| 994  | ENSG00000 | FGF7     | 0.666667 | 0.30404  | 0.474411 | 0.49697  |
| 995  | ENSG00000 | SYTL2    | 0.65227  | 0.336656 | 0.492986 | 0.45515  |
| 996  | ENSG00000 | WDR38    | 0.59697  | 0.356566 | 0.475084 | 0.443434 |
| 997  | ENSG00000 | THNSL2   | 0.636364 | 0.330303 | 0.480808 | 0.479798 |
| 998  | ENSG00000 | NXPE3    | 0.785412 | 0.217759 | 0.484496 | 0.452431 |
| 999  | ENSG00000 | PRPF38B  | 0.712474 | 0.308668 | 0.503524 | 0.432347 |
| 1000 | ENSG00000 | ALDH16A1 | 0.766667 | 0.257576 | 0.497306 | 0.427273 |
| 1001 | ENSG00000 | IGFALS   | 0.842424 | 0.169697 | 0.488552 | 0.374747 |
| 1002 | ENSG00000 | CC2D2B   | 0.689899 | 0.288889 | 0.485522 | 0.491919 |
| 1003 | ENSG00000 | SPSB2    | 0.770613 | 0.245243 | 0.493481 | 0.440803 |
| 1004 | ENSG00000 | NTRK3    | 0.829293 | 0.20404  | 0.495286 | 0.357576 |
| 1005 | ENSG00000 | CCNQ     | 0.684848 | 0.323232 | 0.498485 | 0.448485 |
| 1006 | ENSG00000 | DPF3     | 0.709091 | 0.30303  | 0.502357 | 0.448485 |
| 1007 | ENSG00000 | MANBA    | 0.70303  | 0.320202 | 0.506061 | 0.423232 |
| 1008 | ENSG00000 | LRRRC39  | 0.655391 | 0.321353 | 0.485377 | 0.483087 |
| 1009 | ENSG00000 | WDHD1    | 0.584567 | 0.352008 | 0.466526 | 0.461945 |
| 1010 | ENSG00000 | GRHL1    | 0.787879 | 0.232323 | 0.5      | 0.422222 |
| 1011 | ENSG00000 | FRS3     | 0.810101 | 0.214141 | 0.4867   | 0.418182 |
| 1012 | ENSG00000 | NXN      | 0.752525 | 0.207071 | 0.467172 | 0.494949 |
| 1013 | ENSG00000 | ASB12    | 0.644444 | 0.335354 | 0.487542 | 0.466667 |
| 1014 | ENSG00000 | METTL26  | 0.69798  | 0.30101  | 0.492593 | 0.473737 |
| 1015 | ENSG00000 | FAM187A  | 0.699789 | 0.320296 | 0.497005 | 0.439746 |
| 1016 | ENSG00000 | ORM2     | 0.831313 | 0.164646 | 0.48367  | 0.417172 |
| 1017 | ENSG00000 | POF1B    | 0.645455 | 0.333333 | 0.482492 | 0.473737 |
| 1018 | ENSG00000 | CRB3     | 0.656566 | 0.338384 | 0.496128 | 0.447475 |
| 1019 | ENSG00000 | CHFR     | 0.715152 | 0.306061 | 0.500673 | 0.443434 |
| 1020 | ENSG00000 | PPOX     | 0.769697 | 0.234343 | 0.492424 | 0.455556 |
| 1021 | ENSG00000 | CFC1     | 0.639394 | 0.350505 | 0.493771 | 0.429293 |
| 1022 | ENSG00000 | PAGE4    | 0.709091 | 0.314141 | 0.509764 | 0.425253 |
| 1023 | ENSG00000 | POSTN    | 0.758985 | 0.215645 | 0.471106 | 0.485201 |
| 1024 | ENSG00000 | GRHL3    | 0.769697 | 0.252525 | 0.496128 | 0.432323 |
| 1025 | ENSG00000 | SLC26A2  | 0.690909 | 0.30202  | 0.484848 | 0.482828 |
| 1026 | ENSG00000 | CFC1B    | 0.639394 | 0.350505 | 0.493771 | 0.429293 |
| 1027 | ENSG00000 | SUZ12    | 0.616279 | 0.338266 | 0.468816 | 0.479915 |
| 1028 | ENSG00000 | NLRP1    | 0.742072 | 0.255814 | 0.481677 | 0.475687 |
| 1029 | ENSG00000 | SMURF2   | 0.673737 | 0.338384 | 0.498316 | 0.433333 |
| 1030 | ENSG00000 | CDH8     | 0.698782 | 0.316722 | 0.505906 | 0.438538 |
| 1031 | ENSG00000 | GAB4     | 0.741414 | 0.261616 | 0.488721 | 0.467677 |
| 1032 | ENSG00000 | MRGPRX2  | 0.757576 | 0.264646 | 0.502525 | 0.427273 |
| 1033 | ENSG00000 | GTPBP10  | 0.803383 | 0.224101 | 0.502467 | 0.396406 |
| 1034 | ENSG00000 | A1CF     | 0.77907  | 0.230444 | 0.48661  | 0.453488 |
| 1035 | ENSG00000 | ANKRD35  | 0.640404 | 0.334343 | 0.484848 | 0.472727 |
| 1036 | ENSG00000 | C18orf25 | 0.80404  | 0.234343 | 0.501852 | 0.378788 |
| 1037 | ENSG00000 | RASGEF1A | 0.743434 | 0.252525 | 0.486027 | 0.474747 |
| 1038 | ENSG00000 | ZNF682   | 0.749471 | 0.268499 | 0.495772 | 0.44926  |
| 1039 | ENSG00000 | NELL2    | 0.719192 | 0.30202  | 0.502694 | 0.441414 |
| 1040 | ENSG00000 | RNPEPL1  | 0.80404  | 0.19899  | 0.491246 | 0.443434 |
| 1041 | ENSG00000 | SCAMP5   | 0.580808 | 0.336364 | 0.451852 | 0.493939 |
| 1042 | ENSG00000 | MYBL1    | 0.667677 | 0.332323 | 0.497138 | 0.454545 |
| 1043 | ENSG00000 | MID1     | 0.684385 | 0.330011 | 0.497231 | 0.445183 |

|      |                    |          |          |          |          |
|------|--------------------|----------|----------|----------|----------|
| 1044 | ENSG00000FILIP1    | 0.59596  | 0.344444 | 0.469192 | 0.477778 |
| 1045 | ENSG00000KLHL13    | 0.777778 | 0.238384 | 0.493939 | 0.446465 |
| 1046 | ENSG00000ASF1B     | 0.616833 | 0.345515 | 0.481174 | 0.467331 |
| 1047 | ENSG00000C19orf81  | 0.643411 | 0.342193 | 0.492802 | 0.456257 |
| 1048 | ENSG00000ARL17A    | 0.775758 | 0.232323 | 0.489562 | 0.456566 |
| 1049 | ENSG00000C14orf119 | 0.680808 | 0.324242 | 0.500842 | 0.459596 |
| 1050 | ENSG00000ECE2      | 0.787375 | 0.232558 | 0.50203  | 0.428571 |
| 1051 | ENSG00000STRA6     | 0.690909 | 0.320202 | 0.503872 | 0.452525 |
| 1052 | ENSG00000ARL17B    | 0.775758 | 0.232323 | 0.489562 | 0.456566 |
| 1053 | ENSG00000EEF1AKMT4 | 0.787375 | 0.232558 | 0.50203  | 0.428571 |
| 1054 | ENSG00000TRIM15    | 0.772727 | 0.217172 | 0.476094 | 0.476768 |
| 1055 | ENSG00000NFKBIZ    | 0.630021 | 0.330867 | 0.467583 | 0.491543 |
| 1056 | ENSG00000FCN3      | 0.664646 | 0.321212 | 0.492929 | 0.481818 |
| 1057 | ENSG00000PIK3C2B   | 0.692929 | 0.330303 | 0.507239 | 0.418182 |
| 1058 | ENSG00000SCRN1     | 0.690909 | 0.311111 | 0.495455 | 0.474747 |
| 1059 | ENSG00000PRR35     | 0.688889 | 0.321212 | 0.50202  | 0.456566 |
| 1060 | ENSG00000SATB1     | 0.855072 | 0.157488 | 0.490821 | 0.357488 |
| 1061 | ENSG00000GCH1      | 0.790909 | 0.231313 | 0.494613 | 0.436364 |
| 1062 | ENSG00000HSPB11    | 0.737374 | 0.289899 | 0.506902 | 0.430303 |
| 1063 | ENSG00000SPC24     | 0.617172 | 0.316162 | 0.445286 | 0.519192 |
| 1064 | ENSG00000KLHL9     | 0.777778 | 0.238384 | 0.493939 | 0.446465 |
| 1065 | ENSG00000HABP4     | 0.726263 | 0.292929 | 0.502694 | 0.450505 |
| 1066 | ENSG00000NDST4     | 0.673737 | 0.330303 | 0.500505 | 0.458586 |
| 1067 | ENSG00000CLDN2     | 0.687805 | 0.328049 | 0.496545 | 0.453659 |
| 1068 | ENSG00000GLRA2     | 0.757576 | 0.271717 | 0.497811 | 0.440404 |
| 1069 | ENSG00000TIMM13    | 0.781818 | 0.245455 | 0.499495 | 0.431313 |
| 1070 | ENSG00000SH3BGRL3  | 0.632323 | 0.360606 | 0.493939 | 0.421212 |
| 1071 | ENSG00000EEF2KMT   | 0.711111 | 0.308081 | 0.502862 | 0.454545 |
| 1072 | ENSG00000NPS       | 0.808081 | 0.227273 | 0.503367 | 0.394949 |
| 1073 | ENSG00000NLRC4     | 0.786869 | 0.226263 | 0.490572 | 0.455556 |
| 1074 | ENSG00000NEK10     | 0.735729 | 0.27907  | 0.495948 | 0.461945 |
| 1075 | ENSG00000USP16     | 0.801268 | 0.22093  | 0.496476 | 0.432347 |
| 1076 | ENSG00000SLX1A     | 0.777778 | 0.246465 | 0.500337 | 0.437374 |
| 1077 | ENSG00000TMEM132A  | 0.636364 | 0.340404 | 0.477104 | 0.476768 |
| 1078 | ENSG00000RSRP1     | 0.616279 | 0.349894 | 0.483087 | 0.464059 |
| 1079 | ENSG00000TMEM163   | 0.636766 | 0.346622 | 0.48948  | 0.457364 |
| 1080 | ENSG00000SLX1B     | 0.777778 | 0.246465 | 0.500337 | 0.437374 |
| 1081 | ENSG00000LDB1      | 0.776768 | 0.258586 | 0.507744 | 0.406061 |
| 1082 | ENSG00000HOXA11    | 0.641414 | 0.328283 | 0.478114 | 0.492929 |
| 1083 | ENSG00000FNBP4     | 0.840404 | 0.180808 | 0.493266 | 0.39899  |
| 1084 | ENSG00000AC106782. | 0.79596  | 0.219192 | 0.493771 | 0.447475 |
| 1085 | ENSG00000AC133555. | 0.79596  | 0.219192 | 0.493771 | 0.447475 |
| 1086 | ENSG00000PPAN      | 0.808081 | 0.227273 | 0.503367 | 0.407071 |
| 1087 | ENSG00000BZW1      | 0.706061 | 0.318182 | 0.512121 | 0.435354 |
| 1088 | ENSG00000KLF15     | 0.752525 | 0.265657 | 0.502357 | 0.453535 |
| 1089 | ENSG00000SLC6A12   | 0.673737 | 0.338384 | 0.501347 | 0.446465 |
| 1090 | ENSG00000SLC52A2   | 0.781818 | 0.243434 | 0.49697  | 0.440404 |
| 1091 | ENSG00000AKAIN1    | 0.667019 | 0.34778  | 0.50599  | 0.411205 |
| 1092 | ENSG00000OR7A5     | 0.682828 | 0.330303 | 0.502189 | 0.450505 |
| 1093 | ENSG00000ADNP2     | 0.681818 | 0.328283 | 0.50202  | 0.460606 |
| 1094 | ENSG00000GLB1L2    | 0.846465 | 0.154545 | 0.486364 | 0.418182 |
| 1095 | ENSG00000CDKL4     | 0.8      | 0.230303 | 0.49798  | 0.430303 |
| 1096 | ENSG00000MTURN     | 0.667677 | 0.324242 | 0.49596  | 0.479798 |
| 1097 | ENSG00000ZNF835    | 0.737374 | 0.290909 | 0.501515 | 0.447475 |
| 1098 | ENSG00000RAB9B     | 0.828753 | 0.193446 | 0.48802  | 0.430233 |

|      |                    |          |          |          |          |        |       |
|------|--------------------|----------|----------|----------|----------|--------|-------|
| 1099 | ENSG00000SIX1      | 0.788889 | 0.215152 | 0.482828 | 0.470707 |        |       |
| 1100 | ENSG00000CBLC      | 0.775194 | 0.250277 | 0.508306 | 0.429679 |        |       |
| 1101 | ENSG00000LATS2     | 0.794949 | 0.179798 | 0.468013 | 0.484848 |        |       |
| 1102 | ENSG00000IN080C    | 0.79899  | 0.229293 | 0.502357 | 0.431313 |        |       |
| 1103 | ENSG00000SPTLC3    | 0.693939 | 0.306061 | 0.496465 | 0.482828 |        |       |
| 1104 | ENSG00000PRY       | 0.690909 | 0.337374 | 0.514141 | 0.387879 |        |       |
| 1105 | ENSG00000PDZD4     | 0.752643 | 0.269556 | 0.501586 | 0.45666  |        |       |
| 1106 | ENSG00000PRY2      | 0.690909 | 0.337374 | 0.514141 | 0.387879 |        |       |
| 1107 | ENSG00000DCLK3     | 0.651163 | 0.35518  | 0.501938 | 0.428118 |        |       |
| 1108 | ENSG00000VSTM5     | 0.681818 | 0.301268 | 0.485906 | 0.5      |        |       |
| 1109 | ENSG00000TMA16     | 0.775758 | 0.267677 | 0.511111 | 0.393939 |        |       |
| 1110 | ENSG00000TSHR      | 0.781818 | 0.255556 | 0.505724 | 0.417172 |        |       |
| 1111 | ENSG00000MAFK      | 0.630303 | 0.336364 | 0.475758 | 0.489899 |        |       |
| 1112 | ENSG00000TMOD1     | 0.708081 | 0.312121 | 0.501684 | 0.465657 |        |       |
| 1113 | ENSG00000CCDC92    | 0.733333 | 0.3      | 0.505556 | 0.442424 |        |       |
| 1114 | ENSG00000ASNS      | 0.672727 | 0.345455 | 0.509091 | 0.425253 |        |       |
| 1115 | ENSG00000MYOC      | 0.690909 | 0.312121 | 0.49596  | 0.483838 |        |       |
| 1116 | ENSG00000WIPI2     | 0.828283 | 0.213131 | 0.505387 | 0.380808 |        |       |
| 1117 | ENSG00000ZNF713    | 0.698732 | 0.307611 | 0.493305 | 0.48203  |        |       |
| 1118 | ENSG00000ATAD1     | 0.806061 | 0.210101 | 0.488889 | 0.457576 |        |       |
| 1119 | ENSG00000PITPNM1   | 0.690909 | 0.320202 | 0.503872 | 0.468687 |        |       |
| 1120 | ENSG00000ACOT7     | 0.784848 | 0.186869 | 0.467677 | 0.492929 |        |       |
| 1121 | ENSG00000TADA1     | 0.8      | 0.226263 | 0.502694 | 0.437374 |        |       |
| 1122 | ENSG00000TNRC6C    | 0.630021 | 0.340381 | 0.483968 | 0.483087 |        |       |
| 1123 | ENSG00000RNFT2     | 0.713131 | 0.30303  | 0.508081 | 0.462626 |        |       |
| 1124 | ENSG00000SCAF11    | 0.80202  | 0.242424 | 0.507407 | 0.4      |        |       |
| 1125 | ENSG00000METAP1D   | 0.858586 | 0.158586 | 0.494444 | 0.382828 |        |       |
| 1126 | ENSG00000TCTN3     | 0.733333 | 0.29697  | 0.505051 | 0.451515 |        |       |
| 1127 | ENSG00000PADI2     | 0.745455 | 0.276768 | 0.50303  | 0.458586 |        |       |
| 1128 | ENSG00000SCML2     | 0.654334 | 0.343552 | 0.482734 | 0.472516 |        |       |
| 1129 | ENSG00000BCL9      | 0.754545 | 0.248485 | 0.485859 | 0.483838 |        |       |
| 1130 | ENSG00000FGFR3     | 0.636364 | 0.350505 | 0.492256 | 0.461616 |        |       |
| 1131 | ENSG00000TSEN34    | 0.735354 | 0.277778 | 0.490572 | 0.477778 |        |       |
| 1132 | ENSG00000FAM129C   | 0.720202 | 0.3      | 0.506734 | 0.461616 |        |       |
| 1133 | ENSG00000WDR53     | 0.69556  | 0.320296 | 0.506166 | 0.460888 | 0.3554 | 0.352 |
| 1134 | ENSG00000QPCTL     | 0.721212 | 0.307071 | 0.509091 | 0.449495 |        |       |
| 1135 | ENSG00000GABRA6    | 0.794926 | 0.230444 | 0.495243 | 0.453488 |        |       |
| 1136 | ENSG00000COL20A1   | 0.760606 | 0.221212 | 0.479461 | 0.494949 |        |       |
| 1137 | ENSG00000ACSS2     | 0.76412  | 0.229236 | 0.481728 | 0.48948  |        |       |
| 1138 | ENSG00000OR4M1     | 0.741414 | 0.270707 | 0.496633 | 0.474747 |        |       |
| 1139 | ENSG00000AP4M1     | 0.711111 | 0.317172 | 0.510774 | 0.440404 |        |       |
| 1140 | ENSG00000THAP7     | 0.7463   | 0.273784 | 0.511628 | 0.447146 |        |       |
| 1141 | ENSG00000SLC27A6   | 0.744186 | 0.289641 | 0.508633 | 0.44186  |        |       |
| 1142 | ENSG00000AC135068. | 0.741414 | 0.270707 | 0.496633 | 0.474747 |        |       |
| 1143 | ENSG00000CBFB      | 0.676768 | 0.341414 | 0.504377 | 0.442424 |        |       |
| 1144 | ENSG00000CDC20     | 0.831313 | 0.207071 | 0.506902 | 0.384848 |        |       |
| 1145 | ENSG00000PPRC1     | 0.816162 | 0.205051 | 0.493098 | 0.447475 |        |       |
| 1146 | ENSG00000OR4M2     | 0.741414 | 0.270707 | 0.496633 | 0.474747 |        |       |
| 1147 | ENSG00000AC171558. | 0.741414 | 0.270707 | 0.496633 | 0.474747 |        |       |
| 1148 | ENSG00000MIER3     | 0.708081 | 0.314141 | 0.509259 | 0.458586 |        |       |
| 1149 | ENSG00000TIPIN     | 0.80303  | 0.158586 | 0.462626 | 0.491919 |        |       |
| 1150 | ENSG00000SNIP1     | 0.833333 | 0.20202  | 0.494276 | 0.422222 |        |       |
| 1151 | ENSG00000IGSF3     | 0.656566 | 0.322222 | 0.48165  | 0.50202  |        |       |
| 1152 | ENSG00000NAA11     | 0.676533 | 0.325581 | 0.499471 | 0.478858 |        |       |
| 1153 | ENSG00000TMEM78    | 0.728283 | 0.311111 | 0.511448 | 0.427273 |        |       |

|      |                   |          |          |          |          |        |
|------|-------------------|----------|----------|----------|----------|--------|
| 1154 | ENSG00000C12orf65 | 0.634783 | 0.354589 | 0.493559 | 0.458937 |        |
| 1155 | ENSG00000CCND3    | 0.681818 | 0.30404  | 0.488889 | 0.505051 |        |
| 1156 | ENSG00000AHCYL1   | 0.692929 | 0.330303 | 0.507239 | 0.446465 |        |
| 1157 | ENSG00000SPATS1   | 0.658915 | 0.356589 | 0.50646  | 0.414175 |        |
| 1158 | ENSG00000CYP4B1   | 0.660606 | 0.346465 | 0.502189 | 0.451515 |        |
| 1159 | ENSG00000PNPLA3   | 0.698732 | 0.320296 | 0.507752 | 0.459831 |        |
| 1160 | ENSG00000ZFYVE26  | 0.757576 | 0.278788 | 0.508754 | 0.439394 |        |
| 1161 | ENSG00000LDHAL6B  | 0.638478 | 0.364693 | 0.501586 | 0.42389  |        |
| 1162 | ENSG00000KIF19    | 0.644599 | 0.360046 | 0.502323 | 0.432056 |        |
| 1163 | ENSG00000CNTNAP3  | 0.70303  | 0.3      | 0.490404 | 0.493939 |        |
| 1164 | ENSG00000WRN      | 0.785859 | 0.256566 | 0.50101  | 0.438384 |        |
| 1165 | ENSG00000MLLT1    | 0.807071 | 0.222222 | 0.505724 | 0.437374 |        |
| 1166 | ENSG00000ZNF821   | 0.707317 | 0.315912 | 0.509679 | 0.461092 |        |
| 1167 | ENSG00000ASPA     | 0.676768 | 0.312121 | 0.479293 | 0.507071 |        |
| 1168 | ENSG00000CAPN7    | 0.688889 | 0.346465 | 0.501515 | 0.427273 |        |
| 1169 | ENSG00000SBK2     | 0.70101  | 0.313131 | 0.507071 | 0.470707 |        |
| 1170 | ENSG00000ZFP1     | 0.650505 | 0.333333 | 0.479461 | 0.493939 |        |
| 1171 | ENSG00000CNTNAP3B | 0.70303  | 0.3      | 0.490404 | 0.493939 |        |
| 1172 | ENSG00000SUMF1    | 0.639394 | 0.350505 | 0.493771 | 0.465657 |        |
| 1173 | ENSG00000CEP41    | 0.660606 | 0.346465 | 0.502189 | 0.456566 |        |
| 1174 | ENSG00000HPR      | 0.665657 | 0.30404  | 0.483165 | 0.518182 |        |
| 1175 | ENSG00000NQ01     | 0.79798  | 0.234343 | 0.501347 | 0.447475 | 0.4174 |
| 1176 | ENSG00000ATG9A    | 0.676533 | 0.325581 | 0.499471 | 0.48203  |        |
| 1177 | ENSG00000CLDND1   | 0.778788 | 0.246465 | 0.496296 | 0.464646 |        |
| 1178 | ENSG00000C2orf40  | 0.692929 | 0.312121 | 0.49697  | 0.488889 |        |
| 1179 | ENSG00000SEC61G   | 0.747475 | 0.250505 | 0.485185 | 0.493939 |        |
| 1180 | ENSG00000TBL3     | 0.711416 | 0.32241  | 0.511276 | 0.437632 |        |
| 1181 | ENSG00000DISP1    | 0.715645 | 0.298097 | 0.502819 | 0.478858 |        |
| 1182 | ENSG00000POM121L2 | 0.788584 | 0.218816 | 0.491896 | 0.476744 |        |
| 1183 | ENSG00000MTG2     | 0.754545 | 0.291919 | 0.508754 | 0.435354 |        |
| 1184 | ENSG00000DDX19A   | 0.790909 | 0.253535 | 0.509596 | 0.422222 |        |
| 1185 | ENSG00000ZFP14    | 0.783838 | 0.255556 | 0.503199 | 0.442424 |        |
| 1186 | ENSG00000GPX2     | 0.681818 | 0.340404 | 0.509596 | 0.440404 |        |
| 1187 | ENSG00000PEX5L    | 0.710145 | 0.319807 | 0.513205 | 0.447343 |        |
| 1188 | ENSG00000ZNF564   | 0.672727 | 0.345455 | 0.509091 | 0.442424 |        |
| 1189 | ENSG00000GPR82    | 0.676768 | 0.326263 | 0.495791 | 0.485859 |        |
| 1190 | ENSG00000BBOX1    | 0.738384 | 0.278788 | 0.495286 | 0.480808 |        |
| 1191 | ENSG00000MTFR1    | 0.690909 | 0.328283 | 0.505219 | 0.467677 |        |
| 1192 | ENSG00000APOL4    | 0.645455 | 0.350505 | 0.494613 | 0.467677 |        |
| 1193 | ENSG00000SOD3     | 0.688889 | 0.332323 | 0.504882 | 0.462626 |        |
| 1194 | ENSG00000DEFB108B | 0.778013 | 0.254757 | 0.501409 | 0.455603 |        |
| 1195 | ENSG00000PRICKLE1 | 0.712071 | 0.275748 | 0.486526 | 0.51052  |        |
| 1196 | ENSG00000RGS9BP   | 0.724638 | 0.286957 | 0.499195 | 0.48599  |        |
| 1197 | ENSG00000RABGAP1L | 0.736364 | 0.287879 | 0.506061 | 0.468687 |        |
| 1198 | ENSG00000EMC10    | 0.813953 | 0.204017 | 0.492072 | 0.465116 |        |
| 1199 | ENSG00000GRK4     | 0.69556  | 0.302326 | 0.495419 | 0.498943 |        |
| 1200 | ENSG00000NXPH2    | 0.726467 | 0.27021  | 0.47656  | 0.507198 |        |
| 1201 | ENSG00000ATMIN    | 0.791919 | 0.262626 | 0.511785 | 0.40303  |        |
| 1202 | ENSG00000ZNF184   | 0.833333 | 0.216162 | 0.500337 | 0.420202 |        |
| 1203 | ENSG00000TMEM263  | 0.718816 | 0.294926 | 0.499648 | 0.485201 |        |
| 1204 | ENSG00000C1QTNF2  | 0.711111 | 0.312121 | 0.502525 | 0.474747 |        |
| 1205 | ENSG00000WDR72    | 0.859596 | 0.172727 | 0.505051 | 0.380808 |        |
| 1206 | ENSG00000CDK14    | 0.739958 | 0.236786 | 0.478506 | 0.514799 |        |
| 1207 | ENSG00000RPP30    | 0.79596  | 0.235354 | 0.498316 | 0.459596 |        |
| 1208 | ENSG00000MXRA7    | 0.689218 | 0.316068 | 0.499471 | 0.490486 |        |

|      |                   |          |          |          |          |
|------|-------------------|----------|----------|----------|----------|
| 1209 | ENSG00000ATP8A2   | 0.717608 | 0.316722 | 0.513104 | 0.447398 |
| 1210 | ENSG00000HSPB7    | 0.666667 | 0.348485 | 0.507576 | 0.445455 |
| 1211 | ENSG00000ATP1B1   | 0.658562 | 0.354123 | 0.506342 | 0.445032 |
| 1212 | ENSG00000MTERF4   | 0.689899 | 0.327273 | 0.505387 | 0.471717 |
| 1213 | ENSG00000NEU2     | 0.650505 | 0.340404 | 0.486532 | 0.487879 |
| 1214 | ENSG00000PMAIP1   | 0.690909 | 0.337374 | 0.514141 | 0.435354 |
| 1215 | ENSG00000ZFH3     | 0.816162 | 0.222222 | 0.501515 | 0.444444 |
| 1216 | ENSG00000NLRP8    | 0.673737 | 0.346465 | 0.510101 | 0.440404 |
| 1217 | ENSG00000ARAP3    | 0.669697 | 0.335354 | 0.49899  | 0.480808 |
| 1218 | ENSG00000MBD3L3   | 0.681818 | 0.328283 | 0.50202  | 0.479798 |
| 1219 | ENSG00000SERPINA6 | 0.639394 | 0.354545 | 0.495791 | 0.467677 |
| 1220 | ENSG00000RPH3AL   | 0.654545 | 0.355556 | 0.505051 | 0.445455 |
| 1221 | ENSG00000MBD3L2B  | 0.681818 | 0.328283 | 0.50202  | 0.479798 |
| 1222 | ENSG00000LGALS1   | 0.80303  | 0.239394 | 0.499663 | 0.451515 |
| 1223 | ENSG00000ABCC1    | 0.644444 | 0.360606 | 0.501347 | 0.451515 |
| 1224 | ENSG00000CPSF3    | 0.719192 | 0.269697 | 0.479966 | 0.516162 |
| 1225 | ENSG00000MBD3L4   | 0.681818 | 0.328283 | 0.50202  | 0.479798 |
| 1226 | ENSG00000ZBTB9    | 0.813131 | 0.232323 | 0.506734 | 0.430303 |
| 1227 | ENSG00000FOSL1    | 0.661616 | 0.323232 | 0.486532 | 0.506061 |
| 1228 | ENSG00000ACADSB   | 0.638478 | 0.364693 | 0.501586 | 0.44186  |
| 1229 | ENSG00000NEK11    | 0.645877 | 0.357294 | 0.489429 | 0.465116 |
| 1230 | ENSG00000NUMBL    | 0.866667 | 0.162626 | 0.498485 | 0.40303  |
| 1231 | ENSG00000CENPF    | 0.873737 | 0.168687 | 0.498148 | 0.376768 |
| 1232 | ENSG00000MBD3L2   | 0.681818 | 0.328283 | 0.50202  | 0.479798 |
| 1233 | ENSG00000MBD3L5   | 0.681818 | 0.328283 | 0.50202  | 0.479798 |
| 1234 | ENSG00000KLHL1    | 0.666667 | 0.334343 | 0.493771 | 0.487879 |
| 1235 | ENSG00000ZNF783   | 0.749471 | 0.287526 | 0.506166 | 0.460888 |
| 1236 | ENSG00000WDR4     | 0.630303 | 0.366667 | 0.495455 | 0.452525 |
| 1237 | ENSG00000MAT2A    | 0.848485 | 0.172727 | 0.494444 | 0.440404 |
| 1238 | ENSG00000TMEM235  | 0.733333 | 0.311111 | 0.508418 | 0.447475 |
| 1239 | ENSG00000SGK2     | 0.717172 | 0.30202  | 0.500337 | 0.485859 |
| 1240 | ENSG00000FADS6    | 0.690909 | 0.311111 | 0.495455 | 0.49798  |
| 1241 | ENSG00000MON2     | 0.872727 | 0.173737 | 0.502357 | 0.367677 |
| 1242 | ENSG00000MKL1     | 0.776768 | 0.246465 | 0.495623 | 0.475758 |
| 1243 | ENSG00000LRRC24   | 0.666667 | 0.348485 | 0.507576 | 0.451515 |
| 1244 | ENSG00000SLC7A6   | 0.654545 | 0.330303 | 0.486532 | 0.50404  |
| 1245 | ENSG00000COA5     | 0.656566 | 0.357576 | 0.507071 | 0.439394 |
| 1246 | ENSG00000FBX034   | 0.656448 | 0.354123 | 0.499648 | 0.461945 |
| 1247 | ENSG00000MAMLD1   | 0.690909 | 0.305051 | 0.494613 | 0.507071 |
| 1248 | ENSG00000THAP8    | 0.653277 | 0.34778  | 0.497886 | 0.47463  |
| 1249 | ENSG00000PM20D2   | 0.733333 | 0.29899  | 0.509428 | 0.465657 |
| 1250 | ENSG00000RPS2     | 0.636364 | 0.367677 | 0.50202  | 0.441414 |
| 1251 | ENSG00000ZNF180   | 0.854545 | 0.183838 | 0.504377 | 0.406061 |
| 1252 | ENSG00000KISS1R   | 0.70628  | 0.312077 | 0.504026 | 0.484058 |
| 1253 | ENSG00000CD163L1  | 0.739958 | 0.289641 | 0.506519 | 0.470402 |
| 1254 | ENSG00000OTUB2    | 0.682927 | 0.317073 | 0.490902 | 0.502904 |
| 1255 | ENSG00000RHOF     | 0.673737 | 0.330303 | 0.500505 | 0.488889 |
| 1256 | ENSG00000HCFC2    | 0.769556 | 0.241015 | 0.487667 | 0.491543 |
| 1257 | ENSG00000PARM1    | 0.80101  | 0.255556 | 0.510774 | 0.418182 |
| 1258 | ENSG00000CRIPT    | 0.609091 | 0.379798 | 0.486869 | 0.442424 |
| 1259 | ENSG00000C11orf54 | 0.824242 | 0.190909 | 0.489899 | 0.468687 |
| 1260 | ENSG00000ARHGEF6  | 0.736786 | 0.300211 | 0.510218 | 0.457717 |
| 1261 | ENSG00000GRK5     | 0.831313 | 0.218182 | 0.513131 | 0.4      |
| 1262 | ENSG00000SEM1     | 0.731501 | 0.287526 | 0.4963   | 0.490486 |
| 1263 | ENSG00000CERS5    | 0.806061 | 0.242424 | 0.506734 | 0.441414 |

0.2944

|      |                    |          |          |          |          |
|------|--------------------|----------|----------|----------|----------|
| 1264 | ENSG00000CADM4     | 0.673737 | 0.346465 | 0.510101 | 0.454545 |
| 1265 | ENSG00000PID1      | 0.660606 | 0.341414 | 0.499663 | 0.479798 |
| 1266 | ENSG00000SLC35B2   | 0.690909 | 0.337374 | 0.514141 | 0.444444 |
| 1267 | ENSG00000PDE9A     | 0.692929 | 0.339394 | 0.516162 | 0.432323 |
| 1268 | ENSG00000SF3B4     | 0.709091 | 0.323232 | 0.49596  | 0.477778 |
| 1269 | ENSG00000EZH1      | 0.670707 | 0.346465 | 0.497138 | 0.472727 |
| 1270 | ENSG00000PRSS21    | 0.714588 | 0.316068 | 0.51339  | 0.465116 |
| 1271 | ENSG00000FAAP20    | 0.654545 | 0.355556 | 0.505051 | 0.457576 |
| 1272 | ENSG00000SBSPON    | 0.656566 | 0.357576 | 0.507071 | 0.446465 |
| 1273 | ENSG00000PHYKPL    | 0.8      | 0.263636 | 0.511279 | 0.414141 |
| 1274 | ENSG00000PLEKHB2   | 0.717608 | 0.327796 | 0.522702 | 0.408638 |
| 1275 | ENSG00000CCDC138   | 0.763214 | 0.292812 | 0.513918 | 0.430233 |
| 1276 | ENSG00000SHANK3    | 0.757576 | 0.29596  | 0.514983 | 0.425253 |
| 1277 | ENSG00000CELSR3    | 0.69556  | 0.336152 | 0.515856 | 0.445032 |
| 1278 | ENSG00000COL4A1    | 0.676533 | 0.343552 | 0.510042 | 0.458774 |
| 1279 | ENSG00000INTS4     | 0.822813 | 0.214839 | 0.498154 | 0.458472 |
| 1280 | ENSG00000ZNF439    | 0.777778 | 0.247475 | 0.501515 | 0.475758 |
| 1281 | ENSG00000CEACAM19  | 0.806061 | 0.246465 | 0.514815 | 0.419192 |
| 1282 | ENSG00000WFDC2     | 0.660606 | 0.361616 | 0.511111 | 0.431313 |
| 1283 | ENSG00000NUDT18    | 0.750505 | 0.259596 | 0.489226 | 0.49596  |
| 1284 | ENSG00000ZNF440    | 0.777778 | 0.247475 | 0.501515 | 0.475758 |
| 1285 | ENSG00000LEUTX     | 0.834343 | 0.20202  | 0.509933 | 0.431313 |
| 1286 | ENSG00000C20orf27  | 0.724242 | 0.308081 | 0.512458 | 0.468687 |
| 1287 | ENSG00000HYOU1     | 0.681818 | 0.340404 | 0.509596 | 0.462626 |
| 1288 | ENSG00000ZNF700    | 0.777778 | 0.247475 | 0.501515 | 0.475758 |
| 1289 | ENSG00000CSPG5     | 0.644444 | 0.360606 | 0.501347 | 0.463636 |
| 1290 | ENSG00000DNTTIP2   | 0.858586 | 0.176768 | 0.507071 | 0.416162 |
| 1291 | ENSG00000ZNF763    | 0.777778 | 0.247475 | 0.501515 | 0.475758 |
| 1292 | ENSG00000ZNF69     | 0.777778 | 0.247475 | 0.501515 | 0.475758 |
| 1293 | ENSG00000ADAT3     | 0.725253 | 0.293939 | 0.500842 | 0.489899 |
| 1294 | ENSG00000AC008770. | 0.777778 | 0.247475 | 0.501515 | 0.475758 |
| 1295 | ENSG00000OR1Q1     | 0.690909 | 0.337374 | 0.514141 | 0.451515 |
| 1296 | ENSG00000DHX15     | 0.742424 | 0.285859 | 0.505892 | 0.478788 |
| 1297 | ENSG00000ECM1      | 0.70303  | 0.325253 | 0.510774 | 0.468687 |
| 1298 | ENSG00000ZFP36L1   | 0.635307 | 0.371036 | 0.502114 | 0.440803 |
| 1299 | ENSG00000EMC6      | 0.688889 | 0.321212 | 0.50202  | 0.493939 |
| 1300 | ENSG00000C6orf120  | 0.717172 | 0.320202 | 0.516835 | 0.451515 |
| 1301 | ENSG00000SMCHD1    | 0.722222 | 0.312121 | 0.505387 | 0.475758 |
| 1302 | ENSG00000GALNTL5   | 0.658562 | 0.354123 | 0.506342 | 0.463002 |
| 1303 | ENSG00000REEP4     | 0.690909 | 0.337374 | 0.514141 | 0.452525 |
| 1304 | ENSG00000SULT1C2   | 0.712121 | 0.324242 | 0.514141 | 0.455556 |
| 1305 | ENSG00000SERPINF1  | 0.654545 | 0.355556 | 0.505051 | 0.464646 |
| 1306 | ENSG00000RNF175    | 0.741414 | 0.308081 | 0.514646 | 0.443434 |
| 1307 | ENSG00000SSC4D     | 0.718816 | 0.316068 | 0.515504 | 0.461945 |
| 1308 | ENSG00000HEATR3    | 0.725253 | 0.309091 | 0.515152 | 0.463636 |
| 1309 | ENSG00000SLC34A1   | 0.868687 | 0.174747 | 0.517172 | 0.348485 |
| 1310 | ENSG00000MALL      | 0.724242 | 0.291919 | 0.502525 | 0.492929 |
| 1311 | ENSG00000CHST11    | 0.818182 | 0.227273 | 0.512121 | 0.437374 |
| 1312 | ENSG00000IGSF11    | 0.72979  | 0.285714 | 0.496309 | 0.497231 |
| 1313 | ENSG00000KIRREL1   | 0.667677 | 0.346465 | 0.500337 | 0.474747 |
| 1314 | ENSG00000PIAS2     | 0.705426 | 0.325581 | 0.513658 | 0.465116 |
| 1315 | ENSG00000ARSK      | 0.712474 | 0.311839 | 0.510218 | 0.478858 |
| 1316 | ENSG00000RNF222    | 0.635354 | 0.366667 | 0.50101  | 0.459596 |
| 1317 | ENSG00000GNA15     | 0.8      | 0.219192 | 0.490236 | 0.486869 |
| 1318 | ENSG00000NANOS2    | 0.717172 | 0.284848 | 0.490909 | 0.512121 |

|      |                    |          |          |          |          |
|------|--------------------|----------|----------|----------|----------|
| 1319 | ENSG00000SLC13A5   | 0.682875 | 0.32981  | 0.504757 | 0.487315 |
| 1320 | ENSG00000TMIGD2    | 0.709091 | 0.316162 | 0.510774 | 0.479798 |
| 1321 | ENSG00000ZNF132    | 0.837374 | 0.225253 | 0.510101 | 0.416162 |
| 1322 | ENSG00000COL6A5    | 0.681818 | 0.340404 | 0.509596 | 0.467677 |
| 1323 | ENSG00000ENOX2     | 0.712121 | 0.315152 | 0.50202  | 0.485859 |
| 1324 | ENSG00000IL20      | 0.673737 | 0.346465 | 0.510101 | 0.463636 |
| 1325 | ENSG00000HEATR1    | 0.709091 | 0.30404  | 0.501178 | 0.50101  |
| 1326 | ENSG00000C9orf152  | 0.681818 | 0.346465 | 0.509428 | 0.456566 |
| 1327 | ENSG00000RPF2      | 0.723232 | 0.314141 | 0.516667 | 0.459596 |
| 1328 | ENSG00000BICDL1    | 0.728283 | 0.30404  | 0.516162 | 0.467677 |
| 1329 | ENSG00000C8orf48   | 0.738462 | 0.302564 | 0.514744 | 0.457692 |
| 1330 | ENSG00000NOD2      | 0.673737 | 0.346465 | 0.510101 | 0.464646 |
| 1331 | ENSG00000PLPP7     | 0.709091 | 0.314141 | 0.509764 | 0.484848 |
| 1332 | ENSG00000RET       | 0.704017 | 0.335095 | 0.515152 | 0.448203 |
| 1333 | ENSG00000SLC38A5   | 0.692929 | 0.339394 | 0.516162 | 0.452525 |
| 1334 | ENSG00000SHROOM3   | 0.784355 | 0.274841 | 0.514799 | 0.432347 |
| 1335 | ENSG00000HEATR6    | 0.757576 | 0.265657 | 0.49899  | 0.491919 |
| 1336 | ENSG00000PLEKHG4B  | 0.69697  | 0.343434 | 0.520202 | 0.425253 |
| 1337 | ENSG00000SCYL1     | 0.673737 | 0.346465 | 0.510101 | 0.466667 |
| 1338 | ENSG00000SPIN1     | 0.772727 | 0.264646 | 0.509428 | 0.471717 |
| 1339 | ENSG00000MAGEB3    | 0.632135 | 0.37315  | 0.502643 | 0.448203 |
| 1340 | ENSG00000TAP2      | 0.579268 | 0.389024 | 0.482927 | 0.453659 |
| 1341 | ENSG00000PLEKHA6   | 0.654545 | 0.355556 | 0.505051 | 0.470707 |
| 1342 | ENSG00000AL669918. | 0.579268 | 0.389024 | 0.482927 | 0.453659 |
| 1343 | ENSG00000AKAP14    | 0.569767 | 0.381607 | 0.474982 | 0.470402 |
| 1344 | ENSG00000UBALD2    | 0.676768 | 0.322222 | 0.493771 | 0.510101 |
| 1345 | ENSG00000SPIN2A    | 0.772727 | 0.264646 | 0.509428 | 0.471717 |
| 1346 | ENSG00000TMEM198   | 0.645626 | 0.366556 | 0.506091 | 0.45515  |
| 1347 | ENSG00000TRIM40    | 0.79899  | 0.256566 | 0.510774 | 0.445455 |
| 1348 | ENSG00000ARHGAP5   | 0.692929 | 0.339394 | 0.516162 | 0.454545 |
| 1349 | ENSG00000SNX19     | 0.738901 | 0.302326 | 0.515328 | 0.459831 |
| 1350 | ENSG00000ZDHC6     | 0.656566 | 0.357576 | 0.507071 | 0.464646 |
| 1351 | ENSG00000SLF1      | 0.70303  | 0.329293 | 0.514478 | 0.465657 |
| 1352 | ENSG00000FAM184A   | 0.692929 | 0.339394 | 0.516162 | 0.454545 |
| 1353 | ENSG00000SPIN2B    | 0.772727 | 0.264646 | 0.509428 | 0.471717 |
| 1354 | ENSG00000NAGLU     | 0.708081 | 0.330303 | 0.519192 | 0.453535 |
| 1355 | ENSG00000IL17RE    | 0.811111 | 0.246465 | 0.512795 | 0.439394 |
| 1356 | ENSG00000AQP8      | 0.735354 | 0.294949 | 0.510101 | 0.481818 |
| 1357 | ENSG00000NPW       | 0.571014 | 0.383575 | 0.475523 | 0.469565 |
| 1358 | ENSG00000ZBTB42    | 0.70303  | 0.336364 | 0.518013 | 0.445455 |
| 1359 | ENSG00000LIPE      | 0.690909 | 0.337374 | 0.514141 | 0.466667 |
| 1360 | ENSG00000TACR3     | 0.654545 | 0.355556 | 0.505051 | 0.471717 |
| 1361 | ENSG00000TSR1      | 0.789899 | 0.221212 | 0.486027 | 0.49798  |
| 1362 | ENSG00000MT-ND4    | 0.733333 | 0.315152 | 0.520539 | 0.442424 |
| 1363 | ENSG00000FCRL4     | 0.748485 | 0.29596  | 0.512121 | 0.465657 |
| 1364 | ENSG00000OR2AK2    | 0.673737 | 0.346465 | 0.510101 | 0.467677 |
| 1365 | ENSG00000ARHGAP21  | 0.810101 | 0.221212 | 0.504377 | 0.473737 |
| 1366 | ENSG00000ITGB3     | 0.636364 | 0.367677 | 0.50202  | 0.461616 |
| 1367 | ENSG00000ING3      | 0.717172 | 0.316162 | 0.511279 | 0.479798 |
| 1368 | ENSG00000SERINC3   | 0.672727 | 0.345455 | 0.509091 | 0.475758 |
| 1369 | ENSG00000CDH18     | 0.727273 | 0.310101 | 0.516667 | 0.467677 |
| 1370 | ENSG00000ARL4D     | 0.672727 | 0.345455 | 0.509091 | 0.474747 |
| 1371 | ENSG00000FADD      | 0.84778  | 0.200846 | 0.509514 | 0.434461 |
| 1372 | ENSG00000GOLGA8A   | 0.64482  | 0.371036 | 0.507928 | 0.442918 |
| 1373 | ENSG00000SLITRK4   | 0.717608 | 0.327796 | 0.522702 | 0.437431 |



|      |                   |          |          |          |          |       |
|------|-------------------|----------|----------|----------|----------|-------|
| 1374 | ENSG00000PHRF1    | 0.868687 | 0.154545 | 0.502189 | 0.440404 |       |
| 1375 | ENSG00000HSPH1    | 0.834343 | 0.184848 | 0.492929 | 0.477778 | 0.319 |
| 1376 | ENSG00000GOLGA8B  | 0.64482  | 0.371036 | 0.507928 | 0.442918 |       |
| 1377 | ENSG00000QSOX1    | 0.676768 | 0.349495 | 0.513131 | 0.459596 |       |
| 1378 | ENSG00000IRX2     | 0.666667 | 0.346465 | 0.505219 | 0.479798 |       |
| 1379 | ENSG00000FIBCD1   | 0.737374 | 0.288889 | 0.50404  | 0.491919 |       |
| 1380 | ENSG00000MFHAS1   | 0.754153 | 0.254707 | 0.492802 | 0.508306 |       |
| 1381 | ENSG00000MAGEA8   | 0.737374 | 0.307071 | 0.517003 | 0.459596 |       |
| 1382 | ENSG00000MOGAT2   | 0.789899 | 0.255556 | 0.513805 | 0.457576 |       |
| 1383 | ENSG00000C19orf48 | 0.681818 | 0.328283 | 0.50202  | 0.49899  |       |
| 1384 | ENSG00000TAF9     | 0.674747 | 0.347475 | 0.501347 | 0.477778 |       |
| 1385 | ENSG00000EDNRB    | 0.681818 | 0.320202 | 0.490741 | 0.518182 |       |
| 1386 | ENSG00000SCARF1   | 0.6      | 0.39798  | 0.49899  | 0.424242 |       |
| 1387 | ENSG00000HCFC1R1  | 0.824524 | 0.238901 | 0.514975 | 0.426004 |       |
| 1388 | ENSG00000ZC3H7B   | 0.709091 | 0.331313 | 0.520202 | 0.453535 |       |
| 1389 | ENSG00000CUL9     | 0.781818 | 0.261616 | 0.508923 | 0.471717 |       |
| 1390 | ENSG00000DEFB116  | 0.631313 | 0.346465 | 0.48771  | 0.50404  |       |
| 1391 | ENSG00000EMID1    | 0.838317 | 0.221484 | 0.513104 | 0.430786 |       |
| 1392 | ENSG00000SETX     | 0.694503 | 0.312896 | 0.489429 | 0.51797  |       |
| 1393 | ENSG00000INPP5E   | 0.80303  | 0.261616 | 0.517845 | 0.430303 |       |
| 1394 | ENSG00000PLA2G5   | 0.805051 | 0.246465 | 0.508754 | 0.463636 |       |
| 1395 | ENSG00000SESTD1   | 0.684385 | 0.345515 | 0.51495  | 0.459579 |       |
| 1396 | ENSG00000ZNF786   | 0.651163 | 0.362579 | 0.505638 | 0.466173 |       |
| 1397 | ENSG00000TCP10L   | 0.668687 | 0.319192 | 0.488215 | 0.526263 |       |
| 1398 | ENSG00000NAB1     | 0.689218 | 0.326638 | 0.502114 | 0.496829 |       |
| 1399 | ENSG00000UBE20    | 0.711111 | 0.324242 | 0.506061 | 0.481818 |       |
| 1400 | ENSG00000INTS5    | 0.682875 | 0.349894 | 0.516385 | 0.447146 |       |
| 1401 | ENSG00000LTBR     | 0.654545 | 0.338384 | 0.495118 | 0.508081 |       |
| 1402 | ENSG00000MTNR1B   | 0.722705 | 0.308213 | 0.500644 | 0.494686 |       |
| 1403 | ENSG00000FAM109B  | 0.716501 | 0.326689 | 0.521595 | 0.45072  |       |
| 1404 | ENSG00000SLC43A2  | 0.644444 | 0.354545 | 0.498316 | 0.487879 |       |
| 1405 | ENSG00000CRLF3    | 0.64482  | 0.357294 | 0.498943 | 0.483087 |       |
| 1406 | ENSG00000CDCA2    | 0.714141 | 0.314141 | 0.512121 | 0.484848 |       |
| 1407 | ENSG00000SNTG2    | 0.746465 | 0.291919 | 0.516498 | 0.470707 |       |
| 1408 | ENSG00000ZNF274   | 0.815152 | 0.205051 | 0.494276 | 0.488889 |       |
| 1409 | ENSG00000CCDC114  | 0.682875 | 0.349894 | 0.516385 | 0.450317 |       |
| 1410 | ENSG00000PHYHIP   | 0.673737 | 0.346465 | 0.510101 | 0.474747 |       |
| 1411 | ENSG00000AGR3     | 0.678647 | 0.345666 | 0.512156 | 0.471459 |       |
| 1412 | ENSG00000ZNF358   | 0.829293 | 0.235354 | 0.514141 | 0.431313 |       |
| 1413 | ENSG00000OTOGL    | 0.682875 | 0.349894 | 0.516385 | 0.450317 |       |
| 1414 | ENSG00000CNR1     | 0.686957 | 0.33913  | 0.513043 | 0.475362 |       |
| 1415 | ENSG00000DGKG     | 0.657505 | 0.353066 | 0.505285 | 0.480973 |       |
| 1416 | ENSG00000CAPN3    | 0.673737 | 0.346465 | 0.510101 | 0.478788 |       |
| 1417 | ENSG00000MAP4K3   | 0.689899 | 0.327273 | 0.505387 | 0.49596  |       |
| 1418 | ENSG00000FOSB     | 0.840404 | 0.229293 | 0.506734 | 0.438384 |       |
| 1419 | ENSG00000TINAGL1  | 0.666667 | 0.346465 | 0.500673 | 0.489899 |       |
| 1420 | ENSG00000PSMG1    | 0.704017 | 0.330867 | 0.51568  | 0.470402 |       |
| 1421 | ENSG00000AK1      | 0.843434 | 0.232323 | 0.515488 | 0.40202  |       |
| 1422 | ENSG00000OR8D1    | 0.722038 | 0.323367 | 0.522702 | 0.45072  |       |
| 1423 | ENSG00000TMEM189  | 0.733333 | 0.307071 | 0.51229  | 0.476768 |       |
| 1424 | ENSG00000PERM1    | 0.869697 | 0.20101  | 0.503704 | 0.420202 |       |
| 1425 | ENSG00000MAP3K9   | 0.79899  | 0.239394 | 0.503199 | 0.481818 |       |
| 1426 | ENSG00000SHISA7   | 0.709091 | 0.331313 | 0.520202 | 0.453535 |       |
| 1427 | ENSG00000MAP2K4   | 0.812121 | 0.253535 | 0.518855 | 0.430303 |       |
| 1428 | ENSG00000LAIR1    | 0.676768 | 0.349495 | 0.513131 | 0.465657 |       |

|      |                  |          |          |          |          |
|------|------------------|----------|----------|----------|----------|
| 1429 | ENSG00000PDRG1   | 0.786869 | 0.277778 | 0.51936  | 0.437374 |
| 1430 | ENSG00000AIF1L   | 0.839394 | 0.209091 | 0.509764 | 0.450505 |
| 1431 | ENSG00000GPX3    | 0.829293 | 0.229293 | 0.516835 | 0.434343 |
| 1432 | ENSG00000RGS21   | 0.654545 | 0.355556 | 0.505051 | 0.478788 |
| 1433 | ENSG00000MCM5    | 0.777778 | 0.269697 | 0.511953 | 0.471717 |
| 1434 | ENSG00000LRRIQ3  | 0.709091 | 0.321212 | 0.511111 | 0.485859 |
| 1435 | ENSG00000NDC1    | 0.724242 | 0.314141 | 0.512458 | 0.481818 |
| 1436 | ENSG00000CALML4  | 0.639394 | 0.370707 | 0.505051 | 0.464646 |
| 1437 | ENSG00000TMEM43  | 0.709091 | 0.314141 | 0.509764 | 0.494949 |
| 1438 | ENSG00000FAM214B | 0.849495 | 0.19798  | 0.510774 | 0.444444 |
| 1439 | ENSG00000DPYSL3  | 0.709091 | 0.331313 | 0.520202 | 0.460606 |
| 1440 | ENSG00000MMRN1   | 0.731313 | 0.320202 | 0.522054 | 0.450505 |
| 1441 | ENSG00000SLC46A1 | 0.690909 | 0.337374 | 0.514141 | 0.476768 |
| 1442 | ENSG00000RBP7    | 0.729293 | 0.30101  | 0.500673 | 0.49798  |
| 1443 | ENSG00000TULP3   | 0.676533 | 0.343552 | 0.510042 | 0.48203  |
| 1444 | ENSG00000PTPN5   | 0.727273 | 0.322222 | 0.514646 | 0.465657 |
| 1445 | ENSG00000EGR1    | 0.79697  | 0.255556 | 0.514815 | 0.459596 |
| 1446 | ENSG00000QKI     | 0.880808 | 0.156566 | 0.508923 | 0.415152 |
| 1447 | ENSG00000SC5D    | 0.786869 | 0.265657 | 0.512458 | 0.467677 |
| 1448 | ENSG00000DXO     | 0.715152 | 0.292929 | 0.501684 | 0.516162 |
| 1449 | ENSG00000ADAM28  | 0.712121 | 0.334343 | 0.523232 | 0.445455 |
| 1450 | ENSG00000CLEC12A | 0.654545 | 0.355556 | 0.505051 | 0.481818 |
| 1451 | ENSG00000NRG1    | 0.673737 | 0.356566 | 0.511279 | 0.462626 |
| 1452 | ENSG00000SNX6    | 0.638478 | 0.364693 | 0.501586 | 0.478858 |
| 1453 | ENSG00000B3GNT3  | 0.692929 | 0.339394 | 0.516162 | 0.466667 |
| 1454 | ENSG00000PLPPR2  | 0.723232 | 0.305051 | 0.505892 | 0.49798  |
| 1455 | ENSG00000KCNQ5   | 0.723232 | 0.324242 | 0.521717 | 0.455556 |
| 1456 | ENSG00000PET117  | 0.714588 | 0.330867 | 0.522727 | 0.450317 |
| 1457 | ENSG00000TCTN2   | 0.733615 | 0.309725 | 0.519556 | 0.469345 |
| 1458 | ENSG00000TP63    | 0.864646 | 0.184848 | 0.518519 | 0.412121 |
| 1459 | ENSG00000DDI2    | 0.850505 | 0.180808 | 0.507239 | 0.460606 |
| 1460 | ENSG00000LONRF2  | 0.681818 | 0.354545 | 0.518182 | 0.449495 |
| 1461 | ENSG00000SPRR1A  | 0.694352 | 0.332226 | 0.497416 | 0.496124 |
| 1462 | ENSG00000SCTR    | 0.752525 | 0.289899 | 0.51431  | 0.478788 |
| 1463 | ENSG00000DDX47   | 0.831313 | 0.235354 | 0.518519 | 0.426263 |
| 1464 | ENSG00000PIAS4   | 0.712474 | 0.323467 | 0.514447 | 0.478858 |
| 1465 | ENSG00000BCL2L14 | 0.678647 | 0.345666 | 0.512156 | 0.477801 |
| 1466 | ENSG00000PABPC3  | 0.712474 | 0.328753 | 0.520613 | 0.461945 |
| 1467 | ENSG00000MTHFSD  | 0.727273 | 0.275758 | 0.489899 | 0.527273 |
| 1468 | ENSG00000POLR2I  | 0.767442 | 0.247357 | 0.503347 | 0.503171 |
| 1469 | ENSG00000UBOX5   | 0.70303  | 0.320202 | 0.506061 | 0.49899  |
| 1470 | ENSG00000CCDC105 | 0.654545 | 0.355556 | 0.505051 | 0.484848 |
| 1471 | ENSG00000SPC25   | 0.674747 | 0.346465 | 0.489057 | 0.49596  |
| 1472 | ENSG00000ADGRE1  | 0.676768 | 0.349495 | 0.513131 | 0.471717 |
| 1473 | ENSG00000TYMP    | 0.833333 | 0.229293 | 0.52862  | 0.405051 |
| 1474 | ENSG00000RIN3    | 0.725159 | 0.321353 | 0.521318 | 0.463002 |
| 1475 | ENSG00000RANBP1  | 0.659619 | 0.341438 | 0.498062 | 0.505285 |
| 1476 | ENSG00000CC2D1B  | 0.830303 | 0.235354 | 0.515825 | 0.440404 |
| 1477 | ENSG00000L3HYPDH | 0.767677 | 0.292929 | 0.513468 | 0.462626 |
| 1478 | ENSG00000TPPP3   | 0.769082 | 0.290821 | 0.508535 | 0.471498 |
| 1479 | ENSG00000DDHD1   | 0.712474 | 0.318182 | 0.511276 | 0.491543 |
| 1480 | ENSG00000BCL2L10 | 0.681818 | 0.354545 | 0.518182 | 0.454545 |
| 1481 | ENSG00000ULBP1   | 0.72093  | 0.316722 | 0.516796 | 0.481728 |
| 1482 | ENSG00000AKAP6   | 0.888889 | 0.191919 | 0.513131 | 0.321212 |
| 1483 | ENSG00000CD19    | 0.692929 | 0.339394 | 0.516162 | 0.470707 |

0.2213

|      |                    |          |          |          |          |
|------|--------------------|----------|----------|----------|----------|
| 1484 | ENSG00000WDR76     | 0.881818 | 0.182828 | 0.505387 | 0.417172 |
| 1485 | ENSG00000NUDT10    | 0.754545 | 0.309091 | 0.520202 | 0.449495 |
| 1486 | ENSG00000CES2      | 0.692929 | 0.339394 | 0.516162 | 0.471717 |
| 1487 | ENSG00000APOD      | 0.712474 | 0.311839 | 0.510218 | 0.497886 |
| 1488 | ENSG00000VIM       | 0.878788 | 0.171717 | 0.51431  | 0.412121 |
| 1489 | ENSG00000CEP97     | 0.744444 | 0.308081 | 0.511111 | 0.475758 |
| 1490 | ENSG00000MARVELD2  | 0.763012 | 0.293466 | 0.518272 | 0.461794 |
| 1491 | ENSG00000VSTM2L    | 0.779798 | 0.238384 | 0.502357 | 0.50202  |
| 1492 | ENSG00000ZNF2      | 0.836364 | 0.214141 | 0.508754 | 0.463636 |
| 1493 | ENSG00000DCHS2     | 0.692929 | 0.312121 | 0.49697  | 0.523232 |
| 1494 | ENSG00000GLRB      | 0.686869 | 0.356566 | 0.517845 | 0.445455 |
| 1495 | ENSG00000DLK2      | 0.7537   | 0.295983 | 0.520085 | 0.46723  |
| 1496 | ENSG00000ZBTB20    | 0.729293 | 0.310101 | 0.507576 | 0.490909 |
| 1497 | ENSG00000WSCD1     | 0.711111 | 0.344444 | 0.527778 | 0.415152 |
| 1498 | ENSG00000NUDT11    | 0.754545 | 0.309091 | 0.520202 | 0.449495 |
| 1499 | ENSG00000TMEM69    | 0.635354 | 0.366667 | 0.50101  | 0.484848 |
| 1500 | ENSG00000DYNC1I1   | 0.708081 | 0.330303 | 0.519192 | 0.473737 |
| 1501 | ENSG00000PRKACG    | 0.676768 | 0.349495 | 0.513131 | 0.475758 |
| 1502 | ENSG00000FPGS      | 0.709091 | 0.331313 | 0.520202 | 0.468687 |
| 1503 | ENSG00000GPR78     | 0.622222 | 0.385859 | 0.50404  | 0.457576 |
| 1504 | ENSG00000RPS11     | 0.716501 | 0.326689 | 0.521595 | 0.467331 |
| 1505 | ENSG00000ITPKA     | 0.727273 | 0.310101 | 0.516667 | 0.483838 |
| 1506 | ENSG00000MYO5C     | 0.79798  | 0.244444 | 0.505387 | 0.485859 |
| 1507 | ENSG00000CEBPG     | 0.70303  | 0.345455 | 0.516162 | 0.456566 |
| 1508 | ENSG00000HRK       | 0.824242 | 0.255556 | 0.515488 | 0.433333 |
| 1509 | ENSG00000CLEC14A   | 0.690909 | 0.352525 | 0.518687 | 0.447475 |
| 1510 | ENSG00000SPAG1     | 0.857576 | 0.176768 | 0.501684 | 0.470707 |
| 1511 | ENSG00000DNAJC19   | 0.733333 | 0.305051 | 0.512458 | 0.487879 |
| 1512 | ENSG00000ZIC4      | 0.666667 | 0.346465 | 0.505219 | 0.493939 |
| 1513 | ENSG00000GYS2      | 0.660606 | 0.361616 | 0.511111 | 0.472727 |
| 1514 | ENSG00000SPNS3     | 0.727273 | 0.327273 | 0.527273 | 0.440404 |
| 1515 | ENSG00000HTRA1     | 0.709091 | 0.331313 | 0.520202 | 0.469697 |
| 1516 | ENSG00000PGAM2     | 0.733333 | 0.305051 | 0.512458 | 0.489899 |
| 1517 | ENSG00000GABRG1    | 0.673737 | 0.346465 | 0.510101 | 0.486869 |
| 1518 | ENSG00000TM4SF18   | 0.709091 | 0.316162 | 0.510774 | 0.50101  |
| 1519 | ENSG00000NLRP5     | 0.7463   | 0.303383 | 0.513566 | 0.477801 |
| 1520 | ENSG00000PEX7      | 0.8      | 0.243434 | 0.506566 | 0.485859 |
| 1521 | ENSG00000MCM3      | 0.814141 | 0.212121 | 0.495791 | 0.49798  |
| 1522 | ENSG00000TRIM3     | 0.709091 | 0.313131 | 0.502694 | 0.513131 |
| 1523 | ENSG00000CD101     | 0.816162 | 0.251515 | 0.515657 | 0.453535 |
| 1524 | ENSG00000HUS1      | 0.826263 | 0.235354 | 0.527946 | 0.428283 |
| 1525 | ENSG00000AC019117. | 0.775758 | 0.267677 | 0.51532  | 0.478788 |
| 1526 | ENSG00000ANKS4B    | 0.788889 | 0.259596 | 0.513973 | 0.475758 |
| 1527 | ENSG00000PCNX3     | 0.732323 | 0.288889 | 0.503704 | 0.513131 |
| 1528 | ENSG00000GPR65     | 0.656566 | 0.357576 | 0.507071 | 0.484848 |
| 1529 | ENSG00000DAPL1     | 0.724638 | 0.313043 | 0.516908 | 0.48599  |
| 1530 | ENSG00000TYSND1    | 0.815152 | 0.210101 | 0.491919 | 0.50101  |
| 1531 | ENSG00000SNX24     | 0.712474 | 0.318182 | 0.511276 | 0.496829 |
| 1532 | ENSG00000ABHD17B   | 0.666667 | 0.367677 | 0.517172 | 0.453535 |
| 1533 | ENSG00000KNDC1     | 0.740864 | 0.316722 | 0.525102 | 0.45515  |
| 1534 | ENSG00000PLAC8     | 0.622222 | 0.385859 | 0.50404  | 0.463636 |
| 1535 | ENSG00000GABRD     | 0.727273 | 0.310101 | 0.516667 | 0.485859 |
| 1536 | ENSG00000VAT1      | 0.639394 | 0.370707 | 0.505051 | 0.478788 |
| 1537 | ENSG00000RP9       | 0.792929 | 0.284848 | 0.523569 | 0.432323 |
| 1538 | ENSG00000SPRTRN    | 0.628283 | 0.363636 | 0.493939 | 0.49798  |

|      |                    |          |          |          |          |
|------|--------------------|----------|----------|----------|----------|
| 1539 | ENSG00000SDR16C5   | 0.725253 | 0.324242 | 0.51936  | 0.469697 |
| 1540 | ENSG00000SIRPB1    | 0.681818 | 0.354545 | 0.518182 | 0.466667 |
| 1541 | ENSG00000CLEC10A   | 0.70101  | 0.324242 | 0.503535 | 0.507071 |
| 1542 | ENSG00000CRK       | 0.658562 | 0.354123 | 0.506342 | 0.4926   |
| 1543 | ENSG00000DEPDC1B   | 0.698732 | 0.339323 | 0.519027 | 0.472516 |
| 1544 | ENSG00000OLFML2B   | 0.711416 | 0.330867 | 0.51938  | 0.473573 |
| 1545 | ENSG00000FAM3D     | 0.673737 | 0.346465 | 0.510101 | 0.488889 |
| 1546 | ENSG00000ACVRL1    | 0.722222 | 0.325253 | 0.516835 | 0.476768 |
| 1547 | ENSG00000AC037459. | 0.79899  | 0.255556 | 0.509428 | 0.479798 |
| 1548 | ENSG00000ASB16     | 0.680808 | 0.320202 | 0.496465 | 0.531313 |
| 1549 | ENSG00000NAP1L5    | 0.826263 | 0.252525 | 0.521212 | 0.429293 |
| 1550 | ENSG00000SLC4A5    | 0.717172 | 0.339394 | 0.528283 | 0.431313 |
| 1551 | ENSG00000AAAS      | 0.628283 | 0.351515 | 0.487879 | 0.518182 |
| 1552 | ENSG00000RIIAD1    | 0.681818 | 0.354545 | 0.518182 | 0.464646 |
| 1553 | ENSG00000ZNF793    | 0.676768 | 0.349495 | 0.513131 | 0.480808 |
| 1554 | ENSG00000TMEM218   | 0.684989 | 0.356237 | 0.512685 | 0.46723  |
| 1555 | ENSG00000ZNF853    | 0.739394 | 0.308081 | 0.518687 | 0.476768 |
| 1556 | ENSG00000CLDND2    | 0.59697  | 0.394949 | 0.49596  | 0.465657 |
| 1557 | ENSG00000SRARP     | 0.793939 | 0.270707 | 0.518182 | 0.462626 |
| 1558 | ENSG00000KLRC3     | 0.64482  | 0.35518  | 0.498767 | 0.503171 |
| 1559 | ENSG00000IFNG      | 0.666667 | 0.353535 | 0.508754 | 0.489899 |
| 1560 | ENSG00000AK7       | 0.666667 | 0.367677 | 0.517172 | 0.456566 |
| 1561 | ENSG00000BBS1      | 0.636364 | 0.367677 | 0.50202  | 0.486869 |
| 1562 | ENSG00000CLDN8     | 0.676533 | 0.343552 | 0.510042 | 0.494715 |
| 1563 | ENSG00000AC068775. | 0.64482  | 0.35518  | 0.498767 | 0.503171 |
| 1564 | ENSG00000RNF38     | 0.780127 | 0.2537   | 0.501938 | 0.501057 |
| 1565 | ENSG00000NFIL3     | 0.666667 | 0.355556 | 0.500673 | 0.492929 |
| 1566 | ENSG00000HIPK4     | 0.708081 | 0.330303 | 0.519192 | 0.480808 |
| 1567 | ENSG00000BBC3      | 0.687879 | 0.361616 | 0.520875 | 0.441414 |
| 1568 | ENSG00000AKR1C2    | 0.806061 | 0.252525 | 0.519192 | 0.464646 |
| 1569 | ENSG00000SRSF12    | 0.694352 | 0.337763 | 0.513104 | 0.487265 |
| 1570 | ENSG00000PAPSS2    | 0.664734 | 0.365217 | 0.498229 | 0.484058 |
| 1571 | ENSG00000FBX08     | 0.742424 | 0.310101 | 0.522896 | 0.468687 |
| 1572 | ENSG00000FAM124B   | 0.830303 | 0.258586 | 0.521044 | 0.419192 |
| 1573 | ENSG00000OTOF      | 0.690909 | 0.326263 | 0.505556 | 0.513131 |
| 1574 | ENSG00000ADIRF     | 0.692929 | 0.330303 | 0.507239 | 0.50404  |
| 1575 | ENSG00000AP002748. | 0.636364 | 0.367677 | 0.50202  | 0.486869 |
| 1576 | ENSG00000CCDC28B   | 0.717172 | 0.329293 | 0.519192 | 0.474747 |
| 1577 | ENSG00000RAD51     | 0.866667 | 0.191304 | 0.523671 | 0.421256 |
| 1578 | ENSG00000GRASP     | 0.844444 | 0.235354 | 0.522727 | 0.419192 |
| 1579 | ENSG00000LHFPL1    | 0.676768 | 0.349495 | 0.513131 | 0.482828 |
| 1580 | ENSG00000SLC2A11   | 0.788889 | 0.264646 | 0.518519 | 0.472727 |
| 1581 | ENSG00000DNMBP     | 0.688889 | 0.361616 | 0.525253 | 0.434343 |
| 1582 | ENSG00000SH3TC2    | 0.874747 | 0.177778 | 0.513468 | 0.441414 |
| 1583 | ENSG00000PWP2      | 0.776768 | 0.279798 | 0.521044 | 0.467677 |
| 1584 | ENSG00000HSPA2     | 0.866667 | 0.187879 | 0.515993 | 0.444444 |
| 1585 | ENSG00000CDK1      | 0.806061 | 0.242424 | 0.521886 | 0.469697 |
| 1586 | ENSG00000FP565260. | 0.776768 | 0.279798 | 0.521044 | 0.467677 |
| 1587 | ENSG00000CLIP4     | 0.673737 | 0.346465 | 0.510101 | 0.494949 |
| 1588 | ENSG00000C6orf52   | 0.826263 | 0.240404 | 0.51936  | 0.453535 |
| 1589 | ENSG00000AMMECR1L  | 0.711416 | 0.32981  | 0.514975 | 0.484144 |
| 1590 | ENSG00000ARFGAP3   | 0.704017 | 0.321353 | 0.507047 | 0.509514 |
| 1591 | ENSG00000KLHDC7B   | 0.661734 | 0.357294 | 0.509514 | 0.486258 |
| 1592 | ENSG00000DEFB119   | 0.755814 | 0.307611 | 0.522903 | 0.459831 |
| 1593 | ENSG00000AP000350. | 0.788889 | 0.264646 | 0.518519 | 0.472727 |

|      |                    |          |          |          |          |      |       |
|------|--------------------|----------|----------|----------|----------|------|-------|
| 1594 | ENSG00000SLC20A2   | 0.716162 | 0.330303 | 0.513468 | 0.482828 |      |       |
| 1595 | ENSG00000C10orf67  | 0.708245 | 0.348837 | 0.518147 | 0.454545 | 0.34 | 0.314 |
| 1596 | ENSG00000PKHD1     | 0.733615 | 0.327696 | 0.530655 | 0.440803 |      |       |
| 1597 | ENSG00000CFAP161   | 0.73913  | 0.324638 | 0.531884 | 0.436715 |      |       |
| 1598 | ENSG00000SLC25A37  | 0.812121 | 0.233333 | 0.517845 | 0.476768 |      |       |
| 1599 | ENSG00000RXFP1     | 0.709091 | 0.331313 | 0.520202 | 0.478788 |      |       |
| 1600 | ENSG00000CDH12     | 0.770707 | 0.286869 | 0.514478 | 0.479798 |      |       |
| 1601 | ENSG00000IL33      | 0.867677 | 0.192929 | 0.515993 | 0.442424 |      |       |
| 1602 | ENSG00000CEP152    | 0.718816 | 0.335095 | 0.526956 | 0.454545 |      |       |
| 1603 | ENSG00000SLC39A6   | 0.730303 | 0.322222 | 0.511785 | 0.484848 |      |       |
| 1604 | ENSG00000HSP90AA1  | 0.745455 | 0.313131 | 0.525926 | 0.463636 |      |       |
| 1605 | ENSG00000TOB2      | 0.730444 | 0.325581 | 0.521142 | 0.46723  |      |       |
| 1606 | ENSG00000TMEM100   | 0.660606 | 0.361616 | 0.511111 | 0.480808 |      |       |
| 1607 | ENSG00000LRRC6     | 0.767442 | 0.290698 | 0.522199 | 0.469345 |      |       |
| 1608 | ENSG00000MEIS3     | 0.7      | 0.346465 | 0.51734  | 0.469697 |      |       |
| 1609 | ENSG00000D2HGDH    | 0.673737 | 0.322222 | 0.492256 | 0.539394 |      |       |
| 1610 | ENSG00000LTBP2     | 0.667019 | 0.362579 | 0.514799 | 0.473573 |      |       |
| 1611 | ENSG00000LOXL3     | 0.690909 | 0.328283 | 0.505219 | 0.515152 |      |       |
| 1612 | ENSG00000C8orf82   | 0.823232 | 0.237374 | 0.516498 | 0.466667 |      |       |
| 1613 | ENSG00000EPPK1     | 0.654545 | 0.348485 | 0.496465 | 0.513131 |      |       |
| 1614 | ENSG00000LRRC40    | 0.666667 | 0.367677 | 0.517172 | 0.465657 |      |       |
| 1615 | ENSG00000ZDHC8     | 0.730444 | 0.324524 | 0.527484 | 0.460888 |      |       |
| 1616 | ENSG00000C1QTNF4   | 0.718816 | 0.321353 | 0.518147 | 0.488372 |      |       |
| 1617 | ENSG00000CXXC4     | 0.731313 | 0.320202 | 0.522054 | 0.474747 |      |       |
| 1618 | ENSG00000SLC9A8    | 0.723232 | 0.314141 | 0.5133   | 0.49697  |      |       |
| 1619 | ENSG00000KPNA2     | 0.855556 | 0.211111 | 0.533165 | 0.40404  |      |       |
| 1620 | ENSG00000DNAJB13   | 0.625793 | 0.377378 | 0.500529 | 0.484144 |      |       |
| 1621 | ENSG00000AL035078. | 0.660606 | 0.361616 | 0.511111 | 0.480808 |      |       |
| 1622 | ENSG00000GZF1      | 0.717172 | 0.310101 | 0.508249 | 0.515152 |      |       |
| 1623 | ENSG00000RAD17     | 0.884848 | 0.172727 | 0.521717 | 0.39899  |      |       |
| 1624 | ENSG00000CDK4      | 0.819192 | 0.216162 | 0.514141 | 0.485859 |      |       |
| 1625 | ENSG00000FXVD7     | 0.712121 | 0.316162 | 0.51229  | 0.506061 |      |       |
| 1626 | ENSG00000MGAT4B    | 0.725253 | 0.314141 | 0.515993 | 0.493939 |      |       |
| 1627 | ENSG00000IFT46     | 0.69697  | 0.343434 | 0.520202 | 0.475758 |      |       |
| 1628 | ENSG00000LTB       | 0.681818 | 0.354545 | 0.518182 | 0.471717 |      |       |
| 1629 | ENSG00000TMEM128   | 0.735354 | 0.313131 | 0.519024 | 0.483838 |      |       |
| 1630 | ENSG00000POP7      | 0.721212 | 0.336364 | 0.523232 | 0.458586 |      |       |
| 1631 | ENSG00000GTF3C2    | 0.692929 | 0.339394 | 0.516162 | 0.488889 |      |       |
| 1632 | ENSG00000CACNB1    | 0.788889 | 0.273737 | 0.522559 | 0.466667 |      |       |
| 1633 | ENSG00000YRDC      | 0.709091 | 0.331313 | 0.520202 | 0.480808 |      |       |
| 1634 | ENSG00000RNASEH1   | 0.605051 | 0.39596  | 0.498653 | 0.469697 |      |       |
| 1635 | ENSG00000PSMD5     | 0.759596 | 0.292929 | 0.523232 | 0.475758 |      |       |
| 1636 | ENSG00000BEND7     | 0.660606 | 0.361616 | 0.507744 | 0.486869 |      |       |
| 1637 | ENSG00000AWAT2     | 0.676768 | 0.349495 | 0.513131 | 0.489899 |      |       |
| 1638 | ENSG00000CNPPD1    | 0.712474 | 0.328753 | 0.520613 | 0.48203  |      |       |
| 1639 | ENSG00000SLC25A53  | 0.745455 | 0.311111 | 0.516498 | 0.479798 |      |       |
| 1640 | ENSG00000TEX35     | 0.767677 | 0.282828 | 0.511616 | 0.489899 |      |       |
| 1641 | ENSG00000TNFRSF10A | 0.724242 | 0.326263 | 0.523401 | 0.474747 |      |       |
| 1642 | ENSG00000BHMT2     | 0.676768 | 0.349495 | 0.513131 | 0.490909 |      |       |
| 1643 | ENSG00000RAB3IP    | 0.692929 | 0.339394 | 0.516162 | 0.489899 |      |       |
| 1644 | ENSG00000MSANTD4   | 0.6      | 0.376768 | 0.487542 | 0.49798  |      |       |
| 1645 | ENSG00000ADGRV1    | 0.750505 | 0.312121 | 0.529125 | 0.457576 |      |       |
| 1646 | ENSG00000MXRA5     | 0.681818 | 0.354545 | 0.518182 | 0.477778 |      |       |
| 1647 | ENSG00000DTX2      | 0.840381 | 0.230444 | 0.519204 | 0.453488 |      |       |
| 1648 | ENSG00000HLA-DPA1  | 0.681818 | 0.354545 | 0.518182 | 0.473737 |      |       |

|      |           |           |          |          |          |          |        |
|------|-----------|-----------|----------|----------|----------|----------|--------|
| 1649 | ENSG00000 | TRIM51    | 0.660606 | 0.361616 | 0.511111 | 0.485859 |        |
| 1650 | ENSG00000 | KIAA1324L | 0.709091 | 0.331313 | 0.520202 | 0.483838 |        |
| 1651 | ENSG00000 | DCST1     | 0.732004 | 0.330011 | 0.522887 | 0.462901 |        |
| 1652 | ENSG00000 | DDC       | 0.69697  | 0.343434 | 0.520202 | 0.477778 | 0.2748 |
| 1653 | ENSG00000 | BRINP2    | 0.656566 | 0.357576 | 0.507071 | 0.494949 |        |
| 1654 | ENSG00000 | ATP11C    | 0.672727 | 0.345455 | 0.509091 | 0.506061 |        |
| 1655 | ENSG00000 | STXBP2    | 0.712121 | 0.334343 | 0.523232 | 0.475758 |        |
| 1656 | ENSG00000 | ZNF672    | 0.818182 | 0.257576 | 0.527441 | 0.440404 |        |
| 1657 | ENSG00000 | ACTRT3    | 0.894949 | 0.162626 | 0.518519 | 0.378788 |        |
| 1658 | ENSG00000 | ZCCHC10   | 0.778788 | 0.29596  | 0.524747 | 0.454545 |        |
| 1659 | ENSG00000 | EBPL      | 0.711416 | 0.342495 | 0.522551 | 0.461945 |        |
| 1660 | ENSG00000 | Clorf123  | 0.688889 | 0.348485 | 0.517172 | 0.480808 |        |
| 1661 | ENSG00000 | CFAP206   | 0.717172 | 0.339394 | 0.528283 | 0.449495 |        |
| 1662 | ENSG00000 | CMKLR1    | 0.644444 | 0.375758 | 0.510101 | 0.475758 |        |
| 1663 | ENSG00000 | ITGB3BP   | 0.755556 | 0.282828 | 0.512458 | 0.50202  | 0.3698 |
| 1664 | ENSG00000 | CHAD      | 0.651515 | 0.382828 | 0.517172 | 0.452525 |        |
| 1665 | ENSG00000 | ANO5      | 0.727273 | 0.307071 | 0.509428 | 0.510101 |        |
| 1666 | ENSG00000 | DMRTC1B   | 0.80303  | 0.247475 | 0.513468 | 0.486869 |        |
| 1667 | ENSG00000 | TRAM1     | 0.82241  | 0.242072 | 0.513566 | 0.476744 |        |
| 1668 | ENSG00000 | NXPE4     | 0.718816 | 0.335095 | 0.526956 | 0.463002 |        |
| 1669 | ENSG00000 | IGIP      | 0.628283 | 0.391919 | 0.510101 | 0.459596 |        |
| 1670 | ENSG00000 | DMRTC1    | 0.80303  | 0.247475 | 0.513468 | 0.486869 |        |
| 1671 | ENSG00000 | EPS8L3    | 0.673737 | 0.346465 | 0.510101 | 0.49899  |        |
| 1672 | ENSG00000 | GPR143    | 0.709091 | 0.331313 | 0.520202 | 0.487879 |        |
| 1673 | ENSG00000 | LEP       | 0.692929 | 0.339394 | 0.516162 | 0.490909 |        |
| 1674 | ENSG00000 | PYGB      | 0.759596 | 0.308081 | 0.530808 | 0.455556 |        |
| 1675 | ENSG00000 | CDKN1A    | 0.874747 | 0.168687 | 0.507239 | 0.469697 |        |
| 1676 | ENSG00000 | NR1D2     | 0.753535 | 0.318182 | 0.528283 | 0.451515 |        |
| 1677 | ENSG00000 | GPX8      | 0.676768 | 0.349495 | 0.513131 | 0.492929 |        |
| 1678 | ENSG00000 | CD3D      | 0.674747 | 0.353535 | 0.512795 | 0.490909 |        |
| 1679 | ENSG00000 | POLR2J3   | 0.690909 | 0.320202 | 0.503872 | 0.529293 |        |
| 1680 | ENSG00000 | ZNF563    | 0.708081 | 0.330303 | 0.519192 | 0.490909 |        |
| 1681 | ENSG00000 | ACVR1B    | 0.729387 | 0.323467 | 0.526427 | 0.472516 |        |
| 1682 | ENSG00000 | PARD3     | 0.757576 | 0.283838 | 0.511448 | 0.50101  |        |
| 1683 | ENSG00000 | LIPT1     | 0.681818 | 0.346465 | 0.509428 | 0.49899  |        |
| 1684 | ENSG00000 | RFX1      | 0.817172 | 0.255556 | 0.521886 | 0.460606 |        |
| 1685 | ENSG00000 | UIMC1     | 0.888889 | 0.168687 | 0.526431 | 0.383838 |        |
| 1686 | ENSG00000 | PLEKHG7   | 0.712121 | 0.334343 | 0.523232 | 0.475758 |        |
| 1687 | ENSG00000 | UNC5D     | 0.811111 | 0.248485 | 0.521886 | 0.471717 |        |
| 1688 | ENSG00000 | EMX2      | 0.690909 | 0.337374 | 0.506734 | 0.507071 |        |
| 1689 | ENSG00000 | PMFBP1    | 0.697674 | 0.342495 | 0.518499 | 0.48203  |        |
| 1690 | ENSG00000 | VGLL3     | 0.77907  | 0.289641 | 0.528894 | 0.457717 |        |
| 1691 | ENSG00000 | TRIR      | 0.826263 | 0.225253 | 0.508418 | 0.490909 |        |
| 1692 | ENSG00000 | UPK3BL1   | 0.690909 | 0.320202 | 0.503872 | 0.529293 |        |
| 1693 | ENSG00000 | BBS7      | 0.579798 | 0.40404  | 0.490909 | 0.474747 |        |
| 1694 | ENSG00000 | AIFM2     | 0.7      | 0.348485 | 0.512458 | 0.481818 |        |
| 1695 | ENSG00000 | UPK3BL2   | 0.690909 | 0.320202 | 0.503872 | 0.529293 |        |
| 1696 | ENSG00000 | IL36B     | 0.769697 | 0.279798 | 0.510269 | 0.49697  |        |
| 1697 | ENSG00000 | MTIF2     | 0.733615 | 0.328753 | 0.529246 | 0.45666  |        |
| 1698 | ENSG00000 | GLOD5     | 0.69697  | 0.343434 | 0.520202 | 0.480808 |        |
| 1699 | ENSG00000 | REXO4     | 0.787879 | 0.288889 | 0.525253 | 0.459596 |        |
| 1700 | ENSG00000 | SLC2A13   | 0.682927 | 0.367015 | 0.524971 | 0.447154 |        |
| 1701 | ENSG00000 | TLE3      | 0.681818 | 0.354545 | 0.518182 | 0.481818 |        |
| 1702 | ENSG00000 | FASTKD5   | 0.870707 | 0.193939 | 0.511953 | 0.459596 |        |
| 1703 | ENSG00000 | HSD17B6   | 0.846723 | 0.215645 | 0.512333 | 0.47463  |        |

|      |                    |          |          |          |          |
|------|--------------------|----------|----------|----------|----------|
| 1704 | ENSG00000CDKN1C    | 0.727273 | 0.335354 | 0.525926 | 0.458586 |
| 1705 | ENSG00000TROVE2    | 0.826263 | 0.250505 | 0.522222 | 0.456566 |
| 1706 | ENSG00000NEU4      | 0.64482  | 0.379493 | 0.511099 | 0.475687 |
| 1707 | ENSG00000ADGRL1    | 0.748414 | 0.32241  | 0.535412 | 0.438689 |
| 1708 | ENSG00000CCM2L     | 0.717172 | 0.326263 | 0.519865 | 0.491919 |
| 1709 | ENSG00000RGL4      | 0.667774 | 0.357697 | 0.512735 | 0.490587 |
| 1710 | ENSG00000CERCAM    | 0.758985 | 0.301268 | 0.525018 | 0.47463  |
| 1711 | ENSG00000CAMK1D    | 0.744186 | 0.300211 | 0.516385 | 0.497886 |
| 1712 | ENSG00000DCBLD1    | 0.656566 | 0.357576 | 0.507071 | 0.50101  |
| 1713 | ENSG00000KANK3     | 0.709091 | 0.331313 | 0.520202 | 0.487879 |
| 1714 | ENSG00000ABCD4     | 0.621262 | 0.375415 | 0.498339 | 0.497231 |
| 1715 | ENSG00000RGS13     | 0.787879 | 0.3      | 0.533165 | 0.433333 |
| 1716 | ENSG00000MAGI1     | 0.688889 | 0.361616 | 0.525253 | 0.454545 |
| 1717 | ENSG00000ABLIM2    | 0.692929 | 0.339394 | 0.516162 | 0.494949 |
| 1718 | ENSG00000HTR2B     | 0.708081 | 0.330303 | 0.519192 | 0.494949 |
| 1719 | ENSG00000LANCL3    | 0.672727 | 0.345455 | 0.509091 | 0.511111 |
| 1720 | ENSG00000FSD1      | 0.714588 | 0.320296 | 0.51339  | 0.508457 |
| 1721 | ENSG00000PPM1G     | 0.80444  | 0.256871 | 0.520085 | 0.478858 |
| 1722 | ENSG00000LIN52     | 0.616162 | 0.379798 | 0.49798  | 0.493939 |
| 1723 | ENSG00000AKAP5     | 0.820202 | 0.269697 | 0.52963  | 0.433333 |
| 1724 | ENSG00000TRMT13    | 0.778788 | 0.29596  | 0.524747 | 0.464646 |
| 1725 | ENSG00000ZC3H8     | 0.890909 | 0.173737 | 0.517508 | 0.419192 |
| 1726 | ENSG00000SLC22A15  | 0.689218 | 0.356237 | 0.522727 | 0.468288 |
| 1727 | ENSG00000IL17RA    | 0.745455 | 0.325253 | 0.533333 | 0.445455 |
| 1728 | ENSG00000HHLA2     | 0.750831 | 0.310078 | 0.521226 | 0.481728 |
| 1729 | ENSG00000RTKN2     | 0.886869 | 0.179798 | 0.520875 | 0.419192 |
| 1730 | ENSG00000MATK      | 0.747475 | 0.309091 | 0.521549 | 0.484848 |
| 1731 | ENSG00000VMA21     | 0.772727 | 0.291919 | 0.526599 | 0.471717 |
| 1732 | ENSG00000C1orf189  | 0.761616 | 0.313131 | 0.532492 | 0.451515 |
| 1733 | ENSG00000LMAN2     | 0.725253 | 0.325253 | 0.525253 | 0.480808 |
| 1734 | ENSG00000C19orf57  | 0.72093  | 0.339323 | 0.528365 | 0.460888 |
| 1735 | ENSG00000FAM124A   | 0.659619 | 0.379493 | 0.514094 | 0.468288 |
| 1736 | ENSG00000PROB1     | 0.630303 | 0.369697 | 0.493266 | 0.508081 |
| 1737 | ENSG00000SCGB2A1   | 0.69697  | 0.343434 | 0.520202 | 0.485859 |
| 1738 | ENSG00000ZNF562    | 0.725253 | 0.314141 | 0.515993 | 0.50404  |
| 1739 | ENSG00000PCDHA12   | 0.711416 | 0.32981  | 0.514975 | 0.497886 |
| 1740 | ENSG00000VTCN1     | 0.742424 | 0.308081 | 0.523064 | 0.487879 |
| 1741 | ENSG00000ZNF561    | 0.725253 | 0.314141 | 0.515993 | 0.50404  |
| 1742 | ENSG00000OR14K1    | 0.727273 | 0.327273 | 0.527273 | 0.474747 |
| 1743 | ENSG00000ZNF816-ZN | 0.642424 | 0.369697 | 0.50202  | 0.49798  |
| 1744 | ENSG00000SIAH2     | 0.688889 | 0.345455 | 0.517172 | 0.491919 |
| 1745 | ENSG00000FNDC3B    | 0.734343 | 0.330303 | 0.515825 | 0.479798 |
| 1746 | ENSG00000AQP3      | 0.681818 | 0.354545 | 0.518182 | 0.484848 |
| 1747 | ENSG00000KCNA2     | 0.709091 | 0.331313 | 0.520202 | 0.494949 |
| 1748 | ENSG00000GIPC2     | 0.681818 | 0.354545 | 0.518182 | 0.485859 |
| 1749 | ENSG00000PTGR1     | 0.732323 | 0.322222 | 0.516835 | 0.491919 |
| 1750 | ENSG00000ARL15     | 0.72093  | 0.339323 | 0.528365 | 0.461945 |
| 1751 | ENSG00000KIAA0319L | 0.743322 | 0.325203 | 0.534262 | 0.455285 |
| 1752 | ENSG00000ZDHHC4    | 0.741414 | 0.306061 | 0.521549 | 0.492929 |
| 1753 | ENSG00000SLC38A1   | 0.745455 | 0.325253 | 0.535354 | 0.449495 |
| 1754 | ENSG00000OR10C1    | 0.830303 | 0.242424 | 0.524242 | 0.460606 |
| 1755 | ENSG00000PDK3      | 0.759596 | 0.308081 | 0.530808 | 0.466667 |
| 1756 | ENSG00000UNKL      | 0.725253 | 0.325253 | 0.525253 | 0.484848 |
| 1757 | ENSG00000PNMA8B    | 0.69798  | 0.344444 | 0.510943 | 0.493939 |
| 1758 | ENSG00000CPTP      | 0.622222 | 0.385859 | 0.50404  | 0.484848 |

0.466

|      |                   |          |          |          |          |        |
|------|-------------------|----------|----------|----------|----------|--------|
| 1759 | ENSG00000CAND2    | 0.777778 | 0.3      | 0.532323 | 0.452525 |        |
| 1760 | ENSG00000CD86     | 0.711416 | 0.352008 | 0.531712 | 0.440803 |        |
| 1761 | ENSG00000ING4     | 0.748485 | 0.30303  | 0.512121 | 0.50101  |        |
| 1762 | ENSG00000RIPOR1   | 0.745455 | 0.313131 | 0.525926 | 0.480808 |        |
| 1763 | ENSG00000IGFL3    | 0.682875 | 0.349894 | 0.516385 | 0.491543 |        |
| 1764 | ENSG00000MFSD2A   | 0.782828 | 0.277778 | 0.517508 | 0.485859 |        |
| 1765 | ENSG00000IL31RA   | 0.632323 | 0.392929 | 0.505556 | 0.474747 |        |
| 1766 | ENSG00000MEA1     | 0.712121 | 0.310101 | 0.505724 | 0.530303 |        |
| 1767 | ENSG00000OR6T1    | 0.661616 | 0.373737 | 0.515152 | 0.474747 |        |
| 1768 | ENSG00000ACD      | 0.803383 | 0.268499 | 0.523432 | 0.473573 |        |
| 1769 | ENSG00000ACKR2    | 0.660606 | 0.361616 | 0.511111 | 0.49596  |        |
| 1770 | ENSG00000GRAMD1C  | 0.666667 | 0.367677 | 0.517172 | 0.479798 |        |
| 1771 | ENSG00000ZSWIM5   | 0.628283 | 0.391919 | 0.510101 | 0.473737 |        |
| 1772 | ENSG00000ELAC2    | 0.844444 | 0.244444 | 0.528451 | 0.437374 |        |
| 1773 | ENSG00000KCNJ3    | 0.635354 | 0.366667 | 0.50101  | 0.511111 |        |
| 1774 | ENSG00000ANKRD53  | 0.658562 | 0.354123 | 0.506342 | 0.514799 |        |
| 1775 | ENSG00000FCRLB    | 0.812121 | 0.265657 | 0.524411 | 0.466667 |        |
| 1776 | ENSG00000MYH3     | 0.737374 | 0.325253 | 0.529293 | 0.470707 |        |
| 1777 | ENSG00000HIGD1A   | 0.741414 | 0.321212 | 0.531313 | 0.468687 |        |
| 1778 | ENSG00000SLC35D3  | 0.69697  | 0.343434 | 0.520202 | 0.487879 |        |
| 1779 | ENSG00000TMC04    | 0.678647 | 0.345666 | 0.512156 | 0.508457 |        |
| 1780 | ENSG00000SYDE2    | 0.793939 | 0.293939 | 0.534343 | 0.443434 |        |
| 1781 | ENSG00000SLC11A1  | 0.747475 | 0.318182 | 0.524916 | 0.477778 |        |
| 1782 | ENSG00000CLK4     | 0.813131 | 0.245455 | 0.517172 | 0.488889 |        |
| 1783 | ENSG00000SLC35A3  | 0.690909 | 0.337374 | 0.514141 | 0.510101 |        |
| 1784 | ENSG00000ACP7     | 0.70101  | 0.334343 | 0.517677 | 0.5      |        |
| 1785 | ENSG00000COL8A1   | 0.692929 | 0.339394 | 0.516162 | 0.50202  |        |
| 1786 | ENSG00000CLVS2    | 0.718816 | 0.335095 | 0.526956 | 0.476744 |        |
| 1787 | ENSG00000FPR1     | 0.558586 | 0.409091 | 0.483333 | 0.483838 |        |
| 1788 | ENSG00000C3AR1    | 0.727273 | 0.310101 | 0.516667 | 0.510101 |        |
| 1789 | ENSG00000FHOD1    | 0.673737 | 0.346465 | 0.510101 | 0.514141 |        |
| 1790 | ENSG00000TRPC6    | 0.678647 | 0.345666 | 0.512156 | 0.509514 |        |
| 1791 | ENSG00000SLC35F1  | 0.666667 | 0.367677 | 0.517172 | 0.480808 |        |
| 1792 | ENSG00000KLHL29   | 0.776768 | 0.29899  | 0.522896 | 0.473737 |        |
| 1793 | ENSG00000TENM3    | 0.764271 | 0.261099 | 0.499295 | 0.531712 |        |
| 1794 | ENSG00000GPRC5B   | 0.694503 | 0.335095 | 0.514799 | 0.509514 |        |
| 1795 | ENSG00000OTOL1    | 0.692929 | 0.339394 | 0.516162 | 0.50101  |        |
| 1796 | ENSG00000LPAR6    | 0.681818 | 0.354545 | 0.518182 | 0.490909 |        |
| 1797 | ENSG00000SLC27A3  | 0.745455 | 0.312121 | 0.526599 | 0.482828 | 0.2758 |
| 1798 | ENSG00000RNASE10  | 0.750505 | 0.312121 | 0.529125 | 0.475758 |        |
| 1799 | ENSG00000MED28    | 0.885859 | 0.190909 | 0.532492 | 0.393939 |        |
| 1800 | ENSG00000NFU1     | 0.829293 | 0.245455 | 0.529461 | 0.458586 |        |
| 1801 | ENSG00000TMEM184A | 0.662626 | 0.363636 | 0.508418 | 0.49798  |        |
| 1802 | ENSG00000CENPM    | 0.690909 | 0.337374 | 0.514141 | 0.512121 |        |
| 1803 | ENSG00000HCRTR1   | 0.651208 | 0.357488 | 0.504348 | 0.516908 |        |
| 1804 | ENSG00000ESPNL    | 0.729387 | 0.321353 | 0.518499 | 0.495772 |        |
| 1805 | ENSG00000CCDC88B  | 0.764646 | 0.313131 | 0.526936 | 0.465657 |        |
| 1806 | ENSG00000CARD11   | 0.812121 | 0.244444 | 0.511448 | 0.49596  |        |
| 1807 | ENSG00000ZNF449   | 0.684848 | 0.362626 | 0.522391 | 0.470707 |        |
| 1808 | ENSG00000OR9K2    | 0.757576 | 0.306061 | 0.528788 | 0.475758 |        |
| 1809 | ENSG00000TAAR5    | 0.69697  | 0.343434 | 0.520202 | 0.491919 |        |
| 1810 | ENSG00000YWHAH    | 0.814141 | 0.257576 | 0.525758 | 0.471717 |        |
| 1811 | ENSG00000TRPV6    | 0.689218 | 0.356237 | 0.522727 | 0.476744 |        |
| 1812 | ENSG00000C16orf58 | 0.745455 | 0.325253 | 0.535354 | 0.456566 |        |
| 1813 | ENSG00000MAGEB5   | 0.639394 | 0.370707 | 0.505051 | 0.5      |        |



|      |                   |          |          |          |          |        |
|------|-------------------|----------|----------|----------|----------|--------|
| 1814 | ENSG00000PTPRCAP  | 0.666667 | 0.367677 | 0.517172 | 0.481818 |        |
| 1815 | ENSG00000TMTC3    | 0.70101  | 0.347475 | 0.519865 | 0.482828 |        |
| 1816 | ENSG00000OR11H4   | 0.717172 | 0.326263 | 0.519865 | 0.49798  |        |
| 1817 | ENSG00000YIF1A    | 0.709091 | 0.331313 | 0.520202 | 0.49697  |        |
| 1818 | ENSG00000ANKRD42  | 0.742424 | 0.322222 | 0.532323 | 0.469697 |        |
| 1819 | ENSG00000B3GNT6   | 0.688889 | 0.361616 | 0.525253 | 0.464646 |        |
| 1820 | ENSG00000DAW1     | 0.667019 | 0.362579 | 0.514799 | 0.4926   |        |
| 1821 | ENSG00000HAP1     | 0.767442 | 0.298097 | 0.524489 | 0.480973 |        |
| 1822 | ENSG00000SLC19A3  | 0.735354 | 0.322222 | 0.51734  | 0.492929 |        |
| 1823 | ENSG00000EBP      | 0.681818 | 0.354545 | 0.518182 | 0.491919 |        |
| 1824 | ENSG00000PRKCZ    | 0.695652 | 0.347826 | 0.521739 | 0.485024 |        |
| 1825 | ENSG00000GHR      | 0.688889 | 0.361616 | 0.525253 | 0.469697 |        |
| 1826 | ENSG00000ARHGEF4  | 0.733333 | 0.326263 | 0.523064 | 0.483838 |        |
| 1827 | ENSG00000C4orf19  | 0.812121 | 0.236364 | 0.506061 | 0.509091 |        |
| 1828 | ENSG00000ADRB2    | 0.690909 | 0.337374 | 0.514141 | 0.511111 |        |
| 1829 | ENSG00000VIPR2    | 0.638478 | 0.364693 | 0.501586 | 0.515856 |        |
| 1830 | ENSG00000TMEM255B | 0.740864 | 0.325581 | 0.524363 | 0.47619  |        |
| 1831 | ENSG00000SAM5     | 0.672727 | 0.345455 | 0.509091 | 0.519192 |        |
| 1832 | ENSG00000EME2     | 0.635659 | 0.369878 | 0.501661 | 0.509413 |        |
| 1833 | ENSG00000GATM     | 0.717172 | 0.339394 | 0.528283 | 0.472727 |        |
| 1834 | ENSG00000C20orf96 | 0.729387 | 0.323467 | 0.526427 | 0.485201 |        |
| 1835 | ENSG00000GNAL     | 0.627907 | 0.386892 | 0.5074   | 0.486258 |        |
| 1836 | ENSG00000TACSTD2  | 0.811111 | 0.242424 | 0.509764 | 0.50303  |        |
| 1837 | ENSG00000TMEM121B | 0.724242 | 0.346465 | 0.535354 | 0.439394 |        |
| 1838 | ENSG00000SSTR3    | 0.698732 | 0.339323 | 0.519027 | 0.497886 |        |
| 1839 | ENSG00000CCBE1    | 0.717172 | 0.339394 | 0.528283 | 0.472727 |        |
| 1840 | ENSG00000SSX1     | 0.747357 | 0.289641 | 0.50828  | 0.523256 |        |
| 1841 | ENSG00000MDGA1    | 0.712121 | 0.334343 | 0.523232 | 0.491919 |        |
| 1842 | ENSG00000AGO4     | 0.6      | 0.39798  | 0.49899  | 0.487879 |        |
| 1843 | ENSG00000ISL1     | 0.7      | 0.361616 | 0.521886 | 0.465657 |        |
| 1844 | ENSG00000SSX5     | 0.747357 | 0.289641 | 0.50828  | 0.523256 |        |
| 1845 | ENSG00000MIS12    | 0.835354 | 0.258586 | 0.524579 | 0.453535 |        |
| 1846 | ENSG00000FAM155A  | 0.681818 | 0.354545 | 0.518182 | 0.491919 |        |
| 1847 | ENSG00000COL5A1   | 0.709091 | 0.350505 | 0.524074 | 0.471717 | 0.3829 |
| 1848 | ENSG00000SSX3     | 0.747357 | 0.289641 | 0.50828  | 0.523256 |        |
| 1849 | ENSG00000PKIA     | 0.808081 | 0.265657 | 0.526431 | 0.473737 |        |
| 1850 | ENSG00000AMTN     | 0.90101  | 0.168687 | 0.533165 | 0.348485 |        |
| 1851 | ENSG00000SSX7     | 0.747357 | 0.289641 | 0.50828  | 0.523256 |        |
| 1852 | ENSG00000FAM19A5  | 0.836364 | 0.245455 | 0.524074 | 0.463636 |        |
| 1853 | ENSG00000SSX4     | 0.747357 | 0.289641 | 0.50828  | 0.523256 |        |
| 1854 | ENSG00000RBM41    | 0.750505 | 0.330303 | 0.540404 | 0.435354 |        |
| 1855 | ENSG00000UPRT     | 0.692929 | 0.339394 | 0.516162 | 0.509091 |        |
| 1856 | ENSG00000LRRC34   | 0.666667 | 0.367677 | 0.517172 | 0.485859 |        |
| 1857 | ENSG00000SSX2B    | 0.747357 | 0.289641 | 0.50828  | 0.523256 |        |
| 1858 | ENSG00000S100P    | 0.734343 | 0.314141 | 0.504882 | 0.518182 |        |
| 1859 | ENSG00000SSX4B    | 0.747357 | 0.289641 | 0.50828  | 0.523256 |        |
| 1860 | ENSG00000TRIM29   | 0.618182 | 0.381818 | 0.5      | 0.50202  |        |
| 1861 | ENSG00000PRR36    | 0.700997 | 0.335548 | 0.518272 | 0.503876 |        |
| 1862 | ENSG00000CNTF     | 0.742424 | 0.322222 | 0.532323 | 0.471717 | 0.1558 |
| 1863 | ENSG00000SOX6     | 0.906061 | 0.186869 | 0.513468 | 0.407071 |        |
| 1864 | ENSG00000GCOM1    | 0.725159 | 0.330867 | 0.523961 | 0.486258 |        |
| 1865 | ENSG00000CDKL1    | 0.660606 | 0.361616 | 0.511111 | 0.505051 |        |
| 1866 | ENSG00000SOCS7    | 0.713178 | 0.366556 | 0.514212 | 0.457364 |        |
| 1867 | ENSG00000CYP4V2   | 0.737374 | 0.318182 | 0.525758 | 0.488889 |        |
| 1868 | ENSG00000NKPD1    | 0.867865 | 0.223044 | 0.53136  | 0.43129  |        |

|      |                    |          |          |          |          |
|------|--------------------|----------|----------|----------|----------|
| 1869 | ENSG00000RDH13     | 0.655072 | 0.361353 | 0.508213 | 0.512077 |
| 1870 | ENSG00000ALDH2     | 0.673737 | 0.346465 | 0.510101 | 0.520202 |
| 1871 | ENSG00000WNT8B     | 0.666667 | 0.367677 | 0.517172 | 0.489899 |
| 1872 | ENSG00000SWAP70    | 0.709091 | 0.337374 | 0.520202 | 0.49596  |
| 1873 | ENSG00000MYZAP     | 0.725159 | 0.330867 | 0.523961 | 0.486258 |
| 1874 | ENSG00000PANX2     | 0.70303  | 0.349495 | 0.526263 | 0.477778 |
| 1875 | ENSG00000DOC2B     | 0.725159 | 0.321353 | 0.521318 | 0.5      |
| 1876 | ENSG00000ZNF430    | 0.69798  | 0.358586 | 0.526768 | 0.465657 |
| 1877 | ENSG00000CASD1     | 0.681818 | 0.354545 | 0.518182 | 0.49596  |
| 1878 | ENSG00000ACADL     | 0.689218 | 0.34778  | 0.513742 | 0.502114 |
| 1879 | ENSG00000ZNF74     | 0.692389 | 0.354123 | 0.523256 | 0.48203  |
| 1880 | ENSG00000FAM19A1   | 0.667019 | 0.362579 | 0.514799 | 0.495772 |
| 1881 | ENSG00000CLPSL2    | 0.681818 | 0.354545 | 0.518182 | 0.493939 |
| 1882 | ENSG00000R3HCC1    | 0.889899 | 0.206061 | 0.519192 | 0.426263 |
| 1883 | ENSG00000DNHD1     | 0.666667 | 0.346465 | 0.505219 | 0.526263 |
| 1884 | ENSG00000ANKRD31   | 0.647841 | 0.376523 | 0.512182 | 0.491694 |
| 1885 | ENSG00000BBS5      | 0.776956 | 0.285412 | 0.519027 | 0.494715 |
| 1886 | ENSG00000NOB1      | 0.827273 | 0.269697 | 0.537374 | 0.435354 |
| 1887 | ENSG00000OGDHL     | 0.622222 | 0.385859 | 0.50404  | 0.494949 |
| 1888 | ENSG00000AC093899. | 0.776956 | 0.285412 | 0.519027 | 0.494715 |
| 1889 | ENSG00000GPR84     | 0.7463   | 0.320296 | 0.533298 | 0.473573 |
| 1890 | ENSG00000NPC2      | 0.674747 | 0.353535 | 0.512795 | 0.509091 |
| 1891 | ENSG00000ZNF738    | 0.69798  | 0.358586 | 0.526768 | 0.465657 |
| 1892 | ENSG00000MEP1A     | 0.90202  | 0.179798 | 0.525926 | 0.379798 |
| 1893 | ENSG00000ACAP3     | 0.735354 | 0.325253 | 0.524916 | 0.486869 |
| 1894 | ENSG00000PCDHB6    | 0.745455 | 0.312121 | 0.526599 | 0.490909 |
| 1895 | ENSG00000ZNF431    | 0.69798  | 0.358586 | 0.526768 | 0.465657 |
| 1896 | ENSG00000ZNF100    | 0.69798  | 0.358586 | 0.526768 | 0.465657 |
| 1897 | ENSG00000ARPC1B    | 0.709091 | 0.346465 | 0.520034 | 0.486869 |
| 1898 | ENSG00000SV2C      | 0.692929 | 0.339394 | 0.516162 | 0.511111 |
| 1899 | ENSG00000SFR1      | 0.744444 | 0.322222 | 0.521886 | 0.485859 |
| 1900 | ENSG00000ENPP7     | 0.651163 | 0.377378 | 0.514271 | 0.487315 |
| 1901 | ENSG00000MROH2B    | 0.698732 | 0.339323 | 0.519027 | 0.502114 |
| 1902 | ENSG00000TRAF3     | 0.734343 | 0.323232 | 0.524916 | 0.489899 |
| 1903 | ENSG00000RIN1      | 0.823232 | 0.274747 | 0.531987 | 0.444444 |
| 1904 | ENSG00000DDX50     | 0.90303  | 0.188889 | 0.529125 | 0.352525 |
| 1905 | ENSG00000TNFRSF18  | 0.651163 | 0.377378 | 0.514271 | 0.487315 |
| 1906 | ENSG00000C7orf26   | 0.800211 | 0.276956 | 0.530832 | 0.471459 |
| 1907 | ENSG00000DDX21     | 0.887879 | 0.20404  | 0.531987 | 0.39596  |
| 1908 | ENSG00000LPCAT4    | 0.839323 | 0.260042 | 0.530655 | 0.44186  |
| 1909 | ENSG00000GLTPD2    | 0.722222 | 0.338384 | 0.521549 | 0.483838 |
| 1910 | ENSG00000KRT19     | 0.759596 | 0.277778 | 0.511953 | 0.521212 |
| 1911 | ENSG00000BDNF      | 0.690909 | 0.337374 | 0.514141 | 0.517172 |
| 1912 | ENSG00000URAD      | 0.676768 | 0.349495 | 0.513131 | 0.511111 |
| 1913 | ENSG00000BUD23     | 0.70303  | 0.349495 | 0.526263 | 0.480808 |
| 1914 | ENSG00000POFUT2    | 0.765657 | 0.313131 | 0.524916 | 0.476768 |
| 1915 | ENSG00000CDRT4     | 0.769697 | 0.3      | 0.529966 | 0.477778 |
| 1916 | ENSG00000PTS       | 0.698782 | 0.316722 | 0.505906 | 0.543743 |
| 1917 | ENSG00000FAM81A    | 0.809091 | 0.272727 | 0.527609 | 0.471717 |
| 1918 | ENSG00000HSD3B7    | 0.712474 | 0.328753 | 0.520613 | 0.505285 |
| 1919 | ENSG00000FCRLA     | 0.745455 | 0.318182 | 0.519697 | 0.493939 |
| 1920 | ENSG00000INTS13    | 0.757576 | 0.318182 | 0.53569  | 0.466667 |
| 1921 | ENSG00000ATF6      | 0.778013 | 0.299154 | 0.531712 | 0.471459 |
| 1922 | ENSG00000INSC      | 0.752643 | 0.313953 | 0.531008 | 0.480973 |
| 1923 | ENSG00000VNN1      | 0.737374 | 0.326263 | 0.528114 | 0.481818 |

|      |           |           |          |          |          |          |
|------|-----------|-----------|----------|----------|----------|----------|
| 1924 | ENSG00000 | SPRED1    | 0.843434 | 0.237374 | 0.534343 | 0.455556 |
| 1925 | ENSG00000 | AKR1B15   | 0.69697  | 0.362626 | 0.512963 | 0.481818 |
| 1926 | ENSG00000 | MOV10L1   | 0.69798  | 0.340404 | 0.512458 | 0.512121 |
| 1927 | ENSG00000 | EPB41L3   | 0.688889 | 0.340404 | 0.508923 | 0.523232 |
| 1928 | ENSG00000 | ENOX1     | 0.714588 | 0.330867 | 0.522727 | 0.5      |
| 1929 | ENSG00000 | FAM241B   | 0.732323 | 0.322222 | 0.516835 | 0.50404  |
| 1930 | ENSG00000 | SMC2      | 0.876321 | 0.213531 | 0.529598 | 0.435518 |
| 1931 | ENSG00000 | SLC51B    | 0.612121 | 0.410101 | 0.511111 | 0.464646 |
| 1932 | ENSG00000 | YIPF1     | 0.666667 | 0.367677 | 0.517172 | 0.493939 |
| 1933 | ENSG00000 | SPOUT1    | 0.777778 | 0.293939 | 0.524411 | 0.483838 |
| 1934 | ENSG00000 | ZNF791    | 0.819192 | 0.226263 | 0.506397 | 0.515152 |
| 1935 | ENSG00000 | TIGD1     | 0.825581 | 0.255814 | 0.528189 | 0.468288 |
| 1936 | ENSG00000 | PHF24     | 0.733333 | 0.345455 | 0.535354 | 0.444444 |
| 1937 | ENSG00000 | AGRP      | 0.717172 | 0.339394 | 0.528283 | 0.481818 |
| 1938 | ENSG00000 | RHOXF1    | 0.721212 | 0.331313 | 0.51835  | 0.5      |
| 1939 | ENSG00000 | TOMM40L   | 0.744444 | 0.334343 | 0.534007 | 0.456566 |
| 1940 | ENSG00000 | PIK3R5    | 0.651515 | 0.382828 | 0.517172 | 0.480808 |
| 1941 | ENSG00000 | CLVS1     | 0.742424 | 0.322222 | 0.532323 | 0.478788 |
| 1942 | ENSG00000 | ACSM3     | 0.682875 | 0.349894 | 0.516385 | 0.505285 |
| 1943 | ENSG00000 | SLC7A3    | 0.731313 | 0.331313 | 0.531313 | 0.478788 |
| 1944 | ENSG00000 | GUCA1C    | 0.712474 | 0.328753 | 0.520613 | 0.5074   |
| 1945 | ENSG00000 | KCTD18    | 0.861616 | 0.208081 | 0.518519 | 0.476768 |
| 1946 | ENSG00000 | GLYATL3   | 0.816162 | 0.248485 | 0.520707 | 0.489899 |
| 1947 | ENSG00000 | MRPS33    | 0.725253 | 0.305051 | 0.507407 | 0.537374 |
| 1948 | ENSG00000 | TMEM80    | 0.745455 | 0.310101 | 0.525421 | 0.494949 |
| 1949 | ENSG00000 | COQ2      | 0.789641 | 0.308668 | 0.538584 | 0.438689 |
| 1950 | ENSG00000 | HTR6      | 0.750505 | 0.330303 | 0.540404 | 0.445455 |
| 1951 | ENSG00000 | ZDHHC14   | 0.737374 | 0.337374 | 0.537374 | 0.450505 |
| 1952 | ENSG00000 | LBX2      | 0.658915 | 0.365449 | 0.51089  | 0.507198 |
| 1953 | ENSG00000 | RIPPLY2   | 0.712474 | 0.328753 | 0.520613 | 0.5074   |
| 1954 | ENSG00000 | CYP2S1    | 0.727273 | 0.327273 | 0.527273 | 0.490909 |
| 1955 | ENSG00000 | MS4A5     | 0.674419 | 0.369979 | 0.522199 | 0.479915 |
| 1956 | ENSG00000 | CCNA2     | 0.673737 | 0.346465 | 0.510101 | 0.524242 |
| 1957 | ENSG00000 | ADM       | 0.69798  | 0.348485 | 0.521717 | 0.491919 |
| 1958 | ENSG00000 | UCMA      | 0.807611 | 0.298097 | 0.536117 | 0.436575 |
| 1959 | ENSG00000 | PAX8      | 0.834343 | 0.229293 | 0.510774 | 0.5      |
| 1960 | ENSG00000 | SMAD5     | 0.709091 | 0.331313 | 0.520202 | 0.511111 |
| 1961 | ENSG00000 | TM4SF4    | 0.688889 | 0.361616 | 0.525253 | 0.478788 |
| 1962 | ENSG00000 | IL18BP    | 0.744444 | 0.338384 | 0.523232 | 0.467677 |
| 1963 | ENSG00000 | ANKDD1A   | 0.69798  | 0.334343 | 0.505387 | 0.528283 |
| 1964 | ENSG00000 | SRI       | 0.885835 | 0.206131 | 0.541402 | 0.389006 |
| 1965 | ENSG00000 | AC008687. | 0.673737 | 0.346465 | 0.510101 | 0.523232 |
| 1966 | ENSG00000 | ASAH2     | 0.666667 | 0.367677 | 0.517172 | 0.493939 |
| 1967 | ENSG00000 | ARGFX     | 0.70303  | 0.349495 | 0.526263 | 0.482828 |
| 1968 | ENSG00000 | KRT76     | 0.690909 | 0.337374 | 0.514141 | 0.521212 |
| 1969 | ENSG00000 | OAF       | 0.69697  | 0.343434 | 0.520202 | 0.50202  |
| 1970 | ENSG00000 | ASAH2B    | 0.666667 | 0.367677 | 0.517172 | 0.493939 |
| 1971 | ENSG00000 | ZFP41     | 0.784848 | 0.30101  | 0.542088 | 0.454545 |
| 1972 | ENSG00000 | CDH26     | 0.725159 | 0.341438 | 0.533298 | 0.471459 |
| 1973 | ENSG00000 | NEGR1     | 0.731313 | 0.331313 | 0.531313 | 0.481818 |
| 1974 | ENSG00000 | DUXA      | 0.79798  | 0.29697  | 0.528283 | 0.465657 |
| 1975 | ENSG00000 | SLAIN2    | 0.751515 | 0.3      | 0.521212 | 0.509091 |
| 1976 | ENSG00000 | AC138696. | 0.784848 | 0.30101  | 0.542088 | 0.454545 |
| 1977 | ENSG00000 | TFAP2C    | 0.856566 | 0.227273 | 0.534343 | 0.456566 |
| 1978 | ENSG00000 | MAGEB16   | 0.70303  | 0.349495 | 0.526263 | 0.483838 |

|      |                        |          |          |          |          |
|------|------------------------|----------|----------|----------|----------|
| 1979 | ENSG00000GDF11         | 0.721212 | 0.335354 | 0.513973 | 0.505051 |
| 1980 | ENSG00000GPRASP2       | 0.757576 | 0.29899  | 0.518519 | 0.507071 |
| 1981 | ENSG00000DEFB115       | 0.677778 | 0.378788 | 0.507744 | 0.486869 |
| 1982 | ENSG00000MPP5          | 0.866667 | 0.193237 | 0.514493 | 0.487923 |
| 1983 | ENSG00000PTPRB         | 0.690909 | 0.337374 | 0.514141 | 0.524242 |
| 1984 | ENSG00000PRAC1         | 0.711111 | 0.336364 | 0.522054 | 0.50202  |
| 1985 | ENSG00000FAM168B       | 0.89596  | 0.20101  | 0.536027 | 0.367677 |
| 1986 | ENSG00000DPM2          | 0.79704  | 0.303383 | 0.538407 | 0.445032 |
| 1987 | ENSG00000GGPS1         | 0.731313 | 0.318182 | 0.522727 | 0.509091 |
| 1988 | ENSG00000USP11         | 0.901691 | 0.17759  | 0.531008 | 0.39852  |
| 1989 | ENSG00000CHI3L2        | 0.73913  | 0.324638 | 0.531884 | 0.484058 |
| 1990 | ENSG00000LSM11         | 0.818182 | 0.245455 | 0.519697 | 0.49596  |
| 1991 | ENSG00000IL1RAP        | 0.724242 | 0.346465 | 0.535354 | 0.460606 |
| 1992 | ENSG00000ZGRF1         | 0.90303  | 0.182828 | 0.525926 | 0.407071 |
| 1993 | ENSG00000SLC10A2       | 0.718816 | 0.335095 | 0.526956 | 0.493658 |
| 1994 | ENSG00000GRIN2D        | 0.768116 | 0.303382 | 0.529147 | 0.485024 |
| 1995 | ENSG00000ICK           | 0.738901 | 0.332981 | 0.535941 | 0.468288 |
| 1996 | ENSG00000KLF4          | 0.644444 | 0.375758 | 0.510101 | 0.505051 |
| 1997 | ENSG00000ALMS1         | 0.674419 | 0.369979 | 0.522199 | 0.485201 |
| 1998 | ENSG00000SLC6A15       | 0.724242 | 0.346465 | 0.535354 | 0.466667 |
| 1999 | ENSG00000EEF2K         | 0.709091 | 0.331313 | 0.520202 | 0.516162 |
| 2000 | ENSG00000FBXW2         | 0.674419 | 0.369979 | 0.522199 | 0.485201 |
| 2001 | ENSG00000SBF2          | 0.865657 | 0.243434 | 0.542256 | 0.411111 |
| 2002 | ENSG00000SLC05A1       | 0.686869 | 0.345455 | 0.514478 | 0.519192 |
| 2003 | ENSG00000CLEC3A        | 0.689218 | 0.356237 | 0.522727 | 0.4926   |
| 2004 | ENSG00000CASTOR3       | 0.731313 | 0.320202 | 0.522054 | 0.508081 |
| 2005 | ENSG00000MCM2          | 0.893939 | 0.180808 | 0.527104 | 0.437374 |
| 2006 | ENSG00000PRKRIP1       | 0.672727 | 0.377778 | 0.513468 | 0.488889 |
| 2007 | ENSG00000PIGS          | 0.757576 | 0.316162 | 0.531313 | 0.483838 |
| 2008 | ENSG00000PRSS8         | 0.674747 | 0.375758 | 0.525253 | 0.476768 |
| 2009 | ENSG00000RAB11FIP4     | 0.628283 | 0.391919 | 0.510101 | 0.493939 |
| 2010 | ENSG00000PALM2-<br>AKA | 0.690909 | 0.337374 | 0.514141 | 0.526263 |
| 2011 | ENSG00000HELLS         | 0.854545 | 0.19798  | 0.509933 | 0.50404  |
| 2012 | ENSG00000CARD18        | 0.621212 | 0.390909 | 0.499663 | 0.505051 |
| 2013 | ENSG00000FCRL1         | 0.659619 | 0.385835 | 0.522727 | 0.476744 |
| 2014 | ENSG00000ZC3H10        | 0.840381 | 0.251586 | 0.537174 | 0.454545 |
| 2015 | ENSG00000VKORC1L1      | 0.745455 | 0.325253 | 0.535354 | 0.475758 |
| 2016 | ENSG00000COMMD4        | 0.737374 | 0.318182 | 0.525758 | 0.50202  |
| 2017 | ENSG00000ZNF510        | 0.725159 | 0.341438 | 0.533298 | 0.476744 |
| 2018 | ENSG00000CTNBL1        | 0.824242 | 0.266667 | 0.532997 | 0.468687 |
| 2019 | ENSG00000IFI27         | 0.757576 | 0.319192 | 0.538384 | 0.471717 |
| 2020 | ENSG00000CARS2         | 0.792929 | 0.259596 | 0.52138  | 0.509091 |
| 2021 | ENSG00000ABHD8         | 0.808081 | 0.267677 | 0.52037  | 0.494949 |
| 2022 | ENSG00000GALNT8        | 0.724242 | 0.346465 | 0.535354 | 0.468687 |
| 2023 | ENSG00000NKX2-3        | 0.711111 | 0.336364 | 0.522054 | 0.508081 |
| 2024 | ENSG00000OSR2          | 0.711416 | 0.335095 | 0.514094 | 0.51797  |
| 2025 | ENSG00000C19orf47      | 0.894949 | 0.178788 | 0.536869 | 0.415152 |
| 2026 | ENSG00000SPPL3         | 0.688889 | 0.361616 | 0.525253 | 0.486869 |
| 2027 | ENSG00000PLEKHG6       | 0.725253 | 0.325253 | 0.525253 | 0.509091 |
| 2028 | ENSG00000STX1B         | 0.640404 | 0.39697  | 0.517677 | 0.479798 |
| 2029 | ENSG00000SH2D3C        | 0.7      | 0.334343 | 0.504882 | 0.537374 |
| 2030 | ENSG00000STX2          | 0.640404 | 0.39697  | 0.517677 | 0.479798 |
| 2031 | ENSG00000ZYG11B        | 0.769697 | 0.313131 | 0.539057 | 0.470707 |
| 2032 | ENSG00000UBE2E3        | 0.889899 | 0.179798 | 0.53569  | 0.437374 |
| 2033 | ENSG00000TSPAN1        | 0.738901 | 0.332981 | 0.535941 | 0.47463  |

|      |                   |          |          |          |          |        |
|------|-------------------|----------|----------|----------|----------|--------|
| 2034 | ENSG00000RHOF     | 0.708245 | 0.352008 | 0.528541 | 0.484144 |        |
| 2035 | ENSG00000ARHGAP30 | 0.725253 | 0.325253 | 0.525253 | 0.507071 |        |
| 2036 | ENSG00000HSPA1B   | 0.889899 | 0.182828 | 0.531145 | 0.445455 |        |
| 2037 | ENSG00000UFD1     | 0.681818 | 0.354545 | 0.518182 | 0.514141 |        |
| 2038 | ENSG00000CXXC5    | 0.868687 | 0.222222 | 0.542593 | 0.442424 |        |
| 2039 | ENSG00000CDCA5    | 0.813953 | 0.258985 | 0.528189 | 0.490486 |        |
| 2040 | ENSG00000DBF4B    | 0.636364 | 0.4      | 0.518182 | 0.477778 |        |
| 2041 | ENSG00000PALLD    | 0.718816 | 0.335095 | 0.526956 | 0.498943 |        |
| 2042 | ENSG00000AGXT2    | 0.665657 | 0.362626 | 0.512795 | 0.517172 |        |
| 2043 | ENSG00000SYN3     | 0.757576 | 0.319192 | 0.538384 | 0.474747 |        |
| 2044 | ENSG00000SEMA3G   | 0.7      | 0.352525 | 0.518855 | 0.5      |        |
| 2045 | ENSG00000B3GAT1   | 0.808081 | 0.283838 | 0.535522 | 0.471717 |        |
| 2046 | ENSG00000NEU3     | 0.89596  | 0.176768 | 0.531987 | 0.434343 |        |
| 2047 | ENSG00000RBBP8    | 0.79704  | 0.289641 | 0.536469 | 0.475687 |        |
| 2048 | ENSG00000RAP1GAP  | 0.745455 | 0.334343 | 0.537879 | 0.468687 |        |
| 2049 | ENSG00000SNX22    | 0.772727 | 0.318182 | 0.537374 | 0.466667 |        |
| 2050 | ENSG00000SPINK4   | 0.724242 | 0.346465 | 0.535354 | 0.473737 |        |
| 2051 | ENSG00000HSPA1L   | 0.841438 | 0.181818 | 0.496653 | 0.533827 |        |
| 2052 | ENSG00000ZNF229   | 0.727273 | 0.313131 | 0.518182 | 0.526263 |        |
| 2053 | ENSG00000ENO3     | 0.734343 | 0.345455 | 0.525253 | 0.476768 |        |
| 2054 | ENSG00000AP3B1    | 0.848485 | 0.258586 | 0.537542 | 0.445455 |        |
| 2055 | ENSG00000CD53     | 0.825253 | 0.247475 | 0.527104 | 0.489899 |        |
| 2056 | ENSG00000PPP1R3E  | 0.750505 | 0.318182 | 0.530976 | 0.491919 |        |
| 2057 | ENSG00000FRA10AC1 | 0.750505 | 0.312121 | 0.529125 | 0.49899  |        |
| 2058 | ENSG00000FOXCI    | 0.828753 | 0.238901 | 0.514094 | 0.508457 |        |
| 2059 | ENSG00000DCX      | 0.688889 | 0.361616 | 0.525253 | 0.493939 |        |
| 2060 | ENSG00000BTBD16   | 0.684848 | 0.355556 | 0.51431  | 0.515152 |        |
| 2061 | ENSG00000IFT172   | 0.628283 | 0.391919 | 0.510101 | 0.5      |        |
| 2062 | ENSG00000SNRPN    | 0.610994 | 0.389006 | 0.499119 | 0.51797  |        |
| 2063 | ENSG00000MALT1    | 0.616162 | 0.379798 | 0.49798  | 0.525253 |        |
| 2064 | ENSG00000SLC26A3  | 0.737374 | 0.337374 | 0.537374 | 0.474747 |        |
| 2065 | ENSG00000PRPF3    | 0.793939 | 0.289899 | 0.533165 | 0.483838 |        |
| 2066 | ENSG00000SNX4     | 0.839323 | 0.254757 | 0.533122 | 0.470402 |        |
| 2067 | ENSG00000DEFB132  | 0.708081 | 0.361616 | 0.53165  | 0.471717 |        |
| 2068 | ENSG00000PCDHA8   | 0.729387 | 0.323467 | 0.526427 | 0.508457 |        |
| 2069 | ENSG00000TMEM249  | 0.681818 | 0.354545 | 0.518182 | 0.513131 |        |
| 2070 | ENSG00000BLMH     | 0.842424 | 0.240404 | 0.527778 | 0.482828 |        |
| 2071 | ENSG00000SPIN4    | 0.745455 | 0.325253 | 0.535354 | 0.483838 |        |
| 2072 | ENSG00000TMEM158  | 0.725253 | 0.325253 | 0.525253 | 0.510101 |        |
| 2073 | ENSG00000VANGL2   | 0.676768 | 0.349495 | 0.513131 | 0.528283 |        |
| 2074 | ENSG00000AGR2     | 0.737374 | 0.318182 | 0.525758 | 0.511111 |        |
| 2075 | ENSG00000OGN      | 0.727273 | 0.327273 | 0.527273 | 0.507071 |        |
| 2076 | ENSG00000AREG     | 0.688889 | 0.340404 | 0.513131 | 0.534343 | 0.259  |
| 2077 | ENSG00000TMEM251  | 0.70303  | 0.349495 | 0.526263 | 0.49596  |        |
| 2078 | ENSG00000RCAN1    | 0.750505 | 0.330303 | 0.540404 | 0.468687 | 0.484  |
| 2079 | ENSG00000KPNA1    | 0.848485 | 0.264646 | 0.532997 | 0.455556 |        |
| 2080 | ENSG00000CARD6    | 0.828283 | 0.244444 | 0.518855 | 0.50202  |        |
| 2081 | ENSG00000C15orf59 | 0.660606 | 0.391919 | 0.526263 | 0.470707 |        |
| 2082 | ENSG00000PRICKLE3 | 0.731313 | 0.331313 | 0.523569 | 0.50303  |        |
| 2083 | ENSG00000GNMT     | 0.757576 | 0.318182 | 0.53569  | 0.484848 | 0.2541 |
| 2084 | ENSG00000IZUM02   | 0.780808 | 0.309091 | 0.539731 | 0.471717 |        |
| 2085 | ENSG00000NLGN3    | 0.751515 | 0.317172 | 0.521212 | 0.506061 |        |
| 2086 | ENSG00000FAM120B  | 0.894949 | 0.226263 | 0.529966 | 0.408081 |        |
| 2087 | ENSG00000LYPLA1   | 0.755556 | 0.334343 | 0.542929 | 0.456566 |        |
| 2088 | ENSG00000MS4A18   | 0.64482  | 0.371036 | 0.507928 | 0.522199 |        |

|      |                    |          |          |          |          |
|------|--------------------|----------|----------|----------|----------|
| 2089 | ENSG00000NECAP1    | 0.742424 | 0.310101 | 0.522896 | 0.519192 |
| 2090 | ENSG00000TMEM40    | 0.690909 | 0.337374 | 0.514141 | 0.537374 |
| 2091 | ENSG00000KHDRBS2   | 0.90202  | 0.178788 | 0.53367  | 0.427273 |
| 2092 | ENSG00000YTHDC2    | 0.628283 | 0.391919 | 0.510101 | 0.505051 |
| 2093 | ENSG00000TIGD2     | 0.535354 | 0.424242 | 0.479125 | 0.49697  |
| 2094 | ENSG00000CCDC129   | 0.814141 | 0.283838 | 0.53468  | 0.472727 |
| 2095 | ENSG00000PLPP1     | 0.651163 | 0.377378 | 0.514271 | 0.508457 |
| 2096 | ENSG00000PLA2G4F   | 0.667019 | 0.362579 | 0.514799 | 0.519027 |
| 2097 | ENSG00000PCGF5     | 0.733333 | 0.326263 | 0.529798 | 0.50101  |
| 2098 | ENSG00000MAST1     | 0.721212 | 0.358586 | 0.535522 | 0.461616 |
| 2099 | ENSG00000MT1A      | 0.828283 | 0.277778 | 0.567003 | 0.39798  |
| 2100 | ENSG00000ACSM1     | 0.70303  | 0.349495 | 0.526263 | 0.49798  |
| 2101 | ENSG00000PLOD3     | 0.645626 | 0.366556 | 0.506091 | 0.532669 |
| 2102 | ENSG00000ZNF772    | 0.676768 | 0.349495 | 0.513131 | 0.529293 |
| 2103 | ENSG00000FOXA1     | 0.818182 | 0.277778 | 0.530808 | 0.479798 |
| 2104 | ENSG00000TEX37     | 0.649049 | 0.381607 | 0.509866 | 0.510571 |
| 2105 | ENSG00000PCDHA4    | 0.750505 | 0.330303 | 0.540404 | 0.471717 |
| 2106 | ENSG00000CEP19     | 0.732004 | 0.355482 | 0.541897 | 0.447398 |
| 2107 | ENSG00000MUM1L1    | 0.90202  | 0.184848 | 0.542256 | 0.39798  |
| 2108 | ENSG00000ZNF606    | 0.674419 | 0.379493 | 0.523432 | 0.485201 |
| 2109 | ENSG00000KMT2D     | 0.776768 | 0.30101  | 0.523232 | 0.5      |
| 2110 | ENSG00000KCNK15    | 0.711111 | 0.357576 | 0.534343 | 0.476768 |
| 2111 | ENSG00000CRIP3     | 0.724242 | 0.332323 | 0.508586 | 0.526263 |
| 2112 | ENSG00000LANCL2    | 0.887879 | 0.213131 | 0.540741 | 0.427273 |
| 2113 | ENSG00000COX7B     | 0.722222 | 0.358586 | 0.525253 | 0.475758 |
| 2114 | ENSG00000C6orf223  | 0.745455 | 0.323232 | 0.529125 | 0.49596  |
| 2115 | ENSG00000DDX25     | 0.587879 | 0.422222 | 0.505051 | 0.484848 |
| 2116 | ENSG00000NEK9      | 0.682927 | 0.367015 | 0.524971 | 0.494774 |
| 2117 | ENSG00000ZNF558    | 0.674747 | 0.344444 | 0.502862 | 0.549495 |
| 2118 | ENSG00000SLC14A1   | 0.666667 | 0.367677 | 0.517172 | 0.513131 |
| 2119 | ENSG00000PARP8     | 0.667019 | 0.362579 | 0.514799 | 0.521142 |
| 2120 | ENSG00000CNGA2     | 0.738901 | 0.332981 | 0.535941 | 0.483087 |
| 2121 | ENSG00000AC136352. | 0.72093  | 0.331118 | 0.526024 | 0.512735 |
| 2122 | ENSG00000RHAG      | 0.691919 | 0.344444 | 0.511448 | 0.533333 |
| 2123 | ENSG00000SGO1      | 0.659619 | 0.379493 | 0.514094 | 0.505285 |
| 2124 | ENSG00000PAFAH1B3  | 0.681818 | 0.354545 | 0.518182 | 0.522222 |
| 2125 | ENSG00000ANAPC2    | 0.759596 | 0.323232 | 0.532997 | 0.483838 |
| 2126 | ENSG00000KIAA2026  | 0.793939 | 0.29798  | 0.536869 | 0.478788 |
| 2127 | ENSG00000STK4      | 0.917172 | 0.186869 | 0.53468  | 0.377778 |
| 2128 | ENSG00000VASN      | 0.752643 | 0.326638 | 0.539641 | 0.478858 |
| 2129 | ENSG00000ARSE      | 0.690909 | 0.337374 | 0.514141 | 0.539394 |
| 2130 | ENSG00000MDK       | 0.692929 | 0.339394 | 0.516162 | 0.534343 |
| 2131 | ENSG00000NCBP2L    | 0.738384 | 0.3      | 0.516162 | 0.539394 |
| 2132 | ENSG00000DACT3     | 0.742424 | 0.322222 | 0.532323 | 0.49899  |
| 2133 | ENSG00000IP6K3     | 0.667019 | 0.362579 | 0.514799 | 0.522199 |
| 2134 | ENSG00000PURG      | 0.709091 | 0.331313 | 0.520202 | 0.527273 |
| 2135 | ENSG00000RAB25     | 0.688889 | 0.361616 | 0.525253 | 0.49899  |
| 2136 | ENSG00000IGFBPL1   | 0.61945  | 0.378436 | 0.498943 | 0.53277  |
| 2137 | ENSG00000HTR3B     | 0.839424 | 0.27021  | 0.539313 | 0.457364 |
| 2138 | ENSG00000LRIT3     | 0.695652 | 0.347826 | 0.521739 | 0.515942 |
| 2139 | ENSG00000LY9       | 0.666667 | 0.367677 | 0.517172 | 0.516162 |
| 2140 | ENSG00000ANKRA2    | 0.688889 | 0.355556 | 0.514478 | 0.519192 |
| 2141 | ENSG00000UAP1      | 0.741414 | 0.317172 | 0.520875 | 0.520202 |
| 2142 | ENSG00000AKAP3     | 0.704017 | 0.344609 | 0.524313 | 0.512685 |
| 2143 | ENSG00000STOX1     | 0.811111 | 0.283838 | 0.537037 | 0.477778 |

0.2934

|      |                    |          |          |          |          |        |
|------|--------------------|----------|----------|----------|----------|--------|
| 2144 | ENSG00000RBM45     | 0.727273 | 0.320202 | 0.513468 | 0.536364 |        |
| 2145 | ENSG00000TRPV5     | 0.745455 | 0.314141 | 0.524579 | 0.517172 |        |
| 2146 | ENSG00000SPAG8     | 0.762156 | 0.318182 | 0.540169 | 0.484144 |        |
| 2147 | ENSG00000PI4KA     | 0.737374 | 0.337374 | 0.537374 | 0.478788 |        |
| 2148 | ENSG00000SLC35F2   | 0.879798 | 0.238384 | 0.551852 | 0.40101  |        |
| 2149 | ENSG00000KCNQ4     | 0.773737 | 0.319192 | 0.546465 | 0.466667 |        |
| 2150 | ENSG00000SELL      | 0.681818 | 0.354545 | 0.518182 | 0.521212 |        |
| 2151 | ENSG00000UBN2      | 0.875758 | 0.19798  | 0.518855 | 0.491919 |        |
| 2152 | ENSG00000PARVB     | 0.681818 | 0.354545 | 0.518182 | 0.521212 |        |
| 2153 | ENSG00000MAN1C1    | 0.717172 | 0.339394 | 0.528283 | 0.506061 |        |
| 2154 | ENSG00000TRMT10B   | 0.712121 | 0.334343 | 0.523232 | 0.520202 |        |
| 2155 | ENSG00000RPS24     | 0.733615 | 0.327696 | 0.530655 | 0.504228 |        |
| 2156 | ENSG00000C11orf91  | 0.636364 | 0.4      | 0.518182 | 0.488889 |        |
| 2157 | ENSG00000MAPK12    | 0.90202  | 0.171717 | 0.535017 | 0.439394 |        |
| 2158 | ENSG00000STMN1     | 0.794949 | 0.291919 | 0.526094 | 0.49596  |        |
| 2159 | ENSG00000PTX3      | 0.711111 | 0.336364 | 0.522054 | 0.521212 |        |
| 2160 | ENSG00000CARD16    | 0.725253 | 0.325253 | 0.525253 | 0.519192 |        |
| 2161 | ENSG00000PAK6      | 0.764646 | 0.320202 | 0.52963  | 0.491919 |        |
| 2162 | ENSG00000FAM180A   | 0.723232 | 0.338384 | 0.520034 | 0.511111 |        |
| 2163 | ENSG00000CXCR3     | 0.651163 | 0.372093 | 0.511628 | 0.522702 | 0.2996 |
| 2164 | ENSG00000SLC51A    | 0.776768 | 0.322222 | 0.549495 | 0.454545 |        |
| 2165 | ENSG00000NANP      | 0.737374 | 0.347475 | 0.53165  | 0.473737 |        |
| 2166 | ENSG00000LRIF1     | 0.660606 | 0.361616 | 0.511111 | 0.533333 |        |
| 2167 | ENSG00000CNDP1     | 0.725253 | 0.325253 | 0.525253 | 0.521212 |        |
| 2168 | ENSG00000NELFE     | 0.80404  | 0.310101 | 0.542929 | 0.454545 |        |
| 2169 | ENSG00000FDPS      | 0.815152 | 0.279798 | 0.532155 | 0.484848 |        |
| 2170 | ENSG00000PILRA     | 0.666667 | 0.367677 | 0.517172 | 0.519192 |        |
| 2171 | ENSG00000LETM2     | 0.763214 | 0.319239 | 0.541226 | 0.483087 |        |
| 2172 | ENSG00000ANKRD13B  | 0.919192 | 0.171717 | 0.53266  | 0.392929 |        |
| 2173 | ENSG00000ID3       | 0.891919 | 0.222222 | 0.542761 | 0.413131 |        |
| 2174 | ENSG00000TMEM187   | 0.744444 | 0.344444 | 0.542593 | 0.461616 |        |
| 2175 | ENSG00000JAKMIP3   | 0.737374 | 0.337374 | 0.537374 | 0.481818 |        |
| 2176 | ENSG00000SYNC      | 0.730303 | 0.339394 | 0.525926 | 0.49798  |        |
| 2177 | ENSG00000CDH11     | 0.757576 | 0.325253 | 0.538047 | 0.482828 |        |
| 2178 | ENSG00000BUB1B-PAK | 0.764646 | 0.320202 | 0.52963  | 0.491919 |        |
| 2179 | ENSG00000BPTF      | 0.755556 | 0.335354 | 0.53771  | 0.471717 |        |
| 2180 | ENSG00000DOT1L     | 0.711416 | 0.352008 | 0.531712 | 0.4926   |        |
| 2181 | ENSG00000NTN3      | 0.615152 | 0.391919 | 0.502694 | 0.521212 |        |
| 2182 | ENSG00000AIG1      | 0.681818 | 0.354545 | 0.518182 | 0.525253 |        |
| 2183 | ENSG00000ACOT11    | 0.697674 | 0.364693 | 0.531184 | 0.487315 |        |
| 2184 | ENSG00000DTNB      | 0.724242 | 0.346465 | 0.535354 | 0.486869 |        |
| 2185 | ENSG00000ARHGEF9   | 0.750505 | 0.318182 | 0.530976 | 0.507071 |        |
| 2186 | ENSG00000PPIL4     | 0.737374 | 0.333333 | 0.529293 | 0.49798  |        |
| 2187 | ENSG00000DYRK1B    | 0.782828 | 0.313131 | 0.539731 | 0.476768 |        |
| 2188 | ENSG00000CASTOR2   | 0.812121 | 0.274747 | 0.53468  | 0.489899 |        |
| 2189 | ENSG00000C1orf194  | 0.638478 | 0.391121 | 0.513742 | 0.5074   |        |
| 2190 | ENSG00000AMPD3     | 0.678788 | 0.376768 | 0.526431 | 0.490909 |        |
| 2191 | ENSG00000TESPA1    | 0.749471 | 0.342495 | 0.525722 | 0.480973 |        |
| 2192 | ENSG00000ASIC2     | 0.64482  | 0.403805 | 0.524313 | 0.479915 |        |
| 2193 | ENSG00000CLDN4     | 0.725159 | 0.341438 | 0.533298 | 0.494715 |        |
| 2194 | ENSG00000NCAPH     | 0.850505 | 0.224242 | 0.525926 | 0.49798  |        |
| 2195 | ENSG00000MED13L    | 0.69697  | 0.343434 | 0.520202 | 0.528283 |        |
| 2196 | ENSG00000GPR155    | 0.688889 | 0.361616 | 0.525253 | 0.505051 |        |
| 2197 | ENSG00000ANKRD22   | 0.707641 | 0.368771 | 0.538206 | 0.470653 |        |
| 2198 | ENSG00000SPINK6    | 0.688889 | 0.355556 | 0.518182 | 0.521212 |        |

|      |                    |          |          |          |          |
|------|--------------------|----------|----------|----------|----------|
| 2199 | ENSG00000STYK1     | 0.750505 | 0.330303 | 0.540404 | 0.484848 |
| 2200 | ENSG00000SEC13     | 0.737374 | 0.337374 | 0.537374 | 0.486869 |
| 2201 | ENSG00000SPINK8    | 0.721212 | 0.356566 | 0.537205 | 0.474747 |
| 2202 | ENSG00000CAVIN1    | 0.688889 | 0.361616 | 0.525253 | 0.505051 |
| 2203 | ENSG00000PMM1      | 0.840404 | 0.253535 | 0.527609 | 0.490909 |
| 2204 | ENSG00000TMEM59L   | 0.737374 | 0.337374 | 0.537374 | 0.489899 |
| 2205 | ENSG00000PPP1R35   | 0.726467 | 0.336656 | 0.531561 | 0.504983 |
| 2206 | ENSG00000WDR6      | 0.745455 | 0.345455 | 0.545455 | 0.458586 |
| 2207 | ENSG00000UBXN2B    | 0.616162 | 0.379798 | 0.49798  | 0.539394 |
| 2208 | ENSG00000KCNH5     | 0.674747 | 0.375758 | 0.525253 | 0.49798  |
| 2209 | ENSG00000ADAM20    | 0.683932 | 0.379493 | 0.531712 | 0.48203  |
| 2210 | ENSG00000TFPT      | 0.860606 | 0.220202 | 0.525589 | 0.494949 |
| 2211 | ENSG00000SPAG9     | 0.733615 | 0.349894 | 0.541755 | 0.471459 |
| 2212 | ENSG00000HMCES     | 0.805051 | 0.30101  | 0.540067 | 0.475758 |
| 2213 | ENSG00000MYO3A     | 0.742995 | 0.328502 | 0.535749 | 0.497585 |
| 2214 | ENSG00000SUSD1     | 0.711111 | 0.357576 | 0.534343 | 0.489899 |
| 2215 | ENSG00000NKD2      | 0.738901 | 0.332981 | 0.535941 | 0.494715 |
| 2216 | ENSG00000TRIM54    | 0.70303  | 0.349495 | 0.526263 | 0.513131 |
| 2217 | ENSG00000RNASEH2B  | 0.849495 | 0.260606 | 0.551515 | 0.451515 |
| 2218 | ENSG00000MCRIP2    | 0.724242 | 0.326263 | 0.523401 | 0.528283 |
| 2219 | ENSG00000SHOC2     | 0.734219 | 0.323367 | 0.526763 | 0.520487 |
| 2220 | ENSG00000MPP2      | 0.646465 | 0.410101 | 0.528283 | 0.472727 |
| 2221 | ENSG00000MASP1     | 0.724242 | 0.346465 | 0.535354 | 0.492929 |
| 2222 | ENSG00000C20orf24  | 0.698732 | 0.32981  | 0.509866 | 0.557082 |
| 2223 | ENSG00000SNUPN     | 0.848485 | 0.259596 | 0.548316 | 0.457576 |
| 2224 | ENSG00000RRP7A     | 0.651163 | 0.377378 | 0.502995 | 0.531712 |
| 2225 | ENSG00000NEUROD1   | 0.9      | 0.188889 | 0.538889 | 0.442424 |
| 2226 | ENSG00000PIGC      | 0.724242 | 0.346465 | 0.535354 | 0.492929 |
| 2227 | ENSG00000NUP188    | 0.763636 | 0.328283 | 0.534175 | 0.487879 |
| 2228 | ENSG00000TP73      | 0.794949 | 0.283838 | 0.525589 | 0.512121 |
| 2229 | ENSG00000TMEM209   | 0.717172 | 0.339394 | 0.528283 | 0.515152 |
| 2230 | ENSG00000CAVIN2    | 0.674747 | 0.375758 | 0.525253 | 0.5      |
| 2231 | ENSG00000COL4A3    | 0.717172 | 0.339394 | 0.528283 | 0.515152 |
| 2232 | ENSG00000TRIM73    | 0.733333 | 0.355556 | 0.544444 | 0.461616 |
| 2233 | ENSG00000ZNF385D   | 0.731313 | 0.318182 | 0.522727 | 0.536364 |
| 2234 | ENSG00000ATAD2     | 0.872727 | 0.212121 | 0.549327 | 0.467677 |
| 2235 | ENSG00000NRP2      | 0.809725 | 0.287526 | 0.540698 | 0.485201 |
| 2236 | ENSG00000NMNAT1    | 0.830303 | 0.266667 | 0.543434 | 0.479798 |
| 2237 | ENSG00000APOBEC3H  | 0.640592 | 0.366808 | 0.5037   | 0.548626 |
| 2238 | ENSG00000TBX4      | 0.830303 | 0.269697 | 0.537205 | 0.484848 |
| 2239 | ENSG00000C20orf202 | 0.731313 | 0.331313 | 0.531313 | 0.511111 |
| 2240 | ENSG00000SLC2A9    | 0.675758 | 0.378788 | 0.517172 | 0.509091 |
| 2241 | ENSG00000HOXC13    | 0.67343  | 0.385507 | 0.528341 | 0.491787 |
| 2242 | ENSG00000CCL1      | 0.636364 | 0.385859 | 0.510101 | 0.526263 |
| 2243 | ENSG00000GPBAR1    | 0.731313 | 0.331313 | 0.531313 | 0.512121 |
| 2244 | ENSG00000TBC1D7    | 0.7463   | 0.340381 | 0.54334  | 0.476744 |
| 2245 | ENSG00000TCEANC2   | 0.758586 | 0.337374 | 0.541077 | 0.472727 |
| 2246 | ENSG00000DHRS4     | 0.674419 | 0.364341 | 0.51938  | 0.52381  |
| 2247 | ENSG00000HHAT      | 0.69697  | 0.390909 | 0.538889 | 0.455556 |
| 2248 | ENSG00000ACSM6     | 0.733333 | 0.356566 | 0.543266 | 0.464646 |
| 2249 | ENSG00000ZNF781    | 0.69697  | 0.373737 | 0.534007 | 0.481818 |
| 2250 | ENSG00000DHRS4L2   | 0.674419 | 0.364341 | 0.51938  | 0.52381  |
| 2251 | ENSG00000RAB39A    | 0.646465 | 0.385859 | 0.515152 | 0.517172 |
| 2252 | ENSG00000KIF13B    | 0.828283 | 0.262626 | 0.53569  | 0.491919 |
| 2253 | ENSG00000PLP1      | 0.75526  | 0.323367 | 0.539313 | 0.495017 |



|      |                    |          |          |          |          |
|------|--------------------|----------|----------|----------|----------|
| 2254 | ENSG00000CYTH2     | 0.684848 | 0.390909 | 0.5367   | 0.470707 |
| 2255 | ENSG00000RASGRP2   | 0.683932 | 0.372093 | 0.522903 | 0.504228 |
| 2256 | ENSG00000LRRC38    | 0.711111 | 0.357576 | 0.534343 | 0.492929 |
| 2257 | ENSG00000MYO1G     | 0.711111 | 0.357576 | 0.534343 | 0.493939 |
| 2258 | ENSG00000B3GNT2    | 0.790909 | 0.306061 | 0.539057 | 0.486869 |
| 2259 | ENSG00000FM03      | 0.731313 | 0.331313 | 0.531313 | 0.517172 |
| 2260 | ENSG00000USHBP1    | 0.737374 | 0.337374 | 0.537374 | 0.494949 |
| 2261 | ENSG00000PRDM12    | 0.628283 | 0.391919 | 0.510101 | 0.523232 |
| 2262 | ENSG00000MYT1      | 0.79798  | 0.311111 | 0.543771 | 0.474747 |
| 2263 | ENSG00000MS4A3     | 0.755814 | 0.318182 | 0.528189 | 0.515856 |
| 2264 | ENSG00000ARID3B    | 0.742072 | 0.330867 | 0.524313 | 0.514799 |
| 2265 | ENSG00000PCDH12    | 0.816162 | 0.289899 | 0.540236 | 0.482828 |
| 2266 | ENSG00000SALL2     | 0.621212 | 0.40404  | 0.511785 | 0.510101 |
| 2267 | ENSG00000PLS1      | 0.726467 | 0.336656 | 0.531561 | 0.513843 |
| 2268 | ENSG00000SLC26A4   | 0.688889 | 0.361616 | 0.525253 | 0.518182 |
| 2269 | ENSG00000FASLG     | 0.688889 | 0.361616 | 0.525253 | 0.517172 |
| 2270 | ENSG00000HIC2      | 0.709091 | 0.367677 | 0.52862  | 0.489899 |
| 2271 | ENSG00000DYRK2     | 0.822222 | 0.252525 | 0.521549 | 0.521212 |
| 2272 | ENSG00000ME3       | 0.725159 | 0.341438 | 0.533298 | 0.506342 |
| 2273 | ENSG00000BST1      | 0.692929 | 0.339394 | 0.516162 | 0.550505 |
| 2274 | ENSG00000NT5C1A    | 0.909091 | 0.187879 | 0.546633 | 0.426263 |
| 2275 | ENSG00000EIF4E3    | 0.601329 | 0.428571 | 0.51495  | 0.482835 |
| 2276 | ENSG00000NLRP11    | 0.745455 | 0.325253 | 0.535354 | 0.508081 |
| 2277 | ENSG00000RAI1      | 0.807071 | 0.287879 | 0.536869 | 0.49596  |
| 2278 | ENSG00000WAC       | 0.809091 | 0.281818 | 0.530471 | 0.506061 |
| 2279 | ENSG00000SLC25A25  | 0.777778 | 0.320202 | 0.546633 | 0.479798 |
| 2280 | ENSG00000BORCS6    | 0.806061 | 0.281818 | 0.525758 | 0.511111 |
| 2281 | ENSG00000DISP2     | 0.548173 | 0.457364 | 0.502769 | 0.470653 |
| 2282 | ENSG00000PCDH19    | 0.731313 | 0.320202 | 0.522054 | 0.540404 |
| 2283 | ENSG00000C19orf84  | 0.733333 | 0.355556 | 0.544444 | 0.468687 |
| 2284 | ENSG00000CCDC144A  | 0.911111 | 0.226263 | 0.539731 | 0.40101  |
| 2285 | ENSG00000NIPAL4    | 0.676533 | 0.343552 | 0.510042 | 0.562368 |
| 2286 | ENSG00000SLC24A1   | 0.695652 | 0.347826 | 0.521739 | 0.532367 |
| 2287 | ENSG00000ST8SIA2   | 0.7463   | 0.328753 | 0.535412 | 0.504228 |
| 2288 | ENSG00000TRIM77    | 0.731313 | 0.331313 | 0.531313 | 0.518182 |
| 2289 | ENSG00000COL22A1   | 0.68599  | 0.380676 | 0.532045 | 0.490821 |
| 2290 | ENSG00000ANGPTL3   | 0.681818 | 0.354545 | 0.518182 | 0.540404 |
| 2291 | ENSG00000ASB1      | 0.621212 | 0.419192 | 0.520202 | 0.488889 |
| 2292 | ENSG00000AC118549. | 0.755556 | 0.334343 | 0.539731 | 0.489899 |
| 2293 | ENSG00000MAGEA10   | 0.734219 | 0.346622 | 0.537099 | 0.48948  |
| 2294 | ENSG00000B4GALNT3  | 0.711111 | 0.357576 | 0.534343 | 0.49798  |
| 2295 | ENSG00000LRRC41    | 0.660606 | 0.391919 | 0.526263 | 0.49798  |
| 2296 | ENSG00000GLYATL2   | 0.70303  | 0.349495 | 0.526263 | 0.522222 |
| 2297 | ENSG00000ZFYVE27   | 0.830303 | 0.278788 | 0.541246 | 0.481818 |
| 2298 | ENSG00000C1QB      | 0.762626 | 0.343434 | 0.537037 | 0.473737 |
| 2299 | ENSG00000P2RY4     | 0.72093  | 0.331118 | 0.526024 | 0.533776 |
| 2300 | ENSG00000PRR15     | 0.915152 | 0.194949 | 0.552694 | 0.389899 |
| 2301 | ENSG00000DTWD2     | 0.717172 | 0.339394 | 0.528283 | 0.523232 |
| 2302 | ENSG00000CBX8      | 0.79798  | 0.30303  | 0.534848 | 0.49596  |
| 2303 | ENSG00000TTC17     | 0.836364 | 0.272727 | 0.535859 | 0.487879 |
| 2304 | ENSG00000C14orf178 | 0.694352 | 0.384275 | 0.539313 | 0.475083 |
| 2305 | ENSG00000FFAR2     | 0.688889 | 0.348485 | 0.517172 | 0.544444 |
| 2306 | ENSG00000TNPO2     | 0.808081 | 0.312121 | 0.549158 | 0.466667 |
| 2307 | ENSG00000ZFP42     | 0.716162 | 0.376768 | 0.534007 | 0.472727 |
| 2308 | ENSG00000AQP5      | 0.674419 | 0.369979 | 0.522199 | 0.522199 |

|      |                    |          |          |          |          |
|------|--------------------|----------|----------|----------|----------|
| 2309 | ENSG00000FBLIM1    | 0.632323 | 0.40101  | 0.510269 | 0.518182 |
| 2310 | ENSG00000COLGALT1  | 0.688889 | 0.361616 | 0.525253 | 0.521212 |
| 2311 | ENSG00000KLF14     | 0.805051 | 0.30404  | 0.542424 | 0.483838 |
| 2312 | ENSG00000GPR148    | 0.674747 | 0.375758 | 0.525253 | 0.511111 |
| 2313 | ENSG00000GFRA1     | 0.681818 | 0.354545 | 0.518182 | 0.541414 |
| 2314 | ENSG00000MYO18B    | 0.627907 | 0.386892 | 0.5074   | 0.536998 |
| 2315 | ENSG00000DENND2C   | 0.731313 | 0.326263 | 0.52138  | 0.537374 |
| 2316 | ENSG00000ADRA2C    | 0.704017 | 0.344609 | 0.524313 | 0.53277  |
| 2317 | ENSG00000C10orf99  | 0.664646 | 0.389899 | 0.519024 | 0.510101 |
| 2318 | ENSG00000TSPAN3    | 0.660606 | 0.391919 | 0.526263 | 0.5      |
| 2319 | ENSG00000GJB2      | 0.737374 | 0.337374 | 0.537374 | 0.50101  |
| 2320 | ENSG00000ITGAD     | 0.688889 | 0.361616 | 0.525253 | 0.521212 |
| 2321 | ENSG00000HLX       | 0.820202 | 0.289899 | 0.548653 | 0.477778 |
| 2322 | ENSG00000CYTH3     | 0.725159 | 0.369979 | 0.54475  | 0.463002 |
| 2323 | ENSG00000CPNE2     | 0.740864 | 0.328904 | 0.534884 | 0.516058 |
| 2324 | ENSG00000AP3S2     | 0.635354 | 0.409091 | 0.519024 | 0.50101  |
| 2325 | ENSG00000HTR4      | 0.77167  | 0.341438 | 0.552678 | 0.44926  |
| 2326 | ENSG00000ITPR3     | 0.755814 | 0.338266 | 0.54334  | 0.483087 |
| 2327 | ENSG00000ADIPOR2   | 0.711111 | 0.357576 | 0.534343 | 0.50404  |
| 2328 | ENSG00000DCANP1    | 0.651163 | 0.377378 | 0.514271 | 0.533827 |
| 2329 | ENSG00000EFCAB1    | 0.709302 | 0.366808 | 0.527132 | 0.498943 |
| 2330 | ENSG00000COA4      | 0.789641 | 0.281184 | 0.519908 | 0.534884 |
| 2331 | ENSG00000NUP93     | 0.834343 | 0.246465 | 0.53468  | 0.509091 |
| 2332 | ENSG00000ADGRF1    | 0.684848 | 0.373737 | 0.527946 | 0.507071 |
| 2333 | ENSG00000DACH2     | 0.854545 | 0.261616 | 0.542088 | 0.476768 |
| 2334 | ENSG00000AP3S1     | 0.635354 | 0.409091 | 0.519024 | 0.50101  |
| 2335 | ENSG00000PCSK5     | 0.769697 | 0.331313 | 0.550505 | 0.474747 |
| 2336 | ENSG00000ADCY7     | 0.757576 | 0.315152 | 0.529293 | 0.523232 |
| 2337 | ENSG00000STIMATE   | 0.733333 | 0.344444 | 0.537037 | 0.49798  |
| 2338 | ENSG00000RIBC2     | 0.770764 | 0.325581 | 0.5299   | 0.500554 |
| 2339 | ENSG00000TMEM110-M | 0.733333 | 0.344444 | 0.537037 | 0.49798  |
| 2340 | ENSG00000CCDC24    | 0.674747 | 0.375758 | 0.525253 | 0.515152 |
| 2341 | ENSG00000TNFAIP8   | 0.577778 | 0.412121 | 0.494949 | 0.528283 |
| 2342 | ENSG00000PRSS23    | 0.742424 | 0.310101 | 0.522896 | 0.545455 |
| 2343 | ENSG00000ZNF641    | 0.823232 | 0.275758 | 0.532155 | 0.50303  |
| 2344 | ENSG00000SAGE1     | 0.882664 | 0.209302 | 0.528013 | 0.493658 |
| 2345 | ENSG00000FAM83E    | 0.711111 | 0.357576 | 0.534343 | 0.505051 |
| 2346 | ENSG00000ZNF404    | 0.676768 | 0.349495 | 0.513131 | 0.556566 |
| 2347 | ENSG00000CLDN17    | 0.711111 | 0.357576 | 0.534343 | 0.50404  |
| 2348 | ENSG00000SETD4     | 0.816162 | 0.246465 | 0.527104 | 0.529293 |
| 2349 | ENSG00000FM01      | 0.822222 | 0.30101  | 0.548316 | 0.471717 |
| 2350 | ENSG00000NHLH2     | 0.591919 | 0.410101 | 0.488552 | 0.533333 |
| 2351 | ENSG00000FANCB     | 0.711111 | 0.357576 | 0.534343 | 0.50303  |
| 2352 | ENSG00000SLC25A16  | 0.725253 | 0.325253 | 0.525253 | 0.543434 |
| 2353 | ENSG00000JAM3      | 0.711111 | 0.357576 | 0.534343 | 0.50404  |
| 2354 | ENSG00000SMC02     | 0.805051 | 0.307071 | 0.552189 | 0.477778 |
| 2355 | ENSG00000ACACB     | 0.656448 | 0.402748 | 0.528541 | 0.493658 |
| 2356 | ENSG00000SLC49A3   | 0.763636 | 0.325253 | 0.544444 | 0.494949 |
| 2357 | ENSG00000CHST5     | 0.733333 | 0.345455 | 0.535354 | 0.50303  |
| 2358 | ENSG00000C17orf99  | 0.814141 | 0.283838 | 0.542088 | 0.49596  |
| 2359 | ENSG00000PDXP      | 0.716702 | 0.359408 | 0.53365  | 0.5      |
| 2360 | ENSG00000SUSD5     | 0.745455 | 0.325253 | 0.535354 | 0.518182 |
| 2361 | ENSG00000MSL3      | 0.89697  | 0.184848 | 0.537879 | 0.477778 |
| 2362 | ENSG00000CRISP3    | 0.711111 | 0.357576 | 0.534343 | 0.508081 |
| 2363 | ENSG00000SLC35C1   | 0.7463   | 0.340381 | 0.54334  | 0.491543 |

|      |                    |          |          |          |          |        |
|------|--------------------|----------|----------|----------|----------|--------|
| 2364 | ENSG00000CCNB1     | 0.855556 | 0.253535 | 0.53771  | 0.487879 |        |
| 2365 | ENSG00000SPECC1L   | 0.708245 | 0.363636 | 0.534355 | 0.502114 |        |
| 2366 | ENSG00000S1PR5     | 0.70303  | 0.349495 | 0.526263 | 0.528283 |        |
| 2367 | ENSG00000GABARAPL2 | 0.724242 | 0.346465 | 0.535354 | 0.512121 |        |
| 2368 | ENSG00000NPC1L1    | 0.859596 | 0.267677 | 0.551178 | 0.462626 | 0.3296 |
| 2369 | ENSG00000KCTD14    | 0.916162 | 0.180808 | 0.546296 | 0.437374 |        |
| 2370 | ENSG00000NANS      | 0.79899  | 0.30202  | 0.54596  | 0.492929 |        |
| 2371 | ENSG00000GK2       | 0.688889 | 0.361616 | 0.525253 | 0.524242 |        |
| 2372 | ENSG00000MPP1      | 0.725159 | 0.328753 | 0.525018 | 0.542283 |        |
| 2373 | ENSG00000ZNF34     | 0.775758 | 0.338384 | 0.54697  | 0.465657 |        |
| 2374 | ENSG00000GK        | 0.688889 | 0.361616 | 0.525253 | 0.524242 |        |
| 2375 | ENSG00000EPS8L1    | 0.90101  | 0.19697  | 0.547643 | 0.452525 |        |
| 2376 | ENSG00000BC02      | 0.73913  | 0.324638 | 0.531884 | 0.527536 |        |
| 2377 | ENSG00000GK3P      | 0.688889 | 0.361616 | 0.525253 | 0.524242 |        |
| 2378 | ENSG00000LY86      | 0.926263 | 0.177778 | 0.548822 | 0.370707 |        |
| 2379 | ENSG00000FOS       | 0.860606 | 0.241414 | 0.535017 | 0.494949 |        |
| 2380 | ENSG00000GRM2      | 0.777778 | 0.315152 | 0.540067 | 0.50202  |        |
| 2381 | ENSG00000CYB5D2    | 0.823232 | 0.289899 | 0.544781 | 0.484848 |        |
| 2382 | ENSG00000CSF2RA    | 0.688889 | 0.361616 | 0.525253 | 0.525253 |        |
| 2383 | ENSG00000RND2      | 0.69798  | 0.370707 | 0.534343 | 0.50101  |        |
| 2384 | ENSG00000BEND6     | 0.745455 | 0.345455 | 0.545455 | 0.484848 | 0.3536 |
| 2385 | ENSG00000PCBD1     | 0.766667 | 0.346465 | 0.556566 | 0.448485 |        |
| 2386 | ENSG00000SLC7A1    | 0.671717 | 0.40303  | 0.537374 | 0.480808 |        |
| 2387 | ENSG00000CLDN3     | 0.684848 | 0.385859 | 0.535354 | 0.492929 |        |
| 2388 | ENSG00000SUOX      | 0.879798 | 0.192929 | 0.525589 | 0.510101 |        |
| 2389 | ENSG00000ELOVL6    | 0.79899  | 0.29596  | 0.53771  | 0.507071 |        |
| 2390 | ENSG00000HA01      | 0.709091 | 0.381818 | 0.545455 | 0.471717 |        |
| 2391 | ENSG00000ZNF627    | 0.724242 | 0.346465 | 0.535354 | 0.510101 |        |
| 2392 | ENSG00000RC3H2     | 0.778013 | 0.330867 | 0.552149 | 0.473573 |        |
| 2393 | ENSG00000ZNF446    | 0.757928 | 0.340381 | 0.545102 | 0.48203  |        |
| 2394 | ENSG00000ABHD17C   | 0.711111 | 0.357576 | 0.534343 | 0.510101 |        |
| 2395 | ENSG00000GCNA      | 0.689922 | 0.351052 | 0.520487 | 0.543743 |        |
| 2396 | ENSG00000TAF1D     | 0.893939 | 0.236364 | 0.53771  | 0.458586 |        |
| 2397 | ENSG00000HEXA      | 0.733333 | 0.355556 | 0.544444 | 0.482828 |        |
| 2398 | ENSG00000ANXA2R    | 0.721212 | 0.345455 | 0.53165  | 0.520202 |        |
| 2399 | ENSG00000ZNF727    | 0.69798  | 0.370707 | 0.534343 | 0.49899  |        |
| 2400 | ENSG00000ZNF736    | 0.69798  | 0.370707 | 0.534343 | 0.49899  |        |
| 2401 | ENSG00000FOSL2     | 0.923232 | 0.182828 | 0.556902 | 0.377778 |        |
| 2402 | ENSG00000ANAPC15   | 0.771717 | 0.315152 | 0.535354 | 0.516162 |        |
| 2403 | ENSG00000TRANK1    | 0.757576 | 0.337374 | 0.547475 | 0.484848 |        |
| 2404 | ENSG00000ZBTB80S   | 0.684848 | 0.385859 | 0.535354 | 0.493939 |        |
| 2405 | ENSG00000ZNF648    | 0.681818 | 0.354545 | 0.518182 | 0.549495 |        |
| 2406 | ENSG00000PQLC2     | 0.721212 | 0.367677 | 0.544444 | 0.482828 |        |
| 2407 | ENSG00000CDH13     | 0.821212 | 0.277778 | 0.539226 | 0.50303  |        |
| 2408 | ENSG00000EIF4A1    | 0.697674 | 0.364693 | 0.531184 | 0.515856 |        |
| 2409 | ENSG00000TWNK      | 0.757576 | 0.337374 | 0.547475 | 0.487879 |        |
| 2410 | ENSG00000MRO       | 0.763636 | 0.325253 | 0.544444 | 0.50202  |        |
| 2411 | ENSG00000ACSL6     | 0.7463   | 0.340381 | 0.54334  | 0.495772 |        |
| 2412 | ENSG00000MDFI      | 0.681818 | 0.354545 | 0.518182 | 0.552525 |        |
| 2413 | ENSG00000TDRD5     | 0.767442 | 0.341438 | 0.55444  | 0.466173 |        |
| 2414 | ENSG00000Clorf74   | 0.727273 | 0.327273 | 0.527273 | 0.542424 |        |
| 2415 | ENSG00000ZNF415    | 0.766667 | 0.314141 | 0.535354 | 0.521212 |        |
| 2416 | ENSG00000MICALL2   | 0.784355 | 0.320296 | 0.542812 | 0.493658 |        |
| 2417 | ENSG00000KCNA5     | 0.90303  | 0.205051 | 0.541414 | 0.463636 |        |
| 2418 | ENSG00000ATP1A2    | 0.721212 | 0.367677 | 0.544444 | 0.484848 |        |

|      |                    |          |          |          |          |        |        |
|------|--------------------|----------|----------|----------|----------|--------|--------|
| 2419 | ENSG00000SPEG      | 0.834038 | 0.284355 | 0.546512 | 0.483087 |        |        |
| 2420 | ENSG00000TXNRD3NB  | 0.711416 | 0.342495 | 0.522551 | 0.541226 |        |        |
| 2421 | ENSG00000OVOL2     | 0.667019 | 0.397463 | 0.520085 | 0.510571 |        |        |
| 2422 | ENSG00000LM07DN    | 0.70303  | 0.349495 | 0.526263 | 0.534343 |        |        |
| 2423 | ENSG00000PLLP      | 0.781818 | 0.327273 | 0.554545 | 0.477778 |        |        |
| 2424 | ENSG00000SPIN3     | 0.750529 | 0.344609 | 0.527308 | 0.503171 |        |        |
| 2425 | ENSG00000TXNRD3NB  | 0.711416 | 0.342495 | 0.522551 | 0.541226 |        |        |
| 2426 | ENSG00000TRAM2     | 0.707641 | 0.368771 | 0.538206 | 0.497231 | 0.3232 | 0.2138 |
| 2427 | ENSG00000ADAMTSL1  | 0.731313 | 0.331313 | 0.531313 | 0.532323 |        |        |
| 2428 | ENSG00000VIPAS39   | 0.916162 | 0.20404  | 0.546128 | 0.434343 |        |        |
| 2429 | ENSG00000SLC46A2   | 0.757576 | 0.337374 | 0.547475 | 0.489899 |        |        |
| 2430 | ENSG00000SLITRK1   | 0.708245 | 0.375264 | 0.541755 | 0.487315 |        |        |
| 2431 | ENSG00000 9/8/2019 | 0.732004 | 0.366556 | 0.54928  | 0.471761 |        |        |
| 2432 | ENSG00000TRPM2     | 0.777778 | 0.320202 | 0.546633 | 0.49596  |        |        |
| 2433 | ENSG00000ADHFE1    | 0.714588 | 0.330867 | 0.522727 | 0.553911 |        |        |
| 2434 | ENSG00000CELF2     | 0.785859 | 0.318182 | 0.538552 | 0.50202  |        |        |
| 2435 | ENSG00000GRIN2A    | 0.658586 | 0.410101 | 0.533333 | 0.486869 |        |        |
| 2436 | ENSG00000TIFAB     | 0.64482  | 0.39852  | 0.515856 | 0.523256 |        |        |
| 2437 | ENSG00000PDGFC     | 0.733333 | 0.355556 | 0.539394 | 0.493939 |        |        |
| 2438 | ENSG00000CFAP54    | 0.745455 | 0.325253 | 0.535354 | 0.524242 |        |        |
| 2439 | ENSG00000LPIN3     | 0.681818 | 0.354545 | 0.518182 | 0.554545 |        |        |
| 2440 | ENSG00000ST6GALNAC | 0.729293 | 0.367677 | 0.539899 | 0.481818 |        |        |
| 2441 | ENSG00000C14orf37  | 0.788889 | 0.316162 | 0.55     | 0.490909 |        |        |
| 2442 | ENSG00000CTDSPL    | 0.69798  | 0.370707 | 0.534343 | 0.507071 |        |        |
| 2443 | ENSG00000C18orf21  | 0.904863 | 0.175476 | 0.538055 | 0.477801 |        |        |
| 2444 | ENSG00000VPS35L    | 0.69697  | 0.377778 | 0.53468  | 0.5      |        |        |
| 2445 | ENSG00000HEG1      | 0.731313 | 0.331313 | 0.531313 | 0.534343 |        |        |
| 2446 | ENSG00000DOK6      | 0.757576 | 0.319192 | 0.538384 | 0.520202 |        |        |
| 2447 | ENSG00000GALNTL6   | 0.763636 | 0.325253 | 0.544444 | 0.50404  |        |        |
| 2448 | ENSG00000KAZN      | 0.916162 | 0.208081 | 0.546801 | 0.433333 |        |        |
| 2449 | ENSG00000HOMEZ     | 0.893939 | 0.235354 | 0.548822 | 0.449495 |        |        |
| 2450 | ENSG00000SEMA3F    | 0.757576 | 0.325253 | 0.538047 | 0.518182 |        |        |
| 2451 | ENSG00000DNAH9     | 0.671717 | 0.39697  | 0.528956 | 0.50303  |        |        |
| 2452 | ENSG00000IL17A     | 0.733333 | 0.355556 | 0.544444 | 0.492929 |        |        |
| 2453 | ENSG00000RSU1      | 0.709091 | 0.331313 | 0.520202 | 0.561616 |        |        |
| 2454 | ENSG00000TBC1D10C  | 0.725253 | 0.365657 | 0.53468  | 0.493939 |        |        |
| 2455 | ENSG00000CMTM8     | 0.817276 | 0.295681 | 0.543374 | 0.495017 |        |        |
| 2456 | ENSG00000FOCAD     | 0.72093  | 0.361522 | 0.541226 | 0.497886 |        |        |
| 2457 | ENSG00000STK26     | 0.725253 | 0.314141 | 0.515993 | 0.573737 |        |        |
| 2458 | ENSG00000PCDHB1    | 0.888889 | 0.243434 | 0.551347 | 0.453535 |        |        |
| 2459 | ENSG00000GPAM      | 0.734219 | 0.351052 | 0.537283 | 0.501661 |        |        |
| 2460 | ENSG00000ITGA9     | 0.737374 | 0.337374 | 0.537374 | 0.518182 |        |        |
| 2461 | ENSG00000SIX5      | 0.757576 | 0.337374 | 0.547475 | 0.490909 |        |        |
| 2462 | ENSG00000DTWD1     | 0.772727 | 0.326263 | 0.539394 | 0.50404  |        |        |
| 2463 | ENSG00000FAM46D    | 0.731313 | 0.331313 | 0.531313 | 0.536364 |        |        |
| 2464 | ENSG00000ARHGDIB   | 0.882828 | 0.261616 | 0.552189 | 0.449495 |        |        |
| 2465 | ENSG00000SETDB1    | 0.823232 | 0.288889 | 0.55219  | 0.486869 |        |        |
| 2466 | ENSG00000TTC9B     | 0.80101  | 0.308081 | 0.540236 | 0.50101  |        |        |
| 2467 | ENSG00000NOL4L     | 0.805051 | 0.275758 | 0.524242 | 0.538384 |        |        |
| 2468 | ENSG00000SPATA9    | 0.744186 | 0.360465 | 0.552326 | 0.471459 |        |        |
| 2469 | ENSG00000RNASE3    | 0.69697  | 0.343434 | 0.520202 | 0.556566 |        |        |
| 2470 | ENSG00000MSM01     | 0.755556 | 0.355556 | 0.555556 | 0.464646 |        |        |
| 2471 | ENSG00000VPS4B     | 0.911111 | 0.184848 | 0.543434 | 0.468687 |        |        |
| 2472 | ENSG00000ANKRD62   | 0.710359 | 0.360465 | 0.531008 | 0.520085 |        |        |
| 2473 | ENSG00000NXPE2     | 0.914141 | 0.194949 | 0.543603 | 0.458586 |        |        |

|      |                    |          |          |          |          |
|------|--------------------|----------|----------|----------|----------|
| 2474 | ENSG00000WDR7      | 0.709091 | 0.381818 | 0.545455 | 0.481818 |
| 2475 | ENSG00000PTHLH     | 0.836364 | 0.288889 | 0.548822 | 0.483838 |
| 2476 | ENSG00000TTC7B     | 0.873737 | 0.19899  | 0.522054 | 0.527273 |
| 2477 | ENSG00000VAMP4     | 0.69697  | 0.390909 | 0.538889 | 0.486869 |
| 2478 | ENSG00000PIP4K2C   | 0.79596  | 0.284848 | 0.522896 | 0.540404 |
| 2479 | ENSG00000RUFY4     | 0.839394 | 0.310101 | 0.560943 | 0.440404 |
| 2480 | ENSG00000C1orf216  | 0.745455 | 0.325253 | 0.533333 | 0.533333 |
| 2481 | ENSG00000ARHGAP17  | 0.825253 | 0.307071 | 0.552862 | 0.474747 |
| 2482 | ENSG00000SLC44A3   | 0.688889 | 0.361616 | 0.525253 | 0.538384 |
| 2483 | ENSG00000KDM4D     | 0.923232 | 0.19697  | 0.551515 | 0.406061 |
| 2484 | ENSG00000FN3KRP    | 0.839323 | 0.289641 | 0.54845  | 0.480973 |
| 2485 | ENSG00000GSTO1     | 0.819192 | 0.269697 | 0.521886 | 0.535354 |
| 2486 | ENSG00000NIPAL1    | 0.711111 | 0.357576 | 0.534343 | 0.519192 |
| 2487 | ENSG00000CMBL      | 0.799154 | 0.305497 | 0.547569 | 0.5      |
| 2488 | ENSG00000ADAMTSL2  | 0.848485 | 0.277778 | 0.55     | 0.479798 |
| 2489 | ENSG00000C1QTNF9B  | 0.793939 | 0.322222 | 0.542088 | 0.492929 |
| 2490 | ENSG00000RPS6KC1   | 0.724242 | 0.346465 | 0.535354 | 0.523232 |
| 2491 | ENSG00000FGF4      | 0.769697 | 0.331313 | 0.550505 | 0.492929 |
| 2492 | ENSG00000ZXDA      | 0.744186 | 0.360465 | 0.552326 | 0.47463  |
| 2493 | ENSG00000C1QTNF9   | 0.793939 | 0.322222 | 0.542088 | 0.492929 |
| 2494 | ENSG00000ZXDB      | 0.744186 | 0.360465 | 0.552326 | 0.47463  |
| 2495 | ENSG00000CNOT6L    | 0.639394 | 0.370707 | 0.505051 | 0.569697 |
| 2496 | ENSG00000RFX6      | 0.711111 | 0.357576 | 0.534343 | 0.519192 |
| 2497 | ENSG00000RNF182    | 0.737374 | 0.337374 | 0.537374 | 0.520202 |
| 2498 | ENSG00000MB21D2    | 0.858586 | 0.277778 | 0.551347 | 0.471717 |
| 2499 | ENSG00000C3orf49   | 0.59798  | 0.419192 | 0.507912 | 0.527273 |
| 2500 | ENSG00000ILDR2     | 0.874747 | 0.262626 | 0.549495 | 0.471717 |
| 2501 | ENSG00000PLEK2     | 0.781184 | 0.319239 | 0.54334  | 0.5074   |
| 2502 | ENSG00000CNGB3     | 0.591304 | 0.415459 | 0.502415 | 0.536232 |
| 2503 | ENSG00000ZNF862    | 0.732558 | 0.349894 | 0.539464 | 0.509514 |
| 2504 | ENSG00000COX8C     | 0.69798  | 0.362626 | 0.525589 | 0.530303 |
| 2505 | ENSG00000SAXO1     | 0.646465 | 0.410101 | 0.528283 | 0.505051 |
| 2506 | ENSG00000CADM1     | 0.724242 | 0.346465 | 0.535354 | 0.523232 |
| 2507 | ENSG00000TMED6     | 0.821212 | 0.283838 | 0.537879 | 0.512121 |
| 2508 | ENSG00000PIWIL3    | 0.630021 | 0.39852  | 0.51339  | 0.539112 |
| 2509 | ENSG00000NFIX      | 0.753535 | 0.322222 | 0.524916 | 0.543434 |
| 2510 | ENSG00000SPTBN5    | 0.698551 | 0.382609 | 0.529952 | 0.504348 |
| 2511 | ENSG00000C12orf66  | 0.725159 | 0.341438 | 0.533298 | 0.531712 |
| 2512 | ENSG00000NME9      | 0.876768 | 0.205051 | 0.527441 | 0.520202 |
| 2513 | ENSG00000IL12B     | 0.748414 | 0.32241  | 0.535412 | 0.533827 |
| 2514 | ENSG00000ZNF121    | 0.658586 | 0.40101  | 0.526768 | 0.512121 |
| 2515 | ENSG00000MMP7      | 0.69798  | 0.370707 | 0.534343 | 0.516162 |
| 2516 | ENSG00000CNNM4     | 0.745455 | 0.334343 | 0.536195 | 0.522222 |
| 2517 | ENSG00000ZNF14     | 0.59596  | 0.430303 | 0.513131 | 0.513131 |
| 2518 | ENSG00000GSTT2B    | 0.757576 | 0.325253 | 0.538047 | 0.523232 |
| 2519 | ENSG00000SNRNP200  | 0.814141 | 0.288889 | 0.539394 | 0.515152 |
| 2520 | ENSG00000CTDNBP1   | 0.820202 | 0.293939 | 0.542424 | 0.50202  |
| 2521 | ENSG00000HEXB      | 0.776768 | 0.322222 | 0.549495 | 0.50303  |
| 2522 | ENSG00000SPI1      | 0.861616 | 0.255556 | 0.543434 | 0.494949 |
| 2523 | ENSG00000MYRFL     | 0.69338  | 0.377468 | 0.535424 | 0.509872 |
| 2524 | ENSG00000LDLRAD3   | 0.769697 | 0.331313 | 0.550505 | 0.493939 |
| 2525 | ENSG00000TNFRSF11A | 0.763636 | 0.325253 | 0.544444 | 0.515152 |
| 2526 | ENSG00000TAS2R42   | 0.794949 | 0.325253 | 0.547811 | 0.485859 |
| 2527 | ENSG00000PCDH10    | 0.727273 | 0.335354 | 0.525926 | 0.546465 |
| 2528 | ENSG00000LDLRAD1   | 0.732558 | 0.37315  | 0.552854 | 0.469345 |

|      |                   |          |          |          |          |
|------|-------------------|----------|----------|----------|----------|
| 2529 | ENSG00000MYL10    | 0.763636 | 0.325253 | 0.544444 | 0.517172 |
| 2530 | ENSG00000SLC22A11 | 0.683932 | 0.379493 | 0.531712 | 0.520085 |
| 2531 | ENSG00000DUOX1    | 0.750505 | 0.330303 | 0.540404 | 0.522222 |
| 2532 | ENSG00000EHMT2    | 0.774747 | 0.346465 | 0.553872 | 0.466667 |
| 2533 | ENSG00000SLC25A23 | 0.77907  | 0.335095 | 0.557082 | 0.477801 |
| 2534 | ENSG00000FAM231C  | 0.892178 | 0.201903 | 0.535941 | 0.495772 |
| 2535 | ENSG00000SIAE     | 0.911111 | 0.2      | 0.557912 | 0.452525 |
| 2536 | ENSG00000SLC1A6   | 0.89798  | 0.232323 | 0.557576 | 0.450505 |
| 2537 | ENSG00000FGF2     | 0.878788 | 0.244444 | 0.545286 | 0.486869 |
| 2538 | ENSG00000CTNNBIP1 | 0.729387 | 0.353066 | 0.534355 | 0.51797  |
| 2539 | ENSG00000ARHGAP8  | 0.674747 | 0.375758 | 0.525253 | 0.534343 |
| 2540 | ENSG00000VPS26B   | 0.757576 | 0.337374 | 0.547475 | 0.50101  |
| 2541 | ENSG00000ANKRD13D | 0.79899  | 0.318182 | 0.542761 | 0.5      |
| 2542 | ENSG00000DPYSL4   | 0.810101 | 0.292929 | 0.544781 | 0.511111 |
| 2543 | ENSG00000FAM193A  | 0.636364 | 0.4      | 0.518182 | 0.535354 |
| 2544 | ENSG00000C4orf48  | 0.745455 | 0.345455 | 0.545455 | 0.50101  |
| 2545 | ENSG00000PPP1R32  | 0.756368 | 0.344408 | 0.550388 | 0.492802 |
| 2546 | ENSG00000TECTA    | 0.733333 | 0.355556 | 0.544444 | 0.50404  |
| 2547 | ENSG00000ZBTB43   | 0.69697  | 0.379798 | 0.532492 | 0.511111 |
| 2548 | ENSG00000GBP1     | 0.755814 | 0.349894 | 0.552854 | 0.48203  |
| 2549 | ENSG00000HIST1H1A | 0.890909 | 0.217172 | 0.531818 | 0.49899  |
| 2550 | ENSG00000SAMMD13  | 0.7463   | 0.340381 | 0.54334  | 0.511628 |
| 2551 | ENSG00000LYPD6    | 0.769697 | 0.331313 | 0.550505 | 0.49596  |
| 2552 | ENSG00000LBR      | 0.682828 | 0.389899 | 0.517508 | 0.527273 |
| 2553 | ENSG00000RCC2     | 0.773737 | 0.341414 | 0.548822 | 0.482828 |
| 2554 | ENSG00000PEX1     | 0.733333 | 0.355556 | 0.544444 | 0.50404  |
| 2555 | ENSG00000POLDIP3  | 0.90202  | 0.207071 | 0.548148 | 0.474747 |
| 2556 | ENSG00000ABHD3    | 0.755556 | 0.344444 | 0.546296 | 0.49697  |
| 2557 | ENSG00000VAX1     | 0.722222 | 0.340404 | 0.524579 | 0.548485 |
| 2558 | ENSG00000PCMTD1   | 0.849894 | 0.251586 | 0.545102 | 0.5074   |
| 2559 | ENSG00000UBTD1    | 0.684848 | 0.385859 | 0.535354 | 0.512121 |
| 2560 | ENSG00000LMOD3    | 0.709091 | 0.373737 | 0.5367   | 0.507071 |
| 2561 | ENSG00000HTR7     | 0.761353 | 0.29372  | 0.519807 | 0.569082 |
| 2562 | ENSG00000MEGF8    | 0.688889 | 0.361616 | 0.525253 | 0.548485 |
| 2563 | ENSG00000NIP2     | 0.850505 | 0.30101  | 0.561953 | 0.455556 |
| 2564 | ENSG00000BANF2    | 0.744186 | 0.349894 | 0.542988 | 0.503171 |
| 2565 | ENSG00000PTGDR    | 0.682875 | 0.409091 | 0.545983 | 0.478858 |
| 2566 | ENSG00000ZNF281   | 0.646465 | 0.410101 | 0.528283 | 0.512121 |
| 2567 | ENSG00000ANKS1A   | 0.90404  | 0.194949 | 0.540909 | 0.485859 |
| 2568 | ENSG00000LZTS2    | 0.709302 | 0.379493 | 0.542988 | 0.495772 |
| 2569 | ENSG00000PAK5     | 0.767442 | 0.327696 | 0.542283 | 0.516913 |
| 2570 | ENSG00000GSDMC    | 0.69697  | 0.39798  | 0.547475 | 0.480808 |
| 2571 | ENSG00000RNF219   | 0.891919 | 0.263636 | 0.562121 | 0.430303 |
| 2572 | ENSG00000GAPT     | 0.771717 | 0.321212 | 0.53569  | 0.525253 |
| 2573 | ENSG00000ZEB1     | 0.875758 | 0.265657 | 0.557407 | 0.469697 |
| 2574 | ENSG00000CFAP61   | 0.75526  | 0.323367 | 0.539313 | 0.532669 |
| 2575 | ENSG00000EXOSC7   | 0.923232 | 0.19798  | 0.56532  | 0.409091 |
| 2576 | ENSG00000PHKA1    | 0.738384 | 0.375758 | 0.553872 | 0.464646 |
| 2577 | ENSG00000FAM155B  | 0.745455 | 0.334343 | 0.536195 | 0.529293 |
| 2578 | ENSG00000GPR39    | 0.762156 | 0.30444  | 0.530303 | 0.552854 |
| 2579 | ENSG00000LRRC37B  | 0.72093  | 0.361522 | 0.541226 | 0.512685 |
| 2580 | ENSG00000NTF3     | 0.709091 | 0.358586 | 0.532323 | 0.530303 |
| 2581 | ENSG00000MTMR11   | 0.733333 | 0.353535 | 0.53367  | 0.521212 |
| 2582 | ENSG00000HSD17B11 | 0.757576 | 0.318182 | 0.53569  | 0.538384 |
| 2583 | ENSG00000TMEM121  | 0.735354 | 0.366667 | 0.540909 | 0.492929 |

|      |           |          |          |          |          |          |        |
|------|-----------|----------|----------|----------|----------|----------|--------|
| 2584 | ENSG00000 | TMSB4X   | 0.712121 | 0.334343 | 0.523232 | 0.564646 |        |
| 2585 | ENSG00000 | NUS1     | 0.69697  | 0.39798  | 0.547475 | 0.481818 |        |
| 2586 | ENSG00000 | SLC5A6   | 0.721212 | 0.367677 | 0.544444 | 0.50101  |        |
| 2587 | ENSG00000 | OR4P4    | 0.72093  | 0.361522 | 0.541226 | 0.513742 |        |
| 2588 | ENSG00000 | C4orf22  | 0.707641 | 0.368771 | 0.538206 | 0.517165 | 0.188  |
| 2589 | ENSG00000 | ZMYM4    | 0.817125 | 0.255814 | 0.523961 | 0.552854 |        |
| 2590 | ENSG00000 | NIPBL    | 0.734343 | 0.361616 | 0.539731 | 0.5      |        |
| 2591 | ENSG00000 | IGFL2    | 0.699789 | 0.378436 | 0.53506  | 0.513742 |        |
| 2592 | ENSG00000 | MARCKSL1 | 0.923232 | 0.19899  | 0.549832 | 0.440404 |        |
| 2593 | ENSG00000 | PCED1B   | 0.69697  | 0.39798  | 0.547475 | 0.481818 |        |
| 2594 | ENSG00000 | CHKA     | 0.79798  | 0.314141 | 0.544276 | 0.511111 |        |
| 2595 | ENSG00000 | SLC23A1  | 0.733615 | 0.349894 | 0.541755 | 0.515856 |        |
| 2596 | ENSG00000 | DLX5     | 0.745455 | 0.340404 | 0.530976 | 0.529293 |        |
| 2597 | ENSG00000 | NOL8     | 0.879291 | 0.241417 | 0.543374 | 0.495017 |        |
| 2598 | ENSG00000 | RAB20    | 0.732004 | 0.336656 | 0.527316 | 0.548173 |        |
| 2599 | ENSG00000 | CNTN3    | 0.718816 | 0.335095 | 0.526956 | 0.559197 |        |
| 2600 | ENSG00000 | FOXP1    | 0.919192 | 0.180808 | 0.546633 | 0.470707 |        |
| 2601 | ENSG00000 | TAF7L    | 0.642424 | 0.40202  | 0.510438 | 0.545455 |        |
| 2602 | ENSG00000 | KIF5A    | 0.721212 | 0.367677 | 0.544444 | 0.50303  | 0.2912 |
| 2603 | ENSG00000 | DLGAP5   | 0.683932 | 0.379493 | 0.531712 | 0.527484 |        |
| 2604 | ENSG00000 | TCEAL7   | 0.738384 | 0.366667 | 0.542088 | 0.491919 |        |
| 2605 | ENSG00000 | ANGEL1   | 0.656448 | 0.415433 | 0.535941 | 0.498943 |        |
| 2606 | ENSG00000 | OCM      | 0.636364 | 0.421776 | 0.521494 | 0.516913 |        |
| 2607 | ENSG00000 | RGS16    | 0.906977 | 0.196617 | 0.546159 | 0.48203  |        |
| 2608 | ENSG00000 | 3/1/2019 | 0.721212 | 0.367677 | 0.544444 | 0.50202  |        |
| 2609 | ENSG00000 | OCM2     | 0.636364 | 0.421776 | 0.521494 | 0.516913 |        |
| 2610 | ENSG00000 | CDH1     | 0.788889 | 0.320202 | 0.551852 | 0.505051 |        |
| 2611 | ENSG00000 | TGFBRAP1 | 0.757576 | 0.356566 | 0.555219 | 0.477778 |        |
| 2612 | ENSG00000 | PRIMA1   | 0.721212 | 0.367677 | 0.544444 | 0.50303  |        |
| 2613 | ENSG00000 | IL9R     | 0.918182 | 0.207071 | 0.557239 | 0.446465 |        |
| 2614 | ENSG00000 | TMEM169  | 0.915152 | 0.180808 | 0.542088 | 0.483838 |        |
| 2615 | ENSG00000 | KLHL17   | 0.674747 | 0.375758 | 0.525253 | 0.542424 |        |
| 2616 | ENSG00000 | TMPRSS2  | 0.684848 | 0.385859 | 0.535354 | 0.518182 |        |
| 2617 | ENSG00000 | CEBPZOS  | 0.767677 | 0.338384 | 0.543266 | 0.50404  |        |
| 2618 | ENSG00000 | AKAP10   | 0.759596 | 0.321212 | 0.540404 | 0.535354 |        |
| 2619 | ENSG00000 | SGIP1    | 0.667677 | 0.379798 | 0.522559 | 0.546465 |        |
| 2620 | ENSG00000 | C11orf1  | 0.744444 | 0.352525 | 0.530303 | 0.519192 |        |
| 2621 | ENSG00000 | APOLD1   | 0.854545 | 0.259596 | 0.544949 | 0.506061 |        |
| 2622 | ENSG00000 | CDH7     | 0.684848 | 0.385859 | 0.535354 | 0.521212 |        |
| 2623 | ENSG00000 | EPN3     | 0.709091 | 0.381818 | 0.545455 | 0.49798  |        |
| 2624 | ENSG00000 | C11orf68 | 0.830303 | 0.277778 | 0.539057 | 0.520202 |        |
| 2625 | ENSG00000 | MAN2C1   | 0.925253 | 0.225253 | 0.549832 | 0.418182 |        |
| 2626 | ENSG00000 | SPARCL1  | 0.781818 | 0.326263 | 0.547306 | 0.508081 |        |
| 2627 | ENSG00000 | TRAF4    | 0.787879 | 0.329293 | 0.556229 | 0.493939 |        |
| 2628 | ENSG00000 | B9D2     | 0.891919 | 0.238384 | 0.545118 | 0.483838 |        |
| 2629 | ENSG00000 | TBC1D22A | 0.755814 | 0.349894 | 0.552854 | 0.4926   |        |
| 2630 | ENSG00000 | TMEM178B | 0.750505 | 0.330303 | 0.540404 | 0.531313 |        |
| 2631 | ENSG00000 | FASTKD3  | 0.828753 | 0.307611 | 0.549154 | 0.4926   |        |
| 2632 | ENSG00000 | FREM1    | 0.818182 | 0.289899 | 0.547811 | 0.514141 |        |
| 2633 | ENSG00000 | GPR162   | 0.684848 | 0.385859 | 0.535354 | 0.519192 |        |
| 2634 | ENSG00000 | PDLIM1   | 0.917172 | 0.235354 | 0.548653 | 0.448485 |        |
| 2635 | ENSG00000 | CFAP73   | 0.709091 | 0.381818 | 0.545455 | 0.49596  |        |
| 2636 | ENSG00000 | FAM196A  | 0.927061 | 0.199789 | 0.560606 | 0.414376 |        |
| 2637 | ENSG00000 | OLFM2    | 0.758985 | 0.332981 | 0.545983 | 0.519027 |        |
| 2638 | ENSG00000 | TFEC     | 0.785859 | 0.294949 | 0.52862  | 0.551515 |        |

|      |                    |          |          |          |          |
|------|--------------------|----------|----------|----------|----------|
| 2639 | ENSG00000C16orf72  | 0.694949 | 0.372727 | 0.529966 | 0.532323 |
| 2640 | ENSG00000NKAIN3    | 0.709302 | 0.381607 | 0.534531 | 0.509514 |
| 2641 | ENSG00000FBN3      | 0.767442 | 0.318182 | 0.534003 | 0.542283 |
| 2642 | ENSG00000TNFAIP8L3 | 0.725159 | 0.341438 | 0.533298 | 0.545455 |
| 2643 | ENSG00000CHD1      | 0.817172 | 0.271717 | 0.54596  | 0.529293 |
| 2644 | ENSG00000IP6K2     | 0.805094 | 0.299003 | 0.545773 | 0.521595 |
| 2645 | ENSG00000ALOX15B   | 0.72093  | 0.361522 | 0.541226 | 0.521142 |
| 2646 | ENSG00000HSPA12A   | 0.724242 | 0.346465 | 0.535354 | 0.539394 |
| 2647 | ENSG00000OR6N2     | 0.684848 | 0.385859 | 0.535354 | 0.521212 |
| 2648 | ENSG00000CKLF-CMTM | 0.755556 | 0.334343 | 0.542929 | 0.523232 |
| 2649 | ENSG00000ADGRG6    | 0.745455 | 0.345455 | 0.545455 | 0.517172 |
| 2650 | ENSG00000ZC3HAV1L  | 0.711111 | 0.363636 | 0.53468  | 0.529293 |
| 2651 | ENSG00000DPH3      | 0.674747 | 0.375758 | 0.525253 | 0.547475 |
| 2652 | ENSG00000HTR1F     | 0.69798  | 0.370707 | 0.534343 | 0.528283 |
| 2653 | ENSG00000PHYHIPL   | 0.731313 | 0.363636 | 0.533333 | 0.517172 |
| 2654 | ENSG00000PFAS      | 0.914376 | 0.22833  | 0.561487 | 0.443975 |
| 2655 | ENSG00000SLA       | 0.767677 | 0.345455 | 0.554545 | 0.490909 |
| 2656 | ENSG00000C15orf48  | 0.776768 | 0.322222 | 0.549495 | 0.518182 |
| 2657 | ENSG00000HPS5      | 0.744444 | 0.366667 | 0.555556 | 0.483838 |
| 2658 | ENSG00000CCSAP     | 0.905051 | 0.212121 | 0.547138 | 0.482828 |
| 2659 | ENSG00000ABCA7     | 0.757576 | 0.337374 | 0.547475 | 0.518182 |
| 2660 | ENSG00000PRSS42    | 0.777778 | 0.339394 | 0.558586 | 0.485859 |
| 2661 | ENSG00000SYK       | 0.89899  | 0.251515 | 0.556734 | 0.455556 |
| 2662 | ENSG00000ZSWIM4    | 0.590909 | 0.449495 | 0.519697 | 0.5      |
| 2663 | ENSG00000CD1E      | 0.737374 | 0.337374 | 0.537374 | 0.539394 |
| 2664 | ENSG00000FAM69C    | 0.674419 | 0.369979 | 0.522199 | 0.55814  |
| 2665 | ENSG00000IGF2BP1   | 0.881818 | 0.238384 | 0.538047 | 0.508081 |
| 2666 | ENSG00000FOXJ2     | 0.794949 | 0.308081 | 0.544781 | 0.525253 |
| 2667 | ENSG00000HLTF      | 0.682828 | 0.40101  | 0.529461 | 0.517172 |
| 2668 | ENSG00000SCEL      | 0.866667 | 0.286869 | 0.572559 | 0.457576 |
| 2669 | ENSG00000PRDM2     | 0.82241  | 0.299154 | 0.550388 | 0.5074   |
| 2670 | ENSG00000LPGAT1    | 0.806554 | 0.325581 | 0.553911 | 0.491543 |
| 2671 | ENSG00000TMEM60    | 0.733333 | 0.355556 | 0.544444 | 0.518182 |
| 2672 | ENSG00000ALG1L     | 0.658586 | 0.417172 | 0.532155 | 0.508081 |
| 2673 | ENSG00000ZNF408    | 0.69697  | 0.39798  | 0.547475 | 0.491919 |
| 2674 | ENSG00000MAS1L     | 0.817172 | 0.320202 | 0.559764 | 0.483838 |
| 2675 | ENSG00000RGS7BP    | 0.886892 | 0.257928 | 0.558492 | 0.472516 |
| 2676 | ENSG00000CD248     | 0.684848 | 0.385859 | 0.535354 | 0.525253 |
| 2677 | ENSG00000CCDC50    | 0.682927 | 0.397561 | 0.527236 | 0.521951 |
| 2678 | ENSG00000TMPRSS9   | 0.721212 | 0.372727 | 0.540236 | 0.509091 |
| 2679 | ENSG00000CHD3      | 0.811739 | 0.294574 | 0.539129 | 0.529347 |
| 2680 | ENSG00000MRPL35    | 0.708245 | 0.352008 | 0.528541 | 0.554968 |
| 2681 | ENSG00000APOC4     | 0.658586 | 0.422222 | 0.540404 | 0.494949 |
| 2682 | ENSG00000CLDN5     | 0.733615 | 0.349894 | 0.541755 | 0.524313 |
| 2683 | ENSG00000CORO2A    | 0.923232 | 0.208081 | 0.547138 | 0.461616 |
| 2684 | ENSG00000CDHR2     | 0.862626 | 0.289899 | 0.57037  | 0.466667 |
| 2685 | ENSG00000IL27      | 0.721212 | 0.367677 | 0.544444 | 0.512121 |
| 2686 | ENSG00000ADPRH     | 0.671717 | 0.39697  | 0.528956 | 0.529293 |
| 2687 | ENSG00000KCNMA1    | 0.755556 | 0.334343 | 0.542929 | 0.529293 |
| 2688 | ENSG00000CHTF8     | 0.841414 | 0.29697  | 0.564646 | 0.484848 |
| 2689 | ENSG00000CDH10     | 0.750505 | 0.330303 | 0.540404 | 0.541414 |
| 2690 | ENSG00000ANKRD46   | 0.766667 | 0.346465 | 0.556566 | 0.491919 |
| 2691 | ENSG00000CHMP5     | 0.818182 | 0.310101 | 0.562458 | 0.494949 |
| 2692 | ENSG00000PSPN      | 0.733615 | 0.349894 | 0.541755 | 0.526427 |
| 2693 | ENSG00000PRR14L    | 0.733333 | 0.379798 | 0.556566 | 0.476768 |



|      |                    |          |          |          |          |
|------|--------------------|----------|----------|----------|----------|
| 2694 | ENSG00000GCHFR     | 0.778013 | 0.303383 | 0.538055 | 0.547569 |
| 2695 | ENSG00000TBPL2     | 0.874747 | 0.254545 | 0.550168 | 0.49798  |
| 2696 | ENSG00000IL17B     | 0.70202  | 0.371717 | 0.529966 | 0.536364 |
| 2697 | ENSG00000STAB2     | 0.777778 | 0.357576 | 0.567677 | 0.456566 |
| 2698 | ENSG00000FM05      | 0.757576 | 0.337374 | 0.547475 | 0.521212 |
| 2699 | ENSG00000IGFLR1    | 0.761616 | 0.341414 | 0.544781 | 0.516162 |
| 2700 | ENSG00000ROPN1     | 0.646465 | 0.410101 | 0.528283 | 0.529293 |
| 2701 | ENSG00000HLA-DQA1  | 0.750505 | 0.330303 | 0.540404 | 0.540404 |
| 2702 | ENSG00000PDE3A     | 0.72093  | 0.355482 | 0.538206 | 0.537099 |
| 2703 | ENSG00000RHOC      | 0.682875 | 0.409091 | 0.545983 | 0.495772 |
| 2704 | ENSG00000RCHY1     | 0.721212 | 0.367677 | 0.544444 | 0.516162 |
| 2705 | ENSG00000CTAG2     | 0.67019  | 0.396406 | 0.533298 | 0.528541 |
| 2706 | ENSG00000STAT4     | 0.880808 | 0.213131 | 0.531481 | 0.532323 |
| 2707 | ENSG00000KCNMB4    | 0.69556  | 0.391121 | 0.54334  | 0.510571 |
| 2708 | ENSG00000ROPN1B    | 0.646465 | 0.410101 | 0.528283 | 0.529293 |
| 2709 | ENSG00000NHP2      | 0.852525 | 0.292929 | 0.555219 | 0.489899 |
| 2710 | ENSG00000EED       | 0.930303 | 0.206061 | 0.568013 | 0.394949 |
| 2711 | ENSG00000GPAT2     | 0.646465 | 0.410101 | 0.528283 | 0.527273 |
| 2712 | ENSG00000ATF7IP2   | 0.931313 | 0.221212 | 0.567172 | 0.364646 |
| 2713 | ENSG00000ZKSCAN8   | 0.850505 | 0.280808 | 0.554545 | 0.49899  |
| 2714 | ENSG00000NCALD     | 0.777778 | 0.345455 | 0.558249 | 0.488889 |
| 2715 | ENSG00000ANAPC10   | 0.843434 | 0.275758 | 0.544276 | 0.519192 |
| 2716 | ENSG00000ZC4H2     | 0.733333 | 0.355556 | 0.544444 | 0.523232 |
| 2717 | ENSG00000PFN2      | 0.911111 | 0.266667 | 0.556902 | 0.435354 |
| 2718 | ENSG00000ZNF394    | 0.937374 | 0.191919 | 0.549832 | 0.430303 |
| 2719 | ENSG00000CFAP126   | 0.658586 | 0.39697  | 0.526768 | 0.539394 |
| 2720 | ENSG00000ITGAV     | 0.930303 | 0.205051 | 0.558249 | 0.425253 |
| 2721 | ENSG00000HPCAL1    | 0.777778 | 0.345455 | 0.558249 | 0.488889 |
| 2722 | ENSG00000GCSAML    | 0.854545 | 0.271717 | 0.548316 | 0.508081 |
| 2723 | ENSG00000C1orf116  | 0.881607 | 0.230444 | 0.537879 | 0.520085 |
| 2724 | ENSG00000NR4A1     | 0.69596  | 0.405051 | 0.537879 | 0.5      |
| 2725 | ENSG00000FYB1      | 0.924947 | 0.230444 | 0.553383 | 0.435518 |
| 2726 | ENSG00000CEP131    | 0.684848 | 0.385859 | 0.535354 | 0.531313 |
| 2727 | ENSG00000C5orf30   | 0.762156 | 0.318182 | 0.540169 | 0.548626 |
| 2728 | ENSG00000ZNF239    | 0.722222 | 0.370707 | 0.544949 | 0.510101 |
| 2729 | ENSG00000ATP13A3   | 0.754545 | 0.346465 | 0.542761 | 0.520202 |
| 2730 | ENSG00000DNAL4     | 0.717172 | 0.389899 | 0.546801 | 0.494949 |
| 2731 | ENSG00000LRIG1     | 0.709091 | 0.381818 | 0.545455 | 0.510101 |
| 2732 | ENSG00000FAM83F    | 0.683932 | 0.372093 | 0.522903 | 0.556025 |
| 2733 | ENSG00000PCDHA5    | 0.734219 | 0.369878 | 0.550388 | 0.497231 |
| 2734 | ENSG00000CMTM5     | 0.705074 | 0.392178 | 0.53136  | 0.516913 |
| 2735 | ENSG00000MPHOSPH10 | 0.933333 | 0.206061 | 0.558249 | 0.418182 |
| 2736 | ENSG00000BIK       | 0.777409 | 0.330011 | 0.54928  | 0.518272 |
| 2737 | ENSG00000SIX6      | 0.73358  | 0.357077 | 0.543632 | 0.521739 |
| 2738 | ENSG00000CEACAM7   | 0.766667 | 0.346465 | 0.556566 | 0.5      |
| 2739 | ENSG00000EML6      | 0.773737 | 0.319192 | 0.546465 | 0.534343 |
| 2740 | ENSG00000RAB33B    | 0.646465 | 0.410101 | 0.528283 | 0.530303 |
| 2741 | ENSG00000ENPEP     | 0.763636 | 0.325253 | 0.544444 | 0.539394 |
| 2742 | ENSG00000SMIM2     | 0.711111 | 0.357576 | 0.534343 | 0.547475 |
| 2743 | ENSG00000CHSY1     | 0.634343 | 0.422222 | 0.526599 | 0.525253 |
| 2744 | ENSG00000TSPAN2    | 0.787879 | 0.319192 | 0.553535 | 0.522222 |
| 2745 | ENSG00000RAB27A    | 0.855556 | 0.255556 | 0.547811 | 0.521212 |
| 2746 | ENSG00000GADD45G   | 0.724242 | 0.346465 | 0.535354 | 0.551515 |
| 2747 | ENSG00000OSBPL8    | 0.767442 | 0.355482 | 0.561462 | 0.483942 |
| 2748 | ENSG00000FKBP11    | 0.610994 | 0.404863 | 0.507928 | 0.567653 |

|      |           |           |          |          |          |          |
|------|-----------|-----------|----------|----------|----------|----------|
| 2749 | ENSG00000 | THBS3     | 0.671717 | 0.40303  | 0.537374 | 0.522222 |
| 2750 | ENSG00000 | RPP14     | 0.827243 | 0.326689 | 0.56017  | 0.478405 |
| 2751 | ENSG00000 | TMEM154   | 0.689218 | 0.356237 | 0.522727 | 0.573996 |
| 2752 | ENSG00000 | DHRS13    | 0.733333 | 0.345455 | 0.535354 | 0.546465 |
| 2753 | ENSG00000 | PDLIM2    | 0.697674 | 0.397463 | 0.546335 | 0.503171 |
| 2754 | ENSG00000 | FAM131C   | 0.755814 | 0.349894 | 0.552854 | 0.5074   |
| 2755 | ENSG00000 | TMEM74B   | 0.768499 | 0.337209 | 0.533827 | 0.533827 |
| 2756 | ENSG00000 | SLC2A7    | 0.755814 | 0.349894 | 0.552854 | 0.5074   |
| 2757 | ENSG00000 | WDR63     | 0.692389 | 0.415433 | 0.535941 | 0.496829 |
| 2758 | ENSG00000 | ZNF175    | 0.737374 | 0.337374 | 0.537374 | 0.552525 |
| 2759 | ENSG00000 | RBKS      | 0.930303 | 0.213131 | 0.558923 | 0.427273 |
| 2760 | ENSG00000 | DCAF16    | 0.745455 | 0.345455 | 0.545455 | 0.528283 |
| 2761 | ENSG00000 | RFX3      | 0.642706 | 0.436575 | 0.539641 | 0.496829 |
| 2762 | ENSG00000 | SYTL5     | 0.735354 | 0.371717 | 0.545623 | 0.50303  |
| 2763 | ENSG00000 | SOX9      | 0.909091 | 0.213131 | 0.550673 | 0.490909 |
| 2764 | ENSG00000 | AAMDC     | 0.854545 | 0.310101 | 0.572222 | 0.464646 |
| 2765 | ENSG00000 | RAD18     | 0.932323 | 0.212121 | 0.559596 | 0.424242 |
| 2766 | ENSG00000 | GTF2H3    | 0.913131 | 0.20101  | 0.551684 | 0.490909 |
| 2767 | ENSG00000 | CRYGN     | 0.715645 | 0.371036 | 0.540521 | 0.524313 |
| 2768 | ENSG00000 | EMC2      | 0.858586 | 0.30202  | 0.564646 | 0.477778 |
| 2769 | ENSG00000 | PLSCR4    | 0.766667 | 0.346465 | 0.556566 | 0.50404  |
| 2770 | ENSG00000 | NOP53     | 0.831924 | 0.299154 | 0.563425 | 0.5      |
| 2771 | ENSG00000 | MTTP      | 0.767677 | 0.367677 | 0.567677 | 0.462626 |
| 2772 | ENSG00000 | LGALS2    | 0.906061 | 0.213131 | 0.543771 | 0.5      |
| 2773 | ENSG00000 | VAV3      | 0.82981  | 0.313953 | 0.568006 | 0.487315 |
| 2774 | ENSG00000 | SLC25A22  | 0.848485 | 0.294949 | 0.556734 | 0.49596  |
| 2775 | ENSG00000 | PARD6G    | 0.69798  | 0.370707 | 0.534343 | 0.543434 |
| 2776 | ENSG00000 | PDLIM7    | 0.721212 | 0.367677 | 0.544444 | 0.522222 |
| 2777 | ENSG00000 | TSPAN19   | 0.671717 | 0.40303  | 0.537374 | 0.524242 |
| 2778 | ENSG00000 | CLPS      | 0.755556 | 0.344444 | 0.546296 | 0.524242 |
| 2779 | ENSG00000 | CAPSL     | 0.861616 | 0.216162 | 0.527273 | 0.557576 |
| 2780 | ENSG00000 | ZBTB24    | 0.834343 | 0.268687 | 0.538721 | 0.542424 |
| 2781 | ENSG00000 | RGL2      | 0.806202 | 0.323367 | 0.553525 | 0.508306 |
| 2782 | ENSG00000 | FADS3     | 0.671717 | 0.40303  | 0.537374 | 0.525253 |
| 2783 | ENSG00000 | KRBA1     | 0.838384 | 0.293939 | 0.55202  | 0.512121 |
| 2784 | ENSG00000 | PSME1     | 0.823232 | 0.308081 | 0.553535 | 0.513131 |
| 2785 | ENSG00000 | WDR93     | 0.929293 | 0.235354 | 0.549158 | 0.436364 |
| 2786 | ENSG00000 | POLD2     | 0.806061 | 0.349495 | 0.567677 | 0.459596 |
| 2787 | ENSG00000 | NT5C1B    | 0.737374 | 0.347475 | 0.53165  | 0.545455 |
| 2788 | ENSG00000 | PGC       | 0.889899 | 0.265657 | 0.5633   | 0.475758 |
| 2789 | ENSG00000 | ERICH5    | 0.925253 | 0.180808 | 0.555387 | 0.472727 |
| 2790 | ENSG00000 | CIR1      | 0.805497 | 0.299154 | 0.538055 | 0.545455 |
| 2791 | ENSG00000 | EPHA4     | 0.750505 | 0.312121 | 0.529125 | 0.580808 |
| 2792 | ENSG00000 | AURKC     | 0.756368 | 0.345515 | 0.545404 | 0.52381  |
| 2793 | ENSG00000 | NT5C1B-RD | 0.737374 | 0.347475 | 0.53165  | 0.545455 |
| 2794 | ENSG00000 | LRRC70    | 0.721212 | 0.367677 | 0.544444 | 0.524242 |
| 2795 | ENSG00000 | CLN6      | 0.733333 | 0.379798 | 0.556566 | 0.491919 |
| 2796 | ENSG00000 | HYPM      | 0.709091 | 0.381818 | 0.545455 | 0.517172 |
| 2797 | ENSG00000 | ARHGEF2   | 0.688889 | 0.425253 | 0.556061 | 0.477778 |
| 2798 | ENSG00000 | NPNT      | 0.646465 | 0.410101 | 0.528283 | 0.538384 |
| 2799 | ENSG00000 | OVOL1     | 0.722222 | 0.356566 | 0.528114 | 0.551515 |
| 2800 | ENSG00000 | LIN7A     | 0.750505 | 0.330303 | 0.540404 | 0.552525 |
| 2801 | ENSG00000 | C11orf52  | 0.925253 | 0.20101  | 0.55101  | 0.471717 |
| 2802 | ENSG00000 | FUNDC2    | 0.755556 | 0.355556 | 0.555556 | 0.50404  |
| 2803 | ENSG00000 | ZSCAN25   | 0.824524 | 0.258985 | 0.531536 | 0.562368 |

|      |                    |          |          |          |          |        |
|------|--------------------|----------|----------|----------|----------|--------|
| 2804 | ENSG00000GST02     | 0.855556 | 0.273737 | 0.553535 | 0.514141 |        |
| 2805 | ENSG00000ERF       | 0.806061 | 0.338384 | 0.562795 | 0.484848 |        |
| 2806 | ENSG00000OR2V2     | 0.726467 | 0.336656 | 0.531561 | 0.570321 |        |
| 2807 | ENSG00000ANGPTL5   | 0.79697  | 0.329293 | 0.552189 | 0.511111 |        |
| 2808 | ENSG00000OR2V1     | 0.726467 | 0.336656 | 0.531561 | 0.570321 |        |
| 2809 | ENSG00000CST11     | 0.688889 | 0.370707 | 0.529798 | 0.558586 |        |
| 2810 | ENSG00000FBX047    | 0.684848 | 0.385859 | 0.535354 | 0.539394 |        |
| 2811 | ENSG00000NLRP9     | 0.722222 | 0.370707 | 0.544949 | 0.520202 |        |
| 2812 | ENSG00000JADE2     | 0.684848 | 0.416162 | 0.550505 | 0.494949 |        |
| 2813 | ENSG00000KYNNU     | 0.773737 | 0.341414 | 0.548822 | 0.516162 |        |
| 2814 | ENSG00000MIF       | 0.918182 | 0.237374 | 0.561616 | 0.457576 | 0.3167 |
| 2815 | ENSG00000RANGRF    | 0.884848 | 0.287879 | 0.568182 | 0.464646 |        |
| 2816 | ENSG00000C21orf140 | 0.733333 | 0.355556 | 0.544444 | 0.530303 |        |
| 2817 | ENSG00000EBI3      | 0.69697  | 0.39798  | 0.547475 | 0.511111 | 0.3939 |
| 2818 | ENSG00000FAM216A   | 0.733615 | 0.349894 | 0.541755 | 0.540169 |        |
| 2819 | ENSG00000CHST14    | 0.79798  | 0.343434 | 0.570707 | 0.475758 |        |
| 2820 | ENSG00000POLE4     | 0.737374 | 0.361616 | 0.538721 | 0.527273 |        |
| 2821 | ENSG00000DNAH11    | 0.883838 | 0.250505 | 0.551178 | 0.505051 |        |
| 2822 | ENSG00000CU633980. | 0.733333 | 0.355556 | 0.544444 | 0.530303 |        |
| 2823 | ENSG00000TBC1D9    | 0.931313 | 0.20202  | 0.557744 | 0.448485 |        |
| 2824 | ENSG00000CCDC80    | 0.777778 | 0.336364 | 0.554882 | 0.517172 |        |
| 2825 | ENSG00000PIMREG    | 0.924242 | 0.237374 | 0.560943 | 0.440404 |        |
| 2826 | ENSG00000NLRP3     | 0.823232 | 0.318182 | 0.561953 | 0.49697  |        |
| 2827 | ENSG00000ADAMTS12  | 0.756368 | 0.366556 | 0.561462 | 0.488372 |        |
| 2828 | ENSG00000PSMB9     | 0.899577 | 0.226216 | 0.569239 | 0.483087 |        |
| 2829 | ENSG00000COTL1     | 0.854545 | 0.269697 | 0.548653 | 0.523232 |        |
| 2830 | ENSG00000KMT5C     | 0.749495 | 0.349495 | 0.540741 | 0.531313 |        |
| 2831 | ENSG00000ZNF512B   | 0.833333 | 0.322222 | 0.560438 | 0.485859 |        |
| 2832 | ENSG00000RAB13     | 0.69556  | 0.391121 | 0.54334  | 0.523256 |        |
| 2833 | ENSG00000MIEN1     | 0.697674 | 0.397463 | 0.546335 | 0.511628 |        |
| 2834 | ENSG00000NANOG     | 0.745455 | 0.356566 | 0.544276 | 0.524242 |        |
| 2835 | ENSG00000APOBR     | 0.913131 | 0.229293 | 0.574747 | 0.459596 |        |
| 2836 | ENSG00000CLPTM1L   | 0.755556 | 0.355556 | 0.555556 | 0.510101 |        |
| 2837 | ENSG00000DSCAM     | 0.69798  | 0.370707 | 0.534343 | 0.549495 |        |
| 2838 | ENSG00000FZR1      | 0.745293 | 0.345515 | 0.539683 | 0.541528 |        |
| 2839 | ENSG00000NCAN      | 0.691919 | 0.380808 | 0.53165  | 0.546465 |        |
| 2840 | ENSG00000RSAD1     | 0.828283 | 0.288889 | 0.552862 | 0.528283 |        |
| 2841 | ENSG00000ARRB1     | 0.932323 | 0.20303  | 0.560943 | 0.443434 |        |
| 2842 | ENSG00000ATP12A    | 0.757576 | 0.337374 | 0.547475 | 0.537374 |        |
| 2843 | ENSG00000BARD1     | 0.919192 | 0.209091 | 0.558418 | 0.478788 |        |
| 2844 | ENSG00000NIPSNAP1  | 0.672727 | 0.436364 | 0.554545 | 0.479798 |        |
| 2845 | ENSG00000SNTA1     | 0.854545 | 0.262626 | 0.542424 | 0.534343 |        |
| 2846 | ENSG00000SHMT1     | 0.722222 | 0.370707 | 0.544949 | 0.523232 |        |
| 2847 | ENSG00000RTP5      | 0.721739 | 0.373913 | 0.547826 | 0.518841 |        |
| 2848 | ENSG00000ADCK2     | 0.777778 | 0.336364 | 0.554882 | 0.518182 |        |
| 2849 | ENSG00000MIIP      | 0.733333 | 0.379798 | 0.556566 | 0.49596  |        |
| 2850 | ENSG00000WDR59     | 0.931313 | 0.219192 | 0.556061 | 0.444444 |        |
| 2851 | ENSG00000C8G       | 0.682875 | 0.383721 | 0.532065 | 0.549683 |        |
| 2852 | ENSG00000RBBP6     | 0.914141 | 0.217172 | 0.549663 | 0.492929 |        |
| 2853 | ENSG00000MFS10     | 0.692929 | 0.40202  | 0.547475 | 0.512121 |        |
| 2854 | ENSG00000ABHD12B   | 0.844444 | 0.29798  | 0.561279 | 0.50202  |        |
| 2855 | ENSG00000PAK2      | 0.721212 | 0.367677 | 0.544444 | 0.529293 |        |
| 2856 | ENSG00000WNT8A     | 0.789899 | 0.339394 | 0.550842 | 0.509091 |        |
| 2857 | ENSG00000CCER2     | 0.684848 | 0.378788 | 0.526768 | 0.556566 |        |
| 2858 | ENSG00000FAM46C    | 0.757576 | 0.319192 | 0.538384 | 0.563636 |        |

|      |                   |          |          |          |          |
|------|-------------------|----------|----------|----------|----------|
| 2859 | ENSG00000NCCRP1   | 0.658586 | 0.407071 | 0.521044 | 0.549495 |
| 2860 | ENSG00000MAGI2    | 0.772727 | 0.338384 | 0.548822 | 0.523232 |
| 2861 | ENSG00000GALNT13  | 0.744444 | 0.366667 | 0.555556 | 0.506061 |
| 2862 | ENSG00000WIPF1    | 0.870707 | 0.277778 | 0.554882 | 0.50404  |
| 2863 | ENSG00000SNTB1    | 0.744444 | 0.344444 | 0.542593 | 0.543434 |
| 2864 | ENSG00000PPP1R27  | 0.806202 | 0.322259 | 0.550018 | 0.51938  |
| 2865 | ENSG00000TMEM132B | 0.936364 | 0.219192 | 0.561279 | 0.425253 |
| 2866 | ENSG00000FAM162A  | 0.776768 | 0.322222 | 0.549495 | 0.541414 |
| 2867 | ENSG00000NQO2     | 0.929293 | 0.229293 | 0.545118 | 0.463636 |
| 2868 | ENSG00000RBM7     | 0.943434 | 0.207071 | 0.561616 | 0.422222 |
| 2869 | ENSG00000CCT4     | 0.793939 | 0.325253 | 0.559596 | 0.519192 |
| 2870 | ENSG00000C11orf87 | 0.747475 | 0.368687 | 0.548316 | 0.505051 |
| 2871 | ENSG00000PRADC1   | 0.744444 | 0.366667 | 0.555556 | 0.508081 |
| 2872 | ENSG00000DDX51    | 0.769697 | 0.331313 | 0.550505 | 0.533333 |
| 2873 | ENSG00000DCAF4    | 0.837209 | 0.289037 | 0.54928  | 0.527132 |
| 2874 | ENSG00000MED9     | 0.777778 | 0.339394 | 0.558586 | 0.512121 |
| 2875 | ENSG00000NAB2     | 0.928283 | 0.216162 | 0.585522 | 0.392929 |
| 2876 | ENSG00000LCN15    | 0.672727 | 0.411111 | 0.533165 | 0.529293 |
| 2877 | ENSG00000CDC42BPA | 0.931313 | 0.231313 | 0.560606 | 0.430303 |
| 2878 | ENSG00000MEX3C    | 0.787879 | 0.329293 | 0.556229 | 0.520202 |
| 2879 | ENSG00000GDAP1L1  | 0.616162 | 0.454545 | 0.535354 | 0.5      |
| 2880 | ENSG00000HTR1E    | 0.830867 | 0.291755 | 0.551268 | 0.527484 |
| 2881 | ENSG00000CIITA    | 0.732558 | 0.363636 | 0.543693 | 0.529598 |
| 2882 | ENSG00000DIEXF    | 0.787879 | 0.336364 | 0.556061 | 0.514141 |
| 2883 | ENSG00000MT-ND1   | 0.757576 | 0.337374 | 0.547475 | 0.537374 |
| 2884 | ENSG00000ASXL3    | 0.927273 | 0.232323 | 0.558923 | 0.446465 |
| 2885 | ENSG00000CCDC58   | 0.782946 | 0.353267 | 0.555925 | 0.493909 |
| 2886 | ENSG00000GLS      | 0.745455 | 0.345455 | 0.545455 | 0.541414 |
| 2887 | ENSG00000KIAA1614 | 0.845455 | 0.310101 | 0.557576 | 0.49798  |
| 2888 | ENSG00000HAVCR1   | 0.744444 | 0.366667 | 0.555556 | 0.510101 |
| 2889 | ENSG00000TRIM16L  | 0.732558 | 0.37315  | 0.552854 | 0.512685 |
| 2890 | ENSG00000ARRDC1   | 0.682875 | 0.409091 | 0.545983 | 0.516913 |
| 2891 | ENSG00000RYR2     | 0.757576 | 0.337374 | 0.547475 | 0.538384 |
| 2892 | ENSG00000KLHL4    | 0.737374 | 0.370707 | 0.55404  | 0.511111 |
| 2893 | ENSG00000CIAPIN1  | 0.923232 | 0.20202  | 0.551852 | 0.486869 |
| 2894 | ENSG00000CCR8     | 0.696618 | 0.408696 | 0.540097 | 0.515942 |
| 2895 | ENSG00000AMMECR1  | 0.90202  | 0.255556 | 0.573906 | 0.464646 |
| 2896 | ENSG00000ENTPD8   | 0.733333 | 0.355556 | 0.544444 | 0.539394 |
| 2897 | ENSG00000DTX1     | 0.814141 | 0.324242 | 0.559428 | 0.508081 |
| 2898 | ENSG00000MGAM2    | 0.655556 | 0.425253 | 0.540404 | 0.519192 |
| 2899 | ENSG00000FAM83G   | 0.933333 | 0.221212 | 0.562458 | 0.437374 |
| 2900 | ENSG00000CA2      | 0.822222 | 0.329293 | 0.549158 | 0.506061 |
| 2901 | ENSG00000TMEM237  | 0.853066 | 0.308668 | 0.572586 | 0.48203  |
| 2902 | ENSG00000ZSCAN21  | 0.877778 | 0.29697  | 0.571717 | 0.471717 |
| 2903 | ENSG00000CDKN1B   | 0.921212 | 0.227273 | 0.579798 | 0.446465 |
| 2904 | ENSG00000CDC42SE2 | 0.8      | 0.289899 | 0.536869 | 0.565657 |
| 2905 | ENSG00000ADGRL4   | 0.721212 | 0.358586 | 0.535522 | 0.553535 |
| 2906 | ENSG00000ZNF552   | 0.923232 | 0.190909 | 0.553535 | 0.488889 |
| 2907 | ENSG00000NEURL1   | 0.739394 | 0.352525 | 0.540572 | 0.543434 |
| 2908 | ENSG00000ZNF418   | 0.923232 | 0.190909 | 0.553535 | 0.488889 |
| 2909 | ENSG00000NUP210L  | 0.905051 | 0.262626 | 0.589226 | 0.429293 |
| 2910 | ENSG00000CCRL2    | 0.8      | 0.340404 | 0.567845 | 0.491919 |
| 2911 | ENSG00000ZNF814   | 0.923232 | 0.190909 | 0.553535 | 0.488889 |
| 2912 | ENSG00000SYBU     | 0.777778 | 0.339394 | 0.558586 | 0.517172 |
| 2913 | ENSG00000AUNIP    | 0.671717 | 0.40303  | 0.537374 | 0.540404 |

|      |                   |          |          |          |          |
|------|-------------------|----------|----------|----------|----------|
| 2914 | ENSG00000GJB5     | 0.805497 | 0.343552 | 0.565011 | 0.487315 |
| 2915 | ENSG00000ZNF587B  | 0.923232 | 0.190909 | 0.553535 | 0.488889 |
| 2916 | ENSG00000RAB33A   | 0.777778 | 0.339394 | 0.558586 | 0.518182 |
| 2917 | ENSG00000KIAA1109 | 0.711111 | 0.386869 | 0.547643 | 0.522222 |
| 2918 | ENSG00000ZNF77    | 0.758985 | 0.313953 | 0.534179 | 0.581395 |
| 2919 | ENSG00000TSPAN6   | 0.733333 | 0.379798 | 0.556566 | 0.506061 |
| 2920 | ENSG00000QPCT     | 0.733333 | 0.361353 | 0.547343 | 0.536232 |
| 2921 | ENSG00000SH3BGRL  | 0.754545 | 0.376768 | 0.562626 | 0.485859 |
| 2922 | ENSG00000MSMB     | 0.845455 | 0.272727 | 0.539394 | 0.544444 |
| 2923 | ENSG00000AP1S3    | 0.737374 | 0.363636 | 0.534512 | 0.539394 |
| 2924 | ENSG00000NOSIP    | 0.846723 | 0.270613 | 0.551797 | 0.535941 |
| 2925 | ENSG00000RUVBL1   | 0.931313 | 0.20202  | 0.551178 | 0.472727 |
| 2926 | ENSG00000PDZD3    | 0.709302 | 0.404863 | 0.557082 | 0.495772 |
| 2927 | ENSG00000CTNNA3   | 0.69697  | 0.39798  | 0.547475 | 0.520202 |
| 2928 | ENSG00000NDEL1    | 0.781184 | 0.348837 | 0.55814  | 0.503171 |
| 2929 | ENSG00000TAF9B    | 0.687879 | 0.405051 | 0.544108 | 0.523232 |
| 2930 | ENSG00000APRT     | 0.733333 | 0.355556 | 0.544444 | 0.542424 |
| 2931 | ENSG00000TPST2    | 0.827273 | 0.283838 | 0.538215 | 0.553535 |
| 2932 | ENSG00000ZNF106   | 0.721212 | 0.367677 | 0.544444 | 0.541414 |
| 2933 | ENSG00000MTCL1    | 0.856566 | 0.263636 | 0.556397 | 0.528283 |
| 2934 | ENSG00000ZFP2     | 0.738901 | 0.332981 | 0.535941 | 0.571882 |
| 2935 | ENSG00000SLC3A1   | 0.744444 | 0.356566 | 0.546465 | 0.533333 |
| 2936 | ENSG00000CLBA1    | 0.90404  | 0.213131 | 0.544276 | 0.519192 |
| 2937 | ENSG00000ZFYVE21  | 0.688889 | 0.405051 | 0.545791 | 0.523232 |
| 2938 | ENSG00000GARNL3   | 0.790909 | 0.348485 | 0.567508 | 0.490909 |
| 2939 | ENSG00000S100A11  | 0.870707 | 0.29798  | 0.572391 | 0.481818 |
| 2940 | ENSG00000CCR3     | 0.738901 | 0.332981 | 0.535941 | 0.572939 |
| 2941 | ENSG00000OR52I2   | 0.733333 | 0.355556 | 0.544444 | 0.543434 |
| 2942 | ENSG00000HMX2     | 0.814493 | 0.311111 | 0.561031 | 0.524638 |
| 2943 | ENSG00000FRMD8    | 0.737374 | 0.389899 | 0.547811 | 0.5      |
| 2944 | ENSG00000TEX15    | 0.679704 | 0.428118 | 0.551797 | 0.498943 |
| 2945 | ENSG00000SLC25A15 | 0.777778 | 0.326263 | 0.54899  | 0.545455 |
| 2946 | ENSG00000AFF2     | 0.787375 | 0.348837 | 0.564046 | 0.497231 |
| 2947 | ENSG00000ELF4     | 0.757576 | 0.356566 | 0.548316 | 0.523232 |
| 2948 | ENSG00000PLCXD2   | 0.754545 | 0.346465 | 0.542761 | 0.541414 |
| 2949 | ENSG00000TBRG4    | 0.7463   | 0.386892 | 0.566596 | 0.479915 |
| 2950 | ENSG00000RRS1     | 0.945455 | 0.223232 | 0.5633   | 0.417172 |
| 2951 | ENSG00000NEXMIF   | 0.667828 | 0.441347 | 0.55362  | 0.492451 |
| 2952 | ENSG00000SLC25A2  | 0.777778 | 0.326263 | 0.54899  | 0.545455 |
| 2953 | ENSG00000SUV39H2  | 0.615222 | 0.446089 | 0.530655 | 0.52537  |
| 2954 | ENSG00000VAMP5    | 0.752643 | 0.368922 | 0.557611 | 0.503171 |
| 2955 | ENSG00000OARD1    | 0.818182 | 0.30404  | 0.556734 | 0.533333 |
| 2956 | ENSG00000PTGS1    | 0.915152 | 0.214141 | 0.563131 | 0.493939 |
| 2957 | ENSG00000IPCEF1   | 0.709302 | 0.397463 | 0.548273 | 0.516913 |
| 2958 | ENSG00000ZFP69B   | 0.857576 | 0.251515 | 0.541751 | 0.549495 |
| 2959 | ENSG00000MAPRE2   | 0.79798  | 0.307071 | 0.547475 | 0.552525 |
| 2960 | ENSG00000GPR149   | 0.788584 | 0.344609 | 0.566596 | 0.5      |
| 2961 | ENSG00000ALAD     | 0.927273 | 0.20101  | 0.562795 | 0.474747 |
| 2962 | ENSG00000ZNF101   | 0.855556 | 0.29697  | 0.568687 | 0.49899  |
| 2963 | ENSG00000ZNF460   | 0.875758 | 0.267677 | 0.556566 | 0.516162 |
| 2964 | ENSG00000ARRDC2   | 0.737374 | 0.361616 | 0.546465 | 0.536364 |
| 2965 | ENSG00000NCKAP5   | 0.747475 | 0.377778 | 0.559259 | 0.494949 |
| 2966 | ENSG00000C11orf58 | 0.69697  | 0.39798  | 0.547475 | 0.526263 |
| 2967 | ENSG00000ZNF865   | 0.69697  | 0.39798  | 0.547475 | 0.523232 |
| 2968 | ENSG00000MAP7D1   | 0.777778 | 0.339394 | 0.558586 | 0.523232 |

|      |                     |          |          |          |          |
|------|---------------------|----------|----------|----------|----------|
| 2969 | ENSG000000CCR4      | 0.755556 | 0.355556 | 0.555556 | 0.521212 |
| 2970 | ENSG000000LRCH1     | 0.80202  | 0.328283 | 0.554714 | 0.524242 |
| 2971 | ENSG000000PCDHB3    | 0.747475 | 0.384848 | 0.561785 | 0.488889 |
| 2972 | ENSG000000DLL4      | 0.737374 | 0.384848 | 0.559596 | 0.49798  |
| 2973 | ENSG000000CDK20     | 0.930303 | 0.229293 | 0.573064 | 0.434343 |
| 2974 | ENSG000000AHSP      | 0.675758 | 0.406061 | 0.538721 | 0.538384 |
| 2975 | ENSG000000METTL27   | 0.77167  | 0.358351 | 0.546688 | 0.514799 |
| 2976 | ENSG000000TMEM177   | 0.811839 | 0.323467 | 0.55444  | 0.523256 |
| 2977 | ENSG000000SOWAHD    | 0.788889 | 0.308081 | 0.542761 | 0.561616 |
| 2978 | ENSG000000TMEM30B   | 0.744444 | 0.366667 | 0.555556 | 0.518182 |
| 2979 | ENSG000000RIOK1     | 0.921212 | 0.223232 | 0.580976 | 0.459596 |
| 2980 | ENSG000000PRKAA2    | 0.767677 | 0.367677 | 0.567677 | 0.486869 |
| 2981 | ENSG000000C2orf16   | 0.927273 | 0.229293 | 0.580135 | 0.429293 |
| 2982 | ENSG000000CARHSP1   | 0.870707 | 0.291919 | 0.566162 | 0.49596  |
| 2983 | ENSG000000CYP2W1    | 0.721212 | 0.367677 | 0.544444 | 0.546465 |
| 2984 | ENSG000000UFC1      | 0.947475 | 0.220202 | 0.56532  | 0.420202 |
| 2985 | ENSG000000ALDH3B1   | 0.764646 | 0.357576 | 0.554545 | 0.516162 |
| 2986 | ENSG000000TMEM186   | 0.757576 | 0.319192 | 0.538384 | 0.577778 |
| 2987 | ENSG000000CAPN11    | 0.923232 | 0.216162 | 0.56532  | 0.478788 |
| 2988 | ENSG000000ZNF33A    | 0.755556 | 0.355556 | 0.555556 | 0.522222 |
| 2989 | ENSG000000DHX35     | 0.773737 | 0.362626 | 0.560438 | 0.49596  |
| 2990 | ENSG000000ZNF33B    | 0.755556 | 0.355556 | 0.555556 | 0.522222 |
| 2991 | ENSG000000ZNF324    | 0.755556 | 0.355556 | 0.555556 | 0.525253 |
| 2992 | ENSG000000ARSI      | 0.918182 | 0.185859 | 0.538721 | 0.522222 |
| 2993 | ENSG000000ZNF7      | 0.830303 | 0.288889 | 0.544444 | 0.549495 |
| 2994 | ENSG000000GALM      | 0.89697  | 0.248485 | 0.558586 | 0.50101  |
| 2995 | ENSG000000ZNF665    | 0.877378 | 0.275899 | 0.573996 | 0.494715 |
| 2996 | ENSG000000BEND5     | 0.90101  | 0.229293 | 0.547306 | 0.518182 |
| 2997 | ENSG000000CELF3     | 0.863636 | 0.272727 | 0.550505 | 0.529293 |
| 2998 | ENSG000000STX3      | 0.914141 | 0.251515 | 0.582492 | 0.456566 |
| 2999 | ENSG000000STK10     | 0.907071 | 0.223232 | 0.570539 | 0.494949 |
| 3000 | ENSG000000RAD21L1   | 0.752643 | 0.368922 | 0.557611 | 0.508457 |
| 3001 | ENSG000000TLR8      | 0.733333 | 0.355556 | 0.544444 | 0.553535 |
| 3002 | ENSG000000MRM2      | 0.858586 | 0.273737 | 0.550168 | 0.534343 |
| 3003 | ENSG000000CXCL13    | 0.766667 | 0.346465 | 0.556566 | 0.527273 |
| 3004 | ENSG000000NDUFS1    | 0.72093  | 0.387949 | 0.55444  | 0.519027 |
| 3005 | ENSG000000HAND1     | 0.838266 | 0.313953 | 0.568358 | 0.505285 |
| 3006 | ENSG000000MRPL49    | 0.766667 | 0.362626 | 0.553367 | 0.511111 |
| 3007 | ENSG000000TMED3     | 0.842424 | 0.320202 | 0.564478 | 0.49798  |
| 3008 | ENSG000000TCEA1     | 0.810101 | 0.322222 | 0.562458 | 0.521212 |
| 3009 | ENSG000000TNFRSF10C | 0.671717 | 0.40303  | 0.537374 | 0.548485 |
| 3010 | ENSG000000VPREB3    | 0.757576 | 0.356566 | 0.555219 | 0.523232 |
| 3011 | ENSG000000DLK1      | 0.9343   | 0.215459 | 0.557649 | 0.467633 |
| 3012 | ENSG000000EPDR1     | 0.7      | 0.405051 | 0.551347 | 0.518182 |
| 3013 | ENSG000000PPP4R4    | 0.777778 | 0.345455 | 0.558249 | 0.521212 |
| 3014 | ENSG000000PRSS12    | 0.69697  | 0.39798  | 0.547475 | 0.529293 |
| 3015 | ENSG000000OR10Z1    | 0.747475 | 0.369697 | 0.556902 | 0.513131 |
| 3016 | ENSG000000SCX       | 0.744444 | 0.366667 | 0.555556 | 0.521212 |
| 3017 | ENSG000000C5        | 0.709091 | 0.381818 | 0.545455 | 0.541414 |
| 3018 | ENSG000000ANGEL2    | 0.782828 | 0.339394 | 0.554209 | 0.527273 |
| 3019 | ENSG000000CCDC181   | 0.890909 | 0.219192 | 0.542088 | 0.541414 |
| 3020 | ENSG000000SERPINA3  | 0.881818 | 0.273737 | 0.558249 | 0.509091 |
| 3021 | ENSG000000SLC30A10  | 0.69697  | 0.39798  | 0.547475 | 0.529293 |
| 3022 | ENSG000000FAM177A1  | 0.877378 | 0.275899 | 0.561135 | 0.511628 |
| 3023 | ENSG000000NACAD     | 0.684848 | 0.385859 | 0.535354 | 0.562626 |

|      |           |          |          |          |          |          |
|------|-----------|----------|----------|----------|----------|----------|
| 3024 | ENSG00000 | IFI16    | 0.833333 | 0.320202 | 0.573569 | 0.49899  |
| 3025 | ENSG00000 | HECA     | 0.781818 | 0.361616 | 0.561279 | 0.49596  |
| 3026 | ENSG00000 | SKIV2L   | 0.925253 | 0.241414 | 0.5867   | 0.425253 |
| 3027 | ENSG00000 | TCF7     | 0.709091 | 0.407071 | 0.554714 | 0.511111 |
| 3028 | ENSG00000 | RAB28    | 0.893939 | 0.254545 | 0.558586 | 0.506061 |
| 3029 | ENSG00000 | GSTA4    | 0.778013 | 0.352008 | 0.565011 | 0.5074   |
| 3030 | ENSG00000 | ADAMTSL3 | 0.934343 | 0.186869 | 0.553367 | 0.485859 |
| 3031 | ENSG00000 | SEMA4F   | 0.733333 | 0.361353 | 0.547343 | 0.54686  |
| 3032 | ENSG00000 | GPR101   | 0.790698 | 0.342495 | 0.564306 | 0.511628 |
| 3033 | ENSG00000 | ICOS     | 0.711111 | 0.379798 | 0.539562 | 0.547475 |
| 3034 | ENSG00000 | RIPK4    | 0.69697  | 0.39798  | 0.547475 | 0.531313 |
| 3035 | ENSG00000 | MIDN     | 0.945455 | 0.188889 | 0.573401 | 0.444444 |
| 3036 | ENSG00000 | SMIM18   | 0.762626 | 0.349495 | 0.544781 | 0.539394 |
| 3037 | ENSG00000 | CPNE8    | 0.840404 | 0.282828 | 0.549495 | 0.545455 |
| 3038 | ENSG00000 | LSM8     | 0.862626 | 0.314141 | 0.575758 | 0.482828 |
| 3039 | ENSG00000 | CHMP7    | 0.864693 | 0.311839 | 0.573643 | 0.485201 |
| 3040 | ENSG00000 | MAGED4   | 0.690909 | 0.39899  | 0.538889 | 0.543434 |
| 3041 | ENSG00000 | CNTNAP4  | 0.733333 | 0.379798 | 0.556566 | 0.518182 |
| 3042 | ENSG00000 | TIMD4    | 0.869697 | 0.281818 | 0.560269 | 0.518182 |
| 3043 | ENSG00000 | SLC25A17 | 0.777778 | 0.357576 | 0.567677 | 0.50101  |
| 3044 | ENSG00000 | MLIP     | 0.60404  | 0.476768 | 0.540404 | 0.493939 |
| 3045 | ENSG00000 | DLEC1    | 0.686047 | 0.426004 | 0.544045 | 0.51797  |
| 3046 | ENSG00000 | SLC7A10  | 0.918182 | 0.238384 | 0.584175 | 0.464646 |
| 3047 | ENSG00000 | UBALD1   | 0.816162 | 0.312121 | 0.550673 | 0.542424 |
| 3048 | ENSG00000 | DKK4     | 0.658586 | 0.422222 | 0.540404 | 0.538384 |
| 3049 | ENSG00000 | CSTA     | 0.830303 | 0.313131 | 0.548148 | 0.534343 |
| 3050 | ENSG00000 | MAGED4B  | 0.690909 | 0.39899  | 0.538889 | 0.543434 |
| 3051 | ENSG00000 | NCAM2    | 0.733333 | 0.355556 | 0.544444 | 0.556566 |
| 3052 | ENSG00000 | AGAP1    | 0.733333 | 0.379798 | 0.556566 | 0.519192 |
| 3053 | ENSG00000 | Clorf174 | 0.724242 | 0.352525 | 0.528956 | 0.580808 |
| 3054 | ENSG00000 | GMPR2    | 0.833333 | 0.308081 | 0.557239 | 0.529293 |
| 3055 | ENSG00000 | FRMD7    | 0.776768 | 0.349495 | 0.553872 | 0.524242 |
| 3056 | ENSG00000 | MPV17L2  | 0.69697  | 0.39798  | 0.547475 | 0.533333 |
| 3057 | ENSG00000 | PRR13    | 0.781818 | 0.327273 | 0.554545 | 0.546465 |
| 3058 | ENSG00000 | SKOR2    | 0.737374 | 0.386869 | 0.551852 | 0.511111 |
| 3059 | ENSG00000 | PRPF40B  | 0.914141 | 0.238384 | 0.5633   | 0.494949 |
| 3060 | ENSG00000 | MGAT1    | 0.809091 | 0.334343 | 0.569192 | 0.510101 |
| 3061 | ENSG00000 | AURKA    | 0.918182 | 0.19899  | 0.552862 | 0.516162 |
| 3062 | ENSG00000 | AR       | 0.787879 | 0.329293 | 0.556229 | 0.540404 |
| 3063 | ENSG00000 | ENOSF1   | 0.857294 | 0.289641 | 0.577167 | 0.508457 |
| 3064 | ENSG00000 | KRTCAP3  | 0.777778 | 0.341414 | 0.555219 | 0.533333 |
| 3065 | ENSG00000 | TXNDC2   | 0.909091 | 0.235354 | 0.565488 | 0.49899  |
| 3066 | ENSG00000 | CFAP97D1 | 0.755556 | 0.355556 | 0.555556 | 0.530303 |
| 3067 | ENSG00000 | AOC2     | 0.809091 | 0.338384 | 0.56633  | 0.508081 |
| 3068 | ENSG00000 | NVL      | 0.922222 | 0.210101 | 0.57138  | 0.485859 |
| 3069 | ENSG00000 | DQX1     | 0.769697 | 0.331313 | 0.550505 | 0.554545 |
| 3070 | ENSG00000 | CCSER1   | 0.952525 | 0.192929 | 0.566498 | 0.448485 |
| 3071 | ENSG00000 | EEFSEC   | 0.809091 | 0.340404 | 0.572054 | 0.49798  |
| 3072 | ENSG00000 | TAS2R60  | 0.671717 | 0.40303  | 0.537374 | 0.554545 |
| 3073 | ENSG00000 | ABHD16A  | 0.697674 | 0.42389  | 0.560782 | 0.496829 |
| 3074 | ENSG00000 | LIPH     | 0.72093  | 0.387949 | 0.55444  | 0.524313 |
| 3075 | ENSG00000 | THAP10   | 0.793939 | 0.325253 | 0.559596 | 0.540404 |
| 3076 | ENSG00000 | SNCG     | 0.889899 | 0.280808 | 0.571044 | 0.488889 |
| 3077 | ENSG00000 | OR10V1   | 0.755556 | 0.355556 | 0.555556 | 0.533333 |
| 3078 | ENSG00000 | PKNOX1   | 0.823461 | 0.339141 | 0.570848 | 0.491289 |

|      |                    |          |          |          |          |
|------|--------------------|----------|----------|----------|----------|
| 3079 | ENSG00000SPON1     | 0.69697  | 0.39798  | 0.547475 | 0.535354 |
| 3080 | ENSG00000CAPZA3    | 0.690275 | 0.419662 | 0.548626 | 0.519027 |
| 3081 | ENSG00000C1QC      | 0.884848 | 0.213131 | 0.534175 | 0.563636 |
| 3082 | ENSG00000ABI3BP    | 0.787879 | 0.349495 | 0.568687 | 0.507071 |
| 3083 | ENSG00000CRELD2    | 0.924242 | 0.215152 | 0.56734  | 0.484848 |
| 3084 | ENSG00000UBR1      | 0.810101 | 0.340404 | 0.566162 | 0.50404  |
| 3085 | ENSG00000HCAR2     | 0.787879 | 0.336364 | 0.559091 | 0.531313 |
| 3086 | ENSG00000KRTAP20-3 | 0.69697  | 0.386869 | 0.540572 | 0.553535 |
| 3087 | ENSG00000SH3BP4    | 0.941414 | 0.19697  | 0.576768 | 0.453535 |
| 3088 | ENSG00000ATP2B3    | 0.733333 | 0.379798 | 0.556566 | 0.524242 |
| 3089 | ENSG00000TMEM219   | 0.788584 | 0.344609 | 0.566596 | 0.516913 |
| 3090 | ENSG00000HCAR3     | 0.787879 | 0.336364 | 0.559091 | 0.531313 |
| 3091 | ENSG00000MTA1      | 0.928283 | 0.225253 | 0.565488 | 0.475758 |
| 3092 | ENSG00000SOAT1     | 0.842424 | 0.29798  | 0.563468 | 0.529293 |
| 3093 | ENSG00000ZNF217    | 0.865657 | 0.310101 | 0.572391 | 0.492929 |
| 3094 | ENSG00000MYO1D     | 0.767677 | 0.367677 | 0.567677 | 0.49899  |
| 3095 | ENSG00000FAM117B   | 0.917172 | 0.215152 | 0.560606 | 0.508081 |
| 3096 | ENSG00000DPY19L1   | 0.830303 | 0.314141 | 0.560438 | 0.526263 |
| 3097 | ENSG00000TANC1     | 0.777778 | 0.357576 | 0.567677 | 0.507071 |
| 3098 | ENSG00000COL27A1   | 0.818182 | 0.30404  | 0.556734 | 0.545455 |
| 3099 | ENSG00000OSBPL3    | 0.672727 | 0.436364 | 0.554545 | 0.511111 |
| 3100 | ENSG00000TRIM32    | 0.856566 | 0.318182 | 0.575421 | 0.490909 |
| 3101 | ENSG00000CCDC157   | 0.747475 | 0.369697 | 0.556902 | 0.522222 |
| 3102 | ENSG00000C8B       | 0.72093  | 0.379493 | 0.545455 | 0.544397 |
| 3103 | ENSG00000XPO6      | 0.79798  | 0.351515 | 0.570707 | 0.49596  |
| 3104 | ENSG00000PGRMC2    | 0.89798  | 0.255556 | 0.564815 | 0.50404  |
| 3105 | ENSG00000SCN7A     | 0.721212 | 0.367677 | 0.544444 | 0.558586 |
| 3106 | ENSG00000OPA3      | 0.856566 | 0.318182 | 0.575421 | 0.491919 |
| 3107 | ENSG00000BID       | 0.894949 | 0.291919 | 0.585859 | 0.463636 |
| 3108 | ENSG00000SEZ6      | 0.688889 | 0.429293 | 0.552357 | 0.511111 |
| 3109 | ENSG00000GMPR      | 0.936364 | 0.231313 | 0.570707 | 0.453535 |
| 3110 | ENSG00000PSKH2     | 0.877778 | 0.289899 | 0.568013 | 0.505051 |
| 3111 | ENSG00000HASPIN    | 0.867865 | 0.272727 | 0.562544 | 0.528541 |
| 3112 | ENSG00000GPN3      | 0.947475 | 0.247475 | 0.578451 | 0.380808 |
| 3113 | ENSG00000CCNJ      | 0.756368 | 0.366556 | 0.561462 | 0.520487 |
| 3114 | ENSG00000HES2      | 0.767442 | 0.361522 | 0.564482 | 0.516913 |
| 3115 | ENSG00000OR2B11    | 0.777778 | 0.357576 | 0.567677 | 0.507071 |
| 3116 | ENSG00000SLC22A1   | 0.7      | 0.405051 | 0.551347 | 0.527273 |
| 3117 | ENSG00000CYP11A1   | 0.733333 | 0.379798 | 0.556566 | 0.526263 |
| 3118 | ENSG00000BEAN1     | 0.864646 | 0.29697  | 0.562963 | 0.517172 |
| 3119 | ENSG00000TAS1R3    | 0.69697  | 0.39798  | 0.547475 | 0.541414 |
| 3120 | ENSG00000PCDH11X   | 0.72093  | 0.387949 | 0.55444  | 0.530655 |
| 3121 | ENSG00000GZMM      | 0.70303  | 0.384848 | 0.543939 | 0.554545 |
| 3122 | ENSG00000PSMB10    | 0.923232 | 0.236364 | 0.593434 | 0.449495 |
| 3123 | ENSG00000GNAT1     | 0.766184 | 0.330435 | 0.543317 | 0.571014 |
| 3124 | ENSG00000RFC5      | 0.805051 | 0.347475 | 0.562626 | 0.509091 |
| 3125 | ENSG00000FAM166B   | 0.658586 | 0.422222 | 0.540404 | 0.544444 |
| 3126 | ENSG00000VIP       | 0.919192 | 0.272727 | 0.574916 | 0.458586 |
| 3127 | ENSG00000HIF1A     | 0.89697  | 0.274747 | 0.572727 | 0.490909 |
| 3128 | ENSG00000QRFPR     | 0.849275 | 0.29372  | 0.56715  | 0.527536 |
| 3129 | ENSG00000MIGA2     | 0.877778 | 0.265657 | 0.558923 | 0.530303 |
| 3130 | ENSG00000ART5      | 0.929175 | 0.207188 | 0.563601 | 0.489429 |
| 3131 | ENSG00000GAS6      | 0.744444 | 0.366667 | 0.555556 | 0.535354 |
| 3132 | ENSG00000C6orf132  | 0.772727 | 0.360606 | 0.561279 | 0.517172 |
| 3133 | ENSG00000GPC1      | 0.772727 | 0.370707 | 0.569865 | 0.49697  |



|      |                    |          |          |          |          |
|------|--------------------|----------|----------|----------|----------|
| 3134 | ENSG00000PIK3CG    | 0.777778 | 0.357576 | 0.567677 | 0.512121 |
| 3135 | ENSG00000HLA-DOB   | 0.632323 | 0.430303 | 0.531313 | 0.553535 |
| 3136 | ENSG00000TNFRSF6B  | 0.672727 | 0.436364 | 0.554545 | 0.514141 |
| 3137 | ENSG00000B4GALT7   | 0.77167  | 0.387949 | 0.57981  | 0.468288 |
| 3138 | ENSG00000PAF1      | 0.806554 | 0.32241  | 0.565187 | 0.538055 |
| 3139 | ENSG00000PYHIN1    | 0.808081 | 0.338384 | 0.564646 | 0.519192 |
| 3140 | ENSG00000MTCH2     | 0.777778 | 0.353535 | 0.565657 | 0.521212 |
| 3141 | ENSG00000FAM181B   | 0.732323 | 0.39899  | 0.554882 | 0.513131 |
| 3142 | ENSG00000KRT79     | 0.637681 | 0.405797 | 0.521739 | 0.588406 |
| 3143 | ENSG00000STK40     | 0.7463   | 0.386892 | 0.566596 | 0.502114 |
| 3144 | ENSG00000BTN2A2    | 0.744444 | 0.366667 | 0.555556 | 0.539394 |
| 3145 | ENSG00000RPS26     | 0.814141 | 0.333333 | 0.569024 | 0.517172 |
| 3146 | ENSG00000P2RY13    | 0.744186 | 0.349894 | 0.542988 | 0.566596 |
| 3147 | ENSG00000CDKN2AIPN | 0.882614 | 0.253599 | 0.557032 | 0.535991 |
| 3148 | ENSG00000TLL12     | 0.888889 | 0.294949 | 0.596465 | 0.463636 |
| 3149 | ENSG00000KLHDC2    | 0.89899  | 0.277778 | 0.581987 | 0.478788 |
| 3150 | ENSG00000GPC5      | 0.890063 | 0.286469 | 0.57012  | 0.495772 |
| 3151 | ENSG00000CHAC2     | 0.721212 | 0.367677 | 0.544444 | 0.562626 |
| 3152 | ENSG00000ELOA3C    | 0.917172 | 0.268687 | 0.594108 | 0.444444 |
| 3153 | ENSG00000DDX56     | 0.89697  | 0.281818 | 0.613636 | 0.427273 |
| 3154 | ENSG00000HECW2     | 0.756871 | 0.37315  | 0.565011 | 0.512685 |
| 3155 | ENSG00000AC006538. | 0.735354 | 0.372727 | 0.55     | 0.540404 |
| 3156 | ENSG00000UCP3      | 0.707071 | 0.434343 | 0.558923 | 0.491919 |
| 3157 | ENSG00000SLC2A5    | 0.732558 | 0.37315  | 0.552854 | 0.542283 |
| 3158 | ENSG00000NINL      | 0.850498 | 0.282392 | 0.568475 | 0.537099 |
| 3159 | ENSG00000RIMS1     | 0.789899 | 0.353535 | 0.564983 | 0.515152 |
| 3160 | ENSG00000SLC10A4   | 0.755556 | 0.355556 | 0.555556 | 0.543434 |
| 3161 | ENSG00000OR56B1    | 0.657505 | 0.439746 | 0.547745 | 0.52537  |
| 3162 | ENSG00000FBXL13    | 0.767677 | 0.367677 | 0.567677 | 0.509091 |
| 3163 | ENSG00000PPP1CA    | 0.939394 | 0.211111 | 0.562963 | 0.477778 |
| 3164 | ENSG00000RAB3B     | 0.788889 | 0.320202 | 0.551852 | 0.563636 |
| 3165 | ENSG00000DUSP8     | 0.755556 | 0.355556 | 0.555556 | 0.542424 |
| 3166 | ENSG00000IGFBP7    | 0.939394 | 0.210101 | 0.585859 | 0.449495 |
| 3167 | ENSG00000ZMAT1     | 0.672727 | 0.436364 | 0.554545 | 0.518182 |
| 3168 | ENSG00000OAZ2      | 0.733333 | 0.379798 | 0.556566 | 0.530303 |
| 3169 | ENSG00000FAM234B   | 0.722222 | 0.394949 | 0.558586 | 0.524242 |
| 3170 | ENSG00000CTSW      | 0.755556 | 0.355556 | 0.555556 | 0.543434 |
| 3171 | ENSG00000ZNF770    | 0.838384 | 0.333333 | 0.590909 | 0.478788 |
| 3172 | ENSG00000ADGRE3    | 0.733333 | 0.379798 | 0.556566 | 0.533333 |
| 3173 | ENSG00000RTCA      | 0.930303 | 0.251515 | 0.585859 | 0.434343 |
| 3174 | ENSG00000WDR27     | 0.923232 | 0.271717 | 0.572391 | 0.458586 |
| 3175 | ENSG00000KIF3A     | 0.809091 | 0.334343 | 0.569192 | 0.523232 |
| 3176 | ENSG00000TMPRSS11D | 0.709302 | 0.404863 | 0.557082 | 0.524313 |
| 3177 | ENSG00000ERBIN     | 0.72093  | 0.387949 | 0.55444  | 0.538055 |
| 3178 | ENSG00000CABP5     | 0.756522 | 0.342029 | 0.549275 | 0.564251 |
| 3179 | ENSG00000PANX1     | 0.755814 | 0.349894 | 0.552854 | 0.552854 |
| 3180 | ENSG00000RAB41     | 0.809725 | 0.349894 | 0.57981  | 0.491543 |
| 3181 | ENSG00000ATG16L2   | 0.709091 | 0.381818 | 0.545455 | 0.557576 |
| 3182 | ENSG00000PEBP1     | 0.864646 | 0.310101 | 0.573232 | 0.505051 |
| 3183 | ENSG00000PPFIBP1   | 0.672727 | 0.436364 | 0.554545 | 0.521212 |
| 3184 | ENSG00000LARP1B    | 0.737374 | 0.376768 | 0.551347 | 0.537374 |
| 3185 | ENSG00000MRPS14    | 0.747475 | 0.393939 | 0.570707 | 0.494949 |
| 3186 | ENSG00000NMUR2     | 0.642706 | 0.42389  | 0.532417 | 0.563425 |
| 3187 | ENSG00000SDR42E1   | 0.757576 | 0.379798 | 0.568687 | 0.50202  |
| 3188 | ENSG00000IL1RN     | 0.849495 | 0.306061 | 0.557239 | 0.533333 |

|      |                    |          |          |          |          |
|------|--------------------|----------|----------|----------|----------|
| 3189 | ENSG00000MORF4L1   | 0.837209 | 0.331924 | 0.565011 | 0.509514 |
| 3190 | ENSG00000ALKBH6    | 0.766667 | 0.346465 | 0.556566 | 0.545455 |
| 3191 | ENSG00000MRPL53    | 0.917172 | 0.275758 | 0.584848 | 0.457576 |
| 3192 | ENSG00000SLC16A9   | 0.722222 | 0.370707 | 0.544949 | 0.560606 |
| 3193 | ENSG00000POM121C   | 0.948485 | 0.225253 | 0.58771  | 0.418182 |
| 3194 | ENSG00000NUP210    | 0.877778 | 0.29798  | 0.587542 | 0.490909 |
| 3195 | ENSG00000SH3RF2    | 0.815011 | 0.327696 | 0.562896 | 0.533827 |
| 3196 | ENSG00000SOWAHA    | 0.8      | 0.340404 | 0.567845 | 0.522222 |
| 3197 | ENSG00000UPK1A     | 0.709302 | 0.404863 | 0.557082 | 0.527484 |
| 3198 | ENSG00000ESR1      | 0.906061 | 0.248485 | 0.57037  | 0.507071 |
| 3199 | ENSG00000S100A9    | 0.846465 | 0.294949 | 0.560101 | 0.542424 |
| 3200 | ENSG00000SLC9A3R2  | 0.845455 | 0.328283 | 0.585522 | 0.490909 |
| 3201 | ENSG00000AJUBA     | 0.730897 | 0.410853 | 0.563677 | 0.498339 |
| 3202 | ENSG00000NAMPT     | 0.90303  | 0.233333 | 0.550505 | 0.535354 |
| 3203 | ENSG00000ZNF426    | 0.894949 | 0.279798 | 0.567003 | 0.50303  |
| 3204 | ENSG00000ZNF519    | 0.709091 | 0.381818 | 0.545455 | 0.559596 |
| 3205 | ENSG00000ASS1      | 0.930303 | 0.211111 | 0.558923 | 0.49798  |
| 3206 | ENSG00000GLRA1     | 0.763636 | 0.375758 | 0.564141 | 0.512121 |
| 3207 | ENSG00000KIRREL3   | 0.722222 | 0.376768 | 0.543771 | 0.558586 |
| 3208 | ENSG00000CFAP65    | 0.787879 | 0.349495 | 0.568687 | 0.521212 |
| 3209 | ENSG00000RREB1     | 0.881818 | 0.276768 | 0.5633   | 0.526263 |
| 3210 | ENSG00000LY6G6D    | 0.764271 | 0.349894 | 0.545102 | 0.556025 |
| 3211 | ENSG00000REX05     | 0.883838 | 0.269697 | 0.561279 | 0.530303 |
| 3212 | ENSG00000FAM19A3   | 0.693446 | 0.421776 | 0.541931 | 0.536998 |
| 3213 | ENSG00000LYRM9     | 0.747475 | 0.369697 | 0.556902 | 0.536364 |
| 3214 | ENSG00000VRK1      | 0.955556 | 0.208081 | 0.586532 | 0.432323 |
| 3215 | ENSG00000USB1      | 0.764646 | 0.376768 | 0.567172 | 0.510101 |
| 3216 | ENSG00000AC005697. | 0.747475 | 0.369697 | 0.556902 | 0.536364 |
| 3217 | ENSG00000XKR7      | 0.744444 | 0.366667 | 0.555556 | 0.544444 |
| 3218 | ENSG00000PPP2R5C   | 0.816162 | 0.340404 | 0.593434 | 0.492929 |
| 3219 | ENSG00000CNTN1     | 0.925253 | 0.231313 | 0.553872 | 0.508081 |
| 3220 | ENSG00000FHOD3     | 0.927273 | 0.274747 | 0.581145 | 0.440404 |
| 3221 | ENSG00000MADCAM1   | 0.684848 | 0.410101 | 0.542088 | 0.555556 |
| 3222 | ENSG00000ILDRI     | 0.733333 | 0.379798 | 0.556566 | 0.539394 |
| 3223 | ENSG00000ALG1      | 0.844444 | 0.30404  | 0.559259 | 0.542424 |
| 3224 | ENSG00000PPL       | 0.8      | 0.314141 | 0.554377 | 0.569697 |
| 3225 | ENSG00000BCAS1     | 0.870707 | 0.291919 | 0.576263 | 0.519192 |
| 3226 | ENSG00000GPR179    | 0.788889 | 0.334343 | 0.561616 | 0.546465 |
| 3227 | ENSG00000SHC3      | 0.872727 | 0.313131 | 0.579966 | 0.494949 |
| 3228 | ENSG00000CDH17     | 0.926263 | 0.212121 | 0.563973 | 0.505051 |
| 3229 | ENSG00000AKR1C1    | 0.908081 | 0.265657 | 0.571717 | 0.49697  |
| 3230 | ENSG00000SHD       | 0.680808 | 0.415152 | 0.541919 | 0.553535 |
| 3231 | ENSG00000PRPS2     | 0.672727 | 0.436364 | 0.554545 | 0.527273 |
| 3232 | ENSG00000GALNT12   | 0.672727 | 0.431313 | 0.546296 | 0.538384 |
| 3233 | ENSG00000LVRN      | 0.744444 | 0.366667 | 0.555556 | 0.547475 |
| 3234 | ENSG00000MAGEC3    | 0.72093  | 0.387949 | 0.55444  | 0.544397 |
| 3235 | ENSG00000ASCL3     | 0.887879 | 0.283838 | 0.570707 | 0.510101 |
| 3236 | ENSG00000ADGRA3    | 0.809725 | 0.335095 | 0.569767 | 0.527484 |
| 3237 | ENSG00000MPP6      | 0.818182 | 0.334343 | 0.573906 | 0.520202 |
| 3238 | ENSG00000BNC2      | 0.728283 | 0.384848 | 0.556566 | 0.539394 |
| 3239 | ENSG00000IGF2R     | 0.865657 | 0.29596  | 0.564815 | 0.529293 |
| 3240 | ENSG00000ZCCHC11   | 0.948485 | 0.228283 | 0.584848 | 0.439394 |
| 3241 | ENSG00000TRDN      | 0.870707 | 0.277778 | 0.568013 | 0.534343 |
| 3242 | ENSG00000ALG1L2    | 0.844444 | 0.30404  | 0.559259 | 0.542424 |
| 3243 | ENSG00000AZU1      | 0.657505 | 0.447146 | 0.546159 | 0.530655 |

0.2886

|      |                    |          |          |          |          |
|------|--------------------|----------|----------|----------|----------|
| 3244 | ENSG00000C2orf68   | 0.737374 | 0.370707 | 0.55404  | 0.548485 |
| 3245 | ENSG00000FRMD3     | 0.767442 | 0.361522 | 0.564482 | 0.530655 |
| 3246 | ENSG00000TASP1     | 0.939746 | 0.217759 | 0.582629 | 0.465116 |
| 3247 | ENSG00000FAM84B    | 0.880399 | 0.293466 | 0.569952 | 0.516058 |
| 3248 | ENSG00000NKX1-2    | 0.747475 | 0.377778 | 0.559259 | 0.528283 |
| 3249 | ENSG00000NKX1-1    | 0.747475 | 0.377778 | 0.559259 | 0.528283 |
| 3250 | ENSG00000PPP6C     | 0.727273 | 0.419192 | 0.571886 | 0.492929 |
| 3251 | ENSG00000CSNK1G3   | 0.866667 | 0.271717 | 0.557744 | 0.551515 |
| 3252 | ENSG00000RALGAPB   | 0.807611 | 0.342495 | 0.565011 | 0.526427 |
| 3253 | ENSG00000RFT1      | 0.872727 | 0.287879 | 0.570707 | 0.527273 |
| 3254 | ENSG00000VHL       | 0.709091 | 0.381818 | 0.545455 | 0.567677 |
| 3255 | ENSG00000FAH       | 0.927273 | 0.247475 | 0.586195 | 0.466667 |
| 3256 | ENSG00000C2orf91   | 0.836364 | 0.334343 | 0.575421 | 0.505051 |
| 3257 | ENSG00000TTC21B    | 0.773737 | 0.370707 | 0.567677 | 0.515152 |
| 3258 | ENSG00000MAP3K7CL  | 0.862626 | 0.290909 | 0.564983 | 0.538384 |
| 3259 | ENSG00000KCNJ8     | 0.7      | 0.431313 | 0.565657 | 0.507071 |
| 3260 | ENSG00000SLX4      | 0.781818 | 0.367677 | 0.56532  | 0.513131 |
| 3261 | ENSG00000CD79B     | 0.934343 | 0.249495 | 0.594108 | 0.436364 |
| 3262 | ENSG00000DNMT1     | 0.929293 | 0.233333 | 0.567003 | 0.491919 |
| 3263 | ENSG00000RBM27     | 0.929293 | 0.221212 | 0.586195 | 0.479798 |
| 3264 | ENSG00000PKP2      | 0.921212 | 0.224242 | 0.569529 | 0.511111 |
| 3265 | ENSG00000HTR2A     | 0.709091 | 0.381818 | 0.545455 | 0.569697 |
| 3266 | ENSG00000GCSAM     | 0.712071 | 0.405316 | 0.557401 | 0.532669 |
| 3267 | ENSG00000PI16      | 0.744444 | 0.356566 | 0.548653 | 0.566667 |
| 3268 | ENSG00000PUS3      | 0.814141 | 0.329293 | 0.563973 | 0.541414 |
| 3269 | ENSG00000ZNF490    | 0.727273 | 0.394949 | 0.555219 | 0.533333 |
| 3270 | ENSG00000USP5      | 0.837209 | 0.317125 | 0.568358 | 0.534884 |
| 3271 | ENSG00000CRYAB     | 0.862626 | 0.292929 | 0.571717 | 0.531313 |
| 3272 | ENSG00000DMC1      | 0.948485 | 0.20404  | 0.56936  | 0.480808 |
| 3273 | ENSG00000VRTN      | 0.790909 | 0.328283 | 0.57138  | 0.550505 |
| 3274 | ENSG00000RPUSD4    | 0.865657 | 0.317172 | 0.576768 | 0.506061 |
| 3275 | ENSG00000TLR7      | 0.781818 | 0.354545 | 0.556061 | 0.538384 |
| 3276 | ENSG00000ATP11A    | 0.900634 | 0.234672 | 0.551797 | 0.544397 |
| 3277 | ENSG00000NBEAL1    | 0.923232 | 0.228283 | 0.565825 | 0.509091 |
| 3278 | ENSG00000STS       | 0.727273 | 0.428283 | 0.577778 | 0.480808 |
| 3279 | ENSG00000CPED1     | 0.737374 | 0.378788 | 0.555051 | 0.544444 |
| 3280 | ENSG00000SMIM13    | 0.651515 | 0.449495 | 0.549663 | 0.528283 |
| 3281 | ENSG00000ZNF414    | 0.842424 | 0.333333 | 0.574242 | 0.507071 |
| 3282 | ENSG00000HLA-DRB5  | 0.711111 | 0.40202  | 0.555219 | 0.540404 |
| 3283 | ENSG00000BNIP2     | 0.781818 | 0.377778 | 0.576431 | 0.492929 |
| 3284 | ENSG00000MUTYH     | 0.878788 | 0.273737 | 0.560269 | 0.542424 |
| 3285 | ENSG00000ADCY1     | 0.911111 | 0.273737 | 0.579966 | 0.489899 |
| 3286 | ENSG00000ESD       | 0.830303 | 0.331313 | 0.56633  | 0.526263 |
| 3287 | ENSG00000HYKK      | 0.767677 | 0.356566 | 0.558418 | 0.543434 |
| 3288 | ENSG00000KAT2B     | 0.870707 | 0.321212 | 0.583838 | 0.492929 |
| 3289 | ENSG00000SSTR1     | 0.77167  | 0.363636 | 0.565715 | 0.528541 |
| 3290 | ENSG00000AC091959. | 0.929293 | 0.221212 | 0.586195 | 0.479798 |
| 3291 | ENSG00000PDE4A     | 0.879798 | 0.289899 | 0.575589 | 0.519192 |
| 3292 | ENSG00000TRPM4     | 0.733333 | 0.379798 | 0.556566 | 0.547475 |
| 3293 | ENSG00000OR6K3     | 0.846465 | 0.358586 | 0.593939 | 0.442424 |
| 3294 | ENSG00000TMEM106C  | 0.830867 | 0.321353 | 0.571529 | 0.533827 |
| 3295 | ENSG00000PNRC1     | 0.814141 | 0.353535 | 0.581481 | 0.49798  |
| 3296 | ENSG00000BCAM      | 0.773737 | 0.370707 | 0.567677 | 0.517172 |
| 3297 | ENSG00000DCXR      | 0.923232 | 0.245455 | 0.590572 | 0.477778 |
| 3298 | ENSG00000SLC35F5   | 0.935354 | 0.243434 | 0.58771  | 0.457576 |

|      |                   |          |          |          |          |        |
|------|-------------------|----------|----------|----------|----------|--------|
| 3299 | ENSG00000PKD1     | 0.8      | 0.361616 | 0.580808 | 0.50101  |        |
| 3300 | ENSG00000WDR48    | 0.8      | 0.355556 | 0.569697 | 0.519192 |        |
| 3301 | ENSG00000B4GALT2  | 0.757576 | 0.379798 | 0.568687 | 0.520202 |        |
| 3302 | ENSG00000B4GALNT2 | 0.809725 | 0.335095 | 0.569767 | 0.535941 |        |
| 3303 | ENSG00000MNAT1    | 0.945455 | 0.237374 | 0.576599 | 0.465657 |        |
| 3304 | ENSG00000ZNF20    | 0.841414 | 0.329293 | 0.573064 | 0.518182 |        |
| 3305 | ENSG00000BOLA1    | 0.846465 | 0.325253 | 0.582492 | 0.509091 |        |
| 3306 | ENSG00000SLC8B1   | 0.757576 | 0.379798 | 0.568687 | 0.521212 |        |
| 3307 | ENSG00000C22orf42 | 0.657505 | 0.451374 | 0.55444  | 0.52537  |        |
| 3308 | ENSG00000LENG9    | 0.951515 | 0.261616 | 0.592256 | 0.374747 |        |
| 3309 | ENSG00000CLRN2    | 0.850505 | 0.284848 | 0.553367 | 0.563636 |        |
| 3310 | ENSG00000ARAP2    | 0.658586 | 0.422222 | 0.540404 | 0.567677 |        |
| 3311 | ENSG00000PSAT1    | 0.916162 | 0.259596 | 0.576936 | 0.49798  |        |
| 3312 | ENSG00000XPO7     | 0.919192 | 0.242424 | 0.575758 | 0.50404  |        |
| 3313 | ENSG00000CATSPERB | 0.840404 | 0.317172 | 0.576094 | 0.529293 |        |
| 3314 | ENSG00000CRB1     | 0.890821 | 0.27343  | 0.568921 | 0.525604 |        |
| 3315 | ENSG00000SOX11    | 0.958586 | 0.205051 | 0.577609 | 0.444444 |        |
| 3316 | ENSG00000SYTL4    | 0.89899  | 0.265657 | 0.568519 | 0.522222 |        |
| 3317 | ENSG00000LRG1     | 0.940404 | 0.214141 | 0.561953 | 0.49596  |        |
| 3318 | ENSG00000GRM8     | 0.756871 | 0.362579 | 0.555673 | 0.551797 |        |
| 3319 | ENSG00000SLC10A6  | 0.721212 | 0.367677 | 0.544444 | 0.583838 |        |
| 3320 | ENSG00000GIPC1    | 0.908081 | 0.273737 | 0.571717 | 0.505051 |        |
| 3321 | ENSG00000UNC119B  | 0.734219 | 0.395349 | 0.564784 | 0.527132 |        |
| 3322 | ENSG00000BCL7B    | 0.722222 | 0.39899  | 0.555724 | 0.541414 |        |
| 3323 | ENSG00000PARD3B   | 0.763636 | 0.379798 | 0.561279 | 0.525253 |        |
| 3324 | ENSG00000ST6GAL2  | 0.781818 | 0.358586 | 0.568182 | 0.529293 |        |
| 3325 | ENSG00000TAOK2    | 0.816162 | 0.347475 | 0.572054 | 0.517172 |        |
| 3326 | ENSG00000MEOX1    | 0.867677 | 0.29798  | 0.582155 | 0.523232 |        |
| 3327 | ENSG00000MAIP1    | 0.781818 | 0.368687 | 0.568519 | 0.518182 |        |
| 3328 | ENSG00000BARHL1   | 0.693446 | 0.430233 | 0.560078 | 0.52537  | 0.47   |
| 3329 | ENSG00000ANK3     | 0.920202 | 0.231313 | 0.561279 | 0.523232 |        |
| 3330 | ENSG00000ADPRM    | 0.917172 | 0.245455 | 0.588889 | 0.494949 |        |
| 3331 | ENSG00000FPR2     | 0.722222 | 0.394949 | 0.558586 | 0.542424 |        |
| 3332 | ENSG00000ATG4D    | 0.79798  | 0.362626 | 0.575084 | 0.509091 |        |
| 3333 | ENSG00000PRRG2    | 0.711111 | 0.412121 | 0.561616 | 0.532323 |        |
| 3334 | ENSG00000PDCD7    | 0.800211 | 0.356237 | 0.578224 | 0.512685 |        |
| 3335 | ENSG00000FABP5    | 0.922222 | 0.243434 | 0.584175 | 0.491919 |        |
| 3336 | ENSG00000FKRP     | 0.767677 | 0.367677 | 0.567677 | 0.529293 |        |
| 3337 | ENSG00000GTF2IRD1 | 0.932323 | 0.279798 | 0.577441 | 0.453535 |        |
| 3338 | ENSG00000CHMP2B   | 0.80202  | 0.321212 | 0.561616 | 0.568687 |        |
| 3339 | ENSG00000PDPR     | 0.829293 | 0.331313 | 0.576431 | 0.525253 |        |
| 3340 | ENSG00000NOX01    | 0.69697  | 0.39798  | 0.547475 | 0.565657 |        |
| 3341 | ENSG00000SRC      | 0.911111 | 0.251515 | 0.575758 | 0.514141 |        |
| 3342 | ENSG00000PIAS3    | 0.672727 | 0.436364 | 0.554545 | 0.540404 |        |
| 3343 | ENSG00000ALDH3A1  | 0.943434 | 0.20202  | 0.567003 | 0.49798  |        |
| 3344 | ENSG00000ZFAT     | 0.666667 | 0.420819 | 0.537837 | 0.571429 |        |
| 3345 | ENSG00000RPL4     | 0.816162 | 0.347475 | 0.572054 | 0.518182 |        |
| 3346 | ENSG00000STRIP2   | 0.790698 | 0.364693 | 0.577696 | 0.510571 |        |
| 3347 | ENSG00000EPB41L1  | 0.838384 | 0.327273 | 0.578451 | 0.523232 |        |
| 3348 | ENSG00000ALDH1L2  | 0.794949 | 0.366667 | 0.574747 | 0.509091 |        |
| 3349 | ENSG00000MS4A10   | 0.683278 | 0.437431 | 0.560354 | 0.527132 |        |
| 3350 | ENSG00000SELENOK  | 0.7463   | 0.386892 | 0.566596 | 0.528541 |        |
| 3351 | ENSG00000UBA7     | 0.768687 | 0.357576 | 0.549832 | 0.556566 |        |
| 3352 | ENSG00000CASP6    | 0.933333 | 0.232323 | 0.592593 | 0.472727 | 0.3818 |
| 3353 | ENSG00000RAF1     | 0.956566 | 0.20303  | 0.574747 | 0.474747 |        |

|      |                   |          |          |          |          |
|------|-------------------|----------|----------|----------|----------|
| 3354 | ENSG00000SH3BP5   | 0.727273 | 0.416162 | 0.561279 | 0.519192 |
| 3355 | ENSG00000ORAI1    | 0.766667 | 0.346465 | 0.556566 | 0.564646 |
| 3356 | ENSG00000ABHD4    | 0.792812 | 0.372093 | 0.574524 | 0.503171 |
| 3357 | ENSG00000FGD3     | 0.940803 | 0.258985 | 0.583157 | 0.452431 |
| 3358 | ENSG00000SNX10    | 0.839394 | 0.314141 | 0.573064 | 0.541414 |
| 3359 | ENSG00000RPGRIPI  | 0.898551 | 0.2657   | 0.566345 | 0.528502 |
| 3360 | ENSG00000FAM168A  | 0.743129 | 0.393235 | 0.551445 | 0.540169 |
| 3361 | ENSG00000MAGEB4   | 0.709091 | 0.373737 | 0.5367   | 0.59798  |
| 3362 | ENSG00000GCNT3    | 0.767677 | 0.367677 | 0.567677 | 0.535354 |
| 3363 | ENSG00000TMEM50B  | 0.886869 | 0.312121 | 0.586027 | 0.492929 |
| 3364 | ENSG00000PGLYRP3  | 0.711111 | 0.412121 | 0.561616 | 0.535354 |
| 3365 | ENSG00000SLC26A11 | 0.747475 | 0.393939 | 0.570707 | 0.518182 |
| 3366 | ENSG00000STBD1    | 0.889899 | 0.29697  | 0.588215 | 0.49899  |
| 3367 | ENSG00000TRAPPC6B | 0.856237 | 0.295983 | 0.563953 | 0.551797 |
| 3368 | ENSG00000NEK3     | 0.918182 | 0.231313 | 0.559091 | 0.534343 |
| 3369 | ENSG00000LAMA1    | 0.686047 | 0.445032 | 0.565539 | 0.520085 |
| 3370 | ENSG00000GALK2    | 0.940404 | 0.223232 | 0.577441 | 0.485859 |
| 3371 | ENSG00000CRTAC1   | 0.772727 | 0.394949 | 0.583838 | 0.487879 |
| 3372 | ENSG00000PRKCB    | 0.955556 | 0.238384 | 0.597306 | 0.419192 |
| 3373 | ENSG00000SEMA4C   | 0.7      | 0.431313 | 0.565657 | 0.520202 |
| 3374 | ENSG00000SHISA2   | 0.767677 | 0.381818 | 0.559091 | 0.525253 |
| 3375 | ENSG00000METTL17  | 0.672727 | 0.436364 | 0.554545 | 0.543434 |
| 3376 | ENSG00000ZNF565   | 0.839394 | 0.320202 | 0.574074 | 0.535354 |
| 3377 | ENSG00000REC8     | 0.89899  | 0.210101 | 0.541582 | 0.577778 |
| 3378 | ENSG00000EXOC3L2  | 0.737374 | 0.410101 | 0.573737 | 0.50404  |
| 3379 | ENSG00000PYCR2    | 0.747475 | 0.393939 | 0.570707 | 0.520202 |
| 3380 | ENSG00000GTPBP6   | 0.920266 | 0.294574 | 0.586379 | 0.465116 |
| 3381 | ENSG00000LINGO2   | 0.942424 | 0.205051 | 0.564983 | 0.50404  |
| 3382 | ENSG00000POLR2D   | 0.856237 | 0.290698 | 0.563073 | 0.55814  |
| 3383 | ENSG00000MED20    | 0.763636 | 0.375758 | 0.564141 | 0.534343 |
| 3384 | ENSG00000SLC48A1  | 0.772727 | 0.394949 | 0.583838 | 0.485859 |
| 3385 | ENSG00000SIRT7    | 0.909091 | 0.285859 | 0.58064  | 0.494949 |
| 3386 | ENSG00000RUNDC3B  | 0.878788 | 0.269697 | 0.56835  | 0.551515 |
| 3387 | ENSG00000DNASE2   | 0.767677 | 0.367677 | 0.567677 | 0.539394 |
| 3388 | ENSG00000PKP1     | 0.871717 | 0.283838 | 0.559428 | 0.555556 |
| 3389 | ENSG00000CHCHD10  | 0.756871 | 0.37315  | 0.565011 | 0.541226 |
| 3390 | ENSG00000MYORG    | 0.755556 | 0.355556 | 0.555556 | 0.569697 |
| 3391 | ENSG00000PCYT1B   | 0.756871 | 0.353066 | 0.549507 | 0.578224 |
| 3392 | ENSG00000ACBD4    | 0.707071 | 0.416162 | 0.559596 | 0.540404 |
| 3393 | ENSG00000TUBE1    | 0.952431 | 0.243129 | 0.577343 | 0.466173 |
| 3394 | ENSG00000MBTPS1   | 0.767677 | 0.367677 | 0.567677 | 0.539394 |
| 3395 | ENSG00000CDH9     | 0.684848 | 0.416162 | 0.550505 | 0.561616 |
| 3396 | ENSG00000VSIG4    | 0.891919 | 0.281818 | 0.581987 | 0.517172 |
| 3397 | ENSG00000COL5A3   | 0.848485 | 0.340404 | 0.582997 | 0.5      |
| 3398 | ENSG00000GIPR     | 0.790698 | 0.358804 | 0.574751 | 0.526024 |
| 3399 | ENSG00000KATNBL1  | 0.711111 | 0.412121 | 0.561616 | 0.540404 |
| 3400 | ENSG00000KIFC3    | 0.721212 | 0.367677 | 0.544444 | 0.593939 |
| 3401 | ENSG00000PHLPP2   | 0.777778 | 0.339394 | 0.558586 | 0.573737 |
| 3402 | ENSG00000RSPH3    | 0.911205 | 0.264271 | 0.569239 | 0.522199 |
| 3403 | ENSG00000KIAA0895 | 0.767677 | 0.367677 | 0.567677 | 0.539394 |
| 3404 | ENSG00000MCUB     | 0.711111 | 0.386869 | 0.547643 | 0.579798 |
| 3405 | ENSG00000GMNN     | 0.952525 | 0.254545 | 0.583502 | 0.447475 |
| 3406 | ENSG00000APLNR    | 0.707071 | 0.416162 | 0.559596 | 0.542424 |
| 3407 | ENSG00000FAM170A  | 0.929175 | 0.281184 | 0.589147 | 0.45666  |
| 3408 | ENSG00000CETN2    | 0.891919 | 0.30101  | 0.569697 | 0.517172 |

|      |                   |          |          |          |          |
|------|-------------------|----------|----------|----------|----------|
| 3409 | ENSG00000SEH1L    | 0.781818 | 0.381818 | 0.581818 | 0.50202  |
| 3410 | ENSG00000JCHAIN   | 0.757576 | 0.370707 | 0.56229  | 0.548485 |
| 3411 | ENSG00000MBLAC1   | 0.619192 | 0.491919 | 0.555556 | 0.509091 |
| 3412 | ENSG00000B3GNT8   | 0.711111 | 0.412121 | 0.561616 | 0.540404 |
| 3413 | ENSG00000ZC3H3    | 0.823232 | 0.336364 | 0.573232 | 0.537374 |
| 3414 | ENSG00000RPRML    | 0.711111 | 0.412121 | 0.561616 | 0.540404 |
| 3415 | ENSG00000BAD      | 0.952525 | 0.211111 | 0.57862  | 0.484848 |
| 3416 | ENSG00000CPT2     | 0.917172 | 0.263636 | 0.572559 | 0.514141 |
| 3417 | ENSG00000CTHRC1   | 0.781818 | 0.381818 | 0.581818 | 0.50101  |
| 3418 | ENSG00000RNMT     | 0.879798 | 0.325253 | 0.596296 | 0.484848 |
| 3419 | ENSG00000ZMAT3    | 0.845455 | 0.3      | 0.569697 | 0.558586 |
| 3420 | ENSG00000C9orf40  | 0.817172 | 0.364646 | 0.577609 | 0.50303  |
| 3421 | ENSG00000IRF1     | 0.940404 | 0.217172 | 0.575421 | 0.49697  |
| 3422 | ENSG00000AKR1B10  | 0.830303 | 0.343434 | 0.564983 | 0.529293 |
| 3423 | ENSG00000HMGXB4   | 0.784848 | 0.349495 | 0.557576 | 0.559596 |
| 3424 | ENSG00000ADAM30   | 0.777778 | 0.357576 | 0.567677 | 0.547475 |
| 3425 | ENSG00000NAA60    | 0.871717 | 0.289899 | 0.559259 | 0.556566 |
| 3426 | ENSG00000UBAP2    | 0.757928 | 0.378436 | 0.551621 | 0.549683 |
| 3427 | ENSG00000CASP10   | 0.959596 | 0.240404 | 0.580976 | 0.434343 |
| 3428 | ENSG00000KLHL42   | 0.735729 | 0.402748 | 0.569239 | 0.528541 |
| 3429 | ENSG00000IL10RB   | 0.918182 | 0.276768 | 0.591246 | 0.485859 |
| 3430 | ENSG00000TRIM52   | 0.727273 | 0.40202  | 0.5633   | 0.540404 |
| 3431 | ENSG00000TAF1L    | 0.689899 | 0.415152 | 0.550337 | 0.563636 |
| 3432 | ENSG00000PCP4     | 0.707071 | 0.425253 | 0.553704 | 0.542424 |
| 3433 | ENSG00000HSD17B14 | 0.767677 | 0.367677 | 0.567677 | 0.545455 |
| 3434 | ENSG00000CRKL     | 0.714588 | 0.434461 | 0.569063 | 0.513742 |
| 3435 | ENSG00000CLTCL1   | 0.666667 | 0.446465 | 0.555219 | 0.546465 |
| 3436 | ENSG00000MGAT4C   | 0.709302 | 0.404863 | 0.557082 | 0.556025 |
| 3437 | ENSG00000HAPLN4   | 0.738676 | 0.422764 | 0.58072  | 0.494774 |
| 3438 | ENSG00000ADGRE5   | 0.747475 | 0.393939 | 0.570707 | 0.528283 |
| 3439 | ENSG00000ASB4     | 0.722222 | 0.394949 | 0.558586 | 0.557576 |
| 3440 | ENSG00000RAC3     | 0.762156 | 0.377378 | 0.568006 | 0.538055 |
| 3441 | ENSG00000DDX18    | 0.908081 | 0.271717 | 0.586869 | 0.509091 |
| 3442 | ENSG00000SAT2     | 0.919192 | 0.208081 | 0.56229  | 0.547475 |
| 3443 | ENSG00000POMT2    | 0.735729 | 0.402748 | 0.569239 | 0.530655 |
| 3444 | ENSG00000FLNC     | 0.760797 | 0.385382 | 0.56866  | 0.530454 |
| 3445 | ENSG00000PHF20L1  | 0.947475 | 0.221212 | 0.590572 | 0.477778 |
| 3446 | ENSG00000POLE2    | 0.872727 | 0.29798  | 0.569529 | 0.545455 |
| 3447 | ENSG00000ZFYVE9   | 0.747475 | 0.393939 | 0.570707 | 0.528283 |
| 3448 | ENSG00000ATP1A1   | 0.8      | 0.361616 | 0.580808 | 0.518182 |
| 3449 | ENSG00000SOCS4    | 0.737374 | 0.39596  | 0.556902 | 0.544444 |
| 3450 | ENSG00000FAM20A   | 0.790909 | 0.370707 | 0.580808 | 0.514141 |
| 3451 | ENSG00000LRP5L    | 0.891919 | 0.282828 | 0.581145 | 0.524242 |
| 3452 | ENSG00000NUP85    | 0.893939 | 0.318182 | 0.587205 | 0.488889 |
| 3453 | ENSG00000ASPN     | 0.967677 | 0.214141 | 0.577104 | 0.413131 |
| 3454 | ENSG00000NEK4     | 0.828753 | 0.301268 | 0.561487 | 0.581395 |
| 3455 | ENSG00000ELM02    | 0.767442 | 0.361522 | 0.564482 | 0.557082 |
| 3456 | ENSG00000B3GALT4  | 0.772727 | 0.370707 | 0.569865 | 0.535354 |
| 3457 | ENSG00000H2BFWT   | 0.846465 | 0.326263 | 0.571549 | 0.538384 |
| 3458 | ENSG00000MYO5A    | 0.735729 | 0.402748 | 0.569239 | 0.531712 |
| 3459 | ENSG00000PHF21A   | 0.741414 | 0.391919 | 0.558923 | 0.547475 |
| 3460 | ENSG00000ZDHC13   | 0.844444 | 0.30202  | 0.566498 | 0.564646 |
| 3461 | ENSG00000HMBOX1   | 0.965657 | 0.217172 | 0.591751 | 0.373737 |
| 3462 | ENSG00000PGAM1    | 0.818182 | 0.356566 | 0.577609 | 0.516162 |
| 3463 | ENSG00000HINT1    | 0.85825  | 0.312292 | 0.569952 | 0.545958 |

|      |                    |          |          |          |          |       |        |
|------|--------------------|----------|----------|----------|----------|-------|--------|
| 3464 | ENSG00000PRRT2     | 0.717172 | 0.405051 | 0.559764 | 0.551515 |       |        |
| 3465 | ENSG00000CDKN2D    | 0.755556 | 0.372727 | 0.544108 | 0.569697 |       |        |
| 3466 | ENSG00000AP5B1     | 0.867677 | 0.313131 | 0.583502 | 0.525253 |       |        |
| 3467 | ENSG00000SMG8      | 0.815152 | 0.348485 | 0.570034 | 0.535354 |       |        |
| 3468 | ENSG00000TRIP13    | 0.933333 | 0.234343 | 0.586195 | 0.493939 |       |        |
| 3469 | ENSG00000KHDRBS3   | 0.931313 | 0.226263 | 0.557407 | 0.526263 |       |        |
| 3470 | ENSG00000ZMAT2     | 0.890063 | 0.27907  | 0.57382  | 0.536998 |       |        |
| 3471 | ENSG00000SRFBP1    | 0.711111 | 0.412121 | 0.561616 | 0.548485 |       |        |
| 3472 | ENSG00000PGAM4     | 0.818182 | 0.356566 | 0.577609 | 0.516162 |       |        |
| 3473 | ENSG00000RNF103    | 0.684848 | 0.416162 | 0.550505 | 0.568687 |       |        |
| 3474 | ENSG00000MTMR14    | 0.722222 | 0.394949 | 0.558586 | 0.559596 |       |        |
| 3475 | ENSG00000BTBD6     | 0.7343   | 0.386473 | 0.560386 | 0.558454 |       |        |
| 3476 | ENSG00000SPNS2     | 0.866667 | 0.337374 | 0.589226 | 0.492929 |       |        |
| 3477 | ENSG00000GLB1L3    | 0.711111 | 0.412121 | 0.561616 | 0.548485 |       |        |
| 3478 | ENSG00000PALM      | 0.936364 | 0.223232 | 0.576263 | 0.506061 |       |        |
| 3479 | ENSG00000ACSF2     | 0.769697 | 0.4      | 0.578788 | 0.50202  |       |        |
| 3480 | ENSG00000NPPA      | 0.709091 | 0.431313 | 0.558754 | 0.533333 |       |        |
| 3481 | ENSG00000IL17RB    | 0.809725 | 0.349894 | 0.57981  | 0.529598 |       |        |
| 3482 | ENSG00000FAM198A   | 0.747475 | 0.393939 | 0.570707 | 0.533333 |       |        |
| 3483 | ENSG00000PXDN      | 0.754545 | 0.40101  | 0.576263 | 0.518182 |       |        |
| 3484 | ENSG00000PARL      | 0.809725 | 0.378436 | 0.588795 | 0.487315 |       |        |
| 3485 | ENSG00000IL4I1     | 0.841438 | 0.338266 | 0.578753 | 0.523256 |       |        |
| 3486 | ENSG00000PIKFYVE   | 0.882828 | 0.280808 | 0.564983 | 0.554545 |       |        |
| 3487 | ENSG00000FNDC1     | 0.949495 | 0.264646 | 0.590236 | 0.449495 |       |        |
| 3488 | ENSG00000ENSA      | 0.820296 | 0.330867 | 0.575934 | 0.549683 |       |        |
| 3489 | ENSG00000CGRRF1    | 0.864646 | 0.329293 | 0.584175 | 0.513131 |       |        |
| 3490 | ENSG00000TNS3      | 0.830867 | 0.321353 | 0.571529 | 0.556025 |       |        |
| 3491 | ENSG00000GPRC5C    | 0.781818 | 0.381818 | 0.581818 | 0.510101 |       |        |
| 3492 | ENSG00000MDGA2     | 0.722222 | 0.394949 | 0.558586 | 0.561616 |       |        |
| 3493 | ENSG00000AC131160. | 0.809725 | 0.378436 | 0.588795 | 0.487315 |       |        |
| 3494 | ENSG00000ZNF76     | 0.934343 | 0.243434 | 0.588889 | 0.487879 |       |        |
| 3495 | ENSG00000PRKN      | 0.962626 | 0.216162 | 0.579461 | 0.442424 |       |        |
| 3496 | ENSG00000SOX4      | 0.8      | 0.368687 | 0.58266  | 0.514141 |       |        |
| 3497 | ENSG00000WDR70     | 0.693939 | 0.413131 | 0.55101  | 0.568687 |       |        |
| 3498 | ENSG00000C12orf45  | 0.90101  | 0.29798  | 0.574074 | 0.514141 |       |        |
| 3499 | ENSG00000KLRG2     | 0.873737 | 0.308081 | 0.586195 | 0.526263 |       |        |
| 3500 | ENSG00000AIF1      | 0.77167  | 0.387949 | 0.57981  | 0.515856 |       |        |
| 3501 | ENSG00000ZNF626    | 0.803383 | 0.332981 | 0.555673 | 0.577167 |       |        |
| 3502 | ENSG00000DACH1     | 0.692929 | 0.456566 | 0.569024 | 0.512121 |       |        |
| 3503 | ENSG00000UNC13D    | 0.7      | 0.431313 | 0.565657 | 0.537374 |       |        |
| 3504 | ENSG00000PRR16     | 0.89852  | 0.278013 | 0.574524 | 0.529598 |       |        |
| 3505 | ENSG00000ARHGAP44  | 0.737374 | 0.410101 | 0.573737 | 0.526263 |       |        |
| 3506 | ENSG00000NR1H3     | 0.935354 | 0.274747 | 0.589899 | 0.468687 |       |        |
| 3507 | ENSG00000TVP23B    | 0.757576 | 0.379798 | 0.568687 | 0.543434 |       |        |
| 3508 | ENSG00000DENND1C   | 0.888889 | 0.253535 | 0.551852 | 0.574747 |       |        |
| 3509 | ENSG00000LY75      | 0.877778 | 0.322222 | 0.584512 | 0.514141 |       |        |
| 3510 | ENSG00000SEMA3D    | 0.7      | 0.431313 | 0.565657 | 0.537374 |       |        |
| 3511 | ENSG00000TVP23C    | 0.757576 | 0.379798 | 0.568687 | 0.543434 |       |        |
| 3512 | ENSG00000GP6       | 0.741015 | 0.400634 | 0.562368 | 0.54334  |       |        |
| 3513 | ENSG00000PLK5      | 0.64482  | 0.475687 | 0.560254 | 0.528541 |       |        |
| 3514 | ENSG00000RAI14     | 0.907071 | 0.282828 | 0.582155 | 0.517172 |       |        |
| 3515 | ENSG00000SLC11A2   | 0.948485 | 0.228283 | 0.573401 | 0.49899  |       |        |
| 3516 | ENSG00000CLEC4D    | 0.749495 | 0.416162 | 0.582828 | 0.5      |       |        |
| 3517 | ENSG00000MSI1      | 0.880193 | 0.320773 | 0.580676 | 0.517874 | 0.394 | 0.4374 |
| 3518 | ENSG00000SARS2     | 0.947475 | 0.236364 | 0.573737 | 0.49596  |       |        |

|      |                    |          |          |          |          |        |
|------|--------------------|----------|----------|----------|----------|--------|
| 3519 | ENSG00000RNF144B   | 0.935354 | 0.212121 | 0.57138  | 0.521212 |        |
| 3520 | ENSG00000C21orf62  | 0.747475 | 0.393939 | 0.570707 | 0.536364 |        |
| 3521 | ENSG00000ABCC5     | 0.744444 | 0.366667 | 0.555556 | 0.583838 |        |
| 3522 | ENSG00000UGGT2     | 0.822222 | 0.346465 | 0.581818 | 0.530303 |        |
| 3523 | ENSG00000NSL1      | 0.826263 | 0.358586 | 0.58165  | 0.512121 |        |
| 3524 | ENSG00000THBS4     | 0.733333 | 0.370707 | 0.547643 | 0.592929 |        |
| 3525 | ENSG00000CAMSAP3   | 0.737374 | 0.410101 | 0.573737 | 0.528283 |        |
| 3526 | ENSG00000AS3MT     | 0.727273 | 0.421212 | 0.569192 | 0.526263 |        |
| 3527 | ENSG00000VIRMA     | 0.789899 | 0.353535 | 0.56532  | 0.557576 |        |
| 3528 | ENSG00000SMG7      | 0.7      | 0.431313 | 0.565657 | 0.540404 |        |
| 3529 | ENSG00000C15orf40  | 0.867677 | 0.324242 | 0.582323 | 0.523232 |        |
| 3530 | ENSG00000XKR4      | 0.955556 | 0.244444 | 0.593266 | 0.459596 |        |
| 3531 | ENSG00000CLIC2     | 0.806061 | 0.348485 | 0.565488 | 0.553535 |        |
| 3532 | ENSG00000ZNF860    | 0.741414 | 0.4      | 0.568013 | 0.539394 |        |
| 3533 | ENSG00000MAP4K5    | 0.737374 | 0.410101 | 0.573737 | 0.529293 |        |
| 3534 | ENSG00000KCNH8     | 0.953535 | 0.229293 | 0.582828 | 0.484848 |        |
| 3535 | ENSG00000RSL24D1   | 0.899225 | 0.294574 | 0.606866 | 0.491694 |        |
| 3536 | ENSG00000ORM1      | 0.941414 | 0.219192 | 0.588552 | 0.494949 |        |
| 3537 | ENSG00000TMEM119   | 0.945455 | 0.245455 | 0.607576 | 0.453535 |        |
| 3538 | ENSG00000AC011455. | 0.947475 | 0.236364 | 0.573737 | 0.49596  |        |
| 3539 | ENSG00000POU2F3    | 0.754757 | 0.419662 | 0.570472 | 0.508457 |        |
| 3540 | ENSG00000ZNF154    | 0.741414 | 0.419192 | 0.574411 | 0.515152 |        |
| 3541 | ENSG00000LHCGR     | 0.717949 | 0.389744 | 0.553846 | 0.582051 |        |
| 3542 | ENSG00000DBNDD1    | 0.865751 | 0.311839 | 0.576815 | 0.544397 | 0.2441 |
| 3543 | ENSG00000IL25      | 0.767677 | 0.367677 | 0.567677 | 0.554545 |        |
| 3544 | ENSG00000LIPA      | 0.830303 | 0.313131 | 0.57037  | 0.573737 |        |
| 3545 | ENSG00000ZNF174    | 0.888889 | 0.282828 | 0.571549 | 0.547475 |        |
| 3546 | ENSG00000CCDC173   | 0.930303 | 0.275758 | 0.593603 | 0.475758 |        |
| 3547 | ENSG00000LPAR4     | 0.777778 | 0.326263 | 0.54899  | 0.612121 |        |
| 3548 | ENSG00000AAR2      | 0.90101  | 0.238384 | 0.577609 | 0.552525 |        |
| 3549 | ENSG00000PTGR2     | 0.856237 | 0.32241  | 0.585271 | 0.531712 |        |
| 3550 | ENSG00000COR02B    | 0.749495 | 0.373737 | 0.554882 | 0.572727 |        |
| 3551 | ENSG00000PRCP      | 0.744444 | 0.366667 | 0.555556 | 0.585859 |        |
| 3552 | ENSG00000KDM7A     | 0.833333 | 0.332323 | 0.56936  | 0.552525 |        |
| 3553 | ENSG00000RCSA1     | 0.737374 | 0.410101 | 0.573737 | 0.526263 |        |
| 3554 | ENSG00000CCDC71    | 0.806061 | 0.352525 | 0.570202 | 0.546465 |        |
| 3555 | ENSG00000NUDT14    | 0.9      | 0.30101  | 0.591919 | 0.50202  |        |
| 3556 | ENSG00000MUC15     | 0.858586 | 0.316162 | 0.576768 | 0.545455 |        |
| 3557 | ENSG00000CEACAM3   | 0.767677 | 0.367677 | 0.567677 | 0.555556 |        |
| 3558 | ENSG00000FAM98C    | 0.939394 | 0.269697 | 0.61633  | 0.426263 |        |
| 3559 | ENSG00000ZKSCAN1   | 0.721212 | 0.426263 | 0.557407 | 0.541414 |        |
| 3560 | ENSG00000PDCD11    | 0.955556 | 0.224242 | 0.597643 | 0.473737 |        |
| 3561 | ENSG00000MRI1      | 0.933333 | 0.19697  | 0.563131 | 0.541414 |        |
| 3562 | ENSG00000SYNJ2BP   | 0.725159 | 0.420719 | 0.572939 | 0.529598 |        |
| 3563 | ENSG00000HGH1      | 0.771717 | 0.363636 | 0.560774 | 0.563636 |        |
| 3564 | ENSG00000EFHD1     | 0.893939 | 0.292929 | 0.581145 | 0.528283 |        |
| 3565 | ENSG00000THOC1     | 0.93129  | 0.255814 | 0.593023 | 0.490486 |        |
| 3566 | ENSG00000AC243967. | 0.767677 | 0.367677 | 0.567677 | 0.555556 |        |
| 3567 | ENSG00000CEND1     | 0.777778 | 0.353535 | 0.565657 | 0.568687 |        |
| 3568 | ENSG00000NT5DC1    | 0.677778 | 0.447475 | 0.561785 | 0.545455 |        |
| 3569 | ENSG00000TMEM53    | 0.754545 | 0.40101  | 0.576263 | 0.527273 |        |
| 3570 | ENSG00000NFXL1     | 0.708245 | 0.435518 | 0.565715 | 0.536998 |        |
| 3571 | ENSG00000PLEKHA2   | 0.828283 | 0.356566 | 0.58064  | 0.519192 |        |
| 3572 | ENSG00000VSIG2     | 0.915152 | 0.264646 | 0.577104 | 0.531313 |        |
| 3573 | ENSG00000ALG12     | 0.772727 | 0.394949 | 0.583838 | 0.511111 |        |



|      |                    |          |          |          |          |        |
|------|--------------------|----------|----------|----------|----------|--------|
| 3574 | ENSG00000ZFP92     | 0.802879 | 0.34773  | 0.56423  | 0.561462 |        |
| 3575 | ENSG00000AP002495. | 0.7      | 0.431313 | 0.565657 | 0.542424 |        |
| 3576 | ENSG00000CCDC6     | 0.911111 | 0.275758 | 0.579798 | 0.526263 |        |
| 3577 | ENSG00000CENPB     | 0.899577 | 0.29704  | 0.596899 | 0.504228 |        |
| 3578 | ENSG00000SSSCA1    | 0.89899  | 0.277778 | 0.578283 | 0.535354 |        |
| 3579 | ENSG00000CD300C    | 0.733615 | 0.424947 | 0.573115 | 0.522199 |        |
| 3580 | ENSG00000REV1      | 0.950505 | 0.239394 | 0.59596  | 0.476768 |        |
| 3581 | ENSG00000TAMM41    | 0.737374 | 0.40101  | 0.567677 | 0.547475 |        |
| 3582 | ENSG00000THEM4     | 0.757576 | 0.379798 | 0.568687 | 0.551515 |        |
| 3583 | ENSG00000SLC25A32  | 0.909091 | 0.308081 | 0.601852 | 0.482828 |        |
| 3584 | ENSG00000PLPP3     | 0.877778 | 0.30303  | 0.584512 | 0.538384 |        |
| 3585 | ENSG00000HSD17B3   | 0.737374 | 0.410101 | 0.573737 | 0.533333 |        |
| 3586 | ENSG00000RTN4RL1   | 0.754545 | 0.40101  | 0.576263 | 0.527273 |        |
| 3587 | ENSG00000ATN1      | 0.872727 | 0.30202  | 0.572222 | 0.554545 |        |
| 3588 | ENSG00000CAPN9     | 0.959596 | 0.210101 | 0.579461 | 0.481818 |        |
| 3589 | ENSG00000COX14     | 0.927273 | 0.256566 | 0.583502 | 0.505051 |        |
| 3590 | ENSG00000NXF3      | 0.923232 | 0.265657 | 0.603367 | 0.490909 |        |
| 3591 | ENSG00000ZNF787    | 0.848485 | 0.333333 | 0.577778 | 0.537374 |        |
| 3592 | ENSG00000CDH22     | 0.747475 | 0.393939 | 0.570707 | 0.544444 |        |
| 3593 | ENSG00000RETNLB    | 0.688889 | 0.452525 | 0.570707 | 0.527273 |        |
| 3594 | ENSG00000NECAP2    | 0.743129 | 0.411205 | 0.575758 | 0.526427 |        |
| 3595 | ENSG00000S100A14   | 0.762156 | 0.402748 | 0.582452 | 0.51797  |        |
| 3596 | ENSG00000OBP2A     | 0.838384 | 0.350505 | 0.58165  | 0.521212 |        |
| 3597 | ENSG00000DHX57     | 0.743129 | 0.376321 | 0.550564 | 0.584567 |        |
| 3598 | ENSG00000FAM122B   | 0.676633 | 0.461794 | 0.574751 | 0.524917 |        |
| 3599 | ENSG00000SHISAL2A  | 0.762156 | 0.377378 | 0.568006 | 0.554968 |        |
| 3600 | ENSG00000HAT1      | 0.844444 | 0.352525 | 0.582155 | 0.515152 |        |
| 3601 | ENSG00000RUNX2     | 0.938384 | 0.257576 | 0.595286 | 0.482828 |        |
| 3602 | ENSG00000MXRA8     | 0.939394 | 0.281818 | 0.587205 | 0.472727 |        |
| 3603 | ENSG00000S100A2    | 0.908081 | 0.258586 | 0.573401 | 0.546465 |        |
| 3604 | ENSG00000PIWIL4    | 0.955556 | 0.217172 | 0.5867   | 0.493939 |        |
| 3605 | ENSG00000VWA7      | 0.747475 | 0.393939 | 0.570707 | 0.545455 |        |
| 3606 | ENSG00000CILP      | 0.734219 | 0.395349 | 0.564784 | 0.560354 |        |
| 3607 | ENSG00000PCDH1     | 0.945455 | 0.234343 | 0.574747 | 0.508081 |        |
| 3608 | ENSG00000DUSP12    | 0.809091 | 0.354545 | 0.581818 | 0.541414 |        |
| 3609 | ENSG00000GPR15     | 0.747475 | 0.375758 | 0.556061 | 0.577778 |        |
| 3610 | ENSG00000WARS      | 0.662791 | 0.464059 | 0.56272  | 0.542283 |        |
| 3611 | ENSG00000FAM222B   | 0.772727 | 0.390909 | 0.572391 | 0.532323 |        |
| 3612 | ENSG00000RNF25     | 0.909091 | 0.267677 | 0.573232 | 0.542424 |        |
| 3613 | ENSG00000FAM46A    | 0.752643 | 0.393235 | 0.571353 | 0.545455 |        |
| 3614 | ENSG00000NOLC1     | 0.961616 | 0.246465 | 0.594613 | 0.422222 |        |
| 3615 | ENSG00000FABP3     | 0.837374 | 0.334343 | 0.573737 | 0.551515 |        |
| 3616 | ENSG00000ANKRD39   | 0.833333 | 0.327273 | 0.5633   | 0.569697 |        |
| 3617 | ENSG00000SLC9A9    | 0.844444 | 0.315152 | 0.564646 | 0.574747 |        |
| 3618 | ENSG00000LBHD1     | 0.953535 | 0.273737 | 0.594781 | 0.455556 | 0.3986 |
| 3619 | ENSG00000LIPJ      | 0.737374 | 0.410101 | 0.573737 | 0.535354 |        |
| 3620 | ENSG00000R3HCC1L   | 0.826263 | 0.353535 | 0.583165 | 0.528283 |        |
| 3621 | ENSG00000SPATS2    | 0.951515 | 0.286869 | 0.609428 | 0.407071 |        |
| 3622 | ENSG00000TRIP12    | 0.926004 | 0.275899 | 0.579634 | 0.5074   |        |
| 3623 | ENSG00000DNAJC5G   | 0.687104 | 0.424947 | 0.547921 | 0.582452 |        |
| 3624 | ENSG00000TNFSF4    | 0.841414 | 0.346465 | 0.576599 | 0.533333 |        |
| 3625 | ENSG00000INTS14    | 0.934343 | 0.250505 | 0.584848 | 0.50404  |        |
| 3626 | ENSG00000UBE2I     | 0.915152 | 0.234343 | 0.56835  | 0.560606 |        |
| 3627 | ENSG00000BACE2     | 0.660606 | 0.454545 | 0.551515 | 0.560606 | 0.212  |
| 3628 | ENSG00000DPP10     | 0.821212 | 0.353535 | 0.575084 | 0.540404 |        |

|      |                    |          |          |          |          |
|------|--------------------|----------|----------|----------|----------|
| 3629 | ENSG00000PTER      | 0.958586 | 0.263636 | 0.587879 | 0.448485 |
| 3630 | ENSG00000PDIA5     | 0.818182 | 0.320202 | 0.56633  | 0.591919 |
| 3631 | ENSG00000SRF       | 0.958586 | 0.246465 | 0.587542 | 0.466667 |
| 3632 | ENSG00000MED26     | 0.658562 | 0.457717 | 0.55814  | 0.556025 |
| 3633 | ENSG00000CDK2AP2   | 0.680808 | 0.427273 | 0.550842 | 0.581818 |
| 3634 | ENSG00000DGAT1     | 0.747475 | 0.393939 | 0.570707 | 0.549495 |
| 3635 | ENSG00000SGCZ      | 0.777778 | 0.357576 | 0.567677 | 0.568687 |
| 3636 | ENSG00000RPL38     | 0.836102 | 0.331118 | 0.569952 | 0.561462 |
| 3637 | ENSG00000KCND1     | 0.737374 | 0.410101 | 0.573737 | 0.541414 |
| 3638 | ENSG00000NFKB1     | 0.957576 | 0.229293 | 0.584175 | 0.487879 |
| 3639 | ENSG00000PCGF1     | 0.863636 | 0.325253 | 0.582155 | 0.539394 |
| 3640 | ENSG00000TXNDC5    | 0.814141 | 0.368687 | 0.589057 | 0.515152 |
| 3641 | ENSG00000C8orf76   | 0.845666 | 0.349894 | 0.586857 | 0.516913 |
| 3642 | ENSG00000ZHX1-C8or | 0.845666 | 0.349894 | 0.586857 | 0.516913 |
| 3643 | ENSG00000CCDC142   | 0.686869 | 0.436364 | 0.559596 | 0.561616 |
| 3644 | ENSG00000IFITM3    | 0.772727 | 0.370707 | 0.569865 | 0.558586 |
| 3645 | ENSG00000MUC4      | 0.872727 | 0.321212 | 0.59596  | 0.525253 |
| 3646 | ENSG00000DHDH      | 0.735729 | 0.402748 | 0.569239 | 0.553911 |
| 3647 | ENSG00000IARS      | 0.790909 | 0.370707 | 0.580808 | 0.535354 |
| 3648 | ENSG00000ELK1      | 0.921212 | 0.284848 | 0.587542 | 0.507071 |
| 3649 | ENSG00000MBD2      | 0.877778 | 0.306061 | 0.587037 | 0.542424 |
| 3650 | ENSG00000NFE2L3    | 0.722222 | 0.394949 | 0.558586 | 0.582828 |
| 3651 | ENSG00000OR10J3    | 0.7      | 0.431313 | 0.565657 | 0.552525 |
| 3652 | ENSG00000GCA       | 0.926263 | 0.239394 | 0.601852 | 0.510101 |
| 3653 | ENSG00000TKFC      | 0.931313 | 0.235354 | 0.567508 | 0.536364 |
| 3654 | ENSG00000SIGLEC14  | 0.757576 | 0.379798 | 0.568687 | 0.558586 |
| 3655 | ENSG00000FAM91A1   | 0.834343 | 0.353535 | 0.58367  | 0.525253 |
| 3656 | ENSG00000SDR39U1   | 0.754545 | 0.40101  | 0.576263 | 0.539394 |
| 3657 | ENSG00000NMRK1     | 0.809091 | 0.358586 | 0.578283 | 0.543434 |
| 3658 | ENSG00000IFITM2    | 0.772727 | 0.370707 | 0.569865 | 0.558586 |
| 3659 | ENSG00000TLX2      | 0.818182 | 0.337374 | 0.577778 | 0.562626 |
| 3660 | ENSG00000MAZ       | 0.918182 | 0.285859 | 0.60202  | 0.49899  |
| 3661 | ENSG00000HTR1B     | 0.777778 | 0.357576 | 0.567677 | 0.573737 |
| 3662 | ENSG00000ACP1      | 0.773737 | 0.393939 | 0.580808 | 0.527273 |
| 3663 | ENSG00000BCL2L15   | 0.958586 | 0.236364 | 0.581818 | 0.481818 |
| 3664 | ENSG00000RPS13     | 0.757576 | 0.379798 | 0.568687 | 0.562626 |
| 3665 | ENSG00000PEX16     | 0.924242 | 0.289899 | 0.59899  | 0.486869 |
| 3666 | ENSG00000FAM219B   | 0.711111 | 0.412121 | 0.561616 | 0.568687 |
| 3667 | ENSG00000ALKBH2    | 0.858586 | 0.328283 | 0.581145 | 0.541414 |
| 3668 | ENSG00000FUK       | 0.917172 | 0.277778 | 0.579461 | 0.528283 |
| 3669 | ENSG00000NOTO      | 0.688889 | 0.429293 | 0.552357 | 0.574747 |
| 3670 | ENSG00000IL22RA2   | 0.966667 | 0.211111 | 0.58266  | 0.461616 |
| 3671 | ENSG00000MFAP3L    | 0.841414 | 0.322222 | 0.564478 | 0.575758 |
| 3672 | ENSG00000KCNN4     | 0.960606 | 0.244444 | 0.587542 | 0.460606 |
| 3673 | ENSG00000TRAPPC5   | 0.737374 | 0.410101 | 0.573737 | 0.541414 |
| 3674 | ENSG00000RND3      | 0.79798  | 0.373737 | 0.583838 | 0.529293 |
| 3675 | ENSG00000IPO13     | 0.873737 | 0.320202 | 0.586195 | 0.538384 |
| 3676 | ENSG00000OR4K15    | 0.785412 | 0.39852  | 0.587738 | 0.508457 |
| 3677 | ENSG00000TTLL5     | 0.836364 | 0.322222 | 0.567508 | 0.579798 |
| 3678 | ENSG00000PSMG2     | 0.961616 | 0.233333 | 0.589394 | 0.461616 |
| 3679 | ENSG00000FKBP1B    | 0.781818 | 0.381818 | 0.581818 | 0.534343 |
| 3680 | ENSG00000CD1D      | 0.8      | 0.361616 | 0.580808 | 0.545455 |
| 3681 | ENSG00000PTPRD     | 0.760797 | 0.395349 | 0.578073 | 0.539313 |
| 3682 | ENSG00000DOCK2     | 0.772727 | 0.394949 | 0.577104 | 0.533333 |
| 3683 | ENSG00000ZNF550    | 0.813953 | 0.344609 | 0.572939 | 0.563425 |

|      |           |           |          |          |          |          |
|------|-----------|-----------|----------|----------|----------|----------|
| 3684 | ENSG00000 | TMEM42    | 0.589899 | 0.50303  | 0.546465 | 0.544444 |
| 3685 | ENSG00000 | SGCB      | 0.722222 | 0.394949 | 0.558586 | 0.584848 |
| 3686 | ENSG00000 | VAV1      | 0.722222 | 0.386869 | 0.549832 | 0.60101  |
| 3687 | ENSG00000 | ST8SIA3   | 0.763214 | 0.377378 | 0.562016 | 0.56871  |
| 3688 | ENSG00000 | C11orf86  | 0.747475 | 0.393939 | 0.570707 | 0.555556 |
| 3689 | ENSG00000 | C1orf56   | 0.958586 | 0.230303 | 0.580808 | 0.490909 |
| 3690 | ENSG00000 | BCL2      | 0.672727 | 0.436364 | 0.554545 | 0.580808 |
| 3691 | ENSG00000 | ADAMTS13  | 0.925253 | 0.231313 | 0.568855 | 0.550505 |
| 3692 | ENSG00000 | PPFIA4    | 0.905051 | 0.316162 | 0.592088 | 0.50404  |
| 3693 | ENSG00000 | PDGFA     | 0.9      | 0.289899 | 0.574074 | 0.543434 |
| 3694 | ENSG00000 | FKBP1C    | 0.781818 | 0.381818 | 0.581818 | 0.534343 |
| 3695 | ENSG00000 | CYB561A3  | 0.7      | 0.431313 | 0.565657 | 0.558586 |
| 3696 | ENSG00000 | HTR5A     | 0.747475 | 0.393939 | 0.570707 | 0.557576 |
| 3697 | ENSG00000 | SNPH      | 0.735729 | 0.402748 | 0.569239 | 0.560254 |
| 3698 | ENSG00000 | CLMN      | 0.813953 | 0.369979 | 0.591966 | 0.520085 |
| 3699 | ENSG00000 | C19orf70  | 0.882828 | 0.305051 | 0.585522 | 0.544444 |
| 3700 | ENSG00000 | APOC1     | 0.767677 | 0.367677 | 0.567677 | 0.574747 |
| 3701 | ENSG00000 | VAMP1     | 0.930303 | 0.267677 | 0.587879 | 0.507071 |
| 3702 | ENSG00000 | CTU2      | 0.836364 | 0.365657 | 0.591246 | 0.509091 |
| 3703 | ENSG00000 | SNRK      | 0.861616 | 0.335354 | 0.589226 | 0.528283 |
| 3704 | ENSG00000 | ASAP3     | 0.829293 | 0.30404  | 0.552694 | 0.615152 |
| 3705 | ENSG00000 | KLK15     | 0.737374 | 0.410101 | 0.573737 | 0.546465 |
| 3706 | ENSG00000 | OLAH      | 0.915152 | 0.215152 | 0.561785 | 0.582828 |
| 3707 | ENSG00000 | ZNF697    | 0.712071 | 0.433001 | 0.572536 | 0.54485  |
| 3708 | ENSG00000 | ZNF19     | 0.824242 | 0.360606 | 0.583333 | 0.531313 |
| 3709 | ENSG00000 | AFAP1L2   | 0.752643 | 0.393235 | 0.571353 | 0.556025 |
| 3710 | ENSG00000 | CEMP1     | 0.727273 | 0.428283 | 0.577778 | 0.532323 |
| 3711 | ENSG00000 | CIB1      | 0.872727 | 0.306061 | 0.579293 | 0.559596 |
| 3712 | ENSG00000 | DET1      | 0.735729 | 0.402748 | 0.569239 | 0.561311 |
| 3713 | ENSG00000 | RASSF4    | 0.875758 | 0.331313 | 0.59697  | 0.518182 |
| 3714 | ENSG00000 | NAPEPLD   | 0.957576 | 0.259596 | 0.596465 | 0.465657 |
| 3715 | ENSG00000 | LEF1      | 0.939394 | 0.242424 | 0.580471 | 0.520202 |
| 3716 | ENSG00000 | APOC4-APC | 0.7463   | 0.386892 | 0.566596 | 0.570825 |
| 3717 | ENSG00000 | APOC2     | 0.7463   | 0.386892 | 0.566596 | 0.570825 |
| 3718 | ENSG00000 | DRD5      | 0.674419 | 0.44926  | 0.560078 | 0.564482 |
| 3719 | ENSG00000 | MID1IP1   | 0.727273 | 0.428283 | 0.577778 | 0.535354 |
| 3720 | ENSG00000 | S100A7A   | 0.717172 | 0.422222 | 0.558249 | 0.565657 |
| 3721 | ENSG00000 | SLC25A36  | 0.745455 | 0.425253 | 0.57862  | 0.526263 |
| 3722 | ENSG00000 | RIMS2     | 0.737374 | 0.410101 | 0.573737 | 0.548485 |
| 3723 | ENSG00000 | SSX2      | 0.919192 | 0.265657 | 0.58064  | 0.537374 |
| 3724 | ENSG00000 | ELAC1     | 0.77167  | 0.402748 | 0.581395 | 0.527484 |
| 3725 | ENSG00000 | STMND1    | 0.671096 | 0.460687 | 0.565891 | 0.55371  |
| 3726 | ENSG00000 | C11orf24  | 0.781818 | 0.377778 | 0.576431 | 0.548485 |
| 3727 | ENSG00000 | WSB2      | 0.788584 | 0.379493 | 0.5821   | 0.539112 |
| 3728 | ENSG00000 | HABP2     | 0.737374 | 0.410101 | 0.573737 | 0.550505 |
| 3729 | ENSG00000 | CTNNA2    | 0.745455 | 0.431313 | 0.572222 | 0.526263 |
| 3730 | ENSG00000 | SCFD1     | 0.839323 | 0.369979 | 0.598309 | 0.496829 |
| 3731 | ENSG00000 | MIS18A    | 0.943434 | 0.265657 | 0.579125 | 0.505051 |
| 3732 | ENSG00000 | FAS       | 0.737374 | 0.410101 | 0.573737 | 0.553535 |
| 3733 | ENSG00000 | MERTK     | 0.806061 | 0.385859 | 0.59596  | 0.510101 |
| 3734 | ENSG00000 | CYP26B1   | 0.750831 | 0.41196  | 0.581395 | 0.533776 |
| 3735 | ENSG00000 | EDN2      | 0.680808 | 0.433333 | 0.549663 | 0.588889 |
| 3736 | ENSG00000 | PYG01     | 0.894292 | 0.298097 | 0.584214 | 0.541226 |
| 3737 | ENSG00000 | ABCG1     | 0.907071 | 0.30404  | 0.593266 | 0.518182 |
| 3738 | ENSG00000 | GK5       | 0.822222 | 0.341414 | 0.576094 | 0.564646 |

|      |                   |          |          |          |          |       |
|------|-------------------|----------|----------|----------|----------|-------|
| 3739 | ENSG00000ZNF432   | 0.674419 | 0.468288 | 0.571353 | 0.540169 |       |
| 3740 | ENSG00000NIPA1    | 0.772727 | 0.370707 | 0.569865 | 0.568687 |       |
| 3741 | ENSG00000ZNF720   | 0.727273 | 0.428283 | 0.577778 | 0.536364 |       |
| 3742 | ENSG00000PGBD4    | 0.782241 | 0.356237 | 0.541402 | 0.603594 |       |
| 3743 | ENSG00000RSBN1    | 0.963636 | 0.218182 | 0.610269 | 0.440404 |       |
| 3744 | ENSG00000IFT43    | 0.756871 | 0.37315  | 0.565011 | 0.58351  |       |
| 3745 | ENSG00000CFL2     | 0.763636 | 0.384848 | 0.572559 | 0.559596 | 0.248 |
| 3746 | ENSG00000RAVER1   | 0.910101 | 0.287879 | 0.598316 | 0.522222 |       |
| 3747 | ENSG00000STK11IP  | 0.872727 | 0.311111 | 0.584175 | 0.555556 |       |
| 3748 | ENSG00000DAP3     | 0.877378 | 0.288584 | 0.570472 | 0.582452 |       |
| 3749 | ENSG00000HSPA8    | 0.935354 | 0.259596 | 0.624579 | 0.469697 |       |
| 3750 | ENSG00000SLC15A3  | 0.757576 | 0.369697 | 0.559596 | 0.591919 |       |
| 3751 | ENSG00000TTC13    | 0.780127 | 0.37315  | 0.565539 | 0.566596 |       |
| 3752 | ENSG00000CLEC2D   | 0.90202  | 0.310101 | 0.592424 | 0.520202 |       |
| 3753 | ENSG00000CDC42EP1 | 0.806061 | 0.385859 | 0.59596  | 0.512121 |       |
| 3754 | ENSG00000RNF40    | 0.885859 | 0.339394 | 0.600337 | 0.49596  |       |
| 3755 | ENSG00000NT5C3A   | 0.942424 | 0.257576 | 0.578788 | 0.514141 |       |
| 3756 | ENSG00000RNF4     | 0.790909 | 0.370707 | 0.580808 | 0.550505 |       |
| 3757 | ENSG00000RASD1    | 0.877378 | 0.267442 | 0.561311 | 0.603594 |       |
| 3758 | ENSG00000ZEB2     | 0.723232 | 0.425253 | 0.568182 | 0.554545 |       |
| 3759 | ENSG00000S100A1   | 0.89899  | 0.272727 | 0.607744 | 0.532323 |       |
| 3760 | ENSG00000C5orf49  | 0.688889 | 0.452525 | 0.570707 | 0.545455 |       |
| 3761 | ENSG00000KRCC1    | 0.757576 | 0.379798 | 0.568687 | 0.571717 |       |
| 3762 | ENSG00000SLC9A3   | 0.870707 | 0.326263 | 0.594781 | 0.537374 |       |
| 3763 | ENSG00000PEX11G   | 0.763636 | 0.410101 | 0.586869 | 0.525253 |       |
| 3764 | ENSG00000KCNK17   | 0.668687 | 0.450505 | 0.552357 | 0.577778 |       |
| 3765 | ENSG00000C21orf58 | 0.952525 | 0.229293 | 0.583165 | 0.516162 |       |
| 3766 | ENSG00000FKTN     | 0.754545 | 0.427273 | 0.590909 | 0.511111 |       |
| 3767 | ENSG00000AMN      | 0.839424 | 0.367663 | 0.589701 | 0.513843 |       |
| 3768 | ENSG00000SNX2     | 0.7      | 0.431313 | 0.565657 | 0.564646 |       |
| 3769 | ENSG00000ST3GAL2  | 0.688889 | 0.452525 | 0.570707 | 0.548485 |       |
| 3770 | ENSG00000FAM102B  | 0.861616 | 0.338384 | 0.579125 | 0.541414 |       |
| 3771 | ENSG00000RPL22L1  | 0.7      | 0.431313 | 0.565657 | 0.565657 |       |
| 3772 | ENSG00000COA1     | 0.814141 | 0.375758 | 0.594949 | 0.519192 |       |
| 3773 | ENSG00000PRR12    | 0.866667 | 0.334343 | 0.588384 | 0.536364 |       |
| 3774 | ENSG00000AMD1     | 0.957576 | 0.235354 | 0.606734 | 0.477778 |       |
| 3775 | ENSG00000CDRT15   | 0.747475 | 0.393939 | 0.570707 | 0.563636 |       |
| 3776 | ENSG00000SAE1     | 0.960606 | 0.250505 | 0.592593 | 0.465657 |       |
| 3777 | ENSG00000GBP5     | 0.711111 | 0.412121 | 0.561616 | 0.582828 |       |
| 3778 | ENSG00000DOCK10   | 0.781818 | 0.381818 | 0.581818 | 0.544444 |       |
| 3779 | ENSG00000DNAJB7   | 0.860465 | 0.345666 | 0.588795 | 0.524313 |       |
| 3780 | ENSG00000C11orf49 | 0.955556 | 0.252525 | 0.589226 | 0.493939 |       |
| 3781 | ENSG00000SLC25A21 | 0.823232 | 0.366667 | 0.579461 | 0.536364 |       |
| 3782 | ENSG00000STK16    | 0.789899 | 0.386869 | 0.579125 | 0.538384 |       |
| 3783 | ENSG00000NDUFAB1  | 0.864646 | 0.313131 | 0.579125 | 0.568687 |       |
| 3784 | ENSG00000DNASE1   | 0.688889 | 0.452525 | 0.570707 | 0.547475 |       |
| 3785 | ENSG00000SLC26A6  | 0.82241  | 0.34778  | 0.582452 | 0.554968 |       |
| 3786 | ENSG00000CCDC126  | 0.727273 | 0.40202  | 0.5633   | 0.580808 |       |
| 3787 | ENSG00000ATP8B2   | 0.754545 | 0.40101  | 0.576263 | 0.551515 |       |
| 3788 | ENSG00000WDR44    | 0.832323 | 0.321212 | 0.57037  | 0.591919 |       |
| 3789 | ENSG00000WDR75    | 0.894949 | 0.307071 | 0.583165 | 0.540404 |       |
| 3790 | ENSG00000IL18     | 0.918182 | 0.273737 | 0.61229  | 0.510101 |       |
| 3791 | ENSG00000F3       | 0.737374 | 0.410101 | 0.573737 | 0.556566 |       |
| 3792 | ENSG00000TSEN2    | 0.906061 | 0.305051 | 0.639057 | 0.467677 |       |
| 3793 | ENSG00000SYT7     | 0.711111 | 0.412121 | 0.561616 | 0.585859 |       |

|      |                   |          |          |          |          |
|------|-------------------|----------|----------|----------|----------|
| 3794 | ENSG00000GDNF     | 0.737374 | 0.410101 | 0.573737 | 0.554545 |
| 3795 | ENSG00000MBTD1    | 0.813953 | 0.369979 | 0.591966 | 0.528541 |
| 3796 | ENSG00000BAG2     | 0.859596 | 0.327273 | 0.586195 | 0.551515 |
| 3797 | ENSG00000FCH01    | 0.90404  | 0.317172 | 0.594276 | 0.513131 |
| 3798 | ENSG00000AHI1     | 0.815011 | 0.383721 | 0.597252 | 0.508457 |
| 3799 | ENSG00000SLC35E2B | 0.950505 | 0.246465 | 0.594613 | 0.49899  |
| 3800 | ENSG00000NSMF     | 0.905051 | 0.287879 | 0.586364 | 0.541414 |
| 3801 | ENSG00000HDGFL3   | 0.822222 | 0.357576 | 0.579966 | 0.547475 |
| 3802 | ENSG00000NRF1     | 0.821212 | 0.370707 | 0.588552 | 0.526263 |
| 3803 | ENSG00000ACSL1    | 0.818182 | 0.349495 | 0.583838 | 0.555556 |
| 3804 | ENSG00000SPATA33  | 0.915433 | 0.27167  | 0.578576 | 0.548626 |
| 3805 | ENSG00000DPCR1    | 0.717172 | 0.448485 | 0.582828 | 0.525253 |
| 3806 | ENSG00000CALM3    | 0.838384 | 0.338384 | 0.576599 | 0.561616 |
| 3807 | ENSG00000DNALI1   | 0.727273 | 0.428283 | 0.577778 | 0.542424 |
| 3808 | ENSG00000CPM      | 0.89899  | 0.277778 | 0.576936 | 0.561616 |
| 3809 | ENSG00000TESK2    | 0.870707 | 0.335354 | 0.588721 | 0.534343 |
| 3810 | ENSG00000FAM32A   | 0.723232 | 0.435354 | 0.572222 | 0.545455 |
| 3811 | ENSG00000ZBBX     | 0.824242 | 0.344444 | 0.570202 | 0.570707 |
| 3812 | ENSG00000LENG1    | 0.7463   | 0.386892 | 0.566596 | 0.581395 |
| 3813 | ENSG00000STYXL1   | 0.894949 | 0.259596 | 0.567003 | 0.586869 |
| 3814 | ENSG00000NKX2-2   | 0.830303 | 0.358586 | 0.583502 | 0.539394 |
| 3815 | ENSG00000NWD2     | 0.722222 | 0.394949 | 0.558586 | 0.59697  |
| 3816 | ENSG00000HLA-DOA  | 0.780808 | 0.40303  | 0.587205 | 0.521212 |
| 3817 | ENSG00000MDH1B    | 0.688889 | 0.452525 | 0.570707 | 0.552525 |
| 3818 | ENSG00000SUPT7L   | 0.878788 | 0.29697  | 0.587205 | 0.564646 |
| 3819 | ENSG00000ADAM8    | 0.763636 | 0.410101 | 0.586869 | 0.528283 |
| 3820 | ENSG00000NNMT     | 0.772727 | 0.376768 | 0.56633  | 0.572727 |
| 3821 | ENSG00000MTHFR    | 0.852174 | 0.331401 | 0.59066  | 0.548792 |
| 3822 | ENSG00000KLHL21   | 0.805497 | 0.379493 | 0.592495 | 0.527484 |
| 3823 | ENSG00000TNNI1    | 0.757576 | 0.379798 | 0.568687 | 0.578788 |
| 3824 | ENSG00000ZNF395   | 0.818182 | 0.361616 | 0.581818 | 0.545455 |
| 3825 | ENSG00000CCDC30   | 0.937374 | 0.3      | 0.602694 | 0.471717 |
| 3826 | ENSG00000ELOB     | 0.869697 | 0.338384 | 0.582828 | 0.539394 |
| 3827 | ENSG00000ZNF692   | 0.718816 | 0.443975 | 0.580162 | 0.536998 |
| 3828 | ENSG00000SPIRE2   | 0.924242 | 0.214141 | 0.571717 | 0.568687 |
| 3829 | ENSG00000PPP1R12B | 0.935354 | 0.29798  | 0.607239 | 0.473737 |
| 3830 | ENSG00000DENND5B  | 0.90303  | 0.309091 | 0.590236 | 0.527273 |
| 3831 | ENSG00000KCNJ11   | 0.711111 | 0.405051 | 0.55303  | 0.60202  |
| 3832 | ENSG00000CGNL1    | 0.854545 | 0.349495 | 0.60202  | 0.518182 |
| 3833 | ENSG00000PRC1     | 0.974747 | 0.231313 | 0.606734 | 0.390909 |
| 3834 | ENSG00000CCDC82   | 0.874747 | 0.334343 | 0.593098 | 0.531313 |
| 3835 | ENSG00000PDXDC1   | 0.822222 | 0.331313 | 0.576768 | 0.585859 |
| 3836 | ENSG00000CLSTN1   | 0.754545 | 0.419192 | 0.582155 | 0.533333 |
| 3837 | ENSG00000DNAJC17  | 0.925253 | 0.258586 | 0.610269 | 0.514141 |
| 3838 | ENSG00000WFS1     | 0.781818 | 0.381818 | 0.581818 | 0.551515 |
| 3839 | ENSG00000HPS6     | 0.822222 | 0.367677 | 0.594949 | 0.528283 |
| 3840 | ENSG00000NOP10    | 0.763636 | 0.419192 | 0.591414 | 0.518182 |
| 3841 | ENSG00000CD2BP2   | 0.939394 | 0.277778 | 0.590067 | 0.50101  |
| 3842 | ENSG00000AMPD2    | 0.90303  | 0.275758 | 0.587205 | 0.554545 |
| 3843 | ENSG00000Clorf50  | 0.868687 | 0.333333 | 0.593771 | 0.538384 |
| 3844 | ENSG00000CMYA5    | 0.688889 | 0.452525 | 0.570707 | 0.554545 |
| 3845 | ENSG00000CCDC13   | 0.7463   | 0.386892 | 0.566596 | 0.584567 |
| 3846 | ENSG00000LYN      | 0.863636 | 0.334343 | 0.598316 | 0.533333 |
| 3847 | ENSG00000PALM3    | 0.932323 | 0.238384 | 0.592256 | 0.530303 |
| 3848 | ENSG00000SPATA48  | 0.799154 | 0.374207 | 0.574524 | 0.553911 |

|      |                    |          |          |          |          |
|------|--------------------|----------|----------|----------|----------|
| 3849 | ENSG00000ABCA8     | 0.767442 | 0.389812 | 0.578627 | 0.557032 |
| 3850 | ENSG00000PPP3R2    | 0.835095 | 0.335095 | 0.574172 | 0.575053 |
| 3851 | ENSG00000RTTN      | 0.879798 | 0.305051 | 0.586195 | 0.561616 |
| 3852 | ENSG00000GRIA3     | 0.950505 | 0.226263 | 0.583502 | 0.527273 |
| 3853 | ENSG00000NRGN      | 0.920202 | 0.29697  | 0.598316 | 0.512121 |
| 3854 | ENSG00000NUB1      | 0.947475 | 0.239394 | 0.587879 | 0.521212 |
| 3855 | ENSG00000TONSL     | 0.957576 | 0.240404 | 0.601347 | 0.487879 |
| 3856 | ENSG00000CMTM1     | 0.911111 | 0.306061 | 0.598485 | 0.520202 |
| 3857 | ENSG00000AC010531. | 0.651163 | 0.490486 | 0.570296 | 0.54334  |
| 3858 | ENSG00000WDYHV1    | 0.90202  | 0.282828 | 0.583165 | 0.555556 |
| 3859 | ENSG00000ZBTB21    | 0.79798  | 0.406061 | 0.582155 | 0.518182 |
| 3860 | ENSG00000FAM76A    | 0.781818 | 0.409091 | 0.585354 | 0.524242 |
| 3861 | ENSG00000C16orf95  | 0.651163 | 0.490486 | 0.570296 | 0.54334  |
| 3862 | ENSG00000POU4F3    | 0.663636 | 0.470707 | 0.560269 | 0.563636 |
| 3863 | ENSG00000EXOC6B    | 0.891919 | 0.337374 | 0.608754 | 0.492929 |
| 3864 | ENSG00000TMEM211   | 0.727273 | 0.428283 | 0.577778 | 0.547475 |
| 3865 | ENSG00000CD96      | 0.7      | 0.431313 | 0.565657 | 0.575758 |
| 3866 | ENSG00000COL13A1   | 0.789899 | 0.40202  | 0.591919 | 0.519192 |
| 3867 | ENSG00000PI4K2A    | 0.737374 | 0.410101 | 0.573737 | 0.562626 |
| 3868 | ENSG00000SORBS3    | 0.772727 | 0.386869 | 0.577946 | 0.559596 |
| 3869 | ENSG00000POLB      | 0.967677 | 0.216162 | 0.584343 | 0.482828 |
| 3870 | ENSG00000EFEMP2    | 0.809091 | 0.354545 | 0.581818 | 0.566667 |
| 3871 | ENSG00000C20orf85  | 0.860606 | 0.320202 | 0.575926 | 0.576768 |
| 3872 | ENSG00000ZFY       | 0.787879 | 0.377778 | 0.578788 | 0.558586 |
| 3873 | ENSG00000SEZ6L2    | 0.737374 | 0.410101 | 0.573737 | 0.562626 |
| 3874 | ENSG00000SIT1      | 0.737374 | 0.410101 | 0.573737 | 0.564646 |
| 3875 | ENSG00000ULK3      | 0.926263 | 0.281818 | 0.592761 | 0.520202 |
| 3876 | ENSG00000CES1      | 0.833333 | 0.334343 | 0.583838 | 0.570707 |
| 3877 | ENSG00000SETBP1    | 0.950505 | 0.278788 | 0.63165  | 0.431313 |
| 3878 | ENSG00000CYP4F22   | 0.711111 | 0.412121 | 0.561616 | 0.592929 |
| 3879 | ENSG00000GJA1      | 0.907071 | 0.310101 | 0.59798  | 0.522222 |
| 3880 | ENSG00000SLAMF9    | 0.809091 | 0.354545 | 0.581818 | 0.568687 |
| 3881 | ENSG00000PLEKHH1   | 0.923232 | 0.277778 | 0.585859 | 0.537374 |
| 3882 | ENSG00000CSE1L     | 0.940404 | 0.249495 | 0.618855 | 0.491919 |
| 3883 | ENSG00000ADAMTS1   | 0.7      | 0.431313 | 0.565657 | 0.578788 |
| 3884 | ENSG00000CYP4F12   | 0.711111 | 0.412121 | 0.561616 | 0.592929 |
| 3885 | ENSG00000RINT1     | 0.763636 | 0.410101 | 0.586869 | 0.537374 |
| 3886 | ENSG00000CYP4F8    | 0.711111 | 0.412121 | 0.561616 | 0.592929 |
| 3887 | ENSG00000C16orf74  | 0.660606 | 0.458586 | 0.559596 | 0.580808 |
| 3888 | ENSG00000ZNF35     | 0.943434 | 0.292929 | 0.605387 | 0.475758 |
| 3889 | ENSG00000LCA5      | 0.906061 | 0.286869 | 0.587879 | 0.550505 |
| 3890 | ENSG00000KRT8      | 0.816162 | 0.325253 | 0.570707 | 0.608081 |
| 3891 | ENSG00000CYP4F3    | 0.711111 | 0.412121 | 0.561616 | 0.592929 |
| 3892 | ENSG00000CD63      | 0.822222 | 0.331313 | 0.576768 | 0.592929 |
| 3893 | ENSG00000PDE4C     | 0.736364 | 0.439394 | 0.5867   | 0.528283 |
| 3894 | ENSG00000PPM1L     | 0.971717 | 0.244444 | 0.582155 | 0.462626 |
| 3895 | ENSG00000ACER3     | 0.688889 | 0.452525 | 0.570707 | 0.562626 |
| 3896 | ENSG00000CATSPERD  | 0.704017 | 0.457717 | 0.575053 | 0.544397 |
| 3897 | ENSG00000XAGE5     | 0.781184 | 0.375264 | 0.578224 | 0.566596 |
| 3898 | ENSG00000SSH1      | 0.814141 | 0.375758 | 0.594949 | 0.531313 |
| 3899 | ENSG00000VCAM1     | 0.944444 | 0.237374 | 0.579966 | 0.536364 |
| 3900 | ENSG00000GALC      | 0.754545 | 0.392929 | 0.562626 | 0.583838 |
| 3901 | ENSG00000BCL6B     | 0.737374 | 0.410101 | 0.573737 | 0.565657 |
| 3902 | ENSG00000UBAC2     | 0.8      | 0.361616 | 0.580808 | 0.568687 |
| 3903 | ENSG00000PAQR9     | 0.772727 | 0.394949 | 0.583838 | 0.547475 |

|      |                    |          |          |          |          |
|------|--------------------|----------|----------|----------|----------|
| 3904 | ENSG00000CCDC59    | 0.904863 | 0.320296 | 0.605884 | 0.5074   |
| 3905 | ENSG00000MRGPPE    | 0.666667 | 0.471717 | 0.568519 | 0.558586 |
| 3906 | ENSG00000CLASP1    | 0.754545 | 0.427273 | 0.590909 | 0.525253 |
| 3907 | ENSG00000PPP1R16A  | 0.717172 | 0.448485 | 0.582828 | 0.537374 |
| 3908 | ENSG00000TNFSF14   | 0.805051 | 0.391919 | 0.596296 | 0.521212 |
| 3909 | ENSG00000MARS2     | 0.957576 | 0.239394 | 0.6      | 0.493939 |
| 3910 | ENSG00000FOXP4     | 0.849495 | 0.347475 | 0.586532 | 0.545455 |
| 3911 | ENSG00000MFS13A    | 0.780127 | 0.420719 | 0.600423 | 0.502114 |
| 3912 | ENSG00000RRNAD1    | 0.841414 | 0.332323 | 0.60303  | 0.554545 |
| 3913 | ENSG00000AC008397. | 0.736364 | 0.439394 | 0.5867   | 0.528283 |
| 3914 | ENSG00000PKP4      | 0.817172 | 0.376768 | 0.588047 | 0.534343 |
| 3915 | ENSG00000COX18     | 0.941414 | 0.261616 | 0.595623 | 0.513131 |
| 3916 | ENSG00000HCST      | 0.717172 | 0.442424 | 0.574411 | 0.553535 |
| 3917 | ENSG00000IGSF6     | 0.915152 | 0.258586 | 0.579798 | 0.567677 |
| 3918 | ENSG00000OXT       | 0.663768 | 0.4657   | 0.564734 | 0.571014 |
| 3919 | ENSG00000INPP4A    | 0.913131 | 0.268687 | 0.577441 | 0.567677 |
| 3920 | ENSG00000SIGIRR    | 0.806061 | 0.385859 | 0.59596  | 0.526263 |
| 3921 | ENSG00000ACSS1     | 0.968687 | 0.229293 | 0.589731 | 0.474747 |
| 3922 | ENSG00000HOPX      | 0.922222 | 0.241414 | 0.585185 | 0.559596 |
| 3923 | ENSG00000PLPP2     | 0.772727 | 0.394949 | 0.583838 | 0.550505 |
| 3924 | ENSG00000PSMA2     | 0.845455 | 0.334343 | 0.586195 | 0.566667 |
| 3925 | ENSG00000ELP4      | 0.925253 | 0.270707 | 0.577609 | 0.547475 |
| 3926 | ENSG00000OR51D1    | 0.763636 | 0.410101 | 0.586869 | 0.538384 |
| 3927 | ENSG00000TXNRD2    | 0.937374 | 0.267677 | 0.597475 | 0.512121 |
| 3928 | ENSG00000KLF6      | 0.943434 | 0.238384 | 0.578114 | 0.541414 |
| 3929 | ENSG00000POFUT1    | 0.842424 | 0.340404 | 0.582997 | 0.563636 |
| 3930 | ENSG00000MINDY2    | 0.829293 | 0.356566 | 0.594108 | 0.545455 |
| 3931 | ENSG00000APCDD1L   | 0.688889 | 0.447475 | 0.562458 | 0.576768 |
| 3932 | ENSG00000SLC16A1   | 0.762156 | 0.402748 | 0.582452 | 0.552854 |
| 3933 | ENSG00000CD300LF   | 0.717172 | 0.442424 | 0.574411 | 0.553535 |
| 3934 | ENSG00000FRMD4A    | 0.89899  | 0.341414 | 0.606397 | 0.488889 |
| 3935 | ENSG00000TMC06     | 0.955556 | 0.224242 | 0.585859 | 0.529293 |
| 3936 | ENSG00000PRRG4     | 0.918182 | 0.29596  | 0.586195 | 0.537374 |
| 3937 | ENSG00000SLC4A10   | 0.772727 | 0.394949 | 0.583838 | 0.551515 |
| 3938 | ENSG00000JUP       | 0.885859 | 0.326263 | 0.595791 | 0.536364 |
| 3939 | ENSG00000PFKFB3    | 0.861522 | 0.344609 | 0.590204 | 0.541226 |
| 3940 | ENSG00000PTMS      | 0.818182 | 0.327273 | 0.557576 | 0.618182 |
| 3941 | ENSG00000DMRTA1    | 0.80202  | 0.386869 | 0.58771  | 0.537374 |
| 3942 | ENSG00000PCDHB14   | 0.765657 | 0.405051 | 0.57862  | 0.552525 |
| 3943 | ENSG00000TRAF5     | 0.957576 | 0.224242 | 0.581818 | 0.527273 |
| 3944 | ENSG00000C19orf33  | 0.815011 | 0.362579 | 0.579986 | 0.561311 |
| 3945 | ENSG00000C11orf45  | 0.773737 | 0.393939 | 0.580808 | 0.554545 |
| 3946 | ENSG00000ANXA4     | 0.957576 | 0.238384 | 0.583502 | 0.515152 |
| 3947 | ENSG00000SYT5      | 0.736364 | 0.429293 | 0.571549 | 0.554545 |
| 3948 | ENSG00000NXT2      | 0.809091 | 0.380808 | 0.591246 | 0.537374 |
| 3949 | ENSG00000NECTIN1   | 0.964646 | 0.238384 | 0.598653 | 0.472727 |
| 3950 | ENSG00000SYNGR1    | 0.911111 | 0.305051 | 0.600168 | 0.528283 |
| 3951 | ENSG00000ZNF419    | 0.929125 | 0.277962 | 0.610373 | 0.504983 |
| 3952 | ENSG00000TFAP2A    | 0.935354 | 0.274747 | 0.589899 | 0.520202 |
| 3953 | ENSG00000PAX3      | 0.777409 | 0.410853 | 0.590624 | 0.528239 |
| 3954 | ENSG00000MPG       | 0.911205 | 0.309725 | 0.607294 | 0.51797  |
| 3955 | ENSG00000RBM18     | 0.894949 | 0.29697  | 0.592593 | 0.555556 |
| 3956 | ENSG00000TMEM45B   | 0.9      | 0.334343 | 0.600842 | 0.506061 |
| 3957 | ENSG00000DAPP1     | 0.957576 | 0.229293 | 0.58064  | 0.528283 |
| 3958 | ENSG00000PAIP2B    | 0.735729 | 0.402748 | 0.569239 | 0.586681 |

0.3389

|      |                   |          |          |          |          |        |
|------|-------------------|----------|----------|----------|----------|--------|
| 3959 | ENSG00000CNKSR1   | 0.876768 | 0.344444 | 0.593098 | 0.529293 |        |
| 3960 | ENSG00000MAGEB10  | 0.752643 | 0.419662 | 0.586152 | 0.542283 |        |
| 3961 | ENSG00000ANKUB1   | 0.789899 | 0.386869 | 0.586532 | 0.547475 |        |
| 3962 | ENSG00000LRRC1    | 0.858586 | 0.340404 | 0.586532 | 0.552525 |        |
| 3963 | ENSG00000TEKT1    | 0.945455 | 0.228283 | 0.590741 | 0.535354 |        |
| 3964 | ENSG00000LFNG     | 0.820296 | 0.357294 | 0.575581 | 0.56871  |        |
| 3965 | ENSG00000ELAVL2   | 0.848485 | 0.369697 | 0.594949 | 0.520202 |        |
| 3966 | ENSG00000CLU      | 0.838384 | 0.339394 | 0.588889 | 0.566667 |        |
| 3967 | ENSG00000RNF39    | 0.955556 | 0.285859 | 0.602694 | 0.478788 |        |
| 3968 | ENSG00000MPPE1    | 0.677778 | 0.475758 | 0.576768 | 0.548485 | 0.2264 |
| 3969 | ENSG00000EMILIN2  | 0.767677 | 0.367677 | 0.567677 | 0.60202  |        |
| 3970 | ENSG00000WRAP73   | 0.727273 | 0.412121 | 0.563805 | 0.589899 |        |
| 3971 | ENSG00000OPALIN   | 0.814141 | 0.375758 | 0.594949 | 0.537374 |        |
| 3972 | ENSG00000TMEM215  | 0.777778 | 0.377778 | 0.572391 | 0.577778 |        |
| 3973 | ENSG00000C10orf62 | 0.728283 | 0.445455 | 0.574916 | 0.546465 |        |
| 3974 | ENSG00000HDC      | 0.768116 | 0.373913 | 0.571014 | 0.590338 |        |
| 3975 | ENSG00000COPS2    | 0.955556 | 0.212121 | 0.580135 | 0.542424 |        |
| 3976 | ENSG00000ABCA2    | 0.890909 | 0.324242 | 0.593939 | 0.540404 |        |
| 3977 | ENSG00000ZNF613   | 0.89798  | 0.344444 | 0.597643 | 0.50101  |        |
| 3978 | ENSG00000LDHB     | 0.943434 | 0.265657 | 0.576094 | 0.534343 |        |
| 3979 | ENSG00000IL23A    | 0.757576 | 0.407071 | 0.578788 | 0.559596 |        |
| 3980 | ENSG00000GABRG3   | 0.757576 | 0.379798 | 0.568687 | 0.593939 |        |
| 3981 | ENSG00000BTBD18   | 0.763636 | 0.410101 | 0.586869 | 0.543434 |        |
| 3982 | ENSG00000HS3ST1   | 0.765657 | 0.405051 | 0.57862  | 0.557576 |        |
| 3983 | ENSG00000DNAJC11  | 0.745455 | 0.434343 | 0.579461 | 0.542424 |        |
| 3984 | ENSG00000RDH16    | 0.717172 | 0.448485 | 0.582828 | 0.545455 |        |
| 3985 | ENSG00000ERCC6L2  | 0.772727 | 0.394949 | 0.583838 | 0.555556 |        |
| 3986 | ENSG00000BIRC5    | 0.959596 | 0.228283 | 0.598653 | 0.50303  |        |
| 3987 | ENSG00000PLAC9    | 0.79798  | 0.386869 | 0.588721 | 0.544444 |        |
| 3988 | ENSG00000C6orf106 | 0.907071 | 0.29899  | 0.591246 | 0.547475 |        |
| 3989 | ENSG00000AKR1C4   | 0.918182 | 0.279798 | 0.594444 | 0.545455 |        |
| 3990 | ENSG00000NKAIN4   | 0.688889 | 0.452525 | 0.570707 | 0.571717 |        |
| 3991 | ENSG00000KCNH1    | 0.807611 | 0.385835 | 0.573643 | 0.554968 |        |
| 3992 | ENSG00000GAL3ST1  | 0.725159 | 0.420719 | 0.572939 | 0.578224 |        |
| 3993 | ENSG00000CHCHD7   | 0.762156 | 0.402748 | 0.582452 | 0.560254 |        |
| 3994 | ENSG00000HSF2BP   | 0.749495 | 0.419192 | 0.567677 | 0.565657 |        |
| 3995 | ENSG00000RASAL2   | 0.931313 | 0.228283 | 0.562626 | 0.580808 |        |
| 3996 | ENSG00000NOL10    | 0.763636 | 0.410101 | 0.586869 | 0.549495 |        |
| 3997 | ENSG00000PSMA3    | 0.745455 | 0.446465 | 0.59596  | 0.520202 |        |
| 3998 | ENSG00000SPINK7   | 0.727273 | 0.428283 | 0.577778 | 0.563636 |        |
| 3999 | ENSG00000GJA5     | 0.960606 | 0.245455 | 0.618182 | 0.462626 |        |
| 4000 | ENSG00000FXVD6    | 0.792929 | 0.39899  | 0.594108 | 0.534343 |        |
| 4001 | ENSG00000TNFSF12  | 0.830303 | 0.376768 | 0.59798  | 0.524242 |        |
| 4002 | ENSG00000HES3     | 0.805497 | 0.379493 | 0.592495 | 0.547569 |        |
| 4003 | ENSG00000TOR4A    | 0.881818 | 0.30303  | 0.576768 | 0.586869 |        |
| 4004 | ENSG00000GNG11    | 0.717172 | 0.448485 | 0.582828 | 0.549495 |        |
| 4005 | ENSG00000NLGN4X   | 0.763636 | 0.410101 | 0.586869 | 0.549495 |        |
| 4006 | ENSG00000PTAFR    | 0.831313 | 0.358586 | 0.590236 | 0.552525 |        |
| 4007 | ENSG00000ADGRA2   | 0.677778 | 0.475758 | 0.576768 | 0.555556 |        |
| 4008 | ENSG00000EGR4     | 0.789899 | 0.393939 | 0.583502 | 0.550505 |        |
| 4009 | ENSG00000SLC31A1  | 0.816162 | 0.376768 | 0.596465 | 0.539394 |        |
| 4010 | ENSG00000CATIP    | 0.688889 | 0.452525 | 0.570707 | 0.572727 |        |
| 4011 | ENSG00000TMEM106B | 0.717172 | 0.448485 | 0.582828 | 0.550505 |        |
| 4012 | ENSG00000BRSK1    | 0.727273 | 0.428283 | 0.577778 | 0.564646 |        |
| 4013 | ENSG00000NLGN4Y   | 0.763636 | 0.410101 | 0.586869 | 0.549495 |        |



|      |                   |          |          |          |          |
|------|-------------------|----------|----------|----------|----------|
| 4014 | ENSG00000DMRT2    | 0.754545 | 0.427273 | 0.590909 | 0.536364 |
| 4015 | ENSG00000SARM1    | 0.878788 | 0.327273 | 0.60202  | 0.547475 |
| 4016 | ENSG00000CXCL5    | 0.648485 | 0.482828 | 0.565657 | 0.570707 |
| 4017 | ENSG00000PTRHD1   | 0.842424 | 0.329293 | 0.573401 | 0.59596  |
| 4018 | ENSG00000CNBP2    | 0.970707 | 0.249495 | 0.597306 | 0.460606 |
| 4019 | ENSG00000TAF12    | 0.901691 | 0.315011 | 0.59179  | 0.544397 |
| 4020 | ENSG00000GJE1     | 0.796235 | 0.372093 | 0.580472 | 0.571429 |
| 4021 | ENSG00000TMEM232  | 0.859358 | 0.305648 | 0.572351 | 0.609081 |
| 4022 | ENSG00000SLC30A1  | 0.79798  | 0.390909 | 0.592424 | 0.543434 |
| 4023 | ENSG00000COX20    | 0.789899 | 0.412121 | 0.60101  | 0.516162 |
| 4024 | ENSG00000SLC16A14 | 0.90303  | 0.316162 | 0.591077 | 0.542424 |
| 4025 | ENSG00000GNB1     | 0.717172 | 0.448485 | 0.582828 | 0.552525 |
| 4026 | ENSG00000KRT75    | 0.681159 | 0.459903 | 0.568116 | 0.578744 |
| 4027 | ENSG00000MRPL14   | 0.869697 | 0.332323 | 0.587542 | 0.561616 |
| 4028 | ENSG00000VGLL4    | 0.920202 | 0.320202 | 0.61633  | 0.492929 |
| 4029 | ENSG00000MCMBP    | 0.793869 | 0.360465 | 0.567653 | 0.602537 |
| 4030 | ENSG00000MUC5B    | 0.854545 | 0.355556 | 0.605051 | 0.529293 |
| 4031 | ENSG00000FDXACB1  | 0.717172 | 0.448485 | 0.582828 | 0.549495 |
| 4032 | ENSG00000GNB3     | 0.717172 | 0.448485 | 0.582828 | 0.552525 |
| 4033 | ENSG00000CCDC84   | 0.763636 | 0.410101 | 0.586869 | 0.550505 |
| 4034 | ENSG00000OCIAD2   | 0.860465 | 0.349894 | 0.60518  | 0.529598 |
| 4035 | ENSG00000ITGB2    | 0.838384 | 0.330303 | 0.581145 | 0.593939 |
| 4036 | ENSG00000IQCN     | 0.678848 | 0.48062  | 0.578996 | 0.551495 |
| 4037 | ENSG00000RALGPS2  | 0.979798 | 0.244444 | 0.605387 | 0.428283 |
| 4038 | ENSG00000PPARD    | 0.818182 | 0.390909 | 0.592424 | 0.532323 |
| 4039 | ENSG00000CXCR5    | 0.942424 | 0.244444 | 0.579125 | 0.550505 |
| 4040 | ENSG00000ARHGAP4  | 0.878788 | 0.30404  | 0.582492 | 0.590909 |
| 4041 | ENSG00000ADA2     | 0.854545 | 0.363636 | 0.6      | 0.527273 |
| 4042 | ENSG00000QTRT1    | 0.911111 | 0.317172 | 0.607239 | 0.521212 |
| 4043 | ENSG00000NAGK     | 0.943434 | 0.29899  | 0.617508 | 0.477778 |
| 4044 | ENSG00000MOSPD2   | 0.752643 | 0.419662 | 0.586152 | 0.552854 |
| 4045 | ENSG00000SCNN1D   | 0.662791 | 0.493658 | 0.578224 | 0.547569 |
| 4046 | ENSG00000IMPDH1   | 0.881607 | 0.330867 | 0.596195 | 0.548626 |
| 4047 | ENSG00000KIAA0408 | 0.714588 | 0.43129  | 0.571705 | 0.582452 |
| 4048 | ENSG00000ISLR     | 0.780808 | 0.380808 | 0.574916 | 0.581818 |
| 4049 | ENSG00000Clorf226 | 0.862626 | 0.330303 | 0.588047 | 0.569697 |
| 4050 | ENSG00000FAM8A1   | 0.838384 | 0.357576 | 0.59798  | 0.547475 |
| 4051 | ENSG00000WNT4     | 0.717172 | 0.448485 | 0.582828 | 0.553535 |
| 4052 | ENSG00000OGFOD2   | 0.938384 | 0.240404 | 0.576431 | 0.560606 |
| 4053 | ENSG00000MYL5     | 0.935354 | 0.243434 | 0.579966 | 0.557576 |
| 4054 | ENSG00000EYA3     | 0.731501 | 0.422833 | 0.569415 | 0.582452 |
| 4055 | ENSG00000CUEDC2   | 0.735729 | 0.402748 | 0.569239 | 0.598309 |
| 4056 | ENSG00000FAM167B  | 0.80202  | 0.412121 | 0.601515 | 0.511111 |
| 4057 | ENSG00000KIAA1143 | 0.8      | 0.408081 | 0.600673 | 0.520202 |
| 4058 | ENSG00000LTK      | 0.816162 | 0.376768 | 0.596465 | 0.545455 |
| 4059 | ENSG00000GALNT7   | 0.844444 | 0.354545 | 0.594949 | 0.552525 |
| 4060 | ENSG00000SERPINB1 | 0.907071 | 0.261616 | 0.569697 | 0.6      |
| 4061 | ENSG00000HTRA4    | 0.727273 | 0.428283 | 0.577778 | 0.569697 |
| 4062 | ENSG00000FAM107A  | 0.693446 | 0.470402 | 0.580162 | 0.552854 |
| 4063 | ENSG00000RPS19BP1 | 0.929293 | 0.305051 | 0.606397 | 0.50303  |
| 4064 | ENSG00000CDH3     | 0.838384 | 0.357576 | 0.59798  | 0.550505 |
| 4065 | ENSG00000KIAA1257 | 0.953535 | 0.243434 | 0.62138  | 0.50101  |
| 4066 | ENSG00000RHEB     | 0.822222 | 0.367677 | 0.594949 | 0.554545 |
| 4067 | ENSG00000POPDC2   | 0.707071 | 0.465657 | 0.58064  | 0.552525 |
| 4068 | ENSG00000SPAM1    | 0.605708 | 0.519027 | 0.562368 | 0.561311 |

|      |                    |          |          |          |          |        |
|------|--------------------|----------|----------|----------|----------|--------|
| 4069 | ENSG00000RGS10     | 0.945455 | 0.305051 | 0.613468 | 0.478788 |        |
| 4070 | ENSG00000KCTD3     | 0.814141 | 0.375758 | 0.594949 | 0.550505 | 0.3466 |
| 4071 | ENSG00000SLC47A1   | 0.806061 | 0.385859 | 0.59596  | 0.546465 |        |
| 4072 | ENSG00000VWC2      | 0.79798  | 0.386869 | 0.588721 | 0.554545 |        |
| 4073 | ENSG00000RALYL     | 0.674747 | 0.481818 | 0.577609 | 0.557576 |        |
| 4074 | ENSG00000ATP1B2    | 0.752643 | 0.419662 | 0.586152 | 0.556025 |        |
| 4075 | ENSG00000RPL41     | 0.832323 | 0.348485 | 0.577946 | 0.582828 |        |
| 4076 | ENSG00000TCP10     | 0.907071 | 0.319192 | 0.600673 | 0.533333 |        |
| 4077 | ENSG00000ZNF484    | 0.862626 | 0.339394 | 0.587205 | 0.564646 |        |
| 4078 | ENSG00000PKN2      | 0.958586 | 0.264646 | 0.6      | 0.5      |        |
| 4079 | ENSG00000CEACAM18  | 0.816162 | 0.367677 | 0.587879 | 0.562626 |        |
| 4080 | ENSG00000MEX3B     | 0.679704 | 0.469345 | 0.573643 | 0.569767 |        |
| 4081 | ENSG00000FAM107B   | 0.688889 | 0.452525 | 0.570707 | 0.584848 |        |
| 4082 | ENSG00000CRTC3     | 0.848485 | 0.361616 | 0.589899 | 0.547475 |        |
| 4083 | ENSG00000GCNT1     | 0.848485 | 0.347475 | 0.582997 | 0.567677 |        |
| 4084 | ENSG00000NUDCD1    | 0.794949 | 0.405051 | 0.593266 | 0.537374 |        |
| 4085 | ENSG00000NAALADL1  | 0.727273 | 0.428283 | 0.577778 | 0.572727 |        |
| 4086 | ENSG00000WDR77     | 0.940404 | 0.249495 | 0.612963 | 0.522222 | 0.2593 |
| 4087 | ENSG00000CDC25B    | 0.957576 | 0.277778 | 0.593771 | 0.505051 |        |
| 4088 | ENSG00000USP28     | 0.954545 | 0.281818 | 0.607576 | 0.49596  |        |
| 4089 | ENSG00000BSG       | 0.838384 | 0.357576 | 0.59798  | 0.550505 |        |
| 4090 | ENSG00000MGST1     | 0.814141 | 0.375758 | 0.594949 | 0.553535 |        |
| 4091 | ENSG00000CXorf21   | 0.77907  | 0.41649  | 0.591966 | 0.536998 |        |
| 4092 | ENSG00000EPHX2     | 0.873737 | 0.338384 | 0.597306 | 0.551515 |        |
| 4093 | ENSG00000SPON2     | 0.872727 | 0.332323 | 0.59899  | 0.556566 |        |
| 4094 | ENSG00000MACROD2   | 0.89798  | 0.340404 | 0.607744 | 0.510101 |        |
| 4095 | ENSG00000HTR1A     | 0.773737 | 0.393939 | 0.580808 | 0.572727 |        |
| 4096 | ENSG00000HIPK1     | 0.767677 | 0.408081 | 0.578956 | 0.564646 |        |
| 4097 | ENSG00000LM04      | 0.945455 | 0.270707 | 0.60101  | 0.520202 |        |
| 4098 | ENSG00000MAT2B     | 0.936364 | 0.231313 | 0.572054 | 0.575758 |        |
| 4099 | ENSG00000OAS1      | 0.978788 | 0.235354 | 0.603704 | 0.459596 |        |
| 4100 | ENSG00000EPO       | 0.677778 | 0.475758 | 0.576768 | 0.564646 |        |
| 4101 | ENSG00000TMEM71    | 0.79798  | 0.39798  | 0.59798  | 0.539394 |        |
| 4102 | ENSG00000PCCA      | 0.940404 | 0.287879 | 0.601178 | 0.514141 |        |
| 4103 | ENSG00000NOXRED1   | 0.742072 | 0.446089 | 0.581572 | 0.546512 |        |
| 4104 | ENSG00000DTNA      | 0.763214 | 0.422833 | 0.587033 | 0.548626 |        |
| 4105 | ENSG00000ING5      | 0.89697  | 0.331313 | 0.591751 | 0.540404 |        |
| 4106 | ENSG00000ABHD14A-A | 0.939394 | 0.281818 | 0.587205 | 0.534343 |        |
| 4107 | ENSG00000SCNM1     | 0.787526 | 0.381607 | 0.578224 | 0.582452 |        |
| 4108 | ENSG00000CSNK2A3   | 0.862579 | 0.360465 | 0.598837 | 0.534884 |        |
| 4109 | ENSG00000KAAG1     | 0.737374 | 0.410101 | 0.573737 | 0.591919 |        |
| 4110 | ENSG00000TEX2      | 0.720202 | 0.445455 | 0.575421 | 0.570707 |        |
| 4111 | ENSG00000DDX20     | 0.865657 | 0.322222 | 0.586532 | 0.589899 |        |
| 4112 | ENSG00000FDCSP     | 0.89899  | 0.29798  | 0.582997 | 0.577778 |        |
| 4113 | ENSG00000DDT       | 0.906061 | 0.324242 | 0.6      | 0.535354 |        |
| 4114 | ENSG00000LBP       | 0.907071 | 0.319192 | 0.600673 | 0.539394 |        |
| 4115 | ENSG00000SH2D6     | 0.82241  | 0.362579 | 0.592495 | 0.566596 |        |
| 4116 | ENSG00000ROM1      | 0.702415 | 0.438647 | 0.570531 | 0.593237 |        |
| 4117 | ENSG00000SCML4     | 0.858351 | 0.346723 | 0.600599 | 0.55074  |        |
| 4118 | ENSG00000NDUFV1    | 0.806061 | 0.385859 | 0.59596  | 0.550505 |        |
| 4119 | ENSG00000C19orf54  | 0.919662 | 0.269556 | 0.579281 | 0.578224 |        |
| 4120 | ENSG00000SLC22A12  | 0.717172 | 0.448485 | 0.582828 | 0.559596 |        |
| 4121 | ENSG00000KCNK5     | 0.772727 | 0.394949 | 0.583838 | 0.572727 |        |
| 4122 | ENSG00000KLC3      | 0.945455 | 0.240404 | 0.595623 | 0.546465 |        |
| 4123 | ENSG00000SMURF1    | 0.772727 | 0.394949 | 0.583838 | 0.571717 |        |

|      |                    |          |          |          |          |
|------|--------------------|----------|----------|----------|----------|
| 4124 | ENSG00000PLAUR     | 0.717172 | 0.448485 | 0.582828 | 0.563636 |
| 4125 | ENSG00000NHLRC3    | 0.79798  | 0.39798  | 0.59798  | 0.541414 |
| 4126 | ENSG00000ARPP21    | 0.72093  | 0.457364 | 0.576966 | 0.55814  |
| 4127 | ENSG00000KDR       | 0.754545 | 0.40101  | 0.570034 | 0.594949 |
| 4128 | ENSG00000C1orf159  | 0.874747 | 0.362626 | 0.605219 | 0.517172 |
| 4129 | ENSG00000ECHDC2    | 0.842424 | 0.337374 | 0.589899 | 0.586869 |
| 4130 | ENSG00000BCL11B    | 0.729293 | 0.438384 | 0.583838 | 0.562626 |
| 4131 | ENSG00000PDE6D     | 0.959596 | 0.235354 | 0.577609 | 0.536364 |
| 4132 | ENSG00000NT5M      | 0.835095 | 0.378436 | 0.602537 | 0.530655 |
| 4133 | ENSG00000LRRC26    | 0.806202 | 0.389812 | 0.595976 | 0.548173 |
| 4134 | ENSG00000EPHB1     | 0.714588 | 0.440803 | 0.577696 | 0.579281 |
| 4135 | ENSG00000CAPN2     | 0.830303 | 0.361616 | 0.59596  | 0.559596 |
| 4136 | ENSG00000ANXA5     | 0.933333 | 0.290909 | 0.600673 | 0.524242 |
| 4137 | ENSG00000ACAP1     | 0.752643 | 0.419662 | 0.586152 | 0.563425 |
| 4138 | ENSG00000PTPRG     | 0.727273 | 0.428283 | 0.577778 | 0.580808 |
| 4139 | ENSG00000GPRIN1    | 0.806061 | 0.385859 | 0.59596  | 0.552525 |
| 4140 | ENSG00000SKP2      | 0.954545 | 0.267677 | 0.631313 | 0.484848 |
| 4141 | ENSG00000DSC2      | 0.838384 | 0.357576 | 0.59798  | 0.557576 |
| 4142 | ENSG00000SLC38A6   | 0.765657 | 0.431313 | 0.592593 | 0.537374 |
| 4143 | ENSG00000ERMP1     | 0.704017 | 0.463002 | 0.58351  | 0.559197 |
| 4144 | ENSG00000RFNG      | 0.836364 | 0.355556 | 0.6      | 0.559596 |
| 4145 | ENSG00000AMPH      | 0.979798 | 0.246465 | 0.617003 | 0.428283 |
| 4146 | ENSG00000GOLGA6D   | 0.939746 | 0.274841 | 0.583333 | 0.544397 |
| 4147 | ENSG00000GOLGA6A   | 0.939746 | 0.274841 | 0.583333 | 0.544397 |
| 4148 | ENSG00000SGF29     | 0.941414 | 0.282828 | 0.641751 | 0.472727 |
| 4149 | ENSG00000GOLGA6C   | 0.939746 | 0.274841 | 0.583333 | 0.544397 |
| 4150 | ENSG00000ARIH1     | 0.89899  | 0.3      | 0.59798  | 0.566667 |
| 4151 | ENSG00000GOLGA6B   | 0.939746 | 0.274841 | 0.583333 | 0.544397 |
| 4152 | ENSG00000NEUROD4   | 0.780127 | 0.420719 | 0.600423 | 0.531712 |
| 4153 | ENSG00000SLC25A48  | 0.752643 | 0.411205 | 0.580338 | 0.578224 |
| 4154 | ENSG00000KIAA1586  | 0.752643 | 0.411205 | 0.577167 | 0.581395 |
| 4155 | ENSG00000ARHGEF18  | 0.686869 | 0.462626 | 0.573401 | 0.582828 |
| 4156 | ENSG00000ZNF813    | 0.737374 | 0.410101 | 0.573737 | 0.593939 |
| 4157 | ENSG00000ANKRD9    | 0.712071 | 0.433001 | 0.572536 | 0.593577 |
| 4158 | ENSG00000DNAH100S  | 0.805497 | 0.379493 | 0.592495 | 0.564482 |
| 4159 | ENSG00000ASH1L     | 0.723044 | 0.448203 | 0.577872 | 0.566596 |
| 4160 | ENSG00000ARG2      | 0.868687 | 0.336364 | 0.602189 | 0.560606 |
| 4161 | ENSG00000FAM83H    | 0.909091 | 0.30101  | 0.593266 | 0.562626 |
| 4162 | ENSG00000HID1      | 0.789899 | 0.412121 | 0.60101  | 0.532323 |
| 4163 | ENSG00000TSPYL1    | 0.974747 | 0.259596 | 0.596801 | 0.467677 |
| 4164 | ENSG00000CAMK4     | 0.963636 | 0.222222 | 0.600337 | 0.509091 |
| 4165 | ENSG00000EIF4EBP3  | 0.951515 | 0.267677 | 0.597643 | 0.526263 |
| 4166 | ENSG00000UGT3A2    | 0.727273 | 0.428283 | 0.577778 | 0.582828 |
| 4167 | ENSG00000SPINT3    | 0.688161 | 0.447146 | 0.560254 | 0.609937 |
| 4168 | ENSG00000ANGPT2    | 0.953535 | 0.218182 | 0.60202  | 0.546465 |
| 4169 | ENSG00000TCHP      | 0.915152 | 0.327273 | 0.606902 | 0.521212 |
| 4170 | ENSG00000ZNF382    | 0.826638 | 0.367865 | 0.588619 | 0.565539 |
| 4171 | ENSG00000FBXL22    | 0.948485 | 0.283838 | 0.610438 | 0.506061 |
| 4172 | ENSG00000COPZ2     | 0.781818 | 0.381818 | 0.581818 | 0.588889 |
| 4173 | ENSG00000AC008878. | 0.686869 | 0.462626 | 0.573401 | 0.582828 |
| 4174 | ENSG00000AGPS      | 0.931313 | 0.262626 | 0.590236 | 0.558586 |
| 4175 | ENSG00000DNAJC16   | 0.790909 | 0.40101  | 0.590067 | 0.555556 |
| 4176 | ENSG00000NLRP6     | 0.951515 | 0.226263 | 0.589226 | 0.555556 |
| 4177 | ENSG00000DHX37     | 0.848837 | 0.39852  | 0.619803 | 0.485201 |
| 4178 | ENSG00000ATF7      | 0.727273 | 0.412121 | 0.563805 | 0.611111 |

0.387

|      |                    |          |          |          |          |
|------|--------------------|----------|----------|----------|----------|
| 4179 | ENSG00000CXorf38   | 0.911406 | 0.316722 | 0.617571 | 0.524917 |
| 4180 | ENSG00000TMEM159   | 0.77167  | 0.402748 | 0.581395 | 0.57611  |
| 4181 | ENSG00000CLEC2A    | 0.660606 | 0.458586 | 0.559596 | 0.611111 |
| 4182 | ENSG00000CEP164    | 0.949495 | 0.255556 | 0.5867   | 0.547475 |
| 4183 | ENSG00000VILL      | 0.717172 | 0.448485 | 0.582828 | 0.567677 |
| 4184 | ENSG00000ERV3-1    | 0.912121 | 0.327273 | 0.609764 | 0.521212 |
| 4185 | ENSG00000POM121L12 | 0.733615 | 0.459831 | 0.596723 | 0.531712 |
| 4186 | ENSG00000TGFB1     | 0.662791 | 0.493658 | 0.578224 | 0.562368 |
| 4187 | ENSG00000CA13      | 0.973737 | 0.241414 | 0.58569  | 0.493939 |
| 4188 | ENSG00000OR5A2     | 0.953535 | 0.325253 | 0.605387 | 0.470707 |
| 4189 | ENSG00000PITPNA    | 0.725159 | 0.420719 | 0.572939 | 0.599366 |
| 4190 | ENSG00000TRERF1    | 0.765657 | 0.412121 | 0.584512 | 0.566667 |
| 4191 | ENSG00000PITPNB    | 0.725159 | 0.420719 | 0.572939 | 0.599366 |
| 4192 | ENSG00000CDK5      | 0.981818 | 0.250505 | 0.614983 | 0.429293 |
| 4193 | ENSG00000AC119396. | 0.930233 | 0.29704  | 0.595842 | 0.534884 |
| 4194 | ENSG00000SPCS3     | 0.740864 | 0.430786 | 0.585825 | 0.564784 |
| 4195 | ENSG00000ZNF285    | 0.974747 | 0.235354 | 0.595286 | 0.486869 |
| 4196 | ENSG00000NAA40     | 0.79798  | 0.39798  | 0.59798  | 0.549495 |
| 4197 | ENSG00000P3H3      | 0.79899  | 0.413131 | 0.59798  | 0.531313 |
| 4198 | ENSG00000AC023509. | 0.727273 | 0.412121 | 0.563805 | 0.611111 |
| 4199 | ENSG00000ARL4C     | 0.754545 | 0.427273 | 0.590909 | 0.554545 |
| 4200 | ENSG00000CABP1     | 0.897463 | 0.321353 | 0.594785 | 0.55814  |
| 4201 | ENSG00000CRYL1     | 0.866667 | 0.337374 | 0.588552 | 0.575758 |
| 4202 | ENSG00000CADPS     | 0.730303 | 0.431313 | 0.575758 | 0.582828 |
| 4203 | ENSG00000HS6ST2    | 0.707071 | 0.456566 | 0.575589 | 0.576768 |
| 4204 | ENSG00000OPLAH     | 0.872727 | 0.350505 | 0.608249 | 0.536364 |
| 4205 | ENSG00000TOPAZ1    | 0.972727 | 0.247475 | 0.594781 | 0.485859 |
| 4206 | ENSG00000BSND      | 0.871717 | 0.332323 | 0.587205 | 0.579798 |
| 4207 | ENSG00000OSBPL7    | 0.953535 | 0.259596 | 0.604882 | 0.526263 |
| 4208 | ENSG00000DUSP28    | 0.975758 | 0.232323 | 0.593266 | 0.490909 |
| 4209 | ENSG00000ANKRD34C  | 0.788584 | 0.404863 | 0.596723 | 0.549683 |
| 4210 | ENSG00000FZD10     | 0.970707 | 0.253535 | 0.595286 | 0.487879 |
| 4211 | ENSG00000ARHGAP32  | 0.942424 | 0.229293 | 0.591751 | 0.564646 |
| 4212 | ENSG00000ARHGEF35  | 0.967677 | 0.219192 | 0.595118 | 0.510101 |
| 4213 | ENSG00000NLK       | 0.854545 | 0.341414 | 0.591246 | 0.579798 |
| 4214 | ENSG00000MISP      | 0.830303 | 0.361616 | 0.59596  | 0.569697 |
| 4215 | ENSG00000MAK16     | 0.944444 | 0.277778 | 0.631818 | 0.492929 |
| 4216 | ENSG00000USP13     | 0.865657 | 0.339394 | 0.589899 | 0.575758 |
| 4217 | ENSG00000LCN10     | 0.77167  | 0.387949 | 0.57981  | 0.59408  |
| 4218 | ENSG00000NAT1      | 0.970707 | 0.216162 | 0.595286 | 0.507071 |
| 4219 | ENSG00000DEAF1     | 0.873737 | 0.363636 | 0.613805 | 0.517172 |
| 4220 | ENSG00000PDGFD     | 0.806061 | 0.363636 | 0.577778 | 0.6      |
| 4221 | ENSG00000C1orf162  | 0.869697 | 0.328283 | 0.595623 | 0.582828 |
| 4222 | ENSG00000OTOR      | 0.788584 | 0.404863 | 0.596723 | 0.551797 |
| 4223 | ENSG00000C17orf47  | 0.880808 | 0.370707 | 0.61734  | 0.494949 |
| 4224 | ENSG00000ITSN2     | 0.717172 | 0.448485 | 0.582828 | 0.569697 |
| 4225 | ENSG00000ZNF215    | 0.747475 | 0.393939 | 0.570707 | 0.613131 |
| 4226 | ENSG00000STX6      | 0.967677 | 0.228283 | 0.604209 | 0.49798  |
| 4227 | ENSG00000DOK7      | 0.788584 | 0.404863 | 0.596723 | 0.551797 |
| 4228 | ENSG00000PTCD2     | 0.823232 | 0.378788 | 0.598822 | 0.553535 |
| 4229 | ENSG00000MRPL32    | 0.788584 | 0.404863 | 0.596723 | 0.552854 |
| 4230 | ENSG00000RALGDS    | 0.975758 | 0.258586 | 0.601178 | 0.469697 |
| 4231 | ENSG00000TTBK2     | 0.972727 | 0.230303 | 0.597306 | 0.49596  |
| 4232 | ENSG00000SPATC1L   | 0.743129 | 0.438689 | 0.590909 | 0.556025 |
| 4233 | ENSG00000GLDN      | 0.874747 | 0.362626 | 0.600673 | 0.531313 |

|      |                   |          |          |          |          |
|------|-------------------|----------|----------|----------|----------|
| 4234 | ENSG00000SLC1A4   | 0.754545 | 0.427273 | 0.590909 | 0.560606 |
| 4235 | ENSG00000HOXD4    | 0.89852  | 0.324524 | 0.598309 | 0.553911 |
| 4236 | ENSG00000MINDY1   | 0.831313 | 0.352525 | 0.581145 | 0.593939 |
| 4237 | ENSG00000TPRX1    | 0.860606 | 0.355556 | 0.616498 | 0.534343 |
| 4238 | ENSG00000MT3      | 0.89899  | 0.30303  | 0.585859 | 0.585859 |
| 4239 | ENSG00000PRDX5    | 0.970707 | 0.265657 | 0.601347 | 0.476768 |
| 4240 | ENSG00000SPATA32  | 0.827273 | 0.346465 | 0.586869 | 0.59798  |
| 4241 | ENSG00000LRRC18   | 0.733615 | 0.453488 | 0.58809  | 0.549683 |
| 4242 | ENSG00000ASPDH    | 0.925253 | 0.314141 | 0.643098 | 0.478788 |
| 4243 | ENSG00000LILRA4   | 0.772727 | 0.394949 | 0.583838 | 0.583838 |
| 4244 | ENSG00000C2orf69  | 0.789899 | 0.386869 | 0.586532 | 0.579798 |
| 4245 | ENSG00000ARHGFE26 | 0.727273 | 0.428283 | 0.577778 | 0.591919 |
| 4246 | ENSG00000C5AR2    | 0.747475 | 0.393939 | 0.570707 | 0.615152 |
| 4247 | ENSG00000LIPG     | 0.812121 | 0.40404  | 0.602694 | 0.534343 |
| 4248 | ENSG00000PRPS1    | 0.774747 | 0.412121 | 0.590236 | 0.560606 |
| 4249 | ENSG00000ZNF221   | 0.707071 | 0.470707 | 0.588889 | 0.555556 |
| 4250 | ENSG00000C15orf41 | 0.718182 | 0.457576 | 0.586195 | 0.561616 |
| 4251 | ENSG00000WNK4     | 0.863636 | 0.329293 | 0.584175 | 0.59697  |
| 4252 | ENSG00000C12orf57 | 0.889899 | 0.318182 | 0.594613 | 0.577778 |
| 4253 | ENSG00000CTIF     | 0.951515 | 0.252525 | 0.606734 | 0.534343 |
| 4254 | ENSG00000RPP25    | 0.889006 | 0.319239 | 0.589676 | 0.580338 |
| 4255 | ENSG00000DNAH7    | 0.80101  | 0.410101 | 0.596633 | 0.542424 |
| 4256 | ENSG00000ZNF655   | 0.894949 | 0.29798  | 0.599495 | 0.580808 |
| 4257 | ENSG00000HPX      | 0.707071 | 0.461616 | 0.583333 | 0.571717 |
| 4258 | ENSG00000GDF3     | 0.754545 | 0.427273 | 0.590909 | 0.560606 |
| 4259 | ENSG00000PIK3AP1  | 0.818182 | 0.330303 | 0.571549 | 0.636364 |
| 4260 | ENSG00000SMC6     | 0.949495 | 0.271717 | 0.631145 | 0.49798  |
| 4261 | ENSG00000KREMEN2  | 0.704017 | 0.463002 | 0.58351  | 0.569767 |
| 4262 | ENSG00000SMAGP    | 0.794926 | 0.426004 | 0.608703 | 0.520085 |
| 4263 | ENSG00000EMC9     | 0.830303 | 0.378788 | 0.601515 | 0.549495 |
| 4264 | ENSG00000DAP      | 0.809091 | 0.394949 | 0.596633 | 0.553535 |
| 4265 | ENSG00000ZNF607   | 0.972727 | 0.257576 | 0.606061 | 0.473737 |
| 4266 | ENSG00000SLC39A10 | 0.911111 | 0.29596  | 0.603367 | 0.564646 |
| 4267 | ENSG00000LPCAT2   | 0.736364 | 0.433333 | 0.578788 | 0.581818 |
| 4268 | ENSG00000RB1      | 0.952657 | 0.2657   | 0.591465 | 0.542995 |
| 4269 | ENSG00000PPTC7    | 0.970707 | 0.265657 | 0.599327 | 0.481818 |
| 4270 | ENSG00000PLP2     | 0.927273 | 0.30101  | 0.589731 | 0.551515 |
| 4271 | ENSG00000LRFN4    | 0.756566 | 0.428283 | 0.572391 | 0.575758 |
| 4272 | ENSG00000SLC39A13 | 0.82981  | 0.385835 | 0.607822 | 0.539112 |
| 4273 | ENSG00000PRSS35   | 0.935354 | 0.271717 | 0.628114 | 0.519192 |
| 4274 | ENSG00000CPNE1    | 0.666667 | 0.50101  | 0.583838 | 0.558586 |
| 4275 | ENSG00000REX1BD   | 0.754545 | 0.427273 | 0.590909 | 0.565657 |
| 4276 | ENSG00000TPCN1    | 0.840532 | 0.383167 | 0.60945  | 0.529347 |
| 4277 | ENSG00000JMJD1C   | 0.90101  | 0.333333 | 0.606397 | 0.537374 |
| 4278 | ENSG00000ERICH6B  | 0.870707 | 0.344444 | 0.598653 | 0.563636 |
| 4279 | ENSG00000C19orf66 | 0.936364 | 0.320202 | 0.620539 | 0.490909 |
| 4280 | ENSG00000CTXN2    | 0.765657 | 0.412121 | 0.586195 | 0.573737 |
| 4281 | ENSG00000PRTFDC1  | 0.806061 | 0.385859 | 0.59596  | 0.569697 |
| 4282 | ENSG00000ATPAF1   | 0.718182 | 0.457576 | 0.586195 | 0.566667 |
| 4283 | ENSG00000ACY3     | 0.878788 | 0.294949 | 0.583502 | 0.619192 |
| 4284 | ENSG00000SULT1A1  | 0.879798 | 0.322222 | 0.594276 | 0.586869 |
| 4285 | ENSG00000ATXN1    | 0.9      | 0.334343 | 0.609933 | 0.536364 |
| 4286 | ENSG00000SULT1A2  | 0.879798 | 0.322222 | 0.594276 | 0.586869 |
| 4287 | ENSG00000CA5B     | 0.833333 | 0.392929 | 0.603872 | 0.532323 |
| 4288 | ENSG00000SULT1A4  | 0.879798 | 0.322222 | 0.594276 | 0.586869 |

0.13

|      |                   |          |          |          |          |        |
|------|-------------------|----------|----------|----------|----------|--------|
| 4289 | ENSG00000AP4E1    | 0.911205 | 0.332981 | 0.612403 | 0.524313 |        |
| 4290 | ENSG00000HSF5     | 0.726216 | 0.430233 | 0.578224 | 0.59408  |        |
| 4291 | ENSG00000RFPL4B   | 0.90202  | 0.328283 | 0.609259 | 0.540404 |        |
| 4292 | ENSG00000UQCC2    | 0.788618 | 0.387921 | 0.584785 | 0.586527 |        |
| 4293 | ENSG00000NUBPL    | 0.832753 | 0.363531 | 0.593496 | 0.574913 |        |
| 4294 | ENSG00000SULT1A3  | 0.879798 | 0.322222 | 0.594276 | 0.586869 |        |
| 4295 | ENSG00000NOS2     | 0.763636 | 0.410101 | 0.586869 | 0.582828 |        |
| 4296 | ENSG00000RGS14    | 0.947475 | 0.288889 | 0.599158 | 0.529293 |        |
| 4297 | ENSG00000RASSF6   | 0.769657 | 0.430786 | 0.600221 | 0.542636 |        |
| 4298 | ENSG00000KIF21A   | 0.959596 | 0.238384 | 0.592256 | 0.539394 |        |
| 4299 | ENSG00000TM4SF20  | 0.973737 | 0.264646 | 0.638215 | 0.392929 |        |
| 4300 | ENSG00000TJP3     | 0.931313 | 0.319192 | 0.614141 | 0.508081 |        |
| 4301 | ENSG00000PPP3CA   | 0.842424 | 0.374747 | 0.600337 | 0.549495 |        |
| 4302 | ENSG00000C2CD2    | 0.936364 | 0.277778 | 0.589226 | 0.555556 |        |
| 4303 | ENSG00000ACSM4    | 0.813953 | 0.401993 | 0.607973 | 0.535991 |        |
| 4304 | ENSG00000SLC22A17 | 0.906977 | 0.315011 | 0.599013 | 0.562368 |        |
| 4305 | ENSG00000MVD      | 0.978788 | 0.247475 | 0.606061 | 0.474747 |        |
| 4306 | ENSG00000MUC2     | 0.763636 | 0.410101 | 0.586869 | 0.579798 |        |
| 4307 | ENSG00000SLC12A9  | 0.830303 | 0.368687 | 0.589394 | 0.574747 |        |
| 4308 | ENSG00000TSNARE1  | 0.82981  | 0.385835 | 0.607822 | 0.542283 |        |
| 4309 | ENSG00000BSCL2    | 0.874747 | 0.338384 | 0.593771 | 0.575758 |        |
| 4310 | ENSG00000CENPV    | 0.947475 | 0.254545 | 0.61633  | 0.533333 |        |
| 4311 | ENSG00000ETV7     | 0.714141 | 0.453535 | 0.582828 | 0.577778 |        |
| 4312 | ENSG00000RNF145   | 0.765657 | 0.438384 | 0.600673 | 0.540404 |        |
| 4313 | ENSG00000NOTCH2   | 0.937374 | 0.307071 | 0.602357 | 0.524242 |        |
| 4314 | ENSG00000MBNL1    | 0.970707 | 0.255556 | 0.611111 | 0.479798 |        |
| 4315 | ENSG00000WDR19    | 0.817172 | 0.40202  | 0.600337 | 0.542424 |        |
| 4316 | ENSG00000ZC3H14   | 0.976768 | 0.255556 | 0.60303  | 0.479798 |        |
| 4317 | ENSG00000RPL6     | 0.830303 | 0.391919 | 0.611111 | 0.533333 |        |
| 4318 | ENSG00000C1QTNF5  | 0.942424 | 0.247475 | 0.61431  | 0.543434 |        |
| 4319 | ENSG00000LYVE1    | 0.878788 | 0.339394 | 0.605556 | 0.559596 |        |
| 4320 | ENSG00000ICAM3    | 0.662791 | 0.493658 | 0.578224 | 0.577167 |        |
| 4321 | ENSG00000SLC16A10 | 0.762156 | 0.402748 | 0.582452 | 0.596195 |        |
| 4322 | ENSG00000FRMD4B   | 0.745455 | 0.446465 | 0.59596  | 0.554545 |        |
| 4323 | ENSG00000LRRN1    | 0.792812 | 0.404863 | 0.595666 | 0.561311 |        |
| 4324 | ENSG00000NTN4     | 0.789899 | 0.412121 | 0.60101  | 0.550505 |        |
| 4325 | ENSG00000DPY19L4  | 0.815011 | 0.409091 | 0.612051 | 0.526427 |        |
| 4326 | ENSG00000TSC22D3  | 0.783838 | 0.420202 | 0.595118 | 0.552525 |        |
| 4327 | ENSG00000ADIPOQ   | 0.863636 | 0.340404 | 0.598485 | 0.577778 |        |
| 4328 | ENSG00000MC4R     | 0.745455 | 0.446465 | 0.59596  | 0.553535 |        |
| 4329 | ENSG00000PRR11    | 0.79798  | 0.39798  | 0.59798  | 0.563636 |        |
| 4330 | ENSG00000ZIK1     | 0.745455 | 0.446465 | 0.59596  | 0.553535 |        |
| 4331 | ENSG00000ADAM33   | 0.737844 | 0.442918 | 0.587738 | 0.56871  |        |
| 4332 | ENSG00000CDCA7L   | 0.90303  | 0.339394 | 0.606734 | 0.533333 |        |
| 4333 | ENSG00000PIGX     | 0.781818 | 0.428283 | 0.605051 | 0.535354 |        |
| 4334 | ENSG00000DKKL1    | 0.952525 | 0.273737 | 0.595455 | 0.543434 |        |
| 4335 | ENSG00000SPIDR    | 0.917172 | 0.317172 | 0.605387 | 0.547475 |        |
| 4336 | ENSG00000STRADB   | 0.911111 | 0.277778 | 0.594444 | 0.59596  |        |
| 4337 | ENSG00000SLC6A6   | 0.854545 | 0.355556 | 0.605051 | 0.561616 | 0.2384 |
| 4338 | ENSG00000EHD3     | 0.818182 | 0.349495 | 0.583838 | 0.615152 |        |
| 4339 | ENSG00000CCDC85C  | 0.837209 | 0.362579 | 0.597252 | 0.572939 |        |
| 4340 | ENSG00000ZC3H12C  | 0.976768 | 0.244444 | 0.607744 | 0.482828 |        |
| 4341 | ENSG00000HEXIM2   | 0.984848 | 0.255556 | 0.610943 | 0.457576 | 0.3352 |
| 4342 | ENSG00000PLEKHF2  | 0.827273 | 0.386869 | 0.599832 | 0.553535 |        |
| 4343 | ENSG00000PRR32    | 0.809091 | 0.394949 | 0.596633 | 0.559596 |        |

|      |                    |          |          |          |          |        |        |
|------|--------------------|----------|----------|----------|----------|--------|--------|
| 4344 | ENSG00000SYNP02L   | 0.890909 | 0.318182 | 0.604545 | 0.572727 |        |        |
| 4345 | ENSG00000PCM1      | 0.949495 | 0.312121 | 0.617172 | 0.49596  |        |        |
| 4346 | ENSG00000RABEP2    | 0.769657 | 0.430786 | 0.600221 | 0.548173 |        |        |
| 4347 | ENSG00000VIL1      | 0.932323 | 0.282828 | 0.601684 | 0.551515 |        |        |
| 4348 | ENSG00000CCDC106   | 0.947475 | 0.275758 | 0.624242 | 0.517172 |        |        |
| 4349 | ENSG00000JPT2      | 0.961616 | 0.274747 | 0.62138  | 0.481818 |        |        |
| 4350 | ENSG00000EHD1      | 0.818182 | 0.349495 | 0.583838 | 0.615152 |        |        |
| 4351 | ENSG00000SLC37A4   | 0.87315  | 0.362579 | 0.617865 | 0.527484 |        |        |
| 4352 | ENSG00000RBMS3     | 0.812121 | 0.354545 | 0.573232 | 0.623232 |        |        |
| 4353 | ENSG00000ZNF248    | 0.975687 | 0.236786 | 0.623679 | 0.472516 |        |        |
| 4354 | ENSG00000CCT2      | 0.908034 | 0.346723 | 0.612579 | 0.516913 | 0.4669 | 0.5314 |
| 4355 | ENSG00000SYT15     | 0.957576 | 0.227273 | 0.60404  | 0.546465 |        |        |
| 4356 | ENSG00000OR51Q1    | 0.809091 | 0.405051 | 0.605219 | 0.543434 |        |        |
| 4357 | ENSG00000SMC5      | 0.893939 | 0.366667 | 0.618182 | 0.49899  |        |        |
| 4358 | ENSG00000F0681492. | 0.957576 | 0.227273 | 0.60404  | 0.546465 |        |        |
| 4359 | ENSG00000ZNF16     | 0.791919 | 0.374747 | 0.575421 | 0.612121 |        |        |
| 4360 | ENSG00000ALS2CL    | 0.927273 | 0.29899  | 0.600337 | 0.550505 |        |        |
| 4361 | ENSG00000CDC42SE1  | 0.717172 | 0.448485 | 0.582828 | 0.585859 |        |        |
| 4362 | ENSG00000XK        | 0.757576 | 0.432323 | 0.592593 | 0.564646 |        |        |
| 4363 | ENSG00000E2F2      | 0.779798 | 0.414141 | 0.589057 | 0.569697 |        |        |
| 4364 | ENSG00000ABCG2     | 0.717172 | 0.448485 | 0.582828 | 0.588889 |        |        |
| 4365 | ENSG00000CAPG      | 0.956566 | 0.262626 | 0.623906 | 0.518182 |        |        |
| 4366 | ENSG00000UROC1     | 0.69697  | 0.494949 | 0.59596  | 0.547475 |        |        |
| 4367 | ENSG00000SLC02B1   | 0.707071 | 0.465657 | 0.58064  | 0.584848 |        |        |
| 4368 | ENSG00000KRT5      | 0.707071 | 0.461616 | 0.583333 | 0.583838 |        |        |
| 4369 | ENSG00000GPAA1     | 0.837209 | 0.37315  | 0.598485 | 0.563425 |        |        |
| 4370 | ENSG00000C7orf25   | 0.832323 | 0.384848 | 0.600168 | 0.555556 |        |        |
| 4371 | ENSG00000ATP9A     | 0.912121 | 0.314141 | 0.600842 | 0.565657 |        |        |
| 4372 | ENSG00000TERF2IP   | 0.954545 | 0.278788 | 0.611785 | 0.524242 |        |        |
| 4373 | ENSG00000TARM1     | 0.870707 | 0.346465 | 0.605051 | 0.562626 |        |        |
| 4374 | ENSG00000SRSF7     | 0.970707 | 0.269697 | 0.59798  | 0.494949 |        |        |
| 4375 | ENSG00000RPRD2     | 0.783838 | 0.420202 | 0.595118 | 0.557576 |        |        |
| 4376 | ENSG00000FREM3     | 0.733615 | 0.459831 | 0.596723 | 0.552854 |        |        |
| 4377 | ENSG00000FOXR2     | 0.950505 | 0.320202 | 0.624579 | 0.481818 |        |        |
| 4378 | ENSG00000TMEM63B   | 0.915152 | 0.306061 | 0.604714 | 0.564646 |        |        |
| 4379 | ENSG00000ALDH1A1   | 0.951515 | 0.319192 | 0.61734  | 0.490909 |        |        |
| 4380 | ENSG00000ENOPH1    | 0.919192 | 0.30404  | 0.602525 | 0.561616 |        |        |
| 4381 | ENSG00000MAP3K2    | 0.79798  | 0.39798  | 0.59798  | 0.567677 |        |        |
| 4382 | ENSG00000RPL3L     | 0.643434 | 0.509091 | 0.575758 | 0.581818 |        |        |
| 4383 | ENSG00000C9orf85   | 0.77167  | 0.438689 | 0.60518  | 0.539112 |        |        |
| 4384 | ENSG00000TRIM61    | 0.807611 | 0.397463 | 0.600599 | 0.560254 |        |        |
| 4385 | ENSG00000AGTRAP    | 0.79798  | 0.39798  | 0.59798  | 0.567677 |        |        |
| 4386 | ENSG00000SP110     | 0.871717 | 0.319192 | 0.588552 | 0.613131 |        |        |
| 4387 | ENSG00000CAV2      | 0.828283 | 0.337374 | 0.582828 | 0.628283 |        |        |
| 4388 | ENSG00000FEN1      | 0.946465 | 0.305051 | 0.605387 | 0.522222 |        |        |
| 4389 | ENSG00000GSKIP     | 0.954545 | 0.268687 | 0.608754 | 0.537374 |        |        |
| 4390 | ENSG00000PUS10     | 0.948485 | 0.266667 | 0.634007 | 0.516162 |        |        |
| 4391 | ENSG00000COLGALT2  | 0.931313 | 0.294949 | 0.59798  | 0.551515 |        |        |
| 4392 | ENSG00000SELENBP1  | 0.960606 | 0.269697 | 0.645455 | 0.464646 |        |        |
| 4393 | ENSG00000YIPF6     | 0.842424 | 0.385859 | 0.598653 | 0.549495 |        |        |
| 4394 | ENSG00000PSMG3     | 0.809725 | 0.395349 | 0.596899 | 0.564482 |        |        |
| 4395 | ENSG00000FMN1      | 0.758454 | 0.386473 | 0.572464 | 0.628019 |        |        |
| 4396 | ENSG00000ZFP69     | 0.773737 | 0.419192 | 0.594949 | 0.566667 |        |        |
| 4397 | ENSG00000AZIN1     | 0.883838 | 0.325253 | 0.592256 | 0.593939 |        |        |
| 4398 | ENSG00000BRMS1     | 0.925253 | 0.322222 | 0.613636 | 0.524242 |        |        |

|      |                    |          |          |          |          |
|------|--------------------|----------|----------|----------|----------|
| 4399 | ENSG00000MITD1     | 0.977778 | 0.247475 | 0.602862 | 0.491919 |
| 4400 | ENSG00000PCDHA2    | 0.781818 | 0.428283 | 0.605051 | 0.540404 |
| 4401 | ENSG00000SSX2IP    | 0.841438 | 0.383721 | 0.600599 | 0.551797 |
| 4402 | ENSG00000GLO1      | 0.916162 | 0.322222 | 0.614646 | 0.542424 |
| 4403 | ENSG00000PELI2     | 0.911205 | 0.311839 | 0.610289 | 0.561311 |
| 4404 | ENSG00000CENPP     | 0.910148 | 0.319239 | 0.60377  | 0.561311 |
| 4405 | ENSG00000RCN2      | 0.854545 | 0.337374 | 0.594613 | 0.60303  |
| 4406 | ENSG00000ST20-MTHF | 0.887879 | 0.342424 | 0.600842 | 0.558586 |
| 4407 | ENSG00000PELI1     | 0.911205 | 0.311839 | 0.610289 | 0.561311 |
| 4408 | ENSG00000OR2Z1     | 0.754545 | 0.427273 | 0.590909 | 0.577778 |
| 4409 | ENSG00000PLA2G12B  | 0.90101  | 0.347475 | 0.624579 | 0.515152 |
| 4410 | ENSG00000CA9       | 0.907071 | 0.310101 | 0.59798  | 0.580808 |
| 4411 | ENSG00000PVR       | 0.821212 | 0.411111 | 0.608418 | 0.532323 |
| 4412 | ENSG00000BBS4      | 0.736364 | 0.467677 | 0.60202  | 0.542424 |
| 4413 | ENSG00000PRDX1     | 0.968687 | 0.267677 | 0.607744 | 0.493939 |
| 4414 | ENSG00000PABPC1L2B | 0.69697  | 0.494949 | 0.59596  | 0.550505 |
| 4415 | ENSG00000ARL16     | 0.835095 | 0.391121 | 0.607822 | 0.54334  |
| 4416 | ENSG00000NAXE      | 0.947475 | 0.271717 | 0.623906 | 0.527273 |
| 4417 | ENSG00000RGS1      | 0.781818 | 0.428283 | 0.605051 | 0.545455 |
| 4418 | ENSG00000GYG1      | 0.754545 | 0.413131 | 0.580808 | 0.60101  |
| 4419 | ENSG00000SLC3A2    | 0.854545 | 0.355556 | 0.605051 | 0.568687 |
| 4420 | ENSG00000PABPC1L2A | 0.69697  | 0.494949 | 0.59596  | 0.550505 |
| 4421 | ENSG00000GDPGP1    | 0.745455 | 0.446465 | 0.59596  | 0.561616 |
| 4422 | ENSG00000CHRM5     | 0.765657 | 0.422222 | 0.572391 | 0.592929 |
| 4423 | ENSG00000PDLIM4    | 0.806061 | 0.385859 | 0.59596  | 0.583838 |
| 4424 | ENSG00000SCRT1     | 0.79798  | 0.39798  | 0.59798  | 0.570707 |
| 4425 | ENSG00000COQ10B    | 0.759596 | 0.425253 | 0.5867   | 0.582828 |
| 4426 | ENSG00000CHGA      | 0.892929 | 0.336364 | 0.604545 | 0.560606 |
| 4427 | ENSG00000RPL18A    | 0.794949 | 0.449495 | 0.607071 | 0.515152 |
| 4428 | ENSG00000NME7      | 0.794949 | 0.413131 | 0.60101  | 0.555556 |
| 4429 | ENSG00000C11orf74  | 0.820598 | 0.426357 | 0.621632 | 0.503876 |
| 4430 | ENSG00000GPR156    | 0.957576 | 0.30101  | 0.606734 | 0.510101 |
| 4431 | ENSG00000ENY2      | 0.85518  | 0.346723 | 0.597075 | 0.588795 |
| 4432 | ENSG00000EIF2A     | 0.809091 | 0.405051 | 0.605219 | 0.551515 |
| 4433 | ENSG00000KCNB1     | 0.835749 | 0.340097 | 0.587923 | 0.618357 |
| 4434 | ENSG00000SLC29A3   | 0.836364 | 0.372727 | 0.594781 | 0.574747 |
| 4435 | ENSG00000ATXN7L1   | 0.874747 | 0.329293 | 0.591582 | 0.60303  |
| 4436 | ENSG00000C4orf46   | 0.781818 | 0.392929 | 0.581818 | 0.60303  |
| 4437 | ENSG00000ARHGFE37  | 0.917172 | 0.317172 | 0.607239 | 0.555556 |
| 4438 | ENSG00000TOB1      | 0.885835 | 0.340381 | 0.603066 | 0.566596 |
| 4439 | ENSG00000NPTN      | 0.905051 | 0.346465 | 0.614983 | 0.526263 |
| 4440 | ENSG00000CCDC154   | 0.969697 | 0.226263 | 0.603367 | 0.520202 |
| 4441 | ENSG00000CD9       | 0.714588 | 0.477801 | 0.595314 | 0.55814  |
| 4442 | ENSG00000EMC8      | 0.806202 | 0.41639  | 0.611296 | 0.537099 |
| 4443 | ENSG00000PROZ      | 0.707071 | 0.470707 | 0.588889 | 0.577778 |
| 4444 | ENSG00000ADH6      | 0.893939 | 0.340404 | 0.608754 | 0.550505 |
| 4445 | ENSG00000CPNE3     | 0.890909 | 0.331313 | 0.597811 | 0.578788 |
| 4446 | ENSG00000CDC14A    | 0.872727 | 0.366667 | 0.604209 | 0.550505 |
| 4447 | ENSG00000CAPZA2    | 0.733615 | 0.459831 | 0.596723 | 0.559197 |
| 4448 | ENSG00000ZFPM2     | 0.873737 | 0.342424 | 0.602189 | 0.577778 |
| 4449 | ENSG00000TSEN54    | 0.830303 | 0.391919 | 0.611111 | 0.544444 |
| 4450 | ENSG00000PRSS45    | 0.736364 | 0.467677 | 0.60202  | 0.545455 |
| 4451 | ENSG00000MANSC4    | 0.923232 | 0.256566 | 0.574074 | 0.615152 |
| 4452 | ENSG00000SHISAL2B  | 0.844444 | 0.375758 | 0.610101 | 0.553535 |
| 4453 | ENSG00000GPIHBP1   | 0.781818 | 0.428283 | 0.605051 | 0.546465 |



|      |           |           |          |          |          |          |        |
|------|-----------|-----------|----------|----------|----------|----------|--------|
| 4454 | ENSG00000 | RASA4     | 0.752643 | 0.419662 | 0.586152 | 0.597252 |        |
| 4455 | ENSG00000 | EXOSC1    | 0.856566 | 0.369697 | 0.610269 | 0.551515 |        |
| 4456 | ENSG00000 | PLA2G4E   | 0.707071 | 0.470707 | 0.588889 | 0.578788 |        |
| 4457 | ENSG00000 | CNOT11    | 0.883838 | 0.330303 | 0.59899  | 0.587879 |        |
| 4458 | ENSG00000 | CDKN2B    | 0.973737 | 0.280808 | 0.62963  | 0.446465 |        |
| 4459 | ENSG00000 | FBP1      | 0.969697 | 0.238384 | 0.617508 | 0.50101  |        |
| 4460 | ENSG00000 | RASA4B    | 0.752643 | 0.419662 | 0.586152 | 0.597252 |        |
| 4461 | ENSG00000 | ANKRD16   | 0.880808 | 0.348485 | 0.607407 | 0.560606 |        |
| 4462 | ENSG00000 | BRF1      | 0.793939 | 0.420202 | 0.60303  | 0.552525 |        |
| 4463 | ENSG00000 | AQP10     | 0.745455 | 0.446465 | 0.59596  | 0.568687 |        |
| 4464 | ENSG00000 | FRMD6     | 0.77167  | 0.430233 | 0.596195 | 0.564482 |        |
| 4465 | ENSG00000 | MRPS5     | 0.765657 | 0.431313 | 0.592593 | 0.570707 |        |
| 4466 | ENSG00000 | CCDC152   | 0.889899 | 0.342424 | 0.605892 | 0.558586 |        |
| 4467 | ENSG00000 | IGFBP4    | 0.717172 | 0.439394 | 0.577104 | 0.613131 |        |
| 4468 | ENSG00000 | ZNF326    | 0.952525 | 0.313131 | 0.646801 | 0.468687 |        |
| 4469 | ENSG00000 | INIP      | 0.868687 | 0.358586 | 0.600168 | 0.567677 |        |
| 4470 | ENSG00000 | RHBDD2    | 0.752525 | 0.446465 | 0.593603 | 0.568687 |        |
| 4471 | ENSG00000 | TRMT1     | 0.974747 | 0.257576 | 0.601347 | 0.50202  | 0.248  |
| 4472 | ENSG00000 | KLF2      | 0.875758 | 0.332323 | 0.602357 | 0.591919 |        |
| 4473 | ENSG00000 | MTMR1     | 0.893939 | 0.334343 | 0.607407 | 0.565657 |        |
| 4474 | ENSG00000 | BBS2      | 0.707071 | 0.465657 | 0.58064  | 0.59596  |        |
| 4475 | ENSG00000 | AP5M1     | 0.971717 | 0.284848 | 0.623569 | 0.464646 |        |
| 4476 | ENSG00000 | ACE2      | 0.851515 | 0.364646 | 0.605219 | 0.567677 |        |
| 4477 | ENSG00000 | TEX261    | 0.754545 | 0.427273 | 0.590909 | 0.586869 |        |
| 4478 | ENSG00000 | RNASE1    | 0.789899 | 0.412121 | 0.60101  | 0.565657 |        |
| 4479 | ENSG00000 | GABPA     | 0.972727 | 0.241414 | 0.595286 | 0.522222 |        |
| 4480 | ENSG00000 | PLEKHH3   | 0.79704  | 0.391121 | 0.59408  | 0.591966 |        |
| 4481 | ENSG00000 | ASPRV1    | 0.947475 | 0.213131 | 0.592593 | 0.594949 |        |
| 4482 | ENSG00000 | IGF2BP3   | 0.736364 | 0.467677 | 0.60202  | 0.550505 |        |
| 4483 | ENSG00000 | JUNB      | 0.981818 | 0.235354 | 0.611616 | 0.492929 |        |
| 4484 | ENSG00000 | ZNF341    | 0.913319 | 0.298097 | 0.626321 | 0.561311 |        |
| 4485 | ENSG00000 | TXNIP     | 0.966667 | 0.231313 | 0.590067 | 0.541414 |        |
| 4486 | ENSG00000 | FBLN5     | 0.974747 | 0.241414 | 0.593098 | 0.522222 |        |
| 4487 | ENSG00000 | RASEF     | 0.781818 | 0.428283 | 0.605051 | 0.551515 |        |
| 4488 | ENSG00000 | SCGN      | 0.90303  | 0.341414 | 0.593939 | 0.562626 |        |
| 4489 | ENSG00000 | ANPEP     | 0.844444 | 0.339394 | 0.591919 | 0.616162 |        |
| 4490 | ENSG00000 | AC018755. | 0.821353 | 0.381607 | 0.594433 | 0.585624 |        |
| 4491 | ENSG00000 | APOBEC2   | 0.864646 | 0.329293 | 0.586532 | 0.620202 |        |
| 4492 | ENSG00000 | MYL7      | 0.960606 | 0.237374 | 0.611953 | 0.538384 |        |
| 4493 | ENSG00000 | KRT18     | 0.854545 | 0.355556 | 0.605051 | 0.580808 | 0.3362 |
| 4494 | ENSG00000 | DCAF17    | 0.946465 | 0.3      | 0.602525 | 0.542424 |        |
| 4495 | ENSG00000 | BTG2      | 0.788584 | 0.404863 | 0.596723 | 0.582452 |        |
| 4496 | ENSG00000 | GPR37L1   | 0.727273 | 0.470707 | 0.59798  | 0.558586 |        |
| 4497 | ENSG00000 | APOL1     | 0.959596 | 0.220202 | 0.585185 | 0.576768 |        |
| 4498 | ENSG00000 | BTBD10    | 0.80303  | 0.39899  | 0.590404 | 0.584848 |        |
| 4499 | ENSG00000 | ATP5MC2   | 0.818182 | 0.409091 | 0.609091 | 0.547475 |        |
| 4500 | ENSG00000 | CDC7      | 0.958586 | 0.319192 | 0.63468  | 0.466667 |        |
| 4501 | ENSG00000 | SURF2     | 0.879493 | 0.310782 | 0.590909 | 0.623679 |        |
| 4502 | ENSG00000 | 9/3/2019  | 0.894949 | 0.334343 | 0.611953 | 0.562626 |        |
| 4503 | ENSG00000 | MCOLN2    | 0.890909 | 0.29596  | 0.587205 | 0.624242 |        |
| 4504 | ENSG00000 | LDB3      | 0.707071 | 0.470707 | 0.588889 | 0.585859 |        |
| 4505 | ENSG00000 | SRRM5     | 0.823232 | 0.40303  | 0.613131 | 0.543434 |        |
| 4506 | ENSG00000 | TUBGCP2   | 0.883838 | 0.314141 | 0.598316 | 0.611111 |        |
| 4507 | ENSG00000 | C1orf228  | 0.837374 | 0.382828 | 0.610101 | 0.556566 |        |
| 4508 | ENSG00000 | PFDN2     | 0.916162 | 0.30404  | 0.596128 | 0.588889 |        |

|      |                   |          |          |          |          |
|------|-------------------|----------|----------|----------|----------|
| 4509 | ENSG00000HPGD     | 0.94926  | 0.313953 | 0.605004 | 0.527484 |
| 4510 | ENSG00000NEK5     | 0.948485 | 0.275758 | 0.60202  | 0.556566 |
| 4511 | ENSG00000CD300E   | 0.816162 | 0.390909 | 0.601515 | 0.573737 |
| 4512 | ENSG00000RNF123   | 0.860606 | 0.361616 | 0.600337 | 0.573737 |
| 4513 | ENSG00000RNF125   | 0.878788 | 0.350505 | 0.600168 | 0.574747 |
| 4514 | ENSG00000RPL32    | 0.947475 | 0.259596 | 0.585017 | 0.584848 |
| 4515 | ENSG00000R3HDM4   | 0.89697  | 0.329293 | 0.609428 | 0.568687 |
| 4516 | ENSG00000SMC04    | 0.872727 | 0.324242 | 0.594781 | 0.616162 |
| 4517 | ENSG00000LIN28A   | 0.69697  | 0.485859 | 0.590572 | 0.579798 |
| 4518 | ENSG00000PIN4     | 0.90101  | 0.342424 | 0.625926 | 0.533333 |
| 4519 | ENSG00000IKZF1    | 0.887879 | 0.334343 | 0.604714 | 0.578788 |
| 4520 | ENSG00000PRR18    | 0.763214 | 0.44186  | 0.579986 | 0.582452 |
| 4521 | ENSG00000LGALS1   | 0.913131 | 0.330303 | 0.609428 | 0.555556 |
| 4522 | ENSG00000RPS12    | 0.792812 | 0.422833 | 0.602008 | 0.559197 |
| 4523 | ENSG00000MFAP3    | 0.862626 | 0.371717 | 0.602694 | 0.560606 |
| 4524 | ENSG00000FN3K     | 0.789899 | 0.412121 | 0.60101  | 0.570707 |
| 4525 | ENSG00000LEFTY1   | 0.913131 | 0.310101 | 0.601515 | 0.583838 |
| 4526 | ENSG00000ZNF8     | 0.971717 | 0.247475 | 0.624747 | 0.491919 |
| 4527 | ENSG00000FAM156B  | 0.925253 | 0.285859 | 0.599158 | 0.583838 |
| 4528 | ENSG00000FCAMR    | 0.790909 | 0.370707 | 0.580808 | 0.629293 |
| 4529 | ENSG00000INHA     | 0.909091 | 0.319192 | 0.607407 | 0.574747 |
| 4530 | ENSG00000CYP3A43  | 0.707071 | 0.470707 | 0.588889 | 0.589899 |
| 4531 | ENSG00000FCH02    | 0.969697 | 0.256566 | 0.606397 | 0.514141 |
| 4532 | ENSG00000BTN3A1   | 0.79704  | 0.391121 | 0.59408  | 0.598309 |
| 4533 | ENSG00000ST8SIA5  | 0.943434 | 0.255556 | 0.603872 | 0.574747 |
| 4534 | ENSG00000FAM156A  | 0.925253 | 0.285859 | 0.599158 | 0.583838 |
| 4535 | ENSG00000RNF165   | 0.973737 | 0.243434 | 0.594781 | 0.527273 |
| 4536 | ENSG00000VWC2L    | 0.868687 | 0.357576 | 0.613131 | 0.562626 |
| 4537 | ENSG00000DIS3L    | 0.826263 | 0.411111 | 0.6133   | 0.538384 |
| 4538 | ENSG00000TMEM86B  | 0.781818 | 0.419192 | 0.596128 | 0.576768 |
| 4539 | ENSG00000PLAGL2   | 0.905051 | 0.338384 | 0.616667 | 0.547475 |
| 4540 | ENSG00000ZNF750   | 0.971717 | 0.237374 | 0.582492 | 0.545455 |
| 4541 | ENSG00000PHF3     | 0.949495 | 0.278788 | 0.610774 | 0.550505 |
| 4542 | ENSG00000DMWD     | 0.883838 | 0.360606 | 0.616498 | 0.544444 |
| 4543 | ENSG00000USP49    | 0.950505 | 0.309091 | 0.612795 | 0.527273 |
| 4544 | ENSG00000TOM1L2   | 0.972727 | 0.261616 | 0.597811 | 0.517172 |
| 4545 | ENSG00000CALHM5   | 0.754545 | 0.427273 | 0.590909 | 0.594949 |
| 4546 | ENSG00000SPG21    | 0.909091 | 0.329293 | 0.599663 | 0.574747 |
| 4547 | ENSG00000FHL2     | 0.976768 | 0.229293 | 0.605387 | 0.520202 |
| 4548 | ENSG00000IL1RAPL2 | 0.939394 | 0.286869 | 0.595286 | 0.570707 |
| 4549 | ENSG00000EPN2     | 0.743129 | 0.43129  | 0.5821   | 0.607822 |
| 4550 | ENSG00000LGI4     | 0.975758 | 0.277778 | 0.622054 | 0.474747 |
| 4551 | ENSG00000EFCAB8   | 0.955556 | 0.29697  | 0.608586 | 0.535354 |
| 4552 | ENSG00000SLIT3    | 0.836364 | 0.389899 | 0.604377 | 0.562626 |
| 4553 | ENSG00000IL16     | 0.894949 | 0.326263 | 0.596801 | 0.592929 |
| 4554 | ENSG00000FAM118A  | 0.79798  | 0.438384 | 0.610774 | 0.537374 |
| 4555 | ENSG00000ANKIB1   | 0.963636 | 0.288889 | 0.63468  | 0.481818 |
| 4556 | ENSG00000MINK1    | 0.727273 | 0.482828 | 0.60404  | 0.550505 |
| 4557 | ENSG00000CERS3    | 0.828753 | 0.37315  | 0.590733 | 0.599366 |
| 4558 | ENSG00000COX16    | 0.745455 | 0.446465 | 0.59596  | 0.581818 |
| 4559 | ENSG00000ERCC6L   | 0.922481 | 0.337763 | 0.625692 | 0.51938  |
| 4560 | ENSG00000ACTR6    | 0.959596 | 0.256566 | 0.591246 | 0.561616 |
| 4561 | ENSG00000C11orf53 | 0.876768 | 0.344444 | 0.598822 | 0.591919 |
| 4562 | ENSG00000ME1      | 0.77167  | 0.411205 | 0.589852 | 0.60148  |
| 4563 | ENSG00000AGBL4    | 0.836364 | 0.385859 | 0.607071 | 0.564646 |

|      |                    |          |          |          |          |        |
|------|--------------------|----------|----------|----------|----------|--------|
| 4564 | ENSG00000SPATA5L1  | 0.818182 | 0.409091 | 0.609091 | 0.553535 |        |
| 4565 | ENSG00000CD36      | 0.79798  | 0.39798  | 0.59798  | 0.590909 |        |
| 4566 | ENSG00000TTC26     | 0.763636 | 0.410101 | 0.586869 | 0.612121 |        |
| 4567 | ENSG00000SREBF1    | 0.745455 | 0.446465 | 0.59596  | 0.583838 | 0.3152 |
| 4568 | ENSG00000ITGA11    | 0.873737 | 0.373737 | 0.610774 | 0.548485 |        |
| 4569 | ENSG00000FAM206A   | 0.965657 | 0.240404 | 0.631987 | 0.508081 |        |
| 4570 | ENSG00000SLC19A1   | 0.727273 | 0.456566 | 0.58569  | 0.592929 |        |
| 4571 | ENSG00000NEBL      | 0.878788 | 0.367677 | 0.623232 | 0.540404 |        |
| 4572 | ENSG00000CHORDC1   | 0.9      | 0.322222 | 0.598316 | 0.593939 |        |
| 4573 | ENSG00000PON3      | 0.872727 | 0.361616 | 0.617172 | 0.557576 |        |
| 4574 | ENSG00000CASKIN2   | 0.765657 | 0.426263 | 0.585185 | 0.59596  |        |
| 4575 | ENSG00000LONRF3    | 0.789899 | 0.412121 | 0.60101  | 0.576768 |        |
| 4576 | ENSG00000RAB17     | 0.736364 | 0.467677 | 0.60202  | 0.561616 |        |
| 4577 | ENSG00000SP4       | 0.976744 | 0.248414 | 0.60007  | 0.520085 |        |
| 4578 | ENSG00000RNF11     | 0.892929 | 0.336364 | 0.604545 | 0.579798 |        |
| 4579 | ENSG00000SORCS1    | 0.736364 | 0.467677 | 0.60202  | 0.562626 |        |
| 4580 | ENSG00000FAM161A   | 0.727273 | 0.490909 | 0.609091 | 0.540404 |        |
| 4581 | ENSG00000HEYL      | 0.79798  | 0.40101  | 0.594949 | 0.592929 |        |
| 4582 | ENSG00000NAT6      | 0.89899  | 0.353535 | 0.611616 | 0.544444 |        |
| 4583 | ENSG00000PEX10     | 0.757576 | 0.476768 | 0.6      | 0.540404 |        |
| 4584 | ENSG00000OSR1      | 0.77167  | 0.430233 | 0.596195 | 0.580338 |        |
| 4585 | ENSG00000GLRA4     | 0.851515 | 0.370707 | 0.611111 | 0.566667 |        |
| 4586 | ENSG00000LRRC4B    | 0.828283 | 0.373737 | 0.589226 | 0.605051 |        |
| 4587 | ENSG00000NDUFS8    | 0.830303 | 0.391919 | 0.611111 | 0.563636 |        |
| 4588 | ENSG00000ASPHD1    | 0.773737 | 0.446465 | 0.610101 | 0.549495 |        |
| 4589 | ENSG00000PHF7      | 0.890909 | 0.364646 | 0.624242 | 0.530303 |        |
| 4590 | ENSG00000ZDHH18    | 0.781818 | 0.428283 | 0.605051 | 0.562626 |        |
| 4591 | ENSG00000PTGS2     | 0.894949 | 0.340404 | 0.610943 | 0.566667 |        |
| 4592 | ENSG00000MTG1      | 0.977778 | 0.231313 | 0.606229 | 0.522222 |        |
| 4593 | ENSG00000RFC3      | 0.886869 | 0.352525 | 0.612795 | 0.560606 |        |
| 4594 | ENSG00000OLFM4     | 0.724101 | 0.483087 | 0.603594 | 0.55814  |        |
| 4595 | ENSG00000ERLIN1    | 0.907071 | 0.334343 | 0.604714 | 0.569697 |        |
| 4596 | ENSG00000GRK2      | 0.991919 | 0.305051 | 0.607407 | 0.451515 |        |
| 4597 | ENSG00000RETSAT    | 0.781818 | 0.428283 | 0.605051 | 0.566667 |        |
| 4598 | ENSG00000DUS4L     | 0.890909 | 0.344444 | 0.605892 | 0.573737 |        |
| 4599 | ENSG00000RBM3      | 0.945455 | 0.29798  | 0.616162 | 0.544444 |        |
| 4600 | ENSG00000IL5       | 0.781818 | 0.428283 | 0.605051 | 0.566667 |        |
| 4601 | ENSG00000AL360181. | 0.977778 | 0.231313 | 0.606229 | 0.522222 |        |
| 4602 | ENSG00000PTRJ      | 0.754545 | 0.427273 | 0.590909 | 0.60303  |        |
| 4603 | ENSG00000BRPF1     | 0.892178 | 0.328753 | 0.603594 | 0.593023 |        |
| 4604 | ENSG00000CACNA1C   | 0.745455 | 0.446465 | 0.59596  | 0.586869 |        |
| 4605 | ENSG00000ADAL      | 0.809091 | 0.421212 | 0.611111 | 0.551515 |        |
| 4606 | ENSG00000TMEM62    | 0.830303 | 0.4      | 0.611448 | 0.557576 |        |
| 4607 | ENSG00000ARMCX2    | 0.69697  | 0.494949 | 0.59596  | 0.573737 |        |
| 4608 | ENSG00000KCNH7     | 0.781818 | 0.40202  | 0.590236 | 0.608081 |        |
| 4609 | ENSG00000EPS8L2    | 0.787879 | 0.432323 | 0.607407 | 0.557576 |        |
| 4610 | ENSG00000OXA1L     | 0.778516 | 0.413068 | 0.595792 | 0.595792 |        |
| 4611 | ENSG00000ENHO      | 0.940803 | 0.302326 | 0.608351 | 0.553911 | 0.3579 |
| 4612 | ENSG00000SCAMP2    | 0.967677 | 0.282828 | 0.604545 | 0.516162 |        |
| 4613 | ENSG00000RHEBL1    | 0.968687 | 0.29596  | 0.619192 | 0.488889 |        |
| 4614 | ENSG00000UTP14A    | 0.940404 | 0.310101 | 0.626768 | 0.529293 |        |
| 4615 | ENSG00000FGFBP1    | 0.69697  | 0.485859 | 0.590572 | 0.592929 |        |
| 4616 | ENSG00000SLC30A7   | 0.745455 | 0.446465 | 0.59596  | 0.588889 |        |
| 4617 | ENSG00000BCAN      | 0.954545 | 0.218182 | 0.593939 | 0.605051 |        |
| 4618 | ENSG00000PINLYP    | 0.724101 | 0.483087 | 0.603594 | 0.561311 |        |

|      |           |           |          |          |          |          |
|------|-----------|-----------|----------|----------|----------|----------|
| 4619 | ENSG00000 | TNMD      | 0.969697 | 0.30202  | 0.636532 | 0.459596 |
| 4620 | ENSG00000 | WISP2     | 0.781818 | 0.428283 | 0.605051 | 0.570707 |
| 4621 | ENSG00000 | SLC23A2   | 0.678848 | 0.506091 | 0.59247  | 0.584718 |
| 4622 | ENSG00000 | SLC30A6   | 0.785412 | 0.443975 | 0.608703 | 0.55074  |
| 4623 | ENSG00000 | SYT4      | 0.809091 | 0.431313 | 0.620202 | 0.535354 |
| 4624 | ENSG00000 | CD300LD   | 0.838384 | 0.362626 | 0.585354 | 0.615152 |
| 4625 | ENSG00000 | AP1M1     | 0.892929 | 0.294949 | 0.593098 | 0.634343 |
| 4626 | ENSG00000 | CHD2      | 0.969697 | 0.254545 | 0.601515 | 0.532323 |
| 4627 | ENSG00000 | CARS      | 0.930303 | 0.322222 | 0.616162 | 0.543434 |
| 4628 | ENSG00000 | SERPINB13 | 0.784355 | 0.419662 | 0.582276 | 0.599366 |
| 4629 | ENSG00000 | UTP14C    | 0.940404 | 0.310101 | 0.626768 | 0.529293 |
| 4630 | ENSG00000 | FGFBP3    | 0.69697  | 0.494949 | 0.59596  | 0.577778 |
| 4631 | ENSG00000 | SCN4B     | 0.890909 | 0.347475 | 0.606902 | 0.569697 |
| 4632 | ENSG00000 | PLPPR5    | 0.884848 | 0.360606 | 0.615825 | 0.556566 |
| 4633 | ENSG00000 | THOP1     | 0.967677 | 0.283838 | 0.637205 | 0.477778 |
| 4634 | ENSG00000 | TMEM246   | 0.967677 | 0.30303  | 0.648653 | 0.434343 |
| 4635 | ENSG00000 | CFAP70    | 0.909091 | 0.338384 | 0.608923 | 0.563636 |
| 4636 | ENSG00000 | HRG       | 0.89697  | 0.355556 | 0.61633  | 0.548485 |
| 4637 | ENSG00000 | SP140     | 0.910101 | 0.346465 | 0.625421 | 0.538384 |
| 4638 | ENSG00000 | NUBP2     | 0.883721 | 0.376523 | 0.619786 | 0.535991 |
| 4639 | ENSG00000 | FAT2      | 0.69697  | 0.494949 | 0.59596  | 0.581818 |
| 4640 | ENSG00000 | SULF1     | 0.789899 | 0.412121 | 0.60101  | 0.586869 |
| 4641 | ENSG00000 | CEACAM16  | 0.789899 | 0.412121 | 0.60101  | 0.584848 |
| 4642 | ENSG00000 | SLC25A41  | 0.69697  | 0.490909 | 0.587879 | 0.589899 |
| 4643 | ENSG00000 | TRIM43B   | 0.981818 | 0.272727 | 0.606734 | 0.49899  |
| 4644 | ENSG00000 | PNKD      | 0.923232 | 0.354545 | 0.636869 | 0.494949 |
| 4645 | ENSG00000 | COL12A1   | 0.860606 | 0.363636 | 0.607071 | 0.582828 |
| 4646 | ENSG00000 | TRIM43    | 0.981818 | 0.272727 | 0.606734 | 0.49899  |
| 4647 | ENSG00000 | ABTB2     | 0.815152 | 0.39798  | 0.598316 | 0.587879 |
| 4648 | ENSG00000 | CA1       | 0.89798  | 0.375758 | 0.623232 | 0.517172 |
| 4649 | ENSG00000 | CXorf40B  | 0.848485 | 0.39697  | 0.611616 | 0.550505 |
| 4650 | ENSG00000 | CXorf40A  | 0.848485 | 0.39697  | 0.611616 | 0.550505 |
| 4651 | ENSG00000 | AK5       | 0.888889 | 0.346465 | 0.614478 | 0.569697 |
| 4652 | ENSG00000 | DZIP1L    | 0.886869 | 0.373737 | 0.623569 | 0.531313 |
| 4653 | ENSG00000 | CTSL      | 0.69697  | 0.494949 | 0.59596  | 0.581818 |
| 4654 | ENSG00000 | KLHL32    | 0.763636 | 0.410101 | 0.586869 | 0.619192 |
| 4655 | ENSG00000 | C12orf71  | 0.707071 | 0.470707 | 0.588889 | 0.60303  |
| 4656 | ENSG00000 | ERG28     | 0.760606 | 0.443434 | 0.599663 | 0.581818 |
| 4657 | ENSG00000 | TFRC      | 0.935354 | 0.30303  | 0.616835 | 0.556566 |
| 4658 | ENSG00000 | JADE3     | 0.844961 | 0.386489 | 0.60742  | 0.570321 |
| 4659 | ENSG00000 | IFI30     | 0.736364 | 0.467677 | 0.60202  | 0.569697 |
| 4660 | ENSG00000 | CCDC14    | 0.909091 | 0.329293 | 0.613468 | 0.571717 |
| 4661 | ENSG00000 | RSP01     | 0.866667 | 0.376768 | 0.610774 | 0.560606 |
| 4662 | ENSG00000 | NFE2      | 0.862626 | 0.359596 | 0.603704 | 0.591919 |
| 4663 | ENSG00000 | WASF1     |          | 1        | 0.239394 | 0.612963 |
| 4664 | ENSG00000 | OMA1      | 0.749495 | 0.454545 | 0.6      | 0.575758 |
| 4665 | ENSG00000 | GRB14     | 0.941414 | 0.29798  | 0.599663 | 0.571717 |
| 4666 | ENSG00000 | NGRN      | 0.765657 | 0.438384 | 0.600673 | 0.581818 |
| 4667 | ENSG00000 | PRRC2C    | 0.949495 | 0.276768 | 0.591246 | 0.586869 |
| 4668 | ENSG00000 | CLK1      | 0.819239 | 0.390063 | 0.597604 | 0.596195 |
| 4669 | ENSG00000 | FMR1NB    | 0.943434 | 0.321212 | 0.609596 | 0.540404 |
| 4670 | ENSG00000 | GAB1      | 0.830303 | 0.391919 | 0.611111 | 0.573737 |
| 4671 | ENSG00000 | PP1P5K2   | 0.988372 | 0.2537   | 0.600247 | 0.514799 |
| 4672 | ENSG00000 | AFG1L     | 0.977778 | 0.225253 | 0.603704 | 0.538384 |
| 4673 | ENSG00000 | NEFH      | 0.955556 | 0.244444 | 0.588215 | 0.60202  |

|      |                    |          |          |          |          |       |
|------|--------------------|----------|----------|----------|----------|-------|
| 4674 | ENSG00000CCR7      | 0.789899 | 0.412121 | 0.60101  | 0.590909 |       |
| 4675 | ENSG00000SLC4A1AP  | 0.888889 | 0.371717 | 0.619192 | 0.538384 |       |
| 4676 | ENSG00000MYOZ1     | 0.924242 | 0.334343 | 0.629966 | 0.528283 |       |
| 4677 | ENSG00000C2CD4C    | 0.686869 | 0.521212 | 0.60404  | 0.561616 |       |
| 4678 | ENSG00000PCDHB2    | 0.733615 | 0.459831 | 0.596723 | 0.589852 |       |
| 4679 | ENSG00000KLHL24    | 0.736364 | 0.459596 | 0.596801 | 0.587879 |       |
| 4680 | ENSG00000ADPRHL1   | 0.790698 | 0.436323 | 0.607604 | 0.560354 |       |
| 4681 | ENSG00000HRH1      | 0.816162 | 0.416162 | 0.616162 | 0.553535 |       |
| 4682 | ENSG00000NOCT      | 0.9      | 0.330303 | 0.609764 | 0.585859 |       |
| 4683 | ENSG00000DOPEY1    | 0.981818 | 0.29899  | 0.621717 | 0.468687 |       |
| 4684 | ENSG00000HPD       | 0.968687 | 0.233333 | 0.612121 | 0.540404 |       |
| 4685 | ENSG00000MAST2     | 0.970707 | 0.269697 | 0.608586 | 0.523232 |       |
| 4686 | ENSG00000DPPA4     | 0.980808 | 0.246465 | 0.62963  | 0.494949 |       |
| 4687 | ENSG00000HIRIP3    | 0.9      | 0.334343 | 0.605051 | 0.585859 |       |
| 4688 | ENSG00000TBK1      | 0.924242 | 0.346465 | 0.629966 | 0.514141 |       |
| 4689 | ENSG00000COQ6      | 0.90303  | 0.316162 | 0.608081 | 0.60101  |       |
| 4690 | ENSG00000CACNA1D   | 0.82981  | 0.412262 | 0.616984 | 0.547569 |       |
| 4691 | ENSG00000GDF6      | 0.806061 | 0.418182 | 0.60404  | 0.572727 |       |
| 4692 | ENSG00000IL17C     | 0.712071 | 0.433001 | 0.572536 | 0.650055 |       |
| 4693 | ENSG00000UBXN6     | 0.971717 | 0.270707 | 0.640572 | 0.481818 |       |
| 4694 | ENSG00000KRT7      | 0.872727 | 0.361616 | 0.617172 | 0.570707 | 0.238 |
| 4695 | ENSG00000IL2RG     | 0.773737 | 0.446465 | 0.610101 | 0.561616 |       |
| 4696 | ENSG00000FBX010    | 0.754545 | 0.427273 | 0.590909 | 0.612121 |       |
| 4697 | ENSG00000ARFGAP1   | 0.960606 | 0.251515 | 0.626768 | 0.539394 |       |
| 4698 | ENSG00000C2orf76   | 0.773737 | 0.446465 | 0.610101 | 0.560606 |       |
| 4699 | ENSG00000BCLAF3    | 0.865657 | 0.389899 | 0.615488 | 0.549495 |       |
| 4700 | ENSG00000PRSS38    | 0.878788 | 0.356566 | 0.613805 | 0.573737 |       |
| 4701 | ENSG00000LRCH4     | 0.830303 | 0.391919 | 0.611111 | 0.577778 |       |
| 4702 | ENSG00000CD3G      | 0.870707 | 0.346465 | 0.605051 | 0.60303  |       |
| 4703 | ENSG00000FANCG     | 0.827273 | 0.368687 | 0.59899  | 0.613131 |       |
| 4704 | ENSG00000CHRNA3    | 0.773737 | 0.446465 | 0.610101 | 0.563636 |       |
| 4705 | ENSG00000POLI      | 0.72093  | 0.475083 | 0.598007 | 0.586932 |       |
| 4706 | ENSG00000ZNF524    | 0.757576 | 0.471717 | 0.603367 | 0.554545 |       |
| 4707 | ENSG00000LSM14B    | 0.90404  | 0.340404 | 0.615488 | 0.564646 |       |
| 4708 | ENSG00000CASTOR1   | 0.736364 | 0.467677 | 0.60202  | 0.574747 |       |
| 4709 | ENSG00000AC004997. | 0.736364 | 0.467677 | 0.60202  | 0.574747 |       |
| 4710 | ENSG00000VMP1      | 0.915433 | 0.319239 | 0.608351 | 0.588795 |       |
| 4711 | ENSG00000ZNF596    | 0.82241  | 0.383721 | 0.599718 | 0.603594 |       |
| 4712 | ENSG00000PLXND1    | 0.886892 | 0.389006 | 0.628612 | 0.51797  |       |
| 4713 | ENSG00000DIP2A     | 0.736364 | 0.467677 | 0.60202  | 0.576768 |       |
| 4714 | ENSG00000CRAT      | 0.970707 | 0.247475 | 0.62037  | 0.524242 |       |
| 4715 | ENSG00000KCTD17    | 0.765657 | 0.466667 | 0.616162 | 0.546465 |       |
| 4716 | ENSG00000BEX4      | 0.736364 | 0.467677 | 0.60202  | 0.579798 |       |
| 4717 | ENSG00000TOP2A     | 0.956566 | 0.272727 | 0.642424 | 0.529293 |       |
| 4718 | ENSG00000WDR830S   | 0.890909 | 0.367677 | 0.616667 | 0.549495 |       |
| 4719 | ENSG00000TMEM231   | 0.789899 | 0.412121 | 0.60101  | 0.592929 |       |
| 4720 | ENSG00000NLRP13    | 0.863636 | 0.34778  | 0.602537 | 0.609937 |       |
| 4721 | ENSG00000USP18     | 0.789899 | 0.394949 | 0.587037 | 0.622222 |       |
| 4722 | ENSG00000DSC1      | 0.791304 | 0.419324 | 0.605314 | 0.582609 |       |
| 4723 | ENSG00000IL32      | 0.969697 | 0.251515 | 0.625253 | 0.521212 |       |
| 4724 | ENSG00000OSMR      | 0.884848 | 0.365657 | 0.626094 | 0.549495 |       |
| 4725 | ENSG00000IP6K1     | 0.89697  | 0.335354 | 0.601852 | 0.594949 |       |
| 4726 | ENSG00000TRAT1     | 0.911111 | 0.30404  | 0.598653 | 0.616162 |       |
| 4727 | ENSG00000ALX1      | 0.973737 | 0.246465 | 0.596465 | 0.545455 |       |
| 4728 | ENSG00000GAS2      | 0.773737 | 0.446465 | 0.610101 | 0.565657 |       |

|      |                    |          |          |          |          |
|------|--------------------|----------|----------|----------|----------|
| 4729 | ENSG00000CMC1      | 0.897463 | 0.332981 | 0.601128 | 0.598309 |
| 4730 | ENSG00000C1QTNF6   | 0.718182 | 0.485859 | 0.601178 | 0.579798 |
| 4731 | ENSG00000LACC1     | 0.987879 | 0.232323 | 0.606061 | 0.525253 |
| 4732 | ENSG00000HOOK2     | 0.927273 | 0.341414 | 0.61936  | 0.534343 |
| 4733 | ENSG00000Z98749.3  | 0.823232 | 0.40303  | 0.613131 | 0.569697 |
| 4734 | ENSG00000CLHC1     | 0.79845  | 0.392027 | 0.583426 | 0.625692 |
| 4735 | ENSG00000C15orf65  | 0.717172 | 0.491919 | 0.602189 | 0.569697 |
| 4736 | ENSG00000KLF16     | 0.822222 | 0.417172 | 0.611953 | 0.559596 |
| 4737 | ENSG00000BDH1      | 0.794949 | 0.439394 | 0.615657 | 0.553535 |
| 4738 | ENSG00000EGFL6     | 0.736364 | 0.467677 | 0.60202  | 0.579798 |
| 4739 | ENSG00000FBX048    | 0.718182 | 0.453535 | 0.579125 | 0.624242 |
| 4740 | ENSG00000GDPD3     | 0.958586 | 0.261616 | 0.625421 | 0.550505 |
| 4741 | ENSG00000C5orf15   | 0.945032 | 0.328753 | 0.62086  | 0.527484 |
| 4742 | ENSG00000NUDT16    | 0.949495 | 0.313131 | 0.662963 | 0.487879 |
| 4743 | ENSG00000SIPA1     | 0.949495 | 0.262626 | 0.627609 | 0.563636 |
| 4744 | ENSG00000FAM184B   | 0.941414 | 0.277778 | 0.594781 | 0.6      |
| 4745 | ENSG00000ZCCHC4    | 0.969697 | 0.271717 | 0.597138 | 0.540404 |
| 4746 | ENSG00000CRMP1     | 0.935354 | 0.317172 | 0.622559 | 0.549495 |
| 4747 | ENSG00000BOD1      | 0.848485 | 0.39697  | 0.619697 | 0.554545 |
| 4748 | ENSG00000SMPD4     | 0.915152 | 0.338384 | 0.620875 | 0.558586 |
| 4749 | ENSG00000PRR5      | 0.836364 | 0.39899  | 0.612458 | 0.567677 |
| 4750 | ENSG00000NAF1      | 0.972727 | 0.238384 | 0.607744 | 0.543434 |
| 4751 | ENSG00000TMEM138   | 0.809091 | 0.405051 | 0.605219 | 0.589899 |
| 4752 | ENSG00000MFF       | 0.794949 | 0.439394 | 0.615657 | 0.554545 |
| 4753 | ENSG00000AC010422. | 0.890909 | 0.367677 | 0.616667 | 0.549495 |
| 4754 | ENSG00000NOL3      | 0.926004 | 0.337209 | 0.618746 | 0.544397 |
| 4755 | ENSG00000CDO1      | 0.773737 | 0.419192 | 0.594949 | 0.611111 |
| 4756 | ENSG00000KDELR3    | 0.727273 | 0.490909 | 0.609091 | 0.562626 |
| 4757 | ENSG00000DCTPP1    | 0.893939 | 0.383838 | 0.636364 | 0.510101 |
| 4758 | ENSG00000PANK4     | 0.974747 | 0.231313 | 0.61431  | 0.538384 |
| 4759 | ENSG00000BOD1L2    | 0.848485 | 0.39697  | 0.619697 | 0.554545 |
| 4760 | ENSG00000FZD2      | 0.781818 | 0.428283 | 0.605051 | 0.583838 |
| 4761 | ENSG00000MCM6      | 0.949495 | 0.292929 | 0.636532 | 0.540404 |
| 4762 | ENSG00000CTCFL     | 0.724101 | 0.483087 | 0.603594 | 0.577167 |
| 4763 | ENSG00000CRHBP     | 0.829293 | 0.405051 | 0.617172 | 0.563636 |
| 4764 | ENSG00000STK31     | 0.755814 | 0.443975 | 0.597252 | 0.597252 |
| 4765 | ENSG00000PYCARD    | 1        | 0.270707 | 0.62862  | 0.443434 |
| 4766 | ENSG00000AP1S2     | 0.961616 | 0.285859 | 0.614478 | 0.535354 |
| 4767 | ENSG00000C10orf128 | 0.89798  | 0.345455 | 0.619529 | 0.567677 |
| 4768 | ENSG00000SDF4      | 0.858586 | 0.349495 | 0.60404  | 0.616162 |
| 4769 | ENSG00000FBX044    | 0.875758 | 0.374747 | 0.616162 | 0.562626 |
| 4770 | ENSG00000PDX1      | 0.838384 | 0.376768 | 0.595118 | 0.609091 |
| 4771 | ENSG00000GLB1L     | 0.682875 | 0.513742 | 0.598309 | 0.586681 |
| 4772 | ENSG00000CNTNAP2   | 0.765657 | 0.466667 | 0.616162 | 0.550505 |
| 4773 | ENSG00000GAB2      | 0.980808 | 0.269697 | 0.609428 | 0.517172 |
| 4774 | ENSG00000GIGYF2    | 0.911111 | 0.323232 | 0.608754 | 0.594949 |
| 4775 | ENSG00000APBB3     | 0.813953 | 0.401993 | 0.607973 | 0.590255 |
| 4776 | ENSG00000TEKT3     | 0.868687 | 0.345455 | 0.603367 | 0.616162 |
| 4777 | ENSG00000NPFFR1    | 0.854545 | 0.360606 | 0.613636 | 0.59798  |
| 4778 | ENSG00000ABCC2     | 0.973737 | 0.243434 | 0.609428 | 0.541414 |
| 4779 | ENSG00000KIAA1522  | 0.947475 | 0.293939 | 0.610438 | 0.569697 |
| 4780 | ENSG00000PP2D1     | 0.682875 | 0.513742 | 0.598309 | 0.587738 |
| 4781 | ENSG00000ITGB6     | 0.927273 | 0.317172 | 0.610438 | 0.575758 |
| 4782 | ENSG00000GAK       | 0.965657 | 0.232323 | 0.604377 | 0.563636 |
| 4783 | ENSG00000XCR1      | 0.773737 | 0.446465 | 0.610101 | 0.570707 |

|      |                  |          |          |          |          |        |
|------|------------------|----------|----------|----------|----------|--------|
| 4784 | ENSG00000PTPRK   | 0.816162 | 0.416162 | 0.616162 | 0.565657 |        |
| 4785 | ENSG00000SYNGAP1 | 0.812121 | 0.421212 | 0.609091 | 0.570707 |        |
| 4786 | ENSG00000ABLIM1  | 0.931313 | 0.314141 | 0.606397 | 0.577778 |        |
| 4787 | ENSG00000MCM4    | 1        | 0.250505 | 0.613468 | 0.484848 |        |
| 4788 | ENSG00000ZG16    | 0.886869 | 0.357576 | 0.612121 | 0.575758 |        |
| 4789 | ENSG00000KBTBD6  | 0.934343 | 0.273737 | 0.629798 | 0.576768 |        |
| 4790 | ENSG00000PSMA7   | 0.992929 | 0.243434 | 0.636532 | 0.488889 |        |
| 4791 | ENSG00000CLCNKB  | 0.751515 | 0.447475 | 0.596128 | 0.60101  |        |
| 4792 | ENSG00000CLCNKA  | 0.751515 | 0.447475 | 0.596128 | 0.60101  |        |
| 4793 | ENSG00000CCDC85A | 0.972727 | 0.277778 | 0.63569  | 0.49596  |        |
| 4794 | ENSG00000PGM3    | 0.984848 | 0.29798  | 0.643434 | 0.443434 |        |
| 4795 | ENSG00000RCAN3   | 0.789899 | 0.405051 | 0.595623 | 0.616162 |        |
| 4796 | ENSG00000TM4SF1  | 0.870707 | 0.341414 | 0.605387 | 0.617172 |        |
| 4797 | ENSG00000WDR17   | 0.787879 | 0.432323 | 0.607407 | 0.579798 |        |
| 4798 | ENSG00000HCLS1   | 0.724101 | 0.483087 | 0.603594 | 0.581395 |        |
| 4799 | ENSG00000TSPAN33 | 0.781818 | 0.428283 | 0.605051 | 0.588889 |        |
| 4800 | ENSG00000ADCY3   | 0.909091 | 0.352525 | 0.618013 | 0.555556 |        |
| 4801 | ENSG00000TMEM243 | 0.69697  | 0.494949 | 0.59596  | 0.59798  |        |
| 4802 | ENSG00000C1QTNF8 | 0.773737 | 0.446465 | 0.610101 | 0.572727 |        |
| 4803 | ENSG00000GLRX3   | 0.792929 | 0.411111 | 0.609091 | 0.59697  |        |
| 4804 | ENSG00000MAP4K4  | 0.817172 | 0.40202  | 0.600337 | 0.6      |        |
| 4805 | ENSG00000ZNF124  | 0.887879 | 0.342424 | 0.60202  | 0.605051 |        |
| 4806 | ENSG00000AAK1    | 0.830303 | 0.361616 | 0.59596  | 0.634343 | 0.2413 |
| 4807 | ENSG00000TBX15   | 0.748485 | 0.491919 | 0.613468 | 0.546465 |        |
| 4808 | ENSG00000SPATS2L | 0.809091 | 0.421212 | 0.611111 | 0.573737 |        |
| 4809 | ENSG00000UST     | 0.842424 | 0.39697  | 0.617508 | 0.568687 |        |
| 4810 | ENSG00000TMX1    | 0.80202  | 0.432323 | 0.608081 | 0.570707 |        |
| 4811 | ENSG00000ZZEF1   | 0.878788 | 0.342424 | 0.606566 | 0.613131 |        |
| 4812 | ENSG00000SRSF9   | 0.905051 | 0.345455 | 0.612963 | 0.574747 |        |
| 4813 | ENSG00000PNPLA4  | 0.883721 | 0.374308 | 0.620524 | 0.555925 |        |
| 4814 | ENSG00000PNMA1   | 0.962626 | 0.268687 | 0.640067 | 0.520202 |        |
| 4815 | ENSG00000RHOG    | 0.807611 | 0.42389  | 0.615751 | 0.569767 |        |
| 4816 | ENSG00000OR52N1  | 0.706061 | 0.50101  | 0.602694 | 0.582828 |        |
| 4817 | ENSG00000ST7     | 0.970707 | 0.255556 | 0.59798  | 0.556566 |        |
| 4818 | ENSG00000ADAT2   | 0.858586 | 0.367677 | 0.613131 | 0.591919 |        |
| 4819 | ENSG00000FAM186B | 0.990909 | 0.241414 | 0.607576 | 0.528283 |        |
| 4820 | ENSG00000UPF3A   | 0.887879 | 0.354545 | 0.611111 | 0.584848 |        |
| 4821 | ENSG00000MMP27   | 0.632323 | 0.547475 | 0.589899 | 0.6      |        |
| 4822 | ENSG00000SEC61B  | 0.885835 | 0.362579 | 0.615046 | 0.573996 |        |
| 4823 | ENSG00000WIPF2   | 0.90303  | 0.346465 | 0.657407 | 0.524242 | 0.2138 |
| 4824 | ENSG00000RBPJ    | 0.723347 | 0.460189 | 0.588394 | 0.619433 |        |
| 4825 | ENSG00000NSUN2   | 0.874747 | 0.381818 | 0.614815 | 0.565657 | 0.2299 |
| 4826 | ENSG00000HNF4A   | 0.964646 | 0.277778 | 0.656902 | 0.489899 |        |
| 4827 | ENSG00000DNAAF5  | 0.727273 | 0.490909 | 0.609091 | 0.568687 |        |
| 4828 | ENSG00000HMGCS1  | 0.986869 | 0.265657 | 0.650168 | 0.467677 |        |
| 4829 | ENSG00000CLIC1   | 0.969697 | 0.262626 | 0.599832 | 0.551515 |        |
| 4830 | ENSG00000TROAP   | 0.876768 | 0.374747 | 0.612963 | 0.571717 |        |
| 4831 | ENSG00000AMOTL1  | 0.714588 | 0.5      | 0.606413 | 0.573996 |        |
| 4832 | ENSG00000AOAH    | 0.977778 | 0.227273 | 0.597475 | 0.560606 |        |
| 4833 | ENSG00000HP      | 0.870707 | 0.326263 | 0.594781 | 0.649495 |        |
| 4834 | ENSG00000RBL1    | 0.963002 | 0.318182 | 0.632135 | 0.494715 |        |
| 4835 | ENSG00000MDN1    | 0.984848 | 0.247475 | 0.629966 | 0.509091 | 0.2993 |
| 4836 | ENSG00000ZNF512  | 0.888889 | 0.379798 | 0.627441 | 0.538384 |        |
| 4837 | ENSG00000CITED4  | 0.780127 | 0.420719 | 0.600423 | 0.608879 |        |
| 4838 | ENSG00000PRELID2 | 0.845666 | 0.393235 | 0.603066 | 0.588795 |        |

|      |           |           |          |          |          |          |
|------|-----------|-----------|----------|----------|----------|----------|
| 4839 | ENSG00000 | THOC3     | 0.934343 | 0.354545 | 0.622222 | 0.519192 |
| 4840 | ENSG00000 | C4BPA     | 0.872727 | 0.367677 | 0.620202 | 0.579798 |
| 4841 | ENSG00000 | SCIN      | 0.947475 | 0.306061 | 0.630303 | 0.550505 |
| 4842 | ENSG00000 | RHBDL2    | 0.836364 | 0.410101 | 0.621212 | 0.559596 |
| 4843 | ENSG00000 | HDAC5     | 0.983838 | 0.248485 | 0.627609 | 0.513131 |
| 4844 | ENSG00000 | NR2C2     | 0.849495 | 0.387879 | 0.621212 | 0.571717 |
| 4845 | ENSG00000 | TRPT1     | 0.961616 | 0.311111 | 0.668013 | 0.457576 |
| 4846 | ENSG00000 | EID2B     | 0.765657 | 0.466667 | 0.616162 | 0.559596 |
| 4847 | ENSG00000 | DNAI1     | 0.89899  | 0.355556 | 0.623401 | 0.561616 |
| 4848 | ENSG00000 | DDX4      | 0.980808 | 0.246465 | 0.636027 | 0.508081 |
| 4849 | ENSG00000 | CDCA8     | 0.966667 | 0.273737 | 0.649327 | 0.49798  |
| 4850 | ENSG00000 | CEP85L    | 1        | 0.238384 | 0.617508 | 0.489899 |
| 4851 | ENSG00000 | NOVA1     | 0.755814 | 0.488372 | 0.615046 | 0.549683 |
| 4852 | ENSG00000 | DCHS1     | 0.969697 | 0.256566 | 0.60303  | 0.554545 |
| 4853 | ENSG00000 | ZBTB14    | 0.889006 | 0.365751 | 0.621917 | 0.562368 |
| 4854 | ENSG00000 | C12orf29  | 0.773737 | 0.446465 | 0.610101 | 0.581818 |
| 4855 | ENSG00000 | LMO2      | 0.787879 | 0.465657 | 0.623401 | 0.540404 |
| 4856 | ENSG00000 | KDM1B     | 0.913131 | 0.321212 | 0.599158 | 0.614141 |
| 4857 | ENSG00000 | DHRS7B    | 0.971717 | 0.280808 | 0.613805 | 0.528283 |
| 4858 | ENSG00000 | LRRRC14   | 0.848485 | 0.40101  | 0.619697 | 0.562626 |
| 4859 | ENSG00000 | DNAI2     | 0.863636 | 0.354545 | 0.609091 | 0.612121 |
| 4860 | ENSG00000 | ARPC5L    | 0.818182 | 0.443434 | 0.615657 | 0.549495 |
| 4861 | ENSG00000 | AHSG      | 0.944444 | 0.320202 | 0.624579 | 0.547475 |
| 4862 | ENSG00000 | LGALS9    | 0.98203  | 0.261099 | 0.618041 | 0.520085 |
| 4863 | ENSG00000 | ELP3      | 0.823232 | 0.40303  | 0.613131 | 0.586869 |
| 4864 | ENSG00000 | GEMIN2    | 0.951515 | 0.282828 | 0.602694 | 0.592929 |
| 4865 | ENSG00000 | LGALS9B   | 0.98203  | 0.261099 | 0.618041 | 0.520085 |
| 4866 | ENSG00000 | EIF3E     | 0.831313 | 0.405051 | 0.611448 | 0.580808 |
| 4867 | ENSG00000 | LGALS9C   | 0.98203  | 0.261099 | 0.618041 | 0.520085 |
| 4868 | ENSG00000 | EVI2B     | 0.848485 | 0.39697  | 0.611616 | 0.574747 |
| 4869 | ENSG00000 | ANO7      | 0.678848 | 0.506091 | 0.59247  | 0.610188 |
| 4870 | ENSG00000 | PYCR3     | 0.967677 | 0.335354 | 0.63771  | 0.451515 |
| 4871 | ENSG00000 | ACKR1     | 0.945455 | 0.270707 | 0.601852 | 0.605051 |
| 4872 | ENSG00000 | C3orf18   | 0.794949 | 0.459596 | 0.622559 | 0.542424 |
| 4873 | ENSG00000 | ARPC5     | 0.818182 | 0.443434 | 0.615657 | 0.549495 |
| 4874 | ENSG00000 | OR10K1    | 0.709091 | 0.512121 | 0.609933 | 0.570707 |
| 4875 | ENSG00000 | SLC10A7   | 0.84778  | 0.403805 | 0.625793 | 0.556025 |
| 4876 | ENSG00000 | TET3      | 0.815011 | 0.43129  | 0.615398 | 0.563425 |
| 4877 | ENSG00000 | SERINC1   | 0.960606 | 0.290909 | 0.63165  | 0.530303 |
| 4878 | ENSG00000 | LHPP      | 0.968687 | 0.275758 | 0.60101  | 0.551515 |
| 4879 | ENSG00000 | OR10K2    | 0.709091 | 0.512121 | 0.609933 | 0.570707 |
| 4880 | ENSG00000 | SUDS3     | 0.908081 | 0.373737 | 0.636027 | 0.522222 |
| 4881 | ENSG00000 | TMEM70    | 0.978788 | 0.241414 | 0.60202  | 0.552525 |
| 4882 | ENSG00000 | CYB561    | 0.931313 | 0.348485 | 0.623232 | 0.531313 |
| 4883 | ENSG00000 | VTA1      | 0.823232 | 0.40303  | 0.613131 | 0.590909 |
| 4884 | ENSG00000 | WDR36     | 0.973737 | 0.268687 | 0.616498 | 0.532323 |
| 4885 | ENSG00000 | CHMP4A    | 0.793939 | 0.439394 | 0.605051 | 0.580808 |
| 4886 | ENSG00000 | TICAM1    | 0.891473 | 0.339978 | 0.61591  | 0.599114 |
| 4887 | ENSG00000 | MYH6      | 0.937374 | 0.267677 | 0.594949 | 0.622222 |
| 4888 | ENSG00000 | GJA10     | 0.89899  | 0.361616 | 0.617677 | 0.563636 |
| 4889 | ENSG00000 | CARD9     | 0.754545 | 0.427273 | 0.590909 | 0.631313 |
| 4890 | ENSG00000 | FAM120AOS | 0.866667 | 0.366667 | 0.609933 | 0.6      |
| 4891 | ENSG00000 | FEZ2      | 0.927273 | 0.323232 | 0.613468 | 0.577778 |
| 4892 | ENSG00000 | LYZ       | 0.844444 | 0.360606 | 0.600168 | 0.631313 |
| 4893 | ENSG00000 | P2RY14    | 0.89697  | 0.349495 | 0.629966 | 0.566667 |



|      |                   |          |          |          |          |
|------|-------------------|----------|----------|----------|----------|
| 4894 | ENSG00000HAX1     | 0.773737 | 0.446465 | 0.610101 | 0.585859 |
| 4895 | ENSG00000PDF      | 0.937374 | 0.317172 | 0.610438 | 0.573737 |
| 4896 | ENSG00000ZNF256   | 0.727273 | 0.490909 | 0.609091 | 0.577778 |
| 4897 | ENSG00000GATA2    | 0.919519 | 0.33025  | 0.615479 | 0.584644 |
| 4898 | ENSG00000STAT1    | 0.967677 | 0.240404 | 0.615152 | 0.560606 |
| 4899 | ENSG00000TBCK     | 0.859596 | 0.366667 | 0.60303  | 0.612121 |
| 4900 | ENSG00000CD22     | 0.912121 | 0.314141 | 0.593771 | 0.632323 |
| 4901 | ENSG00000BCORL1   | 0.968687 | 0.271717 | 0.602357 | 0.555556 |
| 4902 | ENSG00000TMEM94   | 0.809091 | 0.431313 | 0.620202 | 0.563636 |
| 4903 | ENSG00000NUTF2    | 0.981818 | 0.313131 | 0.625926 | 0.480808 |
| 4904 | ENSG00000TCEANC   | 0.727273 | 0.477778 | 0.596296 | 0.60101  |
| 4905 | ENSG00000ZNF226   | 0.977778 | 0.254545 | 0.610101 | 0.542424 |
| 4906 | ENSG00000HGD      | 0.80202  | 0.421212 | 0.609933 | 0.592929 |
| 4907 | ENSG00000POLR3F   | 0.927273 | 0.319192 | 0.614815 | 0.584848 |
| 4908 | ENSG00000TMSB15B  | 0.775758 | 0.426263 | 0.598316 | 0.614141 |
| 4909 | ENSG00000KCNN3    | 0.747357 | 0.468288 | 0.607822 | 0.585624 |
| 4910 | ENSG00000AJM1     | 0.809091 | 0.431313 | 0.620202 | 0.563636 |
| 4911 | ENSG00000DSP      | 0.90303  | 0.320202 | 0.609933 | 0.620202 |
| 4912 | ENSG00000TBC1D1   | 0.775758 | 0.462626 | 0.607071 | 0.572727 |
| 4913 | ENSG00000NIFK     | 0.970707 | 0.249495 | 0.635522 | 0.529293 |
| 4914 | ENSG00000THEMIS   | 0.872464 | 0.340097 | 0.606119 | 0.630918 |
| 4915 | ENSG00000NDUFB3   | 0.860606 | 0.411111 | 0.623737 | 0.546465 |
| 4916 | ENSG00000SCN2A    | 0.800211 | 0.440803 | 0.620507 | 0.563425 |
| 4917 | ENSG00000ST18     | 0.872647 | 0.351052 | 0.60096  | 0.623477 |
| 4918 | ENSG00000RYK      | 0.982828 | 0.29899  | 0.651852 | 0.453535 |
| 4919 | ENSG00000ANKLE1   | 0.714588 | 0.508457 | 0.611522 | 0.571882 |
| 4920 | ENSG00000CTSH     | 0.854545 | 0.349495 | 0.60202  | 0.637374 |
| 4921 | ENSG00000AIFM1    | 0.866667 | 0.385859 | 0.626263 | 0.565657 |
| 4922 | ENSG00000FBX06    | 0.90303  | 0.351515 | 0.612626 | 0.581818 |
| 4923 | ENSG00000MCOLN3   | 0.923232 | 0.353535 | 0.63468  | 0.534343 |
| 4924 | ENSG00000KHNYN    | 0.754757 | 0.483087 | 0.612051 | 0.563425 |
| 4925 | ENSG00000PDCL2    | 0.639535 | 0.55074  | 0.595137 | 0.602537 |
| 4926 | ENSG00000AFTPH    | 0.924242 | 0.334343 | 0.618182 | 0.569697 |
| 4927 | ENSG00000MBIP     | 0.721987 | 0.510571 | 0.609232 | 0.56871  |
| 4928 | ENSG00000NDST1    | 0.842424 | 0.422222 | 0.632323 | 0.542424 |
| 4929 | ENSG00000MEIS1    | 0.979798 | 0.323232 | 0.624074 | 0.476768 |
| 4930 | ENSG00000TWF1     | 0.809091 | 0.431313 | 0.620202 | 0.567677 |
| 4931 | ENSG00000GPR17    | 0.788618 | 0.44367  | 0.616144 | 0.574913 |
| 4932 | ENSG00000PTPN7    | 0.955556 | 0.322222 | 0.624579 | 0.542424 |
| 4933 | ENSG00000LRRC45   | 0.966667 | 0.29596  | 0.625589 | 0.522222 |
| 4934 | ENSG00000C19orf24 | 0.990909 | 0.254545 | 0.628956 | 0.510101 |
| 4935 | ENSG00000AVL9     | 0.774747 | 0.453535 | 0.612795 | 0.575758 |
| 4936 | ENSG00000MPST     | 0.863636 | 0.38055  | 0.609584 | 0.591966 |
| 4937 | ENSG00000MRPL54   | 0.993939 | 0.291919 | 0.639731 | 0.468687 |
| 4938 | ENSG00000AKR1C3   | 0.939394 | 0.29798  | 0.65202  | 0.545455 |
| 4939 | ENSG00000RRAD     | 0.856237 | 0.403805 | 0.618041 | 0.564482 |
| 4940 | ENSG00000EXOSC5   | 0.765657 | 0.459596 | 0.611279 | 0.582828 |
| 4941 | ENSG00000DHX32    | 0.874207 | 0.374207 | 0.602361 | 0.598309 |
| 4942 | ENSG00000RFC2     | 0.89697  | 0.364646 | 0.621886 | 0.565657 |
| 4943 | ENSG00000CDNF     | 0.90202  | 0.338384 | 0.605892 | 0.606061 |
| 4944 | ENSG00000ATP6V1C2 | 0.836364 | 0.410101 | 0.621212 | 0.570707 |
| 4945 | ENSG00000SKA2     | 0.809091 | 0.421212 | 0.611111 | 0.589899 |
| 4946 | ENSG00000FBXW9    | 0.80202  | 0.442424 | 0.620539 | 0.564646 |
| 4947 | ENSG00000TTK      | 0.870707 | 0.385859 | 0.619192 | 0.574747 |
| 4948 | ENSG00000CHRM4    | 0.837374 | 0.382828 | 0.610101 | 0.609091 |

|      |                    |          |          |          |          |        |
|------|--------------------|----------|----------|----------|----------|--------|
| 4949 | ENSG000000CHM      | 0.914141 | 0.353535 | 0.617845 | 0.566667 |        |
| 4950 | ENSG000000GTSF1    | 0.947146 | 0.309725 | 0.65222  | 0.533827 |        |
| 4951 | ENSG000000PCYOX1   | 0.824242 | 0.417172 | 0.620707 | 0.573737 |        |
| 4952 | ENSG000000APOBEC3C | 0.765657 | 0.466667 | 0.616162 | 0.570707 |        |
| 4953 | ENSG000000PKDREJ   | 0.714588 | 0.508457 | 0.611522 | 0.577167 |        |
| 4954 | ENSG000000FANCI    | 0.92389  | 0.313953 | 0.621212 | 0.59408  |        |
| 4955 | ENSG000000MYH7     | 0.935354 | 0.274747 | 0.598316 | 0.625253 |        |
| 4956 | ENSG000000MAF1     | 0.933333 | 0.335354 | 0.669697 | 0.49697  |        |
| 4957 | ENSG000000RUBCN    | 0.672727 | 0.521212 | 0.596296 | 0.611111 |        |
| 4958 | ENSG000000CGREF1   | 0.903805 | 0.375264 | 0.626145 | 0.54334  |        |
| 4959 | ENSG000000CNOT6    | 0.736364 | 0.467677 | 0.60202  | 0.607071 |        |
| 4960 | ENSG000000ALKBH7   | 0.972727 | 0.322222 | 0.632323 | 0.483838 |        |
| 4961 | ENSG000000BHLHA15  | 0.873737 | 0.350505 | 0.599832 | 0.628283 |        |
| 4962 | ENSG000000NUDT22   | 0.89899  | 0.384848 | 0.631145 | 0.535354 |        |
| 4963 | ENSG000000PRKCI    | 0.794949 | 0.439394 | 0.615657 | 0.579798 |        |
| 4964 | ENSG000000HEATR5B  | 0.887879 | 0.40303  | 0.633165 | 0.527273 |        |
| 4965 | ENSG000000ACYP1    | 0.870707 | 0.386869 | 0.625589 | 0.568687 | 0.3683 |
| 4966 | ENSG000000EPHA6    | 0.915433 | 0.331924 | 0.616631 | 0.59408  |        |
| 4967 | ENSG000000DCTN5    | 0.787879 | 0.459596 | 0.622391 | 0.557576 |        |
| 4968 | ENSG000000TOR1AIP2 | 0.866667 | 0.355556 | 0.611111 | 0.618182 |        |
| 4969 | ENSG000000CMPK1    | 0.978788 | 0.258586 | 0.646801 | 0.50404  |        |
| 4970 | ENSG000000TLR3     | 0.853535 | 0.39697  | 0.611448 | 0.584848 |        |
| 4971 | ENSG000000SLC27A2  | 0.718182 | 0.516162 | 0.617172 | 0.565657 |        |
| 4972 | ENSG000000CPNE6    | 0.902748 | 0.34778  | 0.608351 | 0.596195 |        |
| 4973 | ENSG000000ZNF532   | 0.828283 | 0.414141 | 0.602357 | 0.59596  |        |
| 4974 | ENSG000000ABCC9    | 0.809725 | 0.438689 | 0.617336 | 0.56871  |        |
| 4975 | ENSG000000SH3RF1   | 0.89697  | 0.365657 | 0.623737 | 0.565657 |        |
| 4976 | ENSG000000C3orf38  | 0.965657 | 0.3      | 0.619529 | 0.533333 |        |
| 4977 | ENSG000000XIRP1    | 0.949495 | 0.325253 | 0.635522 | 0.538384 |        |
| 4978 | ENSG000000C11orf96 | 0.826638 | 0.401691 | 0.602713 | 0.609937 |        |
| 4979 | ENSG000000TMBIM6   | 0.893939 | 0.372727 | 0.621549 | 0.562626 |        |
| 4980 | ENSG000000RUNX3    | 0.957576 | 0.30404  | 0.610269 | 0.572727 |        |
| 4981 | ENSG000000AZGP1    | 0.954545 | 0.283838 | 0.611279 | 0.592929 |        |
| 4982 | ENSG000000ATP6VOD1 | 0.794949 | 0.439394 | 0.615657 | 0.581818 |        |
| 4983 | ENSG000000SIGLEC6  | 0.886869 | 0.329293 | 0.604377 | 0.639394 |        |
| 4984 | ENSG000000TAC1     | 0.736434 | 0.465116 | 0.600775 | 0.612403 |        |
| 4985 | ENSG000000NCOR1    | 1        | 0.255556 | 0.615657 | 0.473737 |        |
| 4986 | ENSG000000CEP78    | 0.89852  | 0.359408 | 0.619803 | 0.57611  |        |
| 4987 | ENSG000000PRRG3    | 0.835095 | 0.429175 | 0.632135 | 0.545455 |        |
| 4988 | ENSG000000CACNA2D1 | 0.881818 | 0.340404 | 0.607744 | 0.627273 |        |
| 4989 | ENSG000000UTS2     | 0.878788 | 0.409091 | 0.635859 | 0.532323 |        |
| 4990 | ENSG000000TES      | 0.978788 | 0.3      | 0.62037  | 0.512121 |        |
| 4991 | ENSG000000TRIM45   | 0.763214 | 0.446089 | 0.59408  | 0.61945  |        |
| 4992 | ENSG000000LCMT2    | 0.930303 | 0.325253 | 0.615152 | 0.580808 |        |
| 4993 | ENSG000000STYX     | 0.889899 | 0.387879 | 0.62963  | 0.545455 |        |
| 4994 | ENSG000000JRKL     | 0.809091 | 0.431313 | 0.620202 | 0.573737 |        |
| 4995 | ENSG000000DYDC2    | 0.923232 | 0.323232 | 0.614141 | 0.59798  |        |
| 4996 | ENSG000000PCID2    | 0.919192 | 0.349495 | 0.627946 | 0.558586 |        |
| 4997 | ENSG000000MAPKAP1  | 1        | 0.254545 | 0.616835 | 0.492929 |        |
| 4998 | ENSG000000INTS3    | 0.809091 | 0.425253 | 0.61532  | 0.588889 |        |
| 4999 | ENSG000000MMGT1    | 0.846465 | 0.419192 | 0.623569 | 0.557576 |        |
| 5000 | ENSG000000CTH      | 0.924242 | 0.334343 | 0.629966 | 0.565657 |        |
| 5001 | ENSG000000TMEM117  | 0.644444 | 0.557576 | 0.60101  | 0.6      |        |
| 5002 | ENSG000000USP17L2  | 0.766667 | 0.447475 | 0.603704 | 0.606061 |        |
| 5003 | ENSG000000USP17L15 | 0.766667 | 0.447475 | 0.603704 | 0.606061 |        |

|      |                   |          |          |          |          |        |        |
|------|-------------------|----------|----------|----------|----------|--------|--------|
| 5004 | ENSG00000USP17L3  | 0.766667 | 0.447475 | 0.603704 | 0.606061 |        |        |
| 5005 | ENSG00000USP17L7  | 0.766667 | 0.447475 | 0.603704 | 0.606061 |        |        |
| 5006 | ENSG00000COX15    | 0.904863 | 0.343552 | 0.617336 | 0.593023 |        |        |
| 5007 | ENSG00000USP17L5  | 0.766667 | 0.447475 | 0.603704 | 0.606061 |        |        |
| 5008 | ENSG00000USP17L12 | 0.766667 | 0.447475 | 0.603704 | 0.606061 |        |        |
| 5009 | ENSG00000DIAPH2   | 1        | 0.244444 | 0.613468 | 0.479798 |        |        |
| 5010 | ENSG00000USP17L30 | 0.766667 | 0.447475 | 0.603704 | 0.606061 |        |        |
| 5011 | ENSG00000SULF2    | 0.773737 | 0.446465 | 0.610101 | 0.59596  |        |        |
| 5012 | ENSG00000FAM198B  | 0.816162 | 0.416162 | 0.616162 | 0.591919 |        |        |
| 5013 | ENSG00000USP17L26 | 0.766667 | 0.447475 | 0.603704 | 0.606061 |        |        |
| 5014 | ENSG00000C1QTNF12 | 0.842424 | 0.4      | 0.614141 | 0.590909 |        |        |
| 5015 | ENSG00000USP17L25 | 0.766667 | 0.447475 | 0.603704 | 0.606061 |        |        |
| 5016 | ENSG00000PRSS27   | 0.848485 | 0.410101 | 0.629293 | 0.559596 |        |        |
| 5017 | ENSG00000ARHGAP26 | 0.939746 | 0.317125 | 0.619979 | 0.575053 |        |        |
| 5018 | ENSG00000USP17L1  | 0.766667 | 0.447475 | 0.603704 | 0.606061 |        |        |
| 5019 | ENSG00000USP17L28 | 0.766667 | 0.447475 | 0.603704 | 0.606061 |        |        |
| 5020 | ENSG00000PLEKHM3  | 0.90101  | 0.356566 | 0.61532  | 0.583838 |        |        |
| 5021 | ENSG00000USP17L10 | 0.766667 | 0.447475 | 0.603704 | 0.606061 |        |        |
| 5022 | ENSG00000RMC1     | 0.736364 | 0.467677 | 0.60202  | 0.611111 |        |        |
| 5023 | ENSG00000USP17L29 | 0.766667 | 0.447475 | 0.603704 | 0.606061 |        |        |
| 5024 | ENSG00000USP17L24 | 0.766667 | 0.447475 | 0.603704 | 0.606061 |        |        |
| 5025 | ENSG00000USP17L13 | 0.766667 | 0.447475 | 0.603704 | 0.606061 |        |        |
| 5026 | ENSG00000USP17L11 | 0.766667 | 0.447475 | 0.603704 | 0.606061 |        |        |
| 5027 | ENSG00000NECTIN4  | 0.848485 | 0.410101 | 0.629293 | 0.561616 |        |        |
| 5028 | ENSG00000USP17L27 | 0.766667 | 0.447475 | 0.603704 | 0.606061 |        |        |
| 5029 | ENSG00000CDC34    | 1        | 0.255556 | 0.613131 | 0.517172 |        |        |
| 5030 | ENSG00000ATP10A   | 0.958586 | 0.266667 | 0.642088 | 0.555556 |        |        |
| 5031 | ENSG00000CD33     | 0.969697 | 0.275758 | 0.616835 | 0.550505 |        |        |
| 5032 | ENSG00000USP17L4  | 0.766667 | 0.447475 | 0.603704 | 0.606061 |        |        |
| 5033 | ENSG00000USP17L8  | 0.766667 | 0.447475 | 0.603704 | 0.606061 |        |        |
| 5034 | ENSG00000DYSF     | 0.893939 | 0.376768 | 0.631481 | 0.552525 |        |        |
| 5035 | ENSG00000USP17L19 | 0.766667 | 0.447475 | 0.603704 | 0.606061 |        |        |
| 5036 | ENSG00000USP17L22 | 0.766667 | 0.447475 | 0.603704 | 0.606061 |        |        |
| 5037 | ENSG00000ZNF367   | 0.836364 | 0.410101 | 0.621212 | 0.579798 |        |        |
| 5038 | ENSG00000USP17L17 | 0.766667 | 0.447475 | 0.603704 | 0.606061 |        |        |
| 5039 | ENSG00000LRRC42   | 0.860606 | 0.391919 | 0.626263 | 0.574747 |        |        |
| 5040 | ENSG00000USP17L21 | 0.766667 | 0.447475 | 0.603704 | 0.606061 |        |        |
| 5041 | ENSG00000USP17L20 | 0.766667 | 0.447475 | 0.603704 | 0.606061 |        |        |
| 5042 | ENSG00000USP17L18 | 0.766667 | 0.447475 | 0.603704 | 0.606061 |        |        |
| 5043 | ENSG00000PPA2     | 0.972727 | 0.271717 | 0.600337 | 0.563636 | 0.3674 | 0.5337 |
| 5044 | ENSG00000CYB561D1 | 0.746465 | 0.458586 | 0.593603 | 0.621212 |        |        |
| 5045 | ENSG00000EFNA5    | 0.90303  | 0.370707 | 0.621717 | 0.558586 |        |        |
| 5046 | ENSG00000DKC1     | 1        | 0.242424 | 0.611111 | 0.50101  |        | 0.2524 |
| 5047 | ENSG00000EOMES    | 0.794949 | 0.453535 | 0.618519 | 0.565657 |        |        |
| 5048 | ENSG00000INPP1    | 0.973737 | 0.264646 | 0.600337 | 0.566667 |        |        |
| 5049 | ENSG00000RNF41    | 0.824242 | 0.407071 | 0.608923 | 0.605051 |        |        |
| 5050 | ENSG00000KLRD1    | 0.765657 | 0.459596 | 0.607576 | 0.59596  |        |        |
| 5051 | ENSG00000ZNF704   | 0.958586 | 0.317172 | 0.632997 | 0.535354 |        |        |
| 5052 | ENSG00000TRAPPC3  | 0.830303 | 0.422222 | 0.620875 | 0.574747 |        |        |
| 5053 | ENSG00000TEX12    | 0.879798 | 0.337374 | 0.601684 | 0.644444 |        |        |
| 5054 | ENSG00000PDE10A   | 0.890063 | 0.377378 | 0.619274 | 0.570825 |        |        |
| 5055 | ENSG00000NUDT4    | 0.979798 | 0.305051 | 0.619529 | 0.513131 |        |        |
| 5056 | ENSG00000TNC      | 0.884848 | 0.343434 | 0.611785 | 0.624242 |        |        |
| 5057 | ENSG00000NUDT4B   | 0.979798 | 0.305051 | 0.619529 | 0.513131 |        |        |
| 5058 | ENSG00000KPNA5    | 0.939394 | 0.332323 | 0.623569 | 0.556566 |        |        |

|      |                    |          |          |          |          |
|------|--------------------|----------|----------|----------|----------|
| 5059 | ENSG00000METTL7B   | 0.816162 | 0.416162 | 0.616162 | 0.594949 |
| 5060 | ENSG00000TLDC2     | 0.655556 | 0.570707 | 0.613131 | 0.581818 |
| 5061 | ENSG00000SEC63     | 1        | 0.236364 | 0.613131 | 0.540404 |
| 5062 | ENSG00000AP5S1     | 1        | 0.255556 | 0.626431 | 0.481818 |
| 5063 | ENSG00000THAP2     | 0.862626 | 0.383838 | 0.613805 | 0.59697  |
| 5064 | ENSG00000SRD5A1    | 0.816162 | 0.416162 | 0.616162 | 0.59596  |
| 5065 | ENSG00000RNF144A   | 0.778013 | 0.445032 | 0.609056 | 0.60148  |
| 5066 | ENSG00000POGK      | 0.910101 | 0.363636 | 0.626263 | 0.560606 |
| 5067 | ENSG00000DMBT1     | 0.727273 | 0.490909 | 0.609091 | 0.592929 |
| 5068 | ENSG00000POLR2G    | 0.900332 | 0.367663 | 0.623108 | 0.568106 |
| 5069 | ENSG00000ZMAT4     | 0.763214 | 0.458774 | 0.610994 | 0.596195 |
| 5070 | ENSG00000CLNS1A    | 1        | 0.268687 | 0.657912 | 0.460606 |
| 5071 | ENSG00000GMFG      | 0.823232 | 0.461616 | 0.63468  | 0.528283 |
| 5072 | ENSG00000LYSMD1    | 0.80101  | 0.440404 | 0.615488 | 0.584848 |
| 5073 | ENSG00000FUZ       | 0.971717 | 0.242424 | 0.597811 | 0.588889 |
| 5074 | ENSG00000CREB3L1   | 0.96723  | 0.273784 | 0.603594 | 0.570825 |
| 5075 | ENSG00000VKORC1    | 0.816162 | 0.416162 | 0.616162 | 0.59697  |
| 5076 | ENSG00000VRK3      | 0.892929 | 0.377778 | 0.625926 | 0.562626 |
| 5077 | ENSG00000CABIN1    | 0.918605 | 0.366808 | 0.641297 | 0.531712 |
| 5078 | ENSG00000RPU5D3    | 0.945455 | 0.320202 | 0.626768 | 0.564646 |
| 5079 | ENSG00000MDM1      | 0.93577  | 0.341085 | 0.623108 | 0.55371  |
| 5080 | ENSG00000HACL1     | 0.976768 | 0.273737 | 0.611448 | 0.549495 |
| 5081 | ENSG00000JPH1      | 1        | 0.244444 | 0.623569 | 0.511111 |
| 5082 | ENSG00000PRAP1     | 0.915152 | 0.360606 | 0.630976 | 0.556566 |
| 5083 | ENSG00000VSX2      | 0.773913 | 0.436715 | 0.58905  | 0.628986 |
| 5084 | ENSG00000TRPM7     | 0.709091 | 0.535354 | 0.621549 | 0.567677 |
| 5085 | ENSG00000GMFB      | 0.823232 | 0.461616 | 0.63468  | 0.528283 |
| 5086 | ENSG00000AC135050. | 0.816162 | 0.416162 | 0.616162 | 0.59697  |
| 5087 | ENSG00000PPIA      | 0.989899 | 0.247475 | 0.611448 | 0.548485 |
| 5088 | ENSG00000TPH1      | 0.965657 | 0.30404  | 0.62138  | 0.540404 |
| 5089 | ENSG00000IKZF3     | 0.659619 | 0.542283 | 0.600599 | 0.612051 |
| 5090 | ENSG00000RMDN1     | 0.825253 | 0.421212 | 0.612626 | 0.591919 |
| 5091 | ENSG00000CKMT2     | 0.676768 | 0.549495 | 0.613131 | 0.587879 |
| 5092 | ENSG00000SYNGR2    | 0.80202  | 0.448485 | 0.625253 | 0.567677 |
| 5093 | ENSG00000GPM6B     | 0.741414 | 0.478788 | 0.608418 | 0.59899  |
| 5094 | ENSG00000NAA16     | 0.963636 | 0.306061 | 0.638384 | 0.523232 |
| 5095 | ENSG00000KIAA1324  | 0.90303  | 0.366667 | 0.631818 | 0.561616 |
| 5096 | ENSG00000CEP63     | 0.780127 | 0.420719 | 0.600423 | 0.633192 |
| 5097 | ENSG00000TAL2      | 0.727273 | 0.490909 | 0.609091 | 0.59697  |
| 5098 | ENSG00000OOSP2     | 0.708245 | 0.483087 | 0.59408  | 0.633192 |
| 5099 | ENSG00000TIMM8A    | 0.754757 | 0.480973 | 0.617865 | 0.578224 |
| 5100 | ENSG00000WDR49     | 0.957576 | 0.308081 | 0.616667 | 0.570707 |
| 5101 | ENSG00000ZAP70     | 0.957576 | 0.330303 | 0.637879 | 0.528283 |
| 5102 | ENSG00000RGPD3     | 0.952525 | 0.326263 | 0.627104 | 0.554545 |
| 5103 | ENSG00000DTD1      | 0.763214 | 0.458774 | 0.610994 | 0.60148  |
| 5104 | ENSG00000PSMD12    | 0.881818 | 0.370707 | 0.623064 | 0.588889 |
| 5105 | ENSG00000ZNF263    | 1        | 0.252525 | 0.614815 | 0.538384 |
| 5106 | ENSG00000SMC3      | 0.919192 | 0.361616 | 0.63569  | 0.548485 |
| 5107 | ENSG00000FBP2      | 0.960606 | 0.276768 | 0.627946 | 0.566667 |
| 5108 | ENSG00000RAB6C     | 0.809091 | 0.431313 | 0.620202 | 0.584848 |
| 5109 | ENSG00000DUSP26    | 0.754757 | 0.480973 | 0.617865 | 0.579281 |
| 5110 | ENSG00000SLFN12L   | 0.89596  | 0.378788 | 0.625589 | 0.561616 |
| 5111 | ENSG00000RHCG      | 0.879798 | 0.355556 | 0.611111 | 0.621212 |
| 5112 | ENSG00000RAB6D     | 0.809091 | 0.431313 | 0.620202 | 0.584848 |
| 5113 | ENSG00000DCAF10    | 0.759596 | 0.462626 | 0.607744 | 0.60303  |

|      |           |           |          |          |          |          |        |
|------|-----------|-----------|----------|----------|----------|----------|--------|
| 5114 | ENSG00000 | RGPD2     | 0.952525 | 0.326263 | 0.627104 | 0.554545 |        |
| 5115 | ENSG00000 | PRRT4     | 0.953535 | 0.268687 | 0.643266 | 0.579798 |        |
| 5116 | ENSG00000 | AL121900. | 0.763214 | 0.458774 | 0.610994 | 0.60148  |        |
| 5117 | ENSG00000 | RGPD1     | 0.952525 | 0.326263 | 0.627104 | 0.554545 |        |
| 5118 | ENSG00000 | RGPD4     | 0.952525 | 0.326263 | 0.627104 | 0.554545 |        |
| 5119 | ENSG00000 | DCAF4L2   | 0.860606 | 0.391919 | 0.626263 | 0.582828 |        |
| 5120 | ENSG00000 | GPATCH2L  | 0.92389  | 0.354123 | 0.627026 | 0.55814  |        |
| 5121 | ENSG00000 | COL18A1   | 0.983838 | 0.268687 | 0.66229  | 0.488889 |        |
| 5122 | ENSG00000 | SLC25A40  | 0.727273 | 0.467677 | 0.590236 | 0.639394 |        |
| 5123 | ENSG00000 | CACYBP    | 0.854545 | 0.40101  | 0.616835 | 0.590909 |        |
| 5124 | ENSG00000 | FAM35A    | 0.830565 | 0.445183 | 0.636028 | 0.543743 |        |
| 5125 | ENSG00000 | NODAL     | 0.749495 | 0.482828 | 0.615152 | 0.585859 |        |
| 5126 | ENSG00000 | FSTL3     | 1        | 0.289899 | 0.63771  | 0.483838 |        |
| 5127 | ENSG00000 | BSDC1     | 0.90303  | 0.364646 | 0.622054 | 0.576768 |        |
| 5128 | ENSG00000 | MRPL51    | 0.818182 | 0.445032 | 0.626498 | 0.563425 |        |
| 5129 | ENSG00000 | SLC2A8    | 0.757576 | 0.475758 | 0.610606 | 0.590909 |        |
| 5130 | ENSG00000 | GTF3A     | 0.884848 | 0.360606 | 0.621717 | 0.60404  |        |
| 5131 | ENSG00000 | UXS1      | 0.848485 | 0.410101 | 0.629293 | 0.573737 |        |
| 5132 | ENSG00000 | RARS2     | 0.955556 | 0.322222 | 0.624747 | 0.561616 |        |
| 5133 | ENSG00000 | SCARB1    | 0.773737 | 0.446465 | 0.610101 | 0.611111 |        |
| 5134 | ENSG00000 | FAF1      | 0.96124  | 0.334441 | 0.633444 | 0.512735 |        |
| 5135 | ENSG00000 | VANGL1    | 0.807611 | 0.42389  | 0.615751 | 0.604651 |        |
| 5136 | ENSG00000 | TTC5      | 0.848485 | 0.40404  | 0.61835  | 0.590909 |        |
| 5137 | ENSG00000 | CASP3     | 0.964646 | 0.252525 | 0.625926 | 0.571717 |        |
| 5138 | ENSG00000 | UCHL1     | 0.89899  | 0.362626 | 0.606566 | 0.6      |        |
| 5139 | ENSG00000 | NPHS1     | 0.709091 | 0.522222 | 0.608754 | 0.593939 |        |
| 5140 | ENSG00000 | PLCH2     | 0.809091 | 0.431313 | 0.620202 | 0.589899 |        |
| 5141 | ENSG00000 | UBE4B     | 0.935354 | 0.335354 | 0.621212 | 0.570707 |        |
| 5142 | ENSG00000 | KCNQ1     | 0.951515 | 0.337374 | 0.632997 | 0.542424 |        |
| 5143 | ENSG00000 | ZBTB41    | 0.964646 | 0.274747 | 0.650842 | 0.531313 |        |
| 5144 | ENSG00000 | EXD3      | 0.714588 | 0.508457 | 0.611522 | 0.595137 |        |
| 5145 | ENSG00000 | HHEX      | 0.736364 | 0.467677 | 0.60202  | 0.622222 |        |
| 5146 | ENSG00000 | NPHP1     | 0.971981 | 0.287923 | 0.61256  | 0.553623 |        |
| 5147 | ENSG00000 | TMEM253   | 0.929293 | 0.329293 | 0.625589 | 0.580808 |        |
| 5148 | ENSG00000 | LRWD1     | 0.733615 | 0.491543 | 0.611522 | 0.59408  |        |
| 5149 | ENSG00000 | PDXK      | 0.954545 | 0.308081 | 0.638047 | 0.562626 |        |
| 5150 | ENSG00000 | SCML1     | 0.926263 | 0.332323 | 0.621886 | 0.587879 |        |
| 5151 | ENSG00000 | DOPEY2    | 0.861616 | 0.429293 | 0.638215 | 0.535354 |        |
| 5152 | ENSG00000 | SUCO      | 0.809091 | 0.431313 | 0.620202 | 0.592929 |        |
| 5153 | ENSG00000 | CMIP      | 0.89899  | 0.344444 | 0.612626 | 0.616162 |        |
| 5154 | ENSG00000 | NSUN4     | 0.934343 | 0.342424 | 0.623232 | 0.562626 |        |
| 5155 | ENSG00000 | GMPPA     | 0.922222 | 0.320202 | 0.619529 | 0.612121 |        |
| 5156 | ENSG00000 | CACHD1    | 0.812121 | 0.454545 | 0.63064  | 0.554545 |        |
| 5157 | ENSG00000 | CHRM3     | 0.914141 | 0.369697 | 0.628283 | 0.558586 | 0.3231 |
| 5158 | ENSG00000 | SYT10     | 0.758985 | 0.491543 | 0.624207 | 0.563425 |        |
| 5159 | ENSG00000 | CDKL5     | 1        | 0.247475 | 0.619529 | 0.540404 |        |
| 5160 | ENSG00000 | GTDC1     | 0.806061 | 0.449495 | 0.624242 | 0.571717 |        |
| 5161 | ENSG00000 | CALN1     | 0.773737 | 0.446465 | 0.610101 | 0.611111 |        |
| 5162 | ENSG00000 | DPP4      | 0.763214 | 0.458774 | 0.610994 | 0.606765 |        |
| 5163 | ENSG00000 | C6orf222  | 0.992929 | 0.269697 | 0.648485 | 0.49899  |        |
| 5164 | ENSG00000 | ACTRT2    | 0.90101  | 0.352525 | 0.619865 | 0.59899  |        |
| 5165 | ENSG00000 | MGST2     | 0.718182 | 0.516162 | 0.617172 | 0.586869 |        |
| 5166 | ENSG00000 | ROS1      | 0.696567 | 0.533776 | 0.608158 | 0.598007 |        |
| 5167 | ENSG00000 | CHST12    | 0.889899 | 0.386869 | 0.640741 | 0.551515 |        |
| 5168 | ENSG00000 | DRC3      | 0.936364 | 0.287879 | 0.617172 | 0.618182 |        |

|      |                   |          |          |          |          |        |        |
|------|-------------------|----------|----------|----------|----------|--------|--------|
| 5169 | ENSG00000NRDE2    | 1        | 0.261616 | 0.620034 | 0.50404  |        |        |
| 5170 | ENSG00000GSK3A    | 0.967677 | 0.30202  | 0.618013 | 0.549495 |        |        |
| 5171 | ENSG00000CERS1    | 0.809091 | 0.431313 | 0.620202 | 0.591919 |        |        |
| 5172 | ENSG00000ALOX5    | 0.817172 | 0.465657 | 0.61532  | 0.562626 | 0.2234 |        |
| 5173 | ENSG00000VSIG10L  | 0.687879 | 0.514141 | 0.594276 | 0.629293 |        |        |
| 5174 | ENSG00000MS4A4A   | 0.781818 | 0.428283 | 0.605051 | 0.627273 |        |        |
| 5175 | ENSG00000ACYP2    | 0.881818 | 0.389899 | 0.620202 | 0.581818 |        |        |
| 5176 | ENSG00000ETS1     | 0.714588 | 0.477801 | 0.595314 | 0.637421 |        |        |
| 5177 | ENSG00000RAB39B   | 0.878788 | 0.345455 | 0.612121 | 0.639394 |        |        |
| 5178 | ENSG00000PPAT     | 1        | 0.243434 | 0.613468 | 0.517172 |        |        |
| 5179 | ENSG00000ZCCHC6   | 0.983838 | 0.245455 | 0.6      | 0.580808 |        |        |
| 5180 | ENSG00000SLC39A2  | 0.842424 | 0.422222 | 0.632323 | 0.565657 |        |        |
| 5181 | ENSG00000SLC12A3  | 0.736364 | 0.467677 | 0.60202  | 0.628283 |        |        |
| 5182 | ENSG00000PORCN    | 0.816162 | 0.416162 | 0.616162 | 0.610101 |        |        |
| 5183 | ENSG00000GHITM    | 0.919192 | 0.336364 | 0.622727 | 0.59899  |        |        |
| 5184 | ENSG00000UBE2G1   | 0.982828 | 0.258586 | 0.608754 | 0.564646 |        |        |
| 5185 | ENSG00000GIMAP7   | 0.984848 | 0.289899 | 0.642088 | 0.505051 |        |        |
| 5186 | ENSG00000RARB     | 0.933404 | 0.30444  | 0.63654  | 0.591966 |        |        |
| 5187 | ENSG00000LURAP1L  | 0.792812 | 0.430233 | 0.596195 | 0.628964 |        |        |
| 5188 | ENSG00000GSTP1    | 1        | 0.290909 | 0.624242 | 0.50303  |        |        |
| 5189 | ENSG00000C2CD3    | 0.963636 | 0.249495 | 0.620034 | 0.588889 | 0.178  |        |
| 5190 | ENSG00000SULT1B1  | 0.792812 | 0.459831 | 0.626321 | 0.570825 |        |        |
| 5191 | ENSG00000RSBN1L   | 1        | 0.248485 | 0.617508 | 0.452525 |        |        |
| 5192 | ENSG00000GRHPR    | 0.757576 | 0.488889 | 0.623232 | 0.572727 |        |        |
| 5193 | ENSG00000SMTN     | 0.972727 | 0.234343 | 0.611448 | 0.587879 |        |        |
| 5194 | ENSG00000LRCH2    | 0.770613 | 0.468288 | 0.617336 | 0.588795 |        |        |
| 5195 | ENSG00000OTUD3    | 0.942424 | 0.348485 | 0.631987 | 0.541414 |        |        |
| 5196 | ENSG00000TMEM104  | 0.883838 | 0.368687 | 0.644781 | 0.574747 |        |        |
| 5197 | ENSG00000SH2D4B   | 0.906061 | 0.364646 | 0.621212 | 0.582828 |        |        |
| 5198 | ENSG00000OR6C6    | 0.710101 | 0.50404  | 0.605556 | 0.612121 |        |        |
| 5199 | ENSG00000ANKRD10  | 1        | 0.281818 | 0.634343 | 0.49697  |        |        |
| 5200 | ENSG00000ERG      | 0.972727 | 0.267677 | 0.636027 | 0.546465 |        |        |
| 5201 | ENSG00000ACO1     | 0.991919 | 0.235354 | 0.623569 | 0.553535 |        |        |
| 5202 | ENSG00000RNF121   | 0.893939 | 0.322222 | 0.600673 | 0.663636 |        |        |
| 5203 | ENSG00000PLA2G2E  | 0.773737 | 0.446465 | 0.610101 | 0.614141 |        |        |
| 5204 | ENSG00000MBOAT7   | 0.718182 | 0.516162 | 0.617172 | 0.589899 |        |        |
| 5205 | ENSG00000RPGR     | 0.768687 | 0.475758 | 0.621044 | 0.579798 | 0.254  |        |
| 5206 | ENSG00000CFAP20   | 0.80202  | 0.448485 | 0.625253 | 0.580808 |        |        |
| 5207 | ENSG00000ZNF572   | 0.833333 | 0.447475 | 0.63569  | 0.547475 |        |        |
| 5208 | ENSG00000PRDM10   | 0.890909 | 0.374747 | 0.629798 | 0.577778 | 0.575  |        |
| 5209 | ENSG00000HLA-DPB1 | 0.757576 | 0.488889 | 0.623232 | 0.571717 |        |        |
| 5210 | ENSG00000C1orf87  | 0.879798 | 0.370707 | 0.625253 | 0.6      |        |        |
| 5211 | ENSG00000CDH15    | 0.676768 | 0.549495 | 0.613131 | 0.6      |        |        |
| 5212 | ENSG00000FAM149A  | 0.800211 | 0.440803 | 0.620507 | 0.59408  |        |        |
| 5213 | ENSG00000BAIAP2L1 | 1        | 0.257576 | 0.627104 | 0.532323 | 0.2948 | 0.4732 |
| 5214 | ENSG00000AUH      | 0.89596  | 0.392929 | 0.629966 | 0.555556 |        |        |
| 5215 | ENSG00000GMPPB    | 0.937374 | 0.339394 | 0.628283 | 0.562626 | 0.3156 |        |
| 5216 | ENSG00000TAPBPL   | 0.860606 | 0.393939 | 0.617172 | 0.60202  |        |        |
| 5217 | ENSG00000COL19A1  | 0.830303 | 0.425253 | 0.625926 | 0.585859 |        |        |
| 5218 | ENSG00000COIL     | 0.836152 | 0.442918 | 0.635307 | 0.553911 |        |        |
| 5219 | ENSG00000PYGL     | 0.929293 | 0.328283 | 0.628451 | 0.589899 |        |        |
| 5220 | ENSG00000SMG9     | 0.980973 | 0.268499 | 0.606413 | 0.567653 |        |        |
| 5221 | ENSG00000CACNB4   | 0.928018 | 0.33887  | 0.621262 | 0.585825 |        |        |
| 5222 | ENSG00000CLNK     | 0.90404  | 0.356566 | 0.626599 | 0.590909 |        |        |
| 5223 | ENSG00000BTN1A1   | 0.864734 | 0.350725 | 0.60467  | 0.655072 |        |        |

|      |                    |          |          |          |          |       |
|------|--------------------|----------|----------|----------|----------|-------|
| 5224 | ENSG00000MAP1A     | 0.919192 | 0.337374 | 0.622559 | 0.60202  |       |
| 5225 | ENSG00000MTHFD2L   | 0.705051 | 0.508081 | 0.606566 | 0.616162 |       |
| 5226 | ENSG00000PMM2      | 0.794949 | 0.467677 | 0.631313 | 0.561616 |       |
| 5227 | ENSG00000TMEM204   | 0.794949 | 0.467677 | 0.631313 | 0.562626 |       |
| 5228 | ENSG00000LY75-CD30 | 0.819192 | 0.459596 | 0.63165  | 0.552525 |       |
| 5229 | ENSG00000MAP1S     | 0.842424 | 0.422222 | 0.632323 | 0.572727 |       |
| 5230 | ENSG00000BRINP3    | 0.836364 | 0.436364 | 0.636364 | 0.558586 |       |
| 5231 | ENSG00000PCDHB7    | 0.870707 | 0.422222 | 0.63771  | 0.548485 |       |
| 5232 | ENSG00000GAMT      | 0.757576 | 0.488889 | 0.623232 | 0.579798 |       |
| 5233 | ENSG00000ARID5B    | 0.834343 | 0.437374 | 0.626936 | 0.568687 |       |
| 5234 | ENSG00000SEMA4G    | 0.794949 | 0.467677 | 0.631313 | 0.564646 |       |
| 5235 | ENSG00000FAM228B   | 0.7463   | 0.4926   | 0.617336 | 0.587738 |       |
| 5236 | ENSG00000DUS2      | 0.921212 | 0.367677 | 0.635522 | 0.550505 |       |
| 5237 | ENSG00000GLA       | 0.886869 | 0.375758 | 0.631313 | 0.586869 |       |
| 5238 | ENSG00000CNTFR     | 0.816162 | 0.416162 | 0.616162 | 0.615152 |       |
| 5239 | ENSG00000TNFSF10   | 0.874747 | 0.373737 | 0.611785 | 0.619192 |       |
| 5240 | ENSG00000RXFP3     | 0.809091 | 0.431313 | 0.620202 | 0.6      |       |
| 5241 | ENSG00000DUSP9     | 0.792812 | 0.453488 | 0.621564 | 0.587738 |       |
| 5242 | ENSG00000CLEC18B   | 0.80202  | 0.448485 | 0.625253 | 0.583838 |       |
| 5243 | ENSG00000RPL23A    | 0.812121 | 0.421212 | 0.606902 | 0.621212 |       |
| 5244 | ENSG00000ZNF696    | 0.828283 | 0.440404 | 0.626094 | 0.572727 |       |
| 5245 | ENSG00000CLEC18A   | 0.80202  | 0.448485 | 0.625253 | 0.583838 |       |
| 5246 | ENSG00000CYP20A1   | 0.959596 | 0.292929 | 0.617508 | 0.588889 |       |
| 5247 | ENSG00000CLEC18C   | 0.80202  | 0.448485 | 0.625253 | 0.583838 |       |
| 5248 | ENSG00000SLC25A46  | 0.842424 | 0.422222 | 0.632323 | 0.573737 |       |
| 5249 | ENSG00000CHRDL1    | 0.960606 | 0.29596  | 0.616498 | 0.584848 |       |
| 5250 | ENSG00000LCLAT1    | 0.929293 | 0.310101 | 0.617845 | 0.618182 |       |
| 5251 | ENSG00000WDR33     | 0.925253 | 0.347475 | 0.624579 | 0.579798 |       |
| 5252 | ENSG00000MORN1     | 0.850498 | 0.405316 | 0.623846 | 0.594684 |       |
| 5253 | ENSG00000SZT2      | 0.827273 | 0.419192 | 0.61734  | 0.60404  |       |
| 5254 | ENSG00000APIP      | 0.986869 | 0.269697 | 0.620202 | 0.550505 |       |
| 5255 | ENSG00000SYT2      | 0.726216 | 0.520085 | 0.616984 | 0.586681 |       |
| 5256 | ENSG00000MRC2      | 0.80202  | 0.421212 | 0.609933 | 0.627273 |       |
| 5257 | ENSG00000RABIF     | 0.852525 | 0.405051 | 0.621044 | 0.59596  |       |
| 5258 | ENSG00000DSPP      | 0.868922 | 0.432347 | 0.639183 | 0.538055 |       |
| 5259 | ENSG00000FNDC4     | 0.960606 | 0.263636 | 0.64697  | 0.569697 |       |
| 5260 | ENSG00000PROSER1   | 0.980808 | 0.29596  | 0.638047 | 0.521212 |       |
| 5261 | ENSG00000TRMT9B    | 0.80202  | 0.448485 | 0.625253 | 0.583838 |       |
| 5262 | ENSG00000OR13C3    | 0.842424 | 0.422222 | 0.632323 | 0.573737 |       |
| 5263 | ENSG00000CYP27A1   | 0.873737 | 0.366667 | 0.602862 | 0.639394 |       |
| 5264 | ENSG00000DISP3     | 0.774747 | 0.5      | 0.635185 | 0.546465 |       |
| 5265 | ENSG00000PIM1      | 0.890909 | 0.381818 | 0.636364 | 0.569697 |       |
| 5266 | ENSG00000MRPS31    | 1        | 0.254545 | 0.612458 | 0.540404 |       |
| 5267 | ENSG00000PHPT1     | 1        | 0.257576 | 0.616162 | 0.547475 |       |
| 5268 | ENSG00000AFF3      | 0.919662 | 0.365751 | 0.639887 | 0.552854 |       |
| 5269 | ENSG00000WRAP53    | 0.951515 | 0.333333 | 0.622222 | 0.570707 |       |
| 5270 | ENSG00000DYRK1A    | 0.966667 | 0.306061 | 0.620202 | 0.555556 | 0.462 |
| 5271 | ENSG00000SGO2      | 0.754757 | 0.47463  | 0.609232 | 0.612051 |       |
| 5272 | ENSG00000LRR1Q4    | 0.836364 | 0.436364 | 0.636364 | 0.560606 |       |
| 5273 | ENSG00000CPSF4L    | 0.923232 | 0.356566 | 0.628114 | 0.568687 |       |
| 5274 | ENSG00000PAX5      | 0.942424 | 0.351515 | 0.629293 | 0.549495 |       |
| 5275 | ENSG00000N4BP2L1   | 0.910101 | 0.344444 | 0.634007 | 0.59899  |       |
| 5276 | ENSG00000URGCP     | 1        | 0.242424 | 0.616162 | 0.540404 |       |
| 5277 | ENSG00000CRCP      | 0.913131 | 0.352525 | 0.625421 | 0.594949 |       |
| 5278 | ENSG00000PIR       | 0.794949 | 0.467677 | 0.631313 | 0.568687 |       |

|      |                    |          |          |          |          |
|------|--------------------|----------|----------|----------|----------|
| 5279 | ENSG00000DLGAP2    | 0.824242 | 0.446465 | 0.624916 | 0.573737 |
| 5280 | ENSG00000DMP1      | 0.919192 | 0.361616 | 0.63569  | 0.563636 |
| 5281 | ENSG00000SMIM11A   | 0.763214 | 0.458774 | 0.610994 | 0.617336 |
| 5282 | ENSG00000SMIM11B   | 0.763214 | 0.458774 | 0.610994 | 0.617336 |
| 5283 | ENSG00000PJA1      | 0.924242 | 0.336364 | 0.627609 | 0.593939 |
| 5284 | ENSG00000NHSL1     | 1        | 0.242424 | 0.62963  | 0.50404  |
| 5285 | ENSG00000RNF169    | 0.719192 | 0.487879 | 0.600673 | 0.634343 |
| 5286 | ENSG00000ZNF555    | 0.952525 | 0.29596  | 0.6367   | 0.589899 |
| 5287 | ENSG00000TNNT3     | 0.971717 | 0.250505 | 0.598148 | 0.606061 |
| 5288 | ENSG00000AFM       | 0.893939 | 0.376768 | 0.625421 | 0.587879 |
| 5289 | ENSG00000OR7C2     | 0.757576 | 0.488889 | 0.623232 | 0.584848 |
| 5290 | ENSG00000 3/4/2019 | 0.80101  | 0.470707 | 0.629966 | 0.562626 |
| 5291 | ENSG00000FAM178B   | 0.672304 | 0.542283 | 0.607294 | 0.620507 |
| 5292 | ENSG00000RHPN2     | 0.886869 | 0.372727 | 0.621717 | 0.605051 |
| 5293 | ENSG00000CDC123    | 0.963636 | 0.30101  | 0.639562 | 0.548485 |
| 5294 | ENSG00000SLC22A18  | 0.90101  | 0.334343 | 0.614983 | 0.639394 |
| 5295 | ENSG00000VRK2      | 0.89596  | 0.375758 | 0.624579 | 0.588889 |
| 5296 | ENSG00000RTL6      | 0.919662 | 0.375264 | 0.638125 | 0.546512 |
| 5297 | ENSG00000SOX10     | 0.909091 | 0.357576 | 0.618182 | 0.60404  |
| 5298 | ENSG00000STXBP3    | 0.830303 | 0.425253 | 0.625926 | 0.593939 |
| 5299 | ENSG00000PNMA6A    | 0.970707 | 0.273737 | 0.605387 | 0.587879 |
| 5300 | ENSG00000CCDC96    | 0.788618 | 0.44367  | 0.616144 | 0.61324  |
| 5301 | ENSG00000GGACT     | 0.718182 | 0.516162 | 0.617172 | 0.60101  |
| 5302 | ENSG00000PEX12     | 0.809091 | 0.431313 | 0.620202 | 0.609091 |
| 5303 | ENSG00000CD40LG    | 0.775758 | 0.446465 | 0.605219 | 0.630303 |
| 5304 | ENSG00000KNTC1     | 0.833333 | 0.441414 | 0.629293 | 0.571717 |
| 5305 | ENSG00000TXN       | 0.949495 | 0.356566 | 0.646296 | 0.522222 |
| 5306 | ENSG00000IPO8      | 0.961616 | 0.285859 | 0.650337 | 0.554545 |
| 5307 | ENSG00000SUPT16H   | 0.942424 | 0.336364 | 0.621717 | 0.582828 |
| 5308 | ENSG00000CCDC17    | 0.705074 | 0.535941 | 0.620507 | 0.595137 |
| 5309 | ENSG00000SCG2      | 0.879798 | 0.370707 | 0.625253 | 0.611111 |
| 5310 | ENSG00000SYTL3     | 0.977778 | 0.272727 | 0.647138 | 0.534343 |
| 5311 | ENSG00000POU2F2    | 0.953535 | 0.275758 | 0.61532  | 0.628283 |
| 5312 | ENSG00000GOLPH3    | 0.915152 | 0.335354 | 0.618182 | 0.624242 |
| 5313 | ENSG00000UHRF1BP1  | 0.933333 | 0.336364 | 0.627104 | 0.586869 |
| 5314 | ENSG00000ZNF699    | 0.787879 | 0.481818 | 0.629798 | 0.564646 |
| 5315 | ENSG00000CERS4     | 0.773737 | 0.482828 | 0.628283 | 0.576768 |
| 5316 | ENSG00000CASS4     | 0.828753 | 0.426004 | 0.618922 | 0.603594 |
| 5317 | ENSG00000ENGASE    | 0.807611 | 0.42389  | 0.615751 | 0.622622 |
| 5318 | ENSG00000RDX       | 0.948485 | 0.312121 | 0.628114 | 0.59596  |
| 5319 | ENSG00000TAF8      | 0.979798 | 0.288889 | 0.657912 | 0.511111 |
| 5320 | ENSG00000DBN1      | 0.872727 | 0.361616 | 0.617172 | 0.637374 |
| 5321 | ENSG00000RD3L      | 0.709091 | 0.543434 | 0.626263 | 0.580808 |
| 5322 | ENSG00000PTPN1     | 0.991919 | 0.271717 | 0.647811 | 0.519192 |
| 5323 | ENSG00000MCM9      | 0.826263 | 0.437374 | 0.622896 | 0.590909 |
| 5324 | ENSG00000GON7      | 0.924242 | 0.344444 | 0.625589 | 0.592929 |
| 5325 | ENSG00000KDELC2    | 0.950505 | 0.310101 | 0.624916 | 0.6      |
| 5326 | ENSG00000LAMB3     | 0.949495 | 0.347475 | 0.649327 | 0.529293 |
| 5327 | ENSG00000IGBP1     | 0.980808 | 0.277778 | 0.660606 | 0.515152 |
| 5328 | ENSG00000CDK6      | 0.977778 | 0.324242 | 0.618687 | 0.530303 |
| 5329 | ENSG00000STX7      | 0.89596  | 0.366667 | 0.623064 | 0.606061 |
| 5330 | ENSG00000AATK      | 0.80202  | 0.448485 | 0.625253 | 0.592929 |
| 5331 | ENSG00000METAP2    | 1        | 0.248485 | 0.617508 | 0.539394 |
| 5332 | ENSG00000SLAMF7    | 0.890909 | 0.337374 | 0.614478 | 0.652525 |
| 5333 | ENSG00000NAPG      | 0.967677 | 0.281818 | 0.604545 | 0.594949 |



|      |                   |          |          |          |          |
|------|-------------------|----------|----------|----------|----------|
| 5334 | ENSG00000SNX12    | 0.812121 | 0.454545 | 0.63064  | 0.574747 |
| 5335 | ENSG00000GOT1     | 0.986869 | 0.326263 | 0.661279 | 0.464646 |
| 5336 | ENSG00000KCNMB2   | 0.838384 | 0.426263 | 0.626936 | 0.587879 |
| 5337 | ENSG00000STX1A    | 0.870707 | 0.407071 | 0.631313 | 0.582828 |
| 5338 | ENSG00000FAM160B1 | 0.893939 | 0.378788 | 0.635185 | 0.580808 |
| 5339 | ENSG00000SLC35C2  | 0.835354 | 0.40303  | 0.610774 | 0.630303 |
| 5340 | ENSG00000CWF19L1  | 1        | 0.281818 | 0.634343 | 0.514141 |
| 5341 | ENSG00000HEATR4   | 0.736364 | 0.506061 | 0.621212 | 0.592929 |
| 5342 | ENSG00000TPRA1    | 0.821705 | 0.418605 | 0.611665 | 0.623477 |
| 5343 | ENSG00000TEX264   | 0.886869 | 0.375758 | 0.631313 | 0.59596  |
| 5344 | ENSG00000ATP11B   | 0.989429 | 0.265328 | 0.660677 | 0.514799 |
| 5345 | ENSG00000EPHX1    | 0.854545 | 0.394949 | 0.622222 | 0.613131 |
| 5346 | ENSG00000BIRC2    | 0.962626 | 0.327273 | 0.649495 | 0.522222 |
| 5347 | ENSG00000VASH1    | 0.870707 | 0.415152 | 0.63064  | 0.574747 |
| 5348 | ENSG00000TXLNB    | 0.971717 | 0.276768 | 0.641077 | 0.551515 |
| 5349 | ENSG00000HAVCR2   | 0.788889 | 0.453535 | 0.61835  | 0.60404  |
| 5350 | ENSG00000GCLM     | 1        | 0.270707 | 0.622222 | 0.544444 |
| 5351 | ENSG00000CCNYL1   | 0.761099 | 0.480973 | 0.61346  | 0.605708 |
| 5352 | ENSG00000RENBP    | 0.959596 | 0.29697  | 0.613468 | 0.60303  |
| 5353 | ENSG00000PTCD3    | 0.936575 | 0.323467 | 0.613813 | 0.613108 |
| 5354 | ENSG00000ATRAID   | 0.727273 | 0.490909 | 0.609091 | 0.624242 |
| 5355 | ENSG00000AKR7A2   | 0.966667 | 0.29798  | 0.61633  | 0.576768 |
| 5356 | ENSG00000FBX038   | 0.8      | 0.422222 | 0.606061 | 0.640404 |
| 5357 | ENSG00000ZDHHC2   | 0.848485 | 0.410101 | 0.629293 | 0.59899  |
| 5358 | ENSG00000STXBP5   | 0.854545 | 0.4      | 0.627273 | 0.60404  |
| 5359 | ENSG00000PRAME    | 0.754757 | 0.480973 | 0.617865 | 0.605708 |
| 5360 | ENSG00000MCM7     | 0.918182 | 0.308081 | 0.614478 | 0.654545 |
| 5361 | ENSG00000TMEM116  | 0.862626 | 0.381818 | 0.612795 | 0.628283 |
| 5362 | ENSG00000SRPRB    | 0.749495 | 0.513131 | 0.631313 | 0.568687 |
| 5363 | ENSG00000RIC8A    | 0.968687 | 0.271717 | 0.617172 | 0.587879 |
| 5364 | ENSG00000SYDE1    | 0.9      | 0.350505 | 0.620202 | 0.622222 |
| 5365 | ENSG00000CD81     | 0.881818 | 0.370707 | 0.626263 | 0.614141 |
| 5366 | ENSG00000CTU1     | 0.757576 | 0.481818 | 0.618519 | 0.60303  |
| 5367 | ENSG00000SKAP2    | 0.923232 | 0.354545 | 0.636869 | 0.576768 |
| 5368 | ENSG00000HOMER3   | 0.914141 | 0.360606 | 0.637037 | 0.583838 |
| 5369 | ENSG00000ARHGFE28 | 0.836364 | 0.436364 | 0.636364 | 0.570707 |
| 5370 | ENSG00000CKB      | 0.914141 | 0.360606 | 0.637037 | 0.582828 |
| 5371 | ENSG00000GPBP1L1  | 0.908081 | 0.373737 | 0.634007 | 0.575758 |
| 5372 | ENSG00000SCG5     | 0.843478 | 0.428986 | 0.636232 | 0.573913 |
| 5373 | ENSG00000APOA4    | 0.944444 | 0.332323 | 0.643603 | 0.564646 |
| 5374 | ENSG00000TMEM132E | 0.842424 | 0.422222 | 0.632323 | 0.586869 |
| 5375 | ENSG00000PLXNA2   | 0.8      | 0.446465 | 0.619192 | 0.610101 |
| 5376 | ENSG00000SEC14L3  | 0.727273 | 0.490909 | 0.609091 | 0.627273 |
| 5377 | ENSG00000KLHL18   | 0.912121 | 0.350505 | 0.612458 | 0.621212 |
| 5378 | ENSG00000UBXN7    | 0.966173 | 0.309725 | 0.645173 | 0.539112 |
| 5379 | ENSG00000AK4      | 0.883838 | 0.386869 | 0.633333 | 0.589899 |
| 5380 | ENSG00000IGF1     | 0.80202  | 0.421212 | 0.609933 | 0.640404 |
| 5381 | ENSG00000ZNF433   | 0.691332 | 0.540169 | 0.598309 | 0.62685  |
| 5382 | ENSG00000NDUFB1   | 0.828753 | 0.445032 | 0.636892 | 0.570825 |
| 5383 | ENSG00000KATNA1   | 0.858586 | 0.438384 | 0.639731 | 0.551515 |
| 5384 | ENSG00000MYOT     | 0.926263 | 0.352525 | 0.626936 | 0.583838 |
| 5385 | ENSG00000SEC23B   | 0.971717 | 0.281818 | 0.609259 | 0.588889 |
| 5386 | ENSG00000CAMLG    | 0.974747 | 0.247475 | 0.597643 | 0.612121 |
| 5387 | ENSG00000SERTAD4  | 1        | 0.244444 | 0.616498 | 0.560606 |
| 5388 | ENSG00000CA14     | 0.848485 | 0.410101 | 0.629293 | 0.60202  |

|      |                    |          |          |          |          |        |
|------|--------------------|----------|----------|----------|----------|--------|
| 5389 | ENSG00000EPCAM     | 0.943434 | 0.341414 | 0.645791 | 0.554545 |        |
| 5390 | ENSG00000SLC2A10   | 0.848485 | 0.429293 | 0.632155 | 0.575758 |        |
| 5391 | ENSG00000FAP       | 0.80202  | 0.448485 | 0.625253 | 0.60101  |        |
| 5392 | ENSG00000HCK       | 0.792812 | 0.459831 | 0.626321 | 0.59408  |        |
| 5393 | ENSG00000DVL2      | 1        | 0.29798  | 0.628788 | 0.527273 | 0.3776 |
| 5394 | ENSG00000BPHL      | 0.90303  | 0.373737 | 0.639057 | 0.575758 |        |
| 5395 | ENSG00000PDPN      | 0.90303  | 0.353535 | 0.621549 | 0.618182 |        |
| 5396 | ENSG00000MYEOV     | 0.873737 | 0.405051 | 0.6367   | 0.579798 |        |
| 5397 | ENSG00000TAF13     | 0.863636 | 0.415152 | 0.628788 | 0.584848 |        |
| 5398 | ENSG00000PRAMEF19  | 0.714141 | 0.520202 | 0.61633  | 0.610101 |        |
| 5399 | ENSG00000GLDC      | 0.90303  | 0.362626 | 0.629798 | 0.59899  |        |
| 5400 | ENSG00000PRAMEF18  | 0.714141 | 0.520202 | 0.61633  | 0.610101 |        |
| 5401 | ENSG00000ARHGAP31  | 0.82241  | 0.434461 | 0.626674 | 0.598309 |        |
| 5402 | ENSG00000SLC5A1    | 0.89899  | 0.357576 | 0.621549 | 0.618182 |        |
| 5403 | ENSG00000AQP1      | 0.878788 | 0.410101 | 0.644444 | 0.558586 |        |
| 5404 | ENSG00000ECEL1     | 0.721739 | 0.523671 | 0.622705 | 0.597101 |        |
| 5405 | ENSG00000WDR74     | 0.89899  | 0.390909 | 0.640404 | 0.562626 |        |
| 5406 | ENSG00000CRYGS     | 0.86087  | 0.424155 | 0.635749 | 0.571981 |        |
| 5407 | ENSG00000ARHGFE25  | 0.757576 | 0.488889 | 0.623232 | 0.593939 |        |
| 5408 | ENSG00000SLC44A4   | 0.888889 | 0.379798 | 0.634343 | 0.591919 |        |
| 5409 | ENSG00000CNN2      | 0.718182 | 0.516162 | 0.617172 | 0.612121 |        |
| 5410 | ENSG00000ZFP64     | 0.959596 | 0.276768 | 0.598653 | 0.634343 |        |
| 5411 | ENSG00000AL049629. | 0.824242 | 0.442424 | 0.63165  | 0.584848 |        |
| 5412 | ENSG00000CIDEB     | 0.700997 | 0.528239 | 0.614618 | 0.616833 |        |
| 5413 | ENSG00000TRPV4     | 0.809725 | 0.46723  | 0.632488 | 0.570825 |        |
| 5414 | ENSG00000TBC1D9B   | 0.833333 | 0.435354 | 0.618519 | 0.59899  |        |
| 5415 | ENSG00000TMEM108   | 0.817125 | 0.42389  | 0.620507 | 0.620507 |        |
| 5416 | ENSG00000BCAR1     | 0.907071 | 0.348485 | 0.620202 | 0.624242 | 0.3161 |
| 5417 | ENSG00000PCCB      | 0.836364 | 0.436364 | 0.636364 | 0.578788 |        |
| 5418 | ENSG00000IQCJ      | 0.824242 | 0.442424 | 0.63165  | 0.585859 |        |
| 5419 | ENSG00000LDHA      | 0.969697 | 0.30404  | 0.634512 | 0.553535 |        |
| 5420 | ENSG00000NSUN3     | 0.842424 | 0.422222 | 0.632323 | 0.591919 |        |
| 5421 | ENSG00000UBL3      | 0.866667 | 0.369697 | 0.616162 | 0.643434 |        |
| 5422 | ENSG00000MTHFS     | 1        | 0.290909 | 0.615152 | 0.506061 | 0.2658 |
| 5423 | ENSG00000ENPP5     | 0.830867 | 0.438689 | 0.629845 | 0.587738 |        |
| 5424 | ENSG00000GGT6      | 1        | 0.270707 | 0.622222 | 0.484848 |        |
| 5425 | ENSG00000MRPS2     | 0.868687 | 0.405051 | 0.634512 | 0.589899 |        |
| 5426 | ENSG00000BORCS8-ME | 0.830867 | 0.452431 | 0.625264 | 0.578224 |        |
| 5427 | ENSG00000MRS2      | 0.857294 | 0.42389  | 0.638478 | 0.572939 |        |
| 5428 | ENSG00000NME5      | 0.718182 | 0.508081 | 0.61229  | 0.622222 |        |
| 5429 | ENSG00000BCL2L1    | 0.904863 | 0.389006 | 0.637245 | 0.564482 |        |
| 5430 | ENSG00000METTL16   | 0.861616 | 0.40101  | 0.623232 | 0.611111 |        |
| 5431 | ENSG00000MEF2B     | 0.830867 | 0.452431 | 0.625264 | 0.578224 |        |
| 5432 | ENSG00000SCOC      | 0.935354 | 0.370707 | 0.639562 | 0.539394 |        |
| 5433 | ENSG00000SEC24A    | 0.794949 | 0.467677 | 0.631313 | 0.584848 |        |
| 5434 | ENSG00000FNIP1     | 0.980808 | 0.270707 | 0.609764 | 0.584848 |        |
| 5435 | ENSG00000PRKG1     | 1        | 0.245455 | 0.615152 | 0.493939 |        |
| 5436 | ENSG00000USP43     | 0.974747 | 0.289899 | 0.617508 | 0.572727 |        |
| 5437 | ENSG00000GUCY1A1   | 0.971717 | 0.29899  | 0.634343 | 0.554545 |        |
| 5438 | ENSG00000ABCG4     | 0.783575 | 0.435749 | 0.609662 | 0.641546 |        |
| 5439 | ENSG00000TCIRG1    | 0.853535 | 0.421212 | 0.63367  | 0.586869 |        |
| 5440 | ENSG00000TCP1      | 1        | 0.271717 | 0.624074 | 0.523232 |        |
| 5441 | ENSG00000POLD3     | 0.893235 | 0.389006 | 0.629845 | 0.587738 | 0.3139 |
| 5442 | ENSG00000ALG14     | 0.765657 | 0.466667 | 0.616162 | 0.621212 |        |
| 5443 | ENSG00000VAC14     | 0.830303 | 0.452525 | 0.641414 | 0.561616 |        |

|      |                    |          |          |          |          |
|------|--------------------|----------|----------|----------|----------|
| 5444 | ENSG00000SLC16A4   | 0.889006 | 0.343552 | 0.603594 | 0.665962 |
| 5445 | ENSG00000TC2N      | 0.912121 | 0.370707 | 0.630471 | 0.586869 |
| 5446 | ENSG00000YIF1B     | 0.958586 | 0.319192 | 0.627609 | 0.581818 |
| 5447 | ENSG00000ZNF583    | 0.922222 | 0.356566 | 0.634175 | 0.583838 |
| 5448 | ENSG00000BSPRY     | 0.741414 | 0.535354 | 0.632323 | 0.568687 |
| 5449 | ENSG00000MOXD1     | 0.757576 | 0.488889 | 0.623232 | 0.60303  |
| 5450 | ENSG00000RPS10-NUD | 0.951515 | 0.315152 | 0.625926 | 0.605051 |
| 5451 | ENSG00000TSC22D4   | 0.806061 | 0.476768 | 0.639057 | 0.559596 |
| 5452 | ENSG00000COL4A2    | 0.749495 | 0.513131 | 0.631313 | 0.579798 |
| 5453 | ENSG00000XRCC5     | 0.979798 | 0.29596  | 0.616835 | 0.566667 |
| 5454 | ENSG00000CDS1      | 0.909091 | 0.362626 | 0.63266  | 0.59697  |
| 5455 | ENSG00000GRAP      | 0.835354 | 0.406061 | 0.607744 | 0.640404 |
| 5456 | ENSG00000PDSS2     | 0.972727 | 0.29798  | 0.61936  | 0.571717 |
| 5457 | ENSG00000RSAD2     | 0.785412 | 0.47463  | 0.628612 | 0.590909 |
| 5458 | ENSG00000LMF2      | 0.850505 | 0.426263 | 0.638384 | 0.580808 |
| 5459 | ENSG00000FER1L6    | 0.69556  | 0.565539 | 0.63055  | 0.587738 |
| 5460 | ENSG00000MTPN      | 0.794949 | 0.459596 | 0.622559 | 0.605051 |
| 5461 | ENSG00000TNS1      | 0.982828 | 0.257576 | 0.620202 | 0.583838 |
| 5462 | ENSG00000SRPK2     | 0.962626 | 0.293939 | 0.657071 | 0.553535 |
| 5463 | ENSG00000MASTL     | 0.80202  | 0.448485 | 0.625253 | 0.607071 |
| 5464 | ENSG00000PLEKHA4   | 0.971717 | 0.306061 | 0.622727 | 0.565657 |
| 5465 | ENSG00000ETFBKMT   | 0.809091 | 0.431313 | 0.620202 | 0.623232 |
| 5466 | ENSG00000PDCD6IP   | 0.878788 | 0.410101 | 0.644444 | 0.566667 |
| 5467 | ENSG00000ETV4      | 0.891986 | 0.37863  | 0.624468 | 0.606272 |
| 5468 | ENSG00000SH3BGRL2  | 0.902748 | 0.366808 | 0.624207 | 0.609937 |
| 5469 | ENSG00000ADD2      | 0.982828 | 0.279798 | 0.669192 | 0.516162 |
| 5470 | ENSG00000FHL1      | 0.971717 | 0.29697  | 0.66734  | 0.523232 |
| 5471 | ENSG00000PRSS37    | 0.727273 | 0.490909 | 0.609091 | 0.635354 |
| 5472 | ENSG00000GLYATL1   | 0.718182 | 0.516162 | 0.617172 | 0.616162 |
| 5473 | ENSG00000NRR0S     | 0.842424 | 0.410101 | 0.622896 | 0.618182 |
| 5474 | ENSG00000OTOP2     | 0.955556 | 0.322222 | 0.624579 | 0.59798  |
| 5475 | ENSG00000CSR1P     | 0.780808 | 0.481818 | 0.630135 | 0.586869 |
| 5476 | ENSG00000ZNF438    | 0.893939 | 0.368687 | 0.62037  | 0.618182 |
| 5477 | ENSG00000MED21     | 0.911406 | 0.3732   | 0.631229 | 0.58804  |
| 5478 | ENSG00000IVL       | 0.878788 | 0.381818 | 0.625253 | 0.617172 |
| 5479 | ENSG00000RC3H1     | 1        | 0.254545 | 0.614141 | 0.536364 |
| 5480 | ENSG00000HOXA4     | 0.932323 | 0.369697 | 0.638047 | 0.550505 |
| 5481 | ENSG00000TMEM130   | 0.835095 | 0.429175 | 0.632135 | 0.596195 |
| 5482 | ENSG00000ACKR3     | 0.809725 | 0.433404 | 0.610289 | 0.631078 |
| 5483 | ENSG00000CSR2P     | 0.780808 | 0.481818 | 0.630135 | 0.586869 |
| 5484 | ENSG00000ELN       | 1        | 0.252525 | 0.610774 | 0.577778 |
| 5485 | ENSG00000ZNF185    | 0.830303 | 0.391919 | 0.611111 | 0.656566 |
| 5486 | ENSG00000FAM135A   | 1        | 0.244444 | 0.614478 | 0.572727 |
| 5487 | ENSG00000ZNF280C   | 1        | 0.306061 | 0.677441 | 0.459596 |
| 5488 | ENSG00000RFC4      | 1        | 0.270707 | 0.627609 | 0.490909 |
| 5489 | ENSG00000SPESP1    | 0.89697  | 0.364646 | 0.630471 | 0.611111 |
| 5490 | ENSG00000GLYATL1B  | 0.718182 | 0.516162 | 0.617172 | 0.616162 |
| 5491 | ENSG00000RPL35     | 0.885835 | 0.404863 | 0.63654  | 0.577167 |
| 5492 | ENSG00000KIF5C     | 0.890909 | 0.381818 | 0.636364 | 0.592929 |
| 5493 | ENSG00000RAC1      | 0.889899 | 0.372727 | 0.625084 | 0.616162 |
| 5494 | ENSG00000MS4A8     | 1        | 0.258586 | 0.613131 | 0.511111 |
| 5495 | ENSG00000LIMCH1    | 0.894949 | 0.362626 | 0.620875 | 0.625253 |
| 5496 | ENSG00000GNRH2     | 0.757576 | 0.488889 | 0.623232 | 0.606061 |
| 5497 | ENSG00000FBXL14    | 0.823232 | 0.436364 | 0.634007 | 0.59697  |
| 5498 | ENSG00000ZFP30     | 0.831313 | 0.420202 | 0.621886 | 0.619192 |

|      |                    |          |          |          |          |        |
|------|--------------------|----------|----------|----------|----------|--------|
| 5499 | ENSG00000ABHD13    | 0.975758 | 0.291919 | 0.664983 | 0.523232 |        |
| 5500 | ENSG00000ZDHHC23   | 0.909091 | 0.375758 | 0.624074 | 0.59596  |        |
| 5501 | ENSG00000PCED1A    | 0.799557 | 0.439646 | 0.61794  | 0.6268   |        |
| 5502 | ENSG00000ZNF436    | 0.910101 | 0.363636 | 0.628283 | 0.606061 |        |
| 5503 | ENSG00000ANXA3     | 1        | 0.282828 | 0.62963  | 0.5      |        |
| 5504 | ENSG00000NLGN1     | 0.782946 | 0.472868 | 0.627907 | 0.596899 |        |
| 5505 | ENSG00000ARFGEF3   | 0.833887 | 0.421927 | 0.627907 | 0.611296 |        |
| 5506 | ENSG00000HINT3     | 0.866667 | 0.438384 | 0.640741 | 0.558586 |        |
| 5507 | ENSG00000C20orf194 | 0.907071 | 0.361616 | 0.62862  | 0.611111 |        |
| 5508 | ENSG00000C16orf45  | 1        | 0.259596 | 0.615993 | 0.510101 |        |
| 5509 | ENSG00000MORC4     | 0.926263 | 0.338384 | 0.608249 | 0.630303 |        |
| 5510 | ENSG00000KLHL8     | 1        | 0.239394 | 0.612963 | 0.539394 |        |
| 5511 | ENSG00000TECPR1    | 0.870707 | 0.407071 | 0.631313 | 0.59596  |        |
| 5512 | ENSG00000KLK11     | 0.752525 | 0.487879 | 0.613468 | 0.621212 |        |
| 5513 | ENSG00000MYBPC1    | 0.912121 | 0.369697 | 0.634007 | 0.590909 |        |
| 5514 | ENSG00000EGFLAM    | 0.780808 | 0.453535 | 0.614815 | 0.627273 |        |
| 5515 | ENSG00000RGPD5     | 0.975758 | 0.282828 | 0.643098 | 0.556566 |        |
| 5516 | ENSG00000SLC25A43  | 0.688889 | 0.564646 | 0.626768 | 0.60303  |        |
| 5517 | ENSG00000RALGAPA1  | 0.790698 | 0.451827 | 0.621262 | 0.616833 |        |
| 5518 | ENSG00000C12orf76  | 0.976768 | 0.29596  | 0.622559 | 0.568687 |        |
| 5519 | ENSG00000WDR54     | 0.981818 | 0.267677 | 0.619697 | 0.585859 |        |
| 5520 | ENSG00000LGALS4    | 0.90303  | 0.366667 | 0.622222 | 0.614141 |        |
| 5521 | ENSG00000APC       | 0.824242 | 0.442424 | 0.63165  | 0.59697  |        |
| 5522 | ENSG00000ARHGEF5   | 1        | 0.256566 | 0.641751 | 0.544444 |        |
| 5523 | ENSG00000TM7SF2    | 0.727273 | 0.490909 | 0.609091 | 0.640404 |        |
| 5524 | ENSG00000GPR137B   | 0.923232 | 0.366667 | 0.641246 | 0.572727 | 0.2748 |
| 5525 | ENSG00000DEPP1     | 0.940404 | 0.355556 | 0.648148 | 0.550505 |        |
| 5526 | ENSG00000NPVF      | 0.706753 | 0.519889 | 0.612704 | 0.631822 |        |
| 5527 | ENSG00000ELOVL1    | 1        | 0.270707 | 0.621549 | 0.559596 |        |
| 5528 | ENSG00000PPP1R3A   | 0.931313 | 0.330303 | 0.615657 | 0.626263 |        |
| 5529 | ENSG00000C9orf116  | 0.881818 | 0.370707 | 0.626263 | 0.628283 | 0.5185 |
| 5530 | ENSG00000RGPD8     | 0.975758 | 0.282828 | 0.643098 | 0.556566 |        |
| 5531 | ENSG00000ARFGEF1   | 0.963636 | 0.323232 | 0.634848 | 0.560606 |        |
| 5532 | ENSG00000TMEM248   | 0.757576 | 0.488889 | 0.623232 | 0.610101 |        |
| 5533 | ENSG00000ZNF41     | 0.867677 | 0.387879 | 0.617508 | 0.633333 |        |
| 5534 | ENSG00000DEPDC1    | 0.825581 | 0.436575 | 0.625793 | 0.608879 |        |
| 5535 | ENSG00000CCDC175   | 0.930303 | 0.387879 | 0.637374 | 0.541414 |        |
| 5536 | ENSG00000LEXM      | 1        | 0.265657 | 0.626599 | 0.50202  |        |
| 5537 | ENSG00000FBXW4     | 0.765657 | 0.466667 | 0.616162 | 0.631313 |        |
| 5538 | ENSG00000RGPD6     | 0.975758 | 0.282828 | 0.643098 | 0.556566 |        |
| 5539 | ENSG00000UFL1      | 0.934343 | 0.350505 | 0.645791 | 0.567677 |        |
| 5540 | ENSG00000HMG3      | 0.972727 | 0.277778 | 0.637879 | 0.572727 |        |
| 5541 | ENSG00000NDFIP2    | 0.821212 | 0.441414 | 0.626599 | 0.608081 |        |
| 5542 | ENSG00000CTSFC     | 0.824242 | 0.442424 | 0.63165  | 0.59899  |        |
| 5543 | ENSG00000ALDH3A2   | 0.991919 | 0.280808 | 0.643771 | 0.542424 |        |
| 5544 | ENSG00000SNTN      | 0.869697 | 0.367677 | 0.606734 | 0.664646 |        |
| 5545 | ENSG00000OR1S2     | 0.811847 | 0.466899 | 0.639373 | 0.576074 |        |
| 5546 | ENSG00000OR1S1     | 0.811847 | 0.466899 | 0.639373 | 0.576074 |        |
| 5547 | ENSG00000CD83      | 0.909091 | 0.376768 | 0.642593 | 0.580808 |        |
| 5548 | ENSG00000DCAF12L2  | 0.959596 | 0.280808 | 0.611785 | 0.628283 |        |
| 5549 | ENSG00000DCAF12L1  | 0.959596 | 0.280808 | 0.611785 | 0.628283 |        |
| 5550 | ENSG00000PSMB8     | 0.90404  | 0.435354 | 0.655387 | 0.510101 |        |
| 5551 | ENSG00000TFE3      | 0.949495 | 0.345455 | 0.654545 | 0.553535 |        |
| 5552 | ENSG00000TBC1D21   | 0.705074 | 0.535941 | 0.620507 | 0.618393 |        |
| 5553 | ENSG00000CDK19     | 0.915152 | 0.363636 | 0.640404 | 0.592929 |        |

|      |                   |          |          |          |          |        |
|------|-------------------|----------|----------|----------|----------|--------|
| 5554 | ENSG00000RSC1A1   | 1        | 0.281818 | 0.612121 | 0.478788 |        |
| 5555 | ENSG00000LCORL    | 0.949495 | 0.320202 | 0.655892 | 0.579798 |        |
| 5556 | ENSG00000SLC5A5   | 0.967677 | 0.346465 | 0.670539 | 0.482828 |        |
| 5557 | ENSG00000C8orf58  | 0.966667 | 0.314141 | 0.637037 | 0.559596 |        |
| 5558 | ENSG00000ROPN1L   | 0.888889 | 0.359596 | 0.620034 | 0.643434 |        |
| 5559 | ENSG00000TGDS     | 0.960606 | 0.316162 | 0.651347 | 0.561616 |        |
| 5560 | ENSG00000ZBTB3    | 0.967677 | 0.318182 | 0.625758 | 0.567677 |        |
| 5561 | ENSG00000ZSCAN4   | 0.887879 | 0.354545 | 0.612626 | 0.657576 |        |
| 5562 | ENSG00000CCDC127  | 0.89697  | 0.345455 | 0.608923 | 0.662626 |        |
| 5563 | ENSG00000GRIN1    | 0.785859 | 0.485859 | 0.631818 | 0.586869 |        |
| 5564 | ENSG00000EFNB3    | 0.772358 | 0.487805 | 0.630081 | 0.598142 |        |
| 5565 | ENSG00000NTN1     | 0.757576 | 0.488889 | 0.623232 | 0.614141 |        |
| 5566 | ENSG00000NEDD4    | 1        | 0.274747 | 0.63468  | 0.547475 |        |
| 5567 | ENSG00000PTK7     | 0.830303 | 0.452525 | 0.641414 | 0.574747 |        |
| 5568 | ENSG00000FAM213A  | 0.975758 | 0.29899  | 0.62037  | 0.577778 |        |
| 5569 | ENSG00000OR10S1   | 0.868687 | 0.430303 | 0.649495 | 0.559596 |        |
| 5570 | ENSG00000YWHAQ    | 1        | 0.287526 | 0.627202 | 0.514799 |        |
| 5571 | ENSG00000GNL1     | 0.983838 | 0.29596  | 0.627609 | 0.560606 |        |
| 5572 | ENSG00000ZBTB1    | 0.848485 | 0.413131 | 0.662795 | 0.576768 |        |
| 5573 | ENSG00000THADA    | 0.945455 | 0.352525 | 0.642593 | 0.562626 |        |
| 5574 | ENSG00000PPP1R18  | 0.915152 | 0.363636 | 0.640404 | 0.594949 |        |
| 5575 | ENSG00000COPG2    | 0.787879 | 0.488889 | 0.638384 | 0.576768 |        |
| 5576 | ENSG00000MYMK     | 0.978788 | 0.316162 | 0.632323 | 0.547475 |        |
| 5577 | ENSG00000TXLNG    | 0.909091 | 0.380808 | 0.641246 | 0.582828 |        |
| 5578 | ENSG00000ZMYM2    | 0.925253 | 0.341414 | 0.621549 | 0.623232 |        |
| 5579 | ENSG00000CBR1     | 0.923232 | 0.356566 | 0.626768 | 0.605051 |        |
| 5580 | ENSG00000CLDN10   | 0.886869 | 0.375758 | 0.631313 | 0.620202 |        |
| 5581 | ENSG00000UNC13B   | 0.924242 | 0.333333 | 0.622222 | 0.632323 |        |
| 5582 | ENSG00000GDAP2    | 0.830303 | 0.425253 | 0.625926 | 0.620202 |        |
| 5583 | ENSG00000COMMD10  | 0.836364 | 0.436364 | 0.636364 | 0.59596  |        |
| 5584 | ENSG00000OR5T1    | 0.80202  | 0.448485 | 0.625253 | 0.617172 |        |
| 5585 | ENSG00000ZSCAN32  | 0.82241  | 0.463002 | 0.642706 | 0.571882 |        |
| 5586 | ENSG00000SEC11C   | 0.739394 | 0.490909 | 0.608418 | 0.638384 |        |
| 5587 | ENSG00000FANCC    | 0.90101  | 0.377778 | 0.641077 | 0.591919 |        |
| 5588 | ENSG00000SIGLEC9  | 0.830303 | 0.425253 | 0.625926 | 0.622222 |        |
| 5589 | ENSG00000USP35    | 0.991919 | 0.289899 | 0.639731 | 0.547475 |        |
| 5590 | ENSG00000NR2C2AP  | 0.914141 | 0.369697 | 0.628283 | 0.605051 |        |
| 5591 | ENSG00000ALDH18A1 | 0.89899  | 0.374747 | 0.635859 | 0.606061 |        |
| 5592 | ENSG00000WNT7A    | 0.9      | 0.370707 | 0.636027 | 0.607071 |        |
| 5593 | ENSG00000ABCC4    | 0.758586 | 0.49798  | 0.627104 | 0.60202  | 0.2485 |
| 5594 | ENSG00000NAGPA    | 0.7463   | 0.505285 | 0.625793 | 0.607822 |        |
| 5595 | ENSG00000EML4     | 0.978788 | 0.312121 | 0.630808 | 0.555556 |        |
| 5596 | ENSG00000DUSP6    | 0.889899 | 0.423232 | 0.649832 | 0.550505 |        |
| 5597 | ENSG00000ACBD5    | 0.948485 | 0.333333 | 0.640741 | 0.588889 | 0.4213 |
| 5598 | ENSG00000NSMCE1   | 0.964646 | 0.317172 | 0.650168 | 0.551515 |        |
| 5599 | ENSG00000KIF6     | 0.7463   | 0.505285 | 0.625793 | 0.607822 |        |
| 5600 | ENSG00000ANKRD55  | 0.847475 | 0.451515 | 0.642761 | 0.564646 |        |
| 5601 | ENSG00000PSMA6    | 0.873737 | 0.412121 | 0.634343 | 0.59798  |        |
| 5602 | ENSG00000ZNF629   | 0.765657 | 0.466667 | 0.616162 | 0.639394 |        |
| 5603 | ENSG00000GOLGA5   | 0.965657 | 0.321212 | 0.631313 | 0.570707 | 0.3351 |
| 5604 | ENSG00000CASP9    | 1        | 0.274747 | 0.617508 | 0.537374 |        |
| 5605 | ENSG00000CIT      | 1        | 0.290909 | 0.636364 | 0.515152 |        |
| 5606 | ENSG00000TRMT12   | 0.894949 | 0.39798  | 0.635522 | 0.586869 |        |
| 5607 | ENSG00000PRKCA    | 0.979798 | 0.285859 | 0.626094 | 0.579798 |        |
| 5608 | ENSG00000ERGIC2   | 0.904863 | 0.392178 | 0.63654  | 0.582452 |        |

|      |                    |          |          |          |          |        |
|------|--------------------|----------|----------|----------|----------|--------|
| 5609 | ENSG00000CSF3R     | 0.957576 | 0.330303 | 0.647306 | 0.570707 |        |
| 5610 | ENSG00000ZNF644    | 0.854545 | 0.385859 | 0.610774 | 0.660606 |        |
| 5611 | ENSG00000TMEM88    | 0.926263 | 0.354545 | 0.624242 | 0.608081 |        |
| 5612 | ENSG00000MAP7      | 0.886869 | 0.40202  | 0.63771  | 0.591919 |        |
| 5613 | ENSG00000AFDN      | 1        | 0.240404 | 0.628283 | 0.547475 |        |
| 5614 | ENSG00000STARD9    | 0.934343 | 0.345455 | 0.626599 | 0.605051 |        |
| 5615 | ENSG00000KIAA1211L | 0.873737 | 0.419192 | 0.646465 | 0.575758 |        |
| 5616 | ENSG00000ISM2      | 0.911111 | 0.363636 | 0.639057 | 0.606061 |        |
| 5617 | ENSG00000QSER1     | 0.860465 | 0.39852  | 0.614165 | 0.640592 |        |
| 5618 | ENSG00000CCNE2     | 0.985859 | 0.289899 | 0.628956 | 0.566667 |        |
| 5619 | ENSG00000CCDC183   | 0.918182 | 0.385859 | 0.647138 | 0.561616 |        |
| 5620 | ENSG00000SKIL      | 0.848485 | 0.429293 | 0.632155 | 0.60202  |        |
| 5621 | ENSG00000KCTD8     | 0.711111 | 0.545455 | 0.62138  | 0.614141 |        |
| 5622 | ENSG00000PPP1R10   | 1        | 0.264646 | 0.627946 | 0.481818 |        |
| 5623 | ENSG00000TGM1      | 0.948485 | 0.366667 | 0.652189 | 0.540404 |        |
| 5624 | ENSG00000BAK1      | 0.787879 | 0.488889 | 0.638384 | 0.584848 |        |
| 5625 | ENSG00000GIMAP6    | 0.891919 | 0.39899  | 0.637037 | 0.589899 |        |
| 5626 | ENSG00000XPNPEP2   | 0.959596 | 0.336364 | 0.639899 | 0.563636 |        |
| 5627 | ENSG00000UBLCP1    | 0.933333 | 0.376768 | 0.643603 | 0.550505 |        |
| 5628 | ENSG00000JUND      | 1        | 0.272727 | 0.616162 | 0.544444 |        |
| 5629 | ENSG00000ANXA1     | 0.954545 | 0.3      | 0.668182 | 0.585859 |        |
| 5630 | ENSG00000MGMT      | 1        | 0.240404 | 0.614815 | 0.530303 |        |
| 5631 | ENSG00000OR8K1     | 0.818182 | 0.461616 | 0.638384 | 0.586869 |        |
| 5632 | ENSG00000RNF186    | 0.890909 | 0.381818 | 0.636364 | 0.607071 |        |
| 5633 | ENSG00000RNPEP     | 1        | 0.245455 | 0.628283 | 0.508081 |        |
| 5634 | ENSG00000AMZ2      | 0.858586 | 0.413131 | 0.624074 | 0.617172 |        |
| 5635 | ENSG00000RAB29     | 1        | 0.270707 | 0.622222 | 0.549495 |        |
| 5636 | ENSG00000C7orf50   | 0.865657 | 0.425253 | 0.647475 | 0.578788 |        |
| 5637 | ENSG00000SPATA18   | 0.886869 | 0.375758 | 0.631313 | 0.624242 |        |
| 5638 | ENSG00000CTPS1     | 1        | 0.267677 | 0.619529 | 0.511111 | 0.4937 |
| 5639 | ENSG00000ZNF805    | 0.882664 | 0.393235 | 0.629316 | 0.615222 |        |
| 5640 | ENSG00000OGG1      | 1        | 0.270707 | 0.648485 | 0.522222 |        |
| 5641 | ENSG00000PIP5K1A   | 0.780808 | 0.506061 | 0.642256 | 0.568687 |        |
| 5642 | ENSG00000DOK4      | 0.836364 | 0.425253 | 0.627104 | 0.622222 |        |
| 5643 | ENSG00000RNF170    | 0.949495 | 0.373737 | 0.649495 | 0.534343 |        |
| 5644 | ENSG00000DEPTOR    | 1        | 0.240404 | 0.611448 | 0.549495 |        |
| 5645 | ENSG00000HAUS5     | 0.845455 | 0.435354 | 0.624916 | 0.609091 |        |
| 5646 | ENSG00000SLC35E1   | 0.842424 | 0.422222 | 0.632323 | 0.616162 |        |
| 5647 | ENSG00000HSD11B1   | 0.718182 | 0.516162 | 0.617172 | 0.635354 |        |
| 5648 | ENSG00000GPN2      | 0.709091 | 0.540404 | 0.61835  | 0.624242 |        |
| 5649 | ENSG00000ALDH7A1   | 0.830303 | 0.452525 | 0.641414 | 0.582828 |        |
| 5650 | ENSG00000FOXD4     | 0.858586 | 0.415152 | 0.632997 | 0.611111 |        |
| 5651 | ENSG00000DDX39B    | 1        | 0.260606 | 0.615488 | 0.505051 |        |
| 5652 | ENSG00000SBSN      | 0.854545 | 0.385859 | 0.617508 | 0.656566 |        |
| 5653 | ENSG00000PTPN6     | 0.990909 | 0.273737 | 0.670034 | 0.530303 |        |
| 5654 | ENSG00000FOXD4L1   | 0.858586 | 0.415152 | 0.632997 | 0.611111 |        |
| 5655 | ENSG00000ADAM21    | 0.770613 | 0.497886 | 0.633192 | 0.595137 |        |
| 5656 | ENSG00000TMEM41B   | 0.794949 | 0.467677 | 0.631313 | 0.607071 |        |
| 5657 | ENSG00000RGL3      | 0.971717 | 0.326263 | 0.637542 | 0.549495 |        |
| 5658 | ENSG00000FOXD4L4   | 0.858586 | 0.415152 | 0.632997 | 0.611111 |        |
| 5659 | ENSG00000ADAMTS6   | 0.757576 | 0.488889 | 0.623232 | 0.624242 |        |
| 5660 | ENSG00000NRAP      | 0.887043 | 0.356589 | 0.621078 | 0.657807 |        |
| 5661 | ENSG00000TRIM17    | 0.719192 | 0.527273 | 0.623232 | 0.622222 |        |
| 5662 | ENSG00000FOXD4L3   | 0.858586 | 0.415152 | 0.632997 | 0.611111 |        |
| 5663 | ENSG00000MED31     | 0.863636 | 0.431313 | 0.644108 | 0.580808 |        |

|      |                   |          |          |          |          |
|------|-------------------|----------|----------|----------|----------|
| 5664 | ENSG00000FOXD4L5  | 0.858586 | 0.415152 | 0.632997 | 0.611111 |
| 5665 | ENSG00000NR4A3    | 0.934343 | 0.350505 | 0.645791 | 0.582828 |
| 5666 | ENSG00000FOXD4L6  | 0.858586 | 0.415152 | 0.632997 | 0.611111 |
| 5667 | ENSG00000CROT     | 1        | 0.281818 | 0.672222 | 0.516162 |
| 5668 | ENSG00000FTL      | 0.915152 | 0.389899 | 0.649158 | 0.568687 |
| 5669 | ENSG00000ZNR2     | 0.923232 | 0.353535 | 0.635859 | 0.609091 |
| 5670 | ENSG00000HPF1     | 0.87315  | 0.428118 | 0.645349 | 0.577167 |
| 5671 | ENSG00000HM13     | 0.830303 | 0.452525 | 0.641414 | 0.587879 |
| 5672 | ENSG00000COMMD9   | 0.886869 | 0.410101 | 0.645623 | 0.582828 |
| 5673 | ENSG00000DNAJA3   | 0.976768 | 0.310101 | 0.63266  | 0.566667 |
| 5674 | ENSG00000PUF60    | 1        | 0.255556 | 0.613131 | 0.522222 |
| 5675 | ENSG00000FLVCR1   | 0.787879 | 0.488889 | 0.638384 | 0.587879 |
| 5676 | ENSG00000DAB1     | 0.955556 | 0.341414 | 0.650168 | 0.566667 |
| 5677 | ENSG00000COR01A   | 0.919192 | 0.370707 | 0.641246 | 0.592929 |
| 5678 | ENSG00000ZSWIM9   | 0.733333 | 0.532323 | 0.626263 | 0.608081 |
| 5679 | ENSG00000GRK3     | 0.916162 | 0.366667 | 0.63468  | 0.611111 |
| 5680 | ENSG00000FEM1C    | 0.773737 | 0.50101  | 0.631145 | 0.59697  |
| 5681 | ENSG00000FRY      | 0.935354 | 0.356566 | 0.630471 | 0.59596  |
| 5682 | ENSG00000RNASEH2C | 0.836152 | 0.457717 | 0.635659 | 0.588795 |
| 5683 | ENSG00000S100A4   | 0.963636 | 0.281818 | 0.637542 | 0.60404  |
| 5684 | ENSG00000MME      | 0.794949 | 0.467677 | 0.631313 | 0.609091 |
| 5685 | ENSG00000CCNF     | 0.842424 | 0.417172 | 0.627609 | 0.628283 |
| 5686 | ENSG00000PGBD2    | 1        | 0.246465 | 0.633333 | 0.50101  |
| 5687 | ENSG00000MSH2     | 1        | 0.30404  | 0.640404 | 0.528283 |
| 5688 | ENSG00000CPVL     | 0.872727 | 0.381818 | 0.627273 | 0.642424 |
| 5689 | ENSG00000ALS2     | 0.787879 | 0.488889 | 0.638384 | 0.592929 |
| 5690 | ENSG00000SLFN13   | 0.854545 | 0.4      | 0.627273 | 0.637374 |
| 5691 | ENSG00000ELFN2    | 0.791919 | 0.482828 | 0.637374 | 0.592929 |
| 5692 | ENSG00000NAPB     | 1        | 0.261616 | 0.620034 | 0.557576 |
| 5693 | ENSG00000ZNF570   | 0.924242 | 0.386869 | 0.637542 | 0.569697 |
| 5694 | ENSG00000ANKRD13A | 0.912121 | 0.370707 | 0.630471 | 0.615152 |
| 5695 | ENSG00000SREBF2   | 0.827273 | 0.437374 | 0.624242 | 0.624242 |
| 5696 | ENSG00000TLCD2    | 0.836364 | 0.436364 | 0.636364 | 0.607071 |
| 5697 | ENSG00000ALKAL1   | 0.892929 | 0.386869 | 0.643939 | 0.6      |
| 5698 | ENSG00000SELENON  | 0.831672 | 0.457364 | 0.63529  | 0.593577 |
| 5699 | ENSG00000HIPK3    | 0.90303  | 0.373737 | 0.649158 | 0.59798  |
| 5700 | ENSG00000ALOX12   | 1        | 0.278788 | 0.645455 | 0.531313 |
| 5701 | ENSG00000HAS3     | 0.946465 | 0.338384 | 0.641751 | 0.594949 |
| 5702 | ENSG00000SLC7A14  | 0.737844 | 0.527484 | 0.626498 | 0.609937 |
| 5703 | ENSG00000ZNF235   | 0.741414 | 0.532323 | 0.636027 | 0.594949 |
| 5704 | ENSG00000ZNF236   | 0.842424 | 0.422222 | 0.632323 | 0.622222 |
| 5705 | ENSG00000PLAA     | 0.978788 | 0.273737 | 0.617508 | 0.608081 |
| 5706 | ENSG00000OLIG3    | 1        | 0.276768 | 0.627273 | 0.49798  |
| 5707 | ENSG00000IFT27    | 0.824242 | 0.470707 | 0.647475 | 0.571717 |
| 5708 | ENSG00000CGN      | 1        | 0.260606 | 0.62862  | 0.536364 |
| 5709 | ENSG00000COASY    | 0.994949 | 0.283838 | 0.671044 | 0.526263 |
| 5710 | ENSG00000TRUB1    | 0.874747 | 0.427273 | 0.643098 | 0.582828 |
| 5711 | ENSG00000CLN3     | 0.836364 | 0.416162 | 0.618519 | 0.644444 |
| 5712 | ENSG00000ERI2     | 0.968687 | 0.326263 | 0.643603 | 0.553535 |
| 5713 | ENSG00000EIF2B1   | 0.945455 | 0.376768 | 0.649327 | 0.543434 |
| 5714 | ENSG00000ARHGAP28 | 0.988889 | 0.271717 | 0.6367   | 0.578788 |
| 5715 | ENSG00000PLPBP    | 1        | 0.265657 | 0.615488 | 0.545455 |
| 5716 | ENSG00000MEF2C    | 0.952525 | 0.343434 | 0.645791 | 0.580808 |
| 5717 | ENSG00000SUGCT    | 0.974747 | 0.29596  | 0.658923 | 0.553535 |
| 5718 | ENSG00000OSCP1    | 0.890909 | 0.420202 | 0.643771 | 0.571717 |

|      |                    |          |          |          |          |       |
|------|--------------------|----------|----------|----------|----------|-------|
| 5719 | ENSG00000CAV3      | 0.909091 | 0.384848 | 0.64798  | 0.584848 |       |
| 5720 | ENSG00000FAM122C   | 0.858586 | 0.454545 | 0.654545 | 0.554545 |       |
| 5721 | ENSG00000TRAK2     | 0.942424 | 0.350505 | 0.645623 | 0.580808 |       |
| 5722 | ENSG00000BRI3      | 0.794949 | 0.467677 | 0.631313 | 0.613131 |       |
| 5723 | ENSG00000ZBTB8B    | 0.752657 | 0.520773 | 0.636715 | 0.594203 |       |
| 5724 | ENSG00000TWISTNB   | 1        | 0.263636 | 0.625758 | 0.566667 |       |
| 5725 | ENSG00000NIN       | 0.787879 | 0.459596 | 0.622391 | 0.636364 |       |
| 5726 | ENSG00000EDF1      | 0.913131 | 0.387879 | 0.643603 | 0.584848 | 0.331 |
| 5727 | ENSG00000PSMF1     | 0.908081 | 0.390909 | 0.643266 | 0.586869 |       |
| 5728 | ENSG00000NTPCR     | 0.963636 | 0.337374 | 0.657239 | 0.539394 |       |
| 5729 | ENSG00000REV3L     | 0.874747 | 0.412121 | 0.6367   | 0.608081 |       |
| 5730 | ENSG00000S100PBP   | 0.97463  | 0.313953 | 0.677766 | 0.520085 |       |
| 5731 | ENSG00000PARPBP    | 0.787879 | 0.467677 | 0.620539 | 0.628283 |       |
| 5732 | ENSG00000TMEM39A   | 0.892929 | 0.40202  | 0.637205 | 0.59697  |       |
| 5733 | ENSG00000CD3E      | 0.965657 | 0.321212 | 0.631313 | 0.581818 |       |
| 5734 | ENSG00000CA7       | 0.914141 | 0.392929 | 0.637037 | 0.586869 |       |
| 5735 | ENSG00000CDC6      | 0.89798  | 0.381818 | 0.645791 | 0.60303  |       |
| 5736 | ENSG00000SCCPDH    | 0.893939 | 0.382828 | 0.638384 | 0.613131 |       |
| 5737 | ENSG00000PSMD8     | 1        | 0.291919 | 0.63569  | 0.548485 |       |
| 5738 | ENSG00000SLC13A1   | 0.872727 | 0.361616 | 0.617172 | 0.682828 |       |
| 5739 | ENSG00000MRPS17    | 0.785412 | 0.480973 | 0.633192 | 0.608879 |       |
| 5740 | ENSG00000AC092647. | 0.785412 | 0.480973 | 0.633192 | 0.608879 |       |
| 5741 | ENSG00000GPR63     | 0.794949 | 0.467677 | 0.631313 | 0.617172 |       |
| 5742 | ENSG00000IQCC      | 0.955556 | 0.325253 | 0.63165  | 0.615152 |       |
| 5743 | ENSG00000SCD5      | 0.882828 | 0.408081 | 0.63569  | 0.607071 |       |
| 5744 | ENSG00000PSG11     | 0.969697 | 0.328283 | 0.645286 | 0.550505 |       |
| 5745 | ENSG00000TAF6L     | 0.933333 | 0.361616 | 0.632997 | 0.593939 |       |
| 5746 | ENSG00000TM6SF1    | 0.915152 | 0.373737 | 0.642088 | 0.6      |       |
| 5747 | ENSG00000DOCK5     | 0.835095 | 0.429175 | 0.632135 | 0.623679 |       |
| 5748 | ENSG00000PDLIM5    | 1        | 0.264646 | 0.620202 | 0.535354 |       |
| 5749 | ENSG00000RAPGEF5   | 1        | 0.261616 | 0.61734  | 0.556566 |       |
| 5750 | ENSG00000BDH2      | 0.933333 | 0.392929 | 0.678114 | 0.507071 |       |
| 5751 | ENSG00000ANGPTL2   | 0.919192 | 0.381818 | 0.642424 | 0.584848 |       |
| 5752 | ENSG00000ACOT1     | 0.816068 | 0.453488 | 0.633192 | 0.613108 |       |
| 5753 | ENSG00000NDUFB8    | 0.830867 | 0.470402 | 0.647287 | 0.570825 | 0.285 |
| 5754 | ENSG00000FKBP2     | 0.90101  | 0.391919 | 0.646465 | 0.588889 |       |
| 5755 | ENSG00000CTS0      | 0.809725 | 0.46723  | 0.632488 | 0.607822 |       |
| 5756 | ENSG00000ZBTB7A    | 1        | 0.242424 | 0.616498 | 0.535354 |       |
| 5757 | ENSG00000GPR180    | 0.820202 | 0.461616 | 0.633165 | 0.606061 |       |
| 5758 | ENSG00000UGT2A1    | 0.883838 | 0.380808 | 0.629461 | 0.637374 |       |
| 5759 | ENSG00000ABCC8     | 1        | 0.29899  | 0.648822 | 0.541414 |       |
| 5760 | ENSG00000CTBS      | 1        | 0.259596 | 0.63064  | 0.559596 |       |
| 5761 | ENSG00000ETFRF1    | 0.7463   | 0.505285 | 0.625793 | 0.622622 |       |
| 5762 | ENSG00000DHX34     | 0.888889 | 0.379798 | 0.634343 | 0.628283 |       |
| 5763 | ENSG00000PRAM1     | 0.824242 | 0.470707 | 0.647475 | 0.576768 |       |
| 5764 | ENSG00000PPP2R2C   | 1        | 0.3      | 0.637879 | 0.547475 |       |
| 5765 | ENSG00000TFF1      | 0.909091 | 0.39798  | 0.653535 | 0.569697 |       |
| 5766 | ENSG00000COBLL1    | 0.936364 | 0.365657 | 0.645455 | 0.574747 |       |
| 5767 | ENSG00000CYSTM1    | 0.656566 | 0.612121 | 0.634343 | 0.614141 |       |
| 5768 | ENSG00000MTMR2     | 0.718182 | 0.516162 | 0.617172 | 0.647475 |       |
| 5769 | ENSG00000MYLPF     | 0.893939 | 0.394949 | 0.644444 | 0.59697  |       |
| 5770 | ENSG00000PPP2R2B   | 1        | 0.255556 | 0.63064  | 0.534343 |       |
| 5771 | ENSG00000PPP2R2A   | 1        | 0.249495 | 0.616835 | 0.518182 |       |
| 5772 | ENSG00000ADGRG5    | 0.794949 | 0.467677 | 0.631313 | 0.618182 |       |
| 5773 | ENSG00000GPATCH1   | 0.983838 | 0.313131 | 0.67138  | 0.522222 |       |



|      |                    |          |          |          |          |        |
|------|--------------------|----------|----------|----------|----------|--------|
| 5774 | ENSG00000NFIC      | 1        | 0.260606 | 0.615488 | 0.557576 |        |
| 5775 | ENSG00000TBCB      | 0.970707 | 0.334343 | 0.636195 | 0.558586 |        |
| 5776 | ENSG00000XAGE2     | 0.889006 | 0.394292 | 0.641649 | 0.607822 |        |
| 5777 | ENSG00000IGFL1     | 0.787879 | 0.482828 | 0.634007 | 0.607071 |        |
| 5778 | ENSG00000XAGE3     | 0.889006 | 0.394292 | 0.641649 | 0.607822 |        |
| 5779 | ENSG00000HIP1R     | 1        | 0.271717 | 0.619024 | 0.557576 | 0.3127 |
| 5780 | ENSG00000TMEM161A  | 0.836152 | 0.435518 | 0.628083 | 0.624736 |        |
| 5781 | ENSG00000PAM       | 0.90303  | 0.391919 | 0.647475 | 0.588889 |        |
| 5782 | ENSG00000PPP2R5D   | 0.948485 | 0.346465 | 0.643098 | 0.589899 |        |
| 5783 | ENSG00000KRBA2     | 0.848485 | 0.429293 | 0.632155 | 0.616162 |        |
| 5784 | ENSG00000C20orf196 | 0.830867 | 0.465116 | 0.644292 | 0.584567 |        |
| 5785 | ENSG00000TTC31     | 0.884778 | 0.422833 | 0.641297 | 0.587738 | 0.3595 |
| 5786 | ENSG00000RASD2     | 0.856035 | 0.444075 | 0.650055 | 0.580288 |        |
| 5787 | ENSG00000DOCK1     | 0.951374 | 0.340381 | 0.640063 | 0.598309 |        |
| 5788 | ENSG00000S100A7    | 0.890909 | 0.412121 | 0.636027 | 0.59596  |        |
| 5789 | ENSG00000ZNF200    | 0.974747 | 0.289899 | 0.607407 | 0.622222 | 0.3418 |
| 5790 | ENSG00000COL2A1    | 0.749495 | 0.513131 | 0.631313 | 0.614141 |        |
| 5791 | ENSG00000KIFC2     | 0.890909 | 0.40202  | 0.641751 | 0.59899  |        |
| 5792 | ENSG00000ATP6V1C1  | 0.830303 | 0.452525 | 0.641414 | 0.59798  |        |
| 5793 | ENSG00000LRRC10B   | 0.838384 | 0.449495 | 0.637037 | 0.6      |        |
| 5794 | ENSG00000RUFY3     | 0.980808 | 0.330303 | 0.640404 | 0.544444 |        |
| 5795 | ENSG00000PHACTR2   | 1        | 0.282828 | 0.630976 | 0.553535 |        |
| 5796 | ENSG00000PEX11B    | 0.830303 | 0.452525 | 0.641414 | 0.59899  |        |
| 5797 | ENSG00000ERBB2     | 0.976768 | 0.30202  | 0.655892 | 0.557576 |        |
| 5798 | ENSG00000SNX7      | 0.830303 | 0.452525 | 0.641414 | 0.59798  |        |
| 5799 | ENSG00000CABP7     | 0.836364 | 0.436364 | 0.636364 | 0.618182 |        |
| 5800 | ENSG00000SOCS5     | 1        | 0.284848 | 0.623906 | 0.514141 | 0.3521 |
| 5801 | ENSG00000C9orf47   | 0.794949 | 0.439394 | 0.615657 | 0.663636 |        |
| 5802 | ENSG00000DTX4      | 0.89697  | 0.385859 | 0.641414 | 0.612121 |        |
| 5803 | ENSG00000PDCL3     | 1        | 0.278788 | 0.646128 | 0.536364 |        |
| 5804 | ENSG00000MORN3     | 0.992929 | 0.285859 | 0.679461 | 0.524242 |        |
| 5805 | ENSG00000GPR61     | 0.945455 | 0.334343 | 0.624411 | 0.627273 |        |
| 5806 | ENSG00000ANKMY1    | 0.9      | 0.362626 | 0.628283 | 0.644444 |        |
| 5807 | ENSG00000FBXW5     | 0.780808 | 0.506061 | 0.638047 | 0.591919 |        |
| 5808 | ENSG00000PIGR      | 0.929293 | 0.356566 | 0.642088 | 0.6      |        |
| 5809 | ENSG00000PLA2G4A   | 1        | 0.261616 | 0.622559 | 0.571717 |        |
| 5810 | ENSG00000S100G     | 0.930303 | 0.380808 | 0.647138 | 0.564646 |        |
| 5811 | ENSG00000TMEM199   | 0.830303 | 0.452525 | 0.641414 | 0.59798  |        |
| 5812 | ENSG00000ARPIN     | 1        | 0.258586 | 0.614141 | 0.519192 |        |
| 5813 | ENSG00000UBR4      | 0.830303 | 0.452525 | 0.641414 | 0.60101  |        |
| 5814 | ENSG00000NUP88     | 0.988889 | 0.294949 | 0.679125 | 0.523232 |        |
| 5815 | ENSG00000TMEM175   | 0.813131 | 0.451515 | 0.640404 | 0.615152 |        |
| 5816 | ENSG00000OR51M1    | 0.794949 | 0.467677 | 0.631313 | 0.621212 |        |
| 5817 | ENSG00000EGR3      | 0.965657 | 0.308081 | 0.637205 | 0.59596  |        |
| 5818 | ENSG00000RRM2B     | 1        | 0.316162 | 0.641077 | 0.540404 |        |
| 5819 | ENSG00000NAPSA     | 0.983838 | 0.331313 | 0.651684 | 0.528283 |        |
| 5820 | ENSG00000KLK5      | 0.985859 | 0.270707 | 0.639226 | 0.588889 |        |
| 5821 | ENSG00000SLC30A3   | 0.90303  | 0.382828 | 0.638552 | 0.612121 |        |
| 5822 | ENSG00000GC        | 1        | 0.272727 | 0.636364 | 0.529293 |        |
| 5823 | ENSG00000KBTBD4    | 1        | 0.273737 | 0.616498 | 0.568687 |        |
| 5824 | ENSG00000TACR1     | 0.709091 | 0.543434 | 0.626263 | 0.633333 |        |
| 5825 | ENSG00000ST3GAL3   | 0.8      | 0.50101  | 0.648485 | 0.572727 |        |
| 5826 | ENSG00000HMGNI     | 0.935354 | 0.371717 | 0.636364 | 0.582828 |        |
| 5827 | ENSG00000ABCF3     | 0.886869 | 0.414141 | 0.646128 | 0.590909 |        |
| 5828 | ENSG00000FIBP      | 0.818182 | 0.490909 | 0.654545 | 0.560606 |        |

|      |                    |          |          |          |          |        |
|------|--------------------|----------|----------|----------|----------|--------|
| 5829 | ENSG00000MAPK8     | 1        | 0.30101  | 0.639057 | 0.538384 |        |
| 5830 | ENSG00000MRPL36    | 0.824242 | 0.470707 | 0.647475 | 0.582828 |        |
| 5831 | ENSG00000DDX58     | 0.823232 | 0.469697 | 0.642256 | 0.592929 |        |
| 5832 | ENSG00000SH3GLB2   | 1        | 0.243434 | 0.61229  | 0.569697 | 0.24   |
| 5833 | ENSG00000HSD17B13  | 0.816162 | 0.416162 | 0.616162 | 0.674747 |        |
| 5834 | ENSG00000CCDC140   | 1        | 0.253535 | 0.613468 | 0.555556 |        |
| 5835 | ENSG00000SERPINF2  | 0.987879 | 0.308081 | 0.663973 | 0.536364 | 0.3642 |
| 5836 | ENSG00000KLF1      | 0.794949 | 0.467677 | 0.631313 | 0.626263 |        |
| 5837 | ENSG00000TRAFD1    | 0.944444 | 0.366667 | 0.643771 | 0.574747 |        |
| 5838 | ENSG00000CETN3     | 0.982828 | 0.328283 | 0.63367  | 0.556566 |        |
| 5839 | ENSG00000ATG2A     | 0.780808 | 0.481818 | 0.630135 | 0.624242 |        |
| 5840 | ENSG00000MIPEP     | 1        | 0.29798  | 0.632155 | 0.567677 |        |
| 5841 | ENSG00000GP2       | 0.915433 | 0.369979 | 0.635659 | 0.61945  |        |
| 5842 | ENSG00000MUC5AC    | 0.945455 | 0.367677 | 0.646296 | 0.567677 |        |
| 5843 | ENSG00000HMOX1     | 0.918182 | 0.346465 | 0.632323 | 0.646465 |        |
| 5844 | ENSG00000CENPA     | 0.888502 | 0.389082 | 0.625823 | 0.636469 |        |
| 5845 | ENSG00000UMAD1     | 0.858586 | 0.446465 | 0.646465 | 0.584848 |        |
| 5846 | ENSG00000CLEC2B    | 0.846723 | 0.457717 | 0.650458 | 0.578224 |        |
| 5847 | ENSG00000FAM86B2   | 0.9      | 0.340404 | 0.618013 | 0.684848 |        |
| 5848 | ENSG00000USP32     | 0.853535 | 0.447475 | 0.648653 | 0.585859 |        |
| 5849 | ENSG00000DCP1A     | 0.824242 | 0.470707 | 0.647475 | 0.583838 |        |
| 5850 | ENSG00000VARS      | 0.867865 | 0.42389  | 0.645877 | 0.603594 |        |
| 5851 | ENSG00000ATF2      | 1        | 0.268687 | 0.617508 | 0.578788 |        |
| 5852 | ENSG00000NGFR      | 0.962626 | 0.328283 | 0.66431  | 0.558586 |        |
| 5853 | ENSG00000PLD1      | 0.946465 | 0.340404 | 0.637205 | 0.612121 |        |
| 5854 | ENSG00000SLC15A4   | 0.889006 | 0.403805 | 0.643058 | 0.605708 |        |
| 5855 | ENSG00000EML1      | 0.964646 | 0.318182 | 0.631818 | 0.60202  |        |
| 5856 | ENSG00000APBB1IP   | 0.909091 | 0.361616 | 0.637037 | 0.636364 |        |
| 5857 | ENSG00000CD180     | 0.757576 | 0.488889 | 0.623232 | 0.641414 |        |
| 5858 | ENSG00000HSF2      | 1        | 0.293939 | 0.629293 | 0.575758 |        |
| 5859 | ENSG00000KIAA0232  | 1        | 0.251515 | 0.641077 | 0.519192 |        |
| 5860 | ENSG00000NUDT16L1  | 1        | 0.293939 | 0.630303 | 0.510101 |        |
| 5861 | ENSG00000ASZ1      | 0.767442 | 0.521595 | 0.644518 | 0.586932 |        |
| 5862 | ENSG00000RAPGEF3   | 1        | 0.267677 | 0.623737 | 0.592929 |        |
| 5863 | ENSG00000ST6GAL1   | 0.881818 | 0.370707 | 0.626263 | 0.665657 |        |
| 5864 | ENSG00000FAM86B1   | 0.9      | 0.340404 | 0.618013 | 0.684848 |        |
| 5865 | ENSG00000CRACR2B   | 0.824242 | 0.470707 | 0.647475 | 0.585859 |        |
| 5866 | ENSG00000ZFAND6    | 0.862626 | 0.387879 | 0.622222 | 0.668687 |        |
| 5867 | ENSG00000SEC23IP   | 0.818182 | 0.490909 | 0.654545 | 0.566667 |        |
| 5868 | ENSG00000GPR142    | 0.858586 | 0.438384 | 0.640741 | 0.60101  |        |
| 5869 | ENSG00000RPE       | 1        | 0.278788 | 0.626599 | 0.50404  |        |
| 5870 | ENSG00000CCDC144NL | 0.836364 | 0.436364 | 0.636364 | 0.622222 |        |
| 5871 | ENSG00000USP21     | 0.848485 | 0.456566 | 0.64697  | 0.584848 |        |
| 5872 | ENSG00000OR13A1    | 0.749495 | 0.513131 | 0.631313 | 0.620202 |        |
| 5873 | ENSG00000MAN2A1    | 0.970707 | 0.334343 | 0.636195 | 0.567677 |        |
| 5874 | ENSG00000MRPS18C   | 0.830303 | 0.452525 | 0.641414 | 0.606061 |        |
| 5875 | ENSG00000SULT2B1   | 1        | 0.273737 | 0.664646 | 0.541414 | 0.283  |
| 5876 | ENSG00000SMLR1     | 0.938689 | 0.362579 | 0.637421 | 0.595137 |        |
| 5877 | ENSG00000ZNF581    | 0.873737 | 0.419192 | 0.646465 | 0.605051 |        |
| 5878 | ENSG00000POLA2     | 0.906061 | 0.386869 | 0.639731 | 0.612121 |        |
| 5879 | ENSG00000CFHR5     | 0.931313 | 0.372727 | 0.644444 | 0.583838 |        |
| 5880 | ENSG00000LDLR      | 0.963636 | 0.355556 | 0.647811 | 0.543434 |        |
| 5881 | ENSG00000PPP1R17   | 0.97971  | 0.319807 | 0.636232 | 0.571981 |        |
| 5882 | ENSG00000TESC      | 0.82241  | 0.463002 | 0.642706 | 0.604651 |        |
| 5883 | ENSG00000CEACAM21  | 0.908034 | 0.391121 | 0.638478 | 0.607822 |        |

|      |                   |          |          |          |          |       |
|------|-------------------|----------|----------|----------|----------|-------|
| 5884 | ENSG00000CYBA     | 0.767677 | 0.506061 | 0.636869 | 0.610101 |       |
| 5885 | ENSG00000ASL      | 0.930303 | 0.368687 | 0.640909 | 0.594949 |       |
| 5886 | ENSG00000CDC20B   | 0.9      | 0.423232 | 0.651852 | 0.565657 |       |
| 5887 | ENSG00000VWA3A    | 1        | 0.275758 | 0.622222 | 0.526263 |       |
| 5888 | ENSG00000TSTD2    | 0.973737 | 0.310101 | 0.649495 | 0.572727 |       |
| 5889 | ENSG00000NRIP3    | 0.754757 | 0.480973 | 0.617865 | 0.658562 |       |
| 5890 | ENSG00000CSTF3    | 1        | 0.247475 | 0.619529 | 0.544444 |       |
| 5891 | ENSG00000DCN      | 0.978788 | 0.277778 | 0.660101 | 0.577778 |       |
| 5892 | ENSG00000UTP18    | 0.965657 | 0.345455 | 0.635354 | 0.568687 |       |
| 5893 | ENSG00000GNB5     | 0.979798 | 0.325253 | 0.647475 | 0.553535 |       |
| 5894 | ENSG00000RASIP1   | 0.737844 | 0.531712 | 0.634778 | 0.615222 |       |
| 5895 | ENSG00000SORBS1   | 0.961616 | 0.334343 | 0.655387 | 0.569697 |       |
| 5896 | ENSG00000RLF      | 0.749495 | 0.513131 | 0.631313 | 0.624242 |       |
| 5897 | ENSG00000AASDHPPT | 0.846723 | 0.430233 | 0.634954 | 0.625793 |       |
| 5898 | ENSG00000FAM78B   | 0.862626 | 0.447475 | 0.649158 | 0.582828 |       |
| 5899 | ENSG00000REN      | 1        | 0.257576 | 0.626263 | 0.557576 |       |
| 5900 | ENSG00000MED27    | 0.89697  | 0.406061 | 0.64899  | 0.590909 |       |
| 5901 | ENSG00000SIRT2    | 0.936364 | 0.368687 | 0.648316 | 0.580808 |       |
| 5902 | ENSG00000TAF1A    | 0.910101 | 0.393939 | 0.643098 | 0.59899  |       |
| 5903 | ENSG00000TPD52L1  | 0.922222 | 0.379798 | 0.644108 | 0.594949 |       |
| 5904 | ENSG00000CDC42EP5 | 0.709091 | 0.543434 | 0.626263 | 0.639394 |       |
| 5905 | ENSG00000DCUN1D1  | 0.863636 | 0.427273 | 0.640404 | 0.613131 |       |
| 5906 | ENSG00000PCGF2    | 0.82241  | 0.463002 | 0.642706 | 0.605708 |       |
| 5907 | ENSG00000RPS10    | 0.884828 | 0.439646 | 0.658915 | 0.562569 |       |
| 5908 | ENSG00000ARPP19   | 0.741414 | 0.539394 | 0.640404 | 0.605051 |       |
| 5909 | ENSG00000ZGLP1    | 0.919192 | 0.394949 | 0.650337 | 0.574747 |       |
| 5910 | ENSG00000KIF1C    | 0.978788 | 0.289899 | 0.657407 | 0.572727 |       |
| 5911 | ENSG00000EIF3L    | 0.853535 | 0.447475 | 0.648653 | 0.592929 |       |
| 5912 | ENSG00000CNIH4    | 0.778013 | 0.504228 | 0.641121 | 0.599366 |       |
| 5913 | ENSG00000RPS9     | 0.878788 | 0.410101 | 0.644444 | 0.612121 |       |
| 5914 | ENSG00000SNX18    | 0.741414 | 0.539394 | 0.640404 | 0.60404  |       |
| 5915 | ENSG00000RBF0X3   | 0.806061 | 0.493939 | 0.633165 | 0.6      |       |
| 5916 | ENSG00000RAB3C    | 0.90101  | 0.368687 | 0.635185 | 0.639394 |       |
| 5917 | ENSG00000GPR137C  | 0.824242 | 0.470707 | 0.647475 | 0.589899 |       |
| 5918 | ENSG00000HBEGF    | 0.794949 | 0.467677 | 0.631313 | 0.632323 |       |
| 5919 | ENSG00000POMGNT2  | 0.909091 | 0.384848 | 0.64798  | 0.605051 |       |
| 5920 | ENSG00000SERPINB4 | 0.927273 | 0.385859 | 0.63771  | 0.586869 |       |
| 5921 | ENSG00000SLFN5    | 0.913131 | 0.379798 | 0.639731 | 0.614141 |       |
| 5922 | ENSG00000MTF1     | 0.935354 | 0.350505 | 0.621886 | 0.629293 |       |
| 5923 | ENSG00000LACTB    | 1        | 0.293939 | 0.629293 | 0.565657 | 0.313 |
| 5924 | ENSG00000CDK2AP1  | 0.843434 | 0.423232 | 0.625589 | 0.647475 |       |
| 5925 | ENSG00000PINX1    | 0.93134  | 0.335548 | 0.623293 | 0.651163 |       |
| 5926 | ENSG00000MAL2     | 0.787879 | 0.488889 | 0.638384 | 0.612121 |       |
| 5927 | ENSG00000CPXM2    | 0.7      | 0.572727 | 0.636364 | 0.621212 |       |
| 5928 | ENSG00000MAN1B1   | 0.938689 | 0.37315  | 0.643763 | 0.580338 |       |
| 5929 | ENSG00000KSR2     | 0.813953 | 0.475083 | 0.644518 | 0.600221 |       |
| 5930 | ENSG00000PARP4    | 0.929293 | 0.393939 | 0.649495 | 0.564646 |       |
| 5931 | ENSG00000RPEL1    | 1        | 0.278788 | 0.626599 | 0.50404  |       |
| 5932 | ENSG00000IFNL2    | 0.830303 | 0.452525 | 0.641414 | 0.610101 |       |
| 5933 | ENSG00000MAX      | 0.980808 | 0.314141 | 0.643771 | 0.569697 |       |
| 5934 | ENSG00000SEMG2    | 0.972727 | 0.328283 | 0.636195 | 0.577778 |       |
| 5935 | ENSG00000EPHB3    | 1        | 0.282828 | 0.619529 | 0.524242 |       |
| 5936 | ENSG00000FHIT     | 1        | 0.291919 | 0.617508 | 0.516162 |       |
| 5937 | ENSG00000SBN02    | 0.963636 | 0.323232 | 0.630135 | 0.609091 |       |
| 5938 | ENSG00000PHLDB2   | 0.951515 | 0.360606 | 0.641582 | 0.586869 |       |

|      |                    |          |          |          |          |
|------|--------------------|----------|----------|----------|----------|
| 5939 | ENSG00000MAP6      | 0.924242 | 0.346465 | 0.628283 | 0.645455 |
| 5940 | ENSG00000NPAS4     | 0.794949 | 0.467677 | 0.631313 | 0.632323 |
| 5941 | ENSG00000TCF15     | 0.825581 | 0.45666  | 0.633192 | 0.621564 |
| 5942 | ENSG00000RPL10A    | 0.858586 | 0.458586 | 0.658586 | 0.567677 |
| 5943 | ENSG00000UROD      | 0.99899  | 0.311111 | 0.699327 | 0.486869 |
| 5944 | ENSG00000MLYCD     | 0.787879 | 0.488889 | 0.638384 | 0.615152 |
| 5945 | ENSG00000PCYOX1L   | 0.946465 | 0.323232 | 0.627609 | 0.648485 |
| 5946 | ENSG00000HDAC3     | 1        | 0.265657 | 0.615488 | 0.548485 |
| 5947 | ENSG00000XKR8      | 0.772358 | 0.487805 | 0.630081 | 0.635308 |
| 5948 | ENSG00000DDX60L    | 0.920202 | 0.388889 | 0.643098 | 0.593939 |
| 5949 | ENSG00000PRIM1     | 0.818182 | 0.461616 | 0.638384 | 0.616162 |
| 5950 | ENSG00000SCNN1B    | 0.946465 | 0.355556 | 0.632323 | 0.608081 |
| 5951 | ENSG00000SH3BGR    | 0.90303  | 0.373737 | 0.639057 | 0.629293 |
| 5952 | ENSG00000ERCC2     | 1        | 0.330303 | 0.650505 | 0.510101 |
| 5953 | ENSG00000CILP2     | 0.812121 | 0.475758 | 0.638047 | 0.610101 |
| 5954 | ENSG00000RFLNA     | 0.734219 | 0.52381  | 0.629014 | 0.634551 |
| 5955 | ENSG00000RBBP5     | 0.923232 | 0.353535 | 0.635859 | 0.636364 |
| 5956 | ENSG00000CHGB      | 0.890909 | 0.377778 | 0.625253 | 0.656566 |
| 5957 | ENSG00000ARID4B    | 0.766667 | 0.49798  | 0.625589 | 0.634343 |
| 5958 | ENSG00000IFI35     | 0.860465 | 0.428118 | 0.632135 | 0.62685  |
| 5959 | ENSG00000CBX7      | 0.975758 | 0.287879 | 0.663131 | 0.577778 |
| 5960 | ENSG00000KCTD4     | 0.823467 | 0.434461 | 0.624031 | 0.654334 |
| 5961 | ENSG00000C14orf39  | 0.890909 | 0.411111 | 0.642593 | 0.60404  |
| 5962 | ENSG00000CA3       | 0.947475 | 0.346465 | 0.647643 | 0.60101  |
| 5963 | ENSG00000EXD2      | 1        | 0.274747 | 0.63771  | 0.581818 |
| 5964 | ENSG00000CALM2     | 1        | 0.3      | 0.625253 | 0.540404 |
| 5965 | ENSG00000UBE2L3    | 0.963636 | 0.327273 | 0.680303 | 0.544444 |
| 5966 | ENSG00000AKAP9     | 1        | 0.288889 | 0.635017 | 0.551515 |
| 5967 | ENSG00000TNFAIP1   | 0.914141 | 0.380808 | 0.647475 | 0.609091 |
| 5968 | ENSG00000CFL1      | 1        | 0.246465 | 0.639057 | 0.533333 |
| 5969 | ENSG00000UBE2L5    | 0.963636 | 0.327273 | 0.680303 | 0.544444 |
| 5970 | ENSG00000SIGLEC10  | 0.886869 | 0.375758 | 0.631313 | 0.657576 |
| 5971 | ENSG00000SECTM1    | 0.923232 | 0.366667 | 0.635017 | 0.624242 |
| 5972 | ENSG00000KAT6A     | 0.962626 | 0.342424 | 0.646633 | 0.571717 |
| 5973 | ENSG00000ACAD11    | 0.780808 | 0.512121 | 0.646465 | 0.592929 |
| 5974 | ENSG00000TEKT4     | 0.963636 | 0.319192 | 0.646296 | 0.59596  |
| 5975 | ENSG00000NDUFB9    | 0.824242 | 0.470707 | 0.647475 | 0.59697  |
| 5976 | ENSG00000AK8       | 0.912121 | 0.353535 | 0.625253 | 0.665657 |
| 5977 | ENSG00000AC020909. | 0.935354 | 0.358586 | 0.637205 | 0.612121 |
| 5978 | ENSG00000TRM0      | 0.824242 | 0.470707 | 0.647475 | 0.59798  |
| 5979 | ENSG00000CLK2      | 0.833333 | 0.463636 | 0.622222 | 0.625253 |
| 5980 | ENSG00000LARGE2    | 0.787879 | 0.488889 | 0.638384 | 0.616162 |
| 5981 | ENSG00000CLIC4     | 0.918182 | 0.368687 | 0.601347 | 0.664646 |
| 5982 | ENSG00000AP1S1     | 0.82241  | 0.463002 | 0.642706 | 0.613108 |
| 5983 | ENSG00000GDF15     | 0.886869 | 0.375758 | 0.631313 | 0.659596 |
| 5984 | ENSG00000NPHP4     | 0.780808 | 0.49596  | 0.63165  | 0.622222 |
| 5985 | ENSG00000SORT1     | 0.923232 | 0.372727 | 0.644444 | 0.608081 |
| 5986 | ENSG00000ACAA1     | 0.886869 | 0.427273 | 0.65202  | 0.588889 |
| 5987 | ENSG00000KRT4      | 0.909091 | 0.359596 | 0.630808 | 0.655556 |
| 5988 | ENSG00000ZFAND3    | 0.794949 | 0.467677 | 0.631313 | 0.638384 |
| 5989 | ENSG00000TUFT1     | 1        | 0.310101 | 0.636364 | 0.523232 |
| 5990 | ENSG00000NSA2      | 0.934461 | 0.37315  | 0.640063 | 0.595137 |
| 5991 | ENSG00000GLP2R     | 0.741414 | 0.539394 | 0.640404 | 0.613131 |
| 5992 | ENSG00000LONP1     | 0.890909 | 0.392929 | 0.630976 | 0.637374 |
| 5993 | ENSG00000FMNL1     | 0.911111 | 0.374747 | 0.633333 | 0.634343 |

0.389

|      |                   |          |          |          |          |        |
|------|-------------------|----------|----------|----------|----------|--------|
| 5994 | ENSG00000PDK2     | 0.9      | 0.423232 | 0.651852 | 0.578788 |        |
| 5995 | ENSG00000SPIB     | 0.935354 | 0.358586 | 0.637205 | 0.612121 |        |
| 5996 | ENSG00000FERD3L   | 0.813953 | 0.475083 | 0.644518 | 0.607973 |        |
| 5997 | ENSG00000RNH1     | 0.967677 | 0.340404 | 0.671044 | 0.538384 |        |
| 5998 | ENSG00000PHLDA1   | 0.976768 | 0.338384 | 0.681987 | 0.509091 |        |
| 5999 | ENSG00000SLFN12   | 0.794949 | 0.467677 | 0.631313 | 0.638384 |        |
| 6000 | ENSG00000LIAS     | 0.908081 | 0.40303  | 0.655556 | 0.587879 |        |
| 6001 | ENSG00000ZNF844   | 0.818182 | 0.490909 | 0.654545 | 0.576768 |        |
| 6002 | ENSG00000ETFDH    | 0.863636 | 0.443434 | 0.653535 | 0.592929 |        |
| 6003 | ENSG00000DDX27    | 0.947475 | 0.345455 | 0.647138 | 0.609091 |        |
| 6004 | ENSG00000HOXB13   | 0.952525 | 0.369697 | 0.641414 | 0.581818 |        |
| 6005 | ENSG00000NOTCH3   | 1        | 0.309091 | 0.648485 | 0.551515 |        |
| 6006 | ENSG00000SASS6    | 0.846723 | 0.457717 | 0.650458 | 0.593023 |        |
| 6007 | ENSG00000SPINT4   | 0.749495 | 0.513131 | 0.631313 | 0.633333 |        |
| 6008 | ENSG00000CXorf57  | 1        | 0.259596 | 0.618013 | 0.572727 |        |
| 6009 | ENSG00000COG6     | 0.989899 | 0.328283 | 0.641077 | 0.556566 |        |
| 6010 | ENSG00000SYNCRIP  | 0.957576 | 0.350505 | 0.664478 | 0.565657 |        |
| 6011 | ENSG00000UBXN11   | 0.868687 | 0.430303 | 0.649495 | 0.606061 |        |
| 6012 | ENSG00000EVPL     | 0.90303  | 0.391919 | 0.647475 | 0.610101 |        |
| 6013 | ENSG00000NID2     | 0.833333 | 0.473737 | 0.65     | 0.590909 |        |
| 6014 | ENSG00000MYOM1    | 0.90303  | 0.414141 | 0.644781 | 0.592929 |        |
| 6015 | ENSG00000NUDT2    | 1        | 0.282828 | 0.656566 | 0.50404  |        |
| 6016 | ENSG00000DBX2     | 0.781818 | 0.475758 | 0.626263 | 0.644444 |        |
| 6017 | ENSG00000POMP     | 0.921212 | 0.377778 | 0.63468  | 0.619192 |        |
| 6018 | ENSG00000YME1L1   | 0.818182 | 0.482828 | 0.645791 | 0.59798  |        |
| 6019 | ENSG00000MS4A2    | 0.718182 | 0.516162 | 0.617172 | 0.670707 |        |
| 6020 | ENSG00000LIMK2    | 1        | 0.278788 | 0.630303 | 0.523232 |        |
| 6021 | ENSG00000MPO      | 0.970707 | 0.324242 | 0.631313 | 0.6      |        |
| 6022 | ENSG00000CCDC86   | 0.942424 | 0.355556 | 0.631987 | 0.619192 |        |
| 6023 | ENSG00000EIF4G3   | 1        | 0.326263 | 0.667003 | 0.514141 |        |
| 6024 | ENSG00000MOB4     | 0.941414 | 0.370707 | 0.631481 | 0.60404  |        |
| 6025 | ENSG00000CCL25    | 0.723232 | 0.528283 | 0.625084 | 0.651515 |        |
| 6026 | ENSG00000G6PD     | 0.90303  | 0.39899  | 0.648148 | 0.60404  |        |
| 6027 | ENSG00000B3GALNT2 | 0.892929 | 0.405051 | 0.638215 | 0.619192 |        |
| 6028 | ENSG00000PHC1     | 0.879798 | 0.394949 | 0.637374 | 0.644444 |        |
| 6029 | ENSG00000ASMTL    | 1        | 0.313131 | 0.642761 | 0.492929 | 0.3124 |
| 6030 | ENSG00000GBX1     | 0.775194 | 0.496124 | 0.635659 | 0.624585 |        |
| 6031 | ENSG00000SLC29A1  | 0.921212 | 0.367677 | 0.635522 | 0.631313 |        |
| 6032 | ENSG00000KATNB1   | 0.947475 | 0.4      | 0.656566 | 0.541414 |        |
| 6033 | ENSG00000OTOA     | 0.830303 | 0.429293 | 0.620539 | 0.664646 |        |
| 6034 | ENSG00000CBWD2    | 0.930303 | 0.390909 | 0.656566 | 0.567677 |        |
| 6035 | ENSG00000MAP3K7   | 0.853535 | 0.447475 | 0.648653 | 0.60404  |        |
| 6036 | ENSG00000KLHDC3   | 0.987315 | 0.276956 | 0.6605   | 0.580338 |        |
| 6037 | ENSG00000ZNF526   | 0.937374 | 0.385859 | 0.648822 | 0.571717 |        |
| 6038 | ENSG00000RHOBTB2  | 0.780808 | 0.506061 | 0.638047 | 0.613131 |        |
| 6039 | ENSG00000DNMT3L   | 0.859596 | 0.434343 | 0.635017 | 0.625253 |        |
| 6040 | ENSG00000DMRT3    | 0.725253 | 0.564646 | 0.644444 | 0.610101 |        |
| 6041 | ENSG00000CBWD5    | 0.930303 | 0.390909 | 0.656566 | 0.567677 |        |
| 6042 | ENSG00000SRR      | 0.921212 | 0.350505 | 0.632492 | 0.650505 |        |
| 6043 | ENSG00000HRC      | 0.7      | 0.556566 | 0.621549 | 0.654545 |        |
| 6044 | ENSG00000SLC9A7   | 0.816068 | 0.47463  | 0.640592 | 0.614165 |        |
| 6045 | ENSG00000SHARPIN  | 0.866667 | 0.430303 | 0.638384 | 0.620202 |        |
| 6046 | ENSG00000PDCL     | 1        | 0.270707 | 0.622222 | 0.573737 |        |
| 6047 | ENSG00000RAB27B   | 0.939394 | 0.368687 | 0.650337 | 0.588889 |        |
| 6048 | ENSG00000WDR43    | 0.943434 | 0.346465 | 0.63165  | 0.628283 |        |

|      |                    |          |          |          |          |        |
|------|--------------------|----------|----------|----------|----------|--------|
| 6049 | ENSG00000CBWD1     | 0.930303 | 0.390909 | 0.656566 | 0.567677 |        |
| 6050 | ENSG00000BLVRA     | 1        | 0.310101 | 0.635522 | 0.556566 |        |
| 6051 | ENSG00000BCL7A     | 0.833333 | 0.441414 | 0.629293 | 0.645455 |        |
| 6052 | ENSG00000FIGNL1    | 0.862626 | 0.39798  | 0.623569 | 0.672727 |        |
| 6053 | ENSG00000MMP10     | 0.822813 | 0.48062  | 0.648394 | 0.595792 |        |
| 6054 | ENSG00000TOX4      | 0.939394 | 0.351515 | 0.670707 | 0.585859 |        |
| 6055 | ENSG00000CYP17A1   | 0.836364 | 0.436364 | 0.636364 | 0.639394 |        |
| 6056 | ENSG00000ZRANB1    | 0.976768 | 0.306061 | 0.659259 | 0.575758 |        |
| 6057 | ENSG00000BPNT1     | 0.948203 | 0.390063 | 0.649401 | 0.559197 |        |
| 6058 | ENSG00000CBWD3     | 0.930303 | 0.390909 | 0.656566 | 0.567677 |        |
| 6059 | ENSG00000CNTN5     | 0.965657 | 0.305051 | 0.620539 | 0.636364 | 0.1774 |
| 6060 | ENSG00000PRKAR1A   | 0.909091 | 0.39798  | 0.653535 | 0.59899  |        |
| 6061 | ENSG00000PSPH      | 0.922222 | 0.370707 | 0.645286 | 0.615152 |        |
| 6062 | ENSG00000PPP1R14D  | 0.853535 | 0.447475 | 0.648653 | 0.605051 |        |
| 6063 | ENSG00000CBWD6     | 0.930303 | 0.390909 | 0.656566 | 0.567677 |        |
| 6064 | ENSG00000MYH15     | 0.787879 | 0.488889 | 0.638384 | 0.623232 |        |
| 6065 | ENSG00000FSBP      | 0.925253 | 0.373737 | 0.644444 | 0.606061 |        |
| 6066 | ENSG00000DDB2      | 1        | 0.317172 | 0.662963 | 0.49697  |        |
| 6067 | ENSG00000ACMSD     | 0.90303  | 0.349495 | 0.625926 | 0.682828 |        |
| 6068 | ENSG00000POLA1     | 0.990909 | 0.342424 | 0.66936  | 0.510101 |        |
| 6069 | ENSG00000PAK4      | 1        | 0.291919 | 0.640236 | 0.549495 | 0.3668 |
| 6070 | ENSG00000MFS12     | 0.977778 | 0.348485 | 0.695455 | 0.481818 |        |
| 6071 | ENSG00000CLASRP    | 0.922481 | 0.361019 | 0.629568 | 0.644518 |        |
| 6072 | ENSG00000HDAC1     | 0.976768 | 0.344444 | 0.642256 | 0.555556 |        |
| 6073 | ENSG00000MAP2K1    | 1        | 0.276768 | 0.621549 | 0.548485 |        |
| 6074 | ENSG00000MED19     | 1        | 0.279798 | 0.650337 | 0.524242 |        |
| 6075 | ENSG00000FAHD2B    | 0.886869 | 0.368687 | 0.617172 | 0.688889 |        |
| 6076 | ENSG00000MVP       | 1        | 0.309091 | 0.664646 | 0.544444 |        |
| 6077 | ENSG00000PSMD14    | 0.923232 | 0.361616 | 0.642088 | 0.629293 |        |
| 6078 | ENSG00000PPP1R13L  | 1        | 0.269697 | 0.656397 | 0.562626 |        |
| 6079 | ENSG00000FAM160A2  | 0.787879 | 0.488889 | 0.638384 | 0.626263 |        |
| 6080 | ENSG00000SPACA9    | 0.919192 | 0.371717 | 0.643771 | 0.621212 |        |
| 6081 | ENSG00000MAF       | 0.985859 | 0.320202 | 0.659428 | 0.553535 |        |
| 6082 | ENSG00000LPA       | 0.890909 | 0.381818 | 0.636364 | 0.647475 |        |
| 6083 | ENSG00000AHS1      | 1        | 0.282828 | 0.626263 | 0.593939 |        |
| 6084 | ENSG00000WNK1      | 0.843434 | 0.477778 | 0.654882 | 0.578788 |        |
| 6085 | ENSG00000DCLK1     | 0.949495 | 0.356566 | 0.641246 | 0.606061 |        |
| 6086 | ENSG00000QTRT2     | 0.969697 | 0.325253 | 0.685522 | 0.539394 |        |
| 6087 | ENSG00000SALL4     | 0.90101  | 0.378788 | 0.635859 | 0.643434 |        |
| 6088 | ENSG00000KCTD6     | 0.909091 | 0.4      | 0.654545 | 0.59697  |        |
| 6089 | ENSG00000STARD10   | 0.917172 | 0.418182 | 0.661953 | 0.560606 |        |
| 6090 | ENSG00000TUSC5     | 0.818182 | 0.49596  | 0.653704 | 0.580808 |        |
| 6091 | ENSG00000LMLN      | 0.986869 | 0.281818 | 0.647138 | 0.59596  |        |
| 6092 | ENSG00000REEP1     | 0.800664 | 0.48948  | 0.64378  | 0.610188 |        |
| 6093 | ENSG00000HK2       | 0.830303 | 0.452525 | 0.641414 | 0.623232 |        |
| 6094 | ENSG00000 9/7/2019 | 0.930303 | 0.388889 | 0.653199 | 0.578788 |        |
| 6095 | ENSG00000PLCL2     | 0.986869 | 0.281818 | 0.677441 | 0.560606 |        |
| 6096 | ENSG00000SPATA2    | 0.787879 | 0.488889 | 0.638384 | 0.625253 |        |
| 6097 | ENSG00000NUP58     | 0.862579 | 0.436575 | 0.649577 | 0.610994 |        |
| 6098 | ENSG00000SLIT2     | 1        | 0.273737 | 0.621717 | 0.569697 |        |
| 6099 | ENSG00000MED15     | 0.908081 | 0.40303  | 0.655556 | 0.59596  |        |
| 6100 | ENSG00000USP9X     | 0.99798  | 0.316162 | 0.698653 | 0.49899  |        |
| 6101 | ENSG00000METTL13   | 1        | 0.30404  | 0.636195 | 0.584848 |        |
| 6102 | ENSG00000C11orf70  | 0.794949 | 0.467677 | 0.631313 | 0.647475 |        |
| 6103 | ENSG00000SF3B6     | 0.933333 | 0.377778 | 0.642088 | 0.59899  |        |

|      |                   |          |          |          |          |
|------|-------------------|----------|----------|----------|----------|
| 6104 | ENSG00000GANAB    | 0.945455 | 0.355556 | 0.638721 | 0.616162 |
| 6105 | ENSG00000WAS      | 1        | 0.316162 | 0.637037 | 0.572727 |
| 6106 | ENSG00000MAGIX    | 0.794949 | 0.467677 | 0.631313 | 0.645455 |
| 6107 | ENSG00000RANBP3   | 1        | 0.306061 | 0.642929 | 0.572727 |
| 6108 | ENSG00000PCNA     | 1        | 0.251515 | 0.624074 | 0.592929 |
| 6109 | ENSG00000C6orf163 | 1        | 0.272727 | 0.624242 | 0.532323 |
| 6110 | ENSG00000SRSF5    | 0.890909 | 0.426263 | 0.656229 | 0.590909 |
| 6111 | ENSG00000IL12RB2  | 0.836364 | 0.474747 | 0.646465 | 0.60101  |
| 6112 | ENSG00000TFB2M    | 0.863636 | 0.443434 | 0.653535 | 0.60202  |
| 6113 | ENSG00000LRRC27   | 0.773737 | 0.537374 | 0.655556 | 0.584848 |
| 6114 | ENSG00000PIN1     | 1        | 0.294949 | 0.684512 | 0.49798  |
| 6115 | ENSG00000TOP1     | 0.971717 | 0.358586 | 0.639057 | 0.552525 |
| 6116 | ENSG00000PLOD1    | 0.915152 | 0.416162 | 0.665657 | 0.565657 |
| 6117 | ENSG00000CAP2     | 0.890909 | 0.381818 | 0.636364 | 0.654545 |
| 6118 | ENSG00000UPK1B    | 0.957576 | 0.373737 | 0.66229  | 0.553535 |
| 6119 | ENSG00000CIART    | 0.858586 | 0.431313 | 0.642929 | 0.626263 |
| 6120 | ENSG00000CCNI2    | 0.852008 | 0.439746 | 0.643939 | 0.622622 |
| 6121 | ENSG00000ETNK1    | 0.939394 | 0.368687 | 0.650337 | 0.594949 |
| 6122 | ENSG00000SERPINB5 | 1        | 0.264646 | 0.657912 | 0.49596  |
| 6123 | ENSG00000PARD6B   | 0.824242 | 0.470707 | 0.647475 | 0.611111 |
| 6124 | ENSG00000OLFML2A  | 0.919192 | 0.394949 | 0.65303  | 0.593939 |
| 6125 | ENSG00000SLC24A3  | 0.909091 | 0.375758 | 0.639562 | 0.638384 |
| 6126 | ENSG00000ZKSCAN7  | 0.89852  | 0.447146 | 0.66649  | 0.55074  |
| 6127 | ENSG00000KIF4A    | 0.967677 | 0.311111 | 0.649663 | 0.605051 |
| 6128 | ENSG00000POP4     | 0.905051 | 0.434343 | 0.660774 | 0.562626 |
| 6129 | ENSG00000CAB39L   | 0.940803 | 0.381607 | 0.659796 | 0.56871  |
| 6130 | ENSG00000WDR26    | 0.932323 | 0.374747 | 0.638384 | 0.609091 |
| 6131 | ENSG00000FDXR     | 0.848485 | 0.410101 | 0.629293 | 0.671717 |
| 6132 | ENSG00000TMEM39B  | 1        | 0.270707 | 0.622222 | 0.594949 |
| 6133 | ENSG00000NCAPG2   | 0.929293 | 0.387879 | 0.658586 | 0.578788 |
| 6134 | ENSG00000REM1     | 0.780808 | 0.512121 | 0.646465 | 0.609091 |
| 6135 | ENSG00000DGKH     | 1        | 0.272727 | 0.636364 | 0.592929 |
| 6136 | ENSG00000TTC29    | 0.909091 | 0.391919 | 0.642424 | 0.622222 |
| 6137 | ENSG00000AOC3     | 0.89899  | 0.374747 | 0.635859 | 0.654545 |
| 6138 | ENSG00000MUC13    | 0.756566 | 0.526263 | 0.640572 | 0.621212 |
| 6139 | ENSG00000TRAM1L1  | 0.787879 | 0.488889 | 0.638384 | 0.628283 |
| 6140 | ENSG00000ACOT6    | 0.919192 | 0.391919 | 0.646465 | 0.605051 |
| 6141 | ENSG00000PPHLN1   | 1        | 0.294949 | 0.63064  | 0.561616 |
| 6142 | ENSG00000CNBD1    | 0.988889 | 0.29596  | 0.673064 | 0.558586 |
| 6143 | ENSG00000MELTF    | 0.816068 | 0.483087 | 0.649577 | 0.604651 |
| 6144 | ENSG00000CHAF1B   | 0.984848 | 0.30202  | 0.646801 | 0.590909 |
| 6145 | ENSG00000S100A7L2 | 0.787879 | 0.488889 | 0.638384 | 0.628283 |
| 6146 | ENSG00000SCAPER   | 0.853535 | 0.465657 | 0.655556 | 0.589899 |
| 6147 | ENSG00000FAM105A  | 0.778013 | 0.504228 | 0.641121 | 0.61945  |
| 6148 | ENSG00000NCSTN    | 0.951515 | 0.359596 | 0.647138 | 0.6      |
| 6149 | ENSG00000PHLDB1   | 1        | 0.322222 | 0.640909 | 0.565657 |
| 6150 | ENSG00000SNRNP27  | 0.914141 | 0.4      | 0.659596 | 0.593939 |
| 6151 | ENSG00000GRAP2    | 0.89697  | 0.385859 | 0.641414 | 0.642424 |
| 6152 | ENSG00000CACNA1H  | 0.937374 | 0.356566 | 0.630135 | 0.633333 |
| 6153 | ENSG00000FM02     | 0.949495 | 0.370707 | 0.641582 | 0.59697  |
| 6154 | ENSG00000KIF4B    | 0.967677 | 0.311111 | 0.649663 | 0.605051 |
| 6155 | ENSG00000TMEM44   | 0.818182 | 0.461616 | 0.638384 | 0.635354 |
| 6156 | ENSG00000SLC9A4   | 0.755556 | 0.522222 | 0.636364 | 0.630303 |
| 6157 | ENSG00000SCFD2    | 0.975758 | 0.338384 | 0.645623 | 0.566667 |
| 6158 | ENSG00000MRPL37   | 1        | 0.277778 | 0.649327 | 0.564646 |

0.321

|      |                    |          |          |          |          |        |      |
|------|--------------------|----------|----------|----------|----------|--------|------|
| 6159 | ENSG000000ARHGAP20 | 1        | 0.287879 | 0.622054 | 0.573737 |        |      |
| 6160 | ENSG000000SAP18    | 1        | 0.280127 | 0.63055  | 0.560254 | 0.3592 | 0.34 |
| 6161 | ENSG000000GAA      | 0.908081 | 0.40303  | 0.655556 | 0.60101  |        |      |
| 6162 | ENSG000000NANOGB   | 0.766667 | 0.532323 | 0.648653 | 0.60404  |        |      |
| 6163 | ENSG000000FNDC8    | 0.770613 | 0.529598 | 0.650106 | 0.602537 |        |      |
| 6164 | ENSG000000SNAPC4   | 0.846723 | 0.457717 | 0.650458 | 0.606765 |        |      |
| 6165 | ENSG000000AGPAT4   | 0.823232 | 0.469697 | 0.642256 | 0.622222 |        |      |
| 6166 | ENSG000000ZNF30    | 0.774747 | 0.5      | 0.635185 | 0.635354 |        |      |
| 6167 | ENSG000000ZNF23    | 0.780808 | 0.512121 | 0.646465 | 0.611111 |        |      |
| 6168 | ENSG000000ADAP1    | 0.945455 | 0.370707 | 0.637879 | 0.607071 |        |      |
| 6169 | ENSG000000A2ML1    | 0.828753 | 0.445032 | 0.636892 | 0.647992 |        |      |
| 6170 | ENSG000000ATG101   | 0.934662 | 0.37763  | 0.641565 | 0.604651 |        |      |
| 6171 | ENSG000000MED4     | 0.839394 | 0.461616 | 0.646465 | 0.614141 |        |      |
| 6172 | ENSG000000EPHX4    | 0.806061 | 0.476768 | 0.639057 | 0.629293 |        |      |
| 6173 | ENSG000000CUL4B    | 0.988889 | 0.29899  | 0.640741 | 0.59899  |        |      |
| 6174 | ENSG000000RPL12    | 0.79704  | 0.471459 | 0.61716  | 0.664905 |        |      |
| 6175 | ENSG000000SHROOM1  | 0.909091 | 0.385859 | 0.643434 | 0.630303 |        |      |
| 6176 | ENSG000000CEBPZ    | 0.862626 | 0.447475 | 0.649158 | 0.610101 |        |      |
| 6177 | ENSG000000SGPP1    | 0.818182 | 0.490909 | 0.654545 | 0.59596  |        |      |
| 6178 | ENSG000000WDR60    | 1        | 0.293939 | 0.630303 | 0.571717 |        |      |
| 6179 | ENSG000000NUDCD2   | 0.970402 | 0.292812 | 0.63513  | 0.633192 |        |      |
| 6180 | ENSG000000PECAM1   | 0.741414 | 0.539394 | 0.640404 | 0.626263 |        |      |
| 6181 | ENSG000000ACAA2    | 0.787879 | 0.488889 | 0.638384 | 0.633333 |        |      |
| 6182 | ENSG000000LIN54    | 0.869697 | 0.445455 | 0.648148 | 0.609091 |        |      |
| 6183 | ENSG000000AMDHD2   | 0.89697  | 0.385859 | 0.641414 | 0.643434 |        |      |
| 6184 | ENSG000000PSMC3IP  | 0.69556  | 0.565539 | 0.63055  | 0.657505 |        |      |
| 6185 | ENSG000000EIF2AK1  | 0.962626 | 0.366667 | 0.655556 | 0.555556 |        |      |
| 6186 | ENSG000000SELENOI  | 0.787879 | 0.488889 | 0.638384 | 0.635354 |        |      |
| 6187 | ENSG000000CLCA4    | 0.863636 | 0.443434 | 0.653535 | 0.611111 |        |      |
| 6188 | ENSG000000NCBP1    | 0.981818 | 0.310101 | 0.627946 | 0.614141 |        |      |
| 6189 | ENSG000000CTAGE5   | 0.987879 | 0.277778 | 0.651684 | 0.60303  |        |      |
| 6190 | ENSG000000OXCT2    | 0.709091 | 0.543434 | 0.626263 | 0.664646 |        |      |
| 6191 | ENSG000000SLC15A1  | 0.920202 | 0.388889 | 0.650168 | 0.609091 |        |      |
| 6192 | ENSG000000ATP4A    | 0.812121 | 0.482828 | 0.646128 | 0.617172 |        |      |
| 6193 | ENSG000000ARMCX1   | 0.945455 | 0.368687 | 0.64596  | 0.60202  |        |      |
| 6194 | ENSG000000MED22    | 0.787879 | 0.488889 | 0.638384 | 0.635354 |        |      |
| 6195 | ENSG000000CHMP1B   | 1        | 0.290909 | 0.623569 | 0.524242 |        |      |
| 6196 | ENSG000000APOB     | 0.878788 | 0.410101 | 0.644444 | 0.640404 |        |      |
| 6197 | ENSG000000TMC5     | 1        | 0.311111 | 0.640741 | 0.565657 |        |      |
| 6198 | ENSG000000DYNC2LI1 | 0.729387 | 0.557082 | 0.636716 | 0.633192 |        |      |
| 6199 | ENSG000000TRAPPC1  | 0.863636 | 0.443434 | 0.653535 | 0.610101 |        |      |
| 6200 | ENSG000000CCDC184  | 1        | 0.266667 | 0.642424 | 0.536364 |        |      |
| 6201 | ENSG000000TGM6     | 0.838384 | 0.478788 | 0.655892 | 0.590909 |        |      |
| 6202 | ENSG000000TYROBP   | 0.951515 | 0.332323 | 0.647138 | 0.636364 |        |      |
| 6203 | ENSG000000STUB1    | 1        | 0.263636 | 0.640236 | 0.59899  |        |      |
| 6204 | ENSG000000DSG3     | 0.953535 | 0.330303 | 0.679798 | 0.60101  |        |      |
| 6205 | ENSG000000ZNF658   | 0.924242 | 0.372727 | 0.649495 | 0.616162 |        |      |
| 6206 | ENSG000000OR14A2   | 0.741414 | 0.539394 | 0.640404 | 0.628283 |        |      |
| 6207 | ENSG000000CALML3   | 0.971717 | 0.321212 | 0.630976 | 0.615152 |        |      |
| 6208 | ENSG000000ALCAM    | 0.911111 | 0.393939 | 0.651178 | 0.615152 |        |      |
| 6209 | ENSG000000LASP1    | 0.936364 | 0.386869 | 0.657912 | 0.580808 |        |      |
| 6210 | ENSG000000ODF2L    | 1        | 0.287879 | 0.66532  | 0.542424 |        |      |
| 6211 | ENSG000000OR10A7   | 0.765657 | 0.513131 | 0.626936 | 0.644444 |        |      |
| 6212 | ENSG000000ATP13A5  | 0.939394 | 0.368687 | 0.650337 | 0.60202  |        |      |
| 6213 | ENSG000000CFLAR    | 1        | 0.307071 | 0.639057 | 0.590909 |        |      |



|      |           |           |          |          |          |          |        |
|------|-----------|-----------|----------|----------|----------|----------|--------|
| 6214 | ENSG00000 | IRF8      | 0.963636 | 0.309091 | 0.666667 | 0.60404  |        |
| 6215 | ENSG00000 | SYNE2     | 0.911111 | 0.372727 | 0.689899 | 0.593939 |        |
| 6216 | ENSG00000 | ABCA10    | 0.838384 | 0.471717 | 0.648316 | 0.607071 |        |
| 6217 | ENSG00000 | AL157392. | 0.810101 | 0.49697  | 0.647643 | 0.605051 |        |
| 6218 | ENSG00000 | TRAF3IP3  | 0.82835  | 0.456257 | 0.638427 | 0.637874 |        |
| 6219 | ENSG00000 | ISYNA1    | 0.934343 | 0.370707 | 0.647811 | 0.610101 |        |
| 6220 | ENSG00000 | PUS7      | 0.927273 | 0.40303  | 0.652525 | 0.583838 |        |
| 6221 | ENSG00000 | SDCCAG8   | 0.914376 | 0.382664 | 0.64482  | 0.631078 |        |
| 6222 | ENSG00000 | PRAMEF12  | 0.949495 | 0.377778 | 0.682155 | 0.547475 |        |
| 6223 | ENSG00000 | VPS9D1    | 0.89899  | 0.406061 | 0.649832 | 0.617172 |        |
| 6224 | ENSG00000 | MICAL2    | 1        | 0.262626 | 0.621549 | 0.60101  |        |
| 6225 | ENSG00000 | MRPL40    | 0.862626 | 0.434343 | 0.643603 | 0.629293 |        |
| 6226 | ENSG00000 | TRIM25    | 0.833887 | 0.491694 | 0.661314 | 0.580288 |        |
| 6227 | ENSG00000 | FAM204A   | 0.942424 | 0.382828 | 0.65101  | 0.585859 |        |
| 6228 | ENSG00000 | DNAJC1    | 0.867677 | 0.448485 | 0.649832 | 0.608081 | 0.4383 |
| 6229 | ENSG00000 | TMED8     | 0.816068 | 0.483087 | 0.649577 | 0.613108 |        |
| 6230 | ENSG00000 | GPI       | 1        | 0.271717 | 0.647811 | 0.585859 |        |
| 6231 | ENSG00000 | TYRO3     | 0.818182 | 0.461616 | 0.638384 | 0.644444 |        |
| 6232 | ENSG00000 | NRSN1     | 0.912121 | 0.390909 | 0.640909 | 0.631313 |        |
| 6233 | ENSG00000 | NIT1      | 0.809725 | 0.505285 | 0.657505 | 0.590909 |        |
| 6234 | ENSG00000 | ANAPC11   | 0.99899  | 0.346465 | 0.684007 | 0.493939 |        |
| 6235 | ENSG00000 | ATOH7     | 0.90303  | 0.426263 | 0.654209 | 0.589899 |        |
| 6236 | ENSG00000 | MPND      | 0.969697 | 0.335354 | 0.636532 | 0.60303  |        |
| 6237 | ENSG00000 | MLLT10    | 0.747967 | 0.504065 | 0.624468 | 0.667828 |        |
| 6238 | ENSG00000 | MAGEE1    | 0.818182 | 0.490909 | 0.654545 | 0.59899  |        |
| 6239 | ENSG00000 | HLA-B     | 0.787879 | 0.488889 | 0.638384 | 0.637374 |        |
| 6240 | ENSG00000 | STOX2     | 0.737844 | 0.531712 | 0.634778 | 0.645877 |        |
| 6241 | ENSG00000 | MYDGF     | 0.919192 | 0.390909 | 0.651515 | 0.614141 |        |
| 6242 | ENSG00000 | SETD2     | 0.751515 | 0.527273 | 0.639394 | 0.635354 |        |
| 6243 | ENSG00000 | KRIT1     | 0.741414 | 0.539394 | 0.640404 | 0.635354 |        |
| 6244 | ENSG00000 | RAB3A     | 0.909091 | 0.39798  | 0.653535 | 0.616162 |        |
| 6245 | ENSG00000 | KANSL1    | 1        | 0.30404  | 0.658586 | 0.544444 |        |
| 6246 | ENSG00000 | USP45     | 0.993939 | 0.374747 | 0.677104 | 0.474747 |        |
| 6247 | ENSG00000 | CCDC148   | 0.841438 | 0.469345 | 0.649577 | 0.609937 |        |
| 6248 | ENSG00000 | CHIT1     | 0.944444 | 0.352525 | 0.639226 | 0.632323 |        |
| 6249 | ENSG00000 | SGMS1     | 0.906061 | 0.433333 | 0.661616 | 0.572727 |        |
| 6250 | ENSG00000 | C17orf67  | 0.780808 | 0.512121 | 0.646465 | 0.617172 |        |
| 6251 | ENSG00000 | ITGB8     | 0.87315  | 0.445032 | 0.65222  | 0.609937 |        |
| 6252 | ENSG00000 | PDZK1     | 1        | 0.275758 | 0.630303 | 0.552525 |        |
| 6253 | ENSG00000 | ALB       | 0.979798 | 0.310101 | 0.637205 | 0.612121 |        |
| 6254 | ENSG00000 | MPDZ      | 1        | 0.287879 | 0.63468  | 0.593939 |        |
| 6255 | ENSG00000 | NT5C3B    | 0.987879 | 0.270707 | 0.653199 | 0.612121 |        |
| 6256 | ENSG00000 | APCS      | 0.939394 | 0.350505 | 0.64697  | 0.630303 |        |
| 6257 | ENSG00000 | TPMT      | 0.928118 | 0.385835 | 0.644292 | 0.612051 |        |
| 6258 | ENSG00000 | ABCBI0    | 1        | 0.270707 | 0.641077 | 0.574747 |        |
| 6259 | ENSG00000 | HDLBP     | 0.980808 | 0.320202 | 0.646296 | 0.593939 |        |
| 6260 | ENSG00000 | SLC35A2   | 0.943434 | 0.367677 | 0.636532 | 0.622222 |        |
| 6261 | ENSG00000 | WNT6      | 0.882828 | 0.428283 | 0.651515 | 0.615152 |        |
| 6262 | ENSG00000 | WDR64     | 0.741414 | 0.539394 | 0.640404 | 0.635354 |        |
| 6263 | ENSG00000 | CST6      | 0.913131 | 0.386869 | 0.640067 | 0.638384 |        |
| 6264 | ENSG00000 | NUTM1     | 0.69103  | 0.55814  | 0.624585 | 0.677741 |        |
| 6265 | ENSG00000 | KRT6B     | 0.907071 | 0.39899  | 0.651347 | 0.618182 |        |
| 6266 | ENSG00000 | IMPACT    | 0.926263 | 0.413131 | 0.683838 | 0.539394 |        |
| 6267 | ENSG00000 | CDC42EP2  | 0.96124  | 0.349945 | 0.639719 | 0.602436 |        |
| 6268 | ENSG00000 | ADRA2B    | 0.733333 | 0.535354 | 0.63367  | 0.651515 |        |

|      |                    |          |          |          |          |        |
|------|--------------------|----------|----------|----------|----------|--------|
| 6269 | ENSG00000MARCKS    | 0.984848 | 0.332323 | 0.658249 | 0.559596 |        |
| 6270 | ENSG00000MADD      | 0.879493 | 0.397463 | 0.635659 | 0.668076 |        |
| 6271 | ENSG00000ATP6V1B1  | 0.948485 | 0.366667 | 0.652189 | 0.60303  |        |
| 6272 | ENSG00000ARFIP1    | 1        | 0.264646 | 0.632323 | 0.568687 | 0.4383 |
| 6273 | ENSG00000FAM13C    | 0.938384 | 0.372727 | 0.645623 | 0.611111 |        |
| 6274 | ENSG00000ARFIP2    | 0.919192 | 0.389899 | 0.653872 | 0.614141 |        |
| 6275 | ENSG00000NRG4      | 0.921776 | 0.371036 | 0.635307 | 0.645877 |        |
| 6276 | ENSG00000NEDD4L    | 0.858586 | 0.458586 | 0.658586 | 0.60303  |        |
| 6277 | ENSG00000SLC26A9   | 0.709091 | 0.543434 | 0.626263 | 0.673737 |        |
| 6278 | ENSG00000COPG1     | 1        | 0.270707 | 0.643098 | 0.538384 |        |
| 6279 | ENSG00000CSNK1E    | 1        | 0.258586 | 0.640404 | 0.536364 |        |
| 6280 | ENSG00000GUCY2C    | 0.823232 | 0.469697 | 0.642256 | 0.632323 |        |
| 6281 | ENSG00000RAB14     | 0.970707 | 0.346465 | 0.641751 | 0.583838 |        |
| 6282 | ENSG00000MICAL1    | 1        | 0.275758 | 0.644108 | 0.569697 |        |
| 6283 | ENSG00000TCF21     | 0.914141 | 0.415152 | 0.660943 | 0.589899 |        |
| 6284 | ENSG00000SLC04A1   | 0.924242 | 0.394949 | 0.660269 | 0.593939 |        |
| 6285 | ENSG00000PRAMEF8   | 0.954545 | 0.316162 | 0.645118 | 0.659596 |        |
| 6286 | ENSG00000TYMS      | 0.890063 | 0.432347 | 0.651515 | 0.605708 |        |
| 6287 | ENSG00000DENND5A   | 0.9      | 0.394949 | 0.647475 | 0.632323 |        |
| 6288 | ENSG00000ACE       | 0.909091 | 0.376768 | 0.642593 | 0.649495 |        |
| 6289 | ENSG00000LM07      | 0.824242 | 0.470707 | 0.647475 | 0.624242 |        |
| 6290 | ENSG00000UQCRH     | 0.890909 | 0.452525 | 0.671717 | 0.558586 |        |
| 6291 | ENSG00000THG1L     | 1        | 0.30101  | 0.626599 | 0.591919 |        |
| 6292 | ENSG00000NEK7      | 0.973737 | 0.337374 | 0.642761 | 0.588889 |        |
| 6293 | ENSG00000PRAMEF7   | 0.954545 | 0.316162 | 0.645118 | 0.659596 |        |
| 6294 | ENSG00000THNSL1    | 0.874747 | 0.436364 | 0.650505 | 0.617172 |        |
| 6295 | ENSG00000KCNQ2     | 0.975758 | 0.345455 | 0.643098 | 0.577778 |        |
| 6296 | ENSG00000TMEM82    | 0.690909 | 0.59596  | 0.643098 | 0.638384 |        |
| 6297 | ENSG00000RAB18     | 0.909091 | 0.407071 | 0.647306 | 0.618182 |        |
| 6298 | ENSG00000LRRC58    | 0.818182 | 0.490909 | 0.654545 | 0.606061 |        |
| 6299 | ENSG00000HLA-E     | 0.868687 | 0.430303 | 0.649495 | 0.629293 |        |
| 6300 | ENSG00000PSKH1     | 0.94186  | 0.390063 | 0.661029 | 0.575053 |        |
| 6301 | ENSG00000UQCRHL    | 0.890909 | 0.452525 | 0.671717 | 0.558586 |        |
| 6302 | ENSG00000DFFB      | 0.843434 | 0.477778 | 0.654882 | 0.59899  |        |
| 6303 | ENSG00000MTA3      | 0.89852  | 0.44186  | 0.663495 | 0.577167 |        |
| 6304 | ENSG00000KIAA1211  | 0.975758 | 0.360606 | 0.680135 | 0.518182 |        |
| 6305 | ENSG00000GLIS3     | 0.917172 | 0.417172 | 0.662963 | 0.584848 |        |
| 6306 | ENSG00000SAMD10    | 0.779798 | 0.514141 | 0.640067 | 0.630303 |        |
| 6307 | ENSG00000ADGRF3    | 0.803383 | 0.529598 | 0.66649  | 0.57611  |        |
| 6308 | ENSG00000MAPRE1    | 0.862626 | 0.472727 | 0.662963 | 0.583838 |        |
| 6309 | ENSG00000ATP7B     | 0.927273 | 0.40101  | 0.65     | 0.59697  |        |
| 6310 | ENSG00000HLA-DRB1  | 0.907071 | 0.39899  | 0.651347 | 0.622222 |        |
| 6311 | ENSG00000SPA17     | 0.72536  | 0.552602 | 0.638981 | 0.644518 |        |
| 6312 | ENSG00000PRKAR2B   | 0.813953 | 0.475083 | 0.644518 | 0.634551 |        |
| 6313 | ENSG00000DCAF5     | 0.973737 | 0.316162 | 0.629798 | 0.629293 |        |
| 6314 | ENSG00000MPP3      | 0.888889 | 0.379798 | 0.634343 | 0.679798 |        |
| 6315 | ENSG00000KRTAP27-1 | 1        | 0.289899 | 0.640236 | 0.522222 |        |
| 6316 | ENSG00000IRX1      | 0.927273 | 0.413131 | 0.659596 | 0.570707 |        |
| 6317 | ENSG00000SEMA4D    | 1        | 0.290909 | 0.627273 | 0.543434 | 0.1756 |
| 6318 | ENSG00000HINT2     | 0.918182 | 0.413131 | 0.660606 | 0.588889 |        |
| 6319 | ENSG00000FCER1G    | 0.980808 | 0.349495 | 0.652189 | 0.555556 |        |
| 6320 | ENSG00000DHFR      | 0.927273 | 0.407071 | 0.655724 | 0.582828 |        |
| 6321 | ENSG00000PBRM1     | 0.936364 | 0.405051 | 0.670539 | 0.556566 |        |
| 6322 | ENSG00000MMP15     | 1        | 0.30101  | 0.63064  | 0.59899  |        |
| 6323 | ENSG00000ARVCF     | 0.960606 | 0.340404 | 0.655724 | 0.605051 |        |

|      |                   |          |          |          |          |        |
|------|-------------------|----------|----------|----------|----------|--------|
| 6324 | ENSG00000CDHR5    | 0.89899  | 0.393939 | 0.646465 | 0.642424 |        |
| 6325 | ENSG00000ZNF195   | 0.880808 | 0.40202  | 0.637374 | 0.665657 | 0.36   |
| 6326 | ENSG00000HSPA4L   | 0.951515 | 0.348485 | 0.649663 | 0.624242 |        |
| 6327 | ENSG00000CCDC168  | 0.954545 | 0.316162 | 0.647475 | 0.660606 |        |
| 6328 | ENSG00000GPR26    | 0.725253 | 0.590909 | 0.657576 | 0.608081 |        |
| 6329 | ENSG00000LRRC29   | 0.775758 | 0.49596  | 0.632492 | 0.654545 |        |
| 6330 | ENSG00000MPC2     | 0.790909 | 0.49596  | 0.641414 | 0.634343 |        |
| 6331 | ENSG00000KRT17    | 0.927273 | 0.370707 | 0.65303  | 0.623232 |        |
| 6332 | ENSG00000ZNF580   | 0.915152 | 0.384848 | 0.646296 | 0.636364 |        |
| 6333 | ENSG00000GMIP     | 0.976768 | 0.310101 | 0.63266  | 0.628283 |        |
| 6334 | ENSG00000TPT1     | 0.965657 | 0.376768 | 0.688047 | 0.508081 |        |
| 6335 | ENSG00000DNAJA2   | 0.927273 | 0.407071 | 0.655724 | 0.587879 |        |
| 6336 | ENSG00000ZNF559   | 0.959596 | 0.386869 | 0.663468 | 0.546465 |        |
| 6337 | ENSG00000LTB4R2   | 0.951515 | 0.370707 | 0.651684 | 0.59798  |        |
| 6338 | ENSG00000RALBP1   | 0.971717 | 0.321212 | 0.630976 | 0.629293 |        |
| 6339 | ENSG00000GNAZ     | 0.818182 | 0.490909 | 0.654545 | 0.611111 |        |
| 6340 | ENSG00000PPIL6    | 0.884848 | 0.379798 | 0.632323 | 0.686869 |        |
| 6341 | ENSG00000PAFAH2   | 0.846723 | 0.487315 | 0.667019 | 0.580338 |        |
| 6342 | ENSG00000AWAT1    | 0.733333 | 0.567677 | 0.650505 | 0.620202 |        |
| 6343 | ENSG00000RPL26L1  | 0.843434 | 0.477778 | 0.654882 | 0.60404  |        |
| 6344 | ENSG00000CEBPE    | 0.964646 | 0.322222 | 0.628283 | 0.643434 |        |
| 6345 | ENSG00000SPINK1   | 0.924242 | 0.380808 | 0.638721 | 0.633333 |        |
| 6346 | ENSG00000CCDC174  | 0.915152 | 0.386869 | 0.643939 | 0.638384 |        |
| 6347 | ENSG00000SFTPD    | 0.977778 | 0.313131 | 0.634007 | 0.624242 |        |
| 6348 | ENSG00000SERPINB3 | 0.944444 | 0.354545 | 0.644444 | 0.634343 |        |
| 6349 | ENSG00000DIRAS3   | 1        | 0.249495 | 0.61633  | 0.60404  |        |
| 6350 | ENSG00000PGM1     | 1        | 0.306061 | 0.668687 | 0.560606 |        |
| 6351 | ENSG00000PDS5A    | 0.976768 | 0.346465 | 0.646633 | 0.574747 |        |
| 6352 | ENSG00000GIMAP4   | 0.951515 | 0.361616 | 0.653872 | 0.610101 |        |
| 6353 | ENSG00000ISLR2    | 1        | 0.313953 | 0.643939 | 0.526427 |        |
| 6354 | ENSG00000NUP35    | 0.971717 | 0.339394 | 0.701684 | 0.524242 |        |
| 6355 | ENSG00000ERICH4   | 0.909091 | 0.371717 | 0.637205 | 0.666667 |        |
| 6356 | ENSG00000ARF6     | 0.812121 | 0.513131 | 0.662626 | 0.589899 |        |
| 6357 | ENSG00000RSP02    | 0.981818 | 0.316162 | 0.64596  | 0.605051 |        |
| 6358 | ENSG00000MGAT4D   | 0.741414 | 0.539394 | 0.640404 | 0.642424 |        |
| 6359 | ENSG00000C2orf49  | 0.887879 | 0.392929 | 0.63064  | 0.676768 |        |
| 6360 | ENSG00000C2orf88  | 0.857294 | 0.451374 | 0.654334 | 0.618393 |        |
| 6361 | ENSG00000C9orf135 | 0.951515 | 0.353535 | 0.640404 | 0.632323 |        |
| 6362 | ENSG00000NBN      | 0.987879 | 0.371717 | 0.657576 | 0.521212 |        |
| 6363 | ENSG00000C7       | 0.852008 | 0.468288 | 0.660148 | 0.602537 | 0.2455 |
| 6364 | ENSG00000MAEL     | 0.741414 | 0.539394 | 0.640404 | 0.644444 |        |
| 6365 | ENSG00000RPL18    | 0.843434 | 0.477778 | 0.654882 | 0.606061 |        |
| 6366 | ENSG00000LRRC23   | 0.939394 | 0.351515 | 0.641246 | 0.646465 |        |
| 6367 | ENSG00000DPCD     | 0.951515 | 0.375758 | 0.658586 | 0.589899 |        |
| 6368 | ENSG00000SOX30    | 0.939394 | 0.394949 | 0.666498 | 0.573737 |        |
| 6369 | ENSG00000BORCS8   | 0.812121 | 0.482828 | 0.646128 | 0.630303 |        |
| 6370 | ENSG00000DENND6B  | 1        | 0.236364 | 0.624242 | 0.574747 |        |
| 6371 | ENSG00000ATP10D   | 0.843434 | 0.485859 | 0.663131 | 0.590909 |        |
| 6372 | ENSG00000GPR160   | 0.836152 | 0.470402 | 0.650458 | 0.621564 |        |
| 6373 | ENSG00000TP53RK   | 1        | 0.288889 | 0.652862 | 0.532323 |        |
| 6374 | ENSG00000ID1      | 0.920202 | 0.411111 | 0.665993 | 0.585859 |        |
| 6375 | ENSG00000SERPINA4 | 0.807309 | 0.497231 | 0.65227  | 0.616833 |        |
| 6376 | ENSG00000OR13D1   | 0.894949 | 0.440404 | 0.667677 | 0.582828 |        |
| 6377 | ENSG00000ERICH3   | 0.915152 | 0.390909 | 0.65202  | 0.628283 |        |
| 6378 | ENSG00000TGFBR1   | 0.927273 | 0.405051 | 0.663468 | 0.583838 |        |

|      |                   |          |          |          |          |        |
|------|-------------------|----------|----------|----------|----------|--------|
| 6379 | ENSG00000GGA1     | 0.966667 | 0.342424 | 0.637879 | 0.610101 |        |
| 6380 | ENSG00000P2RX7    | 1        | 0.313131 | 0.643098 | 0.585859 |        |
| 6381 | ENSG00000L2HGDH   | 0.818182 | 0.490909 | 0.654545 | 0.615152 |        |
| 6382 | ENSG00000VWCE     | 0.947475 | 0.365657 | 0.644781 | 0.621212 |        |
| 6383 | ENSG00000GNAI1    | 0.933333 | 0.370707 | 0.647306 | 0.625253 |        |
| 6384 | ENSG00000IFT81    | 0.961616 | 0.370707 | 0.663636 | 0.560606 |        |
| 6385 | ENSG00000ARNT     | 0.929293 | 0.4      | 0.674747 | 0.570707 |        |
| 6386 | ENSG00000LRRN3    | 1        | 0.249495 | 0.637037 | 0.571717 |        |
| 6387 | ENSG00000PIGG     | 0.824242 | 0.470707 | 0.647475 | 0.632323 |        |
| 6388 | ENSG00000PPID     | 0.921212 | 0.40404  | 0.657239 | 0.60303  | 0.1364 |
| 6389 | ENSG00000TAF6     | 0.922222 | 0.370707 | 0.641751 | 0.650505 |        |
| 6390 | ENSG00000FETUB    | 0.8      | 0.50101  | 0.648485 | 0.625253 |        |
| 6391 | ENSG00000WASHC1   | 0.959831 | 0.382664 | 0.662262 | 0.556025 |        |
| 6392 | ENSG00000NDFIP1   | 0.893939 | 0.429293 | 0.65404  | 0.612121 |        |
| 6393 | ENSG00000SNX15    | 0.878788 | 0.413131 | 0.640909 | 0.657576 |        |
| 6394 | ENSG00000GKN2     | 0.806061 | 0.491919 | 0.642929 | 0.632323 |        |
| 6395 | ENSG00000MFGE8    | 0.90303  | 0.391919 | 0.647475 | 0.644444 |        |
| 6396 | ENSG00000ZNF703   | 1        | 0.315152 | 0.656566 | 0.5      |        |
| 6397 | ENSG00000THRB     | 0.967677 | 0.348485 | 0.64596  | 0.592929 |        |
| 6398 | ENSG00000RBM48    | 0.968687 | 0.357576 | 0.675084 | 0.546465 |        |
| 6399 | ENSG00000CES4A    | 0.866667 | 0.450505 | 0.653199 | 0.617172 |        |
| 6400 | ENSG00000PIP4P1   | 0.934461 | 0.382664 | 0.651691 | 0.609937 |        |
| 6401 | ENSG00000DGKQ     | 0.911111 | 0.412121 | 0.661616 | 0.606061 |        |
| 6402 | ENSG00000RPRD1B   | 0.775758 | 0.528283 | 0.65202  | 0.619192 |        |
| 6403 | ENSG00000PLEKHG3  | 1        | 0.32241  | 0.649577 | 0.546512 |        |
| 6404 | ENSG00000HSPA14   | 0.868922 | 0.47463  | 0.668605 | 0.580338 |        |
| 6405 | ENSG00000MISP3    | 0.843434 | 0.449495 | 0.639731 | 0.649495 |        |
| 6406 | ENSG00000NPEPPS   | 0.972727 | 0.317172 | 0.677104 | 0.584848 |        |
| 6407 | ENSG00000PPP1R3F  | 0.841438 | 0.469345 | 0.649577 | 0.622622 |        |
| 6408 | ENSG00000RP2      | 0.824242 | 0.470707 | 0.647475 | 0.636364 |        |
| 6409 | ENSG00000CHMP4B   | 1        | 0.30202  | 0.63771  | 0.59899  |        |
| 6410 | ENSG00000PRELID1  | 0.924947 | 0.366808 | 0.633192 | 0.660677 |        |
| 6411 | ENSG00000CHODL    | 0.72093  | 0.590909 | 0.65592  | 0.620507 | 0.366  |
| 6412 | ENSG00000SULT1E1  | 0.977778 | 0.317172 | 0.661953 | 0.59798  |        |
| 6413 | ENSG00000CEP95    | 1        | 0.252525 | 0.626263 | 0.563636 |        |
| 6414 | ENSG00000ONECUT1  | 0.812896 | 0.477801 | 0.637949 | 0.647992 |        |
| 6415 | ENSG00000WDR5B    | 0.894949 | 0.415152 | 0.652525 | 0.625253 |        |
| 6416 | ENSG00000DLG3     | 0.762626 | 0.544444 | 0.641246 | 0.632323 |        |
| 6417 | ENSG00000RNF5     | 0.818182 | 0.490909 | 0.654545 | 0.615152 |        |
| 6418 | ENSG00000S100A10  | 0.945455 | 0.370707 | 0.642593 | 0.621212 | 0.2638 |
| 6419 | ENSG00000DNM2     | 0.812121 | 0.50101  | 0.646128 | 0.624242 |        |
| 6420 | ENSG00000KPRP     | 0.970707 | 0.340404 | 0.657071 | 0.585859 |        |
| 6421 | ENSG00000DCDC2    | 0.942424 | 0.352525 | 0.644108 | 0.644444 |        |
| 6422 | ENSG00000HELZ2    | 0.763214 | 0.546512 | 0.653101 | 0.61945  |        |
| 6423 | ENSG00000TRAPPC13 | 0.780808 | 0.512121 | 0.646465 | 0.635354 |        |
| 6424 | ENSG00000C1QL2    | 0.79596  | 0.522222 | 0.656229 | 0.609091 |        |
| 6425 | ENSG00000C8orf88  | 0.710359 | 0.58351  | 0.646934 | 0.642706 |        |
| 6426 | ENSG00000SAV1     | 0.852008 | 0.468288 | 0.660148 | 0.608879 |        |
| 6427 | ENSG00000IRF4     | 0.978788 | 0.3      | 0.667677 | 0.60404  |        |
| 6428 | ENSG00000LRP5     | 1        | 0.30101  | 0.660943 | 0.531313 |        |
| 6429 | ENSG00000MPZL2    | 0.853535 | 0.475758 | 0.664646 | 0.59596  |        |
| 6430 | ENSG00000MKS1     | 0.939746 | 0.367865 | 0.65222  | 0.620507 |        |
| 6431 | ENSG00000RCOR3    | 0.973737 | 0.329293 | 0.63569  | 0.621212 |        |
| 6432 | ENSG00000COL15A1  | 0.915152 | 0.416162 | 0.665657 | 0.593939 |        |
| 6433 | ENSG00000GNL3     | 1        | 0.327273 | 0.655892 | 0.511111 |        |

|      |                   |          |          |          |          |        |        |
|------|-------------------|----------|----------|----------|----------|--------|--------|
| 6434 | ENSG00000SIPA1L1  | 0.962626 | 0.356566 | 0.647138 | 0.59596  |        |        |
| 6435 | ENSG00000ACSM2B   | 0.756566 | 0.526263 | 0.640572 | 0.650505 |        |        |
| 6436 | ENSG00000MAP3K4   | 0.940404 | 0.376768 | 0.6633   | 0.60101  |        |        |
| 6437 | ENSG00000ADCY5    | 0.857294 | 0.451374 | 0.654334 | 0.625793 |        |        |
| 6438 | ENSG00000C11orf21 | 0.741414 | 0.539394 | 0.640404 | 0.652525 |        |        |
| 6439 | ENSG00000NPPC     | 0.90303  | 0.452525 | 0.669865 | 0.563636 |        |        |
| 6440 | ENSG00000FBL      | 0.825581 | 0.519027 | 0.67019  | 0.577167 |        |        |
| 6441 | ENSG00000MMP9     | 0.979798 | 0.338384 | 0.647811 | 0.589899 |        |        |
| 6442 | ENSG00000MRPL33   | 0.903805 | 0.400634 | 0.643058 | 0.64482  |        |        |
| 6443 | ENSG00000REEP2    | 0.965657 | 0.340404 | 0.647643 | 0.609091 |        |        |
| 6444 | ENSG00000PRMT1    | 0.945455 | 0.370707 | 0.642593 | 0.625253 |        |        |
| 6445 | ENSG00000ALG10    | 0.961616 | 0.361616 | 0.643434 | 0.60101  |        |        |
| 6446 | ENSG00000SCUBE1   | 0.806061 | 0.531313 | 0.6633   | 0.591919 |        |        |
| 6447 | ENSG00000ZCCHC24  | 0.911111 | 0.40202  | 0.652189 | 0.629293 |        |        |
| 6448 | ENSG00000ORA12    | 0.853535 | 0.465657 | 0.655556 | 0.618182 |        |        |
| 6449 | ENSG00000CUTC     | 0.962626 | 0.356566 | 0.650168 | 0.59596  |        |        |
| 6450 | ENSG00000ACSM2A   | 0.756566 | 0.526263 | 0.640572 | 0.650505 |        |        |
| 6451 | ENSG00000ZC3H12A  | 0.978788 | 0.351515 | 0.647138 | 0.574747 |        |        |
| 6452 | ENSG00000ALKBH8   | 1        | 0.276768 | 0.641751 | 0.586869 |        |        |
| 6453 | ENSG00000WHAMM    | 1        | 0.280127 | 0.619979 | 0.597252 |        |        |
| 6454 | ENSG00000BICDL2   | 0.8      | 0.50101  | 0.645455 | 0.633333 |        |        |
| 6455 | ENSG00000DCAF8L1  | 0.773737 | 0.506061 | 0.638889 | 0.652525 |        |        |
| 6456 | ENSG00000FNDC9    | 0.894292 | 0.41649  | 0.646054 | 0.636364 |        |        |
| 6457 | ENSG00000SLC9A6   | 1        | 0.29697  | 0.623232 | 0.553535 |        |        |
| 6458 | ENSG00000PPP2R2D  | 1        | 0.3      | 0.637879 | 0.547475 |        |        |
| 6459 | ENSG00000IQGAP3   | 1        | 0.318182 | 0.636364 | 0.529293 |        |        |
| 6460 | ENSG00000TXNRD1   | 1        | 0.291919 | 0.623401 | 0.556566 | 0.2643 |        |
| 6461 | ENSG00000RIDA     | 0.914141 | 0.380808 | 0.647475 | 0.652525 |        |        |
| 6462 | ENSG00000C7orf43  | 1        | 0.282828 | 0.658249 | 0.558586 |        |        |
| 6463 | ENSG00000HAGH     | 0.962626 | 0.368687 | 0.652357 | 0.582828 |        |        |
| 6464 | ENSG00000MAG      | 0.951515 | 0.370707 | 0.651684 | 0.613131 |        |        |
| 6465 | ENSG00000GORASP1  | 0.816068 | 0.483087 | 0.649577 | 0.634249 |        |        |
| 6466 | ENSG00000PRMT5    | 1        | 0.331313 | 0.690572 | 0.514141 |        |        |
| 6467 | ENSG00000ALG10B   | 0.961616 | 0.361616 | 0.643434 | 0.60101  |        |        |
| 6468 | ENSG00000WDR18    | 0.951515 | 0.371717 | 0.679966 | 0.579798 |        |        |
| 6469 | ENSG00000APEH     | 0.982828 | 0.350505 | 0.665993 | 0.550505 |        |        |
| 6470 | ENSG00000PLBD1    | 0.741414 | 0.539394 | 0.640404 | 0.655556 |        |        |
| 6471 | ENSG00000DNAJA4   | 1        | 0.313131 | 0.639731 | 0.563636 |        |        |
| 6472 | ENSG00000CCDC94   | 0.957717 | 0.378436 | 0.663848 | 0.577167 |        |        |
| 6473 | ENSG00000PRKD1    | 0.970707 | 0.324242 | 0.631313 | 0.637374 |        |        |
| 6474 | ENSG00000ABI3     | 0.919192 | 0.410101 | 0.664646 | 0.60303  |        |        |
| 6475 | ENSG00000ITPR2    | 0.870707 | 0.430303 | 0.644444 | 0.651515 |        |        |
| 6476 | ENSG00000DAPK3    | 0.878788 | 0.451515 | 0.660101 | 0.608081 |        |        |
| 6477 | ENSG00000MYO6     | 0.948485 | 0.40303  | 0.672727 | 0.558586 |        |        |
| 6478 | ENSG00000MAP2K6   | 0.973737 | 0.361616 | 0.69798  | 0.514141 |        |        |
| 6479 | ENSG00000SLPI     | 0.848485 | 0.410101 | 0.629293 | 0.707071 |        |        |
| 6480 | ENSG00000MAPK1    | 1        | 0.310101 | 0.662121 | 0.574747 | 0.3294 | 0.4835 |
| 6481 | ENSG00000CBL      | 0.909091 | 0.384848 | 0.64798  | 0.656566 |        |        |
| 6482 | ENSG00000TADA3    | 0.961616 | 0.369697 | 0.649495 | 0.587879 |        |        |
| 6483 | ENSG00000VDAC3    | 0.780808 | 0.512121 | 0.646465 | 0.641414 |        |        |
| 6484 | ENSG00000CCT8     | 0.965657 | 0.332323 | 0.632492 | 0.638384 | 0.3182 |        |
| 6485 | ENSG00000IRGC     | 0.919192 | 0.407071 | 0.659596 | 0.612121 |        |        |
| 6486 | ENSG00000SLC6A18  | 0.741414 | 0.532323 | 0.636027 | 0.667677 |        |        |
| 6487 | ENSG00000OGFOD1   | 0.790698 | 0.514799 | 0.645877 | 0.634249 |        |        |
| 6488 | ENSG00000FUCA2    | 1        | 0.276768 | 0.669697 | 0.60404  |        |        |

|      |           |           |          |          |          |          |
|------|-----------|-----------|----------|----------|----------|----------|
| 6489 | ENSG00000 | CARNS1    | 0.793939 | 0.514141 | 0.645791 | 0.632323 |
| 6490 | ENSG00000 | CBX4      | 0.92691  | 0.41639  | 0.659468 | 0.589147 |
| 6491 | ENSG00000 | PPP5C     | 1        | 0.345455 | 0.664646 | 0.547475 |
| 6492 | ENSG00000 | RAB11FIP2 | 0.944444 | 0.385859 | 0.656902 | 0.60404  |
| 6493 | ENSG00000 | WNK3      | 0.759596 | 0.529293 | 0.643098 | 0.646465 |
| 6494 | ENSG00000 | PHF20     | 0.948485 | 0.340404 | 0.686869 | 0.613131 |
| 6495 | ENSG00000 | TCP11L2   | 1        | 0.343434 | 0.680135 | 0.458586 |
| 6496 | ENSG00000 | PAQR7     | 0.866667 | 0.460606 | 0.643434 | 0.630303 |
| 6497 | ENSG00000 | SUCNR1    | 0.758586 | 0.541414 | 0.63771  | 0.646465 |
| 6498 | ENSG00000 | CSRP3     | 0.725253 | 0.590909 | 0.657576 | 0.624242 |
| 6499 | ENSG00000 | HDDC3     | 0.90303  | 0.407071 | 0.658754 | 0.627273 |
| 6500 | ENSG00000 | IL17RD    | 1        | 0.270707 | 0.648485 | 0.582828 |
| 6501 | ENSG00000 | KCND3     | 0.890909 | 0.444444 | 0.658418 | 0.608081 |
| 6502 | ENSG00000 | SEC16B    | 0.794949 | 0.467677 | 0.631313 | 0.687879 |
| 6503 | ENSG00000 | SLMAP     | 0.881607 | 0.447146 | 0.662262 | 0.613108 |
| 6504 | ENSG00000 | MNS1      | 1        | 0.288889 | 0.648485 | 0.576768 |
| 6505 | ENSG00000 | EDC3      | 0.964646 | 0.338384 | 0.677946 | 0.583838 |
| 6506 | ENSG00000 | EPB42     | 0.763214 | 0.552854 | 0.651868 | 0.623679 |
| 6507 | ENSG00000 | NAV3      | 0.809725 | 0.497886 | 0.648696 | 0.632135 |
| 6508 | ENSG00000 | PCK2      | 0.966667 | 0.342424 | 0.666667 | 0.590909 |
| 6509 | ENSG00000 | TIMM17B   | 0.827273 | 0.50404  | 0.66431  | 0.6      |
| 6510 | ENSG00000 | TCF3      | 0.973737 | 0.317172 | 0.683165 | 0.587879 |
| 6511 | ENSG00000 | PDGFB     | 1        | 0.333333 | 0.654545 | 0.561616 |
| 6512 | ENSG00000 | TMOD2     | 0.820598 | 0.45515  | 0.637874 | 0.674419 |
| 6513 | ENSG00000 | OR2AE1    | 0.733333 | 0.567677 | 0.650505 | 0.636364 |
| 6514 | ENSG00000 | THBD      | 0.927273 | 0.393939 | 0.660606 | 0.610101 |
| 6515 | ENSG00000 | LIG4      | 0.852008 | 0.459831 | 0.653982 | 0.631078 |
| 6516 | ENSG00000 | PAPLN     | 0.869697 | 0.466667 | 0.66229  | 0.608081 |
| 6517 | ENSG00000 | CNN3      | 0.951515 | 0.373737 | 0.655219 | 0.612121 |
| 6518 | ENSG00000 | DMRT1     | 0.770613 | 0.529598 | 0.650106 | 0.635307 |
| 6519 | ENSG00000 | EIF4EBP2  | 1        | 0.309091 | 0.637037 | 0.569697 |
| 6520 | ENSG00000 | NOL11     | 0.959596 | 0.386869 | 0.663468 | 0.567677 |
| 6521 | ENSG00000 | CEACAM1   | 0.89899  | 0.393939 | 0.646465 | 0.662626 |
| 6522 | ENSG00000 | DNPH1     | 1        | 0.29596  | 0.643771 | 0.6      |
| 6523 | ENSG00000 | GFRAL     | 0.852008 | 0.468288 | 0.660148 | 0.616279 |
| 6524 | ENSG00000 | FAM217B   | 0.912121 | 0.414141 | 0.652862 | 0.622222 |
| 6525 | ENSG00000 | RAB11FIP1 | 1        | 0.279798 | 0.638384 | 0.583838 |
| 6526 | ENSG00000 | OR5L2     | 0.881607 | 0.447146 | 0.662262 | 0.614165 |
| 6527 | ENSG00000 | TMEM222   | 0.970707 | 0.340404 | 0.640404 | 0.614141 |
| 6528 | ENSG00000 | OR5L1     | 0.881607 | 0.447146 | 0.662262 | 0.614165 |
| 6529 | ENSG00000 | FAM53A    | 0.990909 | 0.323232 | 0.656566 | 0.593939 |
| 6530 | ENSG00000 | BCAS3     | 0.881818 | 0.459596 | 0.663973 | 0.60101  |
| 6531 | ENSG00000 | NAPRT     | 0.963636 | 0.338384 | 0.702357 | 0.558586 |
| 6532 | ENSG00000 | RNF208    | 0.943434 | 0.392929 | 0.657407 | 0.59798  |
| 6533 | ENSG00000 | MRPL18    | 0.894949 | 0.440404 | 0.667677 | 0.6      |
| 6534 | ENSG00000 | S100B     | 0.975758 | 0.322222 | 0.673401 | 0.591919 |
| 6535 | ENSG00000 | GTPBP4    | 0.89798  | 0.425253 | 0.655556 | 0.624242 |
| 6536 | ENSG00000 | RASL10B   | 0.90404  | 0.394949 | 0.649495 | 0.650505 |
| 6537 | ENSG00000 | MTFR2     | 0.933333 | 0.376768 | 0.65101  | 0.629293 |
| 6538 | ENSG00000 | SHB       | 0.986869 | 0.277778 | 0.644949 | 0.643434 |
| 6539 | ENSG00000 | FADS1     | 0.949495 | 0.386869 | 0.657912 | 0.6      |
| 6540 | ENSG00000 | TFG       | 0.790698 | 0.519027 | 0.653101 | 0.627907 |
| 6541 | ENSG00000 | STK19     | 1        | 0.286869 | 0.63771  | 0.551515 |
| 6542 | ENSG00000 | SCAI      | 0.926004 | 0.39852  | 0.653453 | 0.618393 |
| 6543 | ENSG00000 | FGFR4     | 1        | 0.285859 | 0.629798 | 0.590909 |

|      |                    |          |          |          |          |        |        |
|------|--------------------|----------|----------|----------|----------|--------|--------|
| 6544 | ENSG00000BTD       | 0.766667 | 0.564646 | 0.665657 | 0.60404  |        |        |
| 6545 | ENSG00000LHFPL4    | 0.877378 | 0.436575 | 0.653101 | 0.637421 |        |        |
| 6546 | ENSG00000COX6A1    | 0.846723 | 0.487315 | 0.667019 | 0.60148  |        |        |
| 6547 | ENSG00000AL021546. | 0.846723 | 0.487315 | 0.667019 | 0.60148  |        |        |
| 6548 | ENSG00000CDC45     | 0.964646 | 0.363636 | 0.682492 | 0.554545 |        |        |
| 6549 | ENSG00000PACSIN3   | 1        | 0.316162 | 0.639562 | 0.551515 |        |        |
| 6550 | ENSG00000ANKRD20A4 | 0.955556 | 0.366667 | 0.711785 | 0.548485 |        |        |
| 6551 | ENSG00000COX17     | 0.924242 | 0.40303  | 0.659259 | 0.612121 |        |        |
| 6552 | ENSG00000SEMA6B    | 0.987879 | 0.309091 | 0.693266 | 0.566667 |        |        |
| 6553 | ENSG00000TNFRSF1A  | 1        | 0.316162 | 0.640909 | 0.609091 |        |        |
| 6554 | ENSG00000ANKRD20A2 | 0.955556 | 0.366667 | 0.711785 | 0.548485 |        |        |
| 6555 | ENSG00000SLC35E4   | 0.749495 | 0.513131 | 0.631313 | 0.686869 |        |        |
| 6556 | ENSG00000CSF1R     | 1        | 0.322222 | 0.643603 | 0.526263 |        |        |
| 6557 | ENSG00000ZP2       | 0.886869 | 0.439394 | 0.660943 | 0.620202 |        |        |
| 6558 | ENSG00000REX02     | 0.964646 | 0.370707 | 0.652862 | 0.583838 | 0.257  | 0.3649 |
| 6559 | ENSG00000PCNX4     | 1        | 0.318182 | 0.641751 | 0.577778 |        |        |
| 6560 | ENSG00000ZNF114    | 0.984848 | 0.334343 | 0.663973 | 0.580808 |        |        |
| 6561 | ENSG00000ZNF10     | 0.812896 | 0.506342 | 0.647639 | 0.628964 |        |        |
| 6562 | ENSG00000ANKRD20A8 | 0.955556 | 0.366667 | 0.711785 | 0.548485 |        |        |
| 6563 | ENSG00000FAM163B   | 0.773737 | 0.537374 | 0.655556 | 0.625253 |        |        |
| 6564 | ENSG00000ANKRD20A1 | 0.955556 | 0.366667 | 0.711785 | 0.548485 |        |        |
| 6565 | ENSG00000ANKRD20A3 | 0.955556 | 0.366667 | 0.711785 | 0.548485 |        |        |
| 6566 | ENSG00000SOWAHC    | 0.818182 | 0.490909 | 0.654545 | 0.629293 |        |        |
| 6567 | ENSG00000MYL2      | 0.9      | 0.394949 | 0.647475 | 0.662626 |        |        |
| 6568 | ENSG00000LCE6A     | 0.8      | 0.50101  | 0.645455 | 0.643434 |        |        |
| 6569 | ENSG00000SH3PXD2B  | 0.833333 | 0.49596  | 0.657912 | 0.613131 |        |        |
| 6570 | ENSG00000CTSE      | 0.780808 | 0.512121 | 0.646465 | 0.647475 |        |        |
| 6571 | ENSG00000C10orf88  | 0.919192 | 0.40202  | 0.661953 | 0.622222 |        |        |
| 6572 | ENSG00000KCNJ16    | 0.79697  | 0.49697  | 0.644444 | 0.651515 |        |        |
| 6573 | ENSG00000HDAC9     | 0.906061 | 0.410101 | 0.650168 | 0.641414 | 0.2578 |        |
| 6574 | ENSG00000PRRC2B    | 0.910101 | 0.419192 | 0.664983 | 0.613131 |        |        |
| 6575 | ENSG00000CEP44     | 0.962626 | 0.378788 | 0.668182 | 0.561616 | 0.418  |        |
| 6576 | ENSG00000PLEKHJ1   | 0.806061 | 0.537374 | 0.671717 | 0.592929 |        |        |
| 6577 | ENSG00000SH3RF3    | 0.968687 | 0.336364 | 0.631313 | 0.639394 |        |        |
| 6578 | ENSG00000UBE2N     | 0.9      | 0.447475 | 0.664983 | 0.593939 |        |        |
| 6579 | ENSG00000RUVBL2    | 1        | 0.263636 | 0.640909 | 0.573737 |        |        |
| 6580 | ENSG00000TACC2     | 1        | 0.30202  | 0.63569  | 0.590909 |        |        |
| 6581 | ENSG00000RTL3      | 0.968687 | 0.342424 | 0.669697 | 0.589899 |        |        |
| 6582 | ENSG00000YY1       | 0.962626 | 0.356566 | 0.647138 | 0.613131 |        |        |
| 6583 | ENSG00000SYNGR3    | 0.935354 | 0.353535 | 0.644781 | 0.666667 |        |        |
| 6584 | ENSG00000KLC4      | 0.976768 | 0.355556 | 0.647138 | 0.587879 |        |        |
| 6585 | ENSG00000AKIRIN1   | 0.878788 | 0.461616 | 0.664815 | 0.606061 |        |        |
| 6586 | ENSG00000LRRC4C    | 0.773737 | 0.537374 | 0.655556 | 0.629293 |        |        |
| 6587 | ENSG00000P2RX6     | 0.945455 | 0.372727 | 0.659091 | 0.620202 |        |        |
| 6588 | ENSG00000EIF2B5    | 0.858586 | 0.458586 | 0.658586 | 0.630303 |        |        |
| 6589 | ENSG00000TMEM206   | 0.812121 | 0.513131 | 0.662626 | 0.614141 |        |        |
| 6590 | ENSG00000FKBP6     | 0.836152 | 0.470402 | 0.650458 | 0.642706 |        |        |
| 6591 | ENSG00000B3GNT7    | 0.911111 | 0.412121 | 0.661616 | 0.623232 |        |        |
| 6592 | ENSG00000FAM110D   | 0.773737 | 0.537374 | 0.655556 | 0.628283 |        |        |
| 6593 | ENSG00000FMR1      | 0.962626 | 0.350505 | 0.641751 | 0.625253 |        |        |
| 6594 | ENSG00000POLR1E    | 0.921776 | 0.42389  | 0.664905 | 0.595137 |        |        |
| 6595 | ENSG00000FAM9B     | 0.911205 | 0.41649  | 0.656977 | 0.623679 |        |        |
| 6596 | ENSG00000PHF5A     | 0.864646 | 0.471717 | 0.658418 | 0.615152 |        |        |
| 6597 | ENSG00000ACTRT1    | 0.820296 | 0.487315 | 0.650282 | 0.640592 |        |        |
| 6598 | ENSG00000VWA5A     | 0.973737 | 0.339394 | 0.704209 | 0.543434 |        |        |

|      |                    |          |          |          |          |        |        |  |
|------|--------------------|----------|----------|----------|----------|--------|--------|--|
| 6599 | ENSG00000DIP2C     | 0.941414 | 0.381818 | 0.649832 | 0.623232 |        |        |  |
| 6600 | ENSG00000RNASEK    | 0.894949 | 0.440404 | 0.667677 | 0.605051 |        |        |  |
| 6601 | ENSG00000TREM1     | 0.79704  | 0.523256 | 0.659091 | 0.620507 |        |        |  |
| 6602 | ENSG00000MAPK9     | 0.92691  | 0.401993 | 0.675895 | 0.595792 |        |        |  |
| 6603 | ENSG00000ZNF276    | 0.977778 | 0.346465 | 0.6867   | 0.550505 |        |        |  |
| 6604 | ENSG00000PSTPIP2   | 0.780808 | 0.512121 | 0.646465 | 0.651515 | 0.2793 |        |  |
| 6605 | ENSG00000MUC1      | 0.976768 | 0.305051 | 0.669024 | 0.616162 |        |        |  |
| 6606 | ENSG00000FKBP1A    | 0.936364 | 0.382828 | 0.661279 | 0.617172 |        |        |  |
| 6607 | ENSG00000VPS37D    | 0.908034 | 0.445032 | 0.672304 | 0.585624 |        |        |  |
| 6608 | ENSG00000EFL1      | 0.952525 | 0.365657 | 0.65219  | 0.627273 |        |        |  |
| 6609 | ENSG00000GPR182    | 0.751938 | 0.579181 | 0.665559 | 0.613511 |        |        |  |
| 6610 | ENSG00000OBSL1     | 0.965657 | 0.335354 | 0.634512 | 0.645455 |        |        |  |
| 6611 | ENSG00000AIDA      | 0.886869 | 0.439394 | 0.660943 | 0.623232 |        |        |  |
| 6612 | ENSG00000 9/6/2019 | 0.934343 | 0.417172 | 0.677104 | 0.566667 |        |        |  |
| 6613 | ENSG00000DCDC2C    | 0.858586 | 0.458586 | 0.658586 | 0.630303 |        |        |  |
| 6614 | ENSG00000CPQ       | 0.911111 | 0.405051 | 0.653704 | 0.641414 |        |        |  |
| 6615 | ENSG00000 #####    | 0.934343 | 0.417172 | 0.677104 | 0.566667 |        |        |  |
| 6616 | ENSG00000RAB11FIP3 | 1        | 0.278788 | 0.670707 | 0.60101  |        |        |  |
| 6617 | ENSG00000DNAH5     | 0.947475 | 0.40202  | 0.674074 | 0.574747 |        |        |  |
| 6618 | ENSG00000SGSH      | 0.911111 | 0.412121 | 0.661616 | 0.624242 |        |        |  |
| 6619 | ENSG00000SH2D3A    | 0.89899  | 0.418182 | 0.645455 | 0.647475 |        |        |  |
| 6620 | ENSG00000SENP6     | 0.90101  | 0.424242 | 0.651684 | 0.633333 |        |        |  |
| 6621 | ENSG00000KALRN     | 0.862626 | 0.423232 | 0.636532 | 0.688889 |        |        |  |
| 6622 | ENSG00000NEK8      | 0.986258 | 0.327696 | 0.656977 | 0.602537 |        |        |  |
| 6623 | ENSG00000ST8SIA4   | 0.886869 | 0.450505 | 0.664646 | 0.611111 |        |        |  |
| 6624 | ENSG00000ANXA10    | 0.818182 | 0.482828 | 0.647475 | 0.651515 |        |        |  |
| 6625 | ENSG00000ZNF322    | 1        | 0.282828 | 0.627946 | 0.582828 |        |        |  |
| 6626 | ENSG00000ITPKB     | 0.839424 | 0.500554 | 0.669989 | 0.598007 |        |        |  |
| 6627 | ENSG00000ATP6V1F   | 1        | 0.306061 | 0.642929 | 0.592929 |        |        |  |
| 6628 | ENSG00000MLH1      | 1        | 0.327273 | 0.66532  | 0.572727 |        |        |  |
| 6629 | ENSG00000AXDND1    | 0.676533 | 0.631078 | 0.653805 | 0.65222  | 0.2539 | 0.3145 |  |
| 6630 | ENSG00000NTRK1     | 0.947475 | 0.40202  | 0.668013 | 0.582828 |        |        |  |
| 6631 | ENSG00000PPP1R14A  | 0.983838 | 0.334343 | 0.690067 | 0.556566 |        |        |  |
| 6632 | ENSG00000RAD9A     | 0.856566 | 0.464646 | 0.649832 | 0.639394 |        |        |  |
| 6633 | ENSG00000GTF2E1    | 0.918182 | 0.411111 | 0.657407 | 0.624242 |        |        |  |
| 6634 | ENSG00000GNAQ      | 0.951515 | 0.367677 | 0.658754 | 0.624242 | 0.4734 |        |  |
| 6635 | ENSG00000CCT5      | 1        | 0.341414 | 0.657912 | 0.521212 |        |        |  |
| 6636 | ENSG00000ZDBF2     | 0.942918 | 0.361522 | 0.652572 | 0.645877 |        |        |  |
| 6637 | ENSG00000WDR13     | 0.821212 | 0.493939 | 0.654545 | 0.633333 |        |        |  |
| 6638 | ENSG00000ALOXE3    | 0.790941 | 0.54007  | 0.665505 | 0.610918 |        |        |  |
| 6639 | ENSG00000SPAG6     | 0.72093  | 0.590909 | 0.65592  | 0.643763 |        |        |  |
| 6640 | ENSG00000MAPRE3    | 0.773737 | 0.537374 | 0.655556 | 0.636364 |        |        |  |
| 6641 | ENSG00000APLP1     | 0.945455 | 0.40101  | 0.672222 | 0.583838 |        |        |  |
| 6642 | ENSG00000COX19     | 0.886869 | 0.466667 | 0.676768 | 0.583838 |        |        |  |
| 6643 | ENSG00000CDR2      | 1        | 0.345455 | 0.69697  | 0.472727 | 0.1959 |        |  |
| 6644 | ENSG00000PPP1R1B   | 0.990909 | 0.366667 | 0.69899  | 0.50202  |        |        |  |
| 6645 | ENSG00000HIST1H4A  | 1        | 0.311111 | 0.639731 | 0.534343 |        |        |  |
| 6646 | ENSG00000ZNF667    | 0.863636 | 0.443434 | 0.653535 | 0.651515 |        |        |  |
| 6647 | ENSG00000ABCF2     | 1        | 0.318182 | 0.65101  | 0.608081 |        |        |  |
| 6648 | ENSG00000SRP19     | 0.963636 | 0.331313 | 0.642256 | 0.648485 |        |        |  |
| 6649 | ENSG00000RBM12     | 1        | 0.323232 | 0.644781 | 0.520202 |        |        |  |
| 6650 | ENSG00000CCDC171   | 0.983838 | 0.345455 | 0.653199 | 0.591919 |        |        |  |
| 6651 | ENSG00000ARG1      | 0.994949 | 0.294949 | 0.678451 | 0.60101  |        |        |  |
| 6652 | ENSG00000AP3B2     | 0.908081 | 0.40303  | 0.655556 | 0.648485 |        |        |  |
| 6653 | ENSG00000CD99      | 0.911111 | 0.40202  | 0.652189 | 0.651515 |        |        |  |



|      |                   |          |          |          |          |        |        |
|------|-------------------|----------|----------|----------|----------|--------|--------|
| 6654 | ENSG00000CITED1   | 0.780808 | 0.512121 | 0.646465 | 0.657576 |        |        |
| 6655 | ENSG00000USF3     | 0.983838 | 0.373737 | 0.6633   | 0.546465 |        |        |
| 6656 | ENSG00000IL11RA   | 1        | 0.278788 | 0.653872 | 0.593939 |        |        |
| 6657 | ENSG00000ZNF45    | 0.806061 | 0.531313 | 0.6633   | 0.613131 |        |        |
| 6658 | ENSG00000MAP1B    | 0.911111 | 0.386869 | 0.65     | 0.668687 |        |        |
| 6659 | ENSG00000SUN5     | 0.712474 | 0.588795 | 0.650282 | 0.657505 |        |        |
| 6660 | ENSG00000FGFR1    | 0.978788 | 0.338384 | 0.706229 | 0.542424 |        |        |
| 6661 | ENSG00000FGA      | 0.933333 | 0.391919 | 0.660269 | 0.618182 |        |        |
| 6662 | ENSG00000KIAA0040 | 0.908081 | 0.378788 | 0.644108 | 0.683838 |        |        |
| 6663 | ENSG00000RANBP3L  | 1        | 0.290909 | 0.633333 | 0.591919 |        |        |
| 6664 | ENSG00000ENDOU    | 0.90404  | 0.394949 | 0.649495 | 0.665657 |        |        |
| 6665 | ENSG00000B3GNT5   | 0.874747 | 0.453535 | 0.657407 | 0.629293 |        |        |
| 6666 | ENSG00000ZNF157   | 0.809725 | 0.505285 | 0.657505 | 0.632135 |        |        |
| 6667 | ENSG00000PLEKHM1  | 1        | 0.3      | 0.640741 | 0.548485 |        |        |
| 6668 | ENSG00000CD38     | 0.927273 | 0.380808 | 0.648316 | 0.652525 |        |        |
| 6669 | ENSG00000RASL10A  | 0.806061 | 0.537374 | 0.671717 | 0.60303  |        |        |
| 6670 | ENSG00000TOP3A    | 0.852008 | 0.468288 | 0.660148 | 0.631078 |        |        |
| 6671 | ENSG00000RBFOX1   | 0.789899 | 0.547475 | 0.661448 | 0.617172 |        |        |
| 6672 | ENSG00000ATRNL    | 0.885835 | 0.432347 | 0.656801 | 0.641649 |        |        |
| 6673 | ENSG00000TTI1     | 0.848485 | 0.494949 | 0.671717 | 0.60101  |        |        |
| 6674 | ENSG00000SDCBP    | 0.939394 | 0.383838 | 0.647811 | 0.635354 |        |        |
| 6675 | ENSG00000INPP5D   | 0.914141 | 0.40303  | 0.658586 | 0.641414 |        |        |
| 6676 | ENSG00000TP53AIP1 | 0.991919 | 0.319192 | 0.70202  | 0.557576 |        |        |
| 6677 | ENSG00000DMPK     | 0.927273 | 0.393939 | 0.660606 | 0.628283 |        |        |
| 6678 | ENSG00000MMP16    | 0.818182 | 0.490909 | 0.654545 | 0.642424 |        |        |
| 6679 | ENSG00000ARHGAP18 | 0.901691 | 0.428118 | 0.657858 | 0.628964 |        |        |
| 6680 | ENSG00000PGGT1B   | 0.874747 | 0.474747 | 0.664983 | 0.608081 |        |        |
| 6681 | ENSG00000NCKAP1L  | 0.973737 | 0.361616 | 0.655892 | 0.586869 |        |        |
| 6682 | ENSG00000IKBKE    | 1        | 0.282828 | 0.639731 | 0.559596 |        |        |
| 6683 | ENSG00000PREX1    | 0.846723 | 0.487315 | 0.667019 | 0.614165 |        |        |
| 6684 | ENSG00000CCDC9    | 0.911111 | 0.39596  | 0.656061 | 0.655556 |        |        |
| 6685 | ENSG00000KLHDC1   | 0.927273 | 0.39596  | 0.649832 | 0.634343 |        |        |
| 6686 | ENSG00000JAG2     | 0.977778 | 0.308081 | 0.621886 | 0.674747 |        |        |
| 6687 | ENSG00000UBE2G2   | 0.812121 | 0.513131 | 0.662626 | 0.622222 |        |        |
| 6688 | ENSG00000PDGFRA   | 0.809725 | 0.505285 | 0.657505 | 0.635307 |        |        |
| 6689 | ENSG00000IFI44L   | 0.922222 | 0.39697  | 0.65101  | 0.643434 |        |        |
| 6690 | ENSG00000CAV1     | 0.90404  | 0.394949 | 0.649495 | 0.669697 |        |        |
| 6691 | ENSG00000AP2B1    | 0.930303 | 0.390909 | 0.656566 | 0.632323 |        |        |
| 6692 | ENSG00000FCF1     | 0.888889 | 0.450505 | 0.661785 | 0.618182 |        |        |
| 6693 | ENSG00000DDX41    | 1        | 0.290909 | 0.636364 | 0.574747 |        |        |
| 6694 | ENSG00000CSKMT    | 0.8      | 0.531313 | 0.664646 | 0.616162 |        |        |
| 6695 | ENSG00000NEIL1    | 0.932323 | 0.385859 | 0.648822 | 0.641414 |        |        |
| 6696 | ENSG00000ALDH1L1  | 0.957576 | 0.379798 | 0.673401 | 0.589899 |        |        |
| 6697 | ENSG00000GGCT     | 0.963636 | 0.385859 | 0.649495 | 0.590909 | 0.2143 | 0.3322 |
| 6698 | ENSG00000CCDC85B  | 0.806061 | 0.537374 | 0.671717 | 0.60303  |        |        |
| 6699 | ENSG00000FAM160A1 | 0.858586 | 0.458586 | 0.658586 | 0.641414 |        |        |
| 6700 | ENSG00000DCUN1D2  | 0.90101  | 0.422222 | 0.656902 | 0.638384 |        |        |
| 6701 | ENSG00000EVX2     | 0.928118 | 0.427061 | 0.663495 | 0.593023 |        |        |
| 6702 | ENSG00000CYFIP1   | 0.887879 | 0.447475 | 0.658923 | 0.624242 |        |        |
| 6703 | ENSG00000BATF     | 0.773737 | 0.532323 | 0.647306 | 0.652525 |        |        |
| 6704 | ENSG00000XPNPEP1  | 1        | 0.313131 | 0.659933 | 0.590909 |        |        |
| 6705 | ENSG00000DCAF1    | 1        | 0.30101  | 0.63771  | 0.59697  |        |        |
| 6706 | ENSG00000MRAP     | 0.806061 | 0.537374 | 0.671717 | 0.60404  |        |        |
| 6707 | ENSG00000UPK3A    | 0.933333 | 0.386869 | 0.662121 | 0.627273 |        |        |
| 6708 | ENSG00000GABRA3   | 0.773737 | 0.537374 | 0.655556 | 0.643434 |        | 0.272  |

|      |                    |          |          |          |          |        |
|------|--------------------|----------|----------|----------|----------|--------|
| 6709 | ENSG00000CTNND2    | 0.984848 | 0.30202  | 0.67963  | 0.609091 |        |
| 6710 | ENSG00000ERBB3     | 1        | 0.329293 | 0.653872 | 0.59697  |        |
| 6711 | ENSG00000POU4F1    | 0.818182 | 0.490909 | 0.654545 | 0.645455 |        |
| 6712 | ENSG00000ZSCAN23   | 1        | 0.318182 | 0.686869 | 0.489899 |        |
| 6713 | ENSG00000TPRKB     | 0.959596 | 0.390909 | 0.662458 | 0.584848 |        |
| 6714 | ENSG00000CD74      | 0.915152 | 0.410101 | 0.662626 | 0.635354 |        |
| 6715 | ENSG00000FCGBP     | 0.933333 | 0.387879 | 0.656734 | 0.630303 |        |
| 6716 | ENSG00000ARHGEF1   | 0.886869 | 0.454545 | 0.66734  | 0.613131 |        |
| 6717 | ENSG00000ACSBG1    | 0.980808 | 0.326263 | 0.650168 | 0.625253 |        |
| 6718 | ENSG00000TNS2      | 0.773737 | 0.537374 | 0.655556 | 0.643434 |        |
| 6719 | ENSG00000DNAH14    | 0.983838 | 0.363636 | 0.655387 | 0.573737 |        |
| 6720 | ENSG00000ANXA2     | 0.933333 | 0.370707 | 0.647306 | 0.657576 |        |
| 6721 | ENSG00000LCN2      | 0.89899  | 0.374747 | 0.635859 | 0.713131 |        |
| 6722 | ENSG00000TATDN3    | 0.934343 | 0.394949 | 0.657912 | 0.622222 |        |
| 6723 | ENSG00000PHACTR1   | 1        | 0.315152 | 0.67037  | 0.575758 |        |
| 6724 | ENSG00000KDM4A     | 0.894309 | 0.46806  | 0.669957 | 0.590012 |        |
| 6725 | ENSG00000DAZAP1    | 1        | 0.335354 | 0.650842 | 0.592929 |        |
| 6726 | ENSG00000DCTN6     | 0.89899  | 0.430303 | 0.664646 | 0.626263 |        |
| 6727 | ENSG00000SNX20     | 0.826263 | 0.512121 | 0.647138 | 0.634343 |        |
| 6728 | ENSG00000PKP3      | 0.965657 | 0.366667 | 0.662458 | 0.591919 | 0.4234 |
| 6729 | ENSG00000HSPE1     | 1        | 0.311111 | 0.63771  | 0.614141 |        |
| 6730 | ENSG00000TEX14     | 0.72093  | 0.590909 | 0.65592  | 0.653277 |        |
| 6731 | ENSG00000GNE       | 0.975758 | 0.326263 | 0.625758 | 0.660606 |        |
| 6732 | ENSG00000VEZF1     | 0.994949 | 0.314141 | 0.687542 | 0.583838 |        |
| 6733 | ENSG00000UGCG      | 0.818182 | 0.482828 | 0.645791 | 0.665657 |        |
| 6734 | ENSG00000TMEM164   | 0.853535 | 0.475758 | 0.664646 | 0.625253 |        |
| 6735 | ENSG00000TNNI3     | 0.89697  | 0.385859 | 0.641414 | 0.7      |        |
| 6736 | ENSG00000SHPK      | 0.957576 | 0.405051 | 0.677778 | 0.560606 |        |
| 6737 | ENSG00000PARP6     | 0.830867 | 0.493658 | 0.659796 | 0.631078 |        |
| 6738 | ENSG00000JADE1     | 0.852008 | 0.468288 | 0.660148 | 0.638478 |        |
| 6739 | ENSG00000METTL4    | 0.927273 | 0.40404  | 0.661953 | 0.623232 |        |
| 6740 | ENSG00000LYPD3     | 0.915152 | 0.410101 | 0.662626 | 0.636364 |        |
| 6741 | ENSG00000ZNF846    | 0.909091 | 0.40101  | 0.650673 | 0.661616 |        |
| 6742 | ENSG00000FERMT1    | 1        | 0.342424 | 0.656061 | 0.570707 |        |
| 6743 | ENSG00000ODF3      | 0.953535 | 0.383838 | 0.662626 | 0.613131 |        |
| 6744 | ENSG00000RNF13     | 0.915152 | 0.411111 | 0.656397 | 0.642424 |        |
| 6745 | ENSG00000TPRG1     | 0.953535 | 0.380808 | 0.650673 | 0.627273 |        |
| 6746 | ENSG00000KBTBD8    | 0.957576 | 0.368687 | 0.658923 | 0.622222 |        |
| 6747 | ENSG00000MYOZ2     | 0.94926  | 0.396406 | 0.667195 | 0.60148  |        |
| 6748 | ENSG00000A2M       | 0.951515 | 0.39899  | 0.668519 | 0.594949 |        |
| 6749 | ENSG00000CYSLTR2   | 0.803383 | 0.497886 | 0.649401 | 0.659619 |        |
| 6750 | ENSG00000BPIFB2    | 0.894949 | 0.440404 | 0.667677 | 0.622222 |        |
| 6751 | ENSG00000BAZ1B     | 1        | 0.341414 | 0.657912 | 0.586869 |        |
| 6752 | ENSG00000STKLD1    | 0.882828 | 0.454545 | 0.666667 | 0.620202 |        |
| 6753 | ENSG00000HPS1      | 0.9      | 0.425253 | 0.652189 | 0.648485 |        |
| 6754 | ENSG00000PGD       | 0.968687 | 0.356566 | 0.647306 | 0.616162 |        |
| 6755 | ENSG00000C2orf73   | 1        | 0.340404 | 0.646465 | 0.526263 |        |
| 6756 | ENSG00000RBM14-RBM | 0.919192 | 0.386869 | 0.648822 | 0.667677 |        |
| 6757 | ENSG00000UBL4B     | 0.725253 | 0.59798  | 0.661616 | 0.640404 |        |
| 6758 | ENSG00000CCNG2     | 0.859596 | 0.492929 | 0.67037  | 0.60404  |        |
| 6759 | ENSG00000CEP295NL  | 0.984848 | 0.328283 | 0.703199 | 0.559596 |        |
| 6760 | ENSG00000NOL12     | 0.860606 | 0.471717 | 0.664141 | 0.626263 |        |
| 6761 | ENSG00000SNED1     | 0.963415 | 0.358537 | 0.648374 | 0.62439  |        |
| 6762 | ENSG00000ACSL5     | 0.988889 | 0.346465 | 0.682828 | 0.558586 |        |
| 6763 | ENSG00000CRHR1     | 0.783575 | 0.519807 | 0.651691 | 0.655072 |        |

|      |                    |          |          |          |          |        |
|------|--------------------|----------|----------|----------|----------|--------|
| 6764 | ENSG00000NEURL4    | 0.989899 | 0.3      | 0.68367  | 0.606061 |        |
| 6765 | ENSG00000FNBP1     | 0.927273 | 0.393939 | 0.663636 | 0.630303 |        |
| 6766 | ENSG00000ZCWPW2    | 0.942424 | 0.358586 | 0.646128 | 0.669697 |        |
| 6767 | ENSG00000APOE      | 0.966667 | 0.360606 | 0.660774 | 0.60404  |        |
| 6768 | ENSG00000NOS1AP    | 0.971717 | 0.338384 | 0.674579 | 0.60202  | 0.277  |
| 6769 | ENSG00000TMEM176A  | 0.866667 | 0.443434 | 0.646633 | 0.673737 |        |
| 6770 | ENSG00000INAVA     | 1        | 0.306061 | 0.63367  | 0.593939 |        |
| 6771 | ENSG00000WNT9B     | 0.944444 | 0.39697  | 0.675758 | 0.59697  |        |
| 6772 | ENSG00000LRRC46    | 0.717172 | 0.614141 | 0.659091 | 0.645455 |        |
| 6773 | ENSG00000FAM214A   | 0.993939 | 0.310101 | 0.685522 | 0.59596  |        |
| 6774 | ENSG00000CCNI      | 1        | 0.310101 | 0.675758 | 0.573737 |        |
| 6775 | ENSG00000MAP2K7    | 0.966667 | 0.376768 | 0.656902 | 0.591919 |        |
| 6776 | ENSG00000C2orf42   | 0.939394 | 0.40404  | 0.660774 | 0.614141 |        |
| 6777 | ENSG00000PSD       | 0.741414 | 0.539394 | 0.640404 | 0.688889 |        |
| 6778 | ENSG00000ADAMTS8   | 0.757576 | 0.550505 | 0.652357 | 0.655556 |        |
| 6779 | ENSG00000GPR132    | 1        | 0.315152 | 0.659596 | 0.540404 |        |
| 6780 | ENSG00000TSNAX     | 0.994949 | 0.314141 | 0.691751 | 0.584848 |        |
| 6781 | ENSG00000NREP      | 0.89852  | 0.424947 | 0.661734 | 0.642706 |        |
| 6782 | ENSG00000SPHKAP    | 0.939746 | 0.392178 | 0.65821  | 0.625793 |        |
| 6783 | ENSG00000CD80      | 0.894949 | 0.415152 | 0.652525 | 0.664646 |        |
| 6784 | ENSG00000COX8A     | 0.812121 | 0.513131 | 0.662626 | 0.632323 |        |
| 6785 | ENSG00000C12orf49  | 0.841438 | 0.477801 | 0.658034 | 0.643763 |        |
| 6786 | ENSG00000PLD4      | 0.818182 | 0.485859 | 0.650505 | 0.662626 |        |
| 6787 | ENSG00000ACY1      | 1        | 0.290909 | 0.62963  | 0.580808 |        |
| 6788 | ENSG00000ACR       | 0.72093  | 0.590909 | 0.65592  | 0.659619 |        |
| 6789 | ENSG00000VPS28     | 1        | 0.307071 | 0.634343 | 0.59697  |        |
| 6790 | ENSG00000DNAH12    | 0.959596 | 0.357576 | 0.655219 | 0.632323 | 0.3848 |
| 6791 | ENSG00000PRRT3     | 0.979798 | 0.340404 | 0.675253 | 0.589899 |        |
| 6792 | ENSG00000PBLD      | 0.964646 | 0.370707 | 0.674074 | 0.582828 |        |
| 6793 | ENSG00000AP000721  | 0.812121 | 0.513131 | 0.662626 | 0.632323 |        |
| 6794 | ENSG00000ADO       | 0.957576 | 0.377778 | 0.652862 | 0.623232 |        |
| 6795 | ENSG00000RNPS1     | 0.773737 | 0.537374 | 0.655556 | 0.649495 |        |
| 6796 | ENSG00000HIST1H2BA | 1        | 0.329293 | 0.699327 | 0.50404  |        |
| 6797 | ENSG00000BTBD17    | 0.849391 | 0.499446 | 0.662237 | 0.619048 |        |
| 6798 | ENSG00000ADGB      | 0.763214 | 0.557082 | 0.660148 | 0.642706 |        |
| 6799 | ENSG00000AKR1D1    | 0.725253 | 0.59596  | 0.653872 | 0.655556 |        |
| 6800 | ENSG00000AOX1      | 0.863636 | 0.443434 | 0.653535 | 0.669697 |        |
| 6801 | ENSG00000UBA1      | 1        | 0.324242 | 0.654545 | 0.580808 |        |
| 6802 | ENSG00000PPP1R3G   | 0.763214 | 0.552854 | 0.651868 | 0.653277 |        |
| 6803 | ENSG00000DOK2      | 0.955556 | 0.377778 | 0.658923 | 0.626263 |        |
| 6804 | ENSG00000IGFN1     | 0.733333 | 0.567677 | 0.650505 | 0.668687 |        |
| 6805 | ENSG00000ABAT      | 0.909091 | 0.39798  | 0.653535 | 0.669697 |        |
| 6806 | ENSG00000MBD3L1    | 0.943434 | 0.392929 | 0.657407 | 0.625253 |        |
| 6807 | ENSG00000SERPINA1  | 0.989899 | 0.346465 | 0.700168 | 0.541414 |        |
| 6808 | ENSG00000GUSB      | 0.983838 | 0.334343 | 0.694108 | 0.570707 |        |
| 6809 | ENSG00000PKN3      | 0.924242 | 0.419192 | 0.671717 | 0.609091 |        |
| 6810 | ENSG00000EIF2B2    | 1        | 0.349495 | 0.657912 | 0.554545 |        |
| 6811 | ENSG00000MFN1      | 0.848485 | 0.494949 | 0.671717 | 0.612121 |        |
| 6812 | ENSG00000RAPH1     | 0.972727 | 0.364646 | 0.654882 | 0.59899  |        |
| 6813 | ENSG00000GBP2      | 0.979798 | 0.372727 | 0.672222 | 0.557576 |        |
| 6814 | ENSG00000FAM25A    | 0.893939 | 0.443434 | 0.659259 | 0.634343 |        |
| 6815 | ENSG00000CCDC150   | 0.937374 | 0.417172 | 0.667508 | 0.59798  |        |
| 6816 | ENSG00000CLDN1     | 0.955556 | 0.391919 | 0.670707 | 0.60303  |        |
| 6817 | ENSG00000SGPL1     | 0.89899  | 0.430303 | 0.664646 | 0.634343 |        |
| 6818 | ENSG00000FAM25G    | 0.893939 | 0.443434 | 0.659259 | 0.634343 |        |

|      |                    |          |          |          |          |        |
|------|--------------------|----------|----------|----------|----------|--------|
| 6819 | ENSG00000RHBDL1    | 0.962626 | 0.380808 | 0.658586 | 0.59899  |        |
| 6820 | ENSG00000CNTN6     | 0.87315  | 0.483087 | 0.676357 | 0.60148  |        |
| 6821 | ENSG00000LRRN2     | 0.806061 | 0.506061 | 0.654882 | 0.652525 |        |
| 6822 | ENSG00000FAM185A   | 0.951515 | 0.367677 | 0.658754 | 0.641414 |        |
| 6823 | ENSG00000TFF3      | 0.853535 | 0.475758 | 0.664646 | 0.633333 |        |
| 6824 | ENSG00000ACOX1     | 1        | 0.292929 | 0.680135 | 0.554545 | 0.384  |
| 6825 | ENSG00000TNFRSF11B | 0.780808 | 0.512121 | 0.646465 | 0.674747 | 0.3622 |
| 6826 | ENSG00000RTN2      | 0.806061 | 0.537374 | 0.671717 | 0.616162 |        |
| 6827 | ENSG00000FAM25C    | 0.893939 | 0.443434 | 0.659259 | 0.634343 |        |
| 6828 | ENSG00000TRMU      | 1        | 0.329293 | 0.651852 | 0.60202  |        |
| 6829 | ENSG00000POU2F1    | 0.977778 | 0.376768 | 0.66229  | 0.569697 |        |
| 6830 | ENSG00000TXNDC9    | 1        | 0.29899  | 0.688215 | 0.573737 |        |
| 6831 | ENSG00000VSI610    | 0.751938 | 0.579181 | 0.665559 | 0.635659 |        |
| 6832 | ENSG00000DDX28     | 0.973737 | 0.376768 | 0.660101 | 0.577778 |        |
| 6833 | ENSG00000CCDC97    | 1        | 0.3      | 0.642424 | 0.607071 |        |
| 6834 | ENSG00000DNAL1     | 0.939394 | 0.391919 | 0.670707 | 0.619192 |        |
| 6835 | ENSG00000SERPINB9  | 0.806061 | 0.519192 | 0.651178 | 0.648485 |        |
| 6836 | ENSG00000TPM4      | 1        | 0.30404  | 0.667845 | 0.555556 |        |
| 6837 | ENSG00000PHF13     | 0.843434 | 0.485859 | 0.663131 | 0.636364 |        |
| 6838 | ENSG00000GOLT1B    | 0.797909 | 0.513357 | 0.655633 | 0.653891 |        |
| 6839 | ENSG00000TEPP      | 0.741414 | 0.574747 | 0.651178 | 0.660606 |        |
| 6840 | ENSG00000ZNF639    | 0.99596  | 0.308081 | 0.691582 | 0.593939 |        |
| 6841 | ENSG00000ZNF577    | 0.950505 | 0.40101  | 0.667845 | 0.60404  |        |
| 6842 | ENSG00000ACOT2     | 0.951515 | 0.40404  | 0.6633   | 0.606061 |        |
| 6843 | ENSG00000NPDC1     | 0.961616 | 0.373737 | 0.643434 | 0.626263 |        |
| 6844 | ENSG00000SOGA1     | 0.882828 | 0.454545 | 0.666667 | 0.628283 |        |
| 6845 | ENSG00000HERC2     | 1        | 0.328283 | 0.644781 | 0.591919 |        |
| 6846 | ENSG00000ACAT2     | 1        | 0.318182 | 0.659091 | 0.592929 | 0.2781 |
| 6847 | ENSG00000NECTIN2   | 0.919192 | 0.410101 | 0.664646 | 0.637374 |        |
| 6848 | ENSG00000TRAF3IP1  | 0.972727 | 0.368687 | 0.658923 | 0.590909 |        |
| 6849 | ENSG00000TRIM55    | 0.945455 | 0.374747 | 0.657407 | 0.644444 |        |
| 6850 | ENSG00000EVA1C     | 1        | 0.3      | 0.656061 | 0.574747 |        |
| 6851 | ENSG00000PLBD2     | 0.79402  | 0.548173 | 0.671096 | 0.620155 |        |
| 6852 | ENSG00000SAT1      | 1        | 0.293939 | 0.629293 | 0.637374 |        |
| 6853 | ENSG00000ARHGAP25  | 0.918182 | 0.411111 | 0.657407 | 0.645455 |        |
| 6854 | ENSG00000CDH5      | 0.858586 | 0.458586 | 0.658586 | 0.655556 |        |
| 6855 | ENSG00000ATP5MF    | 0.848485 | 0.494949 | 0.671717 | 0.614141 |        |
| 6856 | ENSG00000ZNF594    | 0.963636 | 0.373737 | 0.710101 | 0.539394 |        |
| 6857 | ENSG00000PLXDC1    | 0.838384 | 0.508081 | 0.671886 | 0.613131 |        |
| 6858 | ENSG00000UBE2L6    | 0.906061 | 0.469697 | 0.674747 | 0.584848 |        |
| 6859 | ENSG00000MACF1     | 0.930303 | 0.409091 | 0.666498 | 0.619192 |        |
| 6860 | ENSG00000CLEC2L    | 0.766667 | 0.554545 | 0.658923 | 0.646465 |        |
| 6861 | ENSG00000NUP43     | 1        | 0.339394 | 0.660269 | 0.567677 |        |
| 6862 | ENSG00000NADK      | 0.780808 | 0.512121 | 0.646465 | 0.679798 |        |
| 6863 | ENSG00000AGAP5     | 0.886869 | 0.454545 | 0.66734  | 0.625253 |        |
| 6864 | ENSG00000ASAP2     | 0.917172 | 0.426263 | 0.668013 | 0.623232 |        |
| 6865 | ENSG00000NELL1     | 0.846723 | 0.487315 | 0.667019 | 0.631078 |        |
| 6866 | ENSG00000UTY       | 0.990909 | 0.316162 | 0.672896 | 0.614141 |        |
| 6867 | ENSG00000SS18L2    | 0.818182 | 0.490909 | 0.654545 | 0.663636 |        |
| 6868 | ENSG00000AGAP4     | 0.886869 | 0.454545 | 0.66734  | 0.625253 |        |
| 6869 | ENSG00000CAMKK1    | 0.848485 | 0.494949 | 0.671717 | 0.619192 |        |
| 6870 | ENSG00000AGAP6     | 0.886869 | 0.454545 | 0.66734  | 0.625253 |        |
| 6871 | ENSG00000AGAP9     | 0.886869 | 0.454545 | 0.66734  | 0.625253 |        |
| 6872 | ENSG00000IL23R     | 0.812121 | 0.513131 | 0.662626 | 0.640404 |        |
| 6873 | ENSG00000FGF18     | 0.773737 | 0.537374 | 0.655556 | 0.657576 |        |

|      |                   |          |          |          |          |
|------|-------------------|----------|----------|----------|----------|
| 6874 | ENSG00000RPL27A   | 0.973737 | 0.380808 | 0.667508 | 0.568687 |
| 6875 | ENSG00000DHRS9    | 0.973737 | 0.376768 | 0.663468 | 0.580808 |
| 6876 | ENSG00000VGLL1    | 0.8      | 0.531313 | 0.664646 | 0.636364 |
| 6877 | ENSG00000FOXP2    | 1        | 0.320296 | 0.642001 | 0.606765 |
| 6878 | ENSG00000MEIS2    | 1        | 0.316162 | 0.653535 | 0.594949 |
| 6879 | ENSG00000FABP4    | 0.951515 | 0.381818 | 0.656566 | 0.635354 |
| 6880 | ENSG00000SNX29    | 0.929293 | 0.420202 | 0.661953 | 0.618182 |
| 6881 | ENSG00000DRAXIN   | 0.843434 | 0.485859 | 0.663131 | 0.640404 |
| 6882 | ENSG00000SLC5A2   | 0.733333 | 0.567677 | 0.650505 | 0.675758 |
| 6883 | ENSG00000CTDSPL2  | 0.941414 | 0.388889 | 0.654714 | 0.641414 |
| 6884 | ENSG00000PIGU     | 0.929293 | 0.406061 | 0.658923 | 0.634343 |
| 6885 | ENSG00000GPR45    | 0.866667 | 0.49798  | 0.675589 | 0.60101  |
| 6886 | ENSG00000SLC44A2  | 0.780808 | 0.512121 | 0.646465 | 0.681818 |
| 6887 | ENSG00000METTL5   | 0.912121 | 0.451515 | 0.676768 | 0.59697  |
| 6888 | ENSG00000ACRBP    | 1        | 0.310101 | 0.654882 | 0.615152 |
| 6889 | ENSG00000SLC25A24 | 0.766667 | 0.564646 | 0.665657 | 0.639394 |
| 6890 | ENSG00000OR5F1    | 0.763214 | 0.557082 | 0.660148 | 0.65222  |
| 6891 | ENSG00000RBBP9    | 0.806061 | 0.537374 | 0.671717 | 0.624242 |
| 6892 | ENSG00000OCSTAMP  | 0.853535 | 0.465657 | 0.655556 | 0.662626 |
| 6893 | ENSG00000PNPT1    | 1        | 0.306061 | 0.637374 | 0.617172 |
| 6894 | ENSG00000COA7     | 0.966667 | 0.376768 | 0.680135 | 0.572727 |
| 6895 | ENSG00000GRIPAP1  | 0.921212 | 0.427273 | 0.671549 | 0.617172 |
| 6896 | ENSG00000LPIN2    | 1        | 0.346465 | 0.659764 | 0.578788 |
| 6897 | ENSG00000FASTK    | 0.878788 | 0.482828 | 0.672391 | 0.609091 |
| 6898 | ENSG00000FXD3     | 0.841438 | 0.508457 | 0.674947 | 0.613108 |
| 6899 | ENSG00000UGT2B4   | 0.924242 | 0.419192 | 0.668855 | 0.620202 |
| 6900 | ENSG00000EEA1     | 1        | 0.30202  | 0.675589 | 0.605051 |
| 6901 | ENSG00000ABC7     | 0.773737 | 0.537374 | 0.655556 | 0.661616 |
| 6902 | ENSG00000PIWIL1   | 0.99697  | 0.380808 | 0.694444 | 0.514141 |
| 6903 | ENSG00000SBDS     | 0.962626 | 0.362626 | 0.647811 | 0.635354 |
| 6904 | ENSG00000MEX3D    | 0.959596 | 0.390909 | 0.665152 | 0.59899  |
| 6905 | ENSG00000CCDC9B   | 1        | 0.29798  | 0.628788 | 0.59697  |
| 6906 | ENSG00000TRA2A    | 0.820296 | 0.520085 | 0.668957 | 0.625793 |
| 6907 | ENSG00000PNISR    | 0.862626 | 0.471717 | 0.661279 | 0.643434 |
| 6908 | ENSG00000ABI2     | 0.853535 | 0.486869 | 0.658586 | 0.641414 |
| 6909 | ENSG00000RCN1     | 0.915152 | 0.410101 | 0.662626 | 0.654545 |
| 6910 | ENSG00000MRM1     | 0.79704  | 0.55074  | 0.672833 | 0.618393 |
| 6911 | ENSG00000XKR6     | 0.919192 | 0.422222 | 0.663973 | 0.632323 |
| 6912 | ENSG00000C4BPB    | 0.870707 | 0.464646 | 0.652525 | 0.656566 |
| 6913 | ENSG00000CCDC189  | 0.975758 | 0.342424 | 0.64899  | 0.632323 |
| 6914 | ENSG00000TERT     | 0.787879 | 0.488889 | 0.638384 | 0.707071 |
| 6915 | ENSG00000ECT2L    | 0.959831 | 0.391121 | 0.673362 | 0.588795 |
| 6916 | ENSG00000IFT52    | 0.853535 | 0.475758 | 0.664646 | 0.644444 |
| 6917 | ENSG00000HEMGN    | 0.968687 | 0.319192 | 0.644108 | 0.678788 |
| 6918 | ENSG00000SERPINB7 | 0.780808 | 0.506061 | 0.638047 | 0.69697  |
| 6919 | ENSG00000SYPL1    | 0.79704  | 0.556025 | 0.676533 | 0.614165 |
| 6920 | ENSG00000NAV1     | 1        | 0.255556 | 0.621044 | 0.671717 |
| 6921 | ENSG00000PYGM     | 0.843434 | 0.485859 | 0.663131 | 0.645455 |
| 6922 | ENSG00000UPF1     | 1        | 0.349495 | 0.657239 | 0.59596  |
| 6923 | ENSG00000RB1CC1   | 0.918182 | 0.437374 | 0.675253 | 0.610101 |
| 6924 | ENSG00000SLFN14   | 0.949495 | 0.349495 | 0.658586 | 0.674747 |
| 6925 | ENSG00000GOSR2    | 0.943434 | 0.410101 | 0.668013 | 0.611111 |
| 6926 | ENSG00000TSC2     | 0.927273 | 0.416162 | 0.671717 | 0.618182 |
| 6927 | ENSG00000BIN2     | 0.909091 | 0.410101 | 0.659596 | 0.664646 |
| 6928 | ENSG00000U2SURP   | 1        | 0.318182 | 0.659091 | 0.568687 |

|      |                    |          |          |          |          |
|------|--------------------|----------|----------|----------|----------|
| 6929 | ENSG00000FAM172A   | 0.900634 | 0.455603 | 0.674947 | 0.608879 |
| 6930 | ENSG00000RAB35     | 0.937374 | 0.419192 | 0.663973 | 0.612121 |
| 6931 | ENSG00000VCX2      | 0.975758 | 0.368687 | 0.656566 | 0.59798  |
| 6932 | ENSG00000ADAM12    | 0.965657 | 0.359596 | 0.662458 | 0.619192 |
| 6933 | ENSG00000TRIM47    | 0.848485 | 0.494949 | 0.671717 | 0.624242 |
| 6934 | ENSG00000STX10     | 0.929293 | 0.39899  | 0.653367 | 0.652525 |
| 6935 | ENSG00000ELOVL5    | 0.963636 | 0.356566 | 0.658586 | 0.633333 |
| 6936 | ENSG00000ADGRG1    | 0.936575 | 0.429175 | 0.686927 | 0.572939 |
| 6937 | ENSG00000ARHGEF10L | 1        | 0.328283 | 0.645623 | 0.626263 |
| 6938 | ENSG00000HAAO      | 0.921212 | 0.373737 | 0.649158 | 0.694949 |
| 6939 | ENSG00000ZFP82     | 0.766667 | 0.564646 | 0.665657 | 0.641414 |
| 6940 | ENSG00000ZNF320    | 0.909091 | 0.441414 | 0.668519 | 0.624242 |
| 6941 | ENSG00000JDP2      | 0.854545 | 0.488889 | 0.663973 | 0.635354 |
| 6942 | ENSG00000ANKFY1    | 0.935354 | 0.430303 | 0.682828 | 0.579798 |
| 6943 | ENSG00000ZNF468    | 0.909091 | 0.441414 | 0.668519 | 0.624242 |
| 6944 | ENSG00000STAG2     | 0.852008 | 0.464059 | 0.656096 | 0.669133 |
| 6945 | ENSG00000MYO3B     | 0.8      | 0.531313 | 0.664646 | 0.643434 |
| 6946 | ENSG00000STXBP6    | 0.939394 | 0.378788 | 0.659933 | 0.652525 |
| 6947 | ENSG00000OR6M1     | 0.770613 | 0.524313 | 0.641649 | 0.691332 |
| 6948 | ENSG00000FKBP4     | 0.937374 | 0.420202 | 0.696296 | 0.573737 |
| 6949 | ENSG00000PLA2G10   | 0.927273 | 0.432323 | 0.67037  | 0.608081 |
| 6950 | ENSG00000GSDMA     | 0.952657 | 0.384541 | 0.659903 | 0.636715 |
| 6951 | ENSG00000REP15     | 1        | 0.306061 | 0.668687 | 0.558586 |
| 6952 | ENSG00000MOG       | 0.812121 | 0.513131 | 0.662626 | 0.647475 |
| 6953 | ENSG00000ZDHHC24   | 0.886869 | 0.466667 | 0.676768 | 0.615152 |
| 6954 | ENSG00000MRPS27    | 0.803383 | 0.529598 | 0.66649  | 0.639535 |
| 6955 | ENSG00000BTNL8     | 0.770613 | 0.529598 | 0.650106 | 0.679704 |
| 6956 | ENSG00000CWH43     | 1        | 0.343434 | 0.651852 | 0.590909 |
| 6957 | ENSG00000POLR3D    | 0.970707 | 0.362626 | 0.651852 | 0.619192 |
| 6958 | ENSG00000MN1       | 0.823232 | 0.520202 | 0.664646 | 0.633333 |
| 6959 | ENSG00000UXT       | 0.94926  | 0.399577 | 0.67019  | 0.615222 |
| 6960 | ENSG00000SUPT5H    | 0.969697 | 0.344444 | 0.641246 | 0.653535 |
| 6961 | ENSG00000EDN1      | 1        | 0.322222 | 0.651178 | 0.627273 |
| 6962 | ENSG00000PRODH2    | 0.848485 | 0.494949 | 0.671717 | 0.624242 |
| 6963 | ENSG00000RFTN2     | 0.831313 | 0.493939 | 0.658081 | 0.653535 |
| 6964 | ENSG00000TCL1A     | 0.933333 | 0.409091 | 0.661616 | 0.632323 |
| 6965 | ENSG00000NDRG2     | 1        | 0.310101 | 0.675758 | 0.556566 |
| 6966 | ENSG00000BCAR3     | 0.880399 | 0.468439 | 0.674419 | 0.62237  |
| 6967 | ENSG00000CFAP57    | 0.951515 | 0.424242 | 0.679125 | 0.578788 |
| 6968 | ENSG00000CDC73     | 0.927273 | 0.422222 | 0.66229  | 0.626263 |
| 6969 | ENSG00000TUBA4A    | 1        | 0.321212 | 0.658586 | 0.59798  |
| 6970 | ENSG00000PRSS54    | 0.725253 | 0.59798  | 0.661616 | 0.662626 |
| 6971 | ENSG00000BUD31     | 0.894949 | 0.465657 | 0.68165  | 0.605051 |
| 6972 | ENSG00000ZFP36L2   | 0.773737 | 0.537374 | 0.655556 | 0.668687 |
| 6973 | ENSG00000SHANK1    | 0.935354 | 0.406061 | 0.67138  | 0.621212 |
| 6974 | ENSG00000ZFHX2     | 1        | 0.313131 | 0.63468  | 0.624242 |
| 6975 | ENSG00000SYNM      | 0.951515 | 0.361616 | 0.6633   | 0.658586 |
| 6976 | ENSG00000CNPY1     | 0.90202  | 0.439394 | 0.67862  | 0.623232 |
| 6977 | ENSG00000ATAD2B    | 0.921212 | 0.412121 | 0.662121 | 0.647475 |
| 6978 | ENSG00000FBX07     | 0.971717 | 0.334343 | 0.698148 | 0.60202  |
| 6979 | ENSG00000GEMIN6    | 0.921212 | 0.444444 | 0.675421 | 0.60404  |
| 6980 | ENSG00000POLG2     | 0.974747 | 0.374747 | 0.665152 | 0.586869 |
| 6981 | ENSG00000ZNF771    | 0.783838 | 0.578788 | 0.668687 | 0.625253 |
| 6982 | ENSG00000FAM171A1  | 0.963636 | 0.374747 | 0.655051 | 0.620202 |
| 6983 | ENSG00000MRPS18A   | 0.951515 | 0.391919 | 0.66431  | 0.630303 |

|      |                    |          |          |          |          |        |        |
|------|--------------------|----------|----------|----------|----------|--------|--------|
| 6984 | ENSG00000ZNF677    | 0.960606 | 0.370707 | 0.653199 | 0.633333 |        |        |
| 6985 | ENSG00000COG7      | 0.773737 | 0.537374 | 0.655556 | 0.669697 |        |        |
| 6986 | ENSG00000TMC3      | 0.79704  | 0.556025 | 0.676533 | 0.620507 |        |        |
| 6987 | ENSG00000ELP1      | 0.936575 | 0.409091 | 0.662791 | 0.628964 |        |        |
| 6988 | ENSG00000RNASE7    | 0.984848 | 0.329293 | 0.678114 | 0.613131 |        |        |
| 6989 | ENSG00000OR6B1     | 0.919662 | 0.433404 | 0.679704 | 0.610994 |        |        |
| 6990 | ENSG00000JAZF1     | 0.940803 | 0.374207 | 0.656272 | 0.664905 |        |        |
| 6991 | ENSG00000COR01B    | 0.886869 | 0.466667 | 0.676768 | 0.619192 |        |        |
| 6992 | ENSG00000KLHL26    | 0.936575 | 0.420719 | 0.67019  | 0.610994 |        |        |
| 6993 | ENSG00000RIOK3     | 1        | 0.363636 | 0.670034 | 0.555556 | 0.2631 | 0.3293 |
| 6994 | ENSG00000ARSG      | 0.893939 | 0.394949 | 0.644444 | 0.716162 |        |        |
| 6995 | ENSG00000TTYH1     | 0.929293 | 0.421212 | 0.676936 | 0.610101 |        |        |
| 6996 | ENSG00000ZNF260    | 0.885859 | 0.461616 | 0.673737 | 0.626263 |        |        |
| 6997 | ENSG00000HOXB7     | 0.890909 | 0.450505 | 0.672727 | 0.629293 |        |        |
| 6998 | ENSG00000POLR3GL   | 0.846465 | 0.5      | 0.669697 | 0.632323 |        |        |
| 6999 | ENSG00000FGB       | 0.935354 | 0.412121 | 0.677441 | 0.610101 |        |        |
| 7000 | ENSG00000TBC1D25   | 0.863636 | 0.486869 | 0.677104 | 0.623232 |        |        |
| 7001 | ENSG00000MOGS      | 0.828283 | 0.527273 | 0.675758 | 0.620202 |        |        |
| 7002 | ENSG00000WDR35     | 0.881607 | 0.475687 | 0.678647 | 0.616279 |        |        |
| 7003 | ENSG00000MMACHC    | 0.985859 | 0.329293 | 0.704377 | 0.582828 |        |        |
| 7004 | ENSG00000MY01B     | 0.927273 | 0.416162 | 0.671717 | 0.625253 |        |        |
| 7005 | ENSG00000NENF      | 0.957576 | 0.388889 | 0.671212 | 0.617172 |        |        |
| 7006 | ENSG00000ASGR1     | 0.919192 | 0.410101 | 0.664646 | 0.653535 |        |        |
| 7007 | ENSG00000RPTN      | 0.930435 | 0.373913 | 0.646377 | 0.689855 |        |        |
| 7008 | ENSG00000AQP6      | 0.759596 | 0.593939 | 0.676768 | 0.626263 |        |        |
| 7009 | ENSG00000CD79A     | 0.816068 | 0.5074   | 0.657505 | 0.661734 |        |        |
| 7010 | ENSG00000DDX10     | 0.881818 | 0.50202  | 0.685185 | 0.584848 |        |        |
| 7011 | ENSG00000RBM23     | 0.921212 | 0.441414 | 0.673064 | 0.613131 |        |        |
| 7012 | ENSG00000HMGCR     | 1        | 0.334343 | 0.656902 | 0.6      |        |        |
| 7013 | ENSG00000CRYBG1    | 0.974747 | 0.348485 | 0.650673 | 0.636364 |        |        |
| 7014 | ENSG00000COQ3      | 0.927273 | 0.419192 | 0.671549 | 0.624242 |        |        |
| 7015 | ENSG00000SHANK2    | 0.79704  | 0.556025 | 0.676533 | 0.623679 |        |        |
| 7016 | ENSG00000SOGA3     | 1        | 0.310101 | 0.643771 | 0.573737 |        |        |
| 7017 | ENSG00000KANSL3    | 0.856566 | 0.469697 | 0.658418 | 0.664646 |        |        |
| 7018 | ENSG00000C12orf73  | 0.853535 | 0.475758 | 0.664646 | 0.651515 |        |        |
| 7019 | ENSG00000PTK6      | 1        | 0.316162 | 0.684175 | 0.59596  |        |        |
| 7020 | ENSG00000FAM126B   | 1        | 0.30404  | 0.658586 | 0.59697  |        |        |
| 7021 | ENSG00000ZNF646    | 0.814141 | 0.521212 | 0.665657 | 0.643434 |        |        |
| 7022 | ENSG00000RRM2      | 0.733333 | 0.567677 | 0.650505 | 0.688889 |        |        |
| 7023 | ENSG00000SOX7      | 0.974747 | 0.343434 | 0.66532  | 0.626263 |        |        |
| 7024 | ENSG00000ZNF717    | 0.924242 | 0.419192 | 0.668855 | 0.630303 |        |        |
| 7025 | ENSG00000SERPINI1  | 0.894949 | 0.440404 | 0.667677 | 0.646465 |        |        |
| 7026 | ENSG00000PDE4B     | 0.8      | 0.558586 | 0.673569 | 0.622222 |        |        |
| 7027 | ENSG00000PPP1R1A   | 0.913131 | 0.419192 | 0.642424 | 0.680808 |        |        |
| 7028 | ENSG00000OR6P1     | 0.866667 | 0.49798  | 0.675589 | 0.613131 |        |        |
| 7029 | ENSG00000METTL9    | 0.909091 | 0.441414 | 0.668519 | 0.632323 |        |        |
| 7030 | ENSG00000AIRE      | 0.853535 | 0.475758 | 0.664646 | 0.653535 |        |        |
| 7031 | ENSG00000NSUN6     | 0.826263 | 0.535354 | 0.680808 | 0.612121 |        |        |
| 7032 | ENSG00000SLC1A5    | 0.924242 | 0.419192 | 0.668855 | 0.633333 |        |        |
| 7033 | ENSG00000NCOA1     | 0.905051 | 0.420202 | 0.655724 | 0.671717 |        |        |
| 7034 | ENSG00000AC105001. | 0.974747 | 0.343434 | 0.66532  | 0.626263 |        |        |
| 7035 | ENSG00000GLE1      | 1        | 0.341414 | 0.657912 | 0.586869 |        |        |
| 7036 | ENSG00000PFDN4     | 0.89697  | 0.451515 | 0.667508 | 0.635354 |        |        |
| 7037 | ENSG00000PLAU      | 0.87315  | 0.483087 | 0.676357 | 0.621564 |        |        |
| 7038 | ENSG00000RRAS      | 1        | 0.318182 | 0.646465 | 0.621212 |        |        |

|      |                    |          |          |          |          |        |
|------|--------------------|----------|----------|----------|----------|--------|
| 7039 | ENSG00000MMP14     | 0.927273 | 0.413131 | 0.667172 | 0.633333 |        |
| 7040 | ENSG00000FAM43A    | 0.725253 | 0.59798  | 0.661616 | 0.668687 |        |
| 7041 | ENSG00000PTX4      | 0.761616 | 0.531313 | 0.646465 | 0.69596  |        |
| 7042 | ENSG00000IFITM1    | 0.90404  | 0.394949 | 0.649495 | 0.70303  |        |
| 7043 | ENSG00000SPATA7    | 0.917874 | 0.407729 | 0.662802 | 0.663768 |        |
| 7044 | ENSG00000AHDC1     | 1        | 0.330303 | 0.67138  | 0.581818 |        |
| 7045 | ENSG00000PSMB4     | 0.809725 | 0.542283 | 0.673009 | 0.628964 |        |
| 7046 | ENSG00000ZDHHC17   | 0.75969  | 0.54928  | 0.654485 | 0.679956 |        |
| 7047 | ENSG00000CLUL1     | 0.776812 | 0.544928 | 0.66087  | 0.663768 |        |
| 7048 | ENSG00000CDC42BPG  | 0.978788 | 0.370707 | 0.670875 | 0.587879 |        |
| 7049 | ENSG00000SPATA13   | 0.977778 | 0.372727 | 0.662121 | 0.59697  |        |
| 7050 | ENSG00000PRSS40A   | 0.880399 | 0.468439 | 0.674419 | 0.631229 |        |
| 7051 | ENSG00000UPK2      | 0.911111 | 0.390909 | 0.647811 | 0.708081 |        |
| 7052 | ENSG00000STAT6     | 0.841438 | 0.506342 | 0.671424 | 0.633192 |        |
| 7053 | ENSG00000OR4K1     | 0.8      | 0.555556 | 0.665993 | 0.637374 |        |
| 7054 | ENSG00000PASD1     | 0.929293 | 0.40101  | 0.66229  | 0.651515 |        |
| 7055 | ENSG00000CT45A5    | 1        | 0.288889 | 0.673064 | 0.558586 |        |
| 7056 | ENSG00000FAM43B    | 0.717172 | 0.623232 | 0.669865 | 0.654545 |        |
| 7057 | ENSG00000B2M       | 0.921212 | 0.437374 | 0.676936 | 0.614141 |        |
| 7058 | ENSG00000RNF157    | 1        | 0.30101  | 0.642424 | 0.627273 |        |
| 7059 | ENSG00000TREH      | 0.919192 | 0.410101 | 0.664646 | 0.659596 |        |
| 7060 | ENSG00000FAR2      | 0.933333 | 0.438384 | 0.677441 | 0.59596  |        |
| 7061 | ENSG00000LRMDA     | 0.959596 | 0.393939 | 0.661953 | 0.616162 |        |
| 7062 | ENSG00000REG4      | 0.927273 | 0.40404  | 0.661953 | 0.653535 |        |
| 7063 | ENSG00000C2orf66   | 0.777778 | 0.550505 | 0.6633   | 0.656566 |        |
| 7064 | ENSG00000ATP6V1E1  | 1        | 0.316162 | 0.640909 | 0.628283 |        |
| 7065 | ENSG00000GGT5      | 0.980808 | 0.326263 | 0.696128 | 0.609091 |        |
| 7066 | ENSG00000FAT3      | 0.890909 | 0.474747 | 0.677441 | 0.613131 | 0.2534 |
| 7067 | ENSG00000KIF2B     | 1        | 0.321212 | 0.693939 | 0.552525 |        |
| 7068 | ENSG00000MTMR3     | 0.949495 | 0.412121 | 0.674747 | 0.609091 |        |
| 7069 | ENSG00000ZNF891    | 0.931313 | 0.413131 | 0.661616 | 0.636364 |        |
| 7070 | ENSG00000ABHD11    | 1        | 0.317172 | 0.6367   | 0.649495 |        |
| 7071 | ENSG00000NUDT21    | 0.843434 | 0.516162 | 0.679798 | 0.617172 |        |
| 7072 | ENSG00000TRIM50    | 0.848485 | 0.494949 | 0.671717 | 0.637374 | 0.395  |
| 7073 | ENSG00000AC011195. | 0.961616 | 0.40404  | 0.670707 | 0.588889 |        |
| 7074 | ENSG00000CTSC      | 0.912121 | 0.437374 | 0.67037  | 0.637374 |        |
| 7075 | ENSG00000C8orf86   | 0.878788 | 0.461616 | 0.664815 | 0.652525 |        |
| 7076 | ENSG00000ARL6IP1   | 0.870707 | 0.482828 | 0.673737 | 0.630303 |        |
| 7077 | ENSG00000CAVIN3    | 0.806061 | 0.537374 | 0.671717 | 0.639394 |        |
| 7078 | ENSG00000NTMT1     | 0.848485 | 0.494949 | 0.671717 | 0.638384 |        |
| 7079 | ENSG00000PTEN      | 1        | 0.314141 | 0.647811 | 0.591919 |        |
| 7080 | ENSG00000TUB       | 0.981818 | 0.344444 | 0.687205 | 0.59798  |        |
| 7081 | ENSG00000PLCB3     | 0.942424 | 0.388889 | 0.66532  | 0.648485 |        |
| 7082 | ENSG00000FAM131A   | 0.859596 | 0.489899 | 0.663636 | 0.644444 | 0.2466 |
| 7083 | ENSG00000RPA1      | 0.973737 | 0.376768 | 0.672391 | 0.590909 |        |
| 7084 | ENSG00000VAV2      | 0.843434 | 0.516162 | 0.679798 | 0.619192 |        |
| 7085 | ENSG00000KCTD19    | 0.927273 | 0.416162 | 0.671717 | 0.631313 |        |
| 7086 | ENSG00000NLN       | 0.882828 | 0.482828 | 0.682828 | 0.612121 |        |
| 7087 | ENSG00000CT45A1    | 1        | 0.288889 | 0.673064 | 0.558586 |        |
| 7088 | ENSG00000AC138811. | 0.870707 | 0.482828 | 0.673737 | 0.630303 |        |
| 7089 | ENSG00000DUOXA1    | 0.963002 | 0.403805 | 0.670366 | 0.589852 |        |
| 7090 | ENSG00000CT45A3    | 1        | 0.288889 | 0.673064 | 0.558586 |        |
| 7091 | ENSG00000CT45A10   | 1        | 0.288889 | 0.673064 | 0.558586 |        |
| 7092 | ENSG00000IDUA      | 0.969697 | 0.385859 | 0.66229  | 0.60404  |        |
| 7093 | ENSG00000STC2      | 0.830867 | 0.524313 | 0.676357 | 0.62685  |        |



|      |                   |          |          |          |          |       |
|------|-------------------|----------|----------|----------|----------|-------|
| 7094 | ENSG00000CT45A9   | 1        | 0.288889 | 0.673064 | 0.558586 |       |
| 7095 | ENSG00000KCNN2    | 0.939394 | 0.415152 | 0.664478 | 0.629293 |       |
| 7096 | ENSG00000CT45A2   | 1        | 0.288889 | 0.673064 | 0.558586 |       |
| 7097 | ENSG00000CHML     | 0.930303 | 0.407071 | 0.656902 | 0.653535 |       |
| 7098 | ENSG00000SYVN1    | 1        | 0.309091 | 0.637037 | 0.621212 | 0.226 |
| 7099 | ENSG00000PLRG1    | 0.958774 | 0.404863 | 0.676885 | 0.595137 |       |
| 7100 | ENSG00000CD55     | 1        | 0.328283 | 0.673401 | 0.536364 |       |
| 7101 | ENSG00000CT45A7   | 1        | 0.288889 | 0.673064 | 0.558586 |       |
| 7102 | ENSG00000FAU      | 0.918182 | 0.449495 | 0.681145 | 0.608081 |       |
| 7103 | ENSG00000CAP1     | 0.828283 | 0.553535 | 0.68468  | 0.60404  |       |
| 7104 | ENSG00000SAMD4A   | 0.991919 | 0.311111 | 0.690236 | 0.622222 |       |
| 7105 | ENSG00000GREM2    | 0.843434 | 0.516162 | 0.679798 | 0.620202 |       |
| 7106 | ENSG00000EID2     | 0.906061 | 0.443434 | 0.669192 | 0.640404 |       |
| 7107 | ENSG00000ATP6V1D  | 0.939394 | 0.407071 | 0.672896 | 0.628283 |       |
| 7108 | ENSG00000GAREM1   | 0.986869 | 0.340404 | 0.673401 | 0.615152 |       |
| 7109 | ENSG00000CT45A8   | 1        | 0.288889 | 0.673064 | 0.558586 |       |
| 7110 | ENSG00000HSD17B2  | 0.918182 | 0.427273 | 0.672727 | 0.640404 |       |
| 7111 | ENSG00000FMC1     | 0.94926  | 0.408034 | 0.672304 | 0.61945  |       |
| 7112 | ENSG00000ENTPD4   | 0.836152 | 0.531712 | 0.683932 | 0.612051 |       |
| 7113 | ENSG00000DTX3L    | 0.960888 | 0.38055  | 0.664905 | 0.623679 |       |
| 7114 | ENSG00000CT45A6   | 1        | 0.288889 | 0.673064 | 0.558586 |       |
| 7115 | ENSG00000C17orf58 | 0.960606 | 0.388889 | 0.664815 | 0.617172 |       |
| 7116 | ENSG00000PTTG2    | 0.99899  | 0.334343 | 0.711279 | 0.564646 |       |
| 7117 | ENSG00000TRAPPC4  | 0.990909 | 0.364646 | 0.713468 | 0.534343 |       |
| 7118 | ENSG00000FTSJ1    | 0.850951 | 0.514799 | 0.675828 | 0.621564 |       |
| 7119 | ENSG00000KNCN     | 0.800664 | 0.521595 | 0.66113  | 0.668882 |       |
| 7120 | ENSG00000KCNE4    | 0.812121 | 0.513131 | 0.662626 | 0.665657 |       |
| 7121 | ENSG00000PTCHD1   | 0.858586 | 0.491919 | 0.667508 | 0.641414 |       |
| 7122 | ENSG00000C1orf131 | 0.959596 | 0.361616 | 0.696128 | 0.614141 |       |
| 7123 | ENSG00000FAIM2    | 0.945455 | 0.389899 | 0.664983 | 0.649495 |       |
| 7124 | ENSG00000LCOR     | 0.90303  | 0.439394 | 0.671212 | 0.644444 |       |
| 7125 | ENSG00000SFXN2    | 0.939394 | 0.440404 | 0.680471 | 0.589899 |       |
| 7126 | ENSG00000AIP      | 1        | 0.339394 | 0.660269 | 0.60303  |       |
| 7127 | ENSG00000ARHGFE38 | 0.79704  | 0.556025 | 0.676533 | 0.634249 |       |
| 7128 | ENSG00000DHDDS    | 1        | 0.29697  | 0.634343 | 0.665657 |       |
| 7129 | ENSG00000FAM118B  | 0.99697  | 0.4      | 0.698653 | 0.512121 |       |
| 7130 | ENSG00000NCOA4    | 0.903654 | 0.482835 | 0.691214 | 0.581395 |       |
| 7131 | ENSG00000SPCS2    | 0.943434 | 0.413131 | 0.675589 | 0.616162 |       |
| 7132 | ENSG00000KLHDC10  | 0.812121 | 0.513131 | 0.662626 | 0.667677 |       |
| 7133 | ENSG00000ANO1     | 0.915152 | 0.416162 | 0.665657 | 0.664646 |       |
| 7134 | ENSG00000STT3A    | 0.886869 | 0.466667 | 0.676768 | 0.633333 |       |
| 7135 | ENSG00000PTGES3   | 0.940803 | 0.368922 | 0.69697  | 0.636364 |       |
| 7136 | ENSG00000GRSF1    | 1        | 0.309091 | 0.639394 | 0.641414 |       |
| 7137 | ENSG00000FAM170B  | 1        | 0.334343 | 0.689562 | 0.524242 |       |
| 7138 | ENSG00000SSFA2    | 0.8      | 0.553535 | 0.670539 | 0.641414 |       |
| 7139 | ENSG00000TAGLN3   | 0.806061 | 0.537374 | 0.671717 | 0.645455 |       |
| 7140 | ENSG00000FTH1     | 0.959596 | 0.415152 | 0.677273 | 0.583838 |       |
| 7141 | ENSG00000CALB1    | 1        | 0.361616 | 0.665993 | 0.574747 |       |
| 7142 | ENSG00000ATRIP    | 0.936364 | 0.385859 | 0.656902 | 0.672727 |       |
| 7143 | ENSG00000TTC30B   | 0.939394 | 0.356566 | 0.647138 | 0.710101 |       |
| 7144 | ENSG00000WDR92    | 0.970707 | 0.334343 | 0.680135 | 0.636364 |       |
| 7145 | ENSG00000ITLN2    | 0.919192 | 0.410101 | 0.664646 | 0.665657 |       |
| 7146 | ENSG00000TTC30A   | 0.939394 | 0.356566 | 0.647138 | 0.710101 |       |
| 7147 | ENSG00000AKR1B1   | 0.981818 | 0.348485 | 0.66431  | 0.625253 |       |
| 7148 | ENSG00000NCAPH2   | 0.8      | 0.558586 | 0.673569 | 0.635354 |       |

|      |                    |          |          |          |          |        |       |
|------|--------------------|----------|----------|----------|----------|--------|-------|
| 7149 | ENSG00000GALNT17   | 0.806061 | 0.531313 | 0.6633   | 0.658586 |        |       |
| 7150 | ENSG00000CLEC4A    | 0.735366 | 0.596341 | 0.665854 | 0.667073 |        |       |
| 7151 | ENSG00000IYD       | 0.759596 | 0.593939 | 0.676768 | 0.639394 |        |       |
| 7152 | ENSG00000PIGQ      | 1        | 0.325253 | 0.650842 | 0.650505 |        |       |
| 7153 | ENSG00000SOCS3     | 0.856237 | 0.508457 | 0.670366 | 0.631078 |        |       |
| 7154 | ENSG00000CCR10     | 0.833333 | 0.532323 | 0.68165  | 0.618182 |        |       |
| 7155 | ENSG00000HSPE1-MOB | 1        | 0.29596  | 0.625589 | 0.613131 |        |       |
| 7156 | ENSG00000ZNF251    | 0.966667 | 0.387879 | 0.662626 | 0.608081 |        |       |
| 7157 | ENSG00000VAT1L     | 0.953623 | 0.37971  | 0.660548 | 0.658937 |        |       |
| 7158 | ENSG00000ZDHC1     | 0.939394 | 0.40404  | 0.658586 | 0.650505 |        |       |
| 7159 | ENSG00000SGTB      | 0.947146 | 0.364693 | 0.656977 | 0.686047 |        |       |
| 7160 | ENSG00000EIF4E     | 1        | 0.349495 | 0.658923 | 0.562626 |        |       |
| 7161 | ENSG00000SSR4      | 0.853535 | 0.475758 | 0.664646 | 0.665657 |        |       |
| 7162 | ENSG00000KLHL40    | 0.969697 | 0.358586 | 0.682997 | 0.610101 |        |       |
| 7163 | ENSG00000ERI1      | 1        | 0.327273 | 0.643434 | 0.640404 |        |       |
| 7164 | ENSG00000EPB41L2   | 0.919192 | 0.410101 | 0.664646 | 0.670707 |        |       |
| 7165 | ENSG00000RPLP0     | 0.936364 | 0.407071 | 0.671044 | 0.638384 |        |       |
| 7166 | ENSG00000TUSC3     | 0.966667 | 0.376768 | 0.656902 | 0.626263 |        |       |
| 7167 | ENSG00000SPDYC     | 0.8      | 0.563636 | 0.681818 | 0.623232 |        |       |
| 7168 | ENSG00000CLCN7     | 0.939394 | 0.425253 | 0.673906 | 0.615152 |        |       |
| 7169 | ENSG00000HYAL2     | 0.766667 | 0.564646 | 0.665657 | 0.665657 |        |       |
| 7170 | ENSG00000AL592183. | 0.773737 | 0.537374 | 0.655556 | 0.684848 |        |       |
| 7171 | ENSG00000OSBP      | 1        | 0.346465 | 0.657071 | 0.60202  |        |       |
| 7172 | ENSG00000THOC6     | 0.935354 | 0.40303  | 0.657912 | 0.657576 |        |       |
| 7173 | ENSG00000CRYM      | 0.947475 | 0.40202  | 0.674074 | 0.629293 |        |       |
| 7174 | ENSG00000CCS       | 1        | 0.290909 | 0.675758 | 0.582828 |        |       |
| 7175 | ENSG00000RWDD2B    | 0.843434 | 0.508081 | 0.671044 | 0.641414 |        |       |
| 7176 | ENSG00000TBKBP1    | 0.981818 | 0.361616 | 0.672727 | 0.60202  |        |       |
| 7177 | ENSG00000ELMOD2    | 0.79704  | 0.55074  | 0.668076 | 0.649049 |        |       |
| 7178 | ENSG00000GLIPR1    | 0.8      | 0.531313 | 0.664646 | 0.664646 |        | 0.423 |
| 7179 | ENSG00000PTGES3L-A | 0.957576 | 0.386869 | 0.665488 | 0.640404 |        |       |
| 7180 | ENSG00000TSPEAR    | 0.977778 | 0.306061 | 0.659596 | 0.682828 |        |       |
| 7181 | ENSG00000TTC12     | 0.993939 | 0.330303 | 0.693603 | 0.60404  | 0.3386 |       |
| 7182 | ENSG00000GABPB2    | 0.9      | 0.433333 | 0.657576 | 0.674747 |        | 0.377 |
| 7183 | ENSG00000VLDLR     | 0.848485 | 0.494949 | 0.671717 | 0.646465 |        |       |
| 7184 | ENSG00000METRN     | 0.929293 | 0.419192 | 0.661448 | 0.648485 |        |       |
| 7185 | ENSG00000STK32A    | 0.843434 | 0.516162 | 0.679798 | 0.626263 |        |       |
| 7186 | ENSG00000SPAG17    | 0.931313 | 0.39596  | 0.660438 | 0.667677 |        |       |
| 7187 | ENSG00000MFSD3     | 0.812121 | 0.508081 | 0.658754 | 0.678788 |        |       |
| 7188 | ENSG00000PRR26     | 0.90101  | 0.434343 | 0.662795 | 0.665657 |        |       |
| 7189 | ENSG00000ATXN3L    | 0.947475 | 0.425253 | 0.681987 | 0.60101  |        |       |
| 7190 | ENSG00000PDPK1     | 0.941414 | 0.4      | 0.660269 | 0.653535 |        |       |
| 7191 | ENSG00000RSPRY1    | 0.905051 | 0.438384 | 0.655724 | 0.668687 |        |       |
| 7192 | ENSG00000RPL7      | 0.838384 | 0.527273 | 0.672391 | 0.632323 |        |       |
| 7193 | ENSG00000GIMAP2    | 0.806061 | 0.537374 | 0.671717 | 0.651515 |        |       |
| 7194 | ENSG00000LMCD1     | 0.917548 | 0.442918 | 0.67759  | 0.627907 |        |       |
| 7195 | ENSG00000HTR3E     | 0.717172 | 0.623232 | 0.669865 | 0.667677 |        |       |
| 7196 | ENSG00000CDV3      | 0.963636 | 0.371717 | 0.673569 | 0.622222 |        |       |
| 7197 | ENSG00000BNIP1     | 0.877378 | 0.483087 | 0.67618  | 0.633192 |        |       |
| 7198 | ENSG00000CACNG5    | 0.869919 | 0.498258 | 0.684088 | 0.616725 |        |       |
| 7199 | ENSG00000BNIP3L    | 1        | 0.329293 | 0.653872 | 0.630303 |        |       |
| 7200 | ENSG00000MAP4      | 0.890909 | 0.452525 | 0.671717 | 0.652525 |        |       |
| 7201 | ENSG00000METTL25   | 0.966667 | 0.411111 | 0.692929 | 0.553535 |        |       |
| 7202 | ENSG00000ZBP1      | 0.790698 | 0.55074  | 0.669838 | 0.654334 |        |       |
| 7203 | ENSG00000ZNF662    | 0.978788 | 0.368687 | 0.668013 | 0.607071 |        |       |

|      |           |           |          |          |          |          |        |        |
|------|-----------|-----------|----------|----------|----------|----------|--------|--------|
| 7204 | ENSG00000 | TPRN      | 0.948485 | 0.410101 | 0.671044 | 0.626263 |        |        |
| 7205 | ENSG00000 | FIBIN     | 0.836152 | 0.531712 | 0.683932 | 0.618393 |        |        |
| 7206 | ENSG00000 | FCGR2B    | 0.915152 | 0.410101 | 0.662626 | 0.683838 |        |        |
| 7207 | ENSG00000 | MAP3K20   | 0.882828 | 0.482828 | 0.682828 | 0.622222 |        |        |
| 7208 | ENSG00000 | NAALAD2   | 0.979798 | 0.356566 | 0.684007 | 0.60202  |        |        |
| 7209 | ENSG00000 | CUL2      | 0.985859 | 0.340404 | 0.695286 | 0.60101  |        |        |
| 7210 | ENSG00000 | AP1AR     | 0.89697  | 0.450505 | 0.669697 | 0.649495 |        |        |
| 7211 | ENSG00000 | EHP1L1    | 0.794949 | 0.553535 | 0.672391 | 0.646465 |        |        |
| 7212 | ENSG00000 | HTATIP2   | 0.973737 | 0.384848 | 0.664141 | 0.606061 |        |        |
| 7213 | ENSG00000 | SLU7      | 0.939394 | 0.394949 | 0.666498 | 0.654545 |        |        |
| 7214 | ENSG00000 | NUDC      | 0.940404 | 0.390909 | 0.663636 | 0.663636 |        |        |
| 7215 | ENSG00000 | PCBD2     | 0.962626 | 0.411111 | 0.674074 | 0.587879 |        |        |
| 7216 | ENSG00000 | SLC41A2   | 0.882828 | 0.482828 | 0.682828 | 0.622222 |        |        |
| 7217 | ENSG00000 | SH3BP5L   | 0.930303 | 0.431313 | 0.680808 | 0.613131 |        |        |
| 7218 | ENSG00000 | ZNF878    | 0.806061 | 0.537374 | 0.671717 | 0.650505 |        |        |
| 7219 | ENSG00000 | LRRFIP1   | 0.836152 | 0.531712 | 0.683932 | 0.620507 |        |        |
| 7220 | ENSG00000 | TMEM41A   | 0.915152 | 0.416162 | 0.665657 | 0.671717 |        |        |
| 7221 | ENSG00000 | GRID2     | 0.929293 | 0.430303 | 0.679798 | 0.618182 |        |        |
| 7222 | ENSG00000 | ENDOD1    | 0.963636 | 0.412121 | 0.675253 | 0.582828 |        |        |
| 7223 | ENSG00000 | C4B       | 0.979798 | 0.340404 | 0.675253 | 0.628283 |        |        |
| 7224 | ENSG00000 | NSFL1C    | 0.950505 | 0.457576 | 0.706734 | 0.539394 |        |        |
| 7225 | ENSG00000 | RCOR1     | 1        | 0.354545 | 0.666498 | 0.59798  | 0.2367 |        |
| 7226 | ENSG00000 | AARSD1    | 0.957576 | 0.386869 | 0.665488 | 0.640404 |        |        |
| 7227 | ENSG00000 | PPIAL4G   | 0.874747 | 0.474747 | 0.664983 | 0.658586 |        |        |
| 7228 | ENSG00000 | LAP3      | 0.886869 | 0.466667 | 0.676768 | 0.643434 |        |        |
| 7229 | ENSG00000 | PPIAL4D   | 0.874747 | 0.474747 | 0.664983 | 0.658586 |        |        |
| 7230 | ENSG00000 | PPIAL4A   | 0.874747 | 0.474747 | 0.664983 | 0.658586 |        |        |
| 7231 | ENSG00000 | SLC22A16  | 0.877378 | 0.493658 | 0.685518 | 0.616279 |        |        |
| 7232 | ENSG00000 | PPIAL4C   | 0.874747 | 0.474747 | 0.664983 | 0.658586 |        |        |
| 7233 | ENSG00000 | AC243756  | 0.874747 | 0.474747 | 0.664983 | 0.658586 |        |        |
| 7234 | ENSG00000 | STK17B    | 0.850505 | 0.523232 | 0.683502 | 0.618182 |        |        |
| 7235 | ENSG00000 | PPIAL4E   | 0.874747 | 0.474747 | 0.664983 | 0.658586 |        |        |
| 7236 | ENSG00000 | TP53BP2   | 0.935354 | 0.405051 | 0.663131 | 0.655556 | 0.215  |        |
| 7237 | ENSG00000 | PPIAL4F   | 0.874747 | 0.474747 | 0.664983 | 0.658586 |        |        |
| 7238 | ENSG00000 | KYAT1     | 1        | 0.306061 | 0.63367  | 0.628283 | 0.3224 | 0.2967 |
| 7239 | ENSG00000 | POLR2B    | 0.938384 | 0.388889 | 0.656902 | 0.677778 |        |        |
| 7240 | ENSG00000 | ZHX2      | 0.969697 | 0.372727 | 0.681313 | 0.60404  |        |        |
| 7241 | ENSG00000 | C4orf47   | 0.725253 | 0.59798  | 0.661616 | 0.686869 |        |        |
| 7242 | ENSG00000 | KLK13     | 0.803383 | 0.519027 | 0.64993  | 0.692389 |        |        |
| 7243 | ENSG00000 | SLC28A1   | 0.755814 | 0.586681 | 0.671247 | 0.661734 |        |        |
| 7244 | ENSG00000 | PUS7L     | 0.99596  | 0.322222 | 0.701684 | 0.608081 |        |        |
| 7245 | ENSG00000 | ADA       | 0.921212 | 0.437374 | 0.668687 | 0.639394 |        |        |
| 7246 | ENSG00000 | VAMP8     | 0.948485 | 0.440404 | 0.688552 | 0.582828 |        |        |
| 7247 | ENSG00000 | PDE6B     | 1        | 0.316908 | 0.642512 | 0.639614 |        |        |
| 7248 | ENSG00000 | APPL1     | 0.8      | 0.563636 | 0.681818 | 0.631313 |        |        |
| 7249 | ENSG00000 | IFNAR1    | 0.977778 | 0.372727 | 0.662121 | 0.615152 |        |        |
| 7250 | ENSG00000 | COMT      | 0.951515 | 0.393939 | 0.677273 | 0.637374 |        |        |
| 7251 | ENSG00000 | RLIM      | 0.944444 | 0.40303  | 0.669697 | 0.643434 |        |        |
| 7252 | ENSG00000 | KIAA1468  | 1        | 0.346465 | 0.659764 | 0.588889 | 0.3513 |        |
| 7253 | ENSG00000 | GINM1     | 0.945455 | 0.411111 | 0.669024 | 0.636364 |        |        |
| 7254 | ENSG00000 | CDPF1     | 0.959596 | 0.406061 | 0.672054 | 0.608081 |        |        |
| 7255 | ENSG00000 | ST6GALNAC | 0.889899 | 0.487879 | 0.677104 | 0.622222 |        |        |
| 7256 | ENSG00000 | TBX21     | 0.937374 | 0.435354 | 0.690741 | 0.594949 |        |        |
| 7257 | ENSG00000 | SPATA17   | 0.781818 | 0.554545 | 0.666667 | 0.666667 |        |        |
| 7258 | ENSG00000 | AEBP1     | 0.971717 | 0.366667 | 0.690404 | 0.6      |        |        |

|      |                   |          |          |          |          |       |
|------|-------------------|----------|----------|----------|----------|-------|
| 7259 | ENSG00000DSC3     | 0.915152 | 0.416162 | 0.665657 | 0.675758 |       |
| 7260 | ENSG00000BBOF1    | 0.943434 | 0.39899  | 0.670034 | 0.648485 |       |
| 7261 | ENSG00000BIN3     | 0.882828 | 0.482828 | 0.682828 | 0.625253 |       |
| 7262 | ENSG00000FZD3     | 0.937374 | 0.417172 | 0.667508 | 0.639394 |       |
| 7263 | ENSG00000AGRN     | 0.850505 | 0.516162 | 0.676094 | 0.632323 |       |
| 7264 | ENSG00000XRCC1    | 0.958586 | 0.411111 | 0.680135 | 0.60404  |       |
| 7265 | ENSG00000CTAGE4   | 0.936364 | 0.427273 | 0.681818 | 0.613131 |       |
| 7266 | ENSG00000CTAGE9   | 0.936364 | 0.427273 | 0.681818 | 0.613131 |       |
| 7267 | ENSG00000SEC23A   | 0.848485 | 0.494949 | 0.671717 | 0.656566 |       |
| 7268 | ENSG00000CTAGE8   | 0.936364 | 0.427273 | 0.681818 | 0.613131 |       |
| 7269 | ENSG00000PLET1    | 0.850505 | 0.492929 | 0.667677 | 0.658586 |       |
| 7270 | ENSG00000CYTH4    | 0.906061 | 0.443434 | 0.669192 | 0.656566 |       |
| 7271 | ENSG00000MAGOHB   | 0.986869 | 0.362626 | 0.710438 | 0.558586 |       |
| 7272 | ENSG00000TSPAN15  | 0.882828 | 0.471717 | 0.673569 | 0.646465 |       |
| 7273 | ENSG00000DLGAP3   | 0.789899 | 0.554545 | 0.671212 | 0.658586 |       |
| 7274 | ENSG00000CTAGE15  | 0.936364 | 0.427273 | 0.681818 | 0.613131 |       |
| 7275 | ENSG00000COPA     | 0.852525 | 0.513131 | 0.671044 | 0.641414 | 0.466 |
| 7276 | ENSG00000CTAGE6   | 0.936364 | 0.427273 | 0.681818 | 0.613131 |       |
| 7277 | ENSG00000GOLGA3   | 0.936575 | 0.442918 | 0.676533 | 0.608879 |       |
| 7278 | ENSG00000PAEP     | 1        | 0.385859 | 0.678114 | 0.534343 |       |
| 7279 | ENSG00000TIMP1    | 0.919192 | 0.410101 | 0.664646 | 0.680808 |       |
| 7280 | ENSG00000ACVR2B   | 0.951515 | 0.391919 | 0.66431  | 0.656566 |       |
| 7281 | ENSG00000CEP55    | 0.877378 | 0.493658 | 0.685518 | 0.61945  |       |
| 7282 | ENSG00000KMO      | 0.974747 | 0.360606 | 0.657576 | 0.640404 |       |
| 7283 | ENSG00000ATF1     | 1        | 0.355556 | 0.661953 | 0.586869 |       |
| 7284 | ENSG00000RCOR2    | 0.955556 | 0.385859 | 0.663973 | 0.657576 |       |
| 7285 | ENSG00000MEMO1    | 0.833333 | 0.526263 | 0.673737 | 0.642424 |       |
| 7286 | ENSG00000KDELC1   | 0.960888 | 0.374207 | 0.654334 | 0.657505 |       |
| 7287 | ENSG00000GBE1     | 1        | 0.342424 | 0.679798 | 0.586869 |       |
| 7288 | ENSG00000DCAF13   | 0.976744 | 0.34773  | 0.655223 | 0.654485 |       |
| 7289 | ENSG00000MAPKAPK5 | 0.984848 | 0.372727 | 0.687374 | 0.580808 |       |
| 7290 | ENSG00000DAAM2    | 0.969697 | 0.40202  | 0.674074 | 0.588889 |       |
| 7291 | ENSG00000FGF17    | 0.843434 | 0.485859 | 0.663131 | 0.679798 |       |
| 7292 | ENSG00000TSKU     | 0.864693 | 0.527484 | 0.694679 | 0.597252 |       |
| 7293 | ENSG00000C15orf62 | 0.852525 | 0.522222 | 0.684343 | 0.619192 |       |
| 7294 | ENSG00000ZC3H4    | 0.980808 | 0.387879 | 0.679125 | 0.580808 |       |
| 7295 | ENSG00000PXN      | 0.788889 | 0.558586 | 0.673737 | 0.653535 |       |
| 7296 | ENSG00000CIB4     | 0.938384 | 0.39899  | 0.706229 | 0.612121 |       |
| 7297 | ENSG00000PRDX2    | 0.925253 | 0.449495 | 0.677609 | 0.614141 |       |
| 7298 | ENSG00000RASSF9   | 0.939746 | 0.409091 | 0.670543 | 0.643763 |       |
| 7299 | ENSG00000DPP3     | 0.975758 | 0.361616 | 0.659933 | 0.633333 |       |
| 7300 | ENSG00000UGT1A6   | 0.971717 | 0.377778 | 0.675084 | 0.607071 |       |
| 7301 | ENSG00000HERC5    | 0.809725 | 0.505285 | 0.657505 | 0.693446 |       |
| 7302 | ENSG00000SRBD1    | 0.974747 | 0.374747 | 0.665152 | 0.618182 |       |
| 7303 | ENSG00000C1orf109 | 1        | 0.343434 | 0.666667 | 0.60101  |       |
| 7304 | ENSG00000LTB4R    | 0.809725 | 0.540169 | 0.672833 | 0.65222  |       |
| 7305 | ENSG00000DNAAF1   | 0.755814 | 0.580338 | 0.667371 | 0.674419 | 0.174 |
| 7306 | ENSG00000MYSM1    | 0.980808 | 0.394949 | 0.682492 | 0.568687 |       |
| 7307 | ENSG00000ASTN2    | 0.979798 | 0.361616 | 0.658923 | 0.632323 |       |
| 7308 | ENSG00000SNCB     | 0.894949 | 0.426263 | 0.657912 | 0.69899  |       |
| 7309 | ENSG00000PTPN3    | 0.981818 | 0.361616 | 0.672727 | 0.616162 |       |
| 7310 | ENSG00000CEP192   | 0.989899 | 0.364646 | 0.672391 | 0.606061 |       |
| 7311 | ENSG00000PPP4R2   | 1        | 0.334343 | 0.661448 | 0.585859 |       |
| 7312 | ENSG00000GLCE     | 0.919192 | 0.421212 | 0.665657 | 0.669697 |       |
| 7313 | ENSG00000FAM212B  | 0.882828 | 0.471717 | 0.673569 | 0.648485 |       |

|      |                    |          |          |          |          |        |
|------|--------------------|----------|----------|----------|----------|--------|
| 7314 | ENSG00000SREK1     | 0.967677 | 0.39596  | 0.662458 | 0.613131 |        |
| 7315 | ENSG00000NARS      | 1        | 0.354545 | 0.660606 | 0.584848 |        |
| 7316 | ENSG00000NES       | 0.984848 | 0.334343 | 0.692088 | 0.621212 |        |
| 7317 | ENSG00000ARHGAP19  | 0.854545 | 0.513131 | 0.66734  | 0.645455 |        |
| 7318 | ENSG00000ACOX3     | 0.982828 | 0.334343 | 0.709428 | 0.60404  |        |
| 7319 | ENSG00000GPM6A     | 0.806061 | 0.537374 | 0.671717 | 0.661616 |        |
| 7320 | ENSG00000RPS18     | 0.930233 | 0.403101 | 0.660022 | 0.675526 |        |
| 7321 | ENSG00000ELAVL3    | 0.790698 | 0.569767 | 0.6679   | 0.656448 |        |
| 7322 | ENSG00000MINPP1    | 0.806061 | 0.537374 | 0.671717 | 0.663636 |        |
| 7323 | ENSG00000GNA12     | 0.877378 | 0.493658 | 0.685518 | 0.623679 |        |
| 7324 | ENSG00000CCNB2     | 0.909091 | 0.479798 | 0.692424 | 0.59697  |        |
| 7325 | ENSG00000NUAK2     | 0.951374 | 0.404863 | 0.671424 | 0.640592 |        |
| 7326 | ENSG00000SPEF1     | 0.755814 | 0.586681 | 0.671247 | 0.67019  |        |
| 7327 | ENSG00000RBFA      | 0.959596 | 0.387879 | 0.664141 | 0.644444 |        |
| 7328 | ENSG00000HELT      | 0.987315 | 0.330867 | 0.671952 | 0.645877 |        |
| 7329 | ENSG00000ECM2      | 0.958774 | 0.385835 | 0.665257 | 0.646934 |        |
| 7330 | ENSG00000EVI2A     | 0.812121 | 0.513131 | 0.662626 | 0.684848 |        |
| 7331 | ENSG00000FNDC7     | 0.800664 | 0.521595 | 0.66113  | 0.687708 |        |
| 7332 | ENSG00000RBMX2     | 0.947475 | 0.414141 | 0.679798 | 0.624242 |        |
| 7333 | ENSG00000APOC3     | 0.766667 | 0.564646 | 0.665657 | 0.680808 |        |
| 7334 | ENSG00000PKD2L2    | 0.975758 | 0.374747 | 0.667508 | 0.617172 |        |
| 7335 | ENSG00000MYO5B     | 0.918182 | 0.449495 | 0.681145 | 0.626263 |        |
| 7336 | ENSG00000CRELD1    | 0.882828 | 0.482828 | 0.682828 | 0.631313 |        |
| 7337 | ENSG00000C11orf80  | 0.972727 | 0.368687 | 0.658923 | 0.636364 |        |
| 7338 | ENSG00000FABP1     | 0.909091 | 0.473737 | 0.671044 | 0.629293 |        |
| 7339 | ENSG00000FAM3C     | 0.955556 | 0.391919 | 0.670707 | 0.648485 |        |
| 7340 | ENSG00000DHRS2     | 0.717172 | 0.630303 | 0.673737 | 0.674747 |        |
| 7341 | ENSG00000HLA-DQB1  | 0.838384 | 0.527273 | 0.672391 | 0.644444 |        |
| 7342 | ENSG00000PPFIA1    | 1        | 0.310101 | 0.660101 | 0.636364 | 0.3169 |
| 7343 | ENSG00000ACAN      | 0.96715  | 0.36715  | 0.667311 | 0.639614 |        |
| 7344 | ENSG00000SAMS1     | 0.99596  | 0.338384 | 0.693603 | 0.607071 |        |
| 7345 | ENSG00000PPP1R9A   | 0.9      | 0.463636 | 0.666667 | 0.650505 |        |
| 7346 | ENSG00000RRAGB     | 0.870707 | 0.512121 | 0.689899 | 0.615152 |        |
| 7347 | ENSG00000MALRD1    | 0.877378 | 0.493658 | 0.685518 | 0.624736 |        |
| 7348 | ENSG00000FAM171A2  | 0.838384 | 0.508081 | 0.671886 | 0.658586 |        |
| 7349 | ENSG00000LRRC69    | 0.878788 | 0.490909 | 0.680808 | 0.631313 |        |
| 7350 | ENSG00000PLEKHA3   | 0.942424 | 0.409091 | 0.675758 | 0.641414 |        |
| 7351 | ENSG00000SUSD4     | 0.941414 | 0.441414 | 0.680471 | 0.607071 |        |
| 7352 | ENSG00000CD47      | 0.924242 | 0.419192 | 0.671717 | 0.656566 |        |
| 7353 | ENSG00000AC134669. | 0.812121 | 0.513131 | 0.662626 | 0.684848 |        |
| 7354 | ENSG00000ATRX      | 1        | 0.40202  | 0.689226 | 0.531313 |        |
| 7355 | ENSG00000IL2       | 0.882828 | 0.482828 | 0.682828 | 0.634343 |        |
| 7356 | ENSG00000GZMK      | 0.766667 | 0.564646 | 0.665657 | 0.682828 |        |
| 7357 | ENSG00000NPIP15    | 1        | 0.341438 | 0.653453 | 0.566596 |        |
| 7358 | ENSG00000IWS1      | 1        | 0.348485 | 0.654545 | 0.580808 |        |
| 7359 | ENSG00000CAMTA1    | 0.969697 | 0.373737 | 0.713805 | 0.570707 |        |
| 7360 | ENSG00000FAM210B   | 0.953535 | 0.389899 | 0.667003 | 0.660606 |        |
| 7361 | ENSG00000BHLHE22   | 1        | 0.331313 | 0.648485 | 0.590909 |        |
| 7362 | ENSG00000DST       | 0.89697  | 0.469697 | 0.674916 | 0.639394 |        |
| 7363 | ENSG00000FAM96A    | 0.858586 | 0.49697  | 0.673737 | 0.651515 |        |
| 7364 | ENSG00000NPIP9     | 1        | 0.341438 | 0.653453 | 0.566596 |        |
| 7365 | ENSG00000CASP4     | 0.966667 | 0.342424 | 0.637879 | 0.70303  |        |
| 7366 | ENSG00000RRAGA     | 0.870707 | 0.512121 | 0.689899 | 0.615152 |        |
| 7367 | ENSG00000CRADD     | 0.893939 | 0.459596 | 0.671717 | 0.655556 |        |
| 7368 | ENSG00000FGFR2     | 0.963636 | 0.376768 | 0.668519 | 0.639394 |        |

|      |                    |          |          |          |          |       |        |
|------|--------------------|----------|----------|----------|----------|-------|--------|
| 7369 | ENSG00000RPGRI1L   | 0.886869 | 0.466667 | 0.676768 | 0.654545 |       |        |
| 7370 | ENSG00000SPG11     | 0.963636 | 0.361616 | 0.667677 | 0.656566 |       |        |
| 7371 | ENSG00000MOB2      | 0.862626 | 0.5      | 0.677778 | 0.642424 |       |        |
| 7372 | ENSG00000DEFB136   | 0.748414 | 0.618393 | 0.683404 | 0.645877 |       |        |
| 7373 | ENSG00000VPS52     | 1        | 0.341414 | 0.645791 | 0.569697 |       |        |
| 7374 | ENSG00000SYNGR4    | 0.936575 | 0.434461 | 0.685518 | 0.612051 |       |        |
| 7375 | ENSG00000SP1       | 1        | 0.331313 | 0.648485 | 0.588889 |       |        |
| 7376 | ENSG00000SLC45A4   | 0.874747 | 0.490909 | 0.681145 | 0.640404 |       |        |
| 7377 | ENSG00000FSCN1     | 0.964646 | 0.40101  | 0.69798  | 0.579798 |       |        |
| 7378 | ENSG00000UCKL1     | 0.945455 | 0.426263 | 0.680471 | 0.617172 |       |        |
| 7379 | ENSG00000AK6       | 0.807071 | 0.552525 | 0.678788 | 0.648485 |       |        |
| 7380 | ENSG00000C5orf42   | 1        | 0.346465 | 0.660606 | 0.552525 |       |        |
| 7381 | ENSG00000PLN       | 0.912121 | 0.469697 | 0.680303 | 0.621212 |       |        |
| 7382 | ENSG00000PRICKLE4  | 0.960606 | 0.39899  | 0.677441 | 0.614141 |       |        |
| 7383 | ENSG00000MTR       | 0.8      | 0.563636 | 0.681818 | 0.643434 |       |        |
| 7384 | ENSG00000PNPO      | 0.937374 | 0.443434 | 0.706734 | 0.579798 |       |        |
| 7385 | ENSG00000NP1PB6    | 1        | 0.341438 | 0.653453 | 0.566596 |       |        |
| 7386 | ENSG00000LAMTOR1   | 0.930303 | 0.425253 | 0.672391 | 0.643434 |       |        |
| 7387 | ENSG00000DDX17     | 0.969697 | 0.371717 | 0.656397 | 0.646465 |       |        |
| 7388 | ENSG00000EDEM1     | 0.838384 | 0.532323 | 0.680303 | 0.637374 |       |        |
| 7389 | ENSG00000MAN2B1    | 0.858586 | 0.49697  | 0.673737 | 0.654545 |       |        |
| 7390 | ENSG00000GABRE     | 0.935354 | 0.411111 | 0.668519 | 0.657576 |       |        |
| 7391 | ENSG00000TMEM132D  | 0.759596 | 0.587879 | 0.673064 | 0.668687 |       |        |
| 7392 | ENSG00000PKHD1L1   | 0.855556 | 0.513131 | 0.667677 | 0.651515 |       |        |
| 7393 | ENSG00000SIGLEC1   | 0.744444 | 0.584848 | 0.664141 | 0.692929 |       |        |
| 7394 | ENSG00000GALT      | 1        | 0.318182 | 0.642256 | 0.60404  |       |        |
| 7395 | ENSG00000MKI67     | 0.979798 | 0.345455 | 0.686364 | 0.626263 |       |        |
| 7396 | ENSG00000MYL6      | 0.934343 | 0.411111 | 0.665993 | 0.661616 |       |        |
| 7397 | ENSG00000PYROXD2   | 0.924242 | 0.443434 | 0.683838 | 0.625253 |       |        |
| 7398 | ENSG00000SAMD14    | 0.929293 | 0.405051 | 0.657071 | 0.683838 |       |        |
| 7399 | ENSG00000HIVEP1    | 0.962626 | 0.384848 | 0.660269 | 0.646465 |       |        |
| 7400 | ENSG00000NLRP12    | 0.878788 | 0.490909 | 0.680808 | 0.637374 |       |        |
| 7401 | ENSG00000CALB2     | 0.986869 | 0.421212 | 0.716667 | 0.5      |       |        |
| 7402 | ENSG00000PGAP2     | 0.895349 | 0.468288 | 0.67618  | 0.642706 |       |        |
| 7403 | ENSG00000GALNT11   | 0.927061 | 0.440803 | 0.678999 | 0.630021 |       |        |
| 7404 | ENSG00000LARP6     | 0.938384 | 0.407071 | 0.673064 | 0.652525 |       |        |
| 7405 | ENSG00000TMC8      | 0.882828 | 0.482828 | 0.682828 | 0.636364 |       |        |
| 7406 | ENSG00000SEMA4B    | 0.870707 | 0.512121 | 0.689899 | 0.617172 |       |        |
| 7407 | ENSG00000LAMTOR4   | 0.870707 | 0.512121 | 0.689899 | 0.617172 |       |        |
| 7408 | ENSG00000ACTR5     | 0.963636 | 0.389899 | 0.662963 | 0.636364 |       |        |
| 7409 | ENSG00000ZNF740    | 0.926263 | 0.386869 | 0.654882 | 0.712121 |       |        |
| 7410 | ENSG00000ASIC3     | 0.806061 | 0.537374 | 0.671717 | 0.667677 |       |        |
| 7411 | ENSG00000CFAP69    | 0.759596 | 0.593939 | 0.676768 | 0.661616 |       |        |
| 7412 | ENSG00000TMED10    | 1        | 0.327273 | 0.633333 | 0.624242 | 0.315 | 0.3258 |
| 7413 | ENSG00000ACTR3B    | 0.945455 | 0.411111 | 0.669024 | 0.648485 |       |        |
| 7414 | ENSG00000PSTK      | 1        | 0.351515 | 0.658586 | 0.560606 |       | 0.483  |
| 7415 | ENSG00000ZNF557    | 0.963636 | 0.371717 | 0.662963 | 0.652525 |       |        |
| 7416 | ENSG00000NME1-NME2 | 1        | 0.370707 | 0.672054 | 0.59899  |       | 0.2964 |
| 7417 | ENSG00000MAP4K1    | 0.934343 | 0.392929 | 0.665993 | 0.682828 |       |        |
| 7418 | ENSG00000OAT       | 0.919192 | 0.410101 | 0.664646 | 0.693939 |       |        |
| 7419 | ENSG00000DAO       | 0.975758 | 0.340404 | 0.669024 | 0.660606 |       |        |
| 7420 | ENSG00000IL6       | 0.8      | 0.563636 | 0.681818 | 0.646465 |       |        |
| 7421 | ENSG00000ZNF213    | 0.973737 | 0.361616 | 0.649495 | 0.662626 |       |        |
| 7422 | ENSG00000IL2RA     | 0.911111 | 0.412121 | 0.661616 | 0.70404  |       |        |
| 7423 | ENSG00000SSTR2     | 0.914376 | 0.470402 | 0.692389 | 0.609937 |       |        |

|      |                    |          |          |          |          |        |
|------|--------------------|----------|----------|----------|----------|--------|
| 7424 | ENSG00000FCAR      | 0.858586 | 0.520202 | 0.682155 | 0.630303 |        |
| 7425 | ENSG00000DMRTB1    | 1        | 0.334343 | 0.661448 | 0.609091 |        |
| 7426 | ENSG00000ANXA6     | 0.939394 | 0.40101  | 0.66734  | 0.666667 |        |
| 7427 | ENSG00000TSPYL2    | 0.889899 | 0.487879 | 0.677104 | 0.635354 |        |
| 7428 | ENSG00000NCOA5     | 0.958586 | 0.427273 | 0.684848 | 0.594949 |        |
| 7429 | ENSG00000FYN       | 0.979798 | 0.314141 | 0.675421 | 0.678788 |        |
| 7430 | ENSG00000ZBTB8A    | 1        | 0.318182 | 0.659091 | 0.618182 |        |
| 7431 | ENSG00000SS18      | 1        | 0.336364 | 0.651852 | 0.617172 |        |
| 7432 | ENSG00000PDIA2     | 0.873737 | 0.419192 | 0.646465 | 0.756566 |        |
| 7433 | ENSG00000NF2       | 1        | 0.316162 | 0.653704 | 0.605051 |        |
| 7434 | ENSG00000SMDT1     | 0.836152 | 0.531712 | 0.683932 | 0.637421 |        |
| 7435 | ENSG00000CTCF      | 1        | 0.374747 | 0.671549 | 0.581818 |        |
| 7436 | ENSG00000ARMC4     | 0.752525 | 0.590909 | 0.671212 | 0.678788 |        |
| 7437 | ENSG00000CRABP1    | 0.833488 | 0.513414 | 0.667746 | 0.6716   |        |
| 7438 | ENSG00000SELENOS   | 0.843434 | 0.516162 | 0.679798 | 0.649495 |        |
| 7439 | ENSG00000NPIP7     | 1        | 0.341438 | 0.653453 | 0.566596 |        |
| 7440 | ENSG00000TRPC4AP   | 0.868922 | 0.51797  | 0.683051 | 0.62685  |        |
| 7441 | ENSG00000PCDHB15   | 1        | 0.359596 | 0.667003 | 0.59697  |        |
| 7442 | ENSG00000SCAF4     | 1        | 0.370707 | 0.669192 | 0.549495 |        |
| 7443 | ENSG00000HGS       | 0.955556 | 0.408081 | 0.680135 | 0.631313 |        |
| 7444 | ENSG00000GSTA3     | 0.963636 | 0.447475 | 0.68266  | 0.558586 |        |
| 7445 | ENSG00000OPN5      | 0.763285 | 0.537198 | 0.648953 | 0.728502 |        |
| 7446 | ENSG00000GTF2A1    | 0.930233 | 0.418605 | 0.670014 | 0.659619 |        |
| 7447 | ENSG00000SRSF10    | 0.956566 | 0.421212 | 0.704377 | 0.585859 |        |
| 7448 | ENSG00000TRIM66    | 0.957576 | 0.405051 | 0.67037  | 0.638384 |        |
| 7449 | ENSG00000ACTR2     | 0.890909 | 0.472727 | 0.675758 | 0.649495 |        |
| 7450 | ENSG00000GSTA5     | 0.963636 | 0.447475 | 0.68266  | 0.558586 |        |
| 7451 | ENSG00000RTL10     | 0.983838 | 0.339394 | 0.706397 | 0.609091 |        |
| 7452 | ENSG00000TMEM64    | 0.879798 | 0.468687 | 0.67037  | 0.672727 |        |
| 7453 | ENSG00000TRIM27    | 0.930303 | 0.431313 | 0.66835  | 0.646465 |        |
| 7454 | ENSG00000ANKEF1    | 0.92691  | 0.445183 | 0.692691 | 0.615725 |        |
| 7455 | ENSG00000TSR2      | 0.89697  | 0.49697  | 0.689394 | 0.608081 |        |
| 7456 | ENSG00000SAM12     | 0.806061 | 0.537374 | 0.671717 | 0.672727 |        |
| 7457 | ENSG00000DPY30     | 0.923345 | 0.47619  | 0.692993 | 0.590012 |        |
| 7458 | ENSG00000NPIP8     | 1        | 0.341438 | 0.653453 | 0.566596 |        |
| 7459 | ENSG00000PSMD10    | 0.972727 | 0.374747 | 0.716162 | 0.572727 |        |
| 7460 | ENSG00000NT5DC4    | 0.963002 | 0.394292 | 0.662438 | 0.637421 |        |
| 7461 | ENSG00000SAA2-SAA4 | 0.759596 | 0.593939 | 0.676768 | 0.664646 |        |
| 7462 | ENSG00000RILPL2    | 0.884848 | 0.476768 | 0.675421 | 0.653535 |        |
| 7463 | ENSG00000SCLT1     | 0.988889 | 0.394949 | 0.693603 | 0.560606 | 0.3437 |
| 7464 | ENSG00000ATP5PB    | 0.969697 | 0.391919 | 0.668519 | 0.621212 |        |
| 7465 | ENSG00000PPM1J     | 0.880399 | 0.468439 | 0.674419 | 0.667774 |        |
| 7466 | ENSG00000SEMA5A    | 0.878788 | 0.50101  | 0.689899 | 0.625253 |        |
| 7467 | ENSG00000SSU72     | 0.977801 | 0.386892 | 0.672128 | 0.607822 |        |
| 7468 | ENSG00000KLRB1     | 0.960888 | 0.381607 | 0.659267 | 0.659619 |        |
| 7469 | ENSG00000SLX4IP    | 0.950505 | 0.413131 | 0.690572 | 0.620202 |        |
| 7470 | ENSG00000GSTA1     | 0.963636 | 0.447475 | 0.68266  | 0.558586 |        |
| 7471 | ENSG00000ADD1      | 0.948485 | 0.427273 | 0.68367  | 0.619192 |        |
| 7472 | ENSG00000GSTA2     | 0.963636 | 0.447475 | 0.68266  | 0.558586 |        |
| 7473 | ENSG00000IL18RAP   | 0.838384 | 0.508081 | 0.671886 | 0.670707 |        |
| 7474 | ENSG00000TRAPPC6A  | 0.901691 | 0.480973 | 0.687808 | 0.61945  |        |
| 7475 | ENSG00000DTNBP1    | 1        | 0.372727 | 0.676263 | 0.593939 |        |
| 7476 | ENSG00000TRAK1     | 0.925253 | 0.446465 | 0.674074 | 0.637374 |        |
| 7477 | ENSG00000CNTRL     | 0.971717 | 0.378788 | 0.708923 | 0.581818 |        |
| 7478 | ENSG00000YBX1      | 1        | 0.381818 | 0.679461 | 0.579798 |        |

|      |                    |          |          |          |          |        |
|------|--------------------|----------|----------|----------|----------|--------|
| 7479 | ENSG00000RBM12B    | 0.843434 | 0.516162 | 0.679798 | 0.651515 |        |
| 7480 | ENSG00000EP300     | 1        | 0.369697 | 0.721212 | 0.530303 |        |
| 7481 | ENSG00000TMEM11    | 0.717172 | 0.623232 | 0.669865 | 0.692929 |        |
| 7482 | ENSG00000YAE1D1    | 0.979798 | 0.374747 | 0.668519 | 0.621212 |        |
| 7483 | ENSG00000MAP2K5    | 1        | 0.324242 | 0.693939 | 0.589899 |        |
| 7484 | ENSG00000SCPEP1    | 0.951515 | 0.434343 | 0.691582 | 0.60202  |        |
| 7485 | ENSG00000TRIM41    | 0.904863 | 0.461945 | 0.679528 | 0.643763 |        |
| 7486 | ENSG00000SPOCK1    | 0.927273 | 0.432323 | 0.67037  | 0.652525 |        |
| 7487 | ENSG00000LRP4      | 1        | 0.361616 | 0.678114 | 0.568687 |        |
| 7488 | ENSG00000SNAI1     | 1        | 0.364646 | 0.696465 | 0.551515 |        |
| 7489 | ENSG00000SGTA      | 0.970707 | 0.40101  | 0.675084 | 0.606061 |        |
| 7490 | ENSG00000TGM2      | 0.945455 | 0.419192 | 0.678283 | 0.635354 |        |
| 7491 | ENSG00000ZNF804A   | 0.838384 | 0.539394 | 0.688889 | 0.630303 |        |
| 7492 | ENSG00000PLCD4     | 0.963636 | 0.391919 | 0.682828 | 0.618182 |        |
| 7493 | ENSG00000WASF3     | 0.956566 | 0.435354 | 0.681987 | 0.606061 |        |
| 7494 | ENSG00000ARHGAP45  | 0.830867 | 0.557082 | 0.693975 | 0.620507 |        |
| 7495 | ENSG00000BRD3      | 0.936364 | 0.423232 | 0.672054 | 0.648485 |        |
| 7496 | ENSG00000CASP14    | 0.933333 | 0.421212 | 0.668687 | 0.659596 |        |
| 7497 | ENSG00000ANKRD34A  | 0.972727 | 0.370707 | 0.682155 | 0.619192 |        |
| 7498 | ENSG00000NGB       | 0.949495 | 0.40404  | 0.679293 | 0.646465 |        |
| 7499 | ENSG00000HDAC8     | 0.820296 | 0.546512 | 0.681642 | 0.650106 |        |
| 7500 | ENSG00000NBR1      | 0.977778 | 0.387879 | 0.67862  | 0.60303  |        |
| 7501 | ENSG00000IFIT3     | 0.878788 | 0.50101  | 0.689899 | 0.628283 |        |
| 7502 | ENSG00000FGF21     | 0.8      | 0.563636 | 0.681818 | 0.654545 |        |
| 7503 | ENSG00000ZFYVE28   | 0.978788 | 0.355556 | 0.655219 | 0.662626 |        |
| 7504 | ENSG00000ZNF24     | 1        | 0.322222 | 0.643603 | 0.624242 |        |
| 7505 | ENSG00000CASC1     | 0.748414 | 0.618393 | 0.683404 | 0.658562 |        |
| 7506 | ENSG00000ERVMER34- | 0.766667 | 0.564646 | 0.665657 | 0.692929 |        |
| 7507 | ENSG00000BICRAL    | 1        | 0.341414 | 0.661953 | 0.628283 | 0.5148 |
| 7508 | ENSG00000MOGAT3    | 0.912121 | 0.469697 | 0.683838 | 0.628283 |        |
| 7509 | ENSG00000BTF3L4    | 0.961616 | 0.40101  | 0.676263 | 0.624242 |        |
| 7510 | ENSG00000ZDHC20    | 1        | 0.323232 | 0.644781 | 0.617172 |        |
| 7511 | ENSG00000CFTR      | 0.987879 | 0.347475 | 0.705724 | 0.60404  |        |
| 7512 | ENSG00000TNFRSF12A | 0.822813 | 0.537099 | 0.673496 | 0.665559 |        |
| 7513 | ENSG00000METAP1    | 1        | 0.316162 | 0.684175 | 0.594949 |        |
| 7514 | ENSG00000GCG       | 1        | 0.325253 | 0.705051 | 0.59596  |        |
| 7515 | ENSG00000SKIDA1    | 0.991919 | 0.360606 | 0.705556 | 0.584848 |        |
| 7516 | ENSG00000ZNF324B   | 0.915152 | 0.449495 | 0.679966 | 0.646465 |        |
| 7517 | ENSG00000SOS2      | 0.985859 | 0.371717 | 0.67963  | 0.611111 |        |
| 7518 | ENSG00000SCAF1     | 0.935354 | 0.40303  | 0.666162 | 0.679798 |        |
| 7519 | ENSG00000SECISBP2  | 0.932323 | 0.423232 | 0.677609 | 0.648485 |        |
| 7520 | ENSG00000ARL8B     | 0.977778 | 0.387879 | 0.672896 | 0.612121 |        |
| 7521 | ENSG00000RHOA      | 0.759596 | 0.593939 | 0.676768 | 0.672727 |        |
| 7522 | ENSG00000PTRH1     | 0.931313 | 0.449495 | 0.68064  | 0.620202 |        |
| 7523 | ENSG00000PREP      | 1        | 0.355556 | 0.66229  | 0.627273 |        |
| 7524 | ENSG00000ATP6V1B2  | 0.878788 | 0.50101  | 0.689899 | 0.629293 |        |
| 7525 | ENSG00000B3GNT4    | 0.806061 | 0.537374 | 0.671717 | 0.678788 |        |
| 7526 | ENSG00000MAGEE2    | 0.833333 | 0.532323 | 0.68165  | 0.650505 |        |
| 7527 | ENSG00000UBE2D1    | 0.913319 | 0.480973 | 0.698732 | 0.603594 |        |
| 7528 | ENSG00000ARL8A     | 0.977778 | 0.387879 | 0.672896 | 0.612121 |        |
| 7529 | ENSG00000MST1      | 0.918182 | 0.449495 | 0.681145 | 0.642424 |        |
| 7530 | ENSG00000FGF9      | 0.874747 | 0.505051 | 0.680808 | 0.641414 |        |
| 7531 | ENSG00000SH2D4A    | 0.941414 | 0.424242 | 0.675758 | 0.642424 |        |
| 7532 | ENSG00000UBE2D4    | 0.913319 | 0.480973 | 0.698732 | 0.603594 |        |
| 7533 | ENSG00000CLPB      | 1        | 0.335354 | 0.650842 | 0.615152 |        |



|      |                    |          |          |          |          |
|------|--------------------|----------|----------|----------|----------|
| 7534 | ENSG00000HEXDC     | 1        | 0.325253 | 0.713131 | 0.542424 |
| 7535 | ENSG00000UBE2D3    | 0.913319 | 0.480973 | 0.698732 | 0.603594 |
| 7536 | ENSG00000STK39     | 1        | 0.30303  | 0.679798 | 0.588889 |
| 7537 | ENSG00000HELQ      | 0.959596 | 0.387879 | 0.664141 | 0.659596 |
| 7538 | ENSG00000NF1       | 0.881607 | 0.475687 | 0.678647 | 0.662791 |
| 7539 | ENSG00000FAM210A   | 0.955556 | 0.374747 | 0.673569 | 0.678788 |
| 7540 | ENSG00000UBE2D2    | 0.913319 | 0.480973 | 0.698732 | 0.603594 |
| 7541 | ENSG00000FAM196B   | 0.877378 | 0.493658 | 0.685518 | 0.640592 |
| 7542 | ENSG00000SIN3A     | 1        | 0.320202 | 0.643771 | 0.631313 |
| 7543 | ENSG00000ZSCAN9    | 1        | 0.364646 | 0.675589 | 0.569697 |
| 7544 | ENSG00000MZT2B     | 0.866667 | 0.492929 | 0.668687 | 0.671717 |
| 7545 | ENSG00000GABARAPL1 | 0.909091 | 0.468687 | 0.68367  | 0.634343 |
| 7546 | ENSG00000MAPK14    | 0.99697  | 0.352525 | 0.724411 | 0.568687 |
| 7547 | ENSG00000ALDH4A1   | 1        | 0.344609 | 0.656096 | 0.603594 |
| 7548 | ENSG00000CTBP2     | 1        | 0.339394 | 0.715825 | 0.519192 |
| 7549 | ENSG00000OSER1     | 0.975758 | 0.366667 | 0.656566 | 0.656566 |
| 7550 | ENSG00000HSD11B2   | 0.963636 | 0.4      | 0.677273 | 0.619192 |
| 7551 | ENSG00000MZT2A     | 0.866667 | 0.492929 | 0.668687 | 0.671717 |
| 7552 | ENSG00000MTHFD1L   | 1        | 0.363636 | 0.666667 | 0.59697  |
| 7553 | ENSG00000LACTB2    | 0.838384 | 0.50101  | 0.663805 | 0.691919 |
| 7554 | ENSG00000SYCE2     | 0.790698 | 0.584567 | 0.687632 | 0.64482  |
| 7555 | ENSG00000AQP4      | 0.951515 | 0.427273 | 0.690404 | 0.614141 |
| 7556 | ENSG00000SSTR4     | 0.828283 | 0.583838 | 0.694276 | 0.615152 |
| 7557 | ENSG00000OR2K2     | 0.892178 | 0.491543 | 0.686927 | 0.62685  |
| 7558 | ENSG00000UBAP2L    | 0.891919 | 0.479798 | 0.681313 | 0.644444 |
| 7559 | ENSG00000PIGK      | 0.926004 | 0.434461 | 0.675476 | 0.653277 |
| 7560 | ENSG00000CFAP46    | 1        | 0.309091 | 0.686532 | 0.593939 |
| 7561 | ENSG00000BMPR1A    | 0.839394 | 0.50404  | 0.668855 | 0.683838 |
| 7562 | ENSG00000LPXN      | 0.951515 | 0.39899  | 0.668519 | 0.670707 |
| 7563 | ENSG00000DNAJA1    | 0.860465 | 0.521142 | 0.688337 | 0.635307 |
| 7564 | ENSG00000SSH3      | 0.951515 | 0.427273 | 0.690404 | 0.615152 |
| 7565 | ENSG00000AGFG2     | 0.970707 | 0.413131 | 0.673906 | 0.6      |
| 7566 | ENSG00000KIAA1551  | 1        | 0.328283 | 0.656566 | 0.609091 |
| 7567 | ENSG00000GATAD2A   | 1        | 0.346465 | 0.659764 | 0.590909 |
| 7568 | ENSG00000HSD17B8   | 0.871717 | 0.509091 | 0.687205 | 0.635354 |
| 7569 | ENSG00000MTERF1    | 0.806061 | 0.537374 | 0.671717 | 0.684848 |
| 7570 | ENSG00000ESYT2     | 0.8      | 0.563636 | 0.681818 | 0.660606 |
| 7571 | ENSG00000HOOK1     | 0.939746 | 0.428118 | 0.683932 | 0.633192 |
| 7572 | ENSG00000NTNG2     | 0.782828 | 0.543434 | 0.656229 | 0.712121 |
| 7573 | ENSG00000ANXA9     | 0.930303 | 0.431313 | 0.680808 | 0.644444 |
| 7574 | ENSG00000OXLD1     | 0.911111 | 0.412121 | 0.661616 | 0.716162 |
| 7575 | ENSG00000PSMB3     | 1        | 0.335354 | 0.675084 | 0.556566 |
| 7576 | ENSG00000DHRS12    | 0.979798 | 0.39596  | 0.677609 | 0.60202  |
| 7577 | ENSG00000PTGFRN    | 0.848485 | 0.494949 | 0.671717 | 0.683838 |
| 7578 | ENSG00000CSMD3     | 0.813131 | 0.582828 | 0.696465 | 0.625253 |
| 7579 | ENSG00000NTRK2     | 0.971717 | 0.414141 | 0.704714 | 0.559596 |
| 7580 | ENSG00000UGT2B10   | 0.787879 | 0.587879 | 0.687205 | 0.651515 |
| 7581 | ENSG00000EPHA1     | 0.961616 | 0.417172 | 0.677609 | 0.613131 |
| 7582 | ENSG00000WLS       | 0.870707 | 0.512121 | 0.689899 | 0.634343 |
| 7583 | ENSG00000SHMT2     | 0.838384 | 0.539394 | 0.688889 | 0.638384 |
| 7584 | ENSG00000TJP2      | 1        | 0.351515 | 0.659259 | 0.622222 |
| 7585 | ENSG00000MCCC2     | 0.945455 | 0.450505 | 0.695286 | 0.59596  |
| 7586 | ENSG00000EIF1AX    | 0.955603 | 0.435518 | 0.68129  | 0.615222 |
| 7587 | ENSG00000SIK2      | 0.877378 | 0.493658 | 0.685518 | 0.645877 |
| 7588 | ENSG00000ZNF501    | 0.868922 | 0.504228 | 0.684989 | 0.64482  |

0.3116

|      |                    |          |          |          |          |        |        |
|------|--------------------|----------|----------|----------|----------|--------|--------|
| 7589 | ENSG00000CRB2      | 0.816162 | 0.533333 | 0.674747 | 0.676768 |        |        |
| 7590 | ENSG00000UGT2A3    | 0.787879 | 0.587879 | 0.687205 | 0.651515 |        |        |
| 7591 | ENSG00000EIF1AY    | 0.955603 | 0.435518 | 0.68129  | 0.615222 |        |        |
| 7592 | ENSG00000UGT2B28   | 0.787879 | 0.587879 | 0.687205 | 0.651515 |        |        |
| 7593 | ENSG00000LRIG2     | 0.893939 | 0.473737 | 0.677946 | 0.654545 |        |        |
| 7594 | ENSG00000PKDCC     | 0.985859 | 0.323232 | 0.690236 | 0.657576 |        |        |
| 7595 | ENSG00000MYCBP     | 0.965657 | 0.421212 | 0.68165  | 0.594949 |        |        |
| 7596 | ENSG00000PLEKHG2   | 0.977778 | 0.375758 | 0.682828 | 0.618182 |        |        |
| 7597 | ENSG00000CHMP2A    | 1        | 0.341438 | 0.653453 | 0.633192 |        |        |
| 7598 | ENSG00000B4GALT3   | 0.874747 | 0.521212 | 0.69798  | 0.616162 |        |        |
| 7599 | ENSG00000CFAP157   | 0.935354 | 0.406061 | 0.67138  | 0.677778 |        |        |
| 7600 | ENSG00000AL139260. | 0.965657 | 0.421212 | 0.68165  | 0.594949 |        |        |
| 7601 | ENSG00000AUTS2     | 0.823232 | 0.550505 | 0.680135 | 0.655556 |        |        |
| 7602 | ENSG00000SLC2A3    | 0.965657 | 0.387879 | 0.671717 | 0.640404 |        |        |
| 7603 | ENSG00000MMP25     | 0.874747 | 0.521212 | 0.69798  | 0.618182 |        |        |
| 7604 | ENSG00000LAMTOR5   | 0.945455 | 0.447475 | 0.689731 | 0.609091 | 0.25   | 0.3467 |
| 7605 | ENSG00000UGT2B7    | 0.787879 | 0.587879 | 0.687205 | 0.651515 |        |        |
| 7606 | ENSG00000ELP2      | 1        | 0.355556 | 0.66633  | 0.60202  |        |        |
| 7607 | ENSG00000FAHD2A    | 0.977778 | 0.368687 | 0.664141 | 0.648485 |        |        |
| 7608 | ENSG00000ANLN      | 0.975758 | 0.350505 | 0.688215 | 0.642424 |        |        |
| 7609 | ENSG00000UGT2B15   | 0.787879 | 0.587879 | 0.687205 | 0.651515 |        |        |
| 7610 | ENSG00000ARL11     | 0.915152 | 0.436364 | 0.670875 | 0.682828 |        |        |
| 7611 | ENSG00000STAT5B    | 0.967677 | 0.349495 | 0.713131 | 0.624242 |        |        |
| 7612 | ENSG00000SAR1A     | 1        | 0.364646 | 0.664815 | 0.623232 |        |        |
| 7613 | ENSG00000UGT2B17   | 0.787879 | 0.587879 | 0.687205 | 0.651515 |        |        |
| 7614 | ENSG00000RBM19     | 0.942918 | 0.439746 | 0.684285 | 0.623679 |        |        |
| 7615 | ENSG00000HJURP     | 0.838384 | 0.508081 | 0.671886 | 0.683838 |        |        |
| 7616 | ENSG00000GIF       | 0.934343 | 0.413131 | 0.671044 | 0.673737 |        |        |
| 7617 | ENSG00000UGT2B11   | 0.787879 | 0.587879 | 0.687205 | 0.651515 |        |        |
| 7618 | ENSG00000KCTD10    | 0.963636 | 0.394949 | 0.665825 | 0.645455 |        |        |
| 7619 | ENSG00000USP4      | 0.759596 | 0.593939 | 0.676768 | 0.680808 |        |        |
| 7620 | ENSG00000FAM89B    | 0.871539 | 0.506091 | 0.688815 | 0.641196 |        |        |
| 7621 | ENSG00000CA10      | 0.828283 | 0.550505 | 0.677609 | 0.656566 |        |        |
| 7622 | ENSG00000UGT2A2    | 0.787879 | 0.587879 | 0.687205 | 0.651515 |        |        |
| 7623 | ENSG00000NFKBIE    | 1        | 0.343434 | 0.656566 | 0.617172 | 0.4139 |        |
| 7624 | ENSG00000TRH       | 0.841438 | 0.508457 | 0.674947 | 0.67759  |        |        |
| 7625 | ENSG00000RIMS4     | 0.888889 | 0.490909 | 0.68165  | 0.645455 |        |        |
| 7626 | ENSG00000PDHA1     | 1        | 0.341414 | 0.678114 | 0.607071 |        |        |
| 7627 | ENSG00000NCEH1     | 0.945455 | 0.419192 | 0.678283 | 0.648485 |        |        |
| 7628 | ENSG00000ANO4      | 0.871717 | 0.50101  | 0.679461 | 0.656566 |        |        |
| 7629 | ENSG00000ALOX15    | 0.934343 | 0.421212 | 0.668687 | 0.669697 |        |        |
| 7630 | ENSG00000MFAP1     | 0.959596 | 0.412121 | 0.676936 | 0.629293 | 0.2939 |        |
| 7631 | ENSG00000SH2B2     | 0.836152 | 0.531712 | 0.683932 | 0.655391 |        |        |
| 7632 | ENSG00000CCDC18    | 0.912121 | 0.491919 | 0.70202  | 0.59899  |        |        |
| 7633 | ENSG00000MED1      | 0.852525 | 0.520202 | 0.67862  | 0.657576 |        |        |
| 7634 | ENSG00000TP53      | 0.992929 | 0.336364 | 0.710101 | 0.616162 |        |        |
| 7635 | ENSG00000SLC25A42  | 0.878788 | 0.50101  | 0.689899 | 0.637374 |        |        |
| 7636 | ENSG00000CYB5A     | 0.927273 | 0.446465 | 0.686869 | 0.633333 |        |        |
| 7637 | ENSG00000FABP2     | 0.921212 | 0.450505 | 0.680471 | 0.646465 |        |        |
| 7638 | ENSG00000ZNF250    | 0.939394 | 0.431313 | 0.687037 | 0.630303 |        |        |
| 7639 | ENSG00000ANO6      | 0.830867 | 0.524313 | 0.676357 | 0.674419 |        |        |
| 7640 | ENSG00000RCC1      | 1        | 0.336364 | 0.671212 | 0.585859 |        |        |
| 7641 | ENSG00000DNAJC24   | 0.939394 | 0.415152 | 0.678283 | 0.657576 |        |        |
| 7642 | ENSG00000ZDHHC16   | 0.806061 | 0.537374 | 0.671717 | 0.688889 |        |        |
| 7643 | ENSG00000CYP2C19   | 0.806061 | 0.537374 | 0.671717 | 0.689899 |        |        |

|      |           |          |          |          |          |          |        |
|------|-----------|----------|----------|----------|----------|----------|--------|
| 7644 | ENSG00000 | IPPK     | 0.878788 | 0.50101  | 0.689899 | 0.640404 |        |
| 7645 | ENSG00000 | PLK1     | 0.965657 | 0.405051 | 0.704545 | 0.585859 |        |
| 7646 | ENSG00000 | AURKAIP1 | 0.937374 | 0.411111 | 0.666498 | 0.678788 | 0.4434 |
| 7647 | ENSG00000 | LPIN1    | 0.89596  | 0.477778 | 0.677609 | 0.653535 |        |
| 7648 | ENSG00000 | PUDP     | 0.874747 | 0.490909 | 0.681145 | 0.663636 |        |
| 7649 | ENSG00000 | CAMK1    | 0.948485 | 0.443434 | 0.69596  | 0.607071 |        |
| 7650 | ENSG00000 | ATP6V0A1 | 0.806061 | 0.537374 | 0.671717 | 0.692929 |        |
| 7651 | ENSG00000 | DPP9     | 0.912121 | 0.463636 | 0.68569  | 0.643434 |        |
| 7652 | ENSG00000 | CCDC149  | 0.924242 | 0.419192 | 0.671717 | 0.683838 |        |
| 7653 | ENSG00000 | EI24     | 0.969697 | 0.413131 | 0.680976 | 0.60101  |        |
| 7654 | ENSG00000 | CREB3L3  | 0.933333 | 0.428283 | 0.680808 | 0.652525 |        |
| 7655 | ENSG00000 | MDH1     | 0.99697  | 0.352525 | 0.728788 | 0.573737 |        |
| 7656 | ENSG00000 | PACSIN2  | 0.921212 | 0.452525 | 0.686869 | 0.641414 |        |
| 7657 | ENSG00000 | HSPA13   | 0.960606 | 0.417172 | 0.677946 | 0.622222 |        |
| 7658 | ENSG00000 | TBC1D32  | 0.921212 | 0.452525 | 0.686869 | 0.639394 |        |
| 7659 | ENSG00000 | TTC21A   | 0.790698 | 0.584567 | 0.687632 | 0.655391 |        |
| 7660 | ENSG00000 | CMTM4    | 0.941414 | 0.474747 | 0.705724 | 0.569697 |        |
| 7661 | ENSG00000 | HSPB6    | 0.975758 | 0.418182 | 0.694276 | 0.571717 |        |
| 7662 | ENSG00000 | PPP1R42  | 1        | 0.340404 | 0.717845 | 0.523232 |        |
| 7663 | ENSG00000 | FUT10    | 0.978788 | 0.356566 | 0.662963 | 0.665657 |        |
| 7664 | ENSG00000 | POLR2C   | 0.983838 | 0.40303  | 0.690236 | 0.582828 |        |
| 7665 | ENSG00000 | MCAM     | 0.945455 | 0.377778 | 0.662963 | 0.713131 |        |
| 7666 | ENSG00000 | TAF7     | 0.934343 | 0.425253 | 0.679125 | 0.656566 |        |
| 7667 | ENSG00000 | CRNN     | 0.906977 | 0.412262 | 0.659619 | 0.730444 |        |
| 7668 | ENSG00000 | GLI4     | 0.709091 | 0.657576 | 0.683165 | 0.683838 |        |
| 7669 | ENSG00000 | WNT11    | 0.785412 | 0.55074  | 0.668076 | 0.701903 |        |
| 7670 | ENSG00000 | Clorf52  | 0.930303 | 0.423232 | 0.670034 | 0.675758 |        |
| 7671 | ENSG00000 | MC2R     | 0.79402  | 0.548173 | 0.671096 | 0.69546  |        |
| 7672 | ENSG00000 | TTC39A   | 0.941414 | 0.454545 | 0.685185 | 0.615152 |        |
| 7673 | ENSG00000 | PRKX     | 0.921212 | 0.437374 | 0.676936 | 0.668687 |        |
| 7674 | ENSG00000 | GJA3     | 0.850242 | 0.498551 | 0.672786 | 0.68599  |        |
| 7675 | ENSG00000 | ANAPC13  | 0.943434 | 0.410101 | 0.668013 | 0.677778 |        |
| 7676 | ENSG00000 | SMIM29   | 0.992929 | 0.368687 | 0.717508 | 0.572727 |        |
| 7677 | ENSG00000 | SCRN2    | 1        | 0.346723 | 0.660677 | 0.616279 | 0.2367 |
| 7678 | ENSG00000 | USP25    | 1        | 0.346465 | 0.663468 | 0.607071 |        |
| 7679 | ENSG00000 | BAZ1A    | 0.971717 | 0.412121 | 0.682997 | 0.59697  |        |
| 7680 | ENSG00000 | SUCLG2   | 0.882828 | 0.482828 | 0.682828 | 0.661616 |        |
| 7681 | ENSG00000 | MDP1     | 1        | 0.367677 | 0.663636 | 0.548485 |        |
| 7682 | ENSG00000 | RAB30    | 0.833333 | 0.564646 | 0.69899  | 0.626263 |        |
| 7683 | ENSG00000 | ABCC11   | 1        | 0.364646 | 0.664815 | 0.610101 |        |
| 7684 | ENSG00000 | FAM189A1 | 0.966667 | 0.386869 | 0.662458 | 0.657576 | 0.2754 |
| 7685 | ENSG00000 | CLPX     | 0.963636 | 0.4      | 0.677273 | 0.632323 |        |
| 7686 | ENSG00000 | HIST1H1B | 1        | 0.340404 | 0.657239 | 0.59798  |        |
| 7687 | ENSG00000 | SYF2     | 0.912121 | 0.477778 | 0.683165 | 0.637374 |        |
| 7688 | ENSG00000 | SLC30A5  | 0.921776 | 0.445032 | 0.674066 | 0.667019 |        |
| 7689 | ENSG00000 | POMGNT1  | 0.877378 | 0.493658 | 0.685518 | 0.656448 |        |
| 7690 | ENSG00000 | POLR1A   | 1        | 0.365657 | 0.669024 | 0.627273 |        |
| 7691 | ENSG00000 | PTPA     | 0.979798 | 0.352525 | 0.721044 | 0.605051 |        |
| 7692 | ENSG00000 | CTTNBP2  | 0.968687 | 0.417172 | 0.681145 | 0.605051 |        |
| 7693 | ENSG00000 | SLC37A1  | 0.934343 | 0.440404 | 0.671717 | 0.653535 |        |
| 7694 | ENSG00000 | REG1A    | 0.924242 | 0.443434 | 0.683838 | 0.652525 |        |
| 7695 | ENSG00000 | JMJD4    | 0.961616 | 0.408081 | 0.685185 | 0.625253 |        |
| 7696 | ENSG00000 | KIF7     | 0.853821 | 0.508306 | 0.677741 | 0.673311 |        |
| 7697 | ENSG00000 | NCS1     | 0.983838 | 0.378788 | 0.672559 | 0.629293 |        |
| 7698 | ENSG00000 | BMPR2    | 0.833333 | 0.526263 | 0.673737 | 0.679798 |        |

|      |                    |          |          |          |          |        |
|------|--------------------|----------|----------|----------|----------|--------|
| 7699 | ENSG00000TBC1D4    | 0.942424 | 0.431313 | 0.686869 | 0.636364 |        |
| 7700 | ENSG00000PEA15     | 0.874747 | 0.521212 | 0.69798  | 0.625253 |        |
| 7701 | ENSG00000TAF4B     | 0.939394 | 0.437374 | 0.681818 | 0.640404 |        |
| 7702 | ENSG00000LRRRC74A  | 0.927273 | 0.467677 | 0.68569  | 0.624242 |        |
| 7703 | ENSG00000LGR6      | 0.838384 | 0.539394 | 0.688889 | 0.651515 |        |
| 7704 | ENSG00000GPC4      | 0.882828 | 0.482828 | 0.682828 | 0.667677 |        |
| 7705 | ENSG00000SLC12A2   | 0.838384 | 0.539394 | 0.688889 | 0.652525 |        |
| 7706 | ENSG00000RAB11FIP5 | 0.927273 | 0.419192 | 0.674916 | 0.682828 |        |
| 7707 | ENSG00000RTF2      | 0.874747 | 0.518182 | 0.694781 | 0.634343 |        |
| 7708 | ENSG00000EIF2D     | 0.866667 | 0.523232 | 0.684175 | 0.647475 |        |
| 7709 | ENSG00000ZNF670    | 0.931313 | 0.451515 | 0.681313 | 0.634343 |        |
| 7710 | ENSG00000GORASP2   | 0.974747 | 0.394949 | 0.677441 | 0.621212 |        |
| 7711 | ENSG00000SLC28A2   | 0.878788 | 0.461616 | 0.664815 | 0.713131 |        |
| 7712 | ENSG00000MRPL39    | 0.878788 | 0.50101  | 0.689899 | 0.646465 |        |
| 7713 | ENSG00000PI3       | 0.886869 | 0.466667 | 0.676768 | 0.686869 |        |
| 7714 | ENSG00000PLA2G6    | 0.830867 | 0.557082 | 0.693975 | 0.640592 |        |
| 7715 | ENSG00000BLOC1S5   | 0.833333 | 0.564646 | 0.69899  | 0.628283 |        |
| 7716 | ENSG00000CASR      | 0.919192 | 0.410101 | 0.664646 | 0.723232 |        |
| 7717 | ENSG00000SLFN11    | 0.886869 | 0.466667 | 0.676768 | 0.685859 |        |
| 7718 | ENSG00000PHLDA3    | 0.932323 | 0.410101 | 0.664983 | 0.694949 |        |
| 7719 | ENSG00000VPS8      | 0.911205 | 0.485201 | 0.698203 | 0.61945  |        |
| 7720 | ENSG00000PPM1E     | 0.931313 | 0.462626 | 0.700337 | 0.606061 |        |
| 7721 | ENSG00000OSBPL5    | 0.949495 | 0.441414 | 0.693771 | 0.618182 |        |
| 7722 | ENSG00000GADD45GIP | 0.866667 | 0.49798  | 0.675589 | 0.676768 |        |
| 7723 | ENSG00000TSPAN31   | 0.912121 | 0.463636 | 0.68569  | 0.652525 |        |
| 7724 | ENSG00000TRIM8     | 0.937374 | 0.441414 | 0.681145 | 0.642424 |        |
| 7725 | ENSG00000LGMN      | 0.830867 | 0.557082 | 0.693975 | 0.642706 |        |
| 7726 | ENSG00000GALNS     | 0.949495 | 0.426263 | 0.684175 | 0.641414 |        |
| 7727 | ENSG00000ANXA7     | 0.959596 | 0.390909 | 0.662458 | 0.680808 |        |
| 7728 | ENSG00000ARL2BP    | 1        | 0.341414 | 0.660943 | 0.658586 |        |
| 7729 | ENSG00000RGS18     | 0.932323 | 0.459596 | 0.69697  | 0.614141 |        |
| 7730 | ENSG00000CACNA1A   | 0.793939 | 0.583838 | 0.687205 | 0.664646 |        |
| 7731 | ENSG00000GLUL      | 1        | 0.349495 | 0.674747 | 0.611111 |        |
| 7732 | ENSG00000CHD1L     | 0.984848 | 0.368687 | 0.678788 | 0.636364 |        |
| 7733 | ENSG00000MRPL58    | 0.89852  | 0.493658 | 0.689218 | 0.635307 |        |
| 7734 | ENSG00000APP       | 0.922222 | 0.431313 | 0.676768 | 0.681818 |        |
| 7735 | ENSG00000GABBR1    | 0.9      | 0.50202  | 0.694276 | 0.620202 |        |
| 7736 | ENSG00000MTSS1     | 0.878788 | 0.50101  | 0.689899 | 0.650505 |        |
| 7737 | ENSG00000ZNF527    | 1        | 0.343434 | 0.666667 | 0.587879 |        |
| 7738 | ENSG00000CBX5      | 0.809091 | 0.578788 | 0.692424 | 0.653535 | 0.2752 |
| 7739 | ENSG00000SLC25A51  | 0.889006 | 0.486258 | 0.67988  | 0.665962 |        |
| 7740 | ENSG00000MOGAT1    | 0.838384 | 0.532323 | 0.680303 | 0.672727 |        |
| 7741 | ENSG00000SLC25A13  | 0.838384 | 0.539394 | 0.688889 | 0.658586 |        |
| 7742 | ENSG00000SLC25A52  | 0.889006 | 0.486258 | 0.67988  | 0.665962 |        |
| 7743 | ENSG00000CLPSL1    | 0.874747 | 0.49697  | 0.671549 | 0.680808 |        |
| 7744 | ENSG00000PRSS50    | 0.852008 | 0.534884 | 0.685342 | 0.654334 |        |
| 7745 | ENSG00000TCEAL3    | 0.965657 | 0.380808 | 0.672391 | 0.658586 |        |
| 7746 | ENSG00000PRSS50    | 0.852008 | 0.534884 | 0.685342 | 0.654334 |        |
| 7747 | ENSG00000SH2D1B    | 0.882828 | 0.482828 | 0.682828 | 0.669697 |        |
| 7748 | ENSG00000RAC2      | 0.960606 | 0.390909 | 0.681818 | 0.654545 |        |
| 7749 | ENSG00000ABHD6     | 0.94926  | 0.433404 | 0.687808 | 0.634249 |        |
| 7750 | ENSG00000NAPA      | 1        | 0.350505 | 0.661448 | 0.646465 |        |
| 7751 | ENSG00000TCEAL5    | 0.965657 | 0.380808 | 0.672391 | 0.658586 |        |
| 7752 | ENSG00000B4GALT1   | 0.927273 | 0.436364 | 0.681818 | 0.664646 | 0.297  |
| 7753 | ENSG00000ASCC2     | 1        | 0.39697  | 0.684343 | 0.576768 |        |

|      |                  |          |          |          |          |        |
|------|------------------|----------|----------|----------|----------|--------|
| 7754 | ENSG00000BAAT    | 0.752525 | 0.625253 | 0.688889 | 0.670707 |        |
| 7755 | ENSG00000TBC1D14 | 0.838384 | 0.539394 | 0.688889 | 0.657576 |        |
| 7756 | ENSG00000PITPNC1 | 0.923232 | 0.453535 | 0.679293 | 0.654545 |        |
| 7757 | ENSG00000TCEAL6  | 0.965657 | 0.380808 | 0.672391 | 0.658586 |        |
| 7758 | ENSG00000PLPP6   | 0.890909 | 0.492929 | 0.68367  | 0.649495 |        |
| 7759 | ENSG00000ZC3H7A  | 0.833887 | 0.52381  | 0.678848 | 0.683278 |        |
| 7760 | ENSG00000TMEM72  | 0.921212 | 0.452525 | 0.686869 | 0.648485 |        |
| 7761 | ENSG00000HIPK2   | 0.919192 | 0.435354 | 0.672054 | 0.691919 |        |
| 7762 | ENSG00000ZNF790  | 0.833333 | 0.558586 | 0.690572 | 0.646465 |        |
| 7763 | ENSG00000YOD1    | 0.961616 | 0.40202  | 0.683165 | 0.637374 |        |
| 7764 | ENSG00000WDR34   | 1        | 0.374747 | 0.672054 | 0.60101  |        |
| 7765 | ENSG00000KRT15   | 0.959596 | 0.412121 | 0.694613 | 0.622222 |        |
| 7766 | ENSG00000RMND5B  | 0.927061 | 0.415433 | 0.674066 | 0.694503 |        |
| 7767 | ENSG00000GBP7    | 0.878788 | 0.50101  | 0.689899 | 0.651515 |        |
| 7768 | ENSG00000DDX11   | 0.926263 | 0.477778 | 0.69798  | 0.610101 |        |
| 7769 | ENSG00000CD247   | 0.930303 | 0.431313 | 0.680808 | 0.663636 |        |
| 7770 | ENSG00000ARNT2   | 0.981818 | 0.338384 | 0.704714 | 0.644444 |        |
| 7771 | ENSG00000RCC1L   | 0.874747 | 0.521212 | 0.69798  | 0.632323 |        |
| 7772 | ENSG00000KCNA4   | 0.961616 | 0.389899 | 0.673064 | 0.663636 |        |
| 7773 | ENSG00000SMG6    | 0.947146 | 0.413319 | 0.674242 | 0.673362 |        |
| 7774 | ENSG00000EZR     | 0.947475 | 0.423232 | 0.676936 | 0.662626 |        |
| 7775 | ENSG00000FUCA1   | 0.931313 | 0.422222 | 0.676768 | 0.677778 |        |
| 7776 | ENSG00000PFDN6   | 0.911205 | 0.472516 | 0.688513 | 0.647992 |        |
| 7777 | ENSG00000PPP5D1  | 0.833333 | 0.564646 | 0.69899  | 0.635354 |        |
| 7778 | ENSG00000SLC2A6  | 0.951515 | 0.427273 | 0.690404 | 0.637374 |        |
| 7779 | ENSG00000DSG1    | 1        | 0.349495 | 0.66633  | 0.625253 |        |
| 7780 | ENSG00000TRIM22  | 0.99899  | 0.331313 | 0.717845 | 0.623232 |        |
| 7781 | ENSG00000U2AF2   | 1        | 0.413131 | 0.692088 | 0.562626 |        |
| 7782 | ENSG00000FRAT1   | 0.942424 | 0.436364 | 0.675758 | 0.654545 |        |
| 7783 | ENSG00000SIAH3   | 0.836152 | 0.531712 | 0.683932 | 0.673362 |        |
| 7784 | ENSG00000MAML2   | 0.924242 | 0.419192 | 0.671717 | 0.69899  |        |
| 7785 | ENSG00000ECI2    | 0.936364 | 0.427273 | 0.681818 | 0.661616 |        |
| 7786 | ENSG00000PPM1A   | 0.849391 | 0.531561 | 0.683093 | 0.665559 |        |
| 7787 | ENSG00000CEP162  | 1        | 0.360606 | 0.681481 | 0.59798  | 0.3862 |
| 7788 | ENSG00000FAM192A | 0.88055  | 0.504228 | 0.699789 | 0.638478 |        |
| 7789 | ENSG00000PRG3    | 0.741015 | 0.65222  | 0.696617 | 0.663848 |        |
| 7790 | ENSG00000TACC3   | 0.959596 | 0.412121 | 0.694613 | 0.629293 |        |
| 7791 | ENSG00000CAPN5   | 0.893939 | 0.487879 | 0.675084 | 0.670707 |        |
| 7792 | ENSG00000ATCAY   | 0.8      | 0.563636 | 0.681818 | 0.683838 |        |
| 7793 | ENSG00000HRH4    | 0.881818 | 0.481818 | 0.677273 | 0.686869 |        |
| 7794 | ENSG00000TPSG1   | 0.833333 | 0.564646 | 0.69899  | 0.640404 |        |
| 7795 | ENSG00000KRT20   | 0.949495 | 0.456566 | 0.700842 | 0.60303  |        |
| 7796 | ENSG00000RHOH    | 0.838384 | 0.539394 | 0.688889 | 0.661616 |        |
| 7797 | ENSG00000SMU1    | 0.887879 | 0.518182 | 0.695286 | 0.630303 |        |
| 7798 | ENSG00000GSN     | 0.989899 | 0.368687 | 0.698148 | 0.615152 |        |
| 7799 | ENSG00000NACC2   | 0.965657 | 0.418182 | 0.681818 | 0.619192 |        |
| 7800 | ENSG00000PROM1   | 0.969697 | 0.365657 | 0.667003 | 0.684848 |        |
| 7801 | ENSG00000TMEM107 | 0.90303  | 0.461616 | 0.677273 | 0.680808 |        |
| 7802 | ENSG00000GGA2    | 0.838384 | 0.539394 | 0.688889 | 0.664646 |        |
| 7803 | ENSG00000NFIA    | 1        | 0.342424 | 0.666162 | 0.618182 |        |
| 7804 | ENSG00000SPINK2  | 0.936364 | 0.405051 | 0.667003 | 0.706061 |        |
| 7805 | ENSG00000COL6A3  | 0.793939 | 0.591919 | 0.692929 | 0.659596 |        |
| 7806 | ENSG00000GGNBP2  | 0.823232 | 0.550505 | 0.680135 | 0.677778 |        |
| 7807 | ENSG00000DEFA1   | 0.990909 | 0.354545 | 0.701515 | 0.626263 |        |
| 7808 | ENSG00000SLC35B3 | 1        | 0.367677 | 0.668013 | 0.615152 |        |

|      |                    |          |          |          |          |        |
|------|--------------------|----------|----------|----------|----------|--------|
| 7809 | ENSG00000MAGEB17   | 0.882828 | 0.482828 | 0.682828 | 0.676768 |        |
| 7810 | ENSG00000RABL2B    | 0.927273 | 0.436364 | 0.681818 | 0.671717 |        |
| 7811 | ENSG00000ABHD17A   | 0.992929 | 0.354545 | 0.73266  | 0.589899 |        |
| 7812 | ENSG00000C5orf34   | 0.878788 | 0.50101  | 0.689899 | 0.658586 |        |
| 7813 | ENSG00000VPS11     | 0.836152 | 0.531712 | 0.683932 | 0.67759  |        |
| 7814 | ENSG00000CNP       | 1        | 0.318182 | 0.678788 | 0.620202 |        |
| 7815 | ENSG00000SCP2      | 1        | 0.343434 | 0.656566 | 0.661616 |        |
| 7816 | ENSG00000EAF1      | 0.924947 | 0.461945 | 0.683932 | 0.646934 |        |
| 7817 | ENSG00000SV2B      | 0.892178 | 0.440803 | 0.659091 | 0.737844 |        |
| 7818 | ENSG00000CFHR2     | 0.982828 | 0.380808 | 0.685185 | 0.627273 |        |
| 7819 | ENSG00000F12       | 0.803383 | 0.529598 | 0.66649  | 0.725159 |        |
| 7820 | ENSG00000RIT2      | 0.793939 | 0.591919 | 0.692929 | 0.661616 |        |
| 7821 | ENSG00000PDHA2     | 1        | 0.341414 | 0.678114 | 0.607071 |        |
| 7822 | ENSG00000SPRR3     | 0.793939 | 0.580808 | 0.671549 | 0.694949 |        |
| 7823 | ENSG00000CD6       | 0.936364 | 0.427273 | 0.681818 | 0.669697 |        |
| 7824 | ENSG00000PDE8B     | 0.709091 | 0.657576 | 0.683165 | 0.705051 |        |
| 7825 | ENSG00000CASP8     | 1        | 0.370707 | 0.67138  | 0.636364 | 0.1923 |
| 7826 | ENSG00000TMPRSS7   | 0.948485 | 0.405051 | 0.686869 | 0.671717 |        |
| 7827 | ENSG00000DHX30     | 0.828283 | 0.558586 | 0.692424 | 0.658586 |        |
| 7828 | ENSG00000RABL2A    | 0.927273 | 0.436364 | 0.681818 | 0.671717 |        |
| 7829 | ENSG00000ZPBP      | 0.784355 | 0.615222 | 0.699789 | 0.650106 |        |
| 7830 | ENSG00000MORN4     | 0.874747 | 0.521212 | 0.69798  | 0.640404 |        |
| 7831 | ENSG00000UTP11     | 0.914141 | 0.436364 | 0.670707 | 0.708081 |        |
| 7832 | ENSG00000SPAG7     | 0.934343 | 0.425253 | 0.685859 | 0.669697 |        |
| 7833 | ENSG00000CEACAM8   | 0.8      | 0.558586 | 0.678283 | 0.694949 |        |
| 7834 | ENSG00000DNAH10    | 0.752525 | 0.625253 | 0.688889 | 0.678788 |        |
| 7835 | ENSG00000LAPTM5    | 0.882828 | 0.482828 | 0.682828 | 0.680808 |        |
| 7836 | ENSG00000CCDC170   | 0.752525 | 0.625253 | 0.688889 | 0.680808 |        |
| 7837 | ENSG00000BX248415. | 0.982828 | 0.380808 | 0.685185 | 0.627273 |        |
| 7838 | ENSG00000FNTB      | 0.793939 | 0.591919 | 0.692929 | 0.661616 |        |
| 7839 | ENSG00000VPS37A    | 1        | 0.321212 | 0.658586 | 0.658586 | 0.1831 |
| 7840 | ENSG00000ADNP      | 0.887879 | 0.508081 | 0.693098 | 0.643434 |        |
| 7841 | ENSG00000PPP1R37   | 0.879493 | 0.473573 | 0.671776 | 0.707188 |        |
| 7842 | ENSG00000UGT3A1    | 0.793939 | 0.586869 | 0.689562 | 0.672727 |        |
| 7843 | ENSG00000RNF17     | 1        | 0.392929 | 0.683165 | 0.567677 |        |
| 7844 | ENSG00000ZNF160    | 0.877378 | 0.493658 | 0.685518 | 0.674419 |        |
| 7845 | ENSG00000C1orf112  | 1        | 0.406061 | 0.737374 | 0.526263 |        |
| 7846 | ENSG00000UTRN      | 1        | 0.350505 | 0.670034 | 0.614141 |        |
| 7847 | ENSG00000ATP13A1   | 0.931313 | 0.422222 | 0.676768 | 0.687879 |        |
| 7848 | ENSG00000CRH       | 0.943434 | 0.413131 | 0.670707 | 0.689899 | 0.2815 |
| 7849 | ENSG00000CREM      | 0.966667 | 0.394949 | 0.685522 | 0.640404 |        |
| 7850 | ENSG00000AC022414. | 0.709091 | 0.657576 | 0.683165 | 0.705051 |        |
| 7851 | ENSG00000MSRA      | 0.860465 | 0.521142 | 0.688337 | 0.664905 |        |
| 7852 | ENSG00000WDTC1     | 1        | 0.360606 | 0.678788 | 0.60101  |        |
| 7853 | ENSG00000PPIH      | 0.931313 | 0.457576 | 0.686869 | 0.640404 |        |
| 7854 | ENSG00000PARS2     | 1        | 0.323232 | 0.661953 | 0.650505 |        |
| 7855 | ENSG00000S100A8    | 0.874747 | 0.493939 | 0.657912 | 0.711111 |        |
| 7856 | ENSG00000PROM2     | 0.959596 | 0.426263 | 0.692929 | 0.622222 |        |
| 7857 | ENSG00000PGP       | 1        | 0.340404 | 0.662795 | 0.611111 |        |
| 7858 | ENSG00000TNKS1BP1  | 0.96723  | 0.412262 | 0.678118 | 0.630021 |        |
| 7859 | ENSG00000ASAP1     | 1        | 0.334343 | 0.661448 | 0.643434 |        |
| 7860 | ENSG00000FKBP7     | 0.874747 | 0.521212 | 0.69798  | 0.644444 |        |
| 7861 | ENSG00000CRYBA1    | 0.8      | 0.563636 | 0.681818 | 0.691919 |        |
| 7862 | ENSG00000SPAG4     | 0.954545 | 0.40303  | 0.684343 | 0.675758 |        |
| 7863 | ENSG00000SUGP2     | 0.931313 | 0.422222 | 0.676768 | 0.689899 |        |

|      |                   |          |          |          |          |        |
|------|-------------------|----------|----------|----------|----------|--------|
| 7864 | ENSG00000GLMP     | 0.843434 | 0.516162 | 0.679798 | 0.690909 |        |
| 7865 | ENSG00000C6orf89  | 0.878788 | 0.490909 | 0.680808 | 0.682828 |        |
| 7866 | ENSG00000RTL1     | 0.822813 | 0.576966 | 0.699889 | 0.646733 |        |
| 7867 | ENSG00000ZNF480   | 0.933404 | 0.451374 | 0.687456 | 0.642706 |        |
| 7868 | ENSG00000PCYT2    | 1        | 0.326263 | 0.650842 | 0.639394 |        |
| 7869 | ENSG00000CDX1     | 0.766667 | 0.609091 | 0.687205 | 0.685859 |        |
| 7870 | ENSG00000SFT2D2   | 0.877378 | 0.493658 | 0.685518 | 0.676533 |        |
| 7871 | ENSG00000CDK16    | 0.964646 | 0.419192 | 0.674579 | 0.637374 |        |
| 7872 | ENSG00000PLK4     | 0.942424 | 0.431313 | 0.686869 | 0.655556 |        |
| 7873 | ENSG00000CYP2D6   | 0.87315  | 0.513742 | 0.693446 | 0.657505 |        |
| 7874 | ENSG00000TMEM131  | 0.949495 | 0.441414 | 0.693771 | 0.634343 |        |
| 7875 | ENSG00000UTP6     | 0.894949 | 0.518182 | 0.697643 | 0.627273 |        |
| 7876 | ENSG00000PRSS36   | 0.833333 | 0.564646 | 0.69899  | 0.646465 |        |
| 7877 | ENSG00000LRRC14B  | 0.939394 | 0.440404 | 0.689899 | 0.646465 |        |
| 7878 | ENSG00000TTPAL    | 0.833333 | 0.564646 | 0.69899  | 0.648485 |        |
| 7879 | ENSG00000PLPPR3   | 0.961616 | 0.384848 | 0.694949 | 0.655556 |        |
| 7880 | ENSG00000MARK3    | 0.790698 | 0.584567 | 0.687632 | 0.681818 |        |
| 7881 | ENSG00000RBM20    | 0.793264 | 0.585366 | 0.688153 | 0.679443 |        |
| 7882 | ENSG00000MTRR     | 0.90303  | 0.488889 | 0.692593 | 0.647475 |        |
| 7883 | ENSG00000SERPINH1 | 0.943434 | 0.413131 | 0.675589 | 0.686869 |        |
| 7884 | ENSG00000ADCY10   | 0.947475 | 0.439394 | 0.695118 | 0.636364 |        |
| 7885 | ENSG00000RPUSD2   | 0.992929 | 0.39596  | 0.688215 | 0.607071 |        |
| 7886 | ENSG00000RIPOR3   | 0.971717 | 0.374747 | 0.715657 | 0.619192 |        |
| 7887 | ENSG00000GAB3     | 0.838384 | 0.539394 | 0.688889 | 0.671717 |        |
| 7888 | ENSG00000NR3C1    | 0.979798 | 0.387879 | 0.681313 | 0.636364 |        |
| 7889 | ENSG00000MRPL48   | 0.953488 | 0.446089 | 0.699789 | 0.620507 |        |
| 7890 | ENSG00000COL9A2   | 0.888992 | 0.477336 | 0.681159 | 0.685476 |        |
| 7891 | ENSG00000SGCA     | 0.935354 | 0.459596 | 0.689394 | 0.636364 |        |
| 7892 | ENSG00000ERGIC3   | 0.947475 | 0.450505 | 0.69697  | 0.623232 |        |
| 7893 | ENSG00000XPO5     | 0.985859 | 0.407071 | 0.714646 | 0.569697 | 0.3165 |
| 7894 | ENSG00000PLCXD1   | 0.817276 | 0.571429 | 0.693429 | 0.664452 |        |
| 7895 | ENSG00000LEPROTL1 | 0.838384 | 0.508081 | 0.671886 | 0.714141 |        |
| 7896 | ENSG00000TRAF2    | 1        | 0.39596  | 0.683165 | 0.573737 |        |
| 7897 | ENSG00000EIF2B4   | 0.833333 | 0.564646 | 0.69899  | 0.650505 |        |
| 7898 | ENSG00000TMPRSS15 | 0.957576 | 0.425253 | 0.691077 | 0.639394 |        |
| 7899 | ENSG00000LRRN4CL  | 0.830867 | 0.557082 | 0.693975 | 0.660677 |        |
| 7900 | ENSG00000OBSCN    | 0.930303 | 0.431313 | 0.680808 | 0.678788 |        |
| 7901 | ENSG00000CDK10    | 0.878788 | 0.50101  | 0.689899 | 0.666667 |        |
| 7902 | ENSG00000RUSC1    | 0.974747 | 0.417172 | 0.690741 | 0.60404  |        |
| 7903 | ENSG00000PIK3C3   | 0.960606 | 0.425253 | 0.682492 | 0.638384 |        |
| 7904 | ENSG00000INF2     | 0.838384 | 0.539394 | 0.688889 | 0.671717 |        |
| 7905 | ENSG00000SPP1     | 0.978788 | 0.407071 | 0.691919 | 0.609091 |        |
| 7906 | ENSG00000CFAP47   | 0.927273 | 0.436364 | 0.681818 | 0.677778 |        |
| 7907 | ENSG00000OR5V1    | 0.945032 | 0.432347 | 0.690275 | 0.651163 |        |
| 7908 | ENSG00000TIGD7    | 0.986869 | 0.421212 | 0.716667 | 0.554545 |        |
| 7909 | ENSG00000MAPK10   | 0.825581 | 0.575053 | 0.681818 | 0.673362 |        |
| 7910 | ENSG00000NAA30    | 0.874747 | 0.521212 | 0.69798  | 0.648485 |        |
| 7911 | ENSG00000LYPD5    | 0.978788 | 0.370707 | 0.665825 | 0.673737 |        |
| 7912 | ENSG00000FOPNL    | 0.933333 | 0.429293 | 0.671044 | 0.690909 | 0.2483 |
| 7913 | ENSG00000YTHDC1   | 0.957717 | 0.409091 | 0.67389  | 0.676533 |        |
| 7914 | ENSG00000CDCP2    | 0.793939 | 0.591919 | 0.692929 | 0.670707 |        |
| 7915 | ENSG00000CLDN7    | 0.979798 | 0.407071 | 0.693434 | 0.606061 |        |
| 7916 | ENSG00000ZSWIM6   | 0.847176 | 0.575858 | 0.711517 | 0.621262 |        |
| 7917 | ENSG00000UBE3D    | 0.90303  | 0.479798 | 0.68468  | 0.667677 |        |
| 7918 | ENSG00000GADL1    | 0.977801 | 0.418605 | 0.703136 | 0.585624 |        |

|      |                    |          |          |          |          |        |
|------|--------------------|----------|----------|----------|----------|--------|
| 7919 | ENSG00000DDAH1     | 0.958586 | 0.435354 | 0.690236 | 0.627273 |        |
| 7920 | ENSG00000SPINT2    | 1        | 0.332323 | 0.660438 | 0.641414 |        |
| 7921 | ENSG00000CHAC1     | 0.970707 | 0.411111 | 0.68064  | 0.630303 |        |
| 7922 | ENSG00000EIF4EBP1  | 1        | 0.349495 | 0.729293 | 0.521212 |        |
| 7923 | ENSG00000RFPL2     | 0.752525 | 0.625253 | 0.688889 | 0.688889 |        |
| 7924 | ENSG00000LAPTM4A   | 1        | 0.385859 | 0.676431 | 0.624242 |        |
| 7925 | ENSG00000ZNF90     | 0.874747 | 0.521212 | 0.69798  | 0.648485 |        |
| 7926 | ENSG00000MAP10     | 0.866667 | 0.535354 | 0.699663 | 0.644444 |        |
| 7927 | ENSG00000MUM1      | 0.866667 | 0.535354 | 0.699663 | 0.645455 |        |
| 7928 | ENSG00000EFCAB7    | 0.983838 | 0.379798 | 0.705724 | 0.612121 |        |
| 7929 | ENSG00000TRPM5     | 0.921212 | 0.452525 | 0.686869 | 0.671717 |        |
| 7930 | ENSG00000CHPF2     | 0.878788 | 0.50101  | 0.689899 | 0.673737 |        |
| 7931 | ENSG00000CYP2A13   | 0.959596 | 0.427273 | 0.696801 | 0.622222 |        |
| 7932 | ENSG00000CAMK2A    | 0.979798 | 0.387879 | 0.681313 | 0.641414 |        |
| 7933 | ENSG00000TRMT5     | 0.939394 | 0.450505 | 0.688215 | 0.644444 |        |
| 7934 | ENSG00000C22orf46  | 0.813131 | 0.576768 | 0.688215 | 0.675758 |        |
| 7935 | ENSG00000PAXX      | 0.887879 | 0.49798  | 0.687879 | 0.665657 |        |
| 7936 | ENSG00000ZNF304    | 0.9      | 0.491919 | 0.680808 | 0.666667 |        |
| 7937 | ENSG00000CYP2A6    | 0.959596 | 0.427273 | 0.696801 | 0.622222 |        |
| 7938 | ENSG00000MAP3K11   | 0.931313 | 0.424242 | 0.673401 | 0.69697  |        |
| 7939 | ENSG00000METTL18   | 0.894949 | 0.485859 | 0.685017 | 0.672727 |        |
| 7940 | ENSG00000SYP       | 0.951515 | 0.442424 | 0.693603 | 0.638384 |        |
| 7941 | ENSG00000VWDE      | 0.939394 | 0.465657 | 0.697643 | 0.623232 |        |
| 7942 | ENSG00000RPL3      | 0.99697  | 0.378788 | 0.720707 | 0.586869 |        |
| 7943 | ENSG00000IER3      | 0.882828 | 0.482828 | 0.682828 | 0.691919 |        |
| 7944 | ENSG00000RBM28     | 0.965657 | 0.390909 | 0.709259 | 0.628283 |        |
| 7945 | ENSG00000KIF26B    | 1        | 0.352525 | 0.673569 | 0.612121 |        |
| 7946 | ENSG00000GNAI3     | 0.939394 | 0.407071 | 0.673064 | 0.709091 |        |
| 7947 | ENSG00000ARMC3     | 0.882828 | 0.482828 | 0.682828 | 0.691919 |        |
| 7948 | ENSG00000SPNS1     | 0.930303 | 0.431313 | 0.680808 | 0.683838 |        |
| 7949 | ENSG00000HLA-DMB   | 0.838384 | 0.539394 | 0.688889 | 0.676768 |        |
| 7950 | ENSG00000AL645941. | 0.838384 | 0.539394 | 0.688889 | 0.676768 |        |
| 7951 | ENSG00000THAP11    | 1        | 0.343434 | 0.666667 | 0.624242 |        |
| 7952 | ENSG00000OR4C5     | 0.793939 | 0.591919 | 0.692929 | 0.674747 |        |
| 7953 | ENSG00000SLC38A7   | 0.972727 | 0.39899  | 0.674411 | 0.650505 |        |
| 7954 | ENSG00000LILRB5    | 0.878788 | 0.50101  | 0.689899 | 0.675758 |        |
| 7955 | ENSG00000ZNF334    | 0.69556  | 0.69556  | 0.69556  | 0.69556  |        |
| 7956 | ENSG00000OPTN      | 1        | 0.370707 | 0.67138  | 0.624242 | 0.4339 |
| 7957 | ENSG00000ITGB4     | 1        | 0.326263 | 0.701852 | 0.631313 |        |
| 7958 | ENSG00000ATXN3     | 0.966173 | 0.415433 | 0.731677 | 0.57611  |        |
| 7959 | ENSG00000MYLK      | 0.949495 | 0.426263 | 0.684175 | 0.669697 |        |
| 7960 | ENSG00000SMYD4     | 0.935354 | 0.444444 | 0.682492 | 0.666667 |        |
| 7961 | ENSG00000TFAM      | 0.858586 | 0.575758 | 0.709091 | 0.623232 |        |
| 7962 | ENSG00000TNFRSF14  | 0.959596 | 0.426263 | 0.692929 | 0.633333 |        |
| 7963 | ENSG00000KRT13     | 0.838384 | 0.539394 | 0.688889 | 0.679798 |        |
| 7964 | ENSG00000LRRC8B    | 0.934343 | 0.445455 | 0.689899 | 0.657576 |        |
| 7965 | ENSG00000HMMR      | 0.927273 | 0.446465 | 0.686869 | 0.673737 |        |
| 7966 | ENSG00000TNK1      | 0.915152 | 0.474747 | 0.692593 | 0.657576 |        |
| 7967 | ENSG00000MFS4B     | 0.89798  | 0.477778 | 0.684512 | 0.678788 | 0.3197 |
| 7968 | ENSG00000ZBED9     | 0.932347 | 0.458774 | 0.69556  | 0.640592 |        |
| 7969 | ENSG00000CD2       | 0.927273 | 0.443434 | 0.673064 | 0.691919 |        |
| 7970 | ENSG00000TGFB1I1   | 0.878788 | 0.50101  | 0.689899 | 0.676768 |        |
| 7971 | ENSG00000BCAS2     | 0.961616 | 0.434343 | 0.686195 | 0.628283 |        |
| 7972 | ENSG00000TTLL11    | 0.906061 | 0.469697 | 0.684175 | 0.680808 |        |
| 7973 | ENSG00000PSAPL1    | 1        | 0.372727 | 0.67138  | 0.581818 |        |



|      |                   |          |          |          |          |        |
|------|-------------------|----------|----------|----------|----------|--------|
| 7974 | ENSG00000FCHSD2   | 0.946089 | 0.438689 | 0.692389 | 0.651163 |        |
| 7975 | ENSG00000LRRC9    | 0.955556 | 0.426263 | 0.690236 | 0.656566 |        |
| 7976 | ENSG00000MPDU1    | 0.870707 | 0.543434 | 0.707071 | 0.635354 |        |
| 7977 | ENSG00000POGLUT1  | 0.961616 | 0.429293 | 0.695791 | 0.621212 |        |
| 7978 | ENSG00000PSORS1C2 | 0.817125 | 0.571882 | 0.682523 | 0.687104 |        |
| 7979 | ENSG00000SRL      | 0.939394 | 0.428283 | 0.683838 | 0.675758 |        |
| 7980 | ENSG00000EXOC5    | 0.833333 | 0.564646 | 0.69899  | 0.660606 |        |
| 7981 | ENSG00000LAMC3    | 0.793939 | 0.591919 | 0.692929 | 0.680808 |        |
| 7982 | ENSG00000LRRC55   | 0.858586 | 0.550505 | 0.697811 | 0.650505 |        |
| 7983 | ENSG00000SMYD5    | 0.951515 | 0.443434 | 0.695118 | 0.640404 |        |
| 7984 | ENSG00000SMAD7    | 0.963636 | 0.426263 | 0.706734 | 0.608081 |        |
| 7985 | ENSG00000OR10AD1  | 0.884778 | 0.486258 | 0.677766 | 0.699789 |        |
| 7986 | ENSG00000SV2A     | 0.939394 | 0.458586 | 0.69899  | 0.631313 |        |
| 7987 | ENSG00000CDA      | 0.820202 | 0.576768 | 0.680471 | 0.686869 |        |
| 7988 | ENSG00000NRAS     | 0.976768 | 0.386869 | 0.672054 | 0.660606 | 0.4575 |
| 7989 | ENSG00000PLK3     | 0.901691 | 0.510571 | 0.704369 | 0.62685  |        |
| 7990 | ENSG00000CYP11B1  | 0.970707 | 0.40101  | 0.675084 | 0.653535 |        |
| 7991 | ENSG00000ASPG     | 0.866667 | 0.520202 | 0.677441 | 0.688889 |        |
| 7992 | ENSG00000ATP2C2   | 0.838384 | 0.539394 | 0.688889 | 0.684848 |        |
| 7993 | ENSG00000RHBG     | 0.790698 | 0.584567 | 0.687632 | 0.692389 |        |
| 7994 | ENSG00000HOXB3    | 0.946089 | 0.438689 | 0.692389 | 0.65222  |        |
| 7995 | ENSG00000CYP11B2  | 0.970707 | 0.40101  | 0.675084 | 0.653535 |        |
| 7996 | ENSG00000XRN2     | 0.955603 | 0.453488 | 0.705426 | 0.612051 |        |
| 7997 | ENSG00000IL4      | 0.779798 | 0.582828 | 0.68064  | 0.711111 |        |
| 7998 | ENSG00000PAPD5    | 0.953535 | 0.426263 | 0.686532 | 0.665657 |        |
| 7999 | ENSG00000PPCS     | 0.994949 | 0.380808 | 0.72138  | 0.591919 |        |
| 8000 | ENSG00000SHTN1    | 0.882828 | 0.482828 | 0.682828 | 0.69596  |        |
| 8001 | ENSG00000PTPRM    | 0.936364 | 0.427273 | 0.681818 | 0.684848 |        |
| 8002 | ENSG00000SLC17A2  | 0.790698 | 0.584567 | 0.687632 | 0.693446 |        |
| 8003 | ENSG00000BTBD19   | 0.787879 | 0.611111 | 0.692761 | 0.676768 |        |
| 8004 | ENSG00000LRTM2    | 0.918182 | 0.463636 | 0.690909 | 0.669697 |        |
| 8005 | ENSG00000SPTBN2   | 0.978788 | 0.405051 | 0.688721 | 0.623232 |        |
| 8006 | ENSG00000DTX3     | 0.878788 | 0.50101  | 0.689899 | 0.678788 |        |
| 8007 | ENSG00000SAXO2    | 0.942424 | 0.39697  | 0.661953 | 0.735354 |        |
| 8008 | ENSG00000CALM1    | 1        | 0.348485 | 0.656566 | 0.617172 | 0.4363 |
| 8009 | ENSG00000PNMA2    | 0.823232 | 0.580808 | 0.689731 | 0.671717 |        |
| 8010 | ENSG00000TTN      | 0.951515 | 0.418182 | 0.681818 | 0.681818 |        |
| 8011 | ENSG00000STT3B    | 0.959831 | 0.392178 | 0.673362 | 0.692389 |        |
| 8012 | ENSG00000FASN     | 0.951515 | 0.427273 | 0.690404 | 0.661616 | 0.2727 |
| 8013 | ENSG00000RAB22A   | 0.886869 | 0.474747 | 0.675421 | 0.713131 |        |
| 8014 | ENSG00000RGN      | 0.973737 | 0.392929 | 0.659933 | 0.678788 |        |
| 8015 | ENSG00000HTT      | 1        | 0.323232 | 0.641751 | 0.664646 |        |
| 8016 | ENSG00000ISG15    | 0.964646 | 0.419192 | 0.679798 | 0.643434 | 0.3927 |
| 8017 | ENSG00000MT01     | 1        | 0.319192 | 0.648485 | 0.706061 |        |
| 8018 | ENSG00000BPIFB3   | 0.892929 | 0.486869 | 0.686532 | 0.681818 |        |
| 8019 | ENSG00000PPP4C    | 0.9      | 0.514141 | 0.695286 | 0.641414 |        |
| 8020 | ENSG00000CCDC66   | 0.941414 | 0.434343 | 0.685185 | 0.670707 |        |
| 8021 | ENSG00000DOCK3    | 0.87315  | 0.513742 | 0.693446 | 0.673362 |        |
| 8022 | ENSG00000ERI3     | 0.991919 | 0.385859 | 0.713468 | 0.60202  |        |
| 8023 | ENSG00000PLXNB3   | 0.860465 | 0.57611  | 0.707012 | 0.628964 |        |
| 8024 | ENSG00000ROR2     | 0.959596 | 0.387879 | 0.663805 | 0.712121 |        |
| 8025 | ENSG00000C2orf83  | 0.8      | 0.558586 | 0.673569 | 0.722222 |        |
| 8026 | ENSG00000A4GNT    | 0.817172 | 0.579798 | 0.696633 | 0.671717 |        |
| 8027 | ENSG00000TCAF1    | 0.849495 | 0.549495 | 0.69697  | 0.661616 |        |
| 8028 | ENSG00000EIF5A    | 0.945455 | 0.436364 | 0.690909 | 0.659596 |        |

|      |                    |          |          |          |          |        |        |
|------|--------------------|----------|----------|----------|----------|--------|--------|
| 8029 | ENSG00000PEMT      | 0.870707 | 0.543434 | 0.707071 | 0.639394 |        |        |
| 8030 | ENSG00000NIP7      | 0.893235 | 0.5      | 0.688161 | 0.669133 |        |        |
| 8031 | ENSG00000DCC       | 0.773737 | 0.609091 | 0.678114 | 0.707071 |        | 0.57   |
| 8032 | ENSG00000CFAP36    | 0.990909 | 0.374747 | 0.725084 | 0.59899  |        |        |
| 8033 | ENSG00000MY07A     | 0.957576 | 0.426263 | 0.688215 | 0.656566 |        |        |
| 8034 | ENSG00000MBNL3     | 0.752525 | 0.625253 | 0.688889 | 0.70101  |        |        |
| 8035 | ENSG00000RDH11     | 0.793939 | 0.591919 | 0.692929 | 0.684848 |        |        |
| 8036 | ENSG00000SETD3     | 0.909091 | 0.479798 | 0.692424 | 0.664646 |        |        |
| 8037 | ENSG00000ARPC2     | 1        | 0.390909 | 0.66936  | 0.586869 |        | 0.2487 |
| 8038 | ENSG00000TRIM2     | 0.945455 | 0.453535 | 0.692761 | 0.641414 |        |        |
| 8039 | ENSG00000TGM4      | 0.959596 | 0.448485 | 0.70404  | 0.606061 |        |        |
| 8040 | ENSG00000MICU1     | 0.943434 | 0.426263 | 0.686195 | 0.679798 | 0.378  | 0.2111 |
| 8041 | ENSG00000LOR       | 0.976768 | 0.39596  | 0.678451 | 0.649495 |        |        |
| 8042 | ENSG00000TMEM160   | 0.933333 | 0.475758 | 0.695286 | 0.632323 |        |        |
| 8043 | ENSG00000APBA3     | 0.937374 | 0.452525 | 0.684007 | 0.661616 |        |        |
| 8044 | ENSG00000MYBBP1A   | 0.870707 | 0.535354 | 0.698316 | 0.657576 |        |        |
| 8045 | ENSG00000BCAT2     | 0.864693 | 0.544397 | 0.693622 | 0.660677 |        |        |
| 8046 | ENSG00000MAGI3     | 0.868922 | 0.504228 | 0.684989 | 0.694503 |        |        |
| 8047 | ENSG00000DNAJC28   | 1        | 0.310101 | 0.662121 | 0.667677 |        |        |
| 8048 | ENSG00000PARP12    | 0.866667 | 0.528283 | 0.691582 | 0.674747 | 0.4517 | 0.2223 |
| 8049 | ENSG00000TXNDC15   | 0.868922 | 0.535941 | 0.702431 | 0.653277 |        |        |
| 8050 | ENSG00000VPS45     | 0.943434 | 0.452525 | 0.688889 | 0.649495 |        |        |
| 8051 | ENSG00000SHROOM2   | 0.886869 | 0.477778 | 0.675589 | 0.712121 |        |        |
| 8052 | ENSG00000CD207     | 0.953535 | 0.412121 | 0.675758 | 0.69697  |        |        |
| 8053 | ENSG00000BLOC1S3   | 0.828283 | 0.587879 | 0.707071 | 0.646465 |        |        |
| 8054 | ENSG00000SERPINC1  | 0.971717 | 0.415152 | 0.685522 | 0.632323 |        |        |
| 8055 | ENSG00000RNASEL    | 1        | 0.365657 | 0.682155 | 0.617172 |        |        |
| 8056 | ENSG00000EXOSC3    | 0.881818 | 0.526263 | 0.697306 | 0.656566 |        |        |
| 8057 | ENSG00000LHFPL6    | 0.848485 | 0.544444 | 0.689394 | 0.678788 |        |        |
| 8058 | ENSG00000 3/1/2019 | 0.900332 | 0.502769 | 0.699705 | 0.645626 |        |        |
| 8059 | ENSG00000ZNF514    | 0.917172 | 0.477778 | 0.692424 | 0.661616 |        |        |
| 8060 | ENSG00000PPM1H     | 0.99798  | 0.374747 | 0.739731 | 0.579798 |        |        |
| 8061 | ENSG00000SMAD4     | 0.887879 | 0.493939 | 0.682828 | 0.688889 |        |        |
| 8062 | ENSG00000FES       | 0.956811 | 0.409745 | 0.671096 | 0.700997 |        |        |
| 8063 | ENSG00000OR51E1    | 0.973737 | 0.412121 | 0.685354 | 0.631313 |        |        |
| 8064 | ENSG00000HDDC2     | 0.939394 | 0.462626 | 0.696633 | 0.639394 |        |        |
| 8065 | ENSG00000CEP170B   | 0.929293 | 0.430303 | 0.679798 | 0.70202  |        |        |
| 8066 | ENSG00000RGS7      | 0.828283 | 0.587879 | 0.707071 | 0.648485 |        |        |
| 8067 | ENSG00000RAD50     | 1        | 0.381818 | 0.676768 | 0.623232 |        | 0.268  |
| 8068 | ENSG00000MARK2     | 0.870707 | 0.512121 | 0.689899 | 0.686869 |        |        |
| 8069 | ENSG00000LYSMD4    | 0.987879 | 0.390909 | 0.701684 | 0.618182 | 0.2468 |        |
| 8070 | ENSG00000GPSM1     | 0.969697 | 0.392929 | 0.712626 | 0.625253 |        |        |
| 8071 | ENSG00000CHRD12    | 0.874747 | 0.521212 | 0.69798  | 0.667677 |        |        |
| 8072 | ENSG00000CAMKV     | 0.915152 | 0.474747 | 0.690236 | 0.671717 |        |        |
| 8073 | ENSG00000OTUD7A    | 0.950505 | 0.425253 | 0.691246 | 0.670707 |        |        |
| 8074 | ENSG00000MRPL11    | 0.870707 | 0.543434 | 0.707071 | 0.642424 |        |        |
| 8075 | ENSG00000ETHE1     | 0.961616 | 0.429293 | 0.695791 | 0.631313 |        |        |
| 8076 | ENSG00000MYLK4     | 0.878788 | 0.50101  | 0.689899 | 0.686869 |        |        |
| 8077 | ENSG00000LRRC63    | 0.994949 | 0.358586 | 0.706566 | 0.638384 |        |        |
| 8078 | ENSG00000A1BG      | 0.924242 | 0.443434 | 0.683838 | 0.693939 |        |        |
| 8079 | ENSG00000TTC25     | 0.784355 | 0.615222 | 0.699789 | 0.675476 |        |        |
| 8080 | ENSG00000FOXO4     | 0.780808 | 0.610101 | 0.688889 | 0.693939 |        |        |
| 8081 | ENSG00000CD93      | 0.927273 | 0.416162 | 0.671717 | 0.731313 |        |        |
| 8082 | ENSG00000CWC25     | 0.977778 | 0.39899  | 0.699158 | 0.624242 |        |        |
| 8083 | ENSG00000FUT4      | 0.947475 | 0.450505 | 0.69697  | 0.641414 |        |        |

|      |                    |          |          |          |          |        |
|------|--------------------|----------|----------|----------|----------|--------|
| 8084 | ENSG00000MRM3      | 1        | 0.391919 | 0.680808 | 0.565657 |        |
| 8085 | ENSG00000FLT4      | 0.886892 | 0.515856 | 0.690275 | 0.669133 |        |
| 8086 | ENSG00000SUM04     | 1        | 0.336364 | 0.690909 | 0.611111 |        |
| 8087 | ENSG00000SARDH     | 0.949495 | 0.458586 | 0.70404  | 0.626263 |        |
| 8088 | ENSG00000AMER2     | 0.787879 | 0.610101 | 0.692088 | 0.687879 |        |
| 8089 | ENSG00000GYG2      | 0.943434 | 0.425253 | 0.68468  | 0.688889 |        |
| 8090 | ENSG00000TNNC1     | 0.953535 | 0.429293 | 0.690404 | 0.666667 |        |
| 8091 | ENSG00000TMEM30A   | 0.793939 | 0.591919 | 0.692929 | 0.690909 |        |
| 8092 | ENSG00000PTP4A2    | 0.943434 | 0.459596 | 0.703872 | 0.630303 |        |
| 8093 | ENSG00000ANAPC1    | 0.974747 | 0.394949 | 0.677441 | 0.660606 |        |
| 8094 | ENSG00000CFAP58    | 0.737374 | 0.652525 | 0.694949 | 0.69899  |        |
| 8095 | ENSG00000NAXD      | 0.870707 | 0.50404  | 0.68165  | 0.70202  |        |
| 8096 | ENSG00000CMTR1     | 0.993939 | 0.384848 | 0.723232 | 0.59697  |        |
| 8097 | ENSG00000NRBF2     | 0.969697 | 0.407071 | 0.711953 | 0.616162 |        |
| 8098 | ENSG00000MAMDC2    | 0.949495 | 0.434343 | 0.688889 | 0.667677 |        |
| 8099 | ENSG00000KIF12     | 1        | 0.370707 | 0.685017 | 0.611111 |        |
| 8100 | ENSG00000CCDC90B   | 0.941414 | 0.489899 | 0.712626 | 0.59697  |        |
| 8101 | ENSG00000GDPD5     | 0.957576 | 0.449495 | 0.705219 | 0.619192 |        |
| 8102 | ENSG00000CCL2      | 0.974747 | 0.390909 | 0.674242 | 0.671717 |        |
| 8103 | ENSG00000WDPCP     | 0.874747 | 0.521212 | 0.69798  | 0.669697 |        |
| 8104 | ENSG00000STON1-GTF | 0.815011 | 0.580338 | 0.697674 | 0.679704 |        |
| 8105 | ENSG00000BCL7C     | 0.926263 | 0.470707 | 0.689226 | 0.660606 |        |
| 8106 | ENSG00000KCNS2     | 0.870707 | 0.543434 | 0.707071 | 0.646465 |        |
| 8107 | ENSG00000SEMA7A    | 0.924947 | 0.48203  | 0.701198 | 0.638478 |        |
| 8108 | ENSG00000FLNA      | 0.936364 | 0.459596 | 0.693098 | 0.651515 |        |
| 8109 | ENSG00000TMEM79    | 0.752525 | 0.625253 | 0.688889 | 0.708081 |        |
| 8110 | ENSG00000KAT7      | 0.858586 | 0.520202 | 0.682155 | 0.70101  |        |
| 8111 | ENSG00000CACNA1B   | 0.866667 | 0.535354 | 0.699663 | 0.665657 |        |
| 8112 | ENSG00000PDSS1     | 0.906061 | 0.487879 | 0.691582 | 0.671717 |        |
| 8113 | ENSG00000NKAP      | 0.847475 | 0.575758 | 0.704714 | 0.650505 |        |
| 8114 | ENSG00000STON1     | 0.815011 | 0.580338 | 0.697674 | 0.679704 |        |
| 8115 | ENSG00000CFHR1     | 0.980808 | 0.406061 | 0.703367 | 0.612121 |        |
| 8116 | ENSG00000C9orf24   | 0.822813 | 0.576966 | 0.699889 | 0.674419 |        |
| 8117 | ENSG00000GSTCD     | 1        | 0.357576 | 0.672727 | 0.638384 |        |
| 8118 | ENSG00000CA8       | 1        | 0.346465 | 0.649158 | 0.647475 |        |
| 8119 | ENSG00000MST1R     | 1        | 0.383838 | 0.675084 | 0.593939 | 0.6357 |
| 8120 | ENSG00000MRPL57    | 0.870707 | 0.543434 | 0.707071 | 0.647475 |        |
| 8121 | ENSG00000KCNK1     | 1        | 0.340404 | 0.662795 | 0.674747 |        |
| 8122 | ENSG00000PSRC1     | 0.745455 | 0.658586 | 0.70202  | 0.683838 |        |
| 8123 | ENSG00000CACNG4    | 0.745455 | 0.658586 | 0.70202  | 0.684848 |        |
| 8124 | ENSG00000COLEC11   | 0.887879 | 0.520202 | 0.696296 | 0.660606 |        |
| 8125 | ENSG00000TRAIP     | 1        | 0.378436 | 0.668076 | 0.590909 |        |
| 8126 | ENSG00000CCDC122   | 1        | 0.369697 | 0.668687 | 0.623232 |        |
| 8127 | ENSG00000SLC39A8   | 1        | 0.361616 | 0.665993 | 0.642424 |        |
| 8128 | ENSG00000NCR2      | 0.745455 | 0.658586 | 0.70202  | 0.684848 |        |
| 8129 | ENSG00000PIK3CD    | 0.949495 | 0.438384 | 0.698316 | 0.654545 |        |
| 8130 | ENSG00000CYP1A1    | 0.828283 | 0.591919 | 0.710101 | 0.648485 |        |
| 8131 | ENSG00000SCGB2A2   | 0.797101 | 0.595169 | 0.690177 | 0.692754 |        |
| 8132 | ENSG00000DPYD      | 0.933333 | 0.428283 | 0.680808 | 0.70101  |        |
| 8133 | ENSG00000TRIM39    | 0.827273 | 0.528283 | 0.672727 | 0.732323 |        |
| 8134 | ENSG00000VPS26A    | 0.945455 | 0.448485 | 0.691919 | 0.657576 |        |
| 8135 | ENSG00000TRIM39-RP | 0.827273 | 0.528283 | 0.672727 | 0.732323 |        |
| 8136 | ENSG00000NKD1      | 0.986869 | 0.358586 | 0.717845 | 0.638384 |        |
| 8137 | ENSG00000MLLT6     | 0.94926  | 0.43129  | 0.68587  | 0.678647 |        |
| 8138 | ENSG00000FCER1A    | 1        | 0.319192 | 0.694949 | 0.627273 |        |

|      |                    |          |          |          |          |        |
|------|--------------------|----------|----------|----------|----------|--------|
| 8139 | ENSG00000RNF212    | 0.931313 | 0.458586 | 0.685017 | 0.670707 |        |
| 8140 | ENSG00000EDEM3     | 0.981818 | 0.411111 | 0.690909 | 0.624242 |        |
| 8141 | ENSG00000WEE2      | 0.958586 | 0.409091 | 0.674242 | 0.693939 |        |
| 8142 | ENSG00000SELENOT   | 0.878788 | 0.501010 | 0.689899 | 0.690909 |        |
| 8143 | ENSG00000CDAN1     | 0.974747 | 0.409091 | 0.682323 | 0.646465 |        |
| 8144 | ENSG00000APBB1     | 1        | 0.382828 | 0.677273 | 0.590909 |        |
| 8145 | ENSG00000ISCA1     | 0.833333 | 0.564646 | 0.69899  | 0.675758 |        |
| 8146 | ENSG00000MY09B     | 0.970707 | 0.425253 | 0.686869 | 0.633333 |        |
| 8147 | ENSG00000PKLR      | 0.838384 | 0.539394 | 0.688889 | 0.69798  |        |
| 8148 | ENSG00000 9/1/2019 | 0.828283 | 0.558586 | 0.692424 | 0.689899 |        |
| 8149 | ENSG00000LMNTD2    | 0.959596 | 0.412121 | 0.676936 | 0.682828 |        |
| 8150 | ENSG00000MAPK3     | 1        | 0.374747 | 0.672054 | 0.650505 |        |
| 8151 | ENSG00000KLF17     | 0.741015 | 0.65222  | 0.696617 | 0.700846 |        |
| 8152 | ENSG00000MAT1A     | 0.915152 | 0.461616 | 0.683502 | 0.69899  |        |
| 8153 | ENSG00000ANKRD50   | 0.870707 | 0.535354 | 0.698316 | 0.668687 |        |
| 8154 | ENSG00000SRGAP2    | 0.969697 | 0.409091 | 0.732828 | 0.593939 |        |
| 8155 | ENSG00000NUBP1     | 0.959596 | 0.461616 | 0.704209 | 0.609091 |        |
| 8156 | ENSG00000CTDP1     | 0.99697  | 0.392929 | 0.724242 | 0.590909 |        |
| 8157 | ENSG00000ZNF615    | 0.9      | 0.510101 | 0.70202  | 0.646465 |        |
| 8158 | ENSG00000ARHGAP27  | 0.8      | 0.563636 | 0.681818 | 0.722222 |        |
| 8159 | ENSG00000ASRGL1    | 0.989899 | 0.365657 | 0.721549 | 0.626263 |        |
| 8160 | ENSG00000MAD2L2    | 0.844444 | 0.577778 | 0.709091 | 0.650505 |        |
| 8161 | ENSG00000HADHA     | 0.959596 | 0.412121 | 0.676936 | 0.687879 |        |
| 8162 | ENSG00000NBEA      | 0.976744 | 0.40592  | 0.680233 | 0.651163 |        |
| 8163 | ENSG00000PARP3     | 0.930303 | 0.440404 | 0.674411 | 0.707071 |        |
| 8164 | ENSG00000SLC8A1    | 0.868922 | 0.535941 | 0.702431 | 0.663848 |        |
| 8165 | ENSG00000BPIFB1    | 0.741015 | 0.65222  | 0.696617 | 0.70296  |        |
| 8166 | ENSG00000NAA10     | 1        | 0.382828 | 0.677273 | 0.638384 |        |
| 8167 | ENSG00000AHCY      | 0.968687 | 0.405051 | 0.724916 | 0.612121 |        |
| 8168 | ENSG00000PCLO      | 0.974747 | 0.40303  | 0.682155 | 0.652525 | 0.2389 |
| 8169 | ENSG00000FAM3A     | 0.960606 | 0.39899  | 0.669697 | 0.707071 |        |
| 8170 | ENSG00000CNNM1     | 0.828283 | 0.591919 | 0.710101 | 0.652525 |        |
| 8171 | ENSG00000CSNK2A1   | 1        | 0.391919 | 0.721549 | 0.578788 |        |
| 8172 | ENSG00000PRM2      | 0.945455 | 0.460606 | 0.698485 | 0.642424 |        |
| 8173 | ENSG00000TYW5      | 0.866667 | 0.535354 | 0.699663 | 0.670707 |        |
| 8174 | ENSG00000SUMO2     | 1        | 0.336364 | 0.690909 | 0.611111 |        |
| 8175 | ENSG00000KIAA1210  | 0.988889 | 0.417172 | 0.6867   | 0.618182 |        |
| 8176 | ENSG00000SNX11     | 0.953535 | 0.431313 | 0.680976 | 0.684848 |        |
| 8177 | ENSG00000DONSON    | 0.906061 | 0.479798 | 0.68367  | 0.690909 |        |
| 8178 | ENSG00000SLC22A4   | 0.833333 | 0.554545 | 0.682828 | 0.70303  |        |
| 8179 | ENSG00000JKAMP     | 0.870707 | 0.543434 | 0.707071 | 0.654545 |        |
| 8180 | ENSG00000PTPN22    | 1        | 0.383838 | 0.680135 | 0.614141 |        |
| 8181 | ENSG00000SLC40A1   | 0.787879 | 0.622222 | 0.705051 | 0.672727 |        |
| 8182 | ENSG00000CROCC     | 0.843434 | 0.516162 | 0.679798 | 0.727273 |        |
| 8183 | ENSG00000ARHGAP36  | 0.984274 | 0.39408  | 0.690873 | 0.641073 |        |
| 8184 | ENSG00000SMCO3     | 0.976768 | 0.390909 | 0.678788 | 0.668687 |        |
| 8185 | ENSG00000NRP1      | 0.977778 | 0.409091 | 0.682323 | 0.646465 |        |
| 8186 | ENSG00000PLCH1     | 0.982828 | 0.39899  | 0.68266  | 0.648485 |        |
| 8187 | ENSG00000TMC03     | 0.973737 | 0.392929 | 0.691751 | 0.654545 |        |
| 8188 | ENSG00000QARS      | 0.912121 | 0.491919 | 0.70202  | 0.652525 |        |
| 8189 | ENSG00000AP000275. | 0.951515 | 0.452525 | 0.70202  | 0.636364 |        |
| 8190 | ENSG00000NOVA2     | 0.860606 | 0.542424 | 0.688889 | 0.684848 |        |
| 8191 | ENSG00000AHNAK2    | 0.982828 | 0.360606 | 0.722896 | 0.638384 |        |
| 8192 | ENSG00000OTUD5     | 0.825581 | 0.584567 | 0.705074 | 0.667019 |        |
| 8193 | ENSG00000CHUK      | 1        | 0.363636 | 0.666667 | 0.60404  | 0.3183 |

|      |                    |          |          |          |          |
|------|--------------------|----------|----------|----------|----------|
| 8194 | ENSG00000NPIPB12   | 0.92389  | 0.488372 | 0.702255 | 0.641649 |
| 8195 | ENSG00000NPIPB3    | 0.92389  | 0.488372 | 0.702255 | 0.641649 |
| 8196 | ENSG00000ERCC5     | 1        | 0.374747 | 0.748822 | 0.539394 |
| 8197 | ENSG00000NSD2      | 1        | 0.378788 | 0.699495 | 0.613131 |
| 8198 | ENSG00000NPIPA1    | 0.92389  | 0.488372 | 0.702255 | 0.641649 |
| 8199 | ENSG00000CD2AP     | 0.972727 | 0.425253 | 0.692256 | 0.625253 |
| 8200 | ENSG00000NPIPA5    | 0.92389  | 0.488372 | 0.702255 | 0.641649 |
| 8201 | ENSG00000C19orf44  | 0.957717 | 0.428118 | 0.699789 | 0.653277 |
| 8202 | ENSG00000AC138969. | 0.92389  | 0.488372 | 0.702255 | 0.641649 |
| 8203 | ENSG00000CLK3      | 0.985859 | 0.391919 | 0.694781 | 0.638384 |
| 8204 | ENSG00000LZTR1     | 0.961616 | 0.40404  | 0.670707 | 0.69899  |
| 8205 | ENSG00000MAD2L1    | 0.833333 | 0.564646 | 0.69899  | 0.679798 |
| 8206 | ENSG00000NPIPB4    | 0.92389  | 0.488372 | 0.702255 | 0.641649 |
| 8207 | ENSG00000SLC44A5   | 1        | 0.376768 | 0.681313 | 0.616162 |
| 8208 | ENSG00000NPIPB13   | 0.92389  | 0.488372 | 0.702255 | 0.641649 |
| 8209 | ENSG00000NPIPA8    | 0.92389  | 0.488372 | 0.702255 | 0.641649 |
| 8210 | ENSG00000PIEZ02    | 1        | 0.390909 | 0.6867   | 0.586869 |
| 8211 | ENSG00000NPIPA7    | 0.92389  | 0.488372 | 0.702255 | 0.641649 |
| 8212 | ENSG00000FLOT1     | 0.973737 | 0.417172 | 0.688721 | 0.637374 |
| 8213 | ENSG00000TMEM87B   | 0.828283 | 0.591919 | 0.710101 | 0.654545 |
| 8214 | ENSG00000NPIPA3    | 0.92389  | 0.488372 | 0.702255 | 0.641649 |
| 8215 | ENSG00000HSPBP1    | 0.893939 | 0.522222 | 0.700673 | 0.653535 |
| 8216 | ENSG00000AC126755. | 0.92389  | 0.488372 | 0.702255 | 0.641649 |
| 8217 | ENSG00000NPIPB2    | 0.92389  | 0.488372 | 0.702255 | 0.641649 |
| 8218 | ENSG00000UNK       | 0.957576 | 0.425253 | 0.691077 | 0.671717 |
| 8219 | ENSG00000NPIPB5    | 0.92389  | 0.488372 | 0.702255 | 0.641649 |
| 8220 | ENSG00000ZNF329    | 0.889899 | 0.487879 | 0.677104 | 0.714141 |
| 8221 | ENSG00000NPIPB11   | 0.92389  | 0.488372 | 0.702255 | 0.641649 |
| 8222 | ENSG00000AKAP12    | 0.945455 | 0.436364 | 0.690909 | 0.677778 |
| 8223 | ENSG00000NPIPA2    | 0.92389  | 0.488372 | 0.702255 | 0.641649 |
| 8224 | ENSG00000AC138894. | 0.92389  | 0.488372 | 0.702255 | 0.641649 |
| 8225 | ENSG00000SULT2A1   | 0.951515 | 0.421212 | 0.689731 | 0.689899 |
| 8226 | ENSG00000TAGLN     | 0.912121 | 0.477778 | 0.689899 | 0.683838 |
| 8227 | ENSG00000CFAP97    | 0.941414 | 0.450505 | 0.688215 | 0.669697 |
| 8228 | ENSG00000SHISA4    | 0.966667 | 0.433333 | 0.703367 | 0.615152 |
| 8229 | ENSG00000SMARCD1   | 0.884828 | 0.51495  | 0.696936 | 0.676633 |
| 8230 | ENSG00000MGME1     | 0.870707 | 0.543434 | 0.707071 | 0.657576 |
| 8231 | ENSG00000BAALC     | 0.951374 | 0.406977 | 0.675123 | 0.723044 |
| 8232 | ENSG00000DEF6      | 0.92389  | 0.438689 | 0.68129  | 0.715645 |
| 8233 | ENSG00000IMMP1L    | 0.838384 | 0.539394 | 0.688889 | 0.705051 |
| 8234 | ENSG00000CYLD      | 0.987879 | 0.379798 | 0.696128 | 0.650505 |
| 8235 | ENSG00000TNFRSF8   | 0.971717 | 0.388889 | 0.683502 | 0.676768 |
| 8236 | ENSG00000PCSK2     | 0.756522 | 0.631884 | 0.694203 | 0.70628  |
| 8237 | ENSG00000B4GALT6   | 1        | 0.376768 | 0.671717 | 0.643434 |
| 8238 | ENSG00000EIF3D     | 0.971717 | 0.422222 | 0.688552 | 0.639394 |
| 8239 | ENSG00000PMS2      | 0.809091 | 0.578788 | 0.692424 | 0.70202  |
| 8240 | ENSG00000CBLB      | 0.966667 | 0.415152 | 0.678788 | 0.665657 |
| 8241 | ENSG00000MYO19     | 0.884848 | 0.547475 | 0.708923 | 0.639394 |
| 8242 | ENSG00000COQ5      | 0.909091 | 0.49798  | 0.699832 | 0.659596 |
| 8243 | ENSG00000USP37     | 0.885859 | 0.5      | 0.686195 | 0.69798  |
| 8244 | ENSG00000MEPE      | 0.984144 | 0.404863 | 0.685694 | 0.641649 |
| 8245 | ENSG00000SMIM24    | 0.948485 | 0.39697  | 0.673737 | 0.738384 |
| 8246 | ENSG00000ZBTB5     | 0.947951 | 0.462901 | 0.684201 | 0.660022 |
| 8247 | ENSG00000LRRC37A   | 1        | 0.360606 | 0.678283 | 0.612121 |
| 8248 | ENSG00000MASP2     | 1        | 0.417172 | 0.696296 | 0.606061 |

|      |                    |          |          |          |          |        |
|------|--------------------|----------|----------|----------|----------|--------|
| 8249 | ENSG00000LRRC37A3  | 1        | 0.360606 | 0.678283 | 0.612121 |        |
| 8250 | ENSG00000CCNO      | 0.783838 | 0.586869 | 0.685354 | 0.723232 |        |
| 8251 | ENSG00000PHF21B    | 0.833333 | 0.564646 | 0.69899  | 0.685859 |        |
| 8252 | ENSG00000TRIP10    | 0.921212 | 0.437374 | 0.676936 | 0.730303 |        |
| 8253 | ENSG00000GSTZ1     | 0.981818 | 0.380808 | 0.677609 | 0.679798 | 0.1222 |
| 8254 | ENSG00000SASH1     | 1        | 0.426263 | 0.717172 | 0.548485 |        |
| 8255 | ENSG00000CD84      | 0.793939 | 0.591919 | 0.692929 | 0.706061 |        |
| 8256 | ENSG00000TKT       | 0.923232 | 0.49596  | 0.698316 | 0.644444 |        |
| 8257 | ENSG00000MUC16     | 0.860627 | 0.544715 | 0.702671 | 0.671312 |        |
| 8258 | ENSG00000GRM1      | 0.874747 | 0.521212 | 0.69798  | 0.682828 |        |
| 8259 | ENSG00000SMARCC1   | 1        | 0.357576 | 0.709091 | 0.580808 |        |
| 8260 | ENSG00000ARHGAP11A | 0.975758 | 0.443434 | 0.693603 | 0.609091 |        |
| 8261 | ENSG00000EIF3C     | 0.971717 | 0.422222 | 0.688552 | 0.640404 |        |
| 8262 | ENSG00000NDUF8     | 0.784355 | 0.615222 | 0.699789 | 0.691332 |        |
| 8263 | ENSG00000IDH1      | 0.988889 | 0.370707 | 0.739899 | 0.609091 |        |
| 8264 | ENSG00000TAC3      | 0.828283 | 0.591919 | 0.710101 | 0.659596 |        |
| 8265 | ENSG00000ITPR1     | 0.939394 | 0.427273 | 0.680808 | 0.710101 |        |
| 8266 | ENSG00000TIMMDC1   | 0.947475 | 0.418182 | 0.677104 | 0.716162 |        |
| 8267 | ENSG00000GOSR1     | 1        | 0.391919 | 0.686532 | 0.623232 |        |
| 8268 | ENSG00000DHRS11    | 0.983838 | 0.422222 | 0.698653 | 0.613131 |        |
| 8269 | ENSG00000C16orf89  | 0.94926  | 0.436575 | 0.691332 | 0.678647 |        |
| 8270 | ENSG00000PPP4R3B   | 1        | 0.336364 | 0.654545 | 0.649495 |        |
| 8271 | ENSG00000LEFTY2    | 0.969697 | 0.39697  | 0.689394 | 0.669697 |        |
| 8272 | ENSG00000FUT8      | 1        | 0.412121 | 0.691246 | 0.616162 |        |
| 8273 | ENSG00000CHPF      | 0.808081 | 0.614141 | 0.704545 | 0.673737 |        |
| 8274 | ENSG00000CEP70     | 1        | 0.371717 | 0.680135 | 0.646465 |        |
| 8275 | ENSG00000OCLN      | 0.973737 | 0.414141 | 0.701347 | 0.629293 |        |
| 8276 | ENSG00000OTUD7B    | 0.938384 | 0.433333 | 0.686532 | 0.69697  |        |
| 8277 | ENSG00000VPS18     | 0.874747 | 0.521212 | 0.69798  | 0.685859 |        |
| 8278 | ENSG00000TMEM17    | 0.912121 | 0.491919 | 0.70202  | 0.661616 |        |
| 8279 | ENSG00000OFD1      | 1        | 0.383838 | 0.680135 | 0.657576 |        |
| 8280 | ENSG00000NFE2L1    | 0.915152 | 0.474747 | 0.692256 | 0.690909 |        |
| 8281 | ENSG00000TUBB4A    | 1        | 0.364646 | 0.696465 | 0.643434 |        |
| 8282 | ENSG00000GRPEL2    | 1        | 0.365657 | 0.665993 | 0.636364 |        |
| 8283 | ENSG00000EHD2      | 0.927273 | 0.436364 | 0.681818 | 0.719192 |        |
| 8284 | ENSG00000PRRC2A    | 0.951515 | 0.433333 | 0.688384 | 0.683838 |        |
| 8285 | ENSG00000USP10     | 1        | 0.425253 | 0.699832 | 0.582828 | 0.2715 |
| 8286 | ENSG00000FBXL8     | 0.977778 | 0.405051 | 0.68468  | 0.655556 |        |
| 8287 | ENSG00000DEPDC4    | 0.828283 | 0.591919 | 0.710101 | 0.662626 |        |
| 8288 | ENSG00000SPINDOC   | 0.964059 | 0.428118 | 0.700141 | 0.637421 |        |
| 8289 | ENSG00000LGR5      | 0.931313 | 0.474747 | 0.694276 | 0.659596 |        |
| 8290 | ENSG00000STK36     | 1        | 0.355556 | 0.666667 | 0.648485 | 0.4491 |
| 8291 | ENSG00000MSLN      | 0.956566 | 0.435354 | 0.681987 | 0.684848 |        |
| 8292 | ENSG00000SATB2     | 0.973737 | 0.40202  | 0.680135 | 0.672727 |        |
| 8293 | ENSG00000ZCCHC7    | 1        | 0.358586 | 0.693603 | 0.622222 |        |
| 8294 | ENSG00000ASB7      | 0.822813 | 0.576966 | 0.699889 | 0.689922 |        |
| 8295 | ENSG00000EARS2     | 0.962626 | 0.445455 | 0.725421 | 0.6      |        |
| 8296 | ENSG00000PTPRF     | 0.878788 | 0.50101  | 0.689899 | 0.708081 |        |
| 8297 | ENSG00000AMOT      | 0.870707 | 0.543434 | 0.707071 | 0.665657 |        |
| 8298 | ENSG00000ST6GALNAC | 0.787879 | 0.622222 | 0.705051 | 0.682828 |        |
| 8299 | ENSG00000FCGR3A    | 0.959596 | 0.426263 | 0.692929 | 0.663636 |        |
| 8300 | ENSG00000SH2B3     | 0.930233 | 0.470402 | 0.702607 | 0.655391 |        |
| 8301 | ENSG00000SLC34A2   | 0.784355 | 0.615222 | 0.699789 | 0.696617 |        |
| 8302 | ENSG00000ATG12     | 1        | 0.377378 | 0.668605 | 0.635307 |        |
| 8303 | ENSG00000ITGA6     | 0.982828 | 0.368687 | 0.727609 | 0.636364 |        |

|      |                    |          |          |          |          |        |
|------|--------------------|----------|----------|----------|----------|--------|
| 8304 | ENSG00000SYTL1     | 0.931313 | 0.50202  | 0.708923 | 0.620202 |        |
| 8305 | ENSG00000IREB2     | 0.948485 | 0.443434 | 0.69596  | 0.673737 |        |
| 8306 | ENSG00000PLCB1     | 1        | 0.361616 | 0.691582 | 0.59798  |        |
| 8307 | ENSG00000RPS16     | 0.828283 | 0.591919 | 0.710101 | 0.667677 |        |
| 8308 | ENSG00000HSBP1L1   | 0.864693 | 0.560254 | 0.712474 | 0.653277 |        |
| 8309 | ENSG00000SFN       | 0.975758 | 0.432323 | 0.702525 | 0.612121 |        |
| 8310 | ENSG00000SYNJ2BP-C | 0.927273 | 0.446465 | 0.686869 | 0.70202  |        |
| 8311 | ENSG00000URB2      | 0.912121 | 0.491919 | 0.70202  | 0.667677 |        |
| 8312 | ENSG00000ITGAM     | 0.943434 | 0.462626 | 0.694276 | 0.659596 |        |
| 8313 | ENSG00000PFN1      | 1        | 0.40303  | 0.687879 | 0.616162 | 0.3241 |
| 8314 | ENSG00000ASNA1     | 0.882828 | 0.516162 | 0.697811 | 0.683838 |        |
| 8315 | ENSG00000ALG13     | 0.823232 | 0.582828 | 0.696633 | 0.692929 |        |
| 8316 | ENSG00000ATP6V1A   | 0.940199 | 0.44629  | 0.690661 | 0.684385 |        |
| 8317 | ENSG00000DDX42     | 1        | 0.358586 | 0.673401 | 0.615152 | 0.331  |
| 8318 | ENSG00000CD177     | 0.951374 | 0.413319 | 0.679528 | 0.718816 |        |
| 8319 | ENSG00000CTNNB1    | 1        | 0.358586 | 0.693603 | 0.611111 | 0.3632 |
| 8320 | ENSG00000IFRD2     | 0.828283 | 0.591919 | 0.710101 | 0.664646 |        |
| 8321 | ENSG00000TPI1      | 1        | 0.39697  | 0.684175 | 0.624242 |        |
| 8322 | ENSG00000TSSK4     | 0.828283 | 0.558586 | 0.692424 | 0.707071 |        |
| 8323 | ENSG00000NABP2     | 0.864693 | 0.560254 | 0.712474 | 0.654334 |        |
| 8324 | ENSG00000TGFBI     | 0.951515 | 0.452525 | 0.70202  | 0.652525 |        |
| 8325 | ENSG00000CYBB      | 0.849495 | 0.549495 | 0.69697  | 0.690909 |        |
| 8326 | ENSG00000FN1       | 0.955556 | 0.425253 | 0.686869 | 0.69596  |        |
| 8327 | ENSG00000ATAT1     | 1        | 0.387879 | 0.688215 | 0.611111 |        |
| 8328 | ENSG00000KIF3B     | 0.858586 | 0.540404 | 0.699495 | 0.687879 |        |
| 8329 | ENSG00000AASDH     | 1        | 0.350505 | 0.671549 | 0.655556 |        |
| 8330 | ENSG00000CHRNA5    | 0.787879 | 0.622222 | 0.705051 | 0.685859 |        |
| 8331 | ENSG00000FGG       | 0.957576 | 0.446465 | 0.70202  | 0.647475 |        |
| 8332 | ENSG00000ENPP4     | 0.854545 | 0.552525 | 0.70101  | 0.683838 |        |
| 8333 | ENSG00000TNFSF12-T | 0.974747 | 0.409091 | 0.682323 | 0.663636 |        |
| 8334 | ENSG00000FOXA3     | 0.934461 | 0.519027 | 0.724806 | 0.589852 |        |
| 8335 | ENSG00000MIEF2     | 0.833333 | 0.564646 | 0.69899  | 0.691919 |        |
| 8336 | ENSG00000VEGFA     | 1        | 0.381818 | 0.677441 | 0.646465 | 0.3721 |
| 8337 | ENSG00000PPP6R2    | 0.948485 | 0.443434 | 0.69596  | 0.676768 |        |
| 8338 | ENSG00000SMIM19    | 0.909091 | 0.509091 | 0.709091 | 0.648485 |        |
| 8339 | ENSG00000GOLGA2    | 1        | 0.370707 | 0.672054 | 0.624242 |        |
| 8340 | ENSG00000BRI3BP    | 0.885835 | 0.544397 | 0.711593 | 0.646934 |        |
| 8341 | ENSG00000SELENOM   | 0.961616 | 0.407071 | 0.68165  | 0.692929 |        |
| 8342 | ENSG00000HMGS2     | 0.949495 | 0.434343 | 0.692256 | 0.686869 |        |
| 8343 | ENSG00000ANKRD45   | 0.957576 | 0.425253 | 0.691077 | 0.681818 | 0.3325 |
| 8344 | ENSG00000CALML5    | 0.828283 | 0.576768 | 0.685859 | 0.708081 |        |
| 8345 | ENSG00000TAF4      | 1        | 0.377778 | 0.677104 | 0.640404 |        |
| 8346 | ENSG00000AUP1      | 0.9701   | 0.434109 | 0.69509  | 0.632337 |        |
| 8347 | ENSG00000ZNF804B   | 0.895349 | 0.52537  | 0.707541 | 0.654334 |        |
| 8348 | ENSG00000TM9SF2    | 0.853535 | 0.557576 | 0.704377 | 0.677778 |        |
| 8349 | ENSG00000ALDOB     | 0.948485 | 0.419192 | 0.684512 | 0.713131 |        |
| 8350 | ENSG00000BATF2     | 0.870707 | 0.543434 | 0.707071 | 0.669697 |        |
| 8351 | ENSG00000PHF1      | 0.928283 | 0.460606 | 0.691919 | 0.686869 |        |
| 8352 | ENSG00000BRWD1     | 1        | 0.322222 | 0.643603 | 0.7      |        |
| 8353 | ENSG00000PAGR1     | 0.981818 | 0.420202 | 0.699327 | 0.624242 |        |
| 8354 | ENSG00000SSUH2     | 0.741015 | 0.65222  | 0.696617 | 0.721987 |        |
| 8355 | ENSG00000ZCHC2     | 0.939394 | 0.462626 | 0.696633 | 0.666667 |        |
| 8356 | ENSG00000CYP2C9    | 0.912121 | 0.491919 | 0.70202  | 0.671717 |        |
| 8357 | ENSG00000SEMA4A    | 0.793939 | 0.591919 | 0.692929 | 0.714141 |        |
| 8358 | ENSG00000UCK1      | 0.926263 | 0.456566 | 0.683838 | 0.70404  |        |

|      |                   |          |          |          |          |        |
|------|-------------------|----------|----------|----------|----------|--------|
| 8359 | ENSG00000LRP12    | 0.958586 | 0.425253 | 0.690741 | 0.680808 |        |
| 8360 | ENSG00000IRS1     | 0.929293 | 0.449495 | 0.68165  | 0.707071 |        |
| 8361 | ENSG00000RNF141   | 0.976768 | 0.425253 | 0.697306 | 0.631313 |        |
| 8362 | ENSG00000TBCC     | 1        | 0.376768 | 0.673232 | 0.651515 |        |
| 8363 | ENSG00000SLC9A3R1 | 0.977778 | 0.424242 | 0.697475 | 0.631313 |        |
| 8364 | ENSG00000MAP3K12  | 0.866667 | 0.560606 | 0.708586 | 0.663636 |        |
| 8365 | ENSG00000CGGBP1   | 1        | 0.40202  | 0.690236 | 0.581818 |        |
| 8366 | ENSG00000CDC42    | 1        | 0.39697  | 0.684175 | 0.644444 |        |
| 8367 | ENSG00000PABPC1   | 0.948485 | 0.443434 | 0.69596  | 0.680808 |        |
| 8368 | ENSG00000CMC2     | 1        | 0.39596  | 0.683165 | 0.636364 |        |
| 8369 | ENSG00000UPF3B    | 0.933333 | 0.462626 | 0.691246 | 0.680808 |        |
| 8370 | ENSG00000STRADA   | 0.932323 | 0.425253 | 0.675084 | 0.737374 |        |
| 8371 | ENSG00000GAP43    | 0.909091 | 0.49798  | 0.695286 | 0.678788 |        |
| 8372 | ENSG00000TTC7A    | 1        | 0.390909 | 0.68266  | 0.654545 |        |
| 8373 | ENSG00000TOMM6    | 0.870707 | 0.543434 | 0.707071 | 0.670707 |        |
| 8374 | ENSG00000ZBTB17   | 0.938689 | 0.468288 | 0.700141 | 0.658562 |        |
| 8375 | ENSG00000FGR      | 0.870707 | 0.543434 | 0.707071 | 0.674747 |        |
| 8376 | ENSG00000AKAP11   | 0.864693 | 0.560254 | 0.712474 | 0.659619 |        |
| 8377 | ENSG00000PGLYRP2  | 0.969697 | 0.441414 | 0.693771 | 0.632323 |        |
| 8378 | ENSG00000POLD1    | 0.959596 | 0.468687 | 0.702862 | 0.623232 |        |
| 8379 | ENSG00000TPCN2    | 0.833333 | 0.564646 | 0.69899  | 0.69697  |        |
| 8380 | ENSG00000TDRD7    | 0.991919 | 0.374747 | 0.735185 | 0.618182 |        |
| 8381 | ENSG00000TP53I3   | 0.969697 | 0.456566 | 0.737205 | 0.565657 |        |
| 8382 | ENSG00000KRT6C    | 0.787879 | 0.619192 | 0.697138 | 0.70404  |        |
| 8383 | ENSG00000UNC5CL   | 0.874747 | 0.521212 | 0.69798  | 0.69596  |        |
| 8384 | ENSG00000LGALS3BP | 0.948485 | 0.443434 | 0.69596  | 0.681818 |        |
| 8385 | ENSG00000TARBP1   | 0.939394 | 0.462626 | 0.696633 | 0.670707 |        |
| 8386 | ENSG00000ADGRG2   | 0.935354 | 0.463636 | 0.68367  | 0.686869 |        |
| 8387 | ENSG00000GPAT3    | 0.828283 | 0.591919 | 0.710101 | 0.673737 |        |
| 8388 | ENSG00000PADI1    | 0.825581 | 0.580338 | 0.701903 | 0.692389 |        |
| 8389 | ENSG00000GUCA1B   | 0.784355 | 0.615222 | 0.699789 | 0.705074 |        |
| 8390 | ENSG00000PRL      | 1        | 0.377778 | 0.670853 | 0.62029  |        |
| 8391 | ENSG00000RHPN1    | 1        | 0.404863 | 0.688337 | 0.587738 |        |
| 8392 | ENSG00000KRT6A    | 0.787879 | 0.619192 | 0.697138 | 0.70404  |        |
| 8393 | ENSG00000 #####   | 0.807611 | 0.605708 | 0.705955 | 0.687104 | 0.4569 |
| 8394 | ENSG00000MANEA    | 0.927273 | 0.436364 | 0.681818 | 0.727273 |        |
| 8395 | ENSG00000CLTA     | 0.959596 | 0.426263 | 0.692929 | 0.676768 |        |
| 8396 | ENSG00000SAMHD1   | 0.890909 | 0.520202 | 0.697811 | 0.681818 |        |
| 8397 | ENSG00000ZNF133   | 0.939746 | 0.458774 | 0.68957  | 0.681818 |        |
| 8398 | ENSG00000LIG1     | 1        | 0.369697 | 0.706734 | 0.635354 |        |
| 8399 | ENSG00000TDRKH    | 1        | 0.361616 | 0.6633   | 0.639394 |        |
| 8400 | ENSG00000PAX9     | 0.775758 | 0.618182 | 0.696296 | 0.715152 |        |
| 8401 | ENSG00000NSDHL    | 0.976768 | 0.425253 | 0.693939 | 0.638384 |        |
| 8402 | ENSG00000CNGA3    | 0.774879 | 0.62029  | 0.69694  | 0.71401  |        |
| 8403 | ENSG00000SERPIND1 | 0.951515 | 0.452525 | 0.70202  | 0.661616 |        |
| 8404 | ENSG00000ABCF2    | 1        | 0.352525 | 0.662626 | 0.633333 |        |
| 8405 | ENSG00000ATG16L1  | 0.890909 | 0.530303 | 0.704882 | 0.667677 |        |
| 8406 | ENSG00000LRRC37A2 | 1        | 0.360606 | 0.678283 | 0.612121 |        |
| 8407 | ENSG00000CD59     | 0.957576 | 0.426263 | 0.688215 | 0.694949 |        |
| 8408 | ENSG00000DGUOK    | 0.961616 | 0.408081 | 0.685185 | 0.69697  |        |
| 8409 | ENSG00000GDI2     | 0.941414 | 0.461616 | 0.696633 | 0.672727 |        |
| 8410 | ENSG00000NAALADL2 | 0.986869 | 0.378788 | 0.694613 | 0.671717 |        |
| 8411 | ENSG00000ZNF548   | 0.926004 | 0.483087 | 0.692389 | 0.674419 |        |
| 8412 | ENSG00000VSIG1    | 0.975758 | 0.421212 | 0.712963 | 0.622222 |        |
| 8413 | ENSG00000PTTG1    | 1        | 0.350505 | 0.727273 | 0.591919 |        |



|      |                    |          |          |          |          |        |
|------|--------------------|----------|----------|----------|----------|--------|
| 8414 | ENSG00000RPL28     | 0.890909 | 0.549495 | 0.712963 | 0.645455 |        |
| 8415 | ENSG00000XIRP2     | 0.943434 | 0.452525 | 0.69798  | 0.673737 |        |
| 8416 | ENSG00000TRESX1    | 0.958586 | 0.427273 | 0.687879 | 0.685859 |        |
| 8417 | ENSG00000DENND4C   | 0.945455 | 0.476768 | 0.711111 | 0.634343 |        |
| 8418 | ENSG00000MYH2      | 0.957576 | 0.446465 | 0.70202  | 0.659596 |        |
| 8419 | ENSG00000ATP6V1G2  | 0.976768 | 0.425253 | 0.697306 | 0.635354 |        |
| 8420 | ENSG00000PTPN2     | 0.963636 | 0.447475 | 0.692761 | 0.642424 |        |
| 8421 | ENSG00000EIPR1     | 1        | 0.391919 | 0.687205 | 0.656566 |        |
| 8422 | ENSG00000DNAJC12   | 0.924242 | 0.50404  | 0.708754 | 0.641414 |        |
| 8423 | ENSG00000ST3GAL6   | 0.89697  | 0.49697  | 0.689394 | 0.705051 |        |
| 8424 | ENSG00000C5orf22   | 0.890909 | 0.520202 | 0.697811 | 0.684848 |        |
| 8425 | ENSG00000SMAD2     | 1        | 0.356566 | 0.73266  | 0.567677 |        |
| 8426 | ENSG00000GSS       | 0.961616 | 0.429293 | 0.726431 | 0.626263 |        |
| 8427 | ENSG00000ZMYND8    | 0.921212 | 0.494949 | 0.706229 | 0.658586 |        |
| 8428 | ENSG00000TLX3      | 0.833333 | 0.564646 | 0.69899  | 0.70202  |        |
| 8429 | ENSG00000NECAB1    | 1        | 0.360606 | 0.686027 | 0.662626 |        |
| 8430 | ENSG00000DENND6A   | 1        | 0.382828 | 0.673737 | 0.613131 |        |
| 8431 | ENSG00000MRPL10    | 0.971717 | 0.429293 | 0.686195 | 0.652525 | 0.3755 |
| 8432 | ENSG00000NDUFB7    | 0.909091 | 0.509091 | 0.709091 | 0.660606 |        |
| 8433 | ENSG00000PSCA      | 0.823232 | 0.611111 | 0.704882 | 0.680808 |        |
| 8434 | ENSG00000FA2H      | 0.838384 | 0.539394 | 0.688889 | 0.729293 |        |
| 8435 | ENSG00000HMGA1     | 0.933333 | 0.472727 | 0.691919 | 0.676768 |        |
| 8436 | ENSG00000AMIG01    | 0.936364 | 0.461616 | 0.708081 | 0.662626 |        |
| 8437 | ENSG00000C7orf55-L | 0.972727 | 0.410101 | 0.744108 | 0.60202  |        |
| 8438 | ENSG00000DRAP1     | 0.943434 | 0.459596 | 0.703872 | 0.663636 |        |
| 8439 | ENSG00000C15orf38- | 1        | 0.343434 | 0.708418 | 0.59798  |        |
| 8440 | ENSG00000PLAC1     | 0.866667 | 0.567677 | 0.717172 | 0.654545 |        |
| 8441 | ENSG00000AK2       | 0.866667 | 0.560606 | 0.708586 | 0.672727 |        |
| 8442 | ENSG00000ACOD1     | 0.752525 | 0.625253 | 0.688889 | 0.744444 |        |
| 8443 | ENSG00000BACE1     | 0.850505 | 0.581818 | 0.714141 | 0.662626 |        |
| 8444 | ENSG00000CXorf56   | 0.99899  | 0.371717 | 0.746801 | 0.610101 |        |
| 8445 | ENSG00000C17orf97  | 0.892178 | 0.544397 | 0.711416 | 0.651163 |        |
| 8446 | ENSG00000SP8       | 0.815152 | 0.613131 | 0.708081 | 0.681818 |        |
| 8447 | ENSG00000LAT2      | 0.870707 | 0.543434 | 0.707071 | 0.681818 |        |
| 8448 | ENSG00000MOCS2     | 0.958586 | 0.435354 | 0.690741 | 0.678788 |        |
| 8449 | ENSG00000LRFN3     | 0.909091 | 0.509091 | 0.709091 | 0.661616 |        |
| 8450 | ENSG00000EFCC1     | 1        | 0.394949 | 0.684175 | 0.636364 |        |
| 8451 | ENSG00000SLAMF6    | 0.966667 | 0.433333 | 0.703367 | 0.638384 |        |
| 8452 | ENSG00000SWI5      | 0.933333 | 0.466667 | 0.697811 | 0.676768 |        |
| 8453 | ENSG00000CD99L2    | 0.970707 | 0.40101  | 0.675084 | 0.7      |        |
| 8454 | ENSG00000NMNAT2    | 0.868922 | 0.527484 | 0.693446 | 0.709302 |        |
| 8455 | ENSG00000SDHAF3    | 0.98203  | 0.377378 | 0.680056 | 0.699789 |        |
| 8456 | ENSG00000GRAMD1A   | 0.943434 | 0.452525 | 0.69798  | 0.679798 |        |
| 8457 | ENSG00000DECR1     | 0.970707 | 0.425253 | 0.686869 | 0.662626 | 0.3714 |
| 8458 | ENSG00000MS4A7     | 1        | 0.360606 | 0.660943 | 0.662626 |        |
| 8459 | ENSG00000CMPK2     | 0.965657 | 0.433333 | 0.688047 | 0.661616 |        |
| 8460 | ENSG00000FRMPD1    | 0.866667 | 0.567677 | 0.717172 | 0.659596 |        |
| 8461 | ENSG00000SLC17A6   | 0.915152 | 0.476768 | 0.69596  | 0.70101  |        |
| 8462 | ENSG00000NUDT7     | 0.866667 | 0.560606 | 0.708586 | 0.673737 |        |
| 8463 | ENSG00000ZNF311    | 0.828283 | 0.591919 | 0.710101 | 0.679798 |        |
| 8464 | ENSG00000TSPYL5    | 0.825581 | 0.584567 | 0.705074 | 0.693446 |        |
| 8465 | ENSG00000PSMD3     | 0.987879 | 0.40202  | 0.732997 | 0.609091 | 0.2953 |
| 8466 | ENSG00000TMEM19    | 0.956811 | 0.434109 | 0.688446 | 0.692137 |        |
| 8467 | ENSG00000FMNL2     | 0.866667 | 0.557576 | 0.706229 | 0.677778 | 0.3994 |
| 8468 | ENSG00000RMI2      | 0.941414 | 0.461616 | 0.696633 | 0.675758 |        |

|      |                   |          |          |          |          |        |
|------|-------------------|----------|----------|----------|----------|--------|
| 8469 | ENSG00000SH3PXD2A | 1        | 0.40101  | 0.70303  | 0.615152 |        |
| 8470 | ENSG00000LETM1    | 0.963636 | 0.458586 | 0.711111 | 0.615152 | 0.3687 |
| 8471 | ENSG00000FOXRED2  | 0.945455 | 0.476768 | 0.711111 | 0.640404 |        |
| 8472 | ENSG00000MESD     | 0.943434 | 0.452525 | 0.69798  | 0.680808 |        |
| 8473 | ENSG00000C2       | 0.838384 | 0.539394 | 0.688889 | 0.730303 |        |
| 8474 | ENSG00000GCNT4    | 0.937374 | 0.467677 | 0.695791 | 0.674747 |        |
| 8475 | ENSG00000PROC     | 1        | 0.370707 | 0.677273 | 0.670707 |        |
| 8476 | ENSG00000AKTIP    | 0.969697 | 0.450505 | 0.70101  | 0.622222 |        |
| 8477 | ENSG00000ERCC4    | 0.853066 | 0.566596 | 0.70155  | 0.689218 |        |
| 8478 | ENSG00000HDHD3    | 0.945455 | 0.461616 | 0.701178 | 0.669697 |        |
| 8479 | ENSG00000P2RX5    | 0.933333 | 0.452525 | 0.692929 | 0.69798  |        |
| 8480 | ENSG00000GIGYF1   | 1        | 0.358586 | 0.670034 | 0.670707 |        |
| 8481 | ENSG00000LRRC75A  | 0.904863 | 0.506342 | 0.703136 | 0.676533 |        |
| 8482 | ENSG00000NOL7     | 0.906061 | 0.528283 | 0.717172 | 0.642424 |        |
| 8483 | ENSG00000SPCS1    | 0.904863 | 0.521142 | 0.713002 | 0.654334 |        |
| 8484 | ENSG00000APOBEC4  | 0.971717 | 0.426263 | 0.674747 | 0.675758 |        |
| 8485 | ENSG00000CCDC125  | 0.957576 | 0.460606 | 0.704545 | 0.645455 |        |
| 8486 | ENSG00000REPIN1   | 0.957576 | 0.440404 | 0.696128 | 0.675758 |        |
| 8487 | ENSG00000MGARP    | 0.828283 | 0.591919 | 0.710101 | 0.683838 |        |
| 8488 | ENSG00000WDFY3    | 0.941414 | 0.478788 | 0.703704 | 0.651515 |        |
| 8489 | ENSG00000DEDD     | 0.965657 | 0.425253 | 0.692593 | 0.667677 |        |
| 8490 | ENSG00000AFF4     | 0.968288 | 0.433404 | 0.690099 | 0.656448 |        |
| 8491 | ENSG00000CES3     | 1        | 0.393939 | 0.67037  | 0.615152 |        |
| 8492 | ENSG00000SEC31B   | 0.99596  | 0.409091 | 0.729293 | 0.60303  |        |
| 8493 | ENSG00000CDYL2    | 0.931313 | 0.50202  | 0.708923 | 0.636364 |        |
| 8494 | ENSG00000CCDC186  | 0.960606 | 0.443434 | 0.708754 | 0.644444 |        |
| 8495 | ENSG00000PALD1    | 1        | 0.407071 | 0.688047 | 0.629293 |        |
| 8496 | ENSG00000METTL21A | 0.957576 | 0.424242 | 0.687374 | 0.705051 | 0.1513 |
| 8497 | ENSG00000MICU2    | 0.893939 | 0.507071 | 0.695623 | 0.69798  |        |
| 8498 | ENSG00000SFMBT2   | 0.971717 | 0.39899  | 0.675253 | 0.70202  |        |
| 8499 | ENSG00000ITSN1    | 0.787879 | 0.622222 | 0.705051 | 0.70101  |        |
| 8500 | ENSG00000ZNF143   | 0.806061 | 0.611111 | 0.707912 | 0.694949 |        |
| 8501 | ENSG00000ARHGEF17 | 0.828283 | 0.591919 | 0.710101 | 0.685859 |        |
| 8502 | ENSG00000AGAP2    | 0.983838 | 0.371717 | 0.68064  | 0.709091 |        |
| 8503 | ENSG00000COG8     | 0.870707 | 0.543434 | 0.707071 | 0.683838 |        |
| 8504 | ENSG00000RPS6KB1  | 1        | 0.365657 | 0.73165  | 0.619192 | 0.4963 |
| 8505 | ENSG00000PDAP1    | 1        | 0.40404  | 0.685185 | 0.637374 |        |
| 8506 | ENSG00000CUL7     | 1        | 0.39596  | 0.710438 | 0.630303 |        |
| 8507 | ENSG00000SPN      | 0.935354 | 0.430303 | 0.682828 | 0.731313 |        |
| 8508 | ENSG00000IRF2     | 1        | 0.375758 | 0.7      | 0.60303  |        |
| 8509 | ENSG00000COG8     | 0.870707 | 0.543434 | 0.707071 | 0.683838 |        |
| 8510 | ENSG00000GLIS1    | 0.882614 | 0.540421 | 0.708933 | 0.674419 |        |
| 8511 | ENSG00000DMRTA2   | 0.823232 | 0.621212 | 0.722222 | 0.660606 |        |
| 8512 | ENSG00000PC       | 0.947475 | 0.466667 | 0.707071 | 0.656566 | 0.3527 |
| 8513 | ENSG00000NCAM1    | 0.948485 | 0.443434 | 0.69596  | 0.692929 |        |
| 8514 | ENSG00000SHISA8   | 0.793939 | 0.591919 | 0.692929 | 0.730303 |        |
| 8515 | ENSG00000CNMD     | 0.87315  | 0.513742 | 0.693446 | 0.721987 |        |
| 8516 | ENSG00000NOM01    | 1        | 0.417172 | 0.696296 | 0.616162 |        |
| 8517 | ENSG00000C10orf76 | 1        | 0.422222 | 0.691582 | 0.607071 |        |
| 8518 | ENSG00000TMEM241  | 0.828283 | 0.579798 | 0.692256 | 0.718182 |        |
| 8519 | ENSG00000TCF12    | 0.934343 | 0.445455 | 0.686364 | 0.718182 |        |
| 8520 | ENSG00000DBI      | 0.909091 | 0.488889 | 0.691246 | 0.708081 |        |
| 8521 | ENSG00000ATG3     | 1        | 0.39596  | 0.683165 | 0.621212 | 0.3884 |
| 8522 | ENSG00000TFR2     | 1        | 0.389899 | 0.687205 | 0.651515 |        |
| 8523 | ENSG00000UPP1     | 0.781818 | 0.649495 | 0.715152 | 0.684848 |        |

|      |           |           |          |          |          |          |        |
|------|-----------|-----------|----------|----------|----------|----------|--------|
| 8524 | ENSG00000 | IL37      | 0.955556 | 0.446465 | 0.70101  | 0.679798 |        |
| 8525 | ENSG00000 | LGALS7    | 0.963636 | 0.427273 | 0.690909 | 0.673737 |        |
| 8526 | ENSG00000 | SST       | 0.904348 | 0.541063 | 0.711755 | 0.648309 |        |
| 8527 | ENSG00000 | DDIT3     | 0.977778 | 0.437374 | 0.712795 | 0.614141 |        |
| 8528 | ENSG00000 | CEACAM6   | 0.936364 | 0.467677 | 0.70202  | 0.676768 |        |
| 8529 | ENSG00000 | SUB1      | 0.964646 | 0.441414 | 0.682155 | 0.672727 |        |
| 8530 | ENSG00000 | MTSS1L    | 0.973737 | 0.40202  | 0.692256 | 0.681818 |        |
| 8531 | ENSG00000 | NPHP3     | 0.887879 | 0.524242 | 0.701852 | 0.691919 |        |
| 8532 | ENSG00000 | CCDC191   | 0.868922 | 0.535941 | 0.702431 | 0.700846 |        |
| 8533 | ENSG00000 | HIGD2A    | 0.870707 | 0.543434 | 0.707071 | 0.688889 |        |
| 8534 | ENSG00000 | CHCHD5    | 0.906061 | 0.528283 | 0.717172 | 0.650505 |        |
| 8535 | ENSG00000 | RAPGEF4   | 1        | 0.424242 | 0.70202  | 0.611111 | 0.411  |
| 8536 | ENSG00000 | CYP1B1    | 1        | 0.380808 | 0.675084 | 0.651515 |        |
| 8537 | ENSG00000 | KBTBD7    | 0.983838 | 0.377778 | 0.731987 | 0.642424 |        |
| 8538 | ENSG00000 | SP3       | 1        | 0.370707 | 0.67138  | 0.640404 |        |
| 8539 | ENSG00000 | PTPRE     | 1        | 0.412121 | 0.690572 | 0.610101 |        |
| 8540 | ENSG00000 | ANKRD11   | 0.957576 | 0.449495 | 0.705219 | 0.659596 |        |
| 8541 | ENSG00000 | GOLGA1    | 0.937374 | 0.478788 | 0.70404  | 0.660606 |        |
| 8542 | ENSG00000 | ERMARD    | 0.858586 | 0.587879 | 0.722222 | 0.656566 |        |
| 8543 | ENSG00000 | NFRKB     | 0.989899 | 0.4      | 0.707239 | 0.644444 |        |
| 8544 | ENSG00000 | ABCD3     | 1        | 0.393939 | 0.691919 | 0.636364 |        |
| 8545 | ENSG00000 | RAPGEF1   | 0.828283 | 0.591919 | 0.710101 | 0.690909 |        |
| 8546 | ENSG00000 | UFSP2     | 0.962626 | 0.431313 | 0.727946 | 0.631313 |        |
| 8547 | ENSG00000 | ASPSCR1   | 0.943434 | 0.449495 | 0.691919 | 0.69697  |        |
| 8548 | ENSG00000 | ZNF462    | 1        | 0.406061 | 0.689899 | 0.606061 |        |
| 8549 | ENSG00000 | DHTKD1    | 1        | 0.369697 | 0.668687 | 0.640404 |        |
| 8550 | ENSG00000 | BRD4      | 1        | 0.421212 | 0.694949 | 0.589899 |        |
| 8551 | ENSG00000 | UBE2F     | 0.934343 | 0.473737 | 0.713131 | 0.658586 |        |
| 8552 | ENSG00000 | PPP2R3A   | 1        | 0.419192 | 0.696128 | 0.628283 |        |
| 8553 | ENSG00000 | ITGAL     | 0.787879 | 0.622222 | 0.705051 | 0.712121 |        |
| 8554 | ENSG00000 | C18orf32  | 0.896406 | 0.512685 | 0.711593 | 0.678647 | 0.2973 |
| 8555 | ENSG00000 | HBD       | 0.951515 | 0.452525 | 0.70202  | 0.673737 |        |
| 8556 | ENSG00000 | TBC1D8B   | 0.967677 | 0.452525 | 0.696465 | 0.638384 |        |
| 8557 | ENSG00000 | DNAJB9    | 1        | 0.405051 | 0.691751 | 0.620202 |        |
| 8558 | ENSG00000 | RTN3      | 0.939394 | 0.458586 | 0.69899  | 0.687879 |        |
| 8559 | ENSG00000 | B3GALT5   | 0.983087 | 0.400634 | 0.696089 | 0.669133 |        |
| 8560 | ENSG00000 | USP48     | 1        | 0.40303  | 0.684512 | 0.652525 | 0.2752 |
| 8561 | ENSG00000 | MTMR10    | 0.815152 | 0.609091 | 0.705051 | 0.69899  |        |
| 8562 | ENSG00000 | AC004691. | 0.950505 | 0.481818 | 0.718855 | 0.630303 |        |
| 8563 | ENSG00000 | ENO2      | 0.970707 | 0.443434 | 0.693771 | 0.647475 |        |
| 8564 | ENSG00000 | MITF      | 0.901691 | 0.514799 | 0.688865 | 0.700846 |        |
| 8565 | ENSG00000 | HS3ST5    | 0.939394 | 0.458586 | 0.69899  | 0.685859 |        |
| 8566 | ENSG00000 | ZNF189    | 0.890909 | 0.525253 | 0.70404  | 0.686869 |        |
| 8567 | ENSG00000 | CEP290    | 1        | 0.383838 | 0.700337 | 0.581818 |        |
| 8568 | ENSG00000 | CHST4     | 0.787879 | 0.622222 | 0.705051 | 0.711111 |        |
| 8569 | ENSG00000 | GALNT10   | 0.86268  | 0.552602 | 0.707641 | 0.689922 |        |
| 8570 | ENSG00000 | SPIRE1    | 1        | 0.438384 | 0.725253 | 0.542424 |        |
| 8571 | ENSG00000 | MTUS2     | 1        | 0.40404  | 0.685185 | 0.625253 |        |
| 8572 | ENSG00000 | CCDC57    | 1        | 0.352525 | 0.677778 | 0.652525 | 0.2878 |
| 8573 | ENSG00000 | PHIP      | 1        | 0.381818 | 0.685522 | 0.634343 |        |
| 8574 | ENSG00000 | PCDH8     | 0.963636 | 0.438384 | 0.690236 | 0.670707 |        |
| 8575 | ENSG00000 | SVEP1     | 0.957576 | 0.449495 | 0.705219 | 0.663636 |        |
| 8576 | ENSG00000 | GPR108    | 0.954545 | 0.437374 | 0.697306 | 0.69697  |        |
| 8577 | ENSG00000 | NKX2-8    | 0.909091 | 0.509091 | 0.709091 | 0.674747 |        |
| 8578 | ENSG00000 | FIGN      | 0.951515 | 0.474747 | 0.706397 | 0.652525 |        |

|      |                    |          |          |          |          |        |
|------|--------------------|----------|----------|----------|----------|--------|
| 8579 | ENSG00000CNTN2     | 0.955556 | 0.425253 | 0.686869 | 0.720202 |        |
| 8580 | ENSG00000SLC29A2   | 0.934343 | 0.449495 | 0.692256 | 0.710101 |        |
| 8581 | ENSG00000F11R      | 0.943434 | 0.488889 | 0.716162 | 0.636364 | 0.4689 |
| 8582 | ENSG00000POU1F1    | 0.972947 | 0.430918 | 0.69533  | 0.654106 |        |
| 8583 | ENSG00000RDH14     | 0.926263 | 0.477778 | 0.69798  | 0.687879 |        |
| 8584 | ENSG00000MAPK7     | 0.921212 | 0.526263 | 0.709428 | 0.647475 |        |
| 8585 | ENSG00000REL       | 0.825581 | 0.584567 | 0.705074 | 0.706131 |        |
| 8586 | ENSG00000RAPSN     | 0.868922 | 0.527484 | 0.693446 | 0.724101 |        |
| 8587 | ENSG00000IPO7      | 0.921776 | 0.512685 | 0.705603 | 0.659619 | 0.3557 |
| 8588 | ENSG00000PTP4A1    | 0.733615 | 0.688161 | 0.710888 | 0.713531 |        |
| 8589 | ENSG00000ANKS3     | 0.994949 | 0.405051 | 0.747306 | 0.593939 |        |
| 8590 | ENSG00000SNX17     | 0.931313 | 0.50202  | 0.708923 | 0.647475 |        |
| 8591 | ENSG00000TSPAN14   | 0.970402 | 0.417548 | 0.698732 | 0.669133 |        |
| 8592 | ENSG00000MTFR1L    | 0.947475 | 0.466667 | 0.707071 | 0.667677 |        |
| 8593 | ENSG00000MBD3      | 0.921212 | 0.505051 | 0.707744 | 0.665657 |        |
| 8594 | ENSG00000LARP7     | 0.929293 | 0.470707 | 0.726263 | 0.654545 |        |
| 8595 | ENSG00000PLSCR1    | 0.818182 | 0.587879 | 0.70303  | 0.712121 |        |
| 8596 | ENSG00000TYW1B     | 0.972727 | 0.409091 | 0.706061 | 0.663636 |        |
| 8597 | ENSG00000PTP4A3    | 0.733615 | 0.688161 | 0.710888 | 0.713531 |        |
| 8598 | ENSG00000GALNT6    | 0.977778 | 0.445455 | 0.711279 | 0.617172 |        |
| 8599 | ENSG00000CXCL16    | 0.833333 | 0.564646 | 0.69899  | 0.720202 |        |
| 8600 | ENSG00000LIN37     | 1        | 0.361616 | 0.678114 | 0.625253 |        |
| 8601 | ENSG00000LOXL4     | 0.959596 | 0.426263 | 0.692929 | 0.69596  |        |
| 8602 | ENSG00000TSHZ2     | 0.934343 | 0.49596  | 0.717845 | 0.637374 |        |
| 8603 | ENSG00000LARP4     | 1        | 0.395349 | 0.670895 | 0.635307 | 0.2979 |
| 8604 | ENSG00000TBCEL     | 1        | 0.387879 | 0.678114 | 0.637374 |        |
| 8605 | ENSG00000TGFBR3    | 0.959596 | 0.448485 | 0.70404  | 0.662626 |        |
| 8606 | ENSG00000CDC37L1   | 0.89697  | 0.526263 | 0.704882 | 0.683838 |        |
| 8607 | ENSG00000PDGFRB    | 0.972727 | 0.415152 | 0.675253 | 0.69697  |        |
| 8608 | ENSG00000GPR137    | 0.733615 | 0.688161 | 0.710888 | 0.714588 |        |
| 8609 | ENSG00000GEN1      | 0.941414 | 0.469697 | 0.746465 | 0.621212 |        |
| 8610 | ENSG00000PTDSS2    | 1        | 0.40101  | 0.685522 | 0.6      |        |
| 8611 | ENSG00000CHAT      | 0.90303  | 0.509091 | 0.700505 | 0.693939 |        |
| 8612 | ENSG00000AHR       | 1        | 0.391919 | 0.740741 | 0.593939 |        |
| 8613 | ENSG00000COPB2     | 0.866667 | 0.567677 | 0.717172 | 0.671717 |        |
| 8614 | ENSG00000KDM6A     | 0.99596  | 0.39899  | 0.750842 | 0.59697  |        |
| 8615 | ENSG00000CFDP1     | 0.961616 | 0.411111 | 0.683165 | 0.715152 |        |
| 8616 | ENSG00000DMKN      | 0.778788 | 0.617172 | 0.69798  | 0.733333 |        |
| 8617 | ENSG00000RAB32     | 0.89697  | 0.533333 | 0.712458 | 0.669697 |        |
| 8618 | ENSG00000KDELR1    | 0.9      | 0.532323 | 0.710438 | 0.669697 |        |
| 8619 | ENSG00000KAZALD1   | 0.958586 | 0.419192 | 0.680303 | 0.728283 | 0.267  |
| 8620 | ENSG00000SERPINB10 | 0.973737 | 0.344444 | 0.667003 | 0.79899  |        |
| 8621 | ENSG00000GPRASP1   | 0.961616 | 0.434343 | 0.693939 | 0.678788 |        |
| 8622 | ENSG00000DEK       | 1        | 0.39697  | 0.682828 | 0.645455 | 0.3727 |
| 8623 | ENSG00000HDAC6     | 1        | 0.390909 | 0.693939 | 0.659596 |        |
| 8624 | ENSG00000C2CD4B    | 0.963636 | 0.447475 | 0.692761 | 0.661616 |        |
| 8625 | ENSG00000TPSD1     | 1        | 0.369697 | 0.677104 | 0.70101  |        |
| 8626 | ENSG00000HERPUD1   | 1        | 0.376768 | 0.729966 | 0.636364 |        |
| 8627 | ENSG00000BRWD3     | 0.884848 | 0.552525 | 0.71532  | 0.668687 |        |
| 8628 | ENSG00000ZNF442    | 0.738384 | 0.693939 | 0.716162 | 0.70303  |        |
| 8629 | ENSG00000FDX2      | 0.927273 | 0.50202  | 0.708754 | 0.654545 |        |
| 8630 | ENSG00000LZTFL1    | 0.939394 | 0.465657 | 0.697643 | 0.689899 |        |
| 8631 | ENSG00000SVIL      | 1        | 0.348485 | 0.656566 | 0.678788 |        |
| 8632 | ENSG00000GRXCR1    | 0.893939 | 0.528283 | 0.707576 | 0.680808 |        |
| 8633 | ENSG00000MINOS1    | 0.866667 | 0.567677 | 0.717172 | 0.673737 |        |

|      |                    |          |          |          |          |        |
|------|--------------------|----------|----------|----------|----------|--------|
| 8634 | ENSG00000EPHB4     | 0.870707 | 0.543434 | 0.707071 | 0.69596  |        |
| 8635 | ENSG00000LMTK3     | 0.828283 | 0.591919 | 0.710101 | 0.69697  |        |
| 8636 | ENSG00000HILPDA    | 0.860465 | 0.552854 | 0.705426 | 0.701903 |        |
| 8637 | ENSG00000PROX2     | 0.852008 | 0.57611  | 0.712297 | 0.687104 |        |
| 8638 | ENSG00000AC009163. | 0.961616 | 0.411111 | 0.683165 | 0.715152 |        |
| 8639 | ENSG00000SLC39A3   | 0.99697  | 0.423232 | 0.722727 | 0.609091 |        |
| 8640 | ENSG00000ERO1B     | 0.850505 | 0.581818 | 0.714141 | 0.683838 |        |
| 8641 | ENSG00000C8orf33   | 1        | 0.348485 | 0.696128 | 0.638384 |        |
| 8642 | ENSG00000DSCC1     | 1        | 0.406061 | 0.696633 | 0.614141 |        |
| 8643 | ENSG00000SLC25A45  | 0.856237 | 0.571882 | 0.702079 | 0.699789 |        |
| 8644 | ENSG00000ZNF266    | 1        | 0.350505 | 0.660943 | 0.683838 |        |
| 8645 | ENSG00000MPHOSPH9  | 0.823232 | 0.621212 | 0.722222 | 0.675758 |        |
| 8646 | ENSG00000GPR176    | 0.972727 | 0.435354 | 0.697811 | 0.653535 |        |
| 8647 | ENSG00000TMEM176B  | 0.860465 | 0.586681 | 0.723573 | 0.663848 |        |
| 8648 | ENSG00000CCM2      | 1        | 0.40404  | 0.685185 | 0.630303 | 0.3234 |
| 8649 | ENSG00000CPT1C     | 0.883721 | 0.544397 | 0.710888 | 0.682875 |        |
| 8650 | ENSG00000CAPN10    | 0.890909 | 0.554545 | 0.719697 | 0.657576 |        |
| 8651 | ENSG00000RFX7      | 0.931313 | 0.510101 | 0.716162 | 0.637374 |        |
| 8652 | ENSG00000TRIM4     | 1        | 0.406061 | 0.69697  | 0.608081 |        |
| 8653 | ENSG00000KIAA1024  | 0.823232 | 0.621212 | 0.722222 | 0.674747 |        |
| 8654 | ENSG00000GBP6      | 0.856566 | 0.572727 | 0.702189 | 0.69899  |        |
| 8655 | ENSG00000DICER1    | 1        | 0.405051 | 0.691751 | 0.648485 |        |
| 8656 | ENSG00000COX5A     | 0.890909 | 0.554545 | 0.719697 | 0.656566 | 0.3229 |
| 8657 | ENSG00000EEF1AKMT1 | 1        | 0.381818 | 0.676768 | 0.651515 |        |
| 8658 | ENSG00000ATF5      | 0.889899 | 0.555556 | 0.718855 | 0.659596 |        |
| 8659 | ENSG00000MCC       | 0.974747 | 0.433333 | 0.7      | 0.649495 |        |
| 8660 | ENSG00000TCTN1     | 1        | 0.354123 | 0.675123 | 0.651163 |        |
| 8661 | ENSG00000DYNC2H1   | 0.943434 | 0.461616 | 0.7      | 0.687879 |        |
| 8662 | ENSG00000UBE4A     | 0.925253 | 0.476768 | 0.693939 | 0.705051 |        |
| 8663 | ENSG00000PEX6      | 0.828283 | 0.591919 | 0.710101 | 0.70101  |        |
| 8664 | ENSG00000COPRS     | 1        | 0.400886 | 0.691768 | 0.601329 |        |
| 8665 | ENSG00000MCFD2     | 0.947475 | 0.466667 | 0.707071 | 0.671717 |        |
| 8666 | ENSG00000FDFT1     | 0.945455 | 0.476768 | 0.711111 | 0.659596 |        |
| 8667 | ENSG00000IL1R2     | 1        | 0.363636 | 0.698379 | 0.672304 |        |
| 8668 | ENSG00000RAD54L    | 0.932347 | 0.495772 | 0.706307 | 0.660677 |        |
| 8669 | ENSG00000ENPP3     | 0.781818 | 0.654545 | 0.718182 | 0.691919 |        |
| 8670 | ENSG00000DHPS      | 1        | 0.40303  | 0.682997 | 0.664646 | 0.32   |
| 8671 | ENSG00000BOLA2B    | 0.941414 | 0.478788 | 0.703704 | 0.669697 |        |
| 8672 | ENSG00000COL6A1    | 0.955556 | 0.446465 | 0.70101  | 0.692929 |        |
| 8673 | ENSG00000P2RX4     | 0.781818 | 0.649495 | 0.715152 | 0.7      |        |
| 8674 | ENSG00000SPATA5    | 0.971717 | 0.450505 | 0.705724 | 0.632323 |        |
| 8675 | ENSG00000BOLA2     | 0.941414 | 0.478788 | 0.703704 | 0.669697 |        |
| 8676 | ENSG00000ENTPD2    | 0.9      | 0.540404 | 0.718687 | 0.659596 |        |
| 8677 | ENSG00000NCBP2     | 0.969697 | 0.436364 | 0.706061 | 0.651515 |        |
| 8678 | ENSG00000PTGDS     | 1        | 0.394949 | 0.701852 | 0.642424 |        |
| 8679 | ENSG00000BAZ2B     | 0.893939 | 0.528283 | 0.707576 | 0.687879 |        |
| 8680 | ENSG00000PYROXD1   | 0.99697  | 0.425253 | 0.751684 | 0.576768 |        |
| 8681 | ENSG00000GLMN      | 0.823232 | 0.621212 | 0.722222 | 0.676768 |        |
| 8682 | ENSG00000SMPD3     | 0.919192 | 0.486869 | 0.696296 | 0.710101 |        |
| 8683 | ENSG00000FGF10     | 0.9      | 0.510101 | 0.70202  | 0.70101  |        |
| 8684 | ENSG00000C15orf39  | 0.830867 | 0.557082 | 0.693975 | 0.743129 |        |
| 8685 | ENSG00000BZW2      | 0.947475 | 0.466667 | 0.707071 | 0.675758 |        |
| 8686 | ENSG00000CPNE5     | 0.820296 | 0.614165 | 0.71723  | 0.689218 |        |
| 8687 | ENSG00000CHRNA7    | 1        | 0.40404  | 0.688889 | 0.6      |        |
| 8688 | ENSG00000TMEM18    | 0.866667 | 0.567677 | 0.717172 | 0.680808 |        |

|      |           |           |          |              |          |          |        |
|------|-----------|-----------|----------|--------------|----------|----------|--------|
| 8689 | ENSG00000 | TMED7     | 0.933333 | 0.479798     | 0.698653 | 0.686869 |        |
| 8690 | ENSG00000 | XAF1      | 0.870707 | 0.543434     | 0.707071 | 0.705051 |        |
| 8691 | ENSG00000 | NALCN     | 0.966667 | 0.425253     | 0.695623 | 0.683838 |        |
| 8692 | ENSG00000 | COQ7      | 0.870707 | 0.543434     | 0.707071 | 0.704040 |        |
| 8693 | ENSG00000 | SDC3      | 0.984848 | 0.401010     | 0.687879 | 0.688889 |        |
| 8694 | ENSG00000 | HBB       | 0.948485 | 0.419192     | 0.684512 | 0.750505 |        |
| 8695 | ENSG00000 | PLXNB1    | 0.919662 | 0.521142     | 0.715469 | 0.656448 |        |
| 8696 | ENSG00000 | RTN1      | 0.979798 | 0.447475     | 0.713973 | 0.618182 |        |
| 8697 | ENSG00000 | PRPF8     | 0.989899 | 0.394949     | 0.704714 | 0.668687 |        |
| 8698 | ENSG00000 | MMP13     | 0.835749 | 0.571981     | 0.703865 | 0.718841 |        |
| 8699 | ENSG00000 | CYFIP2    |          | 1 0.419192   | 0.695791 | 0.645455 |        |
| 8700 | ENSG00000 | BTBD7     | 0.972727 | 0.431313     | 0.741919 | 0.612121 |        |
| 8701 | ENSG00000 | SNRPB     |          | 1 0.328283   | 0.665320 | 0.756566 |        |
| 8702 | ENSG00000 | YWHAE     |          | 1 0.390909   | 0.735354 | 0.610101 |        |
| 8703 | ENSG00000 | PRIMPOL   | 0.906061 | 0.497980     | 0.700168 | 0.708081 |        |
| 8704 | ENSG00000 | TRPV2     | 0.811111 | 0.645455     | 0.721886 | 0.680808 |        |
| 8705 | ENSG00000 | NECAB3    | 0.974747 | 0.429293     | 0.695623 | 0.665657 |        |
| 8706 | ENSG00000 | KCTD11    | 0.928283 | 0.490909     | 0.711448 | 0.668687 |        |
| 8707 | ENSG00000 | CTBP1     |          | 1 0.376768   | 0.748148 | 0.570707 |        |
| 8708 | ENSG00000 | UBA5      | 0.860465 | 0.586681     | 0.723573 | 0.671247 |        |
| 8709 | ENSG00000 | APOM      | 0.957576 | 0.449495     | 0.705219 | 0.675758 |        |
| 8710 | ENSG00000 | DDX5      |          | 1 0.390909   | 0.707744 | 0.642424 |        |
| 8711 | ENSG00000 | REPS2     | 0.951515 | 0.428283     | 0.696970 | 0.723232 |        |
| 8712 | ENSG00000 | CKAP2L    | 0.967677 | 0.427273     | 0.737879 | 0.627273 |        |
| 8713 | ENSG00000 | OR4B1     | 0.787879 | 0.622222     | 0.705051 | 0.726263 |        |
| 8714 | ENSG00000 | DGKA      | 0.920266 | 0.485050     | 0.696198 | 0.712071 |        |
| 8715 | ENSG00000 | TNKS      | 0.939394 | 0.512121     | 0.713468 | 0.638384 |        |
| 8716 | ENSG00000 | TADA2B    | 0.951515 | 0.437374     | 0.690067 | 0.723232 |        |
| 8717 | ENSG00000 | CR1L      | 0.828283 | 0.591919     | 0.710101 | 0.706061 |        |
| 8718 | ENSG00000 | AFMID     | 0.951515 | 0.452525     | 0.702020 | 0.690909 |        |
| 8719 | ENSG00000 | CACNA2D4  |          | 0.9 0.502020 | 0.694276 | 0.720202 |        |
| 8720 | ENSG00000 | BUD13     | 0.984848 | 0.447475     | 0.715993 | 0.614141 |        |
| 8721 | ENSG00000 | ABCA4     | 0.793939 | 0.591919     | 0.692929 | 0.756566 |        |
| 8722 | ENSG00000 | ACSBG2    | 0.943434 | 0.452525     | 0.697980 | 0.706061 |        |
| 8723 | ENSG00000 | TOMM5     | 0.906061 | 0.528283     | 0.717172 | 0.668687 |        |
| 8724 | ENSG00000 | FUNDC1    | 0.846465 | 0.613131     | 0.728283 | 0.664646 |        |
| 8725 | ENSG00000 | TRIM68    | 0.957576 | 0.433333     | 0.692424 | 0.712121 | 0.2739 |
| 8726 | ENSG00000 | SLC19A2   | 0.964646 | 0.461616     | 0.704040 | 0.645455 |        |
| 8727 | ENSG00000 | FAM96B    |          | 1 0.391919   | 0.684175 | 0.629293 |        |
| 8728 | ENSG00000 | MYOM2     |          | 1 0.416162   | 0.694276 | 0.653535 |        |
| 8729 | ENSG00000 | BIVM-ERCC |          | 1 0.374747   | 0.748822 | 0.539394 |        |
| 8730 | ENSG00000 | KLHL38    |          | 1 0.387949   | 0.679175 | 0.631078 |        |
| 8731 | ENSG00000 | PLD6      | 0.893688 | 0.549280     | 0.720007 | 0.666667 |        |
| 8732 | ENSG00000 | CD320     | 0.814141 | 0.617172     | 0.715657 | 0.698990 |        |
| 8733 | ENSG00000 | MSL2      | 0.892178 | 0.520085     | 0.702431 | 0.706131 |        |
| 8734 | ENSG00000 | TCAF2     | 0.945455 | 0.461616     | 0.701178 | 0.693939 |        |
| 8735 | ENSG00000 | MOSPD3    | 0.844961 | 0.594684     | 0.716131 | 0.687708 |        |
| 8736 | ENSG00000 | AKAP17A   | 0.935354 | 0.496970     | 0.712458 | 0.655556 |        |
| 8737 | ENSG00000 | POLR2F    |          | 1 0.423232   | 0.709933 | 0.619192 |        |
| 8738 | ENSG00000 | RNF111    |          | 1 0.401010   | 0.685522 | 0.627273 |        |
| 8739 | ENSG00000 | CCDC190   |          | 1 0.346465   | 0.723401 | 0.615152 | 0.4574 |
| 8740 | ENSG00000 | CD46      | 0.943434 | 0.452525     | 0.697980 | 0.708081 |        |
| 8741 | ENSG00000 | RPL19     | 0.862626 | 0.593939     | 0.728283 | 0.661616 |        |
| 8742 | ENSG00000 | GBF1      | 0.951515 | 0.427273     | 0.690404 | 0.736364 |        |
| 8743 | ENSG00000 | NANOS3    | 0.768687 | 0.641414     | 0.704209 | 0.735354 |        |

|      |                    |          |          |          |          |        |
|------|--------------------|----------|----------|----------|----------|--------|
| 8744 | ENSG00000COPS4     | 0.936364 | 0.467677 | 0.70202  | 0.69596  |        |
| 8745 | ENSG00000TMEM65    | 0.930303 | 0.491919 | 0.712963 | 0.665657 |        |
| 8746 | ENSG00000HOMER1    | 0.981818 | 0.413131 | 0.696633 | 0.673737 |        |
| 8747 | ENSG00000HIGD2B    | 0.959596 | 0.448485 | 0.70404  | 0.672727 |        |
| 8748 | ENSG00000STMN3     | 0.866667 | 0.567677 | 0.717172 | 0.684848 |        |
| 8749 | ENSG00000PRKCE     | 0.953535 | 0.448485 | 0.70101  | 0.69798  |        |
| 8750 | ENSG00000FAM149B1  | 0.972727 | 0.413131 | 0.697306 | 0.685859 |        |
| 8751 | ENSG00000KDM5B     | 1        | 0.424242 | 0.702357 | 0.615152 | 0.392  |
| 8752 | ENSG00000FAM71F2   | 0.778013 | 0.647992 | 0.713002 | 0.713531 |        |
| 8753 | ENSG00000CLIC6     | 0.936364 | 0.467677 | 0.70202  | 0.69596  |        |
| 8754 | ENSG00000TCAF2C    | 0.945455 | 0.461616 | 0.701178 | 0.693939 |        |
| 8755 | ENSG00000SUPT3H    | 0.885835 | 0.544397 | 0.711593 | 0.689218 |        |
| 8756 | ENSG00000PSMB2     | 0.893939 | 0.548485 | 0.735354 | 0.649495 |        |
| 8757 | ENSG00000DGKD      | 0.963636 | 0.426263 | 0.681818 | 0.713131 |        |
| 8758 | ENSG00000NME4      | 0.930233 | 0.512685 | 0.706131 | 0.661734 |        |
| 8759 | ENSG00000NSUN7     | 0.864693 | 0.560254 | 0.712474 | 0.697674 |        |
| 8760 | ENSG00000ANK1      | 0.957576 | 0.436364 | 0.694444 | 0.713131 |        |
| 8761 | ENSG00000JUN       | 0.972727 | 0.461616 | 0.712795 | 0.621212 |        |
| 8762 | ENSG00000KCNG2     | 0.842424 | 0.609091 | 0.724242 | 0.675758 |        |
| 8763 | ENSG00000ROB02     | 0.961616 | 0.482828 | 0.714141 | 0.622222 |        |
| 8764 | ENSG00000CRISP2    | 0.809725 | 0.642706 | 0.725687 | 0.682875 |        |
| 8765 | ENSG00000NIM1K     | 0.904863 | 0.521142 | 0.713002 | 0.681818 |        |
| 8766 | ENSG00000SFRP1     | 0.90303  | 0.549495 | 0.726263 | 0.651515 |        |
| 8767 | ENSG00000SMO       | 0.860465 | 0.586681 | 0.723573 | 0.675476 |        |
| 8768 | ENSG00000FAM47B    | 1        | 0.355556 | 0.715825 | 0.614141 |        |
| 8769 | ENSG00000JAK2      | 1        | 0.368687 | 0.720539 | 0.661616 |        |
| 8770 | ENSG00000CHADL     | 1        | 0.438384 | 0.706397 | 0.611111 |        |
| 8771 | ENSG00000NAV2      | 0.939394 | 0.507071 | 0.719865 | 0.638384 |        |
| 8772 | ENSG00000PHGR1     | 0.780808 | 0.646465 | 0.706734 | 0.723232 |        |
| 8773 | ENSG00000MATR3     | 1        | 0.419192 | 0.696128 | 0.653535 |        |
| 8774 | ENSG00000GAD2      | 1        | 0.409091 | 0.705955 | 0.613108 |        |
| 8775 | ENSG00000PPM1F     | 0.973737 | 0.417172 | 0.688721 | 0.693939 |        |
| 8776 | ENSG00000STIM1     | 1        | 0.39697  | 0.685185 | 0.625253 |        |
| 8777 | ENSG00000GPR171    | 0.817172 | 0.607071 | 0.699663 | 0.727273 |        |
| 8778 | ENSG00000HRASLS2   | 0.906061 | 0.528283 | 0.717172 | 0.673737 |        |
| 8779 | ENSG00000SAR1B     | 1        | 0.40101  | 0.68165  | 0.638384 |        |
| 8780 | ENSG00000DERL2     | 0.945455 | 0.475758 | 0.707912 | 0.676768 | 0.4411 |
| 8781 | ENSG00000CIDEC     | 1        | 0.383838 | 0.683165 | 0.625253 |        |
| 8782 | ENSG00000CLDN11    | 0.974747 | 0.40303  | 0.711785 | 0.677778 |        |
| 8783 | ENSG00000RAD1      | 0.93577  | 0.492802 | 0.712071 | 0.662237 |        |
| 8784 | ENSG00000 3/8/2019 | 0.90303  | 0.549495 | 0.726263 | 0.650505 |        |
| 8785 | ENSG00000NFATC4    | 0.974747 | 0.412121 | 0.746801 | 0.626263 |        |
| 8786 | ENSG00000HMGN5     | 0.862626 | 0.584848 | 0.717677 | 0.681818 |        |
| 8787 | ENSG00000MARK4     | 0.96723  | 0.472516 | 0.713531 | 0.621564 |        |
| 8788 | ENSG00000SLC43A1   | 1        | 0.40202  | 0.689226 | 0.630303 |        |
| 8789 | ENSG00000MIAP      | 0.937374 | 0.49596  | 0.711448 | 0.659596 |        |
| 8790 | ENSG00000SLC6A2    | 0.945455 | 0.461616 | 0.701178 | 0.69899  |        |
| 8791 | ENSG00000ACTR3     | 1        | 0.413131 | 0.697475 | 0.634343 |        |
| 8792 | ENSG00000IRAK4     | 1        | 0.382828 | 0.677273 | 0.630303 | 0.4164 |
| 8793 | ENSG00000LUZP2     | 0.856039 | 0.583575 | 0.712399 | 0.694686 |        |
| 8794 | ENSG00000MYCBPAP   | 0.787879 | 0.622222 | 0.705051 | 0.733333 |        |
| 8795 | ENSG00000MRPL21    | 0.862626 | 0.593939 | 0.728283 | 0.662626 |        |
| 8796 | ENSG00000ELOA3     | 0.990909 | 0.390909 | 0.737542 | 0.639394 |        |
| 8797 | ENSG00000KCNMB3    | 0.982828 | 0.417172 | 0.694781 | 0.674747 |        |
| 8798 | ENSG00000CPLX2     | 0.986869 | 0.417172 | 0.712121 | 0.648485 |        |

|      |           |          |          |          |          |          |
|------|-----------|----------|----------|----------|----------|----------|
| 8799 | ENSG00000 | ZDHC11   | 0.9      | 0.540404 | 0.718687 | 0.668687 |
| 8800 | ENSG00000 | PLA2G16  | 0.906061 | 0.528283 | 0.717172 | 0.673737 |
| 8801 | ENSG00000 | DLEU7    | 0.963455 | 0.436323 | 0.688446 | 0.697674 |
| 8802 | ENSG00000 | RAB6A    | 0.973737 | 0.457576 | 0.712626 | 0.625253 |
| 8803 | ENSG00000 | ZDHC11B  | 0.9      | 0.540404 | 0.718687 | 0.668687 |
| 8804 | ENSG00000 | ELOA3D   | 0.990909 | 0.390909 | 0.737542 | 0.639394 |
| 8805 | ENSG00000 | SH3YL1   | 0.966667 | 0.39697  | 0.691919 | 0.726263 |
| 8806 | ENSG00000 | TCP10L2  | 0.969697 | 0.410101 | 0.685522 | 0.712121 |
| 8807 | ENSG00000 | ELOA3B   | 0.990909 | 0.390909 | 0.737542 | 0.639394 |
| 8808 | ENSG00000 | CPLX1    | 0.986869 | 0.417172 | 0.712121 | 0.648485 |
| 8809 | ENSG00000 | BICD2    | 1        | 0.391919 | 0.687205 | 0.616162 |
| 8810 | ENSG00000 | SIMC1    | 0.948485 | 0.490909 | 0.725926 | 0.638384 |
| 8811 | ENSG00000 | SLC5A11  | 0.866667 | 0.567677 | 0.717172 | 0.690909 |
| 8812 | ENSG00000 | TWSG1    | 0.95666  | 0.426004 | 0.684637 | 0.741015 |
| 8813 | ENSG00000 | MMP3     | 0.959596 | 0.468687 | 0.705892 | 0.657576 |
| 8814 | ENSG00000 | OR2A4    | 0.833333 | 0.564646 | 0.69899  | 0.740404 |
| 8815 | ENSG00000 | ATP1B3   | 1        | 0.430303 | 0.703367 | 0.631313 |
| 8816 | ENSG00000 | SORL1    | 1        | 0.385859 | 0.673737 | 0.675758 |
| 8817 | ENSG00000 | ZNF610   | 0.894292 | 0.54334  | 0.739077 | 0.651163 |
| 8818 | ENSG00000 | FTCD     | 0.985859 | 0.383838 | 0.710438 | 0.686869 |
| 8819 | ENSG00000 | TCHH     | 0.90303  | 0.518182 | 0.708923 | 0.694949 |
| 8820 | ENSG00000 | SLC6A19  | 0.870707 | 0.543434 | 0.707071 | 0.714141 |
| 8821 | ENSG00000 | ADCY2    | 1        | 0.427273 | 0.701515 | 0.636364 |
| 8822 | ENSG00000 | KLC1     | 1        | 0.367677 | 0.710101 | 0.659596 |
| 8823 | ENSG00000 | OR2A42   | 0.833333 | 0.564646 | 0.69899  | 0.740404 |
| 8824 | ENSG00000 | NUP37    | 0.937374 | 0.467677 | 0.745791 | 0.648485 |
| 8825 | ENSG00000 | INTS2    | 0.828283 | 0.591919 | 0.710101 | 0.716162 |
| 8826 | ENSG00000 | MVB12A   | 0.959596 | 0.448485 | 0.70404  | 0.679798 |
| 8827 | ENSG00000 | OR2A25   | 0.833333 | 0.564646 | 0.69899  | 0.740404 |
| 8828 | ENSG00000 | BRAT1    | 0.929293 | 0.471717 | 0.691246 | 0.721212 |
| 8829 | ENSG00000 | MIER1    | 0.89697  | 0.557576 | 0.72138  | 0.661616 |
| 8830 | ENSG00000 | OR2A1    | 0.833333 | 0.564646 | 0.69899  | 0.740404 |
| 8831 | ENSG00000 | HMGB3    | 0.818182 | 0.587879 | 0.70303  | 0.736364 |
| 8832 | ENSG00000 | STOM     | 1        | 0.406061 | 0.69697  | 0.621212 |
| 8833 | ENSG00000 | RBM10    | 0.945455 | 0.460606 | 0.698485 | 0.705051 |
| 8834 | ENSG00000 | OR2A7    | 0.833333 | 0.564646 | 0.69899  | 0.740404 |
| 8835 | ENSG00000 | NPR3     | 0.778013 | 0.647992 | 0.713002 | 0.72093  |
| 8836 | ENSG00000 | RECQL    | 0.974747 | 0.440404 | 0.700673 | 0.660606 |
| 8837 | ENSG00000 | DNER     | 0.823232 | 0.621212 | 0.722222 | 0.689899 |
| 8838 | ENSG00000 | SMC4     | 1        | 0.414141 | 0.695286 | 0.640404 |
| 8839 | ENSG00000 | CD274    | 0.823232 | 0.621212 | 0.722222 | 0.691919 |
| 8840 | ENSG00000 | LAMB4    | 0.977778 | 0.424242 | 0.697475 | 0.676768 |
| 8841 | ENSG00000 | ARHGEF40 | 0.939394 | 0.442424 | 0.692929 | 0.737374 |
| 8842 | ENSG00000 | USH1G    | 0.969345 | 0.468288 | 0.713883 | 0.624736 |
| 8843 | ENSG00000 | ADH5     | 1        | 0.368687 | 0.667508 | 0.660606 |
| 8844 | ENSG00000 | RAB3D    | 0.864693 | 0.552854 | 0.703665 | 0.72093  |
| 8845 | ENSG00000 | VCAN     | 0.862626 | 0.560606 | 0.710438 | 0.710101 |
| 8846 | ENSG00000 | CDHR4    | 0.866667 | 0.567677 | 0.717172 | 0.691919 |
| 8847 | ENSG00000 | CTAGE1   | 0.969697 | 0.447475 | 0.706061 | 0.652525 |
| 8848 | ENSG00000 | CELF6    | 1        | 0.393939 | 0.696633 | 0.640404 |
| 8849 | ENSG00000 | GLCCI1   | 0.931313 | 0.49596  | 0.702357 | 0.683838 |
| 8850 | ENSG00000 | SPRR4    | 0.862626 | 0.579798 | 0.700673 | 0.712121 |
| 8851 | ENSG00000 | ZNF582   | 0.9      | 0.564646 | 0.727609 | 0.651515 |
| 8852 | ENSG00000 | CCDC112  | 1        | 0.40101  | 0.723401 | 0.585859 |
| 8853 | ENSG00000 | SNORC    | 0.890909 | 0.520202 | 0.697811 | 0.723232 |



|      |                    |          |          |          |          |        |        |
|------|--------------------|----------|----------|----------|----------|--------|--------|
| 8854 | ENSG00000ARHGAP29  | 0.89852  | 0.524313 | 0.705603 | 0.704017 |        |        |
| 8855 | ENSG00000AF241726. | 0.862626 | 0.593939 | 0.728283 | 0.667677 |        |        |
| 8856 | ENSG00000GPS2      | 0.978788 | 0.445455 | 0.712121 | 0.637374 |        |        |
| 8857 | ENSG00000TRIM60    | 0.972727 | 0.394949 | 0.693939 | 0.716162 |        |        |
| 8858 | ENSG00000TAPBP     | 0.809725 | 0.642706 | 0.725687 | 0.689218 |        |        |
| 8859 | ENSG00000TAL1      | 0.811111 | 0.645455 | 0.721886 | 0.693939 |        |        |
| 8860 | ENSG00000FBXW11    | 0.962626 | 0.459596 | 0.701684 | 0.668687 |        |        |
| 8861 | ENSG00000KCNT1     | 0.781818 | 0.654545 | 0.718182 | 0.711111 |        |        |
| 8862 | ENSG00000AP1G2     | 0.963002 | 0.5      | 0.724454 | 0.603594 |        |        |
| 8863 | ENSG00000GABBR2    | 0.944444 | 0.475758 | 0.710101 | 0.680808 |        |        |
| 8864 | ENSG00000RETREG2   | 0.901691 | 0.542283 | 0.721987 | 0.67019  |        |        |
| 8865 | ENSG00000OLIG2     | 1        | 0.390909 | 0.682323 | 0.621212 |        |        |
| 8866 | ENSG00000SCN3A     | 0.931313 | 0.50202  | 0.708923 | 0.672727 |        |        |
| 8867 | ENSG00000ASPH      | 0.828283 | 0.591919 | 0.710101 | 0.718182 |        |        |
| 8868 | ENSG00000GPC2      | 0.925253 | 0.50101  | 0.707071 | 0.683838 |        |        |
| 8869 | ENSG00000WDR61     | 1        | 0.40303  | 0.711616 | 0.615152 |        |        |
| 8870 | ENSG00000HCCS      | 0.893939 | 0.558586 | 0.723906 | 0.668687 |        |        |
| 8871 | ENSG00000GPRC5D    | 0.866667 | 0.567677 | 0.717172 | 0.69798  |        |        |
| 8872 | ENSG00000LIMD2     | 0.77167  | 0.674419 | 0.709655 | 0.725159 |        |        |
| 8873 | ENSG00000GPA33     | 0.866667 | 0.567677 | 0.717172 | 0.69697  |        |        |
| 8874 | ENSG00000NMUR1     | 0.939394 | 0.507071 | 0.719865 | 0.646465 |        |        |
| 8875 | ENSG00000DLG2      | 1        | 0.386869 | 0.722559 | 0.612121 |        |        |
| 8876 | ENSG00000FLII      | 1        | 0.385859 | 0.711785 | 0.605051 | 0.2371 |        |
| 8877 | ENSG00000CIB3      | 0.967677 | 0.473737 | 0.725758 | 0.614141 |        |        |
| 8878 | ENSG00000BOD1L1    | 0.99798  | 0.39899  | 0.744781 | 0.626263 |        |        |
| 8879 | ENSG00000NDUFA10   | 0.99697  | 0.39899  | 0.744276 | 0.627273 |        |        |
| 8880 | ENSG00000AEBP2     | 0.945455 | 0.461616 | 0.705892 | 0.7      |        |        |
| 8881 | ENSG00000TPSB2     | 0.933333 | 0.428283 | 0.680808 | 0.787879 |        |        |
| 8882 | ENSG00000PPP1R14B  | 0.925253 | 0.50101  | 0.707071 | 0.685859 |        |        |
| 8883 | ENSG00000TBXT      | 0.851606 | 0.598007 | 0.721669 | 0.685493 |        |        |
| 8884 | ENSG00000LRMP      | 0.963636 | 0.441414 | 0.698316 | 0.687879 |        |        |
| 8885 | ENSG00000TAB1      | 1        | 0.390909 | 0.748822 | 0.616162 |        |        |
| 8886 | ENSG00000TJP1      | 0.972727 | 0.461616 | 0.712795 | 0.633333 | 0.3149 |        |
| 8887 | ENSG00000PCYT1A    | 0.968687 | 0.467677 | 0.708754 | 0.638384 |        |        |
| 8888 | ENSG00000KLK7      | 0.971717 | 0.427273 | 0.682828 | 0.70303  |        |        |
| 8889 | ENSG00000ADH4      | 0.781818 | 0.646465 | 0.713131 | 0.724242 |        |        |
| 8890 | ENSG00000RAB23     | 1        | 0.370707 | 0.672054 | 0.720202 | 0.199  | 0.3776 |
| 8891 | ENSG00000COR07-PAM | 0.954545 | 0.463636 | 0.709091 | 0.687879 |        |        |
| 8892 | ENSG00000STARD13   | 0.972727 | 0.449495 | 0.706734 | 0.650505 |        |        |
| 8893 | ENSG00000EBLN2     | 0.823232 | 0.617172 | 0.714141 | 0.707071 |        |        |
| 8894 | ENSG00000ARHGAP33  | 1        | 0.428283 | 0.685522 | 0.669697 |        |        |
| 8895 | ENSG00000ATP1A3    | 0.943434 | 0.488889 | 0.716162 | 0.667677 |        |        |
| 8896 | ENSG00000RASGRF1   | 1        | 0.413131 | 0.705724 | 0.653535 |        |        |
| 8897 | ENSG00000LMD1      | 0.947475 | 0.466667 | 0.707071 | 0.693939 |        |        |
| 8898 | ENSG00000TRPM3     | 0.778013 | 0.647992 | 0.713002 | 0.72833  |        |        |
| 8899 | ENSG00000NUP50     | 0.935354 | 0.526263 | 0.728956 | 0.632323 |        |        |
| 8900 | ENSG00000CASP2     | 1        | 0.390909 | 0.684848 | 0.688889 |        |        |
| 8901 | ENSG00000PMPCB     | 0.90303  | 0.549495 | 0.726263 | 0.663636 |        |        |
| 8902 | ENSG00000HDAC4     | 0.955603 | 0.448203 | 0.697851 | 0.713531 |        |        |
| 8903 | ENSG00000FOXO1     | 1        | 0.356566 | 0.737205 | 0.627273 |        |        |
| 8904 | ENSG00000TMEM145   | 0.823232 | 0.621212 | 0.722222 | 0.69697  |        |        |
| 8905 | ENSG00000KIF20B    | 0.894949 | 0.523232 | 0.703367 | 0.715152 |        |        |
| 8906 | ENSG00000METTL8    | 0.866667 | 0.567677 | 0.717172 | 0.70101  |        |        |
| 8907 | ENSG00000OR5J2     | 0.75122  | 0.702439 | 0.726829 | 0.707317 |        |        |
| 8908 | ENSG00000IL18R1    | 0.862626 | 0.593939 | 0.728283 | 0.675758 |        |        |

|      |                    |          |          |          |          |        |
|------|--------------------|----------|----------|----------|----------|--------|
| 8909 | ENSG00000CRTC2     | 1        | 0.387879 | 0.688215 | 0.649495 |        |
| 8910 | ENSG00000TRADD     | 1        | 0.407071 | 0.693771 | 0.665657 |        |
| 8911 | ENSG00000FAM129B   | 0.989899 | 0.39798  | 0.744613 | 0.636364 |        |
| 8912 | ENSG00000GYPC      | 0.975758 | 0.434343 | 0.702694 | 0.667677 |        |
| 8913 | ENSG00000CALCR     | 0.945894 | 0.458937 | 0.702415 | 0.708213 |        |
| 8914 | ENSG00000CARD19    | 1        | 0.389899 | 0.694276 | 0.636364 |        |
| 8915 | ENSG00000COR07     | 0.954545 | 0.463636 | 0.709091 | 0.687879 |        |
| 8916 | ENSG00000LRRC15    | 0.939394 | 0.489899 | 0.712458 | 0.673737 |        |
| 8917 | ENSG00000ECHDC1    | 0.890909 | 0.547475 | 0.719192 | 0.687879 |        |
| 8918 | ENSG00000DBNL      | 0.970707 | 0.447475 | 0.702357 | 0.664646 |        |
| 8919 | ENSG00000MOAP1     | 0.855556 | 0.608081 | 0.713805 | 0.691919 |        |
| 8920 | ENSG00000AHNAK     | 1        | 0.39899  | 0.693266 | 0.658586 |        |
| 8921 | ENSG00000IMPA2     | 0.828283 | 0.591919 | 0.710101 | 0.725253 |        |
| 8922 | ENSG00000KCMF1     | 0.939394 | 0.489899 | 0.712458 | 0.673737 |        |
| 8923 | ENSG00000SLC18B1   | 0.980808 | 0.411111 | 0.693771 | 0.694949 | 0.25   |
| 8924 | ENSG00000SEC24C    | 1        | 0.389899 | 0.679125 | 0.644444 |        |
| 8925 | ENSG00000SMYD3     | 1        | 0.40404  | 0.693603 | 0.609091 |        |
| 8926 | ENSG00000IQGAP2    | 0.983838 | 0.406061 | 0.699663 | 0.690909 |        |
| 8927 | ENSG00000GFRA2     | 1        | 0.388889 | 0.685185 | 0.644444 |        |
| 8928 | ENSG00000DLC1      | 0.862626 | 0.593939 | 0.728283 | 0.675758 |        |
| 8929 | ENSG00000RRM1      | 1        | 0.348485 | 0.696128 | 0.676768 |        |
| 8930 | ENSG00000PLA2G12A  | 0.963636 | 0.458586 | 0.711111 | 0.658586 |        |
| 8931 | ENSG00000SIGMAR1   | 1        | 0.393939 | 0.684848 | 0.655556 |        |
| 8932 | ENSG00000AC099489. | 0.866667 | 0.567677 | 0.717172 | 0.7      |        |
| 8933 | ENSG00000NYAP1     | 0.853821 | 0.607973 | 0.730897 | 0.674419 |        |
| 8934 | ENSG00000TMEM35A   | 0.812121 | 0.642424 | 0.720707 | 0.70202  |        |
| 8935 | ENSG00000FRG1      | 0.90303  | 0.549495 | 0.726263 | 0.665657 |        |
| 8936 | ENSG00000TMX2      | 1        | 0.362626 | 0.702357 | 0.629293 |        |
| 8937 | ENSG00000VPS25     | 0.970707 | 0.435354 | 0.759933 | 0.611111 |        |
| 8938 | ENSG00000MYMX      | 0.781818 | 0.654545 | 0.718182 | 0.714141 |        |
| 8939 | ENSG00000ARPC3     | 0.917548 | 0.506342 | 0.724806 | 0.680761 |        |
| 8940 | ENSG00000USP51     | 0.876321 | 0.578224 | 0.716702 | 0.691332 |        |
| 8941 | ENSG00000HVCN1     | 0.870707 | 0.543434 | 0.707071 | 0.728283 |        |
| 8942 | ENSG00000GLOD4     | 1        | 0.363636 | 0.707071 | 0.645455 |        |
| 8943 | ENSG00000NME1      | 1        | 0.407071 | 0.687205 | 0.60404  |        |
| 8944 | ENSG00000SKOR1     | 0.809725 | 0.642706 | 0.725687 | 0.696617 |        |
| 8945 | ENSG00000TAZ       | 0.927273 | 0.476768 | 0.69697  | 0.724242 |        |
| 8946 | ENSG00000KRT1      | 0.954545 | 0.463636 | 0.709091 | 0.690909 |        |
| 8947 | ENSG00000RPS15     | 0.965657 | 0.449495 | 0.695118 | 0.683838 |        |
| 8948 | ENSG00000ORC5      | 0.961616 | 0.433333 | 0.684343 | 0.722222 |        |
| 8949 | ENSG00000HNRNPUL1  | 1        | 0.426263 | 0.702357 | 0.636364 |        |
| 8950 | ENSG00000RBP4      | 0.947475 | 0.466667 | 0.707071 | 0.69798  |        |
| 8951 | ENSG00000CD82      | 0.933333 | 0.452525 | 0.692929 | 0.745455 |        |
| 8952 | ENSG00000ODC1      | 1        | 0.431313 | 0.706061 | 0.620202 |        |
| 8953 | ENSG00000ATF6B     | 0.958586 | 0.461616 | 0.710438 | 0.674747 |        |
| 8954 | ENSG00000SPOPL     | 0.965657 | 0.466667 | 0.69798  | 0.665657 |        |
| 8955 | ENSG00000NAGA      | 0.90303  | 0.549495 | 0.726263 | 0.664646 |        |
| 8956 | ENSG00000GULP1     | 0.9      | 0.540404 | 0.718687 | 0.683838 |        |
| 8957 | ENSG00000PTCD1     | 0.985859 | 0.413131 | 0.703872 | 0.678788 |        |
| 8958 | ENSG00000GPR18     | 0.866667 | 0.567677 | 0.717172 | 0.706061 |        |
| 8959 | ENSG00000TCF20     | 0.965657 | 0.493939 | 0.740236 | 0.591919 |        |
| 8960 | ENSG00000TMPRSS4   | 0.967885 | 0.449612 | 0.70155  | 0.669989 |        |
| 8961 | ENSG00000HMBS      | 0.961616 | 0.474747 | 0.723569 | 0.635354 |        |
| 8962 | ENSG00000WWTR1     | 1        | 0.391919 | 0.743434 | 0.639394 |        |
| 8963 | ENSG00000OXR1      | 1        | 0.385859 | 0.676431 | 0.667677 | 0.2981 |

|      |           |           |          |          |          |          |       |
|------|-----------|-----------|----------|----------|----------|----------|-------|
| 8964 | ENSG00000 | IRAK1     | 0.931313 | 0.519192 | 0.700337 | 0.679798 |       |
| 8965 | ENSG00000 | ADAMTS9   | 0.945455 | 0.476768 | 0.711111 | 0.684848 |       |
| 8966 | ENSG00000 | KLHL33    | 0.945455 | 0.461616 | 0.705892 | 0.707071 |       |
| 8967 | ENSG00000 | LMBR1     | 0.862626 | 0.593939 | 0.728283 | 0.681818 |       |
| 8968 | ENSG00000 | PDE1B     | 0.890909 | 0.547475 | 0.719192 | 0.691919 |       |
| 8969 | ENSG00000 | FGFRL1    | 0.927273 | 0.502020 | 0.708754 | 0.689899 |       |
| 8970 | ENSG00000 | SLBP      | 0.961616 | 0.471717 | 0.704882 | 0.663636 |       |
| 8971 | ENSG00000 | CWC15     | 0.928283 | 0.521212 | 0.700337 | 0.684848 |       |
| 8972 | ENSG00000 | ATP5MF-PT | 0.985859 | 0.413131 | 0.703872 | 0.678788 |       |
| 8973 | ENSG00000 | GCLC      | 1        | 0.416162 | 0.694276 | 0.678788 | 0.296 |
| 8974 | ENSG00000 | SPHK1     | 1        | 0.363636 | 0.727273 | 0.618182 | 0.337 |
| 8975 | ENSG00000 | MANBAL    | 0.935354 | 0.49697  | 0.712458 | 0.678788 |       |
| 8976 | ENSG00000 | RNF146    | 0.985859 | 0.40303  | 0.718687 | 0.673737 |       |
| 8977 | ENSG00000 | OTULIN    | 0.862626 | 0.593939 | 0.728283 | 0.681818 |       |
| 8978 | ENSG00000 | DBX1      | 0.858586 | 0.582828 | 0.714478 | 0.709091 |       |
| 8979 | ENSG00000 | CEP83     | 0.943434 | 0.488889 | 0.718519 | 0.669697 |       |
| 8980 | ENSG00000 | EIF4B     | 0.906061 | 0.528283 | 0.717172 | 0.692929 |       |
| 8981 | ENSG00000 | SP100     | 0.993939 | 0.425253 | 0.750168 | 0.610101 |       |
| 8982 | ENSG00000 | SLC30A4   | 0.787879 | 0.622222 | 0.705051 | 0.756566 |       |
| 8983 | ENSG00000 | ATP6V1E2  | 0.778013 | 0.647992 | 0.713002 | 0.734672 |       |
| 8984 | ENSG00000 | RSRC1     | 0.884848 | 0.547475 | 0.708923 | 0.713131 |       |
| 8985 | ENSG00000 | KLHL11    | 0.967677 | 0.468687 | 0.709933 | 0.645455 |       |
| 8986 | ENSG00000 | BNIP3     | 1        | 0.383838 | 0.683165 | 0.651515 |       |
| 8987 | ENSG00000 | CD69      | 0.9      | 0.562626 | 0.725589 | 0.668687 |       |
| 8988 | ENSG00000 | MAGEB1    | 0.904863 | 0.521142 | 0.713002 | 0.701903 |       |
| 8989 | ENSG00000 | RAX2      | 0.778013 | 0.647992 | 0.713002 | 0.735729 |       |
| 8990 | ENSG00000 | JAK3      | 0.828283 | 0.591919 | 0.710101 | 0.733333 |       |
| 8991 | ENSG00000 | FAM183A   | 0.944444 | 0.475758 | 0.710101 | 0.690909 |       |
| 8992 | ENSG00000 | BPGM      | 0.963636 | 0.468687 | 0.713973 | 0.648485 |       |
| 8993 | ENSG00000 | CA12      | 0.943434 | 0.459596 | 0.703872 | 0.718182 |       |
| 8994 | ENSG00000 | PYY       | 0.906061 | 0.528283 | 0.717172 | 0.692929 |       |
| 8995 | ENSG00000 | FRRS1L    | 0.781818 | 0.654545 | 0.718182 | 0.721212 |       |
| 8996 | ENSG00000 | OXNAD1    | 0.90303  | 0.538384 | 0.715152 | 0.690909 |       |
| 8997 | ENSG00000 | FAM78A    | 1        | 0.40404  | 0.692256 | 0.661616 |       |
| 8998 | ENSG00000 | HSPB1     | 0.974747 | 0.457576 | 0.714815 | 0.641414 |       |
| 8999 | ENSG00000 | GAPVD1    | 0.949495 | 0.465657 | 0.709933 | 0.69899  |       |
| 9000 | ENSG00000 | UGP2      | 0.979798 | 0.40303  | 0.717172 | 0.683838 |       |
| 9001 | ENSG00000 | PGLYRP1   | 0.823232 | 0.617172 | 0.71936  | 0.714141 |       |
| 9002 | ENSG00000 | RERG      | 0.77167  | 0.682875 | 0.727273 | 0.710359 |       |
| 9003 | ENSG00000 | CCDC113   | 0.994949 | 0.439394 | 0.753199 | 0.594949 |       |
| 9004 | ENSG00000 | ACADVL    | 0.973737 | 0.465657 | 0.718013 | 0.634343 |       |
| 9005 | ENSG00000 | TTI2      | 0.958586 | 0.477778 | 0.710438 | 0.667677 |       |
| 9006 | ENSG00000 | ZNF782    | 0.955556 | 0.446465 | 0.70101  | 0.723232 |       |
| 9007 | ENSG00000 | CMTR2     | 0.944444 | 0.475758 | 0.710101 | 0.692929 |       |
| 9008 | ENSG00000 | DYNLT3    | 0.866667 | 0.567677 | 0.717172 | 0.710101 |       |
| 9009 | ENSG00000 | ISCU      | 0.975758 | 0.39596  | 0.679966 | 0.747475 |       |
| 9010 | ENSG00000 | RPA2      | 1        | 0.428283 | 0.702357 | 0.632323 |       |
| 9011 | ENSG00000 | MARK1     | 0.975758 | 0.385859 | 0.705051 | 0.725253 |       |
| 9012 | ENSG00000 | GORAB     | 0.961616 | 0.456566 | 0.721044 | 0.663636 |       |
| 9013 | ENSG00000 | MAP3K5    | 0.862626 | 0.593939 | 0.728283 | 0.683838 |       |
| 9014 | ENSG00000 | OR8S1     | 0.853821 | 0.607973 | 0.730897 | 0.683278 |       |
| 9015 | ENSG00000 | PTPN21    | 0.935354 | 0.49697  | 0.712458 | 0.683838 |       |
| 9016 | ENSG00000 | ITLN1     | 0.990909 | 0.39899  | 0.73468  | 0.656566 |       |
| 9017 | ENSG00000 | SUSD6     | 0.885859 | 0.552525 | 0.716162 | 0.70404  |       |
| 9018 | ENSG00000 | EPHA10    | 0.9      | 0.540404 | 0.718687 | 0.689899 |       |

|      |                    |          |          |          |          |        |
|------|--------------------|----------|----------|----------|----------|--------|
| 9019 | ENSG00000ATXN7L2   | 1        | 0.407071 | 0.693771 | 0.634343 | 0.318  |
| 9020 | ENSG00000APOL6     | 0.99798  | 0.385859 | 0.752189 | 0.642424 |        |
| 9021 | ENSG00000HRAS      | 1        | 0.387879 | 0.684848 | 0.650505 |        |
| 9022 | ENSG00000PLIN2     | 0.94926  | 0.475687 | 0.712474 | 0.689218 |        |
| 9023 | ENSG00000HSD17B7   | 0.90303  | 0.533333 | 0.709091 | 0.706061 |        |
| 9024 | ENSG00000PCK1      | 0.986869 | 0.459596 | 0.715657 | 0.627273 |        |
| 9025 | ENSG00000KRT10     | 0.951515 | 0.452525 | 0.70202  | 0.719192 |        |
| 9026 | ENSG00000DAZ3      | 0.77167  | 0.682875 | 0.727273 | 0.712474 |        |
| 9027 | ENSG00000EPHA8     | 0.968687 | 0.463636 | 0.709596 | 0.656566 |        |
| 9028 | ENSG00000ZCCHC9    | 0.9      | 0.564646 | 0.727609 | 0.668687 |        |
| 9029 | ENSG00000RBM15     | 1        | 0.365657 | 0.694276 | 0.676768 |        |
| 9030 | ENSG00000DAZ1      | 0.77167  | 0.682875 | 0.727273 | 0.712474 |        |
| 9031 | ENSG00000SUGT1     | 0.955556 | 0.446465 | 0.70101  | 0.727273 |        |
| 9032 | ENSG00000SMARCE1   | 1        | 0.425253 | 0.709428 | 0.650505 |        |
| 9033 | ENSG00000BAG1      | 0.99899  | 0.39596  | 0.755892 | 0.630303 |        |
| 9034 | ENSG00000DAZ4      | 0.77167  | 0.682875 | 0.727273 | 0.712474 |        |
| 9035 | ENSG00000DAZ2      | 0.77167  | 0.682875 | 0.727273 | 0.712474 |        |
| 9036 | ENSG00000YJEFN3    | 0.817276 | 0.606866 | 0.712071 | 0.735327 |        |
| 9037 | ENSG00000RIT1      | 0.89899  | 0.524242 | 0.703704 | 0.724242 |        |
| 9038 | ENSG00000TRIM71    | 0.933333 | 0.508081 | 0.713973 | 0.674747 |        |
| 9039 | ENSG00000INSRR     | 0.983838 | 0.427273 | 0.709596 | 0.670707 |        |
| 9040 | ENSG00000AP000646. | 1        | 0.387879 | 0.678114 | 0.637374 |        |
| 9041 | ENSG00000FARP2     | 0.928283 | 0.473737 | 0.698316 | 0.734343 |        |
| 9042 | ENSG00000BLOC1S1   | 0.823232 | 0.621212 | 0.722222 | 0.712121 |        |
| 9043 | ENSG00000ZSCAN18   | 0.872727 | 0.59798  | 0.735354 | 0.671717 |        |
| 9044 | ENSG00000EEF1A1    | 0.973737 | 0.457576 | 0.712626 | 0.648485 |        |
| 9045 | ENSG00000LALBA     | 0.974879 | 0.437681 | 0.702254 | 0.679227 |        |
| 9046 | ENSG00000SQLE      | 0.976768 | 0.445455 | 0.707576 | 0.664646 |        |
| 9047 | ENSG00000EPHA7     | 0.890909 | 0.585859 | 0.736364 | 0.657576 |        |
| 9048 | ENSG00000F2RL1     | 0.862626 | 0.593939 | 0.728283 | 0.687879 |        |
| 9049 | ENSG00000FOLH1     | 0.906061 | 0.528283 | 0.717172 | 0.69899  |        |
| 9050 | ENSG00000SGK494    | 0.930233 | 0.523256 | 0.719873 | 0.663848 |        |
| 9051 | ENSG00000FITM1     | 0.957576 | 0.450505 | 0.695286 | 0.722222 | 0.3683 |
| 9052 | ENSG00000GGT1      | 0.953535 | 0.448485 | 0.70101  | 0.729293 |        |
| 9053 | ENSG00000AC005726. | 0.930233 | 0.523256 | 0.719873 | 0.663848 |        |
| 9054 | ENSG00000GGTLC2    | 0.953535 | 0.448485 | 0.70101  | 0.729293 |        |
| 9055 | ENSG00000TREML4    | 0.979798 | 0.426263 | 0.703367 | 0.682828 |        |
| 9056 | ENSG00000HSP90AB1  | 1        | 0.425253 | 0.709428 | 0.646465 | 0.1788 |
| 9057 | ENSG00000CD40      | 0.983838 | 0.435354 | 0.708923 | 0.664646 |        |
| 9058 | ENSG00000FBX016    | 0.814493 | 0.618357 | 0.714654 | 0.729469 |        |
| 9059 | ENSG00000NUCB2     | 1        | 0.452525 | 0.718182 | 0.615152 |        |
| 9060 | ENSG00000SH3GL3    | 0.820296 | 0.614165 | 0.71723  | 0.725159 |        |
| 9061 | ENSG00000ATP10B    | 0.809091 | 0.643434 | 0.712963 | 0.727273 |        |
| 9062 | ENSG00000SPTBN1    | 0.89697  | 0.564646 | 0.729461 | 0.671717 | 0.2511 |
| 9063 | ENSG00000FAM241A   | 0.89701  | 0.542636 | 0.709856 | 0.707641 |        |
| 9064 | ENSG00000LRRRC8E   | 0.866667 | 0.567677 | 0.717172 | 0.714141 |        |
| 9065 | ENSG00000GP1BA     | 0.961616 | 0.452525 | 0.707071 | 0.683838 |        |
| 9066 | ENSG00000N4BP3     | 1        | 0.392929 | 0.683165 | 0.673737 |        |
| 9067 | ENSG00000GGT2      | 0.953535 | 0.448485 | 0.70101  | 0.729293 |        |
| 9068 | ENSG00000IQGAP1    | 0.90303  | 0.549495 | 0.726263 | 0.677778 | 0.3849 |
| 9069 | ENSG00000SFXN3     | 0.960133 | 0.457364 | 0.696567 | 0.703212 |        |
| 9070 | ENSG00000SYNDIG1L  | 1        | 0.369697 | 0.706734 | 0.640404 |        |
| 9071 | ENSG00000SLC35B1   | 0.823232 | 0.621212 | 0.722222 | 0.714141 |        |
| 9072 | ENSG00000MYBPC3    | 0.959596 | 0.448485 | 0.70404  | 0.70404  |        |
| 9073 | ENSG00000CRTC1     | 0.967677 | 0.426263 | 0.699327 | 0.710101 |        |

|      |           |          |          |          |          |          |        |
|------|-----------|----------|----------|----------|----------|----------|--------|
| 9074 | ENSG00000 | IL10     | 0.943434 | 0.459596 | 0.703872 | 0.725253 |        |
| 9075 | ENSG00000 | GGTLC1   | 0.953535 | 0.448485 | 0.70101  | 0.729293 |        |
| 9076 | ENSG00000 | LSP1     | 0.870707 | 0.543434 | 0.707071 | 0.742424 |        |
| 9077 | ENSG00000 | IMMT     | 0.978788 | 0.445455 | 0.712121 | 0.657576 |        |
| 9078 | ENSG00000 | OR11H1   | 0.781818 | 0.654545 | 0.718182 | 0.731313 |        |
| 9079 | ENSG00000 | ZNF879   | 0.961616 | 0.482828 | 0.714141 | 0.648485 |        |
| 9080 | ENSG00000 | FKBP14   | 0.994949 | 0.423232 | 0.726094 | 0.645455 |        |
| 9081 | ENSG00000 | STRC     | 0.858586 | 0.579798 | 0.707407 | 0.727273 |        |
| 9082 | ENSG00000 | SKAP1    | 0.981818 | 0.420202 | 0.718519 | 0.669697 |        |
| 9083 | ENSG00000 | C5orf63  | 0.862626 | 0.587879 | 0.719865 | 0.706061 |        |
| 9084 | ENSG00000 | DNAJC30  | 0.9      | 0.554545 | 0.712121 | 0.694949 |        |
| 9085 | ENSG00000 | BTG3     | 0.906061 | 0.528283 | 0.717172 | 0.7      |        |
| 9086 | ENSG00000 | SYT12    | 0.945455 | 0.476768 | 0.711111 | 0.694949 |        |
| 9087 | ENSG00000 | EYA4     | 0.99697  | 0.39899  | 0.743939 | 0.646465 |        |
| 9088 | ENSG00000 | CCDC153  | 0.89697  | 0.564646 | 0.729461 | 0.670707 |        |
| 9089 | ENSG00000 | CCT6B    | 1        | 0.424242 | 0.70202  | 0.634343 |        |
| 9090 | ENSG00000 | SLC13A3  | 0.959596 | 0.448485 | 0.70404  | 0.70404  |        |
| 9091 | ENSG00000 | CAPNS2   | 0.781818 | 0.654545 | 0.718182 | 0.730303 |        |
| 9092 | ENSG00000 | MIOX     | 0.977778 | 0.445455 | 0.711279 | 0.662626 |        |
| 9093 | ENSG00000 | GGTLC3   | 0.953535 | 0.448485 | 0.70101  | 0.729293 |        |
| 9094 | ENSG00000 | CCDC40   | 0.815011 | 0.645877 | 0.730444 | 0.701903 |        |
| 9095 | ENSG00000 | C1QA     | 0.978788 | 0.447475 | 0.709259 | 0.659596 |        |
| 9096 | ENSG00000 | VPS41    | 1        | 0.388889 | 0.688047 | 0.725253 |        |
| 9097 | ENSG00000 | C16orf71 | 0.815011 | 0.645877 | 0.730444 | 0.701903 |        |
| 9098 | ENSG00000 | YIPF7    | 0.890909 | 0.554545 | 0.719697 | 0.69697  | 0.4192 |
| 9099 | ENSG00000 | ADAMTS4  | 0.866667 | 0.567677 | 0.717172 | 0.718182 |        |
| 9100 | ENSG00000 | TMEM213  | 0.781818 | 0.654545 | 0.718182 | 0.731313 |        |
| 9101 | ENSG00000 | PDE6H    | 0.826087 | 0.628019 | 0.727053 | 0.704348 |        |
| 9102 | ENSG00000 | MAP3K13  | 1        | 0.419192 | 0.735354 | 0.630303 |        |
| 9103 | ENSG00000 | XRN1     | 1        | 0.419192 | 0.700337 | 0.654545 |        |
| 9104 | ENSG00000 | PDE6G    | 0.826087 | 0.628019 | 0.727053 | 0.704348 |        |
| 9105 | ENSG00000 | OR11H12  | 0.781818 | 0.654545 | 0.718182 | 0.731313 |        |
| 9106 | ENSG00000 | ARHGEF11 | 1        | 0.428283 | 0.702357 | 0.629293 | 0.3973 |
| 9107 | ENSG00000 | MPHOSPH6 | 0.989899 | 0.430303 | 0.741077 | 0.626263 |        |
| 9108 | ENSG00000 | OR11H2   | 0.781818 | 0.654545 | 0.718182 | 0.731313 |        |
| 9109 | ENSG00000 | PAH      | 0.949495 | 0.458586 | 0.70404  | 0.722222 |        |
| 9110 | ENSG00000 | ENKD1    | 0.961616 | 0.452525 | 0.707071 | 0.690909 |        |
| 9111 | ENSG00000 | CAT      | 0.957576 | 0.476768 | 0.722896 | 0.668687 |        |
| 9112 | ENSG00000 | PARP1    | 1        | 0.357576 | 0.73165  | 0.655556 |        |
| 9113 | ENSG00000 | AKAP8L   | 1        | 0.437374 | 0.708249 | 0.651515 |        |
| 9114 | ENSG00000 | TMEM210  | 0.815011 | 0.642706 | 0.72234  | 0.714588 |        |
| 9115 | ENSG00000 | KIAA0825 | 0.972727 | 0.465657 | 0.71633  | 0.644444 |        |
| 9116 | ENSG00000 | C9orf66  | 0.940404 | 0.460606 | 0.69596  | 0.742424 |        |
| 9117 | ENSG00000 | MINDY4   | 0.980808 | 0.433333 | 0.70404  | 0.679798 |        |
| 9118 | ENSG00000 | NANOS1   | 0.972727 | 0.425253 | 0.692256 | 0.713131 |        |
| 9119 | ENSG00000 | GPALPP1  | 0.969697 | 0.49798  | 0.722896 | 0.615152 |        |
| 9120 | ENSG00000 | DNM1L    | 0.988889 | 0.417172 | 0.701852 | 0.690909 | 0.3278 |
| 9121 | ENSG00000 | C1RL     | 0.961616 | 0.452525 | 0.707071 | 0.690909 |        |
| 9122 | ENSG00000 | IGSF8    | 0.820296 | 0.614165 | 0.71723  | 0.729387 |        |
| 9123 | ENSG00000 | PCSK1N   | 0.858586 | 0.622222 | 0.740404 | 0.671717 |        |
| 9124 | ENSG00000 | GLI3     | 0.84778  | 0.606765 | 0.725863 | 0.704017 |        |
| 9125 | ENSG00000 | VTI1A    | 0.90303  | 0.549495 | 0.726263 | 0.682828 |        |
| 9126 | ENSG00000 | MS4A12   | 0.862626 | 0.593939 | 0.728283 | 0.69596  |        |
| 9127 | ENSG00000 | NKAIN1   | 0.849495 | 0.619192 | 0.734343 | 0.686869 |        |
| 9128 | ENSG00000 | NPY4R    | 0.89697  | 0.564646 | 0.729461 | 0.674747 |        |

|      |                    |          |          |          |          |        |        |
|------|--------------------|----------|----------|----------|----------|--------|--------|
| 9129 | ENSG00000EFR3A     | 0.979798 | 0.470707 | 0.725253 | 0.621212 |        |        |
| 9130 | ENSG00000CALCOC02  | 0.939394 | 0.489899 | 0.712458 | 0.693939 |        |        |
| 9131 | ENSG00000EXOSC4    | 0.880808 | 0.548485 | 0.731481 | 0.70101  |        |        |
| 9132 | ENSG00000SLC7A4    | 0.85825  | 0.579181 | 0.718715 | 0.72093  |        |        |
| 9133 | ENSG00000MPZ       | 0.767442 | 0.667774 | 0.71687  | 0.745293 |        |        |
| 9134 | ENSG00000ESYT1     | 0.929125 | 0.539313 | 0.725914 | 0.655592 |        |        |
| 9135 | ENSG00000NPAP1     | 0.969697 | 0.445455 | 0.707912 | 0.680808 |        |        |
| 9136 | ENSG00000KIAA0100  | 0.90303  | 0.549495 | 0.726263 | 0.684848 |        |        |
| 9137 | ENSG00000FRG2C     | 1        | 0.391919 | 0.70303  | 0.634343 |        |        |
| 9138 | ENSG00000ENO4      | 0.775758 | 0.688889 | 0.732323 | 0.706061 |        |        |
| 9139 | ENSG00000HRH2      | 0.778013 | 0.647992 | 0.713002 | 0.752643 |        |        |
| 9140 | ENSG00000TBC1D16   | 0.90303  | 0.549495 | 0.726263 | 0.682828 |        |        |
| 9141 | ENSG00000NPY4R2    | 0.89697  | 0.564646 | 0.729461 | 0.674747 |        |        |
| 9142 | ENSG00000IMPDH2    | 1        | 0.390909 | 0.693939 | 0.643434 |        |        |
| 9143 | ENSG00000APBA2     | 0.929293 | 0.477778 | 0.697138 | 0.738384 |        |        |
| 9144 | ENSG00000SRCIN1    | 0.951515 | 0.482828 | 0.717172 | 0.681818 |        |        |
| 9145 | ENSG00000FSIP1     | 0.974747 | 0.425253 | 0.690572 | 0.714141 |        |        |
| 9146 | ENSG00000POLR3H    | 0.956566 | 0.465657 | 0.712458 | 0.7      |        |        |
| 9147 | ENSG00000CHD4      | 0.977778 | 0.445455 | 0.711279 | 0.666667 |        |        |
| 9148 | ENSG00000CNPY4     | 1        | 0.393939 | 0.683502 | 0.663636 |        |        |
| 9149 | ENSG00000TTC19     | 1        | 0.424242 | 0.70202  | 0.675758 |        |        |
| 9150 | ENSG00000EXOC4     | 0.862626 | 0.593939 | 0.728283 | 0.69596  |        |        |
| 9151 | ENSG00000CPE       | 0.939394 | 0.470707 | 0.705051 | 0.723232 |        |        |
| 9152 | ENSG00000RGS19     | 0.862626 | 0.593939 | 0.728283 | 0.694949 |        |        |
| 9153 | ENSG00000SIKE1     | 1        | 0.412121 | 0.690572 | 0.69697  | 0.3548 |        |
| 9154 | ENSG00000MRPL17    | 1        | 0.424242 | 0.710438 | 0.611111 |        |        |
| 9155 | ENSG00000ANKRD6    | 0.975758 | 0.426263 | 0.694276 | 0.708081 |        |        |
| 9156 | ENSG00000AG02      | 0.925253 | 0.522222 | 0.715488 | 0.686869 |        |        |
| 9157 | ENSG00000GAS8      | 0.969697 | 0.50202  | 0.733502 | 0.60303  |        |        |
| 9158 | ENSG00000DIS3L2    | 1        | 0.408081 | 0.697306 | 0.650505 |        |        |
| 9159 | ENSG00000RNASE11   | 0.919662 | 0.544397 | 0.724454 | 0.672304 |        |        |
| 9160 | ENSG00000SF3B1     | 0.932323 | 0.49596  | 0.709091 | 0.70202  |        |        |
| 9161 | ENSG00000ZBTB34    | 0.970707 | 0.461616 | 0.711111 | 0.660606 |        |        |
| 9162 | ENSG00000CISD3     | 0.971717 | 0.463636 | 0.709596 | 0.658586 |        |        |
| 9163 | ENSG00000ZFP28     | 0.963636 | 0.458586 | 0.711111 | 0.676768 | 0.4423 | 0.2522 |
| 9164 | ENSG00000C17orf75  | 0.974747 | 0.433333 | 0.7      | 0.69596  |        |        |
| 9165 | ENSG00000MYC       | 1        | 0.379798 | 0.756229 | 0.614141 |        |        |
| 9166 | ENSG00000COG4      | 1        | 0.428283 | 0.69899  | 0.659596 |        |        |
| 9167 | ENSG00000YARS2     | 0.979798 | 0.470707 | 0.725253 | 0.623232 |        |        |
| 9168 | ENSG00000PLA2G15   | 1        | 0.431313 | 0.696296 | 0.660606 |        |        |
| 9169 | ENSG00000AC010319. | 0.826087 | 0.628019 | 0.727053 | 0.709179 |        |        |
| 9170 | ENSG00000PPFIBP2   | 0.943434 | 0.488889 | 0.716162 | 0.688889 |        |        |
| 9171 | ENSG00000ITGA3     | 0.943434 | 0.474747 | 0.706397 | 0.716162 |        |        |
| 9172 | ENSG00000PRPF18    | 1        | 0.419192 | 0.695791 | 0.628283 |        |        |
| 9173 | ENSG00000CCL17     | 0.895349 | 0.590909 | 0.743129 | 0.65222  |        |        |
| 9174 | ENSG00000HECTD4    | 0.962626 | 0.49899  | 0.756566 | 0.593939 |        |        |
| 9175 | ENSG00000LAMC2     | 0.948203 | 0.473573 | 0.713531 | 0.70296  |        |        |
| 9176 | ENSG00000CYP2B6    | 0.989899 | 0.412121 | 0.75404  | 0.633333 |        |        |
| 9177 | ENSG00000STK11     | 1        | 0.391919 | 0.743434 | 0.632323 |        |        |
| 9178 | ENSG00000CHMP4C    | 0.854545 | 0.617172 | 0.735017 | 0.685859 |        |        |
| 9179 | ENSG00000KRT78     | 0.823232 | 0.621212 | 0.722222 | 0.722222 |        |        |
| 9180 | ENSG00000KCNA2     | 0.862626 | 0.593939 | 0.728283 | 0.69697  |        |        |
| 9181 | ENSG00000PITPNM3   | 1        | 0.450505 | 0.718519 | 0.620202 |        |        |
| 9182 | ENSG00000ASCL1     | 0.818182 | 0.645455 | 0.725253 | 0.713131 |        |        |
| 9183 | ENSG00000KCNC2     | 0.971717 | 0.447475 | 0.702862 | 0.684848 |        |        |

|      |                    |          |          |          |          |
|------|--------------------|----------|----------|----------|----------|
| 9184 | ENSG00000PSMD9     | 1        | 0.419192 | 0.699158 | 0.665657 |
| 9185 | ENSG00000LATS1     | 0.980808 | 0.427273 | 0.691414 | 0.707071 |
| 9186 | ENSG00000JCAD      | 0.858586 | 0.622222 | 0.740404 | 0.674747 |
| 9187 | ENSG00000SCHIP1    | 0.818182 | 0.652525 | 0.735354 | 0.69596  |
| 9188 | ENSG00000RANBP6    | 0.906061 | 0.528283 | 0.717172 | 0.710101 |
| 9189 | ENSG00000EFCAB14   | 1        | 0.421212 | 0.697138 | 0.632323 |
| 9190 | ENSG00000CEP128    | 1        | 0.428283 | 0.702357 | 0.659596 |
| 9191 | ENSG00000OTUB1     | 1        | 0.413131 | 0.73266  | 0.587879 |
| 9192 | ENSG00000RABGGTA   | 0.946465 | 0.485859 | 0.709428 | 0.70202  |
| 9193 | ENSG00000ITGA5     | 0.957576 | 0.446465 | 0.70202  | 0.731313 |
| 9194 | ENSG00000WNK2      | 0.969697 | 0.474747 | 0.717508 | 0.646465 |
| 9195 | ENSG00000ZNF669    | 0.927273 | 0.523232 | 0.717172 | 0.683838 |
| 9196 | ENSG00000ARSB      | 1        | 0.4      | 0.685859 | 0.7      |
| 9197 | ENSG00000DIABLO    | 0.884848 | 0.578788 | 0.724747 | 0.694949 |
| 9198 | ENSG00000ERLEC1    | 1        | 0.423232 | 0.721044 | 0.652525 |
| 9199 | ENSG00000GPR27     | 0.958586 | 0.463636 | 0.704545 | 0.705051 |
| 9200 | ENSG00000EMP2      | 0.9      | 0.540404 | 0.718687 | 0.705051 |
| 9201 | ENSG00000MRPL23    | 0.927273 | 0.50202  | 0.708754 | 0.708081 |
| 9202 | ENSG00000MYOZ3     | 0.781818 | 0.654545 | 0.718182 | 0.743434 |
| 9203 | ENSG00000ARID3A    | 0.970707 | 0.453535 | 0.699327 | 0.686869 |
| 9204 | ENSG00000ZNF212    | 0.820296 | 0.614165 | 0.71723  | 0.736786 |
| 9205 | ENSG00000AL162231. | 0.820296 | 0.614165 | 0.71723  | 0.736786 |
| 9206 | ENSG00000SH2D7     | 0.774747 | 0.682828 | 0.722559 | 0.731313 |
| 9207 | ENSG00000AC004556. | 0.927273 | 0.50202  | 0.708754 | 0.708081 |
| 9208 | ENSG00000KLHL25    | 0.856237 | 0.609937 | 0.727273 | 0.701903 |
| 9209 | ENSG00000CCDC25    | 1        | 0.411205 | 0.692037 | 0.655391 |
| 9210 | ENSG00000SERGEF    | 0.991919 | 0.441414 | 0.756397 | 0.609091 |
| 9211 | ENSG00000ZNF181    | 0.862626 | 0.593939 | 0.728283 | 0.7      |
| 9212 | ENSG00000GSDMB     | 1        | 0.410101 | 0.73367  | 0.650505 |
| 9213 | ENSG00000GRB10     | 1        | 0.421212 | 0.697643 | 0.671717 |
| 9214 | ENSG00000 9/2/2019 | 1        | 0.410101 | 0.715825 | 0.613131 |
| 9215 | ENSG00000UMODL1    | 0.775758 | 0.688889 | 0.732323 | 0.713131 |
| 9216 | ENSG00000TMED7-TIC | 0.818182 | 0.652525 | 0.735354 | 0.69596  |
| 9217 | ENSG00000ZBED6CL   | 0.917548 | 0.548626 | 0.726216 | 0.67759  |
| 9218 | ENSG00000SNX8      | 1        | 0.462626 | 0.716498 | 0.610101 |
| 9219 | ENSG00000CAMK2G    | 0.978788 | 0.447475 | 0.709259 | 0.671717 |
| 9220 | ENSG00000NPTX2     | 0.913043 | 0.498551 | 0.705797 | 0.744928 |
| 9221 | ENSG00000PLA2G1B   | 1        | 0.390909 | 0.6867   | 0.666667 |
| 9222 | ENSG00000PAX2      | 0.928283 | 0.49596  | 0.706229 | 0.718182 |
| 9223 | ENSG00000ELMOD3    | 0.89697  | 0.533333 | 0.712458 | 0.726263 |
| 9224 | ENSG00000 9/9/2019 | 0.858586 | 0.622222 | 0.740404 | 0.677778 |
| 9225 | ENSG00000HNRNPDL   | 1        | 0.425253 | 0.699832 | 0.632323 |
| 9226 | ENSG00000LARS      | 0.943434 | 0.488889 | 0.716162 | 0.69596  |
| 9227 | ENSG00000CD3EAP    | 0.967677 | 0.433333 | 0.748148 | 0.654545 |
| 9228 | ENSG00000COL4A3BP  | 0.969697 | 0.450505 | 0.70101  | 0.693939 |
| 9229 | ENSG00000LRRRC74B  | 0.929293 | 0.551515 | 0.729293 | 0.650505 |
| 9230 | ENSG00000OPRK1     | 0.855556 | 0.614141 | 0.732997 | 0.694949 |
| 9231 | ENSG00000NPC1      | 1        | 0.39697  | 0.700505 | 0.666667 |
| 9232 | ENSG00000CCT6A     | 1        | 0.424242 | 0.70202  | 0.634343 |
| 9233 | ENSG00000UBXN1     | 0.959831 | 0.473573 | 0.700317 | 0.697674 |
| 9234 | ENSG00000TMEM126B  | 0.959596 | 0.448485 | 0.70404  | 0.716162 |
| 9235 | ENSG00000E2F1      | 1        | 0.416162 | 0.718182 | 0.655556 |
| 9236 | ENSG00000KDF1      | 0.90303  | 0.549495 | 0.726263 | 0.690909 |
| 9237 | ENSG00000ZNF695    | 0.960606 | 0.463636 | 0.714141 | 0.685859 |
| 9238 | ENSG00000TBC1D24   | 0.939394 | 0.49697  | 0.711111 | 0.69798  |

|      |                    |          |          |          |          |        |
|------|--------------------|----------|----------|----------|----------|--------|
| 9239 | ENSG00000EEF1A2    | 0.981818 | 0.465657 | 0.71936  | 0.641414 |        |
| 9240 | ENSG00000TTC3      | 0.980808 | 0.415152 | 0.711785 | 0.69596  |        |
| 9241 | ENSG00000CIC       | 1        | 0.427273 | 0.70303  | 0.671717 |        |
| 9242 | ENSG00000SHC1      | 1        | 0.443434 | 0.709091 | 0.60303  |        |
| 9243 | ENSG00000ZNF275    | 0.883838 | 0.550505 | 0.713805 | 0.730303 |        |
| 9244 | ENSG00000ARMCX6    | 0.975758 | 0.451515 | 0.712626 | 0.665657 |        |
| 9245 | ENSG00000DENND2D   | 0.965657 | 0.441414 | 0.704545 | 0.707071 |        |
| 9246 | ENSG00000BRD1      | 0.966667 | 0.469697 | 0.687879 | 0.69899  |        |
| 9247 | ENSG00000P4HA3     | 0.884848 | 0.575758 | 0.718519 | 0.710101 |        |
| 9248 | ENSG00000MED11     | 0.818182 | 0.652525 | 0.735354 | 0.70202  |        |
| 9249 | ENSG00000AMACR     | 0.967677 | 0.476768 | 0.722222 | 0.644444 |        |
| 9250 | ENSG00000ZBTB46    | 0.969345 | 0.454545 | 0.705074 | 0.686047 |        |
| 9251 | ENSG00000AC093525. | 0.939394 | 0.49697  | 0.711111 | 0.69798  |        |
| 9252 | ENSG00000BRD9      | 0.913131 | 0.537374 | 0.725253 | 0.69596  |        |
| 9253 | ENSG00000GGA3      | 0.89852  | 0.565539 | 0.73203  | 0.682875 |        |
| 9254 | ENSG00000PRKCH     | 0.963636 | 0.492929 | 0.712963 | 0.654545 |        |
| 9255 | ENSG00000RAPGEF6   | 1        | 0.424242 | 0.70202  | 0.630303 | 0.3498 |
| 9256 | ENSG00000KISS1     | 0.965657 | 0.466667 | 0.716162 | 0.669697 |        |
| 9257 | ENSG00000CKAP2     | 0.951515 | 0.482828 | 0.719865 | 0.691919 | 0.3359 |
| 9258 | ENSG00000PATZ1     | 0.985859 | 0.432323 | 0.73468  | 0.650505 |        |
| 9259 | ENSG00000FRYL      | 0.970707 | 0.461616 | 0.711111 | 0.673737 |        |
| 9260 | ENSG00000REX01     | 0.93129  | 0.493658 | 0.718816 | 0.704017 |        |
| 9261 | ENSG00000NR1D1     | 0.862626 | 0.593939 | 0.728283 | 0.708081 |        |
| 9262 | ENSG00000KRTDAP    | 0.85825  | 0.579181 | 0.718715 | 0.733112 |        |
| 9263 | ENSG00000RNF167    | 0.89697  | 0.564646 | 0.729461 | 0.689899 |        |
| 9264 | ENSG00000HEPN1     | 0.937374 | 0.49596  | 0.711448 | 0.70202  |        |
| 9265 | ENSG00000COPS6     | 0.967677 | 0.486869 | 0.717508 | 0.646465 |        |
| 9266 | ENSG00000ABR       | 0.90303  | 0.549495 | 0.726263 | 0.694949 |        |
| 9267 | ENSG00000TMT2      | 1        | 0.408081 | 0.697306 | 0.635354 |        |
| 9268 | ENSG00000PSMD6     | 0.956566 | 0.471717 | 0.742761 | 0.667677 |        |
| 9269 | ENSG00000ICMT      | 0.967677 | 0.435354 | 0.698822 | 0.719192 |        |
| 9270 | ENSG00000ZNF467    | 1        | 0.428283 | 0.713131 | 0.593939 |        |
| 9271 | ENSG00000RTF1      | 0.887949 | 0.569767 | 0.717054 | 0.712474 |        |
| 9272 | ENSG00000TLCD1     | 0.860465 | 0.586681 | 0.723573 | 0.721987 |        |
| 9273 | ENSG00000LRRC75B   | 0.9      | 0.572727 | 0.736364 | 0.673737 | 0.2933 |
| 9274 | ENSG00000AKAP4     | 0.90303  | 0.549495 | 0.726263 | 0.69596  |        |
| 9275 | ENSG00000BMP1      | 0.818182 | 0.652525 | 0.735354 | 0.705051 |        |
| 9276 | ENSG00000DOLPP1    | 0.9      | 0.572727 | 0.736364 | 0.674747 |        |
| 9277 | ENSG00000OSBPL6    | 0.862626 | 0.593939 | 0.728283 | 0.711111 |        |
| 9278 | ENSG00000EXOC3L4   | 0.850505 | 0.614141 | 0.730976 | 0.705051 |        |
| 9279 | ENSG00000ZNF343    | 0.858586 | 0.622222 | 0.740404 | 0.686869 |        |
| 9280 | ENSG00000ADAT1     | 0.978788 | 0.447475 | 0.709259 | 0.679798 |        |
| 9281 | ENSG00000MAGEH1    | 0.972727 | 0.449495 | 0.706734 | 0.684848 |        |
| 9282 | ENSG00000TTBK1     | 0.90303  | 0.549495 | 0.726263 | 0.69697  |        |
| 9283 | ENSG00000CD72      | 0.906061 | 0.528283 | 0.717172 | 0.720202 |        |
| 9284 | ENSG00000ECE1      | 1        | 0.428283 | 0.700673 | 0.659596 | 0.4575 |
| 9285 | ENSG00000IPMK      | 0.89697  | 0.564646 | 0.729461 | 0.690909 |        |
| 9286 | ENSG00000KDM6B     | 0.923232 | 0.523232 | 0.715152 | 0.705051 |        |
| 9287 | ENSG00000KIAA1328  | 0.908081 | 0.508081 | 0.714478 | 0.735354 |        |
| 9288 | ENSG00000LDHC      | 0.837209 | 0.6268   | 0.724991 | 0.716501 |        |
| 9289 | ENSG00000CNTD2     | 0.94926  | 0.47463  | 0.714588 | 0.712474 |        |
| 9290 | ENSG00000DCBLD2    | 0.818182 | 0.652525 | 0.735354 | 0.710101 |        |
| 9291 | ENSG00000EIF3M     | 0.851515 | 0.641414 | 0.733838 | 0.691919 |        |
| 9292 | ENSG00000CCDC34    | 0.946465 | 0.510101 | 0.721212 | 0.676768 |        |
| 9293 | ENSG00000ZNF234    | 0.926263 | 0.494949 | 0.705387 | 0.730303 |        |



|      |                   |          |          |          |          |        |
|------|-------------------|----------|----------|----------|----------|--------|
| 9294 | ENSG00000NDRG1    | 0.956566 | 0.487879 | 0.719697 | 0.686869 |        |
| 9295 | ENSG00000FAM76B   | 0.893939 | 0.558586 | 0.723906 | 0.708081 |        |
| 9296 | ENSG00000Clorf54  | 0.917548 | 0.523256 | 0.710536 | 0.721987 |        |
| 9297 | ENSG00000OR2T10   | 0.818182 | 0.652525 | 0.735354 | 0.707071 |        |
| 9298 | ENSG00000ACTB     | 1        | 0.448485 | 0.725253 | 0.631313 |        |
| 9299 | ENSG00000FBXL17   | 1        | 0.375264 | 0.728858 | 0.656448 |        |
| 9300 | ENSG00000H1F00    | 0.811111 | 0.645455 | 0.727609 | 0.729293 |        |
| 9301 | ENSG00000FRG2     | 1        | 0.391919 | 0.70303  | 0.634343 |        |
| 9302 | ENSG00000PINK1    | 1        | 0.424242 | 0.694949 | 0.644444 | 0.2849 |
| 9303 | ENSG00000JAKMIP2  | 0.9      | 0.572727 | 0.736364 | 0.677778 |        |
| 9304 | ENSG00000C5AR1    | 0.960606 | 0.491919 | 0.726263 | 0.651515 |        |
| 9305 | ENSG00000GIT2     | 0.923232 | 0.523232 | 0.715152 | 0.707071 |        |
| 9306 | ENSG00000HAUS3    | 0.856566 | 0.613131 | 0.731987 | 0.70404  |        |
| 9307 | ENSG00000C16orf70 | 1        | 0.427273 | 0.727778 | 0.625253 |        |
| 9308 | ENSG00000MRPS16   | 0.975758 | 0.451515 | 0.712626 | 0.673737 |        |
| 9309 | ENSG00000LRRC73   | 0.849391 | 0.638981 | 0.744186 | 0.684385 |        |
| 9310 | ENSG00000UTP23    | 0.927273 | 0.529293 | 0.723569 | 0.684848 |        |
| 9311 | ENSG00000ITGAX    | 0.969697 | 0.436364 | 0.706061 | 0.710101 |        |
| 9312 | ENSG00000GART     | 1        | 0.39596  | 0.724579 | 0.635354 | 0.1646 |
| 9313 | ENSG00000TP53I11  | 0.981818 | 0.417172 | 0.697811 | 0.721212 |        |
| 9314 | ENSG00000FAM212B  | 0.823232 | 0.617172 | 0.714141 | 0.750505 |        |
| 9315 | ENSG00000CHRNA4   | 0.923232 | 0.528283 | 0.721044 | 0.69798  |        |
| 9316 | ENSG00000CCK      | 0.816425 | 0.656039 | 0.735749 | 0.708213 |        |
| 9317 | ENSG00000CTPS2    | 0.979798 | 0.428283 | 0.700842 | 0.711111 | 0.2578 |
| 9318 | ENSG00000PTGES2   | 0.929293 | 0.521212 | 0.713805 | 0.69798  |        |
| 9319 | ENSG00000ESCO1    | 0.965657 | 0.450505 | 0.703704 | 0.706061 |        |
| 9320 | ENSG00000TRIM21   | 1        | 0.431313 | 0.703872 | 0.645455 |        |
| 9321 | ENSG00000TMEM229A | 0.862626 | 0.590909 | 0.725589 | 0.718182 |        |
| 9322 | ENSG00000P3H2     | 1        | 0.445455 | 0.702525 | 0.661616 |        |
| 9323 | ENSG00000PTMA     | 0.893939 | 0.558586 | 0.723906 | 0.708081 |        |
| 9324 | ENSG00000MKRN3    | 0.921212 | 0.529293 | 0.720539 | 0.7      |        |
| 9325 | ENSG00000GJB1     | 0.893939 | 0.590909 | 0.741246 | 0.670707 |        |
| 9326 | ENSG00000FRG2B    | 1        | 0.391919 | 0.70303  | 0.634343 |        |
| 9327 | ENSG00000TEX19    | 0.809725 | 0.679704 | 0.744715 | 0.69556  |        |
| 9328 | ENSG00000GTPBP2   | 0.941414 | 0.50303  | 0.722222 | 0.686869 |        |
| 9329 | ENSG00000TXNL1    | 1        | 0.409091 | 0.772391 | 0.620202 | 0.368  |
| 9330 | ENSG00000LRRC59   | 0.939394 | 0.489899 | 0.712458 | 0.714141 |        |
| 9331 | ENSG00000FBX02    | 0.860465 | 0.586681 | 0.723573 | 0.72833  |        |
| 9332 | ENSG00000CP       | 0.977778 | 0.445455 | 0.708081 | 0.689899 |        |
| 9333 | ENSG00000PAG1     | 0.982828 | 0.461616 | 0.713131 | 0.660606 |        |
| 9334 | ENSG00000ALPL     | 0.960606 | 0.463636 | 0.714141 | 0.69596  |        |
| 9335 | ENSG00000WBP1     | 0.934461 | 0.519027 | 0.724806 | 0.681818 |        |
| 9336 | ENSG00000SFRP4    | 0.974747 | 0.457576 | 0.712121 | 0.675758 |        |
| 9337 | ENSG00000CNTNAP1  | 0.845666 | 0.636364 | 0.739077 | 0.69556  |        |
| 9338 | ENSG00000NEMF     | 0.957576 | 0.473737 | 0.7133   | 0.70303  |        |
| 9339 | ENSG00000FAM111A  | 1        | 0.40404  | 0.707071 | 0.643434 |        |
| 9340 | ENSG00000MOCS3    | 0.89852  | 0.565539 | 0.73203  | 0.691332 |        |
| 9341 | ENSG00000PDZD2    | 1        | 0.392929 | 0.763636 | 0.617172 |        |
| 9342 | ENSG00000KRT14    | 0.955556 | 0.461616 | 0.706397 | 0.732323 |        |
| 9343 | ENSG00000RNF150   | 0.90303  | 0.549495 | 0.726263 | 0.70202  | 0.3633 |
| 9344 | ENSG00000CXADR    | 1        | 0.409091 | 0.702862 | 0.654545 |        |
| 9345 | ENSG00000RBM42    | 0.957576 | 0.474747 | 0.711111 | 0.708081 |        |
| 9346 | ENSG00000THRA     | 1        | 0.393939 | 0.713805 | 0.676768 |        |
| 9347 | ENSG00000KDM8     | 0.939394 | 0.508081 | 0.730135 | 0.678788 |        |
| 9348 | ENSG00000PSMC1    | 0.90303  | 0.525253 | 0.721212 | 0.728283 |        |

|      |                   |          |          |          |          |        |        |
|------|-------------------|----------|----------|----------|----------|--------|--------|
| 9349 | ENSG00000GPR42    | 0.9      | 0.572727 | 0.736364 | 0.683838 |        |        |
| 9350 | ENSG00000ABL1     | 1        | 0.407071 | 0.771212 | 0.623232 |        |        |
| 9351 | ENSG00000TRMT112  | 0.966667 | 0.466667 | 0.758586 | 0.628283 |        |        |
| 9352 | ENSG00000POLH     | 0.969697 | 0.473737 | 0.78064  | 0.59899  |        |        |
| 9353 | ENSG00000RTN4     | 0.972727 | 0.441414 | 0.711448 | 0.69697  |        |        |
| 9354 | ENSG00000RAB3IL1  | 0.862626 | 0.593939 | 0.728283 | 0.716162 |        |        |
| 9355 | ENSG00000FAM98B   | 1        | 0.434343 | 0.710438 | 0.608081 |        |        |
| 9356 | ENSG00000MARCO    | 0.860465 | 0.586681 | 0.723573 | 0.730444 |        |        |
| 9357 | ENSG00000CD8A     | 0.971717 | 0.454545 | 0.70101  | 0.69697  |        |        |
| 9358 | ENSG00000NASP     | 0.984848 | 0.415152 | 0.706061 | 0.713131 |        |        |
| 9359 | ENSG00000S100A3   | 0.991304 | 0.365217 | 0.705314 | 0.76715  |        |        |
| 9360 | ENSG00000AG03     | 0.823232 | 0.621212 | 0.722222 | 0.744444 |        |        |
| 9361 | ENSG00000HGFAC    | 0.955603 | 0.445032 | 0.700317 | 0.766385 |        |        |
| 9362 | ENSG00000RPL26    | 0.969697 | 0.481818 | 0.709764 | 0.667677 |        |        |
| 9363 | ENSG00000LRP2     | 0.957717 | 0.446089 | 0.701903 | 0.750529 |        |        |
| 9364 | ENSG00000PAFAH1B1 | 1        | 0.424242 | 0.702357 | 0.69596  |        |        |
| 9365 | ENSG00000ZFAND5   | 0.957576 | 0.5      | 0.726936 | 0.669697 |        |        |
| 9366 | ENSG00000ARL1     | 0.858586 | 0.622222 | 0.740404 | 0.693939 |        |        |
| 9367 | ENSG00000HNRNPA0  | 0.937374 | 0.49596  | 0.711448 | 0.713131 |        |        |
| 9368 | ENSG00000QRFP     | 0.894949 | 0.582828 | 0.731987 | 0.688889 |        |        |
| 9369 | ENSG00000PROSER3  | 0.90303  | 0.549495 | 0.726263 | 0.705051 |        |        |
| 9370 | ENSG00000TUBGCP3  | 1        | 0.436575 | 0.706836 | 0.64482  |        |        |
| 9371 | ENSG00000PI15     | 0.989899 | 0.426263 | 0.719865 | 0.681818 | 0.2626 |        |
| 9372 | ENSG00000SMARCA5  | 0.988889 | 0.443434 | 0.71936  | 0.667677 |        |        |
| 9373 | ENSG00000MRNIP    | 0.962626 | 0.5      | 0.721886 | 0.652525 |        |        |
| 9374 | ENSG00000IFNB1    | 0.956566 | 0.487879 | 0.717508 | 0.693939 |        | 0.563  |
| 9375 | ENSG00000GPSM2    | 1        | 0.432323 | 0.702357 | 0.657576 | 0.2916 | 0.4841 |
| 9376 | ENSG00000NAT9     | 0.820296 | 0.614165 | 0.71723  | 0.758985 |        |        |
| 9377 | ENSG00000AMBRA1   | 0.989899 | 0.430303 | 0.741077 | 0.651515 |        |        |
| 9378 | ENSG00000TRIM64B  | 0.818182 | 0.652525 | 0.735354 | 0.713131 |        |        |
| 9379 | ENSG00000CEP85    | 0.89852  | 0.565539 | 0.73203  | 0.694503 | 0.2113 |        |
| 9380 | ENSG00000HPSE2    | 0.885835 | 0.575053 | 0.727801 | 0.710359 |        |        |
| 9381 | ENSG00000FKBP10   | 0.980808 | 0.433333 | 0.70404  | 0.70303  |        |        |
| 9382 | ENSG00000ZBTB33   | 1        | 0.416162 | 0.774411 | 0.551515 | 0.4343 |        |
| 9383 | ENSG00000CNST     | 0.963636 | 0.470707 | 0.704714 | 0.694949 |        |        |
| 9384 | ENSG00000NPAS2    | 0.975687 | 0.424947 | 0.696441 | 0.731501 |        |        |
| 9385 | ENSG00000TRIM64   | 0.818182 | 0.652525 | 0.735354 | 0.713131 |        |        |
| 9386 | ENSG00000TRIM64C  | 0.818182 | 0.652525 | 0.735354 | 0.713131 |        |        |
| 9387 | ENSG00000KRI1     | 0.956566 | 0.473737 | 0.743771 | 0.676768 |        |        |
| 9388 | ENSG00000FFAR3    | 0.9      | 0.572727 | 0.736364 | 0.683838 |        |        |
| 9389 | ENSG00000KXD1     | 1        | 0.462626 | 0.719529 | 0.622222 |        |        |
| 9390 | ENSG00000DEFB104A | 0.849495 | 0.612121 | 0.728956 | 0.720202 |        |        |
| 9391 | ENSG00000DEFB104B | 0.849495 | 0.612121 | 0.728956 | 0.720202 |        |        |
| 9392 | ENSG00000PPP1R3D  | 0.890909 | 0.554545 | 0.719697 | 0.727273 |        |        |
| 9393 | ENSG00000FAIM     | 1        | 0.370707 | 0.690067 | 0.710101 |        |        |
| 9394 | ENSG00000SIRT5    | 1        | 0.426263 | 0.705387 | 0.660606 |        | 0.2748 |
| 9395 | ENSG00000DPYSL5   | 0.809725 | 0.679704 | 0.744715 | 0.701903 |        |        |
| 9396 | ENSG00000BAIAP3   | 0.9      | 0.540404 | 0.718687 | 0.727273 |        |        |
| 9397 | ENSG00000IQCG     | 0.818182 | 0.652525 | 0.735354 | 0.718182 |        |        |
| 9398 | ENSG00000CDH6     | 1        | 0.441414 | 0.713973 | 0.643434 |        |        |
| 9399 | ENSG00000CMTM6    | 0.937374 | 0.526263 | 0.728114 | 0.676768 |        |        |
| 9400 | ENSG00000GLRX     | 1        | 0.346465 | 0.730808 | 0.672727 |        |        |
| 9401 | ENSG00000TUBD1    | 1        | 0.440404 | 0.710101 | 0.652525 |        |        |
| 9402 | ENSG00000DDX55    | 1        | 0.448485 | 0.720202 | 0.630303 |        |        |
| 9403 | ENSG00000CALHM3   | 0.90303  | 0.538384 | 0.715152 | 0.728283 |        |        |

|      |                    |          |          |          |          |
|------|--------------------|----------|----------|----------|----------|
| 9404 | ENSG00000ATE1      | 0.890909 | 0.585859 | 0.736364 | 0.690909 |
| 9405 | ENSG00000RPS23     | 0.858586 | 0.622222 | 0.740404 | 0.693939 |
| 9406 | ENSG00000CHL1      | 0.969697 | 0.472727 | 0.718182 | 0.668687 |
| 9407 | ENSG00000HBA1      | 0.973737 | 0.450505 | 0.712458 | 0.684848 |
| 9408 | ENSG00000TNFRSF1B  | 1        | 0.464059 | 0.715997 | 0.641649 |
| 9409 | ENSG00000CCDC160   | 0.979798 | 0.447475 | 0.713973 | 0.679798 |
| 9410 | ENSG00000ANKRD54   | 1        | 0.426263 | 0.706397 | 0.679798 |
| 9411 | ENSG00000UQCC3     | 1        | 0.40202  | 0.690236 | 0.649495 |
| 9412 | ENSG00000ZNF766    | 0.955556 | 0.467677 | 0.711616 | 0.724242 |
| 9413 | ENSG00000RRP36     | 0.930303 | 0.545455 | 0.721549 | 0.681818 |
| 9414 | ENSG00000PODXL2    | 1        | 0.389899 | 0.682155 | 0.735354 |
| 9415 | ENSG00000BHMT      | 0.972727 | 0.447475 | 0.701515 | 0.709091 |
| 9416 | ENSG00000UTP4      | 0.880808 | 0.583838 | 0.730303 | 0.711111 |
| 9417 | ENSG00000LYZL6     | 0.957576 | 0.476768 | 0.717172 | 0.69798  |
| 9418 | ENSG00000DSG2      | 1        | 0.446465 | 0.722896 | 0.651515 |
| 9419 | ENSG00000NEDD9     | 1        | 0.430303 | 0.76633  | 0.6      |
| 9420 | ENSG00000OLFML1    | 0.818182 | 0.652525 | 0.735354 | 0.717172 |
| 9421 | ENSG00000LDLRAP1   | 0.965657 | 0.491919 | 0.725926 | 0.648485 |
| 9422 | ENSG00000NDUFV2    | 0.9      | 0.572727 | 0.736364 | 0.686869 |
| 9423 | ENSG00000DDX3Y     | 1        | 0.430303 | 0.725253 | 0.660606 |
| 9424 | ENSG00000FGD2      | 0.975758 | 0.452525 | 0.721212 | 0.672727 |
| 9425 | ENSG00000PLEK      | 0.90303  | 0.549495 | 0.726263 | 0.711111 |
| 9426 | ENSG00000FAAP100   | 0.986869 | 0.441414 | 0.713805 | 0.680808 |
| 9427 | ENSG00000CRLF1     | 1        | 0.436364 | 0.709091 | 0.681818 |
| 9428 | ENSG00000EFCAB12   | 0.961616 | 0.477778 | 0.709933 | 0.691919 |
| 9429 | ENSG00000MKKS      | 1        | 0.434343 | 0.710438 | 0.647475 |
| 9430 | ENSG00000SLC46A3   | 0.971717 | 0.450505 | 0.705724 | 0.70101  |
| 9431 | ENSG00000GSTM2     | 0.969697 | 0.467677 | 0.711279 | 0.680808 |
| 9432 | ENSG00000TSPAN9    | 0.972727 | 0.475758 | 0.722222 | 0.658586 |
| 9433 | ENSG00000MACC1     | 1        | 0.441414 | 0.715488 | 0.593939 |
| 9434 | ENSG00000NRCAM     | 0.9      | 0.572727 | 0.736364 | 0.690909 |
| 9435 | ENSG00000CNOT9     | 0.938689 | 0.512685 | 0.725687 | 0.689218 |
| 9436 | ENSG00000MRPL30    | 0.89852  | 0.565539 | 0.73203  | 0.698732 |
| 9437 | ENSG00000VWA8      | 1        | 0.448485 | 0.725253 | 0.633333 |
| 9438 | ENSG00000LEMD3     | 0.929293 | 0.517172 | 0.71633  | 0.708081 |
| 9439 | ENSG00000PCGF3     | 0.9      | 0.572727 | 0.736364 | 0.687879 |
| 9440 | ENSG00000AC116366. | 0.921776 | 0.524313 | 0.718816 | 0.713531 |
| 9441 | ENSG00000LIMA1     | 0.941414 | 0.50303  | 0.722222 | 0.69798  |
| 9442 | ENSG00000CD1B      | 0.901691 | 0.542283 | 0.721987 | 0.724101 |
| 9443 | ENSG00000CDCP1     | 0.979798 | 0.447475 | 0.713973 | 0.683838 |
| 9444 | ENSG00000COPE      | 1        | 0.440404 | 0.712795 | 0.654545 |
| 9445 | ENSG00000ZNF654    | 0.99899  | 0.411111 | 0.773064 | 0.635354 |
| 9446 | ENSG00000TPM2      | 1        | 0.40303  | 0.69899  | 0.642424 |
| 9447 | ENSG00000RPAP2     | 0.921212 | 0.529293 | 0.720539 | 0.712121 |
| 9448 | ENSG00000DNAJC8    | 0.972727 | 0.449495 | 0.701178 | 0.709091 |
| 9449 | ENSG00000MSRB1     | 0.924242 | 0.5      | 0.706061 | 0.745455 |
| 9450 | ENSG00000ITGA2B    | 0.971717 | 0.460606 | 0.711616 | 0.688889 |
| 9451 | ENSG00000TXNDC17   | 0.887879 | 0.582828 | 0.732828 | 0.70404  |
| 9452 | ENSG00000SQSTM1    | 0.993939 | 0.472727 | 0.754209 | 0.60202  |
| 9453 | ENSG00000C16orf54  | 0.9      | 0.572727 | 0.736364 | 0.688889 |
| 9454 | ENSG00000USP2      | 1        | 0.451374 | 0.713531 | 0.658562 |
| 9455 | ENSG00000DIP2B     | 0.971717 | 0.460606 | 0.711616 | 0.688889 |
| 9456 | ENSG00000NSRP1     | 1        | 0.436364 | 0.704377 | 0.655556 |
| 9457 | ENSG00000ZNF470    | 0.975758 | 0.419192 | 0.693434 | 0.746465 |
| 9458 | ENSG00000SIRT1     | 0.966667 | 0.447475 | 0.747811 | 0.666667 |

|      |           |          |          |          |          |          |        |        |
|------|-----------|----------|----------|----------|----------|----------|--------|--------|
| 9459 | ENSG00000 | IP011    | 0.929293 | 0.533333 | 0.727273 | 0.687879 |        |        |
| 9460 | ENSG00000 | MTA2     | 1        | 0.407071 | 0.700168 | 0.672727 |        |        |
| 9461 | ENSG00000 | PTH      | 0.965657 | 0.469697 | 0.702862 | 0.70101  |        |        |
| 9462 | ENSG00000 | EPB41L5  | 0.957576 | 0.476768 | 0.722896 | 0.7      |        |        |
| 9463 | ENSG00000 | TNFSF11  | 0.955556 | 0.446465 | 0.70101  | 0.776768 |        |        |
| 9464 | ENSG00000 | SLC43A3  | 0.89697  | 0.590909 | 0.738889 | 0.682828 |        |        |
| 9465 | ENSG00000 | MRRF     | 1        | 0.425253 | 0.695623 | 0.661616 |        |        |
| 9466 | ENSG00000 | PSMD4    | 0.941414 | 0.50303  | 0.785859 | 0.634343 |        |        |
| 9467 | ENSG00000 | CPA3     | 0.959596 | 0.490909 | 0.727946 | 0.670707 |        |        |
| 9468 | ENSG00000 | DDX49    | 0.972727 | 0.475758 | 0.722222 | 0.660606 |        |        |
| 9469 | ENSG00000 | WDR25    | 0.967677 | 0.485859 | 0.719865 | 0.662626 |        |        |
| 9470 | ENSG00000 | LRFN2    | 0.847475 | 0.647475 | 0.746633 | 0.691919 |        |        |
| 9471 | ENSG00000 | ALPI     | 0.975758 | 0.428283 | 0.698148 | 0.730303 |        |        |
| 9472 | ENSG00000 | CLIP2    | 1        | 0.424242 | 0.70202  | 0.686869 |        |        |
| 9473 | ENSG00000 | GDI1     | 0.971717 | 0.460606 | 0.711616 | 0.687879 |        |        |
| 9474 | ENSG00000 | KCNE3    | 0.806202 | 0.673311 | 0.739756 | 0.718715 |        |        |
| 9475 | ENSG00000 | PRMT2    | 0.987879 | 0.443434 | 0.722391 | 0.672727 |        |        |
| 9476 | ENSG00000 | TMEM151A | 0.89697  | 0.564646 | 0.729461 | 0.707071 |        |        |
| 9477 | ENSG00000 | PPP1R3B  | 0.92389  | 0.513742 | 0.710359 | 0.731501 |        |        |
| 9478 | ENSG00000 | SUMF2    | 0.974747 | 0.457576 | 0.714815 | 0.683838 |        |        |
| 9479 | ENSG00000 | CTRL     | 0.965657 | 0.450505 | 0.703704 | 0.719192 |        |        |
| 9480 | ENSG00000 | BAIAP2L2 | 0.967677 | 0.468687 | 0.709933 | 0.690909 |        | 0.364  |
| 9481 | ENSG00000 | BAMBI    | 0.890909 | 0.554545 | 0.719697 | 0.735354 |        |        |
| 9482 | ENSG00000 | CFAP45   | 0.945455 | 0.490909 | 0.718182 | 0.711111 |        |        |
| 9483 | ENSG00000 | FBX024   | 0.809725 | 0.679704 | 0.744715 | 0.710359 |        |        |
| 9484 | ENSG00000 | BHLHE23  | 0.967677 | 0.459596 | 0.702862 | 0.710101 | 0.1596 |        |
| 9485 | ENSG00000 | MRPL19   | 0.89697  | 0.59798  | 0.747475 | 0.670707 |        |        |
| 9486 | ENSG00000 | APOA1    | 0.975758 | 0.451515 | 0.712626 | 0.689899 |        |        |
| 9487 | ENSG00000 | LRRK1    | 0.927273 | 0.552525 | 0.732492 | 0.674747 |        |        |
| 9488 | ENSG00000 | TCEA2    | 0.976768 | 0.447475 | 0.711448 | 0.694949 |        |        |
| 9489 | ENSG00000 | BMX      | 0.966667 | 0.467677 | 0.718013 | 0.686869 |        |        |
| 9490 | ENSG00000 | LUC7L3   | 1        | 0.427273 | 0.714478 | 0.667677 | 0.451  | 0.2879 |
| 9491 | ENSG00000 | ELF2     | 1        | 0.434343 | 0.712458 | 0.662626 |        |        |
| 9492 | ENSG00000 | NUCB1    | 0.895349 | 0.590909 | 0.743129 | 0.682875 |        | 0.3818 |
| 9493 | ENSG00000 | EPSTI1   | 0.921212 | 0.526263 | 0.716162 | 0.724242 |        |        |
| 9494 | ENSG00000 | DACT1    | 0.976768 | 0.467677 | 0.722222 | 0.663636 |        |        |
| 9495 | ENSG00000 | ETF1     | 1        | 0.449495 | 0.709596 | 0.643434 |        |        |
| 9496 | ENSG00000 | CLDN18   | 0.990909 | 0.447475 | 0.73266  | 0.656566 |        |        |
| 9497 | ENSG00000 | FRMPD3   | 0.818182 | 0.652525 | 0.735354 | 0.727273 |        |        |
| 9498 | ENSG00000 | STK35    | 0.939394 | 0.519192 | 0.729293 | 0.685859 |        |        |
| 9499 | ENSG00000 | CTGF     | 0.977778 | 0.445455 | 0.708081 | 0.70404  |        |        |
| 9500 | ENSG00000 | BOLA3    | 0.89697  | 0.557576 | 0.72138  | 0.726263 |        |        |
| 9501 | ENSG00000 | HNRNPR   | 1        | 0.437374 | 0.709764 | 0.652525 |        |        |
| 9502 | ENSG00000 | STK38    | 0.961616 | 0.478788 | 0.754545 | 0.646465 |        |        |
| 9503 | ENSG00000 | GYP A    | 0.963636 | 0.434343 | 0.699663 | 0.751515 |        |        |
| 9504 | ENSG00000 | ARSA     | 1        | 0.428283 | 0.702357 | 0.689899 |        |        |
| 9505 | ENSG00000 | BCL10    | 1        | 0.426263 | 0.709428 | 0.650505 |        |        |
| 9506 | ENSG00000 | SERINC5  | 1        | 0.410101 | 0.715825 | 0.643434 |        |        |
| 9507 | ENSG00000 | CPB2     | 0.927273 | 0.548485 | 0.726263 | 0.687879 |        |        |
| 9508 | ENSG00000 | CCNK     | 0.849495 | 0.619192 | 0.734343 | 0.722222 |        |        |
| 9509 | ENSG00000 | ZC2HC1C  | 0.979798 | 0.415152 | 0.731987 | 0.69899  |        |        |
| 9510 | ENSG00000 | TMTC1    | 0.920266 | 0.568106 | 0.740495 | 0.669989 |        |        |
| 9511 | ENSG00000 | TFF2     | 0.906061 | 0.528283 | 0.717172 | 0.741414 |        |        |
| 9512 | ENSG00000 | ZDHHC3   | 0.967677 | 0.479798 | 0.717677 | 0.673737 |        |        |
| 9513 | ENSG00000 | RAB31    | 0.882828 | 0.552525 | 0.714646 | 0.757576 |        |        |

|      |                    |          |          |          |          |        |        |
|------|--------------------|----------|----------|----------|----------|--------|--------|
| 9514 | ENSG00000DZIP3     | 0.89697  | 0.557576 | 0.72138  | 0.726263 |        |        |
| 9515 | ENSG00000RRP15     | 0.958774 | 0.501057 | 0.721811 | 0.678647 |        |        |
| 9516 | ENSG00000NFYA      | 0.99596  | 0.434343 | 0.746128 | 0.649495 |        |        |
| 9517 | ENSG00000SNRPD1    | 0.879493 | 0.603594 | 0.739429 | 0.698732 |        |        |
| 9518 | ENSG00000CBY3      | 0.90303  | 0.549495 | 0.726263 | 0.716162 |        |        |
| 9519 | ENSG00000ALDH6A1   | 1        | 0.427273 | 0.713636 | 0.663636 |        |        |
| 9520 | ENSG00000GTF3C6    | 0.984848 | 0.447475 | 0.715993 | 0.683838 |        |        |
| 9521 | ENSG00000RABL6     | 0.957576 | 0.449495 | 0.705219 | 0.753535 |        |        |
| 9522 | ENSG00000SPATA20   | 0.981818 | 0.434343 | 0.709764 | 0.708081 |        |        |
| 9523 | ENSG00000CCZ1      | 0.978788 | 0.445455 | 0.712121 | 0.69798  |        |        |
| 9524 | ENSG00000PIK3CA    | 1        | 0.438384 | 0.706397 | 0.660606 |        | 0.2987 |
| 9525 | ENSG00000CABCOC01  | 0.815011 | 0.645877 | 0.730444 | 0.743129 |        |        |
| 9526 | ENSG00000CYGB      | 0.89697  | 0.59798  | 0.747475 | 0.672727 |        |        |
| 9527 | ENSG00000TYRP1     | 0.969697 | 0.436364 | 0.694444 | 0.747475 |        |        |
| 9528 | ENSG00000SLC9A2    | 0.941414 | 0.50303  | 0.722222 | 0.706061 |        |        |
| 9529 | ENSG00000CCZ1B     | 0.978788 | 0.445455 | 0.712121 | 0.69798  |        |        |
| 9530 | ENSG00000SCIMP     | 0.849495 | 0.619192 | 0.734343 | 0.723232 |        |        |
| 9531 | ENSG00000ZSCAN12   | 0.938384 | 0.538384 | 0.741751 | 0.661616 |        |        |
| 9532 | ENSG00000IRF7      | 1        | 0.407071 | 0.688047 | 0.666667 |        |        |
| 9533 | ENSG00000ARHGAP22  | 1        | 0.414141 | 0.750842 | 0.625253 |        |        |
| 9534 | ENSG00000WASHC5    | 0.956566 | 0.447475 | 0.701347 | 0.775758 |        |        |
| 9535 | ENSG00000GPR152    | 0.937374 | 0.537374 | 0.737374 | 0.668687 |        |        |
| 9536 | ENSG00000MBD1      | 0.994949 | 0.449495 | 0.743603 | 0.639394 |        |        |
| 9537 | ENSG00000TMED1     | 0.89697  | 0.564646 | 0.729461 | 0.715152 |        |        |
| 9538 | ENSG00000BEST1     | 0.818182 | 0.617172 | 0.717003 | 0.778788 |        |        |
| 9539 | ENSG00000MCL1      | 1        | 0.393939 | 0.757912 | 0.628283 |        |        |
| 9540 | ENSG00000ATXN2     | 1        | 0.412121 | 0.690572 | 0.649495 |        |        |
| 9541 | ENSG00000RPS28     | 0.9      | 0.572727 | 0.736364 | 0.69596  |        |        |
| 9542 | ENSG00000AL358113. | 1        | 0.393939 | 0.681818 | 0.671717 |        |        |
| 9543 | ENSG00000ARHGFE3   | 0.975758 | 0.434343 | 0.702694 | 0.725253 | 0.3248 |        |
| 9544 | ENSG00000KIF9      | 1        | 0.424242 | 0.694949 | 0.712121 |        | 0.3738 |
| 9545 | ENSG00000BORCS5    | 1        | 0.410101 | 0.705724 | 0.657576 |        |        |
| 9546 | ENSG00000MORC2     | 0.974747 | 0.433333 | 0.7      | 0.732323 |        |        |
| 9547 | ENSG00000GOPC      | 1        | 0.436364 | 0.706061 | 0.691919 | 0.489  | 0.5466 |
| 9548 | ENSG00000PRDM15    | 0.974747 | 0.475758 | 0.725253 | 0.659596 |        |        |
| 9549 | ENSG00000ATG2B     | 0.978788 | 0.447475 | 0.709259 | 0.70303  |        |        |
| 9550 | ENSG00000GABPB1    | 0.979798 | 0.470707 | 0.725253 | 0.658586 | 0.4836 |        |
| 9551 | ENSG00000SLC27A4   | 0.959596 | 0.509091 | 0.726431 | 0.664646 | 0.371  |        |
| 9552 | ENSG00000NIPAL2    | 1        | 0.413131 | 0.698316 | 0.710101 |        |        |
| 9553 | ENSG00000PREX2     | 0.818182 | 0.652525 | 0.735354 | 0.733333 |        |        |
| 9554 | ENSG00000NDOR1     | 0.89697  | 0.59798  | 0.747475 | 0.673737 |        |        |
| 9555 | ENSG00000INTS1     | 0.970707 | 0.489899 | 0.723401 | 0.656566 |        |        |
| 9556 | ENSG00000EMILIN3   | 0.954545 | 0.457576 | 0.711111 | 0.754545 |        |        |
| 9557 | ENSG00000CISH      | 1        | 0.419192 | 0.696128 | 0.70101  |        |        |
| 9558 | ENSG00000CLIP1     | 1        | 0.448485 | 0.715825 | 0.635354 |        |        |
| 9559 | ENSG00000TMEM174   | 0.856237 | 0.615222 | 0.735729 | 0.72093  |        |        |
| 9560 | ENSG00000MOSPD1    | 0.925253 | 0.522222 | 0.715488 | 0.726263 |        |        |
| 9561 | ENSG00000GBP4      | 0.931313 | 0.510101 | 0.716162 | 0.721212 |        |        |
| 9562 | ENSG00000DCUN1D3   | 0.858586 | 0.622222 | 0.740404 | 0.708081 |        |        |
| 9563 | ENSG00000PTPRC     | 0.935354 | 0.533333 | 0.720539 | 0.69697  |        |        |
| 9564 | ENSG00000RPLP2     | 0.937374 | 0.537374 | 0.737374 | 0.670707 |        |        |
| 9565 | ENSG00000HECTD1    | 0.919662 | 0.547569 | 0.729387 | 0.701903 |        |        |
| 9566 | ENSG00000SCN9A     | 0.89697  | 0.59798  | 0.747475 | 0.675758 |        |        |
| 9567 | ENSG00000USPL1     | 1        | 0.413131 | 0.701515 | 0.686869 |        |        |
| 9568 | ENSG00000ZNF417    | 0.987879 | 0.447475 | 0.767003 | 0.627273 |        |        |

|      |                   |          |          |          |          |        |
|------|-------------------|----------|----------|----------|----------|--------|
| 9569 | ENSG00000GAL      | 0.828862 | 0.634598 | 0.73173  | 0.738205 |        |
| 9570 | ENSG00000USP24    | 0.974747 | 0.451515 | 0.709933 | 0.70202  |        |
| 9571 | ENSG00000HESX1    | 0.889899 | 0.569697 | 0.728283 | 0.724242 |        |
| 9572 | ENSG00000FAM153C  | 0.975758 | 0.433333 | 0.772054 | 0.648485 |        |
| 9573 | ENSG00000PGM2L1   | 0.853535 | 0.642424 | 0.740404 | 0.707071 |        |
| 9574 | ENSG00000PRAG1    | 0.887879 | 0.611111 | 0.742761 | 0.688889 |        |
| 9575 | ENSG00000UBR3     | 1        | 0.418182 | 0.701684 | 0.673737 | 0.221  |
| 9576 | ENSG00000ZNF587   | 0.987879 | 0.447475 | 0.767003 | 0.627273 |        |
| 9577 | ENSG00000WASL     | 1        | 0.5      | 0.73064  | 0.592929 |        |
| 9578 | ENSG00000WBP1L    | 0.931313 | 0.478788 | 0.737374 | 0.722222 |        |
| 9579 | ENSG00000GSK3B    | 0.963636 | 0.468687 | 0.713973 | 0.705051 |        |
| 9580 | ENSG00000NCKAP1   | 0.892178 | 0.58351  | 0.73661  | 0.705074 |        |
| 9581 | ENSG00000MMAB     | 0.9      | 0.572727 | 0.736364 | 0.70303  |        |
| 9582 | ENSG00000RPP40    | 0.971717 | 0.454545 | 0.701684 | 0.717172 |        |
| 9583 | ENSG00000RACK1    | 0.858586 | 0.622222 | 0.740404 | 0.710101 |        |
| 9584 | ENSG00000DIMIT1   | 0.958586 | 0.516162 | 0.73064  | 0.667677 |        |
| 9585 | ENSG00000RANBP17  | 1        | 0.388889 | 0.678788 | 0.692929 |        |
| 9586 | ENSG00000MROH1    | 0.856237 | 0.615222 | 0.735729 | 0.724101 |        |
| 9587 | ENSG00000EPYC     | 0.955556 | 0.471717 | 0.715993 | 0.734343 |        |
| 9588 | ENSG00000PPP1CB   | 0.966667 | 0.453535 | 0.739731 | 0.677778 |        |
| 9589 | ENSG00000TRIB2    | 0.84778  | 0.641649 | 0.74401  | 0.710359 |        |
| 9590 | ENSG00000B4GALNT4 | 0.966667 | 0.471717 | 0.711785 | 0.69596  |        |
| 9591 | ENSG00000SLC25A31 | 1        | 0.422222 | 0.724242 | 0.639394 |        |
| 9592 | ENSG00000TNNI2    | 0.959596 | 0.448485 | 0.70404  | 0.757576 |        |
| 9593 | ENSG00000MIB1     | 1        | 0.413131 | 0.692256 | 0.725253 |        |
| 9594 | ENSG00000STAMBPL1 | 0.852008 | 0.645877 | 0.748943 | 0.698732 |        |
| 9595 | ENSG00000NRIP2    | 0.968687 | 0.49798  | 0.71532  | 0.669697 |        |
| 9596 | ENSG00000HLA-DMA  | 0.84669  | 0.631823 | 0.739257 | 0.718931 |        |
| 9597 | ENSG00000GTF2H1   | 1        | 0.463636 | 0.723232 | 0.632323 |        |
| 9598 | ENSG00000C6orf15  | 0.966777 | 0.452935 | 0.701181 | 0.728682 |        |
| 9599 | ENSG00000GPHN     | 0.969697 | 0.488889 | 0.735017 | 0.650505 | 0.4773 |
| 9600 | ENSG00000C1orf127 | 0.892929 | 0.583838 | 0.735017 | 0.709091 |        |
| 9601 | ENSG00000PDE5A    | 1        | 0.39899  | 0.693266 | 0.710101 |        |
| 9602 | ENSG00000MBL2     | 0.961616 | 0.434343 | 0.693939 | 0.783838 |        |
| 9603 | ENSG00000GAN      | 0.974747 | 0.475758 | 0.725253 | 0.663636 |        |
| 9604 | ENSG00000SMARCD1  | 0.938384 | 0.494949 | 0.709764 | 0.740404 |        |
| 9605 | ENSG00000SCRIB    | 1        | 0.414141 | 0.695286 | 0.659596 |        |
| 9606 | ENSG00000MANF     | 0.854545 | 0.617172 | 0.735017 | 0.728283 | 0.3514 |
| 9607 | ENSG00000GNB1L    | 0.9      | 0.572727 | 0.736364 | 0.70404  | 0.251  |
| 9608 | ENSG00000FANCL    | 1        | 0.423232 | 0.692256 | 0.707071 | 0.472  |
| 9609 | ENSG00000EPX      | 0.818182 | 0.649495 | 0.727441 | 0.752525 |        |
| 9610 | ENSG00000SPATA45  | 0.967677 | 0.450505 | 0.710438 | 0.717172 |        |
| 9611 | ENSG00000ALDOA    | 1        | 0.431313 | 0.701852 | 0.659596 |        |
| 9612 | ENSG00000ZNF503   | 0.929293 | 0.556566 | 0.736195 | 0.676768 |        |
| 9613 | ENSG00000MRPS11   | 1        | 0.39596  | 0.683165 | 0.691919 |        |
| 9614 | ENSG00000PBX2     | 0.893939 | 0.584848 | 0.733333 | 0.709091 |        |
| 9615 | ENSG00000ERC2     | 0.89701  | 0.55814  | 0.727575 | 0.727575 |        |
| 9616 | ENSG00000NRBP2    | 0.994949 | 0.411111 | 0.746801 | 0.679798 |        |
| 9617 | ENSG00000ST3GAL1  | 0.893939 | 0.625253 | 0.759596 | 0.661616 | 0.4169 |
| 9618 | ENSG00000GBA2     | 0.840404 | 0.644444 | 0.741751 | 0.720202 |        |
| 9619 | ENSG00000ADCY8    | 0.964646 | 0.49798  | 0.719529 | 0.672727 |        |
| 9620 | ENSG00000MOB1A    | 0.923232 | 0.554545 | 0.73468  | 0.693939 |        |
| 9621 | ENSG00000ANK2     | 0.966667 | 0.461616 | 0.710774 | 0.713131 |        |
| 9622 | ENSG00000RAB2B    | 0.818182 | 0.652525 | 0.735354 | 0.740404 |        |
| 9623 | ENSG00000METTL14  | 0.932323 | 0.525253 | 0.719865 | 0.713131 | 0.43   |

|      |                    |          |          |          |          |        |
|------|--------------------|----------|----------|----------|----------|--------|
| 9624 | ENSG00000LPP       | 0.965657 | 0.441414 | 0.704545 | 0.746465 |        |
| 9625 | ENSG00000KRT24     | 0.9      | 0.572727 | 0.736364 | 0.707071 |        |
| 9626 | ENSG00000SRSF2     | 0.924242 | 0.525253 | 0.722896 | 0.723232 |        |
| 9627 | ENSG00000TMEM173   | 0.959596 | 0.448485 | 0.70404  | 0.758586 |        |
| 9628 | ENSG00000TBC1D23   | 1        | 0.444444 | 0.725589 | 0.670707 | 0.3362 |
| 9629 | ENSG00000PIGY      | 0.952525 | 0.5      | 0.718687 | 0.712121 |        |
| 9630 | ENSG00000SERPINB6  | 1        | 0.436364 | 0.706061 | 0.672727 | 0.3943 |
| 9631 | ENSG00000FAM181A   | 0.876321 | 0.588795 | 0.732558 | 0.731501 |        |
| 9632 | ENSG00000FARS2     | 0.965657 | 0.490909 | 0.721549 | 0.676768 |        |
| 9633 | ENSG00000PI4KB     | 1        | 0.428283 | 0.701347 | 0.670707 |        |
| 9634 | ENSG00000TK2       | 0.89701  | 0.55814  | 0.727575 | 0.72979  |        |
| 9635 | ENSG00000TMEM47    | 0.89697  | 0.564646 | 0.769865 | 0.680808 |        |
| 9636 | ENSG00000PLEKHG1   | 1        | 0.406061 | 0.755556 | 0.645455 |        |
| 9637 | ENSG00000TSPYL6    | 0.981818 | 0.440404 | 0.708249 | 0.714141 |        |
| 9638 | ENSG00000SRSF8     | 0.924242 | 0.525253 | 0.722896 | 0.723232 |        |
| 9639 | ENSG00000NEO1      | 1        | 0.410101 | 0.775084 | 0.649495 |        |
| 9640 | ENSG00000BMP4      | 0.943434 | 0.488889 | 0.716162 | 0.736364 |        |
| 9641 | ENSG00000EIF1AD    | 0.975758 | 0.452525 | 0.721212 | 0.691919 |        |
| 9642 | ENSG00000BVES      | 1        | 0.436364 | 0.721212 | 0.663636 |        |
| 9643 | ENSG00000MOB1B     | 0.923232 | 0.554545 | 0.73468  | 0.693939 |        |
| 9644 | ENSG00000ARMC6     | 0.971717 | 0.475758 | 0.721044 | 0.681818 |        |
| 9645 | ENSG00000CAD       | 0.939394 | 0.519192 | 0.729293 | 0.7      |        |
| 9646 | ENSG00000MRPL44    | 1        | 0.461616 | 0.724579 | 0.620202 |        |
| 9647 | ENSG00000ZC3H11A   | 1        | 0.466667 | 0.784512 | 0.592929 |        |
| 9648 | ENSG00000SLC9A1    | 0.973737 | 0.477778 | 0.723569 | 0.672727 |        |
| 9649 | ENSG00000WVOX      | 0.935354 | 0.526263 | 0.728956 | 0.69798  |        |
| 9650 | ENSG00000S100Z     | 0.808081 | 0.648485 | 0.727609 | 0.767677 |        |
| 9651 | ENSG00000SLC8A2    | 1        | 0.410101 | 0.698316 | 0.714141 |        |
| 9652 | ENSG00000CARNMT1   | 0.973737 | 0.440404 | 0.702862 | 0.734343 |        |
| 9653 | ENSG00000AC008695. | 1        | 0.424242 | 0.70202  | 0.630303 |        |
| 9654 | ENSG00000DDX24     | 0.948203 | 0.522199 | 0.737491 | 0.680761 |        |
| 9655 | ENSG00000SF1       | 1        | 0.40592  | 0.699084 | 0.679704 |        |
| 9656 | ENSG00000MPZL1     | 0.919192 | 0.583838 | 0.744781 | 0.673737 |        |
| 9657 | ENSG00000ZBTB12    | 0.983838 | 0.487879 | 0.731145 | 0.642424 |        |
| 9658 | ENSG00000NYAP2     | 0.935354 | 0.526263 | 0.728956 | 0.7      |        |
| 9659 | ENSG00000SPEF2     | 0.893939 | 0.590909 | 0.741246 | 0.70101  |        |
| 9660 | ENSG00000NKX2-1    | 0.963636 | 0.50101  | 0.723064 | 0.673737 |        |
| 9661 | ENSG00000SLC25A29  | 0.9      | 0.572727 | 0.736364 | 0.709091 |        |
| 9662 | ENSG00000CEP104    | 0.9      | 0.572727 | 0.736364 | 0.712121 |        |
| 9663 | ENSG00000S100A13   | 1        | 0.428283 | 0.718519 | 0.617172 |        |
| 9664 | ENSG00000AKT1S1    | 1        | 0.428283 | 0.723232 | 0.608081 |        |
| 9665 | ENSG00000TPP1      | 0.969697 | 0.461616 | 0.701178 | 0.725253 |        |
| 9666 | ENSG00000PDZRN3    | 0.955603 | 0.470402 | 0.713002 | 0.747357 |        |
| 9667 | ENSG00000NSG2      | 0.854545 | 0.652525 | 0.753535 | 0.693939 |        |
| 9668 | ENSG00000RRAGD     | 0.873754 | 0.602436 | 0.736988 | 0.724252 |        |
| 9669 | ENSG00000INPP4B    | 1        | 0.452525 | 0.724579 | 0.646465 |        |
| 9670 | ENSG00000CD300A    | 0.881818 | 0.613131 | 0.745455 | 0.70101  |        |
| 9671 | ENSG00000PPME1     | 0.939394 | 0.49697  | 0.763636 | 0.678788 |        |
| 9672 | ENSG00000SPATA31D1 | 0.854545 | 0.648485 | 0.745455 | 0.706061 |        |
| 9673 | ENSG00000ELOF1     | 0.89697  | 0.59798  | 0.747475 | 0.687879 |        |
| 9674 | ENSG00000HNRNPF    | 0.956566 | 0.518182 | 0.735185 | 0.676768 |        |
| 9675 | ENSG00000ADSS      | 0.887949 | 0.60148  | 0.737139 | 0.708245 |        |
| 9676 | ENSG00000CFAP74    | 0.969697 | 0.479798 | 0.726094 | 0.676768 |        |
| 9677 | ENSG00000GPR3      | 0.880399 | 0.629014 | 0.747693 | 0.69103  |        |
| 9678 | ENSG00000FLG       | 0.979798 | 0.447475 | 0.713973 | 0.707071 |        |

|      |                   |          |          |          |          |        |        |
|------|-------------------|----------|----------|----------|----------|--------|--------|
| 9679 | ENSG00000CHCHD6   | 0.892178 | 0.58351  | 0.73661  | 0.714588 |        |        |
| 9680 | ENSG00000CD14     | 0.980808 | 0.451515 | 0.716835 | 0.69596  |        |        |
| 9681 | ENSG00000MMP2     | 0.975758 | 0.486869 | 0.724579 | 0.665657 |        |        |
| 9682 | ENSG00000APOA2    | 0.858586 | 0.619192 | 0.737879 | 0.727273 |        |        |
| 9683 | ENSG00000SAMd9    | 1        | 0.438384 | 0.706397 | 0.620202 |        |        |
| 9684 | ENSG00000GLYAT    | 0.940803 | 0.480973 | 0.710888 | 0.760042 |        |        |
| 9685 | ENSG00000TIMM50   | 0.923232 | 0.527273 | 0.720202 | 0.734343 |        |        |
| 9686 | ENSG00000PBX1     | 1        | 0.437374 | 0.708249 | 0.626263 |        |        |
| 9687 | ENSG00000CARMIL1  | 1        | 0.463636 | 0.722559 | 0.654545 |        |        |
| 9688 | ENSG00000SDHA     | 1        | 0.457576 | 0.724747 | 0.659596 |        |        |
| 9689 | ENSG00000HIST4H4  | 1        | 0.422222 | 0.688889 | 0.660606 |        |        |
| 9690 | ENSG00000TAS2R1   | 0.895349 | 0.590909 | 0.743129 | 0.700846 |        |        |
| 9691 | ENSG00000GRTP1    | 0.959596 | 0.471717 | 0.708249 | 0.735354 |        |        |
| 9692 | ENSG00000HMGB2    | 1        | 0.438384 | 0.702357 | 0.651515 | 0.4749 | 0.3274 |
| 9693 | ENSG00000GM2A     | 0.892178 | 0.618393 | 0.755285 | 0.67759  |        |        |
| 9694 | ENSG00000ALAS1    | 1        | 0.426263 | 0.705387 | 0.720202 |        |        |
| 9695 | ENSG00000PDCD4    | 1        | 0.390909 | 0.743939 | 0.657576 | 0.468  |        |
| 9696 | ENSG00000CEP170   | 1        | 0.413131 | 0.772391 | 0.612121 |        |        |
| 9697 | ENSG00000CACNA2D2 | 0.849391 | 0.638981 | 0.744186 | 0.72093  |        |        |
| 9698 | ENSG00000RBM44    | 0.837209 | 0.668882 | 0.753045 | 0.705426 |        |        |
| 9699 | ENSG00000CCNE1    | 1        | 0.426263 | 0.773737 | 0.627273 |        |        |
| 9700 | ENSG00000TRMT6    | 0.966667 | 0.487879 | 0.719192 | 0.688889 |        |        |
| 9701 | ENSG00000PYG02    | 0.923232 | 0.554545 | 0.73468  | 0.7      |        |        |
| 9702 | ENSG00000QRICH1   | 1        | 0.406977 | 0.693446 | 0.672304 |        |        |
| 9703 | ENSG00000NEU1     | 0.976768 | 0.467677 | 0.722222 | 0.682828 |        |        |
| 9704 | ENSG00000NSMAF    | 1        | 0.434343 | 0.782828 | 0.627273 |        |        |
| 9705 | ENSG00000HOXA9    | 0.931313 | 0.562626 | 0.741246 | 0.674747 |        |        |
| 9706 | ENSG00000CBX3     | 0.962626 | 0.493939 | 0.713131 | 0.69697  |        |        |
| 9707 | ENSG00000OR4A47   | 0.818182 | 0.652525 | 0.735354 | 0.746465 |        |        |
| 9708 | ENSG00000GJC3     | 0.89697  | 0.59596  | 0.745118 | 0.693939 |        |        |
| 9709 | ENSG00000ARL2     | 0.979798 | 0.477778 | 0.721044 | 0.670707 |        |        |
| 9710 | ENSG00000STRN3    | 1        | 0.413131 | 0.697138 | 0.660606 |        |        |
| 9711 | ENSG00000ATF4     | 0.960606 | 0.508081 | 0.727609 | 0.677778 |        |        |
| 9712 | ENSG00000DNM1     | 0.971717 | 0.50303  | 0.737374 | 0.643434 |        |        |
| 9713 | ENSG00000BEST2    | 0.858586 | 0.622222 | 0.740404 | 0.728283 |        |        |
| 9714 | ENSG00000TTLL9    | 1        | 0.437374 | 0.708418 | 0.671717 |        |        |
| 9715 | ENSG00000SLC52A3  | 0.971717 | 0.448485 | 0.713805 | 0.722222 |        |        |
| 9716 | ENSG00000CENPBD1  | 1        | 0.421212 | 0.697138 | 0.664646 |        |        |
| 9717 | ENSG00000ITGA2    | 0.976768 | 0.445455 | 0.707576 | 0.726263 |        |        |
| 9718 | ENSG00000TBC1D2B  | 0.972727 | 0.491919 | 0.732323 | 0.655556 |        |        |
| 9719 | ENSG00000ZC3H6    | 1        | 0.426263 | 0.706397 | 0.640404 |        |        |
| 9720 | ENSG00000UROS     | 0.962626 | 0.471717 | 0.704882 | 0.729293 |        |        |
| 9721 | ENSG00000RSPH9    | 0.809725 | 0.679704 | 0.744715 | 0.732558 |        |        |
| 9722 | ENSG00000GPR183   | 0.974747 | 0.451515 | 0.709933 | 0.717172 |        |        |
| 9723 | ENSG00000DNAJC6   | 0.978788 | 0.443434 | 0.727441 | 0.70101  |        |        |
| 9724 | ENSG00000FBXL20   | 0.949495 | 0.494949 | 0.722222 | 0.725253 |        |        |
| 9725 | ENSG00000LAMC1    | 0.994949 | 0.411111 | 0.746801 | 0.690909 |        |        |
| 9726 | ENSG00000FAM221A  | 1        | 0.394949 | 0.695791 | 0.684848 | 0.4218 | 0.653  |
| 9727 | ENSG00000DCTN4    | 1        | 0.446465 | 0.716162 | 0.653535 |        |        |
| 9728 | ENSG00000N4BP2L2  | 0.964646 | 0.491919 | 0.709428 | 0.69798  |        |        |
| 9729 | ENSG00000NOSTRIN  | 1        | 0.432347 | 0.705426 | 0.657505 |        |        |
| 9730 | ENSG00000F13B     | 0.959596 | 0.490909 | 0.727946 | 0.69596  |        |        |
| 9731 | ENSG00000AATF     | 0.946844 | 0.497231 | 0.722038 | 0.726467 |        |        |
| 9732 | ENSG00000IRAK2    | 1        | 0.418182 | 0.701684 | 0.69798  |        |        |
| 9733 | ENSG00000ACOT13   | 0.89697  | 0.59798  | 0.747475 | 0.693939 |        |        |



|      |                    |          |          |          |          |        |
|------|--------------------|----------|----------|----------|----------|--------|
| 9734 | ENSG00000SELENOV   | 0.769697 | 0.725253 | 0.747475 | 0.735354 |        |
| 9735 | ENSG00000TMEM150C  | 0.818182 | 0.652525 | 0.735354 | 0.748485 |        |
| 9736 | ENSG00000SMAP2     | 0.965657 | 0.466667 | 0.716162 | 0.717172 |        |
| 9737 | ENSG00000PTGIS     | 0.972727 | 0.491919 | 0.732323 | 0.658586 |        |
| 9738 | ENSG00000PPIB      | 0.9      | 0.572727 | 0.736364 | 0.717172 |        |
| 9739 | ENSG00000OPN3      | 0.937374 | 0.537374 | 0.737374 | 0.689899 |        |
| 9740 | ENSG00000GALNT15   | 0.921212 | 0.580808 | 0.743771 | 0.682828 |        |
| 9741 | ENSG00000FGD5      | 1        | 0.434461 | 0.731501 | 0.630021 |        |
| 9742 | ENSG00000UBL7      | 0.930233 | 0.546512 | 0.742072 | 0.687104 |        |
| 9743 | ENSG00000ULBP2     | 0.862626 | 0.593939 | 0.728283 | 0.758586 |        |
| 9744 | ENSG00000NAA35     | 0.957576 | 0.507071 | 0.728283 | 0.694949 |        |
| 9745 | ENSG00000IMPG2     | 1        | 0.398068 | 0.746538 | 0.692754 |        |
| 9746 | ENSG00000ENTPD5    | 0.858586 | 0.622222 | 0.740404 | 0.727273 |        |
| 9747 | ENSG00000ZNF683    | 0.961616 | 0.474747 | 0.706397 | 0.731313 |        |
| 9748 | ENSG00000PPP2R1B   | 1        | 0.410101 | 0.689899 | 0.718182 | 0.3311 |
| 9749 | ENSG00000NADSYN1   | 1        | 0.431313 | 0.713636 | 0.638384 |        |
| 9750 | ENSG00000STRIP1    | 0.939394 | 0.519192 | 0.729293 | 0.709091 |        |
| 9751 | ENSG00000CPD       | 0.858586 | 0.622222 | 0.740404 | 0.730303 |        |
| 9752 | ENSG00000BAP1      | 1        | 0.412121 | 0.733333 | 0.643434 |        |
| 9753 | ENSG00000CHCHD1    | 0.885835 | 0.636364 | 0.748591 | 0.690275 |        |
| 9754 | ENSG00000SF3A2     | 1        | 0.450505 | 0.718519 | 0.666667 |        |
| 9755 | ENSG00000CCDC93    | 0.89697  | 0.59596  | 0.745118 | 0.69899  |        |
| 9756 | ENSG00000CHURC1-FN | 0.928118 | 0.57611  | 0.741191 | 0.676533 |        |
| 9757 | ENSG00000CLCN4     | 0.850505 | 0.648485 | 0.748822 | 0.714141 |        |
| 9758 | ENSG00000SYN1      | 0.976768 | 0.467677 | 0.722222 | 0.690909 |        |
| 9759 | ENSG00000UBASH3B   | 0.937374 | 0.537374 | 0.737374 | 0.689899 |        |
| 9760 | ENSG00000MS4A1     | 0.90303  | 0.549495 | 0.726263 | 0.743434 |        |
| 9761 | ENSG00000MYH9      | 0.960606 | 0.463636 | 0.714141 | 0.738384 |        |
| 9762 | ENSG00000LRGUK     | 1        | 0.419192 | 0.744108 | 0.632323 |        |
| 9763 | ENSG00000HERC3     | 0.966667 | 0.49798  | 0.726768 | 0.672727 |        |
| 9764 | ENSG00000ZNHIT6    | 0.974747 | 0.451515 | 0.709933 | 0.722222 | 0.3858 |
| 9765 | ENSG00000IFI6      | 0.852008 | 0.645877 | 0.748943 | 0.714588 |        |
| 9766 | ENSG00000RAP1GAP2  | 1        | 0.424242 | 0.710438 | 0.684848 |        |
| 9767 | ENSG00000ATP2B2    | 0.854545 | 0.613131 | 0.727441 | 0.757576 |        |
| 9768 | ENSG00000EGFL7     | 0.858586 | 0.622222 | 0.740404 | 0.729293 |        |
| 9769 | ENSG00000PLCG1     | 1        | 0.449495 | 0.709596 | 0.666667 | 0.175  |
| 9770 | ENSG00000BAG3      | 1        | 0.390909 | 0.707744 | 0.706061 |        |
| 9771 | ENSG00000OR51T1    | 0.937374 | 0.507071 | 0.720202 | 0.731313 |        |
| 9772 | ENSG00000NME8      | 0.984848 | 0.461616 | 0.726936 | 0.681818 |        |
| 9773 | ENSG00000TSPAN7    | 0.939394 | 0.519192 | 0.729293 | 0.710101 |        |
| 9774 | ENSG00000MYH14     | 0.974747 | 0.475758 | 0.725253 | 0.682828 |        |
| 9775 | ENSG00000REST      | 1        | 0.426263 | 0.703367 | 0.721212 |        |
| 9776 | ENSG00000KCNIP3    | 0.854545 | 0.652525 | 0.753535 | 0.706061 |        |
| 9777 | ENSG00000RANBP9    | 0.972727 | 0.449495 | 0.765825 | 0.664646 |        |
| 9778 | ENSG00000CD200     | 0.925253 | 0.547475 | 0.720539 | 0.726263 |        |
| 9779 | ENSG00000RASSF8    | 1        | 0.457576 | 0.716162 | 0.653535 |        |
| 9780 | ENSG00000NGEF      | 1        | 0.443434 | 0.713131 | 0.69697  |        |
| 9781 | ENSG00000DNAJC14   | 1        | 0.443975 | 0.718464 | 0.655391 |        |
| 9782 | ENSG00000KIF1BP    | 0.963636 | 0.468687 | 0.713973 | 0.721212 |        |
| 9783 | ENSG00000KPNA4     | 1        | 0.413131 | 0.750337 | 0.607071 |        |
| 9784 | ENSG00000ZNF81     | 0.89697  | 0.59798  | 0.747475 | 0.694949 |        |
| 9785 | ENSG00000FCRL3     | 0.818182 | 0.652525 | 0.735354 | 0.757576 |        |
| 9786 | ENSG00000PRF1      | 0.809725 | 0.67759  | 0.736786 | 0.751586 |        |
| 9787 | ENSG00000CARMIL2   | 0.892178 | 0.618393 | 0.755285 | 0.684989 |        |
| 9788 | ENSG00000IL3RA     | 1        | 0.427273 | 0.704545 | 0.649495 |        |

|      |                    |          |          |          |          |
|------|--------------------|----------|----------|----------|----------|
| 9789 | ENSG00000SCNN1A    | 0.9      | 0.540404 | 0.718687 | 0.770707 |
| 9790 | ENSG00000ELF1      | 0.984848 | 0.492929 | 0.735354 | 0.642424 |
| 9791 | ENSG00000AGMAT     | 0.978788 | 0.467677 | 0.723232 | 0.688889 |
| 9792 | ENSG00000PZP       | 1        | 0.39852  | 0.684285 | 0.7537   |
| 9793 | ENSG00000ZDHC21    | 0.887879 | 0.615152 | 0.749832 | 0.69798  |
| 9794 | ENSG00000CDH2      | 0.979798 | 0.443434 | 0.73266  | 0.69798  |
| 9795 | ENSG00000PGK2      | 0.991919 | 0.40101  | 0.741751 | 0.716162 |
| 9796 | ENSG00000AC073896. | 0.94926  | 0.497886 | 0.718288 | 0.733615 |
| 9797 | ENSG00000CALY      | 0.901449 | 0.57971  | 0.74058  | 0.71401  |
| 9798 | ENSG00000NPL       | 0.800664 | 0.708749 | 0.747324 | 0.732004 |
| 9799 | ENSG00000MRPL24    | 0.971717 | 0.50303  | 0.737374 | 0.650505 |
| 9800 | ENSG00000ZNHIT2    | 0.818182 | 0.652525 | 0.735354 | 0.758586 |
| 9801 | ENSG00000YARS      | 1        | 0.436364 | 0.70303  | 0.683838 |
| 9802 | ENSG00000PPP1R15A  | 1        | 0.457576 | 0.716162 | 0.676768 |
| 9803 | ENSG00000LIG3      | 0.845455 | 0.641414 | 0.741582 | 0.735354 |
| 9804 | ENSG00000PDHX      | 0.990909 | 0.467677 | 0.736027 | 0.661616 |
| 9805 | ENSG00000BLVRB     | 1        | 0.462626 | 0.73569  | 0.647475 |
| 9806 | ENSG00000UBC       | 1        | 0.413131 | 0.758754 | 0.627273 |
| 9807 | ENSG00000LAT       | 0.947475 | 0.466667 | 0.707071 | 0.792929 |
| 9808 | ENSG00000FGF11     | 0.858586 | 0.622222 | 0.740404 | 0.734343 |
| 9809 | ENSG00000RNASE2    | 0.818182 | 0.652525 | 0.735354 | 0.760606 |
| 9810 | ENSG00000FECH      | 1        | 0.447475 | 0.720034 | 0.687879 |
| 9811 | ENSG00000TLN2      | 0.969697 | 0.461616 | 0.71734  | 0.716162 |
| 9812 | ENSG00000MYLK2     | 0.949495 | 0.494949 | 0.722222 | 0.733333 |
| 9813 | ENSG00000SPRYD7    | 0.89697  | 0.59798  | 0.747475 | 0.70101  |
| 9814 | ENSG00000MEGF6     | 0.9      | 0.572727 | 0.736364 | 0.726263 |
| 9815 | ENSG00000AOC1      | 0.982828 | 0.449495 | 0.713468 | 0.714141 |
| 9816 | ENSG00000FAM3B     | 0.893939 | 0.590909 | 0.741246 | 0.715152 |
| 9817 | ENSG00000ANGPTL1   | 0.90303  | 0.549495 | 0.726263 | 0.752525 |
| 9818 | ENSG00000LAD1      | 0.969697 | 0.488889 | 0.729293 | 0.678788 |
| 9819 | ENSG00000RWDD4     | 1        | 0.441414 | 0.713973 | 0.630303 |
| 9820 | ENSG00000KAT2A     | 0.887043 | 0.604651 | 0.74474  | 0.713178 |
| 9821 | ENSG00000GFAP      | 1        | 0.430303 | 0.705051 | 0.691919 |
| 9822 | ENSG00000ZNF830    | 1        | 0.39697  | 0.690741 | 0.693939 |
| 9823 | ENSG00000LANCL1    | 0.887879 | 0.615152 | 0.749832 | 0.70303  |
| 9824 | ENSG00000ADAMTS18  | 0.884848 | 0.610101 | 0.740572 | 0.721212 |
| 9825 | ENSG00000EPHA3     | 0.935354 | 0.547475 | 0.737374 | 0.694949 |
| 9826 | ENSG00000FOXP3     | 0.884848 | 0.581818 | 0.73064  | 0.750505 |
| 9827 | ENSG00000LCK       | 0.89697  | 0.59798  | 0.747475 | 0.7      |
| 9828 | ENSG00000EMC4      | 0.89697  | 0.59798  | 0.747475 | 0.70202  |
| 9829 | ENSG00000GDAP1     | 0.982828 | 0.491919 | 0.737374 | 0.647475 |
| 9830 | ENSG00000EFNB2     | 1        | 0.447475 | 0.706397 | 0.679798 |
| 9831 | ENSG00000SRGN      | 0.84778  | 0.638478 | 0.736434 | 0.745243 |
| 9832 | ENSG00000BEX5      | 0.890909 | 0.610101 | 0.732828 | 0.722222 |
| 9833 | ENSG00000MRPS35    | 0.89697  | 0.59798  | 0.747475 | 0.70404  |
| 9834 | ENSG00000PTOV1     | 0.977778 | 0.445455 | 0.707912 | 0.736364 |
| 9835 | ENSG00000CRIM1     | 0.887879 | 0.582828 | 0.732828 | 0.741414 |
| 9836 | ENSG00000C6orf62   | 0.971717 | 0.487879 | 0.727441 | 0.681818 |
| 9837 | ENSG00000SPATA6L   | 0.852008 | 0.645877 | 0.748943 | 0.723044 |
| 9838 | ENSG00000DNAH2     | 0.80444  | 0.67759  | 0.740662 | 0.757928 |
| 9839 | ENSG00000VWF       | 0.964646 | 0.49798  | 0.719529 | 0.693939 |
| 9840 | ENSG00000YWHAG     | 1        | 0.419192 | 0.743266 | 0.627273 |
| 9841 | ENSG00000HNRNPU    | 1        | 0.449495 | 0.713805 | 0.645455 |
| 9842 | ENSG00000LGALS7B   | 0.966667 | 0.467677 | 0.713805 | 0.722222 |
| 9843 | ENSG00000SACM1L    | 0.893939 | 0.625253 | 0.759596 | 0.678788 |

0.311

|      |                    |          |          |          |          |        |        |
|------|--------------------|----------|----------|----------|----------|--------|--------|
| 9844 | ENSG00000SMAD3     | 1        | 0.408081 | 0.771717 | 0.615152 |        |        |
| 9845 | ENSG00000ADAM11    | 0.852525 | 0.644444 | 0.746128 | 0.728283 |        |        |
| 9846 | ENSG00000ITFG1     | 0.990909 | 0.412121 | 0.715825 | 0.745455 | 0.4482 |        |
| 9847 | ENSG00000SMIM14    | 0.934461 | 0.55074  | 0.7426   | 0.687104 |        |        |
| 9848 | ENSG00000LRFN5     | 0.895349 | 0.590909 | 0.743129 | 0.714588 |        |        |
| 9849 | ENSG00000CDH23     | 0.961616 | 0.50101  | 0.722054 | 0.7      |        |        |
| 9850 | ENSG00000PCDHB5    | 0.890909 | 0.619192 | 0.75404  | 0.694949 |        |        |
| 9851 | ENSG00000NCF1      | 0.990909 | 0.433333 | 0.723737 | 0.712121 |        |        |
| 9852 | ENSG00000SLC36A1   | 0.878788 | 0.614141 | 0.740236 | 0.729293 |        |        |
| 9853 | ENSG00000C4orf36   | 0.854545 | 0.652525 | 0.753535 | 0.712121 |        |        |
| 9854 | ENSG00000PGR       | 0.982828 | 0.413131 | 0.744444 | 0.716162 |        |        |
| 9855 | ENSG00000LAMA2     | 0.90303  | 0.549495 | 0.726263 | 0.753535 |        |        |
| 9856 | ENSG00000CD68      | 0.935354 | 0.532323 | 0.72037  | 0.727273 |        |        |
| 9857 | ENSG00000SLC4A7    | 0.980808 | 0.440404 | 0.728956 | 0.712121 |        |        |
| 9858 | ENSG00000NR5A2     | 1        | 0.450505 | 0.724579 | 0.660606 | 0.2635 |        |
| 9859 | ENSG00000UGT8      | 0.963636 | 0.509091 | 0.736364 | 0.668687 |        |        |
| 9860 | ENSG00000GJB4      | 0.809725 | 0.673362 | 0.740486 | 0.756871 |        |        |
| 9861 | ENSG00000PSTPIP1   | 0.858586 | 0.622222 | 0.740404 | 0.741414 |        |        |
| 9862 | ENSG00000YPEL3     | 1        | 0.465657 | 0.722054 | 0.669697 |        |        |
| 9863 | ENSG00000PRDM5     | 0.958586 | 0.477778 | 0.711448 | 0.748485 |        |        |
| 9864 | ENSG00000TNIP3     | 0.852008 | 0.645877 | 0.748943 | 0.727273 |        |        |
| 9865 | ENSG00000KLHL20    | 1        | 0.451515 | 0.710943 | 0.69596  |        |        |
| 9866 | ENSG00000SLC26A8   | 0.858586 | 0.622222 | 0.740404 | 0.743434 |        |        |
| 9867 | ENSG00000AC093827. | 0.854545 | 0.652525 | 0.753535 | 0.712121 |        |        |
| 9868 | ENSG00000CEP72     | 0.963636 | 0.528283 | 0.737542 | 0.657576 |        |        |
| 9869 | ENSG00000CLEC16A   | 0.969697 | 0.50202  | 0.733502 | 0.669697 |        |        |
| 9870 | ENSG00000MAPK13    | 0.962626 | 0.493939 | 0.730808 | 0.690909 |        |        |
| 9871 | ENSG00000LRP6      | 1        | 0.448485 | 0.717508 | 0.693939 |        |        |
| 9872 | ENSG00000RNF6      | 0.99697  | 0.405051 | 0.764646 | 0.691919 |        |        |
| 9873 | ENSG00000PBK       | 1        | 0.418182 | 0.651178 | 0.748485 |        |        |
| 9874 | ENSG00000ARSJ      | 0.973737 | 0.482828 | 0.728283 | 0.681818 |        |        |
| 9875 | ENSG00000RNF31     | 0.992929 | 0.49798  | 0.728451 | 0.647475 |        |        |
| 9876 | ENSG00000ABHD12    | 0.813131 | 0.685859 | 0.749495 | 0.735354 |        |        |
| 9877 | ENSG00000PELO      | 0.955556 | 0.522222 | 0.746128 | 0.683838 |        |        |
| 9878 | ENSG00000SH3KBP1   | 0.964646 | 0.49596  | 0.732155 | 0.683838 |        |        |
| 9879 | ENSG00000CLCA1     | 0.893939 | 0.625253 | 0.759596 | 0.686869 |        |        |
| 9880 | ENSG00000ARHGFB39  | 0.935354 | 0.557576 | 0.746465 | 0.682828 |        |        |
| 9881 | ENSG00000ARID1A    | 1        | 0.462626 | 0.719529 | 0.658586 |        |        |
| 9882 | ENSG00000TSKS      | 0.813131 | 0.685859 | 0.749495 | 0.735354 |        |        |
| 9883 | ENSG00000YPEL1     | 1        | 0.465657 | 0.722054 | 0.669697 |        |        |
| 9884 | ENSG00000C6orf58   | 0.862626 | 0.593939 | 0.728283 | 0.774747 |        |        |
| 9885 | ENSG00000WWC1      | 0.969697 | 0.488889 | 0.724411 | 0.692929 |        |        |
| 9886 | ENSG00000RNASE6    | 0.856237 | 0.615222 | 0.735729 | 0.757928 |        |        |
| 9887 | ENSG00000GOLM1     | 0.979798 | 0.470707 | 0.725253 | 0.690909 |        |        |
| 9888 | ENSG00000DNAJB1    | 0.991919 | 0.462626 | 0.765993 | 0.641414 | 0.1782 |        |
| 9889 | ENSG00000CDX4      | 0.850505 | 0.681818 | 0.74596  | 0.717172 |        |        |
| 9890 | ENSG00000LDHD      | 0.967677 | 0.486869 | 0.717508 | 0.706061 |        |        |
| 9891 | ENSG00000ORC1      | 1        | 0.465657 | 0.722054 | 0.673737 |        |        |
| 9892 | ENSG00000TRIM11    | 0.981818 | 0.457576 | 0.720707 | 0.707071 |        |        |
| 9893 | ENSG00000MB        | 0.854545 | 0.649495 | 0.751178 | 0.719192 |        |        |
| 9894 | ENSG00000LIMK1     | 0.986869 | 0.467677 | 0.723906 | 0.689899 | 0.3199 | 0.2532 |
| 9895 | ENSG00000FAM162B   | 1        | 0.452525 | 0.715825 | 0.622222 |        |        |
| 9896 | ENSG00000SDHD      | 0.89697  | 0.59798  | 0.747475 | 0.707071 |        |        |
| 9897 | ENSG00000ZIM3      | 0.89697  | 0.564646 | 0.729461 | 0.753535 |        |        |
| 9898 | ENSG00000TST       | 1        | 0.451515 | 0.722727 | 0.658586 | 0.3158 |        |

|      |                   |          |          |          |          |        |        |
|------|-------------------|----------|----------|----------|----------|--------|--------|
| 9899 | ENSG00000HFE      | 1        | 0.466667 | 0.724579 | 0.678788 | 0.2959 | 0.2359 |
| 9900 | ENSG00000MORC3    | 0.949495 | 0.494949 | 0.722222 | 0.742424 |        |        |
| 9901 | ENSG00000PTGER4   | 1        | 0.431313 | 0.697643 | 0.675758 |        |        |
| 9902 | ENSG00000ZNF25    | 0.963636 | 0.508081 | 0.729125 | 0.682828 |        |        |
| 9903 | ENSG00000PTPRQ    | 0.89697  | 0.59798  | 0.747475 | 0.710101 |        |        |
| 9904 | ENSG00000RFC1     | 0.925253 | 0.558586 | 0.741919 | 0.706061 |        |        |
| 9905 | ENSG00000NUDT5    | 0.862626 | 0.593939 | 0.728283 | 0.779798 |        |        |
| 9906 | ENSG00000SLAMF8   | 0.9      | 0.572727 | 0.736364 | 0.735354 |        |        |
| 9907 | ENSG00000CHRD     | 0.961945 | 0.497886 | 0.722516 | 0.705074 |        |        |
| 9908 | ENSG00000VGF      | 0.977798 | 0.46901  | 0.723404 | 0.698427 |        |        |
| 9909 | ENSG00000MPRIP    | 1        | 0.443434 | 0.709091 | 0.683838 |        |        |
| 9910 | ENSG00000AKR1A1   | 1        | 0.416162 | 0.781145 | 0.641414 |        |        |
| 9911 | ENSG00000ASCC1    | 0.97463  | 0.461945 | 0.735025 | 0.697674 |        |        |
| 9912 | ENSG00000TP53TG5  | 0.809725 | 0.679704 | 0.744715 | 0.756871 |        |        |
| 9913 | ENSG00000ABCB1    | 0.955556 | 0.50101  | 0.728283 | 0.727273 |        |        |
| 9914 | ENSG00000ATG14    | 0.963636 | 0.479798 | 0.724074 | 0.715152 |        | 0.353  |
| 9915 | ENSG00000EPHX3    | 0.929293 | 0.49798  | 0.720034 | 0.773737 |        |        |
| 9916 | ENSG00000SPTLC1   | 1        | 0.431313 | 0.706061 | 0.726263 | 0.3324 |        |
| 9917 | ENSG00000GMSD     | 1        | 0.452525 | 0.713131 | 0.681818 | 0.349  | 0.1955 |
| 9918 | ENSG00000PAWR     | 0.969697 | 0.507071 | 0.731987 | 0.669697 | 0.2971 |        |
| 9919 | ENSG00000FAM13B   | 0.983838 | 0.471717 | 0.741246 | 0.670707 |        |        |
| 9920 | ENSG00000MECP2    | 1        | 0.445455 | 0.699327 | 0.665657 |        |        |
| 9921 | ENSG00000ATG4A    | 0.921212 | 0.588889 | 0.752694 | 0.686869 |        |        |
| 9922 | ENSG00000FAM227A  | 0.954545 | 0.512121 | 0.728114 | 0.718182 |        |        |
| 9923 | ENSG00000PATJ     | 0.89697  | 0.59798  | 0.747475 | 0.712121 |        |        |
| 9924 | ENSG00000CHRM1    | 0.895349 | 0.590909 | 0.743129 | 0.724101 |        |        |
| 9925 | ENSG00000TRIM72   | 0.858586 | 0.622222 | 0.740404 | 0.747475 |        |        |
| 9926 | ENSG00000VASP     | 0.962626 | 0.532323 | 0.741582 | 0.658586 |        | 0.3953 |
| 9927 | ENSG00000DBT      | 0.972727 | 0.491919 | 0.732323 | 0.676768 |        |        |
| 9928 | ENSG00000SLITRK3  | 0.813131 | 0.685859 | 0.749495 | 0.741414 |        |        |
| 9929 | ENSG00000MZT1     | 0.970707 | 0.489899 | 0.724579 | 0.690909 |        |        |
| 9930 | ENSG00000ZBTB32   | 0.89852  | 0.565539 | 0.73203  | 0.750529 |        |        |
| 9931 | ENSG00000SNAP23   | 0.980808 | 0.475758 | 0.728283 | 0.686869 |        |        |
| 9932 | ENSG00000SH3D21   | 0.992929 | 0.477778 | 0.76532  | 0.629293 |        |        |
| 9933 | ENSG00000AP2A1    | 0.854545 | 0.652525 | 0.753535 | 0.719192 | 0.2911 |        |
| 9934 | ENSG00000GTF2F1   | 1        | 0.444444 | 0.725589 | 0.669697 |        |        |
| 9935 | ENSG00000THEMIS2  | 0.9      | 0.572727 | 0.736364 | 0.738384 |        |        |
| 9936 | ENSG00000IL21R    | 0.850505 | 0.648485 | 0.748822 | 0.732323 |        |        |
| 9937 | ENSG00000FLNB     | 1        | 0.447475 | 0.720034 | 0.664646 |        |        |
| 9938 | ENSG00000IFT74    | 0.974747 | 0.475758 | 0.725253 | 0.69899  |        |        |
| 9939 | ENSG00000PDE12    | 0.983838 | 0.447475 | 0.708923 | 0.734343 |        |        |
| 9940 | ENSG00000CACNA1F  | 0.821256 | 0.656039 | 0.732367 | 0.776812 |        |        |
| 9941 | ENSG00000HIVEP3   | 0.971459 | 0.493658 | 0.73432  | 0.67759  |        |        |
| 9942 | ENSG00000IFIT1    | 0.977778 | 0.466667 | 0.722222 | 0.706061 |        |        |
| 9943 | ENSG00000RPL11    | 0.893939 | 0.617172 | 0.749495 | 0.706061 |        |        |
| 9944 | ENSG00000ZFYVE19  | 0.961616 | 0.526263 | 0.760438 | 0.645455 | 0.321  |        |
| 9945 | ENSG00000CD163    | 0.982828 | 0.465657 | 0.725589 | 0.69697  |        |        |
| 9946 | ENSG00000LRRFIP2  | 0.926004 | 0.582452 | 0.751762 | 0.682875 |        |        |
| 9947 | ENSG00000OR5P3    | 0.80444  | 0.715645 | 0.760042 | 0.729387 |        |        |
| 9948 | ENSG00000RSPH4A   | 0.968687 | 0.466667 | 0.718519 | 0.729293 |        |        |
| 9949 | ENSG00000CFB      | 1        | 0.413131 | 0.698316 | 0.674747 |        | 0.42   |
| 9950 | ENSG00000DPEP1    | 0.939394 | 0.507071 | 0.719865 | 0.754545 |        |        |
| 9951 | ENSG00000C6orf118 | 0.972727 | 0.475758 | 0.722222 | 0.708081 |        |        |
| 9952 | ENSG00000CPA1     | 1        | 0.441414 | 0.713973 | 0.709091 |        |        |
| 9953 | ENSG00000TMEM38B  | 1        | 0.439394 | 0.709259 | 0.716162 |        |        |

|       |                    |          |          |          |          |        |        |
|-------|--------------------|----------|----------|----------|----------|--------|--------|
| 9954  | ENSG00000RMDN2     | 0.971717 | 0.489899 | 0.725926 | 0.691919 |        |        |
| 9955  | ENSG00000FGL2      | 0.965657 | 0.465657 | 0.711279 | 0.747475 |        |        |
| 9956  | ENSG00000ECPAS     | 0.957576 | 0.506061 | 0.734848 | 0.709091 |        |        |
| 9957  | ENSG00000ZNF709    | 0.957576 | 0.507071 | 0.728283 | 0.712121 |        |        |
| 9958  | ENSG00000SLC20A1   | 1        | 0.461616 | 0.724074 | 0.641414 |        | 0.462  |
| 9959  | ENSG00000MRPS9     | 0.973737 | 0.482828 | 0.728283 | 0.691919 |        |        |
| 9960  | ENSG00000ALDH8A1   | 1        | 0.413131 | 0.705724 | 0.730303 |        |        |
| 9961  | ENSG00000GSDMD     | 0.970707 | 0.50202  | 0.73367  | 0.674747 |        |        |
| 9962  | ENSG00000ADGRL3    | 1        | 0.448485 | 0.715825 | 0.658586 |        | 0.4433 |
| 9963  | ENSG00000RBM6      | 1        | 0.470707 | 0.725253 | 0.679798 |        |        |
| 9964  | ENSG00000MND1      | 0.848837 | 0.638478 | 0.742072 | 0.751586 |        |        |
| 9965  | ENSG00000TDRD15    | 0.979798 | 0.447475 | 0.713973 | 0.733333 |        |        |
| 9966  | ENSG00000TTLL6     | 0.769697 | 0.725253 | 0.747475 | 0.765657 | 0.2712 | 0.4425 |
| 9967  | ENSG00000SLC12A1   | 1        | 0.475758 | 0.73468  | 0.657576 |        |        |
| 9968  | ENSG00000TDRD6     | 0.769697 | 0.725253 | 0.747475 | 0.765657 |        |        |
| 9969  | ENSG00000TREM2     | 1        | 0.441414 | 0.713973 | 0.710101 |        | 0.448  |
| 9970  | ENSG00000TFDP1     | 0.960606 | 0.508081 | 0.727609 | 0.7      |        |        |
| 9971  | ENSG00000GPATCH4   | 0.960606 | 0.485859 | 0.715657 | 0.736364 |        |        |
| 9972  | ENSG00000EVA1B     | 0.977778 | 0.466667 | 0.722222 | 0.711111 |        |        |
| 9973  | ENSG00000TJAP1     | 0.974747 | 0.475758 | 0.725253 | 0.70101  |        |        |
| 9974  | ENSG00000BRPF3     | 0.954545 | 0.508081 | 0.726094 | 0.730303 |        |        |
| 9975  | ENSG00000PLCD1     | 1        | 0.432323 | 0.702357 | 0.663636 |        |        |
| 9976  | ENSG00000FAM69A    | 1        | 0.461616 | 0.71936  | 0.642424 |        |        |
| 9977  | ENSG00000RSPH1     | 0.9      | 0.572727 | 0.736364 | 0.743434 |        |        |
| 9978  | ENSG00000PQLC2L    | 0.931313 | 0.570707 | 0.749495 | 0.683838 |        |        |
| 9979  | ENSG00000TWF2      | 0.858586 | 0.619192 | 0.737879 | 0.758586 |        |        |
| 9980  | ENSG00000OGFR      | 0.923232 | 0.579798 | 0.744108 | 0.705051 |        |        |
| 9981  | ENSG00000SPATA3    | 0.809725 | 0.679704 | 0.744715 | 0.764271 |        |        |
| 9982  | ENSG00000TAF15     | 0.919662 | 0.57611  | 0.744362 | 0.709302 |        |        |
| 9983  | ENSG00000AP000311. | 0.89697  | 0.59798  | 0.747475 | 0.714141 |        |        |
| 9984  | ENSG00000APOOL     | 0.895349 | 0.588795 | 0.740662 | 0.733615 |        |        |
| 9985  | ENSG00000PAIP2     | 1        | 0.448485 | 0.715825 | 0.683838 |        |        |
| 9986  | ENSG00000CTDSP2    | 0.935354 | 0.526263 | 0.728956 | 0.731313 |        |        |
| 9987  | ENSG00000MOCOS     | 0.979798 | 0.470707 | 0.725253 | 0.70101  |        |        |
| 9988  | ENSG00000BABAM1    | 1        | 0.467677 | 0.729966 | 0.659596 |        |        |
| 9989  | ENSG00000ABHD2     | 0.959596 | 0.535354 | 0.742088 | 0.673737 |        |        |
| 9990  | ENSG00000PARG      | 0.892178 | 0.58351  | 0.73661  | 0.747357 |        |        |
| 9991  | ENSG00000FAM114A1  | 0.893688 | 0.58361  | 0.738649 | 0.744186 |        |        |
| 9992  | ENSG00000CST1      | 0.973737 | 0.482828 | 0.728283 | 0.692929 |        |        |
| 9993  | ENSG00000DHX58     | 0.974747 | 0.475758 | 0.725253 | 0.70404  |        |        |
| 9994  | ENSG00000SVBP      | 0.957576 | 0.526263 | 0.738215 | 0.691919 |        |        |
| 9995  | ENSG00000USO1      | 0.969697 | 0.477778 | 0.715993 | 0.721212 |        |        |
| 9996  | ENSG00000GAD1      | 1        | 0.476768 | 0.723906 | 0.642424 |        |        |
| 9997  | ENSG00000FAM110B   | 1        | 0.461616 | 0.727273 | 0.622222 |        |        |
| 9998  | ENSG00000TPGS2     | 0.973737 | 0.482828 | 0.728283 | 0.694949 |        |        |
| 9999  | ENSG00000SOST      | 0.939394 | 0.519192 | 0.729293 | 0.732323 |        |        |
| 10000 | ENSG00000ELAVL4    | 0.848485 | 0.676768 | 0.744108 | 0.734343 |        |        |
| 10001 | ENSG00000KANSL1L   | 1        | 0.452525 | 0.719865 | 0.655556 |        |        |
| 10002 | ENSG00000ARHGFE12  | 1        | 0.409091 | 0.727273 | 0.656566 |        | 0.6336 |
| 10003 | ENSG00000KCTD16    | 0.985859 | 0.450505 | 0.714478 | 0.725253 |        |        |
| 10004 | ENSG00000SET       | 1        | 0.441414 | 0.713973 | 0.69596  |        |        |
| 10005 | ENSG00000ROCK1     | 1        | 0.448485 | 0.720202 | 0.70404  |        |        |
| 10006 | ENSG00000NKX3-1    | 0.80303  | 0.714141 | 0.758249 | 0.738384 |        |        |
| 10007 | ENSG00000DHFR2     | 0.927273 | 0.583838 | 0.748822 | 0.686869 |        |        |
| 10008 | ENSG00000ZFP37     | 0.818182 | 0.652525 | 0.735354 | 0.789899 |        |        |

|       |                    |          |          |          |          |        |
|-------|--------------------|----------|----------|----------|----------|--------|
| 10009 | ENSG00000ZFAND4    | 0.813131 | 0.685859 | 0.749495 | 0.748485 |        |
| 10010 | ENSG00000GLT8D2    | 0.920266 | 0.568106 | 0.740495 | 0.717608 |        |
| 10011 | ENSG00000SLC26A10  | 0.931313 | 0.585859 | 0.743434 | 0.687879 |        |
| 10012 | ENSG00000ZNF568    | 0.813131 | 0.681818 | 0.74697  | 0.757576 |        |
| 10013 | ENSG00000 3/2/2019 | 1        | 0.467677 | 0.729966 | 0.652525 |        |
| 10014 | ENSG00000NR4A2     | 1        | 0.387879 | 0.754545 | 0.675758 |        |
| 10015 | ENSG00000SMG1      | 1        | 0.461616 | 0.71936  | 0.643434 |        |
| 10016 | ENSG00000LDAH      | 0.978788 | 0.467677 | 0.723232 | 0.710101 |        |
| 10017 | ENSG00000CDK7      | 0.988889 | 0.447475 | 0.72862  | 0.711111 |        |
| 10018 | ENSG00000MAP2K3    | 0.89697  | 0.59798  | 0.747475 | 0.722222 |        |
| 10019 | ENSG00000ARFGAP2   | 0.963636 | 0.523232 | 0.73165  | 0.680808 | 0.2215 |
| 10020 | ENSG00000ZNF391    | 0.973737 | 0.462626 | 0.722559 | 0.723232 |        |
| 10021 | ENSG00000DEFB106A  | 0.813131 | 0.681818 | 0.74697  | 0.758586 |        |
| 10022 | ENSG00000DEFB106B  | 0.813131 | 0.681818 | 0.74697  | 0.758586 |        |
| 10023 | ENSG00000DUXA2     | 0.813131 | 0.685859 | 0.749495 | 0.750505 |        |
| 10024 | ENSG00000STIP1     | 0.983838 | 0.450505 | 0.720202 | 0.722222 |        |
| 10025 | ENSG00000NXNL2     | 0.890909 | 0.619192 | 0.75404  | 0.712121 |        |
| 10026 | ENSG00000SLC5A12   | 0.813131 | 0.685859 | 0.749495 | 0.751515 |        |
| 10027 | ENSG00000IVNS1ABP  | 0.873754 | 0.666667 | 0.769103 | 0.694352 |        |
| 10028 | ENSG00000EIF6      | 0.911406 | 0.561462 | 0.754891 | 0.72093  |        |
| 10029 | ENSG00000RAD54L2   | 0.854545 | 0.648485 | 0.749832 | 0.735354 |        |
| 10030 | ENSG00000TSPAN8    | 0.949495 | 0.494949 | 0.722222 | 0.758586 |        |
| 10031 | ENSG00000RARS      | 1        | 0.475758 | 0.733502 | 0.646465 |        |
| 10032 | ENSG00000ABCC10    | 0.970707 | 0.473737 | 0.717508 | 0.726263 |        |
| 10033 | ENSG00000CTAG1B    | 0.880399 | 0.596899 | 0.732189 | 0.767442 |        |
| 10034 | ENSG00000OSBPL2    | 1        | 0.441414 | 0.715488 | 0.689899 |        |
| 10035 | ENSG00000MPI       | 0.880399 | 0.632337 | 0.754891 | 0.716501 |        |
| 10036 | ENSG00000PRPF40A   | 1        | 0.419192 | 0.695286 | 0.689899 |        |
| 10037 | ENSG00000NHEJ1     | 0.972727 | 0.475758 | 0.722222 | 0.712121 |        |
| 10038 | ENSG00000RBP1      | 0.971717 | 0.466667 | 0.728283 | 0.719192 |        |
| 10039 | ENSG00000CDON      | 1        | 0.448485 | 0.725253 | 0.70202  |        |
| 10040 | ENSG00000CNOT4     | 1        | 0.482828 | 0.738384 | 0.651515 |        |
| 10041 | ENSG00000NRN1L     | 0.893939 | 0.625253 | 0.759596 | 0.69798  |        |
| 10042 | ENSG00000INTS10    | 1        | 0.478788 | 0.719865 | 0.667677 |        |
| 10043 | ENSG00000TMEM97    | 0.813131 | 0.685859 | 0.749495 | 0.755556 |        |
| 10044 | ENSG00000RHBDD3    | 0.895349 | 0.590909 | 0.743129 | 0.735729 |        |
| 10045 | ENSG00000HTR3A     | 0.9      | 0.572727 | 0.736364 | 0.750505 |        |
| 10046 | ENSG00000THAP5     | 0.935354 | 0.557576 | 0.746465 | 0.69596  |        |
| 10047 | ENSG00000NBPF6     | 1        | 0.39596  | 0.763636 | 0.636364 |        |
| 10048 | ENSG00000CCL27     | 0.858586 | 0.622222 | 0.740404 | 0.760606 |        |
| 10049 | ENSG00000DDX19B    | 1        | 0.40303  | 0.715657 | 0.708081 |        |
| 10050 | ENSG00000SIK3      | 1        | 0.441414 | 0.719529 | 0.664646 |        |
| 10051 | ENSG00000PNMA3     | 0.845666 | 0.669133 | 0.750176 | 0.734672 |        |
| 10052 | ENSG00000WWC3      | 1        | 0.505285 | 0.744186 | 0.632135 |        |
| 10053 | ENSG00000SCYL3     | 0.919662 | 0.57611  | 0.744362 | 0.716702 |        |
| 10054 | ENSG00000CTSD      | 0.941414 | 0.50303  | 0.722222 | 0.762626 |        |
| 10055 | ENSG00000SI        | 0.854545 | 0.652525 | 0.753535 | 0.734343 |        |
| 10056 | ENSG00000PLA2R1    | 1        | 0.425253 | 0.705892 | 0.70101  |        |
| 10057 | ENSG00000SHE       | 0.893939 | 0.590909 | 0.741246 | 0.739394 |        |
| 10058 | ENSG00000DNASE1L3  | 0.983838 | 0.475758 | 0.731481 | 0.688889 |        |
| 10059 | ENSG00000TRIM33    | 0.882828 | 0.613131 | 0.746296 | 0.735354 |        |
| 10060 | ENSG00000TSPAN32   | 0.963636 | 0.512121 | 0.740909 | 0.683838 |        |
| 10061 | ENSG00000CHRN1     | 1        | 0.427273 | 0.706902 | 0.683838 |        |
| 10062 | ENSG00000MTM1      | 0.969697 | 0.487879 | 0.718855 | 0.715152 |        |
| 10063 | ENSG00000H1FX      | 0.920719 | 0.580338 | 0.744538 | 0.712474 |        |

|       |                   |          |          |          |          |       |        |
|-------|-------------------|----------|----------|----------|----------|-------|--------|
| 10064 | ENSG00000RIPK2    | 0.975758 | 0.470707 | 0.723232 | 0.715152 |       |        |
| 10065 | ENSG00000CETN1    | 0.99798  | 0.389899 | 0.752189 | 0.736364 |       |        |
| 10066 | ENSG00000FBXW12   | 0.971717 | 0.475758 | 0.721044 | 0.719192 |       |        |
| 10067 | ENSG00000MUC7     | 0.835095 | 0.671247 | 0.752643 | 0.744186 |       |        |
| 10068 | ENSG00000ROM01    | 0.958586 | 0.49596  | 0.720539 | 0.739394 |       |        |
| 10069 | ENSG00000VDAC2    | 0.852008 | 0.645877 | 0.748943 | 0.747357 |       |        |
| 10070 | ENSG00000BEX2     | 0.89697  | 0.59798  | 0.747475 | 0.726263 |       |        |
| 10071 | ENSG00000ETNK2    | 0.935354 | 0.557576 | 0.746465 | 0.69899  |       |        |
| 10072 | ENSG00000MRPS24   | 0.885835 | 0.600423 | 0.730973 | 0.764271 |       |        |
| 10073 | ENSG00000C3orf52  | 0.935354 | 0.547475 | 0.737374 | 0.717172 |       |        |
| 10074 | ENSG00000BEX1     | 0.89697  | 0.59798  | 0.747475 | 0.726263 |       |        |
| 10075 | ENSG00000TMEM207  | 0.854545 | 0.652525 | 0.753535 | 0.732323 |       |        |
| 10076 | ENSG00000ZSWIM1   | 0.968687 | 0.518182 | 0.741246 | 0.667677 |       |        |
| 10077 | ENSG00000CAMSAP1  | 0.854545 | 0.648485 | 0.745455 | 0.748485 |       |        |
| 10078 | ENSG00000DNAJC18  | 0.934461 | 0.55074  | 0.7426   | 0.709302 |       |        |
| 10079 | ENSG00000ZNF584   | 0.991919 | 0.411111 | 0.751852 | 0.720202 |       |        |
| 10080 | ENSG00000RIOK2    | 0.854545 | 0.652525 | 0.753535 | 0.736364 |       |        |
| 10081 | ENSG00000NCF2     | 0.991919 | 0.452525 | 0.743266 | 0.690909 |       |        |
| 10082 | ENSG00000NBPF4    | 1        | 0.39596  | 0.763636 | 0.636364 |       |        |
| 10083 | ENSG00000COL7A1   | 0.980808 | 0.475758 | 0.728283 | 0.69899  |       |        |
| 10084 | ENSG00000MCRS1    | 0.974747 | 0.457576 | 0.714815 | 0.742424 |       |        |
| 10085 | ENSG00000TUBG1    | 0.854545 | 0.652525 | 0.753535 | 0.735354 |       | 0.2694 |
| 10086 | ENSG00000MYBPH    | 0.758985 | 0.758985 | 0.758985 | 0.758985 |       |        |
| 10087 | ENSG00000DRAM2    | 0.963636 | 0.458586 | 0.711111 | 0.775758 |       |        |
| 10088 | ENSG00000NACC1    | 1        | 0.429293 | 0.707912 | 0.691919 |       |        |
| 10089 | ENSG00000CCDC62   | 0.850505 | 0.648485 | 0.748822 | 0.748485 |       |        |
| 10090 | ENSG00000TCTEX1D4 | 0.758985 | 0.758985 | 0.758985 | 0.758985 |       |        |
| 10091 | ENSG00000ADAM2    | 0.967677 | 0.476768 | 0.722222 | 0.728283 |       |        |
| 10092 | ENSG00000IL7      | 0.966667 | 0.49798  | 0.726768 | 0.705051 |       |        |
| 10093 | ENSG00000RIPK1    | 1        | 0.470707 | 0.717508 | 0.656566 | 0.334 | 0.5357 |
| 10094 | ENSG00000DNAJB5   | 0.984848 | 0.487879 | 0.738384 | 0.674747 |       |        |
| 10095 | ENSG00000TAGAP    | 1        | 0.454545 | 0.714141 | 0.655556 |       |        |
| 10096 | ENSG00000CLPP     | 0.850505 | 0.648485 | 0.748822 | 0.749495 |       |        |
| 10097 | ENSG00000PFDN1    | 0.968687 | 0.506061 | 0.732323 | 0.688889 |       |        |
| 10098 | ENSG00000P4HA2    | 0.978788 | 0.445455 | 0.712121 | 0.760606 |       |        |
| 10099 | ENSG00000EP400    | 0.931313 | 0.556566 | 0.73367  | 0.723232 |       |        |
| 10100 | ENSG00000GSTK1    | 1        | 0.374747 | 0.68569  | 0.754545 |       | 0.4532 |
| 10101 | ENSG00000CAPS     | 0.854545 | 0.652525 | 0.753535 | 0.738384 |       |        |
| 10102 | ENSG00000CRYZ     | 1        | 0.470707 | 0.731987 | 0.656566 |       | 0.3372 |
| 10103 | ENSG00000DAND5    | 0.932347 | 0.572939 | 0.752643 | 0.690275 |       |        |
| 10104 | ENSG00000PUS1     | 1        | 0.444075 | 0.714286 | 0.6567   |       |        |
| 10105 | ENSG00000B3GNT9   | 0.917172 | 0.562626 | 0.734175 | 0.747475 |       |        |
| 10106 | ENSG00000RABEP1   | 1        | 0.478788 | 0.730303 | 0.675758 |       |        |
| 10107 | ENSG00000MAP2     | 0.988889 | 0.471717 | 0.738215 | 0.684848 |       |        |
| 10108 | ENSG00000KPNA7    | 0.967677 | 0.532323 | 0.740741 | 0.662626 |       |        |
| 10109 | ENSG00000LAX1     | 0.985859 | 0.449495 | 0.723737 | 0.727273 |       |        |
| 10110 | ENSG00000YES1     | 1        | 0.438384 | 0.706397 | 0.673737 |       |        |
| 10111 | ENSG00000ERBB4    | 0.99596  | 0.447475 | 0.776094 | 0.663636 |       |        |
| 10112 | ENSG00000DAG1     | 0.954545 | 0.516162 | 0.735354 | 0.725253 |       |        |
| 10113 | ENSG00000WDR47    | 1        | 0.482828 | 0.738384 | 0.656566 |       | 0.2615 |
| 10114 | ENSG00000TMCC2    | 0.854545 | 0.652525 | 0.753535 | 0.738384 |       |        |
| 10115 | ENSG00000SMIM21   | 0.809725 | 0.67759  | 0.736786 | 0.795983 |       |        |
| 10116 | ENSG00000ATF7IP   | 0.923232 | 0.550505 | 0.760606 | 0.711111 |       |        |
| 10117 | ENSG00000C17orf51 | 0.892178 | 0.618393 | 0.755285 | 0.716702 |       |        |
| 10118 | ENSG00000SLC1A2   | 0.972727 | 0.491919 | 0.732323 | 0.694949 |       |        |

|       |                    |          |          |          |          |        |
|-------|--------------------|----------|----------|----------|----------|--------|
| 10119 | ENSG00000GNB2      | 0.974747 | 0.475758 | 0.725253 | 0.713131 | 0.2833 |
| 10120 | ENSG00000LSM7      | 0.963636 | 0.50101  | 0.723064 | 0.717172 |        |
| 10121 | ENSG00000CLRN1     | 0.937374 | 0.537374 | 0.737374 | 0.725253 |        |
| 10122 | ENSG00000NEK2      | 0.845455 | 0.641414 | 0.741582 | 0.774747 |        |
| 10123 | ENSG00000C2orf81   | 0.835095 | 0.674419 | 0.754757 | 0.7463   |        |
| 10124 | ENSG00000RGS11     | 1        | 0.431313 | 0.717677 | 0.733333 |        |
| 10125 | ENSG00000CLCN2     | 1        | 0.463636 | 0.725758 | 0.675758 | 0.353  |
| 10126 | ENSG00000TIMM21    | 1        | 0.49798  | 0.791246 | 0.59899  |        |
| 10127 | ENSG00000TRA2B     | 1        | 0.471717 | 0.726094 | 0.650505 |        |
| 10128 | ENSG00000MIA3      | 0.974747 | 0.475758 | 0.725253 | 0.715152 |        |
| 10129 | ENSG00000MAPK1IP1L | 0.957717 | 0.508457 | 0.726216 | 0.730444 |        |
| 10130 | ENSG00000HIKESHI   | 0.967677 | 0.449495 | 0.753535 | 0.718182 |        |
| 10131 | ENSG00000LGR4      | 0.913131 | 0.578788 | 0.749327 | 0.727273 |        |
| 10132 | ENSG00000NHSL2     | 0.9      | 0.572727 | 0.736364 | 0.759596 |        |
| 10133 | ENSG00000HIBCH     | 0.971717 | 0.50303  | 0.737374 | 0.680808 |        |
| 10134 | ENSG00000ATP6V1G1  | 0.893939 | 0.625253 | 0.759596 | 0.709091 |        |
| 10135 | ENSG00000MCEMP1    | 0.893939 | 0.590909 | 0.741246 | 0.748485 |        |
| 10136 | ENSG00000FGFR10P2  | 1        | 0.426263 | 0.710438 | 0.734343 |        |
| 10137 | ENSG00000ZNF777    | 0.954545 | 0.52537  | 0.739958 | 0.715645 |        |
| 10138 | ENSG00000ILK       | 0.9      | 0.572727 | 0.736364 | 0.762626 |        |
| 10139 | ENSG00000NCK2      | 1        | 0.457576 | 0.724747 | 0.70202  |        |
| 10140 | ENSG00000NAT16     | 0.892178 | 0.618393 | 0.755285 | 0.719873 |        |
| 10141 | ENSG00000ADCK1     | 0.954545 | 0.516162 | 0.735354 | 0.730303 |        |
| 10142 | ENSG00000HUNK      | 1        | 0.428283 | 0.737037 | 0.674747 |        |
| 10143 | ENSG00000PIGM      | 0.84778  | 0.678647 | 0.763214 | 0.72833  |        |
| 10144 | ENSG00000SF3A3     | 1        | 0.429293 | 0.710438 | 0.674747 |        |
| 10145 | ENSG00000HEPH      | 0.889006 | 0.647992 | 0.768499 | 0.699789 |        |
| 10146 | ENSG00000TIMM10B   | 0.931313 | 0.562626 | 0.741246 | 0.715152 |        |
| 10147 | ENSG00000UBXN10    | 0.971717 | 0.475758 | 0.721044 | 0.728283 |        |
| 10148 | ENSG00000VTI1B     | 0.974747 | 0.475758 | 0.725253 | 0.719192 |        |
| 10149 | ENSG00000PROS1     | 1        | 0.429293 | 0.707912 | 0.677778 |        |
| 10150 | ENSG00000ERMN      | 1        | 0.430303 | 0.709091 | 0.713131 |        |
| 10151 | ENSG00000FAM120A   | 0.968687 | 0.506061 | 0.732323 | 0.694949 |        |
| 10152 | ENSG00000RPL37A    | 0.883838 | 0.647475 | 0.759933 | 0.714141 |        |
| 10153 | ENSG00000MANSC1    | 0.934461 | 0.55074  | 0.7426   | 0.717759 |        |
| 10154 | ENSG00000ESRP2     | 0.961616 | 0.50101  | 0.722054 | 0.731313 |        |
| 10155 | ENSG00000TCOF1     | 1        | 0.49697  | 0.747138 | 0.641414 |        |
| 10156 | ENSG00000DYDC1     | 0.969697 | 0.50202  | 0.733502 | 0.692929 |        |
| 10157 | ENSG00000PIGN      | 1        | 0.445455 | 0.71936  | 0.645455 | 0.2531 |
| 10158 | ENSG00000PLEKHA7   | 0.890909 | 0.619192 | 0.75404  | 0.724242 |        |
| 10159 | ENSG00000TMEM68    | 0.969697 | 0.488889 | 0.729293 | 0.710101 |        |
| 10160 | ENSG00000MRGBP     | 0.852008 | 0.645877 | 0.748943 | 0.760042 |        |
| 10161 | ENSG00000LUC7L2    | 0.925253 | 0.584848 | 0.750505 | 0.70404  |        |
| 10162 | ENSG00000CA6       | 0.977778 | 0.466667 | 0.722222 | 0.730303 |        |
| 10163 | ENSG00000IL1R1     | 0.988889 | 0.479798 | 0.735354 | 0.686869 |        |
| 10164 | ENSG00000PSMD11    | 0.981818 | 0.421212 | 0.753535 | 0.731313 |        |
| 10165 | ENSG00000OAS3      | 1        | 0.467677 | 0.734175 | 0.669697 |        |
| 10166 | ENSG00000GIMAP1    | 0.969697 | 0.49798  | 0.723737 | 0.709091 |        |
| 10167 | ENSG00000PRPF19    | 1        | 0.436364 | 0.710101 | 0.729293 | 0.347  |
| 10168 | ENSG00000SPRY1     | 0.968687 | 0.49596  | 0.724074 | 0.713131 |        |
| 10169 | ENSG00000SLIRP     | 0.927273 | 0.552525 | 0.732492 | 0.743434 |        |
| 10170 | ENSG00000ARL10     | 0.89697  | 0.590909 | 0.738889 | 0.753535 |        |
| 10171 | ENSG00000PITPNM2   | 1        | 0.474747 | 0.73064  | 0.677778 |        |
| 10172 | ENSG00000RIMKLA    | 0.917172 | 0.575758 | 0.760269 | 0.715152 |        |
| 10173 | ENSG00000FOXSI     | 0.928118 | 0.556025 | 0.739253 | 0.729387 |        |



|       |           |          |          |          |          |          |        |
|-------|-----------|----------|----------|----------|----------|----------|--------|
| 10174 | ENSG00000 | TBCE     | 0.965116 | 0.501057 | 0.724982 | 0.715645 |        |
| 10175 | ENSG00000 | PPP3CC   | 0.964646 | 0.528283 | 0.744781 | 0.675758 |        |
| 10176 | ENSG00000 | TBCE     | 0.965116 | 0.501057 | 0.724982 | 0.715645 |        |
| 10177 | ENSG00000 | KLHL14   | 0.959596 | 0.535354 | 0.742088 | 0.689899 | 0.5232 |
| 10178 | ENSG00000 | ANP32A   | 1        | 0.470707 | 0.731313 | 0.646465 |        |
| 10179 | ENSG00000 | WASF2    | 1        | 0.457576 | 0.758418 | 0.619192 |        |
| 10180 | ENSG00000 | FLAD1    | 1        | 0.457576 | 0.710606 | 0.672727 | 0.2936 |
| 10181 | ENSG00000 | ZW10     | 1        | 0.476768 | 0.732997 | 0.674747 |        |
| 10182 | ENSG00000 | EDDM3B   | 0.808081 | 0.717172 | 0.76229  | 0.748485 |        |
| 10183 | ENSG00000 | CELF5    | 0.977778 | 0.466667 | 0.722222 | 0.731313 |        |
| 10184 | ENSG00000 | CCDC117  | 0.926004 | 0.603594 | 0.74771  | 0.697674 |        |
| 10185 | ENSG00000 | DUSP18   | 0.972727 | 0.520202 | 0.743939 | 0.667677 |        |
| 10186 | ENSG00000 | DHCR24   | 0.980808 | 0.451515 | 0.716835 | 0.749495 |        |
| 10187 | ENSG00000 | IBA57    | 0.957576 | 0.531313 | 0.739057 | 0.707071 |        |
| 10188 | ENSG00000 | PNPLA6   | 0.948203 | 0.504228 | 0.726216 | 0.765328 |        |
| 10189 | ENSG00000 | TBC1D8   | 0.89697  | 0.59798  | 0.747475 | 0.735354 |        |
| 10190 | ENSG00000 | C12orf10 | 0.966667 | 0.49798  | 0.735017 | 0.705051 |        |
| 10191 | ENSG00000 | PCDH17   | 0.929293 | 0.563636 | 0.743771 | 0.721212 |        |
| 10192 | ENSG00000 | HAPLN2   | 0.80444  | 0.715645 | 0.760042 | 0.757928 |        |
| 10193 | ENSG00000 | ITGAE    | 0.979798 | 0.462626 | 0.73266  | 0.720202 |        |
| 10194 | ENSG00000 | AXL      | 0.985859 | 0.488889 | 0.735185 | 0.685859 |        |
| 10195 | ENSG00000 | RHOU     | 0.890909 | 0.654545 | 0.772727 | 0.694949 |        |
| 10196 | ENSG00000 | SYNJ1    | 0.854545 | 0.652525 | 0.753535 | 0.748485 |        |
| 10197 | ENSG00000 | DSTN     | 0.919192 | 0.558586 | 0.735354 | 0.756566 |        |
| 10198 | ENSG00000 | GCN1     | 1        | 0.442424 | 0.709091 | 0.740404 |        |
| 10199 | ENSG00000 | ZNF182   | 0.846465 | 0.681818 | 0.763636 | 0.732323 |        |
| 10200 | ENSG00000 | PTPRU    | 1        | 0.469697 | 0.724242 | 0.69899  |        |
| 10201 | ENSG00000 | SCARA3   | 0.848485 | 0.641414 | 0.737879 | 0.788889 |        |
| 10202 | ENSG00000 | CD151    | 0.933333 | 0.547475 | 0.738721 | 0.730303 |        |
| 10203 | ENSG00000 | WDR45    | 1        | 0.44926  | 0.711769 | 0.654334 |        |
| 10204 | ENSG00000 | SCAMP4   | 0.893939 | 0.625253 | 0.759596 | 0.713131 |        |
| 10205 | ENSG00000 | TMEM63C  | 0.893939 | 0.619192 | 0.751178 | 0.728283 |        |
| 10206 | ENSG00000 | FAHD1    | 0.973737 | 0.482828 | 0.728283 | 0.713131 |        |
| 10207 | ENSG00000 | YAP1     | 1        | 0.436364 | 0.787879 | 0.629293 |        |
| 10208 | ENSG00000 | ZNF623   | 0.967677 | 0.476768 | 0.722222 | 0.737374 |        |
| 10209 | ENSG00000 | PEAK3    | 0.892178 | 0.618393 | 0.755285 | 0.727273 |        |
| 10210 | ENSG00000 | ZFX      | 0.950505 | 0.578788 | 0.746465 | 0.690909 |        |
| 10211 | ENSG00000 | LY6D     | 0.858586 | 0.622222 | 0.740404 | 0.786869 |        |
| 10212 | ENSG00000 | THSD1    | 0.983838 | 0.475758 | 0.731481 | 0.706061 |        |
| 10213 | ENSG00000 | SLC25A39 | 0.893939 | 0.625253 | 0.759596 | 0.719192 |        |
| 10214 | ENSG00000 | EYA2     | 0.970707 | 0.516162 | 0.743434 | 0.679798 |        |
| 10215 | ENSG00000 | ALK      | 1        | 0.448485 | 0.712458 | 0.669697 |        |
| 10216 | ENSG00000 | HPS4     | 1        | 0.466667 | 0.72963  | 0.689899 |        |
| 10217 | ENSG00000 | SLC25A26 | 0.890909 | 0.619192 | 0.75404  | 0.731313 |        |
| 10218 | ENSG00000 | IRF5     | 0.852008 | 0.645877 | 0.748943 | 0.767442 |        |
| 10219 | ENSG00000 | IVD      | 0.965657 | 0.509091 | 0.729461 | 0.708081 |        |
| 10220 | ENSG00000 | GTF2F2   | 0.980808 | 0.475758 | 0.728283 | 0.711111 |        |
| 10221 | ENSG00000 | LARP1    | 0.96723  | 0.51797  | 0.737315 | 0.690275 |        |
| 10222 | ENSG00000 | PNPLA5   | 0.981818 | 0.482828 | 0.732323 | 0.70202  |        |
| 10223 | ENSG00000 | PATE4    | 0.813131 | 0.685859 | 0.749495 | 0.775758 |        |
| 10224 | ENSG00000 | ADRA1A   | 0.89697  | 0.590909 | 0.738889 | 0.762626 |        |
| 10225 | ENSG00000 | ECI1     | 0.970707 | 0.516162 | 0.743434 | 0.677778 |        |
| 10226 | ENSG00000 | MTRF1L   | 0.893939 | 0.623232 | 0.757407 | 0.722222 |        |
| 10227 | ENSG00000 | PSMD13   | 0.998943 | 0.501057 | 0.780655 | 0.621564 |        |
| 10228 | ENSG00000 | EDIL3    | 0.969697 | 0.509091 | 0.737542 | 0.689899 |        |

|       |                    |          |          |          |          |        |      |
|-------|--------------------|----------|----------|----------|----------|--------|------|
| 10229 | ENSG00000ARAP1     | 1        | 0.449495 | 0.715993 | 0.653535 |        |      |
| 10230 | ENSG00000EXOSC2    | 1        | 0.434343 | 0.710438 | 0.721212 | 0.3576 | 0.67 |
| 10231 | ENSG00000ASB3      | 0.893939 | 0.625253 | 0.759596 | 0.719192 |        |      |
| 10232 | ENSG00000SLITRK6   | 0.961616 | 0.549495 | 0.739899 | 0.680808 |        |      |
| 10233 | ENSG00000HCRTR2    | 0.80202  | 0.717172 | 0.759596 | 0.763636 |        |      |
| 10234 | ENSG00000PAN3      | 0.962626 | 0.520202 | 0.725926 | 0.713131 |        |      |
| 10235 | ENSG00000LDLRAD2   | 0.887879 | 0.611111 | 0.742761 | 0.758586 |        |      |
| 10236 | ENSG00000TMEM245   | 0.889006 | 0.612051 | 0.749471 | 0.747357 |        |      |
| 10237 | ENSG00000NFKB2     | 1        | 0.475758 | 0.73468  | 0.682828 |        |      |
| 10238 | ENSG00000RWDD2A    | 1        | 0.439394 | 0.786532 | 0.672727 |        |      |
| 10239 | ENSG00000TMEM184B  | 0.89697  | 0.59798  | 0.747475 | 0.741414 |        |      |
| 10240 | ENSG00000FDX1      | 0.975758 | 0.470707 | 0.723232 | 0.732323 |        |      |
| 10241 | ENSG00000CWC27     | 0.958586 | 0.552525 | 0.772222 | 0.661616 |        |      |
| 10242 | ENSG00000ABHD18    | 0.935354 | 0.557576 | 0.746465 | 0.716162 |        |      |
| 10243 | ENSG00000IGF2BP2   | 1        | 0.462626 | 0.716498 | 0.718182 |        |      |
| 10244 | ENSG00000COPS8     | 0.854545 | 0.648485 | 0.745455 | 0.769697 |        |      |
| 10245 | ENSG00000PCOLCE2   | 0.890909 | 0.619192 | 0.75404  | 0.733333 |        |      |
| 10246 | ENSG00000SLC25A20  | 0.972727 | 0.491919 | 0.732323 | 0.706061 |        |      |
| 10247 | ENSG00000APOL2     | 0.918605 | 0.609937 | 0.762156 | 0.704017 |        |      |
| 10248 | ENSG00000GALK1     | 0.963636 | 0.508081 | 0.729125 | 0.718182 |        |      |
| 10249 | ENSG00000INHBE     | 0.974747 | 0.475758 | 0.725253 | 0.729293 |        |      |
| 10250 | ENSG00000ADPGK     | 0.850505 | 0.684848 | 0.767677 | 0.728283 |        |      |
| 10251 | ENSG00000YBEY      | 0.925253 | 0.555556 | 0.736364 | 0.748485 |        |      |
| 10252 | ENSG00000SLC25A10  | 0.925253 | 0.576768 | 0.734343 | 0.739394 | 0.263  |      |
| 10253 | ENSG00000GPR75-ASB | 0.893939 | 0.625253 | 0.759596 | 0.719192 |        |      |
| 10254 | ENSG00000AC011005. | 0.961945 | 0.542283 | 0.740134 | 0.687104 |        |      |
| 10255 | ENSG00000RPIA      | 0.963636 | 0.50101  | 0.723064 | 0.731313 |        |      |
| 10256 | ENSG00000ABCB4     | 0.977778 | 0.445455 | 0.711279 | 0.787879 | 0.1723 |      |
| 10257 | ENSG00000STAU1     | 1        | 0.437374 | 0.711111 | 0.726263 |        |      |
| 10258 | ENSG00000TTC14     | 0.89697  | 0.59798  | 0.747475 | 0.746465 |        |      |
| 10259 | ENSG00000GREB1L    | 1        | 0.445455 | 0.71936  | 0.693939 |        |      |
| 10260 | ENSG00000PIK3R3    | 1        | 0.519192 | 0.753872 | 0.611111 |        |      |
| 10261 | ENSG00000TFPI2     | 0.972727 | 0.491919 | 0.729461 | 0.713131 |        |      |
| 10262 | ENSG00000ASGR2     | 1        | 0.445455 | 0.719192 | 0.682828 |        |      |
| 10263 | ENSG00000KLHL7     | 1        | 0.467677 | 0.730303 | 0.674747 |        |      |
| 10264 | ENSG00000PADI4     | 0.969697 | 0.507071 | 0.73064  | 0.705051 |        |      |
| 10265 | ENSG00000SDHAF4    | 0.958586 | 0.49798  | 0.722727 | 0.758586 |        |      |
| 10266 | ENSG00000TUBGCP6   | 0.931313 | 0.570707 | 0.749495 | 0.713131 |        |      |
| 10267 | ENSG00000PHF8      | 0.971459 | 0.497886 | 0.731853 | 0.708245 |        |      |
| 10268 | ENSG00000SMARCA2   | 1        | 0.461616 | 0.724579 | 0.711111 | 0.3984 |      |
| 10269 | ENSG00000MAP3K3    | 0.954545 | 0.516162 | 0.735354 | 0.742424 |        |      |
| 10270 | ENSG00000PGAP3     | 0.890909 | 0.619192 | 0.75404  | 0.736364 |        |      |
| 10271 | ENSG00000MMP11     | 0.963636 | 0.509091 | 0.736364 | 0.712121 |        |      |
| 10272 | ENSG00000IPO5      | 1        | 0.448485 | 0.778788 | 0.669697 |        |      |
| 10273 | ENSG00000CAMKK2    | 0.893939 | 0.625253 | 0.759596 | 0.725253 |        |      |
| 10274 | ENSG00000STAT5A    | 1        | 0.379798 | 0.754882 | 0.730303 |        |      |
| 10275 | ENSG00000ITPKC     | 0.959596 | 0.528283 | 0.771549 | 0.678788 |        |      |
| 10276 | ENSG00000NMB       | 0.881818 | 0.617172 | 0.747306 | 0.761616 |        |      |
| 10277 | ENSG00000KRT23     | 1        | 0.482828 | 0.738384 | 0.662626 |        |      |
| 10278 | ENSG00000MRPS25    | 0.892178 | 0.618393 | 0.755285 | 0.734672 |        |      |
| 10279 | ENSG00000MAGEA1    | 0.892178 | 0.612051 | 0.746653 | 0.751586 |        |      |
| 10280 | ENSG00000CUL3      | 1        | 0.472516 | 0.735377 | 0.692389 |        |      |
| 10281 | ENSG00000SNAI2     | 1        | 0.470402 | 0.730796 | 0.701903 |        |      |
| 10282 | ENSG00000FAM110C   | 0.971717 | 0.489899 | 0.725926 | 0.723232 |        |      |
| 10283 | ENSG00000DOK3      | 0.854545 | 0.652525 | 0.753535 | 0.761616 |        |      |

|       |                   |          |          |          |          |        |
|-------|-------------------|----------|----------|----------|----------|--------|
| 10284 | ENSG00000ATXN2L   | 0.969697 | 0.488889 | 0.724411 | 0.730303 |        |
| 10285 | ENSG00000FRK      | 0.927273 | 0.583838 | 0.748822 | 0.717172 |        |
| 10286 | ENSG00000ASTE1    | 1        | 0.482828 | 0.742761 | 0.677778 |        |
| 10287 | ENSG00000ARHGFE16 | 0.893939 | 0.625253 | 0.759596 | 0.726263 |        |
| 10288 | ENSG00000KRT27    | 0.800966 | 0.719807 | 0.760225 | 0.768116 |        |
| 10289 | ENSG00000SSBP1    | 0.929293 | 0.59596  | 0.761279 | 0.693939 |        |
| 10290 | ENSG00000CC2D1A   | 1        | 0.452525 | 0.715152 | 0.70101  |        |
| 10291 | ENSG00000PPIC     | 0.887043 | 0.641196 | 0.76412  | 0.72536  |        |
| 10292 | ENSG00000FAM221B  | 0.852008 | 0.645877 | 0.748943 | 0.775899 |        |
| 10293 | ENSG00000ZMPSTE24 | 0.890909 | 0.619192 | 0.75404  | 0.741414 |        |
| 10294 | ENSG00000ETFA     | 0.984848 | 0.50202  | 0.738552 | 0.680808 | 0.466  |
| 10295 | ENSG00000SIL1     | 0.887879 | 0.615152 | 0.749832 | 0.753535 |        |
| 10296 | ENSG00000TBC1D30  | 0.971717 | 0.50303  | 0.737374 | 0.69899  |        |
| 10297 | ENSG00000FAM177B  | 0.813131 | 0.685859 | 0.749495 | 0.787879 |        |
| 10298 | ENSG00000MAST3    | 0.987879 | 0.518182 | 0.756061 | 0.648485 |        |
| 10299 | ENSG00000RPL9     | 0.895349 | 0.590909 | 0.743129 | 0.767442 |        |
| 10300 | ENSG00000STRN4    | 1        | 0.470707 | 0.73468  | 0.689899 |        |
| 10301 | ENSG00000SYNPO    | 0.990909 | 0.461616 | 0.745455 | 0.70404  |        |
| 10302 | ENSG00000R3HDM2   | 1        | 0.419192 | 0.743266 | 0.664646 |        |
| 10303 | ENSG00000YBX2     | 1        | 0.461616 | 0.724074 | 0.724242 |        |
| 10304 | ENSG00000IQSEC1   | 1        | 0.447475 | 0.720034 | 0.691919 |        |
| 10305 | ENSG00000CYHR1    | 0.927273 | 0.582828 | 0.750168 | 0.715152 |        |
| 10306 | ENSG00000RPS6KB2  | 1        | 0.448485 | 0.712458 | 0.674747 | 0.2766 |
| 10307 | ENSG00000SH3TC1   | 0.929293 | 0.59596  | 0.761279 | 0.694949 |        |
| 10308 | ENSG00000C1R      | 0.969697 | 0.487879 | 0.724074 | 0.735354 |        |
| 10309 | ENSG00000LCP2     | 0.972727 | 0.473737 | 0.728283 | 0.738384 |        |
| 10310 | ENSG00000MAPK8IP3 | 1        | 0.466667 | 0.727609 | 0.670707 |        |
| 10311 | ENSG00000SPINK5   | 0.959596 | 0.539394 | 0.749495 | 0.692929 |        |
| 10312 | ENSG00000VWA5B1   | 0.844961 | 0.672204 | 0.758583 | 0.758583 | 0.4546 |
| 10313 | ENSG00000PLS3     | 0.887879 | 0.643434 | 0.747138 | 0.745455 |        |
| 10314 | ENSG00000WBP2     | 0.922833 | 0.606765 | 0.760747 | 0.704017 |        |
| 10315 | ENSG00000KCNE2    | 0.973737 | 0.482828 | 0.728283 | 0.726263 |        |
| 10316 | ENSG00000DNAJC27  | 0.984848 | 0.489899 | 0.727609 | 0.707071 |        |
| 10317 | ENSG00000SH3GL1   | 0.890909 | 0.654545 | 0.772727 | 0.706061 |        |
| 10318 | ENSG00000PTBP1    | 0.890909 | 0.649495 | 0.764478 | 0.719192 |        |
| 10319 | ENSG00000CFAP77   | 0.935354 | 0.526263 | 0.728956 | 0.771717 |        |
| 10320 | ENSG00000NELFA    | 1        | 0.441414 | 0.719529 | 0.669697 |        |
| 10321 | ENSG00000NAIP     | 0.959596 | 0.512121 | 0.729798 | 0.732323 |        |
| 10322 | ENSG00000ARID1B   | 0.984144 | 0.483087 | 0.723749 | 0.717759 |        |
| 10323 | ENSG00000NEFM     | 1        | 0.452525 | 0.731313 | 0.70404  |        |
| 10324 | ENSG00000C4A      | 0.99596  | 0.439394 | 0.765825 | 0.7      |        |
| 10325 | ENSG00000STK38L   | 0.883838 | 0.647475 | 0.759933 | 0.731313 |        |
| 10326 | ENSG00000GRM6     | 0.898551 | 0.604831 | 0.751691 | 0.742995 |        |
| 10327 | ENSG00000SLC13A2  | 0.808081 | 0.721212 | 0.764646 | 0.760606 |        |
| 10328 | ENSG00000PHF23    | 0.933333 | 0.547475 | 0.738721 | 0.746465 |        |
| 10329 | ENSG00000BIN1     | 1        | 0.470707 | 0.741414 | 0.651515 |        |
| 10330 | ENSG00000ZNF37A   | 1        | 0.459831 | 0.720754 | 0.723044 |        |
| 10331 | ENSG00000IGFBP6   | 0.957717 | 0.53277  | 0.740486 | 0.715645 |        |
| 10332 | ENSG00000STX16    | 1        | 0.466224 | 0.721669 | 0.692137 |        |
| 10333 | ENSG00000GFPT2    | 0.969697 | 0.518182 | 0.740909 | 0.691919 |        |
| 10334 | ENSG00000GRN      | 1        | 0.489899 | 0.745791 | 0.670707 |        |
| 10335 | ENSG00000SLC7A60S | 0.966173 | 0.496829 | 0.737844 | 0.715645 |        |
| 10336 | ENSG00000SAFB     | 1        | 0.407071 | 0.70101  | 0.753535 | 0.3773 |
| 10337 | ENSG00000GBGT1    | 1        | 0.465116 | 0.717407 | 0.679704 |        |
| 10338 | ENSG00000CST2     | 0.972727 | 0.491919 | 0.732323 | 0.714141 |        |

|       |                    |          |          |          |          |        |
|-------|--------------------|----------|----------|----------|----------|--------|
| 10339 | ENSG00000ACSL4     | 0.889006 | 0.647992 | 0.768499 | 0.718816 |        |
| 10340 | ENSG00000SAP30L    | 0.957576 | 0.569697 | 0.758081 | 0.678788 |        |
| 10341 | ENSG00000STEAP1    | 0.890909 | 0.619192 | 0.75404  | 0.743434 |        |
| 10342 | ENSG00000HNRNPA1   | 1        | 0.452525 | 0.721212 | 0.694949 |        |
| 10343 | ENSG00000CACNG8    | 0.887879 | 0.649495 | 0.767845 | 0.719192 |        |
| 10344 | ENSG00000APPL2     | 1        | 0.488889 | 0.739394 | 0.641414 |        |
| 10345 | ENSG00000HADHB     | 1        | 0.467677 | 0.723232 | 0.676768 |        |
| 10346 | ENSG00000TRPC7     | 1        | 0.442424 | 0.788552 | 0.673737 |        |
| 10347 | ENSG00000PIGA      | 0.970402 | 0.510571 | 0.740486 | 0.69556  |        |
| 10348 | ENSG00000YKT6      | 1        | 0.465657 | 0.722054 | 0.706061 | 0.3546 |
| 10349 | ENSG00000ZNF671    | 0.957576 | 0.506061 | 0.734848 | 0.751515 |        |
| 10350 | ENSG00000IL20RA    | 1        | 0.490909 | 0.745455 | 0.672727 |        |
| 10351 | ENSG00000TECR      | 1        | 0.452525 | 0.717508 | 0.729293 |        |
| 10352 | ENSG00000ATP2B1    | 1        | 0.470707 | 0.736027 | 0.69596  | 0.3885 |
| 10353 | ENSG00000NOP56     | 1        | 0.516162 | 0.753199 | 0.632323 |        |
| 10354 | ENSG00000FH        | 1        | 0.467677 | 0.734175 | 0.69697  | 0.382  |
| 10355 | ENSG00000TMEM131L  | 1        | 0.488889 | 0.739394 | 0.653535 |        |
| 10356 | ENSG00000ZNF318    | 0.99798  | 0.467677 | 0.773401 | 0.667677 |        |
| 10357 | ENSG00000TAB3      | 0.993939 | 0.477778 | 0.764478 | 0.669697 |        |
| 10358 | ENSG00000MTOR      | 0.929293 | 0.533333 | 0.727273 | 0.783838 |        |
| 10359 | ENSG00000EIF4H     | 0.985859 | 0.50202  | 0.746296 | 0.676768 | 0.2391 |
| 10360 | ENSG00000SPACA1    | 0.981818 | 0.482828 | 0.732323 | 0.714141 |        |
| 10361 | ENSG00000UNC93B1   | 0.962626 | 0.522222 | 0.718855 | 0.734343 |        |
| 10362 | ENSG00000AGFG1     | 0.890909 | 0.654545 | 0.772727 | 0.708081 |        |
| 10363 | ENSG00000ZBTB26    | 0.973737 | 0.482828 | 0.728283 | 0.729293 | 0.217  |
| 10364 | ENSG00000CNPY3     | 0.844961 | 0.672204 | 0.758583 | 0.76412  | 0.2772 |
| 10365 | ENSG00000CD164L2   | 0.808081 | 0.721212 | 0.764646 | 0.762626 |        |
| 10366 | ENSG00000DOCK9     | 1        | 0.482828 | 0.740067 | 0.678788 |        |
| 10367 | ENSG00000TMEM230   | 1        | 0.475758 | 0.736869 | 0.687879 | 0.398  |
| 10368 | ENSG00000ISY1      | 1        | 0.408081 | 0.698316 | 0.722222 |        |
| 10369 | ENSG00000SLC22A2   | 1        | 0.461616 | 0.73064  | 0.69596  |        |
| 10370 | ENSG00000FSHB      | 0.969082 | 0.524638 | 0.744767 | 0.686957 |        |
| 10371 | ENSG00000HEBP2     | 0.915433 | 0.582452 | 0.746476 | 0.750529 |        |
| 10372 | ENSG00000C21orf59  | 0.983838 | 0.50303  | 0.743434 | 0.681818 |        |
| 10373 | ENSG00000DNPEP     | 1        | 0.452525 | 0.727946 | 0.69798  |        |
| 10374 | ENSG00000RASA2     | 0.971717 | 0.50303  | 0.737374 | 0.705051 |        |
| 10375 | ENSG00000MSH6      | 1        | 0.450505 | 0.789899 | 0.644444 |        |
| 10376 | ENSG00000UHRF1BP1L | 0.971717 | 0.474747 | 0.718182 | 0.761616 |        |
| 10377 | ENSG00000HBS1L     | 1        | 0.474747 | 0.73064  | 0.684848 |        |
| 10378 | ENSG00000RBBP4     | 1        | 0.428283 | 0.702357 | 0.728283 |        |
| 10379 | ENSG00000ST6GALNAC | 0.839323 | 0.674419 | 0.743481 | 0.793869 |        |
| 10380 | ENSG00000BCL2L2    | 0.919662 | 0.577167 | 0.745243 | 0.749471 |        |
| 10381 | ENSG00000CAVIN4    | 0.975758 | 0.520202 | 0.754714 | 0.667677 |        |
| 10382 | ENSG00000UBN1      | 0.926004 | 0.582452 | 0.751762 | 0.725159 |        |
| 10383 | ENSG00000SRRM4     | 0.935354 | 0.557576 | 0.746465 | 0.730303 |        |
| 10384 | ENSG00000LTBP4     | 0.923588 | 0.594684 | 0.750831 | 0.722038 |        |
| 10385 | ENSG00000TBPL1     | 0.966173 | 0.544397 | 0.739605 | 0.687104 |        |
| 10386 | ENSG00000PHKA2     | 0.890909 | 0.654545 | 0.772727 | 0.714141 |        |
| 10387 | ENSG00000ISY1-RAB4 | 1        | 0.408081 | 0.698316 | 0.722222 |        |
| 10388 | ENSG00000GNA13     | 0.933333 | 0.579798 | 0.756566 | 0.711111 |        |
| 10389 | ENSG00000GLS2      | 0.893939 | 0.625253 | 0.759596 | 0.734343 |        |
| 10390 | ENSG00000TAPT1     | 0.884848 | 0.646465 | 0.76431  | 0.733333 |        |
| 10391 | ENSG00000RTKN      | 0.937374 | 0.537374 | 0.737374 | 0.756566 |        |
| 10392 | ENSG00000SPATA2L   | 0.935354 | 0.547475 | 0.737374 | 0.750505 |        |
| 10393 | ENSG00000RPH3A     | 0.922222 | 0.612121 | 0.755892 | 0.714141 |        |

|       |                    |          |          |          |          |        |
|-------|--------------------|----------|----------|----------|----------|--------|
| 10394 | ENSG00000MMRN2     | 0.930233 | 0.563425 | 0.745243 | 0.736786 |        |
| 10395 | ENSG00000RAD21     | 1        | 0.461616 | 0.724579 | 0.668687 | 0.513  |
| 10396 | ENSG00000USP47     | 1        | 0.49798  | 0.733838 | 0.618182 | 0.2277 |
| 10397 | ENSG00000HPCA      | 0.967677 | 0.505051 | 0.742761 | 0.708081 |        |
| 10398 | ENSG00000ENDOG     | 0.966667 | 0.546465 | 0.751178 | 0.672727 |        |
| 10399 | ENSG00000CR2       | 1        | 0.452525 | 0.724579 | 0.710101 |        |
| 10400 | ENSG00000SLC9A5    | 0.964646 | 0.552525 | 0.743434 | 0.683838 |        |
| 10401 | ENSG00000ALPPL2    | 1        | 0.447475 | 0.720539 | 0.688889 |        |
| 10402 | ENSG00000H2AFY2    | 1        | 0.482828 | 0.73064  | 0.690909 |        |
| 10403 | ENSG00000LTN1      | 1        | 0.449495 | 0.715993 | 0.664646 |        |
| 10404 | ENSG00000PKIG      | 0.971459 | 0.524313 | 0.746124 | 0.684989 |        |
| 10405 | ENSG00000TMPRSS11E | 0.808081 | 0.721212 | 0.764646 | 0.769697 |        |
| 10406 | ENSG00000CPS1      | 0.937374 | 0.537374 | 0.737374 | 0.759596 |        |
| 10407 | ENSG00000SGK3      | 0.879798 | 0.643434 | 0.760101 | 0.748485 |        |
| 10408 | ENSG00000NCAPG     | 0.925253 | 0.585859 | 0.752525 | 0.727273 |        |
| 10409 | ENSG00000KIF26A    | 1        | 0.450505 | 0.758923 | 0.694949 |        |
| 10410 | ENSG00000EVC       | 1        | 0.443434 | 0.769865 | 0.692929 |        |
| 10411 | ENSG00000CATSPER4  | 0.790941 | 0.743322 | 0.767131 | 0.774681 |        |
| 10412 | ENSG00000PIP5K1B   | 0.935354 | 0.557576 | 0.746465 | 0.734343 |        |
| 10413 | ENSG00000RPS6KA5   | 1        | 0.470707 | 0.738721 | 0.690909 |        |
| 10414 | ENSG00000AGBL3     | 1        | 0.448485 | 0.715825 | 0.70303  |        |
| 10415 | ENSG00000MTHFD2    | 0.963636 | 0.531313 | 0.750842 | 0.692929 |        |
| 10416 | ENSG00000TMEM259   | 0.923232 | 0.615152 | 0.766667 | 0.70101  |        |
| 10417 | ENSG00000ITIH1     | 0.983838 | 0.475758 | 0.731481 | 0.727273 |        |
| 10418 | ENSG00000FAM92B    | 0.808081 | 0.717172 | 0.76229  | 0.778788 |        |
| 10419 | ENSG00000TELO2     | 1        | 0.450505 | 0.718519 | 0.734343 | 0.3475 |
| 10420 | ENSG00000ASB9      | 0.963636 | 0.555556 | 0.737374 | 0.693939 |        |
| 10421 | ENSG00000RPS27A    | 1        | 0.432323 | 0.73266  | 0.7      |        |
| 10422 | ENSG00000KMT2A     | 1        | 0.437374 | 0.766498 | 0.680808 |        |
| 10423 | ENSG00000KITLG     | 0.850505 | 0.678788 | 0.758081 | 0.763636 |        |
| 10424 | ENSG00000ELOA      | 0.934461 | 0.54334  | 0.737315 | 0.760042 |        |
| 10425 | ENSG00000BANF1     | 1        | 0.450505 | 0.708418 | 0.687879 | 0.465  |
| 10426 | ENSG00000TMEM89    | 0.808081 | 0.721212 | 0.764646 | 0.769697 |        |
| 10427 | ENSG00000DNAJB12   | 0.850505 | 0.684848 | 0.767677 | 0.745455 |        |
| 10428 | ENSG00000ZC3H13    | 1        | 0.445455 | 0.79697  | 0.646465 |        |
| 10429 | ENSG00000MT1E      | 0.917172 | 0.589899 | 0.751178 | 0.742424 |        |
| 10430 | ENSG00000CYBRD1    | 0.92691  | 0.616833 | 0.771872 | 0.692137 |        |
| 10431 | ENSG00000EXOSC10   | 1        | 0.449495 | 0.779461 | 0.617172 | 0.379  |
| 10432 | ENSG00000FAM208A   | 1        | 0.444444 | 0.725589 | 0.687879 |        |
| 10433 | ENSG00000EHHADH    | 0.988889 | 0.462626 | 0.755219 | 0.706061 |        |
| 10434 | ENSG00000FATE1     | 0.843552 | 0.713531 | 0.778541 | 0.732558 |        |
| 10435 | ENSG00000ARPC1A    | 0.846465 | 0.681818 | 0.763636 | 0.758586 |        |
| 10436 | ENSG00000TFPI      | 1        | 0.466667 | 0.72963  | 0.725253 |        |
| 10437 | ENSG00000AC004922. | 0.846465 | 0.681818 | 0.763636 | 0.758586 |        |
| 10438 | ENSG00000ITIH4     | 1        | 0.446465 | 0.722896 | 0.751515 |        |
| 10439 | ENSG00000PRKCD     | 1        | 0.462626 | 0.722559 | 0.674747 |        |
| 10440 | ENSG00000CST4      | 0.971717 | 0.50303  | 0.737374 | 0.713131 |        |
| 10441 | ENSG00000OS9       | 1        | 0.436364 | 0.713805 | 0.731313 | 0.3256 |
| 10442 | ENSG00000NDRG3     | 1        | 0.482828 | 0.738384 | 0.683838 |        |
| 10443 | ENSG00000TSPAN16   | 0.846465 | 0.681818 | 0.763636 | 0.761616 |        |
| 10444 | ENSG00000SUPT6H    | 1        | 0.465657 | 0.72862  | 0.705051 |        |
| 10445 | ENSG00000TYK2      | 0.919662 | 0.639535 | 0.777484 | 0.691332 |        |
| 10446 | ENSG00000PARVG     | 1        | 0.450505 | 0.719529 | 0.705051 |        |
| 10447 | ENSG00000GTF2B     | 0.961616 | 0.526263 | 0.735185 | 0.724242 |        |
| 10448 | ENSG00000GJA4      | 0.933333 | 0.579798 | 0.756566 | 0.714141 |        |

|       |                    |          |          |          |          |        |
|-------|--------------------|----------|----------|----------|----------|--------|
| 10449 | ENSG00000MRPL4     | 0.921212 | 0.643434 | 0.775421 | 0.690909 |        |
| 10450 | ENSG00000CEP120    | 0.957576 | 0.531313 | 0.739057 | 0.732323 |        |
| 10451 | ENSG00000HOXC5     | 0.973737 | 0.482828 | 0.728283 | 0.737374 |        |
| 10452 | ENSG00000PRPF38A   | 0.969697 | 0.527273 | 0.755556 | 0.680808 |        |
| 10453 | ENSG00000GRIA1     | 0.980808 | 0.475758 | 0.728283 | 0.734343 |        |
| 10454 | ENSG00000CAST      | 1        | 0.485859 | 0.724579 | 0.659596 |        |
| 10455 | ENSG00000CACNA1S   | 0.960606 | 0.528283 | 0.733502 | 0.730303 |        |
| 10456 | ENSG00000NDRG4     | 0.839323 | 0.711416 | 0.775018 | 0.743129 |        |
| 10457 | ENSG00000URI1      | 0.887879 | 0.645455 | 0.760269 | 0.743434 |        |
| 10458 | ENSG00000GCSH      | 0.935354 | 0.557576 | 0.746465 | 0.737374 |        |
| 10459 | ENSG00000TEC       | 0.919662 | 0.636364 | 0.770965 | 0.698732 |        |
| 10460 | ENSG00000SPPL2A    | 0.890909 | 0.649495 | 0.764478 | 0.730303 |        |
| 10461 | ENSG00000LING03    | 0.850505 | 0.677778 | 0.757407 | 0.766667 |        |
| 10462 | ENSG00000ZNF800    | 0.929125 | 0.589147 | 0.757475 | 0.716501 |        |
| 10463 | ENSG00000ROCK2     | 1        | 0.443434 | 0.713131 | 0.729293 |        |
| 10464 | ENSG00000METTL24   | 1        | 0.478788 | 0.730303 | 0.708081 |        |
| 10465 | ENSG00000ISG20L2   | 1        | 0.467677 | 0.729966 | 0.675758 |        |
| 10466 | ENSG00000SLC15A5   | 0.890909 | 0.654545 | 0.772727 | 0.717172 |        |
| 10467 | ENSG00000SIX4      | 0.931313 | 0.59596  | 0.758923 | 0.709091 |        |
| 10468 | ENSG00000UBR2      | 1        | 0.447475 | 0.734175 | 0.738384 | 0.3147 |
| 10469 | ENSG00000JAK1      | 0.929125 | 0.590255 | 0.75969  | 0.714286 |        |
| 10470 | ENSG00000PBXIP1    | 0.933333 | 0.579798 | 0.756566 | 0.717172 |        |
| 10471 | ENSG00000MGAT3     | 0.917172 | 0.589899 | 0.751178 | 0.748485 |        |
| 10472 | ENSG00000AC126283. | 1        | 0.428283 | 0.73367  | 0.660606 |        |
| 10473 | ENSG00000CCDC88A   | 0.973737 | 0.482828 | 0.728283 | 0.743434 |        |
| 10474 | ENSG00000TLN1      | 0.965657 | 0.557576 | 0.747306 | 0.680808 |        |
| 10475 | ENSG00000EDC4      | 0.887879 | 0.649495 | 0.767845 | 0.733333 |        |
| 10476 | ENSG00000GPRIN3    | 0.971717 | 0.466667 | 0.728283 | 0.765657 |        |
| 10477 | ENSG00000ASB13     | 0.929293 | 0.588889 | 0.753199 | 0.721212 |        |
| 10478 | ENSG00000SIRT4     | 1        | 0.461616 | 0.724579 | 0.728283 |        |
| 10479 | ENSG00000SNF8      | 0.929293 | 0.59596  | 0.761279 | 0.709091 |        |
| 10480 | ENSG00000ANXA13    | 0.975758 | 0.467677 | 0.735185 | 0.747475 |        |
| 10481 | ENSG00000AC092718. | 0.935354 | 0.557576 | 0.746465 | 0.737374 |        |
| 10482 | ENSG00000DAAM1     | 0.958586 | 0.562626 | 0.750842 | 0.69798  |        |
| 10483 | ENSG00000AHCTF1    | 0.955556 | 0.531313 | 0.743434 | 0.739394 | 0.2651 |
| 10484 | ENSG00000ALOX5AP   | 0.890909 | 0.647475 | 0.762963 | 0.735354 |        |
| 10485 | ENSG00000TMEM139   | 1        | 0.461616 | 0.724579 | 0.661616 |        |
| 10486 | ENSG00000PIP5K1C   | 0.927273 | 0.589899 | 0.756229 | 0.720202 |        |
| 10487 | ENSG00000IL12A     | 0.890909 | 0.654545 | 0.772727 | 0.719192 |        |
| 10488 | ENSG00000SLC6A3    | 1        | 0.43285  | 0.712077 | 0.732367 |        |
| 10489 | ENSG00000HBA2      | 0.975758 | 0.525253 | 0.761616 | 0.667677 |        |
| 10490 | ENSG00000AC092718. | 0.935354 | 0.557576 | 0.746465 | 0.737374 |        |
| 10491 | ENSG00000C17orf107 | 0.850505 | 0.678788 | 0.758081 | 0.768687 |        |
| 10492 | ENSG00000TMEM200A  | 0.890909 | 0.654545 | 0.772727 | 0.720202 |        |
| 10493 | ENSG00000CAMK2N1   | 0.887043 | 0.641196 | 0.76412  | 0.745293 |        |
| 10494 | ENSG00000IGSF23    | 0.966667 | 0.49596  | 0.729293 | 0.739394 |        |
| 10495 | ENSG00000ATP2C1    | 1        | 0.505051 | 0.740741 | 0.677778 | 0.2291 |
| 10496 | ENSG00000CAMK2N2   | 0.887043 | 0.641196 | 0.76412  | 0.745293 |        |
| 10497 | ENSG00000ANGPT4    | 1        | 0.491919 | 0.743098 | 0.673737 |        |
| 10498 | ENSG00000LDOC1     | 0.933333 | 0.579798 | 0.756566 | 0.718182 |        |
| 10499 | ENSG00000FMNL3     | 0.977778 | 0.466667 | 0.722222 | 0.766667 |        |
| 10500 | ENSG00000ZNF219    | 0.958586 | 0.540404 | 0.744949 | 0.717172 |        |
| 10501 | ENSG00000RASA3     | 0.973737 | 0.482828 | 0.728283 | 0.741414 |        |
| 10502 | ENSG00000IFNGR2    | 0.875969 | 0.671096 | 0.773533 | 0.733112 |        |
| 10503 | ENSG00000GEM       | 0.939394 | 0.579798 | 0.758249 | 0.712121 |        |

|       |                   |          |          |          |          |        |
|-------|-------------------|----------|----------|----------|----------|--------|
| 10504 | ENSG00000BDKRB1   | 0.881818 | 0.645455 | 0.762121 | 0.755556 | 0.3468 |
| 10505 | ENSG00000GLIPR1L2 | 0.975758 | 0.470707 | 0.723232 | 0.760606 |        |
| 10506 | ENSG00000SLC6A17  | 0.850505 | 0.684848 | 0.767677 | 0.752525 |        |
| 10507 | ENSG00000MST01    | 1        | 0.4926   | 0.7463   | 0.651163 |        |
| 10508 | ENSG00000AADAT    | 0.893939 | 0.625253 | 0.759596 | 0.747475 |        |
| 10509 | ENSG00000TMEM234  | 0.84778  | 0.678647 | 0.763214 | 0.770613 |        |
| 10510 | ENSG00000UCHL3    | 1        | 0.447475 | 0.785185 | 0.663636 |        |
| 10511 | ENSG00000CLEC4M   | 0.983838 | 0.50303  | 0.743434 | 0.694949 |        |
| 10512 | ENSG00000HSPA12B  | 1        | 0.482828 | 0.770034 | 0.633333 |        |
| 10513 | ENSG00000H2AFZ    | 0.961616 | 0.550505 | 0.744276 | 0.70101  |        |
| 10514 | ENSG00000NDUFA1   | 0.932347 | 0.572939 | 0.752643 | 0.729387 |        |
| 10515 | ENSG00000SOBP     | 0.960606 | 0.526263 | 0.732155 | 0.737374 |        |
| 10516 | ENSG00000NDUF6    | 1        | 0.452525 | 0.719865 | 0.69596  |        |
| 10517 | ENSG00000LAMA3    | 0.987879 | 0.479798 | 0.741919 | 0.713131 |        |
| 10518 | ENSG00000AQP12A   | 0.850505 | 0.684848 | 0.767677 | 0.754545 |        |
| 10519 | ENSG00000PEX3     | 0.970707 | 0.516162 | 0.743434 | 0.707071 |        |
| 10520 | ENSG00000NAP1L4   | 0.975758 | 0.50404  | 0.75     | 0.693939 |        |
| 10521 | ENSG00000S100A12  | 0.929293 | 0.578788 | 0.727441 | 0.770707 |        |
| 10522 | ENSG00000PDP1     | 1        | 0.466667 | 0.72963  | 0.667677 | 0.4921 |
| 10523 | ENSG00000ELSPBP1  | 0.966667 | 0.49798  | 0.735017 | 0.734343 |        |
| 10524 | ENSG00000AQP12B   | 0.850505 | 0.684848 | 0.767677 | 0.754545 |        |
| 10525 | ENSG00000ZNF383   | 0.893939 | 0.625253 | 0.759596 | 0.745455 |        |
| 10526 | ENSG00000ALPK1    | 1        | 0.475758 | 0.73468  | 0.709091 |        |
| 10527 | ENSG00000NT5DC2   | 0.890909 | 0.654545 | 0.772727 | 0.723232 |        |
| 10528 | ENSG00000GTF3C1   | 0.971717 | 0.519192 | 0.743098 | 0.70303  |        |
| 10529 | ENSG00000WRNIP1   | 1        | 0.452525 | 0.715825 | 0.727273 |        |
| 10530 | ENSG00000MALSU1   | 1        | 0.470707 | 0.717508 | 0.683838 |        |
| 10531 | ENSG00000ABHD15   | 0.921776 | 0.571882 | 0.739253 | 0.772727 |        |
| 10532 | ENSG00000PCSK6    | 0.850505 | 0.684848 | 0.767677 | 0.756566 |        |
| 10533 | ENSG00000ZNF43    | 0.808081 | 0.721212 | 0.764646 | 0.781818 |        |
| 10534 | ENSG00000RNF149   | 0.893939 | 0.625253 | 0.759596 | 0.747475 |        |
| 10535 | ENSG00000FAAP24   | 1        | 0.426263 | 0.706397 | 0.768687 |        |
| 10536 | ENSG00000PTH1R    | 0.92389  | 0.637421 | 0.768675 | 0.697674 |        |
| 10537 | ENSG00000BARX2    | 0.846465 | 0.679798 | 0.756397 | 0.781818 |        |
| 10538 | ENSG00000PGLS     | 1        | 0.476768 | 0.797306 | 0.620202 |        |
| 10539 | ENSG00000THAP12   | 0.972516 | 0.483087 | 0.730092 | 0.7463   |        |
| 10540 | ENSG00000EPB41L4B | 0.931313 | 0.570707 | 0.749495 | 0.737374 |        |
| 10541 | ENSG00000PROKR2   | 0.890909 | 0.654545 | 0.772727 | 0.727273 |        |
| 10542 | ENSG00000CHURC1   | 0.972727 | 0.508081 | 0.73771  | 0.712121 |        |
| 10543 | ENSG00000HPRT1    | 1        | 0.469697 | 0.724242 | 0.670707 |        |
| 10544 | ENSG00000BOLL     | 1        | 0.440404 | 0.710101 | 0.727273 |        |
| 10545 | ENSG00000FAM98A   | 0.984848 | 0.491919 | 0.755219 | 0.690909 |        |
| 10546 | ENSG00000YPEL2    | 1        | 0.465657 | 0.722054 | 0.669697 |        |
| 10547 | ENSG00000SEC14L2  | 0.918051 | 0.637874 | 0.775563 | 0.704319 |        |
| 10548 | ENSG00000SH3GLB1  | 1        | 0.474747 | 0.73064  | 0.710101 |        |
| 10549 | ENSG00000LMBRD1   | 0.885835 | 0.642706 | 0.76339  | 0.751586 |        |
| 10550 | ENSG00000TCFL5    | 0.960888 | 0.523256 | 0.735729 | 0.733615 |        |
| 10551 | ENSG00000HNRNP2   | 1        | 0.489899 | 0.738215 | 0.665657 |        |
| 10552 | ENSG00000TVP23A   | 0.893939 | 0.625253 | 0.759596 | 0.748485 |        |
| 10553 | ENSG00000GUCA2A   | 0.843552 | 0.713531 | 0.778541 | 0.743129 |        |
| 10554 | ENSG00000OXCT1    | 0.973737 | 0.482828 | 0.728283 | 0.751515 |        |
| 10555 | ENSG00000CD5      | 0.980808 | 0.475758 | 0.728283 | 0.745455 |        |
| 10556 | ENSG00000NLRP14   | 0.808081 | 0.721212 | 0.764646 | 0.785859 |        |
| 10557 | ENSG00000MTX3     | 0.928118 | 0.616279 | 0.767089 | 0.70296  |        |
| 10558 | ENSG00000ACTL7B   | 0.969697 | 0.50202  | 0.733502 | 0.730303 |        |

|       |                    |          |          |          |          |        |        |
|-------|--------------------|----------|----------|----------|----------|--------|--------|
| 10559 | ENSG00000MYH8      | 0.935354 | 0.557576 | 0.746465 | 0.747475 |        |        |
| 10560 | ENSG00000PCNT      | 0.968687 | 0.526263 | 0.740404 | 0.708081 |        |        |
| 10561 | ENSG00000SSH2      | 1        | 0.447475 | 0.720034 | 0.716162 |        |        |
| 10562 | ENSG00000PQBP1     | 1        | 0.470707 | 0.73468  | 0.707071 |        |        |
| 10563 | ENSG00000ULK4      | 0.929293 | 0.583838 | 0.745791 | 0.740404 |        |        |
| 10564 | ENSG00000GDF9      | 0.840532 | 0.707641 | 0.774086 | 0.753045 |        |        |
| 10565 | ENSG00000SDF2L1    | 0.890909 | 0.654545 | 0.772727 | 0.728283 |        |        |
| 10566 | ENSG00000P2RY12    | 0.987879 | 0.5      | 0.763636 | 0.675758 |        |        |
| 10567 | ENSG00000SLC35B4   | 0.884848 | 0.646465 | 0.76431  | 0.749495 |        |        |
| 10568 | ENSG00000FNDC5     | 0.850505 | 0.648485 | 0.748822 | 0.809091 |        |        |
| 10569 | ENSG00000SHCBP1L   | 0.982828 | 0.491919 | 0.737374 | 0.714141 |        |        |
| 10570 | ENSG00000COQ8B     | 1        | 0.485859 | 0.724579 | 0.690909 |        |        |
| 10571 | ENSG00000LTA       | 0.893939 | 0.625253 | 0.759596 | 0.748485 |        |        |
| 10572 | ENSG00000LAMTOR3   | 0.890909 | 0.649495 | 0.764478 | 0.740404 |        |        |
| 10573 | ENSG00000LYSMD2    | 0.964646 | 0.540404 | 0.74798  | 0.69697  |        |        |
| 10574 | ENSG00000TRAPPC12  | 0.981818 | 0.482828 | 0.732323 | 0.731313 | 0.3759 |        |
| 10575 | ENSG00000DCD       | 0.850505 | 0.684848 | 0.767677 | 0.760606 |        |        |
| 10576 | ENSG00000TRMT2A    | 0.98203  | 0.470402 | 0.721635 | 0.763214 |        | 0.2447 |
| 10577 | ENSG00000SLC37A2   | 0.893939 | 0.625253 | 0.759596 | 0.753535 |        |        |
| 10578 | ENSG00000PLCD3     | 0.926004 | 0.616279 | 0.769908 | 0.706131 |        |        |
| 10579 | ENSG00000LIMS1     | 0.969697 | 0.531313 | 0.750505 | 0.690909 |        |        |
| 10580 | ENSG00000GRINA     | 1        | 0.449495 | 0.727273 | 0.675758 |        |        |
| 10581 | ENSG00000ZKSCAN5   | 0.971717 | 0.475758 | 0.721044 | 0.774747 |        |        |
| 10582 | ENSG00000MON1B     | 0.890909 | 0.654545 | 0.772727 | 0.730303 |        |        |
| 10583 | ENSG00000IST1      | 1        | 0.427273 | 0.714478 | 0.712121 | 0.288  |        |
| 10584 | ENSG00000CYP2E1    | 0.973737 | 0.489899 | 0.734175 | 0.736364 |        |        |
| 10585 | ENSG00000HSF1      | 1        | 0.481818 | 0.737879 | 0.631313 |        |        |
| 10586 | ENSG00000RRN3      | 0.963636 | 0.528283 | 0.737542 | 0.724242 |        |        |
| 10587 | ENSG00000NFS1      | 1        | 0.416162 | 0.694276 | 0.735354 |        |        |
| 10588 | ENSG00000ZC3H11B   | 1        | 0.466667 | 0.784512 | 0.592929 |        |        |
| 10589 | ENSG00000RIOX2     | 0.99899  | 0.465657 | 0.802357 | 0.665657 |        | 0.2124 |
| 10590 | ENSG00000CCDC47    | 0.850505 | 0.684848 | 0.767677 | 0.763636 | 0.365  |        |
| 10591 | ENSG00000P3H1      | 0.969697 | 0.531313 | 0.750505 | 0.693939 |        |        |
| 10592 | ENSG00000ST13      | 1        | 0.443434 | 0.769865 | 0.7      |        |        |
| 10593 | ENSG00000VWA5B2    | 1        | 0.463636 | 0.737879 | 0.677778 |        |        |
| 10594 | ENSG00000RPL17-C18 | 1        | 0.476768 | 0.721549 | 0.644444 |        |        |
| 10595 | ENSG00000CDK11A    | 1        | 0.466667 | 0.743434 | 0.719192 |        |        |
| 10596 | ENSG00000KCNJ15    | 0.890909 | 0.654545 | 0.772727 | 0.729293 |        |        |
| 10597 | ENSG00000SIRPB2    | 1        | 0.457576 | 0.724747 | 0.666667 |        |        |
| 10598 | ENSG00000PCDHB8    | 0.962626 | 0.560606 | 0.756902 | 0.684848 |        |        |
| 10599 | ENSG00000OPRPN     | 0.893939 | 0.625253 | 0.759596 | 0.753535 |        |        |
| 10600 | ENSG00000PEPD      | 0.850505 | 0.684848 | 0.767677 | 0.764646 |        |        |
| 10601 | ENSG00000ANO10     | 0.893939 | 0.625253 | 0.759596 | 0.754545 |        |        |
| 10602 | ENSG00000DID01     | 1        | 0.476768 | 0.723906 | 0.717172 |        |        |
| 10603 | ENSG00000FBN1      | 0.985859 | 0.447475 | 0.73771  | 0.762626 |        |        |
| 10604 | ENSG00000ZNF296    | 0.956566 | 0.518182 | 0.735185 | 0.770707 |        |        |
| 10605 | ENSG00000RFX4      | 0.885835 | 0.679704 | 0.78277  | 0.72093  |        |        |
| 10606 | ENSG00000SIRPD     | 0.799154 | 0.7537   | 0.776427 | 0.773784 |        |        |
| 10607 | ENSG00000ZNF547    | 0.890909 | 0.619192 | 0.75404  | 0.772727 |        |        |
| 10608 | ENSG00000HNRNPH1   | 1        | 0.479798 | 0.731481 | 0.653535 |        |        |
| 10609 | ENSG00000FXVD2     | 0.850505 | 0.684848 | 0.767677 | 0.765657 |        |        |
| 10610 | ENSG00000DNAJC13   | 1        | 0.463636 | 0.723232 | 0.70303  |        |        |
| 10611 | ENSG00000KIF15     | 0.99596  | 0.551515 | 0.786195 | 0.621212 |        |        |
| 10612 | ENSG00000MT-ND3    | 0.930233 | 0.597252 | 0.763742 | 0.715645 |        |        |
| 10613 | ENSG00000NCOA7     | 0.99899  | 0.433333 | 0.775253 | 0.721212 |        |        |



|       |                    |          |          |          |          |        |
|-------|--------------------|----------|----------|----------|----------|--------|
| 10614 | ENSG00000SNX1      | 0.890909 | 0.654545 | 0.772727 | 0.734343 |        |
| 10615 | ENSG00000GPR153    | 0.889006 | 0.647992 | 0.768499 | 0.744186 |        |
| 10616 | ENSG00000PNMA5     | 1        | 0.461616 | 0.717677 | 0.669697 |        |
| 10617 | ENSG00000LARP4B    | 0.80303  | 0.758586 | 0.780808 | 0.762626 |        |
| 10618 | ENSG00000DDX60     | 0.966667 | 0.516162 | 0.73468  | 0.731313 |        |
| 10619 | ENSG00000ABCB8     | 0.979798 | 0.479798 | 0.734848 | 0.737374 |        |
| 10620 | ENSG00000LSM6      | 0.959596 | 0.557576 | 0.75101  | 0.705051 |        |
| 10621 | ENSG00000PLD3      | 1        | 0.475758 | 0.733502 | 0.706061 |        |
| 10622 | ENSG00000ZBED6     | 1        | 0.466667 | 0.784512 | 0.592929 |        |
| 10623 | ENSG00000THAP9     | 1        | 0.469697 | 0.713805 | 0.686869 |        |
| 10624 | ENSG00000OR5T3     | 0.931313 | 0.59596  | 0.758923 | 0.719192 |        |
| 10625 | ENSG00000LING04    | 0.930233 | 0.597252 | 0.763742 | 0.716702 |        |
| 10626 | ENSG00000TMC6      | 1        | 0.452525 | 0.727946 | 0.705051 |        |
| 10627 | ENSG00000NEUROD6   | 0.850505 | 0.684848 | 0.767677 | 0.766667 |        |
| 10628 | ENSG00000KCTD13    | 0.959596 | 0.560606 | 0.755387 | 0.69899  |        |
| 10629 | ENSG00000MGAT4A    | 0.933333 | 0.579798 | 0.756566 | 0.732323 |        |
| 10630 | ENSG00000PCDHA1    | 0.890909 | 0.649495 | 0.764478 | 0.744444 |        |
| 10631 | ENSG00000NIPSNAP3A | 0.889006 | 0.647992 | 0.768499 | 0.7463   |        |
| 10632 | ENSG00000RPL17     | 1        | 0.476768 | 0.721549 | 0.644444 |        |
| 10633 | ENSG00000MKRN2     | 1        | 0.50202  | 0.762458 | 0.662626 |        |
| 10634 | ENSG00000EIF4A3    | 0.969697 | 0.518182 | 0.740909 | 0.717172 |        |
| 10635 | ENSG00000FXVD6-FXY | 0.850505 | 0.684848 | 0.767677 | 0.765657 |        |
| 10636 | ENSG00000PKD2      | 0.981818 | 0.482828 | 0.732323 | 0.738384 |        |
| 10637 | ENSG00000RABGAP1   | 0.969697 | 0.531313 | 0.750505 | 0.69899  |        |
| 10638 | ENSG00000NDUFA7    | 0.967677 | 0.507071 | 0.733333 | 0.736364 |        |
| 10639 | ENSG00000AAED1     | 0.933333 | 0.579798 | 0.756566 | 0.731313 |        |
| 10640 | ENSG00000NIPSNAP3B | 0.889006 | 0.647992 | 0.768499 | 0.7463   |        |
| 10641 | ENSG00000TATDN2    | 0.963636 | 0.535354 | 0.744108 | 0.715152 |        |
| 10642 | ENSG00000TCF4      | 0.99697  | 0.49697  | 0.7633   | 0.675758 |        |
| 10643 | ENSG00000C12orf75  | 0.964646 | 0.512121 | 0.732323 | 0.742424 |        |
| 10644 | ENSG00000EPRS      | 0.969697 | 0.531313 | 0.750505 | 0.69798  |        |
| 10645 | ENSG00000TMCC3     | 0.883721 | 0.673311 | 0.778516 | 0.733112 |        |
| 10646 | ENSG00000RERE      | 0.839323 | 0.711416 | 0.775018 | 0.762156 |        |
| 10647 | ENSG00000WDR66     | 1        | 0.465657 | 0.72862  | 0.685859 |        |
| 10648 | ENSG00000PIK3R1    | 1        | 0.476768 | 0.731313 | 0.677778 |        |
| 10649 | ENSG00000STOML3    | 0.846465 | 0.719192 | 0.782828 | 0.743434 | 0.473  |
| 10650 | ENSG00000HS2ST1    | 0.971717 | 0.50303  | 0.737374 | 0.729293 |        |
| 10651 | ENSG00000SQOR      | 0.966667 | 0.508081 | 0.727273 | 0.750505 | 0.2497 |
| 10652 | ENSG00000ALG11     | 0.929293 | 0.623232 | 0.771212 | 0.69899  |        |
| 10653 | ENSG00000WDR90     | 0.933333 | 0.579798 | 0.756566 | 0.732323 |        |
| 10654 | ENSG00000CXorf58   | 1        | 0.434343 | 0.792593 | 0.645455 |        |
| 10655 | ENSG00000SEMA5B    | 0.890909 | 0.654545 | 0.772727 | 0.737374 |        |
| 10656 | ENSG00000RITA1     | 0.992929 | 0.481818 | 0.7633   | 0.694949 |        |
| 10657 | ENSG00000PLCG2     | 1        | 0.471717 | 0.722559 | 0.658586 |        |
| 10658 | ENSG00000LGALS3    | 0.993939 | 0.475758 | 0.755219 | 0.707071 |        |
| 10659 | ENSG00000DEPDC5    | 0.960606 | 0.491919 | 0.726263 | 0.79697  |        |
| 10660 | ENSG00000MAGED2    | 1        | 0.467677 | 0.733502 | 0.720202 | 0.456  |
| 10661 | ENSG00000GGT7      | 0.931313 | 0.570707 | 0.749495 | 0.750505 |        |
| 10662 | ENSG00000LAMB2     | 0.971717 | 0.50303  | 0.737374 | 0.729293 |        |
| 10663 | ENSG00000ENPP1     | 0.980808 | 0.475758 | 0.728283 | 0.753535 |        |
| 10664 | ENSG00000RPS6KL1   | 0.964646 | 0.516162 | 0.784007 | 0.687879 |        |
| 10665 | ENSG00000BTLA      | 1        | 0.443434 | 0.709933 | 0.708081 |        |
| 10666 | ENSG00000PTGDR2    | 0.893939 | 0.625253 | 0.759596 | 0.761616 |        |
| 10667 | ENSG00000ZPR1      | 1        | 0.476768 | 0.723906 | 0.716162 |        |
| 10668 | ENSG00000C1orf21   | 0.957576 | 0.547475 | 0.759596 | 0.721212 |        |

|       |                    |          |          |          |          |        |
|-------|--------------------|----------|----------|----------|----------|--------|
| 10669 | ENSG00000PLEC      | 1        | 0.447475 | 0.720034 | 0.69596  | 0.3171 |
| 10670 | ENSG00000AC093155. | 0.971717 | 0.50303  | 0.737374 | 0.729293 |        |
| 10671 | ENSG00000AVIL      | 0.80303  | 0.758586 | 0.780808 | 0.768687 |        |
| 10672 | ENSG00000RCN3      | 0.969697 | 0.518182 | 0.740909 | 0.721212 |        |
| 10673 | ENSG00000SSR1      | 1        | 0.488889 | 0.744444 | 0.673737 |        |
| 10674 | ENSG00000ABHD5     | 0.99596  | 0.458586 | 0.778451 | 0.70404  |        |
| 10675 | ENSG00000USP40     | 0.890909 | 0.654545 | 0.772727 | 0.739394 |        |
| 10676 | ENSG00000FARSB     | 0.973737 | 0.507071 | 0.735354 | 0.729293 |        |
| 10677 | ENSG00000CEP68     | 1        | 0.5      | 0.739958 | 0.698732 |        |
| 10678 | ENSG00000LCP1      | 0.850505 | 0.684848 | 0.767677 | 0.773737 |        |
| 10679 | ENSG00000TIGD6     | 0.879493 | 0.638478 | 0.7574   | 0.785412 |        |
| 10680 | ENSG00000ZFR       | 0.968992 | 0.51938  | 0.744186 | 0.717608 |        |
| 10681 | ENSG00000PPP1R8    | 1        | 0.470707 | 0.736027 | 0.70303  |        |
| 10682 | ENSG00000TNFRSF13C | 0.971717 | 0.50303  | 0.737374 | 0.731313 |        |
| 10683 | ENSG00000DAZL      | 0.970707 | 0.50202  | 0.73367  | 0.741414 |        |
| 10684 | ENSG00000MUC6      | 0.80303  | 0.758586 | 0.780808 | 0.767677 |        |
| 10685 | ENSG00000ERAL1     | 1        | 0.482828 | 0.73064  | 0.688889 | 0.4289 |
| 10686 | ENSG00000VPS53     | 1        | 0.447475 | 0.720034 | 0.728283 |        |
| 10687 | ENSG00000TOLLIP    | 1        | 0.487315 | 0.734848 | 0.711416 |        |
| 10688 | ENSG00000SLC1A3    | 1        | 0.488889 | 0.744444 | 0.69798  |        |
| 10689 | ENSG00000CDC42BPB  | 0.887879 | 0.649495 | 0.767845 | 0.751515 |        |
| 10690 | ENSG00000PNKP      | 0.883838 | 0.646465 | 0.7633   | 0.770707 |        |
| 10691 | ENSG00000ORC4      | 1        | 0.461794 | 0.730897 | 0.719823 | 0.3548 |
| 10692 | ENSG00000HLA-G     | 0.850505 | 0.684848 | 0.767677 | 0.772727 |        |
| 10693 | ENSG00000GTPBP1    | 1        | 0.539394 | 0.759596 | 0.640404 |        |
| 10694 | ENSG00000LECT2     | 0.890909 | 0.654545 | 0.772727 | 0.738384 |        |
| 10695 | ENSG00000GPR50     | 0.974879 | 0.479227 | 0.727053 | 0.768116 |        |
| 10696 | ENSG00000ABCC3     | 0.968687 | 0.526263 | 0.740404 | 0.721212 | 0.4358 |
| 10697 | ENSG00000KRT77     | 0.880399 | 0.668882 | 0.773902 | 0.747508 |        |
| 10698 | ENSG00000NCMAP     | 0.808081 | 0.721212 | 0.764646 | 0.80303  |        |
| 10699 | ENSG00000PRCC      | 1        | 0.462626 | 0.73569  | 0.692929 |        |
| 10700 | ENSG00000UBTD2     | 1        | 0.478788 | 0.736027 | 0.658586 |        |
| 10701 | ENSG00000RGS8      | 0.885835 | 0.673362 | 0.766913 | 0.748414 |        |
| 10702 | ENSG00000TTC37     | 0.925253 | 0.618182 | 0.769697 | 0.717172 |        |
| 10703 | ENSG00000IFT80     | 0.935354 | 0.557576 | 0.746465 | 0.766667 |        |
| 10704 | ENSG00000FAM50A    | 1        | 0.487315 | 0.742072 | 0.706131 | 0.4851 |
| 10705 | ENSG00000ADORA2A   | 0.970402 | 0.510571 | 0.740486 | 0.72833  |        |
| 10706 | ENSG00000ODF4      | 0.850505 | 0.681818 | 0.765488 | 0.783838 |        |
| 10707 | ENSG00000HKDC1     | 0.933333 | 0.579798 | 0.756566 | 0.738384 |        |
| 10708 | ENSG00000ZNF75A    | 1        | 0.465657 | 0.730135 | 0.687879 |        |
| 10709 | ENSG00000Z82190.2  | 0.960606 | 0.491919 | 0.726263 | 0.79697  |        |
| 10710 | ENSG00000NUDT8     | 0.965657 | 0.518182 | 0.736869 | 0.737374 |        |
| 10711 | ENSG00000ZNF211    | 0.840532 | 0.707641 | 0.774086 | 0.771872 |        |
| 10712 | ENSG00000RBP3      | 0.977778 | 0.467633 | 0.722705 | 0.791304 |        |
| 10713 | ENSG00000RNF187    | 0.961616 | 0.506061 | 0.726768 | 0.778788 | 0.3391 |
| 10714 | ENSG00000SMARCB1   | 1        | 0.450505 | 0.724579 | 0.759596 |        |
| 10715 | ENSG00000TOR1B     | 1        | 0.441414 | 0.785185 | 0.673737 |        |
| 10716 | ENSG00000DDRKG1    | 0.931313 | 0.60404  | 0.767677 | 0.716162 |        |
| 10717 | ENSG00000PTPN20    | 0.991919 | 0.474747 | 0.789562 | 0.685859 |        |
| 10718 | ENSG00000CUBN      | 0.929293 | 0.622222 | 0.769865 | 0.712121 |        |
| 10719 | ENSG00000GADD45B   | 0.963636 | 0.528283 | 0.737542 | 0.737374 |        |
| 10720 | ENSG00000FST       | 0.846465 | 0.719192 | 0.782828 | 0.752525 |        |
| 10721 | ENSG00000NADK2     | 1        | 0.478788 | 0.730303 | 0.680808 | 0.4394 |
| 10722 | ENSG00000EMD       | 1        | 0.448485 | 0.800673 | 0.679798 |        |
| 10723 | ENSG00000KCNJ9     | 0.887043 | 0.641196 | 0.76412  | 0.771872 |        |

|       |           |          |          |          |          |          |        |       |
|-------|-----------|----------|----------|----------|----------|----------|--------|-------|
| 10724 | ENSG00000 | API5     | 0.92389  | 0.610994 | 0.765328 | 0.732558 |        |       |
| 10725 | ENSG00000 | GRXCR2   | 0.850505 | 0.684848 | 0.767677 | 0.778788 |        |       |
| 10726 | ENSG00000 | PRKG2    | 1        | 0.463636 | 0.735185 | 0.7      | 0.3264 |       |
| 10727 | ENSG00000 | NUMB     | 0.928118 | 0.588795 | 0.757047 | 0.745243 |        |       |
| 10728 | ENSG00000 | GFOD1    | 1        | 0.476768 | 0.731313 | 0.685859 |        |       |
| 10729 | ENSG00000 | NAA15    | 0.890909 | 0.654545 | 0.772727 | 0.744444 |        |       |
| 10730 | ENSG00000 | AK3      | 0.927273 | 0.623232 | 0.774074 | 0.710101 |        |       |
| 10731 | ENSG00000 | MKRN20S  | 0.959596 | 0.539394 | 0.749495 | 0.727273 |        |       |
| 10732 | ENSG00000 | FAM189B  | 0.850505 | 0.684848 | 0.767677 | 0.781818 |        |       |
| 10733 | ENSG00000 | TF       | 0.992929 | 0.524242 | 0.779798 | 0.657576 |        |       |
| 10734 | ENSG00000 | PPWD1    | 1        | 0.467677 | 0.729966 | 0.723232 | 0.4314 |       |
| 10735 | ENSG00000 | ADAMTS5  | 1        | 0.488889 | 0.739394 | 0.662626 |        |       |
| 10736 | ENSG00000 | TMEM170B | 0.990909 | 0.485859 | 0.755219 | 0.709091 |        |       |
| 10737 | ENSG00000 | ANKRD18A | 1        | 0.407071 | 0.77037  | 0.686869 |        |       |
| 10738 | ENSG00000 | DES      | 0.890909 | 0.654545 | 0.772727 | 0.744444 |        |       |
| 10739 | ENSG00000 | LTF      | 0.973913 | 0.486957 | 0.730435 | 0.765217 |        |       |
| 10740 | ENSG00000 | CALR     | 1        | 0.446465 | 0.722896 | 0.70101  |        |       |
| 10741 | ENSG00000 | DLGAP4   | 0.919662 | 0.606765 | 0.760395 | 0.749471 |        |       |
| 10742 | ENSG00000 | PDZK1IP1 | 0.926004 | 0.616279 | 0.769908 | 0.723044 |        |       |
| 10743 | ENSG00000 | CRTAP    | 1        | 0.454545 | 0.715152 | 0.708081 |        |       |
| 10744 | ENSG00000 | FCMR     | 0.926004 | 0.616279 | 0.769908 | 0.723044 |        |       |
| 10745 | ENSG00000 | STK33    | 0.968687 | 0.536364 | 0.749158 | 0.709091 |        |       |
| 10746 | ENSG00000 | NRIP1    | 0.921776 | 0.641649 | 0.779951 | 0.711416 |        |       |
| 10747 | ENSG00000 | ST5      | 0.950505 | 0.555556 | 0.755892 | 0.740404 |        |       |
| 10748 | ENSG00000 | RBM17    | 1        | 0.467677 | 0.734175 | 0.705051 |        |       |
| 10749 | ENSG00000 | RXRA     | 1        | 0.450505 | 0.718519 | 0.69596  | 0.2798 | 0.349 |
| 10750 | ENSG00000 | MDC1     | 1        | 0.478858 | 0.738196 | 0.683932 |        |       |
| 10751 | ENSG00000 | SUPV3L1  | 1        | 0.50202  | 0.738721 | 0.651515 |        |       |
| 10752 | ENSG00000 | SMS      | 0.969697 | 0.527273 | 0.755556 | 0.708081 |        |       |
| 10753 | ENSG00000 | KIAA1191 | 0.963636 | 0.537374 | 0.790572 | 0.683838 |        |       |
| 10754 | ENSG00000 | TSPAN12  | 0.887879 | 0.649495 | 0.767845 | 0.764646 |        |       |
| 10755 | ENSG00000 | VSTM4    | 0.986869 | 0.518182 | 0.742256 | 0.705051 |        |       |
| 10756 | ENSG00000 | ZNF83    | 0.972727 | 0.526263 | 0.742761 | 0.717172 | 0.3976 |       |
| 10757 | ENSG00000 | IDI1     | 0.876321 | 0.671247 | 0.772727 | 0.763214 | 0.2836 |       |
| 10758 | ENSG00000 | BLNK     | 1        | 0.449495 | 0.790404 | 0.692929 |        |       |
| 10759 | ENSG00000 | SIAH1    | 0.967677 | 0.528283 | 0.746296 | 0.719192 | 0.495  |       |
| 10760 | ENSG00000 | DIAPH1   | 0.927273 | 0.589899 | 0.756229 | 0.750505 |        |       |
| 10761 | ENSG00000 | PATE1    | 0.844961 | 0.672204 | 0.758583 | 0.816168 |        |       |
| 10762 | ENSG00000 | NUMA1    | 1        | 0.452525 | 0.719865 | 0.732323 | 0.275  |       |
| 10763 | ENSG00000 | E4F1     | 1        | 0.476768 | 0.725589 | 0.679798 |        |       |
| 10764 | ENSG00000 | GGH      | 1        | 0.491919 | 0.743098 | 0.669697 | 0.385  |       |
| 10765 | ENSG00000 | NOP58    | 0.986869 | 0.506061 | 0.744444 | 0.712121 |        |       |
| 10766 | ENSG00000 | DPAGT1   | 0.890909 | 0.654545 | 0.772727 | 0.747475 |        |       |
| 10767 | ENSG00000 | ERCC3    | 1        | 0.468288 | 0.730092 | 0.688161 |        |       |
| 10768 | ENSG00000 | TAB2     | 1        | 0.518182 | 0.75101  | 0.679798 |        |       |
| 10769 | ENSG00000 | OGT      | 1        | 0.461616 | 0.797306 | 0.641414 |        |       |
| 10770 | ENSG00000 | EIF3CL   | 0.963636 | 0.557576 | 0.75303  | 0.70303  |        |       |
| 10771 | ENSG00000 | GSC2     | 0.924242 | 0.614141 | 0.76532  | 0.734343 |        |       |
| 10772 | ENSG00000 | FEM1B    | 0.993939 | 0.510101 | 0.784848 | 0.663636 |        |       |
| 10773 | ENSG00000 | HYLS1    | 0.840532 | 0.707641 | 0.774086 | 0.779623 |        |       |
| 10774 | ENSG00000 | PHGDH    | 1        | 0.447475 | 0.797811 | 0.692929 |        |       |
| 10775 | ENSG00000 | BCHE     | 0.964646 | 0.540404 | 0.74798  | 0.717172 |        |       |
| 10776 | ENSG00000 | ZNF827   | 0.925253 | 0.609091 | 0.75     | 0.753535 |        |       |
| 10777 | ENSG00000 | PGBD1    | 0.958774 | 0.577167 | 0.760395 | 0.705074 |        |       |
| 10778 | ENSG00000 | NCOR2    | 0.954704 | 0.5482   | 0.747967 | 0.753775 |        |       |

|       |                   |          |          |          |          |        |
|-------|-------------------|----------|----------|----------|----------|--------|
| 10779 | ENSG00000HNRNPD   | 0.887879 | 0.649495 | 0.767845 | 0.765657 |        |
| 10780 | ENSG00000ZNF407   | 0.956566 | 0.556566 | 0.759933 | 0.727273 |        |
| 10781 | ENSG00000ADAR     | 1        | 0.478788 | 0.726936 | 0.685859 |        |
| 10782 | ENSG00000PDK1     | 0.970707 | 0.516162 | 0.743434 | 0.729293 |        |
| 10783 | ENSG00000NPTX1    | 0.843552 | 0.710359 | 0.776427 | 0.773784 |        |
| 10784 | ENSG00000TAAR1    | 0.889006 | 0.647992 | 0.768499 | 0.765328 |        |
| 10785 | ENSG00000PPA1     | 0.99697  | 0.479798 | 0.76835  | 0.69899  | 0.3321 |
| 10786 | ENSG00000RPN1     | 1        | 0.466667 | 0.733333 | 0.688889 |        |
| 10787 | ENSG00000C9orf16  | 0.924242 | 0.642424 | 0.765993 | 0.722222 |        |
| 10788 | ENSG00000GPR4     | 0.928118 | 0.623679 | 0.775899 | 0.711416 |        |
| 10789 | ENSG00000CSK      | 0.969697 | 0.518182 | 0.74697  | 0.727273 |        |
| 10790 | ENSG00000TMEM14A  | 0.931313 | 0.60404  | 0.767677 | 0.727273 |        |
| 10791 | ENSG00000AMDHD1   | 0.889006 | 0.647992 | 0.768499 | 0.766385 |        |
| 10792 | ENSG00000PDE7A    | 1        | 0.445455 | 0.719192 | 0.69899  |        |
| 10793 | ENSG00000DALRD3   | 1        | 0.446465 | 0.722896 | 0.707071 |        |
| 10794 | ENSG00000PPP1R12A | 0.963636 | 0.564646 | 0.760101 | 0.69697  |        |
| 10795 | ENSG00000ZBTB4    | 0.987879 | 0.543434 | 0.764983 | 0.666667 |        |
| 10796 | ENSG00000MSTN     | 0.846465 | 0.719192 | 0.782828 | 0.761616 |        |
| 10797 | ENSG00000GNL3L    | 0.992929 | 0.506061 | 0.772727 | 0.680808 |        |
| 10798 | ENSG00000CTSA     | 1        | 0.488889 | 0.740067 | 0.718182 |        |
| 10799 | ENSG00000HMCN2    | 0.977778 | 0.508081 | 0.736195 | 0.733333 |        |
| 10800 | ENSG00000MAPT     | 0.994949 | 0.530303 | 0.793434 | 0.644444 |        |
| 10801 | ENSG00000PILRB    | 0.959596 | 0.532323 | 0.738215 | 0.760606 |        |
| 10802 | ENSG00000RAP2A    | 1        | 0.482828 | 0.737037 | 0.69798  |        |
| 10803 | ENSG00000ESAM     | 0.930233 | 0.597252 | 0.763742 | 0.734672 |        |
| 10804 | ENSG00000HIST1H1C | 1        | 0.475758 | 0.72862  | 0.664646 | 0.4127 |
| 10805 | ENSG00000RASAL1   | 0.960606 | 0.552525 | 0.745118 | 0.731313 |        |
| 10806 | ENSG00000KPTN     | 1        | 0.457576 | 0.724747 | 0.744444 |        |
| 10807 | ENSG00000POLR3B   | 1        | 0.467677 | 0.729966 | 0.757576 |        |
| 10808 | ENSG00000MRPS22   | 1        | 0.443434 | 0.713131 | 0.725253 |        |
| 10809 | ENSG00000SEL1L3   | 1        | 0.509091 | 0.754545 | 0.677778 |        |
| 10810 | ENSG00000CAB39    | 0.956566 | 0.556566 | 0.751178 | 0.741414 |        |
| 10811 | ENSG00000GNAS     | 0.99697  | 0.463636 | 0.794444 | 0.69697  |        |
| 10812 | ENSG00000RBMXL2   | 0.983838 | 0.50303  | 0.738721 | 0.726263 |        |
| 10813 | ENSG00000TBC1D22B | 0.993939 | 0.474747 | 0.774411 | 0.707071 |        |
| 10814 | ENSG00000MIF4GD   | 0.927273 | 0.623232 | 0.774074 | 0.718182 |        |
| 10815 | ENSG00000POC1A    | 0.930233 | 0.597252 | 0.763742 | 0.735729 |        |
| 10816 | ENSG00000SIDT1    | 0.890909 | 0.654545 | 0.772727 | 0.757576 |        |
| 10817 | ENSG00000MYPN     | 0.840404 | 0.716162 | 0.778283 | 0.777778 | 0.2834 |
| 10818 | ENSG00000ATG7     | 1        | 0.48203  | 0.738548 | 0.646934 |        |
| 10819 | ENSG00000TSSK1B   | 0.789641 | 0.785412 | 0.787526 | 0.788584 |        |
| 10820 | ENSG00000KIFAP3   | 1        | 0.490909 | 0.736027 | 0.719192 |        |
| 10821 | ENSG00000ZNF597   | 0.879798 | 0.675758 | 0.771044 | 0.765657 |        |
| 10822 | ENSG00000PTPN14   | 1        | 0.466667 | 0.743434 | 0.687879 |        |
| 10823 | ENSG00000SGSM2    | 1        | 0.461616 | 0.724074 | 0.723232 | 0.3162 |
| 10824 | ENSG00000DCT      | 0.981818 | 0.482828 | 0.732323 | 0.763636 |        |
| 10825 | ENSG00000EPG5     | 0.963002 | 0.524313 | 0.747005 | 0.738901 |        |
| 10826 | ENSG00000ATL1     | 0.921212 | 0.643434 | 0.775421 | 0.722222 |        |
| 10827 | ENSG00000NME3     | 0.920266 | 0.634551 | 0.775563 | 0.727575 |        |
| 10828 | ENSG00000SCG3     | 1        | 0.488889 | 0.744444 | 0.70303  |        |
| 10829 | ENSG00000NME2     | 0.920266 | 0.634551 | 0.775563 | 0.727575 |        |
| 10830 | ENSG00000GDF10    | 1        | 0.452525 | 0.718182 | 0.687879 |        |
| 10831 | ENSG00000ATP5F1D  | 0.931313 | 0.60404  | 0.767677 | 0.730303 |        |
| 10832 | ENSG00000TAGLN2   | 0.846465 | 0.719192 | 0.782828 | 0.764646 |        |
| 10833 | ENSG00000ART3     | 0.843552 | 0.713531 | 0.778541 | 0.776956 |        |

|       |                    |          |          |          |          |        |        |
|-------|--------------------|----------|----------|----------|----------|--------|--------|
| 10834 | ENSG00000AMER3     | 0.99596  | 0.39899  | 0.74899  | 0.834343 |        |        |
| 10835 | ENSG00000RFX5      | 1        | 0.475758 | 0.736869 | 0.691919 | 0.3777 | 0.1466 |
| 10836 | ENSG00000LYRM2     | 0.80303  | 0.758586 | 0.780808 | 0.792929 |        |        |
| 10837 | ENSG00000VPS16     | 0.963636 | 0.564646 | 0.760101 | 0.69596  |        |        |
| 10838 | ENSG00000CABYR     | 0.973737 | 0.519192 | 0.746465 | 0.722222 |        |        |
| 10839 | ENSG00000IRA3      | 0.929293 | 0.59596  | 0.761279 | 0.745455 |        |        |
| 10840 | ENSG00000CLCN3     | 0.881818 | 0.679798 | 0.774747 | 0.759596 |        |        |
| 10841 | ENSG00000CD34      | 1        | 0.417172 | 0.772054 | 0.687879 |        |        |
| 10842 | ENSG00000HIST2H2AB | 1        | 0.441414 | 0.713973 | 0.723232 |        |        |
| 10843 | ENSG00000TMLHE     | 0.889006 | 0.647992 | 0.768499 | 0.77167  |        |        |
| 10844 | ENSG00000RAB6B     | 1        | 0.488889 | 0.744444 | 0.666667 |        |        |
| 10845 | ENSG00000OTC       | 0.931313 | 0.60404  | 0.767677 | 0.732323 |        |        |
| 10846 | ENSG00000ZNF624    | 1        | 0.454545 | 0.714141 | 0.70202  |        |        |
| 10847 | ENSG00000SNX5      | 1        | 0.489899 | 0.738215 | 0.716162 | 0.3924 |        |
| 10848 | ENSG00000C3orf20   | 0.921212 | 0.611111 | 0.759091 | 0.760606 |        |        |
| 10849 | ENSG00000PECR      | 1        | 0.475758 | 0.73367  | 0.720202 |        | 0.55   |
| 10850 | ENSG00000GALR2     | 0.928118 | 0.623679 | 0.775899 | 0.716702 |        |        |
| 10851 | ENSG00000SARS      | 0.890909 | 0.654545 | 0.772727 | 0.762626 |        |        |
| 10852 | ENSG00000OR2D3     | 0.963636 | 0.552525 | 0.746633 | 0.721212 |        |        |
| 10853 | ENSG00000STAP2     | 0.985859 | 0.49596  | 0.755892 | 0.713131 |        | 0.443  |
| 10854 | ENSG00000MAP7D2    | 0.986869 | 0.506061 | 0.744444 | 0.718182 |        |        |
| 10855 | ENSG00000TSHZ3     | 1        | 0.470707 | 0.731313 | 0.724242 |        |        |
| 10856 | ENSG00000RPAP3     | 1        | 0.467677 | 0.730303 | 0.766667 |        | 0.3352 |
| 10857 | ENSG00000B9D1      | 0.962626 | 0.590909 | 0.773232 | 0.680808 |        |        |
| 10858 | ENSG00000UNG       | 0.923232 | 0.615152 | 0.766667 | 0.746465 |        |        |
| 10859 | ENSG00000ALPP      | 1        | 0.446465 | 0.722896 | 0.729293 |        |        |
| 10860 | ENSG00000UBE2E2    | 0.994949 | 0.459596 | 0.771044 | 0.727273 |        |        |
| 10861 | ENSG00000DMAC1     | 0.966173 | 0.549683 | 0.75599  | 0.707188 |        |        |
| 10862 | ENSG00000N4BP2     | 0.961616 | 0.582828 | 0.764478 | 0.69697  |        |        |
| 10863 | ENSG00000ZCCHC17   | 0.964646 | 0.540404 | 0.74798  | 0.726263 |        |        |
| 10864 | ENSG00000COMMD3    | 0.917172 | 0.648485 | 0.781145 | 0.727273 |        |        |
| 10865 | ENSG00000MAPKAPK2  | 1        | 0.437374 | 0.766498 | 0.687879 |        |        |
| 10866 | ENSG00000SCUBE2    | 1        | 0.443434 | 0.733502 | 0.706061 |        |        |
| 10867 | ENSG00000SENP2     | 1        | 0.476768 | 0.725589 | 0.693939 |        |        |
| 10868 | ENSG00000PCSK1     | 0.933333 | 0.579798 | 0.756566 | 0.757576 |        |        |
| 10869 | ENSG00000TRIM5     | 1        | 0.487879 | 0.739394 | 0.693939 |        |        |
| 10870 | ENSG00000CERS2     | 0.966667 | 0.538384 | 0.743266 | 0.730303 |        |        |
| 10871 | ENSG00000PEAK1     | 1        | 0.426263 | 0.710438 | 0.757576 |        |        |
| 10872 | ENSG00000CCNA1     | 0.843552 | 0.713531 | 0.778541 | 0.785412 |        |        |
| 10873 | ENSG00000ENTPD1    | 0.963636 | 0.543434 | 0.753535 | 0.723232 |        |        |
| 10874 | ENSG00000TSGA13    | 0.878436 | 0.67759  | 0.778013 | 0.768499 |        |        |
| 10875 | ENSG00000BAG6      | 1        | 0.427273 | 0.787879 | 0.653535 |        |        |
| 10876 | ENSG00000AC068580. | 0.846465 | 0.719192 | 0.782828 | 0.768687 |        |        |
| 10877 | ENSG00000AMFR      | 1        | 0.466667 | 0.72963  | 0.705051 |        |        |
| 10878 | ENSG00000JAG1      | 1        | 0.491919 | 0.743098 | 0.708081 |        |        |
| 10879 | ENSG00000FAM103A1  | 1        | 0.489899 | 0.73771  | 0.662626 | 0.3587 | 0.369  |
| 10880 | ENSG00000HNMT      | 1        | 0.428283 | 0.70404  | 0.792929 | 0.2967 | 0.3581 |
| 10881 | ENSG00000IGSF1     | 0.973913 | 0.486957 | 0.730435 | 0.783575 |        |        |
| 10882 | ENSG00000KCNS3     | 0.922481 | 0.633444 | 0.771502 | 0.733112 |        |        |
| 10883 | ENSG00000ZNF345    | 0.921212 | 0.612121 | 0.759933 | 0.759596 |        |        |
| 10884 | ENSG00000MRPL50    | 0.959596 | 0.535354 | 0.742088 | 0.763636 |        | 0.4717 |
| 10885 | ENSG00000GRAMD2A   | 1        | 0.459596 | 0.718013 | 0.711111 |        |        |
| 10886 | ENSG00000PAK1IP1   | 1        | 0.50101  | 0.750505 | 0.684848 | 0.285  | 0.3673 |
| 10887 | ENSG00000AGK       | 1        | 0.509091 | 0.754545 | 0.69697  |        |        |
| 10888 | ENSG00000ANKRD18B  | 1        | 0.407071 | 0.77037  | 0.686869 |        |        |

|       |                   |          |          |          |          |        |
|-------|-------------------|----------|----------|----------|----------|--------|
| 10889 | ENSG00000STX8     | 0.983838 | 0.50303  | 0.743434 | 0.729293 |        |
| 10890 | ENSG00000RNF213   | 0.964646 | 0.532323 | 0.740741 | 0.744444 |        |
| 10891 | ENSG00000TTLL3    | 0.960606 | 0.558586 | 0.754545 | 0.722222 |        |
| 10892 | ENSG00000PPIL3    | 0.965657 | 0.547475 | 0.753199 | 0.716162 |        |
| 10893 | ENSG00000DUSP15   | 0.846465 | 0.716162 | 0.780808 | 0.778788 |        |
| 10894 | ENSG00000IL4R     | 1        | 0.490909 | 0.745455 | 0.715152 |        |
| 10895 | ENSG00000SOCS1    | 0.956566 | 0.578788 | 0.762121 | 0.727273 |        |
| 10896 | ENSG00000IKZF2    | 0.885835 | 0.679704 | 0.78277  | 0.7537   |        |
| 10897 | ENSG00000CAPN13   | 1        | 0.467677 | 0.730303 | 0.70202  |        |
| 10898 | ENSG00000TUBA3D   | 1        | 0.475758 | 0.738889 | 0.738384 |        |
| 10899 | ENSG00000FAM71A   | 0.836364 | 0.715152 | 0.775758 | 0.79899  |        |
| 10900 | ENSG00000FABP7    | 1        | 0.459596 | 0.750842 | 0.683838 |        |
| 10901 | ENSG00000RALGAPA2 | 1        | 0.446465 | 0.748822 | 0.679798 |        |
| 10902 | ENSG00000PRTN3    | 0.967677 | 0.528283 | 0.746296 | 0.733333 |        |
| 10903 | ENSG00000INO80E   | 0.966667 | 0.546465 | 0.751178 | 0.718182 | 0.3935 |
| 10904 | ENSG00000LRRC56   | 0.92389  | 0.645877 | 0.783827 | 0.718816 |        |
| 10905 | ENSG00000TDRD3    | 1        | 0.482828 | 0.737037 | 0.733333 |        |
| 10906 | ENSG00000IGDCC4   | 0.926004 | 0.605708 | 0.754405 | 0.765328 |        |
| 10907 | ENSG00000KBTBD3   | 0.846465 | 0.719192 | 0.782828 | 0.774747 |        |
| 10908 | ENSG00000KLHDC4   | 0.926004 | 0.65222  | 0.789112 | 0.707188 |        |
| 10909 | ENSG00000SIRT3    | 1        | 0.470707 | 0.73468  | 0.709091 |        |
| 10910 | ENSG00000S1PR1    | 0.960606 | 0.582828 | 0.763973 | 0.705051 |        |
| 10911 | ENSG00000XPNPEP3  | 0.929293 | 0.630303 | 0.779798 | 0.716162 |        |
| 10912 | ENSG00000ABCA1    | 0.955603 | 0.549683 | 0.748943 | 0.765328 |        |
| 10913 | ENSG00000ADD3     | 1        | 0.488889 | 0.731987 | 0.691919 |        |
| 10914 | ENSG00000ZNF620   | 1        | 0.434343 | 0.712458 | 0.745455 | 0.281  |
| 10915 | ENSG00000GRAMD1B  | 0.962626 | 0.560606 | 0.756902 | 0.718182 |        |
| 10916 | ENSG00000CDC23    | 0.948485 | 0.612121 | 0.784175 | 0.706061 |        |
| 10917 | ENSG00000GLB1     | 0.965657 | 0.578788 | 0.770539 | 0.687879 |        |
| 10918 | ENSG00000BTN3A2   | 0.884848 | 0.681818 | 0.78266  | 0.754545 |        |
| 10919 | ENSG00000TANK     | 1        | 0.475758 | 0.738889 | 0.705051 | 0.3979 |
| 10920 | ENSG00000MLXIP    | 1        | 0.466667 | 0.727609 | 0.69596  |        |
| 10921 | ENSG00000VPS36    | 1        | 0.488889 | 0.744444 | 0.688889 |        |
| 10922 | ENSG00000TOR3A    | 0.966667 | 0.556566 | 0.759764 | 0.706061 |        |
| 10923 | ENSG00000TNNC2    | 0.970707 | 0.516162 | 0.743434 | 0.747475 |        |
| 10924 | ENSG00000BMP6     | 0.929293 | 0.630303 | 0.779798 | 0.719192 |        |
| 10925 | ENSG00000TAS2R38  | 0.967677 | 0.535354 | 0.754882 | 0.722222 |        |
| 10926 | ENSG00000SYT16    | 1        | 0.509091 | 0.754545 | 0.656566 |        |
| 10927 | ENSG00000CD27     | 0.887879 | 0.685859 | 0.786869 | 0.744444 |        |
| 10928 | ENSG00000RNF26    | 0.923232 | 0.644444 | 0.777104 | 0.729293 |        |
| 10929 | ENSG00000BRIP1    | 0.981417 | 0.487805 | 0.734611 | 0.771196 |        |
| 10930 | ENSG00000TMEM109  | 1        | 0.452525 | 0.718182 | 0.784848 |        |
| 10931 | ENSG00000UBR7     | 0.884848 | 0.678788 | 0.775253 | 0.769697 |        |
| 10932 | ENSG00000NKX3-2   | 1        | 0.488889 | 0.744444 | 0.710101 |        |
| 10933 | ENSG00000EEF1G    | 0.967677 | 0.567677 | 0.767677 | 0.689899 |        |
| 10934 | ENSG00000ABTB1    | 1        | 0.519192 | 0.759596 | 0.666667 |        |
| 10935 | ENSG00000ATP5F1B  | 1        | 0.519192 | 0.759596 | 0.669697 |        |
| 10936 | ENSG00000CCDC151  | 0.843552 | 0.713531 | 0.778541 | 0.793869 |        |
| 10937 | ENSG00000LHX1     | 0.876321 | 0.709302 | 0.792107 | 0.747357 |        |
| 10938 | ENSG00000HTRA2    | 1        | 0.475758 | 0.735354 | 0.728283 |        |
| 10939 | ENSG00000SLC28A3  | 0.966667 | 0.528283 | 0.747475 | 0.736364 |        |
| 10940 | ENSG00000EXOG     | 0.931313 | 0.60404  | 0.767677 | 0.741414 |        |
| 10941 | ENSG00000RWDD1    | 1        | 0.50202  | 0.738721 | 0.70303  |        |
| 10942 | ENSG00000TEDC1    | 1        | 0.476768 | 0.731313 | 0.676768 | 0.4254 |
| 10943 | ENSG00000PCOLCE   | 0.931313 | 0.60404  | 0.767677 | 0.744444 |        |

|       |                   |          |          |          |          |        |        |
|-------|-------------------|----------|----------|----------|----------|--------|--------|
| 10944 | ENSG00000PCMT1    | 0.963995 | 0.557491 | 0.758808 | 0.715447 |        |        |
| 10945 | ENSG00000UQCRQ    | 0.928118 | 0.623679 | 0.775899 | 0.72833  |        |        |
| 10946 | ENSG00000OR10Q1   | 0.929293 | 0.623232 | 0.771212 | 0.730303 |        |        |
| 10947 | ENSG00000COL17A1  | 0.957576 | 0.537374 | 0.747475 | 0.778788 |        |        |
| 10948 | ENSG00000SPDYA    | 0.930233 | 0.597252 | 0.763742 | 0.7537   |        |        |
| 10949 | ENSG00000RGP1     | 0.968687 | 0.548485 | 0.758586 | 0.713131 |        |        |
| 10950 | ENSG00000PTPN13   | 0.883721 | 0.673311 | 0.778516 | 0.771872 |        |        |
| 10951 | ENSG00000TTC23    | 1        | 0.509091 | 0.748485 | 0.692929 |        |        |
| 10952 | ENSG00000ATP8A1   | 0.890909 | 0.654545 | 0.772727 | 0.774747 |        |        |
| 10953 | ENSG00000PSEN1    | 1        | 0.50101  | 0.750505 | 0.707071 |        |        |
| 10954 | ENSG00000RHOT1    | 1        | 0.476768 | 0.753535 | 0.69798  | 0.3983 | 0.2262 |
| 10955 | ENSG00000PKM      | 1        | 0.519192 | 0.753872 | 0.693939 |        |        |
| 10956 | ENSG00000ANKLE2   | 0.846465 | 0.719192 | 0.782828 | 0.782828 |        |        |
| 10957 | ENSG00000EML5     | 0.970402 | 0.542283 | 0.749471 | 0.723044 |        |        |
| 10958 | ENSG00000NFKBIA   | 0.965657 | 0.562626 | 0.754377 | 0.716162 | 0.539  |        |
| 10959 | ENSG00000ZNF267   | 0.968687 | 0.518182 | 0.741246 | 0.754545 |        |        |
| 10960 | ENSG00000AMBP     | 0.989899 | 0.518182 | 0.764141 | 0.69899  |        |        |
| 10961 | ENSG00000CALCOCO1 | 1        | 0.470707 | 0.73468  | 0.768687 |        |        |
| 10962 | ENSG00000TBXAS1   | 0.969697 | 0.518182 | 0.74697  | 0.747475 |        |        |
| 10963 | ENSG00000SFXN1    | 0.887879 | 0.685859 | 0.786869 | 0.747475 |        |        |
| 10964 | ENSG00000PRSS48   | 0.927273 | 0.623232 | 0.774074 | 0.732323 |        |        |
| 10965 | ENSG00000PLXNA1   | 1        | 0.518182 | 0.764983 | 0.665657 |        |        |
| 10966 | ENSG00000SULT4A1  | 0.884848 | 0.716162 | 0.780303 | 0.749495 |        |        |
| 10967 | ENSG00000CTTN     | 0.962626 | 0.580808 | 0.760101 | 0.709091 | 0.2539 |        |
| 10968 | ENSG00000HAUS1    | 0.964646 | 0.562626 | 0.756902 | 0.714141 |        | 0.3473 |
| 10969 | ENSG00000PNPLA2   | 0.965657 | 0.547475 | 0.753199 | 0.726263 |        |        |
| 10970 | ENSG00000ITFG2    | 1        | 0.527273 | 0.776431 | 0.652525 | 0.4232 |        |
| 10971 | ENSG00000EIF3H    | 1        | 0.476768 | 0.73468  | 0.705051 |        |        |
| 10972 | ENSG00000ARHGAP23 | 0.977778 | 0.526263 | 0.755051 | 0.715152 |        |        |
| 10973 | ENSG00000DMBX1    | 0.986869 | 0.49596  | 0.73468  | 0.754545 |        |        |
| 10974 | ENSG00000GPN1     | 0.990909 | 0.488889 | 0.775084 | 0.711111 |        |        |
| 10975 | ENSG00000PML      | 1        | 0.452525 | 0.801347 | 0.669697 |        |        |
| 10976 | ENSG00000TTLL4    | 0.923232 | 0.648485 | 0.784175 | 0.726263 |        |        |
| 10977 | ENSG00000HOXB4    | 0.794949 | 0.790909 | 0.792929 | 0.793939 |        |        |
| 10978 | ENSG00000C8orf44  | 0.961616 | 0.558586 | 0.755051 | 0.728283 |        |        |
| 10979 | ENSG00000RHBDF2   | 0.884848 | 0.681818 | 0.78266  | 0.765657 |        |        |
| 10980 | ENSG00000GRAMD2B  | 0.968687 | 0.548485 | 0.758586 | 0.715152 |        |        |
| 10981 | ENSG00000C3orf33  | 1        | 0.453488 | 0.71494  | 0.729387 |        |        |
| 10982 | ENSG00000CDK17    | 0.887879 | 0.685859 | 0.786869 | 0.753535 |        |        |
| 10983 | ENSG00000PEX2     | 1        | 0.474747 | 0.73064  | 0.70202  |        |        |
| 10984 | ENSG00000RNASET2  | 1        | 0.509091 | 0.754545 | 0.706061 |        |        |
| 10985 | ENSG00000CYP2U1   | 1        | 0.482828 | 0.740067 | 0.690909 |        |        |
| 10986 | ENSG00000DDHD2    | 1        | 0.49697  | 0.739057 | 0.725253 |        |        |
| 10987 | ENSG00000CIB2     | 0.929293 | 0.59596  | 0.761279 | 0.764646 |        |        |
| 10988 | ENSG00000FRRS1    | 0.931313 | 0.60404  | 0.767677 | 0.747475 |        |        |
| 10989 | ENSG00000EBAG9    | 1        | 0.50101  | 0.750505 | 0.667677 |        | 0.4348 |
| 10990 | ENSG00000DSN1     | 1        | 0.476768 | 0.73468  | 0.706061 |        |        |
| 10991 | ENSG00000FBX043   | 0.988889 | 0.49798  | 0.73165  | 0.756566 |        |        |
| 10992 | ENSG00000SNRNP70  | 1        | 0.474747 | 0.73771  | 0.739394 |        | 0.2232 |
| 10993 | ENSG00000ZNRF3    | 0.957717 | 0.557082 | 0.753171 | 0.7537   |        |        |
| 10994 | ENSG00000RBFOX2   | 0.973573 | 0.546512 | 0.767794 | 0.700846 |        |        |
| 10995 | ENSG00000KIAA2012 | 0.843552 | 0.713531 | 0.778541 | 0.802326 |        |        |
| 10996 | ENSG00000GANC     | 0.973737 | 0.519192 | 0.746465 | 0.737374 |        |        |
| 10997 | ENSG00000TRDMT1   | 1        | 0.467677 | 0.811279 | 0.676768 |        |        |
| 10998 | ENSG00000ATP6V0D2 | 0.882664 | 0.675476 | 0.778365 | 0.77907  |        |        |

|       |                    |          |          |          |          |        |
|-------|--------------------|----------|----------|----------|----------|--------|
| 10999 | ENSG00000PLEKHA5   | 1        | 0.488889 | 0.739394 | 0.741414 |        |
| 11000 | ENSG00000LRPPRC    | 0.959596 | 0.557576 | 0.75101  | 0.746465 | 0.354  |
| 11001 | ENSG00000MXD1      | 0.965657 | 0.569697 | 0.762121 | 0.709091 |        |
| 11002 | ENSG00000TTC36     | 0.885835 | 0.675476 | 0.774489 | 0.778013 |        |
| 11003 | ENSG00000ALDH5A1   | 0.933333 | 0.579798 | 0.756566 | 0.778788 | 0.498  |
| 11004 | ENSG00000STX4      | 0.885835 | 0.679704 | 0.78277  | 0.768499 |        |
| 11005 | ENSG00000ENG       | 1        | 0.491919 | 0.747643 | 0.709091 |        |
| 11006 | ENSG00000RASSF3    | 1        | 0.431313 | 0.717677 | 0.779798 |        |
| 11007 | ENSG00000PTGES     | 0.846465 | 0.719192 | 0.782828 | 0.790909 |        |
| 11008 | ENSG00000AL358075. | 1        | 0.519192 | 0.753872 | 0.611111 |        |
| 11009 | ENSG00000ADAMTS10  | 0.884848 | 0.681818 | 0.78266  | 0.767677 |        |
| 11010 | ENSG00000TBC1D5    | 0.968687 | 0.548485 | 0.758586 | 0.718182 |        |
| 11011 | ENSG00000PRX       | 0.890909 | 0.649495 | 0.764478 | 0.8      |        |
| 11012 | ENSG00000AGA       | 1        | 0.489899 | 0.738215 | 0.743434 | 0.2814 |
| 11013 | ENSG00000ZFAND2A   | 0.956566 | 0.536364 | 0.743098 | 0.79899  | 0.4781 |
| 11014 | ENSG00000EIF3F     | 0.963455 | 0.604651 | 0.768549 | 0.689922 |        |
| 11015 | ENSG00000ANKRD24   | 1        | 0.481818 | 0.764141 | 0.713131 |        |
| 11016 | ENSG00000IER3IP1   | 0.931313 | 0.60404  | 0.767677 | 0.751515 |        |
| 11017 | ENSG00000KRT84     | 0.887923 | 0.683092 | 0.778744 | 0.765217 |        |
| 11018 | ENSG00000AP3M2     | 1        | 0.488889 | 0.744444 | 0.734343 | 0.2646 |
| 11019 | ENSG00000NNT       | 1        | 0.479798 | 0.729798 | 0.740404 |        |
| 11020 | ENSG00000CD1A      | 0.966667 | 0.526263 | 0.741246 | 0.760606 |        |
| 11021 | ENSG00000ZCCHC13   | 0.887043 | 0.641196 | 0.76412  | 0.815061 |        |
| 11022 | ENSG00000MGLL      | 1        | 0.471717 | 0.779125 | 0.713131 |        |
| 11023 | ENSG00000TRAF6     | 1        | 0.467677 | 0.729966 | 0.70101  |        |
| 11024 | ENSG00000TBC1D17   | 1        | 0.482828 | 0.737037 | 0.735354 |        |
| 11025 | ENSG00000ETV3      | 0.955603 | 0.571882 | 0.76198  | 0.748414 |        |
| 11026 | ENSG00000R3HDML    | 0.887879 | 0.681818 | 0.778788 | 0.770707 |        |
| 11027 | ENSG00000KCNA3     | 0.887879 | 0.685859 | 0.786869 | 0.753535 |        |
| 11028 | ENSG00000NKX6-1    | 0.965657 | 0.547475 | 0.753199 | 0.731313 |        |
| 11029 | ENSG00000OR1L3     | 0.884848 | 0.681818 | 0.78266  | 0.768687 |        |
| 11030 | ENSG00000POLR1D    | 0.961616 | 0.553535 | 0.749327 | 0.743434 |        |
| 11031 | ENSG00000NMU       | 0.925253 | 0.613131 | 0.762458 | 0.768687 |        |
| 11032 | ENSG00000TOPORS    | 1        | 0.469546 | 0.735511 | 0.683278 |        |
| 11033 | ENSG00000RIPPLY3   | 0.959831 | 0.546512 | 0.744891 | 0.765328 |        |
| 11034 | ENSG00000CDC27     | 1        | 0.49798  | 0.75404  | 0.721212 |        |
| 11035 | ENSG00000STEAP3    | 0.927991 | 0.581882 | 0.753194 | 0.796748 |        |
| 11036 | ENSG00000SLC38A2   | 0.887879 | 0.685859 | 0.786869 | 0.756566 |        |
| 11037 | ENSG00000COL1A1    | 0.846465 | 0.719192 | 0.782828 | 0.79596  |        |
| 11038 | ENSG00000TIFA      | 0.966173 | 0.549683 | 0.75599  | 0.726216 |        |
| 11039 | ENSG00000CD37      | 0.967677 | 0.547475 | 0.749832 | 0.732323 |        |
| 11040 | ENSG00000NSD3      | 1        | 0.448485 | 0.720202 | 0.760606 | 0.316  |
| 11041 | ENSG00000TBR1      | 0.927273 | 0.623232 | 0.774074 | 0.742424 |        |
| 11042 | ENSG00000HAND2     | 0.915152 | 0.652525 | 0.782828 | 0.744444 |        |
| 11043 | ENSG00000AMZ1      | 0.931313 | 0.60404  | 0.767677 | 0.752525 |        |
| 11044 | ENSG00000WDR11     | 0.887879 | 0.685859 | 0.786869 | 0.758586 |        |
| 11045 | ENSG00000CRACR2A   | 0.959596 | 0.557576 | 0.75101  | 0.752525 |        |
| 11046 | ENSG00000CAMP      | 0.987879 | 0.479798 | 0.741919 | 0.769697 |        |
| 11047 | ENSG00000NOS1      | 1        | 0.50101  | 0.750505 | 0.713131 |        |
| 11048 | ENSG00000EDNRA     | 1        | 0.490909 | 0.736364 | 0.694949 |        |
| 11049 | ENSG00000FAR1      | 0.879798 | 0.679798 | 0.779125 | 0.785859 |        |
| 11050 | ENSG00000FBXL16    | 0.975758 | 0.531313 | 0.755892 | 0.723232 |        |
| 11051 | ENSG00000SFXN5     | 0.890909 | 0.654545 | 0.772727 | 0.787879 |        |
| 11052 | ENSG00000NR2C1     | 0.880808 | 0.683838 | 0.782323 | 0.776768 |        |
| 11053 | ENSG00000CDIP1     | 0.993658 | 0.577167 | 0.767089 | 0.669133 |        |



|       |                   |          |          |          |          |
|-------|-------------------|----------|----------|----------|----------|
| 11054 | ENSG00000ANP32B   | 1        | 0.50303  | 0.748822 | 0.681818 |
| 11055 | ENSG00000TCF25    | 0.959596 | 0.532323 | 0.738215 | 0.794949 |
| 11056 | ENSG00000TCEA3    | 0.964646 | 0.558586 | 0.756061 | 0.725253 |
| 11057 | ENSG00000TUBGCP4  | 0.967677 | 0.567677 | 0.767677 | 0.705051 |
| 11058 | ENSG00000RNF139   | 0.882664 | 0.713531 | 0.798097 | 0.748414 |
| 11059 | ENSG00000CPA2     | 0.972727 | 0.491919 | 0.732323 | 0.8      |
| 11060 | ENSG00000MNDA     | 0.842424 | 0.717172 | 0.779461 | 0.809091 |
| 11061 | ENSG00000CTNND1   | 1        | 0.488889 | 0.744444 | 0.656566 |
| 11062 | ENSG00000ANKFN1   | 0.959596 | 0.539394 | 0.749495 | 0.769697 |
| 11063 | ENSG00000FHDC1    | 1        | 0.47463  | 0.726216 | 0.735729 |
| 11064 | ENSG00000PSD4     | 0.969697 | 0.527273 | 0.755556 | 0.738384 |
| 11065 | ENSG00000SLC16A3  | 1        | 0.491919 | 0.744276 | 0.692929 |
| 11066 | ENSG00000HOXA10   | 1        | 0.478788 | 0.730303 | 0.675758 |
| 11067 | ENSG00000GNA01    | 0.967677 | 0.535354 | 0.754882 | 0.738384 |
| 11068 | ENSG00000ERP44    | 0.879493 | 0.710359 | 0.794397 | 0.756871 |
| 11069 | ENSG00000RPS6KA2  | 1        | 0.467677 | 0.815488 | 0.694949 |
| 11070 | ENSG00000SUM03    | 1        | 0.422222 | 0.76835  | 0.70202  |
| 11071 | ENSG00000TULP4    | 0.929293 | 0.630303 | 0.779798 | 0.734343 |
| 11072 | ENSG00000HNF4G    | 0.842424 | 0.755556 | 0.79899  | 0.766667 |
| 11073 | ENSG00000LZTS3    | 1        | 0.519192 | 0.753872 | 0.69899  |
| 11074 | ENSG00000MPLKIP   | 0.842424 | 0.755556 | 0.79899  | 0.766667 |
| 11075 | ENSG00000ARV1     | 0.890909 | 0.654545 | 0.772727 | 0.788889 |
| 11076 | ENSG00000CSNK1G2  | 0.976768 | 0.524242 | 0.74798  | 0.736364 |
| 11077 | ENSG00000ACLY     | 1        | 0.448485 | 0.802694 | 0.689899 |
| 11078 | ENSG00000KPNB1    | 0.962626 | 0.554545 | 0.782323 | 0.714141 |
| 11079 | ENSG00000MTFMT    | 0.927273 | 0.623232 | 0.774074 | 0.748485 |
| 11080 | ENSG00000ZNF471   | 0.951515 | 0.582828 | 0.770539 | 0.744444 |
| 11081 | ENSG00000ANP32D   | 1        | 0.50303  | 0.748822 | 0.681818 |
| 11082 | ENSG00000SAA4     | 0.979798 | 0.517172 | 0.754882 | 0.731313 |
| 11083 | ENSG00000PPM1M    | 0.968687 | 0.548485 | 0.758586 | 0.725253 |
| 11084 | ENSG00000MED16    | 0.887879 | 0.685859 | 0.786869 | 0.761616 |
| 11085 | ENSG00000TRIM35   | 1        | 0.50303  | 0.746801 | 0.712121 |
| 11086 | ENSG00000MAVS     | 1        | 0.535354 | 0.750842 | 0.692929 |
| 11087 | ENSG00000C3orf80  | 0.846465 | 0.719192 | 0.782828 | 0.8      |
| 11088 | ENSG00000SRRT     | 0.921212 | 0.616162 | 0.762626 | 0.786869 |
| 11089 | ENSG00000ASIC5    | 0.986869 | 0.506061 | 0.744444 | 0.743434 |
| 11090 | ENSG00000ZNF48    | 0.928118 | 0.623679 | 0.775899 | 0.743129 |
| 11091 | ENSG00000BBS10    | 0.839323 | 0.750529 | 0.794926 | 0.783298 |
| 11092 | ENSG00000NDUFS2   | 1        | 0.490909 | 0.745455 | 0.684848 |
| 11093 | ENSG00000IFIT5    | 0.929293 | 0.630303 | 0.779798 | 0.735354 |
| 11094 | ENSG00000RERGL    | 1        | 0.451515 | 0.722727 | 0.8      |
| 11095 | ENSG00000CCDC91   | 1        | 0.475758 | 0.73468  | 0.739394 |
| 11096 | ENSG00000LHB      | 0.981643 | 0.479227 | 0.730435 | 0.806763 |
| 11097 | ENSG00000PKD1L1   | 1        | 0.50101  | 0.750505 | 0.670707 |
| 11098 | ENSG00000CCDC12   | 0.957576 | 0.59596  | 0.774074 | 0.720202 |
| 11099 | ENSG00000DARS     | 1        | 0.50404  | 0.737879 | 0.713131 |
| 11100 | ENSG00000GOLGA7   | 0.961945 | 0.577167 | 0.795455 | 0.694503 |
| 11101 | ENSG00000ATP9B    | 0.925253 | 0.618182 | 0.769697 | 0.763636 |
| 11102 | ENSG00000DDX6     | 1        | 0.518182 | 0.754209 | 0.690909 |
| 11103 | ENSG00000C21orf91 | 0.983838 | 0.475758 | 0.731481 | 0.807071 |
| 11104 | ENSG00000GOLGA7B  | 0.961945 | 0.577167 | 0.795455 | 0.694503 |
| 11105 | ENSG00000KNG1     | 0.989899 | 0.562626 | 0.769529 | 0.680808 |
| 11106 | ENSG00000NCK1     | 0.928118 | 0.623679 | 0.775899 | 0.745243 |
| 11107 | ENSG00000NMI      | 0.915152 | 0.623232 | 0.768013 | 0.786869 |
| 11108 | ENSG00000DEFA3    | 0.890909 | 0.654545 | 0.772727 | 0.790909 |

|       |                   |          |          |          |          |        |
|-------|-------------------|----------|----------|----------|----------|--------|
| 11109 | ENSG00000CSN1S1   | 0.984541 | 0.508213 | 0.746377 | 0.744928 |        |
| 11110 | ENSG00000DEFA1B   | 0.890909 | 0.654545 | 0.772727 | 0.790909 |        |
| 11111 | ENSG00000ALKBH5   | 0.984496 | 0.51938  | 0.751938 | 0.728682 | 0.4137 |
| 11112 | ENSG00000SLC6A4   | 0.890909 | 0.654545 | 0.772727 | 0.79697  |        |
| 11113 | ENSG00000CYTIP    | 0.968687 | 0.526263 | 0.740404 | 0.769697 |        |
| 11114 | ENSG00000DNAJB6   | 1        | 0.443434 | 0.792593 | 0.727273 |        |
| 11115 | ENSG00000GPT      | 0.994949 | 0.465657 | 0.769024 | 0.751515 |        |
| 11116 | ENSG00000PHOSPHO2 | 1        | 0.473737 | 0.721886 | 0.742424 | 0.25   |
| 11117 | ENSG00000EDEM2    | 1        | 0.50202  | 0.738721 | 0.732323 |        |
| 11118 | ENSG00000AGTPBP1  | 0.965657 | 0.562626 | 0.754377 | 0.730303 |        |
| 11119 | ENSG00000HRASLS   | 0.887879 | 0.685859 | 0.786869 | 0.767677 |        |
| 11120 | ENSG00000VCL      | 0.965657 | 0.562626 | 0.754377 | 0.732323 |        |
| 11121 | ENSG00000STAT3    | 1        | 0.410101 | 0.775084 | 0.726263 |        |
| 11122 | ENSG00000FBXW8    | 1        | 0.497886 | 0.738548 | 0.674419 |        |
| 11123 | ENSG00000NPRL3    | 0.931313 | 0.60404  | 0.767677 | 0.765657 |        |
| 11124 | ENSG00000ZFYVE1   | 0.919192 | 0.657576 | 0.788384 | 0.736364 |        |
| 11125 | ENSG00000BAG5     | 0.869919 | 0.69338  | 0.774487 | 0.803717 |        |
| 11126 | ENSG00000MAP2K2   | 1        | 0.529293 | 0.752862 | 0.675758 |        |
| 11127 | ENSG00000HACD3    | 0.887879 | 0.685859 | 0.786869 | 0.770707 | 0.313  |
| 11128 | ENSG00000INAFM1   | 0.79798  | 0.79798  | 0.79798  | 0.79798  |        |
| 11129 | ENSG00000AASS     | 0.984848 | 0.516162 | 0.750505 | 0.736364 |        |
| 11130 | ENSG00000POTEE    | 1        | 0.490909 | 0.745455 | 0.663636 |        |
| 11131 | ENSG00000IARS2    | 1        | 0.509091 | 0.754545 | 0.715152 |        |
| 11132 | ENSG00000DNAJC3   | 0.964646 | 0.613131 | 0.796633 | 0.672727 |        |
| 11133 | ENSG00000ALPK2    | 1        | 0.437374 | 0.76633  | 0.687879 | 0.3152 |
| 11134 | ENSG00000SLC6A7   | 0.927273 | 0.658586 | 0.792929 | 0.720202 |        |
| 11135 | ENSG00000BCR      | 1        | 0.485482 | 0.734998 | 0.684088 |        |
| 11136 | ENSG00000CCNDBP1  | 0.984848 | 0.516162 | 0.750505 | 0.734343 |        |
| 11137 | ENSG00000MRPL13   | 0.929293 | 0.630303 | 0.779798 | 0.738384 |        |
| 11138 | ENSG00000FBXL7    | 0.885835 | 0.679704 | 0.78277  | 0.784355 |        |
| 11139 | ENSG00000BCKDHB   | 0.887879 | 0.685859 | 0.786869 | 0.771717 |        |
| 11140 | ENSG00000RAD54B   | 0.928118 | 0.623679 | 0.775899 | 0.748414 |        |
| 11141 | ENSG00000MYOCD    | 0.919192 | 0.651515 | 0.784343 | 0.748485 |        |
| 11142 | ENSG00000RTL9     | 0.831924 | 0.7463   | 0.788936 | 0.805497 |        |
| 11143 | ENSG00000MGP      | 0.839323 | 0.750529 | 0.794926 | 0.790698 | 0.336  |
| 11144 | ENSG00000LRRC8C   | 0.965657 | 0.562626 | 0.797475 | 0.693939 |        |
| 11145 | ENSG00000MRPL3    | 1        | 0.491919 | 0.743098 | 0.724242 |        |
| 11146 | ENSG00000CCDC134  | 0.969697 | 0.531313 | 0.750505 | 0.752525 |        |
| 11147 | ENSG00000CYB5D1   | 0.960888 | 0.580338 | 0.766385 | 0.725159 |        |
| 11148 | ENSG00000KCTD20   | 0.887879 | 0.685859 | 0.786869 | 0.771717 |        |
| 11149 | ENSG00000ACSM5    | 0.890909 | 0.654545 | 0.772727 | 0.79798  |        |
| 11150 | ENSG00000PHKG1    | 0.929293 | 0.630303 | 0.779798 | 0.741414 |        |
| 11151 | ENSG00000PRKD2    | 0.887879 | 0.685859 | 0.786869 | 0.772727 |        |
| 11152 | ENSG00000VCY1B    | 0.966667 | 0.550505 | 0.74596  | 0.749495 |        |
| 11153 | ENSG00000POTEF    | 1        | 0.490909 | 0.745455 | 0.663636 |        |
| 11154 | ENSG00000TUBGCP5  | 0.965657 | 0.562626 | 0.754377 | 0.731313 |        |
| 11155 | ENSG00000PALMD    | 1        | 0.527273 | 0.751515 | 0.70101  |        |
| 11156 | ENSG00000VCY      | 0.966667 | 0.550505 | 0.74596  | 0.749495 |        |
| 11157 | ENSG00000YTHDF2   | 0.842424 | 0.755556 | 0.79899  | 0.774747 |        |
| 11158 | ENSG00000SYNP02   | 0.987879 | 0.525253 | 0.781818 | 0.69798  |        |
| 11159 | ENSG00000POTEI    | 1        | 0.490909 | 0.745455 | 0.663636 |        |
| 11160 | ENSG00000NFATC2   | 0.99899  | 0.465657 | 0.802357 | 0.722222 |        |
| 11161 | ENSG00000FAF2     | 0.884848 | 0.719192 | 0.80202  | 0.747475 |        |
| 11162 | ENSG00000TUBA1B   | 1        | 0.475758 | 0.738889 | 0.738384 |        |
| 11163 | ENSG00000CYB5R2   | 0.911731 | 0.659698 | 0.778939 | 0.761905 |        |

|       |                  |          |          |          |          |        |
|-------|------------------|----------|----------|----------|----------|--------|
| 11164 | ENSG00000ZNF319  | 0.846465 | 0.719192 | 0.782828 | 0.811111 |        |
| 11165 | ENSG00000ZNF330  | 0.956566 | 0.578788 | 0.763636 | 0.757576 |        |
| 11166 | ENSG00000KCNA1   | 0.928118 | 0.623679 | 0.775899 | 0.751586 |        |
| 11167 | ENSG00000VCX3A   | 0.966667 | 0.550505 | 0.74596  | 0.749495 |        |
| 11168 | ENSG00000GDF50S  | 0.846465 | 0.719192 | 0.782828 | 0.810101 |        |
| 11169 | ENSG00000ABC11   | 0.884848 | 0.681818 | 0.78266  | 0.789899 |        |
| 11170 | ENSG00000VCX     | 0.966667 | 0.550505 | 0.74596  | 0.749495 |        |
| 11171 | ENSG00000NSF     | 1        | 0.528283 | 0.758586 | 0.70101  |        |
| 11172 | ENSG00000VM01    | 0.884848 | 0.719192 | 0.80202  | 0.745455 |        |
| 11173 | ENSG00000ZNF778  | 0.966667 | 0.570707 | 0.809091 | 0.680808 |        |
| 11174 | ENSG00000VCX3B   | 0.966667 | 0.550505 | 0.74596  | 0.749495 |        |
| 11175 | ENSG00000LTV1    | 1        | 0.488889 | 0.744444 | 0.713131 |        |
| 11176 | ENSG00000TPM1    | 1        | 0.455556 | 0.76229  | 0.718182 |        |
| 11177 | ENSG00000TEAD3   | 0.927273 | 0.623232 | 0.774074 | 0.760606 |        |
| 11178 | ENSG00000COMMD2  | 0.958586 | 0.562626 | 0.763468 | 0.756566 |        |
| 11179 | ENSG00000ATP5P0  | 0.968687 | 0.548485 | 0.758586 | 0.732323 |        |
| 11180 | ENSG00000DERL3   | 0.884848 | 0.719192 | 0.80202  | 0.750505 |        |
| 11181 | ENSG00000PRPF31  | 1        | 0.529598 | 0.75969  | 0.687104 |        |
| 11182 | ENSG00000ERN1    | 1        | 0.474747 | 0.73771  | 0.69798  | 0.5871 |
| 11183 | ENSG00000HOGA1   | 0.967677 | 0.567677 | 0.767677 | 0.713131 |        |
| 11184 | ENSG00000NDUFC1  | 0.964059 | 0.53277  | 0.743658 | 0.77907  |        |
| 11185 | ENSG00000RFXANK  | 0.955556 | 0.612121 | 0.783838 | 0.725253 |        |
| 11186 | ENSG00000IDE     | 0.929293 | 0.630303 | 0.779798 | 0.747475 | 0.4418 |
| 11187 | ENSG00000DAXX    | 1        | 0.454545 | 0.773064 | 0.668687 |        |
| 11188 | ENSG00000LAG3    | 0.967677 | 0.540404 | 0.741919 | 0.766667 |        |
| 11189 | ENSG00000RAB1A   | 1        | 0.473737 | 0.721886 | 0.757576 | 0.4723 |
| 11190 | ENSG00000GRIP1   | 0.927273 | 0.617172 | 0.766162 | 0.774747 |        |
| 11191 | ENSG00000CXorf36 | 0.884848 | 0.719192 | 0.80202  | 0.750505 |        |
| 11192 | ENSG00000AAMP    | 0.970707 | 0.516162 | 0.743434 | 0.779798 |        |
| 11193 | ENSG00000CTSB    | 1        | 0.475758 | 0.73468  | 0.715152 |        |
| 11194 | ENSG00000FLRT3   | 0.929293 | 0.630303 | 0.779798 | 0.748485 |        |
| 11195 | ENSG00000ACTG2   | 1        | 0.488889 | 0.744444 | 0.694949 |        |
| 11196 | ENSG00000PPFIA3  | 0.967677 | 0.535354 | 0.754882 | 0.751515 |        |
| 11197 | ENSG00000SUFU    | 0.968687 | 0.548485 | 0.756397 | 0.738384 |        |
| 11198 | ENSG00000TPM3    | 1        | 0.455556 | 0.76229  | 0.718182 |        |
| 11199 | ENSG00000ANKRD27 | 0.927273 | 0.658586 | 0.792929 | 0.726263 |        |
| 11200 | ENSG00000VPS37B  | 1        | 0.502114 | 0.739958 | 0.704017 |        |
| 11201 | ENSG00000HOXC12  | 0.842424 | 0.755556 | 0.79899  | 0.785859 |        |
| 11202 | ENSG00000TMEFF2  | 0.929293 | 0.630303 | 0.779798 | 0.748485 |        |
| 11203 | ENSG00000TANG06  | 0.929293 | 0.623232 | 0.771212 | 0.762626 |        |
| 11204 | ENSG00000ZNF689  | 0.99596  | 0.467677 | 0.784512 | 0.741414 |        |
| 11205 | ENSG00000HDHD2   | 1        | 0.461616 | 0.76229  | 0.69697  |        |
| 11206 | ENSG00000OSGEPL1 | 0.923232 | 0.615152 | 0.766667 | 0.791919 |        |
| 11207 | ENSG00000TRIM44  | 0.921212 | 0.646465 | 0.781818 | 0.758586 |        |
| 11208 | ENSG00000TUBA8   | 1        | 0.458586 | 0.73165  | 0.721212 |        |
| 11209 | ENSG00000DPH1    | 0.875264 | 0.708245 | 0.791226 | 0.785412 |        |
| 11210 | ENSG00000KCNK18  | 0.882664 | 0.713531 | 0.798097 | 0.766385 |        |
| 11211 | ENSG00000JPT1    | 0.921212 | 0.616162 | 0.762626 | 0.8      |        |
| 11212 | ENSG00000PSD3    | 0.884848 | 0.719192 | 0.80202  | 0.752525 |        |
| 11213 | ENSG00000RNF212B | 0.846465 | 0.719192 | 0.782828 | 0.818182 |        |
| 11214 | ENSG00000PTTG1IP | 0.929293 | 0.623232 | 0.771212 | 0.760606 |        |
| 11215 | ENSG00000LEPR    | 0.801932 | 0.801932 | 0.801932 | 0.801932 |        |
| 11216 | ENSG00000GF11    | 0.973737 | 0.519192 | 0.746465 | 0.765657 |        |
| 11217 | ENSG00000TTLL8   | 0.923232 | 0.615152 | 0.766667 | 0.791919 |        |
| 11218 | ENSG00000PKD2L1  | 0.929293 | 0.623232 | 0.771212 | 0.763636 |        |

|       |                   |          |          |          |          |        |        |
|-------|-------------------|----------|----------|----------|----------|--------|--------|
| 11219 | ENSG00000DNAH1    | 0.986869 | 0.506061 | 0.744444 | 0.761616 |        |        |
| 11220 | ENSG00000SYCP3    | 1        | 0.482828 | 0.742761 | 0.720202 |        |        |
| 11221 | ENSG00000MMADHC   | 1        | 0.489899 | 0.738215 | 0.69596  |        |        |
| 11222 | ENSG00000POTEJ    | 1        | 0.490909 | 0.745455 | 0.663636 |        |        |
| 11223 | ENSG00000HLA-DRA  | 0.966667 | 0.528283 | 0.747475 | 0.770707 |        |        |
| 11224 | ENSG00000ZNF134   | 0.919192 | 0.615152 | 0.764646 | 0.80303  |        |        |
| 11225 | ENSG00000SLC38A10 | 1        | 0.485859 | 0.73266  | 0.718182 |        |        |
| 11226 | ENSG00000TRUB2    | 0.929293 | 0.630303 | 0.779798 | 0.749495 |        |        |
| 11227 | ENSG00000PATL1    | 0.919662 | 0.671247 | 0.788584 | 0.743129 |        |        |
| 11228 | ENSG00000SLC41A3  | 0.958774 | 0.552854 | 0.750881 | 0.782241 |        |        |
| 11229 | ENSG00000MYL6B    | 0.978788 | 0.528283 | 0.764646 | 0.728283 |        |        |
| 11230 | ENSG00000METTL22  | 0.975758 | 0.507071 | 0.744108 | 0.780808 |        |        |
| 11231 | ENSG00000SLC35A5  | 0.884848 | 0.681818 | 0.78266  | 0.79697  |        |        |
| 11232 | ENSG00000PRKRA    | 0.984848 | 0.516162 | 0.750505 | 0.744444 |        |        |
| 11233 | ENSG00000NAT8     | 0.887879 | 0.685859 | 0.786869 | 0.781818 |        |        |
| 11234 | ENSG00000RGL1     | 0.880808 | 0.683838 | 0.782323 | 0.80101  |        |        |
| 11235 | ENSG00000CEP295   | 1        | 0.50202  | 0.746296 | 0.680808 |        | 0.4627 |
| 11236 | ENSG00000CXCR2    | 1        | 0.450505 | 0.724579 | 0.741414 |        |        |
| 11237 | ENSG00000CPSF2    | 0.929293 | 0.630303 | 0.779798 | 0.751515 |        |        |
| 11238 | ENSG00000UCN2     | 0.884848 | 0.681818 | 0.78266  | 0.79798  |        |        |
| 11239 | ENSG00000HK1      | 1        | 0.490909 | 0.745455 | 0.69899  |        |        |
| 11240 | ENSG00000PROSER2  | 0.929293 | 0.630303 | 0.779798 | 0.752525 |        |        |
| 11241 | ENSG00000TINAG    | 0.967677 | 0.560606 | 0.758586 | 0.734343 |        |        |
| 11242 | ENSG00000LY6H     | 0.882664 | 0.713531 | 0.798097 | 0.770613 |        |        |
| 11243 | ENSG00000DEFB129  | 0.842424 | 0.755556 | 0.79899  | 0.790909 |        |        |
| 11244 | ENSG00000TTF1     | 0.958586 | 0.590909 | 0.771212 | 0.736364 |        |        |
| 11245 | ENSG00000LSR      | 0.961616 | 0.611111 | 0.764478 | 0.721212 |        |        |
| 11246 | ENSG00000ZNF445   | 1        | 0.487879 | 0.739394 | 0.687879 | 0.4143 | 0.1985 |
| 11247 | ENSG00000MAP1LC3A | 1        | 0.509091 | 0.763636 | 0.708081 |        |        |
| 11248 | ENSG00000LTA4H    | 0.99798  | 0.507071 | 0.805051 | 0.691919 |        |        |
| 11249 | ENSG00000IFIT1B   | 0.880399 | 0.707641 | 0.79402  | 0.778516 |        |        |
| 11250 | ENSG00000PXMP4    | 1        | 0.51052  | 0.742709 | 0.72979  |        |        |
| 11251 | ENSG00000TIMP2    | 0.960606 | 0.554545 | 0.749495 | 0.777778 |        |        |
| 11252 | ENSG00000TSPY2    | 0.839323 | 0.750529 | 0.794926 | 0.805497 |        |        |
| 11253 | ENSG00000MECOM    | 1        | 0.519192 | 0.759596 | 0.712121 |        |        |
| 11254 | ENSG00000STXBP4   | 1        | 0.442424 | 0.755219 | 0.729293 |        |        |
| 11255 | ENSG00000RTN4IP1  | 1        | 0.479798 | 0.731481 | 0.751515 |        |        |
| 11256 | ENSG00000CDC25C   | 0.879493 | 0.710359 | 0.794397 | 0.781184 |        |        |
| 11257 | ENSG00000BCLAF1   | 1        | 0.526263 | 0.756397 | 0.718182 |        | 0.4293 |
| 11258 | ENSG00000IKKB     | 1        | 0.50303  | 0.749495 | 0.725253 | 0.2927 |        |
| 11259 | ENSG00000TSPY3    | 0.839323 | 0.750529 | 0.794926 | 0.805497 |        |        |
| 11260 | ENSG00000TM2D3    | 0.887879 | 0.685859 | 0.786869 | 0.783838 |        |        |
| 11261 | ENSG00000WDR41    | 1        | 0.471545 | 0.729965 | 0.731707 |        |        |
| 11262 | ENSG00000TSPY8    | 0.839323 | 0.750529 | 0.794926 | 0.805497 |        |        |
| 11263 | ENSG00000APMAP    | 1        | 0.490909 | 0.745455 | 0.745455 |        |        |
| 11264 | ENSG00000RNF135   | 0.966667 | 0.570707 | 0.760269 | 0.729293 |        |        |
| 11265 | ENSG00000UNC50    | 0.956566 | 0.578788 | 0.763636 | 0.770707 |        |        |
| 11266 | ENSG00000TSPY4    | 0.839323 | 0.750529 | 0.794926 | 0.805497 |        |        |
| 11267 | ENSG00000DUSP22   | 0.975758 | 0.537374 | 0.756566 | 0.738384 |        |        |
| 11268 | ENSG00000TSPY10   | 0.839323 | 0.750529 | 0.794926 | 0.805497 |        |        |
| 11269 | ENSG00000TBCA     | 1        | 0.488889 | 0.744444 | 0.690909 |        | 0.2966 |
| 11270 | ENSG00000ZNF653   | 1        | 0.452525 | 0.735017 | 0.748485 |        |        |
| 11271 | ENSG00000TSPY1    | 0.839323 | 0.750529 | 0.794926 | 0.805497 |        |        |
| 11272 | ENSG00000C2orf72  | 0.885835 | 0.679704 | 0.78277  | 0.801268 |        |        |
| 11273 | ENSG00000PHC3     | 0.969697 | 0.518182 | 0.74697  | 0.781818 |        | 0.1975 |

|       |                    |          |          |          |          |        |        |
|-------|--------------------|----------|----------|----------|----------|--------|--------|
| 11274 | ENSG00000RBM14     | 1        | 0.471459 | 0.726568 | 0.707188 |        |        |
| 11275 | ENSG00000MAGOH     | 1        | 0.487879 | 0.809933 | 0.647475 |        | 0.3698 |
| 11276 | ENSG00000ST3GAL5   | 1        | 0.494949 | 0.747475 | 0.727273 |        |        |
| 11277 | ENSG00000ADIG      | 1        | 0.497886 | 0.748943 | 0.671247 |        |        |
| 11278 | ENSG00000FKBP3     | 1        | 0.518182 | 0.75101  | 0.718182 | 0.1823 | 0.2736 |
| 11279 | ENSG00000PF4       | 0.929293 | 0.630303 | 0.779798 | 0.756566 |        |        |
| 11280 | ENSG00000OMG       | 0.883838 | 0.679798 | 0.775084 | 0.818182 |        |        |
| 11281 | ENSG00000EMILIN1   | 0.887879 | 0.685859 | 0.786869 | 0.788889 |        |        |
| 11282 | ENSG00000CHN2      | 0.963636 | 0.59596  | 0.777104 | 0.712121 |        |        |
| 11283 | ENSG00000PNMT      | 1        | 0.490909 | 0.745455 | 0.713131 | 0.2782 | 0.5196 |
| 11284 | ENSG00000OR4N4     | 0.877378 | 0.747357 | 0.790698 | 0.774841 |        |        |
| 11285 | ENSG00000ACTBL2    | 1        | 0.488889 | 0.744444 | 0.694949 |        |        |
| 11286 | ENSG00000RPL36A    | 0.924695 | 0.645626 | 0.785161 | 0.757475 |        |        |
| 11287 | ENSG00000ABHD10    | 0.958774 | 0.575053 | 0.792812 | 0.72833  | 0.3342 |        |
| 11288 | ENSG00000USP31     | 1        | 0.494949 | 0.747475 | 0.737374 |        |        |
| 11289 | ENSG00000KLF5      | 0.949495 | 0.641414 | 0.799832 | 0.713131 |        |        |
| 11290 | ENSG00000AC171558. | 0.877378 | 0.747357 | 0.790698 | 0.774841 |        |        |
| 11291 | ENSG00000AC135068. | 0.877378 | 0.747357 | 0.790698 | 0.774841 |        |        |
| 11292 | ENSG00000ZNF622    | 1        | 0.476768 | 0.742088 | 0.70404  |        |        |
| 11293 | ENSG00000MAN1A1    | 1        | 0.50303  | 0.746465 | 0.726263 |        |        |
| 11294 | ENSG00000LINC02203 | 0.877378 | 0.747357 | 0.790698 | 0.774841 |        |        |
| 11295 | ENSG00000AC134980. | 0.877378 | 0.747357 | 0.790698 | 0.774841 |        |        |
| 11296 | ENSG00000TFDP2     | 1        | 0.50101  | 0.750505 | 0.722222 | 0.3211 | 0.362  |
| 11297 | ENSG00000IKZF4     | 0.925253 | 0.647475 | 0.780135 | 0.760606 |        |        |
| 11298 | ENSG00000PPIP5K1   | 0.842424 | 0.755556 | 0.79899  | 0.79596  |        |        |
| 11299 | ENSG00000GAS7      | 1        | 0.518182 | 0.747306 | 0.739394 |        |        |
| 11300 | ENSG00000B3GAT2    | 0.927273 | 0.658586 | 0.792929 | 0.734343 |        | 0.3884 |
| 11301 | ENSG00000FAM209B   | 0.839323 | 0.750529 | 0.794926 | 0.811839 |        |        |
| 11302 | ENSG00000MAOA      | 1        | 0.50101  | 0.750505 | 0.663636 |        |        |
| 11303 | ENSG00000CD48      | 0.842424 | 0.755556 | 0.79899  | 0.79899  |        |        |
| 11304 | ENSG00000SLC25A5   | 0.927273 | 0.658586 | 0.792929 | 0.736364 |        |        |
| 11305 | ENSG00000CCNT1     | 1        | 0.490909 | 0.724242 | 0.757576 |        |        |
| 11306 | ENSG00000COL23A1   | 0.963636 | 0.564646 | 0.760101 | 0.749495 |        |        |
| 11307 | ENSG00000TRIM26    | 1        | 0.490909 | 0.736027 | 0.682828 |        |        |
| 11308 | ENSG00000LARS2     | 1        | 0.474747 | 0.73771  | 0.80404  |        |        |
| 11309 | ENSG00000PPP2CB    | 1        | 0.531313 | 0.760606 | 0.69899  | 0.3111 | 0.4964 |
| 11310 | ENSG00000HSD17B1   | 1        | 0.488889 | 0.740067 | 0.755556 |        |        |
| 11311 | ENSG00000RPS21     | 0.928118 | 0.623679 | 0.775899 | 0.770613 |        |        |
| 11312 | ENSG00000ZNF384    | 1        | 0.491919 | 0.741414 | 0.732323 |        |        |
| 11313 | ENSG00000MMEL1     | 1        | 0.491919 | 0.741414 | 0.718182 |        |        |
| 11314 | ENSG00000GRIK2     | 1        | 0.490909 | 0.745455 | 0.7      |        |        |
| 11315 | ENSG00000KIF22     | 0.957576 | 0.623232 | 0.788047 | 0.718182 |        |        |
| 11316 | ENSG00000MDFIC     | 1        | 0.489429 | 0.744715 | 0.726216 |        |        |
| 11317 | ENSG00000HEXIM1    | 1        | 0.466667 | 0.733333 | 0.719192 |        |        |
| 11318 | ENSG00000CKAP4     | 0.966667 | 0.556566 | 0.759764 | 0.746465 |        |        |
| 11319 | ENSG00000GMEB1     | 0.955556 | 0.588889 | 0.772222 | 0.761616 |        |        |
| 11320 | ENSG00000CSTB      | 0.987879 | 0.5      | 0.763636 | 0.751515 |        |        |
| 11321 | ENSG00000SNCA      | 0.931313 | 0.60404  | 0.767677 | 0.789899 |        |        |
| 11322 | ENSG00000TMEM87A   | 0.929293 | 0.630303 | 0.779798 | 0.764646 |        |        |
| 11323 | ENSG00000UBA3      | 1        | 0.494949 | 0.789562 | 0.669697 | 0.316  | 0.2988 |
| 11324 | ENSG00000SDC4      | 1        | 0.526263 | 0.756397 | 0.693939 | 0.3715 | 0.34   |
| 11325 | ENSG00000SPPL2B    | 0.927273 | 0.658586 | 0.792929 | 0.738384 |        |        |
| 11326 | ENSG00000TMEM74    | 0.957576 | 0.570707 | 0.761111 | 0.775758 | 0.3129 |        |
| 11327 | ENSG00000ZNF749    | 1        | 0.461616 | 0.73064  | 0.728283 |        |        |
| 11328 | ENSG00000UBA52     | 1        | 0.454545 | 0.740741 | 0.711111 |        |        |

|       |                    |          |          |          |          |        |
|-------|--------------------|----------|----------|----------|----------|--------|
| 11329 | ENSG00000NEMP1     | 1        | 0.452525 | 0.731313 | 0.753535 |        |
| 11330 | ENSG00000CTNNA1    | 1        | 0.517172 | 0.748822 | 0.737374 |        |
| 11331 | ENSG00000GLT8D1    | 0.884848 | 0.719192 | 0.80202  | 0.769697 |        |
| 11332 | ENSG00000RHBDD1    | 0.879493 | 0.710359 | 0.794397 | 0.790698 |        |
| 11333 | ENSG00000RFESD     | 0.887879 | 0.685859 | 0.786869 | 0.792929 |        |
| 11334 | ENSG00000HSPA4     | 0.968687 | 0.536364 | 0.809933 | 0.712121 |        |
| 11335 | ENSG00000C8orf74   | 0.842424 | 0.755556 | 0.79899  | 0.8      |        |
| 11336 | ENSG00000WNT10A    | 0.924695 | 0.645626 | 0.785161 | 0.763012 |        |
| 11337 | ENSG00000HMGA2     | 1        | 0.50101  | 0.743098 | 0.707071 |        |
| 11338 | ENSG00000CST3      | 1        | 0.50202  | 0.746296 | 0.739394 |        |
| 11339 | ENSG00000CD44      | 0.975758 | 0.533333 | 0.761616 | 0.745455 |        |
| 11340 | ENSG00000AL136454. | 1        | 0.454545 | 0.740741 | 0.711111 |        |
| 11341 | ENSG00000MPEG1     | 0.958586 | 0.588889 | 0.767003 | 0.749495 |        |
| 11342 | ENSG00000CD7       | 0.887879 | 0.685859 | 0.786869 | 0.793939 |        |
| 11343 | ENSG00000FLYWCH1   | 1        | 0.563636 | 0.775758 | 0.683838 | 0.2566 |
| 11344 | ENSG00000THY1      | 1        | 0.49697  | 0.739057 | 0.712121 |        |
| 11345 | ENSG00000SYT1      | 1        | 0.4926   | 0.7463   | 0.761099 |        |
| 11346 | ENSG00000MSANTD2   | 0.961616 | 0.610101 | 0.769192 | 0.725253 |        |
| 11347 | ENSG00000CNN1      | 0.965657 | 0.60303  | 0.779966 | 0.706061 |        |
| 11348 | ENSG00000CRX       | 1        | 0.469565 | 0.7343   | 0.794203 |        |
| 11349 | ENSG00000DPF2      | 0.980973 | 0.531712 | 0.76339  | 0.734672 |        |
| 11350 | ENSG00000STXBP1    | 0.986869 | 0.548485 | 0.767677 | 0.715152 |        |
| 11351 | ENSG00000P2RY1     | 0.959596 | 0.584848 | 0.764815 | 0.750505 |        |
| 11352 | ENSG00000SLC25A4   | 0.927273 | 0.658586 | 0.792929 | 0.736364 |        |
| 11353 | ENSG00000FNIP2     | 1        | 0.516162 | 0.755556 | 0.732323 |        |
| 11354 | ENSG00000CLTC      | 1        | 0.491919 | 0.743098 | 0.721212 |        |
| 11355 | ENSG00000FAM161B   | 1        | 0.471459 | 0.726568 | 0.7537   |        |
| 11356 | ENSG00000CXorf67   | 1        | 0.475758 | 0.72862  | 0.716162 |        |
| 11357 | ENSG00000MTX2      | 1        | 0.509091 | 0.754545 | 0.706061 |        |
| 11358 | ENSG00000PNLIPRP3  | 0.975758 | 0.537374 | 0.756566 | 0.745455 |        |
| 11359 | ENSG00000ZNF280D   | 0.986869 | 0.536364 | 0.756397 | 0.734343 |        |
| 11360 | ENSG00000KIF11     | 1        | 0.490909 | 0.785859 | 0.684848 | 0.524  |
| 11361 | ENSG00000NBPF3     | 1        | 0.442424 | 0.755219 | 0.759596 |        |
| 11362 | ENSG00000SLC25A6   | 0.927273 | 0.658586 | 0.792929 | 0.736364 |        |
| 11363 | ENSG00000AQP9      | 1        | 0.50101  | 0.750505 | 0.735354 |        |
| 11364 | ENSG00000XRCC4     | 0.95666  | 0.587738 | 0.766385 | 0.767442 |        |
| 11365 | ENSG00000TARBP2    | 1        | 0.446465 | 0.801347 | 0.713131 |        |
| 11366 | ENSG00000THSD7A    | 0.887879 | 0.685859 | 0.786869 | 0.80202  |        |
| 11367 | ENSG00000LEKR1     | 0.960606 | 0.613131 | 0.779461 | 0.717172 |        |
| 11368 | ENSG00000NXPE1     | 0.919192 | 0.679798 | 0.79798  | 0.748485 |        |
| 11369 | ENSG00000PCNX2     | 0.985859 | 0.50202  | 0.746296 | 0.779798 | 0.3216 |
| 11370 | ENSG00000CNFN      | 0.887879 | 0.685859 | 0.786869 | 0.80101  |        |
| 11371 | ENSG00000PPP1R7    | 1        | 0.505051 | 0.758923 | 0.714141 | 0.5144 |
| 11372 | ENSG00000HSD17B12  | 0.884848 | 0.719192 | 0.80202  | 0.770707 |        |
| 11373 | ENSG00000MFSD8     | 0.921212 | 0.646465 | 0.781818 | 0.776768 |        |
| 11374 | ENSG00000MARF1     | 1        | 0.48948  | 0.739941 | 0.710963 |        |
| 11375 | ENSG00000KTI12     | 1        | 0.461616 | 0.71936  | 0.740404 |        |
| 11376 | ENSG00000NOL6      | 0.923232 | 0.683838 | 0.802694 | 0.729293 |        |
| 11377 | ENSG00000NHLRC2    | 0.927273 | 0.623232 | 0.774074 | 0.778788 |        |
| 11378 | ENSG00000PRKAA1    | 1        | 0.490909 | 0.745455 | 0.730303 |        |
| 11379 | ENSG00000C17orf64  | 0.828107 | 0.777003 | 0.802362 | 0.810685 |        |
| 11380 | ENSG00000TYW1      | 0.987879 | 0.50101  | 0.767677 | 0.748485 |        |
| 11381 | ENSG00000CLSTN2    | 0.884848 | 0.716162 | 0.794108 | 0.783838 |        |
| 11382 | ENSG00000CRISPLD1  | 0.962626 | 0.584848 | 0.76633  | 0.738384 |        |
| 11383 | ENSG00000SLC33A1   | 0.929293 | 0.630303 | 0.779798 | 0.766667 |        |

|       |                  |          |          |          |          |        |
|-------|------------------|----------|----------|----------|----------|--------|
| 11384 | ENSG00000ACTR1A  | 0.880399 | 0.707641 | 0.79402  | 0.795127 |        |
| 11385 | ENSG00000THYN1   | 1        | 0.516162 | 0.760438 | 0.679798 | 0.5583 |
| 11386 | ENSG00000SGSM1   | 0.921776 | 0.67759  | 0.798802 | 0.743129 |        |
| 11387 | ENSG00000RNF215  | 0.963636 | 0.564646 | 0.760101 | 0.756566 |        |
| 11388 | ENSG00000RING1   | 1        | 0.475758 | 0.738889 | 0.7      |        |
| 11389 | ENSG00000CLDN16  | 0.842424 | 0.755556 | 0.79899  | 0.808081 |        |
| 11390 | ENSG00000TMEM240 | 0.923232 | 0.648485 | 0.784175 | 0.767677 |        |
| 11391 | ENSG00000MRPS30  | 1        | 0.475758 | 0.72862  | 0.792929 |        |
| 11392 | ENSG00000MAFG    | 0.986869 | 0.518182 | 0.755219 | 0.751515 |        |
| 11393 | ENSG00000PODXL   | 1        | 0.532323 | 0.78266  | 0.669697 |        |
| 11394 | ENSG00000RTRAF   | 0.986869 | 0.518182 | 0.755219 | 0.754545 |        |
| 11395 | ENSG00000DMTF1   | 1        | 0.509091 | 0.748485 | 0.710101 |        |
| 11396 | ENSG00000MRPS7   | 1        | 0.531313 | 0.762963 | 0.689899 |        |
| 11397 | ENSG00000ZNF232  | 0.956566 | 0.578788 | 0.765993 | 0.779798 | 0.379  |
| 11398 | ENSG00000AAGAB   | 1        | 0.528283 | 0.758586 | 0.711111 |        |
| 11399 | ENSG00000JMY     | 0.96723  | 0.549683 | 0.754757 | 0.763214 |        |
| 11400 | ENSG00000GATAD2B | 0.964646 | 0.562626 | 0.756902 | 0.758586 | 0.2668 |
| 11401 | ENSG00000SLC41A1 | 0.913319 | 0.645877 | 0.778541 | 0.80444  |        |
| 11402 | ENSG00000SEC16A  | 0.926004 | 0.65222  | 0.789112 | 0.755814 |        |
| 11403 | ENSG00000ATP6V1H | 1        | 0.509091 | 0.763636 | 0.733333 |        |
| 11404 | ENSG00000FRMD1   | 0.839323 | 0.750529 | 0.794926 | 0.826638 |        |
| 11405 | ENSG00000ARMCX3  | 1        | 0.475758 | 0.735354 | 0.794949 |        |
| 11406 | ENSG00000MYO1F   | 0.842424 | 0.752525 | 0.797138 | 0.818182 |        |
| 11407 | ENSG00000GSE1    | 0.886869 | 0.675758 | 0.768855 | 0.846465 |        |
| 11408 | ENSG00000EFNA1   | 0.884848 | 0.719192 | 0.80202  | 0.772727 |        |
| 11409 | ENSG00000CHST7   | 0.927273 | 0.658586 | 0.792929 | 0.743434 |        |
| 11410 | ENSG00000MLLT3   | 0.96124  | 0.602436 | 0.774825 | 0.728682 |        |
| 11411 | ENSG00000MICALL1 | 0.913131 | 0.679798 | 0.795623 | 0.765657 | 0.424  |
| 11412 | ENSG00000MRGPRD  | 0.881818 | 0.716162 | 0.798485 | 0.787879 |        |
| 11413 | ENSG00000SUPT20H | 0.99798  | 0.538384 | 0.805724 | 0.684848 |        |
| 11414 | ENSG00000MTHFD1  | 1        | 0.518182 | 0.754209 | 0.727273 | 0.3736 |
| 11415 | ENSG00000THOC7   | 0.872727 | 0.719192 | 0.79596  | 0.80101  |        |
| 11416 | ENSG00000PA2G4   | 1        | 0.521212 | 0.753872 | 0.669697 |        |
| 11417 | ENSG00000TUBA3E  | 1        | 0.475758 | 0.738889 | 0.738384 |        |
| 11418 | ENSG00000CFAP52  | 0.835095 | 0.786469 | 0.810606 | 0.798097 |        |
| 11419 | ENSG00000EXOC1   | 0.921212 | 0.680808 | 0.799663 | 0.746465 |        |
| 11420 | ENSG00000TDRD1   | 0.887879 | 0.685859 | 0.786869 | 0.807071 |        |
| 11421 | ENSG00000C3orf58 | 0.960888 | 0.580338 | 0.766385 | 0.751586 |        |
| 11422 | ENSG00000NAA50   | 0.926004 | 0.65222  | 0.789112 | 0.758985 |        |
| 11423 | ENSG00000ACPP    | 0.968687 | 0.548485 | 0.756397 | 0.764646 |        |
| 11424 | ENSG00000LUM     | 0.969082 | 0.542995 | 0.752657 | 0.771981 |        |
| 11425 | ENSG00000ACTG1   | 1        | 0.488889 | 0.744444 | 0.694949 |        |
| 11426 | ENSG00000UBE2S   | 0.992929 | 0.49798  | 0.799663 | 0.723232 |        |
| 11427 | ENSG00000GATA6   | 1        | 0.483087 | 0.734672 | 0.748414 |        |
| 11428 | ENSG00000DBR1    | 0.960606 | 0.586869 | 0.769529 | 0.748485 |        |
| 11429 | ENSG00000C9orf3  | 0.927273 | 0.658586 | 0.792929 | 0.745455 |        |
| 11430 | ENSG00000SF3B5   | 0.882664 | 0.713531 | 0.798097 | 0.793869 |        |
| 11431 | ENSG00000OIP5    | 0.931313 | 0.59596  | 0.758923 | 0.824242 |        |
| 11432 | ENSG00000ZNF839  | 1        | 0.490909 | 0.745455 | 0.783838 |        |
| 11433 | ENSG00000ADCY4   | 0.965657 | 0.578788 | 0.770539 | 0.736364 |        |
| 11434 | ENSG00000TFAP4   | 0.917172 | 0.648485 | 0.781145 | 0.79798  |        |
| 11435 | ENSG00000MAATS1  | 0.842424 | 0.755556 | 0.79899  | 0.813131 |        |
| 11436 | ENSG00000SPECC1  | 1        | 0.508081 | 0.744276 | 0.727273 |        |
| 11437 | ENSG00000OVGP1   | 0.877076 | 0.744186 | 0.810631 | 0.772979 |        |
| 11438 | ENSG00000OEP     | 0.887879 | 0.685859 | 0.786869 | 0.805051 |        |

|       |                    |          |          |          |          |        |        |
|-------|--------------------|----------|----------|----------|----------|--------|--------|
| 11439 | ENSG00000ZNF425    | 0.831672 | 0.785161 | 0.808416 | 0.806202 |        |        |
| 11440 | ENSG00000MFAP4     | 0.884848 | 0.719192 | 0.80202  | 0.777778 |        |        |
| 11441 | ENSG00000GNB4      | 1        | 0.50101  | 0.750505 | 0.734343 | 0.2136 |        |
| 11442 | ENSG00000MSN       | 1        | 0.467677 | 0.757407 | 0.730303 |        |        |
| 11443 | ENSG00000TUBA1A    | 1        | 0.466667 | 0.736364 | 0.744444 |        |        |
| 11444 | ENSG00000NEDD1     | 1        | 0.50303  | 0.749495 | 0.712121 | 0.3276 |        |
| 11445 | ENSG00000EEF1AKMT2 | 0.926004 | 0.65222  | 0.789112 | 0.761099 |        |        |
| 11446 | ENSG00000NEB       | 0.842424 | 0.755556 | 0.79899  | 0.814141 |        |        |
| 11447 | ENSG00000SMAP1     | 0.959596 | 0.584848 | 0.764815 | 0.764646 |        |        |
| 11448 | ENSG00000PAK1      | 1        | 0.512121 | 0.74697  | 0.70303  |        |        |
| 11449 | ENSG00000ACADS     | 1        | 0.524242 | 0.739394 | 0.726263 | 0.3944 |        |
| 11450 | ENSG00000BRINP1    | 0.924695 | 0.645626 | 0.785161 | 0.775194 |        |        |
| 11451 | ENSG00000MYH11     | 0.977778 | 0.526263 | 0.755051 | 0.767677 |        |        |
| 11452 | ENSG00000HIBADH    | 1        | 0.516162 | 0.755556 | 0.725253 | 0.3721 | 0.3419 |
| 11453 | ENSG00000CASC4     | 0.966667 | 0.556566 | 0.759764 | 0.759596 |        |        |
| 11454 | ENSG00000MILR1     | 0.842424 | 0.755556 | 0.79899  | 0.814141 |        |        |
| 11455 | ENSG00000LRIG3     | 0.881818 | 0.716162 | 0.798485 | 0.794949 |        |        |
| 11456 | ENSG00000HDAC2     | 1        | 0.479798 | 0.731481 | 0.716162 | 0.4588 |        |
| 11457 | ENSG00000BCS1L     | 0.963636 | 0.583838 | 0.762626 | 0.750505 |        |        |
| 11458 | ENSG00000TBC1D10B  | 0.885835 | 0.679704 | 0.78277  | 0.830867 |        |        |
| 11459 | ENSG00000AK9       | 1        | 0.488889 | 0.82963  | 0.652525 |        |        |
| 11460 | ENSG00000POM121    | 1        | 0.475758 | 0.807912 | 0.648485 |        |        |
| 11461 | ENSG00000TMEM178A  | 0.887879 | 0.685859 | 0.786869 | 0.810101 |        |        |
| 11462 | ENSG00000MUC21     | 0.835095 | 0.789641 | 0.812368 | 0.799154 |        |        |
| 11463 | ENSG00000P2RY6     | 1        | 0.461616 | 0.76229  | 0.714141 |        |        |
| 11464 | ENSG00000FILIP1L   | 0.881818 | 0.716162 | 0.798485 | 0.794949 |        |        |
| 11465 | ENSG00000USP38     | 0.884848 | 0.719192 | 0.80202  | 0.780808 |        |        |
| 11466 | ENSG00000SLC10A5   | 0.842424 | 0.752525 | 0.797138 | 0.826263 |        |        |
| 11467 | ENSG00000CCDC51    | 1        | 0.508081 | 0.744276 | 0.70101  | 0.3666 |        |
| 11468 | ENSG00000SSBP2     | 0.96723  | 0.561311 | 0.764271 | 0.751586 |        |        |
| 11469 | ENSG00000PHOX2A    | 0.879493 | 0.747357 | 0.812896 | 0.770613 |        |        |
| 11470 | ENSG00000GUCY1B1   | 1        | 0.510101 | 0.744108 | 0.764646 |        |        |
| 11471 | ENSG00000COQ9      | 0.965657 | 0.612121 | 0.788889 | 0.708081 |        |        |
| 11472 | ENSG00000QDPR      | 0.979798 | 0.523232 | 0.767003 | 0.753535 |        |        |
| 11473 | ENSG00000RASGEF1C  | 0.976768 | 0.579798 | 0.77138  | 0.717172 |        |        |
| 11474 | ENSG00000HEATR5A   | 0.882664 | 0.710359 | 0.789993 | 0.807611 |        |        |
| 11475 | ENSG00000TMEM141   | 0.925253 | 0.652525 | 0.787879 | 0.764646 |        |        |
| 11476 | ENSG00000TANG02    | 0.918051 | 0.667774 | 0.791436 | 0.771872 |        |        |
| 11477 | ENSG00000SMIM12    | 0.958586 | 0.588889 | 0.767003 | 0.766667 |        |        |
| 11478 | ENSG00000TBP       | 1        | 0.558586 | 0.770539 | 0.682828 |        |        |
| 11479 | ENSG00000CDHR3     | 0.835095 | 0.789641 | 0.812368 | 0.802326 |        |        |
| 11480 | ENSG00000PTPRA     | 1        | 0.50101  | 0.750505 | 0.724242 |        |        |
| 11481 | ENSG00000AC090527. | 0.887879 | 0.685859 | 0.786869 | 0.810101 |        |        |
| 11482 | ENSG00000SCN11A    | 1        | 0.487315 | 0.742072 | 0.718816 |        |        |
| 11483 | ENSG00000CASP1     | 1        | 0.539394 | 0.807407 | 0.644444 |        |        |
| 11484 | ENSG00000ATP5S     | 0.919662 | 0.674419 | 0.795631 | 0.763214 |        |        |
| 11485 | ENSG00000DVL3      | 1        | 0.491919 | 0.739394 | 0.724242 |        |        |
| 11486 | ENSG00000HBQ1      | 0.838384 | 0.790909 | 0.814478 | 0.79798  |        |        |
| 11487 | ENSG00000EAPP      | 0.985859 | 0.531313 | 0.758586 | 0.751515 |        |        |
| 11488 | ENSG00000SERPING1  | 0.986869 | 0.536364 | 0.756397 | 0.747475 |        |        |
| 11489 | ENSG00000EPC2      | 1        | 0.488889 | 0.744444 | 0.742424 | 0.4237 |        |
| 11490 | ENSG00000TMEM223   | 0.927273 | 0.658586 | 0.792929 | 0.751515 |        |        |
| 11491 | ENSG00000MEIOC     | 0.881818 | 0.716162 | 0.798485 | 0.79899  |        |        |
| 11492 | ENSG00000MELK      | 1        | 0.487879 | 0.741582 | 0.724242 |        |        |
| 11493 | ENSG00000UEVLD     | 0.884848 | 0.719192 | 0.80202  | 0.786869 |        |        |



|       |           |           |          |          |          |          |        |        |
|-------|-----------|-----------|----------|----------|----------|----------|--------|--------|
| 11494 | ENSG00000 | TPD52     | 1        | 0.509091 | 0.754545 | 0.748485 |        |        |
| 11495 | ENSG00000 | TRNT1     | 0.963636 | 0.563636 | 0.763636 | 0.768687 |        |        |
| 11496 | ENSG00000 | MAGEA4    | 0.990909 | 0.509091 | 0.751515 | 0.771717 |        |        |
| 11497 | ENSG00000 | DPYS      | 0.882664 | 0.708245 | 0.78876  | 0.816068 |        |        |
| 11498 | ENSG00000 | RUFY1     | 0.925253 | 0.688889 | 0.807071 | 0.729293 |        |        |
| 11499 | ENSG00000 | ZNF649    | 0.969697 | 0.531313 | 0.750505 | 0.790909 | 0.4741 |        |
| 11500 | ENSG00000 | GPRIN2    | 0.917548 | 0.67019  | 0.786998 | 0.782241 |        |        |
| 11501 | ENSG00000 | KRT40     | 0.887879 | 0.685859 | 0.786869 | 0.814141 |        |        |
| 11502 | ENSG00000 | TSPOAP1   | 0.965657 | 0.569697 | 0.762121 | 0.759596 | 0.3929 |        |
| 11503 | ENSG00000 | PRMT8     | 0.985859 | 0.558586 | 0.784343 | 0.710101 | 0.3595 |        |
| 11504 | ENSG00000 | ANKDD1B   | 0.887879 | 0.685859 | 0.786869 | 0.815152 |        |        |
| 11505 | ENSG00000 | GABRA1    | 1        | 0.516162 | 0.755556 | 0.750505 |        |        |
| 11506 | ENSG00000 | GRIK1     | 0.927273 | 0.658586 | 0.792929 | 0.752525 |        |        |
| 11507 | ENSG00000 | IDH3A     | 0.887879 | 0.685859 | 0.786869 | 0.817172 |        |        |
| 11508 | ENSG00000 | TNFRSF4   | 0.931313 | 0.60404  | 0.767677 | 0.812121 |        |        |
| 11509 | ENSG00000 | MYH10     | 0.987879 | 0.567677 | 0.777778 | 0.709091 |        |        |
| 11510 | ENSG00000 | ZSCAN29   | 1        | 0.488889 | 0.744444 | 0.738384 | 0.3753 | 0.3529 |
| 11511 | ENSG00000 | RRBP1     | 0.967677 | 0.567677 | 0.767677 | 0.748485 |        | 0.3137 |
| 11512 | ENSG00000 | RAB1B     | 1        | 0.489899 | 0.73771  | 0.716162 |        |        |
| 11513 | ENSG00000 | CLEC4G    | 0.968687 | 0.548485 | 0.758586 | 0.770707 |        |        |
| 11514 | ENSG00000 | SURF1     | 0.927273 | 0.652525 | 0.784512 | 0.770707 |        |        |
| 11515 | ENSG00000 | SVOPL     | 0.979798 | 0.538384 | 0.757407 | 0.756566 |        |        |
| 11516 | ENSG00000 | CKS2      | 1        | 0.494949 | 0.747475 | 0.744444 |        |        |
| 11517 | ENSG00000 | CEBPB     | 0.918182 | 0.682828 | 0.799663 | 0.761616 |        |        |
| 11518 | ENSG00000 | KLK8      | 0.887879 | 0.685859 | 0.786869 | 0.821212 |        |        |
| 11519 | ENSG00000 | MXI1      | 0.983838 | 0.551515 | 0.765657 | 0.733333 |        |        |
| 11520 | ENSG00000 | BMI1      | 1        | 0.478788 | 0.726936 | 0.748485 |        |        |
| 11521 | ENSG00000 | HEPACAM   | 0.918182 | 0.682828 | 0.799663 | 0.762626 |        |        |
| 11522 | ENSG00000 | EHD4      | 0.973737 | 0.519192 | 0.746465 | 0.806061 |        |        |
| 11523 | ENSG00000 | CCL21     | 0.984848 | 0.516162 | 0.750505 | 0.780808 |        |        |
| 11524 | ENSG00000 | ST7L      | 0.975758 | 0.537374 | 0.756566 | 0.769697 |        |        |
| 11525 | ENSG00000 | SMAD9     | 1        | 0.533333 | 0.794949 | 0.675758 | 0.47   |        |
| 11526 | ENSG00000 | ENTPD6    | 0.884848 | 0.719192 | 0.80202  | 0.787879 |        |        |
| 11527 | ENSG00000 | STX12     | 0.921212 | 0.643434 | 0.775421 | 0.809091 |        |        |
| 11528 | ENSG00000 | PLIN3     | 0.99798  | 0.538384 | 0.805724 | 0.694949 |        |        |
| 11529 | ENSG00000 | SPATA19   | 0.828753 | 0.786469 | 0.807611 | 0.824524 |        |        |
| 11530 | ENSG00000 | SCARF2    | 0.957576 | 0.59596  | 0.774074 | 0.762626 |        |        |
| 11531 | ENSG00000 | ATP8B4    | 0.915152 | 0.683838 | 0.798653 | 0.770707 |        |        |
| 11532 | ENSG00000 | NMT1      | 1        | 0.518182 | 0.75101  | 0.712121 |        |        |
| 11533 | ENSG00000 | EEF1E1    | 0.884848 | 0.717172 | 0.800337 | 0.79697  |        |        |
| 11534 | ENSG00000 | KY        | 1        | 0.491919 | 0.743098 | 0.710101 |        |        |
| 11535 | ENSG00000 | INPP5B    | 0.884848 | 0.719192 | 0.80202  | 0.788889 |        |        |
| 11536 | ENSG00000 | GLTP      | 0.957576 | 0.622222 | 0.784007 | 0.741414 |        |        |
| 11537 | ENSG00000 | HDGF      | 1        | 0.491919 | 0.744276 | 0.734343 |        |        |
| 11538 | ENSG00000 | FAM20B    | 1        | 0.535354 | 0.758923 | 0.710101 |        |        |
| 11539 | ENSG00000 | COMTD1    | 0.927273 | 0.658586 | 0.792929 | 0.756566 |        |        |
| 11540 | ENSG00000 | ATP13A2   | 0.99899  | 0.536364 | 0.825084 | 0.683838 | 0.3758 |        |
| 11541 | ENSG00000 | HoxA6     | 0.958586 | 0.590909 | 0.771212 | 0.770707 | 0.2698 |        |
| 11542 | ENSG00000 | COMMD3-BM | 0.993939 | 0.558586 | 0.802862 | 0.687879 |        |        |
| 11543 | ENSG00000 | FAM114A2  | 1        | 0.516162 | 0.755556 | 0.752525 |        |        |
| 11544 | ENSG00000 | TPSAB1    | 0.983838 | 0.50303  | 0.743434 | 0.809091 |        |        |
| 11545 | ENSG00000 | CSTF2     | 1        | 0.549495 | 0.769697 | 0.70303  |        |        |
| 11546 | ENSG00000 | FAM83B    | 1        | 0.490909 | 0.745455 | 0.716162 |        |        |
| 11547 | ENSG00000 | ICOSLG    | 1        | 0.50101  | 0.750505 | 0.710101 | 0.3286 |        |
| 11548 | ENSG00000 | PUSL1     | 1        | 0.50303  | 0.746465 | 0.70202  |        |        |

|       |           |         |          |          |          |          |        |        |
|-------|-----------|---------|----------|----------|----------|----------|--------|--------|
| 11549 | ENSG00000 | TUBA1C  | 1        | 0.475758 | 0.738889 | 0.738384 |        |        |
| 11550 | ENSG00000 | FJX1    | 0.927273 | 0.658586 | 0.792929 | 0.757576 |        |        |
| 11551 | ENSG00000 | SYMPK   | 1        | 0.491919 | 0.747643 | 0.748485 |        |        |
| 11552 | ENSG00000 | RRAS2   | 1        | 0.485859 | 0.756397 | 0.738384 |        | 0.392  |
| 11553 | ENSG00000 | PTPDC1  | 1        | 0.491919 | 0.75404  | 0.715152 |        |        |
| 11554 | ENSG00000 | HERC4   | 0.884848 | 0.719192 | 0.80202  | 0.794949 |        |        |
| 11555 | ENSG00000 | PDIA4   | 1        | 0.516162 | 0.755724 | 0.69697  | 0.2828 | 0.3589 |
| 11556 | ENSG00000 | USP53   | 1        | 0.509091 | 0.806061 | 0.665657 |        |        |
| 11557 | ENSG00000 | BCDIN3D | 1        | 0.449495 | 0.715993 | 0.789899 |        |        |
| 11558 | ENSG00000 | TRAF1   | 0.979798 | 0.579798 | 0.783165 | 0.713131 |        |        |
| 11559 | ENSG00000 | RPS3    | 0.927273 | 0.658586 | 0.792929 | 0.760606 |        |        |
| 11560 | ENSG00000 | IGF1R   | 1        | 0.509091 | 0.754545 | 0.713131 |        |        |
| 11561 | ENSG00000 | MLX     | 1        | 0.519192 | 0.820875 | 0.677778 |        |        |
| 11562 | ENSG00000 | SEC14L1 | 1        | 0.554545 | 0.793939 | 0.661616 |        |        |
| 11563 | ENSG00000 | RNF128  | 0.964646 | 0.60303  | 0.782323 | 0.726263 |        |        |
| 11564 | ENSG00000 | ZNF346  | 1        | 0.50303  | 0.748822 | 0.747475 |        |        |
| 11565 | ENSG00000 | ATG5    | 1        | 0.519192 | 0.759596 | 0.747475 |        |        |
| 11566 | ENSG00000 | UTP3    | 1        | 0.518182 | 0.757071 | 0.713131 |        |        |
| 11567 | ENSG00000 | CSDE1   | 1        | 0.545455 | 0.772727 | 0.720202 |        |        |
| 11568 | ENSG00000 | CAAP1   | 1        | 0.488889 | 0.810774 | 0.70101  |        |        |
| 11569 | ENSG00000 | MRPL22  | 0.922481 | 0.676633 | 0.799557 | 0.763012 |        |        |
| 11570 | ENSG00000 | TBC1D31 | 0.917172 | 0.648485 | 0.781145 | 0.814141 |        |        |
| 11571 | ENSG00000 | ANKRD2  | 0.987879 | 0.554545 | 0.783838 | 0.716162 |        |        |
| 11572 | ENSG00000 | XCL1    | 0.884848 | 0.719192 | 0.80202  | 0.79798  |        |        |
| 11573 | ENSG00000 | CUZD1   | 1        | 0.466667 | 0.730303 | 0.8      |        |        |
| 11574 | ENSG00000 | XCL2    | 0.884848 | 0.719192 | 0.80202  | 0.79798  |        |        |
| 11575 | ENSG00000 | CBLL1   | 1        | 0.516162 | 0.753199 | 0.740404 |        |        |
| 11576 | ENSG00000 | PTBP2   | 0.925253 | 0.652525 | 0.787879 | 0.781818 |        |        |
| 11577 | ENSG00000 | PHF2    | 1        | 0.466667 | 0.733333 | 0.738384 |        |        |
| 11578 | ENSG00000 | LIME1   | 0.927273 | 0.658586 | 0.792929 | 0.759596 |        |        |
| 11579 | ENSG00000 | PIGZ    | 0.963636 | 0.563636 | 0.763636 | 0.776768 |        |        |
| 11580 | ENSG00000 | PDIA6   | 1        | 0.516162 | 0.755556 | 0.707071 |        |        |
| 11581 | ENSG00000 | TOPBP1  | 1        | 0.494949 | 0.747475 | 0.717172 |        |        |
| 11582 | ENSG00000 | PLXNB2  | 1        | 0.475758 | 0.736869 | 0.725253 |        |        |
| 11583 | ENSG00000 | IGSF9B  | 0.884848 | 0.719192 | 0.80202  | 0.80101  |        |        |
| 11584 | ENSG00000 | SKP1    | 0.978788 | 0.528283 | 0.764646 | 0.767677 |        |        |
| 11585 | ENSG00000 | ACOX2   | 0.977778 | 0.557576 | 0.767677 | 0.742424 |        |        |
| 11586 | ENSG00000 | TRIM69  | 0.929293 | 0.630303 | 0.779798 | 0.792929 |        |        |
| 11587 | ENSG00000 | DBH     | 0.968116 | 0.573913 | 0.771014 | 0.747826 |        |        |
| 11588 | ENSG00000 | PCBP2   | 0.958586 | 0.619192 | 0.785859 | 0.738384 |        |        |
| 11589 | ENSG00000 | FSTL1   | 1        | 0.475758 | 0.736869 | 0.753535 |        |        |
| 11590 | ENSG00000 | IGSF5   | 0.929293 | 0.623232 | 0.771212 | 0.808081 |        |        |
| 11591 | ENSG00000 | RNF180  | 0.961616 | 0.619192 | 0.787374 | 0.725253 |        |        |
| 11592 | ENSG00000 | ECHDC3  | 0.881818 | 0.754545 | 0.818182 | 0.773737 |        |        |
| 11593 | ENSG00000 | ANO3    | 0.923232 | 0.648485 | 0.784175 | 0.79798  |        |        |
| 11594 | ENSG00000 | RUBCNL  | 0.927273 | 0.658586 | 0.792929 | 0.767677 |        |        |
| 11595 | ENSG00000 | QSOX2   | 0.923232 | 0.683838 | 0.802694 | 0.752525 |        |        |
| 11596 | ENSG00000 | MYO1A   | 0.879493 | 0.749471 | 0.814482 | 0.785412 |        |        |
| 11597 | ENSG00000 | WIPI1   | 1        | 0.558586 | 0.770539 | 0.711111 |        |        |
| 11598 | ENSG00000 | JTB     | 0.884848 | 0.719192 | 0.80202  | 0.80101  |        |        |
| 11599 | ENSG00000 | TMED2   | 0.881818 | 0.716162 | 0.798485 | 0.817172 |        | 0.387  |
| 11600 | ENSG00000 | PTPMT1  | 0.925253 | 0.688889 | 0.807071 | 0.741414 |        |        |
| 11601 | ENSG00000 | ACADM   | 1        | 0.516162 | 0.755556 | 0.731313 |        |        |
| 11602 | ENSG00000 | PGAM5   | 0.966667 | 0.588889 | 0.777778 | 0.734343 |        |        |
| 11603 | ENSG00000 | TENM4   | 1        | 0.50101  | 0.750505 | 0.721212 |        |        |

|       |           |          |          |          |          |          |        |
|-------|-----------|----------|----------|----------|----------|----------|--------|
| 11604 | ENSG00000 | IRF2BPL  | 0.954878 | 0.620732 | 0.784756 | 0.760976 |        |
| 11605 | ENSG00000 | C3       | 0.983838 | 0.556566 | 0.773064 | 0.732323 |        |
| 11606 | ENSG00000 | TTC4     | 1        | 0.470707 | 0.731987 | 0.730303 |        |
| 11607 | ENSG00000 | MAP3K21  | 0.922481 | 0.676633 | 0.799557 | 0.767442 |        |
| 11608 | ENSG00000 | SLC18A1  | 0.927273 | 0.658586 | 0.792929 | 0.770707 |        |
| 11609 | ENSG00000 | DACT2    | 1        | 0.529293 | 0.746801 | 0.69596  |        |
| 11610 | ENSG00000 | RAB15    | 0.962626 | 0.623232 | 0.790572 | 0.717172 |        |
| 11611 | ENSG00000 | SPART    | 1        | 0.518182 | 0.754209 | 0.720202 |        |
| 11612 | ENSG00000 | KIF25    | 1        | 0.50202  | 0.748822 | 0.744444 |        |
| 11613 | ENSG00000 | CUTA     | 1        | 0.50404  | 0.778114 | 0.723232 |        |
| 11614 | ENSG00000 | TH       | 1        | 0.469697 | 0.723064 | 0.765657 |        |
| 11615 | ENSG00000 | VEZT     | 1        | 0.537374 | 0.761616 | 0.738384 | 0.4195 |
| 11616 | ENSG00000 | TCF7L2   | 1        | 0.470707 | 0.736027 | 0.775758 |        |
| 11617 | ENSG00000 | PLGRKT   | 1        | 0.545455 | 0.772727 | 0.705051 |        |
| 11618 | ENSG00000 | HSD17B4  | 1        | 0.50202  | 0.746296 | 0.741414 | 0.3969 |
| 11619 | ENSG00000 | CYP2C8   | 0.969697 | 0.549495 | 0.759596 | 0.780808 |        |
| 11620 | ENSG00000 | CASQ2    | 0.929293 | 0.630303 | 0.779798 | 0.80101  |        |
| 11621 | ENSG00000 | ZNF3     | 1        | 0.4926   | 0.7463   | 0.721987 | 0.3158 |
| 11622 | ENSG00000 | ITIH3    | 0.961616 | 0.587879 | 0.770707 | 0.764646 | 0.3499 |
| 11623 | ENSG00000 | UCLH5    | 0.963636 | 0.59596  | 0.777104 | 0.743434 |        |
| 11624 | ENSG00000 | GNRHR    | 0.889855 | 0.691787 | 0.790821 | 0.822222 |        |
| 11625 | ENSG00000 | TMM29    | 1        | 0.50202  | 0.746296 | 0.732323 |        |
| 11626 | ENSG00000 | DNAH8    | 1        | 0.50303  | 0.748822 | 0.745455 |        |
| 11627 | ENSG00000 | FAM219A  | 0.965116 | 0.572939 | 0.756519 | 0.778013 |        |
| 11628 | ENSG00000 | AGPAT5   | 1        | 0.505285 | 0.752643 | 0.714588 |        |
| 11629 | ENSG00000 | SLC25A38 | 0.923232 | 0.679798 | 0.795118 | 0.770707 |        |
| 11630 | ENSG00000 | DNAJB4   | 1        | 0.533333 | 0.752862 | 0.691919 |        |
| 11631 | ENSG00000 | RBL2     | 1        | 0.537374 | 0.76229  | 0.724242 | 0.3152 |
| 11632 | ENSG00000 | SLC22A7  | 0.929293 | 0.630303 | 0.779798 | 0.80202  |        |
| 11633 | ENSG00000 | HGF      | 1        | 0.557576 | 0.775084 | 0.715152 |        |
| 11634 | ENSG00000 | PARD6A   | 1        | 0.537374 | 0.764646 | 0.722222 |        |
| 11635 | ENSG00000 | LRRIQ1   | 1        | 0.564646 | 0.776431 | 0.673737 |        |
| 11636 | ENSG00000 | SPOCD1   | 1        | 0.467677 | 0.733502 | 0.806061 |        |
| 11637 | ENSG00000 | DCAF7    | 1        | 0.490587 | 0.745293 | 0.754153 |        |
| 11638 | ENSG00000 | PPBP     | 0.987879 | 0.507071 | 0.753199 | 0.79596  |        |
| 11639 | ENSG00000 | CYP24A1  | 0.884848 | 0.719192 | 0.80202  | 0.809091 |        |
| 11640 | ENSG00000 | HUWE1    | 0.958586 | 0.642424 | 0.811785 | 0.716162 |        |
| 11641 | ENSG00000 | RPS7     | 0.917172 | 0.680808 | 0.797643 | 0.784848 |        |
| 11642 | ENSG00000 | DAPK1    | 0.975758 | 0.537374 | 0.756566 | 0.779798 |        |
| 11643 | ENSG00000 | NT5C2    | 0.965657 | 0.578788 | 0.770539 | 0.762626 |        |
| 11644 | ENSG00000 | NMRK2    | 0.881818 | 0.754545 | 0.818182 | 0.782828 |        |
| 11645 | ENSG00000 | ZNF140   | 0.916376 | 0.699187 | 0.807007 | 0.765389 |        |
| 11646 | ENSG00000 | COPS3    | 0.987879 | 0.536364 | 0.765152 | 0.755556 |        |
| 11647 | ENSG00000 | DFFA     | 1        | 0.489899 | 0.801347 | 0.684848 | 0.337  |
| 11648 | ENSG00000 | YY2      | 0.989899 | 0.527273 | 0.777104 | 0.745455 |        |
| 11649 | ENSG00000 | CXCL11   | 0.919662 | 0.711416 | 0.814834 | 0.747357 |        |
| 11650 | ENSG00000 | CCDC77   | 1        | 0.491919 | 0.741414 | 0.775758 |        |
| 11651 | ENSG00000 | ZNF701   | 0.977778 | 0.547475 | 0.757239 | 0.770707 |        |
| 11652 | ENSG00000 | BCAP29   | 1        | 0.549495 | 0.769697 | 0.721212 |        |
| 11653 | ENSG00000 | LNX2     | 0.92389  | 0.682875 | 0.803383 | 0.758985 |        |
| 11654 | ENSG00000 | SMR3A    | 0.884848 | 0.719192 | 0.80202  | 0.811111 |        |
| 11655 | ENSG00000 | KDM3B    | 1        | 0.547475 | 0.767003 | 0.70303  | 0.427  |
| 11656 | ENSG00000 | FEZ1     | 0.881818 | 0.754545 | 0.818182 | 0.781818 |        |
| 11657 | ENSG00000 | CD28     | 0.882664 | 0.713531 | 0.798097 | 0.826638 |        |
| 11658 | ENSG00000 | RSRC2    | 1        | 0.497886 | 0.746124 | 0.772727 |        |

|       |                   |          |          |          |          |        |        |
|-------|-------------------|----------|----------|----------|----------|--------|--------|
| 11659 | ENSG00000VDAC1    | 1        | 0.490909 | 0.745455 | 0.70303  |        |        |
| 11660 | ENSG00000PLAT     | 1        | 0.482828 | 0.770034 | 0.765657 |        |        |
| 11661 | ENSG00000NCF4     | 0.985859 | 0.50202  | 0.762458 | 0.794949 |        |        |
| 11662 | ENSG00000CYB561D2 | 0.927273 | 0.658586 | 0.792929 | 0.774747 |        |        |
| 11663 | ENSG00000SEL1L    | 0.922481 | 0.676633 | 0.799557 | 0.774086 |        |        |
| 11664 | ENSG00000FERMT2   | 0.919192 | 0.713131 | 0.809428 | 0.756566 |        |        |
| 11665 | ENSG00000CAPS2    | 0.921212 | 0.680808 | 0.799663 | 0.772727 |        |        |
| 11666 | ENSG00000BLOC1S4  | 0.927273 | 0.658586 | 0.792929 | 0.770707 |        |        |
| 11667 | ENSG00000ERCC1    | 1        | 0.581818 | 0.770707 | 0.710101 |        |        |
| 11668 | ENSG00000PIGL     | 0.925253 | 0.652525 | 0.787879 | 0.793939 |        |        |
| 11669 | ENSG00000ATP2B4   | 1        | 0.545455 | 0.772727 | 0.726263 |        |        |
| 11670 | ENSG00000ZG16B    | 0.927273 | 0.658586 | 0.792929 | 0.772727 |        |        |
| 11671 | ENSG00000P2RY10   | 0.971717 | 0.587879 | 0.774074 | 0.738384 |        |        |
| 11672 | ENSG00000STK32C   | 0.927273 | 0.658586 | 0.792929 | 0.772727 |        |        |
| 11673 | ENSG00000CAGE1    | 0.923232 | 0.679798 | 0.799158 | 0.770707 |        |        |
| 11674 | ENSG00000TUBB2B   | 0.988889 | 0.526263 | 0.763973 | 0.766667 |        |        |
| 11675 | ENSG00000FADS2    | 0.927273 | 0.652525 | 0.784512 | 0.791919 |        |        |
| 11676 | ENSG00000GBA      | 1        | 0.519192 | 0.755219 | 0.686869 |        |        |
| 11677 | ENSG00000FXYPD4   | 0.838384 | 0.793939 | 0.816162 | 0.813131 |        |        |
| 11678 | ENSG00000TIMM8B   | 0.925253 | 0.688889 | 0.807071 | 0.748485 |        |        |
| 11679 | ENSG00000TUBB8P12 | 0.988889 | 0.526263 | 0.763973 | 0.766667 |        |        |
| 11680 | ENSG00000AGXT     | 1        | 0.490909 | 0.745455 | 0.724242 |        |        |
| 11681 | ENSG00000PRR7     | 1        | 0.488889 | 0.744444 | 0.770707 |        |        |
| 11682 | ENSG00000TUBB6    | 0.988889 | 0.526263 | 0.763973 | 0.766667 |        |        |
| 11683 | ENSG00000GLUD1    | 0.962626 | 0.590909 | 0.773232 | 0.760606 |        |        |
| 11684 | ENSG00000SLC22A25 | 0.92389  | 0.682875 | 0.803383 | 0.761099 |        |        |
| 11685 | ENSG00000TUBB4B   | 0.988889 | 0.526263 | 0.763973 | 0.766667 |        |        |
| 11686 | ENSG00000CYR1     | 1        | 0.536364 | 0.763131 | 0.681818 |        |        |
| 11687 | ENSG00000MIB2     | 0.879493 | 0.749471 | 0.814482 | 0.795983 |        |        |
| 11688 | ENSG00000STX17    | 0.959831 | 0.605708 | 0.775194 | 0.762156 |        |        |
| 11689 | ENSG00000IRS4     | 0.92389  | 0.682875 | 0.803383 | 0.763214 |        |        |
| 11690 | ENSG00000SLC35F3  | 0.92389  | 0.682875 | 0.803383 | 0.762156 |        |        |
| 11691 | ENSG00000TUBB3    | 0.988889 | 0.526263 | 0.763973 | 0.766667 |        |        |
| 11692 | ENSG00000TUBB8    | 0.988889 | 0.526263 | 0.763973 | 0.766667 |        |        |
| 11693 | ENSG00000ANO2     | 0.845411 | 0.760386 | 0.802899 | 0.841546 | 0.3567 | 0.3182 |
| 11694 | ENSG00000SIM2     | 0.957576 | 0.622222 | 0.784007 | 0.758586 |        |        |
| 11695 | ENSG00000INSR     | 0.964563 | 0.599114 | 0.781838 | 0.739756 |        |        |
| 11696 | ENSG00000DDX23    | 1        | 0.475758 | 0.73367  | 0.755556 |        |        |
| 11697 | ENSG00000RRP8     | 0.985201 | 0.55074  | 0.780127 | 0.734672 |        |        |
| 11698 | ENSG00000C4orf33  | 0.884848 | 0.719192 | 0.80202  | 0.814141 |        |        |
| 11699 | ENSG00000GLUD2    | 0.962626 | 0.590909 | 0.773232 | 0.760606 |        |        |
| 11700 | ENSG00000LIN7C    | 0.927273 | 0.658586 | 0.792929 | 0.776768 |        |        |
| 11701 | ENSG00000VN1R4    | 1        | 0.509091 | 0.748485 | 0.686869 |        |        |
| 11702 | ENSG00000ZFYVE16  | 1        | 0.561616 | 0.780808 | 0.713131 |        |        |
| 11703 | ENSG00000EIF3A    | 0.962626 | 0.613131 | 0.776431 | 0.747475 | 0.3749 |        |
| 11704 | ENSG00000CCDC15   | 1        | 0.487879 | 0.741582 | 0.758586 |        |        |
| 11705 | ENSG00000PCDHGA10 | 1        | 0.509091 | 0.754545 | 0.678788 |        |        |
| 11706 | ENSG00000IER5     | 0.958586 | 0.590909 | 0.771212 | 0.788889 |        |        |
| 11707 | ENSG00000CNTLN    | 1        | 0.519027 | 0.761276 | 0.762156 |        |        |
| 11708 | ENSG00000LBH      | 1        | 0.476768 | 0.742088 | 0.723232 | 0.2676 | 0.4482 |
| 11709 | ENSG00000MRE11    | 1        | 0.526263 | 0.756397 | 0.764646 |        |        |
| 11710 | ENSG00000EHBP1    | 1        | 0.526263 | 0.754882 | 0.735354 |        |        |
| 11711 | ENSG00000PMEL     | 0.884848 | 0.719192 | 0.80202  | 0.813131 |        |        |
| 11712 | ENSG00000RAB21    | 1        | 0.579798 | 0.786532 | 0.694949 |        |        |
| 11713 | ENSG00000ETAA1    | 1        | 0.509091 | 0.836364 | 0.660606 |        | 0.3862 |

|       |                   |          |          |          |          |        |       |
|-------|-------------------|----------|----------|----------|----------|--------|-------|
| 11714 | ENSG00000CCDC182  | 0.976744 | 0.55074  | 0.763742 | 0.768499 |        |       |
| 11715 | ENSG00000TSC22D2  | 0.884848 | 0.719192 | 0.80202  | 0.813131 |        |       |
| 11716 | ENSG00000Z84492.2 | 0.927273 | 0.658586 | 0.792929 | 0.774747 |        |       |
| 11717 | ENSG00000FAM216B  | 1        | 0.509091 | 0.754545 | 0.694949 |        |       |
| 11718 | ENSG00000MED6     | 0.957717 | 0.612051 | 0.781712 | 0.769556 |        |       |
| 11719 | ENSG00000MORF4L2  | 1        | 0.494949 | 0.747475 | 0.766667 |        |       |
| 11720 | ENSG00000TGIF2LX  | 0.871539 | 0.741971 | 0.806755 | 0.822813 |        |       |
| 11721 | ENSG00000PTH2R    | 0.881818 | 0.754545 | 0.818182 | 0.788889 |        |       |
| 11722 | ENSG00000DENND1B  | 0.954596 | 0.615725 | 0.783684 | 0.778516 |        |       |
| 11723 | ENSG00000RPS6KA1  | 1        | 0.540404 | 0.76229  | 0.717172 | 0.2732 |       |
| 11724 | ENSG00000ZNF473   | 1        | 0.495772 | 0.743129 | 0.752643 |        |       |
| 11725 | ENSG00000NR2E1    | 0.884848 | 0.719192 | 0.80202  | 0.819192 |        |       |
| 11726 | ENSG00000DPH7     | 0.960606 | 0.613131 | 0.779461 | 0.754545 |        |       |
| 11727 | ENSG00000WDR31    | 1        | 0.488889 | 0.73367  | 0.771717 |        |       |
| 11728 | ENSG00000NBL1     | 1        | 0.526263 | 0.764983 | 0.694949 |        |       |
| 11729 | ENSG00000ZNF507   | 0.961945 | 0.58351  | 0.769027 | 0.778013 |        |       |
| 11730 | ENSG00000RPUSD1   | 1        | 0.557576 | 0.775084 | 0.725253 | 0.2474 |       |
| 11731 | ENSG00000ODR4     | 0.925253 | 0.688889 | 0.807071 | 0.753535 |        |       |
| 11732 | ENSG00000C1D      | 1        | 0.488889 | 0.781481 | 0.681818 |        |       |
| 11733 | ENSG00000SETD5    | 1        | 0.552525 | 0.786532 | 0.652525 |        |       |
| 11734 | ENSG00000CYP19A1  | 1        | 0.482828 | 0.740067 | 0.779798 |        |       |
| 11735 | ENSG00000CNOT1    | 1        | 0.563636 | 0.775758 | 0.688889 |        |       |
| 11736 | ENSG00000S100A6   | 0.969697 | 0.518182 | 0.804545 | 0.765657 |        |       |
| 11737 | ENSG00000ERAP2    | 1        | 0.50101  | 0.750505 | 0.722222 |        |       |
| 11738 | ENSG00000KRT222   | 0.882664 | 0.713531 | 0.798097 | 0.840381 |        |       |
| 11739 | ENSG00000MIER2    | 1        | 0.507071 | 0.745791 | 0.776768 |        |       |
| 11740 | ENSG00000C5orf51  | 0.962626 | 0.590909 | 0.773232 | 0.764646 |        |       |
| 11741 | ENSG00000DDOST    | 1        | 0.482828 | 0.740067 | 0.721212 | 0.2529 | 0.526 |
| 11742 | ENSG00000MAGT1    | 0.925253 | 0.652525 | 0.787879 | 0.80303  |        |       |
| 11743 | ENSG00000PLK2     | 1        | 0.531313 | 0.7633   | 0.70303  |        |       |
| 11744 | ENSG00000DARS2    | 1        | 0.510571 | 0.752643 | 0.751586 |        |       |
| 11745 | ENSG00000PLOC2    | 0.925253 | 0.688889 | 0.807071 | 0.755556 |        |       |
| 11746 | ENSG00000SAMM15   | 1        | 0.556566 | 0.776599 | 0.712121 |        |       |
| 11747 | ENSG00000ANKRD49  | 1        | 0.489429 | 0.744715 | 0.734672 |        |       |
| 11748 | ENSG00000ANKRD29  | 0.979798 | 0.538384 | 0.757407 | 0.784848 |        |       |
| 11749 | ENSG00000WDSUB1   | 0.929293 | 0.623232 | 0.771212 | 0.832323 |        |       |
| 11750 | ENSG00000PDE4D    | 1        | 0.491919 | 0.743098 | 0.792929 |        |       |
| 11751 | ENSG00000TRIM10   | 0.838384 | 0.793939 | 0.816162 | 0.819192 |        |       |
| 11752 | ENSG00000TM9SF1   | 0.927273 | 0.658586 | 0.792929 | 0.786869 |        |       |
| 11753 | ENSG00000NRL      | 0.928502 | 0.629952 | 0.7781   | 0.822222 |        |       |
| 11754 | ENSG00000AMY1A    | 0.986869 | 0.548485 | 0.767677 | 0.752525 |        |       |
| 11755 | ENSG00000PNPLA7   | 1        | 0.491919 | 0.743098 | 0.775758 |        |       |
| 11756 | ENSG00000DCAF12   | 0.881818 | 0.754545 | 0.836364 | 0.773737 |        |       |
| 11757 | ENSG00000CXCL14   | 0.966667 | 0.578788 | 0.768687 | 0.770707 |        |       |
| 11758 | ENSG00000ZNF497   | 0.944444 | 0.617172 | 0.785185 | 0.794949 |        |       |
| 11759 | ENSG00000MYOF     | 0.966667 | 0.588889 | 0.777778 | 0.753535 |        |       |
| 11760 | ENSG00000TOX2     | 0.875758 | 0.750505 | 0.812795 | 0.814141 |        |       |
| 11761 | ENSG00000SLC34A3  | 0.884848 | 0.719192 | 0.80202  | 0.820202 |        |       |
| 11762 | ENSG00000CDK5RAP3 | 1        | 0.519192 | 0.759596 | 0.747475 | 0.159  |       |
| 11763 | ENSG00000PRPF6    | 0.958586 | 0.617172 | 0.781145 | 0.768687 |        |       |
| 11764 | ENSG00000ZNF687   | 0.986869 | 0.548485 | 0.767677 | 0.756566 | 0.3497 |       |
| 11765 | ENSG00000UBB      | 1        | 0.505051 | 0.781145 | 0.686869 |        |       |
| 11766 | ENSG00000CHPT1    | 0.927273 | 0.658586 | 0.792929 | 0.788889 |        |       |
| 11767 | ENSG00000PADI3    | 0.965657 | 0.60303  | 0.779966 | 0.745455 |        |       |
| 11768 | ENSG00000SRSF11   | 1        | 0.548485 | 0.771212 | 0.711111 |        |       |

|       |                    |          |          |          |          |        |
|-------|--------------------|----------|----------|----------|----------|--------|
| 11769 | ENSG00000FAM200A   | 0.990909 | 0.532323 | 0.76835  | 0.762626 | 0.3683 |
| 11770 | ENSG00000GJD4      | 0.957717 | 0.636364 | 0.808668 | 0.733615 |        |
| 11771 | ENSG00000ACSS3     | 0.988889 | 0.556566 | 0.776094 | 0.740404 |        |
| 11772 | ENSG00000CADM2     | 0.881818 | 0.754545 | 0.818182 | 0.794949 |        |
| 11773 | ENSG00000NCPD2     | 1        | 0.509091 | 0.836364 | 0.714141 |        |
| 11774 | ENSG00000FAM200B   | 0.990909 | 0.532323 | 0.76835  | 0.762626 |        |
| 11775 | ENSG00000CYP1A2    | 0.884848 | 0.719192 | 0.80202  | 0.828283 |        |
| 11776 | ENSG00000ARMC2     | 0.878788 | 0.752525 | 0.81532  | 0.807071 |        |
| 11777 | ENSG00000TRIM65    | 0.964646 | 0.594949 | 0.774074 | 0.759596 |        |
| 11778 | ENSG00000MYNN      | 0.966667 | 0.588889 | 0.777778 | 0.757576 |        |
| 11779 | ENSG00000ADRB1     | 0.927273 | 0.658586 | 0.792929 | 0.791919 |        |
| 11780 | ENSG00000CAMSAP2   | 1        | 0.50303  | 0.749495 | 0.766667 | 0.3882 |
| 11781 | ENSG00000STC1      | 0.986869 | 0.536364 | 0.756397 | 0.782828 |        |
| 11782 | ENSG00000TUBA3C    | 1        | 0.475758 | 0.738889 | 0.738384 |        |
| 11783 | ENSG00000BCKDK     | 0.92389  | 0.682875 | 0.803383 | 0.773784 | 0.3184 |
| 11784 | ENSG00000EML2      | 0.960606 | 0.617172 | 0.785522 | 0.753535 |        |
| 11785 | ENSG00000GALNT2    | 0.881818 | 0.754545 | 0.818182 | 0.79798  |        |
| 11786 | ENSG00000FAM69B    | 0.92389  | 0.681818 | 0.801797 | 0.778013 |        |
| 11787 | ENSG00000PSMC4     | 0.99697  | 0.540404 | 0.808754 | 0.716162 | 0.2953 |
| 11788 | ENSG00000GCKR      | 0.874747 | 0.750505 | 0.81229  | 0.822222 |        |
| 11789 | ENSG00000FAM153A   | 1        | 0.476768 | 0.814815 | 0.686869 |        |
| 11790 | ENSG00000KIF17     | 0.838384 | 0.793939 | 0.816162 | 0.834343 |        |
| 11791 | ENSG00000ZSWIM3    | 0.881818 | 0.752525 | 0.810438 | 0.809091 |        |
| 11792 | ENSG00000EXTL3     | 0.927273 | 0.658586 | 0.792929 | 0.793939 |        |
| 11793 | ENSG00000SNCAIP    | 0.925253 | 0.688889 | 0.807071 | 0.764646 |        |
| 11794 | ENSG00000EPN1      | 0.917172 | 0.680808 | 0.787205 | 0.820202 |        |
| 11795 | ENSG00000ACTL9     | 1        | 0.552525 | 0.770202 | 0.660606 |        |
| 11796 | ENSG00000OTX1      | 0.874207 | 0.747357 | 0.810782 | 0.826638 |        |
| 11797 | ENSG00000AL136295. | 0.927273 | 0.658586 | 0.792929 | 0.786869 |        |
| 11798 | ENSG00000SCAF8     | 1        | 0.521212 | 0.753872 | 0.683838 |        |
| 11799 | ENSG00000TBC1D3G   | 0.979798 | 0.579798 | 0.779798 | 0.734343 |        |
| 11800 | ENSG00000VPS35     | 0.958586 | 0.649495 | 0.801515 | 0.734343 |        |
| 11801 | ENSG00000COA6      | 0.925253 | 0.688889 | 0.807071 | 0.761616 |        |
| 11802 | ENSG00000FAM166A   | 0.827243 | 0.827243 | 0.827243 | 0.827243 | 0.3449 |
| 11803 | ENSG00000TBC1D3K   | 0.979798 | 0.579798 | 0.779798 | 0.734343 |        |
| 11804 | ENSG00000KLHL36    | 0.969697 | 0.549495 | 0.759596 | 0.80404  |        |
| 11805 | ENSG00000CPNE4     | 0.827243 | 0.827243 | 0.827243 | 0.827243 |        |
| 11806 | ENSG00000TBC1D3H   | 0.979798 | 0.579798 | 0.779798 | 0.734343 |        |
| 11807 | ENSG00000TBC1D3D   | 0.979798 | 0.579798 | 0.779798 | 0.734343 |        |
| 11808 | ENSG00000SS18L1    | 0.981818 | 0.570707 | 0.779966 | 0.736364 |        |
| 11809 | ENSG00000TBC1D3L   | 0.979798 | 0.579798 | 0.779798 | 0.734343 |        |
| 11810 | ENSG00000TBC1D3    | 0.979798 | 0.579798 | 0.779798 | 0.734343 |        |
| 11811 | ENSG00000LY6K      | 0.967677 | 0.567677 | 0.765657 | 0.784848 |        |
| 11812 | ENSG00000TBC1D3B   | 0.979798 | 0.579798 | 0.779798 | 0.734343 |        |
| 11813 | ENSG00000ZNF598    | 1        | 0.476768 | 0.745455 | 0.755556 |        |
| 11814 | ENSG00000LIPF      | 0.884848 | 0.719192 | 0.80202  | 0.829293 |        |
| 11815 | ENSG00000TBC1D3I   | 0.979798 | 0.579798 | 0.779798 | 0.734343 |        |
| 11816 | ENSG00000TBC1D3C   | 0.979798 | 0.579798 | 0.779798 | 0.734343 |        |
| 11817 | ENSG00000GALNT5    | 1        | 0.50303  | 0.748822 | 0.752525 |        |
| 11818 | ENSG00000TBC1D3E   | 0.979798 | 0.579798 | 0.779798 | 0.734343 |        |
| 11819 | ENSG00000RMND5A    | 0.918699 | 0.703833 | 0.811266 | 0.773519 |        |
| 11820 | ENSG00000HRNR      | 0.925253 | 0.683838 | 0.798822 | 0.776768 |        |
| 11821 | ENSG00000PROKR1    | 0.963636 | 0.59596  | 0.777104 | 0.762626 |        |
| 11822 | ENSG00000ERO1A     | 0.988889 | 0.556566 | 0.776094 | 0.743434 |        |
| 11823 | ENSG00000RIC1      | 0.923232 | 0.683838 | 0.802694 | 0.781818 |        |

|       |                   |          |          |          |          |        |
|-------|-------------------|----------|----------|----------|----------|--------|
| 11824 | ENSG00000SAMD3    | 0.966667 | 0.588889 | 0.777778 | 0.759596 |        |
| 11825 | ENSG00000ATP6AP1  | 1        | 0.509091 | 0.754545 | 0.789899 | 0.3749 |
| 11826 | ENSG00000FSD1L    | 0.925253 | 0.683838 | 0.798822 | 0.781818 |        |
| 11827 | ENSG00000CLDN25   | 0.876768 | 0.752525 | 0.814646 | 0.815152 |        |
| 11828 | ENSG00000LMAN2L   | 0.915152 | 0.717172 | 0.815488 | 0.773737 | 0.388  |
| 11829 | ENSG00000GPR107   | 0.947475 | 0.613131 | 0.789394 | 0.79899  |        |
| 11830 | ENSG00000ERC1     | 1        | 0.558586 | 0.768013 | 0.730303 | 0.2615 |
| 11831 | ENSG00000CCDC28A  | 0.958774 | 0.641649 | 0.797393 | 0.744186 |        |
| 11832 | ENSG00000MSL1     | 1        | 0.555556 | 0.76936  | 0.658586 | 0.278  |
| 11833 | ENSG00000SLC45A1  | 0.921776 | 0.715645 | 0.81871  | 0.756871 |        |
| 11834 | ENSG00000LIF      | 0.962626 | 0.590909 | 0.773232 | 0.778788 |        |
| 11835 | ENSG00000SLC03A1  | 0.881818 | 0.752525 | 0.816667 | 0.806061 |        |
| 11836 | ENSG00000SLC2A2   | 0.975758 | 0.59596  | 0.780135 | 0.733333 |        |
| 11837 | ENSG00000ANKRD33  | 0.838384 | 0.793939 | 0.816162 | 0.838384 |        |
| 11838 | ENSG00000CSPG4    | 1        | 0.536364 | 0.763131 | 0.686869 | 0.2423 |
| 11839 | ENSG00000SMIM20   | 0.965657 | 0.612121 | 0.788889 | 0.737374 |        |
| 11840 | ENSG00000HK3      | 0.884848 | 0.719192 | 0.80202  | 0.838384 |        |
| 11841 | ENSG00000SRPX2    | 1        | 0.494949 | 0.747475 | 0.806061 |        |
| 11842 | ENSG00000ZFP36    | 0.959831 | 0.638478 | 0.791931 | 0.744186 |        |
| 11843 | ENSG00000GNS      | 1        | 0.507071 | 0.754882 | 0.747475 |        |
| 11844 | ENSG00000TPPP2    | 0.881818 | 0.752525 | 0.810438 | 0.816162 |        |
| 11845 | ENSG00000PTPRT    | 1        | 0.516162 | 0.755724 | 0.694949 |        |
| 11846 | ENSG00000SLC35F6  | 0.925253 | 0.688889 | 0.807071 | 0.766667 |        |
| 11847 | ENSG00000KCND2    | 0.881818 | 0.754545 | 0.818182 | 0.805051 |        |
| 11848 | ENSG00000PROP1    | 0.882126 | 0.755556 | 0.817552 | 0.802899 |        |
| 11849 | ENSG00000FGD4     | 0.917548 | 0.707188 | 0.805497 | 0.787526 |        |
| 11850 | ENSG00000TAS2R39  | 1        | 0.475758 | 0.736869 | 0.744444 |        |
| 11851 | ENSG00000DOK5     | 0.875758 | 0.750505 | 0.812795 | 0.831313 |        |
| 11852 | ENSG00000GNG2     | 1        | 0.482828 | 0.737037 | 0.748485 |        |
| 11853 | ENSG00000ARHGFE33 | 1        | 0.50101  | 0.750505 | 0.705051 |        |
| 11854 | ENSG00000ZNFX1    | 0.92389  | 0.682875 | 0.803383 | 0.784355 |        |
| 11855 | ENSG00000AP3M1    | 1        | 0.488889 | 0.744444 | 0.734343 |        |
| 11856 | ENSG00000ELAVL1   | 1        | 0.572727 | 0.824242 | 0.686869 |        |
| 11857 | ENSG00000USH1C    | 1        | 0.545455 | 0.772727 | 0.750505 |        |
| 11858 | ENSG00000CD276    | 1        | 0.549495 | 0.769697 | 0.730303 | 0.4464 |
| 11859 | ENSG00000SCGB1A1  | 0.964646 | 0.60303  | 0.782323 | 0.756566 |        |
| 11860 | ENSG00000SNX30    | 1        | 0.494949 | 0.747475 | 0.757576 |        |
| 11861 | ENSG00000CHAMP1   | 1        | 0.491919 | 0.747643 | 0.719192 | 0.2514 |
| 11862 | ENSG00000TMPO     | 0.99899  | 0.594949 | 0.832492 | 0.676768 |        |
| 11863 | ENSG00000INTS11   | 1        | 0.494949 | 0.76431  | 0.759596 | 0.3854 |
| 11864 | ENSG00000XPC      | 1        | 0.539394 | 0.759596 | 0.707071 |        |
| 11865 | ENSG00000TBL1Y    | 1        | 0.540169 | 0.770085 | 0.742072 |        |
| 11866 | ENSG00000TIMM22   | 0.927273 | 0.657576 | 0.791246 | 0.80303  |        |
| 11867 | ENSG00000SOS1     | 0.915433 | 0.714588 | 0.815011 | 0.782241 |        |
| 11868 | ENSG00000GHRL     | 0.964646 | 0.637374 | 0.80101  | 0.723232 |        |
| 11869 | ENSG00000HSPA1A   | 1        | 0.467677 | 0.814815 | 0.684848 |        |
| 11870 | ENSG00000TERF2    | 0.99596  | 0.535354 | 0.799327 | 0.736364 |        |
| 11871 | ENSG00000YIPF3    | 1        | 0.531313 | 0.765657 | 0.720202 |        |
| 11872 | ENSG00000KIAA0556 | 1        | 0.560606 | 0.771886 | 0.737374 | 0.3122 |
| 11873 | ENSG00000TNNT2    | 0.965657 | 0.578788 | 0.770539 | 0.790909 |        |
| 11874 | ENSG00000SHPRH    | 1        | 0.545455 | 0.772727 | 0.69697  |        |
| 11875 | ENSG00000DPP7     | 1        | 0.50101  | 0.750505 | 0.723232 |        |
| 11876 | ENSG00000ZNF502   | 0.988889 | 0.579798 | 0.787879 | 0.726263 |        |
| 11877 | ENSG00000GLIPR1L1 | 0.879493 | 0.749471 | 0.814482 | 0.824524 |        |
| 11878 | ENSG00000RELB     | 1        | 0.526263 | 0.813468 | 0.711111 |        |

|       |                    |          |          |          |          |        |
|-------|--------------------|----------|----------|----------|----------|--------|
| 11879 | ENSG00000PEG10     | 0.981818 | 0.510101 | 0.756061 | 0.833333 |        |
| 11880 | ENSG00000FAM153B   | 1        | 0.476768 | 0.814815 | 0.686869 |        |
| 11881 | ENSG00000ITGA1     | 0.921212 | 0.680808 | 0.799663 | 0.80202  |        |
| 11882 | ENSG00000GALNT3    | 0.95935  | 0.631823 | 0.793264 | 0.754936 |        |
| 11883 | ENSG00000FABP6     | 0.965657 | 0.612121 | 0.787205 | 0.747475 |        |
| 11884 | ENSG00000PRNP      | 1        | 0.491919 | 0.737879 | 0.754545 |        |
| 11885 | ENSG00000VPS50     | 1        | 0.526427 | 0.763214 | 0.783298 | 0.2969 |
| 11886 | ENSG00000STAM2     | 1        | 0.564646 | 0.774579 | 0.712121 |        |
| 11887 | ENSG00000CDT1      | 0.964646 | 0.570707 | 0.764646 | 0.806061 | 0.388  |
| 11888 | ENSG00000AKT3      | 0.964646 | 0.562626 | 0.799832 | 0.772727 |        |
| 11889 | ENSG00000CD8B      | 0.841546 | 0.798068 | 0.819807 | 0.838647 |        |
| 11890 | ENSG00000TUBAL3    | 0.991919 | 0.552525 | 0.775253 | 0.754545 |        |
| 11891 | ENSG00000GPD1      | 0.963636 | 0.588889 | 0.769529 | 0.790909 |        |
| 11892 | ENSG00000OSTM1     | 0.961616 | 0.614141 | 0.78064  | 0.772727 |        |
| 11893 | ENSG00000USP20     | 1        | 0.4926   | 0.7463   | 0.781184 |        |
| 11894 | ENSG00000RPL24     | 0.959596 | 0.617172 | 0.785017 | 0.776768 |        |
| 11895 | ENSG00000TMC7      | 0.925253 | 0.683838 | 0.798822 | 0.791919 |        |
| 11896 | ENSG00000PRPH      | 1        | 0.50101  | 0.750505 | 0.768687 |        |
| 11897 | ENSG00000RFX2      | 0.869979 | 0.787526 | 0.828753 | 0.811839 |        |
| 11898 | ENSG00000SNAP47    | 0.964646 | 0.619192 | 0.776768 | 0.759596 |        |
| 11899 | ENSG00000BCL2L13   | 0.978858 | 0.57611  | 0.785941 | 0.748414 |        |
| 11900 | ENSG00000SMOC1     | 0.878788 | 0.752525 | 0.81532  | 0.827273 | 0.3464 |
| 11901 | ENSG00000GNG13     | 0.841546 | 0.798068 | 0.819807 | 0.841546 |        |
| 11902 | ENSG00000SLC32A1   | 1        | 0.497585 | 0.748792 | 0.813527 |        |
| 11903 | ENSG00000LY6G6F    | 0.876321 | 0.787526 | 0.831924 | 0.800211 |        |
| 11904 | ENSG00000FOXL2     | 0.873737 | 0.788889 | 0.831145 | 0.80404  |        |
| 11905 | ENSG00000ANKRD65   | 0.881818 | 0.754545 | 0.818182 | 0.815152 |        |
| 11906 | ENSG00000ZNF365    | 0.921776 | 0.715645 | 0.81871  | 0.769556 |        |
| 11907 | ENSG00000LY6G6F-LY | 0.876321 | 0.787526 | 0.831924 | 0.800211 |        |
| 11908 | ENSG00000IL17RC    | 0.987879 | 0.567677 | 0.777778 | 0.748485 |        |
| 11909 | ENSG00000GET4      | 0.959596 | 0.644444 | 0.790236 | 0.753535 |        |
| 11910 | ENSG00000GCK       | 1        | 0.563636 | 0.77138  | 0.724242 | 0.3619 |
| 11911 | ENSG00000SNTG1     | 0.881818 | 0.754545 | 0.818182 | 0.819192 |        |
| 11912 | ENSG00000TUFM      | 1        | 0.519192 | 0.753872 | 0.711111 |        |
| 11913 | ENSG00000CFH       | 0.993939 | 0.550505 | 0.786364 | 0.747475 |        |
| 11914 | ENSG00000DCLRE1A   | 0.881818 | 0.754545 | 0.818182 | 0.817172 |        |
| 11915 | ENSG00000HMGCL     | 0.927273 | 0.658586 | 0.792929 | 0.811111 |        |
| 11916 | ENSG00000UNC119    | 0.928502 | 0.664734 | 0.796618 | 0.8      |        |
| 11917 | ENSG00000POLR3K    | 0.910148 | 0.708245 | 0.814658 | 0.801268 |        |
| 11918 | ENSG00000SLC7A8    | 0.986869 | 0.548485 | 0.767677 | 0.779798 |        |
| 11919 | ENSG00000JMJD7-PLA | 0.964059 | 0.596195 | 0.778541 | 0.773784 |        |
| 11920 | ENSG00000BTN2A1    | 0.921212 | 0.680808 | 0.799663 | 0.812121 |        |
| 11921 | ENSG00000GSR       | 0.963636 | 0.59596  | 0.821549 | 0.736364 |        |
| 11922 | ENSG00000JMJD7     | 0.964059 | 0.596195 | 0.778541 | 0.773784 |        |
| 11923 | ENSG00000FAM173A   | 0.922481 | 0.676633 | 0.799557 | 0.811739 |        |
| 11924 | ENSG00000GIT1      | 1        | 0.579798 | 0.789899 | 0.7      |        |
| 11925 | ENSG00000SLC50A1   | 0.925253 | 0.688889 | 0.807071 | 0.779798 |        |
| 11926 | ENSG00000PLPPR1    | 0.927273 | 0.658586 | 0.792929 | 0.811111 |        |
| 11927 | ENSG00000TRIP4     | 0.921212 | 0.717172 | 0.818519 | 0.773737 |        |
| 11928 | ENSG00000IGSF9     | 0.923232 | 0.721212 | 0.822222 | 0.761616 |        |
| 11929 | ENSG00000SERPINA7  | 0.923232 | 0.683838 | 0.802694 | 0.79899  |        |
| 11930 | ENSG00000TUBB      | 1        | 0.475758 | 0.75303  | 0.742424 |        |
| 11931 | ENSG00000ARMS2     | 0.881818 | 0.750505 | 0.809428 | 0.840404 |        |
| 11932 | ENSG00000SNRPA1    | 1        | 0.535354 | 0.758923 | 0.737374 |        |
| 11933 | ENSG00000FNMTA     | 1        | 0.537374 | 0.824916 | 0.652525 | 0.4985 |



|       |                   |          |          |          |          |        |
|-------|-------------------|----------|----------|----------|----------|--------|
| 11934 | ENSG00000SURF4    | 0.965657 | 0.59596  | 0.771717 | 0.782828 |        |
| 11935 | ENSG00000WIPF3    | 1        | 0.531313 | 0.765657 | 0.742424 |        |
| 11936 | ENSG00000PSIP1    | 1        | 0.491919 | 0.747643 | 0.756566 | 0.4684 |
| 11937 | ENSG00000TMEM8A   | 0.963636 | 0.649495 | 0.790404 | 0.737374 |        |
| 11938 | ENSG00000CWC22    | 0.986258 | 0.542283 | 0.764271 | 0.792812 |        |
| 11939 | ENSG00000HIST1H4H | 0.965657 | 0.612121 | 0.788889 | 0.755556 |        |
| 11940 | ENSG00000INTU     | 1        | 0.516162 | 0.755556 | 0.729293 |        |
| 11941 | ENSG00000ALG5     | 0.92389  | 0.682875 | 0.803383 | 0.799154 |        |
| 11942 | ENSG00000LRRC61   | 0.965657 | 0.578788 | 0.770539 | 0.80303  |        |
| 11943 | ENSG00000ANP32E   | 1        | 0.552525 | 0.786532 | 0.692929 |        |
| 11944 | ENSG00000CKS1B    | 1        | 0.494949 | 0.747475 | 0.744444 |        |
| 11945 | ENSG00000MYLK3    | 0.881818 | 0.752525 | 0.810438 | 0.841414 |        |
| 11946 | ENSG00000MPHOSPH8 | 1        | 0.476768 | 0.731313 | 0.775758 |        |
| 11947 | ENSG00000FAM135B  | 1        | 0.467677 | 0.814815 | 0.731313 |        |
| 11948 | ENSG00000PGM5     | 0.975758 | 0.562626 | 0.767677 | 0.790909 |        |
| 11949 | ENSG00000PLIN1    | 0.989899 | 0.547475 | 0.775758 | 0.769697 |        |
| 11950 | ENSG00000SUN3     | 0.878788 | 0.752525 | 0.81532  | 0.840404 |        |
| 11951 | ENSG00000FAM49B   | 0.963636 | 0.629293 | 0.795118 | 0.743434 |        |
| 11952 | ENSG00000OR2M4    | 0.92389  | 0.682875 | 0.803383 | 0.799154 |        |
| 11953 | ENSG00000OR5D16   | 0.881818 | 0.754545 | 0.818182 | 0.824242 |        |
| 11954 | ENSG00000MS4A6A   | 0.966667 | 0.588889 | 0.777778 | 0.782828 |        |
| 11955 | ENSG00000NUDT9    | 1        | 0.488889 | 0.783165 | 0.718182 |        |
| 11956 | ENSG00000ROB01    | 1        | 0.50303  | 0.746801 | 0.742424 |        |
| 11957 | ENSG00000DNAJC4   | 0.925253 | 0.688889 | 0.807071 | 0.787879 | 0.3938 |
| 11958 | ENSG00000HIST1H4C | 0.965657 | 0.612121 | 0.788889 | 0.755556 |        |
| 11959 | ENSG00000SPARC    | 0.978788 | 0.580808 | 0.773064 | 0.765657 |        |
| 11960 | ENSG00000HIST1H4J | 0.965657 | 0.612121 | 0.788889 | 0.755556 |        |
| 11961 | ENSG00000GPR34    | 1        | 0.461616 | 0.774579 | 0.755556 |        |
| 11962 | ENSG00000ZNF630   | 1        | 0.507071 | 0.746801 | 0.717172 |        |
| 11963 | ENSG00000HIST2H4B | 0.965657 | 0.612121 | 0.788889 | 0.755556 |        |
| 11964 | ENSG00000HIST2H4A | 0.965657 | 0.612121 | 0.788889 | 0.755556 |        |
| 11965 | ENSG00000USP33    | 0.923232 | 0.721212 | 0.822222 | 0.766667 |        |
| 11966 | ENSG00000REG1B    | 0.881818 | 0.754545 | 0.818182 | 0.828283 |        |
| 11967 | ENSG00000HIST1H4K | 0.965657 | 0.612121 | 0.788889 | 0.755556 |        |
| 11968 | ENSG00000HIST1H4F | 0.965657 | 0.612121 | 0.788889 | 0.755556 |        |
| 11969 | ENSG00000HIST1H4L | 0.965657 | 0.612121 | 0.788889 | 0.755556 |        |
| 11970 | ENSG00000TMEM205  | 0.915433 | 0.709302 | 0.811311 | 0.803383 |        |
| 11971 | ENSG00000HIST1H4G | 0.965657 | 0.612121 | 0.788889 | 0.755556 |        |
| 11972 | ENSG00000HIST1H4I | 0.965657 | 0.612121 | 0.788889 | 0.755556 |        |
| 11973 | ENSG00000GPKOW    | 1        | 0.578788 | 0.787879 | 0.724242 |        |
| 11974 | ENSG00000RTCB     | 0.915433 | 0.709302 | 0.823643 | 0.791755 |        |
| 11975 | ENSG00000HIST1H4E | 0.965657 | 0.612121 | 0.788889 | 0.755556 |        |
| 11976 | ENSG00000PSME4    | 0.958586 | 0.619192 | 0.785859 | 0.793939 |        |
| 11977 | ENSG00000HIST1H4D | 0.965657 | 0.612121 | 0.788889 | 0.755556 |        |
| 11978 | ENSG00000HIST1H4B | 0.965657 | 0.612121 | 0.788889 | 0.755556 |        |
| 11979 | ENSG00000IGFL4    | 0.881818 | 0.754545 | 0.818182 | 0.828283 |        |
| 11980 | ENSG00000P4HA1    | 1        | 0.518182 | 0.75101  | 0.774747 | 0.3497 |
| 11981 | ENSG00000LIMS4    | 0.925253 | 0.688889 | 0.807071 | 0.786869 |        |
| 11982 | ENSG00000LIMS3    | 0.925253 | 0.688889 | 0.807071 | 0.786869 |        |
| 11983 | ENSG00000ACVR1C   | 1        | 0.545455 | 0.772727 | 0.729293 |        |
| 11984 | ENSG00000CCDC130  | 0.958586 | 0.647475 | 0.796296 | 0.765657 |        |
| 11985 | ENSG00000IDH2     | 0.92389  | 0.682875 | 0.803383 | 0.803383 |        |
| 11986 | ENSG00000STIM2    | 1        | 0.526263 | 0.754882 | 0.776768 |        |
| 11987 | ENSG00000IMPG1    | 1        | 0.508213 | 0.752013 | 0.794203 |        |
| 11988 | ENSG00000CSNK1A1  | 0.962626 | 0.617172 | 0.783165 | 0.773737 |        |

|       |           |          |          |          |          |          |        |        |
|-------|-----------|----------|----------|----------|----------|----------|--------|--------|
| 11989 | ENSG00000 | SEN7     | 0.963636 | 0.622222 | 0.787037 | 0.761616 |        |        |
| 11990 | ENSG00000 | FAM72B   | 0.92389  | 0.682875 | 0.803383 | 0.80444  |        |        |
| 11991 | ENSG00000 | TARSL2   | 0.876321 | 0.787526 | 0.831924 | 0.815011 |        |        |
| 11992 | ENSG00000 | GIP      | 0.981818 | 0.570707 | 0.779966 | 0.763636 |        |        |
| 11993 | ENSG00000 | LCMT1    | 0.993939 | 0.510101 | 0.791414 | 0.783838 |        |        |
| 11994 | ENSG00000 | FAM72A   | 0.92389  | 0.682875 | 0.803383 | 0.80444  |        |        |
| 11995 | ENSG00000 | ARHGAP40 | 1        | 0.527273 | 0.782155 | 0.733333 |        |        |
| 11996 | ENSG00000 | KCNG1    | 0.965657 | 0.612121 | 0.788889 | 0.765657 |        |        |
| 11997 | ENSG00000 | SPATA4   | 0.879493 | 0.749471 | 0.814482 | 0.854123 |        |        |
| 11998 | ENSG00000 | WDFY1    | 0.964059 | 0.596195 | 0.778541 | 0.787526 |        |        |
| 11999 | ENSG00000 | ADGRF4   | 0.878788 | 0.752525 | 0.81532  | 0.850505 |        |        |
| 12000 | ENSG00000 | TAF1     | 1        | 0.527273 | 0.751515 | 0.743434 |        |        |
| 12001 | ENSG00000 | MS4A13   | 0.979798 | 0.547475 | 0.767003 | 0.80202  |        |        |
| 12002 | ENSG00000 | FAM72D   | 0.92389  | 0.682875 | 0.803383 | 0.80444  |        |        |
| 12003 | ENSG00000 | MRPS26   | 0.917172 | 0.715152 | 0.815152 | 0.8      |        |        |
| 12004 | ENSG00000 | MYO9A    | 1        | 0.548485 | 0.772054 | 0.761616 |        |        |
| 12005 | ENSG00000 | AGAP3    | 0.925253 | 0.688889 | 0.807071 | 0.792929 |        |        |
| 12006 | ENSG00000 | SMIM7    | 0.968288 | 0.584567 | 0.776427 | 0.788584 |        |        |
| 12007 | ENSG00000 | FAM72C   | 0.92389  | 0.682875 | 0.803383 | 0.80444  |        |        |
| 12008 | ENSG00000 | TBC1D13  | 1        | 0.514799 | 0.7574   | 0.788584 |        |        |
| 12009 | ENSG00000 | ENKUR    | 0.927273 | 0.658586 | 0.792929 | 0.824242 |        |        |
| 12010 | ENSG00000 | IFIH1    | 0.925253 | 0.688889 | 0.807071 | 0.793939 |        |        |
| 12011 | ENSG00000 | MMAA     | 0.964646 | 0.60303  | 0.782323 | 0.776768 |        |        |
| 12012 | ENSG00000 | ZNF599   | 0.960606 | 0.645455 | 0.79596  | 0.756566 |        |        |
| 12013 | ENSG00000 | TM2D2    | 1        | 0.512121 | 0.747811 | 0.739394 |        |        |
| 12014 | ENSG00000 | FAM151B  | 0.959596 | 0.617172 | 0.785017 | 0.790909 |        |        |
| 12015 | ENSG00000 | PGRMC1   | 0.918182 | 0.682828 | 0.799663 | 0.836364 |        |        |
| 12016 | ENSG00000 | CDX2     | 0.878788 | 0.791919 | 0.835354 | 0.80303  |        |        |
| 12017 | ENSG00000 | KCTD21   | 0.921212 | 0.712121 | 0.809596 | 0.79596  |        |        |
| 12018 | ENSG00000 | ZNF530   | 0.963002 | 0.651163 | 0.801973 | 0.735729 |        |        |
| 12019 | ENSG00000 | RGS20    | 0.925253 | 0.688889 | 0.807071 | 0.793939 |        |        |
| 12020 | ENSG00000 | APLF     | 1        | 0.491919 | 0.821549 | 0.691919 |        |        |
| 12021 | ENSG00000 | EFHC2    | 0.972727 | 0.572727 | 0.772727 | 0.789899 |        |        |
| 12022 | ENSG00000 | DUSP23   | 0.962626 | 0.590909 | 0.773232 | 0.806061 |        |        |
| 12023 | ENSG00000 | PRSS53   | 1        | 0.488889 | 0.744444 | 0.793939 |        |        |
| 12024 | ENSG00000 | WDR24    | 0.963636 | 0.664646 | 0.814141 | 0.719192 | 0.1552 | 0.1625 |
| 12025 | ENSG00000 | USP34    | 0.959596 | 0.648485 | 0.801347 | 0.756566 |        |        |
| 12026 | ENSG00000 | POLR2H   | 0.965657 | 0.588889 | 0.76936  | 0.80303  |        |        |
| 12027 | ENSG00000 | TPBG     | 0.923232 | 0.721212 | 0.822222 | 0.770707 | 0.3658 |        |
| 12028 | ENSG00000 | DZANK1   | 0.925253 | 0.688889 | 0.807071 | 0.79798  |        |        |
| 12029 | ENSG00000 | TNK2     | 0.919192 | 0.715152 | 0.816162 | 0.79798  |        |        |
| 12030 | ENSG00000 | CHD9     | 1        | 0.481818 | 0.764141 | 0.745455 |        |        |
| 12031 | ENSG00000 | PDHB     | 0.965657 | 0.60303  | 0.779966 | 0.778788 |        |        |
| 12032 | ENSG00000 | STOML1   | 0.962626 | 0.657576 | 0.808923 | 0.731313 | 0.2763 |        |
| 12033 | ENSG00000 | FBLN2    | 0.977778 | 0.557576 | 0.767677 | 0.80101  |        |        |
| 12034 | ENSG00000 | RPL31    | 0.962626 | 0.623232 | 0.790572 | 0.766667 |        |        |
| 12035 | ENSG00000 | ANGPT1   | 1        | 0.518182 | 0.764983 | 0.734343 |        |        |
| 12036 | ENSG00000 | N4BP1    | 1        | 0.548485 | 0.777273 | 0.745455 |        |        |
| 12037 | ENSG00000 | BGN      | 0.964646 | 0.564646 | 0.764646 | 0.838384 |        |        |
| 12038 | ENSG00000 | AVP      | 1        | 0.523671 | 0.761836 | 0.786473 |        |        |
| 12039 | ENSG00000 | BRCA1    | 0.99899  | 0.518182 | 0.819865 | 0.750505 | 0.3821 |        |
| 12040 | ENSG00000 | SIPA1L3  | 0.965657 | 0.612121 | 0.844444 | 0.723232 |        |        |
| 12041 | ENSG00000 | SPRY3    | 0.963002 | 0.622622 | 0.791402 | 0.763214 |        |        |
| 12042 | ENSG00000 | ICAM1    | 0.987879 | 0.567677 | 0.777778 | 0.767677 |        |        |
| 12043 | ENSG00000 | SPEN     | 1        | 0.579798 | 0.789899 | 0.729293 |        |        |

|       |                    |          |          |          |          |        |
|-------|--------------------|----------|----------|----------|----------|--------|
| 12044 | ENSG00000MAN1A2    | 0.925253 | 0.688889 | 0.807071 | 0.79596  |        |
| 12045 | ENSG00000CLTRN     | 0.918699 | 0.703833 | 0.811266 | 0.808362 |        |
| 12046 | ENSG00000KLHDC8B   | 1        | 0.516162 | 0.755556 | 0.719192 |        |
| 12047 | ENSG00000CDH16     | 0.965657 | 0.612121 | 0.788889 | 0.767677 |        |
| 12048 | ENSG00000TCAP      | 0.969697 | 0.591919 | 0.780808 | 0.775758 |        |
| 12049 | ENSG00000TTC22     | 0.987879 | 0.536364 | 0.765152 | 0.811111 |        |
| 12050 | ENSG00000BCAS4     | 1        | 0.558586 | 0.768013 | 0.730303 |        |
| 12051 | ENSG00000UQCRC2    | 1        | 0.531313 | 0.7633   | 0.738384 |        |
| 12052 | ENSG00000EPPIN     | 0.881818 | 0.754545 | 0.818182 | 0.850505 |        |
| 12053 | ENSG00000AC005154  | 0.925253 | 0.688889 | 0.807071 | 0.79596  |        |
| 12054 | ENSG00000STARD4    | 1        | 0.494949 | 0.739057 | 0.784848 |        |
| 12055 | ENSG00000C7orf57   | 0.878788 | 0.791919 | 0.835354 | 0.809091 |        |
| 12056 | ENSG00000EIF2AK4   | 0.923232 | 0.721212 | 0.822222 | 0.775758 |        |
| 12057 | ENSG00000TMEM61    | 1        | 0.558586 | 0.768013 | 0.714141 |        |
| 12058 | ENSG00000EIF4G1    | 1        | 0.539394 | 0.789899 | 0.731313 |        |
| 12059 | ENSG00000DIS3      | 0.965657 | 0.612121 | 0.788889 | 0.772727 |        |
| 12060 | ENSG00000RIN2      | 0.927273 | 0.658586 | 0.792929 | 0.836364 |        |
| 12061 | ENSG00000IFT57     | 1        | 0.558586 | 0.770539 | 0.736364 |        |
| 12062 | ENSG00000NOM03     | 0.964646 | 0.637374 | 0.80101  | 0.746465 |        |
| 12063 | ENSG00000MFS09     | 0.960606 | 0.617172 | 0.785522 | 0.791919 |        |
| 12064 | ENSG00000BBS9      | 1        | 0.539394 | 0.762963 | 0.753535 |        |
| 12065 | ENSG00000TLR4      | 0.983838 | 0.547475 | 0.774074 | 0.79697  |        |
| 12066 | ENSG00000PYURF     | 0.979798 | 0.579798 | 0.779798 | 0.771717 |        |
| 12067 | ENSG00000GRB2      | 0.984848 | 0.578788 | 0.790236 | 0.752525 | 0.325  |
| 12068 | ENSG00000C19orf71  | 0.963636 | 0.629293 | 0.795118 | 0.755556 |        |
| 12069 | ENSG00000DHX9      | 1        | 0.536364 | 0.76633  | 0.739394 |        |
| 12070 | ENSG00000ADCY6     | 0.964646 | 0.60303  | 0.782323 | 0.785859 |        |
| 12071 | ENSG00000CHDH      | 0.988889 | 0.556566 | 0.776094 | 0.780808 |        |
| 12072 | ENSG00000ZBED4     | 0.966173 | 0.582452 | 0.774313 | 0.807611 |        |
| 12073 | ENSG00000PPP1R36   | 0.876321 | 0.786469 | 0.824172 | 0.838266 |        |
| 12074 | ENSG00000LRRC72    | 0.917172 | 0.751515 | 0.83367  | 0.774747 |        |
| 12075 | ENSG00000EMSY      | 0.957576 | 0.652525 | 0.80303  | 0.768687 |        |
| 12076 | ENSG00000CLEC4E    | 0.921212 | 0.717172 | 0.818519 | 0.791919 |        |
| 12077 | ENSG00000RAB11A    | 1        | 0.531313 | 0.765657 | 0.776768 |        |
| 12078 | ENSG00000NPHS2     | 0.965657 | 0.612121 | 0.788889 | 0.773737 |        |
| 12079 | ENSG00000SUN2      | 1        | 0.561311 | 0.777308 | 0.745243 | 0.2939 |
| 12080 | ENSG00000G2E3      | 0.921776 | 0.711416 | 0.81043  | 0.80444  |        |
| 12081 | ENSG00000PRMT7     | 1        | 0.526263 | 0.756397 | 0.764646 |        |
| 12082 | ENSG00000FUS       | 1        | 0.537374 | 0.76229  | 0.785859 |        |
| 12083 | ENSG00000SELENOP   | 1        | 0.490909 | 0.745455 | 0.742424 |        |
| 12084 | ENSG00000IMPA1     | 1        | 0.527273 | 0.751515 | 0.768687 |        |
| 12085 | ENSG00000PANK2     | 0.921776 | 0.715645 | 0.81871  | 0.793869 |        |
| 12086 | ENSG00000SELPLG    | 0.876321 | 0.787526 | 0.831924 | 0.831924 |        |
| 12087 | ENSG00000GP9       | 0.917172 | 0.715152 | 0.815152 | 0.810101 |        |
| 12088 | ENSG00000MAP3K14   | 1        | 0.554545 | 0.762121 | 0.787879 |        |
| 12089 | ENSG00000EPPIN-WFD | 0.881818 | 0.754545 | 0.818182 | 0.850505 |        |
| 12090 | ENSG00000ABCA9     | 0.966667 | 0.588889 | 0.777778 | 0.79899  |        |
| 12091 | ENSG00000NOM02     | 0.964646 | 0.637374 | 0.80101  | 0.746465 |        |
| 12092 | ENSG00000PPP3CB    | 0.876321 | 0.787526 | 0.831924 | 0.832981 |        |
| 12093 | ENSG00000PTPN11    | 0.961672 | 0.645761 | 0.803717 | 0.75029  |        |
| 12094 | ENSG00000VPS51     | 1        | 0.50101  | 0.750505 | 0.776768 | 0.1987 |
| 12095 | ENSG00000SNRNP35   | 1        | 0.50101  | 0.750505 | 0.741414 |        |
| 12096 | ENSG00000C12orf43  | 0.965657 | 0.612121 | 0.788889 | 0.773737 |        |
| 12097 | ENSG00000EVPLL     | 0.925253 | 0.688889 | 0.807071 | 0.80202  |        |
| 12098 | ENSG00000MAP6D1    | 0.923232 | 0.715152 | 0.806734 | 0.80303  |        |

|       |                    |          |          |          |          |        |       |
|-------|--------------------|----------|----------|----------|----------|--------|-------|
| 12099 | ENSG00000CFI       | 1        | 0.50404  | 0.778114 | 0.70404  |        |       |
| 12100 | ENSG00000FCER2     | 0.989899 | 0.550505 | 0.788215 | 0.771717 |        |       |
| 12101 | ENSG00000DDX1      | 1        | 0.519192 | 0.76532  | 0.80303  | 0.2836 |       |
| 12102 | ENSG00000TUBB1     | 0.989899 | 0.547475 | 0.775758 | 0.790909 |        |       |
| 12103 | ENSG00000ALKBH3    | 0.965657 | 0.612121 | 0.788889 | 0.773737 |        |       |
| 12104 | ENSG00000AGTR1     | 0.876321 | 0.787526 | 0.831924 | 0.834038 |        |       |
| 12105 | ENSG00000EMC1      | 0.925253 | 0.688889 | 0.807071 | 0.806061 |        |       |
| 12106 | ENSG00000NPEPL1    | 1        | 0.476768 | 0.797306 | 0.710101 |        |       |
| 12107 | ENSG00000ATP6AP1L  | 0.961945 | 0.640592 | 0.789817 | 0.769556 |        |       |
| 12108 | ENSG00000ARHGAP6   | 1        | 0.564646 | 0.774579 | 0.760606 |        |       |
| 12109 | ENSG00000PCDHA6    | 0.918051 | 0.745293 | 0.831672 | 0.781838 |        |       |
| 12110 | ENSG00000TANC2     | 0.988889 | 0.578788 | 0.778283 | 0.765657 |        |       |
| 12111 | ENSG00000KLRK1     | 0.881818 | 0.754545 | 0.818182 | 0.854545 |        |       |
| 12112 | ENSG00000ALKBH1    | 1        | 0.514799 | 0.7574   | 0.811839 |        |       |
| 12113 | ENSG00000THRSP     | 0.964646 | 0.60303  | 0.782323 | 0.790909 |        |       |
| 12114 | ENSG00000AL139300. | 0.989899 | 0.578788 | 0.782828 | 0.757576 |        |       |
| 12115 | ENSG00000ACCS      | 1        | 0.555556 | 0.79798  | 0.724242 |        |       |
| 12116 | ENSG00000SNRPG     | 1        | 0.516162 | 0.755724 | 0.763636 |        |       |
| 12117 | ENSG00000TRIM58    | 0.965657 | 0.612121 | 0.788889 | 0.775758 |        |       |
| 12118 | ENSG00000CHST15    | 0.92389  | 0.682875 | 0.803383 | 0.823467 | 0.2862 |       |
| 12119 | ENSG00000DNAJC5    | 1        | 0.567677 | 0.780471 | 0.738384 |        | 0.318 |
| 12120 | ENSG00000NT5C      | 0.965657 | 0.60303  | 0.779966 | 0.792929 |        |       |
| 12121 | ENSG00000GPER1     | 0.962348 | 0.65227  | 0.807309 | 0.745293 |        |       |
| 12122 | ENSG00000UBXN8     | 0.921776 | 0.715645 | 0.81871  | 0.798097 |        |       |
| 12123 | ENSG00000SFT2D1    | 0.961945 | 0.675476 | 0.79475  | 0.747357 | 0.4264 |       |
| 12124 | ENSG00000C19orf53  | 0.958774 | 0.672304 | 0.808492 | 0.751586 |        |       |
| 12125 | ENSG00000NMT2      | 0.919662 | 0.750529 | 0.835095 | 0.773784 |        |       |
| 12126 | ENSG00000CTR9      | 0.875758 | 0.790909 | 0.833165 | 0.831313 |        |       |
| 12127 | ENSG00000CRBN      | 0.988889 | 0.556566 | 0.776094 | 0.786869 |        |       |
| 12128 | ENSG00000SEPHS1    | 1        | 0.583838 | 0.772054 | 0.745455 | 0.3715 |       |
| 12129 | ENSG00000C8orf34   | 0.95666  | 0.67759  | 0.815363 | 0.755814 |        |       |
| 12130 | ENSG00000MYADML2   | 1        | 0.488889 | 0.744444 | 0.768687 |        |       |
| 12131 | ENSG00000HBE1      | 0.878788 | 0.791919 | 0.835354 | 0.818182 |        |       |
| 12132 | ENSG00000HBG1      | 0.878788 | 0.791919 | 0.835354 | 0.818182 |        |       |
| 12133 | ENSG00000LY6G5B    | 0.881818 | 0.754545 | 0.818182 | 0.858586 |        |       |
| 12134 | ENSG00000OXER1     | 0.962626 | 0.623232 | 0.790572 | 0.775758 |        |       |
| 12135 | ENSG00000MYB       | 1        | 0.545455 | 0.772727 | 0.748485 | 0.4872 |       |
| 12136 | ENSG00000TOR2A     | 0.917172 | 0.720202 | 0.818687 | 0.806061 |        |       |
| 12137 | ENSG00000SAAL1     | 0.956566 | 0.657576 | 0.80202  | 0.779798 |        |       |
| 12138 | ENSG00000MYH1      | 0.923232 | 0.721212 | 0.822222 | 0.787879 |        |       |
| 12139 | ENSG00000KIAA0930  | 0.956566 | 0.657576 | 0.811785 | 0.772727 |        |       |
| 12140 | ENSG00000AC104389. | 0.878788 | 0.791919 | 0.835354 | 0.818182 |        |       |
| 12141 | ENSG00000CGB2      | 1        | 0.50101  | 0.750505 | 0.843434 |        |       |
| 12142 | ENSG00000NKAPD1    | 1        | 0.587879 | 0.808418 | 0.670707 |        |       |
| 12143 | ENSG00000PHF6      | 0.919192 | 0.715152 | 0.816162 | 0.811111 |        |       |
| 12144 | ENSG00000RAP1GDS1  | 0.923232 | 0.721212 | 0.822222 | 0.786869 |        |       |
| 12145 | ENSG00000RABAC1    | 1        | 0.561616 | 0.780808 | 0.740404 |        |       |
| 12146 | ENSG00000RNASEK-C1 | 1        | 0.509091 | 0.748485 | 0.768687 | 0.4511 |       |
| 12147 | ENSG00000ATIC      | 1        | 0.570707 | 0.77862  | 0.711111 |        |       |
| 12148 | ENSG00000CFAP100   | 0.876321 | 0.787526 | 0.831924 | 0.842495 |        |       |
| 12149 | ENSG00000CYB5R4    | 0.921776 | 0.715645 | 0.81871  | 0.802326 |        |       |
| 12150 | ENSG00000MRPS10    | 1        | 0.588889 | 0.792593 | 0.732323 | 0.4375 |       |
| 12151 | ENSG00000HHATL     | 0.878788 | 0.791919 | 0.835354 | 0.831313 |        |       |
| 12152 | ENSG00000TNRC18    | 0.99899  | 0.556566 | 0.833333 | 0.726263 |        |       |
| 12153 | ENSG00000RNF43     | 0.955556 | 0.664646 | 0.810101 | 0.777778 |        |       |

|       |                    |          |          |          |          |        |        |
|-------|--------------------|----------|----------|----------|----------|--------|--------|
| 12154 | ENSG00000FCGR2A    | 1        | 0.531313 | 0.765657 | 0.745455 |        |        |
| 12155 | ENSG00000GAS2L2    | 0.878788 | 0.791919 | 0.835354 | 0.822222 |        |        |
| 12156 | ENSG00000NBAS      | 0.923232 | 0.721212 | 0.822222 | 0.787879 |        |        |
| 12157 | ENSG00000PDCD5     | 0.921212 | 0.717172 | 0.818519 | 0.805051 |        |        |
| 12158 | ENSG00000ZFP57     | 0.917172 | 0.716162 | 0.815993 | 0.818182 |        |        |
| 12159 | ENSG00000ZNF668    | 0.990909 | 0.610101 | 0.804714 | 0.724242 |        |        |
| 12160 | ENSG00000HNRNPC    | 1        | 0.554545 | 0.762121 | 0.779798 | 0.3599 |        |
| 12161 | ENSG00000RFK       | 0.986869 | 0.548485 | 0.830303 | 0.746465 |        |        |
| 12162 | ENSG00000OTUD6B    | 1        | 0.527273 | 0.782155 | 0.725253 |        |        |
| 12163 | ENSG00000SCARA5    | 0.919192 | 0.715152 | 0.816162 | 0.814141 |        |        |
| 12164 | ENSG00000CDK18     | 0.964646 | 0.637374 | 0.80101  | 0.757576 |        |        |
| 12165 | ENSG00000C9orf78   | 1        | 0.547475 | 0.820539 | 0.69596  | 0.2191 | 0.6251 |
| 12166 | ENSG00000ASCC3     | 1        | 0.572727 | 0.781818 | 0.731313 |        | 0.245  |
| 12167 | ENSG00000SP140L    | 0.872093 | 0.785412 | 0.828753 | 0.860465 |        |        |
| 12168 | ENSG00000ITM2B     | 0.925253 | 0.688889 | 0.807071 | 0.817172 |        |        |
| 12169 | ENSG00000AGT       | 0.923232 | 0.721212 | 0.822222 | 0.791919 |        |        |
| 12170 | ENSG00000KIF1B     | 1        | 0.579798 | 0.789899 | 0.744444 |        |        |
| 12171 | ENSG00000ZNF768    | 1        | 0.530655 | 0.761099 | 0.729387 |        |        |
| 12172 | ENSG00000ATPAF2    | 0.923232 | 0.721212 | 0.822222 | 0.789899 |        |        |
| 12173 | ENSG00000CHERP     | 0.958586 | 0.649495 | 0.801515 | 0.783838 |        |        |
| 12174 | ENSG00000CDADC1    | 0.878788 | 0.791919 | 0.835354 | 0.835354 |        |        |
| 12175 | ENSG00000PAXBP1    | 1        | 0.497886 | 0.748943 | 0.788584 | 0.3597 |        |
| 12176 | ENSG00000UBE2M     | 1        | 0.572727 | 0.824242 | 0.686869 |        |        |
| 12177 | ENSG00000UCN3      | 0.923232 | 0.721212 | 0.822222 | 0.789899 |        |        |
| 12178 | ENSG00000ST8SIA6   | 0.921212 | 0.714141 | 0.815825 | 0.814141 | 0.4887 |        |
| 12179 | ENSG00000XIAP      | 1        | 0.561616 | 0.780808 | 0.749495 |        |        |
| 12180 | ENSG00000GSPT2     | 0.964059 | 0.631078 | 0.797569 | 0.766385 |        |        |
| 12181 | ENSG00000CBR4      | 0.917548 | 0.745243 | 0.824524 | 0.798097 |        |        |
| 12182 | ENSG00000NPM3      | 0.99798  | 0.588889 | 0.81835  | 0.722222 |        |        |
| 12183 | ENSG00000PRKAB1    | 1        | 0.59798  | 0.794949 | 0.708081 |        |        |
| 12184 | ENSG00000CCDC136   | 0.923232 | 0.721212 | 0.822222 | 0.793939 |        |        |
| 12185 | ENSG00000DOCK6     | 1        | 0.545455 | 0.772727 | 0.745455 |        |        |
| 12186 | ENSG00000SLC35E3   | 0.921776 | 0.715645 | 0.81871  | 0.806554 |        |        |
| 12187 | ENSG00000ABRAXAS2  | 1        | 0.519192 | 0.759596 | 0.746465 |        |        |
| 12188 | ENSG00000GSTM5     | 1        | 0.558586 | 0.772391 | 0.733333 |        |        |
| 12189 | ENSG00000NBPF20    | 1        | 0.475758 | 0.782323 | 0.770707 |        |        |
| 12190 | ENSG00000AP5Z1     | 1        | 0.483159 | 0.73674  | 0.781649 |        |        |
| 12191 | ENSG00000STAT2     | 0.975758 | 0.59798  | 0.786869 | 0.770707 |        |        |
| 12192 | ENSG00000BOC       | 1        | 0.509091 | 0.754545 | 0.781818 | 0.3272 |        |
| 12193 | ENSG00000TECPR2    | 0.927273 | 0.658586 | 0.832997 | 0.806061 |        |        |
| 12194 | ENSG00000TEK       | 0.961616 | 0.652525 | 0.805051 | 0.760606 |        |        |
| 12195 | ENSG00000COL9A1    | 0.884058 | 0.75942  | 0.821739 | 0.857005 |        |        |
| 12196 | ENSG00000MUC17     | 0.878788 | 0.791919 | 0.835354 | 0.835354 |        |        |
| 12197 | ENSG00000CLCF1     | 1        | 0.537374 | 0.761616 | 0.722222 |        |        |
| 12198 | ENSG00000TRIP6     | 1        | 0.531313 | 0.843771 | 0.729293 |        |        |
| 12199 | ENSG00000GZMH      | 0.925253 | 0.688889 | 0.807071 | 0.826263 |        |        |
| 12200 | ENSG00000KLK9      | 0.878788 | 0.791919 | 0.835354 | 0.834343 |        |        |
| 12201 | ENSG00000WBP4      | 1        | 0.542283 | 0.768147 | 0.764271 | 0.4547 |        |
| 12202 | ENSG00000TMEM208   | 1        | 0.567677 | 0.781818 | 0.692929 |        |        |
| 12203 | ENSG00000ZBTB44    | 1        | 0.516162 | 0.755556 | 0.732323 |        |        |
| 12204 | ENSG00000SLC17A7   | 0.978788 | 0.590909 | 0.788889 | 0.774747 |        |        |
| 12205 | ENSG00000ZNF511-PR | 1        | 0.471717 | 0.773064 | 0.740404 |        |        |
| 12206 | ENSG00000ATP2A3    | 1        | 0.590909 | 0.781145 | 0.745455 |        |        |
| 12207 | ENSG00000GDF5      | 0.923232 | 0.721212 | 0.822222 | 0.79899  |        |        |
| 12208 | ENSG00000FBLN1     | 0.990909 | 0.580808 | 0.805387 | 0.746465 |        |        |

|       |                    |          |          |          |          |        |
|-------|--------------------|----------|----------|----------|----------|--------|
| 12209 | ENSG00000PIH1D3    | 0.867596 | 0.819977 | 0.843786 | 0.833914 |        |
| 12210 | ENSG00000ACAD8     | 1        | 0.557576 | 0.775084 | 0.720202 |        |
| 12211 | ENSG00000PGK1      | 0.99798  | 0.538384 | 0.822559 | 0.754545 |        |
| 12212 | ENSG00000CEP350    | 1        | 0.567677 | 0.778451 | 0.725253 | 0.192  |
| 12213 | ENSG00000DCDC2B    | 0.878788 | 0.791919 | 0.835354 | 0.837374 |        |
| 12214 | ENSG00000PDIA3     | 1        | 0.519192 | 0.759596 | 0.748485 | 0.452  |
| 12215 | ENSG00000ADAMTS20  | 1        | 0.581818 | 0.785185 | 0.681818 |        |
| 12216 | ENSG00000PASK      | 1        | 0.579798 | 0.789899 | 0.725253 |        |
| 12217 | ENSG00000SLC22A6   | 0.965657 | 0.612121 | 0.788889 | 0.790909 |        |
| 12218 | ENSG00000HYAL4     | 1        | 0.59596  | 0.791246 | 0.719192 |        |
| 12219 | ENSG00000TMX3      | 1        | 0.530655 | 0.761099 | 0.739958 | 0.436  |
| 12220 | ENSG00000CPN2      | 0.952525 | 0.676768 | 0.819529 | 0.777778 |        |
| 12221 | ENSG00000CCR6      | 1        | 0.588889 | 0.792593 | 0.720202 |        |
| 12222 | ENSG00000IRAK1BP1  | 1        | 0.543434 | 0.765657 | 0.742424 | 0.3624 |
| 12223 | ENSG00000ZFP91     | 1        | 0.558586 | 0.797306 | 0.674747 |        |
| 12224 | ENSG00000UBE3C     | 0.917172 | 0.751515 | 0.83367  | 0.80101  |        |
| 12225 | ENSG00000FKBP5     | 1        | 0.579798 | 0.842088 | 0.70303  |        |
| 12226 | ENSG00000CCL19     | 0.922222 | 0.716162 | 0.817677 | 0.815152 |        |
| 12227 | ENSG00000ZC3H18    | 1        | 0.516162 | 0.755556 | 0.768687 |        |
| 12228 | ENSG00000PTPN9     | 0.964646 | 0.637374 | 0.80101  | 0.765657 |        |
| 12229 | ENSG00000DDX59     | 0.961945 | 0.651163 | 0.805321 | 0.763214 |        |
| 12230 | ENSG00000PELP1     | 0.920202 | 0.751515 | 0.83468  | 0.789899 |        |
| 12231 | ENSG00000WFDC8     | 0.962626 | 0.623232 | 0.790572 | 0.791919 |        |
| 12232 | ENSG00000NOV       | 0.965657 | 0.612121 | 0.787205 | 0.79798  | 0.4148 |
| 12233 | ENSG00000F2R       | 0.991919 | 0.564646 | 0.790404 | 0.772727 |        |
| 12234 | ENSG00000TMUB1     | 0.923232 | 0.721212 | 0.822222 | 0.8      |        |
| 12235 | ENSG00000CYSRT1    | 1        | 0.560606 | 0.796633 | 0.672727 |        |
| 12236 | ENSG00000CTXN1     | 0.958586 | 0.681818 | 0.818182 | 0.754545 |        |
| 12237 | ENSG00000MGAT5     | 0.963636 | 0.622222 | 0.787037 | 0.79596  |        |
| 12238 | ENSG00000COL6A2    | 0.984848 | 0.582828 | 0.79697  | 0.766667 |        |
| 12239 | ENSG00000SP7       | 0.876321 | 0.787526 | 0.831924 | 0.866808 | 0.291  |
| 12240 | ENSG00000PRDM7     | 0.870432 | 0.82392  | 0.847176 | 0.834994 |        |
| 12241 | ENSG00000DDA1      | 0.96124  | 0.637874 | 0.793282 | 0.791805 |        |
| 12242 | ENSG00000FAM24A    | 0.875758 | 0.790909 | 0.826263 | 0.867677 |        |
| 12243 | ENSG00000C1QTNF7   | 0.987879 | 0.567677 | 0.777778 | 0.794949 |        |
| 12244 | ENSG00000FAM24B    | 0.875758 | 0.790909 | 0.826263 | 0.867677 |        |
| 12245 | ENSG00000PVRIG     | 0.962626 | 0.623232 | 0.790572 | 0.792929 |        |
| 12246 | ENSG00000CHP1      | 1        | 0.547475 | 0.764983 | 0.710101 |        |
| 12247 | ENSG00000LRTOMT    | 0.964059 | 0.631078 | 0.797569 | 0.775899 |        |
| 12248 | ENSG00000TTC38     | 0.962626 | 0.647475 | 0.793771 | 0.781818 |        |
| 12249 | ENSG00000ASB8      | 0.962348 | 0.65227  | 0.807309 | 0.763012 |        |
| 12250 | ENSG00000DYRK4     | 0.923232 | 0.721212 | 0.822222 | 0.807071 | 0.3996 |
| 12251 | ENSG00000HYDIN     | 0.870432 | 0.82392  | 0.847176 | 0.836102 |        |
| 12252 | ENSG00000CDK15     | 0.923232 | 0.721212 | 0.822222 | 0.80404  |        |
| 12253 | ENSG00000TMEM200B  | 0.878788 | 0.791919 | 0.835354 | 0.844444 |        |
| 12254 | ENSG00000INO80D    | 0.957717 | 0.642706 | 0.797569 | 0.808668 |        |
| 12255 | ENSG00000AP000812. | 0.964059 | 0.631078 | 0.797569 | 0.775899 |        |
| 12256 | ENSG00000TOMM20L   | 0.876321 | 0.787526 | 0.831924 | 0.867865 |        |
| 12257 | ENSG00000TRIM23    | 0.975758 | 0.622222 | 0.79899  | 0.754545 |        |
| 12258 | ENSG00000SPATA31E1 | 0.871036 | 0.824524 | 0.847604 | 0.832981 |        |
| 12259 | ENSG00000LOXL2     | 1        | 0.548485 | 0.772054 | 0.749495 |        |
| 12260 | ENSG00000CAMK2D    | 0.989899 | 0.60303  | 0.790741 | 0.752525 |        |
| 12261 | ENSG00000MSR1      | 0.981818 | 0.570707 | 0.779966 | 0.80202  |        |
| 12262 | ENSG00000SFTP2A2   | 1        | 0.50303  | 0.749495 | 0.760606 |        |
| 12263 | ENSG00000DRG2      | 1        | 0.556025 | 0.778013 | 0.762156 |        |

|       |                   |          |          |          |          |        |        |
|-------|-------------------|----------|----------|----------|----------|--------|--------|
| 12264 | ENSG00000ALG2     | 0.975758 | 0.59798  | 0.786869 | 0.783838 |        |        |
| 12265 | ENSG00000EIF2B3   | 1        | 0.590909 | 0.787879 | 0.746465 | 0.2965 | 0.3291 |
| 12266 | ENSG00000TRMT2B   | 0.978788 | 0.584848 | 0.780471 | 0.794949 |        |        |
| 12267 | ENSG00000CCL14    | 1        | 0.532323 | 0.744781 | 0.728283 |        |        |
| 12268 | ENSG00000GZMB     | 0.964646 | 0.619192 | 0.776768 | 0.813131 |        |        |
| 12269 | ENSG00000CGB3     | 1        | 0.519192 | 0.76532  | 0.815152 |        |        |
| 12270 | ENSG00000CSTF1    | 1        | 0.558586 | 0.80303  | 0.740404 |        |        |
| 12271 | ENSG00000FM04     | 1        | 0.558586 | 0.768013 | 0.789899 |        |        |
| 12272 | ENSG00000NCBP3    | 0.994949 | 0.613131 | 0.797138 | 0.738384 |        |        |
| 12273 | ENSG00000TNFRSF21 | 0.989899 | 0.547475 | 0.771044 | 0.824242 |        |        |
| 12274 | ENSG00000CCNC     | 0.962626 | 0.623232 | 0.790572 | 0.79899  |        |        |
| 12275 | ENSG00000AMER1    | 0.963636 | 0.629293 | 0.795118 | 0.783838 |        |        |
| 12276 | ENSG00000RBM34    | 1        | 0.556566 | 0.773064 | 0.69798  |        |        |
| 12277 | ENSG00000USP46    | 0.919192 | 0.752525 | 0.835354 | 0.79899  |        |        |
| 12278 | ENSG00000KCNV2    | 0.928502 | 0.664734 | 0.796618 | 0.869565 |        |        |
| 12279 | ENSG00000APAF1    | 1        | 0.531313 | 0.760606 | 0.793939 |        |        |
| 12280 | ENSG00000TPD52L2  | 0.921212 | 0.755556 | 0.838384 | 0.786869 |        |        |
| 12281 | ENSG00000AFG3L2   | 0.959596 | 0.678788 | 0.806566 | 0.768687 |        |        |
| 12282 | ENSG00000ANKRD12  | 0.975758 | 0.59798  | 0.786869 | 0.787879 |        |        |
| 12283 | ENSG00000STAMPB   | 1        | 0.531313 | 0.765657 | 0.785859 |        | 0.517  |
| 12284 | ENSG00000ALG8     | 0.958774 | 0.675476 | 0.815011 | 0.766385 |        |        |
| 12285 | ENSG00000FAM207A  | 1        | 0.545455 | 0.772727 | 0.731313 |        |        |
| 12286 | ENSG00000SLC22A23 | 1        | 0.560606 | 0.771886 | 0.739394 | 0.2736 |        |
| 12287 | ENSG00000ZNF540   | 1        | 0.516162 | 0.755724 | 0.757576 | 0.5196 |        |
| 12288 | ENSG00000ZNF347   | 0.878788 | 0.791919 | 0.835354 | 0.853535 |        |        |
| 12289 | ENSG00000CLN5     | 0.923232 | 0.721212 | 0.822222 | 0.812121 |        |        |
| 12290 | ENSG00000OSBPL9   | 1        | 0.527273 | 0.751515 | 0.816162 | 0.3734 |        |
| 12291 | ENSG00000RBM33    | 1        | 0.539394 | 0.807407 | 0.684848 |        |        |
| 12292 | ENSG00000BEX3     | 0.917172 | 0.751515 | 0.83367  | 0.807071 |        |        |
| 12293 | ENSG00000FIG4     | 0.965657 | 0.612121 | 0.788889 | 0.805051 | 0.3854 | 0.412  |
| 12294 | ENSG00000ZNF516   | 1        | 0.543434 | 0.765657 | 0.79899  |        |        |
| 12295 | ENSG00000TNFSF13B | 1        | 0.548485 | 0.772054 | 0.786869 |        |        |
| 12296 | ENSG00000TREML1   | 0.92389  | 0.682875 | 0.803383 | 0.863636 |        |        |
| 12297 | ENSG00000ENAH     | 1        | 0.558586 | 0.768013 | 0.731313 |        |        |
| 12298 | ENSG00000USP12    | 0.919192 | 0.752525 | 0.835354 | 0.79899  |        |        |
| 12299 | ENSG00000DKK3     | 1        | 0.561616 | 0.780808 | 0.782828 |        |        |
| 12300 | ENSG00000CCDC65   | 0.956566 | 0.657576 | 0.811785 | 0.794949 |        |        |
| 12301 | ENSG00000WBP2NL   | 0.870432 | 0.82392  | 0.847176 | 0.844961 |        |        |
| 12302 | ENSG00000TMIE     | 0.923232 | 0.721212 | 0.822222 | 0.807071 |        |        |
| 12303 | ENSG00000CCL4     | 0.961616 | 0.652525 | 0.805051 | 0.768687 |        |        |
| 12304 | ENSG00000LZTS1    | 1        | 0.570707 | 0.77862  | 0.776768 |        |        |
| 12305 | ENSG00000RPRD1A   | 0.95666  | 0.676533 | 0.810254 | 0.787526 |        |        |
| 12306 | ENSG00000PLTP     | 0.957576 | 0.652525 | 0.80303  | 0.805051 |        |        |
| 12307 | ENSG00000C9orf72  | 0.964059 | 0.631078 | 0.797569 | 0.784355 |        |        |
| 12308 | ENSG00000CCDC115  | 0.921212 | 0.755556 | 0.838384 | 0.786869 |        |        |
| 12309 | ENSG00000NLGN2    | 0.963636 | 0.649495 | 0.790404 | 0.782828 |        |        |
| 12310 | ENSG00000RASSF1   | 0.919662 | 0.750529 | 0.835095 | 0.802326 |        |        |
| 12311 | ENSG00000MIA      | 0.925253 | 0.688889 | 0.807071 | 0.840404 |        |        |
| 12312 | ENSG00000IDH3G    | 1        | 0.561616 | 0.780808 | 0.780808 |        |        |
| 12313 | ENSG00000GID8     | 0.923232 | 0.721212 | 0.822222 | 0.815152 |        |        |
| 12314 | ENSG00000FLT1     | 0.984848 | 0.582828 | 0.79697  | 0.775758 |        |        |
| 12315 | ENSG00000MAPKBP1  | 1        | 0.564646 | 0.818519 | 0.70101  |        |        |
| 12316 | ENSG00000MC5R     | 0.923232 | 0.721212 | 0.822222 | 0.810101 |        |        |
| 12317 | ENSG00000GGCX     | 0.961672 | 0.645761 | 0.803717 | 0.780488 |        |        |
| 12318 | ENSG00000FAM234A  | 0.921776 | 0.715645 | 0.81871  | 0.831924 |        |        |

|       |                    |          |          |          |          |        |        |
|-------|--------------------|----------|----------|----------|----------|--------|--------|
| 12319 | ENSG00000KLRG1     | 0.923232 | 0.721212 | 0.822222 | 0.814141 |        |        |
| 12320 | ENSG00000GRB7      | 0.988889 | 0.556566 | 0.776094 | 0.816162 |        |        |
| 12321 | ENSG00000KIF13A    | 0.991919 | 0.59596  | 0.802357 | 0.748485 |        |        |
| 12322 | ENSG00000NEK1      | 0.962626 | 0.651515 | 0.80101  | 0.776768 | 0.388  |        |
| 12323 | ENSG00000PRLH      | 0.923232 | 0.721212 | 0.822222 | 0.818182 |        |        |
| 12324 | ENSG00000AC004754. | 0.921776 | 0.715645 | 0.81871  | 0.831924 |        |        |
| 12325 | ENSG00000ARGLU1    | 1        | 0.545455 | 0.772727 | 0.757576 | 0.3885 |        |
| 12326 | ENSG00000ASAH1     | 0.918051 | 0.745293 | 0.831672 | 0.815061 |        |        |
| 12327 | ENSG00000RPS29     | 0.921212 | 0.717172 | 0.818519 | 0.831313 | 0.262  |        |
| 12328 | ENSG00000FAM126A   | 0.963636 | 0.664646 | 0.814141 | 0.753535 |        |        |
| 12329 | ENSG00000ARF1      | 0.964646 | 0.637374 | 0.80101  | 0.778788 | 0.2151 |        |
| 12330 | ENSG00000SNX32     | 0.955603 | 0.651163 | 0.802149 | 0.818182 |        |        |
| 12331 | ENSG00000UBXN2A    | 1        | 0.537374 | 0.761616 | 0.735354 |        |        |
| 12332 | ENSG00000SNX21     | 0.923232 | 0.720202 | 0.820875 | 0.819192 |        |        |
| 12333 | ENSG00000PHAX      | 0.957576 | 0.652525 | 0.80303  | 0.80303  |        |        |
| 12334 | ENSG00000CACNG3    | 0.878788 | 0.791919 | 0.835354 | 0.870707 |        |        |
| 12335 | ENSG00000HAUS4     | 0.923232 | 0.721212 | 0.822222 | 0.818182 |        |        |
| 12336 | ENSG00000GPR139    | 0.956566 | 0.687879 | 0.821212 | 0.768687 |        |        |
| 12337 | ENSG00000FCN1      | 0.966667 | 0.588889 | 0.777778 | 0.845455 |        |        |
| 12338 | ENSG00000IKBIP     | 0.984848 | 0.582828 | 0.79697  | 0.776768 |        |        |
| 12339 | ENSG00000GAS1      | 1        | 0.516162 | 0.755556 | 0.755556 |        |        |
| 12340 | ENSG00000CASQ1     | 0.975758 | 0.59798  | 0.786869 | 0.791919 |        |        |
| 12341 | ENSG00000RABL3     | 1        | 0.536364 | 0.825589 | 0.710101 |        |        |
| 12342 | ENSG00000EIF2AK2   | 0.975758 | 0.59798  | 0.786869 | 0.794949 |        |        |
| 12343 | ENSG00000MRPS12    | 1        | 0.570707 | 0.822896 | 0.706061 |        |        |
| 12344 | ENSG00000PRR25     | 0.958774 | 0.637421 | 0.786117 | 0.832981 |        |        |
| 12345 | ENSG00000HDHD5     | 0.959596 | 0.678788 | 0.81229  | 0.772727 |        |        |
| 12346 | ENSG00000PLEKHD1   | 0.919662 | 0.750529 | 0.835095 | 0.805497 |        |        |
| 12347 | ENSG00000MAP3K10   | 0.96124  | 0.637874 | 0.793282 | 0.803987 |        |        |
| 12348 | ENSG00000CRYBA4    | 0.881159 | 0.796135 | 0.838647 | 0.846377 |        |        |
| 12349 | ENSG00000CLEC3B    | 0.978788 | 0.619192 | 0.793098 | 0.765657 |        |        |
| 12350 | ENSG00000HIRA      | 1        | 0.607822 | 0.792107 | 0.732558 |        |        |
| 12351 | ENSG00000TPO       | 0.964646 | 0.637374 | 0.80101  | 0.783838 |        |        |
| 12352 | ENSG00000TMC05A    | 0.87315  | 0.825581 | 0.84919  | 0.846723 |        |        |
| 12353 | ENSG00000APEX1     | 1        | 0.540404 | 0.757576 | 0.822222 | 0.4663 |        |
| 12354 | ENSG00000SNX16     | 1        | 0.564646 | 0.818519 | 0.731313 |        |        |
| 12355 | ENSG00000DTD2      | 0.921212 | 0.755556 | 0.838384 | 0.792929 |        |        |
| 12356 | ENSG00000GOT2      | 0.923232 | 0.721212 | 0.822222 | 0.820202 |        |        |
| 12357 | ENSG00000PNLIP     | 0.963002 | 0.651163 | 0.801973 | 0.778013 |        |        |
| 12358 | ENSG00000ELOA2     | 0.993939 | 0.585859 | 0.826936 | 0.737374 |        |        |
| 12359 | ENSG00000STK24     | 1        | 0.59596  | 0.791246 | 0.735354 |        |        |
| 12360 | ENSG00000ZNF148    | 1        | 0.528283 | 0.774242 | 0.745455 | 0.2612 |        |
| 12361 | ENSG00000NPL0C4    | 1        | 0.526263 | 0.813468 | 0.69697  |        |        |
| 12362 | ENSG00000TOR1A     | 0.959596 | 0.648485 | 0.801347 | 0.80101  |        |        |
| 12363 | ENSG00000KLF3      | 0.960606 | 0.683838 | 0.820539 | 0.754545 |        |        |
| 12364 | ENSG00000SELP      | 0.99697  | 0.540404 | 0.811111 | 0.781818 |        |        |
| 12365 | ENSG00000RABGGTB   | 1        | 0.567677 | 0.781818 | 0.732323 |        |        |
| 12366 | ENSG00000SRSF3     | 1        | 0.623232 | 0.804882 | 0.705051 | 0.3585 | 0.4278 |
| 12367 | ENSG00000C6orf203  | 0.960888 | 0.645877 | 0.801268 | 0.795983 |        |        |
| 12368 | ENSG00000TMEM126A  | 0.964646 | 0.637374 | 0.80101  | 0.783838 |        |        |
| 12369 | ENSG00000DEFA5     | 0.923232 | 0.721212 | 0.822222 | 0.819192 |        |        |
| 12370 | ENSG00000FZD7      | 0.916162 | 0.754545 | 0.835354 | 0.815152 |        |        |
| 12371 | ENSG00000CISD2     | 0.964646 | 0.637374 | 0.80101  | 0.784848 |        |        |
| 12372 | ENSG00000IFNGR1    | 0.988889 | 0.588889 | 0.788889 | 0.782828 |        |        |
| 12373 | ENSG00000LRRC36    | 0.87315  | 0.827696 | 0.850423 | 0.84778  |        |        |



|       |                    |          |          |          |          |        |
|-------|--------------------|----------|----------|----------|----------|--------|
| 12374 | ENSG00000LSM2      | 1        | 0.531313 | 0.7633   | 0.727273 |        |
| 12375 | ENSG00000TRABD     | 1        | 0.561616 | 0.780808 | 0.711111 |        |
| 12376 | ENSG00000HMOX2     | 1        | 0.59798  | 0.794949 | 0.732323 |        |
| 12377 | ENSG00000KAT6B     | 1        | 0.556566 | 0.773064 | 0.734343 |        |
| 12378 | ENSG00000STAB1     | 0.954596 | 0.675526 | 0.813953 | 0.802879 |        |
| 12379 | ENSG00000CARM1     | 1        | 0.582452 | 0.789464 | 0.715645 |        |
| 12380 | ENSG00000SGK1      | 1        | 0.540404 | 0.76229  | 0.79697  |        |
| 12381 | ENSG00000C6orf136  | 0.925253 | 0.688889 | 0.807071 | 0.855556 |        |
| 12382 | ENSG00000POU5F2    | 0.921776 | 0.711416 | 0.81043  | 0.859408 |        |
| 12383 | ENSG00000ADGRA1    | 0.923232 | 0.721212 | 0.822222 | 0.818182 |        |
| 12384 | ENSG00000PRKAB2    | 0.958586 | 0.679798 | 0.812458 | 0.780808 |        |
| 12385 | ENSG00000GSTM3     | 1        | 0.494949 | 0.789562 | 0.792929 |        |
| 12386 | ENSG00000AL132780. | 0.923232 | 0.721212 | 0.822222 | 0.818182 |        |
| 12387 | ENSG00000CEACAM5   | 0.988889 | 0.588889 | 0.788889 | 0.783838 |        |
| 12388 | ENSG00000OR4Q3     | 0.878788 | 0.791919 | 0.835354 | 0.871717 |        |
| 12389 | ENSG00000DHCR7     | 0.916162 | 0.754545 | 0.835354 | 0.817172 |        |
| 12390 | ENSG00000GCDH      | 1        | 0.6      | 0.8      | 0.727273 |        |
| 12391 | ENSG00000LGALS8    | 0.919192 | 0.752525 | 0.835354 | 0.813131 |        |
| 12392 | ENSG00000TMEM143   | 0.990909 | 0.570707 | 0.788552 | 0.793939 |        |
| 12393 | ENSG00000CCDC73    | 0.975758 | 0.59798  | 0.786869 | 0.79697  |        |
| 12394 | ENSG00000BCAP31    | 1        | 0.519192 | 0.759596 | 0.748485 | 0.4549 |
| 12395 | ENSG00000ZNF521    | 1        | 0.526263 | 0.764983 | 0.731313 |        |
| 12396 | ENSG00000GATB      | 0.961616 | 0.682828 | 0.815993 | 0.760606 |        |
| 12397 | ENSG00000KLB       | 0.923232 | 0.721212 | 0.822222 | 0.826263 |        |
| 12398 | ENSG00000DLG1      | 0.875758 | 0.831313 | 0.853535 | 0.835354 |        |
| 12399 | ENSG00000XDH       | 0.881159 | 0.796135 | 0.838647 | 0.857005 |        |
| 12400 | ENSG00000TMEM185B  | 0.919662 | 0.745243 | 0.819591 | 0.831924 |        |
| 12401 | ENSG00000USP7      | 0.99596  | 0.613131 | 0.82138  | 0.729293 |        |
| 12402 | ENSG00000TMEM185A  | 0.919662 | 0.745243 | 0.819591 | 0.831924 |        |
| 12403 | ENSG00000C1orf35   | 0.985859 | 0.617172 | 0.800337 | 0.756566 |        |
| 12404 | ENSG00000ZNF831    | 0.921212 | 0.755556 | 0.838384 | 0.8      |        |
| 12405 | ENSG00000SFXN4     | 0.921776 | 0.715645 | 0.81871  | 0.846723 |        |
| 12406 | ENSG00000OTP       | 0.919192 | 0.715152 | 0.816162 | 0.861616 | 0.3937 |
| 12407 | ENSG00000EXOSC9    | 0.99798  | 0.594949 | 0.835185 | 0.729293 |        |
| 12408 | ENSG00000SURF6     | 1        | 0.579798 | 0.789899 | 0.715152 |        |
| 12409 | ENSG00000DLG4      | 1        | 0.567677 | 0.800673 | 0.727273 |        |
| 12410 | ENSG00000HHLA3     | 1        | 0.509091 | 0.754545 | 0.759596 |        |
| 12411 | ENSG00000HSPA6     | 1        | 0.494949 | 0.83165  | 0.718182 |        |
| 12412 | ENSG00000RSL1D1    | 0.961616 | 0.647475 | 0.797811 | 0.8      |        |
| 12413 | ENSG00000KIF14     | 1        | 0.550388 | 0.775194 | 0.776301 |        |
| 12414 | ENSG00000STK3      | 1        | 0.556566 | 0.776599 | 0.786869 |        |
| 12415 | ENSG00000TBC1D26   | 0.959596 | 0.648485 | 0.801347 | 0.80404  |        |
| 12416 | ENSG00000CENPL     | 0.963636 | 0.664646 | 0.814141 | 0.763636 |        |
| 12417 | ENSG00000RAB19     | 0.875758 | 0.831313 | 0.853535 | 0.835354 |        |
| 12418 | ENSG00000C10orf90  | 0.964059 | 0.631078 | 0.797569 | 0.798097 |        |
| 12419 | ENSG00000PHF12     | 1        | 0.567677 | 0.781818 | 0.766667 |        |
| 12420 | ENSG00000FLRT1     | 1        | 0.572727 | 0.781818 | 0.747475 |        |
| 12421 | ENSG00000PTPRZ1    | 0.962626 | 0.657576 | 0.808923 | 0.776768 |        |
| 12422 | ENSG00000TMEM254   | 0.963636 | 0.664646 | 0.814141 | 0.763636 |        |
| 12423 | ENSG00000HARS      | 0.875758 | 0.831313 | 0.853535 | 0.835354 |        |
| 12424 | ENSG00000NLRP10    | 0.99697  | 0.532323 | 0.795455 | 0.815152 |        |
| 12425 | ENSG00000CTRC      | 0.917172 | 0.751515 | 0.827946 | 0.834343 |        |
| 12426 | ENSG00000KDSR      | 1        | 0.6      | 0.8      | 0.720202 |        |
| 12427 | ENSG00000ARSD      | 0.921212 | 0.755556 | 0.838384 | 0.806061 | 0.363  |
| 12428 | ENSG00000SNRNP40   | 1        | 0.588889 | 0.798148 | 0.758586 |        |

|       |                    |          |          |          |          |        |        |
|-------|--------------------|----------|----------|----------|----------|--------|--------|
| 12429 | ENSG00000CST7      | 0.875758 | 0.829293 | 0.852357 | 0.850505 |        |        |
| 12430 | ENSG00000PSMA5     | 1        | 0.521212 | 0.806061 | 0.744444 |        | 0.6272 |
| 12431 | ENSG00000RS1       | 0.92657  | 0.694686 | 0.810628 | 0.856039 |        |        |
| 12432 | ENSG00000NLRP7     | 0.992929 | 0.647475 | 0.813468 | 0.726263 |        |        |
| 12433 | ENSG00000WSCD2     | 0.921212 | 0.755556 | 0.838384 | 0.806061 |        |        |
| 12434 | ENSG00000MYL12A    | 0.979798 | 0.583838 | 0.790236 | 0.806061 |        |        |
| 12435 | ENSG00000PRKCSH    | 0.962626 | 0.657576 | 0.808923 | 0.776768 |        |        |
| 12436 | ENSG00000RNF115    | 0.917172 | 0.751515 | 0.83367  | 0.828283 |        |        |
| 12437 | ENSG00000SOD1      | 0.987879 | 0.609091 | 0.802862 | 0.760606 |        | 0.2553 |
| 12438 | ENSG00000SMCP      | 0.919662 | 0.750529 | 0.835095 | 0.820296 |        |        |
| 12439 | ENSG00000HBG2      | 0.963636 | 0.664646 | 0.814141 | 0.762626 |        |        |
| 12440 | ENSG00000LONRF1    | 1        | 0.531313 | 0.765657 | 0.771717 |        |        |
| 12441 | ENSG00000GRK6      | 1        | 0.537374 | 0.764646 | 0.729293 |        |        |
| 12442 | ENSG00000SPRYD3    | 1        | 0.528283 | 0.758586 | 0.767677 |        |        |
| 12443 | ENSG00000HSD3B1    | 1        | 0.519192 | 0.759596 | 0.746465 |        |        |
| 12444 | ENSG00000DMXL1     | 1        | 0.555556 | 0.790909 | 0.711111 |        |        |
| 12445 | ENSG00000ZDHC9     | 0.960606 | 0.683838 | 0.820539 | 0.760606 |        |        |
| 12446 | ENSG00000HSD3B2    | 1        | 0.519192 | 0.759596 | 0.746465 |        |        |
| 12447 | ENSG00000MYH4      | 0.919662 | 0.750529 | 0.835095 | 0.819239 |        |        |
| 12448 | ENSG00000BRD8      | 0.921212 | 0.755556 | 0.838384 | 0.806061 |        |        |
| 12449 | ENSG00000RRP1B     | 0.960606 | 0.649495 | 0.831987 | 0.773737 |        |        |
| 12450 | ENSG00000RYR1      | 0.875758 | 0.831313 | 0.853535 | 0.838384 |        |        |
| 12451 | ENSG00000GAS2L1    | 0.960606 | 0.649495 | 0.802525 | 0.8      |        |        |
| 12452 | ENSG00000GMEB2     | 0.99596  | 0.648485 | 0.840404 | 0.707071 |        | 0.2879 |
| 12453 | ENSG00000HNRNPAB   | 1        | 0.531313 | 0.765657 | 0.734343 |        |        |
| 12454 | ENSG00000GEMIN5    | 1        | 0.567677 | 0.781818 | 0.788889 |        |        |
| 12455 | ENSG00000HTN3      | 0.875758 | 0.831313 | 0.853535 | 0.839394 |        |        |
| 12456 | ENSG00000ABCF1     | 0.960606 | 0.683838 | 0.820539 | 0.761616 |        |        |
| 12457 | ENSG00000STARD3NL  | 0.959596 | 0.681818 | 0.818687 | 0.778788 |        |        |
| 12458 | ENSG00000ALYREF    | 1        | 0.50303  | 0.753535 | 0.781818 |        | 0.2725 |
| 12459 | ENSG00000SEMA3E    | 0.923232 | 0.721212 | 0.822222 | 0.834343 |        |        |
| 12460 | ENSG00000GFM2      | 1        | 0.516162 | 0.755556 | 0.790909 |        |        |
| 12461 | ENSG00000ATP6VOA4  | 1        | 0.545455 | 0.772727 | 0.80404  |        |        |
| 12462 | ENSG00000SLC39A7   | 0.919192 | 0.752525 | 0.835354 | 0.826263 |        |        |
| 12463 | ENSG00000AREL1     | 0.921212 | 0.755556 | 0.838384 | 0.808081 |        |        |
| 12464 | ENSG00000MYO10     | 1        | 0.561616 | 0.780808 | 0.740404 |        | 0.38   |
| 12465 | ENSG00000NDUFS5    | 0.960606 | 0.679798 | 0.813468 | 0.775758 |        |        |
| 12466 | ENSG00000GCM1      | 1        | 0.536364 | 0.763131 | 0.791919 |        |        |
| 12467 | ENSG00000UMPS      | 1        | 0.579798 | 0.789899 | 0.751515 |        |        |
| 12468 | ENSG00000TNNT1     | 0.87315  | 0.827696 | 0.850423 | 0.867865 |        | 0.3574 |
| 12469 | ENSG00000SCRN3     | 1        | 0.589899 | 0.784175 | 0.723232 |        | 0.341  |
| 12470 | ENSG00000ATP7A     | 0.961616 | 0.652525 | 0.805051 | 0.792929 |        |        |
| 12471 | ENSG00000TMF1      | 0.963636 | 0.664646 | 0.814141 | 0.768687 |        |        |
| 12472 | ENSG00000GAPDHS    | 0.87315  | 0.827696 | 0.850423 | 0.868922 |        |        |
| 12473 | ENSG00000SCUBE3    | 0.913621 | 0.780731 | 0.846807 | 0.812846 |        |        |
| 12474 | ENSG00000G3BP1     | 0.963636 | 0.664646 | 0.814141 | 0.768687 |        |        |
| 12475 | ENSG00000AMT       | 0.960888 | 0.681818 | 0.820296 | 0.767442 |        | 0.2566 |
| 12476 | ENSG00000P4HTM     | 0.963002 | 0.658562 | 0.810782 | 0.778013 |        |        |
| 12477 | ENSG00000GCC2      | 1        | 0.590909 | 0.787879 | 0.728283 |        |        |
| 12478 | ENSG00000INTS12    | 0.989899 | 0.612121 | 0.80101  | 0.764646 |        | 0.382  |
| 12479 | ENSG00000NEUROG3   | 1        | 0.60404  | 0.79899  | 0.723232 |        |        |
| 12480 | ENSG00000PDZRN4    | 0.87315  | 0.827696 | 0.850423 | 0.868922 |        | 0.44   |
| 12481 | ENSG00000C10orf113 | 1        | 0.519192 | 0.759596 | 0.748485 | 0.2721 | 0.3892 |
| 12482 | ENSG00000CROCC2    | 0.919662 | 0.750529 | 0.835095 | 0.826638 |        |        |
| 12483 | ENSG00000SOCS6     | 1        | 0.579798 | 0.786532 | 0.708081 |        |        |

|       |                    |          |          |          |          |        |        |
|-------|--------------------|----------|----------|----------|----------|--------|--------|
| 12484 | ENSG00000STATH     | 0.875758 | 0.831313 | 0.853535 | 0.851515 |        |        |
| 12485 | ENSG00000RAB3GAP2  | 1        | 0.613131 | 0.790404 | 0.729293 | 0.4459 |        |
| 12486 | ENSG00000C22orf31  | 0.911205 | 0.787526 | 0.849366 | 0.816068 |        |        |
| 12487 | ENSG00000LRP1      | 0.979798 | 0.617172 | 0.802862 | 0.772727 |        |        |
| 12488 | ENSG00000PPAN-P2RY | 0.963002 | 0.658562 | 0.810782 | 0.77907  |        |        |
| 12489 | ENSG00000GTF2I     | 1        | 0.547475 | 0.764983 | 0.719192 |        |        |
| 12490 | ENSG00000P2RY11    | 0.963002 | 0.658562 | 0.810782 | 0.77907  |        |        |
| 12491 | ENSG00000PARN      | 1        | 0.518182 | 0.802694 | 0.759596 |        |        |
| 12492 | ENSG00000 9/4/2019 | 1        | 0.540404 | 0.810269 | 0.766667 |        |        |
| 12493 | ENSG00000PRKCG     | 0.992929 | 0.590909 | 0.805051 | 0.770707 |        |        |
| 12494 | ENSG00000GSTM4     | 1        | 0.558586 | 0.772391 | 0.733333 |        |        |
| 12495 | ENSG00000TNN       | 1        | 0.563636 | 0.779798 | 0.770707 |        |        |
| 12496 | ENSG00000ITIH2     | 0.875758 | 0.831313 | 0.853535 | 0.852525 |        |        |
| 12497 | ENSG00000FAM193B   | 1        | 0.531313 | 0.765657 | 0.786869 | 0.3861 | 0.3925 |
| 12498 | ENSG00000TRIAP1    | 0.959596 | 0.681818 | 0.818687 | 0.778788 |        |        |
| 12499 | ENSG00000C2CD5     | 0.921212 | 0.755556 | 0.838384 | 0.815152 |        |        |
| 12500 | ENSG00000ADCY9     | 1        | 0.561616 | 0.780808 | 0.733333 |        |        |
| 12501 | ENSG00000FARSA     | 0.956566 | 0.687879 | 0.821212 | 0.790909 |        |        |
| 12502 | ENSG00000WDCP      | 0.958586 | 0.679798 | 0.807407 | 0.8      |        |        |
| 12503 | ENSG00000C17orf49  | 1        | 0.509091 | 0.748485 | 0.768687 |        |        |
| 12504 | ENSG00000ANAPC4    | 1        | 0.561616 | 0.853872 | 0.739394 | 0.6615 |        |
| 12505 | ENSG00000FAM174A   | 0.921212 | 0.755556 | 0.838384 | 0.811111 |        |        |
| 12506 | ENSG00000SNAP91    | 0.983838 | 0.581818 | 0.79596  | 0.805051 |        |        |
| 12507 | ENSG00000CCNG1     | 0.959596 | 0.678788 | 0.81229  | 0.792929 |        |        |
| 12508 | ENSG00000SPDL1     | 1        | 0.588889 | 0.792593 | 0.775758 |        |        |
| 12509 | ENSG00000TCP11     | 0.917548 | 0.787526 | 0.852537 | 0.803383 |        |        |
| 12510 | ENSG00000PEX14     | 0.956566 | 0.678788 | 0.82862  | 0.79697  |        |        |
| 12511 | ENSG00000IFRD1     | 0.960606 | 0.683838 | 0.820539 | 0.773737 |        |        |
| 12512 | ENSG00000PIP       | 0.923232 | 0.721212 | 0.822222 | 0.847475 |        |        |
| 12513 | ENSG00000MIGA1     | 0.919662 | 0.750529 | 0.835095 | 0.834038 |        |        |
| 12514 | ENSG00000TAS2R41   | 0.875758 | 0.831313 | 0.853535 | 0.851515 |        |        |
| 12515 | ENSG00000DCAF11    | 0.959596 | 0.681818 | 0.818687 | 0.786869 | 0.2584 |        |
| 12516 | ENSG00000DMXL2     | 0.919662 | 0.750529 | 0.835095 | 0.836152 |        |        |
| 12517 | ENSG00000TCP11X2   | 0.917548 | 0.787526 | 0.852537 | 0.803383 |        |        |
| 12518 | ENSG00000COBL      | 1        | 0.6      | 0.8      | 0.738384 | 0.3788 |        |
| 12519 | ENSG00000KCNK6     | 0.960606 | 0.645455 | 0.819192 | 0.80303  |        |        |
| 12520 | ENSG00000TCP11X1   | 0.917548 | 0.787526 | 0.852537 | 0.803383 |        |        |
| 12521 | ENSG00000IBTK      | 0.981818 | 0.619192 | 0.804882 | 0.771717 |        |        |
| 12522 | ENSG00000CCDC155   | 1        | 0.539394 | 0.762963 | 0.772727 |        |        |
| 12523 | ENSG00000CYP4F11   | 0.978788 | 0.590909 | 0.788889 | 0.816162 |        |        |
| 12524 | ENSG00000PIAS1     | 0.960606 | 0.683838 | 0.820539 | 0.775758 |        |        |
| 12525 | ENSG00000ODF3B     | 0.875758 | 0.831313 | 0.853535 | 0.856566 |        |        |
| 12526 | ENSG00000MRPS15    | 1        | 0.590909 | 0.787879 | 0.749495 |        |        |
| 12527 | ENSG00000USP54     | 0.957717 | 0.675476 | 0.814482 | 0.80444  |        |        |
| 12528 | ENSG00000GPBP1     | 0.981818 | 0.617172 | 0.798316 | 0.782828 |        |        |
| 12529 | ENSG00000TTR       | 1        | 0.547475 | 0.776094 | 0.794949 |        |        |
| 12530 | ENSG00000SLC35D2   | 0.963636 | 0.664646 | 0.814141 | 0.776768 |        |        |
| 12531 | ENSG00000DIABLO    | 1        | 0.558586 | 0.770539 | 0.727273 |        |        |
| 12532 | ENSG00000TXN2      | 1        | 0.59798  | 0.794949 | 0.754545 | 0.3331 |        |
| 12533 | ENSG00000G3BP2     | 1        | 0.589899 | 0.784175 | 0.734343 |        |        |
| 12534 | ENSG00000COPB1     | 1        | 0.572727 | 0.781818 | 0.759596 |        |        |
| 12535 | ENSG00000PEX26     | 0.955603 | 0.714588 | 0.834214 | 0.782241 |        |        |
| 12536 | ENSG00000MRPS6     | 1        | 0.535354 | 0.750842 | 0.750505 |        |        |
| 12537 | ENSG00000MICU3     | 0.99899  | 0.584848 | 0.838889 | 0.745455 |        |        |
| 12538 | ENSG00000PRG2      | 0.875758 | 0.831313 | 0.853535 | 0.859596 |        |        |

|       |           |           |          |          |          |          |        |        |
|-------|-----------|-----------|----------|----------|----------|----------|--------|--------|
| 12539 | ENSG00000 | ZADH2     | 1        | 0.549495 | 0.769697 | 0.736364 |        |        |
| 12540 | ENSG00000 | CCDC146   | 1        | 0.561311 | 0.778541 | 0.766385 |        |        |
| 12541 | ENSG00000 | ACBD6     | 0.921212 | 0.752525 | 0.830471 | 0.836364 |        |        |
| 12542 | ENSG00000 | IRF3      | 0.963636 | 0.664646 | 0.814141 | 0.781818 |        |        |
| 12543 | ENSG00000 | SUCLA2    | 1        | 0.578788 | 0.784007 | 0.748485 |        |        |
| 12544 | ENSG00000 | AP000781. | 0.875758 | 0.831313 | 0.853535 | 0.859596 |        |        |
| 12545 | ENSG00000 | GSPT1     | 0.918182 | 0.787879 | 0.846128 | 0.814141 |        |        |
| 12546 | ENSG00000 | MTMR12    | 0.916162 | 0.754545 | 0.835354 | 0.851515 |        |        |
| 12547 | ENSG00000 | LLGL2     | 0.955703 | 0.704319 | 0.823367 | 0.79402  |        |        |
| 12548 | ENSG00000 | C1S       | 1        | 0.531313 | 0.765657 | 0.755556 |        |        |
| 12549 | ENSG00000 | NBPF15    | 1        | 0.475758 | 0.782323 | 0.770707 |        |        |
| 12550 | ENSG00000 | RER1      | 0.962626 | 0.657576 | 0.808923 | 0.793939 |        |        |
| 12551 | ENSG00000 | ZNF26     | 0.99596  | 0.583838 | 0.811785 | 0.773737 | 0.4888 |        |
| 12552 | ENSG00000 | PUM3      | 0.984848 | 0.622222 | 0.791582 | 0.785859 |        |        |
| 12553 | ENSG00000 | PUM1      | 0.921212 | 0.755556 | 0.838384 | 0.824242 |        |        |
| 12554 | ENSG00000 | DNA2      | 0.959831 | 0.67759  | 0.816949 | 0.792812 | 0.514  |        |
| 12555 | ENSG00000 | SLC36A2   | 0.964646 | 0.637374 | 0.80101  | 0.809091 |        |        |
| 12556 | ENSG00000 | UBE2H     | 0.915836 | 0.780731 | 0.84127  | 0.82835  |        |        |
| 12557 | ENSG00000 | NBPF19    | 1        | 0.475758 | 0.782323 | 0.770707 |        |        |
| 12558 | ENSG00000 | GPR21     | 0.921212 | 0.755556 | 0.838384 | 0.821212 |        |        |
| 12559 | ENSG00000 | MLANA     | 0.966184 | 0.618357 | 0.792271 | 0.833816 |        |        |
| 12560 | ENSG00000 | GABRB1    | 0.921212 | 0.755556 | 0.838384 | 0.824242 |        |        |
| 12561 | ENSG00000 | CALCRL    | 1        | 0.59408  | 0.79704  | 0.77167  |        |        |
| 12562 | ENSG00000 | DPY19L3   | 0.960606 | 0.683838 | 0.820539 | 0.777778 |        |        |
| 12563 | ENSG00000 | MAOB      | 1        | 0.588889 | 0.792593 | 0.781818 |        |        |
| 12564 | ENSG00000 | ZNF79     | 1        | 0.521212 | 0.753872 | 0.773737 |        |        |
| 12565 | ENSG00000 | TMEM233   | 0.981818 | 0.619192 | 0.804882 | 0.775758 |        |        |
| 12566 | ENSG00000 | RSPH6A    | 0.875758 | 0.831313 | 0.853535 | 0.871717 |        |        |
| 12567 | ENSG00000 | NCDN      | 0.917548 | 0.785412 | 0.838443 | 0.82981  |        |        |
| 12568 | ENSG00000 | PRSS1     | 1        | 0.519192 | 0.759596 | 0.761616 |        |        |
| 12569 | ENSG00000 | NFX1      | 0.988889 | 0.588889 | 0.788889 | 0.812121 |        |        |
| 12570 | ENSG00000 | RPL30     | 0.921212 | 0.755556 | 0.838384 | 0.827273 |        |        |
| 12571 | ENSG00000 | UBQLN3    | 0.964646 | 0.637374 | 0.80101  | 0.814141 |        |        |
| 12572 | ENSG00000 | PGA4      | 0.921212 | 0.755556 | 0.838384 | 0.824242 |        |        |
| 12573 | ENSG00000 | GPX4      | 1        | 0.509091 | 0.824242 | 0.734343 |        |        |
| 12574 | ENSG00000 | ZNF518B   | 0.99596  | 0.584848 | 0.815993 | 0.773737 |        |        |
| 12575 | ENSG00000 | KRTAP3-3  | 0.963285 | 0.663768 | 0.812399 | 0.790338 |        |        |
| 12576 | ENSG00000 | PGA5      | 0.921212 | 0.755556 | 0.838384 | 0.824242 |        |        |
| 12577 | ENSG00000 | NXF5      | 1        | 0.567677 | 0.778451 | 0.775758 |        |        |
| 12578 | ENSG00000 | KRTAP3-2  | 0.963285 | 0.663768 | 0.812399 | 0.790338 |        |        |
| 12579 | ENSG00000 | PSMD2     | 0.918182 | 0.751515 | 0.83367  | 0.858586 |        |        |
| 12580 | ENSG00000 | OCEL1     | 0.960606 | 0.683838 | 0.820539 | 0.785859 |        |        |
| 12581 | ENSG00000 | SP2       | 1        | 0.533333 | 0.797643 | 0.741414 |        |        |
| 12582 | ENSG00000 | RTP4      | 0.958774 | 0.675476 | 0.815011 | 0.807611 |        |        |
| 12583 | ENSG00000 | EME1      | 1        | 0.549683 | 0.769556 | 0.77167  |        |        |
| 12584 | ENSG00000 | RPL8      | 1        | 0.570707 | 0.77862  | 0.742424 |        |        |
| 12585 | ENSG00000 | AFAP1     | 1        | 0.563636 | 0.77138  | 0.726263 |        |        |
| 12586 | ENSG00000 | CFAP53    | 0.921212 | 0.755556 | 0.838384 | 0.829293 | 0.3193 |        |
| 12587 | ENSG00000 | TTC27     | 0.921212 | 0.755556 | 0.838384 | 0.837374 | 0.3341 | 0.2285 |
| 12588 | ENSG00000 | COL9A3    | 0.880666 | 0.838113 | 0.859389 | 0.849214 |        |        |
| 12589 | ENSG00000 | BEST3     | 0.921212 | 0.755556 | 0.838384 | 0.834343 |        |        |
| 12590 | ENSG00000 | PFDN5     | 0.958774 | 0.672304 | 0.808492 | 0.819239 | 0.2492 |        |
| 12591 | ENSG00000 | GLIPR2    | 0.962626 | 0.681818 | 0.798653 | 0.80303  |        |        |
| 12592 | ENSG00000 | LHX6      | 0.921212 | 0.755556 | 0.838384 | 0.837374 |        |        |
| 12593 | ENSG00000 | TMEM200C  | 0.987879 | 0.580808 | 0.792761 | 0.817172 |        |        |

|       |                   |          |          |          |          |        |        |
|-------|-------------------|----------|----------|----------|----------|--------|--------|
| 12594 | ENSG00000MYL9     | 0.975758 | 0.622222 | 0.79899  | 0.80202  |        |        |
| 12595 | ENSG00000MYL3     | 0.987879 | 0.617172 | 0.806397 | 0.774747 |        |        |
| 12596 | ENSG00000PDE8A    | 0.915836 | 0.782946 | 0.849391 | 0.83278  |        |        |
| 12597 | ENSG00000STARD8   | 0.957717 | 0.675476 | 0.814482 | 0.820296 |        |        |
| 12598 | ENSG00000GAR1     | 0.957576 | 0.717172 | 0.836027 | 0.782828 |        |        |
| 12599 | ENSG00000ASTL     | 1        | 0.548485 | 0.772054 | 0.737374 |        | 0.657  |
| 12600 | ENSG00000UFM1     | 0.917172 | 0.789899 | 0.853199 | 0.821212 |        |        |
| 12601 | ENSG00000RP1      | 0.924638 | 0.72657  | 0.825604 | 0.854106 |        |        |
| 12602 | ENSG00000MRPL16   | 1        | 0.561616 | 0.780808 | 0.740404 |        |        |
| 12603 | ENSG00000MYL12B   | 0.975758 | 0.622222 | 0.79899  | 0.80202  |        |        |
| 12604 | ENSG00000CCDC22   | 0.921212 | 0.755556 | 0.838384 | 0.840404 |        |        |
| 12605 | ENSG00000IGSF22   | 0.960606 | 0.683838 | 0.820539 | 0.785859 |        |        |
| 12606 | ENSG00000ARMT1    | 1        | 0.548485 | 0.771212 | 0.781818 |        |        |
| 12607 | ENSG00000HECW1    | 1        | 0.607973 | 0.82392  | 0.751938 |        |        |
| 12608 | ENSG00000PEX13    | 1        | 0.533333 | 0.797643 | 0.751515 |        |        |
| 12609 | ENSG00000C4orf17  | 0.964646 | 0.637374 | 0.80101  | 0.823232 |        |        |
| 12610 | ENSG00000ADAMTSL4 | 0.960133 | 0.675526 | 0.816722 | 0.801772 |        |        |
| 12611 | ENSG00000FAM122A  | 0.921212 | 0.755556 | 0.838384 | 0.833333 |        |        |
| 12612 | ENSG00000DDX3X    | 1        | 0.490909 | 0.830303 | 0.726263 |        |        |
| 12613 | ENSG00000DENR     | 1        | 0.555556 | 0.765993 | 0.790909 |        |        |
| 12614 | ENSG00000RAB9A    | 0.963636 | 0.664646 | 0.814141 | 0.792929 |        |        |
| 12615 | ENSG00000ALDOA    | 0.959596 | 0.681818 | 0.818687 | 0.79596  |        |        |
| 12616 | ENSG00000PPP2R3C  | 0.958586 | 0.714141 | 0.82963  | 0.784848 |        |        |
| 12617 | ENSG00000WWP1     | 0.914141 | 0.788889 | 0.857576 | 0.825253 |        | 0.2341 |
| 12618 | ENSG00000F8       | 0.957576 | 0.683838 | 0.819024 | 0.809091 |        |        |
| 12619 | ENSG00000SELENOH  | 0.959596 | 0.681818 | 0.818687 | 0.79697  |        |        |
| 12620 | ENSG00000SRD5A3   | 0.963636 | 0.664646 | 0.814141 | 0.792929 |        |        |
| 12621 | ENSG00000MAP1LC3B | 1        | 0.531313 | 0.843771 | 0.733333 |        |        |
| 12622 | ENSG00000CUEDC1   | 1        | 0.533333 | 0.755556 | 0.776768 | 0.2665 | 0.745  |
| 12623 | ENSG00000OPHN1    | 1        | 0.616833 | 0.805463 | 0.753045 |        |        |
| 12624 | ENSG00000C14orf93 | 0.955556 | 0.693939 | 0.824747 | 0.813131 |        |        |
| 12625 | ENSG00000WDR12    | 0.959596 | 0.681818 | 0.818687 | 0.80202  |        |        |
| 12626 | ENSG00000ARL14EP  | 1        | 0.547475 | 0.820539 | 0.731313 |        |        |
| 12627 | ENSG00000DERL1    | 0.963636 | 0.664646 | 0.814141 | 0.792929 |        |        |
| 12628 | ENSG00000PAXIP1   | 0.958586 | 0.714141 | 0.82963  | 0.783838 |        |        |
| 12629 | ENSG00000TRIM38   | 0.962626 | 0.687879 | 0.819865 | 0.776768 |        |        |
| 12630 | ENSG00000ARID5A   | 0.990486 | 0.587738 | 0.787703 | 0.82241  |        |        |
| 12631 | ENSG00000IFFO2    | 0.956566 | 0.720202 | 0.837542 | 0.782828 |        | 0.3739 |
| 12632 | ENSG00000EDAR     | 0.961616 | 0.652525 | 0.805051 | 0.823232 |        |        |
| 12633 | ENSG00000MEPCE    | 1        | 0.567677 | 0.780471 | 0.758586 |        |        |
| 12634 | ENSG00000ATP8B1   | 1        | 0.642706 | 0.813953 | 0.734672 | 0.3978 |        |
| 12635 | ENSG00000PAPPA2   | 0.964646 | 0.637374 | 0.80101  | 0.829293 |        |        |
| 12636 | ENSG00000REG3G    | 0.919662 | 0.750529 | 0.835095 | 0.866808 |        |        |
| 12637 | ENSG00000INSL5    | 0.963636 | 0.664646 | 0.814141 | 0.792929 |        |        |
| 12638 | ENSG00000CELF1    | 1        | 0.556566 | 0.776599 | 0.770707 |        |        |
| 12639 | ENSG00000SLC35G2  | 0.921212 | 0.755556 | 0.838384 | 0.841414 |        |        |
| 12640 | ENSG00000RSP03    | 0.919192 | 0.791919 | 0.855556 | 0.812121 | 0.3818 |        |
| 12641 | ENSG00000HAPLN1   | 1        | 0.579798 | 0.789899 | 0.744444 |        |        |
| 12642 | ENSG00000SMPD2    | 1        | 0.567677 | 0.778451 | 0.775758 |        |        |
| 12643 | ENSG00000SLC2A14  | 0.921212 | 0.755556 | 0.838384 | 0.841414 |        |        |
| 12644 | ENSG00000PSMC5    | 1        | 0.586869 | 0.812963 | 0.767677 |        |        |
| 12645 | ENSG00000REG3A    | 0.919662 | 0.750529 | 0.835095 | 0.866808 |        |        |
| 12646 | ENSG00000KPNA6    | 0.988889 | 0.588889 | 0.788889 | 0.826263 |        |        |
| 12647 | ENSG00000HARS2    | 0.917172 | 0.789899 | 0.853199 | 0.830303 |        |        |
| 12648 | ENSG00000SCT      | 0.869979 | 0.869979 | 0.869979 | 0.869979 |        |        |

|       |                    |          |          |          |          |        |
|-------|--------------------|----------|----------|----------|----------|--------|
| 12649 | ENSG00000CNOT2     | 0.921212 | 0.755556 | 0.838384 | 0.849495 |        |
| 12650 | ENSG00000MYO15A    | 0.869979 | 0.869979 | 0.869979 | 0.869979 |        |
| 12651 | ENSG00000NCLN      | 0.961616 | 0.687879 | 0.823737 | 0.781818 |        |
| 12652 | ENSG00000C20orf144 | 0.869979 | 0.869979 | 0.869979 | 0.869979 |        |
| 12653 | ENSG00000TTLL1     | 0.963636 | 0.664646 | 0.814141 | 0.8      |        |
| 12654 | ENSG00000PRUNE2    | 0.99697  | 0.617172 | 0.83064  | 0.751515 |        |
| 12655 | ENSG00000GPR12     | 0.917548 | 0.787526 | 0.852537 | 0.832981 |        |
| 12656 | ENSG00000GLT6D1    | 1        | 0.516162 | 0.760438 | 0.776768 |        |
| 12657 | ENSG00000TEX44     | 1        | 0.509091 | 0.754545 | 0.811111 |        |
| 12658 | ENSG00000NIPSNAP2  | 0.917172 | 0.789899 | 0.853199 | 0.830303 |        |
| 12659 | ENSG00000SACS      | 0.919192 | 0.791919 | 0.855556 | 0.814141 | 0.424  |
| 12660 | ENSG00000SLC12A4   | 0.960606 | 0.649495 | 0.802525 | 0.844444 |        |
| 12661 | ENSG00000MLPH      | 0.959596 | 0.681818 | 0.818687 | 0.809091 |        |
| 12662 | ENSG00000SNX14     | 0.963636 | 0.657576 | 0.805556 | 0.811111 |        |
| 12663 | ENSG00000ZBED5     | 0.964646 | 0.637374 | 0.852525 | 0.777778 |        |
| 12664 | ENSG00000TTC32     | 0.917548 | 0.787526 | 0.852537 | 0.832981 |        |
| 12665 | ENSG00000CUL1      | 0.977852 | 0.634551 | 0.799926 | 0.796235 |        |
| 12666 | ENSG00000ZC2HC1A   | 0.917548 | 0.787526 | 0.852537 | 0.835095 |        |
| 12667 | ENSG00000ATP5IF1   | 0.921212 | 0.755556 | 0.838384 | 0.850505 |        |
| 12668 | ENSG00000HNRNPL    | 1        | 0.612121 | 0.80202  | 0.754545 | 0.436  |
| 12669 | ENSG00000TOMM70    | 1        | 0.579798 | 0.789899 | 0.740404 |        |
| 12670 | ENSG00000POLR2A    | 1        | 0.532323 | 0.793771 | 0.740404 | 0.4858 |
| 12671 | ENSG00000SERPINE3  | 0.987879 | 0.610101 | 0.808249 | 0.787879 |        |
| 12672 | ENSG00000VBP1      | 1        | 0.586869 | 0.785185 | 0.739394 | 0.6183 |
| 12673 | ENSG00000CDC42EP4  | 0.956566 | 0.720202 | 0.837542 | 0.787879 |        |
| 12674 | ENSG00000PSMA4     | 0.962626 | 0.657576 | 0.850168 | 0.778788 |        |
| 12675 | ENSG00000DYNC1I2   | 1        | 0.637374 | 0.81431  | 0.742424 |        |
| 12676 | ENSG00000AGBL5     | 0.919192 | 0.791919 | 0.855556 | 0.821212 |        |
| 12677 | ENSG00000CBLN3     | 0.917548 | 0.785412 | 0.844609 | 0.844609 |        |
| 12678 | ENSG00000OPRD1     | 0.963636 | 0.664646 | 0.814141 | 0.80202  |        |
| 12679 | ENSG00000PXYLP1    | 0.956566 | 0.720202 | 0.837542 | 0.789899 | 0.2788 |
| 12680 | ENSG00000BMF       | 0.961945 | 0.688161 | 0.825053 | 0.77907  |        |
| 12681 | ENSG00000ARL3      | 1        | 0.588889 | 0.792593 | 0.745455 |        |
| 12682 | ENSG00000RPL34     | 0.961616 | 0.687879 | 0.823737 | 0.785859 |        |
| 12683 | ENSG00000ARHGDI    | 1        | 0.590909 | 0.781145 | 0.752525 | 0.316  |
| 12684 | ENSG00000HSPD1     | 1        | 0.588889 | 0.790741 | 0.741414 | 0.2413 |
| 12685 | ENSG00000GPR174    | 0.923232 | 0.721212 | 0.822222 | 0.888889 |        |
| 12686 | ENSG00000MCPH1     | 1        | 0.556566 | 0.832155 | 0.728283 |        |
| 12687 | ENSG00000CEP57     | 0.962626 | 0.693939 | 0.828283 | 0.772727 |        |
| 12688 | ENSG00000SWT1      | 1        | 0.545455 | 0.772727 | 0.834343 |        |
| 12689 | ENSG00000PSMB1     | 1        | 0.615152 | 0.824411 | 0.756566 | 0.4265 |
| 12690 | ENSG00000CCNT2     | 1        | 0.588889 | 0.798148 | 0.790909 |        |
| 12691 | ENSG00000TFB1M     | 0.961616 | 0.682828 | 0.815993 | 0.80404  |        |
| 12692 | ENSG00000IFNLR1    | 0.957576 | 0.683838 | 0.819024 | 0.823232 | 0.1769 |
| 12693 | ENSG00000BBX       | 0.919192 | 0.789899 | 0.847811 | 0.837374 |        |
| 12694 | ENSG00000LAMP3     | 1        | 0.6      | 0.8      | 0.779798 |        |
| 12695 | ENSG00000TMEM25    | 0.961616 | 0.682828 | 0.815993 | 0.80202  |        |
| 12696 | ENSG00000MYL4      | 0.984848 | 0.643434 | 0.801684 | 0.783838 |        |
| 12697 | ENSG00000MOCS1     | 1        | 0.588889 | 0.798148 | 0.759596 |        |
| 12698 | ENSG00000SGSM3     | 0.963636 | 0.664646 | 0.814141 | 0.807071 |        |
| 12699 | ENSG00000SRP68     | 0.963636 | 0.664646 | 0.814141 | 0.80303  |        |
| 12700 | ENSG00000THUMP3    | 1        | 0.6      | 0.8      | 0.739394 |        |
| 12701 | ENSG00000SLC16A8   | 0.922705 | 0.760386 | 0.841546 | 0.841546 |        |
| 12702 | ENSG00000PODNL1    | 0.956566 | 0.687879 | 0.821212 | 0.831313 | 0.328  |
| 12703 | ENSG00000NECAB2    | 1        | 0.625253 | 0.798485 | 0.754545 |        |

|       |                    |          |          |          |          |        |        |
|-------|--------------------|----------|----------|----------|----------|--------|--------|
| 12704 | ENSG00000DDB1      | 0.99899  | 0.629293 | 0.855387 | 0.730303 |        |        |
| 12705 | ENSG00000MRPL28    | 1        | 0.612121 | 0.804377 | 0.768687 |        |        |
| 12706 | ENSG00000CALHM1    | 0.915836 | 0.782946 | 0.849391 | 0.857143 |        |        |
| 12707 | ENSG00000TARDBP    | 1        | 0.572727 | 0.798485 | 0.774747 | 0.4414 |        |
| 12708 | ENSG00000TIPRL     | 0.985859 | 0.622222 | 0.802862 | 0.792929 |        |        |
| 12709 | ENSG00000PDCD1LG2  | 0.962626 | 0.693939 | 0.828283 | 0.775758 |        |        |
| 12710 | ENSG00000ART1      | 0.959596 | 0.681818 | 0.818687 | 0.818182 |        |        |
| 12711 | ENSG00000PCDHB10   | 1        | 0.610188 | 0.805094 | 0.745293 |        |        |
| 12712 | ENSG00000BLM       | 1        | 0.549683 | 0.769556 | 0.750529 |        |        |
| 12713 | ENSG00000STAU2     | 1        | 0.593939 | 0.832323 | 0.765657 |        |        |
| 12714 | ENSG00000HNRNPLL   | 0.979798 | 0.617172 | 0.802862 | 0.809091 |        |        |
| 12715 | ENSG00000LRP2BP    | 0.987879 | 0.581818 | 0.80303  | 0.825253 |        |        |
| 12716 | ENSG00000COPS7A    | 0.958586 | 0.716162 | 0.835859 | 0.792929 |        |        |
| 12717 | ENSG00000ZNF287    | 0.917172 | 0.789899 | 0.853199 | 0.845455 | 0.2989 |        |
| 12718 | ENSG00000TRIM31    | 1        | 0.519192 | 0.753872 | 0.793939 |        |        |
| 12719 | ENSG00000BAX       | 1        | 0.612121 | 0.80202  | 0.772727 |        |        |
| 12720 | ENSG00000PCBP3     | 1        | 0.591919 | 0.790909 | 0.712121 |        |        |
| 12721 | ENSG00000CASC3     | 0.962626 | 0.683838 | 0.812121 | 0.805051 |        |        |
| 12722 | ENSG00000ZNF511    | 1        | 0.531313 | 0.760606 | 0.775758 |        |        |
| 12723 | ENSG00000BORA      | 0.955603 | 0.681818 | 0.817653 | 0.857294 |        |        |
| 12724 | ENSG00000SRP54     | 0.95935  | 0.708479 | 0.833914 | 0.794425 |        |        |
| 12725 | ENSG00000PAFAH1B2  | 1        | 0.564646 | 0.776431 | 0.756566 |        |        |
| 12726 | ENSG00000TTC33     | 1        | 0.609937 | 0.82012  | 0.739958 |        |        |
| 12727 | ENSG00000FIGLA     | 0.913621 | 0.780731 | 0.846807 | 0.870432 |        |        |
| 12728 | ENSG00000CDC37     | 1        | 0.652525 | 0.803704 | 0.735354 |        |        |
| 12729 | ENSG00000PLEKHM2   | 0.985859 | 0.658586 | 0.822222 | 0.755556 |        | 0.6157 |
| 12730 | ENSG00000FOXK1     | 1        | 0.567677 | 0.787205 | 0.748485 | 0.4232 |        |
| 12731 | ENSG00000IGF2      | 0.921212 | 0.755556 | 0.838384 | 0.863636 |        |        |
| 12732 | ENSG00000RSP04     | 0.872727 | 0.872727 | 0.872727 | 0.872727 |        |        |
| 12733 | ENSG00000BUB3      | 1        | 0.59596  | 0.801347 | 0.728283 |        |        |
| 12734 | ENSG00000CKM       | 0.872727 | 0.872727 | 0.872727 | 0.872727 |        |        |
| 12735 | ENSG00000KIF21B    | 0.960606 | 0.677778 | 0.807071 | 0.833333 |        |        |
| 12736 | ENSG00000KCNJ5     | 1        | 0.578788 | 0.787879 | 0.789899 |        |        |
| 12737 | ENSG00000 3/7/2019 | 1        | 0.561616 | 0.780808 | 0.790909 |        |        |
| 12738 | ENSG00000LRRC28    | 1        | 0.557576 | 0.775084 | 0.764646 |        |        |
| 12739 | ENSG00000AP4B1     | 0.917172 | 0.789899 | 0.853199 | 0.851515 | 0.345  |        |
| 12740 | ENSG00000CDKN2A    | 0.986869 | 0.611111 | 0.809428 | 0.80202  | 0.3916 |        |
| 12741 | ENSG00000LAMA4     | 0.989429 | 0.605708 | 0.797569 | 0.815011 |        |        |
| 12742 | ENSG00000KCNH6     | 0.917548 | 0.787526 | 0.852537 | 0.853066 |        |        |
| 12743 | ENSG00000LYPD2     | 0.960606 | 0.679798 | 0.813468 | 0.821212 | 0.2937 | 0.2836 |
| 12744 | ENSG00000PDZD11    | 0.919192 | 0.791919 | 0.855556 | 0.835354 |        | 0.1697 |
| 12745 | ENSG00000PPP2CA    | 1        | 0.60303  | 0.79596  | 0.768687 |        |        |
| 12746 | ENSG00000UBQLN1    | 0.983838 | 0.630303 | 0.807071 | 0.793939 |        |        |
| 12747 | ENSG00000CDKN2C    | 1        | 0.622222 | 0.807071 | 0.737374 | 0.4385 | 0.2884 |
| 12748 | ENSG00000KIT       | 1        | 0.531313 | 0.76835  | 0.814141 |        |        |
| 12749 | ENSG00000NEXN      | 0.919192 | 0.791919 | 0.855556 | 0.832323 |        |        |
| 12750 | ENSG00000SNAPC5    | 0.962626 | 0.687879 | 0.819865 | 0.793939 |        |        |
| 12751 | ENSG00000ACP5      | 1        | 0.579798 | 0.789899 | 0.807071 |        |        |
| 12752 | ENSG00000CALR3     | 1        | 0.531313 | 0.765657 | 0.763636 |        |        |
| 12753 | ENSG00000DPYSL2    | 1        | 0.579798 | 0.789899 | 0.815152 |        |        |
| 12754 | ENSG00000MRGPRG    | 0.872727 | 0.872727 | 0.872727 | 0.872727 |        |        |
| 12755 | ENSG00000EPS15     | 1        | 0.622222 | 0.811111 | 0.762626 |        |        |
| 12756 | ENSG00000MAML1     | 1        | 0.58804  | 0.79402  | 0.737542 |        |        |
| 12757 | ENSG00000CRISPLD2  | 0.962626 | 0.687879 | 0.819865 | 0.79899  |        |        |
| 12758 | ENSG00000MFN2      | 0.959596 | 0.717172 | 0.837037 | 0.789899 |        |        |

|       |                    |          |          |          |          |        |
|-------|--------------------|----------|----------|----------|----------|--------|
| 12759 | ENSG00000CYP2A7    | 1        | 0.564646 | 0.789899 | 0.726263 |        |
| 12760 | ENSG00000PPP3R1    | 1        | 0.491919 | 0.821549 | 0.747475 |        |
| 12761 | ENSG00000CCP110    | 0.919192 | 0.791919 | 0.855556 | 0.841414 |        |
| 12762 | ENSG00000DCTD      | 0.915152 | 0.789899 | 0.852189 | 0.863636 |        |
| 12763 | ENSG00000ASB6      | 0.962626 | 0.693939 | 0.828283 | 0.786869 |        |
| 12764 | ENSG00000SIGLEC5   | 0.987879 | 0.611111 | 0.808754 | 0.805051 |        |
| 12765 | ENSG00000PTPRR     | 1        | 0.617172 | 0.800842 | 0.723232 |        |
| 12766 | ENSG00000FAM189A2  | 1        | 0.579798 | 0.786532 | 0.778788 |        |
| 12767 | ENSG00000POGZ      | 1        | 0.560606 | 0.792929 | 0.771717 |        |
| 12768 | ENSG00000PLIN4     | 0.917548 | 0.787526 | 0.852537 | 0.859408 |        |
| 12769 | ENSG00000ANKRD26   | 1        | 0.637374 | 0.817172 | 0.737374 |        |
| 12770 | ENSG00000CCDC39    | 0.921212 | 0.755556 | 0.838384 | 0.869697 |        |
| 12771 | ENSG00000ZNF710    | 1        | 0.60404  | 0.845118 | 0.708081 |        |
| 12772 | ENSG00000ADAM17    | 1        | 0.591919 | 0.790909 | 0.745455 | 0.422  |
| 12773 | ENSG00000F2        | 1        | 0.585859 | 0.796633 | 0.721212 |        |
| 12774 | ENSG00000C17orf98  | 0.962626 | 0.693939 | 0.828283 | 0.785859 |        |
| 12775 | ENSG00000ARHGAP42  | 0.993939 | 0.587879 | 0.809091 | 0.814141 |        |
| 12776 | ENSG00000PRR27     | 0.963002 | 0.658562 | 0.810782 | 0.830867 |        |
| 12777 | ENSG00000PF4V1     | 0.919192 | 0.791919 | 0.855556 | 0.843434 |        |
| 12778 | ENSG00000SSB       | 1        | 0.59596  | 0.791246 | 0.754545 |        |
| 12779 | ENSG00000PDE2A     | 0.993939 | 0.587879 | 0.809091 | 0.814141 |        |
| 12780 | ENSG00000IDS       | 0.919192 | 0.791919 | 0.855556 | 0.847475 |        |
| 12781 | ENSG00000PPCDC     | 0.961616 | 0.687879 | 0.823737 | 0.80202  |        |
| 12782 | ENSG00000KRT9      | 0.990338 | 0.618357 | 0.798712 | 0.808696 | 0.2679 |
| 12783 | ENSG00000ALDOC     | 0.978788 | 0.625253 | 0.80202  | 0.818182 |        |
| 12784 | ENSG00000PRPF4     | 1        | 0.588889 | 0.798148 | 0.758586 | 0.2847 |
| 12785 | ENSG00000TNFSF13   | 0.962626 | 0.657576 | 0.808923 | 0.838384 |        |
| 12786 | ENSG00000CGB5      | 1        | 0.50101  | 0.750505 | 0.843434 |        |
| 12787 | ENSG00000PLXDC2    | 0.954596 | 0.675526 | 0.813953 | 0.890365 |        |
| 12788 | ENSG00000RAD23A    | 0.956566 | 0.754545 | 0.849495 | 0.783838 |        |
| 12789 | ENSG00000TBL1XR1   | 1        | 0.557576 | 0.775084 | 0.762626 |        |
| 12790 | ENSG00000GRIK4     | 0.919192 | 0.791919 | 0.855556 | 0.843434 |        |
| 12791 | ENSG00000IFT122    | 0.962626 | 0.693939 | 0.828283 | 0.790909 |        |
| 12792 | ENSG00000CGB7      | 1        | 0.50101  | 0.750505 | 0.843434 |        |
| 12793 | ENSG00000PSME3     | 1        | 0.589899 | 0.784175 | 0.782828 |        |
| 12794 | ENSG00000CSTF2T    | 1        | 0.579798 | 0.789899 | 0.734343 |        |
| 12795 | ENSG00000KRTAP21-3 | 0.959831 | 0.710359 | 0.828576 | 0.802326 |        |
| 12796 | ENSG00000ARRDC4    | 0.957576 | 0.717172 | 0.836027 | 0.813131 |        |
| 12797 | ENSG00000DR1       | 0.959596 | 0.713131 | 0.823906 | 0.812121 |        |
| 12798 | ENSG00000STARD7    | 1        | 0.593939 | 0.792256 | 0.810101 | 0.3839 |
| 12799 | ENSG00000LAMB1     | 1        | 0.629293 | 0.813468 | 0.760606 |        |
| 12800 | ENSG00000RPL27     | 0.919192 | 0.791919 | 0.855556 | 0.850505 |        |
| 12801 | ENSG00000RSF1      | 0.918182 | 0.788889 | 0.852694 | 0.867677 |        |
| 12802 | ENSG00000PPP1R21   | 1        | 0.583838 | 0.780135 | 0.761616 |        |
| 12803 | ENSG00000SPINT1    | 0.961616 | 0.687879 | 0.823737 | 0.805051 |        |
| 12804 | ENSG00000TRHR      | 0.875362 | 0.875362 | 0.875362 | 0.875362 |        |
| 12805 | ENSG00000ZNF608    | 0.954596 | 0.744186 | 0.848653 | 0.803987 |        |
| 12806 | ENSG00000TGFBR3L   | 0.875362 | 0.875362 | 0.875362 | 0.875362 |        |
| 12807 | ENSG00000MINDY3    | 1        | 0.547475 | 0.767003 | 0.822222 |        |
| 12808 | ENSG00000RAB34     | 0.962626 | 0.693939 | 0.828283 | 0.79798  |        |
| 12809 | ENSG00000GATA1     | 0.99596  | 0.614141 | 0.826094 | 0.783838 |        |
| 12810 | ENSG00000EEF1B2    | 0.962626 | 0.693939 | 0.828283 | 0.79798  |        |
| 12811 | ENSG00000BFSP2     | 0.964251 | 0.670531 | 0.817391 | 0.818357 |        |
| 12812 | ENSG00000LSG1      | 1        | 0.648485 | 0.823232 | 0.755556 | 0.328  |
| 12813 | ENSG00000SLC35F4   | 0.919192 | 0.791919 | 0.855556 | 0.852525 |        |



|       |                   |          |          |          |          |        |
|-------|-------------------|----------|----------|----------|----------|--------|
| 12814 | ENSG00000SDC1     | 0.984848 | 0.645455 | 0.814141 | 0.793939 |        |
| 12815 | ENSG00000MCCC1    | 0.959596 | 0.717172 | 0.837037 | 0.80303  |        |
| 12816 | ENSG00000PRSS3    | 0.919192 | 0.791919 | 0.855556 | 0.860606 |        |
| 12817 | ENSG00000GRK1     | 1        | 0.525604 | 0.758615 | 0.81256  |        |
| 12818 | ENSG00000WISP1    | 1        | 0.587879 | 0.785859 | 0.819192 |        |
| 12819 | ENSG00000CYP3A4   | 0.919192 | 0.791919 | 0.855556 | 0.853535 |        |
| 12820 | ENSG00000MIS18BP1 | 0.991919 | 0.629293 | 0.814983 | 0.788889 |        |
| 12821 | ENSG00000RUFY2    | 1        | 0.519192 | 0.755219 | 0.812121 |        |
| 12822 | ENSG00000CSDC2    | 1        | 0.567677 | 0.778451 | 0.763636 | 0.245  |
| 12823 | ENSG00000GNG12    | 0.983838 | 0.630303 | 0.807071 | 0.807071 |        |
| 12824 | ENSG00000HSPG2    | 1        | 0.543434 | 0.787205 | 0.807071 |        |
| 12825 | ENSG00000CELA3A   | 0.917548 | 0.787526 | 0.852537 | 0.877378 |        |
| 12826 | ENSG00000ZFP90    | 0.961616 | 0.687879 | 0.823737 | 0.809091 |        |
| 12827 | ENSG00000INSM2    | 0.961616 | 0.687879 | 0.823737 | 0.810101 |        |
| 12828 | ENSG00000IL2RB    | 0.919192 | 0.791919 | 0.855556 | 0.861616 |        |
| 12829 | ENSG00000ZNF268   | 0.963636 | 0.664646 | 0.814141 | 0.838384 |        |
| 12830 | ENSG00000CGB8     | 1        | 0.50101  | 0.750505 | 0.843434 |        |
| 12831 | ENSG00000LURAP1   | 1        | 0.549495 | 0.785859 | 0.771717 |        |
| 12832 | ENSG00000SLC12A7  | 0.961616 | 0.717172 | 0.827609 | 0.8      |        |
| 12833 | ENSG00000HIST1H1E | 1        | 0.591919 | 0.790909 | 0.738384 |        |
| 12834 | ENSG00000CELA3B   | 0.917548 | 0.787526 | 0.852537 | 0.877378 |        |
| 12835 | ENSG00000HNRNPUL2 | 0.95666  | 0.711416 | 0.832629 | 0.837209 |        |
| 12836 | ENSG00000BRAP     | 0.919192 | 0.791919 | 0.855556 | 0.864646 |        |
| 12837 | ENSG00000ZNF567   | 1        | 0.545455 | 0.772727 | 0.772727 |        |
| 12838 | ENSG00000ZNF619   | 1        | 0.536364 | 0.76633  | 0.80202  |        |
| 12839 | ENSG00000RCE1     | 0.960888 | 0.719873 | 0.840381 | 0.787526 |        |
| 12840 | ENSG00000OR7C1    | 0.919192 | 0.791919 | 0.855556 | 0.862626 |        |
| 12841 | ENSG00000TRIM59   | 0.960888 | 0.719873 | 0.840381 | 0.787526 |        |
| 12842 | ENSG00000TCP11L1  | 0.911731 | 0.818815 | 0.865273 | 0.859466 | 0.1881 |
| 12843 | ENSG00000FAM89A   | 0.959596 | 0.751515 | 0.836195 | 0.788889 |        |
| 12844 | ENSG00000GNLY     | 0.962626 | 0.683838 | 0.811953 | 0.832323 |        |
| 12845 | ENSG00000TUBB2A   | 1        | 0.572727 | 0.798485 | 0.780808 |        |
| 12846 | ENSG00000TRIOBP   | 1        | 0.6      | 0.8      | 0.8      |        |
| 12847 | ENSG00000S1PR2    | 0.917548 | 0.787526 | 0.852537 | 0.88055  |        |
| 12848 | ENSG00000C9orf50  | 0.959831 | 0.714588 | 0.836328 | 0.805497 |        |
| 12849 | ENSG00000UBQLN4   | 0.915152 | 0.829293 | 0.872054 | 0.840404 |        |
| 12850 | ENSG00000ZDHC12   | 0.960606 | 0.683838 | 0.820539 | 0.834343 |        |
| 12851 | ENSG00000MROH2A   | 0.962626 | 0.693939 | 0.828283 | 0.80202  |        |
| 12852 | ENSG00000MATN1    | 0.919192 | 0.788889 | 0.847306 | 0.879798 |        |
| 12853 | ENSG00000SLC9B2   | 0.958586 | 0.716162 | 0.835859 | 0.816162 |        |
| 12854 | ENSG00000FGF19    | 0.960606 | 0.683838 | 0.820539 | 0.834343 |        |
| 12855 | ENSG00000RECQL4   | 1        | 0.613131 | 0.801178 | 0.732323 |        |
| 12856 | ENSG00000C1orf198 | 1        | 0.615222 | 0.803383 | 0.765328 |        |
| 12857 | ENSG00000XPA      | 0.914376 | 0.824524 | 0.868922 | 0.853066 |        |
| 12858 | ENSG00000HERPUD2  | 0.919192 | 0.791919 | 0.855556 | 0.867677 |        |
| 12859 | ENSG00000H3F3A    | 1        | 0.531313 | 0.762963 | 0.847475 |        |
| 12860 | ENSG00000ADK      | 1        | 0.567677 | 0.846465 | 0.729293 |        |
| 12861 | ENSG00000RCBTB2   | 1        | 0.590909 | 0.791226 | 0.778013 |        |
| 12862 | ENSG00000ARHGAP35 | 1        | 0.578788 | 0.839394 | 0.727273 |        |
| 12863 | ENSG00000FAM92A   | 0.919192 | 0.791919 | 0.855556 | 0.861616 |        |
| 12864 | ENSG00000HERC1    | 0.919192 | 0.789899 | 0.847811 | 0.883838 |        |
| 12865 | ENSG00000EXOC6    | 0.958586 | 0.752525 | 0.854545 | 0.784848 |        |
| 12866 | ENSG00000PRSS2    | 0.919192 | 0.791919 | 0.855556 | 0.860606 |        |
| 12867 | ENSG00000ACOT9    | 0.919192 | 0.791919 | 0.855556 | 0.869697 |        |
| 12868 | ENSG00000POLR3E   | 1        | 0.625253 | 0.809091 | 0.787879 |        |

|       |                   |          |          |          |          |        |        |
|-------|-------------------|----------|----------|----------|----------|--------|--------|
| 12869 | ENSG00000KCNJ10   | 0.960888 | 0.719873 | 0.840381 | 0.791755 | 0.3822 |        |
| 12870 | ENSG00000YWHAB    | 1        | 0.615152 | 0.797306 | 0.730303 |        |        |
| 12871 | ENSG00000LAMP2    | 1        | 0.646465 | 0.823232 | 0.771717 | 0.2587 | 0.5527 |
| 12872 | ENSG00000CACNA1G  | 1        | 0.624585 | 0.807863 | 0.795127 |        |        |
| 12873 | ENSG00000ZSCAN20  | 0.960606 | 0.720202 | 0.839562 | 0.79596  | 0.3934 |        |
| 12874 | ENSG00000CGB1     | 1        | 0.50101  | 0.750505 | 0.843434 |        |        |
| 12875 | ENSG00000BSPH1    | 0.919192 | 0.791919 | 0.855556 | 0.866667 |        |        |
| 12876 | ENSG00000CCNL2    | 0.959596 | 0.717172 | 0.837037 | 0.806061 |        |        |
| 12877 | ENSG00000HMG20A   | 0.961945 | 0.681818 | 0.819591 | 0.836152 |        |        |
| 12878 | ENSG00000DPH5     | 0.960606 | 0.720202 | 0.839562 | 0.79798  |        |        |
| 12879 | ENSG00000SRA1     | 1        | 0.567677 | 0.845118 | 0.69697  |        |        |
| 12880 | ENSG00000PABPC5   | 1        | 0.587879 | 0.785859 | 0.749495 |        |        |
| 12881 | ENSG00000HOXC10   | 1        | 0.621212 | 0.806397 | 0.709091 |        |        |
| 12882 | ENSG00000TRIM14   | 0.961616 | 0.687879 | 0.823737 | 0.826263 |        |        |
| 12883 | ENSG00000TTLL13P  | 0.917548 | 0.787526 | 0.852537 | 0.891121 |        |        |
| 12884 | ENSG00000OAS2     | 0.989899 | 0.612121 | 0.80101  | 0.840404 |        |        |
| 12885 | ENSG00000ING1     | 0.99596  | 0.589899 | 0.828283 | 0.812121 |        |        |
| 12886 | ENSG00000EMCN     | 0.960133 | 0.714286 | 0.837209 | 0.810631 |        |        |
| 12887 | ENSG00000CLPTM1   | 0.962626 | 0.693939 | 0.828283 | 0.813131 |        |        |
| 12888 | ENSG00000PDYN     | 0.917172 | 0.830303 | 0.873737 | 0.843434 |        |        |
| 12889 | ENSG00000CAMK2B   | 1        | 0.617172 | 0.82963  | 0.781818 |        |        |
| 12890 | ENSG00000GTF2E2   | 0.99697  | 0.619192 | 0.839394 | 0.777778 |        |        |
| 12891 | ENSG00000EVI5L    | 0.960606 | 0.720202 | 0.839562 | 0.79899  |        |        |
| 12892 | ENSG00000GAPDH    | 1        | 0.612121 | 0.859259 | 0.737374 |        |        |
| 12893 | ENSG00000ZNF362   | 0.958586 | 0.716162 | 0.835859 | 0.825253 |        |        |
| 12894 | ENSG00000ADAMTS15 | 0.961945 | 0.688161 | 0.825053 | 0.820296 |        |        |
| 12895 | ENSG00000GUK1     | 0.95666  | 0.747357 | 0.850951 | 0.807611 |        |        |
| 12896 | ENSG00000GAL3ST2  | 0.917172 | 0.830303 | 0.873737 | 0.841414 |        |        |
| 12897 | ENSG00000FNDC3A   | 1        | 0.612121 | 0.80202  | 0.79697  |        |        |
| 12898 | ENSG00000SLC25A12 | 1        | 0.648485 | 0.816835 | 0.745455 |        |        |
| 12899 | ENSG00000KCNF1    | 0.917172 | 0.830303 | 0.873737 | 0.841414 |        |        |
| 12900 | ENSG00000TOMM34   | 0.981818 | 0.649495 | 0.809596 | 0.814141 |        |        |
| 12901 | ENSG00000USP50    | 0.960133 | 0.708749 | 0.828535 | 0.825028 |        |        |
| 12902 | ENSG00000PCDH7    | 0.961945 | 0.688161 | 0.825053 | 0.82241  |        |        |
| 12903 | ENSG00000CECR2    | 0.9926   | 0.651163 | 0.820825 | 0.784355 |        |        |
| 12904 | ENSG00000SLC31A2  | 0.960606 | 0.720202 | 0.839562 | 0.80101  |        |        |
| 12905 | ENSG00000RETREG3  | 0.979798 | 0.652525 | 0.816162 | 0.806061 |        |        |
| 12906 | ENSG00000RELA     | 1        | 0.591919 | 0.790909 | 0.744444 |        |        |
| 12907 | ENSG00000OR4F21   | 0.919192 | 0.791919 | 0.855556 | 0.872727 |        |        |
| 12908 | ENSG00000PKN1     | 1        | 0.646465 | 0.811448 | 0.746465 |        | 0.234  |
| 12909 | ENSG00000KEAP1    | 0.99697  | 0.619192 | 0.835522 | 0.787879 |        |        |
| 12910 | ENSG00000SMN2     | 0.99798  | 0.622222 | 0.844276 | 0.771717 |        |        |
| 12911 | ENSG00000P2RY8    | 0.919192 | 0.791919 | 0.855556 | 0.872727 |        |        |
| 12912 | ENSG00000WBP11    | 1        | 0.612121 | 0.859259 | 0.756566 |        |        |
| 12913 | ENSG00000KRT12    | 1        | 0.56715  | 0.783575 | 0.758454 |        |        |
| 12914 | ENSG00000THBS1    | 0.960888 | 0.719873 | 0.840381 | 0.799154 |        |        |
| 12915 | ENSG00000RBM26    | 0.95666  | 0.747357 | 0.850951 | 0.811839 |        |        |
| 12916 | ENSG00000FTO      | 1        | 0.615152 | 0.791751 | 0.764646 |        |        |
| 12917 | ENSG00000DYNLRB1  | 0.961616 | 0.725253 | 0.843434 | 0.790909 | 0.3644 |        |
| 12918 | ENSG00000LING01   | 0.962626 | 0.693939 | 0.828283 | 0.814141 |        |        |
| 12919 | ENSG00000OR4F3    | 0.919192 | 0.791919 | 0.855556 | 0.872727 |        |        |
| 12920 | ENSG00000LMNB2    | 1        | 0.531313 | 0.843771 | 0.740404 |        |        |
| 12921 | ENSG00000NCL      | 1        | 0.637374 | 0.81431  | 0.757576 |        | 0.4135 |
| 12922 | ENSG00000C2orf50  | 0.917172 | 0.830303 | 0.873737 | 0.847475 |        |        |
| 12923 | ENSG00000OR4F16   | 0.919192 | 0.791919 | 0.855556 | 0.872727 |        |        |

|       |                   |          |          |          |          |        |        |
|-------|-------------------|----------|----------|----------|----------|--------|--------|
| 12924 | ENSG00000OR4F29   | 0.919192 | 0.791919 | 0.855556 | 0.872727 |        |        |
| 12925 | ENSG00000PDC      | 0.918841 | 0.793237 | 0.849275 | 0.890821 |        |        |
| 12926 | ENSG00000CBR3     | 1        | 0.545455 | 0.772727 | 0.828283 |        |        |
| 12927 | ENSG00000FIP1L1   | 0.956566 | 0.720202 | 0.837542 | 0.842424 |        |        |
| 12928 | ENSG00000FAM81B   | 0.917548 | 0.787526 | 0.852537 | 0.908034 |        |        |
| 12929 | ENSG00000MBTPS2   | 1        | 0.649495 | 0.817508 | 0.781818 | 0.3136 | 0.3491 |
| 12930 | ENSG00000NSD1     | 1        | 0.605708 | 0.801092 | 0.738901 |        |        |
| 12931 | ENSG00000MAGEB6   | 1        | 0.519192 | 0.759596 | 0.854545 |        |        |
| 12932 | ENSG00000TIAM2    | 0.991919 | 0.629293 | 0.814983 | 0.806061 |        |        |
| 12933 | ENSG00000PRODH    | 1        | 0.619192 | 0.802189 | 0.79798  |        |        |
| 12934 | ENSG00000CDHR1    | 0.964251 | 0.670531 | 0.817391 | 0.848309 |        |        |
| 12935 | ENSG00000GDA      | 0.994949 | 0.645455 | 0.830303 | 0.783838 |        |        |
| 12936 | ENSG00000INTS8    | 0.955556 | 0.725253 | 0.840404 | 0.839394 |        |        |
| 12937 | ENSG00000ARCNI    | 1        | 0.622222 | 0.807071 | 0.793939 |        |        |
| 12938 | ENSG00000MCAT     | 0.961616 | 0.687879 | 0.823737 | 0.838384 |        |        |
| 12939 | ENSG00000KIAA1958 | 0.913319 | 0.825581 | 0.869274 | 0.872093 |        |        |
| 12940 | ENSG00000PHLPP1   | 0.961616 | 0.725253 | 0.843434 | 0.79596  |        |        |
| 12941 | ENSG00000GNG5     | 1        | 0.564646 | 0.776431 | 0.783838 |        | 0.273  |
| 12942 | ENSG00000TYR      | 0.965772 | 0.649399 | 0.807586 | 0.87234  |        |        |
| 12943 | ENSG00000C19orf18 | 0.959596 | 0.714141 | 0.830135 | 0.832323 |        |        |
| 12944 | ENSG00000NPRL2    | 0.990909 | 0.645455 | 0.833333 | 0.787879 |        |        |
| 12945 | ENSG00000GABRP    | 0.917172 | 0.830303 | 0.873737 | 0.856566 |        | 0.3163 |
| 12946 | ENSG00000CA4      | 0.984144 | 0.642706 | 0.818182 | 0.811839 |        |        |
| 12947 | ENSG00000SLC27A5  | 1        | 0.622222 | 0.811111 | 0.794949 |        |        |
| 12948 | ENSG00000KAT5     | 1        | 0.561616 | 0.780808 | 0.783838 |        |        |
| 12949 | ENSG00000TOMM40   | 0.962626 | 0.693939 | 0.828283 | 0.822222 |        |        |
| 12950 | ENSG00000PVALB    | 0.961616 | 0.720202 | 0.810438 | 0.839394 |        |        |
| 12951 | ENSG00000VPS13D   | 0.919192 | 0.791919 | 0.855556 | 0.892929 |        |        |
| 12952 | ENSG00000RUSC2    | 0.990909 | 0.629293 | 0.804209 | 0.823232 |        |        |
| 12953 | ENSG00000SLC1A1   | 1        | 0.623232 | 0.801347 | 0.787879 |        |        |
| 12954 | ENSG00000KIAA0391 | 1        | 0.625253 | 0.809091 | 0.786869 |        |        |
| 12955 | ENSG00000BMP2K    | 1        | 0.509091 | 0.836364 | 0.815152 |        | 0.3979 |
| 12956 | ENSG00000RILPL1   | 0.914141 | 0.829293 | 0.871717 | 0.868687 |        |        |
| 12957 | ENSG00000BAIAP2   | 1        | 0.593939 | 0.792256 | 0.745455 |        |        |
| 12958 | ENSG00000ACVR1    | 0.957717 | 0.745243 | 0.844609 | 0.816068 |        |        |
| 12959 | ENSG00000EBNA1BP2 | 1        | 0.616279 | 0.80814  | 0.776956 |        |        |
| 12960 | ENSG00000ADH1B    | 0.987879 | 0.652525 | 0.824916 | 0.789899 |        |        |
| 12961 | ENSG00000ATP6V1G3 | 0.917172 | 0.830303 | 0.873737 | 0.856566 |        |        |
| 12962 | ENSG00000SART3    | 0.955556 | 0.725253 | 0.840404 | 0.851515 |        |        |
| 12963 | ENSG00000CSMD2    | 0.959596 | 0.717172 | 0.837037 | 0.828283 |        |        |
| 12964 | ENSG00000GOLIM4   | 1        | 0.567677 | 0.778451 | 0.783838 |        |        |
| 12965 | ENSG00000ANKRD1   | 0.919192 | 0.791919 | 0.855556 | 0.889899 |        |        |
| 12966 | ENSG00000DHX8     | 0.992929 | 0.676768 | 0.834007 | 0.768687 |        |        |
| 12967 | ENSG00000SRM      | 0.960606 | 0.716162 | 0.831987 | 0.827273 |        |        |
| 12968 | ENSG00000ADH1C    | 0.987879 | 0.652525 | 0.824916 | 0.789899 |        |        |
| 12969 | ENSG00000TAF5     | 1        | 0.561616 | 0.780808 | 0.817172 | 0.2743 |        |
| 12970 | ENSG00000PIK3R4   | 1        | 0.590909 | 0.787879 | 0.741414 |        |        |
| 12971 | ENSG00000ARMC8    | 0.956566 | 0.720202 | 0.837542 | 0.854545 |        |        |
| 12972 | ENSG00000CARF     | 1        | 0.567677 | 0.780471 | 0.825253 | 0.392  |        |
| 12973 | ENSG00000ATP2A1   | 0.917172 | 0.830303 | 0.873737 | 0.855556 |        |        |
| 12974 | ENSG00000MSMP     | 0.961616 | 0.687879 | 0.823737 | 0.839394 |        |        |
| 12975 | ENSG00000VPS4A    | 1        | 0.654545 | 0.824242 | 0.729293 |        |        |
| 12976 | ENSG00000PARP16   | 1        | 0.622622 | 0.805497 | 0.752643 |        |        |
| 12977 | ENSG00000CADM3    | 1        | 0.582828 | 0.775758 | 0.79596  |        |        |
| 12978 | ENSG00000PIGF     | 0.919192 | 0.791919 | 0.855556 | 0.891919 |        |        |

|       |                    |          |          |          |          |        |        |
|-------|--------------------|----------|----------|----------|----------|--------|--------|
| 12979 | ENSG000000SBPL1A   | 0.9926   | 0.67019  | 0.830514 | 0.773784 |        |        |
| 12980 | ENSG000000KDELR2   | 0.962626 | 0.693939 | 0.828283 | 0.827273 |        |        |
| 12981 | ENSG000000CHID1    | 0.960888 | 0.719873 | 0.840381 | 0.808668 |        |        |
| 12982 | ENSG000000SNAP29   | 1        | 0.622222 | 0.811111 | 0.794949 | 0.3895 |        |
| 12983 | ENSG000000LSM12    | 0.917172 | 0.830303 | 0.873737 | 0.859596 |        |        |
| 12984 | ENSG000000DEFA4    | 0.919192 | 0.791919 | 0.855556 | 0.891919 |        |        |
| 12985 | ENSG000000INSIG2   | 0.957576 | 0.752525 | 0.85404  | 0.813131 |        | 0.325  |
| 12986 | ENSG000000DYNC1LI1 | 0.917172 | 0.830303 | 0.873737 | 0.861616 |        |        |
| 12987 | ENSG000000SLC4A1   | 1        | 0.648485 | 0.802694 | 0.807071 |        |        |
| 12988 | ENSG000000SYNJ2    | 0.917172 | 0.830303 | 0.873737 | 0.867677 |        |        |
| 12989 | ENSG000000PTPN23   | 1        | 0.623679 | 0.80902  | 0.802326 |        |        |
| 12990 | ENSG000000ZRANB2   | 0.957918 | 0.740864 | 0.842562 | 0.822813 |        |        |
| 12991 | ENSG000000OAZ1     | 1        | 0.648485 | 0.816835 | 0.767677 |        |        |
| 12992 | ENSG000000ADGRF2   | 0.962626 | 0.693939 | 0.828283 | 0.829293 |        |        |
| 12993 | ENSG000000SLC06A1  | 0.913621 | 0.822813 | 0.868217 | 0.887043 |        |        |
| 12994 | ENSG000000LXN      | 0.99697  | 0.619192 | 0.839394 | 0.79596  |        |        |
| 12995 | ENSG000000BRDT     | 0.996829 | 0.675476 | 0.85377  | 0.752643 | 0.4165 | 0.2688 |
| 12996 | ENSG000000TG       | 0.962626 | 0.693939 | 0.828283 | 0.836364 |        |        |
| 12997 | ENSG000000MCRIP1   | 0.957717 | 0.745243 | 0.844609 | 0.82241  |        |        |
| 12998 | ENSG000000NDUFB4   | 0.917172 | 0.830303 | 0.873737 | 0.870707 |        |        |
| 12999 | ENSG000000SLAMF1   | 0.917172 | 0.829293 | 0.866498 | 0.874747 |        |        |
| 13000 | ENSG000000NMNAT3   | 0.960606 | 0.720202 | 0.839562 | 0.815152 |        |        |
| 13001 | ENSG000000SNAP25   | 1        | 0.6      | 0.8      | 0.787879 |        |        |
| 13002 | ENSG000000PERP     | 0.917172 | 0.830303 | 0.873737 | 0.869697 |        |        |
| 13003 | ENSG000000MAD1L1   | 0.960606 | 0.716162 | 0.856902 | 0.809091 |        |        |
| 13004 | ENSG000000GLRX5    | 0.957918 | 0.740864 | 0.842562 | 0.825028 |        |        |
| 13005 | ENSG000000SND1     | 1        | 0.59596  | 0.791246 | 0.737374 |        |        |
| 13006 | ENSG000000DUS3L    | 1        | 0.590909 | 0.787879 | 0.79798  |        |        |
| 13007 | ENSG000000BEST4    | 0.919192 | 0.791919 | 0.855556 | 0.90404  |        |        |
| 13008 | ENSG000000ZNF592   | 0.994949 | 0.613131 | 0.819024 | 0.825253 |        |        |
| 13009 | ENSG000000ZNF566   | 1        | 0.579181 | 0.784422 | 0.765227 |        |        |
| 13010 | ENSG000000LRRC3B   | 0.958774 | 0.749471 | 0.853418 | 0.806554 |        |        |
| 13011 | ENSG000000ABCB9    | 1        | 0.587879 | 0.819529 | 0.759596 |        |        |
| 13012 | ENSG000000LRRC25   | 0.961616 | 0.725253 | 0.843434 | 0.80101  |        |        |
| 13013 | ENSG000000TARS2    | 0.990909 | 0.637374 | 0.814141 | 0.820202 |        | 0.3165 |
| 13014 | ENSG000000WDR1     | 1        | 0.646465 | 0.811448 | 0.794949 |        |        |
| 13015 | ENSG000000JMJ6     | 0.956566 | 0.754545 | 0.854882 | 0.824242 |        |        |
| 13016 | ENSG000000TGFA     | 0.959831 | 0.7537   | 0.856765 | 0.792812 |        |        |
| 13017 | ENSG000000ADAM32   | 0.912262 | 0.825581 | 0.868922 | 0.892178 |        |        |
| 13018 | ENSG000000RP1L1    | 1        | 0.563285 | 0.770048 | 0.796135 |        |        |
| 13019 | ENSG000000ZNF131   | 0.959596 | 0.717172 | 0.837037 | 0.834343 |        |        |
| 13020 | ENSG000000ZBTB10   | 0.983838 | 0.630303 | 0.807071 | 0.846465 |        |        |
| 13021 | ENSG000000ZBTB11   | 0.993939 | 0.615152 | 0.829798 | 0.817172 |        |        |
| 13022 | ENSG000000ZNF354C  | 0.960606 | 0.720202 | 0.839562 | 0.817172 |        |        |
| 13023 | ENSG000000EIF4G2   | 1        | 0.637374 | 0.817172 | 0.772727 | 0.2839 | 0.394  |
| 13024 | ENSG000000PRDX6    | 0.99697  | 0.649495 | 0.845791 | 0.773737 |        |        |
| 13025 | ENSG000000EEF2     | 1        | 0.646465 | 0.811448 | 0.720202 |        |        |
| 13026 | ENSG000000KLHL35   | 0.915433 | 0.825581 | 0.870155 | 0.885835 |        |        |
| 13027 | ENSG000000TSPYL4   | 1        | 0.549683 | 0.769556 | 0.803383 |        |        |
| 13028 | ENSG000000CX3CL1   | 1        | 0.652525 | 0.819529 | 0.791919 |        |        |
| 13029 | ENSG000000TIMM10   | 0.917172 | 0.830303 | 0.873737 | 0.870707 |        |        |
| 13030 | ENSG000000MYEF2    | 0.956811 | 0.739756 | 0.84127  | 0.841639 |        |        |
| 13031 | ENSG000000LUZP1    | 1        | 0.578788 | 0.784007 | 0.784848 |        |        |
| 13032 | ENSG000000DLD      | 0.960606 | 0.720202 | 0.839562 | 0.824242 |        |        |
| 13033 | ENSG000000AKAP7    | 1        | 0.591919 | 0.819529 | 0.791919 |        | 0.472  |

|       |                    |          |          |          |          |        |        |
|-------|--------------------|----------|----------|----------|----------|--------|--------|
| 13034 | ENSG00000SARNP     | 1        | 0.583838 | 0.780135 | 0.756566 |        |        |
| 13035 | ENSG00000PPP1R11   | 0.961616 | 0.720202 | 0.835185 | 0.818182 |        |        |
| 13036 | ENSG00000MED12     | 1        | 0.560606 | 0.792929 | 0.771717 | 0.3286 |        |
| 13037 | ENSG00000PTN       | 0.917172 | 0.830303 | 0.873737 | 0.875758 |        |        |
| 13038 | ENSG00000MRPL46    | 0.954704 | 0.775842 | 0.864499 | 0.813008 |        |        |
| 13039 | ENSG00000FAAH      | 0.917172 | 0.830303 | 0.873737 | 0.874747 |        |        |
| 13040 | ENSG00000ACAD9     | 0.917172 | 0.830303 | 0.873737 | 0.870707 |        |        |
| 13041 | ENSG00000ITGB1     | 1        | 0.593939 | 0.815152 | 0.761616 | 0.481  |        |
| 13042 | ENSG00000LLGL1     | 1        | 0.59596  | 0.791246 | 0.806061 | 0.447  |        |
| 13043 | ENSG00000KLHL10    | 0.915433 | 0.826638 | 0.871036 | 0.887949 |        |        |
| 13044 | ENSG00000SLC25A35  | 0.917172 | 0.830303 | 0.873737 | 0.874747 |        |        |
| 13045 | ENSG00000MBD4      | 0.917172 | 0.830303 | 0.873737 | 0.874747 |        |        |
| 13046 | ENSG00000ARMC9     | 1        | 0.6      | 0.8      | 0.788889 |        |        |
| 13047 | ENSG00000MOBP      | 0.917172 | 0.830303 | 0.873737 | 0.871717 |        |        |
| 13048 | ENSG00000KIF5B     | 1        | 0.60404  | 0.793603 | 0.754545 | 0.3187 |        |
| 13049 | ENSG00000LILRB4    | 0.915433 | 0.826638 | 0.871036 | 0.889006 |        |        |
| 13050 | ENSG00000JSRP1     | 0.919192 | 0.791919 | 0.855556 | 0.911111 |        |        |
| 13051 | ENSG00000PTK2B     | 1        | 0.585859 | 0.849832 | 0.772727 |        |        |
| 13052 | ENSG00000ZNF354B   | 0.960606 | 0.714141 | 0.825084 | 0.852525 |        |        |
| 13053 | ENSG00000LMBRD2    | 0.961616 | 0.725253 | 0.843434 | 0.807071 |        |        |
| 13054 | ENSG00000ERMAP     | 0.958586 | 0.750505 | 0.847811 | 0.822222 |        |        |
| 13055 | ENSG00000PCIF1     | 1        | 0.609081 | 0.797527 | 0.834994 |        |        |
| 13056 | ENSG00000KRT2      | 0.917172 | 0.830303 | 0.873737 | 0.872727 | 0.2441 | 0.2692 |
| 13057 | ENSG00000TRAPPC2   | 0.959596 | 0.754545 | 0.856397 | 0.79798  |        |        |
| 13058 | ENSG00000MZB1      | 0.920773 | 0.796135 | 0.858454 | 0.891787 |        |        |
| 13059 | ENSG00000ADH1A     | 0.993939 | 0.645455 | 0.835859 | 0.79697  |        |        |
| 13060 | ENSG00000CYCS      | 1        | 0.590909 | 0.781145 | 0.776768 |        |        |
| 13061 | ENSG00000BP1FA1    | 0.915152 | 0.829293 | 0.872054 | 0.886869 |        |        |
| 13062 | ENSG00000SAP30BP   | 1        | 0.588889 | 0.790741 | 0.786869 |        |        |
| 13063 | ENSG00000FAM53C    | 0.981818 | 0.654545 | 0.818182 | 0.825253 |        |        |
| 13064 | ENSG00000WDR81     | 1        | 0.590909 | 0.787879 | 0.777778 |        |        |
| 13065 | ENSG00000GID4      | 0.961616 | 0.725253 | 0.843434 | 0.813131 |        |        |
| 13066 | ENSG00000PPP1R3C   | 0.959596 | 0.717172 | 0.837037 | 0.852525 |        |        |
| 13067 | ENSG00000C21orf33  | 0.961616 | 0.725253 | 0.843434 | 0.812121 |        |        |
| 13068 | ENSG00000TMBIM1    | 1        | 0.646465 | 0.811448 | 0.754545 |        |        |
| 13069 | ENSG00000BYSL      | 0.99697  | 0.647475 | 0.840404 | 0.788889 |        |        |
| 13070 | ENSG00000TRIM16    | 1        | 0.6      | 0.8      | 0.729293 | 0.1718 | 0.5252 |
| 13071 | ENSG00000PTK2      | 1        | 0.6      | 0.8      | 0.755556 |        |        |
| 13072 | ENSG00000FUOM      | 0.960606 | 0.716162 | 0.831987 | 0.850505 |        |        |
| 13073 | ENSG00000RBP2      | 0.917172 | 0.830303 | 0.873737 | 0.884848 |        |        |
| 13074 | ENSG00000SLC22A8   | 0.957576 | 0.752525 | 0.85404  | 0.828283 |        |        |
| 13075 | ENSG00000COL1A2    | 0.987315 | 0.639535 | 0.823291 | 0.825581 |        |        |
| 13076 | ENSG00000ZNF85     | 0.992929 | 0.657576 | 0.829966 | 0.79697  |        |        |
| 13077 | ENSG00000SNRPD3    | 0.957717 | 0.747357 | 0.85148  | 0.835095 |        |        |
| 13078 | ENSG00000ATP6AP2   | 0.960606 | 0.720202 | 0.839562 | 0.830303 |        |        |
| 13079 | ENSG00000INTS6     | 1        | 0.645455 | 0.806061 | 0.79899  | 0.3931 |        |
| 13080 | ENSG00000C19orf12  | 0.917172 | 0.830303 | 0.873737 | 0.885859 |        |        |
| 13081 | ENSG00000BTRC      | 1        | 0.59798  | 0.794949 | 0.769697 |        |        |
| 13082 | ENSG00000SYNE1     | 0.985201 | 0.65222  | 0.81871  | 0.826638 |        |        |
| 13083 | ENSG00000AC005324. | 1        | 0.6      | 0.8      | 0.729293 |        |        |
| 13084 | ENSG00000FP565260. | 0.961616 | 0.725253 | 0.843434 | 0.812121 |        |        |
| 13085 | ENSG00000ZMYM5     | 0.958774 | 0.749471 | 0.853418 | 0.823467 |        |        |
| 13086 | ENSG00000CCDC121   | 0.958774 | 0.749471 | 0.853418 | 0.82241  |        |        |
| 13087 | ENSG00000ADGRD1    | 0.961616 | 0.720202 | 0.835185 | 0.838384 |        |        |
| 13088 | ENSG00000PCDHGB3   | 1        | 0.561616 | 0.780808 | 0.773737 |        |        |

|       |                    |          |          |          |          |        |        |
|-------|--------------------|----------|----------|----------|----------|--------|--------|
| 13089 | ENSG00000CEP76     | 1        | 0.625253 | 0.809091 | 0.806061 | 0.2334 |        |
| 13090 | ENSG00000TCTA      | 0.958586 | 0.752525 | 0.854545 | 0.822222 |        |        |
| 13091 | ENSG00000SLC2A1    | 0.991919 | 0.664646 | 0.828283 | 0.79798  |        |        |
| 13092 | ENSG00000LRBA      | 1        | 0.591919 | 0.790909 | 0.750505 | 0.3162 |        |
| 13093 | ENSG00000AVPR1B    | 0.917172 | 0.829293 | 0.866162 | 0.894949 |        |        |
| 13094 | ENSG00000FAM47E    | 0.962626 | 0.693939 | 0.828283 | 0.853535 |        |        |
| 13095 | ENSG00000NDUFC2    | 0.979798 | 0.652525 | 0.816162 | 0.846465 |        |        |
| 13096 | ENSG00000AQP2      | 0.917172 | 0.830303 | 0.873737 | 0.888889 |        |        |
| 13097 | ENSG00000ACTC1     | 1        | 0.622222 | 0.811111 | 0.751515 |        |        |
| 13098 | ENSG00000FAM47E-ST | 0.962626 | 0.693939 | 0.828283 | 0.853535 |        |        |
| 13099 | ENSG00000MBD6      | 0.994949 | 0.677778 | 0.83569  | 0.784848 |        |        |
| 13100 | ENSG00000CERKL     | 0.961616 | 0.725253 | 0.843434 | 0.817172 |        |        |
| 13101 | ENSG00000ZFP62     | 0.915433 | 0.826638 | 0.871036 | 0.910148 |        |        |
| 13102 | ENSG00000RASSF5    | 0.917172 | 0.830303 | 0.873737 | 0.886869 |        |        |
| 13103 | ENSG00000HDGFL1    | 1        | 0.629293 | 0.808923 | 0.79697  |        |        |
| 13104 | ENSG00000ANKS1B    | 0.957576 | 0.752525 | 0.85404  | 0.833333 |        |        |
| 13105 | ENSG00000PACRG     | 0.911406 | 0.864895 | 0.888151 | 0.877076 |        |        |
| 13106 | ENSG00000PLCE1     | 1        | 0.612121 | 0.804377 | 0.784848 |        |        |
| 13107 | ENSG00000SDE2      | 1        | 0.59798  | 0.840741 | 0.752525 |        |        |
| 13108 | ENSG00000SLK       | 0.961616 | 0.725253 | 0.843434 | 0.827273 |        |        |
| 13109 | ENSG00000BTBD3     | 1        | 0.630303 | 0.853199 | 0.739394 |        |        |
| 13110 | ENSG00000MRPL15    | 0.961616 | 0.725253 | 0.843434 | 0.824242 |        |        |
| 13111 | ENSG00000PCDHB9    | 1        | 0.610188 | 0.805094 | 0.745293 |        |        |
| 13112 | ENSG00000PTRN      | 0.962319 | 0.730435 | 0.846377 | 0.814493 |        |        |
| 13113 | ENSG00000OR4C15    | 0.953535 | 0.751515 | 0.858249 | 0.857576 |        |        |
| 13114 | ENSG00000ZNF541    | 0.917172 | 0.829293 | 0.866162 | 0.909091 |        |        |
| 13115 | ENSG00000#####     | 0.961616 | 0.725253 | 0.843434 | 0.819192 |        |        |
| 13116 | ENSG00000AKNAD1    | 0.994949 | 0.649495 | 0.837374 | 0.8      |        |        |
| 13117 | ENSG00000ZNF224    | 0.959596 | 0.751515 | 0.868182 | 0.80404  |        |        |
| 13118 | ENSG00000RPTOR     | 1        | 0.619192 | 0.802189 | 0.777778 |        |        |
| 13119 | ENSG00000FZD1      | 0.913319 | 0.867865 | 0.890592 | 0.872093 |        |        |
| 13120 | ENSG00000RCCD1     | 1        | 0.579798 | 0.786532 | 0.80202  |        |        |
| 13121 | ENSG00000HSPB8     | 0.961616 | 0.725253 | 0.843434 | 0.824242 |        |        |
| 13122 | ENSG00000NDUFC2-KC | 0.979798 | 0.652525 | 0.816162 | 0.846465 |        |        |
| 13123 | ENSG00000HAUS6     | 1        | 0.591919 | 0.825253 | 0.767677 |        |        |
| 13124 | ENSG00000NXF2      | 1        | 0.567677 | 0.778451 | 0.775758 |        |        |
| 13125 | ENSG00000ABHD1     | 1        | 0.623679 | 0.80902  | 0.765328 |        |        |
| 13126 | ENSG00000CASK      | 1        | 0.612121 | 0.804377 | 0.776768 | 0.217  |        |
| 13127 | ENSG00000NXF2B     | 1        | 0.567677 | 0.778451 | 0.775758 |        |        |
| 13128 | ENSG00000ARL6      | 0.958586 | 0.752525 | 0.854545 | 0.832323 |        |        |
| 13129 | ENSG00000TRAPPC8   | 0.959831 | 0.7537   | 0.856765 | 0.811839 |        |        |
| 13130 | ENSG00000PRR4      | 0.913319 | 0.867865 | 0.890592 | 0.874207 |        |        |
| 13131 | ENSG00000MKL2      | 0.955556 | 0.725253 | 0.840404 | 0.882828 |        |        |
| 13132 | ENSG00000ZC3H15    | 1        | 0.657576 | 0.822896 | 0.793939 | 0.43   |        |
| 13133 | ENSG00000SKA3      | 0.959831 | 0.7537   | 0.856765 | 0.811839 | 0.3566 |        |
| 13134 | ENSG00000EFTUD2    | 1        | 0.637374 | 0.817172 | 0.791919 | 0.2461 |        |
| 13135 | ENSG00000OPN4      | 0.917172 | 0.830303 | 0.873737 | 0.90101  |        |        |
| 13136 | ENSG00000SCRG1     | 0.961616 | 0.725253 | 0.843434 | 0.824242 |        |        |
| 13137 | ENSG00000KDM2A     | 1        | 0.6      | 0.8      | 0.759596 | 0.4795 | 0.3319 |
| 13138 | ENSG00000CYP51A1   | 0.962626 | 0.693939 | 0.828283 | 0.868687 |        |        |
| 13139 | ENSG00000RPN2      | 1        | 0.646465 | 0.823232 | 0.771717 | 0.4914 |        |
| 13140 | ENSG00000RPL13A    | 0.961616 | 0.725253 | 0.843434 | 0.828283 |        |        |
| 13141 | ENSG00000AGBL2     | 0.959831 | 0.7537   | 0.856765 | 0.813953 |        |        |
| 13142 | ENSG00000CDSN      | 0.962626 | 0.693939 | 0.828283 | 0.861616 |        |        |
| 13143 | ENSG00000MCOLN1    | 0.961616 | 0.716162 | 0.836364 | 0.856566 |        |        |

|       |                    |          |          |          |          |        |        |
|-------|--------------------|----------|----------|----------|----------|--------|--------|
| 13144 | ENSG00000AC018630. | 0.913319 | 0.867865 | 0.890592 | 0.874207 |        |        |
| 13145 | ENSG00000PPP2R5E   | 1        | 0.60303  | 0.79596  | 0.789899 |        |        |
| 13146 | ENSG00000ACAP2     | 1        | 0.652525 | 0.819529 | 0.774747 | 0.2886 | 0.55   |
| 13147 | ENSG00000LMAN1     | 1        | 0.622222 | 0.811111 | 0.835354 |        |        |
| 13148 | ENSG00000DDIT4     | 0.955603 | 0.786469 | 0.870507 | 0.823467 |        |        |
| 13149 | ENSG00000SLC30A9   | 0.958774 | 0.749471 | 0.853418 | 0.837209 |        | 0.1513 |
| 13150 | ENSG00000DLAT      | 0.961616 | 0.725253 | 0.843434 | 0.829293 |        |        |
| 13151 | ENSG00000SPDYE1    | 0.911406 | 0.864895 | 0.888151 | 0.885936 |        |        |
| 13152 | ENSG00000HHIP      | 0.956566 | 0.790909 | 0.873232 | 0.813131 |        |        |
| 13153 | ENSG00000NISCH     | 1        | 0.685859 | 0.840404 | 0.769697 |        |        |
| 13154 | ENSG00000DEFB118   | 0.917172 | 0.830303 | 0.873737 | 0.906061 |        |        |
| 13155 | ENSG00000ZNF500    | 1        | 0.652525 | 0.822896 | 0.784848 |        |        |
| 13156 | ENSG00000SPDYE5    | 0.911406 | 0.864895 | 0.888151 | 0.885936 |        |        |
| 13157 | ENSG00000ICAM5     | 1        | 0.567677 | 0.846465 | 0.823232 |        |        |
| 13158 | ENSG00000LRR1      | 1        | 0.60404  | 0.79899  | 0.772727 |        |        |
| 13159 | ENSG00000TNIP2     | 1        | 0.612121 | 0.859259 | 0.718182 |        |        |
| 13160 | ENSG00000SPDYE2B   | 0.911406 | 0.864895 | 0.888151 | 0.885936 |        |        |
| 13161 | ENSG00000PLD2      | 0.961616 | 0.725253 | 0.843434 | 0.832323 | 0.2813 |        |
| 13162 | ENSG00000SPDYE16   | 0.911406 | 0.864895 | 0.888151 | 0.885936 |        |        |
| 13163 | ENSG00000PLXNA4    | 0.960606 | 0.720202 | 0.839562 | 0.844444 |        |        |
| 13164 | ENSG00000TTF2      | 0.959831 | 0.7537   | 0.856765 | 0.817125 |        |        |
| 13165 | ENSG00000CMC4      | 0.961616 | 0.725253 | 0.843434 | 0.826263 |        |        |
| 13166 | ENSG00000CXXC1     | 1        | 0.561616 | 0.780808 | 0.851515 |        |        |
| 13167 | ENSG00000NDUFA2    | 1        | 0.597252 | 0.795455 | 0.82241  |        |        |
| 13168 | ENSG00000SPDYE2    | 0.911406 | 0.864895 | 0.888151 | 0.885936 |        |        |
| 13169 | ENSG00000MRPS18B   | 0.960606 | 0.720202 | 0.839562 | 0.845455 |        |        |
| 13170 | ENSG00000SPDYE3    | 0.911406 | 0.864895 | 0.888151 | 0.885936 |        |        |
| 13171 | ENSG00000RBP5      | 1        | 0.646465 | 0.823232 | 0.751515 |        |        |
| 13172 | ENSG00000SPDYE6    | 0.911406 | 0.864895 | 0.888151 | 0.885936 |        |        |
| 13173 | ENSG00000TMEM221   | 1        | 0.585507 | 0.792754 | 0.770048 |        |        |
| 13174 | ENSG00000CHRM2     | 1        | 0.59798  | 0.785859 | 0.772727 | 0.3276 |        |
| 13175 | ENSG00000SYCP1     | 0.911205 | 0.867865 | 0.889535 | 0.885835 |        |        |
| 13176 | ENSG00000SNRNP48   | 1        | 0.622222 | 0.811111 | 0.745455 |        |        |
| 13177 | ENSG00000GMCL1     | 0.961616 | 0.725253 | 0.843434 | 0.836364 |        |        |
| 13178 | ENSG00000PAPD7     | 1        | 0.6      | 0.8      | 0.841414 |        |        |
| 13179 | ENSG00000C3orf30   | 0.913319 | 0.867865 | 0.890592 | 0.88055  |        |        |
| 13180 | ENSG00000UGGT1     | 1        | 0.612121 | 0.804377 | 0.794949 |        | 0.2813 |
| 13181 | ENSG00000RPS6KA4   | 0.984144 | 0.679704 | 0.831924 | 0.810782 |        |        |
| 13182 | ENSG00000SOX21     | 0.958774 | 0.749471 | 0.853418 | 0.840381 |        |        |
| 13183 | ENSG00000TXNDC11   | 0.961616 | 0.725253 | 0.843434 | 0.832323 |        |        |
| 13184 | ENSG00000AL645922. | 1        | 0.570707 | 0.77862  | 0.783838 |        |        |
| 13185 | ENSG00000ZSCAN5B   | 0.983838 | 0.681818 | 0.826599 | 0.813131 |        |        |
| 13186 | ENSG00000YWHAZ     | 1        | 0.588889 | 0.798148 | 0.789899 |        |        |
| 13187 | ENSG00000MAGEB2    | 1        | 0.637374 | 0.81431  | 0.814141 |        |        |
| 13188 | ENSG00000SALL1     | 0.991919 | 0.652525 | 0.810101 | 0.844444 |        |        |
| 13189 | ENSG00000TDO2      | 0.917172 | 0.830303 | 0.873737 | 0.910101 |        |        |
| 13190 | ENSG00000MUC12     | 0.960606 | 0.758586 | 0.859596 | 0.8      |        |        |
| 13191 | ENSG00000PMCH      | 1        | 0.56715  | 0.783575 | 0.801932 |        |        |
| 13192 | ENSG00000CACTIN    | 1        | 0.629293 | 0.855892 | 0.770707 |        |        |
| 13193 | ENSG00000PGPEP1    | 1        | 0.579798 | 0.789899 | 0.862626 |        | 0.4713 |
| 13194 | ENSG00000MYL1      | 0.991919 | 0.676768 | 0.83367  | 0.80101  |        |        |
| 13195 | ENSG00000LRRC66    | 0.994949 | 0.649495 | 0.837374 | 0.807071 |        |        |
| 13196 | ENSG00000LMTK2     | 0.959596 | 0.751515 | 0.84899  | 0.837374 |        |        |
| 13197 | ENSG00000TTLL10    | 0.961616 | 0.725253 | 0.843434 | 0.834343 |        | 0.313  |
| 13198 | ENSG00000IQCJ-SCHI | 1        | 0.564646 | 0.818519 | 0.742424 |        |        |

|       |                   |          |          |          |          |        |        |
|-------|-------------------|----------|----------|----------|----------|--------|--------|
| 13199 | ENSG00000CYLC1    | 0.917172 | 0.830303 | 0.873737 | 0.909091 |        |        |
| 13200 | ENSG00000TOR1AIP1 | 0.99798  | 0.683838 | 0.864983 | 0.761616 |        |        |
| 13201 | ENSG00000SPR      | 1        | 0.640592 | 0.820296 | 0.787526 | 0.3543 |        |
| 13202 | ENSG00000DESI1    | 0.959596 | 0.754545 | 0.856397 | 0.830303 |        |        |
| 13203 | ENSG00000DUT      | 1        | 0.615152 | 0.824411 | 0.786869 |        |        |
| 13204 | ENSG00000CCDC102A | 1        | 0.645877 | 0.816068 | 0.769556 |        |        |
| 13205 | ENSG00000PRDM11   | 0.957576 | 0.789899 | 0.873064 | 0.820202 |        |        |
| 13206 | ENSG00000VEPH1    | 1        | 0.579798 | 0.786532 | 0.783838 |        |        |
| 13207 | ENSG00000BTF3     | 1        | 0.652525 | 0.822896 | 0.745455 |        |        |
| 13208 | ENSG00000PTPRN2   | 0.990338 | 0.689855 | 0.845089 | 0.781643 |        |        |
| 13209 | ENSG00000SPSB3    | 0.960888 | 0.719873 | 0.840381 | 0.856237 |        |        |
| 13210 | ENSG00000MED25    | 0.958586 | 0.752525 | 0.854545 | 0.849495 |        |        |
| 13211 | ENSG00000SFTPB    | 1        | 0.622222 | 0.811111 | 0.749495 |        |        |
| 13212 | ENSG00000SETSIP   | 0.956566 | 0.754545 | 0.854882 | 0.857576 |        |        |
| 13213 | ENSG00000DMGDH    | 1        | 0.6      | 0.8      | 0.819192 |        |        |
| 13214 | ENSG00000SNRPC    | 1        | 0.637374 | 0.817172 | 0.786869 |        |        |
| 13215 | ENSG00000MAML3    | 0.988372 | 0.708245 | 0.835095 | 0.791755 |        |        |
| 13216 | ENSG00000SELE     | 0.915152 | 0.870707 | 0.892929 | 0.880808 |        |        |
| 13217 | ENSG00000HIST1H1D | 1        | 0.652525 | 0.822896 | 0.769697 |        |        |
| 13218 | ENSG00000NUDT17   | 0.959596 | 0.751515 | 0.84899  | 0.841414 |        |        |
| 13219 | ENSG00000TRIP11   | 0.915152 | 0.870707 | 0.892929 | 0.878788 | 0.533  |        |
| 13220 | ENSG00000DEFA6    | 0.915152 | 0.870707 | 0.892929 | 0.872727 |        |        |
| 13221 | ENSG00000PIEZ01   | 0.915152 | 0.870707 | 0.892929 | 0.878788 |        |        |
| 13222 | ENSG00000AKT2     | 0.960888 | 0.719873 | 0.840381 | 0.859408 |        |        |
| 13223 | ENSG00000MSRB2    | 0.955556 | 0.758586 | 0.857071 | 0.860606 |        |        |
| 13224 | ENSG00000TMEM161B | 0.958774 | 0.749471 | 0.853418 | 0.849894 |        |        |
| 13225 | ENSG00000IL17REL  | 0.913319 | 0.867865 | 0.890592 | 0.891121 |        |        |
| 13226 | ENSG00000ARHGAP1  | 1        | 0.622222 | 0.811111 | 0.744444 |        |        |
| 13227 | ENSG00000CBFA2T2  | 0.959596 | 0.751515 | 0.84899  | 0.851515 |        |        |
| 13228 | ENSG00000NDUFAP3  | 1        | 0.59596  | 0.791246 | 0.776768 |        |        |
| 13229 | ENSG00000DPEP2    | 1        | 0.597252 | 0.795455 | 0.787526 |        |        |
| 13230 | ENSG00000TNR      | 0.993939 | 0.652525 | 0.832997 | 0.820202 |        |        |
| 13231 | ENSG00000INS      | 1        | 0.557576 | 0.785859 | 0.791919 |        |        |
| 13232 | ENSG00000POU5F1   | 1        | 0.545455 | 0.848485 | 0.748485 |        |        |
| 13233 | ENSG00000OR10R2   | 0.983838 | 0.684848 | 0.834343 | 0.810101 |        |        |
| 13234 | ENSG00000DNAJB2   | 0.959596 | 0.717172 | 0.861953 | 0.851515 |        |        |
| 13235 | ENSG00000RNF122   | 0.987315 | 0.682875 | 0.835095 | 0.807611 | 0.3178 |        |
| 13236 | ENSG00000GALNT18  | 0.961616 | 0.725253 | 0.843434 | 0.848485 |        |        |
| 13237 | ENSG00000FOXM1    | 1        | 0.622222 | 0.811111 | 0.819192 |        |        |
| 13238 | ENSG00000TNIK     | 1        | 0.612121 | 0.80202  | 0.788889 | 0.454  |        |
| 13239 | ENSG00000BORCS7   | 0.987879 | 0.688889 | 0.838384 | 0.793939 |        |        |
| 13240 | ENSG00000TRAPPC2L | 1        | 0.618182 | 0.79798  | 0.772727 |        |        |
| 13241 | ENSG00000GH2      | 0.918841 | 0.833816 | 0.876329 | 0.900483 |        |        |
| 13242 | ENSG00000AMPD1    | 0.983838 | 0.684848 | 0.834343 | 0.814141 |        |        |
| 13243 | ENSG00000IQCD     | 0.913319 | 0.867865 | 0.890592 | 0.895349 |        |        |
| 13244 | ENSG00000CSH2     | 0.918841 | 0.833816 | 0.876329 | 0.900483 |        |        |
| 13245 | ENSG00000GH1      | 0.918841 | 0.833816 | 0.876329 | 0.900483 |        |        |
| 13246 | ENSG00000RBMS2    | 0.987879 | 0.681818 | 0.839899 | 0.80404  |        |        |
| 13247 | ENSG00000USP15    | 0.960606 | 0.758586 | 0.859596 | 0.814141 |        |        |
| 13248 | ENSG00000PPP1R9B  | 0.915152 | 0.870707 | 0.892929 | 0.882828 |        |        |
| 13249 | ENSG00000TENM1    | 0.956566 | 0.754545 | 0.849495 | 0.879798 | 0.2733 | 0.4876 |
| 13250 | ENSG00000SHROOM4  | 0.956566 | 0.790909 | 0.873232 | 0.827273 |        |        |
| 13251 | ENSG00000MEP1B    | 0.915152 | 0.870707 | 0.892929 | 0.880808 |        |        |
| 13252 | ENSG00000ZCCHC8   | 1        | 0.637374 | 0.823064 | 0.834343 | 0.3657 |        |
| 13253 | ENSG00000CUL5     | 1        | 0.6      | 0.8      | 0.784848 |        |        |



|       |           |           |          |          |          |          |       |        |
|-------|-----------|-----------|----------|----------|----------|----------|-------|--------|
| 13254 | ENSG00000 | ZBPB2     | 1        | 0.579798 | 0.789899 | 0.789899 |       |        |
| 13255 | ENSG00000 | ZBED8     | 0.959596 | 0.754545 | 0.856397 | 0.830303 |       |        |
| 13256 | ENSG00000 | GIMAP8    | 1        | 0.591919 | 0.790909 | 0.792929 |       |        |
| 13257 | ENSG00000 | TPK1      | 1        | 0.579798 | 0.786532 | 0.790909 |       |        |
| 13258 | ENSG00000 | TNRC6B    | 0.959596 | 0.754545 | 0.856397 | 0.841414 |       |        |
| 13259 | ENSG00000 | DCTN1     | 1        | 0.588889 | 0.790741 | 0.770707 |       |        |
| 13260 | ENSG00000 | GPR135    | 0.987879 | 0.677778 | 0.826094 | 0.823232 |       |        |
| 13261 | ENSG00000 | SLC7A9    | 0.915152 | 0.870707 | 0.892929 | 0.889899 |       |        |
| 13262 | ENSG00000 | ACRV1     | 1        | 0.6      | 0.8      | 0.824242 |       |        |
| 13263 | ENSG00000 | ARMC7     | 0.960606 | 0.720202 | 0.839562 | 0.870707 |       |        |
| 13264 | ENSG00000 | PGA3      | 0.961616 | 0.725253 | 0.842424 | 0.846465 |       |        |
| 13265 | ENSG00000 | GPLD1     | 1        | 0.646465 | 0.823232 | 0.793939 |       |        |
| 13266 | ENSG00000 | GALP      | 0.961616 | 0.725253 | 0.843434 | 0.845455 |       |        |
| 13267 | ENSG00000 | GATD1     | 1        | 0.619192 | 0.802189 | 0.756566 |       |        |
| 13268 | ENSG00000 | ZSCAN16   | 0.915152 | 0.870707 | 0.892929 | 0.878788 | 0.318 |        |
| 13269 | ENSG00000 | TRIM6     | 0.961616 | 0.725253 | 0.843434 | 0.854545 |       |        |
| 13270 | ENSG00000 | AIMP2     | 1        | 0.646465 | 0.823232 | 0.8      |       |        |
| 13271 | ENSG00000 | SFPA1     | 1        | 0.6      | 0.8      | 0.845455 |       |        |
| 13272 | ENSG00000 | VPS29     | 0.957576 | 0.789899 | 0.873064 | 0.829293 |       |        |
| 13273 | ENSG00000 | CLCN6     | 0.958586 | 0.752525 | 0.854545 | 0.861616 |       |        |
| 13274 | ENSG00000 | CSRNP2    | 0.959596 | 0.754545 | 0.856397 | 0.842424 | 0.387 |        |
| 13275 | ENSG00000 | APOO      | 0.958586 | 0.790909 | 0.874242 | 0.809091 |       |        |
| 13276 | ENSG00000 | HCRT      | 0.961616 | 0.725253 | 0.843434 | 0.851515 |       |        |
| 13277 | ENSG00000 | ZNF233    | 1        | 0.588889 | 0.790741 | 0.819192 |       |        |
| 13278 | ENSG00000 | EMX1      | 1        | 0.635659 | 0.828165 | 0.771872 | 0.318 |        |
| 13279 | ENSG00000 | PRKD3     | 0.960606 | 0.758586 | 0.858754 | 0.823232 |       |        |
| 13280 | ENSG00000 | ESS2      | 1        | 0.682875 | 0.839323 | 0.772727 |       |        |
| 13281 | ENSG00000 | PSMC6     | 0.993939 | 0.687879 | 0.84596  | 0.788889 |       |        |
| 13282 | ENSG00000 | DNMT3A    | 1        | 0.618182 | 0.83266  | 0.79798  |       |        |
| 13283 | ENSG00000 | GATA4     | 1        | 0.6      | 0.8      | 0.823232 | 0.363 | 0.3926 |
| 13284 | ENSG00000 | TBC1D12   | 0.99697  | 0.647475 | 0.844781 | 0.816162 |       |        |
| 13285 | ENSG00000 | FAM83C    | 0.994949 | 0.714141 | 0.847811 | 0.777778 |       |        |
| 13286 | ENSG00000 | HSFX1     | 0.913319 | 0.867865 | 0.890592 | 0.909091 |       |        |
| 13287 | ENSG00000 | SMC1A     | 0.957717 | 0.747357 | 0.85148  | 0.876321 |       |        |
| 13288 | ENSG00000 | MFAP5     | 0.915152 | 0.870707 | 0.892929 | 0.882828 |       |        |
| 13289 | ENSG00000 | C11orf42  | 0.913319 | 0.867865 | 0.890592 | 0.909091 |       |        |
| 13290 | ENSG00000 | TMEM91    | 0.915152 | 0.870707 | 0.892929 | 0.889899 |       |        |
| 13291 | ENSG00000 | FAM174B   | 0.960606 | 0.758586 | 0.859596 | 0.817172 |       |        |
| 13292 | ENSG00000 | RBM4B     | 1        | 0.613131 | 0.812458 | 0.758586 |       |        |
| 13293 | ENSG00000 | EFCAB2    | 1        | 0.579798 | 0.789899 | 0.785859 |       |        |
| 13294 | ENSG00000 | AC139530. | 1        | 0.582828 | 0.775758 | 0.790909 |       |        |
| 13295 | ENSG00000 | RBM4      | 1        | 0.613131 | 0.812458 | 0.758586 |       |        |
| 13296 | ENSG00000 | CD109     | 0.918841 | 0.833816 | 0.876329 | 0.91401  |       |        |
| 13297 | ENSG00000 | PRAF2     | 1        | 0.593939 | 0.792256 | 0.764646 |       |        |
| 13298 | ENSG00000 | HSFX2     | 0.913319 | 0.867865 | 0.890592 | 0.909091 |       |        |
| 13299 | ENSG00000 | TPTE      | 0.913319 | 0.867865 | 0.890592 | 0.909091 |       |        |
| 13300 | ENSG00000 | TTC39C    | 0.958586 | 0.750505 | 0.860438 | 0.853535 |       |        |
| 13301 | ENSG00000 | FIS1      | 0.960606 | 0.758586 | 0.859596 | 0.817172 | 0.314 | 0.3693 |
| 13302 | ENSG00000 | SLC7A5    | 0.959596 | 0.754545 | 0.856397 | 0.850505 |       |        |
| 13303 | ENSG00000 | KIAA1841  | 0.958586 | 0.750505 | 0.847811 | 0.873737 |       |        |
| 13304 | ENSG00000 | SPAG11B   | 0.915152 | 0.870707 | 0.892929 | 0.891919 |       |        |
| 13305 | ENSG00000 | FKBP9     | 0.959831 | 0.7537   | 0.856765 | 0.843552 |       |        |
| 13306 | ENSG00000 | TARS      | 0.956811 | 0.781838 | 0.868771 | 0.849391 |       |        |
| 13307 | ENSG00000 | CYR61     | 0.960606 | 0.720202 | 0.839562 | 0.879798 |       |        |
| 13308 | ENSG00000 | PICK1     | 0.960606 | 0.758586 | 0.859596 | 0.830303 |       |        |

|       |                    |          |          |          |          |        |
|-------|--------------------|----------|----------|----------|----------|--------|
| 13309 | ENSG00000SPAG11A   | 0.915152 | 0.870707 | 0.892929 | 0.891919 |        |
| 13310 | ENSG00000APOBEC3D  | 0.957576 | 0.789899 | 0.873064 | 0.830303 |        |
| 13311 | ENSG00000OR51A7    | 0.915152 | 0.869697 | 0.892256 | 0.907071 |        |
| 13312 | ENSG00000OTUD1     | 1        | 0.60303  | 0.79596  | 0.79899  |        |
| 13313 | ENSG00000CSN3      | 1        | 0.579798 | 0.789899 | 0.816162 |        |
| 13314 | ENSG00000AL022318. | 0.957576 | 0.789899 | 0.873064 | 0.830303 |        |
| 13315 | ENSG00000CCDC68    | 1        | 0.622222 | 0.811111 | 0.767677 |        |
| 13316 | ENSG00000LONP2     | 0.960606 | 0.754545 | 0.856061 | 0.843434 |        |
| 13317 | ENSG00000PRDX4     | 1        | 0.652525 | 0.819529 | 0.788889 | 0.523  |
| 13318 | ENSG00000LIPT2     | 0.959831 | 0.7537   | 0.856765 | 0.844609 |        |
| 13319 | ENSG00000POU6F1    | 1        | 0.588889 | 0.798148 | 0.785859 |        |
| 13320 | ENSG00000NEDD8-MDP | 0.960606 | 0.758586 | 0.859596 | 0.821212 |        |
| 13321 | ENSG00000LSS       | 1        | 0.59596  | 0.791246 | 0.818182 |        |
| 13322 | ENSG00000TRIO      | 1        | 0.676633 | 0.836102 | 0.803987 |        |
| 13323 | ENSG00000MATR3     | 1        | 0.59596  | 0.788215 | 0.766667 |        |
| 13324 | ENSG00000NCKAP5L   | 1        | 0.60303  | 0.79596  | 0.79697  | 0.2414 |
| 13325 | ENSG00000SYNE4     | 0.957576 | 0.788889 | 0.866498 | 0.841414 |        |
| 13326 | ENSG00000KMT2E     | 0.915152 | 0.870707 | 0.892929 | 0.911111 |        |
| 13327 | ENSG00000SLC25A11  | 1        | 0.685859 | 0.840404 | 0.764646 |        |
| 13328 | ENSG00000ZNF843    | 0.985859 | 0.658586 | 0.822222 | 0.857576 |        |
| 13329 | ENSG00000COLEC12   | 0.960606 | 0.758586 | 0.859596 | 0.828283 |        |
| 13330 | ENSG00000ZP3       | 0.915152 | 0.870707 | 0.892929 | 0.89596  |        |
| 13331 | ENSG00000COX7C     | 0.958586 | 0.752525 | 0.854545 | 0.871717 |        |
| 13332 | ENSG00000NEUROG2   | 1        | 0.622222 | 0.811111 | 0.755556 |        |
| 13333 | ENSG00000BTN3A3    | 1        | 0.681818 | 0.824074 | 0.782828 |        |
| 13334 | ENSG00000FYC01     | 0.957576 | 0.789899 | 0.873064 | 0.840404 |        |
| 13335 | ENSG00000SLITRK5   | 0.984848 | 0.685859 | 0.835354 | 0.824242 |        |
| 13336 | ENSG00000TMOD4     | 0.915152 | 0.870707 | 0.892929 | 0.905051 |        |
| 13337 | ENSG00000ATP5MG    | 0.957918 | 0.744186 | 0.850314 | 0.890365 |        |
| 13338 | ENSG00000PAQR3     | 0.915152 | 0.870707 | 0.892929 | 0.905051 |        |
| 13339 | ENSG00000MAEA      | 0.994949 | 0.682828 | 0.831987 | 0.818182 |        |
| 13340 | ENSG00000ATP5MGL   | 0.957918 | 0.744186 | 0.850314 | 0.890365 |        |
| 13341 | ENSG00000DNAJC7    | 1        | 0.612121 | 0.804377 | 0.783838 |        |
| 13342 | ENSG00000NUDCD3    | 1        | 0.652525 | 0.855556 | 0.806061 | 0.365  |
| 13343 | ENSG00000SMARCA4   | 1        | 0.65222  | 0.823643 | 0.785412 |        |
| 13344 | ENSG00000IDNK      | 0.960606 | 0.758586 | 0.859596 | 0.833333 |        |
| 13345 | ENSG00000KIR3DX1   | 0.960606 | 0.758586 | 0.859596 | 0.837374 |        |
| 13346 | ENSG00000TNRC6A    | 1        | 0.646465 | 0.823232 | 0.828283 |        |
| 13347 | ENSG00000AMY2A     | 0.961616 | 0.725253 | 0.843434 | 0.863636 |        |
| 13348 | ENSG00000KIAA1024L | 0.960606 | 0.758586 | 0.859596 | 0.830303 |        |
| 13349 | ENSG00000CRP       | 0.992929 | 0.651515 | 0.821212 | 0.863636 |        |
| 13350 | ENSG00000EIF5      | 1        | 0.688889 | 0.842424 | 0.772727 |        |
| 13351 | ENSG00000BET1L     | 0.959596 | 0.754545 | 0.856397 | 0.855556 |        |
| 13352 | ENSG00000PNRC2     | 1        | 0.612121 | 0.859259 | 0.722222 | 0.443  |
| 13353 | ENSG00000CCDC43    | 0.958586 | 0.790909 | 0.874242 | 0.825253 |        |
| 13354 | ENSG00000BFSP1     | 1        | 0.605797 | 0.802899 | 0.850242 |        |
| 13355 | ENSG00000DDX52     | 0.960606 | 0.758586 | 0.859596 | 0.828283 |        |
| 13356 | ENSG00000DTYMK     | 1        | 0.616279 | 0.801268 | 0.786469 |        |
| 13357 | ENSG00000OR4C3     | 1        | 0.622222 | 0.807071 | 0.763636 |        |
| 13358 | ENSG00000HECTD3    | 0.959831 | 0.7537   | 0.856765 | 0.857294 |        |
| 13359 | ENSG00000EDARADD   | 0.959596 | 0.754545 | 0.856397 | 0.856566 | 0.3857 |
| 13360 | ENSG00000PFKP      | 0.959596 | 0.754545 | 0.856397 | 0.866667 |        |
| 13361 | ENSG00000SUGP1     | 0.95666  | 0.785412 | 0.870331 | 0.860465 |        |
| 13362 | ENSG00000RDM1      | 0.959831 | 0.7537   | 0.856765 | 0.85518  |        |
| 13363 | ENSG00000RBM38     | 0.961616 | 0.725253 | 0.843434 | 0.874747 |        |

|       |           |           |          |          |          |          |        |
|-------|-----------|-----------|----------|----------|----------|----------|--------|
| 13364 | ENSG00000 | ITGB5     | 1        | 0.658586 | 0.826936 | 0.817172 |        |
| 13365 | ENSG00000 | ABL2      | 1        | 0.612121 | 0.859259 | 0.765657 |        |
| 13366 | ENSG00000 | SLC45A3   | 0.961616 | 0.725253 | 0.843434 | 0.872727 |        |
| 13367 | ENSG00000 | RNF10     | 0.960606 | 0.758586 | 0.859596 | 0.844444 |        |
| 13368 | ENSG00000 | XPO1      | 1        | 0.657576 | 0.865152 | 0.785859 |        |
| 13369 | ENSG00000 | RBSN      | 0.960606 | 0.758586 | 0.859596 | 0.840404 |        |
| 13370 | ENSG00000 | SNAPC2    | 0.957576 | 0.789899 | 0.873064 | 0.853535 |        |
| 13371 | ENSG00000 | PRPF39    | 1        | 0.582452 | 0.789288 | 0.808668 |        |
| 13372 | ENSG00000 | ANAPC7    | 0.99697  | 0.678788 | 0.843434 | 0.809091 |        |
| 13373 | ENSG00000 | CDKN2AIP  | 0.992929 | 0.693939 | 0.843434 | 0.80101  |        |
| 13374 | ENSG00000 | UBTF      | 1        | 0.657576 | 0.822896 | 0.805051 |        |
| 13375 | ENSG00000 | AP1B1     | 0.961616 | 0.725253 | 0.843434 | 0.880808 |        |
| 13376 | ENSG00000 | HEMK1     | 1        | 0.717172 | 0.866667 | 0.736364 |        |
| 13377 | ENSG00000 | RGCC      | 1        | 0.646465 | 0.823232 | 0.826263 | 0.262  |
| 13378 | ENSG00000 | RNF183    | 0.961616 | 0.725253 | 0.843434 | 0.875758 |        |
| 13379 | ENSG00000 | C12orf4   | 1        | 0.664646 | 0.830976 | 0.825253 |        |
| 13380 | ENSG00000 | FBXL4     | 0.99899  | 0.657576 | 0.86835  | 0.80101  |        |
| 13381 | ENSG00000 | TRNAU1AP  | 0.960606 | 0.758586 | 0.859596 | 0.839394 |        |
| 13382 | ENSG00000 | LIMS2     | 0.959596 | 0.789899 | 0.861953 | 0.843434 |        |
| 13383 | ENSG00000 | DPRX      | 0.915152 | 0.870707 | 0.892929 | 0.913131 |        |
| 13384 | ENSG00000 | LAGE3     | 0.99798  | 0.679798 | 0.851178 | 0.805051 |        |
| 13385 | ENSG00000 | PPP1CC    | 0.957918 | 0.785161 | 0.871539 | 0.852713 |        |
| 13386 | ENSG00000 | TMEM155   | 0.957717 | 0.786469 | 0.871564 | 0.856237 |        |
| 13387 | ENSG00000 | CDC26     | 0.960606 | 0.758586 | 0.859596 | 0.842424 |        |
| 13388 | ENSG00000 | PDK4      | 0.960606 | 0.758586 | 0.859596 | 0.852525 |        |
| 13389 | ENSG00000 | BST2      | 0.957918 | 0.785161 | 0.871539 | 0.856035 |        |
| 13390 | ENSG00000 | DYNC1H1   | 1        | 0.588889 | 0.790741 | 0.79798  |        |
| 13391 | ENSG00000 | CX3CR1    | 1        | 0.612121 | 0.810101 | 0.787879 |        |
| 13392 | ENSG00000 | RUNDC1    | 0.960606 | 0.758586 | 0.859596 | 0.841414 |        |
| 13393 | ENSG00000 | PACSIN1   | 0.991919 | 0.680808 | 0.846801 | 0.820202 |        |
| 13394 | ENSG00000 | AC079341. | 0.957717 | 0.786469 | 0.871564 | 0.856237 |        |
| 13395 | ENSG00000 | KIF20A    | 1        | 0.715152 | 0.851515 | 0.755556 |        |
| 13396 | ENSG00000 | EXOC8     | 0.958586 | 0.790909 | 0.874242 | 0.842424 |        |
| 13397 | ENSG00000 | CCDC167   | 0.960606 | 0.758586 | 0.859596 | 0.842424 |        |
| 13398 | ENSG00000 | DNAJB11   | 1        | 0.672727 | 0.836364 | 0.807071 | 0.4651 |
| 13399 | ENSG00000 | PIGB      | 0.989899 | 0.683838 | 0.841919 | 0.826263 |        |
| 13400 | ENSG00000 | COMMD1    | 0.957576 | 0.789899 | 0.873064 | 0.856566 |        |
| 13401 | ENSG00000 | RBM5      | 1        | 0.658586 | 0.839057 | 0.831313 |        |
| 13402 | ENSG00000 | SF3B2     | 1        | 0.658586 | 0.826936 | 0.825253 |        |
| 13403 | ENSG00000 | ZNF22     | 1        | 0.622222 | 0.811111 | 0.784848 |        |
| 13404 | ENSG00000 | PABPC4    | 1        | 0.672727 | 0.836364 | 0.808081 |        |
| 13405 | ENSG00000 | TMEM38A   | 0.959596 | 0.793939 | 0.876094 | 0.827273 |        |
| 13406 | ENSG00000 | PSMC2     | 1        | 0.649495 | 0.847306 | 0.745455 | 0.3487 |
| 13407 | ENSG00000 | HAPLN3    | 0.959596 | 0.754545 | 0.856397 | 0.873737 |        |
| 13408 | ENSG00000 | PLG       | 1        | 0.621212 | 0.86532  | 0.787879 |        |
| 13409 | ENSG00000 | SCGB1D2   | 0.960606 | 0.758586 | 0.859596 | 0.853535 |        |
| 13410 | ENSG00000 | TACC1     | 1        | 0.593939 | 0.815152 | 0.821212 |        |
| 13411 | ENSG00000 | INPPL1    | 0.957576 | 0.789899 | 0.873064 | 0.859596 | 0.394  |
| 13412 | ENSG00000 | PHOX2B    | 0.95666  | 0.785412 | 0.870331 | 0.874207 |        |
| 13413 | ENSG00000 | WASHC4    | 1        | 0.658586 | 0.861953 | 0.748485 |        |
| 13414 | ENSG00000 | FCGRT     | 0.987879 | 0.688889 | 0.838384 | 0.829293 |        |
| 13415 | ENSG00000 | USP29     | 0.954596 | 0.781838 | 0.867663 | 0.89258  |        |
| 13416 | ENSG00000 | LRSAM1    | 1        | 0.621212 | 0.806397 | 0.810101 |        |
| 13417 | ENSG00000 | FXR1      | 0.960606 | 0.758586 | 0.859596 | 0.856566 |        |
| 13418 | ENSG00000 | ANXA11    | 1        | 0.646465 | 0.83468  | 0.80101  |        |

|       |                   |          |          |          |          |        |        |
|-------|-------------------|----------|----------|----------|----------|--------|--------|
| 13419 | ENSG00000BPIFA2   | 0.958774 | 0.789641 | 0.874207 | 0.844609 |        |        |
| 13420 | ENSG00000FAM71B   | 1        | 0.579798 | 0.789899 | 0.842424 |        |        |
| 13421 | ENSG00000SIK1B    | 0.958586 | 0.790909 | 0.874242 | 0.840404 |        |        |
| 13422 | ENSG00000ANKRD40  | 1        | 0.588889 | 0.851852 | 0.787879 |        |        |
| 13423 | ENSG00000TIMM17A  | 1        | 0.625253 | 0.809091 | 0.823232 |        |        |
| 13424 | ENSG00000FAT1     | 1        | 0.687879 | 0.837879 | 0.79899  |        |        |
| 13425 | ENSG00000DAB2     | 0.992929 | 0.657576 | 0.829966 | 0.862626 |        |        |
| 13426 | ENSG00000MRPS34   | 0.959596 | 0.793939 | 0.876768 | 0.829293 |        |        |
| 13427 | ENSG00000CCDC159  | 1        | 0.622222 | 0.807071 | 0.768687 |        |        |
| 13428 | ENSG00000DVL1     | 0.960606 | 0.758586 | 0.859596 | 0.859596 | 0.545  |        |
| 13429 | ENSG00000WRB      | 0.987315 | 0.675476 | 0.836505 | 0.856237 |        |        |
| 13430 | ENSG00000SLC4A4   | 0.992929 | 0.657576 | 0.829966 | 0.866667 |        |        |
| 13431 | ENSG00000HSDL2    | 1        | 0.664646 | 0.830976 | 0.793939 |        |        |
| 13432 | ENSG00000MRPL47   | 1        | 0.615152 | 0.79596  | 0.856566 |        | 0.3332 |
| 13433 | ENSG00000ACBD3    | 0.958774 | 0.789641 | 0.874207 | 0.846723 |        |        |
| 13434 | ENSG00000NFAM1    | 0.958586 | 0.788889 | 0.867003 | 0.857576 |        |        |
| 13435 | ENSG00000ORC3     | 1        | 0.658586 | 0.826936 | 0.782828 |        |        |
| 13436 | ENSG00000SEMG1    | 0.911205 | 0.911205 | 0.911205 | 0.911205 |        |        |
| 13437 | ENSG00000ZNF707   | 1        | 0.588795 | 0.787526 | 0.825581 |        |        |
| 13438 | ENSG00000SUM01    | 0.959596 | 0.789899 | 0.861616 | 0.856566 |        |        |
| 13439 | ENSG00000PCTP     | 0.993939 | 0.687879 | 0.84596  | 0.816162 |        |        |
| 13440 | ENSG00000ERH      | 1        | 0.664646 | 0.827609 | 0.821212 |        |        |
| 13441 | ENSG00000KLHDC7A  | 0.911205 | 0.911205 | 0.911205 | 0.911205 |        |        |
| 13442 | ENSG00000NCOA6    | 1        | 0.60303  | 0.79596  | 0.787879 |        |        |
| 13443 | ENSG00000RPS6KA6  | 1        | 0.685859 | 0.840404 | 0.805051 | 0.3715 | 0.3351 |
| 13444 | ENSG00000ARMC1    | 0.960606 | 0.758586 | 0.859596 | 0.863636 |        |        |
| 13445 | ENSG00000PHYH     | 1        | 0.672727 | 0.836364 | 0.80101  |        | 0.295  |
| 13446 | ENSG00000VPS13A   | 1        | 0.579798 | 0.789899 | 0.816162 |        | 0.3344 |
| 13447 | ENSG00000C17orf53 | 1        | 0.646465 | 0.823232 | 0.812121 |        |        |
| 13448 | ENSG00000XKR3     | 1        | 0.622222 | 0.811111 | 0.779798 | 0.4317 |        |
| 13449 | ENSG00000TRPM1    | 0.916908 | 0.87343  | 0.895169 | 0.916908 |        |        |
| 13450 | ENSG00000KCNJ12   | 0.959596 | 0.793939 | 0.876768 | 0.824242 |        |        |
| 13451 | ENSG00000GUF1     | 1        | 0.657576 | 0.822896 | 0.771717 |        |        |
| 13452 | ENSG00000FAM104B  | 0.958774 | 0.789641 | 0.874207 | 0.853066 |        |        |
| 13453 | ENSG00000PHACTR4  | 0.959596 | 0.790909 | 0.874074 | 0.840404 |        |        |
| 13454 | ENSG00000SPTAN1   | 1        | 0.579798 | 0.789899 | 0.819192 |        |        |
| 13455 | ENSG00000ZNF169   | 1        | 0.612121 | 0.810101 | 0.788889 |        |        |
| 13456 | ENSG00000AARS     | 1        | 0.664646 | 0.830976 | 0.828283 |        |        |
| 13457 | ENSG00000RBM25    | 1        | 0.640592 | 0.820296 | 0.830867 |        |        |
| 13458 | ENSG00000INA      | 0.99596  | 0.679798 | 0.855219 | 0.820202 |        |        |
| 13459 | ENSG00000U2AF1    | 1        | 0.652525 | 0.819529 | 0.773737 |        |        |
| 13460 | ENSG00000SPTA1    | 0.994949 | 0.679798 | 0.842256 | 0.836364 |        |        |
| 13461 | ENSG00000ZSWIM7   | 1        | 0.615222 | 0.803383 | 0.769556 |        |        |
| 13462 | ENSG00000CTSZ     | 0.983838 | 0.684848 | 0.834343 | 0.867677 |        |        |
| 13463 | ENSG00000GFI1B    | 0.912121 | 0.912121 | 0.912121 | 0.912121 |        |        |
| 13464 | ENSG00000ALKBH4   | 0.960606 | 0.758586 | 0.859596 | 0.863636 |        |        |
| 13465 | ENSG00000CR1      | 1        | 0.60404  | 0.810438 | 0.773737 |        |        |
| 13466 | ENSG00000CSAD     | 0.959596 | 0.793939 | 0.876768 | 0.832323 |        |        |
| 13467 | ENSG00000CNOT3    | 0.958774 | 0.789641 | 0.874207 | 0.859408 |        |        |
| 13468 | ENSG00000MON1A    | 1        | 0.646465 | 0.823232 | 0.771717 |        |        |
| 13469 | ENSG00000KCNJ18   | 0.959596 | 0.793939 | 0.876768 | 0.824242 |        |        |
| 13470 | ENSG00000ERICH6   | 0.958774 | 0.789641 | 0.874207 | 0.858351 |        |        |
| 13471 | ENSG00000BTBD8    | 0.959596 | 0.793939 | 0.876768 | 0.827273 |        |        |
| 13472 | ENSG00000EVL      | 0.994949 | 0.649495 | 0.837374 | 0.870707 |        |        |
| 13473 | ENSG00000TIMM23   | 0.959596 | 0.790909 | 0.868855 | 0.849495 |        |        |

|       |                  |          |          |          |          |        |        |
|-------|------------------|----------|----------|----------|----------|--------|--------|
| 13474 | ENSG00000DRG1    | 0.958774 | 0.789641 | 0.874207 | 0.857294 |        |        |
| 13475 | ENSG00000LRRK2   | 1        | 0.6      | 0.8      | 0.793939 |        |        |
| 13476 | ENSG00000HS1BP3  | 0.960606 | 0.758586 | 0.859596 | 0.870707 |        |        |
| 13477 | ENSG00000CARTPT  | 1        | 0.65314  | 0.814976 | 0.772947 |        |        |
| 13478 | ENSG00000RPS5    | 1        | 0.70101  | 0.850505 | 0.792929 |        |        |
| 13479 | ENSG00000MMS19   | 1        | 0.625253 | 0.809091 | 0.806061 |        |        |
| 13480 | ENSG00000DCUN1D4 | 1        | 0.683838 | 0.861448 | 0.773737 |        |        |
| 13481 | ENSG00000INCA1   | 1        | 0.615152 | 0.79596  | 0.790909 |        |        |
| 13482 | ENSG00000MYO1H   | 0.959596 | 0.754545 | 0.856397 | 0.890909 |        | 0.4437 |
| 13483 | ENSG00000DNAJC10 | 0.959596 | 0.793939 | 0.876768 | 0.844444 |        |        |
| 13484 | ENSG00000RMND1   | 1        | 0.60404  | 0.850505 | 0.787879 | 0.4537 |        |
| 13485 | ENSG00000AMY1B   | 0.960606 | 0.758586 | 0.859596 | 0.868687 |        |        |
| 13486 | ENSG00000PJA2    | 0.958774 | 0.789641 | 0.874207 | 0.860465 |        |        |
| 13487 | ENSG00000ADCYAP1 | 0.918594 | 0.876041 | 0.897317 | 0.914894 |        |        |
| 13488 | ENSG00000MED8    | 1        | 0.652525 | 0.851515 | 0.753535 |        |        |
| 13489 | ENSG00000MLN     | 0.913131 | 0.913131 | 0.913131 | 0.913131 |        |        |
| 13490 | ENSG00000SVIP    | 0.958586 | 0.790909 | 0.874242 | 0.859596 |        |        |
| 13491 | ENSG00000DPP6    | 0.959596 | 0.793939 | 0.876768 | 0.841414 |        |        |
| 13492 | ENSG00000MTDH    | 1        | 0.622222 | 0.874074 | 0.764646 |        | 0.5312 |
| 13493 | ENSG00000EIF3K   | 0.960606 | 0.758586 | 0.859596 | 0.869697 |        |        |
| 13494 | ENSG00000P4HB    | 1        | 0.6      | 0.8      | 0.80101  |        |        |
| 13495 | ENSG00000SGCG    | 0.913131 | 0.913131 | 0.913131 | 0.913131 |        |        |
| 13496 | ENSG00000AMY1C   | 0.960606 | 0.758586 | 0.859596 | 0.868687 |        |        |
| 13497 | ENSG00000PCBP1   | 1        | 0.6      | 0.8      | 0.821212 |        | 0.257  |
| 13498 | ENSG00000ATP5MPL | 0.957576 | 0.789899 | 0.873064 | 0.881818 |        |        |
| 13499 | ENSG00000MRC1    | 1        | 0.59408  | 0.79704  | 0.792812 |        |        |
| 13500 | ENSG00000CHRNA1  | 0.913131 | 0.913131 | 0.913131 | 0.913131 |        |        |
| 13501 | ENSG00000XRCC6   | 1        | 0.648485 | 0.816835 | 0.752525 |        |        |
| 13502 | ENSG00000TNPO3   | 1        | 0.658586 | 0.826936 | 0.860606 |        |        |
| 13503 | ENSG00000RFLNB   | 0.959831 | 0.7537   | 0.856765 | 0.893235 |        |        |
| 13504 | ENSG00000ROGDI   | 0.958774 | 0.789641 | 0.874207 | 0.868922 |        |        |
| 13505 | ENSG00000AMY2B   | 0.960606 | 0.758586 | 0.859596 | 0.868687 |        |        |
| 13506 | ENSG00000SYAP1   | 0.955603 | 0.825581 | 0.89024  | 0.861522 |        |        |
| 13507 | ENSG00000LITAF   | 0.956566 | 0.790909 | 0.873232 | 0.889899 |        |        |
| 13508 | ENSG00000KLK2    | 0.913131 | 0.913131 | 0.913131 | 0.913131 |        |        |
| 13509 | ENSG00000GKN1    | 0.913131 | 0.913131 | 0.913131 | 0.913131 |        |        |
| 13510 | ENSG00000SAFB2   | 0.958774 | 0.789641 | 0.874207 | 0.868922 |        |        |
| 13511 | ENSG00000CNPY2   | 1        | 0.59596  | 0.801347 | 0.786869 |        |        |
| 13512 | ENSG00000ATP5F1A | 1        | 0.664646 | 0.827609 | 0.772727 | 0.217  | 0.262  |
| 13513 | ENSG00000ARNTL   | 0.959596 | 0.793939 | 0.876768 | 0.844444 |        |        |
| 13514 | ENSG00000ZSCAN31 | 0.986711 | 0.707641 | 0.847176 | 0.838317 |        | 0.392  |
| 13515 | ENSG00000OLA1    | 1        | 0.646465 | 0.823232 | 0.805051 |        |        |
| 13516 | ENSG00000VSIG8   | 1        | 0.593939 | 0.792256 | 0.80202  |        |        |
| 13517 | ENSG00000RIMBP3C | 0.955865 | 0.817654 | 0.885792 | 0.867596 |        |        |
| 13518 | ENSG00000ZMYND19 | 1        | 0.652525 | 0.815488 | 0.777778 |        |        |
| 13519 | ENSG00000RIMBP3B | 0.955865 | 0.817654 | 0.885792 | 0.867596 |        |        |
| 13520 | ENSG00000AVPI1   | 1        | 0.672727 | 0.836364 | 0.80101  |        |        |
| 13521 | ENSG00000VWA2    | 0.958774 | 0.789641 | 0.874207 | 0.869979 |        |        |
| 13522 | ENSG00000RIMBP3  | 0.955865 | 0.817654 | 0.885792 | 0.867596 |        |        |
| 13523 | ENSG00000TGS1    | 1        | 0.631078 | 0.811135 | 0.830867 |        |        |
| 13524 | ENSG00000PITRM1  | 1        | 0.658586 | 0.826936 | 0.830303 |        |        |
| 13525 | ENSG00000FOXO3   | 0.958586 | 0.790909 | 0.874242 | 0.872727 |        |        |
| 13526 | ENSG00000WASHC2A | 1        | 0.680808 | 0.82862  | 0.832323 |        |        |
| 13527 | ENSG00000TMED4   | 0.959596 | 0.793939 | 0.876768 | 0.844444 |        | 0.2116 |
| 13528 | ENSG00000WDR37   | 1        | 0.715152 | 0.845455 | 0.809091 |        |        |

|       |                   |          |          |          |          |        |        |
|-------|-------------------|----------|----------|----------|----------|--------|--------|
| 13529 | ENSG00000RFFL     | 1        | 0.652525 | 0.847138 | 0.834343 | 0.2954 | 0.3681 |
| 13530 | ENSG00000COX4I1   | 1        | 0.672727 | 0.836364 | 0.790909 |        |        |
| 13531 | ENSG00000BICD1    | 1        | 0.605708 | 0.801092 | 0.856237 | 0.3565 |        |
| 13532 | ENSG00000POMC     | 1        | 0.618357 | 0.807568 | 0.892754 |        |        |
| 13533 | ENSG00000PRRT1    | 1        | 0.652525 | 0.805387 | 0.756566 |        |        |
| 13534 | ENSG00000PPP6R3   | 1        | 0.652525 | 0.853199 | 0.810101 |        |        |
| 13535 | ENSG00000CELF4    | 0.959596 | 0.793939 | 0.876768 | 0.854545 |        |        |
| 13536 | ENSG00000UAP1L1   | 0.959596 | 0.793939 | 0.876768 | 0.841414 |        |        |
| 13537 | ENSG00000ZBTB39   | 1        | 0.640592 | 0.820296 | 0.785412 |        |        |
| 13538 | ENSG00000SIPA1L2  | 0.958586 | 0.790909 | 0.874242 | 0.875758 |        |        |
| 13539 | ENSG00000C3orf14  | 0.956566 | 0.829293 | 0.892593 | 0.858586 |        |        |
| 13540 | ENSG00000IL1RL1   | 1        | 0.693939 | 0.845791 | 0.782828 |        |        |
| 13541 | ENSG00000SKA1     | 0.959596 | 0.793939 | 0.876768 | 0.848485 |        |        |
| 13542 | ENSG00000RPL29    | 0.957717 | 0.827696 | 0.892706 | 0.843552 |        |        |
| 13543 | ENSG00000TMED9    | 0.959596 | 0.793939 | 0.876768 | 0.844444 |        |        |
| 13544 | ENSG00000PRKDC    | 1        | 0.60303  | 0.79596  | 0.794949 |        |        |
| 13545 | ENSG00000TSR3     | 1        | 0.70101  | 0.850505 | 0.818182 |        |        |
| 13546 | ENSG00000RNASE12  | 0.958774 | 0.789641 | 0.874207 | 0.872093 |        |        |
| 13547 | ENSG00000DCP2     | 0.958774 | 0.789641 | 0.874207 | 0.87315  |        |        |
| 13548 | ENSG00000ILF2     | 1        | 0.658562 | 0.827872 | 0.789641 |        |        |
| 13549 | ENSG00000PTCHD4   | 0.959596 | 0.793939 | 0.90303  | 0.818182 |        |        |
| 13550 | ENSG00000SMYD2    | 0.960606 | 0.758586 | 0.859596 | 0.884848 |        |        |
| 13551 | ENSG00000SLC10A3  | 0.958774 | 0.789641 | 0.874207 | 0.877378 |        |        |
| 13552 | ENSG00000MFSD6    | 1        | 0.634551 | 0.817276 | 0.809524 |        |        |
| 13553 | ENSG00000HSP90B1  | 1        | 0.625253 | 0.809091 | 0.80404  |        | 0.1711 |
| 13554 | ENSG00000TIAM1    | 0.959596 | 0.793939 | 0.876768 | 0.850505 |        |        |
| 13555 | ENSG00000NAP1L1   | 1        | 0.629293 | 0.808923 | 0.778788 |        |        |
| 13556 | ENSG00000SLC6A9   | 0.959596 | 0.793939 | 0.876768 | 0.846465 |        |        |
| 13557 | ENSG00000EIF3B    | 1        | 0.685859 | 0.840404 | 0.80303  |        |        |
| 13558 | ENSG00000PLSCR5   | 0.993658 | 0.708245 | 0.856413 | 0.820296 |        |        |
| 13559 | ENSG00000ANKK1    | 0.959596 | 0.793939 | 0.876768 | 0.850505 |        |        |
| 13560 | ENSG00000LYSMD3   | 0.957576 | 0.789899 | 0.873064 | 0.893939 |        |        |
| 13561 | ENSG00000SPRED2   | 0.956566 | 0.829293 | 0.892593 | 0.857576 |        |        |
| 13562 | ENSG00000ZSCAN2   | 1        | 0.652525 | 0.815488 | 0.764646 |        |        |
| 13563 | ENSG00000STRAP    | 1        | 0.683838 | 0.846801 | 0.834343 |        |        |
| 13564 | ENSG00000ARHGAP24 | 0.959596 | 0.793939 | 0.876768 | 0.855556 |        |        |
| 13565 | ENSG00000HBP1     | 0.956566 | 0.829293 | 0.886195 | 0.869697 |        |        |
| 13566 | ENSG00000NARFL    | 0.958774 | 0.789641 | 0.874207 | 0.881607 | 0.3692 |        |
| 13567 | ENSG00000COMMD8   | 0.957576 | 0.789899 | 0.873064 | 0.89899  |        | 0.399  |
| 13568 | ENSG00000CREBBP   | 1        | 0.717172 | 0.851852 | 0.815152 |        |        |
| 13569 | ENSG00000RNF181   | 1        | 0.637374 | 0.86734  | 0.749495 |        |        |
| 13570 | ENSG00000SAMD4B   | 0.960606 | 0.758586 | 0.859596 | 0.886869 |        |        |
| 13571 | ENSG00000FLOT2    | 1        | 0.658586 | 0.826936 | 0.808081 | 0.434  | 0.3852 |
| 13572 | ENSG00000PIF1     | 0.957576 | 0.829293 | 0.893098 | 0.852525 | 0.462  | 0.2575 |
| 13573 | ENSG00000SPOCK2   | 0.959596 | 0.793939 | 0.876768 | 0.863636 |        |        |
| 13574 | ENSG00000ATM      | 0.993658 | 0.676533 | 0.834214 | 0.883721 | 0.438  |        |
| 13575 | ENSG00000TOP2B    | 1        | 0.693939 | 0.841919 | 0.821212 | 0.3916 |        |
| 13576 | ENSG00000WDR83    | 0.993939 | 0.715152 | 0.865657 | 0.815152 |        |        |
| 13577 | ENSG00000TAOK3    | 0.959596 | 0.793939 | 0.876768 | 0.860606 |        |        |
| 13578 | ENSG00000ZNF428   | 1        | 0.654545 | 0.860606 | 0.784848 |        |        |
| 13579 | ENSG00000FAM53B   | 1        | 0.621212 | 0.835859 | 0.764646 | 0.1565 |        |
| 13580 | ENSG00000SF3B3    | 0.958586 | 0.790909 | 0.874242 | 0.880808 |        |        |
| 13581 | ENSG00000MEF2D    | 1        | 0.683838 | 0.83064  | 0.811111 |        |        |
| 13582 | ENSG00000PIP4P2   | 0.955603 | 0.825581 | 0.89024  | 0.878436 |        |        |
| 13583 | ENSG00000ABCB6    | 1        | 0.664646 | 0.830976 | 0.825253 |        |        |

|       |                    |          |          |          |          |        |        |
|-------|--------------------|----------|----------|----------|----------|--------|--------|
| 13584 | ENSG00000CAPZA1    | 1        | 0.679704 | 0.837209 | 0.809725 |        |        |
| 13585 | ENSG00000THTPA     | 1        | 0.588889 | 0.798148 | 0.809091 |        |        |
| 13586 | ENSG00000CPT1A     | 0.957576 | 0.829293 | 0.893098 | 0.858586 |        | 0.465  |
| 13587 | ENSG00000UNC93A    | 1        | 0.646465 | 0.823232 | 0.862626 |        | 0.2957 |
| 13588 | ENSG00000PIRT      | 0.959596 | 0.793939 | 0.876768 | 0.853535 |        |        |
| 13589 | ENSG00000YIPF4     | 1        | 0.685859 | 0.840404 | 0.79596  |        |        |
| 13590 | ENSG00000AL662899. | 0.991919 | 0.712121 | 0.845118 | 0.842424 |        |        |
| 13591 | ENSG00000CNOT8     | 1        | 0.688889 | 0.842424 | 0.754545 |        |        |
| 13592 | ENSG00000PRDM9     | 0.958774 | 0.789641 | 0.873502 | 0.890063 |        |        |
| 13593 | ENSG00000TNP01     | 0.992929 | 0.693939 | 0.843434 | 0.853535 |        |        |
| 13594 | ENSG00000TMEM266   | 1        | 0.646465 | 0.823232 | 0.781818 |        |        |
| 13595 | ENSG00000PARK7     | 1        | 0.684848 | 0.864646 | 0.782828 | 0.2678 |        |
| 13596 | ENSG00000MLST8     | 1        | 0.60404  | 0.79899  | 0.848485 |        |        |
| 13597 | ENSG00000IZUM01    | 0.957717 | 0.827696 | 0.892706 | 0.857294 |        |        |
| 13598 | ENSG00000SEC62     | 1        | 0.687879 | 0.837879 | 0.852525 |        |        |
| 13599 | ENSG00000CLYBL     | 1        | 0.664646 | 0.830976 | 0.817172 | 0.2613 | 0.5878 |
| 13600 | ENSG00000NFYB      | 1        | 0.685859 | 0.840404 | 0.79697  |        |        |
| 13601 | ENSG00000DEF8      | 1        | 0.685859 | 0.840404 | 0.772727 |        |        |
| 13602 | ENSG00000NOA1      | 0.99899  | 0.720202 | 0.885185 | 0.791919 |        |        |
| 13603 | ENSG00000STAR      | 1        | 0.667774 | 0.821705 | 0.796235 |        |        |
| 13604 | ENSG00000CST5      | 0.959596 | 0.793939 | 0.876768 | 0.862626 |        |        |
| 13605 | ENSG00000CAPN1     | 0.957576 | 0.829293 | 0.893098 | 0.867677 |        |        |
| 13606 | ENSG00000ARL13A    | 1        | 0.622222 | 0.807071 | 0.807071 |        |        |
| 13607 | ENSG00000NKTR      | 0.954878 | 0.815854 | 0.885366 | 0.89878  |        |        |
| 13608 | ENSG00000TEX9      | 0.957576 | 0.829293 | 0.893098 | 0.860606 |        |        |
| 13609 | ENSG00000EIF4E1B   | 0.957717 | 0.827696 | 0.892706 | 0.861522 |        |        |
| 13610 | ENSG00000OCIAD1    | 0.959596 | 0.793939 | 0.876768 | 0.871717 |        |        |
| 13611 | ENSG00000CPB1      | 1        | 0.637374 | 0.81431  | 0.824242 |        |        |
| 13612 | ENSG00000KRT28     | 0.961353 | 0.763285 | 0.862319 | 0.890821 |        |        |
| 13613 | ENSG00000SMARCC2   | 1        | 0.664646 | 0.827609 | 0.80202  |        |        |
| 13614 | ENSG00000AIMP1     | 1        | 0.672727 | 0.836364 | 0.768687 | 0.3469 |        |
| 13615 | ENSG00000FXYD5     | 1        | 0.688889 | 0.842424 | 0.825253 |        |        |
| 13616 | ENSG00000ACTN4     | 1        | 0.658586 | 0.826936 | 0.820202 |        |        |
| 13617 | ENSG00000RPS4Y1    | 0.958586 | 0.790909 | 0.874242 | 0.89697  |        |        |
| 13618 | ENSG00000RANBP2    | 1        | 0.622222 | 0.874074 | 0.778788 |        |        |
| 13619 | ENSG00000SAMMD9L   | 1        | 0.658586 | 0.826936 | 0.762626 | 0.3264 | 0.3657 |
| 13620 | ENSG00000C4orf3    | 0.956566 | 0.829293 | 0.892593 | 0.873737 |        |        |
| 13621 | ENSG00000NBPF1     | 1        | 0.567677 | 0.845118 | 0.788889 |        |        |
| 13622 | ENSG00000MKNK2     | 1        | 0.693939 | 0.885522 | 0.785859 |        |        |
| 13623 | ENSG00000SMN1      | 1        | 0.630303 | 0.859596 | 0.760606 |        |        |
| 13624 | ENSG00000NECTIN3   | 1        | 0.631078 | 0.811135 | 0.795983 |        |        |
| 13625 | ENSG00000MRPL20    | 0.959596 | 0.793939 | 0.876768 | 0.861616 |        |        |
| 13626 | ENSG00000MBOAT2    | 0.955703 | 0.821705 | 0.888335 | 0.890365 |        | 0.3285 |
| 13627 | ENSG00000PIK3R6    | 0.95666  | 0.825581 | 0.890768 | 0.878436 |        |        |
| 13628 | ENSG00000TNIP1     | 0.993939 | 0.720202 | 0.850673 | 0.831313 |        |        |
| 13629 | ENSG00000PDCD1     | 1        | 0.612121 | 0.810101 | 0.80303  |        |        |
| 13630 | ENSG00000BRF2      | 1        | 0.693939 | 0.85202  | 0.805051 |        | 0.2583 |
| 13631 | ENSG00000ISCA2     | 0.957576 | 0.829293 | 0.893098 | 0.861616 | 0.2724 |        |
| 13632 | ENSG00000RUNDC3A   | 1        | 0.70101  | 0.850505 | 0.8      |        |        |
| 13633 | ENSG00000YAF2      | 1        | 0.687879 | 0.837879 | 0.858586 |        |        |
| 13634 | ENSG00000MT-CO2    | 1        | 0.637374 | 0.817172 | 0.773737 |        |        |
| 13635 | ENSG00000ZNF638    | 1        | 0.687879 | 0.837879 | 0.845455 |        |        |
| 13636 | ENSG00000C1QBP     | 0.956566 | 0.829293 | 0.892593 | 0.881818 |        |        |
| 13637 | ENSG00000PPT1      | 0.959596 | 0.793939 | 0.876768 | 0.873737 |        | 0.385  |
| 13638 | ENSG00000TMEM168   | 1        | 0.667019 | 0.83351  | 0.792812 |        |        |

|       |           |           |          |          |          |          |        |        |
|-------|-----------|-----------|----------|----------|----------|----------|--------|--------|
| 13639 | ENSG00000 | CELSR2    | 0.959596 | 0.793939 | 0.876768 | 0.871717 |        |        |
| 13640 | ENSG00000 | RPS4X     | 0.958586 | 0.790909 | 0.874242 | 0.89697  |        |        |
| 13641 | ENSG00000 | NHS       | 0.960606 | 0.758586 | 0.859596 | 0.908081 |        |        |
| 13642 | ENSG00000 | CS        | 1        | 0.688889 | 0.842424 | 0.844444 |        |        |
| 13643 | ENSG00000 | ADAM15    | 0.959596 | 0.793939 | 0.876768 | 0.872727 |        |        |
| 13644 | ENSG00000 | MYBL2     | 0.99596  | 0.680808 | 0.860606 | 0.853535 | 0.2766 | 0.2514 |
| 13645 | ENSG00000 | KCNC1     | 0.958586 | 0.831313 | 0.894949 | 0.849495 |        |        |
| 13646 | ENSG00000 | RPS4Y2    | 0.958586 | 0.790909 | 0.874242 | 0.89697  |        |        |
| 13647 | ENSG00000 | CYP21A2   | 1        | 0.622222 | 0.811111 | 0.782828 |        |        |
| 13648 | ENSG00000 | CLOCK     | 1        | 0.658586 | 0.839057 | 0.806061 |        |        |
| 13649 | ENSG00000 | RGS9      | 0.961353 | 0.763285 | 0.862319 | 0.901449 |        |        |
| 13650 | ENSG00000 | PDS5B     | 1        | 0.682875 | 0.852008 | 0.836152 |        |        |
| 13651 | ENSG00000 | TM9SF4    | 0.960606 | 0.758586 | 0.859596 | 0.921212 |        |        |
| 13652 | ENSG00000 | PARVA     | 0.959596 | 0.793939 | 0.876768 | 0.870707 |        |        |
| 13653 | ENSG00000 | NUDT6     | 1        | 0.637374 | 0.823064 | 0.794949 | 0.3369 |        |
| 13654 | ENSG00000 | NBPF11    | 1        | 0.567677 | 0.845118 | 0.788889 |        |        |
| 13655 | ENSG00000 | SPTB      | 0.99596  | 0.681818 | 0.855051 | 0.865657 |        |        |
| 13656 | ENSG00000 | MET       | 0.956566 | 0.829293 | 0.886195 | 0.891919 | 0.3858 | 0.3524 |
| 13657 | ENSG00000 | NBPF12    | 1        | 0.567677 | 0.845118 | 0.788889 |        |        |
| 13658 | ENSG00000 | COX10     | 1        | 0.681818 | 0.833838 | 0.885859 |        |        |
| 13659 | ENSG00000 | C6        | 0.987879 | 0.681818 | 0.839899 | 0.90303  |        |        |
| 13660 | ENSG00000 | KRT71     | 0.960386 | 0.798068 | 0.878583 | 0.862802 |        |        |
| 13661 | ENSG00000 | WDFY4     | 0.957576 | 0.829293 | 0.893098 | 0.872727 |        |        |
| 13662 | ENSG00000 | USP30     | 0.956566 | 0.829293 | 0.892593 | 0.886869 | 0.357  | 0.3135 |
| 13663 | ENSG00000 | CDK12     | 1        | 0.622222 | 0.811111 | 0.825253 |        |        |
| 13664 | ENSG00000 | THEGL     | 1        | 0.6      | 0.8      | 0.811111 |        |        |
| 13665 | ENSG00000 | NBPF9     | 1        | 0.567677 | 0.845118 | 0.788889 |        |        |
| 13666 | ENSG00000 | RNF113A   | 0.987315 | 0.713531 | 0.850423 | 0.867865 |        |        |
| 13667 | ENSG00000 | COG1      | 0.959596 | 0.793939 | 0.876768 | 0.875758 |        |        |
| 13668 | ENSG00000 | PCDHB4    | 0.958586 | 0.831313 | 0.894949 | 0.858586 |        |        |
| 13669 | ENSG00000 | STAC      | 0.955556 | 0.831313 | 0.893434 | 0.882828 | 0.2915 |        |
| 13670 | ENSG00000 | NBPF14    | 1        | 0.567677 | 0.845118 | 0.788889 |        |        |
| 13671 | ENSG00000 | REEP6     | 1        | 0.70101  | 0.850505 | 0.79899  |        |        |
| 13672 | ENSG00000 | RELL1     | 1        | 0.622222 | 0.811111 | 0.805051 |        |        |
| 13673 | ENSG00000 | AC240274. | 1        | 0.567677 | 0.845118 | 0.788889 |        |        |
| 13674 | ENSG00000 | PUM2      | 0.959596 | 0.793939 | 0.876768 | 0.888889 |        |        |
| 13675 | ENSG00000 | NBPF10    | 1        | 0.567677 | 0.845118 | 0.788889 |        |        |
| 13676 | ENSG00000 | ZC3HAV1   | 0.957717 | 0.825581 | 0.884778 | 0.883721 |        |        |
| 13677 | ENSG00000 | NBPF26    | 1        | 0.567677 | 0.845118 | 0.788889 |        |        |
| 13678 | ENSG00000 | SFPQ      | 1        | 0.680808 | 0.82862  | 0.835354 |        |        |
| 13679 | ENSG00000 | PRPSAP2   | 1        | 0.641649 | 0.813249 | 0.853066 |        |        |
| 13680 | ENSG00000 | CCDC88C   | 0.956566 | 0.829293 | 0.892593 | 0.893939 | 0.338  |        |
| 13681 | ENSG00000 | CCNY      | 0.959596 | 0.793939 | 0.876768 | 0.886869 |        |        |
| 13682 | ENSG00000 | APOH      | 0.99697  | 0.679798 | 0.855724 | 0.867677 |        |        |
| 13683 | ENSG00000 | ANKRD17   | 0.957717 | 0.827696 | 0.892706 | 0.876321 |        |        |
| 13684 | ENSG00000 | ZNF420    | 0.958586 | 0.831313 | 0.894949 | 0.847475 |        |        |
| 13685 | ENSG00000 | GAL3ST4   | 0.993939 | 0.715152 | 0.865657 | 0.834343 |        |        |
| 13686 | ENSG00000 | PIK3CB    | 0.958586 | 0.831313 | 0.894949 | 0.863636 |        |        |
| 13687 | ENSG00000 | ILF3      | 1        | 0.682171 | 0.835917 | 0.812846 | 0.253  |        |
| 13688 | ENSG00000 | H2AFV     | 0.958586 | 0.829293 | 0.887205 | 0.876768 |        |        |
| 13689 | ENSG00000 | SEMA3A    | 0.955556 | 0.831313 | 0.893434 | 0.893939 | 0.3893 |        |
| 13690 | ENSG00000 | MFS11     | 0.957717 | 0.827696 | 0.892706 | 0.88055  |        |        |
| 13691 | ENSG00000 | LPAR5     | 1        | 0.647992 | 0.820825 | 0.783298 |        |        |
| 13692 | ENSG00000 | ZNF780B   | 0.956811 | 0.82392  | 0.890365 | 0.899225 |        |        |
| 13693 | ENSG00000 | AFP       | 1        | 0.715152 | 0.863973 | 0.813131 |        |        |



|       |                    |          |          |          |          |        |        |
|-------|--------------------|----------|----------|----------|----------|--------|--------|
| 13694 | ENSG00000PHF14     | 0.957576 | 0.829293 | 0.893098 | 0.884848 |        |        |
| 13695 | ENSG00000ZNF780A   | 0.956811 | 0.82392  | 0.890365 | 0.899225 |        |        |
| 13696 | ENSG00000MAPK8IP2  | 1        | 0.711416 | 0.848837 | 0.850951 |        |        |
| 13697 | ENSG00000HAUS2     | 0.959596 | 0.793939 | 0.876768 | 0.888889 | 0.2358 |        |
| 13698 | ENSG00000CD209     | 0.987879 | 0.719192 | 0.853535 | 0.863636 |        |        |
| 13699 | ENSG00000IKBKG     | 1        | 0.646465 | 0.823232 | 0.762626 |        |        |
| 13700 | ENSG00000CHMP3     | 1        | 0.688889 | 0.842424 | 0.815152 |        |        |
| 13701 | ENSG00000B3GNTL1   | 1        | 0.649495 | 0.808754 | 0.80404  |        |        |
| 13702 | ENSG00000TTC1      | 1        | 0.682171 | 0.839793 | 0.831672 |        |        |
| 13703 | ENSG00000KIF18A    | 1        | 0.715152 | 0.863973 | 0.783838 |        |        |
| 13704 | ENSG00000VTN       | 0.989899 | 0.683838 | 0.841919 | 0.90404  |        |        |
| 13705 | ENSG00000SLTM      | 1        | 0.685859 | 0.840404 | 0.792929 |        |        |
| 13706 | ENSG00000MGRN1     | 0.958586 | 0.829293 | 0.88064  | 0.887879 |        |        |
| 13707 | ENSG00000PDE7B     | 1        | 0.646465 | 0.823232 | 0.79798  |        |        |
| 13708 | ENSG00000AC007325. | 1        | 0.619192 | 0.802189 | 0.79798  |        |        |
| 13709 | ENSG00000TDG       | 0.957576 | 0.829293 | 0.893098 | 0.886869 |        |        |
| 13710 | ENSG00000BPI       | 0.959596 | 0.793939 | 0.876768 | 0.90101  |        |        |
| 13711 | ENSG00000PELI3     | 1        | 0.588889 | 0.85     | 0.812121 | 0.4242 |        |
| 13712 | ENSG00000HEY1      | 0.958586 | 0.831313 | 0.894949 | 0.860606 |        |        |
| 13713 | ENSG00000CUX1      | 0.955556 | 0.828283 | 0.898316 | 0.893939 |        |        |
| 13714 | ENSG00000ZNF569    | 0.958586 | 0.831313 | 0.894949 | 0.857576 |        |        |
| 13715 | ENSG00000HLCS      | 0.957717 | 0.827696 | 0.892706 | 0.886892 |        |        |
| 13716 | ENSG00000SRSF4     | 0.957576 | 0.829293 | 0.893098 | 0.889899 |        |        |
| 13717 | ENSG00000RPL13     | 1        | 0.672727 | 0.836364 | 0.777778 |        |        |
| 13718 | ENSG00000ATG4B     | 0.955556 | 0.828283 | 0.898316 | 0.89899  | 0.3513 | 0.3644 |
| 13719 | ENSG00000CSNK1D    | 0.990909 | 0.716162 | 0.858923 | 0.857576 |        |        |
| 13720 | ENSG00000CYP2R1    | 1        | 0.60404  | 0.810438 | 0.827273 |        |        |
| 13721 | ENSG00000SLC39A14  | 0.955703 | 0.864895 | 0.910299 | 0.870432 |        |        |
| 13722 | ENSG00000SLC22A24  | 1        | 0.65227  | 0.81986  | 0.777409 |        |        |
| 13723 | ENSG00000CAPZB     | 0.957576 | 0.829293 | 0.893098 | 0.893939 |        |        |
| 13724 | ENSG00000ZNF513    | 0.957717 | 0.827696 | 0.892706 | 0.889006 |        |        |
| 13725 | ENSG00000DHRS1     | 0.957576 | 0.829293 | 0.893098 | 0.888889 |        |        |
| 13726 | ENSG00000MATN2     | 0.959596 | 0.790909 | 0.868855 | 0.928283 |        |        |
| 13727 | ENSG00000THEM6     | 0.959596 | 0.793939 | 0.876768 | 0.90202  |        |        |
| 13728 | ENSG00000EIF2AK3   | 1        | 0.649495 | 0.834848 | 0.789899 | 0.5466 |        |
| 13729 | ENSG00000NLRX1     | 0.957717 | 0.827696 | 0.892706 | 0.892178 |        |        |
| 13730 | ENSG00000WDR55     | 0.99798  | 0.717172 | 0.881145 | 0.822222 |        |        |
| 13731 | ENSG00000TP53BP1   | 1        | 0.725253 | 0.861616 | 0.817172 |        |        |
| 13732 | ENSG00000DCAF8     | 1        | 0.664646 | 0.826263 | 0.841414 |        |        |
| 13733 | ENSG00000SRRD      | 0.955603 | 0.866808 | 0.911029 | 0.874207 |        |        |
| 13734 | ENSG00000IFIT2     | 0.957717 | 0.827696 | 0.892706 | 0.896406 |        |        |
| 13735 | ENSG00000H2AFX     | 1        | 0.679798 | 0.822727 | 0.767677 |        |        |
| 13736 | ENSG00000ZNF852    | 0.989899 | 0.721212 | 0.855556 | 0.857576 |        |        |
| 13737 | ENSG00000ARAF      | 0.958586 | 0.831313 | 0.894949 | 0.878788 |        |        |
| 13738 | ENSG00000CLC       | 0.959596 | 0.793939 | 0.876768 | 0.912121 |        |        |
| 13739 | ENSG00000IQCE      | 0.957576 | 0.829293 | 0.893098 | 0.90202  |        |        |
| 13740 | ENSG00000NAA25     | 0.958586 | 0.831313 | 0.894949 | 0.877778 |        |        |
| 13741 | ENSG00000RPS20     | 0.958586 | 0.831313 | 0.894949 | 0.880808 |        |        |
| 13742 | ENSG00000BCL2L12   | 0.958586 | 0.831313 | 0.894949 | 0.875758 | 0.4412 |        |
| 13743 | ENSG00000ZNF292    | 1        | 0.622222 | 0.811111 | 0.813131 |        |        |
| 13744 | ENSG00000AC02      | 0.957717 | 0.827696 | 0.892706 | 0.901691 |        |        |
| 13745 | ENSG00000ZFHx4     | 1        | 0.70101  | 0.850505 | 0.843434 |        |        |
| 13746 | ENSG00000TSG101    | 1        | 0.725253 | 0.861616 | 0.818182 |        |        |
| 13747 | ENSG00000ASPHD2    | 0.958586 | 0.831313 | 0.894949 | 0.876768 |        |        |
| 13748 | ENSG00000PDCD2     | 0.957576 | 0.829293 | 0.893098 | 0.908081 |        |        |

|       |                     |          |          |          |          |        |        |
|-------|---------------------|----------|----------|----------|----------|--------|--------|
| 13749 | ENSG00000NMRAL1     | 0.957576 | 0.829293 | 0.893098 | 0.9      |        |        |
| 13750 | ENSG00000RAB5C      | 0.955703 | 0.864895 | 0.910299 | 0.879291 | 0.342  |        |
| 13751 | ENSG00000RHOT2      | 1        | 0.70101  | 0.850505 | 0.785859 |        |        |
| 13752 | ENSG00000PLVAP      | 0.958586 | 0.831313 | 0.894949 | 0.877778 |        |        |
| 13753 | ENSG00000SIGLEC11   | 0.958586 | 0.831313 | 0.894949 | 0.873737 |        |        |
| 13754 | ENSG00000PEX5       | 1        | 0.688889 | 0.842424 | 0.79697  | 0.3225 |        |
| 13755 | ENSG00000OXSM       | 1        | 0.664646 | 0.827609 | 0.817172 | 0.255  |        |
| 13756 | ENSG00000ETFB       | 1        | 0.693939 | 0.845791 | 0.837374 | 0.6125 |        |
| 13757 | ENSG00000INTS6L     | 1        | 0.719192 | 0.868013 | 0.742424 |        |        |
| 13758 | ENSG00000DYM        | 0.958586 | 0.831313 | 0.894949 | 0.877778 |        |        |
| 13759 | ENSG00000NDUFS4     | 0.957717 | 0.827696 | 0.892706 | 0.904863 |        |        |
| 13760 | ENSG00000MX1        | 0.958586 | 0.831313 | 0.894949 | 0.876768 | 0.42   |        |
| 13761 | ENSG00000CCDC124    | 1        | 0.719192 | 0.857576 | 0.851515 |        |        |
| 13762 | ENSG00000ZBTB47     | 0.958586 | 0.831313 | 0.894949 | 0.882828 |        |        |
| 13763 | ENSG00000RORA       | 1        | 0.688889 | 0.842424 | 0.874747 |        |        |
| 13764 | ENSG00000TMPRSS11F  | 0.958586 | 0.831313 | 0.894949 | 0.871717 |        |        |
| 13765 | ENSG00000GJA8       | 1        | 0.678261 | 0.83913  | 0.844444 |        |        |
| 13766 | ENSG00000MIOS       | 1        | 0.672204 | 0.833149 | 0.79845  |        |        |
| 13767 | ENSG00000OTUD6A     | 0.957717 | 0.827696 | 0.892706 | 0.906977 |        |        |
| 13768 | ENSG00000DHRS7      | 0.957576 | 0.828283 | 0.886027 | 0.924242 |        |        |
| 13769 | ENSG00000OPRM1      | 0.955703 | 0.864895 | 0.910299 | 0.885936 |        |        |
| 13770 | ENSG00000OHNPNPA2B1 | 1        | 0.687879 | 0.837879 | 0.832323 |        |        |
| 13771 | ENSG00000CDC5L      | 1        | 0.688889 | 0.879798 | 0.819192 |        |        |
| 13772 | ENSG00000CFAP44     | 0.959596 | 0.793939 | 0.876768 | 0.908081 |        |        |
| 13773 | ENSG00000PPY        | 0.959596 | 0.793939 | 0.876768 | 0.923232 |        |        |
| 13774 | ENSG00000FAM167A    | 1        | 0.672727 | 0.836364 | 0.807071 |        |        |
| 13775 | ENSG00000PRMT3      | 0.99798  | 0.717172 | 0.876094 | 0.840404 |        |        |
| 13776 | ENSG00000MAPK6      | 1        | 0.725253 | 0.861616 | 0.828283 | 0.3232 | 0.3866 |
| 13777 | ENSG00000PDZD8      | 0.957576 | 0.829293 | 0.893098 | 0.910101 | 0.3787 |        |
| 13778 | ENSG00000GPR161     | 0.956566 | 0.869697 | 0.912963 | 0.878788 | 0.3533 |        |
| 13779 | ENSG00000DDX46      | 1        | 0.646465 | 0.823232 | 0.856566 |        |        |
| 13780 | ENSG00000PPM1K      | 1        | 0.672727 | 0.836364 | 0.79899  | 0.398  |        |
| 13781 | ENSG00000FOX3       | 1        | 0.630303 | 0.806061 | 0.824242 |        |        |
| 13782 | ENSG00000AACS       | 1        | 0.755556 | 0.876431 | 0.79899  |        |        |
| 13783 | ENSG00000UTS2B      | 0.958586 | 0.831313 | 0.894949 | 0.878788 |        |        |
| 13784 | ENSG00000DCP1B      | 1        | 0.646465 | 0.823232 | 0.850505 | 0.341  |        |
| 13785 | ENSG00000FAM117A    | 0.954545 | 0.867865 | 0.911205 | 0.899577 | 0.2292 |        |
| 13786 | ENSG00000U2AF1L5    | 1        | 0.652525 | 0.819529 | 0.773737 |        |        |
| 13787 | ENSG00000ZNF70      | 0.958586 | 0.831313 | 0.894949 | 0.879798 |        |        |
| 13788 | ENSG00000TSC1       | 1        | 0.687879 | 0.837879 | 0.781818 | 0.337  |        |
| 13789 | ENSG00000CCDC71L    | 0.958586 | 0.831313 | 0.894949 | 0.877778 |        |        |
| 13790 | ENSG00000OSTN       | 1        | 0.664646 | 0.837037 | 0.770707 |        |        |
| 13791 | ENSG00000KIAA1549   | 1        | 0.672727 | 0.836364 | 0.859596 | 0.3387 |        |
| 13792 | ENSG00000CANT1      | 1        | 0.622222 | 0.811111 | 0.852525 | 0.3987 | 0.2912 |
| 13793 | ENSG00000ADCK5      | 1        | 0.637374 | 0.81431  | 0.832323 |        |        |
| 13794 | ENSG00000TIGAR      | 1        | 0.70101  | 0.900337 | 0.808081 |        |        |
| 13795 | ENSG00000CITED2     | 1        | 0.664646 | 0.830976 | 0.806061 |        |        |
| 13796 | ENSG00000TRAF3IP2   | 0.954596 | 0.863787 | 0.909007 | 0.905869 |        |        |
| 13797 | ENSG00000CHCHD2     | 0.958586 | 0.831313 | 0.894949 | 0.893939 |        |        |
| 13798 | ENSG00000PFKM       | 0.955556 | 0.870707 | 0.913131 | 0.883838 |        |        |
| 13799 | ENSG00000KYAT3      | 1        | 0.658586 | 0.826936 | 0.850505 |        |        |
| 13800 | ENSG00000TCERG1     | 1        | 0.713531 | 0.854651 | 0.820296 |        |        |
| 13801 | ENSG00000ARMC5      | 0.958586 | 0.831313 | 0.894949 | 0.889899 |        |        |
| 13802 | ENSG00000DNAH17     | 0.958586 | 0.831313 | 0.894949 | 0.882828 |        |        |
| 13803 | ENSG00000NPTXR      | 0.955703 | 0.864895 | 0.910299 | 0.89258  |        |        |

|       |                    |          |          |          |          |        |
|-------|--------------------|----------|----------|----------|----------|--------|
| 13804 | ENSG00000SHC2      | 1        | 0.716162 | 0.851178 | 0.80404  |        |
| 13805 | ENSG00000FUT11     | 1        | 0.612121 | 0.804377 | 0.846465 |        |
| 13806 | ENSG00000ICA1L     | 0.958586 | 0.831313 | 0.894949 | 0.887879 |        |
| 13807 | ENSG00000TPR       | 1        | 0.720202 | 0.880808 | 0.825253 | 0.3646 |
| 13808 | ENSG00000PPARA     | 0.955556 | 0.870707 | 0.913131 | 0.881818 |        |
| 13809 | ENSG00000SLC22A13  | 1        | 0.637374 | 0.81431  | 0.836364 |        |
| 13810 | ENSG00000MIP       | 0.960386 | 0.798068 | 0.879227 | 0.910145 |        |
| 13811 | ENSG00000FRAS1     | 1        | 0.687879 | 0.837879 | 0.814141 |        |
| 13812 | ENSG00000RPAP1     | 1        | 0.719192 | 0.857576 | 0.826263 |        |
| 13813 | ENSG00000PRDM14    | 1        | 0.664646 | 0.827609 | 0.833333 |        |
| 13814 | ENSG00000YPEL5     | 0.957576 | 0.829293 | 0.893098 | 0.925253 |        |
| 13815 | ENSG00000LYRM4     | 0.958586 | 0.831313 | 0.894949 | 0.885859 |        |
| 13816 | ENSG00000SCO1      | 1        | 0.693939 | 0.845791 | 0.813131 | 0.4929 |
| 13817 | ENSG00000FAM129A   | 0.993939 | 0.725253 | 0.859596 | 0.863636 |        |
| 13818 | ENSG00000CDS2      | 0.955603 | 0.866808 | 0.903982 | 0.906977 |        |
| 13819 | ENSG00000SNRPA     | 1        | 0.755556 | 0.876431 | 0.806061 |        |
| 13820 | ENSG00000LIN28B    | 0.958586 | 0.831313 | 0.894949 | 0.889899 |        |
| 13821 | ENSG00000KRT16     | 0.957717 | 0.827696 | 0.892706 | 0.924947 |        |
| 13822 | ENSG00000WARS2     | 0.958586 | 0.831313 | 0.894949 | 0.90404  |        |
| 13823 | ENSG00000PEG3      | 0.994949 | 0.720202 | 0.862963 | 0.864646 |        |
| 13824 | ENSG00000SLC4A9    | 0.95666  | 0.867865 | 0.912262 | 0.891121 |        |
| 13825 | ENSG00000TTC34     | 1        | 0.640592 | 0.820296 | 0.799154 |        |
| 13826 | ENSG00000GUCY1A2   | 1        | 0.658562 | 0.823115 | 0.842495 |        |
| 13827 | ENSG00000ZYG       | 0.991919 | 0.717172 | 0.859933 | 0.879798 |        |
| 13828 | ENSG00000MUT       | 1        | 0.713531 | 0.854651 | 0.787526 |        |
| 13829 | ENSG00000KIAA0586  | 1        | 0.719192 | 0.857576 | 0.838384 |        |
| 13830 | ENSG00000RBM39     | 0.958586 | 0.831313 | 0.894949 | 0.90202  |        |
| 13831 | ENSG00000FASTKD1   | 0.956566 | 0.869697 | 0.912963 | 0.892929 |        |
| 13832 | ENSG00000ZMYM6     | 1        | 0.664646 | 0.830976 | 0.816162 |        |
| 13833 | ENSG00000NUP153    | 1        | 0.693939 | 0.885522 | 0.794949 |        |
| 13834 | ENSG00000FNBP1L    | 0.958586 | 0.831313 | 0.894949 | 0.90404  |        |
| 13835 | ENSG00000AC008982. | 0.99798  | 0.716162 | 0.875589 | 0.857576 |        |
| 13836 | ENSG00000NRK       | 0.958586 | 0.831313 | 0.894949 | 0.908081 | 0.3928 |
| 13837 | ENSG00000CLTB      | 0.95666  | 0.867865 | 0.912262 | 0.893235 |        |
| 13838 | ENSG00000SPTY2D1   | 1        | 0.637374 | 0.817172 | 0.831313 |        |
| 13839 | ENSG00000PICALM    | 1        | 0.721212 | 0.858923 | 0.850505 |        |
| 13840 | ENSG00000HIST1H2BD | 1        | 0.687879 | 0.837879 | 0.80101  |        |
| 13841 | ENSG00000NXF1      | 1        | 0.687879 | 0.837879 | 0.79798  |        |
| 13842 | ENSG00000CMAS      | 1        | 0.720202 | 0.853872 | 0.825253 |        |
| 13843 | ENSG00000SLC1A7    | 0.960386 | 0.798068 | 0.879227 | 0.919807 |        |
| 13844 | ENSG00000CT47A10   | 0.957717 | 0.827696 | 0.892706 | 0.932347 |        |
| 13845 | ENSG00000SMPDL3A   | 1        | 0.658586 | 0.826936 | 0.807071 | 0.2969 |
| 13846 | ENSG00000C10orf53  | 0.95666  | 0.867865 | 0.912262 | 0.895349 |        |
| 13847 | ENSG00000CT47A6    | 0.957717 | 0.827696 | 0.892706 | 0.932347 |        |
| 13848 | ENSG00000EEF1AKMT3 | 1        | 0.679704 | 0.837209 | 0.865751 |        |
| 13849 | ENSG00000CT47A9    | 0.957717 | 0.827696 | 0.892706 | 0.932347 |        |
| 13850 | ENSG00000KTN1      | 1        | 0.685859 | 0.840404 | 0.842424 |        |
| 13851 | ENSG00000CT47A12   | 0.957717 | 0.827696 | 0.892706 | 0.932347 |        |
| 13852 | ENSG00000CT47A11   | 0.957717 | 0.827696 | 0.892706 | 0.932347 |        |
| 13853 | ENSG00000CSH1      | 0.960386 | 0.798068 | 0.879227 | 0.922705 |        |
| 13854 | ENSG00000CT47A7    | 0.957717 | 0.827696 | 0.892706 | 0.932347 |        |
| 13855 | ENSG00000AVEN      | 1        | 0.664646 | 0.830976 | 0.806061 |        |
| 13856 | ENSG00000CT47A8    | 0.957717 | 0.827696 | 0.892706 | 0.932347 |        |
| 13857 | ENSG00000PCDHGA1   | 1        | 0.637374 | 0.81431  | 0.814141 |        |
| 13858 | ENSG00000CT47A4    | 0.957717 | 0.827696 | 0.892706 | 0.932347 |        |

|       |           |           |          |          |          |          |        |        |
|-------|-----------|-----------|----------|----------|----------|----------|--------|--------|
| 13859 | ENSG00000 | ZNF207    | 1        | 0.758586 | 0.873569 | 0.827273 | 0.3636 |        |
| 13860 | ENSG00000 | CT47A3    | 0.957717 | 0.827696 | 0.892706 | 0.932347 |        |        |
| 13861 | ENSG00000 | ARHGEF7   | 0.957576 | 0.870707 | 0.914141 | 0.887879 |        |        |
| 13862 | ENSG00000 | CT47A1    | 0.957717 | 0.827696 | 0.892706 | 0.932347 |        |        |
| 13863 | ENSG00000 | CT47B1    | 0.957717 | 0.827696 | 0.892706 | 0.932347 |        |        |
| 13864 | ENSG00000 | KIRREL2   | 0.955703 | 0.864895 | 0.910299 | 0.913621 |        |        |
| 13865 | ENSG00000 | RPL23     | 0.957576 | 0.870707 | 0.914141 | 0.884848 |        |        |
| 13866 | ENSG00000 | SRRM1     | 1        | 0.731313 | 0.865657 | 0.784848 |        |        |
| 13867 | ENSG00000 | SRP72     | 1        | 0.667019 | 0.83351  | 0.799154 |        |        |
| 13868 | ENSG00000 | CT47A5    | 0.957717 | 0.827696 | 0.892706 | 0.932347 |        |        |
| 13869 | ENSG00000 | HAL       | 1        | 0.751515 | 0.8633   | 0.828283 |        |        |
| 13870 | ENSG00000 | FUBP3     | 0.991543 | 0.750529 | 0.871036 | 0.861522 |        |        |
| 13871 | ENSG00000 | CT47A2    | 0.957717 | 0.827696 | 0.892706 | 0.932347 |        |        |
| 13872 | ENSG00000 | UBE2C     | 1        | 0.646465 | 0.882155 | 0.772727 |        |        |
| 13873 | ENSG00000 | AL772284. | 0.957717 | 0.827696 | 0.892706 | 0.932347 |        |        |
| 13874 | ENSG00000 | SETD6     | 1        | 0.719192 | 0.857576 | 0.841414 |        |        |
| 13875 | ENSG00000 | AC008162. | 0.957717 | 0.827696 | 0.892706 | 0.932347 |        |        |
| 13876 | ENSG00000 | CNKS3     | 0.957576 | 0.870707 | 0.914141 | 0.881818 |        |        |
| 13877 | ENSG00000 | OR2T1     | 0.957576 | 0.869697 | 0.906566 | 0.894949 |        |        |
| 13878 | ENSG00000 | SATL1     | 0.958586 | 0.829293 | 0.887205 | 0.932323 |        |        |
| 13879 | ENSG00000 | ACTL6A    | 1        | 0.672727 | 0.836364 | 0.854545 |        |        |
| 13880 | ENSG00000 | SNAPIN    | 0.956566 | 0.869697 | 0.912963 | 0.907071 |        |        |
| 13881 | ENSG00000 | RHBDL3    | 0.958586 | 0.831313 | 0.894949 | 0.915152 |        |        |
| 13882 | ENSG00000 | PRRC1     | 0.957576 | 0.870707 | 0.914141 | 0.881818 |        |        |
| 13883 | ENSG00000 | PBX3      | 1        | 0.67759  | 0.831924 | 0.811839 |        |        |
| 13884 | ENSG00000 | ATP23     | 0.956566 | 0.869697 | 0.912963 | 0.906061 |        |        |
| 13885 | ENSG00000 | CIA01     | 0.991919 | 0.755556 | 0.873737 | 0.850505 |        |        |
| 13886 | ENSG00000 | OTOP1     | 0.95666  | 0.867865 | 0.912262 | 0.908034 |        |        |
| 13887 | ENSG00000 | RAB10     | 0.956566 | 0.869697 | 0.912963 | 0.912121 |        |        |
| 13888 | ENSG00000 | FLCN      | 1        | 0.672727 | 0.836364 | 0.827273 |        |        |
| 13889 | ENSG00000 | ABCA3     | 0.957576 | 0.870707 | 0.914141 | 0.881818 |        |        |
| 13890 | ENSG00000 | SSC5D     | 0.958586 | 0.831313 | 0.894949 | 0.911111 |        |        |
| 13891 | ENSG00000 | ZBTB37    | 0.991919 | 0.752525 | 0.865657 | 0.865657 |        |        |
| 13892 | ENSG00000 | LYRM7     | 0.954545 | 0.867865 | 0.911205 | 0.928118 |        |        |
| 13893 | ENSG00000 | KLHDC9    | 1        | 0.687879 | 0.870707 | 0.777778 | 0.3292 |        |
| 13894 | ENSG00000 | MTIF3     | 0.957576 | 0.869697 | 0.906566 | 0.910101 | 0.3362 |        |
| 13895 | ENSG00000 | CMA1      | 0.958586 | 0.831313 | 0.894949 | 0.927273 |        |        |
| 13896 | ENSG00000 | TIMM44    | 1        | 0.721212 | 0.858923 | 0.835354 |        |        |
| 13897 | ENSG00000 | EIF4ENIF1 | 1        | 0.622222 | 0.874074 | 0.788889 | 0.3298 | 0.3976 |
| 13898 | ENSG00000 | TNFAIP3   | 0.955603 | 0.866808 | 0.911029 | 0.926004 |        |        |
| 13899 | ENSG00000 | URB1      | 1        | 0.70101  | 0.850505 | 0.808081 | 0.3412 |        |
| 13900 | ENSG00000 | ZBTB45    | 0.957576 | 0.870707 | 0.914141 | 0.89596  |        |        |
| 13901 | ENSG00000 | HECTD2    | 0.956566 | 0.869697 | 0.912963 | 0.912121 |        | 0.296  |
| 13902 | ENSG00000 | RBM22     | 1        | 0.70101  | 0.850505 | 0.886869 |        |        |
| 13903 | ENSG00000 | DSG4      | 0.95942  | 0.834783 | 0.897101 | 0.895652 |        |        |
| 13904 | ENSG00000 | CCDC69    | 0.957576 | 0.870707 | 0.914141 | 0.881818 |        |        |
| 13905 | ENSG00000 | MRPL41    | 1        | 0.652525 | 0.815488 | 0.826263 | 0.1497 |        |
| 13906 | ENSG00000 | GNPDA1    | 0.99596  | 0.754545 | 0.880976 | 0.843434 |        |        |
| 13907 | ENSG00000 | CTSG      | 0.958586 | 0.831313 | 0.894949 | 0.931313 |        |        |
| 13908 | ENSG00000 | ULK2      | 0.956566 | 0.869697 | 0.919865 | 0.907071 |        |        |
| 13909 | ENSG00000 | WTAP      | 1        | 0.685859 | 0.840404 | 0.820202 |        |        |
| 13910 | ENSG00000 | KLHL6     | 0.957576 | 0.869697 | 0.906566 | 0.908081 |        |        |
| 13911 | ENSG00000 | CLGN      | 0.99798  | 0.716162 | 0.875589 | 0.874747 |        |        |
| 13912 | ENSG00000 | ZNF776    | 1        | 0.672727 | 0.836364 | 0.836364 |        |        |
| 13913 | ENSG00000 | SCAP      | 0.957576 | 0.870707 | 0.914141 | 0.90101  |        |        |

|       |                   |          |          |          |          |        |
|-------|-------------------|----------|----------|----------|----------|--------|
| 13914 | ENSG00000GPD2     | 1        | 0.731313 | 0.865657 | 0.813131 |        |
| 13915 | ENSG00000TMEM98   | 1        | 0.755556 | 0.876431 | 0.841414 |        |
| 13916 | ENSG00000INSL3    | 0.95666  | 0.867865 | 0.912262 | 0.914376 |        |
| 13917 | ENSG00000NINJ1    | 0.957576 | 0.870707 | 0.914141 | 0.89899  |        |
| 13918 | ENSG00000SDK1     | 0.957576 | 0.870707 | 0.914141 | 0.894949 |        |
| 13919 | ENSG00000SPICE1   | 1        | 0.672727 | 0.836364 | 0.823232 |        |
| 13920 | ENSG00000GNPDA2   | 0.99596  | 0.754545 | 0.880976 | 0.843434 |        |
| 13921 | ENSG00000EN1      | 0.957576 | 0.869697 | 0.906566 | 0.912121 | 0.3646 |
| 13922 | ENSG00000SMIM9    | 0.957576 | 0.870707 | 0.914141 | 0.885859 |        |
| 13923 | ENSG00000CLP1     | 0.956566 | 0.869697 | 0.912963 | 0.916162 |        |
| 13924 | ENSG00000C17orf62 | 0.957576 | 0.870707 | 0.914141 | 0.889899 |        |
| 13925 | ENSG00000RBM8A    | 0.955556 | 0.870707 | 0.913131 | 0.913131 |        |
| 13926 | ENSG00000RICTOR   | 1        | 0.683838 | 0.83064  | 0.818182 |        |
| 13927 | ENSG00000CHKB     | 1        | 0.731313 | 0.865657 | 0.839394 |        |
| 13928 | ENSG00000CER1     | 0.958586 | 0.831313 | 0.894949 | 0.927273 |        |
| 13929 | ENSG00000DNAJC9   | 1        | 0.630303 | 0.859596 | 0.783838 |        |
| 13930 | ENSG00000LCN9     | 0.957576 | 0.869697 | 0.906734 | 0.916162 |        |
| 13931 | ENSG00000XYLT1    | 1        | 0.731313 | 0.865657 | 0.832323 |        |
| 13932 | ENSG00000ZNF816   | 1        | 0.680808 | 0.82862  | 0.80101  |        |
| 13933 | ENSG00000KIF16B   | 0.957576 | 0.870707 | 0.914141 | 0.911111 |        |
| 13934 | ENSG00000TBC1D10A | 0.957576 | 0.870707 | 0.914141 | 0.911111 |        |
| 13935 | ENSG00000GREB1    | 1        | 0.60404  | 0.810438 | 0.876768 |        |
| 13936 | ENSG00000ELANE    | 0.958586 | 0.831313 | 0.894949 | 0.921212 |        |
| 13937 | ENSG00000GINS4    | 1        | 0.688889 | 0.879798 | 0.786869 |        |
| 13938 | ENSG00000WFDC1    | 0.957576 | 0.870707 | 0.914141 | 0.911111 |        |
| 13939 | ENSG00000AKT1     | 1        | 0.685859 | 0.857912 | 0.814141 |        |
| 13940 | ENSG00000PTAR1    | 0.956566 | 0.869697 | 0.912963 | 0.919192 |        |
| 13941 | ENSG00000ZNF282   | 1        | 0.658562 | 0.827872 | 0.82981  |        |
| 13942 | ENSG00000GFM1     | 1        | 0.652525 | 0.815488 | 0.856566 |        |
| 13943 | ENSG00000MRAS     | 0.957576 | 0.870707 | 0.914141 | 0.90202  |        |
| 13944 | ENSG00000VAPB     | 1        | 0.719192 | 0.857576 | 0.825253 |        |
| 13945 | ENSG00000CBX1     | 0.990909 | 0.754545 | 0.872727 | 0.873737 |        |
| 13946 | ENSG00000FBN2     | 1        | 0.672727 | 0.836364 | 0.864646 |        |
| 13947 | ENSG00000ELOVL3   | 0.957576 | 0.870707 | 0.914141 | 0.911111 |        |
| 13948 | ENSG00000ITGA8    | 0.95666  | 0.867865 | 0.912262 | 0.928118 |        |
| 13949 | ENSG00000SEC24B   | 0.957576 | 0.870707 | 0.914141 | 0.908081 |        |
| 13950 | ENSG00000XYLB     | 0.955603 | 0.866808 | 0.911029 | 0.943975 |        |
| 13951 | ENSG00000FBX05    | 1        | 0.752525 | 0.869529 | 0.815152 |        |
| 13952 | ENSG00000NDUFA9   | 0.957576 | 0.870707 | 0.914141 | 0.911111 |        |
| 13953 | ENSG00000HARBI1   | 0.95666  | 0.867865 | 0.912262 | 0.928118 |        |
| 13954 | ENSG00000LRPAP1   | 1        | 0.664646 | 0.830976 | 0.841414 |        |
| 13955 | ENSG00000UMOD     | 1        | 0.646465 | 0.823232 | 0.857576 |        |
| 13956 | ENSG00000CRYBB3   | 0.95942  | 0.834783 | 0.897101 | 0.914976 |        |
| 13957 | ENSG00000PSMB7    | 0.99596  | 0.754545 | 0.874747 | 0.862626 |        |
| 13958 | ENSG00000PTRH2    | 0.957576 | 0.870707 | 0.914141 | 0.911111 |        |
| 13959 | ENSG00000WIZ      | 1        | 0.726216 | 0.863108 | 0.876321 |        |
| 13960 | ENSG00000ZNHIT1   | 0.99596  | 0.751515 | 0.885522 | 0.859596 |        |
| 13961 | ENSG00000UBE2Z    | 1        | 0.681818 | 0.851852 | 0.816162 |        |
| 13962 | ENSG00000FSCN3    | 0.95666  | 0.867865 | 0.912262 | 0.933404 |        |
| 13963 | ENSG00000ECSIT    | 1        | 0.693939 | 0.845791 | 0.851515 |        |
| 13964 | ENSG00000DCTN2    | 1        | 0.693939 | 0.845791 | 0.784848 |        |
| 13965 | ENSG00000EPB41    | 0.957576 | 0.870707 | 0.914141 | 0.911111 |        |
| 13966 | ENSG00000TRIM56   | 1        | 0.658586 | 0.826936 | 0.835354 |        |
| 13967 | ENSG00000CMTM3    | 0.957576 | 0.870707 | 0.914141 | 0.914141 |        |
| 13968 | ENSG00000NOTCH1   | 1        | 0.687879 | 0.870707 | 0.80202  |        |

|       |           |          |          |          |          |          |        |        |
|-------|-----------|----------|----------|----------|----------|----------|--------|--------|
| 13969 | ENSG00000 | SENP8    | 1        | 0.672727 | 0.836364 | 0.827273 |        |        |
| 13970 | ENSG00000 | ZC3HC1   | 1        | 0.721212 | 0.890909 | 0.836364 | 0.4425 | 0.349  |
| 13971 | ENSG00000 | SERAC1   | 1        | 0.725253 | 0.861616 | 0.821212 |        | 0.1331 |
| 13972 | ENSG00000 | BEND2    | 1        | 0.646465 | 0.811448 | 0.865657 |        |        |
| 13973 | ENSG00000 | SERBP1   | 1        | 0.719192 | 0.857576 | 0.805051 |        |        |
| 13974 | ENSG00000 | ZFPL1    | 1        | 0.688889 | 0.842424 | 0.813131 | 0.2782 |        |
| 13975 | ENSG00000 | GPATCH8  | 1        | 0.664646 | 0.837037 | 0.802020 |        |        |
| 13976 | ENSG00000 | NT5E     | 0.954596 | 0.908084 | 0.93134  | 0.912514 |        |        |
| 13977 | ENSG00000 | PROK2    | 0.957576 | 0.870707 | 0.914141 | 0.914141 |        |        |
| 13978 | ENSG00000 | ARMC10   | 1        | 0.672727 | 0.836364 | 0.820202 |        |        |
| 13979 | ENSG00000 | TBC1D19  | 0.957576 | 0.869697 | 0.906566 | 0.940404 | 0.4456 |        |
| 13980 | ENSG00000 | PSMB6    | 0.993939 | 0.725253 | 0.859596 | 0.908081 | 0.46   |        |
| 13981 | ENSG00000 | PARP14   | 1        | 0.652525 | 0.822896 | 0.847475 |        |        |
| 13982 | ENSG00000 | CREG2    | 0.957576 | 0.870707 | 0.914141 | 0.912121 |        |        |
| 13983 | ENSG00000 | COA3     | 0.957576 | 0.870707 | 0.914141 | 0.911111 |        | 0.3577 |
| 13984 | ENSG00000 | GCAT     | 0.957576 | 0.870707 | 0.914141 | 0.929293 |        |        |
| 13985 | ENSG00000 | TBC1D15  | 1        | 0.70101  | 0.850505 | 0.863636 |        | 0.4884 |
| 13986 | ENSG00000 | UBAC1    | 1        | 0.731313 | 0.865657 | 0.809091 |        |        |
| 13987 | ENSG00000 | ATXN7L3  | 1        | 0.755556 | 0.876431 | 0.836364 |        |        |
| 13988 | ENSG00000 | ARFGEF2  | 1        | 0.688889 | 0.842424 | 0.872727 |        | 0.413  |
| 13989 | ENSG00000 | ANKRD60  | 0.957576 | 0.870707 | 0.914141 | 0.924242 |        |        |
| 13990 | ENSG00000 | NRBP1    | 1        | 0.717172 | 0.851852 | 0.863636 |        |        |
| 13991 | ENSG00000 | HPS3     | 0.957576 | 0.870707 | 0.914141 | 0.917172 |        |        |
| 13992 | ENSG00000 | PGPEP1L  | 1        | 0.654545 | 0.824242 | 0.828283 | 0.425  |        |
| 13993 | ENSG00000 | RNF19A   | 1        | 0.755556 | 0.876431 | 0.855556 |        | 0.3736 |
| 13994 | ENSG00000 | PPIE     | 1        | 0.721212 | 0.858923 | 0.879798 |        |        |
| 13995 | ENSG00000 | KLK3     | 0.957576 | 0.870707 | 0.914141 | 0.922222 |        |        |
| 13996 | ENSG00000 | UBA2     | 0.954545 | 0.910148 | 0.932347 | 0.918605 |        |        |
| 13997 | ENSG00000 | WAPL     | 1        | 0.754545 | 0.876768 | 0.851515 | 0.3239 |        |
| 13998 | ENSG00000 | KCNIP1   | 1        | 0.678647 | 0.836505 | 0.806554 |        |        |
| 13999 | ENSG00000 | B4GAT1   | 0.957576 | 0.870707 | 0.914141 | 0.916162 |        |        |
| 14000 | ENSG00000 | ZBTB2    | 1        | 0.664646 | 0.876094 | 0.780808 |        |        |
| 14001 | ENSG00000 | ADAMTS2  | 1        | 0.719192 | 0.857576 | 0.888889 |        |        |
| 14002 | ENSG00000 | VCPKMT   | 1        | 0.719192 | 0.857576 | 0.878788 |        |        |
| 14003 | ENSG00000 | UBE2J1   | 1        | 0.617172 | 0.82963  | 0.849495 |        |        |
| 14004 | ENSG00000 | TEX22    | 0.95666  | 0.867865 | 0.912262 | 0.948203 |        |        |
| 14005 | ENSG00000 | RHO      | 1        | 0.652174 | 0.826087 | 0.875362 |        |        |
| 14006 | ENSG00000 | CSHL1    | 0.95942  | 0.834783 | 0.897101 | 0.929469 |        |        |
| 14007 | ENSG00000 | NIPAL3   | 0.955603 | 0.910148 | 0.932875 | 0.914376 |        |        |
| 14008 | ENSG00000 | SCYL2    | 1        | 0.683838 | 0.835185 | 0.877778 |        |        |
| 14009 | ENSG00000 | CPAMD8   | 1        | 0.721212 | 0.858923 | 0.789899 |        |        |
| 14010 | ENSG00000 | ELM03    | 1        | 0.731313 | 0.865657 | 0.854545 |        |        |
| 14011 | ENSG00000 | BLOC1S6  | 0.955603 | 0.910148 | 0.932875 | 0.914376 |        | 0.2149 |
| 14012 | ENSG00000 | ARL6IP5  | 1        | 0.693939 | 0.841919 | 0.838384 | 0.298  | 0.3731 |
| 14013 | ENSG00000 | EID1     | 1        | 0.625253 | 0.850337 | 0.805051 |        |        |
| 14014 | ENSG00000 | PHC2     | 1        | 0.721212 | 0.858923 | 0.820202 |        |        |
| 14015 | ENSG00000 | KIAA0513 | 0.99697  | 0.752525 | 0.886532 | 0.868687 |        |        |
| 14016 | ENSG00000 | NDUFB11  | 0.955556 | 0.912121 | 0.933838 | 0.914141 |        | 0.4714 |
| 14017 | ENSG00000 | HACD4    | 0.957576 | 0.869697 | 0.906566 | 0.943434 |        |        |
| 14018 | ENSG00000 | ZMIZ2    | 1        | 0.719192 | 0.857576 | 0.847475 |        |        |
| 14019 | ENSG00000 | SEL1L2   | 0.955603 | 0.910148 | 0.932875 | 0.917548 |        |        |
| 14020 | ENSG00000 | AIM2     | 0.955556 | 0.912121 | 0.933838 | 0.913131 | 0.2855 | 0.4295 |
| 14021 | ENSG00000 | HEATR9   | 1        | 0.681818 | 0.833838 | 0.786869 |        |        |
| 14022 | ENSG00000 | EXOSC8   | 1        | 0.70101  | 0.900337 | 0.815152 |        |        |
| 14023 | ENSG00000 | KRT85    | 0.95942  | 0.834783 | 0.897101 | 0.938164 |        |        |

|       |                   |          |          |          |          |        |
|-------|-------------------|----------|----------|----------|----------|--------|
| 14024 | ENSG00000ATP6VOA2 | 1        | 0.646465 | 0.811448 | 0.866667 |        |
| 14025 | ENSG00000KRT86    | 0.95942  | 0.834783 | 0.897101 | 0.938164 |        |
| 14026 | ENSG00000SERTAD2  | 1        | 0.658586 | 0.839057 | 0.818182 |        |
| 14027 | ENSG00000MRPL38   | 1        | 0.664646 | 0.830976 | 0.806061 |        |
| 14028 | ENSG00000KRT83    | 0.95942  | 0.834783 | 0.897101 | 0.938164 |        |
| 14029 | ENSG00000PON2     | 1        | 0.725253 | 0.857239 | 0.864646 | 0.3865 |
| 14030 | ENSG00000LRRC53   | 0.955603 | 0.910148 | 0.932875 | 0.91649  |        |
| 14031 | ENSG00000KRT81    | 0.95942  | 0.834783 | 0.897101 | 0.938164 |        |
| 14032 | ENSG00000SLC30A8  | 0.953488 | 0.908084 | 0.930786 | 0.934662 |        |
| 14033 | ENSG00000NFIB     | 1        | 0.688889 | 0.842424 | 0.841414 |        |
| 14034 | ENSG00000WASHC2C  | 1        | 0.680808 | 0.82862  | 0.832323 |        |
| 14035 | ENSG00000GNG7     | 0.955603 | 0.910148 | 0.932875 | 0.918605 | 0.2736 |
| 14036 | ENSG00000HSPA5    | 1        | 0.754545 | 0.875758 | 0.869697 | 0.265  |
| 14037 | ENSG00000CSRNP3   | 1        | 0.693939 | 0.841919 | 0.79697  |        |
| 14038 | ENSG00000DCAF4L1  | 0.955603 | 0.910148 | 0.932875 | 0.918605 |        |
| 14039 | ENSG00000ITCH     | 0.956566 | 0.912121 | 0.934343 | 0.916162 |        |
| 14040 | ENSG00000GJA9     | 1        | 0.731313 | 0.865657 | 0.818182 |        |
| 14041 | ENSG00000LAPTM4B  | 0.956566 | 0.912121 | 0.934343 | 0.916162 |        |
| 14042 | ENSG00000ENO1     | 1        | 0.791919 | 0.903704 | 0.810101 |        |
| 14043 | ENSG00000DNAJC2   | 0.956566 | 0.912121 | 0.934343 | 0.916162 | 0.299  |
| 14044 | ENSG00000ZNF792   | 1        | 0.658586 | 0.819529 | 0.848485 |        |
| 14045 | ENSG00000RHD      | 0.957576 | 0.870707 | 0.914141 | 0.929293 |        |
| 14046 | ENSG00000IL1RL2   | 0.956566 | 0.912121 | 0.934343 | 0.916162 |        |
| 14047 | ENSG00000RHCE     | 0.957576 | 0.870707 | 0.914141 | 0.929293 |        |
| 14048 | ENSG00000TNFAIP6  | 0.993939 | 0.752525 | 0.878956 | 0.887879 |        |
| 14049 | ENSG00000CBS      | 1        | 0.713531 | 0.839323 | 0.826638 |        |
| 14050 | ENSG00000CNOT10   | 0.957576 | 0.870707 | 0.914141 | 0.932323 |        |
| 14051 | ENSG00000PAK3     | 1        | 0.731313 | 0.865657 | 0.883838 |        |
| 14052 | ENSG00000SLF2     | 1        | 0.731313 | 0.865657 | 0.837374 | 0.3125 |
| 14053 | ENSG00000F13A1    | 1        | 0.717172 | 0.846801 | 0.870707 |        |
| 14054 | ENSG00000LPAR2    | 0.956566 | 0.912121 | 0.934343 | 0.920202 |        |
| 14055 | ENSG00000KLHL41   | 0.993939 | 0.791919 | 0.892929 | 0.843434 |        |
| 14056 | ENSG00000TLDC1    | 1        | 0.707641 | 0.851606 | 0.842746 |        |
| 14057 | ENSG00000NCOA3    | 1        | 0.752525 | 0.882155 | 0.809091 | 0.3744 |
| 14058 | ENSG00000HDAC10   | 1        | 0.731313 | 0.865657 | 0.871717 |        |
| 14059 | ENSG00000SNN      | 1        | 0.654545 | 0.824242 | 0.843434 |        |
| 14060 | ENSG00000NGLY1    | 0.956566 | 0.912121 | 0.934343 | 0.916162 | 0.3829 |
| 14061 | ENSG00000DGLUCY   | 0.955556 | 0.912121 | 0.933838 | 0.930303 |        |
| 14062 | ENSG00000PIDD1    | 0.955556 | 0.912121 | 0.933838 | 0.923232 |        |
| 14063 | ENSG00000ADRM1    | 1        | 0.688161 | 0.84919  | 0.876321 |        |
| 14064 | ENSG00000LSM4     | 1        | 0.719192 | 0.857576 | 0.847475 |        |
| 14065 | ENSG00000ALDH1B1  | 0.955556 | 0.912121 | 0.933838 | 0.930303 | 0.4555 |
| 14066 | ENSG00000MCM3AP   | 0.956566 | 0.912121 | 0.934343 | 0.916162 |        |
| 14067 | ENSG00000KANSL2   | 1        | 0.685859 | 0.859091 | 0.847475 |        |
| 14068 | ENSG00000DSTYK    | 1        | 0.763636 | 0.881818 | 0.790909 |        |
| 14069 | ENSG00000FGF1     | 0.99697  | 0.752525 | 0.886532 | 0.881818 |        |
| 14070 | ENSG00000C7orf61  | 0.955603 | 0.910148 | 0.932875 | 0.930233 |        |
| 14071 | ENSG00000STOML2   | 0.956566 | 0.912121 | 0.934343 | 0.916162 |        |
| 14072 | ENSG00000OR4D5    | 0.957576 | 0.870707 | 0.914141 | 0.944444 |        |
| 14073 | ENSG00000AP2A2    | 0.955603 | 0.910148 | 0.932875 | 0.93129  | 0.268  |
| 14074 | ENSG00000MYO1C    | 1        | 0.693939 | 0.845791 | 0.785859 |        |
| 14075 | ENSG00000LAMA5    | 0.956566 | 0.912121 | 0.934343 | 0.922222 |        |
| 14076 | ENSG00000HOOK3    | 0.956566 | 0.912121 | 0.934343 | 0.916162 |        |
| 14077 | ENSG00000ST8SIA1  | 1        | 0.731313 | 0.865657 | 0.857576 |        |
| 14078 | ENSG00000ABLIM3   | 0.956566 | 0.912121 | 0.934343 | 0.916162 |        |

|       |                    |          |          |          |          |        |
|-------|--------------------|----------|----------|----------|----------|--------|
| 14079 | ENSG00000C16orf86  | 0.954545 | 0.910148 | 0.932347 | 0.950317 |        |
| 14080 | ENSG00000LPO       | 0.956566 | 0.912121 | 0.934343 | 0.918182 |        |
| 14081 | ENSG00000TEX13A    | 0.957576 | 0.870707 | 0.914141 | 0.938384 |        |
| 14082 | ENSG00000SON       | 0.956566 | 0.912121 | 0.934343 | 0.920202 |        |
| 14083 | ENSG00000OPA1      | 1        | 0.658586 | 0.826936 | 0.826263 |        |
| 14084 | ENSG00000CALD1     | 0.99596  | 0.793939 | 0.888215 | 0.851515 |        |
| 14085 | ENSG00000ZNF609    | 1        | 0.630303 | 0.859596 | 0.834343 |        |
| 14086 | ENSG00000CD5L      | 1        | 0.731313 | 0.865657 | 0.894949 |        |
| 14087 | ENSG00000GFRA3     | 0.956566 | 0.912121 | 0.934343 | 0.924242 |        |
| 14088 | ENSG00000PLEKHG5   | 1        | 0.679704 | 0.837209 | 0.839323 |        |
| 14089 | ENSG00000ARMCX4    | 0.956566 | 0.912121 | 0.934343 | 0.916162 |        |
| 14090 | ENSG00000GLRX2     | 1        | 0.755556 | 0.876431 | 0.879798 |        |
| 14091 | ENSG00000USP39     | 0.956566 | 0.912121 | 0.934343 | 0.920202 |        |
| 14092 | ENSG00000EIF3G     | 1        | 0.731313 | 0.865657 | 0.830303 |        |
| 14093 | ENSG00000RAB12     | 0.956566 | 0.912121 | 0.934343 | 0.916162 | 0.3672 |
| 14094 | ENSG00000KDM1A     | 1        | 0.787526 | 0.892706 | 0.860465 |        |
| 14095 | ENSG00000RPS17     | 0.956566 | 0.912121 | 0.934343 | 0.920202 |        |
| 14096 | ENSG00000PLSCR3    | 0.956566 | 0.912121 | 0.934343 | 0.920202 |        |
| 14097 | ENSG00000NDUFS6    | 0.955603 | 0.910148 | 0.932875 | 0.948203 |        |
| 14098 | ENSG00000ZNF146    | 1        | 0.675526 | 0.831488 | 0.863787 |        |
| 14099 | ENSG00000NTS       | 0.955603 | 0.910148 | 0.932875 | 0.950317 |        |
| 14100 | ENSG00000RNF207    | 0.955603 | 0.910148 | 0.932875 | 0.94926  |        |
| 14101 | ENSG00000MSX1      | 1        | 0.717172 | 0.851852 | 0.818182 |        |
| 14102 | ENSG00000QRSL1     | 1        | 0.725253 | 0.861616 | 0.842424 | 0.387  |
| 14103 | ENSG00000CDH20     | 1        | 0.763636 | 0.881818 | 0.839394 |        |
| 14104 | ENSG00000CDK9      | 1        | 0.720202 | 0.853872 | 0.846465 |        |
| 14105 | ENSG00000TRMT44    | 0.956566 | 0.912121 | 0.934343 | 0.931313 |        |
| 14106 | ENSG00000VARS2     | 0.956566 | 0.912121 | 0.934343 | 0.933333 |        |
| 14107 | ENSG00000CHST9     | 1        | 0.688889 | 0.842424 | 0.854545 |        |
| 14108 | ENSG00000LSM14A    | 0.956566 | 0.912121 | 0.934343 | 0.920202 |        |
| 14109 | ENSG00000PYCR1     | 0.955603 | 0.910148 | 0.932875 | 0.948203 |        |
| 14110 | ENSG00000AC245033. | 0.956566 | 0.912121 | 0.934343 | 0.920202 |        |
| 14111 | ENSG00000SNRPD2    | 1        | 0.758586 | 0.873569 | 0.820202 |        |
| 14112 | ENSG00000CRY1      | 1        | 0.763636 | 0.881818 | 0.872727 | 0.4597 |
| 14113 | ENSG00000ZNF549    | 1        | 0.693939 | 0.85202  | 0.89798  | 0.465  |
| 14114 | ENSG00000INS-IGF2  | 0.956566 | 0.912121 | 0.934343 | 0.938384 |        |
| 14115 | ENSG00000ERGIC1    | 1        | 0.721212 | 0.858923 | 0.876768 | 0.3139 |
| 14116 | ENSG00000SERTM1    | 0.955603 | 0.910148 | 0.932875 | 0.950317 |        |
| 14117 | ENSG00000SYCE1     | 0.955603 | 0.910148 | 0.932875 | 0.951374 |        |
| 14118 | ENSG00000TMEM165   | 0.956566 | 0.912121 | 0.934343 | 0.937374 |        |
| 14119 | ENSG00000PRND      | 0.955603 | 0.910148 | 0.932875 | 0.951374 |        |
| 14120 | ENSG00000ZNF44     | 0.994949 | 0.758586 | 0.876768 | 0.889899 |        |
| 14121 | ENSG00000VAMP7     | 0.956566 | 0.912121 | 0.926936 | 0.949495 | 0.3549 |
| 14122 | ENSG00000RPS15A    | 1        | 0.755556 | 0.876431 | 0.808081 |        |
| 14123 | ENSG00000CRYZL1    | 1        | 0.654545 | 0.842424 | 0.817172 |        |
| 14124 | ENSG00000RGS6      | 0.99697  | 0.790909 | 0.9      | 0.849495 | 0.3899 |
| 14125 | ENSG00000DDIAS     | 1        | 0.704319 | 0.833887 | 0.846069 |        |
| 14126 | ENSG00000ATP4B     | 0.956566 | 0.912121 | 0.934343 | 0.929293 |        |
| 14127 | ENSG00000TSHB      | 0.958454 | 0.87343  | 0.915942 | 0.933333 |        |
| 14128 | ENSG00000CRISP1    | 0.956566 | 0.912121 | 0.934343 | 0.944444 |        |
| 14129 | ENSG00000GNGT1     | 0.958454 | 0.87343  | 0.915942 | 0.9343   |        |
| 14130 | ENSG00000PLEKHA1   | 0.99596  | 0.788889 | 0.892088 | 0.873737 |        |
| 14131 | ENSG00000ING2      | 1        | 0.657576 | 0.865152 | 0.835354 |        |
| 14132 | ENSG00000ZSCAN5A   | 0.993939 | 0.752525 | 0.878956 | 0.914141 |        |
| 14133 | ENSG00000GNPTAB    | 1        | 0.790909 | 0.876094 | 0.827273 |        |



|       |                    |          |          |          |          |        |
|-------|--------------------|----------|----------|----------|----------|--------|
| 14134 | ENSG00000SZRD1     | 0.99798  | 0.789899 | 0.906397 | 0.853535 | 0.3162 |
| 14135 | ENSG00000PRKAR1B   | 1        | 0.658586 | 0.826936 | 0.849495 |        |
| 14136 | ENSG00000BECN1     | 1        | 0.731313 | 0.865657 | 0.848485 |        |
| 14137 | ENSG00000FAM208B   | 0.994949 | 0.758586 | 0.876768 | 0.905051 |        |
| 14138 | ENSG00000GPATCH11  | 1        | 0.684848 | 0.864646 | 0.843434 |        |
| 14139 | ENSG00000CDYL      | 1        | 0.721212 | 0.858923 | 0.819192 |        |
| 14140 | ENSG00000MAP3K6    | 1        | 0.717172 | 0.846801 | 0.857576 |        |
| 14141 | ENSG00000HS3ST3A1  | 1        | 0.731313 | 0.865657 | 0.807071 |        |
| 14142 | ENSG00000MAPK11    | 1        | 0.684848 | 0.839731 | 0.818182 | 0.3244 |
| 14143 | ENSG00000ZSCAN5C   | 0.993939 | 0.752525 | 0.878956 | 0.914141 |        |
| 14144 | ENSG00000BICRA     | 1        | 0.749471 | 0.868217 | 0.913319 |        |
| 14145 | ENSG00000HBZ       | 0.956566 | 0.912121 | 0.934343 | 0.950505 |        |
| 14146 | ENSG00000LRRC47    | 1        | 0.752525 | 0.869529 | 0.833333 |        |
| 14147 | ENSG00000TRIM28    | 1        | 0.719192 | 0.857576 | 0.866667 |        |
| 14148 | ENSG00000TMEM150A  | 1        | 0.684848 | 0.839731 | 0.844444 |        |
| 14149 | ENSG00000IDH3B     | 1        | 0.763636 | 0.881818 | 0.850505 |        |
| 14150 | ENSG00000WDR88     | 1        | 0.726216 | 0.863108 | 0.79704  |        |
| 14151 | ENSG00000CLINT1    | 1        | 0.763636 | 0.881818 | 0.832323 |        |
| 14152 | ENSG00000RRAGC     | 1        | 0.754545 | 0.875758 | 0.846465 | 0.3196 |
| 14153 | ENSG00000ANKRD33B  | 0.956566 | 0.912121 | 0.934343 | 0.949495 |        |
| 14154 | ENSG00000#####     | 0.956566 | 0.912121 | 0.934343 | 0.952525 |        |
| 14155 | ENSG00000PNMA8A    | 0.99899  | 0.790909 | 0.908418 | 0.852525 | 0.4521 |
| 14156 | ENSG00000SLC39A9   | 1        | 0.763636 | 0.881818 | 0.880808 | 0.2854 |
| 14157 | ENSG00000LAS1L     | 1        | 0.791919 | 0.894949 | 0.865657 |        |
| 14158 | ENSG00000DNAAF4    | 1        | 0.679798 | 0.827946 | 0.821212 |        |
| 14159 | ENSG00000HEY2      | 1        | 0.719192 | 0.857576 | 0.862626 |        |
| 14160 | ENSG00000PPP4R3A   | 1        | 0.758586 | 0.873569 | 0.872727 |        |
| 14161 | ENSG00000STX19     | 0.956566 | 0.912121 | 0.934343 | 0.949495 |        |
| 14162 | ENSG00000PKIB      | 1        | 0.731313 | 0.865657 | 0.840404 |        |
| 14163 | ENSG00000TMEM9B    | 1        | 0.70101  | 0.850505 | 0.816162 | 0.3645 |
| 14164 | ENSG00000AC092143. | 0.99899  | 0.790909 | 0.914141 | 0.849495 |        |
| 14165 | ENSG00000WDR62     | 1        | 0.715447 | 0.857724 | 0.961672 |        |
| 14166 | ENSG00000SPATA24   | 0.956566 | 0.912121 | 0.934343 | 0.952525 |        |
| 14167 | ENSG00000PDE6A     | 1        | 0.70628  | 0.85314  | 0.886957 |        |
| 14168 | ENSG00000BEND4     | 0.956566 | 0.912121 | 0.934343 | 0.949495 |        |
| 14169 | ENSG00000CRYBB1    | 0.958454 | 0.87343  | 0.915942 | 0.954589 |        |
| 14170 | ENSG00000UBE2W     | 1        | 0.725253 | 0.861616 | 0.905051 |        |
| 14171 | ENSG00000MROH7     | 0.956566 | 0.912121 | 0.934343 | 0.952525 |        |
| 14172 | ENSG00000CRYGC     | 0.958454 | 0.87343  | 0.915942 | 0.956522 |        |
| 14173 | ENSG00000CPLX4     | 0.958454 | 0.87343  | 0.915942 | 0.956522 |        |
| 14174 | ENSG00000LPCAT1    | 1        | 0.725253 | 0.861616 | 0.822222 |        |
| 14175 | ENSG00000USF1      | 1        | 0.693939 | 0.845791 | 0.859596 |        |
| 14176 | ENSG00000CRYGA     | 0.958454 | 0.87343  | 0.915942 | 0.956522 |        |
| 14177 | ENSG00000RCVRN     | 1        | 0.763285 | 0.876006 | 0.85314  |        |
| 14178 | ENSG00000CPNE7     | 1        | 0.70101  | 0.850505 | 0.815152 |        |
| 14179 | ENSG00000PRR20B    | 0.956566 | 0.912121 | 0.934343 | 0.952525 |        |
| 14180 | ENSG00000CRYGB     | 0.958454 | 0.87343  | 0.915942 | 0.956522 |        |
| 14181 | ENSG00000PRR20A    | 0.956566 | 0.912121 | 0.934343 | 0.952525 |        |
| 14182 | ENSG00000C9        | 0.99697  | 0.752525 | 0.886532 | 0.918182 |        |
| 14183 | ENSG00000SNRNP25   | 1        | 0.717172 | 0.863973 | 0.823232 |        |
| 14184 | ENSG00000FAM205A   | 0.956566 | 0.912121 | 0.934343 | 0.952525 |        |
| 14185 | ENSG00000RHOJ      | 0.994949 | 0.758586 | 0.876768 | 0.918182 |        |
| 14186 | ENSG00000ELP5      | 1        | 0.719192 | 0.857576 | 0.808081 | 0.3794 |
| 14187 | ENSG00000RPS6KA3   | 1        | 0.672727 | 0.890909 | 0.805051 |        |
| 14188 | ENSG00000PRR20D    | 0.956566 | 0.912121 | 0.934343 | 0.952525 |        |

|       |                    |          |          |          |          |        |        |
|-------|--------------------|----------|----------|----------|----------|--------|--------|
| 14189 | ENSG00000VPS37C    | 1        | 0.716162 | 0.851178 | 0.826263 |        |        |
| 14190 | ENSG00000PRR20C    | 0.956566 | 0.912121 | 0.934343 | 0.952525 |        |        |
| 14191 | ENSG00000INSL6     | 0.953488 | 0.953488 | 0.953488 | 0.953488 |        |        |
| 14192 | ENSG00000PRR20E    | 0.956566 | 0.912121 | 0.934343 | 0.952525 |        |        |
| 14193 | ENSG00000TMEM229B  | 1        | 0.672727 | 0.836364 | 0.836364 |        |        |
| 14194 | ENSG00000CCDC102B  | 1        | 0.685859 | 0.859091 | 0.862626 | 0.4535 |        |
| 14195 | ENSG00000SETDB2    | 1        | 0.725253 | 0.861616 | 0.852525 |        |        |
| 14196 | ENSG00000ADRB3     | 0.953488 | 0.953488 | 0.953488 | 0.953488 |        |        |
| 14197 | ENSG00000GCC1      | 1        | 0.70101  | 0.850505 | 0.817172 | 0.3914 |        |
| 14198 | ENSG00000KBTBD2    | 1        | 0.719873 | 0.858879 | 0.807611 | 0.2955 |        |
| 14199 | ENSG00000CCAR1     | 1        | 0.793939 | 0.890909 | 0.862626 | 0.3796 | 0.1942 |
| 14200 | ENSG00000MYD88     | 1        | 0.693939 | 0.845791 | 0.833333 |        |        |
| 14201 | ENSG00000MAGEC2    | 0.954545 | 0.954545 | 0.954545 | 0.954545 |        |        |
| 14202 | ENSG00000VAPA      | 0.954545 | 0.954545 | 0.954545 | 0.954545 |        |        |
| 14203 | ENSG00000ENPP2     | 1        | 0.752525 | 0.869529 | 0.835354 |        |        |
| 14204 | ENSG00000STAG3     | 1        | 0.755556 | 0.876431 | 0.907071 |        |        |
| 14205 | ENSG00000SIRT6     | 1        | 0.758586 | 0.878451 | 0.889899 |        |        |
| 14206 | ENSG00000GPR31     | 1        | 0.720202 | 0.853872 | 0.905051 |        |        |
| 14207 | ENSG00000IGLL1     | 0.954545 | 0.954545 | 0.954545 | 0.954545 |        |        |
| 14208 | ENSG00000TTC9C     | 1        | 0.688161 | 0.842847 | 0.871036 |        |        |
| 14209 | ENSG00000AL139011. | 1        | 0.664646 | 0.826263 | 0.841414 |        |        |
| 14210 | ENSG00000SPAG16    | 1        | 0.726216 | 0.863108 | 0.837209 |        |        |
| 14211 | ENSG00000PACS1     | 0.954545 | 0.954545 | 0.954545 | 0.954545 |        |        |
| 14212 | ENSG00000UNC45A    | 1        | 0.713531 | 0.854651 | 0.876321 |        |        |
| 14213 | ENSG00000RHOBTB1   | 1        | 0.726216 | 0.863108 | 0.946089 |        |        |
| 14214 | ENSG00000RHOXF2B   | 0.954545 | 0.954545 | 0.954545 | 0.954545 |        |        |
| 14215 | ENSG00000ADAM7     | 0.955556 | 0.955556 | 0.955556 | 0.955556 |        |        |
| 14216 | ENSG00000PPP1R12C  | 1        | 0.754545 | 0.875758 | 0.852525 |        |        |
| 14217 | ENSG00000PXK       | 1        | 0.721212 | 0.858923 | 0.815152 |        |        |
| 14218 | ENSG00000AZI2      | 1        | 0.717172 | 0.851852 | 0.846465 |        |        |
| 14219 | ENSG00000OSTF1     | 1        | 0.717172 | 0.846801 | 0.9      |        |        |
| 14220 | ENSG00000PIK3R2    | 0.955556 | 0.955556 | 0.955556 | 0.955556 |        |        |
| 14221 | ENSG00000RORB      | 1        | 0.70101  | 0.850505 | 0.806061 |        |        |
| 14222 | ENSG00000EIF2S1    | 1        | 0.752525 | 0.869529 | 0.851515 | 0.4375 |        |
| 14223 | ENSG00000BTK       | 1        | 0.793939 | 0.890236 | 0.880808 |        |        |
| 14224 | ENSG00000TRMT61B   | 1        | 0.70101  | 0.850505 | 0.840404 | 0.1983 |        |
| 14225 | ENSG00000AARS2     | 0.955556 | 0.955556 | 0.955556 | 0.955556 |        |        |
| 14226 | ENSG00000LAMP5     | 0.955556 | 0.955556 | 0.955556 | 0.955556 |        |        |
| 14227 | ENSG00000NPY       | 0.99798  | 0.752525 | 0.893434 | 0.923232 |        |        |
| 14228 | ENSG00000BABAM2    | 1        | 0.719192 | 0.857576 | 0.845455 |        |        |
| 14229 | ENSG00000KIAA0319  | 1        | 0.731313 | 0.865657 | 0.854545 |        |        |
| 14230 | ENSG00000FBX031    | 1        | 0.758586 | 0.878451 | 0.877778 | 0.2862 |        |
| 14231 | ENSG00000RMDN3     | 0.955556 | 0.955556 | 0.955556 | 0.955556 |        |        |
| 14232 | ENSG00000TMOD3     | 0.955556 | 0.955556 | 0.955556 | 0.955556 | 0.3544 |        |
| 14233 | ENSG00000SEC31A    | 0.955556 | 0.955556 | 0.955556 | 0.955556 |        |        |
| 14234 | ENSG00000PRLHR     | 0.957488 | 0.91401  | 0.935749 | 0.957488 |        |        |
| 14235 | ENSG00000COL3A1    | 1        | 0.683838 | 0.865993 | 0.841414 |        |        |
| 14236 | ENSG00000UBXN4     | 0.955556 | 0.955556 | 0.955556 | 0.955556 | 0.398  |        |
| 14237 | ENSG00000RASL11A   | 1        | 0.785161 | 0.891842 | 0.833887 |        |        |
| 14238 | ENSG00000UQCRFS1   | 1        | 0.731313 | 0.865657 | 0.806061 |        |        |
| 14239 | ENSG00000PSMC3     | 0.99697  | 0.790909 | 0.9      | 0.881818 |        |        |
| 14240 | ENSG00000ZFC3H1    | 0.99697  | 0.790909 | 0.9      | 0.884848 |        |        |
| 14241 | ENSG00000IK        | 1        | 0.758586 | 0.878451 | 0.866667 |        |        |
| 14242 | ENSG00000KLK4      | 0.955556 | 0.955556 | 0.955556 | 0.955556 |        |        |
| 14243 | ENSG00000DCPS      | 1        | 0.785161 | 0.891842 | 0.854928 |        |        |

|       |                    |          |          |          |          |        |        |
|-------|--------------------|----------|----------|----------|----------|--------|--------|
| 14244 | ENSG00000RARRES1   | 1        | 0.755556 | 0.876431 | 0.865657 |        | 0.311  |
| 14245 | ENSG00000NDUFA12   | 0.955556 | 0.955556 | 0.955556 | 0.955556 |        |        |
| 14246 | ENSG00000USP22     | 1        | 0.754545 | 0.875758 | 0.863636 |        |        |
| 14247 | ENSG00000KLHL15    | 1        | 0.720202 | 0.853872 | 0.821212 |        |        |
| 14248 | ENSG00000SLC38A11  | 1        | 0.709856 | 0.853082 | 0.846069 |        |        |
| 14249 | ENSG00000FAT4      | 0.955556 | 0.955556 | 0.955556 | 0.955556 |        |        |
| 14250 | ENSG00000PENK      | 1        | 0.731313 | 0.865657 | 0.79596  |        | 0.234  |
| 14251 | ENSG00000TUBG2     | 1        | 0.79798  | 0.89899  | 0.866667 |        |        |
| 14252 | ENSG00000CREB1     | 1        | 0.789899 | 0.888215 | 0.841414 |        |        |
| 14253 | ENSG00000TAS1R1    | 1        | 0.720202 | 0.853872 | 0.823232 | 0.351  | 0.2291 |
| 14254 | ENSG00000RNF103-CH | 1        | 0.688889 | 0.842424 | 0.815152 |        |        |
| 14255 | ENSG00000C19orf73  | 0.955556 | 0.955556 | 0.955556 | 0.955556 |        |        |
| 14256 | ENSG00000KPNA3     | 1        | 0.785161 | 0.891842 | 0.871539 |        |        |
| 14257 | ENSG00000CNTROB    | 1        | 0.693939 | 0.85202  | 0.852525 | 0.371  | 0.4623 |
| 14258 | ENSG00000FCHSD1    | 1        | 0.688889 | 0.842424 | 0.829293 |        |        |
| 14259 | ENSG00000STON2     | 1        | 0.725253 | 0.861616 | 0.867677 | 0.486  |        |
| 14260 | ENSG00000KCNJ2     | 1        | 0.758586 | 0.878451 | 0.857576 | 0.197  |        |
| 14261 | ENSG00000CCAR2     | 1        | 0.754545 | 0.870875 | 0.821212 |        |        |
| 14262 | ENSG00000TOM1      | 1        | 0.790909 | 0.888889 | 0.875758 |        |        |
| 14263 | ENSG00000PREB      | 1        | 0.755556 | 0.876431 | 0.837374 | 0.2921 |        |
| 14264 | ENSG00000NDUFAF4   | 1        | 0.758586 | 0.878451 | 0.858586 |        |        |
| 14265 | ENSG00000OPTC      | 1        | 0.70628  | 0.85314  | 0.824155 |        |        |
| 14266 | ENSG00000FER       | 1        | 0.725253 | 0.895623 | 0.817172 |        |        |
| 14267 | ENSG00000DHX38     | 1        | 0.725253 | 0.868013 | 0.863636 |        |        |
| 14268 | ENSG00000TBX19     | 0.956522 | 0.956522 | 0.956522 | 0.956522 |        |        |
| 14269 | ENSG00000AC012184. | 1        | 0.688889 | 0.842424 | 0.818182 |        |        |
| 14270 | ENSG00000TMEM258   | 1        | 0.758586 | 0.878451 | 0.841414 |        |        |
| 14271 | ENSG00000ORAI3     | 0.99596  | 0.793939 | 0.894949 | 0.893939 |        |        |
| 14272 | ENSG00000TMEM115   | 1        | 0.758586 | 0.873569 | 0.866667 |        |        |
| 14273 | ENSG00000CLCC1     | 1        | 0.763636 | 0.881818 | 0.856566 |        |        |
| 14274 | ENSG00000DNAJB14   | 1        | 0.693939 | 0.845791 | 0.879798 |        | 0.3173 |
| 14275 | ENSG00000PLA2G3    | 1        | 0.791919 | 0.894949 | 0.866667 |        |        |
| 14276 | ENSG00000NUP155    | 1        | 0.778165 | 0.868757 | 0.883856 |        |        |
| 14277 | ENSG00000AKAP13    | 1        | 0.719192 | 0.857576 | 0.834343 |        |        |
| 14278 | ENSG00000EFEMP1    | 1        | 0.768116 | 0.884058 | 0.864734 |        |        |
| 14279 | ENSG00000GARS      | 1        | 0.791919 | 0.894949 | 0.853535 |        |        |
| 14280 | ENSG00000SYNRG     | 1        | 0.70101  | 0.850505 | 0.807071 |        |        |
| 14281 | ENSG00000HOXC8     | 1        | 0.793939 | 0.923232 | 0.862626 |        |        |
| 14282 | ENSG00000TENM2     | 1        | 0.719192 | 0.883165 | 0.851515 |        |        |
| 14283 | ENSG00000PIK3C2A   | 1        | 0.793939 | 0.90303  | 0.882828 |        | 0.3419 |
| 14284 | ENSG00000CCT7      | 1        | 0.755556 | 0.876431 | 0.851515 |        |        |
| 14285 | ENSG00000RIF1      | 1        | 0.787526 | 0.906448 | 0.879493 |        |        |
| 14286 | ENSG00000CD4       | 1        | 0.791919 | 0.915152 | 0.878788 |        |        |
| 14287 | ENSG00000PSPC1     | 1        | 0.7537   | 0.875969 | 0.882664 | 0.3629 |        |
| 14288 | ENSG00000FUBP1     | 1        | 0.725253 | 0.857239 | 0.851515 | 0.3323 |        |
| 14289 | ENSG00000EMC3      | 1        | 0.755556 | 0.876431 | 0.871717 |        |        |
| 14290 | ENSG00000VIPR1     | 1        | 0.791919 | 0.894949 | 0.849495 |        |        |
| 14291 | ENSG00000EXTL1     | 1        | 0.721212 | 0.858923 | 0.860606 |        | 0.4949 |
| 14292 | ENSG00000PHB2      | 1        | 0.70101  | 0.850505 | 0.821212 |        | 0.661  |
| 14293 | ENSG00000GVQW3     | 1        | 0.725253 | 0.861616 | 0.814141 |        |        |
| 14294 | ENSG00000BCKDHA    | 1        | 0.672727 | 0.836364 | 0.859596 |        | 0.3223 |
| 14295 | ENSG00000DNMT3B    | 1        | 0.763636 | 0.921212 | 0.869697 |        |        |
| 14296 | ENSG00000SPAG5     | 1        | 0.79798  | 0.89899  | 0.871717 | 0.24   |        |
| 14297 | ENSG00000HPN       | 1        | 0.791919 | 0.894949 | 0.865657 |        |        |
| 14298 | ENSG00000STRN      | 1        | 0.755556 | 0.876431 | 0.890909 | 0.3574 |        |

|       |                    |         |          |          |          |        |        |
|-------|--------------------|---------|----------|----------|----------|--------|--------|
| 14299 | ENSG00000AC011462. | 1       | 0.672727 | 0.836364 | 0.859596 |        |        |
| 14300 | ENSG00000FKBP15    | 1       | 0.763636 | 0.881818 | 0.870707 |        |        |
| 14301 | ENSG00000SPAST     | 1       | 0.831313 | 0.915152 | 0.858586 |        |        |
| 14302 | ENSG00000SUSD2     | 1       | 0.763636 | 0.881818 | 0.912121 |        |        |
| 14303 | ENSG00000USP14     | 1       | 0.787526 | 0.892706 | 0.889006 |        |        |
| 14304 | ENSG00000ERP29     | 1       | 0.793939 | 0.896296 | 0.874747 | 0.2682 |        |
| 14305 | ENSG00000GEMIN8    | 1       | 0.79798  | 0.89899  | 0.885859 |        |        |
| 14306 | ENSG00000C6orf141  | 1       | 0.693939 | 0.85202  | 0.836364 |        |        |
| 14307 | ENSG00000NDUFV3    | 1       | 0.716162 | 0.851178 | 0.886869 |        |        |
| 14308 | ENSG00000ALG9      | 1       | 0.791919 | 0.894949 | 0.889899 | 0.2651 |        |
| 14309 | ENSG00000ANKAR     | 1       | 0.721212 | 0.871717 | 0.863636 |        |        |
| 14310 | ENSG00000HMGB1     | 1       | 0.719192 | 0.842424 | 0.836364 |        |        |
| 14311 | ENSG00000OPN1SW    | 1       | 0.72657  | 0.861675 | 0.912077 |        |        |
| 14312 | ENSG00000ARL6IP4   | 1       | 0.715645 | 0.856061 | 0.839323 |        |        |
| 14313 | ENSG00000LEMD2     | 0.99798 | 0.789899 | 0.906397 | 0.916162 |        |        |
| 14314 | ENSG00000CBSL      | 1       | 0.713531 | 0.839323 | 0.826638 |        |        |
| 14315 | ENSG00000ETV5      | 1       | 0.664646 | 0.830976 | 0.878788 |        |        |
| 14316 | ENSG00000SDCCAG3   | 1       | 0.725253 | 0.861616 | 0.849495 |        |        |
| 14317 | ENSG00000RASA1     | 0.99899 | 0.790909 | 0.914141 | 0.909091 |        |        |
| 14318 | ENSG00000PCNP      | 1       | 0.793939 | 0.896296 | 0.887879 |        |        |
| 14319 | ENSG00000CDIPT     | 1       | 0.758586 | 0.878451 | 0.918182 |        |        |
| 14320 | ENSG00000EIF2S2    | 1       | 0.789899 | 0.882155 | 0.858586 |        |        |
| 14321 | ENSG00000COR01C    | 1       | 0.79798  | 0.89899  | 0.850505 | 0.278  |        |
| 14322 | ENSG00000RPL36     | 1       | 0.793939 | 0.890909 | 0.838384 |        |        |
| 14323 | ENSG00000KHDRBS1   | 1       | 0.791919 | 0.894949 | 0.851515 |        |        |
| 14324 | ENSG00000SLC22A3   | 1       | 0.754545 | 0.870875 | 0.859596 | 0.317  |        |
| 14325 | ENSG00000HIP1      | 1       | 0.731313 | 0.865657 | 0.916162 |        |        |
| 14326 | ENSG00000C7orf49   | 1       | 0.763636 | 0.881818 | 0.875758 |        |        |
| 14327 | ENSG00000IQCH      | 1       | 0.789641 | 0.894116 | 0.889006 |        |        |
| 14328 | ENSG00000PIH1D1    | 1       | 0.79798  | 0.89899  | 0.861616 |        |        |
| 14329 | ENSG00000GRPEL1    | 1       | 0.791919 | 0.894949 | 0.871717 |        |        |
| 14330 | ENSG00000MPV17L    | 1       | 0.731313 | 0.865657 | 0.862626 |        |        |
| 14331 | ENSG00000RNF19B    | 1       | 0.793869 | 0.896934 | 0.853066 |        |        |
| 14332 | ENSG00000PI4K2B    | 1       | 0.793939 | 0.896296 | 0.912121 |        |        |
| 14333 | ENSG00000TBC1D20   | 1       | 0.7537   | 0.875969 | 0.897463 |        |        |
| 14334 | ENSG00000MFS6L     | 1       | 0.716162 | 0.851178 | 0.850505 |        |        |
| 14335 | ENSG00000TIMM9     | 1       | 0.793939 | 0.896296 | 0.878788 |        |        |
| 14336 | ENSG00000ASNSD1    | 1       | 0.755556 | 0.876431 | 0.865657 |        |        |
| 14337 | ENSG00000ACTN2     | 1       | 0.791919 | 0.908418 | 0.894949 |        |        |
| 14338 | ENSG00000CYP7B1    | 1       | 0.731313 | 0.865657 | 0.833333 | 0.6556 |        |
| 14339 | ENSG00000LEO1      | 1       | 0.754545 | 0.876768 | 0.824242 |        |        |
| 14340 | ENSG00000CPSF7     | 1       | 0.758586 | 0.873569 | 0.851515 |        |        |
| 14341 | ENSG00000EIF3J     | 1       | 0.826638 | 0.912615 | 0.854123 |        |        |
| 14342 | ENSG00000GLYR1     | 1       | 0.790909 | 0.895118 | 0.824242 | 0.319  |        |
| 14343 | ENSG00000GYS1      | 1       | 0.791919 | 0.894949 | 0.885859 |        |        |
| 14344 | ENSG00000HP1BP3    | 1       | 0.758586 | 0.878451 | 0.881818 |        |        |
| 14345 | ENSG00000ZNF544    | 1       | 0.731313 | 0.865657 | 0.807071 |        |        |
| 14346 | ENSG00000PSMD7     | 1       | 0.793939 | 0.917845 | 0.857576 |        |        |
| 14347 | ENSG00000CYP4F2    | 1       | 0.70101  | 0.850505 | 0.860606 |        |        |
| 14348 | ENSG00000H6PD      | 1       | 0.825581 | 0.90592  | 0.893235 | 0.3717 |        |
| 14349 | ENSG00000RAI2      | 1       | 0.763636 | 0.881818 | 0.869697 |        |        |
| 14350 | ENSG00000SOWAHB    | 1       | 0.725253 | 0.895623 | 0.79697  |        |        |
| 14351 | ENSG00000REPS1     | 1       | 0.791919 | 0.894949 | 0.838384 |        |        |
| 14352 | ENSG00000SRSF6     | 1       | 0.791919 | 0.894949 | 0.859596 | 0.4558 | 0.3156 |
| 14353 | ENSG00000RABEPK    | 1       | 0.758985 | 0.879493 | 0.864693 |        |        |

|       |                    |         |          |          |          |        |        |
|-------|--------------------|---------|----------|----------|----------|--------|--------|
| 14354 | ENSG00000VPS13C    | 1       | 0.763636 | 0.881818 | 0.877778 |        |        |
| 14355 | ENSG00000ARMC12    | 1       | 0.731313 | 0.865657 | 0.871717 |        |        |
| 14356 | ENSG00000ILVBL     | 1       | 0.79798  | 0.89899  | 0.871717 |        |        |
| 14357 | ENSG00000BLOC1S2   | 0.99697 | 0.831313 | 0.914141 | 0.885859 |        |        |
| 14358 | ENSG00000EIF5A2    | 1       | 0.750529 | 0.887245 | 0.839323 |        |        |
| 14359 | ENSG00000M6PR      | 1       | 0.829293 | 0.907912 | 0.906061 | 0.319  |        |
| 14360 | ENSG00000DOHH      | 1       | 0.755556 | 0.876431 | 0.893939 | 0.2424 |        |
| 14361 | ENSG00000TOP1MT    | 1       | 0.685859 | 0.859091 | 0.867677 |        | 0.2625 |
| 14362 | ENSG00000SETD1A    | 1       | 0.793939 | 0.896296 | 0.89596  |        |        |
| 14363 | ENSG00000IL6ST     | 0.99596 | 0.793939 | 0.894949 | 0.950505 |        |        |
| 14364 | ENSG00000EQTN      | 1       | 0.763636 | 0.881818 | 0.89596  |        |        |
| 14365 | ENSG00000CALU      | 1       | 0.755556 | 0.876431 | 0.90101  | 0.285  |        |
| 14366 | ENSG00000TAC01     | 1       | 0.755556 | 0.876431 | 0.881818 | 0.3516 | 0.3757 |
| 14367 | ENSG00000IGFBP1    | 1       | 0.731313 | 0.865657 | 0.890909 |        |        |
| 14368 | ENSG00000MARS      | 1       | 0.731313 | 0.865657 | 0.858586 | 0.3454 |        |
| 14369 | ENSG00000RPL5      | 1       | 0.793939 | 0.896296 | 0.858586 |        |        |
| 14370 | ENSG00000CCT3      | 1       | 0.763636 | 0.881818 | 0.828283 |        |        |
| 14371 | ENSG00000PCDHB12   | 1       | 0.793939 | 0.896296 | 0.862626 |        |        |
| 14372 | ENSG00000PRKAG2    | 1       | 0.791919 | 0.915152 | 0.871717 |        |        |
| 14373 | ENSG00000AC023055. | 1       | 0.664646 | 0.879461 | 0.838384 |        |        |
| 14374 | ENSG00000ATG4C     | 1       | 0.791919 | 0.894949 | 0.865657 |        |        |
| 14375 | ENSG00000KBTBD11   | 1       | 0.725253 | 0.861616 | 0.849495 |        |        |
| 14376 | ENSG00000AKAP8     | 1       | 0.793939 | 0.896296 | 0.887879 |        |        |
| 14377 | ENSG00000ZNF300    | 1       | 0.789641 | 0.888654 | 0.844609 |        |        |
| 14378 | ENSG00000THRAP3    | 1       | 0.831313 | 0.915152 | 0.884848 |        | 0.241  |
| 14379 | ENSG00000BRAFL     | 1       | 0.763636 | 0.881818 | 0.840404 |        |        |
| 14380 | ENSG00000NDUFA8    | 1       | 0.793869 | 0.896934 | 0.868922 | 0.353  |        |
| 14381 | ENSG00000PHF11     | 1       | 0.791919 | 0.894949 | 0.847475 |        |        |
| 14382 | ENSG00000CYB5R3    | 1       | 0.793939 | 0.896296 | 0.909091 |        |        |
| 14383 | ENSG00000SRSF1     | 1       | 0.791919 | 0.894949 | 0.850505 |        |        |
| 14384 | ENSG00000UBE3A     | 1       | 0.79798  | 0.93266  | 0.849495 |        |        |
| 14385 | ENSG00000KCNK13    | 1       | 0.763636 | 0.881818 | 0.851515 |        |        |
| 14386 | ENSG00000RNF14     | 1       | 0.834343 | 0.917172 | 0.885859 |        |        |
| 14387 | ENSG00000SUN1      | 1       | 0.721212 | 0.890909 | 0.857576 |        |        |
| 14388 | ENSG00000BEND3     | 1       | 0.719192 | 0.857576 | 0.867677 |        |        |
| 14389 | ENSG00000RGMA      | 1       | 0.750529 | 0.873855 | 0.828753 |        |        |
| 14390 | ENSG00000FKBP8     | 1       | 0.79798  | 0.89899  | 0.885859 |        |        |
| 14391 | ENSG00000ANKRD61   | 1       | 0.749471 | 0.868217 | 0.882664 |        |        |
| 14392 | ENSG00000CNR2      | 1       | 0.731313 | 0.865657 | 0.831313 |        |        |
| 14393 | ENSG00000SPTBN4    | 1       | 0.758985 | 0.879493 | 0.846723 |        |        |
| 14394 | ENSG00000KDM4E     | 1       | 0.717172 | 0.877104 | 0.817172 |        |        |
| 14395 | ENSG00000C6orf226  | 1       | 0.731313 | 0.865657 | 0.817172 |        |        |
| 14396 | ENSG00000SECISBP2L | 1       | 0.726216 | 0.863108 | 0.930233 |        |        |
| 14397 | ENSG00000DNAAF2    | 1       | 0.754545 | 0.870875 | 0.860606 |        |        |
| 14398 | ENSG00000GSDME     | 1       | 0.791919 | 0.894949 | 0.908081 |        |        |
| 14399 | ENSG00000MECR      | 1       | 0.763636 | 0.881818 | 0.924242 |        |        |
| 14400 | ENSG00000ZMYM3     | 1       | 0.787526 | 0.892706 | 0.850951 |        |        |
| 14401 | ENSG00000NRSN2     | 1       | 0.758586 | 0.878451 | 0.915152 |        |        |
| 14402 | ENSG00000SDHB      | 1       | 0.79798  | 0.89899  | 0.871717 |        | 0.4162 |
| 14403 | ENSG00000TOMM20    | 1       | 0.758586 | 0.878451 | 0.824242 | 0.2929 |        |
| 14404 | ENSG00000WDR91     | 1       | 0.793939 | 0.896296 | 0.90101  |        |        |
| 14405 | ENSG00000KLHL34    | 1       | 0.731313 | 0.865657 | 0.841414 |        |        |
| 14406 | ENSG00000PCMTD2    | 1       | 0.731313 | 0.865657 | 0.827273 |        |        |
| 14407 | ENSG00000ANAPC5    | 1       | 0.793939 | 0.90303  | 0.922222 |        |        |
| 14408 | ENSG00000SPRY4     | 1       | 0.7537   | 0.875969 | 0.823467 |        |        |

|       |                   |         |          |          |          |        |  |        |
|-------|-------------------|---------|----------|----------|----------|--------|--|--------|
| 14409 | ENSG00000NFE2L2   | 1       | 0.791919 | 0.915152 | 0.875758 |        |  | 0.351  |
| 14410 | ENSG00000GFOD2    | 1       | 0.755556 | 0.889562 | 0.881818 |        |  |        |
| 14411 | ENSG00000H2AFY    | 1       | 0.826638 | 0.912615 | 0.871036 |        |  |        |
| 14412 | ENSG00000PTPN12   | 1       | 0.785412 | 0.885835 | 0.902748 |        |  |        |
| 14413 | ENSG00000SUCLG1   | 1       | 0.763636 | 0.881818 | 0.846465 |        |  |        |
| 14414 | ENSG00000FBX018   | 1       | 0.793869 | 0.896934 | 0.859408 |        |  |        |
| 14415 | ENSG00000NARS2    | 1       | 0.758586 | 0.878451 | 0.893939 | 0.372  |  | 0.3781 |
| 14416 | ENSG00000PPP4R1   | 1       | 0.790909 | 0.90303  | 0.828283 |        |  |        |
| 14417 | ENSG00000TCL1B    | 1       | 0.725253 | 0.861616 | 0.833333 |        |  |        |
| 14418 | ENSG00000RNF24    | 1       | 0.793939 | 0.896296 | 0.920202 |        |  |        |
| 14419 | ENSG00000IFT22    | 1       | 0.825581 | 0.90592  | 0.857294 |        |  |        |
| 14420 | ENSG00000ZDHHC7   | 1       | 0.731313 | 0.865657 | 0.912121 |        |  |        |
| 14421 | ENSG00000CARD8    | 1       | 0.831313 | 0.929966 | 0.861616 |        |  |        |
| 14422 | ENSG00000ACAT1    | 1       | 0.79798  | 0.89899  | 0.938384 |        |  |        |
| 14423 | ENSG00000IRF2BP2  | 1       | 0.758586 | 0.878451 | 0.844444 |        |  |        |
| 14424 | ENSG00000USP6NL   | 1       | 0.758985 | 0.879493 | 0.87315  |        |  |        |
| 14425 | ENSG00000APOBEC3A | 1       | 0.791919 | 0.894949 | 0.882828 |        |  |        |
| 14426 | ENSG00000SFSWAP   | 1       | 0.834343 | 0.917172 | 0.894949 |        |  |        |
| 14427 | ENSG00000CRYGD    | 1       | 0.768116 | 0.884058 | 0.931401 |        |  |        |
| 14428 | ENSG00000EEF1D    | 1       | 0.834343 | 0.917172 | 0.865657 |        |  |        |
| 14429 | ENSG00000RAD23B   | 1       | 0.793939 | 0.923232 | 0.866667 | 0.2277 |  |        |
| 14430 | ENSG00000ABHD14B  | 1       | 0.758586 | 0.911279 | 0.917172 |        |  |        |
| 14431 | ENSG00000GALNT1   | 0.99798 | 0.829293 | 0.920034 | 0.927273 |        |  |        |
| 14432 | ENSG00000USE1     | 1       | 0.831313 | 0.915152 | 0.914141 |        |  |        |
| 14433 | ENSG00000DHRS3    | 1       | 0.725253 | 0.861616 | 0.912121 |        |  |        |
| 14434 | ENSG00000GBP3     | 1       | 0.830303 | 0.914478 | 0.861616 |        |  |        |
| 14435 | ENSG00000SDSL     | 1       | 0.793869 | 0.896934 | 0.856237 |        |  |        |
| 14436 | ENSG00000DPP8     | 1       | 0.830303 | 0.914478 | 0.912121 |        |  |        |
| 14437 | ENSG00000TBL1X    | 1       | 0.79798  | 0.89899  | 0.919192 |        |  |        |
| 14438 | ENSG00000NDUFAF1  | 1       | 0.758985 | 0.879493 | 0.900634 |        |  | 0.1989 |
| 14439 | ENSG00000COX6C    | 1       | 0.758586 | 0.878451 | 0.859596 |        |  |        |
| 14440 | ENSG00000RAB3GAP1 | 1       | 0.793869 | 0.896934 | 0.904863 |        |  |        |
| 14441 | ENSG00000RXRB     | 1       | 0.693939 | 0.845791 | 0.893939 |        |  |        |
| 14442 | ENSG00000MMP8     | 0.99596 | 0.830303 | 0.913131 | 0.955556 |        |  |        |
| 14443 | ENSG00000JARID2   | 1       | 0.830303 | 0.914478 | 0.937374 |        |  |        |
| 14444 | ENSG00000EWSR1    | 1       | 0.752525 | 0.863973 | 0.857576 |        |  |        |
| 14445 | ENSG00000TXLNA    | 1       | 0.834343 | 0.917172 | 0.891919 |        |  |        |
| 14446 | ENSG00000RBBP7    | 1       | 0.793939 | 0.896296 | 0.936364 |        |  |        |
| 14447 | ENSG00000RALB     | 1       | 0.758586 | 0.885017 | 0.890909 |        |  |        |
| 14448 | ENSG00000RNF216   | 1       | 0.834343 | 0.917172 | 0.918182 | 0.3386 |  |        |
| 14449 | ENSG00000HIF1AN   | 1       | 0.758586 | 0.911279 | 0.832323 |        |  |        |
| 14450 | ENSG00000ACIN1    | 1       | 0.831313 | 0.915152 | 0.891919 | 0.2746 |  |        |
| 14451 | ENSG00000PDCD10   | 1       | 0.79798  | 0.89899  | 0.90101  |        |  |        |
| 14452 | ENSG00000LYPLAL1  | 1       | 0.763636 | 0.881818 | 0.890909 |        |  |        |
| 14453 | ENSG00000CNBD2    | 1       | 0.789641 | 0.894116 | 0.863636 |        |  |        |
| 14454 | ENSG00000MDM4     | 0.99899 | 0.829293 | 0.927273 | 0.933333 |        |  |        |
| 14455 | ENSG00000SLC01B3  | 1       | 0.79798  | 0.89899  | 0.910101 |        |  |        |
| 14456 | ENSG00000PRDX3    | 1       | 0.758586 | 0.878451 | 0.864646 |        |  |        |
| 14457 | ENSG00000RAD51B   | 1       | 0.786469 | 0.88654  | 0.82241  | 0.3931 |  |        |
| 14458 | ENSG00000POLG     | 1       | 0.793869 | 0.896934 | 0.863636 |        |  |        |
| 14459 | ENSG00000MKLN1    | 1       | 0.793869 | 0.896934 | 0.887949 |        |  |        |
| 14460 | ENSG00000MIPOL1   | 1       | 0.79798  | 0.89899  | 0.839394 |        |  |        |
| 14461 | ENSG00000ATP5PD   | 1       | 0.754545 | 0.870875 | 0.880808 |        |  |        |
| 14462 | ENSG00000DDO      | 1       | 0.755556 | 0.876431 | 0.824242 | 0.2487 |  |        |
| 14463 | ENSG00000LDLRAD4  | 1       | 0.763636 | 0.881818 | 0.852525 |        |  |        |

|       |           |           |         |          |          |          |       |        |
|-------|-----------|-----------|---------|----------|----------|----------|-------|--------|
| 14464 | ENSG00000 | ZDHC5     | 1       | 0.782946 | 0.890365 | 0.871539 |       |        |
| 14465 | ENSG00000 | GRIA2     | 1       | 0.830867 | 0.915433 | 0.865751 |       |        |
| 14466 | ENSG00000 | OTUD4     | 1       | 0.791919 | 0.894949 | 0.839394 |       |        |
| 14467 | ENSG00000 | SHISAL1   | 1       | 0.79798  | 0.89899  | 0.860606 |       |        |
| 14468 | ENSG00000 | FEZF1     | 1       | 0.79798  | 0.89899  | 0.883838 |       |        |
| 14469 | ENSG00000 | ZNF616    | 1       | 0.70101  | 0.850505 | 0.905051 |       |        |
| 14470 | ENSG00000 | PSENE1    | 1       | 0.726216 | 0.863108 | 0.859408 |       |        |
| 14471 | ENSG00000 | TLE1      | 1       | 0.725253 | 0.861616 | 0.870707 |       |        |
| 14472 | ENSG00000 | TGOLN2    | 1       | 0.790909 | 0.888889 | 0.875758 |       | 0.3332 |
| 14473 | ENSG00000 | SF3A1     | 1       | 0.830303 | 0.914478 | 0.918182 |       |        |
| 14474 | ENSG00000 | NTHL1     | 1       | 0.869979 | 0.934989 | 0.900634 | 0.221 | 0.391  |
| 14475 | ENSG00000 | SNW1      | 1       | 0.831313 | 0.922054 | 0.90303  |       |        |
| 14476 | ENSG00000 | MAP3K8    | 1       | 0.834343 | 0.917172 | 0.880808 |       | 0.349  |
| 14477 | ENSG00000 | MLF2      | 1       | 0.830303 | 0.928283 | 0.919192 |       |        |
| 14478 | ENSG00000 | HIST1H2AH | 1       | 0.755556 | 0.876431 | 0.819192 |       |        |
| 14479 | ENSG00000 | TAF10     | 1       | 0.754545 | 0.895455 | 0.867677 |       |        |
| 14480 | ENSG00000 | HIST1H2BJ | 1       | 0.831313 | 0.909259 | 0.877778 |       |        |
| 14481 | ENSG00000 | EPB41L4A  | 1       | 0.793939 | 0.890236 | 0.917172 |       |        |
| 14482 | ENSG00000 | SYNPR     | 1       | 0.758586 | 0.873569 | 0.89798  |       |        |
| 14483 | ENSG00000 | KIAA0895L | 1       | 0.763636 | 0.881818 | 0.829293 |       |        |
| 14484 | ENSG00000 | WWC2      | 1       | 0.789899 | 0.882155 | 0.887879 |       |        |
| 14485 | ENSG00000 | HNRNPK    | 1       | 0.758586 | 0.885017 | 0.877778 |       | 0.2476 |
| 14486 | ENSG00000 | SALL3     | 1       | 0.752525 | 0.869529 | 0.841414 |       |        |
| 14487 | ENSG00000 | DDR1      | 1       | 0.725253 | 0.861616 | 0.869697 |       | 0.3735 |
| 14488 | ENSG00000 | BRD7      | 1       | 0.789641 | 0.894116 | 0.857294 |       |        |
| 14489 | ENSG00000 | SH3GL2    | 1       | 0.834343 | 0.944781 | 0.867677 |       |        |
| 14490 | ENSG00000 | PIGH      | 1       | 0.834343 | 0.917172 | 0.908081 |       |        |
| 14491 | ENSG00000 | SCD       | 1       | 0.834343 | 0.917172 | 0.913131 |       |        |
| 14492 | ENSG00000 | HOMER2    | 1       | 0.823461 | 0.911731 | 0.934959 |       |        |
| 14493 | ENSG00000 | ITPA      | 1       | 0.79798  | 0.89899  | 0.905051 |       |        |
| 14494 | ENSG00000 | STAG1     | 1       | 0.793939 | 0.896296 | 0.930303 |       |        |
| 14495 | ENSG00000 | LNPEP     | 1       | 0.831313 | 0.915152 | 0.890909 |       |        |
| 14496 | ENSG00000 | MT-CYB    | 1       | 0.758586 | 0.878451 | 0.834343 |       |        |
| 14497 | ENSG00000 | ADSL      | 1       | 0.731313 | 0.910438 | 0.817172 |       | 0.2385 |
| 14498 | ENSG00000 | HDGFL2    | 1       | 0.789899 | 0.901347 | 0.843434 |       |        |
| 14499 | ENSG00000 | POLR3A    | 0.99798 | 0.870707 | 0.934343 | 0.928283 |       |        |
| 14500 | ENSG00000 | LRRRC57   | 1       | 0.763636 | 0.881818 | 0.849495 |       |        |
| 14501 | ENSG00000 | PER2      | 1       | 0.793939 | 0.896296 | 0.906061 |       |        |
| 14502 | ENSG00000 | FSTL4     | 1       | 0.834343 | 0.917172 | 0.947475 |       |        |
| 14503 | ENSG00000 | PGS1      | 1       | 0.867865 | 0.93358  | 0.910148 |       |        |
| 14504 | ENSG00000 | RBMY1F    | 1       | 0.721212 | 0.858923 | 0.939394 |       |        |
| 14505 | ENSG00000 | SIGLEC8   | 1       | 0.834343 | 0.917172 | 0.90101  |       |        |
| 14506 | ENSG00000 | ADAM23    | 1       | 0.831313 | 0.915152 | 0.893939 |       |        |
| 14507 | ENSG00000 | UBE2K     | 1       | 0.834343 | 0.944781 | 0.907071 |       | 0.366  |
| 14508 | ENSG00000 | EFCAB13   | 1       | 0.720202 | 0.88569  | 0.887879 |       |        |
| 14509 | ENSG00000 | FAXC      | 1       | 0.793939 | 0.896296 | 0.875758 |       |        |
| 14510 | ENSG00000 | SLC4A11   | 1       | 0.834343 | 0.917172 | 0.928283 |       |        |
| 14511 | ENSG00000 | DHODH     | 1       | 0.834343 | 0.917172 | 0.912121 |       |        |
| 14512 | ENSG00000 | PYM1      | 1       | 0.763636 | 0.921212 | 0.833333 |       |        |
| 14513 | ENSG00000 | CREB3L4   | 1       | 0.793939 | 0.896296 | 0.881818 |       |        |
| 14514 | ENSG00000 | FAM136A   | 1       | 0.870707 | 0.935017 | 0.926263 |       | 0.2494 |
| 14515 | ENSG00000 | PIP4K2A   | 1       | 0.791919 | 0.894949 | 0.882828 |       |        |
| 14516 | ENSG00000 | JHY       | 1       | 0.821705 | 0.903839 | 0.944629 |       |        |
| 14517 | ENSG00000 | NUCKS1    | 1       | 0.872727 | 0.936364 | 0.90202  |       |        |
| 14518 | ENSG00000 | RALA      | 1       | 0.870707 | 0.935017 | 0.934343 |       |        |

|       |                    |         |          |          |          |        |        |
|-------|--------------------|---------|----------|----------|----------|--------|--------|
| 14519 | ENSG00000ACACA     | 1       | 0.725253 | 0.861616 | 0.864646 |        |        |
| 14520 | ENSG00000UQCRC1    | 1       | 0.870707 | 0.935017 | 0.931313 |        |        |
| 14521 | ENSG00000SEC24D    | 1       | 0.79798  | 0.89899  | 0.868687 |        |        |
| 14522 | ENSG00000ZNF135    | 0.99798 | 0.870707 | 0.934343 | 0.938384 |        |        |
| 14523 | ENSG00000PRKACA    | 1       | 0.872727 | 0.936364 | 0.90202  |        |        |
| 14524 | ENSG00000HSD17B10  | 1       | 0.870707 | 0.935017 | 0.916162 |        |        |
| 14525 | ENSG00000PNOC      | 1       | 0.758586 | 0.878451 | 0.888889 |        |        |
| 14526 | ENSG00000BCL2L11   | 1       | 0.791919 | 0.894949 | 0.881818 |        | 0.2919 |
| 14527 | ENSG00000SLC18A2   | 1       | 0.758985 | 0.879493 | 0.892178 |        |        |
| 14528 | ENSG00000ACOT8     | 1       | 0.869979 | 0.934989 | 0.895349 |        | 0.385  |
| 14529 | ENSG00000ILKAP     | 1       | 0.831313 | 0.915152 | 0.871717 | 0.3365 |        |
| 14530 | ENSG00000SPRY2     | 1       | 0.79798  | 0.89899  | 0.894949 |        | 0.339  |
| 14531 | ENSG00000CLDN12    | 1       | 0.791919 | 0.894949 | 0.874747 |        |        |
| 14532 | ENSG00000LDB2      | 1       | 0.758586 | 0.878451 | 0.885859 |        |        |
| 14533 | ENSG00000 9/5/2019 | 0.99798 | 0.870707 | 0.934343 | 0.938384 |        |        |
| 14534 | ENSG00000FAM171B   | 1       | 0.79798  | 0.89899  | 0.877778 |        | 0.3786 |
| 14535 | ENSG00000EIF3I     | 1       | 0.870707 | 0.935017 | 0.910101 |        |        |
| 14536 | ENSG00000MEF2A     | 1       | 0.872727 | 0.936364 | 0.908081 |        |        |
| 14537 | ENSG00000NONO      | 1       | 0.790909 | 0.888889 | 0.911111 |        |        |
| 14538 | ENSG00000RLBP1     | 1       | 0.798068 | 0.893076 | 0.896618 |        |        |
| 14539 | ENSG00000FBX021    | 1       | 0.831313 | 0.915152 | 0.870707 |        |        |
| 14540 | ENSG00000PSMA1     | 1       | 0.793939 | 0.923232 | 0.89899  |        | 0.3171 |
| 14541 | ENSG00000SNX33     | 1       | 0.758985 | 0.879493 | 0.877378 |        | 0.4331 |
| 14542 | ENSG00000RANGAP1   | 1       | 0.831313 | 0.935859 | 0.919192 |        |        |
| 14543 | ENSG00000PRKAR2A   | 1       | 0.831313 | 0.915152 | 0.912121 |        |        |
| 14544 | ENSG00000POLRMT    | 1       | 0.830303 | 0.914478 | 0.956566 |        |        |
| 14545 | ENSG00000KARS      | 1       | 0.872727 | 0.936364 | 0.916162 | 0.355  |        |
| 14546 | ENSG00000CYB5R1    | 1       | 0.79798  | 0.89899  | 0.864646 |        |        |
| 14547 | ENSG00000THAP3     | 1       | 0.870707 | 0.935017 | 0.939394 |        |        |
| 14548 | ENSG00000CGAS      | 1       | 0.79798  | 0.89899  | 0.854545 |        |        |
| 14549 | ENSG00000STAM      | 1       | 0.793939 | 0.890909 | 0.925253 |        |        |
| 14550 | ENSG00000AXIN1     | 1       | 0.834343 | 0.917172 | 0.925253 |        | 0.434  |
| 14551 | ENSG00000VENTX     | 1       | 0.79798  | 0.89899  | 0.873737 |        |        |
| 14552 | ENSG00000FICD      | 1       | 0.758586 | 0.878451 | 0.852525 |        |        |
| 14553 | ENSG00000H3F3B     | 1       | 0.829293 | 0.907912 | 0.9      |        | 0.4219 |
| 14554 | ENSG00000FAM160B2  | 1       | 0.79798  | 0.89899  | 0.867677 |        |        |
| 14555 | ENSG00000EVC2      | 1       | 0.793939 | 0.917845 | 0.822222 |        |        |
| 14556 | ENSG00000CKAP5     | 1       | 0.791919 | 0.894949 | 0.849495 |        | 0.291  |
| 14557 | ENSG00000TMEM88B   | 1       | 0.758586 | 0.873569 | 0.859596 |        |        |
| 14558 | ENSG00000RNF130    | 1       | 0.869697 | 0.927946 | 0.893939 | 0.3255 |        |
| 14559 | ENSG00000ERP27     | 1       | 0.79798  | 0.89899  | 0.89798  |        |        |
| 14560 | ENSG00000CDC16     | 1       | 0.831313 | 0.915152 | 0.886869 |        |        |
| 14561 | ENSG00000SAMM50    | 1       | 0.872727 | 0.936364 | 0.893939 |        | 0.26   |
| 14562 | ENSG00000MRVI1     | 1       | 0.870707 | 0.92862  | 0.945455 |        | 0.3844 |
| 14563 | ENSG00000TMT4      | 1       | 0.831313 | 0.915152 | 0.89798  |        |        |
| 14564 | ENSG00000SPERT     | 1       | 0.755556 | 0.876431 | 0.89798  |        |        |
| 14565 | ENSG00000ATXN10    | 1       | 0.822813 | 0.910668 | 0.914729 |        |        |
| 14566 | ENSG00000MCF2L2    | 1       | 0.831313 | 0.935859 | 0.966667 |        |        |
| 14567 | ENSG00000DKK2      | 1       | 0.793869 | 0.896934 | 0.885835 |        |        |
| 14568 | ENSG00000OGDH      | 1       | 0.831313 | 0.915152 | 0.939394 | 0.581  |        |
| 14569 | ENSG00000KHSRP     | 1       | 0.870707 | 0.935017 | 0.923232 | 0.4733 |        |
| 14570 | ENSG00000GCNT2     | 1       | 0.870707 | 0.935017 | 0.885859 |        |        |
| 14571 | ENSG00000HMG2      | 1       | 0.758586 | 0.878451 | 0.857576 |        |        |
| 14572 | ENSG00000IGSF10    | 1       | 0.793869 | 0.896934 | 0.889006 |        |        |
| 14573 | ENSG00000PHF10     | 1       | 0.830303 | 0.914478 | 0.89798  |        |        |



|       |           |          |         |          |          |          |        |
|-------|-----------|----------|---------|----------|----------|----------|--------|
| 14574 | ENSG00000 | ACTN1    | 1       | 0.870707 | 0.935017 | 0.934343 |        |
| 14575 | ENSG00000 | EGFR     | 0.99899 | 0.912121 | 0.955556 | 0.917172 |        |
| 14576 | ENSG00000 | SNRPB2   | 1       | 0.834343 | 0.917172 | 0.887879 |        |
| 14577 | ENSG00000 | NUDT1    | 1       | 0.834343 | 0.917172 | 0.926263 | 0.3538 |
| 14578 | ENSG00000 | ALDH1A2  | 1       | 0.834343 | 0.917172 | 0.883838 |        |
| 14579 | ENSG00000 | UNC80    | 1       | 0.79798  | 0.89899  | 0.893939 |        |
| 14580 | ENSG00000 | ERLIN2   | 1       | 0.831313 | 0.915152 | 0.858586 | 0.2987 |
| 14581 | ENSG00000 | MSI2     | 1       | 0.789641 | 0.894116 | 0.914376 |        |
| 14582 | ENSG00000 | MRPL55   | 1       | 0.79798  | 0.89899  | 0.869697 |        |
| 14583 | ENSG00000 | GSTM1    | 1       | 0.793939 | 0.917845 | 0.906061 |        |
| 14584 | ENSG00000 | SCARB2   | 1       | 0.79798  | 0.89899  | 0.910101 |        |
| 14585 | ENSG00000 | SPACA4   | 1       | 0.763636 | 0.881818 | 0.879798 |        |
| 14586 | ENSG00000 | NDUFAB2  | 1       | 0.763636 | 0.881818 | 0.916162 |        |
| 14587 | ENSG00000 | RSG1     | 1       | 0.825581 | 0.90592  | 0.918605 | 0.4994 |
| 14588 | ENSG00000 | EXT1     | 1       | 0.785161 | 0.886305 | 0.871539 |        |
| 14589 | ENSG00000 | POLR2E   | 1       | 0.870707 | 0.935017 | 0.926263 |        |
| 14590 | ENSG00000 | CST9     | 1       | 0.763636 | 0.881818 | 0.890909 |        |
| 14591 | ENSG00000 | ABI1     | 1       | 0.827696 | 0.913319 | 0.899577 |        |
| 14592 | ENSG00000 | STARD5   | 1       | 0.790909 | 0.888889 | 0.879798 |        |
| 14593 | ENSG00000 | MCTP2    | 1       | 0.818815 | 0.908633 | 0.902439 |        |
| 14594 | ENSG00000 | DHX36    | 1       | 0.758586 | 0.878451 | 0.89798  |        |
| 14595 | ENSG00000 | EFNB1    | 1       | 0.870707 | 0.935017 | 0.933333 |        |
| 14596 | ENSG00000 | RPS14    | 1       | 0.791919 | 0.894949 | 0.886869 | 0.4121 |
| 14597 | ENSG00000 | DEXI     | 1       | 0.755556 | 0.876431 | 0.89697  | 0.3726 |
| 14598 | ENSG00000 | CREBL2   | 1       | 0.870707 | 0.935017 | 0.90202  |        |
| 14599 | ENSG00000 | SERINC2  | 1       | 0.754545 | 0.875758 | 0.938384 |        |
| 14600 | ENSG00000 | MTREX    | 1       | 0.872727 | 0.936364 | 0.950505 |        |
| 14601 | ENSG00000 | MPC1     | 1       | 0.872727 | 0.936364 | 0.945455 |        |
| 14602 | ENSG00000 | IRF2BP1  | 1       | 0.758586 | 0.878451 | 0.914141 |        |
| 14603 | ENSG00000 | SEMA6A   | 1       | 0.870707 | 0.935017 | 0.933333 |        |
| 14604 | ENSG00000 | PYDC2    | 1       | 0.758586 | 0.873569 | 0.867677 |        |
| 14605 | ENSG00000 | TSPO     | 1       | 0.872727 | 0.936364 | 0.916162 |        |
| 14606 | ENSG00000 | SIK1     | 1       | 0.831313 | 0.929966 | 0.870707 |        |
| 14607 | ENSG00000 | SPACA5B  | 1       | 0.763636 | 0.881818 | 0.905051 |        |
| 14608 | ENSG00000 | BLZF1    | 1       | 0.870707 | 0.942761 | 0.881818 |        |
| 14609 | ENSG00000 | SPACA5   | 1       | 0.763636 | 0.881818 | 0.905051 |        |
| 14610 | ENSG00000 | HTATSF1  | 1       | 0.870707 | 0.935017 | 0.925253 |        |
| 14611 | ENSG00000 | OSGIN2   | 1       | 0.793939 | 0.890909 | 0.892929 |        |
| 14612 | ENSG00000 | MBP      | 1       | 0.79798  | 0.86532  | 0.864646 |        |
| 14613 | ENSG00000 | PAICS    | 1       | 0.834343 | 0.917172 | 0.90101  | 0.4225 |
| 14614 | ENSG00000 | SRPK1    | 1       | 0.872727 | 0.936364 | 0.922222 | 0.297  |
| 14615 | ENSG00000 | SNX31    | 1       | 0.763636 | 0.881818 | 0.9      |        |
| 14616 | ENSG00000 | RINL     | 1       | 0.793939 | 0.917845 | 0.819192 |        |
| 14617 | ENSG00000 | DMAC2    | 1       | 0.870707 | 0.935017 | 0.919192 |        |
| 14618 | ENSG00000 | PRELID3B | 1       | 0.867865 | 0.93358  | 0.94926  |        |
| 14619 | ENSG00000 | DHX29    | 1       | 0.872727 | 0.936364 | 0.948485 |        |
| 14620 | ENSG00000 | SOD2     | 1       | 0.834343 | 0.917172 | 0.937374 | 0.333  |
| 14621 | ENSG00000 | OR2W3    | 1       | 0.763636 | 0.881818 | 0.857576 |        |
| 14622 | ENSG00000 | RAB5A    | 1       | 0.831313 | 0.915152 | 0.876768 | 0.2141 |
| 14623 | ENSG00000 | MRPL45   | 1       | 0.755556 | 0.876431 | 0.862626 |        |
| 14624 | ENSG00000 | AKAP1    | 1       | 0.831313 | 0.915152 | 0.930303 | 0.3719 |
| 14625 | ENSG00000 | RTL4     | 1       | 0.793869 | 0.896934 | 0.845666 |        |
| 14626 | ENSG00000 | UBQLN2   | 1       | 0.790909 | 0.895118 | 0.855556 | 0.2598 |
| 14627 | ENSG00000 | ECH1     | 1       | 0.834343 | 0.917172 | 0.957576 |        |
| 14628 | ENSG00000 | GTF3C5   | 1       | 0.791919 | 0.894949 | 0.927273 |        |

|       |                    |          |          |          |          |        |        |
|-------|--------------------|----------|----------|----------|----------|--------|--------|
| 14629 | ENSG00000PMVK      | 1        | 0.79798  | 0.89899  | 0.883838 |        |        |
| 14630 | ENSG00000CCSER2    | 1        | 0.870707 | 0.942088 | 0.910101 |        |        |
| 14631 | ENSG00000HMG20B    | 1        | 0.912121 | 0.955892 | 0.926263 |        |        |
| 14632 | ENSG00000IMMP2L    | 1        | 0.791919 | 0.894949 | 0.861616 |        |        |
| 14633 | ENSG00000KIAA1217  | 1        | 0.869979 | 0.934989 | 0.900634 |        |        |
| 14634 | ENSG00000HIST1H2AA | 1        | 0.826638 | 0.912615 | 0.871036 |        |        |
| 14635 | ENSG00000FBXW7     | 1        | 0.867865 | 0.93358  | 0.93129  |        |        |
| 14636 | ENSG00000TM9SF3    | 1        | 0.911205 | 0.955603 | 0.921776 |        |        |
| 14637 | ENSG00000PCDHGA2   | 1        | 0.872727 | 0.936364 | 0.945455 |        |        |
| 14638 | ENSG00000KIDINS220 | 1        | 0.827243 | 0.913621 | 0.928018 |        |        |
| 14639 | ENSG00000C1QTNF1   | 1        | 0.79798  | 0.89899  | 0.861616 |        |        |
| 14640 | ENSG00000IL15RA    | 1        | 0.834343 | 0.917172 | 0.89697  |        |        |
| 14641 | ENSG00000IDO1      | 1        | 0.793939 | 0.923232 | 0.939394 |        |        |
| 14642 | ENSG00000HIST3H3   | 1        | 0.789899 | 0.888215 | 0.915152 |        | 0.4167 |
| 14643 | ENSG00000TMX4      | 1        | 0.831313 | 0.935859 | 0.910101 |        |        |
| 14644 | ENSG00000GPR150    | 1        | 0.791919 | 0.894949 | 0.872727 |        |        |
| 14645 | ENSG00000HTRA3     | 1        | 0.79798  | 0.89899  | 0.870707 |        |        |
| 14646 | ENSG00000RBM1J     | 1        | 0.721212 | 0.858923 | 0.939394 |        |        |
| 14647 | ENSG00000TAP1      | 1        | 0.793939 | 0.896296 | 0.884848 |        | 0.4762 |
| 14648 | ENSG00000EIF2S3    | 1        | 0.867865 | 0.93358  | 0.896406 |        |        |
| 14649 | ENSG00000ZNF18     | 0.998943 | 0.910148 | 0.954545 | 0.972516 | 0.231  |        |
| 14650 | ENSG00000RBM1A1    | 1        | 0.721212 | 0.858923 | 0.939394 |        |        |
| 14651 | ENSG00000RBM1E     | 1        | 0.721212 | 0.858923 | 0.939394 |        |        |
| 14652 | ENSG00000GPATCH2   | 1        | 0.872727 | 0.957576 | 0.920202 |        |        |
| 14653 | ENSG00000RBM1B     | 1        | 0.721212 | 0.858923 | 0.939394 |        |        |
| 14654 | ENSG00000KSR1      | 1        | 0.834343 | 0.917172 | 0.887879 |        | 0.6153 |
| 14655 | ENSG00000THOC2     | 1        | 0.834343 | 0.917172 | 0.926263 |        |        |
| 14656 | ENSG00000RBM1D     | 1        | 0.721212 | 0.858923 | 0.939394 |        |        |
| 14657 | ENSG00000ACVR2A    | 1        | 0.872727 | 0.936364 | 0.890909 |        |        |
| 14658 | ENSG00000ACSL3     | 1        | 0.870707 | 0.935017 | 0.90404  |        | 0.2576 |
| 14659 | ENSG00000SMOX      | 1        | 0.872727 | 0.936364 | 0.955556 |        |        |
| 14660 | ENSG00000COG3      | 1        | 0.830867 | 0.915433 | 0.917548 |        |        |
| 14661 | ENSG00000RALY      | 1        | 0.870707 | 0.935017 | 0.89798  |        |        |
| 14662 | ENSG00000C1GALT1   | 1        | 0.872727 | 0.936364 | 0.923232 |        | 0.345  |
| 14663 | ENSG00000SEMA3B    | 1        | 0.910148 | 0.954898 | 0.96723  |        |        |
| 14664 | ENSG00000CCPG1     | 1        | 0.755556 | 0.876431 | 0.884848 |        |        |
| 14665 | ENSG00000ITIH5     | 1        | 0.830303 | 0.914478 | 0.958586 |        |        |
| 14666 | ENSG00000ANKZF1    | 1        | 0.831313 | 0.915152 | 0.868687 | 0.2748 |        |
| 14667 | ENSG00000DPM1      | 1        | 0.913131 | 0.956566 | 0.956566 |        |        |
| 14668 | ENSG00000HIST1H2AE | 1        | 0.791919 | 0.894949 | 0.837374 |        |        |
| 14669 | ENSG00000GKAP1     | 1        | 0.78959  | 0.894795 | 0.932447 |        |        |
| 14670 | ENSG00000TDRP      | 1        | 0.793939 | 0.896296 | 0.871717 |        | 0.491  |
| 14671 | ENSG00000EFNA3     | 1        | 0.829293 | 0.907912 | 0.923232 |        |        |
| 14672 | ENSG00000KIAA0141  | 1        | 0.912121 | 0.955892 | 0.939394 |        |        |
| 14673 | ENSG00000ECHS1     | 1        | 0.834343 | 0.917172 | 0.932323 | 0.223  | 0.4136 |
| 14674 | ENSG00000TNFRSF10B | 1        | 0.872727 | 0.936364 | 0.90202  |        | 0.2994 |
| 14675 | ENSG00000ATG10     | 1        | 0.830303 | 0.914478 | 0.894949 |        |        |
| 14676 | ENSG00000MKNK1     | 1        | 0.913131 | 0.971044 | 0.924242 |        |        |
| 14677 | ENSG00000MDH2      | 1        | 0.834343 | 0.917172 | 0.887879 | 0.3385 | 0.3178 |
| 14678 | ENSG00000MFNG      | 1        | 0.912121 | 0.94899  | 0.936364 |        |        |
| 14679 | ENSG00000PRKACB    | 1        | 0.834343 | 0.917172 | 0.89899  |        |        |
| 14680 | ENSG00000NIF3L1    | 1        | 0.758586 | 0.906397 | 0.880808 |        | 0.4375 |
| 14681 | ENSG00000YIPF5     | 1        | 0.834343 | 0.917172 | 0.891919 |        |        |
| 14682 | ENSG00000TRIM67    | 1        | 0.872727 | 0.936364 | 0.913131 | 0.3728 |        |
| 14683 | ENSG00000MTPAP     | 1        | 0.870707 | 0.935017 | 0.955556 | 0.3426 |        |

|       |                    |   |          |          |          |        |        |
|-------|--------------------|---|----------|----------|----------|--------|--------|
| 14684 | ENSG00000LUZP4     | 1 | 0.870707 | 0.935017 | 0.979798 |        |        |
| 14685 | ENSG00000ISOC2     | 1 | 0.913131 | 0.956566 | 0.953535 |        |        |
| 14686 | ENSG00000ADPRHL2   | 1 | 0.870707 | 0.949158 | 0.919192 |        |        |
| 14687 | ENSG00000TKTL1     | 1 | 0.913131 | 0.956566 | 0.973737 |        |        |
| 14688 | ENSG00000PCDHB11   | 1 | 0.793939 | 0.896296 | 0.862626 |        |        |
| 14689 | ENSG00000NDUF7F7   | 1 | 0.913131 | 0.956566 | 0.984848 |        |        |
| 14690 | ENSG00000SDHAF2    | 1 | 0.791919 | 0.894949 | 0.919192 |        |        |
| 14691 | ENSG00000NPM1      | 1 | 0.793939 | 0.890909 | 0.891919 |        | 0.2386 |
| 14692 | ENSG00000RPL14     | 1 | 0.791919 | 0.894949 | 0.876768 | 0.344  |        |
| 14693 | ENSG00000ANKHD1    | 1 | 0.872727 | 0.936364 | 0.888889 |        |        |
| 14694 | ENSG00000TOE1      | 1 | 0.870707 | 0.935017 | 0.9      |        |        |
| 14695 | ENSG00000MRPL27    | 1 | 0.872727 | 0.936364 | 0.937374 |        |        |
| 14696 | ENSG00000PPP1R13B  | 1 | 0.872727 | 0.957576 | 0.951515 |        |        |
| 14697 | ENSG00000PPIL2     | 1 | 0.912121 | 0.955892 | 0.938384 | 0.3488 |        |
| 14698 | ENSG00000INPP5A    | 1 | 0.913131 | 0.956566 | 0.953535 |        | 0.3119 |
| 14699 | ENSG00000HSPA9     | 1 | 0.870707 | 0.935017 | 0.948485 |        | 0.2638 |
| 14700 | ENSG00000EFHC1     | 1 | 0.872727 | 0.936364 | 0.979798 |        |        |
| 14701 | ENSG00000DNAJC25   | 1 | 0.913131 | 0.956566 | 0.957576 |        |        |
| 14702 | ENSG00000HNRNPA3   | 1 | 0.829293 | 0.907912 | 0.879798 |        |        |
| 14703 | ENSG00000SLC6A1    | 1 | 0.834343 | 0.917172 | 0.880808 |        | 0.2711 |
| 14704 | ENSG00000HSCB      | 1 | 0.913131 | 0.956566 | 0.927273 |        |        |
| 14705 | ENSG00000ESF1      | 1 | 0.912121 | 0.955892 | 0.952525 |        |        |
| 14706 | ENSG00000MRPL1     | 1 | 0.791919 | 0.894949 | 0.918182 |        |        |
| 14707 | ENSG00000EPHB2     | 1 | 0.834343 | 0.917172 | 0.934343 |        | 0.4238 |
| 14708 | ENSG00000HNRNPM    | 1 | 0.912121 | 0.955892 | 0.947475 | 0.327  | 0.4478 |
| 14709 | ENSG00000PAPOLA    | 1 | 0.913131 | 0.956566 | 0.940404 |        |        |
| 14710 | ENSG00000HIST1H2AC | 1 | 0.826638 | 0.912615 | 0.871036 |        |        |
| 14711 | ENSG00000DGCR2     | 1 | 0.913131 | 0.956566 | 0.959596 |        |        |
| 14712 | ENSG00000HIST3H2A  | 1 | 0.826638 | 0.912615 | 0.871036 |        |        |
| 14713 | ENSG00000RAB7A     | 1 | 0.913131 | 0.956566 | 0.956566 |        |        |
| 14714 | ENSG00000TMEM2     | 1 | 0.830303 | 0.914478 | 0.958586 |        |        |
| 14715 | ENSG00000ME2       | 1 | 0.913131 | 0.956566 | 0.953535 |        |        |
| 14716 | ENSG00000DPEP3     | 1 | 0.834343 | 0.917172 | 0.918182 |        |        |
| 14717 | ENSG00000MSRB3     | 1 | 0.79798  | 0.89899  | 0.892929 |        |        |
| 14718 | ENSG00000STX18     | 1 | 0.79798  | 0.89899  | 0.910101 |        |        |
| 14719 | ENSG00000YPEL4     | 1 | 0.793939 | 0.896296 | 0.926263 |        |        |
| 14720 | ENSG00000ADAMTS3   | 1 | 0.831313 | 0.929966 | 0.894949 |        |        |
| 14721 | ENSG00000MYO18A    | 1 | 0.793939 | 0.896296 | 0.875758 |        |        |
| 14722 | ENSG00000LUC7L     | 1 | 0.955556 | 0.977778 | 0.963636 |        |        |
| 14723 | ENSG00000HIST2H2AC | 1 | 0.826638 | 0.912615 | 0.871036 |        |        |
| 14724 | ENSG00000CGA       | 1 | 0.837681 | 0.918841 | 0.933333 |        |        |
| 14725 | ENSG00000KRT33A    | 1 | 0.914976 | 0.957488 | 0.996135 |        |        |
| 14726 | ENSG00000PER3      | 1 | 0.954545 | 0.977273 | 0.958774 | 0.3784 |        |
| 14727 | ENSG00000CHST10    | 1 | 0.872727 | 0.936364 | 0.943434 |        |        |
| 14728 | ENSG00000LAYN      | 1 | 0.79798  | 0.89899  | 0.863636 |        |        |
| 14729 | ENSG00000CDK11B    | 1 | 0.787526 | 0.892706 | 0.887949 |        |        |
| 14730 | ENSG00000TBX2      | 1 | 0.870707 | 0.949158 | 0.933333 |        |        |
| 14731 | ENSG00000SH3BP2    | 1 | 0.913131 | 0.956566 | 0.957576 |        |        |
| 14732 | ENSG00000RAB2A     | 1 | 0.912121 | 0.94899  | 0.952525 | 0.2572 | 0.354  |
| 14733 | ENSG00000MAP3K1    | 1 | 0.913131 | 0.956566 | 0.953535 |        |        |
| 14734 | ENSG00000KIF23     | 1 | 0.831313 | 0.922054 | 0.942424 | 0.479  | 0.2718 |
| 14735 | ENSG00000U2AF1L4   | 1 | 0.831313 | 0.915152 | 0.90404  |        |        |
| 14736 | ENSG00000PALB2     | 1 | 0.913131 | 0.956566 | 0.963636 |        | 0.2912 |
| 14737 | ENSG00000NDUFB5    | 1 | 0.870707 | 0.935017 | 0.912121 |        |        |
| 14738 | ENSG00000NEURL1B   | 1 | 0.789641 | 0.894116 | 0.891121 | 0.4277 |        |

|       |                    |   |          |          |          |        |        |
|-------|--------------------|---|----------|----------|----------|--------|--------|
| 14739 | ENSG00000REEP5     | 1 | 0.872727 | 0.936364 | 0.916162 |        |        |
| 14740 | ENSG00000MRPL2     | 1 | 0.911205 | 0.955603 | 0.932347 |        |        |
| 14741 | ENSG00000SNX9      | 1 | 0.870707 | 0.935017 | 0.931313 |        |        |
| 14742 | ENSG00000RAVER2    | 1 | 0.831313 | 0.915152 | 0.905051 |        |        |
| 14743 | ENSG00000CLRN3     | 1 | 0.79798  | 0.89899  | 0.891919 | 0.3519 |        |
| 14744 | ENSG00000PLCL1     | 1 | 0.872727 | 0.936364 | 0.949495 |        |        |
| 14745 | ENSG00000ACTA2     | 1 | 0.912121 | 0.963131 | 0.929293 |        |        |
| 14746 | ENSG00000Clorf43   | 1 | 0.867865 | 0.919838 | 0.917548 |        |        |
| 14747 | ENSG00000CPSF6     | 1 | 0.913131 | 0.956566 | 0.921212 |        |        |
| 14748 | ENSG00000EOGT      | 1 | 0.834343 | 0.917172 | 0.890909 |        |        |
| 14749 | ENSG00000AP4S1     | 1 | 0.913131 | 0.956566 | 0.953535 |        |        |
| 14750 | ENSG00000RAB5B     | 1 | 0.913131 | 0.956566 | 0.923232 | 0.3135 |        |
| 14751 | ENSG00000METTL6    | 1 | 0.79798  | 0.89899  | 0.868687 | 0.1818 |        |
| 14752 | ENSG00000GLI2      | 1 | 0.953488 | 0.976744 | 0.962348 |        | 0.2835 |
| 14753 | ENSG00000UQCC1     | 1 | 0.912121 | 0.94899  | 0.983838 |        |        |
| 14754 | ENSG00000C17orf80  | 1 | 0.870707 | 0.92862  | 0.917172 |        |        |
| 14755 | ENSG00000ZNRD1     | 1 | 0.955556 | 0.977778 | 0.963636 |        |        |
| 14756 | ENSG00000CCDC8     | 1 | 0.79798  | 0.89899  | 0.923232 |        | 0.41   |
| 14757 | ENSG00000ZFR2      | 1 | 0.913131 | 0.956566 | 0.940404 |        |        |
| 14758 | ENSG00000HIST1H2AI | 1 | 0.826638 | 0.912615 | 0.871036 |        |        |
| 14759 | ENSG00000MRPL52    | 1 | 0.834343 | 0.917172 | 0.870707 |        | 0.3578 |
| 14760 | ENSG00000HIST1H2AG | 1 | 0.826638 | 0.912615 | 0.871036 |        |        |
| 14761 | ENSG00000HIST1H2AD | 1 | 0.826638 | 0.912615 | 0.871036 |        |        |
| 14762 | ENSG00000PKNOX2    | 1 | 0.830867 | 0.915433 | 0.904863 |        |        |
| 14763 | ENSG00000UBA6      | 1 | 0.955556 | 0.977778 | 0.99596  |        |        |
| 14764 | ENSG00000HIST1H2BC | 1 | 0.831313 | 0.909259 | 0.877778 |        |        |
| 14765 | ENSG00000DAD1      | 1 | 0.870707 | 0.935017 | 0.943434 |        |        |
| 14766 | ENSG00000SVOP      | 1 | 0.834343 | 0.917172 | 0.887879 |        |        |
| 14767 | ENSG00000VCP       | 1 | 0.831313 | 0.929966 | 0.891919 |        |        |
| 14768 | ENSG00000GNAI2     | 1 | 0.909192 | 0.954596 | 0.947951 |        |        |
| 14769 | ENSG00000CDR2L     | 1 | 0.913131 | 0.956566 | 0.936364 |        |        |
| 14770 | ENSG00000KIAA1147  | 1 | 0.791919 | 0.894949 | 0.879798 |        |        |
| 14771 | ENSG00000PABPN1    | 1 | 0.913131 | 0.956566 | 0.960606 | 0.321  |        |
| 14772 | ENSG00000UCP2      | 1 | 0.79798  | 0.89899  | 0.914141 |        |        |
| 14773 | ENSG00000PNCK      | 1 | 0.872727 | 0.936364 | 0.925253 |        |        |
| 14774 | ENSG00000NOS3      | 1 | 0.834343 | 0.917172 | 0.893939 |        |        |
| 14775 | ENSG00000HIST2H3C  | 1 | 0.793939 | 0.890909 | 0.90101  |        |        |
| 14776 | ENSG00000SMC1B     | 1 | 0.953488 | 0.976744 | 0.975637 |        |        |
| 14777 | ENSG00000NEDD8     | 1 | 0.870707 | 0.949158 | 0.934343 |        |        |
| 14778 | ENSG00000IRS2      | 1 | 0.793939 | 0.896296 | 0.907071 |        |        |
| 14779 | ENSG00000RPS6      | 1 | 0.870707 | 0.92862  | 0.935354 |        |        |
| 14780 | ENSG00000PDE11A    | 1 | 0.872727 | 0.936364 | 0.933333 |        |        |
| 14781 | ENSG00000HIST2H2AA | 1 | 0.826638 | 0.912615 | 0.871036 |        |        |
| 14782 | ENSG00000IAPP      | 1 | 0.872727 | 0.936364 | 0.953535 |        |        |
| 14783 | ENSG00000MDM2      | 1 | 0.870707 | 0.942088 | 0.921212 | 0.3433 | 0.2222 |
| 14784 | ENSG00000CIP2A     | 1 | 0.830303 | 0.914478 | 0.923232 |        |        |
| 14785 | ENSG00000HIST2H2BE | 1 | 0.831313 | 0.909259 | 0.877778 |        |        |
| 14786 | ENSG00000ARL13B    | 1 | 0.831313 | 0.915152 | 0.893939 |        |        |
| 14787 | ENSG00000ZNF618    | 1 | 0.831313 | 0.915152 | 0.928283 |        |        |
| 14788 | ENSG00000BAHCC1    | 1 | 0.79798  | 0.89899  | 0.867677 |        |        |
| 14789 | ENSG00000FAM13A    | 1 | 0.869979 | 0.95666  | 0.906977 |        |        |
| 14790 | ENSG00000HIST1H2BL | 1 | 0.831313 | 0.909259 | 0.877778 |        |        |
| 14791 | ENSG00000CHRN3     | 1 | 0.86711  | 0.933555 | 0.921373 |        |        |
| 14792 | ENSG00000PDP2      | 1 | 0.79798  | 0.89899  | 0.927273 |        |        |
| 14793 | ENSG00000ZNF80     | 1 | 0.827696 | 0.913319 | 0.90592  |        |        |

|       |                    |   |          |          |          |        |        |
|-------|--------------------|---|----------|----------|----------|--------|--------|
| 14794 | ENSG00000PON1      | 1 | 1        | 1        | 1        |        |        |
| 14795 | ENSG00000DCTN3     | 1 | 0.870707 | 0.935017 | 0.932323 |        |        |
| 14796 | ENSG00000EFCAB10   | 1 | 0.831313 | 0.909259 | 0.879798 |        |        |
| 14797 | ENSG00000RPSA      | 1 | 0.831313 | 0.915152 | 0.905051 |        |        |
| 14798 | ENSG00000SCGB2B2   | 1 | 0.793939 | 0.890909 | 0.905051 |        |        |
| 14799 | ENSG00000POR       | 1 | 0.872727 | 0.936364 | 0.945455 |        |        |
| 14800 | ENSG00000RPAIN     | 1 | 0.872727 | 0.957576 | 0.919192 |        |        |
| 14801 | ENSG00000C8orf37   | 1 | 0.834343 | 0.917172 | 0.924242 |        |        |
| 14802 | ENSG00000AL132671. | 1 | 0.763636 | 0.881818 | 0.918182 |        |        |
| 14803 | ENSG00000TMEM255A  | 1 | 0.872727 | 0.936364 | 0.953535 |        |        |
| 14804 | ENSG00000AP001781. | 1 | 0.791919 | 0.894949 | 0.889899 |        |        |
| 14805 | ENSG00000APBB2     | 1 | 0.834343 | 0.917172 | 0.912121 |        |        |
| 14806 | ENSG00000AXIN2     | 1 | 0.830303 | 0.928283 | 0.905051 |        |        |
| 14807 | ENSG00000LNPK      | 1 | 0.870707 | 0.935017 | 0.917172 | 0.4336 |        |
| 14808 | ENSG00000NDUFS3    | 1 | 0.79798  | 0.89899  | 0.882828 |        |        |
| 14809 | ENSG00000CTF1      | 1 | 0.870707 | 0.92862  | 0.918182 |        |        |
| 14810 | ENSG00000PNN       | 1 | 0.953488 | 0.976744 | 0.962348 |        |        |
| 14811 | ENSG00000CARD10    | 1 | 0.955556 | 0.977778 | 0.959596 | 0.3536 | 0.2786 |
| 14812 | ENSG00000C1QTNF3   | 1 | 0.955556 | 0.977778 | 0.99596  |        |        |
| 14813 | ENSG00000ABCG8     | 1 | 0.870707 | 0.935017 | 0.921212 |        |        |
| 14814 | ENSG00000KRT31     | 1 | 0.914976 | 0.957488 | 0.996135 |        |        |
| 14815 | ENSG00000 3/2/2019 | 1 | 0.955556 | 0.977778 | 0.963636 |        | 0.5554 |
| 14816 | ENSG00000GUCA1A    | 1 | 0.956522 | 0.978261 | 1        |        |        |
| 14817 | ENSG00000PLA2G4C   | 1 | 0.913131 | 0.956566 | 0.965657 | 0.2987 |        |
| 14818 | ENSG00000ADGRG3    | 1 | 0.793939 | 0.896296 | 0.927273 |        |        |
| 14819 | ENSG00000CRY2      | 1 | 0.872727 | 0.936364 | 0.974747 |        | 0.3985 |
| 14820 | ENSG00000H2AFJ     | 1 | 0.826638 | 0.912615 | 0.871036 |        |        |
| 14821 | ENSG00000NAE1      | 1 | 0.869979 | 0.934989 | 0.908034 |        |        |
| 14822 | ENSG00000HHIPL2    | 1 | 0.869979 | 0.934989 | 0.933404 |        |        |
| 14823 | ENSG00000MRPL42    | 1 | 0.791919 | 0.894949 | 0.918182 |        | 0.162  |
| 14824 | ENSG00000BAG4      | 1 | 0.872727 | 0.936364 | 0.887879 | 0.4624 | 0.5713 |
| 14825 | ENSG00000HIST3H2BB | 1 | 0.831313 | 0.909259 | 0.877778 |        |        |
| 14826 | ENSG00000GLG1      | 1 | 0.955556 | 0.977778 | 0.989899 |        |        |
| 14827 | ENSG00000GNPTG     | 1 | 0.955556 | 0.977778 | 0.992929 | 0.3856 | 0.2228 |
| 14828 | ENSG00000SSR3      | 1 | 0.909192 | 0.954596 | 0.982281 | 0.3225 | 0.3597 |
| 14829 | ENSG00000SLC12A5   | 1 | 0.913131 | 0.956566 | 0.927273 | 0.2859 | 0.2787 |
| 14830 | ENSG00000CCR9      | 1 | 0.830867 | 0.915433 | 0.90592  |        |        |
| 14831 | ENSG00000STEAP2    | 1 | 0.834343 | 0.917172 | 0.933333 |        | 0.4698 |
| 14832 | ENSG00000OXSR1     | 1 | 0.831313 | 0.915152 | 0.90202  | 0.317  |        |
| 14833 | ENSG00000ALDH9A1   | 1 | 0.869979 | 0.934989 | 0.939746 |        |        |
| 14834 | ENSG00000RPL21     | 1 | 0.911205 | 0.955603 | 0.952431 |        |        |
| 14835 | ENSG00000LRRCC1    | 1 | 0.912121 | 0.955892 | 0.918182 |        |        |
| 14836 | ENSG00000HIST1H2BK | 1 | 0.831313 | 0.909259 | 0.877778 |        |        |
| 14837 | ENSG00000RNF20     | 1 | 0.870707 | 0.935017 | 0.908081 |        |        |
| 14838 | ENSG00000NDUFB10   | 1 | 0.869979 | 0.934989 | 0.94926  |        |        |
| 14839 | ENSG00000RIC8B     | 1 | 0.913131 | 0.956566 | 0.959596 |        |        |
| 14840 | ENSG00000ACTA1     | 1 | 0.872727 | 0.936364 | 0.916162 |        |        |
| 14841 | ENSG00000CYB5B     | 1 | 0.955556 | 0.977778 | 0.958586 |        | 0.4835 |
| 14842 | ENSG00000PAGE1     | 1 | 1        | 1        | 1        |        |        |
| 14843 | ENSG00000HIST2H2AA | 1 | 0.826638 | 0.912615 | 0.871036 |        |        |
| 14844 | ENSG00000CNIH1     | 1 | 0.955556 | 0.977778 | 0.976768 |        |        |
| 14845 | ENSG00000RASSF2    | 1 | 0.954545 | 0.977273 | 0.9926   |        |        |
| 14846 | ENSG00000HIST1H2AK | 1 | 0.826638 | 0.912615 | 0.871036 |        |        |
| 14847 | ENSG00000HNRNPA1P4 | 1 | 0.829293 | 0.907912 | 0.879798 |        |        |
| 14848 | ENSG00000MRPL9     | 1 | 0.872727 | 0.936364 | 0.919192 |        |        |

|       |           |           |   |          |          |          |        |        |
|-------|-----------|-----------|---|----------|----------|----------|--------|--------|
| 14849 | ENSG00000 | ZMAT5     | 1 | 0.955556 | 0.977778 | 0.992929 | 0.2957 |        |
| 14850 | ENSG00000 | HIST2H2BF | 1 | 0.831313 | 0.909259 | 0.877778 |        |        |
| 14851 | ENSG00000 | HIST1H2AJ | 1 | 0.826638 | 0.912615 | 0.871036 |        |        |
| 14852 | ENSG00000 | LMNB1     | 1 | 0.913131 | 0.971044 | 0.953535 |        |        |
| 14853 | ENSG00000 | HIST1H2AL | 1 | 0.826638 | 0.912615 | 0.871036 |        |        |
| 14854 | ENSG00000 | LRRRC30   | 1 | 0.79798  | 0.89899  | 0.89899  |        |        |
| 14855 | ENSG00000 | ZFAND1    | 1 | 0.954545 | 0.977273 | 0.973573 | 0.2846 |        |
| 14856 | ENSG00000 | SMCR8     | 1 | 0.831313 | 0.929966 | 0.890909 |        |        |
| 14857 | ENSG00000 | HIST1H2AB | 1 | 0.826638 | 0.912615 | 0.871036 |        |        |
| 14858 | ENSG00000 | EPS15L1   | 1 | 0.912121 | 0.955892 | 0.942424 |        |        |
| 14859 | ENSG00000 | HIST1H2AM | 1 | 0.826638 | 0.912615 | 0.871036 |        |        |
| 14860 | ENSG00000 | SPDYE4    | 1 | 0.79798  | 0.89899  | 0.930303 |        |        |
| 14861 | ENSG00000 | AL031777. | 1 | 0.826638 | 0.912615 | 0.871036 |        |        |
| 14862 | ENSG00000 | FXR2      | 1 | 0.913131 | 0.956566 | 0.926263 |        |        |
| 14863 | ENSG00000 | CLUAP1    | 1 | 0.955556 | 0.977778 | 0.967677 | 0.2934 |        |
| 14864 | ENSG00000 | IMPAD1    | 1 | 0.955556 | 0.977778 | 0.963636 | 0.337  |        |
| 14865 | ENSG00000 | CAPRIN1   | 1 | 0.912121 | 0.94899  | 0.929293 | 0.2544 | 0.3129 |
| 14866 | ENSG00000 | PGGHG     | 1 | 0.872727 | 0.936364 | 0.927273 |        | 0.3957 |
| 14867 | ENSG00000 | ARFRP1    | 1 | 0.955556 | 0.977778 | 0.992929 |        |        |
| 14868 | ENSG00000 | ABCE1     | 1 | 0.870707 | 0.935017 | 0.89697  |        | 0.3533 |
| 14869 | ENSG00000 | RPS3A     | 1 | 0.869979 | 0.934989 | 0.946089 |        |        |
| 14870 | ENSG00000 | TRAP1     | 1 | 0.911205 | 0.955603 | 0.953488 |        |        |
| 14871 | ENSG00000 | MTX1      | 1 | 0.834343 | 0.917172 | 0.90101  |        |        |
| 14872 | ENSG00000 | CEL       | 1 | 0.801932 | 0.900966 | 0.960386 |        |        |
| 14873 | ENSG00000 | ZNF366    | 1 | 0.827696 | 0.934461 | 0.903805 |        |        |
| 14874 | ENSG00000 | PIBF1     | 1 | 1        | 1        | 1        |        |        |
| 14875 | ENSG00000 | RPL10     | 1 | 0.872727 | 0.936364 | 0.918182 | 0.2761 | 0.3378 |
| 14876 | ENSG00000 | BSX       | 1 | 0.831313 | 0.915152 | 0.884848 |        |        |
| 14877 | ENSG00000 | APLP2     | 1 | 1        | 1        | 1        |        |        |
| 14878 | ENSG00000 | PPM1B     | 1 | 0.872727 | 0.936364 | 0.945455 |        |        |
| 14879 | ENSG00000 | CPT1B     | 1 | 0.79798  | 0.89899  | 0.909091 |        |        |
| 14880 | ENSG00000 | RD3       | 1 | 0.798068 | 0.89839  | 0.916908 |        |        |
| 14881 | ENSG00000 | APTX      | 1 | 0.872727 | 0.936364 | 0.949495 |        |        |
| 14882 | ENSG00000 | GABRB2    | 1 | 0.872727 | 0.936364 | 0.924242 |        |        |
| 14883 | ENSG00000 | TXNDC16   | 1 | 1        | 1        | 1        | 0.3323 |        |
| 14884 | ENSG00000 | RHOXF2    | 1 | 0.911205 | 0.955603 | 0.946089 |        |        |
| 14885 | ENSG00000 | HIST1H2BN | 1 | 0.831313 | 0.909259 | 0.877778 |        |        |
| 14886 | ENSG00000 | H2BFS     | 1 | 0.831313 | 0.909259 | 0.877778 |        |        |
| 14887 | ENSG00000 | HAUS8     | 1 | 0.913131 | 0.956566 | 0.930303 | 0.3836 |        |
| 14888 | ENSG00000 | ADI1      | 1 | 0.831313 | 0.929966 | 0.891919 |        |        |
| 14889 | ENSG00000 | KLHL5     | 1 | 0.955556 | 0.977778 | 0.959596 |        |        |
| 14890 | ENSG00000 | KLC2      | 1 | 0.831313 | 0.915152 | 0.917172 |        |        |
| 14891 | ENSG00000 | FREM2     | 1 | 0.867865 | 0.93358  | 0.955603 | 0.4565 |        |
| 14892 | ENSG00000 | ZSWIM8    | 1 | 0.826638 | 0.912615 | 0.896406 |        |        |
| 14893 | ENSG00000 | URM1      | 1 | 0.834343 | 0.917172 | 0.928283 |        |        |
| 14894 | ENSG00000 | GOLGB1    | 1 | 0.834343 | 0.917172 | 0.911111 |        |        |
| 14895 | ENSG00000 | GEMIN4    | 1 | 0.831313 | 0.915152 | 0.911111 |        |        |
| 14896 | ENSG00000 | CHTOP     | 1 | 0.870707 | 0.935017 | 0.919192 |        |        |
| 14897 | ENSG00000 | ATAD3B    | 1 | 0.870707 | 0.935017 | 0.919192 |        |        |
| 14898 | ENSG00000 | SRMS      | 1 | 0.911205 | 0.955603 | 0.97463  |        |        |
| 14899 | ENSG00000 | PAIP1     | 1 | 0.834343 | 0.917172 | 0.915152 |        |        |
| 14900 | ENSG00000 | NR3C2     | 1 | 0.872727 | 0.936364 | 0.919192 | 0.285  |        |
| 14901 | ENSG00000 | CBFA2T3   | 1 | 0.913131 | 0.956566 | 0.940404 |        |        |
| 14902 | ENSG00000 | ENTHD1    | 1 | 0.834343 | 0.917172 | 0.906061 |        |        |
| 14903 | ENSG00000 | NELFB     | 1 | 0.830303 | 0.914478 | 0.90202  | 0.391  |        |

|       |                    |   |          |          |          |        |        |
|-------|--------------------|---|----------|----------|----------|--------|--------|
| 14904 | ENSG00000MEOX2     | 1 | 0.955556 | 0.977778 | 0.983838 |        |        |
| 14905 | ENSG00000EFNA4     | 1 | 0.827696 | 0.907329 | 0.895349 |        |        |
| 14906 | ENSG00000CANX      | 1 | 0.912121 | 0.955892 | 0.962626 | 0.4147 |        |
| 14907 | ENSG00000RNF32     | 1 | 0.955556 | 0.977778 | 0.99596  |        |        |
| 14908 | ENSG00000ANKS6     | 1 | 0.869979 | 0.934989 | 0.918605 |        |        |
| 14909 | ENSG00000TOMM22    | 1 | 1        | 1        | 1        |        |        |
| 14910 | ENSG00000MVK       | 1 | 0.955556 | 0.977778 | 0.968687 |        |        |
| 14911 | ENSG00000PNPLA8    | 1 | 0.913131 | 0.956566 | 0.928283 | 0.3874 |        |
| 14912 | ENSG00000LAMTOR2   | 1 | 0.954545 | 0.977273 | 0.957717 |        |        |
| 14913 | ENSG00000NUDT15    | 1 | 0.913131 | 0.956566 | 0.924242 |        |        |
| 14914 | ENSG00000FANCE     | 1 | 0.955556 | 0.977778 | 0.963636 |        |        |
| 14915 | ENSG00000ZNF579    | 1 | 0.830303 | 0.914478 | 0.886869 |        |        |
| 14916 | ENSG00000ELMSAN1   | 1 | 0.870707 | 0.935017 | 0.933333 |        |        |
| 14917 | ENSG00000GNGT2     | 1 | 0.834783 | 0.911111 | 0.953623 |        |        |
| 14918 | ENSG00000SPATA16   | 1 | 0.910148 | 0.947851 | 0.926004 |        |        |
| 14919 | ENSG00000DPM3      | 1 | 0.834343 | 0.917172 | 0.905051 | 0.349  |        |
| 14920 | ENSG00000LMNA      | 1 | 0.831313 | 0.935859 | 0.950505 |        | 0.1693 |
| 14921 | ENSG00000MEGF9     | 1 | 0.955556 | 0.977778 | 0.993939 |        |        |
| 14922 | ENSG00000PRPH2     | 1 | 0.914976 | 0.957488 | 0.998068 |        |        |
| 14923 | ENSG00000PAPPA     | 1 | 0.834343 | 0.917172 | 0.89899  |        |        |
| 14924 | ENSG00000SPANXN4   | 1 | 0.826638 | 0.912615 | 0.922833 |        |        |
| 14925 | ENSG00000NYNRIN    | 1 | 0.834343 | 0.917172 | 0.872727 |        |        |
| 14926 | ENSG00000HIST1H2BM | 1 | 0.831313 | 0.909259 | 0.877778 |        |        |
| 14927 | ENSG00000HIST1H2BG | 1 | 0.831313 | 0.909259 | 0.877778 |        |        |
| 14928 | ENSG00000IFT20     | 1 | 0.955556 | 0.977778 | 0.992929 | 0.3918 |        |
| 14929 | ENSG00000GTPBP3    | 1 | 0.911205 | 0.955603 | 0.971459 |        |        |
| 14930 | ENSG00000CDY2B     | 1 | 0.912121 | 0.955892 | 0.963636 |        |        |
| 14931 | ENSG00000KERA      | 1 | 0.912121 | 0.955892 | 0.930303 |        |        |
| 14932 | ENSG00000HIST1H2BE | 1 | 0.831313 | 0.909259 | 0.877778 |        |        |
| 14933 | ENSG00000CHMP6     | 1 | 0.831313 | 0.909259 | 0.939394 |        |        |
| 14934 | ENSG00000H2BFS     | 1 | 0.831313 | 0.909259 | 0.877778 |        |        |
| 14935 | ENSG00000SAC3D1    | 1 | 0.869979 | 0.934989 | 0.915433 |        |        |
| 14936 | ENSG00000HIST1H2BC | 1 | 0.831313 | 0.909259 | 0.877778 |        |        |
| 14937 | ENSG00000AC104662. | 1 | 0.793939 | 0.896296 | 0.912121 |        |        |
| 14938 | ENSG00000ZNF573    | 1 | 0.834343 | 0.917172 | 0.888889 |        |        |
| 14939 | ENSG00000HIST1H2BH | 1 | 0.831313 | 0.909259 | 0.877778 |        |        |
| 14940 | ENSG00000LBX1      | 1 | 0.902564 | 0.951282 | 0.95     |        |        |
| 14941 | ENSG00000CD164     | 1 | 0.912121 | 0.955892 | 0.949495 |        |        |
| 14942 | ENSG00000CDK5RAP2  | 1 | 0.913131 | 0.956566 | 0.928283 |        |        |
| 14943 | ENSG00000HIST1H2BB | 1 | 0.831313 | 0.909259 | 0.877778 |        |        |
| 14944 | ENSG00000MRPS28    | 1 | 0.872727 | 0.936364 | 0.939394 |        |        |
| 14945 | ENSG00000HIST1H2BF | 1 | 0.831313 | 0.909259 | 0.877778 |        |        |
| 14946 | ENSG00000SHISA6    | 1 | 0.834343 | 0.917172 | 0.891919 |        |        |
| 14947 | ENSG00000HIST1H2BI | 1 | 0.831313 | 0.909259 | 0.877778 |        |        |
| 14948 | ENSG00000FAM182B   | 1 | 0.867865 | 0.93358  | 0.909091 |        |        |
| 14949 | ENSG00000ALPK3     | 1 | 0.911205 | 0.955603 | 0.953488 |        |        |
| 14950 | ENSG00000UBE3B     | 1 | 0.870707 | 0.92862  | 0.970707 |        |        |
| 14951 | ENSG00000TPST1     | 1 | 0.870707 | 0.935017 | 0.90202  |        |        |
| 14952 | ENSG00000NUDT12    | 1 | 0.955556 | 0.977778 | 0.992929 |        |        |
| 14953 | ENSG00000RASGRF2   | 1 | 0.955556 | 0.977778 | 0.989899 | 0.495  |        |
| 14954 | ENSG00000TEX101    | 1 | 0.911205 | 0.955603 | 0.986258 |        |        |
| 14955 | ENSG00000TATDN1    | 1 | 0.872727 | 0.936364 | 0.945455 |        |        |
| 14956 | ENSG00000TMUB2     | 1 | 0.831313 | 0.915152 | 0.956566 | 0.3682 |        |
| 14957 | ENSG00000RPS25     | 1 | 0.955556 | 0.977778 | 0.959596 | 0.2921 | 0.3482 |
| 14958 | ENSG00000LINS1     | 1 | 0.913131 | 0.956566 | 0.924242 |        |        |

|       |                   |   |          |          |          |        |        |
|-------|-------------------|---|----------|----------|----------|--------|--------|
| 14959 | ENSG00000EMC7     | 1 | 0.913131 | 0.956566 | 0.950505 |        |        |
| 14960 | ENSG00000COX6B1   | 1 | 0.913131 | 0.956566 | 0.983838 |        | 0.3279 |
| 14961 | ENSG00000SYCN     | 1 | 0.830867 | 0.915433 | 0.936575 |        |        |
| 14962 | ENSG00000ESX1     | 1 | 0.954545 | 0.977273 | 0.963002 |        |        |
| 14963 | ENSG00000MAGEC1   | 1 | 0.872727 | 0.936364 | 0.935354 |        |        |
| 14964 | ENSG00000ZP4      | 1 | 0.955556 | 0.977778 | 0.980808 |        |        |
| 14965 | ENSG00000KIAA0753 | 1 | 0.831313 | 0.915152 | 0.901010 |        |        |
| 14966 | ENSG00000RPA3     | 1 | 1        | 1        | 1        |        | 0.387  |
| 14967 | ENSG00000SLC6A20  | 1 | 0.870707 | 0.935017 | 0.933333 |        |        |
| 14968 | ENSG00000CHCHD3   | 1 | 1        | 1        | 1        |        | 0.2227 |
| 14969 | ENSG00000HIF3A    | 1 | 0.955556 | 0.977778 | 0.955556 |        |        |
| 14970 | ENSG00000CABS1    | 1 | 0.872727 | 0.936364 | 0.960606 |        |        |
| 14971 | ENSG00000KANK1    | 1 | 1        | 1        | 1        | 0.2883 | 0.228  |
| 14972 | ENSG00000MAP4K2   | 1 | 0.864111 | 0.932056 | 0.947735 |        |        |
| 14973 | ENSG00000SOCS2    | 1 | 0.955556 | 0.977778 | 0.973737 |        |        |
| 14974 | ENSG00000TMEM184C | 1 | 0.872727 | 0.936364 | 0.922222 |        |        |
| 14975 | ENSG00000ZFAND2B  | 1 | 0.870707 | 0.949158 | 0.943434 |        |        |
| 14976 | ENSG00000PISD     | 1 | 0.831313 | 0.909259 | 0.906061 | 0.3983 | 0.3347 |
| 14977 | ENSG00000RPL10L   | 1 | 0.872727 | 0.936364 | 0.918182 |        |        |
| 14978 | ENSG00000KHDC4    | 1 | 0.913131 | 0.956566 | 0.968687 |        | 0.1851 |
| 14979 | ENSG00000DPPA2    | 1 | 0.870707 | 0.935017 | 0.946465 |        | 0.2819 |
| 14980 | ENSG00000FGD6     | 1 | 0.870707 | 0.935017 | 0.893939 |        |        |
| 14981 | ENSG00000GTSF1L   | 1 | 0.954545 | 0.977273 | 0.984144 |        |        |
| 14982 | ENSG00000ARL5A    | 1 | 0.872727 | 0.936364 | 0.930303 |        |        |
| 14983 | ENSG00000DUS1L    | 1 | 0.869979 | 0.934989 | 0.932347 | 0.2584 |        |
| 14984 | ENSG00000SMIM5    | 1 | 0.831313 | 0.915152 | 0.910101 |        |        |
| 14985 | ENSG00000OCRL     | 1 | 0.955556 | 0.977778 | 0.983838 |        |        |
| 14986 | ENSG00000AP1G1    | 1 | 0.872727 | 0.936364 | 0.919192 | 0.1775 |        |
| 14987 | ENSG00000SBN01    | 1 | 0.913131 | 0.956566 | 0.948485 | 0.2737 |        |
| 14988 | ENSG00000SAG      | 1 | 0.914976 | 0.957488 | 0.976812 |        |        |
| 14989 | ENSG00000SCART1   | 1 | 0.79798  | 0.89899  | 0.951515 |        |        |
| 14990 | ENSG00000BP1FA3   | 1 | 0.954545 | 0.977273 | 0.960888 |        |        |
| 14991 | ENSG00000ARR3     | 1 | 0.955556 | 0.977778 | 1        |        |        |
| 14992 | ENSG00000NSMCE2   | 1 | 0.912121 | 0.955892 | 0.926263 |        |        |
| 14993 | ENSG00000TRPC1    | 1 | 0.912121 | 0.955892 | 0.951515 | 0.3933 | 0.2988 |
| 14994 | ENSG00000CAPNS1   | 1 | 0.955556 | 0.977778 | 0.971717 |        |        |
| 14995 | ENSG00000PCDH18   | 1 | 0.869979 | 0.934989 | 0.896406 |        |        |
| 14996 | ENSG00000COPS5    | 1 | 0.955556 | 0.985185 | 0.992929 |        |        |
| 14997 | ENSG00000STX11    | 1 | 0.953488 | 0.976744 | 0.954596 |        |        |
| 14998 | ENSG00000PDE1A    | 1 | 1        | 1        | 1        |        |        |
| 14999 | ENSG00000HDX      | 1 | 0.870707 | 0.935017 | 0.947475 |        |        |
| 15000 | ENSG00000PDCD2L   | 1 | 0.955556 | 0.977778 | 0.974747 |        |        |
| 15001 | ENSG00000PCSK4    | 1 | 1        | 1        | 1        |        |        |
| 15002 | ENSG00000FOX2B    | 1 | 0.834343 | 0.917172 | 0.906061 |        |        |
| 15003 | ENSG00000ARL5B    | 1 | 0.872727 | 0.936364 | 0.930303 |        |        |
| 15004 | ENSG00000NDUFA5   | 1 | 0.955556 | 0.977778 | 0.967677 |        |        |
| 15005 | ENSG00000RARG     | 1 | 0.870707 | 0.935017 | 0.925253 |        |        |
| 15006 | ENSG00000TET2     | 1 | 0.870707 | 0.935017 | 0.938384 | 0.371  |        |
| 15007 | ENSG00000YIPF2    | 1 | 0.955556 | 0.977778 | 0.961616 | 0.472  |        |
| 15008 | ENSG00000MFAP2    | 1 | 1        | 1        | 1        |        |        |
| 15009 | ENSG00000KRT34    | 1 | 0.914976 | 0.957488 | 0.996135 |        |        |
| 15010 | ENSG00000AGL      | 1 | 0.872727 | 0.936364 | 0.950505 |        |        |
| 15011 | ENSG00000KRT33B   | 1 | 0.914976 | 0.957488 | 0.996135 |        |        |
| 15012 | ENSG00000RBMX     | 1 | 0.913131 | 0.956566 | 0.939394 |        |        |
| 15013 | ENSG00000APH1A    | 1 | 1        | 1        | 1        |        | 0.312  |



|       |                    |   |          |          |          |        |        |
|-------|--------------------|---|----------|----------|----------|--------|--------|
| 15014 | ENSG00000EGLN1     | 1 | 0.954545 | 0.977273 | 0.958774 | 0.2851 | 0.3866 |
| 15015 | ENSG00000ZNF75D    | 1 | 0.867865 | 0.93358  | 0.918605 |        | 0.366  |
| 15016 | ENSG00000APOL5     | 1 | 0.955556 | 0.977778 | 0.989899 |        |        |
| 15017 | ENSG00000C2orf74   | 1 | 0.831313 | 0.915152 | 0.913131 |        |        |
| 15018 | ENSG00000TNP1      | 1 | 1        | 1        | 1        |        |        |
| 15019 | ENSG00000QRICH2    | 1 | 0.955556 | 0.97037  | 0.99596  |        |        |
| 15020 | ENSG00000STARD3    | 1 | 0.955556 | 0.977778 | 0.963636 | 0.3751 |        |
| 15021 | ENSG00000TMEM196   | 1 | 0.872727 | 0.936364 | 0.915152 |        |        |
| 15022 | ENSG00000DLST      | 1 | 1        | 1        | 1        |        |        |
| 15023 | ENSG00000KLK14     | 1 | 0.955556 | 0.977778 | 0.989899 |        |        |
| 15024 | ENSG00000AP003108. | 1 | 0.830303 | 0.914478 | 0.922222 |        |        |
| 15025 | ENSG00000C21orf2   | 1 | 0.872727 | 0.957576 | 0.940404 | 0.4764 |        |
| 15026 | ENSG00000ZNF593    | 1 | 0.913131 | 0.956566 | 0.959596 |        |        |
| 15027 | ENSG00000CALHM2    | 1 | 0.953488 | 0.976744 | 0.957918 |        |        |
| 15028 | ENSG00000TNFSF15   | 1 | 0.872727 | 0.936364 | 0.90202  |        |        |
| 15029 | ENSG00000EIF4A2    | 1 | 0.913131 | 0.956566 | 0.930303 | 0.3862 |        |
| 15030 | ENSG00000EPS8      | 1 | 0.910148 | 0.954898 | 0.972516 |        |        |
| 15031 | ENSG00000AIPL1     | 1 | 0.956522 | 0.971014 | 1        |        |        |
| 15032 | ENSG00000FZD6      | 1 | 0.870707 | 0.935017 | 0.968687 | 0.439  |        |
| 15033 | ENSG00000SDS       | 1 | 0.954545 | 0.977273 | 0.9926   |        |        |
| 15034 | ENSG00000STK17A    | 1 | 0.912121 | 0.955892 | 0.926263 | 0.3415 |        |
| 15035 | ENSG00000TPH2      | 1 | 0.914976 | 0.957488 | 0.965217 |        |        |
| 15036 | ENSG00000LYAR      | 1 | 0.913131 | 0.956566 | 0.958586 |        |        |
| 15037 | ENSG00000N6AMT1    | 1 | 0.912121 | 0.963131 | 0.940404 |        |        |
| 15038 | ENSG00000EXTL2     | 1 | 0.910148 | 0.954898 | 0.951374 |        |        |
| 15039 | ENSG00000SLC01B1   | 1 | 0.955556 | 0.977778 | 0.975758 |        |        |
| 15040 | ENSG00000TMEM181   | 1 | 0.913131 | 0.956566 | 0.957576 |        |        |
| 15041 | ENSG00000RFPL4A    | 1 | 0.834343 | 0.917172 | 0.919192 |        |        |
| 15042 | ENSG00000SGMS2     | 1 | 0.912121 | 0.955892 | 0.938384 |        |        |
| 15043 | ENSG00000RFPL4AL1  | 1 | 0.834343 | 0.917172 | 0.919192 |        |        |
| 15044 | ENSG00000ZNF660    | 1 | 0.913131 | 0.956566 | 0.975758 |        |        |
| 15045 | ENSG00000GPR1      | 1 | 0.870707 | 0.935017 | 0.922222 |        |        |
| 15046 | ENSG00000GFER      | 1 | 1        | 1        | 1        | 0.4499 |        |
| 15047 | ENSG00000DCUN1D5   | 1 | 0.955556 | 0.977778 | 0.963636 |        |        |
| 15048 | ENSG00000HIST2H3D  | 1 | 0.870707 | 0.92862  | 0.941414 |        |        |
| 15049 | ENSG00000POC5      | 1 | 0.913131 | 0.956566 | 0.955556 |        |        |
| 15050 | ENSG00000KRT82     | 1 | 0.875362 | 0.937681 | 0.975845 |        |        |
| 15051 | ENSG00000SHISA5    | 1 | 0.911205 | 0.955603 | 0.951374 |        | 0.3972 |
| 15052 | ENSG00000COX5B     | 1 | 0.955556 | 0.977778 | 0.992929 | 0.385  |        |
| 15053 | ENSG00000CTTNBP2NL | 1 | 0.954545 | 0.977273 | 0.963002 |        |        |
| 15054 | ENSG00000CTSV      | 1 | 0.955556 | 0.977778 | 0.977778 |        |        |
| 15055 | ENSG00000HADH      | 1 | 0.954545 | 0.977273 | 0.9926   |        | 0.3718 |
| 15056 | ENSG00000PPIG      | 1 | 0.955556 | 0.977778 | 0.963636 | 0.196  |        |
| 15057 | ENSG00000SPACA3    | 1 | 0.953488 | 0.976744 | 0.990033 |        |        |
| 15058 | ENSG00000AC068631. | 1 | 0.834343 | 0.917172 | 0.912121 |        |        |
| 15059 | ENSG00000UQCRB     | 1 | 0.913131 | 0.956566 | 0.953535 |        |        |
| 15060 | ENSG00000TOM1L1    | 1 | 0.954545 | 0.977273 | 0.989429 |        |        |
| 15061 | ENSG00000SES2      | 1 | 1        | 1        | 1        |        |        |
| 15062 | ENSG00000PTPRO     | 1 | 0.913131 | 0.956566 | 0.965657 |        |        |
| 15063 | ENSG00000TMEM51    | 1 | 0.911205 | 0.955603 | 0.927061 |        |        |
| 15064 | ENSG00000EIF5B     | 1 | 0.912121 | 0.955892 | 0.966667 |        |        |
| 15065 | ENSG00000MTCH1     | 1 | 0.955556 | 0.977778 | 0.992929 |        | 0.2855 |
| 15066 | ENSG00000ZNF443    | 1 | 0.870707 | 0.949158 | 0.930303 |        |        |
| 15067 | ENSG00000PLCB2     | 1 | 0.955556 | 0.977778 | 0.994949 |        | 0.3943 |
| 15068 | ENSG00000H3F3C     | 1 | 0.870707 | 0.92862  | 0.941414 |        |        |

|       |                    |   |          |          |          |        |        |
|-------|--------------------|---|----------|----------|----------|--------|--------|
| 15069 | ENSG00000BPIFB6    | 1 | 0.913131 | 0.956566 | 0.927273 |        |        |
| 15070 | ENSG00000THBS2     | 1 | 0.872727 | 0.936364 | 0.916162 |        |        |
| 15071 | ENSG00000KANK4     | 1 | 1        | 1        | 1        |        | 0.2258 |
| 15072 | ENSG00000LRRRC3    | 1 | 0.913131 | 0.956566 | 0.953535 | 0.562  | 0.2493 |
| 15073 | ENSG00000KIAA1671  | 1 | 0.872727 | 0.936364 | 0.908081 |        |        |
| 15074 | ENSG00000SLC4A2    | 1 | 0.912121 | 0.955892 | 0.953535 |        |        |
| 15075 | ENSG00000SFTPC     | 1 | 0.872727 | 0.936364 | 0.963636 |        |        |
| 15076 | ENSG00000MACROD1   | 1 | 1        | 1        | 1        |        | 0.3329 |
| 15077 | ENSG00000ALOX12B   | 1 | 0.869979 | 0.934989 | 0.963002 |        |        |
| 15078 | ENSG00000TRABD2A   | 1 | 0.872727 | 0.936364 | 0.916162 |        |        |
| 15079 | ENSG00000MRPS36    | 1 | 1        | 1        | 1        |        |        |
| 15080 | ENSG00000FUT2      | 1 | 0.869979 | 0.934989 | 0.978858 | 0.3187 |        |
| 15081 | ENSG00000CSNK2B    | 1 | 0.834343 | 0.944781 | 0.922222 | 0.283  |        |
| 15082 | ENSG00000GOT1L1    | 1 | 0.912121 | 0.955892 | 0.935354 |        |        |
| 15083 | ENSG00000ATAD3A    | 1 | 0.870707 | 0.935017 | 0.919192 |        |        |
| 15084 | ENSG00000COL26A1   | 1 | 0.913131 | 0.956566 | 0.956566 |        |        |
| 15085 | ENSG00000TPP2      | 1 | 1        | 1        | 1        |        | 0.1919 |
| 15086 | ENSG00000HIST1H3J  | 1 | 0.870707 | 0.92862  | 0.941414 |        |        |
| 15087 | ENSG00000HIST1H3D  | 1 | 0.870707 | 0.92862  | 0.941414 |        |        |
| 15088 | ENSG00000ZNF614    | 1 | 0.955556 | 0.977778 | 0.992929 | 0.4229 | 0.5561 |
| 15089 | ENSG00000ANKHD1-EI | 1 | 0.872727 | 0.936364 | 0.888889 |        |        |
| 15090 | ENSG00000IQCK      | 1 | 0.872727 | 0.936364 | 0.954545 |        |        |
| 15091 | ENSG00000COPS7B    | 1 | 0.955556 | 0.977778 | 0.975758 |        |        |
| 15092 | ENSG00000TSHZ1     | 1 | 0.872727 | 0.936364 | 0.943434 |        |        |
| 15093 | ENSG00000DDAH2     | 1 | 0.872727 | 0.936364 | 0.90303  |        |        |
| 15094 | ENSG00000NETO2     | 1 | 0.913131 | 0.956566 | 0.924242 |        |        |
| 15095 | ENSG00000SDC2      | 1 | 0.910148 | 0.954898 | 0.95666  |        |        |
| 15096 | ENSG00000DUSP10    | 1 | 0.955556 | 0.977778 | 0.993939 |        |        |
| 15097 | ENSG00000NDUFB6    | 1 | 0.911205 | 0.955603 | 0.983087 |        |        |
| 15098 | ENSG00000NME6      | 1 | 0.913131 | 0.956566 | 0.923232 |        |        |
| 15099 | ENSG00000MPP7      | 1 | 0.955556 | 0.977778 | 0.962626 |        |        |
| 15100 | ENSG00000FXN       | 1 | 0.913131 | 0.956566 | 0.953535 |        |        |
| 15101 | ENSG00000CHP2      | 1 | 0.910148 | 0.962297 | 0.957717 |        |        |
| 15102 | ENSG00000HIST2H3PS | 1 | 0.870707 | 0.92862  | 0.941414 |        |        |
| 15103 | ENSG00000HIST2H3A  | 1 | 0.870707 | 0.92862  | 0.941414 |        |        |
| 15104 | ENSG00000PSMD1     | 1 | 0.872727 | 0.957576 | 0.945455 |        | 0.4657 |
| 15105 | ENSG00000THUMP2    | 1 | 1        | 1        | 1        |        |        |
| 15106 | ENSG00000PSAP      | 1 | 0.870707 | 0.935017 | 0.937374 |        |        |
| 15107 | ENSG00000TRIM7     | 1 | 0.955556 | 0.977778 | 0.992929 |        |        |
| 15108 | ENSG00000HEPHL1    | 1 | 0.870707 | 0.935017 | 0.963636 |        |        |
| 15109 | ENSG00000ZNF799    | 1 | 0.870707 | 0.949158 | 0.930303 |        |        |
| 15110 | ENSG00000RPA4      | 1 | 0.870707 | 0.935017 | 0.932323 |        |        |
| 15111 | ENSG00000SIRPA     | 1 | 0.872727 | 0.936364 | 0.923232 |        |        |
| 15112 | ENSG00000DMD       | 1 | 0.870707 | 0.942088 | 0.926263 |        |        |
| 15113 | ENSG00000RIC3      | 1 | 0.912121 | 0.955892 | 0.984848 |        |        |
| 15114 | ENSG00000ANKRD37   | 1 | 0.872727 | 0.936364 | 0.942424 |        |        |
| 15115 | ENSG00000HYI       | 1 | 0.909192 | 0.954596 | 0.950166 |        |        |
| 15116 | ENSG00000ZSCAN2    | 1 | 0.913131 | 0.956566 | 0.926263 | 0.2213 |        |
| 15117 | ENSG00000GPANK1    | 1 | 0.872727 | 0.936364 | 0.922222 |        |        |
| 15118 | ENSG00000ARHGAP12  | 1 | 0.913131 | 0.956566 | 0.968687 |        |        |
| 15119 | ENSG00000TAOK1     | 1 | 0.954545 | 0.977273 | 0.976744 |        |        |
| 15120 | ENSG00000XPR1      | 1 | 1        | 1        | 1        |        |        |
| 15121 | ENSG00000CSGALNACT | 1 | 0.912121 | 0.94899  | 0.987879 |        |        |
| 15122 | ENSG00000ABCA5     | 1 | 0.955556 | 0.977778 | 0.989899 | 0.282  | 0.4941 |
| 15123 | ENSG00000LGSN      | 1 | 0.956522 | 0.978261 | 1        |        |        |

|       |           |           |   |          |          |          |        |        |
|-------|-----------|-----------|---|----------|----------|----------|--------|--------|
| 15124 | ENSG00000 | TMEM35B   | 1 | 0.870707 | 0.935017 | 0.929293 |        |        |
| 15125 | ENSG00000 | GLYCTK    | 1 | 0.913131 | 0.956566 | 0.957576 |        | 0.5648 |
| 15126 | ENSG00000 | THSD7B    | 1 | 1        | 1        | 1        |        |        |
| 15127 | ENSG00000 | SPACA7    | 1 | 0.955556 | 0.977778 | 0.99596  |        |        |
| 15128 | ENSG00000 | TOGARAM2  | 1 | 0.870707 | 0.949158 | 0.949495 |        |        |
| 15129 | ENSG00000 | FBX033    | 1 | 0.913131 | 0.956566 | 0.987879 |        |        |
| 15130 | ENSG00000 | GOLGA4    | 1 | 1        | 1        | 1        |        | 0.289  |
| 15131 | ENSG00000 | CRYBA2    | 1 | 0.914976 | 0.957488 | 0.995169 |        |        |
| 15132 | ENSG00000 | CDY1      | 1 | 0.912121 | 0.955892 | 0.963636 |        |        |
| 15133 | ENSG00000 | CDY1B     | 1 | 0.912121 | 0.955892 | 0.963636 |        |        |
| 15134 | ENSG00000 | H3.Y      | 1 | 0.870707 | 0.92862  | 0.941414 |        |        |
| 15135 | ENSG00000 | RNF214    | 1 | 0.913131 | 0.956566 | 0.983838 |        | 0.3139 |
| 15136 | ENSG00000 | ZNF71     | 1 | 0.911205 | 0.955603 | 0.926004 |        |        |
| 15137 | ENSG00000 | HIST1H3G  | 1 | 0.870707 | 0.92862  | 0.941414 |        |        |
| 15138 | ENSG00000 | KRTAP2-3  | 1 | 0.872464 | 0.929469 | 0.95942  |        |        |
| 15139 | ENSG00000 | HIST1H3B  | 1 | 0.870707 | 0.92862  | 0.941414 |        |        |
| 15140 | ENSG00000 | MAP1LC3B2 | 1 | 0.872727 | 0.957576 | 0.90101  |        |        |
| 15141 | ENSG00000 | ACTN3     | 1 | 0.870707 | 0.935017 | 0.934343 |        |        |
| 15142 | ENSG00000 | KRTAP2-1  | 1 | 0.872464 | 0.929469 | 0.95942  |        |        |
| 15143 | ENSG00000 | LSMEM1    | 1 | 0.913131 | 0.956566 | 0.932323 |        |        |
| 15144 | ENSG00000 | HIST1H3E  | 1 | 0.870707 | 0.92862  | 0.941414 |        |        |
| 15145 | ENSG00000 | KRTAP2-4  | 1 | 0.872464 | 0.929469 | 0.95942  |        |        |
| 15146 | ENSG00000 | PAGE5     | 1 | 0.955556 | 0.977778 | 0.99596  |        |        |
| 15147 | ENSG00000 | HIST1H3I  | 1 | 0.870707 | 0.92862  | 0.941414 |        |        |
| 15148 | ENSG00000 | HIST1H3A  | 1 | 0.870707 | 0.92862  | 0.941414 |        |        |
| 15149 | ENSG00000 | KANK2     | 1 | 0.870707 | 0.935017 | 0.966667 |        |        |
| 15150 | ENSG00000 | KRTAP2-2  | 1 | 0.872464 | 0.929469 | 0.95942  |        |        |
| 15151 | ENSG00000 | HIST1H3F  | 1 | 0.870707 | 0.92862  | 0.941414 |        |        |
| 15152 | ENSG00000 | TRABD2B   | 1 | 0.872727 | 0.936364 | 0.916162 |        |        |
| 15153 | ENSG00000 | LAMP1     | 1 | 0.913131 | 0.956566 | 0.924242 |        |        |
| 15154 | ENSG00000 | HIST1H3C  | 1 | 0.870707 | 0.92862  | 0.941414 |        |        |
| 15155 | ENSG00000 | HIST1H3H  | 1 | 0.870707 | 0.92862  | 0.941414 |        |        |
| 15156 | ENSG00000 | KHDC3L    | 1 | 0.872727 | 0.936364 | 0.945455 |        |        |
| 15157 | ENSG00000 | OSBP2     | 1 | 0.913131 | 0.956566 | 0.929293 |        |        |
| 15158 | ENSG00000 | UBAP1     | 1 | 0.955556 | 0.977778 | 0.962626 |        |        |
| 15159 | ENSG00000 | CDCA4     | 1 | 0.913131 | 0.956566 | 0.973737 |        |        |
| 15160 | ENSG00000 | CNNM3     | 1 | 0.954545 | 0.977273 | 0.961945 |        |        |
| 15161 | ENSG00000 | NDUFA13   | 1 | 0.910148 | 0.954898 | 0.95666  |        | 0.2469 |
| 15162 | ENSG00000 | TMEM192   | 1 | 0.913131 | 0.956566 | 0.983838 | 0.4498 | 0.3211 |
| 15163 | ENSG00000 | ATP5PF    | 1 | 1        | 1        | 1        | 0.316  | 0.3587 |
| 15164 | ENSG00000 | AC008758. | 1 | 0.870707 | 0.949158 | 0.930303 |        |        |
| 15165 | ENSG00000 | UCN       | 1 | 0.955556 | 0.977778 | 0.992929 |        |        |
| 15166 | ENSG00000 | COG5      | 1 | 0.955556 | 0.977778 | 0.976768 |        |        |
| 15167 | ENSG00000 | SMIM17    | 1 | 0.872727 | 0.936364 | 0.925253 |        |        |
| 15168 | ENSG00000 | MAGEB18   | 1 | 0.912121 | 0.955892 | 0.979798 |        |        |
| 15169 | ENSG00000 | MCU       | 1 | 1        | 1        | 1        |        |        |
| 15170 | ENSG00000 | COQ4      | 1 | 0.955556 | 0.977778 | 0.961616 |        |        |
| 15171 | ENSG00000 | NEFL      | 1 | 0.872727 | 0.936364 | 0.922222 |        |        |
| 15172 | ENSG00000 | PMPCA     | 1 | 0.955556 | 0.977778 | 0.975758 | 0.464  |        |
| 15173 | ENSG00000 | CRYAA     | 1 | 0.956522 | 0.978261 | 1        |        |        |
| 15174 | ENSG00000 | ADGRG4    | 1 | 1        | 1        | 1        |        |        |
| 15175 | ENSG00000 | ERAP1     | 1 | 0.955556 | 0.977778 | 0.99596  |        |        |
| 15176 | ENSG00000 | VPS26C    | 1 | 1        | 1        | 1        |        | 0.2958 |
| 15177 | ENSG00000 | TMEM268   | 1 | 1        | 1        | 1        |        |        |
| 15178 | ENSG00000 | PCDHGC3   | 1 | 0.872727 | 0.936364 | 0.945455 |        |        |

|       |                   |   |          |          |          |        |        |        |
|-------|-------------------|---|----------|----------|----------|--------|--------|--------|
| 15179 | ENSG00000FAM213B  | 1 | 1        | 1        | 1        |        |        | 0.4467 |
| 15180 | ENSG00000CDY2A    | 1 | 0.912121 | 0.955892 | 0.963636 |        |        |        |
| 15181 | ENSG00000PCDHGC4  | 1 | 0.872727 | 0.936364 | 0.945455 |        |        |        |
| 15182 | ENSG00000SRRM2    | 1 | 0.955556 | 0.977778 | 0.963636 | 0.3647 |        |        |
| 15183 | ENSG00000GPAT4    | 1 | 1        | 1        | 1        | 0.44   |        |        |
| 15184 | ENSG00000KATNAL2  | 1 | 0.955556 | 0.985185 | 0.963636 |        |        |        |
| 15185 | ENSG00000FAM180B  | 1 | 0.911205 | 0.955603 | 0.954545 |        |        | 0.2524 |
| 15186 | ENSG00000PCDHGC5  | 1 | 0.872727 | 0.936364 | 0.946465 |        |        |        |
| 15187 | ENSG00000GHDC     | 1 | 0.955556 | 0.977778 | 0.967677 |        |        |        |
| 15188 | ENSG00000IRX6     | 1 | 1        | 1        | 1        | 0.2734 | 0.3999 |        |
| 15189 | ENSG00000PCDHGA12 | 1 | 0.872727 | 0.936364 | 0.945455 |        |        |        |
| 15190 | ENSG00000HSPBAP1  | 1 | 0.955556 | 0.977778 | 0.959596 |        |        |        |
| 15191 | ENSG00000PCDHGB6  | 1 | 0.872727 | 0.936364 | 0.945455 |        |        |        |
| 15192 | ENSG00000ANAPC16  | 1 | 0.955556 | 0.977778 | 0.992929 |        |        |        |
| 15193 | ENSG00000PCDHGA5  | 1 | 0.872727 | 0.936364 | 0.945455 |        |        |        |
| 15194 | ENSG00000PCDHGA7  | 1 | 0.872727 | 0.936364 | 0.945455 |        |        |        |
| 15195 | ENSG00000SPANXD   | 1 | 0.912121 | 0.94899  | 0.956566 |        |        |        |
| 15196 | ENSG00000PCDHGA6  | 1 | 0.872727 | 0.936364 | 0.945455 |        |        |        |
| 15197 | ENSG00000PCDHGA8  | 1 | 0.872727 | 0.936364 | 0.945455 |        |        |        |
| 15198 | ENSG00000PCDHGA11 | 1 | 0.872727 | 0.936364 | 0.945455 |        |        |        |
| 15199 | ENSG00000PCDHGB2  | 1 | 0.872727 | 0.936364 | 0.945455 |        |        |        |
| 15200 | ENSG00000PCDHGB4  | 1 | 0.872727 | 0.936364 | 0.945455 |        |        |        |
| 15201 | ENSG00000PCDHGB7  | 1 | 0.872727 | 0.936364 | 0.945455 |        |        |        |
| 15202 | ENSG00000PCDHGB1  | 1 | 0.872727 | 0.936364 | 0.945455 |        |        |        |
| 15203 | ENSG00000PCDHGA3  | 1 | 0.872727 | 0.936364 | 0.945455 |        |        |        |
| 15204 | ENSG00000HORMAD2  | 1 | 0.953488 | 0.976744 | 0.96124  |        |        |        |
| 15205 | ENSG00000POMK     | 1 | 0.913131 | 0.956566 | 0.950505 |        |        |        |
| 15206 | ENSG00000PTCH1    | 1 | 0.913131 | 0.956566 | 0.950505 |        |        |        |
| 15207 | ENSG00000H1F0     | 1 | 0.912121 | 0.955892 | 0.956566 |        |        | 0.418  |
| 15208 | ENSG00000PEX19    | 1 | 1        | 1        | 1        |        |        |        |
| 15209 | ENSG00000PCDHGA9  | 1 | 0.872727 | 0.936364 | 0.945455 |        |        |        |
| 15210 | ENSG00000PDE11A   | 1 | 0.872727 | 0.936364 | 0.933333 |        |        |        |
| 15211 | ENSG00000CYC1     | 1 | 0.952381 | 0.97619  | 0.960511 |        |        |        |
| 15212 | ENSG00000PCDHGA4  | 1 | 0.872727 | 0.936364 | 0.945455 |        |        |        |
| 15213 | ENSG00000SPANXA1  | 1 | 0.912121 | 0.94899  | 0.956566 |        |        |        |
| 15214 | ENSG00000CDC42EP3 | 1 | 1        | 1        | 1        |        |        |        |
| 15215 | ENSG00000ZNF454   | 1 | 0.954545 | 0.977273 | 0.957717 |        |        | 0.4451 |
| 15216 | ENSG00000TRIM46   | 1 | 1        | 1        | 1        |        |        |        |
| 15217 | ENSG00000SPANXC   | 1 | 0.912121 | 0.94899  | 0.956566 |        |        |        |
| 15218 | ENSG00000ZNRF1    | 1 | 0.913131 | 0.956566 | 0.953535 |        |        |        |
| 15219 | ENSG00000GTPBP8   | 1 | 1        | 1        | 1        |        |        |        |
| 15220 | ENSG00000PHLDB3   | 1 | 0.954545 | 0.977273 | 0.966173 |        |        |        |
| 15221 | ENSG00000ATP5ME   | 1 | 0.955556 | 0.977778 | 0.992929 | 0.4276 | 0.4419 |        |
| 15222 | ENSG00000NDUFA3   | 1 | 0.955556 | 0.977778 | 0.973737 |        |        |        |
| 15223 | ENSG00000SPANXA2  | 1 | 0.912121 | 0.94899  | 0.956566 |        |        |        |
| 15224 | ENSG00000RBMXL3   | 1 | 0.954545 | 0.977273 | 0.977801 |        |        |        |
| 15225 | ENSG00000PCDHGB5  | 1 | 0.872727 | 0.936364 | 0.945455 |        |        |        |
| 15226 | ENSG00000HMGB4    | 1 | 0.953488 | 0.976744 | 0.990033 |        |        |        |
| 15227 | ENSG00000HLA-DQB2 | 1 | 0.872727 | 0.936364 | 0.968687 |        |        |        |
| 15228 | ENSG00000AGPAT2   | 1 | 0.955556 | 0.977778 | 0.992929 |        |        |        |
| 15229 | ENSG00000WDR73    | 1 | 0.954545 | 0.977273 | 0.975687 |        |        |        |
| 15230 | ENSG00000NUP62    | 1 | 0.912121 | 0.963131 | 0.937374 |        |        |        |
| 15231 | ENSG00000GAST     | 1 | 0.913131 | 0.956566 | 0.972727 |        |        |        |
| 15232 | ENSG00000HGSNAT   | 1 | 1        | 1        | 1        |        |        |        |
| 15233 | ENSG00000DHX16    | 1 | 0.912121 | 0.955892 | 0.953535 |        |        |        |

|       |           |           |   |          |          |          |        |
|-------|-----------|-----------|---|----------|----------|----------|--------|
| 15234 | ENSG00000 | VEGFD     | 1 | 1        | 1        | 1        |        |
| 15235 | ENSG00000 | TCHHL1    | 1 | 0.914976 | 0.957488 | 0.976812 |        |
| 15236 | ENSG00000 | UFSP1     | 1 | 0.955556 | 0.977778 | 0.962626 |        |
| 15237 | ENSG00000 | COX11     | 1 | 1        | 1        | 1        |        |
| 15238 | ENSG00000 | SPATA12   | 1 | 0.913131 | 0.956566 | 0.971717 |        |
| 15239 | ENSG00000 | RBMXL1    | 1 | 0.913131 | 0.956566 | 0.939394 |        |
| 15240 | ENSG00000 | KRT74     | 1 | 0.955556 | 0.977778 | 1        |        |
| 15241 | ENSG00000 | SPANXB1   | 1 | 0.912121 | 0.94899  | 0.956566 |        |
| 15242 | ENSG00000 | CRYBB2    | 1 | 0.875362 | 0.937681 | 0.972947 |        |
| 15243 | ENSG00000 | PHB       | 1 | 1        | 1        | 1        |        |
| 15244 | ENSG00000 | PRR15L    | 1 | 1        | 1        | 1        |        |
| 15245 | ENSG00000 | AGPAT1    | 1 | 0.913131 | 0.956566 | 0.950505 |        |
| 15246 | ENSG00000 | SLC36A4   | 1 | 0.955556 | 0.977778 | 0.959596 | 0.2184 |
| 15247 | ENSG00000 | KRT72     | 1 | 0.956522 | 0.978261 | 1        |        |
| 15248 | ENSG00000 | HES7      | 1 | 0.955556 | 0.977778 | 0.963636 |        |
| 15249 | ENSG00000 | GRIN2B    | 1 | 0.913131 | 0.956566 | 0.927273 |        |
| 15250 | ENSG00000 | AGER      | 1 | 0.912121 | 0.963131 | 0.958586 |        |
| 15251 | ENSG00000 | TMEM120B  | 1 | 0.913131 | 0.956566 | 0.983838 |        |
| 15252 | ENSG00000 | EXOC3L1   | 1 | 0.955556 | 0.977778 | 0.975758 |        |
| 15253 | ENSG00000 | TLK1      | 1 | 0.954545 | 0.977273 | 0.954545 |        |
| 15254 | ENSG00000 | DPY19L2   | 1 | 0.955556 | 0.977778 | 0.99596  |        |
| 15255 | ENSG00000 | KRTAP24-1 | 1 | 0.914976 | 0.957488 | 0.996135 |        |
| 15256 | ENSG00000 | C1GALT1C1 | 1 | 1        | 1        | 1        | 0.2794 |
| 15257 | ENSG00000 | EXOC7     | 1 | 0.955556 | 0.977778 | 0.975758 |        |
| 15258 | ENSG00000 | CEP57L1   | 1 | 0.955556 | 0.977778 | 0.974747 | 0.2716 |
| 15259 | ENSG00000 | MAB21L3   | 1 | 1        | 1        | 1        |        |
| 15260 | ENSG00000 | KRTAP11-1 | 1 | 0.956522 | 0.971014 | 1        |        |
| 15261 | ENSG00000 | ZNF397    | 1 | 0.955556 | 0.977778 | 0.963636 |        |
| 15262 | ENSG00000 | ZSCAN30   | 1 | 0.955556 | 0.977778 | 0.974747 |        |
| 15263 | ENSG00000 | HACD2     | 1 | 0.913131 | 0.956566 | 0.983838 |        |
| 15264 | ENSG00000 | TMPPE     | 1 | 0.955556 | 0.977778 | 0.974747 |        |
| 15265 | ENSG00000 | FAM186A   | 1 | 0.955556 | 0.977778 | 0.992929 |        |
| 15266 | ENSG00000 | LRIT2     | 1 | 0.914976 | 0.957488 | 0.996135 |        |
| 15267 | ENSG00000 | BCL2L2-PA | 1 | 0.913131 | 0.956566 | 0.960606 |        |
| 15268 | ENSG00000 | TNFRSF13B | 1 | 0.913131 | 0.956566 | 0.980808 |        |
| 15269 | ENSG00000 | HIST1H1T  | 1 | 0.955556 | 0.977778 | 0.99596  |        |
| 15270 | ENSG00000 | C3orf22   | 1 | 1        | 1        | 1        |        |
| 15271 | ENSG00000 | MRPS23    | 1 | 1        | 1        | 1        |        |
| 15272 | ENSG00000 | KRT73     | 1 | 0.956522 | 0.978261 | 1        |        |
| 15273 | ENSG00000 | KRT26     | 1 | 0.956522 | 0.978261 | 1        |        |
| 15274 | ENSG00000 | PAGE3     | 1 | 0.955556 | 0.977778 | 0.963636 |        |
| 15275 | ENSG00000 | TMEM250   | 1 | 0.955556 | 0.97037  | 0.963636 |        |
| 15276 | ENSG00000 | CTAG1A    | 1 | 0.953488 | 0.976744 | 0.972315 |        |
| 15277 | ENSG00000 | NOTCH2NL  | 1 | 0.913131 | 0.956566 | 0.993939 |        |
| 15278 | ENSG00000 | CLEC4C    | 1 | 0.955556 | 0.977778 | 0.993939 |        |
| 15279 | ENSG00000 | C12orf56  | 1 | 1        | 1        | 1        |        |
| 15280 | ENSG00000 | MT-C01    | 1 | 0.955556 | 0.977778 | 0.992929 |        |
| 15281 | ENSG00000 | PIP4K2B   | 1 | 0.954545 | 0.977273 | 0.961945 |        |
| 15282 | ENSG00000 | LRCH3     | 1 | 1        | 1        | 1        |        |
| 15283 | ENSG00000 | PSMB11    | 1 | 0.954545 | 0.969697 | 1        |        |
| 15284 | ENSG00000 | SLC01B7   | 1 | 0.955556 | 0.977778 | 0.975758 |        |
| 15285 | ENSG00000 | ACTL7A    | 1 | 1        | 1        | 1        |        |
| 15286 | ENSG00000 | FABP9     | 1 | 0.956522 | 0.971014 | 1        |        |
| 15287 | ENSG00000 | GAGE2A    | 1 | 1        | 1        | 1        |        |
| 15288 | ENSG00000 | AC021097. | 1 | 0.955556 | 0.97037  | 0.963636 |        |

|       |           |           |   |          |          |          |        |
|-------|-----------|-----------|---|----------|----------|----------|--------|
| 15289 | ENSG00000 | IP04      | 1 | 1        | 1        | 1        | 0.3778 |
| 15290 | ENSG00000 | ARL9      | 1 | 1        | 1        | 1        |        |
| 15291 | ENSG00000 | PAGE2     | 1 | 0.955556 | 0.977778 | 0.99596  |        |
| 15292 | ENSG00000 | AC011604. | 1 | 0.955556 | 0.977778 | 0.975758 |        |
| 15293 | ENSG00000 | KRT25     | 1 | 0.956522 | 0.978261 | 1        |        |
| 15294 | ENSG00000 | PAGE2B    | 1 | 0.955556 | 0.977778 | 0.99596  |        |
| 15295 | ENSG00000 | FAM49A    | 1 | 1        | 1        | 1        | 0.2895 |
| 15296 | ENSG00000 | ZNF84     | 1 | 1        | 1        | 1        |        |
| 15297 | ENSG00000 | KRTAP16-1 | 1 | 0.956522 | 0.978261 | 1        |        |
| 15298 | ENSG00000 | LPLP1     | 1 | 1        | 1        | 1        |        |
| 15299 | ENSG00000 | MRPL12    | 1 | 0.955556 | 0.977778 | 0.992929 |        |
| 15300 | ENSG00000 | DUSP14    | 1 | 0.955556 | 0.977778 | 0.982828 |        |
| 15301 | ENSG00000 | GAGE1     | 1 | 1        | 1        | 1        |        |
| 15302 | ENSG00000 | GAGE12G   | 1 | 1        | 1        | 1        |        |
| 15303 | ENSG00000 | GAGE10    | 1 | 1        | 1        | 1        |        |
| 15304 | ENSG00000 | GAGE12E   | 1 | 1        | 1        | 1        |        |
| 15305 | ENSG00000 | GAGE12J   | 1 | 1        | 1        | 1        |        |
| 15306 | ENSG00000 | GAGE12H   | 1 | 1        | 1        | 1        |        |
| 15307 | ENSG00000 | GAGE12D   | 1 | 1        | 1        | 1        |        |
| 15308 | ENSG00000 | GAGE12F   | 1 | 1        | 1        | 1        |        |
| 15309 | ENSG00000 | GAGE12C   | 1 | 1        | 1        | 1        |        |
| 15310 | ENSG00000 | CRYAA2    | 1 | 0.956522 | 0.978261 | 1        |        |
| 15311 | ENSG00000 | ZNF850    | 1 | 1        | 1        | 1        |        |
| 15312 | ENSG00000 | GAGE13    | 1 | 1        | 1        | 1        |        |
| 15313 | ENSG00000 | GAGE2E    | 1 | 1        | 1        | 1        |        |

P value i P value in Kumar et al. (Bladder)







0. 2854

0. 4323















0.3694

0.4727

0.3979

0.569

0.4545

0.3934

0.2967













0.3656



0.3621

0.2564







0.478

0.3357  
0.3999



0.4913

0.393



0.56



0.2315

0.3289

0.2751









0. 4524

0.262

0.5297





0.3864

0.41

0.474

0.3857



0.4386

0.358

0.6475 0.3462

0.2918

0.191

0.8742



0.39





0.383





0.3727

0.4589



0.441

0.4482

0.2142

0.2178

0.3498 0.3436





0. 594

0. 247

0. 2223    0. 3741



0.338



0. 4287

0.364

0. 4488

0. 2627

0. 3571

0.3679



0.5168

0.28

0.441

0.367





0.3125

0.3955

0.4556

0.1381

0.3616

0.4387 0.2973

0.3471



0.4196

0.3859

0.617

0. 5735 0. 3598

0. 2214





0.2651 0.7296

0.4589



0. 3737









0.346

0.5689  
0.368

0.2335

0.492

0. 2215

0.36

0.425

0.3982

0. 2836

0. 3121    0. 2833

0. 3274

0.5651 0.5411







0.3924 0.3215

0. 2466

0. 332

0.278    0.225  
          0.1741

0.3646

0. 5657

0. 3435

0. 3182

0. 3316 0. 3561

0.313

0.391

0.344

0.271

0.327

0.35

0.3187

0.2454



0.53

0.3993

0.698

0.2656

0.3389 0.2967

0.322



0.3349

0.331

0.5278

0.366

0.1663

0.4393

0. 2317

0. 392    0. 489





0.514

0.2516

0.3147

0.5713



0.3971

0.3924

0.26  
0.5569

0.3914

0.3447

0.47

0.5451

0.297

0.448

0.4195

0.4647

0.4335 0.193

0.4526

0.3242 0.2981

0.4148

0.1529



0.426 0.328

0.3711

0.2737

0.381

0.2931

0.3757

0.3655

0.396

0.3383

0. 5374

0. 2488

0.2573

0.3835

0.5399

0.4186

0.356



0.2837 0.2657

0.3932 0.466

0.2381

0. 3279

0. 4437

0. 2542

0. 466

0. 3275

0.3825

0.2314

0.3673

0.337

0.2928

0.485      0.28

0.3161

0.2932

0.5244

0.3364

0.487

0.5289 0.376

0.3428



0.33

0.5246

0.4259

0.331  
0.2619

0.4613

0.457

0.46  
0.3731  
0.2623

0.2514 0.2255

0.4622

0.317

0.3728

0.324

0. 2463

0. 2424

0.569  
0.465

0.2915

0.1882

0.61



0.337

0.281 0.3725

0.412 0.356

0.3827

0.3149

0.511

0.266

0.3482

0. 2925

0. 3598

0.1685

0.428

0.3367

0.1489

0.43

0.187



0.2535

0.335

0.2179

0.268

0.177

0.6218



0.3371

0.3765

0.4734

0.429

0.3416

0.2364

0.1925

0.3593

0.4157

0.3845

0.493

0.3371

0.3584

0.2633

0.3175

0.3957

0.3534



0.2926

0.3792

0.4275

0.3426

0.413

0.446

0. 2698 0. 4739

0. 275

0. 4139

0. 3423

0. 4762



0.3394

0.3128

0.215

0.1629

0.4189

0.2956

0.3133

0.3258

0.599

0.2395

0.3385

0.5781



0.3159

0.57

0.2484

0.5182

0.5428

0.4114

0.3968

0.543

0.4564

0.43  
0.2774

0.2692

0.6

0.4328

0.2664

0.448

0. 2843

0. 3131

0. 3218      0. 4318  
0. 287

0. 3521

0. 3415

0.3139

0.46

0.283

0.5133

0.4556

0.413

0.3365

0.3665

0.3178

0.2591      0.37



0.4691 0.332

0.3436

0.4168

0.3933

0.4191

0.5227

0.3745

0.414

0.3217 0.3679

0.3764

0.3932

0.5624 0.4697

0.3166 0.2232

0.441

0.3253

0. 2826

0. 4668

0. 245 0. 2577

0. 1894

0. 3384 0. 3613

0.2511

0.1683 0.1447

0.4215

0.182

0.3451

0.2945

0.3511 0.4556

0.2981

0.2964

0.4337

0.2963

0.342



0.4535

0.2497

0.337

0.385

0.4672

0.3164

0.4986

0.283

0.3516

0.4715

0.3319

0.3653

0.1693

0.5397

0.4228

0.4182

0.2934

0.2934 0.3191

0.3351

0.4352

0.3366

0.2975

0.4675



0. 3246

0.582

0.3917

0.3227

0.347

0.48

0.318

0. 2399

0. 3891

0. 3857

0. 4474

0. 448



0.3623

0.4794 0.4568  
0.5159

0.3297

0.3893

0.4617

0.2777

0. 4136

0. 3224

0. 3464

0. 3763

0.3122

0.319  
0.4862

0.339  
0.252

0.335

0.3145

0.238

0. 2893

0. 2698

0. 2831

0. 4616

0.3345

0.4474

0.433  
0.7855

0. 4638

0. 2896

0. 2491

0. 5136  
0. 342 0. 3712

0. 315

0. 4273  
0. 3191



0.3114

0.364

0.3598 0.4279

0.3945

0. 275

0. 3616

0.2659

0.4755

0.2836

0.3972 0.5385

0.37

0.2387

0.219

0.322

0.3651

0.2625

0.3481

0. 1334

0. 3689

0. 3672

0. 386

0. 595    0. 519

0. 4187

0.384

0.1566

0.2865

0.5865

0.4237

0.3516

0.33

0.2844

0.6226 0.4388

0.484

0.4918

0.3972

0.442

0.3956

0.361 0.2684

0.4714

0.3893 0.318

0.2828

0.492

0.4928 0.1988

0.282

0.4413 0.2846

0.296

0.3476

0.393



0.2961

0.2919

0.4735

0.3733

0.314

0.6164

0.3293

0.3132

0.2575

0.3419

0.3975

0.489 0.4783

0.3634 0.3499

0.1214

0.3999

0.452

0.453

0.2855

0.4888

0.3827

0. 4299

0. 495

0. 3492      0. 26

0. 4874

0. 439

0. 472      0. 3613

0. 5548

0. 3969

0.3948

0.341

0.435    0.321

0.2294

0.3623    0.1922

0.3811

0.3853

0.4255



0. 2541

0. 385

0. 3689

0.242

0.435

0.4776

0.4199

0.6194

0.3468

0.535

0.48

0.3872

0.3468

0.4176

0.2971

0.3317

0.4168

0.594 0.321

0.2864

0.3326 0.4773

0.3715

0.44

0.346 0.2561  
0.426

0.4654

0.462 0.3285

0.3437

0.562 0.4285

0.2787  
0.3822

0.3954

0.4673

0.4962

0.3439

0.2743



0.2739

0.297

0.4629

0.2755

0.2463

0.4194

0.365  
0.4488

0.5137

0.3949

0.3836

0.433

0.3663

0.4185 0.1889

0.3122

0.361

0.2148

0.3852

0.2471

0.5122

0.2896

0.2321 0.3975

0.3179

0.3223 0.3918

0.3681

0.3546

0.3744

0.3745

0.3331

0.5986

0.2829

0.5734 0.3465

0.4177

0.392

0.3912

0.4691

0.258

0.3598

0.72



0.33  
0.483 0.3926

0.315

0.345

0.2736 0.2476

0.4288

0.2626

0.29

0.488

0.4232

0.4237

0. 4492

0. 5267

0. 2489

0. 2935

0. 2873  
0. 3599

0. 4115

0. 297  
0. 3494

0.2832 0.429

0.446

0.336  
0.2213

0.3829

0.5382 0.422

0.2812

0.4972

0.2769

0.4379

0.2343

0.34

0.391

0.3752

0.3728

0.3531 0.5111

0.3313

0.2876

0.3662

0.384

0.3944

0.4757

0.6347

0.4695      0.3565

0.2738      0.419



0.256

0.529

0.4615

0.3146

0.6239 0.2476

0.4492  
0.383

0.3392

0.293

0.3279

0.2498  
0.2531

0.3716

0.488

0.4849

0.318

0.3871

0.3216

0.3738 0.2999

0.4165

0.4324

0.3583

0.232

0.4599  
0.2896

0.5569 0.3923

0.4828 0.348

0.69 0.3325  
0.3835

0.2526 0.3177

0.2666 0.3568  
0.6196

0.3914

0.3928

0.3649

0.2923

0.3532

0.415

0.3811

0.3655

0.4418

0.2481

0.3489

0.2299

0.3963

0.3928

0.3598

0.3146

0.5611

0.283

0.2487

0.5436

0.425 0.1941

0.3458 0.3542

0.3147

0.2451 0.335

0.2975

0.38

0.4515



0.3176

0.4452

0.258

0.2922

0.283

0.1955      0.47

0.3244

0.2724    0.1849  
0.3745

0.319

0.385

0.3217

0.473

0.2618

0.35 0.3156

0.415

0.4779

0.3733 0.3289

0.5191

0.335

0.384

0.3757

0.3562

0.368

0.212

0.5197

0.2859

0.352

0.298

0.3211

0.3856

0.3751

0.2513

0.343

0.4824 0.3518  
0.331

0.2831

0.495  
0.2893  
0.3961

0.3591

0.325

0.3727

0.2819

0.467

0.1886 0.2673  
0.246 0.4512

0.2754

0.3827

0.372  
0.347  
0.4176

0.4825 0.2956

0.348

0.3565 0.5299

0.3495

0.655



0.4265  
0.3835

0.4142

0.1936

0.334 0.3643

0.326

0.495

0.2553

0.4837

0.428

0.2467

0.2945

0.3683

0.4885

0.2591

0.3845

0.524

0.178

0.5129

0.585

0.3963

0. 4532

0. 2217

0. 3342

0. 3544

0. 441

0. 3334

0. 4195

0. 3878

0.3882 0.286

0.3812

0.4283 0.3248

0.324

0.3249

0.5329

0.2528

0.366

0.5174

0.347

0.348

0.2592

0.3811 0.4267

0.4765

0.4331

0.448

0.3145

0.476

0.3377

0.3956

0.429

0.5461

0.488

0.347

0.3873

0.419  
0.3888

0.2493

0.339 0.4441

0.4125

0.429 0.3833

0.478

0.3186

0.5552

0.3232

0.367 0.3587

0.2852 0.3623



0. 3525

0. 2758

0. 4519

0. 4919

0. 3442

0. 2479

0. 2961    0. 447

0. 3618    0. 2314

0.23

0.1733 0.5432

0.285

0.3831

0.3756 0.3714

0.422

0.3493 0.475

0.5758 0.4586

0.451 0.5273

0.497

0.35 0.3189

0.2469

0.2899

0.3233      0.3366

0.588

0.5857

0.3241

0.3319

0.3764

0.2312      0.3856

0.313

0. 3258

0. 1932 0. 3456

0. 4786

0. 423  
0. 6183 0. 2375

0. 3866

0. 3823

0. 515

0. 4421

0.5284 0.2965  
0.2458  
0.4838

0.2198  
0.5232  
0.4818  
0.3228  
0.5439

0.2887 0.477  
0.5732

0.3119

0.2982 0.2275

0.372 0.5514

0.3638 0.6292  
0.289

0.6986

0.3116

0.3924

0.1475

0.1446 0.2493

0.4141

0.3594

0.434

0.3232

0.486

0.4883

0.587

0.469

0.4434

0.5242

0.599 0.5198

0.2687 0.2623  
0.3125

0.396

0.3898  
0.2165

0.35  
0.466

0.313

0.2882  
0.3716 0.4242



0.4562

0.376

0.2686

0.387

0.3276

0.4789

0.526

0.3422

0.4131

0.493

0. 4213

0. 3138

0. 4232

0. 2239

0. 368

0. 4562

0.418

0.4791

0.4124

0.3642

0.3177

0.494

0.296 0.417

0.41

0.3843

0.4152

0.3338

0.222

0.35
